# Supplementary material for: Comparative transcriptome analysis of transcripts of uncertain coding potential in septic myocardial depression
Source: Springer Nature journal article supplement (doi:10.1186/s12872-021-01973-z), 2021-04-08

DE TUCP\_Sepsis vs Control

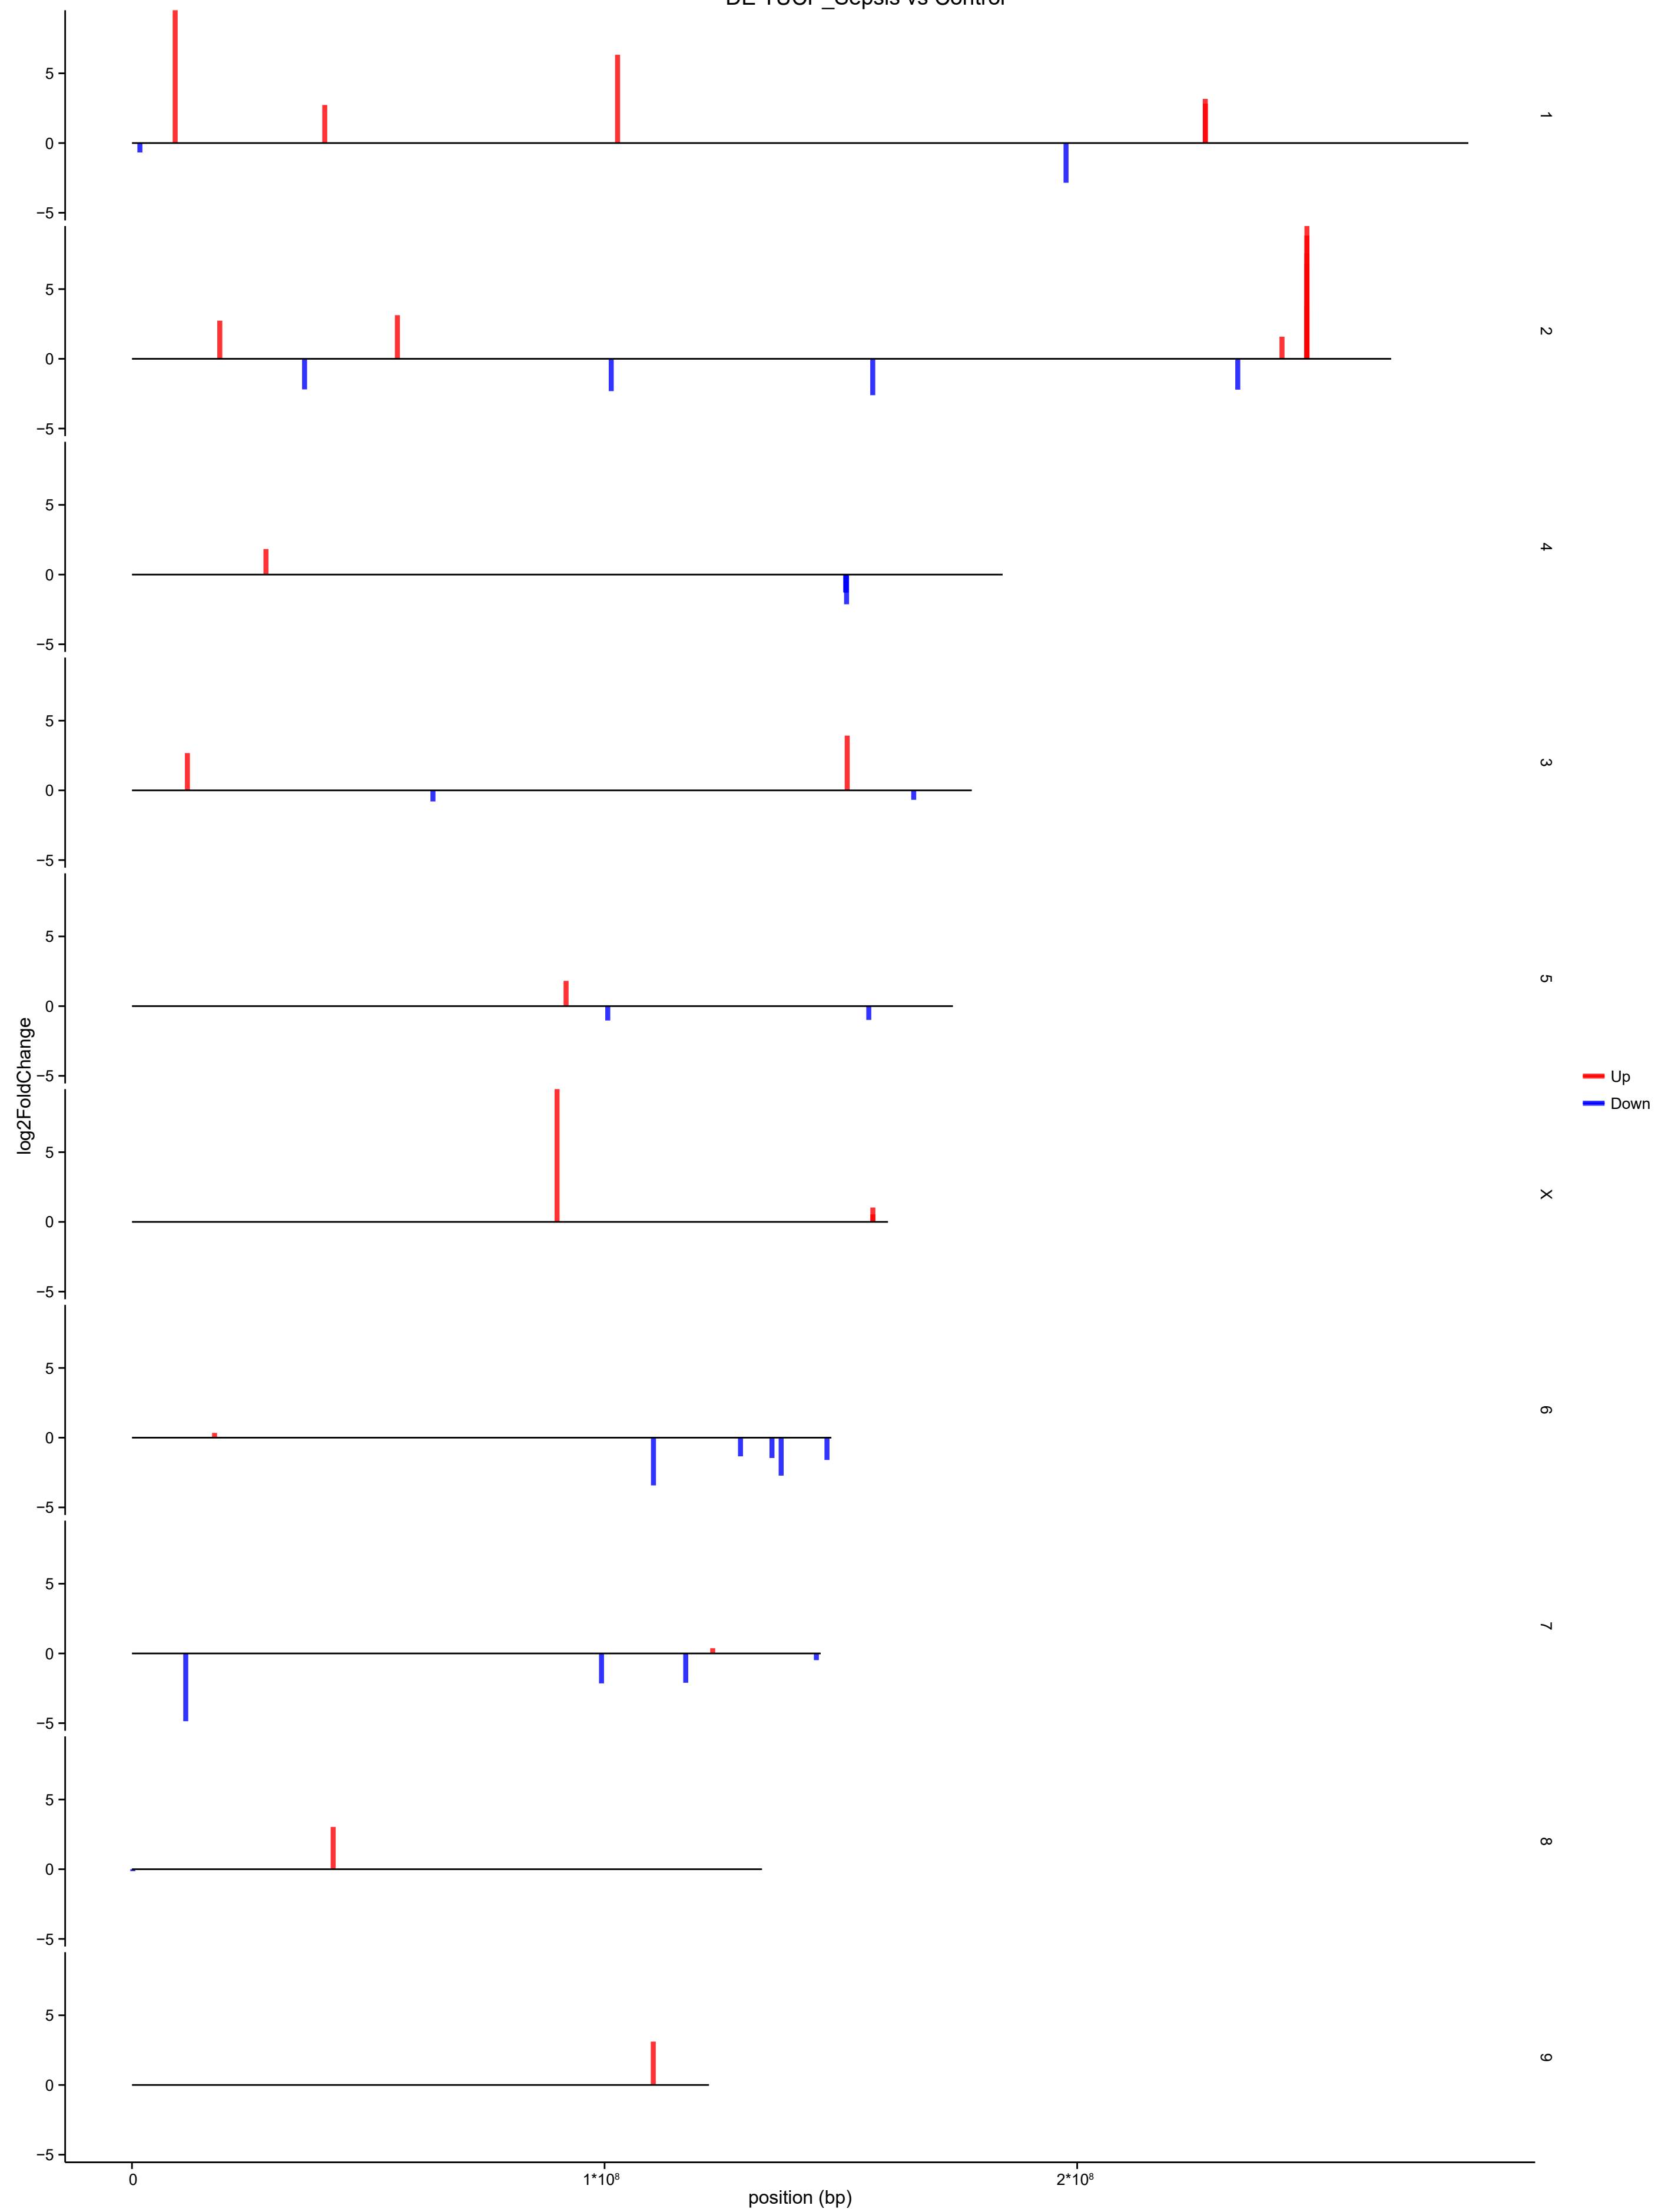

Supplement: MOESM1 [file 19046898]
