# Supplementary material for: Comparative transcriptome analysis of transcripts of uncertain coding potential in septic myocardial depression
Source: Springer Nature journal article supplement (doi:10.1186/s12872-021-01973-z), 2021-04-08
Supplement: MOESM6 [file 19046898]

| TUCP_ID     | TUCP_Gene_ID | mRNA_ID            | Pearson_correlation | Pvalue   |
|-------------|--------------|--------------------|---------------------|----------|
| TUCP_001017 | XLOC_038541  | ENSRNOT00000035840 | 0.955299206         | 1.30E-06 |
| TUCP_001017 | XLOC_038541  | ENSRNOT00000015961 | 0.960269422         | 7.29E-07 |
| TUCP_003185 | XLOC_137338  | ENSRNOT00000085195 | 0.999404969         | 5.87E-16 |
| TUCP_003185 | XLOC_137338  | ENSRNOT00000013705 | 1                   | 0        |
| TUCP_003185 | XLOC_137338  | ENSRNOT00000040851 | 1                   | 0        |
| TUCP_003185 | XLOC_137338  | ENSRNOT00000075676 | 0.958697783         | 8.83E-07 |
| TUCP_003185 | XLOC_137338  | ENSRNOT00000058389 | 1                   | 0        |
| TUCP_003185 | XLOC_137338  | ENSRNOT00000086827 | 0.95592964          | 1.22E-06 |
| TUCP_003185 | XLOC_137338  | ENSRNOT00000023542 | 1                   | 0        |
| TUCP_003185 | XLOC_137338  | ENSRNOT00000028653 | 1                   | 0        |
| TUCP_003185 | XLOC_137338  | ENSRNOT00000017230 | 0.955378945         | 1.29E-06 |
| TUCP_003185 | XLOC_137338  | ENSRNOT00000092890 | 0.955137645         | 1.33E-06 |
| TUCP_003185 | XLOC_137338  | ENSRNOT00000012174 | 1                   | 0        |
| TUCP_003185 | XLOC_137338  | ENSRNOT00000051680 | 0.994991197         | 2.46E-11 |
| TUCP_003185 | XLOC_137338  | ENSRNOT00000089118 | 1                   | 0        |
| TUCP_003185 | XLOC_137338  | ENSRNOT00000025245 | 0.999967061         | 3.05E-22 |
| TUCP_003185 | XLOC_137338  | ENSRNOT00000015138 | 0.999902179         | 7.05E-20 |
| TUCP_003185 | XLOC_137338  | ENSRNOT00000080185 | 0.99902259          | 7.01E-15 |
| TUCP_003185 | XLOC_137338  | ENSRNOT00000090729 | 0.965956282         | 3.40E-07 |
| TUCP_003185 | XLOC_137338  | ENSRNOT00000049165 | 0.973440588         | 9.95E-08 |
| TUCP_003185 | XLOC_137338  | ENSRNOT00000086502 | 0.96495109          | 3.93E-07 |
| TUCP_003185 | XLOC_137338  | ENSRNOT00000079661 | 1                   | 0        |
| TUCP_003185 | XLOC_137338  | ENSRNOT00000076338 | 0.985532463         | 4.87E-09 |
| TUCP_003185 | XLOC_137338  | ENSRNOT00000042220 | 1                   | 1.33E-79 |
| TUCP_003185 | XLOC_137338  | ENSRNOT00000005031 | 0.952974465         | 1.67E-06 |
| TUCP_003185 | XLOC_137338  | ENSRNOT00000079167 | 0.979848988         | 2.53E-08 |
| TUCP_003185 | XLOC_137338  | ENSRNOT00000061950 | 0.962035217         | 5.83E-07 |
| TUCP_003185 | XLOC_137338  | ENSRNOT00000086710 | 0.999839781         | 8.31E-19 |
| TUCP_003185 | XLOC_137338  | ENSRNOT00000075226 | 1                   | 0        |
| TUCP_003185 | XLOC_137338  | ENSRNOT00000000351 | 1                   | 0        |
| TUCP_003185 | XLOC_137338  | ENSRNOT00000092294 | 0.986520908         | 3.43E-09 |
| TUCP_000923 | XLOC_033936  | ENSRNOT00000061253 | 0.950930897         | 2.06E-06 |
| TUCP_000922 | XLOC_033920  | ENSRNOT00000010835 | 0.964313549         | 4.29E-07 |
| TUCP_000922 | XLOC_033920  | ENSRNOT00000054980 | 0.951589561         | 1.93E-06 |
| TUCP_000922 | XLOC_033920  | ENSRNOT00000057965 | 0.951549555         | 1.94E-06 |
| TUCP_000922 | XLOC_033920  | ENSRNOT00000031193 | 0.959362675         | 8.15E-07 |
| TUCP_000922 | XLOC_033920  | ENSRNOT00000091282 | -0.965324966        | 3.72E-07 |
| TUCP_000922 | XLOC_033920  | ENSRNOT00000038546 | -0.953043641        | 1.66E-06 |
| TUCP_000922 | XLOC_033920  | ENSRNOT00000030749 | -0.956007458        | 1.21E-06 |
| TUCP_000922 | XLOC_033920  | ENSRNOT00000021578 | 0.953513432         | 1.58E-06 |
| TUCP_000922 | XLOC_033920  | ENSRNOT00000078856 | -0.950253517        | 2.21E-06 |
| TUCP_000922 | XLOC_033920  | ENSRNOT00000033359 | 0.954959516         | 1.35E-06 |
| TUCP_000922 | XLOC_033920  | ENSRNOT00000001679 | 0.957420939         | 1.03E-06 |
| TUCP_000922 | XLOC_033920  | ENSRNOT00000074212 | 0.974396065         | 8.30E-08 |
| TUCP_000922 | XLOC_033920  | ENSRNOT00000021729 | 0.951649463         | 1.92E-06 |
| TUCP_000922 | XLOC_033920  | ENSRNOT00000015643 | 0.960110985         | 7.44E-07 |
| TUCP_000922 | XLOC_033920  | ENSRNOT00000082570 | -0.957711876        | 9.92E-07 |
| TUCP_000922 | XLOC_033920  | ENSRNOT00000005143 | 0.956887446         | 1.09E-06 |
| TUCP_000922 | XLOC_033920  | ENSRNOT00000012314 | -0.95451652         | 1.42E-06 |
| TUCP_000922 | XLOC_033920  | ENSRNOT00000030109 | 0.961896382         | 5.93E-07 |

|             |             |                     |              |          |
|-------------|-------------|---------------------|--------------|----------|
| TUCP_000922 | XLOC_033920 | ENSRNOT00000009319  | -0.950248239 | 2.21E-06 |
| TUCP_000922 | XLOC_033920 | ENSRNOT00000013191  | -0.951144467 | 2.02E-06 |
| TUCP_000922 | XLOC_033920 | ENSRNOT00000028066  | -0.953421758 | 1.60E-06 |
| TUCP_000922 | XLOC_033920 | ENSRNOT00000044726  | 0.95933282   | 8.18E-07 |
| TUCP_000922 | XLOC_033920 | ENSRNOT00000010344  | -0.951051829 | 2.04E-06 |
| TUCP_002714 | XLOC_114926 | ENSRNOT00000032386  | 0.963455163  | 4.83E-07 |
| TUCP_000284 | XLOC_008664 | ENSRNOT00000042890  | 0.961965737  | 5.88E-07 |
| TUCP_000926 | XLOC_033948 | ENSRNOT00000022384  | -0.951077333 | 2.03E-06 |
| TUCP_004698 | XLOC_206559 | ENSRNOT00000014041  | 0.98792666   | 1.98E-09 |
| TUCP_000928 | XLOC_034230 | ENSRNOT00000090123  | 0.972592216  | 1.16E-07 |
| TUCP_000928 | XLOC_034230 | ENSRNOT00000026633  | 0.954846941  | 1.37E-06 |
| TUCP_000928 | XLOC_034230 | ENSRNOT00000071764  | 0.952947223  | 1.68E-06 |
| TUCP_000928 | XLOC_034230 | ENSRNOT00000032780  | 0.956135416  | 1.19E-06 |
| TUCP_000928 | XLOC_034230 | ENSRNOT00000016991  | 0.968910624  | 2.17E-07 |
| TUCP_000928 | XLOC_034230 | ENSRNOT00000055669  | 0.951731561  | 1.90E-06 |
| TUCP_000928 | XLOC_034230 | ENSRNOT00000081047  | 0.952123828  | 1.83E-06 |
| TUCP_000928 | XLOC_034230 | ENSRNOT00000014537  | 0.954433263  | 1.43E-06 |
| TUCP_000928 | XLOC_034230 | ENSRNOT00000072518  | 0.95097453   | 2.05E-06 |
| TUCP_000928 | XLOC_034230 | ENSRNOT00000051132  | 0.953398188  | 1.60E-06 |
| TUCP_000928 | XLOC_034230 | ENSRNOT00000003891  | 0.967767032  | 2.60E-07 |
| TUCP_000928 | XLOC_034230 | ENSRNOT000000021408 | 0.956958851  | 1.08E-06 |
| TUCP_000928 | XLOC_034230 | ENSRNOT00000077406  | 0.961953158  | 5.89E-07 |
| TUCP_000928 | XLOC_034230 | ENSRNOT00000025656  | 0.967743052  | 2.61E-07 |
| TUCP_000928 | XLOC_034230 | ENSRNOT00000035474  | 0.951247765  | 2.00E-06 |
| TUCP_000928 | XLOC_034230 | ENSRNOT00000021037  | 0.95610159   | 1.19E-06 |
| TUCP_000928 | XLOC_034230 | ENSRNOT00000076872  | 0.954472656  | 1.43E-06 |
| TUCP_000928 | XLOC_034230 | ENSRNOT00000060819  | 0.972228709  | 1.24E-07 |
| TUCP_000928 | XLOC_034230 | ENSRNOT00000093720  | 0.952214982  | 1.81E-06 |
| TUCP_000928 | XLOC_034230 | ENSRNOT00000005490  | 0.973062603  | 1.07E-07 |
| TUCP_000928 | XLOC_034230 | ENSRNOT00000000468  | 0.95360545   | 1.57E-06 |
| TUCP_000928 | XLOC_034230 | ENSRNOT00000090918  | 0.955619125  | 1.26E-06 |
| TUCP_000928 | XLOC_034230 | ENSRNOT00000046973  | 0.950044122  | 2.25E-06 |
| TUCP_000928 | XLOC_034230 | ENSRNOT00000012187  | 0.950066027  | 2.25E-06 |
| TUCP_000928 | XLOC_034230 | ENSRNOT00000064798  | 0.953980147  | 1.50E-06 |
| TUCP_000928 | XLOC_034230 | ENSRNOT00000015609  | 0.960055882  | 7.49E-07 |
| TUCP_000928 | XLOC_034230 | ENSRNOT00000024969  | 0.951137576  | 2.02E-06 |
| TUCP_000928 | XLOC_034230 | ENSRNOT00000022485  | 0.961672164  | 6.11E-07 |
| TUCP_000928 | XLOC_034230 | ENSRNOT00000033235  | 0.95317526   | 1.64E-06 |
| TUCP_000928 | XLOC_034230 | ENSRNOT00000060362  | 0.960132598  | 7.42E-07 |
| TUCP_000928 | XLOC_034230 | ENSRNOT00000010399  | 0.958070988  | 9.51E-07 |
| TUCP_000928 | XLOC_034230 | ENSRNOT00000072132  | 0.963778878  | 4.62E-07 |
| TUCP_000928 | XLOC_034230 | ENSRNOT00000083220  | 0.952280675  | 1.80E-06 |
| TUCP_000928 | XLOC_034230 | ENSRNOT00000015265  | 0.968289249  | 2.39E-07 |
| TUCP_000928 | XLOC_034230 | ENSRNOT00000042498  | 0.963416251  | 4.85E-07 |
| TUCP_000928 | XLOC_034230 | ENSRNOT00000015793  | 0.954150125  | 1.48E-06 |
| TUCP_000928 | XLOC_034230 | ENSRNOT00000015874  | 0.955184913  | 1.32E-06 |
| TUCP_000928 | XLOC_034230 | ENSRNOT00000038066  | 0.958613239  | 8.92E-07 |
| TUCP_000928 | XLOC_034230 | ENSRNOT00000015799  | 0.950689242  | 2.11E-06 |
| TUCP_000928 | XLOC_034230 | ENSRNOT00000078102  | 0.955798162  | 1.23E-06 |
| TUCP_000884 | XLOC_032870 | ENSRNOT00000051450  | 0.951207148  | 2.01E-06 |
| TUCP_000884 | XLOC_032870 | ENSRNOT00000087753  | 0.954617148  | 1.40E-06 |

|             |             |                     |              |          |
|-------------|-------------|---------------------|--------------|----------|
| TUCP_004008 | XLOC_175736 | ENSRNOT00000015576  | 0.950730572  | 2.10E-06 |
| TUCP_004008 | XLOC_175736 | ENSRNOT00000019262  | -0.955247127 | 1.31E-06 |
| TUCP_004008 | XLOC_175736 | ENSRNOT00000087190  | 0.954755764  | 1.38E-06 |
| TUCP_004008 | XLOC_175736 | ENSRNOT00000013053  | 0.9688552    | 2.19E-07 |
| TUCP_004008 | XLOC_175736 | ENSRNOT00000092211  | 0.960186075  | 7.37E-07 |
| TUCP_004008 | XLOC_175736 | ENSRNOT00000073079  | 0.950784584  | 2.09E-06 |
| TUCP_004008 | XLOC_175736 | ENSRNOT00000044452  | 0.961848455  | 5.97E-07 |
| TUCP_004008 | XLOC_175736 | ENSRNOT00000021055  | -0.950354454 | 2.18E-06 |
| TUCP_004008 | XLOC_175736 | ENSRNOT00000090654  | 0.951371106  | 1.97E-06 |
| TUCP_004008 | XLOC_175736 | ENSRNOT00000077935  | 0.960801094  | 6.82E-07 |
| TUCP_000887 | XLOC_033296 | ENSRNOT00000075521  | 0.950836336  | 2.08E-06 |
| TUCP_000887 | XLOC_033296 | ENSRNOT00000090456  | 0.957873573  | 9.73E-07 |
| TUCP_000887 | XLOC_033296 | ENSRNOT00000006186  | 0.960587992  | 7.01E-07 |
| TUCP_000887 | XLOC_033296 | ENSRNOT00000048910  | -0.953967769 | 1.51E-06 |
| TUCP_000887 | XLOC_033296 | ENSRNOT00000020357  | 0.951838539  | 1.88E-06 |
| TUCP_000887 | XLOC_033296 | ENSRNOT00000019104  | -0.956114974 | 1.19E-06 |
| TUCP_000887 | XLOC_033296 | ENSRNOT00000010728  | 0.962848228  | 5.24E-07 |
| TUCP_000887 | XLOC_033296 | ENSRNOT00000082863  | 0.972009346  | 1.29E-07 |
| TUCP_000887 | XLOC_033296 | ENSRNOT00000005659  | 0.959131212  | 8.38E-07 |
| TUCP_000887 | XLOC_033296 | ENSRNOT00000000718  | 0.964824473  | 4.00E-07 |
| TUCP_000887 | XLOC_033296 | ENSRNOT00000007855  | 0.963786032  | 4.62E-07 |
| TUCP_000887 | XLOC_033296 | ENSRNOT000000052063 | 0.968634124  | 2.27E-07 |
| TUCP_000887 | XLOC_033296 | ENSRNOT000000056813 | 0.963050225  | 5.10E-07 |
| TUCP_000887 | XLOC_033296 | ENSRNOT00000018074  | -0.954905659 | 1.36E-06 |
| TUCP_000887 | XLOC_033296 | ENSRNOT00000084069  | 0.951956899  | 1.86E-06 |
| TUCP_000887 | XLOC_033296 | ENSRNOT00000012187  | 0.950640534  | 2.12E-06 |
| TUCP_000887 | XLOC_033296 | ENSRNOT000000050868 | 0.959815113  | 7.71E-07 |
| TUCP_000887 | XLOC_033296 | ENSRNOT00000006055  | 0.965829428  | 3.46E-07 |
| TUCP_000887 | XLOC_033296 | ENSRNOT000000005126 | -0.959904007 | 7.63E-07 |
| TUCP_000887 | XLOC_033296 | ENSRNOT000000065300 | 0.961444739  | 6.29E-07 |
| TUCP_000887 | XLOC_033296 | ENSRNOT00000025079  | -0.962494096 | 5.49E-07 |
| TUCP_000887 | XLOC_033296 | ENSRNOT00000038247  | 0.964067575  | 4.44E-07 |
| TUCP_000887 | XLOC_033296 | ENSRNOT00000012977  | 0.954067168  | 1.49E-06 |
| TUCP_000887 | XLOC_033296 | ENSRNOT00000091448  | -0.957769618 | 9.85E-07 |
| TUCP_000887 | XLOC_033296 | ENSRNOT00000009811  | 0.959721271  | 7.80E-07 |
| TUCP_000887 | XLOC_033296 | ENSRNOT00000068134  | 0.955839899  | 1.23E-06 |
| TUCP_000887 | XLOC_033296 | ENSRNOT00000026718  | 0.958041028  | 9.54E-07 |
| TUCP_000887 | XLOC_033296 | ENSRNOT00000000577  | 0.970531051  | 1.67E-07 |
| TUCP_000887 | XLOC_033296 | ENSRNOT00000032780  | 0.960418779  | 7.16E-07 |
| TUCP_000887 | XLOC_033296 | ENSRNOT00000077231  | 0.971567821  | 1.40E-07 |
| TUCP_000887 | XLOC_033296 | ENSRNOT00000072518  | 0.951431712  | 1.96E-06 |
| TUCP_000887 | XLOC_033296 | ENSRNOT00000016333  | -0.963779247 | 4.62E-07 |
| TUCP_000887 | XLOC_033296 | ENSRNOT00000021523  | 0.953546244  | 1.58E-06 |
| TUCP_000887 | XLOC_033296 | ENSRNOT000000051991 | 0.950270491  | 2.20E-06 |
| TUCP_000887 | XLOC_033296 | ENSRNOT00000006835  | 0.9800512    | 2.41E-08 |
| TUCP_000887 | XLOC_033296 | ENSRNOT00000010141  | 0.96300167   | 5.13E-07 |
| TUCP_000887 | XLOC_033296 | ENSRNOT00000022502  | -0.950085002 | 2.24E-06 |
| TUCP_000887 | XLOC_033296 | ENSRNOT00000044346  | -0.968471511 | 2.33E-07 |
| TUCP_000887 | XLOC_033296 | ENSRNOT000000037133 | 0.950346999  | 2.19E-06 |
| TUCP_000887 | XLOC_033296 | ENSRNOT00000068633  | 0.950852534  | 2.08E-06 |
| TUCP_000887 | XLOC_033296 | ENSRNOT00000037446  | 0.958247887  | 9.31E-07 |

|             |             |                     |              |          |
|-------------|-------------|---------------------|--------------|----------|
| TUCP_000887 | XLOC_033296 | ENSRNOT00000087443  | 0.957923211  | 9.68E-07 |
| TUCP_000887 | XLOC_033296 | ENSRNOT00000000036  | 0.970891992  | 1.57E-07 |
| TUCP_000887 | XLOC_033296 | ENSRNOT00000026481  | 0.961959109  | 5.89E-07 |
| TUCP_000887 | XLOC_033296 | ENSRNOT00000021408  | 0.955585029  | 1.26E-06 |
| TUCP_000887 | XLOC_033296 | ENSRNOT00000015116  | 0.952880781  | 1.69E-06 |
| TUCP_000887 | XLOC_033296 | ENSRNOT00000001081  | 0.95748511   | 1.02E-06 |
| TUCP_000887 | XLOC_033296 | ENSRNOT000000086119 | -0.962449854 | 5.52E-07 |
| TUCP_000887 | XLOC_033296 | ENSRNOT00000067735  | -0.966875687 | 2.97E-07 |
| TUCP_000887 | XLOC_033296 | ENSRNOT00000022190  | -0.950296049 | 2.20E-06 |
| TUCP_000887 | XLOC_033296 | ENSRNOT00000022552  | -0.9555363   | 1.27E-06 |
| TUCP_000887 | XLOC_033296 | ENSRNOT00000019133  | 0.97298062   | 1.08E-07 |
| TUCP_000887 | XLOC_033296 | ENSRNOT00000065983  | 0.958202753  | 9.36E-07 |
| TUCP_000887 | XLOC_033296 | ENSRNOT00000030782  | -0.952450995 | 1.77E-06 |
| TUCP_000887 | XLOC_033296 | ENSRNOT00000079698  | -0.957933595 | 9.67E-07 |
| TUCP_000887 | XLOC_033296 | ENSRNOT00000006824  | -0.950620422 | 2.13E-06 |
| TUCP_000887 | XLOC_033296 | ENSRNOT00000061267  | 0.957331972  | 1.04E-06 |
| TUCP_000887 | XLOC_033296 | ENSRNOT00000080207  | 0.971665951  | 1.37E-07 |
| TUCP_000887 | XLOC_033296 | ENSRNOT00000090461  | 0.951231037  | 2.00E-06 |
| TUCP_000887 | XLOC_033296 | ENSRNOT00000064588  | 0.950051254  | 2.25E-06 |
| TUCP_000887 | XLOC_033296 | ENSRNOT00000086590  | 0.951379249  | 1.97E-06 |
| TUCP_000887 | XLOC_033296 | ENSRNOT00000016445  | 0.967379261  | 2.75E-07 |
| TUCP_000887 | XLOC_033296 | ENSRNOT00000021496  | -0.95032123  | 2.19E-06 |
| TUCP_000887 | XLOC_033296 | ENSRNOT00000077555  | 0.96426184   | 4.32E-07 |
| TUCP_000887 | XLOC_033296 | ENSRNOT00000011880  | 0.961280176  | 6.42E-07 |
| TUCP_000887 | XLOC_033296 | ENSRNOT00000034961  | -0.952402299 | 1.78E-06 |
| TUCP_000887 | XLOC_033296 | ENSRNOT00000006034  | -0.950325564 | 2.19E-06 |
| TUCP_000887 | XLOC_033296 | ENSRNOT00000087429  | 0.969438264  | 1.99E-07 |
| TUCP_000887 | XLOC_033296 | ENSRNOT00000078070  | 0.958051833  | 9.53E-07 |
| TUCP_000887 | XLOC_033296 | ENSRNOT00000025434  | 0.965434611  | 3.67E-07 |
| TUCP_000887 | XLOC_033296 | ENSRNOT00000012424  | 0.98109721   | 1.84E-08 |
| TUCP_000887 | XLOC_033296 | ENSRNOT00000020363  | 0.968081348  | 2.47E-07 |
| TUCP_000887 | XLOC_033296 | ENSRNOT00000083247  | -0.960467673 | 7.12E-07 |
| TUCP_000887 | XLOC_033296 | ENSRNOT00000008427  | -0.957447273 | 1.02E-06 |
| TUCP_000887 | XLOC_033296 | ENSRNOT00000077999  | 0.954867261  | 1.37E-06 |
| TUCP_000887 | XLOC_033296 | ENSRNOT00000067610  | -0.958873077 | 8.65E-07 |
| TUCP_000887 | XLOC_033296 | ENSRNOT00000032505  | -0.978593677 | 3.42E-08 |
| TUCP_000887 | XLOC_033296 | ENSRNOT00000027344  | 0.957952915  | 9.64E-07 |
| TUCP_000887 | XLOC_033296 | ENSRNOT00000029833  | 0.953636427  | 1.56E-06 |
| TUCP_000887 | XLOC_033296 | ENSRNOT00000012702  | -0.951196197 | 2.01E-06 |
| TUCP_000887 | XLOC_033296 | ENSRNOT00000034487  | -0.953538923 | 1.58E-06 |
| TUCP_000887 | XLOC_033296 | ENSRNOT00000028057  | 0.953435697  | 1.59E-06 |
| TUCP_000887 | XLOC_033296 | ENSRNOT00000009691  | 0.968239464  | 2.41E-07 |
| TUCP_000887 | XLOC_033296 | ENSRNOT00000020417  | -0.961561656 | 6.20E-07 |
| TUCP_000887 | XLOC_033296 | ENSRNOT00000019554  | 0.969087635  | 2.11E-07 |
| TUCP_000887 | XLOC_033296 | ENSRNOT00000066133  | -0.959333681 | 8.18E-07 |
| TUCP_000887 | XLOC_033296 | ENSRNOT00000029202  | -0.95063747  | 2.12E-06 |
| TUCP_000887 | XLOC_033296 | ENSRNOT00000011984  | 0.961211712  | 6.48E-07 |
| TUCP_000887 | XLOC_033296 | ENSRNOT00000005489  | 0.952251109  | 1.80E-06 |
| TUCP_000887 | XLOC_033296 | ENSRNOT00000026293  | 0.955683829  | 1.25E-06 |
| TUCP_000887 | XLOC_033296 | ENSRNOT00000019487  | 0.984790549  | 6.25E-09 |
| TUCP_000887 | XLOC_033296 | ENSRNOT00000080602  | 0.963923677  | 4.53E-07 |

|             |             |                    |              |          |
|-------------|-------------|--------------------|--------------|----------|
| TUCP_000887 | XLOC_033296 | ENSRNOT00000054828 | 0.950775375  | 2.10E-06 |
| TUCP_000887 | XLOC_033296 | ENSRNOT00000001923 | 0.963875479  | 4.56E-07 |
| TUCP_000887 | XLOC_033296 | ENSRNOT00000079002 | -0.952750737 | 1.71E-06 |
| TUCP_000887 | XLOC_033296 | ENSRNOT00000055992 | -0.966468216 | 3.16E-07 |
| TUCP_000887 | XLOC_033296 | ENSRNOT00000010218 | 0.960841334  | 6.79E-07 |
| TUCP_000887 | XLOC_033296 | ENSRNOT00000052422 | 0.959523143  | 7.99E-07 |
| TUCP_000887 | XLOC_033296 | ENSRNOT00000055386 | 0.970695057  | 1.62E-07 |
| TUCP_000887 | XLOC_033296 | ENSRNOT00000011466 | 0.952857636  | 1.69E-06 |
| TUCP_000887 | XLOC_033296 | ENSRNOT00000084709 | 0.957198042  | 1.05E-06 |
| TUCP_000887 | XLOC_033296 | ENSRNOT00000037679 | 0.96433141   | 4.28E-07 |
| TUCP_000887 | XLOC_033296 | ENSRNOT00000014124 | 0.950357556  | 2.18E-06 |
| TUCP_000887 | XLOC_033296 | ENSRNOT00000078906 | -0.952469685 | 1.76E-06 |
| TUCP_000887 | XLOC_033296 | ENSRNOT00000028888 | 0.952697286  | 1.72E-06 |
| TUCP_000887 | XLOC_033296 | ENSRNOT00000013538 | 0.9551258    | 1.33E-06 |
| TUCP_000887 | XLOC_033296 | ENSRNOT00000010986 | 0.975608835  | 6.53E-08 |
| TUCP_000887 | XLOC_033296 | ENSRNOT00000060698 | -0.95482377  | 1.37E-06 |
| TUCP_000887 | XLOC_033296 | ENSRNOT00000058351 | 0.954671063  | 1.40E-06 |
| TUCP_000887 | XLOC_033296 | ENSRNOT00000020990 | -0.952988279 | 1.67E-06 |
| TUCP_000887 | XLOC_033296 | ENSRNOT00000023330 | 0.964128277  | 4.40E-07 |
| TUCP_000887 | XLOC_033296 | ENSRNOT00000061100 | 0.952550951  | 1.75E-06 |
| TUCP_000887 | XLOC_033296 | ENSRNOT00000005387 | 0.95055173   | 2.14E-06 |
| TUCP_000887 | XLOC_033296 | ENSRNOT00000083414 | 0.952745022  | 1.71E-06 |
| TUCP_000887 | XLOC_033296 | ENSRNOT00000016401 | 0.972627833  | 1.16E-07 |
| TUCP_000887 | XLOC_033296 | ENSRNOT00000025097 | 0.984070081  | 7.87E-09 |
| TUCP_000887 | XLOC_033296 | ENSRNOT00000026457 | 0.974044448  | 8.88E-08 |
| TUCP_000887 | XLOC_033296 | ENSRNOT00000067901 | -0.958933129 | 8.59E-07 |
| TUCP_000887 | XLOC_033296 | ENSRNOT00000044009 | 0.952331855  | 1.79E-06 |
| TUCP_000887 | XLOC_033296 | ENSRNOT00000036613 | -0.955890122 | 1.22E-06 |
| TUCP_000887 | XLOC_033296 | ENSRNOT00000044628 | 0.953853782  | 1.52E-06 |
| TUCP_000887 | XLOC_033296 | ENSRNOT00000066793 | -0.952055074 | 1.84E-06 |
| TUCP_000887 | XLOC_033296 | ENSRNOT00000078862 | 0.96268049   | 5.35E-07 |
| TUCP_000887 | XLOC_033296 | ENSRNOT0000003989  | 0.95220467   | 1.81E-06 |
| TUCP_000887 | XLOC_033296 | ENSRNOT00000000337 | 0.951882741  | 1.87E-06 |
| TUCP_000887 | XLOC_033296 | ENSRNOT00000079996 | 0.950710553  | 2.11E-06 |
| TUCP_000887 | XLOC_033296 | ENSRNOT00000024548 | 0.969761908  | 1.89E-07 |
| TUCP_003758 | XLOC_165125 | ENSRNOT00000020297 | 0.957712625  | 9.92E-07 |
| TUCP_003758 | XLOC_165125 | ENSRNOT00000014946 | 0.953522675  | 1.58E-06 |
| TUCP_003758 | XLOC_165125 | ENSRNOT00000090621 | 0.977432526  | 4.44E-08 |
| TUCP_003758 | XLOC_165125 | ENSRNOT00000075397 | 0.952087896  | 1.83E-06 |
| TUCP_003758 | XLOC_165125 | ENSRNOT00000007350 | 0.973700748  | 9.48E-08 |
| TUCP_003758 | XLOC_165125 | ENSRNOT00000068353 | 0.963247336  | 4.96E-07 |
| TUCP_003758 | XLOC_165125 | ENSRNOT00000091399 | 0.963913376  | 4.54E-07 |
| TUCP_003758 | XLOC_165125 | ENSRNOT00000058382 | 0.971952333  | 1.30E-07 |
| TUCP_003758 | XLOC_165125 | ENSRNOT00000033437 | 0.984258624  | 7.41E-09 |
| TUCP_003758 | XLOC_165125 | ENSRNOT00000020910 | 0.958459306  | 9.08E-07 |
| TUCP_003758 | XLOC_165125 | ENSRNOT00000084567 | 0.957005175  | 1.08E-06 |
| TUCP_003758 | XLOC_165125 | ENSRNOT00000045926 | 0.950481363  | 2.16E-06 |
| TUCP_003758 | XLOC_165125 | ENSRNOT00000010419 | 0.950760683  | 2.10E-06 |
| TUCP_003758 | XLOC_165125 | ENSRNOT00000002028 | 0.953729929  | 1.55E-06 |
| TUCP_003758 | XLOC_165125 | ENSRNOT00000016306 | -0.950140711 | 2.23E-06 |
| TUCP_003758 | XLOC_165125 | ENSRNOT00000087604 | 0.952795064  | 1.70E-06 |

|             |             |                    |              |          |
|-------------|-------------|--------------------|--------------|----------|
| TUCP_003758 | XLOC_165125 | ENSRNOT00000037409 | 0.966754767  | 3.02E-07 |
| TUCP_003758 | XLOC_165125 | ENSRNOT00000083568 | 0.957510449  | 1.02E-06 |
| TUCP_003758 | XLOC_165125 | ENSRNOT00000026141 | 0.953378222  | 1.60E-06 |
| TUCP_003758 | XLOC_165125 | ENSRNOT00000036137 | 0.954629661  | 1.40E-06 |
| TUCP_003758 | XLOC_165125 | ENSRNOT00000065978 | 0.972281704  | 1.23E-07 |
| TUCP_003758 | XLOC_165125 | ENSRNOT00000075480 | -0.963700242 | 4.67E-07 |
| TUCP_003758 | XLOC_165125 | ENSRNOT00000027760 | 0.972374907  | 1.21E-07 |
| TUCP_003758 | XLOC_165125 | ENSRNOT00000047234 | 0.961268889  | 6.43E-07 |
| TUCP_003758 | XLOC_165125 | ENSRNOT00000065871 | 0.950991853  | 2.05E-06 |
| TUCP_003758 | XLOC_165125 | ENSRNOT00000056100 | -0.951331293 | 1.98E-06 |
| TUCP_003758 | XLOC_165125 | ENSRNOT00000065045 | 0.957241173  | 1.05E-06 |
| TUCP_003758 | XLOC_165125 | ENSRNOT00000005297 | 0.974557565  | 8.05E-08 |
| TUCP_003758 | XLOC_165125 | ENSRNOT00000066708 | 0.956017747  | 1.20E-06 |
| TUCP_003758 | XLOC_165125 | ENSRNOT00000011832 | -0.960233048 | 7.33E-07 |
| TUCP_003758 | XLOC_165125 | ENSRNOT00000073643 | -0.953707416 | 1.55E-06 |
| TUCP_003758 | XLOC_165125 | ENSRNOT00000087278 | -0.960718359 | 6.90E-07 |
| TUCP_003758 | XLOC_165125 | ENSRNOT00000015678 | -0.953575905 | 1.57E-06 |
| TUCP_003758 | XLOC_165125 | ENSRNOT00000011930 | 0.961132849  | 6.54E-07 |
| TUCP_003758 | XLOC_165125 | ENSRNOT00000028089 | 0.961913173  | 5.92E-07 |
| TUCP_003758 | XLOC_165125 | ENSRNOT00000033806 | 0.950592902  | 2.13E-06 |
| TUCP_003758 | XLOC_165125 | ENSRNOT00000009150 | 0.971391883  | 1.44E-07 |
| TUCP_003758 | XLOC_165125 | ENSRNOT00000028828 | 0.952166203  | 1.82E-06 |
| TUCP_003758 | XLOC_165125 | ENSRNOT00000048781 | 0.964426132  | 4.23E-07 |
| TUCP_003758 | XLOC_165125 | ENSRNOT00000072299 | 0.954665216  | 1.40E-06 |
| TUCP_003758 | XLOC_165125 | ENSRNOT00000085334 | 0.95757395   | 1.01E-06 |
| TUCP_003758 | XLOC_165125 | ENSRNOT00000001403 | 0.957211122  | 1.05E-06 |
| TUCP_003758 | XLOC_165125 | ENSRNOT00000014506 | -0.962555679 | 5.44E-07 |
| TUCP_003758 | XLOC_165125 | ENSRNOT00000076230 | 0.956258378  | 1.17E-06 |
| TUCP_003758 | XLOC_165125 | ENSRNOT00000066952 | 0.957590619  | 1.01E-06 |
| TUCP_003758 | XLOC_165125 | ENSRNOT00000035427 | 0.952710571  | 1.72E-06 |
| TUCP_003758 | XLOC_165125 | ENSRNOT00000036658 | -0.962603579 | 5.41E-07 |
| TUCP_003758 | XLOC_165125 | ENSRNOT00000089611 | 0.95607831   | 1.20E-06 |
| TUCP_003758 | XLOC_165125 | ENSRNOT00000023667 | 0.965192479  | 3.80E-07 |
| TUCP_003758 | XLOC_165125 | ENSRNOT00000082138 | -0.955185192 | 1.32E-06 |
| TUCP_003758 | XLOC_165125 | ENSRNOT00000079138 | 0.964572865  | 4.14E-07 |
| TUCP_003758 | XLOC_165125 | ENSRNOT00000027739 | 0.958501487  | 9.04E-07 |
| TUCP_003758 | XLOC_165125 | ENSRNOT00000034883 | -0.951333213 | 1.98E-06 |
| TUCP_003758 | XLOC_165125 | ENSRNOT00000064983 | 0.953993256  | 1.50E-06 |
| TUCP_003758 | XLOC_165125 | ENSRNOT00000035605 | 0.959162646  | 8.35E-07 |
| TUCP_003758 | XLOC_165125 | ENSRNOT00000081351 | 0.964411756  | 4.23E-07 |
| TUCP_003758 | XLOC_165125 | ENSRNOT00000046102 | -0.950533464 | 2.15E-06 |
| TUCP_003758 | XLOC_165125 | ENSRNOT00000092083 | 0.954869342  | 1.37E-06 |
| TUCP_003758 | XLOC_165125 | ENSRNOT00000032324 | 0.964687686  | 4.08E-07 |
| TUCP_003758 | XLOC_165125 | ENSRNOT00000017624 | 0.979525532  | 2.74E-08 |
| TUCP_003758 | XLOC_165125 | ENSRNOT00000036092 | 0.9504441    | 2.17E-06 |
| TUCP_003758 | XLOC_165125 | ENSRNOT00000085954 | 0.953801891  | 1.53E-06 |
| TUCP_003758 | XLOC_165125 | ENSRNOT00000040169 | 0.976164994  | 5.82E-08 |
| TUCP_003758 | XLOC_165125 | ENSRNOT00000015091 | 0.955977182  | 1.21E-06 |
| TUCP_003758 | XLOC_165125 | ENSRNOT00000037015 | 0.954980274  | 1.35E-06 |
| TUCP_003758 | XLOC_165125 | ENSRNOT00000001490 | 0.966410538  | 3.18E-07 |
| TUCP_003758 | XLOC_165125 | ENSRNOT00000011675 | 0.95810737   | 9.47E-07 |

|             |             |                     |              |          |
|-------------|-------------|---------------------|--------------|----------|
| TUCP_003758 | XLOC_165125 | ENSRNOT00000080591  | 0.960080163  | 7.47E-07 |
| TUCP_003758 | XLOC_165125 | ENSRNOT00000015239  | -0.972121531 | 1.27E-07 |
| TUCP_003758 | XLOC_165125 | ENSRNOT00000074649  | 0.951157867  | 2.02E-06 |
| TUCP_003758 | XLOC_165125 | ENSRNOT00000023256  | 0.950076083  | 2.25E-06 |
| TUCP_003758 | XLOC_165125 | ENSRNOT00000077146  | -0.95589674  | 1.22E-06 |
| TUCP_003758 | XLOC_165125 | ENSRNOT00000075209  | -0.962955692 | 5.16E-07 |
| TUCP_003758 | XLOC_165125 | ENSRNOT00000025966  | 0.974188169  | 8.64E-08 |
| TUCP_003758 | XLOC_165125 | ENSRNOT00000003765  | 0.950242178  | 2.21E-06 |
| TUCP_003758 | XLOC_165125 | ENSRNOT00000042799  | 0.952964153  | 1.68E-06 |
| TUCP_003758 | XLOC_165125 | ENSRNOT00000010993  | 0.955217664  | 1.32E-06 |
| TUCP_003758 | XLOC_165125 | ENSRNOT00000017765  | 0.962705971  | 5.34E-07 |
| TUCP_003758 | XLOC_165125 | ENSRNOT00000057738  | 0.97791774   | 3.98E-08 |
| TUCP_003758 | XLOC_165125 | ENSRNOT00000023014  | 0.959090205  | 8.42E-07 |
| TUCP_003758 | XLOC_165125 | ENSRNOT00000015537  | 0.960772263  | 6.85E-07 |
| TUCP_003758 | XLOC_165125 | ENSRNOT00000025009  | 0.954401881  | 1.44E-06 |
| TUCP_003758 | XLOC_165125 | ENSRNOT00000039102  | 0.951784973  | 1.89E-06 |
| TUCP_003758 | XLOC_165125 | ENSRNOT00000032106  | 0.974792409  | 7.68E-08 |
| TUCP_003758 | XLOC_165125 | ENSRNOT00000024306  | -0.953781103 | 1.54E-06 |
| TUCP_003758 | XLOC_165125 | ENSRNOT00000000120  | 0.954571174  | 1.41E-06 |
| TUCP_003758 | XLOC_165125 | ENSRNOT00000074150  | 0.967635648  | 2.65E-07 |
| TUCP_003758 | XLOC_165125 | ENSRNOT00000012528  | 0.954234023  | 1.46E-06 |
| TUCP_003758 | XLOC_165125 | ENSRNOT000000061345 | -0.962742729 | 5.31E-07 |
| TUCP_003758 | XLOC_165125 | ENSRNOT00000016568  | 0.975011538  | 7.36E-08 |
| TUCP_003758 | XLOC_165125 | ENSRNOT00000077503  | 0.95660938   | 1.13E-06 |
| TUCP_003758 | XLOC_165125 | ENSRNOT00000025384  | 0.954485471  | 1.42E-06 |
| TUCP_003758 | XLOC_165125 | ENSRNOT000000051494 | 0.95763963   | 1.00E-06 |
| TUCP_003758 | XLOC_165125 | ENSRNOT00000028907  | 0.953348342  | 1.61E-06 |
| TUCP_003758 | XLOC_165125 | ENSRNOT00000027967  | 0.969399088  | 2.01E-07 |
| TUCP_003758 | XLOC_165125 | ENSRNOT00000025147  | 0.957860335  | 9.75E-07 |
| TUCP_003758 | XLOC_165125 | ENSRNOT00000002358  | -0.951303504 | 1.99E-06 |
| TUCP_003758 | XLOC_165125 | ENSRNOT00000036613  | -0.958178912 | 9.39E-07 |
| TUCP_003758 | XLOC_165125 | ENSRNOT00000020929  | 0.951646433  | 1.92E-06 |
| TUCP_003758 | XLOC_165125 | ENSRNOT00000008113  | -0.961328022 | 6.38E-07 |
| TUCP_000883 | XLOC_032621 | ENSRNOT00000074990  | 0.990229428  | 6.90E-10 |
| TUCP_000883 | XLOC_032621 | ENSRNOT00000068444  | 0.990229428  | 6.90E-10 |
| TUCP_000883 | XLOC_032621 | ENSRNOT00000081370  | 0.991083531  | 4.37E-10 |
| TUCP_000883 | XLOC_032621 | ENSRNOT00000078645  | 0.978366353  | 3.60E-08 |
| TUCP_000883 | XLOC_032621 | ENSRNOT00000075987  | 0.972129558  | 1.26E-07 |
| TUCP_000883 | XLOC_032621 | ENSRNOT00000082043  | 0.985280584  | 5.31E-09 |
| TUCP_000883 | XLOC_032621 | ENSRNOT00000087323  | 0.976129685  | 5.86E-08 |
| TUCP_000883 | XLOC_032621 | ENSRNOT00000074930  | 0.990229428  | 6.90E-10 |
| TUCP_000883 | XLOC_032621 | ENSRNOT00000080575  | 0.991283946  | 3.90E-10 |
| TUCP_000883 | XLOC_032621 | ENSRNOT00000057761  | 0.968048377  | 2.49E-07 |
| TUCP_000883 | XLOC_032621 | ENSRNOT00000078369  | 0.971709911  | 1.36E-07 |
| TUCP_000883 | XLOC_032621 | ENSRNOT00000092982  | 0.990229428  | 6.90E-10 |
| TUCP_000883 | XLOC_032621 | ENSRNOT00000088367  | 0.990229428  | 6.90E-10 |
| TUCP_000883 | XLOC_032621 | ENSRNOT00000061874  | 0.975215923  | 7.06E-08 |
| TUCP_000883 | XLOC_032621 | ENSRNOT00000079606  | 0.975399839  | 6.81E-08 |
| TUCP_000883 | XLOC_032621 | ENSRNOT00000081996  | 0.990229428  | 6.90E-10 |
| TUCP_000883 | XLOC_032621 | ENSRNOT00000064751  | 0.964567329  | 4.14E-07 |
| TUCP_000883 | XLOC_032621 | ENSRNOT00000022280  | 0.983985498  | 8.08E-09 |

|             |             |                    |             |          |
|-------------|-------------|--------------------|-------------|----------|
| TUCP_000883 | XLOC_032621 | ENSRNOT00000082058 | 0.990229428 | 6.90E-10 |
| TUCP_000883 | XLOC_032621 | ENSRNOT00000088905 | 0.990229428 | 6.90E-10 |
| TUCP_000883 | XLOC_032621 | ENSRNOT00000086831 | 0.990229428 | 6.90E-10 |
| TUCP_000883 | XLOC_032621 | ENSRNOT00000045099 | 0.990229428 | 6.90E-10 |
| TUCP_000883 | XLOC_032621 | ENSRNOT00000086745 | 0.954312933 | 1.45E-06 |
| TUCP_000883 | XLOC_032621 | ENSRNOT00000085849 | 0.969187649 | 2.08E-07 |
| TUCP_000883 | XLOC_032621 | ENSRNOT00000086397 | 0.964540084 | 4.16E-07 |
| TUCP_000883 | XLOC_032621 | ENSRNOT00000077789 | 0.980120168 | 2.37E-08 |
| TUCP_000883 | XLOC_032621 | ENSRNOT00000073828 | 0.955295474 | 1.30E-06 |
| TUCP_000883 | XLOC_032621 | ENSRNOT00000087025 | 0.990229428 | 6.90E-10 |
| TUCP_000883 | XLOC_032621 | ENSRNOT00000019853 | 0.990229428 | 6.90E-10 |
| TUCP_000883 | XLOC_032621 | ENSRNOT00000073853 | 0.973898268 | 9.13E-08 |
| TUCP_000883 | XLOC_032621 | ENSRNOT00000065912 | 0.975424932 | 6.77E-08 |
| TUCP_000883 | XLOC_032621 | ENSRNOT00000078683 | 0.963823915 | 4.59E-07 |
| TUCP_000883 | XLOC_032621 | ENSRNOT00000093083 | 0.991522302 | 3.40E-10 |
| TUCP_003755 | XLOC_164804 | ENSRNOT00000084500 | 0.984887141 | 6.05E-09 |
| TUCP_003755 | XLOC_164804 | ENSRNOT00000093467 | 0.996134431 | 6.75E-12 |
| TUCP_003755 | XLOC_164804 | ENSRNOT00000029340 | 0.999116572 | 4.23E-15 |
| TUCP_003755 | XLOC_164804 | ENSRNOT00000077972 | 0.962758032 | 5.30E-07 |
| TUCP_003755 | XLOC_164804 | ENSRNOT00000038646 | 1           | 0        |
| TUCP_003755 | XLOC_164804 | ENSRNOT00000012095 | 0.957750287 | 9.88E-07 |
| TUCP_003755 | XLOC_164804 | ENSRNOT00000017909 | 0.975587192 | 6.56E-08 |
| TUCP_003755 | XLOC_164804 | ENSRNOT00000092579 | 1           | 4.25E-78 |
| TUCP_003755 | XLOC_164804 | ENSRNOT00000089235 | 0.998661162 | 3.38E-14 |
| TUCP_003755 | XLOC_164804 | ENSRNOT00000036383 | 0.988460809 | 1.58E-09 |
| TUCP_003755 | XLOC_164804 | ENSRNOT00000076528 | 0.997115373 | 1.57E-12 |
| TUCP_003755 | XLOC_164804 | ENSRNOT00000075193 | 0.964326971 | 4.29E-07 |
| TUCP_003755 | XLOC_164804 | ENSRNOT00000083034 | 0.990934646 | 4.75E-10 |
| TUCP_003755 | XLOC_164804 | ENSRNOT00000089607 | 0.995091455 | 2.23E-11 |
| TUCP_003755 | XLOC_164804 | ENSRNOT00000086014 | 0.960893638 | 6.74E-07 |
| TUCP_003755 | XLOC_164804 | ENSRNOT00000054939 | 0.958021495 | 9.57E-07 |
| TUCP_003755 | XLOC_164804 | ENSRNOT00000052315 | 0.983687082 | 8.85E-09 |
| TUCP_003755 | XLOC_164804 | ENSRNOT00000088168 | 1           | 0        |
| TUCP_003755 | XLOC_164804 | ENSRNOT00000046231 | 0.96225463  | 5.66E-07 |
| TUCP_003755 | XLOC_164804 | ENSRNOT00000013459 | 0.979098017 | 3.03E-08 |
| TUCP_003755 | XLOC_164804 | ENSRNOT00000078137 | 1           | 0        |
| TUCP_003755 | XLOC_164804 | ENSRNOT00000077764 | 0.977143528 | 4.73E-08 |
| TUCP_003755 | XLOC_164804 | ENSRNOT00000043661 | 0.966975951 | 2.93E-07 |
| TUCP_003755 | XLOC_164804 | ENSRNOT00000092740 | 1           | 0        |
| TUCP_003755 | XLOC_164804 | ENSRNOT00000000117 | 0.990989174 | 4.61E-10 |
| TUCP_003755 | XLOC_164804 | ENSRNOT00000071877 | 0.967113583 | 2.87E-07 |
| TUCP_003755 | XLOC_164804 | ENSRNOT00000070958 | 1           | 0        |
| TUCP_003755 | XLOC_164804 | ENSRNOT00000076757 | 0.959205354 | 8.31E-07 |
| TUCP_003755 | XLOC_164804 | ENSRNOT00000085310 | 0.965230243 | 3.78E-07 |
| TUCP_003755 | XLOC_164804 | ENSRNOT00000047241 | 0.966576993 | 3.11E-07 |
| TUCP_003755 | XLOC_164804 | ENSRNOT00000027268 | 1           | 1.33E-79 |
| TUCP_003755 | XLOC_164804 | ENSRNOT00000004459 | 1           | 0        |
| TUCP_003755 | XLOC_164804 | ENSRNOT00000048373 | 0.959096578 | 8.42E-07 |
| TUCP_003755 | XLOC_164804 | ENSRNOT00000061516 | 0.987595648 | 2.27E-09 |
| TUCP_003755 | XLOC_164804 | ENSRNOT00000088148 | 1           | 0        |
| TUCP_003755 | XLOC_164804 | ENSRNOT00000088527 | 1           | 0        |



|             |             |                     |              |          |
|-------------|-------------|---------------------|--------------|----------|
| TUCP_003755 | XLOC_164804 | ENSRNOT00000078701  | 1            | 0        |
| TUCP_003755 | XLOC_164804 | ENSRNOT00000052308  | 0.962646127  | 5.38E-07 |
| TUCP_003755 | XLOC_164804 | ENSRNOT00000021748  | 1            | 0        |
| TUCP_003755 | XLOC_164804 | ENSRNOT00000089085  | 1            | 0        |
| TUCP_003755 | XLOC_164804 | ENSRNOT00000008153  | 0.999703506  | 1.80E-17 |
| TUCP_003755 | XLOC_164804 | ENSRNOT000000085896 | 0.971605382  | 1.39E-07 |
| TUCP_003755 | XLOC_164804 | ENSRNOT000000079189 | 0.984972387  | 5.89E-09 |
| TUCP_003755 | XLOC_164804 | ENSRNOT00000090078  | 1            | 0        |
| TUCP_003755 | XLOC_164804 | ENSRNOT000000078020 | 0.958421666  | 9.13E-07 |
| TUCP_003755 | XLOC_164804 | ENSRNOT000000092425 | 0.956092273  | 1.19E-06 |
| TUCP_003755 | XLOC_164804 | ENSRNOT00000009776  | 1            | 1.33E-79 |
| TUCP_003120 | XLOC_133211 | ENSRNOT00000043172  | 0.952635447  | 1.73E-06 |
| TUCP_003120 | XLOC_133211 | ENSRNOT000000055259 | 0.973567049  | 9.72E-08 |
| TUCP_003120 | XLOC_133211 | ENSRNOT00000049822  | 0.952298189  | 1.80E-06 |
| TUCP_003756 | XLOC_164891 | ENSRNOT000000082982 | 0.951624326  | 1.92E-06 |
| TUCP_003756 | XLOC_164891 | ENSRNOT00000019057  | 0.960371374  | 7.20E-07 |
| TUCP_003756 | XLOC_164891 | ENSRNOT00000024933  | 0.951744     | 1.90E-06 |
| TUCP_003756 | XLOC_164891 | ENSRNOT00000067011  | -0.962189803 | 5.71E-07 |
| TUCP_003756 | XLOC_164891 | ENSRNOT00000000804  | 0.966942697  | 2.94E-07 |
| TUCP_003756 | XLOC_164891 | ENSRNOT00000002247  | 0.964899619  | 3.96E-07 |
| TUCP_003756 | XLOC_164891 | ENSRNOT00000010030  | 0.952566367  | 1.75E-06 |
| TUCP_000888 | XLOC_033315 | ENSRNOT000000081297 | 0.958468355  | 9.07E-07 |
| TUCP_000888 | XLOC_033315 | ENSRNOT000000023196 | 0.953189007  | 1.64E-06 |
| TUCP_000888 | XLOC_033315 | ENSRNOT00000003177  | 0.957969002  | 9.63E-07 |
| TUCP_000888 | XLOC_033315 | ENSRNOT000000011633 | 0.966655346  | 3.07E-07 |
| TUCP_000888 | XLOC_033315 | ENSRNOT000000024021 | 0.969574202  | 1.95E-07 |
| TUCP_000888 | XLOC_033315 | ENSRNOT00000007491  | 0.95012342   | 2.24E-06 |
| TUCP_000888 | XLOC_033315 | ENSRNOT00000016859  | 0.954245257  | 1.46E-06 |
| TUCP_000888 | XLOC_033315 | ENSRNOT000000080271 | 0.96156307   | 6.19E-07 |
| TUCP_000888 | XLOC_033315 | ENSRNOT000000040731 | 0.950252166  | 2.21E-06 |
| TUCP_000888 | XLOC_033315 | ENSRNOT000000059744 | 0.956750789  | 1.11E-06 |
| TUCP_000889 | XLOC_033326 | ENSRNOT00000006796  | 0.955929731  | 1.22E-06 |
| TUCP_000285 | XLOC_008666 | ENSRNOT000000005190 | 0.957370117  | 1.03E-06 |
| TUCP_000285 | XLOC_008666 | ENSRNOT000000042890 | 0.962395203  | 5.56E-07 |
| TUCP_003234 | XLOC_138628 | ENSRNOT00000023060  | 0.952201684  | 1.81E-06 |
| TUCP_003234 | XLOC_138628 | ENSRNOT000000080124 | 0.957625773  | 1.00E-06 |
| TUCP_003234 | XLOC_138628 | ENSRNOT000000085120 | 0.954513797  | 1.42E-06 |
| TUCP_003234 | XLOC_138628 | ENSRNOT000000077409 | 0.9539852    | 1.50E-06 |
| TUCP_001151 | XLOC_043177 | ENSRNOT00000030102  | 0.960938109  | 6.71E-07 |
| TUCP_001151 | XLOC_043177 | ENSRNOT00000008148  | 0.963867234  | 4.56E-07 |
| TUCP_001151 | XLOC_043177 | ENSRNOT000000090451 | -0.953947358 | 1.51E-06 |
| TUCP_001151 | XLOC_043177 | ENSRNOT000000011659 | 0.96031514   | 7.25E-07 |
| TUCP_001151 | XLOC_043177 | ENSRNOT000000041908 | 0.960113445  | 7.44E-07 |
| TUCP_001151 | XLOC_043177 | ENSRNOT000000064752 | -0.963287355 | 4.94E-07 |
| TUCP_003861 | XLOC_169474 | ENSRNOT000000076404 | 0.962479165  | 5.50E-07 |
| TUCP_003861 | XLOC_169474 | ENSRNOT000000090944 | 0.957609875  | 1.00E-06 |
| TUCP_003861 | XLOC_169474 | ENSRNOT000000028458 | 0.953422808  | 1.60E-06 |
| TUCP_003861 | XLOC_169474 | ENSRNOT000000089226 | 0.95590626   | 1.22E-06 |
| TUCP_003861 | XLOC_169474 | ENSRNOT000000013260 | 0.964903248  | 3.95E-07 |
| TUCP_003861 | XLOC_169474 | ENSRNOT000000014627 | 0.952712649  | 1.72E-06 |
| TUCP_003861 | XLOC_169474 | ENSRNOT000000087138 | 0.950481958  | 2.16E-06 |

|             |             |                    |              |          |
|-------------|-------------|--------------------|--------------|----------|
| TUCP_003861 | XLOC_169474 | ENSRNOT00000010609 | 0.972802109  | 1.12E-07 |
| TUCP_003861 | XLOC_169474 | ENSRNOT00000006670 | 0.958283798  | 9.28E-07 |
| TUCP_003861 | XLOC_169474 | ENSRNOT00000071998 | 0.959448755  | 8.07E-07 |
| TUCP_003861 | XLOC_169474 | ENSRNOT00000085517 | 0.955060185  | 1.34E-06 |
| TUCP_003861 | XLOC_169474 | ENSRNOT00000005144 | 0.952114658  | 1.83E-06 |
| TUCP_003861 | XLOC_169474 | ENSRNOT00000003840 | 0.953291728  | 1.62E-06 |
| TUCP_003861 | XLOC_169474 | ENSRNOT00000079464 | 0.950723985  | 2.11E-06 |
| TUCP_003861 | XLOC_169474 | ENSRNOT00000008971 | 0.969148853  | 2.09E-07 |
| TUCP_003861 | XLOC_169474 | ENSRNOT00000012528 | 0.950906111  | 2.07E-06 |
| TUCP_003861 | XLOC_169474 | ENSRNOT00000078675 | 0.950479212  | 2.16E-06 |
| TUCP_003861 | XLOC_169474 | ENSRNOT00000027170 | 0.96127822   | 6.42E-07 |
| TUCP_003861 | XLOC_169474 | ENSRNOT00000011956 | 0.955697306  | 1.25E-06 |
| TUCP_003861 | XLOC_169474 | ENSRNOT00000012755 | 0.960338674  | 7.23E-07 |
| TUCP_003861 | XLOC_169474 | ENSRNOT00000037790 | 0.957360563  | 1.03E-06 |
| TUCP_003861 | XLOC_169474 | ENSRNOT00000092952 | 0.952849833  | 1.70E-06 |
| TUCP_003861 | XLOC_169474 | ENSRNOT00000074054 | 0.982318659  | 1.32E-08 |
| TUCP_003861 | XLOC_169474 | ENSRNOT00000016967 | 0.951717384  | 1.91E-06 |
| TUCP_001969 | XLOC_079634 | ENSRNOT00000039729 | 0.964624714  | 4.11E-07 |
| TUCP_001969 | XLOC_079634 | ENSRNOT00000040165 | 0.969068361  | 2.12E-07 |
| TUCP_001969 | XLOC_079634 | ENSRNOT00000027891 | 0.950152486  | 2.23E-06 |
| TUCP_001969 | XLOC_079634 | ENSRNOT00000032782 | -0.974357206 | 8.36E-08 |
| TUCP_001969 | XLOC_079634 | ENSRNOT00000013053 | 0.951691141  | 1.91E-06 |
| TUCP_001969 | XLOC_079634 | ENSRNOT00000030344 | 0.961209527  | 6.48E-07 |
| TUCP_001969 | XLOC_079634 | ENSRNOT00000017232 | 0.954154404  | 1.48E-06 |
| TUCP_001969 | XLOC_079634 | ENSRNOT00000028887 | 0.95230979   | 1.79E-06 |
| TUCP_001969 | XLOC_079634 | ENSRNOT00000005647 | -0.956731736 | 1.11E-06 |
| TUCP_001969 | XLOC_079634 | ENSRNOT00000022253 | 0.966767774  | 3.02E-07 |
| TUCP_001969 | XLOC_079634 | ENSRNOT00000011134 | 0.95771477   | 9.92E-07 |
| TUCP_001969 | XLOC_079634 | ENSRNOT00000059487 | 0.955614257  | 1.26E-06 |
| TUCP_001969 | XLOC_079634 | ENSRNOT00000025308 | 0.965763842  | 3.50E-07 |
| TUCP_001969 | XLOC_079634 | ENSRNOT00000024313 | -0.955805161 | 1.23E-06 |
| TUCP_001969 | XLOC_079634 | ENSRNOT00000082645 | 0.968233065  | 2.42E-07 |
| TUCP_001969 | XLOC_079634 | ENSRNOT00000065288 | 0.96492742   | 3.94E-07 |
| TUCP_001969 | XLOC_079634 | ENSRNOT00000007688 | 0.971620557  | 1.38E-07 |
| TUCP_001969 | XLOC_079634 | ENSRNOT00000011344 | 0.955101897  | 1.33E-06 |
| TUCP_001969 | XLOC_079634 | ENSRNOT00000009840 | 0.950962211  | 2.06E-06 |
| TUCP_001969 | XLOC_079634 | ENSRNOT00000035048 | 0.965302796  | 3.74E-07 |
| TUCP_001969 | XLOC_079634 | ENSRNOT00000011481 | 0.961949777  | 5.89E-07 |
| TUCP_001969 | XLOC_079634 | ENSRNOT00000086459 | 0.957547177  | 1.01E-06 |
| TUCP_001969 | XLOC_079634 | ENSRNOT00000015247 | 0.95027419   | 2.20E-06 |
| TUCP_001969 | XLOC_079634 | ENSRNOT00000073952 | 0.950714643  | 2.11E-06 |
| TUCP_001969 | XLOC_079634 | ENSRNOT00000044866 | 0.959552745  | 7.97E-07 |
| TUCP_001969 | XLOC_079634 | ENSRNOT00000048770 | 0.964898703  | 3.96E-07 |
| TUCP_001969 | XLOC_079634 | ENSRNOT00000024568 | 0.952215417  | 1.81E-06 |
| TUCP_001969 | XLOC_079634 | ENSRNOT00000089185 | 0.950274325  | 2.20E-06 |
| TUCP_001969 | XLOC_079634 | ENSRNOT00000023728 | 0.952646814  | 1.73E-06 |
| TUCP_001969 | XLOC_079634 | ENSRNOT0000002936  | 0.953292478  | 1.62E-06 |
| TUCP_003245 | XLOC_139083 | ENSRNOT00000033695 | -0.979370531 | 2.84E-08 |
| TUCP_003245 | XLOC_139083 | ENSRNOT00000087619 | 0.981141155  | 1.82E-08 |
| TUCP_003245 | XLOC_139083 | ENSRNOT00000093462 | 0.983634103  | 9.00E-09 |
| TUCP_003245 | XLOC_139083 | ENSRNOT00000057872 | 0.971047592  | 1.53E-07 |

|             |             |                    |             |          |
|-------------|-------------|--------------------|-------------|----------|
| TUCP_000282 | XLOC_008659 | ENSRNOT00000042890 | 0.968569626 | 2.29E-07 |
| TUCP_000282 | XLOC_008659 | ENSRNOT00000086144 | 0.959173336 | 8.34E-07 |
| TUCP_000282 | XLOC_008659 | ENSRNOT00000065111 | 0.960740945 | 6.88E-07 |
| TUCP_002561 | XLOC_108796 | ENSRNOT00000084075 | 0.984165458 | 7.63E-09 |
| TUCP_002561 | XLOC_108796 | ENSRNOT00000015366 | 0.960330587 | 7.24E-07 |
| TUCP_002561 | XLOC_108796 | ENSRNOT00000012880 | 0.950889973 | 2.07E-06 |
| TUCP_002561 | XLOC_108796 | ENSRNOT00000074465 | 0.988682795 | 1.43E-09 |
| TUCP_002561 | XLOC_108796 | ENSRNOT00000079805 | 0.985425193 | 5.05E-09 |
| TUCP_002561 | XLOC_108796 | ENSRNOT00000040912 | 0.988682795 | 1.43E-09 |
| TUCP_002561 | XLOC_108796 | ENSRNOT00000072648 | 0.988682795 | 1.43E-09 |
| TUCP_002561 | XLOC_108796 | ENSRNOT00000007398 | 0.976576144 | 5.34E-08 |
| TUCP_002561 | XLOC_108796 | ENSRNOT00000070803 | 0.988682795 | 1.43E-09 |
| TUCP_002561 | XLOC_108796 | ENSRNOT00000012196 | 0.988682795 | 1.43E-09 |
| TUCP_002561 | XLOC_108796 | ENSRNOT00000085772 | 0.988682795 | 1.43E-09 |
| TUCP_002561 | XLOC_108796 | ENSRNOT00000093284 | 0.98860631  | 1.48E-09 |
| TUCP_002561 | XLOC_108796 | ENSRNOT00000086374 | 0.985950835 | 4.21E-09 |
| TUCP_002561 | XLOC_108796 | ENSRNOT00000015270 | 0.988682795 | 1.43E-09 |
| TUCP_002561 | XLOC_108796 | ENSRNOT00000046192 | 0.988682795 | 1.43E-09 |
| TUCP_002561 | XLOC_108796 | ENSRNOT00000044226 | 0.988682795 | 1.43E-09 |
| TUCP_002561 | XLOC_108796 | ENSRNOT00000081898 | 0.983462197 | 9.48E-09 |
| TUCP_002561 | XLOC_108796 | ENSRNOT00000080291 | 0.986732571 | 3.17E-09 |
| TUCP_002561 | XLOC_108796 | ENSRNOT00000064601 | 0.965189694 | 3.80E-07 |
| TUCP_002561 | XLOC_108796 | ENSRNOT00000004293 | 0.983072938 | 1.06E-08 |
| TUCP_002561 | XLOC_108796 | ENSRNOT00000078231 | 0.955117062 | 1.33E-06 |
| TUCP_002561 | XLOC_108796 | ENSRNOT00000015870 | 0.974340677 | 8.39E-08 |
| TUCP_002561 | XLOC_108796 | ENSRNOT00000001464 | 0.988682795 | 1.43E-09 |
| TUCP_002561 | XLOC_108796 | ENSRNOT00000090716 | 0.983713397 | 8.78E-09 |
| TUCP_002561 | XLOC_108796 | ENSRNOT00000083542 | 0.958682288 | 8.85E-07 |
| TUCP_002561 | XLOC_108796 | ENSRNOT00000076044 | 0.988682795 | 1.43E-09 |
| TUCP_002561 | XLOC_108796 | ENSRNOT00000074353 | 0.988682795 | 1.43E-09 |
| TUCP_002561 | XLOC_108796 | ENSRNOT00000087122 | 0.961896925 | 5.93E-07 |
| TUCP_002561 | XLOC_108796 | ENSRNOT00000074295 | 0.991280276 | 3.91E-10 |
| TUCP_002561 | XLOC_108796 | ENSRNOT00000057873 | 0.988682795 | 1.43E-09 |
| TUCP_002561 | XLOC_108796 | ENSRNOT00000083002 | 0.973093414 | 1.06E-07 |
| TUCP_002561 | XLOC_108796 | ENSRNOT00000088399 | 0.988708228 | 1.42E-09 |
| TUCP_002561 | XLOC_108796 | ENSRNOT00000086248 | 0.988682795 | 1.43E-09 |
| TUCP_002561 | XLOC_108796 | ENSRNOT00000089750 | 0.988669143 | 1.44E-09 |
| TUCP_002561 | XLOC_108796 | ENSRNOT00000030517 | 0.962535772 | 5.46E-07 |
| TUCP_002561 | XLOC_108796 | ENSRNOT00000034772 | 0.979870674 | 2.52E-08 |
| TUCP_002561 | XLOC_108796 | ENSRNOT00000089305 | 0.958326039 | 9.23E-07 |
| TUCP_002561 | XLOC_108796 | ENSRNOT00000078121 | 0.957735519 | 9.89E-07 |
| TUCP_002561 | XLOC_108796 | ENSRNOT00000002834 | 0.988682795 | 1.43E-09 |
| TUCP_002561 | XLOC_108796 | ENSRNOT00000080812 | 0.985978675 | 4.17E-09 |
| TUCP_002561 | XLOC_108796 | ENSRNOT00000092755 | 0.988682795 | 1.43E-09 |
| TUCP_002561 | XLOC_108796 | ENSRNOT00000031683 | 0.988682795 | 1.43E-09 |
| TUCP_002561 | XLOC_108796 | ENSRNOT00000016843 | 0.953242851 | 1.63E-06 |
| TUCP_002561 | XLOC_108796 | ENSRNOT00000087764 | 0.966389369 | 3.19E-07 |
| TUCP_002560 | XLOC_108796 | ENSRNOT00000065143 | 0.965993981 | 3.38E-07 |
| TUCP_002560 | XLOC_108796 | ENSRNOT00000044885 | 0.952934959 | 1.68E-06 |
| TUCP_002560 | XLOC_108796 | ENSRNOT00000086590 | 0.959476826 | 8.04E-07 |
| TUCP_002560 | XLOC_108796 | ENSRNOT00000006186 | 0.961405493 | 6.32E-07 |

|             |             |                    |              |          |
|-------------|-------------|--------------------|--------------|----------|
| TUCP_002560 | XLOC_108796 | ENSRNOT00000082998 | 0.97119187   | 1.49E-07 |
| TUCP_002560 | XLOC_108796 | ENSRNOT00000081246 | 0.968618304  | 2.27E-07 |
| TUCP_002560 | XLOC_108796 | ENSRNOT00000048910 | -0.956275097 | 1.17E-06 |
| TUCP_002560 | XLOC_108796 | ENSRNOT00000027083 | 0.955414189  | 1.29E-06 |
| TUCP_002560 | XLOC_108796 | ENSRNOT00000009877 | 0.95604004   | 1.20E-06 |
| TUCP_002560 | XLOC_108796 | ENSRNOT00000007351 | -0.967924325 | 2.53E-07 |
| TUCP_002560 | XLOC_108796 | ENSRNOT00000019104 | -0.953666539 | 1.56E-06 |
| TUCP_002560 | XLOC_108796 | ENSRNOT00000021348 | 0.952967559  | 1.67E-06 |
| TUCP_002560 | XLOC_108796 | ENSRNOT00000063930 | -0.952141901 | 1.82E-06 |
| TUCP_002560 | XLOC_108796 | ENSRNOT00000005958 | 0.987988376  | 1.93E-09 |
| TUCP_002560 | XLOC_108796 | ENSRNOT00000082508 | -0.9675966   | 2.66E-07 |
| TUCP_002560 | XLOC_108796 | ENSRNOT00000003605 | -0.950810892 | 2.09E-06 |
| TUCP_002560 | XLOC_108796 | ENSRNOT00000023638 | 0.98128994   | 1.75E-08 |
| TUCP_002560 | XLOC_108796 | ENSRNOT00000009563 | -0.958942034 | 8.58E-07 |
| TUCP_002560 | XLOC_108796 | ENSRNOT00000059524 | -0.9574466   | 1.02E-06 |
| TUCP_002560 | XLOC_108796 | ENSRNOT00000082863 | 0.959347323  | 8.17E-07 |
| TUCP_002560 | XLOC_108796 | ENSRNOT00000028628 | -0.95783346  | 9.78E-07 |
| TUCP_002560 | XLOC_108796 | ENSRNOT00000084709 | 0.958071683  | 9.51E-07 |
| TUCP_002560 | XLOC_108796 | ENSRNOT00000017361 | 0.957199916  | 1.05E-06 |
| TUCP_002560 | XLOC_108796 | ENSRNOT00000005220 | 0.959031678  | 8.48E-07 |
| TUCP_002560 | XLOC_108796 | ENSRNOT00000023144 | 0.963410292  | 4.86E-07 |
| TUCP_002560 | XLOC_108796 | ENSRNOT00000049459 | -0.950373991 | 2.18E-06 |
| TUCP_002560 | XLOC_108796 | ENSRNOT00000045326 | 0.967586006  | 2.67E-07 |
| TUCP_002560 | XLOC_108796 | ENSRNOT00000071166 | 0.960110474  | 7.44E-07 |
| TUCP_002560 | XLOC_108796 | ENSRNOT00000016649 | 0.966687281  | 3.06E-07 |
| TUCP_002560 | XLOC_108796 | ENSRNOT00000086310 | -0.95480991  | 1.38E-06 |
| TUCP_002560 | XLOC_108796 | ENSRNOT00000090342 | 0.978315216  | 3.64E-08 |
| TUCP_002560 | XLOC_108796 | ENSRNOT00000028856 | 0.968275451  | 2.40E-07 |
| TUCP_002560 | XLOC_108796 | ENSRNOT00000000743 | 0.958986979  | 8.53E-07 |
| TUCP_002560 | XLOC_108796 | ENSRNOT00000004140 | 0.955624751  | 1.26E-06 |
| TUCP_002560 | XLOC_108796 | ENSRNOT00000065300 | 0.96314795   | 5.03E-07 |
| TUCP_002560 | XLOC_108796 | ENSRNOT00000030850 | 0.963459887  | 4.82E-07 |
| TUCP_002560 | XLOC_108796 | ENSRNOT00000067170 | -0.974675492 | 7.86E-08 |
| TUCP_002560 | XLOC_108796 | ENSRNOT00000043216 | 0.964369777  | 4.26E-07 |
| TUCP_002560 | XLOC_108796 | ENSRNOT00000091128 | -0.976683186 | 5.22E-08 |
| TUCP_002560 | XLOC_108796 | ENSRNOT00000001586 | -0.964080267 | 4.43E-07 |
| TUCP_002560 | XLOC_108796 | ENSRNOT00000081981 | 0.994332183  | 4.56E-11 |
| TUCP_002560 | XLOC_108796 | ENSRNOT00000086893 | -0.952011813 | 1.85E-06 |
| TUCP_002560 | XLOC_108796 | ENSRNOT00000026543 | 0.957914748  | 9.69E-07 |
| TUCP_002560 | XLOC_108796 | ENSRNOT00000083369 | 0.957908425  | 9.69E-07 |
| TUCP_002560 | XLOC_108796 | ENSRNOT00000006752 | 0.97007639   | 1.80E-07 |
| TUCP_002560 | XLOC_108796 | ENSRNOT00000004172 | 0.973847254  | 9.22E-08 |
| TUCP_002560 | XLOC_108796 | ENSRNOT00000014979 | 0.960160827  | 7.39E-07 |
| TUCP_002560 | XLOC_108796 | ENSRNOT00000019213 | 0.954236832  | 1.46E-06 |
| TUCP_002560 | XLOC_108796 | ENSRNOT00000077201 | -0.955394814 | 1.29E-06 |
| TUCP_002560 | XLOC_108796 | ENSRNOT00000018533 | 0.966929971  | 2.95E-07 |
| TUCP_002560 | XLOC_108796 | ENSRNOT00000073564 | -0.955926994 | 1.22E-06 |
| TUCP_002560 | XLOC_108796 | ENSRNOT00000024969 | 0.978808603  | 3.25E-08 |
| TUCP_002560 | XLOC_108796 | ENSRNOT00000085251 | -0.958873521 | 8.65E-07 |
| TUCP_002560 | XLOC_108796 | ENSRNOT00000001507 | 0.951716922  | 1.91E-06 |
| TUCP_002560 | XLOC_108796 | ENSRNOT00000026783 | 0.961903254  | 5.93E-07 |

|             |             |                    |              |          |
|-------------|-------------|--------------------|--------------|----------|
| TUCP_002560 | XLOC_108796 | ENSRNOT00000042125 | 0.983380064  | 9.71E-09 |
| TUCP_002560 | XLOC_108796 | ENSRNOT00000028646 | 0.956978306  | 1.08E-06 |
| TUCP_002560 | XLOC_108796 | ENSRNOT00000025079 | -0.954017776 | 1.50E-06 |
| TUCP_002560 | XLOC_108796 | ENSRNOT00000048754 | -0.970918583 | 1.56E-07 |
| TUCP_002560 | XLOC_108796 | ENSRNOT00000045699 | 0.952761637  | 1.71E-06 |
| TUCP_002560 | XLOC_108796 | ENSRNOT00000087443 | 0.965548094  | 3.61E-07 |
| TUCP_002560 | XLOC_108796 | ENSRNOT00000029439 | 0.957469685  | 1.02E-06 |
| TUCP_002560 | XLOC_108796 | ENSRNOT00000045285 | 0.95331625   | 1.61E-06 |
| TUCP_002560 | XLOC_108796 | ENSRNOT0000002443  | 0.961331165  | 6.38E-07 |
| TUCP_002560 | XLOC_108796 | ENSRNOT00000084031 | 0.952031294  | 1.85E-06 |
| TUCP_002560 | XLOC_108796 | ENSRNOT00000035320 | -0.955035572 | 1.34E-06 |
| TUCP_002560 | XLOC_108796 | ENSRNOT00000076820 | 0.953347146  | 1.61E-06 |
| TUCP_002560 | XLOC_108796 | ENSRNOT00000071764 | 0.955230663  | 1.31E-06 |
| TUCP_002560 | XLOC_108796 | ENSRNOT00000079109 | 0.955946129  | 1.21E-06 |
| TUCP_002560 | XLOC_108796 | ENSRNOT00000024402 | 0.956883403  | 1.09E-06 |
| TUCP_002560 | XLOC_108796 | ENSRNOT0000004007  | -0.963880248 | 4.56E-07 |
| TUCP_002560 | XLOC_108796 | ENSRNOT00000020681 | -0.95126333  | 1.99E-06 |
| TUCP_002560 | XLOC_108796 | ENSRNOT0000002837  | -0.956593103 | 1.13E-06 |
| TUCP_002560 | XLOC_108796 | ENSRNOT00000026174 | 0.951692873  | 1.91E-06 |
| TUCP_002560 | XLOC_108796 | ENSRNOT00000019519 | 0.965339865  | 3.72E-07 |
| TUCP_002560 | XLOC_108796 | ENSRNOT00000089933 | 0.979770172  | 2.58E-08 |
| TUCP_002560 | XLOC_108796 | ENSRNOT00000077908 | 0.954595701  | 1.41E-06 |
| TUCP_002560 | XLOC_108796 | ENSRNOT00000091602 | -0.964904347 | 3.95E-07 |
| TUCP_002560 | XLOC_108796 | ENSRNOT00000037456 | 0.96245213   | 5.52E-07 |
| TUCP_002560 | XLOC_108796 | ENSRNOT00000080608 | 0.981421115  | 1.69E-08 |
| TUCP_002560 | XLOC_108796 | ENSRNOT00000090123 | 0.964996769  | 3.90E-07 |
| TUCP_002560 | XLOC_108796 | ENSRNOT00000026481 | 0.964049396  | 4.45E-07 |
| TUCP_002560 | XLOC_108796 | ENSRNOT00000065168 | 0.951589133  | 1.93E-06 |
| TUCP_002560 | XLOC_108796 | ENSRNOT00000005490 | 0.95763279   | 1.00E-06 |
| TUCP_002560 | XLOC_108796 | ENSRNOT00000067554 | 0.952818053  | 1.70E-06 |
| TUCP_002560 | XLOC_108796 | ENSRNOT00000072208 | 0.961952871  | 5.89E-07 |
| TUCP_002560 | XLOC_108796 | ENSRNOT00000032780 | 0.982557703  | 1.23E-08 |
| TUCP_002560 | XLOC_108796 | ENSRNOT00000009708 | -0.981678474 | 1.58E-08 |
| TUCP_002560 | XLOC_108796 | ENSRNOT00000074323 | 0.951321633  | 1.98E-06 |
| TUCP_002560 | XLOC_108796 | ENSRNOT00000064535 | -0.955804206 | 1.23E-06 |
| TUCP_002560 | XLOC_108796 | ENSRNOT00000015188 | 0.973177021  | 1.05E-07 |
| TUCP_002560 | XLOC_108796 | ENSRNOT00000033677 | -0.96599092  | 3.38E-07 |
| TUCP_002560 | XLOC_108796 | ENSRNOT00000079866 | 0.961948469  | 5.89E-07 |
| TUCP_002560 | XLOC_108796 | ENSRNOT00000072518 | 0.966990938  | 2.92E-07 |
| TUCP_002560 | XLOC_108796 | ENSRNOT00000023133 | 0.958284457  | 9.27E-07 |
| TUCP_002560 | XLOC_108796 | ENSRNOT00000085279 | 0.963584873  | 4.74E-07 |
| TUCP_002560 | XLOC_108796 | ENSRNOT00000004046 | -0.979087328 | 3.04E-08 |
| TUCP_002560 | XLOC_108796 | ENSRNOT00000011499 | -0.958253271 | 9.31E-07 |
| TUCP_002560 | XLOC_108796 | ENSRNOT00000061392 | 0.979597217  | 2.69E-08 |
| TUCP_002560 | XLOC_108796 | ENSRNOT00000038247 | 0.961294647  | 6.41E-07 |
| TUCP_002560 | XLOC_108796 | ENSRNOT00000002410 | 0.960302986  | 7.26E-07 |
| TUCP_002560 | XLOC_108796 | ENSRNOT00000010927 | 0.957750353  | 9.87E-07 |
| TUCP_002560 | XLOC_108796 | ENSRNOT00000037039 | -0.954744525 | 1.39E-06 |
| TUCP_002560 | XLOC_108796 | ENSRNOT00000021030 | -0.964514841 | 4.17E-07 |
| TUCP_002560 | XLOC_108796 | ENSRNOT00000091909 | 0.967033494  | 2.90E-07 |
| TUCP_002560 | XLOC_108796 | ENSRNOT00000015006 | 0.95544661   | 1.28E-06 |

|             |             |                    |              |          |
|-------------|-------------|--------------------|--------------|----------|
| TUCP_002560 | XLOC_108796 | ENSRNOT00000077727 | -0.954383227 | 1.44E-06 |
| TUCP_002560 | XLOC_108796 | ENSRNOT00000022502 | -0.953754891 | 1.54E-06 |
| TUCP_002560 | XLOC_108796 | ENSRNOT00000044346 | -0.954652208 | 1.40E-06 |
| TUCP_002560 | XLOC_108796 | ENSRNOT00000024119 | 0.955250821  | 1.31E-06 |
| TUCP_002560 | XLOC_108796 | ENSRNOT00000010541 | 0.954592968  | 1.41E-06 |
| TUCP_002560 | XLOC_108796 | ENSRNOT00000017556 | 0.969529571  | 1.97E-07 |
| TUCP_002560 | XLOC_108796 | ENSRNOT00000004032 | 0.96299678   | 5.13E-07 |
| TUCP_002560 | XLOC_108796 | ENSRNOT00000084385 | 0.965654803  | 3.55E-07 |
| TUCP_002560 | XLOC_108796 | ENSRNOT00000047192 | -0.973382977 | 1.01E-07 |
| TUCP_002560 | XLOC_108796 | ENSRNOT00000015479 | 0.952124916  | 1.83E-06 |
| TUCP_002560 | XLOC_108796 | ENSRNOT00000090912 | 0.950924276  | 2.06E-06 |
| TUCP_002560 | XLOC_108796 | ENSRNOT00000044562 | 0.962086311  | 5.79E-07 |
| TUCP_002560 | XLOC_108796 | ENSRNOT00000021803 | -0.965300055 | 3.74E-07 |
| TUCP_002560 | XLOC_108796 | ENSRNOT00000001081 | 0.977207452  | 4.66E-08 |
| TUCP_002560 | XLOC_108796 | ENSRNOT00000005228 | 0.96805964   | 2.48E-07 |
| TUCP_002560 | XLOC_108796 | ENSRNOT00000061304 | -0.951099981 | 2.03E-06 |
| TUCP_002560 | XLOC_108796 | ENSRNOT00000083220 | 0.974834153  | 7.62E-08 |
| TUCP_002560 | XLOC_108796 | ENSRNOT00000025983 | 0.951889047  | 1.87E-06 |
| TUCP_002560 | XLOC_108796 | ENSRNOT00000086119 | -0.968034415 | 2.49E-07 |
| TUCP_002560 | XLOC_108796 | ENSRNOT00000016722 | 0.956983062  | 1.08E-06 |
| TUCP_002560 | XLOC_108796 | ENSRNOT00000022190 | -0.956001301 | 1.21E-06 |
| TUCP_002560 | XLOC_108796 | ENSRNOT00000016132 | -0.963715396 | 4.66E-07 |
| TUCP_002560 | XLOC_108796 | ENSRNOT00000000120 | 0.970774262  | 1.60E-07 |
| TUCP_002560 | XLOC_108796 | ENSRNOT00000058312 | 0.965831744  | 3.46E-07 |
| TUCP_002560 | XLOC_108796 | ENSRNOT00000019133 | 0.97685495   | 5.03E-08 |
| TUCP_002560 | XLOC_108796 | ENSRNOT00000065983 | 0.960894506  | 6.74E-07 |
| TUCP_002560 | XLOC_108796 | ENSRNOT00000030782 | -0.955535908 | 1.27E-06 |
| TUCP_002560 | XLOC_108796 | ENSRNOT00000020437 | 0.955842881  | 1.23E-06 |
| TUCP_002560 | XLOC_108796 | ENSRNOT00000079698 | -0.953500416 | 1.58E-06 |
| TUCP_002560 | XLOC_108796 | ENSRNOT00000067780 | -0.956962658 | 1.08E-06 |
| TUCP_002560 | XLOC_108796 | ENSRNOT00000015265 | 0.964917551  | 3.95E-07 |
| TUCP_002560 | XLOC_108796 | ENSRNOT00000034692 | -0.955307634 | 1.30E-06 |
| TUCP_002560 | XLOC_108796 | ENSRNOT00000048063 | 0.950740775  | 2.10E-06 |
| TUCP_002560 | XLOC_108796 | ENSRNOT00000052422 | 0.978721221  | 3.32E-08 |
| TUCP_002560 | XLOC_108796 | ENSRNOT00000003787 | -0.951141109 | 2.02E-06 |
| TUCP_002560 | XLOC_108796 | ENSRNOT00000068381 | 0.963488801  | 4.81E-07 |
| TUCP_002560 | XLOC_108796 | ENSRNOT00000031977 | 0.950724118  | 2.11E-06 |
| TUCP_002560 | XLOC_108796 | ENSRNOT00000020910 | 0.95594387   | 1.21E-06 |
| TUCP_002560 | XLOC_108796 | ENSRNOT00000031979 | -0.958566219 | 8.97E-07 |
| TUCP_002560 | XLOC_108796 | ENSRNOT00000015609 | 0.964077164  | 4.44E-07 |
| TUCP_002560 | XLOC_108796 | ENSRNOT00000033975 | 0.952253027  | 1.80E-06 |
| TUCP_002560 | XLOC_108796 | ENSRNOT00000004319 | -0.966630729 | 3.08E-07 |
| TUCP_002560 | XLOC_108796 | ENSRNOT00000078102 | 0.985397555  | 5.10E-09 |
| TUCP_002560 | XLOC_108796 | ENSRNOT00000019820 | 0.973601435  | 9.66E-08 |
| TUCP_002560 | XLOC_108796 | ENSRNOT00000000181 | 0.950409505  | 2.17E-06 |
| TUCP_002560 | XLOC_108796 | ENSRNOT00000009811 | 0.977428703  | 4.44E-08 |
| TUCP_002560 | XLOC_108796 | ENSRNOT00000010873 | -0.951968931 | 1.86E-06 |
| TUCP_002560 | XLOC_108796 | ENSRNOT00000087095 | 0.971430928  | 1.43E-07 |
| TUCP_002560 | XLOC_108796 | ENSRNOT00000027526 | 0.966290689  | 3.24E-07 |
| TUCP_002560 | XLOC_108796 | ENSRNOT00000005459 | 0.956462372  | 1.14E-06 |
| TUCP_002560 | XLOC_108796 | ENSRNOT00000088599 | 0.960000016  | 7.54E-07 |

|             |             |                    |              |          |
|-------------|-------------|--------------------|--------------|----------|
| TUCP_002560 | XLOC_108796 | ENSRNOT00000055321 | 0.960856117  | 6.78E-07 |
| TUCP_002560 | XLOC_108796 | ENSRNOT00000026531 | -0.951797363 | 1.89E-06 |
| TUCP_002560 | XLOC_108796 | ENSRNOT00000048933 | -0.953058548 | 1.66E-06 |
| TUCP_002560 | XLOC_108796 | ENSRNOT00000025067 | -0.955113709 | 1.33E-06 |
| TUCP_002560 | XLOC_108796 | ENSRNOT00000016129 | 0.953484089  | 1.59E-06 |
| TUCP_002560 | XLOC_108796 | ENSRNOT00000081047 | 0.975384187  | 6.83E-08 |
| TUCP_002560 | XLOC_108796 | ENSRNOT00000010030 | -0.954639452 | 1.40E-06 |
| TUCP_002560 | XLOC_108796 | ENSRNOT00000073559 | 0.971340083  | 1.45E-07 |
| TUCP_002560 | XLOC_108796 | ENSRNOT00000011880 | 0.955905442  | 1.22E-06 |
| TUCP_002560 | XLOC_108796 | ENSRNOT00000005073 | 0.951251396  | 2.00E-06 |
| TUCP_002560 | XLOC_108796 | ENSRNOT00000005486 | -0.963471561 | 4.82E-07 |
| TUCP_002560 | XLOC_108796 | ENSRNOT00000023989 | 0.971509501  | 1.41E-07 |
| TUCP_002560 | XLOC_108796 | ENSRNOT00000032248 | 0.954888322  | 1.36E-06 |
| TUCP_002560 | XLOC_108796 | ENSRNOT00000003991 | 0.961325541  | 6.39E-07 |
| TUCP_002560 | XLOC_108796 | ENSRNOT00000021408 | 0.967224715  | 2.82E-07 |
| TUCP_002560 | XLOC_108796 | ENSRNOT00000019502 | 0.968049879  | 2.49E-07 |
| TUCP_002560 | XLOC_108796 | ENSRNOT00000078475 | 0.954999226  | 1.35E-06 |
| TUCP_002560 | XLOC_108796 | ENSRNOT00000089211 | 0.95517322   | 1.32E-06 |
| TUCP_002560 | XLOC_108796 | ENSRNOT00000050515 | 0.971050539  | 1.53E-07 |
| TUCP_002560 | XLOC_108796 | ENSRNOT00000013067 | -0.957366511 | 1.03E-06 |
| TUCP_002560 | XLOC_108796 | ENSRNOT00000041277 | -0.952184803 | 1.82E-06 |
| TUCP_002560 | XLOC_108796 | ENSRNOT00000080207 | 0.969471402  | 1.98E-07 |
| TUCP_002560 | XLOC_108796 | ENSRNOT00000035591 | -0.965911516 | 3.42E-07 |
| TUCP_002560 | XLOC_108796 | ENSRNOT00000027910 | 0.978226518  | 3.72E-08 |
| TUCP_002560 | XLOC_108796 | ENSRNOT00000060362 | 0.977258302  | 4.61E-08 |
| TUCP_002560 | XLOC_108796 | ENSRNOT00000052224 | 0.968703111  | 2.24E-07 |
| TUCP_002560 | XLOC_108796 | ENSRNOT00000078070 | 0.98057211   | 2.11E-08 |
| TUCP_002560 | XLOC_108796 | ENSRNOT00000046745 | 0.982910458  | 1.12E-08 |
| TUCP_002560 | XLOC_108796 | ENSRNOT00000021015 | 0.952238828  | 1.81E-06 |
| TUCP_002560 | XLOC_108796 | ENSRNOT00000087502 | 0.960583852  | 7.01E-07 |
| TUCP_002560 | XLOC_108796 | ENSRNOT00000024322 | 0.959314839  | 8.20E-07 |
| TUCP_002560 | XLOC_108796 | ENSRNOT00000088182 | 0.965979908  | 3.39E-07 |
| TUCP_002560 | XLOC_108796 | ENSRNOT00000061201 | -0.953281473 | 1.62E-06 |
| TUCP_002560 | XLOC_108796 | ENSRNOT00000000577 | 0.950461991  | 2.16E-06 |
| TUCP_002560 | XLOC_108796 | ENSRNOT00000026643 | 0.954287452  | 1.46E-06 |
| TUCP_002560 | XLOC_108796 | ENSRNOT00000057146 | 0.955751803  | 1.24E-06 |
| TUCP_002560 | XLOC_108796 | ENSRNOT00000073526 | 0.957307586  | 1.04E-06 |
| TUCP_002560 | XLOC_108796 | ENSRNOT00000010784 | 0.966324114  | 3.22E-07 |
| TUCP_002560 | XLOC_108796 | ENSRNOT00000013801 | 0.952379111  | 1.78E-06 |
| TUCP_002560 | XLOC_108796 | ENSRNOT00000021944 | 0.95028376   | 2.20E-06 |
| TUCP_002560 | XLOC_108796 | ENSRNOT00000078390 | -0.956136229 | 1.19E-06 |
| TUCP_002560 | XLOC_108796 | ENSRNOT00000000013 | 0.977109765  | 4.76E-08 |
| TUCP_002560 | XLOC_108796 | ENSRNOT00000077999 | 0.964101451  | 4.42E-07 |
| TUCP_002560 | XLOC_108796 | ENSRNOT00000092029 | 0.968253934  | 2.41E-07 |
| TUCP_002560 | XLOC_108796 | ENSRNOT00000025832 | 0.950040094  | 2.25E-06 |
| TUCP_002560 | XLOC_108796 | ENSRNOT00000019656 | -0.960396098 | 7.18E-07 |
| TUCP_002560 | XLOC_108796 | ENSRNOT00000017181 | -0.952287298 | 1.80E-06 |
| TUCP_002560 | XLOC_108796 | ENSRNOT00000017753 | 0.980918069  | 1.93E-08 |
| TUCP_002560 | XLOC_108796 | ENSRNOT00000051022 | 0.965158637  | 3.81E-07 |
| TUCP_002560 | XLOC_108796 | ENSRNOT00000006499 | 0.959962174  | 7.58E-07 |
| TUCP_002560 | XLOC_108796 | ENSRNOT00000005909 | 0.971199902  | 1.49E-07 |

|             |             |                    |              |          |
|-------------|-------------|--------------------|--------------|----------|
| TUCP_002560 | XLOC_108796 | ENSRNOT00000029125 | 0.991067586  | 4.41E-10 |
| TUCP_002560 | XLOC_108796 | ENSRNOT00000074649 | 0.96839616   | 2.35E-07 |
| TUCP_002560 | XLOC_108796 | ENSRNOT00000029833 | 0.978387866  | 3.58E-08 |
| TUCP_002560 | XLOC_108796 | ENSRNOT00000034487 | -0.950886316 | 2.07E-06 |
| TUCP_002560 | XLOC_108796 | ENSRNOT00000031904 | 0.951476057  | 1.95E-06 |
| TUCP_002560 | XLOC_108796 | ENSRNOT00000009129 | 0.950624899  | 2.13E-06 |
| TUCP_002560 | XLOC_108796 | ENSRNOT00000017319 | 0.962941932  | 5.17E-07 |
| TUCP_002560 | XLOC_108796 | ENSRNOT00000086122 | 0.955139664  | 1.33E-06 |
| TUCP_002560 | XLOC_108796 | ENSRNOT00000022074 | 0.967181375  | 2.84E-07 |
| TUCP_002560 | XLOC_108796 | ENSRNOT00000040069 | 0.97021145   | 1.76E-07 |
| TUCP_002560 | XLOC_108796 | ENSRNOT00000036951 | 0.961437783  | 6.29E-07 |
| TUCP_002560 | XLOC_108796 | ENSRNOT00000016519 | 0.96254773   | 5.45E-07 |
| TUCP_002560 | XLOC_108796 | ENSRNOT00000000302 | 0.95385584   | 1.52E-06 |
| TUCP_002560 | XLOC_108796 | ENSRNOT00000060002 | -0.956235288 | 1.17E-06 |
| TUCP_002560 | XLOC_108796 | ENSRNOT00000036959 | -0.95897422  | 8.54E-07 |
| TUCP_002560 | XLOC_108796 | ENSRNOT00000015799 | 0.981105112  | 1.84E-08 |
| TUCP_002560 | XLOC_108796 | ENSRNOT00000075424 | 0.955498739  | 1.28E-06 |
| TUCP_002560 | XLOC_108796 | ENSRNOT00000031401 | -0.955696774 | 1.25E-06 |
| TUCP_002560 | XLOC_108796 | ENSRNOT00000085228 | 0.98078982   | 2.00E-08 |
| TUCP_002560 | XLOC_108796 | ENSRNOT00000078250 | 0.958040377  | 9.55E-07 |
| TUCP_002560 | XLOC_108796 | ENSRNOT00000058842 | 0.969907604  | 1.85E-07 |
| TUCP_002560 | XLOC_108796 | ENSRNOT00000002052 | -0.950398213 | 2.18E-06 |
| TUCP_002560 | XLOC_108796 | ENSRNOT00000066133 | -0.96595773  | 3.40E-07 |
| TUCP_002560 | XLOC_108796 | ENSRNOT00000077231 | 0.963750682  | 4.64E-07 |
| TUCP_002560 | XLOC_108796 | ENSRNOT00000035700 | 0.970533951  | 1.66E-07 |
| TUCP_002560 | XLOC_108796 | ENSRNOT00000059181 | 0.959699207  | 7.82E-07 |
| TUCP_002560 | XLOC_108796 | ENSRNOT00000029202 | -0.964919793 | 3.94E-07 |
| TUCP_002560 | XLOC_108796 | ENSRNOT00000054828 | 0.971911798  | 1.31E-07 |
| TUCP_002560 | XLOC_108796 | ENSRNOT00000009803 | 0.973433091  | 9.97E-08 |
| TUCP_002560 | XLOC_108796 | ENSRNOT00000003690 | 0.963093554  | 5.07E-07 |
| TUCP_002560 | XLOC_108796 | ENSRNOT00000028876 | -0.953709285 | 1.55E-06 |
| TUCP_002560 | XLOC_108796 | ENSRNOT00000016991 | 0.95376109   | 1.54E-06 |
| TUCP_002560 | XLOC_108796 | ENSRNOT00000011350 | 0.972039411  | 1.28E-07 |
| TUCP_002560 | XLOC_108796 | ENSRNOT00000085756 | 0.957290326  | 1.04E-06 |
| TUCP_002560 | XLOC_108796 | ENSRNOT00000008901 | -0.975901208 | 6.15E-08 |
| TUCP_002560 | XLOC_108796 | ENSRNOT00000009496 | 0.972359699  | 1.21E-07 |
| TUCP_002560 | XLOC_108796 | ENSRNOT00000005659 | 0.963807063  | 4.60E-07 |
| TUCP_002560 | XLOC_108796 | ENSRNOT00000017761 | 0.968606034  | 2.28E-07 |
| TUCP_002560 | XLOC_108796 | ENSRNOT00000055442 | 0.957757298  | 9.87E-07 |
| TUCP_002560 | XLOC_108796 | ENSRNOT00000020663 | -0.955458748 | 1.28E-06 |
| TUCP_002560 | XLOC_108796 | ENSRNOT00000025887 | -0.959226861 | 8.29E-07 |
| TUCP_002560 | XLOC_108796 | ENSRNOT00000078994 | 0.959295303  | 8.22E-07 |
| TUCP_002560 | XLOC_108796 | ENSRNOT00000002114 | -0.953718831 | 1.55E-06 |
| TUCP_002560 | XLOC_108796 | ENSRNOT00000022142 | 0.968039746  | 2.49E-07 |
| TUCP_002560 | XLOC_108796 | ENSRNOT00000055992 | -0.958971242 | 8.55E-07 |
| TUCP_002560 | XLOC_108796 | ENSRNOT00000017063 | -0.953706342 | 1.55E-06 |
| TUCP_002560 | XLOC_108796 | ENSRNOT00000027970 | 0.977025168  | 4.85E-08 |
| TUCP_002560 | XLOC_108796 | ENSRNOT00000010748 | 0.987846892  | 2.05E-09 |
| TUCP_002560 | XLOC_108796 | ENSRNOT00000012334 | 0.952105065  | 1.83E-06 |
| TUCP_002560 | XLOC_108796 | ENSRNOT00000028885 | -0.962222974 | 5.69E-07 |
| TUCP_002560 | XLOC_108796 | ENSRNOT00000044742 | 0.950970056  | 2.05E-06 |



|             |             |                    |              |          |
|-------------|-------------|--------------------|--------------|----------|
| TUCP_002560 | XLOC_108796 | ENSRNOT0000005478  | -0.957894796 | 9.71E-07 |
| TUCP_002560 | XLOC_108796 | ENSRNOT00000050834 | -0.968933709 | 2.16E-07 |
| TUCP_002560 | XLOC_108796 | ENSRNOT00000052120 | 0.966601813  | 3.09E-07 |
| TUCP_002560 | XLOC_108796 | ENSRNOT0000004762  | 0.951307887  | 1.99E-06 |
| TUCP_002560 | XLOC_108796 | ENSRNOT00000035474 | 0.984818335  | 6.19E-09 |
| TUCP_002560 | XLOC_108796 | ENSRNOT00000039341 | 0.954744151  | 1.39E-06 |
| TUCP_002560 | XLOC_108796 | ENSRNOT00000084422 | 0.977740285  | 4.15E-08 |
| TUCP_002560 | XLOC_108796 | ENSRNOT00000033235 | 0.979258014  | 2.92E-08 |
| TUCP_002560 | XLOC_108796 | ENSRNOT00000018074 | -0.963133828 | 5.04E-07 |
| TUCP_002560 | XLOC_108796 | ENSRNOT00000056130 | 0.950307299  | 2.19E-06 |
| TUCP_002560 | XLOC_108796 | ENSRNOT00000076872 | 0.981845509  | 1.51E-08 |
| TUCP_002560 | XLOC_108796 | ENSRNOT00000091205 | 0.981312525  | 1.74E-08 |
| TUCP_002560 | XLOC_108796 | ENSRNOT00000001234 | -0.952357766 | 1.78E-06 |
| TUCP_002560 | XLOC_108796 | ENSRNOT00000014124 | 0.974098933  | 8.79E-08 |
| TUCP_002560 | XLOC_108796 | ENSRNOT00000085519 | 0.964277295  | 4.31E-07 |
| TUCP_002560 | XLOC_108796 | ENSRNOT00000040476 | 0.983049977  | 1.07E-08 |
| TUCP_002560 | XLOC_108796 | ENSRNOT00000013632 | 0.953476268  | 1.59E-06 |
| TUCP_002560 | XLOC_108796 | ENSRNOT00000038182 | -0.959385673 | 8.13E-07 |
| TUCP_002560 | XLOC_108796 | ENSRNOT00000010983 | 0.958272041  | 9.29E-07 |
| TUCP_002560 | XLOC_108796 | ENSRNOT00000060696 | 0.954340432  | 1.45E-06 |
| TUCP_002560 | XLOC_108796 | ENSRNOT00000004787 | -0.964059065 | 4.45E-07 |
| TUCP_002560 | XLOC_108796 | ENSRNOT00000077406 | 0.958357898  | 9.19E-07 |
| TUCP_002560 | XLOC_108796 | ENSRNOT00000060698 | -0.953663182 | 1.56E-06 |
| TUCP_002560 | XLOC_108796 | ENSRNOT00000009900 | -0.964724172 | 4.05E-07 |
| TUCP_002560 | XLOC_108796 | ENSRNOT00000058351 | 0.977923422  | 3.98E-08 |
| TUCP_002560 | XLOC_108796 | ENSRNOT00000014814 | 0.98154435   | 1.63E-08 |
| TUCP_002560 | XLOC_108796 | ENSRNOT00000026760 | -0.955829674 | 1.23E-06 |
| TUCP_002560 | XLOC_108796 | ENSRNOT00000019172 | -0.954816237 | 1.37E-06 |
| TUCP_002560 | XLOC_108796 | ENSRNOT00000067181 | 0.951477987  | 1.95E-06 |
| TUCP_002560 | XLOC_108796 | ENSRNOT00000064798 | 0.978720903  | 3.32E-08 |
| TUCP_002560 | XLOC_108796 | ENSRNOT00000019177 | 0.970254611  | 1.74E-07 |
| TUCP_002560 | XLOC_108796 | ENSRNOT00000024491 | -0.959074404 | 8.44E-07 |
| TUCP_002560 | XLOC_108796 | ENSRNOT00000084597 | -0.95165811  | 1.92E-06 |
| TUCP_002560 | XLOC_108796 | ENSRNOT00000023537 | -0.952279035 | 1.80E-06 |
| TUCP_002560 | XLOC_108796 | ENSRNOT00000065529 | 0.950586508  | 2.13E-06 |
| TUCP_002560 | XLOC_108796 | ENSRNOT00000027452 | 0.95051201   | 2.15E-06 |
| TUCP_002560 | XLOC_108796 | ENSRNOT00000017776 | 0.976519828  | 5.40E-08 |
| TUCP_002560 | XLOC_108796 | ENSRNOT00000040393 | 0.968321932  | 2.38E-07 |
| TUCP_002560 | XLOC_108796 | ENSRNOT00000017165 | -0.951168002 | 2.01E-06 |
| TUCP_002560 | XLOC_108796 | ENSRNOT00000012187 | 0.969097989  | 2.11E-07 |
| TUCP_002560 | XLOC_108796 | ENSRNOT00000067901 | -0.969608484 | 1.94E-07 |
| TUCP_002560 | XLOC_108796 | ENSRNOT00000004463 | 0.969085142  | 2.11E-07 |
| TUCP_002560 | XLOC_108796 | ENSRNOT00000008757 | 0.964518458  | 4.17E-07 |
| TUCP_002560 | XLOC_108796 | ENSRNOT00000008982 | 0.991197829  | 4.10E-10 |
| TUCP_002560 | XLOC_108796 | ENSRNOT00000021674 | 0.951705894  | 1.91E-06 |
| TUCP_002560 | XLOC_108796 | ENSRNOT00000064700 | 0.962556756  | 5.44E-07 |
| TUCP_002560 | XLOC_108796 | ENSRNOT00000047210 | 0.965367714  | 3.70E-07 |
| TUCP_002560 | XLOC_108796 | ENSRNOT00000036613 | -0.95871453  | 8.81E-07 |
| TUCP_002560 | XLOC_108796 | ENSRNOT00000008987 | -0.950592956 | 2.13E-06 |
| TUCP_002560 | XLOC_108796 | ENSRNOT00000015537 | 0.95792401   | 9.68E-07 |
| TUCP_002560 | XLOC_108796 | ENSRNOT00000025705 | 0.954354637  | 1.45E-06 |

|             |             |                     |              |          |
|-------------|-------------|---------------------|--------------|----------|
| TUCP_002560 | XLOC_108796 | ENSRNOT00000002109  | 0.974385702  | 8.32E-08 |
| TUCP_002560 | XLOC_108796 | ENSRNOT000000083957 | 0.956164968  | 1.18E-06 |
| TUCP_002560 | XLOC_108796 | ENSRNOT00000005311  | 0.951121454  | 2.02E-06 |
| TUCP_002560 | XLOC_108796 | ENSRNOT00000017687  | -0.95994038  | 7.60E-07 |
| TUCP_002560 | XLOC_108796 | ENSRNOT00000036931  | -0.95657666  | 1.13E-06 |
| TUCP_002560 | XLOC_108796 | ENSRNOT00000011682  | -0.954961825 | 1.35E-06 |
| TUCP_002560 | XLOC_108796 | ENSRNOT00000079996  | 0.973911891  | 9.11E-08 |
| TUCP_002560 | XLOC_108796 | ENSRNOT00000072357  | -0.954263766 | 1.46E-06 |
| TUCP_002408 | XLOC_101523 | ENSRNOT00000004508  | 0.951400368  | 1.97E-06 |
| TUCP_002408 | XLOC_101523 | ENSRNOT00000010992  | 0.964305087  | 4.30E-07 |
| TUCP_002408 | XLOC_101523 | ENSRNOT00000044896  | 0.952098761  | 1.83E-06 |
| TUCP_002408 | XLOC_101523 | ENSRNOT00000025092  | 0.97618654   | 5.79E-08 |
| TUCP_002408 | XLOC_101523 | ENSRNOT00000070999  | 0.95767489   | 9.96E-07 |
| TUCP_002408 | XLOC_101523 | ENSRNOT00000058852  | -0.964639625 | 4.10E-07 |
| TUCP_002408 | XLOC_101523 | ENSRNOT00000021116  | 0.956205334  | 1.18E-06 |
| TUCP_002408 | XLOC_101523 | ENSRNOT00000076669  | 0.95844148   | 9.10E-07 |
| TUCP_002408 | XLOC_101523 | ENSRNOT00000043156  | 0.95444674   | 1.43E-06 |
| TUCP_002408 | XLOC_101523 | ENSRNOT00000021132  | 0.959674702  | 7.85E-07 |
| TUCP_002408 | XLOC_101523 | ENSRNOT00000059458  | 0.959786448  | 7.74E-07 |
| TUCP_002408 | XLOC_101523 | ENSRNOT00000015203  | 0.956844811  | 1.10E-06 |
| TUCP_002562 | XLOC_108825 | ENSRNOT00000065143  | 0.965052006  | 3.87E-07 |
| TUCP_002562 | XLOC_108825 | ENSRNOT00000031904  | 0.951812415  | 1.89E-06 |
| TUCP_002562 | XLOC_108825 | ENSRNOT00000082998  | 0.962417327  | 5.54E-07 |
| TUCP_002562 | XLOC_108825 | ENSRNOT00000081246  | 0.970384543  | 1.71E-07 |
| TUCP_002562 | XLOC_108825 | ENSRNOT00000048910  | -0.950676782 | 2.12E-06 |
| TUCP_002562 | XLOC_108825 | ENSRNOT00000027083  | 0.952117765  | 1.83E-06 |
| TUCP_002562 | XLOC_108825 | ENSRNOT0000009877   | 0.972194446  | 1.25E-07 |
| TUCP_002562 | XLOC_108825 | ENSRNOT0000007351   | -0.962935164 | 5.18E-07 |
| TUCP_002562 | XLOC_108825 | ENSRNOT00000021348  | 0.958453944  | 9.09E-07 |
| TUCP_002562 | XLOC_108825 | ENSRNOT00000023133  | 0.956046932  | 1.20E-06 |
| TUCP_002562 | XLOC_108825 | ENSRNOT00000071560  | 0.954834122  | 1.37E-06 |
| TUCP_002562 | XLOC_108825 | ENSRNOT00000025936  | -0.955825829 | 1.23E-06 |
| TUCP_002562 | XLOC_108825 | ENSRNOT00000082508  | -0.95782345  | 9.79E-07 |
| TUCP_002562 | XLOC_108825 | ENSRNOT00000023638  | 0.965868039  | 3.45E-07 |
| TUCP_002562 | XLOC_108825 | ENSRNOT00000005228  | 0.974169641  | 8.67E-08 |
| TUCP_002562 | XLOC_108825 | ENSRNOT00000005220  | 0.953812064  | 1.53E-06 |
| TUCP_002562 | XLOC_108825 | ENSRNOT00000023144  | 0.967958177  | 2.52E-07 |
| TUCP_002562 | XLOC_108825 | ENSRNOT00000019502  | 0.957274725  | 1.04E-06 |
| TUCP_002562 | XLOC_108825 | ENSRNOT00000016649  | 0.954586124  | 1.41E-06 |
| TUCP_002562 | XLOC_108825 | ENSRNOT00000090342  | 0.974249894  | 8.54E-08 |
| TUCP_002562 | XLOC_108825 | ENSRNOT00000000743  | 0.962481818  | 5.50E-07 |
| TUCP_002562 | XLOC_108825 | ENSRNOT00000065300  | 0.959561291  | 7.96E-07 |
| TUCP_002562 | XLOC_108825 | ENSRNOT00000080608  | 0.953467151  | 1.59E-06 |
| TUCP_002562 | XLOC_108825 | ENSRNOT00000043216  | 0.972536369  | 1.18E-07 |
| TUCP_002562 | XLOC_108825 | ENSRNOT00000091128  | -0.980715134 | 2.03E-08 |
| TUCP_002562 | XLOC_108825 | ENSRNOT00000009803  | 0.976759422  | 5.14E-08 |
| TUCP_002562 | XLOC_108825 | ENSRNOT00000081981  | 0.985646417  | 4.68E-09 |
| TUCP_002562 | XLOC_108825 | ENSRNOT00000009496  | 0.961463536  | 6.27E-07 |
| TUCP_002562 | XLOC_108825 | ENSRNOT00000028563  | 0.950010458  | 2.26E-06 |
| TUCP_002562 | XLOC_108825 | ENSRNOT00000083369  | 0.953251211  | 1.63E-06 |
| TUCP_002562 | XLOC_108825 | ENSRNOT00000003158  | -0.95783525  | 9.78E-07 |

|             |             |                    |              |          |
|-------------|-------------|--------------------|--------------|----------|
| TUCP_002562 | XLOC_108825 | ENSRNOT0000004172  | 0.951998758  | 1.85E-06 |
| TUCP_002562 | XLOC_108825 | ENSRNOT00000015073 | 0.952253402  | 1.80E-06 |
| TUCP_002562 | XLOC_108825 | ENSRNOT00000019213 | 0.954556706  | 1.41E-06 |
| TUCP_002562 | XLOC_108825 | ENSRNOT00000077201 | -0.953561305 | 1.57E-06 |
| TUCP_002562 | XLOC_108825 | ENSRNOT00000005942 | 0.95209704   | 1.83E-06 |
| TUCP_002562 | XLOC_108825 | ENSRNOT00000066810 | 0.96562137   | 3.57E-07 |
| TUCP_002562 | XLOC_108825 | ENSRNOT00000018533 | 0.976411639  | 5.53E-08 |
| TUCP_002562 | XLOC_108825 | ENSRNOT00000073564 | -0.963044949 | 5.10E-07 |
| TUCP_002562 | XLOC_108825 | ENSRNOT00000024969 | 0.980004293  | 2.43E-08 |
| TUCP_002562 | XLOC_108825 | ENSRNOT00000026783 | 0.958633481  | 8.90E-07 |
| TUCP_002562 | XLOC_108825 | ENSRNOT00000028646 | 0.969225871  | 2.06E-07 |
| TUCP_002562 | XLOC_108825 | ENSRNOT00000011384 | 0.960664951  | 6.94E-07 |
| TUCP_002562 | XLOC_108825 | ENSRNOT00000048754 | -0.9527525   | 1.71E-06 |
| TUCP_002562 | XLOC_108825 | ENSRNOT00000038247 | 0.959142782  | 8.37E-07 |
| TUCP_002562 | XLOC_108825 | ENSRNOT00000017063 | -0.950027442 | 2.26E-06 |
| TUCP_002562 | XLOC_108825 | ENSRNOT00000071764 | 0.966950305  | 2.94E-07 |
| TUCP_002562 | XLOC_108825 | ENSRNOT00000079109 | 0.954793466  | 1.38E-06 |
| TUCP_002562 | XLOC_108825 | ENSRNOT00000024402 | 0.953345531  | 1.61E-06 |
| TUCP_002562 | XLOC_108825 | ENSRNOT00000025372 | 0.963363827  | 4.89E-07 |
| TUCP_002562 | XLOC_108825 | ENSRNOT00000089933 | 0.955288702  | 1.31E-06 |
| TUCP_002562 | XLOC_108825 | ENSRNOT00000009811 | 0.95316681   | 1.64E-06 |
| TUCP_002562 | XLOC_108825 | ENSRNOT00000083215 | 0.963021173  | 5.12E-07 |
| TUCP_002562 | XLOC_108825 | ENSRNOT00000072208 | 0.954643506  | 1.40E-06 |
| TUCP_002562 | XLOC_108825 | ENSRNOT00000032780 | 0.968342433  | 2.37E-07 |
| TUCP_002562 | XLOC_108825 | ENSRNOT00000009708 | -0.971203406 | 1.49E-07 |
| TUCP_002562 | XLOC_108825 | ENSRNOT00000017319 | 0.958910266  | 8.61E-07 |
| TUCP_002562 | XLOC_108825 | ENSRNOT00000015188 | 0.953083654  | 1.65E-06 |
| TUCP_002562 | XLOC_108825 | ENSRNOT00000033677 | -0.952126814 | 1.83E-06 |
| TUCP_002562 | XLOC_108825 | ENSRNOT00000079866 | 0.956272947  | 1.17E-06 |
| TUCP_002562 | XLOC_108825 | ENSRNOT00000041513 | 0.95824078   | 9.32E-07 |
| TUCP_002562 | XLOC_108825 | ENSRNOT00000019820 | 0.951771491  | 1.89E-06 |
| TUCP_002562 | XLOC_108825 | ENSRNOT00000005958 | 0.979404981  | 2.82E-08 |
| TUCP_002562 | XLOC_108825 | ENSRNOT00000042125 | 0.971100667  | 1.51E-07 |
| TUCP_002562 | XLOC_108825 | ENSRNOT00000074847 | -0.954743558 | 1.39E-06 |
| TUCP_002562 | XLOC_108825 | ENSRNOT00000010927 | 0.953938061  | 1.51E-06 |
| TUCP_002562 | XLOC_108825 | ENSRNOT00000004032 | 0.972065795  | 1.28E-07 |
| TUCP_002562 | XLOC_108825 | ENSRNOT00000084385 | 0.960865447  | 6.77E-07 |
| TUCP_002562 | XLOC_108825 | ENSRNOT00000012895 | 0.961568552  | 6.19E-07 |
| TUCP_002562 | XLOC_108825 | ENSRNOT00000027537 | 0.951001322  | 2.05E-06 |
| TUCP_002562 | XLOC_108825 | ENSRNOT00000091909 | 0.953319979  | 1.61E-06 |
| TUCP_002562 | XLOC_108825 | ENSRNOT00000020147 | 0.950878408  | 2.07E-06 |
| TUCP_002562 | XLOC_108825 | ENSRNOT00000090918 | 0.95063058   | 2.13E-06 |
| TUCP_002562 | XLOC_108825 | ENSRNOT0000001081  | 0.95620803   | 1.18E-06 |
| TUCP_002562 | XLOC_108825 | ENSRNOT00000083220 | 0.975645904  | 6.48E-08 |
| TUCP_002562 | XLOC_108825 | ENSRNOT00000067846 | -0.955794029 | 1.23E-06 |
| TUCP_002562 | XLOC_108825 | ENSRNOT00000015609 | 0.95200089   | 1.85E-06 |
| TUCP_002562 | XLOC_108825 | ENSRNOT00000058312 | 0.965210267  | 3.79E-07 |
| TUCP_002562 | XLOC_108825 | ENSRNOT00000060362 | 0.989232232  | 1.12E-09 |
| TUCP_002562 | XLOC_108825 | ENSRNOT00000022213 | 0.954891275  | 1.36E-06 |
| TUCP_002562 | XLOC_108825 | ENSRNOT00000022610 | 0.954103511  | 1.48E-06 |
| TUCP_002562 | XLOC_108825 | ENSRNOT00000020437 | 0.968336957  | 2.38E-07 |

|             |             |                    |              |          |
|-------------|-------------|--------------------|--------------|----------|
| TUCP_002562 | XLOC_108825 | ENSRNOT0000006828  | 0.964777201  | 4.02E-07 |
| TUCP_002562 | XLOC_108825 | ENSRNOT00000010898 | 0.963274924  | 4.95E-07 |
| TUCP_002562 | XLOC_108825 | ENSRNOT00000015265 | 0.971022133  | 1.53E-07 |
| TUCP_002562 | XLOC_108825 | ENSRNOT00000087095 | 0.967863046  | 2.56E-07 |
| TUCP_002562 | XLOC_108825 | ENSRNOT00000048063 | 0.958844576  | 8.68E-07 |
| TUCP_002562 | XLOC_108825 | ENSRNOT00000052422 | 0.957824264  | 9.79E-07 |
| TUCP_002562 | XLOC_108825 | ENSRNOT00000001242 | 0.956762764  | 1.11E-06 |
| TUCP_002562 | XLOC_108825 | ENSRNOT00000031979 | -0.951102042 | 2.03E-06 |
| TUCP_002562 | XLOC_108825 | ENSRNOT00000086119 | -0.951940794 | 1.86E-06 |
| TUCP_002562 | XLOC_108825 | ENSRNOT00000078102 | 0.981213116  | 1.79E-08 |
| TUCP_002562 | XLOC_108825 | ENSRNOT00000025983 | 0.967984705  | 2.51E-07 |
| TUCP_002562 | XLOC_108825 | ENSRNOT00000027526 | 0.963490529  | 4.80E-07 |
| TUCP_002562 | XLOC_108825 | ENSRNOT00000058072 | 0.950291713  | 2.20E-06 |
| TUCP_002562 | XLOC_108825 | ENSRNOT00000081047 | 0.964800812  | 4.01E-07 |
| TUCP_002562 | XLOC_108825 | ENSRNOT00000073559 | 0.957224177  | 1.05E-06 |
| TUCP_002562 | XLOC_108825 | ENSRNOT00000023989 | 0.955411362  | 1.29E-06 |
| TUCP_002562 | XLOC_108825 | ENSRNOT00000049819 | 0.956479108  | 1.14E-06 |
| TUCP_002562 | XLOC_108825 | ENSRNOT00000003991 | 0.970716555  | 1.61E-07 |
| TUCP_002562 | XLOC_108825 | ENSRNOT00000021408 | 0.952838285  | 1.70E-06 |
| TUCP_002562 | XLOC_108825 | ENSRNOT00000027910 | 0.972501159  | 1.18E-07 |
| TUCP_002562 | XLOC_108825 | ENSRNOT00000080207 | 0.964556416  | 4.15E-07 |
| TUCP_002562 | XLOC_108825 | ENSRNOT00000035591 | -0.957023994 | 1.07E-06 |
| TUCP_002562 | XLOC_108825 | ENSRNOT00000000302 | 0.955566013  | 1.27E-06 |
| TUCP_002562 | XLOC_108825 | ENSRNOT00000052224 | 0.957176843  | 1.06E-06 |
| TUCP_002562 | XLOC_108825 | ENSRNOT00000078070 | 0.973557591  | 9.74E-08 |
| TUCP_002562 | XLOC_108825 | ENSRNOT00000046745 | 0.963669902  | 4.69E-07 |
| TUCP_002562 | XLOC_108825 | ENSRNOT00000092029 | 0.9628646    | 5.23E-07 |
| TUCP_002562 | XLOC_108825 | ENSRNOT00000088182 | 0.982232377  | 1.35E-08 |
| TUCP_002562 | XLOC_108825 | ENSRNOT00000085228 | 0.969396097  | 2.01E-07 |
| TUCP_002562 | XLOC_108825 | ENSRNOT00000091265 | 0.95982054   | 7.71E-07 |
| TUCP_002562 | XLOC_108825 | ENSRNOT00000073526 | 0.956657305  | 1.12E-06 |
| TUCP_002562 | XLOC_108825 | ENSRNOT00000078390 | -0.955779999 | 1.24E-06 |
| TUCP_002562 | XLOC_108825 | ENSRNOT00000000013 | 0.953428027  | 1.60E-06 |
| TUCP_002562 | XLOC_108825 | ENSRNOT00000025832 | 0.971147572  | 1.50E-07 |
| TUCP_002562 | XLOC_108825 | ENSRNOT00000017753 | 0.975636191  | 6.49E-08 |
| TUCP_002562 | XLOC_108825 | ENSRNOT00000051022 | 0.953004049  | 1.67E-06 |
| TUCP_002562 | XLOC_108825 | ENSRNOT00000006499 | 0.962323051  | 5.61E-07 |
| TUCP_002562 | XLOC_108825 | ENSRNOT00000005909 | 0.971515431  | 1.41E-07 |
| TUCP_002562 | XLOC_108825 | ENSRNOT00000029833 | 0.960931351  | 6.71E-07 |
| TUCP_002562 | XLOC_108825 | ENSRNOT00000009198 | 0.968806266  | 2.21E-07 |
| TUCP_002562 | XLOC_108825 | ENSRNOT00000009129 | 0.972068731  | 1.28E-07 |
| TUCP_002562 | XLOC_108825 | ENSRNOT00000036951 | 0.96360136   | 4.73E-07 |
| TUCP_002562 | XLOC_108825 | ENSRNOT00000016519 | 0.95926005   | 8.25E-07 |
| TUCP_002562 | XLOC_108825 | ENSRNOT00000008929 | 0.95394766   | 1.51E-06 |
| TUCP_002562 | XLOC_108825 | ENSRNOT00000004046 | -0.966282208 | 3.24E-07 |
| TUCP_002562 | XLOC_108825 | ENSRNOT00000040393 | 0.955304331  | 1.30E-06 |
| TUCP_002562 | XLOC_108825 | ENSRNOT00000058842 | 0.964675082  | 4.08E-07 |
| TUCP_002562 | XLOC_108825 | ENSRNOT00000000157 | 0.959296945  | 8.22E-07 |
| TUCP_002562 | XLOC_108825 | ENSRNOT00000035700 | 0.971354927  | 1.45E-07 |
| TUCP_002562 | XLOC_108825 | ENSRNOT00000076669 | 0.959893045  | 7.64E-07 |
| TUCP_002562 | XLOC_108825 | ENSRNOT00000016991 | 0.950316996  | 2.19E-06 |

|             |             |                     |              |          |
|-------------|-------------|---------------------|--------------|----------|
| TUCP_002562 | XLOC_108825 | ENSRNOT00000011350  | 0.96001415   | 7.53E-07 |
| TUCP_002562 | XLOC_108825 | ENSRNOT000000085756 | 0.976065141  | 5.94E-08 |
| TUCP_002562 | XLOC_108825 | ENSRNOT00000008901  | -0.964212515 | 4.35E-07 |
| TUCP_002562 | XLOC_108825 | ENSRNOT00000005659  | 0.956556921  | 1.13E-06 |
| TUCP_002562 | XLOC_108825 | ENSRNOT000000050834 | -0.955527217 | 1.27E-06 |
| TUCP_002562 | XLOC_108825 | ENSRNOT000000054828 | 0.96161059   | 6.16E-07 |
| TUCP_002562 | XLOC_108825 | ENSRNOT000000020663 | -0.952842923 | 1.70E-06 |
| TUCP_002562 | XLOC_108825 | ENSRNOT000000059458 | 0.956701856  | 1.11E-06 |
| TUCP_002562 | XLOC_108825 | ENSRNOT000000055992 | -0.959447403 | 8.07E-07 |
| TUCP_002562 | XLOC_108825 | ENSRNOT000000077406 | 0.960288914  | 7.28E-07 |
| TUCP_002562 | XLOC_108825 | ENSRNOT000000040069 | 0.980306935  | 2.26E-08 |
| TUCP_002562 | XLOC_108825 | ENSRNOT000000010748 | 0.968226818  | 2.42E-07 |
| TUCP_002562 | XLOC_108825 | ENSRNOT000000032992 | 0.968595066  | 2.28E-07 |
| TUCP_002562 | XLOC_108825 | ENSRNOT000000008757 | 0.953395696  | 1.60E-06 |
| TUCP_002562 | XLOC_108825 | ENSRNOT000000005478 | -0.950893049 | 2.07E-06 |
| TUCP_002562 | XLOC_108825 | ENSRNOT000000046058 | 0.956459067  | 1.15E-06 |
| TUCP_002562 | XLOC_108825 | ENSRNOT000000052120 | 0.951380846  | 1.97E-06 |
| TUCP_002562 | XLOC_108825 | ENSRNOT000000026543 | 0.972212832  | 1.25E-07 |
| TUCP_002562 | XLOC_108825 | ENSRNOT000000035474 | 0.976557459  | 5.36E-08 |
| TUCP_002562 | XLOC_108825 | ENSRNOT000000080695 | 0.950257631  | 2.21E-06 |
| TUCP_002562 | XLOC_108825 | ENSRNOT000000086336 | 0.954785321  | 1.38E-06 |
| TUCP_002562 | XLOC_108825 | ENSRNOT000000084422 | 0.959783899  | 7.74E-07 |
| TUCP_002562 | XLOC_108825 | ENSRNOT000000061392 | 0.963438133  | 4.84E-07 |
| TUCP_002562 | XLOC_108825 | ENSRNOT000000076872 | 0.98364773   | 8.96E-09 |
| TUCP_002562 | XLOC_108825 | ENSRNOT000000091205 | 0.970195989  | 1.76E-07 |
| TUCP_002562 | XLOC_108825 | ENSRNOT000000014124 | 0.95014827   | 2.23E-06 |
| TUCP_002562 | XLOC_108825 | ENSRNOT000000085519 | 0.952380977  | 1.78E-06 |
| TUCP_002562 | XLOC_108825 | ENSRNOT000000040476 | 0.964072241  | 4.44E-07 |
| TUCP_002562 | XLOC_108825 | ENSRNOT000000029125 | 0.990583089  | 5.74E-10 |
| TUCP_002562 | XLOC_108825 | ENSRNOT000000057146 | 0.961846585  | 5.97E-07 |
| TUCP_002562 | XLOC_108825 | ENSRNOT00000009900  | -0.951258189 | 2.00E-06 |
| TUCP_002562 | XLOC_108825 | ENSRNOT000000027970 | 0.951560063  | 1.94E-06 |
| TUCP_002562 | XLOC_108825 | ENSRNOT000000014814 | 0.988075842  | 1.86E-09 |
| TUCP_002562 | XLOC_108825 | ENSRNOT000000004412 | 0.956116764  | 1.19E-06 |
| TUCP_002562 | XLOC_108825 | ENSRNOT000000067181 | 0.952847493  | 1.70E-06 |
| TUCP_002562 | XLOC_108825 | ENSRNOT000000064798 | 0.979182806  | 2.97E-08 |
| TUCP_002562 | XLOC_108825 | ENSRNOT000000019177 | 0.974832875  | 7.62E-08 |
| TUCP_002562 | XLOC_108825 | ENSRNOT000000033235 | 0.979024027  | 3.09E-08 |
| TUCP_002562 | XLOC_108825 | ENSRNOT000000027452 | 0.955950949  | 1.21E-06 |
| TUCP_002562 | XLOC_108825 | ENSRNOT000000017776 | 0.954574145  | 1.41E-06 |
| TUCP_002562 | XLOC_108825 | ENSRNOT000000075708 | 0.950825152  | 2.08E-06 |
| TUCP_002562 | XLOC_108825 | ENSRNOT000000012187 | 0.966530297  | 3.13E-07 |
| TUCP_002562 | XLOC_108825 | ENSRNOT000000004463 | 0.957089514  | 1.07E-06 |
| TUCP_002562 | XLOC_108825 | ENSRNOT000000027964 | 0.961414404  | 6.31E-07 |
| TUCP_002562 | XLOC_108825 | ENSRNOT000000008982 | 0.981129242  | 1.83E-08 |
| TUCP_002562 | XLOC_108825 | ENSRNOT000000021674 | 0.952931203  | 1.68E-06 |
| TUCP_002562 | XLOC_108825 | ENSRNOT000000047192 | -0.96475125  | 4.04E-07 |
| TUCP_002562 | XLOC_108825 | ENSRNOT000000027615 | 0.957289128  | 1.04E-06 |
| TUCP_002562 | XLOC_108825 | ENSRNOT000000083799 | 0.954540693  | 1.42E-06 |
| TUCP_002562 | XLOC_108825 | ENSRNOT000000012463 | -0.951753831 | 1.90E-06 |
| TUCP_002562 | XLOC_108825 | ENSRNOT000000083957 | 0.958572085  | 8.96E-07 |

|             |             |                    |              |          |
|-------------|-------------|--------------------|--------------|----------|
| TUCP_002562 | XLOC_108825 | ENSRNOT00000015799 | 0.971011985  | 1.54E-07 |
| TUCP_002562 | XLOC_108825 | ENSRNOT00000011682 | -0.952103233 | 1.83E-06 |
| TUCP_002562 | XLOC_108825 | ENSRNOT00000079996 | 0.95902155   | 8.49E-07 |
| TUCP_002565 | XLOC_108833 | ENSRNOT00000065143 | 0.951731458  | 1.90E-06 |
| TUCP_002565 | XLOC_108833 | ENSRNOT00000044885 | 0.950333811  | 2.19E-06 |
| TUCP_002565 | XLOC_108833 | ENSRNOT00000007379 | 0.958359535  | 9.19E-07 |
| TUCP_002565 | XLOC_108833 | ENSRNOT00000027526 | 0.951931306  | 1.86E-06 |
| TUCP_002565 | XLOC_108833 | ENSRNOT00000032780 | 0.962244093  | 5.67E-07 |
| TUCP_002565 | XLOC_108833 | ENSRNOT00000081981 | 0.963885703  | 4.55E-07 |
| TUCP_002565 | XLOC_108833 | ENSRNOT00000011350 | 0.955822601  | 1.23E-06 |
| TUCP_002565 | XLOC_108833 | ENSRNOT00000063873 | 0.950004997  | 2.26E-06 |
| TUCP_002565 | XLOC_108833 | ENSRNOT00000005958 | 0.971707471  | 1.36E-07 |
| TUCP_002565 | XLOC_108833 | ENSRNOT00000049819 | 0.95281591   | 1.70E-06 |
| TUCP_002565 | XLOC_108833 | ENSRNOT00000061392 | 0.951723978  | 1.90E-06 |
| TUCP_002565 | XLOC_108833 | ENSRNOT00000005228 | 0.95112469   | 2.02E-06 |
| TUCP_002565 | XLOC_108833 | ENSRNOT00000008757 | 0.955185421  | 1.32E-06 |
| TUCP_002565 | XLOC_108833 | ENSRNOT00000012966 | 0.964041456  | 4.46E-07 |
| TUCP_002565 | XLOC_108833 | ENSRNOT00000079177 | 0.950678417  | 2.12E-06 |
| TUCP_002565 | XLOC_108833 | ENSRNOT00000008929 | 0.954908474  | 1.36E-06 |
| TUCP_002565 | XLOC_108833 | ENSRNOT00000052224 | 0.961814599  | 6.00E-07 |
| TUCP_002565 | XLOC_108833 | ENSRNOT00000078102 | 0.969087647  | 2.11E-07 |
| TUCP_002565 | XLOC_108833 | ENSRNOT00000056130 | 0.953334879  | 1.61E-06 |
| TUCP_002565 | XLOC_108833 | ENSRNOT00000076872 | 0.958588729  | 8.95E-07 |
| TUCP_002565 | XLOC_108833 | ENSRNOT00000088182 | 0.955013621  | 1.35E-06 |
| TUCP_002565 | XLOC_108833 | ENSRNOT00000059744 | 0.950372324  | 2.18E-06 |
| TUCP_002565 | XLOC_108833 | ENSRNOT00000040476 | 0.956753256  | 1.11E-06 |
| TUCP_002565 | XLOC_108833 | ENSRNOT00000009803 | 0.979179717  | 2.98E-08 |
| TUCP_002565 | XLOC_108833 | ENSRNOT00000029125 | 0.953502212  | 1.58E-06 |
| TUCP_002565 | XLOC_108833 | ENSRNOT00000042125 | 0.951816237  | 1.89E-06 |
| TUCP_002565 | XLOC_108833 | ENSRNOT00000014814 | 0.96365127   | 4.70E-07 |
| TUCP_002565 | XLOC_108833 | ENSRNOT00000077201 | -0.955173164 | 1.32E-06 |
| TUCP_002565 | XLOC_108833 | ENSRNOT00000087095 | 0.957848676  | 9.76E-07 |
| TUCP_002565 | XLOC_108833 | ENSRNOT00000024969 | 0.973768192  | 9.36E-08 |
| TUCP_002565 | XLOC_108833 | ENSRNOT00000033235 | 0.955101536  | 1.33E-06 |
| TUCP_002565 | XLOC_108833 | ENSRNOT00000060362 | 0.957466812  | 1.02E-06 |
| TUCP_002565 | XLOC_108833 | ENSRNOT00000085756 | 0.962167889  | 5.73E-07 |
| TUCP_002565 | XLOC_108833 | ENSRNOT00000017063 | -0.957373986 | 1.03E-06 |
| TUCP_002565 | XLOC_108833 | ENSRNOT00000016519 | 0.974513798  | 8.11E-08 |
| TUCP_002565 | XLOC_108833 | ENSRNOT00000015265 | 0.956136098  | 1.19E-06 |
| TUCP_002565 | XLOC_108833 | ENSRNOT00000017753 | 0.956161731  | 1.18E-06 |
| TUCP_002565 | XLOC_108833 | ENSRNOT00000004046 | -0.964859435 | 3.98E-07 |
| TUCP_002565 | XLOC_108833 | ENSRNOT00000025372 | 0.961414582  | 6.31E-07 |
| TUCP_002565 | XLOC_108833 | ENSRNOT00000057146 | 0.959347506  | 8.17E-07 |
| TUCP_002565 | XLOC_108833 | ENSRNOT00000058842 | 0.957851252  | 9.76E-07 |
| TUCP_002565 | XLOC_108833 | ENSRNOT00000083220 | 0.95839128   | 9.16E-07 |
| TUCP_002565 | XLOC_108833 | ENSRNOT00000008982 | 0.954262889  | 1.46E-06 |
| TUCP_002565 | XLOC_108833 | ENSRNOT00000031568 | 0.956649803  | 1.12E-06 |
| TUCP_002564 | XLOC_108829 | ENSRNOT00000084133 | 1            | 0        |
| TUCP_002564 | XLOC_108829 | ENSRNOT00000093745 | 0.981891039  | 1.49E-08 |
| TUCP_002564 | XLOC_108829 | ENSRNOT00000065542 | 0.99828699   | 1.16E-13 |
| TUCP_002564 | XLOC_108829 | ENSRNOT00000082464 | 1            | 0        |

|             |             |                    |              |          |
|-------------|-------------|--------------------|--------------|----------|
| TUCP_002564 | XLOC_108829 | ENSRNOT00000087659 | 1            | 0        |
| TUCP_002564 | XLOC_108829 | ENSRNOT00000084582 | 0.976633579  | 5.28E-08 |
| TUCP_002564 | XLOC_108829 | ENSRNOT00000085078 | 1            | 0        |
| TUCP_002564 | XLOC_108829 | ENSRNOT00000014028 | 1            | 0        |
| TUCP_002564 | XLOC_108829 | ENSRNOT00000049363 | 1            | 0        |
| TUCP_002564 | XLOC_108829 | ENSRNOT00000065473 | 0.999949098  | 2.69E-21 |
| TUCP_002564 | XLOC_108829 | ENSRNOT00000000142 | 0.998996155  | 8.01E-15 |
| TUCP_002564 | XLOC_108829 | ENSRNOT00000082288 | 0.999998398  | 8.30E-29 |
| TUCP_002564 | XLOC_108829 | ENSRNOT00000039664 | 1            | 0        |
| TUCP_002564 | XLOC_108829 | ENSRNOT00000065402 | 1            | 0        |
| TUCP_002564 | XLOC_108829 | ENSRNOT00000064551 | 0.965365872  | 3.70E-07 |
| TUCP_002564 | XLOC_108829 | ENSRNOT00000084141 | 1            | 0        |
| TUCP_002564 | XLOC_108829 | ENSRNOT00000082435 | 1            | 0        |
| TUCP_002564 | XLOC_108829 | ENSRNOT00000082928 | 0.996801059  | 2.62E-12 |
| TUCP_002564 | XLOC_108829 | ENSRNOT00000066546 | 0.956953619  | 1.08E-06 |
| TUCP_002564 | XLOC_108829 | ENSRNOT00000046013 | 0.988138626  | 1.81E-09 |
| TUCP_002564 | XLOC_108829 | ENSRNOT00000067931 | 0.978893628  | 3.18E-08 |
| TUCP_002564 | XLOC_108829 | ENSRNOT00000086425 | 0.992023315  | 2.51E-10 |
| TUCP_002564 | XLOC_108829 | ENSRNOT00000093696 | 0.956927219  | 1.09E-06 |
| TUCP_002564 | XLOC_108829 | ENSRNOT00000036228 | 0.982337157  | 1.31E-08 |
| TUCP_002564 | XLOC_108829 | ENSRNOT00000014030 | 1            | 0        |
| TUCP_002564 | XLOC_108829 | ENSRNOT00000081966 | 1            | 4.25E-78 |
| TUCP_002564 | XLOC_108829 | ENSRNOT00000075906 | 1            | 1.33E-79 |
| TUCP_002564 | XLOC_108829 | ENSRNOT00000088396 | 0.981336994  | 1.73E-08 |
| TUCP_002564 | XLOC_108829 | ENSRNOT00000049259 | 0.965500259  | 3.63E-07 |
| TUCP_002564 | XLOC_108829 | ENSRNOT00000092838 | 0.982579749  | 1.23E-08 |
| TUCP_002564 | XLOC_108829 | ENSRNOT00000093442 | 0.959217317  | 8.30E-07 |
| TUCP_002567 | XLOC_108858 | ENSRNOT00000065143 | 0.956713886  | 1.11E-06 |
| TUCP_002567 | XLOC_108858 | ENSRNOT00000005958 | 0.973678059  | 9.52E-08 |
| TUCP_002567 | XLOC_108858 | ENSRNOT00000000743 | 0.954866254  | 1.37E-06 |
| TUCP_002567 | XLOC_108858 | ENSRNOT00000027083 | 0.962025736  | 5.83E-07 |
| TUCP_002567 | XLOC_108858 | ENSRNOT00000066041 | -0.950069432 | 2.25E-06 |
| TUCP_002567 | XLOC_108858 | ENSRNOT00000029833 | 0.961751802  | 6.05E-07 |
| TUCP_002567 | XLOC_108858 | ENSRNOT00000001290 | 0.954548079  | 1.42E-06 |
| TUCP_002567 | XLOC_108858 | ENSRNOT00000023638 | 0.950880816  | 2.07E-06 |
| TUCP_002567 | XLOC_108858 | ENSRNOT00000005228 | 0.976161342  | 5.83E-08 |
| TUCP_002567 | XLOC_108858 | ENSRNOT00000008677 | 0.952940368  | 1.68E-06 |
| TUCP_002567 | XLOC_108858 | ENSRNOT00000028625 | -0.962866274 | 5.22E-07 |
| TUCP_002567 | XLOC_108858 | ENSRNOT00000081768 | 0.951305215  | 1.99E-06 |
| TUCP_002567 | XLOC_108858 | ENSRNOT00000082869 | 0.967228534  | 2.82E-07 |
| TUCP_002567 | XLOC_108858 | ENSRNOT00000019502 | 0.950954622  | 2.06E-06 |
| TUCP_002567 | XLOC_108858 | ENSRNOT00000016649 | 0.955222795  | 1.31E-06 |
| TUCP_002567 | XLOC_108858 | ENSRNOT00000028856 | 0.951184569  | 2.01E-06 |
| TUCP_002567 | XLOC_108858 | ENSRNOT00000091128 | -0.966780695 | 3.01E-07 |
| TUCP_002567 | XLOC_108858 | ENSRNOT00000009803 | 0.960655419  | 6.95E-07 |
| TUCP_002567 | XLOC_108858 | ENSRNOT00000081981 | 0.966700237  | 3.05E-07 |
| TUCP_002567 | XLOC_108858 | ENSRNOT00000012187 | 0.978451349  | 3.53E-08 |
| TUCP_002567 | XLOC_108858 | ENSRNOT00000024969 | 0.974441284  | 8.23E-08 |
| TUCP_002567 | XLOC_108858 | ENSRNOT00000085251 | -0.953606889 | 1.57E-06 |
| TUCP_002567 | XLOC_108858 | ENSRNOT00000028646 | 0.968932053  | 2.16E-07 |
| TUCP_002567 | XLOC_108858 | ENSRNOT00000038247 | 0.959594377  | 7.92E-07 |

|             |             |                    |              |          |
|-------------|-------------|--------------------|--------------|----------|
| TUCP_002567 | XLOC_108858 | ENSRNOT00000044628 | 0.964247661  | 4.33E-07 |
| TUCP_002567 | XLOC_108858 | ENSRNOT00000076611 | -0.959524257 | 7.99E-07 |
| TUCP_002567 | XLOC_108858 | ENSRNOT00000004007 | -0.952895453 | 1.69E-06 |
| TUCP_002567 | XLOC_108858 | ENSRNOT00000089933 | 0.952833465  | 1.70E-06 |
| TUCP_002567 | XLOC_108858 | ENSRNOT00000091602 | -0.951706696 | 1.91E-06 |
| TUCP_002567 | XLOC_108858 | ENSRNOT00000031568 | 0.954255178  | 1.46E-06 |
| TUCP_002567 | XLOC_108858 | ENSRNOT00000009811 | 0.951355473  | 1.98E-06 |
| TUCP_002567 | XLOC_108858 | ENSRNOT00000021471 | -0.951255836 | 2.00E-06 |
| TUCP_002567 | XLOC_108858 | ENSRNOT00000085228 | 0.951498143  | 1.95E-06 |
| TUCP_002567 | XLOC_108858 | ENSRNOT00000032780 | 0.966564528  | 3.11E-07 |
| TUCP_002567 | XLOC_108858 | ENSRNOT00000077231 | 0.952926827  | 1.68E-06 |
| TUCP_002567 | XLOC_108858 | ENSRNOT00000087592 | 0.954558345  | 1.41E-06 |
| TUCP_002567 | XLOC_108858 | ENSRNOT00000061392 | 0.96366342   | 4.69E-07 |
| TUCP_002567 | XLOC_108858 | ENSRNOT00000002410 | 0.954258234  | 1.46E-06 |
| TUCP_002567 | XLOC_108858 | ENSRNOT00000008655 | 0.971838187  | 1.33E-07 |
| TUCP_002567 | XLOC_108858 | ENSRNOT00000003714 | 0.957949603  | 9.65E-07 |
| TUCP_002567 | XLOC_108858 | ENSRNOT00000010541 | 0.954099938  | 1.49E-06 |
| TUCP_002567 | XLOC_108858 | ENSRNOT00000087443 | 0.953642277  | 1.56E-06 |
| TUCP_002567 | XLOC_108858 | ENSRNOT00000015116 | 0.966476018  | 3.15E-07 |
| TUCP_002567 | XLOC_108858 | ENSRNOT0000001081  | 0.954657173  | 1.40E-06 |
| TUCP_002567 | XLOC_108858 | ENSRNOT00000083220 | 0.963115545  | 5.05E-07 |
| TUCP_002567 | XLOC_108858 | ENSRNOT00000015609 | 0.95103432   | 2.04E-06 |
| TUCP_002567 | XLOC_108858 | ENSRNOT00000019133 | 0.964826176  | 4.00E-07 |
| TUCP_002567 | XLOC_108858 | ENSRNOT00000052018 | 0.951411984  | 1.97E-06 |
| TUCP_002567 | XLOC_108858 | ENSRNOT00000010898 | 0.956396657  | 1.15E-06 |
| TUCP_002567 | XLOC_108858 | ENSRNOT00000071493 | -0.962794209 | 5.27E-07 |
| TUCP_002567 | XLOC_108858 | ENSRNOT00000015265 | 0.960316673  | 7.25E-07 |
| TUCP_002567 | XLOC_108858 | ENSRNOT00000067181 | 0.954800558  | 1.38E-06 |
| TUCP_002567 | XLOC_108858 | ENSRNOT00000052422 | 0.965074848  | 3.86E-07 |
| TUCP_002567 | XLOC_108858 | ENSRNOT00000057146 | 0.952978465  | 1.67E-06 |
| TUCP_002567 | XLOC_108858 | ENSRNOT00000080207 | 0.963479423  | 4.81E-07 |
| TUCP_002567 | XLOC_108858 | ENSRNOT00000004319 | -0.956681939 | 1.12E-06 |
| TUCP_002567 | XLOC_108858 | ENSRNOT00000078102 | 0.973199015  | 1.04E-07 |
| TUCP_002567 | XLOC_108858 | ENSRNOT00000070893 | 0.965262864  | 3.76E-07 |
| TUCP_002567 | XLOC_108858 | ENSRNOT00000007314 | -0.952994464 | 1.67E-06 |
| TUCP_002567 | XLOC_108858 | ENSRNOT00000090123 | 0.96633344   | 3.22E-07 |
| TUCP_002567 | XLOC_108858 | ENSRNOT00000023144 | 0.956557675  | 1.13E-06 |
| TUCP_002567 | XLOC_108858 | ENSRNOT00000088599 | 0.952447672  | 1.77E-06 |
| TUCP_002567 | XLOC_108858 | ENSRNOT00000063873 | 0.953534983  | 1.58E-06 |
| TUCP_002567 | XLOC_108858 | ENSRNOT00000081047 | 0.972267526  | 1.23E-07 |
| TUCP_002567 | XLOC_108858 | ENSRNOT00000067688 | -0.960164501 | 7.39E-07 |
| TUCP_002567 | XLOC_108858 | ENSRNOT00000088353 | -0.974923226 | 7.49E-08 |
| TUCP_002567 | XLOC_108858 | ENSRNOT00000021408 | 0.966356927  | 3.21E-07 |
| TUCP_002567 | XLOC_108858 | ENSRNOT00000006034 | -0.950134076 | 2.23E-06 |
| TUCP_002567 | XLOC_108858 | ENSRNOT00000087429 | 0.957974142  | 9.62E-07 |
| TUCP_002567 | XLOC_108858 | ENSRNOT00000060362 | 0.961485409  | 6.26E-07 |
| TUCP_002567 | XLOC_108858 | ENSRNOT00000052224 | 0.982035467  | 1.43E-08 |
| TUCP_002567 | XLOC_108858 | ENSRNOT00000078070 | 0.96821526   | 2.42E-07 |
| TUCP_002567 | XLOC_108858 | ENSRNOT00000088182 | 0.954460556  | 1.43E-06 |
| TUCP_002567 | XLOC_108858 | ENSRNOT00000078390 | -0.959822558 | 7.71E-07 |
| TUCP_002567 | XLOC_108858 | ENSRNOT00000017181 | -0.96146272  | 6.27E-07 |



|             |             |                     |              |          |
|-------------|-------------|---------------------|--------------|----------|
| TUCP_002567 | XLOC_108858 | ENSRNOT00000017753  | 0.965596041  | 3.58E-07 |
| TUCP_002567 | XLOC_108858 | ENSRNOT000000051022 | 0.951803944  | 1.89E-06 |
| TUCP_002567 | XLOC_108858 | ENSRNOT000000025936 | -0.962400107 | 5.56E-07 |
| TUCP_002567 | XLOC_108858 | ENSRNOT000000022074 | 0.956720105  | 1.11E-06 |
| TUCP_002567 | XLOC_108858 | ENSRNOT000000016519 | 0.95622354   | 1.18E-06 |
| TUCP_002567 | XLOC_108858 | ENSRNOT000000004046 | -0.961880105 | 5.95E-07 |
| TUCP_002567 | XLOC_108858 | ENSRNOT000000019886 | 0.951366635  | 1.97E-06 |
| TUCP_002567 | XLOC_108858 | ENSRNOT000000058842 | 0.959504747  | 8.01E-07 |
| TUCP_002567 | XLOC_108858 | ENSRNOT000000001586 | -0.954637245 | 1.40E-06 |
| TUCP_002567 | XLOC_108858 | ENSRNOT000000077894 | -0.956231994 | 1.18E-06 |
| TUCP_002567 | XLOC_108858 | ENSRNOT000000000728 | -0.952148398 | 1.82E-06 |
| TUCP_002567 | XLOC_108858 | ENSRNOT000000008901 | -0.959767073 | 7.76E-07 |
| TUCP_002567 | XLOC_108858 | ENSRNOT000000050834 | -0.954721395 | 1.39E-06 |
| TUCP_002567 | XLOC_108858 | ENSRNOT000000054828 | 0.953204303  | 1.63E-06 |
| TUCP_002567 | XLOC_108858 | ENSRNOT00000002443  | 0.953982773  | 1.50E-06 |
| TUCP_002567 | XLOC_108858 | ENSRNOT000000080608 | 0.955890831  | 1.22E-06 |
| TUCP_002567 | XLOC_108858 | ENSRNOT000000027970 | 0.955502584  | 1.27E-06 |
| TUCP_002567 | XLOC_108858 | ENSRNOT000000010748 | 0.958718365  | 8.81E-07 |
| TUCP_002567 | XLOC_108858 | ENSRNOT000000008757 | 0.954269765  | 1.46E-06 |
| TUCP_002567 | XLOC_108858 | ENSRNOT000000005478 | -0.951813116 | 1.89E-06 |
| TUCP_002567 | XLOC_108858 | ENSRNOT000000035474 | 0.958926252  | 8.59E-07 |
| TUCP_002567 | XLOC_108858 | ENSRNOT000000076872 | 0.953279167  | 1.62E-06 |
| TUCP_002567 | XLOC_108858 | ENSRNOT000000080110 | 0.955626468  | 1.26E-06 |
| TUCP_002567 | XLOC_108858 | ENSRNOT000000029125 | 0.956544829  | 1.13E-06 |
| TUCP_002567 | XLOC_108858 | ENSRNOT000000042125 | 0.973357373  | 1.01E-07 |
| TUCP_002567 | XLOC_108858 | ENSRNOT000000009900 | -0.953277198 | 1.62E-06 |
| TUCP_002567 | XLOC_108858 | ENSRNOT000000081400 | 0.958692481  | 8.84E-07 |
| TUCP_002567 | XLOC_108858 | ENSRNOT000000014814 | 0.963945775  | 4.52E-07 |
| TUCP_002567 | XLOC_108858 | ENSRNOT000000087095 | 0.957387992  | 1.03E-06 |
| TUCP_002567 | XLOC_108858 | ENSRNOT000000064798 | 0.952988994  | 1.67E-06 |
| TUCP_002567 | XLOC_108858 | ENSRNOT000000019177 | 0.950169088  | 2.22E-06 |
| TUCP_002567 | XLOC_108858 | ENSRNOT000000014261 | 0.954784358  | 1.38E-06 |
| TUCP_002567 | XLOC_108858 | ENSRNOT000000033235 | 0.959502295  | 8.01E-07 |
| TUCP_002567 | XLOC_108858 | ENSRNOT000000043535 | 0.952273104  | 1.80E-06 |
| TUCP_002567 | XLOC_108858 | ENSRNOT000000077201 | -0.955842744 | 1.23E-06 |
| TUCP_002567 | XLOC_108858 | ENSRNOT000000008982 | 0.957780691  | 9.84E-07 |
| TUCP_002567 | XLOC_108858 | ENSRNOT000000047192 | -0.973880868 | 9.16E-08 |
| TUCP_002567 | XLOC_108858 | ENSRNOT000000038066 | 0.950068626  | 2.25E-06 |
| TUCP_002567 | XLOC_108858 | ENSRNOT000000015799 | 0.960595932  | 7.00E-07 |
| TUCP_002567 | XLOC_108858 | ENSRNOT000000011682 | -0.974440149 | 8.23E-08 |
| TUCP_002402 | XLOC_101398 | ENSRNOT000000022351 | 0.951492572  | 1.95E-06 |
| TUCP_002403 | XLOC_101418 | ENSRNOT000000090828 | -0.971277581 | 1.47E-07 |
| TUCP_002403 | XLOC_101418 | ENSRNOT000000076050 | -0.95835213  | 9.20E-07 |
| TUCP_002400 | XLOC_101329 | ENSRNOT000000081235 | 0.955811684  | 1.23E-06 |
| TUCP_002401 | XLOC_101341 | ENSRNOT000000006034 | -0.960876203 | 6.76E-07 |
| TUCP_002401 | XLOC_101341 | ENSRNOT000000026915 | 0.950276028  | 2.20E-06 |
| TUCP_002401 | XLOC_101341 | ENSRNOT000000008221 | 0.952922394  | 1.68E-06 |
| TUCP_002401 | XLOC_101341 | ENSRNOT000000047093 | 0.952351503  | 1.79E-06 |
| TUCP_002401 | XLOC_101341 | ENSRNOT000000030445 | 0.972315617  | 1.22E-07 |
| TUCP_002401 | XLOC_101341 | ENSRNOT000000046906 | -0.970499444 | 1.67E-07 |
| TUCP_002406 | XLOC_101419 | ENSRNOT000000079080 | 0.954757925  | 1.38E-06 |

|             |             |                    |              |          |
|-------------|-------------|--------------------|--------------|----------|
| TUCP_002404 | XLOC_101418 | ENSRNOT00000050854 | 0.960779489  | 6.84E-07 |
| TUCP_002404 | XLOC_101418 | ENSRNOT00000085000 | 0.95488461   | 1.36E-06 |
| TUCP_002404 | XLOC_101418 | ENSRNOT00000074650 | 0.967509605  | 2.70E-07 |
| TUCP_003108 | XLOC_132831 | ENSRNOT00000044428 | 0.952658204  | 1.73E-06 |
| TUCP_003108 | XLOC_132831 | ENSRNOT00000010216 | 0.955913913  | 1.22E-06 |
| TUCP_002810 | XLOC_118753 | ENSRNOT00000031331 | 0.953652832  | 1.56E-06 |
| TUCP_002761 | XLOC_117228 | ENSRNOT00000085476 | 0.961311748  | 6.40E-07 |
| TUCP_002761 | XLOC_117228 | ENSRNOT00000083608 | 0.954388872  | 1.44E-06 |
| TUCP_002761 | XLOC_117228 | ENSRNOT00000078176 | 0.964418824  | 4.23E-07 |
| TUCP_002761 | XLOC_117228 | ENSRNOT00000021193 | 0.951325853  | 1.98E-06 |
| TUCP_002761 | XLOC_117228 | ENSRNOT00000047560 | 0.956910394  | 1.09E-06 |
| TUCP_002761 | XLOC_117228 | ENSRNOT00000024758 | 0.953951994  | 1.51E-06 |
| TUCP_002761 | XLOC_117228 | ENSRNOT00000088719 | 0.977912681  | 3.99E-08 |
| TUCP_002761 | XLOC_117228 | ENSRNOT00000033187 | 0.97087449   | 1.57E-07 |
| TUCP_002815 | XLOC_119222 | ENSRNOT00000077169 | -0.959786972 | 7.74E-07 |
| TUCP_002815 | XLOC_119222 | ENSRNOT00000084633 | 0.955068576  | 1.34E-06 |
| TUCP_002814 | XLOC_119094 | ENSRNOT00000084133 | 1            | 0        |
| TUCP_002814 | XLOC_119094 | ENSRNOT00000093745 | 0.981891039  | 1.49E-08 |
| TUCP_002814 | XLOC_119094 | ENSRNOT00000065542 | 0.99828699   | 1.16E-13 |
| TUCP_002814 | XLOC_119094 | ENSRNOT00000082464 | 1            | 0        |
| TUCP_002814 | XLOC_119094 | ENSRNOT00000087659 | 1            | 0        |
| TUCP_002814 | XLOC_119094 | ENSRNOT00000084582 | 0.976633579  | 5.28E-08 |
| TUCP_002814 | XLOC_119094 | ENSRNOT00000085078 | 1            | 0        |
| TUCP_002814 | XLOC_119094 | ENSRNOT00000014028 | 1            | 0        |
| TUCP_002814 | XLOC_119094 | ENSRNOT00000049363 | 1            | 0        |
| TUCP_002814 | XLOC_119094 | ENSRNOT00000065473 | 0.999949098  | 2.69E-21 |
| TUCP_002814 | XLOC_119094 | ENSRNOT00000000142 | 0.998996155  | 8.01E-15 |
| TUCP_002814 | XLOC_119094 | ENSRNOT00000082288 | 0.999998398  | 8.30E-29 |
| TUCP_002814 | XLOC_119094 | ENSRNOT00000039664 | 1            | 0        |
| TUCP_002814 | XLOC_119094 | ENSRNOT00000065402 | 1            | 0        |
| TUCP_002814 | XLOC_119094 | ENSRNOT00000064551 | 0.965365872  | 3.70E-07 |
| TUCP_002814 | XLOC_119094 | ENSRNOT00000084141 | 1            | 1.33E-79 |
| TUCP_002814 | XLOC_119094 | ENSRNOT00000082435 | 1            | 0        |
| TUCP_002814 | XLOC_119094 | ENSRNOT00000082928 | 0.996801059  | 2.62E-12 |
| TUCP_002814 | XLOC_119094 | ENSRNOT00000066546 | 0.956953619  | 1.08E-06 |
| TUCP_002814 | XLOC_119094 | ENSRNOT00000046013 | 0.988138626  | 1.81E-09 |
| TUCP_002814 | XLOC_119094 | ENSRNOT00000067931 | 0.978893628  | 3.18E-08 |
| TUCP_002814 | XLOC_119094 | ENSRNOT00000086425 | 0.992023315  | 2.51E-10 |
| TUCP_002814 | XLOC_119094 | ENSRNOT00000093696 | 0.956927219  | 1.09E-06 |
| TUCP_002814 | XLOC_119094 | ENSRNOT00000036228 | 0.982337157  | 1.31E-08 |
| TUCP_002814 | XLOC_119094 | ENSRNOT00000014030 | 1            | 0        |
| TUCP_002814 | XLOC_119094 | ENSRNOT00000081966 | 1            | 1.33E-79 |
| TUCP_002814 | XLOC_119094 | ENSRNOT00000075906 | 1            | 1.33E-79 |
| TUCP_002814 | XLOC_119094 | ENSRNOT00000088396 | 0.981336994  | 1.73E-08 |
| TUCP_002814 | XLOC_119094 | ENSRNOT00000049259 | 0.965500259  | 3.63E-07 |
| TUCP_002814 | XLOC_119094 | ENSRNOT00000092838 | 0.982579749  | 1.23E-08 |
| TUCP_002814 | XLOC_119094 | ENSRNOT00000093442 | 0.959217317  | 8.30E-07 |
| TUCP_002765 | XLOC_117240 | ENSRNOT00000001019 | 0.9532082    | 1.63E-06 |
| TUCP_003192 | XLOC_137559 | ENSRNOT00000024128 | 0.965571967  | 3.60E-07 |
| TUCP_003192 | XLOC_137559 | ENSRNOT00000051265 | 0.969464673  | 1.99E-07 |
| TUCP_003192 | XLOC_137559 | ENSRNOT00000008492 | 0.952172556  | 1.82E-06 |

|             |             |                    |              |          |
|-------------|-------------|--------------------|--------------|----------|
| TUCP_003192 | XLOC_137559 | ENSRNOT00000011833 | 0.958522148  | 9.02E-07 |
| TUCP_003192 | XLOC_137559 | ENSRNOT00000020390 | 0.953040365  | 1.66E-06 |
| TUCP_003100 | XLOC_132620 | ENSRNOT00000026106 | 0.959767013  | 7.76E-07 |
| TUCP_001550 | XLOC_060077 | ENSRNOT00000080185 | 0.955381468  | 1.29E-06 |
| TUCP_001550 | XLOC_060077 | ENSRNOT00000013705 | 0.950982709  | 2.05E-06 |
| TUCP_001550 | XLOC_060077 | ENSRNOT00000000351 | 0.950982709  | 2.05E-06 |
| TUCP_001550 | XLOC_060077 | ENSRNOT00000040851 | 0.950982709  | 2.05E-06 |
| TUCP_001550 | XLOC_060077 | ENSRNOT00000092890 | 0.95256214   | 1.75E-06 |
| TUCP_001550 | XLOC_060077 | ENSRNOT00000002881 | 0.953543782  | 1.58E-06 |
| TUCP_001550 | XLOC_060077 | ENSRNOT00000061950 | 0.959209935  | 8.30E-07 |
| TUCP_001550 | XLOC_060077 | ENSRNOT00000086710 | 0.952867204  | 1.69E-06 |
| TUCP_001550 | XLOC_060077 | ENSRNOT00000086827 | 0.972734456  | 1.13E-07 |
| TUCP_001550 | XLOC_060077 | ENSRNOT00000082031 | 0.96040664   | 7.17E-07 |
| TUCP_001550 | XLOC_060077 | ENSRNOT00000028653 | 0.950982709  | 2.05E-06 |
| TUCP_001550 | XLOC_060077 | ENSRNOT00000058389 | 0.950982709  | 2.05E-06 |
| TUCP_001550 | XLOC_060077 | ENSRNOT00000075226 | 0.950982709  | 2.05E-06 |
| TUCP_001550 | XLOC_060077 | ENSRNOT00000089118 | 0.950982709  | 2.05E-06 |
| TUCP_001550 | XLOC_060077 | ENSRNOT00000023542 | 0.950982709  | 2.05E-06 |
| TUCP_001550 | XLOC_060077 | ENSRNOT00000079661 | 0.950982709  | 2.05E-06 |
| TUCP_001550 | XLOC_060077 | ENSRNOT00000025245 | 0.951256264  | 2.00E-06 |
| TUCP_001550 | XLOC_060077 | ENSRNOT00000012174 | 0.950982709  | 2.05E-06 |
| TUCP_001550 | XLOC_060077 | ENSRNOT00000042220 | 0.950982709  | 2.05E-06 |
| TUCP_003102 | XLOC_132760 | ENSRNOT00000076400 | 0.965618207  | 3.57E-07 |
| TUCP_003102 | XLOC_132760 | ENSRNOT00000055536 | 0.965915585  | 3.42E-07 |
| TUCP_003102 | XLOC_132760 | ENSRNOT00000010680 | 0.954036578  | 1.50E-06 |
| TUCP_003102 | XLOC_132760 | ENSRNOT00000064983 | 0.969189211  | 2.08E-07 |
| TUCP_003102 | XLOC_132760 | ENSRNOT00000016088 | 0.962527311  | 5.46E-07 |
| TUCP_003102 | XLOC_132760 | ENSRNOT00000009975 | 0.989606166  | 9.39E-10 |
| TUCP_003102 | XLOC_132760 | ENSRNOT00000072682 | 0.965687293  | 3.54E-07 |
| TUCP_003102 | XLOC_132760 | ENSRNOT00000015062 | 0.969624874  | 1.94E-07 |
| TUCP_003102 | XLOC_132760 | ENSRNOT00000085954 | 0.951519338  | 1.94E-06 |
| TUCP_003102 | XLOC_132760 | ENSRNOT00000001642 | 0.956417021  | 1.15E-06 |
| TUCP_003102 | XLOC_132760 | ENSRNOT00000027544 | 0.958664745  | 8.87E-07 |
| TUCP_003102 | XLOC_132760 | ENSRNOT00000081631 | 0.95782533   | 9.79E-07 |
| TUCP_003102 | XLOC_132760 | ENSRNOT00000021715 | 0.953893266  | 1.52E-06 |
| TUCP_003102 | XLOC_132760 | ENSRNOT00000017829 | 0.955855571  | 1.23E-06 |
| TUCP_003102 | XLOC_132760 | ENSRNOT00000065897 | 0.965935206  | 3.41E-07 |
| TUCP_003102 | XLOC_132760 | ENSRNOT00000023014 | 0.958305486  | 9.25E-07 |
| TUCP_003102 | XLOC_132760 | ENSRNOT00000083594 | 0.962474012  | 5.50E-07 |
| TUCP_003102 | XLOC_132760 | ENSRNOT00000073493 | 0.952694705  | 1.72E-06 |
| TUCP_003102 | XLOC_132760 | ENSRNOT00000036137 | 0.954246312  | 1.46E-06 |
| TUCP_003102 | XLOC_132760 | ENSRNOT00000056050 | 0.979697655  | 2.63E-08 |
| TUCP_003102 | XLOC_132760 | ENSRNOT00000046552 | 0.954662934  | 1.40E-06 |
| TUCP_003102 | XLOC_132760 | ENSRNOT00000060977 | 0.962390484  | 5.56E-07 |
| TUCP_003102 | XLOC_132760 | ENSRNOT00000065801 | 0.960231873  | 7.33E-07 |
| TUCP_003102 | XLOC_132760 | ENSRNOT00000088385 | 0.961702499  | 6.08E-07 |
| TUCP_003102 | XLOC_132760 | ENSRNOT00000023613 | 0.953197033  | 1.63E-06 |
| TUCP_003102 | XLOC_132760 | ENSRNOT00000092066 | -0.961807992 | 6.00E-07 |
| TUCP_003102 | XLOC_132760 | ENSRNOT00000016485 | 0.975721561  | 6.38E-08 |
| TUCP_003102 | XLOC_132760 | ENSRNOT00000065615 | 0.950655158  | 2.12E-06 |
| TUCP_003102 | XLOC_132760 | ENSRNOT00000011675 | 0.951996641  | 1.85E-06 |

|             |             |                     |             |          |
|-------------|-------------|---------------------|-------------|----------|
| TUCP_003102 | XLOC_132760 | ENSRNOT00000008361  | 0.955409588 | 1.29E-06 |
| TUCP_003102 | XLOC_132760 | ENSRNOT000000042638 | 0.964110542 | 4.41E-07 |
| TUCP_003102 | XLOC_132760 | ENSRNOT00000005770  | 0.974710744 | 7.81E-08 |
| TUCP_003102 | XLOC_132760 | ENSRNOT00000006697  | 0.961936777 | 5.90E-07 |
| TUCP_003102 | XLOC_132760 | ENSRNOT000000066952 | 0.95172239  | 1.90E-06 |
| TUCP_003102 | XLOC_132760 | ENSRNOT00000018640  | 0.950913458 | 2.07E-06 |
| TUCP_003102 | XLOC_132760 | ENSRNOT000000054685 | 0.950984891 | 2.05E-06 |
| TUCP_003102 | XLOC_132760 | ENSRNOT000000085334 | 0.984214224 | 7.52E-09 |
| TUCP_003102 | XLOC_132760 | ENSRNOT000000034482 | 0.973799505 | 9.31E-08 |
| TUCP_003102 | XLOC_132760 | ENSRNOT000000043827 | 0.965736574 | 3.51E-07 |
| TUCP_003102 | XLOC_132760 | ENSRNOT000000081226 | 0.965339293 | 3.72E-07 |
| TUCP_003102 | XLOC_132760 | ENSRNOT000000061054 | 0.952952958 | 1.68E-06 |
| TUCP_003102 | XLOC_132760 | ENSRNOT000000008764 | 0.980197819 | 2.32E-08 |
| TUCP_003102 | XLOC_132760 | ENSRNOT000000012757 | 0.963151772 | 5.03E-07 |
| TUCP_003102 | XLOC_132760 | ENSRNOT000000009009 | 0.962192868 | 5.71E-07 |
| TUCP_003102 | XLOC_132760 | ENSRNOT000000037902 | 0.966470561 | 3.15E-07 |
| TUCP_003102 | XLOC_132760 | ENSRNOT000000020929 | 0.962978368 | 5.15E-07 |
| TUCP_003102 | XLOC_132760 | ENSRNOT000000079128 | 0.953026626 | 1.66E-06 |
| TUCP_003102 | XLOC_132760 | ENSRNOT000000006109 | 0.964557308 | 4.15E-07 |
| TUCP_003102 | XLOC_132760 | ENSRNOT000000057738 | 0.954466897 | 1.43E-06 |
| TUCP_003102 | XLOC_132760 | ENSRNOT000000065871 | 0.954118215 | 1.48E-06 |
| TUCP_003102 | XLOC_132760 | ENSRNOT000000092757 | 0.951573742 | 1.93E-06 |
| TUCP_003102 | XLOC_132760 | ENSRNOT000000025355 | 0.953368369 | 1.61E-06 |
| TUCP_003102 | XLOC_132760 | ENSRNOT000000078800 | 0.968178719 | 2.44E-07 |
| TUCP_002768 | XLOC_117242 | ENSRNOT000000074650 | 0.997078706 | 1.67E-12 |
| TUCP_003104 | XLOC_132831 | ENSRNOT000000092968 | 0.959180323 | 8.33E-07 |
| TUCP_003104 | XLOC_132831 | ENSRNOT000000090449 | 0.953515758 | 1.58E-06 |
| TUCP_000283 | XLOC_008661 | ENSRNOT000000042890 | 0.958549963 | 8.99E-07 |
| TUCP_000283 | XLOC_008661 | ENSRNOT000000065111 | 0.959359844 | 8.15E-07 |
| TUCP_003106 | XLOC_132831 | ENSRNOT000000029197 | 0.976843923 | 5.04E-08 |
| TUCP_001960 | XLOC_079154 | ENSRNOT00000010992  | 0.958190041 | 9.38E-07 |
| TUCP_001960 | XLOC_079154 | ENSRNOT00000004834  | 0.968173022 | 2.44E-07 |
| TUCP_001960 | XLOC_079154 | ENSRNOT000000013932 | 0.959294539 | 8.22E-07 |
| TUCP_001960 | XLOC_079154 | ENSRNOT000000040513 | 0.957198197 | 1.05E-06 |
| TUCP_001960 | XLOC_079154 | ENSRNOT000000068405 | 0.961642677 | 6.13E-07 |
| TUCP_001960 | XLOC_079154 | ENSRNOT00000004740  | 0.951093694 | 2.03E-06 |
| TUCP_001960 | XLOC_079154 | ENSRNOT000000015076 | 0.952082076 | 1.84E-06 |
| TUCP_001960 | XLOC_079154 | ENSRNOT000000018293 | 0.950179152 | 2.22E-06 |
| TUCP_001960 | XLOC_079154 | ENSRNOT000000021865 | 0.963506121 | 4.79E-07 |
| TUCP_001960 | XLOC_079154 | ENSRNOT000000039842 | 0.957128129 | 1.06E-06 |
| TUCP_001960 | XLOC_079154 | ENSRNOT000000039809 | 0.957092749 | 1.07E-06 |
| TUCP_001960 | XLOC_079154 | ENSRNOT000000082100 | 0.956005801 | 1.21E-06 |
| TUCP_001960 | XLOC_079154 | ENSRNOT000000029664 | 0.954170939 | 1.47E-06 |
| TUCP_001960 | XLOC_079154 | ENSRNOT000000082253 | 0.955879631 | 1.22E-06 |
| TUCP_001960 | XLOC_079154 | ENSRNOT000000013260 | 0.955008243 | 1.35E-06 |
| TUCP_001960 | XLOC_079154 | ENSRNOT000000017629 | 0.959162378 | 8.35E-07 |
| TUCP_001960 | XLOC_079154 | ENSRNOT000000087226 | 0.954897031 | 1.36E-06 |
| TUCP_001960 | XLOC_079154 | ENSRNOT000000078175 | 0.961349273 | 6.37E-07 |
| TUCP_001960 | XLOC_079154 | ENSRNOT000000054674 | 0.963436905 | 4.84E-07 |
| TUCP_003190 | XLOC_137467 | ENSRNOT000000040187 | 0.953160462 | 1.64E-06 |
| TUCP_003190 | XLOC_137467 | ENSRNOT000000028609 | 0.957517124 | 1.01E-06 |

|             |             |                    |              |          |
|-------------|-------------|--------------------|--------------|----------|
| TUCP_003190 | XLOC_137467 | ENSRNOT00000072452 | 0.954901108  | 1.36E-06 |
| TUCP_003339 | XLOC_144383 | ENSRNOT00000021590 | 0.950915633  | 2.07E-06 |
| TUCP_003339 | XLOC_144383 | ENSRNOT00000065111 | 0.980464913  | 2.17E-08 |
| TUCP_003339 | XLOC_144383 | ENSRNOT00000024583 | -0.958941066 | 8.58E-07 |
| TUCP_003339 | XLOC_144383 | ENSRNOT00000061569 | 0.969131821  | 2.10E-07 |
| TUCP_003339 | XLOC_144383 | ENSRNOT00000015888 | 0.968511807  | 2.31E-07 |
| TUCP_003339 | XLOC_144383 | ENSRNOT00000091315 | 0.978007549  | 3.91E-08 |
| TUCP_003196 | XLOC_137866 | ENSRNOT00000080232 | 0.961542493  | 6.21E-07 |
| TUCP_003338 | XLOC_144326 | ENSRNOT00000000008 | 1            | 0        |
| TUCP_003338 | XLOC_144326 | ENSRNOT00000060048 | 0.998711457  | 2.79E-14 |
| TUCP_003338 | XLOC_144326 | ENSRNOT00000082304 | 0.996875989  | 2.33E-12 |
| TUCP_003338 | XLOC_144326 | ENSRNOT00000006219 | 1            | 0        |
| TUCP_003338 | XLOC_144326 | ENSRNOT00000065376 | 1            | 0        |
| TUCP_003338 | XLOC_144326 | ENSRNOT00000081433 | 0.984469223  | 6.93E-09 |
| TUCP_003338 | XLOC_144326 | ENSRNOT00000083575 | 1            | 0        |
| TUCP_003338 | XLOC_144326 | ENSRNOT00000087739 | 1            | 0        |
| TUCP_003338 | XLOC_144326 | ENSRNOT00000079826 | 1            | 0        |
| TUCP_003338 | XLOC_144326 | ENSRNOT00000025770 | 0.993828251  | 6.98E-11 |
| TUCP_003338 | XLOC_144326 | ENSRNOT00000088244 | 0.973479481  | 9.88E-08 |
| TUCP_003338 | XLOC_144326 | ENSRNOT00000048523 | 1            | 0        |
| TUCP_003338 | XLOC_144326 | ENSRNOT00000079365 | 0.958936699  | 8.58E-07 |
| TUCP_003338 | XLOC_144326 | ENSRNOT00000020229 | 0.960002785  | 7.54E-07 |
| TUCP_003338 | XLOC_144326 | ENSRNOT00000026428 | 0.996986683  | 1.95E-12 |
| TUCP_003338 | XLOC_144326 | ENSRNOT00000085673 | 1            | 0        |
| TUCP_003338 | XLOC_144326 | ENSRNOT00000072972 | 0.981476166  | 1.67E-08 |
| TUCP_003338 | XLOC_144326 | ENSRNOT00000050573 | 1            | 0        |
| TUCP_003338 | XLOC_144326 | ENSRNOT00000089876 | -0.953630353 | 1.56E-06 |
| TUCP_003338 | XLOC_144326 | ENSRNOT00000074378 | 0.998901807  | 1.26E-14 |
| TUCP_003338 | XLOC_144326 | ENSRNOT00000093571 | 1            | 0        |
| TUCP_003338 | XLOC_144326 | ENSRNOT00000090581 | 1            | 0        |
| TUCP_003338 | XLOC_144326 | ENSRNOT00000076239 | 0.98020752   | 2.31E-08 |
| TUCP_003338 | XLOC_144326 | ENSRNOT00000065485 | 1            | 0        |
| TUCP_003338 | XLOC_144326 | ENSRNOT00000006356 | 0.999544279  | 1.55E-16 |
| TUCP_003338 | XLOC_144326 | ENSRNOT00000087199 | 0.974421555  | 8.26E-08 |
| TUCP_003338 | XLOC_144326 | ENSRNOT00000022091 | 1            | 0        |
| TUCP_003338 | XLOC_144326 | ENSRNOT00000064764 | 0.98460888   | 6.63E-09 |
| TUCP_003338 | XLOC_144326 | ENSRNOT00000076927 | 0.971163156  | 1.50E-07 |
| TUCP_003338 | XLOC_144326 | ENSRNOT00000092395 | 0.999522978  | 1.94E-16 |
| TUCP_001403 | XLOC_053911 | ENSRNOT00000011951 | 0.951081425  | 2.03E-06 |
| TUCP_001403 | XLOC_053911 | ENSRNOT00000015547 | 0.952141289  | 1.82E-06 |
| TUCP_001403 | XLOC_053911 | ENSRNOT00000081375 | 0.964072465  | 4.44E-07 |
| TUCP_002986 | XLOC_128384 | ENSRNOT00000014865 | -0.955641203 | 1.26E-06 |
| TUCP_003243 | XLOC_139063 | ENSRNOT00000088441 | 0.987262749  | 2.58E-09 |
| TUCP_003243 | XLOC_139063 | ENSRNOT00000015138 | 0.955447585  | 1.28E-06 |
| TUCP_003243 | XLOC_139063 | ENSRNOT00000080185 | 0.95317855   | 1.64E-06 |
| TUCP_003243 | XLOC_139063 | ENSRNOT00000089118 | 0.956342845  | 1.16E-06 |
| TUCP_003243 | XLOC_139063 | ENSRNOT00000013705 | 0.956342845  | 1.16E-06 |
| TUCP_003243 | XLOC_139063 | ENSRNOT00000000351 | 0.956342845  | 1.16E-06 |
| TUCP_003243 | XLOC_139063 | ENSRNOT00000040851 | 0.956342845  | 1.16E-06 |
| TUCP_003243 | XLOC_139063 | ENSRNOT00000058389 | 0.956342845  | 1.16E-06 |
| TUCP_003243 | XLOC_139063 | ENSRNOT00000086710 | 0.956957911  | 1.08E-06 |

|             |             |                    |              |          |
|-------------|-------------|--------------------|--------------|----------|
| TUCP_003243 | XLOC_139063 | ENSRNOT00000025245 | 0.956074141  | 1.20E-06 |
| TUCP_003243 | XLOC_139063 | ENSRNOT00000028653 | 0.956342845  | 1.16E-06 |
| TUCP_003243 | XLOC_139063 | ENSRNOT00000079167 | 0.956928054  | 1.09E-06 |
| TUCP_003243 | XLOC_139063 | ENSRNOT00000085195 | 0.96585402   | 3.45E-07 |
| TUCP_003243 | XLOC_139063 | ENSRNOT00000023542 | 0.956342845  | 1.16E-06 |
| TUCP_003243 | XLOC_139063 | ENSRNOT00000042220 | 0.956342845  | 1.16E-06 |
| TUCP_003243 | XLOC_139063 | ENSRNOT00000079661 | 0.956342845  | 1.16E-06 |
| TUCP_003243 | XLOC_139063 | ENSRNOT00000012174 | 0.956342845  | 1.16E-06 |
| TUCP_003243 | XLOC_139063 | ENSRNOT00000075226 | 0.956342845  | 1.16E-06 |
| TUCP_000924 | XLOC_033943 | ENSRNOT00000022384 | -0.979770548 | 2.58E-08 |
| TUCP_001636 | XLOC_064916 | ENSRNOT00000081224 | 0.951727565  | 1.90E-06 |
| TUCP_004408 | XLOC_194445 | ENSRNOT00000024161 | 0.956995405  | 1.08E-06 |
| TUCP_004409 | XLOC_194475 | ENSRNOT00000087673 | 0.954870434  | 1.37E-06 |
| TUCP_004409 | XLOC_194475 | ENSRNOT00000086027 | 0.953019092  | 1.67E-06 |
| TUCP_004404 | XLOC_194388 | ENSRNOT00000074990 | 0.961170909  | 6.51E-07 |
| TUCP_004404 | XLOC_194388 | ENSRNOT00000022280 | 0.963598871  | 4.73E-07 |
| TUCP_004404 | XLOC_194388 | ENSRNOT00000081370 | 0.963180893  | 5.01E-07 |
| TUCP_004404 | XLOC_194388 | ENSRNOT00000075987 | 0.963200542  | 5.00E-07 |
| TUCP_004404 | XLOC_194388 | ENSRNOT00000082043 | 0.961149616  | 6.53E-07 |
| TUCP_004404 | XLOC_194388 | ENSRNOT00000087323 | 0.962918039  | 5.19E-07 |
| TUCP_004404 | XLOC_194388 | ENSRNOT00000074930 | 0.961170909  | 6.51E-07 |
| TUCP_004404 | XLOC_194388 | ENSRNOT00000080575 | 0.960505837  | 7.08E-07 |
| TUCP_004404 | XLOC_194388 | ENSRNOT00000078369 | 0.960717628  | 6.90E-07 |
| TUCP_004404 | XLOC_194388 | ENSRNOT00000092982 | 0.961170909  | 6.51E-07 |
| TUCP_004404 | XLOC_194388 | ENSRNOT00000088367 | 0.961170909  | 6.51E-07 |
| TUCP_004404 | XLOC_194388 | ENSRNOT00000078153 | 0.963105915  | 5.06E-07 |
| TUCP_004404 | XLOC_194388 | ENSRNOT00000081996 | 0.961170909  | 6.51E-07 |
| TUCP_004404 | XLOC_194388 | ENSRNOT00000068444 | 0.961170909  | 6.51E-07 |
| TUCP_004404 | XLOC_194388 | ENSRNOT00000082058 | 0.961170909  | 6.51E-07 |
| TUCP_004404 | XLOC_194388 | ENSRNOT00000088905 | 0.961170909  | 6.51E-07 |
| TUCP_004404 | XLOC_194388 | ENSRNOT00000086831 | 0.961170909  | 6.51E-07 |
| TUCP_004404 | XLOC_194388 | ENSRNOT00000045099 | 0.961170909  | 6.51E-07 |
| TUCP_004404 | XLOC_194388 | ENSRNOT00000086745 | 0.963915534  | 4.53E-07 |
| TUCP_004404 | XLOC_194388 | ENSRNOT00000085849 | 0.953232914  | 1.63E-06 |
| TUCP_004404 | XLOC_194388 | ENSRNOT00000077789 | 0.964344452  | 4.27E-07 |
| TUCP_004404 | XLOC_194388 | ENSRNOT00000090207 | 0.978353819  | 3.61E-08 |
| TUCP_004404 | XLOC_194388 | ENSRNOT00000087025 | 0.961170909  | 6.51E-07 |
| TUCP_004404 | XLOC_194388 | ENSRNOT00000019853 | 0.961170909  | 6.51E-07 |
| TUCP_004404 | XLOC_194388 | ENSRNOT00000065912 | 0.961579796  | 6.18E-07 |
| TUCP_004404 | XLOC_194388 | ENSRNOT00000093083 | 0.96049318   | 7.09E-07 |
| TUCP_001913 | XLOC_078876 | ENSRNOT00000008888 | 0.958106808  | 9.47E-07 |
| TUCP_001915 | XLOC_078877 | ENSRNOT00000079730 | 0.983525749  | 9.30E-09 |
| TUCP_004401 | XLOC_194334 | ENSRNOT00000085394 | 0.957341594  | 1.04E-06 |
| TUCP_003523 | XLOC_153375 | ENSRNOT00000082084 | 0.956466665  | 1.14E-06 |
| TUCP_003523 | XLOC_153375 | ENSRNOT00000081106 | 0.954973099  | 1.35E-06 |
| TUCP_003523 | XLOC_153375 | ENSRNOT00000047784 | 0.95416026   | 1.48E-06 |
| TUCP_003044 | XLOC_129609 | ENSRNOT00000037067 | -0.959919692 | 7.62E-07 |
| TUCP_003198 | XLOC_137908 | ENSRNOT00000015373 | 0.971602351  | 1.39E-07 |
| TUCP_001402 | XLOC_053817 | ENSRNOT00000065312 | 0.991576416  | 3.29E-10 |
| TUCP_001402 | XLOC_053817 | ENSRNOT00000083651 | 0.961809153  | 6.00E-07 |
| TUCP_001402 | XLOC_053817 | ENSRNOT00000040740 | 0.95655159   | 1.13E-06 |

|             |             |                    |              |          |
|-------------|-------------|--------------------|--------------|----------|
| TUCP_003040 | XLOC_129278 | ENSRNOT00000055034 | 0.952744474  | 1.71E-06 |
| TUCP_003040 | XLOC_129278 | ENSRNOT00000074346 | 0.95486886   | 1.37E-06 |
| TUCP_003040 | XLOC_129278 | ENSRNOT00000046837 | 0.961020406  | 6.64E-07 |
| TUCP_003043 | XLOC_129574 | ENSRNOT00000000008 | 1            | 0        |
| TUCP_003043 | XLOC_129574 | ENSRNOT00000060048 | 0.998711457  | 2.79E-14 |
| TUCP_003043 | XLOC_129574 | ENSRNOT00000082304 | 0.996875989  | 2.33E-12 |
| TUCP_003043 | XLOC_129574 | ENSRNOT00000006219 | 1            | 0        |
| TUCP_003043 | XLOC_129574 | ENSRNOT00000065376 | 1            | 0        |
| TUCP_003043 | XLOC_129574 | ENSRNOT00000081433 | 0.984469223  | 6.93E-09 |
| TUCP_003043 | XLOC_129574 | ENSRNOT00000083575 | 1            | 0        |
| TUCP_003043 | XLOC_129574 | ENSRNOT00000087739 | 1            | 0        |
| TUCP_003043 | XLOC_129574 | ENSRNOT00000079826 | 1            | 0        |
| TUCP_003043 | XLOC_129574 | ENSRNOT00000025770 | 0.993828251  | 6.98E-11 |
| TUCP_003043 | XLOC_129574 | ENSRNOT00000088244 | 0.973479481  | 9.88E-08 |
| TUCP_003043 | XLOC_129574 | ENSRNOT00000048523 | 1            | 0        |
| TUCP_003043 | XLOC_129574 | ENSRNOT00000079365 | 0.958936699  | 8.58E-07 |
| TUCP_003043 | XLOC_129574 | ENSRNOT00000020229 | 0.960002785  | 7.54E-07 |
| TUCP_003043 | XLOC_129574 | ENSRNOT00000026428 | 0.996986683  | 1.95E-12 |
| TUCP_003043 | XLOC_129574 | ENSRNOT00000085673 | 1            | 0        |
| TUCP_003043 | XLOC_129574 | ENSRNOT00000072972 | 0.981476166  | 1.67E-08 |
| TUCP_003043 | XLOC_129574 | ENSRNOT00000050573 | 1            | 0        |
| TUCP_003043 | XLOC_129574 | ENSRNOT00000089876 | -0.953630353 | 1.56E-06 |
| TUCP_003043 | XLOC_129574 | ENSRNOT00000074378 | 0.998901807  | 1.26E-14 |
| TUCP_003043 | XLOC_129574 | ENSRNOT00000093571 | 1            | 0        |
| TUCP_003043 | XLOC_129574 | ENSRNOT00000090581 | 1            | 0        |
| TUCP_003043 | XLOC_129574 | ENSRNOT00000076239 | 0.98020752   | 2.31E-08 |
| TUCP_003043 | XLOC_129574 | ENSRNOT00000065485 | 1            | 0        |
| TUCP_003043 | XLOC_129574 | ENSRNOT0000006356  | 0.999544279  | 1.55E-16 |
| TUCP_003043 | XLOC_129574 | ENSRNOT00000087199 | 0.974421555  | 8.26E-08 |
| TUCP_003043 | XLOC_129574 | ENSRNOT00000022091 | 1            | 0        |
| TUCP_003043 | XLOC_129574 | ENSRNOT00000064764 | 0.98460888   | 6.63E-09 |
| TUCP_003043 | XLOC_129574 | ENSRNOT00000076927 | 0.971163156  | 1.50E-07 |
| TUCP_003043 | XLOC_129574 | ENSRNOT00000092395 | 0.999522978  | 1.94E-16 |
| TUCP_001608 | XLOC_063433 | ENSRNOT00000004905 | 0.957253131  | 1.05E-06 |
| TUCP_001608 | XLOC_063433 | ENSRNOT00000025689 | 0.952572152  | 1.74E-06 |
| TUCP_001608 | XLOC_063433 | ENSRNOT00000072427 | 0.953916383  | 1.51E-06 |
| TUCP_001608 | XLOC_063433 | ENSRNOT00000004359 | 0.952462191  | 1.76E-06 |
| TUCP_001608 | XLOC_063433 | ENSRNOT00000042352 | 0.970542619  | 1.66E-07 |
| TUCP_001608 | XLOC_063433 | ENSRNOT0000009066  | 0.967691496  | 2.63E-07 |
| TUCP_000281 | XLOC_008618 | ENSRNOT00000082403 | -0.954789426 | 1.38E-06 |
| TUCP_000566 | XLOC_020107 | ENSRNOT00000016464 | 0.965083259  | 3.85E-07 |
| TUCP_000566 | XLOC_020107 | ENSRNOT00000084928 | 0.957281213  | 1.04E-06 |
| TUCP_000566 | XLOC_020107 | ENSRNOT00000067875 | 0.952172409  | 1.82E-06 |
| TUCP_000566 | XLOC_020107 | ENSRNOT00000000018 | 0.967239833  | 2.81E-07 |
| TUCP_000566 | XLOC_020107 | ENSRNOT00000025843 | 0.963291749  | 4.94E-07 |
| TUCP_003048 | XLOC_129803 | ENSRNOT00000026966 | 0.970322306  | 1.73E-07 |
| TUCP_003048 | XLOC_129803 | ENSRNOT00000068416 | 0.999999782  | 3.88E-33 |
| TUCP_003048 | XLOC_129803 | ENSRNOT00000086036 | 0.999958274  | 9.96E-22 |
| TUCP_003048 | XLOC_129803 | ENSRNOT00000026803 | 0.985046075  | 5.74E-09 |
| TUCP_003048 | XLOC_129803 | ENSRNOT00000047527 | 0.963071698  | 5.08E-07 |
| TUCP_003048 | XLOC_129803 | ENSRNOT00000042251 | 0.999344295  | 9.53E-16 |

|             |             |                    |              |          |
|-------------|-------------|--------------------|--------------|----------|
| TUCP_003048 | XLOC_129803 | ENSRNOT0000002984  | 0.998397069  | 8.31E-14 |
| TUCP_003048 | XLOC_129803 | ENSRNOT00000083764 | 0.999541808  | 1.59E-16 |
| TUCP_003048 | XLOC_129803 | ENSRNOT00000076802 | 0.962695843  | 5.34E-07 |
| TUCP_003048 | XLOC_129803 | ENSRNOT00000092365 | 0.999161651  | 3.26E-15 |
| TUCP_003048 | XLOC_129803 | ENSRNOT00000079275 | 0.999901911  | 7.15E-20 |
| TUCP_003048 | XLOC_129803 | ENSRNOT00000066062 | -0.959706712 | 7.82E-07 |
| TUCP_003048 | XLOC_129803 | ENSRNOT00000045301 | 1            | 0        |
| TUCP_003048 | XLOC_129803 | ENSRNOT00000041186 | 0.999975782  | 6.56E-23 |
| TUCP_003048 | XLOC_129803 | ENSRNOT00000010092 | 0.977711778  | 4.17E-08 |
| TUCP_003048 | XLOC_129803 | ENSRNOT00000076182 | 1            | 0        |
| TUCP_003048 | XLOC_129803 | ENSRNOT00000087404 | 0.951157664  | 2.02E-06 |
| TUCP_003048 | XLOC_129803 | ENSRNOT00000052003 | 0.95837331   | 9.18E-07 |
| TUCP_003048 | XLOC_129803 | ENSRNOT00000081709 | 0.998485154  | 6.27E-14 |
| TUCP_003048 | XLOC_129803 | ENSRNOT00000005726 | 0.959610119  | 7.91E-07 |
| TUCP_003048 | XLOC_129803 | ENSRNOT00000014103 | 1            | 0        |
| TUCP_003048 | XLOC_129803 | ENSRNOT00000057433 | 0.964930601  | 3.94E-07 |
| TUCP_003048 | XLOC_129803 | ENSRNOT00000082289 | 0.998931566  | 1.09E-14 |
| TUCP_003048 | XLOC_129803 | ENSRNOT00000092516 | 0.957459323  | 1.02E-06 |
| TUCP_003048 | XLOC_129803 | ENSRNOT00000008898 | 0.990039768  | 7.59E-10 |
| TUCP_003048 | XLOC_129803 | ENSRNOT00000083493 | 0.995461232  | 1.51E-11 |
| TUCP_003048 | XLOC_129803 | ENSRNOT00000092563 | 0.987201084  | 2.65E-09 |
| TUCP_003048 | XLOC_129803 | ENSRNOT00000088893 | 1            | 0        |
| TUCP_003048 | XLOC_129803 | ENSRNOT00000076693 | 0.955029582  | 1.34E-06 |
| TUCP_003048 | XLOC_129803 | ENSRNOT00000081014 | 1            | 0        |
| TUCP_003048 | XLOC_129803 | ENSRNOT00000067543 | 1            | 0        |
| TUCP_003048 | XLOC_129803 | ENSRNOT00000050968 | 0.996816433  | 2.56E-12 |
| TUCP_003048 | XLOC_129803 | ENSRNOT00000042201 | 0.960235595  | 7.32E-07 |
| TUCP_003048 | XLOC_129803 | ENSRNOT00000004373 | 0.957315473  | 1.04E-06 |
| TUCP_003048 | XLOC_129803 | ENSRNOT00000063929 | 1            | 0        |
| TUCP_003048 | XLOC_129803 | ENSRNOT00000057472 | 1            | 0        |
| TUCP_003048 | XLOC_129803 | ENSRNOT00000041617 | 0.952449765  | 1.77E-06 |
| TUCP_003048 | XLOC_129803 | ENSRNOT00000091763 | 0.986310385  | 3.70E-09 |
| TUCP_003048 | XLOC_129803 | ENSRNOT00000022200 | 0.998491303  | 6.14E-14 |
| TUCP_003048 | XLOC_129803 | ENSRNOT00000067379 | 0.997260967  | 1.21E-12 |
| TUCP_003048 | XLOC_129803 | ENSRNOT00000020786 | 0.976428448  | 5.51E-08 |
| TUCP_003048 | XLOC_129803 | ENSRNOT00000050543 | 0.999722223  | 1.30E-17 |
| TUCP_003048 | XLOC_129803 | ENSRNOT00000089306 | 0.999866649  | 3.32E-19 |
| TUCP_003048 | XLOC_129803 | ENSRNOT00000052367 | 0.997268394  | 1.19E-12 |
| TUCP_003048 | XLOC_129803 | ENSRNOT00000090658 | 1            | 0        |
| TUCP_003048 | XLOC_129803 | ENSRNOT00000022571 | 0.995290013  | 1.81E-11 |
| TUCP_003048 | XLOC_129803 | ENSRNOT00000044520 | 0.981817158  | 1.52E-08 |
| TUCP_003048 | XLOC_129803 | ENSRNOT00000065448 | 0.963648868  | 4.70E-07 |
| TUCP_002967 | XLOC_128223 | ENSRNOT00000088280 | 0.95321887   | 1.63E-06 |
| TUCP_002966 | XLOC_128222 | ENSRNOT00000092026 | 0.96620614   | 3.28E-07 |
| TUCP_002966 | XLOC_128222 | ENSRNOT00000093075 | 1            | 0        |
| TUCP_002966 | XLOC_128222 | ENSRNOT00000058260 | 1            | 0        |
| TUCP_002966 | XLOC_128222 | ENSRNOT00000088887 | 1            | 0        |
| TUCP_002966 | XLOC_128222 | ENSRNOT00000084986 | 1            | 0        |
| TUCP_002966 | XLOC_128222 | ENSRNOT00000074346 | 0.9702256    | 1.75E-07 |
| TUCP_002966 | XLOC_128222 | ENSRNOT00000073209 | 0.983711602  | 8.79E-09 |
| TUCP_002966 | XLOC_128222 | ENSRNOT00000080155 | 0.973069673  | 1.07E-07 |



|             |             |                    |             |          |
|-------------|-------------|--------------------|-------------|----------|
| TUCP_002966 | XLOC_128222 | ENSRNOT00000072573 | 0.996213272 | 6.09E-12 |
| TUCP_002966 | XLOC_128222 | ENSRNOT00000017828 | 0.996001583 | 7.99E-12 |
| TUCP_002966 | XLOC_128222 | ENSRNOT00000080444 | 0.969625907 | 1.93E-07 |
| TUCP_002966 | XLOC_128222 | ENSRNOT00000071312 | 1           | 0        |
| TUCP_002966 | XLOC_128222 | ENSRNOT00000088245 | 1           | 0        |
| TUCP_002966 | XLOC_128222 | ENSRNOT00000036565 | 0.969065335 | 2.12E-07 |
| TUCP_002966 | XLOC_128222 | ENSRNOT00000058833 | 0.998673261 | 3.23E-14 |
| TUCP_002966 | XLOC_128222 | ENSRNOT00000078052 | 1           | 0        |
| TUCP_002966 | XLOC_128222 | ENSRNOT00000078494 | 0.999927093 | 1.62E-20 |
| TUCP_002966 | XLOC_128222 | ENSRNOT00000085653 | 1           | 0        |
| TUCP_002966 | XLOC_128222 | ENSRNOT00000057950 | 0.969329371 | 2.03E-07 |
| TUCP_002966 | XLOC_128222 | ENSRNOT00000081992 | 0.999320526 | 1.14E-15 |
| TUCP_002966 | XLOC_128222 | ENSRNOT00000038553 | 0.955765808 | 1.24E-06 |
| TUCP_002966 | XLOC_128222 | ENSRNOT00000084120 | 0.958115447 | 9.46E-07 |
| TUCP_002966 | XLOC_128222 | ENSRNOT00000055406 | 1           | 0        |
| TUCP_002966 | XLOC_128222 | ENSRNOT00000070817 | 0.998968079 | 9.20E-15 |
| TUCP_002966 | XLOC_128222 | ENSRNOT00000026753 | 1           | 0        |
| TUCP_002966 | XLOC_128222 | ENSRNOT00000080533 | 0.996682529 | 3.15E-12 |
| TUCP_002966 | XLOC_128222 | ENSRNOT00000072774 | 0.979665261 | 2.65E-08 |
| TUCP_002966 | XLOC_128222 | ENSRNOT00000086031 | 1           | 0        |
| TUCP_002966 | XLOC_128222 | ENSRNOT00000014312 | 1           | 0        |
| TUCP_002966 | XLOC_128222 | ENSRNOT00000042882 | 0.963218427 | 4.98E-07 |
| TUCP_002966 | XLOC_128222 | ENSRNOT00000088012 | 0.956765806 | 1.11E-06 |
| TUCP_002966 | XLOC_128222 | ENSRNOT00000051231 | 0.999242378 | 1.96E-15 |
| TUCP_002966 | XLOC_128222 | ENSRNOT00000089407 | 0.992986194 | 1.32E-10 |
| TUCP_002966 | XLOC_128222 | ENSRNOT00000055034 | 0.998331441 | 1.02E-13 |
| TUCP_002966 | XLOC_128222 | ENSRNOT00000046837 | 0.97252559  | 1.18E-07 |
| TUCP_002963 | XLOC_128011 | ENSRNOT00000024186 | 0.985200254 | 5.45E-09 |
| TUCP_002963 | XLOC_128011 | ENSRNOT00000074753 | 0.986206896 | 3.84E-09 |
| TUCP_002963 | XLOC_128011 | ENSRNOT00000004876 | 0.967696156 | 2.62E-07 |
| TUCP_002963 | XLOC_128011 | ENSRNOT00000041904 | 0.988092533 | 1.85E-09 |
| TUCP_002963 | XLOC_128011 | ENSRNOT00000083487 | 0.98408912  | 7.82E-09 |
| TUCP_002963 | XLOC_128011 | ENSRNOT00000077990 | 0.988092533 | 1.85E-09 |
| TUCP_002963 | XLOC_128011 | ENSRNOT00000038826 | 0.988496221 | 1.56E-09 |
| TUCP_002963 | XLOC_128011 | ENSRNOT00000046842 | 0.972697302 | 1.14E-07 |
| TUCP_002963 | XLOC_128011 | ENSRNOT00000037169 | 0.968244541 | 2.41E-07 |
| TUCP_002963 | XLOC_128011 | ENSRNOT00000021243 | 0.968929586 | 2.16E-07 |
| TUCP_002963 | XLOC_128011 | ENSRNOT00000060250 | 0.987337326 | 2.51E-09 |
| TUCP_002963 | XLOC_128011 | ENSRNOT00000091934 | 0.988092533 | 1.85E-09 |
| TUCP_002963 | XLOC_128011 | ENSRNOT00000046585 | 0.990854241 | 4.96E-10 |
| TUCP_002963 | XLOC_128011 | ENSRNOT00000080794 | 0.975494654 | 6.68E-08 |
| TUCP_002963 | XLOC_128011 | ENSRNOT00000014456 | 0.974708393 | 7.81E-08 |
| TUCP_002963 | XLOC_128011 | ENSRNOT00000031205 | 0.991570487 | 3.30E-10 |
| TUCP_002963 | XLOC_128011 | ENSRNOT00000044145 | 0.988092533 | 1.85E-09 |
| TUCP_002963 | XLOC_128011 | ENSRNOT00000088381 | 0.993459627 | 9.32E-11 |
| TUCP_002963 | XLOC_128011 | ENSRNOT00000011743 | 0.982598339 | 1.22E-08 |
| TUCP_002963 | XLOC_128011 | ENSRNOT00000089929 | 0.988092533 | 1.85E-09 |
| TUCP_002963 | XLOC_128011 | ENSRNOT00000088624 | 0.988092533 | 1.85E-09 |
| TUCP_002963 | XLOC_128011 | ENSRNOT00000085659 | 0.98172192  | 1.56E-08 |
| TUCP_002963 | XLOC_128011 | ENSRNOT00000015866 | 0.988358505 | 1.65E-09 |
| TUCP_002963 | XLOC_128011 | ENSRNOT00000078633 | 0.988092533 | 1.85E-09 |

|             |             |                    |             |          |
|-------------|-------------|--------------------|-------------|----------|
| TUCP_002963 | XLOC_128011 | ENSRNOT00000034907 | 0.992360862 | 2.02E-10 |
| TUCP_002963 | XLOC_128011 | ENSRNOT00000093230 | 0.958622806 | 8.91E-07 |
| TUCP_002963 | XLOC_128011 | ENSRNOT00000051835 | 0.988092533 | 1.85E-09 |
| TUCP_002963 | XLOC_128011 | ENSRNOT00000009825 | 0.951867264 | 1.88E-06 |
| TUCP_002963 | XLOC_128011 | ENSRNOT00000079087 | 0.988092533 | 1.85E-09 |
| TUCP_002963 | XLOC_128011 | ENSRNOT00000037206 | 0.988092533 | 1.85E-09 |
| TUCP_002963 | XLOC_128011 | ENSRNOT00000083261 | 0.966624475 | 3.08E-07 |
| TUCP_002963 | XLOC_128011 | ENSRNOT00000080590 | 0.987699996 | 2.17E-09 |
| TUCP_002963 | XLOC_128011 | ENSRNOT00000027552 | 0.987329272 | 2.52E-09 |
| TUCP_002963 | XLOC_128011 | ENSRNOT00000077014 | 0.984155653 | 7.66E-09 |
| TUCP_002963 | XLOC_128011 | ENSRNOT00000080453 | 0.988237068 | 1.74E-09 |
| TUCP_002963 | XLOC_128011 | ENSRNOT00000089057 | 0.968683873 | 2.25E-07 |
| TUCP_002963 | XLOC_128011 | ENSRNOT00000066839 | 0.975293717 | 6.96E-08 |
| TUCP_002963 | XLOC_128011 | ENSRNOT00000061284 | 0.951447118 | 1.96E-06 |
| TUCP_002963 | XLOC_128011 | ENSRNOT00000013423 | 0.969488743 | 1.98E-07 |
| TUCP_002963 | XLOC_128011 | ENSRNOT00000071884 | 0.963854623 | 4.57E-07 |
| TUCP_002963 | XLOC_128011 | ENSRNOT00000004128 | 0.965534244 | 3.61E-07 |
| TUCP_002963 | XLOC_128011 | ENSRNOT00000057729 | 0.986249572 | 3.78E-09 |
| TUCP_002963 | XLOC_128011 | ENSRNOT00000078663 | 0.958516417 | 9.02E-07 |
| TUCP_002963 | XLOC_128011 | ENSRNOT00000064250 | 0.96947992  | 1.98E-07 |
| TUCP_002963 | XLOC_128011 | ENSRNOT00000021608 | 0.96114511  | 6.53E-07 |
| TUCP_002963 | XLOC_128011 | ENSRNOT00000029634 | 0.98057974  | 2.11E-08 |
| TUCP_002963 | XLOC_128011 | ENSRNOT00000093579 | 0.966580276 | 3.10E-07 |
| TUCP_002963 | XLOC_128011 | ENSRNOT00000065460 | 0.988092533 | 1.85E-09 |
| TUCP_002963 | XLOC_128011 | ENSRNOT00000003817 | 0.981726723 | 1.56E-08 |
| TUCP_002963 | XLOC_128011 | ENSRNOT00000016713 | 0.988092533 | 1.85E-09 |
| TUCP_002963 | XLOC_128011 | ENSRNOT00000079260 | 0.991507823 | 3.43E-10 |
| TUCP_002963 | XLOC_128011 | ENSRNOT00000039294 | 0.988092533 | 1.85E-09 |
| TUCP_002963 | XLOC_128011 | ENSRNOT00000024337 | 0.96124143  | 6.45E-07 |
| TUCP_002962 | XLOC_127866 | ENSRNOT00000024186 | 0.983200502 | 1.02E-08 |
| TUCP_002962 | XLOC_127866 | ENSRNOT00000074753 | 0.998182349 | 1.56E-13 |
| TUCP_002962 | XLOC_127866 | ENSRNOT00000004876 | 0.959071443 | 8.44E-07 |
| TUCP_002962 | XLOC_127866 | ENSRNOT00000041904 | 1           | 0        |
| TUCP_002962 | XLOC_127866 | ENSRNOT00000083487 | 0.989515314 | 9.80E-10 |
| TUCP_002962 | XLOC_127866 | ENSRNOT00000077990 | 1           | 0        |
| TUCP_002962 | XLOC_127866 | ENSRNOT00000038826 | 0.99977672  | 4.37E-18 |
| TUCP_002962 | XLOC_127866 | ENSRNOT00000046842 | 0.973644314 | 9.58E-08 |
| TUCP_002962 | XLOC_127866 | ENSRNOT00000037169 | 0.980329406 | 2.24E-08 |
| TUCP_002962 | XLOC_127866 | ENSRNOT00000021243 | 0.987425406 | 2.42E-09 |
| TUCP_002962 | XLOC_127866 | ENSRNOT00000060250 | 0.999933853 | 9.97E-21 |
| TUCP_002962 | XLOC_127866 | ENSRNOT00000091934 | 1           | 1.33E-79 |
| TUCP_002962 | XLOC_127866 | ENSRNOT00000046585 | 0.982941597 | 1.11E-08 |
| TUCP_002962 | XLOC_127866 | ENSRNOT00000080794 | 0.990839253 | 5.00E-10 |
| TUCP_002962 | XLOC_127866 | ENSRNOT00000014456 | 0.991697153 | 3.06E-10 |
| TUCP_002962 | XLOC_127866 | ENSRNOT00000031205 | 0.991394766 | 3.66E-10 |
| TUCP_002962 | XLOC_127866 | ENSRNOT00000044145 | 1           | 1.33E-79 |
| TUCP_002962 | XLOC_127866 | ENSRNOT00000088381 | 0.989013276 | 1.24E-09 |
| TUCP_002962 | XLOC_127866 | ENSRNOT00000011743 | 0.98678427  | 3.11E-09 |
| TUCP_002962 | XLOC_127866 | ENSRNOT00000089929 | 1           | 1.33E-79 |
| TUCP_002962 | XLOC_127866 | ENSRNOT00000088624 | 1           | 0        |
| TUCP_002962 | XLOC_127866 | ENSRNOT00000085659 | 0.989908621 | 8.10E-10 |

|             |             |                    |              |          |
|-------------|-------------|--------------------|--------------|----------|
| TUCP_002962 | XLOC_127866 | ENSRNOT00000015866 | 0.994066664  | 5.73E-11 |
| TUCP_002962 | XLOC_127866 | ENSRNOT00000078633 | 1            | 0        |
| TUCP_002962 | XLOC_127866 | ENSRNOT00000034907 | 0.995318542  | 1.76E-11 |
| TUCP_002962 | XLOC_127866 | ENSRNOT00000093230 | 0.958295175  | 9.26E-07 |
| TUCP_002962 | XLOC_127866 | ENSRNOT00000051835 | 1            | 0        |
| TUCP_002962 | XLOC_127866 | ENSRNOT00000079087 | 1            | 1.33E-79 |
| TUCP_002962 | XLOC_127866 | ENSRNOT00000037206 | 1            | 0        |
| TUCP_002962 | XLOC_127866 | ENSRNOT00000083261 | 0.970991658  | 1.54E-07 |
| TUCP_002962 | XLOC_127866 | ENSRNOT00000080590 | 0.999889216  | 1.31E-19 |
| TUCP_002962 | XLOC_127866 | ENSRNOT00000027552 | 0.999801024  | 2.46E-18 |
| TUCP_002962 | XLOC_127866 | ENSRNOT00000077014 | 0.995074376  | 2.26E-11 |
| TUCP_002962 | XLOC_127866 | ENSRNOT00000080453 | 0.99994332   | 4.61E-21 |
| TUCP_002962 | XLOC_127866 | ENSRNOT00000089057 | 0.968243551  | 2.41E-07 |
| TUCP_002962 | XLOC_127866 | ENSRNOT00000066839 | 0.991868612  | 2.76E-10 |
| TUCP_002962 | XLOC_127866 | ENSRNOT00000061284 | 0.955566942  | 1.27E-06 |
| TUCP_002962 | XLOC_127866 | ENSRNOT00000013423 | 0.959677621  | 7.84E-07 |
| TUCP_002962 | XLOC_127866 | ENSRNOT00000071884 | 0.974769955  | 7.72E-08 |
| TUCP_002962 | XLOC_127866 | ENSRNOT00000004128 | 0.961829362  | 5.99E-07 |
| TUCP_002962 | XLOC_127866 | ENSRNOT00000026316 | 0.964408046  | 4.24E-07 |
| TUCP_002962 | XLOC_127866 | ENSRNOT00000057729 | 0.999384184  | 6.97E-16 |
| TUCP_002962 | XLOC_127866 | ENSRNOT00000078663 | 0.975192577  | 7.10E-08 |
| TUCP_002962 | XLOC_127866 | ENSRNOT00000064250 | 0.983131977  | 1.05E-08 |
| TUCP_002962 | XLOC_127866 | ENSRNOT00000021608 | 0.965228881  | 3.78E-07 |
| TUCP_002962 | XLOC_127866 | ENSRNOT00000029634 | 0.995816134  | 1.00E-11 |
| TUCP_002962 | XLOC_127866 | ENSRNOT00000093579 | 0.958564264  | 8.97E-07 |
| TUCP_002962 | XLOC_127866 | ENSRNOT00000086349 | 0.957242511  | 1.05E-06 |
| TUCP_002962 | XLOC_127866 | ENSRNOT00000065460 | 1            | 4.25E-78 |
| TUCP_002962 | XLOC_127866 | ENSRNOT00000003817 | 0.996778712  | 2.72E-12 |
| TUCP_002962 | XLOC_127866 | ENSRNOT00000016713 | 1            | 1.33E-79 |
| TUCP_002962 | XLOC_127866 | ENSRNOT00000079260 | 0.996448245  | 4.42E-12 |
| TUCP_002962 | XLOC_127866 | ENSRNOT00000039294 | 1            | 1.33E-79 |
| TUCP_002962 | XLOC_127866 | ENSRNOT00000092913 | 0.952980228  | 1.67E-06 |
| TUCP_002969 | XLOC_128258 | ENSRNOT00000010873 | -0.951198515 | 2.01E-06 |
| TUCP_002969 | XLOC_128258 | ENSRNOT00000014821 | -0.956939512 | 1.08E-06 |
| TUCP_002969 | XLOC_128258 | ENSRNOT00000044885 | 0.967852657  | 2.56E-07 |
| TUCP_002969 | XLOC_128258 | ENSRNOT00000084055 | -0.951771406 | 1.89E-06 |
| TUCP_002969 | XLOC_128258 | ENSRNOT00000003690 | 0.952894691  | 1.69E-06 |
| TUCP_002969 | XLOC_128258 | ENSRNOT00000085736 | -0.964270649 | 4.32E-07 |
| TUCP_002969 | XLOC_128258 | ENSRNOT00000032780 | 0.963096087  | 5.07E-07 |
| TUCP_002969 | XLOC_128258 | ENSRNOT00000081981 | 0.965198794  | 3.79E-07 |
| TUCP_002969 | XLOC_128258 | ENSRNOT00000011350 | 0.951940738  | 1.86E-06 |
| TUCP_002969 | XLOC_128258 | ENSRNOT00000063873 | 0.953233205  | 1.63E-06 |
| TUCP_002969 | XLOC_128258 | ENSRNOT00000084422 | 0.957210522  | 1.05E-06 |
| TUCP_002969 | XLOC_128258 | ENSRNOT00000014924 | -0.951987506 | 1.85E-06 |
| TUCP_002969 | XLOC_128258 | ENSRNOT00000002443 | 0.953937233  | 1.51E-06 |
| TUCP_002969 | XLOC_128258 | ENSRNOT00000000181 | 0.961715035  | 6.07E-07 |
| TUCP_002969 | XLOC_128258 | ENSRNOT00000002114 | -0.954522708 | 1.42E-06 |
| TUCP_002969 | XLOC_128258 | ENSRNOT00000022142 | 0.95414482   | 1.48E-06 |
| TUCP_002969 | XLOC_128258 | ENSRNOT00000080608 | 0.961471891  | 6.27E-07 |
| TUCP_002969 | XLOC_128258 | ENSRNOT00000009563 | -0.976664346 | 5.24E-08 |
| TUCP_002969 | XLOC_128258 | ENSRNOT00000010748 | 0.954523938  | 1.42E-06 |

|             |             |                    |              |          |
|-------------|-------------|--------------------|--------------|----------|
| TUCP_002969 | XLOC_128258 | ENSRNOT00000012334 | 0.957912866  | 9.69E-07 |
| TUCP_002969 | XLOC_128258 | ENSRNOT00000015537 | 0.958679128  | 8.85E-07 |
| TUCP_002969 | XLOC_128258 | ENSRNOT00000019133 | 0.952503064  | 1.76E-06 |
| TUCP_002969 | XLOC_128258 | ENSRNOT00000010784 | 0.951083885  | 2.03E-06 |
| TUCP_002969 | XLOC_128258 | ENSRNOT00000049459 | -0.96153139  | 6.22E-07 |
| TUCP_002969 | XLOC_128258 | ENSRNOT00000045326 | 0.958774334  | 8.75E-07 |
| TUCP_002969 | XLOC_128258 | ENSRNOT00000003714 | 0.960043398  | 7.50E-07 |
| TUCP_002969 | XLOC_128258 | ENSRNOT00000015947 | 0.969302506  | 2.04E-07 |
| TUCP_002969 | XLOC_128258 | ENSRNOT00000046745 | 0.953205512  | 1.63E-06 |
| TUCP_002969 | XLOC_128258 | ENSRNOT00000028856 | 0.953205792  | 1.63E-06 |
| TUCP_002969 | XLOC_128258 | ENSRNOT00000078856 | -0.951462317 | 1.96E-06 |
| TUCP_002969 | XLOC_128258 | ENSRNOT00000014124 | 0.950819883  | 2.09E-06 |
| TUCP_002969 | XLOC_128258 | ENSRNOT00000000120 | 0.971667222  | 1.37E-07 |
| TUCP_002969 | XLOC_128258 | ENSRNOT00000005958 | 0.961369391  | 6.35E-07 |
| TUCP_002969 | XLOC_128258 | ENSRNOT00000029125 | 0.950062471  | 2.25E-06 |
| TUCP_002969 | XLOC_128258 | ENSRNOT00000055321 | 0.95060475   | 2.13E-06 |
| TUCP_002969 | XLOC_128258 | ENSRNOT00000013801 | 0.951644367  | 1.92E-06 |
| TUCP_002969 | XLOC_128258 | ENSRNOT00000042125 | 0.957885916  | 9.72E-07 |
| TUCP_002969 | XLOC_128258 | ENSRNOT00000006752 | 0.952499291  | 1.76E-06 |
| TUCP_002969 | XLOC_128258 | ENSRNOT00000060698 | -0.957093894 | 1.07E-06 |
| TUCP_002969 | XLOC_128258 | ENSRNOT00000004172 | 0.952208148  | 1.81E-06 |
| TUCP_002969 | XLOC_128258 | ENSRNOT00000027970 | 0.967075694  | 2.88E-07 |
| TUCP_002969 | XLOC_128258 | ENSRNOT00000058351 | 0.97548938   | 6.69E-08 |
| TUCP_002969 | XLOC_128258 | ENSRNOT00000027616 | -0.953480972 | 1.59E-06 |
| TUCP_002969 | XLOC_128258 | ENSRNOT00000002109 | 0.955446248  | 1.28E-06 |
| TUCP_002969 | XLOC_128258 | ENSRNOT00000004319 | -0.952597352 | 1.74E-06 |
| TUCP_002969 | XLOC_128258 | ENSRNOT00000024969 | 0.950054223  | 2.25E-06 |
| TUCP_002969 | XLOC_128258 | ENSRNOT00000023537 | -0.96005495  | 7.49E-07 |
| TUCP_002969 | XLOC_128258 | ENSRNOT00000059181 | 0.952050463  | 1.84E-06 |
| TUCP_002969 | XLOC_128258 | ENSRNOT00000017776 | 0.954520792  | 1.42E-06 |
| TUCP_002969 | XLOC_128258 | ENSRNOT00000005901 | 0.954435917  | 1.43E-06 |
| TUCP_002969 | XLOC_128258 | ENSRNOT00000086893 | -0.956194317 | 1.18E-06 |
| TUCP_002969 | XLOC_128258 | ENSRNOT00000000013 | 0.957430252  | 1.02E-06 |
| TUCP_002969 | XLOC_128258 | ENSRNOT00000067780 | -0.962659952 | 5.37E-07 |
| TUCP_002969 | XLOC_128258 | ENSRNOT00000084031 | 0.955235507  | 1.31E-06 |
| TUCP_002969 | XLOC_128258 | ENSRNOT00000008982 | 0.964315888  | 4.29E-07 |
| TUCP_002969 | XLOC_128258 | ENSRNOT00000034692 | -0.956138506 | 1.19E-06 |
| TUCP_002969 | XLOC_128258 | ENSRNOT00000004046 | -0.966574371 | 3.11E-07 |
| TUCP_002969 | XLOC_128258 | ENSRNOT00000000170 | -0.950399978 | 2.17E-06 |
| TUCP_002969 | XLOC_128258 | ENSRNOT00000020681 | -0.95932882  | 8.18E-07 |
| TUCP_002969 | XLOC_128258 | ENSRNOT00000040476 | 0.963096242  | 5.07E-07 |
| TUCP_002969 | XLOC_128258 | ENSRNOT00000031977 | 0.961202037  | 6.49E-07 |
| TUCP_002969 | XLOC_128258 | ENSRNOT00000089933 | 0.955368729  | 1.29E-06 |
| TUCP_002969 | XLOC_128258 | ENSRNOT00000055442 | 0.955553012  | 1.27E-06 |
| TUCP_002969 | XLOC_128258 | ENSRNOT00000010983 | 0.952860838  | 1.69E-06 |
| TUCP_002969 | XLOC_128258 | ENSRNOT00000078102 | 0.960801007  | 6.82E-07 |
| TUCP_002969 | XLOC_128258 | ENSRNOT00000066133 | -0.950516714 | 2.15E-06 |
| TUCP_002968 | XLOC_128225 | ENSRNOT00000030300 | 0.960691615  | 6.92E-07 |
| TUCP_002968 | XLOC_128225 | ENSRNOT00000086650 | -0.962641202 | 5.38E-07 |
| TUCP_002880 | XLOC_122988 | ENSRNOT00000085195 | 0.999404969  | 5.87E-16 |
| TUCP_002880 | XLOC_122988 | ENSRNOT00000013705 |              | 1 0      |

|             |             |                    |              |          |
|-------------|-------------|--------------------|--------------|----------|
| TUCP_002880 | XLOC_122988 | ENSRNOT00000040851 | 1            | 0        |
| TUCP_002880 | XLOC_122988 | ENSRNOT00000075676 | 0.958697783  | 8.83E-07 |
| TUCP_002880 | XLOC_122988 | ENSRNOT00000058389 | 1            | 0        |
| TUCP_002880 | XLOC_122988 | ENSRNOT00000086827 | 0.95592964   | 1.22E-06 |
| TUCP_002880 | XLOC_122988 | ENSRNOT00000023542 | 1            | 0        |
| TUCP_002880 | XLOC_122988 | ENSRNOT00000028653 | 1            | 0        |
| TUCP_002880 | XLOC_122988 | ENSRNOT00000017230 | 0.955378945  | 1.29E-06 |
| TUCP_002880 | XLOC_122988 | ENSRNOT00000092890 | 0.955137645  | 1.33E-06 |
| TUCP_002880 | XLOC_122988 | ENSRNOT00000012174 | 1            | 0        |
| TUCP_002880 | XLOC_122988 | ENSRNOT00000051680 | 0.994991197  | 2.46E-11 |
| TUCP_002880 | XLOC_122988 | ENSRNOT00000089118 | 1            | 1.33E-79 |
| TUCP_002880 | XLOC_122988 | ENSRNOT00000025245 | 0.999967061  | 3.05E-22 |
| TUCP_002880 | XLOC_122988 | ENSRNOT00000015138 | 0.999902179  | 7.05E-20 |
| TUCP_002880 | XLOC_122988 | ENSRNOT00000080185 | 0.99902259   | 7.01E-15 |
| TUCP_002880 | XLOC_122988 | ENSRNOT00000090729 | 0.965956282  | 3.40E-07 |
| TUCP_002880 | XLOC_122988 | ENSRNOT00000049165 | 0.973440588  | 9.95E-08 |
| TUCP_002880 | XLOC_122988 | ENSRNOT00000086502 | 0.96495109   | 3.93E-07 |
| TUCP_002880 | XLOC_122988 | ENSRNOT00000079661 | 1            | 0        |
| TUCP_002880 | XLOC_122988 | ENSRNOT00000076338 | 0.985532463  | 4.87E-09 |
| TUCP_002880 | XLOC_122988 | ENSRNOT00000042220 | 1            | 4.25E-78 |
| TUCP_002880 | XLOC_122988 | ENSRNOT00000005031 | 0.952974465  | 1.67E-06 |
| TUCP_002880 | XLOC_122988 | ENSRNOT00000079167 | 0.979848988  | 2.53E-08 |
| TUCP_002880 | XLOC_122988 | ENSRNOT00000061950 | 0.962035217  | 5.83E-07 |
| TUCP_002880 | XLOC_122988 | ENSRNOT00000086710 | 0.999839781  | 8.31E-19 |
| TUCP_002880 | XLOC_122988 | ENSRNOT00000075226 | 1            | 0        |
| TUCP_002880 | XLOC_122988 | ENSRNOT00000000351 | 1            | 0        |
| TUCP_002880 | XLOC_122988 | ENSRNOT00000092294 | 0.986520908  | 3.43E-09 |
| TUCP_003614 | XLOC_158914 | ENSRNOT00000059895 | 0.967046449  | 2.90E-07 |
| TUCP_003614 | XLOC_158914 | ENSRNOT00000059172 | 0.970209107  | 1.76E-07 |
| TUCP_003614 | XLOC_158914 | ENSRNOT00000013836 | 0.954532441  | 1.42E-06 |
| TUCP_003614 | XLOC_158914 | ENSRNOT00000008154 | 0.95394938   | 1.51E-06 |
| TUCP_003614 | XLOC_158914 | ENSRNOT00000072396 | 0.957669718  | 9.97E-07 |
| TUCP_003614 | XLOC_158914 | ENSRNOT00000079549 | 0.955053424  | 1.34E-06 |
| TUCP_003614 | XLOC_158914 | ENSRNOT00000093577 | 0.950796314  | 2.09E-06 |
| TUCP_003619 | XLOC_158964 | ENSRNOT00000023332 | 0.973273522  | 1.03E-07 |
| TUCP_003619 | XLOC_158964 | ENSRNOT00000077185 | 0.958912949  | 8.61E-07 |
| TUCP_000885 | XLOC_032964 | ENSRNOT00000055536 | 0.961361716  | 6.36E-07 |
| TUCP_000885 | XLOC_032964 | ENSRNOT00000010852 | 0.986337394  | 3.66E-09 |
| TUCP_000885 | XLOC_032964 | ENSRNOT00000082711 | 0.956431491  | 1.15E-06 |
| TUCP_000885 | XLOC_032964 | ENSRNOT00000017805 | 0.953320184  | 1.61E-06 |
| TUCP_000885 | XLOC_032964 | ENSRNOT00000001893 | 0.962572706  | 5.43E-07 |
| TUCP_000885 | XLOC_032964 | ENSRNOT00000061054 | 0.952839283  | 1.70E-06 |
| TUCP_000885 | XLOC_032964 | ENSRNOT00000081226 | 0.957126118  | 1.06E-06 |
| TUCP_000885 | XLOC_032964 | ENSRNOT00000014926 | 0.956640518  | 1.12E-06 |
| TUCP_000885 | XLOC_032964 | ENSRNOT00000009080 | -0.956072205 | 1.20E-06 |
| TUCP_000885 | XLOC_032964 | ENSRNOT00000057738 | 0.956978456  | 1.08E-06 |
| TUCP_000885 | XLOC_032964 | ENSRNOT00000081631 | 0.959080825  | 8.43E-07 |
| TUCP_000885 | XLOC_032964 | ENSRNOT00000007461 | 0.951683294  | 1.91E-06 |
| TUCP_000885 | XLOC_032964 | ENSRNOT00000049349 | 0.95086272   | 2.08E-06 |
| TUCP_000885 | XLOC_032964 | ENSRNOT00000013025 | -0.95006013  | 2.25E-06 |
| TUCP_000885 | XLOC_032964 | ENSRNOT00000011832 | -0.950447901 | 2.16E-06 |

|             |             |                    |              |          |
|-------------|-------------|--------------------|--------------|----------|
| TUCP_000885 | XLOC_032964 | ENSRNOT00000026426 | 0.957463634  | 1.02E-06 |
| TUCP_000885 | XLOC_032964 | ENSRNOT00000009462 | 0.956136424  | 1.19E-06 |
| TUCP_000885 | XLOC_032964 | ENSRNOT00000005343 | -0.974121305 | 8.75E-08 |
| TUCP_000885 | XLOC_032964 | ENSRNOT00000086706 | 0.953076352  | 1.66E-06 |
| TUCP_000885 | XLOC_032964 | ENSRNOT00000073370 | 0.964927854  | 3.94E-07 |
| TUCP_000885 | XLOC_032964 | ENSRNOT00000016485 | 0.958103073  | 9.48E-07 |
| TUCP_000885 | XLOC_032964 | ENSRNOT00000065615 | 0.972811575  | 1.12E-07 |
| TUCP_000885 | XLOC_032964 | ENSRNOT00000087838 | -0.950707899 | 2.11E-06 |
| TUCP_000885 | XLOC_032964 | ENSRNOT00000024452 | -0.951624251 | 1.92E-06 |
| TUCP_000885 | XLOC_032964 | ENSRNOT00000008244 | 0.958501414  | 9.04E-07 |
| TUCP_000885 | XLOC_032964 | ENSRNOT00000042638 | 0.971660349  | 1.37E-07 |
| TUCP_000885 | XLOC_032964 | ENSRNOT00000072580 | -0.952407252 | 1.77E-06 |
| TUCP_000885 | XLOC_032964 | ENSRNOT00000039540 | 0.95668635   | 1.12E-06 |
| TUCP_000885 | XLOC_032964 | ENSRNOT00000000469 | 0.961433051  | 6.30E-07 |
| TUCP_000885 | XLOC_032964 | ENSRNOT00000038652 | -0.961855914 | 5.96E-07 |
| TUCP_000885 | XLOC_032964 | ENSRNOT00000017384 | 0.96953681   | 1.96E-07 |
| TUCP_000885 | XLOC_032964 | ENSRNOT00000028685 | 0.954467241  | 1.43E-06 |
| TUCP_000885 | XLOC_032964 | ENSRNOT00000065076 | 0.953833411  | 1.53E-06 |
| TUCP_000885 | XLOC_032964 | ENSRNOT00000080577 | 0.967463974  | 2.72E-07 |
| TUCP_000885 | XLOC_032964 | ENSRNOT00000057562 | 0.956603789  | 1.13E-06 |
| TUCP_000885 | XLOC_032964 | ENSRNOT00000072118 | 0.958247018  | 9.32E-07 |
| TUCP_000885 | XLOC_032964 | ENSRNOT00000054685 | 0.962334353  | 5.60E-07 |
| TUCP_000885 | XLOC_032964 | ENSRNOT00000085334 | 0.95780152   | 9.82E-07 |
| TUCP_000885 | XLOC_032964 | ENSRNOT00000090700 | 0.958065508  | 9.52E-07 |
| TUCP_000885 | XLOC_032964 | ENSRNOT00000057953 | 0.96343845   | 4.84E-07 |
| TUCP_000885 | XLOC_032964 | ENSRNOT00000074515 | -0.951444699 | 1.96E-06 |
| TUCP_000885 | XLOC_032964 | ENSRNOT00000008764 | 0.968008088  | 2.50E-07 |
| TUCP_000885 | XLOC_032964 | ENSRNOT00000009009 | 0.950339294  | 2.19E-06 |
| TUCP_000885 | XLOC_032964 | ENSRNOT00000016060 | 0.98107776   | 1.85E-08 |
| TUCP_000885 | XLOC_032964 | ENSRNOT00000035309 | -0.962217333 | 5.69E-07 |
| TUCP_000885 | XLOC_032964 | ENSRNOT00000052033 | -0.954374906 | 1.44E-06 |
| TUCP_000885 | XLOC_032964 | ENSRNOT00000086260 | -0.966787287 | 3.01E-07 |
| TUCP_000885 | XLOC_032964 | ENSRNOT00000065871 | 0.95003262   | 2.26E-06 |
| TUCP_000885 | XLOC_032964 | ENSRNOT00000036357 | 0.950021886  | 2.26E-06 |
| TUCP_000885 | XLOC_032964 | ENSRNOT00000025355 | 0.961574971  | 6.18E-07 |
| TUCP_000885 | XLOC_032964 | ENSRNOT00000091046 | 0.950618312  | 2.13E-06 |
| TUCP_001788 | XLOC_073522 | ENSRNOT00000008961 | 0.950201498  | 2.22E-06 |
| TUCP_001788 | XLOC_073522 | ENSRNOT00000022724 | 0.955079979  | 1.34E-06 |
| TUCP_001788 | XLOC_073522 | ENSRNOT00000026303 | 0.964779954  | 4.02E-07 |
| TUCP_001788 | XLOC_073522 | ENSRNOT00000073547 | 0.954142674  | 1.48E-06 |
| TUCP_001788 | XLOC_073522 | ENSRNOT00000042865 | -0.954751204 | 1.38E-06 |
| TUCP_001788 | XLOC_073522 | ENSRNOT00000092125 | 0.951565573  | 1.93E-06 |
| TUCP_001788 | XLOC_073522 | ENSRNOT00000058626 | 0.971825912  | 1.33E-07 |
| TUCP_001788 | XLOC_073522 | ENSRNOT00000005085 | 0.955957961  | 1.21E-06 |
| TUCP_001788 | XLOC_073522 | ENSRNOT00000031667 | 0.954357374  | 1.44E-06 |
| TUCP_001788 | XLOC_073522 | ENSRNOT00000009077 | 0.973232779  | 1.03E-07 |
| TUCP_001788 | XLOC_073522 | ENSRNOT00000088151 | 0.983833298  | 8.46E-09 |
| TUCP_001788 | XLOC_073522 | ENSRNOT00000010264 | 0.960484894  | 7.10E-07 |
| TUCP_001658 | XLOC_065680 | ENSRNOT00000010092 | 0.952126226  | 1.83E-06 |
| TUCP_001658 | XLOC_065680 | ENSRNOT00000078434 | 0.958724139  | 8.80E-07 |
| TUCP_001658 | XLOC_065680 | ENSRNOT00000077134 | 0.950428847  | 2.17E-06 |

|             |             |                    |              |          |
|-------------|-------------|--------------------|--------------|----------|
| TUCP_001658 | XLOC_065680 | ENSRNOT00000052003 | 0.953991598  | 1.50E-06 |
| TUCP_001658 | XLOC_065680 | ENSRNOT00000076693 | 0.959726204  | 7.80E-07 |
| TUCP_001658 | XLOC_065680 | ENSRNOT00000047527 | 0.953696687  | 1.55E-06 |
| TUCP_001658 | XLOC_065680 | ENSRNOT00000039263 | 0.953901725  | 1.52E-06 |
| TUCP_001658 | XLOC_065680 | ENSRNOT00000020071 | 0.95022404   | 2.21E-06 |
| TUCP_001658 | XLOC_065680 | ENSRNOT00000047700 | 0.962561763  | 5.44E-07 |
| TUCP_001658 | XLOC_065680 | ENSRNOT00000076802 | 0.95035553   | 2.18E-06 |
| TUCP_001658 | XLOC_065680 | ENSRNOT00000038494 | 0.96041675   | 7.16E-07 |
| TUCP_001658 | XLOC_065680 | ENSRNOT00000057433 | 0.963484909  | 4.81E-07 |
| TUCP_001658 | XLOC_065680 | ENSRNOT00000082143 | 0.952744426  | 1.71E-06 |
| TUCP_001658 | XLOC_065680 | ENSRNOT00000087603 | 0.961009542  | 6.65E-07 |
| TUCP_001658 | XLOC_065680 | ENSRNOT00000072810 | 0.95383773   | 1.53E-06 |
| TUCP_001601 | XLOC_063401 | ENSRNOT00000013914 | -0.964868668 | 3.97E-07 |
| TUCP_001601 | XLOC_063401 | ENSRNOT00000012635 | -0.966409735 | 3.18E-07 |
| TUCP_001601 | XLOC_063401 | ENSRNOT00000009708 | -0.951703609 | 1.91E-06 |
| TUCP_001601 | XLOC_063401 | ENSRNOT00000051554 | -0.966127912 | 3.32E-07 |
| TUCP_001601 | XLOC_063401 | ENSRNOT00000049927 | -0.961713404 | 6.08E-07 |
| TUCP_001601 | XLOC_063401 | ENSRNOT00000077579 | -0.957449684 | 1.02E-06 |
| TUCP_001601 | XLOC_063401 | ENSRNOT00000020663 | -0.964044038 | 4.46E-07 |
| TUCP_001601 | XLOC_063401 | ENSRNOT00000073636 | 0.955649815  | 1.25E-06 |
| TUCP_001601 | XLOC_063401 | ENSRNOT00000028589 | -0.95616549  | 1.18E-06 |
| TUCP_001601 | XLOC_063401 | ENSRNOT00000072110 | -0.963109227 | 5.06E-07 |
| TUCP_001601 | XLOC_063401 | ENSRNOT00000083173 | -0.951596742 | 1.93E-06 |
| TUCP_001601 | XLOC_063401 | ENSRNOT00000024120 | -0.970504418 | 1.67E-07 |
| TUCP_001601 | XLOC_063401 | ENSRNOT00000028625 | -0.973486951 | 9.87E-08 |
| TUCP_001601 | XLOC_063401 | ENSRNOT00000016386 | -0.961038221 | 6.62E-07 |
| TUCP_001601 | XLOC_063401 | ENSRNOT00000021075 | -0.964429175 | 4.22E-07 |
| TUCP_001601 | XLOC_063401 | ENSRNOT00000021073 | -0.95647737  | 1.14E-06 |
| TUCP_001601 | XLOC_063401 | ENSRNOT00000025550 | -0.954317759 | 1.45E-06 |
| TUCP_001601 | XLOC_063401 | ENSRNOT00000015808 | -0.957349905 | 1.03E-06 |
| TUCP_001601 | XLOC_063401 | ENSRNOT00000008364 | -0.95436896  | 1.44E-06 |
| TUCP_001601 | XLOC_063401 | ENSRNOT00000019463 | -0.960177142 | 7.38E-07 |
| TUCP_001601 | XLOC_063401 | ENSRNOT00000060432 | -0.954347309 | 1.45E-06 |
| TUCP_001601 | XLOC_063401 | ENSRNOT00000091864 | -0.950591833 | 2.13E-06 |
| TUCP_001601 | XLOC_063401 | ENSRNOT00000004942 | -0.963636721 | 4.71E-07 |
| TUCP_001601 | XLOC_063401 | ENSRNOT00000006699 | -0.960690909 | 6.92E-07 |
| TUCP_001601 | XLOC_063401 | ENSRNOT00000007002 | -0.972337282 | 1.22E-07 |
| TUCP_001601 | XLOC_063401 | ENSRNOT00000003540 | -0.974486787 | 8.16E-08 |
| TUCP_001601 | XLOC_063401 | ENSRNOT00000055988 | -0.962086816 | 5.79E-07 |
| TUCP_001601 | XLOC_063401 | ENSRNOT00000025936 | -0.950423078 | 2.17E-06 |
| TUCP_001601 | XLOC_063401 | ENSRNOT00000067846 | -0.97504335  | 7.31E-08 |
| TUCP_001601 | XLOC_063401 | ENSRNOT00000061916 | -0.950985389 | 2.05E-06 |
| TUCP_001601 | XLOC_063401 | ENSRNOT0000002052  | -0.968307581 | 2.39E-07 |
| TUCP_001601 | XLOC_063401 | ENSRNOT00000001968 | -0.95764269  | 1.00E-06 |
| TUCP_001601 | XLOC_063401 | ENSRNOT00000006900 | -0.95734098  | 1.04E-06 |
| TUCP_001601 | XLOC_063401 | ENSRNOT00000090420 | -0.953837229 | 1.53E-06 |
| TUCP_001601 | XLOC_063401 | ENSRNOT00000019886 | 0.951849244  | 1.88E-06 |
| TUCP_003617 | XLOC_158936 | ENSRNOT00000006947 | 0.976559777  | 5.36E-08 |
| TUCP_003617 | XLOC_158936 | ENSRNOT00000005505 | 0.959835083  | 7.69E-07 |
| TUCP_003617 | XLOC_158936 | ENSRNOT00000028818 | 0.953200631  | 1.63E-06 |
| TUCP_003617 | XLOC_158936 | ENSRNOT00000067889 | 0.953852795  | 1.53E-06 |

|             |             |                    |              |          |
|-------------|-------------|--------------------|--------------|----------|
| TUCP_003617 | XLOC_158936 | ENSRNOT00000083134 | 0.957580735  | 1.01E-06 |
| TUCP_003617 | XLOC_158936 | ENSRNOT00000010142 | 0.977568185  | 4.31E-08 |
| TUCP_003617 | XLOC_158936 | ENSRNOT00000047453 | 0.958419012  | 9.13E-07 |
| TUCP_003617 | XLOC_158936 | ENSRNOT00000038449 | 0.96114734   | 6.53E-07 |
| TUCP_003617 | XLOC_158936 | ENSRNOT00000081604 | 0.967358403  | 2.76E-07 |
| TUCP_003617 | XLOC_158936 | ENSRNOT00000013343 | 0.953249664  | 1.63E-06 |
| TUCP_003617 | XLOC_158936 | ENSRNOT00000006109 | 0.950235965  | 2.21E-06 |
| TUCP_003617 | XLOC_158936 | ENSRNOT00000073493 | 0.954694207  | 1.39E-06 |
| TUCP_000678 | XLOC_025601 | ENSRNOT00000008685 | 0.974973091  | 7.41E-08 |
| TUCP_000678 | XLOC_025601 | ENSRNOT00000056243 | 0.951235393  | 2.00E-06 |
| TUCP_000678 | XLOC_025601 | ENSRNOT00000009111 | 0.961685082  | 6.10E-07 |
| TUCP_000678 | XLOC_025601 | ENSRNOT00000054915 | 0.953338165  | 1.61E-06 |
| TUCP_000678 | XLOC_025601 | ENSRNOT00000089193 | 0.954333753  | 1.45E-06 |
| TUCP_003529 | XLOC_153608 | ENSRNOT00000085943 | 0.982115243  | 1.40E-08 |
| TUCP_003529 | XLOC_153608 | ENSRNOT00000011342 | 0.974496895  | 8.14E-08 |
| TUCP_003529 | XLOC_153608 | ENSRNOT00000076466 | 0.96221506   | 5.69E-07 |
| TUCP_003529 | XLOC_153608 | ENSRNOT00000072396 | 0.999859744  | 4.27E-19 |
| TUCP_003529 | XLOC_153608 | ENSRNOT00000093577 | 0.973330006  | 1.02E-07 |
| TUCP_001218 | XLOC_045681 | ENSRNOT00000085696 | -0.959817663 | 7.71E-07 |
| TUCP_004246 | XLOC_186698 | ENSRNOT00000005958 | 0.950007939  | 2.26E-06 |
| TUCP_004246 | XLOC_186698 | ENSRNOT00000000383 | -0.951929993 | 1.86E-06 |
| TUCP_004246 | XLOC_186698 | ENSRNOT00000090057 | 0.959458073  | 8.06E-07 |
| TUCP_004246 | XLOC_186698 | ENSRNOT00000061253 | 0.975204789  | 7.08E-08 |
| TUCP_004246 | XLOC_186698 | ENSRNOT00000041044 | 0.95714708   | 1.06E-06 |
| TUCP_004246 | XLOC_186698 | ENSRNOT00000067400 | 0.959044712  | 8.47E-07 |
| TUCP_004531 | XLOC_199661 | ENSRNOT00000092569 | -0.953796462 | 1.53E-06 |
| TUCP_003964 | XLOC_174241 | ENSRNOT00000084133 | 1            | 0        |
| TUCP_003964 | XLOC_174241 | ENSRNOT00000093745 | 0.981891039  | 1.49E-08 |
| TUCP_003964 | XLOC_174241 | ENSRNOT00000065542 | 0.99828699   | 1.16E-13 |
| TUCP_003964 | XLOC_174241 | ENSRNOT00000082464 | 1            | 0        |
| TUCP_003964 | XLOC_174241 | ENSRNOT00000087659 | 1            | 0        |
| TUCP_003964 | XLOC_174241 | ENSRNOT00000084582 | 0.976633579  | 5.28E-08 |
| TUCP_003964 | XLOC_174241 | ENSRNOT00000085078 | 1            | 1.33E-79 |
| TUCP_003964 | XLOC_174241 | ENSRNOT00000014028 | 1            | 1.33E-79 |
| TUCP_003964 | XLOC_174241 | ENSRNOT00000049363 | 1            | 1.33E-79 |
| TUCP_003964 | XLOC_174241 | ENSRNOT00000065473 | 0.999949098  | 2.69E-21 |
| TUCP_003964 | XLOC_174241 | ENSRNOT00000000142 | 0.998996155  | 8.01E-15 |
| TUCP_003964 | XLOC_174241 | ENSRNOT00000082288 | 0.999998398  | 8.30E-29 |
| TUCP_003964 | XLOC_174241 | ENSRNOT00000039664 | 1            | 0        |
| TUCP_003964 | XLOC_174241 | ENSRNOT00000065402 | 1            | 1.33E-79 |
| TUCP_003964 | XLOC_174241 | ENSRNOT00000064551 | 0.965365872  | 3.70E-07 |
| TUCP_003964 | XLOC_174241 | ENSRNOT00000084141 | 1            | 0        |
| TUCP_003964 | XLOC_174241 | ENSRNOT00000082435 | 1            | 0        |
| TUCP_003964 | XLOC_174241 | ENSRNOT00000082928 | 0.996801059  | 2.62E-12 |
| TUCP_003964 | XLOC_174241 | ENSRNOT00000066546 | 0.956953619  | 1.08E-06 |
| TUCP_003964 | XLOC_174241 | ENSRNOT00000046013 | 0.988138626  | 1.81E-09 |
| TUCP_003964 | XLOC_174241 | ENSRNOT00000067931 | 0.978893628  | 3.18E-08 |
| TUCP_003964 | XLOC_174241 | ENSRNOT00000086425 | 0.992023315  | 2.51E-10 |
| TUCP_003964 | XLOC_174241 | ENSRNOT00000093696 | 0.956927219  | 1.09E-06 |
| TUCP_003964 | XLOC_174241 | ENSRNOT00000036228 | 0.982337157  | 1.31E-08 |
| TUCP_003964 | XLOC_174241 | ENSRNOT00000014030 | 1            | 0        |



|             |             |                    |              |          |
|-------------|-------------|--------------------|--------------|----------|
| TUCP_003964 | XLOC_174241 | ENSRNOT00000081966 | 1            | 1.33E-79 |
| TUCP_003964 | XLOC_174241 | ENSRNOT00000075906 | 1            | 0        |
| TUCP_003964 | XLOC_174241 | ENSRNOT00000088396 | 0.981336994  | 1.73E-08 |
| TUCP_003964 | XLOC_174241 | ENSRNOT00000049259 | 0.965500259  | 3.63E-07 |
| TUCP_003964 | XLOC_174241 | ENSRNOT00000092838 | 0.982579749  | 1.23E-08 |
| TUCP_003964 | XLOC_174241 | ENSRNOT00000093442 | 0.959217317  | 8.30E-07 |
| TUCP_004245 | XLOC_186698 | ENSRNOT00000009811 | 0.963524159  | 4.78E-07 |
| TUCP_004245 | XLOC_186698 | ENSRNOT00000065168 | 0.955515126  | 1.27E-06 |
| TUCP_004245 | XLOC_186698 | ENSRNOT00000005486 | -0.953650861 | 1.56E-06 |
| TUCP_004245 | XLOC_186698 | ENSRNOT00000067554 | 0.976525295  | 5.40E-08 |
| TUCP_004245 | XLOC_186698 | ENSRNOT00000083214 | 0.959328962  | 8.18E-07 |
| TUCP_004245 | XLOC_186698 | ENSRNOT00000082711 | 0.962889676  | 5.21E-07 |
| TUCP_004245 | XLOC_186698 | ENSRNOT00000010784 | 0.976511462  | 5.41E-08 |
| TUCP_004245 | XLOC_186698 | ENSRNOT00000026531 | -0.954006052 | 1.50E-06 |
| TUCP_004245 | XLOC_186698 | ENSRNOT00000029328 | 0.96740788   | 2.74E-07 |
| TUCP_004245 | XLOC_186698 | ENSRNOT00000085619 | 0.951192369  | 2.01E-06 |
| TUCP_004245 | XLOC_186698 | ENSRNOT00000000468 | 0.952995297  | 1.67E-06 |
| TUCP_004245 | XLOC_186698 | ENSRNOT00000077231 | 0.95517817   | 1.32E-06 |
| TUCP_004245 | XLOC_186698 | ENSRNOT00000005839 | 0.971350377  | 1.45E-07 |
| TUCP_004245 | XLOC_186698 | ENSRNOT00000017687 | -0.952078654 | 1.84E-06 |
| TUCP_004245 | XLOC_186698 | ENSRNOT00000000181 | 0.959845607  | 7.68E-07 |
| TUCP_004245 | XLOC_186698 | ENSRNOT00000080443 | 0.95112475   | 2.02E-06 |
| TUCP_004245 | XLOC_186698 | ENSRNOT00000058563 | 0.956290407  | 1.17E-06 |
| TUCP_004245 | XLOC_186698 | ENSRNOT00000023989 | 0.955023957  | 1.34E-06 |
| TUCP_004245 | XLOC_186698 | ENSRNOT00000073559 | 0.959101546  | 8.41E-07 |
| TUCP_004245 | XLOC_186698 | ENSRNOT00000005405 | 0.966409535  | 3.18E-07 |
| TUCP_004245 | XLOC_186698 | ENSRNOT00000047264 | 0.952137532  | 1.82E-06 |
| TUCP_004245 | XLOC_186698 | ENSRNOT00000080577 | 0.967497229  | 2.71E-07 |
| TUCP_004245 | XLOC_186698 | ENSRNOT00000089319 | 0.95157209   | 1.93E-06 |
| TUCP_004245 | XLOC_186698 | ENSRNOT00000009462 | 0.969294578  | 2.04E-07 |
| TUCP_004245 | XLOC_186698 | ENSRNOT00000027012 | 0.951453921  | 1.96E-06 |
| TUCP_004245 | XLOC_186698 | ENSRNOT00000082904 | 0.950012812  | 2.26E-06 |
| TUCP_004245 | XLOC_186698 | ENSRNOT00000078994 | 0.962651675  | 5.38E-07 |
| TUCP_004245 | XLOC_186698 | ENSRNOT00000081725 | 0.9509977    | 2.05E-06 |
| TUCP_004245 | XLOC_186698 | ENSRNOT00000074972 | 0.956581322  | 1.13E-06 |
| TUCP_004245 | XLOC_186698 | ENSRNOT00000057361 | 0.972799714  | 1.12E-07 |
| TUCP_004245 | XLOC_186698 | ENSRNOT00000086706 | 0.966373249  | 3.20E-07 |
| TUCP_004245 | XLOC_186698 | ENSRNOT00000073370 | 0.956859752  | 1.09E-06 |
| TUCP_004245 | XLOC_186698 | ENSRNOT00000004017 | 0.972294541  | 1.23E-07 |
| TUCP_004245 | XLOC_186698 | ENSRNOT00000021114 | 0.972181138  | 1.25E-07 |
| TUCP_004245 | XLOC_186698 | ENSRNOT00000046745 | 0.955676109  | 1.25E-06 |
| TUCP_004245 | XLOC_186698 | ENSRNOT00000055607 | -0.95042129  | 2.17E-06 |
| TUCP_004245 | XLOC_186698 | ENSRNOT00000006340 | 0.951812065  | 1.89E-06 |
| TUCP_004245 | XLOC_186698 | ENSRNOT00000017556 | 0.964819346  | 4.00E-07 |
| TUCP_004245 | XLOC_186698 | ENSRNOT00000080608 | 0.956299875  | 1.17E-06 |
| TUCP_004245 | XLOC_186698 | ENSRNOT00000030850 | 0.951181723  | 2.01E-06 |
| TUCP_004245 | XLOC_186698 | ENSRNOT00000040476 | 0.951059587  | 2.04E-06 |
| TUCP_004245 | XLOC_186698 | ENSRNOT00000002410 | 0.950032794  | 2.26E-06 |
| TUCP_004245 | XLOC_186698 | ENSRNOT00000001893 | 0.978724367  | 3.31E-08 |
| TUCP_004245 | XLOC_186698 | ENSRNOT00000061201 | -0.950091386 | 2.24E-06 |
| TUCP_004245 | XLOC_186698 | ENSRNOT00000013801 | 0.955449956  | 1.28E-06 |

|             |             |                     |              |          |
|-------------|-------------|---------------------|--------------|----------|
| TUCP_004245 | XLOC_186698 | ENSRNOT00000007028  | -0.976952464 | 4.93E-08 |
| TUCP_004245 | XLOC_186698 | ENSRNOT00000000469  | 0.954745667  | 1.39E-06 |
| TUCP_004245 | XLOC_186698 | ENSRNOT00000003265  | 0.957538744  | 1.01E-06 |
| TUCP_004245 | XLOC_186698 | ENSRNOT00000020028  | 0.95161927   | 1.92E-06 |
| TUCP_004245 | XLOC_186698 | ENSRNOT00000015006  | 0.951423348  | 1.96E-06 |
| TUCP_004245 | XLOC_186698 | ENSRNOT000000057562 | 0.9803946    | 2.21E-08 |
| TUCP_004245 | XLOC_186698 | ENSRNOT00000001289  | 0.963103205  | 5.06E-07 |
| TUCP_004245 | XLOC_186698 | ENSRNOT00000072118  | 0.958276089  | 9.28E-07 |
| TUCP_004245 | XLOC_186698 | ENSRNOT00000002109  | 0.958507569  | 9.03E-07 |
| TUCP_004245 | XLOC_186698 | ENSRNOT00000015769  | 0.960570096  | 7.02E-07 |
| TUCP_004245 | XLOC_186698 | ENSRNOT00000022190  | -0.950507165 | 2.15E-06 |
| TUCP_004245 | XLOC_186698 | ENSRNOT00000013049  | 0.950709135  | 2.11E-06 |
| TUCP_004245 | XLOC_186698 | ENSRNOT00000024119  | 0.954280176  | 1.46E-06 |
| TUCP_004245 | XLOC_186698 | ENSRNOT00000019133  | 0.950321885  | 2.19E-06 |
| TUCP_004245 | XLOC_186698 | ENSRNOT00000035277  | 0.951801156  | 1.89E-06 |
| TUCP_004245 | XLOC_186698 | ENSRNOT00000087583  | 0.954807661  | 1.38E-06 |
| TUCP_004245 | XLOC_186698 | ENSRNOT00000074683  | 0.955261074  | 1.31E-06 |
| TUCP_004245 | XLOC_186698 | ENSRNOT00000015223  | 0.951156027  | 2.02E-06 |
| TUCP_004245 | XLOC_186698 | ENSRNOT00000019921  | 0.955763926  | 1.24E-06 |
| TUCP_004245 | XLOC_186698 | ENSRNOT00000022074  | 0.950678389  | 2.12E-06 |
| TUCP_004245 | XLOC_186698 | ENSRNOT00000018122  | 0.951779368  | 1.89E-06 |
| TUCP_004245 | XLOC_186698 | ENSRNOT00000013321  | 0.95207092   | 1.84E-06 |
| TUCP_004245 | XLOC_186698 | ENSRNOT00000015898  | 0.957707433  | 9.92E-07 |
| TUCP_004245 | XLOC_186698 | ENSRNOT00000026312  | 0.962340852  | 5.60E-07 |
| TUCP_004245 | XLOC_186698 | ENSRNOT00000090057  | 0.969255796  | 2.05E-07 |
| TUCP_004245 | XLOC_186698 | ENSRNOT00000010748  | 0.950551518  | 2.14E-06 |
| TUCP_004245 | XLOC_186698 | ENSRNOT00000041365  | 0.952700008  | 1.72E-06 |
| TUCP_004245 | XLOC_186698 | ENSRNOT00000057953  | 0.969073239  | 2.12E-07 |
| TUCP_004245 | XLOC_186698 | ENSRNOT00000086260  | -0.952102969 | 1.83E-06 |
| TUCP_004245 | XLOC_186698 | ENSRNOT00000068381  | 0.960025254  | 7.52E-07 |
| TUCP_004245 | XLOC_186698 | ENSRNOT00000007821  | 0.968062707  | 2.48E-07 |
| TUCP_004245 | XLOC_186698 | ENSRNOT00000063951  | 0.952561976  | 1.75E-06 |
| TUCP_004245 | XLOC_186698 | ENSRNOT00000089933  | 0.951330624  | 1.98E-06 |
| TUCP_004245 | XLOC_186698 | ENSRNOT00000015799  | 0.955417406  | 1.29E-06 |
| TUCP_004534 | XLOC_199820 | ENSRNOT00000027644  | 0.961054087  | 6.61E-07 |
| TUCP_004534 | XLOC_199820 | ENSRNOT00000090621  | -0.957146322 | 1.06E-06 |
| TUCP_004534 | XLOC_199820 | ENSRNOT00000001979  | 0.951233377  | 2.00E-06 |
| TUCP_004534 | XLOC_199820 | ENSRNOT00000067375  | 0.970256801  | 1.74E-07 |
| TUCP_004534 | XLOC_199820 | ENSRNOT00000049349  | -0.975235917 | 7.04E-08 |
| TUCP_004534 | XLOC_199820 | ENSRNOT00000078326  | 0.958989328  | 8.53E-07 |
| TUCP_004534 | XLOC_199820 | ENSRNOT00000010031  | 0.951437218  | 1.96E-06 |
| TUCP_004534 | XLOC_199820 | ENSRNOT00000014063  | 0.968913547  | 2.17E-07 |
| TUCP_004534 | XLOC_199820 | ENSRNOT00000015962  | 0.961529803  | 6.22E-07 |
| TUCP_004534 | XLOC_199820 | ENSRNOT00000052063  | -0.960202237 | 7.35E-07 |
| TUCP_004534 | XLOC_199820 | ENSRNOT00000042459  | 0.961944302  | 5.90E-07 |
| TUCP_004534 | XLOC_199820 | ENSRNOT00000037203  | 0.954958058  | 1.35E-06 |
| TUCP_004534 | XLOC_199820 | ENSRNOT00000087386  | 0.957750403  | 9.87E-07 |
| TUCP_004534 | XLOC_199820 | ENSRNOT00000000618  | 0.968951204  | 2.16E-07 |
| TUCP_004534 | XLOC_199820 | ENSRNOT00000006591  | 0.957505491  | 1.02E-06 |
| TUCP_004534 | XLOC_199820 | ENSRNOT00000018622  | 0.964952966  | 3.93E-07 |
| TUCP_004534 | XLOC_199820 | ENSRNOT00000087075  | 0.964309723  | 4.30E-07 |

|             |             |                     |              |          |
|-------------|-------------|---------------------|--------------|----------|
| TUCP_004534 | XLOC_199820 | ENSRNOT00000022126  | 0.954616358  | 1.40E-06 |
| TUCP_004534 | XLOC_199820 | ENSRNOT00000086559  | 0.9805066    | 2.15E-08 |
| TUCP_004534 | XLOC_199820 | ENSRNOT00000008274  | 0.983700677  | 8.82E-09 |
| TUCP_004534 | XLOC_199820 | ENSRNOT00000045041  | 0.958266871  | 9.29E-07 |
| TUCP_004534 | XLOC_199820 | ENSRNOT00000007588  | 0.953480337  | 1.59E-06 |
| TUCP_004534 | XLOC_199820 | ENSRNOT00000077999  | -0.957518933 | 1.01E-06 |
| TUCP_004534 | XLOC_199820 | ENSRNOT00000001891  | 0.980353964  | 2.23E-08 |
| TUCP_004534 | XLOC_199820 | ENSRNOT00000067626  | 0.9753059    | 6.94E-08 |
| TUCP_004534 | XLOC_199820 | ENSRNOT00000026726  | 0.961937656  | 5.90E-07 |
| TUCP_004534 | XLOC_199820 | ENSRNOT00000056644  | 0.973933649  | 9.07E-08 |
| TUCP_004534 | XLOC_199820 | ENSRNOT00000005686  | 0.956702591  | 1.11E-06 |
| TUCP_004534 | XLOC_199820 | ENSRNOT00000014694  | 0.956282384  | 1.17E-06 |
| TUCP_004534 | XLOC_199820 | ENSRNOT00000017268  | 0.957836217  | 9.78E-07 |
| TUCP_004534 | XLOC_199820 | ENSRNOT00000080418  | 0.955457842  | 1.28E-06 |
| TUCP_004534 | XLOC_199820 | ENSRNOT00000067391  | 0.96418677   | 4.37E-07 |
| TUCP_004534 | XLOC_199820 | ENSRNOT00000090004  | 0.950600981  | 2.13E-06 |
| TUCP_004534 | XLOC_199820 | ENSRNOT00000091368  | 0.967419017  | 2.74E-07 |
| TUCP_004534 | XLOC_199820 | ENSRNOT00000037333  | 0.971418792  | 1.43E-07 |
| TUCP_004534 | XLOC_199820 | ENSRNOT00000029179  | 0.951864923  | 1.88E-06 |
| TUCP_004534 | XLOC_199820 | ENSRNOT00000000469  | -0.965084006 | 3.85E-07 |
| TUCP_004534 | XLOC_199820 | ENSRNOT00000025506  | 0.960142329  | 7.41E-07 |
| TUCP_004534 | XLOC_199820 | ENSRNOT00000006395  | 0.955541054  | 1.27E-06 |
| TUCP_004534 | XLOC_199820 | ENSRNOT00000007326  | 0.960744468  | 6.87E-07 |
| TUCP_004534 | XLOC_199820 | ENSRNOT00000017813  | 0.954464351  | 1.43E-06 |
| TUCP_004534 | XLOC_199820 | ENSRNOT00000000812  | 0.968209399  | 2.42E-07 |
| TUCP_004534 | XLOC_199820 | ENSRNOT00000072357  | 0.959599481  | 7.92E-07 |
| TUCP_004534 | XLOC_199820 | ENSRNOT00000013067  | 0.955652662  | 1.25E-06 |
| TUCP_004534 | XLOC_199820 | ENSRNOT00000074515  | 0.969851062  | 1.86E-07 |
| TUCP_004534 | XLOC_199820 | ENSRNOT000000082627 | 0.972091288  | 1.27E-07 |
| TUCP_004534 | XLOC_199820 | ENSRNOT00000027145  | 0.974279258  | 8.49E-08 |
| TUCP_004534 | XLOC_199820 | ENSRNOT00000002313  | 0.956966136  | 1.08E-06 |
| TUCP_004534 | XLOC_199820 | ENSRNOT00000071494  | 0.956500104  | 1.14E-06 |
| TUCP_004534 | XLOC_199820 | ENSRNOT00000072458  | 0.950453846  | 2.16E-06 |
| TUCP_004534 | XLOC_199820 | ENSRNOT00000044449  | 0.973451291  | 9.93E-08 |
| TUCP_004534 | XLOC_199820 | ENSRNOT00000035513  | 0.99063047   | 5.60E-10 |
| TUCP_004534 | XLOC_199820 | ENSRNOT00000019531  | 0.959809332  | 7.72E-07 |
| TUCP_004534 | XLOC_199820 | ENSRNOT00000065023  | 0.968364111  | 2.37E-07 |
| TUCP_004534 | XLOC_199820 | ENSRNOT00000071929  | 0.965115642  | 3.84E-07 |
| TUCP_004534 | XLOC_199820 | ENSRNOT00000002462  | 0.95271743   | 1.72E-06 |
| TUCP_004534 | XLOC_199820 | ENSRNOT00000027604  | 0.966488618  | 3.15E-07 |
| TUCP_004534 | XLOC_199820 | ENSRNOT00000063875  | 0.95058307   | 2.14E-06 |
| TUCP_004534 | XLOC_199820 | ENSRNOT00000027609  | 0.951866082  | 1.88E-06 |
| TUCP_004534 | XLOC_199820 | ENSRNOT00000003992  | 0.955293488  | 1.30E-06 |
| TUCP_004534 | XLOC_199820 | ENSRNOT00000012767  | -0.96294501  | 5.17E-07 |
| TUCP_004534 | XLOC_199820 | ENSRNOT00000038032  | 0.960505295  | 7.08E-07 |
| TUCP_004534 | XLOC_199820 | ENSRNOT00000077706  | -0.963997837 | 4.48E-07 |
| TUCP_004534 | XLOC_199820 | ENSRNOT00000089980  | 0.953436032  | 1.59E-06 |
| TUCP_004534 | XLOC_199820 | ENSRNOT00000055607  | 0.952415473  | 1.77E-06 |
| TUCP_004534 | XLOC_199820 | ENSRNOT00000089294  | 0.966058477  | 3.35E-07 |
| TUCP_004534 | XLOC_199820 | ENSRNOT00000001631  | 0.978714943  | 3.32E-08 |
| TUCP_004534 | XLOC_199820 | ENSRNOT00000061201  | 0.952641082  | 1.73E-06 |

|             |             |                     |              |          |
|-------------|-------------|---------------------|--------------|----------|
| TUCP_004534 | XLOC_199820 | ENSRNOT00000078793  | -0.968101292 | 2.47E-07 |
| TUCP_004534 | XLOC_199820 | ENSRNOT00000033724  | 0.955709479  | 1.25E-06 |
| TUCP_004534 | XLOC_199820 | ENSRNOT00000024924  | 0.980375321  | 2.22E-08 |
| TUCP_004534 | XLOC_199820 | ENSRNOT00000082108  | 0.97505129   | 7.30E-08 |
| TUCP_004534 | XLOC_199820 | ENSRNOT00000018877  | 0.984827302  | 6.17E-09 |
| TUCP_004534 | XLOC_199820 | ENSRNOT00000025104  | 0.9698523    | 1.86E-07 |
| TUCP_004534 | XLOC_199820 | ENSRNOT00000014384  | 0.964898024  | 3.96E-07 |
| TUCP_004534 | XLOC_199820 | ENSRNOT00000031672  | 0.963622735  | 4.72E-07 |
| TUCP_004534 | XLOC_199820 | ENSRNOT00000086456  | 0.960844504  | 6.79E-07 |
| TUCP_004534 | XLOC_199820 | ENSRNOT00000056145  | 0.954712102  | 1.39E-06 |
| TUCP_004534 | XLOC_199820 | ENSRNOT00000030823  | 0.974974416  | 7.41E-08 |
| TUCP_004534 | XLOC_199820 | ENSRNOT0000001227   | 0.955106527  | 1.33E-06 |
| TUCP_004534 | XLOC_199820 | ENSRNOT00000048933  | 0.950447332  | 2.16E-06 |
| TUCP_004534 | XLOC_199820 | ENSRNOT00000012432  | 0.96221339   | 5.69E-07 |
| TUCP_004534 | XLOC_199820 | ENSRNOT00000076388  | 0.979852015  | 2.53E-08 |
| TUCP_004534 | XLOC_199820 | ENSRNOT00000086147  | 0.975115765  | 7.21E-08 |
| TUCP_004534 | XLOC_199820 | ENSRNOT00000064535  | 0.953781014  | 1.54E-06 |
| TUCP_004534 | XLOC_199820 | ENSRNOT00000018341  | 0.984295195  | 7.33E-09 |
| TUCP_004534 | XLOC_199820 | ENSRNOT00000087033  | 0.973961378  | 9.02E-08 |
| TUCP_004534 | XLOC_199820 | ENSRNOT00000082963  | 0.964173269  | 4.38E-07 |
| TUCP_004534 | XLOC_199820 | ENSRNOT00000072632  | 0.960467187  | 7.12E-07 |
| TUCP_004534 | XLOC_199820 | ENSRNOT00000011556  | 0.952162632  | 1.82E-06 |
| TUCP_004534 | XLOC_199820 | ENSRNOT00000079085  | 0.960195749  | 7.36E-07 |
| TUCP_004534 | XLOC_199820 | ENSRNOT00000038811  | 0.968302727  | 2.39E-07 |
| TUCP_004534 | XLOC_199820 | ENSRNOT00000017995  | -0.956710481 | 1.11E-06 |
| TUCP_004534 | XLOC_199820 | ENSRNOT00000008919  | 0.961702347  | 6.08E-07 |
| TUCP_004534 | XLOC_199820 | ENSRNOT00000021534  | 0.958850834  | 8.67E-07 |
| TUCP_004534 | XLOC_199820 | ENSRNOT00000007917  | 0.980462657  | 2.17E-08 |
| TUCP_004534 | XLOC_199820 | ENSRNOT00000016776  | 0.953993307  | 1.50E-06 |
| TUCP_004534 | XLOC_199820 | ENSRNOT00000034386  | 0.958532199  | 9.01E-07 |
| TUCP_004534 | XLOC_199820 | ENSRNOT00000017955  | 0.961181302  | 6.50E-07 |
| TUCP_004534 | XLOC_199820 | ENSRNOT00000019778  | 0.970761591  | 1.60E-07 |
| TUCP_004534 | XLOC_199820 | ENSRNOT00000048022  | 0.97009839   | 1.79E-07 |
| TUCP_004534 | XLOC_199820 | ENSRNOT00000001597  | 0.955883927  | 1.22E-06 |
| TUCP_004534 | XLOC_199820 | ENSRNOT00000039607  | 0.950081027  | 2.24E-06 |
| TUCP_004534 | XLOC_199820 | ENSRNOT00000082183  | -0.953730236 | 1.55E-06 |
| TUCP_004534 | XLOC_199820 | ENSRNOT00000072069  | 0.96932405   | 2.03E-07 |
| TUCP_004534 | XLOC_199820 | ENSRNOT00000075400  | 0.969649463  | 1.93E-07 |
| TUCP_004534 | XLOC_199820 | ENSRNOT00000009080  | 0.963008546  | 5.13E-07 |
| TUCP_004534 | XLOC_199820 | ENSRNOT00000023320  | 0.955235537  | 1.31E-06 |
| TUCP_004534 | XLOC_199820 | ENSRNOT00000020453  | 0.970204187  | 1.76E-07 |
| TUCP_004534 | XLOC_199820 | ENSRNOT00000075494  | 0.95718693   | 1.05E-06 |
| TUCP_004534 | XLOC_199820 | ENSRNOT00000009564  | 0.963944702  | 4.52E-07 |
| TUCP_004534 | XLOC_199820 | ENSRNOT00000041237  | 0.968899284  | 2.17E-07 |
| TUCP_004534 | XLOC_199820 | ENSRNOT00000023430  | 0.964956912  | 3.92E-07 |
| TUCP_004534 | XLOC_199820 | ENSRNOT00000001859  | 0.982242249  | 1.35E-08 |
| TUCP_004534 | XLOC_199820 | ENSRNOT00000003733  | 0.959193325  | 8.32E-07 |
| TUCP_004534 | XLOC_199820 | ENSRNOT00000021110  | 0.976444837  | 5.49E-08 |
| TUCP_004534 | XLOC_199820 | ENSRNOT000000083864 | 0.963489658  | 4.81E-07 |
| TUCP_004534 | XLOC_199820 | ENSRNOT00000020853  | 0.979661347  | 2.65E-08 |
| TUCP_004534 | XLOC_199820 | ENSRNOT00000001774  | 0.981835264  | 1.51E-08 |

|             |             |                    |              |          |
|-------------|-------------|--------------------|--------------|----------|
| TUCP_004534 | XLOC_199820 | ENSRNOT00000080013 | 0.982871459  | 1.13E-08 |
| TUCP_004534 | XLOC_199820 | ENSRNOT00000013759 | 0.975601066  | 6.54E-08 |
| TUCP_004534 | XLOC_199820 | ENSRNOT00000013613 | 0.973960722  | 9.03E-08 |
| TUCP_004534 | XLOC_199820 | ENSRNOT00000010419 | -0.973580615 | 9.70E-08 |
| TUCP_004534 | XLOC_199820 | ENSRNOT00000027553 | 0.983781732  | 8.60E-09 |
| TUCP_004534 | XLOC_199820 | ENSRNOT00000015476 | 0.954060728  | 1.49E-06 |
| TUCP_004534 | XLOC_199820 | ENSRNOT00000021621 | 0.959462192  | 8.05E-07 |
| TUCP_004534 | XLOC_199820 | ENSRNOT00000022827 | 0.966226599  | 3.27E-07 |
| TUCP_004534 | XLOC_199820 | ENSRNOT00000091808 | 0.977085632  | 4.79E-08 |
| TUCP_004534 | XLOC_199820 | ENSRNOT00000025079 | 0.953321301  | 1.61E-06 |
| TUCP_004534 | XLOC_199820 | ENSRNOT00000077063 | 0.971550786  | 1.40E-07 |
| TUCP_004534 | XLOC_199820 | ENSRNOT00000011432 | 0.971504591  | 1.41E-07 |
| TUCP_004534 | XLOC_199820 | ENSRNOT00000014177 | 0.970742965  | 1.61E-07 |
| TUCP_004534 | XLOC_199820 | ENSRNOT00000007824 | 0.957388126  | 1.03E-06 |
| TUCP_004534 | XLOC_199820 | ENSRNOT00000024677 | -0.953367633 | 1.61E-06 |
| TUCP_004534 | XLOC_199820 | ENSRNOT00000034983 | 0.974257132  | 8.53E-08 |
| TUCP_004534 | XLOC_199820 | ENSRNOT00000020707 | 0.957163689  | 1.06E-06 |
| TUCP_004534 | XLOC_199820 | ENSRNOT00000021937 | 0.972441456  | 1.20E-07 |
| TUCP_004534 | XLOC_199820 | ENSRNOT00000052098 | 0.968100847  | 2.47E-07 |
| TUCP_004534 | XLOC_199820 | ENSRNOT00000072762 | 0.950717435  | 2.11E-06 |
| TUCP_004534 | XLOC_199820 | ENSRNOT00000014211 | 0.971084566  | 1.52E-07 |
| TUCP_004534 | XLOC_199820 | ENSRNOT00000032893 | 0.954114055  | 1.48E-06 |
| TUCP_004534 | XLOC_199820 | ENSRNOT00000008140 | 0.955022226  | 1.34E-06 |
| TUCP_004534 | XLOC_199820 | ENSRNOT00000056079 | 0.960600318  | 7.00E-07 |
| TUCP_004534 | XLOC_199820 | ENSRNOT00000026724 | 0.977785977  | 4.10E-08 |
| TUCP_004534 | XLOC_199820 | ENSRNOT00000085545 | 0.955459003  | 1.28E-06 |
| TUCP_004534 | XLOC_199820 | ENSRNOT00000018028 | 0.95461096   | 1.41E-06 |
| TUCP_004534 | XLOC_199820 | ENSRNOT00000015351 | 0.963894748  | 4.55E-07 |
| TUCP_004534 | XLOC_199820 | ENSRNOT00000004351 | 0.952902272  | 1.69E-06 |
| TUCP_004534 | XLOC_199820 | ENSRNOT00000014502 | 0.961327076  | 6.38E-07 |
| TUCP_004534 | XLOC_199820 | ENSRNOT00000003787 | 0.959904914  | 7.63E-07 |
| TUCP_004534 | XLOC_199820 | ENSRNOT00000005608 | 0.951191169  | 2.01E-06 |
| TUCP_004534 | XLOC_199820 | ENSRNOT00000022343 | 0.9515282    | 1.94E-06 |
| TUCP_004534 | XLOC_199820 | ENSRNOT00000072165 | 0.971236795  | 1.48E-07 |
| TUCP_004534 | XLOC_199820 | ENSRNOT00000008317 | 0.969034721  | 2.13E-07 |
| TUCP_004534 | XLOC_199820 | ENSRNOT00000091541 | 0.970333313  | 1.72E-07 |
| TUCP_004534 | XLOC_199820 | ENSRNOT00000068026 | 0.96709576   | 2.87E-07 |
| TUCP_004534 | XLOC_199820 | ENSRNOT00000056923 | 0.975530415  | 6.63E-08 |
| TUCP_004534 | XLOC_199820 | ENSRNOT00000005996 | 0.959607401  | 7.91E-07 |
| TUCP_004534 | XLOC_199820 | ENSRNOT00000008889 | 0.967958341  | 2.52E-07 |
| TUCP_004534 | XLOC_199820 | ENSRNOT00000017805 | -0.966262576 | 3.25E-07 |
| TUCP_004534 | XLOC_199820 | ENSRNOT00000075057 | 0.966282127  | 3.24E-07 |
| TUCP_004534 | XLOC_199820 | ENSRNOT00000016699 | 0.955217294  | 1.32E-06 |
| TUCP_004534 | XLOC_199820 | ENSRNOT00000017746 | 0.975438776  | 6.76E-08 |
| TUCP_004534 | XLOC_199820 | ENSRNOT00000000552 | 0.954087147  | 1.49E-06 |
| TUCP_004534 | XLOC_199820 | ENSRNOT00000016286 | 0.957631429  | 1.00E-06 |
| TUCP_004534 | XLOC_199820 | ENSRNOT00000050696 | -0.95897127  | 8.55E-07 |
| TUCP_004534 | XLOC_199820 | ENSRNOT00000037946 | 0.966924259  | 2.95E-07 |
| TUCP_004534 | XLOC_199820 | ENSRNOT00000070825 | 0.960416196  | 7.16E-07 |
| TUCP_004534 | XLOC_199820 | ENSRNOT00000038677 | 0.955109588  | 1.33E-06 |
| TUCP_004534 | XLOC_199820 | ENSRNOT00000024753 | 0.975789928  | 6.29E-08 |

|             |             |                    |              |          |
|-------------|-------------|--------------------|--------------|----------|
| TUCP_004534 | XLOC_199820 | ENSRNOT00000070916 | 0.965110606  | 3.84E-07 |
| TUCP_004534 | XLOC_199820 | ENSRNOT00000024452 | 0.958984883  | 8.53E-07 |
| TUCP_004534 | XLOC_199820 | ENSRNOT00000024326 | 0.955150425  | 1.33E-06 |
| TUCP_004534 | XLOC_199820 | ENSRNOT00000024456 | 0.967871461  | 2.55E-07 |
| TUCP_004534 | XLOC_199820 | ENSRNOT00000000253 | 0.961227606  | 6.47E-07 |
| TUCP_004534 | XLOC_199820 | ENSRNOT00000000258 | 0.969365043  | 2.02E-07 |
| TUCP_004534 | XLOC_199820 | ENSRNOT00000067524 | -0.9547643   | 1.38E-06 |
| TUCP_004534 | XLOC_199820 | ENSRNOT00000002511 | 0.981327085  | 1.73E-08 |
| TUCP_004534 | XLOC_199820 | ENSRNOT00000012017 | 0.954671578  | 1.40E-06 |
| TUCP_004534 | XLOC_199820 | ENSRNOT00000020417 | 0.95232717   | 1.79E-06 |
| TUCP_004534 | XLOC_199820 | ENSRNOT00000021677 | 0.960490256  | 7.10E-07 |
| TUCP_004534 | XLOC_199820 | ENSRNOT00000006804 | -0.955970741 | 1.21E-06 |
| TUCP_004534 | XLOC_199820 | ENSRNOT00000020809 | 0.972187322  | 1.25E-07 |
| TUCP_004534 | XLOC_199820 | ENSRNOT00000001605 | 0.977944622  | 3.96E-08 |
| TUCP_004534 | XLOC_199820 | ENSRNOT00000003359 | 0.951723978  | 1.90E-06 |
| TUCP_004534 | XLOC_199820 | ENSRNOT00000038511 | 0.959200927  | 8.31E-07 |
| TUCP_004534 | XLOC_199820 | ENSRNOT00000019044 | 0.951804225  | 1.89E-06 |
| TUCP_004534 | XLOC_199820 | ENSRNOT00000020982 | 0.961621544  | 6.15E-07 |
| TUCP_004534 | XLOC_199820 | ENSRNOT00000086847 | 0.954992875  | 1.35E-06 |
| TUCP_004534 | XLOC_199820 | ENSRNOT00000018846 | 0.96477857   | 4.02E-07 |
| TUCP_004534 | XLOC_199820 | ENSRNOT00000025086 | 0.963852073  | 4.57E-07 |
| TUCP_004534 | XLOC_199820 | ENSRNOT00000028876 | 0.959858881  | 7.67E-07 |
| TUCP_004534 | XLOC_199820 | ENSRNOT00000079784 | 0.977023345  | 4.85E-08 |
| TUCP_004534 | XLOC_199820 | ENSRNOT00000013553 | -0.951469997 | 1.95E-06 |
| TUCP_004534 | XLOC_199820 | ENSRNOT00000011694 | 0.968772028  | 2.22E-07 |
| TUCP_004534 | XLOC_199820 | ENSRNOT00000002851 | 0.959740213  | 7.78E-07 |
| TUCP_004534 | XLOC_199820 | ENSRNOT00000068184 | 0.976885302  | 5.00E-08 |
| TUCP_004534 | XLOC_199820 | ENSRNOT00000031692 | 0.975594731  | 6.55E-08 |
| TUCP_004534 | XLOC_199820 | ENSRNOT00000089016 | 0.984566572  | 6.72E-09 |
| TUCP_004534 | XLOC_199820 | ENSRNOT00000022864 | 0.962874467  | 5.22E-07 |
| TUCP_004534 | XLOC_199820 | ENSRNOT00000006578 | 0.967047399  | 2.90E-07 |
| TUCP_004534 | XLOC_199820 | ENSRNOT00000028900 | 0.967016449  | 2.91E-07 |
| TUCP_004534 | XLOC_199820 | ENSRNOT00000072890 | 0.950309593  | 2.19E-06 |
| TUCP_004534 | XLOC_199820 | ENSRNOT00000087556 | 0.980894825  | 1.94E-08 |
| TUCP_004534 | XLOC_199820 | ENSRNOT00000029753 | 0.961481669  | 6.26E-07 |
| TUCP_004534 | XLOC_199820 | ENSRNOT00000040981 | 0.967270502  | 2.80E-07 |
| TUCP_004534 | XLOC_199820 | ENSRNOT00000056725 | 0.950206473  | 2.22E-06 |
| TUCP_004534 | XLOC_199820 | ENSRNOT00000010630 | -0.950237118 | 2.21E-06 |
| TUCP_004534 | XLOC_199820 | ENSRNOT00000038464 | 0.96331294   | 4.92E-07 |
| TUCP_004534 | XLOC_199820 | ENSRNOT00000008359 | 0.965532238  | 3.62E-07 |
| TUCP_004534 | XLOC_199820 | ENSRNOT00000039291 | 0.964486843  | 4.19E-07 |
| TUCP_004534 | XLOC_199820 | ENSRNOT00000035486 | 0.965806893  | 3.48E-07 |
| TUCP_004534 | XLOC_199820 | ENSRNOT00000080174 | 0.965723661  | 3.52E-07 |
| TUCP_004534 | XLOC_199820 | ENSRNOT00000011237 | 0.95985888   | 7.67E-07 |
| TUCP_004534 | XLOC_199820 | ENSRNOT00000013341 | 0.956497251  | 1.14E-06 |
| TUCP_004534 | XLOC_199820 | ENSRNOT00000013344 | 0.957977697  | 9.62E-07 |
| TUCP_004534 | XLOC_199820 | ENSRNOT00000015759 | 0.962567825  | 5.43E-07 |
| TUCP_004534 | XLOC_199820 | ENSRNOT00000030501 | 0.970900785  | 1.56E-07 |
| TUCP_004534 | XLOC_199820 | ENSRNOT00000017204 | 0.973683369  | 9.51E-08 |
| TUCP_004534 | XLOC_199820 | ENSRNOT00000008772 | 0.95360947   | 1.57E-06 |
| TUCP_004534 | XLOC_199820 | ENSRNOT00000005658 | 0.957389449  | 1.03E-06 |

|             |             |                     |              |          |
|-------------|-------------|---------------------|--------------|----------|
| TUCP_004534 | XLOC_199820 | ENSRNOT00000009275  | 0.96713294   | 2.86E-07 |
| TUCP_004534 | XLOC_199820 | ENSRNOT00000022086  | 0.964709628  | 4.06E-07 |
| TUCP_004534 | XLOC_199820 | ENSRNOT00000024714  | 0.967131183  | 2.86E-07 |
| TUCP_004534 | XLOC_199820 | ENSRNOT00000024712  | 0.956241171  | 1.17E-06 |
| TUCP_004534 | XLOC_199820 | ENSRNOT00000017384  | -0.956970295 | 1.08E-06 |
| TUCP_004534 | XLOC_199820 | ENSRNOT000000081787 | 0.960460048  | 7.12E-07 |
| TUCP_004534 | XLOC_199820 | ENSRNOT00000000203  | 0.965737047  | 3.51E-07 |
| TUCP_004534 | XLOC_199820 | ENSRNOT00000002799  | 0.961942466  | 5.90E-07 |
| TUCP_004534 | XLOC_199820 | ENSRNOT00000054685  | -0.950214769 | 2.21E-06 |
| TUCP_004534 | XLOC_199820 | ENSRNOT00000024882  | 0.964147585  | 4.39E-07 |
| TUCP_004534 | XLOC_199820 | ENSRNOT00000023456  | 0.971820096  | 1.33E-07 |
| TUCP_004534 | XLOC_199820 | ENSRNOT00000016012  | 0.975510155  | 6.66E-08 |
| TUCP_004534 | XLOC_199820 | ENSRNOT00000002334  | 0.950481816  | 2.16E-06 |
| TUCP_004534 | XLOC_199820 | ENSRNOT00000013587  | 0.964957169  | 3.92E-07 |
| TUCP_004534 | XLOC_199820 | ENSRNOT000000089545 | 0.954526958  | 1.42E-06 |
| TUCP_004534 | XLOC_199820 | ENSRNOT00000003728  | 0.963946916  | 4.52E-07 |
| TUCP_004534 | XLOC_199820 | ENSRNOT00000019040  | 0.968943102  | 2.16E-07 |
| TUCP_004534 | XLOC_199820 | ENSRNOT000000035400 | 0.977204951  | 4.67E-08 |
| TUCP_004534 | XLOC_199820 | ENSRNOT00000015460  | 0.959491864  | 8.02E-07 |
| TUCP_004534 | XLOC_199820 | ENSRNOT00000003667  | 0.970407765  | 1.70E-07 |
| TUCP_004534 | XLOC_199820 | ENSRNOT000000077727 | 0.963398552  | 4.86E-07 |
| TUCP_004534 | XLOC_199820 | ENSRNOT000000082124 | 0.969961057  | 1.83E-07 |
| TUCP_004534 | XLOC_199820 | ENSRNOT00000025036  | 0.985534573  | 4.87E-09 |
| TUCP_004534 | XLOC_199820 | ENSRNOT00000020197  | 0.960069091  | 7.48E-07 |
| TUCP_004534 | XLOC_199820 | ENSRNOT000000070886 | 0.975221495  | 7.06E-08 |
| TUCP_004534 | XLOC_199820 | ENSRNOT00000014044  | 0.962628332  | 5.39E-07 |
| TUCP_004534 | XLOC_199820 | ENSRNOT000000090156 | 0.952015603  | 1.85E-06 |
| TUCP_004534 | XLOC_199820 | ENSRNOT000000066521 | 0.963674651  | 4.69E-07 |
| TUCP_004534 | XLOC_199820 | ENSRNOT000000003544 | 0.95533585   | 1.30E-06 |
| TUCP_004534 | XLOC_199820 | ENSRNOT000000006306 | 0.958972484  | 8.54E-07 |
| TUCP_004534 | XLOC_199820 | ENSRNOT000000004196 | -0.974157946 | 8.69E-08 |
| TUCP_004534 | XLOC_199820 | ENSRNOT00000007882  | 0.97239193   | 1.21E-07 |
| TUCP_004534 | XLOC_199820 | ENSRNOT000000006946 | 0.973620539  | 9.62E-08 |
| TUCP_004534 | XLOC_199820 | ENSRNOT000000086576 | 0.97193235   | 1.31E-07 |
| TUCP_004534 | XLOC_199820 | ENSRNOT000000089611 | -0.952763186 | 1.71E-06 |
| TUCP_004534 | XLOC_199820 | ENSRNOT000000039012 | 0.968762144  | 2.22E-07 |
| TUCP_004534 | XLOC_199820 | ENSRNOT00000023854  | 0.958906927  | 8.61E-07 |
| TUCP_004534 | XLOC_199820 | ENSRNOT000000008253 | 0.952022009  | 1.85E-06 |
| TUCP_004534 | XLOC_199820 | ENSRNOT000000082894 | 0.959717215  | 7.81E-07 |
| TUCP_004534 | XLOC_199820 | ENSRNOT00000025824  | 0.95411626   | 1.48E-06 |
| TUCP_004534 | XLOC_199820 | ENSRNOT000000039593 | 0.951680971  | 1.91E-06 |
| TUCP_004534 | XLOC_199820 | ENSRNOT00000022676  | 0.958596605  | 8.94E-07 |
| TUCP_004534 | XLOC_199820 | ENSRNOT000000083983 | 0.96982548   | 1.87E-07 |
| TUCP_004534 | XLOC_199820 | ENSRNOT000000007549 | 0.970848192  | 1.58E-07 |
| TUCP_004534 | XLOC_199820 | ENSRNOT00000017626  | 0.967112579  | 2.87E-07 |
| TUCP_004534 | XLOC_199820 | ENSRNOT000000076485 | 0.958097977  | 9.48E-07 |
| TUCP_004534 | XLOC_199820 | ENSRNOT00000022774  | 0.972316214  | 1.22E-07 |
| TUCP_004534 | XLOC_199820 | ENSRNOT00000025134  | 0.977300347  | 4.57E-08 |
| TUCP_004534 | XLOC_199820 | ENSRNOT000000087359 | -0.963536945 | 4.77E-07 |
| TUCP_004534 | XLOC_199820 | ENSRNOT00000014586  | 0.970866124  | 1.57E-07 |
| TUCP_004534 | XLOC_199820 | ENSRNOT00000072580  | 0.965796782  | 3.48E-07 |

|             |             |                    |              |          |
|-------------|-------------|--------------------|--------------|----------|
| TUCP_004534 | XLOC_199820 | ENSRNOT00000014832 | 0.959697857  | 7.83E-07 |
| TUCP_004534 | XLOC_199820 | ENSRNOT00000089879 | 0.963156001  | 5.03E-07 |
| TUCP_004534 | XLOC_199820 | ENSRNOT00000018473 | 0.966336976  | 3.22E-07 |
| TUCP_004534 | XLOC_199820 | ENSRNOT00000026118 | 0.972796466  | 1.12E-07 |
| TUCP_004534 | XLOC_199820 | ENSRNOT00000037955 | 0.953562216  | 1.57E-06 |
| TUCP_004534 | XLOC_199820 | ENSRNOT00000017765 | -0.952216884 | 1.81E-06 |
| TUCP_004534 | XLOC_199820 | ENSRNOT00000017339 | 0.97519412   | 7.10E-08 |
| TUCP_004534 | XLOC_199820 | ENSRNOT00000088752 | 0.95411323   | 1.48E-06 |
| TUCP_004534 | XLOC_199820 | ENSRNOT00000050617 | 0.950703702  | 2.11E-06 |
| TUCP_004534 | XLOC_199820 | ENSRNOT00000015297 | 0.95243368   | 1.77E-06 |
| TUCP_004534 | XLOC_199820 | ENSRNOT00000050227 | 0.968439225  | 2.34E-07 |
| TUCP_004534 | XLOC_199820 | ENSRNOT00000093552 | 0.968965758  | 2.15E-07 |
| TUCP_004534 | XLOC_199820 | ENSRNOT00000025791 | 0.960160993  | 7.39E-07 |
| TUCP_004534 | XLOC_199820 | ENSRNOT00000088884 | 0.956523831  | 1.14E-06 |
| TUCP_004534 | XLOC_199820 | ENSRNOT00000075544 | 0.964515477  | 4.17E-07 |
| TUCP_004534 | XLOC_199820 | ENSRNOT00000009994 | 0.956366126  | 1.16E-06 |
| TUCP_004534 | XLOC_199820 | ENSRNOT00000077367 | 0.956072419  | 1.20E-06 |
| TUCP_004534 | XLOC_199820 | ENSRNOT00000038994 | 0.961131429  | 6.54E-07 |
| TUCP_004534 | XLOC_199820 | ENSRNOT00000024841 | 0.965501392  | 3.63E-07 |
| TUCP_004534 | XLOC_199820 | ENSRNOT00000020409 | 0.953339363  | 1.61E-06 |
| TUCP_004534 | XLOC_199820 | ENSRNOT00000009345 | 0.97536019   | 6.86E-08 |
| TUCP_004534 | XLOC_199820 | ENSRNOT00000009468 | 0.965799629  | 3.48E-07 |
| TUCP_004534 | XLOC_199820 | ENSRNOT00000048529 | 0.975281816  | 6.97E-08 |
| TUCP_004534 | XLOC_199820 | ENSRNOT00000000124 | 0.96412265   | 4.41E-07 |
| TUCP_004534 | XLOC_199820 | ENSRNOT00000043581 | 0.976181555  | 5.80E-08 |
| TUCP_004534 | XLOC_199820 | ENSRNOT00000064636 | 0.959808834  | 7.72E-07 |
| TUCP_004534 | XLOC_199820 | ENSRNOT00000078906 | 0.950823356  | 2.09E-06 |
| TUCP_004534 | XLOC_199820 | ENSRNOT00000013733 | 0.973581836  | 9.69E-08 |
| TUCP_004534 | XLOC_199820 | ENSRNOT00000066561 | 0.9778417    | 4.05E-08 |
| TUCP_004534 | XLOC_199820 | ENSRNOT00000004094 | 0.954702328  | 1.39E-06 |
| TUCP_004534 | XLOC_199820 | ENSRNOT00000006266 | 0.97286918   | 1.11E-07 |
| TUCP_004534 | XLOC_199820 | ENSRNOT00000020909 | 0.959696113  | 7.83E-07 |
| TUCP_004534 | XLOC_199820 | ENSRNOT00000016376 | 0.969594763  | 1.94E-07 |
| TUCP_004534 | XLOC_199820 | ENSRNOT00000011511 | 0.973393275  | 1.00E-07 |
| TUCP_004534 | XLOC_199820 | ENSRNOT00000065722 | 0.966717     | 3.04E-07 |
| TUCP_004534 | XLOC_199820 | ENSRNOT00000065642 | 0.973501643  | 9.84E-08 |
| TUCP_004534 | XLOC_199820 | ENSRNOT00000036195 | 0.970574326  | 1.65E-07 |
| TUCP_004534 | XLOC_199820 | ENSRNOT00000009763 | 0.955438263  | 1.28E-06 |
| TUCP_004534 | XLOC_199820 | ENSRNOT00000031291 | 0.962456043  | 5.52E-07 |
| TUCP_004534 | XLOC_199820 | ENSRNOT00000074586 | 0.964096025  | 4.42E-07 |
| TUCP_004534 | XLOC_199820 | ENSRNOT00000057758 | 0.974845355  | 7.60E-08 |
| TUCP_004534 | XLOC_199820 | ENSRNOT00000022637 | 0.961339989  | 6.37E-07 |
| TUCP_004534 | XLOC_199820 | ENSRNOT00000004241 | 0.950176563  | 2.22E-06 |
| TUCP_004534 | XLOC_199820 | ENSRNOT00000003087 | -0.951384812 | 1.97E-06 |
| TUCP_004534 | XLOC_199820 | ENSRNOT00000083666 | 0.958682871  | 8.85E-07 |
| TUCP_004534 | XLOC_199820 | ENSRNOT00000019358 | 0.978423748  | 3.55E-08 |
| TUCP_004534 | XLOC_199820 | ENSRNOT00000087011 | 0.978924199  | 3.16E-08 |
| TUCP_004534 | XLOC_199820 | ENSRNOT00000084567 | -0.95691167  | 1.09E-06 |
| TUCP_004534 | XLOC_199820 | ENSRNOT00000005286 | 0.975597685  | 6.54E-08 |
| TUCP_004534 | XLOC_199820 | ENSRNOT00000056675 | 0.962129937  | 5.76E-07 |
| TUCP_004534 | XLOC_199820 | ENSRNOT00000013295 | 0.983928933  | 8.22E-09 |



|             |             |                    |              |          |
|-------------|-------------|--------------------|--------------|----------|
| TUCP_004534 | XLOC_199820 | ENSRNOT00000066947 | 0.951542369  | 1.94E-06 |
| TUCP_004534 | XLOC_199820 | ENSRNOT00000021455 | 0.959709917  | 7.81E-07 |
| TUCP_004534 | XLOC_199820 | ENSRNOT00000039177 | 0.962636681  | 5.39E-07 |
| TUCP_004534 | XLOC_199820 | ENSRNOT00000076191 | 0.960945278  | 6.70E-07 |
| TUCP_004534 | XLOC_199820 | ENSRNOT00000013228 | -0.956903556 | 1.09E-06 |
| TUCP_004534 | XLOC_199820 | ENSRNOT00000017784 | 0.978874792  | 3.20E-08 |
| TUCP_004534 | XLOC_199820 | ENSRNOT00000018405 | 0.973712887  | 9.46E-08 |
| TUCP_004534 | XLOC_199820 | ENSRNOT00000021458 | 0.958700568  | 8.83E-07 |
| TUCP_004534 | XLOC_199820 | ENSRNOT00000026496 | 0.95410913   | 1.48E-06 |
| TUCP_004534 | XLOC_199820 | ENSRNOT00000082739 | 0.95889884   | 8.62E-07 |
| TUCP_004534 | XLOC_199820 | ENSRNOT00000026552 | 0.957573713  | 1.01E-06 |
| TUCP_004534 | XLOC_199820 | ENSRNOT00000065045 | -0.963394157 | 4.87E-07 |
| TUCP_004534 | XLOC_199820 | ENSRNOT00000023463 | 0.985047451  | 5.74E-09 |
| TUCP_004534 | XLOC_199820 | ENSRNOT00000034266 | 0.972041685  | 1.28E-07 |
| TUCP_004534 | XLOC_199820 | ENSRNOT00000028781 | -0.960909371 | 6.73E-07 |
| TUCP_004534 | XLOC_199820 | ENSRNOT00000046490 | 0.984734684  | 6.36E-09 |
| TUCP_004534 | XLOC_199820 | ENSRNOT00000001973 | 0.967164192  | 2.84E-07 |
| TUCP_004534 | XLOC_199820 | ENSRNOT00000046552 | -0.960011499 | 7.53E-07 |
| TUCP_004534 | XLOC_199820 | ENSRNOT00000024775 | 0.950396349  | 2.18E-06 |
| TUCP_004534 | XLOC_199820 | ENSRNOT00000024801 | 0.982539846  | 1.24E-08 |
| TUCP_004534 | XLOC_199820 | ENSRNOT00000009544 | 0.951201249  | 2.01E-06 |
| TUCP_004534 | XLOC_199820 | ENSRNOT00000054957 | 0.965488729  | 3.64E-07 |
| TUCP_004534 | XLOC_199820 | ENSRNOT00000079011 | 0.962630408  | 5.39E-07 |
| TUCP_004534 | XLOC_199820 | ENSRNOT00000041808 | 0.966942036  | 2.94E-07 |
| TUCP_004534 | XLOC_199820 | ENSRNOT00000021134 | 0.973357272  | 1.01E-07 |
| TUCP_004534 | XLOC_199820 | ENSRNOT00000013571 | 0.959342376  | 8.17E-07 |
| TUCP_004534 | XLOC_199820 | ENSRNOT00000014002 | 0.959698803  | 7.82E-07 |
| TUCP_004534 | XLOC_199820 | ENSRNOT00000034669 | 0.961758976  | 6.04E-07 |
| TUCP_004534 | XLOC_199820 | ENSRNOT00000077784 | 0.954727725  | 1.39E-06 |
| TUCP_004534 | XLOC_199820 | ENSRNOT00000011898 | 0.960588379  | 7.01E-07 |
| TUCP_004534 | XLOC_199820 | ENSRNOT00000011952 | 0.958253183  | 9.31E-07 |
| TUCP_004534 | XLOC_199820 | ENSRNOT00000016324 | 0.967589278  | 2.67E-07 |
| TUCP_004534 | XLOC_199820 | ENSRNOT00000006824 | 0.96619891   | 3.28E-07 |
| TUCP_004534 | XLOC_199820 | ENSRNOT00000012775 | 0.963654606  | 4.70E-07 |
| TUCP_004534 | XLOC_199820 | ENSRNOT00000077040 | 0.97752254   | 4.35E-08 |
| TUCP_004534 | XLOC_199820 | ENSRNOT00000086260 | 0.953534774  | 1.58E-06 |
| TUCP_004534 | XLOC_199820 | ENSRNOT00000066793 | 0.956707419  | 1.11E-06 |
| TUCP_004534 | XLOC_199820 | ENSRNOT00000001153 | -0.953703388 | 1.55E-06 |
| TUCP_004534 | XLOC_199820 | ENSRNOT00000025517 | -0.95210267  | 1.83E-06 |
| TUCP_004534 | XLOC_199820 | ENSRNOT00000073193 | 0.960165732  | 7.39E-07 |
| TUCP_004534 | XLOC_199820 | ENSRNOT00000020316 | 0.965133286  | 3.83E-07 |
| TUCP_004534 | XLOC_199820 | ENSRNOT00000006709 | 0.972120995  | 1.27E-07 |
| TUCP_004534 | XLOC_199820 | ENSRNOT00000029704 | 0.967168741  | 2.84E-07 |
| TUCP_004534 | XLOC_199820 | ENSRNOT00000012495 | 0.955970676  | 1.21E-06 |
| TUCP_004534 | XLOC_199820 | ENSRNOT00000019816 | 0.957539429  | 1.01E-06 |
| TUCP_004534 | XLOC_199820 | ENSRNOT00000025221 | 0.981480794  | 1.66E-08 |
| TUCP_004534 | XLOC_199820 | ENSRNOT00000025634 | 0.967610509  | 2.66E-07 |
| TUCP_004534 | XLOC_199820 | ENSRNOT00000026909 | 0.951276806  | 1.99E-06 |
| TUCP_004534 | XLOC_199820 | ENSRNOT00000008244 | -0.950877354 | 2.07E-06 |
| TUCP_004534 | XLOC_199820 | ENSRNOT00000066120 | 0.964764129  | 4.03E-07 |
| TUCP_004534 | XLOC_199820 | ENSRNOT00000077730 | 0.977384367  | 4.49E-08 |

|             |             |                    |              |          |
|-------------|-------------|--------------------|--------------|----------|
| TUCP_004534 | XLOC_199820 | ENSRNOT0000000717  | 0.970958427  | 1.55E-07 |
| TUCP_004534 | XLOC_199820 | ENSRNOT00000049048 | 0.978677419  | 3.35E-08 |
| TUCP_004534 | XLOC_199820 | ENSRNOT00000004370 | 0.956782996  | 1.10E-06 |
| TUCP_004534 | XLOC_199820 | ENSRNOT00000014235 | -0.952045571 | 1.84E-06 |
| TUCP_004534 | XLOC_199820 | ENSRNOT00000030222 | 0.980939808  | 1.92E-08 |
| TUCP_004534 | XLOC_199820 | ENSRNOT00000089066 | -0.954702162 | 1.39E-06 |
| TUCP_004534 | XLOC_199820 | ENSRNOT00000072722 | 0.959338726  | 8.18E-07 |
| TUCP_004534 | XLOC_199820 | ENSRNOT00000080216 | 0.982162009  | 1.38E-08 |
| TUCP_004534 | XLOC_199820 | ENSRNOT00000003551 | 0.963009442  | 5.13E-07 |
| TUCP_004534 | XLOC_199820 | ENSRNOT00000027187 | 0.954977907  | 1.35E-06 |
| TUCP_004534 | XLOC_199820 | ENSRNOT00000005155 | -0.973050427 | 1.07E-07 |
| TUCP_004534 | XLOC_199820 | ENSRNOT00000023543 | 0.966732365  | 3.03E-07 |
| TUCP_004534 | XLOC_199820 | ENSRNOT00000023014 | -0.954232564 | 1.46E-06 |
| TUCP_004534 | XLOC_199820 | ENSRNOT00000028737 | 0.95720356   | 1.05E-06 |
| TUCP_004534 | XLOC_199820 | ENSRNOT00000018634 | 0.950551147  | 2.14E-06 |
| TUCP_004534 | XLOC_199820 | ENSRNOT00000017618 | 0.957744679  | 9.88E-07 |
| TUCP_004534 | XLOC_199820 | ENSRNOT00000085458 | 0.978424701  | 3.55E-08 |
| TUCP_004534 | XLOC_199820 | ENSRNOT00000039572 | 0.96655726   | 3.11E-07 |
| TUCP_004534 | XLOC_199820 | ENSRNOT00000038652 | 0.957506581  | 1.02E-06 |
| TUCP_004534 | XLOC_199820 | ENSRNOT00000013535 | 0.981366718  | 1.71E-08 |
| TUCP_004534 | XLOC_199820 | ENSRNOT00000066199 | 0.961658178  | 6.12E-07 |
| TUCP_004534 | XLOC_199820 | ENSRNOT00000026767 | -0.960632293 | 6.97E-07 |
| TUCP_004534 | XLOC_199820 | ENSRNOT00000047698 | 0.950733216  | 2.10E-06 |
| TUCP_004534 | XLOC_199820 | ENSRNOT00000075630 | 0.973958643  | 9.03E-08 |
| TUCP_004534 | XLOC_199820 | ENSRNOT00000024938 | 0.977568953  | 4.31E-08 |
| TUCP_004534 | XLOC_199820 | ENSRNOT00000081678 | -0.952740023 | 1.71E-06 |
| TUCP_004534 | XLOC_199820 | ENSRNOT00000046639 | -0.959904768 | 7.63E-07 |
| TUCP_004534 | XLOC_199820 | ENSRNOT00000011320 | 0.978809513  | 3.25E-08 |
| TUCP_003963 | XLOC_174241 | ENSRNOT00000000109 | 0.965194097  | 3.79E-07 |
| TUCP_003963 | XLOC_174241 | ENSRNOT00000054858 | 0.950193055  | 2.22E-06 |
| TUCP_004240 | XLOC_186273 | ENSRNOT00000039045 | 0.964368475  | 4.26E-07 |
| TUCP_004240 | XLOC_186273 | ENSRNOT00000076052 | 0.950964045  | 2.06E-06 |
| TUCP_004240 | XLOC_186273 | ENSRNOT00000024281 | 0.971411288  | 1.43E-07 |
| TUCP_004240 | XLOC_186273 | ENSRNOT00000010588 | 0.955716597  | 1.24E-06 |
| TUCP_004240 | XLOC_186273 | ENSRNOT00000030991 | 0.953572215  | 1.57E-06 |
| TUCP_003961 | XLOC_173614 | ENSRNOT00000061493 | -0.954450722 | 1.43E-06 |
| TUCP_001865 | XLOC_077400 | ENSRNOT00000091652 | 0.987801248  | 2.08E-09 |
| TUCP_001865 | XLOC_077400 | ENSRNOT00000036564 | 0.991033026  | 4.50E-10 |
| TUCP_001865 | XLOC_077400 | ENSRNOT00000000109 | 0.950148452  | 2.23E-06 |
| TUCP_001865 | XLOC_077400 | ENSRNOT00000080865 | 0.99123585   | 4.01E-10 |
| TUCP_001865 | XLOC_077400 | ENSRNOT00000073534 | 0.983828155  | 8.48E-09 |
| TUCP_001865 | XLOC_077400 | ENSRNOT00000012161 | 0.982865915  | 1.13E-08 |
| TUCP_001865 | XLOC_077400 | ENSRNOT00000087758 | 0.972055179  | 1.28E-07 |
| TUCP_001865 | XLOC_077400 | ENSRNOT00000049832 | 0.967430745  | 2.73E-07 |
| TUCP_001865 | XLOC_077400 | ENSRNOT00000093019 | 0.99123585   | 4.01E-10 |
| TUCP_001865 | XLOC_077400 | ENSRNOT00000024825 | 0.964917902  | 3.95E-07 |
| TUCP_001865 | XLOC_077400 | ENSRNOT00000072734 | 0.951480411  | 1.95E-06 |
| TUCP_001865 | XLOC_077400 | ENSRNOT00000085908 | 0.985038962  | 5.76E-09 |
| TUCP_001865 | XLOC_077400 | ENSRNOT00000046744 | 0.99123585   | 4.01E-10 |
| TUCP_001865 | XLOC_077400 | ENSRNOT00000076429 | 0.99123585   | 4.01E-10 |
| TUCP_001865 | XLOC_077400 | ENSRNOT00000084667 | 0.99252912   | 1.81E-10 |

|             |             |                    |              |          |
|-------------|-------------|--------------------|--------------|----------|
| TUCP_001865 | XLOC_077400 | ENSRNOT00000055412 | 0.99123585   | 4.01E-10 |
| TUCP_001865 | XLOC_077400 | ENSRNOT00000093201 | 0.990370949  | 6.41E-10 |
| TUCP_001865 | XLOC_077400 | ENSRNOT00000072724 | 0.99123585   | 4.01E-10 |
| TUCP_001865 | XLOC_077400 | ENSRNOT00000066017 | 0.97696124   | 4.92E-08 |
| TUCP_001865 | XLOC_077400 | ENSRNOT00000082760 | 0.975469777  | 6.71E-08 |
| TUCP_001865 | XLOC_077400 | ENSRNOT00000073148 | 0.972084157  | 1.27E-07 |
| TUCP_001865 | XLOC_077400 | ENSRNOT00000054858 | 0.974331941  | 8.41E-08 |
| TUCP_001865 | XLOC_077400 | ENSRNOT00000084375 | 0.99123585   | 4.01E-10 |
| TUCP_001865 | XLOC_077400 | ENSRNOT00000006249 | 0.952858674  | 1.69E-06 |
| TUCP_001865 | XLOC_077400 | ENSRNOT00000042369 | 0.984666827  | 6.51E-09 |
| TUCP_001865 | XLOC_077400 | ENSRNOT00000059326 | 0.952656293  | 1.73E-06 |
| TUCP_001865 | XLOC_077400 | ENSRNOT00000086554 | 0.99123585   | 4.01E-10 |
| TUCP_001865 | XLOC_077400 | ENSRNOT00000047921 | 0.99123585   | 4.01E-10 |
| TUCP_001865 | XLOC_077400 | ENSRNOT00000064261 | 0.991033514  | 4.50E-10 |
| TUCP_001865 | XLOC_077400 | ENSRNOT00000086660 | 0.988879228  | 1.31E-09 |
| TUCP_001865 | XLOC_077400 | ENSRNOT00000083977 | 0.99123585   | 4.01E-10 |
| TUCP_001865 | XLOC_077400 | ENSRNOT00000092933 | 0.99123585   | 4.01E-10 |
| TUCP_001865 | XLOC_077400 | ENSRNOT00000085447 | 0.992277476  | 2.14E-10 |
| TUCP_001865 | XLOC_077400 | ENSRNOT00000041281 | 0.974925171  | 7.49E-08 |
| TUCP_003219 | XLOC_138410 | ENSRNOT00000020297 | 0.963430388  | 4.84E-07 |
| TUCP_003219 | XLOC_138410 | ENSRNOT00000006188 | -0.955167486 | 1.32E-06 |
| TUCP_003219 | XLOC_138410 | ENSRNOT00000090621 | 0.965309056  | 3.73E-07 |
| TUCP_003219 | XLOC_138410 | ENSRNOT00000016088 | 0.951387974  | 1.97E-06 |
| TUCP_003219 | XLOC_138410 | ENSRNOT00000090946 | 0.95892649   | 8.59E-07 |
| TUCP_003219 | XLOC_138410 | ENSRNOT00000075397 | 0.958319055  | 9.24E-07 |
| TUCP_003219 | XLOC_138410 | ENSRNOT00000008253 | -0.961679211 | 6.10E-07 |
| TUCP_003219 | XLOC_138410 | ENSRNOT00000085954 | 0.951815244  | 1.89E-06 |
| TUCP_003219 | XLOC_138410 | ENSRNOT00000032926 | -0.970757611 | 1.60E-07 |
| TUCP_003219 | XLOC_138410 | ENSRNOT00000009080 | -0.958294009 | 9.26E-07 |
| TUCP_003219 | XLOC_138410 | ENSRNOT00000038780 | 0.96559346   | 3.58E-07 |
| TUCP_003219 | XLOC_138410 | ENSRNOT00000063930 | -0.96697488  | 2.93E-07 |
| TUCP_003219 | XLOC_138410 | ENSRNOT00000000181 | 0.952281286  | 1.80E-06 |
| TUCP_003219 | XLOC_138410 | ENSRNOT00000003087 | 0.951908213  | 1.87E-06 |
| TUCP_003219 | XLOC_138410 | ENSRNOT00000068353 | 0.957077188  | 1.07E-06 |
| TUCP_003219 | XLOC_138410 | ENSRNOT00000049349 | 0.95863266   | 8.90E-07 |
| TUCP_003219 | XLOC_138410 | ENSRNOT00000013025 | -0.952903759 | 1.69E-06 |
| TUCP_003219 | XLOC_138410 | ENSRNOT00000089319 | 0.958675651  | 8.85E-07 |
| TUCP_003219 | XLOC_138410 | ENSRNOT00000020910 | 0.958033795  | 9.55E-07 |
| TUCP_003219 | XLOC_138410 | ENSRNOT00000087011 | -0.950200828 | 2.22E-06 |
| TUCP_003219 | XLOC_138410 | ENSRNOT00000022086 | -0.955619432 | 1.26E-06 |
| TUCP_003219 | XLOC_138410 | ENSRNOT00000057422 | -0.961660566 | 6.12E-07 |
| TUCP_003219 | XLOC_138410 | ENSRNOT00000036051 | 0.952672901  | 1.73E-06 |
| TUCP_003219 | XLOC_138410 | ENSRNOT00000064776 | -0.957060061 | 1.07E-06 |
| TUCP_003219 | XLOC_138410 | ENSRNOT00000004391 | 0.969933128  | 1.84E-07 |
| TUCP_003219 | XLOC_138410 | ENSRNOT00000074023 | 0.970049257  | 1.81E-07 |
| TUCP_003219 | XLOC_138410 | ENSRNOT00000031692 | -0.96038175  | 7.19E-07 |
| TUCP_003219 | XLOC_138410 | ENSRNOT00000019180 | -0.97643064  | 5.51E-08 |
| TUCP_003219 | XLOC_138410 | ENSRNOT00000024710 | -0.953535967 | 1.58E-06 |
| TUCP_003219 | XLOC_138410 | ENSRNOT00000042459 | -0.954318756 | 1.45E-06 |
| TUCP_003219 | XLOC_138410 | ENSRNOT00000072069 | -0.952310344 | 1.79E-06 |
| TUCP_003219 | XLOC_138410 | ENSRNOT00000013759 | -0.953021362 | 1.67E-06 |

|             |             |                     |              |          |
|-------------|-------------|---------------------|--------------|----------|
| TUCP_003219 | XLOC_138410 | ENSRNOT00000018341  | -0.95613729  | 1.19E-06 |
| TUCP_003219 | XLOC_138410 | ENSRNOT00000010419  | 0.960402451  | 7.17E-07 |
| TUCP_003219 | XLOC_138410 | ENSRNOT00000021534  | -0.950708149 | 2.11E-06 |
| TUCP_003219 | XLOC_138410 | ENSRNOT00000054685  | 0.961387108  | 6.34E-07 |
| TUCP_003219 | XLOC_138410 | ENSRNOT00000022746  | -0.981598915 | 1.61E-08 |
| TUCP_003219 | XLOC_138410 | ENSRNOT00000016306  | -0.959211225 | 8.30E-07 |
| TUCP_003219 | XLOC_138410 | ENSRNOT00000087604  | 0.96103844   | 6.62E-07 |
| TUCP_003219 | XLOC_138410 | ENSRNOT00000079742  | 0.9541011    | 1.49E-06 |
| TUCP_003219 | XLOC_138410 | ENSRNOT00000004722  | -0.951154785 | 2.02E-06 |
| TUCP_003219 | XLOC_138410 | ENSRNOT00000065978  | 0.957747906  | 9.88E-07 |
| TUCP_003219 | XLOC_138410 | ENSRNOT00000075480  | -0.95955175  | 7.97E-07 |
| TUCP_003219 | XLOC_138410 | ENSRNOT00000005620  | -0.968412944 | 2.35E-07 |
| TUCP_003219 | XLOC_138410 | ENSRNOT00000020051  | 0.953772278  | 1.54E-06 |
| TUCP_003219 | XLOC_138410 | ENSRNOT00000064643  | 0.959349242  | 8.16E-07 |
| TUCP_003219 | XLOC_138410 | ENSRNOT00000027760  | 0.975720611  | 6.38E-08 |
| TUCP_003219 | XLOC_138410 | ENSRNOT00000020681  | -0.952925806 | 1.68E-06 |
| TUCP_003219 | XLOC_138410 | ENSRNOT00000042903  | 0.963862934  | 4.57E-07 |
| TUCP_003219 | XLOC_138410 | ENSRNOT00000089933  | 0.954540495  | 1.42E-06 |
| TUCP_003219 | XLOC_138410 | ENSRNOT00000056100  | -0.951343789 | 1.98E-06 |
| TUCP_003219 | XLOC_138410 | ENSRNOT00000000477  | -0.954055667 | 1.49E-06 |
| TUCP_003219 | XLOC_138410 | ENSRNOT00000060002  | -0.95944616  | 8.07E-07 |
| TUCP_003219 | XLOC_138410 | ENSRNOT00000081226  | 0.95578734   | 1.24E-06 |
| TUCP_003219 | XLOC_138410 | ENSRNOT00000017648  | -0.951370709 | 1.97E-06 |
| TUCP_003219 | XLOC_138410 | ENSRNOT00000065045  | 0.951994711  | 1.85E-06 |
| TUCP_003219 | XLOC_138410 | ENSRNOT00000030798  | -0.956045261 | 1.20E-06 |
| TUCP_003219 | XLOC_138410 | ENSRNOT00000007369  | 0.952283517  | 1.80E-06 |
| TUCP_003219 | XLOC_138410 | ENSRNOT00000018634  | -0.975333302 | 6.90E-08 |
| TUCP_003219 | XLOC_138410 | ENSRNOT00000000383  | -0.959036277 | 8.48E-07 |
| TUCP_003219 | XLOC_138410 | ENSRNOT000000031701 | -0.962473943 | 5.50E-07 |
| TUCP_003219 | XLOC_138410 | ENSRNOT000000072849 | -0.954502148 | 1.42E-06 |
| TUCP_003219 | XLOC_138410 | ENSRNOT000000073643 | -0.953918037 | 1.51E-06 |
| TUCP_003219 | XLOC_138410 | ENSRNOT000000078349 | -0.953529629 | 1.58E-06 |
| TUCP_003219 | XLOC_138410 | ENSRNOT00000003940  | -0.955879993 | 1.22E-06 |
| TUCP_003219 | XLOC_138410 | ENSRNOT000000024947 | -0.97381933  | 9.27E-08 |
| TUCP_003219 | XLOC_138410 | ENSRNOT00000046552  | 0.955476084  | 1.28E-06 |
| TUCP_003219 | XLOC_138410 | ENSRNOT00000077727  | -0.95294643  | 1.68E-06 |
| TUCP_003219 | XLOC_138410 | ENSRNOT00000011930  | 0.960621059  | 6.98E-07 |
| TUCP_003219 | XLOC_138410 | ENSRNOT00000067391  | -0.955505357 | 1.27E-06 |
| TUCP_003219 | XLOC_138410 | ENSRNOT00000037333  | -0.953516318 | 1.58E-06 |
| TUCP_003219 | XLOC_138410 | ENSRNOT000000029179 | -0.961452012 | 6.28E-07 |
| TUCP_003219 | XLOC_138410 | ENSRNOT00000090156  | -0.958437988 | 9.11E-07 |
| TUCP_003219 | XLOC_138410 | ENSRNOT00000085545  | -0.962479911 | 5.50E-07 |
| TUCP_003219 | XLOC_138410 | ENSRNOT00000019302  | -0.967513255 | 2.70E-07 |
| TUCP_003219 | XLOC_138410 | ENSRNOT00000025856  | -0.953357092 | 1.61E-06 |
| TUCP_003219 | XLOC_138410 | ENSRNOT00000083344  | 0.952115505  | 1.83E-06 |
| TUCP_003219 | XLOC_138410 | ENSRNOT00000082627  | -0.963742951 | 4.64E-07 |
| TUCP_003219 | XLOC_138410 | ENSRNOT00000003544  | -0.953218436 | 1.63E-06 |
| TUCP_003219 | XLOC_138410 | ENSRNOT00000011082  | -0.959083385 | 8.43E-07 |
| TUCP_003219 | XLOC_138410 | ENSRNOT00000087748  | -0.960249458 | 7.31E-07 |
| TUCP_003219 | XLOC_138410 | ENSRNOT00000085334  | 0.967295792  | 2.79E-07 |
| TUCP_003219 | XLOC_138410 | ENSRNOT00000014506  | -0.96390394  | 4.54E-07 |

|             |             |                    |              |          |
|-------------|-------------|--------------------|--------------|----------|
| TUCP_003219 | XLOC_138410 | ENSRNOT00000023262 | -0.971760078 | 1.35E-07 |
| TUCP_003219 | XLOC_138410 | ENSRNOT00000013067 | -0.958814814 | 8.71E-07 |
| TUCP_003219 | XLOC_138410 | ENSRNOT00000004351 | -0.980469247 | 2.17E-08 |
| TUCP_003219 | XLOC_138410 | ENSRNOT00000078185 | -0.962399689 | 5.56E-07 |
| TUCP_003219 | XLOC_138410 | ENSRNOT00000036658 | -0.967630609 | 2.65E-07 |
| TUCP_003219 | XLOC_138410 | ENSRNOT00000089611 | 0.96853677   | 2.30E-07 |
| TUCP_003219 | XLOC_138410 | ENSRNOT00000086260 | -0.960554658 | 7.04E-07 |
| TUCP_003219 | XLOC_138410 | ENSRNOT00000008772 | -0.970015028 | 1.82E-07 |
| TUCP_003219 | XLOC_138410 | ENSRNOT00000066098 | -0.953348483 | 1.61E-06 |
| TUCP_003219 | XLOC_138410 | ENSRNOT00000068026 | -0.973319004 | 1.02E-07 |
| TUCP_003219 | XLOC_138410 | ENSRNOT00000029701 | 0.984555643  | 6.74E-09 |
| TUCP_003219 | XLOC_138410 | ENSRNOT00000074586 | -0.9548037   | 1.38E-06 |
| TUCP_003219 | XLOC_138410 | ENSRNOT00000058382 | 0.956384526  | 1.16E-06 |
| TUCP_003219 | XLOC_138410 | ENSRNOT00000064983 | 0.95044489   | 2.17E-06 |
| TUCP_003219 | XLOC_138410 | ENSRNOT00000026531 | -0.965457095 | 3.65E-07 |
| TUCP_003219 | XLOC_138410 | ENSRNOT00000035605 | 0.951681732  | 1.91E-06 |
| TUCP_003219 | XLOC_138410 | ENSRNOT00000020316 | -0.950042407 | 2.25E-06 |
| TUCP_003219 | XLOC_138410 | ENSRNOT00000017746 | -0.958891082 | 8.63E-07 |
| TUCP_003219 | XLOC_138410 | ENSRNOT00000018153 | -0.960674065 | 6.93E-07 |
| TUCP_003219 | XLOC_138410 | ENSRNOT00000028290 | -0.957700583 | 9.93E-07 |
| TUCP_003219 | XLOC_138410 | ENSRNOT00000017626 | -0.954215858 | 1.47E-06 |
| TUCP_003219 | XLOC_138410 | ENSRNOT00000003106 | -0.950980212 | 2.05E-06 |
| TUCP_003219 | XLOC_138410 | ENSRNOT00000017291 | -0.959994096 | 7.55E-07 |
| TUCP_003219 | XLOC_138410 | ENSRNOT00000015476 | -0.962071691 | 5.80E-07 |
| TUCP_003219 | XLOC_138410 | ENSRNOT00000071897 | -0.951582005 | 1.93E-06 |
| TUCP_003219 | XLOC_138410 | ENSRNOT00000066923 | -0.968720371 | 2.24E-07 |
| TUCP_003219 | XLOC_138410 | ENSRNOT00000040169 | 0.966861189  | 2.98E-07 |
| TUCP_003219 | XLOC_138410 | ENSRNOT00000005343 | -0.951418986 | 1.96E-06 |
| TUCP_003219 | XLOC_138410 | ENSRNOT00000009327 | -0.960421636 | 7.16E-07 |
| TUCP_003219 | XLOC_138410 | ENSRNOT00000015518 | -0.962030916 | 5.83E-07 |
| TUCP_003219 | XLOC_138410 | ENSRNOT00000012216 | -0.964388185 | 4.25E-07 |
| TUCP_003219 | XLOC_138410 | ENSRNOT00000055602 | -0.96177982  | 6.02E-07 |
| TUCP_003219 | XLOC_138410 | ENSRNOT00000037015 | 0.96858911   | 2.28E-07 |
| TUCP_003219 | XLOC_138410 | ENSRNOT00000008074 | -0.962972655 | 5.15E-07 |
| TUCP_003219 | XLOC_138410 | ENSRNOT00000024452 | -0.958192266 | 9.38E-07 |
| TUCP_003219 | XLOC_138410 | ENSRNOT00000008244 | 0.95017021   | 2.22E-06 |
| TUCP_003219 | XLOC_138410 | ENSRNOT00000015139 | -0.950430075 | 2.17E-06 |
| TUCP_003219 | XLOC_138410 | ENSRNOT00000061201 | -0.958358076 | 9.19E-07 |
| TUCP_003219 | XLOC_138410 | ENSRNOT00000002187 | -0.952425854 | 1.77E-06 |
| TUCP_003219 | XLOC_138410 | ENSRNOT00000066952 | 0.972431382  | 1.20E-07 |
| TUCP_003219 | XLOC_138410 | ENSRNOT00000011130 | -0.963144539 | 5.03E-07 |
| TUCP_003219 | XLOC_138410 | ENSRNOT00000007882 | -0.952767045 | 1.71E-06 |
| TUCP_003219 | XLOC_138410 | ENSRNOT00000049285 | -0.951196002 | 2.01E-06 |
| TUCP_003219 | XLOC_138410 | ENSRNOT00000015239 | -0.957316197 | 1.04E-06 |
| TUCP_003219 | XLOC_138410 | ENSRNOT00000077146 | -0.954839733 | 1.37E-06 |
| TUCP_003219 | XLOC_138410 | ENSRNOT00000087329 | -0.972408125 | 1.20E-07 |
| TUCP_003219 | XLOC_138410 | ENSRNOT00000013463 | 0.95366542   | 1.56E-06 |
| TUCP_003219 | XLOC_138410 | ENSRNOT00000039177 | -0.95085835  | 2.08E-06 |
| TUCP_003219 | XLOC_138410 | ENSRNOT00000089673 | -0.954589501 | 1.41E-06 |
| TUCP_003219 | XLOC_138410 | ENSRNOT00000057953 | 0.955122933  | 1.33E-06 |
| TUCP_003219 | XLOC_138410 | ENSRNOT00000029704 | -0.956869728 | 1.09E-06 |

|             |             |                    |              |          |
|-------------|-------------|--------------------|--------------|----------|
| TUCP_003219 | XLOC_138410 | ENSRNOT00000075209 | -0.952929598 | 1.68E-06 |
| TUCP_003219 | XLOC_138410 | ENSRNOT00000057738 | 0.982747385  | 1.17E-08 |
| TUCP_003219 | XLOC_138410 | ENSRNOT00000025966 | 0.950005381  | 2.26E-06 |
| TUCP_003219 | XLOC_138410 | ENSRNOT00000009202 | 0.969658211  | 1.92E-07 |
| TUCP_003219 | XLOC_138410 | ENSRNOT00000066133 | -0.950911685 | 2.07E-06 |
| TUCP_003219 | XLOC_138410 | ENSRNOT00000010993 | 0.957027978  | 1.07E-06 |
| TUCP_003219 | XLOC_138410 | ENSRNOT00000075630 | -0.951165137 | 2.01E-06 |
| TUCP_003219 | XLOC_138410 | ENSRNOT00000012432 | -0.951640158 | 1.92E-06 |
| TUCP_003219 | XLOC_138410 | ENSRNOT00000080216 | -0.951910819 | 1.87E-06 |
| TUCP_003219 | XLOC_138410 | ENSRNOT00000035385 | 0.954150536  | 1.48E-06 |
| TUCP_003219 | XLOC_138410 | ENSRNOT00000005873 | -0.979790782 | 2.57E-08 |
| TUCP_003219 | XLOC_138410 | ENSRNOT00000014924 | -0.955666585 | 1.25E-06 |
| TUCP_003219 | XLOC_138410 | ENSRNOT00000023543 | -0.955208625 | 1.32E-06 |
| TUCP_003219 | XLOC_138410 | ENSRNOT00000065897 | 0.952694956  | 1.72E-06 |
| TUCP_003219 | XLOC_138410 | ENSRNOT00000002114 | -0.954693658 | 1.39E-06 |
| TUCP_003219 | XLOC_138410 | ENSRNOT00000028737 | -0.953258417 | 1.62E-06 |
| TUCP_003219 | XLOC_138410 | ENSRNOT00000035145 | -0.960330702 | 7.24E-07 |
| TUCP_003219 | XLOC_138410 | ENSRNOT00000085295 | -0.965082762 | 3.85E-07 |
| TUCP_003219 | XLOC_138410 | ENSRNOT00000015537 | 0.953114532  | 1.65E-06 |
| TUCP_003219 | XLOC_138410 | ENSRNOT00000023014 | 0.965386902  | 3.69E-07 |
| TUCP_003219 | XLOC_138410 | ENSRNOT00000002445 | -0.952017147 | 1.85E-06 |
| TUCP_003219 | XLOC_138410 | ENSRNOT00000023965 | -0.957753482 | 9.87E-07 |
| TUCP_003219 | XLOC_138410 | ENSRNOT00000000120 | 0.96135124   | 6.36E-07 |
| TUCP_003219 | XLOC_138410 | ENSRNOT00000074150 | 0.950704018  | 2.11E-06 |
| TUCP_003219 | XLOC_138410 | ENSRNOT00000093672 | -0.957953497 | 9.64E-07 |
| TUCP_003219 | XLOC_138410 | ENSRNOT00000060698 | -0.953773577 | 1.54E-06 |
| TUCP_003219 | XLOC_138410 | ENSRNOT00000026760 | -0.954452129 | 1.43E-06 |
| TUCP_003219 | XLOC_138410 | ENSRNOT00000075800 | -0.970859959 | 1.58E-07 |
| TUCP_003219 | XLOC_138410 | ENSRNOT00000082709 | -0.959441643 | 8.07E-07 |
| TUCP_003219 | XLOC_138410 | ENSRNOT00000015495 | -0.951300163 | 1.99E-06 |
| TUCP_003219 | XLOC_138410 | ENSRNOT00000017998 | 0.951234009  | 2.00E-06 |
| TUCP_003219 | XLOC_138410 | ENSRNOT00000016568 | 0.972593505  | 1.16E-07 |
| TUCP_003219 | XLOC_138410 | ENSRNOT00000027360 | -0.950143272 | 2.23E-06 |
| TUCP_003219 | XLOC_138410 | ENSRNOT00000013431 | -0.951559606 | 1.94E-06 |
| TUCP_003219 | XLOC_138410 | ENSRNOT00000082904 | 0.956937645  | 1.08E-06 |
| TUCP_003219 | XLOC_138410 | ENSRNOT00000015223 | 0.955401118  | 1.29E-06 |
| TUCP_003219 | XLOC_138410 | ENSRNOT00000088679 | -0.958174397 | 9.40E-07 |
| TUCP_003219 | XLOC_138410 | ENSRNOT00000051494 | 0.976145777  | 5.84E-08 |
| TUCP_003219 | XLOC_138410 | ENSRNOT00000080410 | -0.950040744 | 2.25E-06 |
| TUCP_003219 | XLOC_138410 | ENSRNOT00000027967 | 0.959434292  | 8.08E-07 |
| TUCP_003219 | XLOC_138410 | ENSRNOT00000025705 | 0.955254965  | 1.31E-06 |
| TUCP_003219 | XLOC_138410 | ENSRNOT00000021030 | -0.951949605 | 1.86E-06 |
| TUCP_003219 | XLOC_138410 | ENSRNOT00000088073 | -0.957035183 | 1.07E-06 |
| TUCP_003219 | XLOC_138410 | ENSRNOT00000008113 | -0.950897845 | 2.07E-06 |
| TUCP_001861 | XLOC_077321 | ENSRNOT00000085599 | 0.982429661  | 1.28E-08 |
| TUCP_001861 | XLOC_077321 | ENSRNOT00000006689 | 0.974407935  | 8.28E-08 |
| TUCP_001861 | XLOC_077321 | ENSRNOT00000081534 | 0.980161392  | 2.34E-08 |
| TUCP_001861 | XLOC_077321 | ENSRNOT00000085301 | 0.98002468   | 2.42E-08 |
| TUCP_001861 | XLOC_077321 | ENSRNOT00000038729 | 0.982795166  | 1.15E-08 |
| TUCP_001861 | XLOC_077321 | ENSRNOT00000086385 | 0.982795166  | 1.15E-08 |
| TUCP_001861 | XLOC_077321 | ENSRNOT00000078561 | 0.96616209   | 3.30E-07 |

|             |             |                    |             |          |
|-------------|-------------|--------------------|-------------|----------|
| TUCP_001861 | XLOC_077321 | ENSRNOT00000087613 | 0.982795166 | 1.15E-08 |
| TUCP_001861 | XLOC_077321 | ENSRNOT00000073350 | 0.967528886 | 2.69E-07 |
| TUCP_001861 | XLOC_077321 | ENSRNOT00000023062 | 0.982795166 | 1.15E-08 |
| TUCP_001861 | XLOC_077321 | ENSRNOT00000058834 | 0.982795166 | 1.15E-08 |
| TUCP_001861 | XLOC_077321 | ENSRNOT00000079420 | 0.982795166 | 1.15E-08 |
| TUCP_001861 | XLOC_077321 | ENSRNOT00000090761 | 0.982795166 | 1.15E-08 |
| TUCP_001861 | XLOC_077321 | ENSRNOT00000055923 | 0.982795166 | 1.15E-08 |
| TUCP_001861 | XLOC_077321 | ENSRNOT00000015840 | 0.966635582 | 3.08E-07 |
| TUCP_001861 | XLOC_077321 | ENSRNOT00000071930 | 0.982795166 | 1.15E-08 |
| TUCP_001861 | XLOC_077321 | ENSRNOT00000001996 | 0.973131253 | 1.05E-07 |
| TUCP_001861 | XLOC_077321 | ENSRNOT00000076756 | 0.982795166 | 1.15E-08 |
| TUCP_001861 | XLOC_077321 | ENSRNOT00000081527 | 0.981289264 | 1.75E-08 |
| TUCP_001861 | XLOC_077321 | ENSRNOT00000085067 | 0.964389244 | 4.25E-07 |
| TUCP_001861 | XLOC_077321 | ENSRNOT00000091663 | 0.975843555 | 6.22E-08 |
| TUCP_001861 | XLOC_077321 | ENSRNOT00000081780 | 0.982795166 | 1.15E-08 |
| TUCP_001861 | XLOC_077321 | ENSRNOT00000089114 | 0.982795166 | 1.15E-08 |
| TUCP_001861 | XLOC_077321 | ENSRNOT00000021609 | 0.954345024 | 1.45E-06 |
| TUCP_001861 | XLOC_077321 | ENSRNOT00000072402 | 0.973994864 | 8.97E-08 |
| TUCP_001861 | XLOC_077321 | ENSRNOT00000073316 | 0.982795166 | 1.15E-08 |
| TUCP_001861 | XLOC_077321 | ENSRNOT00000014498 | 0.968496189 | 2.32E-07 |
| TUCP_001861 | XLOC_077321 | ENSRNOT00000083296 | 0.958849301 | 8.67E-07 |
| TUCP_001861 | XLOC_077321 | ENSRNOT00000071663 | 0.982795166 | 1.15E-08 |
| TUCP_001861 | XLOC_077321 | ENSRNOT00000042860 | 0.982795166 | 1.15E-08 |
| TUCP_001861 | XLOC_077321 | ENSRNOT00000088421 | 0.982795166 | 1.15E-08 |
| TUCP_001861 | XLOC_077321 | ENSRNOT00000038898 | 0.982795166 | 1.15E-08 |
| TUCP_001861 | XLOC_077321 | ENSRNOT00000064936 | 0.964400664 | 4.24E-07 |
| TUCP_001861 | XLOC_077321 | ENSRNOT00000042777 | 0.969844454 | 1.87E-07 |
| TUCP_001861 | XLOC_077321 | ENSRNOT00000010029 | 0.982795166 | 1.15E-08 |
| TUCP_001860 | XLOC_077315 | ENSRNOT00000085599 | 0.999938502 | 6.93E-21 |
| TUCP_001860 | XLOC_077315 | ENSRNOT00000006689 | 0.9944189   | 4.22E-11 |
| TUCP_001860 | XLOC_077315 | ENSRNOT00000081534 | 0.987999291 | 1.92E-09 |
| TUCP_001860 | XLOC_077315 | ENSRNOT00000085301 | 0.99793679  | 2.93E-13 |
| TUCP_001860 | XLOC_077315 | ENSRNOT00000038729 | 1           | 1.33E-79 |
| TUCP_001860 | XLOC_077315 | ENSRNOT00000086385 | 1           | 1.33E-79 |
| TUCP_001860 | XLOC_077315 | ENSRNOT00000077695 | 0.96038616  | 7.19E-07 |
| TUCP_001860 | XLOC_077315 | ENSRNOT00000078561 | 0.986503348 | 3.45E-09 |
| TUCP_001860 | XLOC_077315 | ENSRNOT00000087613 | 1           | 0        |
| TUCP_001860 | XLOC_077315 | ENSRNOT00000026032 | 0.953050675 | 1.66E-06 |
| TUCP_001860 | XLOC_077315 | ENSRNOT00000073350 | 0.9658754   | 3.44E-07 |
| TUCP_001860 | XLOC_077315 | ENSRNOT00000023062 | 1           | 1.33E-79 |
| TUCP_001860 | XLOC_077315 | ENSRNOT00000058834 | 1           | 0        |
| TUCP_001860 | XLOC_077315 | ENSRNOT00000079420 | 1           | 0        |
| TUCP_001860 | XLOC_077315 | ENSRNOT00000090761 | 1           | 0        |
| TUCP_001860 | XLOC_077315 | ENSRNOT00000055923 | 1           | 0        |
| TUCP_001860 | XLOC_077315 | ENSRNOT00000092416 | 0.963085379 | 5.07E-07 |
| TUCP_001860 | XLOC_077315 | ENSRNOT00000071930 | 1           | 0        |
| TUCP_001860 | XLOC_077315 | ENSRNOT00000001996 | 0.974721715 | 7.79E-08 |
| TUCP_001860 | XLOC_077315 | ENSRNOT00000076756 | 1           | 0        |
| TUCP_001860 | XLOC_077315 | ENSRNOT00000081527 | 0.999420479 | 5.14E-16 |
| TUCP_001860 | XLOC_077315 | ENSRNOT00000085067 | 0.960262084 | 7.30E-07 |
| TUCP_001860 | XLOC_077315 | ENSRNOT00000091663 | 0.99642667  | 4.56E-12 |

|             |             |                    |              |          |
|-------------|-------------|--------------------|--------------|----------|
| TUCP_001860 | XLOC_077315 | ENSRNOT00000081780 | 1            | 0        |
| TUCP_001860 | XLOC_077315 | ENSRNOT00000093689 | 0.953599805  | 1.57E-06 |
| TUCP_001860 | XLOC_077315 | ENSRNOT00000089114 | 1            | 0        |
| TUCP_001860 | XLOC_077315 | ENSRNOT00000021609 | 0.977017895  | 4.86E-08 |
| TUCP_001860 | XLOC_077315 | ENSRNOT00000073316 | 1            | 0        |
| TUCP_001860 | XLOC_077315 | ENSRNOT00000086557 | 0.977413455  | 4.46E-08 |
| TUCP_001860 | XLOC_077315 | ENSRNOT00000071663 | 1            | 0        |
| TUCP_001860 | XLOC_077315 | ENSRNOT00000042860 | 1            | 1.33E-79 |
| TUCP_001860 | XLOC_077315 | ENSRNOT00000072962 | 0.971287317  | 1.46E-07 |
| TUCP_001860 | XLOC_077315 | ENSRNOT00000088421 | 1            | 0        |
| TUCP_001860 | XLOC_077315 | ENSRNOT00000038898 | 1            | 0        |
| TUCP_001860 | XLOC_077315 | ENSRNOT00000015840 | 0.959452012  | 8.06E-07 |
| TUCP_001860 | XLOC_077315 | ENSRNOT00000064936 | 0.985957557  | 4.20E-09 |
| TUCP_001860 | XLOC_077315 | ENSRNOT00000042777 | 0.990642579  | 5.56E-10 |
| TUCP_001860 | XLOC_077315 | ENSRNOT00000010029 | 1            | 0        |
| TUCP_004249 | XLOC_186698 | ENSRNOT00000005958 | 0.96821316   | 2.42E-07 |
| TUCP_004249 | XLOC_186698 | ENSRNOT00000000743 | 0.963279304  | 4.94E-07 |
| TUCP_004249 | XLOC_186698 | ENSRNOT00000027083 | 0.953499378  | 1.58E-06 |
| TUCP_004249 | XLOC_186698 | ENSRNOT00000021348 | 0.956261682  | 1.17E-06 |
| TUCP_004249 | XLOC_186698 | ENSRNOT00000066041 | -0.950482033 | 2.16E-06 |
| TUCP_004249 | XLOC_186698 | ENSRNOT00000023133 | 0.960744594  | 6.87E-07 |
| TUCP_004249 | XLOC_186698 | ENSRNOT00000073559 | 0.960901588  | 6.74E-07 |
| TUCP_004249 | XLOC_186698 | ENSRNOT00000001855 | 0.96038561   | 7.19E-07 |
| TUCP_004249 | XLOC_186698 | ENSRNOT00000023638 | 0.967216059  | 2.82E-07 |
| TUCP_004249 | XLOC_186698 | ENSRNOT00000005228 | 0.951354271  | 1.98E-06 |
| TUCP_004249 | XLOC_186698 | ENSRNOT00000006175 | 0.960220265  | 7.34E-07 |
| TUCP_004249 | XLOC_186698 | ENSRNOT00000023144 | 0.984037159  | 7.95E-09 |
| TUCP_004249 | XLOC_186698 | ENSRNOT00000082869 | 0.959953231  | 7.58E-07 |
| TUCP_004249 | XLOC_186698 | ENSRNOT00000016649 | 0.960520411  | 7.07E-07 |
| TUCP_004249 | XLOC_186698 | ENSRNOT00000026941 | 0.957102371  | 1.06E-06 |
| TUCP_004249 | XLOC_186698 | ENSRNOT00000016975 | 0.955176279  | 1.32E-06 |
| TUCP_004249 | XLOC_186698 | ENSRNOT00000091128 | -0.957112147 | 1.06E-06 |
| TUCP_004249 | XLOC_186698 | ENSRNOT00000081981 | 0.966577388  | 3.11E-07 |
| TUCP_004249 | XLOC_186698 | ENSRNOT00000033017 | 0.982820996  | 1.14E-08 |
| TUCP_004249 | XLOC_186698 | ENSRNOT00000026543 | 0.978080587  | 3.84E-08 |
| TUCP_004249 | XLOC_186698 | ENSRNOT00000012187 | 0.96131534   | 6.39E-07 |
| TUCP_004249 | XLOC_186698 | ENSRNOT00000066810 | 0.95390906   | 1.52E-06 |
| TUCP_004249 | XLOC_186698 | ENSRNOT00000024969 | 0.973292033  | 1.02E-07 |
| TUCP_004249 | XLOC_186698 | ENSRNOT00000067400 | 0.963825195  | 4.59E-07 |
| TUCP_004249 | XLOC_186698 | ENSRNOT00000013049 | 0.956576793  | 1.13E-06 |
| TUCP_004249 | XLOC_186698 | ENSRNOT00000060943 | 0.953619106  | 1.56E-06 |
| TUCP_004249 | XLOC_186698 | ENSRNOT00000025075 | 0.963996417  | 4.48E-07 |
| TUCP_004249 | XLOC_186698 | ENSRNOT00000035989 | 0.952967212  | 1.67E-06 |
| TUCP_004249 | XLOC_186698 | ENSRNOT00000057160 | 0.971810486  | 1.34E-07 |
| TUCP_004249 | XLOC_186698 | ENSRNOT00000024402 | 0.966263545  | 3.25E-07 |
| TUCP_004249 | XLOC_186698 | ENSRNOT00000089933 | 0.971759361  | 1.35E-07 |
| TUCP_004249 | XLOC_186698 | ENSRNOT00000009811 | 0.967642654  | 2.65E-07 |
| TUCP_004249 | XLOC_186698 | ENSRNOT00000065168 | 0.967919196  | 2.54E-07 |
| TUCP_004249 | XLOC_186698 | ENSRNOT00000085228 | 0.955587029  | 1.26E-06 |
| TUCP_004249 | XLOC_186698 | ENSRNOT00000020134 | 0.961699016  | 6.09E-07 |
| TUCP_004249 | XLOC_186698 | ENSRNOT00000077231 | 0.950990417  | 2.05E-06 |



|             |             |                    |              |          |
|-------------|-------------|--------------------|--------------|----------|
| TUCP_004249 | XLOC_186698 | ENSRNOT00000017021 | 0.950923796  | 2.06E-06 |
| TUCP_004249 | XLOC_186698 | ENSRNOT00000061392 | 0.955167037  | 1.32E-06 |
| TUCP_004249 | XLOC_186698 | ENSRNOT00000002410 | 0.958839645  | 8.68E-07 |
| TUCP_004249 | XLOC_186698 | ENSRNOT00000008655 | 0.953422409  | 1.60E-06 |
| TUCP_004249 | XLOC_186698 | ENSRNOT00000088054 | 0.962016006  | 5.84E-07 |
| TUCP_004249 | XLOC_186698 | ENSRNOT00000041044 | 0.971241552  | 1.48E-07 |
| TUCP_004249 | XLOC_186698 | ENSRNOT00000010541 | 0.969614177  | 1.94E-07 |
| TUCP_004249 | XLOC_186698 | ENSRNOT00000047192 | -0.975797722 | 6.28E-08 |
| TUCP_004249 | XLOC_186698 | ENSRNOT00000091909 | 0.95681522   | 1.10E-06 |
| TUCP_004249 | XLOC_186698 | ENSRNOT00000083220 | 0.973076776  | 1.06E-07 |
| TUCP_004249 | XLOC_186698 | ENSRNOT00000003780 | 0.950258958  | 2.21E-06 |
| TUCP_004249 | XLOC_186698 | ENSRNOT00000026643 | 0.953690976  | 1.55E-06 |
| TUCP_004249 | XLOC_186698 | ENSRNOT00000019133 | 0.957262447  | 1.04E-06 |
| TUCP_004249 | XLOC_186698 | ENSRNOT00000013274 | 0.951699646  | 1.91E-06 |
| TUCP_004249 | XLOC_186698 | ENSRNOT00000052018 | 0.956328435  | 1.16E-06 |
| TUCP_004249 | XLOC_186698 | ENSRNOT00000010898 | 0.951079948  | 2.03E-06 |
| TUCP_004249 | XLOC_186698 | ENSRNOT00000047093 | 0.962016176  | 5.84E-07 |
| TUCP_004249 | XLOC_186698 | ENSRNOT00000033975 | 0.965917598  | 3.42E-07 |
| TUCP_004249 | XLOC_186698 | ENSRNOT00000090123 | 0.956312533  | 1.16E-06 |
| TUCP_004249 | XLOC_186698 | ENSRNOT00000088599 | 0.962933523  | 5.18E-07 |
| TUCP_004249 | XLOC_186698 | ENSRNOT00000080024 | 0.95789971   | 9.70E-07 |
| TUCP_004249 | XLOC_186698 | ENSRNOT00000081047 | 0.973793101  | 9.32E-08 |
| TUCP_004249 | XLOC_186698 | ENSRNOT00000081512 | 0.972470847  | 1.19E-07 |
| TUCP_004249 | XLOC_186698 | ENSRNOT00000023989 | 0.950249692  | 2.21E-06 |
| TUCP_004249 | XLOC_186698 | ENSRNOT00000087429 | 0.95921779   | 8.30E-07 |
| TUCP_004249 | XLOC_186698 | ENSRNOT00000060362 | 0.966976016  | 2.93E-07 |
| TUCP_004249 | XLOC_186698 | ENSRNOT00000084088 | 0.961193194  | 6.49E-07 |
| TUCP_004249 | XLOC_186698 | ENSRNOT00000027910 | 0.959587074  | 7.93E-07 |
| TUCP_004249 | XLOC_186698 | ENSRNOT00000052224 | 0.95946337   | 8.05E-07 |
| TUCP_004249 | XLOC_186698 | ENSRNOT00000078070 | 0.973134698  | 1.05E-07 |
| TUCP_004249 | XLOC_186698 | ENSRNOT00000076729 | 0.956313389  | 1.16E-06 |
| TUCP_004249 | XLOC_186698 | ENSRNOT00000091265 | 0.954094176  | 1.49E-06 |
| TUCP_004249 | XLOC_186698 | ENSRNOT00000016191 | 0.955089527  | 1.33E-06 |
| TUCP_004249 | XLOC_186698 | ENSRNOT00000078390 | -0.954823999 | 1.37E-06 |
| TUCP_004249 | XLOC_186698 | ENSRNOT00000065501 | 0.955954636  | 1.21E-06 |
| TUCP_004249 | XLOC_186698 | ENSRNOT00000017753 | 0.951312122  | 1.99E-06 |
| TUCP_004249 | XLOC_186698 | ENSRNOT00000003568 | 0.960117642  | 7.43E-07 |
| TUCP_004249 | XLOC_186698 | ENSRNOT00000031904 | 0.975798138  | 6.28E-08 |
| TUCP_004249 | XLOC_186698 | ENSRNOT00000022074 | 0.957570851  | 1.01E-06 |
| TUCP_004249 | XLOC_186698 | ENSRNOT00000027337 | 0.950823524  | 2.08E-06 |
| TUCP_004249 | XLOC_186698 | ENSRNOT00000004046 | -0.961454773 | 6.28E-07 |
| TUCP_004249 | XLOC_186698 | ENSRNOT00000010367 | 0.961912329  | 5.92E-07 |
| TUCP_004249 | XLOC_186698 | ENSRNOT00000076669 | 0.960384258  | 7.19E-07 |
| TUCP_004249 | XLOC_186698 | ENSRNOT00000038807 | 0.962012736  | 5.84E-07 |
| TUCP_004249 | XLOC_186698 | ENSRNOT00000050834 | -0.951795095 | 1.89E-06 |
| TUCP_004249 | XLOC_186698 | ENSRNOT00000066024 | 0.968181699  | 2.43E-07 |
| TUCP_004249 | XLOC_186698 | ENSRNOT00000025808 | 0.957750455  | 9.87E-07 |
| TUCP_004249 | XLOC_186698 | ENSRNOT00000012736 | 0.954695778  | 1.39E-06 |
| TUCP_004249 | XLOC_186698 | ENSRNOT00000027970 | 0.951373674  | 1.97E-06 |
| TUCP_004249 | XLOC_186698 | ENSRNOT00000010748 | 0.958271083  | 9.29E-07 |
| TUCP_004249 | XLOC_186698 | ENSRNOT00000083127 | 0.953851649  | 1.53E-06 |

|             |             |                    |             |          |
|-------------|-------------|--------------------|-------------|----------|
| TUCP_004249 | XLOC_186698 | ENSRNOT00000078306 | 0.961626838 | 6.14E-07 |
| TUCP_004249 | XLOC_186698 | ENSRNOT00000035474 | 0.952848433 | 1.70E-06 |
| TUCP_004249 | XLOC_186698 | ENSRNOT00000080695 | 0.97481101  | 7.66E-08 |
| TUCP_004249 | XLOC_186698 | ENSRNOT00000029125 | 0.960808675 | 6.82E-07 |
| TUCP_004249 | XLOC_186698 | ENSRNOT00000060696 | 0.976553724 | 5.37E-08 |
| TUCP_004249 | XLOC_186698 | ENSRNOT00000042125 | 0.973056732 | 1.07E-07 |
| TUCP_004249 | XLOC_186698 | ENSRNOT00000014814 | 0.952101085 | 1.83E-06 |
| TUCP_004249 | XLOC_186698 | ENSRNOT00000080207 | 0.969894804 | 1.85E-07 |
| TUCP_004249 | XLOC_186698 | ENSRNOT00000008982 | 0.954129083 | 1.48E-06 |
| TUCP_004249 | XLOC_186698 | ENSRNOT00000090057 | 0.959971834 | 7.57E-07 |
| TUCP_004249 | XLOC_186698 | ENSRNOT00000067866 | 0.95233257  | 1.79E-06 |
| TUCP_004249 | XLOC_186698 | ENSRNOT00000037800 | 0.953200513 | 1.63E-06 |
| TUCP_004249 | XLOC_186698 | ENSRNOT00000022796 | 0.960506169 | 7.08E-07 |
| TUCP_004249 | XLOC_186698 | ENSRNOT00000005311 | 0.952669343 | 1.73E-06 |
| TUCP_004249 | XLOC_186698 | ENSRNOT00000015799 | 0.987432801 | 2.42E-09 |
| TUCP_002588 | XLOC_109609 | ENSRNOT00000024186 | 0.983200502 | 1.02E-08 |
| TUCP_002588 | XLOC_109609 | ENSRNOT00000074753 | 0.998182349 | 1.56E-13 |
| TUCP_002588 | XLOC_109609 | ENSRNOT00000004876 | 0.959071443 | 8.44E-07 |
| TUCP_002588 | XLOC_109609 | ENSRNOT00000041904 | 1           | 0        |
| TUCP_002588 | XLOC_109609 | ENSRNOT00000083487 | 0.989515314 | 9.80E-10 |
| TUCP_002588 | XLOC_109609 | ENSRNOT00000077990 | 1           | 0        |
| TUCP_002588 | XLOC_109609 | ENSRNOT00000038826 | 0.99977672  | 4.37E-18 |
| TUCP_002588 | XLOC_109609 | ENSRNOT00000046842 | 0.973644314 | 9.58E-08 |
| TUCP_002588 | XLOC_109609 | ENSRNOT00000037169 | 0.980329406 | 2.24E-08 |
| TUCP_002588 | XLOC_109609 | ENSRNOT00000021243 | 0.987425406 | 2.42E-09 |
| TUCP_002588 | XLOC_109609 | ENSRNOT00000060250 | 0.999933853 | 9.97E-21 |
| TUCP_002588 | XLOC_109609 | ENSRNOT00000091934 | 1           | 0        |
| TUCP_002588 | XLOC_109609 | ENSRNOT00000046585 | 0.982941597 | 1.11E-08 |
| TUCP_002588 | XLOC_109609 | ENSRNOT00000080794 | 0.990839253 | 5.00E-10 |
| TUCP_002588 | XLOC_109609 | ENSRNOT00000014456 | 0.991697153 | 3.06E-10 |
| TUCP_002588 | XLOC_109609 | ENSRNOT00000031205 | 0.991394766 | 3.66E-10 |
| TUCP_002588 | XLOC_109609 | ENSRNOT00000044145 | 1           | 0        |
| TUCP_002588 | XLOC_109609 | ENSRNOT00000088381 | 0.989013276 | 1.24E-09 |
| TUCP_002588 | XLOC_109609 | ENSRNOT00000011743 | 0.98678427  | 3.11E-09 |
| TUCP_002588 | XLOC_109609 | ENSRNOT00000089929 | 1           | 0        |
| TUCP_002588 | XLOC_109609 | ENSRNOT00000088624 | 1           | 0        |
| TUCP_002588 | XLOC_109609 | ENSRNOT00000085659 | 0.989908621 | 8.10E-10 |
| TUCP_002588 | XLOC_109609 | ENSRNOT00000015866 | 0.994066664 | 5.73E-11 |
| TUCP_002588 | XLOC_109609 | ENSRNOT00000078633 | 1           | 0        |
| TUCP_002588 | XLOC_109609 | ENSRNOT00000034907 | 0.995318542 | 1.76E-11 |
| TUCP_002588 | XLOC_109609 | ENSRNOT00000093230 | 0.958295175 | 9.26E-07 |
| TUCP_002588 | XLOC_109609 | ENSRNOT00000051835 | 1           | 0        |
| TUCP_002588 | XLOC_109609 | ENSRNOT00000079087 | 1           | 0        |
| TUCP_002588 | XLOC_109609 | ENSRNOT00000037206 | 1           | 0        |
| TUCP_002588 | XLOC_109609 | ENSRNOT00000083261 | 0.970991658 | 1.54E-07 |
| TUCP_002588 | XLOC_109609 | ENSRNOT00000080590 | 0.999889216 | 1.31E-19 |
| TUCP_002588 | XLOC_109609 | ENSRNOT00000027552 | 0.999801024 | 2.46E-18 |
| TUCP_002588 | XLOC_109609 | ENSRNOT00000077014 | 0.995074376 | 2.26E-11 |
| TUCP_002588 | XLOC_109609 | ENSRNOT00000080453 | 0.99994332  | 4.61E-21 |
| TUCP_002588 | XLOC_109609 | ENSRNOT00000089057 | 0.968243551 | 2.41E-07 |
| TUCP_002588 | XLOC_109609 | ENSRNOT00000066839 | 0.991868612 | 2.76E-10 |

|             |             |                    |              |          |
|-------------|-------------|--------------------|--------------|----------|
| TUCP_002588 | XLOC_109609 | ENSRNOT00000061284 | 0.955566942  | 1.27E-06 |
| TUCP_002588 | XLOC_109609 | ENSRNOT00000013423 | 0.959677621  | 7.84E-07 |
| TUCP_002588 | XLOC_109609 | ENSRNOT00000071884 | 0.974769955  | 7.72E-08 |
| TUCP_002588 | XLOC_109609 | ENSRNOT00000004128 | 0.961829362  | 5.99E-07 |
| TUCP_002588 | XLOC_109609 | ENSRNOT00000026316 | 0.964408046  | 4.24E-07 |
| TUCP_002588 | XLOC_109609 | ENSRNOT00000057729 | 0.999384184  | 6.97E-16 |
| TUCP_002588 | XLOC_109609 | ENSRNOT00000078663 | 0.975192577  | 7.10E-08 |
| TUCP_002588 | XLOC_109609 | ENSRNOT00000064250 | 0.983131977  | 1.05E-08 |
| TUCP_002588 | XLOC_109609 | ENSRNOT00000021608 | 0.965228881  | 3.78E-07 |
| TUCP_002588 | XLOC_109609 | ENSRNOT00000029634 | 0.995816134  | 1.00E-11 |
| TUCP_002588 | XLOC_109609 | ENSRNOT00000093579 | 0.958564264  | 8.97E-07 |
| TUCP_002588 | XLOC_109609 | ENSRNOT00000086349 | 0.957242511  | 1.05E-06 |
| TUCP_002588 | XLOC_109609 | ENSRNOT00000065460 | 1            | 0        |
| TUCP_002588 | XLOC_109609 | ENSRNOT00000003817 | 0.996778712  | 2.72E-12 |
| TUCP_002588 | XLOC_109609 | ENSRNOT00000016713 | 1            | 0        |
| TUCP_002588 | XLOC_109609 | ENSRNOT00000079260 | 0.996448245  | 4.42E-12 |
| TUCP_002588 | XLOC_109609 | ENSRNOT00000039294 | 1            | 0        |
| TUCP_002588 | XLOC_109609 | ENSRNOT00000092913 | 0.952980228  | 1.67E-06 |
| TUCP_002586 | XLOC_109608 | ENSRNOT00000093579 | 0.955919097  | 1.22E-06 |
| TUCP_002586 | XLOC_109608 | ENSRNOT00000012170 | 0.970605802  | 1.64E-07 |
| TUCP_002586 | XLOC_109608 | ENSRNOT00000020329 | 0.950338901  | 2.19E-06 |
| TUCP_002586 | XLOC_109608 | ENSRNOT00000061139 | 0.966877392  | 2.97E-07 |
| TUCP_002586 | XLOC_109608 | ENSRNOT00000029531 | -0.950335181 | 2.19E-06 |
| TUCP_002585 | XLOC_109601 | ENSRNOT00000071884 | 0.962746932  | 5.31E-07 |
| TUCP_002585 | XLOC_109601 | ENSRNOT00000009825 | 0.955011701  | 1.35E-06 |
| TUCP_002585 | XLOC_109601 | ENSRNOT00000040270 | 0.961736747  | 6.06E-07 |
| TUCP_002585 | XLOC_109601 | ENSRNOT00000008041 | 0.960560435  | 7.03E-07 |
| TUCP_002585 | XLOC_109601 | ENSRNOT00000093579 | 0.971846748  | 1.33E-07 |
| TUCP_002585 | XLOC_109601 | ENSRNOT00000078663 | 0.951475969  | 1.95E-06 |
| TUCP_002585 | XLOC_109601 | ENSRNOT00000085659 | 0.955772035  | 1.24E-06 |
| TUCP_004835 | XLOC_214873 | ENSRNOT00000093467 | 0.968025767  | 2.49E-07 |
| TUCP_004835 | XLOC_214873 | ENSRNOT00000029340 | 0.962076241  | 5.80E-07 |
| TUCP_004835 | XLOC_214873 | ENSRNOT00000038646 | 0.964533064  | 4.16E-07 |
| TUCP_004835 | XLOC_214873 | ENSRNOT00000092579 | 0.964533064  | 4.16E-07 |
| TUCP_004835 | XLOC_214873 | ENSRNOT00000082082 | 0.95412077   | 1.48E-06 |
| TUCP_004835 | XLOC_214873 | ENSRNOT00000036383 | 0.985300353  | 5.27E-09 |
| TUCP_004835 | XLOC_214873 | ENSRNOT00000027882 | -0.960528131 | 7.06E-07 |
| TUCP_004835 | XLOC_214873 | ENSRNOT00000076528 | 0.963812757  | 4.60E-07 |
| TUCP_004835 | XLOC_214873 | ENSRNOT00000083034 | 0.957568197  | 1.01E-06 |
| TUCP_004835 | XLOC_214873 | ENSRNOT00000089607 | 0.954415807  | 1.44E-06 |
| TUCP_004835 | XLOC_214873 | ENSRNOT00000021748 | 0.964533064  | 4.16E-07 |
| TUCP_004835 | XLOC_214873 | ENSRNOT00000013459 | 0.998059381  | 2.16E-13 |
| TUCP_004835 | XLOC_214873 | ENSRNOT00000078137 | 0.964533064  | 4.16E-07 |
| TUCP_004835 | XLOC_214873 | ENSRNOT00000092740 | 0.964533064  | 4.16E-07 |
| TUCP_004835 | XLOC_214873 | ENSRNOT00000067034 | 0.962109367  | 5.77E-07 |
| TUCP_004835 | XLOC_214873 | ENSRNOT00000000117 | 0.952306264  | 1.79E-06 |
| TUCP_004835 | XLOC_214873 | ENSRNOT00000071877 | 0.958667496  | 8.86E-07 |
| TUCP_004835 | XLOC_214873 | ENSRNOT00000070958 | 0.964533064  | 4.16E-07 |
| TUCP_004835 | XLOC_214873 | ENSRNOT00000027268 | 0.964533064  | 4.16E-07 |
| TUCP_004835 | XLOC_214873 | ENSRNOT00000004459 | 0.964533064  | 4.16E-07 |
| TUCP_004835 | XLOC_214873 | ENSRNOT00000089235 | 0.965272383  | 3.75E-07 |

|             |             |                     |              |          |
|-------------|-------------|---------------------|--------------|----------|
| TUCP_004835 | XLOC_214873 | ENSRNOT00000088168  | 0.964533064  | 4.16E-07 |
| TUCP_004835 | XLOC_214873 | ENSRNOT00000088148  | 0.964533064  | 4.16E-07 |
| TUCP_004835 | XLOC_214873 | ENSRNOT00000088527  | 0.964533064  | 4.16E-07 |
| TUCP_004835 | XLOC_214873 | ENSRNOT00000078701  | 0.964533064  | 4.16E-07 |
| TUCP_004835 | XLOC_214873 | ENSRNOT00000090078  | 0.964533064  | 4.16E-07 |
| TUCP_004835 | XLOC_214873 | ENSRNOT00000089085  | 0.964533064  | 4.16E-07 |
| TUCP_004835 | XLOC_214873 | ENSRNOT00000008153  | 0.965249175  | 3.76E-07 |
| TUCP_004835 | XLOC_214873 | ENSRNOT00000007971  | 0.978314808  | 3.64E-08 |
| TUCP_004835 | XLOC_214873 | ENSRNOT000000079189 | 0.953380386  | 1.60E-06 |
| TUCP_004835 | XLOC_214873 | ENSRNOT000000078020 | 0.954527139  | 1.42E-06 |
| TUCP_004835 | XLOC_214873 | ENSRNOT00000009776  | 0.964533064  | 4.16E-07 |
| TUCP_003989 | XLOC_175146 | ENSRNOT00000084075  | 0.967925883  | 2.53E-07 |
| TUCP_003989 | XLOC_175146 | ENSRNOT000000074465 | 0.950020565  | 2.26E-06 |
| TUCP_003989 | XLOC_175146 | ENSRNOT000000079805 | 0.951965221  | 1.86E-06 |
| TUCP_003989 | XLOC_175146 | ENSRNOT000000040912 | 0.950020565  | 2.26E-06 |
| TUCP_003989 | XLOC_175146 | ENSRNOT000000072648 | 0.950020565  | 2.26E-06 |
| TUCP_003989 | XLOC_175146 | ENSRNOT000000070803 | 0.950020565  | 2.26E-06 |
| TUCP_003989 | XLOC_175146 | ENSRNOT000000012196 | 0.950020565  | 2.26E-06 |
| TUCP_003989 | XLOC_175146 | ENSRNOT000000085772 | 0.950020565  | 2.26E-06 |
| TUCP_003989 | XLOC_175146 | ENSRNOT00000004577  | 0.966304535  | 3.23E-07 |
| TUCP_003989 | XLOC_175146 | ENSRNOT000000015270 | 0.950020565  | 2.26E-06 |
| TUCP_003989 | XLOC_175146 | ENSRNOT000000046192 | 0.950020565  | 2.26E-06 |
| TUCP_003989 | XLOC_175146 | ENSRNOT000000044226 | 0.950020565  | 2.26E-06 |
| TUCP_003989 | XLOC_175146 | ENSRNOT000000081954 | 0.966718282  | 3.04E-07 |
| TUCP_003989 | XLOC_175146 | ENSRNOT000000080291 | 0.961530478  | 6.22E-07 |
| TUCP_003989 | XLOC_175146 | ENSRNOT00000001464  | 0.950020565  | 2.26E-06 |
| TUCP_003989 | XLOC_175146 | ENSRNOT000000090716 | 0.952991583  | 1.67E-06 |
| TUCP_003989 | XLOC_175146 | ENSRNOT000000057873 | 0.950020565  | 2.26E-06 |
| TUCP_003989 | XLOC_175146 | ENSRNOT000000076044 | 0.950020565  | 2.26E-06 |
| TUCP_003989 | XLOC_175146 | ENSRNOT000000087764 | 0.959480462  | 8.04E-07 |
| TUCP_003989 | XLOC_175146 | ENSRNOT000000093284 | 0.951700504  | 1.91E-06 |
| TUCP_003989 | XLOC_175146 | ENSRNOT000000083002 | 0.959174169  | 8.34E-07 |
| TUCP_003989 | XLOC_175146 | ENSRNOT000000086248 | 0.950020565  | 2.26E-06 |
| TUCP_003989 | XLOC_175146 | ENSRNOT000000089750 | 0.950025677  | 2.26E-06 |
| TUCP_003989 | XLOC_175146 | ENSRNOT000000034772 | 0.968558446  | 2.30E-07 |
| TUCP_003989 | XLOC_175146 | ENSRNOT000000026473 | 0.950939074  | 2.06E-06 |
| TUCP_003989 | XLOC_175146 | ENSRNOT000000002834 | 0.950020565  | 2.26E-06 |
| TUCP_003989 | XLOC_175146 | ENSRNOT000000092755 | 0.950020565  | 2.26E-06 |
| TUCP_003989 | XLOC_175146 | ENSRNOT000000031683 | 0.950020565  | 2.26E-06 |
| TUCP_003989 | XLOC_175146 | ENSRNOT000000074353 | 0.950020565  | 2.26E-06 |
| TUCP_004836 | XLOC_215132 | ENSRNOT000000042495 | 0.954104418  | 1.48E-06 |
| TUCP_004836 | XLOC_215132 | ENSRNOT000000029915 | 0.99515174   | 2.09E-11 |
| TUCP_004836 | XLOC_215132 | ENSRNOT000000090352 | 0.969250952  | 2.06E-07 |
| TUCP_004836 | XLOC_215132 | ENSRNOT000000004047 | 0.959739386  | 7.79E-07 |
| TUCP_004836 | XLOC_215132 | ENSRNOT000000027343 | 0.964626542  | 4.11E-07 |
| TUCP_004836 | XLOC_215132 | ENSRNOT000000079494 | 0.952438226  | 1.77E-06 |
| TUCP_004836 | XLOC_215132 | ENSRNOT000000055506 | 0.991839662  | 2.81E-10 |
| TUCP_004830 | XLOC_214643 | ENSRNOT000000065387 | 0.957322131  | 1.04E-06 |
| TUCP_004830 | XLOC_214643 | ENSRNOT000000047349 | 0.971806197  | 1.34E-07 |
| TUCP_004830 | XLOC_214643 | ENSRNOT000000071028 | -0.958479772 | 9.06E-07 |
| TUCP_003821 | XLOC_167348 | ENSRNOT000000036383 | 0.953068019  | 1.66E-06 |

|             |             |                    |             |          |
|-------------|-------------|--------------------|-------------|----------|
| TUCP_003821 | XLOC_167348 | ENSRNOT0000007971  | 0.998101458 | 1.94E-13 |
| TUCP_003821 | XLOC_167348 | ENSRNOT00000067034 | 0.950291377 | 2.20E-06 |
| TUCP_003821 | XLOC_167348 | ENSRNOT00000027882 | -0.96775174 | 2.60E-07 |
| TUCP_003821 | XLOC_167348 | ENSRNOT00000013459 | 0.971271488 | 1.47E-07 |
| TUCP_004832 | XLOC_214832 | ENSRNOT00000009649 | 0.954692366 | 1.39E-06 |
| TUCP_004832 | XLOC_214832 | ENSRNOT00000077451 | 0.950261375 | 2.20E-06 |
| TUCP_003980 | XLOC_174431 | ENSRNOT00000084075 | 0.999809585 | 1.97E-18 |
| TUCP_003980 | XLOC_174431 | ENSRNOT00000012880 | 0.964032406 | 4.46E-07 |
| TUCP_003980 | XLOC_174431 | ENSRNOT00000074465 | 0.997636835 | 5.78E-13 |
| TUCP_003980 | XLOC_174431 | ENSRNOT00000090898 | 0.958627187 | 8.91E-07 |
| TUCP_003980 | XLOC_174431 | ENSRNOT00000079805 | 0.995381355 | 1.64E-11 |
| TUCP_003980 | XLOC_174431 | ENSRNOT00000040912 | 0.997636835 | 5.78E-13 |
| TUCP_003980 | XLOC_174431 | ENSRNOT00000072648 | 0.997636835 | 5.78E-13 |
| TUCP_003980 | XLOC_174431 | ENSRNOT00000007398 | 0.985624996 | 4.72E-09 |
| TUCP_003980 | XLOC_174431 | ENSRNOT00000070803 | 0.997636835 | 5.78E-13 |
| TUCP_003980 | XLOC_174431 | ENSRNOT00000012196 | 0.997636835 | 5.78E-13 |
| TUCP_003980 | XLOC_174431 | ENSRNOT00000085772 | 0.997636835 | 5.78E-13 |
| TUCP_003980 | XLOC_174431 | ENSRNOT00000004577 | 0.95072582  | 2.11E-06 |
| TUCP_003980 | XLOC_174431 | ENSRNOT00000093284 | 0.998090195 | 1.99E-13 |
| TUCP_003980 | XLOC_174431 | ENSRNOT00000086374 | 0.989119382 | 1.18E-09 |
| TUCP_003980 | XLOC_174431 | ENSRNOT00000015270 | 0.997636835 | 5.78E-13 |
| TUCP_003980 | XLOC_174431 | ENSRNOT00000046192 | 0.997636835 | 5.78E-13 |
| TUCP_003980 | XLOC_174431 | ENSRNOT00000044226 | 0.997636835 | 5.78E-13 |
| TUCP_003980 | XLOC_174431 | ENSRNOT00000081898 | 0.990511931 | 5.96E-10 |
| TUCP_003980 | XLOC_174431 | ENSRNOT00000081954 | 0.97659645  | 5.32E-08 |
| TUCP_003980 | XLOC_174431 | ENSRNOT00000080291 | 0.999580216 | 1.03E-16 |
| TUCP_003980 | XLOC_174431 | ENSRNOT00000004293 | 0.976315231 | 5.64E-08 |
| TUCP_003980 | XLOC_174431 | ENSRNOT00000078231 | 0.953800499 | 1.53E-06 |
| TUCP_003980 | XLOC_174431 | ENSRNOT00000002834 | 0.997636835 | 5.78E-13 |
| TUCP_003980 | XLOC_174431 | ENSRNOT00000001464 | 0.997636835 | 5.78E-13 |
| TUCP_003980 | XLOC_174431 | ENSRNOT00000008542 | 0.952676457 | 1.73E-06 |
| TUCP_003980 | XLOC_174431 | ENSRNOT00000090716 | 0.991599267 | 3.25E-10 |
| TUCP_003980 | XLOC_174431 | ENSRNOT00000083542 | 0.968569224 | 2.29E-07 |
| TUCP_003980 | XLOC_174431 | ENSRNOT00000076044 | 0.997636835 | 5.78E-13 |
| TUCP_003980 | XLOC_174431 | ENSRNOT00000074353 | 0.997636835 | 5.78E-13 |
| TUCP_003980 | XLOC_174431 | ENSRNOT00000043510 | 0.953043894 | 1.66E-06 |
| TUCP_003980 | XLOC_174431 | ENSRNOT00000087122 | 0.978695408 | 3.34E-08 |
| TUCP_003980 | XLOC_174431 | ENSRNOT00000074295 | 0.980939932 | 1.92E-08 |
| TUCP_003980 | XLOC_174431 | ENSRNOT00000057873 | 0.997636835 | 5.78E-13 |
| TUCP_003980 | XLOC_174431 | ENSRNOT00000083002 | 0.993013635 | 1.30E-10 |
| TUCP_003980 | XLOC_174431 | ENSRNOT00000088399 | 0.997628293 | 5.89E-13 |
| TUCP_003980 | XLOC_174431 | ENSRNOT00000086248 | 0.997636835 | 5.78E-13 |
| TUCP_003980 | XLOC_174431 | ENSRNOT00000089750 | 0.997670871 | 5.38E-13 |
| TUCP_003980 | XLOC_174431 | ENSRNOT00000030517 | 0.95553958  | 1.27E-06 |
| TUCP_003980 | XLOC_174431 | ENSRNOT00000034772 | 0.996867996 | 2.36E-12 |
| TUCP_003980 | XLOC_174431 | ENSRNOT00000026473 | 0.954315347 | 1.45E-06 |
| TUCP_003980 | XLOC_174431 | ENSRNOT00000089305 | 0.968755543 | 2.23E-07 |
| TUCP_003980 | XLOC_174431 | ENSRNOT00000064601 | 0.964400661 | 4.24E-07 |
| TUCP_003980 | XLOC_174431 | ENSRNOT00000015870 | 0.960282781 | 7.28E-07 |
| TUCP_003980 | XLOC_174431 | ENSRNOT00000080812 | 0.987600689 | 2.26E-09 |
| TUCP_003980 | XLOC_174431 | ENSRNOT00000092755 | 0.997636835 | 5.78E-13 |

|             |             |                    |              |          |
|-------------|-------------|--------------------|--------------|----------|
| TUCP_003980 | XLOC_174431 | ENSRNOT00000031683 | 0.997636835  | 5.78E-13 |
| TUCP_003980 | XLOC_174431 | ENSRNOT00000087764 | 0.986058921  | 4.05E-09 |
| TUCP_003982 | XLOC_174489 | ENSRNOT00000092026 | 0.96620614   | 3.28E-07 |
| TUCP_003982 | XLOC_174489 | ENSRNOT00000093075 | 1            | 0        |
| TUCP_003982 | XLOC_174489 | ENSRNOT00000058260 | 1            | 0        |
| TUCP_003982 | XLOC_174489 | ENSRNOT00000088887 | 1            | 0        |
| TUCP_003982 | XLOC_174489 | ENSRNOT00000084986 | 1            | 0        |
| TUCP_003982 | XLOC_174489 | ENSRNOT00000074346 | 0.9702256    | 1.75E-07 |
| TUCP_003982 | XLOC_174489 | ENSRNOT00000073209 | 0.983711602  | 8.79E-09 |
| TUCP_003982 | XLOC_174489 | ENSRNOT00000080155 | 0.973069673  | 1.07E-07 |
| TUCP_003982 | XLOC_174489 | ENSRNOT00000072573 | 0.996213272  | 6.09E-12 |
| TUCP_003982 | XLOC_174489 | ENSRNOT00000017828 | 0.996001583  | 7.99E-12 |
| TUCP_003982 | XLOC_174489 | ENSRNOT00000080444 | 0.969625907  | 1.93E-07 |
| TUCP_003982 | XLOC_174489 | ENSRNOT00000071312 | 1            | 0        |
| TUCP_003982 | XLOC_174489 | ENSRNOT00000088245 | 1            | 0        |
| TUCP_003982 | XLOC_174489 | ENSRNOT00000036565 | 0.969065335  | 2.12E-07 |
| TUCP_003982 | XLOC_174489 | ENSRNOT00000058833 | 0.998673261  | 3.23E-14 |
| TUCP_003982 | XLOC_174489 | ENSRNOT00000078052 | 1            | 0        |
| TUCP_003982 | XLOC_174489 | ENSRNOT00000078494 | 0.999927093  | 1.62E-20 |
| TUCP_003982 | XLOC_174489 | ENSRNOT00000085653 | 1            | 0        |
| TUCP_003982 | XLOC_174489 | ENSRNOT00000057950 | 0.969329371  | 2.03E-07 |
| TUCP_003982 | XLOC_174489 | ENSRNOT00000081992 | 0.999320526  | 1.14E-15 |
| TUCP_003982 | XLOC_174489 | ENSRNOT00000038553 | 0.955765808  | 1.24E-06 |
| TUCP_003982 | XLOC_174489 | ENSRNOT00000084120 | 0.958115447  | 9.46E-07 |
| TUCP_003982 | XLOC_174489 | ENSRNOT00000055406 | 1            | 1.33E-79 |
| TUCP_003982 | XLOC_174489 | ENSRNOT00000070817 | 0.998968079  | 9.20E-15 |
| TUCP_003982 | XLOC_174489 | ENSRNOT00000026753 | 1            | 1.33E-79 |
| TUCP_003982 | XLOC_174489 | ENSRNOT00000080533 | 0.996682529  | 3.15E-12 |
| TUCP_003982 | XLOC_174489 | ENSRNOT00000072774 | 0.979665261  | 2.65E-08 |
| TUCP_003982 | XLOC_174489 | ENSRNOT00000086031 | 1            | 0        |
| TUCP_003982 | XLOC_174489 | ENSRNOT00000014312 | 1            | 0        |
| TUCP_003982 | XLOC_174489 | ENSRNOT00000042882 | 0.963218427  | 4.98E-07 |
| TUCP_003982 | XLOC_174489 | ENSRNOT00000088012 | 0.956765806  | 1.11E-06 |
| TUCP_003982 | XLOC_174489 | ENSRNOT00000051231 | 0.999242378  | 1.96E-15 |
| TUCP_003982 | XLOC_174489 | ENSRNOT00000089407 | 0.992986194  | 1.32E-10 |
| TUCP_003982 | XLOC_174489 | ENSRNOT00000055034 | 0.998331441  | 1.02E-13 |
| TUCP_003982 | XLOC_174489 | ENSRNOT00000046837 | 0.97252559   | 1.18E-07 |
| TUCP_003983 | XLOC_174490 | ENSRNOT00000085476 | 0.988087438  | 1.85E-09 |
| TUCP_003983 | XLOC_174490 | ENSRNOT00000083608 | 0.96644664   | 3.17E-07 |
| TUCP_003983 | XLOC_174490 | ENSRNOT00000076035 | 0.970963518  | 1.55E-07 |
| TUCP_003983 | XLOC_174490 | ENSRNOT00000029298 | 0.959537701  | 7.98E-07 |
| TUCP_003983 | XLOC_174490 | ENSRNOT00000078176 | 0.972062478  | 1.28E-07 |
| TUCP_003983 | XLOC_174490 | ENSRNOT00000047560 | 0.95410051   | 1.49E-06 |
| TUCP_003983 | XLOC_174490 | ENSRNOT00000040386 | 0.950470536  | 2.16E-06 |
| TUCP_003983 | XLOC_174490 | ENSRNOT00000024758 | 0.970757479  | 1.60E-07 |
| TUCP_003983 | XLOC_174490 | ENSRNOT00000088719 | 0.996914267  | 2.19E-12 |
| TUCP_003983 | XLOC_174490 | ENSRNOT00000033187 | 0.966927181  | 2.95E-07 |
| TUCP_003984 | XLOC_174788 | ENSRNOT00000036506 | 0.970626425  | 1.64E-07 |
| TUCP_003984 | XLOC_174788 | ENSRNOT00000005958 | 0.95069767   | 2.11E-06 |
| TUCP_003984 | XLOC_174788 | ENSRNOT00000006188 | -0.968737669 | 2.23E-07 |
| TUCP_003984 | XLOC_174788 | ENSRNOT00000075656 | -0.971336883 | 1.45E-07 |

|             |             |                    |              |          |
|-------------|-------------|--------------------|--------------|----------|
| TUCP_003984 | XLOC_174788 | ENSRNOT00000013745 | -0.977042186 | 4.83E-08 |
| TUCP_003984 | XLOC_174788 | ENSRNOT00000018500 | -0.951767397 | 1.90E-06 |
| TUCP_003984 | XLOC_174788 | ENSRNOT00000075397 | 0.969278029  | 2.05E-07 |
| TUCP_003984 | XLOC_174788 | ENSRNOT00000012617 | -0.962631757 | 5.39E-07 |
| TUCP_003984 | XLOC_174788 | ENSRNOT00000032926 | -0.97121766  | 1.48E-07 |
| TUCP_003984 | XLOC_174788 | ENSRNOT00000019104 | -0.955405821 | 1.29E-06 |
| TUCP_003984 | XLOC_174788 | ENSRNOT00000026279 | -0.960912506 | 6.73E-07 |
| TUCP_003984 | XLOC_174788 | ENSRNOT00000063930 | -0.966284382 | 3.24E-07 |
| TUCP_003984 | XLOC_174788 | ENSRNOT0000000181  | 0.953466488  | 1.59E-06 |
| TUCP_003984 | XLOC_174788 | ENSRNOT00000090499 | -0.956388635 | 1.15E-06 |
| TUCP_003984 | XLOC_174788 | ENSRNOT00000046215 | -0.96450029  | 4.18E-07 |
| TUCP_003984 | XLOC_174788 | ENSRNOT00000087604 | 0.957965636  | 9.63E-07 |
| TUCP_003984 | XLOC_174788 | ENSRNOT00000073492 | -0.968123232 | 2.46E-07 |
| TUCP_003984 | XLOC_174788 | ENSRNOT00000064013 | -0.950809481 | 2.09E-06 |
| TUCP_003984 | XLOC_174788 | ENSRNOT0000001855  | 0.96444912   | 4.21E-07 |
| TUCP_003984 | XLOC_174788 | ENSRNOT00000023638 | 0.960657242  | 6.95E-07 |
| TUCP_003984 | XLOC_174788 | ENSRNOT0000001691  | 0.980569993  | 2.11E-08 |
| TUCP_003984 | XLOC_174788 | ENSRNOT00000089319 | 0.971607221  | 1.39E-07 |
| TUCP_003984 | XLOC_174788 | ENSRNOT00000007169 | -0.951117004 | 2.02E-06 |
| TUCP_003984 | XLOC_174788 | ENSRNOT00000000083 | -0.954206078 | 1.47E-06 |
| TUCP_003984 | XLOC_174788 | ENSRNOT00000086706 | 0.957214721  | 1.05E-06 |
| TUCP_003984 | XLOC_174788 | ENSRNOT00000088555 | -0.954772048 | 1.38E-06 |
| TUCP_003984 | XLOC_174788 | ENSRNOT00000045233 | -0.952674503 | 1.73E-06 |
| TUCP_003984 | XLOC_174788 | ENSRNOT00000074023 | 0.981251122  | 1.77E-08 |
| TUCP_003984 | XLOC_174788 | ENSRNOT00000013852 | 0.950584135  | 2.14E-06 |
| TUCP_003984 | XLOC_174788 | ENSRNOT00000013851 | -0.970612353 | 1.64E-07 |
| TUCP_003984 | XLOC_174788 | ENSRNOT00000089418 | 0.955342095  | 1.30E-06 |
| TUCP_003984 | XLOC_174788 | ENSRNOT00000024710 | -0.958191574 | 9.38E-07 |
| TUCP_003984 | XLOC_174788 | ENSRNOT00000055321 | 0.963176776  | 5.01E-07 |
| TUCP_003984 | XLOC_174788 | ENSRNOT00000055540 | 0.95028203   | 2.20E-06 |
| TUCP_003984 | XLOC_174788 | ENSRNOT00000045926 | 0.954883626  | 1.36E-06 |
| TUCP_003984 | XLOC_174788 | ENSRNOT00000076105 | -0.966054632 | 3.35E-07 |
| TUCP_003984 | XLOC_174788 | ENSRNOT00000028703 | -0.952594787 | 1.74E-06 |
| TUCP_003984 | XLOC_174788 | ENSRNOT00000021534 | -0.95082483  | 2.08E-06 |
| TUCP_003984 | XLOC_174788 | ENSRNOT00000013516 | 0.950879443  | 2.07E-06 |
| TUCP_003984 | XLOC_174788 | ENSRNOT00000003326 | -0.968422386 | 2.35E-07 |
| TUCP_003984 | XLOC_174788 | ENSRNOT00000022746 | -0.969104639 | 2.10E-07 |
| TUCP_003984 | XLOC_174788 | ENSRNOT00000004810 | 0.952466405  | 1.76E-06 |
| TUCP_003984 | XLOC_174788 | ENSRNOT00000016306 | -0.956982857 | 1.08E-06 |
| TUCP_003984 | XLOC_174788 | ENSRNOT00000083677 | -0.955318969 | 1.30E-06 |
| TUCP_003984 | XLOC_174788 | ENSRNOT00000080677 | -0.955114399 | 1.33E-06 |
| TUCP_003984 | XLOC_174788 | ENSRNOT00000065304 | -0.954457689 | 1.43E-06 |
| TUCP_003984 | XLOC_174788 | ENSRNOT00000027301 | -0.96975974  | 1.89E-07 |
| TUCP_003984 | XLOC_174788 | ENSRNOT00000073370 | 0.951851732  | 1.88E-06 |
| TUCP_003984 | XLOC_174788 | ENSRNOT00000004722 | -0.959729899 | 7.79E-07 |
| TUCP_003984 | XLOC_174788 | ENSRNOT00000007350 | 0.952148011  | 1.82E-06 |
| TUCP_003984 | XLOC_174788 | ENSRNOT00000030373 | -0.971205724 | 1.49E-07 |
| TUCP_003984 | XLOC_174788 | ENSRNOT00000065978 | 0.960556899  | 7.04E-07 |
| TUCP_003984 | XLOC_174788 | ENSRNOT00000075480 | -0.970959194 | 1.55E-07 |
| TUCP_003984 | XLOC_174788 | ENSRNOT00000012699 | -0.952526239 | 1.75E-06 |
| TUCP_003984 | XLOC_174788 | ENSRNOT00000020051 | 0.956024683  | 1.20E-06 |

|             |             |                    |              |          |
|-------------|-------------|--------------------|--------------|----------|
| TUCP_003984 | XLOC_174788 | ENSRNOT00000027760 | 0.963383691  | 4.87E-07 |
| TUCP_003984 | XLOC_174788 | ENSRNOT00000083891 | -0.966656235 | 3.07E-07 |
| TUCP_003984 | XLOC_174788 | ENSRNOT00000042903 | 0.98584755   | 4.37E-09 |
| TUCP_003984 | XLOC_174788 | ENSRNOT00000057898 | -0.972770346 | 1.13E-07 |
| TUCP_003984 | XLOC_174788 | ENSRNOT00000089933 | 0.968983181  | 2.15E-07 |
| TUCP_003984 | XLOC_174788 | ENSRNOT00000083876 | -0.961773493 | 6.03E-07 |
| TUCP_003984 | XLOC_174788 | ENSRNOT00000009169 | 0.95145747   | 1.96E-06 |
| TUCP_003984 | XLOC_174788 | ENSRNOT00000056100 | -0.977305138 | 4.56E-08 |
| TUCP_003984 | XLOC_174788 | ENSRNOT00000000477 | -0.965485493 | 3.64E-07 |
| TUCP_003984 | XLOC_174788 | ENSRNOT00000083351 | -0.956574465 | 1.13E-06 |
| TUCP_003984 | XLOC_174788 | ENSRNOT00000009817 | -0.952988801 | 1.67E-06 |
| TUCP_003984 | XLOC_174788 | ENSRNOT00000067554 | 0.951284756  | 1.99E-06 |
| TUCP_003984 | XLOC_174788 | ENSRNOT00000055683 | 0.95160009   | 1.93E-06 |
| TUCP_003984 | XLOC_174788 | ENSRNOT00000022000 | -0.968349266 | 2.37E-07 |
| TUCP_003984 | XLOC_174788 | ENSRNOT00000030798 | -0.970225744 | 1.75E-07 |
| TUCP_003984 | XLOC_174788 | ENSRNOT00000005834 | 0.966206295  | 3.28E-07 |
| TUCP_003984 | XLOC_174788 | ENSRNOT00000005297 | 0.961263265  | 6.44E-07 |
| TUCP_003984 | XLOC_174788 | ENSRNOT00000000048 | 0.972001926  | 1.29E-07 |
| TUCP_003984 | XLOC_174788 | ENSRNOT00000088133 | -0.957448731 | 1.02E-06 |
| TUCP_003984 | XLOC_174788 | ENSRNOT00000031701 | -0.952444442 | 1.77E-06 |
| TUCP_003984 | XLOC_174788 | ENSRNOT00000075934 | -0.963973425 | 4.50E-07 |
| TUCP_003984 | XLOC_174788 | ENSRNOT00000016629 | 0.950769259  | 2.10E-06 |
| TUCP_003984 | XLOC_174788 | ENSRNOT00000076181 | -0.964553591 | 4.15E-07 |
| TUCP_003984 | XLOC_174788 | ENSRNOT00000072849 | -0.960211433 | 7.35E-07 |
| TUCP_003984 | XLOC_174788 | ENSRNOT00000073643 | -0.965486556 | 3.64E-07 |
| TUCP_003984 | XLOC_174788 | ENSRNOT00000016254 | -0.958128853 | 9.45E-07 |
| TUCP_003984 | XLOC_174788 | ENSRNOT00000078349 | -0.962806529 | 5.27E-07 |
| TUCP_003984 | XLOC_174788 | ENSRNOT00000003940 | -0.976049305 | 5.96E-08 |
| TUCP_003984 | XLOC_174788 | ENSRNOT00000005620 | -0.952347234 | 1.79E-06 |
| TUCP_003984 | XLOC_174788 | ENSRNOT00000022502 | -0.955785695 | 1.24E-06 |
| TUCP_003984 | XLOC_174788 | ENSRNOT00000082914 | 0.954087406  | 1.49E-06 |
| TUCP_003984 | XLOC_174788 | ENSRNOT00000004787 | -0.954048628 | 1.49E-06 |
| TUCP_003984 | XLOC_174788 | ENSRNOT00000037133 | 0.962111564  | 5.77E-07 |
| TUCP_003984 | XLOC_174788 | ENSRNOT00000078816 | 0.967777922  | 2.59E-07 |
| TUCP_003984 | XLOC_174788 | ENSRNOT00000017949 | -0.952618972 | 1.74E-06 |
| TUCP_003984 | XLOC_174788 | ENSRNOT00000026098 | -0.952161877 | 1.82E-06 |
| TUCP_003984 | XLOC_174788 | ENSRNOT00000083964 | -0.968650622 | 2.26E-07 |
| TUCP_003984 | XLOC_174788 | ENSRNOT00000090912 | 0.971495047  | 1.41E-07 |
| TUCP_003984 | XLOC_174788 | ENSRNOT00000048781 | 0.961510364  | 6.24E-07 |
| TUCP_003984 | XLOC_174788 | ENSRNOT00000013867 | 0.953163249  | 1.64E-06 |
| TUCP_003984 | XLOC_174788 | ENSRNOT00000021802 | 0.952777686  | 1.71E-06 |
| TUCP_003984 | XLOC_174788 | ENSRNOT00000091909 | 0.958459648  | 9.08E-07 |
| TUCP_003984 | XLOC_174788 | ENSRNOT00000026831 | 0.955735568  | 1.24E-06 |
| TUCP_003984 | XLOC_174788 | ENSRNOT00000009563 | -0.968105075 | 2.46E-07 |
| TUCP_003984 | XLOC_174788 | ENSRNOT00000074985 | -0.955636358 | 1.26E-06 |
| TUCP_003984 | XLOC_174788 | ENSRNOT00000025856 | -0.967392833 | 2.75E-07 |
| TUCP_003984 | XLOC_174788 | ENSRNOT00000004351 | -0.957809971 | 9.81E-07 |
| TUCP_003984 | XLOC_174788 | ENSRNOT00000003544 | -0.95239397  | 1.78E-06 |
| TUCP_003984 | XLOC_174788 | ENSRNOT00000021925 | 0.950072451  | 2.25E-06 |
| TUCP_003984 | XLOC_174788 | ENSRNOT00000003780 | 0.951997953  | 1.85E-06 |
| TUCP_003984 | XLOC_174788 | ENSRNOT00000001403 | 0.958816015  | 8.71E-07 |



|             |             |                    |              |          |
|-------------|-------------|--------------------|--------------|----------|
| TUCP_003984 | XLOC_174788 | ENSRNOT00000064452 | -0.971740633 | 1.35E-07 |
| TUCP_003984 | XLOC_174788 | ENSRNOT00000014506 | -0.954344727 | 1.45E-06 |
| TUCP_003984 | XLOC_174788 | ENSRNOT00000023262 | -0.962337575 | 5.60E-07 |
| TUCP_003984 | XLOC_174788 | ENSRNOT00000025913 | -0.959950311 | 7.59E-07 |
| TUCP_003984 | XLOC_174788 | ENSRNOT00000013067 | -0.959032848 | 8.48E-07 |
| TUCP_003984 | XLOC_174788 | ENSRNOT00000066952 | 0.966622092  | 3.08E-07 |
| TUCP_003984 | XLOC_174788 | ENSRNOT00000078185 | -0.951062152 | 2.04E-06 |
| TUCP_003984 | XLOC_174788 | ENSRNOT00000024119 | 0.961292318  | 6.41E-07 |
| TUCP_003984 | XLOC_174788 | ENSRNOT00000021636 | -0.951386985 | 1.97E-06 |
| TUCP_003984 | XLOC_174788 | ENSRNOT00000016220 | -0.95086651  | 2.08E-06 |
| TUCP_003984 | XLOC_174788 | ENSRNOT00000045946 | 0.971589283  | 1.39E-07 |
| TUCP_003984 | XLOC_174788 | ENSRNOT00000086577 | 0.963801272  | 4.61E-07 |
| TUCP_003984 | XLOC_174788 | ENSRNOT00000036658 | -0.96757108  | 2.67E-07 |
| TUCP_003984 | XLOC_174788 | ENSRNOT00000032363 | 0.972237122  | 1.24E-07 |
| TUCP_003984 | XLOC_174788 | ENSRNOT00000055957 | -0.951829175 | 1.88E-06 |
| TUCP_003984 | XLOC_174788 | ENSRNOT00000032667 | -0.960558521 | 7.03E-07 |
| TUCP_003984 | XLOC_174788 | ENSRNOT00000065600 | 0.963132697  | 5.04E-07 |
| TUCP_003984 | XLOC_174788 | ENSRNOT00000086260 | -0.953016418 | 1.67E-06 |
| TUCP_003984 | XLOC_174788 | ENSRNOT00000058351 | 0.951094459  | 2.03E-06 |
| TUCP_003984 | XLOC_174788 | ENSRNOT00000049310 | -0.953669808 | 1.56E-06 |
| TUCP_003984 | XLOC_174788 | ENSRNOT00000041815 | -0.967615169 | 2.66E-07 |
| TUCP_003984 | XLOC_174788 | ENSRNOT00000033975 | 0.956573209  | 1.13E-06 |
| TUCP_003984 | XLOC_174788 | ENSRNOT00000068026 | -0.955146871 | 1.33E-06 |
| TUCP_003984 | XLOC_174788 | ENSRNOT00000044608 | -0.956813195 | 1.10E-06 |
| TUCP_003984 | XLOC_174788 | ENSRNOT00000001099 | -0.966305758 | 3.23E-07 |
| TUCP_003984 | XLOC_174788 | ENSRNOT00000014821 | -0.981349249 | 1.72E-08 |
| TUCP_003984 | XLOC_174788 | ENSRNOT00000034883 | -0.952134496 | 1.83E-06 |
| TUCP_003984 | XLOC_174788 | ENSRNOT00000045765 | -0.950351186 | 2.19E-06 |
| TUCP_003984 | XLOC_174788 | ENSRNOT00000005459 | 0.952777212  | 1.71E-06 |
| TUCP_003984 | XLOC_174788 | ENSRNOT00000088599 | 0.957443863  | 1.02E-06 |
| TUCP_003984 | XLOC_174788 | ENSRNOT00000022190 | -0.954400772 | 1.44E-06 |
| TUCP_003984 | XLOC_174788 | ENSRNOT00000026531 | -0.96303458  | 5.11E-07 |
| TUCP_003984 | XLOC_174788 | ENSRNOT00000035605 | 0.957304237  | 1.04E-06 |
| TUCP_003984 | XLOC_174788 | ENSRNOT00000050119 | -0.970363843 | 1.71E-07 |
| TUCP_003984 | XLOC_174788 | ENSRNOT00000084031 | 0.964283764  | 4.31E-07 |
| TUCP_003984 | XLOC_174788 | ENSRNOT00000059181 | 0.960770615  | 6.85E-07 |
| TUCP_003984 | XLOC_174788 | ENSRNOT00000009749 | -0.956444571 | 1.15E-06 |
| TUCP_003984 | XLOC_174788 | ENSRNOT00000016568 | 0.958187357  | 9.38E-07 |
| TUCP_003984 | XLOC_174788 | ENSRNOT00000005910 | -0.954752199 | 1.38E-06 |
| TUCP_003984 | XLOC_174788 | ENSRNOT00000028290 | -0.960352485 | 7.22E-07 |
| TUCP_003984 | XLOC_174788 | ENSRNOT00000003412 | -0.961254818 | 6.44E-07 |
| TUCP_003984 | XLOC_174788 | ENSRNOT00000050609 | -0.962570185 | 5.43E-07 |
| TUCP_003984 | XLOC_174788 | ENSRNOT00000089211 | 0.952453419  | 1.77E-06 |
| TUCP_003984 | XLOC_174788 | ENSRNOT00000050515 | 0.955556618  | 1.27E-06 |
| TUCP_003984 | XLOC_174788 | ENSRNOT00000060595 | -0.950479759 | 2.16E-06 |
| TUCP_003984 | XLOC_174788 | ENSRNOT00000029701 | 0.965334476  | 3.72E-07 |
| TUCP_003984 | XLOC_174788 | ENSRNOT00000006765 | -0.962033978 | 5.83E-07 |
| TUCP_003984 | XLOC_174788 | ENSRNOT00000073847 | -0.955868727 | 1.22E-06 |
| TUCP_003984 | XLOC_174788 | ENSRNOT00000015518 | -0.950944635 | 2.06E-06 |
| TUCP_003984 | XLOC_174788 | ENSRNOT00000024947 | -0.960061275 | 7.48E-07 |
| TUCP_003984 | XLOC_174788 | ENSRNOT00000011401 | -0.962720598 | 5.33E-07 |

|             |             |                    |              |          |
|-------------|-------------|--------------------|--------------|----------|
| TUCP_003984 | XLOC_174788 | ENSRNOT00000055602 | -0.965935535 | 3.41E-07 |
| TUCP_003984 | XLOC_174788 | ENSRNOT00000037015 | 0.959407353  | 8.11E-07 |
| TUCP_003984 | XLOC_174788 | ENSRNOT00000067135 | -0.974508178 | 8.12E-08 |
| TUCP_003984 | XLOC_174788 | ENSRNOT00000011563 | -0.964112519 | 4.41E-07 |
| TUCP_003984 | XLOC_174788 | ENSRNOT00000054976 | -0.972743602 | 1.13E-07 |
| TUCP_003984 | XLOC_174788 | ENSRNOT00000010516 | -0.957020004 | 1.07E-06 |
| TUCP_003984 | XLOC_174788 | ENSRNOT00000023876 | 0.960075455  | 7.47E-07 |
| TUCP_003984 | XLOC_174788 | ENSRNOT0000002187  | -0.960599253 | 7.00E-07 |
| TUCP_003984 | XLOC_174788 | ENSRNOT00000025794 | -0.961050361 | 6.61E-07 |
| TUCP_003984 | XLOC_174788 | ENSRNOT00000011130 | -0.953887344 | 1.52E-06 |
| TUCP_003984 | XLOC_174788 | ENSRNOT00000039730 | -0.957450256 | 1.02E-06 |
| TUCP_003984 | XLOC_174788 | ENSRNOT00000083632 | -0.970295951 | 1.73E-07 |
| TUCP_003984 | XLOC_174788 | ENSRNOT00000030329 | -0.964861675 | 3.98E-07 |
| TUCP_003984 | XLOC_174788 | ENSRNOT00000087748 | -0.967407034 | 2.74E-07 |
| TUCP_003984 | XLOC_174788 | ENSRNOT00000003568 | 0.950920991  | 2.06E-06 |
| TUCP_003984 | XLOC_174788 | ENSRNOT00000006366 | -0.950469007 | 2.16E-06 |
| TUCP_003984 | XLOC_174788 | ENSRNOT00000074649 | 0.953664869  | 1.56E-06 |
| TUCP_003984 | XLOC_174788 | ENSRNOT00000016132 | -0.961707276 | 6.08E-07 |
| TUCP_003984 | XLOC_174788 | ENSRNOT00000067780 | -0.953534128 | 1.58E-06 |
| TUCP_003984 | XLOC_174788 | ENSRNOT00000077146 | -0.970100126 | 1.79E-07 |
| TUCP_003984 | XLOC_174788 | ENSRNOT00000026235 | -0.958668825 | 8.86E-07 |
| TUCP_003984 | XLOC_174788 | ENSRNOT00000023872 | -0.97182302  | 1.33E-07 |
| TUCP_003984 | XLOC_174788 | ENSRNOT00000010753 | -0.952562355 | 1.75E-06 |
| TUCP_003984 | XLOC_174788 | ENSRNOT00000004999 | 0.96423735   | 4.34E-07 |
| TUCP_003984 | XLOC_174788 | ENSRNOT00000026312 | 0.952223537  | 1.81E-06 |
| TUCP_003984 | XLOC_174788 | ENSRNOT00000013463 | 0.983436784  | 9.55E-09 |
| TUCP_003984 | XLOC_174788 | ENSRNOT00000060002 | -0.962748645 | 5.31E-07 |
| TUCP_003984 | XLOC_174788 | ENSRNOT00000089673 | -0.974679101 | 7.86E-08 |
| TUCP_003984 | XLOC_174788 | ENSRNOT00000023763 | -0.963692317 | 4.67E-07 |
| TUCP_003984 | XLOC_174788 | ENSRNOT00000019465 | -0.956792005 | 1.10E-06 |
| TUCP_003984 | XLOC_174788 | ENSRNOT00000057738 | 0.965371029  | 3.70E-07 |
| TUCP_003984 | XLOC_174788 | ENSRNOT00000058382 | 0.951126982  | 2.02E-06 |
| TUCP_003984 | XLOC_174788 | ENSRNOT00000000263 | 0.967890433  | 2.55E-07 |
| TUCP_003984 | XLOC_174788 | ENSRNOT00000007889 | -0.95514153  | 1.33E-06 |
| TUCP_003984 | XLOC_174788 | ENSRNOT00000023977 | -0.964140305 | 4.40E-07 |
| TUCP_003984 | XLOC_174788 | ENSRNOT00000009202 | 0.962093477  | 5.78E-07 |
| TUCP_003984 | XLOC_174788 | ENSRNOT00000047663 | -0.975426621 | 6.77E-08 |
| TUCP_003984 | XLOC_174788 | ENSRNOT00000082151 | -0.960014794 | 7.53E-07 |
| TUCP_003984 | XLOC_174788 | ENSRNOT00000020272 | -0.959542635 | 7.97E-07 |
| TUCP_003984 | XLOC_174788 | ENSRNOT00000066133 | -0.959955614 | 7.58E-07 |
| TUCP_003984 | XLOC_174788 | ENSRNOT00000017420 | -0.952766197 | 1.71E-06 |
| TUCP_003984 | XLOC_174788 | ENSRNOT00000034411 | 0.952529328  | 1.75E-06 |
| TUCP_003984 | XLOC_174788 | ENSRNOT0000001607  | 0.952930451  | 1.68E-06 |
| TUCP_003984 | XLOC_174788 | ENSRNOT00000029202 | -0.955518095 | 1.27E-06 |
| TUCP_003984 | XLOC_174788 | ENSRNOT00000017291 | -0.959811508 | 7.72E-07 |
| TUCP_003984 | XLOC_174788 | ENSRNOT00000017907 | -0.966827993 | 2.99E-07 |
| TUCP_003984 | XLOC_174788 | ENSRNOT00000003691 | -0.967982863 | 2.51E-07 |
| TUCP_003984 | XLOC_174788 | ENSRNOT00000045532 | -0.960530391 | 7.06E-07 |
| TUCP_003984 | XLOC_174788 | ENSRNOT00000035385 | 0.958133586  | 9.44E-07 |
| TUCP_003984 | XLOC_174788 | ENSRNOT00000000532 | -0.954805282 | 1.38E-06 |
| TUCP_003984 | XLOC_174788 | ENSRNOT0000002443  | 0.960427424  | 7.15E-07 |

|             |             |                    |              |          |
|-------------|-------------|--------------------|--------------|----------|
| TUCP_003984 | XLOC_174788 | ENSRNOT00000014924 | -0.976040222 | 5.97E-08 |
| TUCP_003984 | XLOC_174788 | ENSRNOT00000007738 | -0.952965788 | 1.67E-06 |
| TUCP_003984 | XLOC_174788 | ENSRNOT00000022144 | -0.957161326 | 1.06E-06 |
| TUCP_003984 | XLOC_174788 | ENSRNOT00000030692 | -0.9606292   | 6.97E-07 |
| TUCP_003984 | XLOC_174788 | ENSRNOT00000057537 | 0.95395908   | 1.51E-06 |
| TUCP_003984 | XLOC_174788 | ENSRNOT00000007771 | -0.958714864 | 8.81E-07 |
| TUCP_003984 | XLOC_174788 | ENSRNOT00000002114 | -0.980068392 | 2.40E-08 |
| TUCP_003984 | XLOC_174788 | ENSRNOT00000022142 | 0.950721579  | 2.11E-06 |
| TUCP_003984 | XLOC_174788 | ENSRNOT00000080608 | 0.965367018  | 3.70E-07 |
| TUCP_003984 | XLOC_174788 | ENSRNOT00000027970 | 0.969474421  | 1.98E-07 |
| TUCP_003984 | XLOC_174788 | ENSRNOT00000018634 | -0.95430771  | 1.45E-06 |
| TUCP_003984 | XLOC_174788 | ENSRNOT00000085971 | -0.977226971 | 4.64E-08 |
| TUCP_003984 | XLOC_174788 | ENSRNOT00000085295 | -0.9644804   | 4.19E-07 |
| TUCP_003984 | XLOC_174788 | ENSRNOT00000015537 | 0.951640741  | 1.92E-06 |
| TUCP_003984 | XLOC_174788 | ENSRNOT00000008222 | -0.965402989 | 3.68E-07 |
| TUCP_003984 | XLOC_174788 | ENSRNOT00000023664 | -0.951661545 | 1.92E-06 |
| TUCP_003984 | XLOC_174788 | ENSRNOT00000016445 | 0.953070001  | 1.66E-06 |
| TUCP_003984 | XLOC_174788 | ENSRNOT00000039341 | 0.951204416  | 2.01E-06 |
| TUCP_003984 | XLOC_174788 | ENSRNOT00000036838 | -0.977930857 | 3.97E-08 |
| TUCP_003984 | XLOC_174788 | ENSRNOT00000039102 | 0.968851262  | 2.19E-07 |
| TUCP_003984 | XLOC_174788 | ENSRNOT00000082138 | -0.961224577 | 6.47E-07 |
| TUCP_003984 | XLOC_174788 | ENSRNOT00000023807 | -0.968475708 | 2.33E-07 |
| TUCP_003984 | XLOC_174788 | ENSRNOT00000078856 | -0.961326058 | 6.38E-07 |
| TUCP_003984 | XLOC_174788 | ENSRNOT00000023965 | -0.972408327 | 1.20E-07 |
| TUCP_003984 | XLOC_174788 | ENSRNOT00000013933 | -0.950150475 | 2.23E-06 |
| TUCP_003984 | XLOC_174788 | ENSRNOT00000033048 | -0.969311941 | 2.04E-07 |
| TUCP_003984 | XLOC_174788 | ENSRNOT00000000120 | 0.983183998  | 1.03E-08 |
| TUCP_003984 | XLOC_174788 | ENSRNOT00000019983 | -0.952768658 | 1.71E-06 |
| TUCP_003984 | XLOC_174788 | ENSRNOT00000003630 | -0.956524036 | 1.14E-06 |
| TUCP_003984 | XLOC_174788 | ENSRNOT00000010983 | 0.955478229  | 1.28E-06 |
| TUCP_003984 | XLOC_174788 | ENSRNOT00000007369 | 0.962629332  | 5.39E-07 |
| TUCP_003984 | XLOC_174788 | ENSRNOT00000042125 | 0.963054693  | 5.09E-07 |
| TUCP_003984 | XLOC_174788 | ENSRNOT00000085466 | 0.951357299  | 1.98E-06 |
| TUCP_003984 | XLOC_174788 | ENSRNOT00000028545 | -0.964287417 | 4.31E-07 |
| TUCP_003984 | XLOC_174788 | ENSRNOT00000060698 | -0.957428849 | 1.03E-06 |
| TUCP_003984 | XLOC_174788 | ENSRNOT0000001759  | -0.965267422 | 3.76E-07 |
| TUCP_003984 | XLOC_174788 | ENSRNOT00000035808 | 0.956921584  | 1.09E-06 |
| TUCP_003984 | XLOC_174788 | ENSRNOT00000028225 | 0.95929091   | 8.22E-07 |
| TUCP_003984 | XLOC_174788 | ENSRNOT00000026760 | -0.96696694  | 2.93E-07 |
| TUCP_003984 | XLOC_174788 | ENSRNOT00000075800 | -0.967336013 | 2.77E-07 |
| TUCP_003984 | XLOC_174788 | ENSRNOT00000082709 | -0.978148781 | 3.78E-08 |
| TUCP_003984 | XLOC_174788 | ENSRNOT00000015624 | 0.955135452  | 1.33E-06 |
| TUCP_003984 | XLOC_174788 | ENSRNOT00000004319 | -0.959210287 | 8.30E-07 |
| TUCP_003984 | XLOC_174788 | ENSRNOT00000063821 | -0.951198175 | 2.01E-06 |
| TUCP_003984 | XLOC_174788 | ENSRNOT00000032248 | 0.952296672  | 1.80E-06 |
| TUCP_003984 | XLOC_174788 | ENSRNOT00000019911 | -0.959102149 | 8.41E-07 |
| TUCP_003984 | XLOC_174788 | ENSRNOT00000013431 | -0.956606638 | 1.13E-06 |
| TUCP_003984 | XLOC_174788 | ENSRNOT00000015318 | -0.961707102 | 6.08E-07 |
| TUCP_003984 | XLOC_174788 | ENSRNOT00000032236 | -0.950235478 | 2.21E-06 |
| TUCP_003984 | XLOC_174788 | ENSRNOT00000016372 | -0.958087408 | 9.49E-07 |
| TUCP_003984 | XLOC_174788 | ENSRNOT0000005885  | -0.968855873 | 2.19E-07 |

|             |             |                    |              |          |
|-------------|-------------|--------------------|--------------|----------|
| TUCP_003984 | XL0C_174788 | ENSRNOT00000051494 | 0.956018524  | 1.20E-06 |
| TUCP_003984 | XL0C_174788 | ENSRNOT00000080410 | -0.968687413 | 2.25E-07 |
| TUCP_003984 | XL0C_174788 | ENSRNOT00000027967 | 0.956411308  | 1.15E-06 |
| TUCP_003984 | XL0C_174788 | ENSRNOT00000049285 | -0.966633185 | 3.08E-07 |
| TUCP_003984 | XL0C_174788 | ENSRNOT00000019109 | -0.955486173 | 1.28E-06 |
| TUCP_003984 | XL0C_174788 | ENSRNOT00000012286 | -0.980121915 | 2.36E-08 |
| TUCP_003984 | XL0C_174788 | ENSRNOT00000037039 | -0.965072651 | 3.86E-07 |
| TUCP_003984 | XL0C_174788 | ENSRNOT00000090057 | 0.951746099  | 1.90E-06 |
| TUCP_003984 | XL0C_174788 | ENSRNOT00000036613 | -0.957358886 | 1.03E-06 |
| TUCP_003984 | XL0C_174788 | ENSRNOT00000008987 | -0.969507855 | 1.97E-07 |
| TUCP_003984 | XL0C_174788 | ENSRNOT00000025705 | 0.965717926  | 3.52E-07 |
| TUCP_003984 | XL0C_174788 | ENSRNOT00000054685 | 0.952457628  | 1.77E-06 |
| TUCP_003984 | XL0C_174788 | ENSRNOT00000090355 | -0.977060839 | 4.81E-08 |
| TUCP_003984 | XL0C_174788 | ENSRNOT00000002445 | -0.968686964 | 2.25E-07 |
| TUCP_003984 | XL0C_174788 | ENSRNOT00000038212 | -0.968825453 | 2.20E-07 |
| TUCP_003984 | XL0C_174788 | ENSRNOT00000005257 | 0.961976106  | 5.87E-07 |
| TUCP_003984 | XL0C_174788 | ENSRNOT00000085621 | 0.960322473  | 7.24E-07 |
| TUCP_003984 | XL0C_174788 | ENSRNOT00000008113 | -0.959361499 | 8.15E-07 |
| TUCP_003984 | XL0C_174788 | ENSRNOT00000000334 | -0.951007448 | 2.05E-06 |
| TUCP_000943 | XL0C_034904 | ENSRNOT00000082585 | 0.958922807  | 8.60E-07 |
| TUCP_003987 | XL0C_175146 | ENSRNOT00000044855 | 0.98435436   | 7.19E-09 |
| TUCP_003589 | XL0C_157709 | ENSRNOT00000084500 | 0.976499889  | 5.43E-08 |
| TUCP_003589 | XL0C_157709 | ENSRNOT00000093467 | 0.985463696  | 4.99E-09 |
| TUCP_003589 | XL0C_157709 | ENSRNOT00000029340 | 0.991413351  | 3.62E-10 |
| TUCP_003589 | XL0C_157709 | ENSRNOT00000077972 | 0.964601361  | 4.12E-07 |
| TUCP_003589 | XL0C_157709 | ENSRNOT00000038646 | 0.993487726  | 9.12E-11 |
| TUCP_003589 | XL0C_157709 | ENSRNOT00000017909 | 0.966731654  | 3.04E-07 |
| TUCP_003589 | XL0C_157709 | ENSRNOT00000085479 | 0.96556545   | 3.60E-07 |
| TUCP_003589 | XL0C_157709 | ENSRNOT00000092579 | 0.993487726  | 9.12E-11 |
| TUCP_003589 | XL0C_157709 | ENSRNOT00000048373 | 0.955511868  | 1.27E-06 |
| TUCP_003589 | XL0C_157709 | ENSRNOT00000036383 | 0.978884088  | 3.19E-08 |
| TUCP_003589 | XL0C_157709 | ENSRNOT00000076528 | 0.998956472  | 9.73E-15 |
| TUCP_003589 | XL0C_157709 | ENSRNOT00000077458 | 0.959164195  | 8.35E-07 |
| TUCP_003589 | XL0C_157709 | ENSRNOT00000083034 | 0.992447229  | 1.91E-10 |
| TUCP_003589 | XL0C_157709 | ENSRNOT00000089607 | 0.999177615  | 2.96E-15 |
| TUCP_003589 | XL0C_157709 | ENSRNOT00000035915 | 0.956960879  | 1.08E-06 |
| TUCP_003589 | XL0C_157709 | ENSRNOT00000052315 | 0.975231412  | 7.04E-08 |
| TUCP_003589 | XL0C_157709 | ENSRNOT00000075193 | 0.972029351  | 1.29E-07 |
| TUCP_003589 | XL0C_157709 | ENSRNOT00000088168 | 0.993487726  | 9.12E-11 |
| TUCP_003589 | XL0C_157709 | ENSRNOT00000046231 | 0.952887301  | 1.69E-06 |
| TUCP_003589 | XL0C_157709 | ENSRNOT00000013459 | 0.970404465  | 1.70E-07 |
| TUCP_003589 | XL0C_157709 | ENSRNOT00000078137 | 0.993487726  | 9.12E-11 |
| TUCP_003589 | XL0C_157709 | ENSRNOT00000077764 | 0.977957872  | 3.95E-08 |
| TUCP_003589 | XL0C_157709 | ENSRNOT00000043661 | 0.957846633  | 9.76E-07 |
| TUCP_003589 | XL0C_157709 | ENSRNOT00000092740 | 0.993487726  | 9.12E-11 |
| TUCP_003589 | XL0C_157709 | ENSRNOT00000000117 | 0.983009457  | 1.08E-08 |
| TUCP_003589 | XL0C_157709 | ENSRNOT00000071877 | 0.953927246  | 1.51E-06 |
| TUCP_003589 | XL0C_157709 | ENSRNOT00000070958 | 0.993487726  | 9.12E-11 |
| TUCP_003589 | XL0C_157709 | ENSRNOT00000076757 | 0.965734772  | 3.51E-07 |
| TUCP_003589 | XL0C_157709 | ENSRNOT00000085310 | 0.956205971  | 1.18E-06 |
| TUCP_003589 | XL0C_157709 | ENSRNOT00000047241 | 0.957361246  | 1.03E-06 |

|             |             |                    |              |          |
|-------------|-------------|--------------------|--------------|----------|
| TUCP_003589 | XLOC_157709 | ENSRNOT00000027268 | 0.993487726  | 9.12E-11 |
| TUCP_003589 | XLOC_157709 | ENSRNOT00000004459 | 0.993487726  | 9.12E-11 |
| TUCP_003589 | XLOC_157709 | ENSRNOT00000089235 | 0.990510426  | 5.96E-10 |
| TUCP_003589 | XLOC_157709 | ENSRNOT00000061516 | 0.984422162  | 7.04E-09 |
| TUCP_003589 | XLOC_157709 | ENSRNOT00000088148 | 0.993487726  | 9.12E-11 |
| TUCP_003589 | XLOC_157709 | ENSRNOT00000088527 | 0.993487726  | 9.12E-11 |
| TUCP_003589 | XLOC_157709 | ENSRNOT00000078701 | 0.993487726  | 9.12E-11 |
| TUCP_003589 | XLOC_157709 | ENSRNOT00000052308 | 0.953292063  | 1.62E-06 |
| TUCP_003589 | XLOC_157709 | ENSRNOT00000021748 | 0.993487726  | 9.12E-11 |
| TUCP_003589 | XLOC_157709 | ENSRNOT00000089085 | 0.993487726  | 9.12E-11 |
| TUCP_003589 | XLOC_157709 | ENSRNOT00000008153 | 0.994776859  | 3.03E-11 |
| TUCP_003589 | XLOC_157709 | ENSRNOT00000085896 | 0.966698338  | 3.05E-07 |
| TUCP_003589 | XLOC_157709 | ENSRNOT00000079189 | 0.973656349  | 9.56E-08 |
| TUCP_003589 | XLOC_157709 | ENSRNOT00000090078 | 0.993487726  | 9.12E-11 |
| TUCP_003589 | XLOC_157709 | ENSRNOT00000078020 | 0.960395871  | 7.18E-07 |
| TUCP_003589 | XLOC_157709 | ENSRNOT00000009776 | 0.993487726  | 9.12E-11 |
| TUCP_003232 | XLOC_138424 | ENSRNOT00000007761 | 0.952715212  | 1.72E-06 |
| TUCP_003232 | XLOC_138424 | ENSRNOT00000031083 | 0.969131158  | 2.10E-07 |
| TUCP_003232 | XLOC_138424 | ENSRNOT00000038188 | 0.957175777  | 1.06E-06 |
| TUCP_003232 | XLOC_138424 | ENSRNOT00000064942 | -0.950492286 | 2.15E-06 |
| TUCP_003232 | XLOC_138424 | ENSRNOT00000090780 | 0.975263099  | 7.00E-08 |
| TUCP_003889 | XLOC_170989 | ENSRNOT00000073970 | -0.962289326 | 5.64E-07 |
| TUCP_001907 | XLOC_078874 | ENSRNOT00000085042 | -0.964117646 | 4.41E-07 |
| TUCP_001907 | XLOC_078874 | ENSRNOT00000047522 | -0.972417455 | 1.20E-07 |
| TUCP_003128 | XLOC_133580 | ENSRNOT00000026966 | 0.970322306  | 1.73E-07 |
| TUCP_003128 | XLOC_133580 | ENSRNOT00000068416 | 0.999999782  | 3.88E-33 |
| TUCP_003128 | XLOC_133580 | ENSRNOT00000086036 | 0.999958274  | 9.96E-22 |
| TUCP_003128 | XLOC_133580 | ENSRNOT00000026803 | 0.985046075  | 5.74E-09 |
| TUCP_003128 | XLOC_133580 | ENSRNOT00000047527 | 0.963071698  | 5.08E-07 |
| TUCP_003128 | XLOC_133580 | ENSRNOT00000042251 | 0.999344295  | 9.53E-16 |
| TUCP_003128 | XLOC_133580 | ENSRNOT0000002984  | 0.998397069  | 8.31E-14 |
| TUCP_003128 | XLOC_133580 | ENSRNOT00000083764 | 0.999541808  | 1.59E-16 |
| TUCP_003128 | XLOC_133580 | ENSRNOT00000076802 | 0.962695843  | 5.34E-07 |
| TUCP_003128 | XLOC_133580 | ENSRNOT00000092365 | 0.999161651  | 3.26E-15 |
| TUCP_003128 | XLOC_133580 | ENSRNOT00000079275 | 0.999901911  | 7.15E-20 |
| TUCP_003128 | XLOC_133580 | ENSRNOT00000066062 | -0.959706712 | 7.82E-07 |
| TUCP_003128 | XLOC_133580 | ENSRNOT00000045301 | 1            | 0        |
| TUCP_003128 | XLOC_133580 | ENSRNOT00000041186 | 0.999975782  | 6.56E-23 |
| TUCP_003128 | XLOC_133580 | ENSRNOT00000010092 | 0.977711778  | 4.17E-08 |
| TUCP_003128 | XLOC_133580 | ENSRNOT00000076182 | 1            | 1.33E-79 |
| TUCP_003128 | XLOC_133580 | ENSRNOT00000087404 | 0.951157664  | 2.02E-06 |
| TUCP_003128 | XLOC_133580 | ENSRNOT00000052003 | 0.95837331   | 9.18E-07 |
| TUCP_003128 | XLOC_133580 | ENSRNOT00000081709 | 0.998485154  | 6.27E-14 |
| TUCP_003128 | XLOC_133580 | ENSRNOT00000005726 | 0.959610119  | 7.91E-07 |
| TUCP_003128 | XLOC_133580 | ENSRNOT00000014103 | 1            | 4.25E-78 |
| TUCP_003128 | XLOC_133580 | ENSRNOT00000057433 | 0.964930601  | 3.94E-07 |
| TUCP_003128 | XLOC_133580 | ENSRNOT00000082289 | 0.998931566  | 1.09E-14 |
| TUCP_003128 | XLOC_133580 | ENSRNOT00000092516 | 0.957459323  | 1.02E-06 |
| TUCP_003128 | XLOC_133580 | ENSRNOT00000008898 | 0.990039768  | 7.59E-10 |
| TUCP_003128 | XLOC_133580 | ENSRNOT00000083493 | 0.995461232  | 1.51E-11 |
| TUCP_003128 | XLOC_133580 | ENSRNOT00000092563 | 0.987201084  | 2.65E-09 |

|             |             |                    |             |          |
|-------------|-------------|--------------------|-------------|----------|
| TUCP_003128 | XLOC_133580 | ENSRNOT00000088893 | 1           | 0        |
| TUCP_003128 | XLOC_133580 | ENSRNOT00000076693 | 0.955029582 | 1.34E-06 |
| TUCP_003128 | XLOC_133580 | ENSRNOT00000081014 | 1           | 1.33E-79 |
| TUCP_003128 | XLOC_133580 | ENSRNOT00000067543 | 1           | 1.33E-79 |
| TUCP_003128 | XLOC_133580 | ENSRNOT00000050968 | 0.996816433 | 2.56E-12 |
| TUCP_003128 | XLOC_133580 | ENSRNOT00000042201 | 0.960235595 | 7.32E-07 |
| TUCP_003128 | XLOC_133580 | ENSRNOT00000004373 | 0.957315473 | 1.04E-06 |
| TUCP_003128 | XLOC_133580 | ENSRNOT00000063929 | 1           | 0        |
| TUCP_003128 | XLOC_133580 | ENSRNOT00000057472 | 1           | 0        |
| TUCP_003128 | XLOC_133580 | ENSRNOT00000041617 | 0.952449765 | 1.77E-06 |
| TUCP_003128 | XLOC_133580 | ENSRNOT00000091763 | 0.986310385 | 3.70E-09 |
| TUCP_003128 | XLOC_133580 | ENSRNOT00000022200 | 0.998491303 | 6.14E-14 |
| TUCP_003128 | XLOC_133580 | ENSRNOT00000067379 | 0.997260967 | 1.21E-12 |
| TUCP_003128 | XLOC_133580 | ENSRNOT00000020786 | 0.976428448 | 5.51E-08 |
| TUCP_003128 | XLOC_133580 | ENSRNOT00000050543 | 0.999722223 | 1.30E-17 |
| TUCP_003128 | XLOC_133580 | ENSRNOT00000089306 | 0.999866649 | 3.32E-19 |
| TUCP_003128 | XLOC_133580 | ENSRNOT00000052367 | 0.997268394 | 1.19E-12 |
| TUCP_003128 | XLOC_133580 | ENSRNOT00000090658 | 1           | 0        |
| TUCP_003128 | XLOC_133580 | ENSRNOT00000022571 | 0.995290013 | 1.81E-11 |
| TUCP_003128 | XLOC_133580 | ENSRNOT00000044520 | 0.981817158 | 1.52E-08 |
| TUCP_003128 | XLOC_133580 | ENSRNOT00000065448 | 0.963648868 | 4.70E-07 |
| TUCP_003093 | XLOC_132420 | ENSRNOT00000036565 | 0.975672313 | 6.44E-08 |
| TUCP_003093 | XLOC_132420 | ENSRNOT00000093075 | 0.969097172 | 2.11E-07 |
| TUCP_003093 | XLOC_132420 | ENSRNOT00000058260 | 0.969097172 | 2.11E-07 |
| TUCP_003093 | XLOC_132420 | ENSRNOT00000088887 | 0.969097172 | 2.11E-07 |
| TUCP_003093 | XLOC_132420 | ENSRNOT00000084986 | 0.969097172 | 2.11E-07 |
| TUCP_003093 | XLOC_132420 | ENSRNOT00000072573 | 0.972592452 | 1.16E-07 |
| TUCP_003093 | XLOC_132420 | ENSRNOT00000017828 | 0.961785641 | 6.02E-07 |
| TUCP_003093 | XLOC_132420 | ENSRNOT00000071312 | 0.969097172 | 2.11E-07 |
| TUCP_003093 | XLOC_132420 | ENSRNOT00000088245 | 0.969097172 | 2.11E-07 |
| TUCP_003093 | XLOC_132420 | ENSRNOT00000058833 | 0.965830464 | 3.46E-07 |
| TUCP_003093 | XLOC_132420 | ENSRNOT00000078052 | 0.969097172 | 2.11E-07 |
| TUCP_003093 | XLOC_132420 | ENSRNOT00000078494 | 0.968561995 | 2.29E-07 |
| TUCP_003093 | XLOC_132420 | ENSRNOT00000085653 | 0.969097172 | 2.11E-07 |
| TUCP_003093 | XLOC_132420 | ENSRNOT00000081992 | 0.969433458 | 2.00E-07 |
| TUCP_003093 | XLOC_132420 | ENSRNOT00000055406 | 0.969097172 | 2.11E-07 |
| TUCP_003093 | XLOC_132420 | ENSRNOT00000070817 | 0.96635004  | 3.21E-07 |
| TUCP_003093 | XLOC_132420 | ENSRNOT00000051285 | 0.964902205 | 3.95E-07 |
| TUCP_003093 | XLOC_132420 | ENSRNOT00000026753 | 0.969097172 | 2.11E-07 |
| TUCP_003093 | XLOC_132420 | ENSRNOT00000080533 | 0.964320637 | 4.29E-07 |
| TUCP_003093 | XLOC_132420 | ENSRNOT00000086031 | 0.969097172 | 2.11E-07 |
| TUCP_003093 | XLOC_132420 | ENSRNOT00000014312 | 0.969097172 | 2.11E-07 |
| TUCP_003093 | XLOC_132420 | ENSRNOT00000051231 | 0.966865785 | 2.98E-07 |
| TUCP_003093 | XLOC_132420 | ENSRNOT00000089407 | 0.95774737  | 9.88E-07 |
| TUCP_003093 | XLOC_132420 | ENSRNOT00000090755 | 0.98210377  | 1.40E-08 |
| TUCP_003093 | XLOC_132420 | ENSRNOT00000055034 | 0.96461781  | 4.12E-07 |
| TUCP_003207 | XLOC_138391 | ENSRNOT00000071885 | 0.956073956 | 1.20E-06 |
| TUCP_003207 | XLOC_138391 | ENSRNOT00000021946 | 0.954751192 | 1.38E-06 |
| TUCP_003207 | XLOC_138391 | ENSRNOT00000006519 | 0.960467331 | 7.12E-07 |
| TUCP_003207 | XLOC_138391 | ENSRNOT00000078710 | 0.980887193 | 1.95E-08 |
| TUCP_003207 | XLOC_138391 | ENSRNOT00000090318 | 0.987930713 | 1.98E-09 |

|             |             |                    |              |          |
|-------------|-------------|--------------------|--------------|----------|
| TUCP_003207 | XLOC_138391 | ENSRNOT00000078140 | 0.981709807  | 1.56E-08 |
| TUCP_003207 | XLOC_138391 | ENSRNOT00000041727 | 0.992639726  | 1.68E-10 |
| TUCP_003207 | XLOC_138391 | ENSRNOT00000021040 | -0.966802786 | 3.00E-07 |
| TUCP_003207 | XLOC_138391 | ENSRNOT00000076451 | 0.972142504  | 1.26E-07 |
| TUCP_000321 | XLOC_010468 | ENSRNOT00000008988 | 0.957790342  | 9.83E-07 |
| TUCP_000321 | XLOC_010468 | ENSRNOT00000037375 | 0.952786846  | 1.71E-06 |
| TUCP_000321 | XLOC_010468 | ENSRNOT00000064983 | 0.950692248  | 2.11E-06 |
| TUCP_000321 | XLOC_010468 | ENSRNOT00000010701 | 0.958025945  | 9.56E-07 |
| TUCP_000321 | XLOC_010468 | ENSRNOT00000034482 | 0.977122011  | 4.75E-08 |
| TUCP_000321 | XLOC_010468 | ENSRNOT00000089358 | 0.956674433  | 1.12E-06 |
| TUCP_000365 | XLOC_012117 | ENSRNOT00000082043 | 0.998796144  | 1.99E-14 |
| TUCP_000365 | XLOC_012117 | ENSRNOT00000090080 | 0.970020271  | 1.81E-07 |
| TUCP_000365 | XLOC_012117 | ENSRNOT00000068444 | 0.999873596  | 2.54E-19 |
| TUCP_000365 | XLOC_012117 | ENSRNOT00000081370 | 0.999582436  | 9.99E-17 |
| TUCP_000365 | XLOC_012117 | ENSRNOT00000078645 | 0.98816239   | 1.79E-09 |
| TUCP_000365 | XLOC_012117 | ENSRNOT00000075987 | 0.98728828   | 2.56E-09 |
| TUCP_000365 | XLOC_012117 | ENSRNOT00000074990 | 0.999873596  | 2.54E-19 |
| TUCP_000365 | XLOC_012117 | ENSRNOT00000087323 | 0.994893311  | 2.71E-11 |
| TUCP_000365 | XLOC_012117 | ENSRNOT00000074930 | 0.999873596  | 2.54E-19 |
| TUCP_000365 | XLOC_012117 | ENSRNOT00000080575 | 0.999800559  | 2.48E-18 |
| TUCP_000365 | XLOC_012117 | ENSRNOT00000057761 | 0.982438118  | 1.28E-08 |
| TUCP_000365 | XLOC_012117 | ENSRNOT00000078369 | 0.992500618  | 1.84E-10 |
| TUCP_000365 | XLOC_012117 | ENSRNOT00000092982 | 0.999873596  | 2.54E-19 |
| TUCP_000365 | XLOC_012117 | ENSRNOT00000088367 | 0.999873596  | 2.54E-19 |
| TUCP_000365 | XLOC_012117 | ENSRNOT00000061874 | 0.969839579  | 1.87E-07 |
| TUCP_000365 | XLOC_012117 | ENSRNOT00000077789 | 0.994432324  | 4.17E-11 |
| TUCP_000365 | XLOC_012117 | ENSRNOT00000081996 | 0.999873596  | 2.54E-19 |
| TUCP_000365 | XLOC_012117 | ENSRNOT00000022280 | 0.981468069  | 1.67E-08 |
| TUCP_000365 | XLOC_012117 | ENSRNOT00000082058 | 0.999873596  | 2.54E-19 |
| TUCP_000365 | XLOC_012117 | ENSRNOT00000088905 | 0.999873596  | 2.54E-19 |
| TUCP_000365 | XLOC_012117 | ENSRNOT00000086831 | 0.999873596  | 2.54E-19 |
| TUCP_000365 | XLOC_012117 | ENSRNOT00000045099 | 0.999873596  | 2.54E-19 |
| TUCP_000365 | XLOC_012117 | ENSRNOT00000086745 | 0.978947417  | 3.14E-08 |
| TUCP_000365 | XLOC_012117 | ENSRNOT00000085849 | 0.987164539  | 2.69E-09 |
| TUCP_000365 | XLOC_012117 | ENSRNOT00000086397 | 0.95829006   | 9.27E-07 |
| TUCP_000365 | XLOC_012117 | ENSRNOT00000079606 | 0.959715564  | 7.81E-07 |
| TUCP_000365 | XLOC_012117 | ENSRNOT00000090207 | 0.955041381  | 1.34E-06 |
| TUCP_000365 | XLOC_012117 | ENSRNOT00000087025 | 0.999873596  | 2.54E-19 |
| TUCP_000365 | XLOC_012117 | ENSRNOT00000019853 | 0.999873596  | 2.54E-19 |
| TUCP_000365 | XLOC_012117 | ENSRNOT00000073853 | 0.989264053  | 1.10E-09 |
| TUCP_000365 | XLOC_012117 | ENSRNOT00000065912 | 0.975458985  | 6.73E-08 |
| TUCP_000365 | XLOC_012117 | ENSRNOT00000073828 | 0.970985169  | 1.54E-07 |
| TUCP_000365 | XLOC_012117 | ENSRNOT00000078683 | 0.970037607  | 1.81E-07 |
| TUCP_000365 | XLOC_012117 | ENSRNOT00000093083 | 0.999121754  | 4.11E-15 |
| TUCP_000323 | XLOC_010515 | ENSRNOT00000084500 | 0.984887141  | 6.05E-09 |
| TUCP_000323 | XLOC_010515 | ENSRNOT00000093467 | 0.996134431  | 6.75E-12 |
| TUCP_000323 | XLOC_010515 | ENSRNOT00000029340 | 0.999116572  | 4.23E-15 |
| TUCP_000323 | XLOC_010515 | ENSRNOT00000077972 | 0.962758032  | 5.30E-07 |
| TUCP_000323 | XLOC_010515 | ENSRNOT00000038646 | 1            | 0        |
| TUCP_000323 | XLOC_010515 | ENSRNOT00000012095 | 0.957750287  | 9.88E-07 |
| TUCP_000323 | XLOC_010515 | ENSRNOT00000017909 | 0.975587192  | 6.56E-08 |

|             |             |                    |              |          |
|-------------|-------------|--------------------|--------------|----------|
| TUCP_000323 | XLOC_010515 | ENSRNOT00000092579 | 1            | 4.25E-78 |
| TUCP_000323 | XLOC_010515 | ENSRNOT00000089235 | 0.998661162  | 3.38E-14 |
| TUCP_000323 | XLOC_010515 | ENSRNOT00000036383 | 0.988460809  | 1.58E-09 |
| TUCP_000323 | XLOC_010515 | ENSRNOT00000076528 | 0.997115373  | 1.57E-12 |
| TUCP_000323 | XLOC_010515 | ENSRNOT00000075193 | 0.964326971  | 4.29E-07 |
| TUCP_000323 | XLOC_010515 | ENSRNOT00000083034 | 0.990934646  | 4.75E-10 |
| TUCP_000323 | XLOC_010515 | ENSRNOT00000089607 | 0.995091455  | 2.23E-11 |
| TUCP_000323 | XLOC_010515 | ENSRNOT00000086014 | 0.960893638  | 6.74E-07 |
| TUCP_000323 | XLOC_010515 | ENSRNOT00000054939 | 0.958021495  | 9.57E-07 |
| TUCP_000323 | XLOC_010515 | ENSRNOT00000052315 | 0.983687082  | 8.85E-09 |
| TUCP_000323 | XLOC_010515 | ENSRNOT00000088168 | 1            | 1.33E-79 |
| TUCP_000323 | XLOC_010515 | ENSRNOT00000046231 | 0.96225463   | 5.66E-07 |
| TUCP_000323 | XLOC_010515 | ENSRNOT00000013459 | 0.979098017  | 3.03E-08 |
| TUCP_000323 | XLOC_010515 | ENSRNOT00000078137 | 1            | 1.33E-79 |
| TUCP_000323 | XLOC_010515 | ENSRNOT00000077764 | 0.977143528  | 4.73E-08 |
| TUCP_000323 | XLOC_010515 | ENSRNOT00000043661 | 0.966975951  | 2.93E-07 |
| TUCP_000323 | XLOC_010515 | ENSRNOT00000092740 | 1            | 0        |
| TUCP_000323 | XLOC_010515 | ENSRNOT00000000117 | 0.990989174  | 4.61E-10 |
| TUCP_000323 | XLOC_010515 | ENSRNOT00000071877 | 0.967113583  | 2.87E-07 |
| TUCP_000323 | XLOC_010515 | ENSRNOT00000070958 | 1            | 4.25E-78 |
| TUCP_000323 | XLOC_010515 | ENSRNOT00000076757 | 0.959205354  | 8.31E-07 |
| TUCP_000323 | XLOC_010515 | ENSRNOT00000085310 | 0.965230243  | 3.78E-07 |
| TUCP_000323 | XLOC_010515 | ENSRNOT00000047241 | 0.966576993  | 3.11E-07 |
| TUCP_000323 | XLOC_010515 | ENSRNOT00000027268 | 1            | 1.33E-79 |
| TUCP_000323 | XLOC_010515 | ENSRNOT00000004459 | 1            | 0        |
| TUCP_000323 | XLOC_010515 | ENSRNOT00000048373 | 0.959096578  | 8.42E-07 |
| TUCP_000323 | XLOC_010515 | ENSRNOT00000061516 | 0.987595648  | 2.27E-09 |
| TUCP_000323 | XLOC_010515 | ENSRNOT00000088148 | 1            | 0        |
| TUCP_000323 | XLOC_010515 | ENSRNOT00000088527 | 1            | 0        |
| TUCP_000323 | XLOC_010515 | ENSRNOT00000078701 | 1            | 1.33E-79 |
| TUCP_000323 | XLOC_010515 | ENSRNOT00000052308 | 0.962646127  | 5.38E-07 |
| TUCP_000323 | XLOC_010515 | ENSRNOT00000021748 | 1            | 0        |
| TUCP_000323 | XLOC_010515 | ENSRNOT00000089085 | 1            | 0        |
| TUCP_000323 | XLOC_010515 | ENSRNOT00000008153 | 0.999703506  | 1.80E-17 |
| TUCP_000323 | XLOC_010515 | ENSRNOT00000085896 | 0.971605382  | 1.39E-07 |
| TUCP_000323 | XLOC_010515 | ENSRNOT00000079189 | 0.984972387  | 5.89E-09 |
| TUCP_000323 | XLOC_010515 | ENSRNOT00000090078 | 1            | 0        |
| TUCP_000323 | XLOC_010515 | ENSRNOT00000078020 | 0.958421666  | 9.13E-07 |
| TUCP_000323 | XLOC_010515 | ENSRNOT00000092425 | 0.956092273  | 1.19E-06 |
| TUCP_000323 | XLOC_010515 | ENSRNOT00000009776 | 1            | 1.33E-79 |
| TUCP_000249 | XLOC_007621 | ENSRNOT00000012161 | 0.951781481  | 1.89E-06 |
| TUCP_000249 | XLOC_007621 | ENSRNOT00000090096 | -0.956402689 | 1.15E-06 |
| TUCP_000249 | XLOC_007621 | ENSRNOT00000081570 | 0.982183362  | 1.37E-08 |
| TUCP_000249 | XLOC_007621 | ENSRNOT00000082601 | 0.979812414  | 2.55E-08 |
| TUCP_000249 | XLOC_007621 | ENSRNOT00000078707 | 0.957116418  | 1.06E-06 |
| TUCP_000329 | XLOC_010523 | ENSRNOT00000013242 | -0.95796802  | 9.63E-07 |
| TUCP_000329 | XLOC_010523 | ENSRNOT00000038020 | 0.957480491  | 1.02E-06 |
| TUCP_000329 | XLOC_010523 | ENSRNOT00000086405 | 0.959261864  | 8.25E-07 |
| TUCP_000329 | XLOC_010523 | ENSRNOT00000072306 | 0.952112783  | 1.83E-06 |
| TUCP_000329 | XLOC_010523 | ENSRNOT00000087907 | 0.95079375   | 2.09E-06 |
| TUCP_000329 | XLOC_010523 | ENSRNOT0000009904  | 0.966363212  | 3.20E-07 |



|             |             |                    |              |          |
|-------------|-------------|--------------------|--------------|----------|
| TUCP_000329 | XLOC_010523 | ENSRNOT00000010171 | 0.983249373  | 1.01E-08 |
| TUCP_003056 | XLOC_130489 | ENSRNOT00000078372 | 0.950750898  | 2.10E-06 |
| TUCP_003056 | XLOC_130489 | ENSRNOT00000056557 | 0.958488444  | 9.05E-07 |
| TUCP_003056 | XLOC_130489 | ENSRNOT00000088078 | 0.958126622  | 9.45E-07 |
| TUCP_003056 | XLOC_130489 | ENSRNOT00000017412 | 0.965701703  | 3.53E-07 |
| TUCP_003056 | XLOC_130489 | ENSRNOT00000076618 | 0.958956119  | 8.56E-07 |
| TUCP_003056 | XLOC_130489 | ENSRNOT00000082002 | 0.964393273  | 4.25E-07 |
| TUCP_003378 | XLOC_146336 | ENSRNOT00000079517 | -0.952388097 | 1.78E-06 |
| TUCP_003378 | XLOC_146336 | ENSRNOT00000013817 | 0.954779031  | 1.38E-06 |
| TUCP_003378 | XLOC_146336 | ENSRNOT00000018864 | -0.951913607 | 1.87E-06 |
| TUCP_003378 | XLOC_146336 | ENSRNOT00000021826 | 0.950612391  | 2.13E-06 |
| TUCP_003378 | XLOC_146336 | ENSRNOT0000001602  | 0.962998239  | 5.13E-07 |
| TUCP_003378 | XLOC_146336 | ENSRNOT00000031384 | 0.951370925  | 1.97E-06 |
| TUCP_003378 | XLOC_146336 | ENSRNOT00000073667 | -0.952446114 | 1.77E-06 |
| TUCP_003378 | XLOC_146336 | ENSRNOT00000048687 | 0.954652267  | 1.40E-06 |
| TUCP_003378 | XLOC_146336 | ENSRNOT00000065600 | 0.956215971  | 1.18E-06 |
| TUCP_003378 | XLOC_146336 | ENSRNOT00000057537 | 0.961448269  | 6.29E-07 |
| TUCP_003378 | XLOC_146336 | ENSRNOT00000083891 | -0.956696214 | 1.11E-06 |
| TUCP_003378 | XLOC_146336 | ENSRNOT00000021537 | 0.955540947  | 1.27E-06 |
| TUCP_003378 | XLOC_146336 | ENSRNOT00000014888 | 0.959652725  | 7.87E-07 |
| TUCP_003378 | XLOC_146336 | ENSRNOT00000037015 | 0.957066207  | 1.07E-06 |
| TUCP_003378 | XLOC_146336 | ENSRNOT00000055630 | 0.956945746  | 1.08E-06 |
| TUCP_003378 | XLOC_146336 | ENSRNOT00000068663 | 0.963612229  | 4.73E-07 |
| TUCP_003378 | XLOC_146336 | ENSRNOT00000056651 | 0.953915141  | 1.51E-06 |
| TUCP_003378 | XLOC_146336 | ENSRNOT00000040525 | 0.951706606  | 1.91E-06 |
| TUCP_003378 | XLOC_146336 | ENSRNOT00000025309 | 0.961625625  | 6.14E-07 |
| TUCP_003378 | XLOC_146336 | ENSRNOT00000068212 | 0.965655279  | 3.55E-07 |
| TUCP_003378 | XLOC_146336 | ENSRNOT00000026518 | 0.953404209  | 1.60E-06 |
| TUCP_004331 | XLOC_191140 | ENSRNOT00000071840 | 0.988457864  | 1.58E-09 |
| TUCP_004331 | XLOC_191140 | ENSRNOT00000083608 | 0.978521528  | 3.47E-08 |
| TUCP_004331 | XLOC_191140 | ENSRNOT00000085476 | 0.961348774  | 6.37E-07 |
| TUCP_004331 | XLOC_191140 | ENSRNOT00000045584 | 0.988457864  | 1.58E-09 |
| TUCP_004331 | XLOC_191140 | ENSRNOT00000077995 | 0.977852332  | 4.04E-08 |
| TUCP_004331 | XLOC_191140 | ENSRNOT00000066004 | 0.98794305   | 1.97E-09 |
| TUCP_004331 | XLOC_191140 | ENSRNOT00000064284 | 0.953844413  | 1.53E-06 |
| TUCP_004331 | XLOC_191140 | ENSRNOT00000066685 | 0.97324662   | 1.03E-07 |
| TUCP_004331 | XLOC_191140 | ENSRNOT00000082086 | 0.981740824  | 1.55E-08 |
| TUCP_004331 | XLOC_191140 | ENSRNOT00000082084 | 0.984426397  | 7.03E-09 |
| TUCP_004331 | XLOC_191140 | ENSRNOT00000092182 | 0.988457864  | 1.58E-09 |
| TUCP_004331 | XLOC_191140 | ENSRNOT00000084461 | 0.988457864  | 1.58E-09 |
| TUCP_004331 | XLOC_191140 | ENSRNOT00000047784 | 0.976227868  | 5.75E-08 |
| TUCP_004331 | XLOC_191140 | ENSRNOT00000032631 | 0.988457864  | 1.58E-09 |
| TUCP_004331 | XLOC_191140 | ENSRNOT00000079503 | 0.964035511  | 4.46E-07 |
| TUCP_004331 | XLOC_191140 | ENSRNOT00000060113 | 0.959247933  | 8.27E-07 |
| TUCP_004331 | XLOC_191140 | ENSRNOT00000054910 | 0.978228282  | 3.71E-08 |
| TUCP_004331 | XLOC_191140 | ENSRNOT00000057176 | 0.988434925  | 1.60E-09 |
| TUCP_004331 | XLOC_191140 | ENSRNOT00000078176 | 0.981265814  | 1.76E-08 |
| TUCP_004331 | XLOC_191140 | ENSRNOT00000056364 | 0.975278865  | 6.98E-08 |
| TUCP_004331 | XLOC_191140 | ENSRNOT00000089494 | 0.971644908  | 1.38E-07 |
| TUCP_004331 | XLOC_191140 | ENSRNOT00000093431 | 0.988457864  | 1.58E-09 |
| TUCP_004331 | XLOC_191140 | ENSRNOT00000060448 | 0.988457864  | 1.58E-09 |

|             |             |                    |              |          |
|-------------|-------------|--------------------|--------------|----------|
| TUCP_004331 | XLOC_191140 | ENSRNOT00000092901 | 0.988457864  | 1.58E-09 |
| TUCP_004331 | XLOC_191140 | ENSRNOT00000089290 | 0.988343388  | 1.66E-09 |
| TUCP_004331 | XLOC_191140 | ENSRNOT00000090211 | 0.985701094  | 4.60E-09 |
| TUCP_004331 | XLOC_191140 | ENSRNOT00000075244 | 0.967857262  | 2.56E-07 |
| TUCP_004331 | XLOC_191140 | ENSRNOT00000091828 | 0.982643817  | 1.20E-08 |
| TUCP_004331 | XLOC_191140 | ENSRNOT00000091944 | 0.987686214  | 2.18E-09 |
| TUCP_004331 | XLOC_191140 | ENSRNOT00000070855 | 0.988457864  | 1.58E-09 |
| TUCP_004331 | XLOC_191140 | ENSRNOT0000009295  | 0.983019801  | 1.08E-08 |
| TUCP_004331 | XLOC_191140 | ENSRNOT00000084109 | 0.986526458  | 3.42E-09 |
| TUCP_004331 | XLOC_191140 | ENSRNOT00000016442 | 0.970369508  | 1.71E-07 |
| TUCP_004331 | XLOC_191140 | ENSRNOT00000060645 | 0.953856037  | 1.52E-06 |
| TUCP_004331 | XLOC_191140 | ENSRNOT00000041569 | 0.988457864  | 1.58E-09 |
| TUCP_004331 | XLOC_191140 | ENSRNOT00000087091 | 0.988457864  | 1.58E-09 |
| TUCP_004331 | XLOC_191140 | ENSRNOT00000003308 | 0.973490601  | 9.86E-08 |
| TUCP_004331 | XLOC_191140 | ENSRNOT00000026113 | 0.988049918  | 1.88E-09 |
| TUCP_004331 | XLOC_191140 | ENSRNOT00000014939 | 0.988281471  | 1.71E-09 |
| TUCP_004331 | XLOC_191140 | ENSRNOT00000074800 | 0.956561151  | 1.13E-06 |
| TUCP_004331 | XLOC_191140 | ENSRNOT00000058314 | 0.977406623  | 4.46E-08 |
| TUCP_004331 | XLOC_191140 | ENSRNOT00000047870 | 0.965937158  | 3.41E-07 |
| TUCP_004331 | XLOC_191140 | ENSRNOT00000071603 | 0.988410276  | 1.62E-09 |
| TUCP_004331 | XLOC_191140 | ENSRNOT00000088376 | 0.950981725  | 2.05E-06 |
| TUCP_004331 | XLOC_191140 | ENSRNOT00000024758 | 0.988001015  | 1.92E-09 |
| TUCP_004331 | XLOC_191140 | ENSRNOT00000044232 | 0.96888897   | 2.18E-07 |
| TUCP_004331 | XLOC_191140 | ENSRNOT00000023287 | 0.975519659  | 6.65E-08 |
| TUCP_004331 | XLOC_191140 | ENSRNOT00000071714 | 0.964414133  | 4.23E-07 |
| TUCP_004331 | XLOC_191140 | ENSRNOT00000075836 | 0.988457864  | 1.58E-09 |
| TUCP_004331 | XLOC_191140 | ENSRNOT00000073229 | 0.988457864  | 1.58E-09 |
| TUCP_004331 | XLOC_191140 | ENSRNOT00000046980 | 0.968516686  | 2.31E-07 |
| TUCP_004331 | XLOC_191140 | ENSRNOT00000039652 | 0.956778034  | 1.10E-06 |
| TUCP_004331 | XLOC_191140 | ENSRNOT00000060454 | 0.988457864  | 1.58E-09 |
| TUCP_004331 | XLOC_191140 | ENSRNOT00000082776 | 0.951330626  | 1.98E-06 |
| TUCP_004331 | XLOC_191140 | ENSRNOT00000088719 | 0.95006797   | 2.25E-06 |
| TUCP_004331 | XLOC_191140 | ENSRNOT00000007683 | 0.988241838  | 1.74E-09 |
| TUCP_004331 | XLOC_191140 | ENSRNOT00000092916 | 0.952470271  | 1.76E-06 |
| TUCP_004331 | XLOC_191140 | ENSRNOT00000081106 | 0.987174616  | 2.67E-09 |
| TUCP_004337 | XLOC_191304 | ENSRNOT00000064255 | 0.963168307  | 5.02E-07 |
| TUCP_000244 | XLOC_007621 | ENSRNOT00000093581 | 0.978403667  | 3.57E-08 |
| TUCP_000244 | XLOC_007621 | ENSRNOT00000076554 | -0.987115235 | 2.74E-09 |
| TUCP_000244 | XLOC_007621 | ENSRNOT00000085797 | 0.965673888  | 3.54E-07 |
| TUCP_000244 | XLOC_007621 | ENSRNOT00000077390 | 0.966146943  | 3.31E-07 |
| TUCP_003913 | XLOC_172285 | ENSRNOT00000000713 | 0.953572612  | 1.57E-06 |
| TUCP_003913 | XLOC_172285 | ENSRNOT00000006992 | 0.950906002  | 2.07E-06 |
| TUCP_003913 | XLOC_172285 | ENSRNOT00000019213 | 0.953846063  | 1.53E-06 |
| TUCP_003913 | XLOC_172285 | ENSRNOT00000041908 | 0.962018359  | 5.84E-07 |
| TUCP_003913 | XLOC_172285 | ENSRNOT00000013050 | -0.965838538 | 3.46E-07 |
| TUCP_003913 | XLOC_172285 | ENSRNOT00000074939 | 0.958729806  | 8.80E-07 |
| TUCP_003913 | XLOC_172285 | ENSRNOT0000006055  | 0.952747949  | 1.71E-06 |
| TUCP_003913 | XLOC_172285 | ENSRNOT00000071560 | 0.953983809  | 1.50E-06 |
| TUCP_003913 | XLOC_172285 | ENSRNOT00000026065 | 0.988222998  | 1.75E-09 |
| TUCP_003913 | XLOC_172285 | ENSRNOT00000022726 | 0.971215514  | 1.48E-07 |
| TUCP_003913 | XLOC_172285 | ENSRNOT0000005659  | 0.971639979  | 1.38E-07 |

|             |             |                    |              |          |
|-------------|-------------|--------------------|--------------|----------|
| TUCP_003913 | XLOC_172285 | ENSRNOT00000044635 | 0.963914476  | 4.54E-07 |
| TUCP_003913 | XLOC_172285 | ENSRNOT00000021116 | 0.953220814  | 1.63E-06 |
| TUCP_003913 | XLOC_172285 | ENSRNOT00000018057 | 0.985036943  | 5.76E-09 |
| TUCP_003913 | XLOC_172285 | ENSRNOT00000011442 | -0.952649199 | 1.73E-06 |
| TUCP_003913 | XLOC_172285 | ENSRNOT00000080654 | 0.962790615  | 5.28E-07 |
| TUCP_003913 | XLOC_172285 | ENSRNOT00000010149 | 0.968247513  | 2.41E-07 |
| TUCP_003913 | XLOC_172285 | ENSRNOT00000028563 | 0.966113979  | 3.32E-07 |
| TUCP_003913 | XLOC_172285 | ENSRNOT00000015076 | 0.982950037  | 1.10E-08 |
| TUCP_003913 | XLOC_172285 | ENSRNOT00000004698 | 0.963647951  | 4.70E-07 |
| TUCP_003913 | XLOC_172285 | ENSRNOT00000010418 | 0.953141609  | 1.64E-06 |
| TUCP_003913 | XLOC_172285 | ENSRNOT00000076516 | 0.961354416  | 6.36E-07 |
| TUCP_003913 | XLOC_172285 | ENSRNOT00000015073 | 0.971162294  | 1.50E-07 |
| TUCP_003913 | XLOC_172285 | ENSRNOT00000018533 | 0.951585629  | 1.93E-06 |
| TUCP_003913 | XLOC_172285 | ENSRNOT00000013046 | -0.955422795 | 1.29E-06 |
| TUCP_003913 | XLOC_172285 | ENSRNOT00000026783 | 0.964258734  | 4.33E-07 |
| TUCP_003913 | XLOC_172285 | ENSRNOT00000005126 | -0.957879329 | 9.73E-07 |
| TUCP_003913 | XLOC_172285 | ENSRNOT00000065300 | 0.959609063  | 7.91E-07 |
| TUCP_003913 | XLOC_172285 | ENSRNOT00000011384 | 0.966194205  | 3.29E-07 |
| TUCP_003913 | XLOC_172285 | ENSRNOT00000087306 | 0.951023977  | 2.04E-06 |
| TUCP_003913 | XLOC_172285 | ENSRNOT00000082691 | 0.964740926  | 4.04E-07 |
| TUCP_003913 | XLOC_172285 | ENSRNOT00000076820 | 0.955055368  | 1.34E-06 |
| TUCP_003913 | XLOC_172285 | ENSRNOT00000006963 | 0.958402107  | 9.15E-07 |
| TUCP_003913 | XLOC_172285 | ENSRNOT00000027944 | 0.988349712  | 1.66E-09 |
| TUCP_003913 | XLOC_172285 | ENSRNOT00000068322 | 0.970067841  | 1.80E-07 |
| TUCP_003913 | XLOC_172285 | ENSRNOT00000052075 | 0.973180392  | 1.04E-07 |
| TUCP_003913 | XLOC_172285 | ENSRNOT00000037456 | 0.950298473  | 2.20E-06 |
| TUCP_003913 | XLOC_172285 | ENSRNOT00000017319 | 0.964866663  | 3.97E-07 |
| TUCP_003913 | XLOC_172285 | ENSRNOT00000055187 | 0.950452167  | 2.16E-06 |
| TUCP_003913 | XLOC_172285 | ENSRNOT00000001809 | 0.961233839  | 6.46E-07 |
| TUCP_003913 | XLOC_172285 | ENSRNOT00000016333 | -0.961578074 | 6.18E-07 |
| TUCP_003913 | XLOC_172285 | ENSRNOT00000078500 | 0.955009598  | 1.35E-06 |
| TUCP_003913 | XLOC_172285 | ENSRNOT00000015612 | 0.974986186  | 7.40E-08 |
| TUCP_003913 | XLOC_172285 | ENSRNOT00000067822 | 0.961907968  | 5.92E-07 |
| TUCP_003913 | XLOC_172285 | ENSRNOT00000022594 | 0.963471093  | 4.82E-07 |
| TUCP_003913 | XLOC_172285 | ENSRNOT00000034722 | 0.976684453  | 5.22E-08 |
| TUCP_003913 | XLOC_172285 | ENSRNOT00000010927 | 0.977430215  | 4.44E-08 |
| TUCP_003913 | XLOC_172285 | ENSRNOT00000051181 | 0.956664022  | 1.12E-06 |
| TUCP_003913 | XLOC_172285 | ENSRNOT00000028483 | 0.953376517  | 1.60E-06 |
| TUCP_003913 | XLOC_172285 | ENSRNOT00000071386 | -0.956103701 | 1.19E-06 |
| TUCP_003913 | XLOC_172285 | ENSRNOT00000054955 | -0.959649387 | 7.87E-07 |
| TUCP_003913 | XLOC_172285 | ENSRNOT00000068633 | 0.982901581  | 1.12E-08 |
| TUCP_003913 | XLOC_172285 | ENSRNOT00000037446 | 0.951259324  | 2.00E-06 |
| TUCP_003913 | XLOC_172285 | ENSRNOT00000058645 | 0.970772212  | 1.60E-07 |
| TUCP_003913 | XLOC_172285 | ENSRNOT00000017948 | 0.967687683  | 2.63E-07 |
| TUCP_003913 | XLOC_172285 | ENSRNOT00000084005 | -0.95611685  | 1.19E-06 |
| TUCP_003913 | XLOC_172285 | ENSRNOT00000023180 | 0.957754893  | 9.87E-07 |
| TUCP_003913 | XLOC_172285 | ENSRNOT00000020892 | -0.957018299 | 1.07E-06 |
| TUCP_003913 | XLOC_172285 | ENSRNOT00000019554 | 0.967137944  | 2.86E-07 |
| TUCP_003913 | XLOC_172285 | ENSRNOT00000077908 | 0.951677056  | 1.91E-06 |
| TUCP_003913 | XLOC_172285 | ENSRNOT00000022213 | 0.952750409  | 1.71E-06 |
| TUCP_003913 | XLOC_172285 | ENSRNOT00000022610 | 0.961925952  | 5.91E-07 |

|             |             |                    |              |          |
|-------------|-------------|--------------------|--------------|----------|
| TUCP_003913 | XLOC_172285 | ENSRNOT00000020437 | 0.954368024  | 1.44E-06 |
| TUCP_003913 | XLOC_172285 | ENSRNOT00000064264 | 0.959048897  | 8.47E-07 |
| TUCP_003913 | XLOC_172285 | ENSRNOT00000073346 | 0.953621206  | 1.56E-06 |
| TUCP_003913 | XLOC_172285 | ENSRNOT00000023330 | 0.978150761  | 3.78E-08 |
| TUCP_003913 | XLOC_172285 | ENSRNOT00000025983 | 0.960247265  | 7.31E-07 |
| TUCP_003913 | XLOC_172285 | ENSRNOT00000007164 | 0.955735079  | 1.24E-06 |
| TUCP_003913 | XLOC_172285 | ENSRNOT00000090451 | -0.958570354 | 8.97E-07 |
| TUCP_003913 | XLOC_172285 | ENSRNOT00000015325 | -0.9629483   | 5.17E-07 |
| TUCP_003913 | XLOC_172285 | ENSRNOT00000013661 | 0.974729838  | 7.78E-08 |
| TUCP_003913 | XLOC_172285 | ENSRNOT00000093174 | 0.954476819  | 1.43E-06 |
| TUCP_003913 | XLOC_172285 | ENSRNOT00000017629 | 0.952236444  | 1.81E-06 |
| TUCP_003913 | XLOC_172285 | ENSRNOT00000080800 | 0.96802176   | 2.50E-07 |
| TUCP_003913 | XLOC_172285 | ENSRNOT00000061100 | 0.95447726   | 1.43E-06 |
| TUCP_003913 | XLOC_172285 | ENSRNOT00000020648 | 0.95694255   | 1.08E-06 |
| TUCP_003913 | XLOC_172285 | ENSRNOT00000082228 | 0.956511802  | 1.14E-06 |
| TUCP_003913 | XLOC_172285 | ENSRNOT00000034744 | 0.972438091  | 1.20E-07 |
| TUCP_003913 | XLOC_172285 | ENSRNOT00000082273 | 0.952197002  | 1.81E-06 |
| TUCP_003913 | XLOC_172285 | ENSRNOT00000021153 | 0.977126344  | 4.75E-08 |
| TUCP_003913 | XLOC_172285 | ENSRNOT00000064902 | 0.958137174  | 9.44E-07 |
| TUCP_003913 | XLOC_172285 | ENSRNOT00000025027 | 0.954419631  | 1.44E-06 |
| TUCP_003913 | XLOC_172285 | ENSRNOT00000088995 | 0.980618138  | 2.09E-08 |
| TUCP_003913 | XLOC_172285 | ENSRNOT00000017884 | 0.950754232  | 2.10E-06 |
| TUCP_003913 | XLOC_172285 | ENSRNOT00000016722 | 0.964004874  | 4.48E-07 |
| TUCP_003913 | XLOC_172285 | ENSRNOT00000012424 | 0.960951529  | 6.70E-07 |
| TUCP_003913 | XLOC_172285 | ENSRNOT00000039631 | 0.96163245   | 6.14E-07 |
| TUCP_003913 | XLOC_172285 | ENSRNOT00000090170 | 0.970010531  | 1.82E-07 |
| TUCP_003913 | XLOC_172285 | ENSRNOT00000019656 | -0.951735238 | 1.90E-06 |
| TUCP_003913 | XLOC_172285 | ENSRNOT00000049538 | 0.95879239   | 8.73E-07 |
| TUCP_003913 | XLOC_172285 | ENSRNOT00000005909 | 0.962958698  | 5.16E-07 |
| TUCP_003913 | XLOC_172285 | ENSRNOT00000027054 | 0.959346541  | 8.17E-07 |
| TUCP_003913 | XLOC_172285 | ENSRNOT00000009129 | 0.957997727  | 9.59E-07 |
| TUCP_003913 | XLOC_172285 | ENSRNOT00000015635 | -0.958156139 | 9.42E-07 |
| TUCP_003913 | XLOC_172285 | ENSRNOT00000036951 | 0.968142824  | 2.45E-07 |
| TUCP_003913 | XLOC_172285 | ENSRNOT00000026186 | 0.9760249    | 5.99E-08 |
| TUCP_003913 | XLOC_172285 | ENSRNOT0000007091  | 0.959148701  | 8.37E-07 |
| TUCP_003913 | XLOC_172285 | ENSRNOT00000075424 | 0.955014628  | 1.35E-06 |
| TUCP_003913 | XLOC_172285 | ENSRNOT00000011663 | 0.962722273  | 5.33E-07 |
| TUCP_003913 | XLOC_172285 | ENSRNOT00000057313 | 0.968396037  | 2.35E-07 |
| TUCP_003913 | XLOC_172285 | ENSRNOT00000088196 | 0.962523142  | 5.47E-07 |
| TUCP_003913 | XLOC_172285 | ENSRNOT00000023645 | 0.97557031   | 6.58E-08 |
| TUCP_003913 | XLOC_172285 | ENSRNOT00000019553 | 0.954634939  | 1.40E-06 |
| TUCP_003913 | XLOC_172285 | ENSRNOT00000035700 | 0.95120403   | 2.01E-06 |
| TUCP_003913 | XLOC_172285 | ENSRNOT00000064840 | 0.968687707  | 2.25E-07 |
| TUCP_003913 | XLOC_172285 | ENSRNOT00000011984 | 0.953153381  | 1.64E-06 |
| TUCP_003913 | XLOC_172285 | ENSRNOT00000005977 | 0.960994203  | 6.66E-07 |
| TUCP_003913 | XLOC_172285 | ENSRNOT00000007175 | 0.971832283  | 1.33E-07 |
| TUCP_003913 | XLOC_172285 | ENSRNOT00000020669 | 0.960736217  | 6.88E-07 |
| TUCP_003913 | XLOC_172285 | ENSRNOT00000074653 | 0.981648823  | 1.59E-08 |
| TUCP_003913 | XLOC_172285 | ENSRNOT00000031230 | 0.956863799  | 1.09E-06 |
| TUCP_003913 | XLOC_172285 | ENSRNOT00000010218 | 0.96307527   | 5.08E-07 |
| TUCP_003913 | XLOC_172285 | ENSRNOT00000010588 | 0.968864764  | 2.19E-07 |

|             |             |                    |              |          |
|-------------|-------------|--------------------|--------------|----------|
| TUCP_003913 | XLOC_172285 | ENSRNOT0000002292  | 0.974406168  | 8.29E-08 |
| TUCP_003913 | XLOC_172285 | ENSRNOT00000045083 | 0.989552063  | 9.63E-10 |
| TUCP_003913 | XLOC_172285 | ENSRNOT00000035491 | 0.950783285  | 2.09E-06 |
| TUCP_003913 | XLOC_172285 | ENSRNOT00000083369 | 0.950910534  | 2.07E-06 |
| TUCP_003913 | XLOC_172285 | ENSRNOT00000092906 | 0.964300871  | 4.30E-07 |
| TUCP_003913 | XLOC_172285 | ENSRNOT00000085596 | 0.965474929  | 3.65E-07 |
| TUCP_003913 | XLOC_172285 | ENSRNOT00000082174 | 0.965139999  | 3.82E-07 |
| TUCP_003913 | XLOC_172285 | ENSRNOT00000024060 | 0.989473415  | 1.00E-09 |
| TUCP_003913 | XLOC_172285 | ENSRNOT00000038349 | 0.960354885  | 7.22E-07 |
| TUCP_003913 | XLOC_172285 | ENSRNOT00000004412 | 0.963655412  | 4.70E-07 |
| TUCP_003913 | XLOC_172285 | ENSRNOT00000019177 | 0.957616669  | 1.00E-06 |
| TUCP_003913 | XLOC_172285 | ENSRNOT00000011784 | 0.958629907  | 8.90E-07 |
| TUCP_003913 | XLOC_172285 | ENSRNOT00000084595 | 0.956171268  | 1.18E-06 |
| TUCP_003913 | XLOC_172285 | ENSRNOT00000024941 | 0.962597424  | 5.41E-07 |
| TUCP_003913 | XLOC_172285 | ENSRNOT00000066593 | 0.965054278  | 3.87E-07 |
| TUCP_003913 | XLOC_172285 | ENSRNOT00000013031 | -0.971654129 | 1.37E-07 |
| TUCP_003913 | XLOC_172285 | ENSRNOT00000036750 | 0.95984082   | 7.69E-07 |
| TUCP_003913 | XLOC_172285 | ENSRNOT00000027964 | 0.960484194  | 7.10E-07 |
| TUCP_003913 | XLOC_172285 | ENSRNOT00000024659 | 0.962135569  | 5.75E-07 |
| TUCP_003913 | XLOC_172285 | ENSRNOT00000003834 | -0.956540988 | 1.13E-06 |
| TUCP_003913 | XLOC_172285 | ENSRNOT00000026216 | 0.954688046  | 1.39E-06 |
| TUCP_003913 | XLOC_172285 | ENSRNOT00000052288 | 0.969273322  | 2.05E-07 |
| TUCP_003913 | XLOC_172285 | ENSRNOT00000048029 | 0.994724419  | 3.19E-11 |
| TUCP_003913 | XLOC_172285 | ENSRNOT00000004140 | 0.950123063  | 2.24E-06 |
| TUCP_003913 | XLOC_172285 | ENSRNOT00000010433 | 0.975416254  | 6.79E-08 |
| TUCP_003913 | XLOC_172285 | ENSRNOT00000064930 | 0.965627476  | 3.57E-07 |
| TUCP_003913 | XLOC_172285 | ENSRNOT00000079996 | 0.963445625  | 4.83E-07 |
| TUCP_003913 | XLOC_172285 | ENSRNOT00000011325 | 0.958248177  | 9.31E-07 |
| TUCP_004625 | XLOC_203969 | ENSRNOT00000003286 | 0.959459324  | 8.06E-07 |
| TUCP_004625 | XLOC_203969 | ENSRNOT00000037191 | 0.9619519    | 5.89E-07 |
| TUCP_004231 | XLOC_185847 | ENSRNOT00000009132 | 0.964960901  | 3.92E-07 |
| TUCP_004231 | XLOC_185847 | ENSRNOT00000031365 | 0.959293564  | 8.22E-07 |
| TUCP_004231 | XLOC_185847 | ENSRNOT00000074096 | 0.955416724  | 1.29E-06 |
| TUCP_004231 | XLOC_185847 | ENSRNOT00000061430 | 0.969452521  | 1.99E-07 |
| TUCP_004231 | XLOC_185847 | ENSRNOT0000005067  | 0.961257199  | 6.44E-07 |
| TUCP_004231 | XLOC_185847 | ENSRNOT00000041762 | 0.957630983  | 1.00E-06 |
| TUCP_003917 | XLOC_172529 | ENSRNOT00000067032 | -0.966181933 | 3.29E-07 |
| TUCP_003916 | XLOC_172480 | ENSRNOT00000013817 | 0.956369235  | 1.16E-06 |
| TUCP_003916 | XLOC_172480 | ENSRNOT00000076404 | 0.953205606  | 1.63E-06 |
| TUCP_003916 | XLOC_172480 | ENSRNOT00000025517 | 0.970505844  | 1.67E-07 |
| TUCP_003916 | XLOC_172480 | ENSRNOT00000082183 | 0.964033374  | 4.46E-07 |
| TUCP_003916 | XLOC_172480 | ENSRNOT00000013524 | 0.980711883  | 2.04E-08 |
| TUCP_003916 | XLOC_172480 | ENSRNOT00000026391 | 0.978305385  | 3.65E-08 |
| TUCP_003916 | XLOC_172480 | ENSRNOT00000013284 | 0.965035956  | 3.88E-07 |
| TUCP_003916 | XLOC_172480 | ENSRNOT00000068212 | 0.983044853  | 1.07E-08 |
| TUCP_003916 | XLOC_172480 | ENSRNOT00000026259 | 0.963409476  | 4.86E-07 |
| TUCP_003916 | XLOC_172480 | ENSRNOT00000089243 | 0.961764726  | 6.04E-07 |
| TUCP_003916 | XLOC_172480 | ENSRNOT00000040525 | 0.960019771  | 7.52E-07 |
| TUCP_003916 | XLOC_172480 | ENSRNOT00000087138 | 0.955030413  | 1.34E-06 |
| TUCP_003916 | XLOC_172480 | ENSRNOT00000027170 | 0.961771583  | 6.03E-07 |
| TUCP_003916 | XLOC_172480 | ENSRNOT00000073041 | 0.974982835  | 7.40E-08 |

|             |             |                    |              |          |
|-------------|-------------|--------------------|--------------|----------|
| TUCP_003916 | XLOC_172480 | ENSRNOT00000022716 | 0.954933223  | 1.36E-06 |
| TUCP_003916 | XLOC_172480 | ENSRNOT00000024066 | 0.959208943  | 8.30E-07 |
| TUCP_003916 | XLOC_172480 | ENSRNOT00000046639 | 0.960646976  | 6.96E-07 |
| TUCP_003916 | XLOC_172480 | ENSRNOT00000071998 | 0.968613294  | 2.28E-07 |
| TUCP_003916 | XLOC_172480 | ENSRNOT00000076973 | 0.95910629   | 8.41E-07 |
| TUCP_003916 | XLOC_172480 | ENSRNOT00000004176 | 0.954660776  | 1.40E-06 |
| TUCP_003916 | XLOC_172480 | ENSRNOT00000037133 | 0.956009605  | 1.20E-06 |
| TUCP_003916 | XLOC_172480 | ENSRNOT00000084567 | 0.969603632  | 1.94E-07 |
| TUCP_003916 | XLOC_172480 | ENSRNOT00000064772 | 0.957806116  | 9.81E-07 |
| TUCP_003916 | XLOC_172480 | ENSRNOT00000014127 | 0.972217997  | 1.24E-07 |
| TUCP_003916 | XLOC_172480 | ENSRNOT00000044395 | 0.955799347  | 1.23E-06 |
| TUCP_003916 | XLOC_172480 | ENSRNOT00000034298 | 0.962580623  | 5.43E-07 |
| TUCP_003916 | XLOC_172480 | ENSRNOT00000049245 | 0.950374933  | 2.18E-06 |
| TUCP_003916 | XLOC_172480 | ENSRNOT00000037015 | 0.95831754   | 9.24E-07 |
| TUCP_003916 | XLOC_172480 | ENSRNOT00000068663 | 0.960535717  | 7.05E-07 |
| TUCP_003916 | XLOC_172480 | ENSRNOT00000017384 | 0.950741924  | 2.10E-06 |
| TUCP_003916 | XLOC_172480 | ENSRNOT00000017805 | 0.972424224  | 1.20E-07 |
| TUCP_003916 | XLOC_172480 | ENSRNOT00000065076 | 0.965087695  | 3.85E-07 |
| TUCP_003916 | XLOC_172480 | ENSRNOT00000048687 | 0.959909683  | 7.62E-07 |
| TUCP_003916 | XLOC_172480 | ENSRNOT00000002996 | 0.950030109  | 2.26E-06 |
| TUCP_003916 | XLOC_172480 | ENSRNOT00000027476 | 0.951583583  | 1.93E-06 |
| TUCP_003916 | XLOC_172480 | ENSRNOT00000086917 | 0.959396985  | 8.12E-07 |
| TUCP_003916 | XLOC_172480 | ENSRNOT00000054685 | 0.953600829  | 1.57E-06 |
| TUCP_003916 | XLOC_172480 | ENSRNOT00000021531 | 0.958497801  | 9.04E-07 |
| TUCP_003916 | XLOC_172480 | ENSRNOT00000016445 | 0.95967532   | 7.85E-07 |
| TUCP_003916 | XLOC_172480 | ENSRNOT00000027264 | 0.967651931  | 2.64E-07 |
| TUCP_003916 | XLOC_172480 | ENSRNOT00000083585 | 0.960523639  | 7.07E-07 |
| TUCP_003916 | XLOC_172480 | ENSRNOT00000036137 | 0.955021684  | 1.34E-06 |
| TUCP_003916 | XLOC_172480 | ENSRNOT00000073327 | 0.961875368  | 5.95E-07 |
| TUCP_003916 | XLOC_172480 | ENSRNOT00000020929 | 0.95073701   | 2.10E-06 |
| TUCP_003916 | XLOC_172480 | ENSRNOT00000027967 | 0.96225037   | 5.67E-07 |
| TUCP_003916 | XLOC_172480 | ENSRNOT00000076822 | 0.96376774   | 4.63E-07 |
| TUCP_003916 | XLOC_172480 | ENSRNOT00000008244 | 0.957886637  | 9.72E-07 |
| TUCP_003916 | XLOC_172480 | ENSRNOT00000011773 | 0.968971954  | 2.15E-07 |
| TUCP_003916 | XLOC_172480 | ENSRNOT00000081678 | 0.961462984  | 6.27E-07 |
| TUCP_003916 | XLOC_172480 | ENSRNOT00000088628 | 0.959648757  | 7.87E-07 |
| TUCP_003916 | XLOC_172480 | ENSRNOT00000003780 | 0.955700016  | 1.25E-06 |
| TUCP_003916 | XLOC_172480 | ENSRNOT00000014888 | 0.955672194  | 1.25E-06 |
| TUCP_003916 | XLOC_172480 | ENSRNOT0000002621  | 0.956013423  | 1.20E-06 |
| TUCP_003916 | XLOC_172480 | ENSRNOT00000010939 | 0.959038131  | 8.48E-07 |
| TUCP_004622 | XLOC_203765 | ENSRNOT00000001215 | -0.955569141 | 1.27E-06 |
| TUCP_004622 | XLOC_203765 | ENSRNOT00000030074 | -0.962152088 | 5.74E-07 |
| TUCP_004622 | XLOC_203765 | ENSRNOT00000020297 | -0.957452939 | 1.02E-06 |
| TUCP_004622 | XLOC_203765 | ENSRNOT00000081796 | -0.952710319 | 1.72E-06 |
| TUCP_004622 | XLOC_203765 | ENSRNOT00000090621 | -0.967493293 | 2.71E-07 |
| TUCP_004622 | XLOC_203765 | ENSRNOT00000006460 | -0.957891941 | 9.71E-07 |
| TUCP_004622 | XLOC_203765 | ENSRNOT00000075397 | -0.959683215 | 7.84E-07 |
| TUCP_004622 | XLOC_203765 | ENSRNOT00000007350 | -0.970345608 | 1.72E-07 |
| TUCP_004622 | XLOC_203765 | ENSRNOT00000020051 | -0.962396234 | 5.56E-07 |
| TUCP_004622 | XLOC_203765 | ENSRNOT00000009080 | 0.95829676   | 9.26E-07 |
| TUCP_004622 | XLOC_203765 | ENSRNOT00000006217 | -0.959893737 | 7.64E-07 |

|             |             |                     |              |          |
|-------------|-------------|---------------------|--------------|----------|
| TUCP_004622 | XLOC_203765 | ENSRNOT00000015678  | 0.965786368  | 3.49E-07 |
| TUCP_004622 | XLOC_203765 | ENSRNOT000000082914 | -0.960815494 | 6.81E-07 |
| TUCP_004622 | XLOC_203765 | ENSRNOT00000007698  | 0.963112032  | 5.06E-07 |
| TUCP_004622 | XLOC_203765 | ENSRNOT00000013025  | 0.953888359  | 1.52E-06 |
| TUCP_004622 | XLOC_203765 | ENSRNOT000000079138 | -0.968314671 | 2.38E-07 |
| TUCP_004622 | XLOC_203765 | ENSRNOT000000071998 | -0.952754566 | 1.71E-06 |
| TUCP_004622 | XLOC_203765 | ENSRNOT000000084567 | -0.979212551 | 2.95E-08 |
| TUCP_004622 | XLOC_203765 | ENSRNOT00000008361  | -0.953588912 | 1.57E-06 |
| TUCP_004622 | XLOC_203765 | ENSRNOT000000052063 | -0.961943583 | 5.90E-07 |
| TUCP_004622 | XLOC_203765 | ENSRNOT000000042638 | -0.956834167 | 1.10E-06 |
| TUCP_004622 | XLOC_203765 | ENSRNOT000000084069 | -0.959531312 | 7.99E-07 |
| TUCP_004622 | XLOC_203765 | ENSRNOT00000001679  | -0.96447521  | 4.20E-07 |
| TUCP_004622 | XLOC_203765 | ENSRNOT000000010419 | -0.958029112 | 9.56E-07 |
| TUCP_004622 | XLOC_203765 | ENSRNOT000000065076 | -0.967251583 | 2.81E-07 |
| TUCP_004622 | XLOC_203765 | ENSRNOT000000031672 | 0.951945676  | 1.86E-06 |
| TUCP_004622 | XLOC_203765 | ENSRNOT000000013516 | -0.967076293 | 2.88E-07 |
| TUCP_004622 | XLOC_203765 | ENSRNOT000000054685 | -0.953909458 | 1.52E-06 |
| TUCP_004622 | XLOC_203765 | ENSRNOT000000022097 | -0.951933496 | 1.86E-06 |
| TUCP_004622 | XLOC_203765 | ENSRNOT000000012060 | -0.964706594 | 4.06E-07 |
| TUCP_004622 | XLOC_203765 | ENSRNOT000000073370 | -0.963198508 | 5.00E-07 |
| TUCP_004622 | XLOC_203765 | ENSRNOT000000083568 | -0.974982035 | 7.40E-08 |
| TUCP_004622 | XLOC_203765 | ENSRNOT000000025079 | 0.958851818  | 8.67E-07 |
| TUCP_004622 | XLOC_203765 | ENSRNOT000000026141 | -0.955258035 | 1.31E-06 |
| TUCP_004622 | XLOC_203765 | ENSRNOT000000084709 | -0.967474569 | 2.71E-07 |
| TUCP_004622 | XLOC_203765 | ENSRNOT000000065978 | -0.958965029 | 8.55E-07 |
| TUCP_004622 | XLOC_203765 | ENSRNOT000000020929 | -0.965192384 | 3.80E-07 |
| TUCP_004622 | XLOC_203765 | ENSRNOT000000039177 | 0.955141032  | 1.33E-06 |
| TUCP_004622 | XLOC_203765 | ENSRNOT000000017271 | -0.954637893 | 1.40E-06 |
| TUCP_004622 | XLOC_203765 | ENSRNOT000000056180 | -0.964799291 | 4.01E-07 |
| TUCP_004622 | XLOC_203765 | ENSRNOT000000034282 | -0.953914454 | 1.52E-06 |
| TUCP_004622 | XLOC_203765 | ENSRNOT000000027760 | -0.963507236 | 4.79E-07 |
| TUCP_004622 | XLOC_203765 | ENSRNOT000000012755 | -0.950881904 | 2.07E-06 |
| TUCP_004622 | XLOC_203765 | ENSRNOT000000065871 | -0.976710383 | 5.19E-08 |
| TUCP_004622 | XLOC_203765 | ENSRNOT000000024677 | -0.975848211 | 6.21E-08 |
| TUCP_004622 | XLOC_203765 | ENSRNOT000000056100 | 0.952644698  | 1.73E-06 |
| TUCP_004622 | XLOC_203765 | ENSRNOT000000030082 | -0.957089726 | 1.07E-06 |
| TUCP_004622 | XLOC_203765 | ENSRNOT000000025517 | -0.951025748 | 2.04E-06 |
| TUCP_004622 | XLOC_203765 | ENSRNOT000000046807 | 0.956818757  | 1.10E-06 |
| TUCP_004622 | XLOC_203765 | ENSRNOT000000073983 | -0.951371167 | 1.97E-06 |
| TUCP_004622 | XLOC_203765 | ENSRNOT000000047126 | 0.97447213   | 8.18E-08 |
| TUCP_004622 | XLOC_203765 | ENSRNOT000000026391 | -0.966008872 | 3.38E-07 |
| TUCP_004622 | XLOC_203765 | ENSRNOT000000081226 | -0.958709377 | 8.82E-07 |
| TUCP_004622 | XLOC_203765 | ENSRNOT000000065045 | -0.964041613 | 4.46E-07 |
| TUCP_004622 | XLOC_203765 | ENSRNOT00000005686  | 0.963589595  | 4.74E-07 |
| TUCP_004622 | XLOC_203765 | ENSRNOT000000072762 | 0.97143315   | 1.43E-07 |
| TUCP_004622 | XLOC_203765 | ENSRNOT000000066708 | -0.95494478  | 1.36E-06 |
| TUCP_004622 | XLOC_203765 | ENSRNOT000000038652 | 0.954695097  | 1.39E-06 |
| TUCP_004622 | XLOC_203765 | ENSRNOT000000011832 | 0.983857425  | 8.40E-09 |
| TUCP_004622 | XLOC_203765 | ENSRNOT000000073643 | 0.967532709  | 2.69E-07 |
| TUCP_004622 | XLOC_203765 | ENSRNOT000000087278 | 0.961282689  | 6.42E-07 |
| TUCP_004622 | XLOC_203765 | ENSRNOT000000046552 | -0.951433728 | 1.96E-06 |

|             |             |                    |              |          |
|-------------|-------------|--------------------|--------------|----------|
| TUCP_004622 | XLOC_203765 | ENSRNOT00000067011 | -0.960786659 | 6.84E-07 |
| TUCP_004622 | XLOC_203765 | ENSRNOT00000083968 | 0.956892109  | 1.09E-06 |
| TUCP_004622 | XLOC_203765 | ENSRNOT00000009150 | -0.956318523 | 1.16E-06 |
| TUCP_004622 | XLOC_203765 | ENSRNOT00000021858 | -0.965731545 | 3.51E-07 |
| TUCP_004622 | XLOC_203765 | ENSRNOT00000083967 | -0.958591018 | 8.94E-07 |
| TUCP_004622 | XLOC_203765 | ENSRNOT00000048781 | -0.955478482 | 1.28E-06 |
| TUCP_004622 | XLOC_203765 | ENSRNOT00000021802 | -0.952686442 | 1.72E-06 |
| TUCP_004622 | XLOC_203765 | ENSRNOT00000068452 | -0.967809471 | 2.58E-07 |
| TUCP_004622 | XLOC_203765 | ENSRNOT00000024352 | -0.964794008 | 4.01E-07 |
| TUCP_004622 | XLOC_203765 | ENSRNOT00000072299 | -0.969506176 | 1.97E-07 |
| TUCP_004622 | XLOC_203765 | ENSRNOT00000072118 | -0.963040592 | 5.10E-07 |
| TUCP_004622 | XLOC_203765 | ENSRNOT00000003780 | -0.962424978 | 5.54E-07 |
| TUCP_004622 | XLOC_203765 | ENSRNOT00000085334 | -0.951142919 | 2.02E-06 |
| TUCP_004622 | XLOC_203765 | ENSRNOT00000027739 | -0.958768954 | 8.76E-07 |
| TUCP_004622 | XLOC_203765 | ENSRNOT00000072357 | 0.951402497  | 1.97E-06 |
| TUCP_004622 | XLOC_203765 | ENSRNOT00000025913 | 0.950505456  | 2.15E-06 |
| TUCP_004622 | XLOC_203765 | ENSRNOT00000013067 | 0.955960857  | 1.21E-06 |
| TUCP_004622 | XLOC_203765 | ENSRNOT00000004196 | -0.970593368 | 1.65E-07 |
| TUCP_004622 | XLOC_203765 | ENSRNOT00000011956 | -0.951017761 | 2.04E-06 |
| TUCP_004622 | XLOC_203765 | ENSRNOT00000073919 | -0.959682936 | 7.84E-07 |
| TUCP_004622 | XLOC_203765 | ENSRNOT00000025966 | -0.954103889 | 1.48E-06 |
| TUCP_004622 | XLOC_203765 | ENSRNOT00000089611 | -0.951503387 | 1.95E-06 |
| TUCP_004622 | XLOC_203765 | ENSRNOT00000023667 | -0.966540644 | 3.12E-07 |
| TUCP_004622 | XLOC_203765 | ENSRNOT00000086260 | 0.965599982  | 3.58E-07 |
| TUCP_004622 | XLOC_203765 | ENSRNOT00000045063 | -0.962696059 | 5.34E-07 |
| TUCP_004622 | XLOC_203765 | ENSRNOT00000008256 | 0.950469536  | 2.16E-06 |
| TUCP_004622 | XLOC_203765 | ENSRNOT00000076404 | -0.951682162 | 1.91E-06 |
| TUCP_004622 | XLOC_203765 | ENSRNOT00000034883 | 0.957755359  | 9.87E-07 |
| TUCP_004622 | XLOC_203765 | ENSRNOT00000001158 | -0.951521014 | 1.94E-06 |
| TUCP_004622 | XLOC_203765 | ENSRNOT00000046639 | -0.956617767 | 1.12E-06 |
| TUCP_004622 | XLOC_203765 | ENSRNOT00000035605 | -0.961738578 | 6.06E-07 |
| TUCP_004622 | XLOC_203765 | ENSRNOT00000081351 | -0.951399702 | 1.97E-06 |
| TUCP_004622 | XLOC_203765 | ENSRNOT00000092083 | -0.954009396 | 1.50E-06 |
| TUCP_004622 | XLOC_203765 | ENSRNOT00000018844 | -0.954639011 | 1.40E-06 |
| TUCP_004622 | XLOC_203765 | ENSRNOT00000017624 | -0.978844923 | 3.22E-08 |
| TUCP_004622 | XLOC_203765 | ENSRNOT00000003992 | 0.954175528  | 1.47E-06 |
| TUCP_004622 | XLOC_203765 | ENSRNOT00000027170 | -0.969182232 | 2.08E-07 |
| TUCP_004622 | XLOC_203765 | ENSRNOT00000036092 | -0.956643993 | 1.12E-06 |
| TUCP_004622 | XLOC_203765 | ENSRNOT00000040169 | -0.950361607 | 2.18E-06 |
| TUCP_004622 | XLOC_203765 | ENSRNOT00000086798 | 0.957973268  | 9.62E-07 |
| TUCP_004622 | XLOC_203765 | ENSRNOT00000081725 | -0.974961526 | 7.43E-08 |
| TUCP_004622 | XLOC_203765 | ENSRNOT00000020383 | -0.971125975 | 1.51E-07 |
| TUCP_004622 | XLOC_203765 | ENSRNOT00000005459 | -0.965609035 | 3.58E-07 |
| TUCP_004622 | XLOC_203765 | ENSRNOT00000012760 | 0.959033606  | 8.48E-07 |
| TUCP_004622 | XLOC_203765 | ENSRNOT00000074515 | 0.958052366  | 9.53E-07 |
| TUCP_004622 | XLOC_203765 | ENSRNOT00000037015 | -0.952675256 | 1.73E-06 |
| TUCP_004622 | XLOC_203765 | ENSRNOT00000027917 | -0.967355828 | 2.76E-07 |
| TUCP_004622 | XLOC_203765 | ENSRNOT00000004290 | -0.965143898 | 3.82E-07 |
| TUCP_004622 | XLOC_203765 | ENSRNOT00000076230 | -0.964434636 | 4.22E-07 |
| TUCP_004622 | XLOC_203765 | ENSRNOT00000001490 | -0.959212677 | 8.30E-07 |
| TUCP_004622 | XLOC_203765 | ENSRNOT00000011675 | -0.974338473 | 8.39E-08 |



|             |             |                    |              |          |
|-------------|-------------|--------------------|--------------|----------|
| TUCP_004622 | XLOC_203765 | ENSRNOT00000055137 | -0.96141454  | 6.31E-07 |
| TUCP_004622 | XLOC_203765 | ENSRNOT00000075476 | -0.960448385 | 7.13E-07 |
| TUCP_004622 | XLOC_203765 | ENSRNOT00000028685 | -0.952849991 | 1.70E-06 |
| TUCP_004622 | XLOC_203765 | ENSRNOT00000010783 | 0.951516837  | 1.94E-06 |
| TUCP_004622 | XLOC_203765 | ENSRNOT00000080591 | -0.9571776   | 1.06E-06 |
| TUCP_004622 | XLOC_203765 | ENSRNOT00000066032 | -0.952561405 | 1.75E-06 |
| TUCP_004622 | XLOC_203765 | ENSRNOT00000005161 | -0.971081223 | 1.52E-07 |
| TUCP_004622 | XLOC_203765 | ENSRNOT00000049285 | 0.953203799  | 1.63E-06 |
| TUCP_004622 | XLOC_203765 | ENSRNOT00000093385 | -0.954070599 | 1.49E-06 |
| TUCP_004622 | XLOC_203765 | ENSRNOT00000015239 | 0.963403563  | 4.86E-07 |
| TUCP_004622 | XLOC_203765 | ENSRNOT00000074649 | -0.952545461 | 1.75E-06 |
| TUCP_004622 | XLOC_203765 | ENSRNOT00000037955 | 0.969125608  | 2.10E-07 |
| TUCP_004622 | XLOC_203765 | ENSRNOT00000077146 | 0.964042478  | 4.46E-07 |
| TUCP_004622 | XLOC_203765 | ENSRNOT00000085911 | 0.952061125  | 1.84E-06 |
| TUCP_004622 | XLOC_203765 | ENSRNOT00000001783 | -0.956494085 | 1.14E-06 |
| TUCP_004622 | XLOC_203765 | ENSRNOT00000017504 | -0.957720188 | 9.91E-07 |
| TUCP_004622 | XLOC_203765 | ENSRNOT00000086456 | 0.953884479  | 1.52E-06 |
| TUCP_004622 | XLOC_203765 | ENSRNOT00000075209 | 0.954434686  | 1.43E-06 |
| TUCP_004622 | XLOC_203765 | ENSRNOT00000044275 | -0.950598467 | 2.13E-06 |
| TUCP_004622 | XLOC_203765 | ENSRNOT00000058382 | -0.976934706 | 4.95E-08 |
| TUCP_004622 | XLOC_203765 | ENSRNOT00000006824 | 0.950172622  | 2.22E-06 |
| TUCP_004622 | XLOC_203765 | ENSRNOT00000010993 | -0.964211845 | 4.35E-07 |
| TUCP_004622 | XLOC_203765 | ENSRNOT00000010852 | -0.957621932 | 1.00E-06 |
| TUCP_004622 | XLOC_203765 | ENSRNOT00000005489 | -0.955502712 | 1.27E-06 |
| TUCP_004622 | XLOC_203765 | ENSRNOT00000058111 | 0.962187548  | 5.71E-07 |
| TUCP_004622 | XLOC_203765 | ENSRNOT00000017765 | -0.97700654  | 4.87E-08 |
| TUCP_004622 | XLOC_203765 | ENSRNOT00000057738 | -0.968168844 | 2.44E-07 |
| TUCP_004622 | XLOC_203765 | ENSRNOT00000018849 | 0.957936097  | 9.66E-07 |
| TUCP_004622 | XLOC_203765 | ENSRNOT00000009994 | 0.95630041   | 1.17E-06 |
| TUCP_004622 | XLOC_203765 | ENSRNOT00000077367 | 0.954590305  | 1.41E-06 |
| TUCP_004622 | XLOC_203765 | ENSRNOT00000024841 | 0.958340465  | 9.21E-07 |
| TUCP_004622 | XLOC_203765 | ENSRNOT00000036137 | -0.959369105 | 8.15E-07 |
| TUCP_004622 | XLOC_203765 | ENSRNOT00000007702 | 0.958651341  | 8.88E-07 |
| TUCP_004622 | XLOC_203765 | ENSRNOT00000023014 | -0.956552517 | 1.13E-06 |
| TUCP_004622 | XLOC_203765 | ENSRNOT00000039102 | -0.958008985 | 9.58E-07 |
| TUCP_004622 | XLOC_203765 | ENSRNOT00000085517 | -0.968696384 | 2.25E-07 |
| TUCP_004622 | XLOC_203765 | ENSRNOT00000019358 | 0.967211669  | 2.82E-07 |
| TUCP_004622 | XLOC_203765 | ENSRNOT00000009742 | 0.95070873   | 2.11E-06 |
| TUCP_004622 | XLOC_203765 | ENSRNOT00000006835 | -0.955216909 | 1.32E-06 |
| TUCP_004622 | XLOC_203765 | ENSRNOT00000078906 | 0.967918275  | 2.54E-07 |
| TUCP_004622 | XLOC_203765 | ENSRNOT00000007369 | -0.950677595 | 2.12E-06 |
| TUCP_004622 | XLOC_203765 | ENSRNOT00000085465 | 0.961854127  | 5.97E-07 |
| TUCP_004622 | XLOC_203765 | ENSRNOT00000025460 | -0.959527776 | 7.99E-07 |
| TUCP_004622 | XLOC_203765 | ENSRNOT00000012528 | -0.96204053  | 5.82E-07 |
| TUCP_004622 | XLOC_203765 | ENSRNOT00000028225 | -0.953860984 | 1.52E-06 |
| TUCP_004622 | XLOC_203765 | ENSRNOT00000061345 | 0.974792784  | 7.68E-08 |
| TUCP_004622 | XLOC_203765 | ENSRNOT00000017998 | -0.955495256 | 1.28E-06 |
| TUCP_004622 | XLOC_203765 | ENSRNOT00000081077 | 0.950104446  | 2.24E-06 |
| TUCP_004622 | XLOC_203765 | ENSRNOT00000016568 | -0.964472871 | 4.20E-07 |
| TUCP_004622 | XLOC_203765 | ENSRNOT00000065529 | -0.95114081  | 2.02E-06 |
| TUCP_004622 | XLOC_203765 | ENSRNOT00000028907 | -0.972226665 | 1.24E-07 |

|             |             |                    |              |          |
|-------------|-------------|--------------------|--------------|----------|
| TUCP_004622 | XLOC_203765 | ENSRNOT00000027967 | -0.95917761  | 8.34E-07 |
| TUCP_004622 | XLOC_203765 | ENSRNOT00000078793 | -0.969006317 | 2.14E-07 |
| TUCP_004622 | XLOC_203765 | ENSRNOT00000089086 | 0.965687155  | 3.54E-07 |
| TUCP_004622 | XLOC_203765 | ENSRNOT00000081678 | -0.950033785 | 2.25E-06 |
| TUCP_004622 | XLOC_203765 | ENSRNOT00000036613 | 0.961957251  | 5.89E-07 |
| TUCP_004622 | XLOC_203765 | ENSRNOT00000090268 | 0.954480436  | 1.43E-06 |
| TUCP_004622 | XLOC_203765 | ENSRNOT00000024011 | -0.951562036 | 1.94E-06 |
| TUCP_004622 | XLOC_203765 | ENSRNOT00000025705 | -0.950394148 | 2.18E-06 |
| TUCP_004622 | XLOC_203765 | ENSRNOT00000092876 | 0.974127502  | 8.74E-08 |
| TUCP_004622 | XLOC_203765 | ENSRNOT00000024253 | -0.955158154 | 1.32E-06 |
| TUCP_004622 | XLOC_203765 | ENSRNOT00000085669 | -0.950655314 | 2.12E-06 |
| TUCP_003129 | XLOC_133698 | ENSRNOT00000027644 | -0.960504652 | 7.08E-07 |
| TUCP_003129 | XLOC_133698 | ENSRNOT00000016083 | -0.967046312 | 2.90E-07 |
| TUCP_003129 | XLOC_133698 | ENSRNOT00000072069 | -0.960669854 | 6.94E-07 |
| TUCP_003129 | XLOC_133698 | ENSRNOT00000087386 | -0.961519164 | 6.23E-07 |
| TUCP_003129 | XLOC_133698 | ENSRNOT00000017268 | -0.967705853 | 2.62E-07 |
| TUCP_003129 | XLOC_133698 | ENSRNOT00000009080 | -0.971339694 | 1.45E-07 |
| TUCP_003129 | XLOC_133698 | ENSRNOT00000059124 | -0.958107903 | 9.47E-07 |
| TUCP_003129 | XLOC_133698 | ENSRNOT00000035400 | -0.958208085 | 9.36E-07 |
| TUCP_003129 | XLOC_133698 | ENSRNOT00000017204 | -0.960670713 | 6.94E-07 |
| TUCP_003129 | XLOC_133698 | ENSRNOT00000032439 | -0.95350168  | 1.58E-06 |
| TUCP_003129 | XLOC_133698 | ENSRNOT00000010720 | -0.96230407  | 5.63E-07 |
| TUCP_003129 | XLOC_133698 | ENSRNOT00000087011 | -0.953463744 | 1.59E-06 |
| TUCP_003129 | XLOC_133698 | ENSRNOT00000022086 | -0.954550314 | 1.41E-06 |
| TUCP_003129 | XLOC_133698 | ENSRNOT00000072970 | -0.960014377 | 7.53E-07 |
| TUCP_003129 | XLOC_133698 | ENSRNOT00000021110 | -0.974044107 | 8.88E-08 |
| TUCP_003129 | XLOC_133698 | ENSRNOT00000031692 | -0.971007055 | 1.54E-07 |
| TUCP_003129 | XLOC_133698 | ENSRNOT00000020853 | -0.956199292 | 1.18E-06 |
| TUCP_003129 | XLOC_133698 | ENSRNOT00000050649 | -0.953761001 | 1.54E-06 |
| TUCP_003129 | XLOC_133698 | ENSRNOT00000001774 | -0.961982966 | 5.87E-07 |
| TUCP_003129 | XLOC_133698 | ENSRNOT00000080013 | -0.966824545 | 2.99E-07 |
| TUCP_003129 | XLOC_133698 | ENSRNOT00000013759 | -0.961689441 | 6.09E-07 |
| TUCP_003129 | XLOC_133698 | ENSRNOT00000018341 | -0.950562975 | 2.14E-06 |
| TUCP_003129 | XLOC_133698 | ENSRNOT00000044847 | -0.964467767 | 4.20E-07 |
| TUCP_003129 | XLOC_133698 | ENSRNOT00000075400 | -0.959102102 | 8.41E-07 |
| TUCP_003129 | XLOC_133698 | ENSRNOT00000070886 | -0.963956448 | 4.51E-07 |
| TUCP_003129 | XLOC_133698 | ENSRNOT00000002799 | -0.95867901  | 8.85E-07 |
| TUCP_003129 | XLOC_133698 | ENSRNOT00000033312 | -0.961801328 | 6.01E-07 |
| TUCP_003129 | XLOC_133698 | ENSRNOT00000016012 | -0.963629821 | 4.71E-07 |
| TUCP_003129 | XLOC_133698 | ENSRNOT00000022126 | -0.96761006  | 2.66E-07 |
| TUCP_003129 | XLOC_133698 | ENSRNOT00000061735 | -0.953478889 | 1.59E-06 |
| TUCP_003129 | XLOC_133698 | ENSRNOT00000077063 | -0.957722613 | 9.91E-07 |
| TUCP_003129 | XLOC_133698 | ENSRNOT00000075057 | -0.969057611 | 2.12E-07 |
| TUCP_003129 | XLOC_133698 | ENSRNOT00000011432 | -0.953272459 | 1.62E-06 |
| TUCP_003129 | XLOC_133698 | ENSRNOT00000021458 | -0.973186697 | 1.04E-07 |
| TUCP_003129 | XLOC_133698 | ENSRNOT00000086559 | -0.970677056 | 1.63E-07 |
| TUCP_003129 | XLOC_133698 | ENSRNOT00000014384 | -0.953922038 | 1.51E-06 |
| TUCP_003129 | XLOC_133698 | ENSRNOT00000016455 | -0.971853148 | 1.33E-07 |
| TUCP_003129 | XLOC_133698 | ENSRNOT00000022432 | -0.953805665 | 1.53E-06 |
| TUCP_003129 | XLOC_133698 | ENSRNOT00000001891 | -0.955079581 | 1.34E-06 |
| TUCP_003129 | XLOC_133698 | ENSRNOT00000014177 | -0.960465526 | 7.12E-07 |

|             |             |                    |              |          |
|-------------|-------------|--------------------|--------------|----------|
| TUCP_003129 | XLOC_133698 | ENSRNOT00000026496 | -0.956306093 | 1.17E-06 |
| TUCP_003129 | XLOC_133698 | ENSRNOT00000034983 | -0.963914551 | 4.54E-07 |
| TUCP_003129 | XLOC_133698 | ENSRNOT00000056644 | -0.981370673 | 1.71E-08 |
| TUCP_003129 | XLOC_133698 | ENSRNOT00000056686 | -0.951617294 | 1.92E-06 |
| TUCP_003129 | XLOC_133698 | ENSRNOT00000022637 | -0.974285689 | 8.48E-08 |
| TUCP_003129 | XLOC_133698 | ENSRNOT00000052098 | -0.9553955   | 1.29E-06 |
| TUCP_003129 | XLOC_133698 | ENSRNOT00000076349 | 0.967260765  | 2.80E-07 |
| TUCP_003129 | XLOC_133698 | ENSRNOT0000006607  | -0.958432893 | 9.11E-07 |
| TUCP_003129 | XLOC_133698 | ENSRNOT00000046490 | -0.951289085 | 1.99E-06 |
| TUCP_003129 | XLOC_133698 | ENSRNOT0000001973  | -0.979707534 | 2.62E-08 |
| TUCP_003129 | XLOC_133698 | ENSRNOT00000072841 | -0.955982934 | 1.21E-06 |
| TUCP_003129 | XLOC_133698 | ENSRNOT00000024801 | -0.964884243 | 3.96E-07 |
| TUCP_003129 | XLOC_133698 | ENSRNOT00000009544 | -0.962899594 | 5.20E-07 |
| TUCP_003129 | XLOC_133698 | ENSRNOT00000082124 | -0.955100986 | 1.33E-06 |
| TUCP_003129 | XLOC_133698 | ENSRNOT00000000203 | -0.964910229 | 3.95E-07 |
| TUCP_003129 | XLOC_133698 | ENSRNOT00000030706 | -0.953188352 | 1.64E-06 |
| TUCP_003129 | XLOC_133698 | ENSRNOT00000085651 | -0.977574753 | 4.30E-08 |
| TUCP_003129 | XLOC_133698 | ENSRNOT00000020316 | -0.970036185 | 1.81E-07 |
| TUCP_003129 | XLOC_133698 | ENSRNOT00000090156 | -0.95692831  | 1.09E-06 |
| TUCP_003129 | XLOC_133698 | ENSRNOT00000000469 | 0.959808492  | 7.72E-07 |
| TUCP_003129 | XLOC_133698 | ENSRNOT00000014694 | -0.971679702 | 1.37E-07 |
| TUCP_003129 | XLOC_133698 | ENSRNOT00000007326 | -0.956527106 | 1.14E-06 |
| TUCP_003129 | XLOC_133698 | ENSRNOT00000028468 | -0.95654793  | 1.13E-06 |
| TUCP_003129 | XLOC_133698 | ENSRNOT00000030823 | -0.962555749 | 5.44E-07 |
| TUCP_003129 | XLOC_133698 | ENSRNOT00000082627 | -0.955621914 | 1.26E-06 |
| TUCP_003129 | XLOC_133698 | ENSRNOT00000006306 | -0.966542381 | 3.12E-07 |
| TUCP_003129 | XLOC_133698 | ENSRNOT00000014502 | -0.971517287 | 1.41E-07 |
| TUCP_003129 | XLOC_133698 | ENSRNOT00000035513 | -0.951596549 | 1.93E-06 |
| TUCP_003129 | XLOC_133698 | ENSRNOT00000011898 | -0.951604955 | 1.93E-06 |
| TUCP_003129 | XLOC_133698 | ENSRNOT00000006308 | -0.970852014 | 1.58E-07 |
| TUCP_003129 | XLOC_133698 | ENSRNOT00000074515 | -0.950898722 | 2.07E-06 |
| TUCP_003129 | XLOC_133698 | ENSRNOT00000013778 | -0.972500721 | 1.18E-07 |
| TUCP_003129 | XLOC_133698 | ENSRNOT00000077784 | -0.981015425 | 1.88E-08 |
| TUCP_003129 | XLOC_133698 | ENSRNOT00000007882 | -0.951135687 | 2.02E-06 |
| TUCP_003129 | XLOC_133698 | ENSRNOT00000006946 | -0.962856527 | 5.23E-07 |
| TUCP_003129 | XLOC_133698 | ENSRNOT00000025104 | -0.950225195 | 2.21E-06 |
| TUCP_003129 | XLOC_133698 | ENSRNOT00000086576 | -0.959209848 | 8.30E-07 |
| TUCP_003129 | XLOC_133698 | ENSRNOT00000015759 | -0.958985106 | 8.53E-07 |
| TUCP_003129 | XLOC_133698 | ENSRNOT00000072458 | -0.965672377 | 3.54E-07 |
| TUCP_003129 | XLOC_133698 | ENSRNOT00000009437 | -0.956967453 | 1.08E-06 |
| TUCP_003129 | XLOC_133698 | ENSRNOT00000081037 | -0.950216524 | 2.21E-06 |
| TUCP_003129 | XLOC_133698 | ENSRNOT00000068026 | -0.952393048 | 1.78E-06 |
| TUCP_003129 | XLOC_133698 | ENSRNOT00000065023 | -0.950254149 | 2.21E-06 |
| TUCP_003129 | XLOC_133698 | ENSRNOT00000068440 | -0.951898858 | 1.87E-06 |
| TUCP_003129 | XLOC_133698 | ENSRNOT00000020558 | -0.957233484 | 1.05E-06 |
| TUCP_003129 | XLOC_133698 | ENSRNOT00000016699 | -0.95522642  | 1.31E-06 |
| TUCP_003129 | XLOC_133698 | ENSRNOT00000017746 | -0.951999651 | 1.85E-06 |
| TUCP_003129 | XLOC_133698 | ENSRNOT00000083983 | -0.978725622 | 3.31E-08 |
| TUCP_003129 | XLOC_133698 | ENSRNOT00000007549 | -0.97252956  | 1.18E-07 |
| TUCP_003129 | XLOC_133698 | ENSRNOT00000005343 | -0.95548706  | 1.28E-06 |
| TUCP_003129 | XLOC_133698 | ENSRNOT00000014586 | -0.953359459 | 1.61E-06 |

|             |             |                    |              |          |
|-------------|-------------|--------------------|--------------|----------|
| TUCP_003129 | XLOC_133698 | ENSRNOT00000025634 | -0.951691872 | 1.91E-06 |
| TUCP_003129 | XLOC_133698 | ENSRNOT00000047303 | 0.959659998  | 7.86E-07 |
| TUCP_003129 | XLOC_133698 | ENSRNOT00000072580 | -0.968744625 | 2.23E-07 |
| TUCP_003129 | XLOC_133698 | ENSRNOT00000024452 | -0.955053711 | 1.34E-06 |
| TUCP_003129 | XLOC_133698 | ENSRNOT00000001631 | -0.976109476 | 5.89E-08 |
| TUCP_003129 | XLOC_133698 | ENSRNOT00000015139 | -0.955894407 | 1.22E-06 |
| TUCP_003129 | XLOC_133698 | ENSRNOT00000026748 | -0.95306113  | 1.66E-06 |
| TUCP_003129 | XLOC_133698 | ENSRNOT0000001639  | -0.95526098  | 1.31E-06 |
| TUCP_003129 | XLOC_133698 | ENSRNOT00000077730 | -0.962467785 | 5.51E-07 |
| TUCP_003129 | XLOC_133698 | ENSRNOT00000002511 | -0.952374663 | 1.78E-06 |
| TUCP_003129 | XLOC_133698 | ENSRNOT00000018877 | -0.970547989 | 1.66E-07 |
| TUCP_003129 | XLOC_133698 | ENSRNOT00000020982 | -0.964653602 | 4.09E-07 |
| TUCP_003129 | XLOC_133698 | ENSRNOT00000012017 | -0.957474703 | 1.02E-06 |
| TUCP_003129 | XLOC_133698 | ENSRNOT00000024714 | -0.956841751 | 1.10E-06 |
| TUCP_003129 | XLOC_133698 | ENSRNOT00000030222 | -0.963105781 | 5.06E-07 |
| TUCP_003129 | XLOC_133698 | ENSRNOT00000017339 | -0.974163725 | 8.68E-08 |
| TUCP_003129 | XLOC_133698 | ENSRNOT00000088752 | -0.97576614  | 6.32E-08 |
| TUCP_003129 | XLOC_133698 | ENSRNOT00000006029 | -0.964672192 | 4.08E-07 |
| TUCP_003129 | XLOC_133698 | ENSRNOT00000087342 | -0.953117536 | 1.65E-06 |
| TUCP_003129 | XLOC_133698 | ENSRNOT00000052033 | -0.968403796 | 2.35E-07 |
| TUCP_003129 | XLOC_133698 | ENSRNOT00000025036 | -0.956186877 | 1.18E-06 |
| TUCP_003129 | XLOC_133698 | ENSRNOT00000056862 | -0.966920826 | 2.95E-07 |
| TUCP_003129 | XLOC_133698 | ENSRNOT00000050227 | -0.972834479 | 1.11E-07 |
| TUCP_003129 | XLOC_133698 | ENSRNOT00000040202 | -0.952362123 | 1.78E-06 |
| TUCP_003129 | XLOC_133698 | ENSRNOT00000042459 | -0.954525175 | 1.42E-06 |
| TUCP_003129 | XLOC_133698 | ENSRNOT00000012432 | -0.977325576 | 4.54E-08 |
| TUCP_003129 | XLOC_133698 | ENSRNOT00000080216 | -0.964677427 | 4.08E-07 |
| TUCP_003129 | XLOC_133698 | ENSRNOT00000023463 | -0.950642112 | 2.12E-06 |
| TUCP_003129 | XLOC_133698 | ENSRNOT00000088884 | -0.966349502 | 3.21E-07 |
| TUCP_003129 | XLOC_133698 | ENSRNOT00000076388 | -0.972697029 | 1.14E-07 |
| TUCP_003129 | XLOC_133698 | ENSRNOT00000064542 | -0.969470647 | 1.98E-07 |
| TUCP_003129 | XLOC_133698 | ENSRNOT00000005155 | 0.967672491  | 2.63E-07 |
| TUCP_003129 | XLOC_133698 | ENSRNOT00000002111 | -0.95887743  | 8.64E-07 |
| TUCP_003129 | XLOC_133698 | ENSRNOT00000091541 | -0.973887864 | 9.15E-08 |
| TUCP_003129 | XLOC_133698 | ENSRNOT00000014095 | -0.957897597 | 9.71E-07 |
| TUCP_003129 | XLOC_133698 | ENSRNOT00000038994 | -0.975255734 | 7.01E-08 |
| TUCP_003129 | XLOC_133698 | ENSRNOT00000072733 | -0.956593879 | 1.13E-06 |
| TUCP_003129 | XLOC_133698 | ENSRNOT00000091965 | -0.960326194 | 7.24E-07 |
| TUCP_003129 | XLOC_133698 | ENSRNOT00000089885 | -0.966303334 | 3.23E-07 |
| TUCP_003129 | XLOC_133698 | ENSRNOT00000017618 | -0.965175831 | 3.80E-07 |
| TUCP_003129 | XLOC_133698 | ENSRNOT00000024924 | -0.95920648  | 8.31E-07 |
| TUCP_003129 | XLOC_133698 | ENSRNOT00000048529 | -0.954545126 | 1.42E-06 |
| TUCP_003129 | XLOC_133698 | ENSRNOT00000079085 | -0.973395516 | 1.00E-07 |
| TUCP_003129 | XLOC_133698 | ENSRNOT00000015130 | -0.955131428 | 1.33E-06 |
| TUCP_003129 | XLOC_133698 | ENSRNOT00000038652 | -0.972498526 | 1.18E-07 |
| TUCP_003129 | XLOC_133698 | ENSRNOT00000013535 | -0.953976757 | 1.50E-06 |
| TUCP_003129 | XLOC_133698 | ENSRNOT00000023543 | -0.950091059 | 2.24E-06 |
| TUCP_003129 | XLOC_133698 | ENSRNOT00000089016 | -0.954646919 | 1.40E-06 |
| TUCP_003129 | XLOC_133698 | ENSRNOT00000000737 | -0.972971616 | 1.09E-07 |
| TUCP_003129 | XLOC_133698 | ENSRNOT00000010906 | -0.950322919 | 2.19E-06 |
| TUCP_003129 | XLOC_133698 | ENSRNOT00000028900 | -0.953107048 | 1.65E-06 |

|             |             |                    |              |          |
|-------------|-------------|--------------------|--------------|----------|
| TUCP_003129 | XLOC_133698 | ENSRNOT0000002524  | -0.954338762 | 1.45E-06 |
| TUCP_003129 | XLOC_133698 | ENSRNOT00000016376 | -0.966704067 | 3.05E-07 |
| TUCP_003129 | XLOC_133698 | ENSRNOT00000072722 | -0.955696517 | 1.25E-06 |
| TUCP_003129 | XLOC_133698 | ENSRNOT00000020900 | -0.952969727 | 1.67E-06 |
| TUCP_003129 | XLOC_133698 | ENSRNOT00000025928 | -0.979182397 | 2.97E-08 |
| TUCP_003129 | XLOC_133698 | ENSRNOT00000087556 | -0.962509678 | 5.48E-07 |
| TUCP_003129 | XLOC_133698 | ENSRNOT00000038464 | -0.952186804 | 1.82E-06 |
| TUCP_003129 | XLOC_133698 | ENSRNOT00000018684 | -0.960565368 | 7.03E-07 |
| TUCP_003129 | XLOC_133698 | ENSRNOT00000088073 | -0.953263826 | 1.62E-06 |
| TUCP_003129 | XLOC_133698 | ENSRNOT00000065642 | -0.951192419 | 2.01E-06 |
| TUCP_003129 | XLOC_133698 | ENSRNOT00000092641 | -0.950798213 | 2.09E-06 |
| TUCP_004584 | XLOC_201051 | ENSRNOT00000025052 | 0.981289184  | 1.75E-08 |
| TUCP_004584 | XLOC_201051 | ENSRNOT00000067655 | 0.952643953  | 1.73E-06 |
| TUCP_004584 | XLOC_201051 | ENSRNOT00000093612 | 0.96145405   | 6.28E-07 |
| TUCP_004584 | XLOC_201051 | ENSRNOT00000092261 | 0.974503312  | 8.13E-08 |
| TUCP_004239 | XLOC_186262 | ENSRNOT00000027611 | 0.961440816  | 6.29E-07 |
| TUCP_004239 | XLOC_186262 | ENSRNOT00000067761 | 0.950071683  | 2.25E-06 |
| TUCP_004239 | XLOC_186262 | ENSRNOT00000041908 | 0.962326861  | 5.61E-07 |
| TUCP_004239 | XLOC_186262 | ENSRNOT00000021348 | 0.958830365  | 8.69E-07 |
| TUCP_004239 | XLOC_186262 | ENSRNOT00000086336 | 0.952316772  | 1.79E-06 |
| TUCP_004239 | XLOC_186262 | ENSRNOT00000021614 | 0.962872973  | 5.22E-07 |
| TUCP_004239 | XLOC_186262 | ENSRNOT00000022726 | 0.966712897  | 3.04E-07 |
| TUCP_004239 | XLOC_186262 | ENSRNOT00000044635 | 0.959588716  | 7.93E-07 |
| TUCP_004239 | XLOC_186262 | ENSRNOT00000021116 | 0.979272187  | 2.91E-08 |
| TUCP_004239 | XLOC_186262 | ENSRNOT00000082100 | 0.973572049  | 9.71E-08 |
| TUCP_004239 | XLOC_186262 | ENSRNOT00000084601 | 0.955608867  | 1.26E-06 |
| TUCP_004239 | XLOC_186262 | ENSRNOT00000081246 | 0.956150528  | 1.19E-06 |
| TUCP_004239 | XLOC_186262 | ENSRNOT00000043216 | 0.966432136  | 3.17E-07 |
| TUCP_004239 | XLOC_186262 | ENSRNOT00000027414 | 0.956433874  | 1.15E-06 |
| TUCP_004239 | XLOC_186262 | ENSRNOT00000028563 | 0.971102826  | 1.51E-07 |
| TUCP_004239 | XLOC_186262 | ENSRNOT00000015076 | 0.961504583  | 6.24E-07 |
| TUCP_004239 | XLOC_186262 | ENSRNOT00000022800 | 0.960413049  | 7.16E-07 |
| TUCP_004239 | XLOC_186262 | ENSRNOT00000015073 | 0.970432383  | 1.69E-07 |
| TUCP_004239 | XLOC_186262 | ENSRNOT00000025832 | 0.954491986  | 1.42E-06 |
| TUCP_004239 | XLOC_186262 | ENSRNOT00000012379 | 0.959632081  | 7.89E-07 |
| TUCP_004239 | XLOC_186262 | ENSRNOT00000080465 | 0.971460601  | 1.42E-07 |
| TUCP_004239 | XLOC_186262 | ENSRNOT00000036951 | 0.962510084  | 5.48E-07 |
| TUCP_004239 | XLOC_186262 | ENSRNOT00000071764 | 0.951361763  | 1.98E-06 |
| TUCP_004239 | XLOC_186262 | ENSRNOT00000074939 | 0.969413267  | 2.00E-07 |
| TUCP_004239 | XLOC_186262 | ENSRNOT00000076453 | 0.956637142  | 1.12E-06 |
| TUCP_004239 | XLOC_186262 | ENSRNOT00000032944 | 0.97483338   | 7.62E-08 |
| TUCP_004239 | XLOC_186262 | ENSRNOT00000083215 | 0.961604839  | 6.16E-07 |
| TUCP_004239 | XLOC_186262 | ENSRNOT00000055187 | 0.966103232  | 3.33E-07 |
| TUCP_004239 | XLOC_186262 | ENSRNOT00000001809 | 0.987404526  | 2.44E-09 |
| TUCP_004239 | XLOC_186262 | ENSRNOT00000081632 | 0.953791716  | 1.53E-06 |
| TUCP_004239 | XLOC_186262 | ENSRNOT00000067822 | 0.961930849  | 5.91E-07 |
| TUCP_004239 | XLOC_186262 | ENSRNOT00000010149 | 0.967237041  | 2.81E-07 |
| TUCP_004239 | XLOC_186262 | ENSRNOT00000008018 | 0.950906806  | 2.07E-06 |
| TUCP_004239 | XLOC_186262 | ENSRNOT00000004032 | 0.953485762  | 1.59E-06 |
| TUCP_004239 | XLOC_186262 | ENSRNOT00000017948 | 0.96484919   | 3.98E-07 |
| TUCP_004239 | XLOC_186262 | ENSRNOT00000012895 | 0.953056958  | 1.66E-06 |

|             |             |                    |             |          |
|-------------|-------------|--------------------|-------------|----------|
| TUCP_004239 | XLOC_186262 | ENSRNOT00000055401 | 0.980636196 | 2.08E-08 |
| TUCP_004239 | XLOC_186262 | ENSRNOT00000066526 | 0.964548164 | 4.16E-07 |
| TUCP_004239 | XLOC_186262 | ENSRNOT00000023180 | 0.960396467 | 7.18E-07 |
| TUCP_004239 | XLOC_186262 | ENSRNOT00000039852 | 0.975117965 | 7.20E-08 |
| TUCP_004239 | XLOC_186262 | ENSRNOT00000070815 | 0.982576068 | 1.23E-08 |
| TUCP_004239 | XLOC_186262 | ENSRNOT00000004581 | 0.95602667  | 1.20E-06 |
| TUCP_004239 | XLOC_186262 | ENSRNOT00000004359 | 0.97092366  | 1.56E-07 |
| TUCP_004239 | XLOC_186262 | ENSRNOT00000013274 | 0.957348152 | 1.03E-06 |
| TUCP_004239 | XLOC_186262 | ENSRNOT00000022610 | 0.96255904  | 5.44E-07 |
| TUCP_004239 | XLOC_186262 | ENSRNOT00000020437 | 0.963528912 | 4.78E-07 |
| TUCP_004239 | XLOC_186262 | ENSRNOT00000051720 | 0.959441272 | 8.07E-07 |
| TUCP_004239 | XLOC_186262 | ENSRNOT00000009430 | 0.954351602 | 1.45E-06 |
| TUCP_004239 | XLOC_186262 | ENSRNOT00000029419 | 0.951091011 | 2.03E-06 |
| TUCP_004239 | XLOC_186262 | ENSRNOT00000027520 | 0.96367558  | 4.69E-07 |
| TUCP_004239 | XLOC_186262 | ENSRNOT00000026174 | 0.951083392 | 2.03E-06 |
| TUCP_004239 | XLOC_186262 | ENSRNOT00000047387 | 0.951108538 | 2.03E-06 |
| TUCP_004239 | XLOC_186262 | ENSRNOT00000013661 | 0.982436426 | 1.28E-08 |
| TUCP_004239 | XLOC_186262 | ENSRNOT00000058072 | 0.970213544 | 1.76E-07 |
| TUCP_004239 | XLOC_186262 | ENSRNOT00000045083 | 0.970609092 | 1.64E-07 |
| TUCP_004239 | XLOC_186262 | ENSRNOT00000017629 | 0.96327647  | 4.95E-07 |
| TUCP_004239 | XLOC_186262 | ENSRNOT00000032199 | 0.959033046 | 8.48E-07 |
| TUCP_004239 | XLOC_186262 | ENSRNOT00000063956 | 0.962453909 | 5.52E-07 |
| TUCP_004239 | XLOC_186262 | ENSRNOT00000003991 | 0.960338211 | 7.23E-07 |
| TUCP_004239 | XLOC_186262 | ENSRNOT00000004508 | 0.964370405 | 4.26E-07 |
| TUCP_004239 | XLOC_186262 | ENSRNOT00000034744 | 0.975707001 | 6.40E-08 |
| TUCP_004239 | XLOC_186262 | ENSRNOT00000021153 | 0.970511522 | 1.67E-07 |
| TUCP_004239 | XLOC_186262 | ENSRNOT00000064902 | 0.958033505 | 9.55E-07 |
| TUCP_004239 | XLOC_186262 | ENSRNOT00000025027 | 0.956931783 | 1.09E-06 |
| TUCP_004239 | XLOC_186262 | ENSRNOT00000076729 | 0.955135725 | 1.33E-06 |
| TUCP_004239 | XLOC_186262 | ENSRNOT00000036442 | 0.95905428  | 8.46E-07 |
| TUCP_004239 | XLOC_186262 | ENSRNOT00000081897 | 0.95185666  | 1.88E-06 |
| TUCP_004239 | XLOC_186262 | ENSRNOT00000074075 | 0.959075115 | 8.44E-07 |
| TUCP_004239 | XLOC_186262 | ENSRNOT00000039631 | 0.984899377 | 6.03E-09 |
| TUCP_004239 | XLOC_186262 | ENSRNOT00000027452 | 0.9557464   | 1.24E-06 |
| TUCP_004239 | XLOC_186262 | ENSRNOT00000049538 | 0.977856056 | 4.04E-08 |
| TUCP_004239 | XLOC_186262 | ENSRNOT00000000713 | 0.98300356  | 1.09E-08 |
| TUCP_004239 | XLOC_186262 | ENSRNOT00000066736 | 0.96974051  | 1.90E-07 |
| TUCP_004239 | XLOC_186262 | ENSRNOT00000009198 | 0.96203579  | 5.83E-07 |
| TUCP_004239 | XLOC_186262 | ENSRNOT00000027054 | 0.972118455 | 1.27E-07 |
| TUCP_004239 | XLOC_186262 | ENSRNOT00000009129 | 0.964457967 | 4.21E-07 |
| TUCP_004239 | XLOC_186262 | ENSRNOT00000006963 | 0.960025447 | 7.52E-07 |
| TUCP_004239 | XLOC_186262 | ENSRNOT00000011663 | 0.966111962 | 3.33E-07 |
| TUCP_004239 | XLOC_186262 | ENSRNOT00000024420 | 0.962321349 | 5.61E-07 |
| TUCP_004239 | XLOC_186262 | ENSRNOT00000000157 | 0.956638747 | 1.12E-06 |
| TUCP_004239 | XLOC_186262 | ENSRNOT00000023645 | 0.977078983 | 4.79E-08 |
| TUCP_004239 | XLOC_186262 | ENSRNOT00000084734 | 0.960008029 | 7.53E-07 |
| TUCP_004239 | XLOC_186262 | ENSRNOT00000085596 | 0.959260869 | 8.25E-07 |
| TUCP_004239 | XLOC_186262 | ENSRNOT00000020070 | 0.957777256 | 9.84E-07 |
| TUCP_004239 | XLOC_186262 | ENSRNOT00000074653 | 0.957568106 | 1.01E-06 |
| TUCP_004239 | XLOC_186262 | ENSRNOT00000031230 | 0.97687086  | 5.01E-08 |
| TUCP_004239 | XLOC_186262 | ENSRNOT00000010588 | 0.950393702 | 2.18E-06 |

|             |             |                    |              |          |
|-------------|-------------|--------------------|--------------|----------|
| TUCP_004239 | XLOC_186262 | ENSRNOT0000002292  | 0.969271792  | 2.05E-07 |
| TUCP_004239 | XLOC_186262 | ENSRNOT00000035491 | 0.956657577  | 1.12E-06 |
| TUCP_004239 | XLOC_186262 | ENSRNOT00000009342 | 0.963998912  | 4.48E-07 |
| TUCP_004239 | XLOC_186262 | ENSRNOT00000082174 | 0.953250069  | 1.63E-06 |
| TUCP_004239 | XLOC_186262 | ENSRNOT00000004412 | 0.968421143  | 2.35E-07 |
| TUCP_004239 | XLOC_186262 | ENSRNOT00000035255 | 0.963148484  | 5.03E-07 |
| TUCP_004239 | XLOC_186262 | ENSRNOT00000024941 | 0.953612293  | 1.56E-06 |
| TUCP_004239 | XLOC_186262 | ENSRNOT00000034704 | 0.975204631  | 7.08E-08 |
| TUCP_004239 | XLOC_186262 | ENSRNOT00000013985 | 0.966894004  | 2.96E-07 |
| TUCP_004239 | XLOC_186262 | ENSRNOT00000036750 | 0.971457027  | 1.42E-07 |
| TUCP_004239 | XLOC_186262 | ENSRNOT00000027964 | 0.955807562  | 1.23E-06 |
| TUCP_004239 | XLOC_186262 | ENSRNOT00000060669 | 0.967717591  | 2.62E-07 |
| TUCP_004239 | XLOC_186262 | ENSRNOT00000024659 | 0.962089441  | 5.79E-07 |
| TUCP_004239 | XLOC_186262 | ENSRNOT00000072081 | 0.964274517  | 4.32E-07 |
| TUCP_004239 | XLOC_186262 | ENSRNOT00000029001 | 0.960690089  | 6.92E-07 |
| TUCP_004239 | XLOC_186262 | ENSRNOT00000010433 | 0.959590507  | 7.93E-07 |
| TUCP_004239 | XLOC_186262 | ENSRNOT00000083799 | 0.953346229  | 1.61E-06 |
| TUCP_004239 | XLOC_186262 | ENSRNOT00000009066 | 0.976316793  | 5.64E-08 |
| TUCP_003918 | XLOC_172539 | ENSRNOT00000028833 | 0.954267715  | 1.46E-06 |
| TUCP_003918 | XLOC_172539 | ENSRNOT00000045223 | 0.957211513  | 1.05E-06 |
| TUCP_003918 | XLOC_172539 | ENSRNOT00000041044 | 0.958440737  | 9.10E-07 |
| TUCP_003918 | XLOC_172539 | ENSRNOT00000065600 | 0.961528124  | 6.22E-07 |
| TUCP_003918 | XLOC_172539 | ENSRNOT00000057160 | 0.956462977  | 1.14E-06 |
| TUCP_003918 | XLOC_172539 | ENSRNOT00000066024 | 0.956581302  | 1.13E-06 |
| TUCP_003918 | XLOC_172539 | ENSRNOT00000022419 | 0.958838159  | 8.68E-07 |
| TUCP_003918 | XLOC_172539 | ENSRNOT00000060499 | 0.959174337  | 8.34E-07 |
| TUCP_004583 | XLOC_201051 | ENSRNOT00000065387 | 0.972014574  | 1.29E-07 |
| TUCP_004582 | XLOC_200952 | ENSRNOT00000048263 | 0.950074071  | 2.25E-06 |
| TUCP_004582 | XLOC_200952 | ENSRNOT00000064936 | 0.974604288  | 7.97E-08 |
| TUCP_004582 | XLOC_200952 | ENSRNOT00000081455 | 0.990562861  | 5.80E-10 |
| TUCP_004582 | XLOC_200952 | ENSRNOT00000034090 | 0.996989789  | 1.94E-12 |
| TUCP_004582 | XLOC_200952 | ENSRNOT00000015840 | 0.955557163  | 1.27E-06 |
| TUCP_000362 | XLOC_012011 | ENSRNOT00000025097 | 0.953595402  | 1.57E-06 |
| TUCP_000362 | XLOC_012011 | ENSRNOT00000071780 | 0.957748414  | 9.88E-07 |
| TUCP_000362 | XLOC_012011 | ENSRNOT00000075521 | 0.988812619  | 1.35E-09 |
| TUCP_000362 | XLOC_012011 | ENSRNOT00000084046 | 0.957555228  | 1.01E-06 |
| TUCP_000362 | XLOC_012011 | ENSRNOT00000063865 | 0.967551613  | 2.68E-07 |
| TUCP_000362 | XLOC_012011 | ENSRNOT00000000577 | 0.959703878  | 7.82E-07 |
| TUCP_000362 | XLOC_012011 | ENSRNOT00000067610 | -0.96694787  | 2.94E-07 |
| TUCP_000362 | XLOC_012011 | ENSRNOT00000020174 | -0.95035127  | 2.19E-06 |
| TUCP_000362 | XLOC_012011 | ENSRNOT00000025434 | 0.969313413  | 2.04E-07 |
| TUCP_000362 | XLOC_012011 | ENSRNOT00000018122 | 0.951123235  | 2.02E-06 |
| TUCP_000362 | XLOC_012011 | ENSRNOT00000028888 | 0.968837581  | 2.20E-07 |
| TUCP_000362 | XLOC_012011 | ENSRNOT00000017571 | -0.959816889 | 7.71E-07 |
| TUCP_000362 | XLOC_012011 | ENSRNOT00000083968 | -0.954552613 | 1.41E-06 |
| TUCP_000362 | XLOC_012011 | ENSRNOT00000019487 | 0.961818161  | 5.99E-07 |
| TUCP_000362 | XLOC_012011 | ENSRNOT0000006835  | 0.956836049  | 1.10E-06 |
| TUCP_000362 | XLOC_012011 | ENSRNOT00000009691 | 0.956727347  | 1.11E-06 |
| TUCP_000362 | XLOC_012011 | ENSRNOT00000064588 | 0.960008503  | 7.53E-07 |
| TUCP_000362 | XLOC_012011 | ENSRNOT00000063917 | -0.9522156   | 1.81E-06 |
| TUCP_000286 | XLOC_008670 | ENSRNOT00000072396 | 0.952787008  | 1.71E-06 |

|             |             |                    |              |          |
|-------------|-------------|--------------------|--------------|----------|
| TUCP_000286 | XLOC_008670 | ENSRNOT00000061569 | 0.950794296  | 2.09E-06 |
| TUCP_000286 | XLOC_008670 | ENSRNOT00000021590 | 0.961880168  | 5.95E-07 |
| TUCP_000286 | XLOC_008670 | ENSRNOT00000091315 | 0.952027461  | 1.85E-06 |
| TUCP_000286 | XLOC_008670 | ENSRNOT00000065111 | 0.976190542  | 5.79E-08 |
| TUCP_002979 | XLOC_128384 | ENSRNOT00000091542 | -0.955643056 | 1.26E-06 |
| TUCP_001404 | XLOC_054315 | ENSRNOT00000071840 | 0.963430539  | 4.84E-07 |
| TUCP_001404 | XLOC_054315 | ENSRNOT00000066382 | 0.954464879  | 1.43E-06 |
| TUCP_001404 | XLOC_054315 | ENSRNOT00000045584 | 0.963430539  | 4.84E-07 |
| TUCP_001404 | XLOC_054315 | ENSRNOT00000077995 | 0.956356609  | 1.16E-06 |
| TUCP_001404 | XLOC_054315 | ENSRNOT00000066004 | 0.962632034  | 5.39E-07 |
| TUCP_001404 | XLOC_054315 | ENSRNOT00000075836 | 0.963430539  | 4.84E-07 |
| TUCP_001404 | XLOC_054315 | ENSRNOT00000082086 | 0.950730988  | 2.10E-06 |
| TUCP_001404 | XLOC_054315 | ENSRNOT00000092186 | 0.981734922  | 1.55E-08 |
| TUCP_001404 | XLOC_054315 | ENSRNOT00000092182 | 0.963430539  | 4.84E-07 |
| TUCP_001404 | XLOC_054315 | ENSRNOT00000084461 | 0.963430539  | 4.84E-07 |
| TUCP_001404 | XLOC_054315 | ENSRNOT00000060448 | 0.963430539  | 4.84E-07 |
| TUCP_001404 | XLOC_054315 | ENSRNOT00000032631 | 0.963430539  | 4.84E-07 |
| TUCP_001404 | XLOC_054315 | ENSRNOT00000057176 | 0.963390786  | 4.87E-07 |
| TUCP_001404 | XLOC_054315 | ENSRNOT00000078176 | 0.955143699  | 1.33E-06 |
| TUCP_001404 | XLOC_054315 | ENSRNOT00000056364 | 0.963626039  | 4.72E-07 |
| TUCP_001404 | XLOC_054315 | ENSRNOT00000093431 | 0.963430539  | 4.84E-07 |
| TUCP_001404 | XLOC_054315 | ENSRNOT00000092901 | 0.963430539  | 4.84E-07 |
| TUCP_001404 | XLOC_054315 | ENSRNOT00000089290 | 0.963883337  | 4.55E-07 |
| TUCP_001404 | XLOC_054315 | ENSRNOT00000090211 | 0.963064519  | 5.09E-07 |
| TUCP_001404 | XLOC_054315 | ENSRNOT00000091828 | 0.970989118  | 1.54E-07 |
| TUCP_001404 | XLOC_054315 | ENSRNOT00000091944 | 0.96223357   | 5.68E-07 |
| TUCP_001404 | XLOC_054315 | ENSRNOT00000070855 | 0.963430539  | 4.84E-07 |
| TUCP_001404 | XLOC_054315 | ENSRNOT00000084109 | 0.961979476  | 5.87E-07 |
| TUCP_001404 | XLOC_054315 | ENSRNOT00000007683 | 0.96437743   | 4.26E-07 |
| TUCP_001404 | XLOC_054315 | ENSRNOT00000060645 | 0.965543622  | 3.61E-07 |
| TUCP_001404 | XLOC_054315 | ENSRNOT00000041569 | 0.963430539  | 4.84E-07 |
| TUCP_001404 | XLOC_054315 | ENSRNOT00000087091 | 0.963430539  | 4.84E-07 |
| TUCP_001404 | XLOC_054315 | ENSRNOT00000003308 | 0.960441534  | 7.14E-07 |
| TUCP_001404 | XLOC_054315 | ENSRNOT00000026113 | 0.962825579  | 5.25E-07 |
| TUCP_001404 | XLOC_054315 | ENSRNOT00000014939 | 0.961034152  | 6.63E-07 |
| TUCP_001404 | XLOC_054315 | ENSRNOT00000058314 | 0.951038519  | 2.04E-06 |
| TUCP_001404 | XLOC_054315 | ENSRNOT00000047870 | 0.978001456  | 3.91E-08 |
| TUCP_001404 | XLOC_054315 | ENSRNOT00000071603 | 0.963349604  | 4.90E-07 |
| TUCP_001404 | XLOC_054315 | ENSRNOT00000088376 | 0.98541349   | 5.07E-09 |
| TUCP_001404 | XLOC_054315 | ENSRNOT00000039313 | 0.970374431  | 1.71E-07 |
| TUCP_001404 | XLOC_054315 | ENSRNOT00000044232 | 0.993825175  | 7.00E-11 |
| TUCP_001404 | XLOC_054315 | ENSRNOT00000023287 | 0.952694994  | 1.72E-06 |
| TUCP_001404 | XLOC_054315 | ENSRNOT00000073229 | 0.963430539  | 4.84E-07 |
| TUCP_001404 | XLOC_054315 | ENSRNOT00000060454 | 0.963430539  | 4.84E-07 |
| TUCP_001404 | XLOC_054315 | ENSRNOT00000009295 | 0.957040227  | 1.07E-06 |
| TUCP_003814 | XLOC_166902 | ENSRNOT00000087408 | 0.950243435  | 2.21E-06 |
| TUCP_003814 | XLOC_166902 | ENSRNOT00000011659 | 0.961493265  | 6.25E-07 |
| TUCP_003814 | XLOC_166902 | ENSRNOT00000009473 | 0.955710345  | 1.25E-06 |
| TUCP_003814 | XLOC_166902 | ENSRNOT00000022286 | 0.963601679  | 4.73E-07 |
| TUCP_003814 | XLOC_166902 | ENSRNOT00000009718 | 0.98208756   | 1.41E-08 |
| TUCP_003814 | XLOC_166902 | ENSRNOT00000024110 | 0.966448751  | 3.16E-07 |



|             |             |                    |              |          |
|-------------|-------------|--------------------|--------------|----------|
| TUCP_003814 | XLOC_166902 | ENSRNOT0000004400  | 0.956128925  | 1.19E-06 |
| TUCP_003814 | XLOC_166902 | ENSRNOT00000073703 | -0.953376562 | 1.60E-06 |
| TUCP_003814 | XLOC_166902 | ENSRNOT00000020726 | 0.952685344  | 1.72E-06 |
| TUCP_003814 | XLOC_166902 | ENSRNOT00000011290 | 0.965316444  | 3.73E-07 |
| TUCP_003814 | XLOC_166902 | ENSRNOT00000090784 | -0.968317907 | 2.38E-07 |
| TUCP_003814 | XLOC_166902 | ENSRNOT00000031047 | 0.960905211  | 6.73E-07 |
| TUCP_003814 | XLOC_166902 | ENSRNOT00000018952 | 0.959564952  | 7.95E-07 |
| TUCP_003814 | XLOC_166902 | ENSRNOT00000044087 | 0.993495154  | 9.07E-11 |
| TUCP_004188 | XLOC_183726 | ENSRNOT00000045677 | 0.950884811  | 2.07E-06 |
| TUCP_004188 | XLOC_183726 | ENSRNOT00000011342 | 0.95017073   | 2.22E-06 |
| TUCP_004188 | XLOC_183726 | ENSRNOT00000081235 | 0.954443716  | 1.43E-06 |
| TUCP_004188 | XLOC_183726 | ENSRNOT00000076466 | 0.954737822  | 1.39E-06 |
| TUCP_004188 | XLOC_183726 | ENSRNOT00000006604 | 0.963866167  | 4.57E-07 |
| TUCP_004188 | XLOC_183726 | ENSRNOT00000091315 | 0.953401525  | 1.60E-06 |
| TUCP_000184 | XLOC_006006 | ENSRNOT00000016581 | 0.952570784  | 1.75E-06 |
| TUCP_000187 | XLOC_006154 | ENSRNOT00000026860 | 0.952423911  | 1.77E-06 |
| TUCP_000187 | XLOC_006154 | ENSRNOT00000006186 | 0.980514157  | 2.14E-08 |
| TUCP_000187 | XLOC_006154 | ENSRNOT00000026941 | 0.960220198  | 7.34E-07 |
| TUCP_000187 | XLOC_006154 | ENSRNOT00000009877 | 0.95504092   | 1.34E-06 |
| TUCP_000187 | XLOC_006154 | ENSRNOT00000021348 | 0.97087107   | 1.57E-07 |
| TUCP_000187 | XLOC_006154 | ENSRNOT00000068353 | 0.959285696  | 8.23E-07 |
| TUCP_000187 | XLOC_006154 | ENSRNOT00000021614 | 0.956621947  | 1.12E-06 |
| TUCP_000187 | XLOC_006154 | ENSRNOT00000044635 | 0.987996156  | 1.92E-09 |
| TUCP_000187 | XLOC_006154 | ENSRNOT00000082100 | 0.975646969  | 6.48E-08 |
| TUCP_000187 | XLOC_006154 | ENSRNOT00000086310 | -0.950028063 | 2.26E-06 |
| TUCP_000187 | XLOC_006154 | ENSRNOT00000028856 | 0.950955773  | 2.06E-06 |
| TUCP_000187 | XLOC_006154 | ENSRNOT00000052063 | 0.961637821  | 6.13E-07 |
| TUCP_000187 | XLOC_006154 | ENSRNOT00000055540 | 0.956658399  | 1.12E-06 |
| TUCP_000187 | XLOC_006154 | ENSRNOT00000006752 | 0.967192145  | 2.83E-07 |
| TUCP_000187 | XLOC_006154 | ENSRNOT00000065300 | 0.980800469  | 1.99E-08 |
| TUCP_000187 | XLOC_006154 | ENSRNOT00000019923 | 0.957737384  | 9.89E-07 |
| TUCP_000187 | XLOC_006154 | ENSRNOT00000004400 | 0.969445854  | 1.99E-07 |
| TUCP_000187 | XLOC_006154 | ENSRNOT00000035320 | -0.950438154 | 2.17E-06 |
| TUCP_000187 | XLOC_006154 | ENSRNOT00000076820 | 0.979711949  | 2.62E-08 |
| TUCP_000187 | XLOC_006154 | ENSRNOT00000036951 | 0.96881503   | 2.20E-07 |
| TUCP_000187 | XLOC_006154 | ENSRNOT00000022534 | 0.95702831   | 1.07E-06 |
| TUCP_000187 | XLOC_006154 | ENSRNOT00000077999 | 0.961968111  | 5.88E-07 |
| TUCP_000187 | XLOC_006154 | ENSRNOT00000068134 | 0.96022974   | 7.33E-07 |
| TUCP_000187 | XLOC_006154 | ENSRNOT00000003146 | -0.953706697 | 1.55E-06 |
| TUCP_000187 | XLOC_006154 | ENSRNOT00000083215 | 0.972587302  | 1.16E-07 |
| TUCP_000187 | XLOC_006154 | ENSRNOT00000085228 | 0.964478921  | 4.20E-07 |
| TUCP_000187 | XLOC_006154 | ENSRNOT00000006969 | 0.966529435  | 3.13E-07 |
| TUCP_000187 | XLOC_006154 | ENSRNOT00000017319 | 0.965680828  | 3.54E-07 |
| TUCP_000187 | XLOC_006154 | ENSRNOT00000055187 | 0.981543719  | 1.64E-08 |
| TUCP_000187 | XLOC_006154 | ENSRNOT00000015188 | 0.972145057  | 1.26E-07 |
| TUCP_000187 | XLOC_006154 | ENSRNOT00000079866 | 0.965857328  | 3.45E-07 |
| TUCP_000187 | XLOC_006154 | ENSRNOT00000005686 | -0.9504567   | 2.16E-06 |
| TUCP_000187 | XLOC_006154 | ENSRNOT00000010149 | 0.958453724  | 9.09E-07 |
| TUCP_000187 | XLOC_006154 | ENSRNOT00000087371 | 0.956633144  | 1.12E-06 |
| TUCP_000187 | XLOC_006154 | ENSRNOT00000037446 | 0.960825971  | 6.80E-07 |
| TUCP_000187 | XLOC_006154 | ENSRNOT00000023619 | 0.950703186  | 2.11E-06 |

|             |             |                    |              |          |
|-------------|-------------|--------------------|--------------|----------|
| TUCP_000187 | XLOC_006154 | ENSRNOT00000084709 | 0.955850618  | 1.23E-06 |
| TUCP_000187 | XLOC_006154 | ENSRNOT00000068033 | 0.957952451  | 9.64E-07 |
| TUCP_000187 | XLOC_006154 | ENSRNOT00000009156 | 0.960188019  | 7.37E-07 |
| TUCP_000187 | XLOC_006154 | ENSRNOT00000026481 | 0.974477136  | 8.17E-08 |
| TUCP_000187 | XLOC_006154 | ENSRNOT00000001403 | 0.955278169  | 1.31E-06 |
| TUCP_000187 | XLOC_006154 | ENSRNOT00000088196 | 0.968223946  | 2.42E-07 |
| TUCP_000187 | XLOC_006154 | ENSRNOT00000016132 | -0.960192798 | 7.36E-07 |
| TUCP_000187 | XLOC_006154 | ENSRNOT00000013067 | -0.951363612 | 1.97E-06 |
| TUCP_000187 | XLOC_006154 | ENSRNOT00000034692 | -0.958044274 | 9.54E-07 |
| TUCP_000187 | XLOC_006154 | ENSRNOT00000088191 | 0.978220939  | 3.72E-08 |
| TUCP_000187 | XLOC_006154 | ENSRNOT00000031979 | -0.966334868 | 3.22E-07 |
| TUCP_000187 | XLOC_006154 | ENSRNOT00000079895 | 0.985429798  | 5.05E-09 |
| TUCP_000187 | XLOC_006154 | ENSRNOT00000078102 | 0.956509041  | 1.14E-06 |
| TUCP_000187 | XLOC_006154 | ENSRNOT00000013661 | 0.968642038  | 2.27E-07 |
| TUCP_000187 | XLOC_006154 | ENSRNOT00000081047 | 0.954885261  | 1.36E-06 |
| TUCP_000187 | XLOC_006154 | ENSRNOT00000011880 | 0.95499026   | 1.35E-06 |
| TUCP_000187 | XLOC_006154 | ENSRNOT00000020885 | 0.97250311   | 1.18E-07 |
| TUCP_000187 | XLOC_006154 | ENSRNOT00000003991 | 0.958369934  | 9.18E-07 |
| TUCP_000187 | XLOC_006154 | ENSRNOT00000016649 | 0.951348265  | 1.98E-06 |
| TUCP_000187 | XLOC_006154 | ENSRNOT00000021153 | 0.974371543  | 8.34E-08 |
| TUCP_000187 | XLOC_006154 | ENSRNOT00000077701 | 0.957620401  | 1.00E-06 |
| TUCP_000187 | XLOC_006154 | ENSRNOT00000064902 | 0.960895409  | 6.74E-07 |
| TUCP_000187 | XLOC_006154 | ENSRNOT00000025027 | 0.954371228  | 1.44E-06 |
| TUCP_000187 | XLOC_006154 | ENSRNOT00000078070 | 0.961407072  | 6.32E-07 |
| TUCP_000187 | XLOC_006154 | ENSRNOT00000046745 | 0.968434248  | 2.34E-07 |
| TUCP_000187 | XLOC_006154 | ENSRNOT00000021015 | 0.971572178  | 1.39E-07 |
| TUCP_000187 | XLOC_006154 | ENSRNOT00000076669 | 0.951867462  | 1.88E-06 |
| TUCP_000187 | XLOC_006154 | ENSRNOT00000003840 | 0.968114186  | 2.46E-07 |
| TUCP_000187 | XLOC_006154 | ENSRNOT00000090170 | 0.95036162   | 2.18E-06 |
| TUCP_000187 | XLOC_006154 | ENSRNOT00000091488 | 0.959510683  | 8.01E-07 |
| TUCP_000187 | XLOC_006154 | ENSRNOT00000027452 | 0.955329986  | 1.30E-06 |
| TUCP_000187 | XLOC_006154 | ENSRNOT00000019656 | -0.971527755 | 1.40E-07 |
| TUCP_000187 | XLOC_006154 | ENSRNOT00000032505 | -0.953011888 | 1.67E-06 |
| TUCP_000187 | XLOC_006154 | ENSRNOT00000074649 | 0.974363622  | 8.35E-08 |
| TUCP_000187 | XLOC_006154 | ENSRNOT0000006963  | 0.954769823  | 1.38E-06 |
| TUCP_000187 | XLOC_006154 | ENSRNOT00000060002 | -0.952456327 | 1.77E-06 |
| TUCP_000187 | XLOC_006154 | ENSRNOT00000066133 | -0.961051741 | 6.61E-07 |
| TUCP_000187 | XLOC_006154 | ENSRNOT00000085596 | 0.978574822  | 3.43E-08 |
| TUCP_000187 | XLOC_006154 | ENSRNOT00000059458 | 0.956286425  | 1.17E-06 |
| TUCP_000187 | XLOC_006154 | ENSRNOT00000055992 | -0.95562096  | 1.26E-06 |
| TUCP_000187 | XLOC_006154 | ENSRNOT00000064535 | -0.960894729 | 6.74E-07 |
| TUCP_000187 | XLOC_006154 | ENSRNOT00000010748 | 0.969701317  | 1.91E-07 |
| TUCP_000187 | XLOC_006154 | ENSRNOT00000035474 | 0.970018998  | 1.81E-07 |
| TUCP_000187 | XLOC_006154 | ENSRNOT00000091205 | 0.977344606  | 4.53E-08 |
| TUCP_000187 | XLOC_006154 | ENSRNOT00000004787 | -0.957146435 | 1.06E-06 |
| TUCP_000187 | XLOC_006154 | ENSRNOT00000040069 | 0.968515813  | 2.31E-07 |
| TUCP_000187 | XLOC_006154 | ENSRNOT00000014814 | 0.956263389  | 1.17E-06 |
| TUCP_000187 | XLOC_006154 | ENSRNOT00000004412 | 0.97367678   | 9.52E-08 |
| TUCP_000187 | XLOC_006154 | ENSRNOT00000066968 | 0.954990797  | 1.35E-06 |
| TUCP_000187 | XLOC_006154 | ENSRNOT00000080207 | 0.957372298  | 1.03E-06 |
| TUCP_000187 | XLOC_006154 | ENSRNOT00000026174 | 0.98201408   | 1.44E-08 |

|             |             |                     |              |          |
|-------------|-------------|---------------------|--------------|----------|
| TUCP_000187 | XLOC_006154 | ENSRNOT00000017995  | 0.953526963  | 1.58E-06 |
| TUCP_000187 | XLOC_006154 | ENSRNOT00000034704  | 0.954249782  | 1.46E-06 |
| TUCP_000187 | XLOC_006154 | ENSRNOT00000005144  | 0.971413776  | 1.43E-07 |
| TUCP_000187 | XLOC_006154 | ENSRNOT00000026457  | 0.954925599  | 1.36E-06 |
| TUCP_000187 | XLOC_006154 | ENSRNOT00000018998  | 0.964577585  | 4.14E-07 |
| TUCP_000187 | XLOC_006154 | ENSRNOT00000004463  | 0.973130675  | 1.05E-07 |
| TUCP_000187 | XLOC_006154 | ENSRNOT000000072081 | 0.954945734  | 1.36E-06 |
| TUCP_000187 | XLOC_006154 | ENSRNOT00000008982  | 0.974509928  | 8.12E-08 |
| TUCP_000187 | XLOC_006154 | ENSRNOT00000048029  | 0.974641029  | 7.92E-08 |
| TUCP_000187 | XLOC_006154 | ENSRNOT00000024253  | 0.953435761  | 1.59E-06 |
| TUCP_000187 | XLOC_006154 | ENSRNOT000000081796 | 0.968294248  | 2.39E-07 |
| TUCP_000187 | XLOC_006154 | ENSRNOT00000074939  | 0.959447151  | 8.07E-07 |
| TUCP_000187 | XLOC_006154 | ENSRNOT000000063930 | -0.951225046 | 2.00E-06 |
| TUCP_000187 | XLOC_006154 | ENSRNOT000000006055 | 0.952226788  | 1.81E-06 |
| TUCP_000187 | XLOC_006154 | ENSRNOT00000020453  | -0.952920585 | 1.68E-06 |
| TUCP_000187 | XLOC_006154 | ENSRNOT00000019502  | 0.960435448  | 7.14E-07 |
| TUCP_000187 | XLOC_006154 | ENSRNOT00000018057  | 0.973505415  | 9.83E-08 |
| TUCP_000187 | XLOC_006154 | ENSRNOT000000038703 | 0.961110641  | 6.56E-07 |
| TUCP_000187 | XLOC_006154 | ENSRNOT00000043216  | 0.975748227  | 6.34E-08 |
| TUCP_000187 | XLOC_006154 | ENSRNOT000000081981 | 0.959104496  | 8.41E-07 |
| TUCP_000187 | XLOC_006154 | ENSRNOT00000013758  | 0.9624932    | 5.49E-07 |
| TUCP_000187 | XLOC_006154 | ENSRNOT00000028563  | 0.966912723  | 2.95E-07 |
| TUCP_000187 | XLOC_006154 | ENSRNOT00000010418  | 0.973619301  | 9.63E-08 |
| TUCP_000187 | XLOC_006154 | ENSRNOT00000015479  | 0.969848727  | 1.87E-07 |
| TUCP_000187 | XLOC_006154 | ENSRNOT00000021629  | -0.95884597  | 8.68E-07 |
| TUCP_000187 | XLOC_006154 | ENSRNOT00000047836  | -0.952607841 | 1.74E-06 |
| TUCP_000187 | XLOC_006154 | ENSRNOT00000079746  | 0.966106511  | 3.33E-07 |
| TUCP_000187 | XLOC_006154 | ENSRNOT00000025079  | -0.965487232 | 3.64E-07 |
| TUCP_000187 | XLOC_006154 | ENSRNOT00000048754  | -0.969057362 | 2.12E-07 |
| TUCP_000187 | XLOC_006154 | ENSRNOT00000079109  | 0.961501411  | 6.24E-07 |
| TUCP_000187 | XLOC_006154 | ENSRNOT00000011926  | 0.966427046  | 3.17E-07 |
| TUCP_000187 | XLOC_006154 | ENSRNOT00000054761  | -0.958969374 | 8.55E-07 |
| TUCP_000187 | XLOC_006154 | ENSRNOT00000007824  | -0.952123539 | 1.83E-06 |
| TUCP_000187 | XLOC_006154 | ENSRNOT00000052075  | 0.956295613  | 1.17E-06 |
| TUCP_000187 | XLOC_006154 | ENSRNOT00000091602  | -0.952547075 | 1.75E-06 |
| TUCP_000187 | XLOC_006154 | ENSRNOT00000012671  | 0.953927618  | 1.51E-06 |
| TUCP_000187 | XLOC_006154 | ENSRNOT00000035989  | 0.961239646  | 6.46E-07 |
| TUCP_000187 | XLOC_006154 | ENSRNOT00000071540  | 0.968533869  | 2.30E-07 |
| TUCP_000187 | XLOC_006154 | ENSRNOT00000022594  | 0.953042448  | 1.66E-06 |
| TUCP_000187 | XLOC_006154 | ENSRNOT00000011654  | -0.957751132 | 9.87E-07 |
| TUCP_000187 | XLOC_006154 | ENSRNOT00000060811  | 0.951164845  | 2.01E-06 |
| TUCP_000187 | XLOC_006154 | ENSRNOT00000087443  | 0.958688717  | 8.84E-07 |
| TUCP_000187 | XLOC_006154 | ENSRNOT00000021803  | -0.965062944 | 3.87E-07 |
| TUCP_000187 | XLOC_006154 | ENSRNOT00000020147  | 0.960597884  | 7.00E-07 |
| TUCP_000187 | XLOC_006154 | ENSRNOT00000024352  | 0.979203351  | 2.96E-08 |
| TUCP_000187 | XLOC_006154 | ENSRNOT00000058312  | 0.957157352  | 1.06E-06 |
| TUCP_000187 | XLOC_006154 | ENSRNOT00000013274  | 0.961017079  | 6.64E-07 |
| TUCP_000187 | XLOC_006154 | ENSRNOT00000022610  | 0.951103705  | 2.03E-06 |
| TUCP_000187 | XLOC_006154 | ENSRNOT00000022342  | 0.957238616  | 1.05E-06 |
| TUCP_000187 | XLOC_006154 | ENSRNOT00000016739  | 0.966790846  | 3.01E-07 |
| TUCP_000187 | XLOC_006154 | ENSRNOT00000009221  | 0.970496897  | 1.68E-07 |

|             |             |                    |              |          |
|-------------|-------------|--------------------|--------------|----------|
| TUCP_000187 | XLOC_006154 | ENSRNOT00000026089 | 0.964537381  | 4.16E-07 |
| TUCP_000187 | XLOC_006154 | ENSRNOT00000005587 | -0.961476998 | 6.26E-07 |
| TUCP_000187 | XLOC_006154 | ENSRNOT00000061100 | 0.9787651    | 3.28E-08 |
| TUCP_000187 | XLOC_006154 | ENSRNOT00000005073 | 0.960693863  | 6.92E-07 |
| TUCP_000187 | XLOC_006154 | ENSRNOT00000065529 | 0.957486166  | 1.02E-06 |
| TUCP_000187 | XLOC_006154 | ENSRNOT00000034744 | 0.97476963   | 7.72E-08 |
| TUCP_000187 | XLOC_006154 | ENSRNOT00000017776 | 0.972346683  | 1.22E-07 |
| TUCP_000187 | XLOC_006154 | ENSRNOT00000027910 | 0.987025742  | 2.83E-09 |
| TUCP_000187 | XLOC_006154 | ENSRNOT00000090262 | 0.963387804  | 4.87E-07 |
| TUCP_000187 | XLOC_006154 | ENSRNOT00000002771 | 0.957900773  | 9.70E-07 |
| TUCP_000187 | XLOC_006154 | ENSRNOT00000039631 | 0.952853029  | 1.69E-06 |
| TUCP_000187 | XLOC_006154 | ENSRNOT00000066032 | 0.956629153  | 1.12E-06 |
| TUCP_000187 | XLOC_006154 | ENSRNOT00000047975 | 0.965610153  | 3.58E-07 |
| TUCP_000187 | XLOC_006154 | ENSRNOT00000027615 | 0.971552908  | 1.40E-07 |
| TUCP_000187 | XLOC_006154 | ENSRNOT00000034487 | -0.950140786 | 2.23E-06 |
| TUCP_000187 | XLOC_006154 | ENSRNOT0000001783  | 0.951355117  | 1.98E-06 |
| TUCP_000187 | XLOC_006154 | ENSRNOT00000036061 | 0.95982769   | 7.70E-07 |
| TUCP_000187 | XLOC_006154 | ENSRNOT00000057313 | 0.978953997  | 3.14E-08 |
| TUCP_000187 | XLOC_006154 | ENSRNOT00000050138 | 0.980135657  | 2.36E-08 |
| TUCP_000187 | XLOC_006154 | ENSRNOT00000003359 | -0.956655194 | 1.12E-06 |
| TUCP_000187 | XLOC_006154 | ENSRNOT00000011984 | 0.969829992  | 1.87E-07 |
| TUCP_000187 | XLOC_006154 | ENSRNOT00000020669 | 0.97415836   | 8.69E-08 |
| TUCP_000187 | XLOC_006154 | ENSRNOT00000074653 | 0.969619034  | 1.94E-07 |
| TUCP_000187 | XLOC_006154 | ENSRNOT00000004570 | 0.952903424  | 1.69E-06 |
| TUCP_000187 | XLOC_006154 | ENSRNOT00000031230 | 0.972546497  | 1.17E-07 |
| TUCP_000187 | XLOC_006154 | ENSRNOT00000022142 | 0.955338561  | 1.30E-06 |
| TUCP_000187 | XLOC_006154 | ENSRNOT00000076300 | -0.957216238 | 1.05E-06 |
| TUCP_000187 | XLOC_006154 | ENSRNOT00000025086 | -0.960370321 | 7.20E-07 |
| TUCP_000187 | XLOC_006154 | ENSRNOT00000002292 | 0.972360835  | 1.21E-07 |
| TUCP_000187 | XLOC_006154 | ENSRNOT00000052120 | 0.956873076  | 1.09E-06 |
| TUCP_000187 | XLOC_006154 | ENSRNOT00000019820 | 0.967340267  | 2.77E-07 |
| TUCP_000187 | XLOC_006154 | ENSRNOT00000004172 | 0.965161548  | 3.81E-07 |
| TUCP_000187 | XLOC_006154 | ENSRNOT00000029125 | 0.974653534  | 7.90E-08 |
| TUCP_000187 | XLOC_006154 | ENSRNOT00000085279 | 0.957751743  | 9.87E-07 |
| TUCP_000187 | XLOC_006154 | ENSRNOT00000074847 | -0.952134901 | 1.83E-06 |
| TUCP_000187 | XLOC_006154 | ENSRNOT00000046058 | 0.960048471  | 7.50E-07 |
| TUCP_000187 | XLOC_006154 | ENSRNOT00000005389 | 0.963385863  | 4.87E-07 |
| TUCP_000187 | XLOC_006154 | ENSRNOT00000010927 | 0.984304368  | 7.31E-09 |
| TUCP_000187 | XLOC_006154 | ENSRNOT00000077888 | -0.972430576 | 1.20E-07 |
| TUCP_000187 | XLOC_006154 | ENSRNOT00000015092 | 0.958181136  | 9.39E-07 |
| TUCP_000187 | XLOC_006154 | ENSRNOT00000003182 | 0.952754955  | 1.71E-06 |
| TUCP_000187 | XLOC_006154 | ENSRNOT00000010224 | 0.962890147  | 5.21E-07 |
| TUCP_000187 | XLOC_006154 | ENSRNOT00000025147 | 0.967709507  | 2.62E-07 |
| TUCP_000187 | XLOC_006154 | ENSRNOT00000087278 | -0.962486973 | 5.49E-07 |
| TUCP_000187 | XLOC_006154 | ENSRNOT00000007175 | 0.974793554  | 7.68E-08 |
| TUCP_000187 | XLOC_006154 | ENSRNOT00000078862 | 0.955399984  | 1.29E-06 |
| TUCP_000187 | XLOC_006154 | ENSRNOT00000039551 | -0.959029731 | 8.49E-07 |
| TUCP_000187 | XLOC_006154 | ENSRNOT00000082998 | 0.976549165  | 5.37E-08 |
| TUCP_000187 | XLOC_006154 | ENSRNOT00000007350 | 0.958976293  | 8.54E-07 |
| TUCP_000187 | XLOC_006154 | ENSRNOT00000007351 | -0.969680577 | 1.92E-07 |
| TUCP_000187 | XLOC_006154 | ENSRNOT00000083578 | 0.972262609  | 1.23E-07 |

|             |             |                    |              |          |
|-------------|-------------|--------------------|--------------|----------|
| TUCP_000187 | XLOC_006154 | ENSRNOT00000026065 | 0.975463884  | 6.72E-08 |
| TUCP_000187 | XLOC_006154 | ENSRNOT00000023638 | 0.975917479  | 6.13E-08 |
| TUCP_000187 | XLOC_006154 | ENSRNOT00000005228 | 0.950793009  | 2.09E-06 |
| TUCP_000187 | XLOC_006154 | ENSRNOT00000022726 | 0.977392577  | 4.48E-08 |
| TUCP_000187 | XLOC_006154 | ENSRNOT00000005220 | 0.974315324  | 8.43E-08 |
| TUCP_000187 | XLOC_006154 | ENSRNOT00000045326 | 0.962112693  | 5.77E-07 |
| TUCP_000187 | XLOC_006154 | ENSRNOT00000092418 | 0.950079584  | 2.24E-06 |
| TUCP_000187 | XLOC_006154 | ENSRNOT00000091128 | -0.957710373 | 9.92E-07 |
| TUCP_000187 | XLOC_006154 | ENSRNOT00000043554 | 0.950296889  | 2.20E-06 |
| TUCP_000187 | XLOC_006154 | ENSRNOT00000028405 | -0.952722505 | 1.72E-06 |
| TUCP_000187 | XLOC_006154 | ENSRNOT00000013695 | -0.954474178 | 1.43E-06 |
| TUCP_000187 | XLOC_006154 | ENSRNOT00000088125 | 0.975311257  | 6.93E-08 |
| TUCP_000187 | XLOC_006154 | ENSRNOT00000038247 | 0.956618388  | 1.12E-06 |
| TUCP_000187 | XLOC_006154 | ENSRNOT00000027944 | 0.961334778  | 6.38E-07 |
| TUCP_000187 | XLOC_006154 | ENSRNOT00000024402 | 0.960176273  | 7.38E-07 |
| TUCP_000187 | XLOC_006154 | ENSRNOT00000024406 | -0.95454645  | 1.42E-06 |
| TUCP_000187 | XLOC_006154 | ENSRNOT00000019519 | 0.955667639  | 1.25E-06 |
| TUCP_000187 | XLOC_006154 | ENSRNOT00000089933 | 0.957081809  | 1.07E-06 |
| TUCP_000187 | XLOC_006154 | ENSRNOT00000077908 | 0.977164452  | 4.71E-08 |
| TUCP_000187 | XLOC_006154 | ENSRNOT00000010463 | 0.962292482  | 5.64E-07 |
| TUCP_000187 | XLOC_006154 | ENSRNOT00000084012 | 0.972566773  | 1.17E-07 |
| TUCP_000187 | XLOC_006154 | ENSRNOT00000074323 | 0.964570561  | 4.14E-07 |
| TUCP_000187 | XLOC_006154 | ENSRNOT00000033677 | -0.962461627 | 5.51E-07 |
| TUCP_000187 | XLOC_006154 | ENSRNOT00000036931 | -0.954978052 | 1.35E-06 |
| TUCP_000187 | XLOC_006154 | ENSRNOT00000067822 | 0.982682538  | 1.19E-08 |
| TUCP_000187 | XLOC_006154 | ENSRNOT00000024060 | 0.978491689  | 3.50E-08 |
| TUCP_000187 | XLOC_006154 | ENSRNOT00000011784 | 0.962931843  | 5.18E-07 |
| TUCP_000187 | XLOC_006154 | ENSRNOT00000051181 | 0.96154364   | 6.21E-07 |
| TUCP_000187 | XLOC_006154 | ENSRNOT00000077727 | -0.957191261 | 1.05E-06 |
| TUCP_000187 | XLOC_006154 | ENSRNOT00000068745 | 0.966840517  | 2.99E-07 |
| TUCP_000187 | XLOC_006154 | ENSRNOT00000004032 | 0.979203099  | 2.96E-08 |
| TUCP_000187 | XLOC_006154 | ENSRNOT00000048613 | 0.98398412   | 8.08E-09 |
| TUCP_000187 | XLOC_006154 | ENSRNOT00000017948 | 0.956907138  | 1.09E-06 |
| TUCP_000187 | XLOC_006154 | ENSRNOT00000091909 | 0.977304883  | 4.56E-08 |
| TUCP_000187 | XLOC_006154 | ENSRNOT0000001081  | 0.966863145  | 2.98E-07 |
| TUCP_000187 | XLOC_006154 | ENSRNOT00000086119 | -0.962322941 | 5.61E-07 |
| TUCP_000187 | XLOC_006154 | ENSRNOT00000077220 | -0.953563073 | 1.57E-06 |
| TUCP_000187 | XLOC_006154 | ENSRNOT00000065983 | 0.966011042  | 3.37E-07 |
| TUCP_000187 | XLOC_006154 | ENSRNOT00000022213 | 0.969734449  | 1.90E-07 |
| TUCP_000187 | XLOC_006154 | ENSRNOT00000073919 | 0.953181493  | 1.64E-06 |
| TUCP_000187 | XLOC_006154 | ENSRNOT00000067780 | -0.95423106  | 1.46E-06 |
| TUCP_000187 | XLOC_006154 | ENSRNOT00000015609 | 0.954937057  | 1.36E-06 |
| TUCP_000187 | XLOC_006154 | ENSRNOT00000086590 | 0.972856002  | 1.11E-07 |
| TUCP_000187 | XLOC_006154 | ENSRNOT00000025983 | 0.953739711  | 1.54E-06 |
| TUCP_000187 | XLOC_006154 | ENSRNOT00000020155 | 0.950683309  | 2.11E-06 |
| TUCP_000187 | XLOC_006154 | ENSRNOT00000015325 | -0.95394165  | 1.51E-06 |
| TUCP_000187 | XLOC_006154 | ENSRNOT00000004698 | 0.954090444  | 1.49E-06 |
| TUCP_000187 | XLOC_006154 | ENSRNOT00000039842 | 0.959380669  | 8.13E-07 |
| TUCP_000187 | XLOC_006154 | ENSRNOT00000045083 | 0.968566662  | 2.29E-07 |
| TUCP_000187 | XLOC_006154 | ENSRNOT00000017629 | 0.973292122  | 1.02E-07 |
| TUCP_000187 | XLOC_006154 | ENSRNOT00000065947 | 0.965358478  | 3.71E-07 |

|             |             |                     |              |          |
|-------------|-------------|---------------------|--------------|----------|
| TUCP_000187 | XLOC_006154 | ENSRNOT0000008803   | 0.95217491   | 1.82E-06 |
| TUCP_000187 | XLOC_006154 | ENSRNOT00000021116  | 0.974007077  | 8.95E-08 |
| TUCP_000187 | XLOC_006154 | ENSRNOT00000078475  | 0.986753253  | 3.14E-09 |
| TUCP_000187 | XLOC_006154 | ENSRNOT0000004740   | 0.958706294  | 8.82E-07 |
| TUCP_000187 | XLOC_006154 | ENSRNOT00000016722  | 0.989591572  | 9.45E-10 |
| TUCP_000187 | XLOC_006154 | ENSRNOT00000073526  | 0.965413146  | 3.68E-07 |
| TUCP_000187 | XLOC_006154 | ENSRNOT00000000013  | 0.971483271  | 1.42E-07 |
| TUCP_000187 | XLOC_006154 | ENSRNOT00000025523  | 0.95254549   | 1.75E-06 |
| TUCP_000187 | XLOC_006154 | ENSRNOT00000005161  | 0.955438998  | 1.28E-06 |
| TUCP_000187 | XLOC_006154 | ENSRNOT00000009198  | 0.963039232  | 5.11E-07 |
| TUCP_000187 | XLOC_006154 | ENSRNOT00000009129  | 0.959020379  | 8.50E-07 |
| TUCP_000187 | XLOC_006154 | ENSRNOT0000004999   | 0.953702487  | 1.55E-06 |
| TUCP_000187 | XLOC_006154 | ENSRNOT00000009122  | 0.957319425  | 1.04E-06 |
| TUCP_000187 | XLOC_006154 | ENSRNOT00000088054  | 0.961219246  | 6.47E-07 |
| TUCP_000187 | XLOC_006154 | ENSRNOT00000019554  | 0.964443643  | 4.22E-07 |
| TUCP_000187 | XLOC_006154 | ENSRNOT00000019553  | 0.954497722  | 1.42E-06 |
| TUCP_000187 | XLOC_006154 | ENSRNOT00000035700  | 0.974022604  | 8.92E-08 |
| TUCP_000187 | XLOC_006154 | ENSRNOT00000029202  | -0.961157439 | 6.52E-07 |
| TUCP_000187 | XLOC_006154 | ENSRNOT00000092029  | 0.954605515  | 1.41E-06 |
| TUCP_000187 | XLOC_006154 | ENSRNOT00000005489  | 0.968583725  | 2.29E-07 |
| TUCP_000187 | XLOC_006154 | ENSRNOT00000084422  | 0.950032151  | 2.26E-06 |
| TUCP_000187 | XLOC_006154 | ENSRNOT000000050834 | -0.95308623  | 1.65E-06 |
| TUCP_000187 | XLOC_006154 | ENSRNOT000000054828 | 0.956160036  | 1.18E-06 |
| TUCP_000187 | XLOC_006154 | ENSRNOT00000027275  | 0.952862725  | 1.69E-06 |
| TUCP_000187 | XLOC_006154 | ENSRNOT00000080928  | 0.9789876    | 3.11E-08 |
| TUCP_000187 | XLOC_006154 | ENSRNOT00000009342  | 0.971797001  | 1.34E-07 |
| TUCP_000187 | XLOC_006154 | ENSRNOT00000018074  | -0.962986914 | 5.14E-07 |
| TUCP_000187 | XLOC_006154 | ENSRNOT00000037679  | 0.953541832  | 1.58E-06 |
| TUCP_000187 | XLOC_006154 | ENSRNOT00000014124  | 0.955596524  | 1.26E-06 |
| TUCP_000187 | XLOC_006154 | ENSRNOT00000078906  | -0.951921564 | 1.87E-06 |
| TUCP_000187 | XLOC_006154 | ENSRNOT00000084049  | 0.9596186    | 7.90E-07 |
| TUCP_000187 | XLOC_006154 | ENSRNOT00000009900  | -0.956046414 | 1.20E-06 |
| TUCP_000187 | XLOC_006154 | ENSRNOT00000085060  | 0.954057098  | 1.49E-06 |
| TUCP_000187 | XLOC_006154 | ENSRNOT00000014979  | 0.95807179   | 9.51E-07 |
| TUCP_000187 | XLOC_006154 | ENSRNOT00000019172  | -0.960961892 | 6.69E-07 |
| TUCP_000187 | XLOC_006154 | ENSRNOT00000064798  | 0.967185969  | 2.84E-07 |
| TUCP_000187 | XLOC_006154 | ENSRNOT00000019177  | 0.964409646  | 4.24E-07 |
| TUCP_000187 | XLOC_006154 | ENSRNOT00000019910  | -0.971223551 | 1.48E-07 |
| TUCP_000187 | XLOC_006154 | ENSRNOT00000040393  | 0.982480132  | 1.26E-08 |
| TUCP_000187 | XLOC_006154 | ENSRNOT00000066593  | 0.963089571  | 5.07E-07 |
| TUCP_000187 | XLOC_006154 | ENSRNOT00000067901  | -0.962618033 | 5.40E-07 |
| TUCP_000187 | XLOC_006154 | ENSRNOT00000036750  | 0.98343519   | 9.55E-09 |
| TUCP_000187 | XLOC_006154 | ENSRNOT00000024659  | 0.978038822  | 3.88E-08 |
| TUCP_000187 | XLOC_006154 | ENSRNOT00000011041  | 0.951676772  | 1.91E-06 |
| TUCP_000187 | XLOC_006154 | ENSRNOT00000021674  | 0.989459236  | 1.01E-09 |
| TUCP_000187 | XLOC_006154 | ENSRNOT00000064700  | 0.951313763  | 1.98E-06 |
| TUCP_000187 | XLOC_006154 | ENSRNOT00000036613  | -0.961600373 | 6.16E-07 |
| TUCP_000187 | XLOC_006154 | ENSRNOT000000052288 | 0.972464495  | 1.19E-07 |
| TUCP_000187 | XLOC_006154 | ENSRNOT00000025705  | 0.952965925  | 1.67E-06 |
| TUCP_000187 | XLOC_006154 | ENSRNOT00000004140  | 0.9854766    | 4.97E-09 |
| TUCP_000187 | XLOC_006154 | ENSRNOT00000010433  | 0.952406222  | 1.78E-06 |

|             |             |                    |              |          |
|-------------|-------------|--------------------|--------------|----------|
| TUCP_000187 | XLOC_006154 | ENSRNOT00000048910 | -0.963308084 | 4.92E-07 |
| TUCP_000187 | XLOC_006154 | ENSRNOT00000019213 | 0.986478743  | 3.48E-09 |
| TUCP_000187 | XLOC_006154 | ENSRNOT00000071560 | 0.964701264  | 4.07E-07 |
| TUCP_000187 | XLOC_006154 | ENSRNOT00000082508 | -0.957017783 | 1.07E-06 |
| TUCP_000187 | XLOC_006154 | ENSRNOT00000007164 | 0.961386451  | 6.34E-07 |
| TUCP_000187 | XLOC_006154 | ENSRNOT00000049459 | -0.955431654 | 1.28E-06 |
| TUCP_000187 | XLOC_006154 | ENSRNOT00000086548 | 0.958366793  | 9.18E-07 |
| TUCP_000187 | XLOC_006154 | ENSRNOT00000047387 | 0.959461319  | 8.05E-07 |
| TUCP_000187 | XLOC_006154 | ENSRNOT00000001118 | 0.976965071  | 4.91E-08 |
| TUCP_000187 | XLOC_006154 | ENSRNOT00000091596 | -0.956413203 | 1.15E-06 |
| TUCP_000187 | XLOC_006154 | ENSRNOT00000011384 | 0.959765189  | 7.76E-07 |
| TUCP_000187 | XLOC_006154 | ENSRNOT00000015076 | 0.978298432  | 3.66E-08 |
| TUCP_000187 | XLOC_006154 | ENSRNOT00000043345 | 0.954244169  | 1.46E-06 |
| TUCP_000187 | XLOC_006154 | ENSRNOT00000076516 | 0.955536121  | 1.27E-06 |
| TUCP_000187 | XLOC_006154 | ENSRNOT00000015073 | 0.988432606  | 1.60E-09 |
| TUCP_000187 | XLOC_006154 | ENSRNOT00000018533 | 0.962626232  | 5.39E-07 |
| TUCP_000187 | XLOC_006154 | ENSRNOT00000073564 | -0.956355364 | 1.16E-06 |
| TUCP_000187 | XLOC_006154 | ENSRNOT00000001507 | 0.982451994  | 1.27E-08 |
| TUCP_000187 | XLOC_006154 | ENSRNOT00000083568 | 0.951126007  | 2.02E-06 |
| TUCP_000187 | XLOC_006154 | ENSRNOT00000018584 | 0.955960769  | 1.21E-06 |
| TUCP_000187 | XLOC_006154 | ENSRNOT00000082691 | 0.954753904  | 1.38E-06 |
| TUCP_000187 | XLOC_006154 | ENSRNOT00000037456 | 0.981649759  | 1.59E-08 |
| TUCP_000187 | XLOC_006154 | ENSRNOT00000025510 | -0.973791669 | 9.32E-08 |
| TUCP_000187 | XLOC_006154 | ENSRNOT00000021496 | -0.95382065  | 1.53E-06 |
| TUCP_000187 | XLOC_006154 | ENSRNOT00000075424 | 0.984561029  | 6.73E-09 |
| TUCP_000187 | XLOC_006154 | ENSRNOT00000016027 | -0.950551799 | 2.14E-06 |
| TUCP_000187 | XLOC_006154 | ENSRNOT00000012177 | -0.970720716 | 1.61E-07 |
| TUCP_000187 | XLOC_006154 | ENSRNOT00000093357 | 0.961155188  | 6.53E-07 |
| TUCP_000187 | XLOC_006154 | ENSRNOT00000068633 | 0.972749436  | 1.13E-07 |
| TUCP_000187 | XLOC_006154 | ENSRNOT00000075452 | 0.951713046  | 1.91E-06 |
| TUCP_000187 | XLOC_006154 | ENSRNOT00000081682 | -0.951246051 | 2.00E-06 |
| TUCP_000187 | XLOC_006154 | ENSRNOT00000020892 | -0.967127574 | 2.86E-07 |
| TUCP_000187 | XLOC_006154 | ENSRNOT00000020437 | 0.959964341  | 7.57E-07 |
| TUCP_000187 | XLOC_006154 | ENSRNOT00000006828 | 0.950164814  | 2.23E-06 |
| TUCP_000187 | XLOC_006154 | ENSRNOT00000006824 | -0.955691335 | 1.25E-06 |
| TUCP_000187 | XLOC_006154 | ENSRNOT00000050515 | 0.950847278  | 2.08E-06 |
| TUCP_000187 | XLOC_006154 | ENSRNOT00000088509 | 0.977537034  | 4.34E-08 |
| TUCP_000187 | XLOC_006154 | ENSRNOT00000086868 | 0.978011173  | 3.90E-08 |
| TUCP_000187 | XLOC_006154 | ENSRNOT00000045488 | 0.97012214   | 1.78E-07 |
| TUCP_000187 | XLOC_006154 | ENSRNOT00000093174 | 0.987773203  | 2.11E-09 |
| TUCP_000187 | XLOC_006154 | ENSRNOT00000026783 | 0.970830512  | 1.58E-07 |
| TUCP_000187 | XLOC_006154 | ENSRNOT00000020648 | 0.973152778  | 1.05E-07 |
| TUCP_000187 | XLOC_006154 | ENSRNOT00000037588 | -0.95198438  | 1.85E-06 |
| TUCP_000187 | XLOC_006154 | ENSRNOT00000004508 | 0.957708278  | 9.92E-07 |
| TUCP_000187 | XLOC_006154 | ENSRNOT00000036666 | 0.961187126  | 6.50E-07 |
| TUCP_000187 | XLOC_006154 | ENSRNOT00000089211 | 0.975298758  | 6.95E-08 |
| TUCP_000187 | XLOC_006154 | ENSRNOT00000020383 | 0.971994622  | 1.29E-07 |
| TUCP_000187 | XLOC_006154 | ENSRNOT00000000302 | 0.977135118  | 4.74E-08 |
| TUCP_000187 | XLOC_006154 | ENSRNOT00000087502 | 0.971624312  | 1.38E-07 |
| TUCP_000187 | XLOC_006154 | ENSRNOT00000087997 | 0.954330635  | 1.45E-06 |
| TUCP_000187 | XLOC_006154 | ENSRNOT00000012424 | 0.963597998  | 4.74E-07 |

|             |             |                    |              |          |
|-------------|-------------|--------------------|--------------|----------|
| TUCP_000187 | XLOC_006154 | ENSRNOT00000025832 | 0.957787123  | 9.83E-07 |
| TUCP_000187 | XLOC_006154 | ENSRNOT00000076729 | 0.95500941   | 1.35E-06 |
| TUCP_000187 | XLOC_006154 | ENSRNOT00000005909 | 0.981993414  | 1.45E-08 |
| TUCP_000187 | XLOC_006154 | ENSRNOT00000086122 | 0.961610084  | 6.16E-07 |
| TUCP_000187 | XLOC_006154 | ENSRNOT00000007091 | 0.982614724  | 1.21E-08 |
| TUCP_000187 | XLOC_006154 | ENSRNOT00000023645 | 0.970351136  | 1.72E-07 |
| TUCP_000187 | XLOC_006154 | ENSRNOT00000042799 | 0.967778273  | 2.59E-07 |
| TUCP_000187 | XLOC_006154 | ENSRNOT00000058362 | 0.968600978  | 2.28E-07 |
| TUCP_000187 | XLOC_006154 | ENSRNOT00000008901 | -0.956004645 | 1.21E-06 |
| TUCP_000187 | XLOC_006154 | ENSRNOT00000005659 | 0.985690744  | 4.61E-09 |
| TUCP_000187 | XLOC_006154 | ENSRNOT00000017761 | 0.970430608  | 1.69E-07 |
| TUCP_000187 | XLOC_006154 | ENSRNOT00000023543 | -0.951061254 | 2.04E-06 |
| TUCP_000187 | XLOC_006154 | ENSRNOT00000015612 | 0.950828936  | 2.08E-06 |
| TUCP_000187 | XLOC_006154 | ENSRNOT00000039341 | 0.953440328  | 1.59E-06 |
| TUCP_000187 | XLOC_006154 | ENSRNOT00000037405 | 0.961698405  | 6.09E-07 |
| TUCP_000187 | XLOC_006154 | ENSRNOT00000085519 | 0.966169178  | 3.30E-07 |
| TUCP_000187 | XLOC_006154 | ENSRNOT00000082174 | 0.971547267  | 1.40E-07 |
| TUCP_000187 | XLOC_006154 | ENSRNOT00000026760 | -0.958275726 | 9.28E-07 |
| TUCP_000187 | XLOC_006154 | ENSRNOT00000023330 | 0.959197408  | 8.32E-07 |
| TUCP_000187 | XLOC_006154 | ENSRNOT00000024491 | -0.951582734 | 1.93E-06 |
| TUCP_000187 | XLOC_006154 | ENSRNOT00000084595 | 0.96808324   | 2.47E-07 |
| TUCP_000187 | XLOC_006154 | ENSRNOT00000013031 | -0.950574699 | 2.14E-06 |
| TUCP_000187 | XLOC_006154 | ENSRNOT00000027964 | 0.987179999  | 2.67E-09 |
| TUCP_000187 | XLOC_006154 | ENSRNOT00000047210 | 0.981660074  | 1.58E-08 |
| TUCP_000187 | XLOC_006154 | ENSRNOT00000064930 | 0.977252587  | 4.62E-08 |
| TUCP_000187 | XLOC_006154 | ENSRNOT00000079996 | 0.980148893  | 2.35E-08 |
| TUCP_003815 | XLOC_166994 | ENSRNOT00000079742 | 0.959995856  | 7.54E-07 |
| TUCP_003815 | XLOC_166994 | ENSRNOT00000011032 | 0.951579856  | 1.93E-06 |
| TUCP_003815 | XLOC_166994 | ENSRNOT00000056234 | 0.951105413  | 2.03E-06 |
| TUCP_000181 | XLOC_005879 | ENSRNOT00000021917 | 0.971931197  | 1.31E-07 |
| TUCP_000181 | XLOC_005879 | ENSRNOT00000085444 | 0.954840939  | 1.37E-06 |
| TUCP_000181 | XLOC_005879 | ENSRNOT00000033420 | 0.957660782  | 9.98E-07 |
| TUCP_000180 | XLOC_005776 | ENSRNOT00000085380 | 0.963872193  | 4.56E-07 |
| TUCP_000180 | XLOC_005776 | ENSRNOT00000090914 | 0.952252951  | 1.80E-06 |
| TUCP_000180 | XLOC_005776 | ENSRNOT00000046842 | 0.95281159   | 1.70E-06 |
| TUCP_000180 | XLOC_005776 | ENSRNOT00000022585 | 0.965473756  | 3.65E-07 |
| TUCP_000180 | XLOC_005776 | ENSRNOT00000022559 | 0.964061534  | 4.44E-07 |
| TUCP_000180 | XLOC_005776 | ENSRNOT00000030327 | 0.962984203  | 5.14E-07 |
| TUCP_000183 | XLOC_005932 | ENSRNOT00000066391 | 0.964039072  | 4.46E-07 |
| TUCP_000183 | XLOC_005932 | ENSRNOT00000072802 | 0.952918478  | 1.68E-06 |
| TUCP_000183 | XLOC_005932 | ENSRNOT00000054939 | 0.951754576  | 1.90E-06 |
| TUCP_000183 | XLOC_005932 | ENSRNOT00000066821 | 0.966094662  | 3.33E-07 |
| TUCP_003126 | XLOC_133460 | ENSRNOT00000066477 | 0.985107358  | 5.63E-09 |
| TUCP_003126 | XLOC_133460 | ENSRNOT00000059854 | 0.965254263  | 3.76E-07 |
| TUCP_003126 | XLOC_133460 | ENSRNOT00000006188 | 0.961744036  | 6.05E-07 |
| TUCP_003126 | XLOC_133460 | ENSRNOT00000024369 | 0.952559147  | 1.75E-06 |
| TUCP_003126 | XLOC_133460 | ENSRNOT00000012617 | 0.953710654  | 1.55E-06 |
| TUCP_003126 | XLOC_133460 | ENSRNOT00000018936 | 0.950568797  | 2.14E-06 |
| TUCP_003126 | XLOC_133460 | ENSRNOT00000007259 | 0.954565895  | 1.41E-06 |
| TUCP_003126 | XLOC_133460 | ENSRNOT00000014559 | 0.952934909  | 1.68E-06 |
| TUCP_003126 | XLOC_133460 | ENSRNOT00000022144 | 0.97451112   | 8.12E-08 |



|             |             |                     |             |          |
|-------------|-------------|---------------------|-------------|----------|
| TUCP_003126 | XLOC_133460 | ENSRNOT00000004408  | 0.970790966 | 1.59E-07 |
| TUCP_003126 | XLOC_133460 | ENSRNOT000000028290 | 0.957081072 | 1.07E-06 |
| TUCP_003126 | XLOC_133460 | ENSRNOT000000010591 | 0.968413379 | 2.35E-07 |
| TUCP_003126 | XLOC_133460 | ENSRNOT000000044299 | 0.95375591  | 1.54E-06 |
| TUCP_003126 | XLOC_133460 | ENSRNOT000000031701 | 0.973076533 | 1.06E-07 |
| TUCP_003126 | XLOC_133460 | ENSRNOT000000073105 | 0.965450275 | 3.66E-07 |
| TUCP_003126 | XLOC_133460 | ENSRNOT000000091139 | 0.954480608 | 1.43E-06 |
| TUCP_003126 | XLOC_133460 | ENSRNOT000000090064 | 0.971796646 | 1.34E-07 |
| TUCP_003126 | XLOC_133460 | ENSRNOT000000016254 | 0.965642244 | 3.56E-07 |
| TUCP_003126 | XLOC_133460 | ENSRNOT000000009345 | 0.95098992  | 2.05E-06 |
| TUCP_003126 | XLOC_133460 | ENSRNOT000000011694 | 0.953575046 | 1.57E-06 |
| TUCP_003126 | XLOC_133460 | ENSRNOT000000008222 | 0.957282986 | 1.04E-06 |
| TUCP_003126 | XLOC_133460 | ENSRNOT000000088555 | 0.981927911 | 1.47E-08 |
| TUCP_003126 | XLOC_133460 | ENSRNOT000000076485 | 0.952609872 | 1.74E-06 |
| TUCP_003126 | XLOC_133460 | ENSRNOT000000088282 | 0.955924431 | 1.22E-06 |
| TUCP_003126 | XLOC_133460 | ENSRNOT000000093353 | 0.957968195 | 9.63E-07 |
| TUCP_003126 | XLOC_133460 | ENSRNOT000000045250 | 0.968022624 | 2.50E-07 |
| TUCP_003126 | XLOC_133460 | ENSRNOT000000038212 | 0.952643672 | 1.73E-06 |
| TUCP_003126 | XLOC_133460 | ENSRNOT000000010700 | 0.958454082 | 9.09E-07 |
| TUCP_003126 | XLOC_133460 | ENSRNOT000000023965 | 0.950523882 | 2.15E-06 |
| TUCP_003126 | XLOC_133460 | ENSRNOT000000011563 | 0.962190683 | 5.71E-07 |
| TUCP_003126 | XLOC_133460 | ENSRNOT000000054976 | 0.953613711 | 1.56E-06 |
| TUCP_003126 | XLOC_133460 | ENSRNOT000000026846 | 0.969563191 | 1.95E-07 |
| TUCP_003126 | XLOC_133460 | ENSRNOT000000060690 | 0.968531237 | 2.31E-07 |
| TUCP_003126 | XLOC_133460 | ENSRNOT000000002187 | 0.974414595 | 8.27E-08 |
| TUCP_003126 | XLOC_133460 | ENSRNOT000000080675 | 0.971484541 | 1.42E-07 |
| TUCP_003126 | XLOC_133460 | ENSRNOT000000080410 | 0.959022708 | 8.49E-07 |
| TUCP_003126 | XLOC_133460 | ENSRNOT000000074985 | 0.957967709 | 9.63E-07 |
| TUCP_003126 | XLOC_133460 | ENSRNOT000000014301 | 0.991291905 | 3.89E-10 |
| TUCP_003126 | XLOC_133460 | ENSRNOT000000004351 | 0.954191552 | 1.47E-06 |
| TUCP_003126 | XLOC_133460 | ENSRNOT000000075800 | 0.953031657 | 1.66E-06 |
| TUCP_003126 | XLOC_133460 | ENSRNOT000000066545 | 0.960642519 | 6.96E-07 |
| TUCP_003126 | XLOC_133460 | ENSRNOT000000084597 | 0.954040847 | 1.49E-06 |
| TUCP_003126 | XLOC_133460 | ENSRNOT000000077243 | 0.959906515 | 7.63E-07 |
| TUCP_003126 | XLOC_133460 | ENSRNOT000000067780 | 0.957162596 | 1.06E-06 |
| TUCP_003126 | XLOC_133460 | ENSRNOT000000079227 | 0.956024247 | 1.20E-06 |
| TUCP_003126 | XLOC_133460 | ENSRNOT000000019109 | 0.965709218 | 3.52E-07 |
| TUCP_003126 | XLOC_133460 | ENSRNOT000000045315 | 0.950385696 | 2.18E-06 |
| TUCP_003126 | XLOC_133460 | ENSRNOT000000060002 | 0.960039043 | 7.50E-07 |
| TUCP_003126 | XLOC_133460 | ENSRNOT000000073910 | 0.951047259 | 2.04E-06 |
| TUCP_003126 | XLOC_133460 | ENSRNOT000000000170 | 0.955987643 | 1.21E-06 |
| TUCP_003126 | XLOC_133460 | ENSRNOT000000066120 | 0.951342544 | 1.98E-06 |
| TUCP_003126 | XLOC_133460 | ENSRNOT000000078806 | 0.9672196   | 2.82E-07 |
| TUCP_003126 | XLOC_133460 | ENSRNOT000000015055 | 0.975059532 | 7.29E-08 |
| TUCP_001124 | XLOC_042595 | ENSRNOT000000024366 | 0.955108358 | 1.33E-06 |
| TUCP_001124 | XLOC_042595 | ENSRNOT000000028540 | 0.955608963 | 1.26E-06 |
| TUCP_001124 | XLOC_042595 | ENSRNOT000000090688 | 0.96847239  | 2.33E-07 |
| TUCP_001124 | XLOC_042595 | ENSRNOT000000001899 | 0.95255425  | 1.75E-06 |
| TUCP_001124 | XLOC_042595 | ENSRNOT000000035992 | 0.961131726 | 6.54E-07 |
| TUCP_001124 | XLOC_042595 | ENSRNOT000000021752 | 0.960913269 | 6.73E-07 |
| TUCP_001124 | XLOC_042595 | ENSRNOT00000002291  | 0.964326193 | 4.29E-07 |

|             |             |                     |              |          |
|-------------|-------------|---------------------|--------------|----------|
| TUCP_001124 | XLOC_042595 | ENSRNOT00000025325  | 0.969640871  | 1.93E-07 |
| TUCP_001124 | XLOC_042595 | ENSRNOT00000023744  | 0.957406188  | 1.03E-06 |
| TUCP_001124 | XLOC_042595 | ENSRNOT00000010332  | 0.958263993  | 9.30E-07 |
| TUCP_001124 | XLOC_042595 | ENSRNOT00000026641  | 0.951973248  | 1.86E-06 |
| TUCP_001124 | XLOC_042595 | ENSRNOT00000066024  | 0.952316032  | 1.79E-06 |
| TUCP_001124 | XLOC_042595 | ENSRNOT00000001826  | 0.955648408  | 1.25E-06 |
| TUCP_001124 | XLOC_042595 | ENSRNOT00000056430  | 0.974687152  | 7.84E-08 |
| TUCP_001124 | XLOC_042595 | ENSRNOT00000085765  | 0.968381606  | 2.36E-07 |
| TUCP_001125 | XLOC_042598 | ENSRNOT00000008573  | 0.954995059  | 1.35E-06 |
| TUCP_001125 | XLOC_042598 | ENSRNOT00000009979  | 0.950626486  | 2.13E-06 |
| TUCP_001125 | XLOC_042598 | ENSRNOT00000018543  | 0.956048333  | 1.20E-06 |
| TUCP_001125 | XLOC_042598 | ENSRNOT00000080271  | 0.952129732  | 1.83E-06 |
| TUCP_001125 | XLOC_042598 | ENSRNOT00000041709  | 0.955365988  | 1.29E-06 |
| TUCP_001125 | XLOC_042598 | ENSRNOT000000081768 | 0.971839211  | 1.33E-07 |
| TUCP_001125 | XLOC_042598 | ENSRNOT00000045326  | 0.953257468  | 1.62E-06 |
| TUCP_001125 | XLOC_042598 | ENSRNOT00000019502  | 0.952476769  | 1.76E-06 |
| TUCP_001125 | XLOC_042598 | ENSRNOT00000028856  | 0.975923626  | 6.12E-08 |
| TUCP_001125 | XLOC_042598 | ENSRNOT00000060282  | 0.972355105  | 1.21E-07 |
| TUCP_001125 | XLOC_042598 | ENSRNOT00000017968  | 0.962905871  | 5.20E-07 |
| TUCP_001125 | XLOC_042598 | ENSRNOT00000038577  | 0.959359306  | 8.15E-07 |
| TUCP_001125 | XLOC_042598 | ENSRNOT00000080654  | 0.973651847  | 9.57E-08 |
| TUCP_001125 | XLOC_042598 | ENSRNOT00000086893  | -0.956957551 | 1.08E-06 |
| TUCP_001125 | XLOC_042598 | ENSRNOT00000043554  | 0.952475963  | 1.76E-06 |
| TUCP_001125 | XLOC_042598 | ENSRNOT00000026783  | 0.950205156  | 2.22E-06 |
| TUCP_001125 | XLOC_042598 | ENSRNOT00000032158  | 0.951620954  | 1.92E-06 |
| TUCP_001125 | XLOC_042598 | ENSRNOT00000073971  | 0.9545663    | 1.41E-06 |
| TUCP_001125 | XLOC_042598 | ENSRNOT00000008703  | 0.957819936  | 9.80E-07 |
| TUCP_001125 | XLOC_042598 | ENSRNOT00000016801  | 0.956729412  | 1.11E-06 |
| TUCP_001125 | XLOC_042598 | ENSRNOT00000016490  | 0.975776676  | 6.31E-08 |
| TUCP_001125 | XLOC_042598 | ENSRNOT00000016519  | 0.95261321   | 1.74E-06 |
| TUCP_001125 | XLOC_042598 | ENSRNOT00000052075  | 0.974226859  | 8.58E-08 |
| TUCP_001125 | XLOC_042598 | ENSRNOT00000026186  | 0.961126495  | 6.55E-07 |
| TUCP_001125 | XLOC_042598 | ENSRNOT00000079109  | 0.951117606  | 2.02E-06 |
| TUCP_001125 | XLOC_042598 | ENSRNOT00000017319  | 0.953987056  | 1.50E-06 |
| TUCP_001125 | XLOC_042598 | ENSRNOT00000057807  | -0.955174846 | 1.32E-06 |
| TUCP_001125 | XLOC_042598 | ENSRNOT00000026121  | 0.957300655  | 1.04E-06 |
| TUCP_001125 | XLOC_042598 | ENSRNOT00000072518  | 0.952002144  | 1.85E-06 |
| TUCP_001125 | XLOC_042598 | ENSRNOT00000034722  | 0.972103025  | 1.27E-07 |
| TUCP_001125 | XLOC_042598 | ENSRNOT00000021037  | 0.952826498  | 1.70E-06 |
| TUCP_001125 | XLOC_042598 | ENSRNOT00000084385  | 0.955238416  | 1.31E-06 |
| TUCP_001125 | XLOC_042598 | ENSRNOT00000044562  | 0.960105955  | 7.44E-07 |
| TUCP_001125 | XLOC_042598 | ENSRNOT00000027200  | -0.95181687  | 1.89E-06 |
| TUCP_001125 | XLOC_042598 | ENSRNOT00000014508  | 0.975391299  | 6.82E-08 |
| TUCP_001125 | XLOC_042598 | ENSRNOT00000016321  | -0.961060306 | 6.60E-07 |
| TUCP_001125 | XLOC_042598 | ENSRNOT00000008817  | 0.954009071  | 1.50E-06 |
| TUCP_001125 | XLOC_042598 | ENSRNOT00000027335  | 0.957742509  | 9.88E-07 |
| TUCP_001125 | XLOC_042598 | ENSRNOT00000071493  | -0.952438138 | 1.77E-06 |
| TUCP_001125 | XLOC_042598 | ENSRNOT00000052422  | 0.957685773  | 9.95E-07 |
| TUCP_001125 | XLOC_042598 | ENSRNOT00000084496  | 0.955420215  | 1.29E-06 |
| TUCP_001125 | XLOC_042598 | ENSRNOT00000001242  | 0.952352178  | 1.79E-06 |
| TUCP_001125 | XLOC_042598 | ENSRNOT00000023330  | 0.965358046  | 3.71E-07 |

|             |             |                     |              |          |
|-------------|-------------|---------------------|--------------|----------|
| TUCP_001125 | XLOC_042598 | ENSRNOT00000010873  | -0.963018042 | 5.12E-07 |
| TUCP_001125 | XLOC_042598 | ENSRNOT00000007164  | 0.953585023  | 1.57E-06 |
| TUCP_001125 | XLOC_042598 | ENSRNOT000000021790 | 0.95265934   | 1.73E-06 |
| TUCP_001125 | XLOC_042598 | ENSRNOT00000090451  | -0.954174013 | 1.47E-06 |
| TUCP_001125 | XLOC_042598 | ENSRNOT00000078639  | 0.95135221   | 1.98E-06 |
| TUCP_001125 | XLOC_042598 | ENSRNOT00000022286  | 0.956077734  | 1.20E-06 |
| TUCP_001125 | XLOC_042598 | ENSRNOT00000016129  | 0.955317754  | 1.30E-06 |
| TUCP_001125 | XLOC_042598 | ENSRNOT00000016289  | 0.95369326   | 1.55E-06 |
| TUCP_001125 | XLOC_042598 | ENSRNOT00000009328  | 0.974700066  | 7.82E-08 |
| TUCP_001125 | XLOC_042598 | ENSRNOT00000048490  | -0.958239821 | 9.32E-07 |
| TUCP_001125 | XLOC_042598 | ENSRNOT00000029660  | 0.951954552  | 1.86E-06 |
| TUCP_001125 | XLOC_042598 | ENSRNOT00000026755  | 0.966263419  | 3.25E-07 |
| TUCP_001125 | XLOC_042598 | ENSRNOT00000087997  | 0.955110483  | 1.33E-06 |
| TUCP_001125 | XLOC_042598 | ENSRNOT00000065618  | 0.956180015  | 1.18E-06 |
| TUCP_001125 | XLOC_042598 | ENSRNOT00000003770  | -0.952630068 | 1.73E-06 |
| TUCP_001125 | XLOC_042598 | ENSRNOT00000015609  | 0.962948182  | 5.17E-07 |
| TUCP_001125 | XLOC_042598 | ENSRNOT00000055318  | 0.954293423  | 1.45E-06 |
| TUCP_001125 | XLOC_042598 | ENSRNOT00000051022  | 0.973223111  | 1.04E-07 |
| TUCP_001125 | XLOC_042598 | ENSRNOT00000087725  | 0.963829381  | 4.59E-07 |
| TUCP_001125 | XLOC_042598 | ENSRNOT00000046594  | 0.961441218  | 6.29E-07 |
| TUCP_001125 | XLOC_042598 | ENSRNOT00000029833  | 0.960600559  | 7.00E-07 |
| TUCP_001125 | XLOC_042598 | ENSRNOT00000036951  | 0.952015382  | 1.85E-06 |
| TUCP_001125 | XLOC_042598 | ENSRNOT00000008022  | 0.963682616  | 4.68E-07 |
| TUCP_001125 | XLOC_042598 | ENSRNOT00000009691  | 0.951765915  | 1.90E-06 |
| TUCP_001125 | XLOC_042598 | ENSRNOT00000013762  | 0.978826216  | 3.23E-08 |
| TUCP_001125 | XLOC_042598 | ENSRNOT00000022963  | 0.971887383  | 1.32E-07 |
| TUCP_001125 | XLOC_042598 | ENSRNOT00000011663  | 0.958167549  | 9.40E-07 |
| TUCP_001125 | XLOC_042598 | ENSRNOT00000043953  | 0.970454875  | 1.69E-07 |
| TUCP_001125 | XLOC_042598 | ENSRNOT00000058842  | 0.951563095  | 1.94E-06 |
| TUCP_001125 | XLOC_042598 | ENSRNOT00000083255  | 0.952913564  | 1.68E-06 |
| TUCP_001125 | XLOC_042598 | ENSRNOT00000077894  | -0.957551292 | 1.01E-06 |
| TUCP_001125 | XLOC_042598 | ENSRNOT00000003690  | 0.971269009  | 1.47E-07 |
| TUCP_001125 | XLOC_042598 | ENSRNOT00000054980  | 0.956133766  | 1.19E-06 |
| TUCP_001125 | XLOC_042598 | ENSRNOT00000005876  | 0.963788959  | 4.61E-07 |
| TUCP_001125 | XLOC_042598 | ENSRNOT0000001682   | 0.951663667  | 1.92E-06 |
| TUCP_001125 | XLOC_042598 | ENSRNOT00000077406  | 0.950481782  | 2.16E-06 |
| TUCP_001125 | XLOC_042598 | ENSRNOT00000004762  | 0.965963897  | 3.40E-07 |
| TUCP_001125 | XLOC_042598 | ENSRNOT00000016859  | 0.959852952  | 7.68E-07 |
| TUCP_001125 | XLOC_042598 | ENSRNOT00000074659  | 0.981324462  | 1.73E-08 |
| TUCP_001125 | XLOC_042598 | ENSRNOT00000056130  | 0.956381292  | 1.16E-06 |
| TUCP_001125 | XLOC_042598 | ENSRNOT00000004172  | 0.955123853  | 1.33E-06 |
| TUCP_001125 | XLOC_042598 | ENSRNOT00000059744  | 0.966428305  | 3.17E-07 |
| TUCP_001125 | XLOC_042598 | ENSRNOT00000057879  | 0.950275416  | 2.20E-06 |
| TUCP_001125 | XLOC_042598 | ENSRNOT00000010218  | 0.960433938  | 7.15E-07 |
| TUCP_001125 | XLOC_042598 | ENSRNOT00000007768  | 0.960879685  | 6.76E-07 |
| TUCP_001125 | XLOC_042598 | ENSRNOT00000019177  | 0.956152562  | 1.19E-06 |
| TUCP_001125 | XLOC_042598 | ENSRNOT00000083414  | 0.962813075  | 5.26E-07 |
| TUCP_001125 | XLOC_042598 | ENSRNOT00000009473  | 0.951132471  | 2.02E-06 |
| TUCP_001125 | XLOC_042598 | ENSRNOT00000008210  | 0.968885652  | 2.18E-07 |
| TUCP_001125 | XLOC_042598 | ENSRNOT00000022947  | -0.957289849 | 1.04E-06 |
| TUCP_001125 | XLOC_042598 | ENSRNOT00000010433  | 0.951248166  | 2.00E-06 |

|             |             |                    |              |          |
|-------------|-------------|--------------------|--------------|----------|
| TUCP_001125 | XLOC_042598 | ENSRNOT00000011682 | -0.951242113 | 2.00E-06 |
| TUCP_000024 | XLOC_000371 | ENSRNOT00000025981 | 0.964732429  | 4.05E-07 |
| TUCP_000024 | XLOC_000371 | ENSRNOT00000012671 | 0.961594053  | 6.17E-07 |
| TUCP_000024 | XLOC_000371 | ENSRNOT00000021833 | 0.950647193  | 2.12E-06 |
| TUCP_000024 | XLOC_000371 | ENSRNOT00000068405 | 0.970876706  | 1.57E-07 |
| TUCP_000024 | XLOC_000371 | ENSRNOT00000038647 | 0.958964807  | 8.55E-07 |
| TUCP_000024 | XLOC_000371 | ENSRNOT00000047387 | 0.956140066  | 1.19E-06 |
| TUCP_000024 | XLOC_000371 | ENSRNOT00000076669 | 0.967590025  | 2.67E-07 |
| TUCP_000024 | XLOC_000371 | ENSRNOT00000085596 | 0.952460317  | 1.77E-06 |
| TUCP_000024 | XLOC_000371 | ENSRNOT00000091910 | 0.953201022  | 1.63E-06 |
| TUCP_000024 | XLOC_000371 | ENSRNOT00000039842 | 0.963945531  | 4.52E-07 |
| TUCP_000024 | XLOC_000371 | ENSRNOT00000055187 | 0.952000348  | 1.85E-06 |
| TUCP_000024 | XLOC_000371 | ENSRNOT00000021348 | 0.962472219  | 5.50E-07 |
| TUCP_000024 | XLOC_000371 | ENSRNOT00000017629 | 0.967876063  | 2.55E-07 |
| TUCP_000024 | XLOC_000371 | ENSRNOT00000067866 | 0.95295382   | 1.68E-06 |
| TUCP_000024 | XLOC_000371 | ENSRNOT00000025859 | 0.976930766  | 4.95E-08 |
| TUCP_000024 | XLOC_000371 | ENSRNOT00000008803 | 0.953647559  | 1.56E-06 |
| TUCP_000024 | XLOC_000371 | ENSRNOT00000031230 | 0.961596671  | 6.17E-07 |
| TUCP_000024 | XLOC_000371 | ENSRNOT00000005664 | 0.961079538  | 6.59E-07 |
| TUCP_000024 | XLOC_000371 | ENSRNOT00000032274 | 0.958586367  | 8.95E-07 |
| TUCP_000024 | XLOC_000371 | ENSRNOT00000004508 | 0.953977123  | 1.50E-06 |
| TUCP_000024 | XLOC_000371 | ENSRNOT00000006175 | 0.970543548  | 1.66E-07 |
| TUCP_000024 | XLOC_000371 | ENSRNOT00000052288 | 0.953869799  | 1.52E-06 |
| TUCP_000024 | XLOC_000371 | ENSRNOT00000023144 | 0.956201434  | 1.18E-06 |
| TUCP_000024 | XLOC_000371 | ENSRNOT00000034704 | 0.955808316  | 1.23E-06 |
| TUCP_000024 | XLOC_000371 | ENSRNOT00000021116 | 0.955007328  | 1.35E-06 |
| TUCP_000024 | XLOC_000371 | ENSRNOT00000039809 | 0.970475432  | 1.68E-07 |
| TUCP_000024 | XLOC_000371 | ENSRNOT00000082100 | 0.960342781  | 7.23E-07 |
| TUCP_000024 | XLOC_000371 | ENSRNOT00000076729 | 0.962682793  | 5.35E-07 |
| TUCP_000024 | XLOC_000371 | ENSRNOT00000090665 | 0.977871643  | 4.03E-08 |
| TUCP_000024 | XLOC_000371 | ENSRNOT00000003296 | 0.958350594  | 9.20E-07 |
| TUCP_000024 | XLOC_000371 | ENSRNOT00000010992 | 0.982832463  | 1.14E-08 |
| TUCP_000024 | XLOC_000371 | ENSRNOT00000026543 | 0.977184243  | 4.69E-08 |
| TUCP_000024 | XLOC_000371 | ENSRNOT00000015073 | 0.951341042  | 1.98E-06 |
| TUCP_000024 | XLOC_000371 | ENSRNOT00000025832 | 0.966523271  | 3.13E-07 |
| TUCP_000024 | XLOC_000371 | ENSRNOT00000004412 | 0.953612131  | 1.56E-06 |
| TUCP_000024 | XLOC_000371 | ENSRNOT00000060499 | 0.951882933  | 1.87E-06 |
| TUCP_000024 | XLOC_000371 | ENSRNOT00000004359 | 0.959531421  | 7.99E-07 |
| TUCP_000024 | XLOC_000371 | ENSRNOT00000071573 | 0.960057295  | 7.49E-07 |
| TUCP_000024 | XLOC_000371 | ENSRNOT00000023696 | 0.959553217  | 7.96E-07 |
| TUCP_000024 | XLOC_000371 | ENSRNOT00000013274 | 0.957786559  | 9.83E-07 |
| TUCP_000024 | XLOC_000371 | ENSRNOT00000025092 | 0.984517933  | 6.83E-09 |
| TUCP_000024 | XLOC_000371 | ENSRNOT00000016209 | 0.96013133   | 7.42E-07 |
| TUCP_000024 | XLOC_000371 | ENSRNOT00000036750 | 0.950292774  | 2.20E-06 |
| TUCP_000024 | XLOC_000371 | ENSRNOT00000027964 | 0.951110108  | 2.03E-06 |
| TUCP_000024 | XLOC_000371 | ENSRNOT00000024420 | 0.962414663  | 5.55E-07 |
| TUCP_000024 | XLOC_000371 | ENSRNOT00000044956 | -0.951141156 | 2.02E-06 |
| TUCP_000024 | XLOC_000371 | ENSRNOT00000035989 | 0.967178826  | 2.84E-07 |
| TUCP_000024 | XLOC_000371 | ENSRNOT00000057160 | 0.954131807  | 1.48E-06 |
| TUCP_000024 | XLOC_000371 | ENSRNOT00000005355 | 0.965188495  | 3.80E-07 |
| TUCP_000024 | XLOC_000371 | ENSRNOT00000088054 | 0.950431239  | 2.17E-06 |

|             |             |                    |              |          |
|-------------|-------------|--------------------|--------------|----------|
| TUCP_000024 | XLOC_000371 | ENSRNOT00000057313 | 0.958168279  | 9.40E-07 |
| TUCP_000024 | XLOC_000371 | ENSRNOT00000083799 | 0.955724318  | 1.24E-06 |
| TUCP_000024 | XLOC_000371 | ENSRNOT0000009066  | 0.954525008  | 1.42E-06 |
| TUCP_000025 | XLOC_000371 | ENSRNOT00000010992 | 0.958286404  | 9.27E-07 |
| TUCP_000025 | XLOC_000371 | ENSRNOT00000025859 | 0.967736167  | 2.61E-07 |
| TUCP_000025 | XLOC_000371 | ENSRNOT00000009712 | 0.958491784  | 9.05E-07 |
| TUCP_000025 | XLOC_000371 | ENSRNOT00000006175 | 0.957790434  | 9.83E-07 |
| TUCP_000025 | XLOC_000371 | ENSRNOT00000089971 | 0.968488495  | 2.32E-07 |
| TUCP_000025 | XLOC_000371 | ENSRNOT00000022522 | 0.968722759  | 2.24E-07 |
| TUCP_000025 | XLOC_000371 | ENSRNOT00000000676 | 0.954030477  | 1.50E-06 |
| TUCP_000025 | XLOC_000371 | ENSRNOT00000038647 | 0.975140886  | 7.17E-08 |
| TUCP_000025 | XLOC_000371 | ENSRNOT00000014664 | 0.959152266  | 8.36E-07 |
| TUCP_000025 | XLOC_000371 | ENSRNOT00000091910 | 0.97882878   | 3.23E-08 |
| TUCP_000025 | XLOC_000371 | ENSRNOT00000075653 | 0.964776346  | 4.02E-07 |
| TUCP_000025 | XLOC_000371 | ENSRNOT00000010035 | 0.992409494  | 1.96E-10 |
| TUCP_000025 | XLOC_000371 | ENSRNOT00000078675 | 0.964369269  | 4.26E-07 |
| TUCP_000025 | XLOC_000371 | ENSRNOT00000066739 | 0.960902069  | 6.74E-07 |
| TUCP_000025 | XLOC_000371 | ENSRNOT00000090665 | 0.975032209  | 7.33E-08 |
| TUCP_000025 | XLOC_000371 | ENSRNOT00000074361 | 0.952757309  | 1.71E-06 |
| TUCP_000025 | XLOC_000371 | ENSRNOT00000085027 | 0.968440801  | 2.34E-07 |
| TUCP_001120 | XLOC_042333 | ENSRNOT00000031901 | -0.960863703 | 6.77E-07 |
| TUCP_001120 | XLOC_042333 | ENSRNOT00000076187 | 0.952508486  | 1.76E-06 |
| TUCP_001120 | XLOC_042333 | ENSRNOT00000091052 | 0.952230606  | 1.81E-06 |
| TUCP_001120 | XLOC_042333 | ENSRNOT00000038553 | 0.964326315  | 4.29E-07 |
| TUCP_000188 | XLOC_006166 | ENSRNOT00000060500 | 0.950296368  | 2.20E-06 |
| TUCP_000188 | XLOC_006166 | ENSRNOT00000032992 | 0.975999478  | 6.02E-08 |
| TUCP_000188 | XLOC_006166 | ENSRNOT00000089082 | 0.953652528  | 1.56E-06 |
| TUCP_000188 | XLOC_006166 | ENSRNOT00000027561 | 0.957947019  | 9.65E-07 |
| TUCP_000188 | XLOC_006166 | ENSRNOT00000021592 | 0.951275852  | 1.99E-06 |
| TUCP_000188 | XLOC_006166 | ENSRNOT00000036054 | 0.954836462  | 1.37E-06 |
| TUCP_000188 | XLOC_006166 | ENSRNOT00000005521 | 0.955742626  | 1.24E-06 |
| TUCP_004841 | XLOC_215395 | ENSRNOT00000074753 | 0.963484041  | 4.81E-07 |
| TUCP_004841 | XLOC_215395 | ENSRNOT00000041904 | 0.963910348  | 4.54E-07 |
| TUCP_004841 | XLOC_215395 | ENSRNOT00000083487 | 0.959363682  | 8.15E-07 |
| TUCP_004841 | XLOC_215395 | ENSRNOT00000077990 | 0.963910348  | 4.54E-07 |
| TUCP_004841 | XLOC_215395 | ENSRNOT00000038826 | 0.966612636  | 3.09E-07 |
| TUCP_004841 | XLOC_215395 | ENSRNOT00000046842 | 0.996792954  | 2.66E-12 |
| TUCP_004841 | XLOC_215395 | ENSRNOT00000060250 | 0.9634578    | 4.83E-07 |
| TUCP_004841 | XLOC_215395 | ENSRNOT00000091934 | 0.963910348  | 4.54E-07 |
| TUCP_004841 | XLOC_215395 | ENSRNOT00000089929 | 0.963910348  | 4.54E-07 |
| TUCP_004841 | XLOC_215395 | ENSRNOT00000014456 | 0.951560295  | 1.94E-06 |
| TUCP_004841 | XLOC_215395 | ENSRNOT00000044145 | 0.963910348  | 4.54E-07 |
| TUCP_004841 | XLOC_215395 | ENSRNOT00000011743 | 0.992583164  | 1.75E-10 |
| TUCP_004841 | XLOC_215395 | ENSRNOT00000034907 | 0.968072636  | 2.48E-07 |
| TUCP_004841 | XLOC_215395 | ENSRNOT00000088624 | 0.963910348  | 4.54E-07 |
| TUCP_004841 | XLOC_215395 | ENSRNOT00000064250 | 0.953551615  | 1.57E-06 |
| TUCP_004841 | XLOC_215395 | ENSRNOT00000051835 | 0.963910348  | 4.54E-07 |
| TUCP_004841 | XLOC_215395 | ENSRNOT00000079087 | 0.963910348  | 4.54E-07 |
| TUCP_004841 | XLOC_215395 | ENSRNOT00000037206 | 0.963910348  | 4.54E-07 |
| TUCP_004841 | XLOC_215395 | ENSRNOT00000083261 | 0.968516215  | 2.31E-07 |
| TUCP_004841 | XLOC_215395 | ENSRNOT00000080794 | 0.971493911  | 1.41E-07 |

|             |             |                    |             |          |
|-------------|-------------|--------------------|-------------|----------|
| TUCP_004841 | XLOC_215395 | ENSRNOT00000080590 | 0.96330042  | 4.93E-07 |
| TUCP_004841 | XLOC_215395 | ENSRNOT00000027552 | 0.963819019 | 4.59E-07 |
| TUCP_004841 | XLOC_215395 | ENSRNOT00000077014 | 0.95430504  | 1.45E-06 |
| TUCP_004841 | XLOC_215395 | ENSRNOT00000080453 | 0.962617044 | 5.40E-07 |
| TUCP_004841 | XLOC_215395 | ENSRNOT00000030327 | 0.963691222 | 4.68E-07 |
| TUCP_004841 | XLOC_215395 | ENSRNOT00000057729 | 0.962130651 | 5.76E-07 |
| TUCP_004841 | XLOC_215395 | ENSRNOT00000078633 | 0.963910348 | 4.54E-07 |
| TUCP_004841 | XLOC_215395 | ENSRNOT00000066839 | 0.973083877 | 1.06E-07 |
| TUCP_004841 | XLOC_215395 | ENSRNOT00000085380 | 0.960982561 | 6.67E-07 |
| TUCP_004841 | XLOC_215395 | ENSRNOT00000029634 | 0.959262768 | 8.25E-07 |
| TUCP_004841 | XLOC_215395 | ENSRNOT00000086349 | 0.951576822 | 1.93E-06 |
| TUCP_004841 | XLOC_215395 | ENSRNOT00000065460 | 0.963910348 | 4.54E-07 |
| TUCP_004841 | XLOC_215395 | ENSRNOT00000003817 | 0.958737925 | 8.79E-07 |
| TUCP_004841 | XLOC_215395 | ENSRNOT00000016713 | 0.963910348 | 4.54E-07 |
| TUCP_004841 | XLOC_215395 | ENSRNOT00000022559 | 0.958616422 | 8.92E-07 |
| TUCP_004841 | XLOC_215395 | ENSRNOT00000079260 | 0.977995625 | 3.92E-08 |
| TUCP_004841 | XLOC_215395 | ENSRNOT00000039294 | 0.963910348 | 4.54E-07 |
| TUCP_004841 | XLOC_215395 | ENSRNOT00000092913 | 0.956604937 | 1.13E-06 |
| TUCP_004758 | XLOC_209622 | ENSRNOT00000086502 | 0.974269348 | 8.51E-08 |
| TUCP_004758 | XLOC_209622 | ENSRNOT00000042165 | 0.979567753 | 2.71E-08 |
| TUCP_004758 | XLOC_209622 | ENSRNOT00000031586 | 0.952667185 | 1.73E-06 |
| TUCP_004758 | XLOC_209622 | ENSRNOT00000092890 | 0.950578905 | 2.14E-06 |
| TUCP_004758 | XLOC_209622 | ENSRNOT00000008278 | 0.989944146 | 7.96E-10 |
| TUCP_004052 | XLOC_178233 | ENSRNOT00000073235 | 0.951501213 | 1.95E-06 |
| TUCP_004052 | XLOC_178233 | ENSRNOT00000027339 | 0.951881153 | 1.87E-06 |
| TUCP_004052 | XLOC_178233 | ENSRNOT00000000036 | 0.972825481 | 1.12E-07 |
| TUCP_004052 | XLOC_178233 | ENSRNOT00000023858 | 0.95345498  | 1.59E-06 |
| TUCP_004052 | XLOC_178233 | ENSRNOT00000014867 | 0.978646803 | 3.37E-08 |
| TUCP_004052 | XLOC_178233 | ENSRNOT00000000337 | 0.979079526 | 3.05E-08 |
| TUCP_004052 | XLOC_178233 | ENSRNOT00000063831 | -0.95290237 | 1.69E-06 |
| TUCP_004051 | XLOC_178179 | ENSRNOT00000008879 | 0.953375596 | 1.60E-06 |
| TUCP_000432 | XLOC_014439 | ENSRNOT00000092026 | 0.980482968 | 2.16E-08 |
| TUCP_000432 | XLOC_014439 | ENSRNOT00000093075 | 0.997361897 | 1.00E-12 |
| TUCP_000432 | XLOC_014439 | ENSRNOT00000058260 | 0.997361897 | 1.00E-12 |
| TUCP_000432 | XLOC_014439 | ENSRNOT00000088887 | 0.997361897 | 1.00E-12 |
| TUCP_000432 | XLOC_014439 | ENSRNOT00000084986 | 0.997361897 | 1.00E-12 |
| TUCP_000432 | XLOC_014439 | ENSRNOT00000074346 | 0.96539464  | 3.69E-07 |
| TUCP_000432 | XLOC_014439 | ENSRNOT00000073209 | 0.983528001 | 9.29E-09 |
| TUCP_000432 | XLOC_014439 | ENSRNOT00000080155 | 0.971162955 | 1.50E-07 |
| TUCP_000432 | XLOC_014439 | ENSRNOT00000072573 | 0.994487606 | 3.97E-11 |
| TUCP_000432 | XLOC_014439 | ENSRNOT00000017828 | 0.99260546  | 1.72E-10 |
| TUCP_000432 | XLOC_014439 | ENSRNOT00000080444 | 0.9680038   | 2.50E-07 |
| TUCP_000432 | XLOC_014439 | ENSRNOT00000071312 | 0.997361897 | 1.00E-12 |
| TUCP_000432 | XLOC_014439 | ENSRNOT00000088245 | 0.997361897 | 1.00E-12 |
| TUCP_000432 | XLOC_014439 | ENSRNOT00000036565 | 0.963452937 | 4.83E-07 |
| TUCP_000432 | XLOC_014439 | ENSRNOT00000058833 | 0.99559564  | 1.30E-11 |
| TUCP_000432 | XLOC_014439 | ENSRNOT00000078052 | 0.997361897 | 1.00E-12 |
| TUCP_000432 | XLOC_014439 | ENSRNOT00000078494 | 0.997185298 | 1.38E-12 |
| TUCP_000432 | XLOC_014439 | ENSRNOT00000085653 | 0.997361897 | 1.00E-12 |
| TUCP_000432 | XLOC_014439 | ENSRNOT00000057950 | 0.965805912 | 3.48E-07 |
| TUCP_000432 | XLOC_014439 | ENSRNOT00000081992 | 0.996596668 | 3.58E-12 |

|             |             |                    |              |          |
|-------------|-------------|--------------------|--------------|----------|
| TUCP_000432 | XLOC_014439 | ENSRNOT00000084120 | 0.952236507  | 1.81E-06 |
| TUCP_000432 | XLOC_014439 | ENSRNOT00000055406 | 0.997361897  | 1.00E-12 |
| TUCP_000432 | XLOC_014439 | ENSRNOT00000070817 | 0.995941962  | 8.61E-12 |
| TUCP_000432 | XLOC_014439 | ENSRNOT00000026753 | 0.997361897  | 1.00E-12 |
| TUCP_000432 | XLOC_014439 | ENSRNOT00000080533 | 0.993352988  | 1.01E-10 |
| TUCP_000432 | XLOC_014439 | ENSRNOT00000072774 | 0.975354675  | 6.87E-08 |
| TUCP_000432 | XLOC_014439 | ENSRNOT00000086031 | 0.997361897  | 1.00E-12 |
| TUCP_000432 | XLOC_014439 | ENSRNOT00000014312 | 0.997361897  | 1.00E-12 |
| TUCP_000432 | XLOC_014439 | ENSRNOT00000042882 | 0.974463352  | 8.19E-08 |
| TUCP_000432 | XLOC_014439 | ENSRNOT00000088012 | 0.951739449  | 1.90E-06 |
| TUCP_000432 | XLOC_014439 | ENSRNOT00000051231 | 0.999383805  | 6.99E-16 |
| TUCP_000432 | XLOC_014439 | ENSRNOT00000089407 | 0.989343425  | 1.06E-09 |
| TUCP_000432 | XLOC_014439 | ENSRNOT00000055034 | 0.99418431   | 5.19E-11 |
| TUCP_000432 | XLOC_014439 | ENSRNOT00000046837 | 0.968234539  | 2.41E-07 |
| TUCP_004751 | XLOC_209444 | ENSRNOT00000080613 | 0.984844887  | 6.14E-09 |
| TUCP_004751 | XLOC_209444 | ENSRNOT00000020941 | -0.951285927 | 1.99E-06 |
| TUCP_003811 | XLOC_166670 | ENSRNOT00000001215 | 0.956769555  | 1.11E-06 |
| TUCP_003811 | XLOC_166670 | ENSRNOT00000006188 | -0.96373216  | 4.65E-07 |
| TUCP_003811 | XLOC_166670 | ENSRNOT00000006186 | 0.963900289  | 4.54E-07 |
| TUCP_003811 | XLOC_166670 | ENSRNOT00000026941 | 0.961819313  | 5.99E-07 |
| TUCP_003811 | XLOC_166670 | ENSRNOT00000013745 | -0.956902409 | 1.09E-06 |
| TUCP_003811 | XLOC_166670 | ENSRNOT00000075397 | 0.973460811  | 9.92E-08 |
| TUCP_003811 | XLOC_166670 | ENSRNOT00000032926 | -0.961282018 | 6.42E-07 |
| TUCP_003811 | XLOC_166670 | ENSRNOT00000019104 | -0.971116223 | 1.51E-07 |
| TUCP_003811 | XLOC_166670 | ENSRNOT00000073559 | 0.95155762   | 1.94E-06 |
| TUCP_003811 | XLOC_166670 | ENSRNOT00000068353 | 0.959565429  | 7.95E-07 |
| TUCP_003811 | XLOC_166670 | ENSRNOT00000001691 | 0.958717297  | 8.81E-07 |
| TUCP_003811 | XLOC_166670 | ENSRNOT00000020910 | 0.975291987  | 6.96E-08 |
| TUCP_003811 | XLOC_166670 | ENSRNOT00000025067 | -0.951610147 | 1.93E-06 |
| TUCP_003811 | XLOC_166670 | ENSRNOT00000086706 | 0.958741896  | 8.78E-07 |
| TUCP_003811 | XLOC_166670 | ENSRNOT00000086310 | -0.966021946 | 3.37E-07 |
| TUCP_003811 | XLOC_166670 | ENSRNOT00000010030 | -0.951592178 | 1.93E-06 |
| TUCP_003811 | XLOC_166670 | ENSRNOT00000028856 | 0.952561724  | 1.75E-06 |
| TUCP_003811 | XLOC_166670 | ENSRNOT00000000743 | 0.955942133  | 1.21E-06 |
| TUCP_003811 | XLOC_166670 | ENSRNOT00000014384 | -0.952899533 | 1.69E-06 |
| TUCP_003811 | XLOC_166670 | ENSRNOT00000030850 | 0.966894347  | 2.96E-07 |
| TUCP_003811 | XLOC_166670 | ENSRNOT00000033017 | 0.959734296  | 7.79E-07 |
| TUCP_003811 | XLOC_166670 | ENSRNOT00000055540 | 0.963175547  | 5.01E-07 |
| TUCP_003811 | XLOC_166670 | ENSRNOT00000006752 | 0.968952136  | 2.16E-07 |
| TUCP_003811 | XLOC_166670 | ENSRNOT00000077201 | -0.953599837 | 1.57E-06 |
| TUCP_003811 | XLOC_166670 | ENSRNOT00000085251 | -0.964339405 | 4.28E-07 |
| TUCP_003811 | XLOC_166670 | ENSRNOT00000072771 | 0.957720807  | 9.91E-07 |
| TUCP_003811 | XLOC_166670 | ENSRNOT00000065300 | 0.974106614  | 8.78E-08 |
| TUCP_003811 | XLOC_166670 | ENSRNOT00000045699 | 0.954608327  | 1.41E-06 |
| TUCP_003811 | XLOC_166670 | ENSRNOT00000065978 | 0.951560635  | 1.94E-06 |
| TUCP_003811 | XLOC_166670 | ENSRNOT00000007351 | -0.950537386 | 2.15E-06 |
| TUCP_003811 | XLOC_166670 | ENSRNOT00000035320 | -0.964457056 | 4.21E-07 |
| TUCP_003811 | XLOC_166670 | ENSRNOT00000057160 | 0.966048616  | 3.36E-07 |
| TUCP_003811 | XLOC_166670 | ENSRNOT00000091448 | -0.954146605 | 1.48E-06 |
| TUCP_003811 | XLOC_166670 | ENSRNOT00000077999 | 0.971155594  | 1.50E-07 |
| TUCP_003811 | XLOC_166670 | ENSRNOT00000003412 | -0.958006776 | 9.58E-07 |

|             |             |                    |              |          |
|-------------|-------------|--------------------|--------------|----------|
| TUCP_003811 | XLOC_166670 | ENSRNOT00000085228 | 0.969710667  | 1.91E-07 |
| TUCP_003811 | XLOC_166670 | ENSRNOT00000015188 | 0.96642565   | 3.18E-07 |
| TUCP_003811 | XLOC_166670 | ENSRNOT00000079866 | 0.954622268  | 1.40E-06 |
| TUCP_003811 | XLOC_166670 | ENSRNOT00000005686 | -0.963221404 | 4.98E-07 |
| TUCP_003811 | XLOC_166670 | ENSRNOT00000036959 | -0.964744214 | 4.04E-07 |
| TUCP_003811 | XLOC_166670 | ENSRNOT00000000048 | 0.951083635  | 2.03E-06 |
| TUCP_003811 | XLOC_166670 | ENSRNOT00000008655 | 0.955344075  | 1.30E-06 |
| TUCP_003811 | XLOC_166670 | ENSRNOT00000087278 | -0.957498343 | 1.02E-06 |
| TUCP_003811 | XLOC_166670 | ENSRNOT00000041044 | 0.960314729  | 7.25E-07 |
| TUCP_003811 | XLOC_166670 | ENSRNOT00000067391 | -0.954102141 | 1.48E-06 |
| TUCP_003811 | XLOC_166670 | ENSRNOT00000092945 | -0.952347982 | 1.79E-06 |
| TUCP_003811 | XLOC_166670 | ENSRNOT00000009150 | 0.955148895  | 1.33E-06 |
| TUCP_003811 | XLOC_166670 | ENSRNOT00000084709 | 0.971659306  | 1.37E-07 |
| TUCP_003811 | XLOC_166670 | ENSRNOT00000068033 | 0.95784631   | 9.76E-07 |
| TUCP_003811 | XLOC_166670 | ENSRNOT00000090912 | 0.964003711  | 4.48E-07 |
| TUCP_003811 | XLOC_166670 | ENSRNOT00000026525 | -0.955420692 | 1.29E-06 |
| TUCP_003811 | XLOC_166670 | ENSRNOT00000082709 | -0.950027714 | 2.26E-06 |
| TUCP_003811 | XLOC_166670 | ENSRNOT00000025856 | -0.968829679 | 2.20E-07 |
| TUCP_003811 | XLOC_166670 | ENSRNOT00000026643 | 0.983507517  | 9.35E-09 |
| TUCP_003811 | XLOC_166670 | ENSRNOT00000001403 | 0.960676252  | 6.93E-07 |
| TUCP_003811 | XLOC_166670 | ENSRNOT00000072357 | -0.962304598 | 5.63E-07 |
| TUCP_003811 | XLOC_166670 | ENSRNOT00000016132 | -0.97634695  | 5.60E-08 |
| TUCP_003811 | XLOC_166670 | ENSRNOT00000058495 | -0.957047107 | 1.07E-06 |
| TUCP_003811 | XLOC_166670 | ENSRNOT00000013067 | -0.973434542 | 9.97E-08 |
| TUCP_003811 | XLOC_166670 | ENSRNOT00000016220 | -0.958098961 | 9.48E-07 |
| TUCP_003811 | XLOC_166670 | ENSRNOT00000002313 | -0.95357765  | 1.57E-06 |
| TUCP_003811 | XLOC_166670 | ENSRNOT00000048063 | 0.960955663  | 6.69E-07 |
| TUCP_003811 | XLOC_166670 | ENSRNOT00000033975 | 0.971804077  | 1.34E-07 |
| TUCP_003811 | XLOC_166670 | ENSRNOT00000079895 | 0.960283385  | 7.28E-07 |
| TUCP_003811 | XLOC_166670 | ENSRNOT00000078102 | 0.972641519  | 1.15E-07 |
| TUCP_003811 | XLOC_166670 | ENSRNOT00000074586 | -0.955530635 | 1.27E-06 |
| TUCP_003811 | XLOC_166670 | ENSRNOT00000063873 | 0.955374794  | 1.29E-06 |
| TUCP_003811 | XLOC_166670 | ENSRNOT00000084031 | 0.968502847  | 2.32E-07 |
| TUCP_003811 | XLOC_166670 | ENSRNOT00000011880 | 0.961841599  | 5.98E-07 |
| TUCP_003811 | XLOC_166670 | ENSRNOT00000029202 | -0.977521957 | 4.35E-08 |
| TUCP_003811 | XLOC_166670 | ENSRNOT00000028290 | -0.955282178 | 1.31E-06 |
| TUCP_003811 | XLOC_166670 | ENSRNOT00000003992 | -0.956778935 | 1.10E-06 |
| TUCP_003811 | XLOC_166670 | ENSRNOT00000050515 | 0.971746228  | 1.35E-07 |
| TUCP_003811 | XLOC_166670 | ENSRNOT00000012942 | 0.957388658  | 1.03E-06 |
| TUCP_003811 | XLOC_166670 | ENSRNOT00000084088 | 0.953439896  | 1.59E-06 |
| TUCP_003811 | XLOC_166670 | ENSRNOT00000052224 | 0.977065642  | 4.81E-08 |
| TUCP_003811 | XLOC_166670 | ENSRNOT00000078070 | 0.988573972  | 1.50E-09 |
| TUCP_003811 | XLOC_166670 | ENSRNOT00000020951 | 0.957376298  | 1.03E-06 |
| TUCP_003811 | XLOC_166670 | ENSRNOT00000046745 | 0.970221472  | 1.75E-07 |
| TUCP_003811 | XLOC_166670 | ENSRNOT00000082146 | -0.962271076 | 5.65E-07 |
| TUCP_003811 | XLOC_166670 | ENSRNOT00000023876 | 0.956962552  | 1.08E-06 |
| TUCP_003811 | XLOC_166670 | ENSRNOT00000061201 | -0.951133465 | 2.02E-06 |
| TUCP_003811 | XLOC_166670 | ENSRNOT00000045233 | -0.957696693 | 9.94E-07 |
| TUCP_003811 | XLOC_166670 | ENSRNOT00000019656 | -0.957633583 | 1.00E-06 |
| TUCP_003811 | XLOC_166670 | ENSRNOT00000049285 | -0.95725923  | 1.05E-06 |
| TUCP_003811 | XLOC_166670 | ENSRNOT00000003568 | 0.961262163  | 6.44E-07 |



|             |             |                    |              |          |
|-------------|-------------|--------------------|--------------|----------|
| TUCP_003811 | XLOC_166670 | ENSRNOT0000006366  | -0.950924963 | 2.06E-06 |
| TUCP_003811 | XLOC_166670 | ENSRNOT00000074649 | 0.973129092  | 1.05E-07 |
| TUCP_003811 | XLOC_166670 | ENSRNOT00000033196 | -0.957508561 | 1.02E-06 |
| TUCP_003811 | XLOC_166670 | ENSRNOT00000077146 | -0.972613088 | 1.16E-07 |
| TUCP_003811 | XLOC_166670 | ENSRNOT00000052063 | 0.96260619   | 5.41E-07 |
| TUCP_003811 | XLOC_166670 | ENSRNOT00000060002 | -0.96875011  | 2.23E-07 |
| TUCP_003811 | XLOC_166670 | ENSRNOT00000089673 | -0.958979686 | 8.54E-07 |
| TUCP_003811 | XLOC_166670 | ENSRNOT0000004046  | -0.980497263 | 2.15E-08 |
| TUCP_003811 | XLOC_166670 | ENSRNOT00000010367 | 0.972106009  | 1.27E-07 |
| TUCP_003811 | XLOC_166670 | ENSRNOT00000057738 | 0.950535444  | 2.15E-06 |
| TUCP_003811 | XLOC_166670 | ENSRNOT00000023977 | -0.96934193  | 2.03E-07 |
| TUCP_003811 | XLOC_166670 | ENSRNOT00000066133 | -0.975076705 | 7.26E-08 |
| TUCP_003811 | XLOC_166670 | ENSRNOT00000048933 | -0.959176606 | 8.34E-07 |
| TUCP_003811 | XLOC_166670 | ENSRNOT00000029136 | -0.954958287 | 1.35E-06 |
| TUCP_003811 | XLOC_166670 | ENSRNOT00000088509 | 0.957656735  | 9.98E-07 |
| TUCP_003811 | XLOC_166670 | ENSRNOT00000086893 | -0.95210155  | 1.83E-06 |
| TUCP_003811 | XLOC_166670 | ENSRNOT00000019487 | 0.953397347  | 1.60E-06 |
| TUCP_003811 | XLOC_166670 | ENSRNOT00000030692 | -0.963740047 | 4.64E-07 |
| TUCP_003811 | XLOC_166670 | ENSRNOT00000055992 | -0.962831787 | 5.25E-07 |
| TUCP_003811 | XLOC_166670 | ENSRNOT00000040069 | 0.967402027  | 2.74E-07 |
| TUCP_003811 | XLOC_166670 | ENSRNOT00000015624 | 0.959702565  | 7.82E-07 |
| TUCP_003811 | XLOC_166670 | ENSRNOT00000073235 | 0.950932923  | 2.06E-06 |
| TUCP_003811 | XLOC_166670 | ENSRNOT00000085295 | -0.953319532 | 1.61E-06 |
| TUCP_003811 | XLOC_166670 | ENSRNOT00000008222 | -0.950138084 | 2.23E-06 |
| TUCP_003811 | XLOC_166670 | ENSRNOT00000035474 | 0.973401739  | 1.00E-07 |
| TUCP_003811 | XLOC_166670 | ENSRNOT00000039102 | 0.96049325   | 7.09E-07 |
| TUCP_003811 | XLOC_166670 | ENSRNOT00000023807 | -0.95585512  | 1.23E-06 |
| TUCP_003811 | XLOC_166670 | ENSRNOT00000078856 | -0.966462306 | 3.16E-07 |
| TUCP_003811 | XLOC_166670 | ENSRNOT00000091205 | 0.97897125   | 3.13E-08 |
| TUCP_003811 | XLOC_166670 | ENSRNOT00000009742 | -0.956869462 | 1.09E-06 |
| TUCP_003811 | XLOC_166670 | ENSRNOT00000010983 | 0.95729992   | 1.04E-06 |
| TUCP_003811 | XLOC_166670 | ENSRNOT0000007369  | 0.960176519  | 7.38E-07 |
| TUCP_003811 | XLOC_166670 | ENSRNOT00000004787 | -0.975015856 | 7.35E-08 |
| TUCP_003811 | XLOC_166670 | ENSRNOT00000060698 | -0.968284577 | 2.40E-07 |
| TUCP_003811 | XLOC_166670 | ENSRNOT00000064535 | -0.961404242 | 6.32E-07 |
| TUCP_003811 | XLOC_166670 | ENSRNOT00000014814 | 0.969884987  | 1.85E-07 |
| TUCP_003811 | XLOC_166670 | ENSRNOT00000022000 | -0.954545626 | 1.42E-06 |
| TUCP_003811 | XLOC_166670 | ENSRNOT00000010748 | 0.980545897  | 2.12E-08 |
| TUCP_003811 | XLOC_166670 | ENSRNOT00000080207 | 0.977036911  | 4.84E-08 |
| TUCP_003811 | XLOC_166670 | ENSRNOT00000061100 | 0.956091181  | 1.19E-06 |
| TUCP_003811 | XLOC_166670 | ENSRNOT00000065529 | 0.964033892  | 4.46E-07 |
| TUCP_003811 | XLOC_166670 | ENSRNOT00000017776 | 0.970789973  | 1.59E-07 |
| TUCP_003811 | XLOC_166670 | ENSRNOT00000017995 | 0.957627579  | 1.00E-06 |
| TUCP_003811 | XLOC_166670 | ENSRNOT00000021534 | -0.958364575 | 9.19E-07 |
| TUCP_003811 | XLOC_166670 | ENSRNOT00000088679 | -0.95931011  | 8.20E-07 |
| TUCP_003811 | XLOC_166670 | ENSRNOT00000004463 | 0.966513683  | 3.13E-07 |
| TUCP_003811 | XLOC_166670 | ENSRNOT00000059807 | 0.956553513  | 1.13E-06 |
| TUCP_003811 | XLOC_166670 | ENSRNOT00000016776 | -0.959822135 | 7.71E-07 |
| TUCP_003811 | XLOC_166670 | ENSRNOT00000090057 | 0.955129989  | 1.33E-06 |
| TUCP_003811 | XLOC_166670 | ENSRNOT00000022097 | 0.958189509  | 9.38E-07 |
| TUCP_003811 | XLOC_166670 | ENSRNOT0000008987  | -0.976350718 | 5.60E-08 |

|             |             |                     |              |          |
|-------------|-------------|---------------------|--------------|----------|
| TUCP_003811 | XLOC_166670 | ENSRNOT00000092876  | -0.963048226 | 5.10E-07 |
| TUCP_003811 | XLOC_166670 | ENSRNOT00000024253  | 0.950084476  | 2.24E-06 |
| TUCP_003811 | XLOC_166670 | ENSRNOT00000088073  | -0.950796564 | 2.09E-06 |
| TUCP_003811 | XLOC_166670 | ENSRNOT00000065143  | 0.967298098  | 2.79E-07 |
| TUCP_003811 | XLOC_166670 | ENSRNOT00000040060  | -0.960918369 | 6.72E-07 |
| TUCP_003811 | XLOC_166670 | ENSRNOT00000027083  | 0.972366592  | 1.21E-07 |
| TUCP_003811 | XLOC_166670 | ENSRNOT00000066041  | -0.959140129 | 8.37E-07 |
| TUCP_003811 | XLOC_166670 | ENSRNOT00000063930  | -0.970741027 | 1.61E-07 |
| TUCP_003811 | XLOC_166670 | ENSRNOT00000013116  | -0.959770435 | 7.76E-07 |
| TUCP_003811 | XLOC_166670 | ENSRNOT00000001290  | 0.950539541  | 2.14E-06 |
| TUCP_003811 | XLOC_166670 | ENSRNOT00000001855  | 0.966065817  | 3.35E-07 |
| TUCP_003811 | XLOC_166670 | ENSRNOT00000009563  | -0.971655815 | 1.37E-07 |
| TUCP_003811 | XLOC_166670 | ENSRNOT00000019502  | 0.959237022  | 8.28E-07 |
| TUCP_003811 | XLOC_166670 | ENSRNOT00000087838  | -0.95742437  | 1.03E-06 |
| TUCP_003811 | XLOC_166670 | ENSRNOT00000081981  | 0.987726162  | 2.15E-09 |
| TUCP_003811 | XLOC_166670 | ENSRNOT00000026531  | -0.96559815  | 3.58E-07 |
| TUCP_003811 | XLOC_166670 | ENSRNOT00000014479  | -0.959642527 | 7.88E-07 |
| TUCP_003811 | XLOC_166670 | ENSRNOT00000003326  | -0.969876125 | 1.86E-07 |
| TUCP_003811 | XLOC_166670 | ENSRNOT00000021629  | -0.958199155 | 9.37E-07 |
| TUCP_003811 | XLOC_166670 | ENSRNOT00000016306  | -0.967282344 | 2.79E-07 |
| TUCP_003811 | XLOC_166670 | ENSRNOT00000015476  | -0.961418609 | 6.31E-07 |
| TUCP_003811 | XLOC_166670 | ENSRNOT00000025079  | -0.967050884 | 2.89E-07 |
| TUCP_003811 | XLOC_166670 | ENSRNOT00000048754  | -0.968540576 | 2.30E-07 |
| TUCP_003811 | XLOC_166670 | ENSRNOT00000044628  | 0.957109213  | 1.06E-06 |
| TUCP_003811 | XLOC_166670 | ENSRNOT00000025075  | 0.952447602  | 1.77E-06 |
| TUCP_003811 | XLOC_166670 | ENSRNOT00000004007  | -0.968235266 | 2.41E-07 |
| TUCP_003811 | XLOC_166670 | ENSRNOT00000020681  | -0.959832116 | 7.70E-07 |
| TUCP_003811 | XLOC_166670 | ENSRNOT00000057898  | -0.968714085 | 2.24E-07 |
| TUCP_003811 | XLOC_166670 | ENSRNOT000000091602 | -0.968902994 | 2.17E-07 |
| TUCP_003811 | XLOC_166670 | ENSRNOT00000090338  | -0.958537116 | 9.00E-07 |
| TUCP_003811 | XLOC_166670 | ENSRNOT00000056100  | -0.956834354 | 1.10E-06 |
| TUCP_003811 | XLOC_166670 | ENSRNOT00000009811  | 0.978553472  | 3.45E-08 |
| TUCP_003811 | XLOC_166670 | ENSRNOT00000006680  | 0.9530031    | 1.67E-06 |
| TUCP_003811 | XLOC_166670 | ENSRNOT00000036838  | -0.955314131 | 1.30E-06 |
| TUCP_003811 | XLOC_166670 | ENSRNOT00000009817  | -0.954109946 | 1.48E-06 |
| TUCP_003811 | XLOC_166670 | ENSRNOT00000090129  | -0.950064751 | 2.25E-06 |
| TUCP_003811 | XLOC_166670 | ENSRNOT00000009708  | -0.965594376 | 3.58E-07 |
| TUCP_003811 | XLOC_166670 | ENSRNOT00000077231  | 0.968457957  | 2.33E-07 |
| TUCP_003811 | XLOC_166670 | ENSRNOT00000060696  | 0.962658553  | 5.37E-07 |
| TUCP_003811 | XLOC_166670 | ENSRNOT00000018634  | -0.960026188 | 7.52E-07 |
| TUCP_003811 | XLOC_166670 | ENSRNOT00000012583  | -0.951858855 | 1.88E-06 |
| TUCP_003811 | XLOC_166670 | ENSRNOT00000073643  | -0.96229144  | 5.64E-07 |
| TUCP_003811 | XLOC_166670 | ENSRNOT00000078349  | -0.963469426 | 4.82E-07 |
| TUCP_003811 | XLOC_166670 | ENSRNOT00000022502  | -0.970780849 | 1.60E-07 |
| TUCP_003811 | XLOC_166670 | ENSRNOT00000026928  | -0.950908724 | 2.07E-06 |
| TUCP_003811 | XLOC_166670 | ENSRNOT00000005329  | -0.960555202 | 7.04E-07 |
| TUCP_003811 | XLOC_166670 | ENSRNOT00000017556  | 0.963031643  | 5.11E-07 |
| TUCP_003811 | XLOC_166670 | ENSRNOT00000087443  | 0.970159301  | 1.77E-07 |
| TUCP_003811 | XLOC_166670 | ENSRNOT00000001759  | -0.955850865 | 1.23E-06 |
| TUCP_003811 | XLOC_166670 | ENSRNOT00000021803  | -0.967951537 | 2.52E-07 |
| TUCP_003811 | XLOC_166670 | ENSRNOT00000020147  | 0.953268316  | 1.62E-06 |

|             |             |                    |              |          |
|-------------|-------------|--------------------|--------------|----------|
| TUCP_003811 | XLOC_166670 | ENSRNOT00000024352 | 0.969467245  | 1.99E-07 |
| TUCP_003811 | XLOC_166670 | ENSRNOT00000058351 | 0.978220636  | 3.72E-08 |
| TUCP_003811 | XLOC_166670 | ENSRNOT00000083220 | 0.980187452  | 2.33E-08 |
| TUCP_003811 | XLOC_166670 | ENSRNOT00000072118 | 0.954027325  | 1.50E-06 |
| TUCP_003811 | XLOC_166670 | ENSRNOT00000003780 | 0.962688064  | 5.35E-07 |
| TUCP_003811 | XLOC_166670 | ENSRNOT00000003787 | -0.957155038 | 1.06E-06 |
| TUCP_003811 | XLOC_166670 | ENSRNOT00000023262 | -0.956640995 | 1.12E-06 |
| TUCP_003811 | XLOC_166670 | ENSRNOT00000058312 | 0.951374268  | 1.97E-06 |
| TUCP_003811 | XLOC_166670 | ENSRNOT00000060362 | 0.958095731  | 9.48E-07 |
| TUCP_003811 | XLOC_166670 | ENSRNOT00000067009 | -0.96022565  | 7.33E-07 |
| TUCP_003811 | XLOC_166670 | ENSRNOT00000019816 | -0.955001262 | 1.35E-06 |
| TUCP_003811 | XLOC_166670 | ENSRNOT00000045946 | 0.957601922  | 1.00E-06 |
| TUCP_003811 | XLOC_166670 | ENSRNOT00000010674 | -0.951584798 | 1.93E-06 |
| TUCP_003811 | XLOC_166670 | ENSRNOT00000016739 | 0.950059805  | 2.25E-06 |
| TUCP_003811 | XLOC_166670 | ENSRNOT00000023664 | -0.951601634 | 1.93E-06 |
| TUCP_003811 | XLOC_166670 | ENSRNOT00000068381 | 0.95937116   | 8.14E-07 |
| TUCP_003811 | XLOC_166670 | ENSRNOT00000068026 | -0.956593961 | 1.13E-06 |
| TUCP_003811 | XLOC_166670 | ENSRNOT00000020994 | -0.959296523 | 8.22E-07 |
| TUCP_003811 | XLOC_166670 | ENSRNOT00000007314 | -0.970901879 | 1.56E-07 |
| TUCP_003811 | XLOC_166670 | ENSRNOT00000014821 | -0.964969555 | 3.92E-07 |
| TUCP_003811 | XLOC_166670 | ENSRNOT00000058382 | 0.962014906  | 5.84E-07 |
| TUCP_003811 | XLOC_166670 | ENSRNOT00000088599 | 0.973968668  | 9.01E-08 |
| TUCP_003811 | XLOC_166670 | ENSRNOT00000005587 | -0.953864122 | 1.52E-06 |
| TUCP_003811 | XLOC_166670 | ENSRNOT00000064068 | -0.957751523 | 9.87E-07 |
| TUCP_003811 | XLOC_166670 | ENSRNOT00000023567 | -0.963067228 | 5.09E-07 |
| TUCP_003811 | XLOC_166670 | ENSRNOT00000023537 | -0.963782136 | 4.62E-07 |
| TUCP_003811 | XLOC_166670 | ENSRNOT00000070912 | -0.958734624 | 8.79E-07 |
| TUCP_003811 | XLOC_166670 | ENSRNOT00000026398 | -0.957911735 | 9.69E-07 |
| TUCP_003811 | XLOC_166670 | ENSRNOT00000050609 | -0.961014551 | 6.64E-07 |
| TUCP_003811 | XLOC_166670 | ENSRNOT00000005459 | 0.966117976  | 3.32E-07 |
| TUCP_003811 | XLOC_166670 | ENSRNOT00000027910 | 0.982311534  | 1.32E-08 |
| TUCP_003811 | XLOC_166670 | ENSRNOT00000037015 | 0.950589467  | 2.13E-06 |
| TUCP_003811 | XLOC_166670 | ENSRNOT00000067135 | -0.961670719 | 6.11E-07 |
| TUCP_003811 | XLOC_166670 | ENSRNOT00000088182 | 0.953949436  | 1.51E-06 |
| TUCP_003811 | XLOC_166670 | ENSRNOT00000054976 | -0.962014541 | 5.84E-07 |
| TUCP_003811 | XLOC_166670 | ENSRNOT00000032780 | 0.970028436  | 1.81E-07 |
| TUCP_003811 | XLOC_166670 | ENSRNOT00000016191 | 0.957609479  | 1.00E-06 |
| TUCP_003811 | XLOC_166670 | ENSRNOT00000028885 | -0.958719336 | 8.81E-07 |
| TUCP_003811 | XLOC_166670 | ENSRNOT00000016372 | -0.964287355 | 4.31E-07 |
| TUCP_003811 | XLOC_166670 | ENSRNOT00000088202 | -0.952072862 | 1.84E-06 |
| TUCP_003811 | XLOC_166670 | ENSRNOT00000029833 | 0.961218475  | 6.47E-07 |
| TUCP_003811 | XLOC_166670 | ENSRNOT00000021145 | -0.950288122 | 2.20E-06 |
| TUCP_003811 | XLOC_166670 | ENSRNOT00000082151 | -0.971596079 | 1.39E-07 |
| TUCP_003811 | XLOC_166670 | ENSRNOT00000008982 | 0.984282298  | 7.36E-09 |
| TUCP_003811 | XLOC_166670 | ENSRNOT00000001607 | 0.955659994  | 1.25E-06 |
| TUCP_003811 | XLOC_166670 | ENSRNOT00000047192 | -0.975120374 | 7.20E-08 |
| TUCP_003811 | XLOC_166670 | ENSRNOT00000085971 | -0.971459354 | 1.42E-07 |
| TUCP_003811 | XLOC_166670 | ENSRNOT00000057537 | 0.950909902  | 2.07E-06 |
| TUCP_003811 | XLOC_166670 | ENSRNOT00000022142 | 0.973579507  | 9.70E-08 |
| TUCP_003811 | XLOC_166670 | ENSRNOT00000076300 | -0.954591934 | 1.41E-06 |
| TUCP_003811 | XLOC_166670 | ENSRNOT00000078390 | -0.963219464 | 4.98E-07 |

|             |             |                    |              |          |
|-------------|-------------|--------------------|--------------|----------|
| TUCP_003811 | XLOC_166670 | ENSRNOT00000015537 | 0.968271443  | 2.40E-07 |
| TUCP_003811 | XLOC_166670 | ENSRNOT00000052120 | 0.959546995  | 7.97E-07 |
| TUCP_003811 | XLOC_166670 | ENSRNOT00000078306 | 0.966405263  | 3.19E-07 |
| TUCP_003811 | XLOC_166670 | ENSRNOT00000011499 | -0.95937114  | 8.14E-07 |
| TUCP_003811 | XLOC_166670 | ENSRNOT00000015946 | -0.962092415 | 5.78E-07 |
| TUCP_003811 | XLOC_166670 | ENSRNOT00000004172 | 0.959231583  | 8.28E-07 |
| TUCP_003811 | XLOC_166670 | ENSRNOT00000023965 | -0.954907704 | 1.36E-06 |
| TUCP_003811 | XLOC_166670 | ENSRNOT00000040476 | 0.957543267  | 1.01E-06 |
| TUCP_003811 | XLOC_166670 | ENSRNOT00000090355 | -0.951754623 | 1.90E-06 |
| TUCP_003811 | XLOC_166670 | ENSRNOT00000002410 | 0.951698113  | 1.91E-06 |
| TUCP_003811 | XLOC_166670 | ENSRNOT00000029125 | 0.982341929  | 1.31E-08 |
| TUCP_003811 | XLOC_166670 | ENSRNOT00000085279 | 0.95161395   | 1.93E-06 |
| TUCP_003811 | XLOC_166670 | ENSRNOT00000004319 | -0.969117283 | 2.10E-07 |
| TUCP_003811 | XLOC_166670 | ENSRNOT00000025819 | -0.950251213 | 2.21E-06 |
| TUCP_003811 | XLOC_166670 | ENSRNOT00000015318 | -0.952871045 | 1.69E-06 |
| TUCP_003811 | XLOC_166670 | ENSRNOT00000083632 | -0.967353994 | 2.76E-07 |
| TUCP_003811 | XLOC_166670 | ENSRNOT00000025147 | 0.950390625  | 2.18E-06 |
| TUCP_003811 | XLOC_166670 | ENSRNOT00000045532 | -0.957081604 | 1.07E-06 |
| TUCP_003811 | XLOC_166670 | ENSRNOT00000025887 | -0.961289749 | 6.41E-07 |
| TUCP_003811 | XLOC_166670 | ENSRNOT00000078862 | 0.955501634  | 1.27E-06 |
| TUCP_003811 | XLOC_166670 | ENSRNOT00000005311 | 0.972221754  | 1.24E-07 |
| TUCP_003811 | XLOC_166670 | ENSRNOT00000005257 | 0.965597852  | 3.58E-07 |
| TUCP_003811 | XLOC_166670 | ENSRNOT00000015799 | 0.981093998  | 1.84E-08 |
| TUCP_003811 | XLOC_166670 | ENSRNOT00000036506 | 0.957052287  | 1.07E-06 |
| TUCP_003811 | XLOC_166670 | ENSRNOT00000005958 | 0.984587128  | 6.68E-09 |
| TUCP_003811 | XLOC_166670 | ENSRNOT00000039551 | -0.966039704 | 3.36E-07 |
| TUCP_003811 | XLOC_166670 | ENSRNOT00000082999 | -0.950870936 | 2.08E-06 |
| TUCP_003811 | XLOC_166670 | ENSRNOT00000082998 | 0.97430582   | 8.45E-08 |
| TUCP_003811 | XLOC_166670 | ENSRNOT00000075656 | -0.954945439 | 1.36E-06 |
| TUCP_003811 | XLOC_166670 | ENSRNOT00000015006 | 0.953310234  | 1.62E-06 |
| TUCP_003811 | XLOC_166670 | ENSRNOT00000007350 | 0.956920456  | 1.09E-06 |
| TUCP_003811 | XLOC_166670 | ENSRNOT00000004956 | 0.953090641  | 1.65E-06 |
| TUCP_003811 | XLOC_166670 | ENSRNOT00000083578 | 0.962531069  | 5.46E-07 |
| TUCP_003811 | XLOC_166670 | ENSRNOT00000023638 | 0.986934693  | 2.93E-09 |
| TUCP_003811 | XLOC_166670 | ENSRNOT00000005228 | 0.959468259  | 8.05E-07 |
| TUCP_003811 | XLOC_166670 | ENSRNOT00000059524 | -0.969113212 | 2.10E-07 |
| TUCP_003811 | XLOC_166670 | ENSRNOT00000017361 | 0.958186569  | 9.38E-07 |
| TUCP_003811 | XLOC_166670 | ENSRNOT00000005220 | 0.969122079  | 2.10E-07 |
| TUCP_003811 | XLOC_166670 | ENSRNOT00000023144 | 0.971815346  | 1.34E-07 |
| TUCP_003811 | XLOC_166670 | ENSRNOT00000045326 | 0.965154678  | 3.82E-07 |
| TUCP_003811 | XLOC_166670 | ENSRNOT00000016649 | 0.974801218  | 7.67E-08 |
| TUCP_003811 | XLOC_166670 | ENSRNOT00000090342 | 0.954435387  | 1.43E-06 |
| TUCP_003811 | XLOC_166670 | ENSRNOT00000074023 | 0.973536551  | 9.78E-08 |
| TUCP_003811 | XLOC_166670 | ENSRNOT00000019465 | -0.957744094 | 9.88E-07 |
| TUCP_003811 | XLOC_166670 | ENSRNOT00000009073 | -0.952227231 | 1.81E-06 |
| TUCP_003811 | XLOC_166670 | ENSRNOT00000067170 | -0.970468086 | 1.68E-07 |
| TUCP_003811 | XLOC_166670 | ENSRNOT00000091128 | -0.966941954 | 2.94E-07 |
| TUCP_003811 | XLOC_166670 | ENSRNOT00000001586 | -0.9730392   | 1.07E-07 |
| TUCP_003811 | XLOC_166670 | ENSRNOT00000026543 | 0.954408465  | 1.44E-06 |
| TUCP_003811 | XLOC_166670 | ENSRNOT00000019213 | 0.959006639  | 8.51E-07 |
| TUCP_003811 | XLOC_166670 | ENSRNOT00000012187 | 0.966290157  | 3.24E-07 |

|             |             |                    |              |          |
|-------------|-------------|--------------------|--------------|----------|
| TUCP_003811 | XLOC_166670 | ENSRNOT00000024969 | 0.978379042  | 3.59E-08 |
| TUCP_003811 | XLOC_166670 | ENSRNOT00000013695 | -0.955760859 | 1.24E-06 |
| TUCP_003811 | XLOC_166670 | ENSRNOT00000081621 | 0.957561467  | 1.01E-06 |
| TUCP_003811 | XLOC_166670 | ENSRNOT00000027301 | -0.95180943  | 1.89E-06 |
| TUCP_003811 | XLOC_166670 | ENSRNOT00000038247 | 0.958814275  | 8.71E-07 |
| TUCP_003811 | XLOC_166670 | ENSRNOT00000009000 | -0.950103431 | 2.24E-06 |
| TUCP_003811 | XLOC_166670 | ENSRNOT00000024402 | 0.971647086  | 1.38E-07 |
| TUCP_003811 | XLOC_166670 | ENSRNOT00000089545 | -0.957677799 | 9.96E-07 |
| TUCP_003811 | XLOC_166670 | ENSRNOT00000019519 | 0.952259604  | 1.80E-06 |
| TUCP_003811 | XLOC_166670 | ENSRNOT00000089933 | 0.99188731   | 2.73E-10 |
| TUCP_003811 | XLOC_166670 | ENSRNOT00000077908 | 0.956304286  | 1.17E-06 |
| TUCP_003811 | XLOC_166670 | ENSRNOT00000083876 | -0.960095277 | 7.45E-07 |
| TUCP_003811 | XLOC_166670 | ENSRNOT00000026481 | 0.971741097  | 1.35E-07 |
| TUCP_003811 | XLOC_166670 | ENSRNOT00000067554 | 0.959484018  | 8.03E-07 |
| TUCP_003811 | XLOC_166670 | ENSRNOT00000026718 | 0.951953483  | 1.86E-06 |
| TUCP_003811 | XLOC_166670 | ENSRNOT00000072208 | 0.962251125  | 5.67E-07 |
| TUCP_003811 | XLOC_166670 | ENSRNOT00000010784 | 0.952907086  | 1.69E-06 |
| TUCP_003811 | XLOC_166670 | ENSRNOT00000084012 | 0.969935242  | 1.84E-07 |
| TUCP_003811 | XLOC_166670 | ENSRNOT00000033677 | -0.968606868 | 2.28E-07 |
| TUCP_003811 | XLOC_166670 | ENSRNOT00000019820 | 0.975475452  | 6.71E-08 |
| TUCP_003811 | XLOC_166670 | ENSRNOT00000083351 | -0.95196877  | 1.86E-06 |
| TUCP_003811 | XLOC_166670 | ENSRNOT00000011832 | -0.956826314 | 1.10E-06 |
| TUCP_003811 | XLOC_166670 | ENSRNOT00000016428 | 0.954897885  | 1.36E-06 |
| TUCP_003811 | XLOC_166670 | ENSRNOT00000021030 | -0.964993588 | 3.90E-07 |
| TUCP_003811 | XLOC_166670 | ENSRNOT00000091909 | 0.979695897  | 2.63E-08 |
| TUCP_003811 | XLOC_166670 | ENSRNOT00000077727 | -0.965417494 | 3.68E-07 |
| TUCP_003811 | XLOC_166670 | ENSRNOT00000011930 | 0.95818486   | 9.38E-07 |
| TUCP_003811 | XLOC_166670 | ENSRNOT00000044346 | -0.961062089 | 6.60E-07 |
| TUCP_003811 | XLOC_166670 | ENSRNOT00000073492 | -0.952649236 | 1.73E-06 |
| TUCP_003811 | XLOC_166670 | ENSRNOT00000010541 | 0.971730934  | 1.36E-07 |
| TUCP_003811 | XLOC_166670 | ENSRNOT00000017949 | -0.958717644 | 8.81E-07 |
| TUCP_003811 | XLOC_166670 | ENSRNOT00000013864 | -0.955859585 | 1.23E-06 |
| TUCP_003811 | XLOC_166670 | ENSRNOT00000001081 | 0.969077936  | 2.11E-07 |
| TUCP_003811 | XLOC_166670 | ENSRNOT00000013025 | -0.960693233 | 6.92E-07 |
| TUCP_003811 | XLOC_166670 | ENSRNOT00000003544 | -0.96400201  | 4.48E-07 |
| TUCP_003811 | XLOC_166670 | ENSRNOT00000086119 | -0.974152838 | 8.70E-08 |
| TUCP_003811 | XLOC_166670 | ENSRNOT00000022190 | -0.974264888 | 8.51E-08 |
| TUCP_003811 | XLOC_166670 | ENSRNOT00000025913 | -0.973610941 | 9.64E-08 |
| TUCP_003811 | XLOC_166670 | ENSRNOT00000019386 | -0.965864766 | 3.45E-07 |
| TUCP_003811 | XLOC_166670 | ENSRNOT00000077220 | -0.956554425 | 1.13E-06 |
| TUCP_003811 | XLOC_166670 | ENSRNOT00000065983 | 0.960747274  | 6.87E-07 |
| TUCP_003811 | XLOC_166670 | ENSRNOT00000030782 | -0.953906711 | 1.52E-06 |
| TUCP_003811 | XLOC_166670 | ENSRNOT00000067780 | -0.963959152 | 4.51E-07 |
| TUCP_003811 | XLOC_166670 | ENSRNOT00000086577 | 0.958241132  | 9.32E-07 |
| TUCP_003811 | XLOC_166670 | ENSRNOT00000025966 | 0.968884901  | 2.18E-07 |
| TUCP_003811 | XLOC_166670 | ENSRNOT00000007738 | -0.959679469 | 7.84E-07 |
| TUCP_003811 | XLOC_166670 | ENSRNOT00000052422 | 0.963443303  | 4.84E-07 |
| TUCP_003811 | XLOC_166670 | ENSRNOT00000025980 | -0.951409777 | 1.97E-06 |
| TUCP_003811 | XLOC_166670 | ENSRNOT00000026174 | 0.951930775  | 1.86E-06 |
| TUCP_003811 | XLOC_166670 | ENSRNOT00000034883 | -0.969771299 | 1.89E-07 |
| TUCP_003811 | XLOC_166670 | ENSRNOT00000020155 | 0.962754376  | 5.30E-07 |

|             |             |                     |              |          |
|-------------|-------------|---------------------|--------------|----------|
| TUCP_003811 | XLOC_166670 | ENSRNOT00000082869  | 0.952315939  | 1.79E-06 |
| TUCP_003811 | XLOC_166670 | ENSRNOT00000055321  | 0.966154185  | 3.30E-07 |
| TUCP_003811 | XLOC_166670 | ENSRNOT00000005910  | -0.96712255  | 2.86E-07 |
| TUCP_003811 | XLOC_166670 | ENSRNOT00000078475  | 0.965830536  | 3.46E-07 |
| TUCP_003811 | XLOC_166670 | ENSRNOT00000087429  | 0.963408423  | 4.86E-07 |
| TUCP_003811 | XLOC_166670 | ENSRNOT00000029701  | 0.95193053   | 1.86E-06 |
| TUCP_003811 | XLOC_166670 | ENSRNOT00000035591  | -0.953297002 | 1.62E-06 |
| TUCP_003811 | XLOC_166670 | ENSRNOT00000016722  | 0.95686223   | 1.09E-06 |
| TUCP_003811 | XLOC_166670 | ENSRNOT00000000013  | 0.968104024  | 2.46E-07 |
| TUCP_003811 | XLOC_166670 | ENSRNOT00000080591  | 0.952530209  | 1.75E-06 |
| TUCP_003811 | XLOC_166670 | ENSRNOT00000030329  | -0.95026791  | 2.20E-06 |
| TUCP_003811 | XLOC_166670 | ENSRNOT00000031904  | 0.964513678  | 4.18E-07 |
| TUCP_003811 | XLOC_166670 | ENSRNOT00000022074  | 0.96198455   | 5.87E-07 |
| TUCP_003811 | XLOC_166670 | ENSRNOT00000004999  | 0.963405087  | 4.86E-07 |
| TUCP_003811 | XLOC_166670 | ENSRNOT00000009122  | 0.957247213  | 1.05E-06 |
| TUCP_003811 | XLOC_166670 | ENSRNOT00000013463  | 0.967629985  | 2.65E-07 |
| TUCP_003811 | XLOC_166670 | ENSRNOT00000088054  | 0.958298819  | 9.26E-07 |
| TUCP_003811 | XLOC_166670 | ENSRNOT00000036658  | -0.953355788 | 1.61E-06 |
| TUCP_003811 | XLOC_166670 | ENSRNOT00000047663  | -0.961165118 | 6.52E-07 |
| TUCP_003811 | XLOC_166670 | ENSRNOT00000005486  | -0.966634966 | 3.08E-07 |
| TUCP_003811 | XLOC_166670 | ENSRNOT00000017907  | -0.969460207 | 1.99E-07 |
| TUCP_003811 | XLOC_166670 | ENSRNOT000000092029 | 0.954453292  | 1.43E-06 |
| TUCP_003811 | XLOC_166670 | ENSRNOT00000005489  | 0.958737798  | 8.79E-07 |
| TUCP_003811 | XLOC_166670 | ENSRNOT00000025794  | -0.971444473 | 1.43E-07 |
| TUCP_003811 | XLOC_166670 | ENSRNOT00000058111  | -0.954806326 | 1.38E-06 |
| TUCP_003811 | XLOC_166670 | ENSRNOT00000084422  | 0.971405962  | 1.43E-07 |
| TUCP_003811 | XLOC_166670 | ENSRNOT00000050834  | -0.977637994 | 4.24E-08 |
| TUCP_003811 | XLOC_166670 | ENSRNOT00000054828  | 0.959930468  | 7.60E-07 |
| TUCP_003811 | XLOC_166670 | ENSRNOT00000002443  | 0.97745088   | 4.42E-08 |
| TUCP_003811 | XLOC_166670 | ENSRNOT00000002114  | -0.976890438 | 4.99E-08 |
| TUCP_003811 | XLOC_166670 | ENSRNOT00000002445  | -0.962028804 | 5.83E-07 |
| TUCP_003811 | XLOC_166670 | ENSRNOT00000027970  | 0.984545226  | 6.77E-09 |
| TUCP_003811 | XLOC_166670 | ENSRNOT00000046215  | -0.968816389 | 2.20E-07 |
| TUCP_003811 | XLOC_166670 | ENSRNOT00000025009  | 0.959773908  | 7.75E-07 |
| TUCP_003811 | XLOC_166670 | ENSRNOT00000000083  | -0.957187221 | 1.05E-06 |
| TUCP_003811 | XLOC_166670 | ENSRNOT00000018074  | -0.97007252  | 1.80E-07 |
| TUCP_003811 | XLOC_166670 | ENSRNOT00000037679  | 0.950266985  | 2.20E-06 |
| TUCP_003811 | XLOC_166670 | ENSRNOT00000014124  | 0.969614526  | 1.94E-07 |
| TUCP_003811 | XLOC_166670 | ENSRNOT00000000120  | 0.989823743  | 8.45E-10 |
| TUCP_003811 | XLOC_166670 | ENSRNOT00000013632  | 0.96444659   | 4.21E-07 |
| TUCP_003811 | XLOC_166670 | ENSRNOT00000028545  | -0.957061082 | 1.07E-06 |
| TUCP_003811 | XLOC_166670 | ENSRNOT00000009900  | -0.972562061 | 1.17E-07 |
| TUCP_003811 | XLOC_166670 | ENSRNOT00000017753  | 0.95237952   | 1.78E-06 |
| TUCP_003811 | XLOC_166670 | ENSRNOT00000019172  | -0.965363608 | 3.70E-07 |
| TUCP_003811 | XLOC_166670 | ENSRNOT00000064798  | 0.959368791  | 8.15E-07 |
| TUCP_003811 | XLOC_166670 | ENSRNOT00000015495  | -0.952039838 | 1.84E-06 |
| TUCP_003811 | XLOC_166670 | ENSRNOT00000032248  | 0.969251187  | 2.06E-07 |
| TUCP_003811 | XLOC_166670 | ENSRNOT00000019911  | -0.955577893 | 1.26E-06 |
| TUCP_003811 | XLOC_166670 | ENSRNOT00000040393  | 0.97682869   | 5.06E-08 |
| TUCP_003811 | XLOC_166670 | ENSRNOT00000032236  | -0.951526245 | 1.94E-06 |
| TUCP_003811 | XLOC_166670 | ENSRNOT00000067901  | -0.971247014 | 1.47E-07 |

|             |             |                    |              |          |
|-------------|-------------|--------------------|--------------|----------|
| TUCP_003811 | XLOC_166670 | ENSRNOT00000012286 | -0.951936001 | 1.86E-06 |
| TUCP_003811 | XLOC_166670 | ENSRNOT00000021674 | 0.96199546   | 5.86E-07 |
| TUCP_003811 | XLOC_166670 | ENSRNOT00000064700 | 0.96536516   | 3.70E-07 |
| TUCP_003811 | XLOC_166670 | ENSRNOT00000036613 | -0.980330806 | 2.24E-08 |
| TUCP_003811 | XLOC_166670 | ENSRNOT00000028876 | -0.954102166 | 1.48E-06 |
| TUCP_003811 | XLOC_166670 | ENSRNOT00000025705 | 0.966775355  | 3.02E-07 |
| TUCP_003811 | XLOC_166670 | ENSRNOT00000019983 | -0.957341668 | 1.04E-06 |
| TUCP_003811 | XLOC_166670 | ENSRNOT00000004140 | 0.959012503  | 8.50E-07 |
| TUCP_003811 | XLOC_166670 | ENSRNOT00000008113 | -0.959815303 | 7.71E-07 |
| TUCP_003811 | XLOC_166670 | ENSRNOT00000022552 | -0.955558285 | 1.27E-06 |
| TUCP_003811 | XLOC_166670 | ENSRNOT00000036194 | -0.952649144 | 1.73E-06 |
| TUCP_003811 | XLOC_166670 | ENSRNOT00000086590 | 0.951728436  | 1.90E-06 |
| TUCP_003811 | XLOC_166670 | ENSRNOT00000048910 | -0.959397067 | 8.12E-07 |
| TUCP_003811 | XLOC_166670 | ENSRNOT00000009645 | -0.950307478 | 2.19E-06 |
| TUCP_003811 | XLOC_166670 | ENSRNOT00000026279 | -0.965611123 | 3.58E-07 |
| TUCP_003811 | XLOC_166670 | ENSRNOT00000082508 | -0.965930298 | 3.41E-07 |
| TUCP_003811 | XLOC_166670 | ENSRNOT00000082863 | 0.970270195  | 1.74E-07 |
| TUCP_003811 | XLOC_166670 | ENSRNOT00000049459 | -0.958728062 | 8.80E-07 |
| TUCP_003811 | XLOC_166670 | ENSRNOT00000014309 | -0.953003013 | 1.67E-06 |
| TUCP_003811 | XLOC_166670 | ENSRNOT00000071166 | 0.96003063   | 7.51E-07 |
| TUCP_003811 | XLOC_166670 | ENSRNOT00000074389 | -0.952849892 | 1.70E-06 |
| TUCP_003811 | XLOC_166670 | ENSRNOT00000028646 | 0.952396951  | 1.78E-06 |
| TUCP_003811 | XLOC_166670 | ENSRNOT00000066204 | -0.961590471 | 6.17E-07 |
| TUCP_003811 | XLOC_166670 | ENSRNOT00000039836 | -0.952099803 | 1.83E-06 |
| TUCP_003811 | XLOC_166670 | ENSRNOT00000009496 | 0.950191661  | 2.22E-06 |
| TUCP_003811 | XLOC_166670 | ENSRNOT00000076872 | 0.955136137  | 1.33E-06 |
| TUCP_003811 | XLOC_166670 | ENSRNOT00000073564 | -0.961944927 | 5.90E-07 |
| TUCP_003811 | XLOC_166670 | ENSRNOT00000001507 | 0.960039653  | 7.50E-07 |
| TUCP_003811 | XLOC_166670 | ENSRNOT00000083568 | 0.969572772  | 1.95E-07 |
| TUCP_003811 | XLOC_166670 | ENSRNOT00000039177 | -0.957835409 | 9.78E-07 |
| TUCP_003811 | XLOC_166670 | ENSRNOT00000081047 | 0.982138007  | 1.39E-08 |
| TUCP_003811 | XLOC_166670 | ENSRNOT0000002837  | -0.967901952 | 2.54E-07 |
| TUCP_003811 | XLOC_166670 | ENSRNOT00000037456 | 0.963575881  | 4.75E-07 |
| TUCP_003811 | XLOC_166670 | ENSRNOT00000012881 | -0.964391924 | 4.25E-07 |
| TUCP_003811 | XLOC_166670 | ENSRNOT00000000577 | 0.961673222  | 6.11E-07 |
| TUCP_003811 | XLOC_166670 | ENSRNOT00000075424 | 0.954362827  | 1.44E-06 |
| TUCP_003811 | XLOC_166670 | ENSRNOT00000041513 | 0.955878995  | 1.22E-06 |
| TUCP_003811 | XLOC_166670 | ENSRNOT00000023989 | 0.963529444  | 4.78E-07 |
| TUCP_003811 | XLOC_166670 | ENSRNOT00000088133 | -0.968401669 | 2.35E-07 |
| TUCP_003811 | XLOC_166670 | ENSRNOT00000080677 | -0.968867276 | 2.19E-07 |
| TUCP_003811 | XLOC_166670 | ENSRNOT00000037039 | -0.965010603 | 3.89E-07 |
| TUCP_003811 | XLOC_166670 | ENSRNOT00000007824 | -0.956839367 | 1.10E-06 |
| TUCP_003811 | XLOC_166670 | ENSRNOT00000003714 | 0.96222688   | 5.68E-07 |
| TUCP_003811 | XLOC_166670 | ENSRNOT00000083968 | -0.9521068   | 1.83E-06 |
| TUCP_003811 | XLOC_166670 | ENSRNOT00000037133 | 0.968370066  | 2.36E-07 |
| TUCP_003811 | XLOC_166670 | ENSRNOT00000024119 | 0.961757315  | 6.04E-07 |
| TUCP_003811 | XLOC_166670 | ENSRNOT00000083964 | -0.965524975 | 3.62E-07 |
| TUCP_003811 | XLOC_166670 | ENSRNOT00000075452 | 0.952652426  | 1.73E-06 |
| TUCP_003811 | XLOC_166670 | ENSRNOT00000061304 | -0.957757257 | 9.87E-07 |
| TUCP_003811 | XLOC_166670 | ENSRNOT00000032363 | 0.963551796  | 4.77E-07 |
| TUCP_003811 | XLOC_166670 | ENSRNOT00000016445 | 0.960079416  | 7.47E-07 |

|             |             |                     |              |          |
|-------------|-------------|---------------------|--------------|----------|
| TUCP_003811 | XLOC_166670 | ENSRNOT00000019133  | 0.974682457  | 7.85E-08 |
| TUCP_003811 | XLOC_166670 | ENSRNOT00000078185  | -0.950702933 | 2.11E-06 |
| TUCP_003811 | XLOC_166670 | ENSRNOT00000002151  | -0.952494746 | 1.76E-06 |
| TUCP_003811 | XLOC_166670 | ENSRNOT00000002187  | -0.951541653 | 1.94E-06 |
| TUCP_003811 | XLOC_166670 | ENSRNOT00000002152  | -0.950253162 | 2.21E-06 |
| TUCP_003811 | XLOC_166670 | ENSRNOT00000006824  | -0.962341645 | 5.60E-07 |
| TUCP_003811 | XLOC_166670 | ENSRNOT00000012775  | -0.950853853 | 2.08E-06 |
| TUCP_003811 | XLOC_166670 | ENSRNOT00000086260  | -0.956479899 | 1.14E-06 |
| TUCP_003811 | XLOC_166670 | ENSRNOT00000018328  | -0.952015419 | 1.85E-06 |
| TUCP_003811 | XLOC_166670 | ENSRNOT00000061392  | 0.97461189   | 7.96E-08 |
| TUCP_003811 | XLOC_166670 | ENSRNOT00000044608  | -0.96437765  | 4.26E-07 |
| TUCP_003811 | XLOC_166670 | ENSRNOT00000001099  | -0.953183321 | 1.64E-06 |
| TUCP_003811 | XLOC_166670 | ENSRNOT00000090123  | 0.959961929  | 7.58E-07 |
| TUCP_003811 | XLOC_166670 | ENSRNOT00000010683  | -0.956814    | 1.10E-06 |
| TUCP_003811 | XLOC_166670 | ENSRNOT00000045488  | 0.952290154  | 1.80E-06 |
| TUCP_003811 | XLOC_166670 | ENSRNOT00000050119  | -0.950323665 | 2.19E-06 |
| TUCP_003811 | XLOC_166670 | ENSRNOT00000090853  | -0.959728982 | 7.80E-07 |
| TUCP_003811 | XLOC_166670 | ENSRNOT00000093174  | 0.952856981  | 1.69E-06 |
| TUCP_003811 | XLOC_166670 | ENSRNOT00000089211  | 0.968475007  | 2.33E-07 |
| TUCP_003811 | XLOC_166670 | ENSRNOT00000020383  | 0.957912613  | 9.69E-07 |
| TUCP_003811 | XLOC_166670 | ENSRNOT00000015518  | -0.956657583 | 1.12E-06 |
| TUCP_003811 | XLOC_166670 | ENSRNOT00000000302  | 0.974061743  | 8.85E-08 |
| TUCP_003811 | XLOC_166670 | ENSRNOT00000055602  | -0.961327249 | 6.38E-07 |
| TUCP_003811 | XLOC_166670 | ENSRNOT00000015092  | 0.964835009  | 3.99E-07 |
| TUCP_003811 | XLOC_166670 | ENSRNOT00000004290  | 0.953768679  | 1.54E-06 |
| TUCP_003811 | XLOC_166670 | ENSRNOT00000017181  | -0.954450119 | 1.43E-06 |
| TUCP_003811 | XLOC_166670 | ENSRNOT00000005909  | 0.959360819  | 8.15E-07 |
| TUCP_003811 | XLOC_166670 | ENSRNOT00000049725  | -0.95469348  | 1.39E-06 |
| TUCP_003811 | XLOC_166670 | ENSRNOT00000086122  | 0.963481197  | 4.81E-07 |
| TUCP_003811 | XLOC_166670 | ENSRNOT00000026235  | -0.957199063 | 1.05E-06 |
| TUCP_003811 | XLOC_166670 | ENSRNOT00000010753  | -0.951532295 | 1.94E-06 |
| TUCP_003811 | XLOC_166670 | ENSRNOT00000023763  | -0.959835892 | 7.69E-07 |
| TUCP_003811 | XLOC_166670 | ENSRNOT00000091596  | -0.954290451 | 1.46E-06 |
| TUCP_003811 | XLOC_166670 | ENSRNOT00000003940  | -0.969729129 | 1.90E-07 |
| TUCP_003811 | XLOC_166670 | ENSRNOT00000058842  | 0.956519693  | 1.14E-06 |
| TUCP_003811 | XLOC_166670 | ENSRNOT00000042799  | 0.959277271  | 8.24E-07 |
| TUCP_003811 | XLOC_166670 | ENSRNOT00000059181  | 0.966669425  | 3.06E-07 |
| TUCP_003811 | XLOC_166670 | ENSRNOT00000017291  | -0.959390999 | 8.12E-07 |
| TUCP_003811 | XLOC_166670 | ENSRNOT00000003691  | -0.972511342 | 1.18E-07 |
| TUCP_003811 | XLOC_166670 | ENSRNOT00000003690  | 0.95541688   | 1.29E-06 |
| TUCP_003811 | XLOC_166670 | ENSRNOT00000038807  | 0.96220546   | 5.70E-07 |
| TUCP_003811 | XLOC_166670 | ENSRNOT00000036931  | -0.9500356   | 2.25E-06 |
| TUCP_003811 | XLOC_166670 | ENSRNOT00000008901  | -0.972171245 | 1.25E-07 |
| TUCP_003811 | XLOC_166670 | ENSRNOT00000005659  | 0.958392531  | 9.16E-07 |
| TUCP_003811 | XLOC_166670 | ENSRNOT000000081077 | -0.954837447 | 1.37E-06 |
| TUCP_003811 | XLOC_166670 | ENSRNOT00000017761  | 0.97564551   | 6.48E-08 |
| TUCP_003811 | XLOC_166670 | ENSRNOT00000023543  | -0.95806395  | 9.52E-07 |
| TUCP_003811 | XLOC_166670 | ENSRNOT00000026691  | 0.953130447  | 1.65E-06 |
| TUCP_003811 | XLOC_166670 | ENSRNOT00000080608  | 0.979200732  | 2.96E-08 |
| TUCP_003811 | XLOC_166670 | ENSRNOT00000008757  | 0.951192578  | 2.01E-06 |
| TUCP_003811 | XLOC_166670 | ENSRNOT00000005478  | -0.952741312 | 1.71E-06 |



|             |             |                    |              |          |
|-------------|-------------|--------------------|--------------|----------|
| TUCP_003811 | XLOC_166670 | ENSRNOT00000016740 | 0.950083489  | 2.24E-06 |
| TUCP_003811 | XLOC_166670 | ENSRNOT00000080695 | 0.973381101  | 1.01E-07 |
| TUCP_003811 | XLOC_166670 | ENSRNOT00000039341 | 0.963452458  | 4.83E-07 |
| TUCP_003811 | XLOC_166670 | ENSRNOT00000055386 | 0.963019311  | 5.12E-07 |
| TUCP_003811 | XLOC_166670 | ENSRNOT00000038212 | -0.963671149 | 4.69E-07 |
| TUCP_003811 | XLOC_166670 | ENSRNOT00000085519 | 0.954770876  | 1.38E-06 |
| TUCP_003811 | XLOC_166670 | ENSRNOT00000042125 | 0.995890479  | 9.17E-12 |
| TUCP_003811 | XLOC_166670 | ENSRNOT00000025460 | 0.952925813  | 1.68E-06 |
| TUCP_003811 | XLOC_166670 | ENSRNOT00000026760 | -0.972017747 | 1.29E-07 |
| TUCP_003811 | XLOC_166670 | ENSRNOT00000017687 | -0.955077716 | 1.34E-06 |
| TUCP_003811 | XLOC_166670 | ENSRNOT00000024491 | -0.967503851 | 2.70E-07 |
| TUCP_003811 | XLOC_166670 | ENSRNOT00000084597 | -0.95180094  | 1.89E-06 |
| TUCP_003811 | XLOC_166670 | ENSRNOT00000016568 | 0.956652144  | 1.12E-06 |
| TUCP_003811 | XLOC_166670 | ENSRNOT00000024947 | -0.962860134 | 5.23E-07 |
| TUCP_003811 | XLOC_166670 | ENSRNOT00000027967 | 0.968636704  | 2.27E-07 |
| TUCP_003811 | XLOC_166670 | ENSRNOT00000047210 | 0.974477617  | 8.17E-08 |
| TUCP_003811 | XLOC_166670 | ENSRNOT00000080110 | 0.955221378  | 1.31E-06 |
| TUCP_003811 | XLOC_166670 | ENSRNOT00000083957 | 0.966323261  | 3.22E-07 |
| TUCP_003811 | XLOC_166670 | ENSRNOT00000046639 | 0.953211929  | 1.63E-06 |
| TUCP_003811 | XLOC_166670 | ENSRNOT00000005885 | -0.955911247 | 1.22E-06 |
| TUCP_003811 | XLOC_166670 | ENSRNOT00000079996 | 0.963482645  | 4.81E-07 |
| TUCP_004754 | XLOC_209508 | ENSRNOT00000092105 | 0.988121184  | 1.83E-09 |
| TUCP_004754 | XLOC_209508 | ENSRNOT00000031076 | 0.983495451  | 9.38E-09 |
| TUCP_004754 | XLOC_209508 | ENSRNOT00000072306 | 0.991887782  | 2.73E-10 |
| TUCP_004754 | XLOC_209508 | ENSRNOT00000087907 | 0.992484443  | 1.86E-10 |
| TUCP_004754 | XLOC_209508 | ENSRNOT00000000215 | 0.982052617  | 1.42E-08 |
| TUCP_004754 | XLOC_209508 | ENSRNOT00000078672 | 0.988728213  | 1.41E-09 |
| TUCP_004756 | XLOC_209565 | ENSRNOT00000040509 | 0.976031179  | 5.98E-08 |
| TUCP_004756 | XLOC_209565 | ENSRNOT00000012170 | 0.951059759  | 2.04E-06 |
| TUCP_004756 | XLOC_209565 | ENSRNOT00000089396 | 0.960864385  | 6.77E-07 |
| TUCP_004757 | XLOC_209565 | ENSRNOT00000072396 | 0.950286685  | 2.20E-06 |
| TUCP_002086 | XLOC_085776 | ENSRNOT00000039729 | 0.969774204  | 1.89E-07 |
| TUCP_002086 | XLOC_085776 | ENSRNOT00000027891 | 0.977877471  | 4.02E-08 |
| TUCP_002086 | XLOC_085776 | ENSRNOT00000055127 | 0.955539129  | 1.27E-06 |
| TUCP_002086 | XLOC_085776 | ENSRNOT00000066764 | 0.967946968  | 2.52E-07 |
| TUCP_002086 | XLOC_085776 | ENSRNOT00000026677 | 0.951743914  | 1.90E-06 |
| TUCP_002086 | XLOC_085776 | ENSRNOT00000019311 | 0.961561262  | 6.20E-07 |
| TUCP_002086 | XLOC_085776 | ENSRNOT00000021816 | 0.951505077  | 1.95E-06 |
| TUCP_002086 | XLOC_085776 | ENSRNOT00000003320 | 0.974583089  | 8.01E-08 |
| TUCP_002086 | XLOC_085776 | ENSRNOT00000083702 | 0.987190815  | 2.66E-09 |
| TUCP_002086 | XLOC_085776 | ENSRNOT00000028067 | 0.960657895  | 6.95E-07 |
| TUCP_002086 | XLOC_085776 | ENSRNOT00000000640 | 0.96103747   | 6.62E-07 |
| TUCP_002086 | XLOC_085776 | ENSRNOT00000028007 | 0.983473551  | 9.44E-09 |
| TUCP_002086 | XLOC_085776 | ENSRNOT00000092857 | 0.950797479  | 2.09E-06 |
| TUCP_002086 | XLOC_085776 | ENSRNOT00000007358 | 0.965280729  | 3.75E-07 |
| TUCP_002086 | XLOC_085776 | ENSRNOT00000084429 | 0.954620381  | 1.40E-06 |
| TUCP_002086 | XLOC_085776 | ENSRNOT00000055888 | 0.951528876  | 1.94E-06 |
| TUCP_002086 | XLOC_085776 | ENSRNOT00000004637 | 0.970815752  | 1.59E-07 |
| TUCP_002086 | XLOC_085776 | ENSRNOT00000020475 | 0.950265717  | 2.20E-06 |
| TUCP_002086 | XLOC_085776 | ENSRNOT00000010079 | 0.953672653  | 1.55E-06 |
| TUCP_002086 | XLOC_085776 | ENSRNOT00000056551 | 0.950791964  | 2.09E-06 |

|             |             |                    |              |          |
|-------------|-------------|--------------------|--------------|----------|
| TUCP_002086 | XLOC_085776 | ENSRNOT00000066618 | 0.950431827  | 2.17E-06 |
| TUCP_002086 | XLOC_085776 | ENSRNOT00000045139 | 0.950060453  | 2.25E-06 |
| TUCP_002086 | XLOC_085776 | ENSRNOT00000015576 | 0.961151646  | 6.53E-07 |
| TUCP_002086 | XLOC_085776 | ENSRNOT00000090186 | 0.96866894   | 2.26E-07 |
| TUCP_002086 | XLOC_085776 | ENSRNOT00000057016 | 0.952822372  | 1.70E-06 |
| TUCP_002086 | XLOC_085776 | ENSRNOT00000022253 | 0.969158686  | 2.09E-07 |
| TUCP_002086 | XLOC_085776 | ENSRNOT00000022373 | 0.952956149  | 1.68E-06 |
| TUCP_002086 | XLOC_085776 | ENSRNOT00000056995 | 0.976835667  | 5.05E-08 |
| TUCP_002086 | XLOC_085776 | ENSRNOT00000080900 | 0.95049251   | 2.15E-06 |
| TUCP_002086 | XLOC_085776 | ENSRNOT00000033719 | 0.956907542  | 1.09E-06 |
| TUCP_002086 | XLOC_085776 | ENSRNOT00000011134 | 0.968911509  | 2.17E-07 |
| TUCP_002086 | XLOC_085776 | ENSRNOT00000088553 | 0.951187718  | 2.01E-06 |
| TUCP_002086 | XLOC_085776 | ENSRNOT00000091499 | 0.97442693   | 8.25E-08 |
| TUCP_002086 | XLOC_085776 | ENSRNOT00000032782 | -0.953991193 | 1.50E-06 |
| TUCP_002086 | XLOC_085776 | ENSRNOT00000081893 | 0.963197382  | 5.00E-07 |
| TUCP_002086 | XLOC_085776 | ENSRNOT00000039005 | 0.960651833  | 6.95E-07 |
| TUCP_002086 | XLOC_085776 | ENSRNOT00000001570 | 0.951531588  | 1.94E-06 |
| TUCP_002086 | XLOC_085776 | ENSRNOT00000004320 | 0.953286574  | 1.62E-06 |
| TUCP_002086 | XLOC_085776 | ENSRNOT00000019361 | 0.962719507  | 5.33E-07 |
| TUCP_002086 | XLOC_085776 | ENSRNOT00000082645 | 0.96392033   | 4.53E-07 |
| TUCP_002086 | XLOC_085776 | ENSRNOT00000065288 | 0.954337238  | 1.45E-06 |
| TUCP_002086 | XLOC_085776 | ENSRNOT00000014912 | 0.954394585  | 1.44E-06 |
| TUCP_002086 | XLOC_085776 | ENSRNOT00000090867 | 0.963829483  | 4.59E-07 |
| TUCP_002086 | XLOC_085776 | ENSRNOT00000029990 | 0.953229008  | 1.63E-06 |
| TUCP_002086 | XLOC_085776 | ENSRNOT00000035523 | 0.951517248  | 1.94E-06 |
| TUCP_002086 | XLOC_085776 | ENSRNOT00000017878 | 0.990177982  | 7.08E-10 |
| TUCP_002086 | XLOC_085776 | ENSRNOT00000092211 | 0.957436134  | 1.02E-06 |
| TUCP_002086 | XLOC_085776 | ENSRNOT00000023504 | 0.958838188  | 8.68E-07 |
| TUCP_002086 | XLOC_085776 | ENSRNOT00000028423 | 0.964100708  | 4.42E-07 |
| TUCP_002086 | XLOC_085776 | ENSRNOT00000033984 | 0.953370317  | 1.61E-06 |
| TUCP_002086 | XLOC_085776 | ENSRNOT00000006246 | 0.968233996  | 2.42E-07 |
| TUCP_002086 | XLOC_085776 | ENSRNOT00000030344 | 0.957834283  | 9.78E-07 |
| TUCP_002086 | XLOC_085776 | ENSRNOT00000011481 | 0.983524483  | 9.30E-09 |
| TUCP_002086 | XLOC_085776 | ENSRNOT00000086390 | 0.95650414   | 1.14E-06 |
| TUCP_002086 | XLOC_085776 | ENSRNOT00000049536 | 0.956404567  | 1.15E-06 |
| TUCP_002086 | XLOC_085776 | ENSRNOT00000044319 | 0.955320951  | 1.30E-06 |
| TUCP_002086 | XLOC_085776 | ENSRNOT00000086459 | 0.964810239  | 4.01E-07 |
| TUCP_002086 | XLOC_085776 | ENSRNOT00000027949 | 0.956630195  | 1.12E-06 |
| TUCP_002086 | XLOC_085776 | ENSRNOT00000073952 | 0.954753518  | 1.38E-06 |
| TUCP_002086 | XLOC_085776 | ENSRNOT00000036753 | 0.964758186  | 4.04E-07 |
| TUCP_002086 | XLOC_085776 | ENSRNOT00000010673 | 0.969657343  | 1.92E-07 |
| TUCP_002086 | XLOC_085776 | ENSRNOT00000080956 | 0.95379459   | 1.53E-06 |
| TUCP_002086 | XLOC_085776 | ENSRNOT00000026331 | 0.9614872    | 6.25E-07 |
| TUCP_002086 | XLOC_085776 | ENSRNOT00000039377 | 0.951823387  | 1.88E-06 |
| TUCP_002086 | XLOC_085776 | ENSRNOT00000081036 | 0.952327605  | 1.79E-06 |
| TUCP_002086 | XLOC_085776 | ENSRNOT00000050656 | 0.979045352  | 3.07E-08 |
| TUCP_002086 | XLOC_085776 | ENSRNOT00000009840 | 0.969571983  | 1.95E-07 |
| TUCP_002086 | XLOC_085776 | ENSRNOT00000032015 | 0.956842687  | 1.10E-06 |
| TUCP_002086 | XLOC_085776 | ENSRNOT00000013904 | 0.961691537  | 6.09E-07 |
| TUCP_002086 | XLOC_085776 | ENSRNOT00000057992 | 0.965396268  | 3.69E-07 |
| TUCP_002086 | XLOC_085776 | ENSRNOT00000044254 | 0.95317367   | 1.64E-06 |

|             |             |                    |              |          |
|-------------|-------------|--------------------|--------------|----------|
| TUCP_002086 | XLOC_085776 | ENSRNOT0000002936  | 0.989203282  | 1.13E-09 |
| TUCP_002086 | XLOC_085776 | ENSRNOT00000054757 | 0.954682607  | 1.39E-06 |
| TUCP_000755 | XLOC_028292 | ENSRNOT00000083701 | 0.953207531  | 1.63E-06 |
| TUCP_002084 | XLOC_085596 | ENSRNOT00000018693 | 0.953010849  | 1.67E-06 |
| TUCP_002085 | XLOC_085612 | ENSRNOT00000090831 | 0.954379722  | 1.44E-06 |
| TUCP_000619 | XLOC_022408 | ENSRNOT00000073559 | 0.955798144  | 1.23E-06 |
| TUCP_000619 | XLOC_022408 | ENSRNOT00000081246 | 0.974459917  | 8.20E-08 |
| TUCP_000619 | XLOC_022408 | ENSRNOT00000080768 | 0.95697946   | 1.08E-06 |
| TUCP_000619 | XLOC_022408 | ENSRNOT00000072241 | 0.952258902  | 1.80E-06 |
| TUCP_000619 | XLOC_022408 | ENSRNOT0000007351  | -0.958869257 | 8.65E-07 |
| TUCP_000619 | XLOC_022408 | ENSRNOT00000021851 | 0.95959849   | 7.92E-07 |
| TUCP_000619 | XLOC_022408 | ENSRNOT00000023989 | 0.953835567  | 1.53E-06 |
| TUCP_000619 | XLOC_022408 | ENSRNOT00000035346 | -0.960360227 | 7.21E-07 |
| TUCP_000619 | XLOC_022408 | ENSRNOT00000021614 | 0.95624672   | 1.17E-06 |
| TUCP_000619 | XLOC_022408 | ENSRNOT0000003991  | 0.95662781   | 1.12E-06 |
| TUCP_000619 | XLOC_022408 | ENSRNOT0000004032  | 0.962305486  | 5.63E-07 |
| TUCP_000619 | XLOC_022408 | ENSRNOT00000063956 | 0.964295771  | 4.30E-07 |
| TUCP_000619 | XLOC_022408 | ENSRNOT00000076763 | 0.976124685  | 5.87E-08 |
| TUCP_000619 | XLOC_022408 | ENSRNOT00000043216 | 0.95371445   | 1.55E-06 |
| TUCP_000619 | XLOC_022408 | ENSRNOT00000027411 | 0.957658389  | 9.98E-07 |
| TUCP_000619 | XLOC_022408 | ENSRNOT00000073526 | 0.965430543  | 3.67E-07 |
| TUCP_000619 | XLOC_022408 | ENSRNOT00000066526 | 0.953339431  | 1.61E-06 |
| TUCP_000619 | XLOC_022408 | ENSRNOT00000012048 | 0.979005789  | 3.10E-08 |
| TUCP_000619 | XLOC_022408 | ENSRNOT00000027194 | 0.951298725  | 1.99E-06 |
| TUCP_000619 | XLOC_022408 | ENSRNOT00000045882 | 0.953301083  | 1.62E-06 |
| TUCP_000619 | XLOC_022408 | ENSRNOT00000058072 | 0.970711356  | 1.62E-07 |
| TUCP_000619 | XLOC_022408 | ENSRNOT00000075558 | 0.960146814  | 7.40E-07 |
| TUCP_000619 | XLOC_022408 | ENSRNOT00000029866 | 0.981946373  | 1.47E-08 |
| TUCP_000619 | XLOC_022408 | ENSRNOT00000019923 | 0.969753518  | 1.89E-07 |
| TUCP_000619 | XLOC_022408 | ENSRNOT00000029439 | 0.972535878  | 1.18E-07 |
| TUCP_000619 | XLOC_022408 | ENSRNOT00000045285 | 0.973436203  | 9.96E-08 |
| TUCP_000619 | XLOC_022408 | ENSRNOT00000028759 | 0.954310856  | 1.45E-06 |
| TUCP_000619 | XLOC_022408 | ENSRNOT00000021650 | 0.952516529  | 1.76E-06 |
| TUCP_000619 | XLOC_022408 | ENSRNOT00000072592 | 0.950251306  | 2.21E-06 |
| TUCP_000619 | XLOC_022408 | ENSRNOT00000076453 | 0.955908842  | 1.22E-06 |
| TUCP_000619 | XLOC_022408 | ENSRNOT0000000157  | 0.962564927  | 5.44E-07 |
| TUCP_000618 | XLOC_022357 | ENSRNOT00000043917 | 0.958830566  | 8.69E-07 |
| TUCP_000618 | XLOC_022357 | ENSRNOT00000092974 | 0.961878929  | 5.95E-07 |
| TUCP_000618 | XLOC_022357 | ENSRNOT00000021320 | 0.972922392  | 1.10E-07 |
| TUCP_002080 | XLOC_085316 | ENSRNOT00000013913 | 0.951133143  | 2.02E-06 |
| TUCP_002080 | XLOC_085316 | ENSRNOT00000018543 | 0.951449387  | 1.96E-06 |
| TUCP_002080 | XLOC_085316 | ENSRNOT00000083255 | 0.960207397  | 7.35E-07 |
| TUCP_002080 | XLOC_085316 | ENSRNOT00000089783 | 0.964653474  | 4.09E-07 |
| TUCP_002080 | XLOC_085316 | ENSRNOT00000090925 | 0.967343738  | 2.77E-07 |
| TUCP_002080 | XLOC_085316 | ENSRNOT00000054980 | 0.96452988   | 4.17E-07 |
| TUCP_002080 | XLOC_085316 | ENSRNOT00000005934 | 0.95557881   | 1.26E-06 |
| TUCP_002080 | XLOC_085316 | ENSRNOT00000066028 | 0.959539789  | 7.98E-07 |
| TUCP_002080 | XLOC_085316 | ENSRNOT00000074659 | 0.953422048  | 1.60E-06 |
| TUCP_002080 | XLOC_085316 | ENSRNOT00000024601 | 0.960797977  | 6.83E-07 |
| TUCP_002080 | XLOC_085316 | ENSRNOT00000009328 | 0.964928205  | 3.94E-07 |
| TUCP_002080 | XLOC_085316 | ENSRNOT00000087625 | 0.95505484   | 1.34E-06 |

|             |             |                     |              |          |
|-------------|-------------|---------------------|--------------|----------|
| TUCP_002080 | XLOC_085316 | ENSRNOT00000024771  | 0.958711998  | 8.82E-07 |
| TUCP_002080 | XLOC_085316 | ENSRNOT00000049474  | 0.972785255  | 1.12E-07 |
| TUCP_002080 | XLOC_085316 | ENSRNOT00000023710  | 0.954677254  | 1.40E-06 |
| TUCP_002080 | XLOC_085316 | ENSRNOT00000028185  | 0.954467664  | 1.43E-06 |
| TUCP_002080 | XLOC_085316 | ENSRNOT00000068037  | 0.956472856  | 1.14E-06 |
| TUCP_002080 | XLOC_085316 | ENSRNOT00000016490  | 0.950262907  | 2.20E-06 |
| TUCP_002080 | XLOC_085316 | ENSRNOT00000080654  | 0.969398441  | 2.01E-07 |
| TUCP_002080 | XLOC_085316 | ENSRNOT00000009497  | 0.960765158  | 6.85E-07 |
| TUCP_002080 | XLOC_085316 | ENSRNOT00000004003  | 0.952182774  | 1.82E-06 |
| TUCP_002080 | XLOC_085316 | ENSRNOT000000058160 | 0.960370631  | 7.20E-07 |
| TUCP_002080 | XLOC_085316 | ENSRNOT00000043554  | 0.950361916  | 2.18E-06 |
| TUCP_002080 | XLOC_085316 | ENSRNOT00000079483  | 0.96313325   | 5.04E-07 |
| TUCP_002080 | XLOC_085316 | ENSRNOT00000000713  | 0.951971912  | 1.86E-06 |
| TUCP_002080 | XLOC_085316 | ENSRNOT00000070812  | 0.95265377   | 1.73E-06 |
| TUCP_002080 | XLOC_085316 | ENSRNOT00000022862  | 0.955723999  | 1.24E-06 |
| TUCP_002080 | XLOC_085316 | ENSRNOT0000002289   | 0.958465166  | 9.08E-07 |
| TUCP_002080 | XLOC_085316 | ENSRNOT00000032158  | 0.951339972  | 1.98E-06 |
| TUCP_002080 | XLOC_085316 | ENSRNOT00000028927  | 0.959243317  | 8.27E-07 |
| TUCP_002080 | XLOC_085316 | ENSRNOT00000050364  | 0.959277139  | 8.24E-07 |
| TUCP_002080 | XLOC_085316 | ENSRNOT00000027809  | 0.953700401  | 1.55E-06 |
| TUCP_002080 | XLOC_085316 | ENSRNOT00000027684  | 0.961776359  | 6.03E-07 |
| TUCP_002080 | XLOC_085316 | ENSRNOT00000046251  | 0.957216831  | 1.05E-06 |
| TUCP_002080 | XLOC_085316 | ENSRNOT00000087697  | 0.951795003  | 1.89E-06 |
| TUCP_002080 | XLOC_085316 | ENSRNOT00000008350  | 0.956818831  | 1.10E-06 |
| TUCP_002080 | XLOC_085316 | ENSRNOT00000001242  | 0.950951995  | 2.06E-06 |
| TUCP_002080 | XLOC_085316 | ENSRNOT00000008573  | 0.956933803  | 1.09E-06 |
| TUCP_002081 | XLOC_085316 | ENSRNOT00000091609  | 0.96302074   | 5.12E-07 |
| TUCP_002081 | XLOC_085316 | ENSRNOT00000071251  | 0.951834846  | 1.88E-06 |
| TUCP_002081 | XLOC_085316 | ENSRNOT00000002907  | 0.966467346  | 3.16E-07 |
| TUCP_002365 | XLOC_099421 | ENSRNOT00000021833  | -0.970895759 | 1.57E-07 |
| TUCP_002365 | XLOC_099421 | ENSRNOT00000009817  | 0.951190382  | 2.01E-06 |
| TUCP_002365 | XLOC_099421 | ENSRNOT00000026396  | 0.959875212  | 7.66E-07 |
| TUCP_002365 | XLOC_099421 | ENSRNOT00000027234  | -0.950686373 | 2.11E-06 |
| TUCP_002365 | XLOC_099421 | ENSRNOT00000002222  | -0.951166034 | 2.01E-06 |
| TUCP_002365 | XLOC_099421 | ENSRNOT00000071540  | -0.953740619 | 1.54E-06 |
| TUCP_002365 | XLOC_099421 | ENSRNOT00000031458  | -0.958228123 | 9.34E-07 |
| TUCP_002365 | XLOC_099421 | ENSRNOT00000071737  | 0.95688688   | 1.09E-06 |
| TUCP_002365 | XLOC_099421 | ENSRNOT00000078349  | 0.950273242  | 2.20E-06 |
| TUCP_002365 | XLOC_099421 | ENSRNOT00000045545  | 0.953561871  | 1.57E-06 |
| TUCP_002365 | XLOC_099421 | ENSRNOT00000064902  | -0.950813805 | 2.09E-06 |
| TUCP_002365 | XLOC_099421 | ENSRNOT00000023807  | 0.951481858  | 1.95E-06 |
| TUCP_002365 | XLOC_099421 | ENSRNOT00000067135  | 0.953932164  | 1.51E-06 |
| TUCP_002365 | XLOC_099421 | ENSRNOT00000071853  | 0.957704363  | 9.93E-07 |
| TUCP_002365 | XLOC_099421 | ENSRNOT00000074985  | 0.954134038  | 1.48E-06 |
| TUCP_002365 | XLOC_099421 | ENSRNOT00000065983  | -0.952113187 | 1.83E-06 |
| TUCP_002365 | XLOC_099421 | ENSRNOT00000067901  | 0.95078989   | 2.09E-06 |
| TUCP_002365 | XLOC_099421 | ENSRNOT00000067840  | -0.953923585 | 1.51E-06 |
| TUCP_002365 | XLOC_099421 | ENSRNOT00000009225  | 0.955129879  | 1.33E-06 |
| TUCP_002365 | XLOC_099421 | ENSRNOT00000022924  | 0.950633949  | 2.12E-06 |
| TUCP_002365 | XLOC_099421 | ENSRNOT00000079895  | -0.952077648 | 1.84E-06 |
| TUCP_002365 | XLOC_099421 | ENSRNOT00000009634  | 0.969988515  | 1.82E-07 |

|             |             |                    |              |          |
|-------------|-------------|--------------------|--------------|----------|
| TUCP_002362 | XLOC_099421 | ENSRNOT00000066250 | -0.955808813 | 1.23E-06 |
| TUCP_000613 | XLOC_022053 | ENSRNOT00000027644 | 0.958631026  | 8.90E-07 |
| TUCP_000613 | XLOC_022053 | ENSRNOT00000016083 | 0.950746458  | 2.10E-06 |
| TUCP_000613 | XLOC_022053 | ENSRNOT00000067375 | 0.971466718  | 1.42E-07 |
| TUCP_000613 | XLOC_022053 | ENSRNOT00000049349 | -0.974731347 | 7.78E-08 |
| TUCP_000613 | XLOC_022053 | ENSRNOT00000089313 | 0.968548997  | 2.30E-07 |
| TUCP_000613 | XLOC_022053 | ENSRNOT00000078737 | 0.953489604  | 1.59E-06 |
| TUCP_000613 | XLOC_022053 | ENSRNOT00000078326 | 0.956302331  | 1.17E-06 |
| TUCP_000613 | XLOC_022053 | ENSRNOT00000007851 | 0.969778104  | 1.89E-07 |
| TUCP_000613 | XLOC_022053 | ENSRNOT00000014063 | 0.963659267  | 4.70E-07 |
| TUCP_000613 | XLOC_022053 | ENSRNOT00000004159 | 0.953277203  | 1.62E-06 |
| TUCP_000613 | XLOC_022053 | ENSRNOT00000015962 | 0.967938921  | 2.53E-07 |
| TUCP_000613 | XLOC_022053 | ENSRNOT00000014384 | 0.965666109  | 3.55E-07 |
| TUCP_000613 | XLOC_022053 | ENSRNOT00000042459 | 0.971265583  | 1.47E-07 |
| TUCP_000613 | XLOC_022053 | ENSRNOT00000055279 | 0.950901269  | 2.07E-06 |
| TUCP_000613 | XLOC_022053 | ENSRNOT00000037203 | 0.950445536  | 2.16E-06 |
| TUCP_000613 | XLOC_022053 | ENSRNOT00000087386 | 0.963291609  | 4.94E-07 |
| TUCP_000613 | XLOC_022053 | ENSRNOT00000057562 | -0.951600202 | 1.93E-06 |
| TUCP_000613 | XLOC_022053 | ENSRNOT00000018622 | 0.968277095  | 2.40E-07 |
| TUCP_000613 | XLOC_022053 | ENSRNOT00000087075 | 0.958308586  | 9.25E-07 |
| TUCP_000613 | XLOC_022053 | ENSRNOT00000000617 | 0.957105519  | 1.06E-06 |
| TUCP_000613 | XLOC_022053 | ENSRNOT00000022126 | 0.954817691  | 1.37E-06 |
| TUCP_000613 | XLOC_022053 | ENSRNOT00000086559 | 0.9782329    | 3.71E-08 |
| TUCP_000613 | XLOC_022053 | ENSRNOT00000008274 | 0.969751976  | 1.90E-07 |
| TUCP_000613 | XLOC_022053 | ENSRNOT00000045041 | 0.969596534  | 1.94E-07 |
| TUCP_000613 | XLOC_022053 | ENSRNOT00000007588 | 0.970477395  | 1.68E-07 |
| TUCP_000613 | XLOC_022053 | ENSRNOT00000013571 | 0.955126926  | 1.33E-06 |
| TUCP_000613 | XLOC_022053 | ENSRNOT00000067626 | 0.95989053   | 7.64E-07 |
| TUCP_000613 | XLOC_022053 | ENSRNOT00000003797 | 0.951275072  | 1.99E-06 |
| TUCP_000613 | XLOC_022053 | ENSRNOT00000056644 | 0.99057539   | 5.76E-10 |
| TUCP_000613 | XLOC_022053 | ENSRNOT00000065275 | 0.95703722   | 1.07E-06 |
| TUCP_000613 | XLOC_022053 | ENSRNOT00000017268 | 0.988563725  | 1.51E-09 |
| TUCP_000613 | XLOC_022053 | ENSRNOT00000067391 | 0.958960225  | 8.56E-07 |
| TUCP_000613 | XLOC_022053 | ENSRNOT00000091368 | 0.952651411  | 1.73E-06 |
| TUCP_000613 | XLOC_022053 | ENSRNOT00000037333 | 0.960346602  | 7.22E-07 |
| TUCP_000613 | XLOC_022053 | ENSRNOT00000029179 | 0.956642208  | 1.12E-06 |
| TUCP_000613 | XLOC_022053 | ENSRNOT00000000469 | -0.971355313 | 1.45E-07 |
| TUCP_000613 | XLOC_022053 | ENSRNOT00000025506 | 0.955593446  | 1.26E-06 |
| TUCP_000613 | XLOC_022053 | ENSRNOT00000007326 | 0.961406659  | 6.32E-07 |
| TUCP_000613 | XLOC_022053 | ENSRNOT00000017813 | 0.950429876  | 2.17E-06 |
| TUCP_000613 | XLOC_022053 | ENSRNOT00000000812 | 0.957429234  | 1.03E-06 |
| TUCP_000613 | XLOC_022053 | ENSRNOT00000000814 | 0.951574552  | 1.93E-06 |
| TUCP_000613 | XLOC_022053 | ENSRNOT00000072357 | 0.953662323  | 1.56E-06 |
| TUCP_000613 | XLOC_022053 | ENSRNOT00000074515 | 0.970220712  | 1.75E-07 |
| TUCP_000613 | XLOC_022053 | ENSRNOT00000082627 | 0.974281099  | 8.49E-08 |
| TUCP_000613 | XLOC_022053 | ENSRNOT00000027145 | 0.965665088  | 3.55E-07 |
| TUCP_000613 | XLOC_022053 | ENSRNOT00000072458 | 0.967921988  | 2.53E-07 |
| TUCP_000613 | XLOC_022053 | ENSRNOT00000044449 | 0.971388294  | 1.44E-07 |
| TUCP_000613 | XLOC_022053 | ENSRNOT00000022827 | 0.964877708  | 3.97E-07 |
| TUCP_000613 | XLOC_022053 | ENSRNOT00000019531 | 0.961666795  | 6.11E-07 |
| TUCP_000613 | XLOC_022053 | ENSRNOT00000065023 | 0.95620082   | 1.18E-06 |

|             |             |                    |              |          |
|-------------|-------------|--------------------|--------------|----------|
| TUCP_000613 | XL0C_022053 | ENSRNOT00000075444 | 0.952008058  | 1.85E-06 |
| TUCP_000613 | XL0C_022053 | ENSRNOT00000020558 | 0.955444099  | 1.28E-06 |
| TUCP_000613 | XL0C_022053 | ENSRNOT00000027604 | 0.958768744  | 8.76E-07 |
| TUCP_000613 | XL0C_022053 | ENSRNOT00000075598 | 0.960730005  | 6.89E-07 |
| TUCP_000613 | XL0C_022053 | ENSRNOT00000009327 | 0.952447255  | 1.77E-06 |
| TUCP_000613 | XL0C_022053 | ENSRNOT00000017883 | -0.954148692 | 1.48E-06 |
| TUCP_000613 | XL0C_022053 | ENSRNOT00000055607 | 0.961883888  | 5.94E-07 |
| TUCP_000613 | XL0C_022053 | ENSRNOT00000082149 | 0.951145352  | 2.02E-06 |
| TUCP_000613 | XL0C_022053 | ENSRNOT00000017889 | 0.964257561  | 4.33E-07 |
| TUCP_000613 | XL0C_022053 | ENSRNOT00000016324 | 0.961347413  | 6.37E-07 |
| TUCP_000613 | XL0C_022053 | ENSRNOT00000001631 | 0.987442694  | 2.41E-09 |
| TUCP_000613 | XL0C_022053 | ENSRNOT00000061201 | 0.96751572   | 2.70E-07 |
| TUCP_000613 | XL0C_022053 | ENSRNOT00000027512 | 0.962240543  | 5.67E-07 |
| TUCP_000613 | XL0C_022053 | ENSRNOT00000001639 | 0.964975961  | 3.91E-07 |
| TUCP_000613 | XL0C_022053 | ENSRNOT00000022170 | 0.955103721  | 1.33E-06 |
| TUCP_000613 | XL0C_022053 | ENSRNOT00000035277 | -0.950242779 | 2.21E-06 |
| TUCP_000613 | XL0C_022053 | ENSRNOT00000018877 | 0.983750898  | 8.68E-09 |
| TUCP_000613 | XL0C_022053 | ENSRNOT00000022343 | 0.954884311  | 1.36E-06 |
| TUCP_000613 | XL0C_022053 | ENSRNOT00000044847 | 0.965751944  | 3.50E-07 |
| TUCP_000613 | XL0C_022053 | ENSRNOT00000085915 | 0.955304942  | 1.30E-06 |
| TUCP_000613 | XL0C_022053 | ENSRNOT00000015831 | 0.968437999  | 2.34E-07 |
| TUCP_000613 | XL0C_022053 | ENSRNOT00000006395 | 0.951572754  | 1.93E-06 |
| TUCP_000613 | XL0C_022053 | ENSRNOT00000030823 | 0.983385543  | 9.70E-09 |
| TUCP_000613 | XL0C_022053 | ENSRNOT00000001227 | 0.955600759  | 1.26E-06 |
| TUCP_000613 | XL0C_022053 | ENSRNOT00000068435 | 0.955476806  | 1.28E-06 |
| TUCP_000613 | XL0C_022053 | ENSRNOT00000012432 | 0.968687858  | 2.25E-07 |
| TUCP_000613 | XL0C_022053 | ENSRNOT00000076388 | 0.979343741  | 2.86E-08 |
| TUCP_000613 | XL0C_022053 | ENSRNOT00000008317 | 0.959865502  | 7.67E-07 |
| TUCP_000613 | XL0C_022053 | ENSRNOT00000087033 | 0.953733364  | 1.54E-06 |
| TUCP_000613 | XL0C_022053 | ENSRNOT00000082963 | 0.976142146  | 5.85E-08 |
| TUCP_000613 | XL0C_022053 | ENSRNOT00000072632 | 0.96365478   | 4.70E-07 |
| TUCP_000613 | XL0C_022053 | ENSRNOT00000016856 | 0.960082595  | 7.46E-07 |
| TUCP_000613 | XL0C_022053 | ENSRNOT00000013936 | 0.952068139  | 1.84E-06 |
| TUCP_000613 | XL0C_022053 | ENSRNOT00000079085 | 0.975191195  | 7.10E-08 |
| TUCP_000613 | XL0C_022053 | ENSRNOT00000068666 | 0.950895453  | 2.07E-06 |
| TUCP_000613 | XL0C_022053 | ENSRNOT00000060690 | 0.952748687  | 1.71E-06 |
| TUCP_000613 | XL0C_022053 | ENSRNOT00000038811 | 0.963040196  | 5.10E-07 |
| TUCP_000613 | XL0C_022053 | ENSRNOT00000008919 | 0.956142537  | 1.19E-06 |
| TUCP_000613 | XL0C_022053 | ENSRNOT00000000618 | 0.950253365  | 2.21E-06 |
| TUCP_000613 | XL0C_022053 | ENSRNOT00000007917 | 0.98676923   | 3.12E-09 |
| TUCP_000613 | XL0C_022053 | ENSRNOT00000034386 | 0.960531099  | 7.06E-07 |
| TUCP_000613 | XL0C_022053 | ENSRNOT00000019778 | 0.95213645   | 1.83E-06 |
| TUCP_000613 | XL0C_022053 | ENSRNOT00000018684 | 0.966340179  | 3.22E-07 |
| TUCP_000613 | XL0C_022053 | ENSRNOT00000048022 | 0.967543968  | 2.69E-07 |
| TUCP_000613 | XL0C_022053 | ENSRNOT00000024707 | 0.953384005  | 1.60E-06 |
| TUCP_000613 | XL0C_022053 | ENSRNOT00000001597 | 0.96550081   | 3.63E-07 |
| TUCP_000613 | XL0C_022053 | ENSRNOT00000009468 | 0.970177061  | 1.77E-07 |
| TUCP_000613 | XL0C_022053 | ENSRNOT00000072069 | 0.963558015  | 4.76E-07 |
| TUCP_000613 | XL0C_022053 | ENSRNOT00000075400 | 0.966714531  | 3.04E-07 |
| TUCP_000613 | XL0C_022053 | ENSRNOT00000009080 | 0.9622929    | 5.63E-07 |
| TUCP_000613 | XL0C_022053 | ENSRNOT00000023320 | 0.980635512  | 2.08E-08 |

|             |             |                     |              |          |
|-------------|-------------|---------------------|--------------|----------|
| TUCP_000613 | XLOC_022053 | ENSRNOT00000020453  | 0.966442276  | 3.17E-07 |
| TUCP_000613 | XLOC_022053 | ENSRNOT00000075494  | 0.96923354   | 2.06E-07 |
| TUCP_000613 | XLOC_022053 | ENSRNOT00000009564  | 0.969889002  | 1.85E-07 |
| TUCP_000613 | XLOC_022053 | ENSRNOT00000041237  | 0.957664828  | 9.97E-07 |
| TUCP_000613 | XLOC_022053 | ENSRNOT00000023430  | 0.975058718  | 7.29E-08 |
| TUCP_000613 | XLOC_022053 | ENSRNOT00000001859  | 0.978868961  | 3.20E-08 |
| TUCP_000613 | XLOC_022053 | ENSRNOT00000003733  | 0.952605404  | 1.74E-06 |
| TUCP_000613 | XLOC_022053 | ENSRNOT00000021114  | -0.955248771 | 1.31E-06 |
| TUCP_000613 | XLOC_022053 | ENSRNOT00000021110  | 0.965672806  | 3.54E-07 |
| TUCP_000613 | XLOC_022053 | ENSRNOT00000083864  | 0.969139478  | 2.09E-07 |
| TUCP_000613 | XLOC_022053 | ENSRNOT00000020853  | 0.980769204  | 2.01E-08 |
| TUCP_000613 | XLOC_022053 | ENSRNOT00000001774  | 0.97168261   | 1.37E-07 |
| TUCP_000613 | XLOC_022053 | ENSRNOT00000080013  | 0.978890069  | 3.19E-08 |
| TUCP_000613 | XLOC_022053 | ENSRNOT000000013759 | 0.976282438  | 5.68E-08 |
| TUCP_000613 | XLOC_022053 | ENSRNOT00000025683  | 0.962041718  | 5.82E-07 |
| TUCP_000613 | XLOC_022053 | ENSRNOT000000013613 | 0.964500394  | 4.18E-07 |
| TUCP_000613 | XLOC_022053 | ENSRNOT000000019056 | 0.96028463   | 7.28E-07 |
| TUCP_000613 | XLOC_022053 | ENSRNOT00000078884  | 0.956115263  | 1.19E-06 |
| TUCP_000613 | XLOC_022053 | ENSRNOT00000027553  | 0.98197214   | 1.46E-08 |
| TUCP_000613 | XLOC_022053 | ENSRNOT00000033312  | 0.952555003  | 1.75E-06 |
| TUCP_000613 | XLOC_022053 | ENSRNOT000000015473 | 0.958470965  | 9.07E-07 |
| TUCP_000613 | XLOC_022053 | ENSRNOT000000015476 | 0.954118209  | 1.48E-06 |
| TUCP_000613 | XLOC_022053 | ENSRNOT000000021621 | 0.951369248  | 1.97E-06 |
| TUCP_000613 | XLOC_022053 | ENSRNOT00000077063  | 0.969880256  | 1.86E-07 |
| TUCP_000613 | XLOC_022053 | ENSRNOT000000011432 | 0.964892873  | 3.96E-07 |
| TUCP_000613 | XLOC_022053 | ENSRNOT000000014177 | 0.981250159  | 1.77E-08 |
| TUCP_000613 | XLOC_022053 | ENSRNOT00000022432  | 0.952403968  | 1.78E-06 |
| TUCP_000613 | XLOC_022053 | ENSRNOT00000034983  | 0.975073422  | 7.27E-08 |
| TUCP_000613 | XLOC_022053 | ENSRNOT000000020707 | 0.971624954  | 1.38E-07 |
| TUCP_000613 | XLOC_022053 | ENSRNOT000000021937 | 0.956104452  | 1.19E-06 |
| TUCP_000613 | XLOC_022053 | ENSRNOT000000052098 | 0.967915159  | 2.54E-07 |
| TUCP_000613 | XLOC_022053 | ENSRNOT000000018634 | 0.955178473  | 1.32E-06 |
| TUCP_000613 | XLOC_022053 | ENSRNOT000000014211 | 0.955500607  | 1.28E-06 |
| TUCP_000613 | XLOC_022053 | ENSRNOT000000008140 | 0.963003238  | 5.13E-07 |
| TUCP_000613 | XLOC_022053 | ENSRNOT00000072841  | 0.952739284  | 1.71E-06 |
| TUCP_000613 | XLOC_022053 | ENSRNOT00000085545  | 0.966737117  | 3.03E-07 |
| TUCP_000613 | XLOC_022053 | ENSRNOT000000015351 | 0.978053356  | 3.86E-08 |
| TUCP_000613 | XLOC_022053 | ENSRNOT000000073466 | -0.95608906  | 1.19E-06 |
| TUCP_000613 | XLOC_022053 | ENSRNOT00000004351  | 0.959965201  | 7.57E-07 |
| TUCP_000613 | XLOC_022053 | ENSRNOT000000014502 | 0.979260705  | 2.92E-08 |
| TUCP_000613 | XLOC_022053 | ENSRNOT00000003787  | 0.960318438  | 7.25E-07 |
| TUCP_000613 | XLOC_022053 | ENSRNOT000000005608 | 0.951794202  | 1.89E-06 |
| TUCP_000613 | XLOC_022053 | ENSRNOT00000025104  | 0.970958049  | 1.55E-07 |
| TUCP_000613 | XLOC_022053 | ENSRNOT000000072165 | 0.9656596    | 3.55E-07 |
| TUCP_000613 | XLOC_022053 | ENSRNOT000000015759 | 0.980987031  | 1.90E-08 |
| TUCP_000613 | XLOC_022053 | ENSRNOT000000091541 | 0.986660658  | 3.25E-09 |
| TUCP_000613 | XLOC_022053 | ENSRNOT000000050774 | 0.957349915  | 1.03E-06 |
| TUCP_000613 | XLOC_022053 | ENSRNOT000000008725 | 0.959608987  | 7.91E-07 |
| TUCP_000613 | XLOC_022053 | ENSRNOT000000068026 | 0.964853336  | 3.98E-07 |
| TUCP_000613 | XLOC_022053 | ENSRNOT000000056923 | 0.968139964  | 2.45E-07 |
| TUCP_000613 | XLOC_022053 | ENSRNOT00000005996  | 0.959648556  | 7.87E-07 |

|             |             |                    |              |          |
|-------------|-------------|--------------------|--------------|----------|
| TUCP_000613 | XLOC_022053 | ENSRNOT0000008889  | 0.966525724  | 3.13E-07 |
| TUCP_000613 | XLOC_022053 | ENSRNOT00000075057 | 0.975207015  | 7.08E-08 |
| TUCP_000613 | XLOC_022053 | ENSRNOT00000017746 | 0.975919941  | 6.12E-08 |
| TUCP_000613 | XLOC_022053 | ENSRNOT00000016286 | 0.959614375  | 7.91E-07 |
| TUCP_000613 | XLOC_022053 | ENSRNOT00000037946 | 0.973919704  | 9.10E-08 |
| TUCP_000613 | XLOC_022053 | ENSRNOT00000070825 | 0.95060466   | 2.13E-06 |
| TUCP_000613 | XLOC_022053 | ENSRNOT00000066923 | 0.95274327   | 1.71E-06 |
| TUCP_000613 | XLOC_022053 | ENSRNOT00000038677 | 0.97382753   | 9.26E-08 |
| TUCP_000613 | XLOC_022053 | ENSRNOT00000024753 | 0.963558128  | 4.76E-07 |
| TUCP_000613 | XLOC_022053 | ENSRNOT00000070916 | 0.972268672  | 1.23E-07 |
| TUCP_000613 | XLOC_022053 | ENSRNOT00000054970 | 0.957226085  | 1.05E-06 |
| TUCP_000613 | XLOC_022053 | ENSRNOT00000024452 | 0.968442741  | 2.34E-07 |
| TUCP_000613 | XLOC_022053 | ENSRNOT00000000253 | 0.956054738  | 1.20E-06 |
| TUCP_000613 | XLOC_022053 | ENSRNOT00000000258 | 0.956139572  | 1.19E-06 |
| TUCP_000613 | XLOC_022053 | ENSRNOT00000067524 | -0.950038845 | 2.25E-06 |
| TUCP_000613 | XLOC_022053 | ENSRNOT00000002511 | 0.97486483   | 7.57E-08 |
| TUCP_000613 | XLOC_022053 | ENSRNOT00000023211 | 0.956741725  | 1.11E-06 |
| TUCP_000613 | XLOC_022053 | ENSRNOT00000016376 | 0.959159119  | 8.35E-07 |
| TUCP_000613 | XLOC_022053 | ENSRNOT00000081593 | 0.956048113  | 1.20E-06 |
| TUCP_000613 | XLOC_022053 | ENSRNOT00000047571 | 0.956837269  | 1.10E-06 |
| TUCP_000613 | XLOC_022053 | ENSRNOT00000025036 | 0.959807365  | 7.72E-07 |
| TUCP_000613 | XLOC_022053 | ENSRNOT00000020809 | 0.965897809  | 3.43E-07 |
| TUCP_000613 | XLOC_022053 | ENSRNOT00000001605 | 0.976980181  | 4.90E-08 |
| TUCP_000613 | XLOC_022053 | ENSRNOT00000075630 | 0.971789996  | 1.34E-07 |
| TUCP_000613 | XLOC_022053 | ENSRNOT00000021677 | 0.975295896  | 6.95E-08 |
| TUCP_000613 | XLOC_022053 | ENSRNOT00000019044 | 0.966625969  | 3.08E-07 |
| TUCP_000613 | XLOC_022053 | ENSRNOT00000020982 | 0.959193922  | 8.32E-07 |
| TUCP_000613 | XLOC_022053 | ENSRNOT00000086847 | 0.956234701  | 1.17E-06 |
| TUCP_000613 | XLOC_022053 | ENSRNOT00000018846 | 0.976259094  | 5.71E-08 |
| TUCP_000613 | XLOC_022053 | ENSRNOT00000012847 | 0.964402657  | 4.24E-07 |
| TUCP_000613 | XLOC_022053 | ENSRNOT00000028876 | 0.954457332  | 1.43E-06 |
| TUCP_000613 | XLOC_022053 | ENSRNOT00000014002 | 0.969336329  | 2.03E-07 |
| TUCP_000613 | XLOC_022053 | ENSRNOT00000011694 | 0.963595185  | 4.74E-07 |
| TUCP_000613 | XLOC_022053 | ENSRNOT00000002851 | 0.950520957  | 2.15E-06 |
| TUCP_000613 | XLOC_022053 | ENSRNOT00000055250 | 0.962782103  | 5.28E-07 |
| TUCP_000613 | XLOC_022053 | ENSRNOT00000068184 | 0.969973458  | 1.83E-07 |
| TUCP_000613 | XLOC_022053 | ENSRNOT00000031692 | 0.981073792  | 1.85E-08 |
| TUCP_000613 | XLOC_022053 | ENSRNOT00000089016 | 0.981486908  | 1.66E-08 |
| TUCP_000613 | XLOC_022053 | ENSRNOT00000000737 | 0.965166062  | 3.81E-07 |
| TUCP_000613 | XLOC_022053 | ENSRNOT00000022864 | 0.950077175  | 2.25E-06 |
| TUCP_000613 | XLOC_022053 | ENSRNOT00000006578 | 0.965230456  | 3.77E-07 |
| TUCP_000613 | XLOC_022053 | ENSRNOT00000028900 | 0.965308455  | 3.73E-07 |
| TUCP_000613 | XLOC_022053 | ENSRNOT00000072722 | 0.955854717  | 1.23E-06 |
| TUCP_000613 | XLOC_022053 | ENSRNOT00000087556 | 0.974857837  | 7.59E-08 |
| TUCP_000613 | XLOC_022053 | ENSRNOT00000029753 | 0.95314804   | 1.64E-06 |
| TUCP_000613 | XLOC_022053 | ENSRNOT00000040981 | 0.967840165  | 2.57E-07 |
| TUCP_000613 | XLOC_022053 | ENSRNOT00000056725 | 0.950120398  | 2.24E-06 |
| TUCP_000613 | XLOC_022053 | ENSRNOT00000038464 | 0.95905608   | 8.46E-07 |
| TUCP_000613 | XLOC_022053 | ENSRNOT00000008359 | 0.970294813  | 1.73E-07 |
| TUCP_000613 | XLOC_022053 | ENSRNOT00000092641 | 0.974403914  | 8.29E-08 |
| TUCP_000613 | XLOC_022053 | ENSRNOT00000035486 | 0.975479355  | 6.70E-08 |



|             |             |                     |              |          |
|-------------|-------------|---------------------|--------------|----------|
| TUCP_000613 | XL0C_022053 | ENSRNOT00000080174  | 0.96765421   | 2.64E-07 |
| TUCP_000613 | XL0C_022053 | ENSRNOT00000011237  | 0.955690962  | 1.25E-06 |
| TUCP_000613 | XL0C_022053 | ENSRNOT00000013344  | 0.957861276  | 9.75E-07 |
| TUCP_000613 | XL0C_022053 | ENSRNOT00000030501  | 0.96136634   | 6.35E-07 |
| TUCP_000613 | XL0C_022053 | ENSRNOT00000017204  | 0.982632131  | 1.21E-08 |
| TUCP_000613 | XL0C_022053 | ENSRNOT00000008772  | 0.963068332  | 5.09E-07 |
| TUCP_000613 | XL0C_022053 | ENSRNOT00000005658  | 0.951745074  | 1.90E-06 |
| TUCP_000613 | XL0C_022053 | ENSRNOT00000009275  | 0.958497652  | 9.04E-07 |
| TUCP_000613 | XL0C_022053 | ENSRNOT00000022086  | 0.972147032  | 1.26E-07 |
| TUCP_000613 | XL0C_022053 | ENSRNOT00000008074  | 0.950722981  | 2.11E-06 |
| TUCP_000613 | XL0C_022053 | ENSRNOT00000024714  | 0.95645098   | 1.15E-06 |
| TUCP_000613 | XL0C_022053 | ENSRNOT00000018341  | 0.975087016  | 7.25E-08 |
| TUCP_000613 | XL0C_022053 | ENSRNOT000000081787 | 0.96212075   | 5.76E-07 |
| TUCP_000613 | XL0C_022053 | ENSRNOT00000070886  | 0.979576195  | 2.70E-08 |
| TUCP_000613 | XL0C_022053 | ENSRNOT00000002799  | 0.966308337  | 3.23E-07 |
| TUCP_000613 | XL0C_022053 | ENSRNOT00000024882  | 0.97254337   | 1.17E-07 |
| TUCP_000613 | XL0C_022053 | ENSRNOT00000023456  | 0.960309743  | 7.26E-07 |
| TUCP_000613 | XL0C_022053 | ENSRNOT00000016012  | 0.967400845  | 2.74E-07 |
| TUCP_000613 | XL0C_022053 | ENSRNOT00000002334  | 0.954975536  | 1.35E-06 |
| TUCP_000613 | XL0C_022053 | ENSRNOT00000023037  | -0.955177546 | 1.32E-06 |
| TUCP_000613 | XL0C_022053 | ENSRNOT000000090232 | 0.955911094  | 1.22E-06 |
| TUCP_000613 | XL0C_022053 | ENSRNOT00000013587  | 0.958305494  | 9.25E-07 |
| TUCP_000613 | XL0C_022053 | ENSRNOT00000003728  | 0.962036116  | 5.83E-07 |
| TUCP_000613 | XL0C_022053 | ENSRNOT00000001891  | 0.977201607  | 4.67E-08 |
| TUCP_000613 | XL0C_022053 | ENSRNOT00000039709  | 0.953130227  | 1.65E-06 |
| TUCP_000613 | XL0C_022053 | ENSRNOT00000019040  | 0.963807052  | 4.60E-07 |
| TUCP_000613 | XL0C_022053 | ENSRNOT00000035400  | 0.979733641  | 2.60E-08 |
| TUCP_000613 | XL0C_022053 | ENSRNOT00000006607  | 0.96757163   | 2.67E-07 |
| TUCP_000613 | XL0C_022053 | ENSRNOT00000073005  | 0.951245231  | 2.00E-06 |
| TUCP_000613 | XL0C_022053 | ENSRNOT00000077727  | 0.956719453  | 1.11E-06 |
| TUCP_000613 | XL0C_022053 | ENSRNOT000000082124 | 0.975524212  | 6.64E-08 |
| TUCP_000613 | XL0C_022053 | ENSRNOT00000000203  | 0.967168437  | 2.84E-07 |
| TUCP_000613 | XL0C_022053 | ENSRNOT00000014044  | 0.962417585  | 5.54E-07 |
| TUCP_000613 | XL0C_022053 | ENSRNOT000000090156 | 0.955451666  | 1.28E-06 |
| TUCP_000613 | XL0C_022053 | ENSRNOT000000086147 | 0.983940378  | 8.19E-09 |
| TUCP_000613 | XL0C_022053 | ENSRNOT00000031653  | 0.951138328  | 2.02E-06 |
| TUCP_000613 | XL0C_022053 | ENSRNOT00000004196  | -0.958005401 | 9.58E-07 |
| TUCP_000613 | XL0C_022053 | ENSRNOT00000007882  | 0.97680274   | 5.09E-08 |
| TUCP_000613 | XL0C_022053 | ENSRNOT00000006946  | 0.986828165  | 3.05E-09 |
| TUCP_000613 | XL0C_022053 | ENSRNOT000000086576 | 0.976906445  | 4.98E-08 |
| TUCP_000613 | XL0C_022053 | ENSRNOT00000022451  | 0.952472074  | 1.76E-06 |
| TUCP_000613 | XL0C_022053 | ENSRNOT00000039012  | 0.959273686  | 8.24E-07 |
| TUCP_000613 | XL0C_022053 | ENSRNOT00000023854  | 0.958518191  | 9.02E-07 |
| TUCP_000613 | XL0C_022053 | ENSRNOT00000001160  | 0.957571334  | 1.01E-06 |
| TUCP_000613 | XL0C_022053 | ENSRNOT000000082894 | 0.960095671  | 7.45E-07 |
| TUCP_000613 | XL0C_022053 | ENSRNOT000000056918 | 0.951091899  | 2.03E-06 |
| TUCP_000613 | XL0C_022053 | ENSRNOT00000079801  | 0.951372309  | 1.97E-06 |
| TUCP_000613 | XL0C_022053 | ENSRNOT00000018153  | 0.953500292  | 1.58E-06 |
| TUCP_000613 | XL0C_022053 | ENSRNOT000000083983 | 0.991214378  | 4.06E-10 |
| TUCP_000613 | XL0C_022053 | ENSRNOT00000007549  | 0.989630197  | 9.28E-10 |
| TUCP_000613 | XL0C_022053 | ENSRNOT00000017626  | 0.958898764  | 8.62E-07 |

|             |             |                    |              |          |
|-------------|-------------|--------------------|--------------|----------|
| TUCP_000613 | XL0C_022053 | ENSRNOT00000076485 | 0.955126609  | 1.33E-06 |
| TUCP_000613 | XL0C_022053 | ENSRNOT00000022774 | 0.967955876  | 2.52E-07 |
| TUCP_000613 | XL0C_022053 | ENSRNOT00000025134 | 0.97337379   | 1.01E-07 |
| TUCP_000613 | XL0C_022053 | ENSRNOT00000087359 | -0.963247475 | 4.96E-07 |
| TUCP_000613 | XL0C_022053 | ENSRNOT00000008630 | -0.955019414 | 1.34E-06 |
| TUCP_000613 | XL0C_022053 | ENSRNOT00000029704 | 0.966606789  | 3.09E-07 |
| TUCP_000613 | XL0C_022053 | ENSRNOT00000029115 | 0.952063889  | 1.84E-06 |
| TUCP_000613 | XL0C_022053 | ENSRNOT00000015139 | 0.961139581  | 6.54E-07 |
| TUCP_000613 | XL0C_022053 | ENSRNOT00000014832 | 0.971618514  | 1.38E-07 |
| TUCP_000613 | XL0C_022053 | ENSRNOT00000089879 | 0.965512243  | 3.63E-07 |
| TUCP_000613 | XL0C_022053 | ENSRNOT00000015130 | 0.95858664   | 8.95E-07 |
| TUCP_000613 | XL0C_022053 | ENSRNOT00000018473 | 0.954585306  | 1.41E-06 |
| TUCP_000613 | XL0C_022053 | ENSRNOT00000026118 | 0.954143078  | 1.48E-06 |
| TUCP_000613 | XL0C_022053 | ENSRNOT00000007276 | 0.955509894  | 1.27E-06 |
| TUCP_000613 | XL0C_022053 | ENSRNOT00000017339 | 0.984241013  | 7.46E-09 |
| TUCP_000613 | XL0C_022053 | ENSRNOT00000088752 | 0.976969792  | 4.91E-08 |
| TUCP_000613 | XL0C_022053 | ENSRNOT00000056862 | 0.980121075  | 2.36E-08 |
| TUCP_000613 | XL0C_022053 | ENSRNOT00000050227 | 0.980003371  | 2.44E-08 |
| TUCP_000613 | XL0C_022053 | ENSRNOT00000093552 | 0.953578455  | 1.57E-06 |
| TUCP_000613 | XL0C_022053 | ENSRNOT00000088884 | 0.952182358  | 1.82E-06 |
| TUCP_000613 | XL0C_022053 | ENSRNOT00000075544 | 0.957194585  | 1.05E-06 |
| TUCP_000613 | XL0C_022053 | ENSRNOT00000077363 | 0.963504923  | 4.80E-07 |
| TUCP_000613 | XL0C_022053 | ENSRNOT00000038994 | 0.961175943  | 6.51E-07 |
| TUCP_000613 | XL0C_022053 | ENSRNOT00000024841 | 0.95412085   | 1.48E-06 |
| TUCP_000613 | XL0C_022053 | ENSRNOT00000009345 | 0.968885405  | 2.18E-07 |
| TUCP_000613 | XL0C_022053 | ENSRNOT00000024924 | 0.982071286  | 1.42E-08 |
| TUCP_000613 | XL0C_022053 | ENSRNOT00000048529 | 0.965151917  | 3.82E-07 |
| TUCP_000613 | XL0C_022053 | ENSRNOT00000000124 | 0.964706348  | 4.06E-07 |
| TUCP_000613 | XL0C_022053 | ENSRNOT00000043581 | 0.96078178   | 6.84E-07 |
| TUCP_000613 | XL0C_022053 | ENSRNOT00000010419 | -0.957864226 | 9.74E-07 |
| TUCP_000613 | XL0C_022053 | ENSRNOT00000064636 | 0.959449182  | 8.07E-07 |
| TUCP_000613 | XL0C_022053 | ENSRNOT00000066561 | 0.961201425  | 6.49E-07 |
| TUCP_000613 | XL0C_022053 | ENSRNOT00000004094 | 0.962373722  | 5.58E-07 |
| TUCP_000613 | XL0C_022053 | ENSRNOT00000020909 | 0.964157994  | 4.39E-07 |
| TUCP_000613 | XL0C_022053 | ENSRNOT00000067905 | 0.957591361  | 1.01E-06 |
| TUCP_000613 | XL0C_022053 | ENSRNOT00000011511 | 0.969881588  | 1.86E-07 |
| TUCP_000613 | XL0C_022053 | ENSRNOT00000020900 | 0.955498416  | 1.28E-06 |
| TUCP_000613 | XL0C_022053 | ENSRNOT00000012376 | 0.950478083  | 2.16E-06 |
| TUCP_000613 | XL0C_022053 | ENSRNOT00000065642 | 0.982455659  | 1.27E-08 |
| TUCP_000613 | XL0C_022053 | ENSRNOT00000036195 | 0.964274208  | 4.32E-07 |
| TUCP_000613 | XL0C_022053 | ENSRNOT00000031291 | 0.958536626  | 9.00E-07 |
| TUCP_000613 | XL0C_022053 | ENSRNOT00000074586 | 0.963841908  | 4.58E-07 |
| TUCP_000613 | XL0C_022053 | ENSRNOT00000057758 | 0.960356815  | 7.21E-07 |
| TUCP_000613 | XL0C_022053 | ENSRNOT00000059124 | 0.954155708  | 1.48E-06 |
| TUCP_000613 | XL0C_022053 | ENSRNOT00000022637 | 0.964306328  | 4.30E-07 |
| TUCP_000613 | XL0C_022053 | ENSRNOT00000083666 | 0.963899792  | 4.54E-07 |
| TUCP_000613 | XL0C_022053 | ENSRNOT00000019358 | 0.959294822  | 8.22E-07 |
| TUCP_000613 | XL0C_022053 | ENSRNOT00000010720 | 0.976866092  | 5.02E-08 |
| TUCP_000613 | XL0C_022053 | ENSRNOT00000087011 | 0.973327264  | 1.02E-07 |
| TUCP_000613 | XL0C_022053 | ENSRNOT00000019180 | 0.95118228   | 2.01E-06 |
| TUCP_000613 | XL0C_022053 | ENSRNOT0000007028  | 0.953774835  | 1.54E-06 |

|             |             |                    |              |          |
|-------------|-------------|--------------------|--------------|----------|
| TUCP_000613 | XLOC_022053 | ENSRNOT0000005286  | 0.975885206  | 6.17E-08 |
| TUCP_000613 | XLOC_022053 | ENSRNOT00000056675 | 0.95897707   | 8.54E-07 |
| TUCP_000613 | XLOC_022053 | ENSRNOT00000013295 | 0.977449024  | 4.42E-08 |
| TUCP_000613 | XLOC_022053 | ENSRNOT00000061735 | 0.96169941   | 6.09E-07 |
| TUCP_000613 | XLOC_022053 | ENSRNOT00000021455 | 0.953598727  | 1.57E-06 |
| TUCP_000613 | XLOC_022053 | ENSRNOT00000076191 | 0.971738451  | 1.35E-07 |
| TUCP_000613 | XLOC_022053 | ENSRNOT00000017784 | 0.959561509  | 7.96E-07 |
| TUCP_000613 | XLOC_022053 | ENSRNOT00000022676 | 0.950162022  | 2.23E-06 |
| TUCP_000613 | XLOC_022053 | ENSRNOT00000021458 | 0.963606887  | 4.73E-07 |
| TUCP_000613 | XLOC_022053 | ENSRNOT00000026496 | 0.979632627  | 2.67E-08 |
| TUCP_000613 | XLOC_022053 | ENSRNOT00000082739 | 0.967008129  | 2.91E-07 |
| TUCP_000613 | XLOC_022053 | ENSRNOT00000026552 | 0.950254042  | 2.21E-06 |
| TUCP_000613 | XLOC_022053 | ENSRNOT00000012179 | 0.961744458  | 6.05E-07 |
| TUCP_000613 | XLOC_022053 | ENSRNOT00000023463 | 0.978171755  | 3.76E-08 |
| TUCP_000613 | XLOC_022053 | ENSRNOT00000034266 | 0.971009617  | 1.54E-07 |
| TUCP_000613 | XLOC_022053 | ENSRNOT00000028781 | -0.965812445 | 3.47E-07 |
| TUCP_000613 | XLOC_022053 | ENSRNOT00000046490 | 0.979620371  | 2.68E-08 |
| TUCP_000613 | XLOC_022053 | ENSRNOT00000001973 | 0.9614409    | 6.29E-07 |
| TUCP_000613 | XLOC_022053 | ENSRNOT00000046552 | -0.951609778 | 1.93E-06 |
| TUCP_000613 | XLOC_022053 | ENSRNOT00000024775 | 0.957358801  | 1.03E-06 |
| TUCP_000613 | XLOC_022053 | ENSRNOT00000024801 | 0.974259017  | 8.52E-08 |
| TUCP_000613 | XLOC_022053 | ENSRNOT00000009544 | 0.965901327  | 3.43E-07 |
| TUCP_000613 | XLOC_022053 | ENSRNOT00000054957 | 0.957623701  | 1.00E-06 |
| TUCP_000613 | XLOC_022053 | ENSRNOT00000041808 | 0.96283241   | 5.25E-07 |
| TUCP_000613 | XLOC_022053 | ENSRNOT00000021134 | 0.962780171  | 5.28E-07 |
| TUCP_000613 | XLOC_022053 | ENSRNOT00000026724 | 0.979731616  | 2.60E-08 |
| TUCP_000613 | XLOC_022053 | ENSRNOT0000001893  | -0.953882911 | 1.52E-06 |
| TUCP_000613 | XLOC_022053 | ENSRNOT00000024981 | 0.956440839  | 1.15E-06 |
| TUCP_000613 | XLOC_022053 | ENSRNOT00000077784 | 0.965061681  | 3.87E-07 |
| TUCP_000613 | XLOC_022053 | ENSRNOT00000081037 | 0.957719164  | 9.91E-07 |
| TUCP_000613 | XLOC_022053 | ENSRNOT00000011898 | 0.95426783   | 1.46E-06 |
| TUCP_000613 | XLOC_022053 | ENSRNOT00000020543 | 0.9639919    | 4.49E-07 |
| TUCP_000613 | XLOC_022053 | ENSRNOT00000011952 | 0.95123291   | 2.00E-06 |
| TUCP_000613 | XLOC_022053 | ENSRNOT00000013778 | 0.972353815  | 1.21E-07 |
| TUCP_000613 | XLOC_022053 | ENSRNOT00000078185 | 0.950868203  | 2.08E-06 |
| TUCP_000613 | XLOC_022053 | ENSRNOT00000077730 | 0.980527555  | 2.13E-08 |
| TUCP_000613 | XLOC_022053 | ENSRNOT00000077040 | 0.96669306   | 3.05E-07 |
| TUCP_000613 | XLOC_022053 | ENSRNOT00000018325 | 0.954201137  | 1.47E-06 |
| TUCP_000613 | XLOC_022053 | ENSRNOT00000017955 | 0.964456966  | 4.21E-07 |
| TUCP_000613 | XLOC_022053 | ENSRNOT00000089980 | 0.951655106  | 1.92E-06 |
| TUCP_000613 | XLOC_022053 | ENSRNOT00000020316 | 0.964616307  | 4.12E-07 |
| TUCP_000613 | XLOC_022053 | ENSRNOT00000077256 | 0.95766481   | 9.97E-07 |
| TUCP_000613 | XLOC_022053 | ENSRNOT0000006709  | 0.978796316  | 3.26E-08 |
| TUCP_000613 | XLOC_022053 | ENSRNOT00000014586 | 0.970082437  | 1.80E-07 |
| TUCP_000613 | XLOC_022053 | ENSRNOT00000012495 | 0.971067235  | 1.52E-07 |
| TUCP_000613 | XLOC_022053 | ENSRNOT00000060012 | 0.960792882  | 6.83E-07 |
| TUCP_000613 | XLOC_022053 | ENSRNOT00000025221 | 0.979744249  | 2.60E-08 |
| TUCP_000613 | XLOC_022053 | ENSRNOT00000025634 | 0.982146715  | 1.39E-08 |
| TUCP_000613 | XLOC_022053 | ENSRNOT00000005693 | 0.955837014  | 1.23E-06 |
| TUCP_000613 | XLOC_022053 | ENSRNOT00000066120 | 0.974132841  | 8.73E-08 |
| TUCP_000613 | XLOC_022053 | ENSRNOT00000012428 | 0.959263245  | 8.25E-07 |

|             |             |                    |              |          |
|-------------|-------------|--------------------|--------------|----------|
| TUCP_000613 | XLOC_022053 | ENSRNOT0000000717  | 0.957736232  | 9.89E-07 |
| TUCP_000613 | XLOC_022053 | ENSRNOT00000049048 | 0.97073754   | 1.61E-07 |
| TUCP_000613 | XLOC_022053 | ENSRNOT00000030222 | 0.975118008  | 7.20E-08 |
| TUCP_000613 | XLOC_022053 | ENSRNOT00000089066 | -0.964753265 | 4.04E-07 |
| TUCP_000613 | XLOC_022053 | ENSRNOT00000087342 | 0.960369631  | 7.20E-07 |
| TUCP_000613 | XLOC_022053 | ENSRNOT00000035513 | 0.979470953  | 2.77E-08 |
| TUCP_000613 | XLOC_022053 | ENSRNOT00000080216 | 0.963328832  | 4.91E-07 |
| TUCP_000613 | XLOC_022053 | ENSRNOT0000005873  | 0.95048177   | 2.16E-06 |
| TUCP_000613 | XLOC_022053 | ENSRNOT0000005155  | -0.951444745 | 1.96E-06 |
| TUCP_000613 | XLOC_022053 | ENSRNOT00000023543 | 0.962753443  | 5.30E-07 |
| TUCP_000613 | XLOC_022053 | ENSRNOT00000017618 | 0.973379764  | 1.01E-07 |
| TUCP_000613 | XLOC_022053 | ENSRNOT00000085458 | 0.965862173  | 3.45E-07 |
| TUCP_000613 | XLOC_022053 | ENSRNOT00000038652 | 0.959982759  | 7.56E-07 |
| TUCP_000613 | XLOC_022053 | ENSRNOT00000013535 | 0.984482205  | 6.90E-09 |
| TUCP_000613 | XLOC_022053 | ENSRNOT00000066199 | 0.978471776  | 3.51E-08 |
| TUCP_000613 | XLOC_022053 | ENSRNOT00000047698 | 0.955202067  | 1.32E-06 |
| TUCP_000613 | XLOC_022053 | ENSRNOT00000024938 | 0.971289132  | 1.46E-07 |
| TUCP_000613 | XLOC_022053 | ENSRNOT00000017683 | 0.956419491  | 1.15E-06 |
| TUCP_000613 | XLOC_022053 | ENSRNOT00000018043 | 0.95339689   | 1.60E-06 |
| TUCP_000613 | XLOC_022053 | ENSRNOT00000011320 | 0.960603057  | 7.00E-07 |
| TUCP_002089 | XLOC_085984 | ENSRNOT00000055735 | 0.955004414  | 1.35E-06 |
| TUCP_002089 | XLOC_085984 | ENSRNOT00000026860 | 0.952910021  | 1.68E-06 |
| TUCP_002089 | XLOC_085984 | ENSRNOT00000066739 | 0.950318723  | 2.19E-06 |
| TUCP_002089 | XLOC_085984 | ENSRNOT00000006186 | 0.956684321  | 1.12E-06 |
| TUCP_002089 | XLOC_085984 | ENSRNOT00000026941 | 0.967529981  | 2.69E-07 |
| TUCP_002089 | XLOC_085984 | ENSRNOT00000019213 | 0.973227227  | 1.04E-07 |
| TUCP_002089 | XLOC_085984 | ENSRNOT00000007351 | -0.953172848 | 1.64E-06 |
| TUCP_002089 | XLOC_085984 | ENSRNOT00000074939 | 0.98711765   | 2.73E-09 |
| TUCP_002089 | XLOC_085984 | ENSRNOT00000066041 | -0.950627358 | 2.13E-06 |
| TUCP_002089 | XLOC_085984 | ENSRNOT00000006055 | 0.984056525  | 7.90E-09 |
| TUCP_002089 | XLOC_085984 | ENSRNOT00000071560 | 0.962870514  | 5.22E-07 |
| TUCP_002089 | XLOC_085984 | ENSRNOT00000078445 | -0.950752396 | 2.10E-06 |
| TUCP_002089 | XLOC_085984 | ENSRNOT00000026065 | 0.95533992   | 1.30E-06 |
| TUCP_002089 | XLOC_085984 | ENSRNOT00000023638 | 0.952344714  | 1.79E-06 |
| TUCP_002089 | XLOC_085984 | ENSRNOT00000005228 | 0.9523723    | 1.78E-06 |
| TUCP_002089 | XLOC_085984 | ENSRNOT00000088125 | 0.990172501  | 7.10E-10 |
| TUCP_002089 | XLOC_085984 | ENSRNOT00000006175 | 0.957980651  | 9.61E-07 |
| TUCP_002089 | XLOC_085984 | ENSRNOT00000005220 | 0.962285744  | 5.64E-07 |
| TUCP_002089 | XLOC_085984 | ENSRNOT00000007164 | 0.954372602  | 1.44E-06 |
| TUCP_002089 | XLOC_085984 | ENSRNOT00000036750 | 0.985048704  | 5.74E-09 |
| TUCP_002089 | XLOC_085984 | ENSRNOT00000065947 | 0.956293712  | 1.17E-06 |
| TUCP_002089 | XLOC_085984 | ENSRNOT00000021116 | 0.957295082  | 1.04E-06 |
| TUCP_002089 | XLOC_085984 | ENSRNOT00000016649 | 0.95334154   | 1.61E-06 |
| TUCP_002089 | XLOC_085984 | ENSRNOT00000082100 | 0.971585143  | 1.39E-07 |
| TUCP_002089 | XLOC_085984 | ENSRNOT00000037699 | 0.953999524  | 1.50E-06 |
| TUCP_002089 | XLOC_085984 | ENSRNOT00000040393 | 0.962831324  | 5.25E-07 |
| TUCP_002089 | XLOC_085984 | ENSRNOT00000052063 | 0.95315974   | 1.64E-06 |
| TUCP_002089 | XLOC_085984 | ENSRNOT00000018057 | 0.971104468  | 1.51E-07 |
| TUCP_002089 | XLOC_085984 | ENSRNOT00000056813 | 0.981203163  | 1.79E-08 |
| TUCP_002089 | XLOC_085984 | ENSRNOT00000043216 | 0.96067619   | 6.93E-07 |
| TUCP_002089 | XLOC_085984 | ENSRNOT00000091128 | -0.952104614 | 1.83E-06 |

|             |             |                    |              |          |
|-------------|-------------|--------------------|--------------|----------|
| TUCP_002089 | XLOC_085984 | ENSRNOT00000011384 | 0.956013612  | 1.20E-06 |
| TUCP_002089 | XLOC_085984 | ENSRNOT00000026543 | 0.95381354   | 1.53E-06 |
| TUCP_002089 | XLOC_085984 | ENSRNOT00000015076 | 0.978655452  | 3.37E-08 |
| TUCP_002089 | XLOC_085984 | ENSRNOT00000044742 | 0.971602722  | 1.39E-07 |
| TUCP_002089 | XLOC_085984 | ENSRNOT00000043345 | 0.972056739  | 1.28E-07 |
| TUCP_002089 | XLOC_085984 | ENSRNOT00000010418 | 0.981840967  | 1.51E-08 |
| TUCP_002089 | XLOC_085984 | ENSRNOT00000015073 | 0.966221126  | 3.27E-07 |
| TUCP_002089 | XLOC_085984 | ENSRNOT00000043554 | 0.951533421  | 1.94E-06 |
| TUCP_002089 | XLOC_085984 | ENSRNOT00000025689 | 0.955170734  | 1.32E-06 |
| TUCP_002089 | XLOC_085984 | ENSRNOT00000012187 | 0.955273758  | 1.31E-06 |
| TUCP_002089 | XLOC_085984 | ENSRNOT00000004698 | 0.977483394  | 4.39E-08 |
| TUCP_002089 | XLOC_085984 | ENSRNOT00000064802 | 0.955610247  | 1.26E-06 |
| TUCP_002089 | XLOC_085984 | ENSRNOT00000001507 | 0.969970019  | 1.83E-07 |
| TUCP_002089 | XLOC_085984 | ENSRNOT00000026783 | 0.951996813  | 1.85E-06 |
| TUCP_002089 | XLOC_085984 | ENSRNOT00000071573 | 0.955628654  | 1.26E-06 |
| TUCP_002089 | XLOC_085984 | ENSRNOT00000005126 | -0.968725864 | 2.24E-07 |
| TUCP_002089 | XLOC_085984 | ENSRNOT00000012736 | 0.969676872  | 1.92E-07 |
| TUCP_002089 | XLOC_085984 | ENSRNOT00000065300 | 0.96582728   | 3.47E-07 |
| TUCP_002089 | XLOC_085984 | ENSRNOT00000025079 | -0.957679426 | 9.96E-07 |
| TUCP_002089 | XLOC_085984 | ENSRNOT00000048754 | -0.953601181 | 1.57E-06 |
| TUCP_002089 | XLOC_085984 | ENSRNOT00000038247 | 0.967249029  | 2.81E-07 |
| TUCP_002089 | XLOC_085984 | ENSRNOT00000012977 | 0.963153699  | 5.03E-07 |
| TUCP_002089 | XLOC_085984 | ENSRNOT00000021496 | -0.955746115 | 1.24E-06 |
| TUCP_002089 | XLOC_085984 | ENSRNOT00000036951 | 0.960701206  | 6.91E-07 |
| TUCP_002089 | XLOC_085984 | ENSRNOT00000071764 | 0.95504176   | 1.34E-06 |
| TUCP_002089 | XLOC_085984 | ENSRNOT00000035989 | 0.968290692  | 2.39E-07 |
| TUCP_002089 | XLOC_085984 | ENSRNOT00000027944 | 0.950325962  | 2.19E-06 |
| TUCP_002089 | XLOC_085984 | ENSRNOT00000024402 | 0.951531459  | 1.94E-06 |
| TUCP_002089 | XLOC_085984 | ENSRNOT00000075326 | 0.957173132  | 1.06E-06 |
| TUCP_002089 | XLOC_085984 | ENSRNOT00000021348 | 0.986428078  | 3.54E-09 |
| TUCP_002089 | XLOC_085984 | ENSRNOT00000025097 | 0.969942695  | 1.84E-07 |
| TUCP_002089 | XLOC_085984 | ENSRNOT00000068322 | 0.970298503  | 1.73E-07 |
| TUCP_002089 | XLOC_085984 | ENSRNOT00000017629 | 0.990207246  | 6.98E-10 |
| TUCP_002089 | XLOC_085984 | ENSRNOT00000077908 | 0.964735497  | 4.05E-07 |
| TUCP_002089 | XLOC_085984 | ENSRNOT00000012671 | 0.966205995  | 3.28E-07 |
| TUCP_002089 | XLOC_085984 | ENSRNOT00000085158 | 0.953656365  | 1.56E-06 |
| TUCP_002089 | XLOC_085984 | ENSRNOT00000010463 | 0.963647533  | 4.70E-07 |
| TUCP_002089 | XLOC_085984 | ENSRNOT00000064840 | 0.95817139   | 9.40E-07 |
| TUCP_002089 | XLOC_085984 | ENSRNOT00000003146 | -0.963358916 | 4.89E-07 |
| TUCP_002089 | XLOC_085984 | ENSRNOT00000026718 | 0.970414035  | 1.70E-07 |
| TUCP_002089 | XLOC_085984 | ENSRNOT00000085228 | 0.961727746  | 6.06E-07 |
| TUCP_002089 | XLOC_085984 | ENSRNOT00000084012 | 0.957903962  | 9.70E-07 |
| TUCP_002089 | XLOC_085984 | ENSRNOT00000022534 | 0.951827692  | 1.88E-06 |
| TUCP_002089 | XLOC_085984 | ENSRNOT00000017319 | 0.961866593  | 5.96E-07 |
| TUCP_002089 | XLOC_085984 | ENSRNOT00000055187 | 0.964747603  | 4.04E-07 |
| TUCP_002089 | XLOC_085984 | ENSRNOT00000001809 | 0.95608028   | 1.20E-06 |
| TUCP_002089 | XLOC_085984 | ENSRNOT00000004834 | 0.967967237  | 2.52E-07 |
| TUCP_002089 | XLOC_085984 | ENSRNOT00000079866 | 0.958827176  | 8.69E-07 |
| TUCP_002089 | XLOC_085984 | ENSRNOT00000024548 | 0.976480682  | 5.45E-08 |
| TUCP_002089 | XLOC_085984 | ENSRNOT00000067822 | 0.979879821  | 2.51E-08 |
| TUCP_002089 | XLOC_085984 | ENSRNOT00000024060 | 0.96236282   | 5.58E-07 |

|             |             |                    |              |          |
|-------------|-------------|--------------------|--------------|----------|
| TUCP_002089 | XLOC_085984 | ENSRNOT00000010927 | 0.959489302  | 8.03E-07 |
| TUCP_002089 | XLOC_085984 | ENSRNOT00000087371 | 0.981239375  | 1.77E-08 |
| TUCP_002089 | XLOC_085984 | ENSRNOT00000091909 | 0.955709773  | 1.25E-06 |
| TUCP_002089 | XLOC_085984 | ENSRNOT00000088054 | 0.963565244  | 4.76E-07 |
| TUCP_002089 | XLOC_085984 | ENSRNOT00000068633 | 0.978462759  | 3.52E-08 |
| TUCP_002089 | XLOC_085984 | ENSRNOT00000010541 | 0.960690317  | 6.92E-07 |
| TUCP_002089 | XLOC_085984 | ENSRNOT00000037446 | 0.996515937  | 4.02E-12 |
| TUCP_002089 | XLOC_085984 | ENSRNOT00000023619 | 0.950162249  | 2.23E-06 |
| TUCP_002089 | XLOC_085984 | ENSRNOT00000058645 | 0.956518936  | 1.14E-06 |
| TUCP_002089 | XLOC_085984 | ENSRNOT00000017948 | 0.982477434  | 1.26E-08 |
| TUCP_002089 | XLOC_085984 | ENSRNOT00000009156 | 0.95625932   | 1.17E-06 |
| TUCP_002089 | XLOC_085984 | ENSRNOT00000026481 | 0.966753362  | 3.03E-07 |
| TUCP_002089 | XLOC_085984 | ENSRNOT00000025859 | 0.950631139  | 2.13E-06 |
| TUCP_002089 | XLOC_085984 | ENSRNOT00000023180 | 0.957676568  | 9.96E-07 |
| TUCP_002089 | XLOC_085984 | ENSRNOT00000057313 | 0.978433296  | 3.54E-08 |
| TUCP_002089 | XLOC_085984 | ENSRNOT00000021803 | -0.951451002 | 1.96E-06 |
| TUCP_002089 | XLOC_085984 | ENSRNOT00000029994 | 0.956424344  | 1.15E-06 |
| TUCP_002089 | XLOC_085984 | ENSRNOT00000001081 | 0.956176081  | 1.18E-06 |
| TUCP_002089 | XLOC_085984 | ENSRNOT00000000676 | 0.963536385  | 4.77E-07 |
| TUCP_002089 | XLOC_085984 | ENSRNOT00000015609 | 0.954122491  | 1.48E-06 |
| TUCP_002089 | XLOC_085984 | ENSRNOT00000019222 | 0.9806106    | 2.09E-08 |
| TUCP_002089 | XLOC_085984 | ENSRNOT00000028070 | 0.967525461  | 2.69E-07 |
| TUCP_002089 | XLOC_085984 | ENSRNOT00000004359 | 0.971309532  | 1.46E-07 |
| TUCP_002089 | XLOC_085984 | ENSRNOT00000013274 | 0.987527433  | 2.33E-09 |
| TUCP_002089 | XLOC_085984 | ENSRNOT00000023144 | 0.957075368  | 1.07E-06 |
| TUCP_002089 | XLOC_085984 | ENSRNOT00000022610 | 0.950830199  | 2.08E-06 |
| TUCP_002089 | XLOC_085984 | ENSRNOT00000020437 | 0.953010985  | 1.67E-06 |
| TUCP_002089 | XLOC_085984 | ENSRNOT00000045574 | 0.953170037  | 1.64E-06 |
| TUCP_002089 | XLOC_085984 | ENSRNOT00000010898 | 0.955556443  | 1.27E-06 |
| TUCP_002089 | XLOC_085984 | ENSRNOT00000047093 | 0.958563404  | 8.97E-07 |
| TUCP_002089 | XLOC_085984 | ENSRNOT00000005355 | 0.965069575  | 3.86E-07 |
| TUCP_002089 | XLOC_085984 | ENSRNOT00000078675 | 0.968343292  | 2.37E-07 |
| TUCP_002089 | XLOC_085984 | ENSRNOT00000079895 | 0.977399448  | 4.47E-08 |
| TUCP_002089 | XLOC_085984 | ENSRNOT00000026089 | 0.955703294  | 1.25E-06 |
| TUCP_002089 | XLOC_085984 | ENSRNOT00000005659 | 0.961286834  | 6.42E-07 |
| TUCP_002089 | XLOC_085984 | ENSRNOT00000027520 | 0.95402201   | 1.50E-06 |
| TUCP_002089 | XLOC_085984 | ENSRNOT00000026174 | 0.960691202  | 6.92E-07 |
| TUCP_002089 | XLOC_085984 | ENSRNOT00000044635 | 0.96306657   | 5.09E-07 |
| TUCP_002089 | XLOC_085984 | ENSRNOT00000047387 | 0.977153471  | 4.72E-08 |
| TUCP_002089 | XLOC_085984 | ENSRNOT00000013661 | 0.954290704  | 1.46E-06 |
| TUCP_002089 | XLOC_085984 | ENSRNOT00000091910 | 0.970922825  | 1.56E-07 |
| TUCP_002089 | XLOC_085984 | ENSRNOT00000045488 | 0.973869469  | 9.18E-08 |
| TUCP_002089 | XLOC_085984 | ENSRNOT00000039842 | 0.963735394  | 4.65E-07 |
| TUCP_002089 | XLOC_085984 | ENSRNOT00000093174 | 0.958882526  | 8.64E-07 |
| TUCP_002089 | XLOC_085984 | ENSRNOT00000083127 | 0.975603614  | 6.53E-08 |
| TUCP_002089 | XLOC_085984 | ENSRNOT00000077555 | 0.973794137  | 9.31E-08 |
| TUCP_002089 | XLOC_085984 | ENSRNOT00000011880 | 0.951660586  | 1.92E-06 |
| TUCP_002089 | XLOC_085984 | ENSRNOT00000013260 | 0.954714554  | 1.39E-06 |
| TUCP_002089 | XLOC_085984 | ENSRNOT00000017021 | 0.969724596  | 1.90E-07 |
| TUCP_002089 | XLOC_085984 | ENSRNOT00000082228 | 0.967871424  | 2.55E-07 |
| TUCP_002089 | XLOC_085984 | ENSRNOT00000003991 | 0.950611457  | 2.13E-06 |

|             |             |                    |              |          |
|-------------|-------------|--------------------|--------------|----------|
| TUCP_002089 | XLOC_085984 | ENSRNOT0000004508  | 0.954571647  | 1.41E-06 |
| TUCP_002089 | XLOC_085984 | ENSRNOT00000034744 | 0.958506697  | 9.03E-07 |
| TUCP_002089 | XLOC_085984 | ENSRNOT00000078475 | 0.966942924  | 2.94E-07 |
| TUCP_002089 | XLOC_085984 | ENSRNOT00000087429 | 0.968668259  | 2.26E-07 |
| TUCP_002089 | XLOC_085984 | ENSRNOT00000009683 | 0.991215095  | 4.06E-10 |
| TUCP_002089 | XLOC_085984 | ENSRNOT00000020383 | 0.958680773  | 8.85E-07 |
| TUCP_002089 | XLOC_085984 | ENSRNOT00000084088 | 0.974421669  | 8.26E-08 |
| TUCP_002089 | XLOC_085984 | ENSRNOT00000017776 | 0.951020585  | 2.04E-06 |
| TUCP_002089 | XLOC_085984 | ENSRNOT00000064902 | 0.979698091  | 2.63E-08 |
| TUCP_002089 | XLOC_085984 | ENSRNOT00000088995 | 0.960934416  | 6.71E-07 |
| TUCP_002089 | XLOC_085984 | ENSRNOT00000078070 | 0.950936907  | 2.06E-06 |
| TUCP_002089 | XLOC_085984 | ENSRNOT00000002771 | 0.971171467  | 1.49E-07 |
| TUCP_002089 | XLOC_085984 | ENSRNOT00000065983 | 0.960531234  | 7.06E-07 |
| TUCP_002089 | XLOC_085984 | ENSRNOT00000079442 | 0.959228148  | 8.29E-07 |
| TUCP_002089 | XLOC_085984 | ENSRNOT00000024322 | 0.970619543  | 1.64E-07 |
| TUCP_002089 | XLOC_085984 | ENSRNOT00000090665 | 0.962532691  | 5.46E-07 |
| TUCP_002089 | XLOC_085984 | ENSRNOT00000005144 | 0.96924961   | 2.06E-07 |
| TUCP_002089 | XLOC_085984 | ENSRNOT00000016722 | 0.969706815  | 1.91E-07 |
| TUCP_002089 | XLOC_085984 | ENSRNOT00000091265 | 0.960476355  | 7.11E-07 |
| TUCP_002089 | XLOC_085984 | ENSRNOT00000012424 | 0.95997155   | 7.57E-07 |
| TUCP_002089 | XLOC_085984 | ENSRNOT00000090170 | 0.959558491  | 7.96E-07 |
| TUCP_002089 | XLOC_085984 | ENSRNOT00000026457 | 0.982879027  | 1.13E-08 |
| TUCP_002089 | XLOC_085984 | ENSRNOT00000000658 | 0.974563782  | 8.04E-08 |
| TUCP_002089 | XLOC_085984 | ENSRNOT00000083247 | -0.95677872  | 1.10E-06 |
| TUCP_002089 | XLOC_085984 | ENSRNOT00000078390 | -0.954376402 | 1.44E-06 |
| TUCP_002089 | XLOC_085984 | ENSRNOT00000089971 | 0.957958048  | 9.64E-07 |
| TUCP_002089 | XLOC_085984 | ENSRNOT00000065501 | 0.97850324   | 3.49E-08 |
| TUCP_002089 | XLOC_085984 | ENSRNOT00000066554 | 0.967813928  | 2.58E-07 |
| TUCP_002089 | XLOC_085984 | ENSRNOT00000091488 | 0.970831466  | 1.58E-07 |
| TUCP_002089 | XLOC_085984 | ENSRNOT00000025523 | 0.968653684  | 2.26E-07 |
| TUCP_002089 | XLOC_085984 | ENSRNOT00000027452 | 0.969557692  | 1.96E-07 |
| TUCP_002089 | XLOC_085984 | ENSRNOT00000076729 | 0.975334695  | 6.90E-08 |
| TUCP_002089 | XLOC_085984 | ENSRNOT00000032505 | -0.95638549  | 1.15E-06 |
| TUCP_002089 | XLOC_085984 | ENSRNOT00000070933 | 0.961375667  | 6.34E-07 |
| TUCP_002089 | XLOC_085984 | ENSRNOT00000005909 | 0.957801603  | 9.82E-07 |
| TUCP_002089 | XLOC_085984 | ENSRNOT00000045882 | 0.959247765  | 8.27E-07 |
| TUCP_002089 | XLOC_085984 | ENSRNOT00000034704 | 0.977464353  | 4.41E-08 |
| TUCP_002089 | XLOC_085984 | ENSRNOT00000012702 | -0.953697682 | 1.55E-06 |
| TUCP_002089 | XLOC_085984 | ENSRNOT00000023330 | 0.958336482  | 9.22E-07 |
| TUCP_002089 | XLOC_085984 | ENSRNOT00000025092 | 0.953235601  | 1.63E-06 |
| TUCP_002089 | XLOC_085984 | ENSRNOT00000055582 | 0.953322229  | 1.61E-06 |
| TUCP_002089 | XLOC_085984 | ENSRNOT00000037790 | 0.955803988  | 1.23E-06 |
| TUCP_002089 | XLOC_085984 | ENSRNOT0000009691  | 0.950663839  | 2.12E-06 |
| TUCP_002089 | XLOC_085984 | ENSRNOT00000027337 | 0.952725467  | 1.72E-06 |
| TUCP_002089 | XLOC_085984 | ENSRNOT00000006969 | 0.969574612  | 1.95E-07 |
| TUCP_002089 | XLOC_085984 | ENSRNOT00000007091 | 0.954065391  | 1.49E-06 |
| TUCP_002089 | XLOC_085984 | ENSRNOT00000010224 | 0.953193591  | 1.64E-06 |
| TUCP_002089 | XLOC_085984 | ENSRNOT00000090420 | -0.95468002  | 1.40E-06 |
| TUCP_002089 | XLOC_085984 | ENSRNOT00000075424 | 0.972163449  | 1.26E-07 |
| TUCP_002089 | XLOC_085984 | ENSRNOT00000078929 | 0.95686194   | 1.09E-06 |
| TUCP_002089 | XLOC_085984 | ENSRNOT00000081897 | 0.956557666  | 1.13E-06 |

|             |             |                    |              |          |
|-------------|-------------|--------------------|--------------|----------|
| TUCP_002089 | XLOC_085984 | ENSRNOT00000090424 | 0.952863422  | 1.69E-06 |
| TUCP_002089 | XLOC_085984 | ENSRNOT00000073930 | 0.951505975  | 1.95E-06 |
| TUCP_002089 | XLOC_085984 | ENSRNOT00000025075 | 0.956106835  | 1.19E-06 |
| TUCP_002089 | XLOC_085984 | ENSRNOT00000019554 | 0.962417012  | 5.54E-07 |
| TUCP_002089 | XLOC_085984 | ENSRNOT00000001222 | 0.969629911  | 1.93E-07 |
| TUCP_002089 | XLOC_085984 | ENSRNOT00000023645 | 0.969936158  | 1.84E-07 |
| TUCP_002089 | XLOC_085984 | ENSRNOT00000027234 | 0.957485115  | 1.02E-06 |
| TUCP_002089 | XLOC_085984 | ENSRNOT00000010992 | 0.969404819  | 2.01E-07 |
| TUCP_002089 | XLOC_085984 | ENSRNOT00000025832 | 0.96788211   | 2.55E-07 |
| TUCP_002089 | XLOC_085984 | ENSRNOT00000038647 | 0.963628328  | 4.72E-07 |
| TUCP_002089 | XLOC_085984 | ENSRNOT00000076669 | 0.965573501  | 3.59E-07 |
| TUCP_002089 | XLOC_085984 | ENSRNOT00000011984 | 0.991743167  | 2.98E-10 |
| TUCP_002089 | XLOC_085984 | ENSRNOT00000007175 | 0.951555952  | 1.94E-06 |
| TUCP_002089 | XLOC_085984 | ENSRNOT00000086119 | -0.960853542 | 6.78E-07 |
| TUCP_002089 | XLOC_085984 | ENSRNOT00000026293 | 0.984702065  | 6.43E-09 |
| TUCP_002089 | XLOC_085984 | ENSRNOT00000074653 | 0.98931811   | 1.08E-09 |
| TUCP_002089 | XLOC_085984 | ENSRNOT00000089007 | -0.958071177 | 9.51E-07 |
| TUCP_002089 | XLOC_085984 | ENSRNOT00000039809 | 0.962827293  | 5.25E-07 |
| TUCP_002089 | XLOC_085984 | ENSRNOT00000031230 | 0.988113858  | 1.83E-09 |
| TUCP_002089 | XLOC_085984 | ENSRNOT00000041096 | 0.951548906  | 1.94E-06 |
| TUCP_002089 | XLOC_085984 | ENSRNOT00000001923 | 0.955502317  | 1.27E-06 |
| TUCP_002089 | XLOC_085984 | ENSRNOT00000010748 | 0.955544246  | 1.27E-06 |
| TUCP_002089 | XLOC_085984 | ENSRNOT00000080928 | 0.962834189  | 5.25E-07 |
| TUCP_002089 | XLOC_085984 | ENSRNOT00000052288 | 0.967579263  | 2.67E-07 |
| TUCP_002089 | XLOC_085984 | ENSRNOT00000039631 | 0.967903552  | 2.54E-07 |
| TUCP_002089 | XLOC_085984 | ENSRNOT00000045083 | 0.968313712  | 2.39E-07 |
| TUCP_002089 | XLOC_085984 | ENSRNOT00000008427 | -0.953060316 | 1.66E-06 |
| TUCP_002089 | XLOC_085984 | ENSRNOT00000021061 | -0.957957027 | 9.64E-07 |
| TUCP_002089 | XLOC_085984 | ENSRNOT00000018074 | -0.950385328 | 2.18E-06 |
| TUCP_002089 | XLOC_085984 | ENSRNOT00000037679 | 0.970142784  | 1.78E-07 |
| TUCP_002089 | XLOC_085984 | ENSRNOT00000027910 | 0.956062617  | 1.20E-06 |
| TUCP_002089 | XLOC_085984 | ENSRNOT00000085596 | 0.994487787  | 3.97E-11 |
| TUCP_002089 | XLOC_085984 | ENSRNOT00000071694 | 0.983431477  | 9.56E-09 |
| TUCP_002089 | XLOC_085984 | ENSRNOT00000035491 | 0.972963716  | 1.09E-07 |
| TUCP_002089 | XLOC_085984 | ENSRNOT00000060696 | 0.962134995  | 5.75E-07 |
| TUCP_002089 | XLOC_085984 | ENSRNOT00000048029 | 0.967422294  | 2.74E-07 |
| TUCP_002089 | XLOC_085984 | ENSRNOT00000010986 | 0.961781228  | 6.02E-07 |
| TUCP_002089 | XLOC_085984 | ENSRNOT00000009900 | -0.952703961 | 1.72E-06 |
| TUCP_002089 | XLOC_085984 | ENSRNOT0000004412  | 0.985152156  | 5.54E-09 |
| TUCP_002089 | XLOC_085984 | ENSRNOT00000066968 | 0.963506024  | 4.79E-07 |
| TUCP_002089 | XLOC_085984 | ENSRNOT00000064798 | 0.958973528  | 8.54E-07 |
| TUCP_002089 | XLOC_085984 | ENSRNOT00000080207 | 0.96436248   | 4.26E-07 |
| TUCP_002089 | XLOC_085984 | ENSRNOT00000026280 | 0.961316872  | 6.39E-07 |
| TUCP_002089 | XLOC_085984 | ENSRNOT00000061100 | 0.984285704  | 7.35E-09 |
| TUCP_002089 | XLOC_085984 | ENSRNOT00000005387 | 0.974077841  | 8.83E-08 |
| TUCP_002089 | XLOC_085984 | ENSRNOT00000024941 | 0.994075084  | 5.69E-11 |
| TUCP_002089 | XLOC_085984 | ENSRNOT00000005381 | 0.957032049  | 1.07E-06 |
| TUCP_002089 | XLOC_085984 | ENSRNOT00000043535 | 0.959924753  | 7.61E-07 |
| TUCP_002089 | XLOC_085984 | ENSRNOT00000082174 | 0.985650909  | 4.68E-09 |
| TUCP_002089 | XLOC_085984 | ENSRNOT00000018584 | 0.960113215  | 7.44E-07 |
| TUCP_002089 | XLOC_085984 | ENSRNOT00000066593 | 0.950386406  | 2.18E-06 |



|             |             |                    |              |          |
|-------------|-------------|--------------------|--------------|----------|
| TUCP_002089 | XLOC_085984 | ENSRNOT00000013985 | 0.959255721  | 8.26E-07 |
| TUCP_002089 | XLOC_085984 | ENSRNOT00000004463 | 0.965175764  | 3.80E-07 |
| TUCP_002089 | XLOC_085984 | ENSRNOT00000027964 | 0.958386031  | 9.16E-07 |
| TUCP_002089 | XLOC_085984 | ENSRNOT00000023428 | 0.959376394  | 8.14E-07 |
| TUCP_002089 | XLOC_085984 | ENSRNOT00000024420 | 0.958510757  | 9.03E-07 |
| TUCP_002089 | XLOC_085984 | ENSRNOT00000011041 | 0.965004432  | 3.90E-07 |
| TUCP_002089 | XLOC_085984 | ENSRNOT00000021674 | 0.973459509  | 9.92E-08 |
| TUCP_002089 | XLOC_085984 | ENSRNOT00000047192 | -0.950006185 | 2.26E-06 |
| TUCP_002089 | XLOC_085984 | ENSRNOT00000047210 | 0.963406695  | 4.86E-07 |
| TUCP_002089 | XLOC_085984 | ENSRNOT00000002292 | 0.985982478  | 4.16E-09 |
| TUCP_002089 | XLOC_085984 | ENSRNOT00000029001 | 0.965375116  | 3.70E-07 |
| TUCP_002089 | XLOC_085984 | ENSRNOT00000078862 | 0.95264955   | 1.73E-06 |
| TUCP_002089 | XLOC_085984 | ENSRNOT00000004140 | 0.963282036  | 4.94E-07 |
| TUCP_002089 | XLOC_085984 | ENSRNOT00000085501 | -0.95317173  | 1.64E-06 |
| TUCP_002089 | XLOC_085984 | ENSRNOT00000064930 | 0.952537623  | 1.75E-06 |
| TUCP_002089 | XLOC_085984 | ENSRNOT00000083799 | 0.978427967  | 3.55E-08 |
| TUCP_002089 | XLOC_085984 | ENSRNOT00000009066 | 0.958005881  | 9.58E-07 |
| TUCP_002089 | XLOC_085984 | ENSRNOT00000082253 | 0.95338436   | 1.60E-06 |
| TUCP_002242 | XLOC_093574 | ENSRNOT00000021348 | 0.968505149  | 2.31E-07 |
| TUCP_002242 | XLOC_093574 | ENSRNOT00000065168 | 0.964896834  | 3.96E-07 |
| TUCP_002242 | XLOC_093574 | ENSRNOT00000085158 | 0.952950086  | 1.68E-06 |
| TUCP_002242 | XLOC_093574 | ENSRNOT00000038647 | 0.969643413  | 1.93E-07 |
| TUCP_002242 | XLOC_093574 | ENSRNOT00000060186 | 0.955937512  | 1.21E-06 |
| TUCP_002242 | XLOC_093574 | ENSRNOT00000071764 | 0.970546423  | 1.66E-07 |
| TUCP_002242 | XLOC_093574 | ENSRNOT00000091910 | 0.969178281  | 2.08E-07 |
| TUCP_002242 | XLOC_093574 | ENSRNOT00000020134 | 0.974469293  | 8.18E-08 |
| TUCP_002242 | XLOC_093574 | ENSRNOT00000016555 | 0.959962248  | 7.58E-07 |
| TUCP_002242 | XLOC_093574 | ENSRNOT00000074939 | 0.969519147  | 1.97E-07 |
| TUCP_002242 | XLOC_093574 | ENSRNOT00000077555 | 0.953094952  | 1.65E-06 |
| TUCP_002242 | XLOC_093574 | ENSRNOT00000073559 | 0.958816558  | 8.71E-07 |
| TUCP_002242 | XLOC_093574 | ENSRNOT00000017021 | 0.974736069  | 7.77E-08 |
| TUCP_002242 | XLOC_093574 | ENSRNOT00000041096 | 0.952783994  | 1.71E-06 |
| TUCP_002242 | XLOC_093574 | ENSRNOT00000087592 | 0.950009398  | 2.26E-06 |
| TUCP_002242 | XLOC_093574 | ENSRNOT00000043856 | 0.95074664   | 2.10E-06 |
| TUCP_002242 | XLOC_093574 | ENSRNOT00000032274 | 0.976565374  | 5.35E-08 |
| TUCP_002242 | XLOC_093574 | ENSRNOT00000071733 | 0.950973638  | 2.05E-06 |
| TUCP_002242 | XLOC_093574 | ENSRNOT00000024941 | 0.952159078  | 1.82E-06 |
| TUCP_002242 | XLOC_093574 | ENSRNOT00000006175 | 0.981377695  | 1.71E-08 |
| TUCP_002242 | XLOC_093574 | ENSRNOT00000009683 | 0.974125277  | 8.75E-08 |
| TUCP_002242 | XLOC_093574 | ENSRNOT00000083127 | 0.951600295  | 1.93E-06 |
| TUCP_002242 | XLOC_093574 | ENSRNOT00000026543 | 0.953940525  | 1.51E-06 |
| TUCP_002242 | XLOC_093574 | ENSRNOT00000004359 | 0.953775174  | 1.54E-06 |
| TUCP_002242 | XLOC_093574 | ENSRNOT00000024322 | 0.97035394   | 1.72E-07 |
| TUCP_002242 | XLOC_093574 | ENSRNOT00000023490 | 0.950287809  | 2.20E-06 |
| TUCP_002242 | XLOC_093574 | ENSRNOT00000027454 | 0.966212753  | 3.28E-07 |
| TUCP_002242 | XLOC_093574 | ENSRNOT00000076729 | 0.955119627  | 1.33E-06 |
| TUCP_002242 | XLOC_093574 | ENSRNOT00000090665 | 0.954340206  | 1.45E-06 |
| TUCP_002242 | XLOC_093574 | ENSRNOT00000034704 | 0.960817002  | 6.81E-07 |
| TUCP_002242 | XLOC_093574 | ENSRNOT00000016975 | 0.970995132  | 1.54E-07 |
| TUCP_002242 | XLOC_093574 | ENSRNOT00000066670 | 0.953333535  | 1.61E-06 |
| TUCP_002242 | XLOC_093574 | ENSRNOT00000091265 | 0.964571775  | 4.14E-07 |

|             |             |                    |             |          |
|-------------|-------------|--------------------|-------------|----------|
| TUCP_002242 | XLOC_093574 | ENSRNOT0000009712  | 0.955106841 | 1.33E-06 |
| TUCP_002242 | XLOC_093574 | ENSRNOT00000055401 | 0.951249043 | 2.00E-06 |
| TUCP_002242 | XLOC_093574 | ENSRNOT00000071697 | 0.953511062 | 1.58E-06 |
| TUCP_002242 | XLOC_093574 | ENSRNOT00000060696 | 0.955318282 | 1.30E-06 |
| TUCP_002242 | XLOC_093574 | ENSRNOT00000089971 | 0.984375193 | 7.14E-09 |
| TUCP_002242 | XLOC_093574 | ENSRNOT00000065501 | 0.953823504 | 1.53E-06 |
| TUCP_002242 | XLOC_093574 | ENSRNOT00000020028 | 0.952727716 | 1.72E-06 |
| TUCP_002242 | XLOC_093574 | ENSRNOT00000043345 | 0.960092087 | 7.45E-07 |
| TUCP_002242 | XLOC_093574 | ENSRNOT0000000676  | 0.970526221 | 1.67E-07 |
| TUCP_002242 | XLOC_093574 | ENSRNOT00000027452 | 0.962475815 | 5.50E-07 |
| TUCP_002242 | XLOC_093574 | ENSRNOT00000004412 | 0.951990974 | 1.85E-06 |
| TUCP_002242 | XLOC_093574 | ENSRNOT00000024128 | 0.950359007 | 2.18E-06 |
| TUCP_002242 | XLOC_093574 | ENSRNOT00000012048 | 0.959221841 | 8.29E-07 |
| TUCP_002242 | XLOC_093574 | ENSRNOT00000072196 | 0.966075473 | 3.34E-07 |
| TUCP_002242 | XLOC_093574 | ENSRNOT00000019222 | 0.96577657  | 3.49E-07 |
| TUCP_002242 | XLOC_093574 | ENSRNOT00000066739 | 0.971061583 | 1.52E-07 |
| TUCP_002242 | XLOC_093574 | ENSRNOT00000045882 | 0.978287318 | 3.66E-08 |
| TUCP_002242 | XLOC_093574 | ENSRNOT00000025832 | 0.956814387 | 1.10E-06 |
| TUCP_002242 | XLOC_093574 | ENSRNOT00000043535 | 0.964381227 | 4.25E-07 |
| TUCP_002242 | XLOC_093574 | ENSRNOT00000013274 | 0.974793507 | 7.68E-08 |
| TUCP_002242 | XLOC_093574 | ENSRNOT00000085027 | 0.952641347 | 1.73E-06 |
| TUCP_002242 | XLOC_093574 | ENSRNOT00000044742 | 0.97366523  | 9.54E-08 |
| TUCP_002242 | XLOC_093574 | ENSRNOT00000072534 | 0.953935998 | 1.51E-06 |
| TUCP_002242 | XLOC_093574 | ENSRNOT00000000468 | 0.950169828 | 2.22E-06 |
| TUCP_002242 | XLOC_093574 | ENSRNOT00000080088 | 0.950206796 | 2.22E-06 |
| TUCP_002242 | XLOC_093574 | ENSRNOT00000014537 | 0.955961618 | 1.21E-06 |
| TUCP_002242 | XLOC_093574 | ENSRNOT00000014664 | 0.973813073 | 9.28E-08 |
| TUCP_002242 | XLOC_093574 | ENSRNOT00000031230 | 0.964404652 | 4.24E-07 |
| TUCP_002242 | XLOC_093574 | ENSRNOT00000023428 | 0.980627847 | 2.08E-08 |
| TUCP_002242 | XLOC_093574 | ENSRNOT00000075326 | 0.987557667 | 2.30E-09 |
| TUCP_002242 | XLOC_093574 | ENSRNOT00000022796 | 0.951127784 | 2.02E-06 |
| TUCP_002242 | XLOC_093574 | ENSRNOT00000073991 | 0.964384944 | 4.25E-07 |
| TUCP_002242 | XLOC_093574 | ENSRNOT00000029001 | 0.964274507 | 4.32E-07 |
| TUCP_002242 | XLOC_093574 | ENSRNOT00000029167 | 0.973713309 | 9.46E-08 |
| TUCP_002242 | XLOC_093574 | ENSRNOT00000083799 | 0.959058656 | 8.46E-07 |
| TUCP_002243 | XLOC_093638 | ENSRNOT00000084500 | 0.977097736 | 4.78E-08 |
| TUCP_002243 | XLOC_093638 | ENSRNOT00000093467 | 0.988979816 | 1.26E-09 |
| TUCP_002243 | XLOC_093638 | ENSRNOT00000029340 | 0.993506308 | 9.00E-11 |
| TUCP_002243 | XLOC_093638 | ENSRNOT00000038646 | 0.994661577 | 3.38E-11 |
| TUCP_002243 | XLOC_093638 | ENSRNOT00000012095 | 0.966714188 | 3.04E-07 |
| TUCP_002243 | XLOC_093638 | ENSRNOT00000017909 | 0.967168975 | 2.84E-07 |
| TUCP_002243 | XLOC_093638 | ENSRNOT00000092579 | 0.994661577 | 3.38E-11 |
| TUCP_002243 | XLOC_093638 | ENSRNOT00000061516 | 0.981321509 | 1.74E-08 |
| TUCP_002243 | XLOC_093638 | ENSRNOT00000036383 | 0.980301589 | 2.26E-08 |
| TUCP_002243 | XLOC_093638 | ENSRNOT00000076528 | 0.99053819  | 5.88E-10 |
| TUCP_002243 | XLOC_093638 | ENSRNOT00000083034 | 0.985296936 | 5.28E-09 |
| TUCP_002243 | XLOC_093638 | ENSRNOT00000089607 | 0.987830255 | 2.06E-09 |
| TUCP_002243 | XLOC_093638 | ENSRNOT00000086014 | 0.956747667 | 1.11E-06 |
| TUCP_002243 | XLOC_093638 | ENSRNOT00000054939 | 0.978428388 | 3.55E-08 |
| TUCP_002243 | XLOC_093638 | ENSRNOT00000052315 | 0.975806284 | 6.27E-08 |
| TUCP_002243 | XLOC_093638 | ENSRNOT00000046231 | 0.953139626 | 1.64E-06 |

|             |             |                    |              |          |
|-------------|-------------|--------------------|--------------|----------|
| TUCP_002243 | XLOC_093638 | ENSRNOT00000013459 | 0.9708982    | 1.57E-07 |
| TUCP_002243 | XLOC_093638 | ENSRNOT00000078137 | 0.994661577  | 3.38E-11 |
| TUCP_002243 | XLOC_093638 | ENSRNOT00000077764 | 0.962673796  | 5.36E-07 |
| TUCP_002243 | XLOC_093638 | ENSRNOT00000043661 | 0.958065065  | 9.52E-07 |
| TUCP_002243 | XLOC_093638 | ENSRNOT00000092740 | 0.994661577  | 3.38E-11 |
| TUCP_002243 | XLOC_093638 | ENSRNOT00000067034 | 0.954760093  | 1.38E-06 |
| TUCP_002243 | XLOC_093638 | ENSRNOT00000000117 | 0.997702666  | 5.02E-13 |
| TUCP_002243 | XLOC_093638 | ENSRNOT00000071877 | 0.955607418  | 1.26E-06 |
| TUCP_002243 | XLOC_093638 | ENSRNOT00000070958 | 0.994661577  | 3.38E-11 |
| TUCP_002243 | XLOC_093638 | ENSRNOT00000035538 | 0.953234927  | 1.63E-06 |
| TUCP_002243 | XLOC_093638 | ENSRNOT00000085310 | 0.956427819  | 1.15E-06 |
| TUCP_002243 | XLOC_093638 | ENSRNOT00000047241 | 0.957669489  | 9.97E-07 |
| TUCP_002243 | XLOC_093638 | ENSRNOT00000027268 | 0.994661577  | 3.38E-11 |
| TUCP_002243 | XLOC_093638 | ENSRNOT00000004459 | 0.994661577  | 3.38E-11 |
| TUCP_002243 | XLOC_093638 | ENSRNOT00000089235 | 0.992314021  | 2.09E-10 |
| TUCP_002243 | XLOC_093638 | ENSRNOT00000088168 | 0.994661577  | 3.38E-11 |
| TUCP_002243 | XLOC_093638 | ENSRNOT00000088148 | 0.994661577  | 3.38E-11 |
| TUCP_002243 | XLOC_093638 | ENSRNOT00000088527 | 0.994661577  | 3.38E-11 |
| TUCP_002243 | XLOC_093638 | ENSRNOT00000078701 | 0.994661577  | 3.38E-11 |
| TUCP_002243 | XLOC_093638 | ENSRNOT00000052308 | 0.953549322  | 1.58E-06 |
| TUCP_002243 | XLOC_093638 | ENSRNOT00000021748 | 0.994661577  | 3.38E-11 |
| TUCP_002243 | XLOC_093638 | ENSRNOT00000089085 | 0.994661577  | 3.38E-11 |
| TUCP_002243 | XLOC_093638 | ENSRNOT00000008153 | 0.994441026  | 4.14E-11 |
| TUCP_002243 | XLOC_093638 | ENSRNOT00000085896 | 0.972049493  | 1.28E-07 |
| TUCP_002243 | XLOC_093638 | ENSRNOT00000079189 | 0.981646568  | 1.59E-08 |
| TUCP_002243 | XLOC_093638 | ENSRNOT00000090078 | 0.994661577  | 3.38E-11 |
| TUCP_002243 | XLOC_093638 | ENSRNOT00000078020 | 0.952293645  | 1.80E-06 |
| TUCP_002243 | XLOC_093638 | ENSRNOT00000092425 | 0.967119244  | 2.86E-07 |
| TUCP_002243 | XLOC_093638 | ENSRNOT00000009776 | 0.994661577  | 3.38E-11 |
| TUCP_002248 | XLOC_093808 | ENSRNOT00000005653 | 0.970488264  | 1.68E-07 |
| TUCP_002248 | XLOC_093808 | ENSRNOT00000059169 | 0.978031239  | 3.88E-08 |
| TUCP_002248 | XLOC_093808 | ENSRNOT00000010561 | 0.9553557    | 1.30E-06 |
| TUCP_002248 | XLOC_093808 | ENSRNOT00000010680 | 0.970191789  | 1.76E-07 |
| TUCP_002248 | XLOC_093808 | ENSRNOT00000035973 | -0.964188223 | 4.37E-07 |
| TUCP_002248 | XLOC_093808 | ENSRNOT00000020832 | 0.957095486  | 1.07E-06 |
| TUCP_002248 | XLOC_093808 | ENSRNOT00000013582 | -0.96221135  | 5.70E-07 |
| TUCP_002248 | XLOC_093808 | ENSRNOT00000076695 | 0.954117593  | 1.48E-06 |
| TUCP_002248 | XLOC_093808 | ENSRNOT00000079432 | 0.98109107   | 1.84E-08 |
| TUCP_002248 | XLOC_093808 | ENSRNOT00000026381 | -0.983466422 | 9.46E-09 |
| TUCP_002248 | XLOC_093808 | ENSRNOT00000018864 | -0.952589416 | 1.74E-06 |
| TUCP_002248 | XLOC_093808 | ENSRNOT00000018711 | -0.962910539 | 5.19E-07 |
| TUCP_002248 | XLOC_093808 | ENSRNOT00000064625 | 0.957059784  | 1.07E-06 |
| TUCP_002248 | XLOC_093808 | ENSRNOT00000061132 | 0.95237557   | 1.78E-06 |
| TUCP_002249 | XLOC_093848 | ENSRNOT00000019104 | 0.971949471  | 1.30E-07 |
| TUCP_002249 | XLOC_093848 | ENSRNOT00000019848 | 0.955113878  | 1.33E-06 |
| TUCP_002249 | XLOC_093848 | ENSRNOT00000077451 | 0.95401109   | 1.50E-06 |
| TUCP_002249 | XLOC_093848 | ENSRNOT00000015566 | -0.950079893 | 2.24E-06 |
| TUCP_002249 | XLOC_093848 | ENSRNOT00000025067 | 0.970195756  | 1.76E-07 |
| TUCP_002249 | XLOC_093848 | ENSRNOT00000006913 | 0.965749274  | 3.50E-07 |
| TUCP_002249 | XLOC_093848 | ENSRNOT00000030914 | 0.972050442  | 1.28E-07 |
| TUCP_002249 | XLOC_093848 | ENSRNOT00000086310 | 0.96239696   | 5.56E-07 |

|             |             |                    |              |          |
|-------------|-------------|--------------------|--------------|----------|
| TUCP_002249 | XLOC_093848 | ENSRNOT00000011130 | 0.950786236  | 2.09E-06 |
| TUCP_002249 | XLOC_093848 | ENSRNOT00000014384 | 0.953729605  | 1.55E-06 |
| TUCP_002249 | XLOC_093848 | ENSRNOT00000030850 | -0.95034087  | 2.19E-06 |
| TUCP_002249 | XLOC_093848 | ENSRNOT00000074606 | 0.952562718  | 1.75E-06 |
| TUCP_002249 | XLOC_093848 | ENSRNOT00000086893 | 0.951885579  | 1.87E-06 |
| TUCP_002249 | XLOC_093848 | ENSRNOT00000055540 | -0.958204088 | 9.36E-07 |
| TUCP_002249 | XLOC_093848 | ENSRNOT00000003247 | 0.959880611  | 7.65E-07 |
| TUCP_002249 | XLOC_093848 | ENSRNOT00000025284 | 0.978348388  | 3.61E-08 |
| TUCP_002249 | XLOC_093848 | ENSRNOT00000022126 | 0.957442285  | 1.02E-06 |
| TUCP_002249 | XLOC_093848 | ENSRNOT00000064153 | -0.953598327 | 1.57E-06 |
| TUCP_002249 | XLOC_093848 | ENSRNOT00000035320 | 0.971314675  | 1.46E-07 |
| TUCP_002249 | XLOC_093848 | ENSRNOT00000017469 | 0.967033001  | 2.90E-07 |
| TUCP_002249 | XLOC_093848 | ENSRNOT00000077999 | -0.952380107 | 1.78E-06 |
| TUCP_002249 | XLOC_093848 | ENSRNOT00000046807 | 0.950871848  | 2.07E-06 |
| TUCP_002249 | XLOC_093848 | ENSRNOT00000026398 | 0.966155389  | 3.30E-07 |
| TUCP_002249 | XLOC_093848 | ENSRNOT00000024264 | 0.96276696   | 5.29E-07 |
| TUCP_002249 | XLOC_093848 | ENSRNOT00000015188 | -0.960833348 | 6.80E-07 |
| TUCP_002249 | XLOC_093848 | ENSRNOT00000018488 | 0.960052435  | 7.49E-07 |
| TUCP_002249 | XLOC_093848 | ENSRNOT00000080522 | 0.972298414  | 1.23E-07 |
| TUCP_002249 | XLOC_093848 | ENSRNOT00000030007 | 0.951825086  | 1.88E-06 |
| TUCP_002249 | XLOC_093848 | ENSRNOT00000082686 | 0.965425578  | 3.67E-07 |
| TUCP_002249 | XLOC_093848 | ENSRNOT00000010141 | -0.95240487  | 1.78E-06 |
| TUCP_002249 | XLOC_093848 | ENSRNOT00000026462 | 0.967574587  | 2.67E-07 |
| TUCP_002249 | XLOC_093848 | ENSRNOT00000084709 | -0.955420193 | 1.29E-06 |
| TUCP_002249 | XLOC_093848 | ENSRNOT00000029179 | 0.964251964  | 4.33E-07 |
| TUCP_002249 | XLOC_093848 | ENSRNOT00000026481 | -0.953098421 | 1.65E-06 |
| TUCP_002249 | XLOC_093848 | ENSRNOT00000044562 | -0.958461918 | 9.08E-07 |
| TUCP_002249 | XLOC_093848 | ENSRNOT00000043752 | 0.958412265  | 9.14E-07 |
| TUCP_002249 | XLOC_093848 | ENSRNOT00000017813 | 0.958719266  | 8.81E-07 |
| TUCP_002249 | XLOC_093848 | ENSRNOT00000026525 | 0.969790541  | 1.88E-07 |
| TUCP_002249 | XLOC_093848 | ENSRNOT0000001404  | 0.974667338  | 7.87E-08 |
| TUCP_002249 | XLOC_093848 | ENSRNOT0000001401  | -0.957340046 | 1.04E-06 |
| TUCP_002249 | XLOC_093848 | ENSRNOT00000016132 | 0.956539849  | 1.13E-06 |
| TUCP_002249 | XLOC_093848 | ENSRNOT0000001366  | 0.961437246  | 6.29E-07 |
| TUCP_002249 | XLOC_093848 | ENSRNOT00000013067 | 0.953780211  | 1.54E-06 |
| TUCP_002249 | XLOC_093848 | ENSRNOT0000001360  | 0.958567234  | 8.97E-07 |
| TUCP_002249 | XLOC_093848 | ENSRNOT00000046486 | 0.956786077  | 1.10E-06 |
| TUCP_002249 | XLOC_093848 | ENSRNOT00000016220 | 0.959650966  | 7.87E-07 |
| TUCP_002249 | XLOC_093848 | ENSRNOT00000017081 | 0.964639332  | 4.10E-07 |
| TUCP_002249 | XLOC_093848 | ENSRNOT0000002313  | 0.966347196  | 3.21E-07 |
| TUCP_002249 | XLOC_093848 | ENSRNOT00000037389 | 0.952992993  | 1.67E-06 |
| TUCP_002249 | XLOC_093848 | ENSRNOT00000016637 | 0.972089736  | 1.27E-07 |
| TUCP_002249 | XLOC_093848 | ENSRNOT00000031979 | 0.964138011  | 4.40E-07 |
| TUCP_002249 | XLOC_093848 | ENSRNOT00000076387 | -0.950260432 | 2.21E-06 |
| TUCP_002249 | XLOC_093848 | ENSRNOT00000045765 | 0.952915637  | 1.68E-06 |
| TUCP_002249 | XLOC_093848 | ENSRNOT00000071929 | 0.958829812  | 8.69E-07 |
| TUCP_002249 | XLOC_093848 | ENSRNOT00000064305 | 0.96614214   | 3.31E-07 |
| TUCP_002249 | XLOC_093848 | ENSRNOT00000000532 | 0.963366085  | 4.89E-07 |
| TUCP_002249 | XLOC_093848 | ENSRNOT00000016458 | -0.960046347 | 7.50E-07 |
| TUCP_002249 | XLOC_093848 | ENSRNOT00000003992 | 0.966658639  | 3.07E-07 |
| TUCP_002249 | XLOC_093848 | ENSRNOT00000046983 | 0.95779528   | 9.82E-07 |

|             |             |                    |              |          |
|-------------|-------------|--------------------|--------------|----------|
| TUCP_002249 | XLOC_093848 | ENSRNOT00000050515 | -0.952960474 | 1.68E-06 |
| TUCP_002249 | XLOC_093848 | ENSRNOT00000078073 | 0.966870718  | 2.97E-07 |
| TUCP_002249 | XLOC_093848 | ENSRNOT00000064901 | -0.954265342 | 1.46E-06 |
| TUCP_002249 | XLOC_093848 | ENSRNOT00000087997 | -0.955429602 | 1.29E-06 |
| TUCP_002249 | XLOC_093848 | ENSRNOT00000055607 | 0.964264293  | 4.32E-07 |
| TUCP_002249 | XLOC_093848 | ENSRNOT00000032289 | 0.963045267  | 5.10E-07 |
| TUCP_002249 | XLOC_093848 | ENSRNOT00000042633 | 0.952080266  | 1.84E-06 |
| TUCP_002249 | XLOC_093848 | ENSRNOT00000019157 | 0.958215055  | 9.35E-07 |
| TUCP_002249 | XLOC_093848 | ENSRNOT00000003207 | 0.951656604  | 1.92E-06 |
| TUCP_002249 | XLOC_093848 | ENSRNOT00000006366 | 0.966339921  | 3.22E-07 |
| TUCP_002249 | XLOC_093848 | ENSRNOT00000079698 | 0.977722019  | 4.16E-08 |
| TUCP_002249 | XLOC_093848 | ENSRNOT00000044847 | 0.959492788  | 8.02E-07 |
| TUCP_002249 | XLOC_093848 | ENSRNOT00000064723 | 0.962477883  | 5.50E-07 |
| TUCP_002249 | XLOC_093848 | ENSRNOT00000073834 | 0.958418239  | 9.13E-07 |
| TUCP_002249 | XLOC_093848 | ENSRNOT00000086456 | 0.961731535  | 6.06E-07 |
| TUCP_002249 | XLOC_093848 | ENSRNOT00000036959 | 0.978826547  | 3.23E-08 |
| TUCP_002249 | XLOC_093848 | ENSRNOT00000075209 | 0.956919268  | 1.09E-06 |
| TUCP_002249 | XLOC_093848 | ENSRNOT00000056145 | 0.952048049  | 1.84E-06 |
| TUCP_002249 | XLOC_093848 | ENSRNOT00000001227 | 0.951357757  | 1.98E-06 |
| TUCP_002249 | XLOC_093848 | ENSRNOT00000066133 | 0.953948231  | 1.51E-06 |
| TUCP_002249 | XLOC_093848 | ENSRNOT00000067741 | 0.956664269  | 1.12E-06 |
| TUCP_002249 | XLOC_093848 | ENSRNOT00000048933 | 0.965710077  | 3.52E-07 |
| TUCP_002249 | XLOC_093848 | ENSRNOT00000051953 | 0.962621991  | 5.40E-07 |
| TUCP_002249 | XLOC_093848 | ENSRNOT00000035385 | -0.953682632 | 1.55E-06 |
| TUCP_002249 | XLOC_093848 | ENSRNOT00000000728 | 0.958570041  | 8.97E-07 |
| TUCP_002249 | XLOC_093848 | ENSRNOT00000019487 | -0.963492018 | 4.80E-07 |
| TUCP_002249 | XLOC_093848 | ENSRNOT00000071192 | 0.956103951  | 1.19E-06 |
| TUCP_002249 | XLOC_093848 | ENSRNOT00000018173 | 0.979016872  | 3.09E-08 |
| TUCP_002249 | XLOC_093848 | ENSRNOT00000064535 | 0.9546923    | 1.39E-06 |
| TUCP_002249 | XLOC_093848 | ENSRNOT00000010748 | -0.952576612 | 1.74E-06 |
| TUCP_002249 | XLOC_093848 | ENSRNOT00000004762 | -0.952133875 | 1.83E-06 |
| TUCP_002249 | XLOC_093848 | ENSRNOT00000040060 | 0.955965086  | 1.21E-06 |
| TUCP_002249 | XLOC_093848 | ENSRNOT00000007044 | 0.965932467  | 3.41E-07 |
| TUCP_002249 | XLOC_093848 | ENSRNOT00000010983 | -0.950134856 | 2.23E-06 |
| TUCP_002249 | XLOC_093848 | ENSRNOT00000004787 | 0.954422068  | 1.43E-06 |
| TUCP_002249 | XLOC_093848 | ENSRNOT00000058351 | -0.955958491 | 1.21E-06 |
| TUCP_002249 | XLOC_093848 | ENSRNOT00000004941 | 0.961111434  | 6.56E-07 |
| TUCP_002249 | XLOC_093848 | ENSRNOT00000027753 | 0.951221072  | 2.00E-06 |
| TUCP_002249 | XLOC_093848 | ENSRNOT00000023628 | 0.951462011  | 1.96E-06 |
| TUCP_002249 | XLOC_093848 | ENSRNOT00000088679 | 0.956393173  | 1.15E-06 |
| TUCP_002249 | XLOC_093848 | ENSRNOT00000016776 | 0.963625275  | 4.72E-07 |
| TUCP_002249 | XLOC_093848 | ENSRNOT00000025913 | 0.954820328  | 1.37E-06 |
| TUCP_002249 | XLOC_093848 | ENSRNOT00000031935 | 0.953022694  | 1.66E-06 |
| TUCP_002249 | XLOC_093848 | ENSRNOT00000024253 | -0.962602637 | 5.41E-07 |
| TUCP_002249 | XLOC_093848 | ENSRNOT00000045833 | -0.956344015 | 1.16E-06 |
| TUCP_002249 | XLOC_093848 | ENSRNOT00000063930 | 0.950454384  | 2.16E-06 |
| TUCP_002249 | XLOC_093848 | ENSRNOT00000046215 | 0.962304978  | 5.63E-07 |
| TUCP_002249 | XLOC_093848 | ENSRNOT00000013116 | 0.959520099  | 8.00E-07 |
| TUCP_002249 | XLOC_093848 | ENSRNOT00000013025 | 0.95273378   | 1.72E-06 |
| TUCP_002249 | XLOC_093848 | ENSRNOT00000014479 | 0.978447122  | 3.53E-08 |
| TUCP_002249 | XLOC_093848 | ENSRNOT00000027220 | 0.960748659  | 6.87E-07 |

|             |             |                     |              |          |
|-------------|-------------|---------------------|--------------|----------|
| TUCP_002249 | XLOC_093848 | ENSRNOT00000003326  | 0.966849222  | 2.98E-07 |
| TUCP_002249 | XLOC_093848 | ENSRNOT00000016306  | 0.961472436  | 6.27E-07 |
| TUCP_002249 | XLOC_093848 | ENSRNOT00000015476  | 0.957173479  | 1.06E-06 |
| TUCP_002249 | XLOC_093848 | ENSRNOT00000073019  | -0.956762236 | 1.11E-06 |
| TUCP_002249 | XLOC_093848 | ENSRNOT00000004007  | 0.98824911   | 1.73E-09 |
| TUCP_002249 | XLOC_093848 | ENSRNOT00000022432  | 0.963730991  | 4.65E-07 |
| TUCP_002249 | XLOC_093848 | ENSRNOT00000009817  | 0.962192899  | 5.71E-07 |
| TUCP_002249 | XLOC_093848 | ENSRNOT00000009708  | 0.965256167  | 3.76E-07 |
| TUCP_002249 | XLOC_093848 | ENSRNOT00000006443  | 0.95556697   | 1.27E-06 |
| TUCP_002249 | XLOC_093848 | ENSRNOT00000025294  | 0.967219432  | 2.82E-07 |
| TUCP_002249 | XLOC_093848 | ENSRNOT00000021523  | -0.964534482 | 4.16E-07 |
| TUCP_002249 | XLOC_093848 | ENSRNOT00000072762  | 0.951666238  | 1.92E-06 |
| TUCP_002249 | XLOC_093848 | ENSRNOT00000012583  | 0.960500124  | 7.09E-07 |
| TUCP_002249 | XLOC_093848 | ENSRNOT00000010318  | 0.953021625  | 1.67E-06 |
| TUCP_002249 | XLOC_093848 | ENSRNOT00000052002  | -0.953712266 | 1.55E-06 |
| TUCP_002249 | XLOC_093848 | ENSRNOT00000022502  | 0.972555486  | 1.17E-07 |
| TUCP_002249 | XLOC_093848 | ENSRNOT00000026928  | 0.963739413  | 4.65E-07 |
| TUCP_002249 | XLOC_093848 | ENSRNOT00000087443  | -0.950577432 | 2.14E-06 |
| TUCP_002249 | XLOC_093848 | ENSRNOT00000018028  | 0.969479326  | 1.98E-07 |
| TUCP_002249 | XLOC_093848 | ENSRNOT00000021803  | 0.961621987  | 6.15E-07 |
| TUCP_002249 | XLOC_093848 | ENSRNOT00000003070  | 0.951247505  | 2.00E-06 |
| TUCP_002249 | XLOC_093848 | ENSRNOT00000039850  | 0.953088473  | 1.65E-06 |
| TUCP_002249 | XLOC_093848 | ENSRNOT00000003787  | 0.950802558  | 2.09E-06 |
| TUCP_002249 | XLOC_093848 | ENSRNOT00000023262  | 0.954804462  | 1.38E-06 |
| TUCP_002249 | XLOC_093848 | ENSRNOT00000014859  | 0.955031248  | 1.34E-06 |
| TUCP_002249 | XLOC_093848 | ENSRNOT00000010674  | 0.970099973  | 1.79E-07 |
| TUCP_002249 | XLOC_093848 | ENSRNOT00000068381  | -0.962498406 | 5.48E-07 |
| TUCP_002249 | XLOC_093848 | ENSRNOT00000007314  | 0.955233749  | 1.31E-06 |
| TUCP_002249 | XLOC_093848 | ENSRNOT000000090456 | -0.963763782 | 4.63E-07 |
| TUCP_002249 | XLOC_093848 | ENSRNOT00000005170  | 0.950404085  | 2.17E-06 |
| TUCP_002249 | XLOC_093848 | ENSRNOT00000023567  | 0.967275282  | 2.80E-07 |
| TUCP_002249 | XLOC_093848 | ENSRNOT00000071897  | 0.961406446  | 6.32E-07 |
| TUCP_002249 | XLOC_093848 | ENSRNOT00000024285  | 0.96030211   | 7.26E-07 |
| TUCP_002249 | XLOC_093848 | ENSRNOT00000041277  | 0.955171966  | 1.32E-06 |
| TUCP_002249 | XLOC_093848 | ENSRNOT00000071482  | 0.954672427  | 1.40E-06 |
| TUCP_002249 | XLOC_093848 | ENSRNOT00000028744  | 0.964304076  | 4.30E-07 |
| TUCP_002249 | XLOC_093848 | ENSRNOT00000028885  | 0.958675903  | 8.85E-07 |
| TUCP_002249 | XLOC_093848 | ENSRNOT00000067901  | 0.964909399  | 3.95E-07 |
| TUCP_002249 | XLOC_093848 | ENSRNOT00000088202  | 0.959169133  | 8.34E-07 |
| TUCP_002249 | XLOC_093848 | ENSRNOT00000029833  | -0.967635192 | 2.65E-07 |
| TUCP_002249 | XLOC_093848 | ENSRNOT00000061916  | 0.96412061   | 4.41E-07 |
| TUCP_002249 | XLOC_093848 | ENSRNOT00000078161  | 0.962580403  | 5.43E-07 |
| TUCP_002249 | XLOC_093848 | ENSRNOT00000011572  | 0.966972425  | 2.93E-07 |
| TUCP_002249 | XLOC_093848 | ENSRNOT00000001607  | -0.970738344 | 1.61E-07 |
| TUCP_002249 | XLOC_093848 | ENSRNOT00000036282  | -0.955371902 | 1.29E-06 |
| TUCP_002249 | XLOC_093848 | ENSRNOT00000020669  | -0.952240607 | 1.81E-06 |
| TUCP_002249 | XLOC_093848 | ENSRNOT00000085971  | 0.951012664  | 2.05E-06 |
| TUCP_002249 | XLOC_093848 | ENSRNOT00000020663  | 0.954104854  | 1.48E-06 |
| TUCP_002249 | XLOC_093848 | ENSRNOT00000022142  | -0.96345257  | 4.83E-07 |
| TUCP_002249 | XLOC_093848 | ENSRNOT00000076300  | 0.962754998  | 5.30E-07 |
| TUCP_002249 | XLOC_093848 | ENSRNOT00000015537  | -0.961995718 | 5.86E-07 |

|             |             |                     |              |          |
|-------------|-------------|---------------------|--------------|----------|
| TUCP_002249 | XLOC_093848 | ENSRNOT00000011499  | 0.950927372  | 2.06E-06 |
| TUCP_002249 | XLOC_093848 | ENSRNOT00000015946  | 0.977484192  | 4.39E-08 |
| TUCP_002249 | XLOC_093848 | ENSRNOT00000004172  | -0.952292335 | 1.80E-06 |
| TUCP_002249 | XLOC_093848 | ENSRNOT00000001234  | 0.955150476  | 1.33E-06 |
| TUCP_002249 | XLOC_093848 | ENSRNOT00000023962  | 0.967331952  | 2.77E-07 |
| TUCP_002249 | XLOC_093848 | ENSRNOT000000085279 | -0.960194278 | 7.36E-07 |
| TUCP_002249 | XLOC_093848 | ENSRNOT00000006570  | 0.965970606  | 3.39E-07 |
| TUCP_002249 | XLOC_093848 | ENSRNOT00000025819  | 0.967212095  | 2.82E-07 |
| TUCP_002249 | XLOC_093848 | ENSRNOT00000015318  | 0.953210378  | 1.63E-06 |
| TUCP_002249 | XLOC_093848 | ENSRNOT00000010224  | -0.950238328 | 2.21E-06 |
| TUCP_002249 | XLOC_093848 | ENSRNOT00000005486  | 0.971563704  | 1.40E-07 |
| TUCP_002249 | XLOC_093848 | ENSRNOT00000045532  | 0.952155955  | 1.82E-06 |
| TUCP_002249 | XLOC_093848 | ENSRNOT00000004770  | 0.954758305  | 1.38E-06 |
| TUCP_002249 | XLOC_093848 | ENSRNOT00000017687  | 0.969164172  | 2.08E-07 |
| TUCP_002249 | XLOC_093848 | ENSRNOT00000039296  | -0.956319318 | 1.16E-06 |
| TUCP_002249 | XLOC_093848 | ENSRNOT00000039551  | 0.962859098  | 5.23E-07 |
| TUCP_002249 | XLOC_093848 | ENSRNOT00000017269  | 0.955752162  | 1.24E-06 |
| TUCP_002249 | XLOC_093848 | ENSRNOT00000087386  | 0.954099345  | 1.49E-06 |
| TUCP_002249 | XLOC_093848 | ENSRNOT00000050795  | -0.951575197 | 1.93E-06 |
| TUCP_002249 | XLOC_093848 | ENSRNOT00000083573  | 0.983547242  | 9.24E-09 |
| TUCP_002249 | XLOC_093848 | ENSRNOT00000083578  | -0.951884193 | 1.87E-06 |
| TUCP_002249 | XLOC_093848 | ENSRNOT00000059524  | 0.957579885  | 1.01E-06 |
| TUCP_002249 | XLOC_093848 | ENSRNOT00000017362  | 0.966664344  | 3.07E-07 |
| TUCP_002249 | XLOC_093848 | ENSRNOT00000005658  | 0.953472567  | 1.59E-06 |
| TUCP_002249 | XLOC_093848 | ENSRNOT00000045326  | -0.95065575  | 2.12E-06 |
| TUCP_002249 | XLOC_093848 | ENSRNOT00000090342  | -0.957041724 | 1.07E-06 |
| TUCP_002249 | XLOC_093848 | ENSRNOT00000019465  | 0.969998528  | 1.82E-07 |
| TUCP_002249 | XLOC_093848 | ENSRNOT00000067170  | 0.967877307  | 2.55E-07 |
| TUCP_002249 | XLOC_093848 | ENSRNOT00000060432  | 0.976320902  | 5.63E-08 |
| TUCP_002249 | XLOC_093848 | ENSRNOT00000001586  | 0.962366856  | 5.58E-07 |
| TUCP_002249 | XLOC_093848 | ENSRNOT00000029332  | 0.966565074  | 3.11E-07 |
| TUCP_002249 | XLOC_093848 | ENSRNOT00000081786  | 0.965870747  | 3.44E-07 |
| TUCP_002249 | XLOC_093848 | ENSRNOT00000019820  | -0.955800099 | 1.23E-06 |
| TUCP_002249 | XLOC_093848 | ENSRNOT00000013695  | 0.956370645  | 1.16E-06 |
| TUCP_002249 | XLOC_093848 | ENSRNOT00000006050  | 0.955939534  | 1.21E-06 |
| TUCP_002249 | XLOC_093848 | ENSRNOT00000009000  | 0.954082077  | 1.49E-06 |
| TUCP_002249 | XLOC_093848 | ENSRNOT00000089545  | 0.964672975  | 4.08E-07 |
| TUCP_002249 | XLOC_093848 | ENSRNOT00000019519  | -0.956748027 | 1.11E-06 |
| TUCP_002249 | XLOC_093848 | ENSRNOT00000077908  | -0.953252882 | 1.63E-06 |
| TUCP_002249 | XLOC_093848 | ENSRNOT00000090461  | -0.959194086 | 8.32E-07 |
| TUCP_002249 | XLOC_093848 | ENSRNOT00000010783  | 0.959216072  | 8.30E-07 |
| TUCP_002249 | XLOC_093848 | ENSRNOT00000016330  | 0.985457735  | 5.00E-09 |
| TUCP_002249 | XLOC_093848 | ENSRNOT00000019121  | 0.953914152  | 1.52E-06 |
| TUCP_002249 | XLOC_093848 | ENSRNOT00000036931  | 0.957290809  | 1.04E-06 |
| TUCP_002249 | XLOC_093848 | ENSRNOT00000012364  | 0.953640153  | 1.56E-06 |
| TUCP_002249 | XLOC_093848 | ENSRNOT00000016389  | 0.970068092  | 1.80E-07 |
| TUCP_002249 | XLOC_093848 | ENSRNOT00000064679  | 0.95456717   | 1.41E-06 |
| TUCP_002249 | XLOC_093848 | ENSRNOT00000032301  | 0.951432539  | 1.96E-06 |
| TUCP_002249 | XLOC_093848 | ENSRNOT00000021030  | 0.971007809  | 1.54E-07 |
| TUCP_002249 | XLOC_093848 | ENSRNOT00000077727  | 0.950604352  | 2.13E-06 |
| TUCP_002249 | XLOC_093848 | ENSRNOT00000044346  | 0.963476088  | 4.81E-07 |

|             |             |                    |              |          |
|-------------|-------------|--------------------|--------------|----------|
| TUCP_002249 | XLOC_093848 | ENSRNOT0000000206  | 0.960759864  | 6.86E-07 |
| TUCP_002249 | XLOC_093848 | ENSRNOT00000091864 | 0.964698528  | 4.07E-07 |
| TUCP_002249 | XLOC_093848 | ENSRNOT00000001081 | -0.954296985 | 1.45E-06 |
| TUCP_002249 | XLOC_093848 | ENSRNOT00000051843 | 0.974499093  | 8.14E-08 |
| TUCP_002249 | XLOC_093848 | ENSRNOT00000003540 | 0.951433166  | 1.96E-06 |
| TUCP_002249 | XLOC_093848 | ENSRNOT00000067739 | 0.970187788  | 1.76E-07 |
| TUCP_002249 | XLOC_093848 | ENSRNOT00000019386 | 0.963783873  | 4.62E-07 |
| TUCP_002249 | XLOC_093848 | ENSRNOT00000006308 | 0.950193669  | 2.22E-06 |
| TUCP_002249 | XLOC_093848 | ENSRNOT00000030782 | 0.955314857  | 1.30E-06 |
| TUCP_002249 | XLOC_093848 | ENSRNOT00000083110 | 0.964825728  | 4.00E-07 |
| TUCP_002249 | XLOC_093848 | ENSRNOT00000036658 | 0.955787249  | 1.24E-06 |
| TUCP_002249 | XLOC_093848 | ENSRNOT00000030803 | 0.963531152  | 4.78E-07 |
| TUCP_002249 | XLOC_093848 | ENSRNOT00000052422 | -0.964131718 | 4.40E-07 |
| TUCP_002249 | XLOC_093848 | ENSRNOT00000064588 | -0.955824412 | 1.23E-06 |
| TUCP_002249 | XLOC_093848 | ENSRNOT00000086590 | -0.953043193 | 1.66E-06 |
| TUCP_002249 | XLOC_093848 | ENSRNOT00000071239 | 0.955596876  | 1.26E-06 |
| TUCP_002249 | XLOC_093848 | ENSRNOT00000086608 | 0.960139832  | 7.41E-07 |
| TUCP_002249 | XLOC_093848 | ENSRNOT00000014585 | 0.952554017  | 1.75E-06 |
| TUCP_002249 | XLOC_093848 | ENSRNOT00000000013 | -0.954548475 | 1.42E-06 |
| TUCP_002249 | XLOC_093848 | ENSRNOT00000080222 | 0.969446969  | 1.99E-07 |
| TUCP_002249 | XLOC_093848 | ENSRNOT00000046594 | -0.961786322 | 6.02E-07 |
| TUCP_002249 | XLOC_093848 | ENSRNOT00000061191 | 0.968499868  | 2.32E-07 |
| TUCP_002249 | XLOC_093848 | ENSRNOT00000029202 | 0.966461779  | 3.16E-07 |
| TUCP_002249 | XLOC_093848 | ENSRNOT00000017907 | 0.955852345  | 1.23E-06 |
| TUCP_002249 | XLOC_093848 | ENSRNOT00000028434 | 0.955904556  | 1.22E-06 |
| TUCP_002249 | XLOC_093848 | ENSRNOT00000025794 | 0.954330409  | 1.45E-06 |
| TUCP_002249 | XLOC_093848 | ENSRNOT00000058111 | 0.961244908  | 6.45E-07 |
| TUCP_002249 | XLOC_093848 | ENSRNOT00000054828 | -0.97212358  | 1.27E-07 |
| TUCP_002249 | XLOC_093848 | ENSRNOT00000009994 | 0.956806716  | 1.10E-06 |
| TUCP_002249 | XLOC_093848 | ENSRNOT00000005762 | 0.952307024  | 1.79E-06 |
| TUCP_002249 | XLOC_093848 | ENSRNOT00000077646 | 0.955222504  | 1.31E-06 |
| TUCP_002249 | XLOC_093848 | ENSRNOT00000021075 | 0.963392711  | 4.87E-07 |
| TUCP_002249 | XLOC_093848 | ENSRNOT00000000083 | 0.95902905   | 8.49E-07 |
| TUCP_002249 | XLOC_093848 | ENSRNOT00000087838 | 0.965173156  | 3.81E-07 |
| TUCP_002249 | XLOC_093848 | ENSRNOT00000016265 | 0.955145525  | 1.33E-06 |
| TUCP_002249 | XLOC_093848 | ENSRNOT00000027575 | 0.966033773  | 3.36E-07 |
| TUCP_002249 | XLOC_093848 | ENSRNOT00000028225 | -0.952124827 | 1.83E-06 |
| TUCP_002249 | XLOC_093848 | ENSRNOT00000019172 | 0.975583287  | 6.56E-08 |
| TUCP_002249 | XLOC_093848 | ENSRNOT00000020994 | 0.962411305  | 5.55E-07 |
| TUCP_002249 | XLOC_093848 | ENSRNOT00000016372 | 0.967840567  | 2.57E-07 |
| TUCP_002249 | XLOC_093848 | ENSRNOT00000008757 | -0.95962278  | 7.90E-07 |
| TUCP_002249 | XLOC_093848 | ENSRNOT00000045226 | 0.960075358  | 7.47E-07 |
| TUCP_002249 | XLOC_093848 | ENSRNOT00000036194 | 0.954414934  | 1.44E-06 |
| TUCP_002249 | XLOC_093848 | ENSRNOT00000023977 | 0.954432707  | 1.43E-06 |
| TUCP_002249 | XLOC_093848 | ENSRNOT00000077186 | 0.953113026  | 1.65E-06 |
| TUCP_002249 | XLOC_093848 | ENSRNOT00000014780 | 0.958444107  | 9.10E-07 |
| TUCP_002249 | XLOC_093848 | ENSRNOT00000020357 | -0.953119509 | 1.65E-06 |
| TUCP_002249 | XLOC_093848 | ENSRNOT00000009645 | 0.95048215   | 2.16E-06 |
| TUCP_002249 | XLOC_093848 | ENSRNOT00000026279 | 0.972119534  | 1.27E-07 |
| TUCP_002249 | XLOC_093848 | ENSRNOT00000087062 | -0.957170778 | 1.06E-06 |
| TUCP_002249 | XLOC_093848 | ENSRNOT00000082508 | 0.958178321  | 9.39E-07 |



|             |             |                    |              |          |
|-------------|-------------|--------------------|--------------|----------|
| TUCP_002249 | XLOC_093848 | ENSRNOT00000022259 | 0.958942355  | 8.58E-07 |
| TUCP_002249 | XLOC_093848 | ENSRNOT00000082863 | -0.956626608 | 1.12E-06 |
| TUCP_002249 | XLOC_093848 | ENSRNOT00000010333 | 0.953134521  | 1.65E-06 |
| TUCP_002249 | XLOC_093848 | ENSRNOT00000065942 | 0.964577359  | 4.14E-07 |
| TUCP_002249 | XLOC_093848 | ENSRNOT00000014309 | 0.952042255  | 1.84E-06 |
| TUCP_002249 | XLOC_093848 | ENSRNOT00000060282 | -0.963275724 | 4.95E-07 |
| TUCP_002249 | XLOC_093848 | ENSRNOT00000074389 | 0.962605951  | 5.41E-07 |
| TUCP_002249 | XLOC_093848 | ENSRNOT00000066204 | 0.954489001  | 1.42E-06 |
| TUCP_002249 | XLOC_093848 | ENSRNOT00000018101 | 0.954187632  | 1.47E-06 |
| TUCP_002249 | XLOC_093848 | ENSRNOT00000003012 | 0.972189838  | 1.25E-07 |
| TUCP_002249 | XLOC_093848 | ENSRNOT00000090970 | -0.951296535 | 1.99E-06 |
| TUCP_002249 | XLOC_093848 | ENSRNOT00000007341 | 0.960052036  | 7.49E-07 |
| TUCP_002249 | XLOC_093848 | ENSRNOT00000087604 | -0.952914661 | 1.68E-06 |
| TUCP_002249 | XLOC_093848 | ENSRNOT00000005620 | 0.951791768  | 1.89E-06 |
| TUCP_002249 | XLOC_093848 | ENSRNOT00000039177 | 0.955754433  | 1.24E-06 |
| TUCP_002249 | XLOC_093848 | ENSRNOT00000016801 | -0.952459826 | 1.77E-06 |
| TUCP_002249 | XLOC_093848 | ENSRNOT00000035628 | 0.957209461  | 1.05E-06 |
| TUCP_002249 | XLOC_093848 | ENSRNOT00000000577 | -0.968225646 | 2.42E-07 |
| TUCP_002249 | XLOC_093848 | ENSRNOT00000063917 | 0.966370251  | 3.20E-07 |
| TUCP_002249 | XLOC_093848 | ENSRNOT00000001979 | 0.968989898  | 2.14E-07 |
| TUCP_002249 | XLOC_093848 | ENSRNOT00000083968 | 0.967001293  | 2.92E-07 |
| TUCP_002249 | XLOC_093848 | ENSRNOT00000083964 | 0.951309124  | 1.99E-06 |
| TUCP_002249 | XLOC_093848 | ENSRNOT00000026726 | 0.951127412  | 2.02E-06 |
| TUCP_002249 | XLOC_093848 | ENSRNOT00000061304 | 0.976560821  | 5.36E-08 |
| TUCP_002249 | XLOC_093848 | ENSRNOT00000020892 | 0.95659455   | 1.13E-06 |
| TUCP_002249 | XLOC_093848 | ENSRNOT00000019133 | -0.950752111 | 2.10E-06 |
| TUCP_002249 | XLOC_093848 | ENSRNOT00000002151 | 0.963470416  | 4.82E-07 |
| TUCP_002249 | XLOC_093848 | ENSRNOT00000020537 | 0.960414675  | 7.16E-07 |
| TUCP_002249 | XLOC_093848 | ENSRNOT00000006824 | 0.953102646  | 1.65E-06 |
| TUCP_002249 | XLOC_093848 | ENSRNOT00000012775 | 0.960612957  | 6.99E-07 |
| TUCP_002249 | XLOC_093848 | ENSRNOT00000000177 | 0.951657686  | 1.92E-06 |
| TUCP_002249 | XLOC_093848 | ENSRNOT00000018328 | 0.966537804  | 3.12E-07 |
| TUCP_002249 | XLOC_093848 | ENSRNOT00000010683 | 0.9543978    | 1.44E-06 |
| TUCP_002249 | XLOC_093848 | ENSRNOT00000031261 | -0.977631658 | 4.25E-08 |
| TUCP_002249 | XLOC_093848 | ENSRNOT00000067836 | 0.984444354  | 6.99E-09 |
| TUCP_002249 | XLOC_093848 | ENSRNOT00000019816 | 0.962066259  | 5.80E-07 |
| TUCP_002249 | XLOC_093848 | ENSRNOT00000073847 | 0.954030404  | 1.50E-06 |
| TUCP_002249 | XLOC_093848 | ENSRNOT00000064068 | 0.972306924  | 1.22E-07 |
| TUCP_002249 | XLOC_093848 | ENSRNOT00000011174 | 0.963580348  | 4.75E-07 |
| TUCP_002249 | XLOC_093848 | ENSRNOT00000056015 | 0.969275133  | 2.05E-07 |
| TUCP_002249 | XLOC_093848 | ENSRNOT00000090784 | 0.953646711  | 1.56E-06 |
| TUCP_002249 | XLOC_093848 | ENSRNOT00000068528 | 0.957616703  | 1.00E-06 |
| TUCP_002249 | XLOC_093848 | ENSRNOT00000087502 | -0.951298135 | 1.99E-06 |
| TUCP_002249 | XLOC_093848 | ENSRNOT00000039000 | 0.974839404  | 7.61E-08 |
| TUCP_002249 | XLOC_093848 | ENSRNOT00000010906 | 0.966025176  | 3.37E-07 |
| TUCP_002249 | XLOC_093848 | ENSRNOT00000021944 | -0.973720983 | 9.44E-08 |
| TUCP_002249 | XLOC_093848 | ENSRNOT00000017224 | 0.958450527  | 9.09E-07 |
| TUCP_002249 | XLOC_093848 | ENSRNOT00000049725 | 0.952586281  | 1.74E-06 |
| TUCP_002249 | XLOC_093848 | ENSRNOT00000087346 | -0.968046701 | 2.49E-07 |
| TUCP_002249 | XLOC_093848 | ENSRNOT00000077231 | -0.957255881 | 1.05E-06 |
| TUCP_002249 | XLOC_093848 | ENSRNOT00000059181 | -0.966621806 | 3.08E-07 |

|             |             |                    |              |          |
|-------------|-------------|--------------------|--------------|----------|
| TUCP_002249 | XLOC_093848 | ENSRNOT00000003691 | 0.961457181  | 6.28E-07 |
| TUCP_002249 | XLOC_093848 | ENSRNOT00000003690 | -0.959498769 | 8.02E-07 |
| TUCP_002249 | XLOC_093848 | ENSRNOT00000022389 | 0.956121116  | 1.19E-06 |
| TUCP_002249 | XLOC_093848 | ENSRNOT00000064849 | 0.951633449  | 1.92E-06 |
| TUCP_002249 | XLOC_093848 | ENSRNOT00000008901 | 0.977930984  | 3.97E-08 |
| TUCP_002249 | XLOC_093848 | ENSRNOT00000025887 | 0.983838385  | 8.45E-09 |
| TUCP_002249 | XLOC_093848 | ENSRNOT00000023017 | 0.961943006  | 5.90E-07 |
| TUCP_002249 | XLOC_093848 | ENSRNOT00000080608 | -0.960735287 | 6.88E-07 |
| TUCP_002249 | XLOC_093848 | ENSRNOT00000017486 | -0.967695052 | 2.62E-07 |
| TUCP_002249 | XLOC_093848 | ENSRNOT00000017340 | 0.954307359  | 1.45E-06 |
| TUCP_002249 | XLOC_093848 | ENSRNOT00000024011 | -0.953009679 | 1.67E-06 |
| TUCP_002249 | XLOC_093848 | ENSRNOT00000079304 | 0.95981492   | 7.71E-07 |
| TUCP_002249 | XLOC_093848 | ENSRNOT00000085519 | -0.961375942 | 6.34E-07 |
| TUCP_002249 | XLOC_093848 | ENSRNOT00000012625 | 0.96659951   | 3.10E-07 |
| TUCP_002249 | XLOC_093848 | ENSRNOT00000080677 | 0.95965735   | 7.86E-07 |
| TUCP_002249 | XLOC_093848 | ENSRNOT00000025460 | -0.95512362  | 1.33E-06 |
| TUCP_002249 | XLOC_093848 | ENSRNOT00000025784 | 0.969155424  | 2.09E-07 |
| TUCP_002249 | XLOC_093848 | ENSRNOT00000026760 | 0.95042081   | 2.17E-06 |
| TUCP_002249 | XLOC_093848 | ENSRNOT00000005705 | 0.956288513  | 1.17E-06 |
| TUCP_002249 | XLOC_093848 | ENSRNOT00000024491 | 0.960755369  | 6.86E-07 |
| TUCP_002249 | XLOC_093848 | ENSRNOT00000037588 | 0.968494771  | 2.32E-07 |
| TUCP_002249 | XLOC_093848 | ENSRNOT00000027360 | 0.961245913  | 6.45E-07 |
| TUCP_002249 | XLOC_093848 | ENSRNOT00000023383 | 0.954385263  | 1.44E-06 |
| TUCP_002249 | XLOC_093848 | ENSRNOT00000044486 | 0.975216456  | 7.06E-08 |
| TUCP_002249 | XLOC_093848 | ENSRNOT00000079414 | 0.970618162  | 1.64E-07 |
| TUCP_002249 | XLOC_093848 | ENSRNOT00000079002 | 0.971806854  | 1.34E-07 |
| TUCP_002249 | XLOC_093848 | ENSRNOT00000078349 | 0.967022998  | 2.91E-07 |
| TUCP_002249 | XLOC_093848 | ENSRNOT00000000134 | 0.974602188  | 7.98E-08 |
| TUCP_002249 | XLOC_093848 | ENSRNOT00000079996 | -0.955058445 | 1.34E-06 |
| TUCP_001001 | XLOC_037807 | ENSRNOT00000077186 | 0.963133645  | 5.04E-07 |
| TUCP_001001 | XLOC_037807 | ENSRNOT00000073521 | 0.96655583   | 3.12E-07 |
| TUCP_001001 | XLOC_037807 | ENSRNOT00000017340 | 0.956205544  | 1.18E-06 |
| TUCP_001001 | XLOC_037807 | ENSRNOT00000060757 | 0.95191381   | 1.87E-06 |
| TUCP_001001 | XLOC_037807 | ENSRNOT00000011344 | 0.953030645  | 1.66E-06 |
| TUCP_001001 | XLOC_037807 | ENSRNOT00000027220 | 0.961712211  | 6.08E-07 |
| TUCP_001001 | XLOC_037807 | ENSRNOT00000001050 | 0.951572078  | 1.93E-06 |
| TUCP_001001 | XLOC_037807 | ENSRNOT00000047572 | 0.951023808  | 2.04E-06 |
| TUCP_001001 | XLOC_037807 | ENSRNOT00000009094 | 0.963900621  | 4.54E-07 |
| TUCP_001001 | XLOC_037807 | ENSRNOT00000021506 | 0.963114882  | 5.05E-07 |
| TUCP_001001 | XLOC_037807 | ENSRNOT00000026387 | 0.955731792  | 1.24E-06 |
| TUCP_001001 | XLOC_037807 | ENSRNOT00000001360 | 0.95100469   | 2.05E-06 |
| TUCP_001001 | XLOC_037807 | ENSRNOT00000072077 | 0.970890543  | 1.57E-07 |
| TUCP_001001 | XLOC_037807 | ENSRNOT00000017224 | 0.958298511  | 9.26E-07 |
| TUCP_001001 | XLOC_037807 | ENSRNOT00000092196 | 0.975924338  | 6.12E-08 |
| TUCP_001001 | XLOC_037807 | ENSRNOT00000000527 | 0.950550427  | 2.14E-06 |
| TUCP_001091 | XLOC_041597 | ENSRNOT00000072939 | 0.969505018  | 1.97E-07 |
| TUCP_001696 | XLOC_069431 | ENSRNOT00000077569 | 0.963411628  | 4.86E-07 |
| TUCP_000659 | XLOC_025126 | ENSRNOT00000025731 | 0.973868791  | 9.18E-08 |
| TUCP_000659 | XLOC_025126 | ENSRNOT00000003414 | 0.958145522  | 9.43E-07 |
| TUCP_000659 | XLOC_025126 | ENSRNOT00000025252 | 0.955488953  | 1.28E-06 |
| TUCP_000659 | XLOC_025126 | ENSRNOT00000000990 | 0.951863832  | 1.88E-06 |

|             |             |                     |             |          |
|-------------|-------------|---------------------|-------------|----------|
| TUCP_000659 | XL0C_025126 | ENSRNOT00000040856  | 0.960837306 | 6.79E-07 |
| TUCP_000659 | XL0C_025126 | ENSRNOT00000085151  | 0.958025589 | 9.56E-07 |
| TUCP_000659 | XL0C_025126 | ENSRNOT00000014481  | 0.956702056 | 1.11E-06 |
| TUCP_000659 | XL0C_025126 | ENSRNOT00000000995  | 0.962977392 | 5.15E-07 |
| TUCP_000659 | XL0C_025126 | ENSRNOT00000014533  | 0.974635624 | 7.92E-08 |
| TUCP_000659 | XL0C_025126 | ENSRNOT00000068354  | 0.972930347 | 1.09E-07 |
| TUCP_000659 | XL0C_025126 | ENSRNOT00000051067  | 0.961921818 | 5.91E-07 |
| TUCP_000659 | XL0C_025126 | ENSRNOT00000003082  | 0.987359484 | 2.49E-09 |
| TUCP_000659 | XL0C_025126 | ENSRNOT00000045993  | 0.956239658 | 1.17E-06 |
| TUCP_000659 | XL0C_025126 | ENSRNOT00000044751  | 0.983502034 | 9.36E-09 |
| TUCP_000659 | XL0C_025126 | ENSRNOT00000031109  | 0.967703278 | 2.62E-07 |
| TUCP_000659 | XL0C_025126 | ENSRNOT00000012963  | 0.969186139 | 2.08E-07 |
| TUCP_000659 | XL0C_025126 | ENSRNOT00000050350  | 0.952012721 | 1.85E-06 |
| TUCP_000659 | XL0C_025126 | ENSRNOT00000010968  | 0.980230706 | 2.30E-08 |
| TUCP_000659 | XL0C_025126 | ENSRNOT00000091476  | 0.950362074 | 2.18E-06 |
| TUCP_000659 | XL0C_025126 | ENSRNOT00000009448  | 0.979642718 | 2.66E-08 |
| TUCP_000659 | XL0C_025126 | ENSRNOT00000000110  | 0.968014879 | 2.50E-07 |
| TUCP_000659 | XL0C_025126 | ENSRNOT00000009136  | 0.9591784   | 8.34E-07 |
| TUCP_000659 | XL0C_025126 | ENSRNOT00000089457  | 0.966307061 | 3.23E-07 |
| TUCP_000659 | XL0C_025126 | ENSRNOT00000023067  | 0.969292974 | 2.04E-07 |
| TUCP_000659 | XL0C_025126 | ENSRNOT00000042973  | 0.963580215 | 4.75E-07 |
| TUCP_000659 | XL0C_025126 | ENSRNOT00000003458  | 0.980820658 | 1.98E-08 |
| TUCP_000659 | XL0C_025126 | ENSRNOT00000042117  | 0.979344625 | 2.86E-08 |
| TUCP_000659 | XL0C_025126 | ENSRNOT00000001050  | 0.951607694 | 1.93E-06 |
| TUCP_000659 | XL0C_025126 | ENSRNOT00000063849  | 0.959968115 | 7.57E-07 |
| TUCP_000659 | XL0C_025126 | ENSRNOT00000050063  | 0.96553276  | 3.62E-07 |
| TUCP_000659 | XL0C_025126 | ENSRNOT00000000256  | 0.974560652 | 8.04E-08 |
| TUCP_000659 | XL0C_025126 | ENSRNOT00000082497  | 0.966462162 | 3.16E-07 |
| TUCP_000659 | XL0C_025126 | ENSRNOT00000003075  | 0.984979349 | 5.87E-09 |
| TUCP_000659 | XL0C_025126 | ENSRNOT000000008813 | 0.973429863 | 9.97E-08 |
| TUCP_000659 | XL0C_025126 | ENSRNOT00000074629  | 0.963911781 | 4.54E-07 |
| TUCP_000659 | XL0C_025126 | ENSRNOT00000093046  | 0.964487706 | 4.19E-07 |
| TUCP_000659 | XL0C_025126 | ENSRNOT00000003343  | 0.951374075 | 1.97E-06 |
| TUCP_000659 | XL0C_025126 | ENSRNOT00000000637  | 0.96220059  | 5.70E-07 |
| TUCP_000659 | XL0C_025126 | ENSRNOT00000019389  | 0.962818094 | 5.26E-07 |
| TUCP_000659 | XL0C_025126 | ENSRNOT00000028527  | 0.958331272 | 9.22E-07 |
| TUCP_000659 | XL0C_025126 | ENSRNOT00000083004  | 0.952243699 | 1.81E-06 |
| TUCP_000659 | XL0C_025126 | ENSRNOT00000057504  | 0.958377531 | 9.17E-07 |
| TUCP_000659 | XL0C_025126 | ENSRNOT0000004965   | 0.98477538  | 6.28E-09 |
| TUCP_000659 | XL0C_025126 | ENSRNOT00000011369  | 0.963256416 | 4.96E-07 |
| TUCP_000659 | XL0C_025126 | ENSRNOT00000082393  | 0.953748237 | 1.54E-06 |
| TUCP_000659 | XL0C_025126 | ENSRNOT00000071612  | 0.966169093 | 3.30E-07 |
| TUCP_000659 | XL0C_025126 | ENSRNOT00000039215  | 0.961339176 | 6.37E-07 |
| TUCP_000659 | XL0C_025126 | ENSRNOT00000006196  | 0.979942074 | 2.47E-08 |
| TUCP_000659 | XL0C_025126 | ENSRNOT00000073388  | 0.957173634 | 1.06E-06 |
| TUCP_000659 | XL0C_025126 | ENSRNOT00000073138  | 0.971163003 | 1.50E-07 |
| TUCP_000659 | XL0C_025126 | ENSRNOT00000045357  | 0.961532831 | 6.22E-07 |
| TUCP_000659 | XL0C_025126 | ENSRNOT00000009260  | 0.954097901 | 1.49E-06 |
| TUCP_000659 | XL0C_025126 | ENSRNOT00000014560  | 0.954186124 | 1.47E-06 |
| TUCP_000659 | XL0C_025126 | ENSRNOT00000040116  | 0.981271366 | 1.76E-08 |
| TUCP_000659 | XL0C_025126 | ENSRNOT00000022128  | 0.957949441 | 9.65E-07 |

|             |             |                    |              |          |
|-------------|-------------|--------------------|--------------|----------|
| TUCP_000659 | XLOC_025126 | ENSRNOT00000013191 | 0.956482446  | 1.14E-06 |
| TUCP_000659 | XLOC_025126 | ENSRNOT00000023483 | 0.964624196  | 4.11E-07 |
| TUCP_000659 | XLOC_025126 | ENSRNOT00000014317 | 0.965321186  | 3.73E-07 |
| TUCP_000659 | XLOC_025126 | ENSRNOT00000050415 | 0.952390031  | 1.78E-06 |
| TUCP_000659 | XLOC_025126 | ENSRNOT00000066776 | 0.967254275  | 2.81E-07 |
| TUCP_001695 | XLOC_069431 | ENSRNOT00000006452 | 0.952109514  | 1.83E-06 |
| TUCP_001695 | XLOC_069431 | ENSRNOT00000008525 | 0.96133888   | 6.37E-07 |
| TUCP_001692 | XLOC_069370 | ENSRNOT00000027520 | 0.968400865  | 2.35E-07 |
| TUCP_001692 | XLOC_069370 | ENSRNOT00000064840 | 0.955861478  | 1.22E-06 |
| TUCP_001692 | XLOC_069370 | ENSRNOT00000004698 | 0.957034905  | 1.07E-06 |
| TUCP_001692 | XLOC_069370 | ENSRNOT00000074939 | 0.961235787  | 6.46E-07 |
| TUCP_001692 | XLOC_069370 | ENSRNOT00000014887 | 0.960365183  | 7.21E-07 |
| TUCP_001692 | XLOC_069370 | ENSRNOT00000010218 | 0.954737071  | 1.39E-06 |
| TUCP_001692 | XLOC_069370 | ENSRNOT00000087371 | 0.959786381  | 7.74E-07 |
| TUCP_001692 | XLOC_069370 | ENSRNOT00000039344 | 0.985304863  | 5.27E-09 |
| TUCP_001692 | XLOC_069370 | ENSRNOT00000078175 | 0.958374157  | 9.18E-07 |
| TUCP_001692 | XLOC_069370 | ENSRNOT00000071694 | 0.959818307  | 7.71E-07 |
| TUCP_001692 | XLOC_069370 | ENSRNOT00000068322 | 0.959047611  | 8.47E-07 |
| TUCP_001692 | XLOC_069370 | ENSRNOT00000027985 | -0.95380831  | 1.53E-06 |
| TUCP_001692 | XLOC_069370 | ENSRNOT00000023180 | 0.969309444  | 2.04E-07 |
| TUCP_001692 | XLOC_069370 | ENSRNOT00000028070 | 0.951925872  | 1.87E-06 |
| TUCP_001692 | XLOC_069370 | ENSRNOT00000020168 | 0.958923783  | 8.59E-07 |
| TUCP_001692 | XLOC_069370 | ENSRNOT00000024941 | 0.961516011  | 6.23E-07 |
| TUCP_001692 | XLOC_069370 | ENSRNOT00000044742 | 0.951583349  | 1.93E-06 |
| TUCP_001692 | XLOC_069370 | ENSRNOT00000026457 | 0.956835503  | 1.10E-06 |
| TUCP_001692 | XLOC_069370 | ENSRNOT00000023428 | 0.953232311  | 1.63E-06 |
| TUCP_001692 | XLOC_069370 | ENSRNOT00000071764 | 0.951519422  | 1.94E-06 |
| TUCP_001692 | XLOC_069370 | ENSRNOT00000001809 | 0.950941877  | 2.06E-06 |
| TUCP_001692 | XLOC_069370 | ENSRNOT00000024548 | 0.954679807  | 1.40E-06 |
| TUCP_000662 | XLOC_025214 | ENSRNOT00000028484 | -0.952984406 | 1.67E-06 |
| TUCP_000662 | XLOC_025214 | ENSRNOT00000065673 | -0.963521548 | 4.78E-07 |
| TUCP_000662 | XLOC_025214 | ENSRNOT00000035628 | -0.961045528 | 6.62E-07 |
| TUCP_000662 | XLOC_025214 | ENSRNOT00000000576 | -0.950199308 | 2.22E-06 |
| TUCP_000662 | XLOC_025214 | ENSRNOT00000045950 | -0.957346422 | 1.03E-06 |
| TUCP_000662 | XLOC_025214 | ENSRNOT00000087113 | -0.950352774 | 2.18E-06 |
| TUCP_000662 | XLOC_025214 | ENSRNOT00000079962 | 0.958418439  | 9.13E-07 |
| TUCP_000662 | XLOC_025214 | ENSRNOT00000018711 | -0.954475509 | 1.43E-06 |
| TUCP_000662 | XLOC_025214 | ENSRNOT00000018864 | -0.963543065 | 4.77E-07 |
| TUCP_000662 | XLOC_025214 | ENSRNOT00000036338 | -0.970892335 | 1.57E-07 |
| TUCP_000662 | XLOC_025214 | ENSRNOT00000075493 | -0.953885802 | 1.52E-06 |
| TUCP_000662 | XLOC_025214 | ENSRNOT00000020932 | -0.952781044 | 1.71E-06 |
| TUCP_000662 | XLOC_025214 | ENSRNOT00000022377 | -0.954394303 | 1.44E-06 |
| TUCP_000662 | XLOC_025214 | ENSRNOT00000021708 | -0.95628716  | 1.17E-06 |
| TUCP_000662 | XLOC_025214 | ENSRNOT00000010602 | -0.960520527 | 7.07E-07 |
| TUCP_000662 | XLOC_025214 | ENSRNOT00000002040 | -0.950172547 | 2.22E-06 |
| TUCP_000662 | XLOC_025214 | ENSRNOT00000011339 | -0.957242568 | 1.05E-06 |
| TUCP_000662 | XLOC_025214 | ENSRNOT00000084563 | -0.976231041 | 5.74E-08 |
| TUCP_000662 | XLOC_025214 | ENSRNOT00000032289 | -0.95582366  | 1.23E-06 |
| TUCP_000662 | XLOC_025214 | ENSRNOT00000028780 | -0.966248658 | 3.26E-07 |
| TUCP_000662 | XLOC_025214 | ENSRNOT00000039850 | -0.964976119 | 3.91E-07 |
| TUCP_000662 | XLOC_025214 | ENSRNOT00000085311 | -0.956833594 | 1.10E-06 |

|             |             |                     |              |          |
|-------------|-------------|---------------------|--------------|----------|
| TUCP_000662 | XLOC_025214 | ENSRNOT00000015199  | -0.963058725 | 5.09E-07 |
| TUCP_000662 | XLOC_025214 | ENSRNOT00000003540  | -0.952401343 | 1.78E-06 |
| TUCP_000662 | XLOC_025214 | ENSRNOT00000026641  | 0.951933016  | 1.86E-06 |
| TUCP_000662 | XLOC_025214 | ENSRNOT00000014585  | -0.950614211 | 2.13E-06 |
| TUCP_000662 | XLOC_025214 | ENSRNOT00000016541  | -0.968483189 | 2.32E-07 |
| TUCP_000662 | XLOC_025214 | ENSRNOT00000022620  | 0.950752549  | 2.10E-06 |
| TUCP_000662 | XLOC_025214 | ENSRNOT00000028703  | -0.957775218 | 9.85E-07 |
| TUCP_000662 | XLOC_025214 | ENSRNOT00000021893  | -0.96594692  | 3.41E-07 |
| TUCP_000662 | XLOC_025214 | ENSRNOT00000002151  | -0.952108084 | 1.83E-06 |
| TUCP_000662 | XLOC_025214 | ENSRNOT00000021636  | -0.959700261 | 7.82E-07 |
| TUCP_000662 | XLOC_025214 | ENSRNOT00000022241  | -0.957318628 | 1.04E-06 |
| TUCP_000662 | XLOC_025214 | ENSRNOT00000022107  | -0.961110934 | 6.56E-07 |
| TUCP_000662 | XLOC_025214 | ENSRNOT00000023914  | 0.954724693  | 1.39E-06 |
| TUCP_000662 | XLOC_025214 | ENSRNOT00000054966  | -0.956555881 | 1.13E-06 |
| TUCP_000662 | XLOC_025214 | ENSRNOT00000039296  | 0.95386234   | 1.52E-06 |
| TUCP_000662 | XLOC_025214 | ENSRNOT00000059599  | -0.96549451  | 3.64E-07 |
| TUCP_001758 | XLOC_072863 | ENSRNOT00000014041  | 0.978732934  | 3.31E-08 |
| TUCP_001757 | XLOC_072771 | ENSRNOT00000031205  | 0.950035684  | 2.25E-06 |
| TUCP_001757 | XLOC_072771 | ENSRNOT00000040509  | 0.981145527  | 1.82E-08 |
| TUCP_001757 | XLOC_072771 | ENSRNOT00000011342  | 0.965083522  | 3.85E-07 |
| TUCP_001757 | XLOC_072771 | ENSRNOT00000088381  | 0.95895898   | 8.56E-07 |
| TUCP_001757 | XLOC_072771 | ENSRNOT00000093579  | 0.974938715  | 7.47E-08 |
| TUCP_001757 | XLOC_072771 | ENSRNOT00000015889  | 0.964131899  | 4.40E-07 |
| TUCP_001757 | XLOC_072771 | ENSRNOT00000076466  | 0.953558673  | 1.57E-06 |
| TUCP_001757 | XLOC_072771 | ENSRNOT00000085943  | 0.9604699    | 7.11E-07 |
| TUCP_001757 | XLOC_072771 | ENSRNOT00000012170  | 0.956623286  | 1.12E-06 |
| TUCP_001757 | XLOC_072771 | ENSRNOT00000046585  | 0.964533405  | 4.16E-07 |
| TUCP_003888 | XLOC_170952 | ENSRNOT00000005584  | 0.967767685  | 2.60E-07 |
| TUCP_001508 | XLOC_058020 | ENSRNOT000000091652 | 0.958567915  | 8.97E-07 |
| TUCP_001508 | XLOC_058020 | ENSRNOT00000075569  | 0.968689391  | 2.25E-07 |
| TUCP_001508 | XLOC_058020 | ENSRNOT00000080865  | 0.964997401  | 3.90E-07 |
| TUCP_001508 | XLOC_058020 | ENSRNOT00000073534  | 0.957437059  | 1.02E-06 |
| TUCP_001508 | XLOC_058020 | ENSRNOT00000093019  | 0.964997401  | 3.90E-07 |
| TUCP_001508 | XLOC_058020 | ENSRNOT00000024825  | 0.956669129  | 1.12E-06 |
| TUCP_001508 | XLOC_058020 | ENSRNOT00000085908  | 0.962566994  | 5.44E-07 |
| TUCP_001508 | XLOC_058020 | ENSRNOT00000046744  | 0.964997401  | 3.90E-07 |
| TUCP_001508 | XLOC_058020 | ENSRNOT00000076429  | 0.964997401  | 3.90E-07 |
| TUCP_001508 | XLOC_058020 | ENSRNOT00000084667  | 0.963755375  | 4.64E-07 |
| TUCP_001508 | XLOC_058020 | ENSRNOT00000055412  | 0.964997401  | 3.90E-07 |
| TUCP_001508 | XLOC_058020 | ENSRNOT00000093201  | 0.965732139  | 3.51E-07 |
| TUCP_001508 | XLOC_058020 | ENSRNOT00000072724  | 0.964997401  | 3.90E-07 |
| TUCP_001508 | XLOC_058020 | ENSRNOT00000066017  | 0.968723133  | 2.24E-07 |
| TUCP_001508 | XLOC_058020 | ENSRNOT00000073148  | 0.983495241  | 9.38E-09 |
| TUCP_001508 | XLOC_058020 | ENSRNOT00000077462  | 0.958789407  | 8.73E-07 |
| TUCP_001508 | XLOC_058020 | ENSRNOT00000084375  | 0.964997401  | 3.90E-07 |
| TUCP_001508 | XLOC_058020 | ENSRNOT00000009061  | 0.964970822  | 3.92E-07 |
| TUCP_001508 | XLOC_058020 | ENSRNOT00000042369  | 0.968610247  | 2.28E-07 |
| TUCP_001508 | XLOC_058020 | ENSRNOT00000086554  | 0.964997401  | 3.90E-07 |
| TUCP_001508 | XLOC_058020 | ENSRNOT00000047921  | 0.964997401  | 3.90E-07 |
| TUCP_001508 | XLOC_058020 | ENSRNOT00000064261  | 0.9650602    | 3.87E-07 |
| TUCP_001508 | XLOC_058020 | ENSRNOT00000086660  | 0.965624291  | 3.57E-07 |

|             |             |                    |             |          |
|-------------|-------------|--------------------|-------------|----------|
| TUCP_001508 | XLOC_058020 | ENSRNOT00000080933 | 0.964964564 | 3.92E-07 |
| TUCP_001508 | XLOC_058020 | ENSRNOT00000083977 | 0.964997401 | 3.90E-07 |
| TUCP_001508 | XLOC_058020 | ENSRNOT00000092933 | 0.964997401 | 3.90E-07 |
| TUCP_001508 | XLOC_058020 | ENSRNOT00000085447 | 0.960329887 | 7.24E-07 |
| TUCP_001754 | XLOC_072675 | ENSRNOT00000024186 | 0.980359789 | 2.23E-08 |
| TUCP_001754 | XLOC_072675 | ENSRNOT00000074753 | 0.99694144  | 2.10E-12 |
| TUCP_001754 | XLOC_072675 | ENSRNOT00000004876 | 0.954570781 | 1.41E-06 |
| TUCP_001754 | XLOC_072675 | ENSRNOT00000041904 | 0.997505277 | 7.58E-13 |
| TUCP_001754 | XLOC_072675 | ENSRNOT00000083487 | 0.982686696 | 1.19E-08 |
| TUCP_001754 | XLOC_072675 | ENSRNOT00000077990 | 0.997505277 | 7.58E-13 |
| TUCP_001754 | XLOC_072675 | ENSRNOT00000038826 | 0.997050257 | 1.75E-12 |
| TUCP_001754 | XLOC_072675 | ENSRNOT00000037094 | 0.96125155  | 6.45E-07 |
| TUCP_001754 | XLOC_072675 | ENSRNOT00000046842 | 0.969605339 | 1.94E-07 |
| TUCP_001754 | XLOC_072675 | ENSRNOT00000037169 | 0.976994931 | 4.88E-08 |
| TUCP_001754 | XLOC_072675 | ENSRNOT00000021243 | 0.983846097 | 8.43E-09 |
| TUCP_001754 | XLOC_072675 | ENSRNOT00000060250 | 0.998251224 | 1.28E-13 |
| TUCP_001754 | XLOC_072675 | ENSRNOT00000091934 | 0.997505277 | 7.58E-13 |
| TUCP_001754 | XLOC_072675 | ENSRNOT00000086027 | 0.958590417 | 8.94E-07 |
| TUCP_001754 | XLOC_072675 | ENSRNOT00000046585 | 0.97905047  | 3.07E-08 |
| TUCP_001754 | XLOC_072675 | ENSRNOT00000080794 | 0.986754577 | 3.14E-09 |
| TUCP_001754 | XLOC_072675 | ENSRNOT00000014456 | 0.988315364 | 1.68E-09 |
| TUCP_001754 | XLOC_072675 | ENSRNOT00000031205 | 0.987614056 | 2.25E-09 |
| TUCP_001754 | XLOC_072675 | ENSRNOT00000044145 | 0.997505277 | 7.58E-13 |
| TUCP_001754 | XLOC_072675 | ENSRNOT00000088381 | 0.985502425 | 4.92E-09 |
| TUCP_001754 | XLOC_072675 | ENSRNOT00000011743 | 0.983178649 | 1.03E-08 |
| TUCP_001754 | XLOC_072675 | ENSRNOT00000089929 | 0.997505277 | 7.58E-13 |
| TUCP_001754 | XLOC_072675 | ENSRNOT00000088624 | 0.997505277 | 7.58E-13 |
| TUCP_001754 | XLOC_072675 | ENSRNOT00000085659 | 0.986438735 | 3.53E-09 |
| TUCP_001754 | XLOC_072675 | ENSRNOT00000015866 | 0.989664257 | 9.13E-10 |
| TUCP_001754 | XLOC_072675 | ENSRNOT00000078633 | 0.997505277 | 7.58E-13 |
| TUCP_001754 | XLOC_072675 | ENSRNOT00000034907 | 0.98946022  | 1.01E-09 |
| TUCP_001754 | XLOC_072675 | ENSRNOT00000093230 | 0.951738643 | 1.90E-06 |
| TUCP_001754 | XLOC_072675 | ENSRNOT00000051835 | 0.997505277 | 7.58E-13 |
| TUCP_001754 | XLOC_072675 | ENSRNOT00000079087 | 0.997505277 | 7.58E-13 |
| TUCP_001754 | XLOC_072675 | ENSRNOT00000037206 | 0.997505277 | 7.58E-13 |
| TUCP_001754 | XLOC_072675 | ENSRNOT00000083261 | 0.973232557 | 1.03E-07 |
| TUCP_001754 | XLOC_072675 | ENSRNOT00000080590 | 0.997289696 | 1.15E-12 |
| TUCP_001754 | XLOC_072675 | ENSRNOT00000027552 | 0.997982197 | 2.63E-13 |
| TUCP_001754 | XLOC_072675 | ENSRNOT00000077014 | 0.998367197 | 9.11E-14 |
| TUCP_001754 | XLOC_072675 | ENSRNOT00000080453 | 0.997632769 | 5.83E-13 |
| TUCP_001754 | XLOC_072675 | ENSRNOT00000089057 | 0.957841579 | 9.77E-07 |
| TUCP_001754 | XLOC_072675 | ENSRNOT00000066839 | 0.988299753 | 1.69E-09 |
| TUCP_001754 | XLOC_072675 | ENSRNOT00000061284 | 0.959795753 | 7.73E-07 |
| TUCP_001754 | XLOC_072675 | ENSRNOT00000020206 | 0.95204606  | 1.84E-06 |
| TUCP_001754 | XLOC_072675 | ENSRNOT00000013423 | 0.958037586 | 9.55E-07 |
| TUCP_001754 | XLOC_072675 | ENSRNOT00000071884 | 0.970015549 | 1.82E-07 |
| TUCP_001754 | XLOC_072675 | ENSRNOT00000004128 | 0.952537834 | 1.75E-06 |
| TUCP_001754 | XLOC_072675 | ENSRNOT00000026316 | 0.960383694 | 7.19E-07 |
| TUCP_001754 | XLOC_072675 | ENSRNOT00000057729 | 0.996643296 | 3.34E-12 |
| TUCP_001754 | XLOC_072675 | ENSRNOT00000078663 | 0.980380211 | 2.22E-08 |
| TUCP_001754 | XLOC_072675 | ENSRNOT00000064250 | 0.987607449 | 2.25E-09 |

|             |             |                    |              |          |
|-------------|-------------|--------------------|--------------|----------|
| TUCP_001754 | XL0C_072675 | ENSRNOT00000021608 | 0.969846859  | 1.87E-07 |
| TUCP_001754 | XL0C_072675 | ENSRNOT00000029634 | 0.992514336  | 1.83E-10 |
| TUCP_001754 | XL0C_072675 | ENSRNOT00000093579 | 0.952428226  | 1.77E-06 |
| TUCP_001754 | XL0C_072675 | ENSRNOT00000086349 | 0.950204432  | 2.22E-06 |
| TUCP_001754 | XL0C_072675 | ENSRNOT00000065460 | 0.997505277  | 7.58E-13 |
| TUCP_001754 | XL0C_072675 | ENSRNOT00000003817 | 0.998449398  | 7.04E-14 |
| TUCP_001754 | XL0C_072675 | ENSRNOT00000016713 | 0.997505277  | 7.58E-13 |
| TUCP_001754 | XL0C_072675 | ENSRNOT00000079260 | 0.992826177  | 1.48E-10 |
| TUCP_001754 | XL0C_072675 | ENSRNOT00000039294 | 0.997505277  | 7.58E-13 |
| TUCP_001754 | XL0C_072675 | ENSRNOT00000092913 | 0.954776031  | 1.38E-06 |
| TUCP_001752 | XL0C_072642 | ENSRNOT00000018970 | 0.959730361  | 7.79E-07 |
| TUCP_001752 | XL0C_072642 | ENSRNOT00000045493 | 0.961102905  | 6.57E-07 |
| TUCP_001752 | XL0C_072642 | ENSRNOT00000000697 | 0.952309783  | 1.79E-06 |
| TUCP_001752 | XL0C_072642 | ENSRNOT00000023623 | 0.950249423  | 2.21E-06 |
| TUCP_001752 | XL0C_072642 | ENSRNOT00000028588 | 0.972812595  | 1.12E-07 |
| TUCP_001752 | XL0C_072642 | ENSRNOT00000024583 | -0.971002694 | 1.54E-07 |
| TUCP_001752 | XL0C_072642 | ENSRNOT00000023661 | 0.956625706  | 1.12E-06 |
| TUCP_001752 | XL0C_072642 | ENSRNOT00000074810 | 0.962040115  | 5.82E-07 |
| TUCP_001752 | XL0C_072642 | ENSRNOT00000086027 | 0.957585062  | 1.01E-06 |
| TUCP_001752 | XL0C_072642 | ENSRNOT00000024575 | 0.957151613  | 1.06E-06 |
| TUCP_001752 | XL0C_072642 | ENSRNOT00000091315 | 0.957017171  | 1.07E-06 |
| TUCP_001698 | XL0C_069431 | ENSRNOT00000090572 | 0.954857959  | 1.37E-06 |
| TUCP_000508 | XL0C_017500 | ENSRNOT00000000117 | 0.953278232  | 1.62E-06 |
| TUCP_000508 | XL0C_017500 | ENSRNOT00000065194 | 0.979658752  | 2.65E-08 |
| TUCP_000508 | XL0C_017500 | ENSRNOT00000054939 | 0.988530498  | 1.53E-09 |
| TUCP_000508 | XL0C_017500 | ENSRNOT00000066391 | 0.990550364  | 5.84E-10 |
| TUCP_000508 | XL0C_017500 | ENSRNOT00000066821 | 0.97042276   | 1.70E-07 |
| TUCP_000508 | XL0C_017500 | ENSRNOT00000072802 | 0.967250486  | 2.81E-07 |
| TUCP_001052 | XL0C_040163 | ENSRNOT00000009975 | 0.954960224  | 1.35E-06 |
| TUCP_001052 | XL0C_040163 | ENSRNOT00000072682 | 0.954330739  | 1.45E-06 |
| TUCP_001052 | XL0C_040163 | ENSRNOT00000024583 | -0.951350589 | 1.98E-06 |
| TUCP_001052 | XL0C_040163 | ENSRNOT0000001642  | 0.953009576  | 1.67E-06 |
| TUCP_001052 | XL0C_040163 | ENSRNOT00000027752 | 0.959364863  | 8.15E-07 |
| TUCP_001052 | XL0C_040163 | ENSRNOT00000007601 | 0.953962852  | 1.51E-06 |
| TUCP_001052 | XL0C_040163 | ENSRNOT00000004764 | 0.952750497  | 1.71E-06 |
| TUCP_001052 | XL0C_040163 | ENSRNOT00000065801 | 0.974787511  | 7.69E-08 |
| TUCP_001052 | XL0C_040163 | ENSRNOT00000010142 | 0.953611329  | 1.56E-06 |
| TUCP_001052 | XL0C_040163 | ENSRNOT00000015864 | 0.975176128  | 7.12E-08 |
| TUCP_001052 | XL0C_040163 | ENSRNOT00000038449 | 0.952968549  | 1.67E-06 |
| TUCP_001052 | XL0C_040163 | ENSRNOT00000079152 | 0.975943093  | 6.09E-08 |
| TUCP_001052 | XL0C_040163 | ENSRNOT00000017282 | 0.96084334   | 6.79E-07 |
| TUCP_001052 | XL0C_040163 | ENSRNOT00000013088 | 0.955394192  | 1.29E-06 |
| TUCP_001052 | XL0C_040163 | ENSRNOT00000040904 | 0.952393317  | 1.78E-06 |
| TUCP_001052 | XL0C_040163 | ENSRNOT00000023890 | -0.95519644  | 1.32E-06 |
| TUCP_001052 | XL0C_040163 | ENSRNOT00000085334 | 0.95290976   | 1.68E-06 |
| TUCP_001052 | XL0C_040163 | ENSRNOT00000043827 | 0.957703323  | 9.93E-07 |
| TUCP_001052 | XL0C_040163 | ENSRNOT00000093008 | 0.954755663  | 1.38E-06 |
| TUCP_001052 | XL0C_040163 | ENSRNOT00000012757 | 0.972087092  | 1.27E-07 |
| TUCP_001052 | XL0C_040163 | ENSRNOT00000035427 | 0.9570476    | 1.07E-06 |
| TUCP_001052 | XL0C_040163 | ENSRNOT00000012247 | 0.953165506  | 1.64E-06 |
| TUCP_001052 | XL0C_040163 | ENSRNOT00000023623 | 0.951941022  | 1.86E-06 |

|             |             |                    |             |          |
|-------------|-------------|--------------------|-------------|----------|
| TUCP_001052 | XLOC_040163 | ENSRNOT00000023607 | 0.960558892 | 7.03E-07 |
| TUCP_001052 | XLOC_040163 | ENSRNOT00000006109 | 0.969561847 | 1.96E-07 |
| TUCP_001052 | XLOC_040163 | ENSRNOT00000002814 | 0.978278016 | 3.67E-08 |
| TUCP_001052 | XLOC_040163 | ENSRNOT00000065811 | 0.967832926 | 2.57E-07 |
| TUCP_001052 | XLOC_040163 | ENSRNOT00000074131 | 0.966374318 | 3.20E-07 |
| TUCP_001052 | XLOC_040163 | ENSRNOT00000023661 | 0.954196773 | 1.47E-06 |
| TUCP_000058 | XLOC_001127 | ENSRNOT00000064764 | 0.965972273 | 3.39E-07 |
| TUCP_000116 | XLOC_002765 | ENSRNOT00000071840 | 0.979971774 | 2.45E-08 |
| TUCP_000116 | XLOC_002765 | ENSRNOT00000083608 | 0.981365397 | 1.72E-08 |
| TUCP_000116 | XLOC_002765 | ENSRNOT00000076035 | 0.958670301 | 8.86E-07 |
| TUCP_000116 | XLOC_002765 | ENSRNOT00000045584 | 0.979971774 | 2.45E-08 |
| TUCP_000116 | XLOC_002765 | ENSRNOT00000077995 | 0.969724167 | 1.90E-07 |
| TUCP_000116 | XLOC_002765 | ENSRNOT00000066004 | 0.979018084 | 3.09E-08 |
| TUCP_000116 | XLOC_002765 | ENSRNOT00000029197 | 0.970036053 | 1.81E-07 |
| TUCP_000116 | XLOC_002765 | ENSRNOT00000066685 | 0.973839701 | 9.23E-08 |
| TUCP_000116 | XLOC_002765 | ENSRNOT00000089494 | 0.965908346 | 3.42E-07 |
| TUCP_000116 | XLOC_002765 | ENSRNOT00000092182 | 0.979971774 | 2.45E-08 |
| TUCP_000116 | XLOC_002765 | ENSRNOT00000084461 | 0.979971774 | 2.45E-08 |
| TUCP_000116 | XLOC_002765 | ENSRNOT00000060448 | 0.979971774 | 2.45E-08 |
| TUCP_000116 | XLOC_002765 | ENSRNOT00000032631 | 0.979971774 | 2.45E-08 |
| TUCP_000116 | XLOC_002765 | ENSRNOT00000054910 | 0.958571821 | 8.96E-07 |
| TUCP_000116 | XLOC_002765 | ENSRNOT00000057176 | 0.980225444 | 2.30E-08 |
| TUCP_000116 | XLOC_002765 | ENSRNOT00000078176 | 0.970933853 | 1.56E-07 |
| TUCP_000116 | XLOC_002765 | ENSRNOT00000056364 | 0.965492268 | 3.64E-07 |
| TUCP_000116 | XLOC_002765 | ENSRNOT00000093431 | 0.979971774 | 2.45E-08 |
| TUCP_000116 | XLOC_002765 | ENSRNOT00000024758 | 0.955686893 | 1.25E-06 |
| TUCP_000116 | XLOC_002765 | ENSRNOT00000092901 | 0.979971774 | 2.45E-08 |
| TUCP_000116 | XLOC_002765 | ENSRNOT00000089290 | 0.980695834 | 2.04E-08 |
| TUCP_000116 | XLOC_002765 | ENSRNOT00000090211 | 0.977927355 | 3.98E-08 |
| TUCP_000116 | XLOC_002765 | ENSRNOT00000091828 | 0.976012671 | 6.01E-08 |
| TUCP_000116 | XLOC_002765 | ENSRNOT00000091944 | 0.979901325 | 2.50E-08 |
| TUCP_000116 | XLOC_002765 | ENSRNOT00000070855 | 0.979971774 | 2.45E-08 |
| TUCP_000116 | XLOC_002765 | ENSRNOT00000046980 | 0.956870174 | 1.09E-06 |
| TUCP_000116 | XLOC_002765 | ENSRNOT00000084109 | 0.981094273 | 1.84E-08 |
| TUCP_000116 | XLOC_002765 | ENSRNOT00000060645 | 0.954081657 | 1.49E-06 |
| TUCP_000116 | XLOC_002765 | ENSRNOT00000041569 | 0.979971774 | 2.45E-08 |
| TUCP_000116 | XLOC_002765 | ENSRNOT00000087091 | 0.979971774 | 2.45E-08 |
| TUCP_000116 | XLOC_002765 | ENSRNOT00000003308 | 0.980938433 | 1.92E-08 |
| TUCP_000116 | XLOC_002765 | ENSRNOT00000026113 | 0.982862153 | 1.13E-08 |
| TUCP_000116 | XLOC_002765 | ENSRNOT00000014939 | 0.979394817 | 2.83E-08 |
| TUCP_000116 | XLOC_002765 | ENSRNOT00000058314 | 0.980433947 | 2.19E-08 |
| TUCP_000116 | XLOC_002765 | ENSRNOT00000047870 | 0.956347386 | 1.16E-06 |
| TUCP_000116 | XLOC_002765 | ENSRNOT00000071603 | 0.979872976 | 2.51E-08 |
| TUCP_000116 | XLOC_002765 | ENSRNOT00000044232 | 0.961830467 | 5.98E-07 |
| TUCP_000116 | XLOC_002765 | ENSRNOT00000007683 | 0.979307636 | 2.89E-08 |
| TUCP_000116 | XLOC_002765 | ENSRNOT00000071714 | 0.957699564 | 9.93E-07 |
| TUCP_000116 | XLOC_002765 | ENSRNOT00000075836 | 0.979971774 | 2.45E-08 |
| TUCP_000116 | XLOC_002765 | ENSRNOT00000073229 | 0.979971774 | 2.45E-08 |
| TUCP_000116 | XLOC_002765 | ENSRNOT00000060454 | 0.979971774 | 2.45E-08 |
| TUCP_000116 | XLOC_002765 | ENSRNOT00000009295 | 0.975272955 | 6.98E-08 |
| TUCP_000117 | XLOC_002878 | ENSRNOT00000026803 | 0.957078703 | 1.07E-06 |



|             |             |                    |              |          |
|-------------|-------------|--------------------|--------------|----------|
| TUCP_000117 | XLOC_002878 | ENSRNOT00000020786 | 0.955370508  | 1.29E-06 |
| TUCP_000117 | XLOC_002878 | ENSRNOT00000050968 | 0.951267971  | 1.99E-06 |
| TUCP_000117 | XLOC_002878 | ENSRNOT00000072398 | 0.952597414  | 1.74E-06 |
| TUCP_000117 | XLOC_002878 | ENSRNOT00000042201 | 0.974910552  | 7.51E-08 |
| TUCP_000117 | XLOC_002878 | ENSRNOT00000085875 | 0.955090001  | 1.33E-06 |
| TUCP_001058 | XLOC_040406 | ENSRNOT00000003378 | 0.977656007  | 4.22E-08 |
| TUCP_001058 | XLOC_040406 | ENSRNOT00000086014 | 0.960435123  | 7.14E-07 |
| TUCP_001059 | XLOC_040425 | ENSRNOT00000063994 | 0.952221726  | 1.81E-06 |
| TUCP_001059 | XLOC_040425 | ENSRNOT00000033017 | 0.961310215  | 6.40E-07 |
| TUCP_001059 | XLOC_040425 | ENSRNOT00000012811 | 0.967424307  | 2.74E-07 |
| TUCP_001059 | XLOC_040425 | ENSRNOT00000030445 | 0.9506689    | 2.12E-06 |
| TUCP_000051 | XLOC_001127 | ENSRNOT00000021972 | 0.977779959  | 4.11E-08 |
| TUCP_000057 | XLOC_001127 | ENSRNOT00000000008 | 1            | 0        |
| TUCP_000057 | XLOC_001127 | ENSRNOT00000060048 | 0.998711457  | 2.79E-14 |
| TUCP_000057 | XLOC_001127 | ENSRNOT00000082304 | 0.996875989  | 2.33E-12 |
| TUCP_000057 | XLOC_001127 | ENSRNOT00000006219 | 1            | 4.25E-78 |
| TUCP_000057 | XLOC_001127 | ENSRNOT00000065376 | 1            | 0        |
| TUCP_000057 | XLOC_001127 | ENSRNOT00000081433 | 0.984469223  | 6.93E-09 |
| TUCP_000057 | XLOC_001127 | ENSRNOT00000083575 | 1            | 0        |
| TUCP_000057 | XLOC_001127 | ENSRNOT00000087739 | 1            | 1.33E-79 |
| TUCP_000057 | XLOC_001127 | ENSRNOT00000079826 | 1            | 1.33E-79 |
| TUCP_000057 | XLOC_001127 | ENSRNOT00000025770 | 0.993828251  | 6.98E-11 |
| TUCP_000057 | XLOC_001127 | ENSRNOT00000088244 | 0.973479481  | 9.88E-08 |
| TUCP_000057 | XLOC_001127 | ENSRNOT00000048523 | 1            | 0        |
| TUCP_000057 | XLOC_001127 | ENSRNOT00000079365 | 0.958936699  | 8.58E-07 |
| TUCP_000057 | XLOC_001127 | ENSRNOT00000020229 | 0.960002785  | 7.54E-07 |
| TUCP_000057 | XLOC_001127 | ENSRNOT00000026428 | 0.996986683  | 1.95E-12 |
| TUCP_000057 | XLOC_001127 | ENSRNOT00000085673 | 1            | 0        |
| TUCP_000057 | XLOC_001127 | ENSRNOT00000072972 | 0.981476166  | 1.67E-08 |
| TUCP_000057 | XLOC_001127 | ENSRNOT00000050573 | 1            | 1.33E-79 |
| TUCP_000057 | XLOC_001127 | ENSRNOT00000089876 | -0.953630353 | 1.56E-06 |
| TUCP_000057 | XLOC_001127 | ENSRNOT00000074378 | 0.998901807  | 1.26E-14 |
| TUCP_000057 | XLOC_001127 | ENSRNOT00000093571 | 1            | 0        |
| TUCP_000057 | XLOC_001127 | ENSRNOT00000090581 | 1            | 0        |
| TUCP_000057 | XLOC_001127 | ENSRNOT00000076239 | 0.98020752   | 2.31E-08 |
| TUCP_000057 | XLOC_001127 | ENSRNOT00000065485 | 1            | 1.33E-79 |
| TUCP_000057 | XLOC_001127 | ENSRNOT00000006356 | 0.999544279  | 1.55E-16 |
| TUCP_000057 | XLOC_001127 | ENSRNOT00000087199 | 0.974421555  | 8.26E-08 |
| TUCP_000057 | XLOC_001127 | ENSRNOT00000022091 | 1            | 0        |
| TUCP_000057 | XLOC_001127 | ENSRNOT00000064764 | 0.98460888   | 6.63E-09 |
| TUCP_000057 | XLOC_001127 | ENSRNOT00000076927 | 0.971163156  | 1.50E-07 |
| TUCP_000057 | XLOC_001127 | ENSRNOT00000092395 | 0.999522978  | 1.94E-16 |
| TUCP_001194 | XLOC_044866 | ENSRNOT00000073559 | 0.959666807  | 7.85E-07 |
| TUCP_001194 | XLOC_044866 | ENSRNOT00000039809 | 0.951879189  | 1.87E-06 |
| TUCP_001194 | XLOC_044866 | ENSRNOT00000081246 | 0.970312637  | 1.73E-07 |
| TUCP_001194 | XLOC_044866 | ENSRNOT00000039852 | 0.961241029  | 6.45E-07 |
| TUCP_001194 | XLOC_044866 | ENSRNOT0000009877  | 0.956753373  | 1.11E-06 |
| TUCP_001194 | XLOC_044866 | ENSRNOT00000016555 | 0.986389365  | 3.60E-09 |
| TUCP_001194 | XLOC_044866 | ENSRNOT00000021348 | 0.97731504   | 4.55E-08 |
| TUCP_001194 | XLOC_044866 | ENSRNOT00000078445 | -0.96202433  | 5.84E-07 |
| TUCP_001194 | XLOC_044866 | ENSRNOT0000005228  | 0.951378107  | 1.97E-06 |

|             |             |                    |              |          |
|-------------|-------------|--------------------|--------------|----------|
| TUCP_001194 | XLOC_044866 | ENSRNOT0000006175  | 0.968097408  | 2.47E-07 |
| TUCP_001194 | XLOC_044866 | ENSRNOT00000076763 | 0.952941525  | 1.68E-06 |
| TUCP_001194 | XLOC_044866 | ENSRNOT00000043216 | 0.966462433  | 3.16E-07 |
| TUCP_001194 | XLOC_044866 | ENSRNOT00000009129 | 0.962158909  | 5.73E-07 |
| TUCP_001194 | XLOC_044866 | ENSRNOT00000026543 | 0.966447605  | 3.17E-07 |
| TUCP_001194 | XLOC_044866 | ENSRNOT00000044742 | 0.972681347  | 1.14E-07 |
| TUCP_001194 | XLOC_044866 | ENSRNOT00000066670 | 0.985722011  | 4.56E-09 |
| TUCP_001194 | XLOC_044866 | ENSRNOT00000005942 | 0.950197931  | 2.22E-06 |
| TUCP_001194 | XLOC_044866 | ENSRNOT00000012463 | -0.951689651 | 1.91E-06 |
| TUCP_001194 | XLOC_044866 | ENSRNOT00000025832 | 0.984340292  | 7.22E-09 |
| TUCP_001194 | XLOC_044866 | ENSRNOT00000026783 | 0.951276684  | 1.99E-06 |
| TUCP_001194 | XLOC_044866 | ENSRNOT00000012379 | 0.952469767  | 1.76E-06 |
| TUCP_001194 | XLOC_044866 | ENSRNOT00000029866 | 0.954006472  | 1.50E-06 |
| TUCP_001194 | XLOC_044866 | ENSRNOT00000071764 | 0.991083513  | 4.37E-10 |
| TUCP_001194 | XLOC_044866 | ENSRNOT00000075326 | 0.969695486  | 1.91E-07 |
| TUCP_001194 | XLOC_044866 | ENSRNOT00000014537 | 0.952857325  | 1.69E-06 |
| TUCP_001194 | XLOC_044866 | ENSRNOT00000085228 | 0.952463646  | 1.76E-06 |
| TUCP_001194 | XLOC_044866 | ENSRNOT00000020134 | 0.952118412  | 1.83E-06 |
| TUCP_001194 | XLOC_044866 | ENSRNOT00000001809 | 0.965172064  | 3.81E-07 |
| TUCP_001194 | XLOC_044866 | ENSRNOT00000087592 | 0.97244154   | 1.20E-07 |
| TUCP_001194 | XLOC_044866 | ENSRNOT00000032274 | 0.994514892  | 3.87E-11 |
| TUCP_001194 | XLOC_044866 | ENSRNOT00000058956 | 0.957390031  | 1.03E-06 |
| TUCP_001194 | XLOC_044866 | ENSRNOT00000017948 | 0.963859778  | 4.57E-07 |
| TUCP_001194 | XLOC_044866 | ENSRNOT00000012895 | 0.969954799  | 1.83E-07 |
| TUCP_001194 | XLOC_044866 | ENSRNOT00000004905 | 0.954635994  | 1.40E-06 |
| TUCP_001194 | XLOC_044866 | ENSRNOT00000055401 | 0.95875064   | 8.77E-07 |
| TUCP_001194 | XLOC_044866 | ENSRNOT00000000468 | 0.957418114  | 1.03E-06 |
| TUCP_001194 | XLOC_044866 | ENSRNOT00000072196 | 0.969345162  | 2.03E-07 |
| TUCP_001194 | XLOC_044866 | ENSRNOT00000020028 | 0.950846496  | 2.08E-06 |
| TUCP_001194 | XLOC_044866 | ENSRNOT00000090918 | 0.955693656  | 1.25E-06 |
| TUCP_001194 | XLOC_044866 | ENSRNOT00000023180 | 0.972303265  | 1.23E-07 |
| TUCP_001194 | XLOC_044866 | ENSRNOT00000000676 | 0.968053673  | 2.48E-07 |
| TUCP_001194 | XLOC_044866 | ENSRNOT00000070815 | 0.958665077  | 8.87E-07 |
| TUCP_001194 | XLOC_044866 | ENSRNOT00000019222 | 0.952319145  | 1.79E-06 |
| TUCP_001194 | XLOC_044866 | ENSRNOT00000028070 | 0.954488812  | 1.42E-06 |
| TUCP_001194 | XLOC_044866 | ENSRNOT00000004359 | 0.951263326  | 1.99E-06 |
| TUCP_001194 | XLOC_044866 | ENSRNOT00000060362 | 0.968783226  | 2.22E-07 |
| TUCP_001194 | XLOC_044866 | ENSRNOT00000013274 | 0.972714497  | 1.14E-07 |
| TUCP_001194 | XLOC_044866 | ENSRNOT00000022610 | 0.968497584  | 2.32E-07 |
| TUCP_001194 | XLOC_044866 | ENSRNOT00000020437 | 0.96473009   | 4.05E-07 |
| TUCP_001194 | XLOC_044866 | ENSRNOT00000006828 | 0.953845674  | 1.53E-06 |
| TUCP_001194 | XLOC_044866 | ENSRNOT00000010898 | 0.967473855  | 2.71E-07 |
| TUCP_001194 | XLOC_044866 | ENSRNOT00000005355 | 0.956425858  | 1.15E-06 |
| TUCP_001194 | XLOC_044866 | ENSRNOT00000029167 | 0.97777899   | 4.11E-08 |
| TUCP_001194 | XLOC_044866 | ENSRNOT00000027520 | 0.975670446  | 6.45E-08 |
| TUCP_001194 | XLOC_044866 | ENSRNOT00000004698 | 0.960893649  | 6.74E-07 |
| TUCP_001194 | XLOC_044866 | ENSRNOT00000091910 | 0.95176107   | 1.90E-06 |
| TUCP_001194 | XLOC_044866 | ENSRNOT00000058072 | 0.956540164  | 1.13E-06 |
| TUCP_001194 | XLOC_044866 | ENSRNOT00000084240 | 0.950207529  | 2.22E-06 |
| TUCP_001194 | XLOC_044866 | ENSRNOT00000017629 | 0.953601287  | 1.57E-06 |
| TUCP_001194 | XLOC_044866 | ENSRNOT00000017021 | 0.961076128  | 6.59E-07 |

|             |             |                    |              |          |
|-------------|-------------|--------------------|--------------|----------|
| TUCP_001194 | XLOC_044866 | ENSRNOT0000003991  | 0.956815329  | 1.10E-06 |
| TUCP_001194 | XLOC_044866 | ENSRNOT0000009683  | 0.969297138  | 2.04E-07 |
| TUCP_001194 | XLOC_044866 | ENSRNOT00000043535 | 0.952492421  | 1.76E-06 |
| TUCP_001194 | XLOC_044866 | ENSRNOT00000064902 | 0.951259569  | 2.00E-06 |
| TUCP_001194 | XLOC_044866 | ENSRNOT00000024322 | 0.9678289    | 2.57E-07 |
| TUCP_001194 | XLOC_044866 | ENSRNOT00000023490 | 0.970495548  | 1.68E-07 |
| TUCP_001194 | XLOC_044866 | ENSRNOT00000091265 | 0.97556645   | 6.58E-08 |
| TUCP_001194 | XLOC_044866 | ENSRNOT00000089971 | 0.958564382  | 8.97E-07 |
| TUCP_001194 | XLOC_044866 | ENSRNOT00000027454 | 0.969299908  | 2.04E-07 |
| TUCP_001194 | XLOC_044866 | ENSRNOT00000027452 | 0.96800914   | 2.50E-07 |
| TUCP_001194 | XLOC_044866 | ENSRNOT00000076729 | 0.954458992  | 1.43E-06 |
| TUCP_001194 | XLOC_044866 | ENSRNOT00000017753 | 0.961520666  | 6.23E-07 |
| TUCP_001194 | XLOC_044866 | ENSRNOT00000045882 | 0.967389437  | 2.75E-07 |
| TUCP_001194 | XLOC_044866 | ENSRNOT00000066736 | 0.961232438  | 6.46E-07 |
| TUCP_001194 | XLOC_044866 | ENSRNOT00000009280 | 0.96346978   | 4.82E-07 |
| TUCP_001194 | XLOC_044866 | ENSRNOT00000072534 | 0.964320152  | 4.29E-07 |
| TUCP_001194 | XLOC_044866 | ENSRNOT00000028759 | 0.95717546   | 1.06E-06 |
| TUCP_001194 | XLOC_044866 | ENSRNOT00000036951 | 0.965130569  | 3.83E-07 |
| TUCP_001194 | XLOC_044866 | ENSRNOT00000026457 | 0.959441533  | 8.07E-07 |
| TUCP_001194 | XLOC_044866 | ENSRNOT00000000157 | 0.962654633  | 5.37E-07 |
| TUCP_001194 | XLOC_044866 | ENSRNOT00000064840 | 0.957540546  | 1.01E-06 |
| TUCP_001194 | XLOC_044866 | ENSRNOT00000076669 | 0.95907818   | 8.44E-07 |
| TUCP_001194 | XLOC_044866 | ENSRNOT00000085596 | 0.950048691  | 2.25E-06 |
| TUCP_001194 | XLOC_044866 | ENSRNOT00000031230 | 0.972849043  | 1.11E-07 |
| TUCP_001194 | XLOC_044866 | ENSRNOT00000071733 | 0.96019697   | 7.36E-07 |
| TUCP_001194 | XLOC_044866 | ENSRNOT00000002292 | 0.953665542  | 1.56E-06 |
| TUCP_001194 | XLOC_044866 | ENSRNOT00000086336 | 0.954058518  | 1.49E-06 |
| TUCP_001194 | XLOC_044866 | ENSRNOT00000074939 | 0.981808754  | 1.52E-08 |
| TUCP_001194 | XLOC_044866 | ENSRNOT00000076872 | 0.952560718  | 1.75E-06 |
| TUCP_001194 | XLOC_044866 | ENSRNOT00000071694 | 0.953672734  | 1.55E-06 |
| TUCP_001194 | XLOC_044866 | ENSRNOT00000041384 | -0.9777716   | 4.12E-08 |
| TUCP_001194 | XLOC_044866 | ENSRNOT00000004412 | 0.968994116  | 2.14E-07 |
| TUCP_001194 | XLOC_044866 | ENSRNOT00000012048 | 0.950071375  | 2.25E-06 |
| TUCP_001194 | XLOC_044866 | ENSRNOT00000064798 | 0.965333416  | 3.72E-07 |
| TUCP_001194 | XLOC_044866 | ENSRNOT00000022485 | 0.974025025  | 8.92E-08 |
| TUCP_001194 | XLOC_044866 | ENSRNOT00000033235 | 0.953422981  | 1.60E-06 |
| TUCP_001194 | XLOC_044866 | ENSRNOT00000024941 | 0.952128032  | 1.83E-06 |
| TUCP_001194 | XLOC_044866 | ENSRNOT00000034704 | 0.966704984  | 3.05E-07 |
| TUCP_001194 | XLOC_044866 | ENSRNOT00000013985 | 0.951013318  | 2.05E-06 |
| TUCP_001194 | XLOC_044866 | ENSRNOT00000002522 | -0.953330603 | 1.61E-06 |
| TUCP_001194 | XLOC_044866 | ENSRNOT00000036750 | 0.95556176   | 1.27E-06 |
| TUCP_001194 | XLOC_044866 | ENSRNOT00000023428 | 0.985078487  | 5.68E-09 |
| TUCP_001194 | XLOC_044866 | ENSRNOT00000024420 | 0.953741142  | 1.54E-06 |
| TUCP_001194 | XLOC_044866 | ENSRNOT00000049538 | 0.955762389  | 1.24E-06 |
| TUCP_001194 | XLOC_044866 | ENSRNOT00000083799 | 0.969762772  | 1.89E-07 |
| TUCP_001194 | XLOC_044866 | ENSRNOT00000009066 | 0.96755948   | 2.68E-07 |
| TUCP_000055 | XLOC_001127 | ENSRNOT00000076978 | 0.959129491  | 8.38E-07 |
| TUCP_000055 | XLOC_001127 | ENSRNOT00000050345 | 0.964594009  | 4.13E-07 |
| TUCP_003441 | XLOC_148563 | ENSRNOT00000002308 | 0.954868777  | 1.37E-06 |
| TUCP_003441 | XLOC_148563 | ENSRNOT00000085465 | 0.966080536  | 3.34E-07 |
| TUCP_003440 | XLOC_148551 | ENSRNOT00000061303 | 0.970823816  | 1.59E-07 |

|             |             |                     |              |          |
|-------------|-------------|---------------------|--------------|----------|
| TUCP_003568 | XLOC_156604 | ENSRNOT00000061569  | 0.95009599   | 2.24E-06 |
| TUCP_003569 | XLOC_156680 | ENSRNOT00000086061  | 0.951104736  | 2.03E-06 |
| TUCP_003569 | XLOC_156680 | ENSRNOT00000076294  | 0.964968431  | 3.92E-07 |
| TUCP_003569 | XLOC_156680 | ENSRNOT00000078157  | 0.958064648  | 9.52E-07 |
| TUCP_003569 | XLOC_156680 | ENSRNOT00000040840  | 0.965447064  | 3.66E-07 |
| TUCP_003569 | XLOC_156680 | ENSRNOT00000083263  | 0.960044891  | 7.50E-07 |
| TUCP_001573 | XLOC_060823 | ENSRNOT00000045926  | 0.950173389  | 2.22E-06 |
| TUCP_001573 | XLOC_060823 | ENSRNOT00000079548  | -0.954126795 | 1.48E-06 |
| TUCP_001573 | XLOC_060823 | ENSRNOT00000011032  | 0.957804358  | 9.81E-07 |
| TUCP_001573 | XLOC_060823 | ENSRNOT00000019278  | 0.95131482   | 1.98E-06 |
| TUCP_001573 | XLOC_060823 | ENSRNOT00000065600  | 0.951290437  | 1.99E-06 |
| TUCP_001573 | XLOC_060823 | ENSRNOT00000079742  | 0.951412421  | 1.97E-06 |
| TUCP_001573 | XLOC_060823 | ENSRNOT00000034300  | 0.956802575  | 1.10E-06 |
| TUCP_003444 | XLOC_148684 | ENSRNOT00000006597  | 0.956250467  | 1.17E-06 |
| TUCP_003444 | XLOC_148684 | ENSRNOT00000001912  | 0.952608643  | 1.74E-06 |
| TUCP_001571 | XLOC_060667 | ENSRNOT00000067846  | -0.952493491 | 1.76E-06 |
| TUCP_001571 | XLOC_060667 | ENSRNOT00000078274  | 0.950357803  | 2.18E-06 |
| TUCP_001571 | XLOC_060667 | ENSRNOT00000004046  | -0.950219088 | 2.21E-06 |
| TUCP_001571 | XLOC_060667 | ENSRNOT00000049819  | 0.953216435  | 1.63E-06 |
| TUCP_001571 | XLOC_060667 | ENSRNOT00000014814  | 0.954903478  | 1.36E-06 |
| TUCP_003446 | XLOC_148940 | ENSRNOT000000071840 | 1            | 0        |
| TUCP_003446 | XLOC_148940 | ENSRNOT000000083608 | 0.992618428  | 1.70E-10 |
| TUCP_003446 | XLOC_148940 | ENSRNOT00000076035  | 0.956476518  | 1.14E-06 |
| TUCP_003446 | XLOC_148940 | ENSRNOT00000085476  | 0.96207118   | 5.80E-07 |
| TUCP_003446 | XLOC_148940 | ENSRNOT00000066382  | 0.96329105   | 4.94E-07 |
| TUCP_003446 | XLOC_148940 | ENSRNOT00000045584  | 1            | 0        |
| TUCP_003446 | XLOC_148940 | ENSRNOT00000077995  | 0.994428404  | 4.19E-11 |
| TUCP_003446 | XLOC_148940 | ENSRNOT00000066004  | 0.999857217  | 4.67E-19 |
| TUCP_003446 | XLOC_148940 | ENSRNOT00000064284  | 0.968782027  | 2.22E-07 |
| TUCP_003446 | XLOC_148940 | ENSRNOT00000068197  | 0.955470548  | 1.28E-06 |
| TUCP_003446 | XLOC_148940 | ENSRNOT00000082086  | 0.97275676   | 1.13E-07 |
| TUCP_003446 | XLOC_148940 | ENSRNOT00000089494  | 0.983505294  | 9.35E-09 |
| TUCP_003446 | XLOC_148940 | ENSRNOT00000083747  | 0.957764469  | 9.86E-07 |
| TUCP_003446 | XLOC_148940 | ENSRNOT00000092182  | 1            | 0        |
| TUCP_003446 | XLOC_148940 | ENSRNOT00000084461  | 1            | 0        |
| TUCP_003446 | XLOC_148940 | ENSRNOT00000060448  | 1            | 0        |
| TUCP_003446 | XLOC_148940 | ENSRNOT00000032631  | 1            | 0        |
| TUCP_003446 | XLOC_148940 | ENSRNOT00000079503  | 0.957317866  | 1.04E-06 |
| TUCP_003446 | XLOC_148940 | ENSRNOT00000027950  | 0.960989928  | 6.66E-07 |
| TUCP_003446 | XLOC_148940 | ENSRNOT00000060113  | 0.975275164  | 6.98E-08 |
| TUCP_003446 | XLOC_148940 | ENSRNOT00000054910  | 0.990580154  | 5.75E-10 |
| TUCP_003446 | XLOC_148940 | ENSRNOT00000057176  | 0.999998955  | 9.83E-30 |
| TUCP_003446 | XLOC_148940 | ENSRNOT00000078176  | 0.994350784  | 4.49E-11 |
| TUCP_003446 | XLOC_148940 | ENSRNOT00000056364  | 0.990647125  | 5.55E-10 |
| TUCP_003446 | XLOC_148940 | ENSRNOT00000093431  | 1            | 0        |
| TUCP_003446 | XLOC_148940 | ENSRNOT00000024758  | 0.981367686  | 1.71E-08 |
| TUCP_003446 | XLOC_148940 | ENSRNOT00000092901  | 1            | 0        |
| TUCP_003446 | XLOC_148940 | ENSRNOT00000089290  | 0.999988082  | 1.89E-24 |
| TUCP_003446 | XLOC_148940 | ENSRNOT00000090211  | 0.998865151  | 1.48E-14 |
| TUCP_003446 | XLOC_148940 | ENSRNOT00000075244  | 0.962646865  | 5.38E-07 |
| TUCP_003446 | XLOC_148940 | ENSRNOT00000091828  | 0.996371069  | 4.93E-12 |

|             |             |                    |              |          |
|-------------|-------------|--------------------|--------------|----------|
| TUCP_003446 | XLOC_148940 | ENSRNOT00000091944 | 0.999786107  | 3.52E-18 |
| TUCP_003446 | XLOC_148940 | ENSRNOT00000070855 | 1            | 0        |
| TUCP_003446 | XLOC_148940 | ENSRNOT00000009295 | 0.995887068  | 9.21E-12 |
| TUCP_003446 | XLOC_148940 | ENSRNOT00000084109 | 0.999673655  | 2.91E-17 |
| TUCP_003446 | XLOC_148940 | ENSRNOT00000060645 | 0.973934385  | 9.07E-08 |
| TUCP_003446 | XLOC_148940 | ENSRNOT00000041569 | 1            | 0        |
| TUCP_003446 | XLOC_148940 | ENSRNOT00000087091 | 1            | 0        |
| TUCP_003446 | XLOC_148940 | ENSRNOT00000003308 | 0.990930758  | 4.76E-10 |
| TUCP_003446 | XLOC_148940 | ENSRNOT00000026113 | 0.999851454  | 5.69E-19 |
| TUCP_003446 | XLOC_148940 | ENSRNOT00000014939 | 0.999846854  | 6.63E-19 |
| TUCP_003446 | XLOC_148940 | ENSRNOT00000058314 | 0.99088442   | 4.88E-10 |
| TUCP_003446 | XLOC_148940 | ENSRNOT00000047870 | 0.981575908  | 1.62E-08 |
| TUCP_003446 | XLOC_148940 | ENSRNOT00000071603 | 0.999995875  | 9.40E-27 |
| TUCP_003446 | XLOC_148940 | ENSRNOT00000088376 | 0.970305372  | 1.73E-07 |
| TUCP_003446 | XLOC_148940 | ENSRNOT00000060454 | 1            | 0        |
| TUCP_003446 | XLOC_148940 | ENSRNOT00000029298 | 0.957304374  | 1.04E-06 |
| TUCP_003446 | XLOC_148940 | ENSRNOT00000044232 | 0.98372207   | 8.76E-09 |
| TUCP_003446 | XLOC_148940 | ENSRNOT00000023287 | 0.974929583  | 7.48E-08 |
| TUCP_003446 | XLOC_148940 | ENSRNOT00000071714 | 0.978813661  | 3.24E-08 |
| TUCP_003446 | XLOC_148940 | ENSRNOT00000075836 | 1            | 0        |
| TUCP_003446 | XLOC_148940 | ENSRNOT00000073229 | 1            | 0        |
| TUCP_003446 | XLOC_148940 | ENSRNOT00000077731 | 0.965942857  | 3.41E-07 |
| TUCP_003446 | XLOC_148940 | ENSRNOT00000046980 | 0.982667176  | 1.20E-08 |
| TUCP_003446 | XLOC_148940 | ENSRNOT00000039652 | 0.972574547  | 1.17E-07 |
| TUCP_003446 | XLOC_148940 | ENSRNOT00000066685 | 0.981130123  | 1.83E-08 |
| TUCP_003446 | XLOC_148940 | ENSRNOT00000082776 | 0.966379954  | 3.20E-07 |
| TUCP_003446 | XLOC_148940 | ENSRNOT00000088719 | 0.965171519  | 3.81E-07 |
| TUCP_003446 | XLOC_148940 | ENSRNOT0000007683  | 0.999755897  | 6.82E-18 |
| TUCP_003446 | XLOC_148940 | ENSRNOT00000092916 | 0.96606874   | 3.35E-07 |
| TUCP_003446 | XLOC_148940 | ENSRNOT00000081106 | 0.95354262   | 1.58E-06 |
| TUCP_000541 | XLOC_019107 | ENSRNOT00000000036 | 0.957305971  | 1.04E-06 |
| TUCP_000541 | XLOC_019107 | ENSRNOT00000091417 | 0.975193871  | 7.10E-08 |
| TUCP_000541 | XLOC_019107 | ENSRNOT00000000337 | 0.962445469  | 5.52E-07 |
| TUCP_001673 | XLOC_066715 | ENSRNOT00000061027 | 0.95523819   | 1.31E-06 |
| TUCP_001673 | XLOC_066715 | ENSRNOT00000093441 | 0.95792975   | 9.67E-07 |
| TUCP_001674 | XLOC_066715 | ENSRNOT00000063862 | 0.977217292  | 4.65E-08 |
| TUCP_003567 | XLOC_156585 | ENSRNOT00000084481 | 0.958537698  | 9.00E-07 |
| TUCP_003567 | XLOC_156585 | ENSRNOT00000015427 | 0.955620715  | 1.26E-06 |
| TUCP_000669 | XLOC_025214 | ENSRNOT00000026893 | 0.973561347  | 9.73E-08 |
| TUCP_001708 | XLOC_069783 | ENSRNOT00000000383 | -0.950420446 | 2.17E-06 |
| TUCP_001709 | XLOC_069785 | ENSRNOT00000005343 | -0.962025647 | 5.83E-07 |
| TUCP_001588 | XLOC_061713 | ENSRNOT00000013423 | 0.958179498  | 9.39E-07 |
| TUCP_001588 | XLOC_061713 | ENSRNOT00000037094 | 0.952252062  | 1.80E-06 |
| TUCP_001588 | XLOC_061713 | ENSRNOT00000054947 | 0.964832163  | 3.99E-07 |
| TUCP_001588 | XLOC_061713 | ENSRNOT00000024337 | 0.972612035  | 1.16E-07 |
| TUCP_001588 | XLOC_061713 | ENSRNOT00000046585 | 0.953175869  | 1.64E-06 |
| TUCP_001588 | XLOC_061713 | ENSRNOT00000089934 | 0.952061001  | 1.84E-06 |
| TUCP_001589 | XLOC_061713 | ENSRNOT00000008988 | 0.959397529  | 8.12E-07 |
| TUCP_001589 | XLOC_061713 | ENSRNOT00000003556 | 0.950707103  | 2.11E-06 |
| TUCP_001589 | XLOC_061713 | ENSRNOT00000003511 | 0.952229442  | 1.81E-06 |
| TUCP_001589 | XLOC_061713 | ENSRNOT00000074810 | 0.954491501  | 1.42E-06 |

|             |             |                    |              |          |
|-------------|-------------|--------------------|--------------|----------|
| TUCP_001589 | XLOC_061713 | ENSRNOT0000006697  | 0.956472788  | 1.14E-06 |
| TUCP_001589 | XLOC_061713 | ENSRNOT0000005505  | 0.952428701  | 1.77E-06 |
| TUCP_001589 | XLOC_061713 | ENSRNOT00000087799 | 0.954192007  | 1.47E-06 |
| TUCP_001589 | XLOC_061713 | ENSRNOT00000009132 | 0.952021056  | 1.85E-06 |
| TUCP_001589 | XLOC_061713 | ENSRNOT00000023623 | 0.956588448  | 1.13E-06 |
| TUCP_001589 | XLOC_061713 | ENSRNOT00000009975 | 0.968876594  | 2.18E-07 |
| TUCP_001589 | XLOC_061713 | ENSRNOT00000072682 | 0.966651195  | 3.07E-07 |
| TUCP_001589 | XLOC_061713 | ENSRNOT00000055877 | 0.950870341  | 2.08E-06 |
| TUCP_001589 | XLOC_061713 | ENSRNOT00000088385 | 0.971671298  | 1.37E-07 |
| TUCP_001589 | XLOC_061713 | ENSRNOT00000050941 | 0.961524574  | 6.22E-07 |
| TUCP_001589 | XLOC_061713 | ENSRNOT00000015864 | 0.963123164  | 5.05E-07 |
| TUCP_001589 | XLOC_061713 | ENSRNOT00000024583 | -0.953295576 | 1.62E-06 |
| TUCP_001589 | XLOC_061713 | ENSRNOT00000010701 | 0.970220879  | 1.75E-07 |
| TUCP_001589 | XLOC_061713 | ENSRNOT00000023661 | 0.957768077  | 9.85E-07 |
| TUCP_001589 | XLOC_061713 | ENSRNOT00000034482 | 0.965075642  | 3.86E-07 |
| TUCP_001589 | XLOC_061713 | ENSRNOT00000091367 | 0.950225551  | 2.21E-06 |
| TUCP_001589 | XLOC_061713 | ENSRNOT00000019660 | 0.950821317  | 2.09E-06 |
| TUCP_001583 | XLOC_061573 | ENSRNOT00000040016 | 0.957874207  | 9.73E-07 |
| TUCP_001580 | XLOC_061424 | ENSRNOT00000019680 | -0.953954931 | 1.51E-06 |
| TUCP_001580 | XLOC_061424 | ENSRNOT00000028625 | -0.955770956 | 1.24E-06 |
| TUCP_001580 | XLOC_061424 | ENSRNOT00000031568 | 0.972382642  | 1.21E-07 |
| TUCP_001580 | XLOC_061424 | ENSRNOT00000009096 | -0.952282078 | 1.80E-06 |
| TUCP_001581 | XLOC_061567 | ENSRNOT00000037655 | 0.952032336  | 1.84E-06 |
| TUCP_001581 | XLOC_061567 | ENSRNOT00000076060 | 0.95077764   | 2.09E-06 |
| TUCP_001581 | XLOC_061567 | ENSRNOT00000084784 | 0.960708708  | 6.90E-07 |
| TUCP_001581 | XLOC_061567 | ENSRNOT00000056557 | 0.955536182  | 1.27E-06 |
| TUCP_002563 | XLOC_108829 | ENSRNOT00000025981 | 0.966842513  | 2.99E-07 |
| TUCP_002563 | XLOC_108829 | ENSRNOT00000055735 | 0.956675561  | 1.12E-06 |
| TUCP_002563 | XLOC_108829 | ENSRNOT00000083799 | 0.952499458  | 1.76E-06 |
| TUCP_002563 | XLOC_108829 | ENSRNOT00000068405 | 0.974508063  | 8.12E-08 |
| TUCP_002563 | XLOC_108829 | ENSRNOT00000047387 | 0.953454125  | 1.59E-06 |
| TUCP_002563 | XLOC_108829 | ENSRNOT00000076669 | 0.974672365  | 7.87E-08 |
| TUCP_002563 | XLOC_108829 | ENSRNOT00000085596 | 0.97332292   | 1.02E-07 |
| TUCP_002563 | XLOC_108829 | ENSRNOT00000084012 | 0.95174554   | 1.90E-06 |
| TUCP_002563 | XLOC_108829 | ENSRNOT00000091910 | 0.950916291  | 2.07E-06 |
| TUCP_002563 | XLOC_108829 | ENSRNOT00000012093 | 0.952342668  | 1.79E-06 |
| TUCP_002563 | XLOC_108829 | ENSRNOT00000039842 | 0.974361721  | 8.36E-08 |
| TUCP_002563 | XLOC_108829 | ENSRNOT00000055187 | 0.956308425  | 1.17E-06 |
| TUCP_002563 | XLOC_108829 | ENSRNOT00000026293 | 0.953168328  | 1.64E-06 |
| TUCP_002563 | XLOC_108829 | ENSRNOT0000004834  | 0.976104547  | 5.89E-08 |
| TUCP_002563 | XLOC_108829 | ENSRNOT00000006401 | -0.953305933 | 1.62E-06 |
| TUCP_002563 | XLOC_108829 | ENSRNOT00000022022 | 0.957780068  | 9.84E-07 |
| TUCP_002563 | XLOC_108829 | ENSRNOT00000057826 | 0.953061285  | 1.66E-06 |
| TUCP_002563 | XLOC_108829 | ENSRNOT00000031230 | 0.960158045  | 7.39E-07 |
| TUCP_002563 | XLOC_108829 | ENSRNOT00000082699 | 0.956226836  | 1.18E-06 |
| TUCP_002563 | XLOC_108829 | ENSRNOT00000004508 | 0.955601704  | 1.26E-06 |
| TUCP_002563 | XLOC_108829 | ENSRNOT00000040513 | 0.959733787  | 7.79E-07 |
| TUCP_002563 | XLOC_108829 | ENSRNOT00000004740 | 0.952496218  | 1.76E-06 |
| TUCP_002563 | XLOC_108829 | ENSRNOT00000009683 | 0.952223891  | 1.81E-06 |
| TUCP_002563 | XLOC_108829 | ENSRNOT00000052288 | 0.967426136  | 2.73E-07 |
| TUCP_002563 | XLOC_108829 | ENSRNOT0000004359  | 0.952344685  | 1.79E-06 |

|             |             |                    |              |          |
|-------------|-------------|--------------------|--------------|----------|
| TUCP_002563 | XLOC_108829 | ENSRNOT00000084088 | 0.966281413  | 3.24E-07 |
| TUCP_002563 | XLOC_108829 | ENSRNOT00000039809 | 0.978856953  | 3.21E-08 |
| TUCP_002563 | XLOC_108829 | ENSRNOT00000082100 | 0.950166895  | 2.23E-06 |
| TUCP_002563 | XLOC_108829 | ENSRNOT00000029664 | 0.95601774   | 1.20E-06 |
| TUCP_002563 | XLOC_108829 | ENSRNOT00000068633 | 0.961836632  | 5.98E-07 |
| TUCP_002563 | XLOC_108829 | ENSRNOT00000076729 | 0.975390672  | 6.82E-08 |
| TUCP_002563 | XLOC_108829 | ENSRNOT00000090665 | 0.965603218  | 3.58E-07 |
| TUCP_002563 | XLOC_108829 | ENSRNOT00000003296 | 0.965616066  | 3.57E-07 |
| TUCP_002563 | XLOC_108829 | ENSRNOT00000017948 | 0.961122135  | 6.55E-07 |
| TUCP_002563 | XLOC_108829 | ENSRNOT00000058852 | -0.954583468 | 1.41E-06 |
| TUCP_002563 | XLOC_108829 | ENSRNOT00000054674 | 0.956050077  | 1.20E-06 |
| TUCP_002563 | XLOC_108829 | ENSRNOT00000071694 | 0.955898238  | 1.22E-06 |
| TUCP_002563 | XLOC_108829 | ENSRNOT00000025859 | 0.97490611   | 7.51E-08 |
| TUCP_002563 | XLOC_108829 | ENSRNOT00000013758 | 0.951476766  | 1.95E-06 |
| TUCP_002563 | XLOC_108829 | ENSRNOT00000034503 | 0.962395106  | 5.56E-07 |
| TUCP_002563 | XLOC_108829 | ENSRNOT00000021865 | 0.952462783  | 1.76E-06 |
| TUCP_002563 | XLOC_108829 | ENSRNOT00000005355 | 0.967355533  | 2.76E-07 |
| TUCP_002563 | XLOC_108829 | ENSRNOT00000035989 | 0.990293473  | 6.68E-10 |
| TUCP_002563 | XLOC_108829 | ENSRNOT00000004412 | 0.96539426   | 3.69E-07 |
| TUCP_002563 | XLOC_108829 | ENSRNOT00000067181 | 0.959298636  | 8.21E-07 |
| TUCP_002563 | XLOC_108829 | ENSRNOT00000010992 | 0.979096962  | 3.03E-08 |
| TUCP_002563 | XLOC_108829 | ENSRNOT00000015076 | 0.955777726  | 1.24E-06 |
| TUCP_002563 | XLOC_108829 | ENSRNOT00000024639 | 0.954069964  | 1.49E-06 |
| TUCP_002563 | XLOC_108829 | ENSRNOT00000024942 | 0.956276141  | 1.17E-06 |
| TUCP_002563 | XLOC_108829 | ENSRNOT00000006055 | 0.959265178  | 8.25E-07 |
| TUCP_002563 | XLOC_108829 | ENSRNOT00000071573 | 0.966365439  | 3.20E-07 |
| TUCP_002563 | XLOC_108829 | ENSRNOT00000028431 | 0.955359267  | 1.30E-06 |
| TUCP_002563 | XLOC_108829 | ENSRNOT00000034704 | 0.962776752  | 5.29E-07 |
| TUCP_002563 | XLOC_108829 | ENSRNOT00000013274 | 0.956227469  | 1.18E-06 |
| TUCP_002563 | XLOC_108829 | ENSRNOT00000085027 | 0.968806692  | 2.21E-07 |
| TUCP_002563 | XLOC_108829 | ENSRNOT00000066593 | 0.95597595   | 1.21E-06 |
| TUCP_002563 | XLOC_108829 | ENSRNOT00000025092 | 0.959852772  | 7.68E-07 |
| TUCP_002563 | XLOC_108829 | ENSRNOT00000051496 | 0.953102114  | 1.65E-06 |
| TUCP_002563 | XLOC_108829 | ENSRNOT00000010898 | 0.960426759  | 7.15E-07 |
| TUCP_002563 | XLOC_108829 | ENSRNOT00000090376 | 0.955582311  | 1.26E-06 |
| TUCP_002563 | XLOC_108829 | ENSRNOT00000024420 | 0.965407934  | 3.68E-07 |
| TUCP_002563 | XLOC_108829 | ENSRNOT00000027762 | 0.95552352   | 1.27E-06 |
| TUCP_002563 | XLOC_108829 | ENSRNOT00000067867 | 0.952860588  | 1.69E-06 |
| TUCP_002563 | XLOC_108829 | ENSRNOT00000016739 | 0.958696624  | 8.83E-07 |
| TUCP_002563 | XLOC_108829 | ENSRNOT00000010242 | 0.980098346  | 2.38E-08 |
| TUCP_002563 | XLOC_108829 | ENSRNOT00000028842 | 0.962580797  | 5.43E-07 |
| TUCP_002563 | XLOC_108829 | ENSRNOT00000090424 | 0.958447174  | 9.10E-07 |
| TUCP_002563 | XLOC_108829 | ENSRNOT00000027828 | 0.952064844  | 1.84E-06 |
| TUCP_002563 | XLOC_108829 | ENSRNOT00000017629 | 0.976119951  | 5.88E-08 |
| TUCP_002563 | XLOC_108829 | ENSRNOT00000086352 | 0.950893562  | 2.07E-06 |
| TUCP_002563 | XLOC_108829 | ENSRNOT00000001222 | 0.966405008  | 3.19E-07 |
| TUCP_002563 | XLOC_108829 | ENSRNOT00000017422 | -0.957151421 | 1.06E-06 |
| TUCP_002563 | XLOC_108829 | ENSRNOT00000057313 | 0.97003329   | 1.81E-07 |
| TUCP_001584 | XLOC_061675 | ENSRNOT00000072735 | -0.964446651 | 4.21E-07 |
| TUCP_001274 | XLOC_048267 | ENSRNOT00000002309 | 0.951263355  | 1.99E-06 |
| TUCP_001274 | XLOC_048267 | ENSRNOT00000084177 | -0.961644423 | 6.13E-07 |

|             |             |                    |              |          |
|-------------|-------------|--------------------|--------------|----------|
| TUCP_001274 | XLOC_048267 | ENSRNOT00000072716 | 0.955892912  | 1.22E-06 |
| TUCP_001274 | XLOC_048267 | ENSRNOT00000024237 | 0.965527362  | 3.62E-07 |
| TUCP_001274 | XLOC_048267 | ENSRNOT0000002638  | -0.951354975 | 1.98E-06 |
| TUCP_001274 | XLOC_048267 | ENSRNOT00000032106 | 0.967731969  | 2.61E-07 |
| TUCP_001274 | XLOC_048267 | ENSRNOT00000005811 | -0.95156901  | 1.93E-06 |
| TUCP_001274 | XLOC_048267 | ENSRNOT00000008440 | 0.965206181  | 3.79E-07 |
| TUCP_001274 | XLOC_048267 | ENSRNOT00000028677 | 0.961881175  | 5.95E-07 |
| TUCP_001274 | XLOC_048267 | ENSRNOT00000006160 | 0.966857427  | 2.98E-07 |
| TUCP_001274 | XLOC_048267 | ENSRNOT00000011773 | 0.973722576  | 9.44E-08 |
| TUCP_001274 | XLOC_048267 | ENSRNOT00000083344 | 0.961282173  | 6.42E-07 |
| TUCP_001274 | XLOC_048267 | ENSRNOT00000091211 | 0.970561479  | 1.66E-07 |
| TUCP_001275 | XLOC_048268 | ENSRNOT00000025081 | 0.961575589  | 6.18E-07 |
| TUCP_001275 | XLOC_048268 | ENSRNOT00000002560 | 0.951230338  | 2.00E-06 |
| TUCP_001275 | XLOC_048268 | ENSRNOT00000077526 | 0.961881882  | 5.94E-07 |
| TUCP_001275 | XLOC_048268 | ENSRNOT00000024393 | 0.971343651  | 1.45E-07 |
| TUCP_001275 | XLOC_048268 | ENSRNOT00000089889 | 0.95356456   | 1.57E-06 |
| TUCP_001275 | XLOC_048268 | ENSRNOT00000041494 | 0.957300674  | 1.04E-06 |
| TUCP_001275 | XLOC_048268 | ENSRNOT00000013580 | 0.955601342  | 1.26E-06 |
| TUCP_001275 | XLOC_048268 | ENSRNOT00000081512 | 0.950531798  | 2.15E-06 |
| TUCP_001275 | XLOC_048268 | ENSRNOT00000037133 | 0.958022776  | 9.57E-07 |
| TUCP_001275 | XLOC_048268 | ENSRNOT00000045223 | 0.951978974  | 1.85E-06 |
| TUCP_001275 | XLOC_048268 | ENSRNOT00000044395 | 0.954100271  | 1.49E-06 |
| TUCP_001275 | XLOC_048268 | ENSRNOT00000047093 | 0.956036389  | 1.20E-06 |
| TUCP_001275 | XLOC_048268 | ENSRNOT00000066132 | 0.956682723  | 1.12E-06 |
| TUCP_001276 | XLOC_048269 | ENSRNOT00000015181 | 0.962214706  | 5.69E-07 |
| TUCP_001276 | XLOC_048269 | ENSRNOT00000025624 | 0.959189209  | 8.32E-07 |
| TUCP_001277 | XLOC_048271 | ENSRNOT00000031904 | 0.957367142  | 1.03E-06 |
| TUCP_001277 | XLOC_048271 | ENSRNOT00000082999 | -0.955769095 | 1.24E-06 |
| TUCP_001277 | XLOC_048271 | ENSRNOT00000072007 | -0.961389397 | 6.33E-07 |
| TUCP_001277 | XLOC_048271 | ENSRNOT00000027083 | 0.951996443  | 1.85E-06 |
| TUCP_001277 | XLOC_048271 | ENSRNOT00000084088 | 0.961844674  | 5.97E-07 |
| TUCP_001277 | XLOC_048271 | ENSRNOT00000023302 | 0.960525     | 7.06E-07 |
| TUCP_001277 | XLOC_048271 | ENSRNOT00000002560 | 0.975901301  | 6.15E-08 |
| TUCP_001277 | XLOC_048271 | ENSRNOT00000089007 | -0.951750087 | 1.90E-06 |
| TUCP_001277 | XLOC_048271 | ENSRNOT00000066024 | 0.963119652  | 5.05E-07 |
| TUCP_001277 | XLOC_048271 | ENSRNOT00000083127 | 0.952961118  | 1.68E-06 |
| TUCP_001277 | XLOC_048271 | ENSRNOT00000023144 | 0.954073949  | 1.49E-06 |
| TUCP_001277 | XLOC_048271 | ENSRNOT00000080695 | 0.962361803  | 5.58E-07 |
| TUCP_001277 | XLOC_048271 | ENSRNOT00000078070 | 0.963828623  | 4.59E-07 |
| TUCP_001277 | XLOC_048271 | ENSRNOT00000026909 | -0.955685122 | 1.25E-06 |
| TUCP_001277 | XLOC_048271 | ENSRNOT00000010180 | -0.961446924 | 6.29E-07 |
| TUCP_001277 | XLOC_048271 | ENSRNOT00000060696 | 0.953786758  | 1.54E-06 |
| TUCP_001277 | XLOC_048271 | ENSRNOT00000026543 | 0.956265505  | 1.17E-06 |
| TUCP_001277 | XLOC_048271 | ENSRNOT00000065501 | 0.952698096  | 1.72E-06 |
| TUCP_001277 | XLOC_048271 | ENSRNOT00000018742 | -0.952205493 | 1.81E-06 |
| TUCP_001277 | XLOC_048271 | ENSRNOT00000092203 | 0.95698221   | 1.08E-06 |
| TUCP_001277 | XLOC_048271 | ENSRNOT00000067846 | -0.956137821 | 1.19E-06 |
| TUCP_001277 | XLOC_048271 | ENSRNOT00000047093 | 0.972114084  | 1.27E-07 |
| TUCP_001277 | XLOC_048271 | ENSRNOT00000050180 | 0.955043137  | 1.34E-06 |
| TUCP_001277 | XLOC_048271 | ENSRNOT00000057160 | 0.968334596  | 2.38E-07 |
| TUCP_001277 | XLOC_048271 | ENSRNOT00000024393 | 0.982522283  | 1.25E-08 |



|             |             |                    |              |          |
|-------------|-------------|--------------------|--------------|----------|
| TUCP_001277 | XLOC_048271 | ENSRNOT00000090420 | -0.950932591 | 2.06E-06 |
| TUCP_001277 | XLOC_048271 | ENSRNOT00000044395 | 0.964732464  | 4.05E-07 |
| TUCP_001277 | XLOC_048271 | ENSRNOT00000001222 | 0.958281341  | 9.28E-07 |
| TUCP_001277 | XLOC_048271 | ENSRNOT00000022552 | -0.951205785 | 2.01E-06 |
| TUCP_001379 | XLOC_053306 | ENSRNOT00000028485 | 0.954421067  | 1.43E-06 |
| TUCP_001272 | XLOC_048239 | ENSRNOT00000026949 | -0.961948899 | 5.89E-07 |
| TUCP_001272 | XLOC_048239 | ENSRNOT00000004698 | 0.95278835   | 1.71E-06 |
| TUCP_001272 | XLOC_048239 | ENSRNOT00000093640 | 0.959014484  | 8.50E-07 |
| TUCP_001272 | XLOC_048239 | ENSRNOT00000025394 | 0.968948036  | 2.16E-07 |
| TUCP_001272 | XLOC_048239 | ENSRNOT00000073636 | 0.950256399  | 2.21E-06 |
| TUCP_001272 | XLOC_048239 | ENSRNOT00000026065 | 0.950980148  | 2.05E-06 |
| TUCP_001272 | XLOC_048239 | ENSRNOT00000005228 | 0.950131512  | 2.23E-06 |
| TUCP_001272 | XLOC_048239 | ENSRNOT00000052288 | 0.952965033  | 1.67E-06 |
| TUCP_001272 | XLOC_048239 | ENSRNOT00000088995 | 0.952669203  | 1.73E-06 |
| TUCP_001272 | XLOC_048239 | ENSRNOT00000003013 | 0.950527644  | 2.15E-06 |
| TUCP_001272 | XLOC_048239 | ENSRNOT00000064900 | 0.976298406  | 5.66E-08 |
| TUCP_001272 | XLOC_048239 | ENSRNOT00000068633 | 0.959479728  | 8.04E-07 |
| TUCP_001272 | XLOC_048239 | ENSRNOT00000019769 | -0.950424539 | 2.17E-06 |
| TUCP_001272 | XLOC_048239 | ENSRNOT00000017948 | 0.960120936  | 7.43E-07 |
| TUCP_001272 | XLOC_048239 | ENSRNOT00000011384 | 0.954756689  | 1.38E-06 |
| TUCP_001272 | XLOC_048239 | ENSRNOT00000013031 | -0.960098543 | 7.45E-07 |
| TUCP_001272 | XLOC_048239 | ENSRNOT00000006195 | 0.950244303  | 2.21E-06 |
| TUCP_001272 | XLOC_048239 | ENSRNOT00000004412 | 0.953515941  | 1.58E-06 |
| TUCP_001272 | XLOC_048239 | ENSRNOT00000057814 | 0.953559996  | 1.57E-06 |
| TUCP_001272 | XLOC_048239 | ENSRNOT00000078639 | 0.95710558   | 1.06E-06 |
| TUCP_001272 | XLOC_048239 | ENSRNOT00000013046 | -0.98030095  | 2.26E-08 |
| TUCP_001272 | XLOC_048239 | ENSRNOT00000087725 | 0.963377834  | 4.88E-07 |
| TUCP_001272 | XLOC_048239 | ENSRNOT00000084595 | 0.953931967  | 1.51E-06 |
| TUCP_001272 | XLOC_048239 | ENSRNOT00000009129 | 0.953841125  | 1.53E-06 |
| TUCP_001272 | XLOC_048239 | ENSRNOT00000020437 | 0.961131218  | 6.55E-07 |
| TUCP_001272 | XLOC_048239 | ENSRNOT00000073346 | 0.963675715  | 4.69E-07 |
| TUCP_001272 | XLOC_048239 | ENSRNOT0000006963  | 0.958732682  | 8.79E-07 |
| TUCP_001272 | XLOC_048239 | ENSRNOT00000011622 | 0.953687959  | 1.55E-06 |
| TUCP_001272 | XLOC_048239 | ENSRNOT00000049538 | 0.966634935  | 3.08E-07 |
| TUCP_001272 | XLOC_048239 | ENSRNOT00000044177 | 0.95756851   | 1.01E-06 |
| TUCP_001272 | XLOC_048239 | ENSRNOT00000027944 | 0.964272436  | 4.32E-07 |
| TUCP_001272 | XLOC_048239 | ENSRNOT00000026087 | -0.970703237 | 1.62E-07 |
| TUCP_001272 | XLOC_048239 | ENSRNOT00000010242 | 0.950437193  | 2.17E-06 |
| TUCP_001272 | XLOC_048239 | ENSRNOT00000028842 | 0.978138017  | 3.79E-08 |
| TUCP_001272 | XLOC_048239 | ENSRNOT00000057313 | 0.95055269   | 2.14E-06 |
| TUCP_001272 | XLOC_048239 | ENSRNOT00000006800 | 0.950751451  | 2.10E-06 |
| TUCP_001272 | XLOC_048239 | ENSRNOT00000004026 | 0.965258313  | 3.76E-07 |
| TUCP_001272 | XLOC_048239 | ENSRNOT00000085648 | 0.958023224  | 9.56E-07 |
| TUCP_000225 | XLOC_006985 | ENSRNOT00000071545 | 0.951844221  | 1.88E-06 |
| TUCP_001377 | XLOC_053305 | ENSRNOT00000009280 | -0.951136574 | 2.02E-06 |
| TUCP_001377 | XLOC_053305 | ENSRNOT00000015529 | -0.952544151 | 1.75E-06 |
| TUCP_001377 | XLOC_053305 | ENSRNOT00000082687 | 0.952920363  | 1.68E-06 |
| TUCP_001377 | XLOC_053305 | ENSRNOT00000019453 | -0.950976433 | 2.05E-06 |
| TUCP_001377 | XLOC_053305 | ENSRNOT00000004742 | 0.953705634  | 1.55E-06 |
| TUCP_001377 | XLOC_053305 | ENSRNOT00000042714 | -0.952657087 | 1.73E-06 |
| TUCP_001377 | XLOC_053305 | ENSRNOT00000016384 | 0.956540181  | 1.13E-06 |

|             |             |                    |              |          |
|-------------|-------------|--------------------|--------------|----------|
| TUCP_001377 | XLOC_053305 | ENSRNOT00000093640 | -0.95094338  | 2.06E-06 |
| TUCP_001377 | XLOC_053305 | ENSRNOT00000088995 | -0.95029522  | 2.20E-06 |
| TUCP_001377 | XLOC_053305 | ENSRNOT00000020098 | 0.951646501  | 1.92E-06 |
| TUCP_001377 | XLOC_053305 | ENSRNOT00000085501 | 0.963143612  | 5.03E-07 |
| TUCP_001377 | XLOC_053305 | ENSRNOT00000005126 | 0.950388802  | 2.18E-06 |
| TUCP_001377 | XLOC_053305 | ENSRNOT00000010385 | 0.965827892  | 3.47E-07 |
| TUCP_001278 | XLOC_048272 | ENSRNOT00000026543 | 0.963103024  | 5.06E-07 |
| TUCP_001278 | XLOC_048272 | ENSRNOT00000090376 | 0.955199732  | 1.32E-06 |
| TUCP_001278 | XLOC_048272 | ENSRNOT00000023144 | 0.961569848  | 6.19E-07 |
| TUCP_001278 | XLOC_048272 | ENSRNOT00000080695 | 0.96811702   | 2.46E-07 |
| TUCP_001278 | XLOC_048272 | ENSRNOT00000057160 | 0.962792998  | 5.28E-07 |
| TUCP_001278 | XLOC_048272 | ENSRNOT00000078070 | 0.95250604   | 1.76E-06 |
| TUCP_001278 | XLOC_048272 | ENSRNOT00000067400 | 0.959912086  | 7.62E-07 |
| TUCP_001279 | XLOC_048274 | ENSRNOT00000012671 | 0.954400615  | 1.44E-06 |
| TUCP_001279 | XLOC_048274 | ENSRNOT00000023144 | 0.979198149  | 2.96E-08 |
| TUCP_001279 | XLOC_048274 | ENSRNOT00000085158 | 0.956321187  | 1.16E-06 |
| TUCP_001279 | XLOC_048274 | ENSRNOT00000050180 | 0.965580165  | 3.59E-07 |
| TUCP_001279 | XLOC_048274 | ENSRNOT00000039809 | 0.953256746  | 1.62E-06 |
| TUCP_001279 | XLOC_048274 | ENSRNOT00000000743 | 0.961544321  | 6.21E-07 |
| TUCP_001279 | XLOC_048274 | ENSRNOT00000027083 | 0.955891699  | 1.22E-06 |
| TUCP_001279 | XLOC_048274 | ENSRNOT00000084088 | 0.972368967  | 1.21E-07 |
| TUCP_001279 | XLOC_048274 | ENSRNOT00000081512 | 0.962975378  | 5.15E-07 |
| TUCP_001279 | XLOC_048274 | ENSRNOT00000023302 | 0.965180077  | 3.80E-07 |
| TUCP_001279 | XLOC_048274 | ENSRNOT0000002560  | 0.975826333  | 6.24E-08 |
| TUCP_001279 | XLOC_048274 | ENSRNOT00000089007 | -0.954797552 | 1.38E-06 |
| TUCP_001279 | XLOC_048274 | ENSRNOT00000066024 | 0.975352737  | 6.87E-08 |
| TUCP_001279 | XLOC_048274 | ENSRNOT00000025808 | 0.953594619  | 1.57E-06 |
| TUCP_001279 | XLOC_048274 | ENSRNOT00000031904 | 0.974043194  | 8.88E-08 |
| TUCP_001279 | XLOC_048274 | ENSRNOT00000012736 | 0.95992424   | 7.61E-07 |
| TUCP_001279 | XLOC_048274 | ENSRNOT00000055992 | -0.950192242 | 2.22E-06 |
| TUCP_001279 | XLOC_048274 | ENSRNOT00000087429 | 0.956165157  | 1.18E-06 |
| TUCP_001279 | XLOC_048274 | ENSRNOT00000040513 | 0.950594578  | 2.13E-06 |
| TUCP_001279 | XLOC_048274 | ENSRNOT00000079072 | 0.958808184  | 8.71E-07 |
| TUCP_001279 | XLOC_048274 | ENSRNOT00000024402 | 0.960272855  | 7.29E-07 |
| TUCP_001279 | XLOC_048274 | ENSRNOT00000083127 | 0.964654307  | 4.09E-07 |
| TUCP_001279 | XLOC_048274 | ENSRNOT00000078306 | 0.958546286  | 8.99E-07 |
| TUCP_001279 | XLOC_048274 | ENSRNOT00000080695 | 0.981656062  | 1.59E-08 |
| TUCP_001279 | XLOC_048274 | ENSRNOT00000041044 | 0.959069761  | 8.45E-07 |
| TUCP_001279 | XLOC_048274 | ENSRNOT00000000302 | 0.95315203   | 1.64E-06 |
| TUCP_001279 | XLOC_048274 | ENSRNOT00000016649 | 0.957329281  | 1.04E-06 |
| TUCP_001279 | XLOC_048274 | ENSRNOT00000078070 | 0.973246658  | 1.03E-07 |
| TUCP_001279 | XLOC_048274 | ENSRNOT00000088054 | 0.957269508  | 1.04E-06 |
| TUCP_001279 | XLOC_048274 | ENSRNOT00000026941 | 0.966079829  | 3.34E-07 |
| TUCP_001279 | XLOC_048274 | ENSRNOT00000010541 | 0.952805259  | 1.70E-06 |
| TUCP_001279 | XLOC_048274 | ENSRNOT00000010180 | -0.952650548 | 1.73E-06 |
| TUCP_001279 | XLOC_048274 | ENSRNOT00000047192 | -0.958700297 | 8.83E-07 |
| TUCP_001279 | XLOC_048274 | ENSRNOT00000033017 | 0.960947085  | 6.70E-07 |
| TUCP_001279 | XLOC_048274 | ENSRNOT00000060696 | 0.969818722  | 1.87E-07 |
| TUCP_001279 | XLOC_048274 | ENSRNOT00000042125 | 0.957878872  | 9.73E-07 |
| TUCP_001279 | XLOC_048274 | ENSRNOT00000026543 | 0.976089866  | 5.91E-08 |
| TUCP_001279 | XLOC_048274 | ENSRNOT00000065501 | 0.967944162  | 2.53E-07 |

|             |             |                    |              |          |
|-------------|-------------|--------------------|--------------|----------|
| TUCP_001279 | XLOC_048274 | ENSRNOT00000026293 | 0.964874138  | 3.97E-07 |
| TUCP_001279 | XLOC_048274 | ENSRNOT00000076729 | 0.95538548   | 1.29E-06 |
| TUCP_001279 | XLOC_048274 | ENSRNOT00000080207 | 0.967708626  | 2.62E-07 |
| TUCP_001279 | XLOC_048274 | ENSRNOT00000067400 | 0.957809563  | 9.81E-07 |
| TUCP_001279 | XLOC_048274 | ENSRNOT00000090665 | 0.961023958  | 6.63E-07 |
| TUCP_001279 | XLOC_048274 | ENSRNOT00000076669 | 0.957771968  | 9.85E-07 |
| TUCP_001279 | XLOC_048274 | ENSRNOT00000005387 | 0.953572801  | 1.57E-06 |
| TUCP_001279 | XLOC_048274 | ENSRNOT00000006175 | 0.964630383  | 4.11E-07 |
| TUCP_001279 | XLOC_048274 | ENSRNOT00000027337 | 0.952039896  | 1.84E-06 |
| TUCP_001279 | XLOC_048274 | ENSRNOT00000024393 | 0.968938806  | 2.16E-07 |
| TUCP_001279 | XLOC_048274 | ENSRNOT00000025075 | 0.963625321  | 4.72E-07 |
| TUCP_001279 | XLOC_048274 | ENSRNOT00000035989 | 0.967608422  | 2.66E-07 |
| TUCP_001279 | XLOC_048274 | ENSRNOT00000057160 | 0.981590208  | 1.61E-08 |
| TUCP_001279 | XLOC_048274 | ENSRNOT00000083799 | 0.951537932  | 1.94E-06 |
| TUCP_001279 | XLOC_048274 | ENSRNOT00000047093 | 0.981403262  | 1.70E-08 |
| TUCP_001279 | XLOC_048274 | ENSRNOT00000090420 | -0.952111528 | 1.83E-06 |
| TUCP_001279 | XLOC_048274 | ENSRNOT00000022796 | 0.952756091  | 1.71E-06 |
| TUCP_001279 | XLOC_048274 | ENSRNOT00000045223 | 0.953270223  | 1.62E-06 |
| TUCP_001279 | XLOC_048274 | ENSRNOT00000044395 | 0.956816321  | 1.10E-06 |
| TUCP_001279 | XLOC_048274 | ENSRNOT00000015799 | 0.9601237    | 7.43E-07 |
| TUCP_001279 | XLOC_048274 | ENSRNOT00000001222 | 0.969489898  | 1.98E-07 |
| TUCP_001279 | XLOC_048274 | ENSRNOT00000022552 | -0.950167309 | 2.23E-06 |
| TUCP_001279 | XLOC_048274 | ENSRNOT00000050834 | -0.951481981 | 1.95E-06 |
| TUCP_001373 | XLOC_053127 | ENSRNOT00000015944 | 0.953116868  | 1.65E-06 |
| TUCP_001373 | XLOC_053127 | ENSRNOT00000030327 | 0.962600796  | 5.41E-07 |
| TUCP_001373 | XLOC_053127 | ENSRNOT00000085380 | 0.965826067  | 3.47E-07 |
| TUCP_001528 | XLOC_059064 | ENSRNOT00000051155 | 0.952301351  | 1.79E-06 |
| TUCP_001409 | XLOC_055092 | ENSRNOT00000024186 | 0.981360569  | 1.72E-08 |
| TUCP_001409 | XLOC_055092 | ENSRNOT00000074753 | 0.997613734  | 6.07E-13 |
| TUCP_001409 | XLOC_055092 | ENSRNOT00000004876 | 0.955908848  | 1.22E-06 |
| TUCP_001409 | XLOC_055092 | ENSRNOT00000041904 | 0.998440622  | 7.24E-14 |
| TUCP_001409 | XLOC_055092 | ENSRNOT00000083487 | 0.984524361  | 6.81E-09 |
| TUCP_001409 | XLOC_055092 | ENSRNOT00000077990 | 0.998440622  | 7.24E-14 |
| TUCP_001409 | XLOC_055092 | ENSRNOT00000038826 | 0.99803399   | 2.31E-13 |
| TUCP_001409 | XLOC_055092 | ENSRNOT00000037094 | 0.958570108  | 8.97E-07 |
| TUCP_001409 | XLOC_055092 | ENSRNOT00000046842 | 0.970852846  | 1.58E-07 |
| TUCP_001409 | XLOC_055092 | ENSRNOT00000037169 | 0.97809782   | 3.83E-08 |
| TUCP_001409 | XLOC_055092 | ENSRNOT00000021243 | 0.985003139  | 5.83E-09 |
| TUCP_001409 | XLOC_055092 | ENSRNOT00000060250 | 0.999016651  | 7.23E-15 |
| TUCP_001409 | XLOC_055092 | ENSRNOT00000091934 | 0.998440622  | 7.24E-14 |
| TUCP_001409 | XLOC_055092 | ENSRNOT00000086027 | 0.957045379  | 1.07E-06 |
| TUCP_001409 | XLOC_055092 | ENSRNOT00000046585 | 0.980270891  | 2.28E-08 |
| TUCP_001409 | XLOC_055092 | ENSRNOT00000080794 | 0.988018754  | 1.91E-09 |
| TUCP_001409 | XLOC_055092 | ENSRNOT00000014456 | 0.989432851  | 1.02E-09 |
| TUCP_001409 | XLOC_055092 | ENSRNOT00000031205 | 0.988814872  | 1.35E-09 |
| TUCP_001409 | XLOC_055092 | ENSRNOT00000044145 | 0.998440622  | 7.24E-14 |
| TUCP_001409 | XLOC_055092 | ENSRNOT00000088381 | 0.986645802  | 3.27E-09 |
| TUCP_001409 | XLOC_055092 | ENSRNOT00000011743 | 0.984340931  | 7.22E-09 |
| TUCP_001409 | XLOC_055092 | ENSRNOT00000089929 | 0.998440622  | 7.24E-14 |
| TUCP_001409 | XLOC_055092 | ENSRNOT00000088624 | 0.998440622  | 7.24E-14 |
| TUCP_001409 | XLOC_055092 | ENSRNOT00000085659 | 0.987573913  | 2.29E-09 |

|             |             |                    |              |          |
|-------------|-------------|--------------------|--------------|----------|
| TUCP_001409 | XLOC_055092 | ENSRNOT00000015866 | 0.990996238  | 4.59E-10 |
| TUCP_001409 | XLOC_055092 | ENSRNOT00000078633 | 0.998440622  | 7.24E-14 |
| TUCP_001409 | XLOC_055092 | ENSRNOT00000034907 | 0.991097297  | 4.34E-10 |
| TUCP_001409 | XLOC_055092 | ENSRNOT00000093230 | 0.953506479  | 1.58E-06 |
| TUCP_001409 | XLOC_055092 | ENSRNOT00000051835 | 0.998440622  | 7.24E-14 |
| TUCP_001409 | XLOC_055092 | ENSRNOT00000079087 | 0.998440622  | 7.24E-14 |
| TUCP_001409 | XLOC_055092 | ENSRNOT00000037206 | 0.998440622  | 7.24E-14 |
| TUCP_001409 | XLOC_055092 | ENSRNOT00000083261 | 0.973165212  | 1.05E-07 |
| TUCP_001409 | XLOC_055092 | ENSRNOT00000080590 | 0.998246919  | 1.30E-13 |
| TUCP_001409 | XLOC_055092 | ENSRNOT00000027552 | 0.998776062  | 2.16E-14 |
| TUCP_001409 | XLOC_055092 | ENSRNOT00000077014 | 0.998089746  | 2.00E-13 |
| TUCP_001409 | XLOC_055092 | ENSRNOT00000080453 | 0.998529562  | 5.40E-14 |
| TUCP_001409 | XLOC_055092 | ENSRNOT00000089057 | 0.960417998  | 7.16E-07 |
| TUCP_001409 | XLOC_055092 | ENSRNOT00000066839 | 0.989456446  | 1.01E-09 |
| TUCP_001409 | XLOC_055092 | ENSRNOT00000061284 | 0.959306158  | 8.21E-07 |
| TUCP_001409 | XLOC_055092 | ENSRNOT00000013423 | 0.958777459  | 8.75E-07 |
| TUCP_001409 | XLOC_055092 | ENSRNOT00000071884 | 0.97141319   | 1.43E-07 |
| TUCP_001409 | XLOC_055092 | ENSRNOT00000004128 | 0.954879295  | 1.37E-06 |
| TUCP_001409 | XLOC_055092 | ENSRNOT00000026316 | 0.961624323  | 6.15E-07 |
| TUCP_001409 | XLOC_055092 | ENSRNOT00000057729 | 0.997629885  | 5.87E-13 |
| TUCP_001409 | XLOC_055092 | ENSRNOT00000078663 | 0.979698144  | 2.63E-08 |
| TUCP_001409 | XLOC_055092 | ENSRNOT00000064250 | 0.987077649  | 2.78E-09 |
| TUCP_001409 | XLOC_055092 | ENSRNOT00000021608 | 0.969279845  | 2.05E-07 |
| TUCP_001409 | XLOC_055092 | ENSRNOT00000029634 | 0.993616792  | 8.26E-11 |
| TUCP_001409 | XLOC_055092 | ENSRNOT00000093579 | 0.954108205  | 1.48E-06 |
| TUCP_001409 | XLOC_055092 | ENSRNOT00000086349 | 0.952072573  | 1.84E-06 |
| TUCP_001409 | XLOC_055092 | ENSRNOT00000065460 | 0.998440622  | 7.24E-14 |
| TUCP_001409 | XLOC_055092 | ENSRNOT0000003817  | 0.998512004  | 5.73E-14 |
| TUCP_001409 | XLOC_055092 | ENSRNOT00000016713 | 0.998440622  | 7.24E-14 |
| TUCP_001409 | XLOC_055092 | ENSRNOT00000079260 | 0.993995895  | 6.08E-11 |
| TUCP_001409 | XLOC_055092 | ENSRNOT00000039294 | 0.998440622  | 7.24E-14 |
| TUCP_001409 | XLOC_055092 | ENSRNOT00000092913 | 0.954794354  | 1.38E-06 |
| TUCP_004605 | XLOC_202883 | ENSRNOT00000052270 | -0.978351071 | 3.61E-08 |
| TUCP_004605 | XLOC_202883 | ENSRNOT00000056727 | -0.969270149 | 2.05E-07 |
| TUCP_004605 | XLOC_202883 | ENSRNOT00000012883 | -0.96607472  | 3.34E-07 |
| TUCP_000804 | XLOC_030654 | ENSRNOT00000085599 | 0.990508967  | 5.97E-10 |
| TUCP_000804 | XLOC_030654 | ENSRNOT00000006689 | 0.983681642  | 8.87E-09 |
| TUCP_000804 | XLOC_030654 | ENSRNOT00000081534 | 0.981134306  | 1.82E-08 |
| TUCP_000804 | XLOC_030654 | ENSRNOT00000085301 | 0.986667804  | 3.24E-09 |
| TUCP_000804 | XLOC_030654 | ENSRNOT00000038729 | 0.990729517  | 5.31E-10 |
| TUCP_000804 | XLOC_030654 | ENSRNOT00000086385 | 0.990729517  | 5.31E-10 |
| TUCP_000804 | XLOC_030654 | ENSRNOT00000077695 | 0.969156445  | 2.09E-07 |
| TUCP_000804 | XLOC_030654 | ENSRNOT00000078561 | 0.991033614  | 4.50E-10 |
| TUCP_000804 | XLOC_030654 | ENSRNOT00000087613 | 0.990729517  | 5.31E-10 |
| TUCP_000804 | XLOC_030654 | ENSRNOT00000023062 | 0.990729517  | 5.31E-10 |
| TUCP_000804 | XLOC_030654 | ENSRNOT00000058834 | 0.990729517  | 5.31E-10 |
| TUCP_000804 | XLOC_030654 | ENSRNOT00000079420 | 0.990729517  | 5.31E-10 |
| TUCP_000804 | XLOC_030654 | ENSRNOT00000090761 | 0.990729517  | 5.31E-10 |
| TUCP_000804 | XLOC_030654 | ENSRNOT00000055923 | 0.990729517  | 5.31E-10 |
| TUCP_000804 | XLOC_030654 | ENSRNOT00000092416 | 0.97065563   | 1.63E-07 |
| TUCP_000804 | XLOC_030654 | ENSRNOT00000071930 | 0.990729517  | 5.31E-10 |

|             |             |                     |             |          |
|-------------|-------------|---------------------|-------------|----------|
| TUCP_000804 | XLOC_030654 | ENSRNOT00000001996  | 0.967401359 | 2.74E-07 |
| TUCP_000804 | XLOC_030654 | ENSRNOT000000076756 | 0.990729517 | 5.31E-10 |
| TUCP_000804 | XLOC_030654 | ENSRNOT000000081527 | 0.989665435 | 9.12E-10 |
| TUCP_000804 | XLOC_030654 | ENSRNOT000000091663 | 0.985389504 | 5.12E-09 |
| TUCP_000804 | XLOC_030654 | ENSRNOT000000081780 | 0.990729517 | 5.31E-10 |
| TUCP_000804 | XLOC_030654 | ENSRNOT000000089114 | 0.990729517 | 5.31E-10 |
| TUCP_000804 | XLOC_030654 | ENSRNOT000000021609 | 0.964892497 | 3.96E-07 |
| TUCP_000804 | XLOC_030654 | ENSRNOT000000093444 | 0.965543909 | 3.61E-07 |
| TUCP_000804 | XLOC_030654 | ENSRNOT000000073316 | 0.990729517 | 5.31E-10 |
| TUCP_000804 | XLOC_030654 | ENSRNOT000000086557 | 0.981871759 | 1.50E-08 |
| TUCP_000804 | XLOC_030654 | ENSRNOT000000071663 | 0.990729517 | 5.31E-10 |
| TUCP_000804 | XLOC_030654 | ENSRNOT000000042860 | 0.990729517 | 5.31E-10 |
| TUCP_000804 | XLOC_030654 | ENSRNOT000000072962 | 0.958717727 | 8.81E-07 |
| TUCP_000804 | XLOC_030654 | ENSRNOT000000088421 | 0.990729517 | 5.31E-10 |
| TUCP_000804 | XLOC_030654 | ENSRNOT000000038898 | 0.990729517 | 5.31E-10 |
| TUCP_000804 | XLOC_030654 | ENSRNOT000000064936 | 0.974413682 | 8.27E-08 |
| TUCP_000804 | XLOC_030654 | ENSRNOT000000042777 | 0.979494463 | 2.76E-08 |
| TUCP_000804 | XLOC_030654 | ENSRNOT000000010029 | 0.990729517 | 5.31E-10 |
| TUCP_003695 | XLOC_161318 | ENSRNOT000000018515 | 0.957662384 | 9.98E-07 |
| TUCP_003695 | XLOC_161318 | ENSRNOT000000068747 | 0.955574144 | 1.26E-06 |
| TUCP_001401 | XLOC_053795 | ENSRNOT000000021243 | 0.955467158 | 1.28E-06 |
| TUCP_001401 | XLOC_053795 | ENSRNOT000000061047 | 0.955460952 | 1.28E-06 |
| TUCP_001401 | XLOC_053795 | ENSRNOT000000064613 | 0.953806292 | 1.53E-06 |
| TUCP_001401 | XLOC_053795 | ENSRNOT000000042721 | 0.95432864  | 1.45E-06 |
| TUCP_000801 | XLOC_030520 | ENSRNOT000000024793 | 0.952103906 | 1.83E-06 |
| TUCP_000801 | XLOC_030520 | ENSRNOT000000018776 | 0.96089697  | 6.74E-07 |
| TUCP_003692 | XLOC_161316 | ENSRNOT000000025981 | 0.953999554 | 1.50E-06 |
| TUCP_003692 | XLOC_161316 | ENSRNOT000000028542 | 0.950744621 | 2.10E-06 |
| TUCP_003692 | XLOC_161316 | ENSRNOT000000023744 | 0.956606218 | 1.13E-06 |
| TUCP_003692 | XLOC_161316 | ENSRNOT000000014888 | 0.958895936 | 8.62E-07 |
| TUCP_003692 | XLOC_161316 | ENSRNOT000000057537 | 0.955358146 | 1.30E-06 |
| TUCP_003692 | XLOC_161316 | ENSRNOT000000032992 | 0.952904748 | 1.69E-06 |
| TUCP_003692 | XLOC_161316 | ENSRNOT000000004740 | 0.951944287 | 1.86E-06 |
| TUCP_003692 | XLOC_161316 | ENSRNOT000000036072 | 0.96409713  | 4.42E-07 |
| TUCP_003692 | XLOC_161316 | ENSRNOT000000080695 | 0.981786692 | 1.53E-08 |
| TUCP_003692 | XLOC_161316 | ENSRNOT00000000302  | 0.957889502 | 9.72E-07 |
| TUCP_003692 | XLOC_161316 | ENSRNOT000000092418 | 0.951913008 | 1.87E-06 |
| TUCP_003692 | XLOC_161316 | ENSRNOT000000076285 | 0.96458617  | 4.13E-07 |
| TUCP_003692 | XLOC_161316 | ENSRNOT000000018787 | 0.966844581 | 2.98E-07 |
| TUCP_003692 | XLOC_161316 | ENSRNOT000000013758 | 0.954498012 | 1.42E-06 |
| TUCP_003692 | XLOC_161316 | ENSRNOT000000010824 | 0.953283641 | 1.62E-06 |
| TUCP_003692 | XLOC_161316 | ENSRNOT000000067400 | 0.951883149 | 1.87E-06 |
| TUCP_003692 | XLOC_161316 | ENSRNOT000000040513 | 0.967407156 | 2.74E-07 |
| TUCP_003692 | XLOC_161316 | ENSRNOT000000033661 | 0.951713594 | 1.91E-06 |
| TUCP_003692 | XLOC_161316 | ENSRNOT000000023696 | 0.953942444 | 1.51E-06 |
| TUCP_003692 | XLOC_161316 | ENSRNOT000000030400 | 0.952829982 | 1.70E-06 |
| TUCP_003692 | XLOC_161316 | ENSRNOT000000090376 | 0.963675094 | 4.69E-07 |
| TUCP_003692 | XLOC_161316 | ENSRNOT000000035989 | 0.966839465 | 2.99E-07 |
| TUCP_003692 | XLOC_161316 | ENSRNOT000000057160 | 0.963476139 | 4.81E-07 |
| TUCP_003692 | XLOC_161316 | ENSRNOT000000016739 | 0.979091871 | 3.04E-08 |
| TUCP_003692 | XLOC_161316 | ENSRNOT00000009221  | 0.960567609 | 7.03E-07 |

|             |             |                     |              |          |
|-------------|-------------|---------------------|--------------|----------|
| TUCP_003692 | XLOC_161316 | ENSRNOT00000042799  | 0.963985158  | 4.49E-07 |
| TUCP_002160 | XLOC_090304 | ENSRNOT00000041533  | 0.954356988  | 1.44E-06 |
| TUCP_002160 | XLOC_090304 | ENSRNOT00000091367  | 0.96064894   | 6.96E-07 |
| TUCP_002160 | XLOC_090304 | ENSRNOT00000074810  | 0.958570958  | 8.96E-07 |
| TUCP_002160 | XLOC_090304 | ENSRNOT00000054963  | 0.951810498  | 1.89E-06 |
| TUCP_002160 | XLOC_090304 | ENSRNOT00000091315  | 0.961839415  | 5.98E-07 |
| TUCP_002160 | XLOC_090304 | ENSRNOT00000079882  | 0.95261581   | 1.74E-06 |
| TUCP_002569 | XLOC_108859 | ENSRNOT00000043784  | 0.951516393  | 1.94E-06 |
| TUCP_002569 | XLOC_108859 | ENSRNOT00000036766  | 0.954437668  | 1.43E-06 |
| TUCP_002569 | XLOC_108859 | ENSRNOT00000080557  | 0.986057238  | 4.05E-09 |
| TUCP_002569 | XLOC_108859 | ENSRNOT00000012811  | 0.957415078  | 1.03E-06 |
| TUCP_002569 | XLOC_108859 | ENSRNOT00000037800  | 0.961085772  | 6.58E-07 |
| TUCP_002569 | XLOC_108859 | ENSRNOT00000010263  | 0.951623145  | 1.92E-06 |
| TUCP_002569 | XLOC_108859 | ENSRNOT00000016975  | 0.982882421  | 1.12E-08 |
| TUCP_002668 | XLOC_113192 | ENSRNOT00000042681  | 0.959853406  | 7.68E-07 |
| TUCP_002568 | XLOC_108859 | ENSRNOT00000092029  | 0.958446249  | 9.10E-07 |
| TUCP_002568 | XLOC_108859 | ENSRNOT00000057045  | -0.951453099 | 1.96E-06 |
| TUCP_002568 | XLOC_108859 | ENSRNOT00000065143  | 0.981536865  | 1.64E-08 |
| TUCP_002568 | XLOC_108859 | ENSRNOT00000005958  | 0.98235204   | 1.31E-08 |
| TUCP_002568 | XLOC_108859 | ENSRNOT00000017063  | -0.969109899 | 2.10E-07 |
| TUCP_002568 | XLOC_108859 | ENSRNOT000000029136 | -0.952855641 | 1.69E-06 |
| TUCP_002568 | XLOC_108859 | ENSRNOT000000027526 | 0.964077543  | 4.44E-07 |
| TUCP_002568 | XLOC_108859 | ENSRNOT000000028793 | 0.959700616  | 7.82E-07 |
| TUCP_002568 | XLOC_108859 | ENSRNOT000000082998 | 0.951411779  | 1.97E-06 |
| TUCP_002568 | XLOC_108859 | ENSRNOT000000072208 | 0.963430433  | 4.84E-07 |
| TUCP_002568 | XLOC_108859 | ENSRNOT000000055321 | 0.951442345  | 1.96E-06 |
| TUCP_002568 | XLOC_108859 | ENSRNOT000000027083 | 0.951482642  | 1.95E-06 |
| TUCP_002568 | XLOC_108859 | ENSRNOT000000087095 | 0.971160354  | 1.50E-07 |
| TUCP_002568 | XLOC_108859 | ENSRNOT000000063873 | 0.955203288  | 1.32E-06 |
| TUCP_002568 | XLOC_108859 | ENSRNOT000000081047 | 0.953156566  | 1.64E-06 |
| TUCP_002568 | XLOC_108859 | ENSRNOT000000008372 | 0.966020229  | 3.37E-07 |
| TUCP_002568 | XLOC_108859 | ENSRNOT000000067688 | -0.962970521 | 5.15E-07 |
| TUCP_002568 | XLOC_108859 | ENSRNOT000000050834 | -0.952592855 | 1.74E-06 |
| TUCP_002568 | XLOC_108859 | ENSRNOT000000002443 | 0.955118532  | 1.33E-06 |
| TUCP_002568 | XLOC_108859 | ENSRNOT00000004046  | -0.950594225 | 2.13E-06 |
| TUCP_002568 | XLOC_108859 | ENSRNOT000000025936 | -0.950954648 | 2.06E-06 |
| TUCP_002568 | XLOC_108859 | ENSRNOT000000088353 | -0.970624183 | 1.64E-07 |
| TUCP_002568 | XLOC_108859 | ENSRNOT000000083173 | -0.95075177  | 2.10E-06 |
| TUCP_002568 | XLOC_108859 | ENSRNOT000000021471 | -0.951102463 | 2.03E-06 |
| TUCP_002568 | XLOC_108859 | ENSRNOT00000019502  | 0.955707125  | 1.25E-06 |
| TUCP_002568 | XLOC_108859 | ENSRNOT000000027970 | 0.953568762  | 1.57E-06 |
| TUCP_002568 | XLOC_108859 | ENSRNOT000000059524 | -0.957751952 | 9.87E-07 |
| TUCP_002568 | XLOC_108859 | ENSRNOT00000008757  | 0.963802754  | 4.61E-07 |
| TUCP_002568 | XLOC_108859 | ENSRNOT000000022963 | 0.950162031  | 2.23E-06 |
| TUCP_002568 | XLOC_108859 | ENSRNOT00000012942  | 0.955296313  | 1.30E-06 |
| TUCP_002568 | XLOC_108859 | ENSRNOT000000028625 | -0.966528971 | 3.13E-07 |
| TUCP_002568 | XLOC_108859 | ENSRNOT00000007379  | 0.955010476  | 1.35E-06 |
| TUCP_002568 | XLOC_108859 | ENSRNOT000000035474 | 0.954602743  | 1.41E-06 |
| TUCP_002568 | XLOC_108859 | ENSRNOT000000048063 | 0.951443557  | 1.96E-06 |
| TUCP_002568 | XLOC_108859 | ENSRNOT000000003714 | 0.952747229  | 1.71E-06 |
| TUCP_002568 | XLOC_108859 | ENSRNOT000000052224 | 0.962353844  | 5.59E-07 |

|             |             |                    |              |          |
|-------------|-------------|--------------------|--------------|----------|
| TUCP_002568 | XLOC_108859 | ENSRNOT00000022142 | 0.958820985  | 8.70E-07 |
| TUCP_002568 | XLOC_108859 | ENSRNOT00000056130 | 0.967763476  | 2.60E-07 |
| TUCP_002568 | XLOC_108859 | ENSRNOT00000008929 | 0.963128764  | 5.04E-07 |
| TUCP_002568 | XLOC_108859 | ENSRNOT00000070893 | 0.969138613  | 2.09E-07 |
| TUCP_002568 | XLOC_108859 | ENSRNOT00000088182 | 0.951532487  | 1.94E-06 |
| TUCP_002568 | XLOC_108859 | ENSRNOT00000084385 | 0.954501203  | 1.42E-06 |
| TUCP_002568 | XLOC_108859 | ENSRNOT00000067170 | -0.95357487  | 1.57E-06 |
| TUCP_002568 | XLOC_108859 | ENSRNOT00000090342 | 0.963325235  | 4.91E-07 |
| TUCP_002568 | XLOC_108859 | ENSRNOT00000001586 | -0.955268463 | 1.31E-06 |
| TUCP_002568 | XLOC_108859 | ENSRNOT00000029125 | 0.95999653   | 7.54E-07 |
| TUCP_002568 | XLOC_108859 | ENSRNOT00000009496 | 0.959267743  | 8.25E-07 |
| TUCP_002568 | XLOC_108859 | ENSRNOT00000044562 | 0.95267552   | 1.73E-06 |
| TUCP_002568 | XLOC_108859 | ENSRNOT00000005329 | -0.959812073 | 7.72E-07 |
| TUCP_002568 | XLOC_108859 | ENSRNOT00000003158 | -0.961030168 | 6.63E-07 |
| TUCP_002568 | XLOC_108859 | ENSRNOT00000005228 | 0.954214433  | 1.47E-06 |
| TUCP_002568 | XLOC_108859 | ENSRNOT00000014814 | 0.950120693  | 2.24E-06 |
| TUCP_002568 | XLOC_108859 | ENSRNOT00000077201 | -0.980652435 | 2.07E-08 |
| TUCP_002568 | XLOC_108859 | ENSRNOT00000017181 | -0.956575586 | 1.13E-06 |
| TUCP_002568 | XLOC_108859 | ENSRNOT00000017753 | 0.957500462  | 1.02E-06 |
| TUCP_002568 | XLOC_108859 | ENSRNOT00000051022 | 0.957778587  | 9.84E-07 |
| TUCP_002568 | XLOC_108859 | ENSRNOT00000081981 | 0.972638434  | 1.15E-07 |
| TUCP_002568 | XLOC_108859 | ENSRNOT00000024969 | 0.963391301  | 4.87E-07 |
| TUCP_002568 | XLOC_108859 | ENSRNOT00000019886 | 0.950368493  | 2.18E-06 |
| TUCP_002568 | XLOC_108859 | ENSRNOT00000033235 | 0.961945346  | 5.90E-07 |
| TUCP_002568 | XLOC_108859 | ENSRNOT00000042125 | 0.965512302  | 3.63E-07 |
| TUCP_002568 | XLOC_108859 | ENSRNOT00000004956 | 0.950014614  | 2.26E-06 |
| TUCP_002568 | XLOC_108859 | ENSRNOT00000082869 | 0.961425031  | 6.30E-07 |
| TUCP_002568 | XLOC_108859 | ENSRNOT00000012187 | 0.95186675   | 1.88E-06 |
| TUCP_002568 | XLOC_108859 | ENSRNOT00000080608 | 0.959667959  | 7.85E-07 |
| TUCP_002568 | XLOC_108859 | ENSRNOT00000008901 | -0.956209005 | 1.18E-06 |
| TUCP_002568 | XLOC_108859 | ENSRNOT00000071493 | -0.957849494 | 9.76E-07 |
| TUCP_002568 | XLOC_108859 | ENSRNOT00000073971 | 0.955671005  | 1.25E-06 |
| TUCP_002568 | XLOC_108859 | ENSRNOT00000009803 | 0.959151466  | 8.36E-07 |
| TUCP_002568 | XLOC_108859 | ENSRNOT00000047192 | -0.952268414 | 1.80E-06 |
| TUCP_002568 | XLOC_108859 | ENSRNOT00000003971 | 0.951555872  | 1.94E-06 |
| TUCP_002568 | XLOC_108859 | ENSRNOT00000078102 | 0.968873466  | 2.18E-07 |
| TUCP_002568 | XLOC_108859 | ENSRNOT00000076611 | -0.954644192 | 1.40E-06 |
| TUCP_002568 | XLOC_108859 | ENSRNOT00000085403 | 0.952779194  | 1.71E-06 |
| TUCP_002568 | XLOC_108859 | ENSRNOT00000008982 | 0.956564824  | 1.13E-06 |
| TUCP_002568 | XLOC_108859 | ENSRNOT00000025372 | 0.954601843  | 1.41E-06 |
| TUCP_002568 | XLOC_108859 | ENSRNOT00000040476 | 0.952873002  | 1.69E-06 |
| TUCP_002568 | XLOC_108859 | ENSRNOT00000016519 | 0.951579462  | 1.93E-06 |
| TUCP_002568 | XLOC_108859 | ENSRNOT00000079917 | 0.959289411  | 8.22E-07 |
| TUCP_002568 | XLOC_108859 | ENSRNOT00000004319 | -0.954938658 | 1.36E-06 |
| TUCP_002568 | XLOC_108859 | ENSRNOT00000058842 | 0.956192416  | 1.18E-06 |
| TUCP_002568 | XLOC_108859 | ENSRNOT00000011682 | -0.971422082 | 1.43E-07 |
| TUCP_002568 | XLOC_108859 | ENSRNOT00000084422 | 0.9548846    | 1.36E-06 |
| TUCP_002568 | XLOC_108859 | ENSRNOT00000079177 | 0.950293727  | 2.20E-06 |
| TUCP_002568 | XLOC_108859 | ENSRNOT00000031568 | 0.975416149  | 6.79E-08 |
| TUCP_003370 | XLOC_146008 | ENSRNOT00000085465 | 0.95298148   | 1.67E-06 |
| TUCP_003370 | XLOC_146008 | ENSRNOT00000052002 | -0.950189132 | 2.22E-06 |

|             |             |                    |              |          |
|-------------|-------------|--------------------|--------------|----------|
| TUCP_003370 | XLOC_146008 | ENSRNOT00000047126 | 0.957099758  | 1.06E-06 |
| TUCP_003370 | XLOC_146008 | ENSRNOT00000068452 | -0.962762882 | 5.30E-07 |
| TUCP_003370 | XLOC_146008 | ENSRNOT00000048910 | 0.955594383  | 1.26E-06 |
| TUCP_003370 | XLOC_146008 | ENSRNOT0000007702  | 0.975162939  | 7.14E-08 |
| TUCP_003370 | XLOC_146008 | ENSRNOT00000012760 | 0.976308579  | 5.65E-08 |
| TUCP_003370 | XLOC_146008 | ENSRNOT00000080613 | 0.951261716  | 2.00E-06 |
| TUCP_003370 | XLOC_146008 | ENSRNOT00000030109 | -0.961358413 | 6.36E-07 |
| TUCP_003370 | XLOC_146008 | ENSRNOT00000086995 | -0.955508097 | 1.27E-06 |
| TUCP_003370 | XLOC_146008 | ENSRNOT00000034609 | -0.950865965 | 2.08E-06 |
| TUCP_003370 | XLOC_146008 | ENSRNOT00000003891 | -0.959248247 | 8.27E-07 |
| TUCP_003370 | XLOC_146008 | ENSRNOT00000081725 | -0.960247749 | 7.31E-07 |
| TUCP_004353 | XLOC_192311 | ENSRNOT00000072818 | 0.953003032  | 1.67E-06 |
| TUCP_002663 | XLOC_112907 | ENSRNOT00000026633 | -0.964639591 | 4.10E-07 |
| TUCP_002663 | XLOC_112907 | ENSRNOT00000001215 | -0.95529382  | 1.30E-06 |
| TUCP_002663 | XLOC_112907 | ENSRNOT00000074583 | 0.953473645  | 1.59E-06 |
| TUCP_002663 | XLOC_112907 | ENSRNOT00000010835 | -0.971792435 | 1.34E-07 |
| TUCP_002663 | XLOC_112907 | ENSRNOT00000081123 | -0.960950078 | 6.70E-07 |
| TUCP_002663 | XLOC_112907 | ENSRNOT00000081353 | -0.955315215 | 1.30E-06 |
| TUCP_002663 | XLOC_112907 | ENSRNOT00000065103 | 0.95228215   | 1.80E-06 |
| TUCP_002663 | XLOC_112907 | ENSRNOT00000087080 | -0.950700889 | 2.11E-06 |
| TUCP_002663 | XLOC_112907 | ENSRNOT00000013768 | 0.955783552  | 1.24E-06 |
| TUCP_002663 | XLOC_112907 | ENSRNOT00000057965 | -0.966847081 | 2.98E-07 |
| TUCP_002663 | XLOC_112907 | ENSRNOT00000091282 | 0.983345752  | 9.81E-09 |
| TUCP_002663 | XLOC_112907 | ENSRNOT0000002443  | -0.959731777 | 7.79E-07 |
| TUCP_002663 | XLOC_112907 | ENSRNOT00000013058 | -0.960811582 | 6.81E-07 |
| TUCP_002663 | XLOC_112907 | ENSRNOT00000077479 | 0.955627898  | 1.26E-06 |
| TUCP_002663 | XLOC_112907 | ENSRNOT00000086798 | 0.973455006  | 9.93E-08 |
| TUCP_002663 | XLOC_112907 | ENSRNOT00000030749 | 0.965919383  | 3.42E-07 |
| TUCP_002663 | XLOC_112907 | ENSRNOT00000015434 | -0.956562201 | 1.13E-06 |
| TUCP_002663 | XLOC_112907 | ENSRNOT00000006111 | 0.956570342  | 1.13E-06 |
| TUCP_002663 | XLOC_112907 | ENSRNOT00000038178 | 0.956205584  | 1.18E-06 |
| TUCP_002663 | XLOC_112907 | ENSRNOT00000014560 | 0.968730324  | 2.23E-07 |
| TUCP_002663 | XLOC_112907 | ENSRNOT00000052002 | -0.957760419 | 9.86E-07 |
| TUCP_002663 | XLOC_112907 | ENSRNOT00000005459 | -0.950168956 | 2.23E-06 |
| TUCP_002663 | XLOC_112907 | ENSRNOT00000045326 | -0.952430573 | 1.77E-06 |
| TUCP_002663 | XLOC_112907 | ENSRNOT00000025222 | 0.957818729  | 9.80E-07 |
| TUCP_002663 | XLOC_112907 | ENSRNOT00000029660 | -0.956883816 | 1.09E-06 |
| TUCP_002663 | XLOC_112907 | ENSRNOT00000029510 | -0.956723065 | 1.11E-06 |
| TUCP_002663 | XLOC_112907 | ENSRNOT00000020951 | -0.964367429 | 4.26E-07 |
| TUCP_002663 | XLOC_112907 | ENSRNOT00000076467 | 0.968565054  | 2.29E-07 |
| TUCP_002663 | XLOC_112907 | ENSRNOT00000078856 | 0.959344474  | 8.17E-07 |
| TUCP_002663 | XLOC_112907 | ENSRNOT00000004290 | -0.974443548 | 8.23E-08 |
| TUCP_002663 | XLOC_112907 | ENSRNOT00000023619 | -0.952606739 | 1.74E-06 |
| TUCP_002663 | XLOC_112907 | ENSRNOT00000009742 | 0.95034937   | 2.19E-06 |
| TUCP_002663 | XLOC_112907 | ENSRNOT00000008104 | -0.955168431 | 1.32E-06 |
| TUCP_002663 | XLOC_112907 | ENSRNOT00000030850 | -0.956075166 | 1.20E-06 |
| TUCP_002663 | XLOC_112907 | ENSRNOT00000038546 | 0.952773687  | 1.71E-06 |
| TUCP_002663 | XLOC_112907 | ENSRNOT00000001679 | -0.962280237 | 5.64E-07 |
| TUCP_002663 | XLOC_112907 | ENSRNOT00000074212 | -0.980945632 | 1.92E-08 |
| TUCP_002663 | XLOC_112907 | ENSRNOT00000068452 | -0.954973118 | 1.35E-06 |
| TUCP_002663 | XLOC_112907 | ENSRNOT00000091325 | 0.953543353  | 1.58E-06 |



|             |             |                    |              |          |
|-------------|-------------|--------------------|--------------|----------|
| TUCP_002663 | XLOC_112907 | ENSRNOT00000083268 | 0.950871418  | 2.08E-06 |
| TUCP_002663 | XLOC_112907 | ENSRNOT00000012996 | -0.965445258 | 3.66E-07 |
| TUCP_002663 | XLOC_112907 | ENSRNOT00000021729 | -0.971210698 | 1.48E-07 |
| TUCP_002663 | XLOC_112907 | ENSRNOT00000066776 | 0.959688585  | 7.83E-07 |
| TUCP_002663 | XLOC_112907 | ENSRNOT00000050868 | -0.950489525 | 2.16E-06 |
| TUCP_002663 | XLOC_112907 | ENSRNOT00000050350 | 0.968036678  | 2.49E-07 |
| TUCP_002663 | XLOC_112907 | ENSRNOT00000012314 | 0.963045431  | 5.10E-07 |
| TUCP_002663 | XLOC_112907 | ENSRNOT00000010399 | -0.958953191 | 8.56E-07 |
| TUCP_002663 | XLOC_112907 | ENSRNOT00000015092 | -0.950843166 | 2.08E-06 |
| TUCP_002663 | XLOC_112907 | ENSRNOT00000073019 | -0.960923715 | 6.72E-07 |
| TUCP_002663 | XLOC_112907 | ENSRNOT00000020005 | -0.950307781 | 2.19E-06 |
| TUCP_002663 | XLOC_112907 | ENSRNOT00000084031 | -0.955491273 | 1.28E-06 |
| TUCP_002663 | XLOC_112907 | ENSRNOT00000004956 | -0.956557756 | 1.13E-06 |
| TUCP_002663 | XLOC_112907 | ENSRNOT00000030109 | -0.976942529 | 4.94E-08 |
| TUCP_002663 | XLOC_112907 | ENSRNOT00000009319 | 0.953158121  | 1.64E-06 |
| TUCP_002663 | XLOC_112907 | ENSRNOT00000024033 | -0.959956077 | 7.58E-07 |
| TUCP_002663 | XLOC_112907 | ENSRNOT00000021578 | -0.950949372 | 2.06E-06 |
| TUCP_002663 | XLOC_112907 | ENSRNOT00000013191 | 0.95423189   | 1.46E-06 |
| TUCP_002663 | XLOC_112907 | ENSRNOT00000028066 | 0.954156432  | 1.48E-06 |
| TUCP_002663 | XLOC_112907 | ENSRNOT00000064667 | 0.976010506  | 6.01E-08 |
| TUCP_002663 | XLOC_112907 | ENSRNOT00000090774 | 0.962586474  | 5.42E-07 |
| TUCP_002663 | XLOC_112907 | ENSRNOT00000038066 | -0.966813959 | 3.00E-07 |
| TUCP_002663 | XLOC_112907 | ENSRNOT00000025252 | 0.9685543    | 2.30E-07 |
| TUCP_002663 | XLOC_112907 | ENSRNOT00000077803 | -0.965336315 | 3.72E-07 |
| TUCP_002663 | XLOC_112907 | ENSRNOT00000050415 | 0.956270323  | 1.17E-06 |
| TUCP_002663 | XLOC_112907 | ENSRNOT00000067009 | 0.956971899  | 1.08E-06 |
| TUCP_002663 | XLOC_112907 | ENSRNOT00000040847 | 0.963038051  | 5.11E-07 |
| TUCP_002663 | XLOC_112907 | ENSRNOT00000077274 | 0.953035544  | 1.66E-06 |
| TUCP_002068 | XLOC_084778 | ENSRNOT00000039045 | 0.952282197  | 1.80E-06 |
| TUCP_002068 | XLOC_084778 | ENSRNOT00000004249 | 0.96131419   | 6.39E-07 |
| TUCP_002068 | XLOC_084778 | ENSRNOT0000001682  | 0.95069833   | 2.11E-06 |
| TUCP_002068 | XLOC_084778 | ENSRNOT00000014988 | 0.971202424  | 1.49E-07 |
| TUCP_002068 | XLOC_084778 | ENSRNOT00000022573 | -0.951075166 | 2.03E-06 |
| TUCP_002106 | XLOC_087136 | ENSRNOT00000006429 | 0.950051324  | 2.25E-06 |
| TUCP_002106 | XLOC_087136 | ENSRNOT00000009111 | 0.951858415  | 1.88E-06 |
| TUCP_002106 | XLOC_087136 | ENSRNOT00000054915 | 0.952138235  | 1.82E-06 |
| TUCP_002106 | XLOC_087136 | ENSRNOT00000004387 | 0.957881614  | 9.72E-07 |
| TUCP_002106 | XLOC_087136 | ENSRNOT00000020174 | -0.958513077 | 9.03E-07 |
| TUCP_002106 | XLOC_087136 | ENSRNOT00000046594 | 0.960366701  | 7.21E-07 |
| TUCP_002106 | XLOC_087136 | ENSRNOT00000083414 | 0.954348803  | 1.45E-06 |
| TUCP_002106 | XLOC_087136 | ENSRNOT00000088581 | 0.955362158  | 1.29E-06 |
| TUCP_002106 | XLOC_087136 | ENSRNOT00000064588 | 0.956197618  | 1.18E-06 |
| TUCP_002105 | XLOC_087128 | ENSRNOT00000042432 | 0.982955485  | 1.10E-08 |
| TUCP_002105 | XLOC_087128 | ENSRNOT00000093696 | 0.953425354  | 1.60E-06 |
| TUCP_002105 | XLOC_087128 | ENSRNOT00000029865 | 0.953671802  | 1.55E-06 |
| TUCP_002105 | XLOC_087128 | ENSRNOT00000007657 | 0.952423074  | 1.77E-06 |
| TUCP_003593 | XLOC_158142 | ENSRNOT00000012413 | 0.955769461  | 1.24E-06 |
| TUCP_003593 | XLOC_158142 | ENSRNOT00000026153 | -0.959862791 | 7.67E-07 |
| TUCP_003593 | XLOC_158142 | ENSRNOT00000088503 | -0.974321941 | 8.42E-08 |
| TUCP_003592 | XLOC_158102 | ENSRNOT00000036565 | 0.95245552   | 1.77E-06 |
| TUCP_003592 | XLOC_158102 | ENSRNOT00000093075 | 0.988421647  | 1.61E-09 |

|             |             |                    |              |          |
|-------------|-------------|--------------------|--------------|----------|
| TUCP_003592 | XLOC_158102 | ENSRNOT00000058260 | 0.988421647  | 1.61E-09 |
| TUCP_003592 | XLOC_158102 | ENSRNOT00000088887 | 0.988421647  | 1.61E-09 |
| TUCP_003592 | XLOC_158102 | ENSRNOT00000084986 | 0.988421647  | 1.61E-09 |
| TUCP_003592 | XLOC_158102 | ENSRNOT00000074346 | 0.985664014  | 4.66E-09 |
| TUCP_003592 | XLOC_158102 | ENSRNOT00000073209 | 0.99829721   | 1.12E-13 |
| TUCP_003592 | XLOC_158102 | ENSRNOT00000080155 | 0.967587561  | 2.67E-07 |
| TUCP_003592 | XLOC_158102 | ENSRNOT00000072573 | 0.981000976  | 1.89E-08 |
| TUCP_003592 | XLOC_158102 | ENSRNOT00000017828 | 0.983114017  | 1.05E-08 |
| TUCP_003592 | XLOC_158102 | ENSRNOT00000080444 | 0.971369219  | 1.44E-07 |
| TUCP_003592 | XLOC_158102 | ENSRNOT00000071312 | 0.988421647  | 1.61E-09 |
| TUCP_003592 | XLOC_158102 | ENSRNOT00000088245 | 0.988421647  | 1.61E-09 |
| TUCP_003592 | XLOC_158102 | ENSRNOT00000058833 | 0.986328927  | 3.68E-09 |
| TUCP_003592 | XLOC_158102 | ENSRNOT00000078052 | 0.988421647  | 1.61E-09 |
| TUCP_003592 | XLOC_158102 | ENSRNOT00000078494 | 0.988166365  | 1.79E-09 |
| TUCP_003592 | XLOC_158102 | ENSRNOT00000085653 | 0.988421647  | 1.61E-09 |
| TUCP_003592 | XLOC_158102 | ENSRNOT00000057950 | 0.957350268  | 1.03E-06 |
| TUCP_003592 | XLOC_158102 | ENSRNOT00000081992 | 0.984791723  | 6.25E-09 |
| TUCP_003592 | XLOC_158102 | ENSRNOT00000038553 | 0.963451635  | 4.83E-07 |
| TUCP_003592 | XLOC_158102 | ENSRNOT00000055406 | 0.988421647  | 1.61E-09 |
| TUCP_003592 | XLOC_158102 | ENSRNOT00000070817 | 0.98671254   | 3.19E-09 |
| TUCP_003592 | XLOC_158102 | ENSRNOT00000026753 | 0.988421647  | 1.61E-09 |
| TUCP_003592 | XLOC_158102 | ENSRNOT00000080533 | 0.983907676  | 8.27E-09 |
| TUCP_003592 | XLOC_158102 | ENSRNOT00000072774 | 0.965278013  | 3.75E-07 |
| TUCP_003592 | XLOC_158102 | ENSRNOT00000086031 | 0.988421647  | 1.61E-09 |
| TUCP_003592 | XLOC_158102 | ENSRNOT00000014312 | 0.988421647  | 1.61E-09 |
| TUCP_003592 | XLOC_158102 | ENSRNOT00000067655 | 0.970462546  | 1.69E-07 |
| TUCP_003592 | XLOC_158102 | ENSRNOT00000051231 | 0.987082274  | 2.77E-09 |
| TUCP_003592 | XLOC_158102 | ENSRNOT00000089407 | 0.979729379  | 2.61E-08 |
| TUCP_003592 | XLOC_158102 | ENSRNOT00000055034 | 0.987841696  | 2.05E-09 |
| TUCP_003592 | XLOC_158102 | ENSRNOT00000046837 | 0.959812805  | 7.72E-07 |
| TUCP_003592 | XLOC_158102 | ENSRNOT00000093612 | 0.96108055   | 6.59E-07 |
| TUCP_002101 | XLOC_086877 | ENSRNOT00000026966 | 0.970322306  | 1.73E-07 |
| TUCP_002101 | XLOC_086877 | ENSRNOT00000068416 | 0.999999782  | 3.88E-33 |
| TUCP_002101 | XLOC_086877 | ENSRNOT00000086036 | 0.999958274  | 9.96E-22 |
| TUCP_002101 | XLOC_086877 | ENSRNOT00000026803 | 0.985046075  | 5.74E-09 |
| TUCP_002101 | XLOC_086877 | ENSRNOT00000047527 | 0.963071698  | 5.08E-07 |
| TUCP_002101 | XLOC_086877 | ENSRNOT00000042251 | 0.999344295  | 9.53E-16 |
| TUCP_002101 | XLOC_086877 | ENSRNOT00000002984 | 0.998397069  | 8.31E-14 |
| TUCP_002101 | XLOC_086877 | ENSRNOT00000083764 | 0.999541808  | 1.59E-16 |
| TUCP_002101 | XLOC_086877 | ENSRNOT00000076802 | 0.962695843  | 5.34E-07 |
| TUCP_002101 | XLOC_086877 | ENSRNOT00000092365 | 0.999161651  | 3.26E-15 |
| TUCP_002101 | XLOC_086877 | ENSRNOT00000079275 | 0.999901911  | 7.15E-20 |
| TUCP_002101 | XLOC_086877 | ENSRNOT00000066062 | -0.959706712 | 7.82E-07 |
| TUCP_002101 | XLOC_086877 | ENSRNOT00000045301 | 1            | 0        |
| TUCP_002101 | XLOC_086877 | ENSRNOT00000041186 | 0.999975782  | 6.56E-23 |
| TUCP_002101 | XLOC_086877 | ENSRNOT00000010092 | 0.977711778  | 4.17E-08 |
| TUCP_002101 | XLOC_086877 | ENSRNOT00000076182 | 1            | 0        |
| TUCP_002101 | XLOC_086877 | ENSRNOT00000087404 | 0.951157664  | 2.02E-06 |
| TUCP_002101 | XLOC_086877 | ENSRNOT00000052003 | 0.95837331   | 9.18E-07 |
| TUCP_002101 | XLOC_086877 | ENSRNOT00000081709 | 0.998485154  | 6.27E-14 |
| TUCP_002101 | XLOC_086877 | ENSRNOT0000005726  | 0.959610119  | 7.91E-07 |

|             |             |                    |              |          |
|-------------|-------------|--------------------|--------------|----------|
| TUCP_002101 | XLOC_086877 | ENSRNOT00000014103 | 1            | 0        |
| TUCP_002101 | XLOC_086877 | ENSRNOT00000057433 | 0.964930601  | 3.94E-07 |
| TUCP_002101 | XLOC_086877 | ENSRNOT00000082289 | 0.998931566  | 1.09E-14 |
| TUCP_002101 | XLOC_086877 | ENSRNOT00000092516 | 0.957459323  | 1.02E-06 |
| TUCP_002101 | XLOC_086877 | ENSRNOT00000008898 | 0.990039768  | 7.59E-10 |
| TUCP_002101 | XLOC_086877 | ENSRNOT00000083493 | 0.995461232  | 1.51E-11 |
| TUCP_002101 | XLOC_086877 | ENSRNOT00000092563 | 0.987201084  | 2.65E-09 |
| TUCP_002101 | XLOC_086877 | ENSRNOT00000088893 | 1            | 0        |
| TUCP_002101 | XLOC_086877 | ENSRNOT00000076693 | 0.955029582  | 1.34E-06 |
| TUCP_002101 | XLOC_086877 | ENSRNOT00000081014 | 1            | 0        |
| TUCP_002101 | XLOC_086877 | ENSRNOT00000067543 | 1            | 0        |
| TUCP_002101 | XLOC_086877 | ENSRNOT00000050968 | 0.996816433  | 2.56E-12 |
| TUCP_002101 | XLOC_086877 | ENSRNOT00000042201 | 0.960235595  | 7.32E-07 |
| TUCP_002101 | XLOC_086877 | ENSRNOT00000004373 | 0.957315473  | 1.04E-06 |
| TUCP_002101 | XLOC_086877 | ENSRNOT00000063929 | 1            | 0        |
| TUCP_002101 | XLOC_086877 | ENSRNOT00000057472 | 1            | 0        |
| TUCP_002101 | XLOC_086877 | ENSRNOT00000041617 | 0.952449765  | 1.77E-06 |
| TUCP_002101 | XLOC_086877 | ENSRNOT00000091763 | 0.986310385  | 3.70E-09 |
| TUCP_002101 | XLOC_086877 | ENSRNOT00000022200 | 0.998491303  | 6.14E-14 |
| TUCP_002101 | XLOC_086877 | ENSRNOT00000067379 | 0.997260967  | 1.21E-12 |
| TUCP_002101 | XLOC_086877 | ENSRNOT00000020786 | 0.976428448  | 5.51E-08 |
| TUCP_002101 | XLOC_086877 | ENSRNOT00000050543 | 0.999722223  | 1.30E-17 |
| TUCP_002101 | XLOC_086877 | ENSRNOT00000089306 | 0.999866649  | 3.32E-19 |
| TUCP_002101 | XLOC_086877 | ENSRNOT00000052367 | 0.997268394  | 1.19E-12 |
| TUCP_002101 | XLOC_086877 | ENSRNOT00000090658 | 1            | 0        |
| TUCP_002101 | XLOC_086877 | ENSRNOT00000022571 | 0.995290013  | 1.81E-11 |
| TUCP_002101 | XLOC_086877 | ENSRNOT00000044520 | 0.981817158  | 1.52E-08 |
| TUCP_002101 | XLOC_086877 | ENSRNOT00000065448 | 0.963648868  | 4.70E-07 |
| TUCP_002100 | XLOC_086877 | ENSRNOT00000026966 | 0.970322306  | 1.73E-07 |
| TUCP_002100 | XLOC_086877 | ENSRNOT00000068416 | 0.999999782  | 3.88E-33 |
| TUCP_002100 | XLOC_086877 | ENSRNOT00000086036 | 0.999958274  | 9.96E-22 |
| TUCP_002100 | XLOC_086877 | ENSRNOT00000026803 | 0.985046075  | 5.74E-09 |
| TUCP_002100 | XLOC_086877 | ENSRNOT00000047527 | 0.963071698  | 5.08E-07 |
| TUCP_002100 | XLOC_086877 | ENSRNOT00000042251 | 0.999344295  | 9.53E-16 |
| TUCP_002100 | XLOC_086877 | ENSRNOT0000002984  | 0.998397069  | 8.31E-14 |
| TUCP_002100 | XLOC_086877 | ENSRNOT00000083764 | 0.999541808  | 1.59E-16 |
| TUCP_002100 | XLOC_086877 | ENSRNOT00000076802 | 0.962695843  | 5.34E-07 |
| TUCP_002100 | XLOC_086877 | ENSRNOT00000092365 | 0.999161651  | 3.26E-15 |
| TUCP_002100 | XLOC_086877 | ENSRNOT00000079275 | 0.999901911  | 7.15E-20 |
| TUCP_002100 | XLOC_086877 | ENSRNOT00000066062 | -0.959706712 | 7.82E-07 |
| TUCP_002100 | XLOC_086877 | ENSRNOT00000045301 | 1            | 0        |
| TUCP_002100 | XLOC_086877 | ENSRNOT00000041186 | 0.999975782  | 6.56E-23 |
| TUCP_002100 | XLOC_086877 | ENSRNOT00000010092 | 0.977711778  | 4.17E-08 |
| TUCP_002100 | XLOC_086877 | ENSRNOT00000076182 | 1            | 0        |
| TUCP_002100 | XLOC_086877 | ENSRNOT00000087404 | 0.951157664  | 2.02E-06 |
| TUCP_002100 | XLOC_086877 | ENSRNOT00000052003 | 0.95837331   | 9.18E-07 |
| TUCP_002100 | XLOC_086877 | ENSRNOT00000081709 | 0.998485154  | 6.27E-14 |
| TUCP_002100 | XLOC_086877 | ENSRNOT00000005726 | 0.959610119  | 7.91E-07 |
| TUCP_002100 | XLOC_086877 | ENSRNOT00000014103 | 1            | 4.25E-78 |
| TUCP_002100 | XLOC_086877 | ENSRNOT00000057433 | 0.964930601  | 3.94E-07 |
| TUCP_002100 | XLOC_086877 | ENSRNOT00000082289 | 0.998931566  | 1.09E-14 |

|             |             |                    |              |          |
|-------------|-------------|--------------------|--------------|----------|
| TUCP_002100 | XLOC_086877 | ENSRNOT00000092516 | 0.957459323  | 1.02E-06 |
| TUCP_002100 | XLOC_086877 | ENSRNOT00000008898 | 0.990039768  | 7.59E-10 |
| TUCP_002100 | XLOC_086877 | ENSRNOT00000083493 | 0.995461232  | 1.51E-11 |
| TUCP_002100 | XLOC_086877 | ENSRNOT00000092563 | 0.987201084  | 2.65E-09 |
| TUCP_002100 | XLOC_086877 | ENSRNOT00000088893 | 1            | 0        |
| TUCP_002100 | XLOC_086877 | ENSRNOT00000076693 | 0.955029582  | 1.34E-06 |
| TUCP_002100 | XLOC_086877 | ENSRNOT00000081014 | 1            | 0        |
| TUCP_002100 | XLOC_086877 | ENSRNOT00000067543 | 1            | 0        |
| TUCP_002100 | XLOC_086877 | ENSRNOT00000050968 | 0.996816433  | 2.56E-12 |
| TUCP_002100 | XLOC_086877 | ENSRNOT00000042201 | 0.960235595  | 7.32E-07 |
| TUCP_002100 | XLOC_086877 | ENSRNOT00000004373 | 0.957315473  | 1.04E-06 |
| TUCP_002100 | XLOC_086877 | ENSRNOT00000063929 | 1            | 0        |
| TUCP_002100 | XLOC_086877 | ENSRNOT00000057472 | 1            | 0        |
| TUCP_002100 | XLOC_086877 | ENSRNOT00000041617 | 0.952449765  | 1.77E-06 |
| TUCP_002100 | XLOC_086877 | ENSRNOT00000091763 | 0.986310385  | 3.70E-09 |
| TUCP_002100 | XLOC_086877 | ENSRNOT00000022200 | 0.998491303  | 6.14E-14 |
| TUCP_002100 | XLOC_086877 | ENSRNOT00000067379 | 0.997260967  | 1.21E-12 |
| TUCP_002100 | XLOC_086877 | ENSRNOT00000020786 | 0.976428448  | 5.51E-08 |
| TUCP_002100 | XLOC_086877 | ENSRNOT00000050543 | 0.999722223  | 1.30E-17 |
| TUCP_002100 | XLOC_086877 | ENSRNOT00000089306 | 0.999866649  | 3.32E-19 |
| TUCP_002100 | XLOC_086877 | ENSRNOT00000052367 | 0.997268394  | 1.19E-12 |
| TUCP_002100 | XLOC_086877 | ENSRNOT00000090658 | 1            | 0        |
| TUCP_002100 | XLOC_086877 | ENSRNOT00000022571 | 0.995290013  | 1.81E-11 |
| TUCP_002100 | XLOC_086877 | ENSRNOT00000044520 | 0.981817158  | 1.52E-08 |
| TUCP_002100 | XLOC_086877 | ENSRNOT00000065448 | 0.963648868  | 4.70E-07 |
| TUCP_002060 | XLOC_084113 | ENSRNOT00000081292 | 0.957040748  | 1.07E-06 |
| TUCP_002066 | XLOC_084467 | ENSRNOT00000036143 | 0.965111737  | 3.84E-07 |
| TUCP_001479 | XLOC_057126 | ENSRNOT00000087287 | 0.960840975  | 6.79E-07 |
| TUCP_001479 | XLOC_057126 | ENSRNOT00000055536 | 0.97062327   | 1.64E-07 |
| TUCP_001479 | XLOC_057126 | ENSRNOT00000083256 | 0.96542042   | 3.67E-07 |
| TUCP_001479 | XLOC_057126 | ENSRNOT00000016088 | 0.977865924  | 4.03E-08 |
| TUCP_001479 | XLOC_057126 | ENSRNOT0000009975  | 0.962245     | 5.67E-07 |
| TUCP_001479 | XLOC_057126 | ENSRNOT00000090700 | 0.96413268   | 4.40E-07 |
| TUCP_001479 | XLOC_057126 | ENSRNOT00000081226 | 0.974128275  | 8.74E-08 |
| TUCP_001479 | XLOC_057126 | ENSRNOT0000001642  | 0.965092306  | 3.85E-07 |
| TUCP_001479 | XLOC_057126 | ENSRNOT00000057738 | 0.953533378  | 1.58E-06 |
| TUCP_001479 | XLOC_057126 | ENSRNOT00000027544 | 0.97972511   | 2.61E-08 |
| TUCP_001479 | XLOC_057126 | ENSRNOT00000081631 | 0.95208073   | 1.84E-06 |
| TUCP_001479 | XLOC_057126 | ENSRNOT00000013343 | 0.95249956   | 1.76E-06 |
| TUCP_001479 | XLOC_057126 | ENSRNOT00000012386 | 0.963286762  | 4.94E-07 |
| TUCP_001479 | XLOC_057126 | ENSRNOT00000065897 | 0.967949099  | 2.52E-07 |
| TUCP_001479 | XLOC_057126 | ENSRNOT00000083594 | 0.954610288  | 1.41E-06 |
| TUCP_001479 | XLOC_057126 | ENSRNOT00000073493 | 0.973382757  | 1.01E-07 |
| TUCP_001479 | XLOC_057126 | ENSRNOT00000005770 | 0.973790875  | 9.32E-08 |
| TUCP_001479 | XLOC_057126 | ENSRNOT00000011589 | 0.961780445  | 6.02E-07 |
| TUCP_001479 | XLOC_057126 | ENSRNOT00000027752 | 0.960783984  | 6.84E-07 |
| TUCP_001479 | XLOC_057126 | ENSRNOT00000057953 | 0.965119908  | 3.83E-07 |
| TUCP_001479 | XLOC_057126 | ENSRNOT00000022255 | 0.965597189  | 3.58E-07 |
| TUCP_001479 | XLOC_057126 | ENSRNOT00000092066 | -0.960741518 | 6.88E-07 |
| TUCP_001479 | XLOC_057126 | ENSRNOT00000016485 | 0.974564443  | 8.03E-08 |
| TUCP_001479 | XLOC_057126 | ENSRNOT00000047139 | 0.957482826  | 1.02E-06 |

|             |             |                    |              |          |
|-------------|-------------|--------------------|--------------|----------|
| TUCP_001479 | XLOC_057126 | ENSRNOT00000085334 | 0.977015183  | 4.86E-08 |
| TUCP_001479 | XLOC_057126 | ENSRNOT00000035427 | 0.961444185  | 6.29E-07 |
| TUCP_001479 | XLOC_057126 | ENSRNOT00000081604 | 0.961480621  | 6.26E-07 |
| TUCP_001479 | XLOC_057126 | ENSRNOT00000043827 | 0.966400732  | 3.19E-07 |
| TUCP_001479 | XLOC_057126 | ENSRNOT00000061054 | 0.972634486  | 1.15E-07 |
| TUCP_001479 | XLOC_057126 | ENSRNOT00000077578 | -0.958673476 | 8.86E-07 |
| TUCP_001479 | XLOC_057126 | ENSRNOT00000082904 | 0.956232898  | 1.18E-06 |
| TUCP_001479 | XLOC_057126 | ENSRNOT0000008764  | 0.97302099   | 1.08E-07 |
| TUCP_001479 | XLOC_057126 | ENSRNOT00000012757 | 0.97767328   | 4.21E-08 |
| TUCP_001479 | XLOC_057126 | ENSRNOT0000009009  | 0.953178195  | 1.64E-06 |
| TUCP_001479 | XLOC_057126 | ENSRNOT00000037902 | 0.970293342  | 1.73E-07 |
| TUCP_001479 | XLOC_057126 | ENSRNOT00000077060 | 0.960253453  | 7.31E-07 |
| TUCP_001479 | XLOC_057126 | ENSRNOT00000035309 | -0.970631193 | 1.64E-07 |
| TUCP_001479 | XLOC_057126 | ENSRNOT00000026212 | 0.952955697  | 1.68E-06 |
| TUCP_001479 | XLOC_057126 | ENSRNOT00000012247 | 0.97386218   | 9.20E-08 |
| TUCP_001479 | XLOC_057126 | ENSRNOT00000083134 | 0.959748095  | 7.78E-07 |
| TUCP_001479 | XLOC_057126 | ENSRNOT00000006109 | 0.974318602  | 8.43E-08 |
| TUCP_001479 | XLOC_057126 | ENSRNOT00000052033 | -0.960699222 | 6.91E-07 |
| TUCP_001479 | XLOC_057126 | ENSRNOT00000038449 | 0.967480604  | 2.71E-07 |
| TUCP_001479 | XLOC_057126 | ENSRNOT00000065629 | 0.952168763  | 1.82E-06 |
| TUCP_001479 | XLOC_057126 | ENSRNOT00000025355 | 0.96966787   | 1.92E-07 |
| TUCP_001476 | XLOC_056833 | ENSRNOT00000074583 | 0.992436233  | 1.93E-10 |
| TUCP_001476 | XLOC_056833 | ENSRNOT00000032802 | 0.960362851  | 7.21E-07 |
| TUCP_001476 | XLOC_056833 | ENSRNOT0000003759  | 0.962214384  | 5.69E-07 |
| TUCP_001476 | XLOC_056833 | ENSRNOT00000089265 | 0.951759169  | 1.90E-06 |
| TUCP_001476 | XLOC_056833 | ENSRNOT00000028066 | 0.983307197  | 9.93E-09 |
| TUCP_001476 | XLOC_056833 | ENSRNOT00000013182 | 0.963010148  | 5.13E-07 |
| TUCP_001476 | XLOC_056833 | ENSRNOT00000091282 | 0.966840221  | 2.99E-07 |
| TUCP_001476 | XLOC_056833 | ENSRNOT00000004713 | 0.982313008  | 1.32E-08 |
| TUCP_001476 | XLOC_056833 | ENSRNOT00000068354 | 0.951887965  | 1.87E-06 |
| TUCP_001476 | XLOC_056833 | ENSRNOT00000022167 | 0.969894199  | 1.85E-07 |
| TUCP_001476 | XLOC_056833 | ENSRNOT00000050099 | 0.950401345  | 2.17E-06 |
| TUCP_001476 | XLOC_056833 | ENSRNOT00000011509 | 0.965617445  | 3.57E-07 |
| TUCP_001476 | XLOC_056833 | ENSRNOT00000050350 | 0.962250618  | 5.67E-07 |
| TUCP_001476 | XLOC_056833 | ENSRNOT00000014560 | 0.980478946  | 2.16E-08 |
| TUCP_001476 | XLOC_056833 | ENSRNOT00000024069 | 0.951089105  | 2.03E-06 |
| TUCP_001476 | XLOC_056833 | ENSRNOT00000009448 | 0.953293564  | 1.62E-06 |
| TUCP_001476 | XLOC_056833 | ENSRNOT00000010580 | 0.956687792  | 1.12E-06 |
| TUCP_001476 | XLOC_056833 | ENSRNOT00000025222 | 0.953530801  | 1.58E-06 |
| TUCP_001476 | XLOC_056833 | ENSRNOT00000021359 | 0.954929485  | 1.36E-06 |
| TUCP_001476 | XLOC_056833 | ENSRNOT00000010050 | 0.965683818  | 3.54E-07 |
| TUCP_001476 | XLOC_056833 | ENSRNOT00000001110 | 0.951075748  | 2.03E-06 |
| TUCP_001476 | XLOC_056833 | ENSRNOT0000003778  | 0.985487745  | 4.95E-09 |
| TUCP_001476 | XLOC_056833 | ENSRNOT00000013809 | 0.95658715   | 1.13E-06 |
| TUCP_001476 | XLOC_056833 | ENSRNOT00000051067 | 0.966819255  | 3.00E-07 |
| TUCP_001476 | XLOC_056833 | ENSRNOT00000076879 | 0.950055857  | 2.25E-06 |
| TUCP_001476 | XLOC_056833 | ENSRNOT00000038546 | 0.973582027  | 9.69E-08 |
| TUCP_001476 | XLOC_056833 | ENSRNOT00000080163 | 0.955334914  | 1.30E-06 |
| TUCP_001476 | XLOC_056833 | ENSRNOT00000078299 | 0.955980462  | 1.21E-06 |
| TUCP_001476 | XLOC_056833 | ENSRNOT00000006196 | 0.955335645  | 1.30E-06 |
| TUCP_001476 | XLOC_056833 | ENSRNOT00000077479 | 0.954692653  | 1.39E-06 |

|             |             |                    |             |          |
|-------------|-------------|--------------------|-------------|----------|
| TUCP_001476 | XLOC_056833 | ENSRNOT00000012963 | 0.952545942 | 1.75E-06 |
| TUCP_001476 | XLOC_056833 | ENSRNOT00000077119 | 0.960503854 | 7.08E-07 |
| TUCP_001476 | XLOC_056833 | ENSRNOT00000083452 | 0.951006948 | 2.05E-06 |
| TUCP_001476 | XLOC_056833 | ENSRNOT00000075936 | 0.962923842 | 5.18E-07 |
| TUCP_001476 | XLOC_056833 | ENSRNOT00000060300 | 0.956861697 | 1.09E-06 |
| TUCP_001476 | XLOC_056833 | ENSRNOT00000066776 | 0.956192881 | 1.18E-06 |
| TUCP_001476 | XLOC_056833 | ENSRNOT00000012314 | 0.982572815 | 1.23E-08 |
| TUCP_001476 | XLOC_056833 | ENSRNOT00000023416 | 0.964380692 | 4.25E-07 |
| TUCP_001476 | XLOC_056833 | ENSRNOT00000082393 | 0.980820851 | 1.98E-08 |
| TUCP_001476 | XLOC_056833 | ENSRNOT00000040736 | 0.987952323 | 1.96E-09 |
| TUCP_001476 | XLOC_056833 | ENSRNOT00000014533 | 0.964818049 | 4.00E-07 |
| TUCP_001476 | XLOC_056833 | ENSRNOT00000032236 | 0.953354411 | 1.61E-06 |
| TUCP_001476 | XLOC_056833 | ENSRNOT00000000637 | 0.968632218 | 2.27E-07 |
| TUCP_001476 | XLOC_056833 | ENSRNOT00000029184 | 0.955088078 | 1.33E-06 |
| TUCP_001476 | XLOC_056833 | ENSRNOT00000073138 | 0.963951319 | 4.51E-07 |
| TUCP_001476 | XLOC_056833 | ENSRNOT00000013989 | 0.952534742 | 1.75E-06 |
| TUCP_001476 | XLOC_056833 | ENSRNOT00000022128 | 0.970616952 | 1.64E-07 |
| TUCP_001476 | XLOC_056833 | ENSRNOT00000070792 | 0.973075081 | 1.07E-07 |
| TUCP_001476 | XLOC_056833 | ENSRNOT00000013191 | 0.983129534 | 1.05E-08 |
| TUCP_001476 | XLOC_056833 | ENSRNOT00000045107 | 0.955338566 | 1.30E-06 |
| TUCP_001476 | XLOC_056833 | ENSRNOT00000050415 | 0.966280202 | 3.24E-07 |
| TUCP_001476 | XLOC_056833 | ENSRNOT00000038610 | 0.952752468 | 1.71E-06 |
| TUCP_001476 | XLOC_056833 | ENSRNOT00000090774 | 0.990453833 | 6.14E-10 |
| TUCP_001476 | XLOC_056833 | ENSRNOT00000019389 | 0.95165045  | 1.92E-06 |
| TUCP_001477 | XLOC_057009 | ENSRNOT00000084799 | 0.958905498 | 8.61E-07 |
| TUCP_001477 | XLOC_057009 | ENSRNOT00000082043 | 0.970956564 | 1.55E-07 |
| TUCP_001477 | XLOC_057009 | ENSRNOT00000090080 | 0.950507386 | 2.15E-06 |
| TUCP_001477 | XLOC_057009 | ENSRNOT00000068444 | 0.975326034 | 6.91E-08 |
| TUCP_001477 | XLOC_057009 | ENSRNOT00000081370 | 0.976343599 | 5.61E-08 |
| TUCP_001477 | XLOC_057009 | ENSRNOT00000078645 | 0.954956273 | 1.35E-06 |
| TUCP_001477 | XLOC_057009 | ENSRNOT00000075987 | 0.952626085 | 1.74E-06 |
| TUCP_001477 | XLOC_057009 | ENSRNOT00000074990 | 0.975326034 | 6.91E-08 |
| TUCP_001477 | XLOC_057009 | ENSRNOT00000087323 | 0.974471788 | 8.18E-08 |
| TUCP_001477 | XLOC_057009 | ENSRNOT00000074930 | 0.975326034 | 6.91E-08 |
| TUCP_001477 | XLOC_057009 | ENSRNOT00000080575 | 0.975314852 | 6.93E-08 |
| TUCP_001477 | XLOC_057009 | ENSRNOT00000078369 | 0.955154323 | 1.32E-06 |
| TUCP_001477 | XLOC_057009 | ENSRNOT00000090207 | 0.950785217 | 2.09E-06 |
| TUCP_001477 | XLOC_057009 | ENSRNOT00000088367 | 0.975326034 | 6.91E-08 |
| TUCP_001477 | XLOC_057009 | ENSRNOT00000081996 | 0.975326034 | 6.91E-08 |
| TUCP_001477 | XLOC_057009 | ENSRNOT00000064751 | 0.955650915 | 1.25E-06 |
| TUCP_001477 | XLOC_057009 | ENSRNOT00000076699 | 0.951638918 | 1.92E-06 |
| TUCP_001477 | XLOC_057009 | ENSRNOT00000082058 | 0.975326034 | 6.91E-08 |
| TUCP_001477 | XLOC_057009 | ENSRNOT00000088905 | 0.975326034 | 6.91E-08 |
| TUCP_001477 | XLOC_057009 | ENSRNOT00000086831 | 0.975326034 | 6.91E-08 |
| TUCP_001477 | XLOC_057009 | ENSRNOT00000045099 | 0.975326034 | 6.91E-08 |
| TUCP_001477 | XLOC_057009 | ENSRNOT00000085849 | 0.963955483 | 4.51E-07 |
| TUCP_001477 | XLOC_057009 | ENSRNOT00000086397 | 0.954447303 | 1.43E-06 |
| TUCP_001477 | XLOC_057009 | ENSRNOT00000077789 | 0.961610935 | 6.16E-07 |
| TUCP_001477 | XLOC_057009 | ENSRNOT00000092982 | 0.975326034 | 6.91E-08 |
| TUCP_001477 | XLOC_057009 | ENSRNOT00000087025 | 0.975326034 | 6.91E-08 |
| TUCP_001477 | XLOC_057009 | ENSRNOT00000019853 | 0.975326034 | 6.91E-08 |

|             |             |                    |             |          |
|-------------|-------------|--------------------|-------------|----------|
| TUCP_001477 | XLOC_057009 | ENSRNOT00000073853 | 0.956396839 | 1.15E-06 |
| TUCP_001477 | XLOC_057009 | ENSRNOT00000065912 | 0.953092364 | 1.65E-06 |
| TUCP_001477 | XLOC_057009 | ENSRNOT00000093083 | 0.972895728 | 1.10E-07 |
| TUCP_001475 | XLOC_056807 | ENSRNOT00000081455 | 0.951375956 | 1.97E-06 |
| TUCP_001475 | XLOC_056807 | ENSRNOT00000034090 | 0.960394627 | 7.18E-07 |
| TUCP_001475 | XLOC_056807 | ENSRNOT00000026679 | 0.954659257 | 1.40E-06 |
| TUCP_001472 | XLOC_056807 | ENSRNOT00000085110 | 0.976087919 | 5.91E-08 |
| TUCP_001472 | XLOC_056807 | ENSRNOT0000008037  | 0.992783501 | 1.52E-10 |
| TUCP_001470 | XLOC_056727 | ENSRNOT00000084500 | 0.984887141 | 6.05E-09 |
| TUCP_001470 | XLOC_056727 | ENSRNOT00000093467 | 0.996134431 | 6.75E-12 |
| TUCP_001470 | XLOC_056727 | ENSRNOT00000029340 | 0.999116572 | 4.23E-15 |
| TUCP_001470 | XLOC_056727 | ENSRNOT00000077972 | 0.962758032 | 5.30E-07 |
| TUCP_001470 | XLOC_056727 | ENSRNOT00000038646 | 1           | 4.25E-78 |
| TUCP_001470 | XLOC_056727 | ENSRNOT00000012095 | 0.957750287 | 9.88E-07 |
| TUCP_001470 | XLOC_056727 | ENSRNOT00000017909 | 0.975587192 | 6.56E-08 |
| TUCP_001470 | XLOC_056727 | ENSRNOT00000092579 | 1           | 1.33E-79 |
| TUCP_001470 | XLOC_056727 | ENSRNOT00000089235 | 0.998661162 | 3.38E-14 |
| TUCP_001470 | XLOC_056727 | ENSRNOT00000036383 | 0.988460809 | 1.58E-09 |
| TUCP_001470 | XLOC_056727 | ENSRNOT00000076528 | 0.997115373 | 1.57E-12 |
| TUCP_001470 | XLOC_056727 | ENSRNOT00000075193 | 0.964326971 | 4.29E-07 |
| TUCP_001470 | XLOC_056727 | ENSRNOT00000083034 | 0.990934646 | 4.75E-10 |
| TUCP_001470 | XLOC_056727 | ENSRNOT00000089607 | 0.995091455 | 2.23E-11 |
| TUCP_001470 | XLOC_056727 | ENSRNOT00000086014 | 0.960893638 | 6.74E-07 |
| TUCP_001470 | XLOC_056727 | ENSRNOT00000054939 | 0.958021495 | 9.57E-07 |
| TUCP_001470 | XLOC_056727 | ENSRNOT00000052315 | 0.983687082 | 8.85E-09 |
| TUCP_001470 | XLOC_056727 | ENSRNOT00000088168 | 1           | 0        |
| TUCP_001470 | XLOC_056727 | ENSRNOT00000046231 | 0.96225463  | 5.66E-07 |
| TUCP_001470 | XLOC_056727 | ENSRNOT00000013459 | 0.979098017 | 3.03E-08 |
| TUCP_001470 | XLOC_056727 | ENSRNOT00000078137 | 1           | 0        |
| TUCP_001470 | XLOC_056727 | ENSRNOT00000077764 | 0.977143528 | 4.73E-08 |
| TUCP_001470 | XLOC_056727 | ENSRNOT00000043661 | 0.966975951 | 2.93E-07 |
| TUCP_001470 | XLOC_056727 | ENSRNOT00000092740 | 1           | 1.33E-79 |
| TUCP_001470 | XLOC_056727 | ENSRNOT00000000117 | 0.990989174 | 4.61E-10 |
| TUCP_001470 | XLOC_056727 | ENSRNOT00000071877 | 0.967113583 | 2.87E-07 |
| TUCP_001470 | XLOC_056727 | ENSRNOT00000070958 | 1           | 1.33E-79 |
| TUCP_001470 | XLOC_056727 | ENSRNOT00000076757 | 0.959205354 | 8.31E-07 |
| TUCP_001470 | XLOC_056727 | ENSRNOT00000085310 | 0.965230243 | 3.78E-07 |
| TUCP_001470 | XLOC_056727 | ENSRNOT00000047241 | 0.966576993 | 3.11E-07 |
| TUCP_001470 | XLOC_056727 | ENSRNOT00000027268 | 1           | 1.33E-79 |
| TUCP_001470 | XLOC_056727 | ENSRNOT00000004459 | 1           | 0        |
| TUCP_001470 | XLOC_056727 | ENSRNOT00000048373 | 0.959096578 | 8.42E-07 |
| TUCP_001470 | XLOC_056727 | ENSRNOT00000061516 | 0.987595648 | 2.27E-09 |
| TUCP_001470 | XLOC_056727 | ENSRNOT00000088148 | 1           | 0        |
| TUCP_001470 | XLOC_056727 | ENSRNOT00000088527 | 1           | 0        |
| TUCP_001470 | XLOC_056727 | ENSRNOT00000078701 | 1           | 1.33E-79 |
| TUCP_001470 | XLOC_056727 | ENSRNOT00000052308 | 0.962646127 | 5.38E-07 |
| TUCP_001470 | XLOC_056727 | ENSRNOT00000021748 | 1           | 1.33E-79 |
| TUCP_001470 | XLOC_056727 | ENSRNOT00000089085 | 1           | 1.33E-79 |
| TUCP_001470 | XLOC_056727 | ENSRNOT00000008153 | 0.999703506 | 1.80E-17 |
| TUCP_001470 | XLOC_056727 | ENSRNOT00000085896 | 0.971605382 | 1.39E-07 |
| TUCP_001470 | XLOC_056727 | ENSRNOT00000079189 | 0.984972387 | 5.89E-09 |

|             |             |                    |              |          |
|-------------|-------------|--------------------|--------------|----------|
| TUCP_001470 | XLOC_056727 | ENSRNOT00000090078 | 1            | 0        |
| TUCP_001470 | XLOC_056727 | ENSRNOT00000078020 | 0.958421666  | 9.13E-07 |
| TUCP_001470 | XLOC_056727 | ENSRNOT00000092425 | 0.956092273  | 1.19E-06 |
| TUCP_001470 | XLOC_056727 | ENSRNOT0000009776  | 1            | 1.33E-79 |
| TUCP_000660 | XLOC_025126 | ENSRNOT00000072028 | -0.954016964 | 1.50E-06 |
| TUCP_003933 | XLOC_172933 | ENSRNOT00000085599 | 0.999938502  | 6.93E-21 |
| TUCP_003933 | XLOC_172933 | ENSRNOT00000006689 | 0.9944189    | 4.22E-11 |
| TUCP_003933 | XLOC_172933 | ENSRNOT00000081534 | 0.987999291  | 1.92E-09 |
| TUCP_003933 | XLOC_172933 | ENSRNOT00000085301 | 0.99793679   | 2.93E-13 |
| TUCP_003933 | XLOC_172933 | ENSRNOT00000038729 | 1            | 4.25E-78 |
| TUCP_003933 | XLOC_172933 | ENSRNOT00000086385 | 1            | 0        |
| TUCP_003933 | XLOC_172933 | ENSRNOT00000077695 | 0.96038616   | 7.19E-07 |
| TUCP_003933 | XLOC_172933 | ENSRNOT00000078561 | 0.986503348  | 3.45E-09 |
| TUCP_003933 | XLOC_172933 | ENSRNOT00000087613 | 1            | 1.33E-79 |
| TUCP_003933 | XLOC_172933 | ENSRNOT00000026032 | 0.953050675  | 1.66E-06 |
| TUCP_003933 | XLOC_172933 | ENSRNOT00000073350 | 0.9658754    | 3.44E-07 |
| TUCP_003933 | XLOC_172933 | ENSRNOT00000023062 | 1            | 0        |
| TUCP_003933 | XLOC_172933 | ENSRNOT00000058834 | 1            | 4.25E-78 |
| TUCP_003933 | XLOC_172933 | ENSRNOT00000079420 | 1            | 0        |
| TUCP_003933 | XLOC_172933 | ENSRNOT00000090761 | 1            | 0        |
| TUCP_003933 | XLOC_172933 | ENSRNOT00000055923 | 1            | 0        |
| TUCP_003933 | XLOC_172933 | ENSRNOT00000092416 | 0.963085379  | 5.07E-07 |
| TUCP_003933 | XLOC_172933 | ENSRNOT00000071930 | 1            | 4.25E-78 |
| TUCP_003933 | XLOC_172933 | ENSRNOT00000001996 | 0.974721715  | 7.79E-08 |
| TUCP_003933 | XLOC_172933 | ENSRNOT00000076756 | 1            | 0        |
| TUCP_003933 | XLOC_172933 | ENSRNOT00000081527 | 0.999420479  | 5.14E-16 |
| TUCP_003933 | XLOC_172933 | ENSRNOT00000085067 | 0.960262084  | 7.30E-07 |
| TUCP_003933 | XLOC_172933 | ENSRNOT00000091663 | 0.99642667   | 4.56E-12 |
| TUCP_003933 | XLOC_172933 | ENSRNOT00000081780 | 1            | 0        |
| TUCP_003933 | XLOC_172933 | ENSRNOT00000093689 | 0.953599805  | 1.57E-06 |
| TUCP_003933 | XLOC_172933 | ENSRNOT00000089114 | 1            | 1.33E-79 |
| TUCP_003933 | XLOC_172933 | ENSRNOT00000021609 | 0.977017895  | 4.86E-08 |
| TUCP_003933 | XLOC_172933 | ENSRNOT00000073316 | 1            | 0        |
| TUCP_003933 | XLOC_172933 | ENSRNOT00000086557 | 0.977413455  | 4.46E-08 |
| TUCP_003933 | XLOC_172933 | ENSRNOT00000071663 | 1            | 0        |
| TUCP_003933 | XLOC_172933 | ENSRNOT00000042860 | 1            | 1.33E-79 |
| TUCP_003933 | XLOC_172933 | ENSRNOT00000072962 | 0.971287317  | 1.46E-07 |
| TUCP_003933 | XLOC_172933 | ENSRNOT00000088421 | 1            | 0        |
| TUCP_003933 | XLOC_172933 | ENSRNOT00000038898 | 1            | 4.25E-78 |
| TUCP_003933 | XLOC_172933 | ENSRNOT00000015840 | 0.959452012  | 8.06E-07 |
| TUCP_003933 | XLOC_172933 | ENSRNOT00000064936 | 0.985957557  | 4.20E-09 |
| TUCP_003933 | XLOC_172933 | ENSRNOT00000042777 | 0.990642579  | 5.56E-10 |
| TUCP_003933 | XLOC_172933 | ENSRNOT00000010029 | 1            | 0        |
| TUCP_003109 | XLOC_132831 | ENSRNOT00000083199 | 0.965615256  | 3.57E-07 |
| TUCP_001798 | XLOC_074271 | ENSRNOT00000055353 | 0.956431287  | 1.15E-06 |
| TUCP_001419 | XLOC_055356 | ENSRNOT00000081570 | 0.952718917  | 1.72E-06 |
| TUCP_001419 | XLOC_055356 | ENSRNOT00000091652 | 0.99190187   | 2.71E-10 |
| TUCP_001419 | XLOC_055356 | ENSRNOT00000036564 | 0.988107914  | 1.84E-09 |
| TUCP_001419 | XLOC_055356 | ENSRNOT00000000109 | 0.954585136  | 1.41E-06 |
| TUCP_001419 | XLOC_055356 | ENSRNOT00000080865 | 0.994948838  | 2.57E-11 |
| TUCP_001419 | XLOC_055356 | ENSRNOT00000073534 | 0.988306556  | 1.69E-09 |



|             |             |                    |             |          |
|-------------|-------------|--------------------|-------------|----------|
| TUCP_001419 | XLOC_055356 | ENSRNOT00000012161 | 0.985577802 | 4.80E-09 |
| TUCP_001419 | XLOC_055356 | ENSRNOT00000087758 | 0.972826714 | 1.11E-07 |
| TUCP_001419 | XLOC_055356 | ENSRNOT00000049832 | 0.969375698 | 2.02E-07 |
| TUCP_001419 | XLOC_055356 | ENSRNOT00000093019 | 0.994948838 | 2.57E-11 |
| TUCP_001419 | XLOC_055356 | ENSRNOT00000024825 | 0.970225213 | 1.75E-07 |
| TUCP_001419 | XLOC_055356 | ENSRNOT00000059266 | 0.951110297 | 2.03E-06 |
| TUCP_001419 | XLOC_055356 | ENSRNOT00000072734 | 0.956283353 | 1.17E-06 |
| TUCP_001419 | XLOC_055356 | ENSRNOT00000085908 | 0.989430935 | 1.02E-09 |
| TUCP_001419 | XLOC_055356 | ENSRNOT00000046744 | 0.994948838 | 2.57E-11 |
| TUCP_001419 | XLOC_055356 | ENSRNOT00000076429 | 0.994948838 | 2.57E-11 |
| TUCP_001419 | XLOC_055356 | ENSRNOT00000084667 | 0.995849616 | 9.63E-12 |
| TUCP_001419 | XLOC_055356 | ENSRNOT00000055412 | 0.994948838 | 2.57E-11 |
| TUCP_001419 | XLOC_055356 | ENSRNOT00000093201 | 0.99421963  | 5.03E-11 |
| TUCP_001419 | XLOC_055356 | ENSRNOT00000072724 | 0.994948838 | 2.57E-11 |
| TUCP_001419 | XLOC_055356 | ENSRNOT00000066017 | 0.981632746 | 1.60E-08 |
| TUCP_001419 | XLOC_055356 | ENSRNOT00000082760 | 0.979655266 | 2.65E-08 |
| TUCP_001419 | XLOC_055356 | ENSRNOT00000073148 | 0.976944301 | 4.94E-08 |
| TUCP_001419 | XLOC_055356 | ENSRNOT00000077462 | 0.95244122  | 1.77E-06 |
| TUCP_001419 | XLOC_055356 | ENSRNOT00000084375 | 0.994948838 | 2.57E-11 |
| TUCP_001419 | XLOC_055356 | ENSRNOT00000006249 | 0.957686369 | 9.95E-07 |
| TUCP_001419 | XLOC_055356 | ENSRNOT00000054858 | 0.97853328  | 3.46E-08 |
| TUCP_001419 | XLOC_055356 | ENSRNOT00000042369 | 0.988907913 | 1.30E-09 |
| TUCP_001419 | XLOC_055356 | ENSRNOT00000059326 | 0.950208414 | 2.22E-06 |
| TUCP_001419 | XLOC_055356 | ENSRNOT00000086554 | 0.994948838 | 2.57E-11 |
| TUCP_001419 | XLOC_055356 | ENSRNOT00000047921 | 0.994948838 | 2.57E-11 |
| TUCP_001419 | XLOC_055356 | ENSRNOT00000064261 | 0.994789575 | 3.00E-11 |
| TUCP_001419 | XLOC_055356 | ENSRNOT00000086660 | 0.992966857 | 1.34E-10 |
| TUCP_001419 | XLOC_055356 | ENSRNOT00000080933 | 0.953109328 | 1.65E-06 |
| TUCP_001419 | XLOC_055356 | ENSRNOT00000083977 | 0.994948838 | 2.57E-11 |
| TUCP_001419 | XLOC_055356 | ENSRNOT00000092933 | 0.994948838 | 2.57E-11 |
| TUCP_001419 | XLOC_055356 | ENSRNOT00000085447 | 0.995353749 | 1.69E-11 |
| TUCP_001419 | XLOC_055356 | ENSRNOT00000041281 | 0.979612444 | 2.68E-08 |
| TUCP_003180 | XLOC_136527 | ENSRNOT00000090914 | 0.952621178 | 1.74E-06 |
| TUCP_003180 | XLOC_136527 | ENSRNOT00000067616 | 0.975856825 | 6.20E-08 |
| TUCP_003180 | XLOC_136527 | ENSRNOT00000022559 | 0.954505118 | 1.42E-06 |
| TUCP_003628 | XLOC_159330 | ENSRNOT00000026710 | 0.951725741 | 1.90E-06 |
| TUCP_003628 | XLOC_159330 | ENSRNOT00000004919 | 0.956079871 | 1.20E-06 |
| TUCP_003628 | XLOC_159330 | ENSRNOT00000026558 | 0.974738532 | 7.77E-08 |
| TUCP_003628 | XLOC_159330 | ENSRNOT00000014824 | 0.950818268 | 2.09E-06 |
| TUCP_003628 | XLOC_159330 | ENSRNOT00000066764 | 0.966934427 | 2.94E-07 |
| TUCP_003628 | XLOC_159330 | ENSRNOT00000086541 | 0.958703655 | 8.82E-07 |
| TUCP_003628 | XLOC_159330 | ENSRNOT00000083702 | 0.951893609 | 1.87E-06 |
| TUCP_003628 | XLOC_159330 | ENSRNOT00000028067 | 0.955899554 | 1.22E-06 |
| TUCP_003628 | XLOC_159330 | ENSRNOT00000000640 | 0.95260463  | 1.74E-06 |
| TUCP_003628 | XLOC_159330 | ENSRNOT00000004363 | 0.955608237 | 1.26E-06 |
| TUCP_003628 | XLOC_159330 | ENSRNOT00000022633 | 0.953765608 | 1.54E-06 |
| TUCP_003628 | XLOC_159330 | ENSRNOT00000020475 | 0.969149354 | 2.09E-07 |
| TUCP_003628 | XLOC_159330 | ENSRNOT00000032249 | 0.975798601 | 6.28E-08 |
| TUCP_003628 | XLOC_159330 | ENSRNOT00000029443 | 0.955297372 | 1.30E-06 |
| TUCP_003628 | XLOC_159330 | ENSRNOT00000090303 | 0.97055127  | 1.66E-07 |
| TUCP_003628 | XLOC_159330 | ENSRNOT00000003823 | 0.96941359  | 2.00E-07 |

|             |             |                     |              |          |
|-------------|-------------|---------------------|--------------|----------|
| TUCP_003628 | XLOC_159330 | ENSRNOT00000019680  | 0.96051824   | 7.07E-07 |
| TUCP_003628 | XLOC_159330 | ENSRNOT00000019501  | 0.965404961  | 3.68E-07 |
| TUCP_003628 | XLOC_159330 | ENSRNOT00000007634  | -0.955024774 | 1.34E-06 |
| TUCP_003628 | XLOC_159330 | ENSRNOT00000008365  | 0.967711161  | 2.62E-07 |
| TUCP_003628 | XLOC_159330 | ENSRNOT000000076421 | 0.961710342  | 6.08E-07 |
| TUCP_003628 | XLOC_159330 | ENSRNOT000000047011 | 0.983230066  | 1.02E-08 |
| TUCP_003628 | XLOC_159330 | ENSRNOT000000086459 | 0.9551674    | 1.32E-06 |
| TUCP_003628 | XLOC_159330 | ENSRNOT000000044788 | 0.951959342  | 1.86E-06 |
| TUCP_003628 | XLOC_159330 | ENSRNOT000000018511 | 0.95124418   | 2.00E-06 |
| TUCP_003628 | XLOC_159330 | ENSRNOT000000035123 | 0.962169087  | 5.73E-07 |
| TUCP_003628 | XLOC_159330 | ENSRNOT000000033984 | 0.95021725   | 2.21E-06 |
| TUCP_003628 | XLOC_159330 | ENSRNOT000000086390 | 0.961354186  | 6.36E-07 |
| TUCP_003628 | XLOC_159330 | ENSRNOT000000067912 | 0.977862664  | 4.03E-08 |
| TUCP_003628 | XLOC_159330 | ENSRNOT000000059662 | 0.959705251  | 7.82E-07 |
| TUCP_003628 | XLOC_159330 | ENSRNOT000000009247 | 0.956137427  | 1.19E-06 |
| TUCP_003628 | XLOC_159330 | ENSRNOT000000025197 | 0.963810677  | 4.60E-07 |
| TUCP_003628 | XLOC_159330 | ENSRNOT000000039377 | 0.955725502  | 1.24E-06 |
| TUCP_003628 | XLOC_159330 | ENSRNOT000000055179 | 0.958740349  | 8.79E-07 |
| TUCP_003628 | XLOC_159330 | ENSRNOT000000078746 | 0.958988507  | 8.53E-07 |
| TUCP_003628 | XLOC_159330 | ENSRNOT000000079310 | 0.968883777  | 2.18E-07 |
| TUCP_003628 | XLOC_159330 | ENSRNOT000000088712 | 0.967347492  | 2.77E-07 |
| TUCP_000934 | XLOC_034573 | ENSRNOT000000046775 | 0.951770096  | 1.89E-06 |
| TUCP_000934 | XLOC_034573 | ENSRNOT000000020329 | 0.961571412  | 6.19E-07 |
| TUCP_001449 | XLOC_056232 | ENSRNOT000000079019 | 0.956833363  | 1.10E-06 |
| TUCP_001449 | XLOC_056232 | ENSRNOT000000023623 | 0.952954469  | 1.68E-06 |
| TUCP_001449 | XLOC_056232 | ENSRNOT000000066598 | 0.950771994  | 2.10E-06 |
| TUCP_001449 | XLOC_056232 | ENSRNOT000000072682 | 0.960405399  | 7.17E-07 |
| TUCP_001449 | XLOC_056232 | ENSRNOT000000044419 | 0.963402343  | 4.86E-07 |
| TUCP_001449 | XLOC_056232 | ENSRNOT000000092757 | 0.950088106  | 2.24E-06 |
| TUCP_001449 | XLOC_056232 | ENSRNOT000000003932 | 0.969496814  | 1.98E-07 |
| TUCP_003186 | XLOC_137407 | ENSRNOT000000023416 | 0.952359729  | 1.78E-06 |
| TUCP_003186 | XLOC_137407 | ENSRNOT000000074583 | 0.953081865  | 1.65E-06 |
| TUCP_003186 | XLOC_137407 | ENSRNOT000000018755 | 0.964137026  | 4.40E-07 |
| TUCP_003186 | XLOC_137407 | ENSRNOT000000078299 | 0.995151694  | 2.09E-11 |
| TUCP_003186 | XLOC_137407 | ENSRNOT000000040736 | 0.968352362  | 2.37E-07 |
| TUCP_003186 | XLOC_137407 | ENSRNOT000000068354 | 0.966599949  | 3.09E-07 |
| TUCP_003186 | XLOC_137407 | ENSRNOT000000029184 | 0.968889929  | 2.18E-07 |
| TUCP_003186 | XLOC_137407 | ENSRNOT000000025257 | 0.976482237  | 5.45E-08 |
| TUCP_003186 | XLOC_137407 | ENSRNOT00000003458  | 0.960678553  | 6.93E-07 |
| TUCP_003186 | XLOC_137407 | ENSRNOT000000004347 | 0.953092218  | 1.65E-06 |
| TUCP_003186 | XLOC_137407 | ENSRNOT000000003778 | 0.953438248  | 1.59E-06 |
| TUCP_003186 | XLOC_137407 | ENSRNOT000000002916 | -0.950431461 | 2.17E-06 |
| TUCP_003186 | XLOC_137407 | ENSRNOT000000051028 | -0.96487126  | 3.97E-07 |
| TUCP_003186 | XLOC_137407 | ENSRNOT000000031693 | 0.955932358  | 1.22E-06 |
| TUCP_003186 | XLOC_137407 | ENSRNOT000000082393 | 0.959040786  | 8.47E-07 |
| TUCP_003186 | XLOC_137407 | ENSRNOT000000022167 | 0.977562636  | 4.31E-08 |
| TUCP_003186 | XLOC_137407 | ENSRNOT000000052130 | 0.950083629  | 2.24E-06 |
| TUCP_003597 | XLOC_158359 | ENSRNOT000000006992 | 0.961146403  | 6.53E-07 |
| TUCP_003597 | XLOC_158359 | ENSRNOT000000067984 | 0.964613017  | 4.12E-07 |
| TUCP_003597 | XLOC_158359 | ENSRNOT000000076343 | 0.962026105  | 5.83E-07 |
| TUCP_003597 | XLOC_158359 | ENSRNOT00000004836  | 0.962735631  | 5.32E-07 |

|             |             |                    |              |          |
|-------------|-------------|--------------------|--------------|----------|
| TUCP_003597 | XLOC_158359 | ENSRNOT00000059458 | 0.960156298  | 7.40E-07 |
| TUCP_003597 | XLOC_158359 | ENSRNOT00000040069 | 0.9582239    | 9.34E-07 |
| TUCP_003597 | XLOC_158359 | ENSRNOT00000016504 | 0.954909807  | 1.36E-06 |
| TUCP_003597 | XLOC_158359 | ENSRNOT00000016739 | 0.960003945  | 7.54E-07 |
| TUCP_003597 | XLOC_158359 | ENSRNOT00000052288 | 0.970820687  | 1.59E-07 |
| TUCP_003597 | XLOC_158359 | ENSRNOT00000021116 | 0.954736112  | 1.39E-06 |
| TUCP_003597 | XLOC_158359 | ENSRNOT00000092418 | 0.973591895  | 9.68E-08 |
| TUCP_003597 | XLOC_158359 | ENSRNOT00000076285 | 0.957426354  | 1.03E-06 |
| TUCP_003597 | XLOC_158359 | ENSRNOT00000008786 | -0.962452939 | 5.52E-07 |
| TUCP_003597 | XLOC_158359 | ENSRNOT00000001449 | 0.950846029  | 2.08E-06 |
| TUCP_003597 | XLOC_158359 | ENSRNOT00000044896 | 0.963398254  | 4.86E-07 |
| TUCP_003597 | XLOC_158359 | ENSRNOT00000022800 | 0.950589093  | 2.13E-06 |
| TUCP_003597 | XLOC_158359 | ENSRNOT00000076516 | 0.967080207  | 2.88E-07 |
| TUCP_003597 | XLOC_158359 | ENSRNOT00000015073 | 0.961341167  | 6.37E-07 |
| TUCP_003597 | XLOC_158359 | ENSRNOT00000076793 | 0.97108305   | 1.52E-07 |
| TUCP_003597 | XLOC_158359 | ENSRNOT00000085332 | -0.973602991 | 9.66E-08 |
| TUCP_003597 | XLOC_158359 | ENSRNOT00000013046 | -0.951041757 | 2.04E-06 |
| TUCP_003597 | XLOC_158359 | ENSRNOT00000071573 | 0.958589045  | 8.95E-07 |
| TUCP_003597 | XLOC_158359 | ENSRNOT00000027964 | 0.971336731  | 1.45E-07 |
| TUCP_003597 | XLOC_158359 | ENSRNOT00000006828 | 0.955813603  | 1.23E-06 |
| TUCP_003597 | XLOC_158359 | ENSRNOT00000087306 | 0.960875658  | 6.76E-07 |
| TUCP_003597 | XLOC_158359 | ENSRNOT00000003182 | 0.960060121  | 7.48E-07 |
| TUCP_003597 | XLOC_158359 | ENSRNOT00000090376 | 0.969001812  | 2.14E-07 |
| TUCP_003597 | XLOC_158359 | ENSRNOT00000072081 | 0.953392251  | 1.60E-06 |
| TUCP_003597 | XLOC_158359 | ENSRNOT00000046058 | 0.955027235  | 1.34E-06 |
| TUCP_003597 | XLOC_158359 | ENSRNOT00000088191 | 0.971462091  | 1.42E-07 |
| TUCP_003597 | XLOC_158359 | ENSRNOT00000057313 | 0.960714595  | 6.90E-07 |
| TUCP_003597 | XLOC_158359 | ENSRNOT00000009221 | 0.952764027  | 1.71E-06 |
| TUCP_003597 | XLOC_158359 | ENSRNOT00000042799 | 0.957379644  | 1.03E-06 |
| TUCP_003621 | XLOC_159011 | ENSRNOT00000092026 | 0.96620614   | 3.28E-07 |
| TUCP_003621 | XLOC_159011 | ENSRNOT00000093075 | 1            | 0        |
| TUCP_003621 | XLOC_159011 | ENSRNOT00000058260 | 1            | 0        |
| TUCP_003621 | XLOC_159011 | ENSRNOT00000088887 | 1            | 0        |
| TUCP_003621 | XLOC_159011 | ENSRNOT00000084986 | 1            | 0        |
| TUCP_003621 | XLOC_159011 | ENSRNOT00000074346 | 0.9702256    | 1.75E-07 |
| TUCP_003621 | XLOC_159011 | ENSRNOT00000073209 | 0.983711602  | 8.79E-09 |
| TUCP_003621 | XLOC_159011 | ENSRNOT00000080155 | 0.973069673  | 1.07E-07 |
| TUCP_003621 | XLOC_159011 | ENSRNOT00000072573 | 0.996213272  | 6.09E-12 |
| TUCP_003621 | XLOC_159011 | ENSRNOT00000017828 | 0.996001583  | 7.99E-12 |
| TUCP_003621 | XLOC_159011 | ENSRNOT00000080444 | 0.969625907  | 1.93E-07 |
| TUCP_003621 | XLOC_159011 | ENSRNOT00000071312 | 1            | 0        |
| TUCP_003621 | XLOC_159011 | ENSRNOT00000088245 | 1            | 0        |
| TUCP_003621 | XLOC_159011 | ENSRNOT00000036565 | 0.969065335  | 2.12E-07 |
| TUCP_003621 | XLOC_159011 | ENSRNOT00000058833 | 0.998673261  | 3.23E-14 |
| TUCP_003621 | XLOC_159011 | ENSRNOT00000078052 | 1            | 0        |
| TUCP_003621 | XLOC_159011 | ENSRNOT00000078494 | 0.999927093  | 1.62E-20 |
| TUCP_003621 | XLOC_159011 | ENSRNOT00000085653 | 1            | 0        |
| TUCP_003621 | XLOC_159011 | ENSRNOT00000057950 | 0.969329371  | 2.03E-07 |
| TUCP_003621 | XLOC_159011 | ENSRNOT00000081992 | 0.999320526  | 1.14E-15 |
| TUCP_003621 | XLOC_159011 | ENSRNOT00000038553 | 0.955765808  | 1.24E-06 |
| TUCP_003621 | XLOC_159011 | ENSRNOT00000084120 | 0.958115447  | 9.46E-07 |

|             |             |                    |              |          |
|-------------|-------------|--------------------|--------------|----------|
| TUCP_003621 | XLOC_159011 | ENSRNOT00000055406 | 1            | 0        |
| TUCP_003621 | XLOC_159011 | ENSRNOT00000070817 | 0.998968079  | 9.20E-15 |
| TUCP_003621 | XLOC_159011 | ENSRNOT00000026753 | 1            | 0        |
| TUCP_003621 | XLOC_159011 | ENSRNOT00000080533 | 0.996682529  | 3.15E-12 |
| TUCP_003621 | XLOC_159011 | ENSRNOT00000072774 | 0.979665261  | 2.65E-08 |
| TUCP_003621 | XLOC_159011 | ENSRNOT00000086031 | 1            | 0        |
| TUCP_003621 | XLOC_159011 | ENSRNOT00000014312 | 1            | 0        |
| TUCP_003621 | XLOC_159011 | ENSRNOT00000042882 | 0.963218427  | 4.98E-07 |
| TUCP_003621 | XLOC_159011 | ENSRNOT00000088012 | 0.956765806  | 1.11E-06 |
| TUCP_003621 | XLOC_159011 | ENSRNOT00000051231 | 0.999242378  | 1.96E-15 |
| TUCP_003621 | XLOC_159011 | ENSRNOT00000089407 | 0.992986194  | 1.32E-10 |
| TUCP_003621 | XLOC_159011 | ENSRNOT00000055034 | 0.998331441  | 1.02E-13 |
| TUCP_003621 | XLOC_159011 | ENSRNOT00000046837 | 0.97252559   | 1.18E-07 |
| TUCP_003620 | XLOC_159010 | ENSRNOT00000084616 | -0.984671292 | 6.50E-09 |
| TUCP_003620 | XLOC_159010 | ENSRNOT00000034642 | 0.983228972  | 1.02E-08 |
| TUCP_003620 | XLOC_159010 | ENSRNOT00000074087 | 0.97652988   | 5.39E-08 |
| TUCP_003620 | XLOC_159010 | ENSRNOT00000045905 | 0.953659213  | 1.56E-06 |
| TUCP_003620 | XLOC_159010 | ENSRNOT00000067500 | 0.970204559  | 1.76E-07 |
| TUCP_003622 | XLOC_159100 | ENSRNOT00000065811 | 0.965781613  | 3.49E-07 |
| TUCP_003622 | XLOC_159100 | ENSRNOT00000038780 | 0.963746082  | 4.64E-07 |
| TUCP_003624 | XLOC_159120 | ENSRNOT00000032439 | 0.953069363  | 1.66E-06 |
| TUCP_003624 | XLOC_159120 | ENSRNOT00000020854 | 0.969546939  | 1.96E-07 |
| TUCP_001756 | XLOC_072762 | ENSRNOT00000074071 | 0.956221789  | 1.18E-06 |
| TUCP_003740 | XLOC_164007 | ENSRNOT00000089602 | 0.977738125  | 4.15E-08 |
| TUCP_002618 | XLOC_110175 | ENSRNOT00000060943 | 0.96009737   | 7.45E-07 |
| TUCP_002618 | XLOC_110175 | ENSRNOT00000023302 | 0.95499016   | 1.35E-06 |
| TUCP_003747 | XLOC_164519 | ENSRNOT00000024186 | 0.983200502  | 1.02E-08 |
| TUCP_003747 | XLOC_164519 | ENSRNOT00000074753 | 0.998182349  | 1.56E-13 |
| TUCP_003747 | XLOC_164519 | ENSRNOT00000004876 | 0.959071443  | 8.44E-07 |
| TUCP_003747 | XLOC_164519 | ENSRNOT00000041904 | 1            | 0        |
| TUCP_003747 | XLOC_164519 | ENSRNOT00000083487 | 0.989515314  | 9.80E-10 |
| TUCP_003747 | XLOC_164519 | ENSRNOT00000077990 | 1            | 0        |
| TUCP_003747 | XLOC_164519 | ENSRNOT00000038826 | 0.99977672   | 4.37E-18 |
| TUCP_003747 | XLOC_164519 | ENSRNOT00000046842 | 0.973644314  | 9.58E-08 |
| TUCP_003747 | XLOC_164519 | ENSRNOT00000037169 | 0.980329406  | 2.24E-08 |
| TUCP_003747 | XLOC_164519 | ENSRNOT00000021243 | 0.987425406  | 2.42E-09 |
| TUCP_003747 | XLOC_164519 | ENSRNOT00000060250 | 0.999933853  | 9.97E-21 |
| TUCP_003747 | XLOC_164519 | ENSRNOT00000091934 | 1            | 1.33E-79 |
| TUCP_003747 | XLOC_164519 | ENSRNOT00000046585 | 0.982941597  | 1.11E-08 |
| TUCP_003747 | XLOC_164519 | ENSRNOT00000080794 | 0.990839253  | 5.00E-10 |
| TUCP_003747 | XLOC_164519 | ENSRNOT00000014456 | 0.991697153  | 3.06E-10 |
| TUCP_003747 | XLOC_164519 | ENSRNOT00000031205 | 0.991394766  | 3.66E-10 |
| TUCP_003747 | XLOC_164519 | ENSRNOT00000044145 | 1            | 0        |
| TUCP_003747 | XLOC_164519 | ENSRNOT00000088381 | 0.989013276  | 1.24E-09 |
| TUCP_003747 | XLOC_164519 | ENSRNOT00000011743 | 0.98678427   | 3.11E-09 |
| TUCP_003747 | XLOC_164519 | ENSRNOT00000089929 | 1            | 0        |
| TUCP_003747 | XLOC_164519 | ENSRNOT00000088624 | 1            | 0        |
| TUCP_003747 | XLOC_164519 | ENSRNOT00000085659 | 0.989908621  | 8.10E-10 |
| TUCP_003747 | XLOC_164519 | ENSRNOT00000015866 | 0.994066664  | 5.73E-11 |
| TUCP_003747 | XLOC_164519 | ENSRNOT00000078633 | 1            | 0        |
| TUCP_003747 | XLOC_164519 | ENSRNOT00000034907 | 0.995318542  | 1.76E-11 |

|             |             |                    |             |          |
|-------------|-------------|--------------------|-------------|----------|
| TUCP_003747 | XLOC_164519 | ENSRNOT00000093230 | 0.958295175 | 9.26E-07 |
| TUCP_003747 | XLOC_164519 | ENSRNOT00000051835 | 1           | 0        |
| TUCP_003747 | XLOC_164519 | ENSRNOT00000079087 | 1           | 0        |
| TUCP_003747 | XLOC_164519 | ENSRNOT00000037206 | 1           | 1.33E-79 |
| TUCP_003747 | XLOC_164519 | ENSRNOT00000083261 | 0.970991658 | 1.54E-07 |
| TUCP_003747 | XLOC_164519 | ENSRNOT00000080590 | 0.999889216 | 1.31E-19 |
| TUCP_003747 | XLOC_164519 | ENSRNOT00000027552 | 0.999801024 | 2.46E-18 |
| TUCP_003747 | XLOC_164519 | ENSRNOT00000077014 | 0.995074376 | 2.26E-11 |
| TUCP_003747 | XLOC_164519 | ENSRNOT00000080453 | 0.99994332  | 4.61E-21 |
| TUCP_003747 | XLOC_164519 | ENSRNOT00000089057 | 0.968243551 | 2.41E-07 |
| TUCP_003747 | XLOC_164519 | ENSRNOT00000066839 | 0.991868612 | 2.76E-10 |
| TUCP_003747 | XLOC_164519 | ENSRNOT00000061284 | 0.955566942 | 1.27E-06 |
| TUCP_003747 | XLOC_164519 | ENSRNOT00000013423 | 0.959677621 | 7.84E-07 |
| TUCP_003747 | XLOC_164519 | ENSRNOT00000071884 | 0.974769955 | 7.72E-08 |
| TUCP_003747 | XLOC_164519 | ENSRNOT00000004128 | 0.961829362 | 5.99E-07 |
| TUCP_003747 | XLOC_164519 | ENSRNOT00000026316 | 0.964408046 | 4.24E-07 |
| TUCP_003747 | XLOC_164519 | ENSRNOT00000057729 | 0.999384184 | 6.97E-16 |
| TUCP_003747 | XLOC_164519 | ENSRNOT00000078663 | 0.975192577 | 7.10E-08 |
| TUCP_003747 | XLOC_164519 | ENSRNOT00000064250 | 0.983131977 | 1.05E-08 |
| TUCP_003747 | XLOC_164519 | ENSRNOT00000021608 | 0.965228881 | 3.78E-07 |
| TUCP_003747 | XLOC_164519 | ENSRNOT00000029634 | 0.995816134 | 1.00E-11 |
| TUCP_003747 | XLOC_164519 | ENSRNOT00000093579 | 0.958564264 | 8.97E-07 |
| TUCP_003747 | XLOC_164519 | ENSRNOT00000086349 | 0.957242511 | 1.05E-06 |
| TUCP_003747 | XLOC_164519 | ENSRNOT00000065460 | 1           | 0        |
| TUCP_003747 | XLOC_164519 | ENSRNOT00000003817 | 0.996778712 | 2.72E-12 |
| TUCP_003747 | XLOC_164519 | ENSRNOT00000016713 | 1           | 0        |
| TUCP_003747 | XLOC_164519 | ENSRNOT00000079260 | 0.996448245 | 4.42E-12 |
| TUCP_003747 | XLOC_164519 | ENSRNOT00000039294 | 1           | 1.33E-79 |
| TUCP_003747 | XLOC_164519 | ENSRNOT00000092913 | 0.952980228 | 1.67E-06 |
| TUCP_003744 | XLOC_164137 | ENSRNOT00000041645 | 0.953409318 | 1.60E-06 |
| TUCP_003745 | XLOC_164442 | ENSRNOT00000090755 | 0.982604671 | 1.22E-08 |
| TUCP_003745 | XLOC_164442 | ENSRNOT00000051285 | 0.950563838 | 2.14E-06 |
| TUCP_003745 | XLOC_164442 | ENSRNOT00000011604 | 0.95235793  | 1.78E-06 |
| TUCP_003745 | XLOC_164442 | ENSRNOT00000036565 | 0.981843117 | 1.51E-08 |
| TUCP_003745 | XLOC_164442 | ENSRNOT00000072573 | 0.953780949 | 1.54E-06 |
| TUCP_002612 | XLOC_109992 | ENSRNOT00000023302 | 0.96394516  | 4.52E-07 |
| TUCP_002612 | XLOC_109992 | ENSRNOT00000086917 | 0.950231027 | 2.21E-06 |
| TUCP_002612 | XLOC_109992 | ENSRNOT00000002403 | 0.952652235 | 1.73E-06 |
| TUCP_002612 | XLOC_109992 | ENSRNOT00000047093 | 0.965611041 | 3.58E-07 |
| TUCP_002612 | XLOC_109992 | ENSRNOT00000025075 | 0.952109352 | 1.83E-06 |
| TUCP_002612 | XLOC_109992 | ENSRNOT00000050180 | 0.975487835 | 6.69E-08 |
| TUCP_002612 | XLOC_109992 | ENSRNOT00000041494 | 0.95816762  | 9.40E-07 |
| TUCP_002612 | XLOC_109992 | ENSRNOT00000018179 | 0.965882022 | 3.44E-07 |
| TUCP_002612 | XLOC_109992 | ENSRNOT00000081512 | 0.95582706  | 1.23E-06 |
| TUCP_002612 | XLOC_109992 | ENSRNOT00000086905 | 0.956630671 | 1.12E-06 |
| TUCP_002612 | XLOC_109992 | ENSRNOT00000045223 | 0.953121814 | 1.65E-06 |
| TUCP_002612 | XLOC_109992 | ENSRNOT00000066024 | 0.958162848 | 9.41E-07 |
| TUCP_002612 | XLOC_109992 | ENSRNOT00000025808 | 0.955745077 | 1.24E-06 |
| TUCP_002612 | XLOC_109992 | ENSRNOT00000031904 | 0.950924853 | 2.06E-06 |
| TUCP_002612 | XLOC_109992 | ENSRNOT00000016975 | 0.958751049 | 8.77E-07 |
| TUCP_002610 | XLOC_109989 | ENSRNOT00000036050 | 0.951706657 | 1.91E-06 |

|             |             |                    |             |          |
|-------------|-------------|--------------------|-------------|----------|
| TUCP_003730 | XLOC_163033 | ENSRNOT00000020425 | 0.957861352 | 9.75E-07 |
| TUCP_003730 | XLOC_163033 | ENSRNOT00000092968 | 0.955709538 | 1.25E-06 |
| TUCP_003730 | XLOC_163033 | ENSRNOT00000078419 | 0.950894094 | 2.07E-06 |
| TUCP_002615 | XLOC_109997 | ENSRNOT00000036766 | 0.954939161 | 1.36E-06 |
| TUCP_004193 | XLOC_184374 | ENSRNOT00000066125 | 0.956166987 | 1.18E-06 |
| TUCP_003596 | XLOC_158306 | ENSRNOT00000024186 | 0.965082092 | 3.86E-07 |
| TUCP_003596 | XLOC_158306 | ENSRNOT00000074753 | 0.969275309 | 2.05E-07 |
| TUCP_003596 | XLOC_158306 | ENSRNOT0000004876  | 0.966843802 | 2.98E-07 |
| TUCP_003596 | XLOC_158306 | ENSRNOT00000041904 | 0.973586165 | 9.69E-08 |
| TUCP_003596 | XLOC_158306 | ENSRNOT00000061194 | 0.955488317 | 1.28E-06 |
| TUCP_003596 | XLOC_158306 | ENSRNOT00000083487 | 0.977060289 | 4.81E-08 |
| TUCP_003596 | XLOC_158306 | ENSRNOT00000077990 | 0.973586165 | 9.69E-08 |
| TUCP_003596 | XLOC_158306 | ENSRNOT00000038826 | 0.974340471 | 8.39E-08 |
| TUCP_003596 | XLOC_158306 | ENSRNOT00000046842 | 0.96622216  | 3.27E-07 |
| TUCP_003596 | XLOC_158306 | ENSRNOT00000060250 | 0.972340817 | 1.22E-07 |
| TUCP_003596 | XLOC_158306 | ENSRNOT00000091934 | 0.973586165 | 9.69E-08 |
| TUCP_003596 | XLOC_158306 | ENSRNOT00000061139 | 0.953088572 | 1.65E-06 |
| TUCP_003596 | XLOC_158306 | ENSRNOT00000046585 | 0.975406567 | 6.80E-08 |
| TUCP_003596 | XLOC_158306 | ENSRNOT00000089929 | 0.973586165 | 9.69E-08 |
| TUCP_003596 | XLOC_158306 | ENSRNOT00000014456 | 0.956643465 | 1.12E-06 |
| TUCP_003596 | XLOC_158306 | ENSRNOT00000031205 | 0.974472587 | 8.18E-08 |
| TUCP_003596 | XLOC_158306 | ENSRNOT00000044145 | 0.973586165 | 9.69E-08 |
| TUCP_003596 | XLOC_158306 | ENSRNOT00000088381 | 0.977011171 | 4.87E-08 |
| TUCP_003596 | XLOC_158306 | ENSRNOT00000072939 | 0.955826929 | 1.23E-06 |
| TUCP_003596 | XLOC_158306 | ENSRNOT00000011743 | 0.973718043 | 9.45E-08 |
| TUCP_003596 | XLOC_158306 | ENSRNOT00000034907 | 0.981047569 | 1.87E-08 |
| TUCP_003596 | XLOC_158306 | ENSRNOT00000088624 | 0.973586165 | 9.69E-08 |
| TUCP_003596 | XLOC_158306 | ENSRNOT00000085659 | 0.972879897 | 1.10E-07 |
| TUCP_003596 | XLOC_158306 | ENSRNOT00000015866 | 0.971933483 | 1.31E-07 |
| TUCP_003596 | XLOC_158306 | ENSRNOT00000064250 | 0.956464379 | 1.14E-06 |
| TUCP_003596 | XLOC_158306 | ENSRNOT00000093230 | 0.954684689 | 1.39E-06 |
| TUCP_003596 | XLOC_158306 | ENSRNOT00000051835 | 0.973586165 | 9.69E-08 |
| TUCP_003596 | XLOC_158306 | ENSRNOT00000079087 | 0.973586165 | 9.69E-08 |
| TUCP_003596 | XLOC_158306 | ENSRNOT00000037206 | 0.973586165 | 9.69E-08 |
| TUCP_003596 | XLOC_158306 | ENSRNOT00000083261 | 0.96339198  | 4.87E-07 |
| TUCP_003596 | XLOC_158306 | ENSRNOT00000080794 | 0.95947493  | 8.04E-07 |
| TUCP_003596 | XLOC_158306 | ENSRNOT00000080590 | 0.97296448  | 1.09E-07 |
| TUCP_003596 | XLOC_158306 | ENSRNOT00000027552 | 0.972428268 | 1.20E-07 |
| TUCP_003596 | XLOC_158306 | ENSRNOT00000077014 | 0.96518749  | 3.80E-07 |
| TUCP_003596 | XLOC_158306 | ENSRNOT00000080453 | 0.973575988 | 9.71E-08 |
| TUCP_003596 | XLOC_158306 | ENSRNOT00000089057 | 0.95925116  | 8.26E-07 |
| TUCP_003596 | XLOC_158306 | ENSRNOT00000057729 | 0.974409793 | 8.28E-08 |
| TUCP_003596 | XLOC_158306 | ENSRNOT00000078633 | 0.973586165 | 9.69E-08 |
| TUCP_003596 | XLOC_158306 | ENSRNOT00000071884 | 0.967815948 | 2.58E-07 |
| TUCP_003596 | XLOC_158306 | ENSRNOT00000066839 | 0.957246138 | 1.05E-06 |
| TUCP_003596 | XLOC_158306 | ENSRNOT00000029634 | 0.964321141 | 4.29E-07 |
| TUCP_003596 | XLOC_158306 | ENSRNOT00000093579 | 0.96560623  | 3.58E-07 |
| TUCP_003596 | XLOC_158306 | ENSRNOT00000086349 | 0.967505902 | 2.70E-07 |
| TUCP_003596 | XLOC_158306 | ENSRNOT00000065460 | 0.973586165 | 9.69E-08 |
| TUCP_003596 | XLOC_158306 | ENSRNOT00000003817 | 0.96378451  | 4.62E-07 |
| TUCP_003596 | XLOC_158306 | ENSRNOT00000016713 | 0.973586165 | 9.69E-08 |

|             |             |                    |              |          |
|-------------|-------------|--------------------|--------------|----------|
| TUCP_003596 | XLOC_158306 | ENSRNOT00000079260 | 0.978201592  | 3.74E-08 |
| TUCP_003596 | XLOC_158306 | ENSRNOT00000039294 | 0.973586165  | 9.69E-08 |
| TUCP_001006 | XLOC_037837 | ENSRNOT00000025052 | 0.984949445  | 5.93E-09 |
| TUCP_001006 | XLOC_037837 | ENSRNOT00000067655 | 0.999608344  | 7.25E-17 |
| TUCP_001006 | XLOC_037837 | ENSRNOT00000074346 | 0.968508239  | 2.31E-07 |
| TUCP_001006 | XLOC_037837 | ENSRNOT00000073209 | 0.979439701  | 2.80E-08 |
| TUCP_001006 | XLOC_037837 | ENSRNOT00000092261 | 0.991318278  | 3.83E-10 |
| TUCP_001006 | XLOC_037837 | ENSRNOT00000093612 | 0.997937181  | 2.93E-13 |
| TUCP_001493 | XLOC_057848 | ENSRNOT00000001077 | 0.952192137  | 1.81E-06 |
| TUCP_001493 | XLOC_057848 | ENSRNOT00000001158 | 0.958323749  | 9.23E-07 |
| TUCP_001493 | XLOC_057848 | ENSRNOT00000085362 | 0.962376245  | 5.57E-07 |
| TUCP_001493 | XLOC_057848 | ENSRNOT00000084177 | -0.950277368 | 2.20E-06 |
| TUCP_001493 | XLOC_057848 | ENSRNOT00000026391 | 0.950600318  | 2.13E-06 |
| TUCP_001493 | XLOC_057848 | ENSRNOT00000012340 | 0.970114072  | 1.79E-07 |
| TUCP_001493 | XLOC_057848 | ENSRNOT00000064039 | 0.962269427  | 5.65E-07 |
| TUCP_001493 | XLOC_057848 | ENSRNOT00000006217 | 0.962037435  | 5.83E-07 |
| TUCP_001493 | XLOC_057848 | ENSRNOT00000003087 | 0.971301048  | 1.46E-07 |
| TUCP_001493 | XLOC_057848 | ENSRNOT00000026518 | 0.958462039  | 9.08E-07 |
| TUCP_001493 | XLOC_057848 | ENSRNOT00000078625 | 0.957323587  | 1.04E-06 |
| TUCP_001493 | XLOC_057848 | ENSRNOT00000001697 | 0.971158979  | 1.50E-07 |
| TUCP_001493 | XLOC_057848 | ENSRNOT00000024066 | 0.954727235  | 1.39E-06 |
| TUCP_001493 | XLOC_057848 | ENSRNOT00000077706 | 0.951051864  | 2.04E-06 |
| TUCP_001493 | XLOC_057848 | ENSRNOT00000076973 | 0.960717426  | 6.90E-07 |
| TUCP_001493 | XLOC_057848 | ENSRNOT00000036051 | 0.955084641  | 1.33E-06 |
| TUCP_001493 | XLOC_057848 | ENSRNOT00000085517 | 0.964822687  | 4.00E-07 |
| TUCP_001493 | XLOC_057848 | ENSRNOT00000036357 | 0.964189352  | 4.37E-07 |
| TUCP_001493 | XLOC_057848 | ENSRNOT00000028685 | 0.963720782  | 4.66E-07 |
| TUCP_001493 | XLOC_057848 | ENSRNOT00000083344 | 0.955145014  | 1.33E-06 |
| TUCP_001493 | XLOC_057848 | ENSRNOT00000027476 | 0.970429948  | 1.69E-07 |
| TUCP_001493 | XLOC_057848 | ENSRNOT00000036137 | 0.951769687  | 1.90E-06 |
| TUCP_001493 | XLOC_057848 | ENSRNOT00000080090 | 0.952796157  | 1.70E-06 |
| TUCP_001493 | XLOC_057848 | ENSRNOT00000012060 | 0.953904181  | 1.52E-06 |
| TUCP_001493 | XLOC_057848 | ENSRNOT00000011956 | 0.954114278  | 1.48E-06 |
| TUCP_001493 | XLOC_057848 | ENSRNOT00000004551 | 0.951543258  | 1.94E-06 |
| TUCP_001493 | XLOC_057848 | ENSRNOT00000012755 | 0.971593203  | 1.39E-07 |
| TUCP_001493 | XLOC_057848 | ENSRNOT00000089068 | 0.950616759  | 2.13E-06 |
| TUCP_001493 | XLOC_057848 | ENSRNOT00000079128 | 0.952296321  | 1.80E-06 |
| TUCP_001493 | XLOC_057848 | ENSRNOT00000081678 | 0.950897234  | 2.07E-06 |
| TUCP_001493 | XLOC_057848 | ENSRNOT00000023178 | 0.953442728  | 1.59E-06 |
| TUCP_001493 | XLOC_057848 | ENSRNOT00000017504 | 0.960296413  | 7.27E-07 |
| TUCP_001493 | XLOC_057848 | ENSRNOT00000025037 | 0.964825808  | 4.00E-07 |
| TUCP_001493 | XLOC_057848 | ENSRNOT00000028677 | 0.959801209  | 7.73E-07 |
| TUCP_001493 | XLOC_057848 | ENSRNOT00000010369 | 0.950590259  | 2.13E-06 |
| TUCP_001991 | XLOC_080885 | ENSRNOT00000028992 | 0.953669849  | 1.56E-06 |
| TUCP_001990 | XLOC_080848 | ENSRNOT00000006995 | 0.950879573  | 2.07E-06 |
| TUCP_001990 | XLOC_080848 | ENSRNOT00000021850 | 0.954987474  | 1.35E-06 |
| TUCP_001990 | XLOC_080848 | ENSRNOT00000040859 | 0.956428101  | 1.15E-06 |
| TUCP_001990 | XLOC_080848 | ENSRNOT00000020339 | 0.960861766  | 6.77E-07 |
| TUCP_001990 | XLOC_080848 | ENSRNOT00000024266 | 0.957585059  | 1.01E-06 |
| TUCP_001990 | XLOC_080848 | ENSRNOT00000020155 | 0.959390419  | 8.12E-07 |
| TUCP_001990 | XLOC_080848 | ENSRNOT00000026941 | 0.950577457  | 2.14E-06 |

|             |             |                     |              |          |
|-------------|-------------|---------------------|--------------|----------|
| TUCP_001990 | XLOC_080848 | ENSRNOT00000055683  | 0.957926327  | 9.67E-07 |
| TUCP_001990 | XLOC_080848 | ENSRNOT00000024224  | 0.979761583  | 2.58E-08 |
| TUCP_001990 | XLOC_080848 | ENSRNOT00000038807  | 0.961771592  | 6.03E-07 |
| TUCP_001990 | XLOC_080848 | ENSRNOT00000023744  | 0.964435186  | 4.22E-07 |
| TUCP_001990 | XLOC_080848 | ENSRNOT00000065333  | 0.950898501  | 2.07E-06 |
| TUCP_001990 | XLOC_080848 | ENSRNOT00000051294  | 0.953841845  | 1.53E-06 |
| TUCP_001990 | XLOC_080848 | ENSRNOT00000026273  | 0.962916409  | 5.19E-07 |
| TUCP_001990 | XLOC_080848 | ENSRNOT00000040629  | 0.960441332  | 7.14E-07 |
| TUCP_001990 | XLOC_080848 | ENSRNOT00000005292  | 0.972068861  | 1.28E-07 |
| TUCP_001990 | XLOC_080848 | ENSRNOT00000001826  | 0.952285972  | 1.80E-06 |
| TUCP_001990 | XLOC_080848 | ENSRNOT00000041096  | 0.956449394  | 1.15E-06 |
| TUCP_001990 | XLOC_080848 | ENSRNOT00000085765  | 0.950956042  | 2.06E-06 |
| TUCP_001990 | XLOC_080848 | ENSRNOT00000031026  | 0.966707944  | 3.05E-07 |
| TUCP_001990 | XLOC_080848 | ENSRNOT00000034261  | 0.953292659  | 1.62E-06 |
| TUCP_001990 | XLOC_080848 | ENSRNOT00000001855  | 0.957999977  | 9.59E-07 |
| TUCP_001990 | XLOC_080848 | ENSRNOT00000001691  | 0.960523048  | 7.07E-07 |
| TUCP_001990 | XLOC_080848 | ENSRNOT00000077526  | 0.956722807  | 1.11E-06 |
| TUCP_001990 | XLOC_080848 | ENSRNOT00000039523  | 0.976196154  | 5.78E-08 |
| TUCP_001990 | XLOC_080848 | ENSRNOT00000035992  | 0.970879307  | 1.57E-07 |
| TUCP_001990 | XLOC_080848 | ENSRNOT00000025323  | 0.958158908  | 9.41E-07 |
| TUCP_001990 | XLOC_080848 | ENSRNOT000000021769 | 0.959537906  | 7.98E-07 |
| TUCP_001990 | XLOC_080848 | ENSRNOT00000028561  | 0.953960262  | 1.51E-06 |
| TUCP_001990 | XLOC_080848 | ENSRNOT00000023140  | 0.968102556  | 2.46E-07 |
| TUCP_001990 | XLOC_080848 | ENSRNOT00000005387  | 0.962253558  | 5.66E-07 |
| TUCP_001990 | XLOC_080848 | ENSRNOT00000007255  | 0.957756145  | 9.87E-07 |
| TUCP_001990 | XLOC_080848 | ENSRNOT000000010853 | 0.967192947  | 2.83E-07 |
| TUCP_001990 | XLOC_080848 | ENSRNOT00000037699  | 0.971336219  | 1.45E-07 |
| TUCP_001990 | XLOC_080848 | ENSRNOT00000020794  | 0.97478629   | 7.69E-08 |
| TUCP_001990 | XLOC_080848 | ENSRNOT000000010541 | 0.955152261  | 1.32E-06 |
| TUCP_001990 | XLOC_080848 | ENSRNOT000000065230 | 0.953384863  | 1.60E-06 |
| TUCP_001990 | XLOC_080848 | ENSRNOT000000092741 | 0.956855278  | 1.09E-06 |
| TUCP_001990 | XLOC_080848 | ENSRNOT00000075656  | -0.961429292 | 6.30E-07 |
| TUCP_001990 | XLOC_080848 | ENSRNOT00000022788  | 0.969624163  | 1.94E-07 |
| TUCP_001990 | XLOC_080848 | ENSRNOT000000016947 | 0.958300751  | 9.26E-07 |
| TUCP_001990 | XLOC_080848 | ENSRNOT00000055582  | 0.962942961  | 5.17E-07 |
| TUCP_001990 | XLOC_080848 | ENSRNOT00000009712  | 0.953509615  | 1.58E-06 |
| TUCP_001990 | XLOC_080848 | ENSRNOT000000016191 | 0.95520724   | 1.32E-06 |
| TUCP_001990 | XLOC_080848 | ENSRNOT000000065501 | 0.953560917  | 1.57E-06 |
| TUCP_001990 | XLOC_080848 | ENSRNOT00000025362  | -0.950169932 | 2.22E-06 |
| TUCP_001990 | XLOC_080848 | ENSRNOT000000060696 | 0.954824352  | 1.37E-06 |
| TUCP_001990 | XLOC_080848 | ENSRNOT000000021158 | 0.975082402  | 7.26E-08 |
| TUCP_001990 | XLOC_080848 | ENSRNOT000000021729 | 0.956112514  | 1.19E-06 |
| TUCP_001990 | XLOC_080848 | ENSRNOT000000084317 | 0.96151975   | 6.23E-07 |
| TUCP_001990 | XLOC_080848 | ENSRNOT00000026789  | 0.950784282  | 2.09E-06 |
| TUCP_001990 | XLOC_080848 | ENSRNOT000000001409 | 0.951419975  | 1.96E-06 |
| TUCP_001990 | XLOC_080848 | ENSRNOT000000066739 | 0.965452377  | 3.66E-07 |
| TUCP_001990 | XLOC_080848 | ENSRNOT00000026280  | 0.953469851  | 1.59E-06 |
| TUCP_001990 | XLOC_080848 | ENSRNOT000000031487 | 0.954813235  | 1.38E-06 |
| TUCP_001990 | XLOC_080848 | ENSRNOT000000060595 | -0.961393485 | 6.33E-07 |
| TUCP_001990 | XLOC_080848 | ENSRNOT00000028057  | 0.957800359  | 9.82E-07 |
| TUCP_001990 | XLOC_080848 | ENSRNOT00000039232  | 0.96225458   | 5.66E-07 |



|             |             |                     |              |          |
|-------------|-------------|---------------------|--------------|----------|
| TUCP_001990 | XLOC_080848 | ENSRNOT00000063772  | 0.961376345  | 6.34E-07 |
| TUCP_001990 | XLOC_080848 | ENSRNOT00000002403  | 0.961813392  | 6.00E-07 |
| TUCP_001990 | XLOC_080848 | ENSRNOT00000079072  | 0.971403418  | 1.44E-07 |
| TUCP_001990 | XLOC_080848 | ENSRNOT00000026057  | -0.957585677 | 1.01E-06 |
| TUCP_001990 | XLOC_080848 | ENSRNOT00000067904  | 0.956369795  | 1.16E-06 |
| TUCP_001990 | XLOC_080848 | ENSRNOT00000026210  | 0.965726501  | 3.52E-07 |
| TUCP_001990 | XLOC_080848 | ENSRNOT00000017252  | 0.957293368  | 1.04E-06 |
| TUCP_001990 | XLOC_080848 | ENSRNOT00000009122  | 0.951629429  | 1.92E-06 |
| TUCP_001990 | XLOC_080848 | ENSRNOT00000000658  | 0.961285714  | 6.42E-07 |
| TUCP_001990 | XLOC_080848 | ENSRNOT000000021925 | 0.975314865  | 6.93E-08 |
| TUCP_001990 | XLOC_080848 | ENSRNOT00000040637  | 0.956033219  | 1.20E-06 |
| TUCP_001990 | XLOC_080848 | ENSRNOT00000052072  | 0.962568846  | 5.43E-07 |
| TUCP_001990 | XLOC_080848 | ENSRNOT00000028847  | 0.961046693  | 6.62E-07 |
| TUCP_001990 | XLOC_080848 | ENSRNOT00000086577  | 0.960055538  | 7.49E-07 |
| TUCP_001990 | XLOC_080848 | ENSRNOT00000013580  | 0.950506489  | 2.15E-06 |
| TUCP_001990 | XLOC_080848 | ENSRNOT00000021285  | 0.954093573  | 1.49E-06 |
| TUCP_001990 | XLOC_080848 | ENSRNOT00000019028  | 0.950401461  | 2.17E-06 |
| TUCP_001990 | XLOC_080848 | ENSRNOT00000021716  | 0.964881735  | 3.97E-07 |
| TUCP_001990 | XLOC_080848 | ENSRNOT00000033976  | 0.956306852  | 1.17E-06 |
| TUCP_001990 | XLOC_080848 | ENSRNOT00000033975  | 0.958460305  | 9.08E-07 |
| TUCP_001990 | XLOC_080848 | ENSRNOT00000081881  | 0.959800616  | 7.73E-07 |
| TUCP_001990 | XLOC_080848 | ENSRNOT00000019911  | -0.950719294 | 2.11E-06 |
| TUCP_001990 | XLOC_080848 | ENSRNOT00000028801  | 0.959412335  | 8.10E-07 |
| TUCP_001990 | XLOC_080848 | ENSRNOT00000044608  | -0.955598486 | 1.26E-06 |
| TUCP_001004 | XLOC_037807 | ENSRNOT00000071840  | 0.993316765  | 1.04E-10 |
| TUCP_001004 | XLOC_037807 | ENSRNOT00000083608  | 0.983938319  | 8.19E-09 |
| TUCP_001004 | XLOC_037807 | ENSRNOT00000086969  | 0.968516334  | 2.31E-07 |
| TUCP_001004 | XLOC_037807 | ENSRNOT00000085476  | 0.952244626  | 1.81E-06 |
| TUCP_001004 | XLOC_037807 | ENSRNOT00000066382  | 0.97727505   | 4.59E-08 |
| TUCP_001004 | XLOC_037807 | ENSRNOT00000045584  | 0.993316765  | 1.04E-10 |
| TUCP_001004 | XLOC_037807 | ENSRNOT00000077995  | 0.986641169  | 3.28E-09 |
| TUCP_001004 | XLOC_037807 | ENSRNOT00000066004  | 0.99268073   | 1.63E-10 |
| TUCP_001004 | XLOC_037807 | ENSRNOT00000064284  | 0.957340228  | 1.04E-06 |
| TUCP_001004 | XLOC_037807 | ENSRNOT00000068197  | 0.957930083  | 9.67E-07 |
| TUCP_001004 | XLOC_037807 | ENSRNOT00000082086  | 0.960937095  | 6.71E-07 |
| TUCP_001004 | XLOC_037807 | ENSRNOT00000089494  | 0.968368084  | 2.37E-07 |
| TUCP_001004 | XLOC_037807 | ENSRNOT00000083747  | 0.955069192  | 1.34E-06 |
| TUCP_001004 | XLOC_037807 | ENSRNOT00000092182  | 0.993316765  | 1.04E-10 |
| TUCP_001004 | XLOC_037807 | ENSRNOT00000084461  | 0.993316765  | 1.04E-10 |
| TUCP_001004 | XLOC_037807 | ENSRNOT00000060448  | 0.993316765  | 1.04E-10 |
| TUCP_001004 | XLOC_037807 | ENSRNOT00000032631  | 0.993316765  | 1.04E-10 |
| TUCP_001004 | XLOC_037807 | ENSRNOT00000079503  | 0.976338567  | 5.61E-08 |
| TUCP_001004 | XLOC_037807 | ENSRNOT00000060113  | 0.993539035  | 8.77E-11 |
| TUCP_001004 | XLOC_037807 | ENSRNOT00000054910  | 0.977321084  | 4.55E-08 |
| TUCP_001004 | XLOC_037807 | ENSRNOT00000057176  | 0.993286755  | 1.06E-10 |
| TUCP_001004 | XLOC_037807 | ENSRNOT00000078176  | 0.985578607  | 4.80E-09 |
| TUCP_001004 | XLOC_037807 | ENSRNOT00000056364  | 0.99553412   | 1.39E-11 |
| TUCP_001004 | XLOC_037807 | ENSRNOT00000093431  | 0.993316765  | 1.04E-10 |
| TUCP_001004 | XLOC_037807 | ENSRNOT00000024758  | 0.969084387  | 2.11E-07 |
| TUCP_001004 | XLOC_037807 | ENSRNOT00000092901  | 0.993316765  | 1.04E-10 |
| TUCP_001004 | XLOC_037807 | ENSRNOT00000089290  | 0.993227874  | 1.11E-10 |

|             |             |                    |             |          |
|-------------|-------------|--------------------|-------------|----------|
| TUCP_001004 | XLOC_037807 | ENSRNOT00000090211 | 0.996582517 | 3.65E-12 |
| TUCP_001004 | XLOC_037807 | ENSRNOT00000075244 | 0.966301388 | 3.23E-07 |
| TUCP_001004 | XLOC_037807 | ENSRNOT00000091828 | 0.993018618 | 1.29E-10 |
| TUCP_001004 | XLOC_037807 | ENSRNOT00000091944 | 0.993994793 | 6.09E-11 |
| TUCP_001004 | XLOC_037807 | ENSRNOT00000070855 | 0.993316765 | 1.04E-10 |
| TUCP_001004 | XLOC_037807 | ENSRNOT00000046980 | 0.972385539 | 1.21E-07 |
| TUCP_001004 | XLOC_037807 | ENSRNOT00000084109 | 0.991452844 | 3.54E-10 |
| TUCP_001004 | XLOC_037807 | ENSRNOT00000060645 | 0.957099372 | 1.06E-06 |
| TUCP_001004 | XLOC_037807 | ENSRNOT00000041569 | 0.993316765 | 1.04E-10 |
| TUCP_001004 | XLOC_037807 | ENSRNOT00000087091 | 0.993316765 | 1.04E-10 |
| TUCP_001004 | XLOC_037807 | ENSRNOT00000003308 | 0.989303265 | 1.08E-09 |
| TUCP_001004 | XLOC_037807 | ENSRNOT00000026113 | 0.992823876 | 1.48E-10 |
| TUCP_001004 | XLOC_037807 | ENSRNOT00000014939 | 0.99187368  | 2.75E-10 |
| TUCP_001004 | XLOC_037807 | ENSRNOT00000058314 | 0.981562965 | 1.63E-08 |
| TUCP_001004 | XLOC_037807 | ENSRNOT00000047870 | 0.972950726 | 1.09E-07 |
| TUCP_001004 | XLOC_037807 | ENSRNOT00000071603 | 0.993293839 | 1.06E-10 |
| TUCP_001004 | XLOC_037807 | ENSRNOT00000088376 | 0.976417717 | 5.52E-08 |
| TUCP_001004 | XLOC_037807 | ENSRNOT00000060454 | 0.993316765 | 1.04E-10 |
| TUCP_001004 | XLOC_037807 | ENSRNOT00000044232 | 0.977298726 | 4.57E-08 |
| TUCP_001004 | XLOC_037807 | ENSRNOT00000023287 | 0.974191779 | 8.64E-08 |
| TUCP_001004 | XLOC_037807 | ENSRNOT00000071714 | 0.968169591 | 2.44E-07 |
| TUCP_001004 | XLOC_037807 | ENSRNOT00000075836 | 0.993316765 | 1.04E-10 |
| TUCP_001004 | XLOC_037807 | ENSRNOT00000073229 | 0.993316765 | 1.04E-10 |
| TUCP_001004 | XLOC_037807 | ENSRNOT00000077731 | 0.970925282 | 1.56E-07 |
| TUCP_001004 | XLOC_037807 | ENSRNOT00000039652 | 0.967433024 | 2.73E-07 |
| TUCP_001004 | XLOC_037807 | ENSRNOT00000066685 | 0.965749141 | 3.50E-07 |
| TUCP_001004 | XLOC_037807 | ENSRNOT00000082776 | 0.9698919   | 1.85E-07 |
| TUCP_001004 | XLOC_037807 | ENSRNOT00000088719 | 0.953479279 | 1.59E-06 |
| TUCP_001004 | XLOC_037807 | ENSRNOT00000007683 | 0.993290961 | 1.06E-10 |
| TUCP_001004 | XLOC_037807 | ENSRNOT00000092916 | 0.984145728 | 7.68E-09 |
| TUCP_001004 | XLOC_037807 | ENSRNOT00000009295 | 0.987415996 | 2.43E-09 |
| TUCP_001994 | XLOC_081004 | ENSRNOT00000084133 | 1           | 0        |
| TUCP_001994 | XLOC_081004 | ENSRNOT00000093745 | 0.981891039 | 1.49E-08 |
| TUCP_001994 | XLOC_081004 | ENSRNOT00000065542 | 0.99828699  | 1.16E-13 |
| TUCP_001994 | XLOC_081004 | ENSRNOT00000082464 | 1           | 0        |
| TUCP_001994 | XLOC_081004 | ENSRNOT00000087659 | 1           | 0        |
| TUCP_001994 | XLOC_081004 | ENSRNOT00000084582 | 0.976633579 | 5.28E-08 |
| TUCP_001994 | XLOC_081004 | ENSRNOT00000085078 | 1           | 0        |
| TUCP_001994 | XLOC_081004 | ENSRNOT00000014028 | 1           | 0        |
| TUCP_001994 | XLOC_081004 | ENSRNOT00000049363 | 1           | 0        |
| TUCP_001994 | XLOC_081004 | ENSRNOT00000065473 | 0.999949098 | 2.69E-21 |
| TUCP_001994 | XLOC_081004 | ENSRNOT00000000142 | 0.998996155 | 8.01E-15 |
| TUCP_001994 | XLOC_081004 | ENSRNOT00000082288 | 0.999998398 | 8.30E-29 |
| TUCP_001994 | XLOC_081004 | ENSRNOT00000039664 | 1           | 0        |
| TUCP_001994 | XLOC_081004 | ENSRNOT00000065402 | 1           | 0        |
| TUCP_001994 | XLOC_081004 | ENSRNOT00000064551 | 0.965365872 | 3.70E-07 |
| TUCP_001994 | XLOC_081004 | ENSRNOT00000084141 | 1           | 0        |
| TUCP_001994 | XLOC_081004 | ENSRNOT00000082435 | 1           | 0        |
| TUCP_001994 | XLOC_081004 | ENSRNOT00000082928 | 0.996801059 | 2.62E-12 |
| TUCP_001994 | XLOC_081004 | ENSRNOT00000066546 | 0.956953619 | 1.08E-06 |
| TUCP_001994 | XLOC_081004 | ENSRNOT00000046013 | 0.988138626 | 1.81E-09 |

|             |             |                    |              |          |
|-------------|-------------|--------------------|--------------|----------|
| TUCP_001994 | XLOC_081004 | ENSRNOT00000067931 | 0.978893628  | 3.18E-08 |
| TUCP_001994 | XLOC_081004 | ENSRNOT00000086425 | 0.992023315  | 2.51E-10 |
| TUCP_001994 | XLOC_081004 | ENSRNOT00000093696 | 0.956927219  | 1.09E-06 |
| TUCP_001994 | XLOC_081004 | ENSRNOT00000036228 | 0.982337157  | 1.31E-08 |
| TUCP_001994 | XLOC_081004 | ENSRNOT00000014030 | 1            | 0        |
| TUCP_001994 | XLOC_081004 | ENSRNOT00000081966 | 1            | 4.25E-78 |
| TUCP_001994 | XLOC_081004 | ENSRNOT00000075906 | 1            | 1.33E-79 |
| TUCP_001994 | XLOC_081004 | ENSRNOT00000088396 | 0.981336994  | 1.73E-08 |
| TUCP_001994 | XLOC_081004 | ENSRNOT00000049259 | 0.965500259  | 3.63E-07 |
| TUCP_001994 | XLOC_081004 | ENSRNOT00000092838 | 0.982579749  | 1.23E-08 |
| TUCP_001994 | XLOC_081004 | ENSRNOT00000093442 | 0.959217317  | 8.30E-07 |
| TUCP_001996 | XLOC_081086 | ENSRNOT00000071885 | 0.958090055  | 9.49E-07 |
| TUCP_001996 | XLOC_081086 | ENSRNOT00000021946 | 0.957122151  | 1.06E-06 |
| TUCP_001996 | XLOC_081086 | ENSRNOT00000006519 | 0.955882415  | 1.22E-06 |
| TUCP_001996 | XLOC_081086 | ENSRNOT00000078710 | 0.977425162  | 4.45E-08 |
| TUCP_001996 | XLOC_081086 | ENSRNOT00000090318 | 0.989663612  | 9.13E-10 |
| TUCP_001996 | XLOC_081086 | ENSRNOT00000078140 | 0.979115365  | 3.02E-08 |
| TUCP_001996 | XLOC_081086 | ENSRNOT00000041727 | 0.990462598  | 6.12E-10 |
| TUCP_001996 | XLOC_081086 | ENSRNOT00000021040 | -0.963678883 | 4.68E-07 |
| TUCP_001996 | XLOC_081086 | ENSRNOT00000076451 | 0.972542394  | 1.17E-07 |
| TUCP_001996 | XLOC_081086 | ENSRNOT00000048293 | 0.952919014  | 1.68E-06 |
| TUCP_001999 | XLOC_081227 | ENSRNOT00000005490 | 0.954281044  | 1.46E-06 |
| TUCP_001999 | XLOC_081227 | ENSRNOT00000050279 | 0.959691892  | 7.83E-07 |
| TUCP_001999 | XLOC_081227 | ENSRNOT00000000468 | 0.962861086  | 5.23E-07 |
| TUCP_001999 | XLOC_081227 | ENSRNOT00000057361 | 0.956488176  | 1.14E-06 |
| TUCP_001999 | XLOC_081227 | ENSRNOT00000025223 | 0.950108735  | 2.24E-06 |
| TUCP_001999 | XLOC_081227 | ENSRNOT00000003286 | 0.95149148   | 1.95E-06 |
| TUCP_001998 | XLOC_081176 | ENSRNOT00000081981 | 0.959575371  | 7.94E-07 |
| TUCP_001998 | XLOC_081176 | ENSRNOT00000005958 | 0.954911162  | 1.36E-06 |
| TUCP_001998 | XLOC_081176 | ENSRNOT00000083629 | 0.95089927   | 2.07E-06 |
| TUCP_001998 | XLOC_081176 | ENSRNOT00000020147 | 0.955297488  | 1.30E-06 |
| TUCP_001998 | XLOC_081176 | ENSRNOT00000080768 | 0.952230422  | 1.81E-06 |
| TUCP_001998 | XLOC_081176 | ENSRNOT00000005798 | 0.95923913   | 8.27E-07 |
| TUCP_001998 | XLOC_081176 | ENSRNOT00000004046 | -0.961062616 | 6.60E-07 |
| TUCP_001002 | XLOC_037807 | ENSRNOT00000068416 | 0.957787791  | 9.83E-07 |
| TUCP_001002 | XLOC_037807 | ENSRNOT00000042251 | 0.957989849  | 9.60E-07 |
| TUCP_001002 | XLOC_037807 | ENSRNOT00000002984 | 0.957519136  | 1.01E-06 |
| TUCP_001002 | XLOC_037807 | ENSRNOT00000020071 | 0.96697024   | 2.93E-07 |
| TUCP_001002 | XLOC_037807 | ENSRNOT00000083764 | 0.955359609  | 1.30E-06 |
| TUCP_001002 | XLOC_037807 | ENSRNOT00000084847 | 0.95733094   | 1.04E-06 |
| TUCP_001002 | XLOC_037807 | ENSRNOT00000092365 | 0.954279205  | 1.46E-06 |
| TUCP_001002 | XLOC_037807 | ENSRNOT00000074738 | 0.95079958   | 2.09E-06 |
| TUCP_001002 | XLOC_037807 | ENSRNOT00000079275 | 0.960220462  | 7.34E-07 |
| TUCP_001002 | XLOC_037807 | ENSRNOT00000066062 | -0.959587006 | 7.93E-07 |
| TUCP_001002 | XLOC_037807 | ENSRNOT00000031025 | 0.950158439  | 2.23E-06 |
| TUCP_001002 | XLOC_037807 | ENSRNOT00000045301 | 0.957830293  | 9.78E-07 |
| TUCP_001002 | XLOC_037807 | ENSRNOT00000041186 | 0.956988894  | 1.08E-06 |
| TUCP_001002 | XLOC_037807 | ENSRNOT00000010092 | 0.975492297  | 6.68E-08 |
| TUCP_001002 | XLOC_037807 | ENSRNOT00000051892 | 0.956045762  | 1.20E-06 |
| TUCP_001002 | XLOC_037807 | ENSRNOT00000077134 | 0.952821149  | 1.70E-06 |
| TUCP_001002 | XLOC_037807 | ENSRNOT00000038494 | 0.960680302  | 6.93E-07 |

|             |             |                    |              |          |
|-------------|-------------|--------------------|--------------|----------|
| TUCP_001002 | XLOC_037807 | ENSRNOT00000081830 | 0.976404222  | 5.54E-08 |
| TUCP_001002 | XLOC_037807 | ENSRNOT00000047527 | 0.982168899  | 1.38E-08 |
| TUCP_001002 | XLOC_037807 | ENSRNOT00000027933 | 0.951624772  | 1.92E-06 |
| TUCP_001002 | XLOC_037807 | ENSRNOT00000039263 | 0.97051608   | 1.67E-07 |
| TUCP_001002 | XLOC_037807 | ENSRNOT00000087603 | 0.973090443  | 1.06E-07 |
| TUCP_001002 | XLOC_037807 | ENSRNOT00000088707 | 0.958261739  | 9.30E-07 |
| TUCP_001002 | XLOC_037807 | ENSRNOT00000054757 | 0.954331103  | 1.45E-06 |
| TUCP_001002 | XLOC_037807 | ENSRNOT00000041741 | 0.953883665  | 1.52E-06 |
| TUCP_001002 | XLOC_037807 | ENSRNOT00000017071 | 0.951448131  | 1.96E-06 |
| TUCP_001002 | XLOC_037807 | ENSRNOT00000014103 | 0.957830293  | 9.78E-07 |
| TUCP_001002 | XLOC_037807 | ENSRNOT00000057433 | 0.987288496  | 2.56E-09 |
| TUCP_001002 | XLOC_037807 | ENSRNOT00000082289 | 0.965800467  | 3.48E-07 |
| TUCP_001002 | XLOC_037807 | ENSRNOT00000092516 | 0.972032854  | 1.29E-07 |
| TUCP_001002 | XLOC_037807 | ENSRNOT00000082143 | 0.987825302  | 2.06E-09 |
| TUCP_001002 | XLOC_037807 | ENSRNOT00000085570 | 0.978391994  | 3.58E-08 |
| TUCP_001002 | XLOC_037807 | ENSRNOT00000083493 | 0.9516184    | 1.92E-06 |
| TUCP_001002 | XLOC_037807 | ENSRNOT00000056551 | 0.954729477  | 1.39E-06 |
| TUCP_001002 | XLOC_037807 | ENSRNOT00000088893 | 0.957830293  | 9.78E-07 |
| TUCP_001002 | XLOC_037807 | ENSRNOT00000076693 | 0.977432909  | 4.44E-08 |
| TUCP_001002 | XLOC_037807 | ENSRNOT00000081014 | 0.957830293  | 9.78E-07 |
| TUCP_001002 | XLOC_037807 | ENSRNOT00000067543 | 0.957830293  | 9.78E-07 |
| TUCP_001002 | XLOC_037807 | ENSRNOT00000076802 | 0.981078502  | 1.85E-08 |
| TUCP_001002 | XLOC_037807 | ENSRNOT00000050968 | 0.968324441  | 2.38E-07 |
| TUCP_001002 | XLOC_037807 | ENSRNOT00000083067 | 0.966166731  | 3.30E-07 |
| TUCP_001002 | XLOC_037807 | ENSRNOT00000039876 | 0.961230554  | 6.46E-07 |
| TUCP_001002 | XLOC_037807 | ENSRNOT00000086036 | 0.956998733  | 1.08E-06 |
| TUCP_001002 | XLOC_037807 | ENSRNOT00000050543 | 0.959845843  | 7.68E-07 |
| TUCP_001002 | XLOC_037807 | ENSRNOT0000002695  | 0.950913932  | 2.07E-06 |
| TUCP_001002 | XLOC_037807 | ENSRNOT00000063929 | 0.957830293  | 9.78E-07 |
| TUCP_001002 | XLOC_037807 | ENSRNOT00000005726 | 0.978994208  | 3.11E-08 |
| TUCP_001002 | XLOC_037807 | ENSRNOT00000078434 | 0.960617992  | 6.98E-07 |
| TUCP_001002 | XLOC_037807 | ENSRNOT00000022200 | 0.96309556   | 5.07E-07 |
| TUCP_001002 | XLOC_037807 | ENSRNOT00000020786 | 0.961800408  | 6.01E-07 |
| TUCP_001002 | XLOC_037807 | ENSRNOT00000076182 | 0.957830293  | 9.78E-07 |
| TUCP_001002 | XLOC_037807 | ENSRNOT00000030228 | 0.957380268  | 1.03E-06 |
| TUCP_001002 | XLOC_037807 | ENSRNOT00000089306 | 0.960363855  | 7.21E-07 |
| TUCP_001002 | XLOC_037807 | ENSRNOT00000052367 | 0.964583891  | 4.13E-07 |
| TUCP_001002 | XLOC_037807 | ENSRNOT00000090658 | 0.957830293  | 9.78E-07 |
| TUCP_001002 | XLOC_037807 | ENSRNOT00000047700 | 0.967304483  | 2.79E-07 |
| TUCP_001002 | XLOC_037807 | ENSRNOT00000093404 | 0.954289637  | 1.46E-06 |
| TUCP_001002 | XLOC_037807 | ENSRNOT00000052003 | 0.972489011  | 1.19E-07 |
| TUCP_001002 | XLOC_037807 | ENSRNOT00000057472 | 0.957830293  | 9.78E-07 |
| TUCP_001002 | XLOC_037807 | ENSRNOT00000065448 | 0.955643083  | 1.26E-06 |
| TUCP_001002 | XLOC_037807 | ENSRNOT00000072810 | 0.983119569  | 1.05E-08 |
| TUCP_002577 | XLOC_109413 | ENSRNOT00000011263 | 0.952620348  | 1.74E-06 |
| TUCP_002577 | XLOC_109413 | ENSRNOT00000040773 | 0.966174957  | 3.29E-07 |
| TUCP_002577 | XLOC_109413 | ENSRNOT00000049732 | 0.953938814  | 1.51E-06 |
| TUCP_002577 | XLOC_109413 | ENSRNOT00000025950 | 0.966613847  | 3.09E-07 |
| TUCP_002577 | XLOC_109413 | ENSRNOT00000080851 | 0.973010641  | 1.08E-07 |
| TUCP_002577 | XLOC_109413 | ENSRNOT00000013732 | 0.958010512  | 9.58E-07 |
| TUCP_002577 | XLOC_109413 | ENSRNOT00000040170 | -0.954041883 | 1.49E-06 |

|             |             |                    |              |          |
|-------------|-------------|--------------------|--------------|----------|
| TUCP_002577 | XLOC_109413 | ENSRNOT00000025797 | -0.973116554 | 1.06E-07 |
| TUCP_002577 | XLOC_109413 | ENSRNOT00000084722 | 0.961759823  | 6.04E-07 |
| TUCP_002577 | XLOC_109413 | ENSRNOT00000092125 | 0.957492024  | 1.02E-06 |
| TUCP_002577 | XLOC_109413 | ENSRNOT00000084282 | -0.953038255 | 1.66E-06 |
| TUCP_002572 | XLOC_108866 | ENSRNOT00000065143 | 0.954280012  | 1.46E-06 |
| TUCP_002572 | XLOC_108866 | ENSRNOT00000005958 | 0.96284581   | 5.24E-07 |
| TUCP_002572 | XLOC_108866 | ENSRNOT00000067688 | -0.952384836 | 1.78E-06 |
| TUCP_002572 | XLOC_108866 | ENSRNOT00000088353 | -0.967150348 | 2.85E-07 |
| TUCP_002572 | XLOC_108866 | ENSRNOT00000005228 | 0.950814293  | 2.09E-06 |
| TUCP_002572 | XLOC_108866 | ENSRNOT00000008677 | 0.952185027  | 1.82E-06 |
| TUCP_002572 | XLOC_108866 | ENSRNOT00000011052 | 0.951947846  | 1.86E-06 |
| TUCP_002572 | XLOC_108866 | ENSRNOT00000028625 | -0.950594706 | 2.13E-06 |
| TUCP_002572 | XLOC_108866 | ENSRNOT00000024149 | 0.950988448  | 2.05E-06 |
| TUCP_002572 | XLOC_108866 | ENSRNOT00000082869 | 0.972008955  | 1.29E-07 |
| TUCP_002572 | XLOC_108866 | ENSRNOT00000078102 | 0.950286517  | 2.20E-06 |
| TUCP_002572 | XLOC_108866 | ENSRNOT00000012895 | 0.957843139  | 9.77E-07 |
| TUCP_002572 | XLOC_108866 | ENSRNOT00000020322 | 0.955008704  | 1.35E-06 |
| TUCP_002572 | XLOC_108866 | ENSRNOT00000050279 | 0.95354843   | 1.58E-06 |
| TUCP_002572 | XLOC_108866 | ENSRNOT00000012187 | 0.955326757  | 1.30E-06 |
| TUCP_002572 | XLOC_108866 | ENSRNOT00000005942 | 0.957203475  | 1.05E-06 |
| TUCP_002572 | XLOC_108866 | ENSRNOT00000017753 | 0.96517358   | 3.81E-07 |
| TUCP_002572 | XLOC_108866 | ENSRNOT00000024969 | 0.952664308  | 1.73E-06 |
| TUCP_002572 | XLOC_108866 | ENSRNOT00000033235 | 0.967830506  | 2.57E-07 |
| TUCP_002572 | XLOC_108866 | ENSRNOT00000056430 | 0.95511541   | 1.33E-06 |
| TUCP_002572 | XLOC_108866 | ENSRNOT00000060362 | 0.954460753  | 1.43E-06 |
| TUCP_002572 | XLOC_108866 | ENSRNOT00000090688 | 0.956889685  | 1.09E-06 |
| TUCP_002572 | XLOC_108866 | ENSRNOT00000017181 | -0.950279081 | 2.20E-06 |
| TUCP_002572 | XLOC_108866 | ENSRNOT00000015520 | 0.952271164  | 1.80E-06 |
| TUCP_002572 | XLOC_108866 | ENSRNOT00000010898 | 0.954389464  | 1.44E-06 |
| TUCP_002572 | XLOC_108866 | ENSRNOT00000066810 | 0.965543385  | 3.61E-07 |
| TUCP_002572 | XLOC_108866 | ENSRNOT00000008372 | 0.95753075   | 1.01E-06 |
| TUCP_002572 | XLOC_108866 | ENSRNOT00000025372 | 0.955270129  | 1.31E-06 |
| TUCP_002572 | XLOC_108866 | ENSRNOT00000070893 | 0.967212896  | 2.82E-07 |
| TUCP_002572 | XLOC_108866 | ENSRNOT00000011682 | -0.966429049 | 3.17E-07 |
| TUCP_002572 | XLOC_108866 | ENSRNOT00000079177 | 0.953624508  | 1.56E-06 |
| TUCP_002572 | XLOC_108866 | ENSRNOT00000031568 | 0.963054558  | 5.09E-07 |
| TUCP_002573 | XLOC_109039 | ENSRNOT00000070972 | 0.952214468  | 1.81E-06 |
| TUCP_002573 | XLOC_109039 | ENSRNOT00000051494 | 0.960908881  | 6.73E-07 |
| TUCP_002573 | XLOC_109039 | ENSRNOT00000045533 | 0.956036267  | 1.20E-06 |
| TUCP_002479 | XLOC_105023 | ENSRNOT00000074951 | 0.957166866  | 1.06E-06 |
| TUCP_002571 | XLOC_108864 | ENSRNOT00000090123 | 0.960155539  | 7.40E-07 |
| TUCP_002571 | XLOC_108864 | ENSRNOT00000026710 | -0.95255697  | 1.75E-06 |
| TUCP_002571 | XLOC_108864 | ENSRNOT00000065143 | 0.955783175  | 1.24E-06 |
| TUCP_002571 | XLOC_108864 | ENSRNOT00000024149 | 0.954310469  | 1.45E-06 |
| TUCP_002571 | XLOC_108864 | ENSRNOT00000005958 | 0.973300684  | 1.02E-07 |
| TUCP_002571 | XLOC_108864 | ENSRNOT00000017063 | -0.951566968 | 1.93E-06 |
| TUCP_002571 | XLOC_108864 | ENSRNOT00000008929 | 0.955199938  | 1.32E-06 |
| TUCP_002571 | XLOC_108864 | ENSRNOT00000077894 | -0.961168795 | 6.51E-07 |
| TUCP_002571 | XLOC_108864 | ENSRNOT00000082869 | 0.966765943  | 3.02E-07 |
| TUCP_002571 | XLOC_108864 | ENSRNOT00000032780 | 0.950539948  | 2.14E-06 |
| TUCP_002571 | XLOC_108864 | ENSRNOT00000081981 | 0.960870473  | 6.76E-07 |

|             |             |                    |              |          |
|-------------|-------------|--------------------|--------------|----------|
| TUCP_002571 | XLOC_108864 | ENSRNOT0000000728  | -0.953764607 | 1.54E-06 |
| TUCP_002571 | XLOC_108864 | ENSRNOT00000008901 | -0.950100897 | 2.24E-06 |
| TUCP_002571 | XLOC_108864 | ENSRNOT00000028625 | -0.957492015 | 1.02E-06 |
| TUCP_002571 | XLOC_108864 | ENSRNOT00000067688 | -0.966299456 | 3.24E-07 |
| TUCP_002571 | XLOC_108864 | ENSRNOT00000033235 | 0.968181436  | 2.43E-07 |
| TUCP_002571 | XLOC_108864 | ENSRNOT00000021471 | -0.950401079 | 2.17E-06 |
| TUCP_002571 | XLOC_108864 | ENSRNOT00000023133 | 0.953319431  | 1.61E-06 |
| TUCP_002571 | XLOC_108864 | ENSRNOT00000025936 | -0.963880287 | 4.56E-07 |
| TUCP_002571 | XLOC_108864 | ENSRNOT00000073559 | 0.95099226   | 2.05E-06 |
| TUCP_002571 | XLOC_108864 | ENSRNOT00000001290 | 0.96187426   | 5.95E-07 |
| TUCP_002571 | XLOC_108864 | ENSRNOT00000002410 | 0.956562445  | 1.13E-06 |
| TUCP_002571 | XLOC_108864 | ENSRNOT00000077406 | 0.950543866  | 2.14E-06 |
| TUCP_002571 | XLOC_108864 | ENSRNOT00000005228 | 0.966561512  | 3.11E-07 |
| TUCP_002571 | XLOC_108864 | ENSRNOT00000010748 | 0.950797376  | 2.09E-06 |
| TUCP_002571 | XLOC_108864 | ENSRNOT00000008677 | 0.963607674  | 4.73E-07 |
| TUCP_002571 | XLOC_108864 | ENSRNOT00000008757 | 0.95320258   | 1.63E-06 |
| TUCP_002571 | XLOC_108864 | ENSRNOT00000070893 | 0.970650869  | 1.63E-07 |
| TUCP_002571 | XLOC_108864 | ENSRNOT00000079177 | 0.958428372  | 9.12E-07 |
| TUCP_002571 | XLOC_108864 | ENSRNOT00000081768 | 0.95488334   | 1.36E-06 |
| TUCP_002571 | XLOC_108864 | ENSRNOT00000035474 | 0.956363227  | 1.16E-06 |
| TUCP_002571 | XLOC_108864 | ENSRNOT00000017753 | 0.970962334  | 1.55E-07 |
| TUCP_002571 | XLOC_108864 | ENSRNOT00000019502 | 0.953203825  | 1.63E-06 |
| TUCP_002571 | XLOC_108864 | ENSRNOT00000052224 | 0.969328301  | 2.03E-07 |
| TUCP_002571 | XLOC_108864 | ENSRNOT00000088353 | -0.97356119  | 9.73E-08 |
| TUCP_002571 | XLOC_108864 | ENSRNOT00000005942 | 0.958970074  | 8.55E-07 |
| TUCP_002571 | XLOC_108864 | ENSRNOT00000092029 | 0.95245476   | 1.77E-06 |
| TUCP_002571 | XLOC_108864 | ENSRNOT00000084385 | 0.950954213  | 2.06E-06 |
| TUCP_002571 | XLOC_108864 | ENSRNOT00000090342 | 0.950996101  | 2.05E-06 |
| TUCP_002571 | XLOC_108864 | ENSRNOT00000012895 | 0.953532925  | 1.58E-06 |
| TUCP_002571 | XLOC_108864 | ENSRNOT00000001586 | -0.952529434 | 1.75E-06 |
| TUCP_002571 | XLOC_108864 | ENSRNOT00000080608 | 0.950903086  | 2.07E-06 |
| TUCP_002571 | XLOC_108864 | ENSRNOT00000009496 | 0.951756834  | 1.90E-06 |
| TUCP_002571 | XLOC_108864 | ENSRNOT00000042125 | 0.959206618  | 8.31E-07 |
| TUCP_002571 | XLOC_108864 | ENSRNOT00000078390 | -0.954236127 | 1.46E-06 |
| TUCP_002571 | XLOC_108864 | ENSRNOT00000008655 | 0.964665097  | 4.09E-07 |
| TUCP_002571 | XLOC_108864 | ENSRNOT00000020322 | 0.956571923  | 1.13E-06 |
| TUCP_002571 | XLOC_108864 | ENSRNOT00000021408 | 0.958935944  | 8.58E-07 |
| TUCP_002571 | XLOC_108864 | ENSRNOT00000077201 | -0.952476    | 1.76E-06 |
| TUCP_002571 | XLOC_108864 | ENSRNOT00000017181 | -0.959536861 | 7.98E-07 |
| TUCP_002571 | XLOC_108864 | ENSRNOT00000087095 | 0.963016454  | 5.12E-07 |
| TUCP_002571 | XLOC_108864 | ENSRNOT00000064798 | 0.950941869  | 2.06E-06 |
| TUCP_002571 | XLOC_108864 | ENSRNOT00000014261 | 0.951970512  | 1.86E-06 |
| TUCP_002571 | XLOC_108864 | ENSRNOT00000015799 | 0.955448511  | 1.28E-06 |
| TUCP_002571 | XLOC_108864 | ENSRNOT00000015116 | 0.955366688  | 1.29E-06 |
| TUCP_002571 | XLOC_108864 | ENSRNOT00000029833 | 0.953062734  | 1.66E-06 |
| TUCP_002571 | XLOC_108864 | ENSRNOT00000060362 | 0.955109847  | 1.33E-06 |
| TUCP_002571 | XLOC_108864 | ENSRNOT00000043535 | 0.952824401  | 1.70E-06 |
| TUCP_002571 | XLOC_108864 | ENSRNOT00000028646 | 0.956887453  | 1.09E-06 |
| TUCP_002571 | XLOC_108864 | ENSRNOT00000012187 | 0.972391266  | 1.21E-07 |
| TUCP_002571 | XLOC_108864 | ENSRNOT00000022074 | 0.951587947  | 1.93E-06 |
| TUCP_002571 | XLOC_108864 | ENSRNOT00000044628 | 0.954843933  | 1.37E-06 |

|             |             |                    |              |          |
|-------------|-------------|--------------------|--------------|----------|
| TUCP_002571 | XLOC_108864 | ENSRNOT00000081047 | 0.966368899  | 3.20E-07 |
| TUCP_002571 | XLOC_108864 | ENSRNOT00000091128 | -0.956766428 | 1.11E-06 |
| TUCP_002571 | XLOC_108864 | ENSRNOT00000071493 | -0.957380955 | 1.03E-06 |
| TUCP_002571 | XLOC_108864 | ENSRNOT00000010898 | 0.952822242  | 1.70E-06 |
| TUCP_002571 | XLOC_108864 | ENSRNOT00000047192 | -0.970212402 | 1.76E-07 |
| TUCP_002571 | XLOC_108864 | ENSRNOT00000066810 | 0.951179137  | 2.01E-06 |
| TUCP_002571 | XLOC_108864 | ENSRNOT00000076611 | -0.956634435 | 1.12E-06 |
| TUCP_002571 | XLOC_108864 | ENSRNOT00000015520 | 0.958154839  | 9.42E-07 |
| TUCP_002571 | XLOC_108864 | ENSRNOT00000052422 | 0.956968536  | 1.08E-06 |
| TUCP_002571 | XLOC_108864 | ENSRNOT00000051022 | 0.953990395  | 1.50E-06 |
| TUCP_002571 | XLOC_108864 | ENSRNOT00000031568 | 0.963134268  | 5.04E-07 |
| TUCP_002571 | XLOC_108864 | ENSRNOT00000057146 | 0.952155355  | 1.82E-06 |
| TUCP_002571 | XLOC_108864 | ENSRNOT00000019886 | 0.957177044  | 1.06E-06 |
| TUCP_002571 | XLOC_108864 | ENSRNOT00000058842 | 0.9520241    | 1.85E-06 |
| TUCP_002571 | XLOC_108864 | ENSRNOT00000011682 | -0.977765906 | 4.12E-08 |
| TUCP_002571 | XLOC_108864 | ENSRNOT00000083220 | 0.951790435  | 1.89E-06 |
| TUCP_002571 | XLOC_108864 | ENSRNOT00000078102 | 0.964429105  | 4.22E-07 |
| TUCP_002571 | XLOC_108864 | ENSRNOT00000061392 | 0.955219534  | 1.32E-06 |
| TUCP_002571 | XLOC_108864 | ENSRNOT00000024969 | 0.964792187  | 4.02E-07 |
| TUCP_002474 | XLOC_104687 | ENSRNOT00000006188 | 0.961530865  | 6.22E-07 |
| TUCP_002474 | XLOC_104687 | ENSRNOT00000013745 | 0.990086806  | 7.42E-10 |
| TUCP_002474 | XLOC_104687 | ENSRNOT00000013743 | -0.955129395 | 1.33E-06 |
| TUCP_002474 | XLOC_104687 | ENSRNOT00000075397 | -0.955040291 | 1.34E-06 |
| TUCP_002474 | XLOC_104687 | ENSRNOT00000032926 | 0.957663725  | 9.98E-07 |
| TUCP_002474 | XLOC_104687 | ENSRNOT00000019104 | 0.975767234  | 6.32E-08 |
| TUCP_002474 | XLOC_104687 | ENSRNOT00000019848 | 0.97510107   | 7.23E-08 |
| TUCP_002474 | XLOC_104687 | ENSRNOT00000015568 | 0.969120147  | 2.10E-07 |
| TUCP_002474 | XLOC_104687 | ENSRNOT00000021944 | -0.952312356 | 1.79E-06 |
| TUCP_002474 | XLOC_104687 | ENSRNOT00000002222 | -0.953683332 | 1.55E-06 |
| TUCP_002474 | XLOC_104687 | ENSRNOT00000083173 | 0.953493876  | 1.58E-06 |
| TUCP_002474 | XLOC_104687 | ENSRNOT0000001691  | -0.963609007 | 4.73E-07 |
| TUCP_002474 | XLOC_104687 | ENSRNOT00000089319 | -0.972927154 | 1.09E-07 |
| TUCP_002474 | XLOC_104687 | ENSRNOT00000020267 | -0.967080324 | 2.88E-07 |
| TUCP_002474 | XLOC_104687 | ENSRNOT00000079138 | -0.961644945 | 6.13E-07 |
| TUCP_002474 | XLOC_104687 | ENSRNOT00000020265 | 0.961778616  | 6.02E-07 |
| TUCP_002474 | XLOC_104687 | ENSRNOT00000078737 | 0.965225168  | 3.78E-07 |
| TUCP_002474 | XLOC_104687 | ENSRNOT00000064305 | 0.979037445  | 3.08E-08 |
| TUCP_002474 | XLOC_104687 | ENSRNOT00000086706 | -0.959425044 | 8.09E-07 |
| TUCP_002474 | XLOC_104687 | ENSRNOT0000004017  | -0.955303007 | 1.30E-06 |
| TUCP_002474 | XLOC_104687 | ENSRNOT00000086310 | 0.969236068  | 2.06E-07 |
| TUCP_002474 | XLOC_104687 | ENSRNOT00000045233 | 0.954243346  | 1.46E-06 |
| TUCP_002474 | XLOC_104687 | ENSRNOT00000011130 | 0.96781784   | 2.58E-07 |
| TUCP_002474 | XLOC_104687 | ENSRNOT00000037955 | 0.952591808  | 1.74E-06 |
| TUCP_002474 | XLOC_104687 | ENSRNOT00000025309 | -0.957911767 | 9.69E-07 |
| TUCP_002474 | XLOC_104687 | ENSRNOT00000025308 | 0.965722099  | 3.52E-07 |
| TUCP_002474 | XLOC_104687 | ENSRNOT00000012663 | 0.956256176  | 1.17E-06 |
| TUCP_002474 | XLOC_104687 | ENSRNOT00000086893 | 0.952817548  | 1.70E-06 |
| TUCP_002474 | XLOC_104687 | ENSRNOT00000055540 | -0.955892166 | 1.22E-06 |
| TUCP_002474 | XLOC_104687 | ENSRNOT00000006752 | -0.952894375 | 1.69E-06 |
| TUCP_002474 | XLOC_104687 | ENSRNOT00000003247 | 0.967132299  | 2.86E-07 |
| TUCP_002474 | XLOC_104687 | ENSRNOT00000085311 | 0.964434923  | 4.22E-07 |

|             |             |                    |              |          |
|-------------|-------------|--------------------|--------------|----------|
| TUCP_002474 | XLOC_104687 | ENSRNOT00000031672 | 0.962995892  | 5.13E-07 |
| TUCP_002474 | XLOC_104687 | ENSRNOT00000015986 | 0.963076657  | 5.08E-07 |
| TUCP_002474 | XLOC_104687 | ENSRNOT00000025284 | 0.987113325  | 2.74E-09 |
| TUCP_002474 | XLOC_104687 | ENSRNOT00000018622 | 0.955415499  | 1.29E-06 |
| TUCP_002474 | XLOC_104687 | ENSRNOT00000065304 | 0.975631974  | 6.50E-08 |
| TUCP_002474 | XLOC_104687 | ENSRNOT00000022620 | -0.979939279 | 2.47E-08 |
| TUCP_002474 | XLOC_104687 | ENSRNOT00000004722 | 0.964151578  | 4.39E-07 |
| TUCP_002474 | XLOC_104687 | ENSRNOT00000015247 | 0.977297695  | 4.57E-08 |
| TUCP_002474 | XLOC_104687 | ENSRNOT00000057045 | 0.956042281  | 1.20E-06 |
| TUCP_002474 | XLOC_104687 | ENSRNOT00000035320 | 0.983397552  | 9.66E-09 |
| TUCP_002474 | XLOC_104687 | ENSRNOT00000022241 | 0.960960261  | 6.69E-07 |
| TUCP_002474 | XLOC_104687 | ENSRNOT00000084674 | 0.962172181  | 5.72E-07 |
| TUCP_002474 | XLOC_104687 | ENSRNOT00000083964 | 0.986834753  | 3.05E-09 |
| TUCP_002474 | XLOC_104687 | ENSRNOT00000077999 | -0.959999149 | 7.54E-07 |
| TUCP_002474 | XLOC_104687 | ENSRNOT00000026398 | 0.987121178  | 2.73E-09 |
| TUCP_002474 | XLOC_104687 | ENSRNOT00000077856 | 0.953396245  | 1.60E-06 |
| TUCP_002474 | XLOC_104687 | ENSRNOT00000003794 | 0.955372673  | 1.29E-06 |
| TUCP_002474 | XLOC_104687 | ENSRNOT00000015188 | -0.954294264 | 1.45E-06 |
| TUCP_002474 | XLOC_104687 | ENSRNOT00000017648 | 0.972238256  | 1.24E-07 |
| TUCP_002474 | XLOC_104687 | ENSRNOT00000018488 | 0.956647087  | 1.12E-06 |
| TUCP_002474 | XLOC_104687 | ENSRNOT00000039335 | 0.9683388    | 2.38E-07 |
| TUCP_002474 | XLOC_104687 | ENSRNOT00000075630 | 0.955694637  | 1.25E-06 |
| TUCP_002474 | XLOC_104687 | ENSRNOT00000040629 | -0.978205453 | 3.73E-08 |
| TUCP_002474 | XLOC_104687 | ENSRNOT00000083287 | 0.954022778  | 1.50E-06 |
| TUCP_002474 | XLOC_104687 | ENSRNOT00000082686 | 0.966325795  | 3.22E-07 |
| TUCP_002474 | XLOC_104687 | ENSRNOT00000076181 | 0.992748614  | 1.56E-10 |
| TUCP_002474 | XLOC_104687 | ENSRNOT00000083283 | 0.954239994  | 1.46E-06 |
| TUCP_002474 | XLOC_104687 | ENSRNOT00000080410 | 0.952528226  | 1.75E-06 |
| TUCP_002474 | XLOC_104687 | ENSRNOT00000022000 | 0.958700866  | 8.83E-07 |
| TUCP_002474 | XLOC_104687 | ENSRNOT00000026462 | 0.979254608  | 2.92E-08 |
| TUCP_002474 | XLOC_104687 | ENSRNOT00000080418 | 0.967638074  | 2.65E-07 |
| TUCP_002474 | XLOC_104687 | ENSRNOT00000067391 | 0.975327119  | 6.91E-08 |
| TUCP_002474 | XLOC_104687 | ENSRNOT00000029076 | 0.956901659  | 1.09E-06 |
| TUCP_002474 | XLOC_104687 | ENSRNOT00000029179 | 0.966037959  | 3.36E-07 |
| TUCP_002474 | XLOC_104687 | ENSRNOT00000026481 | -0.951453533 | 1.96E-06 |
| TUCP_002474 | XLOC_104687 | ENSRNOT00000001322 | 0.964969864  | 3.92E-07 |
| TUCP_002474 | XLOC_104687 | ENSRNOT00000056145 | 0.961899888  | 5.93E-07 |
| TUCP_002474 | XLOC_104687 | ENSRNOT00000023638 | -0.950752644 | 2.10E-06 |
| TUCP_002474 | XLOC_104687 | ENSRNOT00000026525 | 0.964106518  | 4.42E-07 |
| TUCP_002474 | XLOC_104687 | ENSRNOT00000011082 | 0.968139251  | 2.45E-07 |
| TUCP_002474 | XLOC_104687 | ENSRNOT00000025856 | 0.964496501  | 4.19E-07 |
| TUCP_002474 | XLOC_104687 | ENSRNOT00000079644 | 0.956924142  | 1.09E-06 |
| TUCP_002474 | XLOC_104687 | ENSRNOT00000000817 | 0.97271663   | 1.14E-07 |
| TUCP_002474 | XLOC_104687 | ENSRNOT00000084313 | 0.990527012  | 5.91E-10 |
| TUCP_002474 | XLOC_104687 | ENSRNOT00000001401 | -0.976274051 | 5.69E-08 |
| TUCP_002474 | XLOC_104687 | ENSRNOT00000016132 | 0.968622594  | 2.27E-07 |
| TUCP_002474 | XLOC_104687 | ENSRNOT0000001366  | 0.95680279   | 1.10E-06 |
| TUCP_002474 | XLOC_104687 | ENSRNOT00000058495 | 0.960512201  | 7.08E-07 |
| TUCP_002474 | XLOC_104687 | ENSRNOT00000013067 | 0.961491854  | 6.25E-07 |
| TUCP_002474 | XLOC_104687 | ENSRNOT00000016520 | -0.952459556 | 1.77E-06 |
| TUCP_002474 | XLOC_104687 | ENSRNOT0000001360  | 0.991440805  | 3.57E-10 |



|             |             |                     |              |          |
|-------------|-------------|---------------------|--------------|----------|
| TUCP_002474 | XLOC_104687 | ENSRNOT00000023506  | 0.959106305  | 8.41E-07 |
| TUCP_002474 | XLOC_104687 | ENSRNOT00000016220  | 0.966975258  | 2.93E-07 |
| TUCP_002474 | XLOC_104687 | ENSRNOT00000017081  | 0.969008342  | 2.14E-07 |
| TUCP_002474 | XLOC_104687 | ENSRNOT0000002313   | 0.953440354  | 1.59E-06 |
| TUCP_002474 | XLOC_104687 | ENSRNOT00000037389  | 0.969010606  | 2.14E-07 |
| TUCP_002474 | XLOC_104687 | ENSRNOT00000016637  | 0.954074018  | 1.49E-06 |
| TUCP_002474 | XLOC_104687 | ENSRNOT00000083995  | 0.960675061  | 6.93E-07 |
| TUCP_002474 | XLOC_104687 | ENSRNOT00000065288  | 0.971568757  | 1.39E-07 |
| TUCP_002474 | XLOC_104687 | ENSRNOT00000020910  | -0.951035078 | 2.04E-06 |
| TUCP_002474 | XLOC_104687 | ENSRNOT00000041815  | 0.966786686  | 3.01E-07 |
| TUCP_002474 | XLOC_104687 | ENSRNOT00000060607  | 0.972415535  | 1.20E-07 |
| TUCP_002474 | XLOC_104687 | ENSRNOT00000054948  | -0.956508014 | 1.14E-06 |
| TUCP_002474 | XLOC_104687 | ENSRNOT00000074586  | 0.9550135    | 1.35E-06 |
| TUCP_002474 | XLOC_104687 | ENSRNOT00000045765  | 0.9717209    | 1.36E-07 |
| TUCP_002474 | XLOC_104687 | ENSRNOT00000071929  | 0.967798724  | 2.58E-07 |
| TUCP_002474 | XLOC_104687 | ENSRNOT00000024992  | 0.952587729  | 1.74E-06 |
| TUCP_002474 | XLOC_104687 | ENSRNOT00000000532  | 0.991735452  | 2.99E-10 |
| TUCP_002474 | XLOC_104687 | ENSRNOT00000002465  | -0.95795316  | 9.64E-07 |
| TUCP_002474 | XLOC_104687 | ENSRNOT00000029202  | 0.965971032  | 3.39E-07 |
| TUCP_002474 | XLOC_104687 | ENSRNOT00000023989  | -0.953602768 | 1.57E-06 |
| TUCP_002474 | XLOC_104687 | ENSRNOT00000003992  | 0.973022752  | 1.08E-07 |
| TUCP_002474 | XLOC_104687 | ENSRNOT00000016351  | 0.964907815  | 3.95E-07 |
| TUCP_002474 | XLOC_104687 | ENSRNOT00000050515  | -0.972813436 | 1.12E-07 |
| TUCP_002474 | XLOC_104687 | ENSRNOT00000021152  | -0.976048363 | 5.96E-08 |
| TUCP_002474 | XLOC_104687 | ENSRNOT00000078073  | 0.95496287   | 1.35E-06 |
| TUCP_002474 | XLOC_104687 | ENSRNOT00000011401  | 0.974561727  | 8.04E-08 |
| TUCP_002474 | XLOC_104687 | ENSRNOT00000055602  | 0.979246934  | 2.93E-08 |
| TUCP_002474 | XLOC_104687 | ENSRNOT00000055607  | 0.965347091  | 3.71E-07 |
| TUCP_002474 | XLOC_104687 | ENSRNOT00000031555  | 0.950124225  | 2.23E-06 |
| TUCP_002474 | XLOC_104687 | ENSRNOT00000011563  | 0.950890237  | 2.07E-06 |
| TUCP_002474 | XLOC_104687 | ENSRNOT00000000263  | -0.971839119 | 1.33E-07 |
| TUCP_002474 | XLOC_104687 | ENSRNOT00000086350  | 0.955541393  | 1.27E-06 |
| TUCP_002474 | XLOC_104687 | ENSRNOT00000023876  | -0.964305857 | 4.30E-07 |
| TUCP_002474 | XLOC_104687 | ENSRNOT00000003106  | 0.954269114  | 1.46E-06 |
| TUCP_002474 | XLOC_104687 | ENSRNOT00000002187  | 0.958731693  | 8.79E-07 |
| TUCP_002474 | XLOC_104687 | ENSRNOT00000012625  | 0.978102445  | 3.82E-08 |
| TUCP_002474 | XLOC_104687 | ENSRNOT000000009840 | 0.952150576  | 1.82E-06 |
| TUCP_002474 | XLOC_104687 | ENSRNOT00000049285  | 0.971729979  | 1.36E-07 |
| TUCP_002474 | XLOC_104687 | ENSRNOT00000006366  | 0.985878886  | 4.32E-09 |
| TUCP_002474 | XLOC_104687 | ENSRNOT00000074649  | -0.954697317 | 1.39E-06 |
| TUCP_002474 | XLOC_104687 | ENSRNOT00000049536  | 0.961298158  | 6.41E-07 |
| TUCP_002474 | XLOC_104687 | ENSRNOT00000035277  | -0.95035198  | 2.19E-06 |
| TUCP_002474 | XLOC_104687 | ENSRNOT00000033196  | 0.958375704  | 9.18E-07 |
| TUCP_002474 | XLOC_104687 | ENSRNOT00000077146  | 0.956646309  | 1.12E-06 |
| TUCP_002474 | XLOC_104687 | ENSRNOT00000022478  | 0.970918267  | 1.56E-07 |
| TUCP_002474 | XLOC_104687 | ENSRNOT00000042459  | 0.956835239  | 1.10E-06 |
| TUCP_002474 | XLOC_104687 | ENSRNOT00000064723  | 0.972667871  | 1.15E-07 |
| TUCP_002474 | XLOC_104687 | ENSRNOT00000073834  | 0.978995254  | 3.11E-08 |
| TUCP_002474 | XLOC_104687 | ENSRNOT00000028807  | 0.961065391  | 6.60E-07 |
| TUCP_002474 | XLOC_104687 | ENSRNOT00000060002  | 0.960697602  | 6.91E-07 |
| TUCP_002474 | XLOC_104687 | ENSRNOT00000086456  | 0.968672104  | 2.25E-07 |

|             |             |                    |              |          |
|-------------|-------------|--------------------|--------------|----------|
| TUCP_002474 | XLOC_104687 | ENSRNOT00000036959 | 0.979585832  | 2.70E-08 |
| TUCP_002474 | XLOC_104687 | ENSRNOT00000027301 | 0.980101358  | 2.38E-08 |
| TUCP_002474 | XLOC_104687 | ENSRNOT00000075209 | 0.954958799  | 1.35E-06 |
| TUCP_002474 | XLOC_104687 | ENSRNOT00000089185 | 0.972764977  | 1.13E-07 |
| TUCP_002474 | XLOC_104687 | ENSRNOT00000023977 | 0.976268599  | 5.70E-08 |
| TUCP_002474 | XLOC_104687 | ENSRNOT00000066133 | 0.953824572  | 1.53E-06 |
| TUCP_002474 | XLOC_104687 | ENSRNOT00000017420 | 0.952544479  | 1.75E-06 |
| TUCP_002474 | XLOC_104687 | ENSRNOT00000009666 | 0.954372664  | 1.44E-06 |
| TUCP_002474 | XLOC_104687 | ENSRNOT00000051953 | 0.951547644  | 1.94E-06 |
| TUCP_002474 | XLOC_104687 | ENSRNOT00000006765 | 0.978681682  | 3.35E-08 |
| TUCP_002474 | XLOC_104687 | ENSRNOT00000005604 | -0.951069477 | 2.03E-06 |
| TUCP_002474 | XLOC_104687 | ENSRNOT00000035385 | -0.974859089 | 7.58E-08 |
| TUCP_002474 | XLOC_104687 | ENSRNOT00000025067 | 0.961937141  | 5.90E-07 |
| TUCP_002474 | XLOC_104687 | ENSRNOT00000086628 | -0.963283455 | 4.94E-07 |
| TUCP_002474 | XLOC_104687 | ENSRNOT00000008317 | 0.952560383  | 1.75E-06 |
| TUCP_002474 | XLOC_104687 | ENSRNOT00000014559 | 0.954486713  | 1.42E-06 |
| TUCP_002474 | XLOC_104687 | ENSRNOT00000005644 | 0.950391808  | 2.18E-06 |
| TUCP_002474 | XLOC_104687 | ENSRNOT00000014885 | 0.984369662  | 7.16E-09 |
| TUCP_002474 | XLOC_104687 | ENSRNOT00000023786 | 0.968028328  | 2.49E-07 |
| TUCP_002474 | XLOC_104687 | ENSRNOT00000040548 | 0.959724526  | 7.80E-07 |
| TUCP_002474 | XLOC_104687 | ENSRNOT00000028290 | 0.973266056  | 1.03E-07 |
| TUCP_002474 | XLOC_104687 | ENSRNOT00000064535 | 0.955610489  | 1.26E-06 |
| TUCP_002474 | XLOC_104687 | ENSRNOT00000015624 | -0.960495292 | 7.09E-07 |
| TUCP_002474 | XLOC_104687 | ENSRNOT00000013867 | -0.959392743 | 8.12E-07 |
| TUCP_002474 | XLOC_104687 | ENSRNOT00000085295 | 0.970578172  | 1.65E-07 |
| TUCP_002474 | XLOC_104687 | ENSRNOT00000041091 | 0.962130196  | 5.76E-07 |
| TUCP_002474 | XLOC_104687 | ENSRNOT00000008222 | 0.975964827  | 6.07E-08 |
| TUCP_002474 | XLOC_104687 | ENSRNOT00000010962 | 0.975200197  | 7.09E-08 |
| TUCP_002474 | XLOC_104687 | ENSRNOT00000020702 | 0.98916998   | 1.15E-09 |
| TUCP_002474 | XLOC_104687 | ENSRNOT00000009749 | 0.982344722  | 1.31E-08 |
| TUCP_002474 | XLOC_104687 | ENSRNOT00000039102 | -0.969119778 | 2.10E-07 |
| TUCP_002474 | XLOC_104687 | ENSRNOT00000086260 | 0.952069993  | 1.84E-06 |
| TUCP_002474 | XLOC_104687 | ENSRNOT00000001135 | 0.973237763  | 1.03E-07 |
| TUCP_002474 | XLOC_104687 | ENSRNOT00000013933 | 0.956121366  | 1.19E-06 |
| TUCP_002474 | XLOC_104687 | ENSRNOT0000001036  | 0.966651822  | 3.07E-07 |
| TUCP_002474 | XLOC_104687 | ENSRNOT00000060692 | 0.958986972  | 8.53E-07 |
| TUCP_002474 | XLOC_104687 | ENSRNOT00000010983 | -0.970422723 | 1.70E-07 |
| TUCP_002474 | XLOC_104687 | ENSRNOT00000007369 | -0.954851057 | 1.37E-06 |
| TUCP_002474 | XLOC_104687 | ENSRNOT00000004787 | 0.966551134  | 3.12E-07 |
| TUCP_002474 | XLOC_104687 | ENSRNOT00000085466 | -0.963210906 | 4.99E-07 |
| TUCP_002474 | XLOC_104687 | ENSRNOT00000038811 | 0.95024628   | 2.21E-06 |
| TUCP_002474 | XLOC_104687 | ENSRNOT00000007367 | 0.967023621  | 2.91E-07 |
| TUCP_002474 | XLOC_104687 | ENSRNOT00000060757 | 0.965474977  | 3.65E-07 |
| TUCP_002474 | XLOC_104687 | ENSRNOT00000027970 | -0.951985009 | 1.85E-06 |
| TUCP_002474 | XLOC_104687 | ENSRNOT00000045946 | -0.951595995 | 1.93E-06 |
| TUCP_002474 | XLOC_104687 | ENSRNOT00000005148 | 0.966652606  | 3.07E-07 |
| TUCP_002474 | XLOC_104687 | ENSRNOT00000017998 | -0.950699211 | 2.11E-06 |
| TUCP_002474 | XLOC_104687 | ENSRNOT00000017995 | -0.964156519 | 4.39E-07 |
| TUCP_002474 | XLOC_104687 | ENSRNOT00000060595 | 0.954820066  | 1.37E-06 |
| TUCP_002474 | XLOC_104687 | ENSRNOT00000013431 | 0.992509767  | 1.83E-10 |
| TUCP_002474 | XLOC_104687 | ENSRNOT00000028703 | 0.978849003  | 3.22E-08 |

|             |             |                    |              |          |
|-------------|-------------|--------------------|--------------|----------|
| TUCP_002474 | XLOC_104687 | ENSRNOT00000021534 | 0.965169844  | 3.81E-07 |
| TUCP_002474 | XLOC_104687 | ENSRNOT00000023628 | 0.973252674  | 1.03E-07 |
| TUCP_002474 | XLOC_104687 | ENSRNOT00000088679 | 0.954179856  | 1.47E-06 |
| TUCP_002474 | XLOC_104687 | ENSRNOT00000023256 | -0.962045576 | 5.82E-07 |
| TUCP_002474 | XLOC_104687 | ENSRNOT00000016776 | 0.977967585  | 3.94E-08 |
| TUCP_002474 | XLOC_104687 | ENSRNOT00000061619 | 0.953002103  | 1.67E-06 |
| TUCP_002474 | XLOC_104687 | ENSRNOT00000088677 | 0.982720787  | 1.18E-08 |
| TUCP_002474 | XLOC_104687 | ENSRNOT0000008987  | 0.97082372   | 1.59E-07 |
| TUCP_002474 | XLOC_104687 | ENSRNOT00000061580 | 0.964963214  | 3.92E-07 |
| TUCP_002474 | XLOC_104687 | ENSRNOT00000024253 | -0.951132099 | 2.02E-06 |
| TUCP_002474 | XLOC_104687 | ENSRNOT00000019473 | 0.952556115  | 1.75E-06 |
| TUCP_002474 | XLOC_104687 | ENSRNOT00000091116 | 0.955123913  | 1.33E-06 |
| TUCP_002474 | XLOC_104687 | ENSRNOT00000059854 | 0.95342711   | 1.60E-06 |
| TUCP_002474 | XLOC_104687 | ENSRNOT00000039607 | 0.973072584  | 1.07E-07 |
| TUCP_002474 | XLOC_104687 | ENSRNOT00000027083 | -0.950878401 | 2.07E-06 |
| TUCP_002474 | XLOC_104687 | ENSRNOT0000002053  | 0.970391703  | 1.71E-07 |
| TUCP_002474 | XLOC_104687 | ENSRNOT00000063930 | 0.971936956  | 1.31E-07 |
| TUCP_002474 | XLOC_104687 | ENSRNOT00000074420 | 0.950928485  | 2.06E-06 |
| TUCP_002474 | XLOC_104687 | ENSRNOT00000046215 | 0.986727299  | 3.17E-09 |
| TUCP_002474 | XLOC_104687 | ENSRNOT0000002037  | 0.966028253  | 3.37E-07 |
| TUCP_002474 | XLOC_104687 | ENSRNOT00000020155 | -0.959129622 | 8.38E-07 |
| TUCP_002474 | XLOC_104687 | ENSRNOT00000001855 | -0.952456064 | 1.77E-06 |
| TUCP_002474 | XLOC_104687 | ENSRNOT00000072771 | -0.968762865 | 2.22E-07 |
| TUCP_002474 | XLOC_104687 | ENSRNOT00000041237 | 0.975911355  | 6.13E-08 |
| TUCP_002474 | XLOC_104687 | ENSRNOT00000006050 | 0.963963839  | 4.50E-07 |
| TUCP_002474 | XLOC_104687 | ENSRNOT00000002040 | 0.966326097  | 3.22E-07 |
| TUCP_002474 | XLOC_104687 | ENSRNOT00000003733 | 0.95988827   | 7.64E-07 |
| TUCP_002474 | XLOC_104687 | ENSRNOT00000089829 | 0.966180071  | 3.29E-07 |
| TUCP_002474 | XLOC_104687 | ENSRNOT00000013613 | 0.961069426  | 6.60E-07 |
| TUCP_002474 | XLOC_104687 | ENSRNOT00000027653 | 0.965883122  | 3.44E-07 |
| TUCP_002474 | XLOC_104687 | ENSRNOT00000067566 | 0.964069386  | 4.44E-07 |
| TUCP_002474 | XLOC_104687 | ENSRNOT00000014479 | 0.975505618  | 6.66E-08 |
| TUCP_002474 | XLOC_104687 | ENSRNOT00000003326 | 0.976780851  | 5.11E-08 |
| TUCP_002474 | XLOC_104687 | ENSRNOT00000016306 | 0.970143969  | 1.78E-07 |
| TUCP_002474 | XLOC_104687 | ENSRNOT00000006205 | 0.955492925  | 1.28E-06 |
| TUCP_002474 | XLOC_104687 | ENSRNOT00000086813 | 0.953969475  | 1.51E-06 |
| TUCP_002474 | XLOC_104687 | ENSRNOT00000015476 | 0.954464894  | 1.43E-06 |
| TUCP_002474 | XLOC_104687 | ENSRNOT00000017692 | 0.98789173   | 2.01E-09 |
| TUCP_002474 | XLOC_104687 | ENSRNOT00000047530 | -0.963924312 | 4.53E-07 |
| TUCP_002474 | XLOC_104687 | ENSRNOT00000021455 | 0.966566691  | 3.11E-07 |
| TUCP_002474 | XLOC_104687 | ENSRNOT00000064671 | 0.9565498    | 1.13E-06 |
| TUCP_002474 | XLOC_104687 | ENSRNOT00000007824 | 0.974490145  | 8.15E-08 |
| TUCP_002474 | XLOC_104687 | ENSRNOT00000000120 | -0.95663176  | 1.12E-06 |
| TUCP_002474 | XLOC_104687 | ENSRNOT00000057898 | 0.984071776  | 7.86E-09 |
| TUCP_002474 | XLOC_104687 | ENSRNOT00000024677 | -0.953242716 | 1.63E-06 |
| TUCP_002474 | XLOC_104687 | ENSRNOT00000091602 | 0.95554346   | 1.27E-06 |
| TUCP_002474 | XLOC_104687 | ENSRNOT00000090338 | 0.961529008  | 6.22E-07 |
| TUCP_002474 | XLOC_104687 | ENSRNOT00000056100 | 0.974566097  | 8.03E-08 |
| TUCP_002474 | XLOC_104687 | ENSRNOT00000001077 | -0.970481393 | 1.68E-07 |
| TUCP_002474 | XLOC_104687 | ENSRNOT00000007044 | 0.966702642  | 3.05E-07 |
| TUCP_002474 | XLOC_104687 | ENSRNOT00000023567 | 0.97601757   | 6.00E-08 |

|             |             |                     |              |          |
|-------------|-------------|---------------------|--------------|----------|
| TUCP_002474 | XLOC_104687 | ENSRNOT00000009817  | 0.98010169   | 2.38E-08 |
| TUCP_002474 | XLOC_104687 | ENSRNOT00000026258  | -0.950448424 | 2.16E-06 |
| TUCP_002474 | XLOC_104687 | ENSRNOT00000025294  | 0.980382095  | 2.21E-08 |
| TUCP_002474 | XLOC_104687 | ENSRNOT00000015618  | 0.957480258  | 1.02E-06 |
| TUCP_002474 | XLOC_104687 | ENSRNOT00000018634  | 0.961785174  | 6.02E-07 |
| TUCP_002474 | XLOC_104687 | ENSRNOT000000071540 | -0.963732184 | 4.65E-07 |
| TUCP_002474 | XLOC_104687 | ENSRNOT00000012583  | 0.970226732  | 1.75E-07 |
| TUCP_002474 | XLOC_104687 | ENSRNOT00000024568  | 0.957859428  | 9.75E-07 |
| TUCP_002474 | XLOC_104687 | ENSRNOT00000091739  | 0.962449056  | 5.52E-07 |
| TUCP_002474 | XLOC_104687 | ENSRNOT000000072849 | 0.952492654  | 1.76E-06 |
| TUCP_002474 | XLOC_104687 | ENSRNOT000000073643 | 0.973992036  | 8.97E-08 |
| TUCP_002474 | XLOC_104687 | ENSRNOT000000039523 | -0.954607315 | 1.41E-06 |
| TUCP_002474 | XLOC_104687 | ENSRNOT000000078349 | 0.983264591  | 1.01E-08 |
| TUCP_002474 | XLOC_104687 | ENSRNOT000000011654 | 0.965226125  | 3.78E-07 |
| TUCP_002474 | XLOC_104687 | ENSRNOT000000022502 | 0.983142245  | 1.04E-08 |
| TUCP_002474 | XLOC_104687 | ENSRNOT00000005961  | 0.967465399  | 2.72E-07 |
| TUCP_002474 | XLOC_104687 | ENSRNOT000000026928 | 0.982431309  | 1.28E-08 |
| TUCP_002474 | XLOC_104687 | ENSRNOT000000026920 | 0.970401198  | 1.70E-07 |
| TUCP_002474 | XLOC_104687 | ENSRNOT000000078816 | -0.950308816 | 2.19E-06 |
| TUCP_002474 | XLOC_104687 | ENSRNOT000000085545 | 0.959483702  | 8.03E-07 |
| TUCP_002474 | XLOC_104687 | ENSRNOT000000009900 | 0.961489071  | 6.25E-07 |
| TUCP_002474 | XLOC_104687 | ENSRNOT000000021802 | -0.974597163 | 7.98E-08 |
| TUCP_002474 | XLOC_104687 | ENSRNOT000000021803 | 0.966936332  | 2.94E-07 |
| TUCP_002474 | XLOC_104687 | ENSRNOT000000018646 | 0.955361038  | 1.29E-06 |
| TUCP_002474 | XLOC_104687 | ENSRNOT000000024352 | -0.951017398 | 2.04E-06 |
| TUCP_002474 | XLOC_104687 | ENSRNOT000000039850 | 0.959604491  | 7.91E-07 |
| TUCP_002474 | XLOC_104687 | ENSRNOT000000082627 | 0.950208059  | 2.22E-06 |
| TUCP_002474 | XLOC_104687 | ENSRNOT000000087748 | 0.981029014  | 1.87E-08 |
| TUCP_002474 | XLOC_104687 | ENSRNOT000000003787 | 0.97237769   | 1.21E-07 |
| TUCP_002474 | XLOC_104687 | ENSRNOT000000014506 | 0.964637715  | 4.10E-07 |
| TUCP_002474 | XLOC_104687 | ENSRNOT000000023262 | 0.966671643  | 3.06E-07 |
| TUCP_002474 | XLOC_104687 | ENSRNOT000000059246 | -0.95502328  | 1.34E-06 |
| TUCP_002474 | XLOC_104687 | ENSRNOT000000017469 | 0.975940688  | 6.10E-08 |
| TUCP_002474 | XLOC_104687 | ENSRNOT000000014859 | 0.966023702  | 3.37E-07 |
| TUCP_002474 | XLOC_104687 | ENSRNOT00000001916  | 0.973003052  | 1.08E-07 |
| TUCP_002474 | XLOC_104687 | ENSRNOT000000022343 | 0.959704364  | 7.82E-07 |
| TUCP_002474 | XLOC_104687 | ENSRNOT000000004941 | 0.98724148   | 2.61E-09 |
| TUCP_002474 | XLOC_104687 | ENSRNOT000000008865 | 0.952007825  | 1.85E-06 |
| TUCP_002474 | XLOC_104687 | ENSRNOT00000010893  | 0.964330569  | 4.28E-07 |
| TUCP_002474 | XLOC_104687 | ENSRNOT000000055957 | 0.989613629  | 9.35E-10 |
| TUCP_002474 | XLOC_104687 | ENSRNOT000000010674 | 0.988862078  | 1.32E-09 |
| TUCP_002474 | XLOC_104687 | ENSRNOT000000023664 | 0.98782556   | 2.06E-09 |
| TUCP_002474 | XLOC_104687 | ENSRNOT000000009225 | 0.954559309  | 1.41E-06 |
| TUCP_002474 | XLOC_104687 | ENSRNOT000000016730 | 0.952790468  | 1.71E-06 |
| TUCP_002474 | XLOC_104687 | ENSRNOT000000068026 | 0.957429062  | 1.03E-06 |
| TUCP_002474 | XLOC_104687 | ENSRNOT000000090456 | -0.951486007 | 1.95E-06 |
| TUCP_002474 | XLOC_104687 | ENSRNOT000000014821 | 0.957725307  | 9.90E-07 |
| TUCP_002474 | XLOC_104687 | ENSRNOT000000007259 | 0.973974298  | 9.00E-08 |
| TUCP_002474 | XLOC_104687 | ENSRNOT000000018549 | 0.96918227   | 2.08E-07 |
| TUCP_002474 | XLOC_104687 | ENSRNOT000000026531 | 0.959007498  | 8.51E-07 |
| TUCP_002474 | XLOC_104687 | ENSRNOT000000064068 | 0.971486353  | 1.42E-07 |

|             |             |                    |              |          |
|-------------|-------------|--------------------|--------------|----------|
| TUCP_002474 | XLOC_104687 | ENSRNOT00000005172 | -0.96664603  | 3.07E-07 |
| TUCP_002474 | XLOC_104687 | ENSRNOT00000005170 | 0.974658059  | 7.89E-08 |
| TUCP_002474 | XLOC_104687 | ENSRNOT00000017746 | 0.957263343  | 1.04E-06 |
| TUCP_002474 | XLOC_104687 | ENSRNOT00000016286 | 0.95840465   | 9.14E-07 |
| TUCP_002474 | XLOC_104687 | ENSRNOT00000070825 | 0.955280944  | 1.31E-06 |
| TUCP_002474 | XLOC_104687 | ENSRNOT00000003412 | 0.97414837   | 8.71E-08 |
| TUCP_002474 | XLOC_104687 | ENSRNOT00000056015 | 0.983560558  | 9.20E-09 |
| TUCP_002474 | XLOC_104687 | ENSRNOT00000021216 | -0.958860346 | 8.66E-07 |
| TUCP_002474 | XLOC_104687 | ENSRNOT00000066923 | 0.959211768  | 8.30E-07 |
| TUCP_002474 | XLOC_104687 | ENSRNOT00000024285 | 0.978720769  | 3.32E-08 |
| TUCP_002474 | XLOC_104687 | ENSRNOT00000041277 | 0.971166892  | 1.50E-07 |
| TUCP_002474 | XLOC_104687 | ENSRNOT00000071482 | 0.964958673  | 3.92E-07 |
| TUCP_002474 | XLOC_104687 | ENSRNOT00000028744 | 0.975568325  | 6.58E-08 |
| TUCP_002474 | XLOC_104687 | ENSRNOT00000009135 | -0.951170441 | 2.01E-06 |
| TUCP_002474 | XLOC_104687 | ENSRNOT00000044073 | 0.989568418  | 9.56E-10 |
| TUCP_002474 | XLOC_104687 | ENSRNOT0000002771  | -0.95146916  | 1.95E-06 |
| TUCP_002474 | XLOC_104687 | ENSRNOT00000067135 | 0.962927325  | 5.18E-07 |
| TUCP_002474 | XLOC_104687 | ENSRNOT00000054976 | 0.971110196  | 1.51E-07 |
| TUCP_002474 | XLOC_104687 | ENSRNOT00000010516 | 0.965481059  | 3.64E-07 |
| TUCP_002474 | XLOC_104687 | ENSRNOT00000028887 | 0.965910389  | 3.42E-07 |
| TUCP_002474 | XLOC_104687 | ENSRNOT00000000527 | 0.954098176  | 1.49E-06 |
| TUCP_002474 | XLOC_104687 | ENSRNOT00000010510 | 0.956753407  | 1.11E-06 |
| TUCP_002474 | XLOC_104687 | ENSRNOT00000000258 | 0.962760413  | 5.30E-07 |
| TUCP_002474 | XLOC_104687 | ENSRNOT00000000529 | 0.96590636   | 3.43E-07 |
| TUCP_002474 | XLOC_104687 | ENSRNOT00000081110 | 0.95029817   | 2.20E-06 |
| TUCP_002474 | XLOC_104687 | ENSRNOT00000067901 | 0.950266618  | 2.20E-06 |
| TUCP_002474 | XLOC_104687 | ENSRNOT00000071745 | 0.959404599  | 8.11E-07 |
| TUCP_002474 | XLOC_104687 | ENSRNOT0000001734  | 0.961961728  | 5.88E-07 |
| TUCP_002474 | XLOC_104687 | ENSRNOT00000088202 | 0.990453229  | 6.15E-10 |
| TUCP_002474 | XLOC_104687 | ENSRNOT00000088201 | 0.953686408  | 1.55E-06 |
| TUCP_002474 | XLOC_104687 | ENSRNOT00000011874 | -0.952074687 | 1.84E-06 |
| TUCP_002474 | XLOC_104687 | ENSRNOT00000061916 | 0.963963769  | 4.50E-07 |
| TUCP_002474 | XLOC_104687 | ENSRNOT00000078161 | 0.976494371  | 5.43E-08 |
| TUCP_002474 | XLOC_104687 | ENSRNOT00000021145 | 0.972618837  | 1.16E-07 |
| TUCP_002474 | XLOC_104687 | ENSRNOT00000003600 | 0.958882917  | 8.64E-07 |
| TUCP_002474 | XLOC_104687 | ENSRNOT00000031401 | 0.954997172  | 1.35E-06 |
| TUCP_002474 | XLOC_104687 | ENSRNOT00000006802 | -0.962644145 | 5.38E-07 |
| TUCP_002474 | XLOC_104687 | ENSRNOT00000003605 | 0.971430335  | 1.43E-07 |
| TUCP_002474 | XLOC_104687 | ENSRNOT00000082151 | 0.981353373  | 1.72E-08 |
| TUCP_002474 | XLOC_104687 | ENSRNOT00000011572 | 0.984387458  | 7.12E-09 |
| TUCP_002474 | XLOC_104687 | ENSRNOT00000000155 | -0.954216981 | 1.47E-06 |
| TUCP_002474 | XLOC_104687 | ENSRNOT00000034411 | -0.972619073 | 1.16E-07 |
| TUCP_002474 | XLOC_104687 | ENSRNOT0000001607  | -0.984818301 | 6.19E-09 |
| TUCP_002474 | XLOC_104687 | ENSRNOT00000033324 | -0.961903791 | 5.93E-07 |
| TUCP_002474 | XLOC_104687 | ENSRNOT00000036282 | -0.96793841  | 2.53E-07 |
| TUCP_002474 | XLOC_104687 | ENSRNOT00000046126 | 0.96591564   | 3.42E-07 |
| TUCP_002474 | XLOC_104687 | ENSRNOT00000085971 | 0.969551263  | 1.96E-07 |
| TUCP_002474 | XLOC_104687 | ENSRNOT00000086847 | 0.952178219  | 1.82E-06 |
| TUCP_002474 | XLOC_104687 | ENSRNOT00000020663 | 0.957991028  | 9.60E-07 |
| TUCP_002474 | XLOC_104687 | ENSRNOT00000044975 | 0.951191001  | 2.01E-06 |
| TUCP_002474 | XLOC_104687 | ENSRNOT0000007771  | 0.981791088  | 1.53E-08 |

|             |             |                    |              |          |
|-------------|-------------|--------------------|--------------|----------|
| TUCP_002474 | XLOC_104687 | ENSRNOT00000022142 | -0.961592952 | 6.17E-07 |
| TUCP_002474 | XLOC_104687 | ENSRNOT00000076300 | 0.983931304  | 8.21E-09 |
| TUCP_002474 | XLOC_104687 | ENSRNOT00000014433 | 0.958579316  | 8.96E-07 |
| TUCP_002474 | XLOC_104687 | ENSRNOT00000052120 | -0.96634429  | 3.21E-07 |
| TUCP_002474 | XLOC_104687 | ENSRNOT00000065764 | 0.961459064  | 6.28E-07 |
| TUCP_002474 | XLOC_104687 | ENSRNOT00000019820 | -0.962398927 | 5.56E-07 |
| TUCP_002474 | XLOC_104687 | ENSRNOT00000015946 | 0.96023582   | 7.32E-07 |
| TUCP_002474 | XLOC_104687 | ENSRNOT00000005257 | -0.958893024 | 8.63E-07 |
| TUCP_002474 | XLOC_104687 | ENSRNOT00000023965 | 0.982606605  | 1.22E-08 |
| TUCP_002474 | XLOC_104687 | ENSRNOT00000001234 | 0.962920066  | 5.19E-07 |
| TUCP_002474 | XLOC_104687 | ENSRNOT00000058763 | 0.981938354  | 1.47E-08 |
| TUCP_002474 | XLOC_104687 | ENSRNOT00000090355 | 0.971387671  | 1.44E-07 |
| TUCP_002474 | XLOC_104687 | ENSRNOT00000075934 | 0.977456807  | 4.42E-08 |
| TUCP_002474 | XLOC_104687 | ENSRNOT00000004319 | 0.957173456  | 1.06E-06 |
| TUCP_002474 | XLOC_104687 | ENSRNOT00000015769 | -0.95384626  | 1.53E-06 |
| TUCP_002474 | XLOC_104687 | ENSRNOT00000026364 | 0.969264615  | 2.05E-07 |
| TUCP_002474 | XLOC_104687 | ENSRNOT00000025819 | 0.974162669  | 8.68E-08 |
| TUCP_002474 | XLOC_104687 | ENSRNOT00000015318 | 0.976652051  | 5.25E-08 |
| TUCP_002474 | XLOC_104687 | ENSRNOT00000028907 | -0.95679559  | 1.10E-06 |
| TUCP_002474 | XLOC_104687 | ENSRNOT00000010224 | -0.952009652 | 1.85E-06 |
| TUCP_002474 | XLOC_104687 | ENSRNOT00000045532 | 0.99391067   | 6.53E-11 |
| TUCP_002474 | XLOC_104687 | ENSRNOT00000025887 | 0.980639644  | 2.07E-08 |
| TUCP_002474 | XLOC_104687 | ENSRNOT00000066211 | 0.959929715  | 7.61E-07 |
| TUCP_002474 | XLOC_104687 | ENSRNOT00000003940 | 0.962403325  | 5.55E-07 |
| TUCP_002474 | XLOC_104687 | ENSRNOT00000017687 | 0.970722989  | 1.61E-07 |
| TUCP_002474 | XLOC_104687 | ENSRNOT00000039296 | -0.964142164 | 4.40E-07 |
| TUCP_002474 | XLOC_104687 | ENSRNOT00000036195 | 0.956550149  | 1.13E-06 |
| TUCP_002474 | XLOC_104687 | ENSRNOT00000059599 | 0.974080983  | 8.82E-08 |
| TUCP_002474 | XLOC_104687 | ENSRNOT00000039291 | 0.950898629  | 2.07E-06 |
| TUCP_002474 | XLOC_104687 | ENSRNOT00000082999 | 0.973338932  | 1.01E-07 |
| TUCP_002474 | XLOC_104687 | ENSRNOT00000082998 | -0.958698141 | 8.83E-07 |
| TUCP_002474 | XLOC_104687 | ENSRNOT00000075656 | 0.962110355  | 5.77E-07 |
| TUCP_002474 | XLOC_104687 | ENSRNOT00000004810 | -0.951015742 | 2.05E-06 |
| TUCP_002474 | XLOC_104687 | ENSRNOT00000011237 | 0.960901452  | 6.74E-07 |
| TUCP_002474 | XLOC_104687 | ENSRNOT00000083573 | 0.95608504   | 1.19E-06 |
| TUCP_002474 | XLOC_104687 | ENSRNOT00000083578 | -0.966366313 | 3.20E-07 |
| TUCP_002474 | XLOC_104687 | ENSRNOT00000045443 | 0.954581749  | 1.41E-06 |
| TUCP_002474 | XLOC_104687 | ENSRNOT00000059524 | 0.979689062  | 2.63E-08 |
| TUCP_002474 | XLOC_104687 | ENSRNOT00000050721 | 0.967335986  | 2.77E-07 |
| TUCP_002474 | XLOC_104687 | ENSRNOT00000017361 | -0.961368025 | 6.35E-07 |
| TUCP_002474 | XLOC_104687 | ENSRNOT00000017362 | 0.983764369  | 8.65E-09 |
| TUCP_002474 | XLOC_104687 | ENSRNOT00000005658 | 0.972546614  | 1.17E-07 |
| TUCP_002474 | XLOC_104687 | ENSRNOT00000027125 | 0.953306297  | 1.62E-06 |
| TUCP_002474 | XLOC_104687 | ENSRNOT00000090342 | -0.950995491 | 2.05E-06 |
| TUCP_002474 | XLOC_104687 | ENSRNOT00000074023 | -0.965175918 | 3.80E-07 |
| TUCP_002474 | XLOC_104687 | ENSRNOT00000019465 | 0.982219813  | 1.36E-08 |
| TUCP_002474 | XLOC_104687 | ENSRNOT00000009073 | 0.978051848  | 3.87E-08 |
| TUCP_002474 | XLOC_104687 | ENSRNOT00000024712 | 0.966545626  | 3.12E-07 |
| TUCP_002474 | XLOC_104687 | ENSRNOT00000067170 | 0.972749424  | 1.13E-07 |
| TUCP_002474 | XLOC_104687 | ENSRNOT00000060432 | 0.973003594  | 1.08E-07 |
| TUCP_002474 | XLOC_104687 | ENSRNOT0000001586  | 0.968655285  | 2.26E-07 |

|             |             |                     |              |          |
|-------------|-------------|---------------------|--------------|----------|
| TUCP_002474 | XLOC_104687 | ENSRNOT00000029332  | 0.950399187  | 2.17E-06 |
| TUCP_002474 | XLOC_104687 | ENSRNOT00000017385  | 0.955372179  | 1.29E-06 |
| TUCP_002474 | XLOC_104687 | ENSRNOT00000013516  | -0.952849726 | 1.70E-06 |
| TUCP_002474 | XLOC_104687 | ENSRNOT00000013043  | 0.950588879  | 2.13E-06 |
| TUCP_002474 | XLOC_104687 | ENSRNOT00000013695  | 0.977269185  | 4.60E-08 |
| TUCP_002474 | XLOC_104687 | ENSRNOT00000016541  | 0.972238214  | 1.24E-07 |
| TUCP_002474 | XLOC_104687 | ENSRNOT000000081621 | -0.980979956 | 1.90E-08 |
| TUCP_002474 | XLOC_104687 | ENSRNOT00000012060  | -0.961641725 | 6.13E-07 |
| TUCP_002474 | XLOC_104687 | ENSRNOT00000040060  | 0.952688562  | 1.72E-06 |
| TUCP_002474 | XLOC_104687 | ENSRNOT00000030373  | 0.953546433  | 1.58E-06 |
| TUCP_002474 | XLOC_104687 | ENSRNOT00000005033  | 0.967154391  | 2.85E-07 |
| TUCP_002474 | XLOC_104687 | ENSRNOT00000075480  | 0.959039683  | 8.48E-07 |
| TUCP_002474 | XLOC_104687 | ENSRNOT00000020051  | -0.955589226 | 1.26E-06 |
| TUCP_002474 | XLOC_104687 | ENSRNOT00000014044  | 0.950206614  | 2.22E-06 |
| TUCP_002474 | XLOC_104687 | ENSRNOT00000009000  | 0.977022038  | 4.85E-08 |
| TUCP_002474 | XLOC_104687 | ENSRNOT00000012114  | 0.972070371  | 1.28E-07 |
| TUCP_002474 | XLOC_104687 | ENSRNOT00000068033  | -0.950101704 | 2.24E-06 |
| TUCP_002474 | XLOC_104687 | ENSRNOT00000068601  | 0.957146207  | 1.06E-06 |
| TUCP_002474 | XLOC_104687 | ENSRNOT00000085403  | -0.967696416 | 2.62E-07 |
| TUCP_002474 | XLOC_104687 | ENSRNOT00000089545  | 0.976197756  | 5.78E-08 |
| TUCP_002474 | XLOC_104687 | ENSRNOT00000079185  | 0.985588628  | 4.78E-09 |
| TUCP_002474 | XLOC_104687 | ENSRNOT00000077908  | -0.959550819 | 7.97E-07 |
| TUCP_002474 | XLOC_104687 | ENSRNOT00000083876  | 0.965724832  | 3.52E-07 |
| TUCP_002474 | XLOC_104687 | ENSRNOT00000065673  | 0.9698355    | 1.87E-07 |
| TUCP_002474 | XLOC_104687 | ENSRNOT00000073983  | -0.952050627 | 1.84E-06 |
| TUCP_002474 | XLOC_104687 | ENSRNOT00000010783  | 0.955973569  | 1.21E-06 |
| TUCP_002474 | XLOC_104687 | ENSRNOT00000011948  | 0.965986142  | 3.39E-07 |
| TUCP_002474 | XLOC_104687 | ENSRNOT00000033677  | 0.964092288  | 4.43E-07 |
| TUCP_002474 | XLOC_104687 | ENSRNOT00000016330  | 0.970863484  | 1.57E-07 |
| TUCP_002474 | XLOC_104687 | ENSRNOT00000019121  | 0.96705299   | 2.89E-07 |
| TUCP_002474 | XLOC_104687 | ENSRNOT00000011499  | 0.970236522  | 1.75E-07 |
| TUCP_002474 | XLOC_104687 | ENSRNOT00000016389  | 0.971549005  | 1.40E-07 |
| TUCP_002474 | XLOC_104687 | ENSRNOT00000036338  | 0.955696521  | 1.25E-06 |
| TUCP_002474 | XLOC_104687 | ENSRNOT00000021030  | 0.970744619  | 1.61E-07 |
| TUCP_002474 | XLOC_104687 | ENSRNOT00000047572  | 0.964607174  | 4.12E-07 |
| TUCP_002474 | XLOC_104687 | ENSRNOT00000070794  | 0.963183413  | 5.01E-07 |
| TUCP_002474 | XLOC_104687 | ENSRNOT00000020932  | 0.971079705  | 1.52E-07 |
| TUCP_002474 | XLOC_104687 | ENSRNOT00000073492  | 0.984515724  | 6.83E-09 |
| TUCP_002474 | XLOC_104687 | ENSRNOT00000042633  | 0.979539037  | 2.73E-08 |
| TUCP_002474 | XLOC_104687 | ENSRNOT00000030975  | 0.957010855  | 1.08E-06 |
| TUCP_002474 | XLOC_104687 | ENSRNOT00000092068  | -0.955383029 | 1.29E-06 |
| TUCP_002474 | XLOC_104687 | ENSRNOT00000016947  | -0.957217664 | 1.05E-06 |
| TUCP_002474 | XLOC_104687 | ENSRNOT00000091863  | 0.966010067  | 3.37E-07 |
| TUCP_002474 | XLOC_104687 | ENSRNOT00000028405  | 0.972516494  | 1.18E-07 |
| TUCP_002474 | XLOC_104687 | ENSRNOT00000082709  | 0.985635689  | 4.70E-09 |
| TUCP_002474 | XLOC_104687 | ENSRNOT00000003544  | 0.964275381  | 4.32E-07 |
| TUCP_002474 | XLOC_104687 | ENSRNOT00000022194  | 0.951889783  | 1.87E-06 |
| TUCP_002474 | XLOC_104687 | ENSRNOT00000064450  | 0.956676925  | 1.12E-06 |
| TUCP_002474 | XLOC_104687 | ENSRNOT00000003540  | 0.950845264  | 2.08E-06 |
| TUCP_002474 | XLOC_104687 | ENSRNOT00000064452  | 0.968145983  | 2.45E-07 |
| TUCP_002474 | XLOC_104687 | ENSRNOT00000025913  | 0.955907425  | 1.22E-06 |

|             |             |                     |              |          |
|-------------|-------------|---------------------|--------------|----------|
| TUCP_002474 | XLOC_104687 | ENSRNOT00000019386  | 0.982802958  | 1.15E-08 |
| TUCP_002474 | XLOC_104687 | ENSRNOT00000077220  | 0.959985045  | 7.55E-07 |
| TUCP_002474 | XLOC_104687 | ENSRNOT00000025916  | 0.957572434  | 1.01E-06 |
| TUCP_002474 | XLOC_104687 | ENSRNOT00000030782  | 0.95383897   | 1.53E-06 |
| TUCP_002474 | XLOC_104687 | ENSRNOT00000007736  | 0.958060664  | 9.52E-07 |
| TUCP_002474 | XLOC_104687 | ENSRNOT00000021636  | 0.971903679  | 1.32E-07 |
| TUCP_002474 | XLOC_104687 | ENSRNOT00000036658  | 0.975585205  | 6.56E-08 |
| TUCP_002474 | XLOC_104687 | ENSRNOT00000089611  | -0.954923444 | 1.36E-06 |
| TUCP_002474 | XLOC_104687 | ENSRNOT00000073910  | 0.97031906   | 1.73E-07 |
| TUCP_002474 | XLOC_104687 | ENSRNOT00000007738  | 0.975036737  | 7.32E-08 |
| TUCP_002474 | XLOC_104687 | ENSRNOT00000022107  | 0.959112647  | 8.40E-07 |
| TUCP_002474 | XLOC_104687 | ENSRNOT00000030803  | 0.958737006  | 8.79E-07 |
| TUCP_002474 | XLOC_104687 | ENSRNOT00000002645  | 0.952487136  | 1.76E-06 |
| TUCP_002474 | XLOC_104687 | ENSRNOT00000086119  | 0.960123076  | 7.43E-07 |
| TUCP_002474 | XLOC_104687 | ENSRNOT00000008253  | 0.951503395  | 1.95E-06 |
| TUCP_002474 | XLOC_104687 | ENSRNOT00000041116  | 0.964609573  | 4.12E-07 |
| TUCP_002474 | XLOC_104687 | ENSRNOT00000034883  | 0.95045028   | 2.16E-06 |
| TUCP_002474 | XLOC_104687 | ENSRNOT00000056918  | 0.952652883  | 1.73E-06 |
| TUCP_002474 | XLOC_104687 | ENSRNOT00000025827  | -0.95097336  | 2.05E-06 |
| TUCP_002474 | XLOC_104687 | ENSRNOT00000025824  | 0.970399582  | 1.70E-07 |
| TUCP_002474 | XLOC_104687 | ENSRNOT00000072357  | 0.966149158  | 3.31E-07 |
| TUCP_002474 | XLOC_104687 | ENSRNOT00000000707  | 0.963834377  | 4.59E-07 |
| TUCP_002474 | XLOC_104687 | ENSRNOT00000022676  | 0.976050167  | 5.96E-08 |
| TUCP_002474 | XLOC_104687 | ENSRNOT00000067739  | 0.976675793  | 5.23E-08 |
| TUCP_002474 | XLOC_104687 | ENSRNOT00000017232  | 0.983153535  | 1.04E-08 |
| TUCP_002474 | XLOC_104687 | ENSRNOT00000086608  | 0.955205631  | 1.32E-06 |
| TUCP_002474 | XLOC_104687 | ENSRNOT00000090987  | 0.962625393  | 5.39E-07 |
| TUCP_002474 | XLOC_104687 | ENSRNOT00000029701  | -0.96831184  | 2.39E-07 |
| TUCP_002474 | XLOC_104687 | ENSRNOT00000014585  | 0.966213694  | 3.28E-07 |
| TUCP_002474 | XLOC_104687 | ENSRNOT00000029704  | 0.963656154  | 4.70E-07 |
| TUCP_002474 | XLOC_104687 | ENSRNOT00000003691  | 0.979549967  | 2.72E-08 |
| TUCP_002474 | XLOC_104687 | ENSRNOT00000074261  | 0.95145681   | 1.96E-06 |
| TUCP_002474 | XLOC_104687 | ENSRNOT000000051522 | -0.953124085 | 1.65E-06 |
| TUCP_002474 | XLOC_104687 | ENSRNOT00000015199  | 0.959801265  | 7.73E-07 |
| TUCP_002474 | XLOC_104687 | ENSRNOT0000001227   | 0.958496134  | 9.05E-07 |
| TUCP_002474 | XLOC_104687 | ENSRNOT00000004842  | 0.978977627  | 3.12E-08 |
| TUCP_002474 | XLOC_104687 | ENSRNOT00000089879  | 0.972018906  | 1.29E-07 |
| TUCP_002474 | XLOC_104687 | ENSRNOT00000046486  | 0.957282564  | 1.04E-06 |
| TUCP_002474 | XLOC_104687 | ENSRNOT00000083351  | 0.95210196   | 1.83E-06 |
| TUCP_002474 | XLOC_104687 | ENSRNOT00000018477  | 0.952122687  | 1.83E-06 |
| TUCP_002474 | XLOC_104687 | ENSRNOT00000080222  | 0.964367014  | 4.26E-07 |
| TUCP_002474 | XLOC_104687 | ENSRNOT00000011344  | 0.952246114  | 1.80E-06 |
| TUCP_002474 | XLOC_104687 | ENSRNOT00000018473  | 0.951626862  | 1.92E-06 |
| TUCP_002474 | XLOC_104687 | ENSRNOT00000030329  | 0.991708703  | 3.04E-10 |
| TUCP_002474 | XLOC_104687 | ENSRNOT000000033450 | 0.951305045  | 1.99E-06 |
| TUCP_002474 | XLOC_104687 | ENSRNOT00000001935  | 0.972084736  | 1.27E-07 |
| TUCP_002474 | XLOC_104687 | ENSRNOT00000070912  | 0.961963317  | 5.88E-07 |
| TUCP_002474 | XLOC_104687 | ENSRNOT00000016758  | 0.952809868  | 1.70E-06 |
| TUCP_002474 | XLOC_104687 | ENSRNOT00000015213  | 0.968349198  | 2.37E-07 |
| TUCP_002474 | XLOC_104687 | ENSRNOT00000023078  | -0.959535615 | 7.98E-07 |
| TUCP_002474 | XLOC_104687 | ENSRNOT00000004999  | -0.979078946 | 3.05E-08 |



|             |             |                     |              |          |
|-------------|-------------|---------------------|--------------|----------|
| TUCP_002474 | XLOC_104687 | ENSRNOT00000009122  | -0.965088225 | 3.85E-07 |
| TUCP_002474 | XLOC_104687 | ENSRNOT00000013463  | -0.979975481 | 2.45E-08 |
| TUCP_002474 | XLOC_104687 | ENSRNOT00000039177  | 0.975747315  | 6.34E-08 |
| TUCP_002474 | XLOC_104687 | ENSRNOT00000050617  | 0.955673689  | 1.25E-06 |
| TUCP_002474 | XLOC_104687 | ENSRNOT00000013093  | 0.962577223  | 5.43E-07 |
| TUCP_002474 | XLOC_104687 | ENSRNOT00000007889  | 0.959248034  | 8.27E-07 |
| TUCP_002474 | XLOC_104687 | ENSRNOT00000047663  | 0.97510785   | 7.22E-08 |
| TUCP_002474 | XLOC_104687 | ENSRNOT00000061191  | 0.963423319  | 4.85E-07 |
| TUCP_002474 | XLOC_104687 | ENSRNOT00000005486  | 0.976385545  | 5.56E-08 |
| TUCP_002474 | XLOC_104687 | ENSRNOT00000017907  | 0.986862654  | 3.01E-09 |
| TUCP_002474 | XLOC_104687 | ENSRNOT00000025791  | 0.968090394  | 2.47E-07 |
| TUCP_002474 | XLOC_104687 | ENSRNOT00000028434  | 0.971921714  | 1.31E-07 |
| TUCP_002474 | XLOC_104687 | ENSRNOT00000025794  | 0.965391219  | 3.69E-07 |
| TUCP_002474 | XLOC_104687 | ENSRNOT000000058111 | 0.978643881  | 3.38E-08 |
| TUCP_002474 | XLOC_104687 | ENSRNOT000000050834 | 0.957458676  | 1.02E-06 |
| TUCP_002474 | XLOC_104687 | ENSRNOT00000021705  | 0.96443379   | 4.22E-07 |
| TUCP_002474 | XLOC_104687 | ENSRNOT00000009994  | 0.969332428  | 2.03E-07 |
| TUCP_002474 | XLOC_104687 | ENSRNOT00000021826  | -0.956393618 | 1.15E-06 |
| TUCP_002474 | XLOC_104687 | ENSRNOT00000002114  | 0.969094021  | 2.11E-07 |
| TUCP_002474 | XLOC_104687 | ENSRNOT00000002445  | 0.954709449  | 1.39E-06 |
| TUCP_002474 | XLOC_104687 | ENSRNOT00000009993  | 0.983833162  | 8.47E-09 |
| TUCP_002474 | XLOC_104687 | ENSRNOT00000027973  | 0.973973641  | 9.00E-08 |
| TUCP_002474 | XLOC_104687 | ENSRNOT00000024841  | 0.951572475  | 1.93E-06 |
| TUCP_002474 | XLOC_104687 | ENSRNOT00000006376  | 0.958272908  | 9.29E-07 |
| TUCP_002474 | XLOC_104687 | ENSRNOT00000005762  | 0.976418566  | 5.52E-08 |
| TUCP_002474 | XLOC_104687 | ENSRNOT00000044147  | 0.971245325  | 1.48E-07 |
| TUCP_002474 | XLOC_104687 | ENSRNOT00000027875  | -0.957563003 | 1.01E-06 |
| TUCP_002474 | XLOC_104687 | ENSRNOT00000027759  | 0.987886388  | 2.01E-09 |
| TUCP_002474 | XLOC_104687 | ENSRNOT00000018101  | 0.959553615  | 7.96E-07 |
| TUCP_002474 | XLOC_104687 | ENSRNOT00000000083  | 0.98513523   | 5.58E-09 |
| TUCP_002474 | XLOC_104687 | ENSRNOT00000028737  | 0.975130922  | 7.19E-08 |
| TUCP_002474 | XLOC_104687 | ENSRNOT00000018378  | 0.96079687   | 6.83E-07 |
| TUCP_002474 | XLOC_104687 | ENSRNOT00000033048  | 0.975271963  | 6.99E-08 |
| TUCP_002474 | XLOC_104687 | ENSRNOT00000064636  | 0.961835817  | 5.98E-07 |
| TUCP_002474 | XLOC_104687 | ENSRNOT00000028545  | 0.992688852  | 1.63E-10 |
| TUCP_002474 | XLOC_104687 | ENSRNOT0000001759   | 0.954785394  | 1.38E-06 |
| TUCP_002474 | XLOC_104687 | ENSRNOT00000028225  | -0.963550294 | 4.77E-07 |
| TUCP_002474 | XLOC_104687 | ENSRNOT00000019172  | 0.971764989  | 1.35E-07 |
| TUCP_002474 | XLOC_104687 | ENSRNOT00000049927  | 0.961251056  | 6.45E-07 |
| TUCP_002474 | XLOC_104687 | ENSRNOT00000068267  | 0.984908444  | 6.01E-09 |
| TUCP_002474 | XLOC_104687 | ENSRNOT00000020994  | 0.962957428  | 5.16E-07 |
| TUCP_002474 | XLOC_104687 | ENSRNOT00000068269  | 0.955973963  | 1.21E-06 |
| TUCP_002474 | XLOC_104687 | ENSRNOT00000019916  | 0.980928768  | 1.92E-08 |
| TUCP_002474 | XLOC_104687 | ENSRNOT00000019911  | 0.96129172   | 6.41E-07 |
| TUCP_002474 | XLOC_104687 | ENSRNOT00000016372  | 0.971577     | 1.39E-07 |
| TUCP_002474 | XLOC_104687 | ENSRNOT00000077727  | 0.961085296  | 6.58E-07 |
| TUCP_002474 | XLOC_104687 | ENSRNOT00000033015  | 0.957110885  | 1.06E-06 |
| TUCP_002474 | XLOC_104687 | ENSRNOT00000024656  | 0.954653603  | 1.40E-06 |
| TUCP_002474 | XLOC_104687 | ENSRNOT00000020272  | 0.95627755   | 1.17E-06 |
| TUCP_002474 | XLOC_104687 | ENSRNOT00000077163  | 0.957428335  | 1.03E-06 |
| TUCP_002474 | XLOC_104687 | ENSRNOT00000064700  | -0.964746519 | 4.04E-07 |

|             |             |                    |              |          |
|-------------|-------------|--------------------|--------------|----------|
| TUCP_002474 | XLOC_104687 | ENSRNOT00000025705 | -0.961367756 | 6.35E-07 |
| TUCP_002474 | XLOC_104687 | ENSRNOT00000010020 | 0.98706016   | 2.80E-09 |
| TUCP_002474 | XLOC_104687 | ENSRNOT00000074494 | 0.964340594  | 4.28E-07 |
| TUCP_002474 | XLOC_104687 | ENSRNOT00000036931 | 0.969287663  | 2.04E-07 |
| TUCP_002474 | XLOC_104687 | ENSRNOT00000049193 | 0.965204946  | 3.79E-07 |
| TUCP_002474 | XLOC_104687 | ENSRNOT00000036194 | 0.988956404  | 1.27E-09 |
| TUCP_002474 | XLOC_104687 | ENSRNOT00000000334 | 0.971810417  | 1.34E-07 |
| TUCP_002474 | XLOC_104687 | ENSRNOT00000077186 | 0.977663252  | 4.22E-08 |
| TUCP_002474 | XLOC_104687 | ENSRNOT00000081314 | 0.974429918  | 8.25E-08 |
| TUCP_002474 | XLOC_104687 | ENSRNOT00000039729 | 0.952395842  | 1.78E-06 |
| TUCP_002474 | XLOC_104687 | ENSRNOT00000014780 | 0.962344003  | 5.60E-07 |
| TUCP_002474 | XLOC_104687 | ENSRNOT00000006460 | -0.950664206 | 2.12E-06 |
| TUCP_002474 | XLOC_104687 | ENSRNOT00000014785 | 0.984053655  | 7.91E-09 |
| TUCP_002474 | XLOC_104687 | ENSRNOT00000014373 | 0.973192134  | 1.04E-07 |
| TUCP_002474 | XLOC_104687 | ENSRNOT00000026279 | 0.987549753  | 2.31E-09 |
| TUCP_002474 | XLOC_104687 | ENSRNOT00000087062 | -0.951125588 | 2.02E-06 |
| TUCP_002474 | XLOC_104687 | ENSRNOT00000003085 | 0.965739993  | 3.51E-07 |
| TUCP_002474 | XLOC_104687 | ENSRNOT00000082508 | 0.973510656  | 9.83E-08 |
| TUCP_002474 | XLOC_104687 | ENSRNOT00000007169 | 0.958239885  | 9.32E-07 |
| TUCP_002474 | XLOC_104687 | ENSRNOT00000056199 | 0.979887951  | 2.51E-08 |
| TUCP_002474 | XLOC_104687 | ENSRNOT00000065942 | 0.971075318  | 1.52E-07 |
| TUCP_002474 | XLOC_104687 | ENSRNOT00000087011 | 0.953996755  | 1.50E-06 |
| TUCP_002474 | XLOC_104687 | ENSRNOT00000071166 | -0.967433512 | 2.73E-07 |
| TUCP_002474 | XLOC_104687 | ENSRNOT00000084563 | 0.950722061  | 2.11E-06 |
| TUCP_002474 | XLOC_104687 | ENSRNOT00000074389 | 0.982546212  | 1.24E-08 |
| TUCP_002474 | XLOC_104687 | ENSRNOT00000019180 | 0.957734127  | 9.89E-07 |
| TUCP_002474 | XLOC_104687 | ENSRNOT00000066204 | 0.981451347  | 1.68E-08 |
| TUCP_002474 | XLOC_104687 | ENSRNOT00000018674 | 0.954233091  | 1.46E-06 |
| TUCP_002474 | XLOC_104687 | ENSRNOT00000076105 | 0.980096681  | 2.38E-08 |
| TUCP_002474 | XLOC_104687 | ENSRNOT00000003012 | 0.981899702  | 1.48E-08 |
| TUCP_002474 | XLOC_104687 | ENSRNOT00000022746 | 0.960783007  | 6.84E-07 |
| TUCP_002474 | XLOC_104687 | ENSRNOT00000001507 | -0.950557494 | 2.14E-06 |
| TUCP_002474 | XLOC_104687 | ENSRNOT00000073569 | 0.972332593  | 1.22E-07 |
| TUCP_002474 | XLOC_104687 | ENSRNOT00000087604 | -0.966164064 | 3.30E-07 |
| TUCP_002474 | XLOC_104687 | ENSRNOT00000091527 | 0.951736122  | 1.90E-06 |
| TUCP_002474 | XLOC_104687 | ENSRNOT00000067741 | 0.957570346  | 1.01E-06 |
| TUCP_002474 | XLOC_104687 | ENSRNOT00000005620 | 0.981215017  | 1.79E-08 |
| TUCP_002474 | XLOC_104687 | ENSRNOT00000010157 | -0.955287041 | 1.31E-06 |
| TUCP_002474 | XLOC_104687 | ENSRNOT00000017375 | 0.960516504  | 7.07E-07 |
| TUCP_002474 | XLOC_104687 | ENSRNOT00000039377 | 0.950086198  | 2.24E-06 |
| TUCP_002474 | XLOC_104687 | ENSRNOT00000019759 | -0.951121969 | 2.02E-06 |
| TUCP_002474 | XLOC_104687 | ENSRNOT00000042903 | -0.955140952 | 1.33E-06 |
| TUCP_002474 | XLOC_104687 | ENSRNOT00000000477 | 0.987886122  | 2.01E-09 |
| TUCP_002474 | XLOC_104687 | ENSRNOT00000012699 | 0.96520259   | 3.79E-07 |
| TUCP_002474 | XLOC_104687 | ENSRNOT00000091139 | 0.952802132  | 1.70E-06 |
| TUCP_002474 | XLOC_104687 | ENSRNOT00000012881 | 0.968098283  | 2.47E-07 |
| TUCP_002474 | XLOC_104687 | ENSRNOT00000035628 | 0.976914619  | 4.97E-08 |
| TUCP_002474 | XLOC_104687 | ENSRNOT00000000577 | -0.950394925 | 2.18E-06 |
| TUCP_002474 | XLOC_104687 | ENSRNOT00000000576 | 0.960536706  | 7.05E-07 |
| TUCP_002474 | XLOC_104687 | ENSRNOT00000026654 | 0.952124764  | 1.83E-06 |
| TUCP_002474 | XLOC_104687 | ENSRNOT00000065045 | -0.959794492 | 7.73E-07 |

|             |             |                     |              |          |
|-------------|-------------|---------------------|--------------|----------|
| TUCP_002474 | XLOC_104687 | ENSRNOT00000001806  | 0.954201486  | 1.47E-06 |
| TUCP_002474 | XLOC_104687 | ENSRNOT000000031487 | -0.96367246  | 4.69E-07 |
| TUCP_002474 | XLOC_104687 | ENSRNOT000000088133 | 0.974734271  | 7.77E-08 |
| TUCP_002474 | XLOC_104687 | ENSRNOT00000016254  | 0.973703348  | 9.48E-08 |
| TUCP_002474 | XLOC_104687 | ENSRNOT00000027760  | -0.950262958 | 2.20E-06 |
| TUCP_002474 | XLOC_104687 | ENSRNOT00000004007  | 0.970582607  | 1.65E-07 |
| TUCP_002474 | XLOC_104687 | ENSRNOT00000001979  | 0.967932676  | 2.53E-07 |
| TUCP_002474 | XLOC_104687 | ENSRNOT00000003715  | 0.962788682  | 5.28E-07 |
| TUCP_002474 | XLOC_104687 | ENSRNOT000000083968 | 0.969698965  | 1.91E-07 |
| TUCP_002474 | XLOC_104687 | ENSRNOT000000024119 | -0.960064992 | 7.48E-07 |
| TUCP_002474 | XLOC_104687 | ENSRNOT00000007223  | 0.95142687   | 1.96E-06 |
| TUCP_002474 | XLOC_104687 | ENSRNOT00000002837  | 0.968333556  | 2.38E-07 |
| TUCP_002474 | XLOC_104687 | ENSRNOT000000071192 | 0.958801135  | 8.72E-07 |
| TUCP_002474 | XLOC_104687 | ENSRNOT000000026726 | 0.969643953  | 1.93E-07 |
| TUCP_002474 | XLOC_104687 | ENSRNOT000000033795 | 0.970246071  | 1.75E-07 |
| TUCP_002474 | XLOC_104687 | ENSRNOT000000029996 | 0.955238874  | 1.31E-06 |
| TUCP_002474 | XLOC_104687 | ENSRNOT000000026831 | -0.964084746 | 4.43E-07 |
| TUCP_002474 | XLOC_104687 | ENSRNOT000000007821 | -0.953041632 | 1.66E-06 |
| TUCP_002474 | XLOC_104687 | ENSRNOT000000081688 | 0.951633325  | 1.92E-06 |
| TUCP_002474 | XLOC_104687 | ENSRNOT000000037039 | 0.981531777  | 1.64E-08 |
| TUCP_002474 | XLOC_104687 | ENSRNOT000000074985 | 0.954397283  | 1.44E-06 |
| TUCP_002474 | XLOC_104687 | ENSRNOT000000061304 | 0.981068848  | 1.86E-08 |
| TUCP_002474 | XLOC_104687 | ENSRNOT000000032363 | -0.959398419 | 8.12E-07 |
| TUCP_002474 | XLOC_104687 | ENSRNOT000000027200 | 0.952645262  | 1.73E-06 |
| TUCP_002474 | XLOC_104687 | ENSRNOT000000016447 | 0.977335529  | 4.53E-08 |
| TUCP_002474 | XLOC_104687 | ENSRNOT000000066888 | 0.961671767  | 6.11E-07 |
| TUCP_002474 | XLOC_104687 | ENSRNOT000000078185 | 0.962114955  | 5.77E-07 |
| TUCP_002474 | XLOC_104687 | ENSRNOT00000002151  | 0.981406379  | 1.70E-08 |
| TUCP_002474 | XLOC_104687 | ENSRNOT000000002152 | 0.954145336  | 1.48E-06 |
| TUCP_002474 | XLOC_104687 | ENSRNOT000000006824 | 0.964991755  | 3.90E-07 |
| TUCP_002474 | XLOC_104687 | ENSRNOT000000012775 | 0.954323751  | 1.45E-06 |
| TUCP_002474 | XLOC_104687 | ENSRNOT000000077040 | 0.950342469  | 2.19E-06 |
| TUCP_002474 | XLOC_104687 | ENSRNOT000000082138 | 0.959870098  | 7.66E-07 |
| TUCP_002474 | XLOC_104687 | ENSRNOT000000000177 | 0.951551486  | 1.94E-06 |
| TUCP_002474 | XLOC_104687 | ENSRNOT000000018328 | 0.968777212  | 2.22E-07 |
| TUCP_002474 | XLOC_104687 | ENSRNOT000000064290 | 0.956068881  | 1.20E-06 |
| TUCP_002474 | XLOC_104687 | ENSRNOT000000001099 | 0.957944908  | 9.65E-07 |
| TUCP_002474 | XLOC_104687 | ENSRNOT000000012657 | 0.951738188  | 1.90E-06 |
| TUCP_002474 | XLOC_104687 | ENSRNOT000000050119 | 0.976784316  | 5.11E-08 |
| TUCP_002474 | XLOC_104687 | ENSRNOT000000007790 | 0.960274437  | 7.29E-07 |
| TUCP_002474 | XLOC_104687 | ENSRNOT000000083843 | 0.968702304  | 2.24E-07 |
| TUCP_002474 | XLOC_104687 | ENSRNOT000000021548 | 0.950016201  | 2.26E-06 |
| TUCP_002474 | XLOC_104687 | ENSRNOT000000083421 | 0.958949041  | 8.57E-07 |
| TUCP_002474 | XLOC_104687 | ENSRNOT000000021716 | -0.967980142 | 2.51E-07 |
| TUCP_002474 | XLOC_104687 | ENSRNOT000000055888 | 0.95669634   | 1.11E-06 |
| TUCP_002474 | XLOC_104687 | ENSRNOT000000082429 | 0.958024672  | 9.56E-07 |
| TUCP_002474 | XLOC_104687 | ENSRNOT000000018864 | 0.956948526  | 1.08E-06 |
| TUCP_002474 | XLOC_104687 | ENSRNOT000000036838 | 0.981024464  | 1.88E-08 |
| TUCP_002474 | XLOC_104687 | ENSRNOT000000010079 | 0.955877052  | 1.22E-06 |
| TUCP_002474 | XLOC_104687 | ENSRNOT000000031261 | -0.951165548 | 2.01E-06 |
| TUCP_002474 | XLOC_104687 | ENSRNOT000000067836 | 0.964929     | 3.94E-07 |

|             |             |                    |              |          |
|-------------|-------------|--------------------|--------------|----------|
| TUCP_002474 | XLOC_104687 | ENSRNOT00000019816 | 0.964048475  | 4.45E-07 |
| TUCP_002474 | XLOC_104687 | ENSRNOT00000022117 | 0.964722129  | 4.06E-07 |
| TUCP_002474 | XLOC_104687 | ENSRNOT00000073847 | 0.964934687  | 3.94E-07 |
| TUCP_002474 | XLOC_104687 | ENSRNOT00000015518 | 0.968014036  | 2.50E-07 |
| TUCP_002474 | XLOC_104687 | ENSRNOT00000008126 | 0.952117921  | 1.83E-06 |
| TUCP_002474 | XLOC_104687 | ENSRNOT00000064901 | -0.9637995   | 4.61E-07 |
| TUCP_002474 | XLOC_104687 | ENSRNOT00000068528 | 0.952343419  | 1.79E-06 |
| TUCP_002474 | XLOC_104687 | ENSRNOT00000059487 | 0.98120898   | 1.79E-08 |
| TUCP_002474 | XLOC_104687 | ENSRNOT00000041106 | -0.961017771 | 6.64E-07 |
| TUCP_002474 | XLOC_104687 | ENSRNOT00000019713 | 0.987019822  | 2.84E-09 |
| TUCP_002474 | XLOC_104687 | ENSRNOT00000037363 | 0.950683489  | 2.11E-06 |
| TUCP_002474 | XLOC_104687 | ENSRNOT00000085214 | 0.964842505  | 3.99E-07 |
| TUCP_002474 | XLOC_104687 | ENSRNOT00000083633 | 0.966639156  | 3.08E-07 |
| TUCP_002474 | XLOC_104687 | ENSRNOT00000083632 | 0.958854101  | 8.67E-07 |
| TUCP_002474 | XLOC_104687 | ENSRNOT00000000717 | 0.962674477  | 5.36E-07 |
| TUCP_002474 | XLOC_104687 | ENSRNOT00000049048 | 0.958323549  | 9.23E-07 |
| TUCP_002474 | XLOC_104687 | ENSRNOT00000017224 | 0.977572736  | 4.30E-08 |
| TUCP_002474 | XLOC_104687 | ENSRNOT00000049725 | 0.960677886  | 6.93E-07 |
| TUCP_002474 | XLOC_104687 | ENSRNOT00000089062 | -0.967808569 | 2.58E-07 |
| TUCP_002474 | XLOC_104687 | ENSRNOT00000023872 | 0.966613741  | 3.09E-07 |
| TUCP_002474 | XLOC_104687 | ENSRNOT00000010753 | 0.987098845  | 2.75E-09 |
| TUCP_002474 | XLOC_104687 | ENSRNOT00000055281 | 0.958405342  | 9.14E-07 |
| TUCP_002474 | XLOC_104687 | ENSRNOT00000023763 | 0.987109238  | 2.74E-09 |
| TUCP_002474 | XLOC_104687 | ENSRNOT00000023641 | 0.961179684  | 6.50E-07 |
| TUCP_002474 | XLOC_104687 | ENSRNOT00000009202 | -0.969594319 | 1.94E-07 |
| TUCP_002474 | XLOC_104687 | ENSRNOT00000028893 | 0.980239777  | 2.30E-08 |
| TUCP_002474 | XLOC_104687 | ENSRNOT00000059181 | -0.973142349 | 1.05E-07 |
| TUCP_002474 | XLOC_104687 | ENSRNOT00000030798 | 0.979451997  | 2.79E-08 |
| TUCP_002474 | XLOC_104687 | ENSRNOT00000007077 | 0.950996874  | 2.05E-06 |
| TUCP_002474 | XLOC_104687 | ENSRNOT00000007079 | 0.96561481   | 3.57E-07 |
| TUCP_002474 | XLOC_104687 | ENSRNOT00000014809 | 0.974445999  | 8.22E-08 |
| TUCP_002474 | XLOC_104687 | ENSRNOT00000064849 | 0.954944389  | 1.36E-06 |
| TUCP_002474 | XLOC_104687 | ENSRNOT00000004972 | -0.9588942   | 8.63E-07 |
| TUCP_002474 | XLOC_104687 | ENSRNOT00000073564 | 0.952408295  | 1.77E-06 |
| TUCP_002474 | XLOC_104687 | ENSRNOT0000007276  | 0.957101147  | 1.06E-06 |
| TUCP_002474 | XLOC_104687 | ENSRNOT00000008905 | 0.951025989  | 2.04E-06 |
| TUCP_002474 | XLOC_104687 | ENSRNOT00000074081 | 0.958610244  | 8.92E-07 |
| TUCP_002474 | XLOC_104687 | ENSRNOT00000023017 | 0.975581641  | 6.56E-08 |
| TUCP_002474 | XLOC_104687 | ENSRNOT00000080608 | -0.970402409 | 1.70E-07 |
| TUCP_002474 | XLOC_104687 | ENSRNOT00000022065 | 0.969310901  | 2.04E-07 |
| TUCP_002474 | XLOC_104687 | ENSRNOT00000017340 | 0.972288048  | 1.23E-07 |
| TUCP_002474 | XLOC_104687 | ENSRNOT00000016740 | -0.96274158  | 5.31E-07 |
| TUCP_002474 | XLOC_104687 | ENSRNOT00000038212 | 0.978196494  | 3.74E-08 |
| TUCP_002474 | XLOC_104687 | ENSRNOT00000085458 | 0.951716808  | 1.91E-06 |
| TUCP_002474 | XLOC_104687 | ENSRNOT00000032893 | 0.951821811  | 1.88E-06 |
| TUCP_002474 | XLOC_104687 | ENSRNOT00000080677 | 0.969129021  | 2.10E-07 |
| TUCP_002474 | XLOC_104687 | ENSRNOT00000025460 | -0.959694677 | 7.83E-07 |
| TUCP_002474 | XLOC_104687 | ENSRNOT00000087033 | 0.962363143  | 5.58E-07 |
| TUCP_002474 | XLOC_104687 | ENSRNOT00000025784 | 0.95411307   | 1.48E-06 |
| TUCP_002474 | XLOC_104687 | ENSRNOT00000025782 | 0.951749063  | 1.90E-06 |
| TUCP_002474 | XLOC_104687 | ENSRNOT00000026760 | 0.97101965   | 1.53E-07 |

|             |             |                     |              |          |
|-------------|-------------|---------------------|--------------|----------|
| TUCP_002474 | XLOC_104687 | ENSRNOT00000075800  | 0.973679001  | 9.52E-08 |
| TUCP_002474 | XLOC_104687 | ENSRNOT00000024491  | 0.954054536  | 1.49E-06 |
| TUCP_002474 | XLOC_104687 | ENSRNOT00000084597  | 0.956612427  | 1.13E-06 |
| TUCP_002474 | XLOC_104687 | ENSRNOT00000063821  | 0.991443567  | 3.56E-10 |
| TUCP_002474 | XLOC_104687 | ENSRNOT00000037588  | 0.950244878  | 2.21E-06 |
| TUCP_002474 | XLOC_104687 | ENSRNOT00000027360  | 0.973675744  | 9.53E-08 |
| TUCP_002474 | XLOC_104687 | ENSRNOT00000024947  | 0.962520054  | 5.47E-07 |
| TUCP_002474 | XLOC_104687 | ENSRNOT00000041227  | 0.954425038  | 1.43E-06 |
| TUCP_002474 | XLOC_104687 | ENSRNOT00000002355  | 0.972176065  | 1.25E-07 |
| TUCP_002474 | XLOC_104687 | ENSRNOT00000024938  | 0.957301217  | 1.04E-06 |
| TUCP_002474 | XLOC_104687 | ENSRNOT00000044254  | 0.961243413  | 6.45E-07 |
| TUCP_002474 | XLOC_104687 | ENSRNOT00000044486  | 0.969648692  | 1.93E-07 |
| TUCP_002474 | XLOC_104687 | ENSRNOT00000079414  | 0.954502885  | 1.42E-06 |
| TUCP_002474 | XLOC_104687 | ENSRNOT00000079002  | 0.959334947  | 8.18E-07 |
| TUCP_002474 | XLOC_104687 | ENSRNOT00000024011  | -0.956840339 | 1.10E-06 |
| TUCP_002474 | XLOC_104687 | ENSRNOT00000089673  | 0.967834811  | 2.57E-07 |
| TUCP_002474 | XLOC_104687 | ENSRNOT00000000134  | 0.967923495  | 2.53E-07 |
| TUCP_002474 | XLOC_104687 | ENSRNOT00000005885  | 0.961079631  | 6.59E-07 |
| TUCP_002474 | XLOC_104687 | ENSRNOT00000011326  | 0.975867499  | 6.19E-08 |
| TUCP_002474 | XLOC_104687 | ENSRNOT00000080285  | 0.953687765  | 1.55E-06 |
| TUCP_002578 | XLOC_109451 | ENSRNOT00000082290  | -0.955140895 | 1.33E-06 |
| TUCP_002470 | XLOC_104512 | ENSRNOT00000074753  | 0.957963156  | 9.63E-07 |
| TUCP_002470 | XLOC_104512 | ENSRNOT00000041904  | 0.966110957  | 3.33E-07 |
| TUCP_002470 | XLOC_104512 | ENSRNOT00000080193  | -0.951825755 | 1.88E-06 |
| TUCP_002470 | XLOC_104512 | ENSRNOT00000081798  | 0.983790828  | 8.58E-09 |
| TUCP_002470 | XLOC_104512 | ENSRNOT00000083487  | 0.950502442  | 2.15E-06 |
| TUCP_002470 | XLOC_104512 | ENSRNOT00000077990  | 0.966110957  | 3.33E-07 |
| TUCP_002470 | XLOC_104512 | ENSRNOT00000038826  | 0.96886269   | 2.19E-07 |
| TUCP_002470 | XLOC_104512 | ENSRNOT00000081020  | 0.965984758  | 3.39E-07 |
| TUCP_002470 | XLOC_104512 | ENSRNOT00000077014  | 0.955486876  | 1.28E-06 |
| TUCP_002470 | XLOC_104512 | ENSRNOT00000060250  | 0.965516898  | 3.62E-07 |
| TUCP_002470 | XLOC_104512 | ENSRNOT00000091934  | 0.966110957  | 3.33E-07 |
| TUCP_002470 | XLOC_104512 | ENSRNOT00000080794  | 0.960922234  | 6.72E-07 |
| TUCP_002470 | XLOC_104512 | ENSRNOT00000014456  | 0.990144553  | 7.20E-10 |
| TUCP_002470 | XLOC_104512 | ENSRNOT00000031205  | 0.950882926  | 2.07E-06 |
| TUCP_002470 | XLOC_104512 | ENSRNOT00000079260  | 0.96659934   | 3.10E-07 |
| TUCP_002470 | XLOC_104512 | ENSRNOT00000044145  | 0.966110957  | 3.33E-07 |
| TUCP_002470 | XLOC_104512 | ENSRNOT00000088381  | 0.950675025  | 2.12E-06 |
| TUCP_002470 | XLOC_104512 | ENSRNOT00000011743  | 0.954193032  | 1.47E-06 |
| TUCP_002470 | XLOC_104512 | ENSRNOT00000089929  | 0.966110957  | 3.33E-07 |
| TUCP_002470 | XLOC_104512 | ENSRNOT00000088624  | 0.966110957  | 3.33E-07 |
| TUCP_002470 | XLOC_104512 | ENSRNOT00000085659  | 0.954105058  | 1.48E-06 |
| TUCP_002470 | XLOC_104512 | ENSRNOT00000015866  | 0.961412993  | 6.31E-07 |
| TUCP_002470 | XLOC_104512 | ENSRNOT00000034907  | 0.973259885  | 1.03E-07 |
| TUCP_002470 | XLOC_104512 | ENSRNOT000000051835 | 0.966110957  | 3.33E-07 |
| TUCP_002470 | XLOC_104512 | ENSRNOT00000079087  | 0.966110957  | 3.33E-07 |
| TUCP_002470 | XLOC_104512 | ENSRNOT00000037206  | 0.966110957  | 3.33E-07 |
| TUCP_002470 | XLOC_104512 | ENSRNOT00000015353  | 0.972239617  | 1.24E-07 |
| TUCP_002470 | XLOC_104512 | ENSRNOT00000080590  | 0.96531784   | 3.73E-07 |
| TUCP_002470 | XLOC_104512 | ENSRNOT00000027552  | 0.966137687  | 3.31E-07 |
| TUCP_002470 | XLOC_104512 | ENSRNOT00000047694  | 0.9701847    | 1.76E-07 |

|             |             |                    |              |          |
|-------------|-------------|--------------------|--------------|----------|
| TUCP_002470 | XLOC_104512 | ENSRNOT00000018923 | 0.961722326  | 6.07E-07 |
| TUCP_002470 | XLOC_104512 | ENSRNOT00000080453 | 0.964874389  | 3.97E-07 |
| TUCP_002470 | XLOC_104512 | ENSRNOT00000066839 | 0.976622648  | 5.29E-08 |
| TUCP_002470 | XLOC_104512 | ENSRNOT00000078633 | 0.966110957  | 3.33E-07 |
| TUCP_002470 | XLOC_104512 | ENSRNOT00000004128 | 0.953202588  | 1.63E-06 |
| TUCP_002470 | XLOC_104512 | ENSRNOT00000026316 | 0.971583954  | 1.39E-07 |
| TUCP_002470 | XLOC_104512 | ENSRNOT00000057729 | 0.96389863   | 4.55E-07 |
| TUCP_002470 | XLOC_104512 | ENSRNOT00000021243 | 0.950524947  | 2.15E-06 |
| TUCP_002470 | XLOC_104512 | ENSRNOT00000029634 | 0.963279588  | 4.94E-07 |
| TUCP_002470 | XLOC_104512 | ENSRNOT00000065460 | 0.966110957  | 3.33E-07 |
| TUCP_002470 | XLOC_104512 | ENSRNOT00000003817 | 0.969066146  | 2.12E-07 |
| TUCP_002470 | XLOC_104512 | ENSRNOT00000016713 | 0.966110957  | 3.33E-07 |
| TUCP_002470 | XLOC_104512 | ENSRNOT00000041074 | 0.993457827  | 9.34E-11 |
| TUCP_002470 | XLOC_104512 | ENSRNOT00000039294 | 0.966110957  | 3.33E-07 |
| TUCP_002470 | XLOC_104512 | ENSRNOT00000092913 | 0.968429205  | 2.34E-07 |
| TUCP_002804 | XLOC_118473 | ENSRNOT00000080988 | 0.956428625  | 1.15E-06 |
| TUCP_002804 | XLOC_118473 | ENSRNOT00000027407 | 0.957497774  | 1.02E-06 |
| TUCP_002804 | XLOC_118473 | ENSRNOT00000011230 | 0.971033389  | 1.53E-07 |
| TUCP_002804 | XLOC_118473 | ENSRNOT00000027083 | 0.951005012  | 2.05E-06 |
| TUCP_002804 | XLOC_118473 | ENSRNOT00000048914 | 0.95055779   | 2.14E-06 |
| TUCP_002804 | XLOC_118473 | ENSRNOT00000079633 | -0.964425436 | 4.23E-07 |
| TUCP_002804 | XLOC_118473 | ENSRNOT00000074939 | 0.969102777  | 2.11E-07 |
| TUCP_002804 | XLOC_118473 | ENSRNOT00000066041 | -0.953229084 | 1.63E-06 |
| TUCP_002804 | XLOC_118473 | ENSRNOT00000023326 | 0.974124937  | 8.75E-08 |
| TUCP_002804 | XLOC_118473 | ENSRNOT00000026065 | 0.950857449  | 2.08E-06 |
| TUCP_002804 | XLOC_118473 | ENSRNOT00000012056 | 0.968698629  | 2.25E-07 |
| TUCP_002804 | XLOC_118473 | ENSRNOT00000040650 | 0.953998406  | 1.50E-06 |
| TUCP_002804 | XLOC_118473 | ENSRNOT00000005228 | 0.95787177   | 9.74E-07 |
| TUCP_002804 | XLOC_118473 | ENSRNOT00000007164 | 0.969824195  | 1.87E-07 |
| TUCP_002804 | XLOC_118473 | ENSRNOT00000019502 | 0.954834681  | 1.37E-06 |
| TUCP_002804 | XLOC_118473 | ENSRNOT00000028856 | 0.955388674  | 1.29E-06 |
| TUCP_002804 | XLOC_118473 | ENSRNOT00000043535 | 0.985614985  | 4.74E-09 |
| TUCP_002804 | XLOC_118473 | ENSRNOT00000056813 | 0.95454293   | 1.42E-06 |
| TUCP_002804 | XLOC_118473 | ENSRNOT00000080654 | 0.963296714  | 4.93E-07 |
| TUCP_002804 | XLOC_118473 | ENSRNOT00000044742 | 0.965701561  | 3.53E-07 |
| TUCP_002804 | XLOC_118473 | ENSRNOT00000009497 | 0.954755025  | 1.38E-06 |
| TUCP_002804 | XLOC_118473 | ENSRNOT00000007185 | -0.950106042 | 2.24E-06 |
| TUCP_002804 | XLOC_118473 | ENSRNOT00000068633 | 0.959475127  | 8.04E-07 |
| TUCP_002804 | XLOC_118473 | ENSRNOT00000043554 | 0.976787653  | 5.10E-08 |
| TUCP_002804 | XLOC_118473 | ENSRNOT00000012187 | 0.964075743  | 4.44E-07 |
| TUCP_002804 | XLOC_118473 | ENSRNOT00000005942 | 0.951073665  | 2.03E-06 |
| TUCP_002804 | XLOC_118473 | ENSRNOT00000057814 | 0.959910783  | 7.62E-07 |
| TUCP_002804 | XLOC_118473 | ENSRNOT00000026789 | 0.977598328  | 4.28E-08 |
| TUCP_002804 | XLOC_118473 | ENSRNOT00000085251 | -0.951741847 | 1.90E-06 |
| TUCP_002804 | XLOC_118473 | ENSRNOT00000006055 | 0.962852346  | 5.23E-07 |
| TUCP_002804 | XLOC_118473 | ENSRNOT00000025550 | -0.960271675 | 7.29E-07 |
| TUCP_002804 | XLOC_118473 | ENSRNOT00000012977 | 0.95911192   | 8.40E-07 |
| TUCP_002804 | XLOC_118473 | ENSRNOT00000011384 | 0.95737976   | 1.03E-06 |
| TUCP_002804 | XLOC_118473 | ENSRNOT00000010418 | 0.950203474  | 2.22E-06 |
| TUCP_002804 | XLOC_118473 | ENSRNOT00000038247 | 0.962270906  | 5.65E-07 |
| TUCP_002804 | XLOC_118473 | ENSRNOT00000044628 | 0.97802124   | 3.89E-08 |

|             |             |                    |              |          |
|-------------|-------------|--------------------|--------------|----------|
| TUCP_002804 | XLOC_118473 | ENSRNOT00000011622 | 0.956664017  | 1.12E-06 |
| TUCP_002804 | XLOC_118473 | ENSRNOT00000021582 | 0.974582431  | 8.01E-08 |
| TUCP_002804 | XLOC_118473 | ENSRNOT00000022534 | 0.952169205  | 1.82E-06 |
| TUCP_002804 | XLOC_118473 | ENSRNOT00000027944 | 0.953703455  | 1.55E-06 |
| TUCP_002804 | XLOC_118473 | ENSRNOT00000016490 | 0.95646324   | 1.14E-06 |
| TUCP_002804 | XLOC_118473 | ENSRNOT00000052075 | 0.959959649  | 7.58E-07 |
| TUCP_002804 | XLOC_118473 | ENSRNOT00000010463 | 0.954320826  | 1.45E-06 |
| TUCP_002804 | XLOC_118473 | ENSRNOT00000026718 | 0.978910549  | 3.17E-08 |
| TUCP_002804 | XLOC_118473 | ENSRNOT00000000713 | 0.957161635  | 1.06E-06 |
| TUCP_002804 | XLOC_118473 | ENSRNOT00000000689 | 0.95382643   | 1.53E-06 |
| TUCP_002804 | XLOC_118473 | ENSRNOT00000017319 | 0.962824682  | 5.25E-07 |
| TUCP_002804 | XLOC_118473 | ENSRNOT00000057807 | -0.9651859   | 3.80E-07 |
| TUCP_002804 | XLOC_118473 | ENSRNOT00000026231 | 0.966133026  | 3.31E-07 |
| TUCP_002804 | XLOC_118473 | ENSRNOT00000005909 | 0.951065681  | 2.04E-06 |
| TUCP_002804 | XLOC_118473 | ENSRNOT00000051294 | 0.957616748  | 1.00E-06 |
| TUCP_002804 | XLOC_118473 | ENSRNOT00000009894 | -0.965448886 | 3.66E-07 |
| TUCP_002804 | XLOC_118473 | ENSRNOT00000067822 | 0.953906689  | 1.52E-06 |
| TUCP_002804 | XLOC_118473 | ENSRNOT00000024060 | 0.959484165  | 8.03E-07 |
| TUCP_002804 | XLOC_118473 | ENSRNOT00000008018 | 0.951147159  | 2.02E-06 |
| TUCP_002804 | XLOC_118473 | ENSRNOT00000016384 | -0.9626409   | 5.38E-07 |
| TUCP_002804 | XLOC_118473 | ENSRNOT00000054955 | -0.953098065 | 1.65E-06 |
| TUCP_002804 | XLOC_118473 | ENSRNOT00000025362 | -0.952911434 | 1.68E-06 |
| TUCP_002804 | XLOC_118473 | ENSRNOT00000010541 | 0.950451307  | 2.16E-06 |
| TUCP_002804 | XLOC_118473 | ENSRNOT00000017948 | 0.965269535  | 3.75E-07 |
| TUCP_002804 | XLOC_118473 | ENSRNOT00000015119 | -0.955683012 | 1.25E-06 |
| TUCP_002804 | XLOC_118473 | ENSRNOT00000090918 | 0.950763516  | 2.10E-06 |
| TUCP_002804 | XLOC_118473 | ENSRNOT00000023180 | 0.96044114   | 7.14E-07 |
| TUCP_002804 | XLOC_118473 | ENSRNOT00000039852 | 0.95979462   | 7.73E-07 |
| TUCP_002804 | XLOC_118473 | ENSRNOT00000015609 | 0.964617357  | 4.12E-07 |
| TUCP_002804 | XLOC_118473 | ENSRNOT00000028070 | 0.985278432  | 5.31E-09 |
| TUCP_002804 | XLOC_118473 | ENSRNOT00000034722 | 0.959572876  | 7.95E-07 |
| TUCP_002804 | XLOC_118473 | ENSRNOT00000020437 | 0.958008862  | 9.58E-07 |
| TUCP_002804 | XLOC_118473 | ENSRNOT00000027335 | 0.951220823  | 2.00E-06 |
| TUCP_002804 | XLOC_118473 | ENSRNOT00000010898 | 0.960894739  | 6.74E-07 |
| TUCP_002804 | XLOC_118473 | ENSRNOT00000073675 | -0.959856922 | 7.67E-07 |
| TUCP_002804 | XLOC_118473 | ENSRNOT00000023645 | 0.959104524  | 8.41E-07 |
| TUCP_002804 | XLOC_118473 | ENSRNOT00000001242 | 0.955811448  | 1.23E-06 |
| TUCP_002804 | XLOC_118473 | ENSRNOT00000023330 | 0.960616385  | 6.98E-07 |
| TUCP_002804 | XLOC_118473 | ENSRNOT00000078589 | -0.962104068 | 5.78E-07 |
| TUCP_002804 | XLOC_118473 | ENSRNOT00000010873 | -0.95637473  | 1.16E-06 |
| TUCP_002804 | XLOC_118473 | ENSRNOT00000006549 | -0.952177194 | 1.82E-06 |
| TUCP_002804 | XLOC_118473 | ENSRNOT00000004698 | 0.968861035  | 2.19E-07 |
| TUCP_002804 | XLOC_118473 | ENSRNOT00000082388 | 0.971369183  | 1.44E-07 |
| TUCP_002804 | XLOC_118473 | ENSRNOT00000045083 | 0.958622505  | 8.91E-07 |
| TUCP_002804 | XLOC_118473 | ENSRNOT00000014537 | 0.952891941  | 1.69E-06 |
| TUCP_002804 | XLOC_118473 | ENSRNOT00000077555 | 0.977172752  | 4.70E-08 |
| TUCP_002804 | XLOC_118473 | ENSRNOT00000046323 | 0.950363396  | 2.18E-06 |
| TUCP_002804 | XLOC_118473 | ENSRNOT00000017021 | 0.961147784  | 6.53E-07 |
| TUCP_002804 | XLOC_118473 | ENSRNOT00000021408 | 0.954525273  | 1.42E-06 |
| TUCP_002804 | XLOC_118473 | ENSRNOT00000009440 | -0.960965514 | 6.68E-07 |
| TUCP_002804 | XLOC_118473 | ENSRNOT00000087429 | 0.953558503  | 1.57E-06 |

|             |             |                    |              |          |
|-------------|-------------|--------------------|--------------|----------|
| TUCP_002804 | XLOC_118473 | ENSRNOT00000009683 | 0.958697764  | 8.83E-07 |
| TUCP_002804 | XLOC_118473 | ENSRNOT00000048490 | -0.960332761 | 7.24E-07 |
| TUCP_002804 | XLOC_118473 | ENSRNOT00000084088 | 0.955086856  | 1.33E-06 |
| TUCP_002804 | XLOC_118473 | ENSRNOT00000089193 | 0.952400224  | 1.78E-06 |
| TUCP_002804 | XLOC_118473 | ENSRNOT00000058116 | -0.962929348 | 5.18E-07 |
| TUCP_002804 | XLOC_118473 | ENSRNOT00000064900 | 0.965992572  | 3.38E-07 |
| TUCP_002804 | XLOC_118473 | ENSRNOT00000002771 | 0.954500505  | 1.42E-06 |
| TUCP_002804 | XLOC_118473 | ENSRNOT00000024322 | 0.961751492  | 6.05E-07 |
| TUCP_002804 | XLOC_118473 | ENSRNOT00000074075 | 0.956169377  | 1.18E-06 |
| TUCP_002804 | XLOC_118473 | ENSRNOT00000013301 | -0.974219607 | 8.59E-08 |
| TUCP_002804 | XLOC_118473 | ENSRNOT00000078390 | -0.954377628 | 1.44E-06 |
| TUCP_002804 | XLOC_118473 | ENSRNOT00000090170 | 0.979908267  | 2.49E-08 |
| TUCP_002804 | XLOC_118473 | ENSRNOT00000027452 | 0.951225465  | 2.00E-06 |
| TUCP_002804 | XLOC_118473 | ENSRNOT00000017181 | -0.951563522 | 1.94E-06 |
| TUCP_002804 | XLOC_118473 | ENSRNOT00000049538 | 0.95894898   | 8.57E-07 |
| TUCP_002804 | XLOC_118473 | ENSRNOT00000070933 | 0.960426598  | 7.15E-07 |
| TUCP_002804 | XLOC_118473 | ENSRNOT00000004274 | -0.950926482 | 2.06E-06 |
| TUCP_002804 | XLOC_118473 | ENSRNOT00000087725 | 0.985600879  | 4.76E-09 |
| TUCP_002804 | XLOC_118473 | ENSRNOT00000046594 | 0.961223073  | 6.47E-07 |
| TUCP_002804 | XLOC_118473 | ENSRNOT00000025936 | -0.963539357 | 4.77E-07 |
| TUCP_002804 | XLOC_118473 | ENSRNOT00000027125 | -0.963285565 | 4.94E-07 |
| TUCP_002804 | XLOC_118473 | ENSRNOT00000086329 | 0.95603305   | 1.20E-06 |
| TUCP_002804 | XLOC_118473 | ENSRNOT00000036951 | 0.958104146  | 9.47E-07 |
| TUCP_002804 | XLOC_118473 | ENSRNOT00000072416 | -0.952282859 | 1.80E-06 |
| TUCP_002804 | XLOC_118473 | ENSRNOT00000009691 | 0.96016359   | 7.39E-07 |
| TUCP_002804 | XLOC_118473 | ENSRNOT00000002173 | -0.959881101 | 7.65E-07 |
| TUCP_002804 | XLOC_118473 | ENSRNOT00000090420 | -0.960793728 | 6.83E-07 |
| TUCP_002804 | XLOC_118473 | ENSRNOT00000026653 | 0.950138038  | 2.23E-06 |
| TUCP_002804 | XLOC_118473 | ENSRNOT00000078929 | 0.978167868  | 3.77E-08 |
| TUCP_002804 | XLOC_118473 | ENSRNOT00000043953 | 0.950069175  | 2.25E-06 |
| TUCP_002804 | XLOC_118473 | ENSRNOT00000021061 | -0.956696147 | 1.12E-06 |
| TUCP_002804 | XLOC_118473 | ENSRNOT00000019554 | 0.952696748  | 1.72E-06 |
| TUCP_002804 | XLOC_118473 | ENSRNOT00000092158 | 0.966595358  | 3.10E-07 |
| TUCP_002804 | XLOC_118473 | ENSRNOT00000017422 | -0.958223165 | 9.34E-07 |
| TUCP_002804 | XLOC_118473 | ENSRNOT00000027666 | 0.963855874  | 4.57E-07 |
| TUCP_002804 | XLOC_118473 | ENSRNOT00000051953 | -0.950659926 | 2.12E-06 |
| TUCP_002804 | XLOC_118473 | ENSRNOT00000064840 | 0.960185144  | 7.37E-07 |
| TUCP_002804 | XLOC_118473 | ENSRNOT00000077894 | -0.956000028 | 1.21E-06 |
| TUCP_002804 | XLOC_118473 | ENSRNOT00000085596 | 0.961890633  | 5.94E-07 |
| TUCP_002804 | XLOC_118473 | ENSRNOT00000090925 | 0.966880573  | 2.97E-07 |
| TUCP_002804 | XLOC_118473 | ENSRNOT00000000728 | -0.964638725 | 4.10E-07 |
| TUCP_002804 | XLOC_118473 | ENSRNOT00000054980 | 0.965129863  | 3.83E-07 |
| TUCP_002804 | XLOC_118473 | ENSRNOT00000074653 | 0.9703024    | 1.73E-07 |
| TUCP_002804 | XLOC_118473 | ENSRNOT00000031230 | 0.956452846  | 1.15E-06 |
| TUCP_002804 | XLOC_118473 | ENSRNOT00000041096 | 0.961821319  | 5.99E-07 |
| TUCP_002804 | XLOC_118473 | ENSRNOT00000001923 | 0.963298977  | 4.93E-07 |
| TUCP_002804 | XLOC_118473 | ENSRNOT00000080110 | 0.95014586   | 2.23E-06 |
| TUCP_002804 | XLOC_118473 | ENSRNOT00000010218 | 0.968363142  | 2.37E-07 |
| TUCP_002804 | XLOC_118473 | ENSRNOT00000066028 | 0.978893891  | 3.18E-08 |
| TUCP_002804 | XLOC_118473 | ENSRNOT00000005478 | -0.952623973 | 1.74E-06 |
| TUCP_002804 | XLOC_118473 | ENSRNOT0000002292  | 0.970648235  | 1.63E-07 |



|             |             |                    |              |          |
|-------------|-------------|--------------------|--------------|----------|
| TUCP_002804 | XLOC_118473 | ENSRNOT00000086065 | 0.95237607   | 1.78E-06 |
| TUCP_002804 | XLOC_118473 | ENSRNOT00000035491 | 0.967761398  | 2.60E-07 |
| TUCP_002804 | XLOC_118473 | ENSRNOT00000086336 | 0.954815721  | 1.37E-06 |
| TUCP_002804 | XLOC_118473 | ENSRNOT00000008427 | -0.970160311 | 1.77E-07 |
| TUCP_002804 | XLOC_118473 | ENSRNOT00000067181 | 0.962674076  | 5.36E-07 |
| TUCP_002804 | XLOC_118473 | ENSRNOT00000034704 | 0.958437326  | 9.11E-07 |
| TUCP_002804 | XLOC_118473 | ENSRNOT00000082174 | 0.967209401  | 2.83E-07 |
| TUCP_002804 | XLOC_118473 | ENSRNOT00000010986 | 0.96834141   | 2.37E-07 |
| TUCP_002804 | XLOC_118473 | ENSRNOT00000009900 | -0.956412855 | 1.15E-06 |
| TUCP_002804 | XLOC_118473 | ENSRNOT00000004412 | 0.96220041   | 5.70E-07 |
| TUCP_002804 | XLOC_118473 | ENSRNOT00000066968 | 0.959734563  | 7.79E-07 |
| TUCP_002804 | XLOC_118473 | ENSRNOT00000077465 | 0.974748644  | 7.75E-08 |
| TUCP_002804 | XLOC_118473 | ENSRNOT00000026280 | 0.960569991  | 7.02E-07 |
| TUCP_002804 | XLOC_118473 | ENSRNOT00000061100 | 0.959101317  | 8.41E-07 |
| TUCP_002804 | XLOC_118473 | ENSRNOT00000084595 | 0.953510468  | 1.58E-06 |
| TUCP_002804 | XLOC_118473 | ENSRNOT00000024941 | 0.954995543  | 1.35E-06 |
| TUCP_002804 | XLOC_118473 | ENSRNOT00000022862 | 0.957505393  | 1.02E-06 |
| TUCP_002804 | XLOC_118473 | ENSRNOT00000026457 | 0.954236072  | 1.46E-06 |
| TUCP_002804 | XLOC_118473 | ENSRNOT00000023428 | 0.961041925  | 6.62E-07 |
| TUCP_002804 | XLOC_118473 | ENSRNOT00000011041 | 0.953100147  | 1.65E-06 |
| TUCP_002804 | XLOC_118473 | ENSRNOT00000021285 | 0.952033599  | 1.84E-06 |
| TUCP_002804 | XLOC_118473 | ENSRNOT00000048029 | 0.951269003  | 1.99E-06 |
| TUCP_002804 | XLOC_118473 | ENSRNOT00000010433 | 0.950998617  | 2.05E-06 |
| TUCP_002804 | XLOC_118473 | ENSRNOT00000011682 | -0.963721342 | 4.66E-07 |
| TUCP_002804 | XLOC_118473 | ENSRNOT00000083799 | 0.959744513  | 7.78E-07 |
| TUCP_002804 | XLOC_118473 | ENSRNOT00000024548 | 0.969772329  | 1.89E-07 |
| TUCP_002804 | XLOC_118473 | ENSRNOT00000006499 | 0.953877385  | 1.52E-06 |
| TUCP_002805 | XLOC_118501 | ENSRNOT00000079449 | -0.959848107 | 7.68E-07 |
| TUCP_002774 | XLOC_117242 | ENSRNOT00000000008 | 0.989114125  | 1.18E-09 |
| TUCP_002774 | XLOC_117242 | ENSRNOT00000060048 | 0.986656697  | 3.26E-09 |
| TUCP_002774 | XLOC_117242 | ENSRNOT00000082304 | 0.996003582  | 7.97E-12 |
| TUCP_002774 | XLOC_117242 | ENSRNOT00000006219 | 0.989114125  | 1.18E-09 |
| TUCP_002774 | XLOC_117242 | ENSRNOT00000065376 | 0.989114125  | 1.18E-09 |
| TUCP_002774 | XLOC_117242 | ENSRNOT00000081433 | 0.995934073  | 8.69E-12 |
| TUCP_002774 | XLOC_117242 | ENSRNOT00000083575 | 0.989114125  | 1.18E-09 |
| TUCP_002774 | XLOC_117242 | ENSRNOT00000087739 | 0.989114125  | 1.18E-09 |
| TUCP_002774 | XLOC_117242 | ENSRNOT00000079826 | 0.989114125  | 1.18E-09 |
| TUCP_002774 | XLOC_117242 | ENSRNOT00000025770 | 0.979660248  | 2.65E-08 |
| TUCP_002774 | XLOC_117242 | ENSRNOT00000088244 | 0.975909669  | 6.14E-08 |
| TUCP_002774 | XLOC_117242 | ENSRNOT00000048523 | 0.989114125  | 1.18E-09 |
| TUCP_002774 | XLOC_117242 | ENSRNOT00000020229 | 0.968803766  | 2.21E-07 |
| TUCP_002774 | XLOC_117242 | ENSRNOT00000026428 | 0.986605112  | 3.32E-09 |
| TUCP_002774 | XLOC_117242 | ENSRNOT00000085673 | 0.989114125  | 1.18E-09 |
| TUCP_002774 | XLOC_117242 | ENSRNOT00000072972 | 0.959844999  | 7.69E-07 |
| TUCP_002774 | XLOC_117242 | ENSRNOT00000050573 | 0.989114125  | 1.18E-09 |
| TUCP_002774 | XLOC_117242 | ENSRNOT00000089876 | -0.968347211 | 2.37E-07 |
| TUCP_002774 | XLOC_117242 | ENSRNOT00000074378 | 0.986794797  | 3.09E-09 |
| TUCP_002774 | XLOC_117242 | ENSRNOT00000093571 | 0.989114125  | 1.18E-09 |
| TUCP_002774 | XLOC_117242 | ENSRNOT00000090581 | 0.989114125  | 1.18E-09 |
| TUCP_002774 | XLOC_117242 | ENSRNOT00000076239 | 0.985479999  | 4.96E-09 |
| TUCP_002774 | XLOC_117242 | ENSRNOT00000065485 | 0.989114125  | 1.18E-09 |

|             |             |                     |              |          |
|-------------|-------------|---------------------|--------------|----------|
| TUCP_002774 | XLOC_117242 | ENSRNOT00000006356  | 0.987585778  | 2.27E-09 |
| TUCP_002774 | XLOC_117242 | ENSRNOT000000087199 | 0.963516193  | 4.79E-07 |
| TUCP_002774 | XLOC_117242 | ENSRNOT000000022091 | 0.989114125  | 1.18E-09 |
| TUCP_002774 | XLOC_117242 | ENSRNOT000000064764 | 0.97892993   | 3.16E-08 |
| TUCP_002774 | XLOC_117242 | ENSRNOT000000076927 | 0.956827811  | 1.10E-06 |
| TUCP_002774 | XLOC_117242 | ENSRNOT000000092395 | 0.98776511   | 2.12E-09 |
| TUCP_002775 | XLOC_117255 | ENSRNOT000000036527 | 0.970101149  | 1.79E-07 |
| TUCP_002775 | XLOC_117255 | ENSRNOT000000081047 | 0.951382669  | 1.97E-06 |
| TUCP_002775 | XLOC_117255 | ENSRNOT000000017021 | 0.956730601  | 1.11E-06 |
| TUCP_002775 | XLOC_117255 | ENSRNOT000000087592 | 0.960656866  | 6.95E-07 |
| TUCP_002775 | XLOC_117255 | ENSRNOT000000080110 | 0.963257957  | 4.96E-07 |
| TUCP_002775 | XLOC_117255 | ENSRNOT000000051991 | 0.951883237  | 1.87E-06 |
| TUCP_002775 | XLOC_117255 | ENSRNOT000000008655 | 0.960811858  | 6.81E-07 |
| TUCP_002775 | XLOC_117255 | ENSRNOT000000005228 | 0.964648115  | 4.10E-07 |
| TUCP_002775 | XLOC_117255 | ENSRNOT000000087429 | 0.95993969   | 7.60E-07 |
| TUCP_002775 | XLOC_117255 | ENSRNOT000000073235 | 0.95588474   | 1.22E-06 |
| TUCP_002775 | XLOC_117255 | ENSRNOT000000024149 | 0.953999944  | 1.50E-06 |
| TUCP_002775 | XLOC_117255 | ENSRNOT000000052224 | 0.957617083  | 1.00E-06 |
| TUCP_002775 | XLOC_117255 | ENSRNOT000000033420 | 0.959320389  | 8.19E-07 |
| TUCP_002775 | XLOC_117255 | ENSRNOT000000012895 | 0.956026095  | 1.20E-06 |
| TUCP_002775 | XLOC_117255 | ENSRNOT000000026915 | 0.979856546  | 2.53E-08 |
| TUCP_002775 | XLOC_117255 | ENSRNOT000000015116 | 0.959427761  | 8.09E-07 |
| TUCP_002775 | XLOC_117255 | ENSRNOT000000027454 | 0.969703669  | 1.91E-07 |
| TUCP_002775 | XLOC_117255 | ENSRNOT000000066670 | 0.954620992  | 1.40E-06 |
| TUCP_002775 | XLOC_117255 | ENSRNOT000000012187 | 0.960924745  | 6.72E-07 |
| TUCP_002775 | XLOC_117255 | ENSRNOT000000005942 | 0.956031273  | 1.20E-06 |
| TUCP_002775 | XLOC_117255 | ENSRNOT000000017753 | 0.951626032  | 1.92E-06 |
| TUCP_002775 | XLOC_117255 | ENSRNOT000000014261 | 0.95978116   | 7.75E-07 |
| TUCP_002775 | XLOC_117255 | ENSRNOT000000085251 | -0.951801955 | 1.89E-06 |
| TUCP_002775 | XLOC_117255 | ENSRNOT000000022485 | 0.958657703  | 8.87E-07 |
| TUCP_002775 | XLOC_117255 | ENSRNOT000000043535 | 0.957913215  | 9.69E-07 |
| TUCP_002775 | XLOC_117255 | ENSRNOT000000028646 | 0.950688029  | 2.11E-06 |
| TUCP_002775 | XLOC_117255 | ENSRNOT000000044628 | 0.950362719  | 2.18E-06 |
| TUCP_002775 | XLOC_117255 | ENSRNOT000000010898 | 0.950249897  | 2.21E-06 |
| TUCP_002775 | XLOC_117255 | ENSRNOT000000023428 | 0.955781104  | 1.24E-06 |
| TUCP_002775 | XLOC_117255 | ENSRNOT000000021285 | 0.950747735  | 2.10E-06 |
| TUCP_002800 | XLOC_118219 | ENSRNOT000000006246 | 0.979307956  | 2.89E-08 |
| TUCP_002800 | XLOC_118219 | ENSRNOT000000027891 | 0.965819486  | 3.47E-07 |
| TUCP_002800 | XLOC_118219 | ENSRNOT000000045937 | 0.956477319  | 1.14E-06 |
| TUCP_002800 | XLOC_118219 | ENSRNOT000000080666 | -0.951552932 | 1.94E-06 |
| TUCP_002800 | XLOC_118219 | ENSRNOT000000066764 | 0.97826078   | 3.69E-08 |
| TUCP_002800 | XLOC_118219 | ENSRNOT000000026677 | 0.966846952  | 2.98E-07 |
| TUCP_002800 | XLOC_118219 | ENSRNOT000000075656 | 0.966133294  | 3.31E-07 |
| TUCP_002800 | XLOC_118219 | ENSRNOT000000013745 | 0.951353224  | 1.98E-06 |
| TUCP_002800 | XLOC_118219 | ENSRNOT000000035523 | 0.971670147  | 1.37E-07 |
| TUCP_002800 | XLOC_118219 | ENSRNOT000000011907 | 0.990173764  | 7.10E-10 |
| TUCP_002800 | XLOC_118219 | ENSRNOT000000082611 | 0.954173318  | 1.47E-06 |
| TUCP_002800 | XLOC_118219 | ENSRNOT000000024959 | 0.969285819  | 2.04E-07 |
| TUCP_002800 | XLOC_118219 | ENSRNOT000000083702 | 0.962877607  | 5.22E-07 |
| TUCP_002800 | XLOC_118219 | ENSRNOT000000033719 | 0.954571219  | 1.41E-06 |
| TUCP_002800 | XLOC_118219 | ENSRNOT000000015568 | 0.975399304  | 6.81E-08 |

|             |             |                    |              |          |
|-------------|-------------|--------------------|--------------|----------|
| TUCP_002800 | XLOC_118219 | ENSRNOT00000089228 | -0.951270598 | 1.99E-06 |
| TUCP_002800 | XLOC_118219 | ENSRNOT00000013342 | 0.955165884  | 1.32E-06 |
| TUCP_002800 | XLOC_118219 | ENSRNOT00000003085 | 0.956760954  | 1.11E-06 |
| TUCP_002800 | XLOC_118219 | ENSRNOT00000013058 | -0.952183013 | 1.82E-06 |
| TUCP_002800 | XLOC_118219 | ENSRNOT00000022633 | 0.983531564  | 9.28E-09 |
| TUCP_002800 | XLOC_118219 | ENSRNOT00000060607 | 0.950896537  | 2.07E-06 |
| TUCP_002800 | XLOC_118219 | ENSRNOT00000014163 | 0.955701463  | 1.25E-06 |
| TUCP_002800 | XLOC_118219 | ENSRNOT00000079644 | 0.95387282   | 1.52E-06 |
| TUCP_002800 | XLOC_118219 | ENSRNOT00000029620 | 0.97645012   | 5.48E-08 |
| TUCP_002800 | XLOC_118219 | ENSRNOT00000038178 | 0.96398568   | 4.49E-07 |
| TUCP_002800 | XLOC_118219 | ENSRNOT00000002530 | -0.95420339  | 1.47E-06 |
| TUCP_002800 | XLOC_118219 | ENSRNOT00000020267 | -0.958690164 | 8.84E-07 |
| TUCP_002800 | XLOC_118219 | ENSRNOT00000020265 | 0.976872605  | 5.01E-08 |
| TUCP_002800 | XLOC_118219 | ENSRNOT00000019501 | 0.971638935  | 1.38E-07 |
| TUCP_002800 | XLOC_118219 | ENSRNOT00000009173 | -0.953244123 | 1.63E-06 |
| TUCP_002800 | XLOC_118219 | ENSRNOT00000045233 | 0.962140927  | 5.75E-07 |
| TUCP_002800 | XLOC_118219 | ENSRNOT00000018696 | 0.954159815  | 1.48E-06 |
| TUCP_002800 | XLOC_118219 | ENSRNOT00000091050 | 0.963394081  | 4.87E-07 |
| TUCP_002800 | XLOC_118219 | ENSRNOT00000001196 | 0.977329404  | 4.54E-08 |
| TUCP_002800 | XLOC_118219 | ENSRNOT00000046126 | 0.959234932  | 8.28E-07 |
| TUCP_002800 | XLOC_118219 | ENSRNOT00000023033 | 0.963740682  | 4.64E-07 |
| TUCP_002800 | XLOC_118219 | ENSRNOT00000000334 | 0.960167944  | 7.39E-07 |
| TUCP_002800 | XLOC_118219 | ENSRNOT00000076105 | 0.96739602   | 2.75E-07 |
| TUCP_002800 | XLOC_118219 | ENSRNOT00000068683 | 0.980084223  | 2.39E-08 |
| TUCP_002800 | XLOC_118219 | ENSRNOT00000010252 | 0.976755548  | 5.14E-08 |
| TUCP_002800 | XLOC_118219 | ENSRNOT00000027949 | 0.961651143  | 6.12E-07 |
| TUCP_002800 | XLOC_118219 | ENSRNOT00000067566 | 0.950271622  | 2.20E-06 |
| TUCP_002800 | XLOC_118219 | ENSRNOT00000013043 | 0.979529555  | 2.74E-08 |
| TUCP_002800 | XLOC_118219 | ENSRNOT00000034603 | 0.977585633  | 4.29E-08 |
| TUCP_002800 | XLOC_118219 | ENSRNOT00000015986 | 0.964748742  | 4.04E-07 |
| TUCP_002800 | XLOC_118219 | ENSRNOT00000030975 | 0.970980056  | 1.54E-07 |
| TUCP_002800 | XLOC_118219 | ENSRNOT00000073569 | 0.954789606  | 1.38E-06 |
| TUCP_002800 | XLOC_118219 | ENSRNOT00000050119 | 0.956402903  | 1.15E-06 |
| TUCP_002800 | XLOC_118219 | ENSRNOT00000027301 | 0.973763784  | 9.37E-08 |
| TUCP_002800 | XLOC_118219 | ENSRNOT00000051349 | 0.958234368  | 9.33E-07 |
| TUCP_002800 | XLOC_118219 | ENSRNOT00000022648 | 0.980210635  | 2.31E-08 |
| TUCP_002800 | XLOC_118219 | ENSRNOT00000006765 | 0.956147757  | 1.19E-06 |
| TUCP_002800 | XLOC_118219 | ENSRNOT00000089309 | 0.984165833  | 7.63E-09 |
| TUCP_002800 | XLOC_118219 | ENSRNOT00000009313 | 0.976092737  | 5.91E-08 |
| TUCP_002800 | XLOC_118219 | ENSRNOT00000015247 | 0.955605494  | 1.26E-06 |
| TUCP_002800 | XLOC_118219 | ENSRNOT00000030373 | 0.973754828  | 9.38E-08 |
| TUCP_002800 | XLOC_118219 | ENSRNOT00000057045 | 0.952962838  | 1.68E-06 |
| TUCP_002800 | XLOC_118219 | ENSRNOT00000012699 | 0.960898763  | 6.74E-07 |
| TUCP_002800 | XLOC_118219 | ENSRNOT00000017375 | 0.965375998  | 3.70E-07 |
| TUCP_002800 | XLOC_118219 | ENSRNOT00000009247 | 0.966344138  | 3.21E-07 |
| TUCP_002800 | XLOC_118219 | ENSRNOT00000082427 | 0.985293405  | 5.29E-09 |
| TUCP_002800 | XLOC_118219 | ENSRNOT00000029635 | 0.985165085  | 5.52E-09 |
| TUCP_002800 | XLOC_118219 | ENSRNOT00000001036 | 0.973209373  | 1.04E-07 |
| TUCP_002800 | XLOC_118219 | ENSRNOT00000024568 | 0.969555064  | 1.96E-07 |
| TUCP_002800 | XLOC_118219 | ENSRNOT00000010620 | 0.983746917  | 8.69E-09 |
| TUCP_002800 | XLOC_118219 | ENSRNOT00000011731 | 0.963748665  | 4.64E-07 |

|             |             |                    |              |          |
|-------------|-------------|--------------------|--------------|----------|
| TUCP_002800 | XLOC_118219 | ENSRNOT00000082116 | 0.957641531  | 1.00E-06 |
| TUCP_002800 | XLOC_118219 | ENSRNOT00000084674 | 0.970664297  | 1.63E-07 |
| TUCP_002800 | XLOC_118219 | ENSRNOT00000083876 | 0.970144571  | 1.78E-07 |
| TUCP_002800 | XLOC_118219 | ENSRNOT0000002936  | 0.965942772  | 3.41E-07 |
| TUCP_002800 | XLOC_118219 | ENSRNOT00000032249 | 0.967924448  | 2.53E-07 |
| TUCP_002800 | XLOC_118219 | ENSRNOT00000009319 | 0.967285365  | 2.79E-07 |
| TUCP_002800 | XLOC_118219 | ENSRNOT00000003412 | 0.964950297  | 3.93E-07 |
| TUCP_002800 | XLOC_118219 | ENSRNOT00000014684 | 0.972033276  | 1.29E-07 |
| TUCP_002800 | XLOC_118219 | ENSRNOT00000007771 | 0.958695589  | 8.83E-07 |
| TUCP_002800 | XLOC_118219 | ENSRNOT00000091863 | 0.962312603  | 5.62E-07 |
| TUCP_002800 | XLOC_118219 | ENSRNOT00000081530 | -0.968349139 | 2.37E-07 |
| TUCP_002800 | XLOC_118219 | ENSRNOT00000090303 | 0.977388274  | 4.48E-08 |
| TUCP_002800 | XLOC_118219 | ENSRNOT00000007358 | 0.966446257  | 3.17E-07 |
| TUCP_002800 | XLOC_118219 | ENSRNOT00000022000 | 0.952289299  | 1.80E-06 |
| TUCP_002800 | XLOC_118219 | ENSRNOT00000015618 | 0.968110309  | 2.46E-07 |
| TUCP_002800 | XLOC_118219 | ENSRNOT00000040629 | -0.952271136 | 1.80E-06 |
| TUCP_002800 | XLOC_118219 | ENSRNOT00000000049 | 0.959678564  | 7.84E-07 |
| TUCP_002800 | XLOC_118219 | ENSRNOT00000074286 | -0.954158049 | 1.48E-06 |
| TUCP_002800 | XLOC_118219 | ENSRNOT00000075934 | 0.950421119  | 2.17E-06 |
| TUCP_002800 | XLOC_118219 | ENSRNOT00000046888 | 0.966037412  | 3.36E-07 |
| TUCP_002800 | XLOC_118219 | ENSRNOT00000006111 | 0.975922551  | 6.12E-08 |
| TUCP_002800 | XLOC_118219 | ENSRNOT00000015576 | 0.983877974  | 8.35E-09 |
| TUCP_002800 | XLOC_118219 | ENSRNOT00000015579 | 0.975922102  | 6.12E-08 |
| TUCP_002800 | XLOC_118219 | ENSRNOT00000037339 | 0.962018877  | 5.84E-07 |
| TUCP_002800 | XLOC_118219 | ENSRNOT00000019680 | 0.961465068  | 6.27E-07 |
| TUCP_002800 | XLOC_118219 | ENSRNOT00000055062 | 0.971934005  | 1.31E-07 |
| TUCP_002800 | XLOC_118219 | ENSRNOT00000005644 | 0.970032731  | 1.81E-07 |
| TUCP_002800 | XLOC_118219 | ENSRNOT00000047634 | 0.98273892   | 1.17E-08 |
| TUCP_002800 | XLOC_118219 | ENSRNOT00000054897 | -0.972495984 | 1.18E-07 |
| TUCP_002800 | XLOC_118219 | ENSRNOT00000078816 | -0.954652947 | 1.40E-06 |
| TUCP_002800 | XLOC_118219 | ENSRNOT00000025197 | 0.991994168  | 2.56E-10 |
| TUCP_002800 | XLOC_118219 | ENSRNOT00000083964 | 0.950135774  | 2.23E-06 |
| TUCP_002800 | XLOC_118219 | ENSRNOT00000012646 | 0.965104248  | 3.84E-07 |
| TUCP_002800 | XLOC_118219 | ENSRNOT00000001759 | 0.976317582  | 5.64E-08 |
| TUCP_002800 | XLOC_118219 | ENSRNOT00000001228 | 0.956935372  | 1.08E-06 |
| TUCP_002800 | XLOC_118219 | ENSRNOT00000091866 | 0.964524735  | 4.17E-07 |
| TUCP_002800 | XLOC_118219 | ENSRNOT00000081327 | 0.981483138  | 1.66E-08 |
| TUCP_002800 | XLOC_118219 | ENSRNOT00000032363 | -0.954299447 | 1.45E-06 |
| TUCP_002800 | XLOC_118219 | ENSRNOT00000083995 | 0.984896515  | 6.03E-09 |
| TUCP_002800 | XLOC_118219 | ENSRNOT00000016447 | 0.965756544  | 3.50E-07 |
| TUCP_002800 | XLOC_118219 | ENSRNOT00000033984 | 0.973826892  | 9.26E-08 |
| TUCP_002800 | XLOC_118219 | ENSRNOT00000033048 | 0.952231578  | 1.81E-06 |
| TUCP_002800 | XLOC_118219 | ENSRNOT00000018511 | 0.975747139  | 6.34E-08 |
| TUCP_002800 | XLOC_118219 | ENSRNOT00000066888 | 0.965608696  | 3.58E-07 |
| TUCP_002800 | XLOC_118219 | ENSRNOT00000007169 | 0.975787493  | 6.29E-08 |
| TUCP_002800 | XLOC_118219 | ENSRNOT00000037844 | 0.951059525  | 2.04E-06 |
| TUCP_002800 | XLOC_118219 | ENSRNOT0000007889  | 0.980627495  | 2.08E-08 |
| TUCP_002800 | XLOC_118219 | ENSRNOT00000044983 | 0.954864997  | 1.37E-06 |
| TUCP_002800 | XLOC_118219 | ENSRNOT00000084927 | 0.959505193  | 8.01E-07 |
| TUCP_002800 | XLOC_118219 | ENSRNOT00000056166 | -0.969623495 | 1.94E-07 |
| TUCP_002800 | XLOC_118219 | ENSRNOT00000036585 | -0.961498812 | 6.25E-07 |

|             |             |                    |              |          |
|-------------|-------------|--------------------|--------------|----------|
| TUCP_002800 | XLOC_118219 | ENSRNOT00000078746 | 0.984951863  | 5.93E-09 |
| TUCP_002800 | XLOC_118219 | ENSRNOT00000091272 | 0.951977328  | 1.86E-06 |
| TUCP_002800 | XLOC_118219 | ENSRNOT00000016730 | 0.977986142  | 3.92E-08 |
| TUCP_002800 | XLOC_118219 | ENSRNOT00000065764 | 0.961766106  | 6.03E-07 |
| TUCP_002800 | XLOC_118219 | ENSRNOT00000023856 | 0.973646813  | 9.58E-08 |
| TUCP_002800 | XLOC_118219 | ENSRNOT00000010264 | 0.95003236   | 2.26E-06 |
| TUCP_002800 | XLOC_118219 | ENSRNOT00000029819 | 0.967209244  | 2.83E-07 |
| TUCP_002800 | XLOC_118219 | ENSRNOT00000092075 | 0.952162127  | 1.82E-06 |
| TUCP_002800 | XLOC_118219 | ENSRNOT00000011371 | 0.959889326  | 7.64E-07 |
| TUCP_002800 | XLOC_118219 | ENSRNOT00000071927 | 0.968474363  | 2.33E-07 |
| TUCP_002800 | XLOC_118219 | ENSRNOT00000014824 | 0.97541703   | 6.78E-08 |
| TUCP_002800 | XLOC_118219 | ENSRNOT00000018549 | 0.974433211  | 8.24E-08 |
| TUCP_002800 | XLOC_118219 | ENSRNOT00000086541 | 0.976647071  | 5.26E-08 |
| TUCP_002800 | XLOC_118219 | ENSRNOT00000019311 | 0.961995861  | 5.86E-07 |
| TUCP_002800 | XLOC_118219 | ENSRNOT00000012657 | 0.95498103   | 1.35E-06 |
| TUCP_002800 | XLOC_118219 | ENSRNOT00000021816 | 0.960035664  | 7.51E-07 |
| TUCP_002800 | XLOC_118219 | ENSRNOT00000065103 | 0.952966222  | 1.67E-06 |
| TUCP_002800 | XLOC_118219 | ENSRNOT00000024992 | 0.988659788  | 1.45E-09 |
| TUCP_002800 | XLOC_118219 | ENSRNOT00000078644 | -0.955934276 | 1.22E-06 |
| TUCP_002800 | XLOC_118219 | ENSRNOT00000028067 | 0.968546082  | 2.30E-07 |
| TUCP_002800 | XLOC_118219 | ENSRNOT00000026558 | 0.953735393  | 1.54E-06 |
| TUCP_002800 | XLOC_118219 | ENSRNOT00000005694 | 0.950883881  | 2.07E-06 |
| TUCP_002800 | XLOC_118219 | ENSRNOT00000004363 | 0.973951254  | 9.04E-08 |
| TUCP_002800 | XLOC_118219 | ENSRNOT00000027212 | 0.970370447  | 1.71E-07 |
| TUCP_002800 | XLOC_118219 | ENSRNOT00000013989 | 0.953101209  | 1.65E-06 |
| TUCP_002800 | XLOC_118219 | ENSRNOT00000056995 | 0.957072887  | 1.07E-06 |
| TUCP_002800 | XLOC_118219 | ENSRNOT00000083351 | 0.963435558  | 4.84E-07 |
| TUCP_002800 | XLOC_118219 | ENSRNOT00000010079 | 0.950749163  | 2.10E-06 |
| TUCP_002800 | XLOC_118219 | ENSRNOT00000030251 | -0.958820963 | 8.70E-07 |
| TUCP_002800 | XLOC_118219 | ENSRNOT00000023100 | 0.978463785  | 3.52E-08 |
| TUCP_002800 | XLOC_118219 | ENSRNOT00000007949 | 0.986713793  | 3.19E-09 |
| TUCP_002800 | XLOC_118219 | ENSRNOT0000000681  | 0.955888517  | 1.22E-06 |
| TUCP_002800 | XLOC_118219 | ENSRNOT00000083814 | 0.969672449  | 1.92E-07 |
| TUCP_002800 | XLOC_118219 | ENSRNOT00000021400 | 0.966435578  | 3.17E-07 |
| TUCP_002800 | XLOC_118219 | ENSRNOT00000060595 | 0.967599987  | 2.66E-07 |
| TUCP_002800 | XLOC_118219 | ENSRNOT00000024286 | 0.979879308  | 2.51E-08 |
| TUCP_002800 | XLOC_118219 | ENSRNOT00000037397 | 0.951826033  | 1.88E-06 |
| TUCP_002800 | XLOC_118219 | ENSRNOT00000055888 | 0.980880265  | 1.95E-08 |
| TUCP_002800 | XLOC_118219 | ENSRNOT00000028181 | 0.958552529  | 8.98E-07 |
| TUCP_002800 | XLOC_118219 | ENSRNOT00000091499 | 0.952533525  | 1.75E-06 |
| TUCP_002800 | XLOC_118219 | ENSRNOT00000059487 | 0.956793182  | 1.10E-06 |
| TUCP_002800 | XLOC_118219 | ENSRNOT00000039005 | 0.951116851  | 2.02E-06 |
| TUCP_002800 | XLOC_118219 | ENSRNOT00000000263 | -0.969216374 | 2.07E-07 |
| TUCP_002800 | XLOC_118219 | ENSRNOT00000086350 | 0.965865788  | 3.45E-07 |
| TUCP_002800 | XLOC_118219 | ENSRNOT00000010516 | 0.973336045  | 1.02E-07 |
| TUCP_002800 | XLOC_118219 | ENSRNOT00000044975 | 0.989612187  | 9.36E-10 |
| TUCP_002800 | XLOC_118219 | ENSRNOT00000045443 | 0.97541467   | 6.79E-08 |
| TUCP_002800 | XLOC_118219 | ENSRNOT00000023506 | 0.973600219  | 9.66E-08 |
| TUCP_002800 | XLOC_118219 | ENSRNOT00000015131 | 0.983434603  | 9.56E-09 |
| TUCP_002800 | XLOC_118219 | ENSRNOT00000000529 | 0.969144802  | 2.09E-07 |
| TUCP_002800 | XLOC_118219 | ENSRNOT00000044788 | 0.973560235  | 9.73E-08 |

|             |             |                    |              |          |
|-------------|-------------|--------------------|--------------|----------|
| TUCP_002800 | XLOC_118219 | ENSRNOT00000039730 | 0.96569545   | 3.53E-07 |
| TUCP_002800 | XLOC_118219 | ENSRNOT00000030329 | 0.961854088  | 5.97E-07 |
| TUCP_002800 | XLOC_118219 | ENSRNOT00000026057 | 0.956878269  | 1.09E-06 |
| TUCP_002800 | XLOC_118219 | ENSRNOT00000084021 | 0.963675084  | 4.69E-07 |
| TUCP_002800 | XLOC_118219 | ENSRNOT00000090026 | -0.958809217 | 8.71E-07 |
| TUCP_002800 | XLOC_118219 | ENSRNOT00000003567 | 0.982984792  | 1.09E-08 |
| TUCP_002800 | XLOC_118219 | ENSRNOT00000088201 | 0.989728948  | 8.85E-10 |
| TUCP_002800 | XLOC_118219 | ENSRNOT00000049536 | 0.978154373  | 3.78E-08 |
| TUCP_002800 | XLOC_118219 | ENSRNOT00000086459 | 0.958441419  | 9.10E-07 |
| TUCP_002800 | XLOC_118219 | ENSRNOT00000045311 | 0.959343037  | 8.17E-07 |
| TUCP_002800 | XLOC_118219 | ENSRNOT00000022478 | 0.956314839  | 1.16E-06 |
| TUCP_002800 | XLOC_118219 | ENSRNOT00000014980 | -0.952934458 | 1.68E-06 |
| TUCP_002800 | XLOC_118219 | ENSRNOT00000023872 | 0.953716397  | 1.55E-06 |
| TUCP_002800 | XLOC_118219 | ENSRNOT00000023078 | -0.966789996 | 3.01E-07 |
| TUCP_002800 | XLOC_118219 | ENSRNOT00000071133 | 0.974445859  | 8.22E-08 |
| TUCP_002800 | XLOC_118219 | ENSRNOT00000015525 | 0.980781308  | 2.00E-08 |
| TUCP_002800 | XLOC_118219 | ENSRNOT00000092857 | 0.988840567  | 1.34E-09 |
| TUCP_002800 | XLOC_118219 | ENSRNOT00000008365 | 0.964775935  | 4.03E-07 |
| TUCP_002800 | XLOC_118219 | ENSRNOT00000018061 | 0.976040964  | 5.97E-08 |
| TUCP_002800 | XLOC_118219 | ENSRNOT00000089185 | 0.967492629  | 2.71E-07 |
| TUCP_002800 | XLOC_118219 | ENSRNOT00000031951 | 0.976116758  | 5.88E-08 |
| TUCP_002800 | XLOC_118219 | ENSRNOT00000020272 | 0.980764714  | 2.01E-08 |
| TUCP_002800 | XLOC_118219 | ENSRNOT00000017420 | 0.988132365  | 1.82E-09 |
| TUCP_002800 | XLOC_118219 | ENSRNOT00000017907 | 0.955166647  | 1.32E-06 |
| TUCP_002800 | XLOC_118219 | ENSRNOT00000077894 | 0.95338643   | 1.60E-06 |
| TUCP_002800 | XLOC_118219 | ENSRNOT00000015763 | 0.976911323  | 4.97E-08 |
| TUCP_002800 | XLOC_118219 | ENSRNOT00000014809 | 0.978129978  | 3.80E-08 |
| TUCP_002800 | XLOC_118219 | ENSRNOT00000031138 | -0.958943529 | 8.57E-07 |
| TUCP_002800 | XLOC_118219 | ENSRNOT00000019644 | 0.977969209  | 3.94E-08 |
| TUCP_002800 | XLOC_118219 | ENSRNOT00000015320 | 0.965789426  | 3.48E-07 |
| TUCP_002800 | XLOC_118219 | ENSRNOT00000000640 | 0.960961518  | 6.69E-07 |
| TUCP_002800 | XLOC_118219 | ENSRNOT00000020475 | 0.985406004  | 5.09E-09 |
| TUCP_002800 | XLOC_118219 | ENSRNOT00000016263 | 0.963622183  | 4.72E-07 |
| TUCP_002800 | XLOC_118219 | ENSRNOT00000047011 | 0.962862707  | 5.23E-07 |
| TUCP_002800 | XLOC_118219 | ENSRNOT00000039377 | 0.981939346  | 1.47E-08 |
| TUCP_002800 | XLOC_118219 | ENSRNOT00000013933 | 0.971284943  | 1.47E-07 |
| TUCP_002800 | XLOC_118219 | ENSRNOT00000006376 | 0.979372988  | 2.84E-08 |
| TUCP_002800 | XLOC_118219 | ENSRNOT00000041091 | 0.971484775  | 1.42E-07 |
| TUCP_002800 | XLOC_118219 | ENSRNOT00000018782 | 0.984721651  | 6.39E-09 |
| TUCP_002800 | XLOC_118219 | ENSRNOT00000077479 | 0.950468974  | 2.16E-06 |
| TUCP_002800 | XLOC_118219 | ENSRNOT00000077401 | 0.977844894  | 4.05E-08 |
| TUCP_002800 | XLOC_118219 | ENSRNOT00000024464 | 0.96681812   | 3.00E-07 |
| TUCP_002800 | XLOC_118219 | ENSRNOT0000003823  | 0.958571125  | 8.96E-07 |
| TUCP_002800 | XLOC_118219 | ENSRNOT00000022373 | 0.972718051  | 1.14E-07 |
| TUCP_002800 | XLOC_118219 | ENSRNOT00000057016 | 0.960297383  | 7.27E-07 |
| TUCP_002800 | XLOC_118219 | ENSRNOT00000036838 | 0.966040169  | 3.36E-07 |
| TUCP_002800 | XLOC_118219 | ENSRNOT00000061973 | 0.985822518  | 4.41E-09 |
| TUCP_002800 | XLOC_118219 | ENSRNOT00000050223 | 0.97006155   | 1.80E-07 |
| TUCP_002800 | XLOC_118219 | ENSRNOT00000068078 | 0.982082196  | 1.41E-08 |
| TUCP_002800 | XLOC_118219 | ENSRNOT00000009993 | 0.965846399  | 3.46E-07 |
| TUCP_002800 | XLOC_118219 | ENSRNOT00000026844 | -0.957019305 | 1.07E-06 |

|             |             |                    |              |          |
|-------------|-------------|--------------------|--------------|----------|
| TUCP_002800 | XLOC_118219 | ENSRNOT00000064452 | 0.953985849  | 1.50E-06 |
| TUCP_002800 | XLOC_118219 | ENSRNOT00000012625 | 0.956856984  | 1.09E-06 |
| TUCP_002800 | XLOC_118219 | ENSRNOT00000000039 | 0.961059596  | 6.60E-07 |
| TUCP_002800 | XLOC_118219 | ENSRNOT00000037181 | 0.97424969   | 8.54E-08 |
| TUCP_002800 | XLOC_118219 | ENSRNOT00000081272 | 0.953704771  | 1.55E-06 |
| TUCP_002800 | XLOC_118219 | ENSRNOT00000045735 | -0.958911659 | 8.61E-07 |
| TUCP_002800 | XLOC_118219 | ENSRNOT00000019768 | -0.974799276 | 7.67E-08 |
| TUCP_002800 | XLOC_118219 | ENSRNOT00000066618 | 0.972004565  | 1.29E-07 |
| TUCP_002800 | XLOC_118219 | ENSRNOT00000041815 | 0.964960437  | 3.92E-07 |
| TUCP_002800 | XLOC_118219 | ENSRNOT00000028130 | 0.962278469  | 5.65E-07 |
| TUCP_002800 | XLOC_118219 | ENSRNOT00000068267 | 0.960766094  | 6.85E-07 |
| TUCP_002800 | XLOC_118219 | ENSRNOT00000009840 | 0.960995508  | 6.66E-07 |
| TUCP_002800 | XLOC_118219 | ENSRNOT00000084552 | 0.966021258  | 3.37E-07 |
| TUCP_002800 | XLOC_118219 | ENSRNOT00000019916 | 0.959327693  | 8.19E-07 |
| TUCP_002800 | XLOC_118219 | ENSRNOT00000019911 | 0.952352456  | 1.79E-06 |
| TUCP_002800 | XLOC_118219 | ENSRNOT00000034305 | -0.951840302 | 1.88E-06 |
| TUCP_002800 | XLOC_118219 | ENSRNOT00000086390 | 0.98314524   | 1.04E-08 |
| TUCP_002800 | XLOC_118219 | ENSRNOT00000039215 | 0.950983425  | 2.05E-06 |
| TUCP_002800 | XLOC_118219 | ENSRNOT00000049193 | 0.961366721  | 6.35E-07 |
| TUCP_002800 | XLOC_118219 | ENSRNOT0000002355  | 0.96398957   | 4.49E-07 |
| TUCP_002800 | XLOC_118219 | ENSRNOT00000036753 | 0.96913312   | 2.10E-07 |
| TUCP_002800 | XLOC_118219 | ENSRNOT00000044467 | 0.980750592  | 2.02E-08 |
| TUCP_002800 | XLOC_118219 | ENSRNOT00000044254 | 0.963254832  | 4.96E-07 |
| TUCP_002800 | XLOC_118219 | ENSRNOT00000036972 | 0.968880305  | 2.18E-07 |
| TUCP_002800 | XLOC_118219 | ENSRNOT00000029443 | 0.994432772  | 4.17E-11 |
| TUCP_002800 | XLOC_118219 | ENSRNOT00000045532 | 0.950173356  | 2.22E-06 |
| TUCP_002800 | XLOC_118219 | ENSRNOT00000092211 | 0.950174987  | 2.22E-06 |
| TUCP_002800 | XLOC_118219 | ENSRNOT00000015387 | 0.978175091  | 3.76E-08 |
| TUCP_002800 | XLOC_118219 | ENSRNOT00000058611 | 0.95780866   | 9.81E-07 |
| TUCP_002800 | XLOC_118219 | ENSRNOT00000032719 | 0.97637315   | 5.57E-08 |
| TUCP_002800 | XLOC_118219 | ENSRNOT00000023252 | 0.963131012  | 5.04E-07 |
| TUCP_002800 | XLOC_118219 | ENSRNOT00000090355 | 0.967140705  | 2.86E-07 |
| TUCP_002800 | XLOC_118219 | ENSRNOT00000073239 | 0.957215089  | 1.05E-06 |
| TUCP_002800 | XLOC_118219 | ENSRNOT00000005885 | 0.971744506  | 1.35E-07 |
| TUCP_002800 | XLOC_118219 | ENSRNOT00000011326 | 0.957862218  | 9.75E-07 |
| TUCP_002800 | XLOC_118219 | ENSRNOT00000028801 | -0.957801815 | 9.82E-07 |
| TUCP_002800 | XLOC_118219 | ENSRNOT00000087481 | 0.973611435  | 9.64E-08 |
| TUCP_002777 | XLOC_117262 | ENSRNOT00000035672 | 0.968920405  | 2.17E-07 |
| TUCP_000985 | XLOC_036063 | ENSRNOT0000004698  | 0.952456026  | 1.77E-06 |
| TUCP_000985 | XLOC_036063 | ENSRNOT00000012093 | 0.958876118  | 8.64E-07 |
| TUCP_000985 | XLOC_036063 | ENSRNOT00000012156 | 0.966635017  | 3.08E-07 |
| TUCP_000985 | XLOC_036063 | ENSRNOT00000078445 | -0.967066751 | 2.89E-07 |
| TUCP_000985 | XLOC_036063 | ENSRNOT00000087592 | 0.977732251  | 4.15E-08 |
| TUCP_000985 | XLOC_036063 | ENSRNOT00000055992 | -0.956754686 | 1.11E-06 |
| TUCP_000985 | XLOC_036063 | ENSRNOT00000051991 | 0.950250444  | 2.21E-06 |
| TUCP_000985 | XLOC_036063 | ENSRNOT00000004524 | 0.955839533  | 1.23E-06 |
| TUCP_000985 | XLOC_036063 | ENSRNOT00000087429 | 0.950245855  | 2.21E-06 |
| TUCP_000985 | XLOC_036063 | ENSRNOT00000000184 | -0.957104339 | 1.06E-06 |
| TUCP_000985 | XLOC_036063 | ENSRNOT00000023144 | 0.951311519  | 1.99E-06 |
| TUCP_000985 | XLOC_036063 | ENSRNOT00000080800 | 0.954438315  | 1.43E-06 |
| TUCP_000985 | XLOC_036063 | ENSRNOT00000003296 | 0.957406425  | 1.03E-06 |

|             |             |                     |              |          |
|-------------|-------------|---------------------|--------------|----------|
| TUCP_000985 | XLOC_036063 | ENSRNOT00000015116  | 0.953928928  | 1.51E-06 |
| TUCP_000985 | XLOC_036063 | ENSRNOT00000027454  | 0.962719273  | 5.33E-07 |
| TUCP_000985 | XLOC_036063 | ENSRNOT00000000036  | 0.95291153   | 1.68E-06 |
| TUCP_000985 | XLOC_036063 | ENSRNOT00000005228  | 0.951262494  | 2.00E-06 |
| TUCP_000985 | XLOC_036063 | ENSRNOT00000014814  | 0.951057875  | 2.04E-06 |
| TUCP_000985 | XLOC_036063 | ENSRNOT00000080207  | 0.960796601  | 6.83E-07 |
| TUCP_000985 | XLOC_036063 | ENSRNOT000000061267 | 0.973953031  | 9.04E-08 |
| TUCP_000985 | XLOC_036063 | ENSRNOT00000006055  | 0.965363242  | 3.70E-07 |
| TUCP_000985 | XLOC_036063 | ENSRNOT00000005126  | -0.969556746 | 1.96E-07 |
| TUCP_000985 | XLOC_036063 | ENSRNOT00000016325  | -0.952674435 | 1.73E-06 |
| TUCP_000985 | XLOC_036063 | ENSRNOT00000009280  | 0.953654538  | 1.56E-06 |
| TUCP_000985 | XLOC_036063 | ENSRNOT00000026457  | 0.962106322  | 5.77E-07 |
| TUCP_000985 | XLOC_036063 | ENSRNOT000000051550 | 0.961476786  | 6.26E-07 |
| TUCP_000985 | XLOC_036063 | ENSRNOT000000088465 | 0.952880101  | 1.69E-06 |
| TUCP_000985 | XLOC_036063 | ENSRNOT00000023858  | 0.972685131  | 1.14E-07 |
| TUCP_000985 | XLOC_036063 | ENSRNOT00000000337  | 0.976609903  | 5.30E-08 |
| TUCP_003134 | XLOC_134195 | ENSRNOT00000045301  | 0.9511389    | 2.02E-06 |
| TUCP_003134 | XLOC_134195 | ENSRNOT00000041186  | 0.951720075  | 1.90E-06 |
| TUCP_003134 | XLOC_134195 | ENSRNOT00000067379  | 0.957422685  | 1.03E-06 |
| TUCP_003134 | XLOC_134195 | ENSRNOT00000065448  | 0.954429131  | 1.43E-06 |
| TUCP_003134 | XLOC_134195 | ENSRNOT00000026803  | 0.964550553  | 4.15E-07 |
| TUCP_003134 | XLOC_134195 | ENSRNOT00000076182  | 0.9511389    | 2.02E-06 |
| TUCP_003134 | XLOC_134195 | ENSRNOT00000088893  | 0.9511389    | 2.02E-06 |
| TUCP_003134 | XLOC_134195 | ENSRNOT00000020786  | 0.954928017  | 1.36E-06 |
| TUCP_003134 | XLOC_134195 | ENSRNOT00000057472  | 0.9511389    | 2.02E-06 |
| TUCP_003134 | XLOC_134195 | ENSRNOT00000081014  | 0.9511389    | 2.02E-06 |
| TUCP_003134 | XLOC_134195 | ENSRNOT00000050543  | 0.954883456  | 1.36E-06 |
| TUCP_003134 | XLOC_134195 | ENSRNOT00000079275  | 0.950728796  | 2.10E-06 |
| TUCP_003134 | XLOC_134195 | ENSRNOT00000088078  | 0.951296879  | 1.99E-06 |
| TUCP_003134 | XLOC_134195 | ENSRNOT00000090658  | 0.9511389    | 2.02E-06 |
| TUCP_003134 | XLOC_134195 | ENSRNOT00000050968  | 0.952499494  | 1.76E-06 |
| TUCP_003134 | XLOC_134195 | ENSRNOT00000084034  | -0.963051113 | 5.10E-07 |
| TUCP_003134 | XLOC_134195 | ENSRNOT00000014103  | 0.9511389    | 2.02E-06 |
| TUCP_003134 | XLOC_134195 | ENSRNOT00000042201  | 0.962648304  | 5.38E-07 |
| TUCP_003134 | XLOC_134195 | ENSRNOT00000067543  | 0.9511389    | 2.02E-06 |
| TUCP_003134 | XLOC_134195 | ENSRNOT00000063929  | 0.9511389    | 2.02E-06 |
| TUCP_003134 | XLOC_134195 | ENSRNOT00000068416  | 0.951048211  | 2.04E-06 |
| TUCP_000987 | XLOC_036069 | ENSRNOT00000085158  | 0.966917077  | 2.95E-07 |
| TUCP_000987 | XLOC_036069 | ENSRNOT00000006175  | 0.955675531  | 1.25E-06 |
| TUCP_000987 | XLOC_036069 | ENSRNOT00000008221  | 0.987065296  | 2.79E-09 |
| TUCP_000987 | XLOC_036069 | ENSRNOT00000027454  | 0.964102828  | 4.42E-07 |
| TUCP_000987 | XLOC_036069 | ENSRNOT00000023144  | 0.954476486  | 1.43E-06 |
| TUCP_000987 | XLOC_036069 | ENSRNOT00000047093  | 0.969740232  | 1.90E-07 |
| TUCP_000987 | XLOC_036069 | ENSRNOT00000081512  | 0.95108482   | 2.03E-06 |
| TUCP_000987 | XLOC_036069 | ENSRNOT00000026293  | 0.95558175   | 1.26E-06 |
| TUCP_000987 | XLOC_036069 | ENSRNOT00000006454  | 0.953855598  | 1.52E-06 |
| TUCP_000987 | XLOC_036069 | ENSRNOT00000064946  | 0.95747011   | 1.02E-06 |
| TUCP_000987 | XLOC_036069 | ENSRNOT00000012156  | 0.958992005  | 8.52E-07 |
| TUCP_000987 | XLOC_036069 | ENSRNOT00000016975  | 0.95481786   | 1.37E-06 |
| TUCP_000987 | XLOC_036069 | ENSRNOT00000087592  | 0.955535206  | 1.27E-06 |
| TUCP_000986 | XLOC_036067 | ENSRNOT00000051991  | 0.954902479  | 1.36E-06 |



|             |             |                     |              |          |
|-------------|-------------|---------------------|--------------|----------|
| TUCP_000986 | XLOC_036067 | ENSRNOT00000027454  | 0.958093803  | 9.49E-07 |
| TUCP_000986 | XLOC_036067 | ENSRNOT00000023858  | 0.950876739  | 2.07E-06 |
| TUCP_000986 | XLOC_036067 | ENSRNOT00000061267  | 0.950429908  | 2.17E-06 |
| TUCP_000986 | XLOC_036067 | ENSRNOT00000046229  | 0.954432401  | 1.43E-06 |
| TUCP_000986 | XLOC_036067 | ENSRNOT00000012156  | 0.959818693  | 7.71E-07 |
| TUCP_000986 | XLOC_036067 | ENSRNOT00000087592  | 0.967080736  | 2.88E-07 |
| TUCP_000986 | XLOC_036067 | ENSRNOT00000000337  | 0.961825134  | 5.99E-07 |
| TUCP_000980 | XLOC_035788 | ENSRNOT00000056200  | 0.964951402  | 3.93E-07 |
| TUCP_000983 | XLOC_035791 | ENSRNOT00000038580  | 0.966795573  | 3.01E-07 |
| TUCP_000983 | XLOC_035791 | ENSRNOT00000072795  | 0.956514699  | 1.14E-06 |
| TUCP_000983 | XLOC_035791 | ENSRNOT00000010601  | 0.9553012    | 1.30E-06 |
| TUCP_002809 | XLOC_118745 | ENSRNOT00000001912  | 0.963359933  | 4.89E-07 |
| TUCP_001163 | XLOC_044017 | ENSRNOT00000021694  | 0.955742397  | 1.24E-06 |
| TUCP_001163 | XLOC_044017 | ENSRNOT000000081314 | -0.95922118  | 8.29E-07 |
| TUCP_001163 | XLOC_044017 | ENSRNOT00000026550  | 0.979346534  | 2.86E-08 |
| TUCP_001163 | XLOC_044017 | ENSRNOT00000006460  | 0.962082009  | 5.79E-07 |
| TUCP_001163 | XLOC_044017 | ENSRNOT00000087329  | -0.951886752 | 1.87E-06 |
| TUCP_001163 | XLOC_044017 | ENSRNOT00000077578  | -0.961621272 | 6.15E-07 |
| TUCP_001163 | XLOC_044017 | ENSRNOT00000020472  | -0.960758954 | 6.86E-07 |
| TUCP_001163 | XLOC_044017 | ENSRNOT00000065897  | 0.959638041  | 7.88E-07 |
| TUCP_001163 | XLOC_044017 | ENSRNOT000000081226 | 0.951928336  | 1.86E-06 |
| TUCP_001163 | XLOC_044017 | ENSRNOT00000073493  | 0.951859245  | 1.88E-06 |
| TUCP_001163 | XLOC_044017 | ENSRNOT00000071897  | -0.953570453 | 1.57E-06 |
| TUCP_001163 | XLOC_044017 | ENSRNOT00000020446  | 0.9615857    | 6.18E-07 |
| TUCP_001163 | XLOC_044017 | ENSRNOT00000056199  | -0.954835684 | 1.37E-06 |
| TUCP_001163 | XLOC_044017 | ENSRNOT00000029701  | 0.963327361  | 4.91E-07 |
| TUCP_001163 | XLOC_044017 | ENSRNOT00000072716  | 0.959663166  | 7.86E-07 |
| TUCP_001163 | XLOC_044017 | ENSRNOT00000038449  | 0.962449805  | 5.52E-07 |
| TUCP_001163 | XLOC_044017 | ENSRNOT00000078752  | -0.957982961 | 9.61E-07 |
| TUCP_001163 | XLOC_044017 | ENSRNOT00000033806  | 0.962158042  | 5.73E-07 |
| TUCP_001163 | XLOC_044017 | ENSRNOT00000007963  | -0.961663591 | 6.11E-07 |
| TUCP_001163 | XLOC_044017 | ENSRNOT00000016939  | -0.960493823 | 7.09E-07 |
| TUCP_001163 | XLOC_044017 | ENSRNOT00000048781  | 0.952573837  | 1.74E-06 |
| TUCP_001163 | XLOC_044017 | ENSRNOT00000075934  | -0.954139876 | 1.48E-06 |
| TUCP_001163 | XLOC_044017 | ENSRNOT00000087905  | -0.958638144 | 8.89E-07 |
| TUCP_001163 | XLOC_044017 | ENSRNOT00000005064  | -0.96165914  | 6.12E-07 |
| TUCP_001163 | XLOC_044017 | ENSRNOT00000085334  | 0.953978785  | 1.50E-06 |
| TUCP_001163 | XLOC_044017 | ENSRNOT000000081604 | 0.951171221  | 2.01E-06 |
| TUCP_001163 | XLOC_044017 | ENSRNOT00000035427  | 0.959846545  | 7.68E-07 |
| TUCP_001163 | XLOC_044017 | ENSRNOT00000087604  | 0.964147116  | 4.39E-07 |
| TUCP_001163 | XLOC_044017 | ENSRNOT00000059246  | 0.964885509  | 3.96E-07 |
| TUCP_001163 | XLOC_044017 | ENSRNOT00000050902  | -0.951109639 | 2.03E-06 |
| TUCP_001163 | XLOC_044017 | ENSRNOT00000005770  | 0.959161175  | 8.35E-07 |
| TUCP_001163 | XLOC_044017 | ENSRNOT00000012757  | 0.95387364   | 1.52E-06 |
| TUCP_001163 | XLOC_044017 | ENSRNOT00000005873  | -0.9656369   | 3.56E-07 |
| TUCP_001163 | XLOC_044017 | ENSRNOT00000016265  | -0.950949893 | 2.06E-06 |
| TUCP_001163 | XLOC_044017 | ENSRNOT00000005620  | -0.953549959 | 1.57E-06 |
| TUCP_001163 | XLOC_044017 | ENSRNOT00000012247  | 0.95968735   | 7.84E-07 |
| TUCP_001163 | XLOC_044017 | ENSRNOT00000036658  | -0.963856565 | 4.57E-07 |
| TUCP_001163 | XLOC_044017 | ENSRNOT00000089611  | 0.955240569  | 1.31E-06 |
| TUCP_001163 | XLOC_044017 | ENSRNOT00000034282  | 0.954751871  | 1.38E-06 |

|             |             |                    |              |          |
|-------------|-------------|--------------------|--------------|----------|
| TUCP_001163 | XLOC_044017 | ENSRNOT00000075209 | -0.952609913 | 1.74E-06 |
| TUCP_001163 | XLOC_044017 | ENSRNOT00000012474 | 0.958292231  | 9.27E-07 |
| TUCP_001163 | XLOC_044017 | ENSRNOT00000092757 | 0.957151501  | 1.06E-06 |
| TUCP_001163 | XLOC_044017 | ENSRNOT00000009202 | 0.958077029  | 9.50E-07 |
| TUCP_001812 | XLOC_075160 | ENSRNOT00000005048 | 0.954987016  | 1.35E-06 |
| TUCP_001164 | XLOC_044017 | ENSRNOT00000092026 | 0.96620614   | 3.28E-07 |
| TUCP_001164 | XLOC_044017 | ENSRNOT00000093075 | 1            | 1.33E-79 |
| TUCP_001164 | XLOC_044017 | ENSRNOT00000058260 | 1            | 0        |
| TUCP_001164 | XLOC_044017 | ENSRNOT00000088887 | 1            | 0        |
| TUCP_001164 | XLOC_044017 | ENSRNOT00000084986 | 1            | 1.33E-79 |
| TUCP_001164 | XLOC_044017 | ENSRNOT00000074346 | 0.9702256    | 1.75E-07 |
| TUCP_001164 | XLOC_044017 | ENSRNOT00000073209 | 0.983711602  | 8.79E-09 |
| TUCP_001164 | XLOC_044017 | ENSRNOT00000080155 | 0.973069673  | 1.07E-07 |
| TUCP_001164 | XLOC_044017 | ENSRNOT00000072573 | 0.996213272  | 6.09E-12 |
| TUCP_001164 | XLOC_044017 | ENSRNOT00000017828 | 0.996001583  | 7.99E-12 |
| TUCP_001164 | XLOC_044017 | ENSRNOT00000080444 | 0.969625907  | 1.93E-07 |
| TUCP_001164 | XLOC_044017 | ENSRNOT00000071312 | 1            | 4.25E-78 |
| TUCP_001164 | XLOC_044017 | ENSRNOT00000088245 | 1            | 4.25E-78 |
| TUCP_001164 | XLOC_044017 | ENSRNOT00000036565 | 0.969065335  | 2.12E-07 |
| TUCP_001164 | XLOC_044017 | ENSRNOT00000058833 | 0.998673261  | 3.23E-14 |
| TUCP_001164 | XLOC_044017 | ENSRNOT00000078052 | 1            | 1.33E-79 |
| TUCP_001164 | XLOC_044017 | ENSRNOT00000078494 | 0.999927093  | 1.62E-20 |
| TUCP_001164 | XLOC_044017 | ENSRNOT00000085653 | 1            | 0        |
| TUCP_001164 | XLOC_044017 | ENSRNOT00000057950 | 0.969329371  | 2.03E-07 |
| TUCP_001164 | XLOC_044017 | ENSRNOT00000081992 | 0.999320526  | 1.14E-15 |
| TUCP_001164 | XLOC_044017 | ENSRNOT00000038553 | 0.955765808  | 1.24E-06 |
| TUCP_001164 | XLOC_044017 | ENSRNOT00000084120 | 0.958115447  | 9.46E-07 |
| TUCP_001164 | XLOC_044017 | ENSRNOT00000055406 | 1            | 0        |
| TUCP_001164 | XLOC_044017 | ENSRNOT00000070817 | 0.998968079  | 9.20E-15 |
| TUCP_001164 | XLOC_044017 | ENSRNOT00000026753 | 1            | 0        |
| TUCP_001164 | XLOC_044017 | ENSRNOT00000080533 | 0.996682529  | 3.15E-12 |
| TUCP_001164 | XLOC_044017 | ENSRNOT00000072774 | 0.979665261  | 2.65E-08 |
| TUCP_001164 | XLOC_044017 | ENSRNOT00000086031 | 1            | 0        |
| TUCP_001164 | XLOC_044017 | ENSRNOT00000014312 | 1            | 0        |
| TUCP_001164 | XLOC_044017 | ENSRNOT00000042882 | 0.963218427  | 4.98E-07 |
| TUCP_001164 | XLOC_044017 | ENSRNOT00000088012 | 0.956765806  | 1.11E-06 |
| TUCP_001164 | XLOC_044017 | ENSRNOT00000051231 | 0.999242378  | 1.96E-15 |
| TUCP_001164 | XLOC_044017 | ENSRNOT00000089407 | 0.992986194  | 1.32E-10 |
| TUCP_001164 | XLOC_044017 | ENSRNOT00000055034 | 0.998331441  | 1.02E-13 |
| TUCP_001164 | XLOC_044017 | ENSRNOT00000046837 | 0.97252559   | 1.18E-07 |
| TUCP_003428 | XLOC_148227 | ENSRNOT00000009811 | 0.951860086  | 1.88E-06 |
| TUCP_003428 | XLOC_148227 | ENSRNOT00000065168 | 0.957092903  | 1.07E-06 |
| TUCP_003428 | XLOC_148227 | ENSRNOT00000005958 | 0.959484614  | 8.03E-07 |
| TUCP_003428 | XLOC_148227 | ENSRNOT00000067554 | 0.976405     | 5.54E-08 |
| TUCP_003428 | XLOC_148227 | ENSRNOT00000083214 | 0.962572108  | 5.43E-07 |
| TUCP_003428 | XLOC_148227 | ENSRNOT00000010784 | 0.956229564  | 1.18E-06 |
| TUCP_003428 | XLOC_148227 | ENSRNOT00000061253 | 0.956906479  | 1.09E-06 |
| TUCP_003428 | XLOC_148227 | ENSRNOT00000080024 | 0.956118218  | 1.19E-06 |
| TUCP_003428 | XLOC_148227 | ENSRNOT00000023133 | 0.978208149  | 3.73E-08 |
| TUCP_003428 | XLOC_148227 | ENSRNOT00000023989 | 0.956429488  | 1.15E-06 |
| TUCP_003428 | XLOC_148227 | ENSRNOT00000061392 | 0.951570022  | 1.93E-06 |

|             |             |                    |              |          |
|-------------|-------------|--------------------|--------------|----------|
| TUCP_003428 | XLOC_148227 | ENSRNOT00000080608 | 0.958857343  | 8.66E-07 |
| TUCP_003428 | XLOC_148227 | ENSRNOT00000047264 | 0.95136565   | 1.97E-06 |
| TUCP_003428 | XLOC_148227 | ENSRNOT00000027970 | 0.950836992  | 2.08E-06 |
| TUCP_003428 | XLOC_148227 | ENSRNOT00000057361 | 0.965214262  | 3.78E-07 |
| TUCP_003428 | XLOC_148227 | ENSRNOT00000017556 | 0.958853064  | 8.67E-07 |
| TUCP_003428 | XLOC_148227 | ENSRNOT00000025194 | 0.955610423  | 1.26E-06 |
| TUCP_003428 | XLOC_148227 | ENSRNOT00000011662 | 0.950292759  | 2.20E-06 |
| TUCP_003428 | XLOC_148227 | ENSRNOT0000001893  | 0.954624109  | 1.40E-06 |
| TUCP_003428 | XLOC_148227 | ENSRNOT00000033017 | 0.960003754  | 7.54E-07 |
| TUCP_003428 | XLOC_148227 | ENSRNOT00000083220 | 0.952697642  | 1.72E-06 |
| TUCP_003428 | XLOC_148227 | ENSRNOT00000013049 | 0.973191678  | 1.04E-07 |
| TUCP_003428 | XLOC_148227 | ENSRNOT00000087583 | 0.950417543  | 2.17E-06 |
| TUCP_003428 | XLOC_148227 | ENSRNOT00000074972 | 0.968337239  | 2.38E-07 |
| TUCP_003428 | XLOC_148227 | ENSRNOT00000045285 | 0.969488223  | 1.98E-07 |
| TUCP_003428 | XLOC_148227 | ENSRNOT00000090057 | 0.976863358  | 5.02E-08 |
| TUCP_003428 | XLOC_148227 | ENSRNOT00000040476 | 0.950954187  | 2.06E-06 |
| TUCP_003428 | XLOC_148227 | ENSRNOT00000015799 | 0.968731984  | 2.23E-07 |
| TUCP_000295 | XLOC_009318 | ENSRNOT00000026657 | 0.970710813  | 1.62E-07 |
| TUCP_000052 | XLOC_001127 | ENSRNOT00000027411 | 0.964193181  | 4.36E-07 |
| TUCP_000052 | XLOC_001127 | ENSRNOT00000086575 | 0.959362758  | 8.15E-07 |
| TUCP_000052 | XLOC_001127 | ENSRNOT00000091013 | 0.959054277  | 8.46E-07 |
| TUCP_000052 | XLOC_001127 | ENSRNOT00000075558 | 0.953504746  | 1.58E-06 |
| TUCP_002985 | XLOC_128384 | ENSRNOT00000014865 | -0.954986591 | 1.35E-06 |
| TUCP_002982 | XLOC_128384 | ENSRNOT00000024186 | 0.955825978  | 1.23E-06 |
| TUCP_002982 | XLOC_128384 | ENSRNOT00000074753 | 0.972956104  | 1.09E-07 |
| TUCP_002982 | XLOC_128384 | ENSRNOT00000041904 | 0.973495287  | 9.85E-08 |
| TUCP_002982 | XLOC_128384 | ENSRNOT00000083487 | 0.962452498  | 5.52E-07 |
| TUCP_002982 | XLOC_128384 | ENSRNOT00000077990 | 0.973495287  | 9.85E-08 |
| TUCP_002982 | XLOC_128384 | ENSRNOT00000038826 | 0.97215897   | 1.26E-07 |
| TUCP_002982 | XLOC_128384 | ENSRNOT00000046842 | 0.960372815  | 7.20E-07 |
| TUCP_002982 | XLOC_128384 | ENSRNOT00000021243 | 0.981715716  | 1.56E-08 |
| TUCP_002982 | XLOC_128384 | ENSRNOT00000060250 | 0.97423234   | 8.57E-08 |
| TUCP_002982 | XLOC_128384 | ENSRNOT00000091934 | 0.973495287  | 9.85E-08 |
| TUCP_002982 | XLOC_128384 | ENSRNOT00000046585 | 0.958020327  | 9.57E-07 |
| TUCP_002982 | XLOC_128384 | ENSRNOT00000080794 | 0.981259719  | 1.76E-08 |
| TUCP_002982 | XLOC_128384 | ENSRNOT00000014456 | 0.95257527   | 1.74E-06 |
| TUCP_002982 | XLOC_128384 | ENSRNOT00000031205 | 0.963287721  | 4.94E-07 |
| TUCP_002982 | XLOC_128384 | ENSRNOT00000044145 | 0.973495287  | 9.85E-08 |
| TUCP_002982 | XLOC_128384 | ENSRNOT00000088381 | 0.965190702  | 3.80E-07 |
| TUCP_002982 | XLOC_128384 | ENSRNOT00000011743 | 0.969535413  | 1.96E-07 |
| TUCP_002982 | XLOC_128384 | ENSRNOT00000089929 | 0.973495287  | 9.85E-08 |
| TUCP_002982 | XLOC_128384 | ENSRNOT00000088624 | 0.973495287  | 9.85E-08 |
| TUCP_002982 | XLOC_128384 | ENSRNOT00000085659 | 0.972491034  | 1.18E-07 |
| TUCP_002982 | XLOC_128384 | ENSRNOT00000015866 | 0.962993443  | 5.14E-07 |
| TUCP_002982 | XLOC_128384 | ENSRNOT00000064613 | 0.956393946  | 1.15E-06 |
| TUCP_002982 | XLOC_128384 | ENSRNOT00000078633 | 0.973495287  | 9.85E-08 |
| TUCP_002982 | XLOC_128384 | ENSRNOT00000024575 | 0.960944221  | 6.70E-07 |
| TUCP_002982 | XLOC_128384 | ENSRNOT00000034907 | 0.966075866  | 3.34E-07 |
| TUCP_002982 | XLOC_128384 | ENSRNOT00000051835 | 0.973495287  | 9.85E-08 |
| TUCP_002982 | XLOC_128384 | ENSRNOT00000009825 | 0.951366506  | 1.97E-06 |
| TUCP_002982 | XLOC_128384 | ENSRNOT00000079087 | 0.973495287  | 9.85E-08 |

|             |             |                    |             |          |
|-------------|-------------|--------------------|-------------|----------|
| TUCP_002982 | XLOC_128384 | ENSRNOT00000037206 | 0.973495287 | 9.85E-08 |
| TUCP_002982 | XLOC_128384 | ENSRNOT00000083261 | 0.979599376 | 2.69E-08 |
| TUCP_002982 | XLOC_128384 | ENSRNOT00000080590 | 0.972519828 | 1.18E-07 |
| TUCP_002982 | XLOC_128384 | ENSRNOT00000021608 | 0.968742424 | 2.23E-07 |
| TUCP_002982 | XLOC_128384 | ENSRNOT00000072138 | 0.958256722 | 9.31E-07 |
| TUCP_002982 | XLOC_128384 | ENSRNOT00000077014 | 0.975702935 | 6.40E-08 |
| TUCP_002982 | XLOC_128384 | ENSRNOT00000080453 | 0.972702682 | 1.14E-07 |
| TUCP_002982 | XLOC_128384 | ENSRNOT00000057729 | 0.969463507 | 1.99E-07 |
| TUCP_002982 | XLOC_128384 | ENSRNOT00000061284 | 0.95815764  | 9.41E-07 |
| TUCP_002982 | XLOC_128384 | ENSRNOT00000071884 | 0.955175138 | 1.32E-06 |
| TUCP_002982 | XLOC_128384 | ENSRNOT00000066839 | 0.973326686 | 1.02E-07 |
| TUCP_002982 | XLOC_128384 | ENSRNOT00000078663 | 0.979306467 | 2.89E-08 |
| TUCP_002982 | XLOC_128384 | ENSRNOT00000064250 | 0.97047393  | 1.68E-07 |
| TUCP_002982 | XLOC_128384 | ENSRNOT00000027552 | 0.973560423 | 9.73E-08 |
| TUCP_002982 | XLOC_128384 | ENSRNOT00000029634 | 0.969047777 | 2.12E-07 |
| TUCP_002982 | XLOC_128384 | ENSRNOT00000093579 | 0.950162462 | 2.23E-06 |
| TUCP_002982 | XLOC_128384 | ENSRNOT00000065460 | 0.973495287 | 9.85E-08 |
| TUCP_002982 | XLOC_128384 | ENSRNOT00000003817 | 0.973926585 | 9.08E-08 |
| TUCP_002982 | XLOC_128384 | ENSRNOT00000016713 | 0.973495287 | 9.85E-08 |
| TUCP_002982 | XLOC_128384 | ENSRNOT00000022559 | 0.965407019 | 3.68E-07 |
| TUCP_002982 | XLOC_128384 | ENSRNOT00000079260 | 0.971734054 | 1.36E-07 |
| TUCP_002982 | XLOC_128384 | ENSRNOT00000039294 | 0.973495287 | 9.85E-08 |
| TUCP_002982 | XLOC_128384 | ENSRNOT00000026932 | 0.954562058 | 1.41E-06 |
| TUCP_002982 | XLOC_128384 | ENSRNOT00000089934 | 0.953897801 | 1.52E-06 |
| TUCP_002980 | XLOC_128384 | ENSRNOT00000085599 | 0.958991667 | 8.52E-07 |
| TUCP_002980 | XLOC_128384 | ENSRNOT00000083624 | 0.981359808 | 1.72E-08 |
| TUCP_002980 | XLOC_128384 | ENSRNOT00000085301 | 0.950798016 | 2.09E-06 |
| TUCP_002980 | XLOC_128384 | ENSRNOT00000038729 | 0.959589578 | 7.93E-07 |
| TUCP_002980 | XLOC_128384 | ENSRNOT00000086385 | 0.959589578 | 7.93E-07 |
| TUCP_002980 | XLOC_128384 | ENSRNOT00000087613 | 0.959589578 | 7.93E-07 |
| TUCP_002980 | XLOC_128384 | ENSRNOT00000093689 | 0.986774535 | 3.12E-09 |
| TUCP_002980 | XLOC_128384 | ENSRNOT00000022441 | 0.965389033 | 3.69E-07 |
| TUCP_002980 | XLOC_128384 | ENSRNOT00000023062 | 0.959589578 | 7.93E-07 |
| TUCP_002980 | XLOC_128384 | ENSRNOT00000058834 | 0.959589578 | 7.93E-07 |
| TUCP_002980 | XLOC_128384 | ENSRNOT00000079420 | 0.959589578 | 7.93E-07 |
| TUCP_002980 | XLOC_128384 | ENSRNOT00000090761 | 0.959589578 | 7.93E-07 |
| TUCP_002980 | XLOC_128384 | ENSRNOT00000055923 | 0.959589578 | 7.93E-07 |
| TUCP_002980 | XLOC_128384 | ENSRNOT00000092416 | 0.961901829 | 5.93E-07 |
| TUCP_002980 | XLOC_128384 | ENSRNOT00000071930 | 0.959589578 | 7.93E-07 |
| TUCP_002980 | XLOC_128384 | ENSRNOT00000001996 | 0.963740009 | 4.64E-07 |
| TUCP_002980 | XLOC_128384 | ENSRNOT00000076756 | 0.959589578 | 7.93E-07 |
| TUCP_002980 | XLOC_128384 | ENSRNOT00000081527 | 0.957379409 | 1.03E-06 |
| TUCP_002980 | XLOC_128384 | ENSRNOT00000091663 | 0.950084307 | 2.24E-06 |
| TUCP_002980 | XLOC_128384 | ENSRNOT00000081780 | 0.959589578 | 7.93E-07 |
| TUCP_002980 | XLOC_128384 | ENSRNOT00000089114 | 0.959589578 | 7.93E-07 |
| TUCP_002980 | XLOC_128384 | ENSRNOT00000021609 | 0.955453125 | 1.28E-06 |
| TUCP_002980 | XLOC_128384 | ENSRNOT00000073316 | 0.959589578 | 7.93E-07 |
| TUCP_002980 | XLOC_128384 | ENSRNOT00000071663 | 0.959589578 | 7.93E-07 |
| TUCP_002980 | XLOC_128384 | ENSRNOT00000042860 | 0.959589578 | 7.93E-07 |
| TUCP_002980 | XLOC_128384 | ENSRNOT00000088421 | 0.959589578 | 7.93E-07 |
| TUCP_002980 | XLOC_128384 | ENSRNOT00000038898 | 0.959589578 | 7.93E-07 |

|             |             |                     |             |          |
|-------------|-------------|---------------------|-------------|----------|
| TUCP_002980 | XLOC_128384 | ENSRNOT00000042777  | 0.959686865 | 7.84E-07 |
| TUCP_002980 | XLOC_128384 | ENSRNOT00000010029  | 0.959589578 | 7.93E-07 |
| TUCP_001979 | XLOC_079977 | ENSRNOT00000009919  | 0.954417919 | 1.44E-06 |
| TUCP_002988 | XLOC_128384 | ENSRNOT00000002220  | 0.955870056 | 1.22E-06 |
| TUCP_003350 | XLOC_145072 | ENSRNOT000000051363 | 0.953561452 | 1.57E-06 |
| TUCP_003350 | XLOC_145072 | ENSRNOT000000023152 | 0.953737421 | 1.54E-06 |
| TUCP_003353 | XLOC_145172 | ENSRNOT000000093579 | 0.954854208 | 1.37E-06 |
| TUCP_003353 | XLOC_145172 | ENSRNOT000000040509 | 0.966799231 | 3.00E-07 |
| TUCP_003353 | XLOC_145172 | ENSRNOT000000012170 | 0.990453681 | 6.14E-10 |
| TUCP_003353 | XLOC_145172 | ENSRNOT000000061139 | 0.951285434 | 1.99E-06 |
| TUCP_003352 | XLOC_145171 | ENSRNOT000000024186 | 0.983200502 | 1.02E-08 |
| TUCP_003352 | XLOC_145171 | ENSRNOT000000074753 | 0.998182349 | 1.56E-13 |
| TUCP_003352 | XLOC_145171 | ENSRNOT000000004876 | 0.959071443 | 8.44E-07 |
| TUCP_003352 | XLOC_145171 | ENSRNOT000000041904 | 1           | 0        |
| TUCP_003352 | XLOC_145171 | ENSRNOT000000083487 | 0.989515314 | 9.80E-10 |
| TUCP_003352 | XLOC_145171 | ENSRNOT000000077990 | 1           | 0        |
| TUCP_003352 | XLOC_145171 | ENSRNOT000000038826 | 0.99977672  | 4.37E-18 |
| TUCP_003352 | XLOC_145171 | ENSRNOT000000046842 | 0.973644314 | 9.58E-08 |
| TUCP_003352 | XLOC_145171 | ENSRNOT000000037169 | 0.980329406 | 2.24E-08 |
| TUCP_003352 | XLOC_145171 | ENSRNOT000000021243 | 0.987425406 | 2.42E-09 |
| TUCP_003352 | XLOC_145171 | ENSRNOT000000060250 | 0.999933853 | 9.97E-21 |
| TUCP_003352 | XLOC_145171 | ENSRNOT000000091934 | 1           | 4.25E-78 |
| TUCP_003352 | XLOC_145171 | ENSRNOT000000046585 | 0.982941597 | 1.11E-08 |
| TUCP_003352 | XLOC_145171 | ENSRNOT000000080794 | 0.990839253 | 5.00E-10 |
| TUCP_003352 | XLOC_145171 | ENSRNOT000000014456 | 0.991697153 | 3.06E-10 |
| TUCP_003352 | XLOC_145171 | ENSRNOT000000031205 | 0.991394766 | 3.66E-10 |
| TUCP_003352 | XLOC_145171 | ENSRNOT000000044145 | 1           | 1.33E-79 |
| TUCP_003352 | XLOC_145171 | ENSRNOT000000088381 | 0.989013276 | 1.24E-09 |
| TUCP_003352 | XLOC_145171 | ENSRNOT000000011743 | 0.98678427  | 3.11E-09 |
| TUCP_003352 | XLOC_145171 | ENSRNOT000000089929 | 1           | 0        |
| TUCP_003352 | XLOC_145171 | ENSRNOT000000088624 | 1           | 0        |
| TUCP_003352 | XLOC_145171 | ENSRNOT000000085659 | 0.989908621 | 8.10E-10 |
| TUCP_003352 | XLOC_145171 | ENSRNOT000000015866 | 0.994066664 | 5.73E-11 |
| TUCP_003352 | XLOC_145171 | ENSRNOT000000078633 | 1           | 1.33E-79 |
| TUCP_003352 | XLOC_145171 | ENSRNOT000000034907 | 0.995318542 | 1.76E-11 |
| TUCP_003352 | XLOC_145171 | ENSRNOT000000093230 | 0.958295175 | 9.26E-07 |
| TUCP_003352 | XLOC_145171 | ENSRNOT000000051835 | 1           | 0        |
| TUCP_003352 | XLOC_145171 | ENSRNOT000000079087 | 1           | 0        |
| TUCP_003352 | XLOC_145171 | ENSRNOT000000037206 | 1           | 0        |
| TUCP_003352 | XLOC_145171 | ENSRNOT000000083261 | 0.970991658 | 1.54E-07 |
| TUCP_003352 | XLOC_145171 | ENSRNOT000000080590 | 0.999889216 | 1.31E-19 |
| TUCP_003352 | XLOC_145171 | ENSRNOT000000027552 | 0.999801024 | 2.46E-18 |
| TUCP_003352 | XLOC_145171 | ENSRNOT000000077014 | 0.995074376 | 2.26E-11 |
| TUCP_003352 | XLOC_145171 | ENSRNOT000000080453 | 0.99994332  | 4.61E-21 |
| TUCP_003352 | XLOC_145171 | ENSRNOT000000089057 | 0.968243551 | 2.41E-07 |
| TUCP_003352 | XLOC_145171 | ENSRNOT000000066839 | 0.991868612 | 2.76E-10 |
| TUCP_003352 | XLOC_145171 | ENSRNOT000000061284 | 0.955566942 | 1.27E-06 |
| TUCP_003352 | XLOC_145171 | ENSRNOT000000013423 | 0.959677621 | 7.84E-07 |
| TUCP_003352 | XLOC_145171 | ENSRNOT000000071884 | 0.974769955 | 7.72E-08 |
| TUCP_003352 | XLOC_145171 | ENSRNOT000000004128 | 0.961829362 | 5.99E-07 |
| TUCP_003352 | XLOC_145171 | ENSRNOT000000026316 | 0.964408046 | 4.24E-07 |

|             |             |                    |              |          |
|-------------|-------------|--------------------|--------------|----------|
| TUCP_003352 | XLOC_145171 | ENSRNOT00000057729 | 0.999384184  | 6.97E-16 |
| TUCP_003352 | XLOC_145171 | ENSRNOT00000078663 | 0.975192577  | 7.10E-08 |
| TUCP_003352 | XLOC_145171 | ENSRNOT00000064250 | 0.983131977  | 1.05E-08 |
| TUCP_003352 | XLOC_145171 | ENSRNOT00000021608 | 0.965228881  | 3.78E-07 |
| TUCP_003352 | XLOC_145171 | ENSRNOT00000029634 | 0.995816134  | 1.00E-11 |
| TUCP_003352 | XLOC_145171 | ENSRNOT00000093579 | 0.958564264  | 8.97E-07 |
| TUCP_003352 | XLOC_145171 | ENSRNOT00000086349 | 0.957242511  | 1.05E-06 |
| TUCP_003352 | XLOC_145171 | ENSRNOT00000065460 | 1            | 0        |
| TUCP_003352 | XLOC_145171 | ENSRNOT00000003817 | 0.996778712  | 2.72E-12 |
| TUCP_003352 | XLOC_145171 | ENSRNOT00000016713 | 1            | 1.33E-79 |
| TUCP_003352 | XLOC_145171 | ENSRNOT00000079260 | 0.996448245  | 4.42E-12 |
| TUCP_003352 | XLOC_145171 | ENSRNOT00000039294 | 1            | 0        |
| TUCP_003352 | XLOC_145171 | ENSRNOT00000092913 | 0.952980228  | 1.67E-06 |
| TUCP_003355 | XLOC_145345 | ENSRNOT00000055200 | 0.950106585  | 2.24E-06 |
| TUCP_003354 | XLOC_145345 | ENSRNOT00000026641 | 0.955047718  | 1.34E-06 |
| TUCP_004437 | XLOC_195441 | ENSRNOT00000009979 | 0.964951738  | 3.93E-07 |
| TUCP_004437 | XLOC_195441 | ENSRNOT00000011230 | 0.950033818  | 2.25E-06 |
| TUCP_004437 | XLOC_195441 | ENSRNOT00000009877 | 0.950533943  | 2.15E-06 |
| TUCP_004437 | XLOC_195441 | ENSRNOT00000017668 | 0.979157326  | 2.99E-08 |
| TUCP_004437 | XLOC_195441 | ENSRNOT00000078445 | -0.950787316 | 2.09E-06 |
| TUCP_004437 | XLOC_195441 | ENSRNOT00000023326 | 0.961329674  | 6.38E-07 |
| TUCP_004437 | XLOC_195441 | ENSRNOT00000005228 | 0.964624521  | 4.11E-07 |
| TUCP_004437 | XLOC_195441 | ENSRNOT00000027526 | 0.954808043  | 1.38E-06 |
| TUCP_004437 | XLOC_195441 | ENSRNOT00000090342 | 0.95606975   | 1.20E-06 |
| TUCP_004437 | XLOC_195441 | ENSRNOT00000060282 | 0.953963967  | 1.51E-06 |
| TUCP_004437 | XLOC_195441 | ENSRNOT00000017968 | 0.954199756  | 1.47E-06 |
| TUCP_004437 | XLOC_195441 | ENSRNOT00000091128 | -0.958603596 | 8.93E-07 |
| TUCP_004437 | XLOC_195441 | ENSRNOT00000027414 | 0.964792565  | 4.02E-07 |
| TUCP_004437 | XLOC_195441 | ENSRNOT00000028563 | 0.952805712  | 1.70E-06 |
| TUCP_004437 | XLOC_195441 | ENSRNOT00000006195 | 0.970041681  | 1.81E-07 |
| TUCP_004437 | XLOC_195441 | ENSRNOT00000066670 | 0.968813249  | 2.20E-07 |
| TUCP_004437 | XLOC_195441 | ENSRNOT00000012187 | 0.953281931  | 1.62E-06 |
| TUCP_004437 | XLOC_195441 | ENSRNOT00000005942 | 0.962417101  | 5.54E-07 |
| TUCP_004437 | XLOC_195441 | ENSRNOT00000012463 | -0.976200397 | 5.78E-08 |
| TUCP_004437 | XLOC_195441 | ENSRNOT00000026783 | 0.962181351  | 5.72E-07 |
| TUCP_004437 | XLOC_195441 | ENSRNOT00000040731 | 0.957307701  | 1.04E-06 |
| TUCP_004437 | XLOC_195441 | ENSRNOT00000012379 | 0.971309327  | 1.46E-07 |
| TUCP_004437 | XLOC_195441 | ENSRNOT00000028646 | 0.952755346  | 1.71E-06 |
| TUCP_004437 | XLOC_195441 | ENSRNOT00000011384 | 0.961437262  | 6.29E-07 |
| TUCP_004437 | XLOC_195441 | ENSRNOT00000014701 | 0.955486731  | 1.28E-06 |
| TUCP_004437 | XLOC_195441 | ENSRNOT00000027944 | 0.964077876  | 4.43E-07 |
| TUCP_004437 | XLOC_195441 | ENSRNOT00000052075 | 0.966394007  | 3.19E-07 |
| TUCP_004437 | XLOC_195441 | ENSRNOT00000067556 | -0.954068865 | 1.49E-06 |
| TUCP_004437 | XLOC_195441 | ENSRNOT00000055669 | 0.973182306  | 1.04E-07 |
| TUCP_004437 | XLOC_195441 | ENSRNOT00000017319 | 0.969230058  | 2.06E-07 |
| TUCP_004437 | XLOC_195441 | ENSRNOT00000072518 | 0.957972292  | 9.62E-07 |
| TUCP_004437 | XLOC_195441 | ENSRNOT00000005911 | 0.973945353  | 9.05E-08 |
| TUCP_004437 | XLOC_195441 | ENSRNOT00000021037 | 0.956717035  | 1.11E-06 |
| TUCP_004437 | XLOC_195441 | ENSRNOT00000012895 | 0.950525968  | 2.15E-06 |
| TUCP_004437 | XLOC_195441 | ENSRNOT00000003177 | 0.955068201  | 1.34E-06 |
| TUCP_004437 | XLOC_195441 | ENSRNOT00000044562 | 0.953679778  | 1.55E-06 |

|             |             |                    |              |          |
|-------------|-------------|--------------------|--------------|----------|
| TUCP_004437 | XLOC_195441 | ENSRNOT00000015116 | 0.967003454  | 2.91E-07 |
| TUCP_004437 | XLOC_195441 | ENSRNOT00000023180 | 0.966756615  | 3.02E-07 |
| TUCP_004437 | XLOC_195441 | ENSRNOT00000016948 | -0.976302114 | 5.66E-08 |
| TUCP_004437 | XLOC_195441 | ENSRNOT00000015609 | 0.950135552  | 2.23E-06 |
| TUCP_004437 | XLOC_195441 | ENSRNOT00000028070 | 0.951158526  | 2.02E-06 |
| TUCP_004437 | XLOC_195441 | ENSRNOT00000016321 | -0.959605551 | 7.91E-07 |
| TUCP_004437 | XLOC_195441 | ENSRNOT00000008817 | 0.962267722  | 5.65E-07 |
| TUCP_004437 | XLOC_195441 | ENSRNOT00000022610 | 0.962033471  | 5.83E-07 |
| TUCP_004437 | XLOC_195441 | ENSRNOT00000020437 | 0.961685826  | 6.10E-07 |
| TUCP_004437 | XLOC_195441 | ENSRNOT00000029833 | 0.960991431  | 6.66E-07 |
| TUCP_004437 | XLOC_195441 | ENSRNOT00000025580 | -0.954468016 | 1.43E-06 |
| TUCP_004437 | XLOC_195441 | ENSRNOT00000052422 | 0.955405545  | 1.29E-06 |
| TUCP_004437 | XLOC_195441 | ENSRNOT00000001242 | 0.962770562  | 5.29E-07 |
| TUCP_004437 | XLOC_195441 | ENSRNOT00000078102 | 0.951022346  | 2.04E-06 |
| TUCP_004437 | XLOC_195441 | ENSRNOT00000025983 | 0.970619954  | 1.64E-07 |
| TUCP_004437 | XLOC_195441 | ENSRNOT00000021790 | 0.971849652  | 1.33E-07 |
| TUCP_004437 | XLOC_195441 | ENSRNOT00000090451 | -0.955222661 | 1.31E-06 |
| TUCP_004437 | XLOC_195441 | ENSRNOT00000008929 | 0.970122557  | 1.78E-07 |
| TUCP_004437 | XLOC_195441 | ENSRNOT00000016129 | 0.96737504   | 2.76E-07 |
| TUCP_004437 | XLOC_195441 | ENSRNOT00000016289 | 0.965070836  | 3.86E-07 |
| TUCP_004437 | XLOC_195441 | ENSRNOT00000021408 | 0.955869188  | 1.22E-06 |
| TUCP_004437 | XLOC_195441 | ENSRNOT00000009440 | -0.967809573 | 2.58E-07 |
| TUCP_004437 | XLOC_195441 | ENSRNOT00000007379 | 0.964413432  | 4.23E-07 |
| TUCP_004437 | XLOC_195441 | ENSRNOT00000065618 | 0.955373355  | 1.29E-06 |
| TUCP_004437 | XLOC_195441 | ENSRNOT00000017753 | 0.962380837  | 5.57E-07 |
| TUCP_004437 | XLOC_195441 | ENSRNOT00000051022 | 0.95183096   | 1.88E-06 |
| TUCP_004437 | XLOC_195441 | ENSRNOT00000006499 | 0.96992828   | 1.84E-07 |
| TUCP_004437 | XLOC_195441 | ENSRNOT0000005909  | 0.952987     | 1.67E-06 |
| TUCP_004437 | XLOC_195441 | ENSRNOT00000019011 | 0.968267796  | 2.40E-07 |
| TUCP_004437 | XLOC_195441 | ENSRNOT00000025936 | -0.952980127 | 1.67E-06 |
| TUCP_004437 | XLOC_195441 | ENSRNOT00000009129 | 0.964772852  | 4.03E-07 |
| TUCP_004437 | XLOC_195441 | ENSRNOT00000036951 | 0.965306979  | 3.73E-07 |
| TUCP_004437 | XLOC_195441 | ENSRNOT00000016519 | 0.955829276  | 1.23E-06 |
| TUCP_004437 | XLOC_195441 | ENSRNOT00000026186 | 0.964234168  | 4.34E-07 |
| TUCP_004437 | XLOC_195441 | ENSRNOT00000014988 | 0.973655818  | 9.56E-08 |
| TUCP_004437 | XLOC_195441 | ENSRNOT00000022963 | 0.956057666  | 1.20E-06 |
| TUCP_004437 | XLOC_195441 | ENSRNOT00000043953 | 0.963123857  | 5.05E-07 |
| TUCP_004437 | XLOC_195441 | ENSRNOT00000058842 | 0.960758683  | 6.86E-07 |
| TUCP_004437 | XLOC_195441 | ENSRNOT00000084734 | 0.953342879  | 1.61E-06 |
| TUCP_004437 | XLOC_195441 | ENSRNOT00000035700 | 0.956314701  | 1.16E-06 |
| TUCP_004437 | XLOC_195441 | ENSRNOT00000082672 | 0.969851307  | 1.86E-07 |
| TUCP_004437 | XLOC_195441 | ENSRNOT00000064840 | 0.965590876  | 3.59E-07 |
| TUCP_004437 | XLOC_195441 | ENSRNOT00000026755 | 0.980871952  | 1.95E-08 |
| TUCP_004437 | XLOC_195441 | ENSRNOT00000054828 | 0.962341853  | 5.60E-07 |
| TUCP_004437 | XLOC_195441 | ENSRNOT00000001682 | 0.953914005  | 1.52E-06 |
| TUCP_004437 | XLOC_195441 | ENSRNOT00000077406 | 0.960243026  | 7.32E-07 |
| TUCP_004437 | XLOC_195441 | ENSRNOT00000026227 | 0.971159242  | 1.50E-07 |
| TUCP_004437 | XLOC_195441 | ENSRNOT00000008757 | 0.952487152  | 1.76E-06 |
| TUCP_004437 | XLOC_195441 | ENSRNOT00000024149 | 0.971857946  | 1.33E-07 |
| TUCP_004437 | XLOC_195441 | ENSRNOT00000035474 | 0.951210545  | 2.01E-06 |
| TUCP_004437 | XLOC_195441 | ENSRNOT00000077311 | 0.95172471   | 1.90E-06 |

|             |             |                    |              |          |
|-------------|-------------|--------------------|--------------|----------|
| TUCP_004437 | XLOC_195441 | ENSRNOT00000086336 | 0.974623763  | 7.94E-08 |
| TUCP_004437 | XLOC_195441 | ENSRNOT00000083369 | 0.964830896  | 3.99E-07 |
| TUCP_004437 | XLOC_195441 | ENSRNOT00000076872 | 0.960773175  | 6.85E-07 |
| TUCP_004437 | XLOC_195441 | ENSRNOT00000059744 | 0.95238537   | 1.78E-06 |
| TUCP_004437 | XLOC_195441 | ENSRNOT00000010218 | 0.955604983  | 1.26E-06 |
| TUCP_004437 | XLOC_195441 | ENSRNOT00000007768 | 0.982487656  | 1.26E-08 |
| TUCP_004437 | XLOC_195441 | ENSRNOT00000087095 | 0.970674429  | 1.63E-07 |
| TUCP_004437 | XLOC_195441 | ENSRNOT00000064798 | 0.963812532  | 4.60E-07 |
| TUCP_004437 | XLOC_195441 | ENSRNOT00000019177 | 0.969668735  | 1.92E-07 |
| TUCP_004437 | XLOC_195441 | ENSRNOT00000014261 | 0.954968385  | 1.35E-06 |
| TUCP_004437 | XLOC_195441 | ENSRNOT00000022485 | 0.95904192   | 8.47E-07 |
| TUCP_004437 | XLOC_195441 | ENSRNOT00000033235 | 0.963502401  | 4.80E-07 |
| TUCP_004437 | XLOC_195441 | ENSRNOT00000091807 | 0.960956815  | 6.69E-07 |
| TUCP_004437 | XLOC_195441 | ENSRNOT00000018533 | 0.957564174  | 1.01E-06 |
| TUCP_004437 | XLOC_195441 | ENSRNOT00000011682 | -0.951487048 | 1.95E-06 |
| TUCP_001169 | XLOC_044150 | ENSRNOT00000074753 | 0.95422112   | 1.47E-06 |
| TUCP_001169 | XLOC_044150 | ENSRNOT00000041904 | 0.960802577  | 6.82E-07 |
| TUCP_001169 | XLOC_044150 | ENSRNOT00000077990 | 0.960802577  | 6.82E-07 |
| TUCP_001169 | XLOC_044150 | ENSRNOT00000038826 | 0.958231671  | 9.33E-07 |
| TUCP_001169 | XLOC_044150 | ENSRNOT00000021243 | 0.950413979  | 2.17E-06 |
| TUCP_001169 | XLOC_044150 | ENSRNOT00000060250 | 0.961434838  | 6.30E-07 |
| TUCP_001169 | XLOC_044150 | ENSRNOT00000091934 | 0.960802577  | 6.82E-07 |
| TUCP_001169 | XLOC_044150 | ENSRNOT00000086027 | 0.96141872   | 6.31E-07 |
| TUCP_001169 | XLOC_044150 | ENSRNOT00000046585 | 0.973485832  | 9.87E-08 |
| TUCP_001169 | XLOC_044150 | ENSRNOT00000034907 | 0.955637858  | 1.26E-06 |
| TUCP_001169 | XLOC_044150 | ENSRNOT00000031205 | 0.972925345  | 1.09E-07 |
| TUCP_001169 | XLOC_044150 | ENSRNOT00000044145 | 0.960802577  | 6.82E-07 |
| TUCP_001169 | XLOC_044150 | ENSRNOT00000088381 | 0.973303415  | 1.02E-07 |
| TUCP_001169 | XLOC_044150 | ENSRNOT00000089929 | 0.960802577  | 6.82E-07 |
| TUCP_001169 | XLOC_044150 | ENSRNOT00000088624 | 0.960802577  | 6.82E-07 |
| TUCP_001169 | XLOC_044150 | ENSRNOT00000085659 | 0.967689322  | 2.63E-07 |
| TUCP_001169 | XLOC_044150 | ENSRNOT00000015866 | 0.964219238  | 4.35E-07 |
| TUCP_001169 | XLOC_044150 | ENSRNOT00000061284 | 0.968276993  | 2.40E-07 |
| TUCP_001169 | XLOC_044150 | ENSRNOT00000024575 | 0.952640758  | 1.73E-06 |
| TUCP_001169 | XLOC_044150 | ENSRNOT00000051835 | 0.960802577  | 6.82E-07 |
| TUCP_001169 | XLOC_044150 | ENSRNOT00000079087 | 0.960802577  | 6.82E-07 |
| TUCP_001169 | XLOC_044150 | ENSRNOT00000037206 | 0.960802577  | 6.82E-07 |
| TUCP_001169 | XLOC_044150 | ENSRNOT00000080590 | 0.961066198  | 6.60E-07 |
| TUCP_001169 | XLOC_044150 | ENSRNOT00000027552 | 0.961449096  | 6.29E-07 |
| TUCP_001169 | XLOC_044150 | ENSRNOT00000077014 | 0.970135134  | 1.78E-07 |
| TUCP_001169 | XLOC_044150 | ENSRNOT00000080453 | 0.960951971  | 6.70E-07 |
| TUCP_001169 | XLOC_044150 | ENSRNOT00000057729 | 0.960658709  | 6.95E-07 |
| TUCP_001169 | XLOC_044150 | ENSRNOT00000078633 | 0.960802577  | 6.82E-07 |
| TUCP_001169 | XLOC_044150 | ENSRNOT00000071884 | 0.966257894  | 3.25E-07 |
| TUCP_001169 | XLOC_044150 | ENSRNOT00000078663 | 0.969784672  | 1.89E-07 |
| TUCP_001169 | XLOC_044150 | ENSRNOT00000064250 | 0.953236385  | 1.63E-06 |
| TUCP_001169 | XLOC_044150 | ENSRNOT00000040509 | 0.958353911  | 9.20E-07 |
| TUCP_001169 | XLOC_044150 | ENSRNOT00000029634 | 0.953748285  | 1.54E-06 |
| TUCP_001169 | XLOC_044150 | ENSRNOT00000093579 | 0.976734665  | 5.16E-08 |
| TUCP_001169 | XLOC_044150 | ENSRNOT00000065460 | 0.960802577  | 6.82E-07 |
| TUCP_001169 | XLOC_044150 | ENSRNOT0000003817  | 0.959396723  | 8.12E-07 |



|             |             |                     |              |          |
|-------------|-------------|---------------------|--------------|----------|
| TUCP_001169 | XLOC_044150 | ENSRNOT00000016713  | 0.960802577  | 6.82E-07 |
| TUCP_001169 | XLOC_044150 | ENSRNOT00000079260  | 0.955750434  | 1.24E-06 |
| TUCP_001169 | XLOC_044150 | ENSRNOT00000039294  | 0.960802577  | 6.82E-07 |
| TUCP_001169 | XLOC_044150 | ENSRNOT00000024337  | 0.960343705  | 7.23E-07 |
| TUCP_004439 | XLOC_195492 | ENSRNOT00000082191  | 0.967744797  | 2.60E-07 |
| TUCP_004439 | XLOC_195492 | ENSRNOT00000071706  | 0.959373956  | 8.14E-07 |
| TUCP_004438 | XLOC_195492 | ENSRNOT00000006357  | 0.955309327  | 1.30E-06 |
| TUCP_004438 | XLOC_195492 | ENSRNOT00000006860  | 0.970200681  | 1.76E-07 |
| TUCP_004438 | XLOC_195492 | ENSRNOT000000082585 | 0.957548575  | 1.01E-06 |
| TUCP_004438 | XLOC_195492 | ENSRNOT000000038439 | 0.964087713  | 4.43E-07 |
| TUCP_004438 | XLOC_195492 | ENSRNOT000000056355 | 0.957478571  | 1.02E-06 |
| TUCP_004438 | XLOC_195492 | ENSRNOT000000029435 | 0.956929503  | 1.09E-06 |
| TUCP_004438 | XLOC_195492 | ENSRNOT000000047717 | 0.953926409  | 1.51E-06 |
| TUCP_004438 | XLOC_195492 | ENSRNOT000000003515 | 0.952071891  | 1.84E-06 |
| TUCP_004438 | XLOC_195492 | ENSRNOT000000047408 | 0.951628912  | 1.92E-06 |
| TUCP_004438 | XLOC_195492 | ENSRNOT000000010168 | 0.96777687   | 2.59E-07 |
| TUCP_004438 | XLOC_195492 | ENSRNOT000000012376 | 0.951019519  | 2.04E-06 |
| TUCP_004438 | XLOC_195492 | ENSRNOT000000016419 | 0.955487095  | 1.28E-06 |
| TUCP_004438 | XLOC_195492 | ENSRNOT000000068118 | 0.954259267  | 1.46E-06 |
| TUCP_004438 | XLOC_195492 | ENSRNOT000000091456 | 0.964146266  | 4.39E-07 |
| TUCP_004438 | XLOC_195492 | ENSRNOT000000019350 | 0.958957587  | 8.56E-07 |
| TUCP_004438 | XLOC_195492 | ENSRNOT000000014182 | 0.962617528  | 5.40E-07 |
| TUCP_004438 | XLOC_195492 | ENSRNOT000000029072 | 0.952303191  | 1.79E-06 |
| TUCP_004438 | XLOC_195492 | ENSRNOT000000016464 | 0.95809738   | 9.48E-07 |
| TUCP_004438 | XLOC_195492 | ENSRNOT000000026854 | 0.950894139  | 2.07E-06 |
| TUCP_004438 | XLOC_195492 | ENSRNOT000000064116 | 0.955314082  | 1.30E-06 |
| TUCP_001904 | XLOC_078874 | ENSRNOT000000026966 | 0.970322306  | 1.73E-07 |
| TUCP_001904 | XLOC_078874 | ENSRNOT000000068416 | 0.999999782  | 3.88E-33 |
| TUCP_001904 | XLOC_078874 | ENSRNOT000000086036 | 0.999958274  | 9.96E-22 |
| TUCP_001904 | XLOC_078874 | ENSRNOT000000026803 | 0.985046075  | 5.74E-09 |
| TUCP_001904 | XLOC_078874 | ENSRNOT000000047527 | 0.963071698  | 5.08E-07 |
| TUCP_001904 | XLOC_078874 | ENSRNOT000000042251 | 0.999344295  | 9.53E-16 |
| TUCP_001904 | XLOC_078874 | ENSRNOT000000002984 | 0.998397069  | 8.31E-14 |
| TUCP_001904 | XLOC_078874 | ENSRNOT000000083764 | 0.999541808  | 1.59E-16 |
| TUCP_001904 | XLOC_078874 | ENSRNOT000000076802 | 0.962695843  | 5.34E-07 |
| TUCP_001904 | XLOC_078874 | ENSRNOT000000092365 | 0.999161651  | 3.26E-15 |
| TUCP_001904 | XLOC_078874 | ENSRNOT000000079275 | 0.999901911  | 7.15E-20 |
| TUCP_001904 | XLOC_078874 | ENSRNOT000000066062 | -0.959706712 | 7.82E-07 |
| TUCP_001904 | XLOC_078874 | ENSRNOT000000045301 | 1            | 0        |
| TUCP_001904 | XLOC_078874 | ENSRNOT000000041186 | 0.999975782  | 6.56E-23 |
| TUCP_001904 | XLOC_078874 | ENSRNOT000000010092 | 0.977711778  | 4.17E-08 |
| TUCP_001904 | XLOC_078874 | ENSRNOT000000076182 | 1            | 1.33E-79 |
| TUCP_001904 | XLOC_078874 | ENSRNOT000000087404 | 0.951157664  | 2.02E-06 |
| TUCP_001904 | XLOC_078874 | ENSRNOT000000052003 | 0.95837331   | 9.18E-07 |
| TUCP_001904 | XLOC_078874 | ENSRNOT000000081709 | 0.998485154  | 6.27E-14 |
| TUCP_001904 | XLOC_078874 | ENSRNOT000000005726 | 0.959610119  | 7.91E-07 |
| TUCP_001904 | XLOC_078874 | ENSRNOT000000014103 | 1            | 0        |
| TUCP_001904 | XLOC_078874 | ENSRNOT000000057433 | 0.964930601  | 3.94E-07 |
| TUCP_001904 | XLOC_078874 | ENSRNOT000000082289 | 0.998931566  | 1.09E-14 |
| TUCP_001904 | XLOC_078874 | ENSRNOT000000092516 | 0.957459323  | 1.02E-06 |
| TUCP_001904 | XLOC_078874 | ENSRNOT00000008898  | 0.990039768  | 7.59E-10 |

|             |             |                    |              |          |
|-------------|-------------|--------------------|--------------|----------|
| TUCP_001904 | XL0C_078874 | ENSRNOT00000083493 | 0.995461232  | 1.51E-11 |
| TUCP_001904 | XL0C_078874 | ENSRNOT00000092563 | 0.987201084  | 2.65E-09 |
| TUCP_001904 | XL0C_078874 | ENSRNOT00000088893 | 1            | 1.33E-79 |
| TUCP_001904 | XL0C_078874 | ENSRNOT00000076693 | 0.955029582  | 1.34E-06 |
| TUCP_001904 | XL0C_078874 | ENSRNOT00000081014 | 1            | 0        |
| TUCP_001904 | XL0C_078874 | ENSRNOT00000067543 | 1            | 1.33E-79 |
| TUCP_001904 | XL0C_078874 | ENSRNOT00000050968 | 0.996816433  | 2.56E-12 |
| TUCP_001904 | XL0C_078874 | ENSRNOT00000042201 | 0.960235595  | 7.32E-07 |
| TUCP_001904 | XL0C_078874 | ENSRNOT00000004373 | 0.957315473  | 1.04E-06 |
| TUCP_001904 | XL0C_078874 | ENSRNOT00000063929 | 1            | 0        |
| TUCP_001904 | XL0C_078874 | ENSRNOT00000057472 | 1            | 1.33E-79 |
| TUCP_001904 | XL0C_078874 | ENSRNOT00000041617 | 0.952449765  | 1.77E-06 |
| TUCP_001904 | XL0C_078874 | ENSRNOT00000091763 | 0.986310385  | 3.70E-09 |
| TUCP_001904 | XL0C_078874 | ENSRNOT00000022200 | 0.998491303  | 6.14E-14 |
| TUCP_001904 | XL0C_078874 | ENSRNOT00000067379 | 0.997260967  | 1.21E-12 |
| TUCP_001904 | XL0C_078874 | ENSRNOT00000020786 | 0.976428448  | 5.51E-08 |
| TUCP_001904 | XL0C_078874 | ENSRNOT00000050543 | 0.999722223  | 1.30E-17 |
| TUCP_001904 | XL0C_078874 | ENSRNOT00000089306 | 0.999866649  | 3.32E-19 |
| TUCP_001904 | XL0C_078874 | ENSRNOT00000052367 | 0.997268394  | 1.19E-12 |
| TUCP_001904 | XL0C_078874 | ENSRNOT00000090658 | 1            | 0        |
| TUCP_001904 | XL0C_078874 | ENSRNOT00000022571 | 0.995290013  | 1.81E-11 |
| TUCP_001904 | XL0C_078874 | ENSRNOT00000044520 | 0.981817158  | 1.52E-08 |
| TUCP_001904 | XL0C_078874 | ENSRNOT00000065448 | 0.963648868  | 4.70E-07 |
| TUCP_001902 | XL0C_078874 | ENSRNOT00000026966 | 0.971037903  | 1.53E-07 |
| TUCP_001902 | XL0C_078874 | ENSRNOT00000068416 | 0.994279089  | 4.78E-11 |
| TUCP_001902 | XL0C_078874 | ENSRNOT00000086036 | 0.993920314  | 6.48E-11 |
| TUCP_001902 | XL0C_078874 | ENSRNOT00000026803 | 0.976713022  | 5.19E-08 |
| TUCP_001902 | XL0C_078874 | ENSRNOT00000081709 | 0.991758685  | 2.95E-10 |
| TUCP_001902 | XL0C_078874 | ENSRNOT00000042251 | 0.993626405  | 8.20E-11 |
| TUCP_001902 | XL0C_078874 | ENSRNOT00000002984 | 0.992849161  | 1.45E-10 |
| TUCP_001902 | XL0C_078874 | ENSRNOT00000020071 | 0.965195355  | 3.79E-07 |
| TUCP_001902 | XL0C_078874 | ENSRNOT00000083764 | 0.992762064  | 1.55E-10 |
| TUCP_001902 | XL0C_078874 | ENSRNOT00000050543 | 0.994792055  | 2.99E-11 |
| TUCP_001902 | XL0C_078874 | ENSRNOT00000092365 | 0.993952058  | 6.31E-11 |
| TUCP_001902 | XL0C_078874 | ENSRNOT00000089306 | 0.994190692  | 5.16E-11 |
| TUCP_001902 | XL0C_078874 | ENSRNOT00000066062 | -0.966322167 | 3.22E-07 |
| TUCP_001902 | XL0C_078874 | ENSRNOT00000045301 | 0.994316007  | 4.63E-11 |
| TUCP_001902 | XL0C_078874 | ENSRNOT00000041186 | 0.99403051   | 5.91E-11 |
| TUCP_001902 | XL0C_078874 | ENSRNOT00000010092 | 0.986562811  | 3.37E-09 |
| TUCP_001902 | XL0C_078874 | ENSRNOT00000076182 | 0.994316007  | 4.63E-11 |
| TUCP_001902 | XL0C_078874 | ENSRNOT00000038494 | 0.960699094  | 6.91E-07 |
| TUCP_001902 | XL0C_078874 | ENSRNOT00000081830 | 0.952647856  | 1.73E-06 |
| TUCP_001902 | XL0C_078874 | ENSRNOT00000047527 | 0.977930551  | 3.97E-08 |
| TUCP_001902 | XL0C_078874 | ENSRNOT00000005726 | 0.976314831  | 5.64E-08 |
| TUCP_001902 | XL0C_078874 | ENSRNOT00000014103 | 0.994316007  | 4.63E-11 |
| TUCP_001902 | XL0C_078874 | ENSRNOT00000057433 | 0.97909683   | 3.03E-08 |
| TUCP_001902 | XL0C_078874 | ENSRNOT00000082289 | 0.994549904  | 3.75E-11 |
| TUCP_001902 | XL0C_078874 | ENSRNOT00000092516 | 0.958213916  | 9.35E-07 |
| TUCP_001902 | XL0C_078874 | ENSRNOT00000082143 | 0.965794155  | 3.48E-07 |
| TUCP_001902 | XL0C_078874 | ENSRNOT00000085570 | 0.954957516  | 1.35E-06 |
| TUCP_001902 | XL0C_078874 | ENSRNOT00000083493 | 0.987866401  | 2.03E-09 |

|             |             |                    |              |          |
|-------------|-------------|--------------------|--------------|----------|
| TUCP_001902 | XLOC_078874 | ENSRNOT00000092563 | 0.983419335  | 9.60E-09 |
| TUCP_001902 | XLOC_078874 | ENSRNOT00000088893 | 0.994316007  | 4.63E-11 |
| TUCP_001902 | XLOC_078874 | ENSRNOT00000076693 | 0.971568045  | 1.40E-07 |
| TUCP_001902 | XLOC_078874 | ENSRNOT00000081014 | 0.994316007  | 4.63E-11 |
| TUCP_001902 | XLOC_078874 | ENSRNOT00000067543 | 0.994316007  | 4.63E-11 |
| TUCP_001902 | XLOC_078874 | ENSRNOT00000076802 | 0.982810385  | 1.15E-08 |
| TUCP_001902 | XLOC_078874 | ENSRNOT00000050968 | 0.992941349  | 1.36E-10 |
| TUCP_001902 | XLOC_078874 | ENSRNOT00000042201 | 0.953191152  | 1.64E-06 |
| TUCP_001902 | XLOC_078874 | ENSRNOT00000004373 | 0.957854753  | 9.76E-07 |
| TUCP_001902 | XLOC_078874 | ENSRNOT00000063929 | 0.994316007  | 4.63E-11 |
| TUCP_001902 | XLOC_078874 | ENSRNOT00000057472 | 0.994316007  | 4.63E-11 |
| TUCP_001902 | XLOC_078874 | ENSRNOT00000041617 | 0.962310898  | 5.62E-07 |
| TUCP_001902 | XLOC_078874 | ENSRNOT00000091763 | 0.984147025  | 7.68E-09 |
| TUCP_001902 | XLOC_078874 | ENSRNOT00000022200 | 0.99333755   | 1.02E-10 |
| TUCP_001902 | XLOC_078874 | ENSRNOT00000067379 | 0.99149545   | 3.45E-10 |
| TUCP_001902 | XLOC_078874 | ENSRNOT00000020786 | 0.981788288  | 1.53E-08 |
| TUCP_001902 | XLOC_078874 | ENSRNOT00000084847 | 0.96216939   | 5.73E-07 |
| TUCP_001902 | XLOC_078874 | ENSRNOT00000079275 | 0.995365474  | 1.67E-11 |
| TUCP_001902 | XLOC_078874 | ENSRNOT00000052367 | 0.9942345    | 4.97E-11 |
| TUCP_001902 | XLOC_078874 | ENSRNOT00000090658 | 0.994316007  | 4.63E-11 |
| TUCP_001902 | XLOC_078874 | ENSRNOT00000022571 | 0.990028385  | 7.64E-10 |
| TUCP_001902 | XLOC_078874 | ENSRNOT00000088078 | 0.961020206  | 6.64E-07 |
| TUCP_001902 | XLOC_078874 | ENSRNOT00000052003 | 0.972517491  | 1.18E-07 |
| TUCP_001902 | XLOC_078874 | ENSRNOT00000008898 | 0.979165091  | 2.99E-08 |
| TUCP_001902 | XLOC_078874 | ENSRNOT00000044520 | 0.968753338  | 2.23E-07 |
| TUCP_001902 | XLOC_078874 | ENSRNOT00000065448 | 0.982960877  | 1.10E-08 |
| TUCP_001902 | XLOC_078874 | ENSRNOT00000072810 | 0.956974256  | 1.08E-06 |
| TUCP_002388 | XLOC_100877 | ENSRNOT00000081839 | 0.952584042  | 1.74E-06 |
| TUCP_002502 | XLOC_105647 | ENSRNOT00000073718 | 0.951549793  | 1.94E-06 |
| TUCP_002501 | XLOC_105430 | ENSRNOT00000045833 | 0.964652494  | 4.10E-07 |
| TUCP_002501 | XLOC_105430 | ENSRNOT00000013743 | 0.982913965  | 1.11E-08 |
| TUCP_002501 | XLOC_105430 | ENSRNOT00000007350 | 0.951750159  | 1.90E-06 |
| TUCP_002501 | XLOC_105430 | ENSRNOT00000004400 | 0.965214763  | 3.78E-07 |
| TUCP_002501 | XLOC_105430 | ENSRNOT00000087062 | 0.971340054  | 1.45E-07 |
| TUCP_002501 | XLOC_105430 | ENSRNOT00000082914 | 0.950766898  | 2.10E-06 |
| TUCP_002501 | XLOC_105430 | ENSRNOT00000048613 | 0.96302682   | 5.11E-07 |
| TUCP_002501 | XLOC_105430 | ENSRNOT00000023437 | 0.954290905  | 1.46E-06 |
| TUCP_002501 | XLOC_105430 | ENSRNOT00000013025 | -0.950805388 | 2.09E-06 |
| TUCP_002501 | XLOC_105430 | ENSRNOT00000004017 | 0.960860596  | 6.77E-07 |
| TUCP_002501 | XLOC_105430 | ENSRNOT00000036051 | 0.95321083   | 1.63E-06 |
| TUCP_002501 | XLOC_105430 | ENSRNOT00000001679 | 0.962637614  | 5.39E-07 |
| TUCP_002501 | XLOC_105430 | ENSRNOT00000010418 | 0.95031789   | 2.19E-06 |
| TUCP_002501 | XLOC_105430 | ENSRNOT00000015006 | 0.952159094  | 1.82E-06 |
| TUCP_002501 | XLOC_105430 | ENSRNOT00000013516 | 0.969856132  | 1.86E-07 |
| TUCP_002501 | XLOC_105430 | ENSRNOT00000078884 | -0.953143613 | 1.64E-06 |
| TUCP_002501 | XLOC_105430 | ENSRNOT00000001507 | 0.953250516  | 1.63E-06 |
| TUCP_002501 | XLOC_105430 | ENSRNOT00000073370 | 0.968923627  | 2.17E-07 |
| TUCP_002501 | XLOC_105430 | ENSRNOT00000018584 | 0.955047275  | 1.34E-06 |
| TUCP_002501 | XLOC_105430 | ENSRNOT00000091637 | 0.959424223  | 8.09E-07 |
| TUCP_002501 | XLOC_105430 | ENSRNOT00000023037 | 0.975946612  | 6.09E-08 |
| TUCP_002501 | XLOC_105430 | ENSRNOT00000077060 | 0.9567106    | 1.11E-06 |

|             |             |                     |              |          |
|-------------|-------------|---------------------|--------------|----------|
| TUCP_002501 | XLOC_105430 | ENSRNOT00000017271  | 0.965652687  | 3.55E-07 |
| TUCP_002501 | XLOC_105430 | ENSRNOT00000017373  | 0.955291781  | 1.30E-06 |
| TUCP_002501 | XLOC_105430 | ENSRNOT00000034282  | 0.965515586  | 3.62E-07 |
| TUCP_002501 | XLOC_105430 | ENSRNOT00000024677  | 0.969450927  | 1.99E-07 |
| TUCP_002501 | XLOC_105430 | ENSRNOT00000037685  | 0.960909096  | 6.73E-07 |
| TUCP_002501 | XLOC_105430 | ENSRNOT00000090461  | 0.961766472  | 6.03E-07 |
| TUCP_002501 | XLOC_105430 | ENSRNOT00000030082  | 0.955407735  | 1.29E-06 |
| TUCP_002501 | XLOC_105430 | ENSRNOT00000087287  | 0.96407104   | 4.44E-07 |
| TUCP_002501 | XLOC_105430 | ENSRNOT00000026392  | 0.967318494  | 2.78E-07 |
| TUCP_002501 | XLOC_105430 | ENSRNOT00000013286  | 0.957205725  | 1.05E-06 |
| TUCP_002501 | XLOC_105430 | ENSRNOT00000011926  | 0.953052673  | 1.66E-06 |
| TUCP_002501 | XLOC_105430 | ENSRNOT00000005686  | -0.956524284 | 1.14E-06 |
| TUCP_002501 | XLOC_105430 | ENSRNOT000000071540 | 0.95245794   | 1.77E-06 |
| TUCP_002501 | XLOC_105430 | ENSRNOT00000019820  | 0.950692811  | 2.11E-06 |
| TUCP_002501 | XLOC_105430 | ENSRNOT000000073860 | -0.950037871 | 2.25E-06 |
| TUCP_002501 | XLOC_105430 | ENSRNOT00000011832  | -0.960293054 | 7.27E-07 |
| TUCP_002501 | XLOC_105430 | ENSRNOT00000030074  | 0.972307577  | 1.22E-07 |
| TUCP_002501 | XLOC_105430 | ENSRNOT000000083968 | -0.951985909 | 1.85E-06 |
| TUCP_002501 | XLOC_105430 | ENSRNOT000000083578 | 0.95586997   | 1.22E-06 |
| TUCP_002501 | XLOC_105430 | ENSRNOT00000019688  | 0.954730656  | 1.39E-06 |
| TUCP_002501 | XLOC_105430 | ENSRNOT000000084709 | 0.953173632  | 1.64E-06 |
| TUCP_002501 | XLOC_105430 | ENSRNOT000000092068 | 0.950004252  | 2.26E-06 |
| TUCP_002501 | XLOC_105430 | ENSRNOT000000009156 | 0.966956612  | 2.93E-07 |
| TUCP_002501 | XLOC_105430 | ENSRNOT000000021802 | 0.952435028  | 1.77E-06 |
| TUCP_002501 | XLOC_105430 | ENSRNOT000000003265 | 0.953385924  | 1.60E-06 |
| TUCP_002501 | XLOC_105430 | ENSRNOT000000068452 | 0.969550633  | 1.96E-07 |
| TUCP_002501 | XLOC_105430 | ENSRNOT000000007821 | 0.959572901  | 7.95E-07 |
| TUCP_002501 | XLOC_105430 | ENSRNOT00000018122  | 0.968201495  | 2.43E-07 |
| TUCP_002501 | XLOC_105430 | ENSRNOT000000072357 | -0.954920119 | 1.36E-06 |
| TUCP_002501 | XLOC_105430 | ENSRNOT000000059246 | 0.955597702  | 1.26E-06 |
| TUCP_002501 | XLOC_105430 | ENSRNOT00000011956  | 0.951606621  | 1.93E-06 |
| TUCP_002501 | XLOC_105430 | ENSRNOT000000024119 | 0.965541699  | 3.61E-07 |
| TUCP_002501 | XLOC_105430 | ENSRNOT000000091427 | -0.973424295 | 9.98E-08 |
| TUCP_002501 | XLOC_105430 | ENSRNOT000000005604 | 0.950097962  | 2.24E-06 |
| TUCP_002501 | XLOC_105430 | ENSRNOT000000024110 | 0.958604699  | 8.93E-07 |
| TUCP_002501 | XLOC_105430 | ENSRNOT00000016637  | -0.958075688 | 9.51E-07 |
| TUCP_002501 | XLOC_105430 | ENSRNOT000000086260 | -0.952184716 | 1.82E-06 |
| TUCP_002501 | XLOC_105430 | ENSRNOT000000068381 | 0.962694004  | 5.34E-07 |
| TUCP_002501 | XLOC_105430 | ENSRNOT000000054948 | 0.961069677  | 6.60E-07 |
| TUCP_002501 | XLOC_105430 | ENSRNOT000000020383 | 0.954180415  | 1.47E-06 |
| TUCP_002501 | XLOC_105430 | ENSRNOT000000058382 | 0.951244557  | 2.00E-06 |
| TUCP_002501 | XLOC_105430 | ENSRNOT000000026531 | -0.953904962 | 1.52E-06 |
| TUCP_002501 | XLOC_105430 | ENSRNOT000000005172 | 0.959276248  | 8.24E-07 |
| TUCP_002501 | XLOC_105430 | ENSRNOT00000011880  | 0.957035836  | 1.07E-06 |
| TUCP_002501 | XLOC_105430 | ENSRNOT000000000898 | 0.953136264  | 1.65E-06 |
| TUCP_002501 | XLOC_105430 | ENSRNOT000000031261 | 0.952354122  | 1.78E-06 |
| TUCP_002501 | XLOC_105430 | ENSRNOT000000081725 | 0.960012489  | 7.53E-07 |
| TUCP_002501 | XLOC_105430 | ENSRNOT000000089980 | -0.960771958 | 6.85E-07 |
| TUCP_002501 | XLOC_105430 | ENSRNOT000000005459 | 0.95436088   | 1.44E-06 |
| TUCP_002501 | XLOC_105430 | ENSRNOT00000011675  | 0.950156377  | 2.23E-06 |
| TUCP_002501 | XLOC_105430 | ENSRNOT000000020795 | 0.961912431  | 5.92E-07 |

|             |             |                     |              |          |
|-------------|-------------|---------------------|--------------|----------|
| TUCP_002501 | XLOC_105430 | ENSRNOT00000041106  | 0.96736701   | 2.76E-07 |
| TUCP_002501 | XLOC_105430 | ENSRNOT00000023876  | 0.95615617   | 1.19E-06 |
| TUCP_002501 | XLOC_105430 | ENSRNOT00000033359  | 0.979263009  | 2.92E-08 |
| TUCP_002501 | XLOC_105430 | ENSRNOT0000002974   | 0.951142686  | 2.02E-06 |
| TUCP_002501 | XLOC_105430 | ENSRNOT00000028888  | 0.958150883  | 9.42E-07 |
| TUCP_002501 | XLOC_105430 | ENSRNOT00000066032  | 0.977717102  | 4.17E-08 |
| TUCP_002501 | XLOC_105430 | ENSRNOT00000005161  | 0.955918063  | 1.22E-06 |
| TUCP_002501 | XLOC_105430 | ENSRNOT00000019876  | 0.961823727  | 5.99E-07 |
| TUCP_002501 | XLOC_105430 | ENSRNOT00000073919  | 0.961951379  | 5.89E-07 |
| TUCP_002501 | XLOC_105430 | ENSRNOT00000030449  | 0.955932385  | 1.22E-06 |
| TUCP_002501 | XLOC_105430 | ENSRNOT00000037955  | -0.95870822  | 8.82E-07 |
| TUCP_002501 | XLOC_105430 | ENSRNOT00000035277  | 0.973744062  | 9.40E-08 |
| TUCP_002501 | XLOC_105430 | ENSRNOT00000086122  | 0.952249106  | 1.80E-06 |
| TUCP_002501 | XLOC_105430 | ENSRNOT00000004999  | 0.953263504  | 1.62E-06 |
| TUCP_002501 | XLOC_105430 | ENSRNOT00000025314  | 0.962232423  | 5.68E-07 |
| TUCP_002501 | XLOC_105430 | ENSRNOT00000012386  | 0.950292799  | 2.20E-06 |
| TUCP_002501 | XLOC_105430 | ENSRNOT00000086995  | 0.955867611  | 1.22E-06 |
| TUCP_002501 | XLOC_105430 | ENSRNOT00000037246  | 0.950184852  | 2.22E-06 |
| TUCP_002501 | XLOC_105430 | ENSRNOT00000010993  | 0.967264843  | 2.80E-07 |
| TUCP_002501 | XLOC_105430 | ENSRNOT00000059181  | 0.950308015  | 2.19E-06 |
| TUCP_002501 | XLOC_105430 | ENSRNOT00000017765  | 0.955427971  | 1.29E-06 |
| TUCP_002501 | XLOC_105430 | ENSRNOT00000017761  | 0.958822006  | 8.70E-07 |
| TUCP_002501 | XLOC_105430 | ENSRNOT00000009994  | -0.960413534 | 7.16E-07 |
| TUCP_002501 | XLOC_105430 | ENSRNOT00000005405  | 0.956284665  | 1.17E-06 |
| TUCP_002501 | XLOC_105430 | ENSRNOT00000087408  | 0.971200985  | 1.49E-07 |
| TUCP_002501 | XLOC_105430 | ENSRNOT00000009462  | 0.95991038   | 7.62E-07 |
| TUCP_002501 | XLOC_105430 | ENSRNOT00000039102  | 0.96002477   | 7.52E-07 |
| TUCP_002501 | XLOC_105430 | ENSRNOT00000085517  | 0.95765551   | 9.98E-07 |
| TUCP_002501 | XLOC_105430 | ENSRNOT00000037405  | 0.959403716  | 8.11E-07 |
| TUCP_002501 | XLOC_105430 | ENSRNOT00000009742  | -0.951573192 | 1.93E-06 |
| TUCP_002501 | XLOC_105430 | ENSRNOT00000013632  | 0.954849046  | 1.37E-06 |
| TUCP_002501 | XLOC_105430 | ENSRNOT00000085279  | 0.95990646   | 7.63E-07 |
| TUCP_002501 | XLOC_105430 | ENSRNOT00000025460  | 0.967846515  | 2.56E-07 |
| TUCP_002501 | XLOC_105430 | ENSRNOT00000080774  | 0.951812832  | 1.89E-06 |
| TUCP_002501 | XLOC_105430 | ENSRNOT00000026075  | 0.970770172  | 1.60E-07 |
| TUCP_002501 | XLOC_105430 | ENSRNOT00000017998  | 0.963787762  | 4.61E-07 |
| TUCP_002501 | XLOC_105430 | ENSRNOT00000021216  | 0.962136009  | 5.75E-07 |
| TUCP_002501 | XLOC_105430 | ENSRNOT000000082904 | 0.950978411  | 2.05E-06 |
| TUCP_002501 | XLOC_105430 | ENSRNOT00000015223  | 0.953352412  | 1.61E-06 |
| TUCP_002501 | XLOC_105430 | ENSRNOT00000028907  | 0.97131907   | 1.46E-07 |
| TUCP_002501 | XLOC_105430 | ENSRNOT00000010224  | 0.970638223  | 1.64E-07 |
| TUCP_002501 | XLOC_105430 | ENSRNOT00000088214  | 0.954562608  | 1.41E-06 |
| TUCP_002501 | XLOC_105430 | ENSRNOT00000035309  | -0.950284063 | 2.20E-06 |
| TUCP_002501 | XLOC_105430 | ENSRNOT00000024011  | 0.966551722  | 3.12E-07 |
| TUCP_002501 | XLOC_105430 | ENSRNOT00000065722  | -0.962620225 | 5.40E-07 |
| TUCP_002501 | XLOC_105430 | ENSRNOT00000020051  | 0.967130318  | 2.86E-07 |
| TUCP_002501 | XLOC_105430 | ENSRNOT00000092876  | -0.950126687 | 2.23E-06 |
| TUCP_002501 | XLOC_105430 | ENSRNOT00000074395  | 0.952125899  | 1.83E-06 |
| TUCP_002501 | XLOC_105430 | ENSRNOT00000024253  | 0.964875962  | 3.97E-07 |
| TUCP_002500 | XLOC_105385 | ENSRNOT00000088957  | -0.9618868   | 5.94E-07 |
| TUCP_002507 | XLOC_105649 | ENSRNOT00000085476  | 0.975262207  | 7.00E-08 |

|             |             |                    |              |          |
|-------------|-------------|--------------------|--------------|----------|
| TUCP_002507 | XLOC_105649 | ENSRNOT00000083608 | 0.958182783  | 9.39E-07 |
| TUCP_002507 | XLOC_105649 | ENSRNOT00000076035 | 0.955881245  | 1.22E-06 |
| TUCP_002507 | XLOC_105649 | ENSRNOT00000091828 | 0.951936887  | 1.86E-06 |
| TUCP_002507 | XLOC_105649 | ENSRNOT00000078176 | 0.965633759  | 3.56E-07 |
| TUCP_002507 | XLOC_105649 | ENSRNOT00000047560 | 0.955362527  | 1.29E-06 |
| TUCP_002507 | XLOC_105649 | ENSRNOT00000040386 | 0.959609936  | 7.91E-07 |
| TUCP_002507 | XLOC_105649 | ENSRNOT00000024758 | 0.966531254  | 3.13E-07 |
| TUCP_002507 | XLOC_105649 | ENSRNOT00000088719 | 0.984410548  | 7.06E-09 |
| TUCP_002507 | XLOC_105649 | ENSRNOT00000033187 | 0.970132449  | 1.78E-07 |
| TUCP_001874 | XLOC_077907 | ENSRNOT00000007314 | -0.976994573 | 4.88E-08 |
| TUCP_001874 | XLOC_077907 | ENSRNOT00000003412 | -0.952561807 | 1.75E-06 |
| TUCP_001874 | XLOC_077907 | ENSRNOT00000007079 | -0.95731201  | 1.04E-06 |
| TUCP_001874 | XLOC_077907 | ENSRNOT00000035628 | -0.957312167 | 1.04E-06 |
| TUCP_001874 | XLOC_077907 | ENSRNOT00000009584 | -0.953120627 | 1.65E-06 |
| TUCP_001874 | XLOC_077907 | ENSRNOT00000027083 | 0.951198601  | 2.01E-06 |
| TUCP_001874 | XLOC_077907 | ENSRNOT00000014924 | -0.954192282 | 1.47E-06 |
| TUCP_001874 | XLOC_077907 | ENSRNOT00000050834 | -0.960680096 | 6.93E-07 |
| TUCP_001874 | XLOC_077907 | ENSRNOT00000023567 | -0.954900778 | 1.36E-06 |
| TUCP_001874 | XLOC_077907 | ENSRNOT00000072007 | -0.95210243  | 1.83E-06 |
| TUCP_001874 | XLOC_077907 | ENSRNOT00000030692 | -0.951472647 | 1.95E-06 |
| TUCP_001874 | XLOC_077907 | ENSRNOT00000028290 | -0.950369529 | 2.18E-06 |
| TUCP_001874 | XLOC_077907 | ENSRNOT00000007771 | -0.950233135 | 2.21E-06 |
| TUCP_001874 | XLOC_077907 | ENSRNOT00000070912 | -0.95737327  | 1.03E-06 |
| TUCP_001874 | XLOC_077907 | ENSRNOT0000002445  | -0.959578772 | 7.94E-07 |
| TUCP_001874 | XLOC_077907 | ENSRNOT00000083173 | -0.956296685 | 1.17E-06 |
| TUCP_001874 | XLOC_077907 | ENSRNOT00000083351 | -0.951556829 | 1.94E-06 |
| TUCP_001874 | XLOC_077907 | ENSRNOT00000036338 | -0.952853444 | 1.69E-06 |
| TUCP_001874 | XLOC_077907 | ENSRNOT00000050609 | -0.975334429 | 6.90E-08 |
| TUCP_001874 | XLOC_077907 | ENSRNOT00000037039 | -0.960445988 | 7.13E-07 |
| TUCP_001874 | XLOC_077907 | ENSRNOT00000016428 | 0.953572344  | 1.57E-06 |
| TUCP_001874 | XLOC_077907 | ENSRNOT00000003940 | -0.958469685 | 9.07E-07 |
| TUCP_001874 | XLOC_077907 | ENSRNOT00000028625 | -0.950607957 | 2.13E-06 |
| TUCP_001874 | XLOC_077907 | ENSRNOT00000028484 | -0.952134818 | 1.83E-06 |
| TUCP_001874 | XLOC_077907 | ENSRNOT00000055386 | 0.968061301  | 2.48E-07 |
| TUCP_001874 | XLOC_077907 | ENSRNOT00000011930 | 0.950659734  | 2.12E-06 |
| TUCP_001874 | XLOC_077907 | ENSRNOT00000003714 | 0.967719322  | 2.61E-07 |
| TUCP_001874 | XLOC_077907 | ENSRNOT00000079985 | -0.956354699 | 1.16E-06 |
| TUCP_001874 | XLOC_077907 | ENSRNOT00000052224 | 0.957871927  | 9.74E-07 |
| TUCP_001874 | XLOC_077907 | ENSRNOT00000078070 | 0.950512509  | 2.15E-06 |
| TUCP_001874 | XLOC_077907 | ENSRNOT00000032289 | -0.95643054  | 1.15E-06 |
| TUCP_001874 | XLOC_077907 | ENSRNOT00000088353 | -0.967411689 | 2.74E-07 |
| TUCP_001874 | XLOC_077907 | ENSRNOT00000045233 | -0.956209364 | 1.18E-06 |
| TUCP_001874 | XLOC_077907 | ENSRNOT00000003715 | -0.952342406 | 1.79E-06 |
| TUCP_001874 | XLOC_077907 | ENSRNOT00000033048 | -0.955041306 | 1.34E-06 |
| TUCP_001874 | XLOC_077907 | ENSRNOT00000000206 | -0.953462085 | 1.59E-06 |
| TUCP_001874 | XLOC_077907 | ENSRNOT00000067170 | -0.950842997 | 2.08E-06 |
| TUCP_001874 | XLOC_077907 | ENSRNOT00000086350 | -0.953206229 | 1.63E-06 |
| TUCP_001874 | XLOC_077907 | ENSRNOT00000038182 | -0.952840324 | 1.70E-06 |
| TUCP_001874 | XLOC_077907 | ENSRNOT00000086893 | -0.959682669 | 7.84E-07 |
| TUCP_001874 | XLOC_077907 | ENSRNOT00000004787 | -0.961892261 | 5.94E-07 |
| TUCP_001874 | XLOC_077907 | ENSRNOT00000079002 | -0.960568882 | 7.03E-07 |

|             |             |                     |              |          |
|-------------|-------------|---------------------|--------------|----------|
| TUCP_001874 | XLOC_077907 | ENSRNOT00000001759  | -0.950567429 | 2.14E-06 |
| TUCP_001874 | XLOC_077907 | ENSRNOT000000025856 | -0.9505219   | 2.15E-06 |
| TUCP_001874 | XLOC_077907 | ENSRNOT000000028589 | -0.953308606 | 1.62E-06 |
| TUCP_001874 | XLOC_077907 | ENSRNOT00000003326  | -0.950443907 | 2.17E-06 |
| TUCP_001874 | XLOC_077907 | ENSRNOT00000004319  | -0.965295521 | 3.74E-07 |
| TUCP_001874 | XLOC_077907 | ENSRNOT000000024491 | -0.958122025 | 9.45E-07 |
| TUCP_001874 | XLOC_077907 | ENSRNOT000000008911 | -0.956973888 | 1.08E-06 |
| TUCP_001874 | XLOC_077907 | ENSRNOT00000015170  | -0.950694438 | 2.11E-06 |
| TUCP_001874 | XLOC_077907 | ENSRNOT000000042125 | 0.952976958  | 1.67E-06 |
| TUCP_001874 | XLOC_077907 | ENSRNOT000000024947 | -0.964907693 | 3.95E-07 |
| TUCP_001874 | XLOC_077907 | ENSRNOT000000028703 | -0.956086909 | 1.19E-06 |
| TUCP_001874 | XLOC_077907 | ENSRNOT00000015757  | -0.973069855 | 1.07E-07 |
| TUCP_001874 | XLOC_077907 | ENSRNOT000000006943 | 0.952473469  | 1.76E-06 |
| TUCP_001874 | XLOC_077907 | ENSRNOT000000027141 | -0.963223941 | 4.98E-07 |
| TUCP_001874 | XLOC_077907 | ENSRNOT000000002151 | -0.9555153   | 1.27E-06 |
| TUCP_001874 | XLOC_077907 | ENSRNOT00000016220  | -0.964510281 | 4.18E-07 |
| TUCP_001874 | XLOC_077907 | ENSRNOT000000022000 | -0.966503928 | 3.14E-07 |
| TUCP_001874 | XLOC_077907 | ENSRNOT000000054966 | -0.951397007 | 1.97E-06 |
| TUCP_001874 | XLOC_077907 | ENSRNOT000000008865 | -0.953214668 | 1.63E-06 |
| TUCP_001874 | XLOC_077907 | ENSRNOT000000033196 | -0.957514217 | 1.01E-06 |
| TUCP_001874 | XLOC_077907 | ENSRNOT000000051554 | -0.953190427 | 1.64E-06 |
| TUCP_001874 | XLOC_077907 | ENSRNOT000000017949 | -0.955712494 | 1.25E-06 |
| TUCP_001874 | XLOC_077907 | ENSRNOT000000004007 | -0.954132405 | 1.48E-06 |
| TUCP_001874 | XLOC_077907 | ENSRNOT000000000177 | -0.961712423 | 6.08E-07 |
| TUCP_001874 | XLOC_077907 | ENSRNOT000000020910 | 0.95207519   | 1.84E-06 |
| TUCP_001874 | XLOC_077907 | ENSRNOT000000074494 | -0.956993052 | 1.08E-06 |
| TUCP_001874 | XLOC_077907 | ENSRNOT000000003794 | -0.956195644 | 1.18E-06 |
| TUCP_001874 | XLOC_077907 | ENSRNOT000000091602 | -0.957290753 | 1.04E-06 |
| TUCP_002970 | XLOC_128262 | ENSRNOT000000061333 | 0.951613575  | 1.93E-06 |
| TUCP_002970 | XLOC_128262 | ENSRNOT000000011827 | 0.96578743   | 3.49E-07 |
| TUCP_002970 | XLOC_128262 | ENSRNOT00000017911  | -0.954011179 | 1.50E-06 |
| TUCP_002970 | XLOC_128262 | ENSRNOT000000009319 | -0.950726983 | 2.11E-06 |
| TUCP_002970 | XLOC_128262 | ENSRNOT000000079180 | 0.95075234   | 2.10E-06 |
| TUCP_002970 | XLOC_128262 | ENSRNOT000000031026 | 0.961410522  | 6.32E-07 |
| TUCP_002508 | XLOC_105660 | ENSRNOT000000033112 | 0.961361196  | 6.36E-07 |
| TUCP_002508 | XLOC_105660 | ENSRNOT000000030737 | 0.957779218  | 9.84E-07 |
| TUCP_004726 | XLOC_209103 | ENSRNOT000000065646 | 0.953576594  | 1.57E-06 |
| TUCP_004726 | XLOC_209103 | ENSRNOT000000031626 | 0.954730023  | 1.39E-06 |
| TUCP_002974 | XLOC_128384 | ENSRNOT000000085110 | 0.953165973  | 1.64E-06 |
| TUCP_002974 | XLOC_128384 | ENSRNOT000000008037 | 0.95291215   | 1.68E-06 |
| TUCP_003138 | XLOC_134764 | ENSRNOT000000024186 | 0.983200502  | 1.02E-08 |
| TUCP_003138 | XLOC_134764 | ENSRNOT000000074753 | 0.998182349  | 1.56E-13 |
| TUCP_003138 | XLOC_134764 | ENSRNOT000000004876 | 0.959071443  | 8.44E-07 |
| TUCP_003138 | XLOC_134764 | ENSRNOT000000041904 | 1            | 0        |
| TUCP_003138 | XLOC_134764 | ENSRNOT000000083487 | 0.989515314  | 9.80E-10 |
| TUCP_003138 | XLOC_134764 | ENSRNOT000000077990 | 1            | 0        |
| TUCP_003138 | XLOC_134764 | ENSRNOT000000038826 | 0.99977672   | 4.37E-18 |
| TUCP_003138 | XLOC_134764 | ENSRNOT000000046842 | 0.973644314  | 9.58E-08 |
| TUCP_003138 | XLOC_134764 | ENSRNOT000000037169 | 0.980329406  | 2.24E-08 |
| TUCP_003138 | XLOC_134764 | ENSRNOT000000021243 | 0.987425406  | 2.42E-09 |
| TUCP_003138 | XLOC_134764 | ENSRNOT000000060250 | 0.999933853  | 9.97E-21 |

|             |             |                    |              |          |
|-------------|-------------|--------------------|--------------|----------|
| TUCP_003138 | XLOC_134764 | ENSRNOT00000091934 | 1            | 0        |
| TUCP_003138 | XLOC_134764 | ENSRNOT00000046585 | 0.982941597  | 1.11E-08 |
| TUCP_003138 | XLOC_134764 | ENSRNOT00000080794 | 0.990839253  | 5.00E-10 |
| TUCP_003138 | XLOC_134764 | ENSRNOT00000014456 | 0.991697153  | 3.06E-10 |
| TUCP_003138 | XLOC_134764 | ENSRNOT00000031205 | 0.991394766  | 3.66E-10 |
| TUCP_003138 | XLOC_134764 | ENSRNOT00000044145 | 1            | 0        |
| TUCP_003138 | XLOC_134764 | ENSRNOT00000088381 | 0.989013276  | 1.24E-09 |
| TUCP_003138 | XLOC_134764 | ENSRNOT00000011743 | 0.98678427   | 3.11E-09 |
| TUCP_003138 | XLOC_134764 | ENSRNOT00000089929 | 1            | 0        |
| TUCP_003138 | XLOC_134764 | ENSRNOT00000088624 | 1            | 0        |
| TUCP_003138 | XLOC_134764 | ENSRNOT00000085659 | 0.989908621  | 8.10E-10 |
| TUCP_003138 | XLOC_134764 | ENSRNOT00000015866 | 0.994066664  | 5.73E-11 |
| TUCP_003138 | XLOC_134764 | ENSRNOT00000078633 | 1            | 0        |
| TUCP_003138 | XLOC_134764 | ENSRNOT00000034907 | 0.995318542  | 1.76E-11 |
| TUCP_003138 | XLOC_134764 | ENSRNOT00000093230 | 0.958295175  | 9.26E-07 |
| TUCP_003138 | XLOC_134764 | ENSRNOT00000051835 | 1            | 0        |
| TUCP_003138 | XLOC_134764 | ENSRNOT00000079087 | 1            | 0        |
| TUCP_003138 | XLOC_134764 | ENSRNOT00000037206 | 1            | 0        |
| TUCP_003138 | XLOC_134764 | ENSRNOT00000083261 | 0.970991658  | 1.54E-07 |
| TUCP_003138 | XLOC_134764 | ENSRNOT00000080590 | 0.999889216  | 1.31E-19 |
| TUCP_003138 | XLOC_134764 | ENSRNOT00000027552 | 0.999801024  | 2.46E-18 |
| TUCP_003138 | XLOC_134764 | ENSRNOT00000077014 | 0.995074376  | 2.26E-11 |
| TUCP_003138 | XLOC_134764 | ENSRNOT00000080453 | 0.99994332   | 4.61E-21 |
| TUCP_003138 | XLOC_134764 | ENSRNOT00000089057 | 0.968243551  | 2.41E-07 |
| TUCP_003138 | XLOC_134764 | ENSRNOT00000066839 | 0.991868612  | 2.76E-10 |
| TUCP_003138 | XLOC_134764 | ENSRNOT00000061284 | 0.955566942  | 1.27E-06 |
| TUCP_003138 | XLOC_134764 | ENSRNOT00000013423 | 0.959677621  | 7.84E-07 |
| TUCP_003138 | XLOC_134764 | ENSRNOT00000071884 | 0.974769955  | 7.72E-08 |
| TUCP_003138 | XLOC_134764 | ENSRNOT00000004128 | 0.961829362  | 5.99E-07 |
| TUCP_003138 | XLOC_134764 | ENSRNOT00000026316 | 0.964408046  | 4.24E-07 |
| TUCP_003138 | XLOC_134764 | ENSRNOT00000057729 | 0.999384184  | 6.97E-16 |
| TUCP_003138 | XLOC_134764 | ENSRNOT00000078663 | 0.975192577  | 7.10E-08 |
| TUCP_003138 | XLOC_134764 | ENSRNOT00000064250 | 0.983131977  | 1.05E-08 |
| TUCP_003138 | XLOC_134764 | ENSRNOT00000021608 | 0.965228881  | 3.78E-07 |
| TUCP_003138 | XLOC_134764 | ENSRNOT00000029634 | 0.995816134  | 1.00E-11 |
| TUCP_003138 | XLOC_134764 | ENSRNOT00000093579 | 0.958564264  | 8.97E-07 |
| TUCP_003138 | XLOC_134764 | ENSRNOT00000086349 | 0.957242511  | 1.05E-06 |
| TUCP_003138 | XLOC_134764 | ENSRNOT00000065460 | 1            | 0        |
| TUCP_003138 | XLOC_134764 | ENSRNOT00000003817 | 0.996778712  | 2.72E-12 |
| TUCP_003138 | XLOC_134764 | ENSRNOT00000016713 | 1            | 1.33E-79 |
| TUCP_003138 | XLOC_134764 | ENSRNOT00000079260 | 0.996448245  | 4.42E-12 |
| TUCP_003138 | XLOC_134764 | ENSRNOT00000039294 | 1            | 0        |
| TUCP_003138 | XLOC_134764 | ENSRNOT00000092913 | 0.952980228  | 1.67E-06 |
| TUCP_002876 | XLOC_122775 | ENSRNOT00000078502 | 0.951253075  | 2.00E-06 |
| TUCP_002876 | XLOC_122775 | ENSRNOT00000076227 | 0.951306127  | 1.99E-06 |
| TUCP_002875 | XLOC_122673 | ENSRNOT00000091493 | -0.96039598  | 7.18E-07 |
| TUCP_002875 | XLOC_122673 | ENSRNOT00000024813 | -0.953395824 | 1.60E-06 |
| TUCP_002875 | XLOC_122673 | ENSRNOT00000020826 | -0.96897346  | 2.15E-07 |
| TUCP_000297 | XLOC_009319 | ENSRNOT00000012413 | 0.951925247  | 1.87E-06 |
| TUCP_002878 | XLOC_122775 | ENSRNOT00000068171 | 0.954780462  | 1.38E-06 |
| TUCP_001627 | XLOC_064649 | ENSRNOT00000093579 | 0.954657074  | 1.40E-06 |



|             |             |                    |              |          |
|-------------|-------------|--------------------|--------------|----------|
| TUCP_001627 | XLOC_064649 | ENSRNOT00000012170 | 0.965886893  | 3.44E-07 |
| TUCP_001879 | XLOC_077950 | ENSRNOT00000049582 | 0.959396187  | 8.12E-07 |
| TUCP_001626 | XLOC_064609 | ENSRNOT00000037509 | 0.954791868  | 1.38E-06 |
| TUCP_004509 | XLOC_198926 | ENSRNOT00000061675 | 0.950982517  | 2.05E-06 |
| TUCP_003533 | XLOC_153788 | ENSRNOT00000084004 | 0.950999814  | 2.05E-06 |
| TUCP_003533 | XLOC_153788 | ENSRNOT00000011083 | 0.954077428  | 1.49E-06 |
| TUCP_003533 | XLOC_153788 | ENSRNOT00000008760 | 0.961797541  | 6.01E-07 |
| TUCP_002380 | XLOC_100543 | ENSRNOT00000087134 | 0.973584769  | 9.69E-08 |
| TUCP_002380 | XLOC_100543 | ENSRNOT00000076187 | 0.960462999  | 7.12E-07 |
| TUCP_002380 | XLOC_100543 | ENSRNOT00000055200 | 0.974728816  | 7.78E-08 |
| TUCP_002380 | XLOC_100543 | ENSRNOT00000092026 | 0.973836787  | 9.24E-08 |
| TUCP_001123 | XLOC_042340 | ENSRNOT0000002982  | 0.972648661  | 1.15E-07 |
| TUCP_001123 | XLOC_042340 | ENSRNOT00000050180 | 0.956256994  | 1.17E-06 |
| TUCP_001123 | XLOC_042340 | ENSRNOT00000024222 | 0.9533278    | 1.61E-06 |
| TUCP_001123 | XLOC_042340 | ENSRNOT00000018179 | 0.98510581   | 5.63E-09 |
| TUCP_001123 | XLOC_042340 | ENSRNOT00000086917 | 0.966174735  | 3.29E-07 |
| TUCP_001123 | XLOC_042340 | ENSRNOT00000075621 | 0.953806899  | 1.53E-06 |
| TUCP_001123 | XLOC_042340 | ENSRNOT00000024393 | 0.955522421  | 1.27E-06 |
| TUCP_001123 | XLOC_042340 | ENSRNOT00000002560 | 0.966751571  | 3.03E-07 |
| TUCP_001123 | XLOC_042340 | ENSRNOT00000047093 | 0.957163506  | 1.06E-06 |
| TUCP_003430 | XLOC_148230 | ENSRNOT00000070972 | 0.960442324  | 7.14E-07 |
| TUCP_003430 | XLOC_148230 | ENSRNOT00000000383 | -0.950888976 | 2.07E-06 |
| TUCP_003430 | XLOC_148230 | ENSRNOT00000061253 | 0.952381929  | 1.78E-06 |
| TUCP_003430 | XLOC_148230 | ENSRNOT00000080024 | 0.95158997   | 1.93E-06 |
| TUCP_002932 | XLOC_126101 | ENSRNOT00000084075 | 0.972997575  | 1.08E-07 |
| TUCP_002932 | XLOC_126101 | ENSRNOT00000012880 | 0.992552752  | 1.78E-10 |
| TUCP_002932 | XLOC_126101 | ENSRNOT00000074465 | 0.979732464  | 2.60E-08 |
| TUCP_002932 | XLOC_126101 | ENSRNOT00000079805 | 0.975562352  | 6.59E-08 |
| TUCP_002932 | XLOC_126101 | ENSRNOT00000040912 | 0.979732464  | 2.60E-08 |
| TUCP_002932 | XLOC_126101 | ENSRNOT00000072648 | 0.979732464  | 2.60E-08 |
| TUCP_002932 | XLOC_126101 | ENSRNOT00000007398 | 0.97745806   | 4.41E-08 |
| TUCP_002932 | XLOC_126101 | ENSRNOT00000070803 | 0.979732464  | 2.60E-08 |
| TUCP_002932 | XLOC_126101 | ENSRNOT00000012196 | 0.979732464  | 2.60E-08 |
| TUCP_002932 | XLOC_126101 | ENSRNOT00000085772 | 0.979732464  | 2.60E-08 |
| TUCP_002932 | XLOC_126101 | ENSRNOT00000093284 | 0.97947866   | 2.77E-08 |
| TUCP_002932 | XLOC_126101 | ENSRNOT00000086374 | 0.986739212  | 3.16E-09 |
| TUCP_002932 | XLOC_126101 | ENSRNOT00000015270 | 0.979732464  | 2.60E-08 |
| TUCP_002932 | XLOC_126101 | ENSRNOT00000046192 | 0.979732464  | 2.60E-08 |
| TUCP_002932 | XLOC_126101 | ENSRNOT00000044226 | 0.979732464  | 2.60E-08 |
| TUCP_002932 | XLOC_126101 | ENSRNOT00000081898 | 0.959125446  | 8.39E-07 |
| TUCP_002932 | XLOC_126101 | ENSRNOT00000080291 | 0.976541156  | 5.38E-08 |
| TUCP_002932 | XLOC_126101 | ENSRNOT00000004293 | 0.965515997  | 3.62E-07 |
| TUCP_002932 | XLOC_126101 | ENSRNOT00000078231 | 0.968816915  | 2.20E-07 |
| TUCP_002932 | XLOC_126101 | ENSRNOT00000001464 | 0.979732464  | 2.60E-08 |
| TUCP_002932 | XLOC_126101 | ENSRNOT00000090716 | 0.97446784   | 8.19E-08 |
| TUCP_002932 | XLOC_126101 | ENSRNOT00000083542 | 0.966246061  | 3.26E-07 |
| TUCP_002932 | XLOC_126101 | ENSRNOT00000054686 | 0.962419309  | 5.54E-07 |
| TUCP_002932 | XLOC_126101 | ENSRNOT00000076044 | 0.979732464  | 2.60E-08 |
| TUCP_002932 | XLOC_126101 | ENSRNOT00000074353 | 0.979732464  | 2.60E-08 |
| TUCP_002932 | XLOC_126101 | ENSRNOT00000043510 | 0.981553213  | 1.63E-08 |
| TUCP_002932 | XLOC_126101 | ENSRNOT00000087122 | 0.982188482  | 1.37E-08 |

|             |             |                    |              |          |
|-------------|-------------|--------------------|--------------|----------|
| TUCP_002932 | XLOC_126101 | ENSRNOT00000074295 | 0.970281685  | 1.74E-07 |
| TUCP_002932 | XLOC_126101 | ENSRNOT00000057873 | 0.979732464  | 2.60E-08 |
| TUCP_002932 | XLOC_126101 | ENSRNOT00000083002 | 0.984605197  | 6.64E-09 |
| TUCP_002932 | XLOC_126101 | ENSRNOT00000088399 | 0.979723129  | 2.61E-08 |
| TUCP_002932 | XLOC_126101 | ENSRNOT00000086248 | 0.979732464  | 2.60E-08 |
| TUCP_002932 | XLOC_126101 | ENSRNOT00000089750 | 0.979885218  | 2.51E-08 |
| TUCP_002932 | XLOC_126101 | ENSRNOT00000030517 | 0.965104177  | 3.84E-07 |
| TUCP_002932 | XLOC_126101 | ENSRNOT00000034772 | 0.964237968  | 4.34E-07 |
| TUCP_002932 | XLOC_126101 | ENSRNOT00000089305 | 0.993229098  | 1.11E-10 |
| TUCP_002932 | XLOC_126101 | ENSRNOT00000064601 | 0.976288886  | 5.67E-08 |
| TUCP_002932 | XLOC_126101 | ENSRNOT0000002834  | 0.979732464  | 2.60E-08 |
| TUCP_002932 | XLOC_126101 | ENSRNOT00000080812 | 0.96730208   | 2.79E-07 |
| TUCP_002932 | XLOC_126101 | ENSRNOT00000092755 | 0.979732464  | 2.60E-08 |
| TUCP_002932 | XLOC_126101 | ENSRNOT00000031683 | 0.979732464  | 2.60E-08 |
| TUCP_002932 | XLOC_126101 | ENSRNOT00000087764 | 0.975579917  | 6.56E-08 |
| TUCP_004505 | XLOC_198446 | ENSRNOT00000090629 | 0.953476161  | 1.59E-06 |
| TUCP_004505 | XLOC_198446 | ENSRNOT00000008961 | 0.977494012  | 4.38E-08 |
| TUCP_004505 | XLOC_198446 | ENSRNOT00000039876 | 0.970623291  | 1.64E-07 |
| TUCP_004505 | XLOC_198446 | ENSRNOT00000000681 | 0.950211774  | 2.22E-06 |
| TUCP_004505 | XLOC_198446 | ENSRNOT00000055127 | 0.955473529  | 1.28E-06 |
| TUCP_004505 | XLOC_198446 | ENSRNOT00000015387 | 0.953051921  | 1.66E-06 |
| TUCP_004505 | XLOC_198446 | ENSRNOT00000037397 | 0.97332609   | 1.02E-07 |
| TUCP_004505 | XLOC_198446 | ENSRNOT00000001570 | 0.972990573  | 1.08E-07 |
| TUCP_004505 | XLOC_198446 | ENSRNOT00000067455 | 0.951919729  | 1.87E-06 |
| TUCP_004505 | XLOC_198446 | ENSRNOT00000035523 | 0.975206023  | 7.08E-08 |
| TUCP_004505 | XLOC_198446 | ENSRNOT00000024959 | 0.950543322  | 2.14E-06 |
| TUCP_004505 | XLOC_198446 | ENSRNOT00000014158 | 0.977797822  | 4.09E-08 |
| TUCP_004505 | XLOC_198446 | ENSRNOT00000033719 | 0.977629319  | 4.25E-08 |
| TUCP_004505 | XLOC_198446 | ENSRNOT00000000640 | 0.961756583  | 6.04E-07 |
| TUCP_004505 | XLOC_198446 | ENSRNOT00000056174 | 0.981534374  | 1.64E-08 |
| TUCP_004505 | XLOC_198446 | ENSRNOT00000004363 | 0.95002905   | 2.26E-06 |
| TUCP_004505 | XLOC_198446 | ENSRNOT00000074738 | 0.955566593  | 1.27E-06 |
| TUCP_004505 | XLOC_198446 | ENSRNOT00000077022 | 0.968667058  | 2.26E-07 |
| TUCP_004505 | XLOC_198446 | ENSRNOT00000071258 | -0.954240475 | 1.46E-06 |
| TUCP_004505 | XLOC_198446 | ENSRNOT00000032333 | 0.977523236  | 4.35E-08 |
| TUCP_004505 | XLOC_198446 | ENSRNOT00000031025 | 0.972154725  | 1.26E-07 |
| TUCP_004505 | XLOC_198446 | ENSRNOT00000056551 | 0.961535236  | 6.22E-07 |
| TUCP_004505 | XLOC_198446 | ENSRNOT00000002695 | 0.97468163   | 7.85E-08 |
| TUCP_004505 | XLOC_198446 | ENSRNOT00000046313 | 0.966918114  | 2.95E-07 |
| TUCP_004505 | XLOC_198446 | ENSRNOT00000026303 | 0.961377148  | 6.34E-07 |
| TUCP_004505 | XLOC_198446 | ENSRNOT00000001853 | 0.969989744  | 1.82E-07 |
| TUCP_004505 | XLOC_198446 | ENSRNOT00000086541 | 0.953925402  | 1.51E-06 |
| TUCP_004505 | XLOC_198446 | ENSRNOT00000057016 | 0.962928463  | 5.18E-07 |
| TUCP_004505 | XLOC_198446 | ENSRNOT00000003823 | 0.968329561  | 2.38E-07 |
| TUCP_004505 | XLOC_198446 | ENSRNOT00000060765 | 0.972804188  | 1.12E-07 |
| TUCP_004505 | XLOC_198446 | ENSRNOT00000040162 | 0.980303085  | 2.26E-08 |
| TUCP_004505 | XLOC_198446 | ENSRNOT00000058626 | 0.9710551    | 1.52E-07 |
| TUCP_004505 | XLOC_198446 | ENSRNOT00000039263 | 0.952639248  | 1.73E-06 |
| TUCP_004505 | XLOC_198446 | ENSRNOT00000084873 | 0.979612179  | 2.68E-08 |
| TUCP_004505 | XLOC_198446 | ENSRNOT00000076407 | 0.959398392  | 8.12E-07 |
| TUCP_004505 | XLOC_198446 | ENSRNOT00000088707 | 0.959941175  | 7.59E-07 |

|             |             |                    |              |          |
|-------------|-------------|--------------------|--------------|----------|
| TUCP_004505 | XLOC_198446 | ENSRNOT0000005361  | 0.979009005  | 3.10E-08 |
| TUCP_004505 | XLOC_198446 | ENSRNOT00000019501 | 0.973940225  | 9.06E-08 |
| TUCP_004505 | XLOC_198446 | ENSRNOT00000041741 | 0.955713831  | 1.25E-06 |
| TUCP_004505 | XLOC_198446 | ENSRNOT00000034152 | 0.983007982  | 1.08E-08 |
| TUCP_004505 | XLOC_198446 | ENSRNOT00000024718 | 0.970133921  | 1.78E-07 |
| TUCP_004505 | XLOC_198446 | ENSRNOT00000009620 | 0.977453005  | 4.42E-08 |
| TUCP_004505 | XLOC_198446 | ENSRNOT00000019311 | 0.956269157  | 1.17E-06 |
| TUCP_004505 | XLOC_198446 | ENSRNOT00000004637 | 0.959940741  | 7.60E-07 |
| TUCP_004505 | XLOC_198446 | ENSRNOT00000073547 | 0.959955994  | 7.58E-07 |
| TUCP_004505 | XLOC_198446 | ENSRNOT00000067677 | 0.967930239  | 2.53E-07 |
| TUCP_004505 | XLOC_198446 | ENSRNOT00000024464 | 0.973515985  | 9.82E-08 |
| TUCP_004505 | XLOC_198446 | ENSRNOT00000005846 | 0.964723556  | 4.05E-07 |
| TUCP_004505 | XLOC_198446 | ENSRNOT00000043434 | 0.968599587  | 2.28E-07 |
| TUCP_004505 | XLOC_198446 | ENSRNOT00000044788 | 0.957055689  | 1.07E-06 |
| TUCP_004505 | XLOC_198446 | ENSRNOT00000018511 | 0.970539154  | 1.66E-07 |
| TUCP_004505 | XLOC_198446 | ENSRNOT00000051363 | 0.98252571   | 1.25E-08 |
| TUCP_004505 | XLOC_198446 | ENSRNOT00000022648 | 0.979964135  | 2.46E-08 |
| TUCP_004505 | XLOC_198446 | ENSRNOT00000025197 | 0.954633606  | 1.40E-06 |
| TUCP_004505 | XLOC_198446 | ENSRNOT00000029990 | 0.954684843  | 1.39E-06 |
| TUCP_004505 | XLOC_198446 | ENSRNOT00000084021 | 0.968327802  | 2.38E-07 |
| TUCP_004505 | XLOC_198446 | ENSRNOT00000003567 | 0.970525203  | 1.67E-07 |
| TUCP_004505 | XLOC_198446 | ENSRNOT00000016449 | 0.964184652  | 4.37E-07 |
| TUCP_004505 | XLOC_198446 | ENSRNOT00000051349 | 0.975859272  | 6.20E-08 |
| TUCP_004505 | XLOC_198446 | ENSRNOT00000087603 | 0.956196735  | 1.18E-06 |
| TUCP_004505 | XLOC_198446 | ENSRNOT00000086390 | 0.953249694  | 1.63E-06 |
| TUCP_004505 | XLOC_198446 | ENSRNOT00000009313 | 0.974768069  | 7.72E-08 |
| TUCP_004505 | XLOC_198446 | ENSRNOT00000027949 | 0.955409305  | 1.29E-06 |
| TUCP_004505 | XLOC_198446 | ENSRNOT00000023504 | 0.96495094   | 3.93E-07 |
| TUCP_004505 | XLOC_198446 | ENSRNOT00000091506 | 0.955284943  | 1.31E-06 |
| TUCP_004505 | XLOC_198446 | ENSRNOT00000036753 | 0.967312901  | 2.78E-07 |
| TUCP_004505 | XLOC_198446 | ENSRNOT00000025880 | 0.977393985  | 4.48E-08 |
| TUCP_004505 | XLOC_198446 | ENSRNOT00000023152 | 0.955157578  | 1.32E-06 |
| TUCP_004505 | XLOC_198446 | ENSRNOT00000044983 | 0.968183029  | 2.43E-07 |
| TUCP_004505 | XLOC_198446 | ENSRNOT00000014035 | 0.952215008  | 1.81E-06 |
| TUCP_004505 | XLOC_198446 | ENSRNOT00000083943 | 0.978271917  | 3.68E-08 |
| TUCP_004505 | XLOC_198446 | ENSRNOT00000090026 | -0.957242061 | 1.05E-06 |
| TUCP_004505 | XLOC_198446 | ENSRNOT00000008365 | 0.976390254  | 5.55E-08 |
| TUCP_004505 | XLOC_198446 | ENSRNOT00000031951 | 0.960091114  | 7.46E-07 |
| TUCP_004505 | XLOC_198446 | ENSRNOT00000071133 | 0.961067334  | 6.60E-07 |
| TUCP_004505 | XLOC_198446 | ENSRNOT00000010264 | 0.977531493  | 4.34E-08 |
| TUCP_004505 | XLOC_198446 | ENSRNOT00000010594 | 0.960110133  | 7.44E-07 |
| TUCP_004505 | XLOC_198446 | ENSRNOT00000059660 | 0.952881901  | 1.69E-06 |
| TUCP_004505 | XLOC_198446 | ENSRNOT00000054757 | 0.971445581  | 1.43E-07 |
| TUCP_004504 | XLOC_198438 | ENSRNOT00000074753 | 0.966465955  | 3.16E-07 |
| TUCP_004504 | XLOC_198438 | ENSRNOT00000041904 | 0.96401122   | 4.48E-07 |
| TUCP_004504 | XLOC_198438 | ENSRNOT00000077990 | 0.96401122   | 4.48E-07 |
| TUCP_004504 | XLOC_198438 | ENSRNOT00000038826 | 0.963652501  | 4.70E-07 |
| TUCP_004504 | XLOC_198438 | ENSRNOT00000046842 | 0.962361688  | 5.58E-07 |
| TUCP_004504 | XLOC_198438 | ENSRNOT00000021243 | 0.967346281  | 2.77E-07 |
| TUCP_004504 | XLOC_198438 | ENSRNOT00000060250 | 0.964100943  | 4.42E-07 |
| TUCP_004504 | XLOC_198438 | ENSRNOT00000091934 | 0.96401122   | 4.48E-07 |

|             |             |                    |              |          |
|-------------|-------------|--------------------|--------------|----------|
| TUCP_004504 | XLOC_198438 | ENSRNOT00000087656 | 0.963776626  | 4.62E-07 |
| TUCP_004504 | XLOC_198438 | ENSRNOT00000046585 | 0.96932003   | 2.03E-07 |
| TUCP_004504 | XLOC_198438 | ENSRNOT00000080794 | 0.962303228  | 5.63E-07 |
| TUCP_004504 | XLOC_198438 | ENSRNOT00000014456 | 0.952172687  | 1.82E-06 |
| TUCP_004504 | XLOC_198438 | ENSRNOT00000031205 | 0.963052377  | 5.10E-07 |
| TUCP_004504 | XLOC_198438 | ENSRNOT00000079260 | 0.971011152  | 1.54E-07 |
| TUCP_004504 | XLOC_198438 | ENSRNOT00000088381 | 0.969567048  | 1.95E-07 |
| TUCP_004504 | XLOC_198438 | ENSRNOT00000011743 | 0.968150342  | 2.45E-07 |
| TUCP_004504 | XLOC_198438 | ENSRNOT00000089929 | 0.96401122   | 4.48E-07 |
| TUCP_004504 | XLOC_198438 | ENSRNOT00000088624 | 0.96401122   | 4.48E-07 |
| TUCP_004504 | XLOC_198438 | ENSRNOT00000015866 | 0.972206412  | 1.25E-07 |
| TUCP_004504 | XLOC_198438 | ENSRNOT00000034907 | 0.967381162  | 2.75E-07 |
| TUCP_004504 | XLOC_198438 | ENSRNOT00000051835 | 0.96401122   | 4.48E-07 |
| TUCP_004504 | XLOC_198438 | ENSRNOT00000079087 | 0.96401122   | 4.48E-07 |
| TUCP_004504 | XLOC_198438 | ENSRNOT00000037206 | 0.96401122   | 4.48E-07 |
| TUCP_004504 | XLOC_198438 | ENSRNOT00000080590 | 0.962568983  | 5.43E-07 |
| TUCP_004504 | XLOC_198438 | ENSRNOT00000027552 | 0.961466628  | 6.27E-07 |
| TUCP_004504 | XLOC_198438 | ENSRNOT00000077014 | 0.966575279  | 3.11E-07 |
| TUCP_004504 | XLOC_198438 | ENSRNOT00000080453 | 0.962368921  | 5.58E-07 |
| TUCP_004504 | XLOC_198438 | ENSRNOT00000057729 | 0.966303942  | 3.23E-07 |
| TUCP_004504 | XLOC_198438 | ENSRNOT00000078633 | 0.96401122   | 4.48E-07 |
| TUCP_004504 | XLOC_198438 | ENSRNOT00000020206 | 0.960695871  | 6.91E-07 |
| TUCP_004504 | XLOC_198438 | ENSRNOT00000066839 | 0.967361988  | 2.76E-07 |
| TUCP_004504 | XLOC_198438 | ENSRNOT00000026932 | 0.961519885  | 6.23E-07 |
| TUCP_004504 | XLOC_198438 | ENSRNOT00000078663 | 0.972066834  | 1.28E-07 |
| TUCP_004504 | XLOC_198438 | ENSRNOT00000037169 | 0.953739534  | 1.54E-06 |
| TUCP_004504 | XLOC_198438 | ENSRNOT00000029634 | 0.958135894  | 9.44E-07 |
| TUCP_004504 | XLOC_198438 | ENSRNOT00000093579 | 0.963190396  | 5.00E-07 |
| TUCP_004504 | XLOC_198438 | ENSRNOT00000086349 | 0.950740387  | 2.10E-06 |
| TUCP_004504 | XLOC_198438 | ENSRNOT00000065460 | 0.96401122   | 4.48E-07 |
| TUCP_004504 | XLOC_198438 | ENSRNOT00000003817 | 0.95821769   | 9.35E-07 |
| TUCP_004504 | XLOC_198438 | ENSRNOT00000016713 | 0.96401122   | 4.48E-07 |
| TUCP_004504 | XLOC_198438 | ENSRNOT00000022559 | 0.965395375  | 3.69E-07 |
| TUCP_004504 | XLOC_198438 | ENSRNOT00000044145 | 0.96401122   | 4.48E-07 |
| TUCP_004504 | XLOC_198438 | ENSRNOT00000039294 | 0.96401122   | 4.48E-07 |
| TUCP_004504 | XLOC_198438 | ENSRNOT00000085654 | 0.961240962  | 6.45E-07 |
| TUCP_001870 | XLOC_077795 | ENSRNOT00000002330 | 0.953764578  | 1.54E-06 |
| TUCP_001870 | XLOC_077795 | ENSRNOT00000072077 | 0.952932898  | 1.68E-06 |
| TUCP_001870 | XLOC_077795 | ENSRNOT00000087346 | -0.957409579 | 1.03E-06 |
| TUCP_001870 | XLOC_077795 | ENSRNOT00000001577 | -0.970723087 | 1.61E-07 |
| TUCP_001870 | XLOC_077795 | ENSRNOT00000045545 | 0.959999314  | 7.54E-07 |
| TUCP_001870 | XLOC_077795 | ENSRNOT00000030914 | 0.952582029  | 1.74E-06 |
| TUCP_001870 | XLOC_077795 | ENSRNOT00000027220 | 0.961726191  | 6.07E-07 |
| TUCP_001870 | XLOC_077795 | ENSRNOT00000065464 | -0.953357254 | 1.61E-06 |
| TUCP_001870 | XLOC_077795 | ENSRNOT00000071192 | 0.955346739  | 1.30E-06 |
| TUCP_001870 | XLOC_077795 | ENSRNOT00000021944 | -0.971788677 | 1.34E-07 |
| TUCP_004506 | XLOC_198676 | ENSRNOT00000000211 | 0.969161252  | 2.09E-07 |
| TUCP_004506 | XLOC_198676 | ENSRNOT00000061297 | 0.964085771  | 4.43E-07 |
| TUCP_004506 | XLOC_198676 | ENSRNOT00000083410 | 0.969541731  | 1.96E-07 |
| TUCP_004501 | XLOC_198227 | ENSRNOT00000064007 | 0.962044257  | 5.82E-07 |
| TUCP_004501 | XLOC_198227 | ENSRNOT0000006886  | 0.956617564  | 1.13E-06 |

|             |             |                    |             |          |
|-------------|-------------|--------------------|-------------|----------|
| TUCP_004501 | XLOC_198227 | ENSRNOT00000016880 | 0.977060086 | 4.81E-08 |
| TUCP_004501 | XLOC_198227 | ENSRNOT00000013255 | 0.957313793 | 1.04E-06 |
| TUCP_004501 | XLOC_198227 | ENSRNOT00000009482 | 0.956392431 | 1.15E-06 |
| TUCP_004501 | XLOC_198227 | ENSRNOT00000085690 | 0.95746582  | 1.02E-06 |
| TUCP_004500 | XLOC_198108 | ENSRNOT00000091000 | 0.951620444 | 1.92E-06 |
| TUCP_004503 | XLOC_198409 | ENSRNOT00000024186 | 0.964520932 | 4.17E-07 |
| TUCP_004503 | XLOC_198409 | ENSRNOT00000074753 | 0.984644596 | 6.55E-09 |
| TUCP_004503 | XLOC_198409 | ENSRNOT00000041904 | 0.984446026 | 6.98E-09 |
| TUCP_004503 | XLOC_198409 | ENSRNOT00000083487 | 0.973735457 | 9.42E-08 |
| TUCP_004503 | XLOC_198409 | ENSRNOT00000077990 | 0.984446026 | 6.98E-09 |
| TUCP_004503 | XLOC_198409 | ENSRNOT00000038826 | 0.982349284 | 1.31E-08 |
| TUCP_004503 | XLOC_198409 | ENSRNOT00000046842 | 0.954493345 | 1.42E-06 |
| TUCP_004503 | XLOC_198409 | ENSRNOT00000037169 | 0.964279713 | 4.31E-07 |
| TUCP_004503 | XLOC_198409 | ENSRNOT00000021243 | 0.999840653 | 8.09E-19 |
| TUCP_004503 | XLOC_198409 | ENSRNOT00000060250 | 0.984178837 | 7.60E-09 |
| TUCP_004503 | XLOC_198409 | ENSRNOT00000091934 | 0.984446026 | 6.98E-09 |
| TUCP_004503 | XLOC_198409 | ENSRNOT00000046585 | 0.964071704 | 4.44E-07 |
| TUCP_004503 | XLOC_198409 | ENSRNOT00000080794 | 0.985576469 | 4.80E-09 |
| TUCP_004503 | XLOC_198409 | ENSRNOT00000014456 | 0.974013065 | 8.94E-08 |
| TUCP_004503 | XLOC_198409 | ENSRNOT00000031205 | 0.972720678 | 1.14E-07 |
| TUCP_004503 | XLOC_198409 | ENSRNOT00000044145 | 0.984446026 | 6.98E-09 |
| TUCP_004503 | XLOC_198409 | ENSRNOT00000088381 | 0.971033062 | 1.53E-07 |
| TUCP_004503 | XLOC_198409 | ENSRNOT00000011743 | 0.968589025 | 2.28E-07 |
| TUCP_004503 | XLOC_198409 | ENSRNOT00000089929 | 0.984446026 | 6.98E-09 |
| TUCP_004503 | XLOC_198409 | ENSRNOT00000088624 | 0.984446026 | 6.98E-09 |
| TUCP_004503 | XLOC_198409 | ENSRNOT00000085659 | 0.972021993 | 1.29E-07 |
| TUCP_004503 | XLOC_198409 | ENSRNOT00000015866 | 0.982374336 | 1.30E-08 |
| TUCP_004503 | XLOC_198409 | ENSRNOT00000064613 | 0.960213031 | 7.34E-07 |
| TUCP_004503 | XLOC_198409 | ENSRNOT00000034907 | 0.97564574  | 6.48E-08 |
| TUCP_004503 | XLOC_198409 | ENSRNOT00000051835 | 0.984446026 | 6.98E-09 |
| TUCP_004503 | XLOC_198409 | ENSRNOT00000009825 | 0.9584932   | 9.05E-07 |
| TUCP_004503 | XLOC_198409 | ENSRNOT00000079087 | 0.984446026 | 6.98E-09 |
| TUCP_004503 | XLOC_198409 | ENSRNOT00000037206 | 0.984446026 | 6.98E-09 |
| TUCP_004503 | XLOC_198409 | ENSRNOT00000061185 | 0.966990753 | 2.92E-07 |
| TUCP_004503 | XLOC_198409 | ENSRNOT00000083261 | 0.951038217 | 2.04E-06 |
| TUCP_004503 | XLOC_198409 | ENSRNOT00000080590 | 0.98407546  | 7.85E-09 |
| TUCP_004503 | XLOC_198409 | ENSRNOT00000027552 | 0.983018866 | 1.08E-08 |
| TUCP_004503 | XLOC_198409 | ENSRNOT00000072138 | 0.952691887 | 1.72E-06 |
| TUCP_004503 | XLOC_198409 | ENSRNOT00000077014 | 0.977072379 | 4.80E-08 |
| TUCP_004503 | XLOC_198409 | ENSRNOT00000080453 | 0.983860432 | 8.39E-09 |
| TUCP_004503 | XLOC_198409 | ENSRNOT00000057729 | 0.983223316 | 1.02E-08 |
| TUCP_004503 | XLOC_198409 | ENSRNOT00000078633 | 0.984446026 | 6.98E-09 |
| TUCP_004503 | XLOC_198409 | ENSRNOT00000013423 | 0.958186668 | 9.38E-07 |
| TUCP_004503 | XLOC_198409 | ENSRNOT00000071884 | 0.957312305 | 1.04E-06 |
| TUCP_004503 | XLOC_198409 | ENSRNOT00000066839 | 0.984798621 | 6.23E-09 |
| TUCP_004503 | XLOC_198409 | ENSRNOT00000026316 | 0.959298706 | 8.21E-07 |
| TUCP_004503 | XLOC_198409 | ENSRNOT00000078663 | 0.979939693 | 2.47E-08 |
| TUCP_004503 | XLOC_198409 | ENSRNOT00000064250 | 0.963147355 | 5.03E-07 |
| TUCP_004503 | XLOC_198409 | ENSRNOT00000021608 | 0.957368466 | 1.03E-06 |
| TUCP_004503 | XLOC_198409 | ENSRNOT00000029634 | 0.979586859 | 2.70E-08 |
| TUCP_004503 | XLOC_198409 | ENSRNOT00000065460 | 0.984446026 | 6.98E-09 |

|             |             |                    |              |          |
|-------------|-------------|--------------------|--------------|----------|
| TUCP_004503 | XLOC_198409 | ENSRNOT0000003817  | 0.979209924  | 2.95E-08 |
| TUCP_004503 | XLOC_198409 | ENSRNOT00000016713 | 0.984446026  | 6.98E-09 |
| TUCP_004503 | XLOC_198409 | ENSRNOT00000079260 | 0.978121755  | 3.81E-08 |
| TUCP_004503 | XLOC_198409 | ENSRNOT00000039294 | 0.984446026  | 6.98E-09 |
| TUCP_004503 | XLOC_198409 | ENSRNOT00000026932 | 0.979904415  | 2.50E-08 |
| TUCP_001875 | XLOC_077907 | ENSRNOT00000049956 | 0.966486822  | 3.15E-07 |
| TUCP_001875 | XLOC_077907 | ENSRNOT00000061253 | 0.95441066   | 1.44E-06 |
| TUCP_001875 | XLOC_077907 | ENSRNOT00000088353 | -0.955260158 | 1.31E-06 |
| TUCP_001875 | XLOC_077907 | ENSRNOT00000012966 | 0.955984809  | 1.21E-06 |
| TUCP_004134 | XLOC_180414 | ENSRNOT00000085599 | 0.999938502  | 6.93E-21 |
| TUCP_004134 | XLOC_180414 | ENSRNOT0000006689  | 0.9944189    | 4.22E-11 |
| TUCP_004134 | XLOC_180414 | ENSRNOT00000081534 | 0.987999291  | 1.92E-09 |
| TUCP_004134 | XLOC_180414 | ENSRNOT00000085301 | 0.99793679   | 2.93E-13 |
| TUCP_004134 | XLOC_180414 | ENSRNOT00000038729 | 1            | 1.33E-79 |
| TUCP_004134 | XLOC_180414 | ENSRNOT00000086385 | 1            | 1.33E-79 |
| TUCP_004134 | XLOC_180414 | ENSRNOT00000077695 | 0.96038616   | 7.19E-07 |
| TUCP_004134 | XLOC_180414 | ENSRNOT00000078561 | 0.986503348  | 3.45E-09 |
| TUCP_004134 | XLOC_180414 | ENSRNOT00000087613 | 1            | 1.33E-79 |
| TUCP_004134 | XLOC_180414 | ENSRNOT00000026032 | 0.953050675  | 1.66E-06 |
| TUCP_004134 | XLOC_180414 | ENSRNOT00000073350 | 0.9658754    | 3.44E-07 |
| TUCP_004134 | XLOC_180414 | ENSRNOT00000023062 | 1            | 1.33E-79 |
| TUCP_004134 | XLOC_180414 | ENSRNOT00000058834 | 1            | 4.25E-78 |
| TUCP_004134 | XLOC_180414 | ENSRNOT00000079420 | 1            | 0        |
| TUCP_004134 | XLOC_180414 | ENSRNOT00000090761 | 1            | 0        |
| TUCP_004134 | XLOC_180414 | ENSRNOT00000055923 | 1            | 0        |
| TUCP_004134 | XLOC_180414 | ENSRNOT00000092416 | 0.963085379  | 5.07E-07 |
| TUCP_004134 | XLOC_180414 | ENSRNOT00000071930 | 1            | 0        |
| TUCP_004134 | XLOC_180414 | ENSRNOT0000001996  | 0.974721715  | 7.79E-08 |
| TUCP_004134 | XLOC_180414 | ENSRNOT00000076756 | 1            | 0        |
| TUCP_004134 | XLOC_180414 | ENSRNOT00000081527 | 0.999420479  | 5.14E-16 |
| TUCP_004134 | XLOC_180414 | ENSRNOT00000085067 | 0.960262084  | 7.30E-07 |
| TUCP_004134 | XLOC_180414 | ENSRNOT00000091663 | 0.99642667   | 4.56E-12 |
| TUCP_004134 | XLOC_180414 | ENSRNOT00000081780 | 1            | 0        |
| TUCP_004134 | XLOC_180414 | ENSRNOT00000093689 | 0.953599805  | 1.57E-06 |
| TUCP_004134 | XLOC_180414 | ENSRNOT00000089114 | 1            | 0        |
| TUCP_004134 | XLOC_180414 | ENSRNOT00000021609 | 0.977017895  | 4.86E-08 |
| TUCP_004134 | XLOC_180414 | ENSRNOT00000073316 | 1            | 0        |
| TUCP_004134 | XLOC_180414 | ENSRNOT00000086557 | 0.977413455  | 4.46E-08 |
| TUCP_004134 | XLOC_180414 | ENSRNOT00000071663 | 1            | 0        |
| TUCP_004134 | XLOC_180414 | ENSRNOT00000042860 | 1            | 1.33E-79 |
| TUCP_004134 | XLOC_180414 | ENSRNOT00000072962 | 0.971287317  | 1.46E-07 |
| TUCP_004134 | XLOC_180414 | ENSRNOT00000088421 | 1            | 0        |
| TUCP_004134 | XLOC_180414 | ENSRNOT00000038898 | 1            | 0        |
| TUCP_004134 | XLOC_180414 | ENSRNOT00000015840 | 0.959452012  | 8.06E-07 |
| TUCP_004134 | XLOC_180414 | ENSRNOT00000064936 | 0.985957557  | 4.20E-09 |
| TUCP_004134 | XLOC_180414 | ENSRNOT00000042777 | 0.990642579  | 5.56E-10 |
| TUCP_004134 | XLOC_180414 | ENSRNOT00000010029 | 1            | 0        |
| TUCP_001971 | XLOC_079682 | ENSRNOT00000000008 | 0.997147692  | 1.48E-12 |
| TUCP_001971 | XLOC_079682 | ENSRNOT00000060048 | 0.996022704  | 7.79E-12 |
| TUCP_001971 | XLOC_079682 | ENSRNOT00000082304 | 0.993436469  | 9.49E-11 |
| TUCP_001971 | XLOC_079682 | ENSRNOT0000006219  | 0.997147692  | 1.48E-12 |

|             |             |                    |              |          |
|-------------|-------------|--------------------|--------------|----------|
| TUCP_001971 | XLOC_079682 | ENSRNOT00000065376 | 0.997147692  | 1.48E-12 |
| TUCP_001971 | XLOC_079682 | ENSRNOT00000081433 | 0.980336195  | 2.24E-08 |
| TUCP_001971 | XLOC_079682 | ENSRNOT00000083575 | 0.997147692  | 1.48E-12 |
| TUCP_001971 | XLOC_079682 | ENSRNOT00000087739 | 0.997147692  | 1.48E-12 |
| TUCP_001971 | XLOC_079682 | ENSRNOT00000079826 | 0.997147692  | 1.48E-12 |
| TUCP_001971 | XLOC_079682 | ENSRNOT00000025770 | 0.990537542  | 5.88E-10 |
| TUCP_001971 | XLOC_079682 | ENSRNOT00000088244 | 0.973215814  | 1.04E-07 |
| TUCP_001971 | XLOC_079682 | ENSRNOT00000048523 | 0.997147692  | 1.48E-12 |
| TUCP_001971 | XLOC_079682 | ENSRNOT00000079365 | 0.976834515  | 5.05E-08 |
| TUCP_001971 | XLOC_079682 | ENSRNOT00000020229 | 0.950713381  | 2.11E-06 |
| TUCP_001971 | XLOC_079682 | ENSRNOT00000026428 | 0.99307183   | 1.24E-10 |
| TUCP_001971 | XLOC_079682 | ENSRNOT00000085673 | 0.997147692  | 1.48E-12 |
| TUCP_001971 | XLOC_079682 | ENSRNOT00000072972 | 0.975473144  | 6.71E-08 |
| TUCP_001971 | XLOC_079682 | ENSRNOT00000050573 | 0.997147692  | 1.48E-12 |
| TUCP_001971 | XLOC_079682 | ENSRNOT00000074378 | 0.995788134  | 1.04E-11 |
| TUCP_001971 | XLOC_079682 | ENSRNOT00000093571 | 0.997147692  | 1.48E-12 |
| TUCP_001971 | XLOC_079682 | ENSRNOT00000090581 | 0.997147692  | 1.48E-12 |
| TUCP_001971 | XLOC_079682 | ENSRNOT00000076239 | 0.972541127  | 1.17E-07 |
| TUCP_001971 | XLOC_079682 | ENSRNOT00000065485 | 0.997147692  | 1.48E-12 |
| TUCP_001971 | XLOC_079682 | ENSRNOT0000006356  | 0.995963698  | 8.38E-12 |
| TUCP_001971 | XLOC_079682 | ENSRNOT00000087199 | 0.969946069  | 1.84E-07 |
| TUCP_001971 | XLOC_079682 | ENSRNOT00000022091 | 0.997147692  | 1.48E-12 |
| TUCP_001971 | XLOC_079682 | ENSRNOT00000064764 | 0.979772159  | 2.58E-08 |
| TUCP_001971 | XLOC_079682 | ENSRNOT00000076927 | 0.966832923  | 2.99E-07 |
| TUCP_001971 | XLOC_079682 | ENSRNOT00000092395 | 0.996438934  | 4.48E-12 |
| TUCP_004137 | XLOC_180712 | ENSRNOT00000027611 | 0.956833054  | 1.10E-06 |
| TUCP_004137 | XLOC_180712 | ENSRNOT00000081246 | 0.968168454  | 2.44E-07 |
| TUCP_004137 | XLOC_180712 | ENSRNOT0000009877  | 0.95127198   | 1.99E-06 |
| TUCP_004137 | XLOC_180712 | ENSRNOT00000007351 | -0.952627095 | 1.73E-06 |
| TUCP_004137 | XLOC_180712 | ENSRNOT00000074939 | 0.973615773  | 9.63E-08 |
| TUCP_004137 | XLOC_180712 | ENSRNOT00000021614 | 0.953503235  | 1.58E-06 |
| TUCP_004137 | XLOC_180712 | ENSRNOT00000034146 | 0.956248378  | 1.17E-06 |
| TUCP_004137 | XLOC_180712 | ENSRNOT00000021116 | 0.968581777  | 2.29E-07 |
| TUCP_004137 | XLOC_180712 | ENSRNOT00000023823 | 0.956593334  | 1.13E-06 |
| TUCP_004137 | XLOC_180712 | ENSRNOT00000084601 | 0.979773176  | 2.58E-08 |
| TUCP_004137 | XLOC_180712 | ENSRNOT00000043216 | 0.966663786  | 3.07E-07 |
| TUCP_004137 | XLOC_180712 | ENSRNOT00000044742 | 0.954442694  | 1.43E-06 |
| TUCP_004137 | XLOC_180712 | ENSRNOT00000027414 | 0.960651219  | 6.95E-07 |
| TUCP_004137 | XLOC_180712 | ENSRNOT00000028563 | 0.965828206  | 3.46E-07 |
| TUCP_004137 | XLOC_180712 | ENSRNOT00000022800 | 0.953385518  | 1.60E-06 |
| TUCP_004137 | XLOC_180712 | ENSRNOT00000066670 | 0.973183797  | 1.04E-07 |
| TUCP_004137 | XLOC_180712 | ENSRNOT00000071971 | 0.951533907  | 1.94E-06 |
| TUCP_004137 | XLOC_180712 | ENSRNOT00000015073 | 0.956006321  | 1.21E-06 |
| TUCP_004137 | XLOC_180712 | ENSRNOT00000005942 | 0.950775701  | 2.09E-06 |
| TUCP_004137 | XLOC_180712 | ENSRNOT00000012379 | 0.964515098  | 4.17E-07 |
| TUCP_004137 | XLOC_180712 | ENSRNOT00000029866 | 0.953676576  | 1.55E-06 |
| TUCP_004137 | XLOC_180712 | ENSRNOT00000080465 | 0.97060042   | 1.65E-07 |
| TUCP_004137 | XLOC_180712 | ENSRNOT00000006963 | 0.95285215   | 1.69E-06 |
| TUCP_004137 | XLOC_180712 | ENSRNOT00000071764 | 0.966661921  | 3.07E-07 |
| TUCP_004137 | XLOC_180712 | ENSRNOT00000082699 | 0.952415715  | 1.77E-06 |
| TUCP_004137 | XLOC_180712 | ENSRNOT00000021348 | 0.964608291  | 4.12E-07 |

|             |             |                     |              |          |
|-------------|-------------|---------------------|--------------|----------|
| TUCP_004137 | XLOC_180712 | ENSRNOT00000032944  | 0.97426506   | 8.51E-08 |
| TUCP_004137 | XLOC_180712 | ENSRNOT00000083215  | 0.964900654  | 3.96E-07 |
| TUCP_004137 | XLOC_180712 | ENSRNOT00000055187  | 0.960233705  | 7.33E-07 |
| TUCP_004137 | XLOC_180712 | ENSRNOT00000001809  | 0.975489106  | 6.69E-08 |
| TUCP_004137 | XLOC_180712 | ENSRNOT00000079866  | 0.954138131  | 1.48E-06 |
| TUCP_004137 | XLOC_180712 | ENSRNOT00000034267  | 0.951122779  | 2.02E-06 |
| TUCP_004137 | XLOC_180712 | ENSRNOT00000032274  | 0.969825902  | 1.87E-07 |
| TUCP_004137 | XLOC_180712 | ENSRNOT00000010149  | 0.956609923  | 1.13E-06 |
| TUCP_004137 | XLOC_180712 | ENSRNOT00000008018  | 0.964545887  | 4.16E-07 |
| TUCP_004137 | XLOC_180712 | ENSRNOT00000004032  | 0.952922689  | 1.68E-06 |
| TUCP_004137 | XLOC_180712 | ENSRNOT00000003991  | 0.963250855  | 4.96E-07 |
| TUCP_004137 | XLOC_180712 | ENSRNOT00000017948  | 0.972663648  | 1.15E-07 |
| TUCP_004137 | XLOC_180712 | ENSRNOT00000012895  | 0.969881436  | 1.86E-07 |
| TUCP_004137 | XLOC_180712 | ENSRNOT00000055401  | 0.979009882  | 3.10E-08 |
| TUCP_004137 | XLOC_180712 | ENSRNOT00000072196  | 0.952821008  | 1.70E-06 |
| TUCP_004137 | XLOC_180712 | ENSRNOT00000039852  | 0.986694044  | 3.21E-09 |
| TUCP_004137 | XLOC_180712 | ENSRNOT00000023180  | 0.955650042  | 1.25E-06 |
| TUCP_004137 | XLOC_180712 | ENSRNOT00000000676  | 0.963759904  | 4.63E-07 |
| TUCP_004137 | XLOC_180712 | ENSRNOT00000070815  | 0.972940913  | 1.09E-07 |
| TUCP_004137 | XLOC_180712 | ENSRNOT00000028070  | 0.951368117  | 1.97E-06 |
| TUCP_004137 | XLOC_180712 | ENSRNOT00000004359  | 0.95042984   | 2.17E-06 |
| TUCP_004137 | XLOC_180712 | ENSRNOT00000013274  | 0.965392292  | 3.69E-07 |
| TUCP_004137 | XLOC_180712 | ENSRNOT00000022610  | 0.966336988  | 3.22E-07 |
| TUCP_004137 | XLOC_180712 | ENSRNOT00000020437  | 0.97453166   | 8.09E-08 |
| TUCP_004137 | XLOC_180712 | ENSRNOT00000051720  | 0.95604802   | 1.20E-06 |
| TUCP_004137 | XLOC_180712 | ENSRNOT00000010898  | 0.960375527  | 7.20E-07 |
| TUCP_004137 | XLOC_180712 | ENSRNOT00000000157  | 0.971507261  | 1.41E-07 |
| TUCP_004137 | XLOC_180712 | ENSRNOT00000009430  | 0.966096974  | 3.33E-07 |
| TUCP_004137 | XLOC_180712 | ENSRNOT00000029167  | 0.97482847   | 7.63E-08 |
| TUCP_004137 | XLOC_180712 | ENSRNOT00000029419  | 0.955282426  | 1.31E-06 |
| TUCP_004137 | XLOC_180712 | ENSRNOT00000027520  | 0.9549672    | 1.35E-06 |
| TUCP_004137 | XLOC_180712 | ENSRNOT00000047387  | 0.951701496  | 1.91E-06 |
| TUCP_004137 | XLOC_180712 | ENSRNOT00000013661  | 0.960624295  | 6.98E-07 |
| TUCP_004137 | XLOC_180712 | ENSRNOT00000058072  | 0.977200073  | 4.67E-08 |
| TUCP_004137 | XLOC_180712 | ENSRNOT00000017629  | 0.960100403  | 7.45E-07 |
| TUCP_004137 | XLOC_180712 | ENSRNOT00000022839  | 0.956785571  | 1.10E-06 |
| TUCP_004137 | XLOC_180712 | ENSRNOT00000004508  | 0.971520318  | 1.41E-07 |
| TUCP_004137 | XLOC_180712 | ENSRNOT00000034744  | 0.951567228  | 1.93E-06 |
| TUCP_004137 | XLOC_180712 | ENSRNOT00000009440  | -0.954833354 | 1.37E-06 |
| TUCP_004137 | XLOC_180712 | ENSRNOT00000009683  | 0.955712634  | 1.25E-06 |
| TUCP_004137 | XLOC_180712 | ENSRNOT00000021153  | 0.952347247  | 1.79E-06 |
| TUCP_004137 | XLOC_180712 | ENSRNOT00000005262  | 0.95539809   | 1.29E-06 |
| TUCP_004137 | XLOC_180712 | ENSRNOT00000024322  | 0.954549586  | 1.41E-06 |
| TUCP_004137 | XLOC_180712 | ENSRNOT00000063956  | 0.950570602  | 2.14E-06 |
| TUCP_004137 | XLOC_180712 | ENSRNOT000000081897 | 0.953045463  | 1.66E-06 |
| TUCP_004137 | XLOC_180712 | ENSRNOT00000074075  | 0.953185575  | 1.64E-06 |
| TUCP_004137 | XLOC_180712 | ENSRNOT00000039631  | 0.968774359  | 2.22E-07 |
| TUCP_004137 | XLOC_180712 | ENSRNOT00000025832  | 0.965119683  | 3.83E-07 |
| TUCP_004137 | XLOC_180712 | ENSRNOT00000076729  | 0.967578232  | 2.67E-07 |
| TUCP_004137 | XLOC_180712 | ENSRNOT00000017753  | 0.950496671  | 2.15E-06 |
| TUCP_004137 | XLOC_180712 | ENSRNOT00000000713  | 0.96793041   | 2.53E-07 |



|             |             |                    |             |          |
|-------------|-------------|--------------------|-------------|----------|
| TUCP_004137 | XLOC_180712 | ENSRNOT00000045882 | 0.955851191 | 1.23E-06 |
| TUCP_004137 | XLOC_180712 | ENSRNOT00000066736 | 0.98308423  | 1.06E-08 |
| TUCP_004137 | XLOC_180712 | ENSRNOT00000009198 | 0.961960958 | 5.88E-07 |
| TUCP_004137 | XLOC_180712 | ENSRNOT00000027054 | 0.955609212 | 1.26E-06 |
| TUCP_004137 | XLOC_180712 | ENSRNOT00000009129 | 0.97025303  | 1.75E-07 |
| TUCP_004137 | XLOC_180712 | ENSRNOT00000072081 | 0.961098758 | 6.57E-07 |
| TUCP_004137 | XLOC_180712 | ENSRNOT00000072534 | 0.964504186 | 4.18E-07 |
| TUCP_004137 | XLOC_180712 | ENSRNOT00000036951 | 0.962128364 | 5.76E-07 |
| TUCP_004137 | XLOC_180712 | ENSRNOT00000073991 | 0.957369213 | 1.03E-06 |
| TUCP_004137 | XLOC_180712 | ENSRNOT00000091265 | 0.957264189 | 1.04E-06 |
| TUCP_004137 | XLOC_180712 | ENSRNOT00000006800 | 0.966181932 | 3.29E-07 |
| TUCP_004137 | XLOC_180712 | ENSRNOT00000044376 | 0.952474507 | 1.76E-06 |
| TUCP_004137 | XLOC_180712 | ENSRNOT00000092158 | 0.957360547 | 1.03E-06 |
| TUCP_004137 | XLOC_180712 | ENSRNOT00000023645 | 0.964271322 | 4.32E-07 |
| TUCP_004137 | XLOC_180712 | ENSRNOT00000084734 | 0.960805451 | 6.82E-07 |
| TUCP_004137 | XLOC_180712 | ENSRNOT00000010992 | 0.952401551 | 1.78E-06 |
| TUCP_004137 | XLOC_180712 | ENSRNOT00000076669 | 0.964193894 | 4.36E-07 |
| TUCP_004137 | XLOC_180712 | ENSRNOT00000085596 | 0.952679027 | 1.73E-06 |
| TUCP_004137 | XLOC_180712 | ENSRNOT00000066526 | 0.968790938 | 2.21E-07 |
| TUCP_004137 | XLOC_180712 | ENSRNOT00000031230 | 0.971980931 | 1.30E-07 |
| TUCP_004137 | XLOC_180712 | ENSRNOT00000071733 | 0.954426862 | 1.43E-06 |
| TUCP_004137 | XLOC_180712 | ENSRNOT00000002292 | 0.956478497 | 1.14E-06 |
| TUCP_004137 | XLOC_180712 | ENSRNOT00000086336 | 0.964265878 | 4.32E-07 |
| TUCP_004137 | XLOC_180712 | ENSRNOT00000023490 | 0.971140129 | 1.50E-07 |
| TUCP_004137 | XLOC_180712 | ENSRNOT00000041384 | -0.95113168 | 2.02E-06 |
| TUCP_004137 | XLOC_180712 | ENSRNOT00000071697 | 0.951542018 | 1.94E-06 |
| TUCP_004137 | XLOC_180712 | ENSRNOT00000004412 | 0.971875039 | 1.32E-07 |
| TUCP_004137 | XLOC_180712 | ENSRNOT00000064798 | 0.954424105 | 1.43E-06 |
| TUCP_004137 | XLOC_180712 | ENSRNOT00000027452 | 0.966649586 | 3.07E-07 |
| TUCP_004137 | XLOC_180712 | ENSRNOT00000034704 | 0.982336049 | 1.31E-08 |
| TUCP_004137 | XLOC_180712 | ENSRNOT00000082174 | 0.95241491  | 1.77E-06 |
| TUCP_004137 | XLOC_180712 | ENSRNOT00000013985 | 0.968612699 | 2.28E-07 |
| TUCP_004137 | XLOC_180712 | ENSRNOT00000036750 | 0.968070992 | 2.48E-07 |
| TUCP_004137 | XLOC_180712 | ENSRNOT00000060669 | 0.959405119 | 8.11E-07 |
| TUCP_004137 | XLOC_180712 | ENSRNOT00000023428 | 0.957869387 | 9.74E-07 |
| TUCP_004137 | XLOC_180712 | ENSRNOT00000024420 | 0.958344551 | 9.21E-07 |
| TUCP_004137 | XLOC_180712 | ENSRNOT00000049538 | 0.972189997 | 1.25E-07 |
| TUCP_004137 | XLOC_180712 | ENSRNOT00000029001 | 0.961594728 | 6.17E-07 |
| TUCP_004137 | XLOC_180712 | ENSRNOT00000083799 | 0.957527326 | 1.01E-06 |
| TUCP_004137 | XLOC_180712 | ENSRNOT00000009066 | 0.959968697 | 7.57E-07 |
| TUCP_004130 | XLOC_180298 | ENSRNOT00000033018 | 0.952084318 | 1.84E-06 |
| TUCP_004508 | XLOC_198778 | ENSRNOT00000084500 | 0.967784772 | 2.59E-07 |
| TUCP_004508 | XLOC_198778 | ENSRNOT00000071877 | 0.959275266 | 8.24E-07 |
| TUCP_004508 | XLOC_198778 | ENSRNOT00000077972 | 0.953393672 | 1.60E-06 |
| TUCP_004508 | XLOC_198778 | ENSRNOT00000052315 | 0.973708288 | 9.47E-08 |
| TUCP_004508 | XLOC_198778 | ENSRNOT00000052308 | 0.965931678 | 3.41E-07 |
| TUCP_004508 | XLOC_198778 | ENSRNOT00000048858 | 0.976247106 | 5.72E-08 |
| TUCP_004508 | XLOC_198778 | ENSRNOT00000047241 | 0.96682242  | 2.99E-07 |
| TUCP_004508 | XLOC_198778 | ENSRNOT00000043661 | 0.966651612 | 3.07E-07 |
| TUCP_002598 | XLOC_109621 | ENSRNOT00000074990 | 0.988969567 | 1.26E-09 |
| TUCP_002598 | XLOC_109621 | ENSRNOT00000068444 | 0.988969567 | 1.26E-09 |

|             |             |                    |             |          |
|-------------|-------------|--------------------|-------------|----------|
| TUCP_002598 | XLOC_109621 | ENSRNOT00000081370 | 0.989350739 | 1.06E-09 |
| TUCP_002598 | XLOC_109621 | ENSRNOT00000078645 | 0.989802454 | 8.54E-10 |
| TUCP_002598 | XLOC_109621 | ENSRNOT00000075987 | 0.987003394 | 2.86E-09 |
| TUCP_002598 | XLOC_109621 | ENSRNOT00000082043 | 0.986928169 | 2.94E-09 |
| TUCP_002598 | XLOC_109621 | ENSRNOT00000087323 | 0.981708157 | 1.56E-08 |
| TUCP_002598 | XLOC_109621 | ENSRNOT00000074930 | 0.988969567 | 1.26E-09 |
| TUCP_002598 | XLOC_109621 | ENSRNOT00000080575 | 0.989028565 | 1.23E-09 |
| TUCP_002598 | XLOC_109621 | ENSRNOT00000057761 | 0.975412589 | 6.79E-08 |
| TUCP_002598 | XLOC_109621 | ENSRNOT00000078369 | 0.983676245 | 8.88E-09 |
| TUCP_002598 | XLOC_109621 | ENSRNOT00000092982 | 0.988969567 | 1.26E-09 |
| TUCP_002598 | XLOC_109621 | ENSRNOT00000088367 | 0.988969567 | 1.26E-09 |
| TUCP_002598 | XLOC_109621 | ENSRNOT00000079606 | 0.966198332 | 3.28E-07 |
| TUCP_002598 | XLOC_109621 | ENSRNOT00000081996 | 0.988969567 | 1.26E-09 |
| TUCP_002598 | XLOC_109621 | ENSRNOT00000064751 | 0.956445005 | 1.15E-06 |
| TUCP_002598 | XLOC_109621 | ENSRNOT00000022280 | 0.98954896  | 9.65E-10 |
| TUCP_002598 | XLOC_109621 | ENSRNOT00000082058 | 0.988969567 | 1.26E-09 |
| TUCP_002598 | XLOC_109621 | ENSRNOT00000088905 | 0.988969567 | 1.26E-09 |
| TUCP_002598 | XLOC_109621 | ENSRNOT00000086831 | 0.988969567 | 1.26E-09 |
| TUCP_002598 | XLOC_109621 | ENSRNOT00000045099 | 0.988969567 | 1.26E-09 |
| TUCP_002598 | XLOC_109621 | ENSRNOT00000086745 | 0.968313659 | 2.39E-07 |
| TUCP_002598 | XLOC_109621 | ENSRNOT00000085849 | 0.9852386   | 5.38E-09 |
| TUCP_002598 | XLOC_109621 | ENSRNOT00000077789 | 0.974510293 | 8.12E-08 |
| TUCP_002598 | XLOC_109621 | ENSRNOT00000073828 | 0.965143232 | 3.82E-07 |
| TUCP_002598 | XLOC_109621 | ENSRNOT00000087025 | 0.988969567 | 1.26E-09 |
| TUCP_002598 | XLOC_109621 | ENSRNOT00000019853 | 0.988969567 | 1.26E-09 |
| TUCP_002598 | XLOC_109621 | ENSRNOT00000073853 | 0.981147582 | 1.82E-08 |
| TUCP_002598 | XLOC_109621 | ENSRNOT00000065912 | 0.959008008 | 8.51E-07 |
| TUCP_002598 | XLOC_109621 | ENSRNOT00000093083 | 0.987712097 | 2.16E-09 |
| TUCP_003897 | XLOC_171339 | ENSRNOT00000003511 | 0.973889137 | 9.15E-08 |
| TUCP_003897 | XLOC_171339 | ENSRNOT00000005505 | 0.964042344 | 4.46E-07 |
| TUCP_003897 | XLOC_171339 | ENSRNOT00000064070 | 0.952237951 | 1.81E-06 |
| TUCP_003897 | XLOC_171339 | ENSRNOT0000000697  | 0.957021402 | 1.07E-06 |
| TUCP_003897 | XLOC_171339 | ENSRNOT00000023623 | 0.978007116 | 3.91E-08 |
| TUCP_003897 | XLOC_171339 | ENSRNOT00000016390 | 0.951497398 | 1.95E-06 |
| TUCP_003897 | XLOC_171339 | ENSRNOT00000023607 | 0.9520885   | 1.83E-06 |
| TUCP_003897 | XLOC_171339 | ENSRNOT00000087937 | 0.954741316 | 1.39E-06 |
| TUCP_003897 | XLOC_171339 | ENSRNOT00000047453 | 0.97134576  | 1.45E-07 |
| TUCP_003897 | XLOC_171339 | ENSRNOT00000072682 | 0.97898569  | 3.12E-08 |
| TUCP_003897 | XLOC_171339 | ENSRNOT0000009975  | 0.956562771 | 1.13E-06 |
| TUCP_003897 | XLOC_171339 | ENSRNOT00000010701 | 0.972355979 | 1.21E-07 |
| TUCP_003897 | XLOC_171339 | ENSRNOT00000023661 | 0.970720366 | 1.61E-07 |
| TUCP_003897 | XLOC_171339 | ENSRNOT0000002905  | 0.956729693 | 1.11E-06 |
| TUCP_003897 | XLOC_171339 | ENSRNOT00000041762 | 0.986120228 | 3.96E-09 |
| TUCP_003897 | XLOC_171339 | ENSRNOT00000064122 | 0.958304035 | 9.25E-07 |
| TUCP_003897 | XLOC_171339 | ENSRNOT00000006697 | 0.962233384 | 5.68E-07 |
| TUCP_001773 | XLOC_073332 | ENSRNOT00000090449 | 0.957789323 | 9.83E-07 |
| TUCP_001782 | XLOC_073522 | ENSRNOT00000090350 | 0.956948908 | 1.08E-06 |
| TUCP_001782 | XLOC_073522 | ENSRNOT00000088306 | 0.962751647 | 5.30E-07 |
| TUCP_002596 | XLOC_109621 | ENSRNOT00000004876 | 0.961120126 | 6.55E-07 |
| TUCP_002596 | XLOC_109621 | ENSRNOT00000061139 | 0.955434059 | 1.28E-06 |
| TUCP_002597 | XLOC_109621 | ENSRNOT00000048498 | 0.979343473 | 2.86E-08 |

|             |             |                     |              |          |
|-------------|-------------|---------------------|--------------|----------|
| TUCP_002597 | XLOC_109621 | ENSRNOT00000072238  | 0.992713305  | 1.60E-10 |
| TUCP_002597 | XLOC_109621 | ENSRNOT00000033379  | 0.967678135  | 2.63E-07 |
| TUCP_002597 | XLOC_109621 | ENSRNOT00000057051  | 0.988809994  | 1.36E-09 |
| TUCP_002597 | XLOC_109621 | ENSRNOT0000004279   | 0.955084175  | 1.33E-06 |
| TUCP_002597 | XLOC_109621 | ENSRNOT00000046837  | 0.953061804  | 1.66E-06 |
| TUCP_003834 | XLOC_167932 | ENSRNOT00000009666  | 0.955823606  | 1.23E-06 |
| TUCP_003834 | XLOC_167932 | ENSRNOT00000013863  | 0.954291451  | 1.45E-06 |
| TUCP_003834 | XLOC_167932 | ENSRNOT00000025846  | 0.970608931  | 1.64E-07 |
| TUCP_003834 | XLOC_167932 | ENSRNOT00000006549  | 0.955764761  | 1.24E-06 |
| TUCP_003834 | XLOC_167932 | ENSRNOT00000058116  | 0.958695846  | 8.83E-07 |
| TUCP_003834 | XLOC_167932 | ENSRNOT00000006402  | 0.952634663  | 1.73E-06 |
| TUCP_003834 | XLOC_167932 | ENSRNOT00000027083  | -0.962631899 | 5.39E-07 |
| TUCP_003834 | XLOC_167932 | ENSRNOT00000048914  | -0.959841474 | 7.69E-07 |
| TUCP_003834 | XLOC_167932 | ENSRNOT00000079633  | 0.952014272  | 1.85E-06 |
| TUCP_003834 | XLOC_167932 | ENSRNOT00000025391  | -0.970934095 | 1.56E-07 |
| TUCP_003834 | XLOC_167932 | ENSRNOT00000005262  | -0.954783868 | 1.38E-06 |
| TUCP_003834 | XLOC_167932 | ENSRNOT00000021471  | 0.953233615  | 1.63E-06 |
| TUCP_003834 | XLOC_167932 | ENSRNOT00000015566  | -0.953200608 | 1.63E-06 |
| TUCP_003834 | XLOC_167932 | ENSRNOT00000022055  | 0.953688807  | 1.55E-06 |
| TUCP_003834 | XLOC_167932 | ENSRNOT00000023326  | -0.955666662 | 1.25E-06 |
| TUCP_003834 | XLOC_167932 | ENSRNOT00000016351  | 0.952212422  | 1.81E-06 |
| TUCP_003834 | XLOC_167932 | ENSRNOT00000013026  | -0.956977215 | 1.08E-06 |
| TUCP_003834 | XLOC_167932 | ENSRNOT00000008372  | -0.968625526 | 2.27E-07 |
| TUCP_003834 | XLOC_167932 | ENSRNOT00000059524  | 0.950097624  | 2.24E-06 |
| TUCP_003834 | XLOC_167932 | ENSRNOT00000064160  | -0.951030611 | 2.04E-06 |
| TUCP_003834 | XLOC_167932 | ENSRNOT00000017476  | 0.967362175  | 2.76E-07 |
| TUCP_003834 | XLOC_167932 | ENSRNOT00000002291  | -0.952377274 | 1.78E-06 |
| TUCP_003834 | XLOC_167932 | ENSRNOT00000012635  | 0.95553153   | 1.27E-06 |
| TUCP_003834 | XLOC_167932 | ENSRNOT00000029664  | -0.952077133 | 1.84E-06 |
| TUCP_003834 | XLOC_167932 | ENSRNOT00000002715  | 0.956686251  | 1.12E-06 |
| TUCP_003834 | XLOC_167932 | ENSRNOT00000078077  | -0.963404426 | 4.86E-07 |
| TUCP_003834 | XLOC_167932 | ENSRNOT00000025550  | 0.987116428  | 2.74E-09 |
| TUCP_003834 | XLOC_167932 | ENSRNOT00000025196  | 0.95164723   | 1.92E-06 |
| TUCP_003834 | XLOC_167932 | ENSRNOT00000058852  | 0.967084112  | 2.88E-07 |
| TUCP_003834 | XLOC_167932 | ENSRNOT00000092037  | 0.952562384  | 1.75E-06 |
| TUCP_003834 | XLOC_167932 | ENSRNOT00000018003  | -0.957380535 | 1.03E-06 |
| TUCP_003834 | XLOC_167932 | ENSRNOT00000001468  | 0.971463157  | 1.42E-07 |
| TUCP_003834 | XLOC_167932 | ENSRNOT00000021073  | 0.967716375  | 2.62E-07 |
| TUCP_003834 | XLOC_167932 | ENSRNOT00000078390  | 0.95753814   | 1.01E-06 |
| TUCP_003834 | XLOC_167932 | ENSRNOT00000008464  | 0.971757092  | 1.35E-07 |
| TUCP_003834 | XLOC_167932 | ENSRNOT00000034503  | -0.957581671 | 1.01E-06 |
| TUCP_003834 | XLOC_167932 | ENSRNOT00000019630  | -0.959126989 | 8.39E-07 |
| TUCP_003834 | XLOC_167932 | ENSRNOT00000003158  | 0.97037025   | 1.71E-07 |
| TUCP_003834 | XLOC_167932 | ENSRNOT00000055251  | -0.950747069 | 2.10E-06 |
| TUCP_003834 | XLOC_167932 | ENSRNOT00000020322  | -0.950551382 | 2.14E-06 |
| TUCP_003834 | XLOC_167932 | ENSRNOT000000081400 | -0.967847678 | 2.56E-07 |
| TUCP_003834 | XLOC_167932 | ENSRNOT000000084595 | -0.951096416 | 2.03E-06 |
| TUCP_003834 | XLOC_167932 | ENSRNOT00000007002  | 0.952990149  | 1.67E-06 |
| TUCP_003834 | XLOC_167932 | ENSRNOT00000005894  | -0.950461256 | 2.16E-06 |
| TUCP_003834 | XLOC_167932 | ENSRNOT00000025936  | 0.976635283  | 5.27E-08 |
| TUCP_003834 | XLOC_167932 | ENSRNOT00000086812  | -0.956395948 | 1.15E-06 |

|             |             |                    |              |          |
|-------------|-------------|--------------------|--------------|----------|
| TUCP_003834 | XLOC_167932 | ENSRNOT00000011682 | 0.969596017  | 1.94E-07 |
| TUCP_003834 | XLOC_167932 | ENSRNOT00000027121 | -0.954012191 | 1.50E-06 |
| TUCP_003834 | XLOC_167932 | ENSRNOT00000051496 | -0.958356656 | 9.20E-07 |
| TUCP_003834 | XLOC_167932 | ENSRNOT00000014749 | -0.968699186 | 2.25E-07 |
| TUCP_003834 | XLOC_167932 | ENSRNOT00000010898 | -0.953912856 | 1.52E-06 |
| TUCP_003834 | XLOC_167932 | ENSRNOT00000056608 | 0.969340439  | 2.03E-07 |
| TUCP_003834 | XLOC_167932 | ENSRNOT00000009247 | 0.951063627  | 2.04E-06 |
| TUCP_003834 | XLOC_167932 | ENSRNOT00000006900 | 0.968239577  | 2.41E-07 |
| TUCP_003834 | XLOC_167932 | ENSRNOT00000082699 | -0.964521637 | 4.17E-07 |
| TUCP_003834 | XLOC_167932 | ENSRNOT00000031549 | -0.958319396 | 9.24E-07 |
| TUCP_003834 | XLOC_167932 | ENSRNOT00000090420 | 0.954853927  | 1.37E-06 |
| TUCP_003834 | XLOC_167932 | ENSRNOT00000021592 | -0.972431014 | 1.20E-07 |
| TUCP_003834 | XLOC_167932 | ENSRNOT00000017422 | 0.956681831  | 1.12E-06 |
| TUCP_003834 | XLOC_167932 | ENSRNOT00000019886 | -0.955962588 | 1.21E-06 |
| TUCP_003834 | XLOC_167932 | ENSRNOT00000078589 | 0.958520272  | 9.02E-07 |
| TUCP_003834 | XLOC_167932 | ENSRNOT00000081881 | -0.967784445 | 2.59E-07 |
| TUCP_003834 | XLOC_167932 | ENSRNOT00000091065 | -0.955983696 | 1.21E-06 |
| TUCP_003834 | XLOC_167932 | ENSRNOT00000028625 | 0.978086522  | 3.84E-08 |
| TUCP_003834 | XLOC_167932 | ENSRNOT00000078685 | -0.964445115 | 4.22E-07 |
| TUCP_003835 | XLOC_167971 | ENSRNOT00000039045 | 0.955515839  | 1.27E-06 |
| TUCP_003835 | XLOC_167971 | ENSRNOT00000013620 | 0.95539731   | 1.29E-06 |
| TUCP_003835 | XLOC_167971 | ENSRNOT00000000713 | 0.950379058  | 2.18E-06 |
| TUCP_003835 | XLOC_167971 | ENSRNOT00000009979 | 0.963578573  | 4.75E-07 |
| TUCP_003835 | XLOC_167971 | ENSRNOT00000081246 | 0.969712643  | 1.91E-07 |
| TUCP_003835 | XLOC_167971 | ENSRNOT00000009877 | 0.988619816  | 1.47E-09 |
| TUCP_003835 | XLOC_167971 | ENSRNOT00000007351 | -0.953917191 | 1.51E-06 |
| TUCP_003835 | XLOC_167971 | ENSRNOT00000017668 | 0.956752272  | 1.11E-06 |
| TUCP_003835 | XLOC_167971 | ENSRNOT00000021614 | 0.977195244  | 4.68E-08 |
| TUCP_003835 | XLOC_167971 | ENSRNOT00000026065 | 0.9636118    | 4.73E-07 |
| TUCP_003835 | XLOC_167971 | ENSRNOT00000005228 | 0.954113532  | 1.48E-06 |
| TUCP_003835 | XLOC_167971 | ENSRNOT00000022726 | 0.975789127  | 6.29E-08 |
| TUCP_003835 | XLOC_167971 | ENSRNOT0000005659  | 0.953780349  | 1.54E-06 |
| TUCP_003835 | XLOC_167971 | ENSRNOT00000027526 | 0.952932291  | 1.68E-06 |
| TUCP_003835 | XLOC_167971 | ENSRNOT00000086548 | 0.968460961  | 2.33E-07 |
| TUCP_003835 | XLOC_167971 | ENSRNOT00000019502 | 0.957178115  | 1.06E-06 |
| TUCP_003835 | XLOC_167971 | ENSRNOT00000090342 | 0.959496749  | 8.02E-07 |
| TUCP_003835 | XLOC_167971 | ENSRNOT00000017968 | 0.950632929  | 2.13E-06 |
| TUCP_003835 | XLOC_167971 | ENSRNOT00000038703 | 0.965600601  | 3.58E-07 |
| TUCP_003835 | XLOC_167971 | ENSRNOT00000043216 | 0.977621488  | 4.26E-08 |
| TUCP_003835 | XLOC_167971 | ENSRNOT00000081981 | 0.9520775    | 1.84E-06 |
| TUCP_003835 | XLOC_167971 | ENSRNOT00000009496 | 0.966468203  | 3.16E-07 |
| TUCP_003835 | XLOC_167971 | ENSRNOT00000065383 | 0.962872629  | 5.22E-07 |
| TUCP_003835 | XLOC_167971 | ENSRNOT00000027414 | 0.981639469  | 1.59E-08 |
| TUCP_003835 | XLOC_167971 | ENSRNOT00000028563 | 0.990665557  | 5.49E-10 |
| TUCP_003835 | XLOC_167971 | ENSRNOT00000083369 | 0.968747918  | 2.23E-07 |
| TUCP_003835 | XLOC_167971 | ENSRNOT00000003158 | -0.954535202 | 1.42E-06 |
| TUCP_003835 | XLOC_167971 | ENSRNOT00000076516 | 0.968084534  | 2.47E-07 |
| TUCP_003835 | XLOC_167971 | ENSRNOT00000015073 | 0.973907754  | 9.12E-08 |
| TUCP_003835 | XLOC_167971 | ENSRNOT00000005942 | 0.953537623  | 1.58E-06 |
| TUCP_003835 | XLOC_167971 | ENSRNOT00000018533 | 0.975035282  | 7.32E-08 |
| TUCP_003835 | XLOC_167971 | ENSRNOT00000026783 | 0.974515598  | 8.11E-08 |

|             |             |                     |              |          |
|-------------|-------------|---------------------|--------------|----------|
| TUCP_003835 | XLOC_167971 | ENSRNOT00000012379  | 0.984726158  | 6.38E-09 |
| TUCP_003835 | XLOC_167971 | ENSRNOT00000011384  | 0.965320002  | 3.73E-07 |
| TUCP_003835 | XLOC_167971 | ENSRNOT00000014701  | 0.963406004  | 4.86E-07 |
| TUCP_003835 | XLOC_167971 | ENSRNOT00000006963  | 0.981472246  | 1.67E-08 |
| TUCP_003835 | XLOC_167971 | ENSRNOT000000087306 | 0.954824585  | 1.37E-06 |
| TUCP_003835 | XLOC_167971 | ENSRNOT000000076820 | 0.962677196  | 5.36E-07 |
| TUCP_003835 | XLOC_167971 | ENSRNOT000000073879 | 0.954019528  | 1.50E-06 |
| TUCP_003835 | XLOC_167971 | ENSRNOT000000079109 | 0.987409547  | 2.44E-09 |
| TUCP_003835 | XLOC_167971 | ENSRNOT000000027944 | 0.968773034  | 2.22E-07 |
| TUCP_003835 | XLOC_167971 | ENSRNOT000000016801 | 0.955605884  | 1.26E-06 |
| TUCP_003835 | XLOC_167971 | ENSRNOT000000025372 | 0.964771862  | 4.03E-07 |
| TUCP_003835 | XLOC_167971 | ENSRNOT000000076453 | 0.956994859  | 1.08E-06 |
| TUCP_003835 | XLOC_167971 | ENSRNOT000000052075 | 0.969268614  | 2.05E-07 |
| TUCP_003835 | XLOC_167971 | ENSRNOT000000037456 | 0.952104093  | 1.83E-06 |
| TUCP_003835 | XLOC_167971 | ENSRNOT000000032944 | 0.978177497  | 3.76E-08 |
| TUCP_003835 | XLOC_167971 | ENSRNOT000000083215 | 0.975450214  | 6.74E-08 |
| TUCP_003835 | XLOC_167971 | ENSRNOT000000017319 | 0.961651788  | 6.12E-07 |
| TUCP_003835 | XLOC_167971 | ENSRNOT000000055187 | 0.956786334  | 1.10E-06 |
| TUCP_003835 | XLOC_167971 | ENSRNOT000000005934 | 0.958667573  | 8.86E-07 |
| TUCP_003835 | XLOC_167971 | ENSRNOT00000001809  | 0.955056361  | 1.34E-06 |
| TUCP_003835 | XLOC_167971 | ENSRNOT000000035346 | -0.956267865 | 1.17E-06 |
| TUCP_003835 | XLOC_167971 | ENSRNOT000000024060 | 0.955803788  | 1.23E-06 |
| TUCP_003835 | XLOC_167971 | ENSRNOT000000010149 | 0.973683432  | 9.51E-08 |
| TUCP_003835 | XLOC_167971 | ENSRNOT000000051181 | 0.955854825  | 1.23E-06 |
| TUCP_003835 | XLOC_167971 | ENSRNOT000000064774 | 0.95263001   | 1.73E-06 |
| TUCP_003835 | XLOC_167971 | ENSRNOT000000004032 | 0.978064312  | 3.86E-08 |
| TUCP_003835 | XLOC_167971 | ENSRNOT000000084385 | 0.969679558  | 1.92E-07 |
| TUCP_003835 | XLOC_167971 | ENSRNOT000000012895 | 0.95801729   | 9.57E-07 |
| TUCP_003835 | XLOC_167971 | ENSRNOT000000044562 | 0.951001309  | 2.05E-06 |
| TUCP_003835 | XLOC_167971 | ENSRNOT000000027537 | 0.951517994  | 1.94E-06 |
| TUCP_003835 | XLOC_167971 | ENSRNOT000000034744 | 0.964337354  | 4.28E-07 |
| TUCP_003835 | XLOC_167971 | ENSRNOT000000012560 | 0.958812311  | 8.71E-07 |
| TUCP_003835 | XLOC_167971 | ENSRNOT000000070815 | 0.963769967  | 4.63E-07 |
| TUCP_003835 | XLOC_167971 | ENSRNOT000000085332 | -0.952660157 | 1.73E-06 |
| TUCP_003835 | XLOC_167971 | ENSRNOT000000023477 | 0.953408168  | 1.60E-06 |
| TUCP_003835 | XLOC_167971 | ENSRNOT000000022213 | 0.960644523  | 6.96E-07 |
| TUCP_003835 | XLOC_167971 | ENSRNOT000000022610 | 0.972256733  | 1.24E-07 |
| TUCP_003835 | XLOC_167971 | ENSRNOT000000020437 | 0.980754397  | 2.01E-08 |
| TUCP_003835 | XLOC_167971 | ENSRNOT00000006828  | 0.983109545  | 1.05E-08 |
| TUCP_003835 | XLOC_167971 | ENSRNOT00000003971  | 0.952840616  | 1.70E-06 |
| TUCP_003835 | XLOC_167971 | ENSRNOT00000003991  | 0.962577943  | 5.43E-07 |
| TUCP_003835 | XLOC_167971 | ENSRNOT00000008982  | 0.956226411  | 1.18E-06 |
| TUCP_003835 | XLOC_167971 | ENSRNOT00000001242  | 0.962877713  | 5.22E-07 |
| TUCP_003835 | XLOC_167971 | ENSRNOT000000079917 | 0.954164146  | 1.48E-06 |
| TUCP_003835 | XLOC_167971 | ENSRNOT000000078102 | 0.960132077  | 7.42E-07 |
| TUCP_003835 | XLOC_167971 | ENSRNOT000000086868 | 0.956761877  | 1.11E-06 |
| TUCP_003835 | XLOC_167971 | ENSRNOT000000025983 | 0.977955899  | 3.95E-08 |
| TUCP_003835 | XLOC_167971 | ENSRNOT00000008929  | 0.962791472  | 5.28E-07 |
| TUCP_003835 | XLOC_167971 | ENSRNOT000000013661 | 0.963048646  | 5.10E-07 |
| TUCP_003835 | XLOC_167971 | ENSRNOT000000058072 | 0.954229471  | 1.46E-06 |
| TUCP_003835 | XLOC_167971 | ENSRNOT000000016129 | 0.967127617  | 2.86E-07 |

|             |             |                    |             |          |
|-------------|-------------|--------------------|-------------|----------|
| TUCP_003835 | XLOC_167971 | ENSRNOT00000045083 | 0.950931839 | 2.06E-06 |
| TUCP_003835 | XLOC_167971 | ENSRNOT00000033235 | 0.962541669 | 5.45E-07 |
| TUCP_003835 | XLOC_167971 | ENSRNOT00000020648 | 0.953514215 | 1.58E-06 |
| TUCP_003835 | XLOC_167971 | ENSRNOT00000022839 | 0.96706485  | 2.89E-07 |
| TUCP_003835 | XLOC_167971 | ENSRNOT00000021116 | 0.964509627 | 4.18E-07 |
| TUCP_003835 | XLOC_167971 | ENSRNOT00000032158 | 0.95257838  | 1.74E-06 |
| TUCP_003835 | XLOC_167971 | ENSRNOT00000021153 | 0.981383559 | 1.71E-08 |
| TUCP_003835 | XLOC_167971 | ENSRNOT00000027910 | 0.95027892  | 2.20E-06 |
| TUCP_003835 | XLOC_167971 | ENSRNOT00000025027 | 0.956777371 | 1.10E-06 |
| TUCP_003835 | XLOC_167971 | ENSRNOT00000087502 | 0.955415076 | 1.29E-06 |
| TUCP_003835 | XLOC_167971 | ENSRNOT00000025832 | 0.953060648 | 1.66E-06 |
| TUCP_003835 | XLOC_167971 | ENSRNOT00000047975 | 0.959101098 | 8.41E-07 |
| TUCP_003835 | XLOC_167971 | ENSRNOT00000049538 | 0.968301723 | 2.39E-07 |
| TUCP_003835 | XLOC_167971 | ENSRNOT00000051022 | 0.9543758   | 1.44E-06 |
| TUCP_003835 | XLOC_167971 | ENSRNOT00000005909 | 0.975995492 | 6.03E-08 |
| TUCP_003835 | XLOC_167971 | ENSRNOT00000009198 | 0.992566137 | 1.77E-10 |
| TUCP_003835 | XLOC_167971 | ENSRNOT00000009129 | 0.98257251  | 1.23E-08 |
| TUCP_003835 | XLOC_167971 | ENSRNOT00000025394 | 0.955702246 | 1.25E-06 |
| TUCP_003835 | XLOC_167971 | ENSRNOT00000014979 | 0.970265953 | 1.74E-07 |
| TUCP_003835 | XLOC_167971 | ENSRNOT00000036951 | 0.97935     | 2.86E-08 |
| TUCP_003835 | XLOC_167971 | ENSRNOT00000026186 | 0.951979843 | 1.85E-06 |
| TUCP_003835 | XLOC_167971 | ENSRNOT00000026121 | 0.954576366 | 1.41E-06 |
| TUCP_003835 | XLOC_167971 | ENSRNOT00000011663 | 0.965931731 | 3.41E-07 |
| TUCP_003835 | XLOC_167971 | ENSRNOT00000078250 | 0.950466317 | 2.16E-06 |
| TUCP_003835 | XLOC_167971 | ENSRNOT00000023645 | 0.958944782 | 8.57E-07 |
| TUCP_003835 | XLOC_167971 | ENSRNOT00000084734 | 0.964719287 | 4.06E-07 |
| TUCP_003835 | XLOC_167971 | ENSRNOT00000006426 | 0.980995217 | 1.89E-08 |
| TUCP_003835 | XLOC_167971 | ENSRNOT00000035700 | 0.988216984 | 1.75E-09 |
| TUCP_003835 | XLOC_167971 | ENSRNOT00000026755 | 0.9646619   | 4.09E-07 |
| TUCP_003835 | XLOC_167971 | ENSRNOT00000092029 | 0.967783455 | 2.59E-07 |
| TUCP_003835 | XLOC_167971 | ENSRNOT00000058362 | 0.95732201  | 1.04E-06 |
| TUCP_003835 | XLOC_167971 | ENSRNOT00000007175 | 0.963996173 | 4.48E-07 |
| TUCP_003835 | XLOC_167971 | ENSRNOT00000085756 | 0.966041929 | 3.36E-07 |
| TUCP_003835 | XLOC_167971 | ENSRNOT00000020669 | 0.962137681 | 5.75E-07 |
| TUCP_003835 | XLOC_167971 | ENSRNOT00000059458 | 0.965615895 | 3.57E-07 |
| TUCP_003835 | XLOC_167971 | ENSRNOT00000077406 | 0.954709057 | 1.39E-06 |
| TUCP_003835 | XLOC_167971 | ENSRNOT00000040069 | 0.956179242 | 1.18E-06 |
| TUCP_003835 | XLOC_167971 | ENSRNOT00000064320 | 0.952531699 | 1.75E-06 |
| TUCP_003835 | XLOC_167971 | ENSRNOT00000046058 | 0.973486621 | 9.87E-08 |
| TUCP_003835 | XLOC_167971 | ENSRNOT00000035474 | 0.962984851 | 5.14E-07 |
| TUCP_003835 | XLOC_167971 | ENSRNOT00000077311 | 0.972491229 | 1.18E-07 |
| TUCP_003835 | XLOC_167971 | ENSRNOT00000086336 | 0.967608503 | 2.66E-07 |
| TUCP_003835 | XLOC_167971 | ENSRNOT00000006195 | 0.978416417 | 3.56E-08 |
| TUCP_003835 | XLOC_167971 | ENSRNOT00000004172 | 0.950107661 | 2.24E-06 |
| TUCP_003835 | XLOC_167971 | ENSRNOT00000065921 | 0.96461935  | 4.11E-07 |
| TUCP_003835 | XLOC_167971 | ENSRNOT00000029125 | 0.962801326 | 5.27E-07 |
| TUCP_003835 | XLOC_167971 | ENSRNOT00000014814 | 0.950144658 | 2.23E-06 |
| TUCP_003835 | XLOC_167971 | ENSRNOT00000004412 | 0.955664256 | 1.25E-06 |
| TUCP_003835 | XLOC_167971 | ENSRNOT00000007768 | 0.953644281 | 1.56E-06 |
| TUCP_003835 | XLOC_167971 | ENSRNOT00000087095 | 0.971545331 | 1.40E-07 |
| TUCP_003835 | XLOC_167971 | ENSRNOT00000064798 | 0.967743481 | 2.61E-07 |

|             |             |                    |              |          |
|-------------|-------------|--------------------|--------------|----------|
| TUCP_003835 | XLOC_167971 | ENSRNOT00000019177 | 0.975655024  | 6.47E-08 |
| TUCP_003835 | XLOC_167971 | ENSRNOT00000010927 | 0.970015035  | 1.82E-07 |
| TUCP_003835 | XLOC_167971 | ENSRNOT00000084595 | 0.954017866  | 1.50E-06 |
| TUCP_003835 | XLOC_167971 | ENSRNOT00000027964 | 0.972760016  | 1.13E-07 |
| TUCP_003835 | XLOC_167971 | ENSRNOT00000024659 | 0.975612515  | 6.52E-08 |
| TUCP_003835 | XLOC_167971 | ENSRNOT00000072081 | 0.982514015  | 1.25E-08 |
| TUCP_003835 | XLOC_167971 | ENSRNOT00000018990 | 0.96785239   | 2.56E-07 |
| TUCP_003835 | XLOC_167971 | ENSRNOT00000017753 | 0.965087525  | 3.85E-07 |
| TUCP_003835 | XLOC_167971 | ENSRNOT00000012463 | -0.955381504 | 1.29E-06 |
| TUCP_003835 | XLOC_167971 | ENSRNOT00000004140 | 0.952529546  | 1.75E-06 |
| TUCP_003835 | XLOC_167971 | ENSRNOT00000010433 | 0.962184142  | 5.72E-07 |
| TUCP_003835 | XLOC_167971 | ENSRNOT00000027615 | 0.951498989  | 1.95E-06 |
| TUCP_003835 | XLOC_167971 | ENSRNOT00000079996 | 0.959563139  | 7.96E-07 |
| TUCP_003836 | XLOC_167975 | ENSRNOT00000025981 | 0.958583934  | 8.95E-07 |
| TUCP_003836 | XLOC_167975 | ENSRNOT00000026710 | -0.950467355 | 2.16E-06 |
| TUCP_003836 | XLOC_167975 | ENSRNOT00000022839 | 0.962155697  | 5.74E-07 |
| TUCP_003836 | XLOC_167975 | ENSRNOT00000083215 | 0.962731933  | 5.32E-07 |
| TUCP_003836 | XLOC_167975 | ENSRNOT00000025394 | 0.958215018  | 9.35E-07 |
| TUCP_003836 | XLOC_167975 | ENSRNOT00000021471 | -0.955750304 | 1.24E-06 |
| TUCP_003836 | XLOC_167975 | ENSRNOT00000051294 | 0.954088762  | 1.49E-06 |
| TUCP_003836 | XLOC_167975 | ENSRNOT00000078503 | 0.965536613  | 3.61E-07 |
| TUCP_003836 | XLOC_167975 | ENSRNOT00000021321 | 0.960256271  | 7.30E-07 |
| TUCP_003836 | XLOC_167975 | ENSRNOT00000084595 | 0.951061626  | 2.04E-06 |
| TUCP_003836 | XLOC_167975 | ENSRNOT00000003991 | 0.957537842  | 1.01E-06 |
| TUCP_003836 | XLOC_167975 | ENSRNOT00000016036 | 0.958420105  | 9.13E-07 |
| TUCP_003836 | XLOC_167975 | ENSRNOT00000022271 | 0.958685237  | 8.84E-07 |
| TUCP_003836 | XLOC_167975 | ENSRNOT00000021592 | 0.968447563  | 2.34E-07 |
| TUCP_003836 | XLOC_167975 | ENSRNOT00000064900 | 0.954501923  | 1.42E-06 |
| TUCP_003836 | XLOC_167975 | ENSRNOT00000021073 | -0.953327251 | 1.61E-06 |
| TUCP_003836 | XLOC_167975 | ENSRNOT00000075279 | 0.954629457  | 1.40E-06 |
| TUCP_003836 | XLOC_167975 | ENSRNOT00000005894 | 0.970028522  | 1.81E-07 |
| TUCP_003836 | XLOC_167975 | ENSRNOT00000025550 | -0.951825372 | 1.88E-06 |
| TUCP_003836 | XLOC_167975 | ENSRNOT00000025196 | -0.958989687 | 8.53E-07 |
| TUCP_003836 | XLOC_167975 | ENSRNOT00000023678 | 0.966025631  | 3.37E-07 |
| TUCP_003836 | XLOC_167975 | ENSRNOT00000012895 | 0.953677129  | 1.55E-06 |
| TUCP_003836 | XLOC_167975 | ENSRNOT00000003965 | 0.969183741  | 2.08E-07 |
| TUCP_003836 | XLOC_167975 | ENSRNOT00000020322 | 0.953043984  | 1.66E-06 |
| TUCP_003836 | XLOC_167975 | ENSRNOT00000067181 | 0.957555925  | 1.01E-06 |
| TUCP_003836 | XLOC_167975 | ENSRNOT00000066736 | 0.95108831   | 2.03E-06 |
| TUCP_003836 | XLOC_167975 | ENSRNOT00000086812 | 0.952523898  | 1.75E-06 |
| TUCP_003836 | XLOC_167975 | ENSRNOT00000002576 | 0.957006147  | 1.08E-06 |
| TUCP_003836 | XLOC_167975 | ENSRNOT00000056998 | 0.952319489  | 1.79E-06 |
| TUCP_003836 | XLOC_167975 | ENSRNOT00000086329 | 0.951103696  | 2.03E-06 |
| TUCP_003836 | XLOC_167975 | ENSRNOT00000027121 | 0.950930575  | 2.06E-06 |
| TUCP_003836 | XLOC_167975 | ENSRNOT00000014749 | 0.968814718  | 2.20E-07 |
| TUCP_003836 | XLOC_167975 | ENSRNOT00000039235 | 0.964961918  | 3.92E-07 |
| TUCP_003836 | XLOC_167975 | ENSRNOT00000049538 | 0.954453113  | 1.43E-06 |
| TUCP_003836 | XLOC_167975 | ENSRNOT00000082699 | 0.967965278  | 2.52E-07 |
| TUCP_003836 | XLOC_167975 | ENSRNOT00000028847 | 0.960957405  | 6.69E-07 |
| TUCP_003836 | XLOC_167975 | ENSRNOT00000076453 | 0.952691852  | 1.72E-06 |
| TUCP_003836 | XLOC_167975 | ENSRNOT00000085648 | 0.951032098  | 2.04E-06 |

|             |             |                    |              |          |
|-------------|-------------|--------------------|--------------|----------|
| TUCP_003836 | XLOC_167975 | ENSRNOT00000008372 | 0.970731692  | 1.61E-07 |
| TUCP_001783 | XLOC_073522 | ENSRNOT00000077022 | 0.952351779  | 1.79E-06 |
| TUCP_001783 | XLOC_073522 | ENSRNOT00000071258 | -0.950267682 | 2.20E-06 |
| TUCP_001783 | XLOC_073522 | ENSRNOT00000031025 | 0.960471703  | 7.11E-07 |
| TUCP_001783 | XLOC_073522 | ENSRNOT00000017042 | 0.968652582  | 2.26E-07 |
| TUCP_001783 | XLOC_073522 | ENSRNOT00000017071 | 0.973673732  | 9.53E-08 |
| TUCP_001783 | XLOC_073522 | ENSRNOT00000002695 | 0.960481322  | 7.10E-07 |
| TUCP_001783 | XLOC_073522 | ENSRNOT00000010092 | 0.971540482  | 1.40E-07 |
| TUCP_001783 | XLOC_073522 | ENSRNOT00000052003 | 0.983237737  | 1.01E-08 |
| TUCP_001783 | XLOC_073522 | ENSRNOT00000039263 | 0.960599676  | 7.00E-07 |
| TUCP_001783 | XLOC_073522 | ENSRNOT00000087603 | 0.956956985  | 1.08E-06 |
| TUCP_001783 | XLOC_073522 | ENSRNOT00000088707 | 0.980041149  | 2.41E-08 |
| TUCP_001783 | XLOC_073522 | ENSRNOT00000041741 | 0.971290674  | 1.46E-07 |
| TUCP_001783 | XLOC_073522 | ENSRNOT00000009620 | 0.956315746  | 1.16E-06 |
| TUCP_001783 | XLOC_073522 | ENSRNOT00000025564 | 0.96429699   | 4.30E-07 |
| TUCP_001783 | XLOC_073522 | ENSRNOT00000086899 | 0.974990901  | 7.39E-08 |
| TUCP_001783 | XLOC_073522 | ENSRNOT00000028058 | 0.982562878  | 1.23E-08 |
| TUCP_001783 | XLOC_073522 | ENSRNOT00000083067 | 0.953663549  | 1.56E-06 |
| TUCP_001783 | XLOC_073522 | ENSRNOT00000039876 | 0.980047209  | 2.41E-08 |
| TUCP_001783 | XLOC_073522 | ENSRNOT00000016449 | 0.957172819  | 1.06E-06 |
| TUCP_001783 | XLOC_073522 | ENSRNOT00000005726 | 0.971464827  | 1.42E-07 |
| TUCP_001783 | XLOC_073522 | ENSRNOT00000012957 | 0.98067329   | 2.06E-08 |
| TUCP_001783 | XLOC_073522 | ENSRNOT00000020786 | 0.964973473  | 3.91E-07 |
| TUCP_001783 | XLOC_073522 | ENSRNOT00000057433 | 0.971204797  | 1.49E-07 |
| TUCP_001783 | XLOC_073522 | ENSRNOT00000038494 | 0.958117015  | 9.46E-07 |
| TUCP_001783 | XLOC_073522 | ENSRNOT00000023152 | 0.960402623  | 7.17E-07 |
| TUCP_003833 | XLOC_167877 | ENSRNOT00000070848 | 0.965593833  | 3.58E-07 |
| TUCP_003833 | XLOC_167877 | ENSRNOT00000092026 | 0.968600311  | 2.28E-07 |
| TUCP_003833 | XLOC_167877 | ENSRNOT00000093075 | 0.993919386  | 6.48E-11 |
| TUCP_003833 | XLOC_167877 | ENSRNOT00000058260 | 0.993919386  | 6.48E-11 |
| TUCP_003833 | XLOC_167877 | ENSRNOT00000088887 | 0.993919386  | 6.48E-11 |
| TUCP_003833 | XLOC_167877 | ENSRNOT00000084986 | 0.993919386  | 6.48E-11 |
| TUCP_003833 | XLOC_167877 | ENSRNOT00000074346 | 0.959377556  | 8.14E-07 |
| TUCP_003833 | XLOC_167877 | ENSRNOT00000073209 | 0.975177758  | 7.12E-08 |
| TUCP_003833 | XLOC_167877 | ENSRNOT00000080155 | 0.975067681  | 7.28E-08 |
| TUCP_003833 | XLOC_167877 | ENSRNOT00000072573 | 0.989256901  | 1.11E-09 |
| TUCP_003833 | XLOC_167877 | ENSRNOT00000017828 | 0.988961606  | 1.27E-09 |
| TUCP_003833 | XLOC_167877 | ENSRNOT00000080444 | 0.965795161  | 3.48E-07 |
| TUCP_003833 | XLOC_167877 | ENSRNOT00000071312 | 0.993919386  | 6.48E-11 |
| TUCP_003833 | XLOC_167877 | ENSRNOT00000076187 | 0.96814435   | 2.45E-07 |
| TUCP_003833 | XLOC_167877 | ENSRNOT00000036565 | 0.959261631  | 8.25E-07 |
| TUCP_003833 | XLOC_167877 | ENSRNOT00000058833 | 0.992033704  | 2.49E-10 |
| TUCP_003833 | XLOC_167877 | ENSRNOT00000078052 | 0.993919386  | 6.48E-11 |
| TUCP_003833 | XLOC_167877 | ENSRNOT00000078494 | 0.993713963  | 7.65E-11 |
| TUCP_003833 | XLOC_167877 | ENSRNOT00000085653 | 0.993919386  | 6.48E-11 |
| TUCP_003833 | XLOC_167877 | ENSRNOT00000057950 | 0.958481107  | 9.06E-07 |
| TUCP_003833 | XLOC_167877 | ENSRNOT00000081992 | 0.995555253  | 1.36E-11 |
| TUCP_003833 | XLOC_167877 | ENSRNOT00000038553 | 0.977834971  | 4.06E-08 |
| TUCP_003833 | XLOC_167877 | ENSRNOT00000084120 | 0.977871667  | 4.03E-08 |
| TUCP_003833 | XLOC_167877 | ENSRNOT00000055406 | 0.993919386  | 6.48E-11 |
| TUCP_003833 | XLOC_167877 | ENSRNOT00000088245 | 0.993919386  | 6.48E-11 |



|             |             |                    |             |          |
|-------------|-------------|--------------------|-------------|----------|
| TUCP_003833 | XLOC_167877 | ENSRNOT00000070817 | 0.992393644 | 1.98E-10 |
| TUCP_003833 | XLOC_167877 | ENSRNOT00000026753 | 0.993919386 | 6.48E-11 |
| TUCP_003833 | XLOC_167877 | ENSRNOT00000080533 | 0.999583688 | 9.84E-17 |
| TUCP_003833 | XLOC_167877 | ENSRNOT00000072774 | 0.971499057 | 1.41E-07 |
| TUCP_003833 | XLOC_167877 | ENSRNOT00000086031 | 0.993919386 | 6.48E-11 |
| TUCP_003833 | XLOC_167877 | ENSRNOT00000014312 | 0.993919386 | 6.48E-11 |
| TUCP_003833 | XLOC_167877 | ENSRNOT00000042882 | 0.951870882 | 1.88E-06 |
| TUCP_003833 | XLOC_167877 | ENSRNOT00000051231 | 0.992737836 | 1.57E-10 |
| TUCP_003833 | XLOC_167877 | ENSRNOT00000089407 | 0.985633663 | 4.70E-09 |
| TUCP_003833 | XLOC_167877 | ENSRNOT00000055034 | 0.989325507 | 1.07E-09 |
| TUCP_003833 | XLOC_167877 | ENSRNOT00000046837 | 0.961205118 | 6.48E-07 |
| TUCP_004295 | XLOC_188553 | ENSRNOT00000084500 | 0.984887141 | 6.05E-09 |
| TUCP_004295 | XLOC_188553 | ENSRNOT00000093467 | 0.996134431 | 6.75E-12 |
| TUCP_004295 | XLOC_188553 | ENSRNOT00000029340 | 0.999116572 | 4.23E-15 |
| TUCP_004295 | XLOC_188553 | ENSRNOT00000077972 | 0.962758032 | 5.30E-07 |
| TUCP_004295 | XLOC_188553 | ENSRNOT00000038646 | 1           | 0        |
| TUCP_004295 | XLOC_188553 | ENSRNOT00000012095 | 0.957750287 | 9.88E-07 |
| TUCP_004295 | XLOC_188553 | ENSRNOT00000017909 | 0.975587192 | 6.56E-08 |
| TUCP_004295 | XLOC_188553 | ENSRNOT00000092579 | 1           | 0        |
| TUCP_004295 | XLOC_188553 | ENSRNOT00000089235 | 0.998661162 | 3.38E-14 |
| TUCP_004295 | XLOC_188553 | ENSRNOT00000036383 | 0.988460809 | 1.58E-09 |
| TUCP_004295 | XLOC_188553 | ENSRNOT00000076528 | 0.997115373 | 1.57E-12 |
| TUCP_004295 | XLOC_188553 | ENSRNOT00000075193 | 0.964326971 | 4.29E-07 |
| TUCP_004295 | XLOC_188553 | ENSRNOT00000083034 | 0.990934646 | 4.75E-10 |
| TUCP_004295 | XLOC_188553 | ENSRNOT00000089607 | 0.995091455 | 2.23E-11 |
| TUCP_004295 | XLOC_188553 | ENSRNOT00000086014 | 0.960893638 | 6.74E-07 |
| TUCP_004295 | XLOC_188553 | ENSRNOT00000054939 | 0.958021495 | 9.57E-07 |
| TUCP_004295 | XLOC_188553 | ENSRNOT00000052315 | 0.983687082 | 8.85E-09 |
| TUCP_004295 | XLOC_188553 | ENSRNOT00000088168 | 1           | 0        |
| TUCP_004295 | XLOC_188553 | ENSRNOT00000046231 | 0.96225463  | 5.66E-07 |
| TUCP_004295 | XLOC_188553 | ENSRNOT00000013459 | 0.979098017 | 3.03E-08 |
| TUCP_004295 | XLOC_188553 | ENSRNOT00000078137 | 1           | 0        |
| TUCP_004295 | XLOC_188553 | ENSRNOT00000077764 | 0.977143528 | 4.73E-08 |
| TUCP_004295 | XLOC_188553 | ENSRNOT00000043661 | 0.966975951 | 2.93E-07 |
| TUCP_004295 | XLOC_188553 | ENSRNOT00000092740 | 1           | 0        |
| TUCP_004295 | XLOC_188553 | ENSRNOT00000000117 | 0.990989174 | 4.61E-10 |
| TUCP_004295 | XLOC_188553 | ENSRNOT00000071877 | 0.967113583 | 2.87E-07 |
| TUCP_004295 | XLOC_188553 | ENSRNOT00000070958 | 1           | 0        |
| TUCP_004295 | XLOC_188553 | ENSRNOT00000076757 | 0.959205354 | 8.31E-07 |
| TUCP_004295 | XLOC_188553 | ENSRNOT00000085310 | 0.965230243 | 3.78E-07 |
| TUCP_004295 | XLOC_188553 | ENSRNOT00000047241 | 0.966576993 | 3.11E-07 |
| TUCP_004295 | XLOC_188553 | ENSRNOT00000027268 | 1           | 0        |
| TUCP_004295 | XLOC_188553 | ENSRNOT00000004459 | 1           | 0        |
| TUCP_004295 | XLOC_188553 | ENSRNOT00000048373 | 0.959096578 | 8.42E-07 |
| TUCP_004295 | XLOC_188553 | ENSRNOT00000061516 | 0.987595648 | 2.27E-09 |
| TUCP_004295 | XLOC_188553 | ENSRNOT00000088148 | 1           | 0        |
| TUCP_004295 | XLOC_188553 | ENSRNOT00000088527 | 1           | 0        |
| TUCP_004295 | XLOC_188553 | ENSRNOT00000078701 | 1           | 0        |
| TUCP_004295 | XLOC_188553 | ENSRNOT00000052308 | 0.962646127 | 5.38E-07 |
| TUCP_004295 | XLOC_188553 | ENSRNOT00000021748 | 1           | 0        |
| TUCP_004295 | XLOC_188553 | ENSRNOT00000089085 | 1           | 0        |

|             |             |                    |             |          |
|-------------|-------------|--------------------|-------------|----------|
| TUCP_004295 | XLOC_188553 | ENSRNOT0000008153  | 0.999703506 | 1.80E-17 |
| TUCP_004295 | XLOC_188553 | ENSRNOT00000085896 | 0.971605382 | 1.39E-07 |
| TUCP_004295 | XLOC_188553 | ENSRNOT00000079189 | 0.984972387 | 5.89E-09 |
| TUCP_004295 | XLOC_188553 | ENSRNOT00000090078 | 1           | 0        |
| TUCP_004295 | XLOC_188553 | ENSRNOT00000078020 | 0.958421666 | 9.13E-07 |
| TUCP_004295 | XLOC_188553 | ENSRNOT00000092425 | 0.956092273 | 1.19E-06 |
| TUCP_004295 | XLOC_188553 | ENSRNOT00000009776 | 1           | 0        |
| TUCP_004297 | XLOC_188686 | ENSRNOT00000011342 | 0.964383475 | 4.25E-07 |
| TUCP_004297 | XLOC_188686 | ENSRNOT00000015889 | 0.967909279 | 2.54E-07 |
| TUCP_004297 | XLOC_188686 | ENSRNOT00000055289 | 0.974229135 | 8.57E-08 |
| TUCP_004297 | XLOC_188686 | ENSRNOT00000085943 | 0.967758239 | 2.60E-07 |
| TUCP_004297 | XLOC_188686 | ENSRNOT00000076466 | 0.981118434 | 1.83E-08 |
| TUCP_004297 | XLOC_188686 | ENSRNOT00000072396 | 0.966008277 | 3.38E-07 |
| TUCP_004296 | XLOC_188678 | ENSRNOT00000082043 | 0.97289479  | 1.10E-07 |
| TUCP_004296 | XLOC_188678 | ENSRNOT00000076074 | 0.965140336 | 3.82E-07 |
| TUCP_004296 | XLOC_188678 | ENSRNOT00000068444 | 0.975714788 | 6.39E-08 |
| TUCP_004296 | XLOC_188678 | ENSRNOT00000081370 | 0.973613771 | 9.64E-08 |
| TUCP_004296 | XLOC_188678 | ENSRNOT00000078645 | 0.952991174 | 1.67E-06 |
| TUCP_004296 | XLOC_188678 | ENSRNOT00000075987 | 0.954171736 | 1.47E-06 |
| TUCP_004296 | XLOC_188678 | ENSRNOT00000015712 | 0.95097361  | 2.05E-06 |
| TUCP_004296 | XLOC_188678 | ENSRNOT00000087323 | 0.964143501 | 4.39E-07 |
| TUCP_004296 | XLOC_188678 | ENSRNOT00000074930 | 0.975714788 | 6.39E-08 |
| TUCP_004296 | XLOC_188678 | ENSRNOT00000080575 | 0.975863841 | 6.19E-08 |
| TUCP_004296 | XLOC_188678 | ENSRNOT00000057761 | 0.955085571 | 1.33E-06 |
| TUCP_004296 | XLOC_188678 | ENSRNOT00000078369 | 0.959665583 | 7.86E-07 |
| TUCP_004296 | XLOC_188678 | ENSRNOT00000092982 | 0.975714788 | 6.39E-08 |
| TUCP_004296 | XLOC_188678 | ENSRNOT00000088367 | 0.975714788 | 6.39E-08 |
| TUCP_004296 | XLOC_188678 | ENSRNOT00000086397 | 0.961624873 | 6.14E-07 |
| TUCP_004296 | XLOC_188678 | ENSRNOT00000061874 | 0.977511415 | 4.36E-08 |
| TUCP_004296 | XLOC_188678 | ENSRNOT00000081996 | 0.975714788 | 6.39E-08 |
| TUCP_004296 | XLOC_188678 | ENSRNOT00000022280 | 0.952710285 | 1.72E-06 |
| TUCP_004296 | XLOC_188678 | ENSRNOT00000082058 | 0.975714788 | 6.39E-08 |
| TUCP_004296 | XLOC_188678 | ENSRNOT00000088905 | 0.975714788 | 6.39E-08 |
| TUCP_004296 | XLOC_188678 | ENSRNOT00000086831 | 0.975714788 | 6.39E-08 |
| TUCP_004296 | XLOC_188678 | ENSRNOT00000045099 | 0.975714788 | 6.39E-08 |
| TUCP_004296 | XLOC_188678 | ENSRNOT00000086745 | 0.953597598 | 1.57E-06 |
| TUCP_004296 | XLOC_188678 | ENSRNOT00000067349 | 0.974646455 | 7.91E-08 |
| TUCP_004296 | XLOC_188678 | ENSRNOT00000077789 | 0.984058114 | 7.90E-09 |
| TUCP_004296 | XLOC_188678 | ENSRNOT00000087025 | 0.975714788 | 6.39E-08 |
| TUCP_004296 | XLOC_188678 | ENSRNOT00000019853 | 0.975714788 | 6.39E-08 |
| TUCP_004296 | XLOC_188678 | ENSRNOT00000073853 | 0.962546603 | 5.45E-07 |
| TUCP_004296 | XLOC_188678 | ENSRNOT00000074990 | 0.975714788 | 6.39E-08 |
| TUCP_004296 | XLOC_188678 | ENSRNOT00000065912 | 0.963706402 | 4.67E-07 |
| TUCP_004296 | XLOC_188678 | ENSRNOT00000078683 | 0.999088699 | 4.94E-15 |
| TUCP_004296 | XLOC_188678 | ENSRNOT00000093083 | 0.977952991 | 3.95E-08 |
| TUCP_004291 | XLOC_188379 | ENSRNOT00000093439 | 0.974965047 | 7.43E-08 |
| TUCP_003839 | XLOC_168268 | ENSRNOT00000065023 | 0.968004035 | 2.50E-07 |
| TUCP_003839 | XLOC_168268 | ENSRNOT00000080846 | 0.953785717 | 1.54E-06 |
| TUCP_003839 | XLOC_168268 | ENSRNOT00000028217 | 0.980095057 | 2.38E-08 |
| TUCP_003839 | XLOC_168268 | ENSRNOT00000070961 | 0.961269301 | 6.43E-07 |
| TUCP_003839 | XLOC_168268 | ENSRNOT00000009468 | 0.972703901 | 1.14E-07 |

|             |             |                    |             |          |
|-------------|-------------|--------------------|-------------|----------|
| TUCP_003839 | XLOC_168268 | ENSRNOT00000024924 | 0.953235383 | 1.63E-06 |
| TUCP_003839 | XLOC_168268 | ENSRNOT00000019350 | 0.951993436 | 1.85E-06 |
| TUCP_003839 | XLOC_168268 | ENSRNOT00000075400 | 0.954964583 | 1.35E-06 |
| TUCP_003839 | XLOC_168268 | ENSRNOT00000057902 | 0.955125271 | 1.33E-06 |
| TUCP_003839 | XLOC_168268 | ENSRNOT00000076388 | 0.95326159  | 1.62E-06 |
| TUCP_003839 | XLOC_168268 | ENSRNOT00000020982 | 0.956646705 | 1.12E-06 |
| TUCP_003839 | XLOC_168268 | ENSRNOT00000001379 | 0.95304748  | 1.66E-06 |
| TUCP_003839 | XLOC_168268 | ENSRNOT00000067725 | 0.957138947 | 1.06E-06 |
| TUCP_003839 | XLOC_168268 | ENSRNOT00000032922 | 0.96247056  | 5.50E-07 |
| TUCP_003839 | XLOC_168268 | ENSRNOT00000083983 | 0.958818673 | 8.70E-07 |
| TUCP_003839 | XLOC_168268 | ENSRNOT00000019044 | 0.960584827 | 7.01E-07 |
| TUCP_003839 | XLOC_168268 | ENSRNOT00000023132 | 0.951628741 | 1.92E-06 |
| TUCP_003839 | XLOC_168268 | ENSRNOT00000035400 | 0.958186074 | 9.38E-07 |
| TUCP_003839 | XLOC_168268 | ENSRNOT00000011940 | 0.967492644 | 2.71E-07 |
| TUCP_003839 | XLOC_168268 | ENSRNOT00000001373 | 0.95388611  | 1.52E-06 |
| TUCP_003839 | XLOC_168268 | ENSRNOT00000092322 | 0.971143282 | 1.50E-07 |
| TUCP_003839 | XLOC_168268 | ENSRNOT00000041371 | 0.956109418 | 1.19E-06 |
| TUCP_003839 | XLOC_168268 | ENSRNOT00000001970 | 0.952805038 | 1.70E-06 |
| TUCP_003839 | XLOC_168268 | ENSRNOT00000017618 | 0.971540179 | 1.40E-07 |
| TUCP_003839 | XLOC_168268 | ENSRNOT00000067905 | 0.963719399 | 4.66E-07 |
| TUCP_003839 | XLOC_168268 | ENSRNOT00000020543 | 0.964219977 | 4.35E-07 |
| TUCP_003839 | XLOC_168268 | ENSRNOT00000018982 | 0.956768557 | 1.11E-06 |
| TUCP_003839 | XLOC_168268 | ENSRNOT00000024775 | 0.967001159 | 2.92E-07 |
| TUCP_003839 | XLOC_168268 | ENSRNOT00000007940 | 0.965512965 | 3.63E-07 |
| TUCP_003839 | XLOC_168268 | ENSRNOT00000014002 | 0.964826997 | 4.00E-07 |
| TUCP_003839 | XLOC_168268 | ENSRNOT00000021036 | 0.968868266 | 2.19E-07 |
| TUCP_003839 | XLOC_168268 | ENSRNOT00000036374 | 0.968711784 | 2.24E-07 |
| TUCP_003839 | XLOC_168268 | ENSRNOT00000090003 | 0.968314624 | 2.38E-07 |
| TUCP_003839 | XLOC_168268 | ENSRNOT00000004159 | 0.97054979  | 1.66E-07 |
| TUCP_003839 | XLOC_168268 | ENSRNOT00000002198 | 0.961998451 | 5.86E-07 |
| TUCP_003839 | XLOC_168268 | ENSRNOT00000035875 | 0.957550346 | 1.01E-06 |
| TUCP_003839 | XLOC_168268 | ENSRNOT00000020853 | 0.961256965 | 6.44E-07 |
| TUCP_003839 | XLOC_168268 | ENSRNOT00000065642 | 0.966386379 | 3.19E-07 |
| TUCP_003839 | XLOC_168268 | ENSRNOT00000024981 | 0.958980515 | 8.54E-07 |
| TUCP_003839 | XLOC_168268 | ENSRNOT00000068666 | 0.969618693 | 1.94E-07 |
| TUCP_003839 | XLOC_168268 | ENSRNOT00000025506 | 0.959002891 | 8.51E-07 |
| TUCP_003839 | XLOC_168268 | ENSRNOT00000024126 | 0.958112572 | 9.46E-07 |
| TUCP_003839 | XLOC_168268 | ENSRNOT00000027512 | 0.962164117 | 5.73E-07 |
| TUCP_003839 | XLOC_168268 | ENSRNOT00000013535 | 0.964086165 | 4.43E-07 |
| TUCP_003839 | XLOC_168268 | ENSRNOT00000024690 | 0.954692856 | 1.39E-06 |
| TUCP_003839 | XLOC_168268 | ENSRNOT00000019056 | 0.962013755 | 5.84E-07 |
| TUCP_003839 | XLOC_168268 | ENSRNOT00000015130 | 0.954657689 | 1.40E-06 |
| TUCP_003839 | XLOC_168268 | ENSRNOT00000075386 | 0.955886986 | 1.22E-06 |
| TUCP_003839 | XLOC_168268 | ENSRNOT00000027450 | 0.974272694 | 8.50E-08 |
| TUCP_003839 | XLOC_168268 | ENSRNOT00000007681 | 0.971734251 | 1.36E-07 |
| TUCP_003839 | XLOC_168268 | ENSRNOT00000000812 | 0.95891391  | 8.60E-07 |
| TUCP_003839 | XLOC_168268 | ENSRNOT00000005286 | 0.973138092 | 1.05E-07 |
| TUCP_003839 | XLOC_168268 | ENSRNOT00000073926 | 0.994711576 | 3.23E-11 |
| TUCP_003839 | XLOC_168268 | ENSRNOT00000001402 | 0.951836485 | 1.88E-06 |
| TUCP_003839 | XLOC_168268 | ENSRNOT00000066199 | 0.959116368 | 8.40E-07 |
| TUCP_003839 | XLOC_168268 | ENSRNOT00000031653 | 0.970854116 | 1.58E-07 |

|             |             |                    |              |          |
|-------------|-------------|--------------------|--------------|----------|
| TUCP_003839 | XLOC_168268 | ENSRNOT00000022170 | 0.974298355  | 8.46E-08 |
| TUCP_003839 | XLOC_168268 | ENSRNOT00000015192 | 0.975843518  | 6.22E-08 |
| TUCP_003839 | XLOC_168268 | ENSRNOT00000075057 | 0.964716202  | 4.06E-07 |
| TUCP_003839 | XLOC_168268 | ENSRNOT00000056656 | 0.992914432  | 1.39E-10 |
| TUCP_003839 | XLOC_168268 | ENSRNOT00000006860 | 0.965105094  | 3.84E-07 |
| TUCP_003839 | XLOC_168268 | ENSRNOT00000047698 | 0.971893162  | 1.32E-07 |
| TUCP_003839 | XLOC_168268 | ENSRNOT00000030501 | 0.952640764  | 1.73E-06 |
| TUCP_003839 | XLOC_168268 | ENSRNOT00000026552 | 0.975835805  | 6.23E-08 |
| TUCP_003839 | XLOC_168268 | ENSRNOT00000020558 | 0.956540886  | 1.13E-06 |
| TUCP_003839 | XLOC_168268 | ENSRNOT00000011432 | 0.954985745  | 1.35E-06 |
| TUCP_003839 | XLOC_168268 | ENSRNOT00000056644 | 0.955546022  | 1.27E-06 |
| TUCP_003839 | XLOC_168268 | ENSRNOT00000081593 | 0.962249462  | 5.67E-07 |
| TUCP_003839 | XLOC_168268 | ENSRNOT00000039709 | 0.953391372  | 1.60E-06 |
| TUCP_003839 | XLOC_168268 | ENSRNOT00000008359 | 0.970878171  | 1.57E-07 |
| TUCP_003839 | XLOC_168268 | ENSRNOT00000048022 | 0.95137855   | 1.97E-06 |
| TUCP_003839 | XLOC_168268 | ENSRNOT00000016262 | 0.964554267  | 4.15E-07 |
| TUCP_003839 | XLOC_168268 | ENSRNOT00000050774 | 0.952071293  | 1.84E-06 |
| TUCP_003839 | XLOC_168268 | ENSRNOT00000076430 | 0.964672162  | 4.08E-07 |
| TUCP_003839 | XLOC_168268 | ENSRNOT00000013587 | 0.957506915  | 1.02E-06 |
| TUCP_003839 | XLOC_168268 | ENSRNOT00000040981 | 0.966000272  | 3.38E-07 |
| TUCP_003839 | XLOC_168268 | ENSRNOT00000067004 | 0.961070584  | 6.60E-07 |
| TUCP_003839 | XLOC_168268 | ENSRNOT00000018043 | 0.98237111   | 1.30E-08 |
| TUCP_003839 | XLOC_168268 | ENSRNOT00000038464 | 0.958537236  | 9.00E-07 |
| TUCP_003839 | XLOC_168268 | ENSRNOT00000077730 | 0.957352421  | 1.03E-06 |
| TUCP_003839 | XLOC_168268 | ENSRNOT00000007300 | 0.955395107  | 1.29E-06 |
| TUCP_003839 | XLOC_168268 | ENSRNOT00000074051 | 0.953138088  | 1.64E-06 |
| TUCP_003839 | XLOC_168268 | ENSRNOT00000029166 | 0.973611414  | 9.64E-08 |
| TUCP_003839 | XLOC_168268 | ENSRNOT00000017955 | 0.973429726  | 9.97E-08 |
| TUCP_003839 | XLOC_168268 | ENSRNOT00000057758 | 0.957233616  | 1.05E-06 |
| TUCP_003450 | XLOC_148942 | ENSRNOT00000088728 | -0.962918815 | 5.19E-07 |
| TUCP_003450 | XLOC_148942 | ENSRNOT00000022358 | 0.962210712  | 5.70E-07 |
| TUCP_001787 | XLOC_073522 | ENSRNOT00000012957 | 0.980948774  | 1.91E-08 |
| TUCP_001787 | XLOC_073522 | ENSRNOT00000039876 | 0.963742077  | 4.64E-07 |
| TUCP_001787 | XLOC_073522 | ENSRNOT00000080851 | 0.951208478  | 2.01E-06 |
| TUCP_001787 | XLOC_073522 | ENSRNOT00000086899 | 0.987036741  | 2.82E-09 |
| TUCP_001787 | XLOC_073522 | ENSRNOT00000067677 | 0.95117151   | 2.01E-06 |
| TUCP_001787 | XLOC_073522 | ENSRNOT00000025564 | 0.964049246  | 4.45E-07 |
| TUCP_001787 | XLOC_073522 | ENSRNOT00000028058 | 0.965289553  | 3.74E-07 |
| TUCP_001787 | XLOC_073522 | ENSRNOT00000088707 | 0.959580998  | 7.94E-07 |
| TUCP_001787 | XLOC_073522 | ENSRNOT00000031172 | -0.955334959 | 1.30E-06 |
| TUCP_001787 | XLOC_073522 | ENSRNOT00000049732 | 0.952089625  | 1.83E-06 |
| TUCP_001787 | XLOC_073522 | ENSRNOT00000052003 | 0.956303547  | 1.17E-06 |
| TUCP_001787 | XLOC_073522 | ENSRNOT00000092125 | 0.962185943  | 5.71E-07 |
| TUCP_001787 | XLOC_073522 | ENSRNOT00000016449 | 0.953742288  | 1.54E-06 |
| TUCP_001787 | XLOC_073522 | ENSRNOT00000071258 | -0.966526259 | 3.13E-07 |
| TUCP_001787 | XLOC_073522 | ENSRNOT00000023152 | 0.980997885  | 1.89E-08 |
| TUCP_004619 | XLOC_203727 | ENSRNOT00000006835 | 0.98553975   | 4.86E-09 |
| TUCP_004619 | XLOC_203727 | ENSRNOT00000020297 | 0.954970968  | 1.35E-06 |
| TUCP_004619 | XLOC_203727 | ENSRNOT00000039551 | -0.956887818 | 1.09E-06 |
| TUCP_004619 | XLOC_203727 | ENSRNOT00000090456 | 0.964088105  | 4.43E-07 |
| TUCP_004619 | XLOC_203727 | ENSRNOT00000045833 | 0.95970339   | 7.82E-07 |

|             |             |                     |              |          |
|-------------|-------------|---------------------|--------------|----------|
| TUCP_004619 | XLOC_203727 | ENSRNOT00000048910  | -0.958492132 | 9.05E-07 |
| TUCP_004619 | XLOC_203727 | ENSRNOT00000020357  | 0.980422477  | 2.19E-08 |
| TUCP_004619 | XLOC_203727 | ENSRNOT00000075397  | 0.962018352  | 5.84E-07 |
| TUCP_004619 | XLOC_203727 | ENSRNOT00000077727  | -0.966775054 | 3.02E-07 |
| TUCP_004619 | XLOC_203727 | ENSRNOT00000007350  | 0.961632909  | 6.14E-07 |
| TUCP_004619 | XLOC_203727 | ENSRNOT000000032926 | -0.954334077 | 1.45E-06 |
| TUCP_004619 | XLOC_203727 | ENSRNOT00000019104  | -0.975506288 | 6.66E-08 |
| TUCP_004619 | XLOC_203727 | ENSRNOT00000080602  | 0.980195855  | 2.32E-08 |
| TUCP_004619 | XLOC_203727 | ENSRNOT00000063930  | -0.959606559 | 7.91E-07 |
| TUCP_004619 | XLOC_203727 | ENSRNOT00000074544  | -0.967951061 | 2.52E-07 |
| TUCP_004619 | XLOC_203727 | ENSRNOT00000087062  | 0.954774537  | 1.38E-06 |
| TUCP_004619 | XLOC_203727 | ENSRNOT00000006217  | 0.967987522  | 2.51E-07 |
| TUCP_004619 | XLOC_203727 | ENSRNOT00000001979  | -0.959445646 | 8.07E-07 |
| TUCP_004619 | XLOC_203727 | ENSRNOT00000068353  | 0.956246557  | 1.17E-06 |
| TUCP_004619 | XLOC_203727 | ENSRNOT00000003667  | -0.950528195 | 2.15E-06 |
| TUCP_004619 | XLOC_203727 | ENSRNOT00000007698  | -0.955350604 | 1.30E-06 |
| TUCP_004619 | XLOC_203727 | ENSRNOT00000013025  | -0.965667384 | 3.55E-07 |
| TUCP_004619 | XLOC_203727 | ENSRNOT00000009565  | -0.959424494 | 8.09E-07 |
| TUCP_004619 | XLOC_203727 | ENSRNOT00000010728  | 0.981546249  | 1.63E-08 |
| TUCP_004619 | XLOC_203727 | ENSRNOT00000082863  | 0.973636461  | 9.60E-08 |
| TUCP_004619 | XLOC_203727 | ENSRNOT00000015476  | -0.965458335 | 3.65E-07 |
| TUCP_004619 | XLOC_203727 | ENSRNOT00000005659  | 0.966412052  | 3.18E-07 |
| TUCP_004619 | XLOC_203727 | ENSRNOT00000009275  | -0.95280471  | 1.70E-06 |
| TUCP_004619 | XLOC_203727 | ENSRNOT00000045326  | 0.960466025  | 7.12E-07 |
| TUCP_004619 | XLOC_203727 | ENSRNOT00000087011  | -0.954324056 | 1.45E-06 |
| TUCP_004619 | XLOC_203727 | ENSRNOT00000000718  | 0.957687724  | 9.95E-07 |
| TUCP_004619 | XLOC_203727 | ENSRNOT00000002638  | -0.956052652 | 1.20E-06 |
| TUCP_004619 | XLOC_203727 | ENSRNOT00000006186  | 0.975667566  | 6.45E-08 |
| TUCP_004619 | XLOC_203727 | ENSRNOT00000086456  | -0.951645714 | 1.92E-06 |
| TUCP_004619 | XLOC_203727 | ENSRNOT00000007855  | 0.952298748  | 1.79E-06 |
| TUCP_004619 | XLOC_203727 | ENSRNOT00000074023  | 0.958274372  | 9.29E-07 |
| TUCP_004619 | XLOC_203727 | ENSRNOT00000028589  | -0.952894532 | 1.69E-06 |
| TUCP_004619 | XLOC_203727 | ENSRNOT00000078872  | -0.976033288 | 5.98E-08 |
| TUCP_004619 | XLOC_203727 | ENSRNOT000000031692 | -0.955283774 | 1.31E-06 |
| TUCP_004619 | XLOC_203727 | ENSRNOT00000052063  | 0.981368973  | 1.71E-08 |
| TUCP_004619 | XLOC_203727 | ENSRNOT00000006188  | -0.954944293 | 1.36E-06 |
| TUCP_004619 | XLOC_203727 | ENSRNOT000000091596 | -0.950775952 | 2.09E-06 |
| TUCP_004619 | XLOC_203727 | ENSRNOT00000039836  | -0.960480994 | 7.10E-07 |
| TUCP_004619 | XLOC_203727 | ENSRNOT00000010524  | 0.973393063  | 1.00E-07 |
| TUCP_004619 | XLOC_203727 | ENSRNOT00000055540  | 0.9696009    | 1.94E-07 |
| TUCP_004619 | XLOC_203727 | ENSRNOT00000006752  | 0.956418591  | 1.15E-06 |
| TUCP_004619 | XLOC_203727 | ENSRNOT00000019057  | -0.957860445 | 9.75E-07 |
| TUCP_004619 | XLOC_203727 | ENSRNOT00000072890  | -0.952918256 | 1.68E-06 |
| TUCP_004619 | XLOC_203727 | ENSRNOT000000031672 | -0.962750768 | 5.30E-07 |
| TUCP_004619 | XLOC_203727 | ENSRNOT00000002028  | 0.9510362    | 2.04E-06 |
| TUCP_004619 | XLOC_203727 | ENSRNOT000000036959 | -0.956572298 | 1.13E-06 |
| TUCP_004619 | XLOC_203727 | ENSRNOT00000021629  | -0.969819895 | 1.87E-07 |
| TUCP_004619 | XLOC_203727 | ENSRNOT00000016306  | -0.952944262 | 1.68E-06 |
| TUCP_004619 | XLOC_203727 | ENSRNOT00000001507  | 0.951135556  | 2.02E-06 |
| TUCP_004619 | XLOC_203727 | ENSRNOT00000066947  | -0.953206735 | 1.63E-06 |
| TUCP_004619 | XLOC_203727 | ENSRNOT00000012060  | 0.956722245  | 1.11E-06 |

|             |             |                    |              |          |
|-------------|-------------|--------------------|--------------|----------|
| TUCP_004619 | XLOC_203727 | ENSRNOT00000021621 | -0.974261722 | 8.52E-08 |
| TUCP_004619 | XLOC_203727 | ENSRNOT00000020207 | 0.959843238  | 7.69E-07 |
| TUCP_004619 | XLOC_203727 | ENSRNOT00000065300 | 0.962488039  | 5.49E-07 |
| TUCP_004619 | XLOC_203727 | ENSRNOT00000025079 | -0.970754861 | 1.60E-07 |
| TUCP_004619 | XLOC_203727 | ENSRNOT00000048754 | -0.955840694 | 1.23E-06 |
| TUCP_004619 | XLOC_203727 | ENSRNOT00000084709 | 0.977172678  | 4.70E-08 |
| TUCP_004619 | XLOC_203727 | ENSRNOT00000039177 | -0.966802296 | 3.00E-07 |
| TUCP_004619 | XLOC_203727 | ENSRNOT0000004400  | 0.951592505  | 1.93E-06 |
| TUCP_004619 | XLOC_203727 | ENSRNOT00000035320 | -0.950920517 | 2.06E-06 |
| TUCP_004619 | XLOC_203727 | ENSRNOT00000017271 | 0.957644719  | 1.00E-06 |
| TUCP_004619 | XLOC_203727 | ENSRNOT0000009080  | -0.955785267 | 1.24E-06 |
| TUCP_004619 | XLOC_203727 | ENSRNOT00000076610 | -0.956551282 | 1.13E-06 |
| TUCP_004619 | XLOC_203727 | ENSRNOT0000004007  | -0.952366296 | 1.78E-06 |
| TUCP_004619 | XLOC_203727 | ENSRNOT00000020681 | -0.981645955 | 1.59E-08 |
| TUCP_004619 | XLOC_203727 | ENSRNOT00000018028 | -0.969787381 | 1.88E-07 |
| TUCP_004619 | XLOC_203727 | ENSRNOT00000024677 | 0.965029981  | 3.88E-07 |
| TUCP_004619 | XLOC_203727 | ENSRNOT00000019519 | 0.950700384  | 2.11E-06 |
| TUCP_004619 | XLOC_203727 | ENSRNOT00000089933 | 0.953301945  | 1.62E-06 |
| TUCP_004619 | XLOC_203727 | ENSRNOT00000077908 | 0.953859413  | 1.52E-06 |
| TUCP_004619 | XLOC_203727 | ENSRNOT00000027145 | -0.953660454 | 1.56E-06 |
| TUCP_004619 | XLOC_203727 | ENSRNOT00000006843 | -0.954803788 | 1.38E-06 |
| TUCP_004619 | XLOC_203727 | ENSRNOT00000090461 | 0.962524466  | 5.47E-07 |
| TUCP_004619 | XLOC_203727 | ENSRNOT00000009811 | 0.950963589  | 2.06E-06 |
| TUCP_004619 | XLOC_203727 | ENSRNOT00000075452 | 0.95636074   | 1.16E-06 |
| TUCP_004619 | XLOC_203727 | ENSRNOT00000068134 | 0.96559555   | 3.58E-07 |
| TUCP_004619 | XLOC_203727 | ENSRNOT00000025510 | -0.965655354 | 3.55E-07 |
| TUCP_004619 | XLOC_203727 | ENSRNOT00000078906 | -0.964249572 | 4.33E-07 |
| TUCP_004619 | XLOC_203727 | ENSRNOT00000000577 | 0.974976078  | 7.41E-08 |
| TUCP_004619 | XLOC_203727 | ENSRNOT00000032780 | 0.956300147  | 1.17E-06 |
| TUCP_004619 | XLOC_203727 | ENSRNOT00000026391 | 0.95299929   | 1.67E-06 |
| TUCP_004619 | XLOC_203727 | ENSRNOT00000074323 | 0.955569805  | 1.27E-06 |
| TUCP_004619 | XLOC_203727 | ENSRNOT00000083578 | 0.954955601  | 1.35E-06 |
| TUCP_004619 | XLOC_203727 | ENSRNOT00000033677 | -0.954186605 | 1.47E-06 |
| TUCP_004619 | XLOC_203727 | ENSRNOT00000018488 | -0.95260156  | 1.74E-06 |
| TUCP_004619 | XLOC_203727 | ENSRNOT00000077231 | 0.9565827    | 1.13E-06 |
| TUCP_004619 | XLOC_203727 | ENSRNOT00000005686 | -0.96655899  | 3.11E-07 |
| TUCP_004619 | XLOC_203727 | ENSRNOT00000086608 | -0.96087835  | 6.76E-07 |
| TUCP_004619 | XLOC_203727 | ENSRNOT00000077367 | -0.969662146 | 1.92E-07 |
| TUCP_004619 | XLOC_203727 | ENSRNOT00000085279 | 0.950617218  | 2.13E-06 |
| TUCP_004619 | XLOC_203727 | ENSRNOT00000072762 | -0.950778109 | 2.09E-06 |
| TUCP_004619 | XLOC_203727 | ENSRNOT00000012177 | -0.957868843 | 9.74E-07 |
| TUCP_004619 | XLOC_203727 | ENSRNOT00000014605 | -0.961801294 | 6.01E-07 |
| TUCP_004619 | XLOC_203727 | ENSRNOT00000046490 | -0.951146207 | 2.02E-06 |
| TUCP_004619 | XLOC_203727 | ENSRNOT00000011832 | -0.961561227 | 6.20E-07 |
| TUCP_004619 | XLOC_203727 | ENSRNOT00000008274 | -0.956106738 | 1.19E-06 |
| TUCP_004619 | XLOC_203727 | ENSRNOT00000087278 | -0.970738363 | 1.61E-07 |
| TUCP_004619 | XLOC_203727 | ENSRNOT00000078349 | -0.952738438 | 1.72E-06 |
| TUCP_004619 | XLOC_203727 | ENSRNOT00000015678 | -0.980842659 | 1.97E-08 |
| TUCP_004619 | XLOC_203727 | ENSRNOT00000030074 | 0.953945778  | 1.51E-06 |
| TUCP_004619 | XLOC_203727 | ENSRNOT00000010141 | 0.982726215  | 1.18E-08 |
| TUCP_004619 | XLOC_203727 | ENSRNOT0000007824  | -0.95853363  | 9.00E-07 |

|             |             |                    |              |          |
|-------------|-------------|--------------------|--------------|----------|
| TUCP_004619 | XLOC_203727 | ENSRNOT00000022502 | -0.971146715 | 1.50E-07 |
| TUCP_004619 | XLOC_203727 | ENSRNOT00000011930 | 0.967208304  | 2.83E-07 |
| TUCP_004619 | XLOC_203727 | ENSRNOT00000044346 | -0.988368517 | 1.64E-09 |
| TUCP_004619 | XLOC_203727 | ENSRNOT00000083968 | -0.965821495 | 3.47E-07 |
| TUCP_004619 | XLOC_203727 | ENSRNOT00000037133 | 0.952482157  | 1.76E-06 |
| TUCP_004619 | XLOC_203727 | ENSRNOT00000009150 | 0.96103263   | 6.63E-07 |
| TUCP_004619 | XLOC_203727 | ENSRNOT00000068745 | 0.961239331  | 6.46E-07 |
| TUCP_004619 | XLOC_203727 | ENSRNOT00000087443 | 0.962174587  | 5.72E-07 |
| TUCP_004619 | XLOC_203727 | ENSRNOT00000005489 | 0.973817603  | 9.27E-08 |
| TUCP_004619 | XLOC_203727 | ENSRNOT00000029179 | -0.952806289 | 1.70E-06 |
| TUCP_004619 | XLOC_203727 | ENSRNOT00000016722 | 0.95217836   | 1.82E-06 |
| TUCP_004619 | XLOC_203727 | ENSRNOT00000038543 | 0.957131808  | 1.06E-06 |
| TUCP_004619 | XLOC_203727 | ENSRNOT00000018001 | 0.95340004   | 1.60E-06 |
| TUCP_004619 | XLOC_203727 | ENSRNOT00000006395 | -0.957946702 | 9.65E-07 |
| TUCP_004619 | XLOC_203727 | ENSRNOT00000021803 | -0.954578721 | 1.41E-06 |
| TUCP_004619 | XLOC_203727 | ENSRNOT00000039857 | -0.954034386 | 1.50E-06 |
| TUCP_004619 | XLOC_203727 | ENSRNOT00000001081 | 0.955470912  | 1.28E-06 |
| TUCP_004619 | XLOC_203727 | ENSRNOT00000026481 | 0.964281122  | 4.31E-07 |
| TUCP_004619 | XLOC_203727 | ENSRNOT00000024352 | 0.952603808  | 1.74E-06 |
| TUCP_004619 | XLOC_203727 | ENSRNOT00000082627 | -0.952792656 | 1.71E-06 |
| TUCP_004619 | XLOC_203727 | ENSRNOT00000003544 | -0.965307604 | 3.73E-07 |
| TUCP_004619 | XLOC_203727 | ENSRNOT00000028074 | -0.954445941 | 1.43E-06 |
| TUCP_004619 | XLOC_203727 | ENSRNOT00000086119 | -0.957506027 | 1.02E-06 |
| TUCP_004619 | XLOC_203727 | ENSRNOT00000067735 | -0.958273511 | 9.29E-07 |
| TUCP_004619 | XLOC_203727 | ENSRNOT00000020892 | -0.962306295 | 5.62E-07 |
| TUCP_004619 | XLOC_203727 | ENSRNOT00000014506 | -0.965710705 | 3.52E-07 |
| TUCP_004619 | XLOC_203727 | ENSRNOT00000023262 | -0.957126723 | 1.06E-06 |
| TUCP_004619 | XLOC_203727 | ENSRNOT00000025913 | -0.958247359 | 9.32E-07 |
| TUCP_004619 | XLOC_203727 | ENSRNOT00000058495 | -0.957100024 | 1.06E-06 |
| TUCP_004619 | XLOC_203727 | ENSRNOT00000019133 | 0.961230912  | 6.46E-07 |
| TUCP_004619 | XLOC_203727 | ENSRNOT00000022432 | -0.964073351 | 4.44E-07 |
| TUCP_004619 | XLOC_203727 | ENSRNOT00000065983 | 0.951873703  | 1.88E-06 |
| TUCP_004619 | XLOC_203727 | ENSRNOT00000030782 | -0.968573886 | 2.29E-07 |
| TUCP_004619 | XLOC_203727 | ENSRNOT00000072299 | 0.969557461  | 1.96E-07 |
| TUCP_004619 | XLOC_203727 | ENSRNOT00000027141 | -0.950992656 | 2.05E-06 |
| TUCP_004619 | XLOC_203727 | ENSRNOT00000079698 | -0.956000001 | 1.21E-06 |
| TUCP_004619 | XLOC_203727 | ENSRNOT00000025104 | -0.957103937 | 1.06E-06 |
| TUCP_004619 | XLOC_203727 | ENSRNOT00000016220 | -0.959868464 | 7.66E-07 |
| TUCP_004619 | XLOC_203727 | ENSRNOT00000020537 | -0.966806849 | 3.00E-07 |
| TUCP_004619 | XLOC_203727 | ENSRNOT00000025966 | 0.972420773  | 1.20E-07 |
| TUCP_004619 | XLOC_203727 | ENSRNOT00000002313 | -0.950469291 | 2.16E-06 |
| TUCP_004619 | XLOC_203727 | ENSRNOT00000012775 | -0.964312061 | 4.29E-07 |
| TUCP_004619 | XLOC_203727 | ENSRNOT00000016637 | -0.953429073 | 1.60E-06 |
| TUCP_004619 | XLOC_203727 | ENSRNOT00000089614 | 0.95145061   | 1.96E-06 |
| TUCP_004619 | XLOC_203727 | ENSRNOT00000038994 | -0.958831926 | 8.69E-07 |
| TUCP_004619 | XLOC_203727 | ENSRNOT00000023667 | 0.970894292  | 1.57E-07 |
| TUCP_004619 | XLOC_203727 | ENSRNOT00000086260 | -0.956734072 | 1.11E-06 |
| TUCP_004619 | XLOC_203727 | ENSRNOT00000003787 | -0.950061104 | 2.25E-06 |
| TUCP_004619 | XLOC_203727 | ENSRNOT00000000155 | 0.95299281   | 1.67E-06 |
| TUCP_004619 | XLOC_203727 | ENSRNOT00000020910 | 0.961108649  | 6.56E-07 |
| TUCP_004619 | XLOC_203727 | ENSRNOT00000026643 | 0.950100607  | 2.24E-06 |

|             |             |                    |              |          |
|-------------|-------------|--------------------|--------------|----------|
| TUCP_004619 | XLOC_203727 | ENSRNOT00000068026 | -0.962449739 | 5.52E-07 |
| TUCP_004619 | XLOC_203727 | ENSRNOT00000011898 | -0.953462112 | 1.59E-06 |
| TUCP_004619 | XLOC_203727 | ENSRNOT00000066793 | -0.974352691 | 8.37E-08 |
| TUCP_004619 | XLOC_203727 | ENSRNOT00000015495 | -0.961513174 | 6.23E-07 |
| TUCP_004619 | XLOC_203727 | ENSRNOT00000074586 | -0.959493342 | 8.02E-07 |
| TUCP_004619 | XLOC_203727 | ENSRNOT00000034883 | -0.962806214 | 5.27E-07 |
| TUCP_004619 | XLOC_203727 | ENSRNOT00000049459 | -0.972264227 | 1.23E-07 |
| TUCP_004619 | XLOC_203727 | ENSRNOT00000085736 | -0.951833293 | 1.88E-06 |
| TUCP_004619 | XLOC_203727 | ENSRNOT00000022190 | -0.963576647 | 4.75E-07 |
| TUCP_004619 | XLOC_203727 | ENSRNOT00000026531 | -0.960312544 | 7.25E-07 |
| TUCP_004619 | XLOC_203727 | ENSRNOT00000035605 | 0.957209239  | 1.05E-06 |
| TUCP_004619 | XLOC_203727 | ENSRNOT00000081351 | 0.961586444  | 6.18E-07 |
| TUCP_004619 | XLOC_203727 | ENSRNOT00000039593 | -0.96778767  | 2.59E-07 |
| TUCP_004619 | XLOC_203727 | ENSRNOT00000016132 | -0.958481164 | 9.06E-07 |
| TUCP_004619 | XLOC_203727 | ENSRNOT00000079801 | -0.956966129 | 1.08E-06 |
| TUCP_004619 | XLOC_203727 | ENSRNOT00000067739 | -0.956775745 | 1.10E-06 |
| TUCP_004619 | XLOC_203727 | ENSRNOT00000005910 | -0.954046709 | 1.49E-06 |
| TUCP_004619 | XLOC_203727 | ENSRNOT00000020648 | 0.950937501  | 2.06E-06 |
| TUCP_004619 | XLOC_203727 | ENSRNOT00000017626 | -0.953313182 | 1.61E-06 |
| TUCP_004619 | XLOC_203727 | ENSRNOT00000003992 | -0.964742281 | 4.04E-07 |
| TUCP_004619 | XLOC_203727 | ENSRNOT00000076485 | -0.95763992  | 1.00E-06 |
| TUCP_004619 | XLOC_203727 | ENSRNOT00000046983 | -0.952409268 | 1.77E-06 |
| TUCP_004619 | XLOC_203727 | ENSRNOT00000000898 | 0.951560269  | 1.94E-06 |
| TUCP_004619 | XLOC_203727 | ENSRNOT00000008030 | 0.970666751  | 1.63E-07 |
| TUCP_004619 | XLOC_203727 | ENSRNOT00000019816 | -0.965326141 | 3.72E-07 |
| TUCP_004619 | XLOC_203727 | ENSRNOT00000050515 | 0.953717138  | 1.55E-06 |
| TUCP_004619 | XLOC_203727 | ENSRNOT00000013067 | -0.972795427 | 1.12E-07 |
| TUCP_004619 | XLOC_203727 | ENSRNOT00000077706 | 0.954279966  | 1.46E-06 |
| TUCP_004619 | XLOC_203727 | ENSRNOT00000020383 | 0.962134888  | 5.75E-07 |
| TUCP_004619 | XLOC_203727 | ENSRNOT00000028744 | -0.952340864 | 1.79E-06 |
| TUCP_004619 | XLOC_203727 | ENSRNOT00000015518 | -0.963597422 | 4.74E-07 |
| TUCP_004619 | XLOC_203727 | ENSRNOT00000021553 | 0.954922348  | 1.36E-06 |
| TUCP_004619 | XLOC_203727 | ENSRNOT00000073294 | -0.956369683 | 1.16E-06 |
| TUCP_004619 | XLOC_203727 | ENSRNOT00000078070 | 0.954041933  | 1.49E-06 |
| TUCP_004619 | XLOC_203727 | ENSRNOT00000087997 | 0.954371269  | 1.44E-06 |
| TUCP_004619 | XLOC_203727 | ENSRNOT00000082138 | -0.952205025 | 1.81E-06 |
| TUCP_004619 | XLOC_203727 | ENSRNOT00000068524 | -0.952830416 | 1.70E-06 |
| TUCP_004619 | XLOC_203727 | ENSRNOT00000024452 | -0.95082138  | 2.09E-06 |
| TUCP_004619 | XLOC_203727 | ENSRNOT00000089294 | -0.961742872 | 6.05E-07 |
| TUCP_004619 | XLOC_203727 | ENSRNOT00000084729 | -0.955275097 | 1.31E-06 |
| TUCP_004619 | XLOC_203727 | ENSRNOT00000012424 | 0.980952164  | 1.91E-08 |
| TUCP_004619 | XLOC_203727 | ENSRNOT00000003106 | -0.953364243 | 1.61E-06 |
| TUCP_004619 | XLOC_203727 | ENSRNOT00000028885 | -0.959487043 | 8.03E-07 |
| TUCP_004619 | XLOC_203727 | ENSRNOT00000018475 | -0.958389056 | 9.16E-07 |
| TUCP_004619 | XLOC_203727 | ENSRNOT00000084012 | 0.953516248  | 1.58E-06 |
| TUCP_004619 | XLOC_203727 | ENSRNOT00000077999 | 0.968112932  | 2.46E-07 |
| TUCP_004619 | XLOC_203727 | ENSRNOT00000080222 | -0.968503052 | 2.32E-07 |
| TUCP_004619 | XLOC_203727 | ENSRNOT00000058362 | 0.950213187  | 2.22E-06 |
| TUCP_004619 | XLOC_203727 | ENSRNOT00000019656 | -0.951318516 | 1.98E-06 |
| TUCP_004619 | XLOC_203727 | ENSRNOT00000049285 | -0.95476511  | 1.38E-06 |
| TUCP_004619 | XLOC_203727 | ENSRNOT00000026118 | -0.964093876 | 4.43E-07 |



|             |             |                    |              |          |
|-------------|-------------|--------------------|--------------|----------|
| TUCP_004619 | XLOC_203727 | ENSRNOT00000032505 | -0.970200034 | 1.76E-07 |
| TUCP_004619 | XLOC_203727 | ENSRNOT00000015239 | -0.96339524  | 4.87E-07 |
| TUCP_004619 | XLOC_203727 | ENSRNOT00000028907 | 0.964940272  | 3.93E-07 |
| TUCP_004619 | XLOC_203727 | ENSRNOT00000071929 | -0.959805984 | 7.72E-07 |
| TUCP_004619 | XLOC_203727 | ENSRNOT00000074649 | 0.958009701  | 9.58E-07 |
| TUCP_004619 | XLOC_203727 | ENSRNOT00000058111 | -0.950948213 | 2.06E-06 |
| TUCP_004619 | XLOC_203727 | ENSRNOT00000037955 | -0.957335162 | 1.04E-06 |
| TUCP_004619 | XLOC_203727 | ENSRNOT00000034487 | -0.95403913  | 1.49E-06 |
| TUCP_004619 | XLOC_203727 | ENSRNOT00000018877 | -0.952486598 | 1.76E-06 |
| TUCP_004619 | XLOC_203727 | ENSRNOT00000067780 | -0.95331331  | 1.61E-06 |
| TUCP_004619 | XLOC_203727 | ENSRNOT00000077146 | -0.968510886 | 2.31E-07 |
| TUCP_004619 | XLOC_203727 | ENSRNOT00000014384 | -0.959018464 | 8.50E-07 |
| TUCP_004619 | XLOC_203727 | ENSRNOT00000088502 | -0.952358303 | 1.78E-06 |
| TUCP_004619 | XLOC_203727 | ENSRNOT00000017765 | 0.95777355   | 9.85E-07 |
| TUCP_004619 | XLOC_203727 | ENSRNOT00000087346 | 0.950791429  | 2.09E-06 |
| TUCP_004619 | XLOC_203727 | ENSRNOT00000004999 | 0.950862816  | 2.08E-06 |
| TUCP_004619 | XLOC_203727 | ENSRNOT00000024938 | -0.956185028 | 1.18E-06 |
| TUCP_004619 | XLOC_203727 | ENSRNOT00000021145 | -0.950108298 | 2.24E-06 |
| TUCP_004619 | XLOC_203727 | ENSRNOT00000060002 | -0.959038488 | 8.48E-07 |
| TUCP_004619 | XLOC_203727 | ENSRNOT00000046102 | -0.967266794 | 2.80E-07 |
| TUCP_004619 | XLOC_203727 | ENSRNOT00000020417 | -0.972277049 | 1.23E-07 |
| TUCP_004619 | XLOC_203727 | ENSRNOT00000075209 | -0.956289589 | 1.17E-06 |
| TUCP_004619 | XLOC_203727 | ENSRNOT00000085971 | -0.962315219 | 5.62E-07 |
| TUCP_004619 | XLOC_203727 | ENSRNOT00000058382 | 0.954003324  | 1.50E-06 |
| TUCP_004619 | XLOC_203727 | ENSRNOT00000043752 | -0.950387799 | 2.18E-06 |
| TUCP_004619 | XLOC_203727 | ENSRNOT00000006824 | -0.969388179 | 2.01E-07 |
| TUCP_004619 | XLOC_203727 | ENSRNOT00000025460 | 0.959605989  | 7.91E-07 |
| TUCP_004619 | XLOC_203727 | ENSRNOT00000019554 | 0.964943577  | 3.93E-07 |
| TUCP_004619 | XLOC_203727 | ENSRNOT00000047663 | -0.951554543 | 1.94E-06 |
| TUCP_004619 | XLOC_203727 | ENSRNOT00000066133 | -0.979593097 | 2.69E-08 |
| TUCP_004619 | XLOC_203727 | ENSRNOT00000054960 | -0.950035511 | 2.25E-06 |
| TUCP_004619 | XLOC_203727 | ENSRNOT00000011880 | 0.96388159   | 4.56E-07 |
| TUCP_004619 | XLOC_203727 | ENSRNOT00000048933 | -0.956086461 | 1.19E-06 |
| TUCP_004619 | XLOC_203727 | ENSRNOT00000024253 | 0.972150844  | 1.26E-07 |
| TUCP_004619 | XLOC_203727 | ENSRNOT00000029202 | -0.96679966  | 3.00E-07 |
| TUCP_004619 | XLOC_203727 | ENSRNOT00000075630 | -0.950649936 | 2.12E-06 |
| TUCP_004619 | XLOC_203727 | ENSRNOT00000003690 | 0.952839675  | 1.70E-06 |
| TUCP_004619 | XLOC_203727 | ENSRNOT00000080216 | -0.956112729 | 1.19E-06 |
| TUCP_004619 | XLOC_203727 | ENSRNOT00000035385 | 0.957274984  | 1.04E-06 |
| TUCP_004619 | XLOC_203727 | ENSRNOT00000084069 | 0.961784383  | 6.02E-07 |
| TUCP_004619 | XLOC_203727 | ENSRNOT00000011350 | 0.95340733   | 1.60E-06 |
| TUCP_004619 | XLOC_203727 | ENSRNOT00000008901 | -0.953348837 | 1.61E-06 |
| TUCP_004619 | XLOC_203727 | ENSRNOT00000010783 | -0.952781414 | 1.71E-06 |
| TUCP_004619 | XLOC_203727 | ENSRNOT00000061201 | -0.955722643 | 1.24E-06 |
| TUCP_004619 | XLOC_203727 | ENSRNOT00000019487 | 0.970997909  | 1.54E-07 |
| TUCP_004619 | XLOC_203727 | ENSRNOT00000073919 | 0.974290811  | 8.47E-08 |
| TUCP_004619 | XLOC_203727 | ENSRNOT00000009994 | -0.950763983 | 2.10E-06 |
| TUCP_004619 | XLOC_203727 | ENSRNOT00000001923 | 0.951337305  | 1.98E-06 |
| TUCP_004619 | XLOC_203727 | ENSRNOT00000002114 | -0.953605753 | 1.57E-06 |
| TUCP_004619 | XLOC_203727 | ENSRNOT00000010915 | -0.960418626 | 7.16E-07 |
| TUCP_004619 | XLOC_203727 | ENSRNOT00000037679 | 0.955770249  | 1.24E-06 |

|             |             |                    |              |          |
|-------------|-------------|--------------------|--------------|----------|
| TUCP_004619 | XLOC_203727 | ENSRNOT00000064535 | -0.978871342 | 3.20E-08 |
| TUCP_004619 | XLOC_203727 | ENSRNOT00000017486 | 0.957477565  | 1.02E-06 |
| TUCP_004619 | XLOC_203727 | ENSRNOT00000018341 | -0.956640038 | 1.12E-06 |
| TUCP_004619 | XLOC_203727 | ENSRNOT00000025086 | -0.956275088 | 1.17E-06 |
| TUCP_004619 | XLOC_203727 | ENSRNOT00000015537 | 0.984036773  | 7.95E-09 |
| TUCP_004619 | XLOC_203727 | ENSRNOT00000018074 | -0.966509677 | 3.14E-07 |
| TUCP_004619 | XLOC_203727 | ENSRNOT00000024924 | -0.951517762 | 1.94E-06 |
| TUCP_004619 | XLOC_203727 | ENSRNOT00000072632 | -0.961002219 | 6.65E-07 |
| TUCP_004619 | XLOC_203727 | ENSRNOT00000016445 | 0.96543075   | 3.67E-07 |
| TUCP_004619 | XLOC_203727 | ENSRNOT00000079011 | -0.970494625 | 1.68E-07 |
| TUCP_004619 | XLOC_203727 | ENSRNOT00000015946 | -0.968260307 | 2.41E-07 |
| TUCP_004619 | XLOC_203727 | ENSRNOT00000010621 | -0.954989679 | 1.35E-06 |
| TUCP_004619 | XLOC_203727 | ENSRNOT00000055386 | 0.979262024  | 2.92E-08 |
| TUCP_004619 | XLOC_203727 | ENSRNOT00000011466 | 0.95507485   | 1.34E-06 |
| TUCP_004619 | XLOC_203727 | ENSRNOT00000016401 | 0.950164401  | 2.23E-06 |
| TUCP_004619 | XLOC_203727 | ENSRNOT00000087838 | -0.950263238 | 2.20E-06 |
| TUCP_004619 | XLOC_203727 | ENSRNOT00000037405 | 0.954585971  | 1.41E-06 |
| TUCP_004619 | XLOC_203727 | ENSRNOT00000000013 | 0.956430539  | 1.15E-06 |
| TUCP_004619 | XLOC_203727 | ENSRNOT00000090760 | 0.967116074  | 2.87E-07 |
| TUCP_004619 | XLOC_203727 | ENSRNOT00000024306 | -0.97286897  | 1.11E-07 |
| TUCP_004619 | XLOC_203727 | ENSRNOT00000055992 | -0.960503127 | 7.08E-07 |
| TUCP_004619 | XLOC_203727 | ENSRNOT00000085519 | 0.969241829  | 2.06E-07 |
| TUCP_004619 | XLOC_203727 | ENSRNOT00000000120 | 0.956236756  | 1.17E-06 |
| TUCP_004619 | XLOC_203727 | ENSRNOT00000092876 | -0.960230445 | 7.33E-07 |
| TUCP_004619 | XLOC_203727 | ENSRNOT00000016389 | -0.959545531 | 7.97E-07 |
| TUCP_004619 | XLOC_203727 | ENSRNOT00000093672 | -0.950688738 | 2.11E-06 |
| TUCP_004619 | XLOC_203727 | ENSRNOT00000004787 | -0.950512857 | 2.15E-06 |
| TUCP_004619 | XLOC_203727 | ENSRNOT00000002510 | -0.950196121 | 2.22E-06 |
| TUCP_004619 | XLOC_203727 | ENSRNOT00000060698 | -0.980380755 | 2.22E-08 |
| TUCP_004619 | XLOC_203727 | ENSRNOT00000086590 | 0.973854613  | 9.21E-08 |
| TUCP_004619 | XLOC_203727 | ENSRNOT00000058351 | 0.978881248  | 3.19E-08 |
| TUCP_004619 | XLOC_203727 | ENSRNOT00000066561 | -0.955164416 | 1.32E-06 |
| TUCP_004619 | XLOC_203727 | ENSRNOT00000026760 | -0.971314645 | 1.46E-07 |
| TUCP_004619 | XLOC_203727 | ENSRNOT00000020990 | -0.960327929 | 7.24E-07 |
| TUCP_004619 | XLOC_203727 | ENSRNOT00000023543 | -0.974306784 | 8.45E-08 |
| TUCP_004619 | XLOC_203727 | ENSRNOT00000080207 | 0.952677985  | 1.73E-06 |
| TUCP_004619 | XLOC_203727 | ENSRNOT00000024491 | -0.951970965 | 1.86E-06 |
| TUCP_004619 | XLOC_203727 | ENSRNOT00000026767 | 0.956691419  | 1.12E-06 |
| TUCP_004619 | XLOC_203727 | ENSRNOT00000081077 | -0.952734048 | 1.72E-06 |
| TUCP_004619 | XLOC_203727 | ENSRNOT00000016568 | 0.962572979  | 5.43E-07 |
| TUCP_004619 | XLOC_203727 | ENSRNOT00000037588 | -0.971827678 | 1.33E-07 |
| TUCP_004619 | XLOC_203727 | ENSRNOT00000002238 | -0.959242408 | 8.27E-07 |
| TUCP_004619 | XLOC_203727 | ENSRNOT00000019910 | -0.967480325 | 2.71E-07 |
| TUCP_004619 | XLOC_203727 | ENSRNOT00000010906 | -0.958668453 | 8.86E-07 |
| TUCP_004619 | XLOC_203727 | ENSRNOT00000025097 | 0.970630776  | 1.64E-07 |
| TUCP_004619 | XLOC_203727 | ENSRNOT00000067901 | -0.966172185 | 3.30E-07 |
| TUCP_004619 | XLOC_203727 | ENSRNOT00000064930 | 0.955374285  | 1.29E-06 |
| TUCP_004619 | XLOC_203727 | ENSRNOT00000091448 | -0.959626575 | 7.89E-07 |
| TUCP_004619 | XLOC_203727 | ENSRNOT00000087033 | -0.960149791 | 7.40E-07 |
| TUCP_004619 | XLOC_203727 | ENSRNOT00000027967 | 0.963021695  | 5.12E-07 |
| TUCP_004619 | XLOC_203727 | ENSRNOT00000013516 | 0.953273287  | 1.62E-06 |

|             |             |                     |              |          |
|-------------|-------------|---------------------|--------------|----------|
| TUCP_004619 | XLOC_203727 | ENSRNOT00000024841  | -0.970297855 | 1.73E-07 |
| TUCP_004619 | XLOC_203727 | ENSRNOT00000023383  | -0.967094012 | 2.88E-07 |
| TUCP_004619 | XLOC_203727 | ENSRNOT00000017325  | 0.951911741  | 1.87E-06 |
| TUCP_004619 | XLOC_203727 | ENSRNOT00000087556  | -0.960910388 | 6.73E-07 |
| TUCP_004619 | XLOC_203727 | ENSRNOT00000022097  | 0.965904469  | 3.43E-07 |
| TUCP_004619 | XLOC_203727 | ENSRNOT00000036613  | -0.979446365 | 2.79E-08 |
| TUCP_004619 | XLOC_203727 | ENSRNOT00000079002  | -0.957245491 | 1.05E-06 |
| TUCP_004619 | XLOC_203727 | ENSRNOT00000023330  | 0.9520756    | 1.84E-06 |
| TUCP_004619 | XLOC_203727 | ENSRNOT00000089211  | 0.952949701  | 1.68E-06 |
| TUCP_004619 | XLOC_203727 | ENSRNOT00000008256  | -0.951964142 | 1.86E-06 |
| TUCP_004619 | XLOC_203727 | ENSRNOT00000078862  | 0.964629811  | 4.11E-07 |
| TUCP_004619 | XLOC_203727 | ENSRNOT00000021030  | -0.96486143  | 3.98E-07 |
| TUCP_004619 | XLOC_203727 | ENSRNOT00000046639  | 0.954560323  | 1.41E-06 |
| TUCP_004619 | XLOC_203727 | ENSRNOT00000036658  | -0.952792724 | 1.71E-06 |
| TUCP_004619 | XLOC_203727 | ENSRNOT00000008113  | -0.968201039 | 2.43E-07 |
| TUCP_004619 | XLOC_203727 | ENSRNOT00000079996  | 0.963503821  | 4.80E-07 |
| TUCP_004619 | XLOC_203727 | ENSRNOT00000072357  | -0.956032904 | 1.20E-06 |
| TUCP_004619 | XLOC_203727 | ENSRNOT00000023977  | -0.956562651 | 1.13E-06 |
| TUCP_000334 | XLOC_010523 | ENSRNOT00000085599  | 0.999938502  | 6.93E-21 |
| TUCP_000334 | XLOC_010523 | ENSRNOT00000006689  | 0.9944189    | 4.22E-11 |
| TUCP_000334 | XLOC_010523 | ENSRNOT000000081534 | 0.987999291  | 1.92E-09 |
| TUCP_000334 | XLOC_010523 | ENSRNOT000000085301 | 0.99793679   | 2.93E-13 |
| TUCP_000334 | XLOC_010523 | ENSRNOT00000038729  | 1            | 4.25E-78 |
| TUCP_000334 | XLOC_010523 | ENSRNOT00000086385  | 1            | 0        |
| TUCP_000334 | XLOC_010523 | ENSRNOT00000077695  | 0.96038616   | 7.19E-07 |
| TUCP_000334 | XLOC_010523 | ENSRNOT00000078561  | 0.986503348  | 3.45E-09 |
| TUCP_000334 | XLOC_010523 | ENSRNOT00000087613  | 1            | 0        |
| TUCP_000334 | XLOC_010523 | ENSRNOT00000026032  | 0.953050675  | 1.66E-06 |
| TUCP_000334 | XLOC_010523 | ENSRNOT00000073350  | 0.9658754    | 3.44E-07 |
| TUCP_000334 | XLOC_010523 | ENSRNOT00000023062  | 1            | 0        |
| TUCP_000334 | XLOC_010523 | ENSRNOT00000058834  | 1            | 0        |
| TUCP_000334 | XLOC_010523 | ENSRNOT00000079420  | 1            | 0        |
| TUCP_000334 | XLOC_010523 | ENSRNOT00000090761  | 1            | 0        |
| TUCP_000334 | XLOC_010523 | ENSRNOT00000055923  | 1            | 0        |
| TUCP_000334 | XLOC_010523 | ENSRNOT00000092416  | 0.963085379  | 5.07E-07 |
| TUCP_000334 | XLOC_010523 | ENSRNOT00000071930  | 1            | 1.33E-79 |
| TUCP_000334 | XLOC_010523 | ENSRNOT00000001996  | 0.974721715  | 7.79E-08 |
| TUCP_000334 | XLOC_010523 | ENSRNOT00000076756  | 1            | 0        |
| TUCP_000334 | XLOC_010523 | ENSRNOT00000081527  | 0.999420479  | 5.14E-16 |
| TUCP_000334 | XLOC_010523 | ENSRNOT00000085067  | 0.960262084  | 7.30E-07 |
| TUCP_000334 | XLOC_010523 | ENSRNOT00000091663  | 0.99642667   | 4.56E-12 |
| TUCP_000334 | XLOC_010523 | ENSRNOT00000081780  | 1            | 0        |
| TUCP_000334 | XLOC_010523 | ENSRNOT00000093689  | 0.953599805  | 1.57E-06 |
| TUCP_000334 | XLOC_010523 | ENSRNOT00000089114  | 1            | 0        |
| TUCP_000334 | XLOC_010523 | ENSRNOT00000021609  | 0.977017895  | 4.86E-08 |
| TUCP_000334 | XLOC_010523 | ENSRNOT00000073316  | 1            | 0        |
| TUCP_000334 | XLOC_010523 | ENSRNOT00000086557  | 0.977413455  | 4.46E-08 |
| TUCP_000334 | XLOC_010523 | ENSRNOT00000071663  | 1            | 0        |
| TUCP_000334 | XLOC_010523 | ENSRNOT00000042860  | 1            | 0        |
| TUCP_000334 | XLOC_010523 | ENSRNOT00000072962  | 0.971287317  | 1.46E-07 |
| TUCP_000334 | XLOC_010523 | ENSRNOT00000088421  | 1            | 0        |

|             |             |                    |             |          |
|-------------|-------------|--------------------|-------------|----------|
| TUCP_000334 | XLOC_010523 | ENSRNOT00000038898 | 1           | 0        |
| TUCP_000334 | XLOC_010523 | ENSRNOT00000015840 | 0.959452012 | 8.06E-07 |
| TUCP_000334 | XLOC_010523 | ENSRNOT00000064936 | 0.985957557 | 4.20E-09 |
| TUCP_000334 | XLOC_010523 | ENSRNOT00000042777 | 0.990642579 | 5.56E-10 |
| TUCP_000334 | XLOC_010523 | ENSRNOT00000010029 | 1           | 0        |
| TUCP_001206 | XLOC_045178 | ENSRNOT00000081570 | 0.962961027 | 5.16E-07 |
| TUCP_001206 | XLOC_045178 | ENSRNOT00000091652 | 0.99819185  | 1.52E-13 |
| TUCP_001206 | XLOC_045178 | ENSRNOT00000036564 | 0.972337506 | 1.22E-07 |
| TUCP_001206 | XLOC_045178 | ENSRNOT00000000109 | 0.962179854 | 5.72E-07 |
| TUCP_001206 | XLOC_045178 | ENSRNOT00000080865 | 1           | 1.33E-79 |
| TUCP_001206 | XLOC_045178 | ENSRNOT00000073534 | 0.995808019 | 1.01E-11 |
| TUCP_001206 | XLOC_045178 | ENSRNOT00000012161 | 0.987544327 | 2.31E-09 |
| TUCP_001206 | XLOC_045178 | ENSRNOT00000078707 | 0.960060506 | 7.48E-07 |
| TUCP_001206 | XLOC_045178 | ENSRNOT00000087758 | 0.968778527 | 2.22E-07 |
| TUCP_001206 | XLOC_045178 | ENSRNOT00000049832 | 0.969039151 | 2.13E-07 |
| TUCP_001206 | XLOC_045178 | ENSRNOT00000093019 | 1           | 0        |
| TUCP_001206 | XLOC_045178 | ENSRNOT00000024825 | 0.980452701 | 2.18E-08 |
| TUCP_001206 | XLOC_045178 | ENSRNOT00000059266 | 0.96033506  | 7.23E-07 |
| TUCP_001206 | XLOC_045178 | ENSRNOT00000072734 | 0.965018115 | 3.89E-07 |
| TUCP_001206 | XLOC_045178 | ENSRNOT00000085908 | 0.996653227 | 3.29E-12 |
| TUCP_001206 | XLOC_045178 | ENSRNOT00000046744 | 1           | 0        |
| TUCP_001206 | XLOC_045178 | ENSRNOT00000076429 | 1           | 1.33E-79 |
| TUCP_001206 | XLOC_045178 | ENSRNOT00000084667 | 0.999660971 | 3.53E-17 |
| TUCP_001206 | XLOC_045178 | ENSRNOT00000055412 | 1           | 0        |
| TUCP_001206 | XLOC_045178 | ENSRNOT00000093201 | 0.9997022   | 1.84E-17 |
| TUCP_001206 | XLOC_045178 | ENSRNOT00000072724 | 1           | 1.33E-79 |
| TUCP_001206 | XLOC_045178 | ENSRNOT00000090323 | 0.95603782  | 1.20E-06 |
| TUCP_001206 | XLOC_045178 | ENSRNOT00000082760 | 0.986293522 | 3.72E-09 |
| TUCP_001206 | XLOC_045178 | ENSRNOT00000066017 | 0.989785653 | 8.61E-10 |
| TUCP_001206 | XLOC_045178 | ENSRNOT00000073148 | 0.985721397 | 4.56E-09 |
| TUCP_001206 | XLOC_045178 | ENSRNOT00000077462 | 0.960098183 | 7.45E-07 |
| TUCP_001206 | XLOC_045178 | ENSRNOT00000084375 | 1           | 0        |
| TUCP_001206 | XLOC_045178 | ENSRNOT00000085447 | 0.998400682 | 8.22E-14 |
| TUCP_001206 | XLOC_045178 | ENSRNOT00000006249 | 0.966489607 | 3.15E-07 |
| TUCP_001206 | XLOC_045178 | ENSRNOT00000087073 | 0.952450698 | 1.77E-06 |
| TUCP_001206 | XLOC_045178 | ENSRNOT00000042369 | 0.995659369 | 1.20E-11 |
| TUCP_001206 | XLOC_045178 | ENSRNOT00000086554 | 1           | 4.25E-78 |
| TUCP_001206 | XLOC_045178 | ENSRNOT00000054858 | 0.985228824 | 5.40E-09 |
| TUCP_001206 | XLOC_045178 | ENSRNOT00000047921 | 1           | 0        |
| TUCP_001206 | XLOC_045178 | ENSRNOT00000064261 | 0.999977196 | 4.86E-23 |
| TUCP_001206 | XLOC_045178 | ENSRNOT00000086660 | 0.999208903 | 2.44E-15 |
| TUCP_001206 | XLOC_045178 | ENSRNOT00000080933 | 0.967360681 | 2.76E-07 |
| TUCP_001206 | XLOC_045178 | ENSRNOT00000083977 | 1           | 0        |
| TUCP_001206 | XLOC_045178 | ENSRNOT00000092933 | 1           | 0        |
| TUCP_001206 | XLOC_045178 | ENSRNOT00000009061 | 0.953300672 | 1.62E-06 |
| TUCP_001206 | XLOC_045178 | ENSRNOT00000041281 | 0.987828355 | 2.06E-09 |
| TUCP_000332 | XLOC_010523 | ENSRNOT00000084075 | 0.985974704 | 4.17E-09 |
| TUCP_000332 | XLOC_010523 | ENSRNOT00000012880 | 0.955992159 | 1.21E-06 |
| TUCP_000332 | XLOC_010523 | ENSRNOT00000074465 | 0.991013038 | 4.55E-10 |
| TUCP_000332 | XLOC_010523 | ENSRNOT00000079805 | 0.995676039 | 1.18E-11 |
| TUCP_000332 | XLOC_010523 | ENSRNOT00000040912 | 0.991013038 | 4.55E-10 |

|             |             |                     |             |          |
|-------------|-------------|---------------------|-------------|----------|
| TUCP_000332 | XLOC_010523 | ENSRNOT00000072648  | 0.991013038 | 4.55E-10 |
| TUCP_000332 | XLOC_010523 | ENSRNOT00000007398  | 0.978039655 | 3.88E-08 |
| TUCP_000332 | XLOC_010523 | ENSRNOT00000070803  | 0.991013038 | 4.55E-10 |
| TUCP_000332 | XLOC_010523 | ENSRNOT00000012196  | 0.991013038 | 4.55E-10 |
| TUCP_000332 | XLOC_010523 | ENSRNOT00000085772  | 0.991013038 | 4.55E-10 |
| TUCP_000332 | XLOC_010523 | ENSRNOT00000093284  | 0.990896147 | 4.85E-10 |
| TUCP_000332 | XLOC_010523 | ENSRNOT00000086374  | 0.98488923  | 6.05E-09 |
| TUCP_000332 | XLOC_010523 | ENSRNOT00000015270  | 0.991013038 | 4.55E-10 |
| TUCP_000332 | XLOC_010523 | ENSRNOT00000046192  | 0.991013038 | 4.55E-10 |
| TUCP_000332 | XLOC_010523 | ENSRNOT00000044226  | 0.991013038 | 4.55E-10 |
| TUCP_000332 | XLOC_010523 | ENSRNOT00000081898  | 0.988616084 | 1.48E-09 |
| TUCP_000332 | XLOC_010523 | ENSRNOT00000081954  | 0.950162038 | 2.23E-06 |
| TUCP_000332 | XLOC_010523 | ENSRNOT00000080291  | 0.989501159 | 9.87E-10 |
| TUCP_000332 | XLOC_010523 | ENSRNOT00000004293  | 0.981485872 | 1.66E-08 |
| TUCP_000332 | XLOC_010523 | ENSRNOT00000078231  | 0.968938773 | 2.16E-07 |
| TUCP_000332 | XLOC_010523 | ENSRNOT00000087723  | 0.958469185 | 9.07E-07 |
| TUCP_000332 | XLOC_010523 | ENSRNOT00000002834  | 0.991013038 | 4.55E-10 |
| TUCP_000332 | XLOC_010523 | ENSRNOT00000001464  | 0.991013038 | 4.55E-10 |
| TUCP_000332 | XLOC_010523 | ENSRNOT00000090716  | 0.984782606 | 6.26E-09 |
| TUCP_000332 | XLOC_010523 | ENSRNOT00000083542  | 0.960516165 | 7.07E-07 |
| TUCP_000332 | XLOC_010523 | ENSRNOT000000021278 | 0.962112657 | 5.77E-07 |
| TUCP_000332 | XLOC_010523 | ENSRNOT00000076044  | 0.991013038 | 4.55E-10 |
| TUCP_000332 | XLOC_010523 | ENSRNOT00000074353  | 0.991013038 | 4.55E-10 |
| TUCP_000332 | XLOC_010523 | ENSRNOT00000087122  | 0.973304784 | 1.02E-07 |
| TUCP_000332 | XLOC_010523 | ENSRNOT00000074295  | 0.97003188  | 1.81E-07 |
| TUCP_000332 | XLOC_010523 | ENSRNOT00000057873  | 0.991013038 | 4.55E-10 |
| TUCP_000332 | XLOC_010523 | ENSRNOT00000083002  | 0.97640146  | 5.54E-08 |
| TUCP_000332 | XLOC_010523 | ENSRNOT00000088399  | 0.990997922 | 4.59E-10 |
| TUCP_000332 | XLOC_010523 | ENSRNOT00000086248  | 0.991013038 | 4.55E-10 |
| TUCP_000332 | XLOC_010523 | ENSRNOT00000089750  | 0.990990332 | 4.61E-10 |
| TUCP_000332 | XLOC_010523 | ENSRNOT00000030517  | 0.960702224 | 6.91E-07 |
| TUCP_000332 | XLOC_010523 | ENSRNOT00000034772  | 0.981244025 | 1.77E-08 |
| TUCP_000332 | XLOC_010523 | ENSRNOT00000089305  | 0.95159285  | 1.93E-06 |
| TUCP_000332 | XLOC_010523 | ENSRNOT00000024580  | 0.95025522  | 2.21E-06 |
| TUCP_000332 | XLOC_010523 | ENSRNOT00000064601  | 0.956809168 | 1.10E-06 |
| TUCP_000332 | XLOC_010523 | ENSRNOT00000015870  | 0.950725392 | 2.11E-06 |
| TUCP_000332 | XLOC_010523 | ENSRNOT00000080812  | 0.978133624 | 3.80E-08 |
| TUCP_000332 | XLOC_010523 | ENSRNOT00000092755  | 0.991013038 | 4.55E-10 |
| TUCP_000332 | XLOC_010523 | ENSRNOT00000031683  | 0.991013038 | 4.55E-10 |
| TUCP_000332 | XLOC_010523 | ENSRNOT00000087764  | 0.980419127 | 2.19E-08 |
| TUCP_000333 | XLOC_010523 | ENSRNOT00000082043  | 0.998965531 | 9.31E-15 |
| TUCP_000333 | XLOC_010523 | ENSRNOT00000090080  | 0.970514074 | 1.67E-07 |
| TUCP_000333 | XLOC_010523 | ENSRNOT00000068444  | 1           | 0        |
| TUCP_000333 | XLOC_010523 | ENSRNOT00000081370  | 0.999740797 | 9.21E-18 |
| TUCP_000333 | XLOC_010523 | ENSRNOT00000078645  | 0.989717078 | 8.90E-10 |
| TUCP_000333 | XLOC_010523 | ENSRNOT00000075987  | 0.987945283 | 1.96E-09 |
| TUCP_000333 | XLOC_010523 | ENSRNOT00000074990  | 1           | 0        |
| TUCP_000333 | XLOC_010523 | ENSRNOT00000087323  | 0.995029331 | 2.37E-11 |
| TUCP_000333 | XLOC_010523 | ENSRNOT00000074930  | 1           | 0        |
| TUCP_000333 | XLOC_010523 | ENSRNOT00000080575  | 0.999929267 | 1.39E-20 |
| TUCP_000333 | XLOC_010523 | ENSRNOT00000057761  | 0.982981445 | 1.09E-08 |

|             |             |                    |              |          |
|-------------|-------------|--------------------|--------------|----------|
| TUCP_000333 | XLOC_010523 | ENSRNOT00000078369 | 0.993028032  | 1.28E-10 |
| TUCP_000333 | XLOC_010523 | ENSRNOT00000092982 | 1            | 0        |
| TUCP_000333 | XLOC_010523 | ENSRNOT00000088367 | 1            | 0        |
| TUCP_000333 | XLOC_010523 | ENSRNOT00000061874 | 0.968405099  | 2.35E-07 |
| TUCP_000333 | XLOC_010523 | ENSRNOT00000077789 | 0.99346224   | 9.30E-11 |
| TUCP_000333 | XLOC_010523 | ENSRNOT00000081996 | 1            | 0        |
| TUCP_000333 | XLOC_010523 | ENSRNOT00000022280 | 0.982176915  | 1.37E-08 |
| TUCP_000333 | XLOC_010523 | ENSRNOT00000082058 | 1            | 0        |
| TUCP_000333 | XLOC_010523 | ENSRNOT00000088905 | 1            | 0        |
| TUCP_000333 | XLOC_010523 | ENSRNOT00000086831 | 1            | 0        |
| TUCP_000333 | XLOC_010523 | ENSRNOT00000045099 | 1            | 0        |
| TUCP_000333 | XLOC_010523 | ENSRNOT00000086745 | 0.978585655  | 3.42E-08 |
| TUCP_000333 | XLOC_010523 | ENSRNOT00000085849 | 0.988270765  | 1.71E-09 |
| TUCP_000333 | XLOC_010523 | ENSRNOT00000086397 | 0.957188178  | 1.05E-06 |
| TUCP_000333 | XLOC_010523 | ENSRNOT00000079606 | 0.960472013  | 7.11E-07 |
| TUCP_000333 | XLOC_010523 | ENSRNOT00000090207 | 0.953487741  | 1.59E-06 |
| TUCP_000333 | XLOC_010523 | ENSRNOT00000087025 | 1            | 0        |
| TUCP_000333 | XLOC_010523 | ENSRNOT00000019853 | 1            | 0        |
| TUCP_000333 | XLOC_010523 | ENSRNOT00000073853 | 0.989715487  | 8.91E-10 |
| TUCP_000333 | XLOC_010523 | ENSRNOT00000065912 | 0.974234118  | 8.57E-08 |
| TUCP_000333 | XLOC_010523 | ENSRNOT00000073828 | 0.971647353  | 1.38E-07 |
| TUCP_000333 | XLOC_010523 | ENSRNOT00000078683 | 0.966682958  | 3.06E-07 |
| TUCP_000333 | XLOC_010523 | ENSRNOT00000093083 | 0.999140292  | 3.69E-15 |
| TUCP_000239 | XLOC_007350 | ENSRNOT00000055735 | 0.952416453  | 1.77E-06 |
| TUCP_000239 | XLOC_007350 | ENSRNOT00000031904 | 0.96980691   | 1.88E-07 |
| TUCP_000239 | XLOC_007350 | ENSRNOT00000066739 | 0.964240755  | 4.34E-07 |
| TUCP_000239 | XLOC_007350 | ENSRNOT00000068405 | 0.957946343  | 9.65E-07 |
| TUCP_000239 | XLOC_007350 | ENSRNOT00000039809 | 0.98122695   | 1.78E-08 |
| TUCP_000239 | XLOC_007350 | ENSRNOT00000000743 | 0.955365054  | 1.29E-06 |
| TUCP_000239 | XLOC_007350 | ENSRNOT00000081246 | 0.956948011  | 1.08E-06 |
| TUCP_000239 | XLOC_007350 | ENSRNOT00000019213 | 0.971500539  | 1.41E-07 |
| TUCP_000239 | XLOC_007350 | ENSRNOT00000007351 | -0.964823993 | 4.00E-07 |
| TUCP_000239 | XLOC_007350 | ENSRNOT00000074939 | 0.988516018  | 1.54E-09 |
| TUCP_000239 | XLOC_007350 | ENSRNOT00000066041 | -0.955194289 | 1.32E-06 |
| TUCP_000239 | XLOC_007350 | ENSRNOT00000073559 | 0.958937413  | 8.58E-07 |
| TUCP_000239 | XLOC_007350 | ENSRNOT00000071560 | 0.962602573  | 5.41E-07 |
| TUCP_000239 | XLOC_007350 | ENSRNOT00000078445 | -0.958481829 | 9.06E-07 |
| TUCP_000239 | XLOC_007350 | ENSRNOT00000023638 | 0.958260452  | 9.30E-07 |
| TUCP_000239 | XLOC_007350 | ENSRNOT00000005228 | 0.958974372  | 8.54E-07 |
| TUCP_000239 | XLOC_007350 | ENSRNOT00000088125 | 0.978666949  | 3.36E-08 |
| TUCP_000239 | XLOC_007350 | ENSRNOT00000034146 | 0.960611488  | 6.99E-07 |
| TUCP_000239 | XLOC_007350 | ENSRNOT00000006175 | 0.980715328  | 2.03E-08 |
| TUCP_000239 | XLOC_007350 | ENSRNOT00000005220 | 0.964803861  | 4.01E-07 |
| TUCP_000239 | XLOC_007350 | ENSRNOT00000023144 | 0.973540015  | 9.77E-08 |
| TUCP_000239 | XLOC_007350 | ENSRNOT00000021116 | 0.965665208  | 3.55E-07 |
| TUCP_000239 | XLOC_007350 | ENSRNOT00000016649 | 0.961139165  | 6.54E-07 |
| TUCP_000239 | XLOC_007350 | ENSRNOT00000082100 | 0.97198657   | 1.30E-07 |
| TUCP_000239 | XLOC_007350 | ENSRNOT00000040393 | 0.95961955   | 7.90E-07 |
| TUCP_000239 | XLOC_007350 | ENSRNOT00000026941 | 0.969104563  | 2.10E-07 |
| TUCP_000239 | XLOC_007350 | ENSRNOT00000065300 | 0.959261769  | 8.25E-07 |
| TUCP_000239 | XLOC_007350 | ENSRNOT00000056813 | 0.96560101   | 3.58E-07 |

|             |             |                    |              |          |
|-------------|-------------|--------------------|--------------|----------|
| TUCP_000239 | XLOC_007350 | ENSRNOT00000043216 | 0.969977323  | 1.83E-07 |
| TUCP_000239 | XLOC_007350 | ENSRNOT00000091128 | -0.95998993  | 7.55E-07 |
| TUCP_000239 | XLOC_007350 | ENSRNOT00000044742 | 0.973416292  | 1.00E-07 |
| TUCP_000239 | XLOC_007350 | ENSRNOT00000009712 | 0.951369569  | 1.97E-06 |
| TUCP_000239 | XLOC_007350 | ENSRNOT00000013758 | 0.961219894  | 6.47E-07 |
| TUCP_000239 | XLOC_007350 | ENSRNOT00000026543 | 0.979758159  | 2.59E-08 |
| TUCP_000239 | XLOC_007350 | ENSRNOT00000015076 | 0.964795055  | 4.01E-07 |
| TUCP_000239 | XLOC_007350 | ENSRNOT00000066670 | 0.952057919  | 1.84E-06 |
| TUCP_000239 | XLOC_007350 | ENSRNOT00000010418 | 0.965718081  | 3.52E-07 |
| TUCP_000239 | XLOC_007350 | ENSRNOT00000071971 | 0.954582927  | 1.41E-06 |
| TUCP_000239 | XLOC_007350 | ENSRNOT00000015073 | 0.966551343  | 3.12E-07 |
| TUCP_000239 | XLOC_007350 | ENSRNOT00000025689 | 0.960502378  | 7.08E-07 |
| TUCP_000239 | XLOC_007350 | ENSRNOT00000012187 | 0.962108541  | 5.77E-07 |
| TUCP_000239 | XLOC_007350 | ENSRNOT00000064802 | 0.957912542  | 9.69E-07 |
| TUCP_000239 | XLOC_007350 | ENSRNOT00000001507 | 0.958438468  | 9.11E-07 |
| TUCP_000239 | XLOC_007350 | ENSRNOT0000006055  | 0.980322856  | 2.25E-08 |
| TUCP_000239 | XLOC_007350 | ENSRNOT00000071573 | 0.960723148  | 6.89E-07 |
| TUCP_000239 | XLOC_007350 | ENSRNOT00000005126 | -0.961340225 | 6.37E-07 |
| TUCP_000239 | XLOC_007350 | ENSRNOT00000028646 | 0.950261521  | 2.20E-06 |
| TUCP_000239 | XLOC_007350 | ENSRNOT00000011384 | 0.957964621  | 9.63E-07 |
| TUCP_000239 | XLOC_007350 | ENSRNOT00000038247 | 0.965307884  | 3.73E-07 |
| TUCP_000239 | XLOC_007350 | ENSRNOT00000029439 | 0.951320765  | 1.98E-06 |
| TUCP_000239 | XLOC_007350 | ENSRNOT00000093174 | 0.950063898  | 2.25E-06 |
| TUCP_000239 | XLOC_007350 | ENSRNOT00000036951 | 0.960381404  | 7.19E-07 |
| TUCP_000239 | XLOC_007350 | ENSRNOT00000014664 | 0.951825221  | 1.88E-06 |
| TUCP_000239 | XLOC_007350 | ENSRNOT00000035989 | 0.979463334  | 2.78E-08 |
| TUCP_000239 | XLOC_007350 | ENSRNOT00000057160 | 0.957255839  | 1.05E-06 |
| TUCP_000239 | XLOC_007350 | ENSRNOT00000082699 | 0.964239427  | 4.34E-07 |
| TUCP_000239 | XLOC_007350 | ENSRNOT00000024402 | 0.963146247  | 5.03E-07 |
| TUCP_000239 | XLOC_007350 | ENSRNOT00000075326 | 0.962892899  | 5.21E-07 |
| TUCP_000239 | XLOC_007350 | ENSRNOT00000021348 | 0.993893351  | 6.62E-11 |
| TUCP_000239 | XLOC_007350 | ENSRNOT00000017629 | 0.993992864  | 6.10E-11 |
| TUCP_000239 | XLOC_007350 | ENSRNOT00000024941 | 0.978015933  | 3.90E-08 |
| TUCP_000239 | XLOC_007350 | ENSRNOT00000012671 | 0.974975844  | 7.41E-08 |
| TUCP_000239 | XLOC_007350 | ENSRNOT00000026481 | 0.956121165  | 1.19E-06 |
| TUCP_000239 | XLOC_007350 | ENSRNOT00000065168 | 0.95658116   | 1.13E-06 |
| TUCP_000239 | XLOC_007350 | ENSRNOT00000085158 | 0.960353255  | 7.22E-07 |
| TUCP_000239 | XLOC_007350 | ENSRNOT00000010463 | 0.952128672  | 1.83E-06 |
| TUCP_000239 | XLOC_007350 | ENSRNOT00000083215 | 0.962123542  | 5.76E-07 |
| TUCP_000239 | XLOC_007350 | ENSRNOT00000026718 | 0.962556454  | 5.44E-07 |
| TUCP_000239 | XLOC_007350 | ENSRNOT00000085228 | 0.964662486  | 4.09E-07 |
| TUCP_000239 | XLOC_007350 | ENSRNOT00000084012 | 0.950547907  | 2.14E-06 |
| TUCP_000239 | XLOC_007350 | ENSRNOT00000020134 | 0.959993375  | 7.55E-07 |
| TUCP_000239 | XLOC_007350 | ENSRNOT00000017319 | 0.955968528  | 1.21E-06 |
| TUCP_000239 | XLOC_007350 | ENSRNOT00000055187 | 0.971957804  | 1.30E-07 |
| TUCP_000239 | XLOC_007350 | ENSRNOT00000001809 | 0.950544271  | 2.14E-06 |
| TUCP_000239 | XLOC_007350 | ENSRNOT0000004834  | 0.961064791  | 6.60E-07 |
| TUCP_000239 | XLOC_007350 | ENSRNOT00000079866 | 0.966018045  | 3.37E-07 |
| TUCP_000239 | XLOC_007350 | ENSRNOT00000066526 | 0.952882234  | 1.69E-06 |
| TUCP_000239 | XLOC_007350 | ENSRNOT00000009811 | 0.950257941  | 2.21E-06 |
| TUCP_000239 | XLOC_007350 | ENSRNOT00000081632 | 0.952381696  | 1.78E-06 |

|             |             |                    |             |          |
|-------------|-------------|--------------------|-------------|----------|
| TUCP_000239 | XLOC_007350 | ENSRNOT00000087592 | 0.956906085 | 1.09E-06 |
| TUCP_000239 | XLOC_007350 | ENSRNOT00000017021 | 0.973040752 | 1.07E-07 |
| TUCP_000239 | XLOC_007350 | ENSRNOT00000067822 | 0.972043448 | 1.28E-07 |
| TUCP_000239 | XLOC_007350 | ENSRNOT00000032274 | 0.970656983 | 1.63E-07 |
| TUCP_000239 | XLOC_007350 | ENSRNOT00000087371 | 0.974545091 | 8.06E-08 |
| TUCP_000239 | XLOC_007350 | ENSRNOT00000008018 | 0.951158512 | 2.02E-06 |
| TUCP_000239 | XLOC_007350 | ENSRNOT00000088054 | 0.972389062 | 1.21E-07 |
| TUCP_000239 | XLOC_007350 | ENSRNOT00000039842 | 0.966216202 | 3.27E-07 |
| TUCP_000239 | XLOC_007350 | ENSRNOT00000068633 | 0.962063666 | 5.81E-07 |
| TUCP_000239 | XLOC_007350 | ENSRNOT00000010541 | 0.969284073 | 2.05E-07 |
| TUCP_000239 | XLOC_007350 | ENSRNOT00000037446 | 0.982190149 | 1.37E-08 |
| TUCP_000239 | XLOC_007350 | ENSRNOT00000004032 | 0.954510059 | 1.42E-06 |
| TUCP_000239 | XLOC_007350 | ENSRNOT00000017948 | 0.983516449 | 9.32E-09 |
| TUCP_000239 | XLOC_007350 | ENSRNOT00000029994 | 0.957261682 | 1.05E-06 |
| TUCP_000239 | XLOC_007350 | ENSRNOT00000012895 | 0.959599495 | 7.92E-07 |
| TUCP_000239 | XLOC_007350 | ENSRNOT00000025859 | 0.974965799 | 7.43E-08 |
| TUCP_000239 | XLOC_007350 | ENSRNOT00000073991 | 0.952519558 | 1.75E-06 |
| TUCP_000239 | XLOC_007350 | ENSRNOT00000091909 | 0.959246783 | 8.27E-07 |
| TUCP_000239 | XLOC_007350 | ENSRNOT00000090918 | 0.959675592 | 7.85E-07 |
| TUCP_000239 | XLOC_007350 | ENSRNOT00000023180 | 0.952847074 | 1.70E-06 |
| TUCP_000239 | XLOC_007350 | ENSRNOT00000000676 | 0.980922298 | 1.93E-08 |
| TUCP_000239 | XLOC_007350 | ENSRNOT00000078675 | 0.971733755 | 1.36E-07 |
| TUCP_000239 | XLOC_007350 | ENSRNOT00000019222 | 0.969210929 | 2.07E-07 |
| TUCP_000239 | XLOC_007350 | ENSRNOT00000028070 | 0.964556091 | 4.15E-07 |
| TUCP_000239 | XLOC_007350 | ENSRNOT00000004359 | 0.971222487 | 1.48E-07 |
| TUCP_000239 | XLOC_007350 | ENSRNOT00000060362 | 0.959237507 | 8.28E-07 |
| TUCP_000239 | XLOC_007350 | ENSRNOT00000013274 | 0.995289804 | 1.81E-11 |
| TUCP_000239 | XLOC_007350 | ENSRNOT00000022213 | 0.950956051 | 2.06E-06 |
| TUCP_000239 | XLOC_007350 | ENSRNOT00000022610 | 0.955638741 | 1.26E-06 |
| TUCP_000239 | XLOC_007350 | ENSRNOT00000020437 | 0.964364659 | 4.26E-07 |
| TUCP_000239 | XLOC_007350 | ENSRNOT00000045574 | 0.950696523 | 2.11E-06 |
| TUCP_000239 | XLOC_007350 | ENSRNOT00000010898 | 0.975595955 | 6.54E-08 |
| TUCP_000239 | XLOC_007350 | ENSRNOT00000047093 | 0.969843939 | 1.87E-07 |
| TUCP_000239 | XLOC_007350 | ENSRNOT00000001222 | 0.971646577 | 1.38E-07 |
| TUCP_000239 | XLOC_007350 | ENSRNOT00000066968 | 0.956007505 | 1.21E-06 |
| TUCP_000239 | XLOC_007350 | ENSRNOT00000005355 | 0.973720697 | 9.45E-08 |
| TUCP_000239 | XLOC_007350 | ENSRNOT00000002771 | 0.961537175 | 6.21E-07 |
| TUCP_000239 | XLOC_007350 | ENSRNOT00000015609 | 0.950572185 | 2.14E-06 |
| TUCP_000239 | XLOC_007350 | ENSRNOT00000079895 | 0.972105775 | 1.27E-07 |
| TUCP_000239 | XLOC_007350 | ENSRNOT00000025981 | 0.961057696 | 6.61E-07 |
| TUCP_000239 | XLOC_007350 | ENSRNOT00000027520 | 0.95747759  | 1.02E-06 |
| TUCP_000239 | XLOC_007350 | ENSRNOT00000044635 | 0.955157955 | 1.32E-06 |
| TUCP_000239 | XLOC_007350 | ENSRNOT00000047387 | 0.984211776 | 7.52E-09 |
| TUCP_000239 | XLOC_007350 | ENSRNOT00000004698 | 0.973906203 | 9.12E-08 |
| TUCP_000239 | XLOC_007350 | ENSRNOT00000091910 | 0.97703032  | 4.85E-08 |
| TUCP_000239 | XLOC_007350 | ENSRNOT00000045488 | 0.970438954 | 1.69E-07 |
| TUCP_000239 | XLOC_007350 | ENSRNOT00000058072 | 0.963357166 | 4.89E-07 |
| TUCP_000239 | XLOC_007350 | ENSRNOT00000081047 | 0.954568866 | 1.41E-06 |
| TUCP_000239 | XLOC_007350 | ENSRNOT00000084240 | 0.960707418 | 6.90E-07 |
| TUCP_000239 | XLOC_007350 | ENSRNOT00000077555 | 0.964205753 | 4.36E-07 |
| TUCP_000239 | XLOC_007350 | ENSRNOT00000026174 | 0.961911807 | 5.92E-07 |



|             |             |                    |              |          |
|-------------|-------------|--------------------|--------------|----------|
| TUCP_000239 | XL0C_007350 | ENSRNOT00000008803 | 0.958607491  | 8.93E-07 |
| TUCP_000239 | XL0C_007350 | ENSRNOT00000003991 | 0.969236953  | 2.06E-07 |
| TUCP_000239 | XL0C_007350 | ENSRNOT00000004508 | 0.970771142  | 1.60E-07 |
| TUCP_000239 | XL0C_007350 | ENSRNOT00000071764 | 0.974600042  | 7.98E-08 |
| TUCP_000239 | XL0C_007350 | ENSRNOT00000078475 | 0.9661019    | 3.33E-07 |
| TUCP_000239 | XL0C_007350 | ENSRNOT00000087429 | 0.966269188  | 3.25E-07 |
| TUCP_000239 | XL0C_007350 | ENSRNOT00000040513 | 0.954198972  | 1.47E-06 |
| TUCP_000239 | XL0C_007350 | ENSRNOT00000009683 | 0.990963589  | 4.67E-10 |
| TUCP_000239 | XL0C_007350 | ENSRNOT00000083127 | 0.980644099  | 2.07E-08 |
| TUCP_000239 | XL0C_007350 | ENSRNOT00000024548 | 0.969386688  | 2.01E-07 |
| TUCP_000239 | XL0C_007350 | ENSRNOT00000084088 | 0.980360114  | 2.23E-08 |
| TUCP_000239 | XL0C_007350 | ENSRNOT00000034704 | 0.989834578  | 8.40E-10 |
| TUCP_000239 | XL0C_007350 | ENSRNOT00000064902 | 0.972779352  | 1.12E-07 |
| TUCP_000239 | XL0C_007350 | ENSRNOT00000009280 | 0.951118338  | 2.02E-06 |
| TUCP_000239 | XL0C_007350 | ENSRNOT00000078070 | 0.957452912  | 1.02E-06 |
| TUCP_000239 | XL0C_007350 | ENSRNOT00000029664 | 0.952404643  | 1.78E-06 |
| TUCP_000239 | XL0C_007350 | ENSRNOT00000065983 | 0.950922442  | 2.06E-06 |
| TUCP_000239 | XL0C_007350 | ENSRNOT00000079442 | 0.966666569  | 3.06E-07 |
| TUCP_000239 | XL0C_007350 | ENSRNOT00000024322 | 0.972689519  | 1.14E-07 |
| TUCP_000239 | XL0C_007350 | ENSRNOT00000005262 | 0.961667232  | 6.11E-07 |
| TUCP_000239 | XL0C_007350 | ENSRNOT00000085027 | 0.968287596  | 2.39E-07 |
| TUCP_000239 | XL0C_007350 | ENSRNOT00000016722 | 0.956525602  | 1.14E-06 |
| TUCP_000239 | XL0C_007350 | ENSRNOT00000091265 | 0.978662681  | 3.36E-08 |
| TUCP_000239 | XL0C_007350 | ENSRNOT00000026457 | 0.976433452  | 5.50E-08 |
| TUCP_000239 | XL0C_007350 | ENSRNOT00000000658 | 0.96868926   | 2.25E-07 |
| TUCP_000239 | XL0C_007350 | ENSRNOT00000016191 | 0.958433497  | 9.11E-07 |
| TUCP_000239 | XL0C_007350 | ENSRNOT00000078390 | -0.960588958 | 7.01E-07 |
| TUCP_000239 | XL0C_007350 | ENSRNOT00000089971 | 0.966763071  | 3.02E-07 |
| TUCP_000239 | XL0C_007350 | ENSRNOT00000065501 | 0.981741113  | 1.55E-08 |
| TUCP_000239 | XL0C_007350 | ENSRNOT00000027454 | 0.962859349  | 5.23E-07 |
| TUCP_000239 | XL0C_007350 | ENSRNOT00000091488 | 0.961518998  | 6.23E-07 |
| TUCP_000239 | XL0C_007350 | ENSRNOT00000025523 | 0.950842423  | 2.08E-06 |
| TUCP_000239 | XL0C_007350 | ENSRNOT00000025832 | 0.983450734  | 9.51E-09 |
| TUCP_000239 | XL0C_007350 | ENSRNOT00000076729 | 0.991814558  | 2.85E-10 |
| TUCP_000239 | XL0C_007350 | ENSRNOT00000027615 | 0.953773487  | 1.54E-06 |
| TUCP_000239 | XL0C_007350 | ENSRNOT00000005909 | 0.957964301  | 9.63E-07 |
| TUCP_000239 | XL0C_007350 | ENSRNOT00000090665 | 0.982555392  | 1.24E-08 |
| TUCP_000239 | XL0C_007350 | ENSRNOT00000045882 | 0.977844337  | 4.05E-08 |
| TUCP_000239 | XL0C_007350 | ENSRNOT00000036750 | 0.985194565  | 5.47E-09 |
| TUCP_000239 | XL0C_007350 | ENSRNOT00000025936 | -0.954344916 | 1.45E-06 |
| TUCP_000239 | XL0C_007350 | ENSRNOT00000012702 | -0.952099307 | 1.83E-06 |
| TUCP_000239 | XL0C_007350 | ENSRNOT00000025092 | 0.975398181  | 6.81E-08 |
| TUCP_000239 | XL0C_007350 | ENSRNOT00000009129 | 0.961210352  | 6.48E-07 |
| TUCP_000239 | XL0C_007350 | ENSRNOT00000022074 | 0.951117505  | 2.02E-06 |
| TUCP_000239 | XL0C_007350 | ENSRNOT00000037790 | 0.964100123  | 4.42E-07 |
| TUCP_000239 | XL0C_007350 | ENSRNOT00000027337 | 0.965414615  | 3.68E-07 |
| TUCP_000239 | XL0C_007350 | ENSRNOT00000006969 | 0.956128638  | 1.19E-06 |
| TUCP_000239 | XL0C_007350 | ENSRNOT00000090420 | -0.962922662 | 5.19E-07 |
| TUCP_000239 | XL0C_007350 | ENSRNOT00000075424 | 0.963767915  | 4.63E-07 |
| TUCP_000239 | XL0C_007350 | ENSRNOT00000076763 | 0.961631034  | 6.14E-07 |
| TUCP_000239 | XL0C_007350 | ENSRNOT00000057313 | 0.978107255  | 3.82E-08 |

|             |             |                     |              |          |
|-------------|-------------|---------------------|--------------|----------|
| TUCP_000239 | XLOC_007350 | ENSRNOT00000024420  | 0.966305664  | 3.23E-07 |
| TUCP_000239 | XLOC_007350 | ENSRNOT00000025075  | 0.971380448  | 1.44E-07 |
| TUCP_000239 | XLOC_007350 | ENSRNOT00000000157  | 0.966371271  | 3.20E-07 |
| TUCP_000239 | XLOC_007350 | ENSRNOT00000023645  | 0.961550831  | 6.20E-07 |
| TUCP_000239 | XLOC_007350 | ENSRNOT00000027910  | 0.961404514  | 6.32E-07 |
| TUCP_000239 | XLOC_007350 | ENSRNOT00000010992  | 0.987807097  | 2.08E-09 |
| TUCP_000239 | XLOC_007350 | ENSRNOT000000081897 | 0.964540322  | 4.16E-07 |
| TUCP_000239 | XLOC_007350 | ENSRNOT00000038647  | 0.977022386  | 4.85E-08 |
| TUCP_000239 | XLOC_007350 | ENSRNOT00000020379  | 0.951826257  | 1.88E-06 |
| TUCP_000239 | XLOC_007350 | ENSRNOT00000076669  | 0.988361605  | 1.65E-09 |
| TUCP_000239 | XLOC_007350 | ENSRNOT00000011984  | 0.980293006  | 2.26E-08 |
| TUCP_000239 | XLOC_007350 | ENSRNOT00000026293  | 0.981466193  | 1.67E-08 |
| TUCP_000239 | XLOC_007350 | ENSRNOT000000086119 | -0.955504469 | 1.27E-06 |
| TUCP_000239 | XLOC_007350 | ENSRNOT00000043872  | 0.951557139  | 1.94E-06 |
| TUCP_000239 | XLOC_007350 | ENSRNOT00000074653  | 0.972259179  | 1.23E-07 |
| TUCP_000239 | XLOC_007350 | ENSRNOT00000089007  | -0.959376283 | 8.14E-07 |
| TUCP_000239 | XLOC_007350 | ENSRNOT00000088279  | 0.950612795  | 2.13E-06 |
| TUCP_000239 | XLOC_007350 | ENSRNOT00000012736  | 0.973694631  | 9.49E-08 |
| TUCP_000239 | XLOC_007350 | ENSRNOT00000041096  | 0.964698534  | 4.07E-07 |
| TUCP_000239 | XLOC_007350 | ENSRNOT00000031230  | 0.991525835  | 3.39E-10 |
| TUCP_000239 | XLOC_007350 | ENSRNOT00000037679  | 0.952174078  | 1.82E-06 |
| TUCP_000239 | XLOC_007350 | ENSRNOT00000000302  | 0.954146437  | 1.48E-06 |
| TUCP_000239 | XLOC_007350 | ENSRNOT00000080928  | 0.958938251  | 8.58E-07 |
| TUCP_000239 | XLOC_007350 | ENSRNOT00000052288  | 0.963763988  | 4.63E-07 |
| TUCP_000239 | XLOC_007350 | ENSRNOT00000039631  | 0.957206501  | 1.05E-06 |
| TUCP_000239 | XLOC_007350 | ENSRNOT00000035474  | 0.95323487   | 1.63E-06 |
| TUCP_000239 | XLOC_007350 | ENSRNOT00000086336  | 0.950231319  | 2.21E-06 |
| TUCP_000239 | XLOC_007350 | ENSRNOT00000068322  | 0.960202326  | 7.35E-07 |
| TUCP_000239 | XLOC_007350 | ENSRNOT00000067181  | 0.963737306  | 4.65E-07 |
| TUCP_000239 | XLOC_007350 | ENSRNOT00000027762  | 0.954038051  | 1.50E-06 |
| TUCP_000239 | XLOC_007350 | ENSRNOT00000003296  | 0.957622479  | 1.00E-06 |
| TUCP_000239 | XLOC_007350 | ENSRNOT00000043345  | 0.980037535  | 2.41E-08 |
| TUCP_000239 | XLOC_007350 | ENSRNOT00000085596  | 0.991410485  | 3.63E-10 |
| TUCP_000239 | XLOC_007350 | ENSRNOT00000071694  | 0.974849435  | 7.60E-08 |
| TUCP_000239 | XLOC_007350 | ENSRNOT00000083093  | 0.954073929  | 1.49E-06 |
| TUCP_000239 | XLOC_007350 | ENSRNOT00000035491  | 0.95080115   | 2.09E-06 |
| TUCP_000239 | XLOC_007350 | ENSRNOT00000060696  | 0.976019322  | 6.00E-08 |
| TUCP_000239 | XLOC_007350 | ENSRNOT00000009900  | -0.954012988 | 1.50E-06 |
| TUCP_000239 | XLOC_007350 | ENSRNOT00000004412  | 0.990258347  | 6.80E-10 |
| TUCP_000239 | XLOC_007350 | ENSRNOT00000012048  | 0.954894511  | 1.36E-06 |
| TUCP_000239 | XLOC_007350 | ENSRNOT00000064798  | 0.965800994  | 3.48E-07 |
| TUCP_000239 | XLOC_007350 | ENSRNOT00000080207  | 0.967512736  | 2.70E-07 |
| TUCP_000239 | XLOC_007350 | ENSRNOT00000026280  | 0.96361334   | 4.73E-07 |
| TUCP_000239 | XLOC_007350 | ENSRNOT00000024942  | 0.954996674  | 1.35E-06 |
| TUCP_000239 | XLOC_007350 | ENSRNOT00000061100  | 0.97134771   | 1.45E-07 |
| TUCP_000239 | XLOC_007350 | ENSRNOT00000005387  | 0.968953033  | 2.16E-07 |
| TUCP_000239 | XLOC_007350 | ENSRNOT00000027452  | 0.980715238  | 2.03E-08 |
| TUCP_000239 | XLOC_007350 | ENSRNOT00000005381  | 0.953585497  | 1.57E-06 |
| TUCP_000239 | XLOC_007350 | ENSRNOT00000043535  | 0.963154071  | 5.03E-07 |
| TUCP_000239 | XLOC_007350 | ENSRNOT00000082174  | 0.975432711  | 6.76E-08 |
| TUCP_000239 | XLOC_007350 | ENSRNOT00000005144  | 0.956135622  | 1.19E-06 |

|             |             |                    |              |          |
|-------------|-------------|--------------------|--------------|----------|
| TUCP_000239 | XLOC_007350 | ENSRNOT00000013985 | 0.95989952   | 7.63E-07 |
| TUCP_000239 | XLOC_007350 | ENSRNOT00000004463 | 0.961956822  | 5.89E-07 |
| TUCP_000239 | XLOC_007350 | ENSRNOT00000027964 | 0.964483179  | 4.19E-07 |
| TUCP_000239 | XLOC_007350 | ENSRNOT00000023428 | 0.971609243  | 1.39E-07 |
| TUCP_000239 | XLOC_007350 | ENSRNOT00000051550 | 0.95262226   | 1.74E-06 |
| TUCP_000239 | XLOC_007350 | ENSRNOT00000011041 | 0.973314523  | 1.02E-07 |
| TUCP_000239 | XLOC_007350 | ENSRNOT00000021674 | 0.973495208  | 9.85E-08 |
| TUCP_000239 | XLOC_007350 | ENSRNOT00000047192 | -0.960478401 | 7.11E-07 |
| TUCP_000239 | XLOC_007350 | ENSRNOT00000047210 | 0.957244235  | 1.05E-06 |
| TUCP_000239 | XLOC_007350 | ENSRNOT00000002292 | 0.973709564  | 9.46E-08 |
| TUCP_000239 | XLOC_007350 | ENSRNOT00000022796 | 0.95722384   | 1.05E-06 |
| TUCP_000239 | XLOC_007350 | ENSRNOT00000010748 | 0.955946204  | 1.21E-06 |
| TUCP_000239 | XLOC_007350 | ENSRNOT00000029001 | 0.969312385  | 2.04E-07 |
| TUCP_000239 | XLOC_007350 | ENSRNOT00000004140 | 0.960624752  | 6.98E-07 |
| TUCP_000239 | XLOC_007350 | ENSRNOT00000015799 | 0.959845577  | 7.68E-07 |
| TUCP_000239 | XLOC_007350 | ENSRNOT00000083799 | 0.985531006  | 4.87E-09 |
| TUCP_000239 | XLOC_007350 | ENSRNOT00000009066 | 0.961213177  | 6.48E-07 |
| TUCP_004348 | XLOC_192124 | ENSRNOT00000075980 | 0.955409923  | 1.29E-06 |
| TUCP_004610 | XLOC_203061 | ENSRNOT00000075521 | 0.968560417  | 2.29E-07 |
| TUCP_004610 | XLOC_203061 | ENSRNOT00000006188 | -0.952873486 | 1.69E-06 |
| TUCP_004610 | XLOC_203061 | ENSRNOT00000006186 | 0.960477725  | 7.11E-07 |
| TUCP_004610 | XLOC_203061 | ENSRNOT00000013745 | -0.95115181  | 2.02E-06 |
| TUCP_004610 | XLOC_203061 | ENSRNOT00000013743 | 0.985224106  | 5.41E-09 |
| TUCP_004610 | XLOC_203061 | ENSRNOT00000075397 | 0.957489499  | 1.02E-06 |
| TUCP_004610 | XLOC_203061 | ENSRNOT00000032926 | -0.964353081 | 4.27E-07 |
| TUCP_004610 | XLOC_203061 | ENSRNOT00000019104 | -0.963431865 | 4.84E-07 |
| TUCP_004610 | XLOC_203061 | ENSRNOT00000006217 | 0.962587975  | 5.42E-07 |
| TUCP_004610 | XLOC_203061 | ENSRNOT00000025067 | -0.951440408 | 1.96E-06 |
| TUCP_004610 | XLOC_203061 | ENSRNOT00000086706 | 0.963075967  | 5.08E-07 |
| TUCP_004610 | XLOC_203061 | ENSRNOT00000030914 | -0.964929217 | 3.94E-07 |
| TUCP_004610 | XLOC_203061 | ENSRNOT00000004017 | 0.978513818  | 3.48E-08 |
| TUCP_004610 | XLOC_203061 | ENSRNOT00000085885 | -0.956935035 | 1.09E-06 |
| TUCP_004610 | XLOC_203061 | ENSRNOT00000011130 | -0.96230057  | 5.63E-07 |
| TUCP_004610 | XLOC_203061 | ENSRNOT00000031692 | -0.952365668 | 1.78E-06 |
| TUCP_004610 | XLOC_203061 | ENSRNOT00000052063 | 0.95545125   | 1.28E-06 |
| TUCP_004610 | XLOC_203061 | ENSRNOT00000030850 | 0.955141752  | 1.33E-06 |
| TUCP_004610 | XLOC_203061 | ENSRNOT00000055540 | 0.962037248  | 5.83E-07 |
| TUCP_004610 | XLOC_203061 | ENSRNOT00000006752 | 0.959717533  | 7.81E-07 |
| TUCP_004610 | XLOC_203061 | ENSRNOT00000031672 | -0.957804345 | 9.81E-07 |
| TUCP_004610 | XLOC_203061 | ENSRNOT00000072771 | 0.957279573  | 1.04E-06 |
| TUCP_004610 | XLOC_203061 | ENSRNOT00000073370 | 0.974588887  | 8.00E-08 |
| TUCP_004610 | XLOC_203061 | ENSRNOT00000035320 | -0.95320305  | 1.63E-06 |
| TUCP_004610 | XLOC_203061 | ENSRNOT00000077999 | 0.959653744  | 7.87E-07 |
| TUCP_004610 | XLOC_203061 | ENSRNOT00000060002 | -0.959999721 | 7.54E-07 |
| TUCP_004610 | XLOC_203061 | ENSRNOT00000013286 | 0.974710855  | 7.81E-08 |
| TUCP_004610 | XLOC_203061 | ENSRNOT00000015188 | 0.965279819  | 3.75E-07 |
| TUCP_004610 | XLOC_203061 | ENSRNOT00000017648 | -0.956614061 | 1.13E-06 |
| TUCP_004610 | XLOC_203061 | ENSRNOT00000018488 | -0.963168216 | 5.02E-07 |
| TUCP_004610 | XLOC_203061 | ENSRNOT00000005686 | -0.966878262 | 2.97E-07 |
| TUCP_004610 | XLOC_203061 | ENSRNOT00000040629 | 0.95149726   | 1.95E-06 |
| TUCP_004610 | XLOC_203061 | ENSRNOT00000075934 | -0.954291636 | 1.45E-06 |

|             |             |                    |              |          |
|-------------|-------------|--------------------|--------------|----------|
| TUCP_004610 | XLOC_203061 | ENSRNOT00000030074 | 0.973674004  | 9.53E-08 |
| TUCP_004610 | XLOC_203061 | ENSRNOT00000010141 | 0.953269889  | 1.62E-06 |
| TUCP_004610 | XLOC_203061 | ENSRNOT00000067901 | -0.967252231 | 2.81E-07 |
| TUCP_004610 | XLOC_203061 | ENSRNOT00000067391 | -0.952438729 | 1.77E-06 |
| TUCP_004610 | XLOC_203061 | ENSRNOT00000009150 | 0.950721293  | 2.11E-06 |
| TUCP_004610 | XLOC_203061 | ENSRNOT00000084709 | 0.97258767   | 1.16E-07 |
| TUCP_004610 | XLOC_203061 | ENSRNOT00000029179 | -0.958866479 | 8.65E-07 |
| TUCP_004610 | XLOC_203061 | ENSRNOT00000009156 | 0.977814924  | 4.08E-08 |
| TUCP_004610 | XLOC_203061 | ENSRNOT00000026481 | 0.960521207  | 7.07E-07 |
| TUCP_004610 | XLOC_203061 | ENSRNOT00000082709 | -0.957302082 | 1.04E-06 |
| TUCP_004610 | XLOC_203061 | ENSRNOT00000001401 | 0.976928328  | 4.95E-08 |
| TUCP_004610 | XLOC_203061 | ENSRNOT00000016132 | -0.971683863 | 1.37E-07 |
| TUCP_004610 | XLOC_203061 | ENSRNOT00000013067 | -0.969515138 | 1.97E-07 |
| TUCP_004610 | XLOC_203061 | ENSRNOT00000016220 | -0.956419794 | 1.15E-06 |
| TUCP_004610 | XLOC_203061 | ENSRNOT00000002645 | -0.950457614 | 2.16E-06 |
| TUCP_004610 | XLOC_203061 | ENSRNOT00000016637 | -0.97828091  | 3.67E-08 |
| TUCP_004610 | XLOC_203061 | ENSRNOT00000079455 | 0.950128095  | 2.23E-06 |
| TUCP_004610 | XLOC_203061 | ENSRNOT00000054948 | 0.970961907  | 1.55E-07 |
| TUCP_004610 | XLOC_203061 | ENSRNOT00000074586 | -0.967569596 | 2.68E-07 |
| TUCP_004610 | XLOC_203061 | ENSRNOT00000045765 | -0.952704445 | 1.72E-06 |
| TUCP_004610 | XLOC_203061 | ENSRNOT00000088214 | 0.967657146  | 2.64E-07 |
| TUCP_004610 | XLOC_203061 | ENSRNOT00000011880 | 0.97309439   | 1.06E-07 |
| TUCP_004610 | XLOC_203061 | ENSRNOT00000003992 | -0.958266618 | 9.29E-07 |
| TUCP_004610 | XLOC_203061 | ENSRNOT00000050515 | 0.957786688  | 9.83E-07 |
| TUCP_004610 | XLOC_203061 | ENSRNOT00000077706 | 0.960573142  | 7.02E-07 |
| TUCP_004610 | XLOC_203061 | ENSRNOT00000089980 | -0.963956181 | 4.51E-07 |
| TUCP_004610 | XLOC_203061 | ENSRNOT00000078073 | -0.962616894 | 5.40E-07 |
| TUCP_004610 | XLOC_203061 | ENSRNOT00000055602 | -0.95688607  | 1.09E-06 |
| TUCP_004610 | XLOC_203061 | ENSRNOT00000087997 | 0.955167326  | 1.32E-06 |
| TUCP_004610 | XLOC_203061 | ENSRNOT00000055607 | -0.964999737 | 3.90E-07 |
| TUCP_004610 | XLOC_203061 | ENSRNOT00000023876 | 0.97579394   | 6.28E-08 |
| TUCP_004610 | XLOC_203061 | ENSRNOT00000033359 | 0.960755849  | 6.86E-07 |
| TUCP_004610 | XLOC_203061 | ENSRNOT00000091488 | 0.959942832  | 7.59E-07 |
| TUCP_004610 | XLOC_203061 | ENSRNOT00000049285 | -0.962745677 | 5.31E-07 |
| TUCP_004610 | XLOC_203061 | ENSRNOT00000015239 | -0.957155375 | 1.06E-06 |
| TUCP_004610 | XLOC_203061 | ENSRNOT00000025934 | -0.954974903 | 1.35E-06 |
| TUCP_004610 | XLOC_203061 | ENSRNOT00000074649 | 0.960893999  | 6.74E-07 |
| TUCP_004610 | XLOC_203061 | ENSRNOT00000035277 | 0.984888104  | 6.05E-09 |
| TUCP_004610 | XLOC_203061 | ENSRNOT00000077146 | -0.964054684 | 4.45E-07 |
| TUCP_004610 | XLOC_203061 | ENSRNOT00000044847 | -0.959983785 | 7.56E-07 |
| TUCP_004610 | XLOC_203061 | ENSRNOT00000006969 | 0.959301708  | 8.21E-07 |
| TUCP_004610 | XLOC_203061 | ENSRNOT00000086456 | -0.959263543 | 8.25E-07 |
| TUCP_004610 | XLOC_203061 | ENSRNOT00000075209 | -0.960175873 | 7.38E-07 |
| TUCP_004610 | XLOC_203061 | ENSRNOT00000043752 | -0.95606877  | 1.20E-06 |
| TUCP_004610 | XLOC_203061 | ENSRNOT00000019487 | 0.953188381  | 1.64E-06 |
| TUCP_004610 | XLOC_203061 | ENSRNOT00000066133 | -0.972926033 | 1.09E-07 |
| TUCP_004610 | XLOC_203061 | ENSRNOT00000048933 | -0.956149184 | 1.19E-06 |
| TUCP_004610 | XLOC_203061 | ENSRNOT00000035385 | 0.983285716  | 9.99E-09 |
| TUCP_004610 | XLOC_203061 | ENSRNOT00000040540 | 0.951639914  | 1.92E-06 |
| TUCP_004610 | XLOC_203061 | ENSRNOT00000071192 | -0.956694856 | 1.12E-06 |
| TUCP_004610 | XLOC_203061 | ENSRNOT00000080443 | 0.961970165  | 5.88E-07 |

|             |             |                    |              |          |
|-------------|-------------|--------------------|--------------|----------|
| TUCP_004610 | XLOC_203061 | ENSRNOT00000064535 | -0.969282948 | 2.05E-07 |
| TUCP_004610 | XLOC_203061 | ENSRNOT00000010748 | 0.954007298  | 1.50E-06 |
| TUCP_004610 | XLOC_203061 | ENSRNOT00000087408 | 0.981856662  | 1.50E-08 |
| TUCP_004610 | XLOC_203061 | ENSRNOT00000085295 | -0.964296801 | 4.30E-07 |
| TUCP_004610 | XLOC_203061 | ENSRNOT00000072632 | -0.955636541 | 1.26E-06 |
| TUCP_004610 | XLOC_203061 | ENSRNOT00000009749 | -0.953598512 | 1.57E-06 |
| TUCP_004610 | XLOC_203061 | ENSRNOT00000039102 | 0.97004017   | 1.81E-07 |
| TUCP_004610 | XLOC_203061 | ENSRNOT00000023807 | -0.950505303 | 2.15E-06 |
| TUCP_004610 | XLOC_203061 | ENSRNOT00000009742 | -0.96096797  | 6.68E-07 |
| TUCP_004610 | XLOC_203061 | ENSRNOT00000010983 | 0.954575904  | 1.41E-06 |
| TUCP_004610 | XLOC_203061 | ENSRNOT00000060698 | -0.957897703 | 9.71E-07 |
| TUCP_004610 | XLOC_203061 | ENSRNOT00000045946 | 0.958638685  | 8.89E-07 |
| TUCP_004610 | XLOC_203061 | ENSRNOT00000017998 | 0.979249336  | 2.93E-08 |
| TUCP_004610 | XLOC_203061 | ENSRNOT00000061100 | 0.960509756  | 7.08E-07 |
| TUCP_004610 | XLOC_203061 | ENSRNOT00000017995 | 0.955700882  | 1.25E-06 |
| TUCP_004610 | XLOC_203061 | ENSRNOT00000017776 | 0.959673316  | 7.85E-07 |
| TUCP_004610 | XLOC_203061 | ENSRNOT00000005144 | 0.953442024  | 1.59E-06 |
| TUCP_004610 | XLOC_203061 | ENSRNOT00000023628 | -0.955121481 | 1.33E-06 |
| TUCP_004610 | XLOC_203061 | ENSRNOT00000088679 | -0.952218867 | 1.81E-06 |
| TUCP_004610 | XLOC_203061 | ENSRNOT00000016776 | -0.958890629 | 8.63E-07 |
| TUCP_004610 | XLOC_203061 | ENSRNOT00000008987 | -0.95005701  | 2.25E-06 |
| TUCP_004610 | XLOC_203061 | ENSRNOT00000024253 | 0.982876339  | 1.13E-08 |
| TUCP_004610 | XLOC_203061 | ENSRNOT00000039607 | -0.969838096 | 1.87E-07 |
| TUCP_004610 | XLOC_203061 | ENSRNOT00000063930 | -0.96838211  | 2.36E-07 |
| TUCP_004610 | XLOC_203061 | ENSRNOT00000048613 | 0.961820803  | 5.99E-07 |
| TUCP_004610 | XLOC_203061 | ENSRNOT00000023437 | 0.953407967  | 1.60E-06 |
| TUCP_004610 | XLOC_203061 | ENSRNOT00000013025 | -0.969546308 | 1.96E-07 |
| TUCP_004610 | XLOC_203061 | ENSRNOT00000041237 | -0.953096088 | 1.65E-06 |
| TUCP_004610 | XLOC_203061 | ENSRNOT00000036051 | 0.966336749  | 3.22E-07 |
| TUCP_004610 | XLOC_203061 | ENSRNOT00000018074 | -0.96279378  | 5.27E-07 |
| TUCP_004610 | XLOC_203061 | ENSRNOT0000001679  | 0.95831824   | 9.24E-07 |
| TUCP_004610 | XLOC_203061 | ENSRNOT00000010418 | 0.962146346  | 5.74E-07 |
| TUCP_004610 | XLOC_203061 | ENSRNOT00000078884 | -0.957134205 | 1.06E-06 |
| TUCP_004610 | XLOC_203061 | ENSRNOT00000003326 | -0.958064894 | 9.52E-07 |
| TUCP_004610 | XLOC_203061 | ENSRNOT00000016306 | -0.954350895 | 1.45E-06 |
| TUCP_004610 | XLOC_203061 | ENSRNOT00000015476 | -0.964211245 | 4.35E-07 |
| TUCP_004610 | XLOC_203061 | ENSRNOT00000021621 | -0.950095797 | 2.24E-06 |
| TUCP_004610 | XLOC_203061 | ENSRNOT00000020207 | 0.950559593  | 2.14E-06 |
| TUCP_004610 | XLOC_203061 | ENSRNOT00000074683 | 0.973415235  | 1.00E-07 |
| TUCP_004610 | XLOC_203061 | ENSRNOT00000025079 | -0.96129829  | 6.41E-07 |
| TUCP_004610 | XLOC_203061 | ENSRNOT00000003950 | -0.960152681 | 7.40E-07 |
| TUCP_004610 | XLOC_203061 | ENSRNOT00000007824 | -0.954231613 | 1.46E-06 |
| TUCP_004610 | XLOC_203061 | ENSRNOT00000057898 | -0.955667509 | 1.25E-06 |
| TUCP_004610 | XLOC_203061 | ENSRNOT00000024677 | 0.979406192  | 2.82E-08 |
| TUCP_004610 | XLOC_203061 | ENSRNOT00000078680 | -0.954730199 | 1.39E-06 |
| TUCP_004610 | XLOC_203061 | ENSRNOT00000056100 | -0.959047005 | 8.47E-07 |
| TUCP_004610 | XLOC_203061 | ENSRNOT00000009817 | -0.951067346 | 2.03E-06 |
| TUCP_004610 | XLOC_203061 | ENSRNOT00000052002 | 0.958898416  | 8.62E-07 |
| TUCP_004610 | XLOC_203061 | ENSRNOT00000077231 | 0.951016408  | 2.05E-06 |
| TUCP_004610 | XLOC_203061 | ENSRNOT00000030798 | -0.957863267 | 9.75E-07 |
| TUCP_004610 | XLOC_203061 | ENSRNOT00000017486 | 0.969076278  | 2.11E-07 |

|             |             |                     |              |          |
|-------------|-------------|---------------------|--------------|----------|
| TUCP_004610 | XLOC_203061 | ENSRNOT00000071540  | 0.978786705  | 3.26E-08 |
| TUCP_004610 | XLOC_203061 | ENSRNOT00000091739  | -0.952657948 | 1.73E-06 |
| TUCP_004610 | XLOC_203061 | ENSRNOT00000072849  | -0.968655021 | 2.26E-07 |
| TUCP_004610 | XLOC_203061 | ENSRNOT00000073643  | -0.959981044 | 7.56E-07 |
| TUCP_004610 | XLOC_203061 | ENSRNOT00000078349  | -0.970159484 | 1.77E-07 |
| TUCP_004610 | XLOC_203061 | ENSRNOT00000022502  | -0.96493896  | 3.93E-07 |
| TUCP_004610 | XLOC_203061 | ENSRNOT00000026928  | -0.953220186 | 1.63E-06 |
| TUCP_004610 | XLOC_203061 | ENSRNOT00000049082  | -0.963602788 | 4.73E-07 |
| TUCP_004610 | XLOC_203061 | ENSRNOT00000021802  | 0.954224476  | 1.47E-06 |
| TUCP_004610 | XLOC_203061 | ENSRNOT00000021803  | -0.952863454 | 1.69E-06 |
| TUCP_004610 | XLOC_203061 | ENSRNOT00000082627  | -0.96213129  | 5.75E-07 |
| TUCP_004610 | XLOC_203061 | ENSRNOT00000018122  | 0.977200979  | 4.67E-08 |
| TUCP_004610 | XLOC_203061 | ENSRNOT00000003787  | -0.955311738 | 1.30E-06 |
| TUCP_004610 | XLOC_203061 | ENSRNOT00000023262  | -0.968975758 | 2.15E-07 |
| TUCP_004610 | XLOC_203061 | ENSRNOT00000059246  | 0.95486061   | 1.37E-06 |
| TUCP_004610 | XLOC_203061 | ENSRNOT00000077908  | 0.973821247  | 9.27E-08 |
| TUCP_004610 | XLOC_203061 | ENSRNOT00000025104  | -0.952165947 | 1.82E-06 |
| TUCP_004610 | XLOC_203061 | ENSRNOT00000091427  | -0.950132766 | 2.23E-06 |
| TUCP_004610 | XLOC_203061 | ENSRNOT00000026312  | 0.967259596  | 2.80E-07 |
| TUCP_004610 | XLOC_203061 | ENSRNOT00000005604  | 0.966508297  | 3.14E-07 |
| TUCP_004610 | XLOC_203061 | ENSRNOT00000068381  | 0.975187117  | 7.11E-08 |
| TUCP_004610 | XLOC_203061 | ENSRNOT00000068026  | -0.961148487 | 6.53E-07 |
| TUCP_004610 | XLOC_203061 | ENSRNOT00000026089  | 0.958020385  | 9.57E-07 |
| TUCP_004610 | XLOC_203061 | ENSRNOT00000009634  | -0.958390282 | 9.16E-07 |
| TUCP_004610 | XLOC_203061 | ENSRNOT00000085621  | 0.965994176  | 3.38E-07 |
| TUCP_004610 | XLOC_203061 | ENSRNOT00000090456  | 0.961090225  | 6.58E-07 |
| TUCP_004610 | XLOC_203061 | ENSRNOT00000008883  | 0.951803729  | 1.89E-06 |
| TUCP_004610 | XLOC_203061 | ENSRNOT00000058382  | 0.951874856  | 1.87E-06 |
| TUCP_004610 | XLOC_203061 | ENSRNOT00000028695  | -0.961918309 | 5.92E-07 |
| TUCP_004610 | XLOC_203061 | ENSRNOT00000026531  | -0.971766683 | 1.35E-07 |
| TUCP_004610 | XLOC_203061 | ENSRNOT00000035605  | 0.955159894  | 1.32E-06 |
| TUCP_004610 | XLOC_203061 | ENSRNOT00000005172  | 0.95398536   | 1.50E-06 |
| TUCP_004610 | XLOC_203061 | ENSRNOT00000005170  | -0.951097067 | 2.03E-06 |
| TUCP_004610 | XLOC_203061 | ENSRNOT00000010463  | 0.951783788  | 1.89E-06 |
| TUCP_004610 | XLOC_203061 | ENSRNOT00000071897  | -0.955825105 | 1.23E-06 |
| TUCP_004610 | XLOC_203061 | ENSRNOT00000000898  | 0.969947295  | 1.84E-07 |
| TUCP_004610 | XLOC_203061 | ENSRNOT000000081725 | 0.95520505   | 1.32E-06 |
| TUCP_004610 | XLOC_203061 | ENSRNOT00000005459  | 0.952050134  | 1.84E-06 |
| TUCP_004610 | XLOC_203061 | ENSRNOT00000009135  | 0.956412613  | 1.15E-06 |
| TUCP_004610 | XLOC_203061 | ENSRNOT00000002771  | 0.952716637  | 1.72E-06 |
| TUCP_004610 | XLOC_203061 | ENSRNOT00000024452  | -0.962149944 | 5.74E-07 |
| TUCP_004610 | XLOC_203061 | ENSRNOT00000028888  | 0.976665828  | 5.24E-08 |
| TUCP_004610 | XLOC_203061 | ENSRNOT00000018998  | 0.955049161  | 1.34E-06 |
| TUCP_004610 | XLOC_203061 | ENSRNOT00000066032  | 0.971957954  | 1.30E-07 |
| TUCP_004610 | XLOC_203061 | ENSRNOT00000025037  | 0.955431203  | 1.28E-06 |
| TUCP_004610 | XLOC_203061 | ENSRNOT00000011572  | -0.966440278 | 3.17E-07 |
| TUCP_004610 | XLOC_203061 | ENSRNOT00000034411  | 0.95631817   | 1.16E-06 |
| TUCP_004610 | XLOC_203061 | ENSRNOT00000001607  | 0.968245657  | 2.41E-07 |
| TUCP_004610 | XLOC_203061 | ENSRNOT00000075630  | -0.95330762  | 1.62E-06 |
| TUCP_004610 | XLOC_203061 | ENSRNOT00000085971  | -0.957059644 | 1.07E-06 |
| TUCP_004610 | XLOC_203061 | ENSRNOT00000015898  | 0.958128857  | 9.45E-07 |

|             |             |                    |              |          |
|-------------|-------------|--------------------|--------------|----------|
| TUCP_004610 | XLOC_203061 | ENSRNOT00000076300 | -0.961117561 | 6.56E-07 |
| TUCP_004610 | XLOC_203061 | ENSRNOT00000077152 | 0.952821529  | 1.70E-06 |
| TUCP_004610 | XLOC_203061 | ENSRNOT00000015537 | 0.953166416  | 1.64E-06 |
| TUCP_004610 | XLOC_203061 | ENSRNOT00000019820 | 0.964468249  | 4.20E-07 |
| TUCP_004610 | XLOC_203061 | ENSRNOT00000015946 | -0.953646296 | 1.56E-06 |
| TUCP_004610 | XLOC_203061 | ENSRNOT00000004172 | 0.955045227  | 1.34E-06 |
| TUCP_004610 | XLOC_203061 | ENSRNOT00000023965 | -0.963268834 | 4.95E-07 |
| TUCP_004610 | XLOC_203061 | ENSRNOT00000085279 | 0.97689417   | 4.99E-08 |
| TUCP_004610 | XLOC_203061 | ENSRNOT00000015769 | 0.963875969  | 4.56E-07 |
| TUCP_004610 | XLOC_203061 | ENSRNOT00000005381 | 0.951312851  | 1.98E-06 |
| TUCP_004610 | XLOC_203061 | ENSRNOT00000082904 | 0.954670777  | 1.40E-06 |
| TUCP_004610 | XLOC_203061 | ENSRNOT00000015318 | -0.954822264 | 1.37E-06 |
| TUCP_004610 | XLOC_203061 | ENSRNOT00000015223 | 0.965529297  | 3.62E-07 |
| TUCP_004610 | XLOC_203061 | ENSRNOT00000028907 | 0.979612858  | 2.68E-08 |
| TUCP_004610 | XLOC_203061 | ENSRNOT00000010224 | 0.983583087  | 9.14E-09 |
| TUCP_004610 | XLOC_203061 | ENSRNOT00000035309 | -0.963698584 | 4.67E-07 |
| TUCP_004610 | XLOC_203061 | ENSRNOT00000066211 | -0.952669047 | 1.73E-06 |
| TUCP_004610 | XLOC_203061 | ENSRNOT00000017687 | -0.965879758 | 3.44E-07 |
| TUCP_004610 | XLOC_203061 | ENSRNOT00000015006 | 0.955447156  | 1.28E-06 |
| TUCP_004610 | XLOC_203061 | ENSRNOT00000007350 | 0.958823849  | 8.70E-07 |
| TUCP_004610 | XLOC_203061 | ENSRNOT00000004400 | 0.964526969  | 4.17E-07 |
| TUCP_004610 | XLOC_203061 | ENSRNOT00000083578 | 0.97599016   | 6.04E-08 |
| TUCP_004610 | XLOC_203061 | ENSRNOT00000000181 | 0.958857158  | 8.66E-07 |
| TUCP_004610 | XLOC_203061 | ENSRNOT00000090499 | -0.952919414 | 1.68E-06 |
| TUCP_004610 | XLOC_203061 | ENSRNOT00000005658 | -0.95553309  | 1.27E-06 |
| TUCP_004610 | XLOC_203061 | ENSRNOT00000045326 | 0.954656379  | 1.40E-06 |
| TUCP_004610 | XLOC_203061 | ENSRNOT00000045833 | 0.980256381  | 2.29E-08 |
| TUCP_004610 | XLOC_203061 | ENSRNOT00000074023 | 0.966215269  | 3.28E-07 |
| TUCP_004610 | XLOC_203061 | ENSRNOT00000019465 | -0.957263838 | 1.04E-06 |
| TUCP_004610 | XLOC_203061 | ENSRNOT00000009073 | -0.950036182 | 2.25E-06 |
| TUCP_004610 | XLOC_203061 | ENSRNOT00000024710 | -0.955999417 | 1.21E-06 |
| TUCP_004610 | XLOC_203061 | ENSRNOT00000013516 | 0.980026445  | 2.42E-08 |
| TUCP_004610 | XLOC_203061 | ENSRNOT00000016012 | -0.958002128 | 9.59E-07 |
| TUCP_004610 | XLOC_203061 | ENSRNOT00000012060 | 0.963880572  | 4.56E-07 |
| TUCP_004610 | XLOC_203061 | ENSRNOT00000023037 | 0.958797073  | 8.73E-07 |
| TUCP_004610 | XLOC_203061 | ENSRNOT00000034282 | 0.958764257  | 8.76E-07 |
| TUCP_004610 | XLOC_203061 | ENSRNOT00000018028 | -0.963135153 | 5.04E-07 |
| TUCP_004610 | XLOC_203061 | ENSRNOT00000022924 | -0.975081476 | 7.26E-08 |
| TUCP_004610 | XLOC_203061 | ENSRNOT00000090461 | 0.978062979  | 3.86E-08 |
| TUCP_004610 | XLOC_203061 | ENSRNOT00000073983 | 0.953024378  | 1.66E-06 |
| TUCP_004610 | XLOC_203061 | ENSRNOT00000010783 | -0.960213264 | 7.34E-07 |
| TUCP_004610 | XLOC_203061 | ENSRNOT00000026075 | 0.955300425  | 1.30E-06 |
| TUCP_004610 | XLOC_203061 | ENSRNOT00000016330 | -0.960846341 | 6.79E-07 |
| TUCP_004610 | XLOC_203061 | ENSRNOT00000036931 | -0.957241178 | 1.05E-06 |
| TUCP_004610 | XLOC_203061 | ENSRNOT00000016389 | -0.950043882 | 2.25E-06 |
| TUCP_004610 | XLOC_203061 | ENSRNOT00000011832 | -0.965711924 | 3.52E-07 |
| TUCP_004610 | XLOC_203061 | ENSRNOT00000021030 | -0.950194789 | 2.22E-06 |
| TUCP_004610 | XLOC_203061 | ENSRNOT00000006835 | 0.951027305  | 2.04E-06 |
| TUCP_004610 | XLOC_203061 | ENSRNOT00000077727 | -0.968451012 | 2.33E-07 |
| TUCP_004610 | XLOC_203061 | ENSRNOT00000044346 | -0.972369909 | 1.21E-07 |
| TUCP_004610 | XLOC_203061 | ENSRNOT00000068745 | 0.95435935   | 1.44E-06 |

|             |             |                    |              |          |
|-------------|-------------|--------------------|--------------|----------|
| TUCP_004610 | XLOC_203061 | ENSRNOT00000091637 | 0.955328079  | 1.30E-06 |
| TUCP_004610 | XLOC_203061 | ENSRNOT00000092068 | 0.955511875  | 1.27E-06 |
| TUCP_004610 | XLOC_203061 | ENSRNOT00000013867 | 0.959651156  | 7.87E-07 |
| TUCP_004610 | XLOC_203061 | ENSRNOT00000003265 | 0.951178815  | 2.01E-06 |
| TUCP_004610 | XLOC_203061 | ENSRNOT00000022190 | -0.958014911 | 9.57E-07 |
| TUCP_004610 | XLOC_203061 | ENSRNOT00000067739 | -0.959187953 | 8.33E-07 |
| TUCP_004610 | XLOC_203061 | ENSRNOT00000030782 | -0.965037767 | 3.88E-07 |
| TUCP_004610 | XLOC_203061 | ENSRNOT0000007882  | -0.952809444 | 1.70E-06 |
| TUCP_004610 | XLOC_203061 | ENSRNOT00000073919 | 0.979363687  | 2.85E-08 |
| TUCP_004610 | XLOC_203061 | ENSRNOT00000036658 | -0.958589367 | 8.95E-07 |
| TUCP_004610 | XLOC_203061 | ENSRNOT00000089611 | 0.95667565   | 1.12E-06 |
| TUCP_004610 | XLOC_203061 | ENSRNOT00000056166 | 0.951646644  | 1.92E-06 |
| TUCP_004610 | XLOC_203061 | ENSRNOT00000086590 | 0.966676731  | 3.06E-07 |
| TUCP_004610 | XLOC_203061 | ENSRNOT00000020155 | 0.953813694  | 1.53E-06 |
| TUCP_004610 | XLOC_203061 | ENSRNOT00000072357 | -0.961523443 | 6.23E-07 |
| TUCP_004610 | XLOC_203061 | ENSRNOT00000022676 | -0.952303496 | 1.79E-06 |
| TUCP_004610 | XLOC_203061 | ENSRNOT00000025913 | -0.962322809 | 5.61E-07 |
| TUCP_004610 | XLOC_203061 | ENSRNOT00000005910 | -0.962315686 | 5.62E-07 |
| TUCP_004610 | XLOC_203061 | ENSRNOT00000055886 | 0.963727322  | 4.65E-07 |
| TUCP_004610 | XLOC_203061 | ENSRNOT00000016722 | 0.963437829  | 4.84E-07 |
| TUCP_004610 | XLOC_203061 | ENSRNOT00000014832 | -0.952481703 | 1.76E-06 |
| TUCP_004610 | XLOC_203061 | ENSRNOT00000028685 | 0.952133126  | 1.83E-06 |
| TUCP_004610 | XLOC_203061 | ENSRNOT00000000013 | 0.960929599  | 6.71E-07 |
| TUCP_004610 | XLOC_203061 | ENSRNOT00000080222 | -0.96908947  | 2.11E-07 |
| TUCP_004610 | XLOC_203061 | ENSRNOT00000025523 | 0.950243891  | 2.21E-06 |
| TUCP_004610 | XLOC_203061 | ENSRNOT00000037955 | -0.95362374  | 1.56E-06 |
| TUCP_004610 | XLOC_203061 | ENSRNOT00000055582 | 0.9604676    | 7.12E-07 |
| TUCP_004610 | XLOC_203061 | ENSRNOT0000007276  | -0.957178592 | 1.06E-06 |
| TUCP_004610 | XLOC_203061 | ENSRNOT00000004999 | 0.979522776  | 2.74E-08 |
| TUCP_004610 | XLOC_203061 | ENSRNOT00000013463 | 0.960923413  | 6.72E-07 |
| TUCP_004610 | XLOC_203061 | ENSRNOT00000019554 | 0.958370476  | 9.18E-07 |
| TUCP_004610 | XLOC_203061 | ENSRNOT00000047663 | -0.968759495 | 2.22E-07 |
| TUCP_004610 | XLOC_203061 | ENSRNOT00000000532 | -0.952760549 | 1.71E-06 |
| TUCP_004610 | XLOC_203061 | ENSRNOT00000029202 | -0.968321665 | 2.38E-07 |
| TUCP_004610 | XLOC_203061 | ENSRNOT00000002313 | -0.954166477 | 1.47E-06 |
| TUCP_004610 | XLOC_203061 | ENSRNOT00000025794 | -0.951763157 | 1.90E-06 |
| TUCP_004610 | XLOC_203061 | ENSRNOT00000063951 | 0.964107283  | 4.42E-07 |
| TUCP_004610 | XLOC_203061 | ENSRNOT00000058111 | -0.961271018 | 6.43E-07 |
| TUCP_004610 | XLOC_203061 | ENSRNOT00000009994 | -0.965531506 | 3.62E-07 |
| TUCP_004610 | XLOC_203061 | ENSRNOT00000078994 | 0.954319572  | 1.45E-06 |
| TUCP_004610 | XLOC_203061 | ENSRNOT00000002114 | -0.964099337 | 4.42E-07 |
| TUCP_004610 | XLOC_203061 | ENSRNOT00000024841 | -0.954865679 | 1.37E-06 |
| TUCP_004610 | XLOC_203061 | ENSRNOT00000009462 | 0.958267496  | 9.29E-07 |
| TUCP_004610 | XLOC_203061 | ENSRNOT00000046215 | -0.956039841 | 1.20E-06 |
| TUCP_004610 | XLOC_203061 | ENSRNOT00000000083 | -0.952260419 | 1.80E-06 |
| TUCP_004610 | XLOC_203061 | ENSRNOT00000087838 | -0.967340648 | 2.77E-07 |
| TUCP_004610 | XLOC_203061 | ENSRNOT00000014124 | 0.9533367    | 1.61E-06 |
| TUCP_004610 | XLOC_203061 | ENSRNOT00000013632 | 0.959931859  | 7.60E-07 |
| TUCP_004610 | XLOC_203061 | ENSRNOT00000028225 | 0.972600895  | 1.16E-07 |
| TUCP_004610 | XLOC_203061 | ENSRNOT00000019172 | -0.960868565 | 6.77E-07 |
| TUCP_004610 | XLOC_203061 | ENSRNOT00000015495 | -0.953535794 | 1.58E-06 |



|             |             |                    |              |          |
|-------------|-------------|--------------------|--------------|----------|
| TUCP_004610 | XLOC_203061 | ENSRNOT00000021216 | 0.964203363  | 4.36E-07 |
| TUCP_004610 | XLOC_203061 | ENSRNOT00000019911 | -0.952797835 | 1.70E-06 |
| TUCP_004610 | XLOC_203061 | ENSRNOT00000040393 | 0.950799623  | 2.09E-06 |
| TUCP_004610 | XLOC_203061 | ENSRNOT00000025097 | 0.96159909   | 6.17E-07 |
| TUCP_004610 | XLOC_203061 | ENSRNOT00000016372 | -0.964105679 | 4.42E-07 |
| TUCP_004610 | XLOC_203061 | ENSRNOT00000025314 | 0.965885045  | 3.44E-07 |
| TUCP_004610 | XLOC_203061 | ENSRNOT00000064700 | 0.959263505  | 8.25E-07 |
| TUCP_004610 | XLOC_203061 | ENSRNOT00000036613 | -0.951121601 | 2.02E-06 |
| TUCP_004610 | XLOC_203061 | ENSRNOT00000025705 | 0.958514041  | 9.03E-07 |
| TUCP_004610 | XLOC_203061 | ENSRNOT00000065722 | -0.965240623 | 3.77E-07 |
| TUCP_004610 | XLOC_203061 | ENSRNOT00000023977 | -0.960477027 | 7.11E-07 |
| TUCP_004610 | XLOC_203061 | ENSRNOT00000027407 | 0.950455528  | 2.16E-06 |
| TUCP_004610 | XLOC_203061 | ENSRNOT00000020357 | 0.960803091  | 6.82E-07 |
| TUCP_004610 | XLOC_203061 | ENSRNOT00000020051 | 0.975670103  | 6.45E-08 |
| TUCP_004610 | XLOC_203061 | ENSRNOT00000026279 | -0.958741657 | 8.78E-07 |
| TUCP_004610 | XLOC_203061 | ENSRNOT00000087062 | 0.986692172  | 3.21E-09 |
| TUCP_004610 | XLOC_203061 | ENSRNOT00000003087 | 0.952732735  | 1.72E-06 |
| TUCP_004610 | XLOC_203061 | ENSRNOT00000091751 | 0.955683101  | 1.25E-06 |
| TUCP_004610 | XLOC_203061 | ENSRNOT00000049459 | -0.951895719 | 1.87E-06 |
| TUCP_004610 | XLOC_203061 | ENSRNOT00000087011 | -0.956958225 | 1.08E-06 |
| TUCP_004610 | XLOC_203061 | ENSRNOT00000017571 | -0.962218103 | 5.69E-07 |
| TUCP_004610 | XLOC_203061 | ENSRNOT00000013851 | -0.966438691 | 3.17E-07 |
| TUCP_004610 | XLOC_203061 | ENSRNOT00000003012 | -0.956347601 | 1.16E-06 |
| TUCP_004610 | XLOC_203061 | ENSRNOT00000001507 | 0.969319006  | 2.03E-07 |
| TUCP_004610 | XLOC_203061 | ENSRNOT00000087604 | 0.9559474    | 1.21E-06 |
| TUCP_004610 | XLOC_203061 | ENSRNOT00000018584 | 0.950491299  | 2.16E-06 |
| TUCP_004610 | XLOC_203061 | ENSRNOT00000091527 | -0.959530662 | 7.99E-07 |
| TUCP_004610 | XLOC_203061 | ENSRNOT00000005620 | -0.95114858  | 2.02E-06 |
| TUCP_004610 | XLOC_203061 | ENSRNOT00000039177 | -0.967158565 | 2.85E-07 |
| TUCP_004610 | XLOC_203061 | ENSRNOT00000017271 | 0.975731509  | 6.37E-08 |
| TUCP_004610 | XLOC_203061 | ENSRNOT00000017373 | 0.950734257  | 2.10E-06 |
| TUCP_004610 | XLOC_203061 | ENSRNOT00000030082 | 0.978231387  | 3.71E-08 |
| TUCP_004610 | XLOC_203061 | ENSRNOT00000000477 | -0.954288173 | 1.46E-06 |
| TUCP_004610 | XLOC_203061 | ENSRNOT00000000577 | 0.96731287   | 2.78E-07 |
| TUCP_004610 | XLOC_203061 | ENSRNOT00000075424 | 0.958415297  | 9.13E-07 |
| TUCP_004610 | XLOC_203061 | ENSRNOT00000004007 | -0.950185465 | 2.22E-06 |
| TUCP_004610 | XLOC_203061 | ENSRNOT00000083968 | -0.978078436 | 3.84E-08 |
| TUCP_004610 | XLOC_203061 | ENSRNOT00000033806 | 0.952448956  | 1.77E-06 |
| TUCP_004610 | XLOC_203061 | ENSRNOT00000026831 | 0.969687599  | 1.92E-07 |
| TUCP_004610 | XLOC_203061 | ENSRNOT00000068452 | 0.960529083  | 7.06E-07 |
| TUCP_004610 | XLOC_203061 | ENSRNOT00000007821 | 0.959293779  | 8.22E-07 |
| TUCP_004610 | XLOC_203061 | ENSRNOT00000020892 | -0.950600205 | 2.13E-06 |
| TUCP_004610 | XLOC_203061 | ENSRNOT00000011956 | 0.954114125  | 1.48E-06 |
| TUCP_004610 | XLOC_203061 | ENSRNOT00000024119 | 0.969915377  | 1.85E-07 |
| TUCP_004610 | XLOC_203061 | ENSRNOT00000006824 | -0.954569349 | 1.41E-06 |
| TUCP_004610 | XLOC_203061 | ENSRNOT00000024110 | 0.953460228  | 1.59E-06 |
| TUCP_004610 | XLOC_203061 | ENSRNOT00000086260 | -0.965907173 | 3.43E-07 |
| TUCP_004610 | XLOC_203061 | ENSRNOT00000078743 | -0.952526998 | 1.75E-06 |
| TUCP_004610 | XLOC_203061 | ENSRNOT00000010683 | -0.955658847 | 1.25E-06 |
| TUCP_004610 | XLOC_203061 | ENSRNOT00000001158 | 0.953468135  | 1.59E-06 |
| TUCP_004610 | XLOC_203061 | ENSRNOT00000050119 | -0.950121418 | 2.24E-06 |

|             |             |                    |              |          |
|-------------|-------------|--------------------|--------------|----------|
| TUCP_004610 | XLOC_203061 | ENSRNOT00000021548 | -0.952126382 | 1.83E-06 |
| TUCP_004610 | XLOC_203061 | ENSRNOT00000036666 | 0.958062997  | 9.52E-07 |
| TUCP_004610 | XLOC_203061 | ENSRNOT00000031261 | 0.963262083  | 4.96E-07 |
| TUCP_004610 | XLOC_203061 | ENSRNOT00000019816 | -0.959862257 | 7.67E-07 |
| TUCP_004610 | XLOC_203061 | ENSRNOT00000020383 | 0.960831203  | 6.80E-07 |
| TUCP_004610 | XLOC_203061 | ENSRNOT00000015518 | -0.950375617 | 2.18E-06 |
| TUCP_004610 | XLOC_203061 | ENSRNOT00000056015 | -0.960906352 | 6.73E-07 |
| TUCP_004610 | XLOC_203061 | ENSRNOT00000090784 | -0.962450881 | 5.52E-07 |
| TUCP_004610 | XLOC_203061 | ENSRNOT00000020795 | 0.959314334  | 8.20E-07 |
| TUCP_004610 | XLOC_203061 | ENSRNOT00000087502 | 0.958253583  | 9.31E-07 |
| TUCP_004610 | XLOC_203061 | ENSRNOT00000041106 | 0.971716156  | 1.36E-07 |
| TUCP_004610 | XLOC_203061 | ENSRNOT00000012424 | 0.955213363  | 1.32E-06 |
| TUCP_004610 | XLOC_203061 | ENSRNOT00000002974 | 0.975412816  | 6.79E-08 |
| TUCP_004610 | XLOC_203061 | ENSRNOT00000000658 | 0.950147476  | 2.23E-06 |
| TUCP_004610 | XLOC_203061 | ENSRNOT00000067610 | -0.956016779 | 1.20E-06 |
| TUCP_004610 | XLOC_203061 | ENSRNOT00000020005 | 0.962343309  | 5.60E-07 |
| TUCP_004610 | XLOC_203061 | ENSRNOT00000083632 | -0.95581271  | 1.23E-06 |
| TUCP_004610 | XLOC_203061 | ENSRNOT00000086122 | 0.958445604  | 9.10E-07 |
| TUCP_004610 | XLOC_203061 | ENSRNOT00000017504 | 0.958993964  | 8.52E-07 |
| TUCP_004610 | XLOC_203061 | ENSRNOT00000087346 | 0.950566841  | 2.14E-06 |
| TUCP_004610 | XLOC_203061 | ENSRNOT00000023763 | -0.961819035 | 5.99E-07 |
| TUCP_004610 | XLOC_203061 | ENSRNOT00000044009 | 0.950328205  | 2.19E-06 |
| TUCP_004610 | XLOC_203061 | ENSRNOT00000010993 | 0.964851461  | 3.98E-07 |
| TUCP_004610 | XLOC_203061 | ENSRNOT00000059181 | 0.970684493  | 1.62E-07 |
| TUCP_004610 | XLOC_203061 | ENSRNOT00000003691 | -0.963704387 | 4.67E-07 |
| TUCP_004610 | XLOC_203061 | ENSRNOT00000003690 | 0.954096251  | 1.49E-06 |
| TUCP_004610 | XLOC_203061 | ENSRNOT00000017765 | 0.950865422  | 2.08E-06 |
| TUCP_004610 | XLOC_203061 | ENSRNOT00000017761 | 0.962347415  | 5.59E-07 |
| TUCP_004610 | XLOC_203061 | ENSRNOT00000023543 | -0.965279923 | 3.75E-07 |
| TUCP_004610 | XLOC_203061 | ENSRNOT00000001923 | 0.958908195  | 8.61E-07 |
| TUCP_004610 | XLOC_203061 | ENSRNOT00000025887 | -0.96759336  | 2.67E-07 |
| TUCP_004610 | XLOC_203061 | ENSRNOT00000005405 | 0.969106261  | 2.10E-07 |
| TUCP_004610 | XLOC_203061 | ENSRNOT00000006366 | -0.972446932 | 1.19E-07 |
| TUCP_004610 | XLOC_203061 | ENSRNOT00000018634 | -0.950193578 | 2.22E-06 |
| TUCP_004610 | XLOC_203061 | ENSRNOT00000079264 | -0.952862657 | 1.69E-06 |
| TUCP_004610 | XLOC_203061 | ENSRNOT00000085517 | 0.953304063  | 1.62E-06 |
| TUCP_004610 | XLOC_203061 | ENSRNOT00000037405 | 0.978681448  | 3.35E-08 |
| TUCP_004610 | XLOC_203061 | ENSRNOT00000012625 | -0.954964848 | 1.35E-06 |
| TUCP_004610 | XLOC_203061 | ENSRNOT00000080677 | -0.952783316 | 1.71E-06 |
| TUCP_004610 | XLOC_203061 | ENSRNOT00000025460 | 0.976457502  | 5.48E-08 |
| TUCP_004610 | XLOC_203061 | ENSRNOT00000026760 | -0.97517642  | 7.12E-08 |
| TUCP_004610 | XLOC_203061 | ENSRNOT00000037588 | -0.957490839 | 1.02E-06 |
| TUCP_004610 | XLOC_203061 | ENSRNOT00000027360 | -0.960831816 | 6.80E-07 |
| TUCP_004610 | XLOC_203061 | ENSRNOT00000067503 | 0.952236137  | 1.81E-06 |
| TUCP_004610 | XLOC_203061 | ENSRNOT00000044486 | -0.955149253 | 1.33E-06 |
| TUCP_004610 | XLOC_203061 | ENSRNOT00000047210 | 0.953423507  | 1.60E-06 |
| TUCP_004610 | XLOC_203061 | ENSRNOT00000024011 | 0.972703912  | 1.14E-07 |
| TUCP_000235 | XLOC_007153 | ENSRNOT00000024186 | 0.983200502  | 1.02E-08 |
| TUCP_000235 | XLOC_007153 | ENSRNOT00000074753 | 0.998182349  | 1.56E-13 |
| TUCP_000235 | XLOC_007153 | ENSRNOT00000004876 | 0.959071443  | 8.44E-07 |
| TUCP_000235 | XLOC_007153 | ENSRNOT00000041904 | 1            | 0        |

|             |             |                    |             |          |
|-------------|-------------|--------------------|-------------|----------|
| TUCP_000235 | XLOC_007153 | ENSRNOT00000083487 | 0.989515314 | 9.80E-10 |
| TUCP_000235 | XLOC_007153 | ENSRNOT00000077990 | 1           | 0        |
| TUCP_000235 | XLOC_007153 | ENSRNOT00000038826 | 0.99977672  | 4.37E-18 |
| TUCP_000235 | XLOC_007153 | ENSRNOT00000046842 | 0.973644314 | 9.58E-08 |
| TUCP_000235 | XLOC_007153 | ENSRNOT00000037169 | 0.980329406 | 2.24E-08 |
| TUCP_000235 | XLOC_007153 | ENSRNOT00000021243 | 0.987425406 | 2.42E-09 |
| TUCP_000235 | XLOC_007153 | ENSRNOT00000060250 | 0.999933853 | 9.97E-21 |
| TUCP_000235 | XLOC_007153 | ENSRNOT00000091934 | 1           | 0        |
| TUCP_000235 | XLOC_007153 | ENSRNOT00000046585 | 0.982941597 | 1.11E-08 |
| TUCP_000235 | XLOC_007153 | ENSRNOT00000080794 | 0.990839253 | 5.00E-10 |
| TUCP_000235 | XLOC_007153 | ENSRNOT00000014456 | 0.991697153 | 3.06E-10 |
| TUCP_000235 | XLOC_007153 | ENSRNOT00000031205 | 0.991394766 | 3.66E-10 |
| TUCP_000235 | XLOC_007153 | ENSRNOT00000044145 | 1           | 0        |
| TUCP_000235 | XLOC_007153 | ENSRNOT00000088381 | 0.989013276 | 1.24E-09 |
| TUCP_000235 | XLOC_007153 | ENSRNOT00000011743 | 0.98678427  | 3.11E-09 |
| TUCP_000235 | XLOC_007153 | ENSRNOT00000089929 | 1           | 0        |
| TUCP_000235 | XLOC_007153 | ENSRNOT00000088624 | 1           | 0        |
| TUCP_000235 | XLOC_007153 | ENSRNOT00000085659 | 0.989908621 | 8.10E-10 |
| TUCP_000235 | XLOC_007153 | ENSRNOT00000015866 | 0.994066664 | 5.73E-11 |
| TUCP_000235 | XLOC_007153 | ENSRNOT00000078633 | 1           | 0        |
| TUCP_000235 | XLOC_007153 | ENSRNOT00000034907 | 0.995318542 | 1.76E-11 |
| TUCP_000235 | XLOC_007153 | ENSRNOT00000093230 | 0.958295175 | 9.26E-07 |
| TUCP_000235 | XLOC_007153 | ENSRNOT00000051835 | 1           | 0        |
| TUCP_000235 | XLOC_007153 | ENSRNOT00000079087 | 1           | 0        |
| TUCP_000235 | XLOC_007153 | ENSRNOT00000037206 | 1           | 0        |
| TUCP_000235 | XLOC_007153 | ENSRNOT00000083261 | 0.970991658 | 1.54E-07 |
| TUCP_000235 | XLOC_007153 | ENSRNOT00000080590 | 0.999889216 | 1.31E-19 |
| TUCP_000235 | XLOC_007153 | ENSRNOT00000027552 | 0.999801024 | 2.46E-18 |
| TUCP_000235 | XLOC_007153 | ENSRNOT00000077014 | 0.995074376 | 2.26E-11 |
| TUCP_000235 | XLOC_007153 | ENSRNOT00000080453 | 0.99994332  | 4.61E-21 |
| TUCP_000235 | XLOC_007153 | ENSRNOT00000089057 | 0.968243551 | 2.41E-07 |
| TUCP_000235 | XLOC_007153 | ENSRNOT00000066839 | 0.991868612 | 2.76E-10 |
| TUCP_000235 | XLOC_007153 | ENSRNOT00000061284 | 0.955566942 | 1.27E-06 |
| TUCP_000235 | XLOC_007153 | ENSRNOT00000013423 | 0.959677621 | 7.84E-07 |
| TUCP_000235 | XLOC_007153 | ENSRNOT00000071884 | 0.974769955 | 7.72E-08 |
| TUCP_000235 | XLOC_007153 | ENSRNOT00000004128 | 0.961829362 | 5.99E-07 |
| TUCP_000235 | XLOC_007153 | ENSRNOT00000026316 | 0.964408046 | 4.24E-07 |
| TUCP_000235 | XLOC_007153 | ENSRNOT00000057729 | 0.999384184 | 6.97E-16 |
| TUCP_000235 | XLOC_007153 | ENSRNOT00000078663 | 0.975192577 | 7.10E-08 |
| TUCP_000235 | XLOC_007153 | ENSRNOT00000064250 | 0.983131977 | 1.05E-08 |
| TUCP_000235 | XLOC_007153 | ENSRNOT00000021608 | 0.965228881 | 3.78E-07 |
| TUCP_000235 | XLOC_007153 | ENSRNOT00000029634 | 0.995816134 | 1.00E-11 |
| TUCP_000235 | XLOC_007153 | ENSRNOT00000093579 | 0.958564264 | 8.97E-07 |
| TUCP_000235 | XLOC_007153 | ENSRNOT00000086349 | 0.957242511 | 1.05E-06 |
| TUCP_000235 | XLOC_007153 | ENSRNOT00000065460 | 1           | 0        |
| TUCP_000235 | XLOC_007153 | ENSRNOT00000003817 | 0.996778712 | 2.72E-12 |
| TUCP_000235 | XLOC_007153 | ENSRNOT00000016713 | 1           | 0        |
| TUCP_000235 | XLOC_007153 | ENSRNOT00000079260 | 0.996448245 | 4.42E-12 |
| TUCP_000235 | XLOC_007153 | ENSRNOT00000039294 | 1           | 0        |
| TUCP_000235 | XLOC_007153 | ENSRNOT00000092913 | 0.952980228 | 1.67E-06 |
| TUCP_000234 | XLOC_007153 | ENSRNOT00000088424 | -0.95288828 | 1.69E-06 |

|             |             |                    |              |          |
|-------------|-------------|--------------------|--------------|----------|
| TUCP_004615 | XLOC_203544 | ENSRNOT00000054794 | 0.95583962   | 1.23E-06 |
| TUCP_004615 | XLOC_203544 | ENSRNOT00000025434 | 0.960438909  | 7.14E-07 |
| TUCP_004615 | XLOC_203544 | ENSRNOT00000092665 | 0.950642061  | 2.12E-06 |
| TUCP_004614 | XLOC_203501 | ENSRNOT00000085110 | 0.989190073  | 1.14E-09 |
| TUCP_004614 | XLOC_203501 | ENSRNOT00000008037 | 0.965549911  | 3.61E-07 |
| TUCP_004614 | XLOC_203501 | ENSRNOT00000087720 | 0.999223088  | 2.23E-15 |
| TUCP_004614 | XLOC_203501 | ENSRNOT00000083850 | 0.960939273  | 6.71E-07 |
| TUCP_004340 | XLOC_191424 | ENSRNOT00000019886 | 0.9532334    | 1.63E-06 |
| TUCP_004340 | XLOC_191424 | ENSRNOT00000089062 | 0.953510634  | 1.58E-06 |
| TUCP_004340 | XLOC_191424 | ENSRNOT00000005486 | -0.958211196 | 9.36E-07 |
| TUCP_004340 | XLOC_191424 | ENSRNOT00000037363 | -0.951003991 | 2.05E-06 |
| TUCP_004340 | XLOC_191424 | ENSRNOT00000037039 | -0.952086343 | 1.83E-06 |
| TUCP_004340 | XLOC_191424 | ENSRNOT00000082999 | -0.955314081 | 1.30E-06 |
| TUCP_004340 | XLOC_191424 | ENSRNOT00000033324 | 0.953290078  | 1.62E-06 |
| TUCP_004340 | XLOC_191424 | ENSRNOT00000081688 | -0.960879693 | 6.76E-07 |
| TUCP_004340 | XLOC_191424 | ENSRNOT00000061253 | 0.956491133  | 1.14E-06 |
| TUCP_004340 | XLOC_191424 | ENSRNOT00000004972 | 0.965866385  | 3.45E-07 |
| TUCP_004340 | XLOC_191424 | ENSRNOT00000071166 | 0.951035434  | 2.04E-06 |
| TUCP_004340 | XLOC_191424 | ENSRNOT00000072007 | -0.965629087 | 3.57E-07 |
| TUCP_004340 | XLOC_191424 | ENSRNOT00000017556 | 0.951509404  | 1.95E-06 |
| TUCP_004340 | XLOC_191424 | ENSRNOT00000010381 | 0.957129137  | 1.06E-06 |
| TUCP_004340 | XLOC_191424 | ENSRNOT00000080608 | 0.952520156  | 1.75E-06 |
| TUCP_004592 | XLOC_201761 | ENSRNOT00000016975 | 0.967366441  | 2.76E-07 |
| TUCP_004592 | XLOC_201761 | ENSRNOT00000065168 | 0.950594276  | 2.13E-06 |
| TUCP_004592 | XLOC_201761 | ENSRNOT00000006175 | 0.964699636  | 4.07E-07 |
| TUCP_004592 | XLOC_201761 | ENSRNOT00000080557 | 0.954193248  | 1.47E-06 |
| TUCP_004592 | XLOC_201761 | ENSRNOT00000020134 | 0.954648365  | 1.40E-06 |
| TUCP_004592 | XLOC_201761 | ENSRNOT00000051265 | 0.955576261  | 1.26E-06 |
| TUCP_004592 | XLOC_201761 | ENSRNOT00000022635 | 0.969562328  | 1.96E-07 |
| TUCP_004221 | XLOC_185327 | ENSRNOT00000003921 | 0.953296354  | 1.62E-06 |
| TUCP_004590 | XLOC_201699 | ENSRNOT00000076331 | 0.957881756  | 9.72E-07 |
| TUCP_004591 | XLOC_201760 | ENSRNOT00000033468 | 0.951295536  | 1.99E-06 |
| TUCP_004591 | XLOC_201760 | ENSRNOT00000085840 | 0.951615715  | 1.92E-06 |
| TUCP_004597 | XLOC_201951 | ENSRNOT00000021437 | 0.950364402  | 2.18E-06 |
| TUCP_004597 | XLOC_201951 | ENSRNOT00000012253 | 0.954238506  | 1.46E-06 |
| TUCP_004597 | XLOC_201951 | ENSRNOT00000076680 | 0.952970968  | 1.67E-06 |
| TUCP_004597 | XLOC_201951 | ENSRNOT00000016384 | 0.956487254  | 1.14E-06 |
| TUCP_004597 | XLOC_201951 | ENSRNOT00000011174 | 0.958568335  | 8.97E-07 |
| TUCP_004597 | XLOC_201951 | ENSRNOT00000088996 | -0.953167361 | 1.64E-06 |
| TUCP_004597 | XLOC_201951 | ENSRNOT00000022747 | -0.971513564 | 1.41E-07 |
| TUCP_004597 | XLOC_201951 | ENSRNOT00000085501 | 0.963788317  | 4.61E-07 |
| TUCP_004597 | XLOC_201951 | ENSRNOT00000011442 | 0.951927721  | 1.86E-06 |
| TUCP_003906 | XLOC_172034 | ENSRNOT00000000713 | 0.962927621  | 5.18E-07 |
| TUCP_003906 | XLOC_172034 | ENSRNOT00000009877 | 0.950432109  | 2.17E-06 |
| TUCP_003906 | XLOC_172034 | ENSRNOT00000086336 | 0.9564275    | 1.15E-06 |
| TUCP_003906 | XLOC_172034 | ENSRNOT00000026065 | 0.955837362  | 1.23E-06 |
| TUCP_003906 | XLOC_172034 | ENSRNOT00000012056 | 0.951252611  | 2.00E-06 |
| TUCP_003906 | XLOC_172034 | ENSRNOT00000022726 | 0.967281545  | 2.80E-07 |
| TUCP_003906 | XLOC_172034 | ENSRNOT00000044635 | 0.956267829  | 1.17E-06 |
| TUCP_003906 | XLOC_172034 | ENSRNOT00000021116 | 0.955070369  | 1.34E-06 |
| TUCP_003906 | XLOC_172034 | ENSRNOT00000043216 | 0.954771986  | 1.38E-06 |

|             |             |                    |              |          |
|-------------|-------------|--------------------|--------------|----------|
| TUCP_003906 | XLOC_172034 | ENSRNOT00000080654 | 0.959775441  | 7.75E-07 |
| TUCP_003906 | XLOC_172034 | ENSRNOT00000027414 | 0.966069699  | 3.35E-07 |
| TUCP_003906 | XLOC_172034 | ENSRNOT00000028563 | 0.971674872  | 1.37E-07 |
| TUCP_003906 | XLOC_172034 | ENSRNOT00000006195 | 0.965712177  | 3.52E-07 |
| TUCP_003906 | XLOC_172034 | ENSRNOT00000022800 | 0.974544194  | 8.07E-08 |
| TUCP_003906 | XLOC_172034 | ENSRNOT00000076516 | 0.959216457  | 8.30E-07 |
| TUCP_003906 | XLOC_172034 | ENSRNOT00000015073 | 0.960601372  | 7.00E-07 |
| TUCP_003906 | XLOC_172034 | ENSRNOT00000091807 | 0.970492008  | 1.68E-07 |
| TUCP_003906 | XLOC_172034 | ENSRNOT00000013046 | -0.957275231 | 1.04E-06 |
| TUCP_003906 | XLOC_172034 | ENSRNOT00000012379 | 0.951008227  | 2.05E-06 |
| TUCP_003906 | XLOC_172034 | ENSRNOT00000011384 | 0.972016178  | 1.29E-07 |
| TUCP_003906 | XLOC_172034 | ENSRNOT00000082691 | 0.963082612  | 5.08E-07 |
| TUCP_003906 | XLOC_172034 | ENSRNOT00000017948 | 0.953545087  | 1.58E-06 |
| TUCP_003906 | XLOC_172034 | ENSRNOT00000006963 | 0.972523845  | 1.18E-07 |
| TUCP_003906 | XLOC_172034 | ENSRNOT00000079109 | 0.953384112  | 1.60E-06 |
| TUCP_003906 | XLOC_172034 | ENSRNOT00000027944 | 0.96562507   | 3.57E-07 |
| TUCP_003906 | XLOC_172034 | ENSRNOT00000028842 | 0.961136269  | 6.54E-07 |
| TUCP_003906 | XLOC_172034 | ENSRNOT00000004003 | 0.963976163  | 4.50E-07 |
| TUCP_003906 | XLOC_172034 | ENSRNOT00000027828 | 0.95671747   | 1.11E-06 |
| TUCP_003906 | XLOC_172034 | ENSRNOT00000052075 | 0.95625007   | 1.17E-06 |
| TUCP_003906 | XLOC_172034 | ENSRNOT00000085648 | 0.965978225  | 3.39E-07 |
| TUCP_003906 | XLOC_172034 | ENSRNOT00000032944 | 0.959714436  | 7.81E-07 |
| TUCP_003906 | XLOC_172034 | ENSRNOT00000083215 | 0.96213127   | 5.75E-07 |
| TUCP_003906 | XLOC_172034 | ENSRNOT00000093640 | 0.953821027  | 1.53E-06 |
| TUCP_003906 | XLOC_172034 | ENSRNOT00000055187 | 0.955124567  | 1.33E-06 |
| TUCP_003906 | XLOC_172034 | ENSRNOT00000005684 | 0.956843308  | 1.10E-06 |
| TUCP_003906 | XLOC_172034 | ENSRNOT00000078500 | 0.967725469  | 2.61E-07 |
| TUCP_003906 | XLOC_172034 | ENSRNOT00000024060 | 0.965687241  | 3.54E-07 |
| TUCP_003906 | XLOC_172034 | ENSRNOT00000010149 | 0.950117587  | 2.24E-06 |
| TUCP_003906 | XLOC_172034 | ENSRNOT00000028760 | 0.971056526  | 1.52E-07 |
| TUCP_003906 | XLOC_172034 | ENSRNOT00000068633 | 0.956736805  | 1.11E-06 |
| TUCP_003906 | XLOC_172034 | ENSRNOT00000084661 | 0.955336142  | 1.30E-06 |
| TUCP_003906 | XLOC_172034 | ENSRNOT00000012895 | 0.957192585  | 1.05E-06 |
| TUCP_003906 | XLOC_172034 | ENSRNOT00000054874 | 0.951124709  | 2.02E-06 |
| TUCP_003906 | XLOC_172034 | ENSRNOT00000090773 | -0.959747482 | 7.78E-07 |
| TUCP_003906 | XLOC_172034 | ENSRNOT00000020437 | 0.963715607  | 4.66E-07 |
| TUCP_003906 | XLOC_172034 | ENSRNOT00000006828 | 0.954889173  | 1.36E-06 |
| TUCP_003906 | XLOC_172034 | ENSRNOT00000073346 | 0.964799     | 4.01E-07 |
| TUCP_003906 | XLOC_172034 | ENSRNOT0000005355  | 0.953778283  | 1.54E-06 |
| TUCP_003906 | XLOC_172034 | ENSRNOT0000001242  | 0.955053073  | 1.34E-06 |
| TUCP_003906 | XLOC_172034 | ENSRNOT00000087660 | 0.981701817  | 1.57E-08 |
| TUCP_003906 | XLOC_172034 | ENSRNOT00000013661 | 0.954609684  | 1.41E-06 |
| TUCP_003906 | XLOC_172034 | ENSRNOT00000045083 | 0.959605187  | 7.91E-07 |
| TUCP_003906 | XLOC_172034 | ENSRNOT00000022839 | 0.971050847  | 1.53E-07 |
| TUCP_003906 | XLOC_172034 | ENSRNOT00000034744 | 0.963845554  | 4.58E-07 |
| TUCP_003906 | XLOC_172034 | ENSRNOT00000021153 | 0.975184701  | 7.11E-08 |
| TUCP_003906 | XLOC_172034 | ENSRNOT00000064900 | 0.959976162  | 7.56E-07 |
| TUCP_003906 | XLOC_172034 | ENSRNOT00000074075 | 0.950192298  | 2.22E-06 |
| TUCP_003906 | XLOC_172034 | ENSRNOT00000090170 | 0.960585649  | 7.01E-07 |
| TUCP_003906 | XLOC_172034 | ENSRNOT00000049538 | 0.984348435  | 7.21E-09 |
| TUCP_003906 | XLOC_172034 | ENSRNOT0000005909  | 0.952959564  | 1.68E-06 |

|             |             |                     |             |          |
|-------------|-------------|---------------------|-------------|----------|
| TUCP_003906 | XLOC_172034 | ENSRNOT00000073337  | 0.960422674 | 7.16E-07 |
| TUCP_003906 | XLOC_172034 | ENSRNOT00000009198  | 0.960881944 | 6.75E-07 |
| TUCP_003906 | XLOC_172034 | ENSRNOT00000027054  | 0.958442168 | 9.10E-07 |
| TUCP_003906 | XLOC_172034 | ENSRNOT00000009129  | 0.965409716 | 3.68E-07 |
| TUCP_003906 | XLOC_172034 | ENSRNOT00000036951  | 0.95886146  | 8.66E-07 |
| TUCP_003906 | XLOC_172034 | ENSRNOT00000044177  | 0.960784987 | 6.84E-07 |
| TUCP_003906 | XLOC_172034 | ENSRNOT00000011663  | 0.970449418 | 1.69E-07 |
| TUCP_003906 | XLOC_172034 | ENSRNOT00000006800  | 0.951974013 | 1.86E-06 |
| TUCP_003906 | XLOC_172034 | ENSRNOT000000088196 | 0.960059492 | 7.48E-07 |
| TUCP_003906 | XLOC_172034 | ENSRNOT00000023645  | 0.97268395  | 1.14E-07 |
| TUCP_003906 | XLOC_172034 | ENSRNOT000000084734 | 0.959898507 | 7.63E-07 |
| TUCP_003906 | XLOC_172034 | ENSRNOT00000005977  | 0.956775746 | 1.10E-06 |
| TUCP_003906 | XLOC_172034 | ENSRNOT00000025394  | 0.977884734 | 4.01E-08 |
| TUCP_003906 | XLOC_172034 | ENSRNOT000000074653 | 0.955726958 | 1.24E-06 |
| TUCP_003906 | XLOC_172034 | ENSRNOT000000031230 | 0.952139024 | 1.82E-06 |
| TUCP_003906 | XLOC_172034 | ENSRNOT000000064320 | 0.955250809 | 1.31E-06 |
| TUCP_003906 | XLOC_172034 | ENSRNOT00000002292  | 0.953632199 | 1.56E-06 |
| TUCP_003906 | XLOC_172034 | ENSRNOT00000009342  | 0.952173961 | 1.82E-06 |
| TUCP_003906 | XLOC_172034 | ENSRNOT00000015076  | 0.96425832  | 4.33E-07 |
| TUCP_003906 | XLOC_172034 | ENSRNOT00000004412  | 0.953053942 | 1.66E-06 |
| TUCP_003906 | XLOC_172034 | ENSRNOT00000019177  | 0.950026728 | 2.26E-06 |
| TUCP_003906 | XLOC_172034 | ENSRNOT00000010927  | 0.957534901 | 1.01E-06 |
| TUCP_003906 | XLOC_172034 | ENSRNOT000000084595 | 0.953414565 | 1.60E-06 |
| TUCP_003906 | XLOC_172034 | ENSRNOT000000022646 | 0.95964273  | 7.88E-07 |
| TUCP_003906 | XLOC_172034 | ENSRNOT000000066593 | 0.964397526 | 4.24E-07 |
| TUCP_003906 | XLOC_172034 | ENSRNOT000000027964 | 0.955901588 | 1.22E-06 |
| TUCP_003906 | XLOC_172034 | ENSRNOT000000024659 | 0.950566692 | 2.14E-06 |
| TUCP_003906 | XLOC_172034 | ENSRNOT000000024420 | 0.957347717 | 1.03E-06 |
| TUCP_003906 | XLOC_172034 | ENSRNOT000000052288 | 0.951120153 | 2.02E-06 |
| TUCP_003906 | XLOC_172034 | ENSRNOT000000048029 | 0.955915245 | 1.22E-06 |
| TUCP_003906 | XLOC_172034 | ENSRNOT00000010433  | 0.958501828 | 9.04E-07 |
| TUCP_004227 | XLOC_185579 | ENSRNOT000000024186 | 0.956241766 | 1.17E-06 |
| TUCP_004227 | XLOC_185579 | ENSRNOT00000004876  | 0.953750079 | 1.54E-06 |
| TUCP_004227 | XLOC_185579 | ENSRNOT000000031205 | 0.963337393 | 4.91E-07 |
| TUCP_004227 | XLOC_185579 | ENSRNOT000000079260 | 0.960729582 | 6.89E-07 |
| TUCP_004227 | XLOC_185579 | ENSRNOT000000088381 | 0.961122895 | 6.55E-07 |
| TUCP_004227 | XLOC_185579 | ENSRNOT000000037094 | 0.956642876 | 1.12E-06 |
| TUCP_004227 | XLOC_185579 | ENSRNOT000000046842 | 0.953793875 | 1.53E-06 |
| TUCP_004227 | XLOC_185579 | ENSRNOT00000011743  | 0.957322003 | 1.04E-06 |
| TUCP_004227 | XLOC_185579 | ENSRNOT000000081235 | 0.951489453 | 1.95E-06 |
| TUCP_004227 | XLOC_185579 | ENSRNOT000000078663 | 0.950404265 | 2.17E-06 |
| TUCP_004227 | XLOC_185579 | ENSRNOT000000027552 | 0.950000092 | 2.26E-06 |
| TUCP_004227 | XLOC_185579 | ENSRNOT00000003817  | 0.951057691 | 2.04E-06 |
| TUCP_004227 | XLOC_185579 | ENSRNOT000000091315 | 0.954000079 | 1.50E-06 |
| TUCP_004227 | XLOC_185579 | ENSRNOT000000024337 | 0.957281691 | 1.04E-06 |
| TUCP_004227 | XLOC_185579 | ENSRNOT000000077014 | 0.961364216 | 6.35E-07 |
| TUCP_004227 | XLOC_185579 | ENSRNOT000000046585 | 0.959969918 | 7.57E-07 |
| TUCP_004227 | XLOC_185579 | ENSRNOT000000089934 | 0.969090665 | 2.11E-07 |
| TUCP_004227 | XLOC_185579 | ENSRNOT000000064250 | 0.964800027 | 4.01E-07 |
| TUCP_004180 | XLOC_182944 | ENSRNOT00000002403  | 0.952058782 | 1.84E-06 |
| TUCP_004180 | XLOC_182944 | ENSRNOT00000018179  | 0.971318025 | 1.46E-07 |

|             |             |                    |              |          |
|-------------|-------------|--------------------|--------------|----------|
| TUCP_004180 | XLOC_182944 | ENSRNOT00000024393 | 0.960923309  | 6.72E-07 |
| TUCP_004180 | XLOC_182944 | ENSRNOT00000086917 | 0.960576609  | 7.02E-07 |
| TUCP_004180 | XLOC_182944 | ENSRNOT00000050180 | 0.963724462  | 4.65E-07 |
| TUCP_004180 | XLOC_182944 | ENSRNOT00000041494 | 0.963734732  | 4.65E-07 |
| TUCP_004180 | XLOC_182944 | ENSRNOT00000002982 | 0.950252682  | 2.21E-06 |
| TUCP_004180 | XLOC_182944 | ENSRNOT00000081512 | 0.950889416  | 2.07E-06 |
| TUCP_004180 | XLOC_182944 | ENSRNOT00000023302 | 0.964530808  | 4.17E-07 |
| TUCP_004180 | XLOC_182944 | ENSRNOT0000002560  | 0.950696076  | 2.11E-06 |
| TUCP_004180 | XLOC_182944 | ENSRNOT00000045223 | 0.952093089  | 1.83E-06 |
| TUCP_004180 | XLOC_182944 | ENSRNOT00000066024 | 0.950760797  | 2.10E-06 |
| TUCP_004180 | XLOC_182944 | ENSRNOT00000086905 | 0.953705169  | 1.55E-06 |
| TUCP_004180 | XLOC_182944 | ENSRNOT00000075621 | 0.954934158  | 1.36E-06 |
| TUCP_004180 | XLOC_182944 | ENSRNOT00000047093 | 0.96422472   | 4.35E-07 |
| TUCP_004183 | XLOC_183135 | ENSRNOT00000087686 | -0.958661761 | 8.87E-07 |
| TUCP_004187 | XLOC_183713 | ENSRNOT00000057752 | 0.964077841  | 4.43E-07 |
| TUCP_004187 | XLOC_183713 | ENSRNOT00000007144 | 0.965361005  | 3.71E-07 |
| TUCP_004187 | XLOC_183713 | ENSRNOT00000059157 | 0.95173604   | 1.90E-06 |
| TUCP_004187 | XLOC_183713 | ENSRNOT00000024149 | 0.952793911  | 1.71E-06 |
| TUCP_004187 | XLOC_183713 | ENSRNOT00000087697 | 0.952791559  | 1.71E-06 |
| TUCP_004187 | XLOC_183713 | ENSRNOT00000081899 | -0.951998958 | 1.85E-06 |
| TUCP_004187 | XLOC_183713 | ENSRNOT00000077767 | 0.96428725   | 4.31E-07 |
| TUCP_004187 | XLOC_183713 | ENSRNOT00000050179 | 0.957789074  | 9.83E-07 |
| TUCP_004187 | XLOC_183713 | ENSRNOT00000019687 | 0.950325688  | 2.19E-06 |
| TUCP_004187 | XLOC_183713 | ENSRNOT00000027511 | 0.958264774  | 9.30E-07 |
| TUCP_004187 | XLOC_183713 | ENSRNOT00000020322 | 0.951793601  | 1.89E-06 |
| TUCP_004187 | XLOC_183713 | ENSRNOT00000019630 | 0.961935339  | 5.90E-07 |
| TUCP_004187 | XLOC_183713 | ENSRNOT0000008854  | 0.959574836  | 7.94E-07 |
| TUCP_004187 | XLOC_183713 | ENSRNOT00000027630 | 0.97278528   | 1.12E-07 |
| TUCP_004187 | XLOC_183713 | ENSRNOT00000086812 | 0.961689332  | 6.09E-07 |
| TUCP_004187 | XLOC_183713 | ENSRNOT00000001912 | 0.961568345  | 6.19E-07 |
| TUCP_004187 | XLOC_183713 | ENSRNOT00000033420 | 0.962753501  | 5.30E-07 |
| TUCP_004187 | XLOC_183713 | ENSRNOT00000017353 | 0.95317925   | 1.64E-06 |
| TUCP_004187 | XLOC_183713 | ENSRNOT00000003837 | 0.977769583  | 4.12E-08 |
| TUCP_004187 | XLOC_183713 | ENSRNOT00000010712 | -0.953468394 | 1.59E-06 |
| TUCP_004187 | XLOC_183713 | ENSRNOT00000085444 | 0.953528979  | 1.58E-06 |
| TUCP_004187 | XLOC_183713 | ENSRNOT00000091065 | 0.957850893  | 9.76E-07 |
| TUCP_004186 | XLOC_183530 | ENSRNOT00000025410 | 0.950748485  | 2.10E-06 |
| TUCP_004186 | XLOC_183530 | ENSRNOT00000075444 | -0.961575977 | 6.18E-07 |
| TUCP_004186 | XLOC_183530 | ENSRNOT00000063956 | 0.951099149  | 2.03E-06 |
| TUCP_004186 | XLOC_183530 | ENSRNOT00000013743 | 0.95185234   | 1.88E-06 |
| TUCP_004186 | XLOC_183530 | ENSRNOT00000082562 | 0.955498418  | 1.28E-06 |
| TUCP_004186 | XLOC_183530 | ENSRNOT00000006969 | 0.971144671  | 1.50E-07 |
| TUCP_004186 | XLOC_183530 | ENSRNOT00000058206 | 0.960229228  | 7.33E-07 |
| TUCP_004186 | XLOC_183530 | ENSRNOT00000040540 | 0.955660069  | 1.25E-06 |
| TUCP_004186 | XLOC_183530 | ENSRNOT00000071540 | 0.951271094  | 1.99E-06 |
| TUCP_004186 | XLOC_183530 | ENSRNOT00000048613 | 0.969093195  | 2.11E-07 |
| TUCP_004186 | XLOC_183530 | ENSRNOT00000023437 | 0.954684691  | 1.39E-06 |
| TUCP_004186 | XLOC_183530 | ENSRNOT00000036666 | 0.968000481  | 2.50E-07 |
| TUCP_004186 | XLOC_183530 | ENSRNOT00000087408 | 0.95412281   | 1.48E-06 |
| TUCP_004186 | XLOC_183530 | ENSRNOT00000009135 | 0.962848445  | 5.24E-07 |
| TUCP_004186 | XLOC_183530 | ENSRNOT00000020795 | 0.976077272  | 5.93E-08 |

|             |             |                    |              |          |
|-------------|-------------|--------------------|--------------|----------|
| TUCP_004186 | XLOC_183530 | ENSRNOT00000038703 | 0.950137465  | 2.23E-06 |
| TUCP_004186 | XLOC_183530 | ENSRNOT00000037405 | 0.960381533  | 7.19E-07 |
| TUCP_004186 | XLOC_183530 | ENSRNOT00000091488 | 0.952261507  | 1.80E-06 |
| TUCP_004186 | XLOC_183530 | ENSRNOT00000085060 | 0.97971202   | 2.62E-08 |
| TUCP_004186 | XLOC_183530 | ENSRNOT00000066032 | 0.958607675  | 8.93E-07 |
| TUCP_004186 | XLOC_183530 | ENSRNOT00000015479 | 0.963263346  | 4.95E-07 |
| TUCP_004186 | XLOC_183530 | ENSRNOT00000019876 | 0.962316293  | 5.62E-07 |
| TUCP_004186 | XLOC_183530 | ENSRNOT0000001507  | 0.956099777  | 1.19E-06 |
| TUCP_004186 | XLOC_183530 | ENSRNOT00000076085 | -0.957048575 | 1.07E-06 |
| TUCP_004186 | XLOC_183530 | ENSRNOT00000035277 | 0.958699188  | 8.83E-07 |
| TUCP_004186 | XLOC_183530 | ENSRNOT00000019921 | 0.952204574  | 1.81E-06 |
| TUCP_004186 | XLOC_183530 | ENSRNOT00000010224 | 0.956325758  | 1.16E-06 |
| TUCP_004186 | XLOC_183530 | ENSRNOT00000016205 | 0.960445799  | 7.13E-07 |
| TUCP_004186 | XLOC_183530 | ENSRNOT00000009634 | -0.967314197 | 2.78E-07 |
| TUCP_004186 | XLOC_183530 | ENSRNOT00000004486 | 0.969028428  | 2.13E-07 |
| TUCP_004186 | XLOC_183530 | ENSRNOT00000009156 | 0.952666708  | 1.73E-06 |
| TUCP_004186 | XLOC_183530 | ENSRNOT00000074395 | 0.96880478   | 2.21E-07 |
| TUCP_004186 | XLOC_183530 | ENSRNOT00000037685 | 0.950313611  | 2.19E-06 |
| TUCP_004186 | XLOC_183530 | ENSRNOT00000054948 | 0.966269612  | 3.25E-07 |
| TUCP_000591 | XLOC_021652 | ENSRNOT00000084075 | 0.996106112  | 7.00E-12 |
| TUCP_000591 | XLOC_021652 | ENSRNOT00000012880 | 0.968043129  | 2.49E-07 |
| TUCP_000591 | XLOC_021652 | ENSRNOT00000074465 | 1            | 0        |
| TUCP_000591 | XLOC_021652 | ENSRNOT00000090898 | 0.961670541  | 6.11E-07 |
| TUCP_000591 | XLOC_021652 | ENSRNOT00000079805 | 0.997980451  | 2.64E-13 |
| TUCP_000591 | XLOC_021652 | ENSRNOT00000040912 | 1            | 0        |
| TUCP_000591 | XLOC_021652 | ENSRNOT00000072648 | 1            | 0        |
| TUCP_000591 | XLOC_021652 | ENSRNOT00000007398 | 0.989054103  | 1.21E-09 |
| TUCP_000591 | XLOC_021652 | ENSRNOT00000070803 | 1            | 0        |
| TUCP_000591 | XLOC_021652 | ENSRNOT00000012196 | 1            | 0        |
| TUCP_000591 | XLOC_021652 | ENSRNOT00000085772 | 1            | 0        |
| TUCP_000591 | XLOC_021652 | ENSRNOT00000093284 | 0.999975856  | 6.46E-23 |
| TUCP_000591 | XLOC_021652 | ENSRNOT00000086374 | 0.993568904  | 8.57E-11 |
| TUCP_000591 | XLOC_021652 | ENSRNOT00000015270 | 1            | 0        |
| TUCP_000591 | XLOC_021652 | ENSRNOT00000046192 | 1            | 0        |
| TUCP_000591 | XLOC_021652 | ENSRNOT00000044226 | 1            | 0        |
| TUCP_000591 | XLOC_021652 | ENSRNOT00000081898 | 0.989837012  | 8.39E-10 |
| TUCP_000591 | XLOC_021652 | ENSRNOT00000081954 | 0.964005219  | 4.48E-07 |
| TUCP_000591 | XLOC_021652 | ENSRNOT00000080291 | 0.998427671  | 7.55E-14 |
| TUCP_000591 | XLOC_021652 | ENSRNOT00000004293 | 0.984239049  | 7.46E-09 |
| TUCP_000591 | XLOC_021652 | ENSRNOT00000078231 | 0.960455489  | 7.13E-07 |
| TUCP_000591 | XLOC_021652 | ENSRNOT00000002834 | 1            | 0        |
| TUCP_000591 | XLOC_021652 | ENSRNOT00000001464 | 1            | 0        |
| TUCP_000591 | XLOC_021652 | ENSRNOT00000090716 | 0.994769629  | 3.06E-11 |
| TUCP_000591 | XLOC_021652 | ENSRNOT00000083542 | 0.972568514  | 1.17E-07 |
| TUCP_000591 | XLOC_021652 | ENSRNOT00000076044 | 1            | 0        |
| TUCP_000591 | XLOC_021652 | ENSRNOT00000074353 | 1            | 0        |
| TUCP_000591 | XLOC_021652 | ENSRNOT00000043510 | 0.958144129  | 9.43E-07 |
| TUCP_000591 | XLOC_021652 | ENSRNOT00000087122 | 0.980089513  | 2.38E-08 |
| TUCP_000591 | XLOC_021652 | ENSRNOT00000074295 | 0.987777006  | 2.11E-09 |
| TUCP_000591 | XLOC_021652 | ENSRNOT00000057873 | 1            | 0        |
| TUCP_000591 | XLOC_021652 | ENSRNOT00000083002 | 0.988874897  | 1.32E-09 |



|             |             |                    |             |          |
|-------------|-------------|--------------------|-------------|----------|
| TUCP_000591 | XLOC_021652 | ENSRNOT00000088399 | 0.999999855 | 4.99E-34 |
| TUCP_000591 | XLOC_021652 | ENSRNOT00000086248 | 1           | 0        |
| TUCP_000591 | XLOC_021652 | ENSRNOT00000089750 | 0.999992758 | 1.57E-25 |
| TUCP_000591 | XLOC_021652 | ENSRNOT00000030517 | 0.971225224 | 1.48E-07 |
| TUCP_000591 | XLOC_021652 | ENSRNOT00000034772 | 0.994265187 | 4.84E-11 |
| TUCP_000591 | XLOC_021652 | ENSRNOT00000089305 | 0.969641693 | 1.93E-07 |
| TUCP_000591 | XLOC_021652 | ENSRNOT00000024580 | 0.954183021 | 1.47E-06 |
| TUCP_000591 | XLOC_021652 | ENSRNOT00000064601 | 0.966578038 | 3.11E-07 |
| TUCP_000591 | XLOC_021652 | ENSRNOT00000015870 | 0.965901306 | 3.43E-07 |
| TUCP_000591 | XLOC_021652 | ENSRNOT00000080812 | 0.992998865 | 1.31E-10 |
| TUCP_000591 | XLOC_021652 | ENSRNOT00000092755 | 1           | 0        |
| TUCP_000591 | XLOC_021652 | ENSRNOT00000031683 | 1           | 0        |
| TUCP_000591 | XLOC_021652 | ENSRNOT00000087764 | 0.988156196 | 1.80E-09 |
| TUCP_000198 | XLOC_006309 | ENSRNOT00000085599 | 0.999938502 | 6.93E-21 |
| TUCP_000198 | XLOC_006309 | ENSRNOT00000006689 | 0.9944189   | 4.22E-11 |
| TUCP_000198 | XLOC_006309 | ENSRNOT00000081534 | 0.987999291 | 1.92E-09 |
| TUCP_000198 | XLOC_006309 | ENSRNOT00000085301 | 0.99793679  | 2.93E-13 |
| TUCP_000198 | XLOC_006309 | ENSRNOT00000038729 | 1           | 1.33E-79 |
| TUCP_000198 | XLOC_006309 | ENSRNOT00000086385 | 1           | 1.33E-79 |
| TUCP_000198 | XLOC_006309 | ENSRNOT00000077695 | 0.96038616  | 7.19E-07 |
| TUCP_000198 | XLOC_006309 | ENSRNOT00000078561 | 0.986503348 | 3.45E-09 |
| TUCP_000198 | XLOC_006309 | ENSRNOT00000087613 | 1           | 1.33E-79 |
| TUCP_000198 | XLOC_006309 | ENSRNOT00000026032 | 0.953050675 | 1.66E-06 |
| TUCP_000198 | XLOC_006309 | ENSRNOT00000073350 | 0.9658754   | 3.44E-07 |
| TUCP_000198 | XLOC_006309 | ENSRNOT00000023062 | 1           | 0        |
| TUCP_000198 | XLOC_006309 | ENSRNOT00000058834 | 1           | 0        |
| TUCP_000198 | XLOC_006309 | ENSRNOT00000079420 | 1           | 1.33E-79 |
| TUCP_000198 | XLOC_006309 | ENSRNOT00000090761 | 1           | 1.33E-79 |
| TUCP_000198 | XLOC_006309 | ENSRNOT00000055923 | 1           | 0        |
| TUCP_000198 | XLOC_006309 | ENSRNOT00000092416 | 0.963085379 | 5.07E-07 |
| TUCP_000198 | XLOC_006309 | ENSRNOT00000071930 | 1           | 4.25E-78 |
| TUCP_000198 | XLOC_006309 | ENSRNOT00000001996 | 0.974721715 | 7.79E-08 |
| TUCP_000198 | XLOC_006309 | ENSRNOT00000076756 | 1           | 0        |
| TUCP_000198 | XLOC_006309 | ENSRNOT00000081527 | 0.999420479 | 5.14E-16 |
| TUCP_000198 | XLOC_006309 | ENSRNOT00000085067 | 0.960262084 | 7.30E-07 |
| TUCP_000198 | XLOC_006309 | ENSRNOT00000091663 | 0.99642667  | 4.56E-12 |
| TUCP_000198 | XLOC_006309 | ENSRNOT00000081780 | 1           | 0        |
| TUCP_000198 | XLOC_006309 | ENSRNOT00000093689 | 0.953599805 | 1.57E-06 |
| TUCP_000198 | XLOC_006309 | ENSRNOT00000089114 | 1           | 4.25E-78 |
| TUCP_000198 | XLOC_006309 | ENSRNOT00000021609 | 0.977017895 | 4.86E-08 |
| TUCP_000198 | XLOC_006309 | ENSRNOT00000073316 | 1           | 0        |
| TUCP_000198 | XLOC_006309 | ENSRNOT00000086557 | 0.977413455 | 4.46E-08 |
| TUCP_000198 | XLOC_006309 | ENSRNOT00000071663 | 1           | 0        |
| TUCP_000198 | XLOC_006309 | ENSRNOT00000042860 | 1           | 1.33E-79 |
| TUCP_000198 | XLOC_006309 | ENSRNOT00000072962 | 0.971287317 | 1.46E-07 |
| TUCP_000198 | XLOC_006309 | ENSRNOT00000088421 | 1           | 0        |
| TUCP_000198 | XLOC_006309 | ENSRNOT00000038898 | 1           | 0        |
| TUCP_000198 | XLOC_006309 | ENSRNOT00000015840 | 0.959452012 | 8.06E-07 |
| TUCP_000198 | XLOC_006309 | ENSRNOT00000064936 | 0.985957557 | 4.20E-09 |
| TUCP_000198 | XLOC_006309 | ENSRNOT00000042777 | 0.990642579 | 5.56E-10 |
| TUCP_000198 | XLOC_006309 | ENSRNOT00000010029 | 1           | 0        |

|             |             |                    |             |          |
|-------------|-------------|--------------------|-------------|----------|
| TUCP_003766 | XLOC_165235 | ENSRNOT00000024137 | 0.962283604 | 5.64E-07 |
| TUCP_003766 | XLOC_165235 | ENSRNOT00000051265 | 0.958579153 | 8.96E-07 |
| TUCP_003766 | XLOC_165235 | ENSRNOT00000036721 | 0.959555894 | 7.96E-07 |
| TUCP_003766 | XLOC_165235 | ENSRNOT00000050485 | 0.985384177 | 5.13E-09 |
| TUCP_003766 | XLOC_165235 | ENSRNOT00000076227 | 0.951501347 | 1.95E-06 |
| TUCP_000190 | XLOC_006177 | ENSRNOT00000025981 | 0.959364003 | 8.15E-07 |
| TUCP_000190 | XLOC_006177 | ENSRNOT00000010992 | 0.950590908 | 2.13E-06 |
| TUCP_000190 | XLOC_006177 | ENSRNOT00000067528 | 0.95492013  | 1.36E-06 |
| TUCP_000190 | XLOC_006177 | ENSRNOT00000060186 | 0.985028224 | 5.78E-09 |
| TUCP_000190 | XLOC_006177 | ENSRNOT00000076669 | 0.961799069 | 6.01E-07 |
| TUCP_000190 | XLOC_006177 | ENSRNOT00000081246 | 0.956787011 | 1.10E-06 |
| TUCP_000190 | XLOC_006177 | ENSRNOT00000055401 | 0.960054681 | 7.49E-07 |
| TUCP_000190 | XLOC_006177 | ENSRNOT00000020134 | 0.950158381 | 2.23E-06 |
| TUCP_000190 | XLOC_006177 | ENSRNOT00000074939 | 0.95390483  | 1.52E-06 |
| TUCP_000190 | XLOC_006177 | ENSRNOT00000034267 | 0.95254786  | 1.75E-06 |
| TUCP_000190 | XLOC_006177 | ENSRNOT00000017021 | 0.95517205  | 1.32E-06 |
| TUCP_000190 | XLOC_006177 | ENSRNOT00000031230 | 0.961900304 | 5.93E-07 |
| TUCP_000190 | XLOC_006177 | ENSRNOT00000032274 | 0.971017941 | 1.53E-07 |
| TUCP_000190 | XLOC_006177 | ENSRNOT00000004508 | 0.950519797 | 2.15E-06 |
| TUCP_000190 | XLOC_006177 | ENSRNOT00000006175 | 0.959508569 | 8.01E-07 |
| TUCP_000190 | XLOC_006177 | ENSRNOT00000043535 | 0.952538316 | 1.75E-06 |
| TUCP_000190 | XLOC_006177 | ENSRNOT00000039809 | 0.952661243 | 1.73E-06 |
| TUCP_000190 | XLOC_006177 | ENSRNOT00000005262 | 0.950964904 | 2.06E-06 |
| TUCP_000190 | XLOC_006177 | ENSRNOT00000023490 | 0.958721815 | 8.81E-07 |
| TUCP_000190 | XLOC_006177 | ENSRNOT00000076729 | 0.957245882 | 1.05E-06 |
| TUCP_000190 | XLOC_006177 | ENSRNOT00000060819 | 0.95245791  | 1.77E-06 |
| TUCP_000190 | XLOC_006177 | ENSRNOT00000003991 | 0.961912332 | 5.92E-07 |
| TUCP_000190 | XLOC_006177 | ENSRNOT00000066670 | 0.959241347 | 8.27E-07 |
| TUCP_000190 | XLOC_006177 | ENSRNOT00000076763 | 0.963200527 | 5.00E-07 |
| TUCP_000190 | XLOC_006177 | ENSRNOT00000012895 | 0.970842411 | 1.58E-07 |
| TUCP_000190 | XLOC_006177 | ENSRNOT00000025859 | 0.957082728 | 1.07E-06 |
| TUCP_000190 | XLOC_006177 | ENSRNOT00000071697 | 0.964830464 | 3.99E-07 |
| TUCP_000190 | XLOC_006177 | ENSRNOT00000084240 | 0.95652834  | 1.14E-06 |
| TUCP_000190 | XLOC_006177 | ENSRNOT00000090918 | 0.952746098 | 1.71E-06 |
| TUCP_000190 | XLOC_006177 | ENSRNOT00000000676 | 0.958031172 | 9.56E-07 |
| TUCP_000190 | XLOC_006177 | ENSRNOT00000027452 | 0.959103671 | 8.41E-07 |
| TUCP_000190 | XLOC_006177 | ENSRNOT00000004412 | 0.954120358 | 1.48E-06 |
| TUCP_000190 | XLOC_006177 | ENSRNOT00000067181 | 0.954203362 | 1.47E-06 |
| TUCP_000190 | XLOC_006177 | ENSRNOT00000077465 | 0.950792201 | 2.09E-06 |
| TUCP_000190 | XLOC_006177 | ENSRNOT00000045882 | 0.978675122 | 3.35E-08 |
| TUCP_000190 | XLOC_006177 | ENSRNOT00000066736 | 0.965809292 | 3.47E-07 |
| TUCP_000190 | XLOC_006177 | ENSRNOT00000071241 | 0.950633844 | 2.12E-06 |
| TUCP_000190 | XLOC_006177 | ENSRNOT00000025832 | 0.956366518 | 1.16E-06 |
| TUCP_000190 | XLOC_006177 | ENSRNOT00000034704 | 0.960853167 | 6.78E-07 |
| TUCP_000190 | XLOC_006177 | ENSRNOT00000013274 | 0.967410488 | 2.74E-07 |
| TUCP_000190 | XLOC_006177 | ENSRNOT00000085027 | 0.960367239 | 7.20E-07 |
| TUCP_000190 | XLOC_006177 | ENSRNOT00000029866 | 0.96457642  | 4.14E-07 |
| TUCP_000190 | XLOC_006177 | ENSRNOT00000020437 | 0.951391343 | 1.97E-06 |
| TUCP_000190 | XLOC_006177 | ENSRNOT00000010898 | 0.971594318 | 1.39E-07 |
| TUCP_000190 | XLOC_006177 | ENSRNOT00000023428 | 0.966735741 | 3.03E-07 |
| TUCP_000190 | XLOC_006177 | ENSRNOT00000029167 | 0.969068229 | 2.12E-07 |

|             |             |                    |             |          |
|-------------|-------------|--------------------|-------------|----------|
| TUCP_000190 | XLOC_006177 | ENSRNOT00000071764 | 0.965450237 | 3.66E-07 |
| TUCP_000190 | XLOC_006177 | ENSRNOT00000027762 | 0.961845359 | 5.97E-07 |
| TUCP_000190 | XLOC_006177 | ENSRNOT00000075326 | 0.954520028 | 1.42E-06 |
| TUCP_000190 | XLOC_006177 | ENSRNOT00000021348 | 0.956673488 | 1.12E-06 |
| TUCP_000190 | XLOC_006177 | ENSRNOT00000091265 | 0.963425373 | 4.85E-07 |
| TUCP_000190 | XLOC_006177 | ENSRNOT00000092158 | 0.960996955 | 6.66E-07 |
| TUCP_000190 | XLOC_006177 | ENSRNOT00000093714 | 0.952208718 | 1.81E-06 |
| TUCP_000191 | XLOC_006216 | ENSRNOT0000008988  | 0.957084904 | 1.07E-06 |
| TUCP_000191 | XLOC_006216 | ENSRNOT00000090914 | 0.957480707 | 1.02E-06 |
| TUCP_000191 | XLOC_006216 | ENSRNOT00000029572 | 0.95249542  | 1.76E-06 |
| TUCP_000191 | XLOC_006216 | ENSRNOT00000087937 | 0.966018419 | 3.37E-07 |
| TUCP_000191 | XLOC_006216 | ENSRNOT00000039687 | 0.951500884 | 1.95E-06 |
| TUCP_000191 | XLOC_006216 | ENSRNOT00000026106 | 0.957538844 | 1.01E-06 |
| TUCP_000191 | XLOC_006216 | ENSRNOT00000088589 | 0.958682311 | 8.85E-07 |
| TUCP_000196 | XLOC_006308 | ENSRNOT00000081570 | 0.962961027 | 5.16E-07 |
| TUCP_000196 | XLOC_006308 | ENSRNOT00000091652 | 0.99819185  | 1.52E-13 |
| TUCP_000196 | XLOC_006308 | ENSRNOT00000036564 | 0.972337506 | 1.22E-07 |
| TUCP_000196 | XLOC_006308 | ENSRNOT00000000109 | 0.962179854 | 5.72E-07 |
| TUCP_000196 | XLOC_006308 | ENSRNOT00000080865 | 1           | 0        |
| TUCP_000196 | XLOC_006308 | ENSRNOT00000073534 | 0.995808019 | 1.01E-11 |
| TUCP_000196 | XLOC_006308 | ENSRNOT00000012161 | 0.987544327 | 2.31E-09 |
| TUCP_000196 | XLOC_006308 | ENSRNOT00000078707 | 0.960060506 | 7.48E-07 |
| TUCP_000196 | XLOC_006308 | ENSRNOT00000087758 | 0.968778527 | 2.22E-07 |
| TUCP_000196 | XLOC_006308 | ENSRNOT00000049832 | 0.969039151 | 2.13E-07 |
| TUCP_000196 | XLOC_006308 | ENSRNOT00000093019 | 1           | 0        |
| TUCP_000196 | XLOC_006308 | ENSRNOT00000024825 | 0.980452701 | 2.18E-08 |
| TUCP_000196 | XLOC_006308 | ENSRNOT00000059266 | 0.96033506  | 7.23E-07 |
| TUCP_000196 | XLOC_006308 | ENSRNOT00000072734 | 0.965018115 | 3.89E-07 |
| TUCP_000196 | XLOC_006308 | ENSRNOT00000085908 | 0.996653227 | 3.29E-12 |
| TUCP_000196 | XLOC_006308 | ENSRNOT00000046744 | 1           | 0        |
| TUCP_000196 | XLOC_006308 | ENSRNOT00000076429 | 1           | 0        |
| TUCP_000196 | XLOC_006308 | ENSRNOT00000084667 | 0.999660971 | 3.53E-17 |
| TUCP_000196 | XLOC_006308 | ENSRNOT00000055412 | 1           | 0        |
| TUCP_000196 | XLOC_006308 | ENSRNOT00000093201 | 0.9997022   | 1.84E-17 |
| TUCP_000196 | XLOC_006308 | ENSRNOT00000072724 | 1           | 1.33E-79 |
| TUCP_000196 | XLOC_006308 | ENSRNOT00000090323 | 0.95603782  | 1.20E-06 |
| TUCP_000196 | XLOC_006308 | ENSRNOT00000082760 | 0.986293522 | 3.72E-09 |
| TUCP_000196 | XLOC_006308 | ENSRNOT00000066017 | 0.989785653 | 8.61E-10 |
| TUCP_000196 | XLOC_006308 | ENSRNOT00000073148 | 0.985721397 | 4.56E-09 |
| TUCP_000196 | XLOC_006308 | ENSRNOT00000077462 | 0.960098183 | 7.45E-07 |
| TUCP_000196 | XLOC_006308 | ENSRNOT00000084375 | 1           | 0        |
| TUCP_000196 | XLOC_006308 | ENSRNOT00000085447 | 0.998400682 | 8.22E-14 |
| TUCP_000196 | XLOC_006308 | ENSRNOT0000006249  | 0.966489607 | 3.15E-07 |
| TUCP_000196 | XLOC_006308 | ENSRNOT00000087073 | 0.952450698 | 1.77E-06 |
| TUCP_000196 | XLOC_006308 | ENSRNOT00000042369 | 0.995659369 | 1.20E-11 |
| TUCP_000196 | XLOC_006308 | ENSRNOT00000086554 | 1           | 0        |
| TUCP_000196 | XLOC_006308 | ENSRNOT00000054858 | 0.985228824 | 5.40E-09 |
| TUCP_000196 | XLOC_006308 | ENSRNOT00000047921 | 1           | 0        |
| TUCP_000196 | XLOC_006308 | ENSRNOT00000064261 | 0.999977196 | 4.86E-23 |
| TUCP_000196 | XLOC_006308 | ENSRNOT00000086660 | 0.999208903 | 2.44E-15 |
| TUCP_000196 | XLOC_006308 | ENSRNOT00000080933 | 0.967360681 | 2.76E-07 |

|             |             |                    |              |          |
|-------------|-------------|--------------------|--------------|----------|
| TUCP_000196 | XLOC_006308 | ENSRNOT00000083977 | 1            | 0        |
| TUCP_000196 | XLOC_006308 | ENSRNOT00000092933 | 1            | 0        |
| TUCP_000196 | XLOC_006308 | ENSRNOT0000009061  | 0.953300672  | 1.62E-06 |
| TUCP_000196 | XLOC_006308 | ENSRNOT00000041281 | 0.987828355  | 2.06E-09 |
| TUCP_000194 | XLOC_006306 | ENSRNOT00000046563 | 0.979015955  | 3.09E-08 |
| TUCP_001111 | XLOC_042311 | ENSRNOT00000091072 | 0.967150136  | 2.85E-07 |
| TUCP_001111 | XLOC_042311 | ENSRNOT00000036228 | 0.952458803  | 1.77E-06 |
| TUCP_003809 | XLOC_166462 | ENSRNOT00000024725 | 0.969897899  | 1.85E-07 |
| TUCP_000428 | XLOC_014415 | ENSRNOT00000088728 | -0.956540047 | 1.13E-06 |
| TUCP_000582 | XLOC_020637 | ENSRNOT00000000008 | 1            | 0        |
| TUCP_000582 | XLOC_020637 | ENSRNOT00000060048 | 0.998711457  | 2.79E-14 |
| TUCP_000582 | XLOC_020637 | ENSRNOT00000082304 | 0.996875989  | 2.33E-12 |
| TUCP_000582 | XLOC_020637 | ENSRNOT00000006219 | 1            | 4.25E-78 |
| TUCP_000582 | XLOC_020637 | ENSRNOT00000065376 | 1            | 0        |
| TUCP_000582 | XLOC_020637 | ENSRNOT00000081433 | 0.984469223  | 6.93E-09 |
| TUCP_000582 | XLOC_020637 | ENSRNOT00000083575 | 1            | 0        |
| TUCP_000582 | XLOC_020637 | ENSRNOT00000087739 | 1            | 4.25E-78 |
| TUCP_000582 | XLOC_020637 | ENSRNOT00000079826 | 1            | 0        |
| TUCP_000582 | XLOC_020637 | ENSRNOT00000025770 | 0.993828251  | 6.98E-11 |
| TUCP_000582 | XLOC_020637 | ENSRNOT00000088244 | 0.973479481  | 9.88E-08 |
| TUCP_000582 | XLOC_020637 | ENSRNOT00000048523 | 1            | 0        |
| TUCP_000582 | XLOC_020637 | ENSRNOT00000079365 | 0.958936699  | 8.58E-07 |
| TUCP_000582 | XLOC_020637 | ENSRNOT00000020229 | 0.960002785  | 7.54E-07 |
| TUCP_000582 | XLOC_020637 | ENSRNOT00000026428 | 0.996986683  | 1.95E-12 |
| TUCP_000582 | XLOC_020637 | ENSRNOT00000085673 | 1            | 1.33E-79 |
| TUCP_000582 | XLOC_020637 | ENSRNOT00000072972 | 0.981476166  | 1.67E-08 |
| TUCP_000582 | XLOC_020637 | ENSRNOT00000050573 | 1            | 4.25E-78 |
| TUCP_000582 | XLOC_020637 | ENSRNOT00000089876 | -0.953630353 | 1.56E-06 |
| TUCP_000582 | XLOC_020637 | ENSRNOT00000074378 | 0.998901807  | 1.26E-14 |
| TUCP_000582 | XLOC_020637 | ENSRNOT00000093571 | 1            | 0        |
| TUCP_000582 | XLOC_020637 | ENSRNOT00000090581 | 1            | 0        |
| TUCP_000582 | XLOC_020637 | ENSRNOT00000076239 | 0.98020752   | 2.31E-08 |
| TUCP_000582 | XLOC_020637 | ENSRNOT00000065485 | 1            | 1.33E-79 |
| TUCP_000582 | XLOC_020637 | ENSRNOT00000006356 | 0.999544279  | 1.55E-16 |
| TUCP_000582 | XLOC_020637 | ENSRNOT00000087199 | 0.974421555  | 8.26E-08 |
| TUCP_000582 | XLOC_020637 | ENSRNOT00000022091 | 1            | 0        |
| TUCP_000582 | XLOC_020637 | ENSRNOT00000064764 | 0.98460888   | 6.63E-09 |
| TUCP_000582 | XLOC_020637 | ENSRNOT00000076927 | 0.971163156  | 1.50E-07 |
| TUCP_000582 | XLOC_020637 | ENSRNOT00000092395 | 0.999522978  | 1.94E-16 |
| TUCP_001115 | XLOC_042333 | ENSRNOT00000010263 | 0.966567067  | 3.11E-07 |
| TUCP_000584 | XLOC_020716 | ENSRNOT00000013745 | 0.959193579  | 8.32E-07 |
| TUCP_000584 | XLOC_020716 | ENSRNOT00000075397 | -0.963770169 | 4.63E-07 |
| TUCP_000584 | XLOC_020716 | ENSRNOT00000019104 | 0.958468914  | 9.07E-07 |
| TUCP_000584 | XLOC_020716 | ENSRNOT00000019848 | 0.978724803  | 3.31E-08 |
| TUCP_000584 | XLOC_020716 | ENSRNOT00000077451 | 0.951544625  | 1.94E-06 |
| TUCP_000584 | XLOC_020716 | ENSRNOT00000006172 | 0.969866796  | 1.86E-07 |
| TUCP_000584 | XLOC_020716 | ENSRNOT0000001691  | -0.955520405 | 1.27E-06 |
| TUCP_000584 | XLOC_020716 | ENSRNOT00000079644 | 0.958672539  | 8.86E-07 |
| TUCP_000584 | XLOC_020716 | ENSRNOT00000020267 | -0.961867044 | 5.96E-07 |
| TUCP_000584 | XLOC_020716 | ENSRNOT00000079138 | -0.952023724 | 1.85E-06 |
| TUCP_000584 | XLOC_020716 | ENSRNOT00000064305 | 0.985438526  | 5.03E-09 |

|             |             |                     |              |          |
|-------------|-------------|---------------------|--------------|----------|
| TUCP_000584 | XL0C_020716 | ENSRNOT00000030914  | 0.957992814  | 9.60E-07 |
| TUCP_000584 | XL0C_020716 | ENSRNOT00000029508  | -0.96433886  | 4.28E-07 |
| TUCP_000584 | XL0C_020716 | ENSRNOT00000085885  | 0.979051075  | 3.07E-08 |
| TUCP_000584 | XL0C_020716 | ENSRNOT00000045233  | 0.957502818  | 1.02E-06 |
| TUCP_000584 | XL0C_020716 | ENSRNOT00000042633  | 0.958163845  | 9.41E-07 |
| TUCP_000584 | XL0C_020716 | ENSRNOT00000037955  | 0.950315598  | 2.19E-06 |
| TUCP_000584 | XL0C_020716 | ENSRNOT00000025309  | -0.958915042 | 8.60E-07 |
| TUCP_000584 | XL0C_020716 | ENSRNOT00000025308  | 0.955408667  | 1.29E-06 |
| TUCP_000584 | XL0C_020716 | ENSRNOT00000030850  | -0.953376516 | 1.60E-06 |
| TUCP_000584 | XL0C_020716 | ENSRNOT00000050063  | 0.955400864  | 1.29E-06 |
| TUCP_000584 | XL0C_020716 | ENSRNOT00000055540  | -0.960909343 | 6.73E-07 |
| TUCP_000584 | XL0C_020716 | ENSRNOT00000003247  | 0.96770159   | 2.62E-07 |
| TUCP_000584 | XL0C_020716 | ENSRNOT00000085311  | 0.952896042  | 1.69E-06 |
| TUCP_000584 | XL0C_020716 | ENSRNOT00000015986  | 0.978717092  | 3.32E-08 |
| TUCP_000584 | XL0C_020716 | ENSRNOT00000025284  | 0.979930089  | 2.48E-08 |
| TUCP_000584 | XL0C_020716 | ENSRNOT00000072771  | -0.961250848 | 6.45E-07 |
| TUCP_000584 | XL0C_020716 | ENSRNOT00000022620  | -0.959896049 | 7.64E-07 |
| TUCP_000584 | XL0C_020716 | ENSRNOT00000057045  | 0.957097599  | 1.06E-06 |
| TUCP_000584 | XL0C_020716 | ENSRNOT00000035320  | 0.96413341   | 4.40E-07 |
| TUCP_000584 | XL0C_020716 | ENSRNOT00000084674  | 0.957376519  | 1.03E-06 |
| TUCP_000584 | XL0C_020716 | ENSRNOT00000003414  | 0.960443243  | 7.14E-07 |
| TUCP_000584 | XL0C_020716 | ENSRNOT00000046807  | 0.962640494  | 5.38E-07 |
| TUCP_000584 | XL0C_020716 | ENSRNOT00000003412  | 0.971789003  | 1.34E-07 |
| TUCP_000584 | XL0C_020716 | ENSRNOT00000077856  | 0.972877496  | 1.10E-07 |
| TUCP_000584 | XL0C_020716 | ENSRNOT00000003794  | 0.972621931  | 1.16E-07 |
| TUCP_000584 | XL0C_020716 | ENSRNOT00000018488  | 0.959974681  | 7.56E-07 |
| TUCP_000584 | XL0C_020716 | ENSRNOT00000089673  | 0.970784513  | 1.60E-07 |
| TUCP_000584 | XL0C_020716 | ENSRNOT00000080522  | 0.99025227   | 6.82E-10 |
| TUCP_000584 | XL0C_020716 | ENSRNOT00000000049  | 0.961501457  | 6.24E-07 |
| TUCP_000584 | XL0C_020716 | ENSRNOT00000000048  | -0.962400186 | 5.56E-07 |
| TUCP_000584 | XL0C_020716 | ENSRNOT00000075934  | 0.960071774  | 7.47E-07 |
| TUCP_000584 | XL0C_020716 | ENSRNOT00000082686  | 0.986945972  | 2.92E-09 |
| TUCP_000584 | XL0C_020716 | ENSRNOT00000076181  | 0.950503146  | 2.15E-06 |
| TUCP_000584 | XL0C_020716 | ENSRNOT00000017269  | 0.954555846  | 1.41E-06 |
| TUCP_000584 | XL0C_020716 | ENSRNOT00000026462  | 0.982300456  | 1.33E-08 |
| TUCP_000584 | XL0C_020716 | ENSRNOT00000092945  | 0.962655848  | 5.37E-07 |
| TUCP_000584 | XL0C_020716 | ENSRNOT00000029179  | 0.950378408  | 2.18E-06 |
| TUCP_000584 | XL0C_020716 | ENSRNOT00000071388  | -0.95588862  | 1.22E-06 |
| TUCP_000584 | XL0C_020716 | ENSRNOT00000056145  | 0.955526899  | 1.27E-06 |
| TUCP_000584 | XL0C_020716 | ENSRNOT00000026525  | 0.960881003  | 6.76E-07 |
| TUCP_000584 | XL0C_020716 | ENSRNOT00000084313  | 0.955214047  | 1.32E-06 |
| TUCP_000584 | XL0C_020716 | ENSRNOT00000001401  | -0.973198689 | 1.04E-07 |
| TUCP_000584 | XL0C_020716 | ENSRNOT00000016132  | 0.956313333  | 1.16E-06 |
| TUCP_000584 | XL0C_020716 | ENSRNOT00000001366  | 0.992611235  | 1.71E-10 |
| TUCP_000584 | XL0C_020716 | ENSRNOT00000001360  | 0.967909294  | 2.54E-07 |
| TUCP_000584 | XL0C_020716 | ENSRNOT00000023506  | 0.963639187  | 4.71E-07 |
| TUCP_000584 | XL0C_020716 | ENSRNOT00000017081  | 0.960460862  | 7.12E-07 |
| TUCP_000584 | XL0C_020716 | ENSRNOT00000002313  | 0.966232751  | 3.27E-07 |
| TUCP_000584 | XL0C_020716 | ENSRNOT000000032363 | -0.965885864 | 3.44E-07 |
| TUCP_000584 | XL0C_020716 | ENSRNOT00000016637  | 0.968077005  | 2.47E-07 |
| TUCP_000584 | XL0C_020716 | ENSRNOT00000011714  | 0.975451483  | 6.74E-08 |

|             |             |                    |              |          |
|-------------|-------------|--------------------|--------------|----------|
| TUCP_000584 | XL0C_020716 | ENSRNOT00000045765 | 0.960064852  | 7.48E-07 |
| TUCP_000584 | XL0C_020716 | ENSRNOT00000092876 | 0.953663231  | 1.56E-06 |
| TUCP_000584 | XL0C_020716 | ENSRNOT00000000532 | 0.98434274   | 7.22E-09 |
| TUCP_000584 | XL0C_020716 | ENSRNOT00000002465 | -0.96011311  | 7.44E-07 |
| TUCP_000584 | XL0C_020716 | ENSRNOT00000079677 | 0.959809436  | 7.72E-07 |
| TUCP_000584 | XL0C_020716 | ENSRNOT00000003992 | 0.960308593  | 7.26E-07 |
| TUCP_000584 | XL0C_020716 | ENSRNOT00000019028 | -0.953060002 | 1.66E-06 |
| TUCP_000584 | XL0C_020716 | ENSRNOT00000013146 | -0.956084863 | 1.19E-06 |
| TUCP_000584 | XL0C_020716 | ENSRNOT00000021400 | 0.979682353  | 2.64E-08 |
| TUCP_000584 | XL0C_020716 | ENSRNOT00000012942 | -0.952181704 | 1.82E-06 |
| TUCP_000584 | XL0C_020716 | ENSRNOT00000086310 | 0.961702938  | 6.08E-07 |
| TUCP_000584 | XL0C_020716 | ENSRNOT00000020951 | -0.965424741 | 3.67E-07 |
| TUCP_000584 | XL0C_020716 | ENSRNOT00000082146 | 0.950479793  | 2.16E-06 |
| TUCP_000584 | XL0C_020716 | ENSRNOT00000023876 | -0.964260914 | 4.32E-07 |
| TUCP_000584 | XL0C_020716 | ENSRNOT00000034401 | 0.956217723  | 1.18E-06 |
| TUCP_000584 | XL0C_020716 | ENSRNOT00000012625 | 0.980354401  | 2.23E-08 |
| TUCP_000584 | XL0C_020716 | ENSRNOT00000003207 | 0.974711494  | 7.81E-08 |
| TUCP_000584 | XL0C_020716 | ENSRNOT00000006366 | 0.972192482  | 1.25E-07 |
| TUCP_000584 | XL0C_020716 | ENSRNOT00000033196 | 0.951450022  | 1.96E-06 |
| TUCP_000584 | XL0C_020716 | ENSRNOT00000085911 | 0.972152574  | 1.26E-07 |
| TUCP_000584 | XL0C_020716 | ENSRNOT00000044662 | 0.972545184  | 1.17E-07 |
| TUCP_000584 | XL0C_020716 | ENSRNOT00000064723 | 0.958686287  | 8.84E-07 |
| TUCP_000584 | XL0C_020716 | ENSRNOT00000073834 | 0.95452762   | 1.42E-06 |
| TUCP_000584 | XL0C_020716 | ENSRNOT00000086456 | 0.968237968  | 2.41E-07 |
| TUCP_000584 | XL0C_020716 | ENSRNOT00000036959 | 0.958050587  | 9.53E-07 |
| TUCP_000584 | XL0C_020716 | ENSRNOT00000010367 | -0.962340981 | 5.60E-07 |
| TUCP_000584 | XL0C_020716 | ENSRNOT00000089185 | 0.954402679  | 1.44E-06 |
| TUCP_000584 | XL0C_020716 | ENSRNOT00000023977 | 0.963110979  | 5.06E-07 |
| TUCP_000584 | XL0C_020716 | ENSRNOT00000067741 | 0.981401938  | 1.70E-08 |
| TUCP_000584 | XL0C_020716 | ENSRNOT00000009260 | 0.951994798  | 1.85E-06 |
| TUCP_000584 | XL0C_020716 | ENSRNOT00000048933 | 0.950103399  | 2.24E-06 |
| TUCP_000584 | XL0C_020716 | ENSRNOT00000006765 | 0.963965864  | 4.50E-07 |
| TUCP_000584 | XL0C_020716 | ENSRNOT00000035385 | -0.95137684  | 1.97E-06 |
| TUCP_000584 | XL0C_020716 | ENSRNOT00000009994 | 0.965320098  | 3.73E-07 |
| TUCP_000584 | XL0C_020716 | ENSRNOT00000014885 | 0.961814691  | 6.00E-07 |
| TUCP_000584 | XL0C_020716 | ENSRNOT00000005644 | 0.9522497    | 1.80E-06 |
| TUCP_000584 | XL0C_020716 | ENSRNOT00000071192 | 0.964482377  | 4.19E-07 |
| TUCP_000584 | XL0C_020716 | ENSRNOT00000018173 | 0.964957327  | 3.92E-07 |
| TUCP_000584 | XL0C_020716 | ENSRNOT00000040548 | 0.96705956   | 2.89E-07 |
| TUCP_000584 | XL0C_020716 | ENSRNOT00000073239 | 0.98425965   | 7.41E-09 |
| TUCP_000584 | XL0C_020716 | ENSRNOT00000040060 | 0.979240018  | 2.93E-08 |
| TUCP_000584 | XL0C_020716 | ENSRNOT00000010962 | 0.955910019  | 1.22E-06 |
| TUCP_000584 | XL0C_020716 | ENSRNOT00000045545 | 0.955794684  | 1.23E-06 |
| TUCP_000584 | XL0C_020716 | ENSRNOT00000010620 | 0.956286832  | 1.17E-06 |
| TUCP_000584 | XL0C_020716 | ENSRNOT00000039102 | -0.964397251 | 4.24E-07 |
| TUCP_000584 | XL0C_020716 | ENSRNOT00000078856 | 0.95044907   | 2.16E-06 |
| TUCP_000584 | XL0C_020716 | ENSRNOT00000009742 | 0.968955827  | 2.16E-07 |
| TUCP_000584 | XL0C_020716 | ENSRNOT00000001036 | 0.961301891  | 6.40E-07 |
| TUCP_000584 | XL0C_020716 | ENSRNOT00000007044 | 0.992894574  | 1.41E-10 |
| TUCP_000584 | XL0C_020716 | ENSRNOT00000007369 | -0.956606705 | 1.13E-06 |
| TUCP_000584 | XL0C_020716 | ENSRNOT00000085466 | -0.957601044 | 1.00E-06 |

|             |             |                    |              |          |
|-------------|-------------|--------------------|--------------|----------|
| TUCP_000584 | XL0C_020716 | ENSRNOT00000060757 | 0.962512606  | 5.47E-07 |
| TUCP_000584 | XL0C_020716 | ENSRNOT00000012996 | -0.95694869  | 1.08E-06 |
| TUCP_000584 | XL0C_020716 | ENSRNOT00000004941 | 0.958935899  | 8.58E-07 |
| TUCP_000584 | XL0C_020716 | ENSRNOT00000070912 | 0.968605521  | 2.28E-07 |
| TUCP_000584 | XL0C_020716 | ENSRNOT00000060595 | 0.973024737  | 1.08E-07 |
| TUCP_000584 | XL0C_020716 | ENSRNOT00000023252 | 0.95343086   | 1.59E-06 |
| TUCP_000584 | XL0C_020716 | ENSRNOT00000088679 | 0.973676152  | 9.52E-08 |
| TUCP_000584 | XL0C_020716 | ENSRNOT00000016776 | 0.975826127  | 6.24E-08 |
| TUCP_000584 | XL0C_020716 | ENSRNOT00000041106 | -0.958870567 | 8.65E-07 |
| TUCP_000584 | XL0C_020716 | ENSRNOT00000008987 | 0.961966517  | 5.88E-07 |
| TUCP_000584 | XL0C_020716 | ENSRNOT00000090355 | 0.954436443  | 1.43E-06 |
| TUCP_000584 | XL0C_020716 | ENSRNOT00000031935 | 0.976025633  | 5.99E-08 |
| TUCP_000584 | XL0C_020716 | ENSRNOT00000019473 | 0.967380677  | 2.75E-07 |
| TUCP_000584 | XL0C_020716 | ENSRNOT00000066041 | 0.95746514   | 1.02E-06 |
| TUCP_000584 | XL0C_020716 | ENSRNOT00000081835 | 0.978221048  | 3.72E-08 |
| TUCP_000584 | XL0C_020716 | ENSRNOT00000063930 | 0.955191215  | 1.32E-06 |
| TUCP_000584 | XL0C_020716 | ENSRNOT00000013058 | -0.953721397 | 1.55E-06 |
| TUCP_000584 | XL0C_020716 | ENSRNOT00000013116 | 0.978558864  | 3.44E-08 |
| TUCP_000584 | XL0C_020716 | ENSRNOT0000001855  | -0.957415935 | 1.03E-06 |
| TUCP_000584 | XL0C_020716 | ENSRNOT00000013025 | 0.953383934  | 1.60E-06 |
| TUCP_000584 | XL0C_020716 | ENSRNOT00000038178 | 0.979318362  | 2.88E-08 |
| TUCP_000584 | XL0C_020716 | ENSRNOT00000016077 | -0.953738202 | 1.54E-06 |
| TUCP_000584 | XL0C_020716 | ENSRNOT00000027301 | 0.974388648  | 8.31E-08 |
| TUCP_000584 | XL0C_020716 | ENSRNOT00000091050 | 0.955517238  | 1.27E-06 |
| TUCP_000584 | XL0C_020716 | ENSRNOT00000089418 | -0.9510664   | 2.03E-06 |
| TUCP_000584 | XL0C_020716 | ENSRNOT00000087838 | 0.962911186  | 5.19E-07 |
| TUCP_000584 | XL0C_020716 | ENSRNOT00000028561 | -0.95759663  | 1.01E-06 |
| TUCP_000584 | XL0C_020716 | ENSRNOT00000009963 | -0.957184581 | 1.05E-06 |
| TUCP_000584 | XL0C_020716 | ENSRNOT00000067566 | 0.966786963  | 3.01E-07 |
| TUCP_000584 | XL0C_020716 | ENSRNOT00000014479 | 0.974359764  | 8.36E-08 |
| TUCP_000584 | XL0C_020716 | ENSRNOT00000027220 | 0.963962605  | 4.51E-07 |
| TUCP_000584 | XL0C_020716 | ENSRNOT00000003326 | 0.983121601  | 1.05E-08 |
| TUCP_000584 | XL0C_020716 | ENSRNOT00000016306 | 0.972380421  | 1.21E-07 |
| TUCP_000584 | XL0C_020716 | ENSRNOT00000073019 | -0.962053878 | 5.81E-07 |
| TUCP_000584 | XL0C_020716 | ENSRNOT00000012699 | 0.95409582   | 1.49E-06 |
| TUCP_000584 | XL0C_020716 | ENSRNOT00000004007 | 0.96874295   | 2.23E-07 |
| TUCP_000584 | XL0C_020716 | ENSRNOT00000007821 | -0.962441675 | 5.53E-07 |
| TUCP_000584 | XL0C_020716 | ENSRNOT00000090338 | 0.966495497  | 3.14E-07 |
| TUCP_000584 | XL0C_020716 | ENSRNOT00000056100 | 0.955337988  | 1.30E-06 |
| TUCP_000584 | XL0C_020716 | ENSRNOT00000001077 | -0.953786673 | 1.54E-06 |
| TUCP_000584 | XL0C_020716 | ENSRNOT00000036838 | 0.962676923  | 5.36E-07 |
| TUCP_000584 | XL0C_020716 | ENSRNOT00000006443 | 0.963695032  | 4.67E-07 |
| TUCP_000584 | XL0C_020716 | ENSRNOT00000072762 | 0.952876128  | 1.69E-06 |
| TUCP_000584 | XL0C_020716 | ENSRNOT00000012583 | 0.95349565   | 1.58E-06 |
| TUCP_000584 | XL0C_020716 | ENSRNOT00000073643 | 0.974930923  | 7.48E-08 |
| TUCP_000584 | XL0C_020716 | ENSRNOT00000078349 | 0.958615214  | 8.92E-07 |
| TUCP_000584 | XL0C_020716 | ENSRNOT00000022502 | 0.964391582  | 4.25E-07 |
| TUCP_000584 | XL0C_020716 | ENSRNOT00000026928 | 0.982246552  | 1.35E-08 |
| TUCP_000584 | XL0C_020716 | ENSRNOT00000010252 | 0.965594853  | 3.58E-07 |
| TUCP_000584 | XL0C_020716 | ENSRNOT00000021802 | -0.958274833 | 9.29E-07 |
| TUCP_000584 | XL0C_020716 | ENSRNOT00000025856 | 0.95847496   | 9.07E-07 |

|             |             |                    |              |          |
|-------------|-------------|--------------------|--------------|----------|
| TUCP_000584 | XL0C_020716 | ENSRNOT00000039850 | 0.962365001  | 5.58E-07 |
| TUCP_000584 | XL0C_020716 | ENSRNOT00000078161 | 0.966368442  | 3.20E-07 |
| TUCP_000584 | XL0C_020716 | ENSRNOT00000005694 | 0.953138883  | 1.64E-06 |
| TUCP_000584 | XL0C_020716 | ENSRNOT00000023262 | 0.95678428   | 1.10E-06 |
| TUCP_000584 | XL0C_020716 | ENSRNOT00000008813 | 0.952183412  | 1.82E-06 |
| TUCP_000584 | XL0C_020716 | ENSRNOT00000050415 | 0.965387422  | 3.69E-07 |
| TUCP_000584 | XL0C_020716 | ENSRNOT00000045946 | -0.963182112 | 5.01E-07 |
| TUCP_000584 | XL0C_020716 | ENSRNOT00000017254 | 0.953206688  | 1.63E-06 |
| TUCP_000584 | XL0C_020716 | ENSRNOT00000055957 | 0.955222092  | 1.31E-06 |
| TUCP_000584 | XL0C_020716 | ENSRNOT00000010674 | 0.970418546  | 1.70E-07 |
| TUCP_000584 | XL0C_020716 | ENSRNOT00000023664 | 0.96389769   | 4.55E-07 |
| TUCP_000584 | XL0C_020716 | ENSRNOT00000016730 | 0.966483908  | 3.15E-07 |
| TUCP_000584 | XL0C_020716 | ENSRNOT00000007314 | 0.958580406  | 8.95E-07 |
| TUCP_000584 | XL0C_020716 | ENSRNOT00000065103 | 0.976545803  | 5.37E-08 |
| TUCP_000584 | XL0C_020716 | ENSRNOT00000064068 | 0.981539682  | 1.64E-08 |
| TUCP_000584 | XL0C_020716 | ENSRNOT00000005170 | 0.952979345  | 1.67E-06 |
| TUCP_000584 | XL0C_020716 | ENSRNOT00000023567 | 0.964633788  | 4.11E-07 |
| TUCP_000584 | XL0C_020716 | ENSRNOT00000068269 | 0.968500505  | 2.32E-07 |
| TUCP_000584 | XL0C_020716 | ENSRNOT00000026398 | 0.957496855  | 1.02E-06 |
| TUCP_000584 | XL0C_020716 | ENSRNOT00000071897 | 0.977991413  | 3.92E-08 |
| TUCP_000584 | XL0C_020716 | ENSRNOT00000050350 | 0.969634325  | 1.93E-07 |
| TUCP_000584 | XL0C_020716 | ENSRNOT00000018494 | 0.966890812  | 2.96E-07 |
| TUCP_000584 | XL0C_020716 | ENSRNOT00000024285 | 0.954941669  | 1.36E-06 |
| TUCP_000584 | XL0C_020716 | ENSRNOT00000071482 | 0.963908148  | 4.54E-07 |
| TUCP_000584 | XL0C_020716 | ENSRNOT00000009136 | 0.963582273  | 4.75E-07 |
| TUCP_000584 | XL0C_020716 | ENSRNOT00000023067 | 0.979718146  | 2.61E-08 |
| TUCP_000584 | XL0C_020716 | ENSRNOT00000027917 | -0.95398636  | 1.50E-06 |
| TUCP_000584 | XL0C_020716 | ENSRNOT00000010516 | 0.972028455  | 1.29E-07 |
| TUCP_000584 | XL0C_020716 | ENSRNOT00000000527 | 0.986498309  | 3.45E-09 |
| TUCP_000584 | XL0C_020716 | ENSRNOT00000039215 | 0.958780488  | 8.74E-07 |
| TUCP_000584 | XL0C_020716 | ENSRNOT00000067135 | 0.950198218  | 2.22E-06 |
| TUCP_000584 | XL0C_020716 | ENSRNOT00000081110 | 0.964106597  | 4.42E-07 |
| TUCP_000584 | XL0C_020716 | ENSRNOT00000039730 | 0.954315466  | 1.45E-06 |
| TUCP_000584 | XL0C_020716 | ENSRNOT00000028527 | 0.96689704   | 2.96E-07 |
| TUCP_000584 | XL0C_020716 | ENSRNOT00000088202 | 0.973261384  | 1.03E-07 |
| TUCP_000584 | XL0C_020716 | ENSRNOT00000091863 | 0.960576573  | 7.02E-07 |
| TUCP_000584 | XL0C_020716 | ENSRNOT00000082151 | 0.957141318  | 1.06E-06 |
| TUCP_000584 | XL0C_020716 | ENSRNOT00000011572 | 0.979900296  | 2.50E-08 |
| TUCP_000584 | XL0C_020716 | ENSRNOT00000000155 | -0.960499639 | 7.09E-07 |
| TUCP_000584 | XL0C_020716 | ENSRNOT00000001607 | -0.961507285 | 6.24E-07 |
| TUCP_000584 | XL0C_020716 | ENSRNOT00000036282 | -0.965669593 | 3.55E-07 |
| TUCP_000584 | XL0C_020716 | ENSRNOT00000040629 | -0.968833347 | 2.20E-07 |
| TUCP_000584 | XL0C_020716 | ENSRNOT00000046126 | 0.975210072  | 7.07E-08 |
| TUCP_000584 | XL0C_020716 | ENSRNOT00000077479 | 0.977726015  | 4.16E-08 |
| TUCP_000584 | XL0C_020716 | ENSRNOT00000022142 | -0.959660879 | 7.86E-07 |
| TUCP_000584 | XL0C_020716 | ENSRNOT00000030007 | 0.988844832  | 1.34E-09 |
| TUCP_000584 | XL0C_020716 | ENSRNOT00000015946 | 0.974090355  | 8.80E-08 |
| TUCP_000584 | XL0C_020716 | ENSRNOT00000058763 | 0.955018541  | 1.34E-06 |
| TUCP_000584 | XL0C_020716 | ENSRNOT00000023962 | 0.985237632  | 5.39E-09 |
| TUCP_000584 | XL0C_020716 | ENSRNOT00000000529 | 0.986951246  | 2.91E-09 |
| TUCP_000584 | XL0C_020716 | ENSRNOT00000074629 | 0.955203567  | 1.32E-06 |



|             |             |                     |              |          |
|-------------|-------------|---------------------|--------------|----------|
| TUCP_000584 | XL0C_020716 | ENSRNOT00000025819  | 0.96532403   | 3.73E-07 |
| TUCP_000584 | XL0C_020716 | ENSRNOT00000015318  | 0.977446775  | 4.42E-08 |
| TUCP_000584 | XL0C_020716 | ENSRNOT00000073388  | 0.973468984  | 9.90E-08 |
| TUCP_000584 | XL0C_020716 | ENSRNOT00000028907  | -0.954699335 | 1.39E-06 |
| TUCP_000584 | XL0C_020716 | ENSRNOT00000014317  | 0.980797623  | 1.99E-08 |
| TUCP_000584 | XL0C_020716 | ENSRNOT00000005486  | 0.954341262  | 1.45E-06 |
| TUCP_000584 | XL0C_020716 | ENSRNOT00000045532  | 0.969777475  | 1.89E-07 |
| TUCP_000584 | XL0C_020716 | ENSRNOT00000041151  | 0.950784613  | 2.09E-06 |
| TUCP_000584 | XL0C_020716 | ENSRNOT00000025887  | 0.964046686  | 4.45E-07 |
| TUCP_000584 | XL0C_020716 | ENSRNOT00000066211  | 0.96946689   | 1.99E-07 |
| TUCP_000584 | XL0C_020716 | ENSRNOT00000005257  | -0.959543261 | 7.97E-07 |
| TUCP_000584 | XL0C_020716 | ENSRNOT00000039296  | -0.95579403  | 1.23E-06 |
| TUCP_000584 | XL0C_020716 | ENSRNOT00000039551  | 0.965952666  | 3.40E-07 |
| TUCP_000584 | XL0C_020716 | ENSRNOT000000082998 | -0.950153942 | 2.23E-06 |
| TUCP_000584 | XL0C_020716 | ENSRNOT00000075656  | 0.954717638  | 1.39E-06 |
| TUCP_000584 | XL0C_020716 | ENSRNOT00000007350  | -0.95181882  | 1.89E-06 |
| TUCP_000584 | XL0C_020716 | ENSRNOT00000083573  | 0.961966133  | 5.88E-07 |
| TUCP_000584 | XL0C_020716 | ENSRNOT00000005138  | 0.95287086   | 1.69E-06 |
| TUCP_000584 | XL0C_020716 | ENSRNOT00000083578  | -0.958238041 | 9.33E-07 |
| TUCP_000584 | XL0C_020716 | ENSRNOT00000045443  | 0.971419524  | 1.43E-07 |
| TUCP_000584 | XL0C_020716 | ENSRNOT00000059524  | 0.959648576  | 7.87E-07 |
| TUCP_000584 | XL0C_020716 | ENSRNOT00000017361  | -0.952820603 | 1.70E-06 |
| TUCP_000584 | XL0C_020716 | ENSRNOT00000017362  | 0.951840967  | 1.88E-06 |
| TUCP_000584 | XL0C_020716 | ENSRNOT00000019465  | 0.984372439  | 7.15E-09 |
| TUCP_000584 | XL0C_020716 | ENSRNOT00000018696  | 0.9835728    | 9.17E-09 |
| TUCP_000584 | XL0C_020716 | ENSRNOT00000009073  | 0.967208964  | 2.83E-07 |
| TUCP_000584 | XL0C_020716 | ENSRNOT00000001586  | 0.973303217  | 1.02E-07 |
| TUCP_000584 | XL0C_020716 | ENSRNOT00000001468  | 0.959558252  | 7.96E-07 |
| TUCP_000584 | XL0C_020716 | ENSRNOT00000013516  | -0.954836923 | 1.37E-06 |
| TUCP_000584 | XL0C_020716 | ENSRNOT00000013043  | 0.96573631   | 3.51E-07 |
| TUCP_000584 | XL0C_020716 | ENSRNOT00000034603  | 0.950090765  | 2.24E-06 |
| TUCP_000584 | XL0C_020716 | ENSRNOT00000016541  | 0.966266477  | 3.25E-07 |
| TUCP_000584 | XL0C_020716 | ENSRNOT00000012060  | -0.954475788 | 1.43E-06 |
| TUCP_000584 | XL0C_020716 | ENSRNOT00000009000  | 0.9698747    | 1.86E-07 |
| TUCP_000584 | XL0C_020716 | ENSRNOT00000034282  | -0.964116182 | 4.41E-07 |
| TUCP_000584 | XL0C_020716 | ENSRNOT00000039523  | -0.955584258 | 1.26E-06 |
| TUCP_000584 | XL0C_020716 | ENSRNOT00000011731  | 0.959619971  | 7.90E-07 |
| TUCP_000584 | XL0C_020716 | ENSRNOT00000089545  | 0.966696572  | 3.05E-07 |
| TUCP_000584 | XL0C_020716 | ENSRNOT00000037681  | 0.964904991  | 3.95E-07 |
| TUCP_000584 | XL0C_020716 | ENSRNOT00000067009  | 0.95752309   | 1.01E-06 |
| TUCP_000584 | XL0C_020716 | ENSRNOT00000000990  | 0.9620071    | 5.85E-07 |
| TUCP_000584 | XL0C_020716 | ENSRNOT00000085151  | 0.956494285  | 1.14E-06 |
| TUCP_000584 | XL0C_020716 | ENSRNOT00000016330  | 0.961433246  | 6.30E-07 |
| TUCP_000584 | XL0C_020716 | ENSRNOT00000019121  | 0.989187293  | 1.14E-09 |
| TUCP_000584 | XL0C_020716 | ENSRNOT00000086775  | 0.982512582  | 1.25E-08 |
| TUCP_000584 | XL0C_020716 | ENSRNOT00000019820  | -0.957877493 | 9.73E-07 |
| TUCP_000584 | XL0C_020716 | ENSRNOT00000091864  | 0.955879964  | 1.22E-06 |
| TUCP_000584 | XL0C_020716 | ENSRNOT00000083351  | 0.962672709  | 5.36E-07 |
| TUCP_000584 | XL0C_020716 | ENSRNOT00000012963  | 0.972988546  | 1.08E-07 |
| TUCP_000584 | XL0C_020716 | ENSRNOT00000011832  | 0.954835568  | 1.37E-06 |
| TUCP_000584 | XL0C_020716 | ENSRNOT00000020446  | -0.955637552 | 1.26E-06 |

|             |             |                    |              |          |
|-------------|-------------|--------------------|--------------|----------|
| TUCP_000584 | XL0C_020716 | ENSRNOT00000032301 | 0.977383118  | 4.49E-08 |
| TUCP_000584 | XL0C_020716 | ENSRNOT00000024069 | 0.959055377  | 8.46E-07 |
| TUCP_000584 | XL0C_020716 | ENSRNOT00000003940 | 0.950121676  | 2.24E-06 |
| TUCP_000584 | XL0C_020716 | ENSRNOT00000014163 | 0.959115134  | 8.40E-07 |
| TUCP_000584 | XL0C_020716 | ENSRNOT00000020932 | 0.954438445  | 1.43E-06 |
| TUCP_000584 | XL0C_020716 | ENSRNOT00000068745 | -0.951408894 | 1.97E-06 |
| TUCP_000584 | XL0C_020716 | ENSRNOT00000030975 | 0.972937952  | 1.09E-07 |
| TUCP_000584 | XL0C_020716 | ENSRNOT00000092068 | -0.962494557 | 5.49E-07 |
| TUCP_000584 | XL0C_020716 | ENSRNOT00000017949 | 0.960063245  | 7.48E-07 |
| TUCP_000584 | XL0C_020716 | ENSRNOT00000012646 | 0.966562413  | 3.11E-07 |
| TUCP_000584 | XL0C_020716 | ENSRNOT00000074212 | -0.950966268 | 2.06E-06 |
| TUCP_000584 | XL0C_020716 | ENSRNOT00000013864 | 0.977955795  | 3.95E-08 |
| TUCP_000584 | XL0C_020716 | ENSRNOT00000027435 | -0.961507592 | 6.24E-07 |
| TUCP_000584 | XL0C_020716 | ENSRNOT00000003544 | 0.953390119  | 1.60E-06 |
| TUCP_000584 | XL0C_020716 | ENSRNOT00000022194 | 0.979656278  | 2.65E-08 |
| TUCP_000584 | XL0C_020716 | ENSRNOT00000019389 | 0.954512379  | 1.42E-06 |
| TUCP_000584 | XL0C_020716 | ENSRNOT00000060098 | 0.959159866  | 8.35E-07 |
| TUCP_000584 | XL0C_020716 | ENSRNOT00000067739 | 0.962551587  | 5.45E-07 |
| TUCP_000584 | XL0C_020716 | ENSRNOT00000019386 | 0.978443505  | 3.54E-08 |
| TUCP_000584 | XL0C_020716 | ENSRNOT00000076230 | -0.968763966 | 2.22E-07 |
| TUCP_000584 | XL0C_020716 | ENSRNOT00000014767 | 0.957009382  | 1.08E-06 |
| TUCP_000584 | XL0C_020716 | ENSRNOT00000083110 | 0.966668386  | 3.06E-07 |
| TUCP_000584 | XL0C_020716 | ENSRNOT00000036658 | 0.969605224  | 1.94E-07 |
| TUCP_000584 | XL0C_020716 | ENSRNOT00000007738 | 0.966234872  | 3.27E-07 |
| TUCP_000584 | XL0C_020716 | ENSRNOT00000022107 | 0.953284624  | 1.62E-06 |
| TUCP_000584 | XL0C_020716 | ENSRNOT00000030803 | 0.979211189  | 2.95E-08 |
| TUCP_000584 | XL0C_020716 | ENSRNOT00000084552 | 0.972732562  | 1.13E-07 |
| TUCP_000584 | XL0C_020716 | ENSRNOT00000034883 | 0.952653777  | 1.73E-06 |
| TUCP_000584 | XL0C_020716 | ENSRNOT00000020155 | -0.963029674 | 5.11E-07 |
| TUCP_000584 | XL0C_020716 | ENSRNOT00000015320 | 0.966953213  | 2.94E-07 |
| TUCP_000584 | XL0C_020716 | ENSRNOT00000000707 | 0.978889178  | 3.19E-08 |
| TUCP_000584 | XL0C_020716 | ENSRNOT00000071239 | 0.979282534  | 2.90E-08 |
| TUCP_000584 | XL0C_020716 | ENSRNOT00000005910 | 0.957770562  | 9.85E-07 |
| TUCP_000584 | XL0C_020716 | ENSRNOT00000075917 | 0.984040339  | 7.94E-09 |
| TUCP_000584 | XL0C_020716 | ENSRNOT00000029701 | -0.95290219  | 1.69E-06 |
| TUCP_000584 | XL0C_020716 | ENSRNOT00000014585 | 0.97057436   | 1.65E-07 |
| TUCP_000584 | XL0C_020716 | ENSRNOT00000074261 | 0.989970438  | 7.86E-10 |
| TUCP_000584 | XL0C_020716 | ENSRNOT00000055062 | 0.966810734  | 3.00E-07 |
| TUCP_000584 | XL0C_020716 | ENSRNOT00000016939 | 0.957569888  | 1.01E-06 |
| TUCP_000584 | XL0C_020716 | ENSRNOT00000080591 | -0.955274487 | 1.31E-06 |
| TUCP_000584 | XL0C_020716 | ENSRNOT00000030329 | 0.960237416  | 7.32E-07 |
| TUCP_000584 | XL0C_020716 | ENSRNOT00000017469 | 0.981074022  | 1.85E-08 |
| TUCP_000584 | XL0C_020716 | ENSRNOT00000033450 | 0.976186151  | 5.80E-08 |
| TUCP_000584 | XL0C_020716 | ENSRNOT00000045311 | 0.966127379  | 3.32E-07 |
| TUCP_000584 | XL0C_020716 | ENSRNOT00000027121 | -0.950893239 | 2.07E-06 |
| TUCP_000584 | XL0C_020716 | ENSRNOT00000023078 | -0.962468947 | 5.51E-07 |
| TUCP_000584 | XL0C_020716 | ENSRNOT00000004999 | -0.958785651 | 8.74E-07 |
| TUCP_000584 | XL0C_020716 | ENSRNOT00000009122 | -0.961605356 | 6.16E-07 |
| TUCP_000584 | XL0C_020716 | ENSRNOT00000013463 | -0.971402293 | 1.44E-07 |
| TUCP_000584 | XL0C_020716 | ENSRNOT00000039335 | 0.973195714  | 1.04E-07 |
| TUCP_000584 | XL0C_020716 | ENSRNOT00000007889 | 0.969057591  | 2.12E-07 |

|             |             |                    |              |          |
|-------------|-------------|--------------------|--------------|----------|
| TUCP_000584 | XL0C_020716 | ENSRNOT00000061191 | 0.959126297  | 8.39E-07 |
| TUCP_000584 | XL0C_020716 | ENSRNOT00000029202 | 0.956377123  | 1.16E-06 |
| TUCP_000584 | XL0C_020716 | ENSRNOT00000017907 | 0.977588159  | 4.29E-08 |
| TUCP_000584 | XL0C_020716 | ENSRNOT00000028434 | 0.973604096  | 9.65E-08 |
| TUCP_000584 | XL0C_020716 | ENSRNOT00000025794 | 0.978021635  | 3.89E-08 |
| TUCP_000584 | XL0C_020716 | ENSRNOT00000058111 | 0.972303949  | 1.23E-07 |
| TUCP_000584 | XL0C_020716 | ENSRNOT00000011869 | 0.980029004  | 2.42E-08 |
| TUCP_000584 | XL0C_020716 | ENSRNOT0000001720  | 0.964231095  | 4.34E-07 |
| TUCP_000584 | XL0C_020716 | ENSRNOT0000002443  | -0.950273736 | 2.20E-06 |
| TUCP_000584 | XL0C_020716 | ENSRNOT0000002114  | 0.962935715  | 5.18E-07 |
| TUCP_000584 | XL0C_020716 | ENSRNOT0000009993  | 0.976842417  | 5.05E-08 |
| TUCP_000584 | XL0C_020716 | ENSRNOT0000006376  | 0.950755838  | 2.10E-06 |
| TUCP_000584 | XL0C_020716 | ENSRNOT00000027753 | 0.96846235   | 2.33E-07 |
| TUCP_000584 | XL0C_020716 | ENSRNOT00000046215 | 0.984317049  | 7.28E-09 |
| TUCP_000584 | XL0C_020716 | ENSRNOT00000000083 | 0.971627794  | 1.38E-07 |
| TUCP_000584 | XL0C_020716 | ENSRNOT00000076467 | 0.973173628  | 1.05E-07 |
| TUCP_000584 | XL0C_020716 | ENSRNOT00000000120 | -0.956123049 | 1.19E-06 |
| TUCP_000584 | XL0C_020716 | ENSRNOT00000013632 | -0.952616545 | 1.74E-06 |
| TUCP_000584 | XL0C_020716 | ENSRNOT00000028545 | 0.960689966  | 6.92E-07 |
| TUCP_000584 | XL0C_020716 | ENSRNOT00000027575 | 0.967758986  | 2.60E-07 |
| TUCP_000584 | XL0C_020716 | ENSRNOT00000028225 | -0.96586785  | 3.45E-07 |
| TUCP_000584 | XL0C_020716 | ENSRNOT00000019172 | 0.97657045   | 5.35E-08 |
| TUCP_000584 | XL0C_020716 | ENSRNOT00000068267 | 0.957612519  | 1.00E-06 |
| TUCP_000584 | XL0C_020716 | ENSRNOT00000020994 | 0.977317877  | 4.55E-08 |
| TUCP_000584 | XL0C_020716 | ENSRNOT00000032248 | -0.950116375 | 2.24E-06 |
| TUCP_000584 | XL0C_020716 | ENSRNOT00000019911 | 0.950935946  | 2.06E-06 |
| TUCP_000584 | XL0C_020716 | ENSRNOT00000032236 | 0.963106968  | 5.06E-07 |
| TUCP_000584 | XL0C_020716 | ENSRNOT00000016372 | 0.976326992  | 5.63E-08 |
| TUCP_000584 | XL0C_020716 | ENSRNOT00000036972 | 0.956290659  | 1.17E-06 |
| TUCP_000584 | XL0C_020716 | ENSRNOT00000064700 | -0.958402265 | 9.15E-07 |
| TUCP_000584 | XL0C_020716 | ENSRNOT00000025252 | 0.963459794  | 4.82E-07 |
| TUCP_000584 | XL0C_020716 | ENSRNOT00000036194 | 0.953376775  | 1.60E-06 |
| TUCP_000584 | XL0C_020716 | ENSRNOT00000077186 | 0.967466151  | 2.72E-07 |
| TUCP_000584 | XL0C_020716 | ENSRNOT00000081314 | 0.973593125  | 9.67E-08 |
| TUCP_000584 | XL0C_020716 | ENSRNOT00000014780 | 0.97141238   | 1.43E-07 |
| TUCP_000584 | XL0C_020716 | ENSRNOT00000006460 | -0.974954754 | 7.44E-08 |
| TUCP_000584 | XL0C_020716 | ENSRNOT00000026279 | 0.983817003  | 8.51E-09 |
| TUCP_000584 | XL0C_020716 | ENSRNOT00000021506 | 0.950506938  | 2.15E-06 |
| TUCP_000584 | XL0C_020716 | ENSRNOT0000004713  | 0.95107825   | 2.03E-06 |
| TUCP_000584 | XL0C_020716 | ENSRNOT00000060607 | 0.959534928  | 7.98E-07 |
| TUCP_000584 | XL0C_020716 | ENSRNOT00000021858 | -0.958278232 | 9.28E-07 |
| TUCP_000584 | XL0C_020716 | ENSRNOT00000065942 | 0.993354976  | 1.01E-10 |
| TUCP_000584 | XL0C_020716 | ENSRNOT00000014309 | 0.962187393  | 5.71E-07 |
| TUCP_000584 | XL0C_020716 | ENSRNOT00000074389 | 0.950205682  | 2.22E-06 |
| TUCP_000584 | XL0C_020716 | ENSRNOT00000066204 | 0.975966165  | 6.07E-08 |
| TUCP_000584 | XL0C_020716 | ENSRNOT00000039836 | 0.950527318  | 2.15E-06 |
| TUCP_000584 | XL0C_020716 | ENSRNOT00000018101 | 0.990486345  | 6.04E-10 |
| TUCP_000584 | XL0C_020716 | ENSRNOT00000003012 | 0.964287281  | 4.31E-07 |
| TUCP_000584 | XL0C_020716 | ENSRNOT00000000052 | 0.958545723  | 8.99E-07 |
| TUCP_000584 | XL0C_020716 | ENSRNOT00000073569 | 0.966609728  | 3.09E-07 |
| TUCP_000584 | XL0C_020716 | ENSRNOT00000087604 | -0.954962129 | 1.35E-06 |

|             |             |                    |              |          |
|-------------|-------------|--------------------|--------------|----------|
| TUCP_000584 | XL0C_020716 | ENSRNOT00000083568 | -0.956759389 | 1.11E-06 |
| TUCP_000584 | XL0C_020716 | ENSRNOT00000039177 | 0.952532544  | 1.75E-06 |
| TUCP_000584 | XL0C_020716 | ENSRNOT00000005620 | 0.95730525   | 1.04E-06 |
| TUCP_000584 | XL0C_020716 | ENSRNOT00000017375 | 0.975009584  | 7.36E-08 |
| TUCP_000584 | XL0C_020716 | ENSRNOT00000068044 | -0.95206546  | 1.84E-06 |
| TUCP_000584 | XL0C_020716 | ENSRNOT00000012881 | 0.959752131  | 7.77E-07 |
| TUCP_000584 | XL0C_020716 | ENSRNOT00000045855 | 0.952309325  | 1.79E-06 |
| TUCP_000584 | XL0C_020716 | ENSRNOT00000028363 | 0.963450484  | 4.83E-07 |
| TUCP_000584 | XL0C_020716 | ENSRNOT00000014533 | 0.962706836  | 5.34E-07 |
| TUCP_000584 | XL0C_020716 | ENSRNOT00000088133 | 0.966149577  | 3.31E-07 |
| TUCP_000584 | XL0C_020716 | ENSRNOT00000016629 | -0.963814879 | 4.60E-07 |
| TUCP_000584 | XL0C_020716 | ENSRNOT00000075209 | 0.973172094  | 1.05E-07 |
| TUCP_000584 | XL0C_020716 | ENSRNOT00000001979 | 0.955339041  | 1.30E-06 |
| TUCP_000584 | XL0C_020716 | ENSRNOT00000083968 | 0.96807887   | 2.47E-07 |
| TUCP_000584 | XL0C_020716 | ENSRNOT00000083967 | -0.968485205 | 2.32E-07 |
| TUCP_000584 | XL0C_020716 | ENSRNOT00000083964 | 0.971928105  | 1.31E-07 |
| TUCP_000584 | XL0C_020716 | ENSRNOT00000061304 | 0.978055539  | 3.86E-08 |
| TUCP_000584 | XL0C_020716 | ENSRNOT00000079609 | -0.966176685 | 3.29E-07 |
| TUCP_000584 | XL0C_020716 | ENSRNOT00000016447 | 0.963530685  | 4.78E-07 |
| TUCP_000584 | XL0C_020716 | ENSRNOT00000012314 | 0.955120457  | 1.33E-06 |
| TUCP_000584 | XL0C_020716 | ENSRNOT00000066888 | 0.982273924  | 1.34E-08 |
| TUCP_000584 | XL0C_020716 | ENSRNOT00000002151 | 0.965500334  | 3.63E-07 |
| TUCP_000584 | XL0C_020716 | ENSRNOT00000041091 | 0.964076138  | 4.44E-07 |
| TUCP_000584 | XL0C_020716 | ENSRNOT00000029845 | 0.95485957   | 1.37E-06 |
| TUCP_000584 | XL0C_020716 | ENSRNOT00000086260 | 0.955735494  | 1.24E-06 |
| TUCP_000584 | XL0C_020716 | ENSRNOT00000064667 | 0.952615988  | 1.74E-06 |
| TUCP_000584 | XL0C_020716 | ENSRNOT00000000177 | 0.957884746  | 9.72E-07 |
| TUCP_000584 | XL0C_020716 | ENSRNOT00000018328 | 0.993269979  | 1.08E-10 |
| TUCP_000584 | XL0C_020716 | ENSRNOT00000038610 | 0.980472838  | 2.16E-08 |
| TUCP_000584 | XL0C_020716 | ENSRNOT00000010683 | 0.959182457  | 8.33E-07 |
| TUCP_000584 | XL0C_020716 | ENSRNOT00000026988 | 0.959986374  | 7.55E-07 |
| TUCP_000584 | XL0C_020716 | ENSRNOT00000012657 | 0.958078942  | 9.50E-07 |
| TUCP_000584 | XL0C_020716 | ENSRNOT00000050119 | 0.953684406  | 1.55E-06 |
| TUCP_000584 | XL0C_020716 | ENSRNOT00000090853 | 0.971036491  | 1.53E-07 |
| TUCP_000584 | XL0C_020716 | ENSRNOT00000089265 | 0.962461937  | 5.51E-07 |
| TUCP_000584 | XL0C_020716 | ENSRNOT00000031261 | -0.969852328 | 1.86E-07 |
| TUCP_000584 | XL0C_020716 | ENSRNOT00000067836 | 0.977882739  | 4.02E-08 |
| TUCP_000584 | XL0C_020716 | ENSRNOT00000019816 | 0.960508472  | 7.08E-07 |
| TUCP_000584 | XL0C_020716 | ENSRNOT00000073847 | 0.97657812   | 5.34E-08 |
| TUCP_000584 | XL0C_020716 | ENSRNOT00000078366 | -0.951922517 | 1.87E-06 |
| TUCP_000584 | XL0C_020716 | ENSRNOT00000025222 | 0.972454801  | 1.19E-07 |
| TUCP_000584 | XL0C_020716 | ENSRNOT00000056015 | 0.965669526  | 3.55E-07 |
| TUCP_000584 | XL0C_020716 | ENSRNOT00000068528 | 0.9945229    | 3.85E-11 |
| TUCP_000584 | XL0C_020716 | ENSRNOT00000011675 | -0.959757274 | 7.77E-07 |
| TUCP_000584 | XL0C_020716 | ENSRNOT00000004290 | -0.962897095 | 5.20E-07 |
| TUCP_000584 | XL0C_020716 | ENSRNOT00000039000 | 0.985758487  | 4.51E-09 |
| TUCP_000584 | XL0C_020716 | ENSRNOT00000030692 | 0.964721122  | 4.06E-07 |
| TUCP_000584 | XL0C_020716 | ENSRNOT00000019713 | 0.958486127  | 9.06E-07 |
| TUCP_000584 | XL0C_020716 | ENSRNOT00000020005 | -0.953852428 | 1.53E-06 |
| TUCP_000584 | XL0C_020716 | ENSRNOT00000085214 | 0.952733297  | 1.72E-06 |
| TUCP_000584 | XL0C_020716 | ENSRNOT00000083632 | 0.967111574  | 2.87E-07 |

|             |             |                    |              |          |
|-------------|-------------|--------------------|--------------|----------|
| TUCP_000584 | XL0C_020716 | ENSRNOT00000093385 | -0.956142156 | 1.19E-06 |
| TUCP_000584 | XL0C_020716 | ENSRNOT00000017224 | 0.983633437  | 9.00E-09 |
| TUCP_000584 | XL0C_020716 | ENSRNOT00000049725 | 0.960172191  | 7.38E-07 |
| TUCP_000584 | XL0C_020716 | ENSRNOT00000026235 | 0.964694185  | 4.07E-07 |
| TUCP_000584 | XL0C_020716 | ENSRNOT00000010753 | 0.957199448  | 1.05E-06 |
| TUCP_000584 | XL0C_020716 | ENSRNOT00000087346 | -0.953822227 | 1.53E-06 |
| TUCP_000584 | XL0C_020716 | ENSRNOT00000026258 | -0.953026811 | 1.66E-06 |
| TUCP_000584 | XL0C_020716 | ENSRNOT00000009202 | -0.952994764 | 1.67E-06 |
| TUCP_000584 | XL0C_020716 | ENSRNOT00000088615 | 0.966196924  | 3.28E-07 |
| TUCP_000584 | XL0C_020716 | ENSRNOT00000059181 | -0.968220338 | 2.42E-07 |
| TUCP_000584 | XL0C_020716 | ENSRNOT00000007077 | 0.959499865  | 8.02E-07 |
| TUCP_000584 | XL0C_020716 | ENSRNOT00000003691 | 0.980189323  | 2.32E-08 |
| TUCP_000584 | XL0C_020716 | ENSRNOT00000022389 | 0.984862321  | 6.10E-09 |
| TUCP_000584 | XL0C_020716 | ENSRNOT00000014809 | 0.97364704   | 9.58E-08 |
| TUCP_000584 | XL0C_020716 | ENSRNOT00000064849 | 0.987201278  | 2.65E-09 |
| TUCP_000584 | XL0C_020716 | ENSRNOT00000045950 | 0.959125681  | 8.39E-07 |
| TUCP_000584 | XL0C_020716 | ENSRNOT00000008901 | 0.952332272  | 1.79E-06 |
| TUCP_000584 | XL0C_020716 | ENSRNOT00000016260 | 0.956035548  | 1.20E-06 |
| TUCP_000584 | XL0C_020716 | ENSRNOT00000004770 | 0.99040018   | 6.32E-10 |
| TUCP_000584 | XL0C_020716 | ENSRNOT00000023017 | 0.983207215  | 1.02E-08 |
| TUCP_000584 | XL0C_020716 | ENSRNOT00000016265 | 0.984341754  | 7.22E-09 |
| TUCP_000584 | XL0C_020716 | ENSRNOT00000039221 | 0.954906572  | 1.36E-06 |
| TUCP_000584 | XL0C_020716 | ENSRNOT00000018634 | 0.95688472   | 1.09E-06 |
| TUCP_000584 | XL0C_020716 | ENSRNOT00000017340 | 0.985270946  | 5.33E-09 |
| TUCP_000584 | XL0C_020716 | ENSRNOT00000016740 | -0.955481609 | 1.28E-06 |
| TUCP_000584 | XL0C_020716 | ENSRNOT00000019768 | -0.95337038  | 1.61E-06 |
| TUCP_000584 | XL0C_020716 | ENSRNOT00000080677 | 0.98383298   | 8.47E-09 |
| TUCP_000584 | XL0C_020716 | ENSRNOT00000025460 | -0.957236504 | 1.05E-06 |
| TUCP_000584 | XL0C_020716 | ENSRNOT00000025784 | 0.966976637  | 2.93E-07 |
| TUCP_000584 | XL0C_020716 | ENSRNOT00000028130 | 0.954441109  | 1.43E-06 |
| TUCP_000584 | XL0C_020716 | ENSRNOT00000063821 | 0.952222605  | 1.81E-06 |
| TUCP_000584 | XL0C_020716 | ENSRNOT00000025913 | 0.971030789  | 1.53E-07 |
| TUCP_000584 | XL0C_020716 | ENSRNOT00000027360 | 0.972024532  | 1.29E-07 |
| TUCP_000584 | XL0C_020716 | ENSRNOT00000049285 | 0.960205759  | 7.35E-07 |
| TUCP_000584 | XL0C_020716 | ENSRNOT00000044486 | 0.964524379  | 4.17E-07 |
| TUCP_000584 | XL0C_020716 | ENSRNOT00000079414 | 0.980925303  | 1.93E-08 |
| TUCP_000584 | XL0C_020716 | ENSRNOT00000024011 | -0.975886785 | 6.17E-08 |
| TUCP_000584 | XL0C_020716 | ENSRNOT00000000134 | 0.987397029  | 2.45E-09 |
| TUCP_000584 | XL0C_020716 | ENSRNOT00000005885 | 0.964811167  | 4.01E-07 |
| TUCP_000584 | XL0C_020716 | ENSRNOT00000011326 | 0.98313908   | 1.04E-08 |
| TUCP_001117 | XL0C_042333 | ENSRNOT00000076927 | 0.95108622   | 2.03E-06 |
| TUCP_001117 | XL0C_042333 | ENSRNOT00000076239 | 0.962161869  | 5.73E-07 |
| TUCP_000586 | XL0C_020757 | ENSRNOT00000071273 | 0.959082438  | 8.43E-07 |
| TUCP_001119 | XL0C_042333 | ENSRNOT00000088012 | 0.953571159  | 1.57E-06 |
| TUCP_001119 | XL0C_042333 | ENSRNOT00000084066 | 0.967125558  | 2.86E-07 |
| TUCP_000427 | XL0C_014387 | ENSRNOT00000074990 | 0.972162172  | 1.26E-07 |
| TUCP_000427 | XL0C_014387 | ENSRNOT00000068444 | 0.972162172  | 1.26E-07 |
| TUCP_000427 | XL0C_014387 | ENSRNOT00000081370 | 0.973348452  | 1.01E-07 |
| TUCP_000427 | XL0C_014387 | ENSRNOT00000078645 | 0.967237538  | 2.81E-07 |
| TUCP_000427 | XL0C_014387 | ENSRNOT00000075987 | 0.954219892  | 1.47E-06 |
| TUCP_000427 | XL0C_014387 | ENSRNOT00000082043 | 0.969219674  | 2.07E-07 |

|             |             |                    |             |          |
|-------------|-------------|--------------------|-------------|----------|
| TUCP_000427 | XLOC_014387 | ENSRNOT00000087323 | 0.964197114 | 4.36E-07 |
| TUCP_000427 | XLOC_014387 | ENSRNOT00000074930 | 0.972162172 | 1.26E-07 |
| TUCP_000427 | XLOC_014387 | ENSRNOT00000080575 | 0.97253586  | 1.18E-07 |
| TUCP_000427 | XLOC_014387 | ENSRNOT00000057761 | 0.951313006 | 1.98E-06 |
| TUCP_000427 | XLOC_014387 | ENSRNOT00000078369 | 0.958973903 | 8.54E-07 |
| TUCP_000427 | XLOC_014387 | ENSRNOT00000092982 | 0.972162172 | 1.26E-07 |
| TUCP_000427 | XLOC_014387 | ENSRNOT00000088367 | 0.972162172 | 1.26E-07 |
| TUCP_000427 | XLOC_014387 | ENSRNOT00000086397 | 0.959112682 | 8.40E-07 |
| TUCP_000427 | XLOC_014387 | ENSRNOT00000061874 | 0.978572653 | 3.43E-08 |
| TUCP_000427 | XLOC_014387 | ENSRNOT00000081996 | 0.972162172 | 1.26E-07 |
| TUCP_000427 | XLOC_014387 | ENSRNOT00000082058 | 0.972162172 | 1.26E-07 |
| TUCP_000427 | XLOC_014387 | ENSRNOT00000088905 | 0.972162172 | 1.26E-07 |
| TUCP_000427 | XLOC_014387 | ENSRNOT00000086831 | 0.972162172 | 1.26E-07 |
| TUCP_000427 | XLOC_014387 | ENSRNOT00000045099 | 0.972162172 | 1.26E-07 |
| TUCP_000427 | XLOC_014387 | ENSRNOT00000085849 | 0.954412771 | 1.44E-06 |
| TUCP_000427 | XLOC_014387 | ENSRNOT00000089257 | 0.964753457 | 4.04E-07 |
| TUCP_000427 | XLOC_014387 | ENSRNOT00000077789 | 0.953974101 | 1.51E-06 |
| TUCP_000427 | XLOC_014387 | ENSRNOT00000087025 | 0.972162172 | 1.26E-07 |
| TUCP_000427 | XLOC_014387 | ENSRNOT00000019853 | 0.972162172 | 1.26E-07 |
| TUCP_000427 | XLOC_014387 | ENSRNOT00000073853 | 0.958812171 | 8.71E-07 |
| TUCP_000427 | XLOC_014387 | ENSRNOT00000065912 | 0.977769827 | 4.12E-08 |
| TUCP_000427 | XLOC_014387 | ENSRNOT00000093083 | 0.973388041 | 1.01E-07 |
| TUCP_000343 | XLOC_010780 | ENSRNOT00000084075 | 0.996098046 | 7.08E-12 |
| TUCP_000343 | XLOC_010780 | ENSRNOT00000012880 | 0.968020893 | 2.50E-07 |
| TUCP_000343 | XLOC_010780 | ENSRNOT00000074465 | 0.99999962  | 6.25E-32 |
| TUCP_000343 | XLOC_010780 | ENSRNOT00000090898 | 0.96162989  | 6.14E-07 |
| TUCP_000343 | XLOC_010780 | ENSRNOT00000079805 | 0.998023515 | 2.37E-13 |
| TUCP_000343 | XLOC_010780 | ENSRNOT00000040912 | 0.99999962  | 6.25E-32 |
| TUCP_000343 | XLOC_010780 | ENSRNOT00000072648 | 0.99999962  | 6.25E-32 |
| TUCP_000343 | XLOC_010780 | ENSRNOT00000007398 | 0.989039871 | 1.22E-09 |
| TUCP_000343 | XLOC_010780 | ENSRNOT00000070803 | 0.99999962  | 6.25E-32 |
| TUCP_000343 | XLOC_010780 | ENSRNOT00000012196 | 0.99999962  | 6.25E-32 |
| TUCP_000343 | XLOC_010780 | ENSRNOT00000085772 | 0.99999962  | 6.25E-32 |
| TUCP_000343 | XLOC_010780 | ENSRNOT00000093284 | 0.999974869 | 7.89E-23 |
| TUCP_000343 | XLOC_010780 | ENSRNOT00000086374 | 0.993570148 | 8.56E-11 |
| TUCP_000343 | XLOC_010780 | ENSRNOT00000015270 | 0.99999962  | 6.25E-32 |
| TUCP_000343 | XLOC_010780 | ENSRNOT00000046192 | 0.99999962  | 6.25E-32 |
| TUCP_000343 | XLOC_010780 | ENSRNOT00000044226 | 0.99999962  | 6.25E-32 |
| TUCP_000343 | XLOC_010780 | ENSRNOT00000081898 | 0.989886669 | 8.19E-10 |
| TUCP_000343 | XLOC_010780 | ENSRNOT00000081954 | 0.963971091 | 4.50E-07 |
| TUCP_000343 | XLOC_010780 | ENSRNOT00000080291 | 0.998427594 | 7.55E-14 |
| TUCP_000343 | XLOC_010780 | ENSRNOT00000004293 | 0.984278384 | 7.37E-09 |
| TUCP_000343 | XLOC_010780 | ENSRNOT00000078231 | 0.960566679 | 7.03E-07 |
| TUCP_000343 | XLOC_010780 | ENSRNOT00000002834 | 0.99999962  | 6.25E-32 |
| TUCP_000343 | XLOC_010780 | ENSRNOT00000001464 | 0.99999962  | 6.25E-32 |
| TUCP_000343 | XLOC_010780 | ENSRNOT00000090716 | 0.994762425 | 3.08E-11 |
| TUCP_000343 | XLOC_010780 | ENSRNOT00000083542 | 0.972546557 | 1.17E-07 |
| TUCP_000343 | XLOC_010780 | ENSRNOT00000076044 | 0.99999962  | 6.25E-32 |
| TUCP_000343 | XLOC_010780 | ENSRNOT00000074353 | 0.99999962  | 6.25E-32 |
| TUCP_000343 | XLOC_010780 | ENSRNOT00000043510 | 0.958107772 | 9.47E-07 |
| TUCP_000343 | XLOC_010780 | ENSRNOT00000087122 | 0.980102325 | 2.38E-08 |

|             |             |                    |             |          |
|-------------|-------------|--------------------|-------------|----------|
| TUCP_000343 | XLOC_010780 | ENSRNOT00000074295 | 0.987718821 | 2.16E-09 |
| TUCP_000343 | XLOC_010780 | ENSRNOT00000057873 | 0.99999962  | 6.25E-32 |
| TUCP_000343 | XLOC_010780 | ENSRNOT00000083002 | 0.988851133 | 1.33E-09 |
| TUCP_000343 | XLOC_010780 | ENSRNOT00000088399 | 0.999999378 | 7.36E-31 |
| TUCP_000343 | XLOC_010780 | ENSRNOT00000086248 | 0.99999962  | 6.25E-32 |
| TUCP_000343 | XLOC_010780 | ENSRNOT00000089750 | 0.999992276 | 2.16E-25 |
| TUCP_000343 | XLOC_010780 | ENSRNOT00000030517 | 0.971213152 | 1.48E-07 |
| TUCP_000343 | XLOC_010780 | ENSRNOT00000034772 | 0.994238179 | 4.95E-11 |
| TUCP_000343 | XLOC_010780 | ENSRNOT00000089305 | 0.969580457 | 1.95E-07 |
| TUCP_000343 | XLOC_010780 | ENSRNOT00000024580 | 0.954212955 | 1.47E-06 |
| TUCP_000343 | XLOC_010780 | ENSRNOT00000064601 | 0.966570601 | 3.11E-07 |
| TUCP_000343 | XLOC_010780 | ENSRNOT00000015870 | 0.965858602 | 3.45E-07 |
| TUCP_000343 | XLOC_010780 | ENSRNOT00000080812 | 0.992959759 | 1.35E-10 |
| TUCP_000343 | XLOC_010780 | ENSRNOT00000092755 | 0.99999962  | 6.25E-32 |
| TUCP_000343 | XLOC_010780 | ENSRNOT00000031683 | 0.99999962  | 6.25E-32 |
| TUCP_000343 | XLOC_010780 | ENSRNOT00000087764 | 0.98816327  | 1.79E-09 |
| TUCP_003175 | XLOC_136347 | ENSRNOT00000077435 | 0.958007045 | 9.58E-07 |
| TUCP_004046 | XLOC_177930 | ENSRNOT00000077458 | 0.960069756 | 7.48E-07 |
| TUCP_004046 | XLOC_177930 | ENSRNOT00000085479 | 0.953039508 | 1.66E-06 |
| TUCP_004047 | XLOC_177979 | ENSRNOT00000000008 | 0.987543822 | 2.31E-09 |
| TUCP_004047 | XLOC_177979 | ENSRNOT00000060048 | 0.990178846 | 7.08E-10 |
| TUCP_004047 | XLOC_177979 | ENSRNOT00000082304 | 0.991136053 | 4.25E-10 |
| TUCP_004047 | XLOC_177979 | ENSRNOT00000006219 | 0.987543822 | 2.31E-09 |
| TUCP_004047 | XLOC_177979 | ENSRNOT00000065376 | 0.987543822 | 2.31E-09 |
| TUCP_004047 | XLOC_177979 | ENSRNOT00000081433 | 0.987048406 | 2.81E-09 |
| TUCP_004047 | XLOC_177979 | ENSRNOT00000083575 | 0.987543822 | 2.31E-09 |
| TUCP_004047 | XLOC_177979 | ENSRNOT00000087739 | 0.987543822 | 2.31E-09 |
| TUCP_004047 | XLOC_177979 | ENSRNOT00000079826 | 0.987543822 | 2.31E-09 |
| TUCP_004047 | XLOC_177979 | ENSRNOT00000025770 | 0.977468328 | 4.40E-08 |
| TUCP_004047 | XLOC_177979 | ENSRNOT00000088244 | 0.967604106 | 2.66E-07 |
| TUCP_004047 | XLOC_177979 | ENSRNOT00000048523 | 0.987543822 | 2.31E-09 |
| TUCP_004047 | XLOC_177979 | ENSRNOT00000020229 | 0.976499195 | 5.43E-08 |
| TUCP_004047 | XLOC_177979 | ENSRNOT00000026428 | 0.98128615  | 1.75E-08 |
| TUCP_004047 | XLOC_177979 | ENSRNOT00000085673 | 0.987543822 | 2.31E-09 |
| TUCP_004047 | XLOC_177979 | ENSRNOT00000072972 | 0.967326309 | 2.78E-07 |
| TUCP_004047 | XLOC_177979 | ENSRNOT00000050573 | 0.987543822 | 2.31E-09 |
| TUCP_004047 | XLOC_177979 | ENSRNOT00000074378 | 0.984301722 | 7.31E-09 |
| TUCP_004047 | XLOC_177979 | ENSRNOT00000090581 | 0.987543822 | 2.31E-09 |
| TUCP_004047 | XLOC_177979 | ENSRNOT00000076239 | 0.974498187 | 8.14E-08 |
| TUCP_004047 | XLOC_177979 | ENSRNOT00000084374 | 0.966988818 | 2.92E-07 |
| TUCP_004047 | XLOC_177979 | ENSRNOT00000065485 | 0.987543822 | 2.31E-09 |
| TUCP_004047 | XLOC_177979 | ENSRNOT00000006356 | 0.987113724 | 2.74E-09 |
| TUCP_004047 | XLOC_177979 | ENSRNOT00000087199 | 0.990056527 | 7.53E-10 |
| TUCP_004047 | XLOC_177979 | ENSRNOT00000022091 | 0.987543822 | 2.31E-09 |
| TUCP_004047 | XLOC_177979 | ENSRNOT00000064764 | 0.977159466 | 4.71E-08 |
| TUCP_004047 | XLOC_177979 | ENSRNOT00000093571 | 0.987543822 | 2.31E-09 |
| TUCP_004047 | XLOC_177979 | ENSRNOT00000092395 | 0.986358552 | 3.64E-09 |
| TUCP_004769 | XLOC_210605 | ENSRNOT00000015944 | 0.953985962 | 1.50E-06 |
| TUCP_004769 | XLOC_210605 | ENSRNOT00000030327 | 0.997187569 | 1.38E-12 |
| TUCP_004769 | XLOC_210605 | ENSRNOT00000024455 | 0.959374561 | 8.14E-07 |
| TUCP_004769 | XLOC_210605 | ENSRNOT00000013296 | 0.992972832 | 1.33E-10 |

|             |             |                    |             |          |
|-------------|-------------|--------------------|-------------|----------|
| TUCP_004769 | XLOC_210605 | ENSRNOT00000085380 | 0.998512644 | 5.72E-14 |
| TUCP_000346 | XLOC_010781 | ENSRNOT00000010035 | 0.963299577 | 4.93E-07 |
| TUCP_000346 | XLOC_010781 | ENSRNOT00000071697 | 0.951520161 | 1.94E-06 |
| TUCP_000346 | XLOC_010781 | ENSRNOT00000024517 | 0.956596592 | 1.13E-06 |
| TUCP_004042 | XLOC_177832 | ENSRNOT00000092026 | 0.96620614  | 3.28E-07 |
| TUCP_004042 | XLOC_177832 | ENSRNOT00000093075 | 1           | 0        |
| TUCP_004042 | XLOC_177832 | ENSRNOT00000058260 | 1           | 0        |
| TUCP_004042 | XLOC_177832 | ENSRNOT00000088887 | 1           | 4.25E-78 |
| TUCP_004042 | XLOC_177832 | ENSRNOT00000084986 | 1           | 0        |
| TUCP_004042 | XLOC_177832 | ENSRNOT00000074346 | 0.9702256   | 1.75E-07 |
| TUCP_004042 | XLOC_177832 | ENSRNOT00000073209 | 0.983711602 | 8.79E-09 |
| TUCP_004042 | XLOC_177832 | ENSRNOT00000080155 | 0.973069673 | 1.07E-07 |
| TUCP_004042 | XLOC_177832 | ENSRNOT00000072573 | 0.996213272 | 6.09E-12 |
| TUCP_004042 | XLOC_177832 | ENSRNOT00000017828 | 0.996001583 | 7.99E-12 |
| TUCP_004042 | XLOC_177832 | ENSRNOT00000080444 | 0.969625907 | 1.93E-07 |
| TUCP_004042 | XLOC_177832 | ENSRNOT00000071312 | 1           | 0        |
| TUCP_004042 | XLOC_177832 | ENSRNOT00000088245 | 1           | 0        |
| TUCP_004042 | XLOC_177832 | ENSRNOT00000036565 | 0.969065335 | 2.12E-07 |
| TUCP_004042 | XLOC_177832 | ENSRNOT00000058833 | 0.998673261 | 3.23E-14 |
| TUCP_004042 | XLOC_177832 | ENSRNOT00000078052 | 1           | 0        |
| TUCP_004042 | XLOC_177832 | ENSRNOT00000078494 | 0.999927093 | 1.62E-20 |
| TUCP_004042 | XLOC_177832 | ENSRNOT00000085653 | 1           | 0        |
| TUCP_004042 | XLOC_177832 | ENSRNOT00000057950 | 0.969329371 | 2.03E-07 |
| TUCP_004042 | XLOC_177832 | ENSRNOT00000081992 | 0.999320526 | 1.14E-15 |
| TUCP_004042 | XLOC_177832 | ENSRNOT00000038553 | 0.955765808 | 1.24E-06 |
| TUCP_004042 | XLOC_177832 | ENSRNOT00000084120 | 0.958115447 | 9.46E-07 |
| TUCP_004042 | XLOC_177832 | ENSRNOT00000055406 | 1           | 0        |
| TUCP_004042 | XLOC_177832 | ENSRNOT00000070817 | 0.998968079 | 9.20E-15 |
| TUCP_004042 | XLOC_177832 | ENSRNOT00000026753 | 1           | 4.25E-78 |
| TUCP_004042 | XLOC_177832 | ENSRNOT00000080533 | 0.996682529 | 3.15E-12 |
| TUCP_004042 | XLOC_177832 | ENSRNOT00000072774 | 0.979665261 | 2.65E-08 |
| TUCP_004042 | XLOC_177832 | ENSRNOT00000086031 | 1           | 0        |
| TUCP_004042 | XLOC_177832 | ENSRNOT00000014312 | 1           | 0        |
| TUCP_004042 | XLOC_177832 | ENSRNOT00000042882 | 0.963218427 | 4.98E-07 |
| TUCP_004042 | XLOC_177832 | ENSRNOT00000088012 | 0.956765806 | 1.11E-06 |
| TUCP_004042 | XLOC_177832 | ENSRNOT00000051231 | 0.999242378 | 1.96E-15 |
| TUCP_004042 | XLOC_177832 | ENSRNOT00000089407 | 0.992986194 | 1.32E-10 |
| TUCP_004042 | XLOC_177832 | ENSRNOT00000055034 | 0.998331441 | 1.02E-13 |
| TUCP_004042 | XLOC_177832 | ENSRNOT00000046837 | 0.97252559  | 1.18E-07 |
| TUCP_000344 | XLOC_010780 | ENSRNOT00000012602 | 0.957594878 | 1.01E-06 |
| TUCP_004764 | XLOC_209810 | ENSRNOT00000081570 | 0.997186921 | 1.38E-12 |
| TUCP_004764 | XLOC_209810 | ENSRNOT00000091652 | 0.96069526  | 6.92E-07 |
| TUCP_004764 | XLOC_209810 | ENSRNOT00000080865 | 0.965657584 | 3.55E-07 |
| TUCP_004764 | XLOC_209810 | ENSRNOT00000073534 | 0.961719611 | 6.07E-07 |
| TUCP_004764 | XLOC_209810 | ENSRNOT00000093019 | 0.965657584 | 3.55E-07 |
| TUCP_004764 | XLOC_209810 | ENSRNOT00000085908 | 0.956762543 | 1.11E-06 |
| TUCP_004764 | XLOC_209810 | ENSRNOT00000046744 | 0.965657584 | 3.55E-07 |
| TUCP_004764 | XLOC_209810 | ENSRNOT00000076429 | 0.965657584 | 3.55E-07 |
| TUCP_004764 | XLOC_209810 | ENSRNOT00000084667 | 0.964027778 | 4.47E-07 |
| TUCP_004764 | XLOC_209810 | ENSRNOT00000055412 | 0.965657584 | 3.55E-07 |
| TUCP_004764 | XLOC_209810 | ENSRNOT00000093201 | 0.967072897 | 2.88E-07 |



|             |             |                    |             |          |
|-------------|-------------|--------------------|-------------|----------|
| TUCP_004764 | XLOC_209810 | ENSRNOT00000072724 | 0.965657584 | 3.55E-07 |
| TUCP_004764 | XLOC_209810 | ENSRNOT00000082601 | 0.951343858 | 1.98E-06 |
| TUCP_004764 | XLOC_209810 | ENSRNOT00000084375 | 0.965657584 | 3.55E-07 |
| TUCP_004764 | XLOC_209810 | ENSRNOT00000012161 | 0.952295968 | 1.80E-06 |
| TUCP_004764 | XLOC_209810 | ENSRNOT00000042369 | 0.95700847  | 1.08E-06 |
| TUCP_004764 | XLOC_209810 | ENSRNOT00000086554 | 0.965657584 | 3.55E-07 |
| TUCP_004764 | XLOC_209810 | ENSRNOT00000047921 | 0.965657584 | 3.55E-07 |
| TUCP_004764 | XLOC_209810 | ENSRNOT00000064261 | 0.965282072 | 3.75E-07 |
| TUCP_004764 | XLOC_209810 | ENSRNOT00000086660 | 0.971581489 | 1.39E-07 |
| TUCP_004764 | XLOC_209810 | ENSRNOT00000083977 | 0.965657584 | 3.55E-07 |
| TUCP_004764 | XLOC_209810 | ENSRNOT00000092933 | 0.965657584 | 3.55E-07 |
| TUCP_004764 | XLOC_209810 | ENSRNOT00000085447 | 0.973420545 | 9.99E-08 |
| TUCP_001916 | XLOC_078879 | ENSRNOT00000037509 | 0.959692644 | 7.83E-07 |
| TUCP_004048 | XLOC_177979 | ENSRNOT00000071603 | 0.95004426  | 2.25E-06 |
| TUCP_004048 | XLOC_177979 | ENSRNOT00000090211 | 0.952874525 | 1.69E-06 |
| TUCP_004048 | XLOC_177979 | ENSRNOT0000007604  | 0.956146903 | 1.19E-06 |
| TUCP_004048 | XLOC_177979 | ENSRNOT00000047870 | 0.981081943 | 1.85E-08 |
| TUCP_004048 | XLOC_177979 | ENSRNOT00000088376 | 0.957107345 | 1.06E-06 |
| TUCP_004048 | XLOC_177979 | ENSRNOT00000044232 | 0.963089565 | 5.07E-07 |
| TUCP_004048 | XLOC_177979 | ENSRNOT0000007683  | 0.950712059 | 2.11E-06 |
| TUCP_004048 | XLOC_177979 | ENSRNOT00000003308 | 0.960423772 | 7.15E-07 |
| TUCP_004048 | XLOC_177979 | ENSRNOT00000039313 | 0.970347231 | 1.72E-07 |
| TUCP_004048 | XLOC_177979 | ENSRNOT00000084109 | 0.950287843 | 2.20E-06 |
| TUCP_004048 | XLOC_177979 | ENSRNOT00000015316 | 0.958761334 | 8.76E-07 |
| TUCP_004048 | XLOC_177979 | ENSRNOT00000068197 | 0.975100846 | 7.23E-08 |
| TUCP_004048 | XLOC_177979 | ENSRNOT00000039652 | 0.950753866 | 2.10E-06 |
| TUCP_004048 | XLOC_177979 | ENSRNOT00000023287 | 0.965216849 | 3.78E-07 |
| TUCP_004048 | XLOC_177979 | ENSRNOT00000082086 | 0.963756656 | 4.63E-07 |
| TUCP_004048 | XLOC_177979 | ENSRNOT00000018860 | 0.962726732 | 5.32E-07 |
| TUCP_004048 | XLOC_177979 | ENSRNOT00000056364 | 0.952514312 | 1.76E-06 |
| TUCP_004048 | XLOC_177979 | ENSRNOT00000071714 | 0.963084127 | 5.07E-07 |
| TUCP_004048 | XLOC_177979 | ENSRNOT00000018890 | 0.963302188 | 4.93E-07 |
| TUCP_004048 | XLOC_177979 | ENSRNOT00000009295 | 0.960591905 | 7.01E-07 |
| TUCP_004763 | XLOC_209802 | ENSRNOT00000072402 | 0.984701314 | 6.43E-09 |
| TUCP_004762 | XLOC_209653 | ENSRNOT00000003556 | 0.955271597 | 1.31E-06 |
| TUCP_000569 | XLOC_020107 | ENSRNOT00000044232 | 0.95165355  | 1.92E-06 |
| TUCP_000569 | XLOC_020107 | ENSRNOT00000092186 | 0.963557092 | 4.76E-07 |
| TUCP_000569 | XLOC_020107 | ENSRNOT00000023584 | 0.961138078 | 6.54E-07 |
| TUCP_000601 | XLOC_021899 | ENSRNOT00000082043 | 0.998965531 | 9.31E-15 |
| TUCP_000601 | XLOC_021899 | ENSRNOT00000090080 | 0.970514074 | 1.67E-07 |
| TUCP_000601 | XLOC_021899 | ENSRNOT00000068444 | 1           | 0        |
| TUCP_000601 | XLOC_021899 | ENSRNOT00000081370 | 0.999740797 | 9.21E-18 |
| TUCP_000601 | XLOC_021899 | ENSRNOT00000078645 | 0.989717078 | 8.90E-10 |
| TUCP_000601 | XLOC_021899 | ENSRNOT00000075987 | 0.987945283 | 1.96E-09 |
| TUCP_000601 | XLOC_021899 | ENSRNOT00000074990 | 1           | 0        |
| TUCP_000601 | XLOC_021899 | ENSRNOT00000087323 | 0.995029331 | 2.37E-11 |
| TUCP_000601 | XLOC_021899 | ENSRNOT00000074930 | 1           | 0        |
| TUCP_000601 | XLOC_021899 | ENSRNOT00000080575 | 0.999929267 | 1.39E-20 |
| TUCP_000601 | XLOC_021899 | ENSRNOT00000057761 | 0.982981445 | 1.09E-08 |
| TUCP_000601 | XLOC_021899 | ENSRNOT00000078369 | 0.993028032 | 1.28E-10 |
| TUCP_000601 | XLOC_021899 | ENSRNOT00000092982 | 1           | 0        |

|             |             |                    |              |          |
|-------------|-------------|--------------------|--------------|----------|
| TUCP_000601 | XLOC_021899 | ENSRNOT00000088367 | 1            | 0        |
| TUCP_000601 | XLOC_021899 | ENSRNOT00000061874 | 0.968405099  | 2.35E-07 |
| TUCP_000601 | XLOC_021899 | ENSRNOT00000077789 | 0.99346224   | 9.30E-11 |
| TUCP_000601 | XLOC_021899 | ENSRNOT00000081996 | 1            | 0        |
| TUCP_000601 | XLOC_021899 | ENSRNOT00000022280 | 0.982176915  | 1.37E-08 |
| TUCP_000601 | XLOC_021899 | ENSRNOT00000082058 | 1            | 0        |
| TUCP_000601 | XLOC_021899 | ENSRNOT00000088905 | 1            | 0        |
| TUCP_000601 | XLOC_021899 | ENSRNOT00000086831 | 1            | 0        |
| TUCP_000601 | XLOC_021899 | ENSRNOT00000045099 | 1            | 1.33E-79 |
| TUCP_000601 | XLOC_021899 | ENSRNOT00000086745 | 0.978585655  | 3.42E-08 |
| TUCP_000601 | XLOC_021899 | ENSRNOT00000085849 | 0.988270765  | 1.71E-09 |
| TUCP_000601 | XLOC_021899 | ENSRNOT00000086397 | 0.957188178  | 1.05E-06 |
| TUCP_000601 | XLOC_021899 | ENSRNOT00000079606 | 0.960472013  | 7.11E-07 |
| TUCP_000601 | XLOC_021899 | ENSRNOT00000090207 | 0.953487741  | 1.59E-06 |
| TUCP_000601 | XLOC_021899 | ENSRNOT00000087025 | 1            | 0        |
| TUCP_000601 | XLOC_021899 | ENSRNOT00000019853 | 1            | 0        |
| TUCP_000601 | XLOC_021899 | ENSRNOT00000073853 | 0.989715487  | 8.91E-10 |
| TUCP_000601 | XLOC_021899 | ENSRNOT00000065912 | 0.974234118  | 8.57E-08 |
| TUCP_000601 | XLOC_021899 | ENSRNOT00000073828 | 0.971647353  | 1.38E-07 |
| TUCP_000601 | XLOC_021899 | ENSRNOT00000078683 | 0.966682958  | 3.06E-07 |
| TUCP_000601 | XLOC_021899 | ENSRNOT00000093083 | 0.999140292  | 3.69E-15 |
| TUCP_004774 | XLOC_210931 | ENSRNOT00000014699 | -0.958678398 | 8.85E-07 |
| TUCP_000604 | XLOC_021901 | ENSRNOT00000072367 | -0.953211028 | 1.63E-06 |
| TUCP_000562 | XLOC_020072 | ENSRNOT00000083351 | -0.958948069 | 8.57E-07 |
| TUCP_000562 | XLOC_020072 | ENSRNOT00000032802 | -0.955095977 | 1.33E-06 |
| TUCP_000562 | XLOC_020072 | ENSRNOT00000075656 | -0.958568921 | 8.97E-07 |
| TUCP_000562 | XLOC_020072 | ENSRNOT00000014924 | -0.955452772 | 1.28E-06 |
| TUCP_000562 | XLOC_020072 | ENSRNOT00000024030 | 0.955278665  | 1.31E-06 |
| TUCP_000562 | XLOC_020072 | ENSRNOT00000030692 | -0.961890411 | 5.94E-07 |
| TUCP_000562 | XLOC_020072 | ENSRNOT00000057537 | 0.960770208  | 6.85E-07 |
| TUCP_000562 | XLOC_020072 | ENSRNOT00000002445 | -0.952354207 | 1.78E-06 |
| TUCP_000562 | XLOC_020072 | ENSRNOT00000050609 | -0.958494632 | 9.05E-07 |
| TUCP_000562 | XLOC_020072 | ENSRNOT00000073667 | -0.953104591 | 1.65E-06 |
| TUCP_000562 | XLOC_020072 | ENSRNOT00000003940 | -0.953261263 | 1.62E-06 |
| TUCP_000562 | XLOC_020072 | ENSRNOT00000011930 | 0.952026258  | 1.85E-06 |
| TUCP_000562 | XLOC_020072 | ENSRNOT00000045233 | -0.952308198 | 1.79E-06 |
| TUCP_000562 | XLOC_020072 | ENSRNOT00000067135 | -0.953700398 | 1.55E-06 |
| TUCP_000562 | XLOC_020072 | ENSRNOT00000017949 | -0.964431764 | 4.22E-07 |
| TUCP_000562 | XLOC_020072 | ENSRNOT00000039730 | -0.959655642 | 7.87E-07 |
| TUCP_000562 | XLOC_020072 | ENSRNOT00000083632 | -0.953800002 | 1.53E-06 |
| TUCP_000562 | XLOC_020072 | ENSRNOT00000083891 | -0.975855389 | 6.21E-08 |
| TUCP_000562 | XLOC_020072 | ENSRNOT00000063808 | -0.964594606 | 4.13E-07 |
| TUCP_000562 | XLOC_020072 | ENSRNOT00000039232 | 0.951271512  | 1.99E-06 |
| TUCP_000562 | XLOC_020072 | ENSRNOT00000032236 | -0.954003485 | 1.50E-06 |
| TUCP_000562 | XLOC_020072 | ENSRNOT00000011794 | -0.952781529 | 1.71E-06 |
| TUCP_000562 | XLOC_020072 | ENSRNOT00000022000 | -0.951940136 | 1.86E-06 |
| TUCP_000562 | XLOC_020072 | ENSRNOT00000086244 | 0.952237168  | 1.81E-06 |
| TUCP_000562 | XLOC_020072 | ENSRNOT00000089673 | -0.953571797 | 1.57E-06 |
| TUCP_000562 | XLOC_020072 | ENSRNOT00000079180 | 0.959666817  | 7.85E-07 |
| TUCP_000562 | XLOC_020072 | ENSRNOT00000078128 | -0.964835346 | 3.99E-07 |
| TUCP_000561 | XLOC_020072 | ENSRNOT00000088876 | 0.99706668   | 1.70E-12 |

|             |             |                     |              |          |
|-------------|-------------|---------------------|--------------|----------|
| TUCP_002377 | XLOC_100543 | ENSRNOT00000003765  | 0.955062992  | 1.34E-06 |
| TUCP_002377 | XLOC_100543 | ENSRNOT000000032324 | 0.952628927  | 1.73E-06 |
| TUCP_002377 | XLOC_100543 | ENSRNOT000000080215 | 0.960898506  | 6.74E-07 |
| TUCP_002377 | XLOC_100543 | ENSRNOT00000076946  | 0.950507505  | 2.15E-06 |
| TUCP_000567 | XLOC_020107 | ENSRNOT000000089765 | 0.981835539  | 1.51E-08 |
| TUCP_000567 | XLOC_020107 | ENSRNOT00000075752  | 0.972935214  | 1.09E-07 |
| TUCP_000567 | XLOC_020107 | ENSRNOT000000084784 | 0.963190592  | 5.00E-07 |
| TUCP_000567 | XLOC_020107 | ENSRNOT00000079573  | 0.972640484  | 1.15E-07 |
| TUCP_000567 | XLOC_020107 | ENSRNOT000000086962 | 0.950674135  | 2.12E-06 |
| TUCP_000567 | XLOC_020107 | ENSRNOT00000014073  | 0.96053525   | 7.06E-07 |
| TUCP_000567 | XLOC_020107 | ENSRNOT00000002010  | 0.954918788  | 1.36E-06 |
| TUCP_000567 | XLOC_020107 | ENSRNOT00000030489  | 0.981698237  | 1.57E-08 |
| TUCP_002371 | XLOC_100166 | ENSRNOT000000036781 | 0.96045382   | 7.13E-07 |
| TUCP_000565 | XLOC_020107 | ENSRNOT00000078806  | 0.95808828   | 9.49E-07 |
| TUCP_000565 | XLOC_020107 | ENSRNOT000000080900 | 0.95289641   | 1.69E-06 |
| TUCP_000565 | XLOC_020107 | ENSRNOT00000019109  | 0.95122247   | 2.00E-06 |
| TUCP_000564 | XLOC_020107 | ENSRNOT00000073555  | 0.953381406  | 1.60E-06 |
| TUCP_000564 | XLOC_020107 | ENSRNOT00000016039  | 0.96347712   | 4.81E-07 |
| TUCP_000564 | XLOC_020107 | ENSRNOT00000091757  | 0.966398861  | 3.19E-07 |
| TUCP_000564 | XLOC_020107 | ENSRNOT000000089218 | 0.956626818  | 1.12E-06 |
| TUCP_000564 | XLOC_020107 | ENSRNOT000000021612 | 0.95140696   | 1.97E-06 |
| TUCP_000564 | XLOC_020107 | ENSRNOT000000025638 | 0.977608798  | 4.27E-08 |
| TUCP_002274 | XLOC_094511 | ENSRNOT000000000008 | 1            | 0        |
| TUCP_002274 | XLOC_094511 | ENSRNOT00000060048  | 0.998711457  | 2.79E-14 |
| TUCP_002274 | XLOC_094511 | ENSRNOT000000082304 | 0.996875989  | 2.33E-12 |
| TUCP_002274 | XLOC_094511 | ENSRNOT000000006219 | 1            | 0        |
| TUCP_002274 | XLOC_094511 | ENSRNOT00000065376  | 1            | 4.25E-78 |
| TUCP_002274 | XLOC_094511 | ENSRNOT000000081433 | 0.984469223  | 6.93E-09 |
| TUCP_002274 | XLOC_094511 | ENSRNOT000000083575 | 1            | 1.33E-79 |
| TUCP_002274 | XLOC_094511 | ENSRNOT000000087739 | 1            | 1.33E-79 |
| TUCP_002274 | XLOC_094511 | ENSRNOT00000079826  | 1            | 0        |
| TUCP_002274 | XLOC_094511 | ENSRNOT000000025770 | 0.993828251  | 6.98E-11 |
| TUCP_002274 | XLOC_094511 | ENSRNOT000000088244 | 0.973479481  | 9.88E-08 |
| TUCP_002274 | XLOC_094511 | ENSRNOT00000048523  | 1            | 0        |
| TUCP_002274 | XLOC_094511 | ENSRNOT00000079365  | 0.958936699  | 8.58E-07 |
| TUCP_002274 | XLOC_094511 | ENSRNOT00000020229  | 0.960002785  | 7.54E-07 |
| TUCP_002274 | XLOC_094511 | ENSRNOT000000026428 | 0.996986683  | 1.95E-12 |
| TUCP_002274 | XLOC_094511 | ENSRNOT000000085673 | 1            | 0        |
| TUCP_002274 | XLOC_094511 | ENSRNOT00000072972  | 0.981476166  | 1.67E-08 |
| TUCP_002274 | XLOC_094511 | ENSRNOT00000050573  | 1            | 0        |
| TUCP_002274 | XLOC_094511 | ENSRNOT000000089876 | -0.953630353 | 1.56E-06 |
| TUCP_002274 | XLOC_094511 | ENSRNOT00000074378  | 0.998901807  | 1.26E-14 |
| TUCP_002274 | XLOC_094511 | ENSRNOT00000093571  | 1            | 0        |
| TUCP_002274 | XLOC_094511 | ENSRNOT00000090581  | 1            | 4.25E-78 |
| TUCP_002274 | XLOC_094511 | ENSRNOT00000076239  | 0.98020752   | 2.31E-08 |
| TUCP_002274 | XLOC_094511 | ENSRNOT00000065485  | 1            | 1.33E-79 |
| TUCP_002274 | XLOC_094511 | ENSRNOT00000006356  | 0.999544279  | 1.55E-16 |
| TUCP_002274 | XLOC_094511 | ENSRNOT000000087199 | 0.974421555  | 8.26E-08 |
| TUCP_002274 | XLOC_094511 | ENSRNOT00000022091  | 1            | 0        |
| TUCP_002274 | XLOC_094511 | ENSRNOT00000064764  | 0.98460888   | 6.63E-09 |
| TUCP_002274 | XLOC_094511 | ENSRNOT00000076927  | 0.971163156  | 1.50E-07 |

|             |             |                    |              |          |
|-------------|-------------|--------------------|--------------|----------|
| TUCP_002274 | XLOC_094511 | ENSRNOT00000092395 | 0.999522978  | 1.94E-16 |
| TUCP_002276 | XLOC_094576 | ENSRNOT00000090760 | 0.953298025  | 1.62E-06 |
| TUCP_002276 | XLOC_094576 | ENSRNOT00000024362 | 0.957274063  | 1.04E-06 |
| TUCP_001950 | XLOC_078994 | ENSRNOT00000027220 | -0.950358772 | 2.18E-06 |
| TUCP_001950 | XLOC_078994 | ENSRNOT00000073521 | -0.958119456 | 9.46E-07 |
| TUCP_001950 | XLOC_078994 | ENSRNOT00000061297 | -0.954573593 | 1.41E-06 |
| TUCP_001950 | XLOC_078994 | ENSRNOT00000000211 | -0.95799141  | 9.60E-07 |
| TUCP_004672 | XLOC_205750 | ENSRNOT00000009430 | 0.960592512  | 7.00E-07 |
| TUCP_004672 | XLOC_205750 | ENSRNOT00000046690 | -0.954442722 | 1.43E-06 |
| TUCP_004672 | XLOC_205750 | ENSRNOT00000047388 | 0.950913602  | 2.07E-06 |
| TUCP_003041 | XLOC_129304 | ENSRNOT00000089607 | 0.95054061   | 2.14E-06 |
| TUCP_003041 | XLOC_129304 | ENSRNOT00000077972 | 0.954246635  | 1.46E-06 |
| TUCP_003041 | XLOC_129304 | ENSRNOT00000076757 | 0.97254966   | 1.17E-07 |
| TUCP_003041 | XLOC_129304 | ENSRNOT00000052130 | 0.977239847  | 4.63E-08 |
| TUCP_003041 | XLOC_129304 | ENSRNOT00000085479 | 0.955660296  | 1.25E-06 |
| TUCP_003041 | XLOC_129304 | ENSRNOT00000084722 | 0.954498532  | 1.42E-06 |
| TUCP_003041 | XLOC_129304 | ENSRNOT00000031693 | 0.957342683  | 1.04E-06 |
| TUCP_003041 | XLOC_129304 | ENSRNOT00000077458 | 0.969635887  | 1.93E-07 |
| TUCP_003041 | XLOC_129304 | ENSRNOT00000083034 | 0.951730599  | 1.90E-06 |
| TUCP_002279 | XLOC_094576 | ENSRNOT00000003369 | 0.960413354  | 7.16E-07 |
| TUCP_002279 | XLOC_094576 | ENSRNOT00000052249 | 0.968439313  | 2.34E-07 |
| TUCP_002279 | XLOC_094576 | ENSRNOT00000011659 | 0.950158898  | 2.23E-06 |
| TUCP_002279 | XLOC_094576 | ENSRNOT00000024110 | 0.954367142  | 1.44E-06 |
| TUCP_002279 | XLOC_094576 | ENSRNOT00000009718 | 0.953274594  | 1.62E-06 |
| TUCP_002279 | XLOC_094576 | ENSRNOT00000044087 | 0.952834064  | 1.70E-06 |
| TUCP_004778 | XLOC_211058 | ENSRNOT00000009132 | 0.953698981  | 1.55E-06 |
| TUCP_004778 | XLOC_211058 | ENSRNOT00000003511 | 0.958037058  | 9.55E-07 |
| TUCP_004778 | XLOC_211058 | ENSRNOT00000090914 | 0.965341219  | 3.72E-07 |
| TUCP_004778 | XLOC_211058 | ENSRNOT00000022559 | 0.963700529  | 4.67E-07 |
| TUCP_004778 | XLOC_211058 | ENSRNOT00000044419 | 0.966326503  | 3.22E-07 |
| TUCP_003802 | XLOC_166074 | ENSRNOT00000090923 | 0.961372822  | 6.35E-07 |
| TUCP_003802 | XLOC_166074 | ENSRNOT00000076508 | -0.959433751 | 8.08E-07 |
| TUCP_003802 | XLOC_166074 | ENSRNOT00000016967 | 0.95618569   | 1.18E-06 |
| TUCP_003802 | XLOC_166074 | ENSRNOT00000064331 | 0.952289323  | 1.80E-06 |
| TUCP_001748 | XLOC_072267 | ENSRNOT00000015918 | 0.953782218  | 1.54E-06 |
| TUCP_001748 | XLOC_072267 | ENSRNOT00000010763 | 0.954265359  | 1.46E-06 |
| TUCP_001748 | XLOC_072267 | ENSRNOT00000080675 | 0.956319437  | 1.16E-06 |
| TUCP_001748 | XLOC_072267 | ENSRNOT00000021403 | 0.974460446  | 8.20E-08 |
| TUCP_001748 | XLOC_072267 | ENSRNOT00000036770 | 0.969057336  | 2.12E-07 |
| TUCP_001748 | XLOC_072267 | ENSRNOT00000010591 | 0.951160406  | 2.02E-06 |
| TUCP_001748 | XLOC_072267 | ENSRNOT00000007577 | 0.95998984   | 7.55E-07 |
| TUCP_001748 | XLOC_072267 | ENSRNOT00000066545 | 0.954696619  | 1.39E-06 |
| TUCP_001748 | XLOC_072267 | ENSRNOT0000001017  | 0.965349948  | 3.71E-07 |
| TUCP_001748 | XLOC_072267 | ENSRNOT00000055176 | 0.960347926  | 7.22E-07 |
| TUCP_000874 | XLOC_032616 | ENSRNOT00000018843 | 0.965421358  | 3.67E-07 |
| TUCP_004677 | XLOC_205892 | ENSRNOT00000089931 | 0.954450917  | 1.43E-06 |
| TUCP_004677 | XLOC_205892 | ENSRNOT00000040102 | 0.991302824  | 3.86E-10 |
| TUCP_001746 | XLOC_072267 | ENSRNOT00000079021 | 0.954351968  | 1.45E-06 |
| TUCP_003042 | XLOC_129530 | ENSRNOT00000025981 | 0.952776998  | 1.71E-06 |
| TUCP_003042 | XLOC_129530 | ENSRNOT00000012671 | 0.954295304  | 1.45E-06 |
| TUCP_003042 | XLOC_129530 | ENSRNOT00000023144 | 0.977080644  | 4.79E-08 |

|             |             |                    |             |          |
|-------------|-------------|--------------------|-------------|----------|
| TUCP_003042 | XLOC_129530 | ENSRNOT0000009859  | 0.950807254 | 2.09E-06 |
| TUCP_003042 | XLOC_129530 | ENSRNOT0000001559  | 0.954331828 | 1.45E-06 |
| TUCP_003042 | XLOC_129530 | ENSRNOT00000038647 | 0.95826322  | 9.30E-07 |
| TUCP_003042 | XLOC_129530 | ENSRNOT00000039809 | 0.950054401 | 2.25E-06 |
| TUCP_003042 | XLOC_129530 | ENSRNOT0000006727  | 0.951647529 | 1.92E-06 |
| TUCP_003042 | XLOC_129530 | ENSRNOT00000066024 | 0.968424396 | 2.34E-07 |
| TUCP_003042 | XLOC_129530 | ENSRNOT00000038807 | 0.953285967 | 1.62E-06 |
| TUCP_003042 | XLOC_129530 | ENSRNOT00000080024 | 0.954204504 | 1.47E-06 |
| TUCP_003042 | XLOC_129530 | ENSRNOT00000081512 | 0.976328548 | 5.63E-08 |
| TUCP_003042 | XLOC_129530 | ENSRNOT00000021348 | 0.955484208 | 1.28E-06 |
| TUCP_003042 | XLOC_129530 | ENSRNOT00000057160 | 0.981680997 | 1.58E-08 |
| TUCP_003042 | XLOC_129530 | ENSRNOT00000088279 | 0.957517247 | 1.01E-06 |
| TUCP_003042 | XLOC_129530 | ENSRNOT00000025808 | 0.968229537 | 2.42E-07 |
| TUCP_003042 | XLOC_129530 | ENSRNOT00000031904 | 0.97188537  | 1.32E-07 |
| TUCP_003042 | XLOC_129530 | ENSRNOT00000012736 | 0.954870373 | 1.37E-06 |
| TUCP_003042 | XLOC_129530 | ENSRNOT0000005664  | 0.958772374 | 8.75E-07 |
| TUCP_003042 | XLOC_129530 | ENSRNOT00000025092 | 0.969124389 | 2.10E-07 |
| TUCP_003042 | XLOC_129530 | ENSRNOT00000040513 | 0.962120419 | 5.76E-07 |
| TUCP_003042 | XLOC_129530 | ENSRNOT00000006175 | 0.963131023 | 5.04E-07 |
| TUCP_003042 | XLOC_129530 | ENSRNOT00000083127 | 0.954035646 | 1.50E-06 |
| TUCP_003042 | XLOC_129530 | ENSRNOT00000036072 | 0.958346116 | 9.21E-07 |
| TUCP_003042 | XLOC_129530 | ENSRNOT00000080695 | 0.974157098 | 8.69E-08 |
| TUCP_003042 | XLOC_129530 | ENSRNOT00000041044 | 0.97087434  | 1.57E-07 |
| TUCP_003042 | XLOC_129530 | ENSRNOT00000000302 | 0.959279372 | 8.23E-07 |
| TUCP_003042 | XLOC_129530 | ENSRNOT00000026941 | 0.956607387 | 1.13E-06 |
| TUCP_003042 | XLOC_129530 | ENSRNOT00000076729 | 0.95432052  | 1.45E-06 |
| TUCP_003042 | XLOC_129530 | ENSRNOT00000090665 | 0.975114932 | 7.21E-08 |
| TUCP_003042 | XLOC_129530 | ENSRNOT00000088628 | 0.951798774 | 1.89E-06 |
| TUCP_003042 | XLOC_129530 | ENSRNOT00000076763 | 0.962334402 | 5.60E-07 |
| TUCP_003042 | XLOC_129530 | ENSRNOT00000045223 | 0.955936831 | 1.21E-06 |
| TUCP_003042 | XLOC_129530 | ENSRNOT00000027411 | 0.95554699  | 1.27E-06 |
| TUCP_003042 | XLOC_129530 | ENSRNOT00000010992 | 0.965847175 | 3.46E-07 |
| TUCP_003042 | XLOC_129530 | ENSRNOT00000033017 | 0.952771985 | 1.71E-06 |
| TUCP_003042 | XLOC_129530 | ENSRNOT00000060696 | 0.954746151 | 1.39E-06 |
| TUCP_003042 | XLOC_129530 | ENSRNOT00000016191 | 0.951108861 | 2.03E-06 |
| TUCP_003042 | XLOC_129530 | ENSRNOT00000026543 | 0.977679247 | 4.20E-08 |
| TUCP_003042 | XLOC_129530 | ENSRNOT00000065501 | 0.953633604 | 1.56E-06 |
| TUCP_003042 | XLOC_129530 | ENSRNOT00000025832 | 0.95380544  | 1.53E-06 |
| TUCP_003042 | XLOC_129530 | ENSRNOT00000083220 | 0.955705335 | 1.25E-06 |
| TUCP_003042 | XLOC_129530 | ENSRNOT00000050180 | 0.961257888 | 6.44E-07 |
| TUCP_003042 | XLOC_129530 | ENSRNOT00000012048 | 0.954297977 | 1.45E-06 |
| TUCP_003042 | XLOC_129530 | ENSRNOT00000060499 | 0.951218569 | 2.00E-06 |
| TUCP_003042 | XLOC_129530 | ENSRNOT00000071407 | 0.966231842 | 3.27E-07 |
| TUCP_003042 | XLOC_129530 | ENSRNOT00000020673 | 0.955884131 | 1.22E-06 |
| TUCP_003042 | XLOC_129530 | ENSRNOT00000045882 | 0.951548398 | 1.94E-06 |
| TUCP_003042 | XLOC_129530 | ENSRNOT00000076669 | 0.963293627 | 4.93E-07 |
| TUCP_003042 | XLOC_129530 | ENSRNOT00000060362 | 0.957978076 | 9.62E-07 |
| TUCP_003042 | XLOC_129530 | ENSRNOT00000015799 | 0.968380776 | 2.36E-07 |
| TUCP_003042 | XLOC_129530 | ENSRNOT00000013274 | 0.95076146  | 2.10E-06 |
| TUCP_003042 | XLOC_129530 | ENSRNOT00000075558 | 0.952506173 | 1.76E-06 |
| TUCP_003042 | XLOC_129530 | ENSRNOT00000025859 | 0.951005351 | 2.05E-06 |

|             |             |                    |              |          |
|-------------|-------------|--------------------|--------------|----------|
| TUCP_003042 | XLOC_129530 | ENSRNOT00000067663 | 0.952343195  | 1.79E-06 |
| TUCP_003042 | XLOC_129530 | ENSRNOT00000037790 | 0.952119263  | 1.83E-06 |
| TUCP_003042 | XLOC_129530 | ENSRNOT00000021674 | 0.953317198  | 1.61E-06 |
| TUCP_003042 | XLOC_129530 | ENSRNOT00000067400 | 0.965372246  | 3.70E-07 |
| TUCP_003042 | XLOC_129530 | ENSRNOT00000035989 | 0.956614907  | 1.13E-06 |
| TUCP_003042 | XLOC_129530 | ENSRNOT00000067866 | 0.963863005  | 4.57E-07 |
| TUCP_003042 | XLOC_129530 | ENSRNOT00000024402 | 0.971569226  | 1.39E-07 |
| TUCP_003042 | XLOC_129530 | ENSRNOT00000088054 | 0.970271333  | 1.74E-07 |
| TUCP_003042 | XLOC_129530 | ENSRNOT00000091265 | 0.950454016  | 2.16E-06 |
| TUCP_003042 | XLOC_129530 | ENSRNOT00000025075 | 0.953724402  | 1.55E-06 |
| TUCP_003042 | XLOC_129530 | ENSRNOT00000033975 | 0.95287907   | 1.69E-06 |
| TUCP_001741 | XLOC_071526 | ENSRNOT00000042125 | 0.951066222  | 2.03E-06 |
| TUCP_001741 | XLOC_071526 | ENSRNOT00000000170 | -0.952947459 | 1.68E-06 |
| TUCP_001741 | XLOC_071526 | ENSRNOT00000041044 | 0.959212193  | 8.30E-07 |
| TUCP_001741 | XLOC_071526 | ENSRNOT00000016649 | 0.951218174  | 2.00E-06 |
| TUCP_001741 | XLOC_071526 | ENSRNOT00000081512 | 0.95134811   | 1.98E-06 |
| TUCP_001741 | XLOC_071526 | ENSRNOT00000057160 | 0.951279833  | 1.99E-06 |
| TUCP_001741 | XLOC_071526 | ENSRNOT00000003568 | 0.973219941  | 1.04E-07 |
| TUCP_001741 | XLOC_071526 | ENSRNOT00000023537 | -0.954806532 | 1.38E-06 |
| TUCP_003181 | XLOC_136596 | ENSRNOT00000024186 | 0.954883188  | 1.36E-06 |
| TUCP_003181 | XLOC_136596 | ENSRNOT00000074753 | 0.981054039  | 1.86E-08 |
| TUCP_003181 | XLOC_136596 | ENSRNOT00000004876 | 0.950171308  | 2.22E-06 |
| TUCP_003181 | XLOC_136596 | ENSRNOT00000041904 | 0.986338792  | 3.66E-09 |
| TUCP_003181 | XLOC_136596 | ENSRNOT00000080193 | -0.968215775 | 2.42E-07 |
| TUCP_003181 | XLOC_136596 | ENSRNOT00000083487 | 0.976992802  | 4.88E-08 |
| TUCP_003181 | XLOC_136596 | ENSRNOT00000077990 | 0.986338792  | 3.66E-09 |
| TUCP_003181 | XLOC_136596 | ENSRNOT00000038826 | 0.985683666  | 4.62E-09 |
| TUCP_003181 | XLOC_136596 | ENSRNOT00000046842 | 0.956961333  | 1.08E-06 |
| TUCP_003181 | XLOC_136596 | ENSRNOT00000021243 | 0.966310132  | 3.23E-07 |
| TUCP_003181 | XLOC_136596 | ENSRNOT00000060250 | 0.98571872   | 4.57E-09 |
| TUCP_003181 | XLOC_136596 | ENSRNOT00000091934 | 0.986338792  | 3.66E-09 |
| TUCP_003181 | XLOC_136596 | ENSRNOT00000046585 | 0.966032967  | 3.36E-07 |
| TUCP_003181 | XLOC_136596 | ENSRNOT00000082403 | -0.963232245 | 4.97E-07 |
| TUCP_003181 | XLOC_136596 | ENSRNOT00000080794 | 0.971742278  | 1.35E-07 |
| TUCP_003181 | XLOC_136596 | ENSRNOT00000014456 | 0.977312759  | 4.56E-08 |
| TUCP_003181 | XLOC_136596 | ENSRNOT00000031076 | 0.971042291  | 1.53E-07 |
| TUCP_003181 | XLOC_136596 | ENSRNOT00000086349 | 0.981315831  | 1.74E-08 |
| TUCP_003181 | XLOC_136596 | ENSRNOT00000044145 | 0.986338792  | 3.66E-09 |
| TUCP_003181 | XLOC_136596 | ENSRNOT00000088381 | 0.970928424  | 1.56E-07 |
| TUCP_003181 | XLOC_136596 | ENSRNOT00000011743 | 0.970900901  | 1.56E-07 |
| TUCP_003181 | XLOC_136596 | ENSRNOT00000089929 | 0.986338792  | 3.66E-09 |
| TUCP_003181 | XLOC_136596 | ENSRNOT00000088624 | 0.986338792  | 3.66E-09 |
| TUCP_003181 | XLOC_136596 | ENSRNOT00000085659 | 0.988379261  | 1.64E-09 |
| TUCP_003181 | XLOC_136596 | ENSRNOT00000015866 | 0.980280776  | 2.27E-08 |
| TUCP_003181 | XLOC_136596 | ENSRNOT00000078633 | 0.986338792  | 3.66E-09 |
| TUCP_003181 | XLOC_136596 | ENSRNOT00000034907 | 0.981481225  | 1.66E-08 |
| TUCP_003181 | XLOC_136596 | ENSRNOT00000093230 | 0.957233122  | 1.05E-06 |
| TUCP_003181 | XLOC_136596 | ENSRNOT00000051835 | 0.986338792  | 3.66E-09 |
| TUCP_003181 | XLOC_136596 | ENSRNOT00000079087 | 0.986338792  | 3.66E-09 |
| TUCP_003181 | XLOC_136596 | ENSRNOT00000037206 | 0.986338792  | 3.66E-09 |
| TUCP_003181 | XLOC_136596 | ENSRNOT00000083261 | 0.959449168  | 8.07E-07 |

|             |             |                    |              |          |
|-------------|-------------|--------------------|--------------|----------|
| TUCP_003181 | XLOC_136596 | ENSRNOT00000080590 | 0.98615122   | 3.92E-09 |
| TUCP_003181 | XLOC_136596 | ENSRNOT00000027552 | 0.985614948  | 4.74E-09 |
| TUCP_003181 | XLOC_136596 | ENSRNOT00000077014 | 0.975521804  | 6.64E-08 |
| TUCP_003181 | XLOC_136596 | ENSRNOT00000080453 | 0.986278703  | 3.74E-09 |
| TUCP_003181 | XLOC_136596 | ENSRNOT00000089057 | 0.960412413  | 7.16E-07 |
| TUCP_003181 | XLOC_136596 | ENSRNOT00000057729 | 0.98986597   | 8.28E-10 |
| TUCP_003181 | XLOC_136596 | ENSRNOT00000061284 | 0.95554017   | 1.27E-06 |
| TUCP_003181 | XLOC_136596 | ENSRNOT00000071884 | 0.992780072  | 1.53E-10 |
| TUCP_003181 | XLOC_136596 | ENSRNOT00000066839 | 0.974165882  | 8.68E-08 |
| TUCP_003181 | XLOC_136596 | ENSRNOT00000031205 | 0.973784961  | 9.33E-08 |
| TUCP_003181 | XLOC_136596 | ENSRNOT00000078663 | 0.964137307  | 4.40E-07 |
| TUCP_003181 | XLOC_136596 | ENSRNOT00000064250 | 0.964303011  | 4.30E-07 |
| TUCP_003181 | XLOC_136596 | ENSRNOT00000037169 | 0.962402908  | 5.55E-07 |
| TUCP_003181 | XLOC_136596 | ENSRNOT00000029634 | 0.979064261  | 3.06E-08 |
| TUCP_003181 | XLOC_136596 | ENSRNOT00000093579 | 0.968614541  | 2.28E-07 |
| TUCP_003181 | XLOC_136596 | ENSRNOT00000000215 | 0.973167994  | 1.05E-07 |
| TUCP_003181 | XLOC_136596 | ENSRNOT00000065460 | 0.986338792  | 3.66E-09 |
| TUCP_003181 | XLOC_136596 | ENSRNOT00000003817 | 0.977749168  | 4.14E-08 |
| TUCP_003181 | XLOC_136596 | ENSRNOT00000016713 | 0.986338792  | 3.66E-09 |
| TUCP_003181 | XLOC_136596 | ENSRNOT00000079260 | 0.980152977  | 2.35E-08 |
| TUCP_003181 | XLOC_136596 | ENSRNOT00000039294 | 0.986338792  | 3.66E-09 |
| TUCP_000167 | XLOC_004792 | ENSRNOT00000010358 | 0.963952355  | 4.51E-07 |
| TUCP_000167 | XLOC_004792 | ENSRNOT00000018970 | 0.951652562  | 1.92E-06 |
| TUCP_000167 | XLOC_004792 | ENSRNOT00000038188 | 0.954597426  | 1.41E-06 |
| TUCP_000167 | XLOC_004792 | ENSRNOT00000028818 | 0.96312742   | 5.05E-07 |
| TUCP_000167 | XLOC_004792 | ENSRNOT00000010142 | 0.950777458  | 2.09E-06 |
| TUCP_000166 | XLOC_004785 | ENSRNOT00000079547 | 0.952662979  | 1.73E-06 |
| TUCP_000166 | XLOC_004785 | ENSRNOT00000051000 | 0.977655087  | 4.23E-08 |
| TUCP_000165 | XLOC_004498 | ENSRNOT00000086078 | 0.951718937  | 1.90E-06 |
| TUCP_000696 | XLOC_026272 | ENSRNOT00000024825 | 0.957757287  | 9.87E-07 |
| TUCP_000696 | XLOC_026272 | ENSRNOT00000077462 | 0.971502925  | 1.41E-07 |
| TUCP_000696 | XLOC_026272 | ENSRNOT00000075569 | 0.951608203  | 1.93E-06 |
| TUCP_000162 | XLOC_004311 | ENSRNOT00000006835 | 0.953193057  | 1.64E-06 |
| TUCP_000162 | XLOC_004311 | ENSRNOT00000007350 | 0.962291756  | 5.64E-07 |
| TUCP_000162 | XLOC_004311 | ENSRNOT00000004400 | 0.95957233   | 7.95E-07 |
| TUCP_000162 | XLOC_004311 | ENSRNOT00000002428 | 0.957736061  | 9.89E-07 |
| TUCP_000162 | XLOC_004311 | ENSRNOT00000083578 | 0.950781488  | 2.09E-06 |
| TUCP_000162 | XLOC_004311 | ENSRNOT00000006217 | 0.981253032  | 1.77E-08 |
| TUCP_000162 | XLOC_004311 | ENSRNOT00000079138 | 0.95003336   | 2.25E-06 |
| TUCP_000162 | XLOC_004311 | ENSRNOT00000049459 | -0.951931258 | 1.86E-06 |
| TUCP_000162 | XLOC_004311 | ENSRNOT00000065947 | 0.965648046  | 3.56E-07 |
| TUCP_000162 | XLOC_004311 | ENSRNOT00000036051 | 0.956638825  | 1.12E-06 |
| TUCP_000162 | XLOC_004311 | ENSRNOT00000084567 | 0.964722524  | 4.06E-07 |
| TUCP_000162 | XLOC_004311 | ENSRNOT00000007855 | 0.956920312  | 1.09E-06 |
| TUCP_000162 | XLOC_004311 | ENSRNOT00000052063 | 0.973194497  | 1.04E-07 |
| TUCP_000162 | XLOC_004311 | ENSRNOT00000055437 | -0.95512164  | 1.33E-06 |
| TUCP_000162 | XLOC_004311 | ENSRNOT00000055540 | 0.950065892  | 2.25E-06 |
| TUCP_000162 | XLOC_004311 | ENSRNOT00000019057 | -0.964314249 | 4.29E-07 |
| TUCP_000162 | XLOC_004311 | ENSRNOT00000013516 | 0.951206184  | 2.01E-06 |
| TUCP_000162 | XLOC_004311 | ENSRNOT00000001507 | 0.952428598  | 1.77E-06 |
| TUCP_000162 | XLOC_004311 | ENSRNOT00000080090 | 0.957740356  | 9.89E-07 |

|             |             |                    |              |          |
|-------------|-------------|--------------------|--------------|----------|
| TUCP_000162 | XLOC_004311 | ENSRNOT00000088125 | 0.958223378  | 9.34E-07 |
| TUCP_000162 | XLOC_004311 | ENSRNOT00000012060 | 0.95404546   | 1.49E-06 |
| TUCP_000162 | XLOC_004311 | ENSRNOT00000025079 | -0.953798858 | 1.53E-06 |
| TUCP_000162 | XLOC_004311 | ENSRNOT00000018584 | 0.96404939   | 4.45E-07 |
| TUCP_000162 | XLOC_004311 | ENSRNOT00000010418 | 0.950676395  | 2.12E-06 |
| TUCP_000162 | XLOC_004311 | ENSRNOT00000012755 | 0.952529127  | 1.75E-06 |
| TUCP_000162 | XLOC_004311 | ENSRNOT00000017271 | 0.977941977  | 3.96E-08 |
| TUCP_000162 | XLOC_004311 | ENSRNOT00000024677 | 0.967359743  | 2.76E-07 |
| TUCP_000162 | XLOC_004311 | ENSRNOT00000025517 | 0.952464101  | 1.76E-06 |
| TUCP_000162 | XLOC_004311 | ENSRNOT00000003146 | -0.956936723 | 1.08E-06 |
| TUCP_000162 | XLOC_004311 | ENSRNOT00000026391 | 0.978041723  | 3.88E-08 |
| TUCP_000162 | XLOC_004311 | ENSRNOT00000034450 | 0.963838085  | 4.58E-07 |
| TUCP_000162 | XLOC_004311 | ENSRNOT00000005686 | -0.952210911 | 1.81E-06 |
| TUCP_000162 | XLOC_004311 | ENSRNOT00000005292 | 0.950534132  | 2.15E-06 |
| TUCP_000162 | XLOC_004311 | ENSRNOT00000087278 | -0.959087142 | 8.43E-07 |
| TUCP_000162 | XLOC_004311 | ENSRNOT00000030074 | 0.95336737   | 1.61E-06 |
| TUCP_000162 | XLOC_004311 | ENSRNOT00000068745 | 0.954948605  | 1.35E-06 |
| TUCP_000162 | XLOC_004311 | ENSRNOT00000034298 | 0.961160355  | 6.52E-07 |
| TUCP_000162 | XLOC_004311 | ENSRNOT00000024352 | 0.95395058   | 1.51E-06 |
| TUCP_000162 | XLOC_004311 | ENSRNOT00000003544 | -0.954070413 | 1.49E-06 |
| TUCP_000162 | XLOC_004311 | ENSRNOT00000016445 | 0.964787206  | 4.02E-07 |
| TUCP_000162 | XLOC_004311 | ENSRNOT00000058495 | -0.95015281  | 2.23E-06 |
| TUCP_000162 | XLOC_004311 | ENSRNOT00000011956 | 0.962899084  | 5.20E-07 |
| TUCP_000162 | XLOC_004311 | ENSRNOT00000073919 | 0.978680106  | 3.35E-08 |
| TUCP_000162 | XLOC_004311 | ENSRNOT00000023667 | 0.952652445  | 1.73E-06 |
| TUCP_000162 | XLOC_004311 | ENSRNOT00000026089 | 0.969604518  | 1.94E-07 |
| TUCP_000162 | XLOC_004311 | ENSRNOT00000001158 | 0.971388691  | 1.44E-07 |
| TUCP_000162 | XLOC_004311 | ENSRNOT00000055683 | 0.963457386  | 4.83E-07 |
| TUCP_000162 | XLOC_004311 | ENSRNOT00000045488 | 0.951273296  | 1.99E-06 |
| TUCP_000162 | XLOC_004311 | ENSRNOT00000002465 | 0.953772179  | 1.54E-06 |
| TUCP_000162 | XLOC_004311 | ENSRNOT00000000898 | 0.972343879  | 1.22E-07 |
| TUCP_000162 | XLOC_004311 | ENSRNOT00000077706 | 0.965935948  | 3.41E-07 |
| TUCP_000162 | XLOC_004311 | ENSRNOT00000020383 | 0.980663371  | 2.06E-08 |
| TUCP_000162 | XLOC_004311 | ENSRNOT00000003840 | 0.956317065  | 1.16E-06 |
| TUCP_000162 | XLOC_004311 | ENSRNOT00000076230 | 0.958817464  | 8.71E-07 |
| TUCP_000162 | XLOC_004311 | ENSRNOT00000084012 | 0.952094565  | 1.83E-06 |
| TUCP_000162 | XLOC_004311 | ENSRNOT00000025523 | 0.961671365  | 6.11E-07 |
| TUCP_000162 | XLOC_004311 | ENSRNOT00000066032 | 0.956915117  | 1.09E-06 |
| TUCP_000162 | XLOC_004311 | ENSRNOT00000093385 | 0.963322075  | 4.92E-07 |
| TUCP_000162 | XLOC_004311 | ENSRNOT00000015239 | -0.957728816 | 9.90E-07 |
| TUCP_000162 | XLOC_004311 | ENSRNOT00000027264 | 0.950404175  | 2.17E-06 |
| TUCP_000162 | XLOC_004311 | ENSRNOT00000000718 | 0.957742721  | 9.88E-07 |
| TUCP_000162 | XLOC_004311 | ENSRNOT00000077146 | -0.956203101 | 1.18E-06 |
| TUCP_000162 | XLOC_004311 | ENSRNOT00000001783 | 0.952245105  | 1.80E-06 |
| TUCP_000162 | XLOC_004311 | ENSRNOT00000021143 | 0.969740603  | 1.90E-07 |
| TUCP_000162 | XLOC_004311 | ENSRNOT00000005489 | 0.966573961  | 3.11E-07 |
| TUCP_000162 | XLOC_004311 | ENSRNOT00000017765 | 0.975517461  | 6.65E-08 |
| TUCP_000162 | XLOC_004311 | ENSRNOT00000064039 | 0.972238536  | 1.24E-07 |
| TUCP_000162 | XLOC_004311 | ENSRNOT00000001923 | 0.955601099  | 1.26E-06 |
| TUCP_000162 | XLOC_004311 | ENSRNOT00000073041 | 0.950148885  | 2.23E-06 |
| TUCP_000162 | XLOC_004311 | ENSRNOT00000079784 | -0.959527731 | 7.99E-07 |



|             |             |                    |              |          |
|-------------|-------------|--------------------|--------------|----------|
| TUCP_000162 | XLOC_004311 | ENSRNOT00000085517 | 0.976089854  | 5.91E-08 |
| TUCP_000162 | XLOC_004311 | ENSRNOT00000067059 | 0.970904889  | 1.56E-07 |
| TUCP_000162 | XLOC_004311 | ENSRNOT00000037679 | 0.979831801  | 2.54E-08 |
| TUCP_000162 | XLOC_004311 | ENSRNOT00000065076 | 0.958148154  | 9.43E-07 |
| TUCP_000162 | XLOC_004311 | ENSRNOT00000012528 | 0.950853122  | 2.08E-06 |
| TUCP_000162 | XLOC_004311 | ENSRNOT00000060698 | -0.951133408 | 2.02E-06 |
| TUCP_000162 | XLOC_004311 | ENSRNOT00000032244 | 0.965212467  | 3.78E-07 |
| TUCP_000162 | XLOC_004311 | ENSRNOT00000061100 | 0.956424529  | 1.15E-06 |
| TUCP_000162 | XLOC_004311 | ENSRNOT00000005144 | 0.960487647  | 7.10E-07 |
| TUCP_000162 | XLOC_004311 | ENSRNOT00000025097 | 0.966414074  | 3.18E-07 |
| TUCP_000162 | XLOC_004311 | ENSRNOT00000028907 | 0.96046397   | 7.12E-07 |
| TUCP_000162 | XLOC_004311 | ENSRNOT00000081678 | 0.973212051  | 1.04E-07 |
| TUCP_000162 | XLOC_004311 | ENSRNOT00000036613 | -0.952749493 | 1.71E-06 |
| TUCP_000162 | XLOC_004311 | ENSRNOT00000092876 | -0.955293528 | 1.30E-06 |
| TUCP_000162 | XLOC_004311 | ENSRNOT00000078862 | 0.952958685  | 1.68E-06 |
| TUCP_000162 | XLOC_004311 | ENSRNOT00000046639 | 0.967441937  | 2.73E-07 |
| TUCP_001063 | XLOC_040483 | ENSRNOT00000025981 | 0.964182686  | 4.37E-07 |
| TUCP_001063 | XLOC_040483 | ENSRNOT00000010992 | 0.957591282  | 1.01E-06 |
| TUCP_001063 | XLOC_040483 | ENSRNOT00000068405 | 0.956964615  | 1.08E-06 |
| TUCP_001063 | XLOC_040483 | ENSRNOT00000083215 | 0.953262543  | 1.62E-06 |
| TUCP_001063 | XLOC_040483 | ENSRNOT00000076669 | 0.958960385  | 8.56E-07 |
| TUCP_001063 | XLOC_040483 | ENSRNOT00000006401 | -0.951328807 | 1.98E-06 |
| TUCP_001063 | XLOC_040483 | ENSRNOT00000024420 | 0.969676409  | 1.92E-07 |
| TUCP_001063 | XLOC_040483 | ENSRNOT00000005684 | 0.965832035  | 3.46E-07 |
| TUCP_001063 | XLOC_040483 | ENSRNOT00000059458 | 0.950284498  | 2.20E-06 |
| TUCP_001063 | XLOC_040483 | ENSRNOT00000004508 | 0.958819405  | 8.70E-07 |
| TUCP_001063 | XLOC_040483 | ENSRNOT00000082969 | 0.952154657  | 1.82E-06 |
| TUCP_001063 | XLOC_040483 | ENSRNOT00000028155 | 0.973959573  | 9.03E-08 |
| TUCP_001063 | XLOC_040483 | ENSRNOT00000002678 | 0.95174929   | 1.90E-06 |
| TUCP_001063 | XLOC_040483 | ENSRNOT00000015929 | 0.95279654   | 1.70E-06 |
| TUCP_001063 | XLOC_040483 | ENSRNOT00000052288 | 0.954674188  | 1.40E-06 |
| TUCP_001063 | XLOC_040483 | ENSRNOT00000039809 | 0.95205555   | 1.84E-06 |
| TUCP_001063 | XLOC_040483 | ENSRNOT00000064900 | 0.955061283  | 1.34E-06 |
| TUCP_001063 | XLOC_040483 | ENSRNOT00000076729 | 0.952060335  | 1.84E-06 |
| TUCP_001063 | XLOC_040483 | ENSRNOT00000025196 | -0.953461201 | 1.59E-06 |
| TUCP_001063 | XLOC_040483 | ENSRNOT00000058852 | -0.96100844  | 6.65E-07 |
| TUCP_001063 | XLOC_040483 | ENSRNOT00000025859 | 0.95995685   | 7.58E-07 |
| TUCP_001063 | XLOC_040483 | ENSRNOT00000044896 | 0.95441202   | 1.44E-06 |
| TUCP_001063 | XLOC_040483 | ENSRNOT00000013026 | 0.959588429  | 7.93E-07 |
| TUCP_001063 | XLOC_040483 | ENSRNOT00000034503 | 0.953134965  | 1.65E-06 |
| TUCP_001063 | XLOC_040483 | ENSRNOT00000022800 | 0.963912807  | 4.54E-07 |
| TUCP_001063 | XLOC_040483 | ENSRNOT00000017012 | 0.956661051  | 1.12E-06 |
| TUCP_001063 | XLOC_040483 | ENSRNOT00000074725 | 0.955716467  | 1.24E-06 |
| TUCP_001063 | XLOC_040483 | ENSRNOT00000013046 | -0.955406033 | 1.29E-06 |
| TUCP_001063 | XLOC_040483 | ENSRNOT00000024942 | 0.955558445  | 1.27E-06 |
| TUCP_001063 | XLOC_040483 | ENSRNOT00000036646 | 0.965380744  | 3.70E-07 |
| TUCP_001063 | XLOC_040483 | ENSRNOT00000071573 | 0.956214462  | 1.18E-06 |
| TUCP_001063 | XLOC_040483 | ENSRNOT00000022646 | 0.970946606  | 1.55E-07 |
| TUCP_001063 | XLOC_040483 | ENSRNOT00000004412 | 0.950920455  | 2.06E-06 |
| TUCP_001063 | XLOC_040483 | ENSRNOT00000073346 | 0.955956189  | 1.21E-06 |
| TUCP_001063 | XLOC_040483 | ENSRNOT00000051496 | 0.973431547  | 9.97E-08 |

|             |             |                    |              |          |
|-------------|-------------|--------------------|--------------|----------|
| TUCP_001063 | XLOC_040483 | ENSRNOT00000010898 | 0.956771019  | 1.11E-06 |
| TUCP_001063 | XLOC_040483 | ENSRNOT00000090376 | 0.952575846  | 1.74E-06 |
| TUCP_001063 | XLOC_040483 | ENSRNOT00000084661 | 0.951531305  | 1.94E-06 |
| TUCP_001063 | XLOC_040483 | ENSRNOT00000011622 | 0.957867428  | 9.74E-07 |
| TUCP_001063 | XLOC_040483 | ENSRNOT00000035989 | 0.962546397  | 5.45E-07 |
| TUCP_001063 | XLOC_040483 | ENSRNOT00000044177 | 0.95120923   | 2.01E-06 |
| TUCP_001063 | XLOC_040483 | ENSRNOT00000005355 | 0.957027204  | 1.07E-06 |
| TUCP_001063 | XLOC_040483 | ENSRNOT00000021592 | 0.962932159  | 5.18E-07 |
| TUCP_001063 | XLOC_040483 | ENSRNOT00000026087 | -0.960172677 | 7.38E-07 |
| TUCP_001063 | XLOC_040483 | ENSRNOT00000017948 | 0.954551779  | 1.41E-06 |
| TUCP_001063 | XLOC_040483 | ENSRNOT00000010242 | 0.967785981  | 2.59E-07 |
| TUCP_001063 | XLOC_040483 | ENSRNOT00000028842 | 0.987692193  | 2.18E-09 |
| TUCP_001063 | XLOC_040483 | ENSRNOT00000057313 | 0.951964902  | 1.86E-06 |
| TUCP_001063 | XLOC_040483 | ENSRNOT00000006800 | 0.955132959  | 1.33E-06 |
| TUCP_001063 | XLOC_040483 | ENSRNOT00000043156 | 0.95117318   | 2.01E-06 |
| TUCP_001063 | XLOC_040483 | ENSRNOT00000090773 | -0.950825178 | 2.08E-06 |
| TUCP_001063 | XLOC_040483 | ENSRNOT00000085648 | 0.95918723   | 8.33E-07 |
| TUCP_000160 | XLOC_004301 | ENSRNOT00000017090 | 0.963810576  | 4.60E-07 |
| TUCP_000160 | XLOC_004301 | ENSRNOT00000058725 | 0.955770914  | 1.24E-06 |
| TUCP_000041 | XLOC_000890 | ENSRNOT00000026949 | -0.972877464 | 1.10E-07 |
| TUCP_000041 | XLOC_000890 | ENSRNOT00000009440 | -0.952140652 | 1.82E-06 |
| TUCP_000041 | XLOC_000890 | ENSRNOT00000021818 | -0.966646479 | 3.07E-07 |
| TUCP_000041 | XLOC_000890 | ENSRNOT00000007185 | -0.953276241 | 1.62E-06 |
| TUCP_000041 | XLOC_000890 | ENSRNOT00000010103 | -0.95423277  | 1.46E-06 |
| TUCP_000041 | XLOC_000890 | ENSRNOT00000014738 | -0.957450895 | 1.02E-06 |
| TUCP_000041 | XLOC_000890 | ENSRNOT00000078639 | 0.957729891  | 9.90E-07 |
| TUCP_000041 | XLOC_000890 | ENSRNOT00000087725 | 0.962434989  | 5.53E-07 |
| TUCP_000041 | XLOC_000890 | ENSRNOT00000019769 | -0.958074701 | 9.51E-07 |
| TUCP_000042 | XLOC_001015 | ENSRNOT00000092026 | 0.96620614   | 3.28E-07 |
| TUCP_000042 | XLOC_001015 | ENSRNOT00000093075 | 1            | 0        |
| TUCP_000042 | XLOC_001015 | ENSRNOT00000058260 | 1            | 0        |
| TUCP_000042 | XLOC_001015 | ENSRNOT00000088887 | 1            | 4.25E-78 |
| TUCP_000042 | XLOC_001015 | ENSRNOT00000084986 | 1            | 0        |
| TUCP_000042 | XLOC_001015 | ENSRNOT00000074346 | 0.9702256    | 1.75E-07 |
| TUCP_000042 | XLOC_001015 | ENSRNOT00000073209 | 0.983711602  | 8.79E-09 |
| TUCP_000042 | XLOC_001015 | ENSRNOT00000080155 | 0.973069673  | 1.07E-07 |
| TUCP_000042 | XLOC_001015 | ENSRNOT00000072573 | 0.996213272  | 6.09E-12 |
| TUCP_000042 | XLOC_001015 | ENSRNOT00000017828 | 0.996001583  | 7.99E-12 |
| TUCP_000042 | XLOC_001015 | ENSRNOT00000080444 | 0.969625907  | 1.93E-07 |
| TUCP_000042 | XLOC_001015 | ENSRNOT00000071312 | 1            | 0        |
| TUCP_000042 | XLOC_001015 | ENSRNOT00000088245 | 1            | 0        |
| TUCP_000042 | XLOC_001015 | ENSRNOT00000036565 | 0.969065335  | 2.12E-07 |
| TUCP_000042 | XLOC_001015 | ENSRNOT00000058833 | 0.998673261  | 3.23E-14 |
| TUCP_000042 | XLOC_001015 | ENSRNOT00000078052 | 1            | 0        |
| TUCP_000042 | XLOC_001015 | ENSRNOT00000078494 | 0.999927093  | 1.62E-20 |
| TUCP_000042 | XLOC_001015 | ENSRNOT00000085653 | 1            | 0        |
| TUCP_000042 | XLOC_001015 | ENSRNOT00000057950 | 0.969329371  | 2.03E-07 |
| TUCP_000042 | XLOC_001015 | ENSRNOT00000081992 | 0.999320526  | 1.14E-15 |
| TUCP_000042 | XLOC_001015 | ENSRNOT00000038553 | 0.955765808  | 1.24E-06 |
| TUCP_000042 | XLOC_001015 | ENSRNOT00000084120 | 0.958115447  | 9.46E-07 |
| TUCP_000042 | XLOC_001015 | ENSRNOT00000055406 | 1            | 1.33E-79 |

|             |             |                    |             |          |
|-------------|-------------|--------------------|-------------|----------|
| TUCP_000042 | XLOC_001015 | ENSRNOT00000070817 | 0.998968079 | 9.20E-15 |
| TUCP_000042 | XLOC_001015 | ENSRNOT00000026753 | 1           | 1.33E-79 |
| TUCP_000042 | XLOC_001015 | ENSRNOT00000080533 | 0.996682529 | 3.15E-12 |
| TUCP_000042 | XLOC_001015 | ENSRNOT00000072774 | 0.979665261 | 2.65E-08 |
| TUCP_000042 | XLOC_001015 | ENSRNOT00000086031 | 1           | 1.33E-79 |
| TUCP_000042 | XLOC_001015 | ENSRNOT00000014312 | 1           | 0        |
| TUCP_000042 | XLOC_001015 | ENSRNOT00000042882 | 0.963218427 | 4.98E-07 |
| TUCP_000042 | XLOC_001015 | ENSRNOT00000088012 | 0.956765806 | 1.11E-06 |
| TUCP_000042 | XLOC_001015 | ENSRNOT00000051231 | 0.999242378 | 1.96E-15 |
| TUCP_000042 | XLOC_001015 | ENSRNOT00000089407 | 0.992986194 | 1.32E-10 |
| TUCP_000042 | XLOC_001015 | ENSRNOT00000055034 | 0.998331441 | 1.02E-13 |
| TUCP_000042 | XLOC_001015 | ENSRNOT00000046837 | 0.97252559  | 1.18E-07 |
| TUCP_000296 | XLOC_009318 | ENSRNOT00000008041 | 0.951692126 | 1.91E-06 |
| TUCP_001069 | XLOC_040982 | ENSRNOT00000084075 | 0.996106112 | 7.00E-12 |
| TUCP_001069 | XLOC_040982 | ENSRNOT00000012880 | 0.968043129 | 2.49E-07 |
| TUCP_001069 | XLOC_040982 | ENSRNOT00000074465 | 1           | 0        |
| TUCP_001069 | XLOC_040982 | ENSRNOT00000090898 | 0.961670541 | 6.11E-07 |
| TUCP_001069 | XLOC_040982 | ENSRNOT00000079805 | 0.997980451 | 2.64E-13 |
| TUCP_001069 | XLOC_040982 | ENSRNOT00000040912 | 1           | 0        |
| TUCP_001069 | XLOC_040982 | ENSRNOT00000072648 | 1           | 0        |
| TUCP_001069 | XLOC_040982 | ENSRNOT00000007398 | 0.989054103 | 1.21E-09 |
| TUCP_001069 | XLOC_040982 | ENSRNOT00000070803 | 1           | 0        |
| TUCP_001069 | XLOC_040982 | ENSRNOT00000012196 | 1           | 0        |
| TUCP_001069 | XLOC_040982 | ENSRNOT00000085772 | 1           | 0        |
| TUCP_001069 | XLOC_040982 | ENSRNOT00000093284 | 0.999975856 | 6.46E-23 |
| TUCP_001069 | XLOC_040982 | ENSRNOT00000086374 | 0.993568904 | 8.57E-11 |
| TUCP_001069 | XLOC_040982 | ENSRNOT00000015270 | 1           | 0        |
| TUCP_001069 | XLOC_040982 | ENSRNOT00000046192 | 1           | 0        |
| TUCP_001069 | XLOC_040982 | ENSRNOT00000044226 | 1           | 0        |
| TUCP_001069 | XLOC_040982 | ENSRNOT00000081898 | 0.989837012 | 8.39E-10 |
| TUCP_001069 | XLOC_040982 | ENSRNOT00000081954 | 0.964005219 | 4.48E-07 |
| TUCP_001069 | XLOC_040982 | ENSRNOT00000080291 | 0.998427671 | 7.55E-14 |
| TUCP_001069 | XLOC_040982 | ENSRNOT00000004293 | 0.984239049 | 7.46E-09 |
| TUCP_001069 | XLOC_040982 | ENSRNOT00000078231 | 0.960455489 | 7.13E-07 |
| TUCP_001069 | XLOC_040982 | ENSRNOT00000002834 | 1           | 0        |
| TUCP_001069 | XLOC_040982 | ENSRNOT00000001464 | 1           | 0        |
| TUCP_001069 | XLOC_040982 | ENSRNOT00000090716 | 0.994769629 | 3.06E-11 |
| TUCP_001069 | XLOC_040982 | ENSRNOT00000083542 | 0.972568514 | 1.17E-07 |
| TUCP_001069 | XLOC_040982 | ENSRNOT00000076044 | 1           | 0        |
| TUCP_001069 | XLOC_040982 | ENSRNOT00000074353 | 1           | 0        |
| TUCP_001069 | XLOC_040982 | ENSRNOT00000043510 | 0.958144129 | 9.43E-07 |
| TUCP_001069 | XLOC_040982 | ENSRNOT00000087122 | 0.980089513 | 2.38E-08 |
| TUCP_001069 | XLOC_040982 | ENSRNOT00000074295 | 0.987777006 | 2.11E-09 |
| TUCP_001069 | XLOC_040982 | ENSRNOT00000057873 | 1           | 0        |
| TUCP_001069 | XLOC_040982 | ENSRNOT00000083002 | 0.988874897 | 1.32E-09 |
| TUCP_001069 | XLOC_040982 | ENSRNOT00000088399 | 0.999999855 | 4.99E-34 |
| TUCP_001069 | XLOC_040982 | ENSRNOT00000086248 | 1           | 0        |
| TUCP_001069 | XLOC_040982 | ENSRNOT00000089750 | 0.999992758 | 1.57E-25 |
| TUCP_001069 | XLOC_040982 | ENSRNOT00000030517 | 0.971225224 | 1.48E-07 |
| TUCP_001069 | XLOC_040982 | ENSRNOT00000034772 | 0.994265187 | 4.84E-11 |
| TUCP_001069 | XLOC_040982 | ENSRNOT00000089305 | 0.969641693 | 1.93E-07 |

|             |             |                    |              |          |
|-------------|-------------|--------------------|--------------|----------|
| TUCP_001069 | XLOC_040982 | ENSRNOT00000024580 | 0.954183021  | 1.47E-06 |
| TUCP_001069 | XLOC_040982 | ENSRNOT00000064601 | 0.966578038  | 3.11E-07 |
| TUCP_001069 | XLOC_040982 | ENSRNOT00000015870 | 0.965901306  | 3.43E-07 |
| TUCP_001069 | XLOC_040982 | ENSRNOT00000080812 | 0.992998865  | 1.31E-10 |
| TUCP_001069 | XLOC_040982 | ENSRNOT00000092755 | 1            | 0        |
| TUCP_001069 | XLOC_040982 | ENSRNOT00000031683 | 1            | 0        |
| TUCP_001069 | XLOC_040982 | ENSRNOT00000087764 | 0.988156196  | 1.80E-09 |
| TUCP_001183 | XLOC_044723 | ENSRNOT00000084075 | -0.962693402 | 5.35E-07 |
| TUCP_001183 | XLOC_044723 | ENSRNOT00000074465 | -0.963086882 | 5.07E-07 |
| TUCP_001183 | XLOC_044723 | ENSRNOT00000090898 | -0.98104209  | 1.87E-08 |
| TUCP_001183 | XLOC_044723 | ENSRNOT00000079805 | -0.953452063 | 1.59E-06 |
| TUCP_001183 | XLOC_044723 | ENSRNOT00000040912 | -0.963086882 | 5.07E-07 |
| TUCP_001183 | XLOC_044723 | ENSRNOT00000072648 | -0.963086882 | 5.07E-07 |
| TUCP_001183 | XLOC_044723 | ENSRNOT00000007398 | -0.96993108  | 1.84E-07 |
| TUCP_001183 | XLOC_044723 | ENSRNOT00000070803 | -0.963086882 | 5.07E-07 |
| TUCP_001183 | XLOC_044723 | ENSRNOT00000012196 | -0.963086882 | 5.07E-07 |
| TUCP_001183 | XLOC_044723 | ENSRNOT00000085772 | -0.963086882 | 5.07E-07 |
| TUCP_001183 | XLOC_044723 | ENSRNOT00000093284 | -0.963328202 | 4.91E-07 |
| TUCP_001183 | XLOC_044723 | ENSRNOT00000015270 | -0.963086882 | 5.07E-07 |
| TUCP_001183 | XLOC_044723 | ENSRNOT00000046192 | -0.963086882 | 5.07E-07 |
| TUCP_001183 | XLOC_044723 | ENSRNOT00000044226 | -0.963086882 | 5.07E-07 |
| TUCP_001183 | XLOC_044723 | ENSRNOT00000081898 | -0.966840791 | 2.99E-07 |
| TUCP_001183 | XLOC_044723 | ENSRNOT00000081954 | -0.953088841 | 1.65E-06 |
| TUCP_001183 | XLOC_044723 | ENSRNOT00000080291 | -0.962270865 | 5.65E-07 |
| TUCP_001183 | XLOC_044723 | ENSRNOT00000015870 | -0.968903881 | 2.17E-07 |
| TUCP_001183 | XLOC_044723 | ENSRNOT00000001464 | -0.963086882 | 5.07E-07 |
| TUCP_001183 | XLOC_044723 | ENSRNOT00000090716 | -0.950977652 | 2.05E-06 |
| TUCP_001183 | XLOC_044723 | ENSRNOT00000057873 | -0.963086882 | 5.07E-07 |
| TUCP_001183 | XLOC_044723 | ENSRNOT00000076044 | -0.963086882 | 5.07E-07 |
| TUCP_001183 | XLOC_044723 | ENSRNOT00000074353 | -0.963086882 | 5.07E-07 |
| TUCP_001183 | XLOC_044723 | ENSRNOT00000074295 | -0.953780908 | 1.54E-06 |
| TUCP_001183 | XLOC_044723 | ENSRNOT00000083542 | -0.967349307 | 2.77E-07 |
| TUCP_001183 | XLOC_044723 | ENSRNOT00000088399 | -0.963108329 | 5.06E-07 |
| TUCP_001183 | XLOC_044723 | ENSRNOT00000086248 | -0.963086882 | 5.07E-07 |
| TUCP_001183 | XLOC_044723 | ENSRNOT00000089750 | -0.963075653 | 5.08E-07 |
| TUCP_001183 | XLOC_044723 | ENSRNOT00000034772 | -0.959899688 | 7.63E-07 |
| TUCP_001183 | XLOC_044723 | ENSRNOT00000002834 | -0.963086882 | 5.07E-07 |
| TUCP_001183 | XLOC_044723 | ENSRNOT00000080812 | -0.958143783 | 9.43E-07 |
| TUCP_001183 | XLOC_044723 | ENSRNOT00000092755 | -0.963086882 | 5.07E-07 |
| TUCP_001183 | XLOC_044723 | ENSRNOT00000031683 | -0.963086882 | 5.07E-07 |
| TUCP_000046 | XLOC_001084 | ENSRNOT00000087739 | 0.952811767  | 1.70E-06 |
| TUCP_000046 | XLOC_001084 | ENSRNOT00000000008 | 0.952811767  | 1.70E-06 |
| TUCP_000046 | XLOC_001084 | ENSRNOT00000085822 | 0.960486156  | 7.10E-07 |
| TUCP_000046 | XLOC_001084 | ENSRNOT00000022091 | 0.952811767  | 1.70E-06 |
| TUCP_000046 | XLOC_001084 | ENSRNOT00000048523 | 0.952811767  | 1.70E-06 |
| TUCP_000046 | XLOC_001084 | ENSRNOT00000026428 | 0.966196437  | 3.28E-07 |
| TUCP_000046 | XLOC_001084 | ENSRNOT00000065376 | 0.952811767  | 1.70E-06 |
| TUCP_000046 | XLOC_001084 | ENSRNOT00000074378 | 0.954045173  | 1.49E-06 |
| TUCP_000046 | XLOC_001084 | ENSRNOT00000093571 | 0.952811767  | 1.70E-06 |
| TUCP_000046 | XLOC_001084 | ENSRNOT00000085673 | 0.952811767  | 1.70E-06 |
| TUCP_000046 | XLOC_001084 | ENSRNOT00000050573 | 0.952811767  | 1.70E-06 |

|             |             |                    |             |          |
|-------------|-------------|--------------------|-------------|----------|
| TUCP_000046 | XLOC_001084 | ENSRNOT00000090581 | 0.952811767 | 1.70E-06 |
| TUCP_000046 | XLOC_001084 | ENSRNOT00000083575 | 0.952811767 | 1.70E-06 |
| TUCP_000046 | XLOC_001084 | ENSRNOT00000076239 | 0.969750883 | 1.90E-07 |
| TUCP_000046 | XLOC_001084 | ENSRNOT00000006219 | 0.952811767 | 1.70E-06 |
| TUCP_000046 | XLOC_001084 | ENSRNOT00000076927 | 0.950160694 | 2.23E-06 |
| TUCP_000046 | XLOC_001084 | ENSRNOT00000079826 | 0.952811767 | 1.70E-06 |
| TUCP_000046 | XLOC_001084 | ENSRNOT00000092395 | 0.95085252  | 2.08E-06 |
| TUCP_000046 | XLOC_001084 | ENSRNOT00000065485 | 0.952811767 | 1.70E-06 |
| TUCP_000047 | XLOC_001084 | ENSRNOT00000091652 | 0.958384651 | 9.17E-07 |
| TUCP_000047 | XLOC_001084 | ENSRNOT00000080865 | 0.962716145 | 5.33E-07 |
| TUCP_000047 | XLOC_001084 | ENSRNOT00000073534 | 0.974683768 | 7.85E-08 |
| TUCP_000047 | XLOC_001084 | ENSRNOT00000012161 | 0.958204398 | 9.36E-07 |
| TUCP_000047 | XLOC_001084 | ENSRNOT00000071825 | 0.993955664 | 6.29E-11 |
| TUCP_000047 | XLOC_001084 | ENSRNOT00000093019 | 0.962716145 | 5.33E-07 |
| TUCP_000047 | XLOC_001084 | ENSRNOT00000085908 | 0.957374852 | 1.03E-06 |
| TUCP_000047 | XLOC_001084 | ENSRNOT00000046744 | 0.962716145 | 5.33E-07 |
| TUCP_000047 | XLOC_001084 | ENSRNOT00000076429 | 0.962716145 | 5.33E-07 |
| TUCP_000047 | XLOC_001084 | ENSRNOT00000084667 | 0.960399663 | 7.18E-07 |
| TUCP_000047 | XLOC_001084 | ENSRNOT00000055412 | 0.962716145 | 5.33E-07 |
| TUCP_000047 | XLOC_001084 | ENSRNOT00000093201 | 0.960717342 | 6.90E-07 |
| TUCP_000047 | XLOC_001084 | ENSRNOT00000072724 | 0.962716145 | 5.33E-07 |
| TUCP_000047 | XLOC_001084 | ENSRNOT00000066017 | 0.96908207  | 2.11E-07 |
| TUCP_000047 | XLOC_001084 | ENSRNOT00000073148 | 0.96962161  | 1.94E-07 |
| TUCP_000047 | XLOC_001084 | ENSRNOT00000084375 | 0.962716145 | 5.33E-07 |
| TUCP_000047 | XLOC_001084 | ENSRNOT00000006249 | 0.997353837 | 1.02E-12 |
| TUCP_000047 | XLOC_001084 | ENSRNOT00000042369 | 0.963342537 | 4.90E-07 |
| TUCP_000047 | XLOC_001084 | ENSRNOT00000086554 | 0.962716145 | 5.33E-07 |
| TUCP_000047 | XLOC_001084 | ENSRNOT00000047921 | 0.962716145 | 5.33E-07 |
| TUCP_000047 | XLOC_001084 | ENSRNOT00000064261 | 0.962154058 | 5.74E-07 |
| TUCP_000047 | XLOC_001084 | ENSRNOT00000086660 | 0.960240011 | 7.32E-07 |
| TUCP_000047 | XLOC_001084 | ENSRNOT00000083977 | 0.962716145 | 5.33E-07 |
| TUCP_000047 | XLOC_001084 | ENSRNOT00000092933 | 0.962716145 | 5.33E-07 |
| TUCP_000047 | XLOC_001084 | ENSRNOT00000085447 | 0.956274844 | 1.17E-06 |
| TUCP_000047 | XLOC_001084 | ENSRNOT00000041281 | 0.951784304 | 1.89E-06 |
| TUCP_003456 | XLOC_149596 | ENSRNOT00000071840 | 0.960017683 | 7.52E-07 |
| TUCP_003456 | XLOC_149596 | ENSRNOT00000082776 | 0.990914033 | 4.80E-10 |
| TUCP_003456 | XLOC_149596 | ENSRNOT00000077995 | 0.962408328 | 5.55E-07 |
| TUCP_003456 | XLOC_149596 | ENSRNOT00000066004 | 0.958781407 | 8.74E-07 |
| TUCP_003456 | XLOC_149596 | ENSRNOT00000086962 | 0.970231732 | 1.75E-07 |
| TUCP_003456 | XLOC_149596 | ENSRNOT00000075836 | 0.960017683 | 7.52E-07 |
| TUCP_003456 | XLOC_149596 | ENSRNOT00000083747 | 0.971983216 | 1.30E-07 |
| TUCP_003456 | XLOC_149596 | ENSRNOT00000092182 | 0.960017683 | 7.52E-07 |
| TUCP_003456 | XLOC_149596 | ENSRNOT00000084461 | 0.960017683 | 7.52E-07 |
| TUCP_003456 | XLOC_149596 | ENSRNOT00000060448 | 0.960017683 | 7.52E-07 |
| TUCP_003456 | XLOC_149596 | ENSRNOT00000032631 | 0.960017683 | 7.52E-07 |
| TUCP_003456 | XLOC_149596 | ENSRNOT00000079503 | 0.967192433 | 2.83E-07 |
| TUCP_003456 | XLOC_149596 | ENSRNOT00000060113 | 0.955238924 | 1.31E-06 |
| TUCP_003456 | XLOC_149596 | ENSRNOT00000056490 | 0.957060094 | 1.07E-06 |
| TUCP_003456 | XLOC_149596 | ENSRNOT00000054910 | 0.959745986 | 7.78E-07 |
| TUCP_003456 | XLOC_149596 | ENSRNOT00000057176 | 0.959952242 | 7.58E-07 |
| TUCP_003456 | XLOC_149596 | ENSRNOT00000093431 | 0.960017683 | 7.52E-07 |

|             |             |                    |             |          |
|-------------|-------------|--------------------|-------------|----------|
| TUCP_003456 | XLOC_149596 | ENSRNOT00000092901 | 0.960017683 | 7.52E-07 |
| TUCP_003456 | XLOC_149596 | ENSRNOT00000089290 | 0.959704154 | 7.82E-07 |
| TUCP_003456 | XLOC_149596 | ENSRNOT00000071603 | 0.959885731 | 7.65E-07 |
| TUCP_003456 | XLOC_149596 | ENSRNOT00000075244 | 0.961867163 | 5.96E-07 |
| TUCP_003456 | XLOC_149596 | ENSRNOT00000091828 | 0.951759104 | 1.90E-06 |
| TUCP_003456 | XLOC_149596 | ENSRNOT00000091944 | 0.9581644   | 9.41E-07 |
| TUCP_003456 | XLOC_149596 | ENSRNOT00000070855 | 0.960017683 | 7.52E-07 |
| TUCP_003456 | XLOC_149596 | ENSRNOT00000084109 | 0.959634151 | 7.89E-07 |
| TUCP_003456 | XLOC_149596 | ENSRNOT0000007683  | 0.959889611 | 7.64E-07 |
| TUCP_003456 | XLOC_149596 | ENSRNOT00000041569 | 0.960017683 | 7.52E-07 |
| TUCP_003456 | XLOC_149596 | ENSRNOT00000087091 | 0.960017683 | 7.52E-07 |
| TUCP_003456 | XLOC_149596 | ENSRNOT0000003308  | 0.9561498   | 1.19E-06 |
| TUCP_003456 | XLOC_149596 | ENSRNOT00000026113 | 0.95910699  | 8.41E-07 |
| TUCP_003456 | XLOC_149596 | ENSRNOT00000014939 | 0.95910953  | 8.40E-07 |
| TUCP_003456 | XLOC_149596 | ENSRNOT00000090211 | 0.961719802 | 6.07E-07 |
| TUCP_003456 | XLOC_149596 | ENSRNOT00000023287 | 0.959249324 | 8.26E-07 |
| TUCP_003456 | XLOC_149596 | ENSRNOT00000073229 | 0.960017683 | 7.52E-07 |
| TUCP_003456 | XLOC_149596 | ENSRNOT00000045584 | 0.960017683 | 7.52E-07 |
| TUCP_003456 | XLOC_149596 | ENSRNOT00000060454 | 0.960017683 | 7.52E-07 |
| TUCP_003456 | XLOC_149596 | ENSRNOT0000009295  | 0.957134693 | 1.06E-06 |
| TUCP_002341 | XLOC_097556 | ENSRNOT00000028034 | 0.954467922 | 1.43E-06 |
| TUCP_002341 | XLOC_097556 | ENSRNOT00000023791 | 0.956312564 | 1.16E-06 |
| TUCP_003454 | XLOC_149429 | ENSRNOT00000084133 | 1           | 0        |
| TUCP_003454 | XLOC_149429 | ENSRNOT00000093745 | 0.981891039 | 1.49E-08 |
| TUCP_003454 | XLOC_149429 | ENSRNOT00000065542 | 0.99828699  | 1.16E-13 |
| TUCP_003454 | XLOC_149429 | ENSRNOT00000082464 | 1           | 0        |
| TUCP_003454 | XLOC_149429 | ENSRNOT00000087659 | 1           | 0        |
| TUCP_003454 | XLOC_149429 | ENSRNOT00000084582 | 0.976633579 | 5.28E-08 |
| TUCP_003454 | XLOC_149429 | ENSRNOT00000085078 | 1           | 0        |
| TUCP_003454 | XLOC_149429 | ENSRNOT00000014028 | 1           | 0        |
| TUCP_003454 | XLOC_149429 | ENSRNOT00000049363 | 1           | 4.25E-78 |
| TUCP_003454 | XLOC_149429 | ENSRNOT00000065473 | 0.999949098 | 2.69E-21 |
| TUCP_003454 | XLOC_149429 | ENSRNOT00000000142 | 0.998996155 | 8.01E-15 |
| TUCP_003454 | XLOC_149429 | ENSRNOT00000082288 | 0.999998398 | 8.30E-29 |
| TUCP_003454 | XLOC_149429 | ENSRNOT00000039664 | 1           | 0        |
| TUCP_003454 | XLOC_149429 | ENSRNOT00000065402 | 1           | 4.25E-78 |
| TUCP_003454 | XLOC_149429 | ENSRNOT00000064551 | 0.965365872 | 3.70E-07 |
| TUCP_003454 | XLOC_149429 | ENSRNOT00000084141 | 1           | 0        |
| TUCP_003454 | XLOC_149429 | ENSRNOT00000082435 | 1           | 0        |
| TUCP_003454 | XLOC_149429 | ENSRNOT00000082928 | 0.996801059 | 2.62E-12 |
| TUCP_003454 | XLOC_149429 | ENSRNOT00000066546 | 0.956953619 | 1.08E-06 |
| TUCP_003454 | XLOC_149429 | ENSRNOT00000046013 | 0.988138626 | 1.81E-09 |
| TUCP_003454 | XLOC_149429 | ENSRNOT00000067931 | 0.978893628 | 3.18E-08 |
| TUCP_003454 | XLOC_149429 | ENSRNOT00000086425 | 0.992023315 | 2.51E-10 |
| TUCP_003454 | XLOC_149429 | ENSRNOT00000093696 | 0.956927219 | 1.09E-06 |
| TUCP_003454 | XLOC_149429 | ENSRNOT00000036228 | 0.982337157 | 1.31E-08 |
| TUCP_003454 | XLOC_149429 | ENSRNOT00000014030 | 1           | 0        |
| TUCP_003454 | XLOC_149429 | ENSRNOT00000081966 | 1           | 1.33E-79 |
| TUCP_003454 | XLOC_149429 | ENSRNOT00000075906 | 1           | 0        |
| TUCP_003454 | XLOC_149429 | ENSRNOT00000088396 | 0.981336994 | 1.73E-08 |
| TUCP_003454 | XLOC_149429 | ENSRNOT00000049259 | 0.965500259 | 3.63E-07 |

|             |             |                    |              |          |
|-------------|-------------|--------------------|--------------|----------|
| TUCP_003454 | XLOC_149429 | ENSRNOT00000092838 | 0.982579749  | 1.23E-08 |
| TUCP_003454 | XLOC_149429 | ENSRNOT00000093442 | 0.959217317  | 8.30E-07 |
| TUCP_001567 | XLOC_060608 | ENSRNOT00000091856 | 0.963047264  | 5.10E-07 |
| TUCP_001560 | XLOC_060269 | ENSRNOT00000067741 | 0.953811687  | 1.53E-06 |
| TUCP_001560 | XLOC_060269 | ENSRNOT00000015020 | 0.974409845  | 8.28E-08 |
| TUCP_001560 | XLOC_060269 | ENSRNOT00000046807 | 0.956352519  | 1.16E-06 |
| TUCP_001560 | XLOC_060269 | ENSRNOT00000058453 | 0.958807996  | 8.71E-07 |
| TUCP_001560 | XLOC_060269 | ENSRNOT00000082774 | 0.973375718  | 1.01E-07 |
| TUCP_001560 | XLOC_060269 | ENSRNOT00000026550 | -0.951703712 | 1.91E-06 |
| TUCP_001560 | XLOC_060269 | ENSRNOT00000006460 | -0.958973696 | 8.54E-07 |
| TUCP_001560 | XLOC_060269 | ENSRNOT00000065103 | 0.955400986  | 1.29E-06 |
| TUCP_001560 | XLOC_060269 | ENSRNOT00000024033 | -0.95887364  | 8.65E-07 |
| TUCP_001560 | XLOC_060269 | ENSRNOT00000011869 | 0.958478581  | 9.06E-07 |
| TUCP_001560 | XLOC_060269 | ENSRNOT00000089389 | 0.951346953  | 1.98E-06 |
| TUCP_001560 | XLOC_060269 | ENSRNOT00000081835 | 0.955492265  | 1.28E-06 |
| TUCP_001560 | XLOC_060269 | ENSRNOT00000001412 | -0.955352825 | 1.30E-06 |
| TUCP_001560 | XLOC_060269 | ENSRNOT00000020472 | 0.956967305  | 1.08E-06 |
| TUCP_001560 | XLOC_060269 | ENSRNOT00000079677 | 0.967174908  | 2.84E-07 |
| TUCP_001560 | XLOC_060269 | ENSRNOT00000000649 | 0.957184274  | 1.05E-06 |
| TUCP_001560 | XLOC_060269 | ENSRNOT00000077479 | 0.950622885  | 2.13E-06 |
| TUCP_001560 | XLOC_060269 | ENSRNOT00000086775 | 0.976088014  | 5.91E-08 |
| TUCP_001560 | XLOC_060269 | ENSRNOT00000030007 | 0.974634582  | 7.93E-08 |
| TUCP_001560 | XLOC_060269 | ENSRNOT00000016265 | 0.967115789  | 2.87E-07 |
| TUCP_001560 | XLOC_060269 | ENSRNOT00000083162 | -0.952117843 | 1.83E-06 |
| TUCP_001560 | XLOC_060269 | ENSRNOT00000012963 | 0.978985096  | 3.12E-08 |
| TUCP_001560 | XLOC_060269 | ENSRNOT00000027752 | -0.95063085  | 2.13E-06 |
| TUCP_001560 | XLOC_060269 | ENSRNOT00000018494 | 0.954052996  | 1.49E-06 |
| TUCP_001560 | XLOC_060269 | ENSRNOT00000075917 | 0.955201685  | 1.32E-06 |
| TUCP_001560 | XLOC_060269 | ENSRNOT00000073239 | 0.951039757  | 2.04E-06 |
| TUCP_001560 | XLOC_060269 | ENSRNOT00000065942 | 0.96197454   | 5.87E-07 |
| TUCP_001560 | XLOC_060269 | ENSRNOT00000078366 | -0.980100158 | 2.38E-08 |
| TUCP_001560 | XLOC_060269 | ENSRNOT00000013182 | 0.958224622  | 9.34E-07 |
| TUCP_001560 | XLOC_060269 | ENSRNOT00000013116 | 0.951422492  | 1.96E-06 |
| TUCP_001560 | XLOC_060269 | ENSRNOT00000042973 | 0.967579464  | 2.67E-07 |
| TUCP_001560 | XLOC_060269 | ENSRNOT00000029508 | -0.960878931 | 6.76E-07 |
| TUCP_001560 | XLOC_060269 | ENSRNOT00000028089 | -0.96020503  | 7.35E-07 |
| TUCP_001560 | XLOC_060269 | ENSRNOT00000074261 | 0.951191328  | 2.01E-06 |
| TUCP_001560 | XLOC_060269 | ENSRNOT00000068528 | 0.97899269   | 3.11E-08 |
| TUCP_001560 | XLOC_060269 | ENSRNOT00000011675 | -0.950243199 | 2.21E-06 |
| TUCP_001560 | XLOC_060269 | ENSRNOT00000027917 | -0.964183037 | 4.37E-07 |
| TUCP_001560 | XLOC_060269 | ENSRNOT00000004290 | -0.951564189 | 1.94E-06 |
| TUCP_001560 | XLOC_060269 | ENSRNOT00000039000 | 0.960323153  | 7.24E-07 |
| TUCP_001560 | XLOC_060269 | ENSRNOT00000013768 | 0.973856309  | 9.21E-08 |
| TUCP_001560 | XLOC_060269 | ENSRNOT00000009742 | 0.954349584  | 1.45E-06 |
| TUCP_001560 | XLOC_060269 | ENSRNOT00000083967 | -0.96546619  | 3.65E-07 |
| TUCP_001560 | XLOC_060269 | ENSRNOT00000001490 | -0.956561186 | 1.13E-06 |
| TUCP_001560 | XLOC_060269 | ENSRNOT00000076467 | 0.955754427  | 1.24E-06 |
| TUCP_001560 | XLOC_060269 | ENSRNOT00000022389 | 0.958017465  | 9.57E-07 |
| TUCP_001560 | XLOC_060269 | ENSRNOT00000013864 | 0.956951015  | 1.08E-06 |
| TUCP_001560 | XLOC_060269 | ENSRNOT00000018101 | 0.966103199  | 3.33E-07 |
| TUCP_001560 | XLOC_060269 | ENSRNOT00000013809 | 0.950860028  | 2.08E-06 |

|             |             |                     |              |          |
|-------------|-------------|---------------------|--------------|----------|
| TUCP_001560 | XLOC_060269 | ENSRNOT00000023067  | 0.958777641  | 8.75E-07 |
| TUCP_001560 | XLOC_060269 | ENSRNOT00000006196  | 0.959036815  | 8.48E-07 |
| TUCP_001560 | XLOC_060269 | ENSRNOT00000081110  | 0.951062042  | 2.04E-06 |
| TUCP_001560 | XLOC_060269 | ENSRNOT00000034282  | -0.952383686 | 1.78E-06 |
| TUCP_001560 | XLOC_060269 | ENSRNOT00000016260  | 0.982489668  | 1.26E-08 |
| TUCP_001560 | XLOC_060269 | ENSRNOT000000031935 | 0.952893469  | 1.69E-06 |
| TUCP_001560 | XLOC_060269 | ENSRNOT000000079609 | -0.958513659 | 9.03E-07 |
| TUCP_001560 | XLOC_060269 | ENSRNOT00000066776  | 0.958091047  | 9.49E-07 |
| TUCP_001560 | XLOC_060269 | ENSRNOT00000025222  | 0.969147608  | 2.09E-07 |
| TUCP_001560 | XLOC_060269 | ENSRNOT00000050350  | 0.954704724  | 1.39E-06 |
| TUCP_001560 | XLOC_060269 | ENSRNOT00000080522  | 0.957768246  | 9.85E-07 |
| TUCP_001560 | XLOC_060269 | ENSRNOT00000014309  | 0.95028959   | 2.20E-06 |
| TUCP_001560 | XLOC_060269 | ENSRNOT00000004770  | 0.967692574  | 2.63E-07 |
| TUCP_001560 | XLOC_060269 | ENSRNOT00000056022  | -0.951583811 | 1.93E-06 |
| TUCP_001560 | XLOC_060269 | ENSRNOT00000076230  | -0.956703451 | 1.11E-06 |
| TUCP_001560 | XLOC_060269 | ENSRNOT00000014533  | 0.959251458  | 8.26E-07 |
| TUCP_001560 | XLOC_060269 | ENSRNOT00000090853  | 0.950115745  | 2.24E-06 |
| TUCP_001560 | XLOC_060269 | ENSRNOT00000079414  | 0.964418841  | 4.23E-07 |
| TUCP_001560 | XLOC_060269 | ENSRNOT00000064849  | 0.960227564  | 7.33E-07 |
| TUCP_001560 | XLOC_060269 | ENSRNOT00000014317  | 0.966747367  | 3.03E-07 |
| TUCP_001560 | XLOC_060269 | ENSRNOT000000021506 | 0.952569374  | 1.75E-06 |
| TUCP_001560 | XLOC_060269 | ENSRNOT000000077303 | 0.953719589  | 1.55E-06 |
| TUCP_001560 | XLOC_060269 | ENSRNOT000000029845 | 0.95446502   | 1.43E-06 |
| TUCP_001560 | XLOC_060269 | ENSRNOT000000022128 | 0.950170946  | 2.22E-06 |
| TUCP_001560 | XLOC_060269 | ENSRNOT000000085911 | 0.961966771  | 5.88E-07 |
| TUCP_001560 | XLOC_060269 | ENSRNOT000000024011 | -0.963994183 | 4.49E-07 |
| TUCP_001560 | XLOC_060269 | ENSRNOT000000075209 | 0.959546426  | 7.97E-07 |
| TUCP_001560 | XLOC_060269 | ENSRNOT000000072856 | 0.956372338  | 1.16E-06 |
| TUCP_001560 | XLOC_060269 | ENSRNOT000000031261 | -0.954471627 | 1.43E-06 |
| TUCP_001560 | XLOC_060269 | ENSRNOT000000037681 | 0.970535274  | 1.66E-07 |
| TUCP_001560 | XLOC_060269 | ENSRNOT00000018328  | 0.962345432  | 5.60E-07 |
| TUCP_001560 | XLOC_060269 | ENSRNOT00000050415  | 0.959434457  | 8.08E-07 |
| TUCP_001560 | XLOC_060269 | ENSRNOT000000038610 | 0.96114544   | 6.53E-07 |
| TUCP_001560 | XLOC_060269 | ENSRNOT000000071897 | 0.950176816  | 2.22E-06 |
| TUCP_001560 | XLOC_060269 | ENSRNOT00000090774  | 0.95669526   | 1.12E-06 |
| TUCP_001560 | XLOC_060269 | ENSRNOT000000027739 | -0.952011781 | 1.85E-06 |
| TUCP_003453 | XLOC_149260 | ENSRNOT000000065143 | 0.968471222  | 2.33E-07 |
| TUCP_003453 | XLOC_149260 | ENSRNOT000000026631 | 0.972402937  | 1.20E-07 |
| TUCP_003453 | XLOC_149260 | ENSRNOT00000000513  | 0.953735564  | 1.54E-06 |
| TUCP_003453 | XLOC_149260 | ENSRNOT00000055321  | 0.956836057  | 1.10E-06 |
| TUCP_003453 | XLOC_149260 | ENSRNOT00000063873  | 0.955379348  | 1.29E-06 |
| TUCP_003453 | XLOC_149260 | ENSRNOT00000004956  | 0.970566497  | 1.66E-07 |
| TUCP_003453 | XLOC_149260 | ENSRNOT00000074286  | 0.95028658   | 2.20E-06 |
| TUCP_003453 | XLOC_149260 | ENSRNOT000000029600 | 0.979511449  | 2.75E-08 |
| TUCP_003453 | XLOC_149260 | ENSRNOT00000016629  | 0.952738184  | 1.72E-06 |
| TUCP_003453 | XLOC_149260 | ENSRNOT00000012942  | 0.972616635  | 1.16E-07 |
| TUCP_003453 | XLOC_149260 | ENSRNOT00000044991  | 0.970248348  | 1.75E-07 |
| TUCP_003453 | XLOC_149260 | ENSRNOT00000025009  | 0.959556437  | 7.96E-07 |
| TUCP_003453 | XLOC_149260 | ENSRNOT00000013852  | 0.961996158  | 5.86E-07 |
| TUCP_003453 | XLOC_149260 | ENSRNOT00000080591  | 0.953006227  | 1.67E-06 |
| TUCP_003453 | XLOC_149260 | ENSRNOT00000077201  | -0.950488105 | 2.16E-06 |



|             |             |                     |              |          |
|-------------|-------------|---------------------|--------------|----------|
| TUCP_003453 | XLOC_149260 | ENSRNOT00000032248  | 0.977540726  | 4.33E-08 |
| TUCP_003453 | XLOC_149260 | ENSRNOT00000023032  | 0.952909162  | 1.68E-06 |
| TUCP_003453 | XLOC_149260 | ENSRNOT00000017063  | -0.954302698 | 1.45E-06 |
| TUCP_003453 | XLOC_149260 | ENSRNOT00000000313  | 0.952900121  | 1.69E-06 |
| TUCP_003453 | XLOC_149260 | ENSRNOT00000005311  | 0.951742984  | 1.90E-06 |
| TUCP_003453 | XLOC_149260 | ENSRNOT000000084553 | 0.961522744  | 6.23E-07 |
| TUCP_003453 | XLOC_149260 | ENSRNOT000000050415 | -0.95120031  | 2.01E-06 |
| TUCP_002189 | XLOC_091613 | ENSRNOT00000047105  | 0.953974996  | 1.51E-06 |
| TUCP_002189 | XLOC_091613 | ENSRNOT00000001099  | -0.95967689  | 7.85E-07 |
| TUCP_002189 | XLOC_091613 | ENSRNOT00000040060  | -0.956132534 | 1.19E-06 |
| TUCP_002189 | XLOC_091613 | ENSRNOT00000032802  | -0.950350596 | 2.19E-06 |
| TUCP_002189 | XLOC_091613 | ENSRNOT00000090621  | 0.953718534  | 1.55E-06 |
| TUCP_002189 | XLOC_091613 | ENSRNOT00000075656  | -0.959970984 | 7.57E-07 |
| TUCP_002189 | XLOC_091613 | ENSRNOT00000090946  | 0.952218002  | 1.81E-06 |
| TUCP_002189 | XLOC_091613 | ENSRNOT00000006460  | 0.96738648   | 2.75E-07 |
| TUCP_002189 | XLOC_091613 | ENSRNOT00000075397  | 0.983673062  | 8.89E-09 |
| TUCP_002189 | XLOC_091613 | ENSRNOT00000000083  | -0.954103724 | 1.48E-06 |
| TUCP_002189 | XLOC_091613 | ENSRNOT00000007350  | 0.9619453    | 5.90E-07 |
| TUCP_002189 | XLOC_091613 | ENSRNOT00000032926  | -0.962038625 | 5.82E-07 |
| TUCP_002189 | XLOC_091613 | ENSRNOT00000019104  | -0.951677789 | 1.91E-06 |
| TUCP_002189 | XLOC_091613 | ENSRNOT00000026279  | -0.960097308 | 7.45E-07 |
| TUCP_002189 | XLOC_091613 | ENSRNOT00000063930  | -0.968510234 | 2.31E-07 |
| TUCP_002189 | XLOC_091613 | ENSRNOT00000083578  | 0.953570464  | 1.57E-06 |
| TUCP_002189 | XLOC_091613 | ENSRNOT00000006217  | 0.956217272  | 1.18E-06 |
| TUCP_002189 | XLOC_091613 | ENSRNOT00000003087  | 0.954110565  | 1.48E-06 |
| TUCP_002189 | XLOC_091613 | ENSRNOT00000013116  | -0.958334477 | 9.22E-07 |
| TUCP_002189 | XLOC_091613 | ENSRNOT00000006067  | 0.953574525  | 1.57E-06 |
| TUCP_002189 | XLOC_091613 | ENSRNOT00000021858  | 0.951267857  | 1.99E-06 |
| TUCP_002189 | XLOC_091613 | ENSRNOT00000001855  | 0.977694287  | 4.19E-08 |
| TUCP_002189 | XLOC_091613 | ENSRNOT00000023638  | 0.957713318  | 9.92E-07 |
| TUCP_002189 | XLOC_091613 | ENSRNOT00000001691  | 0.983451836  | 9.51E-09 |
| TUCP_002189 | XLOC_091613 | ENSRNOT00000089319  | 0.956163002  | 1.18E-06 |
| TUCP_002189 | XLOC_091613 | ENSRNOT00000006188  | -0.959645314 | 7.88E-07 |
| TUCP_002189 | XLOC_091613 | ENSRNOT00000079138  | 0.959415471  | 8.10E-07 |
| TUCP_002189 | XLOC_091613 | ENSRNOT00000039102  | 0.967382043  | 2.75E-07 |
| TUCP_002189 | XLOC_091613 | ENSRNOT00000086706  | 0.967548735  | 2.68E-07 |
| TUCP_002189 | XLOC_091613 | ENSRNOT00000036051  | 0.955400999  | 1.29E-06 |
| TUCP_002189 | XLOC_091613 | ENSRNOT00000085885  | -0.955305575 | 1.30E-06 |
| TUCP_002189 | XLOC_091613 | ENSRNOT00000084567  | 0.966267896  | 3.25E-07 |
| TUCP_002189 | XLOC_091613 | ENSRNOT00000074023  | 0.982356704  | 1.31E-08 |
| TUCP_002189 | XLOC_091613 | ENSRNOT00000024352  | 0.957482808  | 1.02E-06 |
| TUCP_002189 | XLOC_091613 | ENSRNOT00000008361  | 0.954007298  | 1.50E-06 |
| TUCP_002189 | XLOC_091613 | ENSRNOT00000025309  | 0.95928038   | 8.23E-07 |
| TUCP_002189 | XLOC_091613 | ENSRNOT00000052063  | 0.957305693  | 1.04E-06 |
| TUCP_002189 | XLOC_091613 | ENSRNOT00000009073  | -0.95448383  | 1.43E-06 |
| TUCP_002189 | XLOC_091613 | ENSRNOT00000089418  | 0.961026574  | 6.63E-07 |
| TUCP_002189 | XLOC_091613 | ENSRNOT00000018074  | -0.952777496 | 1.71E-06 |
| TUCP_002189 | XLOC_091613 | ENSRNOT00000033017  | 0.960052991  | 7.49E-07 |
| TUCP_002189 | XLOC_091613 | ENSRNOT00000017384  | 0.951793596  | 1.89E-06 |
| TUCP_002189 | XLOC_091613 | ENSRNOT00000045926  | 0.967818692  | 2.58E-07 |
| TUCP_002189 | XLOC_091613 | ENSRNOT00000086260  | -0.974135952 | 8.73E-08 |

|             |             |                    |              |          |
|-------------|-------------|--------------------|--------------|----------|
| TUCP_002189 | XLOC_091613 | ENSRNOT00000065076 | 0.983003228  | 1.09E-08 |
| TUCP_002189 | XLOC_091613 | ENSRNOT00000021534 | -0.956924508 | 1.09E-06 |
| TUCP_002189 | XLOC_091613 | ENSRNOT00000013516 | 0.957091378  | 1.07E-06 |
| TUCP_002189 | XLOC_091613 | ENSRNOT00000003326 | -0.964847432 | 3.98E-07 |
| TUCP_002189 | XLOC_091613 | ENSRNOT00000022746 | -0.953506322 | 1.58E-06 |
| TUCP_002189 | XLOC_091613 | ENSRNOT00000016306 | -0.959260171 | 8.25E-07 |
| TUCP_002189 | XLOC_091613 | ENSRNOT00000083677 | -0.955111796 | 1.33E-06 |
| TUCP_002189 | XLOC_091613 | ENSRNOT00000072771 | 0.954260367  | 1.46E-06 |
| TUCP_002189 | XLOC_091613 | ENSRNOT00000012060 | 0.95946196   | 8.05E-07 |
| TUCP_002189 | XLOC_091613 | ENSRNOT00000073370 | 0.971643674  | 1.38E-07 |
| TUCP_002189 | XLOC_091613 | ENSRNOT00000023965 | -0.952278203 | 1.80E-06 |
| TUCP_002189 | XLOC_091613 | ENSRNOT00000083568 | 0.972977216  | 1.08E-07 |
| TUCP_002189 | XLOC_091613 | ENSRNOT00000025079 | -0.951501869 | 1.95E-06 |
| TUCP_002189 | XLOC_091613 | ENSRNOT00000036137 | 0.951943991  | 1.86E-06 |
| TUCP_002189 | XLOC_091613 | ENSRNOT00000065978 | 0.959312411  | 8.20E-07 |
| TUCP_002189 | XLOC_091613 | ENSRNOT00000075480 | -0.962579901 | 5.43E-07 |
| TUCP_002189 | XLOC_091613 | ENSRNOT00000039177 | -0.956642428 | 1.12E-06 |
| TUCP_002189 | XLOC_091613 | ENSRNOT00000020051 | 0.961709058  | 6.08E-07 |
| TUCP_002189 | XLOC_091613 | ENSRNOT00000087838 | -0.961218114 | 6.47E-07 |
| TUCP_002189 | XLOC_091613 | ENSRNOT00000090338 | -0.961843872 | 5.97E-07 |
| TUCP_002189 | XLOC_091613 | ENSRNOT00000009080 | -0.954420927 | 1.43E-06 |
| TUCP_002189 | XLOC_091613 | ENSRNOT00000027760 | 0.965192485  | 3.80E-07 |
| TUCP_002189 | XLOC_091613 | ENSRNOT00000000048 | 0.97798272   | 3.93E-08 |
| TUCP_002189 | XLOC_091613 | ENSRNOT00000024402 | 0.953576202  | 1.57E-06 |
| TUCP_002189 | XLOC_091613 | ENSRNOT00000065871 | 0.968274727  | 2.40E-07 |
| TUCP_002189 | XLOC_091613 | ENSRNOT00000042903 | 0.962244934  | 5.67E-07 |
| TUCP_002189 | XLOC_091613 | ENSRNOT00000057898 | -0.96141345  | 6.31E-07 |
| TUCP_002189 | XLOC_091613 | ENSRNOT00000024677 | 0.958620541  | 8.91E-07 |
| TUCP_002189 | XLOC_091613 | ENSRNOT00000089933 | 0.974999955  | 7.38E-08 |
| TUCP_002189 | XLOC_091613 | ENSRNOT00000056100 | -0.969712739 | 1.91E-07 |
| TUCP_002189 | XLOC_091613 | ENSRNOT00000001077 | 0.958620149  | 8.91E-07 |
| TUCP_002189 | XLOC_091613 | ENSRNOT00000025517 | 0.953681338  | 1.55E-06 |
| TUCP_002189 | XLOC_091613 | ENSRNOT00000003412 | -0.950616901 | 2.13E-06 |
| TUCP_002189 | XLOC_091613 | ENSRNOT00000067554 | 0.962614304  | 5.40E-07 |
| TUCP_002189 | XLOC_091613 | ENSRNOT00000055683 | 0.957172718  | 1.06E-06 |
| TUCP_002189 | XLOC_091613 | ENSRNOT00000026391 | 0.964404619  | 4.24E-07 |
| TUCP_002189 | XLOC_091613 | ENSRNOT00000081226 | 0.964797822  | 4.01E-07 |
| TUCP_002189 | XLOC_091613 | ENSRNOT00000065045 | 0.958930134  | 8.59E-07 |
| TUCP_002189 | XLOC_091613 | ENSRNOT0000005686  | -0.96481697  | 4.00E-07 |
| TUCP_002189 | XLOC_091613 | ENSRNOT00000018634 | -0.966013334 | 3.37E-07 |
| TUCP_002189 | XLOC_091613 | ENSRNOT00000019820 | 0.951091573  | 2.03E-06 |
| TUCP_002189 | XLOC_091613 | ENSRNOT00000088133 | -0.956861988 | 1.09E-06 |
| TUCP_002189 | XLOC_091613 | ENSRNOT00000042125 | 0.962264693  | 5.66E-07 |
| TUCP_002189 | XLOC_091613 | ENSRNOT00000040525 | 0.961708754  | 6.08E-07 |
| TUCP_002189 | XLOC_091613 | ENSRNOT00000011832 | -0.970184319 | 1.77E-07 |
| TUCP_002189 | XLOC_091613 | ENSRNOT00000031384 | 0.959126372  | 8.39E-07 |
| TUCP_002189 | XLOC_091613 | ENSRNOT00000073643 | -0.975846932 | 6.22E-08 |
| TUCP_002189 | XLOC_091613 | ENSRNOT00000078349 | -0.951415731 | 1.96E-06 |
| TUCP_002189 | XLOC_091613 | ENSRNOT00000003940 | -0.968734856 | 2.23E-07 |
| TUCP_002189 | XLOC_091613 | ENSRNOT00000046552 | 0.952960046  | 1.68E-06 |
| TUCP_002189 | XLOC_091613 | ENSRNOT00000000707 | -0.956478007 | 1.14E-06 |

|             |             |                    |              |          |
|-------------|-------------|--------------------|--------------|----------|
| TUCP_002189 | XLOC_091613 | ENSRNOT00000077727 | -0.952891133 | 1.69E-06 |
| TUCP_002189 | XLOC_091613 | ENSRNOT00000022502 | -0.953661886 | 1.56E-06 |
| TUCP_002189 | XLOC_091613 | ENSRNOT00000011930 | 0.954393143  | 1.44E-06 |
| TUCP_002189 | XLOC_091613 | ENSRNOT00000083968 | -0.955931256 | 1.22E-06 |
| TUCP_002189 | XLOC_091613 | ENSRNOT00000037133 | 0.976183221  | 5.80E-08 |
| TUCP_002189 | XLOC_091613 | ENSRNOT00000064772 | 0.952653791  | 1.73E-06 |
| TUCP_002189 | XLOC_091613 | ENSRNOT00000055630 | 0.950975578  | 2.05E-06 |
| TUCP_002189 | XLOC_091613 | ENSRNOT00000084709 | 0.963825199  | 4.59E-07 |
| TUCP_002189 | XLOC_091613 | ENSRNOT00000017949 | -0.962378408 | 5.57E-07 |
| TUCP_002189 | XLOC_091613 | ENSRNOT00000083964 | -0.958646458 | 8.88E-07 |
| TUCP_002189 | XLOC_091613 | ENSRNOT00000090912 | 0.950267967  | 2.20E-06 |
| TUCP_002189 | XLOC_091613 | ENSRNOT00000016776 | -0.95858006  | 8.96E-07 |
| TUCP_002189 | XLOC_091613 | ENSRNOT00000000469 | 0.951214555  | 2.00E-06 |
| TUCP_002189 | XLOC_091613 | ENSRNOT00000048781 | 0.964570426  | 4.14E-07 |
| TUCP_002189 | XLOC_091613 | ENSRNOT00000013867 | 0.954249432  | 1.46E-06 |
| TUCP_002189 | XLOC_091613 | ENSRNOT00000039341 | 0.951848109  | 1.88E-06 |
| TUCP_002189 | XLOC_091613 | ENSRNOT00000021802 | 0.961959012  | 5.89E-07 |
| TUCP_002189 | XLOC_091613 | ENSRNOT00000091909 | 0.956320498  | 1.16E-06 |
| TUCP_002189 | XLOC_091613 | ENSRNOT00000026831 | 0.957781461  | 9.84E-07 |
| TUCP_002189 | XLOC_091613 | ENSRNOT00000018640 | 0.956112848  | 1.19E-06 |
| TUCP_002189 | XLOC_091613 | ENSRNOT00000007821 | 0.951759592  | 1.90E-06 |
| TUCP_002189 | XLOC_091613 | ENSRNOT00000009563 | -0.951724103 | 1.90E-06 |
| TUCP_002189 | XLOC_091613 | ENSRNOT00000025856 | -0.970348968 | 1.72E-07 |
| TUCP_002189 | XLOC_091613 | ENSRNOT00000072299 | 0.960414427  | 7.16E-07 |
| TUCP_002189 | XLOC_091613 | ENSRNOT00000003544 | -0.96427735  | 4.31E-07 |
| TUCP_002189 | XLOC_091613 | ENSRNOT00000032363 | 0.961941054  | 5.90E-07 |
| TUCP_002189 | XLOC_091613 | ENSRNOT00000003780 | 0.973316537  | 1.02E-07 |
| TUCP_002189 | XLOC_091613 | ENSRNOT00000026643 | 0.965578791  | 3.59E-07 |
| TUCP_002189 | XLOC_091613 | ENSRNOT00000001403 | 0.950319971  | 2.19E-06 |
| TUCP_002189 | XLOC_091613 | ENSRNOT00000016445 | 0.965245821  | 3.77E-07 |
| TUCP_002189 | XLOC_091613 | ENSRNOT00000023262 | -0.961929406 | 5.91E-07 |
| TUCP_002189 | XLOC_091613 | ENSRNOT00000025913 | -0.976699495 | 5.20E-08 |
| TUCP_002189 | XLOC_091613 | ENSRNOT00000058495 | -0.951188147 | 2.01E-06 |
| TUCP_002189 | XLOC_091613 | ENSRNOT00000013067 | -0.968394867 | 2.36E-07 |
| TUCP_002189 | XLOC_091613 | ENSRNOT00000011956 | 0.96678712   | 3.01E-07 |
| TUCP_002189 | XLOC_091613 | ENSRNOT00000004351 | -0.952575186 | 1.74E-06 |
| TUCP_002189 | XLOC_091613 | ENSRNOT00000072357 | -0.951097383 | 2.03E-06 |
| TUCP_002189 | XLOC_091613 | ENSRNOT00000024119 | 0.958708582  | 8.82E-07 |
| TUCP_002189 | XLOC_091613 | ENSRNOT00000045946 | 0.96351033   | 4.79E-07 |
| TUCP_002189 | XLOC_091613 | ENSRNOT00000086577 | 0.966411382  | 3.18E-07 |
| TUCP_002189 | XLOC_091613 | ENSRNOT00000036658 | -0.963330342 | 4.91E-07 |
| TUCP_002189 | XLOC_091613 | ENSRNOT00000089611 | 0.958548961  | 8.99E-07 |
| TUCP_002189 | XLOC_091613 | ENSRNOT00000026235 | -0.963727116 | 4.65E-07 |
| TUCP_002189 | XLOC_091613 | ENSRNOT00000017254 | -0.952430608 | 1.77E-06 |
| TUCP_002189 | XLOC_091613 | ENSRNOT00000079609 | 0.959259757  | 8.25E-07 |
| TUCP_002189 | XLOC_091613 | ENSRNOT00000007738 | -0.953272671 | 1.62E-06 |
| TUCP_002189 | XLOC_091613 | ENSRNOT00000032667 | -0.950971065 | 2.05E-06 |
| TUCP_002189 | XLOC_091613 | ENSRNOT00000030007 | -0.951053182 | 2.04E-06 |
| TUCP_002189 | XLOC_091613 | ENSRNOT00000065600 | 0.978742985  | 3.30E-08 |
| TUCP_002189 | XLOC_091613 | ENSRNOT00000022194 | -0.956220628 | 1.18E-06 |
| TUCP_002189 | XLOC_091613 | ENSRNOT00000072118 | 0.96426908   | 4.32E-07 |

|             |             |                    |              |          |
|-------------|-------------|--------------------|--------------|----------|
| TUCP_002189 | XLOC_091613 | ENSRNOT00000018328 | -0.959602169 | 7.92E-07 |
| TUCP_002189 | XLOC_091613 | ENSRNOT00000033975 | 0.957764128  | 9.86E-07 |
| TUCP_002189 | XLOC_091613 | ENSRNOT00000068026 | -0.965486353 | 3.64E-07 |
| TUCP_002189 | XLOC_091613 | ENSRNOT00000085621 | 0.960002552  | 7.54E-07 |
| TUCP_002189 | XLOC_091613 | ENSRNOT00000007314 | -0.952025564 | 1.85E-06 |
| TUCP_002189 | XLOC_091613 | ENSRNOT00000009811 | 0.953326284  | 1.61E-06 |
| TUCP_002189 | XLOC_091613 | ENSRNOT00000014821 | -0.963689259 | 4.68E-07 |
| TUCP_002189 | XLOC_091613 | ENSRNOT00000034883 | -0.963479426 | 4.81E-07 |
| TUCP_002189 | XLOC_091613 | ENSRNOT00000015318 | -0.960154955 | 7.40E-07 |
| TUCP_002189 | XLOC_091613 | ENSRNOT00000005459 | 0.960763196  | 6.86E-07 |
| TUCP_002189 | XLOC_091613 | ENSRNOT00000088599 | 0.950750738  | 2.10E-06 |
| TUCP_002189 | XLOC_091613 | ENSRNOT00000022190 | -0.972308164 | 1.22E-07 |
| TUCP_002189 | XLOC_091613 | ENSRNOT00000026531 | -0.966879544 | 2.97E-07 |
| TUCP_002189 | XLOC_091613 | ENSRNOT00000035605 | 0.958275539  | 9.28E-07 |
| TUCP_002189 | XLOC_091613 | ENSRNOT00000081351 | 0.950457837  | 2.16E-06 |
| TUCP_002189 | XLOC_091613 | ENSRNOT00000090853 | -0.965330083 | 3.72E-07 |
| TUCP_002189 | XLOC_091613 | ENSRNOT00000084031 | 0.967263283  | 2.80E-07 |
| TUCP_002189 | XLOC_091613 | ENSRNOT00000092083 | 0.953472836  | 1.59E-06 |
| TUCP_002189 | XLOC_091613 | ENSRNOT00000086456 | -0.953167193 | 1.64E-06 |
| TUCP_002189 | XLOC_091613 | ENSRNOT00000005910 | -0.97330906  | 1.02E-07 |
| TUCP_002189 | XLOC_091613 | ENSRNOT00000082914 | 0.963604196  | 4.73E-07 |
| TUCP_002189 | XLOC_091613 | ENSRNOT00000017995 | 0.950192439  | 2.22E-06 |
| TUCP_002189 | XLOC_091613 | ENSRNOT00000036838 | -0.959616156 | 7.90E-07 |
| TUCP_002189 | XLOC_091613 | ENSRNOT00000015476 | -0.956358452 | 1.16E-06 |
| TUCP_002189 | XLOC_091613 | ENSRNOT00000071897 | -0.956062189 | 1.20E-06 |
| TUCP_002189 | XLOC_091613 | ENSRNOT00000075209 | -0.956487383 | 1.14E-06 |
| TUCP_002189 | XLOC_091613 | ENSRNOT00000006765 | -0.951311101 | 1.99E-06 |
| TUCP_002189 | XLOC_091613 | ENSRNOT00000013025 | -0.966378592 | 3.20E-07 |
| TUCP_002189 | XLOC_091613 | ENSRNOT00000029701 | 0.972216515  | 1.24E-07 |
| TUCP_002189 | XLOC_091613 | ENSRNOT00000020383 | 0.959224958  | 8.29E-07 |
| TUCP_002189 | XLOC_091613 | ENSRNOT00000026988 | -0.953600552 | 1.57E-06 |
| TUCP_002189 | XLOC_091613 | ENSRNOT00000030706 | -0.954198561 | 1.47E-06 |
| TUCP_002189 | XLOC_091613 | ENSRNOT00000065615 | 0.962579894  | 5.43E-07 |
| TUCP_002189 | XLOC_091613 | ENSRNOT00000011675 | 0.974828638  | 7.63E-08 |
| TUCP_002189 | XLOC_091613 | ENSRNOT00000067135 | -0.957443908 | 1.02E-06 |
| TUCP_002189 | XLOC_091613 | ENSRNOT00000004290 | 0.958400726  | 9.15E-07 |
| TUCP_002189 | XLOC_091613 | ENSRNOT00000020951 | 0.951322648  | 1.98E-06 |
| TUCP_002189 | XLOC_091613 | ENSRNOT00000076230 | 0.95256029   | 1.75E-06 |
| TUCP_002189 | XLOC_091613 | ENSRNOT00000037015 | 0.980831714  | 1.97E-08 |
| TUCP_002189 | XLOC_091613 | ENSRNOT00000023876 | 0.967943818  | 2.53E-07 |
| TUCP_002189 | XLOC_091613 | ENSRNOT00000002443 | 0.95962121   | 7.90E-07 |
| TUCP_002189 | XLOC_091613 | ENSRNOT00000085334 | 0.95601339   | 1.20E-06 |
| TUCP_002189 | XLOC_091613 | ENSRNOT00000066952 | 0.966070844  | 3.35E-07 |
| TUCP_002189 | XLOC_091613 | ENSRNOT00000028685 | 0.963185127  | 5.01E-07 |
| TUCP_002189 | XLOC_091613 | ENSRNOT00000080591 | 0.964398816  | 4.24E-07 |
| TUCP_002189 | XLOC_091613 | ENSRNOT00000083632 | -0.968132069 | 2.45E-07 |
| TUCP_002189 | XLOC_091613 | ENSRNOT00000074150 | 0.953155607  | 1.64E-06 |
| TUCP_002189 | XLOC_091613 | ENSRNOT00000015239 | -0.962908839 | 5.19E-07 |
| TUCP_002189 | XLOC_091613 | ENSRNOT00000057953 | 0.960229901  | 7.33E-07 |
| TUCP_002189 | XLOC_091613 | ENSRNOT00000003568 | 0.972166162  | 1.26E-07 |
| TUCP_002189 | XLOC_091613 | ENSRNOT00000074649 | 0.951799545  | 1.89E-06 |

|             |             |                     |              |          |
|-------------|-------------|---------------------|--------------|----------|
| TUCP_002189 | XLOC_091613 | ENSRNOT00000005257  | 0.972387581  | 1.21E-07 |
| TUCP_002189 | XLOC_091613 | ENSRNOT00000016132  | -0.960678916 | 6.93E-07 |
| TUCP_002189 | XLOC_091613 | ENSRNOT00000049725  | -0.952409071 | 1.77E-06 |
| TUCP_002189 | XLOC_091613 | ENSRNOT00000077146  | -0.97419527  | 8.63E-08 |
| TUCP_002189 | XLOC_091613 | ENSRNOT00000086122  | 0.952113241  | 1.83E-06 |
| TUCP_002189 | XLOC_091613 | ENSRNOT00000013851  | -0.962294739 | 5.63E-07 |
| TUCP_002189 | XLOC_091613 | ENSRNOT00000017765  | 0.95630029   | 1.17E-06 |
| TUCP_002189 | XLOC_091613 | ENSRNOT00000042638  | 0.969761873  | 1.89E-07 |
| TUCP_002189 | XLOC_091613 | ENSRNOT00000004999  | 0.962627866  | 5.39E-07 |
| TUCP_002189 | XLOC_091613 | ENSRNOT00000009122  | 0.950582275  | 2.14E-06 |
| TUCP_002189 | XLOC_091613 | ENSRNOT00000013463  | 0.97801982   | 3.89E-08 |
| TUCP_002189 | XLOC_091613 | ENSRNOT00000060002  | -0.955680713 | 1.25E-06 |
| TUCP_002189 | XLOC_091613 | ENSRNOT00000089673  | -0.97461506  | 7.96E-08 |
| TUCP_002189 | XLOC_091613 | ENSRNOT00000027301  | -0.950060755 | 2.25E-06 |
| TUCP_002189 | XLOC_091613 | ENSRNOT00000010367  | 0.974139587  | 8.72E-08 |
| TUCP_002189 | XLOC_091613 | ENSRNOT00000057738  | 0.980675838  | 2.05E-08 |
| TUCP_002189 | XLOC_091613 | ENSRNOT00000058382  | 0.965240269  | 3.77E-07 |
| TUCP_002189 | XLOC_091613 | ENSRNOT00000006802  | 0.956894266  | 1.09E-06 |
| TUCP_002189 | XLOC_091613 | ENSRNOT00000025966  | 0.958374814  | 9.18E-07 |
| TUCP_002189 | XLOC_091613 | ENSRNOT00000023977  | -0.963640498 | 4.71E-07 |
| TUCP_002189 | XLOC_091613 | ENSRNOT00000009202  | 0.96575603   | 3.50E-07 |
| TUCP_002189 | XLOC_091613 | ENSRNOT00000047663  | -0.961667975 | 6.11E-07 |
| TUCP_002189 | XLOC_091613 | ENSRNOT000000082151 | -0.967549963 | 2.68E-07 |
| TUCP_002189 | XLOC_091613 | ENSRNOT00000022578  | 0.968306012  | 2.39E-07 |
| TUCP_002189 | XLOC_091613 | ENSRNOT00000066133  | -0.958308247 | 9.25E-07 |
| TUCP_002189 | XLOC_091613 | ENSRNOT000000055602 | -0.958058334 | 9.53E-07 |
| TUCP_002189 | XLOC_091613 | ENSRNOT000000059181 | 0.953316273  | 1.61E-06 |
| TUCP_002189 | XLOC_091613 | ENSRNOT00000029202  | -0.959142122 | 8.37E-07 |
| TUCP_002189 | XLOC_091613 | ENSRNOT00000017291  | -0.966586644 | 3.10E-07 |
| TUCP_002189 | XLOC_091613 | ENSRNOT00000017907  | -0.959141408 | 8.37E-07 |
| TUCP_002189 | XLOC_091613 | ENSRNOT00000003691  | -0.971990036 | 1.30E-07 |
| TUCP_002189 | XLOC_091613 | ENSRNOT00000010852  | 0.967940422  | 2.53E-07 |
| TUCP_002189 | XLOC_091613 | ENSRNOT00000013524  | 0.960675077  | 6.93E-07 |
| TUCP_002189 | XLOC_091613 | ENSRNOT00000035385  | 0.95378941   | 1.54E-06 |
| TUCP_002189 | XLOC_091613 | ENSRNOT00000025794  | -0.973551271 | 9.75E-08 |
| TUCP_002189 | XLOC_091613 | ENSRNOT00000038807  | 0.957592719  | 1.01E-06 |
| TUCP_002189 | XLOC_091613 | ENSRNOT000000058111 | -0.950997303 | 2.05E-06 |
| TUCP_002189 | XLOC_091613 | ENSRNOT00000014926  | 0.95009686   | 2.24E-06 |
| TUCP_002189 | XLOC_091613 | ENSRNOT00000014924  | -0.954633719 | 1.40E-06 |
| TUCP_002189 | XLOC_091613 | ENSRNOT00000017761  | 0.961169639  | 6.51E-07 |
| TUCP_002189 | XLOC_091613 | ENSRNOT00000008987  | -0.973797851 | 9.31E-08 |
| TUCP_002189 | XLOC_091613 | ENSRNOT00000009994  | -0.951180804 | 2.01E-06 |
| TUCP_002189 | XLOC_091613 | ENSRNOT00000030692  | -0.963390867 | 4.87E-07 |
| TUCP_002189 | XLOC_091613 | ENSRNOT000000057537 | 0.958071753  | 9.51E-07 |
| TUCP_002189 | XLOC_091613 | ENSRNOT00000022716  | 0.95709853   | 1.06E-06 |
| TUCP_002189 | XLOC_091613 | ENSRNOT00000002114  | -0.977485057 | 4.39E-08 |
| TUCP_002189 | XLOC_091613 | ENSRNOT00000002445  | -0.960656045 | 6.95E-07 |
| TUCP_002189 | XLOC_091613 | ENSRNOT000000080608 | 0.951123649  | 2.02E-06 |
| TUCP_002189 | XLOC_091613 | ENSRNOT00000027970  | 0.963095589  | 5.07E-07 |
| TUCP_002189 | XLOC_091613 | ENSRNOT00000077479  | -0.951578808 | 1.93E-06 |
| TUCP_002189 | XLOC_091613 | ENSRNOT00000085971  | -0.963440429 | 4.84E-07 |

|             |             |                    |              |          |
|-------------|-------------|--------------------|--------------|----------|
| TUCP_002189 | XLOC_091613 | ENSRNOT00000085295 | -0.958250761 | 9.31E-07 |
| TUCP_002189 | XLOC_091613 | ENSRNOT00000021578 | 0.950980235  | 2.05E-06 |
| TUCP_002189 | XLOC_091613 | ENSRNOT00000078306 | 0.95158747   | 1.93E-06 |
| TUCP_002189 | XLOC_091613 | ENSRNOT00000027875 | 0.950039583  | 2.25E-06 |
| TUCP_002189 | XLOC_091613 | ENSRNOT00000046215 | -0.969259032 | 2.05E-07 |
| TUCP_002189 | XLOC_091613 | ENSRNOT00000055386 | 0.950950621  | 2.06E-06 |
| TUCP_002189 | XLOC_091613 | ENSRNOT00000082138 | -0.953975325 | 1.51E-06 |
| TUCP_002189 | XLOC_091613 | ENSRNOT00000038212 | -0.953276662 | 1.62E-06 |
| TUCP_002189 | XLOC_091613 | ENSRNOT00000078856 | -0.961237259 | 6.46E-07 |
| TUCP_002189 | XLOC_091613 | ENSRNOT00000014127 | 0.950854109  | 2.08E-06 |
| TUCP_002189 | XLOC_091613 | ENSRNOT00000008244 | 0.954339678  | 1.45E-06 |
| TUCP_002189 | XLOC_091613 | ENSRNOT00000037409 | 0.961496705  | 6.25E-07 |
| TUCP_002189 | XLOC_091613 | ENSRNOT00000009742 | -0.969272501 | 2.05E-07 |
| TUCP_002189 | XLOC_091613 | ENSRNOT00000000120 | 0.980069439  | 2.40E-08 |
| TUCP_002189 | XLOC_091613 | ENSRNOT00000088073 | -0.960581031 | 7.02E-07 |
| TUCP_002189 | XLOC_091613 | ENSRNOT00000013632 | 0.955529387  | 1.27E-06 |
| TUCP_002189 | XLOC_091613 | ENSRNOT00000007369 | 0.981005343  | 1.89E-08 |
| TUCP_002189 | XLOC_091613 | ENSRNOT00000080677 | -0.964546754 | 4.16E-07 |
| TUCP_002189 | XLOC_091613 | ENSRNOT00000085466 | 0.960994115  | 6.66E-07 |
| TUCP_002189 | XLOC_091613 | ENSRNOT00000028545 | -0.951296205 | 1.99E-06 |
| TUCP_002189 | XLOC_091613 | ENSRNOT00000012528 | 0.95678858   | 1.10E-06 |
| TUCP_002189 | XLOC_091613 | ENSRNOT00000060698 | -0.958348346 | 9.20E-07 |
| TUCP_002189 | XLOC_091613 | ENSRNOT00000028225 | 0.957239722  | 1.05E-06 |
| TUCP_002189 | XLOC_091613 | ENSRNOT00000026760 | -0.964034461 | 4.46E-07 |
| TUCP_002189 | XLOC_091613 | ENSRNOT00000075800 | -0.953781188 | 1.54E-06 |
| TUCP_002189 | XLOC_091613 | ENSRNOT00000083891 | -0.960949    | 6.70E-07 |
| TUCP_002189 | XLOC_091613 | ENSRNOT00000015624 | 0.964734536  | 4.05E-07 |
| TUCP_002189 | XLOC_091613 | ENSRNOT00000026941 | 0.958428636  | 9.12E-07 |
| TUCP_002189 | XLOC_091613 | ENSRNOT00000032244 | 0.961341877  | 6.37E-07 |
| TUCP_002189 | XLOC_091613 | ENSRNOT00000017998 | 0.950056148  | 2.25E-06 |
| TUCP_002189 | XLOC_091613 | ENSRNOT00000016568 | 0.971952363  | 1.30E-07 |
| TUCP_002189 | XLOC_091613 | ENSRNOT00000032248 | 0.955174516  | 1.32E-06 |
| TUCP_002189 | XLOC_091613 | ENSRNOT00000027360 | -0.955551157 | 1.27E-06 |
| TUCP_002189 | XLOC_091613 | ENSRNOT00000024947 | -0.95989641  | 7.64E-07 |
| TUCP_002189 | XLOC_091613 | ENSRNOT00000013745 | -0.956161273 | 1.18E-06 |
| TUCP_002189 | XLOC_091613 | ENSRNOT00000065529 | 0.956682822  | 1.12E-06 |
| TUCP_002189 | XLOC_091613 | ENSRNOT00000032236 | -0.953353932 | 1.61E-06 |
| TUCP_002189 | XLOC_091613 | ENSRNOT00000016372 | -0.955912777 | 1.22E-06 |
| TUCP_002189 | XLOC_091613 | ENSRNOT00000088679 | -0.96556768  | 3.60E-07 |
| TUCP_002189 | XLOC_091613 | ENSRNOT00000051494 | 0.957130091  | 1.06E-06 |
| TUCP_002189 | XLOC_091613 | ENSRNOT00000028907 | 0.957806926  | 9.81E-07 |
| TUCP_002189 | XLOC_091613 | ENSRNOT00000027967 | 0.975684553  | 6.43E-08 |
| TUCP_002189 | XLOC_091613 | ENSRNOT00000049285 | -0.968541602 | 2.30E-07 |
| TUCP_002189 | XLOC_091613 | ENSRNOT00000016060 | 0.961785685  | 6.02E-07 |
| TUCP_002189 | XLOC_091613 | ENSRNOT00000016637 | -0.950749353 | 2.10E-06 |
| TUCP_002189 | XLOC_091613 | ENSRNOT00000090057 | 0.964097893  | 4.42E-07 |
| TUCP_002189 | XLOC_091613 | ENSRNOT00000081678 | 0.968388064  | 2.36E-07 |
| TUCP_002189 | XLOC_091613 | ENSRNOT00000036613 | -0.966383458 | 3.20E-07 |
| TUCP_002189 | XLOC_091613 | ENSRNOT00000020929 | 0.960675692  | 6.93E-07 |
| TUCP_002189 | XLOC_091613 | ENSRNOT00000024011 | 0.952937868  | 1.68E-06 |
| TUCP_002189 | XLOC_091613 | ENSRNOT00000025705 | 0.961257023  | 6.44E-07 |

|             |             |                     |              |          |
|-------------|-------------|---------------------|--------------|----------|
| TUCP_002189 | XL0C_091613 | ENSRNOT00000054685  | 0.970808612  | 1.59E-07 |
| TUCP_002189 | XL0C_091613 | ENSRNOT00000052051  | 0.958929369  | 8.59E-07 |
| TUCP_002189 | XL0C_091613 | ENSRNOT00000092876  | -0.962021892 | 5.84E-07 |
| TUCP_002189 | XL0C_091613 | ENSRNOT00000005311  | 0.956963861  | 1.08E-06 |
| TUCP_002189 | XL0C_091613 | ENSRNOT00000031935  | -0.950254523 | 2.21E-06 |
| TUCP_002189 | XL0C_091613 | ENSRNOT00000046639  | 0.959584762  | 7.93E-07 |
| TUCP_002189 | XL0C_091613 | ENSRNOT00000015799  | 0.950899642  | 2.07E-06 |
| TUCP_002189 | XL0C_091613 | ENSRNOT00000005885  | -0.954999339 | 1.35E-06 |
| TUCP_002189 | XL0C_091613 | ENSRNOT00000008113  | -0.954730746 | 1.39E-06 |
| TUCP_002189 | XL0C_091613 | ENSRNOT00000013864  | -0.963099139 | 5.06E-07 |
| TUCP_000676 | XL0C_025446 | ENSRNOT00000001672  | 0.961926238  | 5.91E-07 |
| TUCP_000676 | XL0C_025446 | ENSRNOT00000042853  | 0.979013805  | 3.10E-08 |
| TUCP_000576 | XL0C_020464 | ENSRNOT000000081570 | 0.963013074  | 5.12E-07 |
| TUCP_000576 | XL0C_020464 | ENSRNOT000000091652 | 0.998205555  | 1.46E-13 |
| TUCP_000576 | XL0C_020464 | ENSRNOT00000036564  | 0.972235638  | 1.24E-07 |
| TUCP_000576 | XL0C_020464 | ENSRNOT00000000109  | 0.96209449   | 5.78E-07 |
| TUCP_000576 | XL0C_020464 | ENSRNOT000000080865 | 0.999995568  | 1.35E-26 |
| TUCP_000576 | XL0C_020464 | ENSRNOT00000073534  | 0.995799759  | 1.02E-11 |
| TUCP_000576 | XL0C_020464 | ENSRNOT00000012161  | 0.987810849  | 2.08E-09 |
| TUCP_000576 | XL0C_020464 | ENSRNOT00000078707  | 0.960848603  | 6.78E-07 |
| TUCP_000576 | XL0C_020464 | ENSRNOT000000087758 | 0.968738278  | 2.23E-07 |
| TUCP_000576 | XL0C_020464 | ENSRNOT00000049832  | 0.969006857  | 2.14E-07 |
| TUCP_000576 | XL0C_020464 | ENSRNOT000000093019 | 0.999995568  | 1.35E-26 |
| TUCP_000576 | XL0C_020464 | ENSRNOT00000024825  | 0.980366661  | 2.22E-08 |
| TUCP_000576 | XL0C_020464 | ENSRNOT000000059266 | 0.960812081  | 6.81E-07 |
| TUCP_000576 | XL0C_020464 | ENSRNOT00000072734  | 0.964876664  | 3.97E-07 |
| TUCP_000576 | XL0C_020464 | ENSRNOT000000085908 | 0.996737201  | 2.90E-12 |
| TUCP_000576 | XL0C_020464 | ENSRNOT00000046744  | 0.999995568  | 1.35E-26 |
| TUCP_000576 | XL0C_020464 | ENSRNOT00000076429  | 0.999995568  | 1.35E-26 |
| TUCP_000576 | XL0C_020464 | ENSRNOT000000084667 | 0.999692292  | 2.17E-17 |
| TUCP_000576 | XL0C_020464 | ENSRNOT00000055412  | 0.999995568  | 1.35E-26 |
| TUCP_000576 | XL0C_020464 | ENSRNOT00000093201  | 0.999684931  | 2.44E-17 |
| TUCP_000576 | XL0C_020464 | ENSRNOT00000072724  | 0.999995568  | 1.35E-26 |
| TUCP_000576 | XL0C_020464 | ENSRNOT00000090323  | 0.95590434   | 1.22E-06 |
| TUCP_000576 | XL0C_020464 | ENSRNOT000000082760 | 0.986240029  | 3.80E-09 |
| TUCP_000576 | XL0C_020464 | ENSRNOT00000066017  | 0.98980576   | 8.52E-10 |
| TUCP_000576 | XL0C_020464 | ENSRNOT00000073148  | 0.985604389  | 4.75E-09 |
| TUCP_000576 | XL0C_020464 | ENSRNOT00000077462  | 0.96001067   | 7.53E-07 |
| TUCP_000576 | XL0C_020464 | ENSRNOT000000084375 | 0.999995568  | 1.35E-26 |
| TUCP_000576 | XL0C_020464 | ENSRNOT000000085447 | 0.998391504  | 8.46E-14 |
| TUCP_000576 | XL0C_020464 | ENSRNOT00000006249  | 0.966395319  | 3.19E-07 |
| TUCP_000576 | XL0C_020464 | ENSRNOT000000087073 | 0.952311764  | 1.79E-06 |
| TUCP_000576 | XL0C_020464 | ENSRNOT00000042369  | 0.995720519  | 1.12E-11 |
| TUCP_000576 | XL0C_020464 | ENSRNOT000000086554 | 0.999995568  | 1.35E-26 |
| TUCP_000576 | XL0C_020464 | ENSRNOT000000054858 | 0.985173477  | 5.50E-09 |
| TUCP_000576 | XL0C_020464 | ENSRNOT00000047921  | 0.999995568  | 1.35E-26 |
| TUCP_000576 | XL0C_020464 | ENSRNOT000000064261 | 0.999974745  | 8.09E-23 |
| TUCP_000576 | XL0C_020464 | ENSRNOT000000086660 | 0.999205397  | 2.49E-15 |
| TUCP_000576 | XL0C_020464 | ENSRNOT000000080933 | 0.967530613  | 2.69E-07 |
| TUCP_000576 | XL0C_020464 | ENSRNOT000000083977 | 0.999995568  | 1.35E-26 |
| TUCP_000576 | XL0C_020464 | ENSRNOT00000092933  | 0.999995568  | 1.35E-26 |

|             |             |                    |             |          |
|-------------|-------------|--------------------|-------------|----------|
| TUCP_000576 | XLOC_020464 | ENSRNOT00000009061 | 0.953243995 | 1.63E-06 |
| TUCP_000576 | XLOC_020464 | ENSRNOT00000041281 | 0.987750448 | 2.13E-09 |
| TUCP_003516 | XLOC_152769 | ENSRNOT00000024186 | 0.960230863 | 7.33E-07 |
| TUCP_003516 | XLOC_152769 | ENSRNOT00000074753 | 0.977658447 | 4.22E-08 |
| TUCP_003516 | XLOC_152769 | ENSRNOT00000041904 | 0.975611398 | 6.52E-08 |
| TUCP_003516 | XLOC_152769 | ENSRNOT00000083487 | 0.962161869 | 5.73E-07 |
| TUCP_003516 | XLOC_152769 | ENSRNOT00000077990 | 0.975611398 | 6.52E-08 |
| TUCP_003516 | XLOC_152769 | ENSRNOT00000038826 | 0.974716481 | 7.80E-08 |
| TUCP_003516 | XLOC_152769 | ENSRNOT00000037094 | 0.964246605 | 4.33E-07 |
| TUCP_003516 | XLOC_152769 | ENSRNOT00000037169 | 0.966062959 | 3.35E-07 |
| TUCP_003516 | XLOC_152769 | ENSRNOT00000021243 | 0.9702277   | 1.75E-07 |
| TUCP_003516 | XLOC_152769 | ENSRNOT00000060250 | 0.976853767 | 5.03E-08 |
| TUCP_003516 | XLOC_152769 | ENSRNOT00000091934 | 0.975611398 | 6.52E-08 |
| TUCP_003516 | XLOC_152769 | ENSRNOT00000086027 | 0.981984322 | 1.45E-08 |
| TUCP_003516 | XLOC_152769 | ENSRNOT00000046585 | 0.97975719  | 2.59E-08 |
| TUCP_003516 | XLOC_152769 | ENSRNOT00000080794 | 0.967130151 | 2.86E-07 |
| TUCP_003516 | XLOC_152769 | ENSRNOT00000014456 | 0.960594983 | 7.00E-07 |
| TUCP_003516 | XLOC_152769 | ENSRNOT00000031205 | 0.974648781 | 7.90E-08 |
| TUCP_003516 | XLOC_152769 | ENSRNOT00000044145 | 0.975611398 | 6.52E-08 |
| TUCP_003516 | XLOC_152769 | ENSRNOT00000088381 | 0.981244506 | 1.77E-08 |
| TUCP_003516 | XLOC_152769 | ENSRNOT00000054947 | 0.950791572 | 2.09E-06 |
| TUCP_003516 | XLOC_152769 | ENSRNOT00000028588 | 0.950678205 | 2.12E-06 |
| TUCP_003516 | XLOC_152769 | ENSRNOT00000011743 | 0.95965152  | 7.87E-07 |
| TUCP_003516 | XLOC_152769 | ENSRNOT00000089929 | 0.975611398 | 6.52E-08 |
| TUCP_003516 | XLOC_152769 | ENSRNOT00000088624 | 0.975611398 | 6.52E-08 |
| TUCP_003516 | XLOC_152769 | ENSRNOT00000085659 | 0.9564292   | 1.15E-06 |
| TUCP_003516 | XLOC_152769 | ENSRNOT00000015866 | 0.978470631 | 3.51E-08 |
| TUCP_003516 | XLOC_152769 | ENSRNOT00000078633 | 0.975611398 | 6.52E-08 |
| TUCP_003516 | XLOC_152769 | ENSRNOT00000024575 | 0.975287131 | 6.96E-08 |
| TUCP_003516 | XLOC_152769 | ENSRNOT00000034907 | 0.973880336 | 9.16E-08 |
| TUCP_003516 | XLOC_152769 | ENSRNOT00000093230 | 0.951478514 | 1.95E-06 |
| TUCP_003516 | XLOC_152769 | ENSRNOT00000051835 | 0.975611398 | 6.52E-08 |
| TUCP_003516 | XLOC_152769 | ENSRNOT00000079087 | 0.975611398 | 6.52E-08 |
| TUCP_003516 | XLOC_152769 | ENSRNOT00000037206 | 0.975611398 | 6.52E-08 |
| TUCP_003516 | XLOC_152769 | ENSRNOT00000083261 | 0.959656642 | 7.86E-07 |
| TUCP_003516 | XLOC_152769 | ENSRNOT00000000697 | 0.954930705 | 1.36E-06 |
| TUCP_003516 | XLOC_152769 | ENSRNOT00000080590 | 0.974151639 | 8.70E-08 |
| TUCP_003516 | XLOC_152769 | ENSRNOT00000027552 | 0.974569135 | 8.03E-08 |
| TUCP_003516 | XLOC_152769 | ENSRNOT00000077014 | 0.986964683 | 2.90E-09 |
| TUCP_003516 | XLOC_152769 | ENSRNOT00000080453 | 0.975001506 | 7.37E-08 |
| TUCP_003516 | XLOC_152769 | ENSRNOT00000057729 | 0.975641588 | 6.48E-08 |
| TUCP_003516 | XLOC_152769 | ENSRNOT00000061284 | 0.957653745 | 9.99E-07 |
| TUCP_003516 | XLOC_152769 | ENSRNOT00000020206 | 0.964673886 | 4.08E-07 |
| TUCP_003516 | XLOC_152769 | ENSRNOT00000013423 | 0.960061914 | 7.48E-07 |
| TUCP_003516 | XLOC_152769 | ENSRNOT00000066839 | 0.963437953 | 4.84E-07 |
| TUCP_003516 | XLOC_152769 | ENSRNOT00000078663 | 0.985206531 | 5.44E-09 |
| TUCP_003516 | XLOC_152769 | ENSRNOT00000064250 | 0.968374383 | 2.36E-07 |
| TUCP_003516 | XLOC_152769 | ENSRNOT00000021608 | 0.968343736 | 2.37E-07 |
| TUCP_003516 | XLOC_152769 | ENSRNOT00000029634 | 0.972710929 | 1.14E-07 |
| TUCP_003516 | XLOC_152769 | ENSRNOT00000093579 | 0.951568229 | 1.93E-06 |
| TUCP_003516 | XLOC_152769 | ENSRNOT00000065460 | 0.975611398 | 6.52E-08 |



|             |             |                    |             |          |
|-------------|-------------|--------------------|-------------|----------|
| TUCP_003516 | XLOC_152769 | ENSRNOT0000003817  | 0.978998721 | 3.11E-08 |
| TUCP_003516 | XLOC_152769 | ENSRNOT00000016713 | 0.975611398 | 6.52E-08 |
| TUCP_003516 | XLOC_152769 | ENSRNOT00000079260 | 0.972299755 | 1.23E-07 |
| TUCP_003516 | XLOC_152769 | ENSRNOT00000039294 | 0.975611398 | 6.52E-08 |
| TUCP_002185 | XLOC_091237 | ENSRNOT00000065600 | 0.958287245 | 9.27E-07 |
| TUCP_002184 | XLOC_091236 | ENSRNOT00000010332 | 0.956114516 | 1.19E-06 |
| TUCP_002184 | XLOC_091236 | ENSRNOT00000086575 | 0.951238789 | 2.00E-06 |
| TUCP_002184 | XLOC_091236 | ENSRNOT00000067663 | 0.956832702 | 1.10E-06 |
| TUCP_002184 | XLOC_091236 | ENSRNOT00000041044 | 0.960906447 | 6.73E-07 |
| TUCP_002184 | XLOC_091236 | ENSRNOT00000044174 | 0.95000299  | 2.26E-06 |
| TUCP_002184 | XLOC_091236 | ENSRNOT00000065600 | 0.968207921 | 2.42E-07 |
| TUCP_002184 | XLOC_091236 | ENSRNOT00000067400 | 0.950772682 | 2.10E-06 |
| TUCP_002184 | XLOC_091236 | ENSRNOT00000066024 | 0.9505463   | 2.14E-06 |
| TUCP_002184 | XLOC_091236 | ENSRNOT00000001826 | 0.951313451 | 1.98E-06 |
| TUCP_002184 | XLOC_091236 | ENSRNOT00000038807 | 0.951222143 | 2.00E-06 |
| TUCP_002184 | XLOC_091236 | ENSRNOT0000006067  | 0.953006813 | 1.67E-06 |
| TUCP_002184 | XLOC_091236 | ENSRNOT00000075558 | 0.950376186 | 2.18E-06 |
| TUCP_001641 | XLOC_064931 | ENSRNOT00000024366 | 0.955686648 | 1.25E-06 |
| TUCP_001641 | XLOC_064931 | ENSRNOT00000010396 | 0.950137584 | 2.23E-06 |
| TUCP_001641 | XLOC_064931 | ENSRNOT00000010332 | 0.966035667 | 3.36E-07 |
| TUCP_001641 | XLOC_064931 | ENSRNOT00000065600 | 0.950622298 | 2.13E-06 |
| TUCP_001641 | XLOC_064931 | ENSRNOT00000041044 | 0.958256943 | 9.30E-07 |
| TUCP_001641 | XLOC_064931 | ENSRNOT00000010367 | 0.955141804 | 1.33E-06 |
| TUCP_001641 | XLOC_064931 | ENSRNOT00000026641 | 0.967679808 | 2.63E-07 |
| TUCP_001641 | XLOC_064931 | ENSRNOT00000022714 | 0.965735016 | 3.51E-07 |
| TUCP_002343 | XLOC_097704 | ENSRNOT00000025981 | 0.955132874 | 1.33E-06 |
| TUCP_002343 | XLOC_097704 | ENSRNOT00000008510 | 0.957497409 | 1.02E-06 |
| TUCP_002343 | XLOC_097704 | ENSRNOT00000031904 | 0.956168982 | 1.18E-06 |
| TUCP_002343 | XLOC_097704 | ENSRNOT00000038807 | 0.953560769 | 1.57E-06 |
| TUCP_002343 | XLOC_097704 | ENSRNOT00000057924 | 0.962751052 | 5.30E-07 |
| TUCP_002343 | XLOC_097704 | ENSRNOT00000066024 | 0.970753963 | 1.60E-07 |
| TUCP_002343 | XLOC_097704 | ENSRNOT0000004570  | 0.950125575 | 2.23E-06 |
| TUCP_002343 | XLOC_097704 | ENSRNOT00000005664 | 0.96289135  | 5.21E-07 |
| TUCP_002343 | XLOC_097704 | ENSRNOT00000011429 | 0.971065102 | 1.52E-07 |
| TUCP_002343 | XLOC_097704 | ENSRNOT00000040513 | 0.957021966 | 1.07E-06 |
| TUCP_002343 | XLOC_097704 | ENSRNOT00000078306 | 0.961093458 | 6.58E-07 |
| TUCP_002343 | XLOC_097704 | ENSRNOT00000080695 | 0.951904178 | 1.87E-06 |
| TUCP_002343 | XLOC_097704 | ENSRNOT00000041044 | 0.974346451 | 8.38E-08 |
| TUCP_002343 | XLOC_097704 | ENSRNOT00000036054 | 0.956192893 | 1.18E-06 |
| TUCP_002343 | XLOC_097704 | ENSRNOT00000054674 | 0.950951917 | 2.06E-06 |
| TUCP_002343 | XLOC_097704 | ENSRNOT00000075279 | 0.960847559 | 6.78E-07 |
| TUCP_002343 | XLOC_097704 | ENSRNOT00000067400 | 0.958864817 | 8.66E-07 |
| TUCP_002343 | XLOC_097704 | ENSRNOT00000020673 | 0.958111332 | 9.47E-07 |
| TUCP_002343 | XLOC_097704 | ENSRNOT00000026261 | 0.955444283 | 1.28E-06 |
| TUCP_002343 | XLOC_097704 | ENSRNOT00000016209 | 0.958662769 | 8.87E-07 |
| TUCP_002343 | XLOC_097704 | ENSRNOT00000019923 | 0.950929097 | 2.06E-06 |
| TUCP_002343 | XLOC_097704 | ENSRNOT00000025092 | 0.950749846 | 2.10E-06 |
| TUCP_002343 | XLOC_097704 | ENSRNOT00000057160 | 0.97051413  | 1.67E-07 |
| TUCP_002343 | XLOC_097704 | ENSRNOT00000016739 | 0.96314311  | 5.03E-07 |
| TUCP_002343 | XLOC_097704 | ENSRNOT00000079595 | 0.962521527 | 5.47E-07 |
| TUCP_002343 | XLOC_097704 | ENSRNOT00000036072 | 0.966039187 | 3.36E-07 |

|             |             |                     |              |          |
|-------------|-------------|---------------------|--------------|----------|
| TUCP_002343 | XLOC_097704 | ENSRNOT00000003641  | 0.951119059  | 2.02E-06 |
| TUCP_003458 | XLOC_149596 | ENSRNOT000000081570 | 0.962961027  | 5.16E-07 |
| TUCP_003458 | XLOC_149596 | ENSRNOT000000091652 | 0.99819185   | 1.52E-13 |
| TUCP_003458 | XLOC_149596 | ENSRNOT000000036564 | 0.972337506  | 1.22E-07 |
| TUCP_003458 | XLOC_149596 | ENSRNOT00000000109  | 0.962179854  | 5.72E-07 |
| TUCP_003458 | XLOC_149596 | ENSRNOT000000080865 | 1            | 4.25E-78 |
| TUCP_003458 | XLOC_149596 | ENSRNOT000000073534 | 0.995808019  | 1.01E-11 |
| TUCP_003458 | XLOC_149596 | ENSRNOT00000012161  | 0.987544327  | 2.31E-09 |
| TUCP_003458 | XLOC_149596 | ENSRNOT000000078707 | 0.960060506  | 7.48E-07 |
| TUCP_003458 | XLOC_149596 | ENSRNOT000000087758 | 0.968778527  | 2.22E-07 |
| TUCP_003458 | XLOC_149596 | ENSRNOT000000049832 | 0.969039151  | 2.13E-07 |
| TUCP_003458 | XLOC_149596 | ENSRNOT000000093019 | 1            | 0        |
| TUCP_003458 | XLOC_149596 | ENSRNOT000000024825 | 0.980452701  | 2.18E-08 |
| TUCP_003458 | XLOC_149596 | ENSRNOT000000059266 | 0.96033506   | 7.23E-07 |
| TUCP_003458 | XLOC_149596 | ENSRNOT000000072734 | 0.965018115  | 3.89E-07 |
| TUCP_003458 | XLOC_149596 | ENSRNOT000000085908 | 0.996653227  | 3.29E-12 |
| TUCP_003458 | XLOC_149596 | ENSRNOT000000046744 | 1            | 1.33E-79 |
| TUCP_003458 | XLOC_149596 | ENSRNOT000000076429 | 1            | 4.25E-78 |
| TUCP_003458 | XLOC_149596 | ENSRNOT000000084667 | 0.999660971  | 3.53E-17 |
| TUCP_003458 | XLOC_149596 | ENSRNOT000000055412 | 1            | 1.33E-79 |
| TUCP_003458 | XLOC_149596 | ENSRNOT000000093201 | 0.9997022    | 1.84E-17 |
| TUCP_003458 | XLOC_149596 | ENSRNOT000000072724 | 1            | 4.25E-78 |
| TUCP_003458 | XLOC_149596 | ENSRNOT000000090323 | 0.95603782   | 1.20E-06 |
| TUCP_003458 | XLOC_149596 | ENSRNOT000000082760 | 0.986293522  | 3.72E-09 |
| TUCP_003458 | XLOC_149596 | ENSRNOT000000066017 | 0.989785653  | 8.61E-10 |
| TUCP_003458 | XLOC_149596 | ENSRNOT000000073148 | 0.985721397  | 4.56E-09 |
| TUCP_003458 | XLOC_149596 | ENSRNOT000000077462 | 0.960098183  | 7.45E-07 |
| TUCP_003458 | XLOC_149596 | ENSRNOT000000084375 | 1            | 4.25E-78 |
| TUCP_003458 | XLOC_149596 | ENSRNOT000000085447 | 0.998400682  | 8.22E-14 |
| TUCP_003458 | XLOC_149596 | ENSRNOT000000006249 | 0.966489607  | 3.15E-07 |
| TUCP_003458 | XLOC_149596 | ENSRNOT000000087073 | 0.952450698  | 1.77E-06 |
| TUCP_003458 | XLOC_149596 | ENSRNOT000000042369 | 0.995659369  | 1.20E-11 |
| TUCP_003458 | XLOC_149596 | ENSRNOT000000086554 | 1            | 1.33E-79 |
| TUCP_003458 | XLOC_149596 | ENSRNOT000000054858 | 0.985228824  | 5.40E-09 |
| TUCP_003458 | XLOC_149596 | ENSRNOT000000047921 | 1            | 4.25E-78 |
| TUCP_003458 | XLOC_149596 | ENSRNOT000000064261 | 0.999977196  | 4.86E-23 |
| TUCP_003458 | XLOC_149596 | ENSRNOT000000086660 | 0.999208903  | 2.44E-15 |
| TUCP_003458 | XLOC_149596 | ENSRNOT000000080933 | 0.967360681  | 2.76E-07 |
| TUCP_003458 | XLOC_149596 | ENSRNOT000000083977 | 1            | 0        |
| TUCP_003458 | XLOC_149596 | ENSRNOT000000092933 | 1            | 0        |
| TUCP_003458 | XLOC_149596 | ENSRNOT00000009061  | 0.953300672  | 1.62E-06 |
| TUCP_003458 | XLOC_149596 | ENSRNOT000000041281 | 0.987828355  | 2.06E-09 |
| TUCP_002180 | XLOC_091086 | ENSRNOT000000030074 | -0.961364296 | 6.35E-07 |
| TUCP_002180 | XLOC_091086 | ENSRNOT000000032802 | 0.965995625  | 3.38E-07 |
| TUCP_002180 | XLOC_091086 | ENSRNOT000000010835 | -0.977398838 | 4.47E-08 |
| TUCP_002180 | XLOC_091086 | ENSRNOT000000075656 | 0.95181283   | 1.89E-06 |
| TUCP_002180 | XLOC_091086 | ENSRNOT000000075397 | -0.967063186 | 2.89E-07 |
| TUCP_002180 | XLOC_091086 | ENSRNOT00000007350  | -0.960425392 | 7.15E-07 |
| TUCP_002180 | XLOC_091086 | ENSRNOT000000004713 | 0.956292699  | 1.17E-06 |
| TUCP_002180 | XLOC_091086 | ENSRNOT000000013116 | 0.96694763   | 2.94E-07 |
| TUCP_002180 | XLOC_091086 | ENSRNOT000000010683 | 0.951307511  | 1.99E-06 |

|             |             |                    |              |          |
|-------------|-------------|--------------------|--------------|----------|
| TUCP_002180 | XLOC_091086 | ENSRNOT00000013025 | 0.955089835  | 1.33E-06 |
| TUCP_002180 | XLOC_091086 | ENSRNOT00000039551 | 0.955751241  | 1.24E-06 |
| TUCP_002180 | XLOC_091086 | ENSRNOT00000038178 | 0.959684738  | 7.84E-07 |
| TUCP_002180 | XLOC_091086 | ENSRNOT00000007164 | -0.954999247 | 1.35E-06 |
| TUCP_002180 | XLOC_091086 | ENSRNOT00000049459 | 0.962793554  | 5.27E-07 |
| TUCP_002180 | XLOC_091086 | ENSRNOT00000045326 | -0.957361303 | 1.03E-06 |
| TUCP_002180 | XLOC_091086 | ENSRNOT00000014309 | 0.969272469  | 2.05E-07 |
| TUCP_002180 | XLOC_091086 | ENSRNOT00000085885 | 0.969018346  | 2.13E-07 |
| TUCP_002180 | XLOC_091086 | ENSRNOT00000017571 | 0.964334038  | 4.28E-07 |
| TUCP_002180 | XLOC_091086 | ENSRNOT00000013851 | 0.954596877  | 1.41E-06 |
| TUCP_002180 | XLOC_091086 | ENSRNOT00000085736 | 0.952327604  | 1.79E-06 |
| TUCP_002180 | XLOC_091086 | ENSRNOT0000001679  | -0.9766719   | 5.23E-08 |
| TUCP_002180 | XLOC_091086 | ENSRNOT00000055540 | -0.96237222  | 5.58E-07 |
| TUCP_002180 | XLOC_091086 | ENSRNOT00000018584 | -0.963397664 | 4.87E-07 |
| TUCP_002180 | XLOC_091086 | ENSRNOT00000078856 | 0.979165692  | 2.99E-08 |
| TUCP_002180 | XLOC_091086 | ENSRNOT00000040847 | 0.954377572  | 1.44E-06 |
| TUCP_002180 | XLOC_091086 | ENSRNOT00000013516 | -0.970021213 | 1.81E-07 |
| TUCP_002180 | XLOC_091086 | ENSRNOT00000017147 | -0.952073577 | 1.84E-06 |
| TUCP_002180 | XLOC_091086 | ENSRNOT00000073019 | -0.952923401 | 1.68E-06 |
| TUCP_002180 | XLOC_091086 | ENSRNOT00000031935 | 0.951119396  | 2.02E-06 |
| TUCP_002180 | XLOC_091086 | ENSRNOT00000064401 | -0.962066052 | 5.80E-07 |
| TUCP_002180 | XLOC_091086 | ENSRNOT00000017271 | -0.950124219 | 2.23E-06 |
| TUCP_002180 | XLOC_091086 | ENSRNOT00000030109 | -0.965033611 | 3.88E-07 |
| TUCP_002180 | XLOC_091086 | ENSRNOT00000009319 | 0.951618631  | 1.92E-06 |
| TUCP_002180 | XLOC_091086 | ENSRNOT00000013191 | 0.950273252  | 2.20E-06 |
| TUCP_002180 | XLOC_091086 | ENSRNOT00000024677 | -0.95029726  | 2.20E-06 |
| TUCP_002180 | XLOC_091086 | ENSRNOT00000067009 | 0.971441165  | 1.43E-07 |
| TUCP_002180 | XLOC_091086 | ENSRNOT00000089418 | -0.960114138 | 7.43E-07 |
| TUCP_002180 | XLOC_091086 | ENSRNOT00000091448 | 0.953275447  | 1.62E-06 |
| TUCP_002180 | XLOC_091086 | ENSRNOT00000077856 | 0.956970114  | 1.08E-06 |
| TUCP_002180 | XLOC_091086 | ENSRNOT00000090129 | 0.96995698   | 1.83E-07 |
| TUCP_002180 | XLOC_091086 | ENSRNOT00000089265 | 0.952552451  | 1.75E-06 |
| TUCP_002180 | XLOC_091086 | ENSRNOT00000018488 | 0.964164333  | 4.38E-07 |
| TUCP_002180 | XLOC_091086 | ENSRNOT00000005686 | 0.950487234  | 2.16E-06 |
| TUCP_002180 | XLOC_091086 | ENSRNOT00000056405 | -0.955525118 | 1.27E-06 |
| TUCP_002180 | XLOC_091086 | ENSRNOT00000012361 | 0.953052276  | 1.66E-06 |
| TUCP_002180 | XLOC_091086 | ENSRNOT00000000886 | -0.95677373  | 1.11E-06 |
| TUCP_002180 | XLOC_091086 | ENSRNOT00000030007 | 0.966479727  | 3.15E-07 |
| TUCP_002180 | XLOC_091086 | ENSRNOT00000074212 | -0.980944479 | 1.92E-08 |
| TUCP_002180 | XLOC_091086 | ENSRNOT00000016629 | -0.953142029 | 1.64E-06 |
| TUCP_002180 | XLOC_091086 | ENSRNOT00000006111 | 0.954347062  | 1.45E-06 |
| TUCP_002180 | XLOC_091086 | ENSRNOT00000087278 | 0.96144723   | 6.29E-07 |
| TUCP_002180 | XLOC_091086 | ENSRNOT0000006835  | -0.954315124 | 1.45E-06 |
| TUCP_002180 | XLOC_091086 | ENSRNOT00000092945 | 0.954183639  | 1.47E-06 |
| TUCP_002180 | XLOC_091086 | ENSRNOT00000068745 | -0.960308127 | 7.26E-07 |
| TUCP_002180 | XLOC_091086 | ENSRNOT00000023619 | -0.963287019 | 4.94E-07 |
| TUCP_002180 | XLOC_091086 | ENSRNOT00000084709 | -0.952561861 | 1.75E-06 |
| TUCP_002180 | XLOC_091086 | ENSRNOT00000017949 | 0.958894314  | 8.63E-07 |
| TUCP_002180 | XLOC_091086 | ENSRNOT00000038546 | 0.960059745  | 7.48E-07 |
| TUCP_002180 | XLOC_091086 | ENSRNOT00000013864 | 0.97030952   | 1.73E-07 |
| TUCP_002180 | XLOC_091086 | ENSRNOT00000068452 | -0.955132626 | 1.33E-06 |

|             |             |                    |              |          |
|-------------|-------------|--------------------|--------------|----------|
| TUCP_002180 | XLOC_091086 | ENSRNOT00000025856 | 0.95119797   | 2.01E-06 |
| TUCP_002180 | XLOC_091086 | ENSRNOT00000021729 | -0.968998753 | 2.14E-07 |
| TUCP_002180 | XLOC_091086 | ENSRNOT00000022190 | 0.953946935  | 1.51E-06 |
| TUCP_002180 | XLOC_091086 | ENSRNOT00000016132 | 0.954088362  | 1.49E-06 |
| TUCP_002180 | XLOC_091086 | ENSRNOT00000025913 | 0.970280137  | 1.74E-07 |
| TUCP_002180 | XLOC_091086 | ENSRNOT00000012314 | 0.966964226  | 2.93E-07 |
| TUCP_002180 | XLOC_091086 | ENSRNOT00000076230 | -0.959234708 | 8.28E-07 |
| TUCP_002180 | XLOC_091086 | ENSRNOT00000073919 | -0.955808843 | 1.23E-06 |
| TUCP_002180 | XLOC_091086 | ENSRNOT00000082863 | -0.951354147 | 1.98E-06 |
| TUCP_002180 | XLOC_091086 | ENSRNOT00000032667 | 0.957866889  | 9.74E-07 |
| TUCP_002180 | XLOC_091086 | ENSRNOT00000064667 | 0.975303068  | 6.94E-08 |
| TUCP_002180 | XLOC_091086 | ENSRNOT00000038610 | 0.961362342  | 6.36E-07 |
| TUCP_002180 | XLOC_091086 | ENSRNOT00000034883 | 0.970426318  | 1.70E-07 |
| TUCP_002180 | XLOC_091086 | ENSRNOT00000020155 | -0.954845198 | 1.37E-06 |
| TUCP_002180 | XLOC_091086 | ENSRNOT00000005459 | -0.950385391 | 2.18E-06 |
| TUCP_002180 | XLOC_091086 | ENSRNOT00000081123 | -0.960557341 | 7.04E-07 |
| TUCP_002180 | XLOC_091086 | ENSRNOT00000081351 | -0.955481595 | 1.28E-06 |
| TUCP_002180 | XLOC_091086 | ENSRNOT00000090853 | 0.966895597  | 2.96E-07 |
| TUCP_002180 | XLOC_091086 | ENSRNOT00000081077 | 0.967140223  | 2.86E-07 |
| TUCP_002180 | XLOC_091086 | ENSRNOT00000028066 | 0.963437508  | 4.84E-07 |
| TUCP_002180 | XLOC_091086 | ENSRNOT00000092083 | -0.957087173 | 1.07E-06 |
| TUCP_002180 | XLOC_091086 | ENSRNOT00000011880 | -0.964042661 | 4.46E-07 |
| TUCP_002180 | XLOC_091086 | ENSRNOT00000005910 | 0.969074384  | 2.12E-07 |
| TUCP_002180 | XLOC_091086 | ENSRNOT00000055437 | 0.961316913  | 6.39E-07 |
| TUCP_002180 | XLOC_091086 | ENSRNOT00000000898 | -0.968756536 | 2.22E-07 |
| TUCP_002180 | XLOC_091086 | ENSRNOT00000050350 | 0.957509844  | 1.02E-06 |
| TUCP_002180 | XLOC_091086 | ENSRNOT00000020383 | -0.96121118  | 6.48E-07 |
| TUCP_002180 | XLOC_091086 | ENSRNOT00000026988 | 0.960445198  | 7.14E-07 |
| TUCP_002180 | XLOC_091086 | ENSRNOT00000078366 | -0.955405878 | 1.29E-06 |
| TUCP_002180 | XLOC_091086 | ENSRNOT00000025222 | 0.969654439  | 1.93E-07 |
| TUCP_002180 | XLOC_091086 | ENSRNOT00000020951 | -0.955538014 | 1.27E-06 |
| TUCP_002180 | XLOC_091086 | ENSRNOT00000011675 | -0.950166549 | 2.23E-06 |
| TUCP_002180 | XLOC_091086 | ENSRNOT00000027917 | -0.963974023 | 4.50E-07 |
| TUCP_002180 | XLOC_091086 | ENSRNOT00000004290 | -0.966206019 | 3.28E-07 |
| TUCP_002180 | XLOC_091086 | ENSRNOT00000023876 | -0.957443786 | 1.02E-06 |
| TUCP_002180 | XLOC_091086 | ENSRNOT00000033359 | -0.963622857 | 4.72E-07 |
| TUCP_002180 | XLOC_091086 | ENSRNOT00000072031 | 0.950196449  | 2.22E-06 |
| TUCP_002180 | XLOC_091086 | ENSRNOT00000039730 | 0.964192729  | 4.37E-07 |
| TUCP_002180 | XLOC_091086 | ENSRNOT00000049285 | 0.95664455   | 1.12E-06 |
| TUCP_002180 | XLOC_091086 | ENSRNOT00000093385 | -0.956535073 | 1.14E-06 |
| TUCP_002180 | XLOC_091086 | ENSRNOT00000015239 | 0.959035942  | 8.48E-07 |
| TUCP_002180 | XLOC_091086 | ENSRNOT00000082146 | 0.959732286  | 7.79E-07 |
| TUCP_002180 | XLOC_091086 | ENSRNOT00000077146 | 0.957524841  | 1.01E-06 |
| TUCP_002180 | XLOC_091086 | ENSRNOT00000026235 | 0.975712833  | 6.39E-08 |
| TUCP_002180 | XLOC_091086 | ENSRNOT00000054980 | -0.960720388 | 6.89E-07 |
| TUCP_002180 | XLOC_091086 | ENSRNOT00000024033 | -0.958467143 | 9.08E-07 |
| TUCP_002180 | XLOC_091086 | ENSRNOT00000089673 | 0.953257629  | 1.62E-06 |
| TUCP_002180 | XLOC_091086 | ENSRNOT00000030850 | -0.955739336 | 1.24E-06 |
| TUCP_002180 | XLOC_091086 | ENSRNOT00000075209 | 0.950563213  | 2.14E-06 |
| TUCP_002180 | XLOC_091086 | ENSRNOT00000023977 | 0.952873454  | 1.69E-06 |
| TUCP_002180 | XLOC_091086 | ENSRNOT00000090774 | 0.961543131  | 6.21E-07 |

|             |             |                    |              |          |
|-------------|-------------|--------------------|--------------|----------|
| TUCP_002180 | XLOC_091086 | ENSRNOT00000009318 | -0.951570222 | 1.93E-06 |
| TUCP_002180 | XLOC_091086 | ENSRNOT00000003691 | 0.952431185  | 1.77E-06 |
| TUCP_002180 | XLOC_091086 | ENSRNOT00000025794 | 0.963525065  | 4.78E-07 |
| TUCP_002180 | XLOC_091086 | ENSRNOT00000017765 | -0.961617834 | 6.15E-07 |
| TUCP_002180 | XLOC_091086 | ENSRNOT00000057965 | -0.950442274 | 2.17E-06 |
| TUCP_002180 | XLOC_091086 | ENSRNOT00000017761 | -0.951588236 | 1.93E-06 |
| TUCP_002180 | XLOC_091086 | ENSRNOT00000091282 | 0.985156957  | 5.53E-09 |
| TUCP_002180 | XLOC_091086 | ENSRNOT00000030692 | 0.961314832  | 6.39E-07 |
| TUCP_002180 | XLOC_091086 | ENSRNOT00000001923 | -0.965834031 | 3.46E-07 |
| TUCP_002180 | XLOC_091086 | ENSRNOT00000077479 | 0.972589413  | 1.16E-07 |
| TUCP_002180 | XLOC_091086 | ENSRNOT00000002114 | 0.961285542  | 6.42E-07 |
| TUCP_002180 | XLOC_091086 | ENSRNOT00000021578 | -0.965407686 | 3.68E-07 |
| TUCP_002180 | XLOC_091086 | ENSRNOT00000040060 | 0.964388987  | 4.25E-07 |
| TUCP_002180 | XLOC_091086 | ENSRNOT00000010580 | 0.963127882  | 5.05E-07 |
| TUCP_002180 | XLOC_091086 | ENSRNOT00000039102 | -0.954745957 | 1.39E-06 |
| TUCP_002180 | XLOC_091086 | ENSRNOT00000091325 | 0.953435437  | 1.59E-06 |
| TUCP_002180 | XLOC_091086 | ENSRNOT00000037679 | -0.950626651 | 2.13E-06 |
| TUCP_002180 | XLOC_091086 | ENSRNOT00000024306 | 0.954662306  | 1.40E-06 |
| TUCP_002180 | XLOC_091086 | ENSRNOT00000009742 | 0.980182112  | 2.33E-08 |
| TUCP_002180 | XLOC_091086 | ENSRNOT00000000120 | -0.955186762 | 1.32E-06 |
| TUCP_002180 | XLOC_091086 | ENSRNOT00000019983 | 0.966290213  | 3.24E-07 |
| TUCP_002180 | XLOC_091086 | ENSRNOT00000013632 | -0.973944469 | 9.05E-08 |
| TUCP_002180 | XLOC_091086 | ENSRNOT00000080677 | 0.96624168   | 3.26E-07 |
| TUCP_002180 | XLOC_091086 | ENSRNOT00000025460 | -0.955984911 | 1.21E-06 |
| TUCP_002180 | XLOC_091086 | ENSRNOT00000012996 | -0.952141298 | 1.82E-06 |
| TUCP_002180 | XLOC_091086 | ENSRNOT00000045946 | -0.966020149 | 3.37E-07 |
| TUCP_002180 | XLOC_091086 | ENSRNOT00000015643 | -0.956318235 | 1.16E-06 |
| TUCP_002180 | XLOC_091086 | ENSRNOT00000082570 | 0.955469879  | 1.28E-06 |
| TUCP_002180 | XLOC_091086 | ENSRNOT00000005389 | -0.95678774  | 1.10E-06 |
| TUCP_002180 | XLOC_091086 | ENSRNOT00000032244 | -0.963469201 | 4.82E-07 |
| TUCP_002180 | XLOC_091086 | ENSRNOT00000005143 | -0.971954323 | 1.30E-07 |
| TUCP_002180 | XLOC_091086 | ENSRNOT00000011832 | 0.959054659  | 8.46E-07 |
| TUCP_002180 | XLOC_091086 | ENSRNOT00000015318 | 0.950887117  | 2.07E-06 |
| TUCP_002180 | XLOC_091086 | ENSRNOT00000032236 | 0.962549642  | 5.45E-07 |
| TUCP_002180 | XLOC_091086 | ENSRNOT00000077274 | 0.961322764  | 6.39E-07 |
| TUCP_002180 | XLOC_091086 | ENSRNOT00000028907 | -0.962446714 | 5.52E-07 |
| TUCP_002180 | XLOC_091086 | ENSRNOT00000047210 | -0.950556194 | 2.14E-06 |
| TUCP_002180 | XLOC_091086 | ENSRNOT00000036613 | 0.96552971   | 3.62E-07 |
| TUCP_002180 | XLOC_091086 | ENSRNOT00000008987 | 0.958869401  | 8.65E-07 |
| TUCP_002180 | XLOC_091086 | ENSRNOT00000092876 | 0.966897548  | 2.96E-07 |
| TUCP_002180 | XLOC_091086 | ENSRNOT00000077803 | -0.966512216 | 3.14E-07 |
| TUCP_002180 | XLOC_091086 | ENSRNOT00000005885 | 0.9565269    | 1.14E-06 |
| TUCP_003301 | XLOC_141907 | ENSRNOT00000026966 | 0.960377192  | 7.20E-07 |
| TUCP_003301 | XLOC_141907 | ENSRNOT00000081709 | 0.950111631  | 2.24E-06 |
| TUCP_003301 | XLOC_141907 | ENSRNOT00000020071 | 0.971469121  | 1.42E-07 |
| TUCP_003301 | XLOC_141907 | ENSRNOT00000067379 | 0.952724316  | 1.72E-06 |
| TUCP_003301 | XLOC_141907 | ENSRNOT00000050543 | 0.951813059  | 1.89E-06 |
| TUCP_003301 | XLOC_141907 | ENSRNOT00000057433 | 0.953496705  | 1.58E-06 |
| TUCP_003301 | XLOC_141907 | ENSRNOT00000010092 | 0.954444852  | 1.43E-06 |
| TUCP_003301 | XLOC_141907 | ENSRNOT00000047527 | 0.969914288  | 1.85E-07 |
| TUCP_003301 | XLOC_141907 | ENSRNOT00000017412 | 0.953755989  | 1.54E-06 |

|             |             |                     |              |          |
|-------------|-------------|---------------------|--------------|----------|
| TUCP_003301 | XLOC_141907 | ENSRNOT00000082289  | 0.952570144  | 1.75E-06 |
| TUCP_003301 | XLOC_141907 | ENSRNOT00000082002  | 0.973265122  | 1.03E-07 |
| TUCP_003301 | XLOC_141907 | ENSRNOT00000082143  | 0.957773074  | 9.85E-07 |
| TUCP_003301 | XLOC_141907 | ENSRNOT00000085570  | 0.955567727  | 1.27E-06 |
| TUCP_003301 | XLOC_141907 | ENSRNOT00000076693  | 0.966606405  | 3.09E-07 |
| TUCP_003301 | XLOC_141907 | ENSRNOT00000076802  | 0.979911988  | 2.49E-08 |
| TUCP_003301 | XLOC_141907 | ENSRNOT00000004373  | 0.960784838  | 6.84E-07 |
| TUCP_003301 | XLOC_141907 | ENSRNOT00000005726  | 0.953561623  | 1.57E-06 |
| TUCP_003301 | XLOC_141907 | ENSRNOT00000041617  | 0.952467767  | 1.76E-06 |
| TUCP_003301 | XLOC_141907 | ENSRNOT00000091763  | 0.952906827  | 1.69E-06 |
| TUCP_003301 | XLOC_141907 | ENSRNOT00000020786  | 0.955394606  | 1.29E-06 |
| TUCP_003301 | XLOC_141907 | ENSRNOT00000084847  | 0.955044942  | 1.34E-06 |
| TUCP_003301 | XLOC_141907 | ENSRNOT00000079275  | 0.952987475  | 1.67E-06 |
| TUCP_003301 | XLOC_141907 | ENSRNOT00000088078  | 0.980748457  | 2.02E-08 |
| TUCP_003301 | XLOC_141907 | ENSRNOT00000076618  | 0.954498209  | 1.42E-06 |
| TUCP_003301 | XLOC_141907 | ENSRNOT00000065448  | 0.991182517  | 4.14E-10 |
| TUCP_003301 | XLOC_141907 | ENSRNOT00000072810  | 0.955124517  | 1.33E-06 |
| TUCP_003212 | XLOC_138405 | ENSRNOT00000092186  | 0.952813597  | 1.70E-06 |
| TUCP_003212 | XLOC_138405 | ENSRNOT00000025491  | 0.952428342  | 1.77E-06 |
| TUCP_003212 | XLOC_138405 | ENSRNOT00000018890  | 0.95291298   | 1.68E-06 |
| TUCP_002251 | XLOC_093849 | ENSRNOT00000026817  | 0.950031025  | 2.26E-06 |
| TUCP_002251 | XLOC_093849 | ENSRNOT00000086729  | -0.957567646 | 1.01E-06 |
| TUCP_003132 | XLOC_134102 | ENSRNOT00000002673  | 0.950375293  | 2.18E-06 |
| TUCP_003132 | XLOC_134102 | ENSRNOT00000003745  | 0.957276833  | 1.04E-06 |
| TUCP_003132 | XLOC_134102 | ENSRNOT000000031693 | 0.964725495  | 4.05E-07 |
| TUCP_003132 | XLOC_134102 | ENSRNOT00000024418  | 0.952567276  | 1.75E-06 |
| TUCP_003132 | XLOC_134102 | ENSRNOT00000034421  | 0.972231767  | 1.24E-07 |
| TUCP_003132 | XLOC_134102 | ENSRNOT00000011845  | 0.968156458  | 2.44E-07 |
| TUCP_003132 | XLOC_134102 | ENSRNOT00000009965  | -0.952194487 | 1.81E-06 |
| TUCP_003132 | XLOC_134102 | ENSRNOT00000013732  | 0.961260166  | 6.44E-07 |
| TUCP_003132 | XLOC_134102 | ENSRNOT00000025731  | 0.953876276  | 1.52E-06 |
| TUCP_003132 | XLOC_134102 | ENSRNOT00000025797  | -0.956299427 | 1.17E-06 |
| TUCP_003132 | XLOC_134102 | ENSRNOT00000084722  | 0.977072276  | 4.80E-08 |
| TUCP_003132 | XLOC_134102 | ENSRNOT00000055148  | 0.954301248  | 1.45E-06 |
| TUCP_003132 | XLOC_134102 | ENSRNOT00000068354  | 0.955205747  | 1.32E-06 |
| TUCP_003132 | XLOC_134102 | ENSRNOT00000093700  | 0.954634821  | 1.40E-06 |
| TUCP_001249 | XLOC_046149 | ENSRNOT00000055536  | 0.964902693  | 3.95E-07 |
| TUCP_001249 | XLOC_046149 | ENSRNOT00000090621  | 0.95568525   | 1.25E-06 |
| TUCP_001249 | XLOC_046149 | ENSRNOT00000016088  | 0.971667989  | 1.37E-07 |
| TUCP_001249 | XLOC_046149 | ENSRNOT00000075397  | 0.962312787  | 5.62E-07 |
| TUCP_001249 | XLOC_046149 | ENSRNOT00000008253  | -0.973297604 | 1.02E-07 |
| TUCP_001249 | XLOC_046149 | ENSRNOT00000032926  | -0.951166342 | 2.01E-06 |
| TUCP_001249 | XLOC_046149 | ENSRNOT0000009080   | -0.9679338   | 2.53E-07 |
| TUCP_001249 | XLOC_046149 | ENSRNOT00000063930  | -0.956628167 | 1.12E-06 |
| TUCP_001249 | XLOC_046149 | ENSRNOT00000000181  | 0.960912765  | 6.73E-07 |
| TUCP_001249 | XLOC_046149 | ENSRNOT00000003087  | 0.957239856  | 1.05E-06 |
| TUCP_001249 | XLOC_046149 | ENSRNOT00000067524  | 0.95580284   | 1.23E-06 |
| TUCP_001249 | XLOC_046149 | ENSRNOT00000073493  | 0.969154912  | 2.09E-07 |
| TUCP_001249 | XLOC_046149 | ENSRNOT00000049349  | 0.965455478  | 3.66E-07 |
| TUCP_001249 | XLOC_046149 | ENSRNOT00000013025  | -0.960270811 | 7.29E-07 |
| TUCP_001249 | XLOC_046149 | ENSRNOT00000015476  | -0.958320214 | 9.24E-07 |

|             |             |                    |              |          |
|-------------|-------------|--------------------|--------------|----------|
| TUCP_001249 | XLOC_046149 | ENSRNOT00000028624 | 0.951535056  | 1.94E-06 |
| TUCP_001249 | XLOC_046149 | ENSRNOT00000032439 | -0.955053746 | 1.34E-06 |
| TUCP_001249 | XLOC_046149 | ENSRNOT00000022255 | 0.959650379  | 7.87E-07 |
| TUCP_001249 | XLOC_046149 | ENSRNOT00000086706 | 0.951884531  | 1.87E-06 |
| TUCP_001249 | XLOC_046149 | ENSRNOT00000022086 | -0.961720444 | 6.07E-07 |
| TUCP_001249 | XLOC_046149 | ENSRNOT00000057422 | -0.96268336  | 5.35E-07 |
| TUCP_001249 | XLOC_046149 | ENSRNOT00000021114 | 0.952051165  | 1.84E-06 |
| TUCP_001249 | XLOC_046149 | ENSRNOT00000083968 | -0.950381534 | 2.18E-06 |
| TUCP_001249 | XLOC_046149 | ENSRNOT00000004391 | 0.975486235  | 6.69E-08 |
| TUCP_001249 | XLOC_046149 | ENSRNOT00000074023 | 0.962574819  | 5.43E-07 |
| TUCP_001249 | XLOC_046149 | ENSRNOT00000031692 | -0.961670907 | 6.11E-07 |
| TUCP_001249 | XLOC_046149 | ENSRNOT00000013851 | -0.953153821 | 1.64E-06 |
| TUCP_001249 | XLOC_046149 | ENSRNOT00000004351 | -0.963762679 | 4.63E-07 |
| TUCP_001249 | XLOC_046149 | ENSRNOT00000019180 | -0.950486471 | 2.16E-06 |
| TUCP_001249 | XLOC_046149 | ENSRNOT00000024710 | -0.959363892 | 8.15E-07 |
| TUCP_001249 | XLOC_046149 | ENSRNOT00000042459 | -0.960278453 | 7.28E-07 |
| TUCP_001249 | XLOC_046149 | ENSRNOT00000028695 | -0.950087984 | 2.24E-06 |
| TUCP_001249 | XLOC_046149 | ENSRNOT00000054685 | 0.959215422  | 8.30E-07 |
| TUCP_001249 | XLOC_046149 | ENSRNOT00000022746 | -0.975890957 | 6.16E-08 |
| TUCP_001249 | XLOC_046149 | ENSRNOT00000023037 | 0.950236108  | 2.21E-06 |
| TUCP_001249 | XLOC_046149 | ENSRNOT00000087604 | 0.968611812  | 2.28E-07 |
| TUCP_001249 | XLOC_046149 | ENSRNOT00000057953 | 0.971527822  | 1.40E-07 |
| TUCP_001249 | XLOC_046149 | ENSRNOT00000073370 | 0.956552607  | 1.13E-06 |
| TUCP_001249 | XLOC_046149 | ENSRNOT00000012757 | 0.950404204  | 2.17E-06 |
| TUCP_001249 | XLOC_046149 | ENSRNOT00000065978 | 0.95532813   | 1.30E-06 |
| TUCP_001249 | XLOC_046149 | ENSRNOT00000005620 | -0.959291757 | 8.22E-07 |
| TUCP_001249 | XLOC_046149 | ENSRNOT00000039177 | -0.95165941  | 1.92E-06 |
| TUCP_001249 | XLOC_046149 | ENSRNOT00000020051 | 0.956021837  | 1.20E-06 |
| TUCP_001249 | XLOC_046149 | ENSRNOT00000027760 | 0.958025874  | 9.56E-07 |
| TUCP_001249 | XLOC_046149 | ENSRNOT00000007821 | 0.955688389  | 1.25E-06 |
| TUCP_001249 | XLOC_046149 | ENSRNOT00000087287 | 0.954798297  | 1.38E-06 |
| TUCP_001249 | XLOC_046149 | ENSRNOT00000085545 | -0.97432729  | 8.41E-08 |
| TUCP_001249 | XLOC_046149 | ENSRNOT00000081226 | 0.976787691  | 5.10E-08 |
| TUCP_001249 | XLOC_046149 | ENSRNOT00000013286 | 0.959141917  | 8.37E-07 |
| TUCP_001249 | XLOC_046149 | ENSRNOT00000075630 | -0.955538952 | 1.27E-06 |
| TUCP_001249 | XLOC_046149 | ENSRNOT00000081631 | 0.960975681  | 6.68E-07 |
| TUCP_001249 | XLOC_046149 | ENSRNOT00000018634 | -0.973135802 | 1.05E-07 |
| TUCP_001249 | XLOC_046149 | ENSRNOT00000006607 | -0.960485109 | 7.10E-07 |
| TUCP_001249 | XLOC_046149 | ENSRNOT00000075934 | -0.957400852 | 1.03E-06 |
| TUCP_001249 | XLOC_046149 | ENSRNOT00000011832 | -0.957786801 | 9.83E-07 |
| TUCP_001249 | XLOC_046149 | ENSRNOT00000073643 | -0.95416692  | 1.47E-06 |
| TUCP_001249 | XLOC_046149 | ENSRNOT00000024947 | -0.953793038 | 1.53E-06 |
| TUCP_001249 | XLOC_046149 | ENSRNOT00000046552 | 0.960965031  | 6.68E-07 |
| TUCP_001249 | XLOC_046149 | ENSRNOT00000023613 | 0.952739251  | 1.71E-06 |
| TUCP_001249 | XLOC_046149 | ENSRNOT00000064776 | -0.964942554 | 3.93E-07 |
| TUCP_001249 | XLOC_046149 | ENSRNOT00000033806 | 0.961512207  | 6.23E-07 |
| TUCP_001249 | XLOC_046149 | ENSRNOT00000037333 | -0.953858392 | 1.52E-06 |
| TUCP_001249 | XLOC_046149 | ENSRNOT00000029179 | -0.966535887 | 3.12E-07 |
| TUCP_001249 | XLOC_046149 | ENSRNOT00000000469 | 0.95997851   | 7.56E-07 |
| TUCP_001249 | XLOC_046149 | ENSRNOT00000048781 | 0.953046554  | 1.66E-06 |
| TUCP_001249 | XLOC_046149 | ENSRNOT00000003265 | 0.958063356  | 9.52E-07 |

|             |             |                    |              |          |
|-------------|-------------|--------------------|--------------|----------|
| TUCP_001249 | XLOC_046149 | ENSRNOT00000022309 | 0.959293832  | 8.22E-07 |
| TUCP_001249 | XLOC_046149 | ENSRNOT00000011082 | -0.952990984 | 1.67E-06 |
| TUCP_001249 | XLOC_046149 | ENSRNOT00000083344 | 0.951160319  | 2.02E-06 |
| TUCP_001249 | XLOC_046149 | ENSRNOT00000082627 | -0.962383417 | 5.57E-07 |
| TUCP_001249 | XLOC_046149 | ENSRNOT00000072118 | 0.953012048  | 1.67E-06 |
| TUCP_001249 | XLOC_046149 | ENSRNOT00000014502 | -0.97361687  | 9.63E-08 |
| TUCP_001249 | XLOC_046149 | ENSRNOT00000085334 | 0.977190298  | 4.68E-08 |
| TUCP_001249 | XLOC_046149 | ENSRNOT00000022190 | -0.951668452 | 1.91E-06 |
| TUCP_001249 | XLOC_046149 | ENSRNOT00000023262 | -0.971555277 | 1.40E-07 |
| TUCP_001249 | XLOC_046149 | ENSRNOT00000025913 | -0.950927587 | 2.06E-06 |
| TUCP_001249 | XLOC_046149 | ENSRNOT00000059246 | 0.951185653  | 2.01E-06 |
| TUCP_001249 | XLOC_046149 | ENSRNOT00000013067 | -0.956304241 | 1.17E-06 |
| TUCP_001249 | XLOC_046149 | ENSRNOT00000004196 | 0.955235458  | 1.31E-06 |
| TUCP_001249 | XLOC_046149 | ENSRNOT00000072299 | 0.954315603  | 1.45E-06 |
| TUCP_001249 | XLOC_046149 | ENSRNOT00000078185 | -0.955493134 | 1.28E-06 |
| TUCP_001249 | XLOC_046149 | ENSRNOT00000035427 | 0.963420374  | 4.85E-07 |
| TUCP_001249 | XLOC_046149 | ENSRNOT00000036658 | -0.967145929 | 2.85E-07 |
| TUCP_001249 | XLOC_046149 | ENSRNOT00000089611 | 0.978135038  | 3.79E-08 |
| TUCP_001249 | XLOC_046149 | ENSRNOT00000010061 | -0.96441871  | 4.23E-07 |
| TUCP_001249 | XLOC_046149 | ENSRNOT00000016637 | -0.964375061 | 4.26E-07 |
| TUCP_001249 | XLOC_046149 | ENSRNOT00000038994 | -0.964105879 | 4.42E-07 |
| TUCP_001249 | XLOC_046149 | ENSRNOT00000086260 | -0.976538746 | 5.38E-08 |
| TUCP_001249 | XLOC_046149 | ENSRNOT00000008772 | -0.959880113 | 7.65E-07 |
| TUCP_001249 | XLOC_046149 | ENSRNOT00000018328 | -0.95077736  | 2.09E-06 |
| TUCP_001249 | XLOC_046149 | ENSRNOT00000066098 | -0.968346679 | 2.37E-07 |
| TUCP_001249 | XLOC_046149 | ENSRNOT00000068026 | -0.973524861 | 9.80E-08 |
| TUCP_001249 | XLOC_046149 | ENSRNOT00000025355 | 0.960358694  | 7.21E-07 |
| TUCP_001249 | XLOC_046149 | ENSRNOT00000045765 | -0.956195543 | 1.18E-06 |
| TUCP_001249 | XLOC_046149 | ENSRNOT00000009327 | -0.963438324 | 4.84E-07 |
| TUCP_001249 | XLOC_046149 | ENSRNOT00000014506 | -0.957619754 | 1.00E-06 |
| TUCP_001249 | XLOC_046149 | ENSRNOT00000026531 | -0.968370926 | 2.36E-07 |
| TUCP_001249 | XLOC_046149 | ENSRNOT00000035605 | 0.958547373  | 8.99E-07 |
| TUCP_001249 | XLOC_046149 | ENSRNOT00000090700 | 0.976075331  | 5.93E-08 |
| TUCP_001249 | XLOC_046149 | ENSRNOT00000088214 | 0.96672923   | 3.04E-07 |
| TUCP_001249 | XLOC_046149 | ENSRNOT00000020316 | -0.95409713  | 1.49E-06 |
| TUCP_001249 | XLOC_046149 | ENSRNOT00000017746 | -0.95899752  | 8.52E-07 |
| TUCP_001249 | XLOC_046149 | ENSRNOT00000087011 | -0.950008238 | 2.26E-06 |
| TUCP_001249 | XLOC_046149 | ENSRNOT00000008919 | -0.955296423 | 1.30E-06 |
| TUCP_001249 | XLOC_046149 | ENSRNOT00000006709 | -0.952106847 | 1.83E-06 |
| TUCP_001249 | XLOC_046149 | ENSRNOT00000017291 | -0.952464153 | 1.76E-06 |
| TUCP_001249 | XLOC_046149 | ENSRNOT00000071897 | -0.960549814 | 7.04E-07 |
| TUCP_001249 | XLOC_046149 | ENSRNOT00000027360 | -0.953338258 | 1.61E-06 |
| TUCP_001249 | XLOC_046149 | ENSRNOT00000066923 | -0.957366376 | 1.03E-06 |
| TUCP_001249 | XLOC_046149 | ENSRNOT00000029701 | 0.978903786  | 3.18E-08 |
| TUCP_001249 | XLOC_046149 | ENSRNOT00000026988 | -0.953849313 | 1.53E-06 |
| TUCP_001249 | XLOC_046149 | ENSRNOT00000036051 | 0.963067129  | 5.09E-07 |
| TUCP_001249 | XLOC_046149 | ENSRNOT00000029704 | -0.950828063 | 2.08E-06 |
| TUCP_001249 | XLOC_046149 | ENSRNOT00000001013 | -0.953924043 | 1.51E-06 |
| TUCP_001249 | XLOC_046149 | ENSRNOT00000025634 | -0.964867555 | 3.97E-07 |
| TUCP_001249 | XLOC_046149 | ENSRNOT00000065615 | 0.952536655  | 1.75E-06 |
| TUCP_001249 | XLOC_046149 | ENSRNOT00000011675 | 0.953963505  | 1.51E-06 |



|             |             |                    |              |          |
|-------------|-------------|--------------------|--------------|----------|
| TUCP_001249 | XLOC_046149 | ENSRNOT00000055607 | -0.96013979  | 7.41E-07 |
| TUCP_001249 | XLOC_046149 | ENSRNOT00000068156 | 0.954940057  | 1.36E-06 |
| TUCP_001249 | XLOC_046149 | ENSRNOT00000008074 | -0.988991074 | 1.25E-09 |
| TUCP_001249 | XLOC_046149 | ENSRNOT00000024452 | -0.971631713 | 1.38E-07 |
| TUCP_001249 | XLOC_046149 | ENSRNOT00000029115 | -0.955369834 | 1.29E-06 |
| TUCP_001249 | XLOC_046149 | ENSRNOT00000008764 | 0.964743577  | 4.04E-07 |
| TUCP_001249 | XLOC_046149 | ENSRNOT00000066952 | 0.965991467  | 3.38E-07 |
| TUCP_001249 | XLOC_046149 | ENSRNOT00000018477 | -0.961237488 | 6.46E-07 |
| TUCP_001249 | XLOC_046149 | ENSRNOT00000011130 | -0.961019128 | 6.64E-07 |
| TUCP_001249 | XLOC_046149 | ENSRNOT00000012428 | -0.951693233 | 1.91E-06 |
| TUCP_001249 | XLOC_046149 | ENSRNOT00000029328 | 0.963740939  | 4.64E-07 |
| TUCP_001249 | XLOC_046149 | ENSRNOT00000016485 | 0.958765715  | 8.76E-07 |
| TUCP_001249 | XLOC_046149 | ENSRNOT00000081604 | 0.954339707  | 1.45E-06 |
| TUCP_001249 | XLOC_046149 | ENSRNOT00000087748 | -0.954904119 | 1.36E-06 |
| TUCP_001249 | XLOC_046149 | ENSRNOT00000049725 | -0.954998993 | 1.35E-06 |
| TUCP_001249 | XLOC_046149 | ENSRNOT00000087329 | -0.956428604 | 1.15E-06 |
| TUCP_001249 | XLOC_046149 | ENSRNOT00000008244 | 0.951088493  | 2.03E-06 |
| TUCP_001249 | XLOC_046149 | ENSRNOT00000091990 | -0.951239844 | 2.00E-06 |
| TUCP_001249 | XLOC_046149 | ENSRNOT00000017504 | 0.953458264  | 1.59E-06 |
| TUCP_001249 | XLOC_046149 | ENSRNOT00000031083 | 0.962177692  | 5.72E-07 |
| TUCP_001249 | XLOC_046149 | ENSRNOT00000086456 | -0.960684306 | 6.92E-07 |
| TUCP_001249 | XLOC_046149 | ENSRNOT00000052033 | -0.978887817 | 3.19E-08 |
| TUCP_001249 | XLOC_046149 | ENSRNOT00000075209 | -0.959784676 | 7.74E-07 |
| TUCP_001249 | XLOC_046149 | ENSRNOT00000077578 | -0.966304679 | 3.23E-07 |
| TUCP_001249 | XLOC_046149 | ENSRNOT00000046268 | -0.95646601  | 1.14E-06 |
| TUCP_001249 | XLOC_046149 | ENSRNOT00000009202 | 0.962306334  | 5.62E-07 |
| TUCP_001249 | XLOC_046149 | ENSRNOT00000010369 | 0.957020964  | 1.07E-06 |
| TUCP_001249 | XLOC_046149 | ENSRNOT00000010993 | 0.96219903   | 5.70E-07 |
| TUCP_001249 | XLOC_046149 | ENSRNOT00000005686 | -0.951281566 | 1.99E-06 |
| TUCP_001249 | XLOC_046149 | ENSRNOT00000083256 | 0.981253     | 1.77E-08 |
| TUCP_001249 | XLOC_046149 | ENSRNOT00000010852 | 0.964157977  | 4.39E-07 |
| TUCP_001249 | XLOC_046149 | ENSRNOT00000035385 | 0.960156339  | 7.40E-07 |
| TUCP_001249 | XLOC_046149 | ENSRNOT00000061054 | 0.967519339  | 2.70E-07 |
| TUCP_001249 | XLOC_046149 | ENSRNOT00000005873 | -0.973091894 | 1.06E-07 |
| TUCP_001249 | XLOC_046149 | ENSRNOT00000057738 | 0.977758783  | 4.13E-08 |
| TUCP_001249 | XLOC_046149 | ENSRNOT00000009994 | -0.960676455 | 6.93E-07 |
| TUCP_001249 | XLOC_046149 | ENSRNOT00000065897 | 0.957140675  | 1.06E-06 |
| TUCP_001249 | XLOC_046149 | ENSRNOT00000023014 | 0.961374675  | 6.35E-07 |
| TUCP_001249 | XLOC_046149 | ENSRNOT00000026518 | 0.951582572  | 1.93E-06 |
| TUCP_001249 | XLOC_046149 | ENSRNOT00000038449 | 0.952280316  | 1.80E-06 |
| TUCP_001249 | XLOC_046149 | ENSRNOT00000035145 | -0.979121222 | 3.02E-08 |
| TUCP_001249 | XLOC_046149 | ENSRNOT00000085295 | -0.953737461 | 1.54E-06 |
| TUCP_001249 | XLOC_046149 | ENSRNOT00000087838 | -0.957956931 | 9.64E-07 |
| TUCP_001249 | XLOC_046149 | ENSRNOT00000064636 | -0.95542816  | 1.29E-06 |
| TUCP_001249 | XLOC_046149 | ENSRNOT00000079085 | -0.951491429 | 1.95E-06 |
| TUCP_001249 | XLOC_046149 | ENSRNOT00000093672 | -0.954745147 | 1.39E-06 |
| TUCP_001249 | XLOC_046149 | ENSRNOT00000038652 | -0.955067086 | 1.34E-06 |
| TUCP_001249 | XLOC_046149 | ENSRNOT00000074515 | -0.969370314 | 2.02E-07 |
| TUCP_001249 | XLOC_046149 | ENSRNOT00000075800 | -0.955705365 | 1.25E-06 |
| TUCP_001249 | XLOC_046149 | ENSRNOT00000017998 | 0.971122013  | 1.51E-07 |
| TUCP_001249 | XLOC_046149 | ENSRNOT00000016568 | 0.973489878  | 9.86E-08 |

|             |             |                    |              |          |
|-------------|-------------|--------------------|--------------|----------|
| TUCP_001249 | XLOC_046149 | ENSRNOT00000005343 | -0.964676737 | 4.08E-07 |
| TUCP_001249 | XLOC_046149 | ENSRNOT00000012216 | -0.970081087 | 1.80E-07 |
| TUCP_001249 | XLOC_046149 | ENSRNOT00000082904 | 0.968973462  | 2.15E-07 |
| TUCP_001249 | XLOC_046149 | ENSRNOT00000015223 | 0.967786859  | 2.59E-07 |
| TUCP_001249 | XLOC_046149 | ENSRNOT00000088679 | -0.958017972 | 9.57E-07 |
| TUCP_001249 | XLOC_046149 | ENSRNOT00000049285 | -0.956973947 | 1.08E-06 |
| TUCP_001249 | XLOC_046149 | ENSRNOT00000079414 | -0.950055644 | 2.25E-06 |
| TUCP_001249 | XLOC_046149 | ENSRNOT00000035309 | -0.981407245 | 1.70E-08 |
| TUCP_001249 | XLOC_046149 | ENSRNOT00000024011 | 0.961420871  | 6.31E-07 |
| TUCP_001249 | XLOC_046149 | ENSRNOT00000088073 | -0.953656155 | 1.56E-06 |
| TUCP_001249 | XLOC_046149 | ENSRNOT00000015239 | -0.953210381 | 1.63E-06 |
| TUCP_001248 | XLOC_046147 | ENSRNOT00000010680 | 0.952877834  | 1.69E-06 |
| TUCP_001248 | XLOC_046147 | ENSRNOT00000067554 | 0.95053323   | 2.15E-06 |
| TUCP_001248 | XLOC_046147 | ENSRNOT00000000383 | -0.955121598 | 1.33E-06 |
| TUCP_001248 | XLOC_046147 | ENSRNOT00000016088 | 0.950546086  | 2.14E-06 |
| TUCP_001248 | XLOC_046147 | ENSRNOT00000081226 | 0.958674456  | 8.86E-07 |
| TUCP_001248 | XLOC_046147 | ENSRNOT00000057738 | 0.954723118  | 1.39E-06 |
| TUCP_001248 | XLOC_046147 | ENSRNOT00000038780 | 0.950964365  | 2.06E-06 |
| TUCP_001248 | XLOC_046147 | ENSRNOT00000018634 | -0.950424416 | 2.17E-06 |
| TUCP_001248 | XLOC_046147 | ENSRNOT00000065897 | 0.960627187  | 6.97E-07 |
| TUCP_001248 | XLOC_046147 | ENSRNOT00000089319 | 0.962484892  | 5.49E-07 |
| TUCP_001248 | XLOC_046147 | ENSRNOT00000020832 | 0.952604723  | 1.74E-06 |
| TUCP_001248 | XLOC_046147 | ENSRNOT00000029701 | 0.972380262  | 1.21E-07 |
| TUCP_001248 | XLOC_046147 | ENSRNOT00000064776 | -0.950489962 | 2.16E-06 |
| TUCP_001248 | XLOC_046147 | ENSRNOT00000078752 | -0.95806423  | 9.52E-07 |
| TUCP_001248 | XLOC_046147 | ENSRNOT00000042638 | 0.957213457  | 1.05E-06 |
| TUCP_001248 | XLOC_046147 | ENSRNOT00000002188 | 0.979628046  | 2.67E-08 |
| TUCP_001248 | XLOC_046147 | ENSRNOT00000005770 | 0.951675317  | 1.91E-06 |
| TUCP_001248 | XLOC_046147 | ENSRNOT00000085545 | -0.956525274 | 1.14E-06 |
| TUCP_001248 | XLOC_046147 | ENSRNOT00000018640 | 0.957729184  | 9.90E-07 |
| TUCP_001248 | XLOC_046147 | ENSRNOT00000035808 | 0.964814362  | 4.00E-07 |
| TUCP_001248 | XLOC_046147 | ENSRNOT00000016485 | 0.981270138  | 1.76E-08 |
| TUCP_001248 | XLOC_046147 | ENSRNOT00000085334 | 0.965880733  | 3.44E-07 |
| TUCP_001248 | XLOC_046147 | ENSRNOT00000057953 | 0.979039842  | 3.08E-08 |
| TUCP_001248 | XLOC_046147 | ENSRNOT00000008764 | 0.956367342  | 1.16E-06 |
| TUCP_001248 | XLOC_046147 | ENSRNOT00000005873 | -0.958878004 | 8.64E-07 |
| TUCP_001248 | XLOC_046147 | ENSRNOT00000009009 | 0.960936307  | 6.71E-07 |
| TUCP_001248 | XLOC_046147 | ENSRNOT00000005257 | 0.950690068  | 2.11E-06 |
| TUCP_001248 | XLOC_046147 | ENSRNOT00000009202 | 0.951379233  | 1.97E-06 |
| TUCP_001241 | XLOC_046143 | ENSRNOT00000076294 | 0.958087711  | 9.49E-07 |
| TUCP_001241 | XLOC_046143 | ENSRNOT00000078157 | 0.950959257  | 2.06E-06 |
| TUCP_001241 | XLOC_046143 | ENSRNOT00000040840 | 0.959108005  | 8.41E-07 |
| TUCP_001241 | XLOC_046143 | ENSRNOT00000083263 | 0.953051149  | 1.66E-06 |
| TUCP_001243 | XLOC_046143 | ENSRNOT00000082545 | 0.976828647  | 5.06E-08 |
| TUCP_004152 | XLOC_180760 | ENSRNOT00000024137 | 0.954919278  | 1.36E-06 |
| TUCP_004152 | XLOC_180760 | ENSRNOT00000080088 | 0.963103948  | 5.06E-07 |
| TUCP_004152 | XLOC_180760 | ENSRNOT00000051265 | 0.957512497  | 1.02E-06 |
| TUCP_004152 | XLOC_180760 | ENSRNOT00000071697 | 0.951138978  | 2.02E-06 |
| TUCP_001245 | XLOC_046143 | ENSRNOT00000024186 | 0.972113064  | 1.27E-07 |
| TUCP_001245 | XLOC_046143 | ENSRNOT00000074753 | 0.956459235  | 1.15E-06 |
| TUCP_001245 | XLOC_046143 | ENSRNOT0000004876  | 0.966040402  | 3.36E-07 |

|             |             |                    |             |          |
|-------------|-------------|--------------------|-------------|----------|
| TUCP_001245 | XLOC_046143 | ENSRNOT00000041904 | 0.964670491 | 4.09E-07 |
| TUCP_001245 | XLOC_046143 | ENSRNOT00000083487 | 0.962309986 | 5.62E-07 |
| TUCP_001245 | XLOC_046143 | ENSRNOT00000077990 | 0.964670491 | 4.09E-07 |
| TUCP_001245 | XLOC_046143 | ENSRNOT00000038826 | 0.962103734 | 5.78E-07 |
| TUCP_001245 | XLOC_046143 | ENSRNOT00000021243 | 0.955157349 | 1.32E-06 |
| TUCP_001245 | XLOC_046143 | ENSRNOT00000060250 | 0.964120113 | 4.41E-07 |
| TUCP_001245 | XLOC_046143 | ENSRNOT00000091934 | 0.964670491 | 4.09E-07 |
| TUCP_001245 | XLOC_046143 | ENSRNOT00000034842 | 0.95361874  | 1.56E-06 |
| TUCP_001245 | XLOC_046143 | ENSRNOT00000034907 | 0.951773054 | 1.89E-06 |
| TUCP_001245 | XLOC_046143 | ENSRNOT00000014456 | 0.955060186 | 1.34E-06 |
| TUCP_001245 | XLOC_046143 | ENSRNOT00000031205 | 0.97405295  | 8.87E-08 |
| TUCP_001245 | XLOC_046143 | ENSRNOT00000044145 | 0.964670491 | 4.09E-07 |
| TUCP_001245 | XLOC_046143 | ENSRNOT00000088381 | 0.955516023 | 1.27E-06 |
| TUCP_001245 | XLOC_046143 | ENSRNOT00000057729 | 0.962592022 | 5.42E-07 |
| TUCP_001245 | XLOC_046143 | ENSRNOT00000089929 | 0.964670491 | 4.09E-07 |
| TUCP_001245 | XLOC_046143 | ENSRNOT00000088624 | 0.964670491 | 4.09E-07 |
| TUCP_001245 | XLOC_046143 | ENSRNOT00000015866 | 0.956248751 | 1.17E-06 |
| TUCP_001245 | XLOC_046143 | ENSRNOT00000064250 | 0.968362513 | 2.37E-07 |
| TUCP_001245 | XLOC_046143 | ENSRNOT00000051835 | 0.964670491 | 4.09E-07 |
| TUCP_001245 | XLOC_046143 | ENSRNOT00000079087 | 0.964670491 | 4.09E-07 |
| TUCP_001245 | XLOC_046143 | ENSRNOT00000037206 | 0.964670491 | 4.09E-07 |
| TUCP_001245 | XLOC_046143 | ENSRNOT00000080590 | 0.96835476  | 2.37E-07 |
| TUCP_001245 | XLOC_046143 | ENSRNOT00000027552 | 0.967291583 | 2.79E-07 |
| TUCP_001245 | XLOC_046143 | ENSRNOT00000077014 | 0.956769536 | 1.11E-06 |
| TUCP_001245 | XLOC_046143 | ENSRNOT00000080453 | 0.965753622 | 3.50E-07 |
| TUCP_001245 | XLOC_046143 | ENSRNOT00000066839 | 0.951530178 | 1.94E-06 |
| TUCP_001245 | XLOC_046143 | ENSRNOT00000078633 | 0.964670491 | 4.09E-07 |
| TUCP_001245 | XLOC_046143 | ENSRNOT00000037169 | 0.958055454 | 9.53E-07 |
| TUCP_001245 | XLOC_046143 | ENSRNOT00000029634 | 0.959351035 | 8.16E-07 |
| TUCP_001245 | XLOC_046143 | ENSRNOT00000065460 | 0.964670491 | 4.09E-07 |
| TUCP_001245 | XLOC_046143 | ENSRNOT00000003817 | 0.959650077 | 7.87E-07 |
| TUCP_001245 | XLOC_046143 | ENSRNOT00000016713 | 0.964670491 | 4.09E-07 |
| TUCP_001245 | XLOC_046143 | ENSRNOT00000079260 | 0.962605754 | 5.41E-07 |
| TUCP_001245 | XLOC_046143 | ENSRNOT00000039294 | 0.964670491 | 4.09E-07 |
| TUCP_001245 | XLOC_046143 | ENSRNOT00000035840 | 0.950902189 | 2.07E-06 |
| TUCP_001244 | XLOC_046143 | ENSRNOT00000024186 | 0.973130394 | 1.05E-07 |
| TUCP_001244 | XLOC_046143 | ENSRNOT00000074753 | 0.993435062 | 9.50E-11 |
| TUCP_001244 | XLOC_046143 | ENSRNOT00000041904 | 0.994074255 | 5.70E-11 |
| TUCP_001244 | XLOC_046143 | ENSRNOT00000083487 | 0.975356971 | 6.87E-08 |
| TUCP_001244 | XLOC_046143 | ENSRNOT00000077990 | 0.994074255 | 5.70E-11 |
| TUCP_001244 | XLOC_046143 | ENSRNOT00000038826 | 0.993103255 | 1.21E-10 |
| TUCP_001244 | XLOC_046143 | ENSRNOT00000037094 | 0.957889915 | 9.72E-07 |
| TUCP_001244 | XLOC_046143 | ENSRNOT00000046842 | 0.962301207 | 5.63E-07 |
| TUCP_001244 | XLOC_046143 | ENSRNOT00000037169 | 0.969297646 | 2.04E-07 |
| TUCP_001244 | XLOC_046143 | ENSRNOT00000021243 | 0.986897177 | 2.98E-09 |
| TUCP_001244 | XLOC_046143 | ENSRNOT00000060250 | 0.994893592 | 2.71E-11 |
| TUCP_001244 | XLOC_046143 | ENSRNOT00000091934 | 0.994074255 | 5.70E-11 |
| TUCP_001244 | XLOC_046143 | ENSRNOT00000086027 | 0.958098495 | 9.48E-07 |
| TUCP_001244 | XLOC_046143 | ENSRNOT00000046585 | 0.977339898 | 4.53E-08 |
| TUCP_001244 | XLOC_046143 | ENSRNOT00000080794 | 0.98557478  | 4.80E-09 |
| TUCP_001244 | XLOC_046143 | ENSRNOT00000014456 | 0.98414454  | 7.68E-09 |

|             |             |                    |              |          |
|-------------|-------------|--------------------|--------------|----------|
| TUCP_001244 | XLOC_046143 | ENSRNOT00000031205 | 0.984061832  | 7.89E-09 |
| TUCP_001244 | XLOC_046143 | ENSRNOT00000044145 | 0.994074255  | 5.70E-11 |
| TUCP_001244 | XLOC_046143 | ENSRNOT00000088381 | 0.98379554   | 8.56E-09 |
| TUCP_001244 | XLOC_046143 | ENSRNOT00000011743 | 0.976976973  | 4.90E-08 |
| TUCP_001244 | XLOC_046143 | ENSRNOT00000089929 | 0.994074255  | 5.70E-11 |
| TUCP_001244 | XLOC_046143 | ENSRNOT00000088624 | 0.994074255  | 5.70E-11 |
| TUCP_001244 | XLOC_046143 | ENSRNOT00000085659 | 0.990243537  | 6.85E-10 |
| TUCP_001244 | XLOC_046143 | ENSRNOT00000015866 | 0.987332444  | 2.51E-09 |
| TUCP_001244 | XLOC_046143 | ENSRNOT00000078633 | 0.994074255  | 5.70E-11 |
| TUCP_001244 | XLOC_046143 | ENSRNOT00000024575 | 0.950327218  | 2.19E-06 |
| TUCP_001244 | XLOC_046143 | ENSRNOT00000034907 | 0.985052901  | 5.73E-09 |
| TUCP_001244 | XLOC_046143 | ENSRNOT00000051835 | 0.994074255  | 5.70E-11 |
| TUCP_001244 | XLOC_046143 | ENSRNOT00000009825 | 0.954758765  | 1.38E-06 |
| TUCP_001244 | XLOC_046143 | ENSRNOT00000079087 | 0.994074255  | 5.70E-11 |
| TUCP_001244 | XLOC_046143 | ENSRNOT00000037206 | 0.994074255  | 5.70E-11 |
| TUCP_001244 | XLOC_046143 | ENSRNOT00000061185 | 0.950835607  | 2.08E-06 |
| TUCP_001244 | XLOC_046143 | ENSRNOT00000083261 | 0.974330952  | 8.41E-08 |
| TUCP_001244 | XLOC_046143 | ENSRNOT00000080590 | 0.993508981  | 8.98E-11 |
| TUCP_001244 | XLOC_046143 | ENSRNOT00000027552 | 0.994379476  | 4.38E-11 |
| TUCP_001244 | XLOC_046143 | ENSRNOT00000077014 | 0.99615113   | 6.61E-12 |
| TUCP_001244 | XLOC_046143 | ENSRNOT00000080453 | 0.994111082  | 5.52E-11 |
| TUCP_001244 | XLOC_046143 | ENSRNOT00000089057 | 0.951495588  | 1.95E-06 |
| TUCP_001244 | XLOC_046143 | ENSRNOT00000057729 | 0.992389126  | 1.99E-10 |
| TUCP_001244 | XLOC_046143 | ENSRNOT00000061284 | 0.966786096  | 3.01E-07 |
| TUCP_001244 | XLOC_046143 | ENSRNOT00000020206 | 0.952960146  | 1.68E-06 |
| TUCP_001244 | XLOC_046143 | ENSRNOT00000013423 | 0.96169305   | 6.09E-07 |
| TUCP_001244 | XLOC_046143 | ENSRNOT00000071884 | 0.974702389  | 7.82E-08 |
| TUCP_001244 | XLOC_046143 | ENSRNOT00000066839 | 0.986720038  | 3.18E-09 |
| TUCP_001244 | XLOC_046143 | ENSRNOT00000026316 | 0.960185044  | 7.37E-07 |
| TUCP_001244 | XLOC_046143 | ENSRNOT00000078663 | 0.985723143  | 4.56E-09 |
| TUCP_001244 | XLOC_046143 | ENSRNOT00000064250 | 0.981129134  | 1.83E-08 |
| TUCP_001244 | XLOC_046143 | ENSRNOT00000021608 | 0.96988476   | 1.85E-07 |
| TUCP_001244 | XLOC_046143 | ENSRNOT00000029634 | 0.988213862  | 1.76E-09 |
| TUCP_001244 | XLOC_046143 | ENSRNOT00000093579 | 0.959555631  | 7.96E-07 |
| TUCP_001244 | XLOC_046143 | ENSRNOT00000065460 | 0.994074255  | 5.70E-11 |
| TUCP_001244 | XLOC_046143 | ENSRNOT00000003817 | 0.994975808  | 2.50E-11 |
| TUCP_001244 | XLOC_046143 | ENSRNOT00000016713 | 0.994074255  | 5.70E-11 |
| TUCP_001244 | XLOC_046143 | ENSRNOT00000079260 | 0.987934305  | 1.97E-09 |
| TUCP_001244 | XLOC_046143 | ENSRNOT00000039294 | 0.994074255  | 5.70E-11 |
| TUCP_001244 | XLOC_046143 | ENSRNOT00000024337 | 0.952330869  | 1.79E-06 |
| TUCP_001247 | XLOC_046146 | ENSRNOT00000016088 | 0.953876062  | 1.52E-06 |
| TUCP_001247 | XLOC_046146 | ENSRNOT00000075397 | 0.956982016  | 1.08E-06 |
| TUCP_001247 | XLOC_046146 | ENSRNOT00000020051 | 0.956066868  | 1.20E-06 |
| TUCP_001247 | XLOC_046146 | ENSRNOT00000009080 | -0.95634851  | 1.16E-06 |
| TUCP_001247 | XLOC_046146 | ENSRNOT00000063930 | -0.952680926 | 1.73E-06 |
| TUCP_001247 | XLOC_046146 | ENSRNOT00000000181 | 0.958913315  | 8.61E-07 |
| TUCP_001247 | XLOC_046146 | ENSRNOT00000049349 | 0.953490543  | 1.58E-06 |
| TUCP_001247 | XLOC_046146 | ENSRNOT00000001691 | 0.955970051  | 1.21E-06 |
| TUCP_001247 | XLOC_046146 | ENSRNOT00000089319 | 0.975241527  | 7.03E-08 |
| TUCP_001247 | XLOC_046146 | ENSRNOT00000078737 | -0.963146001 | 5.03E-07 |
| TUCP_001247 | XLOC_046146 | ENSRNOT00000086706 | 0.967307401  | 2.78E-07 |

|             |             |                     |              |          |
|-------------|-------------|---------------------|--------------|----------|
| TUCP_001247 | XLOC_046146 | ENSRNOT00000004017  | 0.95478211   | 1.38E-06 |
| TUCP_001247 | XLOC_046146 | ENSRNOT000000021114 | 0.969186527  | 2.08E-07 |
| TUCP_001247 | XLOC_046146 | ENSRNOT000000016485 | 0.974840192  | 7.61E-08 |
| TUCP_001247 | XLOC_046146 | ENSRNOT00000008074  | -0.953686022 | 1.55E-06 |
| TUCP_001247 | XLOC_046146 | ENSRNOT000000074023 | 0.96146275   | 6.27E-07 |
| TUCP_001247 | XLOC_046146 | ENSRNOT000000014384 | -0.951171789 | 2.01E-06 |
| TUCP_001247 | XLOC_046146 | ENSRNOT000000042638 | 0.963420553  | 4.85E-07 |
| TUCP_001247 | XLOC_046146 | ENSRNOT00000007028  | -0.950733557 | 2.10E-06 |
| TUCP_001247 | XLOC_046146 | ENSRNOT000000057562 | 0.953662167  | 1.56E-06 |
| TUCP_001247 | XLOC_046146 | ENSRNOT000000054685 | 0.950485967  | 2.16E-06 |
| TUCP_001247 | XLOC_046146 | ENSRNOT000000057953 | 0.990495543  | 6.01E-10 |
| TUCP_001247 | XLOC_046146 | ENSRNOT000000073370 | 0.957246582  | 1.05E-06 |
| TUCP_001247 | XLOC_046146 | ENSRNOT000000019921 | 0.958461587  | 9.08E-07 |
| TUCP_001247 | XLOC_046146 | ENSRNOT000000007821 | 0.973886436  | 9.15E-08 |
| TUCP_001247 | XLOC_046146 | ENSRNOT000000089933 | 0.952327628  | 1.79E-06 |
| TUCP_001247 | XLOC_046146 | ENSRNOT000000067554 | 0.983641295  | 8.98E-09 |
| TUCP_001247 | XLOC_046146 | ENSRNOT000000010784 | 0.958588536  | 8.95E-07 |
| TUCP_001247 | XLOC_046146 | ENSRNOT000000085545 | -0.960671128 | 6.94E-07 |
| TUCP_001247 | XLOC_046146 | ENSRNOT000000061253 | 0.954141503  | 1.48E-06 |
| TUCP_001247 | XLOC_046146 | ENSRNOT000000081226 | 0.955976402  | 1.21E-06 |
| TUCP_001247 | XLOC_046146 | ENSRNOT000000018634 | -0.969783316 | 1.89E-07 |
| TUCP_001247 | XLOC_046146 | ENSRNOT000000011832 | -0.950126757 | 2.23E-06 |
| TUCP_001247 | XLOC_046146 | ENSRNOT000000073643 | -0.95525827  | 1.31E-06 |
| TUCP_001247 | XLOC_046146 | ENSRNOT000000017556 | 0.957464794  | 1.02E-06 |
| TUCP_001247 | XLOC_046146 | ENSRNOT000000001893 | 0.972405842  | 1.20E-07 |
| TUCP_001247 | XLOC_046146 | ENSRNOT000000080577 | 0.950500902  | 2.15E-06 |
| TUCP_001247 | XLOC_046146 | ENSRNOT000000004351 | -0.950095674 | 2.24E-06 |
| TUCP_001247 | XLOC_046146 | ENSRNOT000000072118 | 0.96983796   | 1.87E-07 |
| TUCP_001247 | XLOC_046146 | ENSRNOT000000085334 | 0.952004887  | 1.85E-06 |
| TUCP_001247 | XLOC_046146 | ENSRNOT000000022190 | -0.953251592 | 1.63E-06 |
| TUCP_001247 | XLOC_046146 | ENSRNOT000000023262 | -0.951113922 | 2.03E-06 |
| TUCP_001247 | XLOC_046146 | ENSRNOT000000013067 | -0.95296501  | 1.67E-06 |
| TUCP_001247 | XLOC_046146 | ENSRNOT000000024119 | 0.952699858  | 1.72E-06 |
| TUCP_001247 | XLOC_046146 | ENSRNOT000000026312 | 0.950625951  | 2.13E-06 |
| TUCP_001247 | XLOC_046146 | ENSRNOT000000086260 | -0.964566204 | 4.14E-07 |
| TUCP_001247 | XLOC_046146 | ENSRNOT000000068026 | -0.956411095 | 1.15E-06 |
| TUCP_001247 | XLOC_046146 | ENSRNOT000000029701 | 0.976735081  | 5.16E-08 |
| TUCP_001247 | XLOC_046146 | ENSRNOT000000058382 | 0.950491399  | 2.16E-06 |
| TUCP_001247 | XLOC_046146 | ENSRNOT00000000383  | -0.967139598 | 2.86E-07 |
| TUCP_001247 | XLOC_046146 | ENSRNOT000000082711 | 0.966588919  | 3.10E-07 |
| TUCP_001247 | XLOC_046146 | ENSRNOT000000072357 | -0.952076646 | 1.84E-06 |
| TUCP_001247 | XLOC_046146 | ENSRNOT000000026531 | -0.961684084 | 6.10E-07 |
| TUCP_001247 | XLOC_046146 | ENSRNOT000000084031 | 0.951296861  | 1.99E-06 |
| TUCP_001247 | XLOC_046146 | ENSRNOT000000017746 | -0.950240988 | 2.21E-06 |
| TUCP_001247 | XLOC_046146 | ENSRNOT000000005343 | -0.950743675 | 2.10E-06 |
| TUCP_001247 | XLOC_046146 | ENSRNOT000000005459 | 0.950072025  | 2.25E-06 |
| TUCP_001247 | XLOC_046146 | ENSRNOT000000055602 | -0.950256689 | 2.21E-06 |
| TUCP_001247 | XLOC_046146 | ENSRNOT000000055607 | -0.953031182 | 1.66E-06 |
| TUCP_001247 | XLOC_046146 | ENSRNOT000000080750 | 0.953382109  | 1.60E-06 |
| TUCP_001247 | XLOC_046146 | ENSRNOT000000013801 | 0.964524679  | 4.17E-07 |
| TUCP_001247 | XLOC_046146 | ENSRNOT000000033116 | 0.95369223   | 1.55E-06 |

|             |             |                     |              |          |
|-------------|-------------|---------------------|--------------|----------|
| TUCP_001247 | XLOC_046146 | ENSRNOT00000002188  | 0.966946641  | 2.94E-07 |
| TUCP_001247 | XLOC_046146 | ENSRNOT000000029328 | 0.958450678  | 9.09E-07 |
| TUCP_001247 | XLOC_046146 | ENSRNOT000000074972 | 0.959660163  | 7.86E-07 |
| TUCP_001247 | XLOC_046146 | ENSRNOT00000010993  | 0.95311171   | 1.65E-06 |
| TUCP_001247 | XLOC_046146 | ENSRNOT00000005486  | -0.962057716 | 5.81E-07 |
| TUCP_001247 | XLOC_046146 | ENSRNOT00000010852  | 0.952327802  | 1.79E-06 |
| TUCP_001247 | XLOC_046146 | ENSRNOT00000014926  | 0.954584676  | 1.41E-06 |
| TUCP_001247 | XLOC_046146 | ENSRNOT00000057738  | 0.963647546  | 4.70E-07 |
| TUCP_001247 | XLOC_046146 | ENSRNOT00000065897  | 0.962219347  | 5.69E-07 |
| TUCP_001247 | XLOC_046146 | ENSRNOT00000080608  | 0.961309674  | 6.40E-07 |
| TUCP_001247 | XLOC_046146 | ENSRNOT00000046215  | -0.950566096 | 2.14E-06 |
| TUCP_001247 | XLOC_046146 | ENSRNOT00000000120  | 0.952716154  | 1.72E-06 |
| TUCP_001247 | XLOC_046146 | ENSRNOT00000010983  | 0.952944514  | 1.68E-06 |
| TUCP_001247 | XLOC_046146 | ENSRNOT00000000469  | 0.969773202  | 1.89E-07 |
| TUCP_001247 | XLOC_046146 | ENSRNOT00000035808  | 0.961694098  | 6.09E-07 |
| TUCP_001247 | XLOC_046146 | ENSRNOT00000015769  | 0.953241127  | 1.63E-06 |
| TUCP_001247 | XLOC_046146 | ENSRNOT00000016568  | 0.956995933  | 1.08E-06 |
| TUCP_001247 | XLOC_046146 | ENSRNOT00000027360  | -0.95483783  | 1.37E-06 |
| TUCP_001247 | XLOC_046146 | ENSRNOT00000082904  | 0.960934759  | 6.71E-07 |
| TUCP_001247 | XLOC_046146 | ENSRNOT00000015223  | 0.956074999  | 1.20E-06 |
| TUCP_001247 | XLOC_046146 | ENSRNOT00000007672  | 0.950752946  | 2.10E-06 |
| TUCP_001247 | XLOC_046146 | ENSRNOT00000090057  | 0.977585761  | 4.29E-08 |
| TUCP_001247 | XLOC_046146 | ENSRNOT00000025705  | 0.951370306  | 1.97E-06 |
| TUCP_001247 | XLOC_046146 | ENSRNOT00000061580  | -0.964406389 | 4.24E-07 |
| TUCP_001247 | XLOC_046146 | ENSRNOT00000005257  | 0.968205678  | 2.43E-07 |
| TUCP_002349 | XLOC_098054 | ENSRNOT00000005095  | 0.950231875  | 2.21E-06 |
| TUCP_002349 | XLOC_098054 | ENSRNOT00000014629  | 0.962216086  | 5.69E-07 |
| TUCP_001360 | XLOC_052435 | ENSRNOT00000087199  | 0.957219065  | 1.05E-06 |
| TUCP_001360 | XLOC_052435 | ENSRNOT00000076072  | 0.997882162  | 3.34E-13 |
| TUCP_001360 | XLOC_052435 | ENSRNOT00000084374  | 0.987720681  | 2.15E-09 |
| TUCP_001367 | XLOC_052624 | ENSRNOT00000085332  | 0.951264454  | 1.99E-06 |
| TUCP_001367 | XLOC_052624 | ENSRNOT00000073879  | -0.955421004 | 1.29E-06 |
| TUCP_001367 | XLOC_052624 | ENSRNOT00000024281  | -0.95176639  | 1.90E-06 |
| TUCP_001367 | XLOC_052624 | ENSRNOT00000034201  | -0.967944233 | 2.53E-07 |
| TUCP_001367 | XLOC_052624 | ENSRNOT00000087306  | -0.951916466 | 1.87E-06 |
| TUCP_002348 | XLOC_098054 | ENSRNOT00000010680  | 0.960280737  | 7.28E-07 |
| TUCP_002348 | XLOC_098054 | ENSRNOT00000005505  | 0.954442572  | 1.43E-06 |
| TUCP_002348 | XLOC_098054 | ENSRNOT00000009975  | 0.959005078  | 8.51E-07 |
| TUCP_002348 | XLOC_098054 | ENSRNOT00000009960  | 0.952346086  | 1.79E-06 |
| TUCP_002348 | XLOC_098054 | ENSRNOT00000083623  | 0.965073335  | 3.86E-07 |
| TUCP_002348 | XLOC_098054 | ENSRNOT00000001642  | 0.956318234  | 1.16E-06 |
| TUCP_002348 | XLOC_098054 | ENSRNOT00000016485  | 0.951079109  | 2.03E-06 |
| TUCP_002348 | XLOC_098054 | ENSRNOT00000078752  | -0.96026065  | 7.30E-07 |
| TUCP_002348 | XLOC_098054 | ENSRNOT00000034482  | 0.955076517  | 1.34E-06 |
| TUCP_002348 | XLOC_098054 | ENSRNOT00000006109  | 0.952980275  | 1.67E-06 |
| TUCP_002348 | XLOC_098054 | ENSRNOT00000006697  | 0.951779713  | 1.89E-06 |
| TUCP_000763 | XLOC_028735 | ENSRNOT00000020329  | 0.954823291  | 1.37E-06 |
| TUCP_001369 | XLOC_052624 | ENSRNOT00000088355  | 0.983748247  | 8.69E-09 |
| TUCP_001369 | XLOC_052624 | ENSRNOT00000049798  | -0.958950576 | 8.57E-07 |
| TUCP_001369 | XLOC_052624 | ENSRNOT00000021358  | 0.968061986  | 2.48E-07 |
| TUCP_001369 | XLOC_052624 | ENSRNOT00000088919  | -0.960270535 | 7.29E-07 |

|             |             |                    |              |          |
|-------------|-------------|--------------------|--------------|----------|
| TUCP_000764 | XLOC_028835 | ENSRNOT00000089807 | 0.965487078  | 3.64E-07 |
| TUCP_001716 | XLOC_069842 | ENSRNOT00000044971 | 0.967771415  | 2.59E-07 |
| TUCP_001716 | XLOC_069842 | ENSRNOT00000091013 | 0.950734061  | 2.10E-06 |
| TUCP_000831 | XLOC_032209 | ENSRNOT0000009975  | 0.952794799  | 1.70E-06 |
| TUCP_000831 | XLOC_032209 | ENSRNOT00000072682 | 0.95981479   | 7.71E-07 |
| TUCP_000831 | XLOC_032209 | ENSRNOT00000076113 | 0.957752387  | 9.87E-07 |
| TUCP_000831 | XLOC_032209 | ENSRNOT00000086144 | 0.952995455  | 1.67E-06 |
| TUCP_000831 | XLOC_032209 | ENSRNOT00000042890 | 0.960665627  | 6.94E-07 |
| TUCP_000831 | XLOC_032209 | ENSRNOT00000021590 | 0.955179654  | 1.32E-06 |
| TUCP_000831 | XLOC_032209 | ENSRNOT00000010142 | 0.978058493  | 3.86E-08 |
| TUCP_000831 | XLOC_032209 | ENSRNOT00000047453 | 0.976108376  | 5.89E-08 |
| TUCP_000831 | XLOC_032209 | ENSRNOT00000005306 | 0.950763309  | 2.10E-06 |
| TUCP_000831 | XLOC_032209 | ENSRNOT00000041762 | 0.952098164  | 1.83E-06 |
| TUCP_000831 | XLOC_032209 | ENSRNOT00000010539 | 0.952598441  | 1.74E-06 |
| TUCP_000831 | XLOC_032209 | ENSRNOT00000082172 | 0.953835342  | 1.53E-06 |
| TUCP_000831 | XLOC_032209 | ENSRNOT00000021452 | -0.950212504 | 2.22E-06 |
| TUCP_000831 | XLOC_032209 | ENSRNOT00000012757 | 0.960520394  | 7.07E-07 |
| TUCP_000831 | XLOC_032209 | ENSRNOT00000037902 | 0.954304654  | 1.45E-06 |
| TUCP_000831 | XLOC_032209 | ENSRNOT00000006947 | 0.952155636  | 1.82E-06 |
| TUCP_000831 | XLOC_032209 | ENSRNOT00000005505 | 0.969983206  | 1.82E-07 |
| TUCP_000831 | XLOC_032209 | ENSRNOT00000023623 | 0.961456208  | 6.28E-07 |
| TUCP_000831 | XLOC_032209 | ENSRNOT00000023607 | 0.970865609  | 1.57E-07 |
| TUCP_000831 | XLOC_032209 | ENSRNOT00000006109 | 0.963523086  | 4.78E-07 |
| TUCP_000831 | XLOC_032209 | ENSRNOT00000016804 | 0.957292742  | 1.04E-06 |
| TUCP_000831 | XLOC_032209 | ENSRNOT00000023661 | 0.969342933  | 2.03E-07 |
| TUCP_002657 | XLOC_112799 | ENSRNOT00000020329 | 0.953614176  | 1.56E-06 |
| TUCP_002657 | XLOC_112799 | ENSRNOT00000040509 | 0.958474604  | 9.07E-07 |
| TUCP_002657 | XLOC_112799 | ENSRNOT00000072939 | 0.987949291  | 1.96E-09 |
| TUCP_002657 | XLOC_112799 | ENSRNOT00000073792 | 0.9660302    | 3.36E-07 |
| TUCP_002657 | XLOC_112799 | ENSRNOT00000093579 | 0.962018089  | 5.84E-07 |
| TUCP_002657 | XLOC_112799 | ENSRNOT00000015889 | 0.950899334  | 2.07E-06 |
| TUCP_002657 | XLOC_112799 | ENSRNOT00000061139 | 0.975979774  | 6.05E-08 |
| TUCP_002657 | XLOC_112799 | ENSRNOT00000012170 | 0.958212861  | 9.35E-07 |
| TUCP_000833 | XLOC_032339 | ENSRNOT00000032992 | 0.954214173  | 1.47E-06 |
| TUCP_000833 | XLOC_032339 | ENSRNOT00000024156 | 0.952043029  | 1.84E-06 |
| TUCP_000833 | XLOC_032339 | ENSRNOT00000078274 | 0.955355593  | 1.30E-06 |
| TUCP_000833 | XLOC_032339 | ENSRNOT00000066810 | 0.950108384  | 2.24E-06 |
| TUCP_000833 | XLOC_032339 | ENSRNOT00000090518 | 0.95748734   | 1.02E-06 |
| TUCP_000833 | XLOC_032339 | ENSRNOT00000043156 | 0.950159018  | 2.23E-06 |
| TUCP_000833 | XLOC_032339 | ENSRNOT00000012156 | 0.956960679  | 1.08E-06 |
| TUCP_000833 | XLOC_032339 | ENSRNOT00000049819 | 0.954920722  | 1.36E-06 |
| TUCP_000832 | XLOC_032339 | ENSRNOT00000031904 | 0.966605694  | 3.09E-07 |
| TUCP_000832 | XLOC_032339 | ENSRNOT00000027083 | 0.956151899  | 1.19E-06 |
| TUCP_000832 | XLOC_032339 | ENSRNOT00000021348 | 0.956835894  | 1.10E-06 |
| TUCP_000832 | XLOC_032339 | ENSRNOT00000017665 | 0.955806919  | 1.23E-06 |
| TUCP_000832 | XLOC_032339 | ENSRNOT00000023133 | 0.971916962  | 1.31E-07 |
| TUCP_000832 | XLOC_032339 | ENSRNOT00000003891 | 0.953838099  | 1.53E-06 |
| TUCP_000832 | XLOC_032339 | ENSRNOT00000073559 | 0.97269396   | 1.14E-07 |
| TUCP_000832 | XLOC_032339 | ENSRNOT00000001290 | 0.962082162  | 5.79E-07 |
| TUCP_000832 | XLOC_032339 | ENSRNOT00000023638 | 0.960034242  | 7.51E-07 |
| TUCP_000832 | XLOC_032339 | ENSRNOT00000005228 | 0.954799905  | 1.38E-06 |

|             |             |                     |              |          |
|-------------|-------------|---------------------|--------------|----------|
| TUCP_000832 | XLOC_032339 | ENSRNOT00000008677  | 0.95700894   | 1.08E-06 |
| TUCP_000832 | XLOC_032339 | ENSRNOT00000006175  | 0.961292993  | 6.41E-07 |
| TUCP_000832 | XLOC_032339 | ENSRNOT00000028628  | -0.955238824 | 1.31E-06 |
| TUCP_000832 | XLOC_032339 | ENSRNOT00000005220  | 0.960727335  | 6.89E-07 |
| TUCP_000832 | XLOC_032339 | ENSRNOT00000023144  | 0.96910054   | 2.11E-07 |
| TUCP_000832 | XLOC_032339 | ENSRNOT000000082869 | 0.951657627  | 1.92E-06 |
| TUCP_000832 | XLOC_032339 | ENSRNOT000000071166 | 0.960933893  | 6.71E-07 |
| TUCP_000832 | XLOC_032339 | ENSRNOT00000016649  | 0.971483852  | 1.42E-07 |
| TUCP_000832 | XLOC_032339 | ENSRNOT00000016975  | 0.959423843  | 8.09E-07 |
| TUCP_000832 | XLOC_032339 | ENSRNOT00000030850  | 0.962313472  | 5.62E-07 |
| TUCP_000832 | XLOC_032339 | ENSRNOT00000043216  | 0.950263421  | 2.20E-06 |
| TUCP_000832 | XLOC_032339 | ENSRNOT00000091128  | -0.950891889 | 2.07E-06 |
| TUCP_000832 | XLOC_032339 | ENSRNOT000000081981 | 0.957130617  | 1.06E-06 |
| TUCP_000832 | XLOC_032339 | ENSRNOT000000033017 | 0.983055891  | 1.07E-08 |
| TUCP_000832 | XLOC_032339 | ENSRNOT00000026543  | 0.970197339  | 1.76E-07 |
| TUCP_000832 | XLOC_032339 | ENSRNOT00000071971  | 0.959696754  | 7.83E-07 |
| TUCP_000832 | XLOC_032339 | ENSRNOT00000015006  | 0.951679548  | 1.91E-06 |
| TUCP_000832 | XLOC_032339 | ENSRNOT00000012187  | 0.972168305  | 1.26E-07 |
| TUCP_000832 | XLOC_032339 | ENSRNOT00000024969  | 0.959832146  | 7.70E-07 |
| TUCP_000832 | XLOC_032339 | ENSRNOT000000085251 | -0.961982375 | 5.87E-07 |
| TUCP_000832 | XLOC_032339 | ENSRNOT00000013049  | 0.981130298  | 1.83E-08 |
| TUCP_000832 | XLOC_032339 | ENSRNOT000000034609 | 0.951822049  | 1.88E-06 |
| TUCP_000832 | XLOC_032339 | ENSRNOT00000045285  | 0.960110213  | 7.44E-07 |
| TUCP_000832 | XLOC_032339 | ENSRNOT00000044742  | 0.969932214  | 1.84E-07 |
| TUCP_000832 | XLOC_032339 | ENSRNOT00000048754  | -0.951846414 | 1.88E-06 |
| TUCP_000832 | XLOC_032339 | ENSRNOT00000045699  | 0.958908788  | 8.61E-07 |
| TUCP_000832 | XLOC_032339 | ENSRNOT00000038247  | 0.95550322   | 1.27E-06 |
| TUCP_000832 | XLOC_032339 | ENSRNOT00000029439  | 0.96739806   | 2.75E-07 |
| TUCP_000832 | XLOC_032339 | ENSRNOT00000044628  | 0.960462165  | 7.12E-07 |
| TUCP_000832 | XLOC_032339 | ENSRNOT000000071764 | 0.964883262  | 3.96E-07 |
| TUCP_000832 | XLOC_032339 | ENSRNOT000000081906 | 0.950199992  | 2.22E-06 |
| TUCP_000832 | XLOC_032339 | ENSRNOT000000057160 | 0.951623393  | 1.92E-06 |
| TUCP_000832 | XLOC_032339 | ENSRNOT00000024402  | 0.953772077  | 1.54E-06 |
| TUCP_000832 | XLOC_032339 | ENSRNOT000000091319 | 0.962536131  | 5.46E-07 |
| TUCP_000832 | XLOC_032339 | ENSRNOT000000089933 | 0.95488466   | 1.36E-06 |
| TUCP_000832 | XLOC_032339 | ENSRNOT000000083876 | -0.951666785 | 1.91E-06 |
| TUCP_000832 | XLOC_032339 | ENSRNOT00000012671  | 0.952650753  | 1.73E-06 |
| TUCP_000832 | XLOC_032339 | ENSRNOT00000016947  | 0.955248763  | 1.31E-06 |
| TUCP_000832 | XLOC_032339 | ENSRNOT000000065168 | 0.984088449  | 7.82E-09 |
| TUCP_000832 | XLOC_032339 | ENSRNOT00000024266  | 0.960218386  | 7.34E-07 |
| TUCP_000832 | XLOC_032339 | ENSRNOT00000026718  | 0.955653261  | 1.25E-06 |
| TUCP_000832 | XLOC_032339 | ENSRNOT000000085228 | 0.976773991  | 5.12E-08 |
| TUCP_000832 | XLOC_032339 | ENSRNOT000000032780 | 0.954621948  | 1.40E-06 |
| TUCP_000832 | XLOC_032339 | ENSRNOT000000020134 | 0.986821311  | 3.06E-09 |
| TUCP_000832 | XLOC_032339 | ENSRNOT000000079866 | 0.960805811  | 6.82E-07 |
| TUCP_000832 | XLOC_032339 | ENSRNOT000000005839 | 0.958643636  | 8.89E-07 |
| TUCP_000832 | XLOC_032339 | ENSRNOT00000041513  | 0.955231641  | 1.31E-06 |
| TUCP_000832 | XLOC_032339 | ENSRNOT00000010381  | 0.952337965  | 1.79E-06 |
| TUCP_000832 | XLOC_032339 | ENSRNOT000000087592 | 0.952692545  | 1.72E-06 |
| TUCP_000832 | XLOC_032339 | ENSRNOT00000019820  | 0.953025286  | 1.66E-06 |
| TUCP_000832 | XLOC_032339 | ENSRNOT00000005958  | 0.963150513  | 5.03E-07 |



|             |             |                    |              |          |
|-------------|-------------|--------------------|--------------|----------|
| TUCP_000832 | XLOC_032339 | ENSRNOT0000002410  | 0.98069222   | 2.05E-08 |
| TUCP_000832 | XLOC_032339 | ENSRNOT00000008655 | 0.964123303  | 4.41E-07 |
| TUCP_000832 | XLOC_032339 | ENSRNOT00000045047 | 0.958301104  | 9.26E-07 |
| TUCP_000832 | XLOC_032339 | ENSRNOT00000091909 | 0.953701219  | 1.55E-06 |
| TUCP_000832 | XLOC_032339 | ENSRNOT00000075326 | 0.957870123  | 9.74E-07 |
| TUCP_000832 | XLOC_032339 | ENSRNOT00000025362 | -0.961429764 | 6.30E-07 |
| TUCP_000832 | XLOC_032339 | ENSRNOT00000010541 | 0.967339626  | 2.77E-07 |
| TUCP_000832 | XLOC_032339 | ENSRNOT00000017556 | 0.96370212   | 4.67E-07 |
| TUCP_000832 | XLOC_032339 | ENSRNOT00000012895 | 0.956839063  | 1.10E-06 |
| TUCP_000832 | XLOC_032339 | ENSRNOT00000000468 | 0.953336235  | 1.61E-06 |
| TUCP_000832 | XLOC_032339 | ENSRNOT00000023989 | 0.969965111  | 1.83E-07 |
| TUCP_000832 | XLOC_032339 | ENSRNOT00000012892 | 0.965676113  | 3.54E-07 |
| TUCP_000832 | XLOC_032339 | ENSRNOT00000020028 | 0.963450499  | 4.83E-07 |
| TUCP_000832 | XLOC_032339 | ENSRNOT00000090918 | 0.96131832   | 6.39E-07 |
| TUCP_000832 | XLOC_032339 | ENSRNOT00000000676 | 0.951033291  | 2.04E-06 |
| TUCP_000832 | XLOC_032339 | ENSRNOT00000083220 | 0.963905758  | 4.54E-07 |
| TUCP_000832 | XLOC_032339 | ENSRNOT00000028266 | 0.952871064  | 1.69E-06 |
| TUCP_000832 | XLOC_032339 | ENSRNOT00000015609 | 0.951915291  | 1.87E-06 |
| TUCP_000832 | XLOC_032339 | ENSRNOT00000019133 | 0.95637723   | 1.16E-06 |
| TUCP_000832 | XLOC_032339 | ENSRNOT00000065983 | 0.953363795  | 1.61E-06 |
| TUCP_000832 | XLOC_032339 | ENSRNOT00000052018 | 0.983661059  | 8.92E-09 |
| TUCP_000832 | XLOC_032339 | ENSRNOT00000010898 | 0.955960502  | 1.21E-06 |
| TUCP_000832 | XLOC_032339 | ENSRNOT00000047093 | 0.956690027  | 1.12E-06 |
| TUCP_000832 | XLOC_032339 | ENSRNOT00000078274 | 0.951931352  | 1.86E-06 |
| TUCP_000832 | XLOC_032339 | ENSRNOT00000050515 | 0.951573558  | 1.93E-06 |
| TUCP_000832 | XLOC_032339 | ENSRNOT00000021001 | 0.964680816  | 4.08E-07 |
| TUCP_000832 | XLOC_032339 | ENSRNOT00000048063 | 0.952011987  | 1.85E-06 |
| TUCP_000832 | XLOC_032339 | ENSRNOT00000052422 | 0.962168219  | 5.73E-07 |
| TUCP_000832 | XLOC_032339 | ENSRNOT00000086119 | -0.959386695 | 8.13E-07 |
| TUCP_000832 | XLOC_032339 | ENSRNOT00000033975 | 0.974827868  | 7.63E-08 |
| TUCP_000832 | XLOC_032339 | ENSRNOT00000078102 | 0.950367284  | 2.18E-06 |
| TUCP_000832 | XLOC_032339 | ENSRNOT00000009811 | 0.972692615  | 1.14E-07 |
| TUCP_000832 | XLOC_032339 | ENSRNOT00000090123 | 0.969776796  | 1.89E-07 |
| TUCP_000832 | XLOC_032339 | ENSRNOT00000081768 | 0.952002013  | 1.85E-06 |
| TUCP_000832 | XLOC_032339 | ENSRNOT00000020155 | 0.952991017  | 1.67E-06 |
| TUCP_000832 | XLOC_032339 | ENSRNOT00000088599 | 0.967297558  | 2.79E-07 |
| TUCP_000832 | XLOC_032339 | ENSRNOT00000081047 | 0.969434206  | 2.00E-07 |
| TUCP_000832 | XLOC_032339 | ENSRNOT00000081512 | 0.950651558  | 2.12E-06 |
| TUCP_000832 | XLOC_032339 | ENSRNOT00000014537 | 0.964581803  | 4.14E-07 |
| TUCP_000832 | XLOC_032339 | ENSRNOT00000077555 | 0.955746611  | 1.24E-06 |
| TUCP_000832 | XLOC_032339 | ENSRNOT00000023537 | -0.953542003 | 1.58E-06 |
| TUCP_000832 | XLOC_032339 | ENSRNOT00000017021 | 0.957769016  | 9.85E-07 |
| TUCP_000832 | XLOC_032339 | ENSRNOT00000021717 | 0.96117155   | 6.51E-07 |
| TUCP_000832 | XLOC_032339 | ENSRNOT00000003991 | 0.955355272  | 1.30E-06 |
| TUCP_000832 | XLOC_032339 | ENSRNOT00000021408 | 0.960778354  | 6.84E-07 |
| TUCP_000832 | XLOC_032339 | ENSRNOT00000087429 | 0.95943193   | 8.08E-07 |
| TUCP_000832 | XLOC_032339 | ENSRNOT00000009683 | 0.952467425  | 1.76E-06 |
| TUCP_000832 | XLOC_032339 | ENSRNOT00000060362 | 0.965828528  | 3.46E-07 |
| TUCP_000832 | XLOC_032339 | ENSRNOT00000084088 | 0.950332938  | 2.19E-06 |
| TUCP_000832 | XLOC_032339 | ENSRNOT00000017776 | 0.953457893  | 1.59E-06 |
| TUCP_000832 | XLOC_032339 | ENSRNOT00000027910 | 0.950798211  | 2.09E-06 |

|             |             |                    |              |          |
|-------------|-------------|--------------------|--------------|----------|
| TUCP_000832 | XLOC_032339 | ENSRNOT00000052224 | 0.973533224  | 9.78E-08 |
| TUCP_000832 | XLOC_032339 | ENSRNOT00000078070 | 0.960200281  | 7.36E-07 |
| TUCP_000832 | XLOC_032339 | ENSRNOT00000083214 | 0.96396047   | 4.51E-07 |
| TUCP_000832 | XLOC_032339 | ENSRNOT00000024322 | 0.968670783  | 2.26E-07 |
| TUCP_000832 | XLOC_032339 | ENSRNOT00000088182 | 0.951419953  | 1.96E-06 |
| TUCP_000832 | XLOC_032339 | ENSRNOT00000011408 | 0.953397223  | 1.60E-06 |
| TUCP_000832 | XLOC_032339 | ENSRNOT00000011270 | 0.950044215  | 2.25E-06 |
| TUCP_000832 | XLOC_032339 | ENSRNOT00000091265 | 0.974081791  | 8.82E-08 |
| TUCP_000832 | XLOC_032339 | ENSRNOT00000002443 | 0.951274877  | 1.99E-06 |
| TUCP_000832 | XLOC_032339 | ENSRNOT00000016191 | 0.966096468  | 3.33E-07 |
| TUCP_000832 | XLOC_032339 | ENSRNOT00000078390 | -0.952809213 | 1.70E-06 |
| TUCP_000832 | XLOC_032339 | ENSRNOT00000065501 | 0.964786935  | 4.02E-07 |
| TUCP_000832 | XLOC_032339 | ENSRNOT00000027454 | 0.955254298  | 1.31E-06 |
| TUCP_000832 | XLOC_032339 | ENSRNOT00000025832 | 0.950546328  | 2.14E-06 |
| TUCP_000832 | XLOC_032339 | ENSRNOT00000017181 | -0.956702634 | 1.11E-06 |
| TUCP_000832 | XLOC_032339 | ENSRNOT00000017753 | 0.965794599  | 3.48E-07 |
| TUCP_000832 | XLOC_032339 | ENSRNOT00000006499 | 0.962355464  | 5.59E-07 |
| TUCP_000832 | XLOC_032339 | ENSRNOT00000066739 | 0.957006601  | 1.08E-06 |
| TUCP_000832 | XLOC_032339 | ENSRNOT00000030445 | 0.953007473  | 1.67E-06 |
| TUCP_000832 | XLOC_032339 | ENSRNOT00000045882 | 0.952685297  | 1.72E-06 |
| TUCP_000832 | XLOC_032339 | ENSRNOT00000029833 | 0.950560521  | 2.14E-06 |
| TUCP_000832 | XLOC_032339 | ENSRNOT00000028057 | 0.951496376  | 1.95E-06 |
| TUCP_000832 | XLOC_032339 | ENSRNOT00000086122 | 0.959033208  | 8.48E-07 |
| TUCP_000832 | XLOC_032339 | ENSRNOT00000022074 | 0.968186447  | 2.43E-07 |
| TUCP_000832 | XLOC_032339 | ENSRNOT00000015520 | 0.971402585  | 1.44E-07 |
| TUCP_000832 | XLOC_032339 | ENSRNOT00000044174 | 0.96632672   | 3.22E-07 |
| TUCP_000832 | XLOC_032339 | ENSRNOT00000041365 | 0.952635572  | 1.73E-06 |
| TUCP_000832 | XLOC_032339 | ENSRNOT00000086577 | 0.955754227  | 1.24E-06 |
| TUCP_000832 | XLOC_032339 | ENSRNOT00000025075 | 0.971205155  | 1.49E-07 |
| TUCP_000832 | XLOC_032339 | ENSRNOT00000019886 | 0.957452109  | 1.02E-06 |
| TUCP_000832 | XLOC_032339 | ENSRNOT00000058842 | 0.952240514  | 1.81E-06 |
| TUCP_000832 | XLOC_032339 | ENSRNOT00000000157 | 0.951623215  | 1.92E-06 |
| TUCP_000832 | XLOC_032339 | ENSRNOT00000077231 | 0.959216932  | 8.30E-07 |
| TUCP_000832 | XLOC_032339 | ENSRNOT00000083093 | 0.958496963  | 9.04E-07 |
| TUCP_000832 | XLOC_032339 | ENSRNOT00000047192 | -0.977776244 | 4.11E-08 |
| TUCP_000832 | XLOC_032339 | ENSRNOT00000084422 | 0.954520743  | 1.42E-06 |
| TUCP_000832 | XLOC_032339 | ENSRNOT00000043872 | 0.953207622  | 1.63E-06 |
| TUCP_000832 | XLOC_032339 | ENSRNOT00000021471 | -0.950321213 | 2.19E-06 |
| TUCP_000832 | XLOC_032339 | ENSRNOT00000080443 | 0.959744835  | 7.78E-07 |
| TUCP_000832 | XLOC_032339 | ENSRNOT00000041096 | 0.954085504  | 1.49E-06 |
| TUCP_000832 | XLOC_032339 | ENSRNOT00000046323 | 0.958232132  | 9.33E-07 |
| TUCP_000832 | XLOC_032339 | ENSRNOT00000080608 | 0.960698679  | 6.91E-07 |
| TUCP_000832 | XLOC_032339 | ENSRNOT00000077406 | 0.961333915  | 6.38E-07 |
| TUCP_000832 | XLOC_032339 | ENSRNOT00000027970 | 0.964486662  | 4.19E-07 |
| TUCP_000832 | XLOC_032339 | ENSRNOT00000010748 | 0.965566968  | 3.60E-07 |
| TUCP_000832 | XLOC_032339 | ENSRNOT00000026915 | 0.96346847   | 4.82E-07 |
| TUCP_000832 | XLOC_032339 | ENSRNOT00000011052 | 0.955424797  | 1.29E-06 |
| TUCP_000832 | XLOC_032339 | ENSRNOT00000005478 | -0.951828961 | 1.88E-06 |
| TUCP_000832 | XLOC_032339 | ENSRNOT00000083127 | 0.961265111  | 6.43E-07 |
| TUCP_000832 | XLOC_032339 | ENSRNOT00000066370 | 0.952450626  | 1.77E-06 |
| TUCP_000832 | XLOC_032339 | ENSRNOT00000035474 | 0.965230074  | 3.78E-07 |

|             |             |                    |              |          |
|-------------|-------------|--------------------|--------------|----------|
| TUCP_000832 | XLOC_032339 | ENSRNOT00000039341 | 0.95374929   | 1.54E-06 |
| TUCP_000832 | XLOC_032339 | ENSRNOT00000061392 | 0.981308719  | 1.74E-08 |
| TUCP_000832 | XLOC_032339 | ENSRNOT00000076872 | 0.960249769  | 7.31E-07 |
| TUCP_000832 | XLOC_032339 | ENSRNOT00000014124 | 0.964563492  | 4.15E-07 |
| TUCP_000832 | XLOC_032339 | ENSRNOT00000029125 | 0.952926191  | 1.68E-06 |
| TUCP_000832 | XLOC_032339 | ENSRNOT00000060696 | 0.981396222  | 1.70E-08 |
| TUCP_000832 | XLOC_032339 | ENSRNOT00000042125 | 0.969706335  | 1.91E-07 |
| TUCP_000832 | XLOC_032339 | ENSRNOT00000009900 | -0.953630107 | 1.56E-06 |
| TUCP_000832 | XLOC_032339 | ENSRNOT00000045735 | 0.950657573  | 2.12E-06 |
| TUCP_000832 | XLOC_032339 | ENSRNOT00000064798 | 0.966189358  | 3.29E-07 |
| TUCP_000832 | XLOC_032339 | ENSRNOT00000080207 | 0.960829027  | 6.80E-07 |
| TUCP_000832 | XLOC_032339 | ENSRNOT00000026280 | 0.965710456  | 3.52E-07 |
| TUCP_000832 | XLOC_032339 | ENSRNOT00000033235 | 0.961165449  | 6.52E-07 |
| TUCP_000832 | XLOC_032339 | ENSRNOT00000005387 | 0.959783112  | 7.74E-07 |
| TUCP_000832 | XLOC_032339 | ENSRNOT00000027452 | 0.966523112  | 3.13E-07 |
| TUCP_000832 | XLOC_032339 | ENSRNOT00000022863 | 0.956466915  | 1.14E-06 |
| TUCP_000832 | XLOC_032339 | ENSRNOT00000043535 | 0.959151924  | 8.36E-07 |
| TUCP_000832 | XLOC_032339 | ENSRNOT00000040393 | 0.952795336  | 1.70E-06 |
| TUCP_000832 | XLOC_032339 | ENSRNOT00000026457 | 0.95140855   | 1.97E-06 |
| TUCP_000832 | XLOC_032339 | ENSRNOT00000004463 | 0.951377792  | 1.97E-06 |
| TUCP_000832 | XLOC_032339 | ENSRNOT00000023428 | 0.962001757  | 5.85E-07 |
| TUCP_000832 | XLOC_032339 | ENSRNOT00000011041 | 0.957899273  | 9.70E-07 |
| TUCP_000832 | XLOC_032339 | ENSRNOT00000064700 | 0.955290792  | 1.30E-06 |
| TUCP_000832 | XLOC_032339 | ENSRNOT00000037800 | 0.950170874  | 2.22E-06 |
| TUCP_000832 | XLOC_032339 | ENSRNOT00000022796 | 0.9615656    | 6.19E-07 |
| TUCP_000832 | XLOC_032339 | ENSRNOT00000080110 | 0.950713628  | 2.11E-06 |
| TUCP_000832 | XLOC_032339 | ENSRNOT00000083957 | 0.962628019  | 5.39E-07 |
| TUCP_000832 | XLOC_032339 | ENSRNOT00000015799 | 0.986090873  | 4.01E-09 |
| TUCP_000832 | XLOC_032339 | ENSRNOT00000044608 | -0.956517564 | 1.14E-06 |
| TUCP_000832 | XLOC_032339 | ENSRNOT00000083799 | 0.964789973  | 4.02E-07 |
| TUCP_000832 | XLOC_032339 | ENSRNOT00000024548 | 0.95764978   | 9.99E-07 |
| TUCP_000832 | XLOC_032339 | ENSRNOT00000048020 | 0.950915137  | 2.07E-06 |
| TUCP_000835 | XLOC_032384 | ENSRNOT00000001579 | -0.957877134 | 9.73E-07 |
| TUCP_000835 | XLOC_032384 | ENSRNOT00000031963 | 0.950102626  | 2.24E-06 |
| TUCP_000835 | XLOC_032384 | ENSRNOT00000004609 | 0.964650384  | 4.10E-07 |
| TUCP_000835 | XLOC_032384 | ENSRNOT00000027630 | 0.959909968  | 7.62E-07 |
| TUCP_000835 | XLOC_032384 | ENSRNOT00000009100 | 0.958798405  | 8.72E-07 |
| TUCP_000835 | XLOC_032384 | ENSRNOT00000084912 | 0.969611624  | 1.94E-07 |
| TUCP_000835 | XLOC_032384 | ENSRNOT00000034157 | 0.962843881  | 5.24E-07 |
| TUCP_000835 | XLOC_032384 | ENSRNOT00000016499 | 0.952505747  | 1.76E-06 |
| TUCP_000835 | XLOC_032384 | ENSRNOT00000045049 | 0.95013033   | 2.23E-06 |
| TUCP_000834 | XLOC_032339 | ENSRNOT00000036143 | 0.951981391  | 1.85E-06 |
| TUCP_000834 | XLOC_032339 | ENSRNOT00000060035 | 0.977044465  | 4.83E-08 |
| TUCP_000834 | XLOC_032339 | ENSRNOT00000082691 | 0.954124482  | 1.48E-06 |
| TUCP_000834 | XLOC_032339 | ENSRNOT00000063956 | 0.952637466  | 1.73E-06 |
| TUCP_000834 | XLOC_032339 | ENSRNOT00000036061 | 0.95649755   | 1.14E-06 |
| TUCP_000834 | XLOC_032339 | ENSRNOT00000017373 | 0.960747178  | 6.87E-07 |
| TUCP_000834 | XLOC_032339 | ENSRNOT00000038431 | 0.956756032  | 1.11E-06 |
| TUCP_000834 | XLOC_032339 | ENSRNOT00000060811 | 0.952402567  | 1.78E-06 |
| TUCP_000834 | XLOC_032339 | ENSRNOT00000038912 | 0.953321728  | 1.61E-06 |
| TUCP_000834 | XLOC_032339 | ENSRNOT00000067489 | 0.969923152  | 1.84E-07 |

|             |             |                     |              |          |
|-------------|-------------|---------------------|--------------|----------|
| TUCP_000834 | XLOC_032339 | ENSRNOT00000027275  | 0.951582283  | 1.93E-06 |
| TUCP_000834 | XLOC_032339 | ENSRNOT00000013093  | -0.96181507  | 6.00E-07 |
| TUCP_002159 | XLOC_090256 | ENSRNOT00000073559  | 0.973460794  | 9.92E-08 |
| TUCP_002159 | XLOC_090256 | ENSRNOT00000027407  | 0.971144714  | 1.50E-07 |
| TUCP_002159 | XLOC_090256 | ENSRNOT00000013743  | 0.9764419    | 5.49E-08 |
| TUCP_002159 | XLOC_090256 | ENSRNOT00000075714  | 0.950583018  | 2.14E-06 |
| TUCP_002159 | XLOC_090256 | ENSRNOT00000087062  | 0.956221465  | 1.18E-06 |
| TUCP_002159 | XLOC_090256 | ENSRNOT00000012052  | 0.952698644  | 1.72E-06 |
| TUCP_002159 | XLOC_090256 | ENSRNOT00000008677  | 0.950969492  | 2.05E-06 |
| TUCP_002159 | XLOC_090256 | ENSRNOT00000017361  | 0.968347822  | 2.37E-07 |
| TUCP_002159 | XLOC_090256 | ENSRNOT00000086706  | 0.966252306  | 3.26E-07 |
| TUCP_002159 | XLOC_090256 | ENSRNOT00000071166  | 0.959291506  | 8.22E-07 |
| TUCP_002159 | XLOC_090256 | ENSRNOT00000004017  | 0.983725436  | 8.75E-09 |
| TUCP_002159 | XLOC_090256 | ENSRNOT00000021114  | 0.956429748  | 1.15E-06 |
| TUCP_002159 | XLOC_090256 | ENSRNOT00000086310  | -0.955068654 | 1.34E-06 |
| TUCP_002159 | XLOC_090256 | ENSRNOT00000090342  | 0.959937049  | 7.60E-07 |
| TUCP_002159 | XLOC_090256 | ENSRNOT00000028856  | 0.955417903  | 1.29E-06 |
| TUCP_002159 | XLOC_090256 | ENSRNOT00000030850  | 0.978963483  | 3.13E-08 |
| TUCP_002159 | XLOC_090256 | ENSRNOT00000001586  | -0.959991608 | 7.55E-07 |
| TUCP_002159 | XLOC_090256 | ENSRNOT00000001289  | 0.964943444  | 3.93E-07 |
| TUCP_002159 | XLOC_090256 | ENSRNOT00000009496  | 0.953740075  | 1.54E-06 |
| TUCP_002159 | XLOC_090256 | ENSRNOT00000029332  | -0.959670886 | 7.85E-07 |
| TUCP_002159 | XLOC_090256 | ENSRNOT00000044742  | 0.960176082  | 7.38E-07 |
| TUCP_002159 | XLOC_090256 | ENSRNOT00000081786  | -0.959437603 | 8.08E-07 |
| TUCP_002159 | XLOC_090256 | ENSRNOT00000071971  | 0.968301242  | 2.39E-07 |
| TUCP_002159 | XLOC_090256 | ENSRNOT00000040847  | -0.950141669 | 2.23E-06 |
| TUCP_002159 | XLOC_090256 | ENSRNOT00000015006  | 0.967827982  | 2.57E-07 |
| TUCP_002159 | XLOC_090256 | ENSRNOT00000014479  | -0.951209225 | 2.01E-06 |
| TUCP_002159 | XLOC_090256 | ENSRNOT00000010083  | 0.958749911  | 8.78E-07 |
| TUCP_002159 | XLOC_090256 | ENSRNOT000000061005 | 0.954278073  | 1.46E-06 |
| TUCP_002159 | XLOC_090256 | ENSRNOT00000072771  | 0.957016503  | 1.07E-06 |
| TUCP_002159 | XLOC_090256 | ENSRNOT00000073370  | 0.950236566  | 2.21E-06 |
| TUCP_002159 | XLOC_090256 | ENSRNOT00000074683  | 0.956522342  | 1.14E-06 |
| TUCP_002159 | XLOC_090256 | ENSRNOT00000021453  | 0.956740927  | 1.11E-06 |
| TUCP_002159 | XLOC_090256 | ENSRNOT00000045699  | 0.951772093  | 1.89E-06 |
| TUCP_002159 | XLOC_090256 | ENSRNOT00000084709  | 0.953226225  | 1.63E-06 |
| TUCP_002159 | XLOC_090256 | ENSRNOT00000035320  | -0.955439639 | 1.28E-06 |
| TUCP_002159 | XLOC_090256 | ENSRNOT00000045047  | 0.950258658  | 2.21E-06 |
| TUCP_002159 | XLOC_090256 | ENSRNOT0000004007   | -0.952927437 | 1.68E-06 |
| TUCP_002159 | XLOC_090256 | ENSRNOT0000007821   | 0.967003151  | 2.91E-07 |
| TUCP_002159 | XLOC_090256 | ENSRNOT00000077908  | 0.95164135   | 1.92E-06 |
| TUCP_002159 | XLOC_090256 | ENSRNOT00000090461  | 0.951440239  | 1.96E-06 |
| TUCP_002159 | XLOC_090256 | ENSRNOT00000009811  | 0.960968504  | 6.68E-07 |
| TUCP_002159 | XLOC_090256 | ENSRNOT00000065168  | 0.952301753  | 1.79E-06 |
| TUCP_002159 | XLOC_090256 | ENSRNOT00000026398  | -0.95022538  | 2.21E-06 |
| TUCP_002159 | XLOC_090256 | ENSRNOT00000067554  | 0.958039842  | 9.55E-07 |
| TUCP_002159 | XLOC_090256 | ENSRNOT00000085228  | 0.966228931  | 3.27E-07 |
| TUCP_002159 | XLOC_090256 | ENSRNOT00000010784  | 0.976717661  | 5.18E-08 |
| TUCP_002159 | XLOC_090256 | ENSRNOT00000010783  | -0.95550855  | 1.27E-06 |
| TUCP_002159 | XLOC_090256 | ENSRNOT00000017319  | 0.955412823  | 1.29E-06 |
| TUCP_002159 | XLOC_090256 | ENSRNOT00000015188  | 0.965874029  | 3.44E-07 |

|             |             |                     |              |          |
|-------------|-------------|---------------------|--------------|----------|
| TUCP_002159 | XLOC_090256 | ENSRNOT00000033677  | -0.951649839 | 1.92E-06 |
| TUCP_002159 | XLOC_090256 | ENSRNOT00000086065  | 0.967719083  | 2.61E-07 |
| TUCP_002159 | XLOC_090256 | ENSRNOT00000079866  | 0.957533282  | 1.01E-06 |
| TUCP_002159 | XLOC_090256 | ENSRNOT0000005839   | 0.976700805  | 5.20E-08 |
| TUCP_002159 | XLOC_090256 | ENSRNOT00000040629  | 0.952243185  | 1.81E-06 |
| TUCP_002159 | XLOC_090256 | ENSRNOT00000072196  | 0.958453943  | 9.09E-07 |
| TUCP_002159 | XLOC_090256 | ENSRNOT00000017486  | 0.951618922  | 1.92E-06 |
| TUCP_002159 | XLOC_090256 | ENSRNOT00000019820  | 0.972139284  | 1.26E-07 |
| TUCP_002159 | XLOC_090256 | ENSRNOT00000061392  | 0.961461935  | 6.27E-07 |
| TUCP_002159 | XLOC_090256 | ENSRNOT00000012364  | -0.954469181 | 1.43E-06 |
| TUCP_002159 | XLOC_090256 | ENSRNOT00000002410  | 0.977261317  | 4.61E-08 |
| TUCP_002159 | XLOC_090256 | ENSRNOT00000027012  | 0.967987799  | 2.51E-07 |
| TUCP_002159 | XLOC_090256 | ENSRNOT00000052002  | 0.961761058  | 6.04E-07 |
| TUCP_002159 | XLOC_090256 | ENSRNOT000000021744 | -0.959714051 | 7.81E-07 |
| TUCP_002159 | XLOC_090256 | ENSRNOT000000021037 | 0.960944503  | 6.70E-07 |
| TUCP_002159 | XLOC_090256 | ENSRNOT00000083968  | -0.955192565 | 1.32E-06 |
| TUCP_002159 | XLOC_090256 | ENSRNOT00000026831  | 0.961138512  | 6.54E-07 |
| TUCP_002159 | XLOC_090256 | ENSRNOT00000073991  | 0.956912643  | 1.09E-06 |
| TUCP_002159 | XLOC_090256 | ENSRNOT00000017556  | 0.957767449  | 9.86E-07 |
| TUCP_002159 | XLOC_090256 | ENSRNOT00000091637  | 0.960090505  | 7.46E-07 |
| TUCP_002159 | XLOC_090256 | ENSRNOT00000009156  | 0.964186294  | 4.37E-07 |
| TUCP_002159 | XLOC_090256 | ENSRNOT00000026481  | 0.957249153  | 1.05E-06 |
| TUCP_002159 | XLOC_090256 | ENSRNOT00000000468  | 0.951557123  | 1.94E-06 |
| TUCP_002159 | XLOC_090256 | ENSRNOT00000044562  | 0.956719571  | 1.11E-06 |
| TUCP_002159 | XLOC_090256 | ENSRNOT000000021802 | 0.950455104  | 2.16E-06 |
| TUCP_002159 | XLOC_090256 | ENSRNOT00000012892  | 0.981997302  | 1.44E-08 |
| TUCP_002159 | XLOC_090256 | ENSRNOT00000020028  | 0.964474821  | 4.20E-07 |
| TUCP_002159 | XLOC_090256 | ENSRNOT00000061304  | -0.956331644 | 1.16E-06 |
| TUCP_002159 | XLOC_090256 | ENSRNOT00000077231  | 0.966368691  | 3.20E-07 |
| TUCP_002159 | XLOC_090256 | ENSRNOT00000028266  | 0.959240195  | 8.27E-07 |
| TUCP_002159 | XLOC_090256 | ENSRNOT00000080124  | 0.959267693  | 8.25E-07 |
| TUCP_002159 | XLOC_090256 | ENSRNOT00000072357  | -0.952498518 | 1.76E-06 |
| TUCP_002159 | XLOC_090256 | ENSRNOT00000016132  | -0.958090119 | 9.49E-07 |
| TUCP_002159 | XLOC_090256 | ENSRNOT00000016321  | -0.951162209 | 2.02E-06 |
| TUCP_002159 | XLOC_090256 | ENSRNOT00000019133  | 0.950272225  | 2.20E-06 |
| TUCP_002159 | XLOC_090256 | ENSRNOT00000087583  | 0.974151172  | 8.70E-08 |
| TUCP_002159 | XLOC_090256 | ENSRNOT00000078187  | 0.951895744  | 1.87E-06 |
| TUCP_002159 | XLOC_090256 | ENSRNOT00000002151  | -0.950725681 | 2.11E-06 |
| TUCP_002159 | XLOC_090256 | ENSRNOT00000018122  | 0.973894803  | 9.14E-08 |
| TUCP_002159 | XLOC_090256 | ENSRNOT00000014454  | 0.95367943   | 1.55E-06 |
| TUCP_002159 | XLOC_090256 | ENSRNOT00000010224  | 0.972816173  | 1.12E-07 |
| TUCP_002159 | XLOC_090256 | ENSRNOT00000016637  | -0.952462243 | 1.76E-06 |
| TUCP_002159 | XLOC_090256 | ENSRNOT00000052422  | 0.965983037  | 3.39E-07 |
| TUCP_002159 | XLOC_090256 | ENSRNOT00000064798  | 0.954180205  | 1.47E-06 |
| TUCP_002159 | XLOC_090256 | ENSRNOT00000078741  | 0.951070779  | 2.03E-06 |
| TUCP_002159 | XLOC_090256 | ENSRNOT00000068381  | 0.976933822  | 4.95E-08 |
| TUCP_002159 | XLOC_090256 | ENSRNOT00000019531  | -0.952522408 | 1.75E-06 |
| TUCP_002159 | XLOC_090256 | ENSRNOT00000064588  | 0.954074881  | 1.49E-06 |
| TUCP_002159 | XLOC_090256 | ENSRNOT00000026633  | 0.956214961  | 1.18E-06 |
| TUCP_002159 | XLOC_090256 | ENSRNOT00000020155  | 0.956651039  | 1.12E-06 |
| TUCP_002159 | XLOC_090256 | ENSRNOT00000025827  | 0.96192494   | 5.91E-07 |

|             |             |                     |              |          |
|-------------|-------------|---------------------|--------------|----------|
| TUCP_002159 | XLOC_090256 | ENSRNOT00000015769  | 0.973681037  | 9.52E-08 |
| TUCP_002159 | XLOC_090256 | ENSRNOT00000014537  | 0.95832616   | 9.23E-07 |
| TUCP_002159 | XLOC_090256 | ENSRNOT00000077555  | 0.950625539  | 2.13E-06 |
| TUCP_002159 | XLOC_090256 | ENSRNOT00000011880  | 0.964642515  | 4.10E-07 |
| TUCP_002159 | XLOC_090256 | ENSRNOT00000005486  | -0.964834877 | 3.99E-07 |
| TUCP_002159 | XLOC_090256 | ENSRNOT00000023989  | 0.970502159  | 1.67E-07 |
| TUCP_002159 | XLOC_090256 | ENSRNOT00000021717  | 0.974103115  | 8.78E-08 |
| TUCP_002159 | XLOC_090256 | ENSRNOT00000049423  | -0.969512493 | 1.97E-07 |
| TUCP_002159 | XLOC_090256 | ENSRNOT00000019502  | 0.954900778  | 1.36E-06 |
| TUCP_002159 | XLOC_090256 | ENSRNOT000000050515 | 0.963907638  | 4.54E-07 |
| TUCP_002159 | XLOC_090256 | ENSRNOT00000023477  | 0.961948249  | 5.89E-07 |
| TUCP_002159 | XLOC_090256 | ENSRNOT00000081725  | 0.957518922  | 1.01E-06 |
| TUCP_002159 | XLOC_090256 | ENSRNOT00000089980  | -0.963969825 | 4.50E-07 |
| TUCP_002159 | XLOC_090256 | ENSRNOT00000005459  | 0.956872516  | 1.09E-06 |
| TUCP_002159 | XLOC_090256 | ENSRNOT00000078073  | -0.980836938 | 1.97E-08 |
| TUCP_002159 | XLOC_090256 | ENSRNOT0000002771   | 0.954889983  | 1.36E-06 |
| TUCP_002159 | XLOC_090256 | ENSRNOT00000046745  | 0.95834966   | 9.20E-07 |
| TUCP_002159 | XLOC_090256 | ENSRNOT000000055607 | -0.960795218 | 6.83E-07 |
| TUCP_002159 | XLOC_090256 | ENSRNOT00000087502  | 0.953289004  | 1.62E-06 |
| TUCP_002159 | XLOC_090256 | ENSRNOT00000024322  | 0.958164122  | 9.41E-07 |
| TUCP_002159 | XLOC_090256 | ENSRNOT00000041106  | 0.967450707  | 2.72E-07 |
| TUCP_002159 | XLOC_090256 | ENSRNOT00000011408  | 0.954514177  | 1.42E-06 |
| TUCP_002159 | XLOC_090256 | ENSRNOT00000000577  | 0.958745524  | 8.78E-07 |
| TUCP_002159 | XLOC_090256 | ENSRNOT00000010463  | 0.959361171  | 8.15E-07 |
| TUCP_002159 | XLOC_090256 | ENSRNOT00000023876  | 0.968708132  | 2.24E-07 |
| TUCP_002159 | XLOC_090256 | ENSRNOT00000021944  | 0.954065119  | 1.49E-06 |
| TUCP_002159 | XLOC_090256 | ENSRNOT00000008427  | -0.953659707 | 1.56E-06 |
| TUCP_002159 | XLOC_090256 | ENSRNOT00000000013  | 0.958626318  | 8.91E-07 |
| TUCP_002159 | XLOC_090256 | ENSRNOT00000028888  | 0.97081813   | 1.59E-07 |
| TUCP_002159 | XLOC_090256 | ENSRNOT00000020005  | 0.950653364  | 2.12E-06 |
| TUCP_002159 | XLOC_090256 | ENSRNOT0000002109   | 0.975361184  | 6.86E-08 |
| TUCP_002159 | XLOC_090256 | ENSRNOT00000006499  | 0.954119442  | 1.48E-06 |
| TUCP_002159 | XLOC_090256 | ENSRNOT00000024119  | 0.965668522  | 3.55E-07 |
| TUCP_002159 | XLOC_090256 | ENSRNOT00000029833  | 0.956657942  | 1.12E-06 |
| TUCP_002159 | XLOC_090256 | ENSRNOT00000035277  | 0.960439591  | 7.14E-07 |
| TUCP_002159 | XLOC_090256 | ENSRNOT00000000728  | -0.953837663 | 1.53E-06 |
| TUCP_002159 | XLOC_090256 | ENSRNOT00000086122  | 0.96020361   | 7.35E-07 |
| TUCP_002159 | XLOC_090256 | ENSRNOT00000022074  | 0.957737274  | 9.89E-07 |
| TUCP_002159 | XLOC_090256 | ENSRNOT00000026231  | 0.954229527  | 1.46E-06 |
| TUCP_002159 | XLOC_090256 | ENSRNOT00000078161  | -0.952539665 | 1.75E-06 |
| TUCP_002159 | XLOC_090256 | ENSRNOT00000004999  | 0.950105174  | 2.24E-06 |
| TUCP_002159 | XLOC_090256 | ENSRNOT00000026312  | 0.955011845  | 1.35E-06 |
| TUCP_002159 | XLOC_090256 | ENSRNOT00000041365  | 0.975178806  | 7.12E-08 |
| TUCP_002159 | XLOC_090256 | ENSRNOT00000021803  | -0.956038046 | 1.20E-06 |
| TUCP_002159 | XLOC_090256 | ENSRNOT00000008337  | 0.951362319  | 1.98E-06 |
| TUCP_002159 | XLOC_090256 | ENSRNOT00000043752  | -0.951395237 | 1.97E-06 |
| TUCP_002159 | XLOC_090256 | ENSRNOT00000023979  | 0.960005685  | 7.53E-07 |
| TUCP_002159 | XLOC_090256 | ENSRNOT00000040540  | 0.961553996  | 6.20E-07 |
| TUCP_002159 | XLOC_090256 | ENSRNOT00000037246  | 0.968905128  | 2.17E-07 |
| TUCP_002159 | XLOC_090256 | ENSRNOT00000034411  | 0.970787735  | 1.60E-07 |
| TUCP_002159 | XLOC_090256 | ENSRNOT00000059181  | 0.960451901  | 7.13E-07 |

|             |             |                    |              |          |
|-------------|-------------|--------------------|--------------|----------|
| TUCP_002159 | XLOC_090256 | ENSRNOT00000027666 | 0.963074264  | 5.08E-07 |
| TUCP_002159 | XLOC_090256 | ENSRNOT00000072518 | 0.963037134  | 5.11E-07 |
| TUCP_002159 | XLOC_090256 | ENSRNOT00000003690 | 0.953681936  | 1.55E-06 |
| TUCP_002159 | XLOC_090256 | ENSRNOT00000063951 | 0.960181784  | 7.37E-07 |
| TUCP_002159 | XLOC_090256 | ENSRNOT00000085619 | 0.95142221   | 1.96E-06 |
| TUCP_002159 | XLOC_090256 | ENSRNOT00000058111 | -0.951478547 | 1.95E-06 |
| TUCP_002159 | XLOC_090256 | ENSRNOT00000082245 | 0.95334356   | 1.61E-06 |
| TUCP_002159 | XLOC_090256 | ENSRNOT00000008901 | -0.954377856 | 1.44E-06 |
| TUCP_002159 | XLOC_090256 | ENSRNOT00000019487 | 0.950870817  | 2.08E-06 |
| TUCP_002159 | XLOC_090256 | ENSRNOT00000017761 | 0.959104703  | 8.41E-07 |
| TUCP_002159 | XLOC_090256 | ENSRNOT00000054828 | 0.965874504  | 3.44E-07 |
| TUCP_002159 | XLOC_090256 | ENSRNOT00000080443 | 0.978591874  | 3.42E-08 |
| TUCP_002159 | XLOC_090256 | ENSRNOT00000015898 | 0.982595701  | 1.22E-08 |
| TUCP_002159 | XLOC_090256 | ENSRNOT00000046323 | 0.960877301  | 6.76E-07 |
| TUCP_002159 | XLOC_090256 | ENSRNOT00000080608 | 0.967543753  | 2.69E-07 |
| TUCP_002159 | XLOC_090256 | ENSRNOT00000027970 | 0.955197755  | 1.32E-06 |
| TUCP_002159 | XLOC_090256 | ENSRNOT00000010748 | 0.968591298  | 2.28E-07 |
| TUCP_002159 | XLOC_090256 | ENSRNOT00000005405 | 0.978574312  | 3.43E-08 |
| TUCP_002159 | XLOC_090256 | ENSRNOT00000009462 | 0.958636813  | 8.89E-07 |
| TUCP_002159 | XLOC_090256 | ENSRNOT00000058563 | 0.979374057  | 2.84E-08 |
| TUCP_002159 | XLOC_090256 | ENSRNOT00000035474 | 0.957637454  | 1.00E-06 |
| TUCP_002159 | XLOC_090256 | ENSRNOT00000039341 | 0.950495461  | 2.15E-06 |
| TUCP_002159 | XLOC_090256 | ENSRNOT00000084422 | 0.961920606  | 5.91E-07 |
| TUCP_002159 | XLOC_090256 | ENSRNOT00000004172 | 0.963603054  | 4.73E-07 |
| TUCP_002159 | XLOC_090256 | ENSRNOT00000078994 | 0.978114876  | 3.81E-08 |
| TUCP_002159 | XLOC_090256 | ENSRNOT00000014124 | 0.970313587  | 1.73E-07 |
| TUCP_002159 | XLOC_090256 | ENSRNOT00000040476 | 0.95770394   | 9.93E-07 |
| TUCP_002159 | XLOC_090256 | ENSRNOT00000013632 | 0.960269609  | 7.29E-07 |
| TUCP_002159 | XLOC_090256 | ENSRNOT00000010983 | 0.9617273    | 6.06E-07 |
| TUCP_002159 | XLOC_090256 | ENSRNOT00000091488 | 0.956866146  | 1.09E-06 |
| TUCP_002159 | XLOC_090256 | ENSRNOT00000085279 | 0.966232547  | 3.27E-07 |
| TUCP_002159 | XLOC_090256 | ENSRNOT00000007276 | -0.956264203 | 1.17E-06 |
| TUCP_002159 | XLOC_090256 | ENSRNOT00000055442 | 0.961298999  | 6.41E-07 |
| TUCP_002159 | XLOC_090256 | ENSRNOT00000019172 | -0.954319161 | 1.45E-06 |
| TUCP_002159 | XLOC_090256 | ENSRNOT00000061432 | 0.975436951  | 6.76E-08 |
| TUCP_002159 | XLOC_090256 | ENSRNOT00000015799 | 0.95166512   | 1.92E-06 |
| TUCP_002159 | XLOC_090256 | ENSRNOT00000026280 | 0.962272511  | 5.65E-07 |
| TUCP_002159 | XLOC_090256 | ENSRNOT00000033235 | 0.955814086  | 1.23E-06 |
| TUCP_002159 | XLOC_090256 | ENSRNOT00000021216 | 0.959250316  | 8.26E-07 |
| TUCP_002159 | XLOC_090256 | ENSRNOT00000063917 | -0.972852455 | 1.11E-07 |
| TUCP_002159 | XLOC_090256 | ENSRNOT00000017776 | 0.960714075  | 6.90E-07 |
| TUCP_002159 | XLOC_090256 | ENSRNOT00000017165 | -0.974672941 | 7.87E-08 |
| TUCP_002159 | XLOC_090256 | ENSRNOT00000013985 | 0.951869995  | 1.88E-06 |
| TUCP_002159 | XLOC_090256 | ENSRNOT00000004463 | 0.953120702  | 1.65E-06 |
| TUCP_002159 | XLOC_090256 | ENSRNOT00000044009 | 0.961956479  | 5.89E-07 |
| TUCP_002159 | XLOC_090256 | ENSRNOT00000064700 | 0.972731784  | 1.13E-07 |
| TUCP_002159 | XLOC_090256 | ENSRNOT00000025887 | -0.95473319  | 1.39E-06 |
| TUCP_002159 | XLOC_090256 | ENSRNOT00000024011 | 0.95368981   | 1.55E-06 |
| TUCP_002159 | XLOC_090256 | ENSRNOT00000061580 | -0.95712675  | 1.06E-06 |
| TUCP_002159 | XLOC_090256 | ENSRNOT00000017687 | -0.966622974 | 3.08E-07 |
| TUCP_002159 | XLOC_090256 | ENSRNOT00000031401 | -0.95658703  | 1.13E-06 |

|             |             |                    |              |          |
|-------------|-------------|--------------------|--------------|----------|
| TUCP_002159 | XLOC_090256 | ENSRNOT00000036931 | -0.952744914 | 1.71E-06 |
| TUCP_002159 | XLOC_090256 | ENSRNOT00000001607 | 0.962712829  | 5.33E-07 |
| TUCP_000839 | XLOC_032453 | ENSRNOT00000022290 | 0.967333965  | 2.77E-07 |
| TUCP_000839 | XLOC_032453 | ENSRNOT00000066419 | 0.95878113   | 8.74E-07 |
| TUCP_000839 | XLOC_032453 | ENSRNOT00000001092 | 0.952292167  | 1.80E-06 |
| TUCP_000839 | XLOC_032453 | ENSRNOT00000007963 | -0.952581709 | 1.74E-06 |
| TUCP_000839 | XLOC_032453 | ENSRNOT00000011864 | -0.953592909 | 1.57E-06 |
| TUCP_000839 | XLOC_032453 | ENSRNOT00000089377 | 0.966670668  | 3.06E-07 |
| TUCP_000574 | XLOC_020459 | ENSRNOT00000001810 | 0.954569831  | 1.41E-06 |
| TUCP_001412 | XLOC_055123 | ENSRNOT00000024186 | 0.983198584  | 1.03E-08 |
| TUCP_001412 | XLOC_055123 | ENSRNOT00000074753 | 0.998188286  | 1.53E-13 |
| TUCP_001412 | XLOC_055123 | ENSRNOT00000004876 | 0.959061272  | 8.45E-07 |
| TUCP_001412 | XLOC_055123 | ENSRNOT00000041904 | 0.999999943  | 4.90E-36 |
| TUCP_001412 | XLOC_055123 | ENSRNOT00000083487 | 0.989494335  | 9.90E-10 |
| TUCP_001412 | XLOC_055123 | ENSRNOT00000077990 | 0.999999943  | 4.90E-36 |
| TUCP_001412 | XLOC_055123 | ENSRNOT00000038826 | 0.999775548  | 4.48E-18 |
| TUCP_001412 | XLOC_055123 | ENSRNOT00000046842 | 0.973636533  | 9.60E-08 |
| TUCP_001412 | XLOC_055123 | ENSRNOT00000037169 | 0.980325085  | 2.25E-08 |
| TUCP_001412 | XLOC_055123 | ENSRNOT00000021243 | 0.987419995  | 2.43E-09 |
| TUCP_001412 | XLOC_055123 | ENSRNOT00000060250 | 0.999937692  | 7.39E-21 |
| TUCP_001412 | XLOC_055123 | ENSRNOT00000091934 | 0.999999943  | 4.90E-36 |
| TUCP_001412 | XLOC_055123 | ENSRNOT00000046585 | 0.982934636  | 1.11E-08 |
| TUCP_001412 | XLOC_055123 | ENSRNOT00000080794 | 0.990831457  | 5.02E-10 |
| TUCP_001412 | XLOC_055123 | ENSRNOT00000014456 | 0.99169274   | 3.07E-10 |
| TUCP_001412 | XLOC_055123 | ENSRNOT00000031205 | 0.991388435  | 3.68E-10 |
| TUCP_001412 | XLOC_055123 | ENSRNOT00000044145 | 0.999999943  | 4.90E-36 |
| TUCP_001412 | XLOC_055123 | ENSRNOT00000088381 | 0.989008211  | 1.24E-09 |
| TUCP_001412 | XLOC_055123 | ENSRNOT00000011743 | 0.986778725  | 3.11E-09 |
| TUCP_001412 | XLOC_055123 | ENSRNOT00000089929 | 0.999999943  | 4.90E-36 |
| TUCP_001412 | XLOC_055123 | ENSRNOT00000088624 | 0.999999943  | 4.90E-36 |
| TUCP_001412 | XLOC_055123 | ENSRNOT00000085659 | 0.989903764  | 8.12E-10 |
| TUCP_001412 | XLOC_055123 | ENSRNOT00000015866 | 0.994057382  | 5.78E-11 |
| TUCP_001412 | XLOC_055123 | ENSRNOT00000078633 | 0.999999943  | 4.90E-36 |
| TUCP_001412 | XLOC_055123 | ENSRNOT00000034907 | 0.995302289  | 1.79E-11 |
| TUCP_001412 | XLOC_055123 | ENSRNOT00000093230 | 0.95827513   | 9.28E-07 |
| TUCP_001412 | XLOC_055123 | ENSRNOT00000051835 | 0.999999943  | 4.90E-36 |
| TUCP_001412 | XLOC_055123 | ENSRNOT00000079087 | 0.999999943  | 4.90E-36 |
| TUCP_001412 | XLOC_055123 | ENSRNOT00000037206 | 0.999999943  | 4.90E-36 |
| TUCP_001412 | XLOC_055123 | ENSRNOT00000083261 | 0.971013979  | 1.53E-07 |
| TUCP_001412 | XLOC_055123 | ENSRNOT00000080590 | 0.999888655  | 1.35E-19 |
| TUCP_001412 | XLOC_055123 | ENSRNOT00000027552 | 0.999804208  | 2.27E-18 |
| TUCP_001412 | XLOC_055123 | ENSRNOT00000077014 | 0.995102032  | 2.20E-11 |
| TUCP_001412 | XLOC_055123 | ENSRNOT00000080453 | 0.999944146  | 4.28E-21 |
| TUCP_001412 | XLOC_055123 | ENSRNOT00000089057 | 0.968205171  | 2.43E-07 |
| TUCP_001412 | XLOC_055123 | ENSRNOT00000066839 | 0.991863304  | 2.77E-10 |
| TUCP_001412 | XLOC_055123 | ENSRNOT00000061284 | 0.955598619  | 1.26E-06 |
| TUCP_001412 | XLOC_055123 | ENSRNOT00000013423 | 0.959681185  | 7.84E-07 |
| TUCP_001412 | XLOC_055123 | ENSRNOT00000071884 | 0.974758753  | 7.73E-08 |
| TUCP_001412 | XLOC_055123 | ENSRNOT00000004128 | 0.961796235  | 6.01E-07 |
| TUCP_001412 | XLOC_055123 | ENSRNOT00000026316 | 0.964400224  | 4.24E-07 |
| TUCP_001412 | XLOC_055123 | ENSRNOT00000057729 | 0.999382938  | 7.04E-16 |



|             |             |                    |             |          |
|-------------|-------------|--------------------|-------------|----------|
| TUCP_001412 | XLOC_055123 | ENSRNOT00000078663 | 0.975229089 | 7.05E-08 |
| TUCP_001412 | XLOC_055123 | ENSRNOT00000064250 | 0.983165167 | 1.04E-08 |
| TUCP_001412 | XLOC_055123 | ENSRNOT00000021608 | 0.965262541 | 3.76E-07 |
| TUCP_001412 | XLOC_055123 | ENSRNOT00000029634 | 0.995812154 | 1.01E-11 |
| TUCP_001412 | XLOC_055123 | ENSRNOT00000093579 | 0.958546239 | 8.99E-07 |
| TUCP_001412 | XLOC_055123 | ENSRNOT00000086349 | 0.957220142 | 1.05E-06 |
| TUCP_001412 | XLOC_055123 | ENSRNOT00000065460 | 0.999999943 | 4.90E-36 |
| TUCP_001412 | XLOC_055123 | ENSRNOT00000003817 | 0.996798605 | 2.63E-12 |
| TUCP_001412 | XLOC_055123 | ENSRNOT00000016713 | 0.999999943 | 4.90E-36 |
| TUCP_001412 | XLOC_055123 | ENSRNOT00000079260 | 0.996442736 | 4.46E-12 |
| TUCP_001412 | XLOC_055123 | ENSRNOT00000039294 | 0.999999943 | 4.90E-36 |
| TUCP_001412 | XLOC_055123 | ENSRNOT00000092913 | 0.9530002   | 1.67E-06 |
| TUCP_000698 | XLOC_026355 | ENSRNOT00000080146 | 0.950555116 | 2.14E-06 |
| TUCP_000698 | XLOC_026355 | ENSRNOT00000041541 | -0.95847466 | 9.07E-07 |
| TUCP_001416 | XLOC_055294 | ENSRNOT00000084076 | 0.951544085 | 1.94E-06 |
| TUCP_001416 | XLOC_055294 | ENSRNOT00000042558 | 0.955025449 | 1.34E-06 |
| TUCP_001416 | XLOC_055294 | ENSRNOT00000001098 | 0.972466197 | 1.19E-07 |
| TUCP_001416 | XLOC_055294 | ENSRNOT00000075400 | 0.963863583 | 4.57E-07 |
| TUCP_001416 | XLOC_055294 | ENSRNOT00000030479 | 0.952587711 | 1.74E-06 |
| TUCP_001416 | XLOC_055294 | ENSRNOT00000029097 | 0.974344248 | 8.39E-08 |
| TUCP_001416 | XLOC_055294 | ENSRNOT00000057758 | 0.984073466 | 7.86E-09 |
| TUCP_001416 | XLOC_055294 | ENSRNOT00000019350 | 0.977883905 | 4.02E-08 |
| TUCP_001416 | XLOC_055294 | ENSRNOT00000035400 | 0.975488919 | 6.69E-08 |
| TUCP_001416 | XLOC_055294 | ENSRNOT00000010932 | 0.970776309 | 1.60E-07 |
| TUCP_001416 | XLOC_055294 | ENSRNOT00000075494 | 0.963291382 | 4.94E-07 |
| TUCP_001416 | XLOC_055294 | ENSRNOT00000023149 | 0.960818807 | 6.81E-07 |
| TUCP_001416 | XLOC_055294 | ENSRNOT00000017204 | 0.97313436  | 1.05E-07 |
| TUCP_001416 | XLOC_055294 | ENSRNOT00000087540 | 0.95022562  | 2.21E-06 |
| TUCP_001416 | XLOC_055294 | ENSRNOT00000010720 | 0.961487145 | 6.25E-07 |
| TUCP_001416 | XLOC_055294 | ENSRNOT00000077268 | 0.958533854 | 9.00E-07 |
| TUCP_001416 | XLOC_055294 | ENSRNOT00000018877 | 0.952323076 | 1.79E-06 |
| TUCP_001416 | XLOC_055294 | ENSRNOT00000004159 | 0.983105652 | 1.05E-08 |
| TUCP_001416 | XLOC_055294 | ENSRNOT00000082108 | 0.955583269 | 1.26E-06 |
| TUCP_001416 | XLOC_055294 | ENSRNOT00000082585 | 0.953497251 | 1.58E-06 |
| TUCP_001416 | XLOC_055294 | ENSRNOT00000013854 | 0.954988613 | 1.35E-06 |
| TUCP_001416 | XLOC_055294 | ENSRNOT00000019056 | 0.970740871 | 1.61E-07 |
| TUCP_001416 | XLOC_055294 | ENSRNOT00000012376 | 0.951302859 | 1.99E-06 |
| TUCP_001416 | XLOC_055294 | ENSRNOT00000027553 | 0.950491642 | 2.16E-06 |
| TUCP_001416 | XLOC_055294 | ENSRNOT00000015473 | 0.979905966 | 2.49E-08 |
| TUCP_001416 | XLOC_055294 | ENSRNOT00000028787 | 0.951122847 | 2.02E-06 |
| TUCP_001416 | XLOC_055294 | ENSRNOT00000016164 | 0.976482396 | 5.45E-08 |
| TUCP_001416 | XLOC_055294 | ENSRNOT00000061735 | 0.950221399 | 2.21E-06 |
| TUCP_001416 | XLOC_055294 | ENSRNOT00000011432 | 0.966880048 | 2.97E-07 |
| TUCP_001416 | XLOC_055294 | ENSRNOT00000014177 | 0.95952748  | 7.99E-07 |
| TUCP_001416 | XLOC_055294 | ENSRNOT00000042864 | 0.955610588 | 1.26E-06 |
| TUCP_001416 | XLOC_055294 | ENSRNOT00000013587 | 0.965730416 | 3.51E-07 |
| TUCP_001416 | XLOC_055294 | ENSRNOT00000008274 | 0.956567894 | 1.13E-06 |
| TUCP_001416 | XLOC_055294 | ENSRNOT00000045041 | 0.962619437 | 5.40E-07 |
| TUCP_001416 | XLOC_055294 | ENSRNOT00000088856 | 0.950686082 | 2.11E-06 |
| TUCP_001416 | XLOC_055294 | ENSRNOT00000003728 | 0.978704758 | 3.33E-08 |
| TUCP_001416 | XLOC_055294 | ENSRNOT00000080846 | 0.966743667 | 3.03E-07 |

|             |             |                    |              |          |
|-------------|-------------|--------------------|--------------|----------|
| TUCP_001416 | XLOC_055294 | ENSRNOT00000070961 | 0.964369364  | 4.26E-07 |
| TUCP_001416 | XLOC_055294 | ENSRNOT00000049973 | 0.951180314  | 2.01E-06 |
| TUCP_001416 | XLOC_055294 | ENSRNOT00000039709 | 0.974401658  | 8.29E-08 |
| TUCP_001416 | XLOC_055294 | ENSRNOT00000056644 | 0.970594919  | 1.65E-07 |
| TUCP_001416 | XLOC_055294 | ENSRNOT00000012179 | 0.963615119  | 4.72E-07 |
| TUCP_001416 | XLOC_055294 | ENSRNOT00000019044 | 0.97095813   | 1.55E-07 |
| TUCP_001416 | XLOC_055294 | ENSRNOT00000001373 | 0.969210599  | 2.07E-07 |
| TUCP_001416 | XLOC_055294 | ENSRNOT00000022637 | 0.960415216  | 7.16E-07 |
| TUCP_001416 | XLOC_055294 | ENSRNOT00000012495 | 0.953078326  | 1.66E-06 |
| TUCP_001416 | XLOC_055294 | ENSRNOT00000016259 | 0.961873642  | 5.95E-07 |
| TUCP_001416 | XLOC_055294 | ENSRNOT00000009015 | 0.970739383  | 1.61E-07 |
| TUCP_001416 | XLOC_055294 | ENSRNOT00000017268 | 0.962419685  | 5.54E-07 |
| TUCP_001416 | XLOC_055294 | ENSRNOT00000035238 | 0.950350816  | 2.19E-06 |
| TUCP_001416 | XLOC_055294 | ENSRNOT00000024578 | 0.969327009  | 2.03E-07 |
| TUCP_001416 | XLOC_055294 | ENSRNOT00000056079 | 0.952207505  | 1.81E-06 |
| TUCP_001416 | XLOC_055294 | ENSRNOT00000054958 | 0.980033962  | 2.42E-08 |
| TUCP_001416 | XLOC_055294 | ENSRNOT00000001891 | 0.964298739  | 4.30E-07 |
| TUCP_001416 | XLOC_055294 | ENSRNOT00000025506 | 0.957099165  | 1.06E-06 |
| TUCP_001416 | XLOC_055294 | ENSRNOT00000030823 | 0.962539211  | 5.46E-07 |
| TUCP_001416 | XLOC_055294 | ENSRNOT00000024980 | 0.950639104  | 2.12E-06 |
| TUCP_001416 | XLOC_055294 | ENSRNOT00000024981 | 0.972297442  | 1.23E-07 |
| TUCP_001416 | XLOC_055294 | ENSRNOT00000035513 | 0.956984004  | 1.08E-06 |
| TUCP_001416 | XLOC_055294 | ENSRNOT00000031653 | 0.962042287  | 5.82E-07 |
| TUCP_001416 | XLOC_055294 | ENSRNOT00000020543 | 0.961946177  | 5.90E-07 |
| TUCP_001416 | XLOC_055294 | ENSRNOT00000056656 | 0.965968737  | 3.40E-07 |
| TUCP_001416 | XLOC_055294 | ENSRNOT00000013778 | 0.960417053  | 7.16E-07 |
| TUCP_001416 | XLOC_055294 | ENSRNOT00000015918 | 0.954082037  | 1.49E-06 |
| TUCP_001416 | XLOC_055294 | ENSRNOT00000006946 | 0.96867965   | 2.25E-07 |
| TUCP_001416 | XLOC_055294 | ENSRNOT00000077730 | 0.95302018   | 1.67E-06 |
| TUCP_001416 | XLOC_055294 | ENSRNOT00000015759 | 0.985474344  | 4.97E-09 |
| TUCP_001416 | XLOC_055294 | ENSRNOT00000032173 | 0.958662681  | 8.87E-07 |
| TUCP_001416 | XLOC_055294 | ENSRNOT00000050774 | 0.960196367  | 7.36E-07 |
| TUCP_001416 | XLOC_055294 | ENSRNOT00000089313 | 0.96773576   | 2.61E-07 |
| TUCP_001416 | XLOC_055294 | ENSRNOT00000023854 | 0.969722157  | 1.90E-07 |
| TUCP_001416 | XLOC_055294 | ENSRNOT00000024690 | 0.95839046   | 9.16E-07 |
| TUCP_001416 | XLOC_055294 | ENSRNOT00000017955 | 0.956980123  | 1.08E-06 |
| TUCP_001416 | XLOC_055294 | ENSRNOT00000065023 | 0.954895177  | 1.36E-06 |
| TUCP_001416 | XLOC_055294 | ENSRNOT00000047717 | 0.956773256  | 1.11E-06 |
| TUCP_001416 | XLOC_055294 | ENSRNOT00000075057 | 0.976612611  | 5.30E-08 |
| TUCP_001416 | XLOC_055294 | ENSRNOT00000003277 | 0.974027615  | 8.91E-08 |
| TUCP_001416 | XLOC_055294 | ENSRNOT00000083983 | 0.969726799  | 1.90E-07 |
| TUCP_001416 | XLOC_055294 | ENSRNOT00000007549 | 0.971535776  | 1.40E-07 |
| TUCP_001416 | XLOC_055294 | ENSRNOT00000017626 | 0.951942131  | 1.86E-06 |
| TUCP_001416 | XLOC_055294 | ENSRNOT00000037946 | 0.966639912  | 3.08E-07 |
| TUCP_001416 | XLOC_055294 | ENSRNOT00000087359 | -0.968533436 | 2.30E-07 |
| TUCP_001416 | XLOC_055294 | ENSRNOT00000060683 | 0.95247457   | 1.76E-06 |
| TUCP_001416 | XLOC_055294 | ENSRNOT00000021403 | 0.955707356  | 1.25E-06 |
| TUCP_001416 | XLOC_055294 | ENSRNOT00000075598 | 0.953826519  | 1.53E-06 |
| TUCP_001416 | XLOC_055294 | ENSRNOT00000073926 | 0.979661455  | 2.65E-08 |
| TUCP_001416 | XLOC_055294 | ENSRNOT00000026552 | 0.958321156  | 9.23E-07 |
| TUCP_001416 | XLOC_055294 | ENSRNOT0000001631  | 0.95873339   | 8.79E-07 |

|             |             |                    |              |          |
|-------------|-------------|--------------------|--------------|----------|
| TUCP_001416 | XLOC_055294 | ENSRNOT00000064851 | 0.973403483  | 1.00E-07 |
| TUCP_001416 | XLOC_055294 | ENSRNOT00000000253 | 0.959003023  | 8.51E-07 |
| TUCP_001416 | XLOC_055294 | ENSRNOT00000091456 | 0.958365469  | 9.19E-07 |
| TUCP_001416 | XLOC_055294 | ENSRNOT00000027512 | 0.973206763  | 1.04E-07 |
| TUCP_001416 | XLOC_055294 | ENSRNOT00000082149 | 0.950945356  | 2.06E-06 |
| TUCP_001416 | XLOC_055294 | ENSRNOT00000027450 | 0.970627614  | 1.64E-07 |
| TUCP_001416 | XLOC_055294 | ENSRNOT00000007577 | 0.958908284  | 8.61E-07 |
| TUCP_001416 | XLOC_055294 | ENSRNOT00000056639 | 0.9539842    | 1.50E-06 |
| TUCP_001416 | XLOC_055294 | ENSRNOT00000004560 | 0.968130507  | 2.45E-07 |
| TUCP_001416 | XLOC_055294 | ENSRNOT00000002511 | 0.973794463  | 9.31E-08 |
| TUCP_001416 | XLOC_055294 | ENSRNOT00000043518 | 0.956013946  | 1.20E-06 |
| TUCP_001416 | XLOC_055294 | ENSRNOT00000020853 | 0.96589857   | 3.43E-07 |
| TUCP_001416 | XLOC_055294 | ENSRNOT00000017339 | 0.976497206  | 5.43E-08 |
| TUCP_001416 | XLOC_055294 | ENSRNOT00000081593 | 0.987439791  | 2.41E-09 |
| TUCP_001416 | XLOC_055294 | ENSRNOT00000021309 | 0.969578721  | 1.95E-07 |
| TUCP_001416 | XLOC_055294 | ENSRNOT00000020707 | 0.959925439  | 7.61E-07 |
| TUCP_001416 | XLOC_055294 | ENSRNOT00000008509 | 0.954798488  | 1.38E-06 |
| TUCP_001416 | XLOC_055294 | ENSRNOT00000050227 | 0.961738996  | 6.06E-07 |
| TUCP_001416 | XLOC_055294 | ENSRNOT00000020809 | 0.952088678  | 1.83E-06 |
| TUCP_001416 | XLOC_055294 | ENSRNOT00000037710 | 0.964806064  | 4.01E-07 |
| TUCP_001416 | XLOC_055294 | ENSRNOT00000028234 | 0.953513504  | 1.58E-06 |
| TUCP_001416 | XLOC_055294 | ENSRNOT00000002198 | 0.964036839  | 4.46E-07 |
| TUCP_001416 | XLOC_055294 | ENSRNOT00000003514 | 0.98473084   | 6.37E-09 |
| TUCP_001416 | XLOC_055294 | ENSRNOT00000076388 | 0.954824965  | 1.37E-06 |
| TUCP_001416 | XLOC_055294 | ENSRNOT00000005155 | -0.962671194 | 5.36E-07 |
| TUCP_001416 | XLOC_055294 | ENSRNOT00000016262 | 0.970343515  | 1.72E-07 |
| TUCP_001416 | XLOC_055294 | ENSRNOT00000091541 | 0.9514463    | 1.96E-06 |
| TUCP_001416 | XLOC_055294 | ENSRNOT00000027060 | 0.950208018  | 2.22E-06 |
| TUCP_001416 | XLOC_055294 | ENSRNOT00000085690 | 0.969382235  | 2.01E-07 |
| TUCP_001416 | XLOC_055294 | ENSRNOT00000064323 | 0.961343803  | 6.37E-07 |
| TUCP_001416 | XLOC_055294 | ENSRNOT00000017618 | 0.972993342  | 1.08E-07 |
| TUCP_001416 | XLOC_055294 | ENSRNOT00000082963 | 0.964298252  | 4.30E-07 |
| TUCP_001416 | XLOC_055294 | ENSRNOT00000009468 | 0.973941082  | 9.06E-08 |
| TUCP_001416 | XLOC_055294 | ENSRNOT00000014002 | 0.959133217  | 8.38E-07 |
| TUCP_001416 | XLOC_055294 | ENSRNOT00000064924 | 0.97343497   | 9.96E-08 |
| TUCP_001416 | XLOC_055294 | ENSRNOT00000005666 | 0.962741436  | 5.31E-07 |
| TUCP_001416 | XLOC_055294 | ENSRNOT00000002867 | 0.95039038   | 2.18E-06 |
| TUCP_001416 | XLOC_055294 | ENSRNOT00000016856 | 0.971054794  | 1.52E-07 |
| TUCP_001416 | XLOC_055294 | ENSRNOT00000051428 | 0.97631942   | 5.64E-08 |
| TUCP_001416 | XLOC_055294 | ENSRNOT00000068666 | 0.958064707  | 9.52E-07 |
| TUCP_001416 | XLOC_055294 | ENSRNOT00000015130 | 0.991285241  | 3.90E-10 |
| TUCP_001416 | XLOC_055294 | ENSRNOT00000044895 | 0.952310851  | 1.79E-06 |
| TUCP_001416 | XLOC_055294 | ENSRNOT00000013535 | 0.978781908  | 3.27E-08 |
| TUCP_001416 | XLOC_055294 | ENSRNOT00000018043 | 0.980350834  | 2.23E-08 |
| TUCP_001416 | XLOC_055294 | ENSRNOT00000018470 | 0.953068807  | 1.66E-06 |
| TUCP_001416 | XLOC_055294 | ENSRNOT00000066199 | 0.952635821  | 1.73E-06 |
| TUCP_001416 | XLOC_055294 | ENSRNOT00000089016 | 0.962452555  | 5.52E-07 |
| TUCP_001416 | XLOC_055294 | ENSRNOT00000047698 | 0.985321865  | 5.24E-09 |
| TUCP_001416 | XLOC_055294 | ENSRNOT00000011320 | 0.950188586  | 2.22E-06 |
| TUCP_001416 | XLOC_055294 | ENSRNOT00000070916 | 0.954307335  | 1.45E-06 |
| TUCP_001416 | XLOC_055294 | ENSRNOT0000006860  | 0.957737697  | 9.89E-07 |

|             |             |                     |              |          |
|-------------|-------------|---------------------|--------------|----------|
| TUCP_001416 | XLOC_055294 | ENSRNOT0000007917   | 0.9611014    | 6.57E-07 |
| TUCP_001416 | XLOC_055294 | ENSRNOT00000067905  | 0.993614079  | 8.27E-11 |
| TUCP_001416 | XLOC_055294 | ENSRNOT00000021677  | 0.957314944  | 1.04E-06 |
| TUCP_001416 | XLOC_055294 | ENSRNOT00000065642  | 0.98248558   | 1.26E-08 |
| TUCP_001416 | XLOC_055294 | ENSRNOT00000005286  | 0.965534753  | 3.61E-07 |
| TUCP_001416 | XLOC_055294 | ENSRNOT00000036042  | 0.951817605  | 1.89E-06 |
| TUCP_001416 | XLOC_055294 | ENSRNOT00000073466  | -0.950478501 | 2.16E-06 |
| TUCP_001416 | XLOC_055294 | ENSRNOT00000017564  | 0.955953295  | 1.21E-06 |
| TUCP_001416 | XLOC_055294 | ENSRNOT00000040981  | 0.977072154  | 4.80E-08 |
| TUCP_001416 | XLOC_055294 | ENSRNOT00000010630  | -0.974005316 | 8.95E-08 |
| TUCP_001416 | XLOC_055294 | ENSRNOT00000005255  | 0.960667521  | 6.94E-07 |
| TUCP_001416 | XLOC_055294 | ENSRNOT00000008359  | 0.962112337  | 5.77E-07 |
| TUCP_001416 | XLOC_055294 | ENSRNOT000000092641 | 0.967647236  | 2.64E-07 |
| TUCP_001417 | XLOC_055353 | ENSRNOT00000027321  | 0.954315077  | 1.45E-06 |
| TUCP_002693 | XLOC_114394 | ENSRNOT00000000008  | 1            | 0        |
| TUCP_002693 | XLOC_114394 | ENSRNOT00000060048  | 0.998711457  | 2.79E-14 |
| TUCP_002693 | XLOC_114394 | ENSRNOT00000082304  | 0.996875989  | 2.33E-12 |
| TUCP_002693 | XLOC_114394 | ENSRNOT00000006219  | 1            | 0        |
| TUCP_002693 | XLOC_114394 | ENSRNOT00000065376  | 1            | 0        |
| TUCP_002693 | XLOC_114394 | ENSRNOT00000081433  | 0.984469223  | 6.93E-09 |
| TUCP_002693 | XLOC_114394 | ENSRNOT00000083575  | 1            | 0        |
| TUCP_002693 | XLOC_114394 | ENSRNOT00000087739  | 1            | 0        |
| TUCP_002693 | XLOC_114394 | ENSRNOT00000079826  | 1            | 0        |
| TUCP_002693 | XLOC_114394 | ENSRNOT00000025770  | 0.993828251  | 6.98E-11 |
| TUCP_002693 | XLOC_114394 | ENSRNOT00000088244  | 0.973479481  | 9.88E-08 |
| TUCP_002693 | XLOC_114394 | ENSRNOT00000048523  | 1            | 0        |
| TUCP_002693 | XLOC_114394 | ENSRNOT00000079365  | 0.958936699  | 8.58E-07 |
| TUCP_002693 | XLOC_114394 | ENSRNOT00000020229  | 0.960002785  | 7.54E-07 |
| TUCP_002693 | XLOC_114394 | ENSRNOT00000026428  | 0.996986683  | 1.95E-12 |
| TUCP_002693 | XLOC_114394 | ENSRNOT00000085673  | 1            | 0        |
| TUCP_002693 | XLOC_114394 | ENSRNOT00000072972  | 0.981476166  | 1.67E-08 |
| TUCP_002693 | XLOC_114394 | ENSRNOT00000050573  | 1            | 0        |
| TUCP_002693 | XLOC_114394 | ENSRNOT00000089876  | -0.953630353 | 1.56E-06 |
| TUCP_002693 | XLOC_114394 | ENSRNOT00000074378  | 0.998901807  | 1.26E-14 |
| TUCP_002693 | XLOC_114394 | ENSRNOT00000093571  | 1            | 0        |
| TUCP_002693 | XLOC_114394 | ENSRNOT00000090581  | 1            | 0        |
| TUCP_002693 | XLOC_114394 | ENSRNOT00000076239  | 0.98020752   | 2.31E-08 |
| TUCP_002693 | XLOC_114394 | ENSRNOT00000065485  | 1            | 0        |
| TUCP_002693 | XLOC_114394 | ENSRNOT0000006356   | 0.999544279  | 1.55E-16 |
| TUCP_002693 | XLOC_114394 | ENSRNOT00000087199  | 0.974421555  | 8.26E-08 |
| TUCP_002693 | XLOC_114394 | ENSRNOT00000022091  | 1            | 0        |
| TUCP_002693 | XLOC_114394 | ENSRNOT00000064764  | 0.98460888   | 6.63E-09 |
| TUCP_002693 | XLOC_114394 | ENSRNOT00000076927  | 0.971163156  | 1.50E-07 |
| TUCP_002693 | XLOC_114394 | ENSRNOT00000092395  | 0.999522978  | 1.94E-16 |
| TUCP_002692 | XLOC_114315 | ENSRNOT00000060527  | 0.97449155   | 8.15E-08 |
| TUCP_002692 | XLOC_114315 | ENSRNOT00000044896  | 0.955967542  | 1.21E-06 |
| TUCP_002692 | XLOC_114315 | ENSRNOT00000075659  | 0.960819549  | 6.81E-07 |
| TUCP_002692 | XLOC_114315 | ENSRNOT00000083215  | 0.950574689  | 2.14E-06 |
| TUCP_002692 | XLOC_114315 | ENSRNOT00000072081  | 0.950143051  | 2.23E-06 |
| TUCP_002692 | XLOC_114315 | ENSRNOT00000015546  | 0.95190289   | 1.87E-06 |
| TUCP_002692 | XLOC_114315 | ENSRNOT00000031792  | 0.954196772  | 1.47E-06 |

|             |             |                    |              |          |
|-------------|-------------|--------------------|--------------|----------|
| TUCP_002692 | XLOC_114315 | ENSRNOT00000080768 | 0.967453449  | 2.72E-07 |
| TUCP_002692 | XLOC_114315 | ENSRNOT00000027561 | 0.951879452  | 1.87E-06 |
| TUCP_002692 | XLOC_114315 | ENSRNOT00000047975 | 0.95916101   | 8.35E-07 |
| TUCP_002692 | XLOC_114315 | ENSRNOT00000083971 | 0.962643607  | 5.38E-07 |
| TUCP_002692 | XLOC_114315 | ENSRNOT00000020147 | 0.955741704  | 1.24E-06 |
| TUCP_002692 | XLOC_114315 | ENSRNOT00000076453 | 0.958981717  | 8.54E-07 |
| TUCP_002692 | XLOC_114315 | ENSRNOT00000034267 | 0.960578641  | 7.02E-07 |
| TUCP_002692 | XLOC_114315 | ENSRNOT0000004032  | 0.954531158  | 1.42E-06 |
| TUCP_002692 | XLOC_114315 | ENSRNOT00000009198 | 0.960343284  | 7.23E-07 |
| TUCP_002692 | XLOC_114315 | ENSRNOT00000021614 | 0.956167407  | 1.18E-06 |
| TUCP_002691 | XLOC_114226 | ENSRNOT00000074583 | 0.955008497  | 1.35E-06 |
| TUCP_002691 | XLOC_114226 | ENSRNOT00000003759 | 0.975345434  | 6.88E-08 |
| TUCP_002691 | XLOC_114226 | ENSRNOT00000018888 | 0.954432324  | 1.43E-06 |
| TUCP_002691 | XLOC_114226 | ENSRNOT00000000995 | 0.970940074  | 1.55E-07 |
| TUCP_002691 | XLOC_114226 | ENSRNOT00000014533 | 0.970581509  | 1.65E-07 |
| TUCP_002691 | XLOC_114226 | ENSRNOT00000089389 | 0.961287093  | 6.42E-07 |
| TUCP_002691 | XLOC_114226 | ENSRNOT00000068354 | 0.967489162  | 2.71E-07 |
| TUCP_002691 | XLOC_114226 | ENSRNOT00000022167 | 0.98281957   | 1.15E-08 |
| TUCP_002691 | XLOC_114226 | ENSRNOT00000003082 | 0.96975554   | 1.89E-07 |
| TUCP_002691 | XLOC_114226 | ENSRNOT00000045993 | 0.954367496  | 1.44E-06 |
| TUCP_002691 | XLOC_114226 | ENSRNOT00000012963 | 0.964349541  | 4.27E-07 |
| TUCP_002691 | XLOC_114226 | ENSRNOT00000057504 | 0.95834854   | 9.20E-07 |
| TUCP_002691 | XLOC_114226 | ENSRNOT00000010968 | 0.979847727  | 2.53E-08 |
| TUCP_002691 | XLOC_114226 | ENSRNOT00000024069 | 0.963473235  | 4.82E-07 |
| TUCP_002691 | XLOC_114226 | ENSRNOT00000009448 | 0.955474225  | 1.28E-06 |
| TUCP_002691 | XLOC_114226 | ENSRNOT00000013182 | 0.985838879  | 4.38E-09 |
| TUCP_002691 | XLOC_114226 | ENSRNOT00000025731 | 0.954248531  | 1.46E-06 |
| TUCP_002691 | XLOC_114226 | ENSRNOT00000042973 | 0.977752759  | 4.13E-08 |
| TUCP_002691 | XLOC_114226 | ENSRNOT00000008813 | 0.960753258  | 6.87E-07 |
| TUCP_002691 | XLOC_114226 | ENSRNOT00000003458 | 0.975317399  | 6.92E-08 |
| TUCP_002691 | XLOC_114226 | ENSRNOT00000001110 | 0.957451251  | 1.02E-06 |
| TUCP_002691 | XLOC_114226 | ENSRNOT00000076879 | 0.965703565  | 3.53E-07 |
| TUCP_002691 | XLOC_114226 | ENSRNOT00000051402 | 0.953474992  | 1.59E-06 |
| TUCP_002691 | XLOC_114226 | ENSRNOT00000002853 | 0.954143462  | 1.48E-06 |
| TUCP_002691 | XLOC_114226 | ENSRNOT00000078299 | 0.971078675  | 1.52E-07 |
| TUCP_002691 | XLOC_114226 | ENSRNOT00000006196 | 0.982599238  | 1.22E-08 |
| TUCP_002691 | XLOC_114226 | ENSRNOT00000013809 | 0.987306362  | 2.54E-09 |
| TUCP_002691 | XLOC_114226 | ENSRNOT00000073087 | 0.983402806  | 9.65E-09 |
| TUCP_002691 | XLOC_114226 | ENSRNOT00000019389 | 0.96300638   | 5.13E-07 |
| TUCP_002691 | XLOC_114226 | ENSRNOT00000021487 | 0.987520467  | 2.33E-09 |
| TUCP_002691 | XLOC_114226 | ENSRNOT00000051028 | -0.961565336 | 6.19E-07 |
| TUCP_002691 | XLOC_114226 | ENSRNOT00000051067 | 0.983816313  | 8.51E-09 |
| TUCP_002691 | XLOC_114226 | ENSRNOT00000082393 | 0.960905632  | 6.73E-07 |
| TUCP_002691 | XLOC_114226 | ENSRNOT00000021359 | 0.968413836  | 2.35E-07 |
| TUCP_002691 | XLOC_114226 | ENSRNOT00000014560 | 0.962595345  | 5.42E-07 |
| TUCP_002691 | XLOC_114226 | ENSRNOT00000073138 | 0.964076793  | 4.44E-07 |
| TUCP_002691 | XLOC_114226 | ENSRNOT00000077303 | 0.976671444  | 5.23E-08 |
| TUCP_002691 | XLOC_114226 | ENSRNOT00000029845 | 0.95078679   | 2.09E-06 |
| TUCP_002691 | XLOC_114226 | ENSRNOT00000022128 | 0.996735497  | 2.90E-12 |
| TUCP_002691 | XLOC_114226 | ENSRNOT00000013191 | 0.969465825  | 1.99E-07 |
| TUCP_002691 | XLOC_114226 | ENSRNOT00000045107 | 0.955529816  | 1.27E-06 |

|             |             |                    |              |          |
|-------------|-------------|--------------------|--------------|----------|
| TUCP_002691 | XLOC_114226 | ENSRNOT00000019738 | 0.955479437  | 1.28E-06 |
| TUCP_002691 | XLOC_114226 | ENSRNOT00000014317 | 0.954826396  | 1.37E-06 |
| TUCP_002691 | XLOC_114226 | ENSRNOT00000090774 | 0.97160083   | 1.39E-07 |
| TUCP_002690 | XLOC_114226 | ENSRNOT00000067455 | 0.955249756  | 1.31E-06 |
| TUCP_002690 | XLOC_114226 | ENSRNOT00000040856 | 0.969104487  | 2.10E-07 |
| TUCP_002690 | XLOC_114226 | ENSRNOT00000056174 | 0.95667168   | 1.12E-06 |
| TUCP_002690 | XLOC_114226 | ENSRNOT00000012632 | 0.953807857  | 1.53E-06 |
| TUCP_002690 | XLOC_114226 | ENSRNOT00000024464 | 0.951300031  | 1.99E-06 |
| TUCP_002690 | XLOC_114226 | ENSRNOT00000005085 | 0.961058269  | 6.61E-07 |
| TUCP_002690 | XLOC_114226 | ENSRNOT00000009077 | 0.950591976  | 2.13E-06 |
| TUCP_002690 | XLOC_114226 | ENSRNOT00000010264 | 0.956982099  | 1.08E-06 |
| TUCP_002690 | XLOC_114226 | ENSRNOT00000032333 | 0.961657006  | 6.12E-07 |
| TUCP_002690 | XLOC_114226 | ENSRNOT00000034152 | 0.954622951  | 1.40E-06 |
| TUCP_002697 | XLOC_114537 | ENSRNOT00000040985 | 0.963621937  | 4.72E-07 |
| TUCP_002697 | XLOC_114537 | ENSRNOT00000074608 | 0.950100433  | 2.24E-06 |
| TUCP_002696 | XLOC_114535 | ENSRNOT00000079339 | 0.967197442  | 2.83E-07 |
| TUCP_002695 | XLOC_114471 | ENSRNOT00000009706 | 0.966496572  | 3.14E-07 |
| TUCP_002695 | XLOC_114471 | ENSRNOT00000027640 | -0.957653844 | 9.99E-07 |
| TUCP_002695 | XLOC_114471 | ENSRNOT00000029980 | -0.953752441 | 1.54E-06 |
| TUCP_002695 | XLOC_114471 | ENSRNOT00000012837 | -0.954486736 | 1.42E-06 |
| TUCP_002695 | XLOC_114471 | ENSRNOT00000026416 | -0.953308691 | 1.62E-06 |
| TUCP_002695 | XLOC_114471 | ENSRNOT00000027704 | -0.95110792  | 2.03E-06 |
| TUCP_002695 | XLOC_114471 | ENSRNOT00000016581 | -0.954973968 | 1.35E-06 |
| TUCP_002699 | XLOC_114767 | ENSRNOT00000029764 | -0.951111976 | 2.03E-06 |
| TUCP_002699 | XLOC_114767 | ENSRNOT00000011794 | -0.959144054 | 8.37E-07 |
| TUCP_002699 | XLOC_114767 | ENSRNOT00000042100 | 0.950552222  | 2.14E-06 |
| TUCP_002699 | XLOC_114767 | ENSRNOT00000003568 | 0.953719693  | 1.55E-06 |
| TUCP_002265 | XLOC_094370 | ENSRNOT00000074753 | 0.958764394  | 8.76E-07 |
| TUCP_002265 | XLOC_094370 | ENSRNOT00000041904 | 0.959863002  | 7.67E-07 |
| TUCP_002265 | XLOC_094370 | ENSRNOT00000077990 | 0.959863002  | 7.67E-07 |
| TUCP_002265 | XLOC_094370 | ENSRNOT00000038826 | 0.96142432   | 6.31E-07 |
| TUCP_002265 | XLOC_094370 | ENSRNOT00000046842 | 0.977204653  | 4.67E-08 |
| TUCP_002265 | XLOC_094370 | ENSRNOT00000060250 | 0.960785698  | 6.84E-07 |
| TUCP_002265 | XLOC_094370 | ENSRNOT00000091934 | 0.959863002  | 7.67E-07 |
| TUCP_002265 | XLOC_094370 | ENSRNOT00000089929 | 0.959863002  | 7.67E-07 |
| TUCP_002265 | XLOC_094370 | ENSRNOT00000080794 | 0.962952207  | 5.16E-07 |
| TUCP_002265 | XLOC_094370 | ENSRNOT00000044145 | 0.959863002  | 7.67E-07 |
| TUCP_002265 | XLOC_094370 | ENSRNOT00000011743 | 0.977472046  | 4.40E-08 |
| TUCP_002265 | XLOC_094370 | ENSRNOT00000034907 | 0.953610201  | 1.56E-06 |
| TUCP_002265 | XLOC_094370 | ENSRNOT00000088624 | 0.959863002  | 7.67E-07 |
| TUCP_002265 | XLOC_094370 | ENSRNOT00000085659 | 0.97121893   | 1.48E-07 |
| TUCP_002265 | XLOC_094370 | ENSRNOT00000061284 | 0.964386315  | 4.25E-07 |
| TUCP_002265 | XLOC_094370 | ENSRNOT00000051835 | 0.959863002  | 7.67E-07 |
| TUCP_002265 | XLOC_094370 | ENSRNOT00000079087 | 0.959863002  | 7.67E-07 |
| TUCP_002265 | XLOC_094370 | ENSRNOT00000037206 | 0.959863002  | 7.67E-07 |
| TUCP_002265 | XLOC_094370 | ENSRNOT00000083261 | 0.979310371  | 2.88E-08 |
| TUCP_002265 | XLOC_094370 | ENSRNOT00000080590 | 0.958973002  | 8.54E-07 |
| TUCP_002265 | XLOC_094370 | ENSRNOT00000027552 | 0.961374344  | 6.35E-07 |
| TUCP_002265 | XLOC_094370 | ENSRNOT00000077014 | 0.959670098  | 7.85E-07 |
| TUCP_002265 | XLOC_094370 | ENSRNOT00000080453 | 0.959145682  | 8.37E-07 |
| TUCP_002265 | XLOC_094370 | ENSRNOT00000057729 | 0.957424499  | 1.03E-06 |

|             |             |                    |              |          |
|-------------|-------------|--------------------|--------------|----------|
| TUCP_002265 | XLOC_094370 | ENSRNOT00000078633 | 0.959863002  | 7.67E-07 |
| TUCP_002265 | XLOC_094370 | ENSRNOT00000071884 | 0.957442555  | 1.02E-06 |
| TUCP_002265 | XLOC_094370 | ENSRNOT00000066839 | 0.966763763  | 3.02E-07 |
| TUCP_002265 | XLOC_094370 | ENSRNOT00000064250 | 0.951357156  | 1.98E-06 |
| TUCP_002265 | XLOC_094370 | ENSRNOT00000029634 | 0.952675377  | 1.73E-06 |
| TUCP_002265 | XLOC_094370 | ENSRNOT00000065460 | 0.959863002  | 7.67E-07 |
| TUCP_002265 | XLOC_094370 | ENSRNOT00000003817 | 0.958464338  | 9.08E-07 |
| TUCP_002265 | XLOC_094370 | ENSRNOT00000016713 | 0.959863002  | 7.67E-07 |
| TUCP_002265 | XLOC_094370 | ENSRNOT00000079260 | 0.96698268   | 2.92E-07 |
| TUCP_002265 | XLOC_094370 | ENSRNOT00000039294 | 0.959863002  | 7.67E-07 |
| TUCP_003586 | XLOC_157608 | ENSRNOT00000046914 | 0.953661554  | 1.56E-06 |
| TUCP_002117 | XLOC_087725 | ENSRNOT00000000514 | -0.958423802 | 9.12E-07 |
| TUCP_002110 | XLOC_087410 | ENSRNOT00000042890 | 0.963356798  | 4.89E-07 |
| TUCP_002110 | XLOC_087410 | ENSRNOT00000012757 | 0.962969055  | 5.15E-07 |
| TUCP_002110 | XLOC_087410 | ENSRNOT00000086144 | 0.964556257  | 4.15E-07 |
| TUCP_002110 | XLOC_087410 | ENSRNOT00000005505 | 0.957699313  | 9.93E-07 |
| TUCP_002110 | XLOC_087410 | ENSRNOT00000056050 | 0.950510789  | 2.15E-06 |
| TUCP_002110 | XLOC_087410 | ENSRNOT00000009975 | 0.970096989  | 1.79E-07 |
| TUCP_002110 | XLOC_087410 | ENSRNOT00000072682 | 0.95105906   | 2.04E-06 |
| TUCP_002110 | XLOC_087410 | ENSRNOT00000055877 | 0.964867556  | 3.97E-07 |
| TUCP_002110 | XLOC_087410 | ENSRNOT00000006109 | 0.961474512  | 6.26E-07 |
| TUCP_002110 | XLOC_087410 | ENSRNOT00000075144 | 0.959093628  | 8.42E-07 |
| TUCP_002110 | XLOC_087410 | ENSRNOT00000081224 | 0.956164163  | 1.18E-06 |
| TUCP_002110 | XLOC_087410 | ENSRNOT00000001642 | 0.964145089  | 4.39E-07 |
| TUCP_002110 | XLOC_087410 | ENSRNOT00000034482 | 0.975232546  | 7.04E-08 |
| TUCP_002110 | XLOC_087410 | ENSRNOT00000043827 | 0.959443088  | 8.07E-07 |
| TUCP_002110 | XLOC_087410 | ENSRNOT00000037375 | 0.96417214   | 4.38E-07 |
| TUCP_002111 | XLOC_087416 | ENSRNOT00000047105 | 0.974669048  | 7.87E-08 |
| TUCP_002111 | XLOC_087416 | ENSRNOT00000031904 | 0.96293259   | 5.18E-07 |
| TUCP_002111 | XLOC_087416 | ENSRNOT00000026941 | 0.968552407  | 2.30E-07 |
| TUCP_002111 | XLOC_087416 | ENSRNOT00000067479 | 0.952045338  | 1.84E-06 |
| TUCP_002111 | XLOC_087416 | ENSRNOT00000006067 | 0.968877857  | 2.18E-07 |
| TUCP_002111 | XLOC_087416 | ENSRNOT00000001855 | 0.976248092  | 5.72E-08 |
| TUCP_002111 | XLOC_087416 | ENSRNOT00000001691 | 0.966921361  | 2.95E-07 |
| TUCP_002111 | XLOC_087416 | ENSRNOT00000086706 | 0.961808613  | 6.00E-07 |
| TUCP_002111 | XLOC_087416 | ENSRNOT00000037699 | 0.965082274  | 3.86E-07 |
| TUCP_002111 | XLOC_087416 | ENSRNOT00000074023 | 0.95163367   | 1.92E-06 |
| TUCP_002111 | XLOC_087416 | ENSRNOT00000016975 | 0.95391045   | 1.52E-06 |
| TUCP_002111 | XLOC_087416 | ENSRNOT00000033017 | 0.986102576  | 3.99E-09 |
| TUCP_002111 | XLOC_087416 | ENSRNOT00000009712 | 0.964076208  | 4.44E-07 |
| TUCP_002111 | XLOC_087416 | ENSRNOT00000028561 | 0.956164808  | 1.18E-06 |
| TUCP_002111 | XLOC_087416 | ENSRNOT00000066370 | 0.959113277  | 8.40E-07 |
| TUCP_002111 | XLOC_087416 | ENSRNOT00000029237 | 0.950791783  | 2.09E-06 |
| TUCP_002111 | XLOC_087416 | ENSRNOT00000043345 | 0.962398745  | 5.56E-07 |
| TUCP_002111 | XLOC_087416 | ENSRNOT00000071381 | 0.953135056  | 1.65E-06 |
| TUCP_002111 | XLOC_087416 | ENSRNOT00000013049 | 0.957626309  | 1.00E-06 |
| TUCP_002111 | XLOC_087416 | ENSRNOT00000072771 | 0.956481956  | 1.14E-06 |
| TUCP_002111 | XLOC_087416 | ENSRNOT00000073370 | 0.953993422  | 1.50E-06 |
| TUCP_002111 | XLOC_087416 | ENSRNOT00000060943 | 0.976377272  | 5.57E-08 |
| TUCP_002111 | XLOC_087416 | ENSRNOT00000013580 | 0.971007824  | 1.54E-07 |
| TUCP_002111 | XLOC_087416 | ENSRNOT00000014664 | 0.965108166  | 3.84E-07 |

|             |             |                    |              |          |
|-------------|-------------|--------------------|--------------|----------|
| TUCP_002111 | XLOC_087416 | ENSRNOT00000057160 | 0.955996109  | 1.21E-06 |
| TUCP_002111 | XLOC_087416 | ENSRNOT00000045047 | 0.961778626  | 6.02E-07 |
| TUCP_002111 | XLOC_087416 | ENSRNOT00000091319 | 0.957824288  | 9.79E-07 |
| TUCP_002111 | XLOC_087416 | ENSRNOT00000065168 | 0.959636683  | 7.88E-07 |
| TUCP_002111 | XLOC_087416 | ENSRNOT00000024266 | 0.951123806  | 2.02E-06 |
| TUCP_002111 | XLOC_087416 | ENSRNOT00000025075 | 0.956740775  | 1.11E-06 |
| TUCP_002111 | XLOC_087416 | ENSRNOT00000020134 | 0.959897696  | 7.64E-07 |
| TUCP_002111 | XLOC_087416 | ENSRNOT00000080152 | 0.955237981  | 1.31E-06 |
| TUCP_002111 | XLOC_087416 | ENSRNOT00000027232 | 0.951160858  | 2.02E-06 |
| TUCP_002111 | XLOC_087416 | ENSRNOT00000060696 | 0.96957855   | 1.95E-07 |
| TUCP_002111 | XLOC_087416 | ENSRNOT00000034261 | 0.953515607  | 1.58E-06 |
| TUCP_002111 | XLOC_087416 | ENSRNOT00000024402 | 0.953093442  | 1.65E-06 |
| TUCP_002111 | XLOC_087416 | ENSRNOT00000064772 | 0.950361796  | 2.18E-06 |
| TUCP_002111 | XLOC_087416 | ENSRNOT00000010541 | 0.950717789  | 2.11E-06 |
| TUCP_002111 | XLOC_087416 | ENSRNOT00000092741 | 0.953217417  | 1.63E-06 |
| TUCP_002111 | XLOC_087416 | ENSRNOT00000049245 | 0.955914257  | 1.22E-06 |
| TUCP_002111 | XLOC_087416 | ENSRNOT00000026831 | 0.96822822   | 2.42E-07 |
| TUCP_002111 | XLOC_087416 | ENSRNOT00000028266 | 0.951018326  | 2.04E-06 |
| TUCP_002111 | XLOC_087416 | ENSRNOT00000003780 | 0.969194171  | 2.07E-07 |
| TUCP_002111 | XLOC_087416 | ENSRNOT00000011956 | 0.956979144  | 1.08E-06 |
| TUCP_002111 | XLOC_087416 | ENSRNOT00000002403 | 0.974868465  | 7.57E-08 |
| TUCP_002111 | XLOC_087416 | ENSRNOT00000027337 | 0.964426756  | 4.23E-07 |
| TUCP_002111 | XLOC_087416 | ENSRNOT00000086577 | 0.965929397  | 3.41E-07 |
| TUCP_002111 | XLOC_087416 | ENSRNOT00000089524 | 0.964622924  | 4.11E-07 |
| TUCP_002111 | XLOC_087416 | ENSRNOT00000065600 | 0.968928828  | 2.16E-07 |
| TUCP_002111 | XLOC_087416 | ENSRNOT00000033975 | 0.958385108  | 9.16E-07 |
| TUCP_002111 | XLOC_087416 | ENSRNOT00000085621 | 0.950756172  | 2.10E-06 |
| TUCP_002111 | XLOC_087416 | ENSRNOT00000055683 | 0.96244608   | 5.52E-07 |
| TUCP_002111 | XLOC_087416 | ENSRNOT00000045488 | 0.956044569  | 1.20E-06 |
| TUCP_002111 | XLOC_087416 | ENSRNOT00000032843 | 0.966215481  | 3.28E-07 |
| TUCP_002111 | XLOC_087416 | ENSRNOT00000031487 | 0.95817903   | 9.39E-07 |
| TUCP_002111 | XLOC_087416 | ENSRNOT00000000060 | 0.950599945  | 2.13E-06 |
| TUCP_002111 | XLOC_087416 | ENSRNOT00000021158 | 0.953115013  | 1.65E-06 |
| TUCP_002111 | XLOC_087416 | ENSRNOT00000079072 | 0.968770924  | 2.22E-07 |
| TUCP_002111 | XLOC_087416 | ENSRNOT00000020428 | 0.953466568  | 1.59E-06 |
| TUCP_002111 | XLOC_087416 | ENSRNOT00000065615 | 0.954611596  | 1.41E-06 |
| TUCP_002111 | XLOC_087416 | ENSRNOT00000079442 | 0.955895282  | 1.22E-06 |
| TUCP_002111 | XLOC_087416 | ENSRNOT00000000658 | 0.964347974  | 4.27E-07 |
| TUCP_002111 | XLOC_087416 | ENSRNOT00000065501 | 0.958116268  | 9.46E-07 |
| TUCP_002111 | XLOC_087416 | ENSRNOT00000011582 | 0.951233518  | 2.00E-06 |
| TUCP_002111 | XLOC_087416 | ENSRNOT00000083632 | -0.950083537 | 2.24E-06 |
| TUCP_002111 | XLOC_087416 | ENSRNOT00000066739 | 0.959744538  | 7.78E-07 |
| TUCP_002111 | XLOC_087416 | ENSRNOT00000028057 | 0.955672237  | 1.25E-06 |
| TUCP_002111 | XLOC_087416 | ENSRNOT00000055582 | 0.964463544  | 4.20E-07 |
| TUCP_002111 | XLOC_087416 | ENSRNOT00000086122 | 0.956150976  | 1.19E-06 |
| TUCP_002111 | XLOC_087416 | ENSRNOT00000037790 | 0.962531432  | 5.46E-07 |
| TUCP_002111 | XLOC_087416 | ENSRNOT00000088054 | 0.957796677  | 9.82E-07 |
| TUCP_002111 | XLOC_087416 | ENSRNOT00000006802 | 0.953388433  | 1.60E-06 |
| TUCP_002111 | XLOC_087416 | ENSRNOT00000038647 | 0.965304079  | 3.74E-07 |
| TUCP_002111 | XLOC_087416 | ENSRNOT00000010853 | 0.952328319  | 1.79E-06 |
| TUCP_002111 | XLOC_087416 | ENSRNOT00000024224 | 0.961552722  | 6.20E-07 |



|             |             |                    |             |          |
|-------------|-------------|--------------------|-------------|----------|
| TUCP_002111 | XLOC_087416 | ENSRNOT00000038807 | 0.965255232 | 3.76E-07 |
| TUCP_002111 | XLOC_087416 | ENSRNOT00000085619 | 0.952845069 | 1.70E-06 |
| TUCP_002111 | XLOC_087416 | ENSRNOT00000023302 | 0.965125064 | 3.83E-07 |
| TUCP_002111 | XLOC_087416 | ENSRNOT00000066024 | 0.95762845  | 1.00E-06 |
| TUCP_002111 | XLOC_087416 | ENSRNOT00000012736 | 0.973086266 | 1.06E-07 |
| TUCP_002111 | XLOC_087416 | ENSRNOT00000022716 | 0.961948446 | 5.89E-07 |
| TUCP_002111 | XLOC_087416 | ENSRNOT00000080443 | 0.955804652 | 1.23E-06 |
| TUCP_002111 | XLOC_087416 | ENSRNOT00000015624 | 0.951928182 | 1.86E-06 |
| TUCP_002111 | XLOC_087416 | ENSRNOT00000026426 | 0.967564355 | 2.68E-07 |
| TUCP_002111 | XLOC_087416 | ENSRNOT00000082805 | 0.958959457 | 8.56E-07 |
| TUCP_002111 | XLOC_087416 | ENSRNOT00000078306 | 0.951243217 | 2.00E-06 |
| TUCP_002111 | XLOC_087416 | ENSRNOT00000039341 | 0.956642683 | 1.12E-06 |
| TUCP_002111 | XLOC_087416 | ENSRNOT00000065076 | 0.954910227 | 1.36E-06 |
| TUCP_002111 | XLOC_087416 | ENSRNOT00000007369 | 0.962373183 | 5.58E-07 |
| TUCP_002111 | XLOC_087416 | ENSRNOT00000026280 | 0.950756735 | 2.10E-06 |
| TUCP_002111 | XLOC_087416 | ENSRNOT00000005387 | 0.961691767 | 6.09E-07 |
| TUCP_002111 | XLOC_087416 | ENSRNOT00000005381 | 0.960246884 | 7.31E-07 |
| TUCP_002111 | XLOC_087416 | ENSRNOT00000088279 | 0.969501971 | 1.97E-07 |
| TUCP_002111 | XLOC_087416 | ENSRNOT00000065229 | 0.957003669 | 1.08E-06 |
| TUCP_002111 | XLOC_087416 | ENSRNOT00000090057 | 0.958561358 | 8.98E-07 |
| TUCP_002111 | XLOC_087416 | ENSRNOT00000041494 | 0.964114526 | 4.41E-07 |
| TUCP_002111 | XLOC_087416 | ENSRNOT00000037800 | 0.950630279 | 2.13E-06 |
| TUCP_002111 | XLOC_087416 | ENSRNOT00000021286 | 0.953043845 | 1.66E-06 |
| TUCP_002111 | XLOC_087416 | ENSRNOT00000022796 | 0.97323884  | 1.03E-07 |
| TUCP_002111 | XLOC_087416 | ENSRNOT00000015799 | 0.955777865 | 1.24E-06 |
| TUCP_002112 | XLOC_087561 | ENSRNOT00000022092 | 0.965612867 | 3.57E-07 |
| TUCP_002112 | XLOC_087561 | ENSRNOT00000027793 | 0.957450161 | 1.02E-06 |
| TUCP_002112 | XLOC_087561 | ENSRNOT00000016654 | 0.958401587 | 9.15E-07 |
| TUCP_002882 | XLOC_123039 | ENSRNOT00000043054 | 0.975797709 | 6.28E-08 |
| TUCP_000331 | XLOC_010523 | ENSRNOT00000084500 | 0.984775744 | 6.28E-09 |
| TUCP_000331 | XLOC_010523 | ENSRNOT00000093467 | 0.995918755 | 8.86E-12 |
| TUCP_000331 | XLOC_010523 | ENSRNOT00000029340 | 0.999157673 | 3.33E-15 |
| TUCP_000331 | XLOC_010523 | ENSRNOT00000077972 | 0.96221111  | 5.70E-07 |
| TUCP_000331 | XLOC_010523 | ENSRNOT00000038646 | 0.999984574 | 6.88E-24 |
| TUCP_000331 | XLOC_010523 | ENSRNOT00000012095 | 0.957685595 | 9.95E-07 |
| TUCP_000331 | XLOC_010523 | ENSRNOT00000017909 | 0.975450158 | 6.74E-08 |
| TUCP_000331 | XLOC_010523 | ENSRNOT00000092579 | 0.999984574 | 6.88E-24 |
| TUCP_000331 | XLOC_010523 | ENSRNOT00000089235 | 0.998770284 | 2.21E-14 |
| TUCP_000331 | XLOC_010523 | ENSRNOT00000036383 | 0.988473506 | 1.57E-09 |
| TUCP_000331 | XLOC_010523 | ENSRNOT00000076528 | 0.997038475 | 1.79E-12 |
| TUCP_000331 | XLOC_010523 | ENSRNOT00000075193 | 0.963919961 | 4.53E-07 |
| TUCP_000331 | XLOC_010523 | ENSRNOT00000083034 | 0.990751333 | 5.25E-10 |
| TUCP_000331 | XLOC_010523 | ENSRNOT00000089607 | 0.994983241 | 2.48E-11 |
| TUCP_000331 | XLOC_010523 | ENSRNOT00000086014 | 0.961507357 | 6.24E-07 |
| TUCP_000331 | XLOC_010523 | ENSRNOT00000054939 | 0.957832975 | 9.78E-07 |
| TUCP_000331 | XLOC_010523 | ENSRNOT00000052315 | 0.983571988 | 9.17E-09 |
| TUCP_000331 | XLOC_010523 | ENSRNOT00000088168 | 0.999984574 | 6.88E-24 |
| TUCP_000331 | XLOC_010523 | ENSRNOT00000046231 | 0.962088619 | 5.79E-07 |
| TUCP_000331 | XLOC_010523 | ENSRNOT00000013459 | 0.97896994  | 3.13E-08 |
| TUCP_000331 | XLOC_010523 | ENSRNOT00000078137 | 0.999984574 | 6.88E-24 |
| TUCP_000331 | XLOC_010523 | ENSRNOT00000077764 | 0.976773262 | 5.12E-08 |

|             |             |                    |              |          |
|-------------|-------------|--------------------|--------------|----------|
| TUCP_000331 | XLOC_010523 | ENSRNOT00000043661 | 0.966794035  | 3.01E-07 |
| TUCP_000331 | XLOC_010523 | ENSRNOT00000092740 | 0.999984574  | 6.88E-24 |
| TUCP_000331 | XLOC_010523 | ENSRNOT00000000117 | 0.990899488  | 4.84E-10 |
| TUCP_000331 | XLOC_010523 | ENSRNOT00000071877 | 0.966880732  | 2.97E-07 |
| TUCP_000331 | XLOC_010523 | ENSRNOT00000070958 | 0.999984574  | 6.88E-24 |
| TUCP_000331 | XLOC_010523 | ENSRNOT00000076757 | 0.958902378  | 8.62E-07 |
| TUCP_000331 | XLOC_010523 | ENSRNOT00000085310 | 0.965072964  | 3.86E-07 |
| TUCP_000331 | XLOC_010523 | ENSRNOT00000047241 | 0.966419677  | 3.18E-07 |
| TUCP_000331 | XLOC_010523 | ENSRNOT00000027268 | 0.999984574  | 6.88E-24 |
| TUCP_000331 | XLOC_010523 | ENSRNOT00000004459 | 0.999984574  | 6.88E-24 |
| TUCP_000331 | XLOC_010523 | ENSRNOT00000048373 | 0.959176632  | 8.34E-07 |
| TUCP_000331 | XLOC_010523 | ENSRNOT00000061516 | 0.987780469  | 2.10E-09 |
| TUCP_000331 | XLOC_010523 | ENSRNOT00000088148 | 0.999984574  | 6.88E-24 |
| TUCP_000331 | XLOC_010523 | ENSRNOT00000088527 | 0.999984574  | 6.88E-24 |
| TUCP_000331 | XLOC_010523 | ENSRNOT00000078701 | 0.999984574  | 6.88E-24 |
| TUCP_000331 | XLOC_010523 | ENSRNOT00000052308 | 0.962480881  | 5.50E-07 |
| TUCP_000331 | XLOC_010523 | ENSRNOT00000021748 | 0.999984574  | 6.88E-24 |
| TUCP_000331 | XLOC_010523 | ENSRNOT00000089085 | 0.999984574  | 6.88E-24 |
| TUCP_000331 | XLOC_010523 | ENSRNOT00000008153 | 0.999673797  | 2.91E-17 |
| TUCP_000331 | XLOC_010523 | ENSRNOT00000085896 | 0.97141463   | 1.43E-07 |
| TUCP_000331 | XLOC_010523 | ENSRNOT00000079189 | 0.985328329  | 5.22E-09 |
| TUCP_000331 | XLOC_010523 | ENSRNOT00000090078 | 0.999984574  | 6.88E-24 |
| TUCP_000331 | XLOC_010523 | ENSRNOT00000078020 | 0.958284003  | 9.28E-07 |
| TUCP_000331 | XLOC_010523 | ENSRNOT00000092425 | 0.955834879  | 1.23E-06 |
| TUCP_000331 | XLOC_010523 | ENSRNOT00000009776 | 0.999984574  | 6.88E-24 |
| TUCP_003588 | XLOC_157663 | ENSRNOT00000089407 | 0.963198749  | 5.00E-07 |
| TUCP_003588 | XLOC_157663 | ENSRNOT00000014268 | 0.992875249  | 1.43E-10 |
| TUCP_003588 | XLOC_157663 | ENSRNOT00000011801 | 0.978616567  | 3.40E-08 |
| TUCP_003588 | XLOC_157663 | ENSRNOT00000080155 | 0.956443286  | 1.15E-06 |
| TUCP_003588 | XLOC_157663 | ENSRNOT00000093356 | 0.987675017  | 2.19E-09 |
| TUCP_002119 | XLOC_087870 | ENSRNOT00000079080 | -0.954266983 | 1.46E-06 |
| TUCP_002053 | XLOC_083635 | ENSRNOT00000084075 | 0.994525844  | 3.84E-11 |
| TUCP_002053 | XLOC_083635 | ENSRNOT00000012880 | 0.965617426  | 3.57E-07 |
| TUCP_002053 | XLOC_083635 | ENSRNOT00000074465 | 0.998890628  | 1.32E-14 |
| TUCP_002053 | XLOC_083635 | ENSRNOT00000090898 | 0.960907517  | 6.73E-07 |
| TUCP_002053 | XLOC_083635 | ENSRNOT00000079805 | 0.995967732  | 8.34E-12 |
| TUCP_002053 | XLOC_083635 | ENSRNOT00000040912 | 0.998890628  | 1.32E-14 |
| TUCP_002053 | XLOC_083635 | ENSRNOT00000072648 | 0.998890628  | 1.32E-14 |
| TUCP_002053 | XLOC_083635 | ENSRNOT0000007398  | 0.987100332  | 2.75E-09 |
| TUCP_002053 | XLOC_083635 | ENSRNOT00000070803 | 0.998890628  | 1.32E-14 |
| TUCP_002053 | XLOC_083635 | ENSRNOT00000012196 | 0.998890628  | 1.32E-14 |
| TUCP_002053 | XLOC_083635 | ENSRNOT00000085772 | 0.998890628  | 1.32E-14 |
| TUCP_002053 | XLOC_083635 | ENSRNOT00000093284 | 0.998829054  | 1.73E-14 |
| TUCP_002053 | XLOC_083635 | ENSRNOT00000086374 | 0.990297825  | 6.66E-10 |
| TUCP_002053 | XLOC_083635 | ENSRNOT00000015270 | 0.998890628  | 1.32E-14 |
| TUCP_002053 | XLOC_083635 | ENSRNOT00000046192 | 0.998890628  | 1.32E-14 |
| TUCP_002053 | XLOC_083635 | ENSRNOT00000044226 | 0.998890628  | 1.32E-14 |
| TUCP_002053 | XLOC_083635 | ENSRNOT00000081898 | 0.991660892  | 3.13E-10 |
| TUCP_002053 | XLOC_083635 | ENSRNOT00000081954 | 0.960848792  | 6.78E-07 |
| TUCP_002053 | XLOC_083635 | ENSRNOT00000080291 | 0.997147072  | 1.48E-12 |
| TUCP_002053 | XLOC_083635 | ENSRNOT0000004293  | 0.982686547  | 1.19E-08 |

|             |             |                    |              |          |
|-------------|-------------|--------------------|--------------|----------|
| TUCP_002053 | XLOC_083635 | ENSRNOT00000078231 | 0.955949666  | 1.21E-06 |
| TUCP_002053 | XLOC_083635 | ENSRNOT00000015870 | 0.962212662  | 5.69E-07 |
| TUCP_002053 | XLOC_083635 | ENSRNOT00000001464 | 0.998890628  | 1.32E-14 |
| TUCP_002053 | XLOC_083635 | ENSRNOT00000090716 | 0.991348794  | 3.76E-10 |
| TUCP_002053 | XLOC_083635 | ENSRNOT00000083542 | 0.970165851  | 1.77E-07 |
| TUCP_002053 | XLOC_083635 | ENSRNOT00000076044 | 0.998890628  | 1.32E-14 |
| TUCP_002053 | XLOC_083635 | ENSRNOT00000074353 | 0.998890628  | 1.32E-14 |
| TUCP_002053 | XLOC_083635 | ENSRNOT00000043510 | 0.954856316  | 1.37E-06 |
| TUCP_002053 | XLOC_083635 | ENSRNOT00000087122 | 0.976050513  | 5.96E-08 |
| TUCP_002053 | XLOC_083635 | ENSRNOT00000074295 | 0.985280077  | 5.31E-09 |
| TUCP_002053 | XLOC_083635 | ENSRNOT00000057873 | 0.998890628  | 1.32E-14 |
| TUCP_002053 | XLOC_083635 | ENSRNOT00000083002 | 0.987536564  | 2.32E-09 |
| TUCP_002053 | XLOC_083635 | ENSRNOT00000088399 | 0.998907233  | 1.22E-14 |
| TUCP_002053 | XLOC_083635 | ENSRNOT00000086248 | 0.998890628  | 1.32E-14 |
| TUCP_002053 | XLOC_083635 | ENSRNOT00000089750 | 0.998843656  | 1.62E-14 |
| TUCP_002053 | XLOC_083635 | ENSRNOT00000030517 | 0.969687933  | 1.92E-07 |
| TUCP_002053 | XLOC_083635 | ENSRNOT00000034772 | 0.993093691  | 1.22E-10 |
| TUCP_002053 | XLOC_083635 | ENSRNOT00000089305 | 0.963527281  | 4.78E-07 |
| TUCP_002053 | XLOC_083635 | ENSRNOT00000064601 | 0.9642863    | 4.31E-07 |
| TUCP_002053 | XLOC_083635 | ENSRNOT0000002834  | 0.998890628  | 1.32E-14 |
| TUCP_002053 | XLOC_083635 | ENSRNOT00000080812 | 0.990836271  | 5.01E-10 |
| TUCP_002053 | XLOC_083635 | ENSRNOT00000092755 | 0.998890628  | 1.32E-14 |
| TUCP_002053 | XLOC_083635 | ENSRNOT00000031683 | 0.998890628  | 1.32E-14 |
| TUCP_002053 | XLOC_083635 | ENSRNOT00000087764 | 0.986561558  | 3.37E-09 |
| TUCP_002052 | XLOC_083635 | ENSRNOT00000084944 | 0.96900129   | 2.14E-07 |
| TUCP_002052 | XLOC_083635 | ENSRNOT00000076072 | 0.985792727  | 4.45E-09 |
| TUCP_001483 | XLOC_057566 | ENSRNOT00000026141 | 0.961555956  | 6.20E-07 |
| TUCP_001483 | XLOC_057566 | ENSRNOT00000037597 | 0.963557378  | 4.76E-07 |
| TUCP_001483 | XLOC_057566 | ENSRNOT00000075708 | 0.950190205  | 2.22E-06 |
| TUCP_001483 | XLOC_057566 | ENSRNOT00000003391 | 0.960323363  | 7.24E-07 |
| TUCP_001482 | XLOC_057502 | ENSRNOT00000013233 | -0.9567742   | 1.11E-06 |
| TUCP_001480 | XLOC_057201 | ENSRNOT00000079236 | 0.978645009  | 3.37E-08 |
| TUCP_001480 | XLOC_057201 | ENSRNOT00000020603 | 0.956706861  | 1.11E-06 |
| TUCP_001480 | XLOC_057201 | ENSRNOT00000093641 | 0.952876344  | 1.69E-06 |
| TUCP_001487 | XLOC_057671 | ENSRNOT00000081433 | 0.953922063  | 1.51E-06 |
| TUCP_001487 | XLOC_057671 | ENSRNOT00000091911 | 0.956308329  | 1.17E-06 |
| TUCP_001486 | XLOC_057671 | ENSRNOT00000093462 | 0.962533953  | 5.46E-07 |
| TUCP_004613 | XLOC_203501 | ENSRNOT00000085911 | 0.953035205  | 1.66E-06 |
| TUCP_004613 | XLOC_203501 | ENSRNOT00000072077 | 0.956934153  | 1.09E-06 |
| TUCP_004613 | XLOC_203501 | ENSRNOT00000087346 | -0.967862519 | 2.56E-07 |
| TUCP_004613 | XLOC_203501 | ENSRNOT00000008301 | 0.95716988   | 1.06E-06 |
| TUCP_004613 | XLOC_203501 | ENSRNOT00000089086 | 0.961118437  | 6.56E-07 |
| TUCP_004613 | XLOC_203501 | ENSRNOT00000054932 | 0.952056492  | 1.84E-06 |
| TUCP_004613 | XLOC_203501 | ENSRNOT00000058111 | 0.953597357  | 1.57E-06 |
| TUCP_004613 | XLOC_203501 | ENSRNOT00000028074 | 0.955196274  | 1.32E-06 |
| TUCP_004613 | XLOC_203501 | ENSRNOT00000010783 | 0.955952689  | 1.21E-06 |
| TUCP_004613 | XLOC_203501 | ENSRNOT00000047126 | 0.967865055  | 2.56E-07 |
| TUCP_004613 | XLOC_203501 | ENSRNOT00000090268 | 0.960552269  | 7.04E-07 |
| TUCP_004613 | XLOC_203501 | ENSRNOT00000090816 | 0.958524014  | 9.02E-07 |
| TUCP_004613 | XLOC_203501 | ENSRNOT00000015845 | -0.952762518 | 1.71E-06 |
| TUCP_004613 | XLOC_203501 | ENSRNOT00000083967 | -0.955881926 | 1.22E-06 |

|             |             |                    |              |          |
|-------------|-------------|--------------------|--------------|----------|
| TUCP_004613 | XLOC_203501 | ENSRNOT00000075206 | -0.960514038 | 7.07E-07 |
| TUCP_003253 | XLOC_139349 | ENSRNOT00000049798 | -0.952181926 | 1.82E-06 |
| TUCP_003253 | XLOC_139349 | ENSRNOT00000050558 | -0.953929481 | 1.51E-06 |
| TUCP_003253 | XLOC_139349 | ENSRNOT00000088919 | -0.957326402 | 1.04E-06 |
| TUCP_003253 | XLOC_139349 | ENSRNOT00000010594 | 0.951859707  | 1.88E-06 |
| TUCP_003253 | XLOC_139349 | ENSRNOT00000035123 | 0.979468157  | 2.78E-08 |
| TUCP_003253 | XLOC_139349 | ENSRNOT00000019501 | 0.951247378  | 2.00E-06 |
| TUCP_003253 | XLOC_139349 | ENSRNOT00000088712 | 0.973745612  | 9.40E-08 |
| TUCP_003253 | XLOC_139349 | ENSRNOT00000019195 | 0.951477544  | 1.95E-06 |
| TUCP_003253 | XLOC_139349 | ENSRNOT00000014603 | 0.955305201  | 1.30E-06 |
| TUCP_003253 | XLOC_139349 | ENSRNOT00000041033 | 0.972085818  | 1.27E-07 |
| TUCP_003253 | XLOC_139349 | ENSRNOT00000088355 | 0.956664066  | 1.12E-06 |
| TUCP_004343 | XLOC_191731 | ENSRNOT00000025467 | 0.950000791  | 2.26E-06 |
| TUCP_004343 | XLOC_191731 | ENSRNOT00000001215 | -0.959173159 | 8.34E-07 |
| TUCP_004343 | XLOC_191731 | ENSRNOT00000036092 | -0.982324982 | 1.32E-08 |
| TUCP_004343 | XLOC_191731 | ENSRNOT00000010835 | -0.957294413 | 1.04E-06 |
| TUCP_004343 | XLOC_191731 | ENSRNOT00000081123 | -0.952793837 | 1.71E-06 |
| TUCP_004343 | XLOC_191731 | ENSRNOT00000064358 | -0.962441175 | 5.53E-07 |
| TUCP_004343 | XLOC_191731 | ENSRNOT00000011032 | -0.955506576 | 1.27E-06 |
| TUCP_004343 | XLOC_191731 | ENSRNOT00000004290 | -0.95066109  | 2.12E-06 |
| TUCP_004343 | XLOC_191731 | ENSRNOT00000084031 | -0.963625128 | 4.72E-07 |
| TUCP_004343 | XLOC_191731 | ENSRNOT00000073588 | -0.958024118 | 9.56E-07 |
| TUCP_004343 | XLOC_191731 | ENSRNOT00000080387 | -0.956964031 | 1.08E-06 |
| TUCP_004343 | XLOC_191731 | ENSRNOT00000091282 | 0.950457874  | 2.16E-06 |
| TUCP_004343 | XLOC_191731 | ENSRNOT00000002443 | -0.953675975 | 1.55E-06 |
| TUCP_004343 | XLOC_191731 | ENSRNOT00000056022 | -0.960012004 | 7.53E-07 |
| TUCP_001806 | XLOC_074849 | ENSRNOT00000086868 | 0.96133437   | 6.38E-07 |
| TUCP_001806 | XLOC_074849 | ENSRNOT00000004878 | -0.950059088 | 2.25E-06 |
| TUCP_001806 | XLOC_074849 | ENSRNOT00000013050 | -0.953481448 | 1.59E-06 |
| TUCP_001806 | XLOC_074849 | ENSRNOT00000020648 | 0.957246488  | 1.05E-06 |
| TUCP_001806 | XLOC_074849 | ENSRNOT00000020885 | 0.95073098   | 2.10E-06 |
| TUCP_001806 | XLOC_074849 | ENSRNOT00000010765 | 0.964972936  | 3.92E-07 |
| TUCP_001806 | XLOC_074849 | ENSRNOT00000046058 | 0.950431069  | 2.17E-06 |
| TUCP_001806 | XLOC_074849 | ENSRNOT00000021176 | -0.955747872 | 1.24E-06 |
| TUCP_001806 | XLOC_074849 | ENSRNOT00000077701 | 0.969726763  | 1.90E-07 |
| TUCP_001806 | XLOC_074849 | ENSRNOT00000064774 | 0.952251162  | 1.80E-06 |
| TUCP_001806 | XLOC_074849 | ENSRNOT00000003472 | -0.950289832 | 2.20E-06 |
| TUCP_001806 | XLOC_074849 | ENSRNOT00000068745 | 0.963421568  | 4.85E-07 |
| TUCP_001806 | XLOC_074849 | ENSRNOT00000075452 | 0.952863888  | 1.69E-06 |
| TUCP_001806 | XLOC_074849 | ENSRNOT00000034400 | -0.953414242 | 1.60E-06 |
| TUCP_001806 | XLOC_074849 | ENSRNOT00000018475 | -0.953441452 | 1.59E-06 |
| TUCP_001806 | XLOC_074849 | ENSRNOT00000089859 | 0.965515945  | 3.62E-07 |
| TUCP_001806 | XLOC_074849 | ENSRNOT00000005389 | 0.956196361  | 1.18E-06 |
| TUCP_001806 | XLOC_074849 | ENSRNOT00000014323 | 0.955869697  | 1.22E-06 |
| TUCP_001806 | XLOC_074849 | ENSRNOT00000002353 | 0.961444792  | 6.29E-07 |
| TUCP_001806 | XLOC_074849 | ENSRNOT00000024428 | 0.961699407  | 6.09E-07 |
| TUCP_001806 | XLOC_074849 | ENSRNOT00000036209 | 0.950979334  | 2.05E-06 |
| TUCP_001806 | XLOC_074849 | ENSRNOT00000072922 | 0.962785261  | 5.28E-07 |
| TUCP_001806 | XLOC_074849 | ENSRNOT00000036061 | 0.963755561  | 4.63E-07 |
| TUCP_001806 | XLOC_074849 | ENSRNOT00000088509 | 0.96676509   | 3.02E-07 |
| TUCP_001806 | XLOC_074849 | ENSRNOT00000007091 | 0.952650297  | 1.73E-06 |

|             |             |                    |              |          |
|-------------|-------------|--------------------|--------------|----------|
| TUCP_001806 | XLOC_074849 | ENSRNOT00000031891 | -0.954386735 | 1.44E-06 |
| TUCP_001806 | XLOC_074849 | ENSRNOT00000009221 | 0.960320351  | 7.25E-07 |
| TUCP_001806 | XLOC_074849 | ENSRNOT00000079593 | 0.96670233   | 3.05E-07 |
| TUCP_001806 | XLOC_074849 | ENSRNOT00000088191 | 0.963857756  | 4.57E-07 |
| TUCP_001431 | XLOC_055750 | ENSRNOT00000092024 | -0.952988833 | 1.67E-06 |
| TUCP_001431 | XLOC_055750 | ENSRNOT00000055711 | -0.950214223 | 2.22E-06 |
| TUCP_000900 | XLOC_033439 | ENSRNOT00000045678 | 0.950140609  | 2.23E-06 |
| TUCP_003638 | XLOC_159677 | ENSRNOT00000089370 | 0.950887982  | 2.07E-06 |
| TUCP_003638 | XLOC_159677 | ENSRNOT00000032613 | 0.955634716  | 1.26E-06 |
| TUCP_003638 | XLOC_159677 | ENSRNOT00000031656 | 0.959114743  | 8.40E-07 |
| TUCP_003638 | XLOC_159677 | ENSRNOT00000009497 | 0.958792023  | 8.73E-07 |
| TUCP_003636 | XLOC_159561 | ENSRNOT00000033670 | 0.95876149   | 8.76E-07 |
| TUCP_004616 | XLOC_203544 | ENSRNOT00000032944 | 0.952326397  | 1.79E-06 |
| TUCP_004616 | XLOC_203544 | ENSRNOT00000006426 | 0.959642367  | 7.88E-07 |
| TUCP_004616 | XLOC_203544 | ENSRNOT00000083215 | 0.953035111  | 1.66E-06 |
| TUCP_004616 | XLOC_203544 | ENSRNOT00000067761 | 0.953345825  | 1.61E-06 |
| TUCP_004616 | XLOC_203544 | ENSRNOT00000076343 | 0.958895542  | 8.62E-07 |
| TUCP_004616 | XLOC_203544 | ENSRNOT00000004836 | 0.953779008  | 1.54E-06 |
| TUCP_004616 | XLOC_203544 | ENSRNOT00000005521 | 0.96100073   | 6.65E-07 |
| TUCP_004616 | XLOC_203544 | ENSRNOT00000015203 | 0.956936459  | 1.08E-06 |
| TUCP_004616 | XLOC_203544 | ENSRNOT00000059458 | 0.957044458  | 1.07E-06 |
| TUCP_004616 | XLOC_203544 | ENSRNOT00000021614 | 0.978080969  | 3.84E-08 |
| TUCP_004616 | XLOC_203544 | ENSRNOT00000004508 | 0.950678539  | 2.12E-06 |
| TUCP_004616 | XLOC_203544 | ENSRNOT00000009198 | 0.956903081  | 1.09E-06 |
| TUCP_004616 | XLOC_203544 | ENSRNOT00000021116 | 0.966725722  | 3.04E-07 |
| TUCP_004616 | XLOC_203544 | ENSRNOT00000031792 | 0.963363804  | 4.89E-07 |
| TUCP_004616 | XLOC_203544 | ENSRNOT00000004032 | 0.951654405  | 1.92E-06 |
| TUCP_004616 | XLOC_203544 | ENSRNOT00000044896 | 0.979164989  | 2.99E-08 |
| TUCP_004616 | XLOC_203544 | ENSRNOT00000022800 | 0.955645566  | 1.25E-06 |
| TUCP_004616 | XLOC_203544 | ENSRNOT00000015073 | 0.956549499  | 1.13E-06 |
| TUCP_004616 | XLOC_203544 | ENSRNOT00000043156 | 0.957168251  | 1.06E-06 |
| TUCP_004616 | XLOC_203544 | ENSRNOT00000085332 | -0.961336745 | 6.38E-07 |
| TUCP_004616 | XLOC_203544 | ENSRNOT00000027964 | 0.964354082  | 4.27E-07 |
| TUCP_004616 | XLOC_203544 | ENSRNOT00000017658 | 0.955102479  | 1.33E-06 |
| TUCP_004616 | XLOC_203544 | ENSRNOT00000090828 | 0.95119304   | 2.01E-06 |
| TUCP_004616 | XLOC_203544 | ENSRNOT00000006828 | 0.958653445  | 8.88E-07 |
| TUCP_004616 | XLOC_203544 | ENSRNOT00000009877 | 0.95420879   | 1.47E-06 |
| TUCP_004616 | XLOC_203544 | ENSRNOT00000025092 | 0.956574602  | 1.13E-06 |
| TUCP_004616 | XLOC_203544 | ENSRNOT00000080465 | 0.95413526   | 1.48E-06 |
| TUCP_004616 | XLOC_203544 | ENSRNOT00000072081 | 0.9821121    | 1.40E-08 |
| TUCP_004616 | XLOC_203544 | ENSRNOT00000073879 | 0.962520053  | 5.47E-07 |
| TUCP_004616 | XLOC_203544 | ENSRNOT00000083971 | 0.960739207  | 6.88E-07 |
| TUCP_004616 | XLOC_203544 | ENSRNOT00000076453 | 0.950324551  | 2.19E-06 |
| TUCP_000909 | XLOC_033903 | ENSRNOT00000023425 | 0.952359132  | 1.78E-06 |
| TUCP_000909 | XLOC_033903 | ENSRNOT00000012690 | 0.96777271   | 2.59E-07 |
| TUCP_003631 | XLOC_159485 | ENSRNOT00000074472 | 0.953380914  | 1.60E-06 |
| TUCP_003631 | XLOC_159485 | ENSRNOT00000087712 | 0.95987641   | 7.66E-07 |
| TUCP_003631 | XLOC_159485 | ENSRNOT00000009650 | 0.979113006  | 3.02E-08 |
| TUCP_003735 | XLOC_163482 | ENSRNOT00000029842 | 0.984930289  | 5.97E-09 |
| TUCP_003735 | XLOC_163482 | ENSRNOT00000086400 | 0.965438846  | 3.66E-07 |
| TUCP_003735 | XLOC_163482 | ENSRNOT00000056554 | 0.954064731  | 1.49E-06 |

|             |             |                    |              |          |
|-------------|-------------|--------------------|--------------|----------|
| TUCP_003735 | XLOC_163482 | ENSRNOT00000010216 | 0.953178426  | 1.64E-06 |
| TUCP_003734 | XLOC_163326 | ENSRNOT00000031901 | -0.960614356 | 6.99E-07 |
| TUCP_003734 | XLOC_163326 | ENSRNOT00000004279 | 0.953861561  | 1.52E-06 |
| TUCP_003734 | XLOC_163326 | ENSRNOT00000009542 | 0.973388942  | 1.01E-07 |
| TUCP_003734 | XLOC_163326 | ENSRNOT00000090896 | 0.96061894   | 6.98E-07 |
| TUCP_003732 | XLOC_163166 | ENSRNOT00000022892 | 0.954806716  | 1.38E-06 |
| TUCP_003732 | XLOC_163166 | ENSRNOT00000003965 | 0.971141018  | 1.50E-07 |
| TUCP_003732 | XLOC_163166 | ENSRNOT00000025598 | 0.954231795  | 1.46E-06 |
| TUCP_004593 | XLOC_201768 | ENSRNOT00000065168 | 0.961631818  | 6.14E-07 |
| TUCP_004593 | XLOC_201768 | ENSRNOT00000031904 | 0.965077487  | 3.86E-07 |
| TUCP_004593 | XLOC_201768 | ENSRNOT00000038647 | 0.958994519  | 8.52E-07 |
| TUCP_004593 | XLOC_201768 | ENSRNOT00000076669 | 0.950442572  | 2.17E-06 |
| TUCP_004593 | XLOC_201768 | ENSRNOT00000020134 | 0.964350299  | 4.27E-07 |
| TUCP_004593 | XLOC_201768 | ENSRNOT00000081512 | 0.954391607  | 1.44E-06 |
| TUCP_004593 | XLOC_201768 | ENSRNOT00000023302 | 0.96490736   | 3.95E-07 |
| TUCP_004593 | XLOC_201768 | ENSRNOT00000057160 | 0.953245247  | 1.63E-06 |
| TUCP_004593 | XLOC_201768 | ENSRNOT00000066024 | 0.967084572  | 2.88E-07 |
| TUCP_004593 | XLOC_201768 | ENSRNOT00000006175 | 0.979431008  | 2.80E-08 |
| TUCP_004593 | XLOC_201768 | ENSRNOT00000041044 | 0.960026274  | 7.52E-07 |
| TUCP_004593 | XLOC_201768 | ENSRNOT00000049582 | 0.950041348  | 2.25E-06 |
| TUCP_004593 | XLOC_201768 | ENSRNOT00000076729 | 0.951272922  | 1.99E-06 |
| TUCP_004593 | XLOC_201768 | ENSRNOT00000090665 | 0.956088528  | 1.19E-06 |
| TUCP_004593 | XLOC_201768 | ENSRNOT00000016975 | 0.970953349  | 1.55E-07 |
| TUCP_004593 | XLOC_201768 | ENSRNOT00000027411 | 0.985216694  | 5.42E-09 |
| TUCP_004593 | XLOC_201768 | ENSRNOT00000033017 | 0.958279438  | 9.28E-07 |
| TUCP_004593 | XLOC_201768 | ENSRNOT00000060696 | 0.960650429  | 6.95E-07 |
| TUCP_004593 | XLOC_201768 | ENSRNOT00000026543 | 0.966982294  | 2.92E-07 |
| TUCP_004593 | XLOC_201768 | ENSRNOT00000012048 | 0.964284916  | 4.31E-07 |
| TUCP_004593 | XLOC_201768 | ENSRNOT00000060499 | 0.960497297  | 7.09E-07 |
| TUCP_004593 | XLOC_201768 | ENSRNOT00000067400 | 0.954767386  | 1.38E-06 |
| TUCP_004593 | XLOC_201768 | ENSRNOT00000045882 | 0.951219444  | 2.00E-06 |
| TUCP_004593 | XLOC_201768 | ENSRNOT00000060943 | 0.959170817  | 8.34E-07 |
| TUCP_004593 | XLOC_201768 | ENSRNOT00000027337 | 0.960243909  | 7.32E-07 |
| TUCP_004593 | XLOC_201768 | ENSRNOT00000025075 | 0.956590442  | 1.13E-06 |
| TUCP_004593 | XLOC_201768 | ENSRNOT00000067866 | 0.962507863  | 5.48E-07 |
| TUCP_004593 | XLOC_201768 | ENSRNOT00000037800 | 0.950517143  | 2.15E-06 |
| TUCP_004593 | XLOC_201768 | ENSRNOT00000015799 | 0.951941533  | 1.86E-06 |
| TUCP_000169 | XLOC_005324 | ENSRNOT00000092026 | 0.96620614   | 3.28E-07 |
| TUCP_000169 | XLOC_005324 | ENSRNOT00000093075 | 1            | 0        |
| TUCP_000169 | XLOC_005324 | ENSRNOT00000058260 | 1            | 0        |
| TUCP_000169 | XLOC_005324 | ENSRNOT00000088887 | 1            | 0        |
| TUCP_000169 | XLOC_005324 | ENSRNOT00000084986 | 1            | 0        |
| TUCP_000169 | XLOC_005324 | ENSRNOT00000074346 | 0.9702256    | 1.75E-07 |
| TUCP_000169 | XLOC_005324 | ENSRNOT00000073209 | 0.983711602  | 8.79E-09 |
| TUCP_000169 | XLOC_005324 | ENSRNOT00000080155 | 0.973069673  | 1.07E-07 |
| TUCP_000169 | XLOC_005324 | ENSRNOT00000072573 | 0.996213272  | 6.09E-12 |
| TUCP_000169 | XLOC_005324 | ENSRNOT00000017828 | 0.996001583  | 7.99E-12 |
| TUCP_000169 | XLOC_005324 | ENSRNOT00000080444 | 0.969625907  | 1.93E-07 |
| TUCP_000169 | XLOC_005324 | ENSRNOT00000071312 | 1            | 0        |
| TUCP_000169 | XLOC_005324 | ENSRNOT00000088245 | 1            | 0        |
| TUCP_000169 | XLOC_005324 | ENSRNOT00000036565 | 0.969065335  | 2.12E-07 |

|             |             |                    |             |          |
|-------------|-------------|--------------------|-------------|----------|
| TUCP_000169 | XLOC_005324 | ENSRNOT00000058833 | 0.998673261 | 3.23E-14 |
| TUCP_000169 | XLOC_005324 | ENSRNOT00000078052 | 1           | 0        |
| TUCP_000169 | XLOC_005324 | ENSRNOT00000078494 | 0.999927093 | 1.62E-20 |
| TUCP_000169 | XLOC_005324 | ENSRNOT00000085653 | 1           | 0        |
| TUCP_000169 | XLOC_005324 | ENSRNOT00000057950 | 0.969329371 | 2.03E-07 |
| TUCP_000169 | XLOC_005324 | ENSRNOT00000081992 | 0.999320526 | 1.14E-15 |
| TUCP_000169 | XLOC_005324 | ENSRNOT00000038553 | 0.955765808 | 1.24E-06 |
| TUCP_000169 | XLOC_005324 | ENSRNOT00000084120 | 0.958115447 | 9.46E-07 |
| TUCP_000169 | XLOC_005324 | ENSRNOT00000055406 | 1           | 0        |
| TUCP_000169 | XLOC_005324 | ENSRNOT00000070817 | 0.998968079 | 9.20E-15 |
| TUCP_000169 | XLOC_005324 | ENSRNOT00000026753 | 1           | 1.33E-79 |
| TUCP_000169 | XLOC_005324 | ENSRNOT00000080533 | 0.996682529 | 3.15E-12 |
| TUCP_000169 | XLOC_005324 | ENSRNOT00000072774 | 0.979665261 | 2.65E-08 |
| TUCP_000169 | XLOC_005324 | ENSRNOT00000086031 | 1           | 0        |
| TUCP_000169 | XLOC_005324 | ENSRNOT00000014312 | 1           | 0        |
| TUCP_000169 | XLOC_005324 | ENSRNOT00000042882 | 0.963218427 | 4.98E-07 |
| TUCP_000169 | XLOC_005324 | ENSRNOT00000088012 | 0.956765806 | 1.11E-06 |
| TUCP_000169 | XLOC_005324 | ENSRNOT00000051231 | 0.999242378 | 1.96E-15 |
| TUCP_000169 | XLOC_005324 | ENSRNOT00000089407 | 0.992986194 | 1.32E-10 |
| TUCP_000169 | XLOC_005324 | ENSRNOT00000055034 | 0.998331441 | 1.02E-13 |
| TUCP_000169 | XLOC_005324 | ENSRNOT00000046837 | 0.97252559  | 1.18E-07 |
| TUCP_002604 | XLOC_109701 | ENSRNOT00000084500 | 0.984887141 | 6.05E-09 |
| TUCP_002604 | XLOC_109701 | ENSRNOT00000093467 | 0.996134431 | 6.75E-12 |
| TUCP_002604 | XLOC_109701 | ENSRNOT00000029340 | 0.999116572 | 4.23E-15 |
| TUCP_002604 | XLOC_109701 | ENSRNOT00000077972 | 0.962758032 | 5.30E-07 |
| TUCP_002604 | XLOC_109701 | ENSRNOT00000038646 | 1           | 0        |
| TUCP_002604 | XLOC_109701 | ENSRNOT00000012095 | 0.957750287 | 9.88E-07 |
| TUCP_002604 | XLOC_109701 | ENSRNOT00000017909 | 0.975587192 | 6.56E-08 |
| TUCP_002604 | XLOC_109701 | ENSRNOT00000092579 | 1           | 4.25E-78 |
| TUCP_002604 | XLOC_109701 | ENSRNOT00000089235 | 0.998661162 | 3.38E-14 |
| TUCP_002604 | XLOC_109701 | ENSRNOT00000036383 | 0.988460809 | 1.58E-09 |
| TUCP_002604 | XLOC_109701 | ENSRNOT00000076528 | 0.997115373 | 1.57E-12 |
| TUCP_002604 | XLOC_109701 | ENSRNOT00000075193 | 0.964326971 | 4.29E-07 |
| TUCP_002604 | XLOC_109701 | ENSRNOT00000083034 | 0.990934646 | 4.75E-10 |
| TUCP_002604 | XLOC_109701 | ENSRNOT00000089607 | 0.995091455 | 2.23E-11 |
| TUCP_002604 | XLOC_109701 | ENSRNOT00000086014 | 0.960893638 | 6.74E-07 |
| TUCP_002604 | XLOC_109701 | ENSRNOT00000054939 | 0.958021495 | 9.57E-07 |
| TUCP_002604 | XLOC_109701 | ENSRNOT00000052315 | 0.983687082 | 8.85E-09 |
| TUCP_002604 | XLOC_109701 | ENSRNOT00000088168 | 1           | 0        |
| TUCP_002604 | XLOC_109701 | ENSRNOT00000046231 | 0.96225463  | 5.66E-07 |
| TUCP_002604 | XLOC_109701 | ENSRNOT00000013459 | 0.979098017 | 3.03E-08 |
| TUCP_002604 | XLOC_109701 | ENSRNOT00000078137 | 1           | 1.33E-79 |
| TUCP_002604 | XLOC_109701 | ENSRNOT00000077764 | 0.977143528 | 4.73E-08 |
| TUCP_002604 | XLOC_109701 | ENSRNOT00000043661 | 0.966975951 | 2.93E-07 |
| TUCP_002604 | XLOC_109701 | ENSRNOT00000092740 | 1           | 0        |
| TUCP_002604 | XLOC_109701 | ENSRNOT00000000117 | 0.990989174 | 4.61E-10 |
| TUCP_002604 | XLOC_109701 | ENSRNOT00000071877 | 0.967113583 | 2.87E-07 |
| TUCP_002604 | XLOC_109701 | ENSRNOT00000070958 | 1           | 0        |
| TUCP_002604 | XLOC_109701 | ENSRNOT00000076757 | 0.959205354 | 8.31E-07 |
| TUCP_002604 | XLOC_109701 | ENSRNOT00000085310 | 0.965230243 | 3.78E-07 |
| TUCP_002604 | XLOC_109701 | ENSRNOT00000047241 | 0.966576993 | 3.11E-07 |

|             |             |                    |             |          |
|-------------|-------------|--------------------|-------------|----------|
| TUCP_002604 | XLOC_109701 | ENSRNOT00000027268 | 1           | 1.33E-79 |
| TUCP_002604 | XLOC_109701 | ENSRNOT00000004459 | 1           | 0        |
| TUCP_002604 | XLOC_109701 | ENSRNOT00000048373 | 0.959096578 | 8.42E-07 |
| TUCP_002604 | XLOC_109701 | ENSRNOT00000061516 | 0.987595648 | 2.27E-09 |
| TUCP_002604 | XLOC_109701 | ENSRNOT00000088148 | 1           | 0        |
| TUCP_002604 | XLOC_109701 | ENSRNOT00000088527 | 1           | 0        |
| TUCP_002604 | XLOC_109701 | ENSRNOT00000078701 | 1           | 0        |
| TUCP_002604 | XLOC_109701 | ENSRNOT00000052308 | 0.962646127 | 5.38E-07 |
| TUCP_002604 | XLOC_109701 | ENSRNOT00000021748 | 1           | 0        |
| TUCP_002604 | XLOC_109701 | ENSRNOT00000089085 | 1           | 0        |
| TUCP_002604 | XLOC_109701 | ENSRNOT00000008153 | 0.999703506 | 1.80E-17 |
| TUCP_002604 | XLOC_109701 | ENSRNOT00000085896 | 0.971605382 | 1.39E-07 |
| TUCP_002604 | XLOC_109701 | ENSRNOT00000079189 | 0.984972387 | 5.89E-09 |
| TUCP_002604 | XLOC_109701 | ENSRNOT00000090078 | 1           | 0        |
| TUCP_002604 | XLOC_109701 | ENSRNOT00000078020 | 0.958421666 | 9.13E-07 |
| TUCP_002604 | XLOC_109701 | ENSRNOT00000092425 | 0.956092273 | 1.19E-06 |
| TUCP_002604 | XLOC_109701 | ENSRNOT00000009776 | 1           | 1.33E-79 |
| TUCP_003739 | XLOC_164001 | ENSRNOT00000091323 | 0.956926557 | 1.09E-06 |
| TUCP_003739 | XLOC_164001 | ENSRNOT00000040102 | 0.988139181 | 1.81E-09 |
| TUCP_002607 | XLOC_109878 | ENSRNOT00000081570 | 0.962961027 | 5.16E-07 |
| TUCP_002607 | XLOC_109878 | ENSRNOT00000091652 | 0.99819185  | 1.52E-13 |
| TUCP_002607 | XLOC_109878 | ENSRNOT00000036564 | 0.972337506 | 1.22E-07 |
| TUCP_002607 | XLOC_109878 | ENSRNOT00000000109 | 0.962179854 | 5.72E-07 |
| TUCP_002607 | XLOC_109878 | ENSRNOT00000080865 | 1           | 0        |
| TUCP_002607 | XLOC_109878 | ENSRNOT00000073534 | 0.995808019 | 1.01E-11 |
| TUCP_002607 | XLOC_109878 | ENSRNOT00000012161 | 0.987544327 | 2.31E-09 |
| TUCP_002607 | XLOC_109878 | ENSRNOT00000078707 | 0.960060506 | 7.48E-07 |
| TUCP_002607 | XLOC_109878 | ENSRNOT00000087758 | 0.968778527 | 2.22E-07 |
| TUCP_002607 | XLOC_109878 | ENSRNOT00000049832 | 0.969039151 | 2.13E-07 |
| TUCP_002607 | XLOC_109878 | ENSRNOT00000093019 | 1           | 0        |
| TUCP_002607 | XLOC_109878 | ENSRNOT00000024825 | 0.980452701 | 2.18E-08 |
| TUCP_002607 | XLOC_109878 | ENSRNOT00000059266 | 0.96033506  | 7.23E-07 |
| TUCP_002607 | XLOC_109878 | ENSRNOT00000072734 | 0.965018115 | 3.89E-07 |
| TUCP_002607 | XLOC_109878 | ENSRNOT00000085908 | 0.996653227 | 3.29E-12 |
| TUCP_002607 | XLOC_109878 | ENSRNOT00000046744 | 1           | 0        |
| TUCP_002607 | XLOC_109878 | ENSRNOT00000076429 | 1           | 0        |
| TUCP_002607 | XLOC_109878 | ENSRNOT00000084667 | 0.999660971 | 3.53E-17 |
| TUCP_002607 | XLOC_109878 | ENSRNOT00000055412 | 1           | 0        |
| TUCP_002607 | XLOC_109878 | ENSRNOT00000093201 | 0.9997022   | 1.84E-17 |
| TUCP_002607 | XLOC_109878 | ENSRNOT00000072724 | 1           | 0        |
| TUCP_002607 | XLOC_109878 | ENSRNOT00000090323 | 0.95603782  | 1.20E-06 |
| TUCP_002607 | XLOC_109878 | ENSRNOT00000082760 | 0.986293522 | 3.72E-09 |
| TUCP_002607 | XLOC_109878 | ENSRNOT00000066017 | 0.989785653 | 8.61E-10 |
| TUCP_002607 | XLOC_109878 | ENSRNOT00000073148 | 0.985721397 | 4.56E-09 |
| TUCP_002607 | XLOC_109878 | ENSRNOT00000077462 | 0.960098183 | 7.45E-07 |
| TUCP_002607 | XLOC_109878 | ENSRNOT00000084375 | 1           | 0        |
| TUCP_002607 | XLOC_109878 | ENSRNOT00000085447 | 0.998400682 | 8.22E-14 |
| TUCP_002607 | XLOC_109878 | ENSRNOT00000006249 | 0.966489607 | 3.15E-07 |
| TUCP_002607 | XLOC_109878 | ENSRNOT00000087073 | 0.952450698 | 1.77E-06 |
| TUCP_002607 | XLOC_109878 | ENSRNOT00000042369 | 0.995659369 | 1.20E-11 |
| TUCP_002607 | XLOC_109878 | ENSRNOT00000086554 | 1           | 1.33E-79 |



|             |             |                    |              |          |
|-------------|-------------|--------------------|--------------|----------|
| TUCP_002607 | XLOC_109878 | ENSRNOT00000054858 | 0.985228824  | 5.40E-09 |
| TUCP_002607 | XLOC_109878 | ENSRNOT00000047921 | 1            | 0        |
| TUCP_002607 | XLOC_109878 | ENSRNOT00000064261 | 0.999977196  | 4.86E-23 |
| TUCP_002607 | XLOC_109878 | ENSRNOT00000086660 | 0.999208903  | 2.44E-15 |
| TUCP_002607 | XLOC_109878 | ENSRNOT00000080933 | 0.967360681  | 2.76E-07 |
| TUCP_002607 | XLOC_109878 | ENSRNOT00000083977 | 1            | 0        |
| TUCP_002607 | XLOC_109878 | ENSRNOT00000092933 | 1            | 0        |
| TUCP_002607 | XLOC_109878 | ENSRNOT0000009061  | 0.953300672  | 1.62E-06 |
| TUCP_002607 | XLOC_109878 | ENSRNOT00000041281 | 0.987828355  | 2.06E-09 |
| TUCP_003903 | XLOC_171920 | ENSRNOT00000071913 | 0.959287029  | 8.23E-07 |
| TUCP_003326 | XLOC_143304 | ENSRNOT00000032618 | 0.977910969  | 3.99E-08 |
| TUCP_003905 | XLOC_172034 | ENSRNOT00000016289 | 0.957751113  | 9.87E-07 |
| TUCP_003905 | XLOC_172034 | ENSRNOT00000072698 | 0.977520953  | 4.35E-08 |
| TUCP_003905 | XLOC_172034 | ENSRNOT00000013369 | 0.952030895  | 1.85E-06 |
| TUCP_001986 | XLOC_080700 | ENSRNOT00000055572 | -0.957500227 | 1.02E-06 |
| TUCP_001984 | XLOC_080392 | ENSRNOT00000065285 | 0.953244994  | 1.63E-06 |
| TUCP_001985 | XLOC_080640 | ENSRNOT00000086279 | 0.964825795  | 4.00E-07 |
| TUCP_001985 | XLOC_080640 | ENSRNOT00000066583 | 0.953765022  | 1.54E-06 |
| TUCP_001565 | XLOC_060492 | ENSRNOT00000027411 | 0.975724355  | 6.37E-08 |
| TUCP_001565 | XLOC_060492 | ENSRNOT00000045285 | 0.95260585   | 1.74E-06 |
| TUCP_001565 | XLOC_060492 | ENSRNOT00000081512 | 0.959334981  | 8.18E-07 |
| TUCP_001565 | XLOC_060492 | ENSRNOT00000067663 | 0.964706063  | 4.06E-07 |
| TUCP_001565 | XLOC_060492 | ENSRNOT00000067866 | 0.958638189  | 8.89E-07 |
| TUCP_001565 | XLOC_060492 | ENSRNOT00000080024 | 0.958887232  | 8.63E-07 |
| TUCP_001565 | XLOC_060492 | ENSRNOT00000012048 | 0.968449359  | 2.34E-07 |
| TUCP_001565 | XLOC_060492 | ENSRNOT00000071407 | 0.957455482  | 1.02E-06 |
| TUCP_001565 | XLOC_060492 | ENSRNOT00000076763 | 0.961689085  | 6.09E-07 |
| TUCP_001565 | XLOC_060492 | ENSRNOT00000075558 | 0.973189731  | 1.04E-07 |
| TUCP_004226 | XLOC_185563 | ENSRNOT00000004842 | 0.958203528  | 9.36E-07 |
| TUCP_004226 | XLOC_185563 | ENSRNOT00000030893 | 0.963046996  | 5.10E-07 |
| TUCP_004226 | XLOC_185563 | ENSRNOT00000044147 | 0.95445507   | 1.43E-06 |
| TUCP_004226 | XLOC_185563 | ENSRNOT00000011344 | 0.978627342  | 3.39E-08 |
| TUCP_004226 | XLOC_185563 | ENSRNOT00000014553 | 0.950339838  | 2.19E-06 |
| TUCP_004226 | XLOC_185563 | ENSRNOT00000048298 | 0.95266467   | 1.73E-06 |
| TUCP_004226 | XLOC_185563 | ENSRNOT00000025308 | 0.953352924  | 1.61E-06 |
| TUCP_004226 | XLOC_185563 | ENSRNOT00000010020 | 0.959816509  | 7.71E-07 |
| TUCP_004226 | XLOC_185563 | ENSRNOT00000017232 | 0.966825411  | 2.99E-07 |
| TUCP_004226 | XLOC_185563 | ENSRNOT00000029076 | 0.953079571  | 1.65E-06 |
| TUCP_004226 | XLOC_185563 | ENSRNOT00000071453 | -0.95054739  | 2.14E-06 |
| TUCP_004226 | XLOC_185563 | ENSRNOT00000048770 | 0.961007423  | 6.65E-07 |
| TUCP_001980 | XLOC_079978 | ENSRNOT00000040116 | 0.960063895  | 7.48E-07 |
| TUCP_001980 | XLOC_079978 | ENSRNOT00000008399 | 0.965888074  | 3.44E-07 |
| TUCP_001980 | XLOC_079978 | ENSRNOT00000000995 | 0.96453545   | 4.16E-07 |
| TUCP_001980 | XLOC_079978 | ENSRNOT00000014533 | 0.964881564  | 3.97E-07 |
| TUCP_001980 | XLOC_079978 | ENSRNOT00000018888 | 0.963231932  | 4.98E-07 |
| TUCP_001980 | XLOC_079978 | ENSRNOT00000068354 | 0.960481015  | 7.10E-07 |
| TUCP_001980 | XLOC_079978 | ENSRNOT0000003082  | 0.981080262  | 1.85E-08 |
| TUCP_001980 | XLOC_079978 | ENSRNOT00000044751 | 0.954891781  | 1.36E-06 |
| TUCP_001980 | XLOC_079978 | ENSRNOT00000012963 | 0.965844397  | 3.46E-07 |
| TUCP_001980 | XLOC_079978 | ENSRNOT00000057504 | 0.962105259  | 5.77E-07 |
| TUCP_001980 | XLOC_079978 | ENSRNOT00000010968 | 0.977689438  | 4.19E-08 |

|             |             |                    |              |          |
|-------------|-------------|--------------------|--------------|----------|
| TUCP_001980 | XLOC_079978 | ENSRNOT0000009448  | 0.95510821   | 1.33E-06 |
| TUCP_001980 | XLOC_079978 | ENSRNOT00000047731 | 0.957071718  | 1.07E-06 |
| TUCP_001980 | XLOC_079978 | ENSRNOT00000009136 | 0.954152563  | 1.48E-06 |
| TUCP_001980 | XLOC_079978 | ENSRNOT00000013182 | 0.964553904  | 4.15E-07 |
| TUCP_001980 | XLOC_079978 | ENSRNOT00000025731 | 0.961267228  | 6.43E-07 |
| TUCP_001980 | XLOC_079978 | ENSRNOT00000042973 | 0.96509786   | 3.85E-07 |
| TUCP_001980 | XLOC_079978 | ENSRNOT00000003458 | 0.966437823  | 3.17E-07 |
| TUCP_001980 | XLOC_079978 | ENSRNOT00000042117 | 0.971313306  | 1.46E-07 |
| TUCP_001980 | XLOC_079978 | ENSRNOT00000002853 | 0.965456853  | 3.66E-07 |
| TUCP_001980 | XLOC_079978 | ENSRNOT00000000110 | 0.960317901  | 7.25E-07 |
| TUCP_001980 | XLOC_079978 | ENSRNOT00000006196 | 0.972185652  | 1.25E-07 |
| TUCP_001980 | XLOC_079978 | ENSRNOT00000013809 | 0.950120424  | 2.24E-06 |
| TUCP_001980 | XLOC_079978 | ENSRNOT00000073087 | 0.96219186   | 5.71E-07 |
| TUCP_001980 | XLOC_079978 | ENSRNOT00000019389 | 0.964940329  | 3.93E-07 |
| TUCP_001980 | XLOC_079978 | ENSRNOT00000021487 | 0.969534246  | 1.96E-07 |
| TUCP_001980 | XLOC_079978 | ENSRNOT00000008813 | 0.981453637  | 1.68E-08 |
| TUCP_001980 | XLOC_079978 | ENSRNOT00000051067 | 0.973718344  | 9.45E-08 |
| TUCP_001980 | XLOC_079978 | ENSRNOT00000023067 | 0.956971661  | 1.08E-06 |
| TUCP_001980 | XLOC_079978 | ENSRNOT00000073138 | 0.958431119  | 9.12E-07 |
| TUCP_001980 | XLOC_079978 | ENSRNOT00000045357 | 0.954671049  | 1.40E-06 |
| TUCP_001980 | XLOC_079978 | ENSRNOT00000014317 | 0.957941227  | 9.66E-07 |
| TUCP_001980 | XLOC_079978 | ENSRNOT00000029845 | 0.951716413  | 1.91E-06 |
| TUCP_001980 | XLOC_079978 | ENSRNOT00000022128 | 0.971283181  | 1.47E-07 |
| TUCP_001981 | XLOC_080226 | ENSRNOT00000082869 | 0.963796537  | 4.61E-07 |
| TUCP_001981 | XLOC_080226 | ENSRNOT00000012811 | 0.955954744  | 1.21E-06 |
| TUCP_001981 | XLOC_080226 | ENSRNOT00000088353 | -0.960875586 | 6.76E-07 |
| TUCP_004595 | XLOC_201913 | ENSRNOT00000087934 | 0.962569371  | 5.43E-07 |
| TUCP_004595 | XLOC_201913 | ENSRNOT00000082891 | 0.953719809  | 1.55E-06 |
| TUCP_000688 | XLOC_026080 | ENSRNOT00000063883 | 0.960874214  | 6.76E-07 |
| TUCP_003118 | XLOC_133008 | ENSRNOT00000067150 | 0.960214992  | 7.34E-07 |
| TUCP_003118 | XLOC_133008 | ENSRNOT00000008982 | 0.954798055  | 1.38E-06 |
| TUCP_003118 | XLOC_133008 | ENSRNOT00000001215 | 0.96317308   | 5.01E-07 |
| TUCP_003118 | XLOC_133008 | ENSRNOT00000027526 | 0.950096022  | 2.24E-06 |
| TUCP_003118 | XLOC_133008 | ENSRNOT00000092029 | 0.951133185  | 2.02E-06 |
| TUCP_003118 | XLOC_133008 | ENSRNOT00000088599 | 0.950890855  | 2.07E-06 |
| TUCP_003118 | XLOC_133008 | ENSRNOT00000048910 | -0.956968117 | 1.08E-06 |
| TUCP_003118 | XLOC_133008 | ENSRNOT00000016991 | 0.970001585  | 1.82E-07 |
| TUCP_003118 | XLOC_133008 | ENSRNOT00000027375 | 0.966658124  | 3.07E-07 |
| TUCP_003118 | XLOC_133008 | ENSRNOT0000005934  | 0.952107286  | 1.83E-06 |
| TUCP_003118 | XLOC_133008 | ENSRNOT00000043872 | 0.971698597  | 1.36E-07 |
| TUCP_003118 | XLOC_133008 | ENSRNOT00000017665 | 0.962676105  | 5.36E-07 |
| TUCP_003118 | XLOC_133008 | ENSRNOT00000079866 | 0.951596858  | 1.93E-06 |
| TUCP_003118 | XLOC_133008 | ENSRNOT00000041513 | 0.956328869  | 1.16E-06 |
| TUCP_003118 | XLOC_133008 | ENSRNOT00000002443 | 0.95239586   | 1.78E-06 |
| TUCP_003118 | XLOC_133008 | ENSRNOT00000003891 | 0.961359529  | 6.36E-07 |
| TUCP_003118 | XLOC_133008 | ENSRNOT00000077406 | 0.961559296  | 6.20E-07 |
| TUCP_003118 | XLOC_133008 | ENSRNOT00000015434 | 0.963679629  | 4.68E-07 |
| TUCP_003118 | XLOC_133008 | ENSRNOT00000012334 | 0.973623353  | 9.62E-08 |
| TUCP_003118 | XLOC_133008 | ENSRNOT00000015092 | 0.954443514  | 1.43E-06 |
| TUCP_003118 | XLOC_133008 | ENSRNOT00000005220 | 0.951355875  | 1.98E-06 |
| TUCP_003118 | XLOC_133008 | ENSRNOT00000005459 | 0.957814653  | 9.80E-07 |

|             |             |                    |              |          |
|-------------|-------------|--------------------|--------------|----------|
| TUCP_003118 | XLOC_133008 | ENSRNOT00000045326 | 0.958538506  | 9.00E-07 |
| TUCP_003118 | XLOC_133008 | ENSRNOT00000017776 | 0.958696302  | 8.83E-07 |
| TUCP_003118 | XLOC_133008 | ENSRNOT00000084422 | 0.964821723  | 4.00E-07 |
| TUCP_003118 | XLOC_133008 | ENSRNOT00000046745 | 0.950917992  | 2.07E-06 |
| TUCP_003118 | XLOC_133008 | ENSRNOT00000004172 | 0.952650244  | 1.73E-06 |
| TUCP_003118 | XLOC_133008 | ENSRNOT00000084385 | 0.954918925  | 1.36E-06 |
| TUCP_003118 | XLOC_133008 | ENSRNOT00000008104 | 0.965251766  | 3.76E-07 |
| TUCP_003118 | XLOC_133008 | ENSRNOT00000072208 | 0.960854972  | 6.78E-07 |
| TUCP_003118 | XLOC_133008 | ENSRNOT00000040476 | 0.952716686  | 1.72E-06 |
| TUCP_003118 | XLOC_133008 | ENSRNOT00000001403 | 0.960456713  | 7.12E-07 |
| TUCP_003118 | XLOC_133008 | ENSRNOT00000029125 | 0.953746461  | 1.54E-06 |
| TUCP_003118 | XLOC_133008 | ENSRNOT00000055321 | 0.961742182  | 6.05E-07 |
| TUCP_003118 | XLOC_133008 | ENSRNOT00000001242 | 0.950812303  | 2.09E-06 |
| TUCP_003118 | XLOC_133008 | ENSRNOT00000000013 | 0.952640726  | 1.73E-06 |
| TUCP_003118 | XLOC_133008 | ENSRNOT00000090918 | 0.954964207  | 1.35E-06 |
| TUCP_003118 | XLOC_133008 | ENSRNOT00000046973 | 0.970320265  | 1.73E-07 |
| TUCP_003118 | XLOC_133008 | ENSRNOT00000045699 | 0.956239453  | 1.17E-06 |
| TUCP_003118 | XLOC_133008 | ENSRNOT00000040069 | 0.955716338  | 1.24E-06 |
| TUCP_003118 | XLOC_133008 | ENSRNOT00000083220 | 0.955830333  | 1.23E-06 |
| TUCP_003118 | XLOC_133008 | ENSRNOT00000081981 | 0.951635282  | 1.92E-06 |
| TUCP_003118 | XLOC_133008 | ENSRNOT00000024969 | 0.951958521  | 1.86E-06 |
| TUCP_003118 | XLOC_133008 | ENSRNOT00000017063 | -0.952867579 | 1.69E-06 |
| TUCP_003118 | XLOC_133008 | ENSRNOT00000010399 | 0.971860829  | 1.33E-07 |
| TUCP_003118 | XLOC_133008 | ENSRNOT00000072132 | 0.952478307  | 1.76E-06 |
| TUCP_003118 | XLOC_133008 | ENSRNOT00000047356 | 0.95179836   | 1.89E-06 |
| TUCP_003118 | XLOC_133008 | ENSRNOT00000014124 | 0.951007413  | 2.05E-06 |
| TUCP_003118 | XLOC_133008 | ENSRNOT00000004463 | 0.950660463  | 2.12E-06 |
| TUCP_003118 | XLOC_133008 | ENSRNOT00000030109 | 0.960185222  | 7.37E-07 |
| TUCP_003118 | XLOC_133008 | ENSRNOT00000081047 | 0.954317537  | 1.45E-06 |
| TUCP_003118 | XLOC_133008 | ENSRNOT00000026597 | 0.958016368  | 9.57E-07 |
| TUCP_003118 | XLOC_133008 | ENSRNOT00000011270 | 0.954550599  | 1.41E-06 |
| TUCP_003118 | XLOC_133008 | ENSRNOT00000015265 | 0.955660009  | 1.25E-06 |
| TUCP_003118 | XLOC_133008 | ENSRNOT00000078475 | 0.95803596   | 9.55E-07 |
| TUCP_003118 | XLOC_133008 | ENSRNOT00000042498 | 0.957853602  | 9.76E-07 |
| TUCP_003118 | XLOC_133008 | ENSRNOT00000048063 | 0.950932229  | 2.06E-06 |
| TUCP_003118 | XLOC_133008 | ENSRNOT00000027970 | 0.960280769  | 7.28E-07 |
| TUCP_003118 | XLOC_133008 | ENSRNOT00000015793 | 0.956341537  | 1.16E-06 |
| TUCP_003118 | XLOC_133008 | ENSRNOT00000011287 | 0.960808394  | 6.82E-07 |
| TUCP_003118 | XLOC_133008 | ENSRNOT00000079454 | 0.954621357  | 1.40E-06 |
| TUCP_003118 | XLOC_133008 | ENSRNOT00000032780 | 0.953019709  | 1.67E-06 |
| TUCP_003118 | XLOC_133008 | ENSRNOT00000083957 | 0.966941901  | 2.94E-07 |
| TUCP_003118 | XLOC_133008 | ENSRNOT00000038066 | 0.955390828  | 1.29E-06 |
| TUCP_003118 | XLOC_133008 | ENSRNOT00000015609 | 0.953138739  | 1.64E-06 |
| TUCP_003118 | XLOC_133008 | ENSRNOT00000035474 | 0.957062395  | 1.07E-06 |
| TUCP_003118 | XLOC_133008 | ENSRNOT00000078102 | 0.960620882  | 6.98E-07 |
| TUCP_003118 | XLOC_133008 | ENSRNOT00000037456 | 0.956065164  | 1.20E-06 |
| TUCP_003118 | XLOC_133008 | ENSRNOT00000086122 | 0.950469554  | 2.16E-06 |
| TUCP_002468 | XLOC_104510 | ENSRNOT00000001215 | 0.961052132  | 6.61E-07 |
| TUCP_002468 | XLOC_104510 | ENSRNOT00000006188 | -0.977588703 | 4.29E-08 |
| TUCP_002468 | XLOC_104510 | ENSRNOT00000006186 | 0.950609533  | 2.13E-06 |
| TUCP_002468 | XLOC_104510 | ENSRNOT00000090621 | 0.959739224  | 7.79E-07 |

|             |             |                    |              |          |
|-------------|-------------|--------------------|--------------|----------|
| TUCP_002468 | XLOC_104510 | ENSRNOT00000013745 | -0.973253365 | 1.03E-07 |
| TUCP_002468 | XLOC_104510 | ENSRNOT00000075397 | 0.977641908  | 4.24E-08 |
| TUCP_002468 | XLOC_104510 | ENSRNOT00000032926 | -0.970173167 | 1.77E-07 |
| TUCP_002468 | XLOC_104510 | ENSRNOT00000019104 | -0.961866231 | 5.96E-07 |
| TUCP_002468 | XLOC_104510 | ENSRNOT00000006217 | 0.953974264  | 1.51E-06 |
| TUCP_002468 | XLOC_104510 | ENSRNOT00000068353 | 0.959158065  | 8.36E-07 |
| TUCP_002468 | XLOC_104510 | ENSRNOT00000001691 | 0.977705904  | 4.18E-08 |
| TUCP_002468 | XLOC_104510 | ENSRNOT00000089319 | 0.970742516  | 1.61E-07 |
| TUCP_002468 | XLOC_104510 | ENSRNOT00000079138 | 0.968346982  | 2.37E-07 |
| TUCP_002468 | XLOC_104510 | ENSRNOT00000086706 | 0.961454684  | 6.28E-07 |
| TUCP_002468 | XLOC_104510 | ENSRNOT00000085885 | -0.952407913 | 1.77E-06 |
| TUCP_002468 | XLOC_104510 | ENSRNOT00000010030 | -0.950382912 | 2.18E-06 |
| TUCP_002468 | XLOC_104510 | ENSRNOT00000045233 | -0.959909132 | 7.62E-07 |
| TUCP_002468 | XLOC_104510 | ENSRNOT00000011130 | -0.951907458 | 1.87E-06 |
| TUCP_002468 | XLOC_104510 | ENSRNOT00000052063 | 0.955677692  | 1.25E-06 |
| TUCP_002468 | XLOC_104510 | ENSRNOT00000030850 | 0.953283883  | 1.62E-06 |
| TUCP_002468 | XLOC_104510 | ENSRNOT00000055582 | 0.951211689  | 2.01E-06 |
| TUCP_002468 | XLOC_104510 | ENSRNOT00000055540 | 0.961754252  | 6.04E-07 |
| TUCP_002468 | XLOC_104510 | ENSRNOT00000006752 | 0.969698791  | 1.91E-07 |
| TUCP_002468 | XLOC_104510 | ENSRNOT00000021534 | -0.971439674 | 1.43E-07 |
| TUCP_002468 | XLOC_104510 | ENSRNOT00000085251 | -0.954066919 | 1.49E-06 |
| TUCP_002468 | XLOC_104510 | ENSRNOT00000083677 | -0.96875628  | 2.22E-07 |
| TUCP_002468 | XLOC_104510 | ENSRNOT00000065304 | -0.950996355 | 2.05E-06 |
| TUCP_002468 | XLOC_104510 | ENSRNOT00000073370 | 0.961736015  | 6.06E-07 |
| TUCP_002468 | XLOC_104510 | ENSRNOT00000065978 | 0.965363416  | 3.70E-07 |
| TUCP_002468 | XLOC_104510 | ENSRNOT00000035320 | -0.953723531 | 1.55E-06 |
| TUCP_002468 | XLOC_104510 | ENSRNOT00000057160 | 0.961865656  | 5.96E-07 |
| TUCP_002468 | XLOC_104510 | ENSRNOT00000065871 | 0.956567155  | 1.13E-06 |
| TUCP_002468 | XLOC_104510 | ENSRNOT00000083964 | -0.974900136 | 7.52E-08 |
| TUCP_002468 | XLOC_104510 | ENSRNOT00000019192 | -0.957320901 | 1.04E-06 |
| TUCP_002468 | XLOC_104510 | ENSRNOT00000077999 | 0.959939181  | 7.60E-07 |
| TUCP_002468 | XLOC_104510 | ENSRNOT00000083351 | -0.961582007 | 6.18E-07 |
| TUCP_002468 | XLOC_104510 | ENSRNOT00000077856 | -0.953504622 | 1.58E-06 |
| TUCP_002468 | XLOC_104510 | ENSRNOT00000015188 | 0.956886783  | 1.09E-06 |
| TUCP_002468 | XLOC_104510 | ENSRNOT00000018488 | -0.95476431  | 1.38E-06 |
| TUCP_002468 | XLOC_104510 | ENSRNOT00000005686 | -0.960378197 | 7.19E-07 |
| TUCP_002468 | XLOC_104510 | ENSRNOT00000040629 | 0.954824433  | 1.37E-06 |
| TUCP_002468 | XLOC_104510 | ENSRNOT00000005834 | 0.954026797  | 1.50E-06 |
| TUCP_002468 | XLOC_104510 | ENSRNOT00000005297 | 0.959514478  | 8.00E-07 |
| TUCP_002468 | XLOC_104510 | ENSRNOT00000000048 | 0.979168737  | 2.98E-08 |
| TUCP_002468 | XLOC_104510 | ENSRNOT00000075934 | -0.952152975 | 1.82E-06 |
| TUCP_002468 | XLOC_104510 | ENSRNOT00000076181 | -0.966277925 | 3.25E-07 |
| TUCP_002468 | XLOC_104510 | ENSRNOT00000031384 | 0.954693608  | 1.39E-06 |
| TUCP_002468 | XLOC_104510 | ENSRNOT00000080410 | -0.970728766 | 1.61E-07 |
| TUCP_002468 | XLOC_104510 | ENSRNOT00000087278 | -0.955301561 | 1.30E-06 |
| TUCP_002468 | XLOC_104510 | ENSRNOT00000010367 | 0.96539806   | 3.69E-07 |
| TUCP_002468 | XLOC_104510 | ENSRNOT00000041044 | 0.958589514  | 8.95E-07 |
| TUCP_002468 | XLOC_104510 | ENSRNOT00000067391 | -0.960758354 | 6.86E-07 |
| TUCP_002468 | XLOC_104510 | ENSRNOT00000009150 | 0.962387453  | 5.57E-07 |
| TUCP_002468 | XLOC_104510 | ENSRNOT00000084709 | 0.964333544  | 4.28E-07 |
| TUCP_002468 | XLOC_104510 | ENSRNOT00000068033 | 0.959339121  | 8.17E-07 |

|             |             |                    |              |          |
|-------------|-------------|--------------------|--------------|----------|
| TUCP_002468 | XLOC_104510 | ENSRNOT00000026481 | 0.956322761  | 1.16E-06 |
| TUCP_002468 | XLOC_104510 | ENSRNOT00000082709 | -0.966402582 | 3.19E-07 |
| TUCP_002468 | XLOC_104510 | ENSRNOT00000025856 | -0.979457273 | 2.78E-08 |
| TUCP_002468 | XLOC_104510 | ENSRNOT00000026643 | 0.96810738   | 2.46E-07 |
| TUCP_002468 | XLOC_104510 | ENSRNOT00000001403 | 0.975283451  | 6.97E-08 |
| TUCP_002468 | XLOC_104510 | ENSRNOT00000072357 | -0.965592636 | 3.58E-07 |
| TUCP_002468 | XLOC_104510 | ENSRNOT00000016132 | -0.975312313 | 6.93E-08 |
| TUCP_002468 | XLOC_104510 | ENSRNOT00000058495 | -0.959929192 | 7.61E-07 |
| TUCP_002468 | XLOC_104510 | ENSRNOT00000013067 | -0.97420643  | 8.61E-08 |
| TUCP_002468 | XLOC_104510 | ENSRNOT00000066952 | 0.965391712  | 3.69E-07 |
| TUCP_002468 | XLOC_104510 | ENSRNOT00000016220 | -0.953931511 | 1.51E-06 |
| TUCP_002468 | XLOC_104510 | ENSRNOT00000048063 | 0.951558514  | 1.94E-06 |
| TUCP_002468 | XLOC_104510 | ENSRNOT00000003780 | 0.968023554  | 2.50E-07 |
| TUCP_002468 | XLOC_104510 | ENSRNOT00000020910 | 0.970864858  | 1.57E-07 |
| TUCP_002468 | XLOC_104510 | ENSRNOT00000041815 | -0.959566665 | 7.95E-07 |
| TUCP_002468 | XLOC_104510 | ENSRNOT00000033975 | 0.966908016  | 2.96E-07 |
| TUCP_002468 | XLOC_104510 | ENSRNOT00000079895 | 0.953317894  | 1.61E-06 |
| TUCP_002468 | XLOC_104510 | ENSRNOT00000074586 | -0.96079207  | 6.83E-07 |
| TUCP_002468 | XLOC_104510 | ENSRNOT00000045765 | -0.960165217 | 7.39E-07 |
| TUCP_002468 | XLOC_104510 | ENSRNOT00000060494 | 0.95265609   | 1.73E-06 |
| TUCP_002468 | XLOC_104510 | ENSRNOT00000002465 | 0.952427542  | 1.77E-06 |
| TUCP_002468 | XLOC_104510 | ENSRNOT00000011880 | 0.951022936  | 2.04E-06 |
| TUCP_002468 | XLOC_104510 | ENSRNOT00000029202 | -0.970588427 | 1.65E-07 |
| TUCP_002468 | XLOC_104510 | ENSRNOT00000031487 | 0.952215605  | 1.81E-06 |
| TUCP_002468 | XLOC_104510 | ENSRNOT00000020885 | 0.951376964  | 1.97E-06 |
| TUCP_002468 | XLOC_104510 | ENSRNOT00000012286 | -0.959817332 | 7.71E-07 |
| TUCP_002468 | XLOC_104510 | ENSRNOT00000050515 | 0.965711917  | 3.52E-07 |
| TUCP_002468 | XLOC_104510 | ENSRNOT00000012942 | 0.951614931  | 1.93E-06 |
| TUCP_002468 | XLOC_104510 | ENSRNOT00000011401 | -0.958688958 | 8.84E-07 |
| TUCP_002468 | XLOC_104510 | ENSRNOT00000055602 | -0.97479019  | 7.69E-08 |
| TUCP_002468 | XLOC_104510 | ENSRNOT00000046745 | 0.961049369  | 6.61E-07 |
| TUCP_002468 | XLOC_104510 | ENSRNOT00000082146 | -0.961443415 | 6.29E-07 |
| TUCP_002468 | XLOC_104510 | ENSRNOT00000031555 | -0.958571401 | 8.96E-07 |
| TUCP_002468 | XLOC_104510 | ENSRNOT00000011563 | -0.960955469 | 6.69E-07 |
| TUCP_002468 | XLOC_104510 | ENSRNOT00000000263 | 0.958933145  | 8.59E-07 |
| TUCP_002468 | XLOC_104510 | ENSRNOT00000023876 | 0.962748406  | 5.31E-07 |
| TUCP_002468 | XLOC_104510 | ENSRNOT00000023872 | -0.952536514 | 1.75E-06 |
| TUCP_002468 | XLOC_104510 | ENSRNOT00000049285 | -0.974990109 | 7.39E-08 |
| TUCP_002468 | XLOC_104510 | ENSRNOT00000015239 | -0.965931549 | 3.41E-07 |
| TUCP_002468 | XLOC_104510 | ENSRNOT00000003568 | 0.96813392   | 2.45E-07 |
| TUCP_002468 | XLOC_104510 | ENSRNOT00000006366 | -0.954136907 | 1.48E-06 |
| TUCP_002468 | XLOC_104510 | ENSRNOT00000074649 | 0.974427763  | 8.25E-08 |
| TUCP_002468 | XLOC_104510 | ENSRNOT00000033196 | -0.956158818 | 1.18E-06 |
| TUCP_002468 | XLOC_104510 | ENSRNOT00000077146 | -0.981659135 | 1.58E-08 |
| TUCP_002468 | XLOC_104510 | ENSRNOT00000060002 | -0.973618432 | 9.63E-08 |
| TUCP_002468 | XLOC_104510 | ENSRNOT00000089673 | -0.982629549 | 1.21E-08 |
| TUCP_002468 | XLOC_104510 | ENSRNOT00000027301 | -0.964953927 | 3.93E-07 |
| TUCP_002468 | XLOC_104510 | ENSRNOT00000075209 | -0.960392846 | 7.18E-07 |
| TUCP_002468 | XLOC_104510 | ENSRNOT00000057738 | 0.971688311  | 1.37E-07 |
| TUCP_002468 | XLOC_104510 | ENSRNOT00000023977 | -0.976518379 | 5.41E-08 |
| TUCP_002468 | XLOC_104510 | ENSRNOT00000066133 | -0.969096083 | 2.11E-07 |

|             |             |                     |              |          |
|-------------|-------------|---------------------|--------------|----------|
| TUCP_002468 | XLOC_104510 | ENSRNOT00000006765  | -0.967910156 | 2.54E-07 |
| TUCP_002468 | XLOC_104510 | ENSRNOT000000035385 | 0.961493635  | 6.25E-07 |
| TUCP_002468 | XLOC_104510 | ENSRNOT00000003102  | 0.950050365  | 2.25E-06 |
| TUCP_002468 | XLOC_104510 | ENSRNOT00000002443  | 0.965992268  | 3.38E-07 |
| TUCP_002468 | XLOC_104510 | ENSRNOT00000014924  | -0.966165226 | 3.30E-07 |
| TUCP_002468 | XLOC_104510 | ENSRNOT000000030692 | -0.969040476 | 2.13E-07 |
| TUCP_002468 | XLOC_104510 | ENSRNOT00000014885  | -0.956200126 | 1.18E-06 |
| TUCP_002468 | XLOC_104510 | ENSRNOT000000064535 | -0.957746199 | 9.88E-07 |
| TUCP_002468 | XLOC_104510 | ENSRNOT00000015624  | 0.964788676  | 4.02E-07 |
| TUCP_002468 | XLOC_104510 | ENSRNOT000000085295 | -0.964148137 | 4.39E-07 |
| TUCP_002468 | XLOC_104510 | ENSRNOT00000008222  | -0.966896834 | 2.96E-07 |
| TUCP_002468 | XLOC_104510 | ENSRNOT00000009749  | -0.951269264 | 1.99E-06 |
| TUCP_002468 | XLOC_104510 | ENSRNOT000000039102 | 0.978996681  | 3.11E-08 |
| TUCP_002468 | XLOC_104510 | ENSRNOT000000086260 | -0.962628186 | 5.39E-07 |
| TUCP_002468 | XLOC_104510 | ENSRNOT000000023807 | -0.971301574 | 1.46E-07 |
| TUCP_002468 | XLOC_104510 | ENSRNOT000000078856 | -0.972693229 | 1.14E-07 |
| TUCP_002468 | XLOC_104510 | ENSRNOT000000091205 | 0.967295883  | 2.79E-07 |
| TUCP_002468 | XLOC_104510 | ENSRNOT000000017692 | -0.956539991 | 1.13E-06 |
| TUCP_002468 | XLOC_104510 | ENSRNOT000000009742 | -0.963720863 | 4.66E-07 |
| TUCP_002468 | XLOC_104510 | ENSRNOT00000010983  | 0.966894057  | 2.96E-07 |
| TUCP_002468 | XLOC_104510 | ENSRNOT000000007369 | 0.979979196  | 2.45E-08 |
| TUCP_002468 | XLOC_104510 | ENSRNOT000000004787 | -0.965603771 | 3.58E-07 |
| TUCP_002468 | XLOC_104510 | ENSRNOT000000085466 | 0.961516528  | 6.23E-07 |
| TUCP_002468 | XLOC_104510 | ENSRNOT000000060698 | -0.968904713 | 2.17E-07 |
| TUCP_002468 | XLOC_104510 | ENSRNOT000000058351 | 0.957474207  | 1.02E-06 |
| TUCP_002468 | XLOC_104510 | ENSRNOT000000022000 | -0.963140363 | 5.04E-07 |
| TUCP_002468 | XLOC_104510 | ENSRNOT000000083891 | -0.958587409 | 8.95E-07 |
| TUCP_002468 | XLOC_104510 | ENSRNOT00000010748  | 0.959745527  | 7.78E-07 |
| TUCP_002468 | XLOC_104510 | ENSRNOT000000023537 | -0.958747367 | 8.78E-07 |
| TUCP_002468 | XLOC_104510 | ENSRNOT000000017995 | 0.965321676  | 3.73E-07 |
| TUCP_002468 | XLOC_104510 | ENSRNOT00000013431  | -0.953219709 | 1.63E-06 |
| TUCP_002468 | XLOC_104510 | ENSRNOT000000028703 | -0.953380841 | 1.60E-06 |
| TUCP_002468 | XLOC_104510 | ENSRNOT000000088679 | -0.965721655 | 3.52E-07 |
| TUCP_002468 | XLOC_104510 | ENSRNOT000000051494 | 0.955227953  | 1.31E-06 |
| TUCP_002468 | XLOC_104510 | ENSRNOT000000023256 | 0.965480851  | 3.64E-07 |
| TUCP_002468 | XLOC_104510 | ENSRNOT000000037809 | -0.952743036 | 1.71E-06 |
| TUCP_002468 | XLOC_104510 | ENSRNOT000000059807 | 0.951439777  | 1.96E-06 |
| TUCP_002468 | XLOC_104510 | ENSRNOT000000008982 | 0.960708354  | 6.90E-07 |
| TUCP_002468 | XLOC_104510 | ENSRNOT000000022097 | 0.956961826  | 1.08E-06 |
| TUCP_002468 | XLOC_104510 | ENSRNOT000000008987 | -0.985081166 | 5.68E-09 |
| TUCP_002468 | XLOC_104510 | ENSRNOT000000090299 | 0.960315865  | 7.25E-07 |
| TUCP_002468 | XLOC_104510 | ENSRNOT000000092876 | -0.964966653 | 3.92E-07 |
| TUCP_002468 | XLOC_104510 | ENSRNOT000000024253 | 0.95307126   | 1.66E-06 |
| TUCP_002468 | XLOC_104510 | ENSRNOT000000088073 | -0.956343013 | 1.16E-06 |
| TUCP_002468 | XLOC_104510 | ENSRNOT000000065143 | 0.955104922  | 1.33E-06 |
| TUCP_002468 | XLOC_104510 | ENSRNOT000000040060 | -0.960584544 | 7.01E-07 |
| TUCP_002468 | XLOC_104510 | ENSRNOT000000081796 | 0.951693669  | 1.91E-06 |
| TUCP_002468 | XLOC_104510 | ENSRNOT000000027083 | 0.951386871  | 1.97E-06 |
| TUCP_002468 | XLOC_104510 | ENSRNOT000000063930 | -0.981371834 | 1.71E-08 |
| TUCP_002468 | XLOC_104510 | ENSRNOT00000013116  | -0.953808946 | 1.53E-06 |
| TUCP_002468 | XLOC_104510 | ENSRNOT00000001855  | 0.968904608  | 2.17E-07 |

|             |             |                     |              |          |
|-------------|-------------|---------------------|--------------|----------|
| TUCP_002468 | XLOC_104510 | ENSRNOT00000009563  | -0.976064774 | 5.94E-08 |
| TUCP_002468 | XLOC_104510 | ENSRNOT00000072771  | 0.960060035  | 7.48E-07 |
| TUCP_002468 | XLOC_104510 | ENSRNOT00000041237  | -0.950042751 | 2.25E-06 |
| TUCP_002468 | XLOC_104510 | ENSRNOT00000057953  | 0.951020787  | 2.04E-06 |
| TUCP_002468 | XLOC_104510 | ENSRNOT00000088555  | -0.958210986 | 9.36E-07 |
| TUCP_002468 | XLOC_104510 | ENSRNOT00000055683  | 0.955401329  | 1.29E-06 |
| TUCP_002468 | XLOC_104510 | ENSRNOT00000081981  | 0.967158021  | 2.85E-07 |
| TUCP_002468 | XLOC_104510 | ENSRNOT00000026531  | -0.974703769 | 7.82E-08 |
| TUCP_002468 | XLOC_104510 | ENSRNOT00000003326  | -0.975734628 | 6.36E-08 |
| TUCP_002468 | XLOC_104510 | ENSRNOT00000016306  | -0.974798694 | 7.67E-08 |
| TUCP_002468 | XLOC_104510 | ENSRNOT00000015476  | -0.959771114 | 7.76E-07 |
| TUCP_002468 | XLOC_104510 | ENSRNOT00000036904  | 0.956141405  | 1.19E-06 |
| TUCP_002468 | XLOC_104510 | ENSRNOT00000025079  | -0.957959617 | 9.64E-07 |
| TUCP_002468 | XLOC_104510 | ENSRNOT00000048754  | -0.955689685 | 1.25E-06 |
| TUCP_002468 | XLOC_104510 | ENSRNOT00000012699  | -0.956735181 | 1.11E-06 |
| TUCP_002468 | XLOC_104510 | ENSRNOT00000064643  | 0.957301011  | 1.04E-06 |
| TUCP_002468 | XLOC_104510 | ENSRNOT00000007824  | -0.957805072 | 9.81E-07 |
| TUCP_002468 | XLOC_104510 | ENSRNOT00000020681  | -0.956200781 | 1.18E-06 |
| TUCP_002468 | XLOC_104510 | ENSRNOT00000057898  | -0.979746266 | 2.59E-08 |
| TUCP_002468 | XLOC_104510 | ENSRNOT00000024677  | 0.959458941  | 8.06E-07 |
| TUCP_002468 | XLOC_104510 | ENSRNOT00000091602  | -0.957544698 | 1.01E-06 |
| TUCP_002468 | XLOC_104510 | ENSRNOT00000090338  | -0.961724012 | 6.07E-07 |
| TUCP_002468 | XLOC_104510 | ENSRNOT00000056100  | -0.976656641 | 5.25E-08 |
| TUCP_002468 | XLOC_104510 | ENSRNOT00000001077  | 0.952219072  | 1.81E-06 |
| TUCP_002468 | XLOC_104510 | ENSRNOT00000036838  | -0.97568223  | 6.43E-08 |
| TUCP_002468 | XLOC_104510 | ENSRNOT00000009817  | -0.953475953 | 1.59E-06 |
| TUCP_002468 | XLOC_104510 | ENSRNOT00000030798  | -0.95760981  | 1.00E-06 |
| TUCP_002468 | XLOC_104510 | ENSRNOT00000018634  | -0.971143922 | 1.50E-07 |
| TUCP_002468 | XLOC_104510 | ENSRNOT00000071540  | 0.954216664  | 1.47E-06 |
| TUCP_002468 | XLOC_104510 | ENSRNOT000000031701 | -0.956008234 | 1.21E-06 |
| TUCP_002468 | XLOC_104510 | ENSRNOT00000072849  | -0.958113764 | 9.46E-07 |
| TUCP_002468 | XLOC_104510 | ENSRNOT00000073643  | -0.973645401 | 9.58E-08 |
| TUCP_002468 | XLOC_104510 | ENSRNOT00000078349  | -0.964557474 | 4.15E-07 |
| TUCP_002468 | XLOC_104510 | ENSRNOT00000011654  | -0.956786557 | 1.10E-06 |
| TUCP_002468 | XLOC_104510 | ENSRNOT00000022502  | -0.965784576 | 3.49E-07 |
| TUCP_002468 | XLOC_104510 | ENSRNOT00000026928  | -0.952205704 | 1.81E-06 |
| TUCP_002468 | XLOC_104510 | ENSRNOT00000017556  | 0.951442325  | 1.96E-06 |
| TUCP_002468 | XLOC_104510 | ENSRNOT00000078816  | 0.955604479  | 1.26E-06 |
| TUCP_002468 | XLOC_104510 | ENSRNOT0000001759   | -0.962624859 | 5.39E-07 |
| TUCP_002468 | XLOC_104510 | ENSRNOT00000021802  | 0.9629097    | 5.19E-07 |
| TUCP_002468 | XLOC_104510 | ENSRNOT00000021803  | -0.952666501 | 1.73E-06 |
| TUCP_002468 | XLOC_104510 | ENSRNOT00000020147  | 0.950164277  | 2.23E-06 |
| TUCP_002468 | XLOC_104510 | ENSRNOT00000024352  | 0.972417398  | 1.20E-07 |
| TUCP_002468 | XLOC_104510 | ENSRNOT00000004351  | -0.962356237 | 5.59E-07 |
| TUCP_002468 | XLOC_104510 | ENSRNOT00000072118  | 0.956228639  | 1.18E-06 |
| TUCP_002468 | XLOC_104510 | ENSRNOT00000087748  | -0.962053349 | 5.81E-07 |
| TUCP_002468 | XLOC_104510 | ENSRNOT00000003787  | -0.954844127 | 1.37E-06 |
| TUCP_002468 | XLOC_104510 | ENSRNOT00000014506  | -0.960971491 | 6.68E-07 |
| TUCP_002468 | XLOC_104510 | ENSRNOT00000023262  | -0.970782767 | 1.60E-07 |
| TUCP_002468 | XLOC_104510 | ENSRNOT00000059246  | 0.954773045  | 1.38E-06 |
| TUCP_002468 | XLOC_104510 | ENSRNOT00000081800  | 0.954715557  | 1.39E-06 |

|             |             |                     |              |          |
|-------------|-------------|---------------------|--------------|----------|
| TUCP_002468 | XLOC_104510 | ENSRNOT00000045946  | 0.974331296  | 8.41E-08 |
| TUCP_002468 | XLOC_104510 | ENSRNOT00000008865  | -0.950690503 | 2.11E-06 |
| TUCP_002468 | XLOC_104510 | ENSRNOT00000055957  | -0.968284126 | 2.40E-07 |
| TUCP_002468 | XLOC_104510 | ENSRNOT00000023664  | -0.965061947 | 3.87E-07 |
| TUCP_002468 | XLOC_104510 | ENSRNOT00000068026  | -0.964976493 | 3.91E-07 |
| TUCP_002468 | XLOC_104510 | ENSRNOT00000085621  | 0.95721786   | 1.05E-06 |
| TUCP_002468 | XLOC_104510 | ENSRNOT00000007314  | -0.953415406 | 1.60E-06 |
| TUCP_002468 | XLOC_104510 | ENSRNOT00000014821  | -0.985087133 | 5.67E-09 |
| TUCP_002468 | XLOC_104510 | ENSRNOT00000058382  | 0.971332333  | 1.45E-07 |
| TUCP_002468 | XLOC_104510 | ENSRNOT00000088599  | 0.972609958  | 1.16E-07 |
| TUCP_002468 | XLOC_104510 | ENSRNOT00000005587  | -0.964934053 | 3.94E-07 |
| TUCP_002468 | XLOC_104510 | ENSRNOT00000005172  | 0.95013092   | 2.23E-06 |
| TUCP_002468 | XLOC_104510 | ENSRNOT00000017746  | -0.955119967 | 1.33E-06 |
| TUCP_002468 | XLOC_104510 | ENSRNOT00000023567  | -0.957911935 | 9.69E-07 |
| TUCP_002468 | XLOC_104510 | ENSRNOT00000070912  | -0.960921816 | 6.72E-07 |
| TUCP_002468 | XLOC_104510 | ENSRNOT00000003412  | -0.966036695 | 3.36E-07 |
| TUCP_002468 | XLOC_104510 | ENSRNOT00000050609  | -0.962826982 | 5.25E-07 |
| TUCP_002468 | XLOC_104510 | ENSRNOT00000015495  | -0.959321223 | 8.19E-07 |
| TUCP_002468 | XLOC_104510 | ENSRNOT00000005459  | 0.970083975  | 1.79E-07 |
| TUCP_002468 | XLOC_104510 | ENSRNOT00000017776  | 0.956008925  | 1.20E-06 |
| TUCP_002468 | XLOC_104510 | ENSRNOT00000027910  | 0.970482149  | 1.68E-07 |
| TUCP_002468 | XLOC_104510 | ENSRNOT000000037015 | 0.976206941  | 5.77E-08 |
| TUCP_002468 | XLOC_104510 | ENSRNOT00000067135  | -0.971930503 | 1.31E-07 |
| TUCP_002468 | XLOC_104510 | ENSRNOT00000054976  | -0.975679816 | 6.43E-08 |
| TUCP_002468 | XLOC_104510 | ENSRNOT00000010516  | -0.959434876 | 8.08E-07 |
| TUCP_002468 | XLOC_104510 | ENSRNOT00000016372  | -0.965224884 | 3.78E-07 |
| TUCP_002468 | XLOC_104510 | ENSRNOT00000039730  | -0.952344696 | 1.79E-06 |
| TUCP_002468 | XLOC_104510 | ENSRNOT00000088202  | -0.95673905  | 1.11E-06 |
| TUCP_002468 | XLOC_104510 | ENSRNOT00000033677  | -0.954548079 | 1.42E-06 |
| TUCP_002468 | XLOC_104510 | ENSRNOT00000006802  | 0.952114537  | 1.83E-06 |
| TUCP_002468 | XLOC_104510 | ENSRNOT00000082151  | -0.975126446 | 7.19E-08 |
| TUCP_002468 | XLOC_104510 | ENSRNOT00000016776  | -0.960960077 | 6.69E-07 |
| TUCP_002468 | XLOC_104510 | ENSRNOT00000034411  | 0.952555319  | 1.75E-06 |
| TUCP_002468 | XLOC_104510 | ENSRNOT00000001607  | 0.950314741  | 2.19E-06 |
| TUCP_002468 | XLOC_104510 | ENSRNOT00000085971  | -0.96951805  | 1.97E-07 |
| TUCP_002468 | XLOC_104510 | ENSRNOT00000057537  | 0.969040926  | 2.13E-07 |
| TUCP_002468 | XLOC_104510 | ENSRNOT00000007771  | -0.953945315 | 1.51E-06 |
| TUCP_002468 | XLOC_104510 | ENSRNOT00000022142  | 0.96591695   | 3.42E-07 |
| TUCP_002468 | XLOC_104510 | ENSRNOT00000033048  | -0.966838306 | 2.99E-07 |
| TUCP_002468 | XLOC_104510 | ENSRNOT00000015537  | 0.96236978   | 5.58E-07 |
| TUCP_002468 | XLOC_104510 | ENSRNOT00000052120  | 0.961301634  | 6.40E-07 |
| TUCP_002468 | XLOC_104510 | ENSRNOT00000078306  | 0.962742069  | 5.31E-07 |
| TUCP_002468 | XLOC_104510 | ENSRNOT00000015946  | -0.95098201  | 2.05E-06 |
| TUCP_002468 | XLOC_104510 | ENSRNOT00000023965  | -0.972755753 | 1.13E-07 |
| TUCP_002468 | XLOC_104510 | ENSRNOT00000090355  | -0.968836513 | 2.20E-07 |
| TUCP_002468 | XLOC_104510 | ENSRNOT00000029125  | 0.958374529  | 9.18E-07 |
| TUCP_002468 | XLOC_104510 | ENSRNOT00000012528  | 0.959189855  | 8.32E-07 |
| TUCP_002468 | XLOC_104510 | ENSRNOT00000004319  | -0.95951049  | 8.01E-07 |
| TUCP_002468 | XLOC_104510 | ENSRNOT00000015092  | 0.954522601  | 1.42E-06 |
| TUCP_002468 | XLOC_104510 | ENSRNOT00000015318  | -0.962337796 | 5.60E-07 |
| TUCP_002468 | XLOC_104510 | ENSRNOT00000065529  | 0.973941111  | 9.06E-08 |



|             |             |                    |              |          |
|-------------|-------------|--------------------|--------------|----------|
| TUCP_002468 | XLOC_104510 | ENSRNOT00000028907 | 0.964261183  | 4.32E-07 |
| TUCP_002468 | XLOC_104510 | ENSRNOT00000045532 | -0.966761011 | 3.02E-07 |
| TUCP_002468 | XLOC_104510 | ENSRNOT00000025887 | -0.954885703 | 1.36E-06 |
| TUCP_002468 | XLOC_104510 | ENSRNOT00000005311 | 0.962762792  | 5.30E-07 |
| TUCP_002468 | XLOC_104510 | ENSRNOT00000005257 | 0.962456249  | 5.52E-07 |
| TUCP_002468 | XLOC_104510 | ENSRNOT00000015799 | 0.955068302  | 1.34E-06 |
| TUCP_002468 | XLOC_104510 | ENSRNOT00000036506 | 0.961118395  | 6.56E-07 |
| TUCP_002468 | XLOC_104510 | ENSRNOT00000005958 | 0.962262157  | 5.66E-07 |
| TUCP_002468 | XLOC_104510 | ENSRNOT00000082998 | 0.968277105  | 2.40E-07 |
| TUCP_002468 | XLOC_104510 | ENSRNOT00000075656 | -0.972017554 | 1.29E-07 |
| TUCP_002468 | XLOC_104510 | ENSRNOT00000090946 | 0.954535458  | 1.42E-06 |
| TUCP_002468 | XLOC_104510 | ENSRNOT00000015006 | 0.954865247  | 1.37E-06 |
| TUCP_002468 | XLOC_104510 | ENSRNOT00000007350 | 0.974530111  | 8.09E-08 |
| TUCP_002468 | XLOC_104510 | ENSRNOT00000004956 | 0.952882238  | 1.69E-06 |
| TUCP_002468 | XLOC_104510 | ENSRNOT00000018936 | -0.951149089 | 2.02E-06 |
| TUCP_002468 | XLOC_104510 | ENSRNOT00000083578 | 0.96958836   | 1.95E-07 |
| TUCP_002468 | XLOC_104510 | ENSRNOT00000000181 | 0.955491527  | 1.28E-06 |
| TUCP_002468 | XLOC_104510 | ENSRNOT00000023638 | 0.979617124  | 2.68E-08 |
| TUCP_002468 | XLOC_104510 | ENSRNOT00000059524 | -0.956795435 | 1.10E-06 |
| TUCP_002468 | XLOC_104510 | ENSRNOT00000017361 | 0.960802977  | 6.82E-07 |
| TUCP_002468 | XLOC_104510 | ENSRNOT00000005220 | 0.964271591  | 4.32E-07 |
| TUCP_002468 | XLOC_104510 | ENSRNOT00000016649 | 0.962676472  | 5.36E-07 |
| TUCP_002468 | XLOC_104510 | ENSRNOT00000074023 | 0.979772313  | 2.58E-08 |
| TUCP_002468 | XLOC_104510 | ENSRNOT00000019465 | -0.959302698 | 8.21E-07 |
| TUCP_002468 | XLOC_104510 | ENSRNOT00000009073 | -0.970199797 | 1.76E-07 |
| TUCP_002468 | XLOC_104510 | ENSRNOT00000067170 | -0.961803595 | 6.00E-07 |
| TUCP_002468 | XLOC_104510 | ENSRNOT00000001586 | -0.962999029 | 5.13E-07 |
| TUCP_002468 | XLOC_104510 | ENSRNOT00000018341 | -0.952342017 | 1.79E-06 |
| TUCP_002468 | XLOC_104510 | ENSRNOT00000045926 | 0.967584019  | 2.67E-07 |
| TUCP_002468 | XLOC_104510 | ENSRNOT00000065076 | 0.967327563  | 2.78E-07 |
| TUCP_002468 | XLOC_104510 | ENSRNOT00000013516 | 0.958691058  | 8.84E-07 |
| TUCP_002468 | XLOC_104510 | ENSRNOT00000054685 | 0.954624204  | 1.40E-06 |
| TUCP_002468 | XLOC_104510 | ENSRNOT00000081621 | 0.963057372  | 5.09E-07 |
| TUCP_002468 | XLOC_104510 | ENSRNOT00000012060 | 0.951762798  | 1.90E-06 |
| TUCP_002468 | XLOC_104510 | ENSRNOT00000050549 | 0.950023156  | 2.26E-06 |
| TUCP_002468 | XLOC_104510 | ENSRNOT00000075480 | -0.968234084 | 2.42E-07 |
| TUCP_002468 | XLOC_104510 | ENSRNOT00000009000 | -0.957044392 | 1.07E-06 |
| TUCP_002468 | XLOC_104510 | ENSRNOT00000034282 | 0.952086569  | 1.83E-06 |
| TUCP_002468 | XLOC_104510 | ENSRNOT00000027760 | 0.968249348  | 2.41E-07 |
| TUCP_002468 | XLOC_104510 | ENSRNOT00000024402 | 0.95950186   | 8.01E-07 |
| TUCP_002468 | XLOC_104510 | ENSRNOT00000089545 | -0.956415494 | 1.15E-06 |
| TUCP_002468 | XLOC_104510 | ENSRNOT00000089933 | 0.9793505    | 2.86E-08 |
| TUCP_002468 | XLOC_104510 | ENSRNOT00000083876 | -0.957568987 | 1.01E-06 |
| TUCP_002468 | XLOC_104510 | ENSRNOT00000003641 | 0.961294298  | 6.41E-07 |
| TUCP_002468 | XLOC_104510 | ENSRNOT00000090912 | 0.969535867  | 1.96E-07 |
| TUCP_002468 | XLOC_104510 | ENSRNOT00000073983 | 0.951020426  | 2.04E-06 |
| TUCP_002468 | XLOC_104510 | ENSRNOT00000067554 | 0.952952999  | 1.68E-06 |
| TUCP_002468 | XLOC_104510 | ENSRNOT00000072208 | 0.951592042  | 1.93E-06 |
| TUCP_002468 | XLOC_104510 | ENSRNOT00000010784 | 0.951141588  | 2.02E-06 |
| TUCP_002468 | XLOC_104510 | ENSRNOT00000084012 | 0.956374925  | 1.16E-06 |
| TUCP_002468 | XLOC_104510 | ENSRNOT00000027232 | 0.953577221  | 1.57E-06 |

|             |             |                    |              |          |
|-------------|-------------|--------------------|--------------|----------|
| TUCP_002468 | XLOC_104510 | ENSRNOT00000019820 | 0.968896747  | 2.18E-07 |
| TUCP_002468 | XLOC_104510 | ENSRNOT00000011832 | -0.963906015 | 4.54E-07 |
| TUCP_002468 | XLOC_104510 | ENSRNOT00000021030 | -0.952723883 | 1.72E-06 |
| TUCP_002468 | XLOC_104510 | ENSRNOT00000013864 | -0.962395916 | 5.56E-07 |
| TUCP_002468 | XLOC_104510 | ENSRNOT00000077727 | -0.96215989  | 5.73E-07 |
| TUCP_002468 | XLOC_104510 | ENSRNOT00000011930 | 0.960008092  | 7.53E-07 |
| TUCP_002468 | XLOC_104510 | ENSRNOT00000073492 | -0.967540721 | 2.69E-07 |
| TUCP_002468 | XLOC_104510 | ENSRNOT00000010541 | 0.95092328   | 2.06E-06 |
| TUCP_002468 | XLOC_104510 | ENSRNOT00000068745 | 0.950596221  | 2.13E-06 |
| TUCP_002468 | XLOC_104510 | ENSRNOT00000092068 | 0.958725509  | 8.80E-07 |
| TUCP_002468 | XLOC_104510 | ENSRNOT00000017949 | -0.962047526 | 5.82E-07 |
| TUCP_002468 | XLOC_104510 | ENSRNOT00000048781 | 0.958661607  | 8.87E-07 |
| TUCP_002468 | XLOC_104510 | ENSRNOT00000091909 | 0.980904397  | 1.94E-08 |
| TUCP_002468 | XLOC_104510 | ENSRNOT00000013025 | -0.960312988 | 7.25E-07 |
| TUCP_002468 | XLOC_104510 | ENSRNOT00000003544 | -0.968677877 | 2.25E-07 |
| TUCP_002468 | XLOC_104510 | ENSRNOT00000021925 | 0.957027213  | 1.07E-06 |
| TUCP_002468 | XLOC_104510 | ENSRNOT00000022194 | -0.957024568 | 1.07E-06 |
| TUCP_002468 | XLOC_104510 | ENSRNOT00000086119 | -0.955931948 | 1.22E-06 |
| TUCP_002468 | XLOC_104510 | ENSRNOT00000064452 | -0.966231541 | 3.27E-07 |
| TUCP_002468 | XLOC_104510 | ENSRNOT00000022190 | -0.970162546 | 1.77E-07 |
| TUCP_002468 | XLOC_104510 | ENSRNOT00000025913 | -0.975967917 | 6.06E-08 |
| TUCP_002468 | XLOC_104510 | ENSRNOT00000019386 | -0.957373701 | 1.03E-06 |
| TUCP_002468 | XLOC_104510 | ENSRNOT00000077220 | -0.950703317 | 2.11E-06 |
| TUCP_002468 | XLOC_104510 | ENSRNOT00000076230 | 0.951923791  | 1.87E-06 |
| TUCP_002468 | XLOC_104510 | ENSRNOT00000021636 | -0.953157158 | 1.64E-06 |
| TUCP_002468 | XLOC_104510 | ENSRNOT00000086577 | 0.971605824  | 1.39E-07 |
| TUCP_002468 | XLOC_104510 | ENSRNOT00000025966 | 0.95746029   | 1.02E-06 |
| TUCP_002468 | XLOC_104510 | ENSRNOT00000089611 | 0.956593582  | 1.13E-06 |
| TUCP_002468 | XLOC_104510 | ENSRNOT00000073910 | -0.95267507  | 1.73E-06 |
| TUCP_002468 | XLOC_104510 | ENSRNOT00000007738 | -0.967794132 | 2.59E-07 |
| TUCP_002468 | XLOC_104510 | ENSRNOT00000065600 | 0.965906099  | 3.43E-07 |
| TUCP_002468 | XLOC_104510 | ENSRNOT00000008253 | -0.951538269 | 1.94E-06 |
| TUCP_002468 | XLOC_104510 | ENSRNOT00000025980 | -0.952335616 | 1.79E-06 |
| TUCP_002468 | XLOC_104510 | ENSRNOT00000034883 | -0.972756664 | 1.13E-07 |
| TUCP_002468 | XLOC_104510 | ENSRNOT00000010993 | 0.956086392  | 1.19E-06 |
| TUCP_002468 | XLOC_104510 | ENSRNOT00000020155 | 0.958254384  | 9.31E-07 |
| TUCP_002468 | XLOC_104510 | ENSRNOT00000055321 | 0.971842159  | 1.33E-07 |
| TUCP_002468 | XLOC_104510 | ENSRNOT00000000707 | -0.954339374 | 1.45E-06 |
| TUCP_002468 | XLOC_104510 | ENSRNOT00000005910 | -0.965874291 | 3.44E-07 |
| TUCP_002468 | XLOC_104510 | ENSRNOT00000078475 | 0.954951402  | 1.35E-06 |
| TUCP_002468 | XLOC_104510 | ENSRNOT00000040169 | 0.959586291  | 7.93E-07 |
| TUCP_002468 | XLOC_104510 | ENSRNOT00000029701 | 0.973309727  | 1.02E-07 |
| TUCP_002468 | XLOC_104510 | ENSRNOT00000026988 | -0.95084183  | 2.08E-06 |
| TUCP_002468 | XLOC_104510 | ENSRNOT00000036051 | 0.953891844  | 1.52E-06 |
| TUCP_002468 | XLOC_104510 | ENSRNOT00000000013 | 0.956816518  | 1.10E-06 |
| TUCP_002468 | XLOC_104510 | ENSRNOT00000080591 | 0.972416055  | 1.20E-07 |
| TUCP_002468 | XLOC_104510 | ENSRNOT00000072031 | -0.951607474 | 1.93E-06 |
| TUCP_002468 | XLOC_104510 | ENSRNOT00000030329 | -0.963316852 | 4.92E-07 |
| TUCP_002468 | XLOC_104510 | ENSRNOT00000037955 | -0.950412057 | 2.17E-06 |
| TUCP_002468 | XLOC_104510 | ENSRNOT00000067780 | -0.965548377 | 3.61E-07 |
| TUCP_002468 | XLOC_104510 | ENSRNOT00000039232 | 0.95669045   | 1.12E-06 |

|             |             |                    |              |          |
|-------------|-------------|--------------------|--------------|----------|
| TUCP_002468 | XLOC_104510 | ENSRNOT00000004999 | 0.974007523  | 8.95E-08 |
| TUCP_002468 | XLOC_104510 | ENSRNOT00000009122 | 0.961578556  | 6.18E-07 |
| TUCP_002468 | XLOC_104510 | ENSRNOT00000013463 | 0.983997773  | 8.05E-09 |
| TUCP_002468 | XLOC_104510 | ENSRNOT00000089418 | 0.969872875  | 1.86E-07 |
| TUCP_002468 | XLOC_104510 | ENSRNOT00000007889 | -0.954368682 | 1.44E-06 |
| TUCP_002468 | XLOC_104510 | ENSRNOT00000047663 | -0.971755008 | 1.35E-07 |
| TUCP_002468 | XLOC_104510 | ENSRNOT00000000532 | -0.956878376 | 1.09E-06 |
| TUCP_002468 | XLOC_104510 | ENSRNOT00000005486 | -0.952785169 | 1.71E-06 |
| TUCP_002468 | XLOC_104510 | ENSRNOT00000017907 | -0.972971316 | 1.09E-07 |
| TUCP_002468 | XLOC_104510 | ENSRNOT00000005489 | 0.96098717   | 6.67E-07 |
| TUCP_002468 | XLOC_104510 | ENSRNOT00000025794 | -0.977644207 | 4.24E-08 |
| TUCP_002468 | XLOC_104510 | ENSRNOT00000058111 | -0.95630868  | 1.17E-06 |
| TUCP_002468 | XLOC_104510 | ENSRNOT00000084422 | 0.962219689  | 5.69E-07 |
| TUCP_002468 | XLOC_104510 | ENSRNOT00000050834 | -0.966103263 | 3.33E-07 |
| TUCP_002468 | XLOC_104510 | ENSRNOT00000088279 | 0.955630123  | 1.26E-06 |
| TUCP_002468 | XLOC_104510 | ENSRNOT00000009994 | -0.957111954 | 1.06E-06 |
| TUCP_002468 | XLOC_104510 | ENSRNOT00000002114 | -0.986854944 | 3.02E-09 |
| TUCP_002468 | XLOC_104510 | ENSRNOT00000002445 | -0.975186808 | 7.11E-08 |
| TUCP_002468 | XLOC_104510 | ENSRNOT00000009993 | -0.950221676 | 2.21E-06 |
| TUCP_002468 | XLOC_104510 | ENSRNOT00000027970 | 0.976014677  | 6.01E-08 |
| TUCP_002468 | XLOC_104510 | ENSRNOT00000077479 | -0.95429249  | 1.45E-06 |
| TUCP_002468 | XLOC_104510 | ENSRNOT00000027875 | 0.964397327  | 4.24E-07 |
| TUCP_002468 | XLOC_104510 | ENSRNOT00000046215 | -0.974947529 | 7.45E-08 |
| TUCP_002468 | XLOC_104510 | ENSRNOT00000025009 | 0.953091647  | 1.65E-06 |
| TUCP_002468 | XLOC_104510 | ENSRNOT00000000083 | -0.960568151 | 7.03E-07 |
| TUCP_002468 | XLOC_104510 | ENSRNOT00000018074 | -0.959417665 | 8.10E-07 |
| TUCP_002468 | XLOC_104510 | ENSRNOT00000014124 | 0.95383582   | 1.53E-06 |
| TUCP_002468 | XLOC_104510 | ENSRNOT00000000120 | 0.991116709  | 4.29E-10 |
| TUCP_002468 | XLOC_104510 | ENSRNOT00000013632 | 0.962228505  | 5.68E-07 |
| TUCP_002468 | XLOC_104510 | ENSRNOT00000028545 | -0.967904445 | 2.54E-07 |
| TUCP_002468 | XLOC_104510 | ENSRNOT00000009900 | -0.956158402 | 1.18E-06 |
| TUCP_002468 | XLOC_104510 | ENSRNOT00000028225 | 0.958248862  | 9.31E-07 |
| TUCP_002468 | XLOC_104510 | ENSRNOT00000019172 | -0.954611576 | 1.41E-06 |
| TUCP_002468 | XLOC_104510 | ENSRNOT00000026941 | 0.962485766  | 5.49E-07 |
| TUCP_002468 | XLOC_104510 | ENSRNOT00000020994 | -0.956984882 | 1.08E-06 |
| TUCP_002468 | XLOC_104510 | ENSRNOT00000032244 | 0.952694259  | 1.72E-06 |
| TUCP_002468 | XLOC_104510 | ENSRNOT00000032248 | 0.972998564  | 1.08E-07 |
| TUCP_002468 | XLOC_104510 | ENSRNOT00000019911 | -0.957270749 | 1.04E-06 |
| TUCP_002468 | XLOC_104510 | ENSRNOT00000040393 | 0.968472619  | 2.33E-07 |
| TUCP_002468 | XLOC_104510 | ENSRNOT00000032236 | -0.959876862 | 7.66E-07 |
| TUCP_002468 | XLOC_104510 | ENSRNOT00000067901 | -0.952354272 | 1.78E-06 |
| TUCP_002468 | XLOC_104510 | ENSRNOT00000020272 | -0.959232238 | 8.28E-07 |
| TUCP_002468 | XLOC_104510 | ENSRNOT00000064700 | 0.961252769  | 6.44E-07 |
| TUCP_002468 | XLOC_104510 | ENSRNOT00000036613 | -0.973964384 | 9.02E-08 |
| TUCP_002468 | XLOC_104510 | ENSRNOT00000025705 | 0.977923641  | 3.98E-08 |
| TUCP_002468 | XLOC_104510 | ENSRNOT00000052051 | 0.952342766  | 1.79E-06 |
| TUCP_002468 | XLOC_104510 | ENSRNOT00000019983 | -0.957886304 | 9.72E-07 |
| TUCP_002468 | XLOC_104510 | ENSRNOT00000004140 | 0.953325304  | 1.61E-06 |
| TUCP_002468 | XLOC_104510 | ENSRNOT00000074494 | -0.955971574 | 1.21E-06 |
| TUCP_002468 | XLOC_104510 | ENSRNOT00000049193 | -0.950126756 | 2.23E-06 |
| TUCP_002468 | XLOC_104510 | ENSRNOT00000008113 | -0.966624713 | 3.08E-07 |

|             |             |                    |              |          |
|-------------|-------------|--------------------|--------------|----------|
| TUCP_002468 | XLOC_104510 | ENSRNOT00000036194 | -0.950864318 | 2.08E-06 |
| TUCP_002468 | XLOC_104510 | ENSRNOT00000000334 | -0.954893912 | 1.36E-06 |
| TUCP_002468 | XLOC_104510 | ENSRNOT00000020297 | 0.952425225  | 1.77E-06 |
| TUCP_002468 | XLOC_104510 | ENSRNOT00000032802 | -0.953757148 | 1.54E-06 |
| TUCP_002468 | XLOC_104510 | ENSRNOT00000078070 | 0.958874899  | 8.65E-07 |
| TUCP_002468 | XLOC_104510 | ENSRNOT00000084031 | 0.964261296  | 4.32E-07 |
| TUCP_002468 | XLOC_104510 | ENSRNOT00000006460 | 0.956503912  | 1.14E-06 |
| TUCP_002468 | XLOC_104510 | ENSRNOT00000020051 | 0.962040765  | 5.82E-07 |
| TUCP_002468 | XLOC_104510 | ENSRNOT00000026279 | -0.968438363 | 2.34E-07 |
| TUCP_002468 | XLOC_104510 | ENSRNOT00000027117 | -0.956021776 | 1.20E-06 |
| TUCP_002468 | XLOC_104510 | ENSRNOT00000082914 | 0.963745522  | 4.64E-07 |
| TUCP_002468 | XLOC_104510 | ENSRNOT00000082508 | -0.952051823 | 1.84E-06 |
| TUCP_002468 | XLOC_104510 | ENSRNOT00000049459 | -0.955191899 | 1.32E-06 |
| TUCP_002468 | XLOC_104510 | ENSRNOT00000065947 | 0.953005943  | 1.67E-06 |
| TUCP_002468 | XLOC_104510 | ENSRNOT00000071166 | 0.950311231  | 2.19E-06 |
| TUCP_002468 | XLOC_104510 | ENSRNOT00000084567 | 0.950721251  | 2.11E-06 |
| TUCP_002468 | XLOC_104510 | ENSRNOT00000013852 | 0.964897989  | 3.96E-07 |
| TUCP_002468 | XLOC_104510 | ENSRNOT00000013851 | -0.963097854 | 5.07E-07 |
| TUCP_002468 | XLOC_104510 | ENSRNOT00000001118 | 0.966894797  | 2.96E-07 |
| TUCP_002468 | XLOC_104510 | ENSRNOT00000019180 | -0.958966052 | 8.55E-07 |
| TUCP_002468 | XLOC_104510 | ENSRNOT00000066204 | -0.957960615 | 9.64E-07 |
| TUCP_002468 | XLOC_104510 | ENSRNOT00000076105 | -0.962803611 | 5.27E-07 |
| TUCP_002468 | XLOC_104510 | ENSRNOT00000022746 | -0.963887615 | 4.55E-07 |
| TUCP_002468 | XLOC_104510 | ENSRNOT00000001507 | 0.957862427  | 9.75E-07 |
| TUCP_002468 | XLOC_104510 | ENSRNOT00000087604 | 0.952436766  | 1.77E-06 |
| TUCP_002468 | XLOC_104510 | ENSRNOT00000083568 | 0.969534904  | 1.96E-07 |
| TUCP_002468 | XLOC_104510 | ENSRNOT00000039177 | -0.960288005 | 7.28E-07 |
| TUCP_002468 | XLOC_104510 | ENSRNOT00000005620 | -0.960949097 | 6.70E-07 |
| TUCP_002468 | XLOC_104510 | ENSRNOT00000081047 | 0.955393967  | 1.29E-06 |
| TUCP_002468 | XLOC_104510 | ENSRNOT00000042903 | 0.965183152  | 3.80E-07 |
| TUCP_002468 | XLOC_104510 | ENSRNOT00000037456 | 0.956303308  | 1.17E-06 |
| TUCP_002468 | XLOC_104510 | ENSRNOT00000000477 | -0.962137131 | 5.75E-07 |
| TUCP_002468 | XLOC_104510 | ENSRNOT00000012881 | -0.96158264  | 6.18E-07 |
| TUCP_002468 | XLOC_104510 | ENSRNOT00000081226 | 0.953210122  | 1.63E-06 |
| TUCP_002468 | XLOC_104510 | ENSRNOT00000065045 | 0.969560814  | 1.96E-07 |
| TUCP_002468 | XLOC_104510 | ENSRNOT00000056405 | 0.951104344  | 2.03E-06 |
| TUCP_002468 | XLOC_104510 | ENSRNOT00000041456 | -0.95053434  | 2.15E-06 |
| TUCP_002468 | XLOC_104510 | ENSRNOT00000023989 | 0.959134306  | 8.38E-07 |
| TUCP_002468 | XLOC_104510 | ENSRNOT00000088133 | -0.97074067  | 1.61E-07 |
| TUCP_002468 | XLOC_104510 | ENSRNOT00000080677 | -0.970283505 | 1.74E-07 |
| TUCP_002468 | XLOC_104510 | ENSRNOT00000016629 | 0.966585045  | 3.10E-07 |
| TUCP_002468 | XLOC_104510 | ENSRNOT00000016254 | -0.962327099 | 5.61E-07 |
| TUCP_002468 | XLOC_104510 | ENSRNOT00000083968 | -0.951923497 | 1.87E-06 |
| TUCP_002468 | XLOC_104510 | ENSRNOT00000037133 | 0.966268235  | 3.25E-07 |
| TUCP_002468 | XLOC_104510 | ENSRNOT00000002837 | -0.963636202 | 4.71E-07 |
| TUCP_002468 | XLOC_104510 | ENSRNOT00000026831 | 0.956706529  | 1.11E-06 |
| TUCP_002468 | XLOC_104510 | ENSRNOT00000007821 | 0.953952556  | 1.51E-06 |
| TUCP_002468 | XLOC_104510 | ENSRNOT00000032363 | 0.965922595  | 3.42E-07 |
| TUCP_002468 | XLOC_104510 | ENSRNOT00000016445 | 0.957210022  | 1.05E-06 |
| TUCP_002468 | XLOC_104510 | ENSRNOT00000011956 | 0.953138498  | 1.64E-06 |
| TUCP_002468 | XLOC_104510 | ENSRNOT00000078185 | -0.961409567 | 6.32E-07 |

|             |             |                     |              |          |
|-------------|-------------|---------------------|--------------|----------|
| TUCP_002468 | XLOC_104510 | ENSRNOT00000024119  | 0.974082788  | 8.82E-08 |
| TUCP_002468 | XLOC_104510 | ENSRNOT00000002187  | -0.962761102 | 5.30E-07 |
| TUCP_002468 | XLOC_104510 | ENSRNOT00000002152  | -0.952644775 | 1.73E-06 |
| TUCP_002468 | XLOC_104510 | ENSRNOT00000006824  | -0.953631215 | 1.56E-06 |
| TUCP_002468 | XLOC_104510 | ENSRNOT000000088509 | 0.950550107  | 2.14E-06 |
| TUCP_002468 | XLOC_104510 | ENSRNOT000000032667 | -0.956519524 | 1.14E-06 |
| TUCP_002468 | XLOC_104510 | ENSRNOT000000082138 | -0.958469023 | 9.07E-07 |
| TUCP_002468 | XLOC_104510 | ENSRNOT00000018328  | -0.955231986 | 1.31E-06 |
| TUCP_002468 | XLOC_104510 | ENSRNOT000000044608 | -0.958791902 | 8.73E-07 |
| TUCP_002468 | XLOC_104510 | ENSRNOT00000001099  | -0.975261281 | 7.00E-08 |
| TUCP_002468 | XLOC_104510 | ENSRNOT00000009811  | 0.953730781  | 1.54E-06 |
| TUCP_002468 | XLOC_104510 | ENSRNOT000000085736 | -0.956655578 | 1.12E-06 |
| TUCP_002468 | XLOC_104510 | ENSRNOT000000045488 | 0.954043578  | 1.49E-06 |
| TUCP_002468 | XLOC_104510 | ENSRNOT000000050119 | -0.967188649 | 2.83E-07 |
| TUCP_002468 | XLOC_104510 | ENSRNOT000000090853 | -0.960915837 | 6.73E-07 |
| TUCP_002468 | XLOC_104510 | ENSRNOT000000063821 | -0.954825305 | 1.37E-06 |
| TUCP_002468 | XLOC_104510 | ENSRNOT000000089211 | 0.966559641  | 3.11E-07 |
| TUCP_002468 | XLOC_104510 | ENSRNOT000000020383 | 0.960902516  | 6.74E-07 |
| TUCP_002468 | XLOC_104510 | ENSRNOT000000073847 | -0.951449253 | 1.96E-06 |
| TUCP_002468 | XLOC_104510 | ENSRNOT000000015518 | -0.961717635 | 6.07E-07 |
| TUCP_002468 | XLOC_104510 | ENSRNOT000000000302 | 0.968307306  | 2.39E-07 |
| TUCP_002468 | XLOC_104510 | ENSRNOT000000028181 | -0.950297771 | 2.20E-06 |
| TUCP_002468 | XLOC_104510 | ENSRNOT000000011675 | 0.962603387  | 5.41E-07 |
| TUCP_002468 | XLOC_104510 | ENSRNOT000000041106 | 0.958247626  | 9.32E-07 |
| TUCP_002468 | XLOC_104510 | ENSRNOT000000015223 | 0.954403836  | 1.44E-06 |
| TUCP_002468 | XLOC_104510 | ENSRNOT000000019713 | -0.950336348 | 2.19E-06 |
| TUCP_002468 | XLOC_104510 | ENSRNOT000000083632 | -0.975192044 | 7.10E-08 |
| TUCP_002468 | XLOC_104510 | ENSRNOT00000000717  | -0.950871681 | 2.07E-06 |
| TUCP_002468 | XLOC_104510 | ENSRNOT000000049725 | -0.961001587 | 6.65E-07 |
| TUCP_002468 | XLOC_104510 | ENSRNOT000000086122 | 0.966055827  | 3.35E-07 |
| TUCP_002468 | XLOC_104510 | ENSRNOT000000026235 | -0.967566216 | 2.68E-07 |
| TUCP_002468 | XLOC_104510 | ENSRNOT000000010753 | -0.958161556 | 9.41E-07 |
| TUCP_002468 | XLOC_104510 | ENSRNOT000000023763 | -0.967454763 | 2.72E-07 |
| TUCP_002468 | XLOC_104510 | ENSRNOT000000066230 | 0.956619849  | 1.12E-06 |
| TUCP_002468 | XLOC_104510 | ENSRNOT000000003940 | -0.982008969 | 1.44E-08 |
| TUCP_002468 | XLOC_104510 | ENSRNOT000000009202 | 0.969146127  | 2.09E-07 |
| TUCP_002468 | XLOC_104510 | ENSRNOT000000042799 | 0.954560277  | 1.41E-06 |
| TUCP_002468 | XLOC_104510 | ENSRNOT000000086310 | -0.950958546 | 2.06E-06 |
| TUCP_002468 | XLOC_104510 | ENSRNOT000000059181 | 0.971621456  | 1.38E-07 |
| TUCP_002468 | XLOC_104510 | ENSRNOT000000017291 | -0.976571668 | 5.34E-08 |
| TUCP_002468 | XLOC_104510 | ENSRNOT000000003691 | -0.979863738 | 2.52E-08 |
| TUCP_002468 | XLOC_104510 | ENSRNOT000000038807 | 0.965565875  | 3.60E-07 |
| TUCP_002468 | XLOC_104510 | ENSRNOT000000081678 | 0.959034093  | 8.48E-07 |
| TUCP_002468 | XLOC_104510 | ENSRNOT000000017765 | 0.952235233  | 1.81E-06 |
| TUCP_002468 | XLOC_104510 | ENSRNOT000000017761 | 0.974859092  | 7.58E-08 |
| TUCP_002468 | XLOC_104510 | ENSRNOT000000023543 | -0.954494683 | 1.42E-06 |
| TUCP_002468 | XLOC_104510 | ENSRNOT000000080608 | 0.967950959  | 2.52E-07 |
| TUCP_002468 | XLOC_104510 | ENSRNOT000000016740 | 0.961423114  | 6.31E-07 |
| TUCP_002468 | XLOC_104510 | ENSRNOT000000080695 | 0.950164181  | 2.23E-06 |
| TUCP_002468 | XLOC_104510 | ENSRNOT000000039341 | 0.964777517  | 4.02E-07 |
| TUCP_002468 | XLOC_104510 | ENSRNOT000000038212 | -0.976322514 | 5.63E-08 |

|             |             |                    |              |          |
|-------------|-------------|--------------------|--------------|----------|
| TUCP_002468 | XLOC_104510 | ENSRNOT00000037409 | 0.957990416  | 9.60E-07 |
| TUCP_002468 | XLOC_104510 | ENSRNOT00000028290 | -0.965527102 | 3.62E-07 |
| TUCP_002468 | XLOC_104510 | ENSRNOT00000042125 | 0.977718874  | 4.17E-08 |
| TUCP_002468 | XLOC_104510 | ENSRNOT00000025460 | 0.962984472  | 5.14E-07 |
| TUCP_002468 | XLOC_104510 | ENSRNOT00000087033 | -0.953301415 | 1.62E-06 |
| TUCP_002468 | XLOC_104510 | ENSRNOT00000038178 | -0.953362544 | 1.61E-06 |
| TUCP_002468 | XLOC_104510 | ENSRNOT00000026760 | -0.977769739 | 4.12E-08 |
| TUCP_002468 | XLOC_104510 | ENSRNOT00000075800 | -0.969895908 | 1.85E-07 |
| TUCP_002468 | XLOC_104510 | ENSRNOT00000081077 | -0.951765723 | 1.90E-06 |
| TUCP_002468 | XLOC_104510 | ENSRNOT00000016568 | 0.96971292   | 1.91E-07 |
| TUCP_002468 | XLOC_104510 | ENSRNOT00000027360 | -0.951415288 | 1.96E-06 |
| TUCP_002468 | XLOC_104510 | ENSRNOT00000024947 | -0.969087208 | 2.11E-07 |
| TUCP_002468 | XLOC_104510 | ENSRNOT00000005885 | -0.965918811 | 3.42E-07 |
| TUCP_002468 | XLOC_104510 | ENSRNOT00000027967 | 0.969202488  | 2.07E-07 |
| TUCP_002468 | XLOC_104510 | ENSRNOT00000037039 | -0.962866384 | 5.22E-07 |
| TUCP_002468 | XLOC_104510 | ENSRNOT00000047210 | 0.967332734  | 2.77E-07 |
| TUCP_002468 | XLOC_104510 | ENSRNOT00000074177 | 0.950017013  | 2.26E-06 |
| TUCP_002468 | XLOC_104510 | ENSRNOT00000036658 | -0.969654559 | 1.93E-07 |
| TUCP_002469 | XLOC_104512 | ENSRNOT00000089536 | -0.959883156 | 7.65E-07 |
| TUCP_003909 | XLOC_172179 | ENSRNOT00000038247 | 0.953487901  | 1.59E-06 |
| TUCP_003909 | XLOC_172179 | ENSRNOT00000039809 | 0.962450436  | 5.52E-07 |
| TUCP_003909 | XLOC_172179 | ENSRNOT00000085596 | 0.950999579  | 2.05E-06 |
| TUCP_003909 | XLOC_172179 | ENSRNOT00000004698 | 0.961035563  | 6.62E-07 |
| TUCP_003909 | XLOC_172179 | ENSRNOT00000076285 | 0.965655113  | 3.55E-07 |
| TUCP_003909 | XLOC_172179 | ENSRNOT00000026293 | 0.964410655  | 4.24E-07 |
| TUCP_003909 | XLOC_172179 | ENSRNOT00000002560 | 0.964804892  | 4.01E-07 |
| TUCP_003909 | XLOC_172179 | ENSRNOT00000001222 | 0.97460399   | 7.97E-08 |
| TUCP_003909 | XLOC_172179 | ENSRNOT00000071560 | 0.960633088  | 6.97E-07 |
| TUCP_003909 | XLOC_172179 | ENSRNOT00000005355 | 0.972069609  | 1.28E-07 |
| TUCP_003909 | XLOC_172179 | ENSRNOT00000012156 | 0.960173699  | 7.38E-07 |
| TUCP_003909 | XLOC_172179 | ENSRNOT00000055992 | -0.963635651 | 4.71E-07 |
| TUCP_003909 | XLOC_172179 | ENSRNOT00000075952 | 0.958985867  | 8.53E-07 |
| TUCP_003909 | XLOC_172179 | ENSRNOT00000005228 | 0.951449746  | 1.96E-06 |
| TUCP_003909 | XLOC_172179 | ENSRNOT00000087429 | 0.963426364  | 4.85E-07 |
| TUCP_003909 | XLOC_172179 | ENSRNOT00000073235 | 0.956464046  | 1.14E-06 |
| TUCP_003909 | XLOC_172179 | ENSRNOT00000009683 | 0.952975787  | 1.67E-06 |
| TUCP_003909 | XLOC_172179 | ENSRNOT00000005228 | 0.958578895  | 8.96E-07 |
| TUCP_003909 | XLOC_172179 | ENSRNOT00000023144 | 0.968176026  | 2.44E-07 |
| TUCP_003909 | XLOC_172179 | ENSRNOT00000080695 | 0.9561791    | 1.18E-06 |
| TUCP_003909 | XLOC_172179 | ENSRNOT00000075311 | 0.951277413  | 1.99E-06 |
| TUCP_003909 | XLOC_172179 | ENSRNOT00000068322 | 0.967436012  | 2.73E-07 |
| TUCP_003909 | XLOC_172179 | ENSRNOT00000078070 | 0.955102167  | 1.33E-06 |
| TUCP_003909 | XLOC_172179 | ENSRNOT00000068633 | 0.952666173  | 1.73E-06 |
| TUCP_003909 | XLOC_172179 | ENSRNOT00000080800 | 0.963579513  | 4.75E-07 |
| TUCP_003909 | XLOC_172179 | ENSRNOT00000002866 | -0.970680547 | 1.62E-07 |
| TUCP_003909 | XLOC_172179 | ENSRNOT00000071694 | 0.958240033  | 9.32E-07 |
| TUCP_003909 | XLOC_172179 | ENSRNOT00000013570 | -0.950612271 | 2.13E-06 |
| TUCP_003909 | XLOC_172179 | ENSRNOT00000001449 | 0.953451933  | 1.59E-06 |
| TUCP_003909 | XLOC_172179 | ENSRNOT00000010986 | 0.952761752  | 1.71E-06 |
| TUCP_003909 | XLOC_172179 | ENSRNOT00000065501 | 0.957763511  | 9.86E-07 |
| TUCP_003909 | XLOC_172179 | ENSRNOT00000027454 | 0.950440445  | 2.17E-06 |

|             |             |                     |              |          |
|-------------|-------------|---------------------|--------------|----------|
| TUCP_003909 | XLOC_172179 | ENSRNOT00000000036  | 0.975906007  | 6.14E-08 |
| TUCP_003909 | XLOC_172179 | ENSRNOT00000014814  | 0.950623841  | 2.13E-06 |
| TUCP_003909 | XLOC_172179 | ENSRNOT00000091417  | 0.969763936  | 1.89E-07 |
| TUCP_003909 | XLOC_172179 | ENSRNOT00000080207  | 0.969868067  | 1.86E-07 |
| TUCP_003909 | XLOC_172179 | ENSRNOT00000061267  | 0.969899537  | 1.85E-07 |
| TUCP_003909 | XLOC_172179 | ENSRNOT00000006055  | 0.975898032  | 6.15E-08 |
| TUCP_003909 | XLOC_172179 | ENSRNOT00000071573  | 0.979431085  | 2.80E-08 |
| TUCP_003909 | XLOC_172179 | ENSRNOT00000005126  | -0.973481625 | 9.88E-08 |
| TUCP_003909 | XLOC_172179 | ENSRNOT00000065300  | 0.956819988  | 1.10E-06 |
| TUCP_003909 | XLOC_172179 | ENSRNOT00000009280  | 0.952330503  | 1.79E-06 |
| TUCP_003909 | XLOC_172179 | ENSRNOT00000026457  | 0.964222082  | 4.35E-07 |
| TUCP_003909 | XLOC_172179 | ENSRNOT00000003296  | 0.97305469   | 1.07E-07 |
| TUCP_003909 | XLOC_172179 | ENSRNOT00000089724  | 0.959584478  | 7.93E-07 |
| TUCP_003909 | XLOC_172179 | ENSRNOT00000073346  | 0.952730047  | 1.72E-06 |
| TUCP_003909 | XLOC_172179 | ENSRNOT00000003182  | 0.961294139  | 6.41E-07 |
| TUCP_003909 | XLOC_172179 | ENSRNOT00000028646  | 0.956883537  | 1.09E-06 |
| TUCP_003909 | XLOC_172179 | ENSRNOT000000051550 | 0.982928473  | 1.11E-08 |
| TUCP_003909 | XLOC_172179 | ENSRNOT000000035989 | 0.961391684  | 6.33E-07 |
| TUCP_003909 | XLOC_172179 | ENSRNOT00000067867  | 0.958130395  | 9.44E-07 |
| TUCP_003909 | XLOC_172179 | ENSRNOT00000047093  | 0.951188727  | 2.01E-06 |
| TUCP_003909 | XLOC_172179 | ENSRNOT00000080110  | 0.957419602  | 1.03E-06 |
| TUCP_003909 | XLOC_172179 | ENSRNOT00000023858  | 0.972208991  | 1.25E-07 |
| TUCP_003909 | XLOC_172179 | ENSRNOT000000057313 | 0.969619288  | 1.94E-07 |
| TUCP_003909 | XLOC_172179 | ENSRNOT00000073930  | 0.952920409  | 1.68E-06 |
| TUCP_003909 | XLOC_172179 | ENSRNOT00000044395  | 0.951866345  | 1.88E-06 |
| TUCP_003909 | XLOC_172179 | ENSRNOT00000000337  | 0.97352406   | 9.80E-08 |
| TUCP_003909 | XLOC_172179 | ENSRNOT00000083799  | 0.952328496  | 1.79E-06 |
| TUCP_003909 | XLOC_172179 | ENSRNOT00000024548  | 0.951479766  | 1.95E-06 |
| TUCP_002465 | XLOC_104506 | ENSRNOT00000005536  | 0.959577628  | 7.94E-07 |
| TUCP_002465 | XLOC_104506 | ENSRNOT00000009975  | 0.959375642  | 8.14E-07 |
| TUCP_002465 | XLOC_104506 | ENSRNOT00000006460  | 0.957112779  | 1.06E-06 |
| TUCP_002465 | XLOC_104506 | ENSRNOT00000012340  | 0.962825282  | 5.25E-07 |
| TUCP_002465 | XLOC_104506 | ENSRNOT00000006217  | 0.953341015  | 1.61E-06 |
| TUCP_002465 | XLOC_104506 | ENSRNOT00000003087  | 0.970652678  | 1.63E-07 |
| TUCP_002465 | XLOC_104506 | ENSRNOT00000082914  | 0.973500507  | 9.84E-08 |
| TUCP_002465 | XLOC_104506 | ENSRNOT00000073493  | 0.971280645  | 1.47E-07 |
| TUCP_002465 | XLOC_104506 | ENSRNOT00000011589  | 0.956686266  | 1.12E-06 |
| TUCP_002465 | XLOC_104506 | ENSRNOT00000079138  | 0.962878225  | 5.22E-07 |
| TUCP_002465 | XLOC_104506 | ENSRNOT00000071998  | 0.956514601  | 1.14E-06 |
| TUCP_002465 | XLOC_104506 | ENSRNOT00000029508  | 0.965365386  | 3.70E-07 |
| TUCP_002465 | XLOC_104506 | ENSRNOT00000036051  | 0.974587314  | 8.00E-08 |
| TUCP_002465 | XLOC_104506 | ENSRNOT00000084567  | 0.968249478  | 2.41E-07 |
| TUCP_002465 | XLOC_104506 | ENSRNOT00000008361  | 0.956128284  | 1.19E-06 |
| TUCP_002465 | XLOC_104506 | ENSRNOT00000042638  | 0.951619847  | 1.92E-06 |
| TUCP_002465 | XLOC_104506 | ENSRNOT00000036357  | 0.983965537  | 8.13E-09 |
| TUCP_002465 | XLOC_104506 | ENSRNOT00000046951  | 0.958515431  | 9.02E-07 |
| TUCP_002465 | XLOC_104506 | ENSRNOT00000045926  | 0.95904959   | 8.47E-07 |
| TUCP_002465 | XLOC_104506 | ENSRNOT00000010419  | 0.955921132  | 1.22E-06 |
| TUCP_002465 | XLOC_104506 | ENSRNOT00000065076  | 0.972753681  | 1.13E-07 |
| TUCP_002465 | XLOC_104506 | ENSRNOT00000057738  | 0.953168928  | 1.64E-06 |
| TUCP_002465 | XLOC_104506 | ENSRNOT00000013516  | 0.955749541  | 1.24E-06 |

|             |             |                    |              |          |
|-------------|-------------|--------------------|--------------|----------|
| TUCP_002465 | XLOC_104506 | ENSRNOT00000054685 | 0.969194147  | 2.07E-07 |
| TUCP_002465 | XLOC_104506 | ENSRNOT00000012060 | 0.952600768  | 1.74E-06 |
| TUCP_002465 | XLOC_104506 | ENSRNOT00000073370 | 0.966070271  | 3.35E-07 |
| TUCP_002465 | XLOC_104506 | ENSRNOT00000020929 | 0.977707545  | 4.18E-08 |
| TUCP_002465 | XLOC_104506 | ENSRNOT00000009009 | 0.971690192  | 1.37E-07 |
| TUCP_002465 | XLOC_104506 | ENSRNOT00000037902 | 0.954772606  | 1.38E-06 |
| TUCP_002465 | XLOC_104506 | ENSRNOT00000075480 | -0.950332913 | 2.19E-06 |
| TUCP_002465 | XLOC_104506 | ENSRNOT00000020051 | 0.961830487  | 5.98E-07 |
| TUCP_002465 | XLOC_104506 | ENSRNOT00000034282 | 0.955367326  | 1.29E-06 |
| TUCP_002465 | XLOC_104506 | ENSRNOT00000012755 | 0.99216863   | 2.29E-10 |
| TUCP_002465 | XLOC_104506 | ENSRNOT00000065871 | 0.978504187  | 3.49E-08 |
| TUCP_002465 | XLOC_104506 | ENSRNOT00000024677 | 0.958418348  | 9.13E-07 |
| TUCP_002465 | XLOC_104506 | ENSRNOT00000067161 | 0.962709351  | 5.33E-07 |
| TUCP_002465 | XLOC_104506 | ENSRNOT00000001077 | 0.952665091  | 1.73E-06 |
| TUCP_002465 | XLOC_104506 | ENSRNOT00000044511 | 0.960266077  | 7.30E-07 |
| TUCP_002465 | XLOC_104506 | ENSRNOT00000015062 | 0.967421249  | 2.74E-07 |
| TUCP_002465 | XLOC_104506 | ENSRNOT00000081226 | 0.975673209  | 6.44E-08 |
| TUCP_002465 | XLOC_104506 | ENSRNOT00000027544 | 0.957782347  | 9.84E-07 |
| TUCP_002465 | XLOC_104506 | ENSRNOT00000081631 | 0.958787741  | 8.74E-07 |
| TUCP_002465 | XLOC_104506 | ENSRNOT00000046552 | 0.977405366  | 4.47E-08 |
| TUCP_002465 | XLOC_104506 | ENSRNOT00000062057 | 0.957559959  | 1.01E-06 |
| TUCP_002465 | XLOC_104506 | ENSRNOT00000023613 | 0.96545192   | 3.66E-07 |
| TUCP_002465 | XLOC_104506 | ENSRNOT00000092066 | -0.95789833  | 9.71E-07 |
| TUCP_002465 | XLOC_104506 | ENSRNOT00000071381 | 0.952673843  | 1.73E-06 |
| TUCP_002465 | XLOC_104506 | ENSRNOT00000048781 | 0.956159512  | 1.18E-06 |
| TUCP_002465 | XLOC_104506 | ENSRNOT00000013867 | 0.971115385  | 1.51E-07 |
| TUCP_002465 | XLOC_104506 | ENSRNOT00000021802 | 0.957748183  | 9.88E-07 |
| TUCP_002465 | XLOC_104506 | ENSRNOT00000018640 | 0.971981936  | 1.30E-07 |
| TUCP_002465 | XLOC_104506 | ENSRNOT00000085334 | 0.958119343  | 9.46E-07 |
| TUCP_002465 | XLOC_104506 | ENSRNOT00000081604 | 0.957218826  | 1.05E-06 |
| TUCP_002465 | XLOC_104506 | ENSRNOT00000059246 | 0.952868424  | 1.69E-06 |
| TUCP_002465 | XLOC_104506 | ENSRNOT00000076230 | 0.950805185  | 2.09E-06 |
| TUCP_002465 | XLOC_104506 | ENSRNOT00000066952 | 0.974712999  | 7.80E-08 |
| TUCP_002465 | XLOC_104506 | ENSRNOT00000026075 | 0.987597546  | 2.26E-09 |
| TUCP_002465 | XLOC_104506 | ENSRNOT00000089611 | 0.965588454  | 3.59E-07 |
| TUCP_002465 | XLOC_104506 | ENSRNOT00000074054 | 0.970865377  | 1.57E-07 |
| TUCP_002465 | XLOC_104506 | ENSRNOT00000045063 | 0.966877479  | 2.97E-07 |
| TUCP_002465 | XLOC_104506 | ENSRNOT00000076400 | 0.97639095   | 5.55E-08 |
| TUCP_002465 | XLOC_104506 | ENSRNOT00000030082 | 0.95574496   | 1.24E-06 |
| TUCP_002465 | XLOC_104506 | ENSRNOT00000001158 | 0.959782303  | 7.74E-07 |
| TUCP_002465 | XLOC_104506 | ENSRNOT00000005172 | 0.976080422  | 5.92E-08 |
| TUCP_002465 | XLOC_104506 | ENSRNOT00000060494 | 0.963824386  | 4.59E-07 |
| TUCP_002465 | XLOC_104506 | ENSRNOT00000021715 | 0.963684644  | 4.68E-07 |
| TUCP_002465 | XLOC_104506 | ENSRNOT00000087138 | 0.968318913  | 2.38E-07 |
| TUCP_002465 | XLOC_104506 | ENSRNOT00000039911 | 0.958885544  | 8.63E-07 |
| TUCP_002465 | XLOC_104506 | ENSRNOT00000007461 | 0.973597855  | 9.67E-08 |
| TUCP_002465 | XLOC_104506 | ENSRNOT00000060977 | 0.976438685  | 5.50E-08 |
| TUCP_002465 | XLOC_104506 | ENSRNOT00000065615 | 0.976561993  | 5.36E-08 |
| TUCP_002465 | XLOC_104506 | ENSRNOT00000037015 | 0.963404855  | 4.86E-07 |
| TUCP_002465 | XLOC_104506 | ENSRNOT00000027917 | 0.955505455  | 1.27E-06 |
| TUCP_002465 | XLOC_104506 | ENSRNOT00000011956 | 0.980258529  | 2.28E-08 |



|             |             |                     |              |          |
|-------------|-------------|---------------------|--------------|----------|
| TUCP_002465 | XLOC_104506 | ENSRNOT00000022716  | 0.950874647  | 2.07E-06 |
| TUCP_002465 | XLOC_104506 | ENSRNOT00000011675  | 0.982400891  | 1.29E-08 |
| TUCP_002465 | XLOC_104506 | ENSRNOT00000033359  | 0.950518102  | 2.15E-06 |
| TUCP_002465 | XLOC_104506 | ENSRNOT0000002974   | 0.953021705  | 1.67E-06 |
| TUCP_002465 | XLOC_104506 | ENSRNOT00000060476  | 0.970552702  | 1.66E-07 |
| TUCP_002465 | XLOC_104506 | ENSRNOT00000068156  | 0.966488555  | 3.15E-07 |
| TUCP_002465 | XLOC_104506 | ENSRNOT00000066032  | 0.95549885   | 1.28E-06 |
| TUCP_002465 | XLOC_104506 | ENSRNOT00000049285  | -0.950378463 | 2.18E-06 |
| TUCP_002465 | XLOC_104506 | ENSRNOT00000026392  | 0.959308782  | 8.20E-07 |
| TUCP_002465 | XLOC_104506 | ENSRNOT00000014320  | 0.978013551  | 3.90E-08 |
| TUCP_002465 | XLOC_104506 | ENSRNOT00000005770  | 0.965935992  | 3.41E-07 |
| TUCP_002465 | XLOC_104506 | ENSRNOT00000017504  | 0.962355467  | 5.59E-07 |
| TUCP_002465 | XLOC_104506 | ENSRNOT00000025037  | 0.978908738  | 3.17E-08 |
| TUCP_002465 | XLOC_104506 | ENSRNOT00000012386  | 0.953081465  | 1.65E-06 |
| TUCP_002465 | XLOC_104506 | ENSRNOT00000006802  | 0.963954824  | 4.51E-07 |
| TUCP_002465 | XLOC_104506 | ENSRNOT00000009202  | 0.96786113   | 2.56E-07 |
| TUCP_002465 | XLOC_104506 | ENSRNOT00000010369  | 0.965169306  | 3.81E-07 |
| TUCP_002465 | XLOC_104506 | ENSRNOT00000013524  | 0.960392718  | 7.18E-07 |
| TUCP_002465 | XLOC_104506 | ENSRNOT00000017765  | 0.960120958  | 7.43E-07 |
| TUCP_002465 | XLOC_104506 | ENSRNOT00000064039  | 0.95709746   | 1.07E-06 |
| TUCP_002465 | XLOC_104506 | ENSRNOT00000006168  | 0.981751424  | 1.55E-08 |
| TUCP_002465 | XLOC_104506 | ENSRNOT00000017829  | 0.957649973  | 9.99E-07 |
| TUCP_002465 | XLOC_104506 | ENSRNOT00000005719  | 0.952984899  | 1.67E-06 |
| TUCP_002465 | XLOC_104506 | ENSRNOT00000023014  | 0.960592695  | 7.00E-07 |
| TUCP_002465 | XLOC_104506 | ENSRNOT00000026518  | 0.961126233  | 6.55E-07 |
| TUCP_002465 | XLOC_104506 | ENSRNOT00000036137  | 0.972640485  | 1.15E-07 |
| TUCP_002465 | XLOC_104506 | ENSRNOT00000027875  | 0.963772436  | 4.62E-07 |
| TUCP_002465 | XLOC_104506 | ENSRNOT00000028685  | 0.981010521  | 1.88E-08 |
| TUCP_002465 | XLOC_104506 | ENSRNOT00000085517  | 0.97717182   | 4.70E-08 |
| TUCP_002465 | XLOC_104506 | ENSRNOT00000007369  | 0.961067184  | 6.60E-07 |
| TUCP_002465 | XLOC_104506 | ENSRNOT00000085466  | 0.950779987  | 2.09E-06 |
| TUCP_002465 | XLOC_104506 | ENSRNOT00000012528  | 0.96425073   | 4.33E-07 |
| TUCP_002465 | XLOC_104506 | ENSRNOT00000027476  | 0.979257112  | 2.92E-08 |
| TUCP_002465 | XLOC_104506 | ENSRNOT00000017998  | 0.965911634  | 3.42E-07 |
| TUCP_002465 | XLOC_104506 | ENSRNOT00000027170  | 0.963650164  | 4.70E-07 |
| TUCP_002465 | XLOC_104506 | ENSRNOT00000006071  | 0.953609815  | 1.56E-06 |
| TUCP_002465 | XLOC_104506 | ENSRNOT00000008764  | 0.975582228  | 6.56E-08 |
| TUCP_002465 | XLOC_104506 | ENSRNOT00000028907  | 0.952705665  | 1.72E-06 |
| TUCP_002465 | XLOC_104506 | ENSRNOT00000079128  | 0.988504367  | 1.55E-09 |
| TUCP_002465 | XLOC_104506 | ENSRNOT00000081678  | 0.956490005  | 1.14E-06 |
| TUCP_002465 | XLOC_104506 | ENSRNOT000000051394 | 0.972311747  | 1.22E-07 |
| TUCP_002466 | XLOC_104506 | ENSRNOT00000001215  | 0.961384515  | 6.34E-07 |
| TUCP_002466 | XLOC_104506 | ENSRNOT00000006188  | -0.961356855 | 6.36E-07 |
| TUCP_002466 | XLOC_104506 | ENSRNOT00000061233  | -0.95058576  | 2.14E-06 |
| TUCP_002466 | XLOC_104506 | ENSRNOT00000026941  | 0.957526337  | 1.01E-06 |
| TUCP_002466 | XLOC_104506 | ENSRNOT00000013745  | -0.968806339 | 2.21E-07 |
| TUCP_002466 | XLOC_104506 | ENSRNOT00000075397  | 0.966902243  | 2.96E-07 |
| TUCP_002466 | XLOC_104506 | ENSRNOT00000012617  | -0.968627625 | 2.27E-07 |
| TUCP_002466 | XLOC_104506 | ENSRNOT00000032926  | -0.960563701 | 7.03E-07 |
| TUCP_002466 | XLOC_104506 | ENSRNOT00000019104  | -0.964791348 | 4.02E-07 |
| TUCP_002466 | XLOC_104506 | ENSRNOT00000031904  | 0.950377237  | 2.18E-06 |

|             |             |                     |              |          |
|-------------|-------------|---------------------|--------------|----------|
| TUCP_002466 | XLOC_104506 | ENSRNOT00000003891  | 0.950579764  | 2.14E-06 |
| TUCP_002466 | XLOC_104506 | ENSRNOT00000001691  | 0.974228999  | 8.57E-08 |
| TUCP_002466 | XLOC_104506 | ENSRNOT000000089319 | 0.950152396  | 2.23E-06 |
| TUCP_002466 | XLOC_104506 | ENSRNOT000000086706 | 0.954124923  | 1.48E-06 |
| TUCP_002466 | XLOC_104506 | ENSRNOT000000006186 | 0.950220444  | 2.21E-06 |
| TUCP_002466 | XLOC_104506 | ENSRNOT000000045233 | -0.961355259 | 6.36E-07 |
| TUCP_002466 | XLOC_104506 | ENSRNOT000000030850 | 0.964011882  | 4.48E-07 |
| TUCP_002466 | XLOC_104506 | ENSRNOT000000039232 | 0.950389462  | 2.18E-06 |
| TUCP_002466 | XLOC_104506 | ENSRNOT000000033017 | 0.968709913  | 2.24E-07 |
| TUCP_002466 | XLOC_104506 | ENSRNOT000000055540 | 0.963742496  | 4.64E-07 |
| TUCP_002466 | XLOC_104506 | ENSRNOT000000066370 | 0.955783493  | 1.24E-06 |
| TUCP_002466 | XLOC_104506 | ENSRNOT000000085251 | -0.97613779  | 5.85E-08 |
| TUCP_002466 | XLOC_104506 | ENSRNOT000000065304 | -0.958821935 | 8.70E-07 |
| TUCP_002466 | XLOC_104506 | ENSRNOT000000065300 | 0.959707326  | 7.82E-07 |
| TUCP_002466 | XLOC_104506 | ENSRNOT000000045699 | 0.958165802  | 9.41E-07 |
| TUCP_002466 | XLOC_104506 | ENSRNOT000000078816 | 0.960051457  | 7.49E-07 |
| TUCP_002466 | XLOC_104506 | ENSRNOT000000064401 | 0.956792824  | 1.10E-06 |
| TUCP_002466 | XLOC_104506 | ENSRNOT000000065971 | -0.957485661 | 1.02E-06 |
| TUCP_002466 | XLOC_104506 | ENSRNOT000000057160 | 0.95489447   | 1.36E-06 |
| TUCP_002466 | XLOC_104506 | ENSRNOT000000077999 | 0.950199019  | 2.22E-06 |
| TUCP_002466 | XLOC_104506 | ENSRNOT000000024266 | 0.958110665  | 9.47E-07 |
| TUCP_002466 | XLOC_104506 | ENSRNOT000000085228 | 0.961952771  | 5.89E-07 |
| TUCP_002466 | XLOC_104506 | ENSRNOT000000015525 | -0.950898167 | 2.07E-06 |
| TUCP_002466 | XLOC_104506 | ENSRNOT000000015188 | 0.953134179  | 1.65E-06 |
| TUCP_002466 | XLOC_104506 | ENSRNOT000000040629 | 0.959060618  | 8.45E-07 |
| TUCP_002466 | XLOC_104506 | ENSRNOT000000005292 | 0.956061149  | 1.20E-06 |
| TUCP_002466 | XLOC_104506 | ENSRNOT000000005834 | 0.951304867  | 1.99E-06 |
| TUCP_002466 | XLOC_104506 | ENSRNOT000000005297 | 0.952650226  | 1.73E-06 |
| TUCP_002466 | XLOC_104506 | ENSRNOT000000000048 | 0.960516808  | 7.07E-07 |
| TUCP_002466 | XLOC_104506 | ENSRNOT000000008655 | 0.959138152  | 8.38E-07 |
| TUCP_002466 | XLOC_104506 | ENSRNOT000000076181 | -0.952709834 | 1.72E-06 |
| TUCP_002466 | XLOC_104506 | ENSRNOT000000087278 | -0.950399402 | 2.17E-06 |
| TUCP_002466 | XLOC_104506 | ENSRNOT000000023619 | 0.954220721  | 1.47E-06 |
| TUCP_002466 | XLOC_104506 | ENSRNOT000000084709 | 0.95868069   | 8.85E-07 |
| TUCP_002466 | XLOC_104506 | ENSRNOT000000068033 | 0.960659832  | 6.95E-07 |
| TUCP_002466 | XLOC_104506 | ENSRNOT000000026481 | 0.958535289  | 9.00E-07 |
| TUCP_002466 | XLOC_104506 | ENSRNOT000000082709 | -0.963252444 | 4.96E-07 |
| TUCP_002466 | XLOC_104506 | ENSRNOT000000025856 | -0.959197003 | 8.32E-07 |
| TUCP_002466 | XLOC_104506 | ENSRNOT000000026643 | 0.972403017  | 1.20E-07 |
| TUCP_002466 | XLOC_104506 | ENSRNOT00000001403  | 0.968612863  | 2.28E-07 |
| TUCP_002466 | XLOC_104506 | ENSRNOT000000016132 | -0.971195498 | 1.49E-07 |
| TUCP_002466 | XLOC_104506 | ENSRNOT000000013067 | -0.957219592 | 1.05E-06 |
| TUCP_002466 | XLOC_104506 | ENSRNOT000000026398 | -0.95034053  | 2.19E-06 |
| TUCP_002466 | XLOC_104506 | ENSRNOT000000037844 | -0.951573445 | 1.93E-06 |
| TUCP_002466 | XLOC_104506 | ENSRNOT000000048063 | 0.958465251  | 9.08E-07 |
| TUCP_002466 | XLOC_104506 | ENSRNOT000000041815 | -0.975035424 | 7.32E-08 |
| TUCP_002466 | XLOC_104506 | ENSRNOT000000033975 | 0.978680603  | 3.35E-08 |
| TUCP_002466 | XLOC_104506 | ENSRNOT000000079895 | 0.95552633   | 1.27E-06 |
| TUCP_002466 | XLOC_104506 | ENSRNOT000000084031 | 0.970531418  | 1.67E-07 |
| TUCP_002466 | XLOC_104506 | ENSRNOT000000011880 | 0.954506571  | 1.42E-06 |
| TUCP_002466 | XLOC_104506 | ENSRNOT000000023989 | 0.959526835  | 7.99E-07 |

|             |             |                    |              |          |
|-------------|-------------|--------------------|--------------|----------|
| TUCP_002466 | XLOC_104506 | ENSRNOT00000021717 | 0.954672964  | 1.40E-06 |
| TUCP_002466 | XLOC_104506 | ENSRNOT00000021158 | 0.953016918  | 1.67E-06 |
| TUCP_002466 | XLOC_104506 | ENSRNOT00000050515 | 0.964396826  | 4.24E-07 |
| TUCP_002466 | XLOC_104506 | ENSRNOT00000011401 | -0.95780938  | 9.81E-07 |
| TUCP_002466 | XLOC_104506 | ENSRNOT00000055602 | -0.955614654 | 1.26E-06 |
| TUCP_002466 | XLOC_104506 | ENSRNOT00000020951 | 0.965850134  | 3.45E-07 |
| TUCP_002466 | XLOC_104506 | ENSRNOT00000082146 | -0.958359434 | 9.19E-07 |
| TUCP_002466 | XLOC_104506 | ENSRNOT00000031555 | -0.951281714 | 1.99E-06 |
| TUCP_002466 | XLOC_104506 | ENSRNOT00000011563 | -0.958417977 | 9.13E-07 |
| TUCP_002466 | XLOC_104506 | ENSRNOT00000000263 | 0.95343526   | 1.59E-06 |
| TUCP_002466 | XLOC_104506 | ENSRNOT00000023876 | 0.963020256  | 5.12E-07 |
| TUCP_002466 | XLOC_104506 | ENSRNOT00000002187 | -0.951044772 | 2.04E-06 |
| TUCP_002466 | XLOC_104506 | ENSRNOT00000049285 | -0.957928265 | 9.67E-07 |
| TUCP_002466 | XLOC_104506 | ENSRNOT00000003568 | 0.957553946  | 1.01E-06 |
| TUCP_002466 | XLOC_104506 | ENSRNOT00000006366 | -0.954788594 | 1.38E-06 |
| TUCP_002466 | XLOC_104506 | ENSRNOT00000074649 | 0.95772863   | 9.90E-07 |
| TUCP_002466 | XLOC_104506 | ENSRNOT00000077146 | -0.970163542 | 1.77E-07 |
| TUCP_002466 | XLOC_104506 | ENSRNOT00000028801 | 0.959412732  | 8.10E-07 |
| TUCP_002466 | XLOC_104506 | ENSRNOT00000060002 | -0.957171117 | 1.06E-06 |
| TUCP_002466 | XLOC_104506 | ENSRNOT00000089673 | -0.960533436 | 7.06E-07 |
| TUCP_002466 | XLOC_104506 | ENSRNOT00000014924 | -0.956984792 | 1.08E-06 |
| TUCP_002466 | XLOC_104506 | ENSRNOT00000023977 | -0.962544364 | 5.45E-07 |
| TUCP_002466 | XLOC_104506 | ENSRNOT00000066133 | -0.965632312 | 3.56E-07 |
| TUCP_002466 | XLOC_104506 | ENSRNOT00000017420 | -0.950796387 | 2.09E-06 |
| TUCP_002466 | XLOC_104506 | ENSRNOT00000006765 | -0.953535615 | 1.58E-06 |
| TUCP_002466 | XLOC_104506 | ENSRNOT00000086893 | -0.951060758 | 2.04E-06 |
| TUCP_002466 | XLOC_104506 | ENSRNOT00000030692 | -0.960058037 | 7.49E-07 |
| TUCP_002466 | XLOC_104506 | ENSRNOT00000071192 | -0.950743492 | 2.10E-06 |
| TUCP_002466 | XLOC_104506 | ENSRNOT00000080443 | 0.960230804  | 7.33E-07 |
| TUCP_002466 | XLOC_104506 | ENSRNOT00000080110 | 0.961641125  | 6.13E-07 |
| TUCP_002466 | XLOC_104506 | ENSRNOT00000015624 | 0.963919679  | 4.53E-07 |
| TUCP_002466 | XLOC_104506 | ENSRNOT00000073235 | 0.958624165  | 8.91E-07 |
| TUCP_002466 | XLOC_104506 | ENSRNOT00000085295 | -0.950591111 | 2.13E-06 |
| TUCP_002466 | XLOC_104506 | ENSRNOT00000008222 | -0.953452543 | 1.59E-06 |
| TUCP_002466 | XLOC_104506 | ENSRNOT00000035474 | 0.962321237  | 5.61E-07 |
| TUCP_002466 | XLOC_104506 | ENSRNOT00000039102 | 0.962865153  | 5.23E-07 |
| TUCP_002466 | XLOC_104506 | ENSRNOT00000023807 | -0.96981906  | 1.87E-07 |
| TUCP_002466 | XLOC_104506 | ENSRNOT00000078856 | -0.973157435 | 1.05E-07 |
| TUCP_002466 | XLOC_104506 | ENSRNOT00000091205 | 0.952962727  | 1.68E-06 |
| TUCP_002466 | XLOC_104506 | ENSRNOT00000007369 | 0.95836469   | 9.19E-07 |
| TUCP_002466 | XLOC_104506 | ENSRNOT00000004787 | -0.965039794 | 3.88E-07 |
| TUCP_002466 | XLOC_104506 | ENSRNOT00000060698 | -0.956937932 | 1.08E-06 |
| TUCP_002466 | XLOC_104506 | ENSRNOT00000058351 | 0.959218077  | 8.30E-07 |
| TUCP_002466 | XLOC_104506 | ENSRNOT00000022000 | -0.966180718 | 3.29E-07 |
| TUCP_002466 | XLOC_104506 | ENSRNOT00000010748 | 0.963217078  | 4.99E-07 |
| TUCP_002466 | XLOC_104506 | ENSRNOT00000080207 | 0.954114164  | 1.48E-06 |
| TUCP_002466 | XLOC_104506 | ENSRNOT00000023537 | -0.96413514  | 4.40E-07 |
| TUCP_002466 | XLOC_104506 | ENSRNOT00000070912 | -0.951829895 | 1.88E-06 |
| TUCP_002466 | XLOC_104506 | ENSRNOT00000060595 | -0.957098085 | 1.06E-06 |
| TUCP_002466 | XLOC_104506 | ENSRNOT00000017776 | 0.962717544  | 5.33E-07 |
| TUCP_002466 | XLOC_104506 | ENSRNOT00000059807 | 0.961992356  | 5.86E-07 |

|             |             |                     |              |          |
|-------------|-------------|---------------------|--------------|----------|
| TUCP_002466 | XLOC_104506 | ENSRNOT00000008982  | 0.957826236  | 9.79E-07 |
| TUCP_002466 | XLOC_104506 | ENSRNOT00000047192  | -0.970772693 | 1.60E-07 |
| TUCP_002466 | XLOC_104506 | ENSRNOT00000022097  | 0.95255045   | 1.75E-06 |
| TUCP_002466 | XLOC_104506 | ENSRNOT00000008987  | -0.973863195 | 9.19E-08 |
| TUCP_002466 | XLOC_104506 | ENSRNOT00000090299  | 0.951022081  | 2.04E-06 |
| TUCP_002466 | XLOC_104506 | ENSRNOT00000090355  | -0.966978343 | 2.93E-07 |
| TUCP_002466 | XLOC_104506 | ENSRNOT00000065143  | 0.95242184   | 1.77E-06 |
| TUCP_002466 | XLOC_104506 | ENSRNOT00000027083  | 0.965559613  | 3.60E-07 |
| TUCP_002466 | XLOC_104506 | ENSRNOT00000063930  | -0.956427688 | 1.15E-06 |
| TUCP_002466 | XLOC_104506 | ENSRNOT00000006067  | 0.950248125  | 2.21E-06 |
| TUCP_002466 | XLOC_104506 | ENSRNOT00000001290  | 0.970324501  | 1.72E-07 |
| TUCP_002466 | XLOC_104506 | ENSRNOT00000001855  | 0.971181172  | 1.49E-07 |
| TUCP_002466 | XLOC_104506 | ENSRNOT00000009563  | -0.972397448 | 1.20E-07 |
| TUCP_002466 | XLOC_104506 | ENSRNOT00000038178  | -0.952238643 | 1.81E-06 |
| TUCP_002466 | XLOC_104506 | ENSRNOT00000055683  | 0.965726889  | 3.52E-07 |
| TUCP_002466 | XLOC_104506 | ENSRNOT00000081981  | 0.965439454  | 3.66E-07 |
| TUCP_002466 | XLOC_104506 | ENSRNOT00000003326  | -0.965205913 | 3.79E-07 |
| TUCP_002466 | XLOC_104506 | ENSRNOT000000025079 | -0.954538396 | 1.42E-06 |
| TUCP_002466 | XLOC_104506 | ENSRNOT00000048754  | -0.954070298 | 1.49E-06 |
| TUCP_002466 | XLOC_104506 | ENSRNOT00000044628  | 0.962211965  | 5.69E-07 |
| TUCP_002466 | XLOC_104506 | ENSRNOT000000012699 | -0.958988652 | 8.53E-07 |
| TUCP_002466 | XLOC_104506 | ENSRNOT00000004007  | -0.950949934 | 2.06E-06 |
| TUCP_002466 | XLOC_104506 | ENSRNOT00000057898  | -0.970216299 | 1.76E-07 |
| TUCP_002466 | XLOC_104506 | ENSRNOT00000091602  | -0.965561499 | 3.60E-07 |
| TUCP_002466 | XLOC_104506 | ENSRNOT00000056100  | -0.972791804 | 1.12E-07 |
| TUCP_002466 | XLOC_104506 | ENSRNOT00000009811  | 0.964752804  | 4.04E-07 |
| TUCP_002466 | XLOC_104506 | ENSRNOT00000036838  | -0.967962209 | 2.52E-07 |
| TUCP_002466 | XLOC_104506 | ENSRNOT00000009817  | -0.952536215 | 1.75E-06 |
| TUCP_002466 | XLOC_104506 | ENSRNOT00000090129  | -0.956646071 | 1.12E-06 |
| TUCP_002466 | XLOC_104506 | ENSRNOT00000077231  | 0.954658567  | 1.40E-06 |
| TUCP_002466 | XLOC_104506 | ENSRNOT00000030798  | -0.95224632  | 1.80E-06 |
| TUCP_002466 | XLOC_104506 | ENSRNOT00000060696  | 0.958695692  | 8.83E-07 |
| TUCP_002466 | XLOC_104506 | ENSRNOT00000073643  | -0.961285186 | 6.42E-07 |
| TUCP_002466 | XLOC_104506 | ENSRNOT00000024402  | 0.951403342  | 1.97E-06 |
| TUCP_002466 | XLOC_104506 | ENSRNOT00000052002  | 0.954139865  | 1.48E-06 |
| TUCP_002466 | XLOC_104506 | ENSRNOT00000011654  | -0.951798098 | 1.89E-06 |
| TUCP_002466 | XLOC_104506 | ENSRNOT00000022502  | -0.961879182 | 5.95E-07 |
| TUCP_002466 | XLOC_104506 | ENSRNOT00000026928  | -0.958296987 | 9.26E-07 |
| TUCP_002466 | XLOC_104506 | ENSRNOT00000005329  | -0.957414082 | 1.03E-06 |
| TUCP_002466 | XLOC_104506 | ENSRNOT00000087443  | 0.967303562  | 2.79E-07 |
| TUCP_002466 | XLOC_104506 | ENSRNOT00000009900  | -0.957158486 | 1.06E-06 |
| TUCP_002466 | XLOC_104506 | ENSRNOT00000024352  | 0.960682738  | 6.93E-07 |
| TUCP_002466 | XLOC_104506 | ENSRNOT00000083220  | 0.960214752  | 7.34E-07 |
| TUCP_002466 | XLOC_104506 | ENSRNOT00000003780  | 0.960902041  | 6.74E-07 |
| TUCP_002466 | XLOC_104506 | ENSRNOT00000045946  | 0.968276605  | 2.40E-07 |
| TUCP_002466 | XLOC_104506 | ENSRNOT00000017254  | -0.950255599 | 2.21E-06 |
| TUCP_002466 | XLOC_104506 | ENSRNOT00000016730  | -0.956947713 | 1.08E-06 |
| TUCP_002466 | XLOC_104506 | ENSRNOT00000085621  | 0.96730818   | 2.78E-07 |
| TUCP_002466 | XLOC_104506 | ENSRNOT00000014821  | -0.975185385 | 7.11E-08 |
| TUCP_002466 | XLOC_104506 | ENSRNOT00000088599  | 0.97815428   | 3.78E-08 |
| TUCP_002466 | XLOC_104506 | ENSRNOT00000026531  | -0.951312597 | 1.99E-06 |

|             |             |                    |              |          |
|-------------|-------------|--------------------|--------------|----------|
| TUCP_002466 | XLOC_104506 | ENSRNOT00000083351 | -0.957314381 | 1.04E-06 |
| TUCP_002466 | XLOC_104506 | ENSRNOT00000050609 | -0.962047646 | 5.82E-07 |
| TUCP_002466 | XLOC_104506 | ENSRNOT00000005459 | 0.959359284  | 8.15E-07 |
| TUCP_002466 | XLOC_104506 | ENSRNOT00000027910 | 0.963728235  | 4.65E-07 |
| TUCP_002466 | XLOC_104506 | ENSRNOT00000067135 | -0.971760477 | 1.35E-07 |
| TUCP_002466 | XLOC_104506 | ENSRNOT00000011270 | 0.95053881   | 2.15E-06 |
| TUCP_002466 | XLOC_104506 | ENSRNOT00000003770 | -0.960913407 | 6.73E-07 |
| TUCP_002466 | XLOC_104506 | ENSRNOT00000010516 | -0.951411945 | 1.97E-06 |
| TUCP_002466 | XLOC_104506 | ENSRNOT00000016191 | 0.956795077  | 1.10E-06 |
| TUCP_002466 | XLOC_104506 | ENSRNOT00000067901 | -0.961071838 | 6.59E-07 |
| TUCP_002466 | XLOC_104506 | ENSRNOT00000039730 | -0.960504092 | 7.08E-07 |
| TUCP_002466 | XLOC_104506 | ENSRNOT00000002173 | -0.950950941 | 2.06E-06 |
| TUCP_002466 | XLOC_104506 | ENSRNOT00000054976 | -0.964253121 | 4.33E-07 |
| TUCP_002466 | XLOC_104506 | ENSRNOT00000038212 | -0.964094868 | 4.42E-07 |
| TUCP_002466 | XLOC_104506 | ENSRNOT00000082151 | -0.960580342 | 7.02E-07 |
| TUCP_002466 | XLOC_104506 | ENSRNOT00000020272 | -0.962102204 | 5.78E-07 |
| TUCP_002466 | XLOC_104506 | ENSRNOT00000001607 | 0.963158358  | 5.02E-07 |
| TUCP_002466 | XLOC_104506 | ENSRNOT00000090057 | 0.950252039  | 2.21E-06 |
| TUCP_002466 | XLOC_104506 | ENSRNOT00000085971 | -0.982779447 | 1.16E-08 |
| TUCP_002466 | XLOC_104506 | ENSRNOT00000057537 | 0.953259636  | 1.62E-06 |
| TUCP_002466 | XLOC_104506 | ENSRNOT00000007771 | -0.957873771 | 9.73E-07 |
| TUCP_002466 | XLOC_104506 | ENSRNOT00000022142 | 0.964536628  | 4.16E-07 |
| TUCP_002466 | XLOC_104506 | ENSRNOT00000033048 | -0.95694099  | 1.08E-06 |
| TUCP_002466 | XLOC_104506 | ENSRNOT00000015537 | 0.950958474  | 2.06E-06 |
| TUCP_002466 | XLOC_104506 | ENSRNOT00000023965 | -0.957668306 | 9.97E-07 |
| TUCP_002466 | XLOC_104506 | ENSRNOT00000029125 | 0.954121648  | 1.48E-06 |
| TUCP_002466 | XLOC_104506 | ENSRNOT00000004319 | -0.969960736 | 1.83E-07 |
| TUCP_002466 | XLOC_104506 | ENSRNOT00000005387 | 0.959526289  | 7.99E-07 |
| TUCP_002466 | XLOC_104506 | ENSRNOT00000015092 | 0.959616208  | 7.90E-07 |
| TUCP_002466 | XLOC_104506 | ENSRNOT00000015318 | -0.962355051 | 5.59E-07 |
| TUCP_002466 | XLOC_104506 | ENSRNOT00000083632 | -0.972351762 | 1.21E-07 |
| TUCP_002466 | XLOC_104506 | ENSRNOT00000045532 | -0.960175292 | 7.38E-07 |
| TUCP_002466 | XLOC_104506 | ENSRNOT00000005257 | 0.959761864  | 7.76E-07 |
| TUCP_002466 | XLOC_104506 | ENSRNOT00000015799 | 0.965640662  | 3.56E-07 |
| TUCP_002466 | XLOC_104506 | ENSRNOT00000036506 | 0.977841317  | 4.05E-08 |
| TUCP_002466 | XLOC_104506 | ENSRNOT00000005958 | 0.969364536  | 2.02E-07 |
| TUCP_002466 | XLOC_104506 | ENSRNOT00000082998 | 0.960457348  | 7.12E-07 |
| TUCP_002466 | XLOC_104506 | ENSRNOT00000075656 | -0.975402684 | 6.80E-08 |
| TUCP_002466 | XLOC_104506 | ENSRNOT00000015006 | 0.953259723  | 1.62E-06 |
| TUCP_002466 | XLOC_104506 | ENSRNOT00000023638 | 0.975476372  | 6.70E-08 |
| TUCP_002466 | XLOC_104506 | ENSRNOT00000059524 | -0.962161123 | 5.73E-07 |
| TUCP_002466 | XLOC_104506 | ENSRNOT00000017361 | 0.950024756  | 2.26E-06 |
| TUCP_002466 | XLOC_104506 | ENSRNOT00000005220 | 0.965631614  | 3.56E-07 |
| TUCP_002466 | XLOC_104506 | ENSRNOT00000023144 | 0.952124362  | 1.83E-06 |
| TUCP_002466 | XLOC_104506 | ENSRNOT00000045326 | 0.958492663  | 9.05E-07 |
| TUCP_002466 | XLOC_104506 | ENSRNOT00000016649 | 0.968992728  | 2.14E-07 |
| TUCP_002466 | XLOC_104506 | ENSRNOT00000074023 | 0.976442475  | 5.49E-08 |
| TUCP_002466 | XLOC_104506 | ENSRNOT00000019465 | -0.962163871 | 5.73E-07 |
| TUCP_002466 | XLOC_104506 | ENSRNOT00000001586 | -0.961692652 | 6.09E-07 |
| TUCP_002466 | XLOC_104506 | ENSRNOT00000012187 | 0.953548313  | 1.58E-06 |
| TUCP_002466 | XLOC_104506 | ENSRNOT00000024969 | 0.959109267  | 8.41E-07 |

|             |             |                    |              |          |
|-------------|-------------|--------------------|--------------|----------|
| TUCP_002466 | XLOC_104506 | ENSRNOT00000013049 | 0.962401566  | 5.56E-07 |
| TUCP_002466 | XLOC_104506 | ENSRNOT00000013695 | -0.950373556 | 2.18E-06 |
| TUCP_002466 | XLOC_104506 | ENSRNOT00000081621 | 0.960334824  | 7.23E-07 |
| TUCP_002466 | XLOC_104506 | ENSRNOT00000027301 | -0.966802447 | 3.00E-07 |
| TUCP_002466 | XLOC_104506 | ENSRNOT00000030373 | -0.950803249 | 2.09E-06 |
| TUCP_002466 | XLOC_104506 | ENSRNOT00000090338 | -0.958940845 | 8.58E-07 |
| TUCP_002466 | XLOC_104506 | ENSRNOT00000039523 | 0.950203283  | 2.22E-06 |
| TUCP_002466 | XLOC_104506 | ENSRNOT00000089933 | 0.979428472  | 2.80E-08 |
| TUCP_002466 | XLOC_104506 | ENSRNOT00000083876 | -0.977609685 | 4.27E-08 |
| TUCP_002466 | XLOC_104506 | ENSRNOT00000090912 | 0.977122358  | 4.75E-08 |
| TUCP_002466 | XLOC_104506 | ENSRNOT00000072208 | 0.963552369  | 4.76E-07 |
| TUCP_002466 | XLOC_104506 | ENSRNOT00000084012 | 0.959199195  | 8.31E-07 |
| TUCP_002466 | XLOC_104506 | ENSRNOT00000033677 | -0.950967963 | 2.06E-06 |
| TUCP_002466 | XLOC_104506 | ENSRNOT00000019820 | 0.962444209  | 5.52E-07 |
| TUCP_002466 | XLOC_104506 | ENSRNOT00000003940 | -0.96632834  | 3.22E-07 |
| TUCP_002466 | XLOC_104506 | ENSRNOT00000025362 | -0.968561567 | 2.29E-07 |
| TUCP_002466 | XLOC_104506 | ENSRNOT00000010541 | 0.962122346  | 5.76E-07 |
| TUCP_002466 | XLOC_104506 | ENSRNOT00000017949 | -0.950808457 | 2.09E-06 |
| TUCP_002466 | XLOC_104506 | ENSRNOT00000074212 | 0.950773977  | 2.10E-06 |
| TUCP_002466 | XLOC_104506 | ENSRNOT00000091909 | 0.971114503  | 1.51E-07 |
| TUCP_002466 | XLOC_104506 | ENSRNOT00000021925 | 0.975142126  | 7.17E-08 |
| TUCP_002466 | XLOC_104506 | ENSRNOT00000086119 | -0.963015153 | 5.12E-07 |
| TUCP_002466 | XLOC_104506 | ENSRNOT00000064452 | -0.958063859 | 9.52E-07 |
| TUCP_002466 | XLOC_104506 | ENSRNOT00000022190 | -0.956343333 | 1.16E-06 |
| TUCP_002466 | XLOC_104506 | ENSRNOT00000025913 | -0.960484764 | 7.10E-07 |
| TUCP_002466 | XLOC_104506 | ENSRNOT00000019386 | -0.961463246 | 6.27E-07 |
| TUCP_002466 | XLOC_104506 | ENSRNOT00000077220 | -0.961874789 | 5.95E-07 |
| TUCP_002466 | XLOC_104506 | ENSRNOT00000065983 | 0.965146595  | 3.82E-07 |
| TUCP_002466 | XLOC_104506 | ENSRNOT00000067780 | -0.959627547 | 7.89E-07 |
| TUCP_002466 | XLOC_104506 | ENSRNOT00000086577 | 0.977930899  | 3.97E-08 |
| TUCP_002466 | XLOC_104506 | ENSRNOT00000036658 | -0.950633071 | 2.12E-06 |
| TUCP_002466 | XLOC_104506 | ENSRNOT0000007738  | -0.956230425 | 1.18E-06 |
| TUCP_002466 | XLOC_104506 | ENSRNOT00000065600 | 0.954769866  | 1.38E-06 |
| TUCP_002466 | XLOC_104506 | ENSRNOT00000034883 | -0.957327509 | 1.04E-06 |
| TUCP_002466 | XLOC_104506 | ENSRNOT00000020155 | 0.968038854  | 2.49E-07 |
| TUCP_002466 | XLOC_104506 | ENSRNOT00000055321 | 0.972591099  | 1.16E-07 |
| TUCP_002466 | XLOC_104506 | ENSRNOT00000005910 | -0.955940097 | 1.21E-06 |
| TUCP_002466 | XLOC_104506 | ENSRNOT00000078475 | 0.953448941  | 1.59E-06 |
| TUCP_002466 | XLOC_104506 | ENSRNOT00000087429 | 0.960311429  | 7.25E-07 |
| TUCP_002466 | XLOC_104506 | ENSRNOT00000055888 | -0.950704823 | 2.11E-06 |
| TUCP_002466 | XLOC_104506 | ENSRNOT00000000013 | 0.950389139  | 2.18E-06 |
| TUCP_002466 | XLOC_104506 | ENSRNOT00000030329 | -0.961330672 | 6.38E-07 |
| TUCP_002466 | XLOC_104506 | ENSRNOT00000026057 | -0.951844825 | 1.88E-06 |
| TUCP_002466 | XLOC_104506 | ENSRNOT00000028057 | 0.959746672  | 7.78E-07 |
| TUCP_002466 | XLOC_104506 | ENSRNOT00000055582 | 0.959362858  | 8.15E-07 |
| TUCP_002466 | XLOC_104506 | ENSRNOT00000022074 | 0.952760498  | 1.71E-06 |
| TUCP_002466 | XLOC_104506 | ENSRNOT00000004999 | 0.967178326  | 2.84E-07 |
| TUCP_002466 | XLOC_104506 | ENSRNOT00000009122 | 0.951579143  | 1.93E-06 |
| TUCP_002466 | XLOC_104506 | ENSRNOT00000013463 | 0.977980257  | 3.93E-08 |
| TUCP_002466 | XLOC_104506 | ENSRNOT00000089418 | 0.960363603  | 7.21E-07 |
| TUCP_002466 | XLOC_104506 | ENSRNOT00000007889 | -0.95793934  | 9.66E-07 |

|             |             |                    |              |          |
|-------------|-------------|--------------------|--------------|----------|
| TUCP_002466 | XLOC_104506 | ENSRNOT00000047663 | -0.976932084 | 4.95E-08 |
| TUCP_002466 | XLOC_104506 | ENSRNOT00000000532 | -0.951705561 | 1.91E-06 |
| TUCP_002466 | XLOC_104506 | ENSRNOT00000029202 | -0.960842192 | 6.79E-07 |
| TUCP_002466 | XLOC_104506 | ENSRNOT00000017907 | -0.971399395 | 1.44E-07 |
| TUCP_002466 | XLOC_104506 | ENSRNOT00000005489 | 0.956805833  | 1.10E-06 |
| TUCP_002466 | XLOC_104506 | ENSRNOT00000025794 | -0.958271417 | 9.29E-07 |
| TUCP_002466 | XLOC_104506 | ENSRNOT00000084422 | 0.966251757  | 3.26E-07 |
| TUCP_002466 | XLOC_104506 | ENSRNOT00000050834 | -0.958241891 | 9.32E-07 |
| TUCP_002466 | XLOC_104506 | ENSRNOT00000088279 | 0.955835242  | 1.23E-06 |
| TUCP_002466 | XLOC_104506 | ENSRNOT00000002443 | 0.977646336  | 4.23E-08 |
| TUCP_002466 | XLOC_104506 | ENSRNOT00000002114 | -0.977699858 | 4.18E-08 |
| TUCP_002466 | XLOC_104506 | ENSRNOT00000002445 | -0.955554976 | 1.27E-06 |
| TUCP_002466 | XLOC_104506 | ENSRNOT00000027970 | 0.982899925  | 1.12E-08 |
| TUCP_002466 | XLOC_104506 | ENSRNOT00000052422 | 0.95313659   | 1.65E-06 |
| TUCP_002466 | XLOC_104506 | ENSRNOT00000046215 | -0.962168511 | 5.73E-07 |
| TUCP_002466 | XLOC_104506 | ENSRNOT00000000083 | -0.953910038 | 1.52E-06 |
| TUCP_002466 | XLOC_104506 | ENSRNOT00000037679 | 0.952699106  | 1.72E-06 |
| TUCP_002466 | XLOC_104506 | ENSRNOT00000014124 | 0.961302709  | 6.40E-07 |
| TUCP_002466 | XLOC_104506 | ENSRNOT00000000120 | 0.984129655  | 7.72E-09 |
| TUCP_002466 | XLOC_104506 | ENSRNOT00000013632 | 0.954856287  | 1.37E-06 |
| TUCP_002466 | XLOC_104506 | ENSRNOT00000028545 | -0.965947965 | 3.41E-07 |
| TUCP_002466 | XLOC_104506 | ENSRNOT00000001759 | -0.972390129 | 1.21E-07 |
| TUCP_002466 | XLOC_104506 | ENSRNOT00000028225 | 0.960042632  | 7.50E-07 |
| TUCP_002466 | XLOC_104506 | ENSRNOT00000032248 | 0.955176242  | 1.32E-06 |
| TUCP_002466 | XLOC_104506 | ENSRNOT00000019911 | -0.969594026 | 1.94E-07 |
| TUCP_002466 | XLOC_104506 | ENSRNOT00000040393 | 0.969464218  | 1.99E-07 |
| TUCP_002466 | XLOC_104506 | ENSRNOT00000032236 | -0.950666946 | 2.12E-06 |
| TUCP_002466 | XLOC_104506 | ENSRNOT00000016372 | -0.956928576 | 1.09E-06 |
| TUCP_002466 | XLOC_104506 | ENSRNOT00000012286 | -0.976270491 | 5.69E-08 |
| TUCP_002466 | XLOC_104506 | ENSRNOT00000007169 | -0.95488462  | 1.36E-06 |
| TUCP_002466 | XLOC_104506 | ENSRNOT00000064700 | 0.960395346  | 7.18E-07 |
| TUCP_002466 | XLOC_104506 | ENSRNOT00000036613 | -0.971509912 | 1.41E-07 |
| TUCP_002466 | XLOC_104506 | ENSRNOT00000025705 | 0.96280043   | 5.27E-07 |
| TUCP_002466 | XLOC_104506 | ENSRNOT00000021285 | 0.952332817  | 1.79E-06 |
| TUCP_002466 | XLOC_104506 | ENSRNOT00000019983 | -0.969095258 | 2.11E-07 |
| TUCP_002466 | XLOC_104506 | ENSRNOT00000004140 | 0.953646119  | 1.56E-06 |
| TUCP_002466 | XLOC_104506 | ENSRNOT00000008113 | -0.961324164 | 6.39E-07 |
| TUCP_002466 | XLOC_104506 | ENSRNOT00000000334 | -0.967008716 | 2.91E-07 |
| TUCP_002466 | XLOC_104506 | ENSRNOT00000026279 | -0.955407582 | 1.29E-06 |
| TUCP_002466 | XLOC_104506 | ENSRNOT00000021850 | 0.969799768  | 1.88E-07 |
| TUCP_002466 | XLOC_104506 | ENSRNOT00000039341 | 0.968649871  | 2.26E-07 |
| TUCP_002466 | XLOC_104506 | ENSRNOT00000073492 | -0.961565522 | 6.19E-07 |
| TUCP_002466 | XLOC_104506 | ENSRNOT00000082863 | 0.960582664  | 7.01E-07 |
| TUCP_002466 | XLOC_104506 | ENSRNOT00000071166 | 0.952700063  | 1.72E-06 |
| TUCP_002466 | XLOC_104506 | ENSRNOT00000003412 | -0.961186484 | 6.50E-07 |
| TUCP_002466 | XLOC_104506 | ENSRNOT00000013852 | 0.954741847  | 1.39E-06 |
| TUCP_002466 | XLOC_104506 | ENSRNOT00000013851 | -0.961535695 | 6.22E-07 |
| TUCP_002466 | XLOC_104506 | ENSRNOT00000066204 | -0.959858088 | 7.67E-07 |
| TUCP_002466 | XLOC_104506 | ENSRNOT00000076105 | -0.952315258 | 1.79E-06 |
| TUCP_002466 | XLOC_104506 | ENSRNOT00000001507 | 0.950678883  | 2.12E-06 |
| TUCP_002466 | XLOC_104506 | ENSRNOT00000081047 | 0.975335061  | 6.90E-08 |

|             |             |                    |              |          |
|-------------|-------------|--------------------|--------------|----------|
| TUCP_002466 | XLOC_104506 | ENSRNOT00000042903 | 0.960027323  | 7.51E-07 |
| TUCP_002466 | XLOC_104506 | ENSRNOT00000037456 | 0.957145377  | 1.06E-06 |
| TUCP_002466 | XLOC_104506 | ENSRNOT00000000477 | -0.952807309 | 1.70E-06 |
| TUCP_002466 | XLOC_104506 | ENSRNOT00000012881 | -0.957792565 | 9.83E-07 |
| TUCP_002466 | XLOC_104506 | ENSRNOT00000000577 | 0.95759597   | 1.01E-06 |
| TUCP_002466 | XLOC_104506 | ENSRNOT00000041513 | 0.953571328  | 1.57E-06 |
| TUCP_002466 | XLOC_104506 | ENSRNOT00000088133 | -0.966583029 | 3.10E-07 |
| TUCP_002466 | XLOC_104506 | ENSRNOT00000080677 | -0.962615751 | 5.40E-07 |
| TUCP_002466 | XLOC_104506 | ENSRNOT00000037039 | -0.964419506 | 4.23E-07 |
| TUCP_002466 | XLOC_104506 | ENSRNOT00000037133 | 0.970284929  | 1.74E-07 |
| TUCP_002466 | XLOC_104506 | ENSRNOT00000083964 | -0.970237057 | 1.75E-07 |
| TUCP_002466 | XLOC_104506 | ENSRNOT00000026831 | 0.960254985  | 7.31E-07 |
| TUCP_002466 | XLOC_104506 | ENSRNOT00000028266 | 0.956724125  | 1.11E-06 |
| TUCP_002466 | XLOC_104506 | ENSRNOT00000032363 | 0.97637809   | 5.57E-08 |
| TUCP_002466 | XLOC_104506 | ENSRNOT00000016445 | 0.971221246  | 1.48E-07 |
| TUCP_002466 | XLOC_104506 | ENSRNOT00000019133 | 0.950863399  | 2.08E-06 |
| TUCP_002466 | XLOC_104506 | ENSRNOT00000024119 | 0.961732783  | 6.06E-07 |
| TUCP_002466 | XLOC_104506 | ENSRNOT00000002152 | -0.957086137 | 1.07E-06 |
| TUCP_002466 | XLOC_104506 | ENSRNOT00000032667 | -0.958811711 | 8.71E-07 |
| TUCP_002466 | XLOC_104506 | ENSRNOT00000082138 | -0.964919178 | 3.94E-07 |
| TUCP_002466 | XLOC_104506 | ENSRNOT00000044608 | -0.981733459 | 1.55E-08 |
| TUCP_002466 | XLOC_104506 | ENSRNOT00000001099 | -0.952725447 | 1.72E-06 |
| TUCP_002466 | XLOC_104506 | ENSRNOT00000050119 | -0.972714144 | 1.14E-07 |
| TUCP_002466 | XLOC_104506 | ENSRNOT00000082427 | -0.953734979 | 1.54E-06 |
| TUCP_002466 | XLOC_104506 | ENSRNOT00000089211 | 0.971460531  | 1.42E-07 |
| TUCP_002466 | XLOC_104506 | ENSRNOT00000020383 | 0.950004285  | 2.26E-06 |
| TUCP_002466 | XLOC_104506 | ENSRNOT00000073847 | -0.950859169 | 2.08E-06 |
| TUCP_002466 | XLOC_104506 | ENSRNOT00000052224 | 0.976534668  | 5.39E-08 |
| TUCP_002466 | XLOC_104506 | ENSRNOT00000000302 | 0.959096431  | 8.42E-07 |
| TUCP_002466 | XLOC_104506 | ENSRNOT00000078070 | 0.966480069  | 3.15E-07 |
| TUCP_002466 | XLOC_104506 | ENSRNOT00000000658 | 0.950313541  | 2.19E-06 |
| TUCP_002466 | XLOC_104506 | ENSRNOT00000065229 | 0.957293086  | 1.04E-06 |
| TUCP_002466 | XLOC_104506 | ENSRNOT00000086122 | 0.967895598  | 2.55E-07 |
| TUCP_002466 | XLOC_104506 | ENSRNOT00000026235 | -0.956806827 | 1.10E-06 |
| TUCP_002466 | XLOC_104506 | ENSRNOT00000027967 | 0.958613303  | 8.92E-07 |
| TUCP_002466 | XLOC_104506 | ENSRNOT00000023872 | -0.956862188 | 1.09E-06 |
| TUCP_002466 | XLOC_104506 | ENSRNOT00000010753 | -0.959813486 | 7.72E-07 |
| TUCP_002466 | XLOC_104506 | ENSRNOT00000023763 | -0.960092712 | 7.45E-07 |
| TUCP_002466 | XLOC_104506 | ENSRNOT00000059181 | 0.960225532  | 7.33E-07 |
| TUCP_002466 | XLOC_104506 | ENSRNOT0000003691  | -0.965123243 | 3.83E-07 |
| TUCP_002466 | XLOC_104506 | ENSRNOT0000003690  | 0.95251476   | 1.76E-06 |
| TUCP_002466 | XLOC_104506 | ENSRNOT00000056405 | 0.950576378  | 2.14E-06 |
| TUCP_002466 | XLOC_104506 | ENSRNOT00000038807 | 0.961941801  | 5.90E-07 |
| TUCP_002466 | XLOC_104506 | ENSRNOT00000017761 | 0.958079142  | 9.50E-07 |
| TUCP_002466 | XLOC_104506 | ENSRNOT00000080608 | 0.969079319  | 2.11E-07 |
| TUCP_002466 | XLOC_104506 | ENSRNOT00000005478 | -0.953541947 | 1.58E-06 |
| TUCP_002466 | XLOC_104506 | ENSRNOT00000080695 | 0.951913577  | 1.87E-06 |
| TUCP_002466 | XLOC_104506 | ENSRNOT00000027117 | -0.963911976 | 4.54E-07 |
| TUCP_002466 | XLOC_104506 | ENSRNOT00000055386 | 0.951352525  | 1.98E-06 |
| TUCP_002466 | XLOC_104506 | ENSRNOT00000061392 | 0.972126134  | 1.26E-07 |
| TUCP_002466 | XLOC_104506 | ENSRNOT00000019768 | 0.961113893  | 6.56E-07 |



|             |             |                    |              |          |
|-------------|-------------|--------------------|--------------|----------|
| TUCP_002466 | XLOC_104506 | ENSRNOT00000017181 | -0.964279894 | 4.31E-07 |
| TUCP_002466 | XLOC_104506 | ENSRNOT00000071853 | -0.950620664 | 2.13E-06 |
| TUCP_002466 | XLOC_104506 | ENSRNOT00000042125 | 0.981983276  | 1.45E-08 |
| TUCP_002466 | XLOC_104506 | ENSRNOT00000081272 | -0.962071086 | 5.80E-07 |
| TUCP_002466 | XLOC_104506 | ENSRNOT00000045735 | 0.966326842  | 3.22E-07 |
| TUCP_002466 | XLOC_104506 | ENSRNOT00000026760 | -0.966957521 | 2.93E-07 |
| TUCP_002466 | XLOC_104506 | ENSRNOT00000063821 | -0.950405381 | 2.17E-06 |
| TUCP_002466 | XLOC_104506 | ENSRNOT0000002355  | -0.952920697 | 1.68E-06 |
| TUCP_002466 | XLOC_104506 | ENSRNOT00000047210 | 0.96926501   | 2.05E-07 |
| TUCP_002466 | XLOC_104506 | ENSRNOT00000078349 | -0.960153277 | 7.40E-07 |
| TUCP_002466 | XLOC_104506 | ENSRNOT00000083957 | 0.956603468  | 1.13E-06 |
| TUCP_002466 | XLOC_104506 | ENSRNOT0000005885  | -0.970192684 | 1.76E-07 |
| TUCP_003177 | XLOC_136347 | ENSRNOT00000037086 | 0.95049073   | 2.16E-06 |
| TUCP_003177 | XLOC_136347 | ENSRNOT00000064609 | 0.953466518  | 1.59E-06 |
| TUCP_003177 | XLOC_136347 | ENSRNOT00000084784 | 0.955610336  | 1.26E-06 |
| TUCP_002462 | XLOC_104349 | ENSRNOT00000084133 | 0.987028858  | 2.83E-09 |
| TUCP_002462 | XLOC_104349 | ENSRNOT00000093745 | 0.997438975  | 8.64E-13 |
| TUCP_002462 | XLOC_104349 | ENSRNOT00000065542 | 0.985338279  | 5.21E-09 |
| TUCP_002462 | XLOC_104349 | ENSRNOT00000082464 | 0.987028858  | 2.83E-09 |
| TUCP_002462 | XLOC_104349 | ENSRNOT00000087659 | 0.987028858  | 2.83E-09 |
| TUCP_002462 | XLOC_104349 | ENSRNOT00000084582 | 0.973327197  | 1.02E-07 |
| TUCP_002462 | XLOC_104349 | ENSRNOT00000085078 | 0.987028858  | 2.83E-09 |
| TUCP_002462 | XLOC_104349 | ENSRNOT00000014028 | 0.987028858  | 2.83E-09 |
| TUCP_002462 | XLOC_104349 | ENSRNOT00000049363 | 0.987028858  | 2.83E-09 |
| TUCP_002462 | XLOC_104349 | ENSRNOT00000065473 | 0.986724919  | 3.18E-09 |
| TUCP_002462 | XLOC_104349 | ENSRNOT00000000142 | 0.984483497  | 6.90E-09 |
| TUCP_002462 | XLOC_104349 | ENSRNOT00000082288 | 0.987233016  | 2.61E-09 |
| TUCP_002462 | XLOC_104349 | ENSRNOT00000039664 | 0.987028858  | 2.83E-09 |
| TUCP_002462 | XLOC_104349 | ENSRNOT00000065402 | 0.987028858  | 2.83E-09 |
| TUCP_002462 | XLOC_104349 | ENSRNOT00000064551 | 0.957775525  | 9.85E-07 |
| TUCP_002462 | XLOC_104349 | ENSRNOT00000084141 | 0.987028858  | 2.83E-09 |
| TUCP_002462 | XLOC_104349 | ENSRNOT00000082435 | 0.987028858  | 2.83E-09 |
| TUCP_002462 | XLOC_104349 | ENSRNOT00000082928 | 0.981980208  | 1.45E-08 |
| TUCP_002462 | XLOC_104349 | ENSRNOT00000066546 | 0.951548574  | 1.94E-06 |
| TUCP_002462 | XLOC_104349 | ENSRNOT00000046013 | 0.974831182  | 7.63E-08 |
| TUCP_002462 | XLOC_104349 | ENSRNOT00000067931 | 0.960854569  | 6.78E-07 |
| TUCP_002462 | XLOC_104349 | ENSRNOT00000086425 | 0.978690263  | 3.34E-08 |
| TUCP_002462 | XLOC_104349 | ENSRNOT00000093696 | 0.955531091  | 1.27E-06 |
| TUCP_002462 | XLOC_104349 | ENSRNOT00000036228 | 0.96411621   | 4.41E-07 |
| TUCP_002462 | XLOC_104349 | ENSRNOT00000014030 | 0.987028858  | 2.83E-09 |
| TUCP_002462 | XLOC_104349 | ENSRNOT00000081966 | 0.987028858  | 2.83E-09 |
| TUCP_002462 | XLOC_104349 | ENSRNOT00000075906 | 0.987028858  | 2.83E-09 |
| TUCP_002462 | XLOC_104349 | ENSRNOT00000088396 | 0.96162299   | 6.15E-07 |
| TUCP_002462 | XLOC_104349 | ENSRNOT00000049259 | 0.958249275  | 9.31E-07 |
| TUCP_002462 | XLOC_104349 | ENSRNOT00000092838 | 0.964102345  | 4.42E-07 |
| TUCP_000992 | XLOC_036559 | ENSRNOT00000084500 | 0.999195771  | 2.65E-15 |
| TUCP_000992 | XLOC_036559 | ENSRNOT00000093467 | 0.975831016  | 6.24E-08 |
| TUCP_000992 | XLOC_036559 | ENSRNOT00000029340 | 0.974011953  | 8.94E-08 |
| TUCP_000992 | XLOC_036559 | ENSRNOT00000077972 | 0.980321536  | 2.25E-08 |
| TUCP_000992 | XLOC_036559 | ENSRNOT00000038646 | 0.977150283  | 4.72E-08 |
| TUCP_000992 | XLOC_036559 | ENSRNOT00000048858 | 0.986776327  | 3.11E-09 |

|             |             |                    |              |          |
|-------------|-------------|--------------------|--------------|----------|
| TUCP_000992 | XLOC_036559 | ENSRNOT00000092579 | 0.977150283  | 4.72E-08 |
| TUCP_000992 | XLOC_036559 | ENSRNOT00000048373 | 0.979274384  | 2.91E-08 |
| TUCP_000992 | XLOC_036559 | ENSRNOT00000036383 | 0.95882932   | 8.69E-07 |
| TUCP_000992 | XLOC_036559 | ENSRNOT00000076528 | 0.971977597  | 1.30E-07 |
| TUCP_000992 | XLOC_036559 | ENSRNOT00000083034 | 0.97803018   | 3.89E-08 |
| TUCP_000992 | XLOC_036559 | ENSRNOT00000089607 | 0.968649439  | 2.26E-07 |
| TUCP_000992 | XLOC_036559 | ENSRNOT00000086014 | 0.957499041  | 1.02E-06 |
| TUCP_000992 | XLOC_036559 | ENSRNOT00000052315 | 0.957386597  | 1.03E-06 |
| TUCP_000992 | XLOC_036559 | ENSRNOT00000076833 | 0.954952189  | 1.35E-06 |
| TUCP_000992 | XLOC_036559 | ENSRNOT00000013459 | 0.95240288   | 1.78E-06 |
| TUCP_000992 | XLOC_036559 | ENSRNOT00000078137 | 0.977150283  | 4.72E-08 |
| TUCP_000992 | XLOC_036559 | ENSRNOT00000077764 | 0.953448143  | 1.59E-06 |
| TUCP_000992 | XLOC_036559 | ENSRNOT00000043661 | 0.999031697  | 6.69E-15 |
| TUCP_000992 | XLOC_036559 | ENSRNOT00000092740 | 0.977150283  | 4.72E-08 |
| TUCP_000992 | XLOC_036559 | ENSRNOT00000000117 | 0.965498421  | 3.63E-07 |
| TUCP_000992 | XLOC_036559 | ENSRNOT00000071877 | 0.986692042  | 3.21E-09 |
| TUCP_000992 | XLOC_036559 | ENSRNOT00000070958 | 0.977150283  | 4.72E-08 |
| TUCP_000992 | XLOC_036559 | ENSRNOT00000076757 | 0.985140761  | 5.56E-09 |
| TUCP_000992 | XLOC_036559 | ENSRNOT00000047241 | 0.998983703  | 8.52E-15 |
| TUCP_000992 | XLOC_036559 | ENSRNOT00000027268 | 0.977150283  | 4.72E-08 |
| TUCP_000992 | XLOC_036559 | ENSRNOT00000004459 | 0.977150283  | 4.72E-08 |
| TUCP_000992 | XLOC_036559 | ENSRNOT00000089235 | 0.975520129  | 6.64E-08 |
| TUCP_000992 | XLOC_036559 | ENSRNOT00000088168 | 0.977150283  | 4.72E-08 |
| TUCP_000992 | XLOC_036559 | ENSRNOT00000088148 | 0.977150283  | 4.72E-08 |
| TUCP_000992 | XLOC_036559 | ENSRNOT00000088527 | 0.977150283  | 4.72E-08 |
| TUCP_000992 | XLOC_036559 | ENSRNOT00000078701 | 0.977150283  | 4.72E-08 |
| TUCP_000992 | XLOC_036559 | ENSRNOT00000052308 | 0.998200432  | 1.48E-13 |
| TUCP_000992 | XLOC_036559 | ENSRNOT00000052130 | 0.955241663  | 1.31E-06 |
| TUCP_000992 | XLOC_036559 | ENSRNOT00000021748 | 0.977150283  | 4.72E-08 |
| TUCP_000992 | XLOC_036559 | ENSRNOT00000089085 | 0.977150283  | 4.72E-08 |
| TUCP_000992 | XLOC_036559 | ENSRNOT00000008153 | 0.977433584  | 4.44E-08 |
| TUCP_000992 | XLOC_036559 | ENSRNOT00000079189 | 0.953831224  | 1.53E-06 |
| TUCP_000992 | XLOC_036559 | ENSRNOT00000090078 | 0.977150283  | 4.72E-08 |
| TUCP_000992 | XLOC_036559 | ENSRNOT00000078020 | 0.956097766  | 1.19E-06 |
| TUCP_000992 | XLOC_036559 | ENSRNOT00000009776 | 0.977150283  | 4.72E-08 |
| TUCP_002747 | XLOC_116543 | ENSRNOT00000035840 | 0.975935799  | 6.10E-08 |
| TUCP_000996 | XLOC_036942 | ENSRNOT00000026966 | 0.970322306  | 1.73E-07 |
| TUCP_000996 | XLOC_036942 | ENSRNOT00000068416 | 0.999999782  | 3.88E-33 |
| TUCP_000996 | XLOC_036942 | ENSRNOT00000086036 | 0.999958274  | 9.96E-22 |
| TUCP_000996 | XLOC_036942 | ENSRNOT00000026803 | 0.985046075  | 5.74E-09 |
| TUCP_000996 | XLOC_036942 | ENSRNOT00000047527 | 0.963071698  | 5.08E-07 |
| TUCP_000996 | XLOC_036942 | ENSRNOT00000042251 | 0.999344295  | 9.53E-16 |
| TUCP_000996 | XLOC_036942 | ENSRNOT0000002984  | 0.998397069  | 8.31E-14 |
| TUCP_000996 | XLOC_036942 | ENSRNOT00000083764 | 0.999541808  | 1.59E-16 |
| TUCP_000996 | XLOC_036942 | ENSRNOT00000076802 | 0.962695843  | 5.34E-07 |
| TUCP_000996 | XLOC_036942 | ENSRNOT00000092365 | 0.999161651  | 3.26E-15 |
| TUCP_000996 | XLOC_036942 | ENSRNOT00000079275 | 0.999901911  | 7.15E-20 |
| TUCP_000996 | XLOC_036942 | ENSRNOT00000066062 | -0.959706712 | 7.82E-07 |
| TUCP_000996 | XLOC_036942 | ENSRNOT00000045301 | 1            | 4.25E-78 |
| TUCP_000996 | XLOC_036942 | ENSRNOT00000041186 | 0.999975782  | 6.56E-23 |
| TUCP_000996 | XLOC_036942 | ENSRNOT00000010092 | 0.977711778  | 4.17E-08 |

|             |             |                    |              |          |
|-------------|-------------|--------------------|--------------|----------|
| TUCP_000996 | XLOC_036942 | ENSRNOT00000076182 | 1            | 1.33E-79 |
| TUCP_000996 | XLOC_036942 | ENSRNOT00000087404 | 0.951157664  | 2.02E-06 |
| TUCP_000996 | XLOC_036942 | ENSRNOT00000052003 | 0.95837331   | 9.18E-07 |
| TUCP_000996 | XLOC_036942 | ENSRNOT00000081709 | 0.998485154  | 6.27E-14 |
| TUCP_000996 | XLOC_036942 | ENSRNOT00000005726 | 0.959610119  | 7.91E-07 |
| TUCP_000996 | XLOC_036942 | ENSRNOT00000014103 | 1            | 0        |
| TUCP_000996 | XLOC_036942 | ENSRNOT00000057433 | 0.964930601  | 3.94E-07 |
| TUCP_000996 | XLOC_036942 | ENSRNOT00000082289 | 0.998931566  | 1.09E-14 |
| TUCP_000996 | XLOC_036942 | ENSRNOT00000092516 | 0.957459323  | 1.02E-06 |
| TUCP_000996 | XLOC_036942 | ENSRNOT00000008898 | 0.990039768  | 7.59E-10 |
| TUCP_000996 | XLOC_036942 | ENSRNOT00000083493 | 0.995461232  | 1.51E-11 |
| TUCP_000996 | XLOC_036942 | ENSRNOT00000092563 | 0.987201084  | 2.65E-09 |
| TUCP_000996 | XLOC_036942 | ENSRNOT00000088893 | 1            | 0        |
| TUCP_000996 | XLOC_036942 | ENSRNOT00000076693 | 0.955029582  | 1.34E-06 |
| TUCP_000996 | XLOC_036942 | ENSRNOT00000081014 | 1            | 0        |
| TUCP_000996 | XLOC_036942 | ENSRNOT00000067543 | 1            | 0        |
| TUCP_000996 | XLOC_036942 | ENSRNOT00000050968 | 0.996816433  | 2.56E-12 |
| TUCP_000996 | XLOC_036942 | ENSRNOT00000042201 | 0.960235595  | 7.32E-07 |
| TUCP_000996 | XLOC_036942 | ENSRNOT00000004373 | 0.957315473  | 1.04E-06 |
| TUCP_000996 | XLOC_036942 | ENSRNOT00000063929 | 1            | 0        |
| TUCP_000996 | XLOC_036942 | ENSRNOT00000057472 | 1            | 4.25E-78 |
| TUCP_000996 | XLOC_036942 | ENSRNOT00000041617 | 0.952449765  | 1.77E-06 |
| TUCP_000996 | XLOC_036942 | ENSRNOT00000091763 | 0.986310385  | 3.70E-09 |
| TUCP_000996 | XLOC_036942 | ENSRNOT00000022200 | 0.998491303  | 6.14E-14 |
| TUCP_000996 | XLOC_036942 | ENSRNOT00000067379 | 0.997260967  | 1.21E-12 |
| TUCP_000996 | XLOC_036942 | ENSRNOT00000020786 | 0.976428448  | 5.51E-08 |
| TUCP_000996 | XLOC_036942 | ENSRNOT00000050543 | 0.999722223  | 1.30E-17 |
| TUCP_000996 | XLOC_036942 | ENSRNOT00000089306 | 0.999866649  | 3.32E-19 |
| TUCP_000996 | XLOC_036942 | ENSRNOT00000052367 | 0.997268394  | 1.19E-12 |
| TUCP_000996 | XLOC_036942 | ENSRNOT00000090658 | 1            | 0        |
| TUCP_000996 | XLOC_036942 | ENSRNOT00000022571 | 0.995290013  | 1.81E-11 |
| TUCP_000996 | XLOC_036942 | ENSRNOT00000044520 | 0.981817158  | 1.52E-08 |
| TUCP_000996 | XLOC_036942 | ENSRNOT00000065448 | 0.963648868  | 4.70E-07 |
| TUCP_002740 | XLOC_116280 | ENSRNOT00000077972 | 0.968818246  | 2.20E-07 |
| TUCP_002740 | XLOC_116280 | ENSRNOT00000000995 | 0.95227019   | 1.80E-06 |
| TUCP_002740 | XLOC_116280 | ENSRNOT00000028877 | 0.963812896  | 4.60E-07 |
| TUCP_002740 | XLOC_116280 | ENSRNOT00000046231 | 0.953293856  | 1.62E-06 |
| TUCP_002740 | XLOC_116280 | ENSRNOT00000085479 | 0.960561467  | 7.03E-07 |
| TUCP_002740 | XLOC_116280 | ENSRNOT00000048373 | 0.966996598  | 2.92E-07 |
| TUCP_002740 | XLOC_116280 | ENSRNOT00000077764 | 0.97442148   | 8.26E-08 |
| TUCP_002740 | XLOC_116280 | ENSRNOT00000093748 | 0.957307699  | 1.04E-06 |
| TUCP_002740 | XLOC_116280 | ENSRNOT00000017909 | 0.954212445  | 1.47E-06 |
| TUCP_002740 | XLOC_116280 | ENSRNOT00000078020 | 0.967531906  | 2.69E-07 |
| TUCP_002740 | XLOC_116280 | ENSRNOT00000051028 | -0.953879565 | 1.52E-06 |
| TUCP_002743 | XLOC_116516 | ENSRNOT00000018233 | -0.96027442  | 7.29E-07 |
| TUCP_002743 | XLOC_116516 | ENSRNOT00000089068 | 0.952266548  | 1.80E-06 |
| TUCP_002742 | XLOC_116403 | ENSRNOT00000056450 | 0.986128242  | 3.95E-09 |
| TUCP_003641 | XLOC_160009 | ENSRNOT00000087764 | 0.961837004  | 5.98E-07 |
| TUCP_003641 | XLOC_160009 | ENSRNOT00000090716 | 0.952815782  | 1.70E-06 |
| TUCP_002412 | XLOC_101758 | ENSRNOT00000011263 | -0.954176717 | 1.47E-06 |
| TUCP_002412 | XLOC_101758 | ENSRNOT0000000264  | 0.958725725  | 8.80E-07 |

|             |             |                    |              |          |
|-------------|-------------|--------------------|--------------|----------|
| TUCP_002412 | XLOC_101758 | ENSRNOT00000025797 | 0.957044214  | 1.07E-06 |
| TUCP_002412 | XLOC_101758 | ENSRNOT00000084282 | 0.961491271  | 6.25E-07 |
| TUCP_002412 | XLOC_101758 | ENSRNOT00000025403 | -0.953129686 | 1.65E-06 |
| TUCP_003798 | XLOC_166074 | ENSRNOT00000019921 | 0.951651375  | 1.92E-06 |
| TUCP_003798 | XLOC_166074 | ENSRNOT00000059246 | 0.958986102  | 8.53E-07 |
| TUCP_003798 | XLOC_166074 | ENSRNOT00000091427 | -0.958278273 | 9.28E-07 |
| TUCP_003798 | XLOC_166074 | ENSRNOT00000089970 | 0.955314415  | 1.30E-06 |
| TUCP_003798 | XLOC_166074 | ENSRNOT00000014627 | 0.95750611   | 1.02E-06 |
| TUCP_003798 | XLOC_166074 | ENSRNOT00000027435 | 0.954902998  | 1.36E-06 |
| TUCP_003798 | XLOC_166074 | ENSRNOT00000034282 | 0.956521222  | 1.14E-06 |
| TUCP_003798 | XLOC_166074 | ENSRNOT00000027875 | 0.957075219  | 1.07E-06 |
| TUCP_003798 | XLOC_166074 | ENSRNOT00000060494 | 0.964429943  | 4.22E-07 |
| TUCP_003798 | XLOC_166074 | ENSRNOT00000038838 | 0.978759085  | 3.29E-08 |
| TUCP_003798 | XLOC_166074 | ENSRNOT00000065897 | 0.96977672   | 1.89E-07 |
| TUCP_003798 | XLOC_166074 | ENSRNOT00000036904 | 0.953478478  | 1.59E-06 |
| TUCP_003798 | XLOC_166074 | ENSRNOT00000066708 | 0.950964544  | 2.06E-06 |
| TUCP_003646 | XLOC_160056 | ENSRNOT00000085943 | 0.972653566  | 1.15E-07 |
| TUCP_003646 | XLOC_160056 | ENSRNOT00000011342 | 0.968902267  | 2.17E-07 |
| TUCP_003646 | XLOC_160056 | ENSRNOT00000023610 | 0.966331938  | 3.22E-07 |
| TUCP_003646 | XLOC_160056 | ENSRNOT00000072396 | 0.972568024  | 1.17E-07 |
| TUCP_003646 | XLOC_160056 | ENSRNOT00000093577 | 0.982950649  | 1.10E-08 |
| TUCP_003519 | XLOC_153199 | ENSRNOT00000028234 | 0.961338624  | 6.37E-07 |
| TUCP_003519 | XLOC_153199 | ENSRNOT00000082982 | 0.974569349  | 8.03E-08 |
| TUCP_003519 | XLOC_153199 | ENSRNOT00000034096 | 0.953875192  | 1.52E-06 |
| TUCP_003519 | XLOC_153199 | ENSRNOT00000024933 | 0.952958893  | 1.68E-06 |
| TUCP_003519 | XLOC_153199 | ENSRNOT00000038250 | 0.952791446  | 1.71E-06 |
| TUCP_003519 | XLOC_153199 | ENSRNOT00000018776 | 0.953507766  | 1.58E-06 |
| TUCP_003519 | XLOC_153199 | ENSRNOT00000067011 | -0.966175408 | 3.29E-07 |
| TUCP_003519 | XLOC_153199 | ENSRNOT00000000804 | 0.959877675  | 7.65E-07 |
| TUCP_003519 | XLOC_153199 | ENSRNOT00000049973 | 0.953478585  | 1.59E-06 |
| TUCP_003519 | XLOC_153199 | ENSRNOT00000002247 | 0.962853775  | 5.23E-07 |
| TUCP_003519 | XLOC_153199 | ENSRNOT00000029193 | 0.967935221  | 2.53E-07 |
| TUCP_001778 | XLOC_073508 | ENSRNOT00000086899 | 0.95474535   | 1.39E-06 |
| TUCP_001778 | XLOC_073508 | ENSRNOT00000023152 | 0.950503668  | 2.15E-06 |
| TUCP_001778 | XLOC_073508 | ENSRNOT00000028058 | 0.978452692  | 3.53E-08 |
| TUCP_001778 | XLOC_073508 | ENSRNOT00000088707 | 0.950797769  | 2.09E-06 |
| TUCP_001778 | XLOC_073508 | ENSRNOT00000039876 | 0.953977261  | 1.50E-06 |
| TUCP_001778 | XLOC_073508 | ENSRNOT00000052003 | 0.958397652  | 9.15E-07 |
| TUCP_001778 | XLOC_073508 | ENSRNOT00000093244 | 0.956479244  | 1.14E-06 |
| TUCP_003089 | XLOC_132420 | ENSRNOT00000027770 | 0.953531054  | 1.58E-06 |
| TUCP_003089 | XLOC_132420 | ENSRNOT00000087027 | 0.983677432  | 8.88E-09 |
| TUCP_003089 | XLOC_132420 | ENSRNOT00000079498 | 0.986682239  | 3.23E-09 |
| TUCP_003089 | XLOC_132420 | ENSRNOT00000085704 | 0.950507493  | 2.15E-06 |
| TUCP_003089 | XLOC_132420 | ENSRNOT00000092435 | 0.97141367   | 1.43E-07 |
| TUCP_003101 | XLOC_132687 | ENSRNOT00000065892 | 0.960847752  | 6.78E-07 |
| TUCP_003101 | XLOC_132687 | ENSRNOT00000018405 | 0.959105299  | 8.41E-07 |
| TUCP_003101 | XLOC_132687 | ENSRNOT00000021458 | 0.95575211   | 1.24E-06 |
| TUCP_003101 | XLOC_132687 | ENSRNOT00000079784 | 0.95905315   | 8.46E-07 |
| TUCP_003101 | XLOC_132687 | ENSRNOT00000082183 | -0.951031975 | 2.04E-06 |
| TUCP_003101 | XLOC_132687 | ENSRNOT00000024924 | 0.960017136  | 7.52E-07 |
| TUCP_003101 | XLOC_132687 | ENSRNOT00000074544 | 0.955566156  | 1.27E-06 |

|             |             |                    |              |          |
|-------------|-------------|--------------------|--------------|----------|
| TUCP_003101 | XLOC_132687 | ENSRNOT00000088884 | 0.959604959  | 7.91E-07 |
| TUCP_003101 | XLOC_132687 | ENSRNOT00000076388 | 0.96583104   | 3.46E-07 |
| TUCP_003101 | XLOC_132687 | ENSRNOT00000021368 | 0.959421232  | 8.09E-07 |
| TUCP_003101 | XLOC_132687 | ENSRNOT00000005155 | -0.988689923 | 1.43E-09 |
| TUCP_003101 | XLOC_132687 | ENSRNOT00000009080 | 0.954979134  | 1.35E-06 |
| TUCP_003101 | XLOC_132687 | ENSRNOT00000072864 | 0.974862097  | 7.58E-08 |
| TUCP_003101 | XLOC_132687 | ENSRNOT00000083983 | 0.968460461  | 2.33E-07 |
| TUCP_003101 | XLOC_132687 | ENSRNOT00000035400 | 0.954724506  | 1.39E-06 |
| TUCP_003101 | XLOC_132687 | ENSRNOT00000016262 | 0.950304657  | 2.20E-06 |
| TUCP_003101 | XLOC_132687 | ENSRNOT00000022637 | 0.970682675  | 1.62E-07 |
| TUCP_003101 | XLOC_132687 | ENSRNOT00000038652 | 0.960835598  | 6.79E-07 |
| TUCP_003101 | XLOC_132687 | ENSRNOT00000001891 | 0.954898685  | 1.36E-06 |
| TUCP_003101 | XLOC_132687 | ENSRNOT00000014095 | 0.972882179  | 1.10E-07 |
| TUCP_003101 | XLOC_132687 | ENSRNOT00000019358 | 0.962119523  | 5.76E-07 |
| TUCP_003101 | XLOC_132687 | ENSRNOT00000030823 | 0.953489356  | 1.59E-06 |
| TUCP_003101 | XLOC_132687 | ENSRNOT00000001973 | 0.955601797  | 1.26E-06 |
| TUCP_003101 | XLOC_132687 | ENSRNOT00000030501 | 0.971771684  | 1.35E-07 |
| TUCP_003101 | XLOC_132687 | ENSRNOT00000017618 | 0.962201684  | 5.70E-07 |
| TUCP_003101 | XLOC_132687 | ENSRNOT00000010333 | 0.951196342  | 2.01E-06 |
| TUCP_003101 | XLOC_132687 | ENSRNOT00000003728 | 0.950977333  | 2.05E-06 |
| TUCP_003101 | XLOC_132687 | ENSRNOT00000024775 | 0.959513717  | 8.00E-07 |
| TUCP_003101 | XLOC_132687 | ENSRNOT00000024801 | 0.959911324  | 7.62E-07 |
| TUCP_003101 | XLOC_132687 | ENSRNOT00000090575 | 0.950275788  | 2.20E-06 |
| TUCP_003101 | XLOC_132687 | ENSRNOT00000021110 | 0.96383497   | 4.58E-07 |
| TUCP_003101 | XLOC_132687 | ENSRNOT00000026552 | 0.9576508    | 9.99E-07 |
| TUCP_003101 | XLOC_132687 | ENSRNOT00000020853 | 0.956754913  | 1.11E-06 |
| TUCP_003101 | XLOC_132687 | ENSRNOT00000003636 | 0.95510582   | 1.33E-06 |
| TUCP_003101 | XLOC_132687 | ENSRNOT00000013854 | 0.95274072   | 1.71E-06 |
| TUCP_003101 | XLOC_132687 | ENSRNOT00000001774 | 0.977375252  | 4.49E-08 |
| TUCP_003101 | XLOC_132687 | ENSRNOT00000068666 | 0.951157318  | 2.02E-06 |
| TUCP_003101 | XLOC_132687 | ENSRNOT00000020982 | 0.973767674  | 9.36E-08 |
| TUCP_003101 | XLOC_132687 | ENSRNOT00000014694 | 0.964010071  | 4.48E-07 |
| TUCP_003101 | XLOC_132687 | ENSRNOT00000013535 | 0.9584157    | 9.13E-07 |
| TUCP_003101 | XLOC_132687 | ENSRNOT00000015130 | 0.955317907  | 1.30E-06 |
| TUCP_003101 | XLOC_132687 | ENSRNOT00000075386 | 0.959167532  | 8.35E-07 |
| TUCP_003101 | XLOC_132687 | ENSRNOT00000027450 | 0.952499706  | 1.76E-06 |
| TUCP_003101 | XLOC_132687 | ENSRNOT00000076679 | 0.952866587  | 1.69E-06 |
| TUCP_003101 | XLOC_132687 | ENSRNOT00000075400 | 0.968681327  | 2.25E-07 |
| TUCP_003101 | XLOC_132687 | ENSRNOT00000017955 | 0.966030479  | 3.36E-07 |
| TUCP_003101 | XLOC_132687 | ENSRNOT00000078793 | -0.969287594 | 2.04E-07 |
| TUCP_003101 | XLOC_132687 | ENSRNOT00000005286 | 0.95414006   | 1.48E-06 |
| TUCP_003101 | XLOC_132687 | ENSRNOT00000026118 | 0.950360035  | 2.18E-06 |
| TUCP_003101 | XLOC_132687 | ENSRNOT00000081037 | 0.953212053  | 1.63E-06 |
| TUCP_003101 | XLOC_132687 | ENSRNOT00000089016 | 0.951460296  | 1.96E-06 |
| TUCP_003101 | XLOC_132687 | ENSRNOT00000011898 | 0.951032343  | 2.04E-06 |
| TUCP_003101 | XLOC_132687 | ENSRNOT00000007681 | 0.972688696  | 1.14E-07 |
| TUCP_003101 | XLOC_132687 | ENSRNOT00000075057 | 0.969740135  | 1.90E-07 |
| TUCP_003101 | XLOC_132687 | ENSRNOT00000018877 | 0.955365373  | 1.29E-06 |
| TUCP_003101 | XLOC_132687 | ENSRNOT00000073926 | 0.964865274  | 3.97E-07 |
| TUCP_003101 | XLOC_132687 | ENSRNOT00000056644 | 0.967998676  | 2.50E-07 |
| TUCP_003101 | XLOC_132687 | ENSRNOT00000030222 | 0.96256105   | 5.44E-07 |

|             |             |                    |             |          |
|-------------|-------------|--------------------|-------------|----------|
| TUCP_003101 | XLOC_132687 | ENSRNOT00000020409 | 0.959052863 | 8.46E-07 |
| TUCP_003101 | XLOC_132687 | ENSRNOT00000093552 | 0.963422002 | 4.85E-07 |
| TUCP_003101 | XLOC_132687 | ENSRNOT00000006843 | 0.951060987 | 2.04E-06 |
| TUCP_003101 | XLOC_132687 | ENSRNOT00000065642 | 0.952983562 | 1.67E-06 |
| TUCP_003101 | XLOC_132687 | ENSRNOT00000017339 | 0.962049129 | 5.82E-07 |
| TUCP_003101 | XLOC_132687 | ENSRNOT00000081593 | 0.958728183 | 8.80E-07 |
| TUCP_003101 | XLOC_132687 | ENSRNOT00000077730 | 0.961649806 | 6.13E-07 |
| TUCP_003101 | XLOC_132687 | ENSRNOT00000086179 | 0.957505222 | 1.02E-06 |
| TUCP_003101 | XLOC_132687 | ENSRNOT00000071494 | 0.951909154 | 1.87E-06 |
| TUCP_003101 | XLOC_132687 | ENSRNOT00000013587 | 0.962419804 | 5.54E-07 |
| TUCP_003101 | XLOC_132687 | ENSRNOT00000038994 | 0.951504481 | 1.95E-06 |
| TUCP_003101 | XLOC_132687 | ENSRNOT00000011432 | 0.974413171 | 8.27E-08 |
| TUCP_003101 | XLOC_132687 | ENSRNOT00000001631 | 0.959989788 | 7.55E-07 |
| TUCP_003101 | XLOC_132687 | ENSRNOT00000021129 | 0.955087692 | 1.33E-06 |
| TUCP_003101 | XLOC_132687 | ENSRNOT00000050227 | 0.950225983 | 2.21E-06 |
| TUCP_003101 | XLOC_132687 | ENSRNOT00000038464 | 0.96288744  | 5.21E-07 |
| TUCP_003101 | XLOC_132687 | ENSRNOT00000035513 | 0.957199389 | 1.05E-06 |
| TUCP_003101 | XLOC_132687 | ENSRNOT00000008359 | 0.955272313 | 1.31E-06 |
| TUCP_003101 | XLOC_132687 | ENSRNOT00000065023 | 0.970726394 | 1.61E-07 |
| TUCP_003101 | XLOC_132687 | ENSRNOT00000057758 | 0.962593151 | 5.42E-07 |
| TUCP_002996 | XLOC_128384 | ENSRNOT00000093075 | 0.964684549 | 4.08E-07 |
| TUCP_002996 | XLOC_128384 | ENSRNOT00000072573 | 0.954136459 | 1.48E-06 |
| TUCP_002996 | XLOC_128384 | ENSRNOT00000058260 | 0.964684549 | 4.08E-07 |
| TUCP_002996 | XLOC_128384 | ENSRNOT00000088887 | 0.964684549 | 4.08E-07 |
| TUCP_002996 | XLOC_128384 | ENSRNOT00000084986 | 0.964684549 | 4.08E-07 |
| TUCP_002996 | XLOC_128384 | ENSRNOT00000074346 | 0.974496313 | 8.14E-08 |
| TUCP_002996 | XLOC_128384 | ENSRNOT00000073209 | 0.987339806 | 2.51E-09 |
| TUCP_002996 | XLOC_128384 | ENSRNOT00000080155 | 0.958045192 | 9.54E-07 |
| TUCP_002996 | XLOC_128384 | ENSRNOT00000092261 | 0.95654938  | 1.13E-06 |
| TUCP_002996 | XLOC_128384 | ENSRNOT00000017828 | 0.957349103 | 1.03E-06 |
| TUCP_002996 | XLOC_128384 | ENSRNOT00000080444 | 0.957807772 | 9.81E-07 |
| TUCP_002996 | XLOC_128384 | ENSRNOT00000071312 | 0.964684549 | 4.08E-07 |
| TUCP_002996 | XLOC_128384 | ENSRNOT00000088245 | 0.964684549 | 4.08E-07 |
| TUCP_002996 | XLOC_128384 | ENSRNOT00000070817 | 0.961920752 | 5.91E-07 |
| TUCP_002996 | XLOC_128384 | ENSRNOT00000058833 | 0.96139974  | 6.32E-07 |
| TUCP_002996 | XLOC_128384 | ENSRNOT00000078052 | 0.964684549 | 4.08E-07 |
| TUCP_002996 | XLOC_128384 | ENSRNOT00000078494 | 0.964144077 | 4.39E-07 |
| TUCP_002996 | XLOC_128384 | ENSRNOT00000085653 | 0.964684549 | 4.08E-07 |
| TUCP_002996 | XLOC_128384 | ENSRNOT00000081992 | 0.962015209 | 5.84E-07 |
| TUCP_002996 | XLOC_128384 | ENSRNOT00000038553 | 0.984750887 | 6.33E-09 |
| TUCP_002996 | XLOC_128384 | ENSRNOT00000055406 | 0.964684549 | 4.08E-07 |
| TUCP_002996 | XLOC_128384 | ENSRNOT00000067655 | 0.978471541 | 3.51E-08 |
| TUCP_002996 | XLOC_128384 | ENSRNOT00000026753 | 0.964684549 | 4.08E-07 |
| TUCP_002996 | XLOC_128384 | ENSRNOT00000080533 | 0.970056178 | 1.80E-07 |
| TUCP_002996 | XLOC_128384 | ENSRNOT00000086031 | 0.964684549 | 4.08E-07 |
| TUCP_002996 | XLOC_128384 | ENSRNOT00000014312 | 0.964684549 | 4.08E-07 |
| TUCP_002996 | XLOC_128384 | ENSRNOT00000051231 | 0.962438401 | 5.53E-07 |
| TUCP_002996 | XLOC_128384 | ENSRNOT00000089407 | 0.953356413 | 1.61E-06 |
| TUCP_002996 | XLOC_128384 | ENSRNOT00000055034 | 0.961557007 | 6.20E-07 |
| TUCP_002996 | XLOC_128384 | ENSRNOT00000093612 | 0.972009269 | 1.29E-07 |
| TUCP_000681 | XLOC_025780 | ENSRNOT0000008542  | 0.955698057 | 1.25E-06 |

|             |             |                    |              |          |
|-------------|-------------|--------------------|--------------|----------|
| TUCP_000681 | XLOC_025780 | ENSRNOT00000026473 | 0.975909227  | 6.14E-08 |
| TUCP_002990 | XLOC_128384 | ENSRNOT00000008893 | -0.958633678 | 8.90E-07 |
| TUCP_002992 | XLOC_128384 | ENSRNOT00000080575 | 0.950917271  | 2.07E-06 |
| TUCP_002992 | XLOC_128384 | ENSRNOT00000076699 | 0.956760272  | 1.11E-06 |
| TUCP_002992 | XLOC_128384 | ENSRNOT00000087025 | 0.950734678  | 2.10E-06 |
| TUCP_002992 | XLOC_128384 | ENSRNOT00000074990 | 0.950734678  | 2.10E-06 |
| TUCP_002992 | XLOC_128384 | ENSRNOT00000092982 | 0.950734678  | 2.10E-06 |
| TUCP_002992 | XLOC_128384 | ENSRNOT00000086831 | 0.950734678  | 2.10E-06 |
| TUCP_002992 | XLOC_128384 | ENSRNOT00000088367 | 0.950734678  | 2.10E-06 |
| TUCP_002992 | XLOC_128384 | ENSRNOT00000082058 | 0.950734678  | 2.10E-06 |
| TUCP_002992 | XLOC_128384 | ENSRNOT00000082235 | 0.955000454  | 1.35E-06 |
| TUCP_002992 | XLOC_128384 | ENSRNOT00000068444 | 0.950734678  | 2.10E-06 |
| TUCP_002992 | XLOC_128384 | ENSRNOT00000088905 | 0.950734678  | 2.10E-06 |
| TUCP_002992 | XLOC_128384 | ENSRNOT00000045099 | 0.950734678  | 2.10E-06 |
| TUCP_002992 | XLOC_128384 | ENSRNOT00000019853 | 0.950734678  | 2.10E-06 |
| TUCP_002992 | XLOC_128384 | ENSRNOT00000022280 | 0.950152444  | 2.23E-06 |
| TUCP_002992 | XLOC_128384 | ENSRNOT00000081996 | 0.950734678  | 2.10E-06 |
| TUCP_002992 | XLOC_128384 | ENSRNOT00000074930 | 0.950734678  | 2.10E-06 |
| TUCP_002992 | XLOC_128384 | ENSRNOT00000093083 | 0.953632674  | 1.56E-06 |
| TUCP_002792 | XLOC_117879 | ENSRNOT00000014041 | 0.966923846  | 2.95E-07 |
| TUCP_002792 | XLOC_117879 | ENSRNOT00000078310 | 0.951416172  | 1.96E-06 |
| TUCP_002999 | XLOC_128384 | ENSRNOT00000048923 | 0.95067362   | 2.12E-06 |
| TUCP_003116 | XLOC_132897 | ENSRNOT00000093075 | 0.982492665  | 1.26E-08 |
| TUCP_003116 | XLOC_132897 | ENSRNOT00000058260 | 0.982492665  | 1.26E-08 |
| TUCP_003116 | XLOC_132897 | ENSRNOT00000088887 | 0.982492665  | 1.26E-08 |
| TUCP_003116 | XLOC_132897 | ENSRNOT00000084986 | 0.982492665  | 1.26E-08 |
| TUCP_003116 | XLOC_132897 | ENSRNOT00000073209 | 0.962171107  | 5.73E-07 |
| TUCP_003116 | XLOC_132897 | ENSRNOT00000080155 | 0.95022178   | 2.21E-06 |
| TUCP_003116 | XLOC_132897 | ENSRNOT00000072573 | 0.983729807  | 8.74E-09 |
| TUCP_003116 | XLOC_132897 | ENSRNOT00000017828 | 0.976899917  | 4.98E-08 |
| TUCP_003116 | XLOC_132897 | ENSRNOT00000080444 | 0.966722878  | 3.04E-07 |
| TUCP_003116 | XLOC_132897 | ENSRNOT00000071312 | 0.982492665  | 1.26E-08 |
| TUCP_003116 | XLOC_132897 | ENSRNOT00000088245 | 0.982492665  | 1.26E-08 |
| TUCP_003116 | XLOC_132897 | ENSRNOT00000058833 | 0.980229799  | 2.30E-08 |
| TUCP_003116 | XLOC_132897 | ENSRNOT00000078052 | 0.982492665  | 1.26E-08 |
| TUCP_003116 | XLOC_132897 | ENSRNOT00000078494 | 0.982196073  | 1.37E-08 |
| TUCP_003116 | XLOC_132897 | ENSRNOT00000085653 | 0.982492665  | 1.26E-08 |
| TUCP_003116 | XLOC_132897 | ENSRNOT00000057950 | 0.972222767  | 1.24E-07 |
| TUCP_003116 | XLOC_132897 | ENSRNOT00000081992 | 0.982756684  | 1.17E-08 |
| TUCP_003116 | XLOC_132897 | ENSRNOT00000055406 | 0.982492665  | 1.26E-08 |
| TUCP_003116 | XLOC_132897 | ENSRNOT00000091100 | 0.954470033  | 1.43E-06 |
| TUCP_003116 | XLOC_132897 | ENSRNOT00000090449 | 0.955026659  | 1.34E-06 |
| TUCP_003116 | XLOC_132897 | ENSRNOT00000070817 | 0.989940205  | 7.98E-10 |
| TUCP_003116 | XLOC_132897 | ENSRNOT00000026753 | 0.982492665  | 1.26E-08 |
| TUCP_003116 | XLOC_132897 | ENSRNOT00000080533 | 0.977717014  | 4.17E-08 |
| TUCP_003116 | XLOC_132897 | ENSRNOT00000072774 | 0.958776005  | 8.75E-07 |
| TUCP_003116 | XLOC_132897 | ENSRNOT00000086031 | 0.982492665  | 1.26E-08 |
| TUCP_003116 | XLOC_132897 | ENSRNOT00000019393 | 0.950670294  | 2.12E-06 |
| TUCP_003116 | XLOC_132897 | ENSRNOT00000014312 | 0.982492665  | 1.26E-08 |
| TUCP_003116 | XLOC_132897 | ENSRNOT00000051231 | 0.981023246  | 1.88E-08 |
| TUCP_003116 | XLOC_132897 | ENSRNOT00000092974 | 0.965655503  | 3.55E-07 |

|             |             |                    |             |          |
|-------------|-------------|--------------------|-------------|----------|
| TUCP_003116 | XLOC_132897 | ENSRNOT00000089407 | 0.973375946 | 1.01E-07 |
| TUCP_003116 | XLOC_132897 | ENSRNOT00000055034 | 0.982292938 | 1.33E-08 |
| TUCP_003346 | XLOC_144832 | ENSRNOT00000014229 | 0.965036597 | 3.88E-07 |
| TUCP_003347 | XLOC_144849 | ENSRNOT00000047105 | 0.95044934  | 2.16E-06 |
| TUCP_003347 | XLOC_144849 | ENSRNOT00000031904 | 0.963884097 | 4.55E-07 |
| TUCP_003347 | XLOC_144849 | ENSRNOT00000026941 | 0.96071109  | 6.90E-07 |
| TUCP_003347 | XLOC_144849 | ENSRNOT00000075653 | 0.960109786 | 7.44E-07 |
| TUCP_003347 | XLOC_144849 | ENSRNOT00000074939 | 0.95545377  | 1.28E-06 |
| TUCP_003347 | XLOC_144849 | ENSRNOT00000073710 | 0.957276416 | 1.04E-06 |
| TUCP_003347 | XLOC_144849 | ENSRNOT00000043856 | 0.97126424  | 1.47E-07 |
| TUCP_003347 | XLOC_144849 | ENSRNOT00000034146 | 0.957166061 | 1.06E-06 |
| TUCP_003347 | XLOC_144849 | ENSRNOT00000006175 | 0.975489045 | 6.69E-08 |
| TUCP_003347 | XLOC_144849 | ENSRNOT00000010035 | 0.958052183 | 9.53E-07 |
| TUCP_003347 | XLOC_144849 | ENSRNOT00000037699 | 0.955394278 | 1.29E-06 |
| TUCP_003347 | XLOC_144849 | ENSRNOT00000016975 | 0.958704917 | 8.82E-07 |
| TUCP_003347 | XLOC_144849 | ENSRNOT00000027411 | 0.950963577 | 2.06E-06 |
| TUCP_003347 | XLOC_144849 | ENSRNOT00000009712 | 0.964501615 | 4.18E-07 |
| TUCP_003347 | XLOC_144849 | ENSRNOT00000026543 | 0.953054985 | 1.66E-06 |
| TUCP_003347 | XLOC_144849 | ENSRNOT00000043345 | 0.977193901 | 4.68E-08 |
| TUCP_003347 | XLOC_144849 | ENSRNOT00000010418 | 0.950324183 | 2.19E-06 |
| TUCP_003347 | XLOC_144849 | ENSRNOT00000071971 | 0.953860102 | 1.52E-06 |
| TUCP_003347 | XLOC_144849 | ENSRNOT00000025689 | 0.964927063 | 3.94E-07 |
| TUCP_003347 | XLOC_144849 | ENSRNOT00000022628 | 0.962060512 | 5.81E-07 |
| TUCP_003347 | XLOC_144849 | ENSRNOT00000064802 | 0.967589433 | 2.67E-07 |
| TUCP_003347 | XLOC_144849 | ENSRNOT00000088125 | 0.960515873 | 7.07E-07 |
| TUCP_003347 | XLOC_144849 | ENSRNOT00000044742 | 0.952697708 | 1.72E-06 |
| TUCP_003347 | XLOC_144849 | ENSRNOT00000060943 | 0.956699741 | 1.11E-06 |
| TUCP_003347 | XLOC_144849 | ENSRNOT00000014664 | 0.966576781 | 3.11E-07 |
| TUCP_003347 | XLOC_144849 | ENSRNOT00000004486 | 0.958912088 | 8.61E-07 |
| TUCP_003347 | XLOC_144849 | ENSRNOT00000045047 | 0.957609019 | 1.00E-06 |
| TUCP_003347 | XLOC_144849 | ENSRNOT00000075326 | 0.960394629 | 7.18E-07 |
| TUCP_003347 | XLOC_144849 | ENSRNOT00000021348 | 0.965160974 | 3.81E-07 |
| TUCP_003347 | XLOC_144849 | ENSRNOT00000012671 | 0.964611976 | 4.12E-07 |
| TUCP_003347 | XLOC_144849 | ENSRNOT00000065168 | 0.957376109 | 1.03E-06 |
| TUCP_003347 | XLOC_144849 | ENSRNOT00000085158 | 0.952352111 | 1.79E-06 |
| TUCP_003347 | XLOC_144849 | ENSRNOT00000025075 | 0.970392189 | 1.71E-07 |
| TUCP_003347 | XLOC_144849 | ENSRNOT00000020134 | 0.963467224 | 4.82E-07 |
| TUCP_003347 | XLOC_144849 | ENSRNOT00000028271 | 0.954523194 | 1.42E-06 |
| TUCP_003347 | XLOC_144849 | ENSRNOT00000027234 | 0.951843497 | 1.88E-06 |
| TUCP_003347 | XLOC_144849 | ENSRNOT00000087371 | 0.955773647 | 1.24E-06 |
| TUCP_003347 | XLOC_144849 | ENSRNOT00000008018 | 0.958738416 | 8.79E-07 |
| TUCP_003347 | XLOC_144849 | ENSRNOT00000037446 | 0.963467468 | 4.82E-07 |
| TUCP_003347 | XLOC_144849 | ENSRNOT00000009627 | 0.979367858 | 2.84E-08 |
| TUCP_003347 | XLOC_144849 | ENSRNOT00000016947 | 0.95034513  | 2.19E-06 |
| TUCP_003347 | XLOC_144849 | ENSRNOT00000073991 | 0.961831526 | 5.98E-07 |
| TUCP_003347 | XLOC_144849 | ENSRNOT00000029994 | 0.974411144 | 8.28E-08 |
| TUCP_003347 | XLOC_144849 | ENSRNOT00000000676 | 0.96840944  | 2.35E-07 |
| TUCP_003347 | XLOC_144849 | ENSRNOT00000078675 | 0.977953277 | 3.95E-08 |
| TUCP_003347 | XLOC_144849 | ENSRNOT00000019222 | 0.957053102 | 1.07E-06 |
| TUCP_003347 | XLOC_144849 | ENSRNOT00000004359 | 0.954149538 | 1.48E-06 |
| TUCP_003347 | XLOC_144849 | ENSRNOT00000013274 | 0.967786375 | 2.59E-07 |



|             |             |                    |              |          |
|-------------|-------------|--------------------|--------------|----------|
| TUCP_003347 | XLOC_144849 | ENSRNOT00000085027 | 0.95602825   | 1.20E-06 |
| TUCP_003347 | XLOC_144849 | ENSRNOT00000002403 | 0.969498975  | 1.98E-07 |
| TUCP_003347 | XLOC_144849 | ENSRNOT00000045574 | 0.952117412  | 1.83E-06 |
| TUCP_003347 | XLOC_144849 | ENSRNOT00000027337 | 0.981929344  | 1.47E-08 |
| TUCP_003347 | XLOC_144849 | ENSRNOT00000047093 | 0.962156779  | 5.74E-07 |
| TUCP_003347 | XLOC_144849 | ENSRNOT00000001222 | 0.952169069  | 1.82E-06 |
| TUCP_003347 | XLOC_144849 | ENSRNOT00000076404 | 0.95306497   | 1.66E-06 |
| TUCP_003347 | XLOC_144849 | ENSRNOT00000003671 | 0.960619358  | 6.98E-07 |
| TUCP_003347 | XLOC_144849 | ENSRNOT00000047387 | 0.971594095  | 1.39E-07 |
| TUCP_003347 | XLOC_144849 | ENSRNOT00000055680 | 0.966885838  | 2.97E-07 |
| TUCP_003347 | XLOC_144849 | ENSRNOT00000091910 | 0.967794306  | 2.58E-07 |
| TUCP_003347 | XLOC_144849 | ENSRNOT00000045488 | 0.963720324  | 4.66E-07 |
| TUCP_003347 | XLOC_144849 | ENSRNOT00000017629 | 0.965414268  | 3.68E-07 |
| TUCP_003347 | XLOC_144849 | ENSRNOT00000009683 | 0.968962692  | 2.15E-07 |
| TUCP_003347 | XLOC_144849 | ENSRNOT00000084088 | 0.952443065  | 1.77E-06 |
| TUCP_003347 | XLOC_144849 | ENSRNOT00000079442 | 0.970090766  | 1.79E-07 |
| TUCP_003347 | XLOC_144849 | ENSRNOT00000024322 | 0.954514759  | 1.42E-06 |
| TUCP_003347 | XLOC_144849 | ENSRNOT00000090665 | 0.971107749  | 1.51E-07 |
| TUCP_003347 | XLOC_144849 | ENSRNOT00000085596 | 0.956783589  | 1.10E-06 |
| TUCP_003347 | XLOC_144849 | ENSRNOT00000081897 | 0.967451117  | 2.72E-07 |
| TUCP_003347 | XLOC_144849 | ENSRNOT00000000658 | 0.968378375  | 2.36E-07 |
| TUCP_003347 | XLOC_144849 | ENSRNOT00000089971 | 0.983517597  | 9.32E-09 |
| TUCP_003347 | XLOC_144849 | ENSRNOT00000065501 | 0.972453145  | 1.19E-07 |
| TUCP_003347 | XLOC_144849 | ENSRNOT00000091488 | 0.956757967  | 1.11E-06 |
| TUCP_003347 | XLOC_144849 | ENSRNOT00000027452 | 0.956371275  | 1.16E-06 |
| TUCP_003347 | XLOC_144849 | ENSRNOT00000076729 | 0.969186453  | 2.08E-07 |
| TUCP_003347 | XLOC_144849 | ENSRNOT00000066739 | 0.971144741  | 1.50E-07 |
| TUCP_003347 | XLOC_144849 | ENSRNOT00000045882 | 0.964165486  | 4.38E-07 |
| TUCP_003347 | XLOC_144849 | ENSRNOT00000037790 | 0.976617956  | 5.29E-08 |
| TUCP_003347 | XLOC_144849 | ENSRNOT00000088054 | 0.967109394  | 2.87E-07 |
| TUCP_003347 | XLOC_144849 | ENSRNOT00000006804 | 0.950777413  | 2.09E-06 |
| TUCP_003347 | XLOC_144849 | ENSRNOT00000000157 | 0.954321784  | 1.45E-06 |
| TUCP_003347 | XLOC_144849 | ENSRNOT00000010992 | 0.96198468   | 5.87E-07 |
| TUCP_003347 | XLOC_144849 | ENSRNOT00000038647 | 0.98262861   | 1.21E-08 |
| TUCP_003347 | XLOC_144849 | ENSRNOT00000083093 | 0.970951236  | 1.55E-07 |
| TUCP_003347 | XLOC_144849 | ENSRNOT00000076669 | 0.955152682  | 1.32E-06 |
| TUCP_003347 | XLOC_144849 | ENSRNOT00000011984 | 0.957684622  | 9.95E-07 |
| TUCP_003347 | XLOC_144849 | ENSRNOT00000024402 | 0.952071005  | 1.84E-06 |
| TUCP_003347 | XLOC_144849 | ENSRNOT00000026293 | 0.963331817  | 4.91E-07 |
| TUCP_003347 | XLOC_144849 | ENSRNOT00000089007 | -0.956467272 | 1.14E-06 |
| TUCP_003347 | XLOC_144849 | ENSRNOT00000012736 | 0.97878132   | 3.27E-08 |
| TUCP_003347 | XLOC_144849 | ENSRNOT00000041096 | 0.957289822  | 1.04E-06 |
| TUCP_003347 | XLOC_144849 | ENSRNOT00000031230 | 0.956965782  | 1.08E-06 |
| TUCP_003347 | XLOC_144849 | ENSRNOT00000074361 | 0.959320847  | 8.19E-07 |
| TUCP_003347 | XLOC_144849 | ENSRNOT00000083127 | 0.972012181  | 1.29E-07 |
| TUCP_003347 | XLOC_144849 | ENSRNOT00000023302 | 0.957872906  | 9.73E-07 |
| TUCP_003347 | XLOC_144849 | ENSRNOT00000060696 | 0.971156416  | 1.50E-07 |
| TUCP_003347 | XLOC_144849 | ENSRNOT00000012048 | 0.959861138  | 7.67E-07 |
| TUCP_003347 | XLOC_144849 | ENSRNOT00000026280 | 0.957175629  | 1.06E-06 |
| TUCP_003347 | XLOC_144849 | ENSRNOT00000005387 | 0.961388283  | 6.33E-07 |
| TUCP_003347 | XLOC_144849 | ENSRNOT00000024941 | 0.955320619  | 1.30E-06 |

|             |             |                    |             |          |
|-------------|-------------|--------------------|-------------|----------|
| TUCP_003347 | XLOC_144849 | ENSRNOT0000005381  | 0.968276895 | 2.40E-07 |
| TUCP_003347 | XLOC_144849 | ENSRNOT00000034704 | 0.966497204 | 3.14E-07 |
| TUCP_003347 | XLOC_144849 | ENSRNOT00000013985 | 0.95384722  | 1.53E-06 |
| TUCP_003347 | XLOC_144849 | ENSRNOT00000036750 | 0.959881575 | 7.65E-07 |
| TUCP_003347 | XLOC_144849 | ENSRNOT00000025092 | 0.952241505 | 1.81E-06 |
| TUCP_003347 | XLOC_144849 | ENSRNOT00000022796 | 0.971906522 | 1.31E-07 |
| TUCP_003347 | XLOC_144849 | ENSRNOT00000029001 | 0.976864424 | 5.02E-08 |
| TUCP_003347 | XLOC_144849 | ENSRNOT00000083799 | 0.958125898 | 9.45E-07 |
| TUCP_003344 | XLOC_144746 | ENSRNOT00000030479 | 0.95792469  | 9.68E-07 |
| TUCP_003344 | XLOC_144746 | ENSRNOT00000025093 | 0.95568909  | 1.25E-06 |
| TUCP_003344 | XLOC_144746 | ENSRNOT00000061686 | 0.950713542 | 2.11E-06 |
| TUCP_003344 | XLOC_144746 | ENSRNOT00000024079 | 0.972296204 | 1.23E-07 |
| TUCP_003344 | XLOC_144746 | ENSRNOT00000018470 | 0.960996346 | 6.66E-07 |
| TUCP_003344 | XLOC_144746 | ENSRNOT00000005374 | 0.951556755 | 1.94E-06 |
| TUCP_003344 | XLOC_144746 | ENSRNOT00000020889 | 0.955232935 | 1.31E-06 |
| TUCP_003344 | XLOC_144746 | ENSRNOT00000083560 | 0.956831761 | 1.10E-06 |
| TUCP_003344 | XLOC_144746 | ENSRNOT00000008909 | 0.954155636 | 1.48E-06 |
| TUCP_003344 | XLOC_144746 | ENSRNOT00000007133 | 0.964119874 | 4.41E-07 |
| TUCP_003344 | XLOC_144746 | ENSRNOT00000027060 | 0.966287297 | 3.24E-07 |
| TUCP_003344 | XLOC_144746 | ENSRNOT00000024707 | 0.953200758 | 1.63E-06 |
| TUCP_003345 | XLOC_144811 | ENSRNOT00000028535 | -0.9644868  | 4.19E-07 |
| TUCP_003342 | XLOC_144618 | ENSRNOT00000013423 | 0.970528424 | 1.67E-07 |
| TUCP_003342 | XLOC_144618 | ENSRNOT00000009825 | 0.962775582 | 5.29E-07 |
| TUCP_003342 | XLOC_144618 | ENSRNOT00000046585 | 0.962168508 | 5.73E-07 |
| TUCP_003342 | XLOC_144618 | ENSRNOT00000061185 | 0.953028901 | 1.66E-06 |
| TUCP_003342 | XLOC_144618 | ENSRNOT00000031205 | 0.955933722 | 1.22E-06 |
| TUCP_003342 | XLOC_144618 | ENSRNOT00000021243 | 0.972366293 | 1.21E-07 |
| TUCP_003342 | XLOC_144618 | ENSRNOT00000088381 | 0.961930717 | 5.91E-07 |
| TUCP_003342 | XLOC_144618 | ENSRNOT00000078663 | 0.961983501 | 5.87E-07 |
| TUCP_003342 | XLOC_144618 | ENSRNOT00000015866 | 0.962099434 | 5.78E-07 |
| TUCP_003342 | XLOC_144618 | ENSRNOT00000064613 | 0.976443944 | 5.49E-08 |
| TUCP_003342 | XLOC_144618 | ENSRNOT00000026932 | 0.963254633 | 4.96E-07 |
| TUCP_003343 | XLOC_144746 | ENSRNOT00000084500 | 0.984887141 | 6.05E-09 |
| TUCP_003343 | XLOC_144746 | ENSRNOT00000093467 | 0.996134431 | 6.75E-12 |
| TUCP_003343 | XLOC_144746 | ENSRNOT00000029340 | 0.999116572 | 4.23E-15 |
| TUCP_003343 | XLOC_144746 | ENSRNOT00000077972 | 0.962758032 | 5.30E-07 |
| TUCP_003343 | XLOC_144746 | ENSRNOT00000038646 | 1           | 0        |
| TUCP_003343 | XLOC_144746 | ENSRNOT00000012095 | 0.957750287 | 9.88E-07 |
| TUCP_003343 | XLOC_144746 | ENSRNOT00000017909 | 0.975587192 | 6.56E-08 |
| TUCP_003343 | XLOC_144746 | ENSRNOT00000092579 | 1           | 0        |
| TUCP_003343 | XLOC_144746 | ENSRNOT00000089235 | 0.998661162 | 3.38E-14 |
| TUCP_003343 | XLOC_144746 | ENSRNOT00000036383 | 0.988460809 | 1.58E-09 |
| TUCP_003343 | XLOC_144746 | ENSRNOT00000076528 | 0.997115373 | 1.57E-12 |
| TUCP_003343 | XLOC_144746 | ENSRNOT00000075193 | 0.964326971 | 4.29E-07 |
| TUCP_003343 | XLOC_144746 | ENSRNOT00000083034 | 0.990934646 | 4.75E-10 |
| TUCP_003343 | XLOC_144746 | ENSRNOT00000089607 | 0.995091455 | 2.23E-11 |
| TUCP_003343 | XLOC_144746 | ENSRNOT00000086014 | 0.960893638 | 6.74E-07 |
| TUCP_003343 | XLOC_144746 | ENSRNOT00000054939 | 0.958021495 | 9.57E-07 |
| TUCP_003343 | XLOC_144746 | ENSRNOT00000052315 | 0.983687082 | 8.85E-09 |
| TUCP_003343 | XLOC_144746 | ENSRNOT00000088168 | 1           | 0        |
| TUCP_003343 | XLOC_144746 | ENSRNOT00000046231 | 0.96225463  | 5.66E-07 |

|             |             |                    |              |          |
|-------------|-------------|--------------------|--------------|----------|
| TUCP_003343 | XLOC_144746 | ENSRNOT00000013459 | 0.979098017  | 3.03E-08 |
| TUCP_003343 | XLOC_144746 | ENSRNOT00000078137 | 1            | 0        |
| TUCP_003343 | XLOC_144746 | ENSRNOT00000077764 | 0.977143528  | 4.73E-08 |
| TUCP_003343 | XLOC_144746 | ENSRNOT00000043661 | 0.966975951  | 2.93E-07 |
| TUCP_003343 | XLOC_144746 | ENSRNOT00000092740 | 1            | 0        |
| TUCP_003343 | XLOC_144746 | ENSRNOT00000000117 | 0.990989174  | 4.61E-10 |
| TUCP_003343 | XLOC_144746 | ENSRNOT00000071877 | 0.967113583  | 2.87E-07 |
| TUCP_003343 | XLOC_144746 | ENSRNOT00000070958 | 1            | 0        |
| TUCP_003343 | XLOC_144746 | ENSRNOT00000076757 | 0.959205354  | 8.31E-07 |
| TUCP_003343 | XLOC_144746 | ENSRNOT00000085310 | 0.965230243  | 3.78E-07 |
| TUCP_003343 | XLOC_144746 | ENSRNOT00000047241 | 0.966576993  | 3.11E-07 |
| TUCP_003343 | XLOC_144746 | ENSRNOT00000027268 | 1            | 0        |
| TUCP_003343 | XLOC_144746 | ENSRNOT00000004459 | 1            | 0        |
| TUCP_003343 | XLOC_144746 | ENSRNOT00000048373 | 0.959096578  | 8.42E-07 |
| TUCP_003343 | XLOC_144746 | ENSRNOT00000061516 | 0.987595648  | 2.27E-09 |
| TUCP_003343 | XLOC_144746 | ENSRNOT00000088148 | 1            | 0        |
| TUCP_003343 | XLOC_144746 | ENSRNOT00000088527 | 1            | 0        |
| TUCP_003343 | XLOC_144746 | ENSRNOT00000078701 | 1            | 0        |
| TUCP_003343 | XLOC_144746 | ENSRNOT00000052308 | 0.962646127  | 5.38E-07 |
| TUCP_003343 | XLOC_144746 | ENSRNOT00000021748 | 1            | 0        |
| TUCP_003343 | XLOC_144746 | ENSRNOT00000089085 | 1            | 0        |
| TUCP_003343 | XLOC_144746 | ENSRNOT00000008153 | 0.999703506  | 1.80E-17 |
| TUCP_003343 | XLOC_144746 | ENSRNOT00000085896 | 0.971605382  | 1.39E-07 |
| TUCP_003343 | XLOC_144746 | ENSRNOT00000079189 | 0.984972387  | 5.89E-09 |
| TUCP_003343 | XLOC_144746 | ENSRNOT00000090078 | 1            | 0        |
| TUCP_003343 | XLOC_144746 | ENSRNOT00000078020 | 0.958421666  | 9.13E-07 |
| TUCP_003343 | XLOC_144746 | ENSRNOT00000092425 | 0.956092273  | 1.19E-06 |
| TUCP_003343 | XLOC_144746 | ENSRNOT00000009776 | 1            | 0        |
| TUCP_003340 | XLOC_144386 | ENSRNOT00000080945 | 0.951586227  | 1.93E-06 |
| TUCP_003340 | XLOC_144386 | ENSRNOT00000075035 | 0.962914465  | 5.19E-07 |
| TUCP_003340 | XLOC_144386 | ENSRNOT00000065111 | 0.962972509  | 5.15E-07 |
| TUCP_003340 | XLOC_144386 | ENSRNOT00000061569 | 0.954607578  | 1.41E-06 |
| TUCP_003340 | XLOC_144386 | ENSRNOT00000016804 | 0.978287558  | 3.66E-08 |
| TUCP_003340 | XLOC_144386 | ENSRNOT00000019551 | 0.963204513  | 4.99E-07 |
| TUCP_004603 | XLOC_202488 | ENSRNOT00000067037 | -0.976180481 | 5.80E-08 |
| TUCP_004603 | XLOC_202488 | ENSRNOT00000021801 | -0.954171112 | 1.47E-06 |
| TUCP_003023 | XLOC_128683 | ENSRNOT00000091116 | 0.982849702  | 1.14E-08 |
| TUCP_003023 | XLOC_128683 | ENSRNOT00000077186 | 0.956854282  | 1.10E-06 |
| TUCP_003023 | XLOC_128683 | ENSRNOT00000056199 | 0.957411662  | 1.03E-06 |
| TUCP_003023 | XLOC_128683 | ENSRNOT00000081314 | 0.95067231   | 2.12E-06 |
| TUCP_003023 | XLOC_128683 | ENSRNOT00000039607 | 0.967610741  | 2.66E-07 |
| TUCP_003023 | XLOC_128683 | ENSRNOT00000090621 | -0.952077749 | 1.84E-06 |
| TUCP_003023 | XLOC_128683 | ENSRNOT00000030996 | 0.95553733   | 1.27E-06 |
| TUCP_003023 | XLOC_128683 | ENSRNOT00000086946 | 0.966543377  | 3.12E-07 |
| TUCP_003023 | XLOC_128683 | ENSRNOT00000006460 | -0.953824229 | 1.53E-06 |
| TUCP_003023 | XLOC_128683 | ENSRNOT00000011237 | 0.963845782  | 4.58E-07 |
| TUCP_003023 | XLOC_128683 | ENSRNOT00000080418 | 0.967050138  | 2.89E-07 |
| TUCP_003023 | XLOC_128683 | ENSRNOT0000002222  | -0.955800157 | 1.23E-06 |
| TUCP_003023 | XLOC_128683 | ENSRNOT00000003087 | -0.963242259 | 4.97E-07 |
| TUCP_003023 | XLOC_128683 | ENSRNOT00000019358 | 0.951102571  | 2.03E-06 |
| TUCP_003023 | XLOC_128683 | ENSRNOT00000049349 | -0.974912068 | 7.50E-08 |

|             |             |                     |              |          |
|-------------|-------------|---------------------|--------------|----------|
| TUCP_003023 | XLOC_128683 | ENSRNOT00000086605  | 0.956497034  | 1.14E-06 |
| TUCP_003023 | XLOC_128683 | ENSRNOT00000014002  | 0.956254494  | 1.17E-06 |
| TUCP_003023 | XLOC_128683 | ENSRNOT00000041237  | 0.966084977  | 3.34E-07 |
| TUCP_003023 | XLOC_128683 | ENSRNOT00000079138  | -0.954758955 | 1.38E-06 |
| TUCP_003023 | XLOC_128683 | ENSRNOT00000005658  | 0.973336861  | 1.01E-07 |
| TUCP_003023 | XLOC_128683 | ENSRNOT000000087011 | 0.960936566  | 6.71E-07 |
| TUCP_003023 | XLOC_128683 | ENSRNOT00000002329  | -0.974497603 | 8.14E-08 |
| TUCP_003023 | XLOC_128683 | ENSRNOT00000078326  | 0.963345346  | 4.90E-07 |
| TUCP_003023 | XLOC_128683 | ENSRNOT000000087329 | 0.962874363  | 5.22E-07 |
| TUCP_003023 | XLOC_128683 | ENSRNOT00000010031  | 0.950127184  | 2.23E-06 |
| TUCP_003023 | XLOC_128683 | ENSRNOT00000011130  | 0.953215589  | 1.63E-06 |
| TUCP_003023 | XLOC_128683 | ENSRNOT00000008361  | -0.958024747 | 9.56E-07 |
| TUCP_003023 | XLOC_128683 | ENSRNOT00000025309  | -0.959780243 | 7.75E-07 |
| TUCP_003023 | XLOC_128683 | ENSRNOT00000004351  | 0.951223966  | 2.00E-06 |
| TUCP_003023 | XLOC_128683 | ENSRNOT00000024712  | 0.95174864   | 1.90E-06 |
| TUCP_003023 | XLOC_128683 | ENSRNOT00000019180  | 0.962007926  | 5.85E-07 |
| TUCP_003023 | XLOC_128683 | ENSRNOT00000042459  | 0.95993721   | 7.60E-07 |
| TUCP_003023 | XLOC_128683 | ENSRNOT00000021826  | -0.971883497 | 1.32E-07 |
| TUCP_003023 | XLOC_128683 | ENSRNOT00000018341  | 0.953017299  | 1.67E-06 |
| TUCP_003023 | XLOC_128683 | ENSRNOT00000013613  | 0.950041553  | 2.25E-06 |
| TUCP_003023 | XLOC_128683 | ENSRNOT00000010419  | -0.951713374 | 1.91E-06 |
| TUCP_003023 | XLOC_128683 | ENSRNOT000000057738 | -0.953254695 | 1.62E-06 |
| TUCP_003023 | XLOC_128683 | ENSRNOT000000031672 | 0.95327852   | 1.62E-06 |
| TUCP_003023 | XLOC_128683 | ENSRNOT00000021537  | -0.950025751 | 2.26E-06 |
| TUCP_003023 | XLOC_128683 | ENSRNOT00000022746  | 0.950210171  | 2.22E-06 |
| TUCP_003023 | XLOC_128683 | ENSRNOT00000024882  | 0.956478885  | 1.14E-06 |
| TUCP_003023 | XLOC_128683 | ENSRNOT00000025284  | 0.95048564   | 2.16E-06 |
| TUCP_003023 | XLOC_128683 | ENSRNOT00000018622  | 0.952031814  | 1.84E-06 |
| TUCP_003023 | XLOC_128683 | ENSRNOT00000001360  | 0.956820505  | 1.10E-06 |
| TUCP_003023 | XLOC_128683 | ENSRNOT00000012060  | -0.951257723 | 2.00E-06 |
| TUCP_003023 | XLOC_128683 | ENSRNOT00000075480  | 0.952475727  | 1.76E-06 |
| TUCP_003023 | XLOC_128683 | ENSRNOT00000005620  | 0.968794756  | 2.21E-07 |
| TUCP_003023 | XLOC_128683 | ENSRNOT00000014044  | 0.954212838  | 1.47E-06 |
| TUCP_003023 | XLOC_128683 | ENSRNOT00000072389  | 0.951190234  | 2.01E-06 |
| TUCP_003023 | XLOC_128683 | ENSRNOT00000013228  | -0.957860052 | 9.75E-07 |
| TUCP_003023 | XLOC_128683 | ENSRNOT00000027760  | -0.964755399 | 4.04E-07 |
| TUCP_003023 | XLOC_128683 | ENSRNOT00000048529  | 0.953731588  | 1.54E-06 |
| TUCP_003023 | XLOC_128683 | ENSRNOT000000033795 | 0.970781257  | 1.60E-07 |
| TUCP_003023 | XLOC_128683 | ENSRNOT00000045041  | 0.960184685  | 7.37E-07 |
| TUCP_003023 | XLOC_128683 | ENSRNOT00000092757  | -0.972844974 | 1.11E-07 |
| TUCP_003023 | XLOC_128683 | ENSRNOT00000001077  | -0.968873468 | 2.18E-07 |
| TUCP_003023 | XLOC_128683 | ENSRNOT00000000477  | 0.954202981  | 1.47E-06 |
| TUCP_003023 | XLOC_128683 | ENSRNOT00000082739  | 0.96559067   | 3.59E-07 |
| TUCP_003023 | XLOC_128683 | ENSRNOT00000000576  | 0.968428975  | 2.34E-07 |
| TUCP_003023 | XLOC_128683 | ENSRNOT00000024344  | 0.958741203  | 8.78E-07 |
| TUCP_003023 | XLOC_128683 | ENSRNOT00000000469  | -0.955394701 | 1.29E-06 |
| TUCP_003023 | XLOC_128683 | ENSRNOT00000030065  | 0.955383888  | 1.29E-06 |
| TUCP_003023 | XLOC_128683 | ENSRNOT00000011948  | 0.956104099  | 1.19E-06 |
| TUCP_003023 | XLOC_128683 | ENSRNOT00000017648  | 0.974037819  | 8.89E-08 |
| TUCP_003023 | XLOC_128683 | ENSRNOT00000013764  | 0.962572391  | 5.43E-07 |
| TUCP_003023 | XLOC_128683 | ENSRNOT00000065045  | -0.957518348 | 1.01E-06 |

|             |             |                    |              |          |
|-------------|-------------|--------------------|--------------|----------|
| TUCP_003023 | XLOC_128683 | ENSRNOT00000075630 | 0.952295075  | 1.80E-06 |
| TUCP_003023 | XLOC_128683 | ENSRNOT00000023463 | 0.953658031  | 1.56E-06 |
| TUCP_003023 | XLOC_128683 | ENSRNOT00000081631 | -0.952779713 | 1.71E-06 |
| TUCP_003023 | XLOC_128683 | ENSRNOT00000052098 | 0.966316336  | 3.23E-07 |
| TUCP_003023 | XLOC_128683 | ENSRNOT00000018634 | 0.953396335  | 1.60E-06 |
| TUCP_003023 | XLOC_128683 | ENSRNOT00000001806 | 0.954137233  | 1.48E-06 |
| TUCP_003023 | XLOC_128683 | ENSRNOT00000046490 | 0.959556184  | 7.96E-07 |
| TUCP_003023 | XLOC_128683 | ENSRNOT00000023763 | 0.950042837  | 2.25E-06 |
| TUCP_003023 | XLOC_128683 | ENSRNOT00000073643 | 0.952640243  | 1.73E-06 |
| TUCP_003023 | XLOC_128683 | ENSRNOT00000046552 | -0.969123822 | 2.10E-07 |
| TUCP_003023 | XLOC_128683 | ENSRNOT00000024801 | 0.959895248  | 7.64E-07 |
| TUCP_003023 | XLOC_128683 | ENSRNOT00000023613 | -0.956033778 | 1.20E-06 |
| TUCP_003023 | XLOC_128683 | ENSRNOT00000005961 | 0.969096705  | 2.11E-07 |
| TUCP_003023 | XLOC_128683 | ENSRNOT00000067391 | 0.957369862  | 1.03E-06 |
| TUCP_003023 | XLOC_128683 | ENSRNOT00000033806 | -0.955641881 | 1.26E-06 |
| TUCP_003023 | XLOC_128683 | ENSRNOT00000041808 | 0.957953517  | 9.64E-07 |
| TUCP_003023 | XLOC_128683 | ENSRNOT00000037333 | 0.970452005  | 1.69E-07 |
| TUCP_003023 | XLOC_128683 | ENSRNOT00000018237 | 0.954364678  | 1.44E-06 |
| TUCP_003023 | XLOC_128683 | ENSRNOT00000029179 | 0.957455084  | 1.02E-06 |
| TUCP_003023 | XLOC_128683 | ENSRNOT00000085545 | 0.966892844  | 2.96E-07 |
| TUCP_003023 | XLOC_128683 | ENSRNOT00000083188 | 0.957028482  | 1.07E-06 |
| TUCP_003023 | XLOC_128683 | ENSRNOT00000011082 | 0.96845431   | 2.33E-07 |
| TUCP_003023 | XLOC_128683 | ENSRNOT00000039850 | 0.951516921  | 1.94E-06 |
| TUCP_003023 | XLOC_128683 | ENSRNOT00000083344 | -0.962679142 | 5.36E-07 |
| TUCP_003023 | XLOC_128683 | ENSRNOT00000005064 | 0.964760633  | 4.03E-07 |
| TUCP_003023 | XLOC_128683 | ENSRNOT00000014502 | 0.953450904  | 1.59E-06 |
| TUCP_003023 | XLOC_128683 | ENSRNOT00000085334 | -0.953204074 | 1.63E-06 |
| TUCP_003023 | XLOC_128683 | ENSRNOT00000000817 | 0.962360245  | 5.59E-07 |
| TUCP_003023 | XLOC_128683 | ENSRNOT00000014506 | 0.956064891  | 1.20E-06 |
| TUCP_003023 | XLOC_128683 | ENSRNOT00000074515 | 0.963140254  | 5.04E-07 |
| TUCP_003023 | XLOC_128683 | ENSRNOT00000014859 | 0.958178214  | 9.39E-07 |
| TUCP_003023 | XLOC_128683 | ENSRNOT00000022987 | 0.952667461  | 1.73E-06 |
| TUCP_003023 | XLOC_128683 | ENSRNOT00000000812 | 0.965740093  | 3.51E-07 |
| TUCP_003023 | XLOC_128683 | ENSRNOT00000001322 | 0.950266943  | 2.20E-06 |
| TUCP_003023 | XLOC_128683 | ENSRNOT00000036658 | 0.955878077  | 1.22E-06 |
| TUCP_003023 | XLOC_128683 | ENSRNOT00000089611 | -0.964954555 | 3.93E-07 |
| TUCP_003023 | XLOC_128683 | ENSRNOT00000002645 | 0.954471524  | 1.43E-06 |
| TUCP_003023 | XLOC_128683 | ENSRNOT00000008317 | 0.95999688   | 7.54E-07 |
| TUCP_003023 | XLOC_128683 | ENSRNOT00000077040 | 0.956229492  | 1.18E-06 |
| TUCP_003023 | XLOC_128683 | ENSRNOT00000087517 | -0.951156561 | 2.02E-06 |
| TUCP_003023 | XLOC_128683 | ENSRNOT00000008772 | 0.958367308  | 9.18E-07 |
| TUCP_003023 | XLOC_128683 | ENSRNOT00000026726 | 0.955275744  | 1.31E-06 |
| TUCP_003023 | XLOC_128683 | ENSRNOT00000068026 | 0.954363831  | 1.44E-06 |
| TUCP_003023 | XLOC_128683 | ENSRNOT00000001160 | 0.951498157  | 1.95E-06 |
| TUCP_003023 | XLOC_128683 | ENSRNOT00000041116 | 0.967681567  | 2.63E-07 |
| TUCP_003023 | XLOC_128683 | ENSRNOT00000078737 | 0.958046082  | 9.54E-07 |
| TUCP_003023 | XLOC_128683 | ENSRNOT00000010680 | -0.951172127 | 2.01E-06 |
| TUCP_003023 | XLOC_128683 | ENSRNOT00000064901 | -0.965759958 | 3.50E-07 |
| TUCP_003023 | XLOC_128683 | ENSRNOT00000025824 | 0.959245825  | 8.27E-07 |
| TUCP_003023 | XLOC_128683 | ENSRNOT00000071929 | 0.957700545  | 9.93E-07 |
| TUCP_003023 | XLOC_128683 | ENSRNOT00000005172 | -0.958045605 | 9.54E-07 |

|             |             |                     |              |          |
|-------------|-------------|---------------------|--------------|----------|
| TUCP_003023 | XLOC_128683 | ENSRNOT00000005170  | 0.975590054  | 6.55E-08 |
| TUCP_003023 | XLOC_128683 | ENSRNOT00000017746  | 0.951658055  | 1.92E-06 |
| TUCP_003023 | XLOC_128683 | ENSRNOT00000016286  | 0.952889004  | 1.69E-06 |
| TUCP_003023 | XLOC_128683 | ENSRNOT00000017626  | 0.959295616  | 8.22E-07 |
| TUCP_003023 | XLOC_128683 | ENSRNOT00000012495  | 0.952404377  | 1.78E-06 |
| TUCP_003023 | XLOC_128683 | ENSRNOT00000070825  | 0.959722687  | 7.80E-07 |
| TUCP_003023 | XLOC_128683 | ENSRNOT00000025134  | 0.954117309  | 1.48E-06 |
| TUCP_003023 | XLOC_128683 | ENSRNOT00000020472  | 0.956377989  | 1.16E-06 |
| TUCP_003023 | XLOC_128683 | ENSRNOT00000022086  | 0.955588428  | 1.26E-06 |
| TUCP_003023 | XLOC_128683 | ENSRNOT00000066923  | 0.960716335  | 6.90E-07 |
| TUCP_003023 | XLOC_128683 | ENSRNOT00000003733  | 0.980957091  | 1.91E-08 |
| TUCP_003023 | XLOC_128683 | ENSRNOT00000012767  | -0.950879783 | 2.07E-06 |
| TUCP_003023 | XLOC_128683 | ENSRNOT00000029701  | -0.975111175 | 7.21E-08 |
| TUCP_003023 | XLOC_128683 | ENSRNOT00000054717  | 0.958503694  | 9.04E-07 |
| TUCP_003023 | XLOC_128683 | ENSRNOT00000028744  | 0.955638568  | 1.26E-06 |
| TUCP_003023 | XLOC_128683 | ENSRNOT00000029704  | 0.963269687  | 4.95E-07 |
| TUCP_003023 | XLOC_128683 | ENSRNOT00000056015  | 0.960997638  | 6.66E-07 |
| TUCP_003023 | XLOC_128683 | ENSRNOT00000001013  | 0.958196653  | 9.37E-07 |
| TUCP_003023 | XLOC_128683 | ENSRNOT00000055602  | 0.955419093  | 1.29E-06 |
| TUCP_003023 | XLOC_128683 | ENSRNOT00000037015  | -0.955309105 | 1.30E-06 |
| TUCP_003023 | XLOC_128683 | ENSRNOT00000016324  | 0.978429949  | 3.55E-08 |
| TUCP_003023 | XLOC_128683 | ENSRNOT000000082627 | 0.958101619  | 9.48E-07 |
| TUCP_003023 | XLOC_128683 | ENSRNOT00000077578  | 0.969471841  | 1.98E-07 |
| TUCP_003023 | XLOC_128683 | ENSRNOT00000014832  | 0.952380977  | 1.78E-06 |
| TUCP_003023 | XLOC_128683 | ENSRNOT00000089879  | 0.971125139  | 1.51E-07 |
| TUCP_003023 | XLOC_128683 | ENSRNOT00000066952  | -0.957767577 | 9.86E-07 |
| TUCP_003023 | XLOC_128683 | ENSRNOT00000000258  | 0.976071078  | 5.94E-08 |
| TUCP_003023 | XLOC_128683 | ENSRNOT00000018477  | 0.956570403  | 1.13E-06 |
| TUCP_003023 | XLOC_128683 | ENSRNOT00000087905  | 0.985671326  | 4.64E-09 |
| TUCP_003023 | XLOC_128683 | ENSRNOT00000090939  | 0.950447814  | 2.16E-06 |
| TUCP_003023 | XLOC_128683 | ENSRNOT00000074079  | 0.952121615  | 1.83E-06 |
| TUCP_003023 | XLOC_128683 | ENSRNOT00000027553  | 0.964368695  | 4.26E-07 |
| TUCP_003023 | XLOC_128683 | ENSRNOT00000049048  | 0.95425979   | 1.46E-06 |
| TUCP_003023 | XLOC_128683 | ENSRNOT00000018149  | 0.961130985  | 6.55E-07 |
| TUCP_003023 | XLOC_128683 | ENSRNOT00000075602  | 0.972449503  | 1.19E-07 |
| TUCP_003023 | XLOC_128683 | ENSRNOT00000059169  | -0.953503559 | 1.58E-06 |
| TUCP_003023 | XLOC_128683 | ENSRNOT00000044477  | 0.950354058  | 2.18E-06 |
| TUCP_003023 | XLOC_128683 | ENSRNOT00000052131  | 0.95456889   | 1.41E-06 |
| TUCP_003023 | XLOC_128683 | ENSRNOT00000039177  | 0.959536676  | 7.98E-07 |
| TUCP_003023 | XLOC_128683 | ENSRNOT00000086456  | 0.968134463  | 2.45E-07 |
| TUCP_003023 | XLOC_128683 | ENSRNOT00000057953  | -0.950115805 | 2.24E-06 |
| TUCP_003023 | XLOC_128683 | ENSRNOT00000047572  | 0.967798369  | 2.58E-07 |
| TUCP_003023 | XLOC_128683 | ENSRNOT00000019040  | 0.954329886  | 1.45E-06 |
| TUCP_003023 | XLOC_128683 | ENSRNOT00000006802  | -0.957621046 | 1.00E-06 |
| TUCP_003023 | XLOC_128683 | ENSRNOT00000056145  | 0.954806273  | 1.38E-06 |
| TUCP_003023 | XLOC_128683 | ENSRNOT00000001227  | 0.960670787  | 6.94E-07 |
| TUCP_003023 | XLOC_128683 | ENSRNOT00000009202  | -0.96928806  | 2.04E-07 |
| TUCP_003023 | XLOC_128683 | ENSRNOT00000080013  | 0.95239005   | 1.78E-06 |
| TUCP_003023 | XLOC_128683 | ENSRNOT00000067217  | 0.956475445  | 1.14E-06 |
| TUCP_003023 | XLOC_128683 | ENSRNOT00000064290  | 0.982888365  | 1.12E-08 |
| TUCP_003023 | XLOC_128683 | ENSRNOT00000012663  | 0.956150728  | 1.19E-06 |

|             |             |                    |              |          |
|-------------|-------------|--------------------|--------------|----------|
| TUCP_003023 | XLOC_128683 | ENSRNOT0000003106  | 0.968552736  | 2.30E-07 |
| TUCP_003023 | XLOC_128683 | ENSRNOT0000005873  | 0.978485172  | 3.50E-08 |
| TUCP_003023 | XLOC_128683 | ENSRNOT00000025634 | 0.96794131   | 2.53E-07 |
| TUCP_003023 | XLOC_128683 | ENSRNOT0000000253  | 0.969324734  | 2.03E-07 |
| TUCP_003023 | XLOC_128683 | ENSRNOT00000086847 | 0.961302011  | 6.40E-07 |
| TUCP_003023 | XLOC_128683 | ENSRNOT00000008905 | 0.972104661  | 1.27E-07 |
| TUCP_003023 | XLOC_128683 | ENSRNOT00000018674 | 0.955196011  | 1.32E-06 |
| TUCP_003023 | XLOC_128683 | ENSRNOT00000009994 | 0.953124665  | 1.65E-06 |
| TUCP_003023 | XLOC_128683 | ENSRNOT00000077363 | 0.970407404  | 1.70E-07 |
| TUCP_003023 | XLOC_128683 | ENSRNOT00000023014 | -0.961586374 | 6.18E-07 |
| TUCP_003023 | XLOC_128683 | ENSRNOT00000028737 | 0.970630699  | 1.64E-07 |
| TUCP_003023 | XLOC_128683 | ENSRNOT00000026518 | -0.957129739 | 1.06E-06 |
| TUCP_003023 | XLOC_128683 | ENSRNOT00000027973 | 0.956645838  | 1.12E-06 |
| TUCP_003023 | XLOC_128683 | ENSRNOT00000024841 | 0.951592242  | 1.93E-06 |
| TUCP_003023 | XLOC_128683 | ENSRNOT00000012847 | 0.969664405  | 1.92E-07 |
| TUCP_003023 | XLOC_128683 | ENSRNOT00000044147 | 0.962090971  | 5.79E-07 |
| TUCP_003023 | XLOC_128683 | ENSRNOT00000027875 | -0.952020058 | 1.85E-06 |
| TUCP_003023 | XLOC_128683 | ENSRNOT00000023641 | 0.958269055  | 9.29E-07 |
| TUCP_003023 | XLOC_128683 | ENSRNOT00000003593 | -0.971550243 | 1.40E-07 |
| TUCP_003023 | XLOC_128683 | ENSRNOT00000015573 | 0.951769755  | 1.90E-06 |
| TUCP_003023 | XLOC_128683 | ENSRNOT00000018378 | 0.95424057   | 1.46E-06 |
| TUCP_003023 | XLOC_128683 | ENSRNOT00000008244 | -0.955812856 | 1.23E-06 |
| TUCP_003023 | XLOC_128683 | ENSRNOT00000064636 | 0.988025509  | 1.90E-09 |
| TUCP_003023 | XLOC_128683 | ENSRNOT00000032893 | 0.957365591  | 1.03E-06 |
| TUCP_003023 | XLOC_128683 | ENSRNOT00000056725 | 0.952297979  | 1.80E-06 |
| TUCP_003023 | XLOC_128683 | ENSRNOT00000022676 | 0.955298393  | 1.30E-06 |
| TUCP_003023 | XLOC_128683 | ENSRNOT00000013733 | 0.957200048  | 1.05E-06 |
| TUCP_003023 | XLOC_128683 | ENSRNOT00000012428 | 0.964246225  | 4.33E-07 |
| TUCP_003023 | XLOC_128683 | ENSRNOT00000025782 | 0.959406671  | 8.11E-07 |
| TUCP_003023 | XLOC_128683 | ENSRNOT00000075800 | 0.958140911  | 9.43E-07 |
| TUCP_003023 | XLOC_128683 | ENSRNOT00000018473 | 0.967492235  | 2.71E-07 |
| TUCP_003023 | XLOC_128683 | ENSRNOT00000066199 | 0.959139108  | 8.37E-07 |
| TUCP_003023 | XLOC_128683 | ENSRNOT00000017998 | -0.955914493 | 1.22E-06 |
| TUCP_003023 | XLOC_128683 | ENSRNOT00000004094 | 0.952233501  | 1.81E-06 |
| TUCP_003023 | XLOC_128683 | ENSRNOT00000027360 | 0.969047648  | 2.12E-07 |
| TUCP_003023 | XLOC_128683 | ENSRNOT00000013431 | 0.971319422  | 1.46E-07 |
| TUCP_003023 | XLOC_128683 | ENSRNOT00000008253 | 0.951549655  | 1.94E-06 |
| TUCP_003023 | XLOC_128683 | ENSRNOT00000025149 | 0.958547989  | 8.99E-07 |
| TUCP_003023 | XLOC_128683 | ENSRNOT00000024938 | 0.957338361  | 1.04E-06 |
| TUCP_003023 | XLOC_128683 | ENSRNOT00000016776 | 0.95297722   | 1.67E-06 |
| TUCP_003023 | XLOC_128683 | ENSRNOT00000047152 | -0.950891593 | 2.07E-06 |
| TUCP_003023 | XLOC_128683 | ENSRNOT00000015199 | 0.959133037  | 8.38E-07 |
| TUCP_003023 | XLOC_128683 | ENSRNOT00000010020 | 0.956587236  | 1.13E-06 |
| TUCP_003023 | XLOC_128683 | ENSRNOT00000038464 | 0.950500633  | 2.15E-06 |
| TUCP_003023 | XLOC_128683 | ENSRNOT00000036194 | 0.952791393  | 1.71E-06 |
| TUCP_003023 | XLOC_128683 | ENSRNOT00000029696 | 0.954950133  | 1.35E-06 |
| TUCP_004325 | XLOC_190552 | ENSRNOT00000015366 | 0.972332952  | 1.22E-07 |
| TUCP_004325 | XLOC_190552 | ENSRNOT00000074465 | 0.95217836   | 1.82E-06 |
| TUCP_004325 | XLOC_190552 | ENSRNOT00000040912 | 0.95217836   | 1.82E-06 |
| TUCP_004325 | XLOC_190552 | ENSRNOT00000072648 | 0.95217836   | 1.82E-06 |
| TUCP_004325 | XLOC_190552 | ENSRNOT00000070803 | 0.95217836   | 1.82E-06 |

|             |             |                    |             |          |
|-------------|-------------|--------------------|-------------|----------|
| TUCP_004325 | XLOC_190552 | ENSRNOT00000012196 | 0.95217836  | 1.82E-06 |
| TUCP_004325 | XLOC_190552 | ENSRNOT00000085772 | 0.95217836  | 1.82E-06 |
| TUCP_004325 | XLOC_190552 | ENSRNOT00000086374 | 0.952925164 | 1.68E-06 |
| TUCP_004325 | XLOC_190552 | ENSRNOT00000015270 | 0.95217836  | 1.82E-06 |
| TUCP_004325 | XLOC_190552 | ENSRNOT00000046192 | 0.95217836  | 1.82E-06 |
| TUCP_004325 | XLOC_190552 | ENSRNOT00000044226 | 0.95217836  | 1.82E-06 |
| TUCP_004325 | XLOC_190552 | ENSRNOT00000081898 | 0.95475253  | 1.38E-06 |
| TUCP_004325 | XLOC_190552 | ENSRNOT00000004293 | 0.962100106 | 5.78E-07 |
| TUCP_004325 | XLOC_190552 | ENSRNOT00000015870 | 0.957363685 | 1.03E-06 |
| TUCP_004325 | XLOC_190552 | ENSRNOT00000001464 | 0.95217836  | 1.82E-06 |
| TUCP_004325 | XLOC_190552 | ENSRNOT00000057873 | 0.95217836  | 1.82E-06 |
| TUCP_004325 | XLOC_190552 | ENSRNOT00000076044 | 0.95217836  | 1.82E-06 |
| TUCP_004325 | XLOC_190552 | ENSRNOT00000074353 | 0.95217836  | 1.82E-06 |
| TUCP_004325 | XLOC_190552 | ENSRNOT00000074295 | 0.96971567  | 1.91E-07 |
| TUCP_004325 | XLOC_190552 | ENSRNOT00000093284 | 0.951913185 | 1.87E-06 |
| TUCP_004325 | XLOC_190552 | ENSRNOT00000088399 | 0.952242793 | 1.81E-06 |
| TUCP_004325 | XLOC_190552 | ENSRNOT00000086248 | 0.95217836  | 1.82E-06 |
| TUCP_004325 | XLOC_190552 | ENSRNOT00000089750 | 0.952170613 | 1.82E-06 |
| TUCP_004325 | XLOC_190552 | ENSRNOT00000078121 | 0.974782309 | 7.70E-08 |
| TUCP_004325 | XLOC_190552 | ENSRNOT00000002834 | 0.95217836  | 1.82E-06 |
| TUCP_004325 | XLOC_190552 | ENSRNOT00000080812 | 0.953937783 | 1.51E-06 |
| TUCP_004325 | XLOC_190552 | ENSRNOT00000092755 | 0.95217836  | 1.82E-06 |
| TUCP_004325 | XLOC_190552 | ENSRNOT00000031683 | 0.95217836  | 1.82E-06 |
| TUCP_004325 | XLOC_190552 | ENSRNOT00000016843 | 0.980136382 | 2.36E-08 |
| TUCP_002510 | XLOC_105862 | ENSRNOT00000089625 | 0.967420795 | 2.74E-07 |
| TUCP_002511 | XLOC_105963 | ENSRNOT00000028234 | 0.957235394 | 1.05E-06 |
| TUCP_002511 | XLOC_105963 | ENSRNOT00000016083 | 0.958366823 | 9.18E-07 |
| TUCP_002511 | XLOC_105963 | ENSRNOT00000001098 | 0.951733623 | 1.90E-06 |
| TUCP_002511 | XLOC_105963 | ENSRNOT00000049973 | 0.963685594 | 4.68E-07 |
| TUCP_002511 | XLOC_105963 | ENSRNOT00000034096 | 0.954633105 | 1.40E-06 |
| TUCP_002511 | XLOC_105963 | ENSRNOT00000088884 | 0.963942739 | 4.52E-07 |
| TUCP_002511 | XLOC_105963 | ENSRNOT00000003514 | 0.956105821 | 1.19E-06 |
| TUCP_002511 | XLOC_105963 | ENSRNOT00000029097 | 0.9697844   | 1.89E-07 |
| TUCP_002511 | XLOC_105963 | ENSRNOT00000083983 | 0.951729086 | 1.90E-06 |
| TUCP_002511 | XLOC_105963 | ENSRNOT00000075494 | 0.955872885 | 1.22E-06 |
| TUCP_002511 | XLOC_105963 | ENSRNOT00000001973 | 0.963921723 | 4.53E-07 |
| TUCP_002511 | XLOC_105963 | ENSRNOT00000023149 | 0.967565865 | 2.68E-07 |
| TUCP_002511 | XLOC_105963 | ENSRNOT00000009113 | 0.958295059 | 9.26E-07 |
| TUCP_002511 | XLOC_105963 | ENSRNOT00000078599 | 0.981974188 | 1.45E-08 |
| TUCP_002511 | XLOC_105963 | ENSRNOT00000051525 | 0.950049848 | 2.25E-06 |
| TUCP_002511 | XLOC_105963 | ENSRNOT00000023736 | 0.953312582 | 1.61E-06 |
| TUCP_002511 | XLOC_105963 | ENSRNOT00000007326 | 0.954286315 | 1.46E-06 |
| TUCP_002511 | XLOC_105963 | ENSRNOT00000050227 | 0.976102751 | 5.90E-08 |
| TUCP_002511 | XLOC_105963 | ENSRNOT00000059447 | 0.965971305 | 3.39E-07 |
| TUCP_002511 | XLOC_105963 | ENSRNOT00000057978 | 0.961739069 | 6.06E-07 |
| TUCP_002511 | XLOC_105963 | ENSRNOT00000072733 | 0.966288565 | 3.24E-07 |
| TUCP_002511 | XLOC_105963 | ENSRNOT00000012017 | 0.950767234 | 2.10E-06 |
| TUCP_002511 | XLOC_105963 | ENSRNOT00000017339 | 0.961667525 | 6.11E-07 |
| TUCP_002511 | XLOC_105963 | ENSRNOT00000032173 | 0.959088947 | 8.43E-07 |
| TUCP_002511 | XLOC_105963 | ENSRNOT00000017564 | 0.962723024 | 5.32E-07 |
| TUCP_002511 | XLOC_105963 | ENSRNOT00000084860 | 0.950265294 | 2.20E-06 |



|             |             |                     |              |          |
|-------------|-------------|---------------------|--------------|----------|
| TUCP_002511 | XLOC_105963 | ENSRNOT0000009778   | 0.96135304   | 6.36E-07 |
| TUCP_002511 | XLOC_105963 | ENSRNOT00000030823  | 0.955436289  | 1.28E-06 |
| TUCP_002511 | XLOC_105963 | ENSRNOT00000088856  | 0.965927145  | 3.42E-07 |
| TUCP_002511 | XLOC_105963 | ENSRNOT00000003728  | 0.968292497  | 2.39E-07 |
| TUCP_003510 | XLOC_152431 | ENSRNOT00000077791  | 0.957146328  | 1.06E-06 |
| TUCP_002513 | XLOC_106085 | ENSRNOT00000032588  | -0.958699403 | 8.83E-07 |
| TUCP_002513 | XLOC_106085 | ENSRNOT00000049848  | -0.968928678 | 2.16E-07 |
| TUCP_002513 | XLOC_106085 | ENSRNOT0000009687   | 0.954175411  | 1.47E-06 |
| TUCP_002513 | XLOC_106085 | ENSRNOT0000004742   | 0.956035428  | 1.20E-06 |
| TUCP_002513 | XLOC_106085 | ENSRNOT00000027809  | -0.957861468 | 9.75E-07 |
| TUCP_002513 | XLOC_106085 | ENSRNOT00000085316  | 0.952397441  | 1.78E-06 |
| TUCP_002513 | XLOC_106085 | ENSRNOT00000049357  | -0.978727539 | 3.31E-08 |
| TUCP_002513 | XLOC_106085 | ENSRNOT00000024725  | -0.952354076 | 1.78E-06 |
| TUCP_002513 | XLOC_106085 | ENSRNOT00000018449  | -0.96203912  | 5.82E-07 |
| TUCP_002513 | XLOC_106085 | ENSRNOT00000068037  | -0.954118234 | 1.48E-06 |
| TUCP_002513 | XLOC_106085 | ENSRNOT00000083255  | -0.956539152 | 1.14E-06 |
| TUCP_002513 | XLOC_106085 | ENSRNOT00000088364  | -0.95944133  | 8.07E-07 |
| TUCP_002513 | XLOC_106085 | ENSRNOT00000091065  | -0.950017166 | 2.26E-06 |
| TUCP_002513 | XLOC_106085 | ENSRNOT00000028084  | -0.969328217 | 2.03E-07 |
| TUCP_003229 | XLOC_138410 | ENSRNOT00000050138  | 0.95640691   | 1.15E-06 |
| TUCP_003229 | XLOC_138410 | ENSRNOT00000000743  | 0.951556659  | 1.94E-06 |
| TUCP_003229 | XLOC_138410 | ENSRNOT000000081981 | 0.962464532  | 5.51E-07 |
| TUCP_003229 | XLOC_138410 | ENSRNOT00000057924  | 0.981160862  | 1.81E-08 |
| TUCP_003229 | XLOC_138410 | ENSRNOT00000024402  | 0.954672516  | 1.40E-06 |
| TUCP_003229 | XLOC_138410 | ENSRNOT00000018527  | -0.952691155 | 1.72E-06 |
| TUCP_003229 | XLOC_138410 | ENSRNOT00000041044  | 0.964240949  | 4.34E-07 |
| TUCP_003229 | XLOC_138410 | ENSRNOT00000068353  | 0.967381776  | 2.75E-07 |
| TUCP_003229 | XLOC_138410 | ENSRNOT00000026691  | 0.972254816  | 1.24E-07 |
| TUCP_003229 | XLOC_138410 | ENSRNOT00000011429  | 0.951178879  | 2.01E-06 |
| TUCP_003229 | XLOC_138410 | ENSRNOT00000023638  | 0.95870148   | 8.83E-07 |
| TUCP_003229 | XLOC_138410 | ENSRNOT00000040069  | 0.958124626  | 9.45E-07 |
| TUCP_003229 | XLOC_138410 | ENSRNOT00000032992  | 0.957975594  | 9.62E-07 |
| TUCP_003229 | XLOC_138410 | ENSRNOT00000040169  | 0.950459539  | 2.16E-06 |
| TUCP_003229 | XLOC_138410 | ENSRNOT00000050834  | -0.954374117 | 1.44E-06 |
| TUCP_003229 | XLOC_138410 | ENSRNOT00000029764  | -0.956352411 | 1.16E-06 |
| TUCP_003229 | XLOC_138410 | ENSRNOT00000023144  | 0.951338471  | 1.98E-06 |
| TUCP_003229 | XLOC_138410 | ENSRNOT00000080695  | 0.967330617  | 2.77E-07 |
| TUCP_003229 | XLOC_138410 | ENSRNOT00000035591  | -0.960354064 | 7.22E-07 |
| TUCP_003229 | XLOC_138410 | ENSRNOT00000000302  | 0.961904048  | 5.93E-07 |
| TUCP_003229 | XLOC_138410 | ENSRNOT00000078070  | 0.966156401  | 3.30E-07 |
| TUCP_003229 | XLOC_138410 | ENSRNOT00000091205  | 0.957292637  | 1.04E-06 |
| TUCP_003229 | XLOC_138410 | ENSRNOT00000089293  | 0.952241581  | 1.81E-06 |
| TUCP_003229 | XLOC_138410 | ENSRNOT00000078282  | -0.951568082 | 1.93E-06 |
| TUCP_003229 | XLOC_138410 | ENSRNOT00000029125  | 0.965597646  | 3.58E-07 |
| TUCP_003229 | XLOC_138410 | ENSRNOT00000042125  | 0.95447732   | 1.43E-06 |
| TUCP_003229 | XLOC_138410 | ENSRNOT00000091909  | 0.957027694  | 1.07E-06 |
| TUCP_003229 | XLOC_138410 | ENSRNOT00000020147  | 0.958829305  | 8.69E-07 |
| TUCP_003229 | XLOC_138410 | ENSRNOT00000014814  | 0.951809172  | 1.89E-06 |
| TUCP_003229 | XLOC_138410 | ENSRNOT00000073564  | -0.953148003 | 1.64E-06 |
| TUCP_003229 | XLOC_138410 | ENSRNOT00000065529  | 0.958431039  | 9.12E-07 |
| TUCP_003229 | XLOC_138410 | ENSRNOT00000090376  | 0.951085029  | 2.03E-06 |

|             |             |                     |              |          |
|-------------|-------------|---------------------|--------------|----------|
| TUCP_003229 | XLOC_138410 | ENSRNOT00000008982  | 0.959208443  | 8.31E-07 |
| TUCP_003229 | XLOC_138410 | ENSRNOT000000057160 | 0.963233711  | 4.97E-07 |
| TUCP_003229 | XLOC_138410 | ENSRNOT00000004046  | -0.972403747 | 1.20E-07 |
| TUCP_003229 | XLOC_138410 | ENSRNOT00000016739  | 0.961399329  | 6.33E-07 |
| TUCP_003229 | XLOC_138410 | ENSRNOT00000002837  | -0.956445899 | 1.15E-06 |
| TUCP_003229 | XLOC_138410 | ENSRNOT000000020910 | 0.956301774  | 1.17E-06 |
| TUCP_003229 | XLOC_138410 | ENSRNOT000000089933 | 0.959273475  | 8.24E-07 |
| TUCP_003229 | XLOC_138410 | ENSRNOT000000064643 | 0.956443895  | 1.15E-06 |
| TUCP_003229 | XLOC_138410 | ENSRNOT000000042799 | 0.972745443  | 1.13E-07 |
| TUCP_003229 | XLOC_138410 | ENSRNOT000000027910 | 0.95922866   | 8.28E-07 |
| TUCP_002910 | XLOC_125062 | ENSRNOT00000007314  | 0.959208852  | 8.30E-07 |
| TUCP_002910 | XLOC_125062 | ENSRNOT000000040060 | 0.962273628  | 5.65E-07 |
| TUCP_002910 | XLOC_125062 | ENSRNOT000000027891 | 0.951452908  | 1.96E-06 |
| TUCP_002910 | XLOC_125062 | ENSRNOT000000001196 | 0.955637917  | 1.26E-06 |
| TUCP_002910 | XLOC_125062 | ENSRNOT000000014780 | 0.972311473  | 1.22E-07 |
| TUCP_002910 | XLOC_125062 | ENSRNOT000000027083 | -0.952990099 | 1.67E-06 |
| TUCP_002910 | XLOC_125062 | ENSRNOT000000014373 | 0.968037259  | 2.49E-07 |
| TUCP_002910 | XLOC_125062 | ENSRNOT000000026279 | 0.960512007  | 7.08E-07 |
| TUCP_002910 | XLOC_125062 | ENSRNOT000000015568 | 0.963661892  | 4.69E-07 |
| TUCP_002910 | XLOC_125062 | ENSRNOT000000009883 | 0.966844796  | 2.98E-07 |
| TUCP_002910 | XLOC_125062 | ENSRNOT000000049536 | 0.961186891  | 6.50E-07 |
| TUCP_002910 | XLOC_125062 | ENSRNOT000000003085 | 0.980892335  | 1.94E-08 |
| TUCP_002910 | XLOC_125062 | ENSRNOT000000002037 | 0.974920411  | 7.49E-08 |
| TUCP_002910 | XLOC_125062 | ENSRNOT000000060607 | 0.954901671  | 1.36E-06 |
| TUCP_002910 | XLOC_125062 | ENSRNOT000000083173 | 0.951485533  | 1.95E-06 |
| TUCP_002910 | XLOC_125062 | ENSRNOT000000045443 | 0.962747883  | 5.31E-07 |
| TUCP_002910 | XLOC_125062 | ENSRNOT000000079644 | 0.954077869  | 1.49E-06 |
| TUCP_002910 | XLOC_125062 | ENSRNOT000000059524 | 0.9675726    | 2.67E-07 |
| TUCP_002910 | XLOC_125062 | ENSRNOT000000038178 | 0.954491896  | 1.42E-06 |
| TUCP_002910 | XLOC_125062 | ENSRNOT000000003715 | 0.954234822  | 1.46E-06 |
| TUCP_002910 | XLOC_125062 | ENSRNOT000000050721 | 0.976865725  | 5.02E-08 |
| TUCP_002910 | XLOC_125062 | ENSRNOT000000017361 | -0.956703432 | 1.11E-06 |
| TUCP_002910 | XLOC_125062 | ENSRNOT000000017362 | 0.961510125  | 6.24E-07 |
| TUCP_002910 | XLOC_125062 | ENSRNOT000000064305 | 0.967529473  | 2.69E-07 |
| TUCP_002910 | XLOC_125062 | ENSRNOT000000022117 | 0.961382     | 6.34E-07 |
| TUCP_002910 | XLOC_125062 | ENSRNOT00000002152  | 0.974322268  | 8.42E-08 |
| TUCP_002910 | XLOC_125062 | ENSRNOT000000004941 | 0.952527237  | 1.75E-06 |
| TUCP_002910 | XLOC_125062 | ENSRNOT000000088553 | 0.956008397  | 1.21E-06 |
| TUCP_002910 | XLOC_125062 | ENSRNOT000000045233 | 0.984334205  | 7.24E-09 |
| TUCP_002910 | XLOC_125062 | ENSRNOT000000042633 | 0.969516326  | 1.97E-07 |
| TUCP_002910 | XLOC_125062 | ENSRNOT000000018696 | 0.973802846  | 9.30E-08 |
| TUCP_002910 | XLOC_125062 | ENSRNOT000000009073 | 0.964780005  | 4.02E-07 |
| TUCP_002910 | XLOC_125062 | ENSRNOT000000075656 | 0.965424842  | 3.67E-07 |
| TUCP_002910 | XLOC_125062 | ENSRNOT000000067170 | 0.956306478  | 1.17E-06 |
| TUCP_002910 | XLOC_125062 | ENSRNOT000000066204 | 0.969567644  | 1.95E-07 |
| TUCP_002910 | XLOC_125062 | ENSRNOT000000033015 | 0.979368173  | 2.84E-08 |
| TUCP_002910 | XLOC_125062 | ENSRNOT000000018506 | 0.955537944  | 1.27E-06 |
| TUCP_002910 | XLOC_125062 | ENSRNOT000000001468 | 0.950968214  | 2.06E-06 |
| TUCP_002910 | XLOC_125062 | ENSRNOT000000076105 | 0.985936627  | 4.23E-09 |
| TUCP_002910 | XLOC_125062 | ENSRNOT000000005148 | 0.960339449  | 7.23E-07 |
| TUCP_002910 | XLOC_125062 | ENSRNOT000000032667 | 0.956101414  | 1.19E-06 |

|             |             |                    |              |          |
|-------------|-------------|--------------------|--------------|----------|
| TUCP_002910 | XLOC_125062 | ENSRNOT00000085311 | 0.969217562  | 2.07E-07 |
| TUCP_002910 | XLOC_125062 | ENSRNOT00000014479 | 0.952831038  | 1.70E-06 |
| TUCP_002910 | XLOC_125062 | ENSRNOT00000087146 | -0.956261047 | 1.17E-06 |
| TUCP_002910 | XLOC_125062 | ENSRNOT00000010396 | -0.958020445 | 9.57E-07 |
| TUCP_002910 | XLOC_125062 | ENSRNOT00000003326 | 0.964681965  | 4.08E-07 |
| TUCP_002910 | XLOC_125062 | ENSRNOT00000060300 | 0.956857615  | 1.09E-06 |
| TUCP_002910 | XLOC_125062 | ENSRNOT00000025284 | 0.955092035  | 1.33E-06 |
| TUCP_002910 | XLOC_125062 | ENSRNOT00000073569 | 0.962482382  | 5.50E-07 |
| TUCP_002910 | XLOC_125062 | ENSRNOT00000016541 | 0.98544542   | 5.02E-09 |
| TUCP_002910 | XLOC_125062 | ENSRNOT00000065304 | 0.966385406  | 3.19E-07 |
| TUCP_002910 | XLOC_125062 | ENSRNOT00000027301 | 0.968351148  | 2.37E-07 |
| TUCP_002910 | XLOC_125062 | ENSRNOT00000022620 | -0.95435561  | 1.44E-06 |
| TUCP_002910 | XLOC_125062 | ENSRNOT00000006765 | 0.990359788  | 6.45E-10 |
| TUCP_002910 | XLOC_125062 | ENSRNOT00000023033 | 0.955105342  | 1.33E-06 |
| TUCP_002910 | XLOC_125062 | ENSRNOT00000000334 | 0.950530902  | 2.15E-06 |
| TUCP_002910 | XLOC_125062 | ENSRNOT00000015247 | 0.957063892  | 1.07E-06 |
| TUCP_002910 | XLOC_125062 | ENSRNOT00000057045 | 0.984488658  | 6.89E-09 |
| TUCP_002910 | XLOC_125062 | ENSRNOT00000088615 | 0.960255108  | 7.31E-07 |
| TUCP_002910 | XLOC_125062 | ENSRNOT00000009000 | 0.98120545   | 1.79E-08 |
| TUCP_002910 | XLOC_125062 | ENSRNOT00000009247 | 0.968961961  | 2.15E-07 |
| TUCP_002910 | XLOC_125062 | ENSRNOT00000012114 | 0.952372397  | 1.78E-06 |
| TUCP_002910 | XLOC_125062 | ENSRNOT00000022241 | 0.977859061  | 4.04E-08 |
| TUCP_002910 | XLOC_125062 | ENSRNOT00000038212 | 0.960853341  | 6.78E-07 |
| TUCP_002910 | XLOC_125062 | ENSRNOT00000039377 | 0.968100959  | 2.47E-07 |
| TUCP_002910 | XLOC_125062 | ENSRNOT00000085403 | -0.975020577 | 7.35E-08 |
| TUCP_002910 | XLOC_125062 | ENSRNOT00000019848 | 0.977325874  | 4.54E-08 |
| TUCP_002910 | XLOC_125062 | ENSRNOT00000011731 | 0.98276382   | 1.16E-08 |
| TUCP_002910 | XLOC_125062 | ENSRNOT0000002837  | 0.95297346   | 1.67E-06 |
| TUCP_002910 | XLOC_125062 | ENSRNOT00000057898 | 0.955519438  | 1.27E-06 |
| TUCP_002910 | XLOC_125062 | ENSRNOT00000010753 | 0.971627088  | 1.38E-07 |
| TUCP_002910 | XLOC_125062 | ENSRNOT00000023786 | 0.970921039  | 1.56E-07 |
| TUCP_002910 | XLOC_125062 | ENSRNOT00000079962 | -0.971879569 | 1.32E-07 |
| TUCP_002910 | XLOC_125062 | ENSRNOT00000084674 | 0.966150828  | 3.31E-07 |
| TUCP_002910 | XLOC_125062 | ENSRNOT00000083876 | 0.959786354  | 7.74E-07 |
| TUCP_002910 | XLOC_125062 | ENSRNOT00000090338 | 0.967189868  | 2.83E-07 |
| TUCP_002910 | XLOC_125062 | ENSRNOT00000019192 | 0.959023864  | 8.49E-07 |
| TUCP_002910 | XLOC_125062 | ENSRNOT00000007044 | 0.964758654  | 4.03E-07 |
| TUCP_002910 | XLOC_125062 | ENSRNOT00000065673 | 0.959168519  | 8.35E-07 |
| TUCP_002910 | XLOC_125062 | ENSRNOT0000003412  | 0.988970091  | 1.26E-09 |
| TUCP_002910 | XLOC_125062 | ENSRNOT00000077856 | 0.972928858  | 1.09E-07 |
| TUCP_002910 | XLOC_125062 | ENSRNOT00000012881 | 0.978064797  | 3.85E-08 |
| TUCP_002910 | XLOC_125062 | ENSRNOT00000003794 | 0.970719945  | 1.61E-07 |
| TUCP_002910 | XLOC_125062 | ENSRNOT00000028363 | 0.955798662  | 1.23E-06 |
| TUCP_002910 | XLOC_125062 | ENSRNOT00000071239 | 0.950429668  | 2.17E-06 |
| TUCP_002910 | XLOC_125062 | ENSRNOT00000007771 | 0.977867609  | 4.03E-08 |
| TUCP_002910 | XLOC_125062 | ENSRNOT00000018488 | 0.951526806  | 1.94E-06 |
| TUCP_002910 | XLOC_125062 | ENSRNOT00000029635 | 0.960516528  | 7.07E-07 |
| TUCP_002910 | XLOC_125062 | ENSRNOT00000020702 | 0.960103692  | 7.44E-07 |
| TUCP_002910 | XLOC_125062 | ENSRNOT00000040629 | -0.96591475  | 3.42E-07 |
| TUCP_002910 | XLOC_125062 | ENSRNOT00000019121 | 0.951507707  | 1.95E-06 |
| TUCP_002910 | XLOC_125062 | ENSRNOT00000010381 | -0.959436162 | 8.08E-07 |

|             |             |                    |              |          |
|-------------|-------------|--------------------|--------------|----------|
| TUCP_002910 | XLOC_125062 | ENSRNOT00000041456 | 0.974246032  | 8.55E-08 |
| TUCP_002910 | XLOC_125062 | ENSRNOT00000088133 | 0.976284385  | 5.68E-08 |
| TUCP_002910 | XLOC_125062 | ENSRNOT00000000039 | 0.960523892  | 7.07E-07 |
| TUCP_002910 | XLOC_125062 | ENSRNOT00000083351 | 0.979505612  | 2.75E-08 |
| TUCP_002910 | XLOC_125062 | ENSRNOT00000024568 | 0.956778391  | 1.10E-06 |
| TUCP_002910 | XLOC_125062 | ENSRNOT00000036338 | 0.984823555  | 6.18E-09 |
| TUCP_002910 | XLOC_125062 | ENSRNOT00000082686 | 0.960912566  | 6.73E-07 |
| TUCP_002910 | XLOC_125062 | ENSRNOT00000076181 | 0.971494075  | 1.41E-07 |
| TUCP_002910 | XLOC_125062 | ENSRNOT00000073486 | 0.954555295  | 1.41E-06 |
| TUCP_002910 | XLOC_125062 | ENSRNOT00000080410 | 0.958731289  | 8.80E-07 |
| TUCP_002910 | XLOC_125062 | ENSRNOT00000037039 | 0.95958337   | 7.94E-07 |
| TUCP_002910 | XLOC_125062 | ENSRNOT0000003940  | 0.964855532  | 3.98E-07 |
| TUCP_002910 | XLOC_125062 | ENSRNOT00000015579 | 0.990338523  | 6.52E-10 |
| TUCP_002910 | XLOC_125062 | ENSRNOT00000070794 | 0.955956203  | 1.21E-06 |
| TUCP_002910 | XLOC_125062 | ENSRNOT00000045532 | 0.972875282  | 1.10E-07 |
| TUCP_002910 | XLOC_125062 | ENSRNOT00000020932 | 0.977635809  | 4.24E-08 |
| TUCP_002910 | XLOC_125062 | ENSRNOT00000026928 | 0.951992245  | 1.85E-06 |
| TUCP_002910 | XLOC_125062 | ENSRNOT00000019473 | 0.963388978  | 4.87E-07 |
| TUCP_002910 | XLOC_125062 | ENSRNOT00000073492 | 0.952729676  | 1.72E-06 |
| TUCP_002910 | XLOC_125062 | ENSRNOT00000047634 | 0.959540899  | 7.98E-07 |
| TUCP_002910 | XLOC_125062 | ENSRNOT00000022341 | 0.965278909  | 3.75E-07 |
| TUCP_002910 | XLOC_125062 | ENSRNOT00000083964 | 0.96323757   | 4.97E-07 |
| TUCP_002910 | XLOC_125062 | ENSRNOT00000066520 | -0.957984008 | 9.61E-07 |
| TUCP_002910 | XLOC_125062 | ENSRNOT0000009900  | 0.958055566  | 9.53E-07 |
| TUCP_002910 | XLOC_125062 | ENSRNOT00000013864 | 0.957159141  | 1.06E-06 |
| TUCP_002910 | XLOC_125062 | ENSRNOT00000022714 | -0.976093136 | 5.91E-08 |
| TUCP_002910 | XLOC_125062 | ENSRNOT00000026525 | 0.95813185   | 9.44E-07 |
| TUCP_002910 | XLOC_125062 | ENSRNOT00000081327 | 0.970692416  | 1.62E-07 |
| TUCP_002910 | XLOC_125062 | ENSRNOT00000025856 | 0.966325666  | 3.22E-07 |
| TUCP_002910 | XLOC_125062 | ENSRNOT00000061304 | 0.970559393  | 1.66E-07 |
| TUCP_002910 | XLOC_125062 | ENSRNOT00000036838 | 0.976924355  | 4.96E-08 |
| TUCP_002910 | XLOC_125062 | ENSRNOT00000083995 | 0.963602478  | 4.73E-07 |
| TUCP_002910 | XLOC_125062 | ENSRNOT00000064450 | 0.9567074    | 1.11E-06 |
| TUCP_002910 | XLOC_125062 | ENSRNOT00000075992 | 0.953073396  | 1.66E-06 |
| TUCP_002910 | XLOC_125062 | ENSRNOT00000064452 | 0.972060335  | 1.28E-07 |
| TUCP_002910 | XLOC_125062 | ENSRNOT00000017688 | 0.978141326  | 3.79E-08 |
| TUCP_002910 | XLOC_125062 | ENSRNOT00000001366 | 0.957289384  | 1.04E-06 |
| TUCP_002910 | XLOC_125062 | ENSRNOT00000058495 | 0.955466696  | 1.28E-06 |
| TUCP_002910 | XLOC_125062 | ENSRNOT00000016520 | -0.95396033  | 1.51E-06 |
| TUCP_002910 | XLOC_125062 | ENSRNOT00000019130 | 0.977175205  | 4.70E-08 |
| TUCP_002910 | XLOC_125062 | ENSRNOT00000015757 | 0.962221874  | 5.69E-07 |
| TUCP_002910 | XLOC_125062 | ENSRNOT00000023506 | 0.979769287  | 2.58E-08 |
| TUCP_002910 | XLOC_125062 | ENSRNOT00000040348 | 0.961116519  | 6.56E-07 |
| TUCP_002910 | XLOC_125062 | ENSRNOT00000002151 | 0.973929098  | 9.08E-08 |
| TUCP_002910 | XLOC_125062 | ENSRNOT00000021636 | 0.977706479  | 4.18E-08 |
| TUCP_002910 | XLOC_125062 | ENSRNOT00000009333 | 0.950346027  | 2.19E-06 |
| TUCP_002910 | XLOC_125062 | ENSRNOT0000007889  | 0.961959521  | 5.88E-07 |
| TUCP_002910 | XLOC_125062 | ENSRNOT00000087190 | 0.953818972  | 1.53E-06 |
| TUCP_002910 | XLOC_125062 | ENSRNOT00000017254 | 0.966234407  | 3.27E-07 |
| TUCP_002910 | XLOC_125062 | ENSRNOT00000007738 | 0.971495864  | 1.41E-07 |
| TUCP_002910 | XLOC_125062 | ENSRNOT00000010674 | 0.965915497  | 3.42E-07 |

|             |             |                    |              |          |
|-------------|-------------|--------------------|--------------|----------|
| TUCP_002910 | XLOC_125062 | ENSRNOT00000020267 | -0.969936849 | 1.84E-07 |
| TUCP_002910 | XLOC_125062 | ENSRNOT00000023664 | 0.972293722  | 1.23E-07 |
| TUCP_002910 | XLOC_125062 | ENSRNOT00000078746 | 0.97327804   | 1.03E-07 |
| TUCP_002910 | XLOC_125062 | ENSRNOT00000091272 | 0.952674243  | 1.73E-06 |
| TUCP_002910 | XLOC_125062 | ENSRNOT00000056199 | 0.950631404  | 2.13E-06 |
| TUCP_002910 | XLOC_125062 | ENSRNOT00000016730 | 0.969090791  | 2.11E-07 |
| TUCP_002910 | XLOC_125062 | ENSRNOT00000084552 | 0.968982906  | 2.15E-07 |
| TUCP_002910 | XLOC_125062 | ENSRNOT0000004319  | 0.950591268  | 2.13E-06 |
| TUCP_002910 | XLOC_125062 | ENSRNOT00000066247 | 0.95099129   | 2.05E-06 |
| TUCP_002910 | XLOC_125062 | ENSRNOT00000016447 | 0.964417459  | 4.23E-07 |
| TUCP_002910 | XLOC_125062 | ENSRNOT0000001099  | 0.958057893  | 9.53E-07 |
| TUCP_002910 | XLOC_125062 | ENSRNOT0000009666  | 0.96729621   | 2.79E-07 |
| TUCP_002910 | XLOC_125062 | ENSRNOT00000014821 | 0.950143928  | 2.23E-06 |
| TUCP_002910 | XLOC_125062 | ENSRNOT00000013043 | 0.969449069  | 1.99E-07 |
| TUCP_002910 | XLOC_125062 | ENSRNOT00000045765 | 0.967451685  | 2.72E-07 |
| TUCP_002910 | XLOC_125062 | ENSRNOT00000018549 | 0.955122149  | 1.33E-06 |
| TUCP_002910 | XLOC_125062 | ENSRNOT00000032236 | 0.965841345  | 3.46E-07 |
| TUCP_002910 | XLOC_125062 | ENSRNOT00000024992 | 0.95283263   | 1.70E-06 |
| TUCP_002910 | XLOC_125062 | ENSRNOT00000013745 | 0.96794147   | 2.53E-07 |
| TUCP_002910 | XLOC_125062 | ENSRNOT0000000707  | 0.968922579  | 2.17E-07 |
| TUCP_002910 | XLOC_125062 | ENSRNOT00000001607 | -0.95010231  | 2.24E-06 |
| TUCP_002910 | XLOC_125062 | ENSRNOT00000001935 | 0.951422664  | 1.96E-06 |
| TUCP_002910 | XLOC_125062 | ENSRNOT00000023567 | 0.96687657   | 2.97E-07 |
| TUCP_002910 | XLOC_125062 | ENSRNOT00000089265 | 0.950373923  | 2.18E-06 |
| TUCP_002910 | XLOC_125062 | ENSRNOT00000017692 | 0.974487924  | 8.15E-08 |
| TUCP_002910 | XLOC_125062 | ENSRNOT00000068269 | 0.974549582  | 8.06E-08 |
| TUCP_002910 | XLOC_125062 | ENSRNOT00000018864 | 0.957273295  | 1.04E-06 |
| TUCP_002910 | XLOC_125062 | ENSRNOT00000016351 | 0.96113217   | 6.54E-07 |
| TUCP_002910 | XLOC_125062 | ENSRNOT00000010079 | 0.975773738  | 6.31E-08 |
| TUCP_002910 | XLOC_125062 | ENSRNOT00000050609 | 0.97122014   | 1.48E-07 |
| TUCP_002910 | XLOC_125062 | ENSRNOT0000007949  | 0.977443533  | 4.43E-08 |
| TUCP_002910 | XLOC_125062 | ENSRNOT00000091139 | 0.960562538  | 7.03E-07 |
| TUCP_002910 | XLOC_125062 | ENSRNOT00000021400 | 0.952527068  | 1.75E-06 |
| TUCP_002910 | XLOC_125062 | ENSRNOT00000024286 | 0.954608821  | 1.41E-06 |
| TUCP_002910 | XLOC_125062 | ENSRNOT00000014585 | 0.952005871  | 1.85E-06 |
| TUCP_002910 | XLOC_125062 | ENSRNOT00000064068 | 0.951866989  | 1.88E-06 |
| TUCP_002910 | XLOC_125062 | ENSRNOT00000007079 | 0.95453072   | 1.42E-06 |
| TUCP_002910 | XLOC_125062 | ENSRNOT00000011401 | 0.959369347  | 8.14E-07 |
| TUCP_002910 | XLOC_125062 | ENSRNOT00000044073 | 0.956815     | 1.10E-06 |
| TUCP_002910 | XLOC_125062 | ENSRNOT00000079130 | -0.964978042 | 3.91E-07 |
| TUCP_002910 | XLOC_125062 | ENSRNOT00000035628 | 0.960241342  | 7.32E-07 |
| TUCP_002910 | XLOC_125062 | ENSRNOT00000082146 | 0.971767068  | 1.35E-07 |
| TUCP_002910 | XLOC_125062 | ENSRNOT00000019680 | 0.968759692  | 2.22E-07 |
| TUCP_002910 | XLOC_125062 | ENSRNOT00000051522 | -0.962957857 | 5.16E-07 |
| TUCP_002910 | XLOC_125062 | ENSRNOT00000011563 | 0.954546752  | 1.42E-06 |
| TUCP_002910 | XLOC_125062 | ENSRNOT00000054976 | 0.955438627  | 1.28E-06 |
| TUCP_002910 | XLOC_125062 | ENSRNOT00000086350 | 0.992436181  | 1.93E-10 |
| TUCP_002910 | XLOC_125062 | ENSRNOT00000010516 | 0.984958616  | 5.91E-09 |
| TUCP_002910 | XLOC_125062 | ENSRNOT00000004842 | 0.953186944  | 1.64E-06 |
| TUCP_002910 | XLOC_125062 | ENSRNOT00000019713 | 0.965791679  | 3.48E-07 |
| TUCP_002910 | XLOC_125062 | ENSRNOT00000037363 | 0.968064547  | 2.48E-07 |

|             |             |                    |              |          |
|-------------|-------------|--------------------|--------------|----------|
| TUCP_002910 | XL0C_125062 | ENSRNOT00000071482 | 0.955161294  | 1.32E-06 |
| TUCP_002910 | XL0C_125062 | ENSRNOT00000066888 | 0.951099244  | 2.03E-06 |
| TUCP_002910 | XL0C_125062 | ENSRNOT00000025794 | 0.957866731  | 9.74E-07 |
| TUCP_002910 | XL0C_125062 | ENSRNOT00000015131 | 0.958642701  | 8.89E-07 |
| TUCP_002910 | XL0C_125062 | ENSRNOT00000000529 | 0.962567277  | 5.44E-07 |
| TUCP_002910 | XL0C_125062 | ENSRNOT00000072031 | 0.978397362  | 3.57E-08 |
| TUCP_002910 | XL0C_125062 | ENSRNOT00000009840 | 0.964562367  | 4.15E-07 |
| TUCP_002910 | XL0C_125062 | ENSRNOT00000085214 | 0.977564223  | 4.31E-08 |
| TUCP_002910 | XL0C_125062 | ENSRNOT00000017181 | 0.955867855  | 1.22E-06 |
| TUCP_002910 | XL0C_125062 | ENSRNOT00000030329 | 0.975487811  | 6.69E-08 |
| TUCP_002910 | XL0C_125062 | ENSRNOT00000017469 | 0.965445165  | 3.66E-07 |
| TUCP_002910 | XL0C_125062 | ENSRNOT00000087748 | 0.968669786  | 2.26E-07 |
| TUCP_002910 | XL0C_125062 | ENSRNOT00000006246 | 0.959429313  | 8.09E-07 |
| TUCP_002910 | XL0C_125062 | ENSRNOT00000088202 | 0.958468664  | 9.07E-07 |
| TUCP_002910 | XL0C_125062 | ENSRNOT00000088201 | 0.960674642  | 6.93E-07 |
| TUCP_002910 | XL0C_125062 | ENSRNOT00000033450 | 0.978057219  | 3.86E-08 |
| TUCP_002910 | XL0C_125062 | ENSRNOT00000049725 | 0.958962736  | 8.55E-07 |
| TUCP_002910 | XL0C_125062 | ENSRNOT00000033196 | 0.987373195  | 2.47E-09 |
| TUCP_002910 | XL0C_125062 | ENSRNOT00000027125 | 0.968688049  | 2.25E-07 |
| TUCP_002910 | XL0C_125062 | ENSRNOT00000065288 | 0.95479162   | 1.38E-06 |
| TUCP_002910 | XL0C_125062 | ENSRNOT00000026235 | 0.955288869  | 1.31E-06 |
| TUCP_002910 | XL0C_125062 | ENSRNOT00000022478 | 0.968611738  | 2.28E-07 |
| TUCP_002910 | XL0C_125062 | ENSRNOT00000023078 | -0.96707844  | 2.88E-07 |
| TUCP_002910 | XL0C_125062 | ENSRNOT00000082151 | 0.955484295  | 1.28E-06 |
| TUCP_002910 | XL0C_125062 | ENSRNOT00000026398 | 0.966286842  | 3.24E-07 |
| TUCP_002910 | XL0C_125062 | ENSRNOT00000013463 | -0.956385124 | 1.16E-06 |
| TUCP_002910 | XL0C_125062 | ENSRNOT00000089624 | 0.956245074  | 1.17E-06 |
| TUCP_002910 | XL0C_125062 | ENSRNOT00000089673 | 0.964763495  | 4.03E-07 |
| TUCP_002910 | XL0C_125062 | ENSRNOT00000005644 | 0.982794146  | 1.15E-08 |
| TUCP_002910 | XL0C_125062 | ENSRNOT00000038448 | 0.974899267  | 7.52E-08 |
| TUCP_002910 | XL0C_125062 | ENSRNOT00000050223 | 0.969908844  | 1.85E-07 |
| TUCP_002910 | XL0C_125062 | ENSRNOT00000000263 | -0.964728209 | 4.05E-07 |
| TUCP_002910 | XL0C_125062 | ENSRNOT00000089185 | 0.95406495   | 1.49E-06 |
| TUCP_002910 | XL0C_125062 | ENSRNOT00000023977 | 0.960491151  | 7.09E-07 |
| TUCP_002910 | XL0C_125062 | ENSRNOT00000032289 | 0.96248238   | 5.50E-07 |
| TUCP_002910 | XL0C_125062 | ENSRNOT00000014134 | 0.979898884  | 2.50E-08 |
| TUCP_002910 | XL0C_125062 | ENSRNOT00000008865 | 0.983965104  | 8.13E-09 |
| TUCP_002910 | XL0C_125062 | ENSRNOT00000017420 | 0.976051331  | 5.96E-08 |
| TUCP_002910 | XL0C_125062 | ENSRNOT00000067741 | 0.95035006   | 2.19E-06 |
| TUCP_002910 | XL0C_125062 | ENSRNOT00000092021 | 0.961891169  | 5.94E-07 |
| TUCP_002910 | XL0C_125062 | ENSRNOT00000061191 | 0.964600428  | 4.13E-07 |
| TUCP_002910 | XL0C_125062 | ENSRNOT00000017907 | 0.975743572  | 6.35E-08 |
| TUCP_002910 | XL0C_125062 | ENSRNOT0000007077  | 0.977165836  | 4.71E-08 |
| TUCP_002910 | XL0C_125062 | ENSRNOT00000001586 | 0.968634567  | 2.27E-07 |
| TUCP_002910 | XL0C_125062 | ENSRNOT00000003691 | 0.962874515  | 5.22E-07 |
| TUCP_002910 | XL0C_125062 | ENSRNOT00000007954 | -0.951170565 | 2.01E-06 |
| TUCP_002910 | XL0C_125062 | ENSRNOT00000028434 | 0.962599247  | 5.41E-07 |
| TUCP_002910 | XL0C_125062 | ENSRNOT00000014559 | 0.95713511   | 1.06E-06 |
| TUCP_002910 | XL0C_125062 | ENSRNOT00000000532 | 0.953341946  | 1.61E-06 |
| TUCP_002910 | XL0C_125062 | ENSRNOT00000014809 | 0.97324564   | 1.03E-07 |
| TUCP_002910 | XL0C_125062 | ENSRNOT00000064849 | 0.960593615  | 7.00E-07 |

|             |             |                    |              |          |
|-------------|-------------|--------------------|--------------|----------|
| TUCP_002910 | XL0C_125062 | ENSRNOT00000019644 | 0.961457725  | 6.28E-07 |
| TUCP_002910 | XL0C_125062 | ENSRNOT00000046126 | 0.953559847  | 1.57E-06 |
| TUCP_002910 | XL0C_125062 | ENSRNOT00000055957 | 0.960027912  | 7.51E-07 |
| TUCP_002910 | XL0C_125062 | ENSRNOT00000030692 | 0.951272971  | 1.99E-06 |
| TUCP_002910 | XL0C_125062 | ENSRNOT00000021471 | 0.960498705  | 7.09E-07 |
| TUCP_002910 | XL0C_125062 | ENSRNOT00000014885 | 0.974499151  | 8.14E-08 |
| TUCP_002910 | XL0C_125062 | ENSRNOT00000067566 | 0.971378728  | 1.44E-07 |
| TUCP_002910 | XL0C_125062 | ENSRNOT00000006376 | 0.95054575   | 2.14E-06 |
| TUCP_002910 | XL0C_125062 | ENSRNOT00000041091 | 0.975182466  | 7.11E-08 |
| TUCP_002910 | XL0C_125062 | ENSRNOT00000002114 | 0.953357502  | 1.61E-06 |
| TUCP_002910 | XL0C_125062 | ENSRNOT00000023017 | 0.975800622  | 6.28E-08 |
| TUCP_002910 | XL0C_125062 | ENSRNOT00000033048 | 0.983133539  | 1.05E-08 |
| TUCP_002910 | XL0C_125062 | ENSRNOT00000077479 | 0.95964517   | 7.88E-07 |
| TUCP_002910 | XL0C_125062 | ENSRNOT00000074261 | 0.95711119   | 1.06E-06 |
| TUCP_002910 | XL0C_125062 | ENSRNOT00000022194 | 0.972310485  | 1.22E-07 |
| TUCP_002910 | XL0C_125062 | ENSRNOT00000050834 | 0.957832931  | 9.78E-07 |
| TUCP_002910 | XL0C_125062 | ENSRNOT00000040548 | 0.957467605  | 1.02E-06 |
| TUCP_002910 | XL0C_125062 | ENSRNOT00000008222 | 0.969295832  | 2.04E-07 |
| TUCP_002910 | XL0C_125062 | ENSRNOT00000010962 | 0.964357195  | 4.27E-07 |
| TUCP_002910 | XL0C_125062 | ENSRNOT00000081835 | 0.954766977  | 1.38E-06 |
| TUCP_002910 | XL0C_125062 | ENSRNOT00000046215 | 0.962760395  | 5.30E-07 |
| TUCP_002910 | XL0C_125062 | ENSRNOT00000010620 | 0.965789551  | 3.48E-07 |
| TUCP_002910 | XL0C_125062 | ENSRNOT00000000083 | 0.973857375  | 9.20E-08 |
| TUCP_002910 | XL0C_125062 | ENSRNOT00000061973 | 0.955136738  | 1.33E-06 |
| TUCP_002910 | XL0C_125062 | ENSRNOT00000002445 | 0.965594857  | 3.58E-07 |
| TUCP_002910 | XL0C_125062 | ENSRNOT00000001135 | 0.961540923  | 6.21E-07 |
| TUCP_002910 | XL0C_125062 | ENSRNOT00000001234 | 0.953845398  | 1.53E-06 |
| TUCP_002910 | XL0C_125062 | ENSRNOT00000068078 | 0.964620499  | 4.11E-07 |
| TUCP_002910 | XL0C_125062 | ENSRNOT00000009993 | 0.968485591  | 2.32E-07 |
| TUCP_002910 | XL0C_125062 | ENSRNOT00000056877 | 0.958307228  | 9.25E-07 |
| TUCP_002910 | XL0C_125062 | ENSRNOT00000001036 | 0.951342147  | 1.98E-06 |
| TUCP_002910 | XL0C_125062 | ENSRNOT00000058763 | 0.96387998   | 4.56E-07 |
| TUCP_002910 | XL0C_125062 | ENSRNOT00000021152 | -0.95723218  | 1.05E-06 |
| TUCP_002910 | XL0C_125062 | ENSRNOT00000092037 | 0.969422172  | 2.00E-07 |
| TUCP_002910 | XL0C_125062 | ENSRNOT00000012583 | 0.961854838  | 5.97E-07 |
| TUCP_002910 | XL0C_125062 | ENSRNOT00000081621 | -0.963309781 | 4.92E-07 |
| TUCP_002910 | XL0C_125062 | ENSRNOT00000012625 | 0.962853491  | 5.23E-07 |
| TUCP_002910 | XL0C_125062 | ENSRNOT00000080677 | 0.961175464  | 6.51E-07 |
| TUCP_002910 | XL0C_125062 | ENSRNOT00000028545 | 0.958556216  | 8.98E-07 |
| TUCP_002910 | XL0C_125062 | ENSRNOT00000007367 | 0.953605192  | 1.57E-06 |
| TUCP_002910 | XL0C_125062 | ENSRNOT00000001759 | 0.978869667  | 3.20E-08 |
| TUCP_002910 | XL0C_125062 | ENSRNOT00000080797 | 0.950842258  | 2.08E-06 |
| TUCP_002910 | XL0C_125062 | ENSRNOT00000039191 | 0.953522757  | 1.58E-06 |
| TUCP_002910 | XL0C_125062 | ENSRNOT00000078532 | 0.967292863  | 2.79E-07 |
| TUCP_002910 | XL0C_125062 | ENSRNOT00000022000 | 0.970487741  | 1.68E-07 |
| TUCP_002910 | XL0C_125062 | ENSRNOT00000028130 | 0.972267113  | 1.23E-07 |
| TUCP_002910 | XL0C_125062 | ENSRNOT00000068267 | 0.971314294  | 1.46E-07 |
| TUCP_002910 | XL0C_125062 | ENSRNOT00000020994 | 0.966671146  | 3.06E-07 |
| TUCP_002910 | XL0C_125062 | ENSRNOT00000018328 | 0.950341866  | 2.19E-06 |
| TUCP_002910 | XL0C_125062 | ENSRNOT00000063821 | 0.966369176  | 3.20E-07 |
| TUCP_002910 | XL0C_125062 | ENSRNOT00000070912 | 0.985949041  | 4.21E-09 |

|             |             |                     |              |          |
|-------------|-------------|---------------------|--------------|----------|
| TUCP_002910 | XL0C_125062 | ENSRNOT00000019916  | 0.971918018  | 1.31E-07 |
| TUCP_002910 | XL0C_125062 | ENSRNOT00000019911  | 0.955346428  | 1.30E-06 |
| TUCP_002910 | XL0C_125062 | ENSRNOT00000015763  | 0.955674669  | 1.25E-06 |
| TUCP_002910 | XL0C_125062 | ENSRNOT00000025819  | 0.95053205   | 2.15E-06 |
| TUCP_002910 | XL0C_125062 | ENSRNOT00000028703  | 0.969335969  | 2.03E-07 |
| TUCP_002910 | XL0C_125062 | ENSRNOT00000011907  | 0.967095146  | 2.87E-07 |
| TUCP_002910 | XL0C_125062 | ENSRNOT00000049193  | 0.977580285  | 4.30E-08 |
| TUCP_002910 | XL0C_125062 | ENSRNOT00000077401  | 0.973721394  | 9.44E-08 |
| TUCP_002910 | XL0C_125062 | ENSRNOT00000002355  | 0.986856259  | 3.02E-09 |
| TUCP_002910 | XL0C_125062 | ENSRNOT00000011326  | 0.968109566  | 2.46E-07 |
| TUCP_002910 | XL0C_125062 | ENSRNOT00000020272  | 0.981514331  | 1.65E-08 |
| TUCP_002910 | XL0C_125062 | ENSRNOT00000007169  | 0.964449479  | 4.21E-07 |
| TUCP_002910 | XL0C_125062 | ENSRNOT00000064700  | -0.950524437 | 2.15E-06 |
| TUCP_002910 | XL0C_125062 | ENSRNOT00000088677  | 0.950025019  | 2.26E-06 |
| TUCP_002910 | XL0C_125062 | ENSRNOT00000008987  | 0.956636299  | 1.12E-06 |
| TUCP_002910 | XL0C_125062 | ENSRNOT00000022377  | 0.956759422  | 1.11E-06 |
| TUCP_002910 | XL0C_125062 | ENSRNOT00000090355  | 0.961808139  | 6.00E-07 |
| TUCP_002910 | XL0C_125062 | ENSRNOT00000012361  | 0.974168223  | 8.67E-08 |
| TUCP_002910 | XL0C_125062 | ENSRNOT00000016740  | -0.952656324 | 1.73E-06 |
| TUCP_002910 | XL0C_125062 | ENSRNOT00000019386  | 0.965392022  | 3.69E-07 |
| TUCP_002910 | XL0C_125062 | ENSRNOT00000074494  | 0.979958771  | 2.46E-08 |
| TUCP_002910 | XL0C_125062 | ENSRNOT00000039296  | -0.969404977 | 2.01E-07 |
| TUCP_002910 | XL0C_125062 | ENSRNOT00000005885  | 0.967117017  | 2.87E-07 |
| TUCP_002910 | XL0C_125062 | ENSRNOT00000059599  | 0.980534568  | 2.13E-08 |
| TUCP_002910 | XL0C_125062 | ENSRNOT00000010316  | 0.965726398  | 3.52E-07 |
| TUCP_002910 | XL0C_125062 | ENSRNOT00000036194  | 0.9504134    | 2.17E-06 |
| TUCP_002910 | XL0C_125062 | ENSRNOT00000026057  | 0.978528786  | 3.47E-08 |
| TUCP_002908 | XL0C_125033 | ENSRNOT00000089934  | 0.95465014   | 1.40E-06 |
| TUCP_003409 | XL0C_147609 | ENSRNOT00000008655  | 0.951494152  | 1.95E-06 |
| TUCP_003409 | XL0C_147609 | ENSRNOT00000026915  | 0.959713413  | 7.81E-07 |
| TUCP_003409 | XL0C_147609 | ENSRNOT00000015116  | 0.959336993  | 8.18E-07 |
| TUCP_003409 | XL0C_147609 | ENSRNOT00000027454  | 0.958122358  | 9.45E-07 |
| TUCP_003409 | XL0C_147609 | ENSRNOT00000028117  | -0.967695084 | 2.62E-07 |
| TUCP_003409 | XL0C_147609 | ENSRNOT00000000337  | 0.957551483  | 1.01E-06 |
| TUCP_002904 | XL0C_124874 | ENSRNOT00000009825  | 0.954081216  | 1.49E-06 |
| TUCP_002904 | XL0C_124874 | ENSRNOT00000022559  | 0.956881587  | 1.09E-06 |
| TUCP_002902 | XL0C_124838 | ENSRNOT000000081850 | 0.969028272  | 2.13E-07 |
| TUCP_002902 | XL0C_124838 | ENSRNOT000000032157 | 0.963257144  | 4.96E-07 |
| TUCP_002902 | XL0C_124838 | ENSRNOT00000037134  | 0.960957561  | 6.69E-07 |
| TUCP_002902 | XL0C_124838 | ENSRNOT00000002257  | 0.961742805  | 6.05E-07 |
| TUCP_002902 | XL0C_124838 | ENSRNOT00000001825  | 0.970672024  | 1.63E-07 |
| TUCP_002902 | XL0C_124838 | ENSRNOT00000082585  | 0.952203513  | 1.81E-06 |
| TUCP_002902 | XL0C_124838 | ENSRNOT00000026854  | 0.955501643  | 1.27E-06 |
| TUCP_002901 | XL0C_124732 | ENSRNOT00000086502  | 0.952935763  | 1.68E-06 |
| TUCP_002901 | XL0C_124732 | ENSRNOT00000042165  | 0.988661808  | 1.45E-09 |
| TUCP_002901 | XL0C_124732 | ENSRNOT00000008278  | 0.994530265  | 3.82E-11 |
| TUCP_002901 | XL0C_124732 | ENSRNOT00000072599  | 0.964135413  | 4.40E-07 |
| TUCP_002860 | XL0C_121757 | ENSRNOT00000066419  | 0.960730561  | 6.88E-07 |
| TUCP_002860 | XL0C_121757 | ENSRNOT00000016088  | 0.95558519   | 1.26E-06 |
| TUCP_002860 | XL0C_121757 | ENSRNOT00000009975  | 0.953945957  | 1.51E-06 |
| TUCP_002860 | XL0C_121757 | ENSRNOT00000083623  | 0.962288779  | 5.64E-07 |



|             |             |                    |              |          |
|-------------|-------------|--------------------|--------------|----------|
| TUCP_002860 | XLOC_121757 | ENSRNOT00000081226 | 0.957267313  | 1.04E-06 |
| TUCP_002860 | XLOC_121757 | ENSRNOT00000001642 | 0.951172717  | 2.01E-06 |
| TUCP_002860 | XLOC_121757 | ENSRNOT00000027544 | 0.952339628  | 1.79E-06 |
| TUCP_002860 | XLOC_121757 | ENSRNOT00000065897 | 0.962928596  | 5.18E-07 |
| TUCP_002860 | XLOC_121757 | ENSRNOT00000083594 | 0.958689994  | 8.84E-07 |
| TUCP_002860 | XLOC_121757 | ENSRNOT00000073493 | 0.954513336  | 1.42E-06 |
| TUCP_002860 | XLOC_121757 | ENSRNOT00000056050 | 0.9543206    | 1.45E-06 |
| TUCP_002860 | XLOC_121757 | ENSRNOT00000016485 | 0.970123424  | 1.78E-07 |
| TUCP_002860 | XLOC_121757 | ENSRNOT00000078752 | -0.952206026 | 1.81E-06 |
| TUCP_002860 | XLOC_121757 | ENSRNOT00000002188 | 0.951206685  | 2.01E-06 |
| TUCP_002860 | XLOC_121757 | ENSRNOT00000005770 | 0.968501325  | 2.32E-07 |
| TUCP_002860 | XLOC_121757 | ENSRNOT00000028687 | -0.963047897 | 5.10E-07 |
| TUCP_002860 | XLOC_121757 | ENSRNOT00000035808 | 0.950225632  | 2.21E-06 |
| TUCP_002860 | XLOC_121757 | ENSRNOT00000085334 | 0.961053859  | 6.61E-07 |
| TUCP_002860 | XLOC_121757 | ENSRNOT00000057953 | 0.950319295  | 2.19E-06 |
| TUCP_002860 | XLOC_121757 | ENSRNOT00000008764 | 0.955506462  | 1.27E-06 |
| TUCP_002860 | XLOC_121757 | ENSRNOT00000012757 | 0.964480231  | 4.19E-07 |
| TUCP_002860 | XLOC_121757 | ENSRNOT00000037902 | 0.951360132  | 1.98E-06 |
| TUCP_002860 | XLOC_121757 | ENSRNOT00000012247 | 0.961116566  | 6.56E-07 |
| TUCP_002860 | XLOC_121757 | ENSRNOT00000038449 | 0.953451503  | 1.59E-06 |
| TUCP_002864 | XLOC_122356 | ENSRNOT00000024878 | 0.958024215  | 9.56E-07 |
| TUCP_002864 | XLOC_122356 | ENSRNOT00000034741 | 0.953111679  | 1.65E-06 |
| TUCP_002866 | XLOC_122447 | ENSRNOT00000093261 | 0.961109498  | 6.56E-07 |
| TUCP_002866 | XLOC_122447 | ENSRNOT00000014155 | 0.959683886  | 7.84E-07 |
| TUCP_002866 | XLOC_122447 | ENSRNOT00000026809 | 0.964947731  | 3.93E-07 |
| TUCP_002866 | XLOC_122447 | ENSRNOT00000059167 | 0.955194393  | 1.32E-06 |
| TUCP_002868 | XLOC_122520 | ENSRNOT00000026706 | -0.960839526 | 6.79E-07 |
| TUCP_000170 | XLOC_005377 | ENSRNOT00000021408 | 0.958464945  | 9.08E-07 |
| TUCP_000170 | XLOC_005377 | ENSRNOT00000026457 | 0.957580847  | 1.01E-06 |
| TUCP_000170 | XLOC_005377 | ENSRNOT00000004524 | 0.97553444   | 6.63E-08 |
| TUCP_000170 | XLOC_005377 | ENSRNOT00000032780 | 0.950464782  | 2.16E-06 |
| TUCP_000170 | XLOC_005377 | ENSRNOT00000064840 | 0.955202067  | 1.32E-06 |
| TUCP_000170 | XLOC_005377 | ENSRNOT00000087592 | 0.976645562  | 5.26E-08 |
| TUCP_000170 | XLOC_005377 | ENSRNOT00000026186 | 0.954882948  | 1.36E-06 |
| TUCP_000170 | XLOC_005377 | ENSRNOT00000023180 | 0.95694706   | 1.08E-06 |
| TUCP_000170 | XLOC_005377 | ENSRNOT00000071698 | 0.951514655  | 1.94E-06 |
| TUCP_000170 | XLOC_005377 | ENSRNOT00000011350 | 0.955089774  | 1.33E-06 |
| TUCP_000170 | XLOC_005377 | ENSRNOT00000010218 | 0.963833854  | 4.59E-07 |
| TUCP_000170 | XLOC_005377 | ENSRNOT00000072518 | 0.956706186  | 1.11E-06 |
| TUCP_000170 | XLOC_005377 | ENSRNOT00000076872 | 0.950330127  | 2.19E-06 |
| TUCP_000170 | XLOC_005377 | ENSRNOT00000022485 | 0.950768862  | 2.10E-06 |
| TUCP_000170 | XLOC_005377 | ENSRNOT00000028628 | -0.950433126 | 2.17E-06 |
| TUCP_000170 | XLOC_005377 | ENSRNOT00000046229 | 0.964629342  | 4.11E-07 |
| TUCP_000170 | XLOC_005377 | ENSRNOT00000078445 | -0.956724891 | 1.11E-06 |
| TUCP_000170 | XLOC_005377 | ENSRNOT00000016333 | -0.958657794 | 8.87E-07 |
| TUCP_000170 | XLOC_005377 | ENSRNOT00000008817 | 0.965724523  | 3.52E-07 |
| TUCP_000170 | XLOC_005377 | ENSRNOT00000015116 | 0.962924545  | 5.18E-07 |
| TUCP_000170 | XLOC_005377 | ENSRNOT00000016401 | 0.958364431  | 9.19E-07 |
| TUCP_000078 | XLOC_001928 | ENSRNOT00000079256 | 0.962026712  | 5.83E-07 |
| TUCP_000078 | XLOC_001928 | ENSRNOT00000057685 | 0.954757585  | 1.38E-06 |
| TUCP_003210 | XLOC_138405 | ENSRNOT00000078220 | 0.955889864  | 1.22E-06 |

|             |             |                    |              |          |
|-------------|-------------|--------------------|--------------|----------|
| TUCP_003210 | XLOC_138405 | ENSRNOT00000063875 | 0.952872285  | 1.69E-06 |
| TUCP_001800 | XLOC_074612 | ENSRNOT00000085599 | 0.951402655  | 1.97E-06 |
| TUCP_001800 | XLOC_074612 | ENSRNOT00000081534 | 0.965573442  | 3.59E-07 |
| TUCP_001800 | XLOC_074612 | ENSRNOT00000038729 | 0.951950972  | 1.86E-06 |
| TUCP_001800 | XLOC_074612 | ENSRNOT00000086385 | 0.951950972  | 1.86E-06 |
| TUCP_001800 | XLOC_074612 | ENSRNOT00000032339 | 0.987076505  | 2.78E-09 |
| TUCP_001800 | XLOC_074612 | ENSRNOT00000087613 | 0.951950972  | 1.86E-06 |
| TUCP_001800 | XLOC_074612 | ENSRNOT00000023062 | 0.951950972  | 1.86E-06 |
| TUCP_001800 | XLOC_074612 | ENSRNOT00000058834 | 0.951950972  | 1.86E-06 |
| TUCP_001800 | XLOC_074612 | ENSRNOT00000079420 | 0.951950972  | 1.86E-06 |
| TUCP_001800 | XLOC_074612 | ENSRNOT00000090761 | 0.951950972  | 1.86E-06 |
| TUCP_001800 | XLOC_074612 | ENSRNOT00000055923 | 0.951950972  | 1.86E-06 |
| TUCP_001800 | XLOC_074612 | ENSRNOT00000071930 | 0.951950972  | 1.86E-06 |
| TUCP_001800 | XLOC_074612 | ENSRNOT00000076756 | 0.951950972  | 1.86E-06 |
| TUCP_001800 | XLOC_074612 | ENSRNOT00000081527 | 0.950004824  | 2.26E-06 |
| TUCP_001800 | XLOC_074612 | ENSRNOT00000091663 | 0.960944595  | 6.70E-07 |
| TUCP_001800 | XLOC_074612 | ENSRNOT00000081780 | 0.951950972  | 1.86E-06 |
| TUCP_001800 | XLOC_074612 | ENSRNOT00000089114 | 0.951950972  | 1.86E-06 |
| TUCP_001800 | XLOC_074612 | ENSRNOT00000058497 | 0.971183644  | 1.49E-07 |
| TUCP_001800 | XLOC_074612 | ENSRNOT00000073316 | 0.951950972  | 1.86E-06 |
| TUCP_001800 | XLOC_074612 | ENSRNOT00000071663 | 0.951950972  | 1.86E-06 |
| TUCP_001800 | XLOC_074612 | ENSRNOT00000042860 | 0.951950972  | 1.86E-06 |
| TUCP_001800 | XLOC_074612 | ENSRNOT00000088421 | 0.951950972  | 1.86E-06 |
| TUCP_001800 | XLOC_074612 | ENSRNOT00000038898 | 0.951950972  | 1.86E-06 |
| TUCP_001800 | XLOC_074612 | ENSRNOT00000042777 | 0.952115062  | 1.83E-06 |
| TUCP_001800 | XLOC_074612 | ENSRNOT00000010029 | 0.951950972  | 1.86E-06 |
| TUCP_003967 | XLOC_174241 | ENSRNOT00000087656 | 0.953963467  | 1.51E-06 |
| TUCP_000173 | XLOC_005567 | ENSRNOT00000006517 | -0.95270486  | 1.72E-06 |
| TUCP_000173 | XLOC_005567 | ENSRNOT00000009532 | 0.952965058  | 1.67E-06 |
| TUCP_000173 | XLOC_005567 | ENSRNOT00000024413 | 0.95066975   | 2.12E-06 |
| TUCP_000173 | XLOC_005567 | ENSRNOT00000075159 | 0.973807663  | 9.29E-08 |
| TUCP_000173 | XLOC_005567 | ENSRNOT00000002394 | 0.956140038  | 1.19E-06 |
| TUCP_000173 | XLOC_005567 | ENSRNOT00000005894 | 0.957166054  | 1.06E-06 |
| TUCP_000173 | XLOC_005567 | ENSRNOT00000025906 | 0.951380225  | 1.97E-06 |
| TUCP_004244 | XLOC_186617 | ENSRNOT00000012512 | 0.952837175  | 1.70E-06 |
| TUCP_004244 | XLOC_186617 | ENSRNOT00000001196 | 0.96100667   | 6.65E-07 |
| TUCP_004244 | XLOC_186617 | ENSRNOT00000088799 | 0.952323257  | 1.79E-06 |
| TUCP_004244 | XLOC_186617 | ENSRNOT00000018931 | -0.953081481 | 1.65E-06 |
| TUCP_004244 | XLOC_186617 | ENSRNOT00000000990 | 0.969504045  | 1.97E-07 |
| TUCP_004244 | XLOC_186617 | ENSRNOT00000026273 | -0.957604389 | 1.00E-06 |
| TUCP_004244 | XLOC_186617 | ENSRNOT00000022633 | 0.961647823  | 6.13E-07 |
| TUCP_004244 | XLOC_186617 | ENSRNOT00000060607 | 0.954025397  | 1.50E-06 |
| TUCP_004244 | XLOC_186617 | ENSRNOT00000006172 | 0.953149575  | 1.64E-06 |
| TUCP_004244 | XLOC_186617 | ENSRNOT00000029620 | 0.968367627  | 2.37E-07 |
| TUCP_004244 | XLOC_186617 | ENSRNOT00000019465 | 0.95281586   | 1.70E-06 |
| TUCP_004244 | XLOC_186617 | ENSRNOT00000068683 | 0.970012208  | 1.82E-07 |
| TUCP_004244 | XLOC_186617 | ENSRNOT00000047634 | 0.953504147  | 1.58E-06 |
| TUCP_004244 | XLOC_186617 | ENSRNOT00000013043 | 0.959901576  | 7.63E-07 |
| TUCP_004244 | XLOC_186617 | ENSRNOT00000034603 | 0.975747929  | 6.34E-08 |
| TUCP_004244 | XLOC_186617 | ENSRNOT00000015986 | 0.976682759  | 5.22E-08 |
| TUCP_004244 | XLOC_186617 | ENSRNOT00000015320 | 0.969300664  | 2.04E-07 |

|             |             |                    |              |          |
|-------------|-------------|--------------------|--------------|----------|
| TUCP_004244 | XLOC_186617 | ENSRNOT00000073569 | 0.954203656  | 1.47E-06 |
| TUCP_004244 | XLOC_186617 | ENSRNOT00000012699 | 0.954339289  | 1.45E-06 |
| TUCP_004244 | XLOC_186617 | ENSRNOT00000017375 | 0.976773145  | 5.12E-08 |
| TUCP_004244 | XLOC_186617 | ENSRNOT00000078046 | 0.95651022   | 1.14E-06 |
| TUCP_004244 | XLOC_186617 | ENSRNOT00000000911 | 0.959729972  | 7.79E-07 |
| TUCP_004244 | XLOC_186617 | ENSRNOT00000000211 | 0.960075195  | 7.47E-07 |
| TUCP_004244 | XLOC_186617 | ENSRNOT00000084674 | 0.95860785   | 8.93E-07 |
| TUCP_004244 | XLOC_186617 | ENSRNOT00000014684 | 0.961245734  | 6.45E-07 |
| TUCP_004244 | XLOC_186617 | ENSRNOT00000045855 | 0.959008328  | 8.51E-07 |
| TUCP_004244 | XLOC_186617 | ENSRNOT00000001577 | -0.95800869  | 9.58E-07 |
| TUCP_004244 | XLOC_186617 | ENSRNOT00000015618 | 0.968896687  | 2.18E-07 |
| TUCP_004244 | XLOC_186617 | ENSRNOT00000019121 | 0.953343366  | 1.61E-06 |
| TUCP_004244 | XLOC_186617 | ENSRNOT00000000049 | 0.952822294  | 1.70E-06 |
| TUCP_004244 | XLOC_186617 | ENSRNOT00000046888 | 0.965982119  | 3.39E-07 |
| TUCP_004244 | XLOC_186617 | ENSRNOT00000014163 | 0.97376214   | 9.37E-08 |
| TUCP_004244 | XLOC_186617 | ENSRNOT00000026928 | 0.957279256  | 1.04E-06 |
| TUCP_004244 | XLOC_186617 | ENSRNOT00000055062 | 0.96043368   | 7.15E-07 |
| TUCP_004244 | XLOC_186617 | ENSRNOT00000010252 | 0.976311589  | 5.65E-08 |
| TUCP_004244 | XLOC_186617 | ENSRNOT00000030975 | 0.971734215  | 1.36E-07 |
| TUCP_004244 | XLOC_186617 | ENSRNOT00000012646 | 0.960196788  | 7.36E-07 |
| TUCP_004244 | XLOC_186617 | ENSRNOT00000005694 | 0.97398537   | 8.98E-08 |
| TUCP_004244 | XLOC_186617 | ENSRNOT00000016447 | 0.956148385  | 1.19E-06 |
| TUCP_004244 | XLOC_186617 | ENSRNOT00000033984 | 0.950530564  | 2.15E-06 |
| TUCP_004244 | XLOC_186617 | ENSRNOT00000035048 | 0.956185898  | 1.18E-06 |
| TUCP_004244 | XLOC_186617 | ENSRNOT00000066888 | 0.968072317  | 2.48E-07 |
| TUCP_004244 | XLOC_186617 | ENSRNOT00000061973 | 0.961492954  | 6.25E-07 |
| TUCP_004244 | XLOC_186617 | ENSRNOT00000011714 | 0.969676776  | 1.92E-07 |
| TUCP_004244 | XLOC_186617 | ENSRNOT00000011371 | 0.975042238  | 7.31E-08 |
| TUCP_004244 | XLOC_186617 | ENSRNOT00000012657 | 0.980635474  | 2.08E-08 |
| TUCP_004244 | XLOC_186617 | ENSRNOT00000065103 | 0.960268749  | 7.29E-07 |
| TUCP_004244 | XLOC_186617 | ENSRNOT00000024992 | 0.951051546  | 2.04E-06 |
| TUCP_004244 | XLOC_186617 | ENSRNOT00000078644 | -0.954766753 | 1.38E-06 |
| TUCP_004244 | XLOC_186617 | ENSRNOT00000023100 | 0.964098174  | 4.42E-07 |
| TUCP_004244 | XLOC_186617 | ENSRNOT00000021400 | 0.959186499  | 8.33E-07 |
| TUCP_004244 | XLOC_186617 | ENSRNOT00000073847 | 0.952214167  | 1.81E-06 |
| TUCP_004244 | XLOC_186617 | ENSRNOT00000044975 | 0.962195898  | 5.71E-07 |
| TUCP_004244 | XLOC_186617 | ENSRNOT00000018782 | 0.952028872  | 1.85E-06 |
| TUCP_004244 | XLOC_186617 | ENSRNOT00000000256 | 0.950820819  | 2.09E-06 |
| TUCP_004244 | XLOC_186617 | ENSRNOT00000000529 | 0.964196987  | 4.36E-07 |
| TUCP_004244 | XLOC_186617 | ENSRNOT00000045311 | 0.972847223  | 1.11E-07 |
| TUCP_004244 | XLOC_186617 | ENSRNOT00000091863 | 0.979311632  | 2.88E-08 |
| TUCP_004244 | XLOC_186617 | ENSRNOT00000039335 | 0.973308421  | 1.02E-07 |
| TUCP_004244 | XLOC_186617 | ENSRNOT00000018061 | 0.950263941  | 2.20E-06 |
| TUCP_004244 | XLOC_186617 | ENSRNOT00000036972 | 0.974472793  | 8.18E-08 |
| TUCP_004244 | XLOC_186617 | ENSRNOT00000014809 | 0.952344669  | 1.79E-06 |
| TUCP_004244 | XLOC_186617 | ENSRNOT00000014481 | 0.960496936  | 7.09E-07 |
| TUCP_004244 | XLOC_186617 | ENSRNOT00000046126 | 0.970448975  | 1.69E-07 |
| TUCP_004244 | XLOC_186617 | ENSRNOT00000006376 | 0.962628769  | 5.39E-07 |
| TUCP_004244 | XLOC_186617 | ENSRNOT00000041091 | 0.95210817   | 1.83E-06 |
| TUCP_004244 | XLOC_186617 | ENSRNOT00000061297 | 0.956881088  | 1.09E-06 |
| TUCP_004244 | XLOC_186617 | ENSRNOT00000027753 | 0.970589496  | 1.65E-07 |

|             |             |                     |              |          |
|-------------|-------------|---------------------|--------------|----------|
| TUCP_004244 | XLOC_186617 | ENSRNOT00000073239  | 0.965164008  | 3.81E-07 |
| TUCP_004244 | XLOC_186617 | ENSRNOT00000024466  | -0.955099568 | 1.33E-06 |
| TUCP_004244 | XLOC_186617 | ENSRNOT00000076467  | 0.963391915  | 4.87E-07 |
| TUCP_004244 | XLOC_186617 | ENSRNOT00000019768  | -0.958864873 | 8.66E-07 |
| TUCP_004244 | XLOC_186617 | ENSRNOT00000001036  | 0.965774483  | 3.49E-07 |
| TUCP_004244 | XLOC_186617 | ENSRNOT000000037181 | 0.96086607   | 6.77E-07 |
| TUCP_004244 | XLOC_186617 | ENSRNOT00000074629  | 0.959597145  | 7.92E-07 |
| TUCP_004244 | XLOC_186617 | ENSRNOT00000060757  | 0.979931277  | 2.48E-08 |
| TUCP_004244 | XLOC_186617 | ENSRNOT00000012996  | -0.958061402 | 9.52E-07 |
| TUCP_004244 | XLOC_186617 | ENSRNOT00000003343  | 0.973100555  | 1.06E-07 |
| TUCP_004244 | XLOC_186617 | ENSRNOT00000060595  | 0.964123461  | 4.41E-07 |
| TUCP_004244 | XLOC_186617 | ENSRNOT00000071612  | 0.951406076  | 1.97E-06 |
| TUCP_004244 | XLOC_186617 | ENSRNOT00000023252  | 0.971328302  | 1.45E-07 |
| TUCP_004244 | XLOC_186617 | ENSRNOT00000073388  | 0.952312911  | 1.79E-06 |
| TUCP_004244 | XLOC_186617 | ENSRNOT00000002527  | -0.962994512 | 5.14E-07 |
| TUCP_004244 | XLOC_186617 | ENSRNOT00000009260  | 0.954899944  | 1.36E-06 |
| TUCP_004244 | XLOC_186617 | ENSRNOT00000043736  | 0.950616809  | 2.13E-06 |
| TUCP_004244 | XLOC_186617 | ENSRNOT00000083814  | 0.972893074  | 1.10E-07 |
| TUCP_004244 | XLOC_186617 | ENSRNOT00000011326  | 0.95167059   | 1.91E-06 |
| TUCP_004244 | XLOC_186617 | ENSRNOT00000040637  | -0.961298152 | 6.41E-07 |
| TUCP_004518 | XLOC_199300 | ENSRNOT00000000593  | 0.967423795  | 2.74E-07 |
| TUCP_003965 | XLOC_174241 | ENSRNOT00000080159  | 0.956766681  | 1.11E-06 |
| TUCP_004694 | XLOC_206402 | ENSRNOT00000019195  | -0.954723205 | 1.39E-06 |
| TUCP_004694 | XLOC_206402 | ENSRNOT00000021752  | 0.966260907  | 3.25E-07 |
| TUCP_004694 | XLOC_206402 | ENSRNOT00000089336  | 0.954487752  | 1.42E-06 |
| TUCP_004512 | XLOC_198926 | ENSRNOT00000055073  | 0.987456529  | 2.39E-09 |
| TUCP_004512 | XLOC_198926 | ENSRNOT00000019171  | 0.980115606  | 2.37E-08 |
| TUCP_004512 | XLOC_198926 | ENSRNOT00000071484  | 0.973216696  | 1.04E-07 |
| TUCP_004512 | XLOC_198926 | ENSRNOT00000010948  | 0.983153135  | 1.04E-08 |
| TUCP_004513 | XLOC_198926 | ENSRNOT00000000215  | 0.954371961  | 1.44E-06 |
| TUCP_004513 | XLOC_198926 | ENSRNOT00000093230  | 0.950795715  | 2.09E-06 |
| TUCP_004513 | XLOC_198926 | ENSRNOT00000072306  | 0.958238029  | 9.33E-07 |
| TUCP_004513 | XLOC_198926 | ENSRNOT00000087907  | 0.95653181   | 1.14E-06 |
| TUCP_004513 | XLOC_198926 | ENSRNOT00000031076  | 0.955232867  | 1.31E-06 |
| TUCP_003230 | XLOC_138412 | ENSRNOT00000031904  | 0.966771964  | 3.02E-07 |
| TUCP_003230 | XLOC_138412 | ENSRNOT00000082999  | -0.951464728 | 1.95E-06 |
| TUCP_003230 | XLOC_138412 | ENSRNOT00000000743  | 0.964060254  | 4.45E-07 |
| TUCP_003230 | XLOC_138412 | ENSRNOT00000027083  | 0.957628872  | 1.00E-06 |
| TUCP_003230 | XLOC_138412 | ENSRNOT00000037597  | 0.956102137  | 1.19E-06 |
| TUCP_003230 | XLOC_138412 | ENSRNOT00000005958  | 0.95545204   | 1.28E-06 |
| TUCP_003230 | XLOC_138412 | ENSRNOT00000068353  | 0.954501409  | 1.42E-06 |
| TUCP_003230 | XLOC_138412 | ENSRNOT00000023638  | 0.965138878  | 3.82E-07 |
| TUCP_003230 | XLOC_138412 | ENSRNOT00000020910  | 0.958464082  | 9.08E-07 |
| TUCP_003230 | XLOC_138412 | ENSRNOT00000005220  | 0.953473613  | 1.59E-06 |
| TUCP_003230 | XLOC_138412 | ENSRNOT00000023144  | 0.980469775  | 2.17E-08 |
| TUCP_003230 | XLOC_138412 | ENSRNOT00000071166  | 0.95786983   | 9.74E-07 |
| TUCP_003230 | XLOC_138412 | ENSRNOT00000016649  | 0.967905852  | 2.54E-07 |
| TUCP_003230 | XLOC_138412 | ENSRNOT00000074023  | 0.955216393  | 1.32E-06 |
| TUCP_003230 | XLOC_138412 | ENSRNOT00000014384  | -0.953156626 | 1.64E-06 |
| TUCP_003230 | XLOC_138412 | ENSRNOT00000091596  | -0.950932989 | 2.06E-06 |
| TUCP_003230 | XLOC_138412 | ENSRNOT00000091128  | -0.959197721 | 8.32E-07 |

|             |             |                    |              |          |
|-------------|-------------|--------------------|--------------|----------|
| TUCP_003230 | XLOC_138412 | ENSRNOT00000081981 | 0.962991479  | 5.14E-07 |
| TUCP_003230 | XLOC_138412 | ENSRNOT00000033017 | 0.958337369  | 9.22E-07 |
| TUCP_003230 | XLOC_138412 | ENSRNOT00000013759 | -0.950668102 | 2.12E-06 |
| TUCP_003230 | XLOC_138412 | ENSRNOT00000018341 | -0.951479131 | 1.95E-06 |
| TUCP_003230 | XLOC_138412 | ENSRNOT00000026543 | 0.965941865  | 3.41E-07 |
| TUCP_003230 | XLOC_138412 | ENSRNOT00000012187 | 0.950253554  | 2.21E-06 |
| TUCP_003230 | XLOC_138412 | ENSRNOT00000073564 | -0.951579519 | 1.93E-06 |
| TUCP_003230 | XLOC_138412 | ENSRNOT00000024969 | 0.964763801  | 4.03E-07 |
| TUCP_003230 | XLOC_138412 | ENSRNOT00000015476 | -0.950110987 | 2.24E-06 |
| TUCP_003230 | XLOC_138412 | ENSRNOT00000065300 | 0.956112366  | 1.19E-06 |
| TUCP_003230 | XLOC_138412 | ENSRNOT00000025079 | -0.958094199 | 9.49E-07 |
| TUCP_003230 | XLOC_138412 | ENSRNOT00000048754 | -0.964352221 | 4.27E-07 |
| TUCP_003230 | XLOC_138412 | ENSRNOT00000025075 | 0.958319548  | 9.24E-07 |
| TUCP_003230 | XLOC_138412 | ENSRNOT00000057160 | 0.975273626  | 6.98E-08 |
| TUCP_003230 | XLOC_138412 | ENSRNOT00000024402 | 0.970031998  | 1.81E-07 |
| TUCP_003230 | XLOC_138412 | ENSRNOT0000002837  | -0.957649109 | 9.99E-07 |
| TUCP_003230 | XLOC_138412 | ENSRNOT00000089933 | 0.97266665   | 1.15E-07 |
| TUCP_003230 | XLOC_138412 | ENSRNOT00000009811 | 0.971883849  | 1.32E-07 |
| TUCP_003230 | XLOC_138412 | ENSRNOT00000025517 | 0.954359297  | 1.44E-06 |
| TUCP_003230 | XLOC_138412 | ENSRNOT00000065168 | 0.951978762  | 1.85E-06 |
| TUCP_003230 | XLOC_138412 | ENSRNOT00000085228 | 0.952762328  | 1.71E-06 |
| TUCP_003230 | XLOC_138412 | ENSRNOT00000032780 | 0.956227916  | 1.18E-06 |
| TUCP_003230 | XLOC_138412 | ENSRNOT00000009708 | -0.95271496  | 1.72E-06 |
| TUCP_003230 | XLOC_138412 | ENSRNOT00000061253 | 0.955583229  | 1.26E-06 |
| TUCP_003230 | XLOC_138412 | ENSRNOT00000033677 | -0.961002077 | 6.65E-07 |
| TUCP_003230 | XLOC_138412 | ENSRNOT00000077231 | 0.958679869  | 8.85E-07 |
| TUCP_003230 | XLOC_138412 | ENSRNOT00000011499 | -0.954359177 | 1.44E-06 |
| TUCP_003230 | XLOC_138412 | ENSRNOT00000061392 | 0.95874088   | 8.79E-07 |
| TUCP_003230 | XLOC_138412 | ENSRNOT00000004787 | -0.958799298 | 8.72E-07 |
| TUCP_003230 | XLOC_138412 | ENSRNOT00000037039 | -0.952530617 | 1.75E-06 |
| TUCP_003230 | XLOC_138412 | ENSRNOT00000016428 | 0.954966567  | 1.35E-06 |
| TUCP_003230 | XLOC_138412 | ENSRNOT00000091909 | 0.965914524  | 3.42E-07 |
| TUCP_003230 | XLOC_138412 | ENSRNOT00000077727 | -0.956931458 | 1.09E-06 |
| TUCP_003230 | XLOC_138412 | ENSRNOT00000041044 | 0.965583457  | 3.59E-07 |
| TUCP_003230 | XLOC_138412 | ENSRNOT00000037133 | 0.966553762  | 3.12E-07 |
| TUCP_003230 | XLOC_138412 | ENSRNOT00000010541 | 0.954458774  | 1.43E-06 |
| TUCP_003230 | XLOC_138412 | ENSRNOT00000017556 | 0.966146721  | 3.31E-07 |
| TUCP_003230 | XLOC_138412 | ENSRNOT00000084709 | 0.950156151  | 2.23E-06 |
| TUCP_003230 | XLOC_138412 | ENSRNOT00000026481 | 0.951857561  | 1.88E-06 |
| TUCP_003230 | XLOC_138412 | ENSRNOT00000021803 | -0.956337154 | 1.16E-06 |
| TUCP_003230 | XLOC_138412 | ENSRNOT00000001081 | 0.953430211  | 1.60E-06 |
| TUCP_003230 | XLOC_138412 | ENSRNOT00000083220 | 0.971002438  | 1.54E-07 |
| TUCP_003230 | XLOC_138412 | ENSRNOT00000003544 | -0.952714206 | 1.72E-06 |
| TUCP_003230 | XLOC_138412 | ENSRNOT00000003780 | 0.954832218  | 1.37E-06 |
| TUCP_003230 | XLOC_138412 | ENSRNOT00000086119 | -0.965006795 | 3.90E-07 |
| TUCP_003230 | XLOC_138412 | ENSRNOT00000022190 | -0.962772625 | 5.29E-07 |
| TUCP_003230 | XLOC_138412 | ENSRNOT00000016132 | -0.95028157  | 2.20E-06 |
| TUCP_003230 | XLOC_138412 | ENSRNOT00000019133 | 0.969554448  | 1.96E-07 |
| TUCP_003230 | XLOC_138412 | ENSRNOT00000067780 | -0.950165082 | 2.23E-06 |
| TUCP_003230 | XLOC_138412 | ENSRNOT00000047093 | 0.963290154  | 4.94E-07 |
| TUCP_003230 | XLOC_138412 | ENSRNOT00000025966 | 0.952200101  | 1.81E-06 |

|             |             |                    |              |          |
|-------------|-------------|--------------------|--------------|----------|
| TUCP_003230 | XLOC_138412 | ENSRNOT00000003787 | -0.952577151 | 1.74E-06 |
| TUCP_003230 | XLOC_138412 | ENSRNOT00000026643 | 0.960970111  | 6.68E-07 |
| TUCP_003230 | XLOC_138412 | ENSRNOT00000007314 | -0.960499716 | 7.09E-07 |
| TUCP_003230 | XLOC_138412 | ENSRNOT00000077999 | 0.966400316  | 3.19E-07 |
| TUCP_003230 | XLOC_138412 | ENSRNOT00000081047 | 0.955919506  | 1.22E-06 |
| TUCP_003230 | XLOC_138412 | ENSRNOT00000081512 | 0.970364793  | 1.71E-07 |
| TUCP_003230 | XLOC_138412 | ENSRNOT00000005486 | -0.95477046  | 1.38E-06 |
| TUCP_003230 | XLOC_138412 | ENSRNOT00000027910 | 0.960442664  | 7.14E-07 |
| TUCP_003230 | XLOC_138412 | ENSRNOT00000006034 | -0.95240957  | 1.77E-06 |
| TUCP_003230 | XLOC_138412 | ENSRNOT00000087429 | 0.95648526   | 1.14E-06 |
| TUCP_003230 | XLOC_138412 | ENSRNOT00000013067 | -0.956837248 | 1.10E-06 |
| TUCP_003230 | XLOC_138412 | ENSRNOT00000080207 | 0.979951004  | 2.47E-08 |
| TUCP_003230 | XLOC_138412 | ENSRNOT00000084088 | 0.955320857  | 1.30E-06 |
| TUCP_003230 | XLOC_138412 | ENSRNOT00000000302 | 0.966125601  | 3.32E-07 |
| TUCP_003230 | XLOC_138412 | ENSRNOT00000052224 | 0.963082003  | 5.08E-07 |
| TUCP_003230 | XLOC_138412 | ENSRNOT00000078070 | 0.989113014  | 1.18E-09 |
| TUCP_003230 | XLOC_138412 | ENSRNOT00000026909 | -0.954606835 | 1.41E-06 |
| TUCP_003230 | XLOC_138412 | ENSRNOT00000088182 | 0.951038746  | 2.04E-06 |
| TUCP_003230 | XLOC_138412 | ENSRNOT00000089293 | 0.963120275  | 5.05E-07 |
| TUCP_003230 | XLOC_138412 | ENSRNOT00000028885 | -0.952812659 | 1.70E-06 |
| TUCP_003230 | XLOC_138412 | ENSRNOT00000040069 | 0.95212384   | 1.83E-06 |
| TUCP_003230 | XLOC_138412 | ENSRNOT00000000717 | -0.950657455 | 2.12E-06 |
| TUCP_003230 | XLOC_138412 | ENSRNOT00000003568 | 0.960575317  | 7.02E-07 |
| TUCP_003230 | XLOC_138412 | ENSRNOT00000052063 | 0.954442931  | 1.43E-06 |
| TUCP_003230 | XLOC_138412 | ENSRNOT00000060002 | -0.959381277 | 8.13E-07 |
| TUCP_003230 | XLOC_138412 | ENSRNOT00000004046 | -0.976644718 | 5.26E-08 |
| TUCP_003230 | XLOC_138412 | ENSRNOT00000010367 | 0.957580105  | 1.01E-06 |
| TUCP_003230 | XLOC_138412 | ENSRNOT00000006395 | -0.950605733 | 2.13E-06 |
| TUCP_003230 | XLOC_138412 | ENSRNOT00000006824 | -0.955188199 | 1.32E-06 |
| TUCP_003230 | XLOC_138412 | ENSRNOT00000082151 | -0.960846518 | 6.78E-07 |
| TUCP_003230 | XLOC_138412 | ENSRNOT00000066133 | -0.956346619 | 1.16E-06 |
| TUCP_003230 | XLOC_138412 | ENSRNOT00000029202 | -0.959380099 | 8.13E-07 |
| TUCP_003230 | XLOC_138412 | ENSRNOT00000089963 | 0.951343712  | 1.98E-06 |
| TUCP_003230 | XLOC_138412 | ENSRNOT00000088054 | 0.962086583  | 5.79E-07 |
| TUCP_003230 | XLOC_138412 | ENSRNOT00000044395 | 0.95324661   | 1.63E-06 |
| TUCP_003230 | XLOC_138412 | ENSRNOT00000050834 | -0.966673622 | 3.06E-07 |
| TUCP_003230 | XLOC_138412 | ENSRNOT00000066024 | 0.956094176  | 1.19E-06 |
| TUCP_003230 | XLOC_138412 | ENSRNOT00000023543 | -0.950777757 | 2.09E-06 |
| TUCP_003230 | XLOC_138412 | ENSRNOT00000026691 | 0.954162575  | 1.48E-06 |
| TUCP_003230 | XLOC_138412 | ENSRNOT00000055992 | -0.96726125  | 2.80E-07 |
| TUCP_003230 | XLOC_138412 | ENSRNOT00000027970 | 0.952015167  | 1.85E-06 |
| TUCP_003230 | XLOC_138412 | ENSRNOT00000015624 | 0.951824949  | 1.88E-06 |
| TUCP_003230 | XLOC_138412 | ENSRNOT00000028876 | -0.971247193 | 1.47E-07 |
| TUCP_003230 | XLOC_138412 | ENSRNOT00000078306 | 0.959164275  | 8.35E-07 |
| TUCP_003230 | XLOC_138412 | ENSRNOT00000080695 | 0.977818316  | 4.07E-08 |
| TUCP_003230 | XLOC_138412 | ENSRNOT00000079011 | -0.950487189 | 2.16E-06 |
| TUCP_003230 | XLOC_138412 | ENSRNOT00000055386 | 0.954648225  | 1.40E-06 |
| TUCP_003230 | XLOC_138412 | ENSRNOT00000018074 | -0.962335162 | 5.60E-07 |
| TUCP_003230 | XLOC_138412 | ENSRNOT00000091205 | 0.950309555  | 2.19E-06 |
| TUCP_003230 | XLOC_138412 | ENSRNOT00000010180 | -0.960827055 | 6.80E-07 |
| TUCP_003230 | XLOC_138412 | ENSRNOT00000080608 | 0.954290109  | 1.46E-06 |

|             |             |                    |              |          |
|-------------|-------------|--------------------|--------------|----------|
| TUCP_003230 | XLOC_138412 | ENSRNOT0000000120  | 0.958463677  | 9.08E-07 |
| TUCP_003230 | XLOC_138412 | ENSRNOT00000038182 | -0.959806848 | 7.72E-07 |
| TUCP_003230 | XLOC_138412 | ENSRNOT00000029125 | 0.964930014  | 3.94E-07 |
| TUCP_003230 | XLOC_138412 | ENSRNOT00000060696 | 0.960397604  | 7.18E-07 |
| TUCP_003230 | XLOC_138412 | ENSRNOT00000042125 | 0.982561297  | 1.23E-08 |
| TUCP_003230 | XLOC_138412 | ENSRNOT00000060698 | -0.954360889 | 1.44E-06 |
| TUCP_003230 | XLOC_138412 | ENSRNOT00000009900 | -0.959713999 | 7.81E-07 |
| TUCP_003230 | XLOC_138412 | ENSRNOT00000058351 | 0.958972722  | 8.54E-07 |
| TUCP_003230 | XLOC_138412 | ENSRNOT00000014814 | 0.967170956  | 2.84E-07 |
| TUCP_003230 | XLOC_138412 | ENSRNOT00000010748 | 0.960099343  | 7.45E-07 |
| TUCP_003230 | XLOC_138412 | ENSRNOT00000026941 | 0.958827202  | 8.69E-07 |
| TUCP_003230 | XLOC_138412 | ENSRNOT00000024491 | -0.961140935 | 6.54E-07 |
| TUCP_003230 | XLOC_138412 | ENSRNOT00000084597 | -0.954728998 | 1.39E-06 |
| TUCP_003230 | XLOC_138412 | ENSRNOT00000024947 | -0.95023062  | 2.21E-06 |
| TUCP_003230 | XLOC_138412 | ENSRNOT00000021534 | -0.951642145 | 1.92E-06 |
| TUCP_003230 | XLOC_138412 | ENSRNOT00000067901 | -0.951499914 | 1.95E-06 |
| TUCP_003230 | XLOC_138412 | ENSRNOT00000060362 | 0.959682258  | 7.84E-07 |
| TUCP_003230 | XLOC_138412 | ENSRNOT00000027967 | 0.955473843  | 1.28E-06 |
| TUCP_003230 | XLOC_138412 | ENSRNOT00000008982 | 0.962555348  | 5.44E-07 |
| TUCP_003230 | XLOC_138412 | ENSRNOT00000047192 | -0.958964265 | 8.55E-07 |
| TUCP_003230 | XLOC_138412 | ENSRNOT00000022097 | 0.953523517  | 1.58E-06 |
| TUCP_003230 | XLOC_138412 | ENSRNOT00000036613 | -0.953003402 | 1.67E-06 |
| TUCP_003230 | XLOC_138412 | ENSRNOT00000083127 | 0.961884731  | 5.94E-07 |
| TUCP_003230 | XLOC_138412 | ENSRNOT00000025705 | 0.950435268  | 2.17E-06 |
| TUCP_003230 | XLOC_138412 | ENSRNOT00000083957 | 0.950981914  | 2.05E-06 |
| TUCP_003230 | XLOC_138412 | ENSRNOT00000024016 | -0.956182098 | 1.18E-06 |
| TUCP_003230 | XLOC_138412 | ENSRNOT00000046639 | 0.956625885  | 1.12E-06 |
| TUCP_003230 | XLOC_138412 | ENSRNOT00000015799 | 0.977179449  | 4.69E-08 |
| TUCP_003230 | XLOC_138412 | ENSRNOT00000008113 | -0.951127312 | 2.02E-06 |
| TUCP_003230 | XLOC_138412 | ENSRNOT00000022552 | -0.963025912 | 5.11E-07 |
| TUCP_003230 | XLOC_138412 | ENSRNOT00000021629 | -0.951526677 | 1.94E-06 |
| TUCP_003231 | XLOC_138414 | ENSRNOT00000009811 | 0.953623983  | 1.56E-06 |
| TUCP_003231 | XLOC_138414 | ENSRNOT00000065168 | 0.95060955   | 2.13E-06 |
| TUCP_003231 | XLOC_138414 | ENSRNOT00000005486 | -0.953218112 | 1.63E-06 |
| TUCP_003231 | XLOC_138414 | ENSRNOT00000067554 | 0.965842949  | 3.46E-07 |
| TUCP_003231 | XLOC_138414 | ENSRNOT00000000383 | -0.974997781 | 7.38E-08 |
| TUCP_003231 | XLOC_138414 | ENSRNOT00000010784 | 0.951832324  | 1.88E-06 |
| TUCP_003231 | XLOC_138414 | ENSRNOT00000001893 | 0.973766939  | 9.36E-08 |
| TUCP_003231 | XLOC_138414 | ENSRNOT00000061253 | 0.960274557  | 7.29E-07 |
| TUCP_003231 | XLOC_138414 | ENSRNOT00000081512 | 0.955952668  | 1.21E-06 |
| TUCP_003231 | XLOC_138414 | ENSRNOT00000061201 | -0.950581411 | 2.14E-06 |
| TUCP_003231 | XLOC_138414 | ENSRNOT00000041044 | 0.958168622  | 9.40E-07 |
| TUCP_003231 | XLOC_138414 | ENSRNOT00000023989 | 0.950996427  | 2.05E-06 |
| TUCP_003231 | XLOC_138414 | ENSRNOT00000080608 | 0.950999263  | 2.05E-06 |
| TUCP_003231 | XLOC_138414 | ENSRNOT00000089319 | 0.951751642  | 1.90E-06 |
| TUCP_003231 | XLOC_138414 | ENSRNOT00000078737 | -0.950360208 | 2.18E-06 |
| TUCP_003231 | XLOC_138414 | ENSRNOT00000057361 | 0.953626064  | 1.56E-06 |
| TUCP_003231 | XLOC_138414 | ENSRNOT00000086706 | 0.955425435  | 1.29E-06 |
| TUCP_003231 | XLOC_138414 | ENSRNOT00000021114 | 0.955989611  | 1.21E-06 |
| TUCP_003231 | XLOC_138414 | ENSRNOT00000046745 | 0.951621607  | 1.92E-06 |
| TUCP_003231 | XLOC_138414 | ENSRNOT00000017556 | 0.965681893  | 3.54E-07 |

|             |             |                    |              |          |
|-------------|-------------|--------------------|--------------|----------|
| TUCP_003231 | XLOC_138414 | ENSRNOT00000080750 | 0.955574262  | 1.26E-06 |
| TUCP_003231 | XLOC_138414 | ENSRNOT00000000469 | 0.956835132  | 1.10E-06 |
| TUCP_003231 | XLOC_138414 | ENSRNOT00000033017 | 0.951176643  | 2.01E-06 |
| TUCP_003231 | XLOC_138414 | ENSRNOT00000007028 | -0.954665911 | 1.40E-06 |
| TUCP_003231 | XLOC_138414 | ENSRNOT00000057562 | 0.959208238  | 8.31E-07 |
| TUCP_003231 | XLOC_138414 | ENSRNOT00000072118 | 0.954370913  | 1.44E-06 |
| TUCP_003231 | XLOC_138414 | ENSRNOT00000081981 | 0.951985756  | 1.85E-06 |
| TUCP_003231 | XLOC_138414 | ENSRNOT00000057953 | 0.957943062  | 9.65E-07 |
| TUCP_003231 | XLOC_138414 | ENSRNOT00000075558 | 0.953410946  | 1.60E-06 |
| TUCP_003231 | XLOC_138414 | ENSRNOT00000074972 | 0.965444202  | 3.66E-07 |
| TUCP_003231 | XLOC_138414 | ENSRNOT00000045285 | 0.958110632  | 9.47E-07 |
| TUCP_003231 | XLOC_138414 | ENSRNOT00000090057 | 0.973292868  | 1.02E-07 |
| TUCP_003231 | XLOC_138414 | ENSRNOT00000007821 | 0.950881754  | 2.07E-06 |
| TUCP_003231 | XLOC_138414 | ENSRNOT00000089933 | 0.958875101  | 8.65E-07 |
| TUCP_003231 | XLOC_138414 | ENSRNOT00000015799 | 0.965887316  | 3.44E-07 |
| TUCP_004514 | XLOC_198926 | ENSRNOT00000083687 | 0.992336819  | 2.05E-10 |
| TUCP_004515 | XLOC_199002 | ENSRNOT00000004702 | 0.953955495  | 1.51E-06 |
| TUCP_001807 | XLOC_074917 | ENSRNOT00000003840 | 0.951728845  | 1.90E-06 |
| TUCP_001807 | XLOC_074917 | ENSRNOT00000013260 | 0.950221309  | 2.21E-06 |
| TUCP_001807 | XLOC_074917 | ENSRNOT00000010609 | 0.978843107  | 3.22E-08 |
| TUCP_001807 | XLOC_074917 | ENSRNOT00000008971 | 0.969122122  | 2.10E-07 |
| TUCP_001807 | XLOC_074917 | ENSRNOT00000006554 | 0.964537258  | 4.16E-07 |
| TUCP_004452 | XLOC_196072 | ENSRNOT00000088287 | 0.963003832  | 5.13E-07 |
| TUCP_004452 | XLOC_196072 | ENSRNOT00000089314 | 0.964200545  | 4.36E-07 |
| TUCP_003331 | XLOC_143339 | ENSRNOT00000005846 | -0.957783551 | 9.84E-07 |
| TUCP_003331 | XLOC_143339 | ENSRNOT00000037397 | -0.960350418 | 7.22E-07 |
| TUCP_003331 | XLOC_143339 | ENSRNOT00000012632 | -0.96666223  | 3.07E-07 |
| TUCP_003331 | XLOC_143339 | ENSRNOT00000031667 | -0.95823091  | 9.33E-07 |
| TUCP_003331 | XLOC_143339 | ENSRNOT00000010264 | -0.956949926 | 1.08E-06 |
| TUCP_003331 | XLOC_143339 | ENSRNOT00000032333 | -0.962502593 | 5.48E-07 |
| TUCP_003331 | XLOC_143339 | ENSRNOT00000021550 | -0.955627378 | 1.26E-06 |
| TUCP_004105 | XLOC_179460 | ENSRNOT00000079548 | -0.960701358 | 6.91E-07 |
| TUCP_004104 | XLOC_179430 | ENSRNOT00000084075 | 0.982014949  | 1.44E-08 |
| TUCP_004104 | XLOC_179430 | ENSRNOT00000012880 | 0.95118578   | 2.01E-06 |
| TUCP_004104 | XLOC_179430 | ENSRNOT00000074465 | 0.987549419  | 2.31E-09 |
| TUCP_004104 | XLOC_179430 | ENSRNOT00000090898 | 0.95788696   | 9.72E-07 |
| TUCP_004104 | XLOC_179430 | ENSRNOT00000079805 | 0.982354968  | 1.31E-08 |
| TUCP_004104 | XLOC_179430 | ENSRNOT00000040912 | 0.987549419  | 2.31E-09 |
| TUCP_004104 | XLOC_179430 | ENSRNOT00000072648 | 0.987549419  | 2.31E-09 |
| TUCP_004104 | XLOC_179430 | ENSRNOT00000007398 | 0.97934884   | 2.86E-08 |
| TUCP_004104 | XLOC_179430 | ENSRNOT00000070803 | 0.987549419  | 2.31E-09 |
| TUCP_004104 | XLOC_179430 | ENSRNOT00000012196 | 0.987549419  | 2.31E-09 |
| TUCP_004104 | XLOC_179430 | ENSRNOT00000085772 | 0.987549419  | 2.31E-09 |
| TUCP_004104 | XLOC_179430 | ENSRNOT00000093284 | 0.987392443  | 2.46E-09 |
| TUCP_004104 | XLOC_179430 | ENSRNOT00000086374 | 0.974952598  | 7.44E-08 |
| TUCP_004104 | XLOC_179430 | ENSRNOT00000015270 | 0.987549419  | 2.31E-09 |
| TUCP_004104 | XLOC_179430 | ENSRNOT00000046192 | 0.987549419  | 2.31E-09 |
| TUCP_004104 | XLOC_179430 | ENSRNOT00000044226 | 0.987549419  | 2.31E-09 |
| TUCP_004104 | XLOC_179430 | ENSRNOT00000081898 | 0.987239469  | 2.61E-09 |
| TUCP_004104 | XLOC_179430 | ENSRNOT00000080291 | 0.985731908  | 4.55E-09 |
| TUCP_004104 | XLOC_179430 | ENSRNOT00000004293 | 0.966909205  | 2.96E-07 |



|             |             |                     |              |          |
|-------------|-------------|---------------------|--------------|----------|
| TUCP_004104 | XLOC_179430 | ENSRNOT00000015870  | 0.952401814  | 1.78E-06 |
| TUCP_004104 | XLOC_179430 | ENSRNOT00000001464  | 0.987549419  | 2.31E-09 |
| TUCP_004104 | XLOC_179430 | ENSRNOT000000090716 | 0.973414683  | 1.00E-07 |
| TUCP_004104 | XLOC_179430 | ENSRNOT00000083542  | 0.964652518  | 4.10E-07 |
| TUCP_004104 | XLOC_179430 | ENSRNOT00000076044  | 0.987549419  | 2.31E-09 |
| TUCP_004104 | XLOC_179430 | ENSRNOT00000074353  | 0.987549419  | 2.31E-09 |
| TUCP_004104 | XLOC_179430 | ENSRNOT00000087122  | 0.963019479  | 5.12E-07 |
| TUCP_004104 | XLOC_179430 | ENSRNOT00000074295  | 0.971838641  | 1.33E-07 |
| TUCP_004104 | XLOC_179430 | ENSRNOT00000057873  | 0.987549419  | 2.31E-09 |
| TUCP_004104 | XLOC_179430 | ENSRNOT00000083002  | 0.975421664  | 6.78E-08 |
| TUCP_004104 | XLOC_179430 | ENSRNOT00000088399  | 0.987604915  | 2.26E-09 |
| TUCP_004104 | XLOC_179430 | ENSRNOT00000086248  | 0.987549419  | 2.31E-09 |
| TUCP_004104 | XLOC_179430 | ENSRNOT00000089750  | 0.987438132  | 2.41E-09 |
| TUCP_004104 | XLOC_179430 | ENSRNOT00000030517  | 0.957123762  | 1.06E-06 |
| TUCP_004104 | XLOC_179430 | ENSRNOT00000034772  | 0.98037401   | 2.22E-08 |
| TUCP_004104 | XLOC_179430 | ENSRNOT00000064601  | 0.953931167  | 1.51E-06 |
| TUCP_004104 | XLOC_179430 | ENSRNOT00000002834  | 0.987549419  | 2.31E-09 |
| TUCP_004104 | XLOC_179430 | ENSRNOT00000080812  | 0.974684178  | 7.85E-08 |
| TUCP_004104 | XLOC_179430 | ENSRNOT00000092755  | 0.987549419  | 2.31E-09 |
| TUCP_004104 | XLOC_179430 | ENSRNOT00000031683  | 0.987549419  | 2.31E-09 |
| TUCP_004104 | XLOC_179430 | ENSRNOT00000087764  | 0.974609244  | 7.96E-08 |
| TUCP_004107 | XLOC_179475 | ENSRNOT00000015124  | 0.96620422   | 3.28E-07 |
| TUCP_004107 | XLOC_179475 | ENSRNOT00000057851  | -0.95778113  | 9.84E-07 |
| TUCP_004107 | XLOC_179475 | ENSRNOT00000064776  | -0.953090294 | 1.65E-06 |
| TUCP_004107 | XLOC_179475 | ENSRNOT00000026699  | -0.976331333 | 5.62E-08 |
| TUCP_004106 | XLOC_179461 | ENSRNOT00000074361  | 0.950517936  | 2.15E-06 |
| TUCP_004106 | XLOC_179461 | ENSRNOT00000036766  | 0.958336991  | 9.22E-07 |
| TUCP_001193 | XLOC_044844 | ENSRNOT00000092026  | 0.96620614   | 3.28E-07 |
| TUCP_001193 | XLOC_044844 | ENSRNOT00000093075  | 1            | 0        |
| TUCP_001193 | XLOC_044844 | ENSRNOT00000058260  | 1            | 0        |
| TUCP_001193 | XLOC_044844 | ENSRNOT00000088887  | 1            | 0        |
| TUCP_001193 | XLOC_044844 | ENSRNOT00000084986  | 1            | 0        |
| TUCP_001193 | XLOC_044844 | ENSRNOT00000074346  | 0.9702256    | 1.75E-07 |
| TUCP_001193 | XLOC_044844 | ENSRNOT00000073209  | 0.983711602  | 8.79E-09 |
| TUCP_001193 | XLOC_044844 | ENSRNOT00000080155  | 0.973069673  | 1.07E-07 |
| TUCP_001193 | XLOC_044844 | ENSRNOT00000072573  | 0.996213272  | 6.09E-12 |
| TUCP_001193 | XLOC_044844 | ENSRNOT00000017828  | 0.996001583  | 7.99E-12 |
| TUCP_001193 | XLOC_044844 | ENSRNOT00000080444  | 0.969625907  | 1.93E-07 |
| TUCP_001193 | XLOC_044844 | ENSRNOT00000071312  | 1            | 0        |
| TUCP_001193 | XLOC_044844 | ENSRNOT00000088245  | 1            | 0        |
| TUCP_001193 | XLOC_044844 | ENSRNOT00000036565  | 0.969065335  | 2.12E-07 |
| TUCP_001193 | XLOC_044844 | ENSRNOT00000058833  | 0.998673261  | 3.23E-14 |
| TUCP_001193 | XLOC_044844 | ENSRNOT00000078052  | 1            | 0        |
| TUCP_001193 | XLOC_044844 | ENSRNOT00000078494  | 0.999927093  | 1.62E-20 |
| TUCP_001193 | XLOC_044844 | ENSRNOT00000085653  | 1            | 0        |
| TUCP_001193 | XLOC_044844 | ENSRNOT00000057950  | 0.969329371  | 2.03E-07 |
| TUCP_001193 | XLOC_044844 | ENSRNOT00000081992  | 0.999320526  | 1.14E-15 |
| TUCP_001193 | XLOC_044844 | ENSRNOT00000038553  | 0.955765808  | 1.24E-06 |
| TUCP_001193 | XLOC_044844 | ENSRNOT00000084120  | 0.958115447  | 9.46E-07 |
| TUCP_001193 | XLOC_044844 | ENSRNOT00000055406  | 1            | 0        |
| TUCP_001193 | XLOC_044844 | ENSRNOT00000070817  | 0.998968079  | 9.20E-15 |

|             |             |                    |              |          |
|-------------|-------------|--------------------|--------------|----------|
| TUCP_001193 | XLOC_044844 | ENSRNOT00000026753 | 1            | 0        |
| TUCP_001193 | XLOC_044844 | ENSRNOT00000080533 | 0.996682529  | 3.15E-12 |
| TUCP_001193 | XLOC_044844 | ENSRNOT00000072774 | 0.979665261  | 2.65E-08 |
| TUCP_001193 | XLOC_044844 | ENSRNOT00000086031 | 1            | 0        |
| TUCP_001193 | XLOC_044844 | ENSRNOT00000014312 | 1            | 0        |
| TUCP_001193 | XLOC_044844 | ENSRNOT00000042882 | 0.963218427  | 4.98E-07 |
| TUCP_001193 | XLOC_044844 | ENSRNOT00000088012 | 0.956765806  | 1.11E-06 |
| TUCP_001193 | XLOC_044844 | ENSRNOT00000051231 | 0.999242378  | 1.96E-15 |
| TUCP_001193 | XLOC_044844 | ENSRNOT00000089407 | 0.992986194  | 1.32E-10 |
| TUCP_001193 | XLOC_044844 | ENSRNOT00000055034 | 0.998331441  | 1.02E-13 |
| TUCP_001193 | XLOC_044844 | ENSRNOT00000046837 | 0.97252559   | 1.18E-07 |
| TUCP_001961 | XLOC_079154 | ENSRNOT00000089806 | 0.963839078  | 4.58E-07 |
| TUCP_001961 | XLOC_079154 | ENSRNOT00000013088 | 0.969235011  | 2.06E-07 |
| TUCP_001961 | XLOC_079154 | ENSRNOT00000090547 | 0.959383256  | 8.13E-07 |
| TUCP_004459 | XLOC_196157 | ENSRNOT00000085659 | 0.961166885  | 6.52E-07 |
| TUCP_004459 | XLOC_196157 | ENSRNOT0000002220  | 0.966062761  | 3.35E-07 |
| TUCP_004241 | XLOC_186296 | ENSRNOT00000035865 | -0.950234439 | 2.21E-06 |
| TUCP_001621 | XLOC_064489 | ENSRNOT00000013817 | 0.96551265   | 3.63E-07 |
| TUCP_001621 | XLOC_064489 | ENSRNOT00000028210 | -0.957645682 | 1.00E-06 |
| TUCP_001621 | XLOC_064489 | ENSRNOT00000001153 | 0.96106972   | 6.60E-07 |
| TUCP_001621 | XLOC_064489 | ENSRNOT00000035448 | -0.957757535 | 9.87E-07 |
| TUCP_001621 | XLOC_064489 | ENSRNOT00000002982 | 0.963309642  | 4.92E-07 |
| TUCP_001621 | XLOC_064489 | ENSRNOT00000082183 | 0.959199185  | 8.31E-07 |
| TUCP_001621 | XLOC_064489 | ENSRNOT00000080216 | -0.967102482 | 2.87E-07 |
| TUCP_001621 | XLOC_064489 | ENSRNOT00000026391 | 0.970264462  | 1.74E-07 |
| TUCP_001621 | XLOC_064489 | ENSRNOT00000081678 | 0.970760844  | 1.60E-07 |
| TUCP_001621 | XLOC_064489 | ENSRNOT00000028271 | 0.958836133  | 8.69E-07 |
| TUCP_001621 | XLOC_064489 | ENSRNOT00000018155 | -0.972288957 | 1.23E-07 |
| TUCP_001621 | XLOC_064489 | ENSRNOT00000026259 | 0.950042899  | 2.25E-06 |
| TUCP_001621 | XLOC_064489 | ENSRNOT00000010593 | 0.96673847   | 3.03E-07 |
| TUCP_001621 | XLOC_064489 | ENSRNOT00000006217 | 0.953615992  | 1.56E-06 |
| TUCP_001621 | XLOC_064489 | ENSRNOT00000003087 | 0.950213192  | 2.22E-06 |
| TUCP_001621 | XLOC_064489 | ENSRNOT00000043831 | 0.966053796  | 3.35E-07 |
| TUCP_001621 | XLOC_064489 | ENSRNOT00000078739 | -0.976447166 | 5.49E-08 |
| TUCP_001621 | XLOC_064489 | ENSRNOT00000090987 | -0.957303071 | 1.04E-06 |
| TUCP_001621 | XLOC_064489 | ENSRNOT00000025081 | 0.952402133  | 1.78E-06 |
| TUCP_001621 | XLOC_064489 | ENSRNOT00000073041 | 0.978958737  | 3.14E-08 |
| TUCP_001621 | XLOC_064489 | ENSRNOT00000001697 | 0.955941261  | 1.21E-06 |
| TUCP_001621 | XLOC_064489 | ENSRNOT00000064060 | 0.950293038  | 2.20E-06 |
| TUCP_001621 | XLOC_064489 | ENSRNOT00000077526 | 0.955458374  | 1.28E-06 |
| TUCP_001621 | XLOC_064489 | ENSRNOT00000012767 | 0.96822307   | 2.42E-07 |
| TUCP_001621 | XLOC_064489 | ENSRNOT00000077706 | 0.95719369   | 1.05E-06 |
| TUCP_001621 | XLOC_064489 | ENSRNOT00000009275 | -0.956051291 | 1.20E-06 |
| TUCP_001621 | XLOC_064489 | ENSRNOT00000079784 | -0.966660817 | 3.07E-07 |
| TUCP_001621 | XLOC_064489 | ENSRNOT00000076973 | 0.956254075  | 1.17E-06 |
| TUCP_001621 | XLOC_064489 | ENSRNOT00000025036 | -0.956014268 | 1.20E-06 |
| TUCP_001621 | XLOC_064489 | ENSRNOT00000037133 | 0.950177495  | 2.22E-06 |
| TUCP_001621 | XLOC_064489 | ENSRNOT00000084567 | 0.952434073  | 1.77E-06 |
| TUCP_001621 | XLOC_064489 | ENSRNOT00000007855 | 0.960658152  | 6.95E-07 |
| TUCP_001621 | XLOC_064489 | ENSRNOT00000085362 | 0.952248336  | 1.80E-06 |
| TUCP_001621 | XLOC_064489 | ENSRNOT00000037679 | 0.955816692  | 1.23E-06 |

|             |             |                     |              |          |
|-------------|-------------|---------------------|--------------|----------|
| TUCP_001621 | XLOC_064489 | ENSRNOT00000052063  | 0.95524382   | 1.31E-06 |
| TUCP_001621 | XLOC_064489 | ENSRNOT00000049245  | 0.9589424    | 8.58E-07 |
| TUCP_001621 | XLOC_064489 | ENSRNOT00000026909  | -0.96457708  | 4.14E-07 |
| TUCP_001621 | XLOC_064489 | ENSRNOT00000066521  | -0.952319925 | 1.79E-06 |
| TUCP_001621 | XLOC_064489 | ENSRNOT00000018341  | -0.95251064  | 1.76E-06 |
| TUCP_001621 | XLOC_064489 | ENSRNOT00000028685  | 0.951544385  | 1.94E-06 |
| TUCP_001621 | XLOC_064489 | ENSRNOT00000017805  | 0.955237791  | 1.31E-06 |
| TUCP_001621 | XLOC_064489 | ENSRNOT00000012801  | 0.952139236  | 1.82E-06 |
| TUCP_001621 | XLOC_064489 | ENSRNOT00000034669  | -0.964440143 | 4.22E-07 |
| TUCP_001621 | XLOC_064489 | ENSRNOT00000025523  | 0.958260321  | 9.30E-07 |
| TUCP_001621 | XLOC_064489 | ENSRNOT00000019115  | 0.959623856  | 7.90E-07 |
| TUCP_001621 | XLOC_064489 | ENSRNOT00000003544  | -0.958712342 | 8.82E-07 |
| TUCP_001621 | XLOC_064489 | ENSRNOT00000013279  | 0.954108543  | 1.48E-06 |
| TUCP_001621 | XLOC_064489 | ENSRNOT00000012279  | 0.957283212  | 1.04E-06 |
| TUCP_001621 | XLOC_064489 | ENSRNOT00000078579  | 0.95252514   | 1.75E-06 |
| TUCP_001621 | XLOC_064489 | ENSRNOT00000006205  | -0.957748877 | 9.88E-07 |
| TUCP_001621 | XLOC_064489 | ENSRNOT00000058495  | -0.958255866 | 9.31E-07 |
| TUCP_001621 | XLOC_064489 | ENSRNOT00000002511  | -0.950063632 | 2.25E-06 |
| TUCP_001621 | XLOC_064489 | ENSRNOT00000000718  | 0.958219281  | 9.35E-07 |
| TUCP_001621 | XLOC_064489 | ENSRNOT00000007414  | 0.956174615  | 1.18E-06 |
| TUCP_001621 | XLOC_064489 | ENSRNOT000000085458 | -0.955463125 | 1.28E-06 |
| TUCP_001621 | XLOC_064489 | ENSRNOT000000061132 | 0.966796731  | 3.01E-07 |
| TUCP_001621 | XLOC_064489 | ENSRNOT00000047530  | 0.966641533  | 3.08E-07 |
| TUCP_001621 | XLOC_064489 | ENSRNOT00000019816  | -0.951387038 | 1.97E-06 |
| TUCP_001621 | XLOC_064489 | ENSRNOT00000016376  | -0.963146288 | 5.03E-07 |
| TUCP_001621 | XLOC_064489 | ENSRNOT000000089068 | 0.955068722  | 1.34E-06 |
| TUCP_001621 | XLOC_064489 | ENSRNOT00000013344  | -0.954016907 | 1.50E-06 |
| TUCP_001621 | XLOC_064489 | ENSRNOT00000013228  | 0.958691248  | 8.84E-07 |
| TUCP_001621 | XLOC_064489 | ENSRNOT00000020417  | -0.961570096 | 6.19E-07 |
| TUCP_001621 | XLOC_064489 | ENSRNOT000000067949 | 0.953839974  | 1.53E-06 |
| TUCP_001621 | XLOC_064489 | ENSRNOT00000019759  | 0.967423493  | 2.74E-07 |
| TUCP_001621 | XLOC_064489 | ENSRNOT00000006804  | 0.95161226   | 1.93E-06 |
| TUCP_001621 | XLOC_064489 | ENSRNOT00000046639  | 0.955597823  | 1.26E-06 |
| TUCP_001621 | XLOC_064489 | ENSRNOT00000039572  | -0.952493523 | 1.76E-06 |
| TUCP_001621 | XLOC_064489 | ENSRNOT00000002621  | 0.957311809  | 1.04E-06 |
| TUCP_001808 | XLOC_074931 | ENSRNOT00000091911  | 0.969426115  | 2.00E-07 |
| TUCP_001808 | XLOC_074931 | ENSRNOT00000076530  | 0.973631564  | 9.60E-08 |
| TUCP_003218 | XLOC_138410 | ENSRNOT000000065312 | 0.967744941  | 2.60E-07 |
| TUCP_004282 | XLOC_188199 | ENSRNOT00000000438  | 0.954268326  | 1.46E-06 |
| TUCP_004282 | XLOC_188199 | ENSRNOT00000014217  | 0.957001802  | 1.08E-06 |
| TUCP_004282 | XLOC_188199 | ENSRNOT000000088589 | 0.966236721  | 3.26E-07 |
| TUCP_004284 | XLOC_188211 | ENSRNOT000000066058 | 0.95245249   | 1.77E-06 |
| TUCP_004122 | XLOC_180258 | ENSRNOT000000084500 | 0.984887141  | 6.05E-09 |
| TUCP_004122 | XLOC_180258 | ENSRNOT000000093467 | 0.996134431  | 6.75E-12 |
| TUCP_004122 | XLOC_180258 | ENSRNOT00000029340  | 0.999116572  | 4.23E-15 |
| TUCP_004122 | XLOC_180258 | ENSRNOT00000077972  | 0.962758032  | 5.30E-07 |
| TUCP_004122 | XLOC_180258 | ENSRNOT00000038646  | 1            | 0        |
| TUCP_004122 | XLOC_180258 | ENSRNOT00000012095  | 0.957750287  | 9.88E-07 |
| TUCP_004122 | XLOC_180258 | ENSRNOT00000017909  | 0.975587192  | 6.56E-08 |
| TUCP_004122 | XLOC_180258 | ENSRNOT00000092579  | 1            | 0        |
| TUCP_004122 | XLOC_180258 | ENSRNOT000000089235 | 0.998661162  | 3.38E-14 |

|             |             |                    |             |          |
|-------------|-------------|--------------------|-------------|----------|
| TUCP_004122 | XLOC_180258 | ENSRNOT00000036383 | 0.988460809 | 1.58E-09 |
| TUCP_004122 | XLOC_180258 | ENSRNOT00000076528 | 0.997115373 | 1.57E-12 |
| TUCP_004122 | XLOC_180258 | ENSRNOT00000075193 | 0.964326971 | 4.29E-07 |
| TUCP_004122 | XLOC_180258 | ENSRNOT00000083034 | 0.990934646 | 4.75E-10 |
| TUCP_004122 | XLOC_180258 | ENSRNOT00000089607 | 0.995091455 | 2.23E-11 |
| TUCP_004122 | XLOC_180258 | ENSRNOT00000086014 | 0.960893638 | 6.74E-07 |
| TUCP_004122 | XLOC_180258 | ENSRNOT00000054939 | 0.958021495 | 9.57E-07 |
| TUCP_004122 | XLOC_180258 | ENSRNOT00000052315 | 0.983687082 | 8.85E-09 |
| TUCP_004122 | XLOC_180258 | ENSRNOT00000088168 | 1           | 0        |
| TUCP_004122 | XLOC_180258 | ENSRNOT00000046231 | 0.96225463  | 5.66E-07 |
| TUCP_004122 | XLOC_180258 | ENSRNOT00000013459 | 0.979098017 | 3.03E-08 |
| TUCP_004122 | XLOC_180258 | ENSRNOT00000078137 | 1           | 0        |
| TUCP_004122 | XLOC_180258 | ENSRNOT00000077764 | 0.977143528 | 4.73E-08 |
| TUCP_004122 | XLOC_180258 | ENSRNOT00000043661 | 0.966975951 | 2.93E-07 |
| TUCP_004122 | XLOC_180258 | ENSRNOT00000092740 | 1           | 0        |
| TUCP_004122 | XLOC_180258 | ENSRNOT00000000117 | 0.990989174 | 4.61E-10 |
| TUCP_004122 | XLOC_180258 | ENSRNOT00000071877 | 0.967113583 | 2.87E-07 |
| TUCP_004122 | XLOC_180258 | ENSRNOT00000070958 | 1           | 0        |
| TUCP_004122 | XLOC_180258 | ENSRNOT00000076757 | 0.959205354 | 8.31E-07 |
| TUCP_004122 | XLOC_180258 | ENSRNOT00000085310 | 0.965230243 | 3.78E-07 |
| TUCP_004122 | XLOC_180258 | ENSRNOT00000047241 | 0.966576993 | 3.11E-07 |
| TUCP_004122 | XLOC_180258 | ENSRNOT00000027268 | 1           | 1.33E-79 |
| TUCP_004122 | XLOC_180258 | ENSRNOT00000004459 | 1           | 0        |
| TUCP_004122 | XLOC_180258 | ENSRNOT00000048373 | 0.959096578 | 8.42E-07 |
| TUCP_004122 | XLOC_180258 | ENSRNOT00000061516 | 0.987595648 | 2.27E-09 |
| TUCP_004122 | XLOC_180258 | ENSRNOT00000088148 | 1           | 0        |
| TUCP_004122 | XLOC_180258 | ENSRNOT00000088527 | 1           | 0        |
| TUCP_004122 | XLOC_180258 | ENSRNOT00000078701 | 1           | 1.33E-79 |
| TUCP_004122 | XLOC_180258 | ENSRNOT00000052308 | 0.962646127 | 5.38E-07 |
| TUCP_004122 | XLOC_180258 | ENSRNOT00000021748 | 1           | 0        |
| TUCP_004122 | XLOC_180258 | ENSRNOT00000089085 | 1           | 0        |
| TUCP_004122 | XLOC_180258 | ENSRNOT00000008153 | 0.999703506 | 1.80E-17 |
| TUCP_004122 | XLOC_180258 | ENSRNOT00000085896 | 0.971605382 | 1.39E-07 |
| TUCP_004122 | XLOC_180258 | ENSRNOT00000079189 | 0.984972387 | 5.89E-09 |
| TUCP_004122 | XLOC_180258 | ENSRNOT00000090078 | 1           | 0        |
| TUCP_004122 | XLOC_180258 | ENSRNOT00000078020 | 0.958421666 | 9.13E-07 |
| TUCP_004122 | XLOC_180258 | ENSRNOT00000092425 | 0.956092273 | 1.19E-06 |
| TUCP_004122 | XLOC_180258 | ENSRNOT00000009776 | 1           | 0        |
| TUCP_003907 | XLOC_172121 | ENSRNOT00000052288 | 0.958390395 | 9.16E-07 |
| TUCP_003907 | XLOC_172121 | ENSRNOT00000022646 | 0.961807824 | 6.00E-07 |
| TUCP_003907 | XLOC_172121 | ENSRNOT00000005909 | 0.982800822 | 1.15E-08 |
| TUCP_003907 | XLOC_172121 | ENSRNOT00000008573 | 0.961639333 | 6.13E-07 |
| TUCP_003907 | XLOC_172121 | ENSRNOT00000009979 | 0.962687665 | 5.35E-07 |
| TUCP_003907 | XLOC_172121 | ENSRNOT00000082998 | 0.952074037 | 1.84E-06 |
| TUCP_003907 | XLOC_172121 | ENSRNOT00000081246 | 0.963594669 | 4.74E-07 |
| TUCP_003907 | XLOC_172121 | ENSRNOT00000019213 | 0.96315476  | 5.03E-07 |
| TUCP_003907 | XLOC_172121 | ENSRNOT00000009877 | 0.98570969  | 4.58E-09 |
| TUCP_003907 | XLOC_172121 | ENSRNOT00000027452 | 0.966500307 | 3.14E-07 |
| TUCP_003907 | XLOC_172121 | ENSRNOT00000021348 | 0.966753263 | 3.03E-07 |
| TUCP_003907 | XLOC_172121 | ENSRNOT00000006055 | 0.962970235 | 5.15E-07 |
| TUCP_003907 | XLOC_172121 | ENSRNOT00000017668 | 0.951233051 | 2.00E-06 |

|             |             |                     |              |          |
|-------------|-------------|---------------------|--------------|----------|
| TUCP_003907 | XLOC_172121 | ENSRNOT00000071560  | 0.965926689  | 3.42E-07 |
| TUCP_003907 | XLOC_172121 | ENSRNOT00000078445  | -0.959075182 | 8.44E-07 |
| TUCP_003907 | XLOC_172121 | ENSRNOT00000023326  | 0.963170962  | 5.02E-07 |
| TUCP_003907 | XLOC_172121 | ENSRNOT00000026065  | 0.975058533  | 7.29E-08 |
| TUCP_003907 | XLOC_172121 | ENSRNOT00000041709  | 0.958285787  | 9.27E-07 |
| TUCP_003907 | XLOC_172121 | ENSRNOT00000005228  | 0.988545957  | 1.52E-09 |
| TUCP_003907 | XLOC_172121 | ENSRNOT00000022726  | 0.967690908  | 2.63E-07 |
| TUCP_003907 | XLOC_172121 | ENSRNOT00000021592  | 0.951902411  | 1.87E-06 |
| TUCP_003907 | XLOC_172121 | ENSRNOT00000005659  | 0.970970498  | 1.55E-07 |
| TUCP_003907 | XLOC_172121 | ENSRNOT00000044635  | 0.950060542  | 2.25E-06 |
| TUCP_003907 | XLOC_172121 | ENSRNOT00000045326  | 0.957781445  | 9.84E-07 |
| TUCP_003907 | XLOC_172121 | ENSRNOT00000086548  | 0.965847494  | 3.46E-07 |
| TUCP_003907 | XLOC_172121 | ENSRNOT00000047210  | 0.960514838  | 7.07E-07 |
| TUCP_003907 | XLOC_172121 | ENSRNOT00000019502  | 0.969446707  | 1.99E-07 |
| TUCP_003907 | XLOC_172121 | ENSRNOT000000082107 | 0.957986766  | 9.61E-07 |
| TUCP_003907 | XLOC_172121 | ENSRNOT00000028856  | 0.969164403  | 2.08E-07 |
| TUCP_003907 | XLOC_172121 | ENSRNOT00000065300  | 0.966094613  | 3.33E-07 |
| TUCP_003907 | XLOC_172121 | ENSRNOT00000015073  | 0.970235555  | 1.75E-07 |
| TUCP_003907 | XLOC_172121 | ENSRNOT00000043216  | 0.982776901  | 1.16E-08 |
| TUCP_003907 | XLOC_172121 | ENSRNOT00000080654  | 0.973658189  | 9.56E-08 |
| TUCP_003907 | XLOC_172121 | ENSRNOT00000044742  | 0.959506926  | 8.01E-07 |
| TUCP_003907 | XLOC_172121 | ENSRNOT000000081981 | 0.953068477  | 1.66E-06 |
| TUCP_003907 | XLOC_172121 | ENSRNOT00000009496  | 0.961179632  | 6.50E-07 |
| TUCP_003907 | XLOC_172121 | ENSRNOT00000027414  | 0.987853764  | 2.04E-09 |
| TUCP_003907 | XLOC_172121 | ENSRNOT00000028563  | 0.98478819   | 6.25E-09 |
| TUCP_003907 | XLOC_172121 | ENSRNOT00000015076  | 0.95859364   | 8.94E-07 |
| TUCP_003907 | XLOC_172121 | ENSRNOT00000004698  | 0.983841274  | 8.44E-09 |
| TUCP_003907 | XLOC_172121 | ENSRNOT00000003158  | -0.960905493 | 6.73E-07 |
| TUCP_003907 | XLOC_172121 | ENSRNOT00000004172  | 0.961449455  | 6.28E-07 |
| TUCP_003907 | XLOC_172121 | ENSRNOT00000076516  | 0.961944515  | 5.90E-07 |
| TUCP_003907 | XLOC_172121 | ENSRNOT00000014979  | 0.952755764  | 1.71E-06 |
| TUCP_003907 | XLOC_172121 | ENSRNOT00000043554  | 0.969064979  | 2.12E-07 |
| TUCP_003907 | XLOC_172121 | ENSRNOT00000091807  | 0.970236207  | 1.75E-07 |
| TUCP_003907 | XLOC_172121 | ENSRNOT00000005942  | 0.985348196  | 5.19E-09 |
| TUCP_003907 | XLOC_172121 | ENSRNOT00000057814  | 0.95930958   | 8.20E-07 |
| TUCP_003907 | XLOC_172121 | ENSRNOT00000012463  | -0.971081866 | 1.52E-07 |
| TUCP_003907 | XLOC_172121 | ENSRNOT00000085251  | -0.959073971 | 8.44E-07 |
| TUCP_003907 | XLOC_172121 | ENSRNOT00000013046  | -0.954695096 | 1.39E-06 |
| TUCP_003907 | XLOC_172121 | ENSRNOT00000026783  | 0.981705324  | 1.57E-08 |
| TUCP_003907 | XLOC_172121 | ENSRNOT00000005126  | -0.952131849 | 1.83E-06 |
| TUCP_003907 | XLOC_172121 | ENSRNOT00000012379  | 0.973722826  | 9.44E-08 |
| TUCP_003907 | XLOC_172121 | ENSRNOT00000028646  | 0.98044514   | 2.18E-08 |
| TUCP_003907 | XLOC_172121 | ENSRNOT00000011384  | 0.991832576  | 2.82E-10 |
| TUCP_003907 | XLOC_172121 | ENSRNOT00000045699  | 0.955504215  | 1.27E-06 |
| TUCP_003907 | XLOC_172121 | ENSRNOT00000087443  | 0.964604765  | 4.12E-07 |
| TUCP_003907 | XLOC_172121 | ENSRNOT00000045083  | 0.960548535  | 7.04E-07 |
| TUCP_003907 | XLOC_172121 | ENSRNOT00000006963  | 0.983171079  | 1.03E-08 |
| TUCP_003907 | XLOC_172121 | ENSRNOT00000071764  | 0.961272464  | 6.43E-07 |
| TUCP_003907 | XLOC_172121 | ENSRNOT00000079109  | 0.970655335  | 1.63E-07 |
| TUCP_003907 | XLOC_172121 | ENSRNOT00000027944  | 0.984456439  | 6.96E-09 |
| TUCP_003907 | XLOC_172121 | ENSRNOT00000074939  | 0.975949111  | 6.09E-08 |

|             |             |                    |              |          |
|-------------|-------------|--------------------|--------------|----------|
| TUCP_003907 | XLOC_172121 | ENSRNOT00000027611 | 0.952197831  | 1.81E-06 |
| TUCP_003907 | XLOC_172121 | ENSRNOT00000028842 | 0.964583389  | 4.14E-07 |
| TUCP_003907 | XLOC_172121 | ENSRNOT00000004003 | 0.976461749  | 5.47E-08 |
| TUCP_003907 | XLOC_172121 | ENSRNOT00000036750 | 0.960369536  | 7.20E-07 |
| TUCP_003907 | XLOC_172121 | ENSRNOT00000068322 | 0.960003064  | 7.54E-07 |
| TUCP_003907 | XLOC_172121 | ENSRNOT00000052075 | 0.980396456  | 2.21E-08 |
| TUCP_003907 | XLOC_172121 | ENSRNOT00000085648 | 0.952243847  | 1.81E-06 |
| TUCP_003907 | XLOC_172121 | ENSRNOT00000037456 | 0.96637753   | 3.20E-07 |
| TUCP_003907 | XLOC_172121 | ENSRNOT00000022947 | -0.953847616 | 1.53E-06 |
| TUCP_003907 | XLOC_172121 | ENSRNOT00000087095 | 0.966730251  | 3.04E-07 |
| TUCP_003907 | XLOC_172121 | ENSRNOT00000032944 | 0.956649083  | 1.12E-06 |
| TUCP_003907 | XLOC_172121 | ENSRNOT00000083215 | 0.971176575  | 1.49E-07 |
| TUCP_003907 | XLOC_172121 | ENSRNOT00000026718 | 0.950465715  | 2.16E-06 |
| TUCP_003907 | XLOC_172121 | ENSRNOT00000072208 | 0.953422755  | 1.60E-06 |
| TUCP_003907 | XLOC_172121 | ENSRNOT00000032780 | 0.959685471  | 7.84E-07 |
| TUCP_003907 | XLOC_172121 | ENSRNOT00000055669 | 0.950995979  | 2.05E-06 |
| TUCP_003907 | XLOC_172121 | ENSRNOT00000022534 | 0.955917844  | 1.22E-06 |
| TUCP_003907 | XLOC_172121 | ENSRNOT00000017319 | 0.978629949  | 3.39E-08 |
| TUCP_003907 | XLOC_172121 | ENSRNOT00000055187 | 0.95942338   | 8.09E-07 |
| TUCP_003907 | XLOC_172121 | ENSRNOT00000005934 | 0.976402928  | 5.54E-08 |
| TUCP_003907 | XLOC_172121 | ENSRNOT00000001809 | 0.958884572  | 8.64E-07 |
| TUCP_003907 | XLOC_172121 | ENSRNOT00000079866 | 0.964473081  | 4.20E-07 |
| TUCP_003907 | XLOC_172121 | ENSRNOT00000072518 | 0.95662891   | 1.12E-06 |
| TUCP_003907 | XLOC_172121 | ENSRNOT00000041513 | 0.962975456  | 5.15E-07 |
| TUCP_003907 | XLOC_172121 | ENSRNOT00000034722 | 0.96521048   | 3.79E-07 |
| TUCP_003907 | XLOC_172121 | ENSRNOT00000087592 | 0.95753635   | 1.01E-06 |
| TUCP_003907 | XLOC_172121 | ENSRNOT00000067822 | 0.950163551  | 2.23E-06 |
| TUCP_003907 | XLOC_172121 | ENSRNOT00000024060 | 0.974422973  | 8.26E-08 |
| TUCP_003907 | XLOC_172121 | ENSRNOT00000008982 | 0.960021171  | 7.52E-07 |
| TUCP_003907 | XLOC_172121 | ENSRNOT00000010149 | 0.973018002  | 1.08E-07 |
| TUCP_003907 | XLOC_172121 | ENSRNOT00000034704 | 0.962588113  | 5.42E-07 |
| TUCP_003907 | XLOC_172121 | ENSRNOT00000028760 | 0.951959462  | 1.86E-06 |
| TUCP_003907 | XLOC_172121 | ENSRNOT00000024771 | 0.950679974  | 2.12E-06 |
| TUCP_003907 | XLOC_172121 | ENSRNOT00000021037 | 0.958285354  | 9.27E-07 |
| TUCP_003907 | XLOC_172121 | ENSRNOT00000064930 | 0.964196383  | 4.36E-07 |
| TUCP_003907 | XLOC_172121 | ENSRNOT00000074725 | 0.953864023  | 1.52E-06 |
| TUCP_003907 | XLOC_172121 | ENSRNOT00000019687 | 0.964418978  | 4.23E-07 |
| TUCP_003907 | XLOC_172121 | ENSRNOT00000068633 | 0.966224377  | 3.27E-07 |
| TUCP_003907 | XLOC_172121 | ENSRNOT00000015092 | 0.951921189  | 1.87E-06 |
| TUCP_003907 | XLOC_172121 | ENSRNOT00000004032 | 0.965493209  | 3.64E-07 |
| TUCP_003907 | XLOC_172121 | ENSRNOT00000084385 | 0.976953995  | 4.93E-08 |
| TUCP_003907 | XLOC_172121 | ENSRNOT00000017948 | 0.977098646  | 4.77E-08 |
| TUCP_003907 | XLOC_172121 | ENSRNOT00000012895 | 0.9812337    | 1.78E-08 |
| TUCP_003907 | XLOC_172121 | ENSRNOT00000004508 | 0.953939451  | 1.51E-06 |
| TUCP_003907 | XLOC_172121 | ENSRNOT00000023180 | 0.969096616  | 2.11E-07 |
| TUCP_003907 | XLOC_172121 | ENSRNOT00000044562 | 0.956817408  | 1.10E-06 |
| TUCP_003907 | XLOC_172121 | ENSRNOT00000057313 | 0.970273421  | 1.74E-07 |
| TUCP_003907 | XLOC_172121 | ENSRNOT00000015116 | 0.956776406  | 1.10E-06 |
| TUCP_003907 | XLOC_172121 | ENSRNOT00000090918 | 0.97708902   | 4.78E-08 |
| TUCP_003907 | XLOC_172121 | ENSRNOT00000001081 | 0.955920784  | 1.22E-06 |
| TUCP_003907 | XLOC_172121 | ENSRNOT00000039852 | 0.962805227  | 5.27E-07 |

|             |             |                    |              |          |
|-------------|-------------|--------------------|--------------|----------|
| TUCP_003907 | XLOC_172121 | ENSRNOT0000009440  | -0.96602736  | 3.37E-07 |
| TUCP_003907 | XLOC_172121 | ENSRNOT00000016948 | -0.951203806 | 2.01E-06 |
| TUCP_003907 | XLOC_172121 | ENSRNOT00000025983 | 0.987293888  | 2.55E-09 |
| TUCP_003907 | XLOC_172121 | ENSRNOT0000000713  | 0.962074649  | 5.80E-07 |
| TUCP_003907 | XLOC_172121 | ENSRNOT00000054874 | 0.964651074  | 4.10E-07 |
| TUCP_003907 | XLOC_172121 | ENSRNOT00000028070 | 0.969195558  | 2.07E-07 |
| TUCP_003907 | XLOC_172121 | ENSRNOT00000088196 | 0.967081993  | 2.88E-07 |
| TUCP_003907 | XLOC_172121 | ENSRNOT00000014508 | 0.958372731  | 9.18E-07 |
| TUCP_003907 | XLOC_172121 | ENSRNOT00000060362 | 0.962752581  | 5.30E-07 |
| TUCP_003907 | XLOC_172121 | ENSRNOT00000065983 | 0.960952637  | 6.69E-07 |
| TUCP_003907 | XLOC_172121 | ENSRNOT00000022213 | 0.981231636  | 1.78E-08 |
| TUCP_003907 | XLOC_172121 | ENSRNOT00000022610 | 0.968858729  | 2.19E-07 |
| TUCP_003907 | XLOC_172121 | ENSRNOT00000020437 | 0.991098175  | 4.34E-10 |
| TUCP_003907 | XLOC_172121 | ENSRNOT00000006828 | 0.977307319  | 4.56E-08 |
| TUCP_003907 | XLOC_172121 | ENSRNOT00000073346 | 0.96614478   | 3.31E-07 |
| TUCP_003907 | XLOC_172121 | ENSRNOT00000010898 | 0.977510978  | 4.36E-08 |
| TUCP_003907 | XLOC_172121 | ENSRNOT00000071493 | -0.962801722 | 5.27E-07 |
| TUCP_003907 | XLOC_172121 | ENSRNOT00000015265 | 0.969537577  | 1.96E-07 |
| TUCP_003907 | XLOC_172121 | ENSRNOT00000078639 | 0.954492562  | 1.42E-06 |
| TUCP_003907 | XLOC_172121 | ENSRNOT00000029833 | 0.963707654  | 4.67E-07 |
| TUCP_003907 | XLOC_172121 | ENSRNOT00000003971 | 0.954311456  | 1.45E-06 |
| TUCP_003907 | XLOC_172121 | ENSRNOT00000005355 | 0.972455195  | 1.19E-07 |
| TUCP_003907 | XLOC_172121 | ENSRNOT00000048063 | 0.950912834  | 2.07E-06 |
| TUCP_003907 | XLOC_172121 | ENSRNOT00000052422 | 0.958040436  | 9.55E-07 |
| TUCP_003907 | XLOC_172121 | ENSRNOT00000001242 | 0.991153628  | 4.20E-10 |
| TUCP_003907 | XLOC_172121 | ENSRNOT00000004026 | 0.954502641  | 1.42E-06 |
| TUCP_003907 | XLOC_172121 | ENSRNOT00000078589 | -0.961075706 | 6.59E-07 |
| TUCP_003907 | XLOC_172121 | ENSRNOT00000083799 | 0.964548264  | 4.16E-07 |
| TUCP_003907 | XLOC_172121 | ENSRNOT00000078102 | 0.977848478  | 4.05E-08 |
| TUCP_003907 | XLOC_172121 | ENSRNOT00000070893 | 0.955269334  | 1.31E-06 |
| TUCP_003907 | XLOC_172121 | ENSRNOT00000027520 | 0.957979774  | 9.61E-07 |
| TUCP_003907 | XLOC_172121 | ENSRNOT00000010873 | -0.950207385 | 2.22E-06 |
| TUCP_003907 | XLOC_172121 | ENSRNOT00000007164 | 0.966065573  | 3.35E-07 |
| TUCP_003907 | XLOC_172121 | ENSRNOT00000027526 | 0.954129541  | 1.48E-06 |
| TUCP_003907 | XLOC_172121 | ENSRNOT00000026755 | 0.97227701   | 1.23E-07 |
| TUCP_003907 | XLOC_172121 | ENSRNOT00000013661 | 0.951873777  | 1.88E-06 |
| TUCP_003907 | XLOC_172121 | ENSRNOT00000016129 | 0.965700558  | 3.53E-07 |
| TUCP_003907 | XLOC_172121 | ENSRNOT00000081047 | 0.968943142  | 2.16E-07 |
| TUCP_003907 | XLOC_172121 | ENSRNOT00000084240 | 0.962205541  | 5.70E-07 |
| TUCP_003907 | XLOC_172121 | ENSRNOT00000017629 | 0.95669175   | 1.12E-06 |
| TUCP_003907 | XLOC_172121 | ENSRNOT00000023619 | 0.95102444   | 2.04E-06 |
| TUCP_003907 | XLOC_172121 | ENSRNOT00000005911 | 0.972204718  | 1.25E-07 |
| TUCP_003907 | XLOC_172121 | ENSRNOT00000022839 | 0.97429977   | 8.46E-08 |
| TUCP_003907 | XLOC_172121 | ENSRNOT00000021408 | 0.960921747  | 6.72E-07 |
| TUCP_003907 | XLOC_172121 | ENSRNOT00000021116 | 0.956258584  | 1.17E-06 |
| TUCP_003907 | XLOC_172121 | ENSRNOT00000078475 | 0.957692534  | 9.94E-07 |
| TUCP_003907 | XLOC_172121 | ENSRNOT00000087429 | 0.963044888  | 5.10E-07 |
| TUCP_003907 | XLOC_172121 | ENSRNOT00000032158 | 0.956264827  | 1.17E-06 |
| TUCP_003907 | XLOC_172121 | ENSRNOT00000009683 | 0.958106451  | 9.47E-07 |
| TUCP_003907 | XLOC_172121 | ENSRNOT00000021153 | 0.974608824  | 7.97E-08 |
| TUCP_003907 | XLOC_172121 | ENSRNOT00000080207 | 0.953884524  | 1.52E-06 |

|             |             |                     |              |          |
|-------------|-------------|---------------------|--------------|----------|
| TUCP_003907 | XLOC_172121 | ENSRNOT00000017776  | 0.962515692  | 5.47E-07 |
| TUCP_003907 | XLOC_172121 | ENSRNOT000000064902 | 0.957214528  | 1.05E-06 |
| TUCP_003907 | XLOC_172121 | ENSRNOT00000009280  | 0.953818463  | 1.53E-06 |
| TUCP_003907 | XLOC_172121 | ENSRNOT000000064900 | 0.967968992  | 2.52E-07 |
| TUCP_003907 | XLOC_172121 | ENSRNOT000000024420 | 0.953901653  | 1.52E-06 |
| TUCP_003907 | XLOC_172121 | ENSRNOT000000005262 | 0.965379962  | 3.70E-07 |
| TUCP_003907 | XLOC_172121 | ENSRNOT000000013274 | 0.961612073  | 6.16E-07 |
| TUCP_003907 | XLOC_172121 | ENSRNOT000000021015 | 0.959921891  | 7.61E-07 |
| TUCP_003907 | XLOC_172121 | ENSRNOT000000092029 | 0.971277513  | 1.47E-07 |
| TUCP_003907 | XLOC_172121 | ENSRNOT000000024322 | 0.955647021  | 1.25E-06 |
| TUCP_003907 | XLOC_172121 | ENSRNOT000000011408 | 0.955984897  | 1.21E-06 |
| TUCP_003907 | XLOC_172121 | ENSRNOT000000016722 | 0.954746163  | 1.39E-06 |
| TUCP_003907 | XLOC_172121 | ENSRNOT000000091265 | 0.964925207  | 3.94E-07 |
| TUCP_003907 | XLOC_172121 | ENSRNOT000000010463 | 0.956704619  | 1.11E-06 |
| TUCP_003907 | XLOC_172121 | ENSRNOT000000058362 | 0.950497716  | 2.15E-06 |
| TUCP_003907 | XLOC_172121 | ENSRNOT000000015609 | 0.979724234  | 2.61E-08 |
| TUCP_003907 | XLOC_172121 | ENSRNOT000000078390 | -0.951362725 | 1.97E-06 |
| TUCP_003907 | XLOC_172121 | ENSRNOT000000026457 | 0.964545263  | 4.16E-07 |
| TUCP_003907 | XLOC_172121 | ENSRNOT000000090170 | 0.955470013  | 1.28E-06 |
| TUCP_003907 | XLOC_172121 | ENSRNOT000000027454 | 0.950067531  | 2.25E-06 |
| TUCP_003907 | XLOC_172121 | ENSRNOT000000035989 | 0.950863155  | 2.08E-06 |
| TUCP_003907 | XLOC_172121 | ENSRNOT000000003690 | 0.959047442  | 8.47E-07 |
| TUCP_003907 | XLOC_172121 | ENSRNOT000000076729 | 0.951533188  | 1.94E-06 |
| TUCP_003907 | XLOC_172121 | ENSRNOT000000049538 | 0.984191184  | 7.57E-09 |
| TUCP_003907 | XLOC_172121 | ENSRNOT000000051022 | 0.971127777  | 1.51E-07 |
| TUCP_003907 | XLOC_172121 | ENSRNOT000000006499 | 0.960208992  | 7.35E-07 |
| TUCP_003907 | XLOC_172121 | ENSRNOT000000073337 | 0.951524479  | 1.94E-06 |
| TUCP_003907 | XLOC_172121 | ENSRNOT000000087725 | 0.975912518  | 6.13E-08 |
| TUCP_003907 | XLOC_172121 | ENSRNOT000000066736 | 0.958228767  | 9.34E-07 |
| TUCP_003907 | XLOC_172121 | ENSRNOT000000025936 | -0.962383462 | 5.57E-07 |
| TUCP_003907 | XLOC_172121 | ENSRNOT000000009198 | 0.972020383  | 1.29E-07 |
| TUCP_003907 | XLOC_172121 | ENSRNOT000000009129 | 0.981998835  | 1.44E-08 |
| TUCP_003907 | XLOC_172121 | ENSRNOT000000036951 | 0.990900081  | 4.84E-10 |
| TUCP_003907 | XLOC_172121 | ENSRNOT000000083369 | 0.961400797  | 6.32E-07 |
| TUCP_003907 | XLOC_172121 | ENSRNOT000000016519 | 0.955404683  | 1.29E-06 |
| TUCP_003907 | XLOC_172121 | ENSRNOT000000026186 | 0.969552449  | 1.96E-07 |
| TUCP_003907 | XLOC_172121 | ENSRNOT000000002173 | -0.964968363 | 3.92E-07 |
| TUCP_003907 | XLOC_172121 | ENSRNOT000000013762 | 0.959840255  | 7.69E-07 |
| TUCP_003907 | XLOC_172121 | ENSRNOT000000044177 | 0.959809759  | 7.72E-07 |
| TUCP_003907 | XLOC_172121 | ENSRNOT000000030229 | 0.950538121  | 2.15E-06 |
| TUCP_003907 | XLOC_172121 | ENSRNOT000000087697 | 0.952595475  | 1.74E-06 |
| TUCP_003907 | XLOC_172121 | ENSRNOT000000011663 | 0.979140033  | 3.00E-08 |
| TUCP_003907 | XLOC_172121 | ENSRNOT000000043953 | 0.97980184   | 2.56E-08 |
| TUCP_003907 | XLOC_172121 | ENSRNOT000000085228 | 0.962127017  | 5.76E-07 |
| TUCP_003907 | XLOC_172121 | ENSRNOT000000072081 | 0.953958259  | 1.51E-06 |
| TUCP_003907 | XLOC_172121 | ENSRNOT000000019554 | 0.954749227  | 1.38E-06 |
| TUCP_003907 | XLOC_172121 | ENSRNOT000000058842 | 0.961824224  | 5.99E-07 |
| TUCP_003907 | XLOC_172121 | ENSRNOT000000023645 | 0.978457689  | 3.52E-08 |
| TUCP_003907 | XLOC_172121 | ENSRNOT000000019553 | 0.957390036  | 1.03E-06 |
| TUCP_003907 | XLOC_172121 | ENSRNOT000000084734 | 0.978812459  | 3.25E-08 |
| TUCP_003907 | XLOC_172121 | ENSRNOT000000023330 | 0.968589546  | 2.28E-07 |



|             |             |                    |              |          |
|-------------|-------------|--------------------|--------------|----------|
| TUCP_003907 | XLOC_172121 | ENSRNOT00000091128 | -0.963580569 | 4.75E-07 |
| TUCP_003907 | XLOC_172121 | ENSRNOT00000035700 | 0.976431427  | 5.51E-08 |
| TUCP_003907 | XLOC_172121 | ENSRNOT00000038247 | 0.973244643  | 1.03E-07 |
| TUCP_003907 | XLOC_172121 | ENSRNOT00000083255 | 0.962307035  | 5.62E-07 |
| TUCP_003907 | XLOC_172121 | ENSRNOT00000029136 | -0.959509036 | 8.01E-07 |
| TUCP_003907 | XLOC_172121 | ENSRNOT00000064840 | 0.970308491  | 1.73E-07 |
| TUCP_003907 | XLOC_172121 | ENSRNOT00000020379 | 0.957718896  | 9.91E-07 |
| TUCP_003907 | XLOC_172121 | ENSRNOT00000076669 | 0.955904911  | 1.22E-06 |
| TUCP_003907 | XLOC_172121 | ENSRNOT00000085596 | 0.964479074  | 4.20E-07 |
| TUCP_003907 | XLOC_172121 | ENSRNOT00000016333 | -0.95275132  | 1.71E-06 |
| TUCP_003907 | XLOC_172121 | ENSRNOT00000016991 | 0.956447784  | 1.15E-06 |
| TUCP_003907 | XLOC_172121 | ENSRNOT00000090925 | 0.974560965  | 8.04E-08 |
| TUCP_003907 | XLOC_172121 | ENSRNOT00000007175 | 0.966524683  | 3.13E-07 |
| TUCP_003907 | XLOC_172121 | ENSRNOT00000025394 | 0.976644963  | 5.26E-08 |
| TUCP_003907 | XLOC_172121 | ENSRNOT00000043872 | 0.956738485  | 1.11E-06 |
| TUCP_003907 | XLOC_172121 | ENSRNOT00000074653 | 0.96416787   | 4.38E-07 |
| TUCP_003907 | XLOC_172121 | ENSRNOT00000025391 | 0.954675145  | 1.40E-06 |
| TUCP_003907 | XLOC_172121 | ENSRNOT00000054828 | 0.961035934  | 6.62E-07 |
| TUCP_003907 | XLOC_172121 | ENSRNOT00000031230 | 0.973227199  | 1.04E-07 |
| TUCP_003907 | XLOC_172121 | ENSRNOT00000014887 | 0.957727654  | 9.90E-07 |
| TUCP_003907 | XLOC_172121 | ENSRNOT00000059458 | 0.955317612  | 1.30E-06 |
| TUCP_003907 | XLOC_172121 | ENSRNOT00000074659 | 0.956363952  | 1.16E-06 |
| TUCP_003907 | XLOC_172121 | ENSRNOT00000013758 | 0.951265395  | 1.99E-06 |
| TUCP_003907 | XLOC_172121 | ENSRNOT00000077406 | 0.976151359  | 5.84E-08 |
| TUCP_003907 | XLOC_172121 | ENSRNOT00000040069 | 0.962714046  | 5.33E-07 |
| TUCP_003907 | XLOC_172121 | ENSRNOT00000010748 | 0.957492034  | 1.02E-06 |
| TUCP_003907 | XLOC_172121 | ENSRNOT00000005478 | -0.950942047 | 2.06E-06 |
| TUCP_003907 | XLOC_172121 | ENSRNOT00000046058 | 0.958968146  | 8.55E-07 |
| TUCP_003907 | XLOC_172121 | ENSRNOT00000024149 | 0.970976312  | 1.54E-07 |
| TUCP_003907 | XLOC_172121 | ENSRNOT00000035474 | 0.97560161   | 6.54E-08 |
| TUCP_003907 | XLOC_172121 | ENSRNOT00000026087 | -0.954216289 | 1.47E-06 |
| TUCP_003907 | XLOC_172121 | ENSRNOT00000077311 | 0.961505481  | 6.24E-07 |
| TUCP_003907 | XLOC_172121 | ENSRNOT00000086336 | 0.986922942  | 2.95E-09 |
| TUCP_003907 | XLOC_172121 | ENSRNOT00000008929 | 0.965247218  | 3.77E-07 |
| TUCP_003907 | XLOC_172121 | ENSRNOT00000006195 | 0.990348506  | 6.49E-10 |
| TUCP_003907 | XLOC_172121 | ENSRNOT00000033235 | 0.96249206   | 5.49E-07 |
| TUCP_003907 | XLOC_172121 | ENSRNOT00000021285 | 0.950515875  | 2.15E-06 |
| TUCP_003907 | XLOC_172121 | ENSRNOT00000056130 | 0.955015421  | 1.35E-06 |
| TUCP_003907 | XLOC_172121 | ENSRNOT00000076872 | 0.95697813   | 1.08E-06 |
| TUCP_003907 | XLOC_172121 | ENSRNOT00000080800 | 0.960973087  | 6.68E-07 |
| TUCP_003907 | XLOC_172121 | ENSRNOT00000027910 | 0.955457118  | 1.28E-06 |
| TUCP_003907 | XLOC_172121 | ENSRNOT00000019769 | -0.950510691 | 2.15E-06 |
| TUCP_003907 | XLOC_172121 | ENSRNOT00000066670 | 0.974088575  | 8.81E-08 |
| TUCP_003907 | XLOC_172121 | ENSRNOT00000065921 | 0.957002778  | 1.08E-06 |
| TUCP_003907 | XLOC_172121 | ENSRNOT00000029125 | 0.960984068  | 6.67E-07 |
| TUCP_003907 | XLOC_172121 | ENSRNOT00000082174 | 0.968918521  | 2.17E-07 |
| TUCP_003907 | XLOC_172121 | ENSRNOT00000010218 | 0.966540532  | 3.12E-07 |
| TUCP_003907 | XLOC_172121 | ENSRNOT00000020322 | 0.961144336  | 6.53E-07 |
| TUCP_003907 | XLOC_172121 | ENSRNOT00000010824 | 0.955879221  | 1.22E-06 |
| TUCP_003907 | XLOC_172121 | ENSRNOT00000014814 | 0.963526156  | 4.78E-07 |
| TUCP_003907 | XLOC_172121 | ENSRNOT00000004412 | 0.980900169  | 1.94E-08 |

|             |             |                     |              |          |
|-------------|-------------|---------------------|--------------|----------|
| TUCP_003907 | XLOC_172121 | ENSRNOT00000007768  | 0.971215663  | 1.48E-07 |
| TUCP_003907 | XLOC_172121 | ENSRNOT000000067181 | 0.961967745  | 5.88E-07 |
| TUCP_003907 | XLOC_172121 | ENSRNOT000000064798 | 0.980200203  | 2.32E-08 |
| TUCP_003907 | XLOC_172121 | ENSRNOT00000019177  | 0.985784959  | 4.46E-09 |
| TUCP_003907 | XLOC_172121 | ENSRNOT00000014261  | 0.963477254  | 4.81E-07 |
| TUCP_003907 | XLOC_172121 | ENSRNOT000000022485 | 0.984365467  | 7.17E-09 |
| TUCP_003907 | XLOC_172121 | ENSRNOT00000010927  | 0.981398999  | 1.70E-08 |
| TUCP_003907 | XLOC_172121 | ENSRNOT000000084595 | 0.965868805  | 3.44E-07 |
| TUCP_003907 | XLOC_172121 | ENSRNOT000000025832 | 0.971782047  | 1.34E-07 |
| TUCP_003907 | XLOC_172121 | ENSRNOT000000043535 | 0.959687754  | 7.83E-07 |
| TUCP_003907 | XLOC_172121 | ENSRNOT000000040393 | 0.96039455   | 7.18E-07 |
| TUCP_003907 | XLOC_172121 | ENSRNOT000000066593 | 0.95666679   | 1.12E-06 |
| TUCP_003907 | XLOC_172121 | ENSRNOT00000012187  | 0.976929616  | 4.95E-08 |
| TUCP_003907 | XLOC_172121 | ENSRNOT00000011682  | -0.960211056 | 7.35E-07 |
| TUCP_003907 | XLOC_172121 | ENSRNOT00000004463  | 0.959270817  | 8.24E-07 |
| TUCP_003907 | XLOC_172121 | ENSRNOT000000027964 | 0.972751927  | 1.13E-07 |
| TUCP_003907 | XLOC_172121 | ENSRNOT000000024659 | 0.958321272  | 9.23E-07 |
| TUCP_003907 | XLOC_172121 | ENSRNOT000000023428 | 0.962384247  | 5.57E-07 |
| TUCP_003907 | XLOC_172121 | ENSRNOT000000051550 | 0.955567596  | 1.27E-06 |
| TUCP_003907 | XLOC_172121 | ENSRNOT00000011041  | 0.951095964  | 2.03E-06 |
| TUCP_003907 | XLOC_172121 | ENSRNOT000000047192 | -0.954068478 | 1.49E-06 |
| TUCP_003907 | XLOC_172121 | ENSRNOT00000017753  | 0.973649677  | 9.57E-08 |
| TUCP_003907 | XLOC_172121 | ENSRNOT000000079996 | 0.968920856  | 2.17E-07 |
| TUCP_003907 | XLOC_172121 | ENSRNOT00000002292  | 0.972189589  | 1.25E-07 |
| TUCP_003907 | XLOC_172121 | ENSRNOT00000018533  | 0.975265917  | 6.99E-08 |
| TUCP_003907 | XLOC_172121 | ENSRNOT000000080110 | 0.962301255  | 5.63E-07 |
| TUCP_003907 | XLOC_172121 | ENSRNOT000000048029 | 0.967147115  | 2.85E-07 |
| TUCP_003907 | XLOC_172121 | ENSRNOT000000004140 | 0.965115478  | 3.84E-07 |
| TUCP_003907 | XLOC_172121 | ENSRNOT00000010433  | 0.967828875  | 2.57E-07 |
| TUCP_003907 | XLOC_172121 | ENSRNOT000000003991 | 0.971704103  | 1.36E-07 |
| TUCP_003907 | XLOC_172121 | ENSRNOT000000093174 | 0.95522109   | 1.32E-06 |
| TUCP_003907 | XLOC_172121 | ENSRNOT000000034744 | 0.970348253  | 1.72E-07 |
| TUCP_003907 | XLOC_172121 | ENSRNOT000000024548 | 0.952332313  | 1.79E-06 |
| TUCP_003170 | XLOC_136254 | ENSRNOT000000084616 | -0.964054578 | 4.45E-07 |
| TUCP_003170 | XLOC_136254 | ENSRNOT000000067500 | 0.957541783  | 1.01E-06 |
| TUCP_004120 | XLOC_180256 | ENSRNOT000000068405 | 0.952502926  | 1.76E-06 |
| TUCP_004120 | XLOC_180256 | ENSRNOT000000039809 | 0.979523475  | 2.74E-08 |
| TUCP_004120 | XLOC_180256 | ENSRNOT000000000743 | 0.955324016  | 1.30E-06 |
| TUCP_004120 | XLOC_180256 | ENSRNOT00000019213  | 0.952474642  | 1.76E-06 |
| TUCP_004120 | XLOC_180256 | ENSRNOT00000009877  | 0.95309658   | 1.65E-06 |
| TUCP_004120 | XLOC_180256 | ENSRNOT000000007351 | -0.950049087 | 2.25E-06 |
| TUCP_004120 | XLOC_180256 | ENSRNOT000000074939 | 0.975951422  | 6.08E-08 |
| TUCP_004120 | XLOC_180256 | ENSRNOT000000071560 | 0.957020505  | 1.07E-06 |
| TUCP_004120 | XLOC_180256 | ENSRNOT000000078445 | -0.985886519 | 4.31E-09 |
| TUCP_004120 | XLOC_180256 | ENSRNOT000000000184 | -0.953797477 | 1.53E-06 |
| TUCP_004120 | XLOC_180256 | ENSRNOT000000005228 | 0.962270792  | 5.65E-07 |
| TUCP_004120 | XLOC_180256 | ENSRNOT000000023144 | 0.954001002  | 1.50E-06 |
| TUCP_004120 | XLOC_180256 | ENSRNOT000000021116 | 0.972996384  | 1.08E-07 |
| TUCP_004120 | XLOC_180256 | ENSRNOT000000082100 | 0.959990751  | 7.55E-07 |
| TUCP_004120 | XLOC_180256 | ENSRNOT000000028646 | 0.95886282   | 8.66E-07 |
| TUCP_004120 | XLOC_180256 | ENSRNOT000000043216 | 0.962966473  | 5.16E-07 |

|             |             |                    |              |          |
|-------------|-------------|--------------------|--------------|----------|
| TUCP_004120 | XLOC_180256 | ENSRNOT00000091128 | -0.962602595 | 5.41E-07 |
| TUCP_004120 | XLOC_180256 | ENSRNOT00000009280 | 0.966123339  | 3.32E-07 |
| TUCP_004120 | XLOC_180256 | ENSRNOT00000028563 | 0.953211745  | 1.63E-06 |
| TUCP_004120 | XLOC_180256 | ENSRNOT00000015076 | 0.96122892   | 6.46E-07 |
| TUCP_004120 | XLOC_180256 | ENSRNOT00000022800 | 0.952250844  | 1.80E-06 |
| TUCP_004120 | XLOC_180256 | ENSRNOT00000066670 | 0.964531448  | 4.17E-07 |
| TUCP_004120 | XLOC_180256 | ENSRNOT00000076516 | 0.950521851  | 2.15E-06 |
| TUCP_004120 | XLOC_180256 | ENSRNOT00000015073 | 0.974910202  | 7.51E-08 |
| TUCP_004120 | XLOC_180256 | ENSRNOT00000025689 | 0.953286742  | 1.62E-06 |
| TUCP_004120 | XLOC_180256 | ENSRNOT00000018533 | 0.950766569  | 2.10E-06 |
| TUCP_004120 | XLOC_180256 | ENSRNOT00000025832 | 0.983484538  | 9.41E-09 |
| TUCP_004120 | XLOC_180256 | ENSRNOT00000013046 | -0.953704816 | 1.55E-06 |
| TUCP_004120 | XLOC_180256 | ENSRNOT00000006055 | 0.970375677  | 1.71E-07 |
| TUCP_004120 | XLOC_180256 | ENSRNOT00000071573 | 0.977511239  | 4.36E-08 |
| TUCP_004120 | XLOC_180256 | ENSRNOT00000005126 | -0.969784764 | 1.89E-07 |
| TUCP_004120 | XLOC_180256 | ENSRNOT00000065300 | 0.950647572  | 2.12E-06 |
| TUCP_004120 | XLOC_180256 | ENSRNOT00000011384 | 0.967860057  | 2.56E-07 |
| TUCP_004120 | XLOC_180256 | ENSRNOT00000038247 | 0.952009017  | 1.85E-06 |
| TUCP_004120 | XLOC_180256 | ENSRNOT00000087306 | 0.955703479  | 1.25E-06 |
| TUCP_004120 | XLOC_180256 | ENSRNOT00000071764 | 0.96711502   | 2.87E-07 |
| TUCP_004120 | XLOC_180256 | ENSRNOT00000035989 | 0.967958921  | 2.52E-07 |
| TUCP_004120 | XLOC_180256 | ENSRNOT00000027944 | 0.959434376  | 8.08E-07 |
| TUCP_004120 | XLOC_180256 | ENSRNOT00000021348 | 0.973025791  | 1.07E-07 |
| TUCP_004120 | XLOC_180256 | ENSRNOT00000024406 | -0.961393396 | 6.33E-07 |
| TUCP_004120 | XLOC_180256 | ENSRNOT00000043156 | 0.963490526  | 4.80E-07 |
| TUCP_004120 | XLOC_180256 | ENSRNOT00000012671 | 0.957260152  | 1.05E-06 |
| TUCP_004120 | XLOC_180256 | ENSRNOT00000083215 | 0.968290551  | 2.39E-07 |
| TUCP_004120 | XLOC_180256 | ENSRNOT00000083127 | 0.950189641  | 2.22E-06 |
| TUCP_004120 | XLOC_180256 | ENSRNOT00000055187 | 0.96211331   | 5.77E-07 |
| TUCP_004120 | XLOC_180256 | ENSRNOT00000001809 | 0.952107156  | 1.83E-06 |
| TUCP_004120 | XLOC_180256 | ENSRNOT00000078500 | 0.977265537  | 4.60E-08 |
| TUCP_004120 | XLOC_180256 | ENSRNOT00000087592 | 0.955625812  | 1.26E-06 |
| TUCP_004120 | XLOC_180256 | ENSRNOT00000067822 | 0.95022312   | 2.21E-06 |
| TUCP_004120 | XLOC_180256 | ENSRNOT00000032274 | 0.970455087  | 1.69E-07 |
| TUCP_004120 | XLOC_180256 | ENSRNOT00000082687 | -0.966086163 | 3.34E-07 |
| TUCP_004120 | XLOC_180256 | ENSRNOT00000011784 | 0.955757072  | 1.24E-06 |
| TUCP_004120 | XLOC_180256 | ENSRNOT00000068633 | 0.95814635   | 9.43E-07 |
| TUCP_004120 | XLOC_180256 | ENSRNOT00000037446 | 0.951529747  | 1.94E-06 |
| TUCP_004120 | XLOC_180256 | ENSRNOT00000017948 | 0.978992668  | 3.11E-08 |
| TUCP_004120 | XLOC_180256 | ENSRNOT00000028842 | 0.959228909  | 8.28E-07 |
| TUCP_004120 | XLOC_180256 | ENSRNOT00000012895 | 0.958305517  | 9.25E-07 |
| TUCP_004120 | XLOC_180256 | ENSRNOT00000013570 | -0.968324958 | 2.38E-07 |
| TUCP_004120 | XLOC_180256 | ENSRNOT00000025859 | 0.95675969   | 1.11E-06 |
| TUCP_004120 | XLOC_180256 | ENSRNOT00000023180 | 0.959738815  | 7.79E-07 |
| TUCP_004120 | XLOC_180256 | ENSRNOT00000000676 | 0.960630638  | 6.97E-07 |
| TUCP_004120 | XLOC_180256 | ENSRNOT00000004359 | 0.957877894  | 9.73E-07 |
| TUCP_004120 | XLOC_180256 | ENSRNOT00000060362 | 0.95975826   | 7.77E-07 |
| TUCP_004120 | XLOC_180256 | ENSRNOT00000013274 | 0.965086266  | 3.85E-07 |
| TUCP_004120 | XLOC_180256 | ENSRNOT00000022610 | 0.982931426  | 1.11E-08 |
| TUCP_004120 | XLOC_180256 | ENSRNOT00000020437 | 0.970929376  | 1.56E-07 |
| TUCP_004120 | XLOC_180256 | ENSRNOT00000006828 | 0.971906638  | 1.31E-07 |

|             |             |                     |              |          |
|-------------|-------------|---------------------|--------------|----------|
| TUCP_004120 | XLOC_180256 | ENSRNOT00000073346  | 0.957444753  | 1.02E-06 |
| TUCP_004120 | XLOC_180256 | ENSRNOT00000010898  | 0.975814882  | 6.26E-08 |
| TUCP_004120 | XLOC_180256 | ENSRNOT00000001222  | 0.95311991   | 1.65E-06 |
| TUCP_004120 | XLOC_180256 | ENSRNOT00000067181  | 0.959073961  | 8.44E-07 |
| TUCP_004120 | XLOC_180256 | ENSRNOT00000005355  | 0.977329627  | 4.54E-08 |
| TUCP_004120 | XLOC_180256 | ENSRNOT00000080207  | 0.951567105  | 1.93E-06 |
| TUCP_004120 | XLOC_180256 | ENSRNOT00000025981  | 0.952395269  | 1.78E-06 |
| TUCP_004120 | XLOC_180256 | ENSRNOT00000027520  | 0.97544047   | 6.75E-08 |
| TUCP_004120 | XLOC_180256 | ENSRNOT00000025983  | 0.957966817  | 9.63E-07 |
| TUCP_004120 | XLOC_180256 | ENSRNOT00000047387  | 0.969452727  | 1.99E-07 |
| TUCP_004120 | XLOC_180256 | ENSRNOT00000004698  | 0.968653906  | 2.26E-07 |
| TUCP_004120 | XLOC_180256 | ENSRNOT00000012093  | 0.961134205  | 6.54E-07 |
| TUCP_004120 | XLOC_180256 | ENSRNOT00000058072  | 0.95226409   | 1.80E-06 |
| TUCP_004120 | XLOC_180256 | ENSRNOT00000084240  | 0.966831579  | 2.99E-07 |
| TUCP_004120 | XLOC_180256 | ENSRNOT00000017629  | 0.977148153  | 4.72E-08 |
| TUCP_004120 | XLOC_180256 | ENSRNOT00000032199  | 0.961918408  | 5.92E-07 |
| TUCP_004120 | XLOC_180256 | ENSRNOT00000003991  | 0.965245214  | 3.77E-07 |
| TUCP_004120 | XLOC_180256 | ENSRNOT00000004508  | 0.955941642  | 1.21E-06 |
| TUCP_004120 | XLOC_180256 | ENSRNOT00000009683  | 0.961427023  | 6.30E-07 |
| TUCP_004120 | XLOC_180256 | ENSRNOT00000021153  | 0.951249755  | 2.00E-06 |
| TUCP_004120 | XLOC_180256 | ENSRNOT00000084088  | 0.966580321  | 3.10E-07 |
| TUCP_004120 | XLOC_180256 | ENSRNOT000000064902 | 0.955988734  | 1.21E-06 |
| TUCP_004120 | XLOC_180256 | ENSRNOT00000088995  | 0.958587809  | 8.95E-07 |
| TUCP_004120 | XLOC_180256 | ENSRNOT00000024420  | 0.986932131  | 2.94E-09 |
| TUCP_004120 | XLOC_180256 | ENSRNOT00000029664  | 0.956582049  | 1.13E-06 |
| TUCP_004120 | XLOC_180256 | ENSRNOT00000076729  | 0.973599327  | 9.66E-08 |
| TUCP_004120 | XLOC_180256 | ENSRNOT00000085596  | 0.974773395  | 7.71E-08 |
| TUCP_004120 | XLOC_180256 | ENSRNOT00000091265  | 0.961193365  | 6.49E-07 |
| TUCP_004120 | XLOC_180256 | ENSRNOT00000030943  | -0.961269639 | 6.43E-07 |
| TUCP_004120 | XLOC_180256 | ENSRNOT00000026457  | 0.958706121  | 8.82E-07 |
| TUCP_004120 | XLOC_180256 | ENSRNOT00000027452  | 0.953199235  | 1.63E-06 |
| TUCP_004120 | XLOC_180256 | ENSRNOT00000027615  | 0.957529078  | 1.01E-06 |
| TUCP_004120 | XLOC_180256 | ENSRNOT00000005909  | 0.954020737  | 1.50E-06 |
| TUCP_004120 | XLOC_180256 | ENSRNOT00000066736  | 0.950725529  | 2.11E-06 |
| TUCP_004120 | XLOC_180256 | ENSRNOT00000025936  | -0.951062449 | 2.04E-06 |
| TUCP_004120 | XLOC_180256 | ENSRNOT00000012702  | -0.952953051 | 1.68E-06 |
| TUCP_004120 | XLOC_180256 | ENSRNOT00000009198  | 0.956437915  | 1.15E-06 |
| TUCP_004120 | XLOC_180256 | ENSRNOT00000025092  | 0.965184048  | 3.80E-07 |
| TUCP_004120 | XLOC_180256 | ENSRNOT00000009129  | 0.98474737   | 6.34E-09 |
| TUCP_004120 | XLOC_180256 | ENSRNOT00000050138  | 0.951291176  | 1.99E-06 |
| TUCP_004120 | XLOC_180256 | ENSRNOT00000072081  | 0.961110514  | 6.56E-07 |
| TUCP_004120 | XLOC_180256 | ENSRNOT00000036951  | 0.96308096   | 5.08E-07 |
| TUCP_004120 | XLOC_180256 | ENSRNOT00000090376  | 0.958189624  | 9.38E-07 |
| TUCP_004120 | XLOC_180256 | ENSRNOT00000090420  | -0.964916647 | 3.95E-07 |
| TUCP_004120 | XLOC_180256 | ENSRNOT00000081897  | 0.954939731  | 1.36E-06 |
| TUCP_004120 | XLOC_180256 | ENSRNOT00000057313  | 0.983861928  | 8.39E-09 |
| TUCP_004120 | XLOC_180256 | ENSRNOT00000073930  | 0.964484126  | 4.19E-07 |
| TUCP_004120 | XLOC_180256 | ENSRNOT00000000157  | 0.959533829  | 7.98E-07 |
| TUCP_004120 | XLOC_180256 | ENSRNOT00000010992  | 0.972644054  | 1.15E-07 |
| TUCP_004120 | XLOC_180256 | ENSRNOT00000076669  | 0.98107889   | 1.85E-08 |
| TUCP_004120 | XLOC_180256 | ENSRNOT00000011984  | 0.954594607  | 1.41E-06 |

|             |             |                    |              |          |
|-------------|-------------|--------------------|--------------|----------|
| TUCP_004120 | XLOC_180256 | ENSRNOT00000074653 | 0.954649342  | 1.40E-06 |
| TUCP_004120 | XLOC_180256 | ENSRNOT00000031230 | 0.975024762  | 7.34E-08 |
| TUCP_004120 | XLOC_180256 | ENSRNOT00000059458 | 0.989168796  | 1.15E-09 |
| TUCP_004120 | XLOC_180256 | ENSRNOT00000055992 | -0.951364688 | 1.97E-06 |
| TUCP_004120 | XLOC_180256 | ENSRNOT00000008184 | 0.958085936  | 9.49E-07 |
| TUCP_004120 | XLOC_180256 | ENSRNOT00000052288 | 0.977920892  | 3.98E-08 |
| TUCP_004120 | XLOC_180256 | ENSRNOT00000026543 | 0.971596129  | 1.39E-07 |
| TUCP_004120 | XLOC_180256 | ENSRNOT00000068322 | 0.972676584  | 1.15E-07 |
| TUCP_004120 | XLOC_180256 | ENSRNOT00000080800 | 0.954156565  | 1.48E-06 |
| TUCP_004120 | XLOC_180256 | ENSRNOT00000003296 | 0.976547887  | 5.37E-08 |
| TUCP_004120 | XLOC_180256 | ENSRNOT00000058852 | -0.966420842 | 3.18E-07 |
| TUCP_004120 | XLOC_180256 | ENSRNOT00000019810 | -0.950281639 | 2.20E-06 |
| TUCP_004120 | XLOC_180256 | ENSRNOT00000071694 | 0.967703611  | 2.62E-07 |
| TUCP_004120 | XLOC_180256 | ENSRNOT00000014814 | 0.955883426  | 1.22E-06 |
| TUCP_004120 | XLOC_180256 | ENSRNOT00000004412 | 0.983981716  | 8.09E-09 |
| TUCP_004120 | XLOC_180256 | ENSRNOT00000004942 | -0.957102215 | 1.06E-06 |
| TUCP_004120 | XLOC_180256 | ENSRNOT00000064798 | 0.956502026  | 1.14E-06 |
| TUCP_004120 | XLOC_180256 | ENSRNOT00000019177 | 0.952510385  | 1.76E-06 |
| TUCP_004120 | XLOC_180256 | ENSRNOT00000010927 | 0.952368718  | 1.78E-06 |
| TUCP_004120 | XLOC_180256 | ENSRNOT00000024941 | 0.955890518  | 1.22E-06 |
| TUCP_004120 | XLOC_180256 | ENSRNOT00000034704 | 0.976016315  | 6.00E-08 |
| TUCP_004120 | XLOC_180256 | ENSRNOT00000013031 | -0.956624976 | 1.12E-06 |
| TUCP_004120 | XLOC_180256 | ENSRNOT00000036750 | 0.966734878  | 3.03E-07 |
| TUCP_004120 | XLOC_180256 | ENSRNOT00000027964 | 0.973388528  | 1.01E-07 |
| TUCP_004120 | XLOC_180256 | ENSRNOT00000023428 | 0.952153217  | 1.82E-06 |
| TUCP_004120 | XLOC_180256 | ENSRNOT00000051550 | 0.974799353  | 7.67E-08 |
| TUCP_004120 | XLOC_180256 | ENSRNOT00000049538 | 0.960427525  | 7.15E-07 |
| TUCP_004120 | XLOC_180256 | ENSRNOT0000002292  | 0.951653015  | 1.92E-06 |
| TUCP_004120 | XLOC_180256 | ENSRNOT00000012463 | -0.962259741 | 5.66E-07 |
| TUCP_004120 | XLOC_180256 | ENSRNOT00000013661 | 0.957269228  | 1.04E-06 |
| TUCP_004120 | XLOC_180256 | ENSRNOT00000083799 | 0.976033664  | 5.98E-08 |
| TUCP_004120 | XLOC_180256 | ENSRNOT0000009066  | 0.965010524  | 3.89E-07 |
| TUCP_003165 | XLOC_135900 | ENSRNOT00000031360 | 0.962691592  | 5.35E-07 |
| TUCP_003165 | XLOC_135900 | ENSRNOT00000042495 | 0.952302132  | 1.79E-06 |
| TUCP_003165 | XLOC_135900 | ENSRNOT00000079494 | 0.956691588  | 1.12E-06 |
| TUCP_001595 | XLOC_062340 | ENSRNOT00000079464 | 0.954535152  | 1.42E-06 |
| TUCP_001595 | XLOC_062340 | ENSRNOT00000028458 | 0.951472013  | 1.95E-06 |
| TUCP_004358 | XLOC_192367 | ENSRNOT00000072077 | 0.954985462  | 1.35E-06 |
| TUCP_004358 | XLOC_192367 | ENSRNOT00000011344 | 0.961346814  | 6.37E-07 |
| TUCP_004358 | XLOC_192367 | ENSRNOT00000026361 | 0.969578168  | 1.95E-07 |
| TUCP_004358 | XLOC_192367 | ENSRNOT00000092196 | 0.954817503  | 1.37E-06 |
| TUCP_004358 | XLOC_192367 | ENSRNOT00000018674 | 0.950569814  | 2.14E-06 |
| TUCP_004359 | XLOC_192368 | ENSRNOT00000011344 | 0.95582755   | 1.23E-06 |
| TUCP_004359 | XLOC_192368 | ENSRNOT00000026361 | 0.959273718  | 8.24E-07 |
| TUCP_004359 | XLOC_192368 | ENSRNOT00000092196 | 0.954150726  | 1.48E-06 |
| TUCP_004608 | XLOC_203040 | ENSRNOT00000007698 | -0.958825132 | 8.70E-07 |
| TUCP_004608 | XLOC_203040 | ENSRNOT00000006188 | -0.950285517 | 2.20E-06 |
| TUCP_004608 | XLOC_203040 | ENSRNOT00000081796 | 0.959029908  | 8.49E-07 |
| TUCP_004608 | XLOC_203040 | ENSRNOT00000090621 | 0.967265338  | 2.80E-07 |
| TUCP_004608 | XLOC_203040 | ENSRNOT00000016088 | 0.961787998  | 6.02E-07 |
| TUCP_004608 | XLOC_203040 | ENSRNOT00000014780 | -0.951446628 | 1.96E-06 |

|             |             |                     |              |          |
|-------------|-------------|---------------------|--------------|----------|
| TUCP_004608 | XLOC_203040 | ENSRNOT00000075397  | 0.953762838  | 1.54E-06 |
| TUCP_004608 | XLOC_203040 | ENSRNOT00000007350  | 0.96522762   | 3.78E-07 |
| TUCP_004608 | XLOC_203040 | ENSRNOT00000020051  | 0.95670782   | 1.11E-06 |
| TUCP_004608 | XLOC_203040 | ENSRNOT00000009080  | -0.953743151 | 1.54E-06 |
| TUCP_004608 | XLOC_203040 | ENSRNOT00000063930  | -0.961561892 | 6.19E-07 |
| TUCP_004608 | XLOC_203040 | ENSRNOT00000088202  | -0.956873598 | 1.09E-06 |
| TUCP_004608 | XLOC_203040 | ENSRNOT00000087062  | 0.973897746  | 9.13E-08 |
| TUCP_004608 | XLOC_203040 | ENSRNOT0000000181   | 0.979387818  | 2.83E-08 |
| TUCP_004608 | XLOC_203040 | ENSRNOT00000015678  | -0.960819763 | 6.81E-07 |
| TUCP_004608 | XLOC_203040 | ENSRNOT00000048613  | 0.952498289  | 1.76E-06 |
| TUCP_004608 | XLOC_203040 | ENSRNOT00000041237  | -0.951860765 | 1.88E-06 |
| TUCP_004608 | XLOC_203040 | ENSRNOT00000023430  | -0.953228392 | 1.63E-06 |
| TUCP_004608 | XLOC_203040 | ENSRNOT00000079138  | 0.961376934  | 6.34E-07 |
| TUCP_004608 | XLOC_203040 | ENSRNOT00000078737  | -0.957873761 | 9.73E-07 |
| TUCP_004608 | XLOC_203040 | ENSRNOT00000076916  | 0.956544688  | 1.13E-06 |
| TUCP_004608 | XLOC_203040 | ENSRNOT00000045833  | 0.976282458  | 5.68E-08 |
| TUCP_004608 | XLOC_203040 | ENSRNOT00000008074  | -0.950513571 | 2.15E-06 |
| TUCP_004608 | XLOC_203040 | ENSRNOT00000074683  | 0.954833639  | 1.37E-06 |
| TUCP_004608 | XLOC_203040 | ENSRNOT00000009073  | -0.95424517  | 1.46E-06 |
| TUCP_004608 | XLOC_203040 | ENSRNOT00000019180  | -0.950244315 | 2.21E-06 |
| TUCP_004608 | XLOC_203040 | ENSRNOT00000015318  | -0.952919658 | 1.68E-06 |
| TUCP_004608 | XLOC_203040 | ENSRNOT00000013613  | -0.957790807 | 9.83E-07 |
| TUCP_004608 | XLOC_203040 | ENSRNOT00000006752  | 0.975765181  | 6.32E-08 |
| TUCP_004608 | XLOC_203040 | ENSRNOT00000040847  | -0.950369976 | 2.18E-06 |
| TUCP_004608 | XLOC_203040 | ENSRNOT000000031672 | -0.959503708 | 8.01E-07 |
| TUCP_004608 | XLOC_203040 | ENSRNOT00000002028  | 0.955832377  | 1.23E-06 |
| TUCP_004608 | XLOC_203040 | ENSRNOT00000025284  | -0.950922729 | 2.06E-06 |
| TUCP_004608 | XLOC_203040 | ENSRNOT00000016306  | -0.952898549 | 1.69E-06 |
| TUCP_004608 | XLOC_203040 | ENSRNOT00000023037  | 0.977669636  | 4.21E-08 |
| TUCP_004608 | XLOC_203040 | ENSRNOT00000087604  | 0.961727501  | 6.06E-07 |
| TUCP_004608 | XLOC_203040 | ENSRNOT00000057953  | 0.95619467   | 1.18E-06 |
| TUCP_004608 | XLOC_203040 | ENSRNOT00000020207  | 0.952700713  | 1.72E-06 |
| TUCP_004608 | XLOC_203040 | ENSRNOT00000083568  | 0.953824086  | 1.53E-06 |
| TUCP_004608 | XLOC_203040 | ENSRNOT00000019921  | 0.970164702  | 1.77E-07 |
| TUCP_004608 | XLOC_203040 | ENSRNOT00000065978  | 0.975551043  | 6.60E-08 |
| TUCP_004608 | XLOC_203040 | ENSRNOT00000077060  | 0.957000765  | 1.08E-06 |
| TUCP_004608 | XLOC_203040 | ENSRNOT00000005620  | -0.950134193 | 2.23E-06 |
| TUCP_004608 | XLOC_203040 | ENSRNOT00000004956  | 0.952607831  | 1.74E-06 |
| TUCP_004608 | XLOC_203040 | ENSRNOT00000061580  | -0.952274567 | 1.80E-06 |
| TUCP_004608 | XLOC_203040 | ENSRNOT00000092068  | 0.975954727  | 6.08E-08 |
| TUCP_004608 | XLOC_203040 | ENSRNOT00000087572  | -0.952112316 | 1.83E-06 |
| TUCP_004608 | XLOC_203040 | ENSRNOT00000027760  | 0.952072999  | 1.84E-06 |
| TUCP_004608 | XLOC_203040 | ENSRNOT00000065045  | 0.953898839  | 1.52E-06 |
| TUCP_004608 | XLOC_203040 | ENSRNOT00000007824  | -0.954774266 | 1.38E-06 |
| TUCP_004608 | XLOC_203040 | ENSRNOT00000025819  | -0.951092556 | 2.03E-06 |
| TUCP_004608 | XLOC_203040 | ENSRNOT00000057898  | -0.950695549 | 2.11E-06 |
| TUCP_004608 | XLOC_203040 | ENSRNOT00000024677  | 0.956745708  | 1.11E-06 |
| TUCP_004608 | XLOC_203040 | ENSRNOT00000019519  | 0.960382274  | 7.19E-07 |
| TUCP_004608 | XLOC_203040 | ENSRNOT00000019192  | -0.955170532 | 1.32E-06 |
| TUCP_004608 | XLOC_203040 | ENSRNOT00000067626  | -0.956941338 | 1.08E-06 |
| TUCP_004608 | XLOC_203040 | ENSRNOT00000081725  | 0.954513693  | 1.42E-06 |

|             |             |                     |              |          |
|-------------|-------------|---------------------|--------------|----------|
| TUCP_004608 | XLOC_203040 | ENSRNOT00000026550  | 0.955857825  | 1.23E-06 |
| TUCP_004608 | XLOC_203040 | ENSRNOT00000010783  | -0.957508373 | 1.02E-06 |
| TUCP_004608 | XLOC_203040 | ENSRNOT00000026726  | -0.957800093 | 9.82E-07 |
| TUCP_004608 | XLOC_203040 | ENSRNOT00000081226  | 0.957102789  | 1.06E-06 |
| TUCP_004608 | XLOC_203040 | ENSRNOT00000013286  | 0.975407518  | 6.80E-08 |
| TUCP_004608 | XLOC_203040 | ENSRNOT00000011948  | -0.953652244 | 1.56E-06 |
| TUCP_004608 | XLOC_203040 | ENSRNOT00000018488  | -0.95151216  | 1.95E-06 |
| TUCP_004608 | XLOC_203040 | ENSRNOT00000034282  | 0.970070466  | 1.80E-07 |
| TUCP_004608 | XLOC_203040 | ENSRNOT00000005686  | -0.950131412 | 2.23E-06 |
| TUCP_004608 | XLOC_203040 | ENSRNOT000000072762 | -0.9597351   | 7.79E-07 |
| TUCP_004608 | XLOC_203040 | ENSRNOT00000018952  | 0.956358343  | 1.16E-06 |
| TUCP_004608 | XLOC_203040 | ENSRNOT00000019820  | 0.950928004  | 2.06E-06 |
| TUCP_004608 | XLOC_203040 | ENSRNOT00000066708  | 0.980568413  | 2.11E-08 |
| TUCP_004608 | XLOC_203040 | ENSRNOT00000016389  | -0.951193369 | 2.01E-06 |
| TUCP_004608 | XLOC_203040 | ENSRNOT00000073860  | -0.965470667 | 3.65E-07 |
| TUCP_004608 | XLOC_203040 | ENSRNOT00000016629  | 0.953993614  | 1.50E-06 |
| TUCP_004608 | XLOC_203040 | ENSRNOT00000011832  | -0.968210348 | 2.42E-07 |
| TUCP_004608 | XLOC_203040 | ENSRNOT000000073643 | -0.964224467 | 4.35E-07 |
| TUCP_004608 | XLOC_203040 | ENSRNOT00000030074  | 0.967677192  | 2.63E-07 |
| TUCP_004608 | XLOC_203040 | ENSRNOT00000001979  | -0.96329911  | 4.93E-07 |
| TUCP_004608 | XLOC_203040 | ENSRNOT00000028089  | 0.966643314  | 3.08E-07 |
| TUCP_004608 | XLOC_203040 | ENSRNOT000000083968 | -0.95346401  | 1.59E-06 |
| TUCP_004608 | XLOC_203040 | ENSRNOT000000033806 | 0.969299229  | 2.04E-07 |
| TUCP_004608 | XLOC_203040 | ENSRNOT000000083578 | 0.950193847  | 2.22E-06 |
| TUCP_004608 | XLOC_203040 | ENSRNOT000000009150 | 0.978571906  | 3.43E-08 |
| TUCP_004608 | XLOC_203040 | ENSRNOT00000026920  | -0.96728312  | 2.79E-07 |
| TUCP_004608 | XLOC_203040 | ENSRNOT000000084709 | 0.955749348  | 1.24E-06 |
| TUCP_004608 | XLOC_203040 | ENSRNOT000000083967 | 0.952123403  | 1.83E-06 |
| TUCP_004608 | XLOC_203040 | ENSRNOT000000083964 | -0.953068434 | 1.66E-06 |
| TUCP_004608 | XLOC_203040 | ENSRNOT000000085545 | -0.955314033 | 1.30E-06 |
| TUCP_004608 | XLOC_203040 | ENSRNOT00000017486  | 0.971369422  | 1.44E-07 |
| TUCP_004608 | XLOC_203040 | ENSRNOT000000089545 | -0.956415046 | 1.15E-06 |
| TUCP_004608 | XLOC_203040 | ENSRNOT000000021802 | 0.952497103  | 1.76E-06 |
| TUCP_004608 | XLOC_203040 | ENSRNOT000000037809 | -0.96647701  | 3.15E-07 |
| TUCP_004608 | XLOC_203040 | ENSRNOT00000003265  | 0.958420446  | 9.13E-07 |
| TUCP_004608 | XLOC_203040 | ENSRNOT00000026525  | -0.95165682  | 1.92E-06 |
| TUCP_004608 | XLOC_203040 | ENSRNOT000000027435 | 0.962037331  | 5.83E-07 |
| TUCP_004608 | XLOC_203040 | ENSRNOT000000072118 | 0.959576435  | 7.94E-07 |
| TUCP_004608 | XLOC_203040 | ENSRNOT00000003787  | -0.950256621 | 2.21E-06 |
| TUCP_004608 | XLOC_203040 | ENSRNOT00000014506  | -0.964543614 | 4.16E-07 |
| TUCP_004608 | XLOC_203040 | ENSRNOT000000023262 | -0.958403585 | 9.14E-07 |
| TUCP_004608 | XLOC_203040 | ENSRNOT00000015213  | -0.954161893 | 1.48E-06 |
| TUCP_004608 | XLOC_203040 | ENSRNOT000000059246 | 0.97538298   | 6.83E-08 |
| TUCP_004608 | XLOC_203040 | ENSRNOT00000013067  | -0.961795364 | 6.01E-07 |
| TUCP_004608 | XLOC_203040 | ENSRNOT00000014859  | -0.954058273 | 1.49E-06 |
| TUCP_004608 | XLOC_203040 | ENSRNOT000000076230 | 0.95572178   | 1.24E-06 |
| TUCP_004608 | XLOC_203040 | ENSRNOT00000026760  | -0.958072247 | 9.51E-07 |
| TUCP_004608 | XLOC_203040 | ENSRNOT000000024119 | 0.966707922  | 3.05E-07 |
| TUCP_004608 | XLOC_203040 | ENSRNOT000000027145 | -0.961633538 | 6.14E-07 |
| TUCP_004608 | XLOC_203040 | ENSRNOT00000026312  | 0.964466877  | 4.20E-07 |
| TUCP_004608 | XLOC_203040 | ENSRNOT00000020537  | -0.961638509 | 6.13E-07 |

|             |             |                    |              |          |
|-------------|-------------|--------------------|--------------|----------|
| TUCP_004608 | XLOC_203040 | ENSRNOT00000036658 | -0.967757945 | 2.60E-07 |
| TUCP_004608 | XLOC_203040 | ENSRNOT00000089611 | 0.957184319  | 1.05E-06 |
| TUCP_004608 | XLOC_203040 | ENSRNOT00000005604 | 0.982681068  | 1.19E-08 |
| TUCP_004608 | XLOC_203040 | ENSRNOT00000016637 | -0.955942402 | 1.21E-06 |
| TUCP_004608 | XLOC_203040 | ENSRNOT00000010674 | -0.954946692 | 1.36E-06 |
| TUCP_004608 | XLOC_203040 | ENSRNOT00000038994 | -0.954893299 | 1.36E-06 |
| TUCP_004608 | XLOC_203040 | ENSRNOT00000086260 | -0.958167625 | 9.40E-07 |
| TUCP_004608 | XLOC_203040 | ENSRNOT00000068381 | 0.961607553  | 6.16E-07 |
| TUCP_004608 | XLOC_203040 | ENSRNOT00000031977 | 0.961532431  | 6.22E-07 |
| TUCP_004608 | XLOC_203040 | ENSRNOT00000017361 | 0.961844911  | 5.97E-07 |
| TUCP_004608 | XLOC_203040 | ENSRNOT00000018328 | -0.950615576 | 2.13E-06 |
| TUCP_004608 | XLOC_203040 | ENSRNOT00000019531 | -0.951355641 | 1.98E-06 |
| TUCP_004608 | XLOC_203040 | ENSRNOT00000008253 | -0.965775234 | 3.49E-07 |
| TUCP_004608 | XLOC_203040 | ENSRNOT00000029701 | 0.959306779  | 8.21E-07 |
| TUCP_004608 | XLOC_203040 | ENSRNOT00000008256 | -0.951671782 | 1.91E-06 |
| TUCP_004608 | XLOC_203040 | ENSRNOT00000001099 | -0.952050052 | 1.84E-06 |
| TUCP_004608 | XLOC_203040 | ENSRNOT00000071482 | -0.973632525 | 9.60E-08 |
| TUCP_004608 | XLOC_203040 | ENSRNOT00000034883 | -0.964381701 | 4.25E-07 |
| TUCP_004608 | XLOC_203040 | ENSRNOT00000045765 | -0.957167817 | 1.06E-06 |
| TUCP_004608 | XLOC_203040 | ENSRNOT00000010993 | 0.981674606  | 1.58E-08 |
| TUCP_004608 | XLOC_203040 | ENSRNOT00000005459 | 0.971333393  | 1.45E-07 |
| TUCP_004608 | XLOC_203040 | ENSRNOT00000025824 | -0.958811008 | 8.71E-07 |
| TUCP_004608 | XLOC_203040 | ENSRNOT00000007821 | 0.966340026  | 3.22E-07 |
| TUCP_004608 | XLOC_203040 | ENSRNOT00000026531 | -0.967256438 | 2.81E-07 |
| TUCP_004608 | XLOC_203040 | ENSRNOT00000005172 | 0.960762114  | 6.86E-07 |
| TUCP_004608 | XLOC_203040 | ENSRNOT00000020316 | -0.951143692 | 2.02E-06 |
| TUCP_004608 | XLOC_203040 | ENSRNOT00000067739 | -0.977494918 | 4.38E-08 |
| TUCP_004608 | XLOC_203040 | ENSRNOT00000005073 | 0.953704695  | 1.55E-06 |
| TUCP_004608 | XLOC_203040 | ENSRNOT00000017624 | 0.96393088   | 4.53E-07 |
| TUCP_004608 | XLOC_203040 | ENSRNOT00000003992 | -0.959890226 | 7.64E-07 |
| TUCP_004608 | XLOC_203040 | ENSRNOT00000065529 | 0.951187112  | 2.01E-06 |
| TUCP_004608 | XLOC_203040 | ENSRNOT00000073356 | 0.969659708  | 1.92E-07 |
| TUCP_004608 | XLOC_203040 | ENSRNOT00000031261 | 0.968233786  | 2.42E-07 |
| TUCP_004608 | XLOC_203040 | ENSRNOT00000050515 | 0.961469914  | 6.27E-07 |
| TUCP_004608 | XLOC_203040 | ENSRNOT00000026249 | -0.974001808 | 8.95E-08 |
| TUCP_004608 | XLOC_203040 | ENSRNOT00000089980 | -0.951708531 | 1.91E-06 |
| TUCP_004608 | XLOC_203040 | ENSRNOT00000028744 | -0.959986472 | 7.55E-07 |
| TUCP_004608 | XLOC_203040 | ENSRNOT00000015518 | -0.961664734 | 6.11E-07 |
| TUCP_004608 | XLOC_203040 | ENSRNOT00000055602 | -0.957698554 | 9.93E-07 |
| TUCP_004608 | XLOC_203040 | ENSRNOT00000075843 | -0.980440716 | 2.18E-08 |
| TUCP_004608 | XLOC_203040 | ENSRNOT00000055607 | -0.953519629 | 1.58E-06 |
| TUCP_004608 | XLOC_203040 | ENSRNOT00000073019 | 0.963258053  | 4.96E-07 |
| TUCP_004608 | XLOC_203040 | ENSRNOT00000041106 | 0.965820637  | 3.47E-07 |
| TUCP_004608 | XLOC_203040 | ENSRNOT00000011277 | 0.953630792  | 1.56E-06 |
| TUCP_004608 | XLOC_203040 | ENSRNOT00000034400 | -0.956613909 | 1.13E-06 |
| TUCP_004608 | XLOC_203040 | ENSRNOT00000013801 | 0.97270333   | 1.14E-07 |
| TUCP_004608 | XLOC_203040 | ENSRNOT00000088214 | 0.977191053  | 4.68E-08 |
| TUCP_004608 | XLOC_203040 | ENSRNOT00000000258 | -0.953252374 | 1.63E-06 |
| TUCP_004608 | XLOC_203040 | ENSRNOT00000000013 | 0.962626409  | 5.39E-07 |
| TUCP_004608 | XLOC_203040 | ENSRNOT00000018477 | -0.971138039 | 1.50E-07 |
| TUCP_004608 | XLOC_203040 | ENSRNOT00000087502 | 0.951833143  | 1.88E-06 |



|             |             |                    |              |          |
|-------------|-------------|--------------------|--------------|----------|
| TUCP_004608 | XLOC_203040 | ENSRNOT00000081110 | -0.960061078 | 7.48E-07 |
| TUCP_004608 | XLOC_203040 | ENSRNOT00000026258 | 0.955174405  | 1.32E-06 |
| TUCP_004608 | XLOC_203040 | ENSRNOT00000049285 | -0.965490062 | 3.64E-07 |
| TUCP_004608 | XLOC_203040 | ENSRNOT00000015239 | -0.956510493 | 1.14E-06 |
| TUCP_004608 | XLOC_203040 | ENSRNOT00000074649 | 0.968941872  | 2.16E-07 |
| TUCP_004608 | XLOC_203040 | ENSRNOT00000037955 | -0.977881612 | 4.02E-08 |
| TUCP_004608 | XLOC_203040 | ENSRNOT00000049725 | -0.951242441 | 2.00E-06 |
| TUCP_004608 | XLOC_203040 | ENSRNOT00000077146 | -0.959072023 | 8.44E-07 |
| TUCP_004608 | XLOC_203040 | ENSRNOT00000036282 | 0.966451043  | 3.16E-07 |
| TUCP_004608 | XLOC_203040 | ENSRNOT00000091427 | -0.950469694 | 2.16E-06 |
| TUCP_004608 | XLOC_203040 | ENSRNOT00000084422 | 0.952665089  | 1.73E-06 |
| TUCP_004608 | XLOC_203040 | ENSRNOT00000024938 | -0.9559361   | 1.21E-06 |
| TUCP_004608 | XLOC_203040 | ENSRNOT00000039177 | -0.956726861 | 1.11E-06 |
| TUCP_004608 | XLOC_203040 | ENSRNOT00000086456 | -0.956529769 | 1.14E-06 |
| TUCP_004608 | XLOC_203040 | ENSRNOT00000075209 | -0.972282311 | 1.23E-07 |
| TUCP_004608 | XLOC_203040 | ENSRNOT00000058382 | 0.972159791  | 1.26E-07 |
| TUCP_004608 | XLOC_203040 | ENSRNOT00000023977 | -0.963155283 | 5.03E-07 |
| TUCP_004608 | XLOC_203040 | ENSRNOT00000000155 | 0.952570877  | 1.75E-06 |
| TUCP_004608 | XLOC_203040 | ENSRNOT00000017761 | 0.955840126  | 1.23E-06 |
| TUCP_004608 | XLOC_203040 | ENSRNOT00000034411 | 0.964639739  | 4.10E-07 |
| TUCP_004608 | XLOC_203040 | ENSRNOT00000055957 | -0.95454118  | 1.42E-06 |
| TUCP_004608 | XLOC_203040 | ENSRNOT00000048933 | -0.951139611 | 2.02E-06 |
| TUCP_004608 | XLOC_203040 | ENSRNOT00000059181 | 0.975940098  | 6.10E-08 |
| TUCP_004608 | XLOC_203040 | ENSRNOT00000075630 | -0.964755458 | 4.04E-07 |
| TUCP_004608 | XLOC_203040 | ENSRNOT00000003691 | -0.955467171 | 1.28E-06 |
| TUCP_004608 | XLOC_203040 | ENSRNOT00000002313 | -0.95706301  | 1.07E-06 |
| TUCP_004608 | XLOC_203040 | ENSRNOT00000025794 | -0.960602979 | 7.00E-07 |
| TUCP_004608 | XLOC_203040 | ENSRNOT00000058111 | -0.9680434   | 2.49E-07 |
| TUCP_004608 | XLOC_203040 | ENSRNOT00000085118 | 0.957669857  | 9.97E-07 |
| TUCP_004608 | XLOC_203040 | ENSRNOT00000007276 | -0.951135649 | 2.02E-06 |
| TUCP_004608 | XLOC_203040 | ENSRNOT00000057738 | 0.954692452  | 1.39E-06 |
| TUCP_004608 | XLOC_203040 | ENSRNOT00000007738 | -0.955460066 | 1.28E-06 |
| TUCP_004608 | XLOC_203040 | ENSRNOT00000017190 | 0.965083453  | 3.85E-07 |
| TUCP_004608 | XLOC_203040 | ENSRNOT00000009994 | -0.979416356 | 2.81E-08 |
| TUCP_004608 | XLOC_203040 | ENSRNOT00000025887 | -0.953553788 | 1.57E-06 |
| TUCP_004608 | XLOC_203040 | ENSRNOT00000065897 | 0.961559458  | 6.20E-07 |
| TUCP_004608 | XLOC_203040 | ENSRNOT00000002114 | -0.951240642 | 2.00E-06 |
| TUCP_004608 | XLOC_203040 | ENSRNOT00000022142 | 0.951728373  | 1.90E-06 |
| TUCP_004608 | XLOC_203040 | ENSRNOT00000080608 | 0.95060277   | 2.13E-06 |
| TUCP_004608 | XLOC_203040 | ENSRNOT00000064535 | -0.964023447 | 4.47E-07 |
| TUCP_004608 | XLOC_203040 | ENSRNOT00000018634 | -0.964494888 | 4.19E-07 |
| TUCP_004608 | XLOC_203040 | ENSRNOT00000087408 | 0.954277945  | 1.46E-06 |
| TUCP_004608 | XLOC_203040 | ENSRNOT00000035145 | -0.95198446  | 1.85E-06 |
| TUCP_004608 | XLOC_203040 | ENSRNOT00000077152 | 0.962440985  | 5.53E-07 |
| TUCP_004608 | XLOC_203040 | ENSRNOT00000015537 | 0.966029082  | 3.37E-07 |
| TUCP_004608 | XLOC_203040 | ENSRNOT00000052120 | 0.957256041  | 1.05E-06 |
| TUCP_004608 | XLOC_203040 | ENSRNOT00000017385 | -0.979969611 | 2.46E-08 |
| TUCP_004608 | XLOC_203040 | ENSRNOT00000064735 | 0.951686759  | 1.91E-06 |
| TUCP_004608 | XLOC_203040 | ENSRNOT00000010024 | 0.956012234  | 1.20E-06 |
| TUCP_004608 | XLOC_203040 | ENSRNOT00000046215 | -0.957596024 | 1.01E-06 |
| TUCP_004608 | XLOC_203040 | ENSRNOT00000039102 | 0.974646672  | 7.91E-08 |

|             |             |                    |              |          |
|-------------|-------------|--------------------|--------------|----------|
| TUCP_004608 | XLOC_203040 | ENSRNOT00000037405 | 0.95893037   | 8.59E-07 |
| TUCP_004608 | XLOC_203040 | ENSRNOT00000001135 | -0.953316633 | 1.61E-06 |
| TUCP_004608 | XLOC_203040 | ENSRNOT00000091205 | 0.950481513  | 2.16E-06 |
| TUCP_004608 | XLOC_203040 | ENSRNOT00000078994 | 0.953012613  | 1.67E-06 |
| TUCP_004608 | XLOC_203040 | ENSRNOT00000025705 | 0.956172277  | 1.18E-06 |
| TUCP_004608 | XLOC_203040 | ENSRNOT00000025791 | -0.950670002 | 2.12E-06 |
| TUCP_004608 | XLOC_203040 | ENSRNOT00000010983 | 0.982395695  | 1.29E-08 |
| TUCP_004608 | XLOC_203040 | ENSRNOT00000080222 | -0.956153307 | 1.19E-06 |
| TUCP_004608 | XLOC_203040 | ENSRNOT00000085279 | 0.967352731  | 2.77E-07 |
| TUCP_004608 | XLOC_203040 | ENSRNOT00000025460 | 0.982738169  | 1.17E-08 |
| TUCP_004608 | XLOC_203040 | ENSRNOT00000071917 | 0.957665851  | 9.97E-07 |
| TUCP_004608 | XLOC_203040 | ENSRNOT00000055442 | 0.973292672  | 1.02E-07 |
| TUCP_004608 | XLOC_203040 | ENSRNOT00000028225 | 0.952661945  | 1.73E-06 |
| TUCP_004608 | XLOC_203040 | ENSRNOT00000001412 | 0.963627426  | 4.72E-07 |
| TUCP_004608 | XLOC_203040 | ENSRNOT00000001289 | 0.950609214  | 2.13E-06 |
| TUCP_004608 | XLOC_203040 | ENSRNOT00000061345 | -0.96262288  | 5.40E-07 |
| TUCP_004608 | XLOC_203040 | ENSRNOT00000015495 | -0.951811597 | 1.89E-06 |
| TUCP_004608 | XLOC_203040 | ENSRNOT00000016568 | 0.966870264  | 2.97E-07 |
| TUCP_004608 | XLOC_203040 | ENSRNOT00000032248 | 0.959354978  | 8.16E-07 |
| TUCP_004608 | XLOC_203040 | ENSRNOT00000027360 | -0.952351286 | 1.79E-06 |
| TUCP_004608 | XLOC_203040 | ENSRNOT00000082904 | 0.986661582  | 3.25E-09 |
| TUCP_004608 | XLOC_203040 | ENSRNOT00000010906 | -0.951360594 | 1.98E-06 |
| TUCP_004608 | XLOC_203040 | ENSRNOT00000015223 | 0.984883502  | 6.06E-09 |
| TUCP_004608 | XLOC_203040 | ENSRNOT00000021534 | -0.952576889 | 1.74E-06 |
| TUCP_004608 | XLOC_203040 | ENSRNOT00000023628 | -0.97295353  | 1.09E-07 |
| TUCP_004608 | XLOC_203040 | ENSRNOT00000028907 | 0.969983071  | 1.82E-07 |
| TUCP_004608 | XLOC_203040 | ENSRNOT00000015188 | 0.95654693   | 1.13E-06 |
| TUCP_004608 | XLOC_203040 | ENSRNOT00000013516 | 0.962250445  | 5.67E-07 |
| TUCP_004608 | XLOC_203040 | ENSRNOT00000025314 | 0.970695113  | 1.62E-07 |
| TUCP_004608 | XLOC_203040 | ENSRNOT00000024841 | -0.971305217 | 1.46E-07 |
| TUCP_004608 | XLOC_203040 | ENSRNOT00000016776 | -0.951186214 | 2.01E-06 |
| TUCP_004608 | XLOC_203040 | ENSRNOT00000015383 | 0.950724556  | 2.11E-06 |
| TUCP_004608 | XLOC_203040 | ENSRNOT00000079414 | -0.962473199 | 5.50E-07 |
| TUCP_004608 | XLOC_203040 | ENSRNOT00000008987 | -0.953604449 | 1.57E-06 |
| TUCP_004608 | XLOC_203040 | ENSRNOT00000024011 | 0.969433511  | 2.00E-07 |
| TUCP_004608 | XLOC_203040 | ENSRNOT00000037665 | 0.96506109   | 3.87E-07 |
| TUCP_004608 | XLOC_203040 | ENSRNOT00000092876 | -0.963053153 | 5.10E-07 |
| TUCP_004608 | XLOC_203040 | ENSRNOT00000025913 | -0.952682905 | 1.72E-06 |
| TUCP_004608 | XLOC_203040 | ENSRNOT00000024253 | 0.972217285  | 1.24E-07 |
| TUCP_004608 | XLOC_203040 | ENSRNOT00000072357 | -0.97680519  | 5.09E-08 |
| TUCP_004354 | XLOC_192341 | ENSRNOT00000061139 | 0.972503422  | 1.18E-07 |
| TUCP_004354 | XLOC_192341 | ENSRNOT00000074042 | 0.971272476  | 1.47E-07 |
| TUCP_004354 | XLOC_192341 | ENSRNOT00000072939 | 0.968073702  | 2.48E-07 |
| TUCP_004354 | XLOC_192341 | ENSRNOT00000029531 | -0.956403559 | 1.15E-06 |
| TUCP_004607 | XLOC_202994 | ENSRNOT00000092200 | 0.957873245  | 9.73E-07 |
| TUCP_004356 | XLOC_192365 | ENSRNOT00000072077 | 0.955902811  | 1.22E-06 |
| TUCP_004356 | XLOC_192365 | ENSRNOT00000011344 | 0.961006643  | 6.65E-07 |
| TUCP_004356 | XLOC_192365 | ENSRNOT00000026361 | 0.962951847  | 5.17E-07 |
| TUCP_004356 | XLOC_192365 | ENSRNOT00000092196 | 0.962389915  | 5.56E-07 |
| TUCP_004357 | XLOC_192366 | ENSRNOT00000008961 | 0.975339793  | 6.89E-08 |
| TUCP_004357 | XLOC_192366 | ENSRNOT00000026677 | 0.968893756  | 2.18E-07 |

|             |             |                    |              |          |
|-------------|-------------|--------------------|--------------|----------|
| TUCP_004357 | XLOC_192366 | ENSRNOT00000035523 | 0.97346889   | 9.90E-08 |
| TUCP_004357 | XLOC_192366 | ENSRNOT00000082611 | 0.974370091  | 8.34E-08 |
| TUCP_004357 | XLOC_192366 | ENSRNOT00000033719 | 0.969618236  | 1.94E-07 |
| TUCP_004357 | XLOC_192366 | ENSRNOT00000007358 | 0.953735045  | 1.54E-06 |
| TUCP_004357 | XLOC_192366 | ENSRNOT00000029620 | 0.953820015  | 1.53E-06 |
| TUCP_004357 | XLOC_192366 | ENSRNOT00000001853 | 0.95660121   | 1.13E-06 |
| TUCP_004357 | XLOC_192366 | ENSRNOT00000086541 | 0.966738801  | 3.03E-07 |
| TUCP_004357 | XLOC_192366 | ENSRNOT00000055127 | 0.967262647  | 2.80E-07 |
| TUCP_004357 | XLOC_192366 | ENSRNOT00000030745 | -0.966712929 | 3.04E-07 |
| TUCP_004357 | XLOC_192366 | ENSRNOT00000084873 | 0.955312692  | 1.30E-06 |
| TUCP_004357 | XLOC_192366 | ENSRNOT00000011134 | 0.957051916  | 1.07E-06 |
| TUCP_004357 | XLOC_192366 | ENSRNOT00000076910 | 0.969077028  | 2.11E-07 |
| TUCP_004357 | XLOC_192366 | ENSRNOT00000024718 | 0.977250272  | 4.62E-08 |
| TUCP_004357 | XLOC_192366 | ENSRNOT00000055674 | 0.953944924  | 1.51E-06 |
| TUCP_004357 | XLOC_192366 | ENSRNOT00000000448 | 0.962674116  | 5.36E-07 |
| TUCP_004357 | XLOC_192366 | ENSRNOT00000068683 | 0.96092763   | 6.72E-07 |
| TUCP_004357 | XLOC_192366 | ENSRNOT00000090867 | 0.953647416  | 1.56E-06 |
| TUCP_004357 | XLOC_192366 | ENSRNOT00000034603 | 0.963494865  | 4.80E-07 |
| TUCP_004357 | XLOC_192366 | ENSRNOT00000032719 | 0.972804527  | 1.12E-07 |
| TUCP_004357 | XLOC_192366 | ENSRNOT00000089309 | 0.967602498  | 2.66E-07 |
| TUCP_004357 | XLOC_192366 | ENSRNOT00000027949 | 0.98106876   | 1.86E-08 |
| TUCP_004357 | XLOC_192366 | ENSRNOT00000050656 | 0.961447903  | 6.29E-07 |
| TUCP_004357 | XLOC_192366 | ENSRNOT00000082116 | 0.97585946   | 6.20E-08 |
| TUCP_004357 | XLOC_192366 | ENSRNOT0000002936  | 0.962558767  | 5.44E-07 |
| TUCP_004357 | XLOC_192366 | ENSRNOT00000014684 | 0.970531233  | 1.67E-07 |
| TUCP_004357 | XLOC_192366 | ENSRNOT00000001570 | 0.96840878   | 2.35E-07 |
| TUCP_004357 | XLOC_192366 | ENSRNOT00000081530 | -0.955425344 | 1.29E-06 |
| TUCP_004357 | XLOC_192366 | ENSRNOT00000074738 | 0.955544547  | 1.27E-06 |
| TUCP_004357 | XLOC_192366 | ENSRNOT00000015618 | 0.952581678  | 1.74E-06 |
| TUCP_004357 | XLOC_192366 | ENSRNOT00000004637 | 0.970281214  | 1.74E-07 |
| TUCP_004357 | XLOC_192366 | ENSRNOT00000078058 | 0.950335708  | 2.19E-06 |
| TUCP_004357 | XLOC_192366 | ENSRNOT00000046888 | 0.956443116  | 1.15E-06 |
| TUCP_004357 | XLOC_192366 | ENSRNOT00000015576 | 0.973760456  | 9.37E-08 |
| TUCP_004357 | XLOC_192366 | ENSRNOT00000054757 | 0.959715449  | 7.81E-07 |
| TUCP_004357 | XLOC_192366 | ENSRNOT00000043660 | 0.963594285  | 4.74E-07 |
| TUCP_004357 | XLOC_192366 | ENSRNOT00000019262 | -0.969516738 | 1.97E-07 |
| TUCP_004357 | XLOC_192366 | ENSRNOT00000054897 | -0.954127583 | 1.48E-06 |
| TUCP_004357 | XLOC_192366 | ENSRNOT00000009620 | 0.955181678  | 1.32E-06 |
| TUCP_004357 | XLOC_192366 | ENSRNOT00000091863 | 0.951026692  | 2.04E-06 |
| TUCP_004357 | XLOC_192366 | ENSRNOT00000029990 | 0.974191353  | 8.64E-08 |
| TUCP_004357 | XLOC_192366 | ENSRNOT00000081036 | 0.952525497  | 1.75E-06 |
| TUCP_004357 | XLOC_192366 | ENSRNOT00000033984 | 0.974289738  | 8.47E-08 |
| TUCP_004357 | XLOC_192366 | ENSRNOT00000092272 | 0.963027272  | 5.11E-07 |
| TUCP_004357 | XLOC_192366 | ENSRNOT00000011481 | 0.968840889  | 2.20E-07 |
| TUCP_004357 | XLOC_192366 | ENSRNOT00000016449 | 0.959695804  | 7.83E-07 |
| TUCP_004357 | XLOC_192366 | ENSRNOT00000010678 | -0.957338033 | 1.04E-06 |
| TUCP_004357 | XLOC_192366 | ENSRNOT00000044983 | 0.977772578  | 4.12E-08 |
| TUCP_004357 | XLOC_192366 | ENSRNOT00000024464 | 0.957771032  | 9.85E-07 |
| TUCP_004357 | XLOC_192366 | ENSRNOT00000061973 | 0.95693415   | 1.09E-06 |
| TUCP_004357 | XLOC_192366 | ENSRNOT00000010264 | 0.958221186  | 9.34E-07 |
| TUCP_004357 | XLOC_192366 | ENSRNOT00000090654 | 0.970582597  | 1.65E-07 |

|             |             |                    |              |          |
|-------------|-------------|--------------------|--------------|----------|
| TUCP_004357 | XLOC_192366 | ENSRNOT00000039729 | 0.95203381   | 1.84E-06 |
| TUCP_004357 | XLOC_192366 | ENSRNOT00000004919 | 0.96046603   | 7.12E-07 |
| TUCP_004357 | XLOC_192366 | ENSRNOT00000060765 | 0.968412815  | 2.35E-07 |
| TUCP_004357 | XLOC_192366 | ENSRNOT00000021816 | 0.961649634  | 6.13E-07 |
| TUCP_004357 | XLOC_192366 | ENSRNOT00000024992 | 0.964506201  | 4.18E-07 |
| TUCP_004357 | XLOC_192366 | ENSRNOT00000030532 | 0.971272949  | 1.47E-07 |
| TUCP_004357 | XLOC_192366 | ENSRNOT00000056995 | 0.978885938  | 3.19E-08 |
| TUCP_004357 | XLOC_192366 | ENSRNOT00000056551 | 0.952910517  | 1.68E-06 |
| TUCP_004357 | XLOC_192366 | ENSRNOT00000030251 | -0.961353486 | 6.36E-07 |
| TUCP_004357 | XLOC_192366 | ENSRNOT00000023100 | 0.964219991  | 4.35E-07 |
| TUCP_004357 | XLOC_192366 | ENSRNOT00000057016 | 0.985294823  | 5.28E-09 |
| TUCP_004357 | XLOC_192366 | ENSRNOT00000055888 | 0.957203433  | 1.05E-06 |
| TUCP_004357 | XLOC_192366 | ENSRNOT00000019501 | 0.950277102  | 2.20E-06 |
| TUCP_004357 | XLOC_192366 | ENSRNOT00000044975 | 0.955446043  | 1.28E-06 |
| TUCP_004357 | XLOC_192366 | ENSRNOT00000018782 | 0.963339863  | 4.90E-07 |
| TUCP_004357 | XLOC_192366 | ENSRNOT00000023504 | 0.961365097  | 6.35E-07 |
| TUCP_004357 | XLOC_192366 | ENSRNOT00000084021 | 0.979898904  | 2.50E-08 |
| TUCP_004357 | XLOC_192366 | ENSRNOT00000088201 | 0.955648965  | 1.25E-06 |
| TUCP_004357 | XLOC_192366 | ENSRNOT00000049536 | 0.951799988  | 1.89E-06 |
| TUCP_004357 | XLOC_192366 | ENSRNOT00000086459 | 0.958923418  | 8.60E-07 |
| TUCP_004357 | XLOC_192366 | ENSRNOT00000071133 | 0.950284695  | 2.20E-06 |
| TUCP_004357 | XLOC_192366 | ENSRNOT00000092857 | 0.970065094  | 1.80E-07 |
| TUCP_004357 | XLOC_192366 | ENSRNOT00000018061 | 0.958522002  | 9.02E-07 |
| TUCP_004357 | XLOC_192366 | ENSRNOT00000089185 | 0.954280803  | 1.46E-06 |
| TUCP_004357 | XLOC_192366 | ENSRNOT00000031951 | 0.959182777  | 8.33E-07 |
| TUCP_004357 | XLOC_192366 | ENSRNOT0000000640  | 0.963199419  | 5.00E-07 |
| TUCP_004357 | XLOC_192366 | ENSRNOT00000084429 | 0.95149569   | 1.95E-06 |
| TUCP_004357 | XLOC_192366 | ENSRNOT00000029443 | 0.953331715  | 1.61E-06 |
| TUCP_004357 | XLOC_192366 | ENSRNOT00000022373 | 0.959756831  | 7.77E-07 |
| TUCP_004357 | XLOC_192366 | ENSRNOT00000059660 | 0.952918195  | 1.68E-06 |
| TUCP_004357 | XLOC_192366 | ENSRNOT00000090186 | 0.9509059    | 2.07E-06 |
| TUCP_004357 | XLOC_192366 | ENSRNOT00000073547 | 0.980648358  | 2.07E-08 |
| TUCP_004357 | XLOC_192366 | ENSRNOT00000043434 | 0.962178091  | 5.72E-07 |
| TUCP_004357 | XLOC_192366 | ENSRNOT00000028423 | 0.953306196  | 1.62E-06 |
| TUCP_004357 | XLOC_192366 | ENSRNOT00000051363 | 0.950187794  | 2.22E-06 |
| TUCP_004357 | XLOC_192366 | ENSRNOT00000022648 | 0.965443838  | 3.66E-07 |
| TUCP_004357 | XLOC_192366 | ENSRNOT00000086390 | 0.95332804   | 1.61E-06 |
| TUCP_004357 | XLOC_192366 | ENSRNOT00000073952 | 0.969517924  | 1.97E-07 |
| TUCP_004357 | XLOC_192366 | ENSRNOT00000036753 | 0.95631496   | 1.16E-06 |
| TUCP_004357 | XLOC_192366 | ENSRNOT00000036972 | 0.955627818  | 1.26E-06 |
| TUCP_004357 | XLOC_192366 | ENSRNOT00000083814 | 0.954945351  | 1.36E-06 |
| TUCP_000221 | XLOC_006887 | ENSRNOT00000071840 | 0.999992988  | 1.33E-25 |
| TUCP_000221 | XLOC_006887 | ENSRNOT00000083608 | 0.992964626  | 1.34E-10 |
| TUCP_000221 | XLOC_006887 | ENSRNOT00000076035 | 0.957251891  | 1.05E-06 |
| TUCP_000221 | XLOC_006887 | ENSRNOT00000085476 | 0.962978424  | 5.15E-07 |
| TUCP_000221 | XLOC_006887 | ENSRNOT00000066382 | 0.962855154  | 5.23E-07 |
| TUCP_000221 | XLOC_006887 | ENSRNOT00000045584 | 0.999992988  | 1.33E-25 |
| TUCP_000221 | XLOC_006887 | ENSRNOT00000077995 | 0.994337005  | 4.54E-11 |
| TUCP_000221 | XLOC_006887 | ENSRNOT00000066004 | 0.999882249  | 1.78E-19 |
| TUCP_000221 | XLOC_006887 | ENSRNOT00000064284 | 0.968682394  | 2.25E-07 |
| TUCP_000221 | XLOC_006887 | ENSRNOT00000068197 | 0.955184471  | 1.32E-06 |

|             |             |                    |             |          |
|-------------|-------------|--------------------|-------------|----------|
| TUCP_000221 | XLOC_006887 | ENSRNOT00000082086 | 0.972842455 | 1.11E-07 |
| TUCP_000221 | XLOC_006887 | ENSRNOT00000089494 | 0.983640853 | 8.98E-09 |
| TUCP_000221 | XLOC_006887 | ENSRNOT00000083747 | 0.957552538 | 1.01E-06 |
| TUCP_000221 | XLOC_006887 | ENSRNOT00000092182 | 0.999992988 | 1.33E-25 |
| TUCP_000221 | XLOC_006887 | ENSRNOT00000084461 | 0.999992988 | 1.33E-25 |
| TUCP_000221 | XLOC_006887 | ENSRNOT00000060448 | 0.999992988 | 1.33E-25 |
| TUCP_000221 | XLOC_006887 | ENSRNOT00000032631 | 0.999992988 | 1.33E-25 |
| TUCP_000221 | XLOC_006887 | ENSRNOT00000079503 | 0.957014919 | 1.08E-06 |
| TUCP_000221 | XLOC_006887 | ENSRNOT00000027950 | 0.960812588 | 6.81E-07 |
| TUCP_000221 | XLOC_006887 | ENSRNOT00000060113 | 0.975150403 | 7.16E-08 |
| TUCP_000221 | XLOC_006887 | ENSRNOT00000054910 | 0.990762785 | 5.22E-10 |
| TUCP_000221 | XLOC_006887 | ENSRNOT00000057176 | 0.999991401 | 3.70E-25 |
| TUCP_000221 | XLOC_006887 | ENSRNOT00000078176 | 0.994741303 | 3.14E-11 |
| TUCP_000221 | XLOC_006887 | ENSRNOT00000056364 | 0.990542932 | 5.86E-10 |
| TUCP_000221 | XLOC_006887 | ENSRNOT00000093431 | 0.999992988 | 1.33E-25 |
| TUCP_000221 | XLOC_006887 | ENSRNOT00000024758 | 0.981879802 | 1.49E-08 |
| TUCP_000221 | XLOC_006887 | ENSRNOT00000092901 | 0.999992988 | 1.33E-25 |
| TUCP_000221 | XLOC_006887 | ENSRNOT00000089290 | 0.999978532 | 3.59E-23 |
| TUCP_000221 | XLOC_006887 | ENSRNOT00000090211 | 0.998803396 | 1.93E-14 |
| TUCP_000221 | XLOC_006887 | ENSRNOT00000075244 | 0.962402049 | 5.55E-07 |
| TUCP_000221 | XLOC_006887 | ENSRNOT00000091828 | 0.996480469 | 4.23E-12 |
| TUCP_000221 | XLOC_006887 | ENSRNOT00000091944 | 0.999765249 | 5.61E-18 |
| TUCP_000221 | XLOC_006887 | ENSRNOT00000070855 | 0.999992988 | 1.33E-25 |
| TUCP_000221 | XLOC_006887 | ENSRNOT0000009295  | 0.995846156 | 9.67E-12 |
| TUCP_000221 | XLOC_006887 | ENSRNOT00000084109 | 0.9996843   | 2.47E-17 |
| TUCP_000221 | XLOC_006887 | ENSRNOT00000060645 | 0.973757044 | 9.38E-08 |
| TUCP_000221 | XLOC_006887 | ENSRNOT00000041569 | 0.999992988 | 1.33E-25 |
| TUCP_000221 | XLOC_006887 | ENSRNOT00000087091 | 0.999992988 | 1.33E-25 |
| TUCP_000221 | XLOC_006887 | ENSRNOT00000003308 | 0.990733327 | 5.30E-10 |
| TUCP_000221 | XLOC_006887 | ENSRNOT00000026113 | 0.999837988 | 8.79E-19 |
| TUCP_000221 | XLOC_006887 | ENSRNOT00000014939 | 0.999866453 | 3.34E-19 |
| TUCP_000221 | XLOC_006887 | ENSRNOT00000058314 | 0.990827024 | 5.04E-10 |
| TUCP_000221 | XLOC_006887 | ENSRNOT00000047870 | 0.981462504 | 1.67E-08 |
| TUCP_000221 | XLOC_006887 | ENSRNOT00000071603 | 0.999987788 | 2.14E-24 |
| TUCP_000221 | XLOC_006887 | ENSRNOT00000088376 | 0.970345943 | 1.72E-07 |
| TUCP_000221 | XLOC_006887 | ENSRNOT00000060454 | 0.999992988 | 1.33E-25 |
| TUCP_000221 | XLOC_006887 | ENSRNOT00000029298 | 0.95794394  | 9.65E-07 |
| TUCP_000221 | XLOC_006887 | ENSRNOT00000044232 | 0.983629178 | 9.01E-09 |
| TUCP_000221 | XLOC_006887 | ENSRNOT00000023287 | 0.974834689 | 7.62E-08 |
| TUCP_000221 | XLOC_006887 | ENSRNOT00000071714 | 0.978730121 | 3.31E-08 |
| TUCP_000221 | XLOC_006887 | ENSRNOT00000075836 | 0.999992988 | 1.33E-25 |
| TUCP_000221 | XLOC_006887 | ENSRNOT00000073229 | 0.999992988 | 1.33E-25 |
| TUCP_000221 | XLOC_006887 | ENSRNOT00000077731 | 0.965526056 | 3.62E-07 |
| TUCP_000221 | XLOC_006887 | ENSRNOT00000046980 | 0.982590864 | 1.22E-08 |
| TUCP_000221 | XLOC_006887 | ENSRNOT00000039652 | 0.972454739 | 1.19E-07 |
| TUCP_000221 | XLOC_006887 | ENSRNOT00000066685 | 0.980945022 | 1.92E-08 |
| TUCP_000221 | XLOC_006887 | ENSRNOT00000082776 | 0.966276892 | 3.25E-07 |
| TUCP_000221 | XLOC_006887 | ENSRNOT00000088719 | 0.966144467 | 3.31E-07 |
| TUCP_000221 | XLOC_006887 | ENSRNOT00000007683 | 0.999774923 | 4.55E-18 |
| TUCP_000221 | XLOC_006887 | ENSRNOT00000092916 | 0.966025713 | 3.37E-07 |
| TUCP_000221 | XLOC_006887 | ENSRNOT00000081106 | 0.953338022 | 1.61E-06 |

|             |             |                    |              |          |
|-------------|-------------|--------------------|--------------|----------|
| TUCP_004352 | XLOC_192224 | ENSRNOT00000093467 | 0.951435504  | 1.96E-06 |
| TUCP_004352 | XLOC_192224 | ENSRNOT00000029340 | 0.967208214  | 2.83E-07 |
| TUCP_004352 | XLOC_192224 | ENSRNOT00000038646 | 0.962390738  | 5.56E-07 |
| TUCP_004352 | XLOC_192224 | ENSRNOT00000092579 | 0.962390738  | 5.56E-07 |
| TUCP_004352 | XLOC_192224 | ENSRNOT00000036383 | 0.954947521  | 1.36E-06 |
| TUCP_004352 | XLOC_192224 | ENSRNOT00000076528 | 0.956578036  | 1.13E-06 |
| TUCP_004352 | XLOC_192224 | ENSRNOT00000083034 | 0.957150091  | 1.06E-06 |
| TUCP_004352 | XLOC_192224 | ENSRNOT00000089607 | 0.954509419  | 1.42E-06 |
| TUCP_004352 | XLOC_192224 | ENSRNOT00000021748 | 0.962390738  | 5.56E-07 |
| TUCP_004352 | XLOC_192224 | ENSRNOT00000071484 | 0.987018814  | 2.84E-09 |
| TUCP_004352 | XLOC_192224 | ENSRNOT00000078137 | 0.962390738  | 5.56E-07 |
| TUCP_004352 | XLOC_192224 | ENSRNOT00000092740 | 0.962390738  | 5.56E-07 |
| TUCP_004352 | XLOC_192224 | ENSRNOT00000000117 | 0.9500972    | 2.24E-06 |
| TUCP_004352 | XLOC_192224 | ENSRNOT00000070958 | 0.962390738  | 5.56E-07 |
| TUCP_004352 | XLOC_192224 | ENSRNOT00000027268 | 0.962390738  | 5.56E-07 |
| TUCP_004352 | XLOC_192224 | ENSRNOT00000004459 | 0.962390738  | 5.56E-07 |
| TUCP_004352 | XLOC_192224 | ENSRNOT00000089235 | 0.955763807  | 1.24E-06 |
| TUCP_004352 | XLOC_192224 | ENSRNOT00000088168 | 0.962390738  | 5.56E-07 |
| TUCP_004352 | XLOC_192224 | ENSRNOT00000088148 | 0.962390738  | 5.56E-07 |
| TUCP_004352 | XLOC_192224 | ENSRNOT00000088527 | 0.962390738  | 5.56E-07 |
| TUCP_004352 | XLOC_192224 | ENSRNOT00000078701 | 0.962390738  | 5.56E-07 |
| TUCP_004352 | XLOC_192224 | ENSRNOT00000090078 | 0.962390738  | 5.56E-07 |
| TUCP_004352 | XLOC_192224 | ENSRNOT00000089085 | 0.962390738  | 5.56E-07 |
| TUCP_004352 | XLOC_192224 | ENSRNOT00000008153 | 0.959453003  | 8.06E-07 |
| TUCP_004352 | XLOC_192224 | ENSRNOT00000055073 | 0.969742388  | 1.90E-07 |
| TUCP_004352 | XLOC_192224 | ENSRNOT00000010948 | 0.952949403  | 1.68E-06 |
| TUCP_004352 | XLOC_192224 | ENSRNOT00000009776 | 0.962390738  | 5.56E-07 |
| TUCP_000223 | XLOC_006892 | ENSRNOT00000084243 | -0.959739793 | 7.79E-07 |
| TUCP_003934 | XLOC_172959 | ENSRNOT00000014401 | 0.952444855  | 1.77E-06 |
| TUCP_003934 | XLOC_172959 | ENSRNOT00000059984 | 0.966832587  | 2.99E-07 |
| TUCP_004217 | XLOC_184965 | ENSRNOT00000084500 | 0.984887141  | 6.05E-09 |
| TUCP_004217 | XLOC_184965 | ENSRNOT00000093467 | 0.996134431  | 6.75E-12 |
| TUCP_004217 | XLOC_184965 | ENSRNOT00000029340 | 0.999116572  | 4.23E-15 |
| TUCP_004217 | XLOC_184965 | ENSRNOT00000077972 | 0.962758032  | 5.30E-07 |
| TUCP_004217 | XLOC_184965 | ENSRNOT00000038646 | 1            | 0        |
| TUCP_004217 | XLOC_184965 | ENSRNOT00000012095 | 0.957750287  | 9.88E-07 |
| TUCP_004217 | XLOC_184965 | ENSRNOT00000017909 | 0.975587192  | 6.56E-08 |
| TUCP_004217 | XLOC_184965 | ENSRNOT00000092579 | 1            | 0        |
| TUCP_004217 | XLOC_184965 | ENSRNOT00000089235 | 0.998661162  | 3.38E-14 |
| TUCP_004217 | XLOC_184965 | ENSRNOT00000036383 | 0.988460809  | 1.58E-09 |
| TUCP_004217 | XLOC_184965 | ENSRNOT00000076528 | 0.997115373  | 1.57E-12 |
| TUCP_004217 | XLOC_184965 | ENSRNOT00000075193 | 0.964326971  | 4.29E-07 |
| TUCP_004217 | XLOC_184965 | ENSRNOT00000083034 | 0.990934646  | 4.75E-10 |
| TUCP_004217 | XLOC_184965 | ENSRNOT00000089607 | 0.995091455  | 2.23E-11 |
| TUCP_004217 | XLOC_184965 | ENSRNOT00000086014 | 0.960893638  | 6.74E-07 |
| TUCP_004217 | XLOC_184965 | ENSRNOT00000054939 | 0.958021495  | 9.57E-07 |
| TUCP_004217 | XLOC_184965 | ENSRNOT00000052315 | 0.983687082  | 8.85E-09 |
| TUCP_004217 | XLOC_184965 | ENSRNOT00000088168 | 1            | 0        |
| TUCP_004217 | XLOC_184965 | ENSRNOT00000046231 | 0.96225463   | 5.66E-07 |
| TUCP_004217 | XLOC_184965 | ENSRNOT00000013459 | 0.979098017  | 3.03E-08 |
| TUCP_004217 | XLOC_184965 | ENSRNOT00000078137 | 1            | 0        |

|             |             |                    |             |          |
|-------------|-------------|--------------------|-------------|----------|
| TUCP_004217 | XLOC_184965 | ENSRNOT00000077764 | 0.977143528 | 4.73E-08 |
| TUCP_004217 | XLOC_184965 | ENSRNOT00000043661 | 0.966975951 | 2.93E-07 |
| TUCP_004217 | XLOC_184965 | ENSRNOT00000092740 | 1           | 0        |
| TUCP_004217 | XLOC_184965 | ENSRNOT00000000117 | 0.990989174 | 4.61E-10 |
| TUCP_004217 | XLOC_184965 | ENSRNOT00000071877 | 0.967113583 | 2.87E-07 |
| TUCP_004217 | XLOC_184965 | ENSRNOT00000070958 | 1           | 0        |
| TUCP_004217 | XLOC_184965 | ENSRNOT00000076757 | 0.959205354 | 8.31E-07 |
| TUCP_004217 | XLOC_184965 | ENSRNOT00000085310 | 0.965230243 | 3.78E-07 |
| TUCP_004217 | XLOC_184965 | ENSRNOT00000047241 | 0.966576993 | 3.11E-07 |
| TUCP_004217 | XLOC_184965 | ENSRNOT00000027268 | 1           | 0        |
| TUCP_004217 | XLOC_184965 | ENSRNOT00000004459 | 1           | 0        |
| TUCP_004217 | XLOC_184965 | ENSRNOT00000048373 | 0.959096578 | 8.42E-07 |
| TUCP_004217 | XLOC_184965 | ENSRNOT00000061516 | 0.987595648 | 2.27E-09 |
| TUCP_004217 | XLOC_184965 | ENSRNOT00000088148 | 1           | 0        |
| TUCP_004217 | XLOC_184965 | ENSRNOT00000088527 | 1           | 0        |
| TUCP_004217 | XLOC_184965 | ENSRNOT00000078701 | 1           | 0        |
| TUCP_004217 | XLOC_184965 | ENSRNOT00000052308 | 0.962646127 | 5.38E-07 |
| TUCP_004217 | XLOC_184965 | ENSRNOT00000021748 | 1           | 0        |
| TUCP_004217 | XLOC_184965 | ENSRNOT00000089085 | 1           | 0        |
| TUCP_004217 | XLOC_184965 | ENSRNOT00000008153 | 0.999703506 | 1.80E-17 |
| TUCP_004217 | XLOC_184965 | ENSRNOT00000085896 | 0.971605382 | 1.39E-07 |
| TUCP_004217 | XLOC_184965 | ENSRNOT00000079189 | 0.984972387 | 5.89E-09 |
| TUCP_004217 | XLOC_184965 | ENSRNOT00000090078 | 1           | 0        |
| TUCP_004217 | XLOC_184965 | ENSRNOT00000078020 | 0.958421666 | 9.13E-07 |
| TUCP_004217 | XLOC_184965 | ENSRNOT00000092425 | 0.956092273 | 1.19E-06 |
| TUCP_004217 | XLOC_184965 | ENSRNOT00000009776 | 1           | 1.33E-79 |
| TUCP_004216 | XLOC_184965 | ENSRNOT00000084500 | 0.983839419 | 8.45E-09 |
| TUCP_004216 | XLOC_184965 | ENSRNOT00000093467 | 0.99444796  | 4.12E-11 |
| TUCP_004216 | XLOC_184965 | ENSRNOT00000029340 | 0.998929726 | 1.10E-14 |
| TUCP_004216 | XLOC_184965 | ENSRNOT00000077972 | 0.959552202 | 7.97E-07 |
| TUCP_004216 | XLOC_184965 | ENSRNOT00000038646 | 0.999528793 | 1.83E-16 |
| TUCP_004216 | XLOC_184965 | ENSRNOT00000012095 | 0.956803359 | 1.10E-06 |
| TUCP_004216 | XLOC_184965 | ENSRNOT00000017909 | 0.974387444 | 8.32E-08 |
| TUCP_004216 | XLOC_184965 | ENSRNOT00000092579 | 0.999528793 | 1.83E-16 |
| TUCP_004216 | XLOC_184965 | ENSRNOT00000089235 | 0.99884101  | 1.64E-14 |
| TUCP_004216 | XLOC_184965 | ENSRNOT00000036383 | 0.988071744 | 1.86E-09 |
| TUCP_004216 | XLOC_184965 | ENSRNOT00000076528 | 0.996512271 | 4.04E-12 |
| TUCP_004216 | XLOC_184965 | ENSRNOT00000075193 | 0.962044335 | 5.82E-07 |
| TUCP_004216 | XLOC_184965 | ENSRNOT00000083034 | 0.989733695 | 8.83E-10 |
| TUCP_004216 | XLOC_184965 | ENSRNOT00000089607 | 0.994371014 | 4.41E-11 |
| TUCP_004216 | XLOC_184965 | ENSRNOT00000086014 | 0.963786348 | 4.62E-07 |
| TUCP_004216 | XLOC_184965 | ENSRNOT00000054939 | 0.95652531  | 1.14E-06 |
| TUCP_004216 | XLOC_184965 | ENSRNOT00000052315 | 0.98261738  | 1.21E-08 |
| TUCP_004216 | XLOC_184965 | ENSRNOT00000088168 | 0.999528793 | 1.83E-16 |
| TUCP_004216 | XLOC_184965 | ENSRNOT00000046231 | 0.960884122 | 6.75E-07 |
| TUCP_004216 | XLOC_184965 | ENSRNOT00000013459 | 0.977951284 | 3.95E-08 |
| TUCP_004216 | XLOC_184965 | ENSRNOT00000078137 | 0.999528793 | 1.83E-16 |
| TUCP_004216 | XLOC_184965 | ENSRNOT00000077764 | 0.974889882 | 7.54E-08 |
| TUCP_004216 | XLOC_184965 | ENSRNOT00000043661 | 0.965522007 | 3.62E-07 |
| TUCP_004216 | XLOC_184965 | ENSRNOT00000092740 | 0.999528793 | 1.83E-16 |
| TUCP_004216 | XLOC_184965 | ENSRNOT00000000117 | 0.990070859 | 7.47E-10 |

|             |             |                    |             |          |
|-------------|-------------|--------------------|-------------|----------|
| TUCP_004216 | XLOC_184965 | ENSRNOT00000071877 | 0.965275283 | 3.75E-07 |
| TUCP_004216 | XLOC_184965 | ENSRNOT00000070958 | 0.999528793 | 1.83E-16 |
| TUCP_004216 | XLOC_184965 | ENSRNOT00000076757 | 0.957472317 | 1.02E-06 |
| TUCP_004216 | XLOC_184965 | ENSRNOT00000085310 | 0.963916143 | 4.53E-07 |
| TUCP_004216 | XLOC_184965 | ENSRNOT00000047241 | 0.965257604 | 3.76E-07 |
| TUCP_004216 | XLOC_184965 | ENSRNOT00000027268 | 0.999528793 | 1.83E-16 |
| TUCP_004216 | XLOC_184965 | ENSRNOT00000004459 | 0.999528793 | 1.83E-16 |
| TUCP_004216 | XLOC_184965 | ENSRNOT00000048373 | 0.959237962 | 8.28E-07 |
| TUCP_004216 | XLOC_184965 | ENSRNOT00000061516 | 0.988322825 | 1.68E-09 |
| TUCP_004216 | XLOC_184965 | ENSRNOT00000088148 | 0.999528793 | 1.83E-16 |
| TUCP_004216 | XLOC_184965 | ENSRNOT00000088527 | 0.999528793 | 1.83E-16 |
| TUCP_004216 | XLOC_184965 | ENSRNOT00000078701 | 0.999528793 | 1.83E-16 |
| TUCP_004216 | XLOC_184965 | ENSRNOT00000052308 | 0.961280112 | 6.42E-07 |
| TUCP_004216 | XLOC_184965 | ENSRNOT00000021748 | 0.999528793 | 1.83E-16 |
| TUCP_004216 | XLOC_184965 | ENSRNOT00000089085 | 0.999528793 | 1.83E-16 |
| TUCP_004216 | XLOC_184965 | ENSRNOT00000008153 | 0.99919269  | 2.70E-15 |
| TUCP_004216 | XLOC_184965 | ENSRNOT00000085896 | 0.970206907 | 1.76E-07 |
| TUCP_004216 | XLOC_184965 | ENSRNOT00000079189 | 0.986446935 | 3.52E-09 |
| TUCP_004216 | XLOC_184965 | ENSRNOT00000090078 | 0.999528793 | 1.83E-16 |
| TUCP_004216 | XLOC_184965 | ENSRNOT00000078020 | 0.957493028 | 1.02E-06 |
| TUCP_004216 | XLOC_184965 | ENSRNOT00000092425 | 0.95416969  | 1.47E-06 |
| TUCP_004216 | XLOC_184965 | ENSRNOT00000009776 | 0.999528793 | 1.83E-16 |
| TUCP_003931 | XLOC_172901 | ENSRNOT00000029340 | 0.954625253 | 1.40E-06 |
| TUCP_003931 | XLOC_172901 | ENSRNOT00000035915 | 0.979184327 | 2.97E-08 |
| TUCP_003931 | XLOC_172901 | ENSRNOT00000092579 | 0.955173681 | 1.32E-06 |
| TUCP_003931 | XLOC_172901 | ENSRNOT00000016026 | 0.95786466  | 9.74E-07 |
| TUCP_003931 | XLOC_172901 | ENSRNOT00000075193 | 0.950291091 | 2.20E-06 |
| TUCP_003931 | XLOC_172901 | ENSRNOT00000038646 | 0.955173681 | 1.32E-06 |
| TUCP_003931 | XLOC_172901 | ENSRNOT00000052315 | 0.992847162 | 1.46E-10 |
| TUCP_003931 | XLOC_172901 | ENSRNOT00000011761 | 0.97836476  | 3.60E-08 |
| TUCP_003931 | XLOC_172901 | ENSRNOT00000078137 | 0.955173681 | 1.32E-06 |
| TUCP_003931 | XLOC_172901 | ENSRNOT00000092740 | 0.955173681 | 1.32E-06 |
| TUCP_003931 | XLOC_172901 | ENSRNOT00000070958 | 0.955173681 | 1.32E-06 |
| TUCP_003931 | XLOC_172901 | ENSRNOT00000035538 | 0.978034245 | 3.88E-08 |
| TUCP_003931 | XLOC_172901 | ENSRNOT00000027268 | 0.955173681 | 1.32E-06 |
| TUCP_003931 | XLOC_172901 | ENSRNOT00000004459 | 0.955173681 | 1.32E-06 |
| TUCP_003931 | XLOC_172901 | ENSRNOT00000089235 | 0.95765882  | 9.98E-07 |
| TUCP_003931 | XLOC_172901 | ENSRNOT00000088168 | 0.955173681 | 1.32E-06 |
| TUCP_003931 | XLOC_172901 | ENSRNOT00000088148 | 0.955173681 | 1.32E-06 |
| TUCP_003931 | XLOC_172901 | ENSRNOT00000088527 | 0.955173681 | 1.32E-06 |
| TUCP_003931 | XLOC_172901 | ENSRNOT00000078701 | 0.955173681 | 1.32E-06 |
| TUCP_003931 | XLOC_172901 | ENSRNOT00000090078 | 0.955173681 | 1.32E-06 |
| TUCP_003931 | XLOC_172901 | ENSRNOT00000021748 | 0.955173681 | 1.32E-06 |
| TUCP_003931 | XLOC_172901 | ENSRNOT00000089085 | 0.955173681 | 1.32E-06 |
| TUCP_003931 | XLOC_172901 | ENSRNOT00000008153 | 0.954033507 | 1.50E-06 |
| TUCP_003931 | XLOC_172901 | ENSRNOT00000059593 | 0.974574638 | 8.02E-08 |
| TUCP_003931 | XLOC_172901 | ENSRNOT00000092425 | 0.972215534 | 1.24E-07 |
| TUCP_003931 | XLOC_172901 | ENSRNOT00000009776 | 0.955173681 | 1.32E-06 |
| TUCP_004210 | XLOC_184712 | ENSRNOT00000089377 | 0.967920034 | 2.54E-07 |
| TUCP_004198 | XLOC_184475 | ENSRNOT00000071840 | 0.973751406 | 9.39E-08 |
| TUCP_004198 | XLOC_184475 | ENSRNOT00000083608 | 0.959086725 | 8.43E-07 |



|             |             |                    |              |          |
|-------------|-------------|--------------------|--------------|----------|
| TUCP_004198 | XLOC_184475 | ENSRNOT00000045584 | 0.973751406  | 9.39E-08 |
| TUCP_004198 | XLOC_184475 | ENSRNOT00000077995 | 0.982294909  | 1.33E-08 |
| TUCP_004198 | XLOC_184475 | ENSRNOT00000066004 | 0.973050655  | 1.07E-07 |
| TUCP_004198 | XLOC_184475 | ENSRNOT00000066685 | 0.983578243  | 9.15E-09 |
| TUCP_004198 | XLOC_184475 | ENSRNOT00000089494 | 0.980454584  | 2.17E-08 |
| TUCP_004198 | XLOC_184475 | ENSRNOT00000092182 | 0.973751406  | 9.39E-08 |
| TUCP_004198 | XLOC_184475 | ENSRNOT00000084461 | 0.973751406  | 9.39E-08 |
| TUCP_004198 | XLOC_184475 | ENSRNOT00000060448 | 0.973751406  | 9.39E-08 |
| TUCP_004198 | XLOC_184475 | ENSRNOT00000032631 | 0.973751406  | 9.39E-08 |
| TUCP_004198 | XLOC_184475 | ENSRNOT00000027950 | 0.987169761  | 2.68E-09 |
| TUCP_004198 | XLOC_184475 | ENSRNOT00000054910 | 0.962267155  | 5.65E-07 |
| TUCP_004198 | XLOC_184475 | ENSRNOT00000057176 | 0.973717294  | 9.45E-08 |
| TUCP_004198 | XLOC_184475 | ENSRNOT00000078176 | 0.965821161  | 3.47E-07 |
| TUCP_004198 | XLOC_184475 | ENSRNOT00000056364 | 0.958704344  | 8.82E-07 |
| TUCP_004198 | XLOC_184475 | ENSRNOT00000093431 | 0.973751406  | 9.39E-08 |
| TUCP_004198 | XLOC_184475 | ENSRNOT00000047560 | 0.951361123  | 1.98E-06 |
| TUCP_004198 | XLOC_184475 | ENSRNOT00000090439 | 0.963624919  | 4.72E-07 |
| TUCP_004198 | XLOC_184475 | ENSRNOT00000092901 | 0.973751406  | 9.39E-08 |
| TUCP_004198 | XLOC_184475 | ENSRNOT00000089290 | 0.973584703  | 9.69E-08 |
| TUCP_004198 | XLOC_184475 | ENSRNOT00000090211 | 0.97072794   | 1.61E-07 |
| TUCP_004198 | XLOC_184475 | ENSRNOT00000091828 | 0.971520155  | 1.41E-07 |
| TUCP_004198 | XLOC_184475 | ENSRNOT00000091944 | 0.972700047  | 1.14E-07 |
| TUCP_004198 | XLOC_184475 | ENSRNOT00000070855 | 0.973751406  | 9.39E-08 |
| TUCP_004198 | XLOC_184475 | ENSRNOT00000046980 | 0.952666388  | 1.73E-06 |
| TUCP_004198 | XLOC_184475 | ENSRNOT00000084109 | 0.975156674  | 7.15E-08 |
| TUCP_004198 | XLOC_184475 | ENSRNOT00000060645 | 0.954583699  | 1.41E-06 |
| TUCP_004198 | XLOC_184475 | ENSRNOT00000041569 | 0.973751406  | 9.39E-08 |
| TUCP_004198 | XLOC_184475 | ENSRNOT00000087091 | 0.973751406  | 9.39E-08 |
| TUCP_004198 | XLOC_184475 | ENSRNOT00000003308 | 0.955722071  | 1.24E-06 |
| TUCP_004198 | XLOC_184475 | ENSRNOT00000026113 | 0.973212285  | 1.04E-07 |
| TUCP_004198 | XLOC_184475 | ENSRNOT00000014939 | 0.974776109  | 7.71E-08 |
| TUCP_004198 | XLOC_184475 | ENSRNOT00000058314 | 0.961812495  | 6.00E-07 |
| TUCP_004198 | XLOC_184475 | ENSRNOT00000071603 | 0.973681828  | 9.51E-08 |
| TUCP_004198 | XLOC_184475 | ENSRNOT00000044232 | 0.952657096  | 1.73E-06 |
| TUCP_004198 | XLOC_184475 | ENSRNOT0000007683  | 0.971728829  | 1.36E-07 |
| TUCP_004198 | XLOC_184475 | ENSRNOT00000075836 | 0.973751406  | 9.39E-08 |
| TUCP_004198 | XLOC_184475 | ENSRNOT00000073229 | 0.973751406  | 9.39E-08 |
| TUCP_004198 | XLOC_184475 | ENSRNOT00000077731 | 0.957616676  | 1.00E-06 |
| TUCP_004198 | XLOC_184475 | ENSRNOT00000060454 | 0.973751406  | 9.39E-08 |
| TUCP_004198 | XLOC_184475 | ENSRNOT00000009295 | 0.967672798  | 2.63E-07 |
| TUCP_001792 | XLOC_073846 | ENSRNOT00000030497 | 0.954919424  | 1.36E-06 |
| TUCP_001792 | XLOC_073846 | ENSRNOT00000064478 | 0.950299423  | 2.20E-06 |
| TUCP_004196 | XLOC_184475 | ENSRNOT00000067448 | 0.96613642   | 3.31E-07 |
| TUCP_004196 | XLOC_184475 | ENSRNOT00000000327 | -0.950352126 | 2.19E-06 |
| TUCP_004196 | XLOC_184475 | ENSRNOT00000048858 | 0.950513951  | 2.15E-06 |
| TUCP_004195 | XLOC_184447 | ENSRNOT00000025733 | 0.953484667  | 1.59E-06 |
| TUCP_004219 | XLOC_185247 | ENSRNOT00000009811 | 0.953329107  | 1.61E-06 |
| TUCP_004219 | XLOC_185247 | ENSRNOT00000005486 | -0.961115936 | 6.56E-07 |
| TUCP_004219 | XLOC_185247 | ENSRNOT00000067554 | 0.975269676  | 6.99E-08 |
| TUCP_004219 | XLOC_185247 | ENSRNOT00000010852 | 0.951110565  | 2.03E-06 |
| TUCP_004219 | XLOC_185247 | ENSRNOT00000026531 | -0.951379202 | 1.97E-06 |

|             |             |                    |              |          |
|-------------|-------------|--------------------|--------------|----------|
| TUCP_004219 | XLOC_185247 | ENSRNOT0000001893  | 0.957135455  | 1.06E-06 |
| TUCP_004219 | XLOC_185247 | ENSRNOT00000061253 | 0.964721998  | 4.06E-07 |
| TUCP_004219 | XLOC_185247 | ENSRNOT00000084031 | 0.957039461  | 1.07E-06 |
| TUCP_004219 | XLOC_185247 | ENSRNOT0000009080  | -0.953323029 | 1.61E-06 |
| TUCP_004219 | XLOC_185247 | ENSRNOT00000057738 | 0.958567833  | 8.97E-07 |
| TUCP_004219 | XLOC_185247 | ENSRNOT00000077231 | 0.950274066  | 2.20E-06 |
| TUCP_004219 | XLOC_185247 | ENSRNOT00000016568 | 0.954822621  | 1.37E-06 |
| TUCP_004219 | XLOC_185247 | ENSRNOT00000018634 | -0.958293001 | 9.27E-07 |
| TUCP_004219 | XLOC_185247 | ENSRNOT00000080608 | 0.960452124  | 7.13E-07 |
| TUCP_004219 | XLOC_185247 | ENSRNOT00000001855 | 0.952336799  | 1.79E-06 |
| TUCP_004219 | XLOC_185247 | ENSRNOT00000080577 | 0.955085166  | 1.33E-06 |
| TUCP_004219 | XLOC_185247 | ENSRNOT00000013067 | -0.951577026 | 1.93E-06 |
| TUCP_004219 | XLOC_185247 | ENSRNOT00000029701 | 0.961919269  | 5.92E-07 |
| TUCP_004219 | XLOC_185247 | ENSRNOT00000086706 | 0.956897368  | 1.09E-06 |
| TUCP_004219 | XLOC_185247 | ENSRNOT00000037133 | 0.955066532  | 1.34E-06 |
| TUCP_004219 | XLOC_185247 | ENSRNOT00000087838 | -0.953510246 | 1.58E-06 |
| TUCP_004219 | XLOC_185247 | ENSRNOT00000000383 | -0.955227305 | 1.31E-06 |
| TUCP_004219 | XLOC_185247 | ENSRNOT00000017556 | 0.952554309  | 1.75E-06 |
| TUCP_004219 | XLOC_185247 | ENSRNOT00000014384 | -0.954424004 | 1.43E-06 |
| TUCP_004219 | XLOC_185247 | ENSRNOT00000000120 | 0.961010063  | 6.65E-07 |
| TUCP_004219 | XLOC_185247 | ENSRNOT00000000469 | 0.955599071  | 1.26E-06 |
| TUCP_004219 | XLOC_185247 | ENSRNOT00000033017 | 0.953993783  | 1.50E-06 |
| TUCP_004219 | XLOC_185247 | ENSRNOT00000042125 | 0.954972272  | 1.35E-06 |
| TUCP_004219 | XLOC_185247 | ENSRNOT00000082496 | -0.959670083 | 7.85E-07 |
| TUCP_004219 | XLOC_185247 | ENSRNOT00000074023 | 0.964309118  | 4.30E-07 |
| TUCP_004219 | XLOC_185247 | ENSRNOT00000081688 | -0.950317566 | 2.19E-06 |
| TUCP_004219 | XLOC_185247 | ENSRNOT00000001691 | 0.951935156  | 1.86E-06 |
| TUCP_004219 | XLOC_185247 | ENSRNOT00000004046 | -0.956584194 | 1.13E-06 |
| TUCP_004219 | XLOC_185247 | ENSRNOT00000058351 | 0.951609946  | 1.93E-06 |
| TUCP_004219 | XLOC_185247 | ENSRNOT00000072118 | 0.958076222  | 9.51E-07 |
| TUCP_004219 | XLOC_185247 | ENSRNOT00000075397 | 0.962007042  | 5.85E-07 |
| TUCP_004219 | XLOC_185247 | ENSRNOT00000022190 | -0.958161305 | 9.41E-07 |
| TUCP_004219 | XLOC_185247 | ENSRNOT00000025913 | -0.950817101 | 2.09E-06 |
| TUCP_004219 | XLOC_185247 | ENSRNOT00000057953 | 0.960720499  | 6.89E-07 |
| TUCP_004219 | XLOC_185247 | ENSRNOT00000024947 | -0.954002242 | 1.50E-06 |
| TUCP_004219 | XLOC_185247 | ENSRNOT00000068026 | -0.953605299 | 1.57E-06 |
| TUCP_004219 | XLOC_185247 | ENSRNOT00000051494 | 0.96663724   | 3.08E-07 |
| TUCP_004219 | XLOC_185247 | ENSRNOT00000014926 | 0.971379951  | 1.44E-07 |
| TUCP_004219 | XLOC_185247 | ENSRNOT00000016060 | 0.960389655  | 7.18E-07 |
| TUCP_004219 | XLOC_185247 | ENSRNOT00000090057 | 0.975277602  | 6.98E-08 |
| TUCP_004219 | XLOC_185247 | ENSRNOT00000027970 | 0.951136329  | 2.02E-06 |
| TUCP_004219 | XLOC_185247 | ENSRNOT00000010367 | 0.961031001  | 6.63E-07 |
| TUCP_004219 | XLOC_185247 | ENSRNOT00000086260 | -0.959009857 | 8.51E-07 |
| TUCP_004219 | XLOC_185247 | ENSRNOT00000055630 | 0.957937928  | 9.66E-07 |
| TUCP_004219 | XLOC_185247 | ENSRNOT00000005257 | 0.974570181  | 8.03E-08 |
| TUCP_004219 | XLOC_185247 | ENSRNOT00000089933 | 0.965419016  | 3.67E-07 |
| TUCP_004219 | XLOC_185247 | ENSRNOT00000015799 | 0.953226073  | 1.63E-06 |
| TUCP_004219 | XLOC_185247 | ENSRNOT00000088073 | -0.950289657 | 2.20E-06 |
| TUCP_004218 | XLOC_185155 | ENSRNOT00000059190 | 0.967310756  | 2.78E-07 |
| TUCP_003055 | XLOC_130485 | ENSRNOT00000038879 | 0.994709243  | 3.24E-11 |
| TUCP_004191 | XLOC_183998 | ENSRNOT00000042890 | 0.962941701  | 5.17E-07 |

|             |             |                    |              |          |
|-------------|-------------|--------------------|--------------|----------|
| TUCP_004191 | XLOC_183998 | ENSRNOT00000012757 | 0.95575527   | 1.24E-06 |
| TUCP_004191 | XLOC_183998 | ENSRNOT00000080183 | 0.95911298   | 8.40E-07 |
| TUCP_004191 | XLOC_183998 | ENSRNOT00000037902 | 0.950335086  | 2.19E-06 |
| TUCP_004191 | XLOC_183998 | ENSRNOT00000005505 | 0.981046496  | 1.87E-08 |
| TUCP_004191 | XLOC_183998 | ENSRNOT00000009975 | 0.952973022  | 1.67E-06 |
| TUCP_004191 | XLOC_183998 | ENSRNOT00000072682 | 0.952109774  | 1.83E-06 |
| TUCP_004191 | XLOC_183998 | ENSRNOT00000010142 | 0.965852098  | 3.45E-07 |
| TUCP_004191 | XLOC_183998 | ENSRNOT00000047453 | 0.95770871   | 9.92E-07 |
| TUCP_004191 | XLOC_183998 | ENSRNOT00000001642 | 0.976370054  | 5.58E-08 |
| TUCP_004191 | XLOC_183998 | ENSRNOT00000075144 | 0.955692747  | 1.25E-06 |
| TUCP_004191 | XLOC_183998 | ENSRNOT00000086144 | 0.959145047  | 8.37E-07 |
| TUCP_004191 | XLOC_183998 | ENSRNOT00000006109 | 0.967849288  | 2.56E-07 |
| TUCP_004191 | XLOC_183998 | ENSRNOT00000077025 | 0.951045759  | 2.04E-06 |
| TUCP_003507 | XLOC_152308 | ENSRNOT00000077186 | -0.955396405 | 1.29E-06 |
| TUCP_003507 | XLOC_152308 | ENSRNOT00000081314 | -0.951101245 | 2.03E-06 |
| TUCP_003507 | XLOC_152308 | ENSRNOT00000039607 | -0.955278401 | 1.31E-06 |
| TUCP_003507 | XLOC_152308 | ENSRNOT00000013745 | -0.956271238 | 1.17E-06 |
| TUCP_003507 | XLOC_152308 | ENSRNOT00000006460 | 0.976910151  | 4.97E-08 |
| TUCP_003507 | XLOC_152308 | ENSRNOT00000075397 | 0.968102188  | 2.47E-07 |
| TUCP_003507 | XLOC_152308 | ENSRNOT00000062057 | 0.97049174   | 1.68E-07 |
| TUCP_003507 | XLOC_152308 | ENSRNOT00000020051 | 0.958733469  | 8.79E-07 |
| TUCP_003507 | XLOC_152308 | ENSRNOT00000026279 | -0.960937312 | 6.71E-07 |
| TUCP_003507 | XLOC_152308 | ENSRNOT00000089228 | 0.958399259  | 9.15E-07 |
| TUCP_003507 | XLOC_152308 | ENSRNOT00000003087 | 0.954753257  | 1.38E-06 |
| TUCP_003507 | XLOC_152308 | ENSRNOT00000082914 | 0.954686813  | 1.39E-06 |
| TUCP_003507 | XLOC_152308 | ENSRNOT00000073493 | 0.963167802  | 5.02E-07 |
| TUCP_003507 | XLOC_152308 | ENSRNOT00000001855 | 0.963909347  | 4.54E-07 |
| TUCP_003507 | XLOC_152308 | ENSRNOT00000045443 | -0.95062991  | 2.13E-06 |
| TUCP_003507 | XLOC_152308 | ENSRNOT00000001691 | 0.977389463  | 4.48E-08 |
| TUCP_003507 | XLOC_152308 | ENSRNOT00000089319 | 0.95423989   | 1.46E-06 |
| TUCP_003507 | XLOC_152308 | ENSRNOT00000038178 | -0.953603501 | 1.57E-06 |
| TUCP_003507 | XLOC_152308 | ENSRNOT00000036585 | 0.954581796  | 1.41E-06 |
| TUCP_003507 | XLOC_152308 | ENSRNOT00000027301 | -0.958726309 | 8.80E-07 |
| TUCP_003507 | XLOC_152308 | ENSRNOT00000065942 | -0.969432376 | 2.00E-07 |
| TUCP_003507 | XLOC_152308 | ENSRNOT00000026928 | -0.951701242 | 1.91E-06 |
| TUCP_003507 | XLOC_152308 | ENSRNOT00000086706 | 0.955702035  | 1.25E-06 |
| TUCP_003507 | XLOC_152308 | ENSRNOT00000029508 | 0.96460841   | 4.12E-07 |
| TUCP_003507 | XLOC_152308 | ENSRNOT00000016485 | 0.955345947  | 1.30E-06 |
| TUCP_003507 | XLOC_152308 | ENSRNOT00000089829 | -0.950411354 | 2.17E-06 |
| TUCP_003507 | XLOC_152308 | ENSRNOT00000074023 | 0.965018754  | 3.89E-07 |
| TUCP_003507 | XLOC_152308 | ENSRNOT00000019465 | -0.958363432 | 9.19E-07 |
| TUCP_003507 | XLOC_152308 | ENSRNOT00000008361 | 0.960109556  | 7.44E-07 |
| TUCP_003507 | XLOC_152308 | ENSRNOT00000025309 | 0.967913901  | 2.54E-07 |
| TUCP_003507 | XLOC_152308 | ENSRNOT00000013851 | -0.962069375 | 5.80E-07 |
| TUCP_003507 | XLOC_152308 | ENSRNOT00000042638 | 0.960457521  | 7.12E-07 |
| TUCP_003507 | XLOC_152308 | ENSRNOT00000021826 | 0.962498836  | 5.48E-07 |
| TUCP_003507 | XLOC_152308 | ENSRNOT00000028561 | 0.957481703  | 1.02E-06 |
| TUCP_003507 | XLOC_152308 | ENSRNOT00000018101 | -0.951891518 | 1.87E-06 |
| TUCP_003507 | XLOC_152308 | ENSRNOT00000067566 | -0.957222466 | 1.05E-06 |
| TUCP_003507 | XLOC_152308 | ENSRNOT00000013516 | 0.958690562  | 8.84E-07 |
| TUCP_003507 | XLOC_152308 | ENSRNOT00000003326 | -0.956851313 | 1.10E-06 |

|             |             |                    |              |          |
|-------------|-------------|--------------------|--------------|----------|
| TUCP_003507 | XLOC_152308 | ENSRNOT00000015986 | -0.964142564 | 4.40E-07 |
| TUCP_003507 | XLOC_152308 | ENSRNOT00000065103 | -0.953474189 | 1.59E-06 |
| TUCP_003507 | XLOC_152308 | ENSRNOT00000025284 | -0.966185936 | 3.29E-07 |
| TUCP_003507 | XLOC_152308 | ENSRNOT00000087604 | 0.961641092  | 6.13E-07 |
| TUCP_003507 | XLOC_152308 | ENSRNOT00000012060 | 0.966847272  | 2.98E-07 |
| TUCP_003507 | XLOC_152308 | ENSRNOT00000073370 | 0.955513146  | 1.27E-06 |
| TUCP_003507 | XLOC_152308 | ENSRNOT00000020929 | 0.958371968  | 9.18E-07 |
| TUCP_003507 | XLOC_152308 | ENSRNOT00000054685 | 0.951414265  | 1.96E-06 |
| TUCP_003507 | XLOC_152308 | ENSRNOT0000009009  | 0.959208556  | 8.30E-07 |
| TUCP_003507 | XLOC_152308 | ENSRNOT00000065978 | 0.957287007  | 1.04E-06 |
| TUCP_003507 | XLOC_152308 | ENSRNOT00000075480 | -0.963425229 | 4.85E-07 |
| TUCP_003507 | XLOC_152308 | ENSRNOT00000039177 | -0.956477431 | 1.14E-06 |
| TUCP_003507 | XLOC_152308 | ENSRNOT00000000707 | -0.959048182 | 8.47E-07 |
| TUCP_003507 | XLOC_152308 | ENSRNOT00000090338 | -0.961977267 | 5.87E-07 |
| TUCP_003507 | XLOC_152308 | ENSRNOT00000034282 | 0.958382907  | 9.17E-07 |
| TUCP_003507 | XLOC_152308 | ENSRNOT00000027760 | 0.95363406   | 1.56E-06 |
| TUCP_003507 | XLOC_152308 | ENSRNOT00000065871 | 0.956930151  | 1.09E-06 |
| TUCP_003507 | XLOC_152308 | ENSRNOT00000042903 | 0.959677978  | 7.84E-07 |
| TUCP_003507 | XLOC_152308 | ENSRNOT00000057898 | -0.950009338 | 2.26E-06 |
| TUCP_003507 | XLOC_152308 | ENSRNOT00000007821 | 0.952430914  | 1.77E-06 |
| TUCP_003507 | XLOC_152308 | ENSRNOT00000056100 | -0.972355072 | 1.21E-07 |
| TUCP_003507 | XLOC_152308 | ENSRNOT00000001077 | 0.971212386  | 1.48E-07 |
| TUCP_003507 | XLOC_152308 | ENSRNOT00000074150 | 0.950030134  | 2.26E-06 |
| TUCP_003507 | XLOC_152308 | ENSRNOT00000036838 | -0.959434386 | 8.08E-07 |
| TUCP_003507 | XLOC_152308 | ENSRNOT00000067554 | 0.957615777  | 1.00E-06 |
| TUCP_003507 | XLOC_152308 | ENSRNOT00000081226 | 0.9729887    | 1.08E-07 |
| TUCP_003507 | XLOC_152308 | ENSRNOT00000011948 | -0.952707453 | 1.72E-06 |
| TUCP_003507 | XLOC_152308 | ENSRNOT00000086456 | -0.964497854 | 4.18E-07 |
| TUCP_003507 | XLOC_152308 | ENSRNOT00000040629 | 0.960243244  | 7.32E-07 |
| TUCP_003507 | XLOC_152308 | ENSRNOT00000019121 | -0.957627528 | 1.00E-06 |
| TUCP_003507 | XLOC_152308 | ENSRNOT00000000048 | 0.964059002  | 4.45E-07 |
| TUCP_003507 | XLOC_152308 | ENSRNOT00000075934 | -0.967626076 | 2.65E-07 |
| TUCP_003507 | XLOC_152308 | ENSRNOT00000040525 | 0.953468721  | 1.59E-06 |
| TUCP_003507 | XLOC_152308 | ENSRNOT00000011832 | -0.961500293 | 6.24E-07 |
| TUCP_003507 | XLOC_152308 | ENSRNOT00000073643 | -0.983190775 | 1.03E-08 |
| TUCP_003507 | XLOC_152308 | ENSRNOT00000066893 | 0.951007901  | 2.05E-06 |
| TUCP_003507 | XLOC_152308 | ENSRNOT00000026462 | -0.955975545 | 1.21E-06 |
| TUCP_003507 | XLOC_152308 | ENSRNOT00000092066 | -0.957408332 | 1.03E-06 |
| TUCP_003507 | XLOC_152308 | ENSRNOT00000083968 | -0.968320767 | 2.38E-07 |
| TUCP_003507 | XLOC_152308 | ENSRNOT00000037133 | 0.954103748  | 1.48E-06 |
| TUCP_003507 | XLOC_152308 | ENSRNOT00000083967 | 0.962460723  | 5.51E-07 |
| TUCP_003507 | XLOC_152308 | ENSRNOT00000083964 | -0.963955091 | 4.51E-07 |
| TUCP_003507 | XLOC_152308 | ENSRNOT00000016776 | -0.956114449 | 1.19E-06 |
| TUCP_003507 | XLOC_152308 | ENSRNOT00000020472 | -0.950414413 | 2.17E-06 |
| TUCP_003507 | XLOC_152308 | ENSRNOT00000048781 | 0.978105689  | 3.82E-08 |
| TUCP_003507 | XLOC_152308 | ENSRNOT00000013867 | 0.969757608  | 1.89E-07 |
| TUCP_003507 | XLOC_152308 | ENSRNOT00000000083 | -0.959359247 | 8.15E-07 |
| TUCP_003507 | XLOC_152308 | ENSRNOT00000021802 | 0.975362913  | 6.86E-08 |
| TUCP_003507 | XLOC_152308 | ENSRNOT00000013864 | -0.950685666 | 2.11E-06 |
| TUCP_003507 | XLOC_152308 | ENSRNOT00000026831 | 0.952882481  | 1.69E-06 |
| TUCP_003507 | XLOC_152308 | ENSRNOT00000018640 | 0.974590421  | 7.99E-08 |

|             |             |                    |              |          |
|-------------|-------------|--------------------|--------------|----------|
| TUCP_003507 | XLOC_152308 | ENSRNOT00000068663 | 0.954569259  | 1.41E-06 |
| TUCP_003507 | XLOC_152308 | ENSRNOT00000082709 | -0.956930087 | 1.09E-06 |
| TUCP_003507 | XLOC_152308 | ENSRNOT00000072299 | 0.969169633  | 2.08E-07 |
| TUCP_003507 | XLOC_152308 | ENSRNOT00000018122 | 0.957043711  | 1.07E-06 |
| TUCP_003507 | XLOC_152308 | ENSRNOT00000032363 | 0.96872993   | 2.23E-07 |
| TUCP_003507 | XLOC_152308 | ENSRNOT00000022194 | -0.957120701 | 1.06E-06 |
| TUCP_003507 | XLOC_152308 | ENSRNOT00000085334 | 0.958404367  | 9.14E-07 |
| TUCP_003507 | XLOC_152308 | ENSRNOT0000000817  | -0.950326408 | 2.19E-06 |
| TUCP_003507 | XLOC_152308 | ENSRNOT00000084313 | -0.959695695 | 7.83E-07 |
| TUCP_003507 | XLOC_152308 | ENSRNOT00000001401 | 0.951945715  | 1.86E-06 |
| TUCP_003507 | XLOC_152308 | ENSRNOT00000025913 | -0.954176695 | 1.47E-06 |
| TUCP_003507 | XLOC_152308 | ENSRNOT00000059246 | 0.952072457  | 1.84E-06 |
| TUCP_003507 | XLOC_152308 | ENSRNOT00000056022 | 0.972029759  | 1.29E-07 |
| TUCP_003507 | XLOC_152308 | ENSRNOT00000001360 | -0.957913224 | 9.69E-07 |
| TUCP_003507 | XLOC_152308 | ENSRNOT00000066888 | -0.957352468 | 1.03E-06 |
| TUCP_003507 | XLOC_152308 | ENSRNOT00000002151 | -0.95615197  | 1.19E-06 |
| TUCP_003507 | XLOC_152308 | ENSRNOT00000036658 | -0.97203978  | 1.28E-07 |
| TUCP_003507 | XLOC_152308 | ENSRNOT00000089611 | 0.957779618  | 9.84E-07 |
| TUCP_003507 | XLOC_152308 | ENSRNOT00000017254 | -0.953188292 | 1.64E-06 |
| TUCP_003507 | XLOC_152308 | ENSRNOT00000079609 | 0.960968231  | 6.68E-07 |
| TUCP_003507 | XLOC_152308 | ENSRNOT00000007738 | -0.954310491 | 1.45E-06 |
| TUCP_003507 | XLOC_152308 | ENSRNOT00000065629 | 0.954405859  | 1.44E-06 |
| TUCP_003507 | XLOC_152308 | ENSRNOT00000016077 | 0.968107699  | 2.46E-07 |
| TUCP_003507 | XLOC_152308 | ENSRNOT00000086260 | -0.968067518 | 2.48E-07 |
| TUCP_003507 | XLOC_152308 | ENSRNOT00000018328 | -0.970177612 | 1.77E-07 |
| TUCP_003507 | XLOC_152308 | ENSRNOT00000068044 | 0.953636056  | 1.56E-06 |
| TUCP_003507 | XLOC_152308 | ENSRNOT00000076400 | 0.962467421  | 5.51E-07 |
| TUCP_003507 | XLOC_152308 | ENSRNOT00000034411 | 0.961650031  | 6.13E-07 |
| TUCP_003507 | XLOC_152308 | ENSRNOT00000007044 | -0.953858021 | 1.52E-06 |
| TUCP_003507 | XLOC_152308 | ENSRNOT00000081123 | 0.955514966  | 1.27E-06 |
| TUCP_003507 | XLOC_152308 | ENSRNOT00000015769 | 0.959534191  | 7.98E-07 |
| TUCP_003507 | XLOC_152308 | ENSRNOT00000035605 | 0.96823169   | 2.42E-07 |
| TUCP_003507 | XLOC_152308 | ENSRNOT00000005172 | 0.964911425  | 3.95E-07 |
| TUCP_003507 | XLOC_152308 | ENSRNOT00000084031 | 0.954269517  | 1.46E-06 |
| TUCP_003507 | XLOC_152308 | ENSRNOT00000005170 | -0.952220473 | 1.81E-06 |
| TUCP_003507 | XLOC_152308 | ENSRNOT00000092083 | 0.968103896  | 2.46E-07 |
| TUCP_003507 | XLOC_152308 | ENSRNOT00000021717 | 0.950990821  | 2.05E-06 |
| TUCP_003507 | XLOC_152308 | ENSRNOT00000039911 | 0.957492798  | 1.02E-06 |
| TUCP_003507 | XLOC_152308 | ENSRNOT00000071897 | -0.957739998 | 9.89E-07 |
| TUCP_003507 | XLOC_152308 | ENSRNOT00000004770 | -0.959466782 | 8.05E-07 |
| TUCP_003507 | XLOC_152308 | ENSRNOT00000029701 | 0.96749871   | 2.70E-07 |
| TUCP_003507 | XLOC_152308 | ENSRNOT00000017907 | -0.959646887 | 7.87E-07 |
| TUCP_003507 | XLOC_152308 | ENSRNOT00000014585 | -0.950343617 | 2.19E-06 |
| TUCP_003507 | XLOC_152308 | ENSRNOT00000064901 | 0.954844797  | 1.37E-06 |
| TUCP_003507 | XLOC_152308 | ENSRNOT00000068528 | -0.963663665 | 4.69E-07 |
| TUCP_003507 | XLOC_152308 | ENSRNOT00000011675 | 0.971566057  | 1.40E-07 |
| TUCP_003507 | XLOC_152308 | ENSRNOT00000020794 | 0.952627483  | 1.73E-06 |
| TUCP_003507 | XLOC_152308 | ENSRNOT00000065615 | 0.952892345  | 1.69E-06 |
| TUCP_003507 | XLOC_152308 | ENSRNOT00000002574 | 0.957529269  | 1.01E-06 |
| TUCP_003507 | XLOC_152308 | ENSRNOT00000023876 | 0.970912491  | 1.56E-07 |
| TUCP_003507 | XLOC_152308 | ENSRNOT0000002974  | 0.9565451    | 1.13E-06 |

|             |             |                    |              |          |
|-------------|-------------|--------------------|--------------|----------|
| TUCP_003507 | XLOC_152308 | ENSRNOT00000066952 | 0.957838023  | 9.77E-07 |
| TUCP_003507 | XLOC_152308 | ENSRNOT00000028685 | 0.961596447  | 6.17E-07 |
| TUCP_003507 | XLOC_152308 | ENSRNOT00000000529 | -0.956585731 | 1.13E-06 |
| TUCP_003507 | XLOC_152308 | ENSRNOT00000083633 | -0.956456276 | 1.15E-06 |
| TUCP_003507 | XLOC_152308 | ENSRNOT00000049285 | -0.966148774 | 3.31E-07 |
| TUCP_003507 | XLOC_152308 | ENSRNOT00000087748 | -0.953011022 | 1.67E-06 |
| TUCP_003507 | XLOC_152308 | ENSRNOT00000006366 | -0.951359144 | 1.98E-06 |
| TUCP_003507 | XLOC_152308 | ENSRNOT00000088202 | -0.964102273 | 4.42E-07 |
| TUCP_003507 | XLOC_152308 | ENSRNOT00000017224 | -0.956849571 | 1.10E-06 |
| TUCP_003507 | XLOC_152308 | ENSRNOT00000005770 | 0.953435224  | 1.59E-06 |
| TUCP_003507 | XLOC_152308 | ENSRNOT00000085911 | -0.954359698 | 1.44E-06 |
| TUCP_003507 | XLOC_152308 | ENSRNOT00000004999 | 0.950532435  | 2.15E-06 |
| TUCP_003507 | XLOC_152308 | ENSRNOT00000013463 | 0.972847312  | 1.11E-07 |
| TUCP_003507 | XLOC_152308 | ENSRNOT00000089673 | -0.962053157 | 5.81E-07 |
| TUCP_003507 | XLOC_152308 | ENSRNOT00000000886 | 0.962964738  | 5.16E-07 |
| TUCP_003507 | XLOC_152308 | ENSRNOT00000057953 | 0.969290645  | 2.04E-07 |
| TUCP_003507 | XLOC_152308 | ENSRNOT00000075209 | -0.953296436 | 1.62E-06 |
| TUCP_003507 | XLOC_152308 | ENSRNOT00000057738 | 0.964661378  | 4.09E-07 |
| TUCP_003507 | XLOC_152308 | ENSRNOT00000006802 | 0.968937217  | 2.16E-07 |
| TUCP_003507 | XLOC_152308 | ENSRNOT00000007889 | -0.954883088 | 1.36E-06 |
| TUCP_003507 | XLOC_152308 | ENSRNOT00000023977 | -0.9541117   | 1.48E-06 |
| TUCP_003507 | XLOC_152308 | ENSRNOT00000009202 | 0.96371937   | 4.66E-07 |
| TUCP_003507 | XLOC_152308 | ENSRNOT00000047663 | -0.958760549 | 8.76E-07 |
| TUCP_003507 | XLOC_152308 | ENSRNOT00000082151 | -0.957182925 | 1.05E-06 |
| TUCP_003507 | XLOC_152308 | ENSRNOT00000011572 | -0.958520419 | 9.02E-07 |
| TUCP_003507 | XLOC_152308 | ENSRNOT00000067741 | -0.954621979 | 1.40E-06 |
| TUCP_003507 | XLOC_152308 | ENSRNOT00000000532 | -0.964642029 | 4.10E-07 |
| TUCP_003507 | XLOC_152308 | ENSRNOT00000005486 | -0.950677476 | 2.12E-06 |
| TUCP_003507 | XLOC_152308 | ENSRNOT00000083256 | 0.955155831  | 1.32E-06 |
| TUCP_003507 | XLOC_152308 | ENSRNOT00000003691 | -0.962152678 | 5.74E-07 |
| TUCP_003507 | XLOC_152308 | ENSRNOT00000010852 | 0.974968669  | 7.42E-08 |
| TUCP_003507 | XLOC_152308 | ENSRNOT00000025794 | -0.960361742 | 7.21E-07 |
| TUCP_003507 | XLOC_152308 | ENSRNOT00000014809 | -0.954420344 | 1.43E-06 |
| TUCP_003507 | XLOC_152308 | ENSRNOT00000058111 | -0.964872171 | 3.97E-07 |
| TUCP_003507 | XLOC_152308 | ENSRNOT00000014926 | 0.957755201  | 9.87E-07 |
| TUCP_003507 | XLOC_152308 | ENSRNOT00000085971 | -0.953206422 | 1.63E-06 |
| TUCP_003507 | XLOC_152308 | ENSRNOT00000009993 | -0.952383169 | 1.78E-06 |
| TUCP_003507 | XLOC_152308 | ENSRNOT00000016637 | -0.950222142 | 2.21E-06 |
| TUCP_003507 | XLOC_152308 | ENSRNOT00000008987 | -0.954530174 | 1.42E-06 |
| TUCP_003507 | XLOC_152308 | ENSRNOT00000009994 | -0.954769066 | 1.38E-06 |
| TUCP_003507 | XLOC_152308 | ENSRNOT00000071192 | -0.959880116 | 7.65E-07 |
| TUCP_003507 | XLOC_152308 | ENSRNOT00000022716 | 0.962685357  | 5.35E-07 |
| TUCP_003507 | XLOC_152308 | ENSRNOT00000002114 | -0.955735332 | 1.24E-06 |
| TUCP_003507 | XLOC_152308 | ENSRNOT00000091046 | 0.964816172  | 4.00E-07 |
| TUCP_003507 | XLOC_152308 | ENSRNOT00000039221 | -0.956227765 | 1.18E-06 |
| TUCP_003507 | XLOC_152308 | ENSRNOT00000015624 | 0.950243096  | 2.21E-06 |
| TUCP_003507 | XLOC_152308 | ENSRNOT00000017340 | -0.959947338 | 7.59E-07 |
| TUCP_003507 | XLOC_152308 | ENSRNOT00000073239 | -0.952845055 | 1.70E-06 |
| TUCP_003507 | XLOC_152308 | ENSRNOT00000044147 | -0.968218726 | 2.42E-07 |
| TUCP_003507 | XLOC_152308 | ENSRNOT00000030007 | -0.956272411 | 1.17E-06 |
| TUCP_003507 | XLOC_152308 | ENSRNOT00000046215 | -0.973945117 | 9.05E-08 |

|             |             |                    |              |          |
|-------------|-------------|--------------------|--------------|----------|
| TUCP_003507 | XLOC_152308 | ENSRNOT00000039102 | 0.962613896  | 5.40E-07 |
| TUCP_003507 | XLOC_152308 | ENSRNOT00000082138 | -0.957433142 | 1.02E-06 |
| TUCP_003507 | XLOC_152308 | ENSRNOT00000076467 | -0.950843806 | 2.08E-06 |
| TUCP_003507 | XLOC_152308 | ENSRNOT00000026518 | 0.958624815  | 8.91E-07 |
| TUCP_003507 | XLOC_152308 | ENSRNOT00000039540 | 0.966857466  | 2.98E-07 |
| TUCP_003507 | XLOC_152308 | ENSRNOT00000012625 | -0.963764606 | 4.63E-07 |
| TUCP_003507 | XLOC_152308 | ENSRNOT00000007369 | 0.950948462  | 2.06E-06 |
| TUCP_003507 | XLOC_152308 | ENSRNOT00000080677 | -0.959047893 | 8.47E-07 |
| TUCP_003507 | XLOC_152308 | ENSRNOT00000085466 | 0.952249512  | 1.80E-06 |
| TUCP_003507 | XLOC_152308 | ENSRNOT00000028545 | -0.962097654 | 5.78E-07 |
| TUCP_003507 | XLOC_152308 | ENSRNOT00000028225 | 0.969946701  | 1.84E-07 |
| TUCP_003507 | XLOC_152308 | ENSRNOT00000045946 | 0.950997578  | 2.05E-06 |
| TUCP_003507 | XLOC_152308 | ENSRNOT00000017998 | 0.95662075   | 1.12E-06 |
| TUCP_003507 | XLOC_152308 | ENSRNOT00000027360 | -0.970438392 | 1.69E-07 |
| TUCP_003507 | XLOC_152308 | ENSRNOT00000060595 | -0.954284822 | 1.46E-06 |
| TUCP_003507 | XLOC_152308 | ENSRNOT00000013431 | -0.954551829 | 1.41E-06 |
| TUCP_003507 | XLOC_152308 | ENSRNOT00000015318 | -0.980764627 | 2.01E-08 |
| TUCP_003507 | XLOC_152308 | ENSRNOT00000045063 | 0.962506369  | 5.48E-07 |
| TUCP_003507 | XLOC_152308 | ENSRNOT00000082805 | 0.951338312  | 1.98E-06 |
| TUCP_003507 | XLOC_152308 | ENSRNOT00000027967 | 0.950891331  | 2.07E-06 |
| TUCP_003507 | XLOC_152308 | ENSRNOT00000079128 | 0.960858072  | 6.78E-07 |
| TUCP_003507 | XLOC_152308 | ENSRNOT00000045532 | -0.957588034 | 1.01E-06 |
| TUCP_003507 | XLOC_152308 | ENSRNOT00000079414 | -0.952211702 | 1.81E-06 |
| TUCP_003507 | XLOC_152308 | ENSRNOT00000035309 | -0.951190307 | 2.01E-06 |
| TUCP_003507 | XLOC_152308 | ENSRNOT00000024011 | 0.972790273  | 1.12E-07 |
| TUCP_003507 | XLOC_152308 | ENSRNOT00000021537 | 0.950954421  | 2.06E-06 |
| TUCP_003507 | XLOC_152308 | ENSRNOT00000061580 | -0.954471295 | 1.43E-06 |
| TUCP_003507 | XLOC_152308 | ENSRNOT00000010020 | -0.961083724 | 6.58E-07 |
| TUCP_003507 | XLOC_152308 | ENSRNOT00000005257 | 0.978193423  | 3.74E-08 |
| TUCP_003507 | XLOC_152308 | ENSRNOT00000011326 | -0.958622956 | 8.91E-07 |
| TUCP_003507 | XLOC_152308 | ENSRNOT00000019473 | -0.955057085 | 1.34E-06 |
| TUCP_004377 | XLOC_193231 | ENSRNOT00000039045 | 0.963893808  | 4.55E-07 |
| TUCP_004377 | XLOC_193231 | ENSRNOT00000013620 | 0.963887344  | 4.55E-07 |
| TUCP_004377 | XLOC_193231 | ENSRNOT00000035700 | 0.951071968  | 2.03E-06 |
| TUCP_004377 | XLOC_193231 | ENSRNOT00000006426 | 0.959780023  | 7.75E-07 |
| TUCP_004377 | XLOC_193231 | ENSRNOT00000026755 | 0.963754641  | 4.64E-07 |
| TUCP_004377 | XLOC_193231 | ENSRNOT00000078639 | 0.952010256  | 1.85E-06 |
| TUCP_004377 | XLOC_193231 | ENSRNOT00000005977 | 0.956296389  | 1.17E-06 |
| TUCP_004377 | XLOC_193231 | ENSRNOT00000079109 | 0.959458522  | 8.06E-07 |
| TUCP_004377 | XLOC_193231 | ENSRNOT00000025394 | 0.959792259  | 7.74E-07 |
| TUCP_004377 | XLOC_193231 | ENSRNOT00000004718 | 0.956874627  | 1.09E-06 |
| TUCP_004377 | XLOC_193231 | ENSRNOT00000026121 | 0.960956708  | 6.69E-07 |
| TUCP_004377 | XLOC_193231 | ENSRNOT00000078685 | 0.951287446  | 1.99E-06 |
| TUCP_004377 | XLOC_193231 | ENSRNOT00000073636 | 0.962825866  | 5.25E-07 |
| TUCP_004377 | XLOC_193231 | ENSRNOT00000078500 | 0.97569281   | 6.42E-08 |
| TUCP_004377 | XLOC_193231 | ENSRNOT00000059458 | 0.966981137  | 2.92E-07 |
| TUCP_004377 | XLOC_193231 | ENSRNOT00000022610 | 0.966392978  | 3.19E-07 |
| TUCP_004377 | XLOC_193231 | ENSRNOT00000026065 | 0.953019651  | 1.67E-06 |
| TUCP_004377 | XLOC_193231 | ENSRNOT00000027537 | 0.951328383  | 1.98E-06 |
| TUCP_004377 | XLOC_193231 | ENSRNOT00000024060 | 0.954875837  | 1.37E-06 |
| TUCP_004377 | XLOC_193231 | ENSRNOT00000010149 | 0.950094985  | 2.24E-06 |

|             |             |                    |              |          |
|-------------|-------------|--------------------|--------------|----------|
| TUCP_004377 | XLOC_193231 | ENSRNOT00000022726 | 0.950571429  | 2.14E-06 |
| TUCP_004377 | XLOC_193231 | ENSRNOT00000046058 | 0.968514802  | 2.31E-07 |
| TUCP_004377 | XLOC_193231 | ENSRNOT00000021153 | 0.961179025  | 6.51E-07 |
| TUCP_004377 | XLOC_193231 | ENSRNOT00000025983 | 0.970741144  | 1.61E-07 |
| TUCP_004377 | XLOC_193231 | ENSRNOT00000024281 | 0.954854359  | 1.37E-06 |
| TUCP_004377 | XLOC_193231 | ENSRNOT00000077311 | 0.958339516  | 9.21E-07 |
| TUCP_004377 | XLOC_193231 | ENSRNOT00000086336 | 0.950149674  | 2.23E-06 |
| TUCP_004377 | XLOC_193231 | ENSRNOT00000010433 | 0.955968944  | 1.21E-06 |
| TUCP_004377 | XLOC_193231 | ENSRNOT00000054955 | -0.959296768 | 8.22E-07 |
| TUCP_004377 | XLOC_193231 | ENSRNOT00000017968 | 0.957490132  | 1.02E-06 |
| TUCP_004377 | XLOC_193231 | ENSRNOT00000048543 | 0.971109887  | 1.51E-07 |
| TUCP_004377 | XLOC_193231 | ENSRNOT00000065921 | 0.956412897  | 1.15E-06 |
| TUCP_004377 | XLOC_193231 | ENSRNOT00000013863 | -0.955858041 | 1.23E-06 |
| TUCP_004377 | XLOC_193231 | ENSRNOT00000066440 | -0.965767171 | 3.50E-07 |
| TUCP_004377 | XLOC_193231 | ENSRNOT00000010927 | 0.951001824  | 2.05E-06 |
| TUCP_004377 | XLOC_193231 | ENSRNOT00000027414 | 0.957929429  | 9.67E-07 |
| TUCP_004377 | XLOC_193231 | ENSRNOT00000028563 | 0.966871923  | 2.97E-07 |
| TUCP_004377 | XLOC_193231 | ENSRNOT00000006195 | 0.965300534  | 3.74E-07 |
| TUCP_004377 | XLOC_193231 | ENSRNOT00000028760 | 0.950192372  | 2.22E-06 |
| TUCP_004377 | XLOC_193231 | ENSRNOT00000003158 | -0.961241286 | 6.45E-07 |
| TUCP_004377 | XLOC_193231 | ENSRNOT00000023180 | 0.950820848  | 2.09E-06 |
| TUCP_004377 | XLOC_193231 | ENSRNOT00000076516 | 0.974729547  | 7.78E-08 |
| TUCP_004377 | XLOC_193231 | ENSRNOT00000012560 | 0.968205466  | 2.43E-07 |
| TUCP_004377 | XLOC_193231 | ENSRNOT00000030991 | 0.96411847   | 4.41E-07 |
| TUCP_004377 | XLOC_193231 | ENSRNOT00000091807 | 0.961785276  | 6.02E-07 |
| TUCP_004377 | XLOC_193231 | ENSRNOT00000085332 | -0.950604839 | 2.13E-06 |
| TUCP_004377 | XLOC_193231 | ENSRNOT00000012463 | -0.977483233 | 4.39E-08 |
| TUCP_004377 | XLOC_193231 | ENSRNOT00000019177 | 0.965581989  | 3.59E-07 |
| TUCP_004377 | XLOC_193231 | ENSRNOT00000054874 | 0.952348762  | 1.79E-06 |
| TUCP_004377 | XLOC_193231 | ENSRNOT00000013046 | -0.964262664 | 4.32E-07 |
| TUCP_004377 | XLOC_193231 | ENSRNOT00000011384 | 0.96470746   | 4.06E-07 |
| TUCP_004377 | XLOC_193231 | ENSRNOT00000016948 | -0.952832108 | 1.70E-06 |
| TUCP_004377 | XLOC_193231 | ENSRNOT00000009198 | 0.963569617  | 4.75E-07 |
| TUCP_004377 | XLOC_193231 | ENSRNOT00000012379 | 0.964622829  | 4.11E-07 |
| TUCP_004377 | XLOC_193231 | ENSRNOT00000006828 | 0.972727972  | 1.13E-07 |
| TUCP_004377 | XLOC_193231 | ENSRNOT00000009129 | 0.976910187  | 4.97E-08 |
| TUCP_004377 | XLOC_193231 | ENSRNOT00000020437 | 0.962017639  | 5.84E-07 |
| TUCP_004377 | XLOC_193231 | ENSRNOT00000087306 | 0.957867005  | 9.74E-07 |
| TUCP_004377 | XLOC_193231 | ENSRNOT00000009877 | 0.954990004  | 1.35E-06 |
| TUCP_004377 | XLOC_193231 | ENSRNOT00000006963 | 0.957124386  | 1.06E-06 |
| TUCP_004377 | XLOC_193231 | ENSRNOT00000018990 | 0.950313761  | 2.19E-06 |
| TUCP_004377 | XLOC_193231 | ENSRNOT00000036951 | 0.960547652  | 7.04E-07 |
| TUCP_004377 | XLOC_193231 | ENSRNOT00000049538 | 0.967679448  | 2.63E-07 |
| TUCP_004377 | XLOC_193231 | ENSRNOT00000044177 | 0.975593853  | 6.55E-08 |
| TUCP_004377 | XLOC_193231 | ENSRNOT00000027944 | 0.972966365  | 1.09E-07 |
| TUCP_004377 | XLOC_193231 | ENSRNOT00000018533 | 0.960326965  | 7.24E-07 |
| TUCP_004377 | XLOC_193231 | ENSRNOT00000011663 | 0.958250551  | 9.31E-07 |
| TUCP_004377 | XLOC_193231 | ENSRNOT00000087660 | 0.97169956   | 1.36E-07 |
| TUCP_004377 | XLOC_193231 | ENSRNOT00000052075 | 0.967162812  | 2.85E-07 |
| TUCP_004377 | XLOC_193231 | ENSRNOT00000093631 | -0.97534625  | 6.88E-08 |
| TUCP_004377 | XLOC_193231 | ENSRNOT00000026186 | 0.964233508  | 4.34E-07 |



|             |             |                    |              |          |
|-------------|-------------|--------------------|--------------|----------|
| TUCP_004377 | XLOC_193231 | ENSRNOT00000022947 | -0.961039885 | 6.62E-07 |
| TUCP_000731 | XLOC_027261 | ENSRNOT00000092026 | 0.96620614   | 3.28E-07 |
| TUCP_000731 | XLOC_027261 | ENSRNOT00000093075 | 1            | 0        |
| TUCP_000731 | XLOC_027261 | ENSRNOT00000058260 | 1            | 0        |
| TUCP_000731 | XLOC_027261 | ENSRNOT00000088887 | 1            | 4.25E-78 |
| TUCP_000731 | XLOC_027261 | ENSRNOT00000084986 | 1            | 4.25E-78 |
| TUCP_000731 | XLOC_027261 | ENSRNOT00000074346 | 0.9702256    | 1.75E-07 |
| TUCP_000731 | XLOC_027261 | ENSRNOT00000073209 | 0.983711602  | 8.79E-09 |
| TUCP_000731 | XLOC_027261 | ENSRNOT00000080155 | 0.973069673  | 1.07E-07 |
| TUCP_000731 | XLOC_027261 | ENSRNOT00000072573 | 0.996213272  | 6.09E-12 |
| TUCP_000731 | XLOC_027261 | ENSRNOT00000017828 | 0.996001583  | 7.99E-12 |
| TUCP_000731 | XLOC_027261 | ENSRNOT00000080444 | 0.969625907  | 1.93E-07 |
| TUCP_000731 | XLOC_027261 | ENSRNOT00000071312 | 1            | 1.33E-79 |
| TUCP_000731 | XLOC_027261 | ENSRNOT00000088245 | 1            | 4.25E-78 |
| TUCP_000731 | XLOC_027261 | ENSRNOT00000036565 | 0.969065335  | 2.12E-07 |
| TUCP_000731 | XLOC_027261 | ENSRNOT00000058833 | 0.998673261  | 3.23E-14 |
| TUCP_000731 | XLOC_027261 | ENSRNOT00000078052 | 1            | 0        |
| TUCP_000731 | XLOC_027261 | ENSRNOT00000078494 | 0.999927093  | 1.62E-20 |
| TUCP_000731 | XLOC_027261 | ENSRNOT00000085653 | 1            | 0        |
| TUCP_000731 | XLOC_027261 | ENSRNOT00000057950 | 0.969329371  | 2.03E-07 |
| TUCP_000731 | XLOC_027261 | ENSRNOT00000081992 | 0.999320526  | 1.14E-15 |
| TUCP_000731 | XLOC_027261 | ENSRNOT00000038553 | 0.955765808  | 1.24E-06 |
| TUCP_000731 | XLOC_027261 | ENSRNOT00000084120 | 0.958115447  | 9.46E-07 |
| TUCP_000731 | XLOC_027261 | ENSRNOT00000055406 | 1            | 1.33E-79 |
| TUCP_000731 | XLOC_027261 | ENSRNOT00000070817 | 0.998968079  | 9.20E-15 |
| TUCP_000731 | XLOC_027261 | ENSRNOT00000026753 | 1            | 1.33E-79 |
| TUCP_000731 | XLOC_027261 | ENSRNOT00000080533 | 0.996682529  | 3.15E-12 |
| TUCP_000731 | XLOC_027261 | ENSRNOT00000072774 | 0.979665261  | 2.65E-08 |
| TUCP_000731 | XLOC_027261 | ENSRNOT00000086031 | 1            | 4.25E-78 |
| TUCP_000731 | XLOC_027261 | ENSRNOT00000014312 | 1            | 0        |
| TUCP_000731 | XLOC_027261 | ENSRNOT00000042882 | 0.963218427  | 4.98E-07 |
| TUCP_000731 | XLOC_027261 | ENSRNOT00000088012 | 0.956765806  | 1.11E-06 |
| TUCP_000731 | XLOC_027261 | ENSRNOT00000051231 | 0.999242378  | 1.96E-15 |
| TUCP_000731 | XLOC_027261 | ENSRNOT00000089407 | 0.992986194  | 1.32E-10 |
| TUCP_000731 | XLOC_027261 | ENSRNOT00000055034 | 0.998331441  | 1.02E-13 |
| TUCP_000731 | XLOC_027261 | ENSRNOT00000046837 | 0.97252559   | 1.18E-07 |
| TUCP_001797 | XLOC_074266 | ENSRNOT00000041541 | -0.965966951 | 3.40E-07 |
| TUCP_000583 | XLOC_020714 | ENSRNOT00000022389 | 0.96917649   | 2.08E-07 |
| TUCP_000583 | XLOC_020714 | ENSRNOT00000040116 | 0.965485949  | 3.64E-07 |
| TUCP_000583 | XLOC_020714 | ENSRNOT00000011869 | 0.976773649  | 5.12E-08 |
| TUCP_000583 | XLOC_020714 | ENSRNOT00000034401 | 0.959549369  | 7.97E-07 |
| TUCP_000583 | XLOC_020714 | ENSRNOT00000077451 | 0.951305683  | 1.99E-06 |
| TUCP_000583 | XLOC_020714 | ENSRNOT00000021506 | 0.962515031  | 5.47E-07 |
| TUCP_000583 | XLOC_020714 | ENSRNOT00000019121 | 0.955004058  | 1.35E-06 |
| TUCP_000583 | XLOC_020714 | ENSRNOT00000050063 | 0.951067639  | 2.03E-06 |
| TUCP_000583 | XLOC_020714 | ENSRNOT00000006172 | 0.96410479   | 4.42E-07 |
| TUCP_000583 | XLOC_020714 | ENSRNOT00000017340 | 0.953940298  | 1.51E-06 |
| TUCP_000583 | XLOC_020714 | ENSRNOT00000018494 | 0.961673354  | 6.11E-07 |
| TUCP_000583 | XLOC_020714 | ENSRNOT00000023067 | 0.970709103  | 1.62E-07 |
| TUCP_000583 | XLOC_020714 | ENSRNOT00000074261 | 0.95660261   | 1.13E-06 |
| TUCP_000583 | XLOC_020714 | ENSRNOT00000000527 | 0.967294577  | 2.79E-07 |

|             |             |                    |              |          |
|-------------|-------------|--------------------|--------------|----------|
| TUCP_000583 | XLOC_020714 | ENSRNOT00000039000 | 0.957084582  | 1.07E-06 |
| TUCP_000583 | XLOC_020714 | ENSRNOT00000016265 | 0.950851612  | 2.08E-06 |
| TUCP_000583 | XLOC_020714 | ENSRNOT00000001050 | 0.963852122  | 4.57E-07 |
| TUCP_000583 | XLOC_020714 | ENSRNOT00000085581 | 0.952156772  | 1.82E-06 |
| TUCP_000583 | XLOC_020714 | ENSRNOT00000002853 | 0.954053309  | 1.49E-06 |
| TUCP_000583 | XLOC_020714 | ENSRNOT00000073521 | 0.982439197  | 1.28E-08 |
| TUCP_000583 | XLOC_020714 | ENSRNOT00000000528 | 0.965332137  | 3.72E-07 |
| TUCP_000583 | XLOC_020714 | ENSRNOT00000074629 | 0.957213121  | 1.05E-06 |
| TUCP_000583 | XLOC_020714 | ENSRNOT00000027220 | 0.962922394  | 5.19E-07 |
| TUCP_000583 | XLOC_020714 | ENSRNOT00000023452 | 0.971769157  | 1.35E-07 |
| TUCP_000583 | XLOC_020714 | ENSRNOT00000028527 | 0.958609806  | 8.92E-07 |
| TUCP_000583 | XLOC_020714 | ENSRNOT00000008813 | 0.951322059  | 1.98E-06 |
| TUCP_000583 | XLOC_020714 | ENSRNOT00000017224 | 0.954674464  | 1.40E-06 |
| TUCP_000583 | XLOC_020714 | ENSRNOT00000086007 | 0.963438638  | 4.84E-07 |
| TUCP_000583 | XLOC_020714 | ENSRNOT00000073388 | 0.9557202    | 1.24E-06 |
| TUCP_000583 | XLOC_020714 | ENSRNOT00000014317 | 0.955172694  | 1.32E-06 |
| TUCP_000583 | XLOC_020714 | ENSRNOT00000041151 | 0.970215817  | 1.76E-07 |
| TUCP_000583 | XLOC_020714 | ENSRNOT00000004770 | 0.95356819   | 1.57E-06 |
| TUCP_000583 | XLOC_020714 | ENSRNOT00000000134 | 0.960376608  | 7.20E-07 |
| TUCP_000705 | XLOC_026751 | ENSRNOT00000079808 | -0.955613246 | 1.26E-06 |
| TUCP_001197 | XLOC_045075 | ENSRNOT00000047560 | 0.957755962  | 9.87E-07 |
| TUCP_003689 | XLOC_161313 | ENSRNOT00000031904 | 0.971945427  | 1.31E-07 |
| TUCP_003689 | XLOC_161313 | ENSRNOT00000067400 | 0.957613238  | 1.00E-06 |
| TUCP_003689 | XLOC_161313 | ENSRNOT00000039809 | 0.961430359  | 6.30E-07 |
| TUCP_003689 | XLOC_161313 | ENSRNOT00000000743 | 0.974294142  | 8.47E-08 |
| TUCP_003689 | XLOC_161313 | ENSRNOT00000027083 | 0.969977621  | 1.83E-07 |
| TUCP_003689 | XLOC_161313 | ENSRNOT00000048914 | 0.952018339  | 1.85E-06 |
| TUCP_003689 | XLOC_161313 | ENSRNOT00000013507 | 0.951093641  | 2.03E-06 |
| TUCP_003689 | XLOC_161313 | ENSRNOT00000023638 | 0.954312596  | 1.45E-06 |
| TUCP_003689 | XLOC_161313 | ENSRNOT00000006175 | 0.95078185   | 2.09E-06 |
| TUCP_003689 | XLOC_161313 | ENSRNOT00000021592 | 0.960843039  | 6.79E-07 |
| TUCP_003689 | XLOC_161313 | ENSRNOT00000028625 | -0.952213077 | 1.81E-06 |
| TUCP_003689 | XLOC_161313 | ENSRNOT00000023144 | 0.962102376  | 5.78E-07 |
| TUCP_003689 | XLOC_161313 | ENSRNOT00000082869 | 0.965516725  | 3.62E-07 |
| TUCP_003689 | XLOC_161313 | ENSRNOT00000016649 | 0.964203455  | 4.36E-07 |
| TUCP_003689 | XLOC_161313 | ENSRNOT00000026941 | 0.955525218  | 1.27E-06 |
| TUCP_003689 | XLOC_161313 | ENSRNOT00000013758 | 0.960241904  | 7.32E-07 |
| TUCP_003689 | XLOC_161313 | ENSRNOT00000026543 | 0.970326988  | 1.72E-07 |
| TUCP_003689 | XLOC_161313 | ENSRNOT00000085251 | -0.950234535 | 2.21E-06 |
| TUCP_003689 | XLOC_161313 | ENSRNOT00000025075 | 0.955979858  | 1.21E-06 |
| TUCP_003689 | XLOC_161313 | ENSRNOT00000035989 | 0.983777881  | 8.61E-09 |
| TUCP_003689 | XLOC_161313 | ENSRNOT00000057160 | 0.974719289  | 7.79E-08 |
| TUCP_003689 | XLOC_161313 | ENSRNOT00000082699 | 0.977333305  | 4.54E-08 |
| TUCP_003689 | XLOC_161313 | ENSRNOT00000028847 | 0.95092603   | 2.06E-06 |
| TUCP_003689 | XLOC_161313 | ENSRNOT00000010242 | 0.953952369  | 1.51E-06 |
| TUCP_003689 | XLOC_161313 | ENSRNOT00000091602 | -0.950324484 | 2.19E-06 |
| TUCP_003689 | XLOC_161313 | ENSRNOT00000084012 | 0.955432947  | 1.28E-06 |
| TUCP_003689 | XLOC_161313 | ENSRNOT00000002560 | 0.964177166  | 4.37E-07 |
| TUCP_003689 | XLOC_161313 | ENSRNOT00000051294 | 0.952430512  | 1.77E-06 |
| TUCP_003689 | XLOC_161313 | ENSRNOT00000041513 | 0.95611724   | 1.19E-06 |
| TUCP_003689 | XLOC_161313 | ENSRNOT00000091909 | 0.950368883  | 2.18E-06 |

|             |             |                    |              |          |
|-------------|-------------|--------------------|--------------|----------|
| TUCP_003689 | XLOC_161313 | ENSRNOT00000041044 | 0.961912831  | 5.92E-07 |
| TUCP_003689 | XLOC_161313 | ENSRNOT00000010541 | 0.962518986  | 5.47E-07 |
| TUCP_003689 | XLOC_161313 | ENSRNOT00000012895 | 0.952353027  | 1.78E-06 |
| TUCP_003689 | XLOC_161313 | ENSRNOT00000025859 | 0.951059831  | 2.04E-06 |
| TUCP_003689 | XLOC_161313 | ENSRNOT00000013026 | 0.9505678    | 2.14E-06 |
| TUCP_003689 | XLOC_161313 | ENSRNOT00000034503 | 0.962393767  | 5.56E-07 |
| TUCP_003689 | XLOC_161313 | ENSRNOT00000085027 | 0.954382803  | 1.44E-06 |
| TUCP_003689 | XLOC_161313 | ENSRNOT00000010898 | 0.96845796   | 2.33E-07 |
| TUCP_003689 | XLOC_161313 | ENSRNOT00000047093 | 0.952053579  | 1.84E-06 |
| TUCP_003689 | XLOC_161313 | ENSRNOT00000023744 | 0.96946642   | 1.99E-07 |
| TUCP_003689 | XLOC_161313 | ENSRNOT00000005355 | 0.959637173  | 7.88E-07 |
| TUCP_003689 | XLOC_161313 | ENSRNOT00000048063 | 0.952699463  | 1.72E-06 |
| TUCP_003689 | XLOC_161313 | ENSRNOT00000016739 | 0.956933307  | 1.09E-06 |
| TUCP_003689 | XLOC_161313 | ENSRNOT00000081881 | 0.951677778  | 1.91E-06 |
| TUCP_003689 | XLOC_161313 | ENSRNOT00000044608 | -0.957387895 | 1.03E-06 |
| TUCP_003689 | XLOC_161313 | ENSRNOT00000025981 | 0.974779917  | 7.70E-08 |
| TUCP_003689 | XLOC_161313 | ENSRNOT00000047387 | 0.953039595  | 1.66E-06 |
| TUCP_003689 | XLOC_161313 | ENSRNOT00000021769 | 0.957058621  | 1.07E-06 |
| TUCP_003689 | XLOC_161313 | ENSRNOT00000088599 | 0.957937786  | 9.66E-07 |
| TUCP_003689 | XLOC_161313 | ENSRNOT00000081047 | 0.950923491  | 2.06E-06 |
| TUCP_003689 | XLOC_161313 | ENSRNOT00000017629 | 0.955214222  | 1.32E-06 |
| TUCP_003689 | XLOC_161313 | ENSRNOT00000003991 | 0.959429445  | 8.09E-07 |
| TUCP_003689 | XLOC_161313 | ENSRNOT00000087429 | 0.953450973  | 1.59E-06 |
| TUCP_003689 | XLOC_161313 | ENSRNOT00000079072 | 0.96477091   | 4.03E-07 |
| TUCP_003689 | XLOC_161313 | ENSRNOT00000084088 | 0.973657767  | 9.56E-08 |
| TUCP_003689 | XLOC_161313 | ENSRNOT00000078070 | 0.960406681  | 7.17E-07 |
| TUCP_003689 | XLOC_161313 | ENSRNOT00000005262 | 0.950451091  | 2.16E-06 |
| TUCP_003689 | XLOC_161313 | ENSRNOT00000076729 | 0.975769274  | 6.32E-08 |
| TUCP_003689 | XLOC_161313 | ENSRNOT00000090665 | 0.954726904  | 1.39E-06 |
| TUCP_003689 | XLOC_161313 | ENSRNOT00000078390 | -0.950197831 | 2.22E-06 |
| TUCP_003689 | XLOC_161313 | ENSRNOT00000065501 | 0.953109701  | 1.65E-06 |
| TUCP_003689 | XLOC_161313 | ENSRNOT00000025936 | -0.956324598 | 1.16E-06 |
| TUCP_003689 | XLOC_161313 | ENSRNOT00000050180 | 0.956672925  | 1.12E-06 |
| TUCP_003689 | XLOC_161313 | ENSRNOT00000090420 | -0.959607483 | 7.91E-07 |
| TUCP_003689 | XLOC_161313 | ENSRNOT0000001222  | 0.956574431  | 1.13E-06 |
| TUCP_003689 | XLOC_161313 | ENSRNOT00000017422 | -0.954277225 | 1.46E-06 |
| TUCP_003689 | XLOC_161313 | ENSRNOT00000010992 | 0.960577559  | 7.02E-07 |
| TUCP_003689 | XLOC_161313 | ENSRNOT00000076669 | 0.977026859  | 4.85E-08 |
| TUCP_003689 | XLOC_161313 | ENSRNOT00000085596 | 0.955351125  | 1.30E-06 |
| TUCP_003689 | XLOC_161313 | ENSRNOT00000038807 | 0.954373969  | 1.44E-06 |
| TUCP_003689 | XLOC_161313 | ENSRNOT00000073675 | -0.956298312 | 1.17E-06 |
| TUCP_003689 | XLOC_161313 | ENSRNOT00000025808 | 0.950879165  | 2.07E-06 |
| TUCP_003689 | XLOC_161313 | ENSRNOT00000050834 | -0.962100299 | 5.78E-07 |
| TUCP_003689 | XLOC_161313 | ENSRNOT00000066024 | 0.977146624  | 4.72E-08 |
| TUCP_003689 | XLOC_161313 | ENSRNOT00000021471 | -0.958508117 | 9.03E-07 |
| TUCP_003689 | XLOC_161313 | ENSRNOT00000041096 | 0.95276955   | 1.71E-06 |
| TUCP_003689 | XLOC_161313 | ENSRNOT00000080110 | 0.961302222  | 6.40E-07 |
| TUCP_003689 | XLOC_161313 | ENSRNOT00000078306 | 0.967883015  | 2.55E-07 |
| TUCP_003689 | XLOC_161313 | ENSRNOT00000080695 | 0.974418789  | 8.27E-08 |
| TUCP_003689 | XLOC_161313 | ENSRNOT00000075279 | 0.953297779  | 1.62E-06 |
| TUCP_003689 | XLOC_161313 | ENSRNOT00000060696 | 0.964583518  | 4.13E-07 |

|             |             |                     |              |          |
|-------------|-------------|---------------------|--------------|----------|
| TUCP_003689 | XLOC_161313 | ENSRNOT00000042125  | 0.95633433   | 1.16E-06 |
| TUCP_003689 | XLOC_161313 | ENSRNOT00000009900  | -0.954163915 | 1.48E-06 |
| TUCP_003689 | XLOC_161313 | ENSRNOT000000081400 | 0.955582796  | 1.26E-06 |
| TUCP_003689 | XLOC_161313 | ENSRNOT00000004412  | 0.952396413  | 1.78E-06 |
| TUCP_003689 | XLOC_161313 | ENSRNOT000000067181 | 0.972454626  | 1.19E-07 |
| TUCP_003689 | XLOC_161313 | ENSRNOT000000080207 | 0.950097516  | 2.24E-06 |
| TUCP_003689 | XLOC_161313 | ENSRNOT000000034704 | 0.955728719  | 1.24E-06 |
| TUCP_003689 | XLOC_161313 | ENSRNOT000000051496 | 0.96207574   | 5.80E-07 |
| TUCP_003689 | XLOC_161313 | ENSRNOT000000067904 | 0.959096377  | 8.42E-07 |
| TUCP_003689 | XLOC_161313 | ENSRNOT000000011041 | 0.951415974  | 1.96E-06 |
| TUCP_003689 | XLOC_161313 | ENSRNOT000000047192 | -0.962806807 | 5.27E-07 |
| TUCP_003689 | XLOC_161313 | ENSRNOT000000083799 | 0.955846574  | 1.23E-06 |
| TUCP_003503 | XLOC_151982 | ENSRNOT00000000474  | 0.952518507  | 1.75E-06 |
| TUCP_003503 | XLOC_151982 | ENSRNOT000000007144 | 0.964531973  | 4.16E-07 |
| TUCP_003503 | XLOC_151982 | ENSRNOT000000059157 | 0.952684631  | 1.72E-06 |
| TUCP_003503 | XLOC_151982 | ENSRNOT00000019630  | 0.951856121  | 1.88E-06 |
| TUCP_003503 | XLOC_151982 | ENSRNOT000000087355 | 0.957900183  | 9.70E-07 |
| TUCP_003503 | XLOC_151982 | ENSRNOT000000084912 | 0.958833331  | 8.69E-07 |
| TUCP_003503 | XLOC_151982 | ENSRNOT000000028075 | 0.952654815  | 1.73E-06 |
| TUCP_003503 | XLOC_151982 | ENSRNOT000000047179 | 0.966935459  | 2.94E-07 |
| TUCP_003503 | XLOC_151982 | ENSRNOT000000086812 | 0.956583266  | 1.13E-06 |
| TUCP_003503 | XLOC_151982 | ENSRNOT000000091065 | 0.956207756  | 1.18E-06 |
| TUCP_003503 | XLOC_151982 | ENSRNOT00000001912  | 0.956988706  | 1.08E-06 |
| TUCP_003503 | XLOC_151982 | ENSRNOT000000045049 | 0.957144871  | 1.06E-06 |
| TUCP_003882 | XLOC_170691 | ENSRNOT000000092026 | 0.966196429  | 3.28E-07 |
| TUCP_003882 | XLOC_170691 | ENSRNOT000000093075 | 0.999999982  | 1.41E-38 |
| TUCP_003882 | XLOC_170691 | ENSRNOT000000058260 | 0.999999982  | 1.41E-38 |
| TUCP_003882 | XLOC_170691 | ENSRNOT000000088887 | 0.999999982  | 1.41E-38 |
| TUCP_003882 | XLOC_170691 | ENSRNOT000000084986 | 0.999999982  | 1.41E-38 |
| TUCP_003882 | XLOC_170691 | ENSRNOT000000074346 | 0.970213101  | 1.76E-07 |
| TUCP_003882 | XLOC_170691 | ENSRNOT000000073209 | 0.983705147  | 8.80E-09 |
| TUCP_003882 | XLOC_170691 | ENSRNOT000000080155 | 0.973060741  | 1.07E-07 |
| TUCP_003882 | XLOC_170691 | ENSRNOT000000072573 | 0.996212824  | 6.10E-12 |
| TUCP_003882 | XLOC_170691 | ENSRNOT000000017828 | 0.996014699  | 7.86E-12 |
| TUCP_003882 | XLOC_170691 | ENSRNOT000000080444 | 0.969650743  | 1.93E-07 |
| TUCP_003882 | XLOC_170691 | ENSRNOT000000071312 | 0.999999982  | 1.41E-38 |
| TUCP_003882 | XLOC_170691 | ENSRNOT000000088245 | 0.999999982  | 1.41E-38 |
| TUCP_003882 | XLOC_170691 | ENSRNOT000000036565 | 0.969078919  | 2.11E-07 |
| TUCP_003882 | XLOC_170691 | ENSRNOT000000058833 | 0.998671813  | 3.25E-14 |
| TUCP_003882 | XLOC_170691 | ENSRNOT000000078052 | 0.999999982  | 1.41E-38 |
| TUCP_003882 | XLOC_170691 | ENSRNOT000000078494 | 0.99992885   | 1.44E-20 |
| TUCP_003882 | XLOC_170691 | ENSRNOT000000085653 | 0.999999982  | 1.41E-38 |
| TUCP_003882 | XLOC_170691 | ENSRNOT000000057950 | 0.969364372  | 2.02E-07 |
| TUCP_003882 | XLOC_170691 | ENSRNOT000000081992 | 0.999320772  | 1.14E-15 |
| TUCP_003882 | XLOC_170691 | ENSRNOT000000038553 | 0.955754164  | 1.24E-06 |
| TUCP_003882 | XLOC_170691 | ENSRNOT000000084120 | 0.95810184   | 9.48E-07 |
| TUCP_003882 | XLOC_170691 | ENSRNOT000000055406 | 0.999999982  | 1.41E-38 |
| TUCP_003882 | XLOC_170691 | ENSRNOT000000070817 | 0.998972736  | 8.99E-15 |
| TUCP_003882 | XLOC_170691 | ENSRNOT000000026753 | 0.999999982  | 1.41E-38 |
| TUCP_003882 | XLOC_170691 | ENSRNOT000000080533 | 0.996680251  | 3.16E-12 |
| TUCP_003882 | XLOC_170691 | ENSRNOT000000072774 | 0.979694742  | 2.63E-08 |

|             |             |                    |             |          |
|-------------|-------------|--------------------|-------------|----------|
| TUCP_003882 | XLOC_170691 | ENSRNOT00000086031 | 0.999999982 | 1.41E-38 |
| TUCP_003882 | XLOC_170691 | ENSRNOT00000014312 | 0.999999982 | 1.41E-38 |
| TUCP_003882 | XLOC_170691 | ENSRNOT00000042882 | 0.96322829  | 4.98E-07 |
| TUCP_003882 | XLOC_170691 | ENSRNOT00000088012 | 0.956808551 | 1.10E-06 |
| TUCP_003882 | XLOC_170691 | ENSRNOT00000051231 | 0.999241279 | 1.98E-15 |
| TUCP_003882 | XLOC_170691 | ENSRNOT00000089407 | 0.992982889 | 1.32E-10 |
| TUCP_003882 | XLOC_170691 | ENSRNOT00000055034 | 0.998332806 | 1.01E-13 |
| TUCP_003882 | XLOC_170691 | ENSRNOT00000046837 | 0.972534573 | 1.18E-07 |
| TUCP_001106 | XLOC_042098 | ENSRNOT00000076400 | 0.961477936 | 6.26E-07 |
| TUCP_001106 | XLOC_042098 | ENSRNOT00000055536 | 0.98080685  | 1.99E-08 |
| TUCP_001106 | XLOC_042098 | ENSRNOT00000010680 | 0.956495137 | 1.14E-06 |
| TUCP_001106 | XLOC_042098 | ENSRNOT00000010852 | 0.964882477 | 3.97E-07 |
| TUCP_001106 | XLOC_042098 | ENSRNOT00000009975 | 0.975317743 | 6.92E-08 |
| TUCP_001106 | XLOC_042098 | ENSRNOT00000072682 | 0.970692794 | 1.62E-07 |
| TUCP_001106 | XLOC_042098 | ENSRNOT00000061054 | 0.969322065 | 2.03E-07 |
| TUCP_001106 | XLOC_042098 | ENSRNOT00000081226 | 0.964826842 | 4.00E-07 |
| TUCP_001106 | XLOC_042098 | ENSRNOT00000001642 | 0.951417544 | 1.96E-06 |
| TUCP_001106 | XLOC_042098 | ENSRNOT00000022309 | 0.965705591 | 3.53E-07 |
| TUCP_001106 | XLOC_042098 | ENSRNOT00000081631 | 0.975265886 | 6.99E-08 |
| TUCP_001106 | XLOC_042098 | ENSRNOT00000017829 | 0.952583143 | 1.74E-06 |
| TUCP_001106 | XLOC_042098 | ENSRNOT00000039911 | 0.964793541 | 4.02E-07 |
| TUCP_001106 | XLOC_042098 | ENSRNOT00000026518 | 0.962403029 | 5.55E-07 |
| TUCP_001106 | XLOC_042098 | ENSRNOT00000006071 | 0.951168192 | 2.01E-06 |
| TUCP_001106 | XLOC_042098 | ENSRNOT00000028624 | 0.960738327 | 6.88E-07 |
| TUCP_001106 | XLOC_042098 | ENSRNOT00000065801 | 0.958344987 | 9.21E-07 |
| TUCP_001106 | XLOC_042098 | ENSRNOT00000088385 | 0.95495925  | 1.35E-06 |
| TUCP_001106 | XLOC_042098 | ENSRNOT00000016485 | 0.963586795 | 4.74E-07 |
| TUCP_001106 | XLOC_042098 | ENSRNOT00000079152 | 0.950087783 | 2.24E-06 |
| TUCP_001106 | XLOC_042098 | ENSRNOT00000073493 | 0.963410914 | 4.86E-07 |
| TUCP_001106 | XLOC_042098 | ENSRNOT00000042638 | 0.950250519 | 2.21E-06 |
| TUCP_001106 | XLOC_042098 | ENSRNOT00000014382 | 0.956272871 | 1.17E-06 |
| TUCP_001106 | XLOC_042098 | ENSRNOT00000087521 | 0.959787931 | 7.74E-07 |
| TUCP_001106 | XLOC_042098 | ENSRNOT00000005770 | 0.960814965 | 6.81E-07 |
| TUCP_001106 | XLOC_042098 | ENSRNOT00000090700 | 0.969692939 | 1.91E-07 |
| TUCP_001106 | XLOC_042098 | ENSRNOT00000027476 | 0.952419097 | 1.77E-06 |
| TUCP_001106 | XLOC_042098 | ENSRNOT00000036137 | 0.951364338 | 1.97E-06 |
| TUCP_001106 | XLOC_042098 | ENSRNOT00000085334 | 0.973980022 | 8.99E-08 |
| TUCP_001106 | XLOC_042098 | ENSRNOT00000011589 | 0.958750025 | 8.78E-07 |
| TUCP_001106 | XLOC_042098 | ENSRNOT00000064122 | 0.957997482 | 9.59E-07 |
| TUCP_001106 | XLOC_042098 | ENSRNOT00000057295 | 0.958487015 | 9.05E-07 |
| TUCP_001106 | XLOC_042098 | ENSRNOT00000008764 | 0.977697767 | 4.19E-08 |
| TUCP_001106 | XLOC_042098 | ENSRNOT00000009009 | 0.956549416 | 1.13E-06 |
| TUCP_001106 | XLOC_042098 | ENSRNOT00000020929 | 0.961932649 | 5.91E-07 |
| TUCP_001106 | XLOC_042098 | ENSRNOT00000083134 | 0.954458567 | 1.43E-06 |
| TUCP_001106 | XLOC_042098 | ENSRNOT00000006109 | 0.950336898 | 2.19E-06 |
| TUCP_001106 | XLOC_042098 | ENSRNOT00000033933 | 0.954817572 | 1.37E-06 |
| TUCP_001106 | XLOC_042098 | ENSRNOT00000009398 | 0.95422028  | 1.47E-06 |
| TUCP_001106 | XLOC_042098 | ENSRNOT00000074131 | 0.95525256  | 1.31E-06 |
| TUCP_001106 | XLOC_042098 | ENSRNOT00000010369 | 0.961965933 | 5.88E-07 |
| TUCP_001106 | XLOC_042098 | ENSRNOT00000065629 | 0.969536735 | 1.96E-07 |
| TUCP_001106 | XLOC_042098 | ENSRNOT00000078800 | 0.955724147 | 1.24E-06 |

|             |             |                     |              |          |
|-------------|-------------|---------------------|--------------|----------|
| TUCP_001107 | XLOC_042133 | ENSRNOT00000026949  | -0.953580986 | 1.57E-06 |
| TUCP_001107 | XLOC_042133 | ENSRNOT00000005909  | 0.952866523  | 1.69E-06 |
| TUCP_001107 | XLOC_042133 | ENSRNOT00000006549  | -0.956728133 | 1.11E-06 |
| TUCP_001107 | XLOC_042133 | ENSRNOT00000083215  | 0.957782565  | 9.84E-07 |
| TUCP_001107 | XLOC_042133 | ENSRNOT00000015325  | -0.958959201 | 8.56E-07 |
| TUCP_001107 | XLOC_042133 | ENSRNOT00000005977  | 0.950462074  | 2.16E-06 |
| TUCP_001107 | XLOC_042133 | ENSRNOT00000003834  | -0.970179175 | 1.77E-07 |
| TUCP_001107 | XLOC_042133 | ENSRNOT00000025394  | 0.969276396  | 2.05E-07 |
| TUCP_001107 | XLOC_042133 | ENSRNOT00000045083  | 0.96237169   | 5.58E-07 |
| TUCP_001107 | XLOC_042133 | ENSRNOT00000013050  | -0.967761363 | 2.60E-07 |
| TUCP_001107 | XLOC_042133 | ENSRNOT00000074653  | 0.955422006  | 1.29E-06 |
| TUCP_001107 | XLOC_042133 | ENSRNOT00000046364  | 0.952096472  | 1.83E-06 |
| TUCP_001107 | XLOC_042133 | ENSRNOT00000073636  | 0.962386707  | 5.57E-07 |
| TUCP_001107 | XLOC_042133 | ENSRNOT00000078500  | 0.95152002   | 1.94E-06 |
| TUCP_001107 | XLOC_042133 | ENSRNOT00000072416  | -0.955887206 | 1.22E-06 |
| TUCP_001107 | XLOC_042133 | ENSRNOT00000067822  | 0.950148983  | 2.23E-06 |
| TUCP_001107 | XLOC_042133 | ENSRNOT00000012056  | 0.964287793  | 4.31E-07 |
| TUCP_001107 | XLOC_042133 | ENSRNOT00000024060  | 0.976094986  | 5.91E-08 |
| TUCP_001107 | XLOC_042133 | ENSRNOT00000013031  | -0.976599517 | 5.31E-08 |
| TUCP_001107 | XLOC_042133 | ENSRNOT00000022726  | 0.956040034  | 1.20E-06 |
| TUCP_001107 | XLOC_042133 | ENSRNOT00000023645  | 0.956734235  | 1.11E-06 |
| TUCP_001107 | XLOC_042133 | ENSRNOT00000046058  | 0.960062962  | 7.48E-07 |
| TUCP_001107 | XLOC_042133 | ENSRNOT00000021153  | 0.953799572  | 1.53E-06 |
| TUCP_001107 | XLOC_042133 | ENSRNOT00000017476  | -0.951206203 | 2.01E-06 |
| TUCP_001107 | XLOC_042133 | ENSRNOT00000007164  | 0.958412801  | 9.13E-07 |
| TUCP_001107 | XLOC_042133 | ENSRNOT000000064900 | 0.973332182  | 1.02E-07 |
| TUCP_001107 | XLOC_042133 | ENSRNOT000000086548 | 0.951781942  | 1.89E-06 |
| TUCP_001107 | XLOC_042133 | ENSRNOT00000004942  | -0.95647787  | 1.14E-06 |
| TUCP_001107 | XLOC_042133 | ENSRNOT000000090170 | 0.982491773  | 1.26E-08 |
| TUCP_001107 | XLOC_042133 | ENSRNOT000000088995 | 0.954521875  | 1.42E-06 |
| TUCP_001107 | XLOC_042133 | ENSRNOT000000054955 | -0.955793367 | 1.23E-06 |
| TUCP_001107 | XLOC_042133 | ENSRNOT00000017884  | 0.95456657   | 1.41E-06 |
| TUCP_001107 | XLOC_042133 | ENSRNOT000000068633 | 0.968299261  | 2.39E-07 |
| TUCP_001107 | XLOC_042133 | ENSRNOT00000025550  | -0.954241764 | 1.46E-06 |
| TUCP_001107 | XLOC_042133 | ENSRNOT000000058645 | 0.960796334  | 6.83E-07 |
| TUCP_001107 | XLOC_042133 | ENSRNOT00000017948  | 0.952898064  | 1.69E-06 |
| TUCP_001107 | XLOC_042133 | ENSRNOT000000057814 | 0.953272038  | 1.62E-06 |
| TUCP_001107 | XLOC_042133 | ENSRNOT000000009129 | 0.952735835  | 1.72E-06 |
| TUCP_001107 | XLOC_042133 | ENSRNOT00000022534  | 0.957848478  | 9.76E-07 |
| TUCP_001107 | XLOC_042133 | ENSRNOT000000039423 | -0.954614383 | 1.41E-06 |
| TUCP_001107 | XLOC_042133 | ENSRNOT000000091864 | -0.950382112 | 2.18E-06 |
| TUCP_001107 | XLOC_042133 | ENSRNOT00000028563  | 0.951594988  | 1.93E-06 |
| TUCP_001107 | XLOC_042133 | ENSRNOT00000013914  | -0.956817534 | 1.10E-06 |
| TUCP_001107 | XLOC_042133 | ENSRNOT000000060530 | 0.960453591  | 7.13E-07 |
| TUCP_001107 | XLOC_042133 | ENSRNOT000000064320 | 0.963376279  | 4.88E-07 |
| TUCP_001107 | XLOC_042133 | ENSRNOT00000043554  | 0.954920335  | 1.36E-06 |
| TUCP_001107 | XLOC_042133 | ENSRNOT00000049538  | 0.953385528  | 1.60E-06 |
| TUCP_001107 | XLOC_042133 | ENSRNOT00000026065  | 0.97185083   | 1.33E-07 |
| TUCP_001107 | XLOC_042133 | ENSRNOT00000009963  | 0.95384077   | 1.53E-06 |
| TUCP_001107 | XLOC_042133 | ENSRNOT00000015076  | 0.967166949  | 2.84E-07 |
| TUCP_001107 | XLOC_042133 | ENSRNOT00000013046  | -0.97680323  | 5.09E-08 |

|             |             |                    |              |          |
|-------------|-------------|--------------------|--------------|----------|
| TUCP_001107 | XLOC_042133 | ENSRNOT00000087725 | 0.959298215  | 8.22E-07 |
| TUCP_001107 | XLOC_042133 | ENSRNOT00000011384 | 0.955040355  | 1.34E-06 |
| TUCP_001107 | XLOC_042133 | ENSRNOT00000084595 | 0.979880521  | 2.51E-08 |
| TUCP_001107 | XLOC_042133 | ENSRNOT00000093640 | 0.957525772  | 1.01E-06 |
| TUCP_001107 | XLOC_042133 | ENSRNOT00000010433 | 0.95986701   | 7.66E-07 |
| TUCP_001107 | XLOC_042133 | ENSRNOT00000022213 | 0.956479266  | 1.14E-06 |
| TUCP_001107 | XLOC_042133 | ENSRNOT00000066593 | 0.973617743  | 9.63E-08 |
| TUCP_001107 | XLOC_042133 | ENSRNOT00000020437 | 0.951795146  | 1.89E-06 |
| TUCP_001107 | XLOC_042133 | ENSRNOT00000015635 | -0.951090347 | 2.03E-06 |
| TUCP_001107 | XLOC_042133 | ENSRNOT00000082691 | 0.98398228   | 8.08E-09 |
| TUCP_001107 | XLOC_042133 | ENSRNOT00000002173 | -0.951603323 | 1.93E-06 |
| TUCP_001107 | XLOC_042133 | ENSRNOT00000044237 | 0.95019341   | 2.22E-06 |
| TUCP_001107 | XLOC_042133 | ENSRNOT00000027944 | 0.969797591  | 1.88E-07 |
| TUCP_001107 | XLOC_042133 | ENSRNOT00000066968 | 0.954854176  | 1.37E-06 |
| TUCP_001107 | XLOC_042133 | ENSRNOT00000028842 | 0.950170272  | 2.22E-06 |
| TUCP_001107 | XLOC_042133 | ENSRNOT00000048029 | 0.959593026  | 7.93E-07 |
| TUCP_001107 | XLOC_042133 | ENSRNOT00000091336 | 0.951569165  | 1.93E-06 |
| TUCP_001107 | XLOC_042133 | ENSRNOT00000027828 | 0.963621972  | 4.72E-07 |
| TUCP_001107 | XLOC_042133 | ENSRNOT00000088196 | 0.964169424  | 4.38E-07 |
| TUCP_001107 | XLOC_042133 | ENSRNOT00000052075 | 0.958074278  | 9.51E-07 |
| TUCP_001107 | XLOC_042133 | ENSRNOT00000011325 | 0.958912745  | 8.61E-07 |
| TUCP_001107 | XLOC_042133 | ENSRNOT00000005389 | 0.963653538  | 4.70E-07 |
| TUCP_001107 | XLOC_042133 | ENSRNOT00000078685 | 0.970631089  | 1.64E-07 |
| TUCP_001107 | XLOC_042133 | ENSRNOT00000019553 | 0.96851313   | 2.31E-07 |
| TUCP_001107 | XLOC_042133 | ENSRNOT00000082855 | 0.955952423  | 1.21E-06 |
| TUCP_001104 | XLOC_041816 | ENSRNOT00000084075 | 0.996106112  | 7.00E-12 |
| TUCP_001104 | XLOC_041816 | ENSRNOT00000012880 | 0.968043129  | 2.49E-07 |
| TUCP_001104 | XLOC_041816 | ENSRNOT00000074465 | 1            | 0        |
| TUCP_001104 | XLOC_041816 | ENSRNOT00000090898 | 0.961670541  | 6.11E-07 |
| TUCP_001104 | XLOC_041816 | ENSRNOT00000079805 | 0.997980451  | 2.64E-13 |
| TUCP_001104 | XLOC_041816 | ENSRNOT00000040912 | 1            | 4.25E-78 |
| TUCP_001104 | XLOC_041816 | ENSRNOT00000072648 | 1            | 4.25E-78 |
| TUCP_001104 | XLOC_041816 | ENSRNOT00000007398 | 0.989054103  | 1.21E-09 |
| TUCP_001104 | XLOC_041816 | ENSRNOT00000070803 | 1            | 4.25E-78 |
| TUCP_001104 | XLOC_041816 | ENSRNOT00000012196 | 1            | 0        |
| TUCP_001104 | XLOC_041816 | ENSRNOT00000085772 | 1            | 4.25E-78 |
| TUCP_001104 | XLOC_041816 | ENSRNOT00000093284 | 0.999975856  | 6.46E-23 |
| TUCP_001104 | XLOC_041816 | ENSRNOT00000086374 | 0.993568904  | 8.57E-11 |
| TUCP_001104 | XLOC_041816 | ENSRNOT00000015270 | 1            | 4.25E-78 |
| TUCP_001104 | XLOC_041816 | ENSRNOT00000046192 | 1            | 0        |
| TUCP_001104 | XLOC_041816 | ENSRNOT00000044226 | 1            | 1.33E-79 |
| TUCP_001104 | XLOC_041816 | ENSRNOT00000081898 | 0.989837012  | 8.39E-10 |
| TUCP_001104 | XLOC_041816 | ENSRNOT00000081954 | 0.964005219  | 4.48E-07 |
| TUCP_001104 | XLOC_041816 | ENSRNOT00000080291 | 0.998427671  | 7.55E-14 |
| TUCP_001104 | XLOC_041816 | ENSRNOT00000004293 | 0.984239049  | 7.46E-09 |
| TUCP_001104 | XLOC_041816 | ENSRNOT00000078231 | 0.960455489  | 7.13E-07 |
| TUCP_001104 | XLOC_041816 | ENSRNOT0000002834  | 1            | 0        |
| TUCP_001104 | XLOC_041816 | ENSRNOT0000001464  | 1            | 0        |
| TUCP_001104 | XLOC_041816 | ENSRNOT00000090716 | 0.994769629  | 3.06E-11 |
| TUCP_001104 | XLOC_041816 | ENSRNOT00000083542 | 0.972568514  | 1.17E-07 |
| TUCP_001104 | XLOC_041816 | ENSRNOT00000076044 | 1            | 0        |

|             |             |                    |              |          |
|-------------|-------------|--------------------|--------------|----------|
| TUCP_001104 | XLOC_041816 | ENSRNOT00000074353 | 1            | 0        |
| TUCP_001104 | XLOC_041816 | ENSRNOT00000043510 | 0.958144129  | 9.43E-07 |
| TUCP_001104 | XLOC_041816 | ENSRNOT00000087122 | 0.980089513  | 2.38E-08 |
| TUCP_001104 | XLOC_041816 | ENSRNOT00000074295 | 0.987777006  | 2.11E-09 |
| TUCP_001104 | XLOC_041816 | ENSRNOT00000057873 | 1            | 1.33E-79 |
| TUCP_001104 | XLOC_041816 | ENSRNOT00000083002 | 0.988874897  | 1.32E-09 |
| TUCP_001104 | XLOC_041816 | ENSRNOT00000088399 | 0.999999855  | 4.99E-34 |
| TUCP_001104 | XLOC_041816 | ENSRNOT00000086248 | 1            | 0        |
| TUCP_001104 | XLOC_041816 | ENSRNOT00000089750 | 0.999992758  | 1.57E-25 |
| TUCP_001104 | XLOC_041816 | ENSRNOT00000030517 | 0.971225224  | 1.48E-07 |
| TUCP_001104 | XLOC_041816 | ENSRNOT00000034772 | 0.994265187  | 4.84E-11 |
| TUCP_001104 | XLOC_041816 | ENSRNOT00000089305 | 0.969641693  | 1.93E-07 |
| TUCP_001104 | XLOC_041816 | ENSRNOT00000024580 | 0.954183021  | 1.47E-06 |
| TUCP_001104 | XLOC_041816 | ENSRNOT00000064601 | 0.966578038  | 3.11E-07 |
| TUCP_001104 | XLOC_041816 | ENSRNOT00000015870 | 0.965901306  | 3.43E-07 |
| TUCP_001104 | XLOC_041816 | ENSRNOT00000080812 | 0.992998865  | 1.31E-10 |
| TUCP_001104 | XLOC_041816 | ENSRNOT00000092755 | 1            | 4.25E-78 |
| TUCP_001104 | XLOC_041816 | ENSRNOT00000031683 | 1            | 1.33E-79 |
| TUCP_001104 | XLOC_041816 | ENSRNOT00000087764 | 0.988156196  | 1.80E-09 |
| TUCP_001545 | XLOC_060077 | ENSRNOT00000010144 | 0.954235118  | 1.46E-06 |
| TUCP_001102 | XLOC_041816 | ENSRNOT00000076720 | 0.954069508  | 1.49E-06 |
| TUCP_001100 | XLOC_041696 | ENSRNOT00000001215 | 0.959683615  | 7.84E-07 |
| TUCP_001100 | XLOC_041696 | ENSRNOT00000006188 | -0.984121854 | 7.74E-09 |
| TUCP_001100 | XLOC_041696 | ENSRNOT00000006186 | 0.968755553  | 2.23E-07 |
| TUCP_001100 | XLOC_041696 | ENSRNOT00000026941 | 0.954226103  | 1.47E-06 |
| TUCP_001100 | XLOC_041696 | ENSRNOT00000075397 | 0.976182606  | 5.80E-08 |
| TUCP_001100 | XLOC_041696 | ENSRNOT00000032926 | -0.955655633 | 1.25E-06 |
| TUCP_001100 | XLOC_041696 | ENSRNOT00000006217 | 0.955317352  | 1.30E-06 |
| TUCP_001100 | XLOC_041696 | ENSRNOT00000003891 | 0.954405459  | 1.44E-06 |
| TUCP_001100 | XLOC_041696 | ENSRNOT00000001691 | 0.960513789  | 7.07E-07 |
| TUCP_001100 | XLOC_041696 | ENSRNOT00000089319 | 0.955075002  | 1.34E-06 |
| TUCP_001100 | XLOC_041696 | ENSRNOT00000079138 | 0.950165663  | 2.23E-06 |
| TUCP_001100 | XLOC_041696 | ENSRNOT00000086706 | 0.965453873  | 3.66E-07 |
| TUCP_001100 | XLOC_041696 | ENSRNOT00000004017 | 0.968944305  | 2.16E-07 |
| TUCP_001100 | XLOC_041696 | ENSRNOT00000086310 | -0.951085985 | 2.03E-06 |
| TUCP_001100 | XLOC_041696 | ENSRNOT00000010030 | -0.976158867 | 5.83E-08 |
| TUCP_001100 | XLOC_041696 | ENSRNOT00000052063 | 0.963275581  | 4.95E-07 |
| TUCP_001100 | XLOC_041696 | ENSRNOT00000042638 | 0.953514871  | 1.58E-06 |
| TUCP_001100 | XLOC_041696 | ENSRNOT00000030850 | 0.968645521  | 2.26E-07 |
| TUCP_001100 | XLOC_041696 | ENSRNOT00000033017 | 0.95334348   | 1.61E-06 |
| TUCP_001100 | XLOC_041696 | ENSRNOT00000006752 | 0.968135851  | 2.45E-07 |
| TUCP_001100 | XLOC_041696 | ENSRNOT00000031672 | -0.954197967 | 1.47E-06 |
| TUCP_001100 | XLOC_041696 | ENSRNOT00000085251 | -0.950500311 | 2.15E-06 |
| TUCP_001100 | XLOC_041696 | ENSRNOT00000083677 | -0.96760398  | 2.66E-07 |
| TUCP_001100 | XLOC_041696 | ENSRNOT00000073370 | 0.97169062   | 1.37E-07 |
| TUCP_001100 | XLOC_041696 | ENSRNOT00000045699 | 0.952751268  | 1.71E-06 |
| TUCP_001100 | XLOC_041696 | ENSRNOT00000029439 | 0.96477881   | 4.02E-07 |
| TUCP_001100 | XLOC_041696 | ENSRNOT00000065871 | 0.955470273  | 1.28E-06 |
| TUCP_001100 | XLOC_041696 | ENSRNOT00000019192 | -0.950660879 | 2.12E-06 |
| TUCP_001100 | XLOC_041696 | ENSRNOT00000077999 | 0.964527952  | 4.17E-07 |
| TUCP_001100 | XLOC_041696 | ENSRNOT00000085228 | 0.964136303  | 4.40E-07 |



|             |             |                    |              |          |
|-------------|-------------|--------------------|--------------|----------|
| TUCP_001100 | XLOC_041696 | ENSRNOT00000015188 | 0.959540435  | 7.98E-07 |
| TUCP_001100 | XLOC_041696 | ENSRNOT00000018488 | -0.954173624 | 1.47E-06 |
| TUCP_001100 | XLOC_041696 | ENSRNOT00000079866 | 0.952274312  | 1.80E-06 |
| TUCP_001100 | XLOC_041696 | ENSRNOT00000075630 | -0.952989918 | 1.67E-06 |
| TUCP_001100 | XLOC_041696 | ENSRNOT00000005834 | 0.957282382  | 1.04E-06 |
| TUCP_001100 | XLOC_041696 | ENSRNOT00000080410 | -0.952554914 | 1.75E-06 |
| TUCP_001100 | XLOC_041696 | ENSRNOT00000087371 | 0.952689731  | 1.72E-06 |
| TUCP_001100 | XLOC_041696 | ENSRNOT00000030074 | 0.956225991  | 1.18E-06 |
| TUCP_001100 | XLOC_041696 | ENSRNOT00000024841 | -0.951831076 | 1.88E-06 |
| TUCP_001100 | XLOC_041696 | ENSRNOT00000067391 | -0.954325238 | 1.45E-06 |
| TUCP_001100 | XLOC_041696 | ENSRNOT00000009150 | 0.955474686  | 1.28E-06 |
| TUCP_001100 | XLOC_041696 | ENSRNOT00000084709 | 0.976377641  | 5.57E-08 |
| TUCP_001100 | XLOC_041696 | ENSRNOT00000068033 | 0.954124213  | 1.48E-06 |
| TUCP_001100 | XLOC_041696 | ENSRNOT00000009156 | 0.95794099   | 9.66E-07 |
| TUCP_001100 | XLOC_041696 | ENSRNOT00000026481 | 0.968350043  | 2.37E-07 |
| TUCP_001100 | XLOC_041696 | ENSRNOT00000012892 | 0.953955032  | 1.51E-06 |
| TUCP_001100 | XLOC_041696 | ENSRNOT00000025856 | -0.96657546  | 3.11E-07 |
| TUCP_001100 | XLOC_041696 | ENSRNOT00000026643 | 0.958379687  | 9.17E-07 |
| TUCP_001100 | XLOC_041696 | ENSRNOT00000001403 | 0.969840843  | 1.87E-07 |
| TUCP_001100 | XLOC_041696 | ENSRNOT00000072357 | -0.971008916 | 1.54E-07 |
| TUCP_001100 | XLOC_041696 | ENSRNOT00000016132 | -0.975032099 | 7.33E-08 |
| TUCP_001100 | XLOC_041696 | ENSRNOT00000058495 | -0.952856906 | 1.69E-06 |
| TUCP_001100 | XLOC_041696 | ENSRNOT00000013067 | -0.977960684 | 3.95E-08 |
| TUCP_001100 | XLOC_041696 | ENSRNOT00000034692 | -0.963622296 | 4.72E-07 |
| TUCP_001100 | XLOC_041696 | ENSRNOT00000041815 | -0.951315673 | 1.98E-06 |
| TUCP_001100 | XLOC_041696 | ENSRNOT00000033975 | 0.960808793  | 6.82E-07 |
| TUCP_001100 | XLOC_041696 | ENSRNOT00000079895 | 0.951303033  | 1.99E-06 |
| TUCP_001100 | XLOC_041696 | ENSRNOT00000074586 | -0.965287366 | 3.74E-07 |
| TUCP_001100 | XLOC_041696 | ENSRNOT00000081047 | 0.956424933  | 1.15E-06 |
| TUCP_001100 | XLOC_041696 | ENSRNOT00000011880 | 0.977033416  | 4.84E-08 |
| TUCP_001100 | XLOC_041696 | ENSRNOT00000023989 | 0.967372295  | 2.76E-07 |
| TUCP_001100 | XLOC_041696 | ENSRNOT00000021717 | 0.955177411  | 1.32E-06 |
| TUCP_001100 | XLOC_041696 | ENSRNOT00000050515 | 0.975356436  | 6.87E-08 |
| TUCP_001100 | XLOC_041696 | ENSRNOT00000089980 | -0.957002085 | 1.08E-06 |
| TUCP_001100 | XLOC_041696 | ENSRNOT00000055602 | -0.971945977 | 1.31E-07 |
| TUCP_001100 | XLOC_041696 | ENSRNOT00000046745 | 0.971935313  | 1.31E-07 |
| TUCP_001100 | XLOC_041696 | ENSRNOT00000082146 | -0.952238235 | 1.81E-06 |
| TUCP_001100 | XLOC_041696 | ENSRNOT00000031555 | -0.961182958 | 6.50E-07 |
| TUCP_001100 | XLOC_041696 | ENSRNOT00000011563 | -0.958735294 | 8.79E-07 |
| TUCP_001100 | XLOC_041696 | ENSRNOT00000023876 | 0.970861755  | 1.58E-07 |
| TUCP_001100 | XLOC_041696 | ENSRNOT00000033359 | 0.954435072  | 1.43E-06 |
| TUCP_001100 | XLOC_041696 | ENSRNOT00000061201 | -0.956345484 | 1.16E-06 |
| TUCP_001100 | XLOC_041696 | ENSRNOT00000002187 | -0.967587463 | 2.67E-07 |
| TUCP_001100 | XLOC_041696 | ENSRNOT00000091488 | 0.953750527  | 1.54E-06 |
| TUCP_001100 | XLOC_041696 | ENSRNOT00000049285 | -0.972846869 | 1.11E-07 |
| TUCP_001100 | XLOC_041696 | ENSRNOT00000015239 | -0.958952715 | 8.56E-07 |
| TUCP_001100 | XLOC_041696 | ENSRNOT00000003568 | 0.965929426  | 3.41E-07 |
| TUCP_001100 | XLOC_041696 | ENSRNOT00000074649 | 0.972959369  | 1.09E-07 |
| TUCP_001100 | XLOC_041696 | ENSRNOT00000035277 | 0.957400854  | 1.03E-06 |
| TUCP_001100 | XLOC_041696 | ENSRNOT00000077146 | -0.989824271 | 8.45E-10 |
| TUCP_001100 | XLOC_041696 | ENSRNOT00000060002 | -0.969005716 | 2.14E-07 |

|             |             |                    |              |          |
|-------------|-------------|--------------------|--------------|----------|
| TUCP_001100 | XLOC_041696 | ENSRNOT00000089673 | -0.956725502 | 1.11E-06 |
| TUCP_001100 | XLOC_041696 | ENSRNOT00000006395 | -0.955525889 | 1.27E-06 |
| TUCP_001100 | XLOC_041696 | ENSRNOT00000023977 | -0.973215945 | 1.04E-07 |
| TUCP_001100 | XLOC_041696 | ENSRNOT00000066133 | -0.975864962 | 6.19E-08 |
| TUCP_001100 | XLOC_041696 | ENSRNOT00000035385 | 0.952737916  | 1.72E-06 |
| TUCP_001100 | XLOC_041696 | ENSRNOT00000009994 | -0.952161655 | 1.82E-06 |
| TUCP_001100 | XLOC_041696 | ENSRNOT00000057738 | 0.960920704  | 6.72E-07 |
| TUCP_001100 | XLOC_041696 | ENSRNOT00000080443 | 0.961156979  | 6.52E-07 |
| TUCP_001100 | XLOC_041696 | ENSRNOT00000064535 | -0.965771076 | 3.49E-07 |
| TUCP_001100 | XLOC_041696 | ENSRNOT00000010748 | 0.970345545  | 1.72E-07 |
| TUCP_001100 | XLOC_041696 | ENSRNOT00000087033 | -0.95087601  | 2.07E-06 |
| TUCP_001100 | XLOC_041696 | ENSRNOT00000008222 | -0.95305114  | 1.66E-06 |
| TUCP_001100 | XLOC_041696 | ENSRNOT00000035474 | 0.955802791  | 1.23E-06 |
| TUCP_001100 | XLOC_041696 | ENSRNOT00000077367 | -0.959340437 | 8.17E-07 |
| TUCP_001100 | XLOC_041696 | ENSRNOT00000039102 | 0.97378358   | 9.33E-08 |
| TUCP_001100 | XLOC_041696 | ENSRNOT00000023807 | -0.951478901 | 1.95E-06 |
| TUCP_001100 | XLOC_041696 | ENSRNOT00000078856 | -0.972781981 | 1.12E-07 |
| TUCP_001100 | XLOC_041696 | ENSRNOT00000091205 | 0.959830163  | 7.70E-07 |
| TUCP_001100 | XLOC_041696 | ENSRNOT00000009742 | -0.957613054 | 1.00E-06 |
| TUCP_001100 | XLOC_041696 | ENSRNOT00000010983 | 0.966378642  | 3.20E-07 |
| TUCP_001100 | XLOC_041696 | ENSRNOT00000007369 | 0.953029286  | 1.66E-06 |
| TUCP_001100 | XLOC_041696 | ENSRNOT00000060698 | -0.982611894 | 1.22E-08 |
| TUCP_001100 | XLOC_041696 | ENSRNOT00000058351 | 0.962504015  | 5.48E-07 |
| TUCP_001100 | XLOC_041696 | ENSRNOT00000045946 | 0.960750622  | 6.87E-07 |
| TUCP_001100 | XLOC_041696 | ENSRNOT00000015624 | 0.976449548  | 5.48E-08 |
| TUCP_001100 | XLOC_041696 | ENSRNOT00000061100 | 0.957332879  | 1.04E-06 |
| TUCP_001100 | XLOC_041696 | ENSRNOT00000065529 | 0.962772569  | 5.29E-07 |
| TUCP_001100 | XLOC_041696 | ENSRNOT00000017776 | 0.971099909  | 1.51E-07 |
| TUCP_001100 | XLOC_041696 | ENSRNOT00000005686 | -0.966222901 | 3.27E-07 |
| TUCP_001100 | XLOC_041696 | ENSRNOT00000021534 | -0.970222113 | 1.75E-07 |
| TUCP_001100 | XLOC_041696 | ENSRNOT00000004463 | 0.964939762  | 3.93E-07 |
| TUCP_001100 | XLOC_041696 | ENSRNOT00000037809 | -0.962142964 | 5.75E-07 |
| TUCP_001100 | XLOC_041696 | ENSRNOT00000002028 | 0.955237033  | 1.31E-06 |
| TUCP_001100 | XLOC_041696 | ENSRNOT00000008982 | 0.960049603  | 7.49E-07 |
| TUCP_001100 | XLOC_041696 | ENSRNOT00000022097 | 0.980212239  | 2.31E-08 |
| TUCP_001100 | XLOC_041696 | ENSRNOT00000008987 | -0.979706599 | 2.62E-08 |
| TUCP_001100 | XLOC_041696 | ENSRNOT00000090299 | 0.953758904  | 1.54E-06 |
| TUCP_001100 | XLOC_041696 | ENSRNOT00000061580 | -0.951878989 | 1.87E-06 |
| TUCP_001100 | XLOC_041696 | ENSRNOT00000024253 | 0.956026332  | 1.20E-06 |
| TUCP_001100 | XLOC_041696 | ENSRNOT00000088073 | -0.950848786 | 2.08E-06 |
| TUCP_001100 | XLOC_041696 | ENSRNOT00000048020 | 0.955595988  | 1.26E-06 |
| TUCP_001100 | XLOC_041696 | ENSRNOT00000063930 | -0.968806483 | 2.21E-07 |
| TUCP_001100 | XLOC_041696 | ENSRNOT00000048613 | 0.954556771  | 1.41E-06 |
| TUCP_001100 | XLOC_041696 | ENSRNOT00000009563 | -0.969329627 | 2.03E-07 |
| TUCP_001100 | XLOC_041696 | ENSRNOT00000088555 | -0.975326982 | 6.91E-08 |
| TUCP_001100 | XLOC_041696 | ENSRNOT00000089418 | 0.950546893  | 2.14E-06 |
| TUCP_001100 | XLOC_041696 | ENSRNOT00000081981 | 0.957304469  | 1.04E-06 |
| TUCP_001100 | XLOC_041696 | ENSRNOT00000026531 | -0.976193835 | 5.79E-08 |
| TUCP_001100 | XLOC_041696 | ENSRNOT00000019057 | -0.963421113 | 4.85E-07 |
| TUCP_001100 | XLOC_041696 | ENSRNOT00000040847 | -0.951962341 | 1.86E-06 |
| TUCP_001100 | XLOC_041696 | ENSRNOT00000073193 | -0.957782319 | 9.84E-07 |

|             |             |                    |              |          |
|-------------|-------------|--------------------|--------------|----------|
| TUCP_001100 | XLOC_041696 | ENSRNOT00000047836 | -0.958172371 | 9.40E-07 |
| TUCP_001100 | XLOC_041696 | ENSRNOT00000065978 | 0.95953587   | 7.98E-07 |
| TUCP_001100 | XLOC_041696 | ENSRNOT00000074683 | 0.95035631   | 2.18E-06 |
| TUCP_001100 | XLOC_041696 | ENSRNOT00000025079 | -0.976606727 | 5.31E-08 |
| TUCP_001100 | XLOC_041696 | ENSRNOT00000048754 | -0.977086992 | 4.79E-08 |
| TUCP_001100 | XLOC_041696 | ENSRNOT00000007824 | -0.961767461 | 6.03E-07 |
| TUCP_001100 | XLOC_041696 | ENSRNOT00000020681 | -0.956098842 | 1.19E-06 |
| TUCP_001100 | XLOC_041696 | ENSRNOT00000057898 | -0.974416701 | 8.27E-08 |
| TUCP_001100 | XLOC_041696 | ENSRNOT00000024677 | 0.965320204  | 3.73E-07 |
| TUCP_001100 | XLOC_041696 | ENSRNOT00000056100 | -0.96405348  | 4.45E-07 |
| TUCP_001100 | XLOC_041696 | ENSRNOT00000009811 | 0.977157776  | 4.71E-08 |
| TUCP_001100 | XLOC_041696 | ENSRNOT00000055683 | 0.960474934  | 7.11E-07 |
| TUCP_001100 | XLOC_041696 | ENSRNOT00000077231 | 0.961256218  | 6.44E-07 |
| TUCP_001100 | XLOC_041696 | ENSRNOT00000018634 | -0.951492771 | 1.95E-06 |
| TUCP_001100 | XLOC_041696 | ENSRNOT00000031701 | -0.955500042 | 1.28E-06 |
| TUCP_001100 | XLOC_041696 | ENSRNOT00000073643 | -0.963410394 | 4.86E-07 |
| TUCP_001100 | XLOC_041696 | ENSRNOT00000052002 | 0.952270356  | 1.80E-06 |
| TUCP_001100 | XLOC_041696 | ENSRNOT00000022502 | -0.956208027 | 1.18E-06 |
| TUCP_001100 | XLOC_041696 | ENSRNOT00000017556 | 0.969881022  | 1.86E-07 |
| TUCP_001100 | XLOC_041696 | ENSRNOT00000021802 | 0.963291686  | 4.94E-07 |
| TUCP_001100 | XLOC_041696 | ENSRNOT00000021803 | -0.953799296 | 1.53E-06 |
| TUCP_001100 | XLOC_041696 | ENSRNOT00000046973 | 0.95461812   | 1.40E-06 |
| TUCP_001100 | XLOC_041696 | ENSRNOT00000024352 | 0.971725388  | 1.36E-07 |
| TUCP_001100 | XLOC_041696 | ENSRNOT00000018122 | 0.971235785  | 1.48E-07 |
| TUCP_001100 | XLOC_041696 | ENSRNOT00000072118 | 0.972496434  | 1.18E-07 |
| TUCP_001100 | XLOC_041696 | ENSRNOT00000003780 | 0.972742526  | 1.13E-07 |
| TUCP_001100 | XLOC_041696 | ENSRNOT00000003787 | -0.956386348 | 1.15E-06 |
| TUCP_001100 | XLOC_041696 | ENSRNOT00000014506 | -0.955826407 | 1.23E-06 |
| TUCP_001100 | XLOC_041696 | ENSRNOT00000023262 | -0.951367618 | 1.97E-06 |
| TUCP_001100 | XLOC_041696 | ENSRNOT00000026312 | 0.964622535  | 4.11E-07 |
| TUCP_001100 | XLOC_041696 | ENSRNOT00000068381 | 0.965881532  | 3.44E-07 |
| TUCP_001100 | XLOC_041696 | ENSRNOT00000068026 | -0.958310069 | 9.25E-07 |
| TUCP_001100 | XLOC_041696 | ENSRNOT00000085621 | 0.980836446  | 1.97E-08 |
| TUCP_001100 | XLOC_041696 | ENSRNOT00000014821 | -0.980696481 | 2.04E-08 |
| TUCP_001100 | XLOC_041696 | ENSRNOT00000058382 | 0.972832144  | 1.11E-07 |
| TUCP_001100 | XLOC_041696 | ENSRNOT00000088599 | 0.969002906  | 2.14E-07 |
| TUCP_001100 | XLOC_041696 | ENSRNOT00000005587 | -0.95983545  | 7.69E-07 |
| TUCP_001100 | XLOC_041696 | ENSRNOT00000017746 | -0.952418604 | 1.77E-06 |
| TUCP_001100 | XLOC_041696 | ENSRNOT00000023537 | -0.971779571 | 1.34E-07 |
| TUCP_001100 | XLOC_041696 | ENSRNOT00000017995 | 0.9693231    | 2.03E-07 |
| TUCP_001100 | XLOC_041696 | ENSRNOT00000008126 | -0.968087292 | 2.47E-07 |
| TUCP_001100 | XLOC_041696 | ENSRNOT00000081725 | 0.977343927  | 4.53E-08 |
| TUCP_001100 | XLOC_041696 | ENSRNOT00000005459 | 0.981649375  | 1.59E-08 |
| TUCP_001100 | XLOC_041696 | ENSRNOT00000027910 | 0.962998451  | 5.13E-07 |
| TUCP_001100 | XLOC_041696 | ENSRNOT00000037015 | 0.950458876  | 2.16E-06 |
| TUCP_001100 | XLOC_041696 | ENSRNOT00000054976 | -0.96540615  | 3.68E-07 |
| TUCP_001100 | XLOC_041696 | ENSRNOT00000032780 | 0.954275484  | 1.46E-06 |
| TUCP_001100 | XLOC_041696 | ENSRNOT00000066032 | 0.953454513  | 1.59E-06 |
| TUCP_001100 | XLOC_041696 | ENSRNOT00000001783 | 0.956268604  | 1.17E-06 |
| TUCP_001100 | XLOC_041696 | ENSRNOT00000027232 | 0.964004908  | 4.48E-07 |
| TUCP_001100 | XLOC_041696 | ENSRNOT00000082151 | -0.9640836   | 4.43E-07 |

|             |             |                    |              |          |
|-------------|-------------|--------------------|--------------|----------|
| TUCP_001100 | XLOC_041696 | ENSRNOT00000034411 | 0.963904313  | 4.54E-07 |
| TUCP_001100 | XLOC_041696 | ENSRNOT00000005839 | 0.955439106  | 1.28E-06 |
| TUCP_001100 | XLOC_041696 | ENSRNOT00000038511 | -0.964101263 | 4.42E-07 |
| TUCP_001100 | XLOC_041696 | ENSRNOT00000085971 | -0.955996832 | 1.21E-06 |
| TUCP_001100 | XLOC_041696 | ENSRNOT00000022142 | 0.950436154  | 2.17E-06 |
| TUCP_001100 | XLOC_041696 | ENSRNOT00000012334 | 0.958132565  | 9.44E-07 |
| TUCP_001100 | XLOC_041696 | ENSRNOT00000015537 | 0.959929521  | 7.61E-07 |
| TUCP_001100 | XLOC_041696 | ENSRNOT00000022461 | -0.953071949 | 1.66E-06 |
| TUCP_001100 | XLOC_041696 | ENSRNOT00000004172 | 0.957260309  | 1.05E-06 |
| TUCP_001100 | XLOC_041696 | ENSRNOT00000023965 | -0.95536801  | 1.29E-06 |
| TUCP_001100 | XLOC_041696 | ENSRNOT00000092876 | -0.976033094 | 5.98E-08 |
| TUCP_001100 | XLOC_041696 | ENSRNOT00000029125 | 0.954996537  | 1.35E-06 |
| TUCP_001100 | XLOC_041696 | ENSRNOT00000085279 | 0.958896092  | 8.62E-07 |
| TUCP_001100 | XLOC_041696 | ENSRNOT00000012528 | 0.956345109  | 1.16E-06 |
| TUCP_001100 | XLOC_041696 | ENSRNOT00000082904 | 0.954267948  | 1.46E-06 |
| TUCP_001100 | XLOC_041696 | ENSRNOT00000015318 | -0.953334538 | 1.61E-06 |
| TUCP_001100 | XLOC_041696 | ENSRNOT00000015223 | 0.960836458  | 6.79E-07 |
| TUCP_001100 | XLOC_041696 | ENSRNOT00000085669 | 0.968240047  | 2.41E-07 |
| TUCP_001100 | XLOC_041696 | ENSRNOT00000028907 | 0.969064215  | 2.12E-07 |
| TUCP_001100 | XLOC_041696 | ENSRNOT00000010224 | 0.953370437  | 1.61E-06 |
| TUCP_001100 | XLOC_041696 | ENSRNOT00000087278 | -0.96553632  | 3.61E-07 |
| TUCP_001100 | XLOC_041696 | ENSRNOT00000005311 | 0.958609634  | 8.92E-07 |
| TUCP_001100 | XLOC_041696 | ENSRNOT00000015799 | 0.966781312  | 3.01E-07 |
| TUCP_001100 | XLOC_041696 | ENSRNOT00000082998 | 0.955649604  | 1.25E-06 |
| TUCP_001100 | XLOC_041696 | ENSRNOT00000075656 | -0.951377361 | 1.97E-06 |
| TUCP_001100 | XLOC_041696 | ENSRNOT00000015006 | 0.96373314   | 4.65E-07 |
| TUCP_001100 | XLOC_041696 | ENSRNOT00000007350 | 0.964855352  | 3.98E-07 |
| TUCP_001100 | XLOC_041696 | ENSRNOT00000018936 | -0.972172723 | 1.25E-07 |
| TUCP_001100 | XLOC_041696 | ENSRNOT00000017665 | 0.951819192  | 1.89E-06 |
| TUCP_001100 | XLOC_041696 | ENSRNOT00000083578 | 0.954448627  | 1.43E-06 |
| TUCP_001100 | XLOC_041696 | ENSRNOT00000000181 | 0.967838775  | 2.57E-07 |
| TUCP_001100 | XLOC_041696 | ENSRNOT00000020297 | 0.962522013  | 5.47E-07 |
| TUCP_001100 | XLOC_041696 | ENSRNOT00000023638 | 0.96741527   | 2.74E-07 |
| TUCP_001100 | XLOC_041696 | ENSRNOT00000028628 | -0.950181311 | 2.22E-06 |
| TUCP_001100 | XLOC_041696 | ENSRNOT00000017361 | 0.963994553  | 4.49E-07 |
| TUCP_001100 | XLOC_041696 | ENSRNOT00000005220 | 0.972450617  | 1.19E-07 |
| TUCP_001100 | XLOC_041696 | ENSRNOT00000045326 | 0.963794933  | 4.61E-07 |
| TUCP_001100 | XLOC_041696 | ENSRNOT00000016649 | 0.964767636  | 4.03E-07 |
| TUCP_001100 | XLOC_041696 | ENSRNOT00000074023 | 0.975696842  | 6.41E-08 |
| TUCP_001100 | XLOC_041696 | ENSRNOT00000018341 | -0.956850566 | 1.10E-06 |
| TUCP_001100 | XLOC_041696 | ENSRNOT00000065076 | 0.961193767  | 6.49E-07 |
| TUCP_001100 | XLOC_041696 | ENSRNOT00000013516 | 0.968436687  | 2.34E-07 |
| TUCP_001100 | XLOC_041696 | ENSRNOT00000054685 | 0.957615052  | 1.00E-06 |
| TUCP_001100 | XLOC_041696 | ENSRNOT00000061005 | 0.951908871  | 1.87E-06 |
| TUCP_001100 | XLOC_041696 | ENSRNOT00000057953 | 0.950094426  | 2.24E-06 |
| TUCP_001100 | XLOC_041696 | ENSRNOT00000090338 | -0.952250835 | 1.80E-06 |
| TUCP_001100 | XLOC_041696 | ENSRNOT00000027760 | 0.957652158  | 9.99E-07 |
| TUCP_001100 | XLOC_041696 | ENSRNOT00000024402 | 0.957592485  | 1.01E-06 |
| TUCP_001100 | XLOC_041696 | ENSRNOT00000089933 | 0.969778735  | 1.89E-07 |
| TUCP_001100 | XLOC_041696 | ENSRNOT00000003641 | 0.954351499  | 1.45E-06 |
| TUCP_001100 | XLOC_041696 | ENSRNOT00000090912 | 0.969360091  | 2.02E-07 |

|             |             |                    |              |          |
|-------------|-------------|--------------------|--------------|----------|
| TUCP_001100 | XLOC_041696 | ENSRNOT00000067554 | 0.956546852  | 1.13E-06 |
| TUCP_001100 | XLOC_041696 | ENSRNOT00000010784 | 0.957761654  | 9.86E-07 |
| TUCP_001100 | XLOC_041696 | ENSRNOT00000033677 | -0.964601403 | 4.12E-07 |
| TUCP_001100 | XLOC_041696 | ENSRNOT00000019820 | 0.968979524  | 2.15E-07 |
| TUCP_001100 | XLOC_041696 | ENSRNOT00000080962 | 0.952498572  | 1.76E-06 |
| TUCP_001100 | XLOC_041696 | ENSRNOT00000011832 | -0.97043209  | 1.69E-07 |
| TUCP_001100 | XLOC_041696 | ENSRNOT00000003940 | -0.960507992 | 7.08E-07 |
| TUCP_001100 | XLOC_041696 | ENSRNOT00000006835 | 0.953993782  | 1.50E-06 |
| TUCP_001100 | XLOC_041696 | ENSRNOT00000077727 | -0.961932041 | 5.91E-07 |
| TUCP_001100 | XLOC_041696 | ENSRNOT00000044346 | -0.961688231 | 6.10E-07 |
| TUCP_001100 | XLOC_041696 | ENSRNOT00000010541 | 0.951991707  | 1.85E-06 |
| TUCP_001100 | XLOC_041696 | ENSRNOT00000092068 | 0.953044107  | 1.66E-06 |
| TUCP_001100 | XLOC_041696 | ENSRNOT00000091909 | 0.975840862  | 6.22E-08 |
| TUCP_001100 | XLOC_041696 | ENSRNOT00000013025 | -0.957094855 | 1.07E-06 |
| TUCP_001100 | XLOC_041696 | ENSRNOT00000003544 | -0.95243375  | 1.77E-06 |
| TUCP_001100 | XLOC_041696 | ENSRNOT00000086119 | -0.961576333 | 6.18E-07 |
| TUCP_001100 | XLOC_041696 | ENSRNOT00000022190 | -0.978413521 | 3.56E-08 |
| TUCP_001100 | XLOC_041696 | ENSRNOT00000025913 | -0.969512189 | 1.97E-07 |
| TUCP_001100 | XLOC_041696 | ENSRNOT00000077220 | -0.959768526 | 7.76E-07 |
| TUCP_001100 | XLOC_041696 | ENSRNOT00000030782 | -0.950318339 | 2.19E-06 |
| TUCP_001100 | XLOC_041696 | ENSRNOT00000067780 | -0.983997629 | 8.05E-09 |
| TUCP_001100 | XLOC_041696 | ENSRNOT00000086577 | 0.975032187  | 7.33E-08 |
| TUCP_001100 | XLOC_041696 | ENSRNOT00000073910 | -0.962210607 | 5.70E-07 |
| TUCP_001100 | XLOC_041696 | ENSRNOT0000007738  | -0.961819601 | 5.99E-07 |
| TUCP_001100 | XLOC_041696 | ENSRNOT00000086590 | 0.95505863   | 1.34E-06 |
| TUCP_001100 | XLOC_041696 | ENSRNOT00000034883 | -0.978270212 | 3.68E-08 |
| TUCP_001100 | XLOC_041696 | ENSRNOT00000020155 | 0.956599721  | 1.13E-06 |
| TUCP_001100 | XLOC_041696 | ENSRNOT00000025827 | 0.951405263  | 1.97E-06 |
| TUCP_001100 | XLOC_041696 | ENSRNOT00000055321 | 0.959968034  | 7.57E-07 |
| TUCP_001100 | XLOC_041696 | ENSRNOT00000005910 | -0.957116296 | 1.06E-06 |
| TUCP_001100 | XLOC_041696 | ENSRNOT00000076485 | -0.955166576 | 1.32E-06 |
| TUCP_001100 | XLOC_041696 | ENSRNOT0000003359  | -0.951487608 | 1.95E-06 |
| TUCP_001100 | XLOC_041696 | ENSRNOT00000078475 | 0.962885668  | 5.21E-07 |
| TUCP_001100 | XLOC_041696 | ENSRNOT00000026249 | -0.96900117  | 2.14E-07 |
| TUCP_001100 | XLOC_041696 | ENSRNOT00000016722 | 0.950812499  | 2.09E-06 |
| TUCP_001100 | XLOC_041696 | ENSRNOT00000073526 | 0.950617265  | 2.13E-06 |
| TUCP_001100 | XLOC_041696 | ENSRNOT00000000013 | 0.968248587  | 2.41E-07 |
| TUCP_001100 | XLOC_041696 | ENSRNOT00000018477 | -0.95451212  | 1.42E-06 |
| TUCP_001100 | XLOC_041696 | ENSRNOT00000005161 | 0.965145447  | 3.82E-07 |
| TUCP_001100 | XLOC_041696 | ENSRNOT00000037955 | -0.963296005 | 4.93E-07 |
| TUCP_001100 | XLOC_041696 | ENSRNOT00000055582 | 0.952109219  | 1.83E-06 |
| TUCP_001100 | XLOC_041696 | ENSRNOT00000022074 | 0.964164997  | 4.38E-07 |
| TUCP_001100 | XLOC_041696 | ENSRNOT0000004999  | 0.967717625  | 2.62E-07 |
| TUCP_001100 | XLOC_041696 | ENSRNOT00000013463 | 0.965834355  | 3.46E-07 |
| TUCP_001100 | XLOC_041696 | ENSRNOT00000041365 | 0.952852498  | 1.69E-06 |
| TUCP_001100 | XLOC_041696 | ENSRNOT00000088054 | 0.95532898   | 1.30E-06 |
| TUCP_001100 | XLOC_041696 | ENSRNOT00000043872 | 0.951633844  | 1.92E-06 |
| TUCP_001100 | XLOC_041696 | ENSRNOT00000047663 | -0.966915437 | 2.95E-07 |
| TUCP_001100 | XLOC_041696 | ENSRNOT00000029202 | -0.959357394 | 8.16E-07 |
| TUCP_001100 | XLOC_041696 | ENSRNOT00000005489 | 0.977551908  | 4.32E-08 |
| TUCP_001100 | XLOC_041696 | ENSRNOT00000025794 | -0.964921388 | 3.94E-07 |

|             |             |                    |              |          |
|-------------|-------------|--------------------|--------------|----------|
| TUCP_001100 | XLOC_041696 | ENSRNOT00000058111 | -0.952641781 | 1.73E-06 |
| TUCP_001100 | XLOC_041696 | ENSRNOT00000084422 | 0.966905217  | 2.96E-07 |
| TUCP_001100 | XLOC_041696 | ENSRNOT00000088279 | 0.957257902  | 1.05E-06 |
| TUCP_001100 | XLOC_041696 | ENSRNOT0000002443  | 0.962104284  | 5.78E-07 |
| TUCP_001100 | XLOC_041696 | ENSRNOT00000012736 | 0.951611879  | 1.93E-06 |
| TUCP_001100 | XLOC_041696 | ENSRNOT00000002114 | -0.977606007 | 4.27E-08 |
| TUCP_001100 | XLOC_041696 | ENSRNOT00000027970 | 0.980448477  | 2.18E-08 |
| TUCP_001100 | XLOC_041696 | ENSRNOT00000009462 | 0.95443003   | 1.43E-06 |
| TUCP_001100 | XLOC_041696 | ENSRNOT00000046215 | -0.95679903  | 1.10E-06 |
| TUCP_001100 | XLOC_041696 | ENSRNOT00000018074 | -0.966233551 | 3.27E-07 |
| TUCP_001100 | XLOC_041696 | ENSRNOT00000037679 | 0.951333367  | 1.98E-06 |
| TUCP_001100 | XLOC_041696 | ENSRNOT00000014124 | 0.978950628  | 3.14E-08 |
| TUCP_001100 | XLOC_041696 | ENSRNOT00000000120 | 0.977409126  | 4.46E-08 |
| TUCP_001100 | XLOC_041696 | ENSRNOT00000013632 | 0.972302298  | 1.23E-07 |
| TUCP_001100 | XLOC_041696 | ENSRNOT00000078906 | -0.9579227   | 9.68E-07 |
| TUCP_001100 | XLOC_041696 | ENSRNOT00000028545 | -0.952136669 | 1.83E-06 |
| TUCP_001100 | XLOC_041696 | ENSRNOT00000055442 | 0.964248589  | 4.33E-07 |
| TUCP_001100 | XLOC_041696 | ENSRNOT00000028225 | 0.950374504  | 2.18E-06 |
| TUCP_001100 | XLOC_041696 | ENSRNOT00000015495 | -0.979594111 | 2.69E-08 |
| TUCP_001100 | XLOC_041696 | ENSRNOT00000032248 | 0.956490001  | 1.14E-06 |
| TUCP_001100 | XLOC_041696 | ENSRNOT00000021216 | 0.950895159  | 2.07E-06 |
| TUCP_001100 | XLOC_041696 | ENSRNOT00000040393 | 0.968330507  | 2.38E-07 |
| TUCP_001100 | XLOC_041696 | ENSRNOT00000011511 | -0.953320544 | 1.61E-06 |
| TUCP_001100 | XLOC_041696 | ENSRNOT00000064700 | 0.958724703  | 8.80E-07 |
| TUCP_001100 | XLOC_041696 | ENSRNOT00000036613 | -0.976137536 | 5.85E-08 |
| TUCP_001100 | XLOC_041696 | ENSRNOT00000028876 | -0.953488435 | 1.59E-06 |
| TUCP_001100 | XLOC_041696 | ENSRNOT00000025705 | 0.984747889  | 6.34E-09 |
| TUCP_001100 | XLOC_041696 | ENSRNOT00000019983 | -0.969146255 | 2.09E-07 |
| TUCP_001100 | XLOC_041696 | ENSRNOT00000004140 | 0.950697248  | 2.11E-06 |
| TUCP_001100 | XLOC_041696 | ENSRNOT00000008113 | -0.973394589 | 1.00E-07 |
| TUCP_001100 | XLOC_041696 | ENSRNOT00000047105 | 0.957230507  | 1.05E-06 |
| TUCP_001100 | XLOC_041696 | ENSRNOT0000007698  | -0.979437394 | 2.80E-08 |
| TUCP_001100 | XLOC_041696 | ENSRNOT00000048910 | -0.95005695  | 2.25E-06 |
| TUCP_001100 | XLOC_041696 | ENSRNOT00000019213 | 0.950919834  | 2.06E-06 |
| TUCP_001100 | XLOC_041696 | ENSRNOT00000020051 | 0.960924506  | 6.72E-07 |
| TUCP_001100 | XLOC_041696 | ENSRNOT00000039341 | 0.960642901  | 6.96E-07 |
| TUCP_001100 | XLOC_041696 | ENSRNOT00000015678 | -0.965319164 | 3.73E-07 |
| TUCP_001100 | XLOC_041696 | ENSRNOT00000082914 | 0.976585789  | 5.33E-08 |
| TUCP_001100 | XLOC_041696 | ENSRNOT00000082863 | 0.962810944  | 5.26E-07 |
| TUCP_001100 | XLOC_041696 | ENSRNOT00000049459 | -0.976853236 | 5.03E-08 |
| TUCP_001100 | XLOC_041696 | ENSRNOT00000065947 | 0.954198828  | 1.47E-06 |
| TUCP_001100 | XLOC_041696 | ENSRNOT00000071166 | 0.956111973  | 1.19E-06 |
| TUCP_001100 | XLOC_041696 | ENSRNOT00000084567 | 0.950415369  | 2.17E-06 |
| TUCP_001100 | XLOC_041696 | ENSRNOT00000013851 | -0.974237558 | 8.56E-08 |
| TUCP_001100 | XLOC_041696 | ENSRNOT00000055437 | -0.950081819 | 2.24E-06 |
| TUCP_001100 | XLOC_041696 | ENSRNOT00000038212 | -0.971704838 | 1.36E-07 |
| TUCP_001100 | XLOC_041696 | ENSRNOT0000007028  | -0.958301741 | 9.26E-07 |
| TUCP_001100 | XLOC_041696 | ENSRNOT00000001507 | 0.964712592  | 4.06E-07 |
| TUCP_001100 | XLOC_041696 | ENSRNOT00000083568 | 0.960404582  | 7.17E-07 |
| TUCP_001100 | XLOC_041696 | ENSRNOT00000018584 | 0.951063053  | 2.04E-06 |
| TUCP_001100 | XLOC_041696 | ENSRNOT00000039177 | -0.959389449 | 8.12E-07 |

|             |             |                    |              |          |
|-------------|-------------|--------------------|--------------|----------|
| TUCP_001100 | XLOC_041696 | ENSRNOT00000084031 | 0.968919352  | 2.17E-07 |
| TUCP_001100 | XLOC_041696 | ENSRNOT00000030109 | 0.95009582   | 2.24E-06 |
| TUCP_001100 | XLOC_041696 | ENSRNOT00000037456 | 0.958210959  | 9.36E-07 |
| TUCP_001100 | XLOC_041696 | ENSRNOT00000030082 | 0.950710086  | 2.11E-06 |
| TUCP_001100 | XLOC_041696 | ENSRNOT00000065168 | 0.954137435  | 1.48E-06 |
| TUCP_001100 | XLOC_041696 | ENSRNOT00000000577 | 0.958418588  | 9.13E-07 |
| TUCP_001100 | XLOC_041696 | ENSRNOT00000081226 | 0.950318943  | 2.19E-06 |
| TUCP_001100 | XLOC_041696 | ENSRNOT00000065045 | 0.957268351  | 1.04E-06 |
| TUCP_001100 | XLOC_041696 | ENSRNOT00000056405 | 0.969075996  | 2.11E-07 |
| TUCP_001100 | XLOC_041696 | ENSRNOT00000088133 | -0.9613775   | 6.34E-07 |
| TUCP_001100 | XLOC_041696 | ENSRNOT00000080677 | -0.957422822 | 1.03E-06 |
| TUCP_001100 | XLOC_041696 | ENSRNOT00000016254 | -0.954154961 | 1.48E-06 |
| TUCP_001100 | XLOC_041696 | ENSRNOT00000005405 | 0.967545854  | 2.69E-07 |
| TUCP_001100 | XLOC_041696 | ENSRNOT00000083968 | -0.95652346  | 1.14E-06 |
| TUCP_001100 | XLOC_041696 | ENSRNOT00000037133 | 0.972470437  | 1.19E-07 |
| TUCP_001100 | XLOC_041696 | ENSRNOT00000083964 | -0.957210442 | 1.05E-06 |
| TUCP_001100 | XLOC_041696 | ENSRNOT00000001893 | 0.960130542  | 7.42E-07 |
| TUCP_001100 | XLOC_041696 | ENSRNOT00000026831 | 0.963878578  | 4.56E-07 |
| TUCP_001100 | XLOC_041696 | ENSRNOT00000068452 | 0.952909463  | 1.68E-06 |
| TUCP_001100 | XLOC_041696 | ENSRNOT00000028266 | 0.958735957  | 8.79E-07 |
| TUCP_001100 | XLOC_041696 | ENSRNOT00000032363 | 0.950974934  | 2.05E-06 |
| TUCP_001100 | XLOC_041696 | ENSRNOT00000016445 | 0.960906214  | 6.73E-07 |
| TUCP_001100 | XLOC_041696 | ENSRNOT00000019133 | 0.957923139  | 9.68E-07 |
| TUCP_001100 | XLOC_041696 | ENSRNOT00000024119 | 0.9779574    | 3.95E-08 |
| TUCP_001100 | XLOC_041696 | ENSRNOT00000006824 | -0.956187901 | 1.18E-06 |
| TUCP_001100 | XLOC_041696 | ENSRNOT00000032667 | -0.956121476 | 1.19E-06 |
| TUCP_001100 | XLOC_041696 | ENSRNOT00000000170 | -0.967338717 | 2.77E-07 |
| TUCP_001100 | XLOC_041696 | ENSRNOT00000086260 | -0.966701812 | 3.05E-07 |
| TUCP_001100 | XLOC_041696 | ENSRNOT00000078741 | 0.950547799  | 2.14E-06 |
| TUCP_001100 | XLOC_041696 | ENSRNOT00000001099 | -0.97423252  | 8.57E-08 |
| TUCP_001100 | XLOC_041696 | ENSRNOT00000090123 | 0.956386824  | 1.15E-06 |
| TUCP_001100 | XLOC_041696 | ENSRNOT00000001158 | 0.955519837  | 1.27E-06 |
| TUCP_001100 | XLOC_041696 | ENSRNOT00000045488 | 0.950389515  | 2.18E-06 |
| TUCP_001100 | XLOC_041696 | ENSRNOT00000084597 | -0.959334139 | 8.18E-07 |
| TUCP_001100 | XLOC_041696 | ENSRNOT00000089211 | 0.954616167  | 1.40E-06 |
| TUCP_001100 | XLOC_041696 | ENSRNOT00000020383 | 0.968555769  | 2.30E-07 |
| TUCP_001100 | XLOC_041696 | ENSRNOT00000000302 | 0.958388568  | 9.16E-07 |
| TUCP_001100 | XLOC_041696 | ENSRNOT00000078070 | 0.952363787  | 1.78E-06 |
| TUCP_001100 | XLOC_041696 | ENSRNOT00000041106 | 0.96035229   | 7.22E-07 |
| TUCP_001100 | XLOC_041696 | ENSRNOT00000090129 | -0.956917068 | 1.09E-06 |
| TUCP_001100 | XLOC_041696 | ENSRNOT00000000658 | 0.952454002  | 1.77E-06 |
| TUCP_001100 | XLOC_041696 | ENSRNOT00000000717 | -0.958294201 | 9.26E-07 |
| TUCP_001100 | XLOC_041696 | ENSRNOT00000005901 | 0.952682034  | 1.73E-06 |
| TUCP_001100 | XLOC_041696 | ENSRNOT00000086122 | 0.976670528  | 5.23E-08 |
| TUCP_001100 | XLOC_041696 | ENSRNOT00000026235 | -0.955489117 | 1.28E-06 |
| TUCP_001100 | XLOC_041696 | ENSRNOT00000023763 | -0.958512058 | 9.03E-07 |
| TUCP_001100 | XLOC_041696 | ENSRNOT00000010993 | 0.961839949  | 5.98E-07 |
| TUCP_001100 | XLOC_041696 | ENSRNOT00000059181 | 0.966202943  | 3.28E-07 |
| TUCP_001100 | XLOC_041696 | ENSRNOT00000017291 | -0.959623281 | 7.90E-07 |
| TUCP_001100 | XLOC_041696 | ENSRNOT00000003691 | -0.962454302 | 5.52E-07 |
| TUCP_001100 | XLOC_041696 | ENSRNOT00000017765 | 0.956405502  | 1.15E-06 |

|             |             |                    |              |          |
|-------------|-------------|--------------------|--------------|----------|
| TUCP_001100 | XLOC_041696 | ENSRNOT00000017761 | 0.978642612  | 3.38E-08 |
| TUCP_001100 | XLOC_041696 | ENSRNOT00000023543 | -0.9610625   | 6.60E-07 |
| TUCP_001100 | XLOC_041696 | ENSRNOT00000080608 | 0.964639516  | 4.10E-07 |
| TUCP_001100 | XLOC_041696 | ENSRNOT00000027117 | -0.969977291 | 1.83E-07 |
| TUCP_001100 | XLOC_041696 | ENSRNOT00000061392 | 0.963427317  | 4.85E-07 |
| TUCP_001100 | XLOC_041696 | ENSRNOT00000014605 | -0.961158909 | 6.52E-07 |
| TUCP_001100 | XLOC_041696 | ENSRNOT00000042125 | 0.969196684  | 2.07E-07 |
| TUCP_001100 | XLOC_041696 | ENSRNOT00000025460 | 0.966209993  | 3.28E-07 |
| TUCP_001100 | XLOC_041696 | ENSRNOT00000026760 | -0.978485168 | 3.50E-08 |
| TUCP_001100 | XLOC_041696 | ENSRNOT00000001289 | 0.960796786  | 6.83E-07 |
| TUCP_001100 | XLOC_041696 | ENSRNOT00000081077 | -0.982151968 | 1.38E-08 |
| TUCP_001100 | XLOC_041696 | ENSRNOT00000016568 | 0.968332837  | 2.38E-07 |
| TUCP_001100 | XLOC_041696 | ENSRNOT00000023388 | -0.962728494 | 5.32E-07 |
| TUCP_001100 | XLOC_041696 | ENSRNOT00000024938 | -0.951275971 | 1.99E-06 |
| TUCP_001100 | XLOC_041696 | ENSRNOT00000024933 | -0.950627772 | 2.13E-06 |
| TUCP_001100 | XLOC_041696 | ENSRNOT00000047210 | 0.966370018  | 3.20E-07 |
| TUCP_001100 | XLOC_041696 | ENSRNOT00000083957 | 0.960596766  | 7.00E-07 |
| TUCP_001101 | XLOC_041786 | ENSRNOT00000015113 | 0.952940508  | 1.68E-06 |
| TUCP_001101 | XLOC_041786 | ENSRNOT00000058563 | -0.95547496  | 1.28E-06 |
| TUCP_001101 | XLOC_041786 | ENSRNOT00000074993 | 0.953099267  | 1.65E-06 |
| TUCP_004071 | XLOC_178906 | ENSRNOT00000028555 | 0.963439553  | 4.84E-07 |
| TUCP_004071 | XLOC_178906 | ENSRNOT00000034951 | 0.952412054  | 1.77E-06 |
| TUCP_004071 | XLOC_178906 | ENSRNOT00000065105 | 0.952906328  | 1.69E-06 |
| TUCP_004071 | XLOC_178906 | ENSRNOT00000025225 | 0.959814157  | 7.71E-07 |
| TUCP_004071 | XLOC_178906 | ENSRNOT00000001438 | 0.953656909  | 1.56E-06 |
| TUCP_004071 | XLOC_178906 | ENSRNOT00000010759 | 0.965244284  | 3.77E-07 |
| TUCP_004071 | XLOC_178906 | ENSRNOT00000022348 | 0.96002261   | 7.52E-07 |
| TUCP_004071 | XLOC_178906 | ENSRNOT00000001518 | 0.955848699  | 1.23E-06 |
| TUCP_004071 | XLOC_178906 | ENSRNOT00000084232 | 0.976091464  | 5.91E-08 |
| TUCP_004071 | XLOC_178906 | ENSRNOT00000013461 | 0.953688096  | 1.55E-06 |
| TUCP_004071 | XLOC_178906 | ENSRNOT00000023935 | 0.971147841  | 1.50E-07 |
| TUCP_004071 | XLOC_178906 | ENSRNOT00000027305 | 0.971655113  | 1.37E-07 |
| TUCP_004071 | XLOC_178906 | ENSRNOT00000025421 | 0.96319023   | 5.00E-07 |
| TUCP_004071 | XLOC_178906 | ENSRNOT00000000603 | 0.966594105  | 3.10E-07 |
| TUCP_004071 | XLOC_178906 | ENSRNOT00000020635 | 0.97536606   | 6.85E-08 |
| TUCP_004070 | XLOC_178777 | ENSRNOT00000037559 | 0.963716344  | 4.66E-07 |
| TUCP_000455 | XLOC_015128 | ENSRNOT00000040625 | 0.957557639  | 1.01E-06 |
| TUCP_000455 | XLOC_015128 | ENSRNOT00000037336 | 0.960233466  | 7.33E-07 |
| TUCP_001108 | XLOC_042154 | ENSRNOT00000080512 | 0.954025402  | 1.50E-06 |
| TUCP_001109 | XLOC_042156 | ENSRNOT00000008764 | 0.951394375  | 1.97E-06 |
| TUCP_001109 | XLOC_042156 | ENSRNOT00000012757 | 0.957233868  | 1.05E-06 |
| TUCP_001109 | XLOC_042156 | ENSRNOT00000025355 | 0.953929008  | 1.51E-06 |
| TUCP_001109 | XLOC_042156 | ENSRNOT00000012247 | 0.95786265   | 9.75E-07 |
| TUCP_001109 | XLOC_042156 | ENSRNOT00000065897 | 0.956770774  | 1.11E-06 |
| TUCP_001109 | XLOC_042156 | ENSRNOT00000082711 | 0.957771127  | 9.85E-07 |
| TUCP_001109 | XLOC_042156 | ENSRNOT00000078572 | 0.958099599  | 9.48E-07 |
| TUCP_001109 | XLOC_042156 | ENSRNOT00000006109 | 0.950846141  | 2.08E-06 |
| TUCP_001109 | XLOC_042156 | ENSRNOT00000081226 | 0.950340887  | 2.19E-06 |
| TUCP_001109 | XLOC_042156 | ENSRNOT00000016485 | 0.971433125  | 1.43E-07 |
| TUCP_001109 | XLOC_042156 | ENSRNOT00000092066 | -0.953250586 | 1.63E-06 |
| TUCP_001109 | XLOC_042156 | ENSRNOT00000027544 | 0.952706481  | 1.72E-06 |



|             |             |                     |              |          |
|-------------|-------------|---------------------|--------------|----------|
| TUCP_001109 | XLOC_042156 | ENSRNOT00000085334  | 0.961965516  | 5.88E-07 |
| TUCP_001109 | XLOC_042156 | ENSRNOT00000035309  | -0.95013251  | 2.23E-06 |
| TUCP_001109 | XLOC_042156 | ENSRNOT00000043827  | 0.959739609  | 7.79E-07 |
| TUCP_001109 | XLOC_042156 | ENSRNOT00000048437  | 0.963066679  | 5.09E-07 |
| TUCP_001109 | XLOC_042156 | ENSRNOT00000061054  | 0.952109415  | 1.83E-06 |
| TUCP_001109 | XLOC_042156 | ENSRNOT00000057953  | 0.961666782  | 6.11E-07 |
| TUCP_001109 | XLOC_042156 | ENSRNOT00000016088  | 0.95976602   | 7.76E-07 |
| TUCP_001109 | XLOC_042156 | ENSRNOT00000042638  | 0.950487926  | 2.16E-06 |
| TUCP_000350 | XLOC_010989 | ENSRNOT00000084069  | -0.950392576 | 2.18E-06 |
| TUCP_000350 | XLOC_010989 | ENSRNOT00000039437  | 0.950451974  | 2.16E-06 |
| TUCP_000350 | XLOC_010989 | ENSRNOT00000044435  | 0.950418033  | 2.17E-06 |
| TUCP_000350 | XLOC_010989 | ENSRNOT00000006266  | 0.953175009  | 1.64E-06 |
| TUCP_000350 | XLOC_010989 | ENSRNOT00000078793  | -0.958959093 | 8.56E-07 |
| TUCP_000350 | XLOC_010989 | ENSRNOT00000003636  | 0.9511262    | 2.02E-06 |
| TUCP_000351 | XLOC_011328 | ENSRNOT00000032973  | 0.963863058  | 4.57E-07 |
| TUCP_000352 | XLOC_011561 | ENSRNOT00000020704  | 0.953159865  | 1.64E-06 |
| TUCP_000352 | XLOC_011561 | ENSRNOT00000024583  | -0.97062799  | 1.64E-07 |
| TUCP_000352 | XLOC_011561 | ENSRNOT00000021590  | 0.963172758  | 5.01E-07 |
| TUCP_000352 | XLOC_011561 | ENSRNOT00000022932  | 0.975642465  | 6.48E-08 |
| TUCP_003771 | XLOC_165752 | ENSRNOT00000018179  | 0.982974919  | 1.09E-08 |
| TUCP_003771 | XLOC_165752 | ENSRNOT000000086917 | 0.962407869  | 5.55E-07 |
| TUCP_000355 | XLOC_011771 | ENSRNOT00000012413  | 0.952169678  | 1.82E-06 |
| TUCP_000355 | XLOC_011771 | ENSRNOT00000079080  | 0.955848397  | 1.23E-06 |
| TUCP_000355 | XLOC_011771 | ENSRNOT00000012837  | -0.955749223 | 1.24E-06 |
| TUCP_000355 | XLOC_011771 | ENSRNOT00000006148  | 0.95405871   | 1.49E-06 |
| TUCP_000355 | XLOC_011771 | ENSRNOT00000023548  | -0.95866103  | 8.87E-07 |
| TUCP_000355 | XLOC_011771 | ENSRNOT00000007583  | 0.95112012   | 2.03E-06 |
| TUCP_000355 | XLOC_011771 | ENSRNOT00000035770  | 0.961847031  | 5.97E-07 |
| TUCP_000356 | XLOC_011781 | ENSRNOT00000068354  | 0.979824238  | 2.55E-08 |
| TUCP_000356 | XLOC_011781 | ENSRNOT00000034421  | 0.961644252  | 6.13E-07 |
| TUCP_000356 | XLOC_011781 | ENSRNOT00000011845  | 0.969531305  | 1.96E-07 |
| TUCP_000356 | XLOC_011781 | ENSRNOT00000028877  | 0.950917403  | 2.07E-06 |
| TUCP_000356 | XLOC_011781 | ENSRNOT00000078299  | 0.962904062  | 5.20E-07 |
| TUCP_000356 | XLOC_011781 | ENSRNOT00000083268  | 0.954701481  | 1.39E-06 |
| TUCP_000356 | XLOC_011781 | ENSRNOT00000073846  | -0.952037755 | 1.84E-06 |
| TUCP_000356 | XLOC_011781 | ENSRNOT00000085479  | 0.975267383  | 6.99E-08 |
| TUCP_000356 | XLOC_011781 | ENSRNOT00000025731  | 0.968728812  | 2.23E-07 |
| TUCP_000356 | XLOC_011781 | ENSRNOT00000000995  | 0.970493518  | 1.68E-07 |
| TUCP_000356 | XLOC_011781 | ENSRNOT00000003458  | 0.957061303  | 1.07E-06 |
| TUCP_000356 | XLOC_011781 | ENSRNOT00000084722  | 0.95495068   | 1.35E-06 |
| TUCP_000356 | XLOC_011781 | ENSRNOT00000003778  | 0.954496561  | 1.42E-06 |
| TUCP_000356 | XLOC_011781 | ENSRNOT00000051028  | -0.964286924 | 4.31E-07 |
| TUCP_000356 | XLOC_011781 | ENSRNOT00000051067  | 0.951464514  | 1.95E-06 |
| TUCP_000356 | XLOC_011781 | ENSRNOT00000031693  | 0.974209091  | 8.61E-08 |
| TUCP_000356 | XLOC_011781 | ENSRNOT00000082393  | 0.95810133   | 9.48E-07 |
| TUCP_000356 | XLOC_011781 | ENSRNOT00000003082  | 0.950901054  | 2.07E-06 |
| TUCP_000357 | XLOC_011859 | ENSRNOT00000081800  | 0.954131438  | 1.48E-06 |
| TUCP_000357 | XLOC_011859 | ENSRNOT00000020147  | 0.955697166  | 1.25E-06 |
| TUCP_000357 | XLOC_011859 | ENSRNOT00000057924  | 0.957027112  | 1.07E-06 |
| TUCP_000357 | XLOC_011859 | ENSRNOT00000003102  | 0.954430569  | 1.43E-06 |
| TUCP_000357 | XLOC_011859 | ENSRNOT0000005664   | 0.961067816  | 6.60E-07 |

|             |             |                    |             |          |
|-------------|-------------|--------------------|-------------|----------|
| TUCP_000357 | XLOC_011859 | ENSRNOT00000065529 | 0.953069838 | 1.66E-06 |
| TUCP_000357 | XLOC_011859 | ENSRNOT00000042799 | 0.956253596 | 1.17E-06 |
| TUCP_004673 | XLOC_205765 | ENSRNOT00000001921 | 0.953208343 | 1.63E-06 |
| TUCP_000359 | XLOC_011980 | ENSRNOT00000084133 | 0.999963246 | 5.28E-22 |
| TUCP_000359 | XLOC_011980 | ENSRNOT00000093745 | 0.981678123 | 1.58E-08 |
| TUCP_000359 | XLOC_011980 | ENSRNOT00000065542 | 0.998137629 | 1.76E-13 |
| TUCP_000359 | XLOC_011980 | ENSRNOT00000082464 | 0.999963246 | 5.28E-22 |
| TUCP_000359 | XLOC_011980 | ENSRNOT00000087659 | 0.999963246 | 5.28E-22 |
| TUCP_000359 | XLOC_011980 | ENSRNOT00000084582 | 0.977196127 | 4.67E-08 |
| TUCP_000359 | XLOC_011980 | ENSRNOT00000085078 | 0.999963246 | 5.28E-22 |
| TUCP_000359 | XLOC_011980 | ENSRNOT00000014028 | 0.999963246 | 5.28E-22 |
| TUCP_000359 | XLOC_011980 | ENSRNOT00000049363 | 0.999963246 | 5.28E-22 |
| TUCP_000359 | XLOC_011980 | ENSRNOT00000065473 | 0.999901309 | 7.37E-20 |
| TUCP_000359 | XLOC_011980 | ENSRNOT00000000142 | 0.999179381 | 2.93E-15 |
| TUCP_000359 | XLOC_011980 | ENSRNOT00000082288 | 0.999964045 | 4.73E-22 |
| TUCP_000359 | XLOC_011980 | ENSRNOT00000039664 | 0.999963246 | 5.28E-22 |
| TUCP_000359 | XLOC_011980 | ENSRNOT00000065402 | 0.999963246 | 5.28E-22 |
| TUCP_000359 | XLOC_011980 | ENSRNOT00000064551 | 0.964758737 | 4.03E-07 |
| TUCP_000359 | XLOC_011980 | ENSRNOT00000084141 | 0.999963246 | 5.28E-22 |
| TUCP_000359 | XLOC_011980 | ENSRNOT00000082435 | 0.999963246 | 5.28E-22 |
| TUCP_000359 | XLOC_011980 | ENSRNOT00000082928 | 0.996746855 | 2.85E-12 |
| TUCP_000359 | XLOC_011980 | ENSRNOT00000066546 | 0.956277686 | 1.17E-06 |
| TUCP_000359 | XLOC_011980 | ENSRNOT00000046013 | 0.988178249 | 1.78E-09 |
| TUCP_000359 | XLOC_011980 | ENSRNOT00000067931 | 0.978688873 | 3.34E-08 |
| TUCP_000359 | XLOC_011980 | ENSRNOT00000086425 | 0.991093089 | 4.35E-10 |
| TUCP_000359 | XLOC_011980 | ENSRNOT00000093696 | 0.956245627 | 1.17E-06 |
| TUCP_000359 | XLOC_011980 | ENSRNOT00000036228 | 0.983757819 | 8.66E-09 |
| TUCP_000359 | XLOC_011980 | ENSRNOT00000014030 | 0.999963246 | 5.28E-22 |
| TUCP_000359 | XLOC_011980 | ENSRNOT00000081966 | 0.999963246 | 5.28E-22 |
| TUCP_000359 | XLOC_011980 | ENSRNOT00000075906 | 0.999963246 | 5.28E-22 |
| TUCP_000359 | XLOC_011980 | ENSRNOT00000088396 | 0.981836644 | 1.51E-08 |
| TUCP_000359 | XLOC_011980 | ENSRNOT00000049259 | 0.96589464  | 3.43E-07 |
| TUCP_000359 | XLOC_011980 | ENSRNOT00000092838 | 0.982355707 | 1.31E-08 |
| TUCP_000359 | XLOC_011980 | ENSRNOT00000093442 | 0.958993185 | 8.52E-07 |
| TUCP_003803 | XLOC_166074 | ENSRNOT00000001507 | 0.953105065 | 1.65E-06 |
| TUCP_003803 | XLOC_166074 | ENSRNOT00000026860 | 0.974225831 | 8.58E-08 |
| TUCP_003803 | XLOC_166074 | ENSRNOT00000038647 | 0.954812036 | 1.38E-06 |
| TUCP_003803 | XLOC_166074 | ENSRNOT00000026941 | 0.96214409  | 5.75E-07 |
| TUCP_003803 | XLOC_166074 | ENSRNOT00000011984 | 0.959759239 | 7.77E-07 |
| TUCP_003803 | XLOC_166074 | ENSRNOT00000038433 | 0.951763742 | 1.90E-06 |
| TUCP_003803 | XLOC_166074 | ENSRNOT00000045488 | 0.966831776 | 2.99E-07 |
| TUCP_003803 | XLOC_166074 | ENSRNOT00000039842 | 0.9722304   | 1.24E-07 |
| TUCP_003803 | XLOC_166074 | ENSRNOT00000044635 | 0.954471184 | 1.43E-06 |
| TUCP_003803 | XLOC_166074 | ENSRNOT00000026293 | 0.961210109 | 6.48E-07 |
| TUCP_003803 | XLOC_166074 | ENSRNOT00000017629 | 0.968348486 | 2.37E-07 |
| TUCP_003803 | XLOC_166074 | ENSRNOT00000013260 | 0.981692635 | 1.57E-08 |
| TUCP_003803 | XLOC_166074 | ENSRNOT00000031230 | 0.963173319 | 5.01E-07 |
| TUCP_003803 | XLOC_166074 | ENSRNOT00000082228 | 0.96352753  | 4.78E-07 |
| TUCP_003803 | XLOC_166074 | ENSRNOT00000012736 | 0.962895751 | 5.20E-07 |
| TUCP_003803 | XLOC_166074 | ENSRNOT00000067822 | 0.962246121 | 5.67E-07 |
| TUCP_003803 | XLOC_166074 | ENSRNOT00000078475 | 0.952604675 | 1.74E-06 |

|             |             |                    |             |          |
|-------------|-------------|--------------------|-------------|----------|
| TUCP_003803 | XLOC_166074 | ENSRNOT00000024941 | 0.962864121 | 5.23E-07 |
| TUCP_003803 | XLOC_166074 | ENSRNOT00000087371 | 0.953000042 | 1.67E-06 |
| TUCP_003803 | XLOC_166074 | ENSRNOT00000002292 | 0.95915015  | 8.36E-07 |
| TUCP_003803 | XLOC_166074 | ENSRNOT00000020383 | 0.955674697 | 1.25E-06 |
| TUCP_003803 | XLOC_166074 | ENSRNOT00000065947 | 0.963410244 | 4.86E-07 |
| TUCP_003803 | XLOC_166074 | ENSRNOT00000015076 | 0.962115985 | 5.77E-07 |
| TUCP_003803 | XLOC_166074 | ENSRNOT00000082100 | 0.963379804 | 4.88E-07 |
| TUCP_003803 | XLOC_166074 | ENSRNOT00000079442 | 0.954761431 | 1.38E-06 |
| TUCP_003803 | XLOC_166074 | ENSRNOT00000037679 | 0.964733728 | 4.05E-07 |
| TUCP_003803 | XLOC_166074 | ENSRNOT00000074653 | 0.9645843   | 4.13E-07 |
| TUCP_003803 | XLOC_166074 | ENSRNOT00000079464 | 0.953465775 | 1.59E-06 |
| TUCP_003803 | XLOC_166074 | ENSRNOT00000055683 | 0.957076235 | 1.07E-06 |
| TUCP_003803 | XLOC_166074 | ENSRNOT00000085596 | 0.971670587 | 1.37E-07 |
| TUCP_003803 | XLOC_166074 | ENSRNOT00000035491 | 0.956432065 | 1.15E-06 |
| TUCP_003803 | XLOC_166074 | ENSRNOT00000000658 | 0.961568751 | 6.19E-07 |
| TUCP_003803 | XLOC_166074 | ENSRNOT00000039631 | 0.951865537 | 1.88E-06 |
| TUCP_003803 | XLOC_166074 | ENSRNOT00000065501 | 0.950380949 | 2.18E-06 |
| TUCP_003803 | XLOC_166074 | ENSRNOT00000006554 | 0.988099935 | 1.84E-09 |
| TUCP_003803 | XLOC_166074 | ENSRNOT00000029994 | 0.957858969 | 9.75E-07 |
| TUCP_003803 | XLOC_166074 | ENSRNOT00000010418 | 0.972886443 | 1.10E-07 |
| TUCP_003803 | XLOC_166074 | ENSRNOT00000025523 | 0.965358674 | 3.71E-07 |
| TUCP_003803 | XLOC_166074 | ENSRNOT00000082174 | 0.952911966 | 1.68E-06 |
| TUCP_003803 | XLOC_166074 | ENSRNOT00000035989 | 0.952973515 | 1.67E-06 |
| TUCP_003803 | XLOC_166074 | ENSRNOT00000078675 | 0.966265872 | 3.25E-07 |
| TUCP_003803 | XLOC_166074 | ENSRNOT00000070933 | 0.961203467 | 6.49E-07 |
| TUCP_003803 | XLOC_166074 | ENSRNOT00000037446 | 0.975979019 | 6.05E-08 |
| TUCP_003803 | XLOC_166074 | ENSRNOT00000004359 | 0.959734445 | 7.79E-07 |
| TUCP_003803 | XLOC_166074 | ENSRNOT00000061100 | 0.966274403 | 3.25E-07 |
| TUCP_003803 | XLOC_166074 | ENSRNOT00000005387 | 0.950832878 | 2.08E-06 |
| TUCP_003803 | XLOC_166074 | ENSRNOT00000088125 | 0.98427346  | 7.38E-09 |
| TUCP_003803 | XLOC_166074 | ENSRNOT00000013274 | 0.960660758 | 6.95E-07 |
| TUCP_003803 | XLOC_166074 | ENSRNOT00000005144 | 0.973967894 | 9.01E-08 |
| TUCP_003803 | XLOC_166074 | ENSRNOT00000018584 | 0.960828214 | 6.80E-07 |
| TUCP_003803 | XLOC_166074 | ENSRNOT00000036750 | 0.958417229 | 9.13E-07 |
| TUCP_003803 | XLOC_166074 | ENSRNOT00000043345 | 0.963681643 | 4.68E-07 |
| TUCP_003803 | XLOC_166074 | ENSRNOT00000037790 | 0.955555963 | 1.27E-06 |
| TUCP_003803 | XLOC_166074 | ENSRNOT00000010609 | 0.979833096 | 2.54E-08 |
| TUCP_003803 | XLOC_166074 | ENSRNOT00000068633 | 0.956121432 | 1.19E-06 |
| TUCP_003803 | XLOC_166074 | ENSRNOT00000049245 | 0.951486457 | 1.95E-06 |
| TUCP_003803 | XLOC_166074 | ENSRNOT00000009683 | 0.954495899 | 1.42E-06 |
| TUCP_003803 | XLOC_166074 | ENSRNOT00000056813 | 0.959361388 | 8.15E-07 |
| TUCP_003803 | XLOC_166074 | ENSRNOT00000004834 | 0.977762089 | 4.13E-08 |
| TUCP_003803 | XLOC_166074 | ENSRNOT00000079895 | 0.957746115 | 9.88E-07 |
| TUCP_003803 | XLOC_166074 | ENSRNOT00000026089 | 0.963499193 | 4.80E-07 |
| TUCP_003803 | XLOC_166074 | ENSRNOT00000019222 | 0.960103578 | 7.44E-07 |
| TUCP_004779 | XLOC_211073 | ENSRNOT00000012895 | 0.969750125 | 1.90E-07 |
| TUCP_004779 | XLOC_211073 | ENSRNOT00000019687 | 0.951818215 | 1.89E-06 |
| TUCP_004779 | XLOC_211073 | ENSRNOT00000067904 | 0.950553903 | 2.14E-06 |
| TUCP_004779 | XLOC_211073 | ENSRNOT00000060186 | 0.959820197 | 7.71E-07 |
| TUCP_004779 | XLOC_211073 | ENSRNOT00000021769 | 0.954988847 | 1.35E-06 |
| TUCP_004779 | XLOC_211073 | ENSRNOT00000036212 | 0.951310488 | 1.99E-06 |

|             |             |                     |              |          |
|-------------|-------------|---------------------|--------------|----------|
| TUCP_004779 | XLOC_211073 | ENSRNOT00000020322  | 0.953966145  | 1.51E-06 |
| TUCP_004779 | XLOC_211073 | ENSRNOT00000092535  | 0.956283105  | 1.17E-06 |
| TUCP_004779 | XLOC_211073 | ENSRNOT00000067528  | 0.950070086  | 2.25E-06 |
| TUCP_004779 | XLOC_211073 | ENSRNOT00000039117  | 0.953865539  | 1.52E-06 |
| TUCP_004779 | XLOC_211073 | ENSRNOT00000005942  | 0.960276623  | 7.29E-07 |
| TUCP_004779 | XLOC_211073 | ENSRNOT00000016248  | 0.952931354  | 1.68E-06 |
| TUCP_004779 | XLOC_211073 | ENSRNOT000000050179 | 0.955362387  | 1.29E-06 |
| TUCP_004779 | XLOC_211073 | ENSRNOT00000004003  | 0.966195122  | 3.28E-07 |
| TUCP_004779 | XLOC_211073 | ENSRNOT000000078503 | 0.955877433  | 1.22E-06 |
| TUCP_004779 | XLOC_211073 | ENSRNOT000000086812 | 0.95583944   | 1.23E-06 |
| TUCP_004779 | XLOC_211073 | ENSRNOT000000031462 | 0.960054215  | 7.49E-07 |
| TUCP_004779 | XLOC_211073 | ENSRNOT000000071241 | 0.961381428  | 6.34E-07 |
| TUCP_004779 | XLOC_211073 | ENSRNOT000000022839 | 0.950102581  | 2.24E-06 |
| TUCP_003805 | XLOC_166111 | ENSRNOT000000047105 | 0.962166958  | 5.73E-07 |
| TUCP_003805 | XLOC_166111 | ENSRNOT000000003568 | 0.96202523   | 5.83E-07 |
| TUCP_003805 | XLOC_166111 | ENSRNOT000000036072 | 0.953624957  | 1.56E-06 |
| TUCP_003805 | XLOC_166111 | ENSRNOT000000031904 | 0.970194439  | 1.76E-07 |
| TUCP_003805 | XLOC_166111 | ENSRNOT000000026941 | 0.980170679  | 2.34E-08 |
| TUCP_003805 | XLOC_166111 | ENSRNOT000000048910 | -0.950908444 | 2.07E-06 |
| TUCP_003805 | XLOC_166111 | ENSRNOT000000019213 | 0.950881695  | 2.07E-06 |
| TUCP_003805 | XLOC_166111 | ENSRNOT000000021348 | 0.963771737  | 4.62E-07 |
| TUCP_003805 | XLOC_166111 | ENSRNOT000000037597 | 0.964205177  | 4.36E-07 |
| TUCP_003805 | XLOC_166111 | ENSRNOT000000068353 | 0.965845987  | 3.46E-07 |
| TUCP_003805 | XLOC_166111 | ENSRNOT00000001855  | 0.954939289  | 1.36E-06 |
| TUCP_003805 | XLOC_166111 | ENSRNOT000000023638 | 0.967418078  | 2.74E-07 |
| TUCP_003805 | XLOC_166111 | ENSRNOT000000006175 | 0.950275003  | 2.20E-06 |
| TUCP_003805 | XLOC_166111 | ENSRNOT000000005220 | 0.960752322  | 6.87E-07 |
| TUCP_003805 | XLOC_166111 | ENSRNOT000000023144 | 0.985088994  | 5.66E-09 |
| TUCP_003805 | XLOC_166111 | ENSRNOT000000083568 | 0.958946873  | 8.57E-07 |
| TUCP_003805 | XLOC_166111 | ENSRNOT000000084069 | 0.953083003  | 1.65E-06 |
| TUCP_003805 | XLOC_166111 | ENSRNOT000000033017 | 0.955982974  | 1.21E-06 |
| TUCP_003805 | XLOC_166111 | ENSRNOT000000013758 | 0.960116032  | 7.43E-07 |
| TUCP_003805 | XLOC_166111 | ENSRNOT000000026543 | 0.970696777  | 1.62E-07 |
| TUCP_003805 | XLOC_166111 | ENSRNOT000000043345 | 0.954613863  | 1.41E-06 |
| TUCP_003805 | XLOC_166111 | ENSRNOT000000065076 | 0.953457156  | 1.59E-06 |
| TUCP_003805 | XLOC_166111 | ENSRNOT000000024969 | 0.956645283  | 1.12E-06 |
| TUCP_003805 | XLOC_166111 | ENSRNOT000000067400 | 0.95735429   | 1.03E-06 |
| TUCP_003805 | XLOC_166111 | ENSRNOT000000001507 | 0.955378898  | 1.29E-06 |
| TUCP_003805 | XLOC_166111 | ENSRNOT000000088125 | 0.950117111  | 2.24E-06 |
| TUCP_003805 | XLOC_166111 | ENSRNOT000000065300 | 0.959528029  | 7.99E-07 |
| TUCP_003805 | XLOC_166111 | ENSRNOT000000025079 | -0.95837381  | 9.18E-07 |
| TUCP_003805 | XLOC_166111 | ENSRNOT000000048754 | -0.954822973 | 1.37E-06 |
| TUCP_003805 | XLOC_166111 | ENSRNOT000000025075 | 0.951483413  | 1.95E-06 |
| TUCP_003805 | XLOC_166111 | ENSRNOT000000035989 | 0.967490808  | 2.71E-07 |
| TUCP_003805 | XLOC_166111 | ENSRNOT000000057160 | 0.981826748  | 1.51E-08 |
| TUCP_003805 | XLOC_166111 | ENSRNOT000000024402 | 0.983746165  | 8.69E-09 |
| TUCP_003805 | XLOC_166111 | ENSRNOT000000089933 | 0.973016647  | 1.08E-07 |
| TUCP_003805 | XLOC_166111 | ENSRNOT000000012671 | 0.958360129  | 9.19E-07 |
| TUCP_003805 | XLOC_166111 | ENSRNOT000000025517 | 0.978843971  | 3.22E-08 |
| TUCP_003805 | XLOC_166111 | ENSRNOT000000084012 | 0.955716937  | 1.24E-06 |
| TUCP_003805 | XLOC_166111 | ENSRNOT000000060696 | 0.959998918  | 7.54E-07 |

|             |             |                    |              |          |
|-------------|-------------|--------------------|--------------|----------|
| TUCP_003805 | XLOC_166111 | ENSRNOT00000038807 | 0.953960803  | 1.51E-06 |
| TUCP_003805 | XLOC_166111 | ENSRNOT00000011429 | 0.950494725  | 2.15E-06 |
| TUCP_003805 | XLOC_166111 | ENSRNOT00000077727 | -0.950191179 | 2.22E-06 |
| TUCP_003805 | XLOC_166111 | ENSRNOT00000041044 | 0.963499736  | 4.80E-07 |
| TUCP_003805 | XLOC_166111 | ENSRNOT00000037133 | 0.952908854  | 1.68E-06 |
| TUCP_003805 | XLOC_166111 | ENSRNOT00000010541 | 0.957456654  | 1.02E-06 |
| TUCP_003805 | XLOC_166111 | ENSRNOT00000034298 | 0.957604438  | 1.00E-06 |
| TUCP_003805 | XLOC_166111 | ENSRNOT00000091909 | 0.970787519  | 1.60E-07 |
| TUCP_003805 | XLOC_166111 | ENSRNOT00000024352 | 0.966991415  | 2.92E-07 |
| TUCP_003805 | XLOC_166111 | ENSRNOT00000083220 | 0.965420057  | 3.67E-07 |
| TUCP_003805 | XLOC_166111 | ENSRNOT00000003780 | 0.97122373   | 1.48E-07 |
| TUCP_003805 | XLOC_166111 | ENSRNOT00000026643 | 0.960398521  | 7.18E-07 |
| TUCP_003805 | XLOC_166111 | ENSRNOT00000016445 | 0.955902398  | 1.22E-06 |
| TUCP_003805 | XLOC_166111 | ENSRNOT00000060362 | 0.952072068  | 1.84E-06 |
| TUCP_003805 | XLOC_166111 | ENSRNOT00000013274 | 0.956718553  | 1.11E-06 |
| TUCP_003805 | XLOC_166111 | ENSRNOT00000027337 | 0.951253729  | 2.00E-06 |
| TUCP_003805 | XLOC_166111 | ENSRNOT00000047093 | 0.954926778  | 1.36E-06 |
| TUCP_003805 | XLOC_166111 | ENSRNOT00000025966 | 0.954145322  | 1.48E-06 |
| TUCP_003805 | XLOC_166111 | ENSRNOT00000016739 | 0.961261851  | 6.44E-07 |
| TUCP_003805 | XLOC_166111 | ENSRNOT00000078675 | 0.95117524   | 2.01E-06 |
| TUCP_003805 | XLOC_166111 | ENSRNOT00000033975 | 0.952354603  | 1.78E-06 |
| TUCP_003805 | XLOC_166111 | ENSRNOT00000079895 | 0.96338762   | 4.87E-07 |
| TUCP_003805 | XLOC_166111 | ENSRNOT00000009811 | 0.962368122  | 5.58E-07 |
| TUCP_003805 | XLOC_166111 | ENSRNOT00000047387 | 0.953177843  | 1.64E-06 |
| TUCP_003805 | XLOC_166111 | ENSRNOT00000045488 | 0.967384842  | 2.75E-07 |
| TUCP_003805 | XLOC_166111 | ENSRNOT00000039842 | 0.95047369   | 2.16E-06 |
| TUCP_003805 | XLOC_166111 | ENSRNOT00000081047 | 0.958961916  | 8.56E-07 |
| TUCP_003805 | XLOC_166111 | ENSRNOT00000081512 | 0.970976203  | 1.54E-07 |
| TUCP_003805 | XLOC_166111 | ENSRNOT00000017629 | 0.958505652  | 9.03E-07 |
| TUCP_003805 | XLOC_166111 | ENSRNOT00000008803 | 0.95383092   | 1.53E-06 |
| TUCP_003805 | XLOC_166111 | ENSRNOT00000005387 | 0.957834709  | 9.78E-07 |
| TUCP_003805 | XLOC_166111 | ENSRNOT00000005664 | 0.968075208  | 2.48E-07 |
| TUCP_003805 | XLOC_166111 | ENSRNOT00000027910 | 0.971646966  | 1.38E-07 |
| TUCP_003805 | XLOC_166111 | ENSRNOT00000078475 | 0.971427734  | 1.43E-07 |
| TUCP_003805 | XLOC_166111 | ENSRNOT00000087429 | 0.95417749   | 1.47E-06 |
| TUCP_003805 | XLOC_166111 | ENSRNOT00000040513 | 0.975932796  | 6.11E-08 |
| TUCP_003805 | XLOC_166111 | ENSRNOT00000020383 | 0.958265025  | 9.30E-07 |
| TUCP_003805 | XLOC_166111 | ENSRNOT00000084088 | 0.955941588  | 1.21E-06 |
| TUCP_003805 | XLOC_166111 | ENSRNOT00000000302 | 0.978899177  | 3.18E-08 |
| TUCP_003805 | XLOC_166111 | ENSRNOT00000090262 | 0.951911827  | 1.87E-06 |
| TUCP_003805 | XLOC_166111 | ENSRNOT00000078070 | 0.975000952  | 7.37E-08 |
| TUCP_003805 | XLOC_166111 | ENSRNOT00000037015 | 0.951586672  | 1.93E-06 |
| TUCP_003805 | XLOC_166111 | ENSRNOT00000076729 | 0.955105001  | 1.33E-06 |
| TUCP_003805 | XLOC_166111 | ENSRNOT00000090665 | 0.967797741  | 2.58E-07 |
| TUCP_003805 | XLOC_166111 | ENSRNOT00000089293 | 0.957493775  | 1.02E-06 |
| TUCP_003805 | XLOC_166111 | ENSRNOT00000088628 | 0.964410794  | 4.24E-07 |
| TUCP_003805 | XLOC_166111 | ENSRNOT00000016191 | 0.951600266  | 1.93E-06 |
| TUCP_003805 | XLOC_166111 | ENSRNOT00000065501 | 0.963638778  | 4.71E-07 |
| TUCP_003805 | XLOC_166111 | ENSRNOT00000077999 | 0.954405745  | 1.44E-06 |
| TUCP_003805 | XLOC_166111 | ENSRNOT00000025832 | 0.950764751  | 2.10E-06 |
| TUCP_003805 | XLOC_166111 | ENSRNOT00000065229 | 0.957838773  | 9.77E-07 |

|             |             |                    |              |          |
|-------------|-------------|--------------------|--------------|----------|
| TUCP_003805 | XLOC_166111 | ENSRNOT00000020673 | 0.957761388  | 9.86E-07 |
| TUCP_003805 | XLOC_166111 | ENSRNOT00000014235 | 0.953315736  | 1.61E-06 |
| TUCP_003805 | XLOC_166111 | ENSRNOT00000052063 | 0.959415032  | 8.10E-07 |
| TUCP_003805 | XLOC_166111 | ENSRNOT0000001783  | 0.953942836  | 1.51E-06 |
| TUCP_003805 | XLOC_166111 | ENSRNOT00000037790 | 0.96181639   | 6.00E-07 |
| TUCP_003805 | XLOC_166111 | ENSRNOT00000009122 | 0.952051127  | 1.84E-06 |
| TUCP_003805 | XLOC_166111 | ENSRNOT00000004046 | -0.956026768 | 1.20E-06 |
| TUCP_003805 | XLOC_166111 | ENSRNOT00000086577 | 0.954535967  | 1.42E-06 |
| TUCP_003805 | XLOC_166111 | ENSRNOT00000088054 | 0.983936254  | 8.20E-09 |
| TUCP_003805 | XLOC_166111 | ENSRNOT00000057313 | 0.953983988  | 1.50E-06 |
| TUCP_003805 | XLOC_166111 | ENSRNOT00000044395 | 0.951363525  | 1.97E-06 |
| TUCP_003805 | XLOC_166111 | ENSRNOT00000087534 | -0.951679043 | 1.91E-06 |
| TUCP_003805 | XLOC_166111 | ENSRNOT00000042799 | 0.964828041  | 4.00E-07 |
| TUCP_003805 | XLOC_166111 | ENSRNOT00000010992 | 0.961233422  | 6.46E-07 |
| TUCP_003805 | XLOC_166111 | ENSRNOT00000038647 | 0.953057787  | 1.66E-06 |
| TUCP_003805 | XLOC_166111 | ENSRNOT00000076669 | 0.957559531  | 1.01E-06 |
| TUCP_003805 | XLOC_166111 | ENSRNOT00000011984 | 0.953924216  | 1.51E-06 |
| TUCP_003805 | XLOC_166111 | ENSRNOT00000088279 | 0.969362563  | 2.02E-07 |
| TUCP_003805 | XLOC_166111 | ENSRNOT00000081981 | 0.955355056  | 1.30E-06 |
| TUCP_003805 | XLOC_166111 | ENSRNOT00000026293 | 0.963550311  | 4.77E-07 |
| TUCP_003805 | XLOC_166111 | ENSRNOT00000014888 | 0.955427498  | 1.29E-06 |
| TUCP_003805 | XLOC_166111 | ENSRNOT00000017761 | 0.951124854  | 2.02E-06 |
| TUCP_003805 | XLOC_166111 | ENSRNOT00000066024 | 0.960633656  | 6.97E-07 |
| TUCP_003805 | XLOC_166111 | ENSRNOT00000001222 | 0.959730822  | 7.79E-07 |
| TUCP_003805 | XLOC_166111 | ENSRNOT00000012736 | 0.967804288  | 2.58E-07 |
| TUCP_003805 | XLOC_166111 | ENSRNOT00000055992 | -0.954780425 | 1.38E-06 |
| TUCP_003805 | XLOC_166111 | ENSRNOT00000040069 | 0.955534706  | 1.27E-06 |
| TUCP_003805 | XLOC_166111 | ENSRNOT00000010748 | 0.950025121  | 2.26E-06 |
| TUCP_003805 | XLOC_166111 | ENSRNOT00000083127 | 0.962464914  | 5.51E-07 |
| TUCP_003805 | XLOC_166111 | ENSRNOT00000078306 | 0.953814028  | 1.53E-06 |
| TUCP_003805 | XLOC_166111 | ENSRNOT00000080695 | 0.985800264  | 4.44E-09 |
| TUCP_003805 | XLOC_166111 | ENSRNOT00000018074 | -0.956105999 | 1.19E-06 |
| TUCP_003805 | XLOC_166111 | ENSRNOT00000091205 | 0.957762408  | 9.86E-07 |
| TUCP_003805 | XLOC_166111 | ENSRNOT00000037679 | 0.953889521  | 1.52E-06 |
| TUCP_003805 | XLOC_166111 | ENSRNOT0000002866  | -0.963154139 | 5.03E-07 |
| TUCP_003805 | XLOC_166111 | ENSRNOT00000085596 | 0.954851579  | 1.37E-06 |
| TUCP_003805 | XLOC_166111 | ENSRNOT00000029125 | 0.96230734   | 5.62E-07 |
| TUCP_003805 | XLOC_166111 | ENSRNOT00000007369 | 0.958069562  | 9.51E-07 |
| TUCP_003805 | XLOC_166111 | ENSRNOT00000042125 | 0.962062952  | 5.81E-07 |
| TUCP_003805 | XLOC_166111 | ENSRNOT00000014814 | 0.952305073  | 1.79E-06 |
| TUCP_003805 | XLOC_166111 | ENSRNOT00000080207 | 0.972479202  | 1.19E-07 |
| TUCP_003805 | XLOC_166111 | ENSRNOT00000065529 | 0.961791089  | 6.01E-07 |
| TUCP_003805 | XLOC_166111 | ENSRNOT00000040393 | 0.954678926  | 1.40E-06 |
| TUCP_003805 | XLOC_166111 | ENSRNOT00000036750 | 0.950162713  | 2.23E-06 |
| TUCP_003805 | XLOC_166111 | ENSRNOT00000025092 | 0.966975671  | 2.93E-07 |
| TUCP_003805 | XLOC_166111 | ENSRNOT00000027967 | 0.958201478  | 9.37E-07 |
| TUCP_003805 | XLOC_166111 | ENSRNOT00000008982 | 0.956819531  | 1.10E-06 |
| TUCP_003805 | XLOC_166111 | ENSRNOT00000021674 | 0.978278603  | 3.67E-08 |
| TUCP_003805 | XLOC_166111 | ENSRNOT00000047192 | -0.95217373  | 1.82E-06 |
| TUCP_003805 | XLOC_166111 | ENSRNOT00000025705 | 0.950176249  | 2.22E-06 |
| TUCP_003805 | XLOC_166111 | ENSRNOT00000005311 | 0.951686494  | 1.91E-06 |

|             |             |                    |              |          |
|-------------|-------------|--------------------|--------------|----------|
| TUCP_003805 | XLOC_166111 | ENSRNOT00000046639 | 0.969688646  | 1.92E-07 |
| TUCP_003805 | XLOC_166111 | ENSRNOT00000015799 | 0.972617443  | 1.16E-07 |
| TUCP_000294 | XLOC_009318 | ENSRNOT00000074753 | 0.963871744  | 4.56E-07 |
| TUCP_000294 | XLOC_009318 | ENSRNOT00000041904 | 0.964331765  | 4.28E-07 |
| TUCP_000294 | XLOC_009318 | ENSRNOT00000077990 | 0.964331765  | 4.28E-07 |
| TUCP_000294 | XLOC_009318 | ENSRNOT00000038826 | 0.961891138  | 5.94E-07 |
| TUCP_000294 | XLOC_009318 | ENSRNOT00000046842 | 0.950514546  | 2.15E-06 |
| TUCP_000294 | XLOC_009318 | ENSRNOT00000021243 | 0.955610791  | 1.26E-06 |
| TUCP_000294 | XLOC_009318 | ENSRNOT00000060250 | 0.964181699  | 4.37E-07 |
| TUCP_000294 | XLOC_009318 | ENSRNOT00000091934 | 0.964331765  | 4.28E-07 |
| TUCP_000294 | XLOC_009318 | ENSRNOT00000087656 | 0.953448394  | 1.59E-06 |
| TUCP_000294 | XLOC_009318 | ENSRNOT00000012170 | 0.970522387  | 1.67E-07 |
| TUCP_000294 | XLOC_009318 | ENSRNOT00000046585 | 0.970643384  | 1.63E-07 |
| TUCP_000294 | XLOC_009318 | ENSRNOT00000034907 | 0.956548326  | 1.13E-06 |
| TUCP_000294 | XLOC_009318 | ENSRNOT00000031205 | 0.972774001  | 1.13E-07 |
| TUCP_000294 | XLOC_009318 | ENSRNOT00000044145 | 0.964331765  | 4.28E-07 |
| TUCP_000294 | XLOC_009318 | ENSRNOT00000088381 | 0.971181299  | 1.49E-07 |
| TUCP_000294 | XLOC_009318 | ENSRNOT00000011743 | 0.959827805  | 7.70E-07 |
| TUCP_000294 | XLOC_009318 | ENSRNOT00000089929 | 0.964331765  | 4.28E-07 |
| TUCP_000294 | XLOC_009318 | ENSRNOT00000088624 | 0.964331765  | 4.28E-07 |
| TUCP_000294 | XLOC_009318 | ENSRNOT00000085659 | 0.971672659  | 1.37E-07 |
| TUCP_000294 | XLOC_009318 | ENSRNOT00000015866 | 0.967940543  | 2.53E-07 |
| TUCP_000294 | XLOC_009318 | ENSRNOT00000078633 | 0.964331765  | 4.28E-07 |
| TUCP_000294 | XLOC_009318 | ENSRNOT00000051835 | 0.964331765  | 4.28E-07 |
| TUCP_000294 | XLOC_009318 | ENSRNOT00000009825 | 0.965752615  | 3.50E-07 |
| TUCP_000294 | XLOC_009318 | ENSRNOT00000079087 | 0.964331765  | 4.28E-07 |
| TUCP_000294 | XLOC_009318 | ENSRNOT00000037206 | 0.964331765  | 4.28E-07 |
| TUCP_000294 | XLOC_009318 | ENSRNOT00000080590 | 0.964806542  | 4.01E-07 |
| TUCP_000294 | XLOC_009318 | ENSRNOT00000027552 | 0.96397123   | 4.50E-07 |
| TUCP_000294 | XLOC_009318 | ENSRNOT00000077014 | 0.965565213  | 3.60E-07 |
| TUCP_000294 | XLOC_009318 | ENSRNOT00000080453 | 0.964792266  | 4.02E-07 |
| TUCP_000294 | XLOC_009318 | ENSRNOT00000057729 | 0.965490645  | 3.64E-07 |
| TUCP_000294 | XLOC_009318 | ENSRNOT00000061284 | 0.951661928  | 1.92E-06 |
| TUCP_000294 | XLOC_009318 | ENSRNOT00000071884 | 0.968200663  | 2.43E-07 |
| TUCP_000294 | XLOC_009318 | ENSRNOT00000066839 | 0.95371325   | 1.55E-06 |
| TUCP_000294 | XLOC_009318 | ENSRNOT00000078663 | 0.963665477  | 4.69E-07 |
| TUCP_000294 | XLOC_009318 | ENSRNOT00000040509 | 0.964880247  | 3.97E-07 |
| TUCP_000294 | XLOC_009318 | ENSRNOT00000037169 | 0.952012367  | 1.85E-06 |
| TUCP_000294 | XLOC_009318 | ENSRNOT00000029634 | 0.950063426  | 2.25E-06 |
| TUCP_000294 | XLOC_009318 | ENSRNOT00000093579 | 0.991995099  | 2.55E-10 |
| TUCP_000294 | XLOC_009318 | ENSRNOT00000065460 | 0.964331765  | 4.28E-07 |
| TUCP_000294 | XLOC_009318 | ENSRNOT00000003817 | 0.952462677  | 1.76E-06 |
| TUCP_000294 | XLOC_009318 | ENSRNOT00000016713 | 0.964331765  | 4.28E-07 |
| TUCP_000294 | XLOC_009318 | ENSRNOT00000079260 | 0.967874369  | 2.55E-07 |
| TUCP_000294 | XLOC_009318 | ENSRNOT00000039294 | 0.964331765  | 4.28E-07 |
| TUCP_000294 | XLOC_009318 | ENSRNOT00000024337 | 0.983061387  | 1.07E-08 |
| TUCP_003807 | XLOC_166167 | ENSRNOT00000079130 | -0.964555649 | 4.15E-07 |
| TUCP_003807 | XLOC_166167 | ENSRNOT00000027647 | 0.969411447  | 2.00E-07 |
| TUCP_003807 | XLOC_166167 | ENSRNOT00000091139 | 0.95221842   | 1.81E-06 |
| TUCP_003807 | XLOC_166167 | ENSRNOT00000022341 | 0.965793156  | 3.48E-07 |
| TUCP_003807 | XLOC_166167 | ENSRNOT00000021842 | 0.95676263   | 1.11E-06 |

|             |             |                    |              |          |
|-------------|-------------|--------------------|--------------|----------|
| TUCP_003807 | XLOC_166167 | ENSRNOT00000075992 | 0.95888589   | 8.63E-07 |
| TUCP_003807 | XLOC_166167 | ENSRNOT00000014559 | 0.960993884  | 6.66E-07 |
| TUCP_003807 | XLOC_166167 | ENSRNOT00000036718 | 0.973658326  | 9.56E-08 |
| TUCP_003807 | XLOC_166167 | ENSRNOT00000019130 | 0.950233743  | 2.21E-06 |
| TUCP_003807 | XLOC_166167 | ENSRNOT00000056877 | 0.954167193  | 1.47E-06 |
| TUCP_003807 | XLOC_166167 | ENSRNOT00000068183 | 0.953051666  | 1.66E-06 |
| TUCP_003806 | XLOC_166117 | ENSRNOT00000016083 | -0.950650783 | 2.12E-06 |
| TUCP_003806 | XLOC_166117 | ENSRNOT0000001215  | 0.951648072  | 1.92E-06 |
| TUCP_003806 | XLOC_166117 | ENSRNOT00000026860 | 0.958188446  | 9.38E-07 |
| TUCP_003806 | XLOC_166117 | ENSRNOT00000006188 | -0.974565128 | 8.03E-08 |
| TUCP_003806 | XLOC_166117 | ENSRNOT00000006186 | 0.982697736  | 1.19E-08 |
| TUCP_003806 | XLOC_166117 | ENSRNOT00000090621 | 0.962720936  | 5.33E-07 |
| TUCP_003806 | XLOC_166117 | ENSRNOT00000013743 | 0.950715907  | 2.11E-06 |
| TUCP_003806 | XLOC_166117 | ENSRNOT00000075397 | 0.961843524  | 5.97E-07 |
| TUCP_003806 | XLOC_166117 | ENSRNOT00000032926 | -0.969071062 | 2.12E-07 |
| TUCP_003806 | XLOC_166117 | ENSRNOT00000019104 | -0.962629447 | 5.39E-07 |
| TUCP_003806 | XLOC_166117 | ENSRNOT00000021348 | 0.962405018  | 5.55E-07 |
| TUCP_003806 | XLOC_166117 | ENSRNOT00000006217 | 0.967091259  | 2.88E-07 |
| TUCP_003806 | XLOC_166117 | ENSRNOT00000068353 | 0.979191101  | 2.97E-08 |
| TUCP_003806 | XLOC_166117 | ENSRNOT00000079138 | 0.967138737  | 2.86E-07 |
| TUCP_003806 | XLOC_166117 | ENSRNOT00000044635 | 0.965726784  | 3.52E-07 |
| TUCP_003806 | XLOC_166117 | ENSRNOT00000025067 | -0.952401412 | 1.78E-06 |
| TUCP_003806 | XLOC_166117 | ENSRNOT00000086706 | 0.955077261  | 1.34E-06 |
| TUCP_003806 | XLOC_166117 | ENSRNOT00000035277 | 0.959273921  | 8.24E-07 |
| TUCP_003806 | XLOC_166117 | ENSRNOT00000082100 | 0.957061929  | 1.07E-06 |
| TUCP_003806 | XLOC_166117 | ENSRNOT00000086310 | -0.957388513 | 1.03E-06 |
| TUCP_003806 | XLOC_166117 | ENSRNOT00000010030 | -0.975867731 | 6.19E-08 |
| TUCP_003806 | XLOC_166117 | ENSRNOT00000026941 | 0.979996506  | 2.44E-08 |
| TUCP_003806 | XLOC_166117 | ENSRNOT00000031692 | -0.956593342 | 1.13E-06 |
| TUCP_003806 | XLOC_166117 | ENSRNOT00000052063 | 0.981396259  | 1.70E-08 |
| TUCP_003806 | XLOC_166117 | ENSRNOT00000030850 | 0.950361316  | 2.18E-06 |
| TUCP_003806 | XLOC_166117 | ENSRNOT00000055540 | 0.962201818  | 5.70E-07 |
| TUCP_003806 | XLOC_166117 | ENSRNOT00000006752 | 0.980835464  | 1.97E-08 |
| TUCP_003806 | XLOC_166117 | ENSRNOT00000000618 | -0.951260995 | 2.00E-06 |
| TUCP_003806 | XLOC_166117 | ENSRNOT00000085251 | -0.950549202 | 2.14E-06 |
| TUCP_003806 | XLOC_166117 | ENSRNOT00000072771 | 0.966540959  | 3.12E-07 |
| TUCP_003806 | XLOC_166117 | ENSRNOT00000073370 | 0.967471855  | 2.72E-07 |
| TUCP_003806 | XLOC_166117 | ENSRNOT00000065300 | 0.971090241  | 1.52E-07 |
| TUCP_003806 | XLOC_166117 | ENSRNOT00000019923 | 0.960794504  | 6.83E-07 |
| TUCP_003806 | XLOC_166117 | ENSRNOT00000029439 | 0.9587843    | 8.74E-07 |
| TUCP_003806 | XLOC_166117 | ENSRNOT00000004400 | 0.965262516  | 3.76E-07 |
| TUCP_003806 | XLOC_166117 | ENSRNOT00000035320 | -0.958545666 | 8.99E-07 |
| TUCP_003806 | XLOC_166117 | ENSRNOT00000076820 | 0.963639438  | 4.71E-07 |
| TUCP_003806 | XLOC_166117 | ENSRNOT00000035989 | 0.951952855  | 1.86E-06 |
| TUCP_003806 | XLOC_166117 | ENSRNOT00000057160 | 0.960029105  | 7.51E-07 |
| TUCP_003806 | XLOC_166117 | ENSRNOT00000008274 | -0.965828496 | 3.46E-07 |
| TUCP_003806 | XLOC_166117 | ENSRNOT00000065871 | 0.953165137  | 1.64E-06 |
| TUCP_003806 | XLOC_166117 | ENSRNOT00000067489 | 0.95361358   | 1.56E-06 |
| TUCP_003806 | XLOC_166117 | ENSRNOT00000091448 | -0.952404927 | 1.78E-06 |
| TUCP_003806 | XLOC_166117 | ENSRNOT00000077999 | 0.980576178  | 2.11E-08 |
| TUCP_003806 | XLOC_166117 | ENSRNOT00000068134 | 0.960775136  | 6.85E-07 |



|             |             |                    |              |          |
|-------------|-------------|--------------------|--------------|----------|
| TUCP_003806 | XLOC_166117 | ENSRNOT00000067626 | -0.954776952 | 1.38E-06 |
| TUCP_003806 | XLOC_166117 | ENSRNOT00000003146 | -0.95913228  | 8.38E-07 |
| TUCP_003806 | XLOC_166117 | ENSRNOT00000085228 | 0.96833752   | 2.38E-07 |
| TUCP_003806 | XLOC_166117 | ENSRNOT00000026391 | 0.953308013  | 1.62E-06 |
| TUCP_003806 | XLOC_166117 | ENSRNOT00000060002 | -0.981270442 | 1.76E-08 |
| TUCP_003806 | XLOC_166117 | ENSRNOT00000055187 | 0.958432844  | 9.11E-07 |
| TUCP_003806 | XLOC_166117 | ENSRNOT00000015188 | 0.971939243  | 1.31E-07 |
| TUCP_003806 | XLOC_166117 | ENSRNOT00000079866 | 0.96241552   | 5.54E-07 |
| TUCP_003806 | XLOC_166117 | ENSRNOT00000005686 | -0.97829342  | 3.66E-08 |
| TUCP_003806 | XLOC_166117 | ENSRNOT00000015537 | 0.962577782  | 5.43E-07 |
| TUCP_003806 | XLOC_166117 | ENSRNOT00000010927 | 0.962903394  | 5.20E-07 |
| TUCP_003806 | XLOC_166117 | ENSRNOT00000087371 | 0.960817366  | 6.81E-07 |
| TUCP_003806 | XLOC_166117 | ENSRNOT00000030074 | 0.959981814  | 7.56E-07 |
| TUCP_003806 | XLOC_166117 | ENSRNOT00000067391 | -0.963878664 | 4.56E-07 |
| TUCP_003806 | XLOC_166117 | ENSRNOT00000039857 | -0.960386387 | 7.19E-07 |
| TUCP_003806 | XLOC_166117 | ENSRNOT00000009150 | 0.962260552  | 5.66E-07 |
| TUCP_003806 | XLOC_166117 | ENSRNOT00000037446 | 0.957869987  | 9.74E-07 |
| TUCP_003806 | XLOC_166117 | ENSRNOT00000084709 | 0.978814628  | 3.24E-08 |
| TUCP_003806 | XLOC_166117 | ENSRNOT00000068033 | 0.957666612  | 9.97E-07 |
| TUCP_003806 | XLOC_166117 | ENSRNOT00000009156 | 0.9656272    | 3.57E-07 |
| TUCP_003806 | XLOC_166117 | ENSRNOT00000090912 | 0.968133612  | 2.45E-07 |
| TUCP_003806 | XLOC_166117 | ENSRNOT00000025856 | -0.959794591 | 7.73E-07 |
| TUCP_003806 | XLOC_166117 | ENSRNOT00000026643 | 0.9560504    | 1.20E-06 |
| TUCP_003806 | XLOC_166117 | ENSRNOT00000001403 | 0.968654781  | 2.26E-07 |
| TUCP_003806 | XLOC_166117 | ENSRNOT00000001401 | 0.950734089  | 2.10E-06 |
| TUCP_003806 | XLOC_166117 | ENSRNOT00000016132 | -0.978411057 | 3.56E-08 |
| TUCP_003806 | XLOC_166117 | ENSRNOT00000058495 | -0.954487692 | 1.42E-06 |
| TUCP_003806 | XLOC_166117 | ENSRNOT00000013067 | -0.980752445 | 2.01E-08 |
| TUCP_003806 | XLOC_166117 | ENSRNOT00000004351 | -0.957365608 | 1.03E-06 |
| TUCP_003806 | XLOC_166117 | ENSRNOT00000027145 | -0.951419225 | 1.96E-06 |
| TUCP_003806 | XLOC_166117 | ENSRNOT00000002313 | -0.954881    | 1.36E-06 |
| TUCP_003806 | XLOC_166117 | ENSRNOT00000034692 | -0.969456514 | 1.99E-07 |
| TUCP_003806 | XLOC_166117 | ENSRNOT00000016637 | -0.950739893 | 2.10E-06 |
| TUCP_003806 | XLOC_166117 | ENSRNOT00000020910 | 0.957728405  | 9.90E-07 |
| TUCP_003806 | XLOC_166117 | ENSRNOT00000031979 | -0.951033918 | 2.04E-06 |
| TUCP_003806 | XLOC_166117 | ENSRNOT00000079895 | 0.983573369  | 9.16E-09 |
| TUCP_003806 | XLOC_166117 | ENSRNOT00000054948 | 0.956495222  | 1.14E-06 |
| TUCP_003806 | XLOC_166117 | ENSRNOT00000074586 | -0.976798419 | 5.09E-08 |
| TUCP_003806 | XLOC_166117 | ENSRNOT00000075444 | -0.964697906 | 4.07E-07 |
| TUCP_003806 | XLOC_166117 | ENSRNOT00000021496 | -0.955677828 | 1.25E-06 |
| TUCP_003806 | XLOC_166117 | ENSRNOT00000002465 | 0.954147635  | 1.48E-06 |
| TUCP_003806 | XLOC_166117 | ENSRNOT00000011880 | 0.972552343  | 1.17E-07 |
| TUCP_003806 | XLOC_166117 | ENSRNOT00000028290 | -0.956825226 | 1.10E-06 |
| TUCP_003806 | XLOC_166117 | ENSRNOT00000003992 | -0.960385205 | 7.19E-07 |
| TUCP_003806 | XLOC_166117 | ENSRNOT00000020885 | 0.968511644  | 2.31E-07 |
| TUCP_003806 | XLOC_166117 | ENSRNOT00000050515 | 0.968931541  | 2.16E-07 |
| TUCP_003806 | XLOC_166117 | ENSRNOT00000089980 | -0.953144491 | 1.64E-06 |
| TUCP_003806 | XLOC_166117 | ENSRNOT00000078070 | 0.969104074  | 2.11E-07 |
| TUCP_003806 | XLOC_166117 | ENSRNOT00000046745 | 0.979587055  | 2.70E-08 |
| TUCP_003806 | XLOC_166117 | ENSRNOT00000021015 | 0.96538686   | 3.69E-07 |
| TUCP_003806 | XLOC_166117 | ENSRNOT00000003840 | 0.968641548  | 2.27E-07 |

|             |             |                     |              |          |
|-------------|-------------|---------------------|--------------|----------|
| TUCP_003806 | XLOC_166117 | ENSRNOT00000023876  | 0.951642447  | 1.92E-06 |
| TUCP_003806 | XLOC_166117 | ENSRNOT00000061201  | -0.967036851 | 2.90E-07 |
| TUCP_003806 | XLOC_166117 | ENSRNOT00000002187  | -0.965590694 | 3.59E-07 |
| TUCP_003806 | XLOC_166117 | ENSRNOT00000091488  | 0.969496061  | 1.98E-07 |
| TUCP_003806 | XLOC_166117 | ENSRNOT00000019656  | -0.968152211 | 2.45E-07 |
| TUCP_003806 | XLOC_166117 | ENSRNOT00000049285  | -0.958836382 | 8.69E-07 |
| TUCP_003806 | XLOC_166117 | ENSRNOT00000015239  | -0.970574341 | 1.65E-07 |
| TUCP_003806 | XLOC_166117 | ENSRNOT00000003568  | 0.951021125  | 2.04E-06 |
| TUCP_003806 | XLOC_166117 | ENSRNOT00000074649  | 0.987478904  | 2.37E-09 |
| TUCP_003806 | XLOC_166117 | ENSRNOT00000082108  | -0.950857729 | 2.08E-06 |
| TUCP_003806 | XLOC_166117 | ENSRNOT00000018877  | -0.963062174 | 5.09E-07 |
| TUCP_003806 | XLOC_166117 | ENSRNOT00000077146  | -0.981683677 | 1.57E-08 |
| TUCP_003806 | XLOC_166117 | ENSRNOT000000031672 | -0.952155419 | 1.82E-06 |
| TUCP_003806 | XLOC_166117 | ENSRNOT00000006969  | 0.968128581  | 2.45E-07 |
| TUCP_003806 | XLOC_166117 | ENSRNOT00000075209  | -0.950471206 | 2.16E-06 |
| TUCP_003806 | XLOC_166117 | ENSRNOT00000006395  | -0.965940075 | 3.41E-07 |
| TUCP_003806 | XLOC_166117 | ENSRNOT00000023977  | -0.96431001  | 4.30E-07 |
| TUCP_003806 | XLOC_166117 | ENSRNOT00000066133  | -0.982880935 | 1.13E-08 |
| TUCP_003806 | XLOC_166117 | ENSRNOT00000048933  | -0.962858626 | 5.23E-07 |
| TUCP_003806 | XLOC_166117 | ENSRNOT00000027970  | 0.958903166  | 8.62E-07 |
| TUCP_003806 | XLOC_166117 | ENSRNOT00000012432  | -0.954859146 | 1.37E-06 |
| TUCP_003806 | XLOC_166117 | ENSRNOT00000085596  | 0.964029974  | 4.46E-07 |
| TUCP_003806 | XLOC_166117 | ENSRNOT00000035385  | 0.961367987  | 6.35E-07 |
| TUCP_003806 | XLOC_166117 | ENSRNOT00000003102  | 0.950428587  | 2.17E-06 |
| TUCP_003806 | XLOC_166117 | ENSRNOT00000057738  | 0.951587412  | 1.93E-06 |
| TUCP_003806 | XLOC_166117 | ENSRNOT00000089007  | -0.954717136 | 1.39E-06 |
| TUCP_003806 | XLOC_166117 | ENSRNOT00000018170  | -0.954134833 | 1.48E-06 |
| TUCP_003806 | XLOC_166117 | ENSRNOT00000010915  | -0.952018719 | 1.85E-06 |
| TUCP_003806 | XLOC_166117 | ENSRNOT00000040069  | 0.956542713  | 1.13E-06 |
| TUCP_003806 | XLOC_166117 | ENSRNOT00000015624  | 0.96214929   | 5.74E-07 |
| TUCP_003806 | XLOC_166117 | ENSRNOT00000085295  | -0.955976172 | 1.21E-06 |
| TUCP_003806 | XLOC_166117 | ENSRNOT00000035474  | 0.965462066  | 3.65E-07 |
| TUCP_003806 | XLOC_166117 | ENSRNOT00000002114  | -0.969539574 | 1.96E-07 |
| TUCP_003806 | XLOC_166117 | ENSRNOT00000039102  | 0.965693894  | 3.53E-07 |
| TUCP_003806 | XLOC_166117 | ENSRNOT00000023807  | -0.961711232 | 6.08E-07 |
| TUCP_003806 | XLOC_166117 | ENSRNOT00000078856  | -0.95341809  | 1.60E-06 |
| TUCP_003806 | XLOC_166117 | ENSRNOT000000091205 | 0.981100168  | 1.84E-08 |
| TUCP_003806 | XLOC_166117 | ENSRNOT00000009742  | -0.954679446 | 1.40E-06 |
| TUCP_003806 | XLOC_166117 | ENSRNOT00000010983  | 0.950516598  | 2.15E-06 |
| TUCP_003806 | XLOC_166117 | ENSRNOT00000007369  | 0.971711777  | 1.36E-07 |
| TUCP_003806 | XLOC_166117 | ENSRNOT00000004787  | -0.966996654 | 2.92E-07 |
| TUCP_003806 | XLOC_166117 | ENSRNOT00000060698  | -0.980476874 | 2.16E-08 |
| TUCP_003806 | XLOC_166117 | ENSRNOT00000058351  | 0.959990564  | 7.55E-07 |
| TUCP_003806 | XLOC_166117 | ENSRNOT00000004412  | 0.950325167  | 2.19E-06 |
| TUCP_003806 | XLOC_166117 | ENSRNOT00000010748  | 0.977048885  | 4.83E-08 |
| TUCP_003806 | XLOC_166117 | ENSRNOT00000080207  | 0.961261608  | 6.44E-07 |
| TUCP_003806 | XLOC_166117 | ENSRNOT00000061100  | 0.980359721  | 2.23E-08 |
| TUCP_003806 | XLOC_166117 | ENSRNOT00000017995  | 0.980777221  | 2.00E-08 |
| TUCP_003806 | XLOC_166117 | ENSRNOT00000017776  | 0.975916762  | 6.13E-08 |
| TUCP_003806 | XLOC_166117 | ENSRNOT00000005144  | 0.978294585  | 3.66E-08 |
| TUCP_003806 | XLOC_166117 | ENSRNOT00000021534  | -0.969234228 | 2.06E-07 |

|             |             |                     |              |          |
|-------------|-------------|---------------------|--------------|----------|
| TUCP_003806 | XLOC_166117 | ENSRNOT00000018998  | 0.95783113   | 9.78E-07 |
| TUCP_003806 | XLOC_166117 | ENSRNOT000000088679 | -0.953582341 | 1.57E-06 |
| TUCP_003806 | XLOC_166117 | ENSRNOT00000004463  | 0.972866619  | 1.11E-07 |
| TUCP_003806 | XLOC_166117 | ENSRNOT00000023256  | 0.967195468  | 2.83E-07 |
| TUCP_003806 | XLOC_166117 | ENSRNOT00000016776  | -0.959798013 | 7.73E-07 |
| TUCP_003806 | XLOC_166117 | ENSRNOT00000022097  | 0.971203992  | 1.49E-07 |
| TUCP_003806 | XLOC_166117 | ENSRNOT00000008987  | -0.971549075 | 1.40E-07 |
| TUCP_003806 | XLOC_166117 | ENSRNOT00000090299  | 0.954096841  | 1.49E-06 |
| TUCP_003806 | XLOC_166117 | ENSRNOT00000092876  | -0.969993979 | 1.82E-07 |
| TUCP_003806 | XLOC_166117 | ENSRNOT00000024253  | 0.969806376  | 1.88E-07 |
| TUCP_003806 | XLOC_166117 | ENSRNOT00000088073  | -0.958829363 | 8.69E-07 |
| TUCP_003806 | XLOC_166117 | ENSRNOT00000059854  | -0.957201494 | 1.05E-06 |
| TUCP_003806 | XLOC_166117 | ENSRNOT00000086868  | 0.963133548  | 5.04E-07 |
| TUCP_003806 | XLOC_166117 | ENSRNOT00000045833  | 0.955849681  | 1.23E-06 |
| TUCP_003806 | XLOC_166117 | ENSRNOT00000009080  | -0.951940298 | 1.86E-06 |
| TUCP_003806 | XLOC_166117 | ENSRNOT00000063930  | -0.980167237 | 2.34E-08 |
| TUCP_003806 | XLOC_166117 | ENSRNOT00000046215  | -0.952228582 | 1.81E-06 |
| TUCP_003806 | XLOC_166117 | ENSRNOT00000013116  | -0.951753642 | 1.90E-06 |
| TUCP_003806 | XLOC_166117 | ENSRNOT00000020453  | -0.974448934 | 8.22E-08 |
| TUCP_003806 | XLOC_166117 | ENSRNOT00000013025  | -0.9684415   | 2.34E-07 |
| TUCP_003806 | XLOC_166117 | ENSRNOT00000016012  | -0.966024295 | 3.37E-07 |
| TUCP_003806 | XLOC_166117 | ENSRNOT00000041237  | -0.958420558 | 9.13E-07 |
| TUCP_003806 | XLOC_166117 | ENSRNOT00000088555  | -0.961999088 | 5.85E-07 |
| TUCP_003806 | XLOC_166117 | ENSRNOT00000088599  | 0.955903025  | 1.22E-06 |
| TUCP_003806 | XLOC_166117 | ENSRNOT00000087838  | -0.951774819 | 1.89E-06 |
| TUCP_003806 | XLOC_166117 | ENSRNOT00000081981  | 0.965326546  | 3.72E-07 |
| TUCP_003806 | XLOC_166117 | ENSRNOT0000001679   | 0.950445878  | 2.16E-06 |
| TUCP_003806 | XLOC_166117 | ENSRNOT00000013758  | 0.953646383  | 1.56E-06 |
| TUCP_003806 | XLOC_166117 | ENSRNOT00000013613  | -0.959712798 | 7.81E-07 |
| TUCP_003806 | XLOC_166117 | ENSRNOT00000026531  | -0.974028618 | 8.91E-08 |
| TUCP_003806 | XLOC_166117 | ENSRNOT00000010419  | 0.965009225  | 3.90E-07 |
| TUCP_003806 | XLOC_166117 | ENSRNOT00000019057  | -0.96466785  | 4.09E-07 |
| TUCP_003806 | XLOC_166117 | ENSRNOT00000003326  | -0.950443472 | 2.17E-06 |
| TUCP_003806 | XLOC_166117 | ENSRNOT00000021629  | -0.961516089 | 6.23E-07 |
| TUCP_003806 | XLOC_166117 | ENSRNOT00000047836  | -0.962268629 | 5.65E-07 |
| TUCP_003806 | XLOC_166117 | ENSRNOT00000015476  | -0.965951483 | 3.40E-07 |
| TUCP_003806 | XLOC_166117 | ENSRNOT00000075630  | -0.959814896 | 7.71E-07 |
| TUCP_003806 | XLOC_166117 | ENSRNOT00000025079  | -0.984358097 | 7.18E-09 |
| TUCP_003806 | XLOC_166117 | ENSRNOT00000048754  | -0.983714842 | 8.78E-09 |
| TUCP_003806 | XLOC_166117 | ENSRNOT00000055602  | -0.970681778 | 1.62E-07 |
| TUCP_003806 | XLOC_166117 | ENSRNOT00000093174  | 0.978282228  | 3.67E-08 |
| TUCP_003806 | XLOC_166117 | ENSRNOT00000021458  | -0.960356658 | 7.21E-07 |
| TUCP_003806 | XLOC_166117 | ENSRNOT00000011926  | 0.964712851  | 4.06E-07 |
| TUCP_003806 | XLOC_166117 | ENSRNOT00000054761  | -0.966550419 | 3.12E-07 |
| TUCP_003806 | XLOC_166117 | ENSRNOT00000007824  | -0.971643356 | 1.38E-07 |
| TUCP_003806 | XLOC_166117 | ENSRNOT00000019816  | -0.962321148 | 5.61E-07 |
| TUCP_003806 | XLOC_166117 | ENSRNOT00000020681  | -0.96614518  | 3.31E-07 |
| TUCP_003806 | XLOC_166117 | ENSRNOT00000057898  | -0.96716073  | 2.85E-07 |
| TUCP_003806 | XLOC_166117 | ENSRNOT00000024677  | 0.974605976  | 7.97E-08 |
| TUCP_003806 | XLOC_166117 | ENSRNOT00000091602  | -0.956310186 | 1.16E-06 |
| TUCP_003806 | XLOC_166117 | ENSRNOT00000056100  | -0.9555591   | 1.27E-06 |

|             |             |                     |              |          |
|-------------|-------------|---------------------|--------------|----------|
| TUCP_003806 | XLOC_166117 | ENSRNOT00000012671  | 0.95625391   | 1.17E-06 |
| TUCP_003806 | XLOC_166117 | ENSRNOT00000018634  | -0.959584217 | 7.93E-07 |
| TUCP_003806 | XLOC_166117 | ENSRNOT00000071540  | 0.978045153  | 3.87E-08 |
| TUCP_003806 | XLOC_166117 | ENSRNOT00000031701  | -0.95708625  | 1.07E-06 |
| TUCP_003806 | XLOC_166117 | ENSRNOT00000072849  | -0.962263514 | 5.66E-07 |
| TUCP_003806 | XLOC_166117 | ENSRNOT00000073643  | -0.9552675   | 1.31E-06 |
| TUCP_003806 | XLOC_166117 | ENSRNOT00000078349  | -0.958952445 | 8.57E-07 |
| TUCP_003806 | XLOC_166117 | ENSRNOT00000011654  | -0.957211961 | 1.05E-06 |
| TUCP_003806 | XLOC_166117 | ENSRNOT00000022502  | -0.963964777 | 4.50E-07 |
| TUCP_003806 | XLOC_166117 | ENSRNOT00000060811  | 0.954522933  | 1.42E-06 |
| TUCP_003806 | XLOC_166117 | ENSRNOT00000017556  | 0.950847667  | 2.08E-06 |
| TUCP_003806 | XLOC_166117 | ENSRNOT00000087443  | 0.954842223  | 1.37E-06 |
| TUCP_003806 | XLOC_166117 | ENSRNOT00000021803  | -0.971471555 | 1.42E-07 |
| TUCP_003806 | XLOC_166117 | ENSRNOT00000020147  | 0.955606543  | 1.26E-06 |
| TUCP_003806 | XLOC_166117 | ENSRNOT00000024352  | 0.990859117  | 4.95E-10 |
| TUCP_003806 | XLOC_166117 | ENSRNOT00000082627  | -0.96215152  | 5.74E-07 |
| TUCP_003806 | XLOC_166117 | ENSRNOT00000072118  | 0.956162865  | 1.18E-06 |
| TUCP_003806 | XLOC_166117 | ENSRNOT00000003780  | 0.974725479  | 7.79E-08 |
| TUCP_003806 | XLOC_166117 | ENSRNOT00000003787  | -0.963546455 | 4.77E-07 |
| TUCP_003806 | XLOC_166117 | ENSRNOT00000023262  | -0.96169379  | 6.09E-07 |
| TUCP_003806 | XLOC_166117 | ENSRNOT00000058312  | 0.95704844   | 1.07E-06 |
| TUCP_003806 | XLOC_166117 | ENSRNOT00000013274  | 0.953133584  | 1.65E-06 |
| TUCP_003806 | XLOC_166117 | ENSRNOT000000081800 | 0.956361513  | 1.16E-06 |
| TUCP_003806 | XLOC_166117 | ENSRNOT00000022342  | 0.953810187  | 1.53E-06 |
| TUCP_003806 | XLOC_166117 | ENSRNOT00000025104  | -0.956991709 | 1.08E-06 |
| TUCP_003806 | XLOC_166117 | ENSRNOT00000055957  | -0.955039179 | 1.34E-06 |
| TUCP_003806 | XLOC_166117 | ENSRNOT00000016739  | 0.955797945  | 1.23E-06 |
| TUCP_003806 | XLOC_166117 | ENSRNOT00000068381  | 0.961968827  | 5.88E-07 |
| TUCP_003806 | XLOC_166117 | ENSRNOT00000009221  | 0.955371974  | 1.29E-06 |
| TUCP_003806 | XLOC_166117 | ENSRNOT00000074054  | 0.957796117  | 9.82E-07 |
| TUCP_003806 | XLOC_166117 | ENSRNOT00000068026  | -0.965211341 | 3.79E-07 |
| TUCP_003806 | XLOC_166117 | ENSRNOT00000026089  | 0.965801239  | 3.48E-07 |
| TUCP_003806 | XLOC_166117 | ENSRNOT00000085621  | 0.959515272  | 8.00E-07 |
| TUCP_003806 | XLOC_166117 | ENSRNOT00000014821  | -0.964301053 | 4.30E-07 |
| TUCP_003806 | XLOC_166117 | ENSRNOT00000058382  | 0.976562056  | 5.36E-08 |
| TUCP_003806 | XLOC_166117 | ENSRNOT00000008889  | -0.956970559 | 1.08E-06 |
| TUCP_003806 | XLOC_166117 | ENSRNOT00000055683  | 0.961871408  | 5.95E-07 |
| TUCP_003806 | XLOC_166117 | ENSRNOT00000005587  | -0.974821266 | 7.64E-08 |
| TUCP_003806 | XLOC_166117 | ENSRNOT00000017746  | -0.961534401 | 6.22E-07 |
| TUCP_003806 | XLOC_166117 | ENSRNOT00000043216  | 0.957965241  | 9.63E-07 |
| TUCP_003806 | XLOC_166117 | ENSRNOT00000023567  | -0.951311973 | 1.99E-06 |
| TUCP_003806 | XLOC_166117 | ENSRNOT00000026174  | 0.977039793  | 4.84E-08 |
| TUCP_003806 | XLOC_166117 | ENSRNOT00000005073  | 0.951679036  | 1.91E-06 |
| TUCP_003806 | XLOC_166117 | ENSRNOT00000065529  | 0.979106028  | 3.03E-08 |
| TUCP_003806 | XLOC_166117 | ENSRNOT00000073983  | 0.958336405  | 9.22E-07 |
| TUCP_003806 | XLOC_166117 | ENSRNOT00000000898  | 0.953932157  | 1.51E-06 |
| TUCP_003806 | XLOC_166117 | ENSRNOT00000013375  | -0.951092857 | 2.03E-06 |
| TUCP_003806 | XLOC_166117 | ENSRNOT00000081725  | 0.957274194  | 1.04E-06 |
| TUCP_003806 | XLOC_166117 | ENSRNOT00000005459  | 0.967354493  | 2.76E-07 |
| TUCP_003806 | XLOC_166117 | ENSRNOT00000009135  | 0.953781201  | 1.54E-06 |
| TUCP_003806 | XLOC_166117 | ENSRNOT00000027910  | 0.988186107  | 1.78E-09 |

|             |             |                     |              |          |
|-------------|-------------|---------------------|--------------|----------|
| TUCP_003806 | XLOC_166117 | ENSRNOT00000090262  | 0.958995397  | 8.52E-07 |
| TUCP_003806 | XLOC_166117 | ENSRNOT00000002771  | 0.956893933  | 1.09E-06 |
| TUCP_003806 | XLOC_166117 | ENSRNOT00000037015  | 0.964073305  | 4.44E-07 |
| TUCP_003806 | XLOC_166117 | ENSRNOT00000079442  | 0.957451675  | 1.02E-06 |
| TUCP_003806 | XLOC_166117 | ENSRNOT00000054976  | -0.950101114 | 2.24E-06 |
| TUCP_003806 | XLOC_166117 | ENSRNOT00000017765  | 0.965891443  | 3.43E-07 |
| TUCP_003806 | XLOC_166117 | ENSRNOT00000028885  | -0.961853267 | 5.97E-07 |
| TUCP_003806 | XLOC_166117 | ENSRNOT00000010783  | -0.953835663 | 1.53E-06 |
| TUCP_003806 | XLOC_166117 | ENSRNOT00000016372  | -0.952172189 | 1.82E-06 |
| TUCP_003806 | XLOC_166117 | ENSRNOT00000066032  | 0.972943665  | 1.09E-07 |
| TUCP_003806 | XLOC_166117 | ENSRNOT00000027616  | -0.956826407 | 1.10E-06 |
| TUCP_003806 | XLOC_166117 | ENSRNOT00000028876  | -0.96059669  | 7.00E-07 |
| TUCP_003806 | XLOC_166117 | ENSRNOT00000002510  | -0.950674602 | 2.12E-06 |
| TUCP_003806 | XLOC_166117 | ENSRNOT00000001783  | 0.964790259  | 4.02E-07 |
| TUCP_003806 | XLOC_166117 | ENSRNOT00000021145  | -0.955659523 | 1.25E-06 |
| TUCP_003806 | XLOC_166117 | ENSRNOT00000025314  | 0.953012832  | 1.67E-06 |
| TUCP_003806 | XLOC_166117 | ENSRNOT00000019040  | -0.952319055 | 1.79E-06 |
| TUCP_003806 | XLOC_166117 | ENSRNOT00000057313  | 0.951334221  | 1.98E-06 |
| TUCP_003806 | XLOC_166117 | ENSRNOT00000038212  | -0.9619726   | 5.87E-07 |
| TUCP_003806 | XLOC_166117 | ENSRNOT00000020809  | -0.956574137 | 1.13E-06 |
| TUCP_003806 | XLOC_166117 | ENSRNOT000000082151 | -0.962654703 | 5.37E-07 |
| TUCP_003806 | XLOC_166117 | ENSRNOT000000008982 | 0.975599079  | 6.54E-08 |
| TUCP_003806 | XLOC_166117 | ENSRNOT00000050138  | 0.971964274  | 1.30E-07 |
| TUCP_003806 | XLOC_166117 | ENSRNOT00000003359  | -0.971380428 | 1.44E-07 |
| TUCP_003806 | XLOC_166117 | ENSRNOT00000039607  | -0.951040234 | 2.04E-06 |
| TUCP_003806 | XLOC_166117 | ENSRNOT00000038511  | -0.960512907 | 7.08E-07 |
| TUCP_003806 | XLOC_166117 | ENSRNOT00000011984  | 0.966256965  | 3.26E-07 |
| TUCP_003806 | XLOC_166117 | ENSRNOT00000020669  | 0.951044634  | 2.04E-06 |
| TUCP_003806 | XLOC_166117 | ENSRNOT000000085971 | -0.953473901 | 1.59E-06 |
| TUCP_003806 | XLOC_166117 | ENSRNOT000000084069 | 0.953077486  | 1.66E-06 |
| TUCP_003806 | XLOC_166117 | ENSRNOT00000031230  | 0.957278973  | 1.04E-06 |
| TUCP_003806 | XLOC_166117 | ENSRNOT00000022142  | 0.956439321  | 1.15E-06 |
| TUCP_003806 | XLOC_166117 | ENSRNOT00000076300  | -0.961098569 | 6.57E-07 |
| TUCP_003806 | XLOC_166117 | ENSRNOT00000025086  | -0.968639606 | 2.27E-07 |
| TUCP_003806 | XLOC_166117 | ENSRNOT00000002292  | 0.956395747  | 1.15E-06 |
| TUCP_003806 | XLOC_166117 | ENSRNOT00000052120  | 0.958210641  | 9.36E-07 |
| TUCP_003806 | XLOC_166117 | ENSRNOT00000078306  | 0.953959444  | 1.51E-06 |
| TUCP_003806 | XLOC_166117 | ENSRNOT00000019820  | 0.977220997  | 4.65E-08 |
| TUCP_003806 | XLOC_166117 | ENSRNOT00000015946  | -0.952133826 | 1.83E-06 |
| TUCP_003806 | XLOC_166117 | ENSRNOT00000022461  | -0.951823677 | 1.88E-06 |
| TUCP_003806 | XLOC_166117 | ENSRNOT00000004172  | 0.962290106  | 5.64E-07 |
| TUCP_003806 | XLOC_166117 | ENSRNOT00000023965  | -0.957875928 | 9.73E-07 |
| TUCP_003806 | XLOC_166117 | ENSRNOT00000011694  | -0.950224119 | 2.21E-06 |
| TUCP_003806 | XLOC_166117 | ENSRNOT00000029125  | 0.973135861  | 1.05E-07 |
| TUCP_003806 | XLOC_166117 | ENSRNOT000000085279 | 0.965799316  | 3.48E-07 |
| TUCP_003806 | XLOC_166117 | ENSRNOT00000012528  | 0.971179627  | 1.49E-07 |
| TUCP_003806 | XLOC_166117 | ENSRNOT00000068184  | -0.96024563  | 7.31E-07 |
| TUCP_003806 | XLOC_166117 | ENSRNOT00000005389  | 0.95166113   | 1.92E-06 |
| TUCP_003806 | XLOC_166117 | ENSRNOT00000005387  | 0.956087681  | 1.19E-06 |
| TUCP_003806 | XLOC_166117 | ENSRNOT00000077888  | -0.95814982  | 9.42E-07 |
| TUCP_003806 | XLOC_166117 | ENSRNOT00000005381  | 0.955775553  | 1.24E-06 |

|             |             |                     |              |          |
|-------------|-------------|---------------------|--------------|----------|
| TUCP_003806 | XLOC_166117 | ENSRNOT00000015092  | 0.95286476   | 1.69E-06 |
| TUCP_003806 | XLOC_166117 | ENSRNOT00000028907  | 0.972602968  | 1.16E-07 |
| TUCP_003806 | XLOC_166117 | ENSRNOT00000083632  | -0.957010125 | 1.08E-06 |
| TUCP_003806 | XLOC_166117 | ENSRNOT00000010224  | 0.970508234  | 1.67E-07 |
| TUCP_003806 | XLOC_166117 | ENSRNOT00000025147  | 0.968264741  | 2.40E-07 |
| TUCP_003806 | XLOC_166117 | ENSRNOT00000087278  | -0.975436163 | 6.76E-08 |
| TUCP_003806 | XLOC_166117 | ENSRNOT00000007175  | 0.950431773  | 2.17E-06 |
| TUCP_003806 | XLOC_166117 | ENSRNOT00000025887  | -0.950859456 | 2.08E-06 |
| TUCP_003806 | XLOC_166117 | ENSRNOT00000078862  | 0.959984633  | 7.55E-07 |
| TUCP_003806 | XLOC_166117 | ENSRNOT00000005311  | 0.957210399  | 1.05E-06 |
| TUCP_003806 | XLOC_166117 | ENSRNOT00000017687  | -0.952681157 | 1.73E-06 |
| TUCP_003806 | XLOC_166117 | ENSRNOT00000015799  | 0.96013584   | 7.41E-07 |
| TUCP_003806 | XLOC_166117 | ENSRNOT00000047105  | 0.963265958  | 4.95E-07 |
| TUCP_003806 | XLOC_166117 | ENSRNOT000000031904 | 0.952663824  | 1.73E-06 |
| TUCP_003806 | XLOC_166117 | ENSRNOT000000039551 | -0.960024219 | 7.52E-07 |
| TUCP_003806 | XLOC_166117 | ENSRNOT00000082998  | 0.973671831  | 9.53E-08 |
| TUCP_003806 | XLOC_166117 | ENSRNOT00000015006  | 0.961969612  | 5.88E-07 |
| TUCP_003806 | XLOC_166117 | ENSRNOT00000007350  | 0.978885376  | 3.19E-08 |
| TUCP_003806 | XLOC_166117 | ENSRNOT00000007351  | -0.966040543 | 3.36E-07 |
| TUCP_003806 | XLOC_166117 | ENSRNOT00000018936  | -0.965715947 | 3.52E-07 |
| TUCP_003806 | XLOC_166117 | ENSRNOT00000083578  | 0.984959582  | 5.91E-09 |
| TUCP_003806 | XLOC_166117 | ENSRNOT00000020297  | 0.964999125  | 3.90E-07 |
| TUCP_003806 | XLOC_166117 | ENSRNOT00000023638  | 0.985981712  | 4.16E-09 |
| TUCP_003806 | XLOC_166117 | ENSRNOT00000022726  | 0.950723509  | 2.11E-06 |
| TUCP_003806 | XLOC_166117 | ENSRNOT00000005220  | 0.981322257  | 1.74E-08 |
| TUCP_003806 | XLOC_166117 | ENSRNOT00000023144  | 0.953302247  | 1.62E-06 |
| TUCP_003806 | XLOC_166117 | ENSRNOT00000045326  | 0.963386026  | 4.87E-07 |
| TUCP_003806 | XLOC_166117 | ENSRNOT00000016649  | 0.964513049  | 4.18E-07 |
| TUCP_003806 | XLOC_166117 | ENSRNOT00000074023  | 0.96772156   | 2.61E-07 |
| TUCP_003806 | XLOC_166117 | ENSRNOT00000009073  | -0.958565531 | 8.97E-07 |
| TUCP_003806 | XLOC_166117 | ENSRNOT00000067170  | -0.956578111 | 1.13E-06 |
| TUCP_003806 | XLOC_166117 | ENSRNOT00000048910  | -0.960373454 | 7.20E-07 |
| TUCP_003806 | XLOC_166117 | ENSRNOT00000018341  | -0.968285846 | 2.40E-07 |
| TUCP_003806 | XLOC_166117 | ENSRNOT00000065076  | 0.96584621   | 3.46E-07 |
| TUCP_003806 | XLOC_166117 | ENSRNOT00000014235  | 0.953015727  | 1.67E-06 |
| TUCP_003806 | XLOC_166117 | ENSRNOT00000013516  | 0.95748035   | 1.02E-06 |
| TUCP_003806 | XLOC_166117 | ENSRNOT00000028405  | -0.952239262 | 1.81E-06 |
| TUCP_003806 | XLOC_166117 | ENSRNOT00000013695  | -0.951728595 | 1.90E-06 |
| TUCP_003806 | XLOC_166117 | ENSRNOT00000088125  | 0.977794402  | 4.10E-08 |
| TUCP_003806 | XLOC_166117 | ENSRNOT00000012177  | -0.963038397 | 5.11E-07 |
| TUCP_003806 | XLOC_166117 | ENSRNOT00000080928  | 0.969667679  | 1.92E-07 |
| TUCP_003806 | XLOC_166117 | ENSRNOT00000027760  | 0.958369455  | 9.18E-07 |
| TUCP_003806 | XLOC_166117 | ENSRNOT00000024402  | 0.976066056  | 5.94E-08 |
| TUCP_003806 | XLOC_166117 | ENSRNOT00000089545  | -0.953669669 | 1.56E-06 |
| TUCP_003806 | XLOC_166117 | ENSRNOT00000019519  | 0.953190189  | 1.64E-06 |
| TUCP_003806 | XLOC_166117 | ENSRNOT00000089933  | 0.978594058  | 3.41E-08 |
| TUCP_003806 | XLOC_166117 | ENSRNOT00000077908  | 0.978452226  | 3.53E-08 |
| TUCP_003806 | XLOC_166117 | ENSRNOT00000003641  | 0.963298157  | 4.93E-07 |
| TUCP_003806 | XLOC_166117 | ENSRNOT00000026481  | 0.979531736  | 2.73E-08 |
| TUCP_003806 | XLOC_166117 | ENSRNOT00000010463  | 0.952297969  | 1.80E-06 |
| TUCP_003806 | XLOC_166117 | ENSRNOT00000084012  | 0.968263487  | 2.40E-07 |

|             |             |                    |              |          |
|-------------|-------------|--------------------|--------------|----------|
| TUCP_003806 | XLOC_166117 | ENSRNOT00000027232 | 0.961918204  | 5.92E-07 |
| TUCP_003806 | XLOC_166117 | ENSRNOT00000036931 | -0.964416162 | 4.23E-07 |
| TUCP_003806 | XLOC_166117 | ENSRNOT00000067822 | 0.96932478   | 2.03E-07 |
| TUCP_003806 | XLOC_166117 | ENSRNOT00000011832 | -0.965340021 | 3.72E-07 |
| TUCP_003806 | XLOC_166117 | ENSRNOT00000024066 | 0.959096004  | 8.42E-07 |
| TUCP_003806 | XLOC_166117 | ENSRNOT00000021030 | -0.951164264 | 2.01E-06 |
| TUCP_003806 | XLOC_166117 | ENSRNOT00000077727 | -0.980869657 | 1.95E-08 |
| TUCP_003806 | XLOC_166117 | ENSRNOT00000044346 | -0.965367104 | 3.70E-07 |
| TUCP_003806 | XLOC_166117 | ENSRNOT00000020197 | -0.965019001 | 3.89E-07 |
| TUCP_003806 | XLOC_166117 | ENSRNOT00000000203 | -0.952118125 | 1.83E-06 |
| TUCP_003806 | XLOC_166117 | ENSRNOT00000068745 | 0.96449652   | 4.19E-07 |
| TUCP_003806 | XLOC_166117 | ENSRNOT0000004032  | 0.962934288  | 5.18E-07 |
| TUCP_003806 | XLOC_166117 | ENSRNOT00000048613 | 0.985991019  | 4.15E-09 |
| TUCP_003806 | XLOC_166117 | ENSRNOT00000091909 | 0.992151819  | 2.31E-10 |
| TUCP_003806 | XLOC_166117 | ENSRNOT00000001081 | 0.966413393  | 3.18E-07 |
| TUCP_003806 | XLOC_166117 | ENSRNOT00000009563 | -0.957295756 | 1.04E-06 |
| TUCP_003806 | XLOC_166117 | ENSRNOT00000064535 | -0.979577078 | 2.70E-08 |
| TUCP_003806 | XLOC_166117 | ENSRNOT00000003544 | -0.966328978 | 3.22E-07 |
| TUCP_003806 | XLOC_166117 | ENSRNOT00000086119 | -0.970363599 | 1.71E-07 |
| TUCP_003806 | XLOC_166117 | ENSRNOT00000022190 | -0.973720635 | 9.45E-08 |
| TUCP_003806 | XLOC_166117 | ENSRNOT00000025913 | -0.968267277 | 2.40E-07 |
| TUCP_003806 | XLOC_166117 | ENSRNOT00000077220 | -0.964693204 | 4.07E-07 |
| TUCP_003806 | XLOC_166117 | ENSRNOT00000065983 | 0.963827793  | 4.59E-07 |
| TUCP_003806 | XLOC_166117 | ENSRNOT00000030782 | -0.961567868 | 6.19E-07 |
| TUCP_003806 | XLOC_166117 | ENSRNOT00000007882 | -0.959456313 | 8.06E-07 |
| TUCP_003806 | XLOC_166117 | ENSRNOT00000073919 | 0.968588485  | 2.28E-07 |
| TUCP_003806 | XLOC_166117 | ENSRNOT00000067780 | -0.981257603 | 1.77E-08 |
| TUCP_003806 | XLOC_166117 | ENSRNOT00000086577 | 0.957550572  | 1.01E-06 |
| TUCP_003806 | XLOC_166117 | ENSRNOT00000025966 | 0.9574605    | 1.02E-06 |
| TUCP_003806 | XLOC_166117 | ENSRNOT00000073910 | -0.956695149 | 1.12E-06 |
| TUCP_003806 | XLOC_166117 | ENSRNOT00000086590 | 0.974323735  | 8.42E-08 |
| TUCP_003806 | XLOC_166117 | ENSRNOT00000034883 | -0.96737204  | 2.76E-07 |
| TUCP_003806 | XLOC_166117 | ENSRNOT00000020155 | 0.957809177  | 9.81E-07 |
| TUCP_003806 | XLOC_166117 | ENSRNOT00000072357 | -0.975927919 | 6.11E-08 |
| TUCP_003806 | XLOC_166117 | ENSRNOT00000017629 | 0.955723139  | 1.24E-06 |
| TUCP_003806 | XLOC_166117 | ENSRNOT00000087011 | -0.961130185 | 6.55E-07 |
| TUCP_003806 | XLOC_166117 | ENSRNOT00000005910 | -0.962290253 | 5.64E-07 |
| TUCP_003806 | XLOC_166117 | ENSRNOT00000013260 | 0.953250047  | 1.63E-06 |
| TUCP_003806 | XLOC_166117 | ENSRNOT00000076485 | -0.971752171 | 1.35E-07 |
| TUCP_003806 | XLOC_166117 | ENSRNOT00000005664 | 0.954951054  | 1.35E-06 |
| TUCP_003806 | XLOC_166117 | ENSRNOT00000078475 | 0.987013417  | 2.85E-09 |
| TUCP_003806 | XLOC_166117 | ENSRNOT00000040169 | 0.969870594  | 1.86E-07 |
| TUCP_003806 | XLOC_166117 | ENSRNOT00000026249 | -0.953209319 | 1.63E-06 |
| TUCP_003806 | XLOC_166117 | ENSRNOT00000036051 | 0.952931746  | 1.68E-06 |
| TUCP_003806 | XLOC_166117 | ENSRNOT00000016722 | 0.98209504   | 1.41E-08 |
| TUCP_003806 | XLOC_166117 | ENSRNOT00000073526 | 0.970622847  | 1.64E-07 |
| TUCP_003806 | XLOC_166117 | ENSRNOT00000089970 | 0.955581854  | 1.26E-06 |
| TUCP_003806 | XLOC_166117 | ENSRNOT00000000013 | 0.975967357  | 6.06E-08 |
| TUCP_003806 | XLOC_166117 | ENSRNOT00000080591 | 0.95102183   | 2.04E-06 |
| TUCP_003806 | XLOC_166117 | ENSRNOT00000025523 | 0.962829486  | 5.25E-07 |
| TUCP_003806 | XLOC_166117 | ENSRNOT00000005161 | 0.978265842  | 3.68E-08 |

|             |             |                    |              |          |
|-------------|-------------|--------------------|--------------|----------|
| TUCP_003806 | XLOC_166117 | ENSRNOT00000037955 | -0.961415792 | 6.31E-07 |
| TUCP_003806 | XLOC_166117 | ENSRNOT00000055582 | 0.961369401  | 6.35E-07 |
| TUCP_003806 | XLOC_166117 | ENSRNOT00000022074 | 0.952846008  | 1.70E-06 |
| TUCP_003806 | XLOC_166117 | ENSRNOT00000016220 | -0.95091933  | 2.07E-06 |
| TUCP_003806 | XLOC_166117 | ENSRNOT00000037790 | 0.965006112  | 3.90E-07 |
| TUCP_003806 | XLOC_166117 | ENSRNOT00000004999 | 0.976358408  | 5.59E-08 |
| TUCP_003806 | XLOC_166117 | ENSRNOT00000009122 | 0.964490267  | 4.19E-07 |
| TUCP_003806 | XLOC_166117 | ENSRNOT00000013463 | 0.955228827  | 1.31E-06 |
| TUCP_003806 | XLOC_166117 | ENSRNOT00000088054 | 0.979758149  | 2.59E-08 |
| TUCP_003806 | XLOC_166117 | ENSRNOT00000019554 | 0.957831438  | 9.78E-07 |
| TUCP_003806 | XLOC_166117 | ENSRNOT00000047663 | -0.962055656 | 5.81E-07 |
| TUCP_003806 | XLOC_166117 | ENSRNOT00000035700 | 0.952254101  | 1.80E-06 |
| TUCP_003806 | XLOC_166117 | ENSRNOT00000029202 | -0.97802056  | 3.89E-08 |
| TUCP_003806 | XLOC_166117 | ENSRNOT00000025791 | -0.965513066 | 3.63E-07 |
| TUCP_003806 | XLOC_166117 | ENSRNOT00000005489 | 0.982269892  | 1.34E-08 |
| TUCP_003806 | XLOC_166117 | ENSRNOT00000025794 | -0.958794094 | 8.73E-07 |
| TUCP_003806 | XLOC_166117 | ENSRNOT00000060494 | 0.951241613  | 2.00E-06 |
| TUCP_003806 | XLOC_166117 | ENSRNOT00000058111 | -0.956262319 | 1.17E-06 |
| TUCP_003806 | XLOC_166117 | ENSRNOT00000084422 | 0.957641314  | 1.00E-06 |
| TUCP_003806 | XLOC_166117 | ENSRNOT00000050834 | -0.961012219 | 6.64E-07 |
| TUCP_003806 | XLOC_166117 | ENSRNOT00000088279 | 0.970799174  | 1.59E-07 |
| TUCP_003806 | XLOC_166117 | ENSRNOT00000009994 | -0.958154808 | 9.42E-07 |
| TUCP_003806 | XLOC_166117 | ENSRNOT00000013759 | -0.953903828 | 1.52E-06 |
| TUCP_003806 | XLOC_166117 | ENSRNOT00000012736 | 0.963749629  | 4.64E-07 |
| TUCP_003806 | XLOC_166117 | ENSRNOT00000077367 | -0.957531517 | 1.01E-06 |
| TUCP_003806 | XLOC_166117 | ENSRNOT00000002445 | -0.950564969 | 2.14E-06 |
| TUCP_003806 | XLOC_166117 | ENSRNOT00000024841 | -0.959913355 | 7.62E-07 |
| TUCP_003806 | XLOC_166117 | ENSRNOT00000009462 | 0.959966893  | 7.57E-07 |
| TUCP_003806 | XLOC_166117 | ENSRNOT00000009345 | -0.95650603  | 1.14E-06 |
| TUCP_003806 | XLOC_166117 | ENSRNOT00000027875 | 0.957599718  | 1.00E-06 |
| TUCP_003806 | XLOC_166117 | ENSRNOT00000079011 | -0.955583084 | 1.26E-06 |
| TUCP_003806 | XLOC_166117 | ENSRNOT00000018074 | -0.984889692 | 6.05E-09 |
| TUCP_003806 | XLOC_166117 | ENSRNOT00000037679 | 0.967828587  | 2.57E-07 |
| TUCP_003806 | XLOC_166117 | ENSRNOT00000014124 | 0.968234772  | 2.41E-07 |
| TUCP_003806 | XLOC_166117 | ENSRNOT00000043581 | -0.963662175 | 4.69E-07 |
| TUCP_003806 | XLOC_166117 | ENSRNOT00000000120 | 0.971118075  | 1.51E-07 |
| TUCP_003806 | XLOC_166117 | ENSRNOT00000013632 | 0.967541912  | 2.69E-07 |
| TUCP_003806 | XLOC_166117 | ENSRNOT00000078906 | -0.966519086 | 3.13E-07 |
| TUCP_003806 | XLOC_166117 | ENSRNOT00000010418 | 0.971782212  | 1.34E-07 |
| TUCP_003806 | XLOC_166117 | ENSRNOT00000084049 | 0.957784264  | 9.84E-07 |
| TUCP_003806 | XLOC_166117 | ENSRNOT00000009900 | -0.960933693 | 6.71E-07 |
| TUCP_003806 | XLOC_166117 | ENSRNOT00000085060 | 0.962137999  | 5.75E-07 |
| TUCP_003806 | XLOC_166117 | ENSRNOT00000066561 | -0.953572544 | 1.57E-06 |
| TUCP_003806 | XLOC_166117 | ENSRNOT00000019172 | -0.96435727  | 4.27E-07 |
| TUCP_003806 | XLOC_166117 | ENSRNOT00000064798 | 0.955818907  | 1.23E-06 |
| TUCP_003806 | XLOC_166117 | ENSRNOT00000015495 | -0.980493784 | 2.15E-08 |
| TUCP_003806 | XLOC_166117 | ENSRNOT00000032244 | 0.957831998  | 9.78E-07 |
| TUCP_003806 | XLOC_166117 | ENSRNOT00000019910 | -0.959760281 | 7.77E-07 |
| TUCP_003806 | XLOC_166117 | ENSRNOT00000040393 | 0.98375696   | 8.67E-09 |
| TUCP_003806 | XLOC_166117 | ENSRNOT00000025097 | 0.960964201  | 6.68E-07 |
| TUCP_003806 | XLOC_166117 | ENSRNOT00000067901 | -0.970159941 | 1.77E-07 |



|             |             |                     |              |          |
|-------------|-------------|---------------------|--------------|----------|
| TUCP_003806 | XLOC_166117 | ENSRNOT00000036750  | 0.964981748  | 3.91E-07 |
| TUCP_003806 | XLOC_166117 | ENSRNOT00000024659  | 0.952924748  | 1.68E-06 |
| TUCP_003806 | XLOC_166117 | ENSRNOT00000011511  | -0.951718723 | 1.90E-06 |
| TUCP_003806 | XLOC_166117 | ENSRNOT00000021674  | 0.984956952  | 5.92E-09 |
| TUCP_003806 | XLOC_166117 | ENSRNOT00000064700  | 0.961619863  | 6.15E-07 |
| TUCP_003806 | XLOC_166117 | ENSRNOT00000036613  | -0.977659636 | 4.22E-08 |
| TUCP_003806 | XLOC_166117 | ENSRNOT00000083127  | 0.961474181  | 6.26E-07 |
| TUCP_003806 | XLOC_166117 | ENSRNOT00000025705  | 0.984433701  | 7.01E-09 |
| TUCP_003806 | XLOC_166117 | ENSRNOT00000015479  | 0.968541142  | 2.30E-07 |
| TUCP_003806 | XLOC_166117 | ENSRNOT00000004140  | 0.977814295  | 4.08E-08 |
| TUCP_003806 | XLOC_166117 | ENSRNOT00000008113  | -0.970771629 | 1.60E-07 |
| TUCP_003806 | XLOC_166117 | ENSRNOT00000022552  | -0.952059102 | 1.84E-06 |
| TUCP_003806 | XLOC_166117 | ENSRNOT00000036195  | -0.951400443 | 1.97E-06 |
| TUCP_003806 | XLOC_166117 | ENSRNOT00000009763  | -0.952994299 | 1.67E-06 |
| TUCP_003806 | XLOC_166117 | ENSRNOT00000007698  | -0.961588334 | 6.17E-07 |
| TUCP_003806 | XLOC_166117 | ENSRNOT00000016306  | -0.965277519 | 3.75E-07 |
| TUCP_003806 | XLOC_166117 | ENSRNOT00000019213  | 0.976595432  | 5.32E-08 |
| TUCP_003806 | XLOC_166117 | ENSRNOT00000020051  | 0.962276239  | 5.65E-07 |
| TUCP_003806 | XLOC_166117 | ENSRNOT00000087062  | 0.954121913  | 1.48E-06 |
| TUCP_003806 | XLOC_166117 | ENSRNOT00000015678  | -0.961246826 | 6.45E-07 |
| TUCP_003806 | XLOC_166117 | ENSRNOT00000082508  | -0.956397017 | 1.15E-06 |
| TUCP_003806 | XLOC_166117 | ENSRNOT00000073193  | -0.959410312 | 8.10E-07 |
| TUCP_003806 | XLOC_166117 | ENSRNOT00000082863  | 0.957327947  | 1.04E-06 |
| TUCP_003806 | XLOC_166117 | ENSRNOT00000049459  | -0.975670007 | 6.45E-08 |
| TUCP_003806 | XLOC_166117 | ENSRNOT00000065947  | 0.9750945    | 7.24E-08 |
| TUCP_003806 | XLOC_166117 | ENSRNOT00000071166  | 0.954862817  | 1.37E-06 |
| TUCP_003806 | XLOC_166117 | ENSRNOT00000084567  | 0.951378944  | 1.97E-06 |
| TUCP_003806 | XLOC_166117 | ENSRNOT00000001118  | 0.983959237  | 8.14E-09 |
| TUCP_003806 | XLOC_166117 | ENSRNOT000000091596 | -0.958601489 | 8.93E-07 |
| TUCP_003806 | XLOC_166117 | ENSRNOT00000043345  | 0.963463827  | 4.82E-07 |
| TUCP_003806 | XLOC_166117 | ENSRNOT00000090461  | 0.953280151  | 1.62E-06 |
| TUCP_003806 | XLOC_166117 | ENSRNOT00000015073  | 0.957154326  | 1.06E-06 |
| TUCP_003806 | XLOC_166117 | ENSRNOT00000001507  | 0.99055412   | 5.83E-10 |
| TUCP_003806 | XLOC_166117 | ENSRNOT00000066947  | -0.95073976  | 2.10E-06 |
| TUCP_003806 | XLOC_166117 | ENSRNOT00000083568  | 0.974075493  | 8.83E-08 |
| TUCP_003806 | XLOC_166117 | ENSRNOT00000018584  | 0.961031932  | 6.63E-07 |
| TUCP_003806 | XLOC_166117 | ENSRNOT00000039177  | -0.965896145 | 3.43E-07 |
| TUCP_003806 | XLOC_166117 | ENSRNOT00000081047  | 0.958856408  | 8.66E-07 |
| TUCP_003806 | XLOC_166117 | ENSRNOT00000017271  | 0.96116637   | 6.52E-07 |
| TUCP_003806 | XLOC_166117 | ENSRNOT00000004486  | 0.956437071  | 1.15E-06 |
| TUCP_003806 | XLOC_166117 | ENSRNOT00000022676  | -0.955560963 | 1.27E-06 |
| TUCP_003806 | XLOC_166117 | ENSRNOT00000037456  | 0.974958662  | 7.44E-08 |
| TUCP_003806 | XLOC_166117 | ENSRNOT00000030082  | 0.951078469  | 2.03E-06 |
| TUCP_003806 | XLOC_166117 | ENSRNOT00000025517  | 0.965013233  | 3.89E-07 |
| TUCP_003806 | XLOC_166117 | ENSRNOT00000025510  | -0.962366864 | 5.58E-07 |
| TUCP_003806 | XLOC_166117 | ENSRNOT00000000577  | 0.952223577  | 1.81E-06 |
| TUCP_003806 | XLOC_166117 | ENSRNOT00000011499  | -0.952470438 | 1.76E-06 |
| TUCP_003806 | XLOC_166117 | ENSRNOT00000075424  | 0.980135983  | 2.36E-08 |
| TUCP_003806 | XLOC_166117 | ENSRNOT00000065045  | 0.975062076  | 7.28E-08 |
| TUCP_003806 | XLOC_166117 | ENSRNOT00000013176  | -0.951716379 | 1.91E-06 |
| TUCP_003806 | XLOC_166117 | ENSRNOT00000023989  | 0.963852165  | 4.57E-07 |

|             |             |                    |              |          |
|-------------|-------------|--------------------|--------------|----------|
| TUCP_003806 | XLOC_166117 | ENSRNOT00000088133 | -0.951528241 | 1.94E-06 |
| TUCP_003806 | XLOC_166117 | ENSRNOT00000080677 | -0.952582636 | 1.74E-06 |
| TUCP_003806 | XLOC_166117 | ENSRNOT00000046490 | -0.953746326 | 1.54E-06 |
| TUCP_003806 | XLOC_166117 | ENSRNOT00000033677 | -0.972644333 | 1.15E-07 |
| TUCP_003806 | XLOC_166117 | ENSRNOT00000083968 | -0.951608828 | 1.93E-06 |
| TUCP_003806 | XLOC_166117 | ENSRNOT00000037133 | 0.954038756  | 1.50E-06 |
| TUCP_003806 | XLOC_166117 | ENSRNOT00000034298 | 0.963322342  | 4.91E-07 |
| TUCP_003806 | XLOC_166117 | ENSRNOT00000026726 | -0.950893195 | 2.07E-06 |
| TUCP_003806 | XLOC_166117 | ENSRNOT00000009342 | 0.95494991   | 1.35E-06 |
| TUCP_003806 | XLOC_166117 | ENSRNOT00000026831 | 0.954694634  | 1.39E-06 |
| TUCP_003806 | XLOC_166117 | ENSRNOT00000074985 | -0.95075017  | 2.10E-06 |
| TUCP_003806 | XLOC_166117 | ENSRNOT00000020892 | -0.950427098 | 2.17E-06 |
| TUCP_003806 | XLOC_166117 | ENSRNOT00000016445 | 0.961881705  | 5.94E-07 |
| TUCP_003806 | XLOC_166117 | ENSRNOT00000011898 | -0.953375445 | 1.60E-06 |
| TUCP_003806 | XLOC_166117 | ENSRNOT00000019133 | 0.954173133  | 1.47E-06 |
| TUCP_003806 | XLOC_166117 | ENSRNOT00000011956 | 0.959317611  | 8.20E-07 |
| TUCP_003806 | XLOC_166117 | ENSRNOT00000078185 | -0.952347116 | 1.79E-06 |
| TUCP_003806 | XLOC_166117 | ENSRNOT00000024119 | 0.971668014  | 1.37E-07 |
| TUCP_003806 | XLOC_166117 | ENSRNOT00000075800 | -0.954019886 | 1.50E-06 |
| TUCP_003806 | XLOC_166117 | ENSRNOT00000006824 | -0.972672826 | 1.15E-07 |
| TUCP_003806 | XLOC_166117 | ENSRNOT00000088509 | 0.966122534  | 3.32E-07 |
| TUCP_003806 | XLOC_166117 | ENSRNOT00000086260 | -0.9577163   | 9.91E-07 |
| TUCP_003806 | XLOC_166117 | ENSRNOT00000009811 | 0.969438108  | 1.99E-07 |
| TUCP_003806 | XLOC_166117 | ENSRNOT00000010683 | -0.959534571 | 7.98E-07 |
| TUCP_003806 | XLOC_166117 | ENSRNOT00000045488 | 0.981269075  | 1.76E-08 |
| TUCP_003806 | XLOC_166117 | ENSRNOT00000090853 | -0.953133013 | 1.65E-06 |
| TUCP_003806 | XLOC_166117 | ENSRNOT00000020316 | -0.954264645 | 1.46E-06 |
| TUCP_003806 | XLOC_166117 | ENSRNOT00000020648 | 0.951332251  | 1.98E-06 |
| TUCP_003806 | XLOC_166117 | ENSRNOT00000036666 | 0.964290743  | 4.31E-07 |
| TUCP_003806 | XLOC_166117 | ENSRNOT00000089211 | 0.974736739  | 7.77E-08 |
| TUCP_003806 | XLOC_166117 | ENSRNOT00000020383 | 0.988445239  | 1.59E-09 |
| TUCP_003806 | XLOC_166117 | ENSRNOT00000015518 | -0.965468452 | 3.65E-07 |
| TUCP_003806 | XLOC_166117 | ENSRNOT00000000302 | 0.98338429   | 9.70E-09 |
| TUCP_003806 | XLOC_166117 | ENSRNOT00000030706 | -0.951797835 | 1.89E-06 |
| TUCP_003806 | XLOC_166117 | ENSRNOT00000087502 | 0.96209585   | 5.78E-07 |
| TUCP_003806 | XLOC_166117 | ENSRNOT00000041106 | 0.958641808  | 8.89E-07 |
| TUCP_003806 | XLOC_166117 | ENSRNOT00000012424 | 0.960226961  | 7.33E-07 |
| TUCP_003806 | XLOC_166117 | ENSRNOT00000000658 | 0.963975939  | 4.50E-07 |
| TUCP_003806 | XLOC_166117 | ENSRNOT00000065229 | 0.950114453  | 2.24E-06 |
| TUCP_003806 | XLOC_166117 | ENSRNOT00000000717 | -0.966313793 | 3.23E-07 |
| TUCP_003806 | XLOC_166117 | ENSRNOT00000005909 | 0.963130239  | 5.04E-07 |
| TUCP_003806 | XLOC_166117 | ENSRNOT00000049048 | -0.9556626   | 1.25E-06 |
| TUCP_003806 | XLOC_166117 | ENSRNOT00000086122 | 0.977281664  | 4.59E-08 |
| TUCP_003806 | XLOC_166117 | ENSRNOT00000007091 | 0.958370591  | 9.18E-07 |
| TUCP_003806 | XLOC_166117 | ENSRNOT00000088628 | 0.956670977  | 1.12E-06 |
| TUCP_003806 | XLOC_166117 | ENSRNOT00000023763 | -0.963647515 | 4.70E-07 |
| TUCP_003806 | XLOC_166117 | ENSRNOT00000003940 | -0.959421505 | 8.09E-07 |
| TUCP_003806 | XLOC_166117 | ENSRNOT00000042799 | 0.967962818  | 2.52E-07 |
| TUCP_003806 | XLOC_166117 | ENSRNOT00000010993 | 0.961323584  | 6.39E-07 |
| TUCP_003806 | XLOC_166117 | ENSRNOT00000059181 | 0.961107386  | 6.56E-07 |
| TUCP_003806 | XLOC_166117 | ENSRNOT00000017291 | -0.96400713  | 4.48E-07 |

|             |             |                     |              |          |
|-------------|-------------|---------------------|--------------|----------|
| TUCP_003806 | XLOC_166117 | ENSRNOT00000003691  | -0.962870623 | 5.22E-07 |
| TUCP_003806 | XLOC_166117 | ENSRNOT000000081678 | 0.96165351   | 6.12E-07 |
| TUCP_003806 | XLOC_166117 | ENSRNOT00000008901  | -0.950459546 | 2.16E-06 |
| TUCP_003806 | XLOC_166117 | ENSRNOT000000081621 | 0.956838849  | 1.10E-06 |
| TUCP_003806 | XLOC_166117 | ENSRNOT00000005659  | 0.971013841  | 1.53E-07 |
| TUCP_003806 | XLOC_166117 | ENSRNOT000000081077 | -0.963799052 | 4.61E-07 |
| TUCP_003806 | XLOC_166117 | ENSRNOT00000017761  | 0.98768936   | 2.18E-09 |
| TUCP_003806 | XLOC_166117 | ENSRNOT00000023543  | -0.978391311 | 3.58E-08 |
| TUCP_003806 | XLOC_166117 | ENSRNOT00000039341  | 0.966284153  | 3.24E-07 |
| TUCP_003806 | XLOC_166117 | ENSRNOT000000085517 | 0.961798023  | 6.01E-07 |
| TUCP_003806 | XLOC_166117 | ENSRNOT000000085458 | -0.963723522 | 4.66E-07 |
| TUCP_003806 | XLOC_166117 | ENSRNOT00000037405  | 0.965300725  | 3.74E-07 |
| TUCP_003806 | XLOC_166117 | ENSRNOT00000014605  | -0.950772931 | 2.10E-06 |
| TUCP_003806 | XLOC_166117 | ENSRNOT000000085519 | 0.953740753  | 1.54E-06 |
| TUCP_003806 | XLOC_166117 | ENSRNOT000000082174 | 0.957696111  | 9.94E-07 |
| TUCP_003806 | XLOC_166117 | ENSRNOT00000042125  | 0.96493585   | 3.94E-07 |
| TUCP_003806 | XLOC_166117 | ENSRNOT00000025460  | 0.967584254  | 2.67E-07 |
| TUCP_003806 | XLOC_166117 | ENSRNOT000000087033 | -0.970695243 | 1.62E-07 |
| TUCP_003806 | XLOC_166117 | ENSRNOT00000010541  | 0.955847378  | 1.23E-06 |
| TUCP_003806 | XLOC_166117 | ENSRNOT00000026760  | -0.983327226 | 9.87E-09 |
| TUCP_003806 | XLOC_166117 | ENSRNOT00000001322  | -0.962381908 | 5.57E-07 |
| TUCP_003806 | XLOC_166117 | ENSRNOT00000024491  | -0.957382672 | 1.03E-06 |
| TUCP_003806 | XLOC_166117 | ENSRNOT000000084597 | -0.957862006 | 9.75E-07 |
| TUCP_003806 | XLOC_166117 | ENSRNOT00000016568  | 0.957238377  | 1.05E-06 |
| TUCP_003806 | XLOC_166117 | ENSRNOT00000037588  | -0.956930179 | 1.09E-06 |
| TUCP_003806 | XLOC_166117 | ENSRNOT000000067503 | 0.961273499  | 6.43E-07 |
| TUCP_003806 | XLOC_166117 | ENSRNOT00000023388  | -0.961356015 | 6.36E-07 |
| TUCP_003806 | XLOC_166117 | ENSRNOT000000064930 | 0.96386843   | 4.56E-07 |
| TUCP_003806 | XLOC_166117 | ENSRNOT00000027964  | 0.956845407  | 1.10E-06 |
| TUCP_003806 | XLOC_166117 | ENSRNOT00000027967  | 0.95790154   | 9.70E-07 |
| TUCP_003806 | XLOC_166117 | ENSRNOT00000024938  | -0.957860093 | 9.75E-07 |
| TUCP_003806 | XLOC_166117 | ENSRNOT000000081796 | 0.966064426  | 3.35E-07 |
| TUCP_003806 | XLOC_166117 | ENSRNOT00000002053  | -0.957155061 | 1.06E-06 |
| TUCP_003806 | XLOC_166117 | ENSRNOT00000024933  | -0.954400545 | 1.44E-06 |
| TUCP_003806 | XLOC_166117 | ENSRNOT00000047210  | 0.982431772  | 1.28E-08 |
| TUCP_003806 | XLOC_166117 | ENSRNOT000000083957 | 0.950152719  | 2.23E-06 |
| TUCP_003806 | XLOC_166117 | ENSRNOT00000046639  | 0.969906115  | 1.85E-07 |
| TUCP_003806 | XLOC_166117 | ENSRNOT00000070886  | -0.951654332 | 1.92E-06 |
| TUCP_003806 | XLOC_166117 | ENSRNOT00000079996  | 0.968926132  | 2.17E-07 |
| TUCP_001087 | XLOC_041374 | ENSRNOT000000080945 | 0.966518498  | 3.13E-07 |
| TUCP_001087 | XLOC_041374 | ENSRNOT00000016804  | 0.954390883  | 1.44E-06 |
| TUCP_001086 | XLOC_041371 | ENSRNOT000000074810 | 0.966779959  | 3.01E-07 |
| TUCP_001086 | XLOC_041371 | ENSRNOT00000077331  | 0.958676202  | 8.85E-07 |
| TUCP_001086 | XLOC_041371 | ENSRNOT00000005505  | 0.959154454  | 8.36E-07 |
| TUCP_001086 | XLOC_041371 | ENSRNOT00000000697  | 0.959281251  | 8.23E-07 |
| TUCP_001086 | XLOC_041371 | ENSRNOT00000056558  | 0.956676961  | 1.12E-06 |
| TUCP_001086 | XLOC_041371 | ENSRNOT00000023623  | 0.969816579  | 1.88E-07 |
| TUCP_001086 | XLOC_041371 | ENSRNOT00000026757  | 0.950884814  | 2.07E-06 |
| TUCP_001086 | XLOC_041371 | ENSRNOT00000009975  | 0.956362657  | 1.16E-06 |
| TUCP_001086 | XLOC_041371 | ENSRNOT00000072682  | 0.951292994  | 1.99E-06 |
| TUCP_001086 | XLOC_041371 | ENSRNOT00000075144  | 0.964373716  | 4.26E-07 |

|             |             |                    |              |          |
|-------------|-------------|--------------------|--------------|----------|
| TUCP_001086 | XLOC_041371 | ENSRNOT00000022585 | 0.951906011  | 1.87E-06 |
| TUCP_001086 | XLOC_041371 | ENSRNOT00000041533 | 0.961324247  | 6.39E-07 |
| TUCP_001086 | XLOC_041371 | ENSRNOT00000047763 | 0.951005367  | 2.05E-06 |
| TUCP_001086 | XLOC_041371 | ENSRNOT00000023661 | 0.964290293  | 4.31E-07 |
| TUCP_001086 | XLOC_041371 | ENSRNOT00000091367 | 0.950548812  | 2.14E-06 |
| TUCP_001086 | XLOC_041371 | ENSRNOT00000054963 | 0.960229705  | 7.33E-07 |
| TUCP_001086 | XLOC_041371 | ENSRNOT00000079882 | 0.963531254  | 4.78E-07 |
| TUCP_001085 | XLOC_041370 | ENSRNOT0000004602  | 0.966364439  | 3.20E-07 |
| TUCP_001085 | XLOC_041370 | ENSRNOT00000022585 | 0.963327761  | 4.91E-07 |
| TUCP_002344 | XLOC_097822 | ENSRNOT00000077771 | 0.995375996  | 1.65E-11 |
| TUCP_002344 | XLOC_097822 | ENSRNOT00000071462 | -0.957776043 | 9.85E-07 |
| TUCP_001081 | XLOC_041191 | ENSRNOT0000001215  | 0.95720611   | 1.05E-06 |
| TUCP_001081 | XLOC_041191 | ENSRNOT00000006188 | -0.962448913 | 5.52E-07 |
| TUCP_001081 | XLOC_041191 | ENSRNOT00000006186 | 0.968955739  | 2.16E-07 |
| TUCP_001081 | XLOC_041191 | ENSRNOT00000026941 | 0.970344649  | 1.72E-07 |
| TUCP_001081 | XLOC_041191 | ENSRNOT00000075397 | 0.974058133  | 8.86E-08 |
| TUCP_001081 | XLOC_041191 | ENSRNOT00000032926 | -0.954679544 | 1.40E-06 |
| TUCP_001081 | XLOC_041191 | ENSRNOT00000019104 | -0.967827348 | 2.57E-07 |
| TUCP_001081 | XLOC_041191 | ENSRNOT00000021348 | 0.96217115   | 5.73E-07 |
| TUCP_001081 | XLOC_041191 | ENSRNOT00000073559 | 0.95993889   | 7.60E-07 |
| TUCP_001081 | XLOC_041191 | ENSRNOT00000003891 | 0.950057759  | 2.25E-06 |
| TUCP_001081 | XLOC_041191 | ENSRNOT00000068353 | 0.951628182  | 1.92E-06 |
| TUCP_001081 | XLOC_041191 | ENSRNOT00000001691 | 0.957858264  | 9.75E-07 |
| TUCP_001081 | XLOC_041191 | ENSRNOT00000020910 | 0.95742665   | 1.03E-06 |
| TUCP_001081 | XLOC_041191 | ENSRNOT00000086706 | 0.964747498  | 4.04E-07 |
| TUCP_001081 | XLOC_041191 | ENSRNOT00000004017 | 0.953511489  | 1.58E-06 |
| TUCP_001081 | XLOC_041191 | ENSRNOT00000086310 | -0.969635417 | 1.93E-07 |
| TUCP_001081 | XLOC_041191 | ENSRNOT00000010030 | -0.952098733 | 1.83E-06 |
| TUCP_001081 | XLOC_041191 | ENSRNOT00000028856 | 0.952377508  | 1.78E-06 |
| TUCP_001081 | XLOC_041191 | ENSRNOT00000000743 | 0.951776002  | 1.89E-06 |
| TUCP_001081 | XLOC_041191 | ENSRNOT00000052063 | 0.97211377   | 1.27E-07 |
| TUCP_001081 | XLOC_041191 | ENSRNOT00000030850 | 0.974056058  | 8.86E-08 |
| TUCP_001081 | XLOC_041191 | ENSRNOT00000033017 | 0.973137547  | 1.05E-07 |
| TUCP_001081 | XLOC_041191 | ENSRNOT00000055540 | 0.958254695  | 9.31E-07 |
| TUCP_001081 | XLOC_041191 | ENSRNOT00000066370 | 0.952524444  | 1.75E-06 |
| TUCP_001081 | XLOC_041191 | ENSRNOT00000006752 | 0.958163403  | 9.41E-07 |
| TUCP_001081 | XLOC_041191 | ENSRNOT00000021534 | -0.957132597 | 1.06E-06 |
| TUCP_001081 | XLOC_041191 | ENSRNOT00000085251 | -0.962220423 | 5.69E-07 |
| TUCP_001081 | XLOC_041191 | ENSRNOT00000072771 | 0.960869303  | 6.77E-07 |
| TUCP_001081 | XLOC_041191 | ENSRNOT00000073370 | 0.956082961  | 1.19E-06 |
| TUCP_001081 | XLOC_041191 | ENSRNOT00000065300 | 0.975179435  | 7.12E-08 |
| TUCP_001081 | XLOC_041191 | ENSRNOT00000044742 | 0.956059258  | 1.20E-06 |
| TUCP_001081 | XLOC_041191 | ENSRNOT00000045699 | 0.959373499  | 8.14E-07 |
| TUCP_001081 | XLOC_041191 | ENSRNOT00000029439 | 0.953403729  | 1.60E-06 |
| TUCP_001081 | XLOC_041191 | ENSRNOT00000035320 | -0.96303598  | 5.11E-07 |
| TUCP_001081 | XLOC_041191 | ENSRNOT00000035989 | 0.955308326  | 1.30E-06 |
| TUCP_001081 | XLOC_041191 | ENSRNOT00000057160 | 0.968375961  | 2.36E-07 |
| TUCP_001081 | XLOC_041191 | ENSRNOT00000091448 | -0.966440697 | 3.17E-07 |
| TUCP_001081 | XLOC_041191 | ENSRNOT00000077999 | 0.973621732  | 9.62E-08 |
| TUCP_001081 | XLOC_041191 | ENSRNOT00000068134 | 0.952376047  | 1.78E-06 |
| TUCP_001081 | XLOC_041191 | ENSRNOT00000026398 | -0.95456747  | 1.41E-06 |

|             |             |                     |              |          |
|-------------|-------------|---------------------|--------------|----------|
| TUCP_001081 | XLOC_041191 | ENSRNOT00000003146  | -0.950537186 | 2.15E-06 |
| TUCP_001081 | XLOC_041191 | ENSRNOT000000083214 | 0.953785444  | 1.54E-06 |
| TUCP_001081 | XLOC_041191 | ENSRNOT000000085228 | 0.975749197  | 6.34E-08 |
| TUCP_001081 | XLOC_041191 | ENSRNOT000000020134 | 0.953415438  | 1.60E-06 |
| TUCP_001081 | XLOC_041191 | ENSRNOT000000017319 | 0.951230609  | 2.00E-06 |
| TUCP_001081 | XLOC_041191 | ENSRNOT000000015188 | 0.962014525  | 5.84E-07 |
| TUCP_001081 | XLOC_041191 | ENSRNOT000000079866 | 0.961119282  | 6.55E-07 |
| TUCP_001081 | XLOC_041191 | ENSRNOT00000005686  | -0.966487881 | 3.15E-07 |
| TUCP_001081 | XLOC_041191 | ENSRNOT000000040629 | 0.951235664  | 2.00E-06 |
| TUCP_001081 | XLOC_041191 | ENSRNOT00000004046  | -0.969766244 | 1.89E-07 |
| TUCP_001081 | XLOC_041191 | ENSRNOT000000015537 | 0.959122457  | 8.39E-07 |
| TUCP_001081 | XLOC_041191 | ENSRNOT00000008655  | 0.963946686  | 4.52E-07 |
| TUCP_001081 | XLOC_041191 | ENSRNOT000000087371 | 0.961130176  | 6.55E-07 |
| TUCP_001081 | XLOC_041191 | ENSRNOT000000041044 | 0.955667801  | 1.25E-06 |
| TUCP_001081 | XLOC_041191 | ENSRNOT000000067391 | -0.950822675 | 2.09E-06 |
| TUCP_001081 | XLOC_041191 | ENSRNOT000000092945 | -0.959442764 | 8.07E-07 |
| TUCP_001081 | XLOC_041191 | ENSRNOT000000023619 | 0.955828834  | 1.23E-06 |
| TUCP_001081 | XLOC_041191 | ENSRNOT000000084709 | 0.976672413  | 5.23E-08 |
| TUCP_001081 | XLOC_041191 | ENSRNOT000000068033 | 0.955467361  | 1.28E-06 |
| TUCP_001081 | XLOC_041191 | ENSRNOT000000026481 | 0.979777518  | 2.57E-08 |
| TUCP_001081 | XLOC_041191 | ENSRNOT000000026525 | -0.952700413 | 1.72E-06 |
| TUCP_001081 | XLOC_041191 | ENSRNOT000000025856 | -0.962885003 | 5.21E-07 |
| TUCP_001081 | XLOC_041191 | ENSRNOT000000028074 | -0.951718385 | 1.90E-06 |
| TUCP_001081 | XLOC_041191 | ENSRNOT000000026643 | 0.983236431  | 1.01E-08 |
| TUCP_001081 | XLOC_041191 | ENSRNOT000000001403 | 0.954373497  | 1.44E-06 |
| TUCP_001081 | XLOC_041191 | ENSRNOT000000072357 | -0.960127797 | 7.42E-07 |
| TUCP_001081 | XLOC_041191 | ENSRNOT000000016132 | -0.976810915 | 5.08E-08 |
| TUCP_001081 | XLOC_041191 | ENSRNOT000000058495 | -0.959734216 | 7.79E-07 |
| TUCP_001081 | XLOC_041191 | ENSRNOT000000013067 | -0.973701966 | 9.48E-08 |
| TUCP_001081 | XLOC_041191 | ENSRNOT000000016220 | -0.952902992 | 1.69E-06 |
| TUCP_001081 | XLOC_041191 | ENSRNOT000000047093 | 0.960680007  | 6.93E-07 |
| TUCP_001081 | XLOC_041191 | ENSRNOT00000002313  | -0.953461556 | 1.59E-06 |
| TUCP_001081 | XLOC_041191 | ENSRNOT000000048063 | 0.957015804  | 1.08E-06 |
| TUCP_001081 | XLOC_041191 | ENSRNOT000000031979 | -0.950436188 | 2.17E-06 |
| TUCP_001081 | XLOC_041191 | ENSRNOT000000033975 | 0.974377848  | 8.33E-08 |
| TUCP_001081 | XLOC_041191 | ENSRNOT000000079895 | 0.96567179   | 3.54E-07 |
| TUCP_001081 | XLOC_041191 | ENSRNOT000000078102 | 0.969559971  | 1.96E-07 |
| TUCP_001081 | XLOC_041191 | ENSRNOT000000074586 | -0.955659664 | 1.25E-06 |
| TUCP_001081 | XLOC_041191 | ENSRNOT000000084031 | 0.966076655  | 3.34E-07 |
| TUCP_001081 | XLOC_041191 | ENSRNOT000000081512 | 0.962248807  | 5.67E-07 |
| TUCP_001081 | XLOC_041191 | ENSRNOT000000011880 | 0.973102264  | 1.06E-07 |
| TUCP_001081 | XLOC_041191 | ENSRNOT000000029202 | -0.974163775 | 8.68E-08 |
| TUCP_001081 | XLOC_041191 | ENSRNOT000000023989 | 0.963602006  | 4.73E-07 |
| TUCP_001081 | XLOC_041191 | ENSRNOT000000021717 | 0.955644599  | 1.25E-06 |
| TUCP_001081 | XLOC_041191 | ENSRNOT000000003992 | -0.957923105 | 9.68E-07 |
| TUCP_001081 | XLOC_041191 | ENSRNOT000000021408 | 0.960974631  | 6.68E-07 |
| TUCP_001081 | XLOC_041191 | ENSRNOT000000050515 | 0.970681425  | 1.62E-07 |
| TUCP_001081 | XLOC_041191 | ENSRNOT000000084088 | 0.960680742  | 6.93E-07 |
| TUCP_001081 | XLOC_041191 | ENSRNOT000000052224 | 0.978483502  | 3.50E-08 |
| TUCP_001081 | XLOC_041191 | ENSRNOT000000078070 | 0.98873478   | 1.40E-09 |
| TUCP_001081 | XLOC_041191 | ENSRNOT000000020951 | 0.959928744  | 7.61E-07 |

|             |             |                    |              |          |
|-------------|-------------|--------------------|--------------|----------|
| TUCP_001081 | XLOC_041191 | ENSRNOT00000046745 | 0.966869234  | 2.97E-07 |
| TUCP_001081 | XLOC_041191 | ENSRNOT00000082146 | -0.957788579 | 9.83E-07 |
| TUCP_001081 | XLOC_041191 | ENSRNOT00000023876 | 0.963675776  | 4.69E-07 |
| TUCP_001081 | XLOC_041191 | ENSRNOT00000091488 | 0.955755398  | 1.24E-06 |
| TUCP_001081 | XLOC_041191 | ENSRNOT00000027452 | 0.957558005  | 1.01E-06 |
| TUCP_001081 | XLOC_041191 | ENSRNOT00000049285 | -0.955056558 | 1.34E-06 |
| TUCP_001081 | XLOC_041191 | ENSRNOT00000003568 | 0.966062745  | 3.35E-07 |
| TUCP_001081 | XLOC_041191 | ENSRNOT00000074649 | 0.965875168  | 3.44E-07 |
| TUCP_001081 | XLOC_041191 | ENSRNOT00000077146 | -0.974531069 | 8.09E-08 |
| TUCP_001081 | XLOC_041191 | ENSRNOT00000014384 | -0.956314165 | 1.16E-06 |
| TUCP_001081 | XLOC_041191 | ENSRNOT00000060002 | -0.964436594 | 4.22E-07 |
| TUCP_001081 | XLOC_041191 | ENSRNOT00000036959 | -0.958641336 | 8.89E-07 |
| TUCP_001081 | XLOC_041191 | ENSRNOT00000010367 | 0.967356147  | 2.76E-07 |
| TUCP_001081 | XLOC_041191 | ENSRNOT00000006395 | -0.950294409 | 2.20E-06 |
| TUCP_001081 | XLOC_041191 | ENSRNOT00000023977 | -0.966267806 | 3.25E-07 |
| TUCP_001081 | XLOC_041191 | ENSRNOT00000066133 | -0.975353691 | 6.87E-08 |
| TUCP_001081 | XLOC_041191 | ENSRNOT00000048933 | -0.956816241 | 1.10E-06 |
| TUCP_001081 | XLOC_041191 | ENSRNOT00000085596 | 0.954549706  | 1.41E-06 |
| TUCP_001081 | XLOC_041191 | ENSRNOT00000026293 | 0.956987356  | 1.08E-06 |
| TUCP_001081 | XLOC_041191 | ENSRNOT00000019487 | 0.968538552  | 2.30E-07 |
| TUCP_001081 | XLOC_041191 | ENSRNOT00000030692 | -0.953400916 | 1.60E-06 |
| TUCP_001081 | XLOC_041191 | ENSRNOT00000080443 | 0.955047469  | 1.34E-06 |
| TUCP_001081 | XLOC_041191 | ENSRNOT00000055992 | -0.966829086 | 2.99E-07 |
| TUCP_001081 | XLOC_041191 | ENSRNOT00000040069 | 0.960296317  | 7.27E-07 |
| TUCP_001081 | XLOC_041191 | ENSRNOT00000015624 | 0.972092352  | 1.27E-07 |
| TUCP_001081 | XLOC_041191 | ENSRNOT00000073235 | 0.954326309  | 1.45E-06 |
| TUCP_001081 | XLOC_041191 | ENSRNOT00000040060 | -0.955631256 | 1.26E-06 |
| TUCP_001081 | XLOC_041191 | ENSRNOT00000035474 | 0.972761143  | 1.13E-07 |
| TUCP_001081 | XLOC_041191 | ENSRNOT00000039102 | 0.954156234  | 1.48E-06 |
| TUCP_001081 | XLOC_041191 | ENSRNOT00000078856 | -0.965868379 | 3.44E-07 |
| TUCP_001081 | XLOC_041191 | ENSRNOT00000091205 | 0.970232278  | 1.75E-07 |
| TUCP_001081 | XLOC_041191 | ENSRNOT00000009742 | -0.954815772 | 1.37E-06 |
| TUCP_001081 | XLOC_041191 | ENSRNOT00000007369 | 0.956666135  | 1.12E-06 |
| TUCP_001081 | XLOC_041191 | ENSRNOT00000004787 | -0.968852927 | 2.19E-07 |
| TUCP_001081 | XLOC_041191 | ENSRNOT00000060698 | -0.96953046  | 1.97E-07 |
| TUCP_001081 | XLOC_041191 | ENSRNOT00000064535 | -0.959678833 | 7.84E-07 |
| TUCP_001081 | XLOC_041191 | ENSRNOT00000014814 | 0.968318804  | 2.38E-07 |
| TUCP_001081 | XLOC_041191 | ENSRNOT00000010748 | 0.982671635  | 1.20E-08 |
| TUCP_001081 | XLOC_041191 | ENSRNOT00000080207 | 0.988427803  | 1.60E-09 |
| TUCP_001081 | XLOC_041191 | ENSRNOT00000026174 | 0.951259917  | 2.00E-06 |
| TUCP_001081 | XLOC_041191 | ENSRNOT00000065529 | 0.955337219  | 1.30E-06 |
| TUCP_001081 | XLOC_041191 | ENSRNOT00000017776 | 0.972983765  | 1.08E-07 |
| TUCP_001081 | XLOC_041191 | ENSRNOT00000026457 | 0.965271355  | 3.75E-07 |
| TUCP_001081 | XLOC_041191 | ENSRNOT00000004463 | 0.976589506  | 5.32E-08 |
| TUCP_001081 | XLOC_041191 | ENSRNOT00000059807 | 0.956698082  | 1.11E-06 |
| TUCP_001081 | XLOC_041191 | ENSRNOT00000008982 | 0.977271136  | 4.60E-08 |
| TUCP_001081 | XLOC_041191 | ENSRNOT00000090057 | 0.952202505  | 1.81E-06 |
| TUCP_001081 | XLOC_041191 | ENSRNOT00000022097 | 0.967466849  | 2.72E-07 |
| TUCP_001081 | XLOC_041191 | ENSRNOT00000008987 | -0.97540425  | 6.80E-08 |
| TUCP_001081 | XLOC_041191 | ENSRNOT00000092876 | -0.969306027 | 2.04E-07 |
| TUCP_001081 | XLOC_041191 | ENSRNOT00000083799 | 0.95319785   | 1.63E-06 |

|             |             |                    |              |          |
|-------------|-------------|--------------------|--------------|----------|
| TUCP_001081 | XLOC_041191 | ENSRNOT00000013864 | -0.951057574 | 2.04E-06 |
| TUCP_001081 | XLOC_041191 | ENSRNOT00000065143 | 0.951959283  | 1.86E-06 |
| TUCP_001081 | XLOC_041191 | ENSRNOT00000027083 | 0.97198023   | 1.30E-07 |
| TUCP_001081 | XLOC_041191 | ENSRNOT00000066041 | -0.965559278 | 3.60E-07 |
| TUCP_001081 | XLOC_041191 | ENSRNOT00000063930 | -0.963216201 | 4.99E-07 |
| TUCP_001081 | XLOC_041191 | ENSRNOT00000006055 | 0.958588369  | 8.95E-07 |
| TUCP_001081 | XLOC_041191 | ENSRNOT00000013116 | -0.960185658 | 7.37E-07 |
| TUCP_001081 | XLOC_041191 | ENSRNOT0000001290  | 0.9510935    | 2.03E-06 |
| TUCP_001081 | XLOC_041191 | ENSRNOT0000001855  | 0.964827022  | 4.00E-07 |
| TUCP_001081 | XLOC_041191 | ENSRNOT00000009563 | -0.96328098  | 4.94E-07 |
| TUCP_001081 | XLOC_041191 | ENSRNOT00000088125 | 0.953487565  | 1.59E-06 |
| TUCP_001081 | XLOC_041191 | ENSRNOT00000019502 | 0.956079095  | 1.20E-06 |
| TUCP_001081 | XLOC_041191 | ENSRNOT00000055683 | 0.950136156  | 2.23E-06 |
| TUCP_001081 | XLOC_041191 | ENSRNOT00000087838 | -0.957149942 | 1.06E-06 |
| TUCP_001081 | XLOC_041191 | ENSRNOT00000081981 | 0.97705185   | 4.82E-08 |
| TUCP_001081 | XLOC_041191 | ENSRNOT00000014479 | -0.95759501  | 1.01E-06 |
| TUCP_001081 | XLOC_041191 | ENSRNOT00000003326 | -0.958037768 | 9.55E-07 |
| TUCP_001081 | XLOC_041191 | ENSRNOT00000021629 | -0.951044719 | 2.04E-06 |
| TUCP_001081 | XLOC_041191 | ENSRNOT00000016306 | -0.950679657 | 2.12E-06 |
| TUCP_001081 | XLOC_041191 | ENSRNOT00000015476 | -0.95626598  | 1.17E-06 |
| TUCP_001081 | XLOC_041191 | ENSRNOT00000025079 | -0.977673807 | 4.21E-08 |
| TUCP_001081 | XLOC_041191 | ENSRNOT00000048754 | -0.973635358 | 9.60E-08 |
| TUCP_001081 | XLOC_041191 | ENSRNOT00000044628 | 0.968319799  | 2.38E-07 |
| TUCP_001081 | XLOC_041191 | ENSRNOT00000025075 | 0.967687921  | 2.63E-07 |
| TUCP_001081 | XLOC_041191 | ENSRNOT00000004007 | -0.962663246 | 5.37E-07 |
| TUCP_001081 | XLOC_041191 | ENSRNOT00000020681 | -0.952007967 | 1.85E-06 |
| TUCP_001081 | XLOC_041191 | ENSRNOT00000057898 | -0.965350982 | 3.71E-07 |
| TUCP_001081 | XLOC_041191 | ENSRNOT00000091602 | -0.959858409 | 7.67E-07 |
| TUCP_001081 | XLOC_041191 | ENSRNOT00000056100 | -0.95182005  | 1.89E-06 |
| TUCP_001081 | XLOC_041191 | ENSRNOT00000012671 | 0.950408133  | 2.17E-06 |
| TUCP_001081 | XLOC_041191 | ENSRNOT00000090129 | -0.953419633 | 1.60E-06 |
| TUCP_001081 | XLOC_041191 | ENSRNOT00000009708 | -0.953505209 | 1.58E-06 |
| TUCP_001081 | XLOC_041191 | ENSRNOT00000077231 | 0.981508463  | 1.65E-08 |
| TUCP_001081 | XLOC_041191 | ENSRNOT00000060696 | 0.974749875  | 7.75E-08 |
| TUCP_001081 | XLOC_041191 | ENSRNOT00000009811 | 0.989737884  | 8.81E-10 |
| TUCP_001081 | XLOC_041191 | ENSRNOT00000014605 | -0.952519502 | 1.75E-06 |
| TUCP_001081 | XLOC_041191 | ENSRNOT00000073643 | -0.959523466 | 7.99E-07 |
| TUCP_001081 | XLOC_041191 | ENSRNOT00000052002 | 0.951815029  | 1.89E-06 |
| TUCP_001081 | XLOC_041191 | ENSRNOT00000022502 | -0.967967654 | 2.52E-07 |
| TUCP_001081 | XLOC_041191 | ENSRNOT00000017556 | 0.966226678  | 3.27E-07 |
| TUCP_001081 | XLOC_041191 | ENSRNOT00000087443 | 0.971013634  | 1.54E-07 |
| TUCP_001081 | XLOC_041191 | ENSRNOT00000021803 | -0.969764232 | 1.89E-07 |
| TUCP_001081 | XLOC_041191 | ENSRNOT00000024352 | 0.971751852  | 1.35E-07 |
| TUCP_001081 | XLOC_041191 | ENSRNOT00000058351 | 0.972102572  | 1.27E-07 |
| TUCP_001081 | XLOC_041191 | ENSRNOT00000083220 | 0.982667709  | 1.20E-08 |
| TUCP_001081 | XLOC_041191 | ENSRNOT00000072118 | 0.958888861  | 8.63E-07 |
| TUCP_001081 | XLOC_041191 | ENSRNOT00000003780 | 0.973265549  | 1.03E-07 |
| TUCP_001081 | XLOC_041191 | ENSRNOT00000003787 | -0.955774221 | 1.24E-06 |
| TUCP_001081 | XLOC_041191 | ENSRNOT00000060362 | 0.963796757  | 4.61E-07 |
| TUCP_001081 | XLOC_041191 | ENSRNOT00000013274 | 0.954455942  | 1.43E-06 |
| TUCP_001081 | XLOC_041191 | ENSRNOT00000083876 | -0.956892619 | 1.09E-06 |

|             |             |                    |              |          |
|-------------|-------------|--------------------|--------------|----------|
| TUCP_001081 | XLOC_041191 | ENSRNOT00000019816 | -0.954291363 | 1.46E-06 |
| TUCP_001081 | XLOC_041191 | ENSRNOT00000017254 | -0.953058856 | 1.66E-06 |
| TUCP_001081 | XLOC_041191 | ENSRNOT00000068381 | 0.961793858  | 6.01E-07 |
| TUCP_001081 | XLOC_041191 | ENSRNOT00000068026 | -0.953450232 | 1.59E-06 |
| TUCP_001081 | XLOC_041191 | ENSRNOT00000085621 | 0.962949601  | 5.17E-07 |
| TUCP_001081 | XLOC_041191 | ENSRNOT00000007314 | -0.964522729 | 4.17E-07 |
| TUCP_001081 | XLOC_041191 | ENSRNOT00000014821 | -0.958669218 | 8.86E-07 |
| TUCP_001081 | XLOC_041191 | ENSRNOT00000058382 | 0.956759461  | 1.11E-06 |
| TUCP_001081 | XLOC_041191 | ENSRNOT00000088599 | 0.972761498  | 1.13E-07 |
| TUCP_001081 | XLOC_041191 | ENSRNOT00000026531 | -0.961451203 | 6.28E-07 |
| TUCP_001081 | XLOC_041191 | ENSRNOT00000023567 | -0.956163981 | 1.18E-06 |
| TUCP_001081 | XLOC_041191 | ENSRNOT00000061100 | 0.967015198  | 2.91E-07 |
| TUCP_001081 | XLOC_041191 | ENSRNOT00000017021 | 0.952949177  | 1.68E-06 |
| TUCP_001081 | XLOC_041191 | ENSRNOT00000017995 | 0.959301271  | 8.21E-07 |
| TUCP_001081 | XLOC_041191 | ENSRNOT00000050609 | -0.952615482 | 1.74E-06 |
| TUCP_001081 | XLOC_041191 | ENSRNOT00000081725 | 0.956304954  | 1.17E-06 |
| TUCP_001081 | XLOC_041191 | ENSRNOT00000005459 | 0.966233571  | 3.27E-07 |
| TUCP_001081 | XLOC_041191 | ENSRNOT00000027910 | 0.979021524  | 3.09E-08 |
| TUCP_001081 | XLOC_041191 | ENSRNOT00000002771 | 0.957654151  | 9.99E-07 |
| TUCP_001081 | XLOC_041191 | ENSRNOT00000024322 | 0.956178913  | 1.18E-06 |
| TUCP_001081 | XLOC_041191 | ENSRNOT00000088182 | 0.955642396  | 1.26E-06 |
| TUCP_001081 | XLOC_041191 | ENSRNOT00000054976 | -0.950504227 | 2.15E-06 |
| TUCP_001081 | XLOC_041191 | ENSRNOT00000016191 | 0.969460431  | 1.99E-07 |
| TUCP_001081 | XLOC_041191 | ENSRNOT00000078390 | -0.972257059 | 1.24E-07 |
| TUCP_001081 | XLOC_041191 | ENSRNOT00000008427 | -0.952990916 | 1.67E-06 |
| TUCP_001081 | XLOC_041191 | ENSRNOT00000016372 | -0.952685711 | 1.72E-06 |
| TUCP_001081 | XLOC_041191 | ENSRNOT00000029833 | 0.960468663  | 7.11E-07 |
| TUCP_001081 | XLOC_041191 | ENSRNOT00000012702 | -0.957282135 | 1.04E-06 |
| TUCP_001081 | XLOC_041191 | ENSRNOT00000082151 | -0.971281966 | 1.47E-07 |
| TUCP_001081 | XLOC_041191 | ENSRNOT00000016776 | -0.95702998  | 1.07E-06 |
| TUCP_001081 | XLOC_041191 | ENSRNOT0000001607  | 0.954645798  | 1.40E-06 |
| TUCP_001081 | XLOC_041191 | ENSRNOT00000047192 | -0.977074623 | 4.80E-08 |
| TUCP_001081 | XLOC_041191 | ENSRNOT00000011984 | 0.9562935    | 1.17E-06 |
| TUCP_001081 | XLOC_041191 | ENSRNOT00000085971 | -0.967847356 | 2.56E-07 |
| TUCP_001081 | XLOC_041191 | ENSRNOT00000044395 | 0.951497873  | 1.95E-06 |
| TUCP_001081 | XLOC_041191 | ENSRNOT00000022142 | 0.961407735  | 6.32E-07 |
| TUCP_001081 | XLOC_041191 | ENSRNOT00000076300 | -0.95120628  | 2.01E-06 |
| TUCP_001081 | XLOC_041191 | ENSRNOT00000028876 | -0.962478622 | 5.50E-07 |
| TUCP_001081 | XLOC_041191 | ENSRNOT00000078306 | 0.961847085  | 5.97E-07 |
| TUCP_001081 | XLOC_041191 | ENSRNOT00000015946 | -0.953256593 | 1.62E-06 |
| TUCP_001081 | XLOC_041191 | ENSRNOT00000004172 | 0.959250738  | 8.26E-07 |
| TUCP_001081 | XLOC_041191 | ENSRNOT00000029125 | 0.975559821  | 6.59E-08 |
| TUCP_001081 | XLOC_041191 | ENSRNOT00000004319 | -0.956301758 | 1.17E-06 |
| TUCP_001081 | XLOC_041191 | ENSRNOT00000026280 | 0.953817814  | 1.53E-06 |
| TUCP_001081 | XLOC_041191 | ENSRNOT00000005387 | 0.968343566  | 2.37E-07 |
| TUCP_001081 | XLOC_041191 | ENSRNOT00000015092 | 0.963467204  | 4.82E-07 |
| TUCP_001081 | XLOC_041191 | ENSRNOT00000015318 | -0.950145564 | 2.23E-06 |
| TUCP_001081 | XLOC_041191 | ENSRNOT00000028907 | 0.950249021  | 2.21E-06 |
| TUCP_001081 | XLOC_041191 | ENSRNOT00000087278 | -0.959996545 | 7.54E-07 |
| TUCP_001081 | XLOC_041191 | ENSRNOT00000022796 | 0.959109948  | 8.40E-07 |
| TUCP_001081 | XLOC_041191 | ENSRNOT00000078862 | 0.965292648  | 3.74E-07 |



|             |             |                    |              |          |
|-------------|-------------|--------------------|--------------|----------|
| TUCP_001081 | XLOC_041191 | ENSRNOT00000003940 | -0.959894032 | 7.64E-07 |
| TUCP_001081 | XLOC_041191 | ENSRNOT00000005257 | 0.962314208  | 5.62E-07 |
| TUCP_001081 | XLOC_041191 | ENSRNOT00000015799 | 0.988876628  | 1.32E-09 |
| TUCP_001081 | XLOC_041191 | ENSRNOT00000036506 | 0.951752506  | 1.90E-06 |
| TUCP_001081 | XLOC_041191 | ENSRNOT00000005958 | 0.973382189  | 1.01E-07 |
| TUCP_001081 | XLOC_041191 | ENSRNOT00000039551 | -0.97076822  | 1.60E-07 |
| TUCP_001081 | XLOC_041191 | ENSRNOT00000082998 | 0.966130406  | 3.32E-07 |
| TUCP_001081 | XLOC_041191 | ENSRNOT00000075656 | -0.950903783 | 2.07E-06 |
| TUCP_001081 | XLOC_041191 | ENSRNOT00000015006 | 0.955681709  | 1.25E-06 |
| TUCP_001081 | XLOC_041191 | ENSRNOT00000007350 | 0.950814622  | 2.09E-06 |
| TUCP_001081 | XLOC_041191 | ENSRNOT00000007351 | -0.95202682  | 1.85E-06 |
| TUCP_001081 | XLOC_041191 | ENSRNOT00000083578 | 0.956948463  | 1.08E-06 |
| TUCP_001081 | XLOC_041191 | ENSRNOT00000023133 | 0.950346461  | 2.19E-06 |
| TUCP_001081 | XLOC_041191 | ENSRNOT00000023638 | 0.981724396  | 1.56E-08 |
| TUCP_001081 | XLOC_041191 | ENSRNOT00000005228 | 0.964010209  | 4.48E-07 |
| TUCP_001081 | XLOC_041191 | ENSRNOT00000059524 | -0.960878676 | 6.76E-07 |
| TUCP_001081 | XLOC_041191 | ENSRNOT00000084597 | -0.953543101 | 1.58E-06 |
| TUCP_001081 | XLOC_041191 | ENSRNOT00000028628 | -0.951784571 | 1.89E-06 |
| TUCP_001081 | XLOC_041191 | ENSRNOT00000017361 | 0.953087673  | 1.65E-06 |
| TUCP_001081 | XLOC_041191 | ENSRNOT00000005220 | 0.974812718  | 7.65E-08 |
| TUCP_001081 | XLOC_041191 | ENSRNOT00000023144 | 0.983682702  | 8.86E-09 |
| TUCP_001081 | XLOC_041191 | ENSRNOT00000045326 | 0.966001848  | 3.38E-07 |
| TUCP_001081 | XLOC_041191 | ENSRNOT00000016649 | 0.978304366  | 3.65E-08 |
| TUCP_001081 | XLOC_041191 | ENSRNOT00000074023 | 0.973651196  | 9.57E-08 |
| TUCP_001081 | XLOC_041191 | ENSRNOT00000067170 | -0.955538206 | 1.27E-06 |
| TUCP_001081 | XLOC_041191 | ENSRNOT00000091128 | -0.970113163 | 1.79E-07 |
| TUCP_001081 | XLOC_041191 | ENSRNOT00000001586 | -0.969097217 | 2.11E-07 |
| TUCP_001081 | XLOC_041191 | ENSRNOT00000018341 | -0.950725942 | 2.11E-06 |
| TUCP_001081 | XLOC_041191 | ENSRNOT00000026543 | 0.96219044   | 5.71E-07 |
| TUCP_001081 | XLOC_041191 | ENSRNOT00000065076 | 0.951513612  | 1.95E-06 |
| TUCP_001081 | XLOC_041191 | ENSRNOT00000019213 | 0.965347245  | 3.71E-07 |
| TUCP_001081 | XLOC_041191 | ENSRNOT00000012187 | 0.976793445  | 5.10E-08 |
| TUCP_001081 | XLOC_041191 | ENSRNOT00000024969 | 0.97510417   | 7.22E-08 |
| TUCP_001081 | XLOC_041191 | ENSRNOT00000050868 | 0.95872608   | 8.80E-07 |
| TUCP_001081 | XLOC_041191 | ENSRNOT00000013695 | -0.95611363  | 1.19E-06 |
| TUCP_001081 | XLOC_041191 | ENSRNOT00000081621 | 0.951461349  | 1.96E-06 |
| TUCP_001081 | XLOC_041191 | ENSRNOT00000038247 | 0.972987352  | 1.08E-07 |
| TUCP_001081 | XLOC_041191 | ENSRNOT00000090338 | -0.96199725  | 5.86E-07 |
| TUCP_001081 | XLOC_041191 | ENSRNOT00000024402 | 0.978175557  | 3.76E-08 |
| TUCP_001081 | XLOC_041191 | ENSRNOT00000089545 | -0.952669659 | 1.73E-06 |
| TUCP_001081 | XLOC_041191 | ENSRNOT00000089933 | 0.988172602  | 1.79E-09 |
| TUCP_001081 | XLOC_041191 | ENSRNOT00000077908 | 0.957920699  | 9.68E-07 |
| TUCP_001081 | XLOC_041191 | ENSRNOT00000067009 | -0.960745526 | 6.87E-07 |
| TUCP_001081 | XLOC_041191 | ENSRNOT00000090912 | 0.960074951  | 7.47E-07 |
| TUCP_001081 | XLOC_041191 | ENSRNOT00000067554 | 0.957696702  | 9.94E-07 |
| TUCP_001081 | XLOC_041191 | ENSRNOT00000026718 | 0.965265991  | 3.76E-07 |
| TUCP_001081 | XLOC_041191 | ENSRNOT00000072208 | 0.954153207  | 1.48E-06 |
| TUCP_001081 | XLOC_041191 | ENSRNOT00000032780 | 0.974337611  | 8.40E-08 |
| TUCP_001081 | XLOC_041191 | ENSRNOT00000084012 | 0.97078979   | 1.59E-07 |
| TUCP_001081 | XLOC_041191 | ENSRNOT00000033677 | -0.972723034 | 1.14E-07 |
| TUCP_001081 | XLOC_041191 | ENSRNOT00000019820 | 0.974851551  | 7.59E-08 |

|             |             |                    |              |          |
|-------------|-------------|--------------------|--------------|----------|
| TUCP_001081 | XLOC_041191 | ENSRNOT0000002410  | 0.963641039  | 4.71E-07 |
| TUCP_001081 | XLOC_041191 | ENSRNOT00000011832 | -0.958920961 | 8.60E-07 |
| TUCP_001081 | XLOC_041191 | ENSRNOT00000016428 | 0.954382303  | 1.44E-06 |
| TUCP_001081 | XLOC_041191 | ENSRNOT00000021030 | -0.954396356 | 1.44E-06 |
| TUCP_001081 | XLOC_041191 | ENSRNOT00000006835 | 0.958830139  | 8.69E-07 |
| TUCP_001081 | XLOC_041191 | ENSRNOT00000077727 | -0.965537768 | 3.61E-07 |
| TUCP_001081 | XLOC_041191 | ENSRNOT00000044346 | -0.963344993 | 4.90E-07 |
| TUCP_001081 | XLOC_041191 | ENSRNOT00000010541 | 0.983064878  | 1.07E-08 |
| TUCP_001081 | XLOC_041191 | ENSRNOT00000017949 | -0.951710851 | 1.91E-06 |
| TUCP_001081 | XLOC_041191 | ENSRNOT00000016947 | 0.951519618  | 1.94E-06 |
| TUCP_001081 | XLOC_041191 | ENSRNOT00000091909 | 0.978236837  | 3.71E-08 |
| TUCP_001081 | XLOC_041191 | ENSRNOT0000001081  | 0.96945506   | 1.99E-07 |
| TUCP_001081 | XLOC_041191 | ENSRNOT00000013025 | -0.95964351  | 7.88E-07 |
| TUCP_001081 | XLOC_041191 | ENSRNOT00000003544 | -0.961722787 | 6.07E-07 |
| TUCP_001081 | XLOC_041191 | ENSRNOT00000086119 | -0.979493118 | 2.76E-08 |
| TUCP_001081 | XLOC_041191 | ENSRNOT00000022190 | -0.979136138 | 3.01E-08 |
| TUCP_001081 | XLOC_041191 | ENSRNOT00000025913 | -0.972643142 | 1.15E-07 |
| TUCP_001081 | XLOC_041191 | ENSRNOT00000019386 | -0.96115484  | 6.53E-07 |
| TUCP_001081 | XLOC_041191 | ENSRNOT00000077220 | -0.964165965 | 4.38E-07 |
| TUCP_001081 | XLOC_041191 | ENSRNOT00000065983 | 0.963973034  | 4.50E-07 |
| TUCP_001081 | XLOC_041191 | ENSRNOT00000052018 | 0.957081246  | 1.07E-06 |
| TUCP_001081 | XLOC_041191 | ENSRNOT00000067780 | -0.966193375 | 3.29E-07 |
| TUCP_001081 | XLOC_041191 | ENSRNOT00000086577 | 0.965895811  | 3.43E-07 |
| TUCP_001081 | XLOC_041191 | ENSRNOT00000025966 | 0.96417905   | 4.37E-07 |
| TUCP_001081 | XLOC_041191 | ENSRNOT00000015265 | 0.95723423   | 1.05E-06 |
| TUCP_001081 | XLOC_041191 | ENSRNOT00000073910 | -0.951855036 | 1.88E-06 |
| TUCP_001081 | XLOC_041191 | ENSRNOT00000007738 | -0.957113904 | 1.06E-06 |
| TUCP_001081 | XLOC_041191 | ENSRNOT00000052422 | 0.967407613  | 2.74E-07 |
| TUCP_001081 | XLOC_041191 | ENSRNOT00000015609 | 0.958370032  | 9.18E-07 |
| TUCP_001081 | XLOC_041191 | ENSRNOT00000086590 | 0.953123005  | 1.65E-06 |
| TUCP_001081 | XLOC_041191 | ENSRNOT00000034883 | -0.970120463 | 1.78E-07 |
| TUCP_001081 | XLOC_041191 | ENSRNOT00000020155 | 0.968483037  | 2.32E-07 |
| TUCP_001081 | XLOC_041191 | ENSRNOT00000025827 | 0.950946703  | 2.06E-06 |
| TUCP_001081 | XLOC_041191 | ENSRNOT00000055321 | 0.953334861  | 1.61E-06 |
| TUCP_001081 | XLOC_041191 | ENSRNOT00000005910 | -0.965762754 | 3.50E-07 |
| TUCP_001081 | XLOC_041191 | ENSRNOT00000075311 | 0.954582655  | 1.41E-06 |
| TUCP_001081 | XLOC_041191 | ENSRNOT00000078475 | 0.971531226  | 1.40E-07 |
| TUCP_001081 | XLOC_041191 | ENSRNOT00000087429 | 0.978810755  | 3.25E-08 |
| TUCP_001081 | XLOC_041191 | ENSRNOT00000016722 | 0.959929752  | 7.61E-07 |
| TUCP_001081 | XLOC_041191 | ENSRNOT00000091265 | 0.954066183  | 1.49E-06 |
| TUCP_001081 | XLOC_041191 | ENSRNOT00000065501 | 0.964794162  | 4.01E-07 |
| TUCP_001081 | XLOC_041191 | ENSRNOT00000000013 | 0.964121619  | 4.41E-07 |
| TUCP_001081 | XLOC_041191 | ENSRNOT00000037955 | -0.951619825 | 1.92E-06 |
| TUCP_001081 | XLOC_041191 | ENSRNOT00000031904 | 0.969720903  | 1.91E-07 |
| TUCP_001081 | XLOC_041191 | ENSRNOT00000028057 | 0.962222343  | 5.69E-07 |
| TUCP_001081 | XLOC_041191 | ENSRNOT00000055582 | 0.956225225  | 1.18E-06 |
| TUCP_001081 | XLOC_041191 | ENSRNOT00000022074 | 0.972702456  | 1.14E-07 |
| TUCP_001081 | XLOC_041191 | ENSRNOT00000004999 | 0.963651927  | 4.70E-07 |
| TUCP_001081 | XLOC_041191 | ENSRNOT00000009122 | 0.953596963  | 1.57E-06 |
| TUCP_001081 | XLOC_041191 | ENSRNOT00000013463 | 0.961630304  | 6.14E-07 |
| TUCP_001081 | XLOC_041191 | ENSRNOT00000088054 | 0.968414152  | 2.35E-07 |

|             |             |                    |              |          |
|-------------|-------------|--------------------|--------------|----------|
| TUCP_001081 | XLOC_041191 | ENSRNOT00000047663 | -0.959419771 | 8.10E-07 |
| TUCP_001081 | XLOC_041191 | ENSRNOT00000005486 | -0.962406838 | 5.55E-07 |
| TUCP_001081 | XLOC_041191 | ENSRNOT00000017907 | -0.961971264 | 5.88E-07 |
| TUCP_001081 | XLOC_041191 | ENSRNOT00000076669 | 0.950304792  | 2.20E-06 |
| TUCP_001081 | XLOC_041191 | ENSRNOT00000005489 | 0.964792951  | 4.02E-07 |
| TUCP_001081 | XLOC_041191 | ENSRNOT00000025794 | -0.96626569  | 3.25E-07 |
| TUCP_001081 | XLOC_041191 | ENSRNOT00000058111 | -0.955123122 | 1.33E-06 |
| TUCP_001081 | XLOC_041191 | ENSRNOT00000084422 | 0.965600869  | 3.58E-07 |
| TUCP_001081 | XLOC_041191 | ENSRNOT00000050834 | -0.967234162 | 2.82E-07 |
| TUCP_001081 | XLOC_041191 | ENSRNOT00000054828 | 0.963670763  | 4.69E-07 |
| TUCP_001081 | XLOC_041191 | ENSRNOT00000088279 | 0.954335904  | 1.45E-06 |
| TUCP_001081 | XLOC_041191 | ENSRNOT0000002443  | 0.974118238  | 8.76E-08 |
| TUCP_001081 | XLOC_041191 | ENSRNOT00000012736 | 0.963423791  | 4.85E-07 |
| TUCP_001081 | XLOC_041191 | ENSRNOT00000002114 | -0.972116172 | 1.27E-07 |
| TUCP_001081 | XLOC_041191 | ENSRNOT00000002445 | -0.950095463 | 2.24E-06 |
| TUCP_001081 | XLOC_041191 | ENSRNOT00000027970 | 0.982161721  | 1.38E-08 |
| TUCP_001081 | XLOC_041191 | ENSRNOT00000009462 | 0.955777628  | 1.24E-06 |
| TUCP_001081 | XLOC_041191 | ENSRNOT00000046215 | -0.963086557 | 5.07E-07 |
| TUCP_001081 | XLOC_041191 | ENSRNOT00000000083 | -0.955107782 | 1.33E-06 |
| TUCP_001081 | XLOC_041191 | ENSRNOT00000018074 | -0.972970372 | 1.09E-07 |
| TUCP_001081 | XLOC_041191 | ENSRNOT00000037679 | 0.966835462  | 2.99E-07 |
| TUCP_001081 | XLOC_041191 | ENSRNOT00000014124 | 0.977047937  | 4.83E-08 |
| TUCP_001081 | XLOC_041191 | ENSRNOT00000000120 | 0.980719657  | 2.03E-08 |
| TUCP_001081 | XLOC_041191 | ENSRNOT00000013632 | 0.969702673  | 1.91E-07 |
| TUCP_001081 | XLOC_041191 | ENSRNOT00000078906 | -0.957457994 | 1.02E-06 |
| TUCP_001081 | XLOC_041191 | ENSRNOT00000028545 | -0.952307555 | 1.79E-06 |
| TUCP_001081 | XLOC_041191 | ENSRNOT00000009900 | -0.973379446 | 1.01E-07 |
| TUCP_001081 | XLOC_041191 | ENSRNOT00000019172 | -0.962635479 | 5.39E-07 |
| TUCP_001081 | XLOC_041191 | ENSRNOT00000064798 | 0.964175905  | 4.38E-07 |
| TUCP_001081 | XLOC_041191 | ENSRNOT00000015495 | -0.952589302 | 1.74E-06 |
| TUCP_001081 | XLOC_041191 | ENSRNOT00000032248 | 0.9550816    | 1.34E-06 |
| TUCP_001081 | XLOC_041191 | ENSRNOT00000040393 | 0.978268041  | 3.68E-08 |
| TUCP_001081 | XLOC_041191 | ENSRNOT00000025097 | 0.959905401  | 7.63E-07 |
| TUCP_001081 | XLOC_041191 | ENSRNOT00000067901 | -0.969459295 | 1.99E-07 |
| TUCP_001081 | XLOC_041191 | ENSRNOT00000011041 | 0.964190405  | 4.37E-07 |
| TUCP_001081 | XLOC_041191 | ENSRNOT00000021674 | 0.968774419  | 2.22E-07 |
| TUCP_001081 | XLOC_041191 | ENSRNOT00000064700 | 0.965598169  | 3.58E-07 |
| TUCP_001081 | XLOC_041191 | ENSRNOT00000036613 | -0.981283122 | 1.75E-08 |
| TUCP_001081 | XLOC_041191 | ENSRNOT00000083127 | 0.966017685  | 3.37E-07 |
| TUCP_001081 | XLOC_041191 | ENSRNOT00000025705 | 0.966054232  | 3.35E-07 |
| TUCP_001081 | XLOC_041191 | ENSRNOT00000019983 | -0.960649156 | 6.96E-07 |
| TUCP_001081 | XLOC_041191 | ENSRNOT00000004140 | 0.959030754  | 8.49E-07 |
| TUCP_001081 | XLOC_041191 | ENSRNOT00000008113 | -0.960733922 | 6.88E-07 |
| TUCP_001081 | XLOC_041191 | ENSRNOT00000022552 | -0.965227901 | 3.78E-07 |
| TUCP_001081 | XLOC_041191 | ENSRNOT00000048910 | -0.970461329 | 1.69E-07 |
| TUCP_001081 | XLOC_041191 | ENSRNOT00000009645 | -0.950480632 | 2.16E-06 |
| TUCP_001081 | XLOC_041191 | ENSRNOT00000026279 | -0.95438389  | 1.44E-06 |
| TUCP_001081 | XLOC_041191 | ENSRNOT00000071560 | 0.95700121   | 1.08E-06 |
| TUCP_001081 | XLOC_041191 | ENSRNOT00000082508 | -0.955824533 | 1.23E-06 |
| TUCP_001081 | XLOC_041191 | ENSRNOT00000082863 | 0.976924641  | 4.96E-08 |
| TUCP_001081 | XLOC_041191 | ENSRNOT0000007164  | 0.952046284  | 1.84E-06 |

|             |             |                    |              |          |
|-------------|-------------|--------------------|--------------|----------|
| TUCP_001081 | XLOC_041191 | ENSRNOT00000049459 | -0.961561539 | 6.20E-07 |
| TUCP_001081 | XLOC_041191 | ENSRNOT00000071166 | 0.963374187  | 4.88E-07 |
| TUCP_001081 | XLOC_041191 | ENSRNOT00000074389 | -0.952744423 | 1.71E-06 |
| TUCP_001081 | XLOC_041191 | ENSRNOT00000028646 | 0.958770837  | 8.75E-07 |
| TUCP_001081 | XLOC_041191 | ENSRNOT00000055437 | -0.967071321 | 2.88E-07 |
| TUCP_001081 | XLOC_041191 | ENSRNOT00000066204 | -0.956431281 | 1.15E-06 |
| TUCP_001081 | XLOC_041191 | ENSRNOT00000043345 | 0.950498009  | 2.15E-06 |
| TUCP_001081 | XLOC_041191 | ENSRNOT00000076872 | 0.959639927  | 7.88E-07 |
| TUCP_001081 | XLOC_041191 | ENSRNOT00000073564 | -0.951148181 | 2.02E-06 |
| TUCP_001081 | XLOC_041191 | ENSRNOT00000001507 | 0.965484335  | 3.64E-07 |
| TUCP_001081 | XLOC_041191 | ENSRNOT00000083568 | 0.968273312  | 2.40E-07 |
| TUCP_001081 | XLOC_041191 | ENSRNOT00000039177 | -0.959319611 | 8.19E-07 |
| TUCP_001081 | XLOC_041191 | ENSRNOT00000081047 | 0.985717974  | 4.57E-09 |
| TUCP_001081 | XLOC_041191 | ENSRNOT00000020994 | -0.954448986 | 1.43E-06 |
| TUCP_001081 | XLOC_041191 | ENSRNOT00000037456 | 0.961180491  | 6.50E-07 |
| TUCP_001081 | XLOC_041191 | ENSRNOT00000025517 | 0.954309164  | 1.45E-06 |
| TUCP_001081 | XLOC_041191 | ENSRNOT00000065168 | 0.964797335  | 4.01E-07 |
| TUCP_001081 | XLOC_041191 | ENSRNOT00000012881 | -0.96351209  | 4.79E-07 |
| TUCP_001081 | XLOC_041191 | ENSRNOT00000000577 | 0.970733279  | 1.61E-07 |
| TUCP_001081 | XLOC_041191 | ENSRNOT00000075424 | 0.955942809  | 1.21E-06 |
| TUCP_001081 | XLOC_041191 | ENSRNOT00000041513 | 0.960394404  | 7.18E-07 |
| TUCP_001081 | XLOC_041191 | ENSRNOT00000088133 | -0.96727803  | 2.80E-07 |
| TUCP_001081 | XLOC_041191 | ENSRNOT00000080677 | -0.96616312  | 3.30E-07 |
| TUCP_001081 | XLOC_041191 | ENSRNOT00000037039 | -0.957558428 | 1.01E-06 |
| TUCP_001081 | XLOC_041191 | ENSRNOT00000007824 | -0.959098953 | 8.42E-07 |
| TUCP_001081 | XLOC_041191 | ENSRNOT00000003714 | 0.953480921  | 1.59E-06 |
| TUCP_001081 | XLOC_041191 | ENSRNOT00000083968 | -0.957222118 | 1.05E-06 |
| TUCP_001081 | XLOC_041191 | ENSRNOT00000037133 | 0.979188526  | 2.97E-08 |
| TUCP_001081 | XLOC_041191 | ENSRNOT00000083964 | -0.957640213 | 1.00E-06 |
| TUCP_001081 | XLOC_041191 | ENSRNOT00000026831 | 0.957074958  | 1.07E-06 |
| TUCP_001081 | XLOC_041191 | ENSRNOT00000021729 | 0.951475283  | 1.95E-06 |
| TUCP_001081 | XLOC_041191 | ENSRNOT00000032363 | 0.95534838   | 1.30E-06 |
| TUCP_001081 | XLOC_041191 | ENSRNOT00000016445 | 0.972426744  | 1.20E-07 |
| TUCP_001081 | XLOC_041191 | ENSRNOT00000019133 | 0.983672939  | 8.89E-09 |
| TUCP_001081 | XLOC_041191 | ENSRNOT00000024119 | 0.958570045  | 8.97E-07 |
| TUCP_001081 | XLOC_041191 | ENSRNOT00000006824 | -0.966679346 | 3.06E-07 |
| TUCP_001081 | XLOC_041191 | ENSRNOT00000012775 | -0.951195602 | 2.01E-06 |
| TUCP_001081 | XLOC_041191 | ENSRNOT00000086260 | -0.959427129 | 8.09E-07 |
| TUCP_001081 | XLOC_041191 | ENSRNOT00000061392 | 0.979786676  | 2.57E-08 |
| TUCP_001081 | XLOC_041191 | ENSRNOT00000044608 | -0.96004555  | 7.50E-07 |
| TUCP_001081 | XLOC_041191 | ENSRNOT00000090123 | 0.975907821  | 6.14E-08 |
| TUCP_001081 | XLOC_041191 | ENSRNOT00000010683 | -0.956470585 | 1.14E-06 |
| TUCP_001081 | XLOC_041191 | ENSRNOT00000045488 | 0.961350033  | 6.37E-07 |
| TUCP_001081 | XLOC_041191 | ENSRNOT00000090853 | -0.9578126   | 9.80E-07 |
| TUCP_001081 | XLOC_041191 | ENSRNOT00000093174 | 0.951050037  | 2.04E-06 |
| TUCP_001081 | XLOC_041191 | ENSRNOT00000077555 | 0.961181365  | 6.50E-07 |
| TUCP_001081 | XLOC_041191 | ENSRNOT00000089211 | 0.960433762  | 7.15E-07 |
| TUCP_001081 | XLOC_041191 | ENSRNOT00000020383 | 0.967161994  | 2.85E-07 |
| TUCP_001081 | XLOC_041191 | ENSRNOT00000000302 | 0.973514845  | 9.82E-08 |
| TUCP_001081 | XLOC_041191 | ENSRNOT00000055602 | -0.95724996  | 1.05E-06 |
| TUCP_001081 | XLOC_041191 | ENSRNOT00000004290 | 0.955982917  | 1.21E-06 |

|             |             |                    |              |          |
|-------------|-------------|--------------------|--------------|----------|
| TUCP_001081 | XLOC_041191 | ENSRNOT0000000658  | 0.963621725  | 4.72E-07 |
| TUCP_001081 | XLOC_041191 | ENSRNOT00000083632 | -0.958220803 | 9.34E-07 |
| TUCP_001081 | XLOC_041191 | ENSRNOT0000000717  | -0.952476057 | 1.76E-06 |
| TUCP_001081 | XLOC_041191 | ENSRNOT0000005909  | 0.957696744  | 9.94E-07 |
| TUCP_001081 | XLOC_041191 | ENSRNOT00000086122 | 0.969392316  | 2.01E-07 |
| TUCP_001081 | XLOC_041191 | ENSRNOT00000026235 | -0.951121927 | 2.02E-06 |
| TUCP_001081 | XLOC_041191 | ENSRNOT00000023763 | -0.95555504  | 1.27E-06 |
| TUCP_001081 | XLOC_041191 | ENSRNOT00000091596 | -0.956550175 | 1.13E-06 |
| TUCP_001081 | XLOC_041191 | ENSRNOT00000058842 | 0.956080261  | 1.20E-06 |
| TUCP_001081 | XLOC_041191 | ENSRNOT00000023537 | -0.96714469  | 2.85E-07 |
| TUCP_001081 | XLOC_041191 | ENSRNOT00000059181 | 0.957791955  | 9.83E-07 |
| TUCP_001081 | XLOC_041191 | ENSRNOT0000003691  | -0.96623286  | 3.27E-07 |
| TUCP_001081 | XLOC_041191 | ENSRNOT0000003690  | 0.956167841  | 1.18E-06 |
| TUCP_001081 | XLOC_041191 | ENSRNOT00000038807 | 0.958758268  | 8.77E-07 |
| TUCP_001081 | XLOC_041191 | ENSRNOT00000008901 | -0.970596509 | 1.65E-07 |
| TUCP_001081 | XLOC_041191 | ENSRNOT0000005659  | 0.96059143   | 7.01E-07 |
| TUCP_001081 | XLOC_041191 | ENSRNOT00000017761 | 0.975849512  | 6.21E-08 |
| TUCP_001081 | XLOC_041191 | ENSRNOT00000023543 | -0.958967514 | 8.55E-07 |
| TUCP_001081 | XLOC_041191 | ENSRNOT00000080608 | 0.971499439  | 1.41E-07 |
| TUCP_001081 | XLOC_041191 | ENSRNOT00000080695 | 0.973253754  | 1.03E-07 |
| TUCP_001081 | XLOC_041191 | ENSRNOT00000039341 | 0.962944993  | 5.17E-07 |
| TUCP_001081 | XLOC_041191 | ENSRNOT00000055386 | 0.965115792  | 3.84E-07 |
| TUCP_001081 | XLOC_041191 | ENSRNOT00000038212 | -0.959274006 | 8.24E-07 |
| TUCP_001081 | XLOC_041191 | ENSRNOT00000082174 | 0.953104615  | 1.65E-06 |
| TUCP_001081 | XLOC_041191 | ENSRNOT00000042125 | 0.992972157  | 1.33E-10 |
| TUCP_001081 | XLOC_041191 | ENSRNOT00000005311 | 0.974080873  | 8.82E-08 |
| TUCP_001081 | XLOC_041191 | ENSRNOT00000026760 | -0.970552037 | 1.66E-07 |
| TUCP_001081 | XLOC_041191 | ENSRNOT00000017687 | -0.952112694 | 1.83E-06 |
| TUCP_001081 | XLOC_041191 | ENSRNOT00000024491 | -0.963017884 | 5.12E-07 |
| TUCP_001081 | XLOC_041191 | ENSRNOT00000081077 | -0.966752409 | 3.03E-07 |
| TUCP_001081 | XLOC_041191 | ENSRNOT00000016568 | 0.950457441  | 2.16E-06 |
| TUCP_001081 | XLOC_041191 | ENSRNOT00000016401 | 0.950959837  | 2.06E-06 |
| TUCP_001081 | XLOC_041191 | ENSRNOT00000027967 | 0.966422435  | 3.18E-07 |
| TUCP_001081 | XLOC_041191 | ENSRNOT00000047210 | 0.975478592  | 6.70E-08 |
| TUCP_001081 | XLOC_041191 | ENSRNOT00000078349 | -0.953701056 | 1.55E-06 |
| TUCP_001081 | XLOC_041191 | ENSRNOT00000080110 | 0.96322415   | 4.98E-07 |
| TUCP_001081 | XLOC_041191 | ENSRNOT00000083957 | 0.976498586  | 5.43E-08 |
| TUCP_001081 | XLOC_041191 | ENSRNOT00000038066 | 0.95549406   | 1.28E-06 |
| TUCP_001081 | XLOC_041191 | ENSRNOT00000046639 | 0.963836416  | 4.58E-07 |
| TUCP_001081 | XLOC_041191 | ENSRNOT00000079996 | 0.960044202  | 7.50E-07 |
| TUCP_001081 | XLOC_041191 | ENSRNOT00000024548 | 0.966863512  | 2.98E-07 |
| TUCP_002346 | XLOC_098002 | ENSRNOT00000006071 | 0.971197823  | 1.49E-07 |
| TUCP_002346 | XLOC_098002 | ENSRNOT00000082172 | 0.959528891  | 7.99E-07 |
| TUCP_002346 | XLOC_098002 | ENSRNOT00000064070 | 0.965885329  | 3.44E-07 |
| TUCP_002346 | XLOC_098002 | ENSRNOT00000079019 | 0.951361956  | 1.98E-06 |
| TUCP_002346 | XLOC_098002 | ENSRNOT00000023623 | 0.955398796  | 1.29E-06 |
| TUCP_002346 | XLOC_098002 | ENSRNOT00000084177 | -0.971066643 | 1.52E-07 |
| TUCP_002346 | XLOC_098002 | ENSRNOT00000015448 | 0.965691267  | 3.53E-07 |
| TUCP_002346 | XLOC_098002 | ENSRNOT00000072682 | 0.954634502  | 1.40E-06 |
| TUCP_002346 | XLOC_098002 | ENSRNOT00000083344 | 0.958374951  | 9.18E-07 |
| TUCP_002346 | XLOC_098002 | ENSRNOT00000023613 | 0.962144833  | 5.74E-07 |

|             |             |                     |              |          |
|-------------|-------------|---------------------|--------------|----------|
| TUCP_002346 | XLOC_098002 | ENSRNOT00000061430  | 0.961386583  | 6.34E-07 |
| TUCP_002346 | XLOC_098002 | ENSRNOT00000032106  | 0.95506638   | 1.34E-06 |
| TUCP_002346 | XLOC_098002 | ENSRNOT00000057740  | 0.987361639  | 2.49E-09 |
| TUCP_002346 | XLOC_098002 | ENSRNOT00000010701  | 0.957217318  | 1.05E-06 |
| TUCP_002346 | XLOC_098002 | ENSRNOT00000023661  | 0.953429221  | 1.60E-06 |
| TUCP_002346 | XLOC_098002 | ENSRNOT000000081604 | 0.959394798  | 8.12E-07 |
| TUCP_002346 | XLOC_098002 | ENSRNOT000000008440 | 0.953625273  | 1.56E-06 |
| TUCP_002346 | XLOC_098002 | ENSRNOT00000017829  | 0.969193639  | 2.08E-07 |
| TUCP_002346 | XLOC_098002 | ENSRNOT00000071068  | -0.9566985   | 1.11E-06 |
| TUCP_002346 | XLOC_098002 | ENSRNOT000000064122 | 0.964785509  | 4.02E-07 |
| TUCP_002346 | XLOC_098002 | ENSRNOT00000091211  | 0.960595482  | 7.00E-07 |
| TUCP_002262 | XLOC_093918 | ENSRNOT00000035865  | -0.951408013 | 1.97E-06 |
| TUCP_002262 | XLOC_093918 | ENSRNOT00000073955  | 0.952836551  | 1.70E-06 |
| TUCP_002262 | XLOC_093918 | ENSRNOT00000049357  | -0.953707446 | 1.55E-06 |
| TUCP_002262 | XLOC_093918 | ENSRNOT00000079388  | -0.961049045 | 6.61E-07 |
| TUCP_002263 | XLOC_093941 | ENSRNOT00000050656  | 0.950056581  | 2.25E-06 |
| TUCP_002263 | XLOC_093941 | ENSRNOT00000056557  | 0.962051604  | 5.81E-07 |
| TUCP_002263 | XLOC_093941 | ENSRNOT00000065448  | 0.952016741  | 1.85E-06 |
| TUCP_002263 | XLOC_093941 | ENSRNOT00000029990  | 0.951819049  | 1.89E-06 |
| TUCP_002263 | XLOC_093941 | ENSRNOT00000020071  | 0.955523093  | 1.27E-06 |
| TUCP_002263 | XLOC_093941 | ENSRNOT00000088078  | 0.95643087   | 1.15E-06 |
| TUCP_002263 | XLOC_093941 | ENSRNOT00000043486  | 0.970446435  | 1.69E-07 |
| TUCP_002263 | XLOC_093941 | ENSRNOT00000047564  | 0.956264001  | 1.17E-06 |
| TUCP_002263 | XLOC_093941 | ENSRNOT00000017412  | 0.967427106  | 2.73E-07 |
| TUCP_002263 | XLOC_093941 | ENSRNOT00000076910  | 0.965518676  | 3.62E-07 |
| TUCP_002263 | XLOC_093941 | ENSRNOT00000092272  | 0.957547239  | 1.01E-06 |
| TUCP_002263 | XLOC_093941 | ENSRNOT00000082002  | 0.964060193  | 4.45E-07 |
| TUCP_002263 | XLOC_093941 | ENSRNOT00000084429  | 0.952054867  | 1.84E-06 |
| TUCP_002263 | XLOC_093941 | ENSRNOT00000081108  | 0.950405071  | 2.17E-06 |
| TUCP_002263 | XLOC_093941 | ENSRNOT00000030532  | 0.974001254  | 8.96E-08 |
| TUCP_002263 | XLOC_093941 | ENSRNOT00000076618  | 0.96970327   | 1.91E-07 |
| TUCP_000572 | XLOC_020108 | ENSRNOT00000064193  | 0.979840998  | 2.53E-08 |
| TUCP_000572 | XLOC_020108 | ENSRNOT00000075987  | 0.960606803  | 6.99E-07 |
| TUCP_000572 | XLOC_020108 | ENSRNOT00000003451  | 0.985401262  | 5.10E-09 |
| TUCP_000572 | XLOC_020108 | ENSRNOT00000073853  | 0.960480231  | 7.10E-07 |
| TUCP_000573 | XLOC_020375 | ENSRNOT00000002191  | 0.957869523  | 9.74E-07 |
| TUCP_000573 | XLOC_020375 | ENSRNOT00000031458  | 0.954296042  | 1.45E-06 |
| TUCP_000573 | XLOC_020375 | ENSRNOT00000090688  | 0.96801894   | 2.50E-07 |
| TUCP_000573 | XLOC_020375 | ENSRNOT00000028759  | 0.952247094  | 1.80E-06 |
| TUCP_000573 | XLOC_020375 | ENSRNOT00000007634  | 0.963510824  | 4.79E-07 |
| TUCP_000573 | XLOC_020375 | ENSRNOT00000085424  | 0.972926988  | 1.09E-07 |
| TUCP_000573 | XLOC_020375 | ENSRNOT00000078503  | 0.96329623   | 4.93E-07 |
| TUCP_000573 | XLOC_020375 | ENSRNOT00000041897  | -0.952032068 | 1.84E-06 |
| TUCP_000573 | XLOC_020375 | ENSRNOT00000013049  | 0.955195782  | 1.32E-06 |
| TUCP_000573 | XLOC_020375 | ENSRNOT00000019886  | 0.954096785  | 1.49E-06 |
| TUCP_000573 | XLOC_020375 | ENSRNOT00000056430  | 0.955664204  | 1.25E-06 |
| TUCP_002266 | XLOC_094427 | ENSRNOT00000000053  | 0.962788277  | 5.28E-07 |
| TUCP_000575 | XLOC_020464 | ENSRNOT00000083871  | 0.950793426  | 2.09E-06 |
| TUCP_001089 | XLOC_041516 | ENSRNOT00000008573  | 0.957533841  | 1.01E-06 |
| TUCP_001089 | XLOC_041516 | ENSRNOT00000009979  | 0.954432237  | 1.43E-06 |
| TUCP_001089 | XLOC_041516 | ENSRNOT00000006186  | 0.971191898  | 1.49E-07 |

|             |             |                    |              |          |
|-------------|-------------|--------------------|--------------|----------|
| TUCP_001089 | XLOC_041516 | ENSRNOT0000009877  | 0.966062473  | 3.35E-07 |
| TUCP_001089 | XLOC_041516 | ENSRNOT00000021348 | 0.982179028  | 1.37E-08 |
| TUCP_001089 | XLOC_041516 | ENSRNOT00000073559 | 0.990745713  | 5.26E-10 |
| TUCP_001089 | XLOC_041516 | ENSRNOT00000003891 | 0.972278846  | 1.23E-07 |
| TUCP_001089 | XLOC_041516 | ENSRNOT00000025067 | -0.950522739 | 2.15E-06 |
| TUCP_001089 | XLOC_041516 | ENSRNOT00000004017 | 0.9552133    | 1.32E-06 |
| TUCP_001089 | XLOC_041516 | ENSRNOT00000086310 | -0.950486175 | 2.16E-06 |
| TUCP_001089 | XLOC_041516 | ENSRNOT00000010030 | -0.95215191  | 1.82E-06 |
| TUCP_001089 | XLOC_041516 | ENSRNOT00000028856 | 0.980266763  | 2.28E-08 |
| TUCP_001089 | XLOC_041516 | ENSRNOT00000030850 | 0.974746256  | 7.75E-08 |
| TUCP_001089 | XLOC_041516 | ENSRNOT00000055582 | 0.957258478  | 1.05E-06 |
| TUCP_001089 | XLOC_041516 | ENSRNOT00000033017 | 0.950243323  | 2.21E-06 |
| TUCP_001089 | XLOC_041516 | ENSRNOT00000027414 | 0.962139077  | 5.75E-07 |
| TUCP_001089 | XLOC_041516 | ENSRNOT00000006752 | 0.95947124   | 8.04E-07 |
| TUCP_001089 | XLOC_041516 | ENSRNOT00000006321 | -0.955852022 | 1.23E-06 |
| TUCP_001089 | XLOC_041516 | ENSRNOT00000079698 | -0.954698538 | 1.39E-06 |
| TUCP_001089 | XLOC_041516 | ENSRNOT00000085251 | -0.963481871 | 4.81E-07 |
| TUCP_001089 | XLOC_041516 | ENSRNOT00000072771 | 0.950573304  | 2.14E-06 |
| TUCP_001089 | XLOC_041516 | ENSRNOT00000065300 | 0.96612774   | 3.32E-07 |
| TUCP_001089 | XLOC_041516 | ENSRNOT00000044742 | 0.987059645  | 2.80E-09 |
| TUCP_001089 | XLOC_041516 | ENSRNOT00000014701 | 0.959169531  | 8.34E-07 |
| TUCP_001089 | XLOC_041516 | ENSRNOT00000029439 | 0.977525529  | 4.35E-08 |
| TUCP_001089 | XLOC_041516 | ENSRNOT00000045285 | 0.954156733  | 1.48E-06 |
| TUCP_001089 | XLOC_041516 | ENSRNOT00000076820 | 0.966790844  | 3.01E-07 |
| TUCP_001089 | XLOC_041516 | ENSRNOT00000045047 | 0.952448725  | 1.77E-06 |
| TUCP_001089 | XLOC_041516 | ENSRNOT00000075326 | 0.964835909  | 3.99E-07 |
| TUCP_001089 | XLOC_041516 | ENSRNOT00000077999 | 0.959936798  | 7.60E-07 |
| TUCP_001089 | XLOC_041516 | ENSRNOT00000068134 | 0.952640966  | 1.73E-06 |
| TUCP_001089 | XLOC_041516 | ENSRNOT00000024266 | 0.960719296  | 6.89E-07 |
| TUCP_001089 | XLOC_041516 | ENSRNOT00000083215 | 0.955904699  | 1.22E-06 |
| TUCP_001089 | XLOC_041516 | ENSRNOT00000085228 | 0.995034181  | 2.36E-11 |
| TUCP_001089 | XLOC_041516 | ENSRNOT00000020134 | 0.962956877  | 5.16E-07 |
| TUCP_001089 | XLOC_041516 | ENSRNOT00000017319 | 0.98571935   | 4.57E-09 |
| TUCP_001089 | XLOC_041516 | ENSRNOT00000055187 | 0.952982769  | 1.67E-06 |
| TUCP_001089 | XLOC_041516 | ENSRNOT0000005934  | 0.957941216  | 9.66E-07 |
| TUCP_001089 | XLOC_041516 | ENSRNOT00000079866 | 0.987451901  | 2.40E-09 |
| TUCP_001089 | XLOC_041516 | ENSRNOT00000005839 | 0.968792912  | 2.21E-07 |
| TUCP_001089 | XLOC_041516 | ENSRNOT00000008655 | 0.95116114   | 2.02E-06 |
| TUCP_001089 | XLOC_041516 | ENSRNOT00000010149 | 0.956557721  | 1.13E-06 |
| TUCP_001089 | XLOC_041516 | ENSRNOT00000087371 | 0.961628241  | 6.14E-07 |
| TUCP_001089 | XLOC_041516 | ENSRNOT00000037446 | 0.95012042   | 2.24E-06 |
| TUCP_001089 | XLOC_041516 | ENSRNOT00000084709 | 0.959875461  | 7.66E-07 |
| TUCP_001089 | XLOC_041516 | ENSRNOT00000068033 | 0.959634035  | 7.89E-07 |
| TUCP_001089 | XLOC_041516 | ENSRNOT00000009156 | 0.970390451  | 1.71E-07 |
| TUCP_001089 | XLOC_041516 | ENSRNOT00000026481 | 0.975089737  | 7.24E-08 |
| TUCP_001089 | XLOC_041516 | ENSRNOT00000000468 | 0.977408099  | 4.46E-08 |
| TUCP_001089 | XLOC_041516 | ENSRNOT00000044562 | 0.96767254   | 2.63E-07 |
| TUCP_001089 | XLOC_041516 | ENSRNOT00000012892 | 0.976079922  | 5.92E-08 |
| TUCP_001089 | XLOC_041516 | ENSRNOT00000090918 | 0.96482307   | 4.00E-07 |
| TUCP_001089 | XLOC_041516 | ENSRNOT00000023180 | 0.965115144  | 3.84E-07 |
| TUCP_001089 | XLOC_041516 | ENSRNOT00000070815 | 0.950437647  | 2.17E-06 |

|             |             |                    |              |          |
|-------------|-------------|--------------------|--------------|----------|
| TUCP_001089 | XLOC_041516 | ENSRNOT00000028070 | 0.960387098  | 7.19E-07 |
| TUCP_001089 | XLOC_041516 | ENSRNOT00000016132 | -0.966335774 | 3.22E-07 |
| TUCP_001089 | XLOC_041516 | ENSRNOT00000023477 | 0.9673731    | 2.76E-07 |
| TUCP_001089 | XLOC_041516 | ENSRNOT00000034692 | -0.956386059 | 1.15E-06 |
| TUCP_001089 | XLOC_041516 | ENSRNOT00000048063 | 0.953710147  | 1.55E-06 |
| TUCP_001089 | XLOC_041516 | ENSRNOT00000031979 | -0.960033828 | 7.51E-07 |
| TUCP_001089 | XLOC_041516 | ENSRNOT00000033975 | 0.95203168   | 1.84E-06 |
| TUCP_001089 | XLOC_041516 | ENSRNOT00000079895 | 0.96930918   | 2.04E-07 |
| TUCP_001089 | XLOC_041516 | ENSRNOT00000078102 | 0.97824566   | 3.70E-08 |
| TUCP_001089 | XLOC_041516 | ENSRNOT00000026633 | 0.958413532  | 9.13E-07 |
| TUCP_001089 | XLOC_041516 | ENSRNOT00000058072 | 0.96910365   | 2.11E-07 |
| TUCP_001089 | XLOC_041516 | ENSRNOT00000021496 | -0.951857362 | 1.88E-06 |
| TUCP_001089 | XLOC_041516 | ENSRNOT00000011880 | 0.97201362   | 1.29E-07 |
| TUCP_001089 | XLOC_041516 | ENSRNOT00000023989 | 0.979336772  | 2.87E-08 |
| TUCP_001089 | XLOC_041516 | ENSRNOT00000003991 | 0.972034224  | 1.29E-07 |
| TUCP_001089 | XLOC_041516 | ENSRNOT00000021408 | 0.979003786  | 3.10E-08 |
| TUCP_001089 | XLOC_041516 | ENSRNOT00000050515 | 0.966417609  | 3.18E-07 |
| TUCP_001089 | XLOC_041516 | ENSRNOT00000084088 | 0.95860025   | 8.93E-07 |
| TUCP_001089 | XLOC_041516 | ENSRNOT00000064902 | 0.963547121  | 4.77E-07 |
| TUCP_001089 | XLOC_041516 | ENSRNOT00000025027 | 0.959328815  | 8.18E-07 |
| TUCP_001089 | XLOC_041516 | ENSRNOT00000052224 | 0.954424158  | 1.43E-06 |
| TUCP_001089 | XLOC_041516 | ENSRNOT00000078070 | 0.967513032  | 2.70E-07 |
| TUCP_001089 | XLOC_041516 | ENSRNOT00000046745 | 0.98593718   | 4.23E-09 |
| TUCP_001089 | XLOC_041516 | ENSRNOT00000021015 | 0.974064136  | 8.85E-08 |
| TUCP_001089 | XLOC_041516 | ENSRNOT00000076669 | 0.954169529  | 1.47E-06 |
| TUCP_001089 | XLOC_041516 | ENSRNOT00000076729 | 0.956394429  | 1.15E-06 |
| TUCP_001089 | XLOC_041516 | ENSRNOT00000011408 | 0.97016329   | 1.77E-07 |
| TUCP_001089 | XLOC_041516 | ENSRNOT00000091488 | 0.970117217  | 1.78E-07 |
| TUCP_001089 | XLOC_041516 | ENSRNOT00000027452 | 0.982542368  | 1.24E-08 |
| TUCP_001089 | XLOC_041516 | ENSRNOT00000019656 | -0.955411971 | 1.29E-06 |
| TUCP_001089 | XLOC_041516 | ENSRNOT00000006499 | 0.974015685  | 8.93E-08 |
| TUCP_001089 | XLOC_041516 | ENSRNOT00000074649 | 0.963412252  | 4.86E-07 |
| TUCP_001089 | XLOC_041516 | ENSRNOT00000025936 | -0.956933467 | 1.09E-06 |
| TUCP_001089 | XLOC_041516 | ENSRNOT00000036951 | 0.983239042  | 1.01E-08 |
| TUCP_001089 | XLOC_041516 | ENSRNOT00000006969 | 0.970869886  | 1.57E-07 |
| TUCP_001089 | XLOC_041516 | ENSRNOT00000011663 | 0.957668779  | 9.97E-07 |
| TUCP_001089 | XLOC_041516 | ENSRNOT00000078250 | 0.959270507  | 8.24E-07 |
| TUCP_001089 | XLOC_041516 | ENSRNOT00000066133 | -0.964207322 | 4.36E-07 |
| TUCP_001089 | XLOC_041516 | ENSRNOT00000051953 | -0.954704645 | 1.39E-06 |
| TUCP_001089 | XLOC_041516 | ENSRNOT00000085596 | 0.963141655  | 5.04E-07 |
| TUCP_001089 | XLOC_041516 | ENSRNOT00000000728 | -0.962592489 | 5.42E-07 |
| TUCP_001089 | XLOC_041516 | ENSRNOT00000019487 | 0.952452625  | 1.77E-06 |
| TUCP_001089 | XLOC_041516 | ENSRNOT00000080443 | 0.956454852  | 1.15E-06 |
| TUCP_001089 | XLOC_041516 | ENSRNOT00000040069 | 0.955439532  | 1.28E-06 |
| TUCP_001089 | XLOC_041516 | ENSRNOT00000010748 | 0.993171991  | 1.16E-10 |
| TUCP_001089 | XLOC_041516 | ENSRNOT00000035474 | 0.994287977  | 4.74E-11 |
| TUCP_001089 | XLOC_041516 | ENSRNOT00000023807 | -0.953548645 | 1.58E-06 |
| TUCP_001089 | XLOC_041516 | ENSRNOT00000091205 | 0.974379292  | 8.33E-08 |
| TUCP_001089 | XLOC_041516 | ENSRNOT00000060696 | 0.970321405  | 1.73E-07 |
| TUCP_001089 | XLOC_041516 | ENSRNOT00000004787 | -0.956506026 | 1.14E-06 |
| TUCP_001089 | XLOC_041516 | ENSRNOT00000058351 | 0.957341441  | 1.04E-06 |



|             |             |                     |              |          |
|-------------|-------------|---------------------|--------------|----------|
| TUCP_001089 | XLOC_041516 | ENSRNOT00000014814  | 0.968523797  | 2.31E-07 |
| TUCP_001089 | XLOC_041516 | ENSRNOT00000004412  | 0.970957822  | 1.55E-07 |
| TUCP_001089 | XLOC_041516 | ENSRNOT000000080207 | 0.969861061  | 1.86E-07 |
| TUCP_001089 | XLOC_041516 | ENSRNOT000000061100 | 0.972747852  | 1.13E-07 |
| TUCP_001089 | XLOC_041516 | ENSRNOT000000043535 | 0.965119098  | 3.84E-07 |
| TUCP_001089 | XLOC_041516 | ENSRNOT000000013985 | 0.9700828    | 1.80E-07 |
| TUCP_001089 | XLOC_041516 | ENSRNOT000000018998 | 0.960668216  | 6.94E-07 |
| TUCP_001089 | XLOC_041516 | ENSRNOT00000004463  | 0.981134954  | 1.82E-08 |
| TUCP_001089 | XLOC_041516 | ENSRNOT000000009462 | 0.95146602   | 1.95E-06 |
| TUCP_001089 | XLOC_041516 | ENSRNOT000000008982 | 0.980427705  | 2.19E-08 |
| TUCP_001089 | XLOC_041516 | ENSRNOT000000047192 | -0.979512079 | 2.75E-08 |
| TUCP_001089 | XLOC_041516 | ENSRNOT000000090299 | 0.95383195   | 1.53E-06 |
| TUCP_001089 | XLOC_041516 | ENSRNOT000000029001 | 0.951509746  | 1.95E-06 |
| TUCP_001089 | XLOC_041516 | ENSRNOT000000083799 | 0.97138554   | 1.44E-07 |
| TUCP_001089 | XLOC_041516 | ENSRNOT000000081246 | 0.984140783  | 7.69E-09 |
| TUCP_001089 | XLOC_041516 | ENSRNOT000000074939 | 0.979476335  | 2.77E-08 |
| TUCP_001089 | XLOC_041516 | ENSRNOT000000066041 | -0.954959058 | 1.35E-06 |
| TUCP_001089 | XLOC_041516 | ENSRNOT000000006055 | 0.954977963  | 1.35E-06 |
| TUCP_001089 | XLOC_041516 | ENSRNOT00000001290  | 0.958545219  | 8.99E-07 |
| TUCP_001089 | XLOC_041516 | ENSRNOT000000081768 | 0.955675736  | 1.25E-06 |
| TUCP_001089 | XLOC_041516 | ENSRNOT000000019502 | 0.978347873  | 3.61E-08 |
| TUCP_001089 | XLOC_041516 | ENSRNOT000000018057 | 0.952939615  | 1.68E-06 |
| TUCP_001089 | XLOC_041516 | ENSRNOT000000076763 | 0.959798615  | 7.73E-07 |
| TUCP_001089 | XLOC_041516 | ENSRNOT000000043216 | 0.985985168  | 4.16E-09 |
| TUCP_001089 | XLOC_041516 | ENSRNOT000000081981 | 0.97935089   | 2.86E-08 |
| TUCP_001089 | XLOC_041516 | ENSRNOT000000028563 | 0.962983412  | 5.14E-07 |
| TUCP_001089 | XLOC_041516 | ENSRNOT000000010418 | 0.963588577  | 4.74E-07 |
| TUCP_001089 | XLOC_041516 | ENSRNOT000000045699 | 0.969069598  | 2.12E-07 |
| TUCP_001089 | XLOC_041516 | ENSRNOT000000038247 | 0.975649321  | 6.47E-08 |
| TUCP_001089 | XLOC_041516 | ENSRNOT000000047836 | -0.959485858 | 8.03E-07 |
| TUCP_001089 | XLOC_041516 | ENSRNOT000000012379 | 0.961691484  | 6.09E-07 |
| TUCP_001089 | XLOC_041516 | ENSRNOT000000029866 | 0.955469981  | 1.28E-06 |
| TUCP_001089 | XLOC_041516 | ENSRNOT000000048754 | -0.973442818 | 9.95E-08 |
| TUCP_001089 | XLOC_041516 | ENSRNOT000000044628 | 0.954851117  | 1.37E-06 |
| TUCP_001089 | XLOC_041516 | ENSRNOT000000025075 | 0.955463306  | 1.28E-06 |
| TUCP_001089 | XLOC_041516 | ENSRNOT000000079109 | 0.959803673  | 7.72E-07 |
| TUCP_001089 | XLOC_041516 | ENSRNOT000000011926 | 0.960214252  | 7.34E-07 |
| TUCP_001089 | XLOC_041516 | ENSRNOT000000004007 | -0.953390971 | 1.60E-06 |
| TUCP_001089 | XLOC_041516 | ENSRNOT000000052075 | 0.963949739  | 4.51E-07 |
| TUCP_001089 | XLOC_041516 | ENSRNOT000000091602 | -0.958740928 | 8.79E-07 |
| TUCP_001089 | XLOC_041516 | ENSRNOT000000012671 | 0.954460997  | 1.43E-06 |
| TUCP_001089 | XLOC_041516 | ENSRNOT000000006680 | 0.953228602  | 1.63E-06 |
| TUCP_001089 | XLOC_041516 | ENSRNOT000000009708 | -0.963066424 | 5.09E-07 |
| TUCP_001089 | XLOC_041516 | ENSRNOT000000086065 | 0.959438656  | 8.08E-07 |
| TUCP_001089 | XLOC_041516 | ENSRNOT000000077231 | 0.968461244  | 2.33E-07 |
| TUCP_001089 | XLOC_041516 | ENSRNOT000000009811 | 0.983079392  | 1.06E-08 |
| TUCP_001089 | XLOC_041516 | ENSRNOT000000087592 | 0.961568341  | 6.19E-07 |
| TUCP_001089 | XLOC_041516 | ENSRNOT000000052002 | 0.95530308   | 1.30E-06 |
| TUCP_001089 | XLOC_041516 | ENSRNOT000000017556 | 0.958958586  | 8.56E-07 |
| TUCP_001089 | XLOC_041516 | ENSRNOT000000087443 | 0.971989532  | 1.30E-07 |
| TUCP_001089 | XLOC_041516 | ENSRNOT000000021803 | -0.963615956 | 4.72E-07 |

|             |             |                    |              |          |
|-------------|-------------|--------------------|--------------|----------|
| TUCP_001089 | XLOC_041516 | ENSRNOT00000020028 | 0.971321613  | 1.46E-07 |
| TUCP_001089 | XLOC_041516 | ENSRNOT00000046973 | 0.955353205  | 1.30E-06 |
| TUCP_001089 | XLOC_041516 | ENSRNOT00000024352 | 0.954925113  | 1.36E-06 |
| TUCP_001089 | XLOC_041516 | ENSRNOT00000083220 | 0.960335662  | 7.23E-07 |
| TUCP_001089 | XLOC_041516 | ENSRNOT00000058312 | 0.963908288  | 4.54E-07 |
| TUCP_001089 | XLOC_041516 | ENSRNOT00000060362 | 0.97634401   | 5.61E-08 |
| TUCP_001089 | XLOC_041516 | ENSRNOT00000013274 | 0.9712413    | 1.48E-07 |
| TUCP_001089 | XLOC_041516 | ENSRNOT00000022610 | 0.955864202  | 1.22E-06 |
| TUCP_001089 | XLOC_041516 | ENSRNOT00000010898 | 0.96029627   | 7.27E-07 |
| TUCP_001089 | XLOC_041516 | ENSRNOT00000068381 | 0.972747932  | 1.13E-07 |
| TUCP_001089 | XLOC_041516 | ENSRNOT00000029167 | 0.95195545   | 1.86E-06 |
| TUCP_001089 | XLOC_041516 | ENSRNOT00000010873 | -0.952492177 | 1.76E-06 |
| TUCP_001089 | XLOC_041516 | ENSRNOT00000088599 | 0.95974699   | 7.78E-07 |
| TUCP_001089 | XLOC_041516 | ENSRNOT00000016129 | 0.959502421  | 8.01E-07 |
| TUCP_001089 | XLOC_041516 | ENSRNOT00000026174 | 0.970787099  | 1.60E-07 |
| TUCP_001089 | XLOC_041516 | ENSRNOT00000017021 | 0.959864485  | 7.67E-07 |
| TUCP_001089 | XLOC_041516 | ENSRNOT00000034744 | 0.951746219  | 1.90E-06 |
| TUCP_001089 | XLOC_041516 | ENSRNOT00000009683 | 0.964517722  | 4.17E-07 |
| TUCP_001089 | XLOC_041516 | ENSRNOT00000005459 | 0.956948874  | 1.08E-06 |
| TUCP_001089 | XLOC_041516 | ENSRNOT00000017776 | 0.989469913  | 1.00E-09 |
| TUCP_001089 | XLOC_041516 | ENSRNOT00000027910 | 0.979993256  | 2.44E-08 |
| TUCP_001089 | XLOC_041516 | ENSRNOT00000002771 | 0.965001471  | 3.90E-07 |
| TUCP_001089 | XLOC_041516 | ENSRNOT00000079442 | 0.953072142  | 1.66E-06 |
| TUCP_001089 | XLOC_041516 | ENSRNOT00000024322 | 0.989506287  | 9.85E-10 |
| TUCP_001089 | XLOC_041516 | ENSRNOT00000088182 | 0.950693896  | 2.11E-06 |
| TUCP_001089 | XLOC_041516 | ENSRNOT00000011270 | 0.964017194  | 4.47E-07 |
| TUCP_001089 | XLOC_041516 | ENSRNOT00000003770 | -0.95639321  | 1.15E-06 |
| TUCP_001089 | XLOC_041516 | ENSRNOT00000010784 | 0.967073435  | 2.88E-07 |
| TUCP_001089 | XLOC_041516 | ENSRNOT00000016191 | 0.959174774  | 8.34E-07 |
| TUCP_001089 | XLOC_041516 | ENSRNOT00000078390 | -0.963115006 | 5.05E-07 |
| TUCP_001089 | XLOC_041516 | ENSRNOT00000026457 | 0.972960309  | 1.09E-07 |
| TUCP_001089 | XLOC_041516 | ENSRNOT00000008427 | -0.956492207 | 1.14E-06 |
| TUCP_001089 | XLOC_041516 | ENSRNOT00000002109 | 0.971225099  | 1.48E-07 |
| TUCP_001089 | XLOC_041516 | ENSRNOT00000029833 | 0.982477781  | 1.26E-08 |
| TUCP_001089 | XLOC_041516 | ENSRNOT00000034487 | -0.955908274 | 1.22E-06 |
| TUCP_001089 | XLOC_041516 | ENSRNOT00000016519 | 0.95017372   | 2.22E-06 |
| TUCP_001089 | XLOC_041516 | ENSRNOT00000002173 | -0.952483869 | 1.76E-06 |
| TUCP_001089 | XLOC_041516 | ENSRNOT00000015188 | 0.97969822   | 2.63E-08 |
| TUCP_001089 | XLOC_041516 | ENSRNOT00000090420 | -0.950765786 | 2.10E-06 |
| TUCP_001089 | XLOC_041516 | ENSRNOT00000031401 | -0.956601164 | 1.13E-06 |
| TUCP_001089 | XLOC_041516 | ENSRNOT00000000157 | 0.961661235  | 6.12E-07 |
| TUCP_001089 | XLOC_041516 | ENSRNOT00000027666 | 0.951963613  | 1.86E-06 |
| TUCP_001089 | XLOC_041516 | ENSRNOT00000072518 | 0.985779415  | 4.47E-09 |
| TUCP_001089 | XLOC_041516 | ENSRNOT00000011984 | 0.965737447  | 3.51E-07 |
| TUCP_001089 | XLOC_041516 | ENSRNOT00000012895 | 0.965272818  | 3.75E-07 |
| TUCP_001089 | XLOC_041516 | ENSRNOT00000016991 | 0.969949918  | 1.83E-07 |
| TUCP_001089 | XLOC_041516 | ENSRNOT00000020669 | 0.956335857  | 1.16E-06 |
| TUCP_001089 | XLOC_041516 | ENSRNOT00000043872 | 0.961732694  | 6.06E-07 |
| TUCP_001089 | XLOC_041516 | ENSRNOT00000074653 | 0.957794427  | 9.82E-07 |
| TUCP_001089 | XLOC_041516 | ENSRNOT00000031230 | 0.973609658  | 9.64E-08 |
| TUCP_001089 | XLOC_041516 | ENSRNOT00000015898 | 0.956735471  | 1.11E-06 |

|             |             |                     |              |          |
|-------------|-------------|---------------------|--------------|----------|
| TUCP_001089 | XLOC_041516 | ENSRNOT00000022142  | 0.956198342  | 1.18E-06 |
| TUCP_001089 | XLOC_041516 | ENSRNOT00000077406  | 0.976667488  | 5.24E-08 |
| TUCP_001089 | XLOC_041516 | ENSRNOT00000005405  | 0.965821335  | 3.47E-07 |
| TUCP_001089 | XLOC_041516 | ENSRNOT00000083127  | 0.960811911  | 6.81E-07 |
| TUCP_001089 | XLOC_041516 | ENSRNOT00000052120  | 0.957886819  | 9.72E-07 |
| TUCP_001089 | XLOC_041516 | ENSRNOT00000019820  | 0.979886799  | 2.51E-08 |
| TUCP_001089 | XLOC_041516 | ENSRNOT00000004172  | 0.984616799  | 6.61E-09 |
| TUCP_001089 | XLOC_041516 | ENSRNOT00000040476  | 0.970900709  | 1.56E-07 |
| TUCP_001089 | XLOC_041516 | ENSRNOT00000029125  | 0.981027945  | 1.88E-08 |
| TUCP_001089 | XLOC_041516 | ENSRNOT00000085279  | 0.969528929  | 1.97E-07 |
| TUCP_001089 | XLOC_041516 | ENSRNOT00000067181  | 0.954280405  | 1.46E-06 |
| TUCP_001089 | XLOC_041516 | ENSRNOT00000004319  | -0.951366892 | 1.97E-06 |
| TUCP_001089 | XLOC_041516 | ENSRNOT00000026280  | 0.974169305  | 8.67E-08 |
| TUCP_001089 | XLOC_041516 | ENSRNOT00000010927  | 0.971101555  | 1.51E-07 |
| TUCP_001089 | XLOC_041516 | ENSRNOT00000005387  | 0.953355437  | 1.61E-06 |
| TUCP_001089 | XLOC_041516 | ENSRNOT00000022862  | 0.954545184  | 1.42E-06 |
| TUCP_001089 | XLOC_041516 | ENSRNOT00000015092  | 0.950292843  | 2.20E-06 |
| TUCP_001089 | XLOC_041516 | ENSRNOT00000017165  | -0.971830912 | 1.33E-07 |
| TUCP_001089 | XLOC_041516 | ENSRNOT00000010224  | 0.970320024  | 1.73E-07 |
| TUCP_001089 | XLOC_041516 | ENSRNOT00000007175  | 0.972229592  | 1.24E-07 |
| TUCP_001089 | XLOC_041516 | ENSRNOT000000051022 | 0.972885668  | 1.10E-07 |
| TUCP_001089 | XLOC_041516 | ENSRNOT00000017687  | -0.950064531 | 2.25E-06 |
| TUCP_001089 | XLOC_041516 | ENSRNOT00000015799  | 0.982630116  | 1.21E-08 |
| TUCP_001089 | XLOC_041516 | ENSRNOT00000005958  | 0.96859378   | 2.28E-07 |
| TUCP_001089 | XLOC_041516 | ENSRNOT00000039551  | -0.950640569 | 2.12E-06 |
| TUCP_001089 | XLOC_041516 | ENSRNOT00000082998  | 0.969489156  | 1.98E-07 |
| TUCP_001089 | XLOC_041516 | ENSRNOT00000015006  | 0.977373389  | 4.50E-08 |
| TUCP_001089 | XLOC_041516 | ENSRNOT00000007351  | -0.978220465 | 3.72E-08 |
| TUCP_001089 | XLOC_041516 | ENSRNOT00000017665  | 0.954924137  | 1.36E-06 |
| TUCP_001089 | XLOC_041516 | ENSRNOT00000023133  | 0.957056195  | 1.07E-06 |
| TUCP_001089 | XLOC_041516 | ENSRNOT00000026065  | 0.952341825  | 1.79E-06 |
| TUCP_001089 | XLOC_041516 | ENSRNOT00000023638  | 0.981126564  | 1.83E-08 |
| TUCP_001089 | XLOC_041516 | ENSRNOT00000005228  | 0.973598052  | 9.67E-08 |
| TUCP_001089 | XLOC_041516 | ENSRNOT00000022726  | 0.966684865  | 3.06E-07 |
| TUCP_001089 | XLOC_041516 | ENSRNOT00000028628  | -0.957204316 | 1.05E-06 |
| TUCP_001089 | XLOC_041516 | ENSRNOT00000005220  | 0.970110973  | 1.79E-07 |
| TUCP_001089 | XLOC_041516 | ENSRNOT00000023144  | 0.965786229  | 3.49E-07 |
| TUCP_001089 | XLOC_041516 | ENSRNOT00000045326  | 0.975441763  | 6.75E-08 |
| TUCP_001089 | XLOC_041516 | ENSRNOT00000016649  | 0.966282728  | 3.24E-07 |
| TUCP_001089 | XLOC_041516 | ENSRNOT00000090342  | 0.973744262  | 9.40E-08 |
| TUCP_001089 | XLOC_041516 | ENSRNOT00000067170  | -0.955701152 | 1.25E-06 |
| TUCP_001089 | XLOC_041516 | ENSRNOT00000077871  | 0.950332505  | 2.19E-06 |
| TUCP_001089 | XLOC_041516 | ENSRNOT00000091128  | -0.975730636 | 6.37E-08 |
| TUCP_001089 | XLOC_041516 | ENSRNOT00000001586  | -0.959516369 | 8.00E-07 |
| TUCP_001089 | XLOC_041516 | ENSRNOT00000026543  | 0.964388801  | 4.25E-07 |
| TUCP_001089 | XLOC_041516 | ENSRNOT00000066670  | 0.954476381  | 1.43E-06 |
| TUCP_001089 | XLOC_041516 | ENSRNOT00000081786  | -0.950210499 | 2.22E-06 |
| TUCP_001089 | XLOC_041516 | ENSRNOT00000071971  | 0.968720165  | 2.24E-07 |
| TUCP_001089 | XLOC_041516 | ENSRNOT00000043554  | 0.961500733  | 6.24E-07 |
| TUCP_001089 | XLOC_041516 | ENSRNOT00000012187  | 0.979044367  | 3.07E-08 |
| TUCP_001089 | XLOC_041516 | ENSRNOT00000024969  | 0.961463373  | 6.27E-07 |

|             |             |                    |              |          |
|-------------|-------------|--------------------|--------------|----------|
| TUCP_001089 | XLOC_041516 | ENSRNOT00000013049 | 0.953464125  | 1.59E-06 |
| TUCP_001089 | XLOC_041516 | ENSRNOT00000026783 | 0.984811762  | 6.21E-09 |
| TUCP_001089 | XLOC_041516 | ENSRNOT00000088125 | 0.957142385  | 1.06E-06 |
| TUCP_001089 | XLOC_041516 | ENSRNOT00000084385 | 0.976632855  | 5.28E-08 |
| TUCP_001089 | XLOC_041516 | ENSRNOT00000027944 | 0.950907247  | 2.07E-06 |
| TUCP_001089 | XLOC_041516 | ENSRNOT00000024402 | 0.959578245  | 7.94E-07 |
| TUCP_001089 | XLOC_041516 | ENSRNOT00000019519 | 0.956997629  | 1.08E-06 |
| TUCP_001089 | XLOC_041516 | ENSRNOT00000089933 | 0.971874104  | 1.32E-07 |
| TUCP_001089 | XLOC_041516 | ENSRNOT00000077908 | 0.969458562  | 1.99E-07 |
| TUCP_001089 | XLOC_041516 | ENSRNOT00000090912 | 0.951329868  | 1.98E-06 |
| TUCP_001089 | XLOC_041516 | ENSRNOT00000010463 | 0.975303774  | 6.94E-08 |
| TUCP_001089 | XLOC_041516 | ENSRNOT00000026718 | 0.966219939  | 3.27E-07 |
| TUCP_001089 | XLOC_041516 | ENSRNOT00000072208 | 0.96100291   | 6.65E-07 |
| TUCP_001089 | XLOC_041516 | ENSRNOT00000032780 | 0.977079477  | 4.79E-08 |
| TUCP_001089 | XLOC_041516 | ENSRNOT00000033677 | -0.964069673 | 4.44E-07 |
| TUCP_001089 | XLOC_041516 | ENSRNOT00000072196 | 0.97271465   | 1.14E-07 |
| TUCP_001089 | XLOC_041516 | ENSRNOT00000036931 | -0.951319508 | 1.98E-06 |
| TUCP_001089 | XLOC_041516 | ENSRNOT00000067822 | 0.961750931  | 6.05E-07 |
| TUCP_001089 | XLOC_041516 | ENSRNOT00000002410 | 0.972735649  | 1.13E-07 |
| TUCP_001089 | XLOC_041516 | ENSRNOT00000024060 | 0.952107641  | 1.83E-06 |
| TUCP_001089 | XLOC_041516 | ENSRNOT00000077727 | -0.950182078 | 2.22E-06 |
| TUCP_001089 | XLOC_041516 | ENSRNOT00000021037 | 0.980421695  | 2.19E-08 |
| TUCP_001089 | XLOC_041516 | ENSRNOT00000044346 | -0.953458588 | 1.59E-06 |
| TUCP_001089 | XLOC_041516 | ENSRNOT00000010541 | 0.967279074  | 2.80E-07 |
| TUCP_001089 | XLOC_041516 | ENSRNOT00000004032 | 0.974223815  | 8.58E-08 |
| TUCP_001089 | XLOC_041516 | ENSRNOT00000048613 | 0.961962781  | 5.88E-07 |
| TUCP_001089 | XLOC_041516 | ENSRNOT00000017948 | 0.954963034  | 1.35E-06 |
| TUCP_001089 | XLOC_041516 | ENSRNOT00000091909 | 0.968071125  | 2.48E-07 |
| TUCP_001089 | XLOC_041516 | ENSRNOT00000001081 | 0.98144376   | 1.68E-08 |
| TUCP_001089 | XLOC_041516 | ENSRNOT00000086119 | -0.970024095 | 1.81E-07 |
| TUCP_001089 | XLOC_041516 | ENSRNOT00000019222 | 0.958367197  | 9.18E-07 |
| TUCP_001089 | XLOC_041516 | ENSRNOT00000077220 | -0.950953001 | 2.06E-06 |
| TUCP_001089 | XLOC_041516 | ENSRNOT00000065983 | 0.975148706  | 7.16E-08 |
| TUCP_001089 | XLOC_041516 | ENSRNOT00000030782 | -0.951672498 | 1.91E-06 |
| TUCP_001089 | XLOC_041516 | ENSRNOT00000052018 | 0.955447033  | 1.28E-06 |
| TUCP_001089 | XLOC_041516 | ENSRNOT00000067780 | -0.958894498 | 8.63E-07 |
| TUCP_001089 | XLOC_041516 | ENSRNOT00000015265 | 0.963549309  | 4.77E-07 |
| TUCP_001089 | XLOC_041516 | ENSRNOT00000007768 | 0.959898744  | 7.63E-07 |
| TUCP_001089 | XLOC_041516 | ENSRNOT00000052422 | 0.985132228  | 5.58E-09 |
| TUCP_001089 | XLOC_041516 | ENSRNOT00000001242 | 0.966131662  | 3.32E-07 |
| TUCP_001089 | XLOC_041516 | ENSRNOT00000015609 | 0.984730517  | 6.37E-09 |
| TUCP_001089 | XLOC_041516 | ENSRNOT00000086590 | 0.967226632  | 2.82E-07 |
| TUCP_001089 | XLOC_041516 | ENSRNOT00000025983 | 0.956903045  | 1.09E-06 |
| TUCP_001089 | XLOC_041516 | ENSRNOT00000020155 | 0.9634231    | 4.85E-07 |
| TUCP_001089 | XLOC_041516 | ENSRNOT00000055321 | 0.952366374  | 1.78E-06 |
| TUCP_001089 | XLOC_041516 | ENSRNOT00000004698 | 0.962284971  | 5.64E-07 |
| TUCP_001089 | XLOC_041516 | ENSRNOT00000045083 | 0.952439753  | 1.77E-06 |
| TUCP_001089 | XLOC_041516 | ENSRNOT00000014537 | 0.981008526  | 1.88E-08 |
| TUCP_001089 | XLOC_041516 | ENSRNOT00000017629 | 0.954383518  | 1.44E-06 |
| TUCP_001089 | XLOC_041516 | ENSRNOT00000078475 | 0.971220546  | 1.48E-07 |
| TUCP_001089 | XLOC_041516 | ENSRNOT00000087429 | 0.962586575  | 5.42E-07 |

|             |             |                     |              |          |
|-------------|-------------|---------------------|--------------|----------|
| TUCP_001089 | XLOC_041516 | ENSRNOT00000022213  | 0.961977879  | 5.87E-07 |
| TUCP_001089 | XLOC_041516 | ENSRNOT00000016722  | 0.975303938  | 6.94E-08 |
| TUCP_001089 | XLOC_041516 | ENSRNOT00000091265  | 0.971438152  | 1.43E-07 |
| TUCP_001089 | XLOC_041516 | ENSRNOT00000073526  | 0.961713261  | 6.08E-07 |
| TUCP_001089 | XLOC_041516 | ENSRNOT00000065501  | 0.95226135   | 1.80E-06 |
| TUCP_001089 | XLOC_041516 | ENSRNOT00000000013  | 0.978245698  | 3.70E-08 |
| TUCP_001089 | XLOC_041516 | ENSRNOT00000017753  | 0.990861086  | 4.94E-10 |
| TUCP_001089 | XLOC_041516 | ENSRNOT00000045882  | 0.959698443  | 7.82E-07 |
| TUCP_001089 | XLOC_041516 | ENSRNOT00000009198  | 0.959548761  | 7.97E-07 |
| TUCP_001089 | XLOC_041516 | ENSRNOT000000031904 | 0.954367238  | 1.44E-06 |
| TUCP_001089 | XLOC_041516 | ENSRNOT00000009129  | 0.962820003  | 5.26E-07 |
| TUCP_001089 | XLOC_041516 | ENSRNOT00000022074  | 0.981467692  | 1.67E-08 |
| TUCP_001089 | XLOC_041516 | ENSRNOT00000009691  | 0.954972907  | 1.35E-06 |
| TUCP_001089 | XLOC_041516 | ENSRNOT00000041365  | 0.962933845  | 5.18E-07 |
| TUCP_001089 | XLOC_041516 | ENSRNOT00000088054  | 0.962532509  | 5.46E-07 |
| TUCP_001089 | XLOC_041516 | ENSRNOT00000038703  | 0.965965394  | 3.40E-07 |
| TUCP_001089 | XLOC_041516 | ENSRNOT00000019554  | 0.963455648  | 4.83E-07 |
| TUCP_001089 | XLOC_041516 | ENSRNOT00000011384  | 0.962483943  | 5.50E-07 |
| TUCP_001089 | XLOC_041516 | ENSRNOT00000035700  | 0.982071369  | 1.42E-08 |
| TUCP_001089 | XLOC_041516 | ENSRNOT00000029202  | -0.958797093 | 8.73E-07 |
| TUCP_001089 | XLOC_041516 | ENSRNOT000000092029 | 0.974586161  | 8.00E-08 |
| TUCP_001089 | XLOC_041516 | ENSRNOT00000084422  | 0.976667946  | 5.24E-08 |
| TUCP_001089 | XLOC_041516 | ENSRNOT00000050834  | -0.951097703 | 2.03E-06 |
| TUCP_001089 | XLOC_041516 | ENSRNOT00000054828  | 0.981778369  | 1.53E-08 |
| TUCP_001089 | XLOC_041516 | ENSRNOT00000078994  | 0.969029799  | 2.13E-07 |
| TUCP_001089 | XLOC_041516 | ENSRNOT00000027970  | 0.96849239   | 2.32E-07 |
| TUCP_001089 | XLOC_041516 | ENSRNOT00000080928  | 0.954501827  | 1.42E-06 |
| TUCP_001089 | XLOC_041516 | ENSRNOT00000018074  | -0.963900968 | 4.54E-07 |
| TUCP_001089 | XLOC_041516 | ENSRNOT00000014124  | 0.982215622  | 1.36E-08 |
| TUCP_001089 | XLOC_041516 | ENSRNOT00000000120  | 0.953199026  | 1.63E-06 |
| TUCP_001089 | XLOC_041516 | ENSRNOT00000013632  | 0.96381556   | 4.60E-07 |
| TUCP_001089 | XLOC_041516 | ENSRNOT00000009900  | -0.962201225 | 5.70E-07 |
| TUCP_001089 | XLOC_041516 | ENSRNOT00000014979  | 0.967251639  | 2.81E-07 |
| TUCP_001089 | XLOC_041516 | ENSRNOT00000019172  | -0.953011162 | 1.67E-06 |
| TUCP_001089 | XLOC_041516 | ENSRNOT00000064798  | 0.994830896  | 2.88E-11 |
| TUCP_001089 | XLOC_041516 | ENSRNOT00000019177  | 0.977025604  | 4.85E-08 |
| TUCP_001089 | XLOC_041516 | ENSRNOT00000022485  | 0.97513629   | 7.18E-08 |
| TUCP_001089 | XLOC_041516 | ENSRNOT00000040393  | 0.979308299  | 2.89E-08 |
| TUCP_001089 | XLOC_041516 | ENSRNOT00000067901  | -0.972775213 | 1.13E-07 |
| TUCP_001089 | XLOC_041516 | ENSRNOT00000036750  | 0.969900088  | 1.85E-07 |
| TUCP_001089 | XLOC_041516 | ENSRNOT00000024659  | 0.957631343  | 1.00E-06 |
| TUCP_001089 | XLOC_041516 | ENSRNOT00000011041  | 0.959501359  | 8.02E-07 |
| TUCP_001089 | XLOC_041516 | ENSRNOT00000021674  | 0.968623183  | 2.27E-07 |
| TUCP_001089 | XLOC_041516 | ENSRNOT00000064700  | 0.973108417  | 1.06E-07 |
| TUCP_001089 | XLOC_041516 | ENSRNOT00000036613  | -0.953268376 | 1.62E-06 |
| TUCP_001089 | XLOC_041516 | ENSRNOT00000002292  | 0.976307843  | 5.65E-08 |
| TUCP_001089 | XLOC_041516 | ENSRNOT00000025705  | 0.952495725  | 1.76E-06 |
| TUCP_001089 | XLOC_041516 | ENSRNOT00000015479  | 0.973518178  | 9.81E-08 |
| TUCP_001089 | XLOC_041516 | ENSRNOT00000004140  | 0.976497562  | 5.43E-08 |
| TUCP_001089 | XLOC_041516 | ENSRNOT00000011682  | -0.954271355 | 1.46E-06 |
| TUCP_001089 | XLOC_041516 | ENSRNOT00000027407  | 0.958817118  | 8.71E-07 |

|             |             |                    |              |          |
|-------------|-------------|--------------------|--------------|----------|
| TUCP_001089 | XLOC_041516 | ENSRNOT00000048910 | -0.965287137 | 3.74E-07 |
| TUCP_001089 | XLOC_041516 | ENSRNOT00000019213 | 0.972029383  | 1.29E-07 |
| TUCP_001089 | XLOC_041516 | ENSRNOT00000071560 | 0.957825971  | 9.79E-07 |
| TUCP_001089 | XLOC_041516 | ENSRNOT00000086336 | 0.969875423  | 1.86E-07 |
| TUCP_001089 | XLOC_041516 | ENSRNOT00000082508 | -0.959308028 | 8.21E-07 |
| TUCP_001089 | XLOC_041516 | ENSRNOT00000082863 | 0.958062289  | 9.52E-07 |
| TUCP_001089 | XLOC_041516 | ENSRNOT00000007164 | 0.966007776  | 3.38E-07 |
| TUCP_001089 | XLOC_041516 | ENSRNOT00000049459 | -0.951391286 | 1.97E-06 |
| TUCP_001089 | XLOC_041516 | ENSRNOT00000071166 | 0.959258532  | 8.25E-07 |
| TUCP_001089 | XLOC_041516 | ENSRNOT00000047387 | 0.959290785  | 8.22E-07 |
| TUCP_001089 | XLOC_041516 | ENSRNOT00000025079 | -0.962486174 | 5.49E-07 |
| TUCP_001089 | XLOC_041516 | ENSRNOT00000009496 | 0.979111513  | 3.02E-08 |
| TUCP_001089 | XLOC_041516 | ENSRNOT00000083369 | 0.959746605  | 7.78E-07 |
| TUCP_001089 | XLOC_041516 | ENSRNOT00000043345 | 0.963072624  | 5.08E-07 |
| TUCP_001089 | XLOC_041516 | ENSRNOT00000076872 | 0.981728926  | 1.56E-08 |
| TUCP_001089 | XLOC_041516 | ENSRNOT00000015073 | 0.958199593  | 9.37E-07 |
| TUCP_001089 | XLOC_041516 | ENSRNOT00000005942 | 0.962196853  | 5.71E-07 |
| TUCP_001089 | XLOC_041516 | ENSRNOT00000018533 | 0.960074536  | 7.47E-07 |
| TUCP_001089 | XLOC_041516 | ENSRNOT00000001507 | 0.969463272  | 1.99E-07 |
| TUCP_001089 | XLOC_041516 | ENSRNOT00000028646 | 0.957166162  | 1.06E-06 |
| TUCP_001089 | XLOC_041516 | ENSRNOT00000081047 | 0.981794372  | 1.53E-08 |
| TUCP_001089 | XLOC_041516 | ENSRNOT00000071764 | 0.979632956  | 2.67E-08 |
| TUCP_001089 | XLOC_041516 | ENSRNOT00000016801 | 0.950738486  | 2.10E-06 |
| TUCP_001089 | XLOC_041516 | ENSRNOT00000037456 | 0.974502407  | 8.13E-08 |
| TUCP_001089 | XLOC_041516 | ENSRNOT00000065168 | 0.971604445  | 1.39E-07 |
| TUCP_001089 | XLOC_041516 | ENSRNOT00000071853 | -0.953297507 | 1.62E-06 |
| TUCP_001089 | XLOC_041516 | ENSRNOT00000000577 | 0.956994328  | 1.08E-06 |
| TUCP_001089 | XLOC_041516 | ENSRNOT00000055669 | 0.953422749  | 1.60E-06 |
| TUCP_001089 | XLOC_041516 | ENSRNOT00000001809 | 0.956064011  | 1.20E-06 |
| TUCP_001089 | XLOC_041516 | ENSRNOT00000041513 | 0.951361244  | 1.98E-06 |
| TUCP_001089 | XLOC_041516 | ENSRNOT00000061392 | 0.978796977  | 3.26E-08 |
| TUCP_001089 | XLOC_041516 | ENSRNOT00000027012 | 0.959830343  | 7.70E-07 |
| TUCP_001089 | XLOC_041516 | ENSRNOT00000024771 | 0.959159463  | 8.35E-07 |
| TUCP_001089 | XLOC_041516 | ENSRNOT00000073991 | 0.957676193  | 9.96E-07 |
| TUCP_001089 | XLOC_041516 | ENSRNOT00000028266 | 0.962414732  | 5.55E-07 |
| TUCP_001089 | XLOC_041516 | ENSRNOT00000016321 | -0.95769629  | 9.94E-07 |
| TUCP_001089 | XLOC_041516 | ENSRNOT00000019133 | 0.974036983  | 8.89E-08 |
| TUCP_001089 | XLOC_041516 | ENSRNOT00000020437 | 0.973444674  | 9.95E-08 |
| TUCP_001089 | XLOC_041516 | ENSRNOT00000024119 | 0.961779146  | 6.02E-07 |
| TUCP_001089 | XLOC_041516 | ENSRNOT00000087095 | 0.968222975  | 2.42E-07 |
| TUCP_001089 | XLOC_041516 | ENSRNOT00000090123 | 0.971176505  | 1.49E-07 |
| TUCP_001089 | XLOC_041516 | ENSRNOT00000027526 | 0.961422401  | 6.31E-07 |
| TUCP_001089 | XLOC_041516 | ENSRNOT00000045488 | 0.950851741  | 2.08E-06 |
| TUCP_001089 | XLOC_041516 | ENSRNOT00000093174 | 0.964060593  | 4.45E-07 |
| TUCP_001089 | XLOC_041516 | ENSRNOT00000077555 | 0.974038011  | 8.89E-08 |
| TUCP_001089 | XLOC_041516 | ENSRNOT00000078073 | -0.958774693 | 8.75E-07 |
| TUCP_001089 | XLOC_041516 | ENSRNOT00000036666 | 0.968931021  | 2.16E-07 |
| TUCP_001089 | XLOC_041516 | ENSRNOT00000089211 | 0.956172046  | 1.18E-06 |
| TUCP_001089 | XLOC_041516 | ENSRNOT00000087502 | 0.970286843  | 1.74E-07 |
| TUCP_001089 | XLOC_041516 | ENSRNOT00000041106 | 0.955318053  | 1.30E-06 |
| TUCP_001089 | XLOC_041516 | ENSRNOT00000012424 | 0.95572116   | 1.24E-06 |

|             |             |                     |              |          |
|-------------|-------------|---------------------|--------------|----------|
| TUCP_001089 | XLOC_041516 | ENSRNOT0000000658   | 0.955440161  | 1.28E-06 |
| TUCP_001089 | XLOC_041516 | ENSRNOT00000021944  | 0.957309484  | 1.04E-06 |
| TUCP_001089 | XLOC_041516 | ENSRNOT00000025832  | 0.97301864   | 1.08E-07 |
| TUCP_001089 | XLOC_041516 | ENSRNOT0000005909   | 0.98323046   | 1.02E-08 |
| TUCP_001089 | XLOC_041516 | ENSRNOT00000087725  | 0.950002236  | 2.26E-06 |
| TUCP_001089 | XLOC_041516 | ENSRNOT00000086122  | 0.976557127  | 5.36E-08 |
| TUCP_001089 | XLOC_041516 | ENSRNOT00000026231  | 0.951678425  | 1.91E-06 |
| TUCP_001089 | XLOC_041516 | ENSRNOT00000044009  | 0.966122192  | 3.32E-07 |
| TUCP_001089 | XLOC_041516 | ENSRNOT00000075424  | 0.970518778  | 1.67E-07 |
| TUCP_001089 | XLOC_041516 | ENSRNOT00000058842  | 0.967748951  | 2.60E-07 |
| TUCP_001089 | XLOC_041516 | ENSRNOT00000023645  | 0.96180189   | 6.01E-07 |
| TUCP_001089 | XLOC_041516 | ENSRNOT00000084734  | 0.956884796  | 1.09E-06 |
| TUCP_001089 | XLOC_041516 | ENSRNOT00000059181  | 0.951921434  | 1.87E-06 |
| TUCP_001089 | XLOC_041516 | ENSRNOT00000064840  | 0.963701232  | 4.67E-07 |
| TUCP_001089 | XLOC_041516 | ENSRNOT00000003690  | 0.973010464  | 1.08E-07 |
| TUCP_001089 | XLOC_041516 | ENSRNOT00000090925  | 0.967109849  | 2.87E-07 |
| TUCP_001089 | XLOC_041516 | ENSRNOT00000011350  | 0.960075156  | 7.47E-07 |
| TUCP_001089 | XLOC_041516 | ENSRNOT00000008901  | -0.968843984 | 2.19E-07 |
| TUCP_001089 | XLOC_041516 | ENSRNOT00000005659  | 0.970544494  | 1.66E-07 |
| TUCP_001089 | XLOC_041516 | ENSRNOT00000017761  | 0.972663144  | 1.15E-07 |
| TUCP_001089 | XLOC_041516 | ENSRNOT00000058563  | 0.953829963  | 1.53E-06 |
| TUCP_001089 | XLOC_041516 | ENSRNOT00000080608  | 0.962225227  | 5.68E-07 |
| TUCP_001089 | XLOC_041516 | ENSRNOT00000071733  | 0.966837492  | 2.99E-07 |
| TUCP_001089 | XLOC_041516 | ENSRNOT00000008757  | 0.956863661  | 1.09E-06 |
| TUCP_001089 | XLOC_041516 | ENSRNOT00000005478  | -0.956228581 | 1.18E-06 |
| TUCP_001089 | XLOC_041516 | ENSRNOT00000039341  | 0.970688098  | 1.62E-07 |
| TUCP_001089 | XLOC_041516 | ENSRNOT00000034704  | 0.960598541  | 7.00E-07 |
| TUCP_001089 | XLOC_041516 | ENSRNOT00000005490  | 0.974394228  | 8.30E-08 |
| TUCP_001089 | XLOC_041516 | ENSRNOT000000082174 | 0.978462262  | 3.52E-08 |
| TUCP_001089 | XLOC_041516 | ENSRNOT00000042125  | 0.965380404  | 3.70E-07 |
| TUCP_001089 | XLOC_041516 | ENSRNOT00000026760  | -0.952881863 | 1.69E-06 |
| TUCP_001089 | XLOC_041516 | ENSRNOT00000012048  | 0.958233905  | 9.33E-07 |
| TUCP_001089 | XLOC_041516 | ENSRNOT00000061432  | 0.954306348  | 1.45E-06 |
| TUCP_001089 | XLOC_041516 | ENSRNOT00000023330  | 0.96468439   | 4.08E-07 |
| TUCP_001089 | XLOC_041516 | ENSRNOT00000081077  | -0.951261738 | 2.00E-06 |
| TUCP_001089 | XLOC_041516 | ENSRNOT00000033235  | 0.984013871  | 8.00E-09 |
| TUCP_001089 | XLOC_041516 | ENSRNOT00000027964  | 0.954405204  | 1.44E-06 |
| TUCP_001089 | XLOC_041516 | ENSRNOT00000023428  | 0.965208779  | 3.79E-07 |
| TUCP_001089 | XLOC_041516 | ENSRNOT00000047210  | 0.976783096  | 5.11E-08 |
| TUCP_001089 | XLOC_041516 | ENSRNOT00000083957  | 0.958559863  | 8.98E-07 |
| TUCP_001089 | XLOC_041516 | ENSRNOT00000064930  | 0.966493192  | 3.14E-07 |
| TUCP_001089 | XLOC_041516 | ENSRNOT00000079996  | 0.978151869  | 3.78E-08 |
| TUCP_001089 | XLOC_041516 | ENSRNOT00000024548  | 0.967566421  | 2.68E-07 |
| TUCP_001088 | XLOC_041384 | ENSRNOT00000019524  | -0.957135221 | 1.06E-06 |
| TUCP_001088 | XLOC_041384 | ENSRNOT00000079180  | 0.962058809  | 5.81E-07 |
| TUCP_001088 | XLOC_041384 | ENSRNOT00000024030  | 0.957987956  | 9.60E-07 |
| TUCP_003824 | XLOC_167348 | ENSRNOT00000000008  | 1            | 0        |
| TUCP_003824 | XLOC_167348 | ENSRNOT00000060048  | 0.998711457  | 2.79E-14 |
| TUCP_003824 | XLOC_167348 | ENSRNOT00000082304  | 0.996875989  | 2.33E-12 |
| TUCP_003824 | XLOC_167348 | ENSRNOT00000006219  | 1            | 0        |
| TUCP_003824 | XLOC_167348 | ENSRNOT00000065376  | 1            | 0        |

|             |             |                    |              |          |
|-------------|-------------|--------------------|--------------|----------|
| TUCP_003824 | XLOC_167348 | ENSRNOT00000081433 | 0.984469223  | 6.93E-09 |
| TUCP_003824 | XLOC_167348 | ENSRNOT00000083575 | 1            | 0        |
| TUCP_003824 | XLOC_167348 | ENSRNOT00000087739 | 1            | 0        |
| TUCP_003824 | XLOC_167348 | ENSRNOT00000079826 | 1            | 0        |
| TUCP_003824 | XLOC_167348 | ENSRNOT00000025770 | 0.993828251  | 6.98E-11 |
| TUCP_003824 | XLOC_167348 | ENSRNOT00000088244 | 0.973479481  | 9.88E-08 |
| TUCP_003824 | XLOC_167348 | ENSRNOT00000048523 | 1            | 0        |
| TUCP_003824 | XLOC_167348 | ENSRNOT00000079365 | 0.958936699  | 8.58E-07 |
| TUCP_003824 | XLOC_167348 | ENSRNOT00000020229 | 0.960002785  | 7.54E-07 |
| TUCP_003824 | XLOC_167348 | ENSRNOT00000026428 | 0.996986683  | 1.95E-12 |
| TUCP_003824 | XLOC_167348 | ENSRNOT00000085673 | 1            | 0        |
| TUCP_003824 | XLOC_167348 | ENSRNOT00000072972 | 0.981476166  | 1.67E-08 |
| TUCP_003824 | XLOC_167348 | ENSRNOT00000050573 | 1            | 0        |
| TUCP_003824 | XLOC_167348 | ENSRNOT00000089876 | -0.953630353 | 1.56E-06 |
| TUCP_003824 | XLOC_167348 | ENSRNOT00000074378 | 0.998901807  | 1.26E-14 |
| TUCP_003824 | XLOC_167348 | ENSRNOT00000093571 | 1            | 0        |
| TUCP_003824 | XLOC_167348 | ENSRNOT00000090581 | 1            | 0        |
| TUCP_003824 | XLOC_167348 | ENSRNOT00000076239 | 0.98020752   | 2.31E-08 |
| TUCP_003824 | XLOC_167348 | ENSRNOT00000065485 | 1            | 0        |
| TUCP_003824 | XLOC_167348 | ENSRNOT0000006356  | 0.999544279  | 1.55E-16 |
| TUCP_003824 | XLOC_167348 | ENSRNOT00000087199 | 0.974421555  | 8.26E-08 |
| TUCP_003824 | XLOC_167348 | ENSRNOT00000022091 | 1            | 0        |
| TUCP_003824 | XLOC_167348 | ENSRNOT00000064764 | 0.98460888   | 6.63E-09 |
| TUCP_003824 | XLOC_167348 | ENSRNOT00000076927 | 0.971163156  | 1.50E-07 |
| TUCP_003824 | XLOC_167348 | ENSRNOT00000092395 | 0.999522978  | 1.94E-16 |
| TUCP_003884 | XLOC_170720 | ENSRNOT00000027223 | 0.9625977    | 5.41E-07 |
| TUCP_003884 | XLOC_170720 | ENSRNOT00000008372 | 0.951361482  | 1.98E-06 |
| TUCP_003884 | XLOC_170720 | ENSRNOT00000070893 | 0.953784688  | 1.54E-06 |
| TUCP_003375 | XLOC_146309 | ENSRNOT00000092021 | 0.950316089  | 2.19E-06 |
| TUCP_003375 | XLOC_146309 | ENSRNOT00000071482 | 0.955334735  | 1.30E-06 |
| TUCP_003375 | XLOC_146309 | ENSRNOT00000003412 | 0.951362562  | 1.98E-06 |
| TUCP_003375 | XLOC_146309 | ENSRNOT00000045765 | 0.95891554   | 8.60E-07 |
| TUCP_003375 | XLOC_146309 | ENSRNOT00000006765 | 0.960922358  | 6.72E-07 |
| TUCP_003375 | XLOC_146309 | ENSRNOT00000007079 | 0.974441137  | 8.23E-08 |
| TUCP_003375 | XLOC_146309 | ENSRNOT00000014780 | 0.952120393  | 1.83E-06 |
| TUCP_003375 | XLOC_146309 | ENSRNOT00000025980 | 0.956566572  | 1.13E-06 |
| TUCP_003375 | XLOC_146309 | ENSRNOT00000000083 | 0.95281195   | 1.70E-06 |
| TUCP_003375 | XLOC_146309 | ENSRNOT00000000707 | 0.959016288  | 8.50E-07 |
| TUCP_003375 | XLOC_146309 | ENSRNOT00000019848 | 0.956305858  | 1.17E-06 |
| TUCP_003375 | XLOC_146309 | ENSRNOT00000079962 | -0.973015006 | 1.08E-07 |
| TUCP_003375 | XLOC_146309 | ENSRNOT00000023567 | 0.962916957  | 5.19E-07 |
| TUCP_003375 | XLOC_146309 | ENSRNOT00000014885 | 0.979200131  | 2.96E-08 |
| TUCP_003375 | XLOC_146309 | ENSRNOT00000086608 | 0.971697358  | 1.36E-07 |
| TUCP_003375 | XLOC_146309 | ENSRNOT00000056041 | 0.95031789   | 2.19E-06 |
| TUCP_003375 | XLOC_146309 | ENSRNOT00000058495 | 0.955772348  | 1.24E-06 |
| TUCP_003375 | XLOC_146309 | ENSRNOT00000018864 | 0.966369696  | 3.20E-07 |
| TUCP_003375 | XLOC_146309 | ENSRNOT00000033048 | 0.959330561  | 8.18E-07 |
| TUCP_003375 | XLOC_146309 | ENSRNOT00000012583 | 0.955534446  | 1.27E-06 |
| TUCP_003375 | XLOC_146309 | ENSRNOT00000036338 | 0.974651244  | 7.90E-08 |
| TUCP_003375 | XLOC_146309 | ENSRNOT00000076181 | 0.957932222  | 9.67E-07 |
| TUCP_003375 | XLOC_146309 | ENSRNOT00000091139 | 0.961762702  | 6.04E-07 |



|             |             |                     |             |          |
|-------------|-------------|---------------------|-------------|----------|
| TUCP_003375 | XLOC_146309 | ENSRNOT00000080410  | 0.951964469 | 1.86E-06 |
| TUCP_003375 | XLOC_146309 | ENSRNOT00000022117  | 0.980532782 | 2.13E-08 |
| TUCP_003375 | XLOC_146309 | ENSRNOT00000017362  | 0.961542387 | 6.21E-07 |
| TUCP_003375 | XLOC_146309 | ENSRNOT00000008222  | 0.951645457 | 1.92E-06 |
| TUCP_003375 | XLOC_146309 | ENSRNOT00000014585  | 0.960744444 | 6.87E-07 |
| TUCP_003375 | XLOC_146309 | ENSRNOT00000010962  | 0.95579432  | 1.23E-06 |
| TUCP_003375 | XLOC_146309 | ENSRNOT00000002040  | 0.950962128 | 2.06E-06 |
| TUCP_003375 | XLOC_146309 | ENSRNOT00000020932  | 0.953412853 | 1.60E-06 |
| TUCP_003375 | XLOC_146309 | ENSRNOT000000085516 | 0.956593459 | 1.13E-06 |
| TUCP_003375 | XLOC_146309 | ENSRNOT00000019473  | 0.950858005 | 2.08E-06 |
| TUCP_003375 | XLOC_146309 | ENSRNOT00000001135  | 0.976110268 | 5.89E-08 |
| TUCP_003375 | XLOC_146309 | ENSRNOT00000028703  | 0.954691008 | 1.39E-06 |
| TUCP_003375 | XLOC_146309 | ENSRNOT00000002779  | 0.955356377 | 1.30E-06 |
| TUCP_003375 | XLOC_146309 | ENSRNOT000000086350 | 0.951635688 | 1.92E-06 |
| TUCP_003375 | XLOC_146309 | ENSRNOT00000039296  | -0.9676392  | 2.65E-07 |
| TUCP_003375 | XLOC_146309 | ENSRNOT00000033015  | 0.959341875 | 8.17E-07 |
| TUCP_003375 | XLOC_146309 | ENSRNOT00000019713  | 0.964623372 | 4.11E-07 |
| TUCP_003375 | XLOC_146309 | ENSRNOT000000084531 | 0.9568361   | 1.10E-06 |
| TUCP_003375 | XLOC_146309 | ENSRNOT000000076105 | 0.951326576 | 1.98E-06 |
| TUCP_003375 | XLOC_146309 | ENSRNOT00000007367  | 0.953256141 | 1.62E-06 |
| TUCP_003375 | XLOC_146309 | ENSRNOT000000042633 | 0.97675828  | 5.14E-08 |
| TUCP_003375 | XLOC_146309 | ENSRNOT000000081110 | 0.959415513 | 8.10E-07 |
| TUCP_003375 | XLOC_146309 | ENSRNOT000000025856 | 0.954828637 | 1.37E-06 |
| TUCP_003375 | XLOC_146309 | ENSRNOT000000085214 | 0.950967684 | 2.06E-06 |
| TUCP_003375 | XLOC_146309 | ENSRNOT00000004941  | 0.950265076 | 2.20E-06 |
| TUCP_003375 | XLOC_146309 | ENSRNOT00000001935  | 0.953128007 | 1.65E-06 |
| TUCP_003375 | XLOC_146309 | ENSRNOT00000005148  | 0.95489947  | 1.36E-06 |
| TUCP_003375 | XLOC_146309 | ENSRNOT00000000052  | 0.968005752 | 2.50E-07 |
| TUCP_003375 | XLOC_146309 | ENSRNOT00000020994  | 0.952949982 | 1.68E-06 |
| TUCP_003375 | XLOC_146309 | ENSRNOT00000016541  | 0.956046862 | 1.20E-06 |
| TUCP_003375 | XLOC_146309 | ENSRNOT000000085311 | 0.959631288 | 7.89E-07 |
| TUCP_003375 | XLOC_146309 | ENSRNOT00000033450  | 0.950724842 | 2.11E-06 |
| TUCP_003375 | XLOC_146309 | ENSRNOT00000024947  | 0.955474854 | 1.28E-06 |
| TUCP_003375 | XLOC_146309 | ENSRNOT00000049725  | 0.959013013 | 8.50E-07 |
| TUCP_003375 | XLOC_146309 | ENSRNOT00000019130  | 0.95693626  | 1.08E-06 |
| TUCP_003375 | XLOC_146309 | ENSRNOT00000015757  | 0.950824664 | 2.08E-06 |
| TUCP_003375 | XLOC_146309 | ENSRNOT000000070912 | 0.955069757 | 1.34E-06 |
| TUCP_003375 | XLOC_146309 | ENSRNOT00000008253  | 0.953162197 | 1.64E-06 |
| TUCP_003375 | XLOC_146309 | ENSRNOT00000021455  | 0.950722267 | 2.11E-06 |
| TUCP_003375 | XLOC_146309 | ENSRNOT00000003544  | 0.951054984 | 2.04E-06 |
| TUCP_003375 | XLOC_146309 | ENSRNOT00000017081  | 0.955866973 | 1.22E-06 |
| TUCP_003375 | XLOC_146309 | ENSRNOT000000056877 | 0.962669387 | 5.36E-07 |
| TUCP_003375 | XLOC_146309 | ENSRNOT00000008865  | 0.968612966 | 2.28E-07 |
| TUCP_003375 | XLOC_146309 | ENSRNOT00000033196  | 0.967005443 | 2.91E-07 |
| TUCP_003375 | XLOC_146309 | ENSRNOT00000022241  | 0.960451188 | 7.13E-07 |
| TUCP_003375 | XLOC_146309 | ENSRNOT00000010674  | 0.953038503 | 1.66E-06 |
| TUCP_003375 | XLOC_146309 | ENSRNOT000000091068 | 0.95663647  | 1.12E-06 |
| TUCP_003375 | XLOC_146309 | ENSRNOT00000023664  | 0.957692475 | 9.94E-07 |
| TUCP_003375 | XLOC_146309 | ENSRNOT000000087748 | 0.955005946 | 1.35E-06 |
| TUCP_003375 | XLOC_146309 | ENSRNOT00000009073  | 0.964498954 | 4.18E-07 |
| TUCP_003375 | XLOC_146309 | ENSRNOT00000007077  | 0.957588498 | 1.01E-06 |

|             |             |                    |              |          |
|-------------|-------------|--------------------|--------------|----------|
| TUCP_003375 | XLOC_146309 | ENSRNOT00000017688 | 0.95171075   | 1.91E-06 |
| TUCP_003375 | XLOC_146309 | ENSRNOT00000074494 | 0.968796918  | 2.21E-07 |
| TUCP_003375 | XLOC_146309 | ENSRNOT00000017469 | 0.951731636  | 1.90E-06 |
| TUCP_003375 | XLOC_146309 | ENSRNOT00000049193 | 0.955682117  | 1.25E-06 |
| TUCP_003375 | XLOC_146309 | ENSRNOT00000059599 | 0.962850011  | 5.24E-07 |
| TUCP_003375 | XLOC_146309 | ENSRNOT00000009000 | 0.971467979  | 1.42E-07 |
| TUCP_003375 | XLOC_146309 | ENSRNOT00000000155 | -0.961339729 | 6.37E-07 |
| TUCP_003375 | XLOC_146309 | ENSRNOT00000019192 | 0.957615353  | 1.00E-06 |
| TUCP_003822 | XLOC_167348 | ENSRNOT00000000008 | 1            | 0        |
| TUCP_003822 | XLOC_167348 | ENSRNOT00000060048 | 0.998711457  | 2.79E-14 |
| TUCP_003822 | XLOC_167348 | ENSRNOT00000082304 | 0.996875989  | 2.33E-12 |
| TUCP_003822 | XLOC_167348 | ENSRNOT00000006219 | 1            | 0        |
| TUCP_003822 | XLOC_167348 | ENSRNOT00000065376 | 1            | 0        |
| TUCP_003822 | XLOC_167348 | ENSRNOT00000081433 | 0.984469223  | 6.93E-09 |
| TUCP_003822 | XLOC_167348 | ENSRNOT00000083575 | 1            | 0        |
| TUCP_003822 | XLOC_167348 | ENSRNOT00000087739 | 1            | 1.33E-79 |
| TUCP_003822 | XLOC_167348 | ENSRNOT00000079826 | 1            | 0        |
| TUCP_003822 | XLOC_167348 | ENSRNOT00000025770 | 0.993828251  | 6.98E-11 |
| TUCP_003822 | XLOC_167348 | ENSRNOT00000088244 | 0.973479481  | 9.88E-08 |
| TUCP_003822 | XLOC_167348 | ENSRNOT00000048523 | 1            | 0        |
| TUCP_003822 | XLOC_167348 | ENSRNOT00000079365 | 0.958936699  | 8.58E-07 |
| TUCP_003822 | XLOC_167348 | ENSRNOT00000020229 | 0.960002785  | 7.54E-07 |
| TUCP_003822 | XLOC_167348 | ENSRNOT00000026428 | 0.996986683  | 1.95E-12 |
| TUCP_003822 | XLOC_167348 | ENSRNOT00000085673 | 1            | 1.33E-79 |
| TUCP_003822 | XLOC_167348 | ENSRNOT00000072972 | 0.981476166  | 1.67E-08 |
| TUCP_003822 | XLOC_167348 | ENSRNOT00000050573 | 1            | 1.33E-79 |
| TUCP_003822 | XLOC_167348 | ENSRNOT00000089876 | -0.953630353 | 1.56E-06 |
| TUCP_003822 | XLOC_167348 | ENSRNOT00000074378 | 0.998901807  | 1.26E-14 |
| TUCP_003822 | XLOC_167348 | ENSRNOT00000093571 | 1            | 1.33E-79 |
| TUCP_003822 | XLOC_167348 | ENSRNOT00000090581 | 1            | 4.25E-78 |
| TUCP_003822 | XLOC_167348 | ENSRNOT00000076239 | 0.98020752   | 2.31E-08 |
| TUCP_003822 | XLOC_167348 | ENSRNOT00000065485 | 1            | 1.33E-79 |
| TUCP_003822 | XLOC_167348 | ENSRNOT0000006356  | 0.999544279  | 1.55E-16 |
| TUCP_003822 | XLOC_167348 | ENSRNOT00000087199 | 0.974421555  | 8.26E-08 |
| TUCP_003822 | XLOC_167348 | ENSRNOT00000022091 | 1            | 0        |
| TUCP_003822 | XLOC_167348 | ENSRNOT00000064764 | 0.98460888   | 6.63E-09 |
| TUCP_003822 | XLOC_167348 | ENSRNOT00000076927 | 0.971163156  | 1.50E-07 |
| TUCP_003822 | XLOC_167348 | ENSRNOT00000092395 | 0.999522978  | 1.94E-16 |
| TUCP_001078 | XLOC_041095 | ENSRNOT00000078014 | 0.955314657  | 1.30E-06 |
| TUCP_000689 | XLOC_026080 | ENSRNOT00000074990 | 0.983290101  | 9.98E-09 |
| TUCP_000689 | XLOC_026080 | ENSRNOT00000068444 | 0.983290101  | 9.98E-09 |
| TUCP_000689 | XLOC_026080 | ENSRNOT00000081370 | 0.984189729  | 7.58E-09 |
| TUCP_000689 | XLOC_026080 | ENSRNOT00000078645 | 0.962524645  | 5.47E-07 |
| TUCP_000689 | XLOC_026080 | ENSRNOT00000075987 | 0.969537088  | 1.96E-07 |
| TUCP_000689 | XLOC_026080 | ENSRNOT00000082043 | 0.982903563  | 1.12E-08 |
| TUCP_000689 | XLOC_026080 | ENSRNOT00000087323 | 0.990925673  | 4.77E-10 |
| TUCP_000689 | XLOC_026080 | ENSRNOT00000074930 | 0.983290101  | 9.98E-09 |
| TUCP_000689 | XLOC_026080 | ENSRNOT00000080575 | 0.982234376  | 1.35E-08 |
| TUCP_000689 | XLOC_026080 | ENSRNOT00000057761 | 0.981654412  | 1.59E-08 |
| TUCP_000689 | XLOC_026080 | ENSRNOT00000078369 | 0.983833672  | 8.46E-09 |
| TUCP_000689 | XLOC_026080 | ENSRNOT00000092982 | 0.983290101  | 9.98E-09 |

|             |             |                    |              |          |
|-------------|-------------|--------------------|--------------|----------|
| TUCP_000689 | XLOC_026080 | ENSRNOT00000088367 | 0.983290101  | 9.98E-09 |
| TUCP_000689 | XLOC_026080 | ENSRNOT00000078153 | 0.955036267  | 1.34E-06 |
| TUCP_000689 | XLOC_026080 | ENSRNOT00000081996 | 0.983290101  | 9.98E-09 |
| TUCP_000689 | XLOC_026080 | ENSRNOT00000022280 | 0.959055536  | 8.46E-07 |
| TUCP_000689 | XLOC_026080 | ENSRNOT00000082058 | 0.983290101  | 9.98E-09 |
| TUCP_000689 | XLOC_026080 | ENSRNOT00000088905 | 0.983290101  | 9.98E-09 |
| TUCP_000689 | XLOC_026080 | ENSRNOT00000086831 | 0.983290101  | 9.98E-09 |
| TUCP_000689 | XLOC_026080 | ENSRNOT00000045099 | 0.983290101  | 9.98E-09 |
| TUCP_000689 | XLOC_026080 | ENSRNOT00000086745 | 0.984638203  | 6.57E-09 |
| TUCP_000689 | XLOC_026080 | ENSRNOT00000085849 | 0.979018921  | 3.09E-08 |
| TUCP_000689 | XLOC_026080 | ENSRNOT00000077789 | 0.980826638  | 1.98E-08 |
| TUCP_000689 | XLOC_026080 | ENSRNOT00000090207 | 0.978973563  | 3.12E-08 |
| TUCP_000689 | XLOC_026080 | ENSRNOT00000087025 | 0.983290101  | 9.98E-09 |
| TUCP_000689 | XLOC_026080 | ENSRNOT00000019853 | 0.983290101  | 9.98E-09 |
| TUCP_000689 | XLOC_026080 | ENSRNOT00000073853 | 0.96943284   | 2.00E-07 |
| TUCP_000689 | XLOC_026080 | ENSRNOT00000065912 | 0.958453546  | 9.09E-07 |
| TUCP_000689 | XLOC_026080 | ENSRNOT00000073828 | 0.974843524  | 7.61E-08 |
| TUCP_000689 | XLOC_026080 | ENSRNOT00000093083 | 0.979569788  | 2.71E-08 |
| TUCP_001775 | XLOC_073508 | ENSRNOT00000090629 | 0.956261769  | 1.17E-06 |
| TUCP_001775 | XLOC_073508 | ENSRNOT00000008961 | 0.979228756  | 2.94E-08 |
| TUCP_001775 | XLOC_073508 | ENSRNOT00000039876 | 0.980081857  | 2.39E-08 |
| TUCP_001775 | XLOC_073508 | ENSRNOT00000055127 | 0.976255134  | 5.71E-08 |
| TUCP_001775 | XLOC_073508 | ENSRNOT00000026677 | 0.954225606  | 1.47E-06 |
| TUCP_001775 | XLOC_073508 | ENSRNOT00000001570 | 0.980699036  | 2.04E-08 |
| TUCP_001775 | XLOC_073508 | ENSRNOT00000035523 | 0.971389777  | 1.44E-07 |
| TUCP_001775 | XLOC_073508 | ENSRNOT00000025564 | 0.950650098  | 2.12E-06 |
| TUCP_001775 | XLOC_073508 | ENSRNOT00000033719 | 0.965596053  | 3.58E-07 |
| TUCP_001775 | XLOC_073508 | ENSRNOT00000000640 | 0.951003585  | 2.05E-06 |
| TUCP_001775 | XLOC_073508 | ENSRNOT00000056174 | 0.964387533  | 4.25E-07 |
| TUCP_001775 | XLOC_073508 | ENSRNOT00000074738 | 0.976880092  | 5.00E-08 |
| TUCP_001775 | XLOC_073508 | ENSRNOT00000084429 | 0.957962373  | 9.63E-07 |
| TUCP_001775 | XLOC_073508 | ENSRNOT00000077022 | 0.976834993  | 5.05E-08 |
| TUCP_001775 | XLOC_073508 | ENSRNOT00000071258 | -0.963817569 | 4.60E-07 |
| TUCP_001775 | XLOC_073508 | ENSRNOT00000004637 | 0.958428047  | 9.12E-07 |
| TUCP_001775 | XLOC_073508 | ENSRNOT00000031025 | 0.982592169  | 1.22E-08 |
| TUCP_001775 | XLOC_073508 | ENSRNOT00000017042 | 0.954308427  | 1.45E-06 |
| TUCP_001775 | XLOC_073508 | ENSRNOT00000056551 | 0.973445386  | 9.95E-08 |
| TUCP_001775 | XLOC_073508 | ENSRNOT00000002695 | 0.981340839  | 1.73E-08 |
| TUCP_001775 | XLOC_073508 | ENSRNOT00000056995 | 0.960626649  | 6.98E-07 |
| TUCP_001775 | XLOC_073508 | ENSRNOT00000054757 | 0.984793791  | 6.24E-09 |
| TUCP_001775 | XLOC_073508 | ENSRNOT00000001853 | 0.984682483  | 6.47E-09 |
| TUCP_001775 | XLOC_073508 | ENSRNOT00000077134 | 0.979955059  | 2.46E-08 |
| TUCP_001775 | XLOC_073508 | ENSRNOT00000057016 | 0.971612296  | 1.38E-07 |
| TUCP_001775 | XLOC_073508 | ENSRNOT00000052003 | 0.952231859  | 1.81E-06 |
| TUCP_001775 | XLOC_073508 | ENSRNOT00000060765 | 0.981178961  | 1.80E-08 |
| TUCP_001775 | XLOC_073508 | ENSRNOT00000040162 | 0.958969912  | 8.55E-07 |
| TUCP_001775 | XLOC_073508 | ENSRNOT00000083943 | 0.965319182  | 3.73E-07 |
| TUCP_001775 | XLOC_073508 | ENSRNOT00000039263 | 0.976726625  | 5.17E-08 |
| TUCP_001775 | XLOC_073508 | ENSRNOT00000084873 | 0.972140847  | 1.26E-07 |
| TUCP_001775 | XLOC_073508 | ENSRNOT00000076407 | 0.955040964  | 1.34E-06 |
| TUCP_001775 | XLOC_073508 | ENSRNOT00000088707 | 0.975935985  | 6.10E-08 |

|             |             |                     |             |          |
|-------------|-------------|---------------------|-------------|----------|
| TUCP_001775 | XLOC_073508 | ENSRNOT00000005361  | 0.967292776 | 2.79E-07 |
| TUCP_001775 | XLOC_073508 | ENSRNOT00000019501  | 0.951027049 | 2.04E-06 |
| TUCP_001775 | XLOC_073508 | ENSRNOT00000041741  | 0.975565465 | 6.58E-08 |
| TUCP_001775 | XLOC_073508 | ENSRNOT00000034152  | 0.978230968 | 3.71E-08 |
| TUCP_001775 | XLOC_073508 | ENSRNOT00000024718  | 0.970103464 | 1.79E-07 |
| TUCP_001775 | XLOC_073508 | ENSRNOT00000009620  | 0.982896314 | 1.12E-08 |
| TUCP_001775 | XLOC_073508 | ENSRNOT000000082143 | 0.953406673 | 1.60E-06 |
| TUCP_001775 | XLOC_073508 | ENSRNOT00000085570  | 0.962105334 | 5.77E-07 |
| TUCP_001775 | XLOC_073508 | ENSRNOT00000017071  | 0.959432204 | 8.08E-07 |
| TUCP_001775 | XLOC_073508 | ENSRNOT00000073547  | 0.966928335 | 2.95E-07 |
| TUCP_001775 | XLOC_073508 | ENSRNOT00000018511  | 0.952891159 | 1.69E-06 |
| TUCP_001775 | XLOC_073508 | ENSRNOT00000043434  | 0.986719539 | 3.18E-09 |
| TUCP_001775 | XLOC_073508 | ENSRNOT00000038426  | 0.960862514 | 6.77E-07 |
| TUCP_001775 | XLOC_073508 | ENSRNOT00000090867  | 0.957018019 | 1.07E-06 |
| TUCP_001775 | XLOC_073508 | ENSRNOT00000051363  | 0.979842038 | 2.53E-08 |
| TUCP_001775 | XLOC_073508 | ENSRNOT00000022648  | 0.96489459  | 3.96E-07 |
| TUCP_001775 | XLOC_073508 | ENSRNOT00000083067  | 0.971949611 | 1.30E-07 |
| TUCP_001775 | XLOC_073508 | ENSRNOT00000084021  | 0.956528717 | 1.14E-06 |
| TUCP_001775 | XLOC_073508 | ENSRNOT00000038494  | 0.960316721 | 7.25E-07 |
| TUCP_001775 | XLOC_073508 | ENSRNOT00000057433  | 0.951998394 | 1.85E-06 |
| TUCP_001775 | XLOC_073508 | ENSRNOT00000016449  | 0.968264367 | 2.40E-07 |
| TUCP_001775 | XLOC_073508 | ENSRNOT00000087603  | 0.98008739  | 2.38E-08 |
| TUCP_001775 | XLOC_073508 | ENSRNOT00000029990  | 0.967885414 | 2.55E-07 |
| TUCP_001775 | XLOC_073508 | ENSRNOT00000023504  | 0.969900778 | 1.85E-07 |
| TUCP_001775 | XLOC_073508 | ENSRNOT00000036753  | 0.974299146 | 8.46E-08 |
| TUCP_001775 | XLOC_073508 | ENSRNOT00000025880  | 0.983769725 | 8.63E-09 |
| TUCP_001775 | XLOC_073508 | ENSRNOT00000044983  | 0.957195945 | 1.05E-06 |
| TUCP_001775 | XLOC_073508 | ENSRNOT00000080956  | 0.950055593 | 2.25E-06 |
| TUCP_001775 | XLOC_073508 | ENSRNOT00000008365  | 0.951127831 | 2.02E-06 |
| TUCP_001775 | XLOC_073508 | ENSRNOT00000047700  | 0.954279906 | 1.46E-06 |
| TUCP_001775 | XLOC_073508 | ENSRNOT00000003823  | 0.952737208 | 1.72E-06 |
| TUCP_001775 | XLOC_073508 | ENSRNOT00000010264  | 0.953042517 | 1.66E-06 |
| TUCP_001775 | XLOC_073508 | ENSRNOT00000059660  | 0.960640316 | 6.96E-07 |
| TUCP_001775 | XLOC_073508 | ENSRNOT00000072810  | 0.958846393 | 8.67E-07 |
| TUCP_001774 | XLOC_073508 | ENSRNOT00000042251  | 0.95239433  | 1.78E-06 |
| TUCP_001774 | XLOC_073508 | ENSRNOT00000043258  | 0.950842988 | 2.08E-06 |
| TUCP_001774 | XLOC_073508 | ENSRNOT00000005726  | 0.989736046 | 8.82E-10 |
| TUCP_001774 | XLOC_073508 | ENSRNOT00000086167  | 0.953857439 | 1.52E-06 |
| TUCP_001774 | XLOC_073508 | ENSRNOT00000076802  | 0.966179477 | 3.29E-07 |
| TUCP_001774 | XLOC_073508 | ENSRNOT00000074738  | 0.957467408 | 1.02E-06 |
| TUCP_001774 | XLOC_073508 | ENSRNOT00000031025  | 0.960430703 | 7.15E-07 |
| TUCP_001774 | XLOC_073508 | ENSRNOT00000017042  | 0.978208094 | 3.73E-08 |
| TUCP_001774 | XLOC_073508 | ENSRNOT00000017071  | 0.984236385 | 7.47E-09 |
| TUCP_001774 | XLOC_073508 | ENSRNOT00000010092  | 0.98516939  | 5.51E-09 |
| TUCP_001774 | XLOC_073508 | ENSRNOT00000001853  | 0.95139135  | 1.97E-06 |
| TUCP_001774 | XLOC_073508 | ENSRNOT00000077134  | 0.959405587 | 8.11E-07 |
| TUCP_001774 | XLOC_073508 | ENSRNOT00000038494  | 0.985915983 | 4.26E-09 |
| TUCP_001774 | XLOC_073508 | ENSRNOT00000081830  | 0.971081435 | 1.52E-07 |
| TUCP_001774 | XLOC_073508 | ENSRNOT00000039263  | 0.973396634 | 1.00E-07 |
| TUCP_001774 | XLOC_073508 | ENSRNOT00000078478  | 0.962077498 | 5.80E-07 |
| TUCP_001774 | XLOC_073508 | ENSRNOT00000088707  | 0.985137174 | 5.57E-09 |

|             |             |                    |             |          |
|-------------|-------------|--------------------|-------------|----------|
| TUCP_001774 | XLOC_073508 | ENSRNOT00000041741 | 0.979123128 | 3.02E-08 |
| TUCP_001774 | XLOC_073508 | ENSRNOT00000009620 | 0.959173517 | 8.34E-07 |
| TUCP_001774 | XLOC_073508 | ENSRNOT00000082143 | 0.963661095 | 4.69E-07 |
| TUCP_001774 | XLOC_073508 | ENSRNOT00000085570 | 0.964195173 | 4.36E-07 |
| TUCP_001774 | XLOC_073508 | ENSRNOT00000083067 | 0.969746313 | 1.90E-07 |
| TUCP_001774 | XLOC_073508 | ENSRNOT00000038426 | 0.958670416 | 8.86E-07 |
| TUCP_001774 | XLOC_073508 | ENSRNOT00000028058 | 0.978093414 | 3.83E-08 |
| TUCP_001774 | XLOC_073508 | ENSRNOT00000050968 | 0.950436689 | 2.17E-06 |
| TUCP_001774 | XLOC_073508 | ENSRNOT00000025564 | 0.957033176 | 1.07E-06 |
| TUCP_001774 | XLOC_073508 | ENSRNOT00000039876 | 0.977075621 | 4.80E-08 |
| TUCP_001774 | XLOC_073508 | ENSRNOT0000002695  | 0.965988313 | 3.39E-07 |
| TUCP_001774 | XLOC_073508 | ENSRNOT00000087603 | 0.975517431 | 6.65E-08 |
| TUCP_001774 | XLOC_073508 | ENSRNOT00000012957 | 0.978988491 | 3.11E-08 |
| TUCP_001774 | XLOC_073508 | ENSRNOT00000020786 | 0.971782942 | 1.34E-07 |
| TUCP_001774 | XLOC_073508 | ENSRNOT00000084847 | 0.970917899 | 1.56E-07 |
| TUCP_001774 | XLOC_073508 | ENSRNOT00000057433 | 0.981604028 | 1.61E-08 |
| TUCP_001774 | XLOC_073508 | ENSRNOT00000052367 | 0.963071251 | 5.08E-07 |
| TUCP_001774 | XLOC_073508 | ENSRNOT00000052003 | 0.987931416 | 1.98E-09 |
| TUCP_001774 | XLOC_073508 | ENSRNOT00000072810 | 0.956601166 | 1.13E-06 |
| TUCP_001777 | XLOC_073508 | ENSRNOT00000068416 | 0.959777837 | 7.75E-07 |
| TUCP_001777 | XLOC_073508 | ENSRNOT00000086036 | 0.959178763 | 8.33E-07 |
| TUCP_001777 | XLOC_073508 | ENSRNOT00000081709 | 0.960281853 | 7.28E-07 |
| TUCP_001777 | XLOC_073508 | ENSRNOT00000042251 | 0.960102885 | 7.44E-07 |
| TUCP_001777 | XLOC_073508 | ENSRNOT0000002984  | 0.963749785 | 4.64E-07 |
| TUCP_001777 | XLOC_073508 | ENSRNOT00000020071 | 0.96584285  | 3.46E-07 |
| TUCP_001777 | XLOC_073508 | ENSRNOT00000083764 | 0.957981228 | 9.61E-07 |
| TUCP_001777 | XLOC_073508 | ENSRNOT00000050543 | 0.960753763 | 6.86E-07 |
| TUCP_001777 | XLOC_073508 | ENSRNOT00000092365 | 0.956151039 | 1.19E-06 |
| TUCP_001777 | XLOC_073508 | ENSRNOT00000074738 | 0.962784446 | 5.28E-07 |
| TUCP_001777 | XLOC_073508 | ENSRNOT00000084429 | 0.956275826 | 1.17E-06 |
| TUCP_001777 | XLOC_073508 | ENSRNOT00000089306 | 0.959834664 | 7.70E-07 |
| TUCP_001777 | XLOC_073508 | ENSRNOT00000031025 | 0.951236502 | 2.00E-06 |
| TUCP_001777 | XLOC_073508 | ENSRNOT00000045301 | 0.959795642 | 7.73E-07 |
| TUCP_001777 | XLOC_073508 | ENSRNOT00000041186 | 0.959367232 | 8.15E-07 |
| TUCP_001777 | XLOC_073508 | ENSRNOT00000010092 | 0.979325048 | 2.87E-08 |
| TUCP_001777 | XLOC_073508 | ENSRNOT00000076182 | 0.959795642 | 7.73E-07 |
| TUCP_001777 | XLOC_073508 | ENSRNOT00000038494 | 0.969985985 | 1.82E-07 |
| TUCP_001777 | XLOC_073508 | ENSRNOT00000081830 | 0.953257192 | 1.62E-06 |
| TUCP_001777 | XLOC_073508 | ENSRNOT00000047527 | 0.969297519 | 2.04E-07 |
| TUCP_001777 | XLOC_073508 | ENSRNOT00000039263 | 0.971600566 | 1.39E-07 |
| TUCP_001777 | XLOC_073508 | ENSRNOT00000078478 | 0.957979298 | 9.61E-07 |
| TUCP_001777 | XLOC_073508 | ENSRNOT00000088707 | 0.964920161 | 3.94E-07 |
| TUCP_001777 | XLOC_073508 | ENSRNOT00000043486 | 0.955558678 | 1.27E-06 |
| TUCP_001777 | XLOC_073508 | ENSRNOT00000047564 | 0.957220177 | 1.05E-06 |
| TUCP_001777 | XLOC_073508 | ENSRNOT00000041741 | 0.967904018 | 2.54E-07 |
| TUCP_001777 | XLOC_073508 | ENSRNOT00000017071 | 0.964698446 | 4.07E-07 |
| TUCP_001777 | XLOC_073508 | ENSRNOT00000014103 | 0.959795642 | 7.73E-07 |
| TUCP_001777 | XLOC_073508 | ENSRNOT00000057433 | 0.976583361 | 5.33E-08 |
| TUCP_001777 | XLOC_073508 | ENSRNOT00000082289 | 0.960483856 | 7.10E-07 |
| TUCP_001777 | XLOC_073508 | ENSRNOT00000087140 | 0.96948654  | 1.98E-07 |
| TUCP_001777 | XLOC_073508 | ENSRNOT00000082143 | 0.972582814 | 1.17E-07 |

|             |             |                    |              |          |
|-------------|-------------|--------------------|--------------|----------|
| TUCP_001777 | XLOC_073508 | ENSRNOT00000085570 | 0.981026312  | 1.88E-08 |
| TUCP_001777 | XLOC_073508 | ENSRNOT00000056551 | 0.950597655  | 2.13E-06 |
| TUCP_001777 | XLOC_073508 | ENSRNOT00000088893 | 0.959795642  | 7.73E-07 |
| TUCP_001777 | XLOC_073508 | ENSRNOT00000076693 | 0.980313935  | 2.25E-08 |
| TUCP_001777 | XLOC_073508 | ENSRNOT00000081014 | 0.959795642  | 7.73E-07 |
| TUCP_001777 | XLOC_073508 | ENSRNOT00000038426 | 0.959391052  | 8.12E-07 |
| TUCP_001777 | XLOC_073508 | ENSRNOT00000067543 | 0.959795642  | 7.73E-07 |
| TUCP_001777 | XLOC_073508 | ENSRNOT00000076802 | 0.987504177  | 2.35E-09 |
| TUCP_001777 | XLOC_073508 | ENSRNOT00000050968 | 0.967775858  | 2.59E-07 |
| TUCP_001777 | XLOC_073508 | ENSRNOT00000083067 | 0.97495817   | 7.44E-08 |
| TUCP_001777 | XLOC_073508 | ENSRNOT00000039876 | 0.956511213  | 1.14E-06 |
| TUCP_001777 | XLOC_073508 | ENSRNOT00000004373 | 0.955383784  | 1.29E-06 |
| TUCP_001777 | XLOC_073508 | ENSRNOT00000002695 | 0.953299237  | 1.62E-06 |
| TUCP_001777 | XLOC_073508 | ENSRNOT00000063929 | 0.959795642  | 7.73E-07 |
| TUCP_001777 | XLOC_073508 | ENSRNOT00000005726 | 0.984643394  | 6.56E-09 |
| TUCP_001777 | XLOC_073508 | ENSRNOT00000087603 | 0.970960586  | 1.55E-07 |
| TUCP_001777 | XLOC_073508 | ENSRNOT00000041617 | 0.974813092  | 7.65E-08 |
| TUCP_001777 | XLOC_073508 | ENSRNOT00000091763 | 0.974571917  | 8.02E-08 |
| TUCP_001777 | XLOC_073508 | ENSRNOT00000022200 | 0.961536634  | 6.21E-07 |
| TUCP_001777 | XLOC_073508 | ENSRNOT00000067379 | 0.958769735  | 8.75E-07 |
| TUCP_001777 | XLOC_073508 | ENSRNOT00000020786 | 0.973478224  | 9.88E-08 |
| TUCP_001777 | XLOC_073508 | ENSRNOT00000084847 | 0.993888887  | 6.64E-11 |
| TUCP_001777 | XLOC_073508 | ENSRNOT00000079275 | 0.961999713  | 5.85E-07 |
| TUCP_001777 | XLOC_073508 | ENSRNOT00000052367 | 0.965896909  | 3.43E-07 |
| TUCP_001777 | XLOC_073508 | ENSRNOT00000090658 | 0.959795642  | 7.73E-07 |
| TUCP_001777 | XLOC_073508 | ENSRNOT00000088078 | 0.96099327   | 6.66E-07 |
| TUCP_001777 | XLOC_073508 | ENSRNOT00000052003 | 0.974138012  | 8.72E-08 |
| TUCP_001777 | XLOC_073508 | ENSRNOT00000057992 | 0.960847287  | 6.78E-07 |
| TUCP_001777 | XLOC_073508 | ENSRNOT00000057472 | 0.959795642  | 7.73E-07 |
| TUCP_001777 | XLOC_073508 | ENSRNOT00000065448 | 0.964256705  | 4.33E-07 |
| TUCP_001777 | XLOC_073508 | ENSRNOT00000072810 | 0.966972269  | 2.93E-07 |
| TUCP_001776 | XLOC_073508 | ENSRNOT00000046313 | 0.960150001  | 7.40E-07 |
| TUCP_001776 | XLOC_073508 | ENSRNOT00000026303 | 0.969399716  | 2.01E-07 |
| TUCP_001776 | XLOC_073508 | ENSRNOT00000080851 | 0.980508762  | 2.14E-08 |
| TUCP_001776 | XLOC_073508 | ENSRNOT00000086899 | 0.989518052  | 9.79E-10 |
| TUCP_001776 | XLOC_073508 | ENSRNOT00000067677 | 0.977828455  | 4.07E-08 |
| TUCP_001776 | XLOC_073508 | ENSRNOT00000092125 | 0.986147857  | 3.92E-09 |
| TUCP_001776 | XLOC_073508 | ENSRNOT00000051363 | 0.950023183  | 2.26E-06 |
| TUCP_001776 | XLOC_073508 | ENSRNOT00000058626 | 0.955436391  | 1.28E-06 |
| TUCP_001776 | XLOC_073508 | ENSRNOT00000049732 | 0.973931405  | 9.08E-08 |
| TUCP_001776 | XLOC_073508 | ENSRNOT00000013732 | 0.960443609  | 7.14E-07 |
| TUCP_001776 | XLOC_073508 | ENSRNOT0000009077  | 0.965309648  | 3.73E-07 |
| TUCP_001776 | XLOC_073508 | ENSRNOT00000088151 | 0.953105865  | 1.65E-06 |
| TUCP_001776 | XLOC_073508 | ENSRNOT00000071258 | -0.960508666 | 7.08E-07 |
| TUCP_001776 | XLOC_073508 | ENSRNOT00000023152 | 0.993573366  | 8.54E-11 |
| TUCP_000682 | XLOC_025909 | ENSRNOT00000011284 | -0.958060478 | 9.52E-07 |
| TUCP_000683 | XLOC_025909 | ENSRNOT00000084396 | 0.967412277  | 2.74E-07 |
| TUCP_000680 | XLOC_025780 | ENSRNOT00000089273 | 0.963777802  | 4.62E-07 |
| TUCP_000680 | XLOC_025780 | ENSRNOT00000000167 | 0.965255935  | 3.76E-07 |
| TUCP_003820 | XLOC_167152 | ENSRNOT00000090376 | 0.950724034  | 2.11E-06 |
| TUCP_003820 | XLOC_167152 | ENSRNOT00000071573 | 0.95567404   | 1.25E-06 |

|             |             |                    |             |          |
|-------------|-------------|--------------------|-------------|----------|
| TUCP_003820 | XLOC_167152 | ENSRNOT00000078207 | 0.96320862  | 4.99E-07 |
| TUCP_003820 | XLOC_167152 | ENSRNOT00000085332 | -0.96087248 | 6.76E-07 |
| TUCP_003820 | XLOC_167152 | ENSRNOT00000076793 | 0.964464911 | 4.20E-07 |
| TUCP_001077 | XLOC_041095 | ENSRNOT00000090051 | -0.9593326  | 8.18E-07 |
| TUCP_001077 | XLOC_041095 | ENSRNOT00000072173 | 0.955697328 | 1.25E-06 |
| TUCP_000685 | XLOC_025959 | ENSRNOT00000011317 | 0.955445476 | 1.28E-06 |
| TUCP_001173 | XLOC_044210 | ENSRNOT00000020443 | -0.96060578 | 6.99E-07 |
| TUCP_001173 | XLOC_044210 | ENSRNOT00000027949 | 0.953087351 | 1.65E-06 |
| TUCP_001173 | XLOC_044210 | ENSRNOT00000011134 | 0.957405058 | 1.03E-06 |
| TUCP_001173 | XLOC_044210 | ENSRNOT00000033984 | 0.959690251 | 7.83E-07 |
| TUCP_001173 | XLOC_044210 | ENSRNOT00000092272 | 0.961390338 | 6.33E-07 |
| TUCP_001173 | XLOC_044210 | ENSRNOT00000035048 | 0.959817112 | 7.71E-07 |
| TUCP_001171 | XLOC_044183 | ENSRNOT00000024186 | 0.961466728 | 6.27E-07 |
| TUCP_001171 | XLOC_044183 | ENSRNOT00000074753 | 0.982954235 | 1.10E-08 |
| TUCP_001171 | XLOC_044183 | ENSRNOT00000041904 | 0.979101998 | 3.03E-08 |
| TUCP_001171 | XLOC_044183 | ENSRNOT00000083487 | 0.956631843 | 1.12E-06 |
| TUCP_001171 | XLOC_044183 | ENSRNOT00000077990 | 0.979101998 | 3.03E-08 |
| TUCP_001171 | XLOC_044183 | ENSRNOT00000038826 | 0.977705911 | 4.18E-08 |
| TUCP_001171 | XLOC_044183 | ENSRNOT00000037094 | 0.954136421 | 1.48E-06 |
| TUCP_001171 | XLOC_044183 | ENSRNOT00000037169 | 0.973096651 | 1.06E-07 |
| TUCP_001171 | XLOC_044183 | ENSRNOT00000021243 | 0.975608877 | 6.53E-08 |
| TUCP_001171 | XLOC_044183 | ENSRNOT00000060250 | 0.979482412 | 2.77E-08 |
| TUCP_001171 | XLOC_044183 | ENSRNOT00000091934 | 0.979101998 | 3.03E-08 |
| TUCP_001171 | XLOC_044183 | ENSRNOT00000086027 | 0.966295336 | 3.24E-07 |
| TUCP_001171 | XLOC_044183 | ENSRNOT00000046585 | 0.989756673 | 8.73E-10 |
| TUCP_001171 | XLOC_044183 | ENSRNOT00000080794 | 0.961865381 | 5.96E-07 |
| TUCP_001171 | XLOC_044183 | ENSRNOT00000014456 | 0.968384594 | 2.36E-07 |
| TUCP_001171 | XLOC_044183 | ENSRNOT00000031205 | 0.982325188 | 1.32E-08 |
| TUCP_001171 | XLOC_044183 | ENSRNOT00000044145 | 0.979101998 | 3.03E-08 |
| TUCP_001171 | XLOC_044183 | ENSRNOT00000088381 | 0.989368267 | 1.05E-09 |
| TUCP_001171 | XLOC_044183 | ENSRNOT00000011743 | 0.96161139  | 6.16E-07 |
| TUCP_001171 | XLOC_044183 | ENSRNOT00000089929 | 0.979101998 | 3.03E-08 |
| TUCP_001171 | XLOC_044183 | ENSRNOT00000088624 | 0.979101998 | 3.03E-08 |
| TUCP_001171 | XLOC_044183 | ENSRNOT00000085659 | 0.965494103 | 3.64E-07 |
| TUCP_001171 | XLOC_044183 | ENSRNOT00000015866 | 0.99161028  | 3.23E-10 |
| TUCP_001171 | XLOC_044183 | ENSRNOT00000064250 | 0.9514042   | 1.97E-06 |
| TUCP_001171 | XLOC_044183 | ENSRNOT00000034907 | 0.977732169 | 4.15E-08 |
| TUCP_001171 | XLOC_044183 | ENSRNOT00000093230 | 0.962360113 | 5.59E-07 |
| TUCP_001171 | XLOC_044183 | ENSRNOT00000051835 | 0.979101998 | 3.03E-08 |
| TUCP_001171 | XLOC_044183 | ENSRNOT00000009825 | 0.956342768 | 1.16E-06 |
| TUCP_001171 | XLOC_044183 | ENSRNOT00000079087 | 0.979101998 | 3.03E-08 |
| TUCP_001171 | XLOC_044183 | ENSRNOT00000037206 | 0.979101998 | 3.03E-08 |
| TUCP_001171 | XLOC_044183 | ENSRNOT00000061185 | 0.963942004 | 4.52E-07 |
| TUCP_001171 | XLOC_044183 | ENSRNOT00000011342 | 0.952870351 | 1.69E-06 |
| TUCP_001171 | XLOC_044183 | ENSRNOT00000080590 | 0.977736243 | 4.15E-08 |
| TUCP_001171 | XLOC_044183 | ENSRNOT00000027552 | 0.976867967 | 5.02E-08 |
| TUCP_001171 | XLOC_044183 | ENSRNOT00000015888 | 0.95194547  | 1.86E-06 |
| TUCP_001171 | XLOC_044183 | ENSRNOT00000077014 | 0.985665082 | 4.65E-09 |
| TUCP_001171 | XLOC_044183 | ENSRNOT00000080453 | 0.978970971 | 3.13E-08 |
| TUCP_001171 | XLOC_044183 | ENSRNOT00000057729 | 0.980473024 | 2.16E-08 |
| TUCP_001171 | XLOC_044183 | ENSRNOT00000078633 | 0.979101998 | 3.03E-08 |

|             |             |                    |              |          |
|-------------|-------------|--------------------|--------------|----------|
| TUCP_001171 | XLOC_044183 | ENSRNOT00000020206 | 0.955803296  | 1.23E-06 |
| TUCP_001171 | XLOC_044183 | ENSRNOT00000013423 | 0.980047533  | 2.41E-08 |
| TUCP_001171 | XLOC_044183 | ENSRNOT00000071884 | 0.958671448  | 8.86E-07 |
| TUCP_001171 | XLOC_044183 | ENSRNOT00000066839 | 0.968189552  | 2.43E-07 |
| TUCP_001171 | XLOC_044183 | ENSRNOT00000078663 | 0.98425565   | 7.42E-09 |
| TUCP_001171 | XLOC_044183 | ENSRNOT00000021608 | 0.964399186  | 4.24E-07 |
| TUCP_001171 | XLOC_044183 | ENSRNOT00000029634 | 0.96983053   | 1.87E-07 |
| TUCP_001171 | XLOC_044183 | ENSRNOT00000093579 | 0.975104745  | 7.22E-08 |
| TUCP_001171 | XLOC_044183 | ENSRNOT00000065460 | 0.979101998  | 3.03E-08 |
| TUCP_001171 | XLOC_044183 | ENSRNOT00000003817 | 0.974913886  | 7.50E-08 |
| TUCP_001171 | XLOC_044183 | ENSRNOT00000016713 | 0.979101998  | 3.03E-08 |
| TUCP_001171 | XLOC_044183 | ENSRNOT00000079260 | 0.977221858  | 4.65E-08 |
| TUCP_001171 | XLOC_044183 | ENSRNOT00000039294 | 0.979101998  | 3.03E-08 |
| TUCP_001171 | XLOC_044183 | ENSRNOT00000026932 | 0.955085171  | 1.33E-06 |
| TUCP_001171 | XLOC_044183 | ENSRNOT00000024337 | 0.974098173  | 8.79E-08 |
| TUCP_001170 | XLOC_044154 | ENSRNOT00000033017 | 0.953379121  | 1.60E-06 |
| TUCP_001170 | XLOC_044154 | ENSRNOT00000001559 | 0.966595627  | 3.10E-07 |
| TUCP_001170 | XLOC_044154 | ENSRNOT00000006175 | 0.961940928  | 5.90E-07 |
| TUCP_001170 | XLOC_044154 | ENSRNOT00000026543 | 0.95142518   | 1.96E-06 |
| TUCP_001170 | XLOC_044154 | ENSRNOT00000020028 | 0.964695424  | 4.07E-07 |
| TUCP_001170 | XLOC_044154 | ENSRNOT00000071764 | 0.951117174  | 2.02E-06 |
| TUCP_001170 | XLOC_044154 | ENSRNOT00000020134 | 0.963501626  | 4.80E-07 |
| TUCP_001170 | XLOC_044154 | ENSRNOT00000081512 | 0.960856368  | 6.78E-07 |
| TUCP_001170 | XLOC_044154 | ENSRNOT00000000468 | 0.957679599  | 9.96E-07 |
| TUCP_001170 | XLOC_044154 | ENSRNOT00000065168 | 0.978722847  | 3.31E-08 |
| TUCP_001170 | XLOC_044154 | ENSRNOT00000046746 | 0.959289179  | 8.22E-07 |
| TUCP_001170 | XLOC_044154 | ENSRNOT00000078274 | 0.959705068  | 7.82E-07 |
| TUCP_001170 | XLOC_044154 | ENSRNOT00000015799 | 0.960163107  | 7.39E-07 |
| TUCP_001170 | XLOC_044154 | ENSRNOT00000022635 | 0.957214148  | 1.05E-06 |
| TUCP_001170 | XLOC_044154 | ENSRNOT00000060362 | 0.950595093  | 2.13E-06 |
| TUCP_001177 | XLOC_044325 | ENSRNOT00000047482 | 0.962128431  | 5.76E-07 |
| TUCP_001176 | XLOC_044274 | ENSRNOT00000047264 | 0.963512625  | 4.79E-07 |
| TUCP_001176 | XLOC_044274 | ENSRNOT00000003391 | 0.952860914  | 1.69E-06 |
| TUCP_001176 | XLOC_044274 | ENSRNOT00000001893 | 0.95672242   | 1.11E-06 |
| TUCP_001176 | XLOC_044274 | ENSRNOT00000033017 | 0.967135015  | 2.86E-07 |
| TUCP_001176 | XLOC_044274 | ENSRNOT00000074972 | 0.954419718  | 1.44E-06 |
| TUCP_001176 | XLOC_044274 | ENSRNOT00000083214 | 0.967889919  | 2.55E-07 |
| TUCP_001176 | XLOC_044274 | ENSRNOT00000090057 | 0.962042629  | 5.82E-07 |
| TUCP_001176 | XLOC_044274 | ENSRNOT00000041494 | 0.957847247  | 9.76E-07 |
| TUCP_001176 | XLOC_044274 | ENSRNOT00000064984 | -0.954426725 | 1.43E-06 |
| TUCP_001176 | XLOC_044274 | ENSRNOT00000080024 | 0.976301958  | 5.66E-08 |
| TUCP_001176 | XLOC_044274 | ENSRNOT00000033468 | 0.961838049  | 5.98E-07 |
| TUCP_001176 | XLOC_044274 | ENSRNOT00000081512 | 0.975334378  | 6.90E-08 |
| TUCP_001176 | XLOC_044274 | ENSRNOT00000065168 | 0.961114441  | 6.56E-07 |
| TUCP_001176 | XLOC_044274 | ENSRNOT00000023133 | 0.957554762  | 1.01E-06 |
| TUCP_001176 | XLOC_044274 | ENSRNOT00000071672 | 0.952313521  | 1.79E-06 |
| TUCP_001176 | XLOC_044274 | ENSRNOT00000015799 | 0.961386718  | 6.34E-07 |
| TUCP_001175 | XLOC_044220 | ENSRNOT00000002169 | 0.972167084  | 1.26E-07 |
| TUCP_001175 | XLOC_044220 | ENSRNOT00000023628 | 0.951643674  | 1.92E-06 |
| TUCP_001175 | XLOC_044220 | ENSRNOT00000014832 | 0.952620111  | 1.74E-06 |
| TUCP_001175 | XLOC_044220 | ENSRNOT00000029332 | 0.953818102  | 1.53E-06 |



|             |             |                    |              |          |
|-------------|-------------|--------------------|--------------|----------|
| TUCP_001175 | XLOC_044220 | ENSRNOT00000072368 | 0.97162662   | 1.38E-07 |
| TUCP_001175 | XLOC_044220 | ENSRNOT00000072890 | 0.953170454  | 1.64E-06 |
| TUCP_001175 | XLOC_044220 | ENSRNOT00000073005 | 0.968295435  | 2.39E-07 |
| TUCP_001175 | XLOC_044220 | ENSRNOT00000084416 | 0.973998617  | 8.96E-08 |
| TUCP_001175 | XLOC_044220 | ENSRNOT00000010464 | 0.960738112  | 6.88E-07 |
| TUCP_001175 | XLOC_044220 | ENSRNOT00000029456 | 0.955800897  | 1.23E-06 |
| TUCP_001175 | XLOC_044220 | ENSRNOT00000084700 | 0.958138279  | 9.44E-07 |
| TUCP_001175 | XLOC_044220 | ENSRNOT00000080174 | 0.956185627  | 1.18E-06 |
| TUCP_001175 | XLOC_044220 | ENSRNOT00000009503 | 0.980635937  | 2.08E-08 |
| TUCP_001175 | XLOC_044220 | ENSRNOT00000007100 | 0.960607302  | 6.99E-07 |
| TUCP_001175 | XLOC_044220 | ENSRNOT00000072632 | 0.955752853  | 1.24E-06 |
| TUCP_001175 | XLOC_044220 | ENSRNOT00000019531 | 0.952093452  | 1.83E-06 |
| TUCP_001175 | XLOC_044220 | ENSRNOT00000024251 | 0.965820647  | 3.47E-07 |
| TUCP_001175 | XLOC_044220 | ENSRNOT00000084452 | 0.952151662  | 1.82E-06 |
| TUCP_001175 | XLOC_044220 | ENSRNOT00000072129 | 0.976817429  | 5.07E-08 |
| TUCP_001175 | XLOC_044220 | ENSRNOT00000046983 | 0.954520464  | 1.42E-06 |
| TUCP_001174 | XLOC_044215 | ENSRNOT00000047139 | 0.951447319  | 1.96E-06 |
| TUCP_001174 | XLOC_044215 | ENSRNOT00000021064 | 0.971938462  | 1.31E-07 |
| TUCP_001174 | XLOC_044215 | ENSRNOT00000074676 | 0.951015315  | 2.05E-06 |
| TUCP_000075 | XLOC_001720 | ENSRNOT00000082453 | -0.958653811 | 8.88E-07 |
| TUCP_000347 | XLOC_010851 | ENSRNOT00000056234 | 0.952534765  | 1.75E-06 |
| TUCP_000347 | XLOC_010851 | ENSRNOT00000077530 | 0.960962268  | 6.69E-07 |
| TUCP_000077 | XLOC_001813 | ENSRNOT00000021752 | 0.955377536  | 1.29E-06 |
| TUCP_000077 | XLOC_001813 | ENSRNOT00000026536 | 0.969214365  | 2.07E-07 |
| TUCP_001178 | XLOC_044395 | ENSRNOT00000078820 | 0.971534201  | 1.40E-07 |
| TUCP_000178 | XLOC_005703 | ENSRNOT00000078372 | 0.966255691  | 3.26E-07 |
| TUCP_000070 | XLOC_001575 | ENSRNOT00000042495 | 0.957433852  | 1.02E-06 |
| TUCP_000070 | XLOC_001575 | ENSRNOT00000029915 | 0.972677098  | 1.15E-07 |
| TUCP_000070 | XLOC_001575 | ENSRNOT00000027343 | 0.954832639  | 1.37E-06 |
| TUCP_000070 | XLOC_001575 | ENSRNOT00000004047 | 0.951344369  | 1.98E-06 |
| TUCP_000070 | XLOC_001575 | ENSRNOT00000090352 | 0.967474604  | 2.71E-07 |
| TUCP_000070 | XLOC_001575 | ENSRNOT00000079494 | 0.960618089  | 6.98E-07 |
| TUCP_000070 | XLOC_001575 | ENSRNOT00000065701 | 0.953879908  | 1.52E-06 |
| TUCP_000070 | XLOC_001575 | ENSRNOT00000055506 | 0.968905963  | 2.17E-07 |
| TUCP_000073 | XLOC_001712 | ENSRNOT00000055127 | 0.950648784  | 2.12E-06 |
| TUCP_000073 | XLOC_001712 | ENSRNOT00000066764 | 0.954273396  | 1.46E-06 |
| TUCP_000073 | XLOC_001712 | ENSRNOT00000001570 | 0.952095714  | 1.83E-06 |
| TUCP_000073 | XLOC_001712 | ENSRNOT00000083702 | 0.968301086  | 2.39E-07 |
| TUCP_000073 | XLOC_001712 | ENSRNOT00000028007 | 0.950067567  | 2.25E-06 |
| TUCP_000073 | XLOC_001712 | ENSRNOT00000013342 | 0.956286655  | 1.17E-06 |
| TUCP_000073 | XLOC_001712 | ENSRNOT00000088457 | 0.962048324  | 5.82E-07 |
| TUCP_000073 | XLOC_001712 | ENSRNOT00000027933 | 0.961562609  | 6.19E-07 |
| TUCP_000073 | XLOC_001712 | ENSRNOT00000054757 | 0.960598293  | 7.00E-07 |
| TUCP_000073 | XLOC_001712 | ENSRNOT00000091499 | 0.95541686   | 1.29E-06 |
| TUCP_000073 | XLOC_001712 | ENSRNOT00000039383 | 0.968011295  | 2.50E-07 |
| TUCP_000073 | XLOC_001712 | ENSRNOT00000039005 | 0.954957535  | 1.35E-06 |
| TUCP_000073 | XLOC_001712 | ENSRNOT00000082143 | 0.962712864  | 5.33E-07 |
| TUCP_000073 | XLOC_001712 | ENSRNOT00000085570 | 0.961523633  | 6.23E-07 |
| TUCP_000073 | XLOC_001712 | ENSRNOT00000047011 | 0.96169254   | 6.09E-07 |
| TUCP_000073 | XLOC_001712 | ENSRNOT00000090867 | 0.955189424  | 1.32E-06 |
| TUCP_000073 | XLOC_001712 | ENSRNOT00000019361 | 0.953070692  | 1.66E-06 |

|             |             |                    |             |          |
|-------------|-------------|--------------------|-------------|----------|
| TUCP_000073 | XLOC_001712 | ENSRNOT00000017878 | 0.955088727 | 1.33E-06 |
| TUCP_000073 | XLOC_001712 | ENSRNOT00000003320 | 0.952032384 | 1.84E-06 |
| TUCP_000073 | XLOC_001712 | ENSRNOT00000015058 | 0.957601143 | 1.00E-06 |
| TUCP_000073 | XLOC_001712 | ENSRNOT00000086390 | 0.958098612 | 9.48E-07 |
| TUCP_000073 | XLOC_001712 | ENSRNOT00000087603 | 0.951427999 | 1.96E-06 |
| TUCP_000073 | XLOC_001712 | ENSRNOT00000078434 | 0.952439873 | 1.77E-06 |
| TUCP_000073 | XLOC_001712 | ENSRNOT00000044319 | 0.950623303 | 2.13E-06 |
| TUCP_000073 | XLOC_001712 | ENSRNOT00000036753 | 0.969399541 | 2.01E-07 |
| TUCP_000073 | XLOC_001712 | ENSRNOT00000010673 | 0.967997466 | 2.51E-07 |
| TUCP_000073 | XLOC_001712 | ENSRNOT00000037806 | 0.983238932 | 1.01E-08 |
| TUCP_000073 | XLOC_001712 | ENSRNOT00000030228 | 0.964842561 | 3.99E-07 |
| TUCP_000073 | XLOC_001712 | ENSRNOT00000047700 | 0.951783325 | 1.89E-06 |
| TUCP_000073 | XLOC_001712 | ENSRNOT00000057992 | 0.967032655 | 2.90E-07 |
| TUCP_000073 | XLOC_001712 | ENSRNOT00000002936 | 0.954424543 | 1.43E-06 |
| TUCP_000073 | XLOC_001712 | ENSRNOT00000072810 | 0.967992659 | 2.51E-07 |
| TUCP_000072 | XLOC_001711 | ENSRNOT00000024186 | 0.956027358 | 1.20E-06 |
| TUCP_000072 | XLOC_001711 | ENSRNOT00000074753 | 0.978549178 | 3.45E-08 |
| TUCP_000072 | XLOC_001711 | ENSRNOT00000041904 | 0.977954924 | 3.95E-08 |
| TUCP_000072 | XLOC_001711 | ENSRNOT00000083487 | 0.96460181  | 4.12E-07 |
| TUCP_000072 | XLOC_001711 | ENSRNOT00000077990 | 0.977954924 | 3.95E-08 |
| TUCP_000072 | XLOC_001711 | ENSRNOT00000038826 | 0.980112086 | 2.37E-08 |
| TUCP_000072 | XLOC_001711 | ENSRNOT00000046842 | 0.999805318 | 2.20E-18 |
| TUCP_000072 | XLOC_001711 | ENSRNOT00000037169 | 0.951821265 | 1.89E-06 |
| TUCP_000072 | XLOC_001711 | ENSRNOT00000021243 | 0.962356455 | 5.59E-07 |
| TUCP_000072 | XLOC_001711 | ENSRNOT00000060250 | 0.97765006  | 4.23E-08 |
| TUCP_000072 | XLOC_001711 | ENSRNOT00000091934 | 0.977954924 | 3.95E-08 |
| TUCP_000072 | XLOC_001711 | ENSRNOT00000046585 | 0.957016024 | 1.08E-06 |
| TUCP_000072 | XLOC_001711 | ENSRNOT00000080794 | 0.98198418  | 1.45E-08 |
| TUCP_000072 | XLOC_001711 | ENSRNOT00000014456 | 0.967149836 | 2.85E-07 |
| TUCP_000072 | XLOC_001711 | ENSRNOT00000031205 | 0.965671843 | 3.54E-07 |
| TUCP_000072 | XLOC_001711 | ENSRNOT00000044145 | 0.977954924 | 3.95E-08 |
| TUCP_000072 | XLOC_001711 | ENSRNOT00000088381 | 0.964123543 | 4.41E-07 |
| TUCP_000072 | XLOC_001711 | ENSRNOT00000011743 | 0.998866996 | 1.47E-14 |
| TUCP_000072 | XLOC_001711 | ENSRNOT00000089929 | 0.977954924 | 3.95E-08 |
| TUCP_000072 | XLOC_001711 | ENSRNOT00000088624 | 0.977954924 | 3.95E-08 |
| TUCP_000072 | XLOC_001711 | ENSRNOT00000085659 | 0.965126936 | 3.83E-07 |
| TUCP_000072 | XLOC_001711 | ENSRNOT00000015866 | 0.966465533 | 3.16E-07 |
| TUCP_000072 | XLOC_001711 | ENSRNOT00000064250 | 0.960924008 | 6.72E-07 |
| TUCP_000072 | XLOC_001711 | ENSRNOT00000034907 | 0.979166996 | 2.98E-08 |
| TUCP_000072 | XLOC_001711 | ENSRNOT00000051835 | 0.977954924 | 3.95E-08 |
| TUCP_000072 | XLOC_001711 | ENSRNOT00000079087 | 0.977954924 | 3.95E-08 |
| TUCP_000072 | XLOC_001711 | ENSRNOT00000037206 | 0.977954924 | 3.95E-08 |
| TUCP_000072 | XLOC_001711 | ENSRNOT00000083261 | 0.970452855 | 1.69E-07 |
| TUCP_000072 | XLOC_001711 | ENSRNOT00000080590 | 0.977535765 | 4.34E-08 |
| TUCP_000072 | XLOC_001711 | ENSRNOT00000027552 | 0.977730623 | 4.16E-08 |
| TUCP_000072 | XLOC_001711 | ENSRNOT00000077014 | 0.970137187 | 1.78E-07 |
| TUCP_000072 | XLOC_001711 | ENSRNOT00000080453 | 0.976855999 | 5.03E-08 |
| TUCP_000072 | XLOC_001711 | ENSRNOT00000030327 | 0.95054244  | 2.14E-06 |
| TUCP_000072 | XLOC_001711 | ENSRNOT00000066839 | 0.98618852  | 3.87E-09 |
| TUCP_000072 | XLOC_001711 | ENSRNOT00000078633 | 0.977954924 | 3.95E-08 |
| TUCP_000072 | XLOC_001711 | ENSRNOT00000004128 | 0.961646147 | 6.13E-07 |

|             |             |                    |              |          |
|-------------|-------------|--------------------|--------------|----------|
| TUCP_000072 | XLOC_001711 | ENSRNOT00000057729 | 0.976619965  | 5.29E-08 |
| TUCP_000072 | XLOC_001711 | ENSRNOT00000021608 | 0.951759618  | 1.90E-06 |
| TUCP_000072 | XLOC_001711 | ENSRNOT00000029634 | 0.974212583  | 8.60E-08 |
| TUCP_000072 | XLOC_001711 | ENSRNOT00000086349 | 0.957150901  | 1.06E-06 |
| TUCP_000072 | XLOC_001711 | ENSRNOT00000065460 | 0.977954924  | 3.95E-08 |
| TUCP_000072 | XLOC_001711 | ENSRNOT00000003817 | 0.971655609  | 1.37E-07 |
| TUCP_000072 | XLOC_001711 | ENSRNOT00000016713 | 0.977954924  | 3.95E-08 |
| TUCP_000072 | XLOC_001711 | ENSRNOT00000022559 | 0.959518404  | 8.00E-07 |
| TUCP_000072 | XLOC_001711 | ENSRNOT00000079260 | 0.989337645  | 1.07E-09 |
| TUCP_000072 | XLOC_001711 | ENSRNOT00000039294 | 0.977954924  | 3.95E-08 |
| TUCP_000072 | XLOC_001711 | ENSRNOT00000092913 | 0.966171238  | 3.30E-07 |
| TUCP_001652 | XLOC_065264 | ENSRNOT00000035531 | 0.971677033  | 1.37E-07 |
| TUCP_001653 | XLOC_065456 | ENSRNOT00000013913 | 0.966973204  | 2.93E-07 |
| TUCP_001653 | XLOC_065456 | ENSRNOT00000046251 | 0.963072084  | 5.08E-07 |
| TUCP_001653 | XLOC_065456 | ENSRNOT00000023290 | 0.966490877  | 3.15E-07 |
| TUCP_001653 | XLOC_065456 | ENSRNOT00000008350 | 0.953703889  | 1.55E-06 |
| TUCP_001653 | XLOC_065456 | ENSRNOT00000037372 | 0.980816248  | 1.98E-08 |
| TUCP_003696 | XLOC_161323 | ENSRNOT00000025981 | 0.958512274  | 9.03E-07 |
| TUCP_003696 | XLOC_161323 | ENSRNOT00000031904 | 0.95065455   | 2.12E-06 |
| TUCP_003696 | XLOC_161323 | ENSRNOT00000000743 | 0.960429909  | 7.15E-07 |
| TUCP_003696 | XLOC_161323 | ENSRNOT00000084012 | 0.967888905  | 2.55E-07 |
| TUCP_003696 | XLOC_161323 | ENSRNOT00000027083 | 0.966202542  | 3.28E-07 |
| TUCP_003696 | XLOC_161323 | ENSRNOT00000035989 | 0.981447688  | 1.68E-08 |
| TUCP_003696 | XLOC_161323 | ENSRNOT00000002560 | 0.953128131  | 1.65E-06 |
| TUCP_003696 | XLOC_161323 | ENSRNOT00000050834 | -0.966631649 | 3.08E-07 |
| TUCP_003696 | XLOC_161323 | ENSRNOT00000066024 | 0.959285659  | 8.23E-07 |
| TUCP_003696 | XLOC_161323 | ENSRNOT00000057537 | 0.963860631  | 4.57E-07 |
| TUCP_003696 | XLOC_161323 | ENSRNOT00000067867 | 0.951130923  | 2.02E-06 |
| TUCP_003696 | XLOC_161323 | ENSRNOT00000004787 | -0.950517859 | 2.15E-06 |
| TUCP_003696 | XLOC_161323 | ENSRNOT00000023638 | 0.950024811  | 2.26E-06 |
| TUCP_003696 | XLOC_161323 | ENSRNOT00000040513 | 0.953052786  | 1.66E-06 |
| TUCP_003696 | XLOC_161323 | ENSRNOT00000073235 | 0.953422401  | 1.60E-06 |
| TUCP_003696 | XLOC_161323 | ENSRNOT00000004740 | 0.955714195  | 1.25E-06 |
| TUCP_003696 | XLOC_161323 | ENSRNOT00000021592 | 0.950928928  | 2.06E-06 |
| TUCP_003696 | XLOC_161323 | ENSRNOT00000078306 | 0.961325069  | 6.39E-07 |
| TUCP_003696 | XLOC_161323 | ENSRNOT00000082869 | 0.950373815  | 2.18E-06 |
| TUCP_003696 | XLOC_161323 | ENSRNOT00000080695 | 0.976075596  | 5.93E-08 |
| TUCP_003696 | XLOC_161323 | ENSRNOT00000041044 | 0.95229345   | 1.80E-06 |
| TUCP_003696 | XLOC_161323 | ENSRNOT00000000302 | 0.95644712   | 1.15E-06 |
| TUCP_003696 | XLOC_161323 | ENSRNOT00000016649 | 0.955637694  | 1.26E-06 |
| TUCP_003696 | XLOC_161323 | ENSRNOT00000078070 | 0.959500957  | 8.02E-07 |
| TUCP_003696 | XLOC_161323 | ENSRNOT00000026941 | 0.950882244  | 2.07E-06 |
| TUCP_003696 | XLOC_161323 | ENSRNOT00000076729 | 0.953261122  | 1.62E-06 |
| TUCP_003696 | XLOC_161323 | ENSRNOT00000080110 | 0.957852113  | 9.76E-07 |
| TUCP_003696 | XLOC_161323 | ENSRNOT00000018787 | 0.962195146  | 5.71E-07 |
| TUCP_003696 | XLOC_161323 | ENSRNOT00000013758 | 0.953437812  | 1.59E-06 |
| TUCP_003696 | XLOC_161323 | ENSRNOT00000091909 | 0.951134497  | 2.02E-06 |
| TUCP_003696 | XLOC_161323 | ENSRNOT00000034503 | 0.960385113  | 7.19E-07 |
| TUCP_003696 | XLOC_161323 | ENSRNOT00000010824 | 0.960908334  | 6.73E-07 |
| TUCP_003696 | XLOC_161323 | ENSRNOT00000067181 | 0.961179489  | 6.51E-07 |
| TUCP_003696 | XLOC_161323 | ENSRNOT00000073564 | -0.952432186 | 1.77E-06 |

|             |             |                     |              |          |
|-------------|-------------|---------------------|--------------|----------|
| TUCP_003696 | XLOC_161323 | ENSRNOT00000084088  | 0.95820292   | 9.36E-07 |
| TUCP_003696 | XLOC_161323 | ENSRNOT00000076669  | 0.955157191  | 1.32E-06 |
| TUCP_003696 | XLOC_161323 | ENSRNOT00000042125  | 0.954180387  | 1.47E-06 |
| TUCP_003696 | XLOC_161323 | ENSRNOT00000065300  | 0.95237169   | 1.78E-06 |
| TUCP_003696 | XLOC_161323 | ENSRNOT00000066593  | 0.957850208  | 9.76E-07 |
| TUCP_003696 | XLOC_161323 | ENSRNOT00000090376  | 0.959439558  | 8.08E-07 |
| TUCP_003696 | XLOC_161323 | ENSRNOT00000023744  | 0.959266608  | 8.25E-07 |
| TUCP_003696 | XLOC_161323 | ENSRNOT00000057160  | 0.968689897  | 2.25E-07 |
| TUCP_003696 | XLOC_161323 | ENSRNOT00000082699  | 0.956482322  | 1.14E-06 |
| TUCP_003696 | XLOC_161323 | ENSRNOT00000016739  | 0.978901078  | 3.18E-08 |
| TUCP_003696 | XLOC_161323 | ENSRNOT00000073675  | -0.952741004 | 1.71E-06 |
| TUCP_003696 | XLOC_161323 | ENSRNOT00000010242  | 0.950477     | 2.16E-06 |
| TUCP_003696 | XLOC_161323 | ENSRNOT00000009221  | 0.960775873  | 6.85E-07 |
| TUCP_003696 | XLOC_161323 | ENSRNOT00000014888  | 0.958032766  | 9.55E-07 |
| TUCP_003696 | XLOC_161323 | ENSRNOT00000091602  | -0.952102893 | 1.83E-06 |
| TUCP_003696 | XLOC_161323 | ENSRNOT00000042799  | 0.953900848  | 1.52E-06 |
| TUCP_003696 | XLOC_161323 | ENSRNOT00000044608  | -0.955499502 | 1.28E-06 |
| TUCP_000708 | XLOC_026771 | ENSRNOT00000086985  | 0.960158986  | 7.39E-07 |
| TUCP_000345 | XLOC_010780 | ENSRNOT00000033554  | -0.953534676 | 1.58E-06 |
| TUCP_000703 | XLOC_026597 | ENSRNOT00000066477  | 0.950029936  | 2.26E-06 |
| TUCP_000703 | XLOC_026597 | ENSRNOT00000059854  | 0.964182517  | 4.37E-07 |
| TUCP_000703 | XLOC_026597 | ENSRNOT00000006188  | 0.969074549  | 2.12E-07 |
| TUCP_000703 | XLOC_026597 | ENSRNOT00000063930  | 0.951383108  | 1.97E-06 |
| TUCP_000703 | XLOC_026597 | ENSRNOT00000004408  | 0.961745107  | 6.05E-07 |
| TUCP_000703 | XLOC_026597 | ENSRNOT00000067479  | -0.952950671 | 1.68E-06 |
| TUCP_000703 | XLOC_026597 | ENSRNOT00000082914  | -0.966299277 | 3.24E-07 |
| TUCP_000703 | XLOC_026597 | ENSRNOT00000019109  | 0.954012471  | 1.50E-06 |
| TUCP_000703 | XLOC_026597 | ENSRNOT00000089319  | -0.977537146 | 4.34E-08 |
| TUCP_000703 | XLOC_026597 | ENSRNOT00000014301  | 0.967194995  | 2.83E-07 |
| TUCP_000703 | XLOC_026597 | ENSRNOT00000008772  | 0.953874326  | 1.52E-06 |
| TUCP_000703 | XLOC_026597 | ENSRNOT00000006917  | -0.971141301 | 1.50E-07 |
| TUCP_000703 | XLOC_026597 | ENSRNOT00000086706  | -0.953890962 | 1.52E-06 |
| TUCP_000703 | XLOC_026597 | ENSRNOT00000071166  | -0.950019925 | 2.26E-06 |
| TUCP_000703 | XLOC_026597 | ENSRNOT00000004017  | -0.951046643 | 2.04E-06 |
| TUCP_000703 | XLOC_026597 | ENSRNOT00000021114  | -0.957962201 | 9.63E-07 |
| TUCP_000703 | XLOC_026597 | ENSRNOT00000064776  | 0.97221739   | 1.24E-07 |
| TUCP_000703 | XLOC_026597 | ENSRNOT00000013613  | 0.958441908  | 9.10E-07 |
| TUCP_000703 | XLOC_026597 | ENSRNOT00000021534  | 0.964738939  | 4.05E-07 |
| TUCP_000703 | XLOC_026597 | ENSRNOT00000054685  | -0.95176853  | 1.90E-06 |
| TUCP_000703 | XLOC_026597 | ENSRNOT00000057953  | -0.954463764 | 1.43E-06 |
| TUCP_000703 | XLOC_026597 | ENSRNOT00000004722  | 0.963994084  | 4.49E-07 |
| TUCP_000703 | XLOC_026597 | ENSRNOT00000057898  | 0.960560897  | 7.03E-07 |
| TUCP_000703 | XLOC_026597 | ENSRNOT00000079185  | 0.95864521   | 8.89E-07 |
| TUCP_000703 | XLOC_026597 | ENSRNOT00000003641  | -0.96198857  | 5.86E-07 |
| TUCP_000703 | XLOC_026597 | ENSRNOT000000091139 | 0.953915552  | 1.51E-06 |
| TUCP_000703 | XLOC_026597 | ENSRNOT000000030798 | 0.955637006  | 1.26E-06 |
| TUCP_000703 | XLOC_026597 | ENSRNOT00000005834  | -0.971961771 | 1.30E-07 |
| TUCP_000703 | XLOC_026597 | ENSRNOT000000031701 | 0.952047807  | 1.84E-06 |
| TUCP_000703 | XLOC_026597 | ENSRNOT00000080962  | -0.952759781 | 1.71E-06 |
| TUCP_000703 | XLOC_026597 | ENSRNOT00000080410  | 0.958750517  | 8.78E-07 |
| TUCP_000703 | XLOC_026597 | ENSRNOT00000016254  | 0.972404589  | 1.20E-07 |

|             |             |                    |              |          |
|-------------|-------------|--------------------|--------------|----------|
| TUCP_000703 | XL0C_026597 | ENSRNOT00000079227 | 0.964250068  | 4.33E-07 |
| TUCP_000703 | XL0C_026597 | ENSRNOT00000067391 | 0.958357651  | 9.19E-07 |
| TUCP_000703 | XL0C_026597 | ENSRNOT00000017556 | -0.958635896 | 8.90E-07 |
| TUCP_000703 | XL0C_026597 | ENSRNOT00000026724 | 0.954718842  | 1.39E-06 |
| TUCP_000703 | XL0C_026597 | ENSRNOT00000085545 | 0.967837029  | 2.57E-07 |
| TUCP_000703 | XL0C_026597 | ENSRNOT00000013867 | -0.953737887 | 1.54E-06 |
| TUCP_000703 | XL0C_026597 | ENSRNOT00000021802 | -0.955997815 | 1.21E-06 |
| TUCP_000703 | XL0C_026597 | ENSRNOT00000026831 | -0.951213578 | 2.00E-06 |
| TUCP_000703 | XL0C_026597 | ENSRNOT00000018640 | -0.951530117 | 1.94E-06 |
| TUCP_000703 | XL0C_026597 | ENSRNOT00000011082 | 0.958633302  | 8.90E-07 |
| TUCP_000703 | XL0C_026597 | ENSRNOT00000004351 | 0.955832886  | 1.23E-06 |
| TUCP_000703 | XL0C_026597 | ENSRNOT00000087748 | 0.95429441   | 1.45E-06 |
| TUCP_000703 | XL0C_026597 | ENSRNOT00000003787 | 0.953873552  | 1.52E-06 |
| TUCP_000703 | XL0C_026597 | ENSRNOT00000072357 | 0.953437423  | 1.59E-06 |
| TUCP_000703 | XL0C_026597 | ENSRNOT00000066952 | -0.950705972 | 2.11E-06 |
| TUCP_000703 | XL0C_026597 | ENSRNOT00000078185 | 0.950341169  | 2.19E-06 |
| TUCP_000703 | XL0C_026597 | ENSRNOT00000024119 | -0.951407881 | 1.97E-06 |
| TUCP_000703 | XL0C_026597 | ENSRNOT00000001289 | -0.958614891 | 8.92E-07 |
| TUCP_000703 | XL0C_026597 | ENSRNOT00000073910 | 0.957236188  | 1.05E-06 |
| TUCP_000703 | XL0C_026597 | ENSRNOT00000000170 | 0.957593131  | 1.01E-06 |
| TUCP_000703 | XL0C_026597 | ENSRNOT00000029701 | -0.955288682 | 1.31E-06 |
| TUCP_000703 | XL0C_026597 | ENSRNOT00000001099 | 0.960680091  | 6.93E-07 |
| TUCP_000703 | XL0C_026597 | ENSRNOT00000074586 | 0.954814551  | 1.37E-06 |
| TUCP_000703 | XL0C_026597 | ENSRNOT00000014821 | 0.957813932  | 9.80E-07 |
| TUCP_000703 | XL0C_026597 | ENSRNOT00000007259 | 0.966572621  | 3.11E-07 |
| TUCP_000703 | XL0C_026597 | ENSRNOT00000026531 | 0.954268785  | 1.46E-06 |
| TUCP_000703 | XL0C_026597 | ENSRNOT00000005172 | -0.958169513 | 9.40E-07 |
| TUCP_000703 | XL0C_026597 | ENSRNOT00000017746 | 0.955793389  | 1.23E-06 |
| TUCP_000703 | XL0C_026597 | ENSRNOT00000028290 | 0.953182373  | 1.64E-06 |
| TUCP_000703 | XL0C_026597 | ENSRNOT00000022774 | 0.950632662  | 2.13E-06 |
| TUCP_000703 | XL0C_026597 | ENSRNOT00000073105 | 0.954687034  | 1.39E-06 |
| TUCP_000703 | XL0C_026597 | ENSRNOT00000026249 | 0.964186057  | 4.37E-07 |
| TUCP_000703 | XL0C_026597 | ENSRNOT00000088555 | 0.960956881  | 6.69E-07 |
| TUCP_000703 | XL0C_026597 | ENSRNOT00000029704 | 0.960802661  | 6.82E-07 |
| TUCP_000703 | XL0C_026597 | ENSRNOT00000055602 | 0.971092512  | 1.51E-07 |
| TUCP_000703 | XL0C_026597 | ENSRNOT00000011563 | 0.960674238  | 6.93E-07 |
| TUCP_000703 | XL0C_026597 | ENSRNOT00000054976 | 0.95922866   | 8.28E-07 |
| TUCP_000703 | XL0C_026597 | ENSRNOT00000002187 | 0.968860619  | 2.19E-07 |
| TUCP_000703 | XL0C_026597 | ENSRNOT00000018477 | 0.955447202  | 1.28E-06 |
| TUCP_000703 | XL0C_026597 | ENSRNOT00000000717 | 0.953815641  | 1.53E-06 |
| TUCP_000703 | XL0C_026597 | ENSRNOT00000035277 | -0.951074719 | 2.03E-06 |
| TUCP_000703 | XL0C_026597 | ENSRNOT00000060002 | 0.954770842  | 1.38E-06 |
| TUCP_000703 | XL0C_026597 | ENSRNOT00000023763 | 0.954142458  | 1.48E-06 |
| TUCP_000703 | XL0C_026597 | ENSRNOT00000047571 | 0.963854377  | 4.57E-07 |
| TUCP_000703 | XL0C_026597 | ENSRNOT00000009202 | -0.950407573 | 2.17E-06 |
| TUCP_000703 | XL0C_026597 | ENSRNOT00000034411 | -0.951181423 | 2.01E-06 |
| TUCP_000703 | XL0C_026597 | ENSRNOT00000054864 | 0.971717611  | 1.36E-07 |
| TUCP_000703 | XL0C_026597 | ENSRNOT00000038511 | 0.950873607  | 2.07E-06 |
| TUCP_000703 | XL0C_026597 | ENSRNOT00000085619 | -0.960579726 | 7.02E-07 |
| TUCP_000703 | XL0C_026597 | ENSRNOT00000007276 | 0.950710858  | 2.11E-06 |
| TUCP_000703 | XL0C_026597 | ENSRNOT00000022144 | 0.981391652  | 1.70E-08 |

|             |             |                    |              |          |
|-------------|-------------|--------------------|--------------|----------|
| TUCP_000703 | XLOC_026597 | ENSRNOT00000013800 | -0.961051047 | 6.61E-07 |
| TUCP_000703 | XLOC_026597 | ENSRNOT00000027973 | 0.957602573  | 1.00E-06 |
| TUCP_000703 | XLOC_026597 | ENSRNOT00000008222 | 0.962763045  | 5.30E-07 |
| TUCP_000703 | XLOC_026597 | ENSRNOT00000027875 | -0.962440349 | 5.53E-07 |
| TUCP_000703 | XLOC_026597 | ENSRNOT00000038212 | 0.964830415  | 3.99E-07 |
| TUCP_000703 | XLOC_026597 | ENSRNOT00000023965 | 0.964157054  | 4.39E-07 |
| TUCP_000703 | XLOC_026597 | ENSRNOT00000002188 | -0.960047918 | 7.50E-07 |
| TUCP_000703 | XLOC_026597 | ENSRNOT00000011694 | 0.956910906  | 1.09E-06 |
| TUCP_000703 | XLOC_026597 | ENSRNOT00000010983 | -0.952990766 | 1.67E-06 |
| TUCP_000703 | XLOC_026597 | ENSRNOT00000035808 | -0.977882454 | 4.02E-08 |
| TUCP_000703 | XLOC_026597 | ENSRNOT00000075800 | 0.966011649  | 3.37E-07 |
| TUCP_000703 | XLOC_026597 | ENSRNOT00000084597 | 0.954776009  | 1.38E-06 |
| TUCP_000703 | XLOC_026597 | ENSRNOT00000017995 | -0.965170452 | 3.81E-07 |
| TUCP_000703 | XLOC_026597 | ENSRNOT00000075630 | 0.958480795  | 9.06E-07 |
| TUCP_000703 | XLOC_026597 | ENSRNOT00000025705 | -0.968046161 | 2.49E-07 |
| TUCP_000703 | XLOC_026597 | ENSRNOT00000061580 | 0.951510864  | 1.95E-06 |
| TUCP_000703 | XLOC_026597 | ENSRNOT00000026871 | 0.95286843   | 1.69E-06 |
| TUCP_000702 | XLOC_026469 | ENSRNOT00000055187 | 0.950858712  | 2.08E-06 |
| TUCP_000702 | XLOC_026469 | ENSRNOT00000050834 | -0.951335134 | 1.98E-06 |
| TUCP_000702 | XLOC_026469 | ENSRNOT00000013507 | 0.954914086  | 1.36E-06 |
| TUCP_000702 | XLOC_026469 | ENSRNOT00000004570 | 0.963427662  | 4.85E-07 |
| TUCP_000702 | XLOC_026469 | ENSRNOT00000077435 | -0.952239711 | 1.81E-06 |
| TUCP_000702 | XLOC_026469 | ENSRNOT00000070809 | -0.953508864 | 1.58E-06 |
| TUCP_000702 | XLOC_026469 | ENSRNOT00000022377 | -0.959478577 | 8.04E-07 |
| TUCP_000702 | XLOC_026469 | ENSRNOT00000016740 | 0.964003755  | 4.48E-07 |
| TUCP_000702 | XLOC_026469 | ENSRNOT00000017476 | -0.95725871  | 1.05E-06 |
| TUCP_000702 | XLOC_026469 | ENSRNOT00000078306 | 0.967934408  | 2.53E-07 |
| TUCP_000702 | XLOC_026469 | ENSRNOT00000060811 | 0.951392282  | 1.97E-06 |
| TUCP_000702 | XLOC_026469 | ENSRNOT00000075279 | 0.983407398  | 9.63E-09 |
| TUCP_000702 | XLOC_026469 | ENSRNOT00000076729 | 0.952441321  | 1.77E-06 |
| TUCP_000702 | XLOC_026469 | ENSRNOT00000010545 | 0.967389247  | 2.75E-07 |
| TUCP_000702 | XLOC_026469 | ENSRNOT00000054674 | 0.960596517  | 7.00E-07 |
| TUCP_000702 | XLOC_026469 | ENSRNOT00000074156 | 0.95399498   | 1.50E-06 |
| TUCP_000702 | XLOC_026469 | ENSRNOT00000066968 | 0.960142423  | 7.41E-07 |
| TUCP_000702 | XLOC_026469 | ENSRNOT00000026057 | -0.95026476  | 2.20E-06 |
| TUCP_000702 | XLOC_026469 | ENSRNOT00000049044 | 0.950131805  | 2.23E-06 |
| TUCP_000702 | XLOC_026469 | ENSRNOT00000026174 | 0.951360148  | 1.98E-06 |
| TUCP_000702 | XLOC_026469 | ENSRNOT00000084595 | 0.951598973  | 1.93E-06 |
| TUCP_000702 | XLOC_026469 | ENSRNOT00000087146 | 0.953219771  | 1.63E-06 |
| TUCP_000702 | XLOC_026469 | ENSRNOT00000023414 | 0.975123408  | 7.20E-08 |
| TUCP_000702 | XLOC_026469 | ENSRNOT00000019130 | -0.951665674 | 1.92E-06 |
| TUCP_000702 | XLOC_026469 | ENSRNOT00000027121 | 0.964226133  | 4.35E-07 |
| TUCP_000702 | XLOC_026469 | ENSRNOT00000082691 | 0.953385013  | 1.60E-06 |
| TUCP_000702 | XLOC_026469 | ENSRNOT00000007954 | 0.950781758  | 2.09E-06 |
| TUCP_000702 | XLOC_026469 | ENSRNOT00000009122 | 0.95946176   | 8.05E-07 |
| TUCP_000702 | XLOC_026469 | ENSRNOT00000089778 | 0.96335336   | 4.89E-07 |
| TUCP_000702 | XLOC_026469 | ENSRNOT00000082699 | 0.968578003  | 2.29E-07 |
| TUCP_000702 | XLOC_026469 | ENSRNOT00000028847 | 0.956768499  | 1.11E-06 |
| TUCP_000702 | XLOC_026469 | ENSRNOT00000067489 | 0.951427949  | 1.96E-06 |
| TUCP_000702 | XLOC_026469 | ENSRNOT00000027828 | 0.953500602  | 1.58E-06 |
| TUCP_001791 | XLOC_073665 | ENSRNOT00000030300 | 0.973774448  | 9.35E-08 |

|             |             |                      |              |          |
|-------------|-------------|----------------------|--------------|----------|
| TUCP_001791 | XL0C_073665 | ENSRNOT00000006481   | 0.954458834  | 1.43E-06 |
| TUCP_001791 | XL0C_073665 | ENSRNOT00000005443   | 0.952482472  | 1.76E-06 |
| TUCP_001791 | XL0C_073665 | ENSRNOT00000007952   | 0.97362377   | 9.62E-08 |
| TUCP_000700 | XL0C_026462 | ENSRNOT00000006680   | 0.951910762  | 1.87E-06 |
| TUCP_000700 | XL0C_026462 | ENSRNOT000000031904  | 0.953783334  | 1.54E-06 |
| TUCP_000700 | XL0C_026462 | ENSRNOT000000003794  | -0.950598238 | 2.13E-06 |
| TUCP_000700 | XL0C_026462 | ENSRNOT000000000743  | 0.951331135  | 1.98E-06 |
| TUCP_000700 | XL0C_026462 | ENSRNOT000000088599  | 0.964526939  | 4.17E-07 |
| TUCP_000700 | XL0C_026462 | ENSRNOT000000013507  | 0.962118653  | 5.76E-07 |
| TUCP_000700 | XL0C_026462 | ENSRNOT000000038807  | 0.96739686   | 2.75E-07 |
| TUCP_000700 | XL0C_026462 | ENSRNOT000000004570  | 0.953841341  | 1.53E-06 |
| TUCP_000700 | XL0C_026462 | ENSRNOT000000066024  | 0.957967485  | 9.63E-07 |
| TUCP_000700 | XL0C_026462 | ENSRNOT000000030692  | -0.951767412 | 1.90E-06 |
| TUCP_000700 | XL0C_026462 | ENSRNOT000000001826  | 0.955939907  | 1.21E-06 |
| TUCP_000700 | XL0C_026462 | ENSRNOT000000000048  | 0.954423194  | 1.43E-06 |
| TUCP_000700 | XL0C_026462 | ENSRNOT000000005958  | 0.951627221  | 1.92E-06 |
| TUCP_000700 | XL0C_026462 | ENSRNOT000000001855  | 0.953902146  | 1.52E-06 |
| TUCP_000700 | XL0C_026462 | ENSRNOT000000023638  | 0.959974532  | 7.56E-07 |
| TUCP_000700 | XL0C_026462 | ENSRNOT000000003940  | -0.950646346 | 2.12E-06 |
| TUCP_000700 | XL0C_026462 | ENSRNOT000000078306  | 0.971273818  | 1.47E-07 |
| TUCP_000700 | XL0C_026462 | ENSRNOT0000000082869 | 0.971031609  | 1.53E-07 |
| TUCP_000700 | XL0C_026462 | ENSRNOT0000000065600 | 0.954797998  | 1.38E-06 |
| TUCP_000700 | XL0C_026462 | ENSRNOT000000041044  | 0.976105319  | 5.89E-08 |
| TUCP_000700 | XL0C_026462 | ENSRNOT000000002445  | -0.952819727 | 1.70E-06 |
| TUCP_000700 | XL0C_026462 | ENSRNOT000000033017  | 0.950804074  | 2.09E-06 |
| TUCP_000700 | XL0C_026462 | ENSRNOT0000000083632 | -0.958229106 | 9.34E-07 |
| TUCP_000700 | XL0C_026462 | ENSRNOT000000003568  | 0.951348126  | 1.98E-06 |
| TUCP_000700 | XL0C_026462 | ENSRNOT0000000090057 | 0.951245849  | 2.00E-06 |
| TUCP_000700 | XL0C_026462 | ENSRNOT0000000082699 | 0.953840707  | 1.53E-06 |
| TUCP_000700 | XL0C_026462 | ENSRNOT0000000090299 | 0.951010984  | 2.05E-06 |
| TUCP_000700 | XL0C_026462 | ENSRNOT000000010367  | 0.971981354  | 1.30E-07 |
| TUCP_000700 | XL0C_026462 | ENSRNOT0000000089933 | 0.950145977  | 2.23E-06 |
| TUCP_002190 | XL0C_091614 | ENSRNOT000000047105  | 0.954343477  | 1.45E-06 |
| TUCP_002190 | XL0C_091614 | ENSRNOT000000001215  | 0.953570712  | 1.57E-06 |
| TUCP_002190 | XL0C_091614 | ENSRNOT000000005958  | 0.953507005  | 1.58E-06 |
| TUCP_002190 | XL0C_091614 | ENSRNOT000000026941  | 0.95343316   | 1.59E-06 |
| TUCP_002190 | XL0C_091614 | ENSRNOT0000000081047 | 0.960286927  | 7.28E-07 |
| TUCP_002190 | XL0C_091614 | ENSRNOT000000006460  | 0.966789423  | 3.01E-07 |
| TUCP_002190 | XL0C_091614 | ENSRNOT000000075397  | 0.980830667  | 1.97E-08 |
| TUCP_002190 | XL0C_091614 | ENSRNOT0000000080695 | 0.951381339  | 1.97E-06 |
| TUCP_002190 | XL0C_091614 | ENSRNOT000000007350  | 0.958900698  | 8.62E-07 |
| TUCP_002190 | XL0C_091614 | ENSRNOT000000032926  | -0.954980431 | 1.35E-06 |
| TUCP_002190 | XL0C_091614 | ENSRNOT000000019104  | -0.952830277 | 1.70E-06 |
| TUCP_002190 | XL0C_091614 | ENSRNOT000000026279  | -0.954944216 | 1.36E-06 |
| TUCP_002190 | XL0C_091614 | ENSRNOT0000000063930 | -0.960120921 | 7.43E-07 |
| TUCP_002190 | XL0C_091614 | ENSRNOT0000000083578 | 0.951700345  | 1.91E-06 |
| TUCP_002190 | XL0C_091614 | ENSRNOT000000040525  | 0.95135806   | 1.98E-06 |
| TUCP_002190 | XL0C_091614 | ENSRNOT000000013116  | -0.961289019 | 6.41E-07 |
| TUCP_002190 | XL0C_091614 | ENSRNOT000000006067  | 0.95936826   | 8.15E-07 |
| TUCP_002190 | XL0C_091614 | ENSRNOT000000034883  | -0.958653394 | 8.88E-07 |
| TUCP_002190 | XL0C_091614 | ENSRNOT000000001855  | 0.979789389  | 2.57E-08 |

|             |             |                    |              |          |
|-------------|-------------|--------------------|--------------|----------|
| TUCP_002190 | XLOC_091614 | ENSRNOT00000023638 | 0.958410911  | 9.14E-07 |
| TUCP_002190 | XLOC_091614 | ENSRNOT00000001691 | 0.969463445  | 1.99E-07 |
| TUCP_002190 | XLOC_091614 | ENSRNOT00000038610 | -0.950673573 | 2.12E-06 |
| TUCP_002190 | XLOC_091614 | ENSRNOT00000012060 | 0.955298871  | 1.30E-06 |
| TUCP_002190 | XLOC_091614 | ENSRNOT00000065942 | -0.951816439 | 1.89E-06 |
| TUCP_002190 | XLOC_091614 | ENSRNOT00000086706 | 0.961720811  | 6.07E-07 |
| TUCP_002190 | XLOC_091614 | ENSRNOT00000085885 | -0.952426579 | 1.77E-06 |
| TUCP_002190 | XLOC_091614 | ENSRNOT00000084567 | 0.955598548  | 1.26E-06 |
| TUCP_002190 | XLOC_091614 | ENSRNOT00000074023 | 0.977349685  | 4.52E-08 |
| TUCP_002190 | XLOC_091614 | ENSRNOT00000052063 | 0.959103617  | 8.41E-07 |
| TUCP_002190 | XLOC_091614 | ENSRNOT00000042638 | 0.967739546  | 2.61E-07 |
| TUCP_002190 | XLOC_091614 | ENSRNOT00000089418 | 0.953966484  | 1.51E-06 |
| TUCP_002190 | XLOC_091614 | ENSRNOT00000087838 | -0.966730389 | 3.04E-07 |
| TUCP_002190 | XLOC_091614 | ENSRNOT00000055582 | 0.952177646  | 1.82E-06 |
| TUCP_002190 | XLOC_091614 | ENSRNOT00000081981 | 0.951749433  | 1.90E-06 |
| TUCP_002190 | XLOC_091614 | ENSRNOT00000033017 | 0.962199804  | 5.70E-07 |
| TUCP_002190 | XLOC_091614 | ENSRNOT00000045926 | 0.954821128  | 1.37E-06 |
| TUCP_002190 | XLOC_091614 | ENSRNOT00000065076 | 0.975510654  | 6.66E-08 |
| TUCP_002190 | XLOC_091614 | ENSRNOT00000009150 | 0.950946427  | 2.06E-06 |
| TUCP_002190 | XLOC_091614 | ENSRNOT00000003326 | -0.959276039 | 8.24E-07 |
| TUCP_002190 | XLOC_091614 | ENSRNOT00000004238 | 0.955711469  | 1.25E-06 |
| TUCP_002190 | XLOC_091614 | ENSRNOT00000016306 | -0.955184086 | 1.32E-06 |
| TUCP_002190 | XLOC_091614 | ENSRNOT00000072771 | 0.950898317  | 2.07E-06 |
| TUCP_002190 | XLOC_091614 | ENSRNOT00000057953 | 0.955746715  | 1.24E-06 |
| TUCP_002190 | XLOC_091614 | ENSRNOT00000073370 | 0.969280739  | 2.05E-07 |
| TUCP_002190 | XLOC_091614 | ENSRNOT00000083568 | 0.980205542  | 2.32E-08 |
| TUCP_002190 | XLOC_091614 | ENSRNOT00000025079 | -0.953066788 | 1.66E-06 |
| TUCP_002190 | XLOC_091614 | ENSRNOT00000065978 | 0.961634443  | 6.14E-07 |
| TUCP_002190 | XLOC_091614 | ENSRNOT00000039177 | -0.952241518 | 1.81E-06 |
| TUCP_002190 | XLOC_091614 | ENSRNOT00000020051 | 0.960404061  | 7.17E-07 |
| TUCP_002190 | XLOC_091614 | ENSRNOT00000064643 | 0.951196508  | 2.01E-06 |
| TUCP_002190 | XLOC_091614 | ENSRNOT00000056180 | 0.951482385  | 1.95E-06 |
| TUCP_002190 | XLOC_091614 | ENSRNOT00000009080 | -0.961544088 | 6.21E-07 |
| TUCP_002190 | XLOC_091614 | ENSRNOT00000027760 | 0.95774522   | 9.88E-07 |
| TUCP_002190 | XLOC_091614 | ENSRNOT00000000048 | 0.968616378  | 2.27E-07 |
| TUCP_002190 | XLOC_091614 | ENSRNOT00000024402 | 0.957121081  | 1.06E-06 |
| TUCP_002190 | XLOC_091614 | ENSRNOT00000065871 | 0.963377342  | 4.88E-07 |
| TUCP_002190 | XLOC_091614 | ENSRNOT00000024677 | 0.956248323  | 1.17E-06 |
| TUCP_002190 | XLOC_091614 | ENSRNOT00000089933 | 0.983124626  | 1.05E-08 |
| TUCP_002190 | XLOC_091614 | ENSRNOT00000090338 | -0.951283749 | 1.99E-06 |
| TUCP_002190 | XLOC_091614 | ENSRNOT00000056100 | -0.963701941 | 4.67E-07 |
| TUCP_002190 | XLOC_091614 | ENSRNOT00000009811 | 0.96283973   | 5.24E-07 |
| TUCP_002190 | XLOC_091614 | ENSRNOT00000025517 | 0.956981805  | 1.08E-06 |
| TUCP_002190 | XLOC_091614 | ENSRNOT00000067554 | 0.968799698  | 2.21E-07 |
| TUCP_002190 | XLOC_091614 | ENSRNOT00000000577 | 0.954367744  | 1.44E-06 |
| TUCP_002190 | XLOC_091614 | ENSRNOT00000026391 | 0.958814248  | 8.71E-07 |
| TUCP_002190 | XLOC_091614 | ENSRNOT00000025966 | 0.968763594  | 2.22E-07 |
| TUCP_002190 | XLOC_091614 | ENSRNOT00000081226 | 0.952167686  | 1.82E-06 |
| TUCP_002190 | XLOC_091614 | ENSRNOT00000077231 | 0.956011194  | 1.20E-06 |
| TUCP_002190 | XLOC_091614 | ENSRNOT00000005686 | -0.969989146 | 1.82E-07 |
| TUCP_002190 | XLOC_091614 | ENSRNOT00000072762 | -0.954343666 | 1.45E-06 |



|             |             |                    |              |          |
|-------------|-------------|--------------------|--------------|----------|
| TUCP_002190 | XLOC_091614 | ENSRNOT00000019820 | 0.953575118  | 1.57E-06 |
| TUCP_002190 | XLOC_091614 | ENSRNOT00000042125 | 0.961493965  | 6.25E-07 |
| TUCP_002190 | XLOC_091614 | ENSRNOT00000011832 | -0.974723902 | 7.79E-08 |
| TUCP_002190 | XLOC_091614 | ENSRNOT00000073643 | -0.974568664 | 8.03E-08 |
| TUCP_002190 | XLOC_091614 | ENSRNOT00000087278 | -0.954808462 | 1.38E-06 |
| TUCP_002190 | XLOC_091614 | ENSRNOT00000003940 | -0.953154856 | 1.64E-06 |
| TUCP_002190 | XLOC_091614 | ENSRNOT00000023262 | -0.953669949 | 1.56E-06 |
| TUCP_002190 | XLOC_091614 | ENSRNOT00000077727 | -0.951096041 | 2.03E-06 |
| TUCP_002190 | XLOC_091614 | ENSRNOT00000022502 | -0.950241446 | 2.21E-06 |
| TUCP_002190 | XLOC_091614 | ENSRNOT00000083968 | -0.956527073 | 1.14E-06 |
| TUCP_002190 | XLOC_091614 | ENSRNOT00000037133 | 0.968357766  | 2.37E-07 |
| TUCP_002190 | XLOC_091614 | ENSRNOT00000010541 | 0.95382094   | 1.53E-06 |
| TUCP_002190 | XLOC_091614 | ENSRNOT00000084709 | 0.970211433  | 1.76E-07 |
| TUCP_002190 | XLOC_091614 | ENSRNOT00000017949 | -0.956679515 | 1.12E-06 |
| TUCP_002190 | XLOC_091614 | ENSRNOT00000065229 | 0.953752218  | 1.54E-06 |
| TUCP_002190 | XLOC_091614 | ENSRNOT00000000469 | 0.954813156  | 1.38E-06 |
| TUCP_002190 | XLOC_091614 | ENSRNOT00000048781 | 0.955790162  | 1.23E-06 |
| TUCP_002190 | XLOC_091614 | ENSRNOT00000039341 | 0.959350931  | 8.16E-07 |
| TUCP_002190 | XLOC_091614 | ENSRNOT00000021802 | 0.951133826  | 2.02E-06 |
| TUCP_002190 | XLOC_091614 | ENSRNOT00000013864 | -0.958019737 | 9.57E-07 |
| TUCP_002190 | XLOC_091614 | ENSRNOT00000007821 | 0.95278961   | 1.71E-06 |
| TUCP_002190 | XLOC_091614 | ENSRNOT00000025856 | -0.955941221 | 1.21E-06 |
| TUCP_002190 | XLOC_091614 | ENSRNOT00000024352 | 0.958035624  | 9.55E-07 |
| TUCP_002190 | XLOC_091614 | ENSRNOT00000072299 | 0.965932583  | 3.41E-07 |
| TUCP_002190 | XLOC_091614 | ENSRNOT00000003544 | -0.953024455 | 1.66E-06 |
| TUCP_002190 | XLOC_091614 | ENSRNOT00000032363 | 0.964224384  | 4.35E-07 |
| TUCP_002190 | XLOC_091614 | ENSRNOT00000003780 | 0.970796855  | 1.59E-07 |
| TUCP_002190 | XLOC_091614 | ENSRNOT00000026643 | 0.972835417  | 1.11E-07 |
| TUCP_002190 | XLOC_091614 | ENSRNOT00000016445 | 0.962652153  | 5.37E-07 |
| TUCP_002190 | XLOC_091614 | ENSRNOT00000060098 | -0.951939445 | 1.86E-06 |
| TUCP_002190 | XLOC_091614 | ENSRNOT00000025913 | -0.974431411 | 8.24E-08 |
| TUCP_002190 | XLOC_091614 | ENSRNOT00000019133 | 0.95029007   | 2.20E-06 |
| TUCP_002190 | XLOC_091614 | ENSRNOT00000011956 | 0.957979065  | 9.61E-07 |
| TUCP_002190 | XLOC_091614 | ENSRNOT00000083220 | 0.954939167  | 1.36E-06 |
| TUCP_002190 | XLOC_091614 | ENSRNOT00000024119 | 0.957914391  | 9.69E-07 |
| TUCP_002190 | XLOC_091614 | ENSRNOT00000086577 | 0.958138322  | 9.44E-07 |
| TUCP_002190 | XLOC_091614 | ENSRNOT00000036658 | -0.958133728 | 9.44E-07 |
| TUCP_002190 | XLOC_091614 | ENSRNOT00000026235 | -0.956559723 | 1.13E-06 |
| TUCP_002190 | XLOC_091614 | ENSRNOT00000079609 | 0.962853525  | 5.23E-07 |
| TUCP_002190 | XLOC_091614 | ENSRNOT00000016637 | -0.95568957  | 1.25E-06 |
| TUCP_002190 | XLOC_091614 | ENSRNOT00000030007 | -0.955440231 | 1.28E-06 |
| TUCP_002190 | XLOC_091614 | ENSRNOT00000065600 | 0.965138557  | 3.82E-07 |
| TUCP_002190 | XLOC_091614 | ENSRNOT00000086260 | -0.972811306 | 1.12E-07 |
| TUCP_002190 | XLOC_091614 | ENSRNOT00000068381 | 0.952006628  | 1.85E-06 |
| TUCP_002190 | XLOC_091614 | ENSRNOT00000072118 | 0.963866299  | 4.57E-07 |
| TUCP_002190 | XLOC_091614 | ENSRNOT00000018328 | -0.958396799 | 9.15E-07 |
| TUCP_002190 | XLOC_091614 | ENSRNOT00000033975 | 0.956801211  | 1.10E-06 |
| TUCP_002190 | XLOC_091614 | ENSRNOT00000068026 | -0.957809137 | 9.81E-07 |
| TUCP_002190 | XLOC_091614 | ENSRNOT00000081725 | 0.952946154  | 1.68E-06 |
| TUCP_002190 | XLOC_091614 | ENSRNOT00000085621 | 0.952792822  | 1.71E-06 |
| TUCP_002190 | XLOC_091614 | ENSRNOT00000030082 | 0.950496251  | 2.15E-06 |

|             |             |                    |              |          |
|-------------|-------------|--------------------|--------------|----------|
| TUCP_002190 | XLOC_091614 | ENSRNOT00000018634 | -0.958821587 | 8.70E-07 |
| TUCP_002190 | XLOC_091614 | ENSRNOT00000010683 | -0.951614919 | 1.93E-06 |
| TUCP_002190 | XLOC_091614 | ENSRNOT00000022190 | -0.969267012 | 2.05E-07 |
| TUCP_002190 | XLOC_091614 | ENSRNOT00000026531 | -0.960548599 | 7.04E-07 |
| TUCP_002190 | XLOC_091614 | ENSRNOT00000035605 | 0.958053194  | 9.53E-07 |
| TUCP_002190 | XLOC_091614 | ENSRNOT00000090853 | -0.963670374 | 4.69E-07 |
| TUCP_002190 | XLOC_091614 | ENSRNOT00000084031 | 0.976218043  | 5.76E-08 |
| TUCP_002190 | XLOC_091614 | ENSRNOT00000014309 | -0.959071215 | 8.44E-07 |
| TUCP_002190 | XLOC_091614 | ENSRNOT00000011880 | 0.950832052  | 2.08E-06 |
| TUCP_002190 | XLOC_091614 | ENSRNOT00000005910 | -0.977542912 | 4.33E-08 |
| TUCP_002190 | XLOC_091614 | ENSRNOT00000032248 | 0.957668378  | 9.97E-07 |
| TUCP_002190 | XLOC_091614 | ENSRNOT00000015476 | -0.95281743  | 1.70E-06 |
| TUCP_002190 | XLOC_091614 | ENSRNOT00000071897 | -0.963792806 | 4.61E-07 |
| TUCP_002190 | XLOC_091614 | ENSRNOT00000075209 | -0.95667977  | 1.12E-06 |
| TUCP_002190 | XLOC_091614 | ENSRNOT00000013067 | -0.965223002 | 3.78E-07 |
| TUCP_002190 | XLOC_091614 | ENSRNOT00000029701 | 0.960281375  | 7.28E-07 |
| TUCP_002190 | XLOC_091614 | ENSRNOT00000020383 | 0.961696252  | 6.09E-07 |
| TUCP_002190 | XLOC_091614 | ENSRNOT00000005459 | 0.965282701  | 3.75E-07 |
| TUCP_002190 | XLOC_091614 | ENSRNOT00000027910 | 0.952703671  | 1.72E-06 |
| TUCP_002190 | XLOC_091614 | ENSRNOT00000065615 | 0.955062789  | 1.34E-06 |
| TUCP_002190 | XLOC_091614 | ENSRNOT00000037015 | 0.968579026  | 2.29E-07 |
| TUCP_002190 | XLOC_091614 | ENSRNOT00000004290 | 0.971238304  | 1.48E-07 |
| TUCP_002190 | XLOC_091614 | ENSRNOT00000020951 | 0.959846205  | 7.68E-07 |
| TUCP_002190 | XLOC_091614 | ENSRNOT00000011675 | 0.968405041  | 2.35E-07 |
| TUCP_002190 | XLOC_091614 | ENSRNOT00000023876 | 0.964567425  | 4.14E-07 |
| TUCP_002190 | XLOC_091614 | ENSRNOT00000086456 | -0.953485043 | 1.59E-06 |
| TUCP_002190 | XLOC_091614 | ENSRNOT00000028685 | 0.950884695  | 2.07E-06 |
| TUCP_002190 | XLOC_091614 | ENSRNOT00000080591 | 0.961940463  | 5.90E-07 |
| TUCP_002190 | XLOC_091614 | ENSRNOT00000049285 | -0.956347375 | 1.16E-06 |
| TUCP_002190 | XLOC_091614 | ENSRNOT00000015239 | -0.961647904 | 6.13E-07 |
| TUCP_002190 | XLOC_091614 | ENSRNOT00000003568 | 0.962084893  | 5.79E-07 |
| TUCP_002190 | XLOC_091614 | ENSRNOT00000074649 | 0.955374546  | 1.29E-06 |
| TUCP_002190 | XLOC_091614 | ENSRNOT00000005257 | 0.968737793  | 2.23E-07 |
| TUCP_002190 | XLOC_091614 | ENSRNOT00000016132 | -0.955651843 | 1.25E-06 |
| TUCP_002190 | XLOC_091614 | ENSRNOT00000077146 | -0.967750619 | 2.60E-07 |
| TUCP_002190 | XLOC_091614 | ENSRNOT00000086122 | 0.954398336  | 1.44E-06 |
| TUCP_002190 | XLOC_091614 | ENSRNOT00000013851 | -0.955352645 | 1.30E-06 |
| TUCP_002190 | XLOC_091614 | ENSRNOT00000017765 | 0.951881381  | 1.87E-06 |
| TUCP_002190 | XLOC_091614 | ENSRNOT00000004999 | 0.955330945  | 1.30E-06 |
| TUCP_002190 | XLOC_091614 | ENSRNOT00000013463 | 0.967321854  | 2.78E-07 |
| TUCP_002190 | XLOC_091614 | ENSRNOT00000089673 | -0.959559813 | 7.96E-07 |
| TUCP_002190 | XLOC_091614 | ENSRNOT00000030850 | 0.958077513  | 9.50E-07 |
| TUCP_002190 | XLOC_091614 | ENSRNOT00000010367 | 0.973391044  | 1.00E-07 |
| TUCP_002190 | XLOC_091614 | ENSRNOT00000057738 | 0.975612423  | 6.52E-08 |
| TUCP_002190 | XLOC_091614 | ENSRNOT00000058382 | 0.970611524  | 1.64E-07 |
| TUCP_002190 | XLOC_091614 | ENSRNOT00000028828 | 0.955662243  | 1.25E-06 |
| TUCP_002190 | XLOC_091614 | ENSRNOT00000023977 | -0.953132952 | 1.65E-06 |
| TUCP_002190 | XLOC_091614 | ENSRNOT00000047663 | -0.956679487 | 1.12E-06 |
| TUCP_002190 | XLOC_091614 | ENSRNOT00000082151 | -0.956066426 | 1.20E-06 |
| TUCP_002190 | XLOC_091614 | ENSRNOT00000022578 | 0.958493055  | 9.05E-07 |
| TUCP_002190 | XLOC_091614 | ENSRNOT00000066133 | -0.960010821 | 7.53E-07 |

|             |             |                     |              |          |
|-------------|-------------|---------------------|--------------|----------|
| TUCP_002190 | XLOC_091614 | ENSRNOT00000048933  | -0.957018305 | 1.07E-06 |
| TUCP_002190 | XLOC_091614 | ENSRNOT00000059181  | 0.952319088  | 1.79E-06 |
| TUCP_002190 | XLOC_091614 | ENSRNOT00000029202  | -0.957251129 | 1.05E-06 |
| TUCP_002190 | XLOC_091614 | ENSRNOT00000017291  | -0.952019993 | 1.85E-06 |
| TUCP_002190 | XLOC_091614 | ENSRNOT00000017907  | -0.950319122 | 2.19E-06 |
| TUCP_002190 | XLOC_091614 | ENSRNOT00000003691  | -0.9647254   | 4.05E-07 |
| TUCP_002190 | XLOC_091614 | ENSRNOT00000010852  | 0.967350459  | 2.77E-07 |
| TUCP_002190 | XLOC_091614 | ENSRNOT00000013524  | 0.950180054  | 2.22E-06 |
| TUCP_002190 | XLOC_091614 | ENSRNOT00000025794  | -0.967933391 | 2.53E-07 |
| TUCP_002190 | XLOC_091614 | ENSRNOT00000038807  | 0.956408257  | 1.15E-06 |
| TUCP_002190 | XLOC_091614 | ENSRNOT00000058111  | -0.951634113 | 1.92E-06 |
| TUCP_002190 | XLOC_091614 | ENSRNOT00000014926  | 0.958545765  | 8.99E-07 |
| TUCP_002190 | XLOC_091614 | ENSRNOT00000085971  | -0.961165293 | 6.52E-07 |
| TUCP_002190 | XLOC_091614 | ENSRNOT00000017761  | 0.962554511  | 5.44E-07 |
| TUCP_002190 | XLOC_091614 | ENSRNOT00000002443  | 0.965533079  | 3.62E-07 |
| TUCP_002190 | XLOC_091614 | ENSRNOT00000030692  | -0.958088161 | 9.49E-07 |
| TUCP_002190 | XLOC_091614 | ENSRNOT00000008987  | -0.964001427 | 4.48E-07 |
| TUCP_002190 | XLOC_091614 | ENSRNOT00000002114  | -0.968721545 | 2.24E-07 |
| TUCP_002190 | XLOC_091614 | ENSRNOT00000080608  | 0.9501663    | 2.23E-06 |
| TUCP_002190 | XLOC_091614 | ENSRNOT00000027970  | 0.965898272  | 3.43E-07 |
| TUCP_002190 | XLOC_091614 | ENSRNOT00000015624  | 0.952391901  | 1.78E-06 |
| TUCP_002190 | XLOC_091614 | ENSRNOT00000009462  | 0.95684351   | 1.10E-06 |
| TUCP_002190 | XLOC_091614 | ENSRNOT000000024011 | 0.954558248  | 1.41E-06 |
| TUCP_002190 | XLOC_091614 | ENSRNOT00000015537  | 0.952497039  | 1.76E-06 |
| TUCP_002190 | XLOC_091614 | ENSRNOT00000040060  | -0.952161242 | 1.82E-06 |
| TUCP_002190 | XLOC_091614 | ENSRNOT00000007702  | -0.952967188 | 1.67E-06 |
| TUCP_002190 | XLOC_091614 | ENSRNOT00000046215  | -0.962773478 | 5.29E-07 |
| TUCP_002190 | XLOC_091614 | ENSRNOT00000015946  | -0.953600523 | 1.57E-06 |
| TUCP_002190 | XLOC_091614 | ENSRNOT00000039102  | 0.96304244   | 5.10E-07 |
| TUCP_002190 | XLOC_091614 | ENSRNOT000000082138 | -0.95100796  | 2.05E-06 |
| TUCP_002190 | XLOC_091614 | ENSRNOT00000018074  | -0.955399148 | 1.29E-06 |
| TUCP_002190 | XLOC_091614 | ENSRNOT00000078856  | -0.955790378 | 1.23E-06 |
| TUCP_002190 | XLOC_091614 | ENSRNOT00000091205  | 0.95504679   | 1.34E-06 |
| TUCP_002190 | XLOC_091614 | ENSRNOT00000009742  | -0.972333619 | 1.22E-07 |
| TUCP_002190 | XLOC_091614 | ENSRNOT00000000120  | 0.977871628  | 4.03E-08 |
| TUCP_002190 | XLOC_091614 | ENSRNOT00000013632  | 0.956100473  | 1.19E-06 |
| TUCP_002190 | XLOC_091614 | ENSRNOT00000007369  | 0.97499769   | 7.38E-08 |
| TUCP_002190 | XLOC_091614 | ENSRNOT000000080677 | -0.961363462 | 6.35E-07 |
| TUCP_002190 | XLOC_091614 | ENSRNOT00000012528  | 0.950162422  | 2.23E-06 |
| TUCP_002190 | XLOC_091614 | ENSRNOT00000060698  | -0.953653192 | 1.56E-06 |
| TUCP_002190 | XLOC_091614 | ENSRNOT00000058351  | 0.95063565   | 2.12E-06 |
| TUCP_002190 | XLOC_091614 | ENSRNOT00000028225  | 0.962849868  | 5.24E-07 |
| TUCP_002190 | XLOC_091614 | ENSRNOT00000026760  | -0.958078501 | 9.50E-07 |
| TUCP_002190 | XLOC_091614 | ENSRNOT00000045946  | 0.960451725  | 7.13E-07 |
| TUCP_002190 | XLOC_091614 | ENSRNOT00000013025  | -0.971221485 | 1.48E-07 |
| TUCP_002190 | XLOC_091614 | ENSRNOT00000032244  | 0.96222386   | 5.69E-07 |
| TUCP_002190 | XLOC_091614 | ENSRNOT00000016568  | 0.968543077  | 2.30E-07 |
| TUCP_002190 | XLOC_091614 | ENSRNOT00000065529  | 0.958613562  | 8.92E-07 |
| TUCP_002190 | XLOC_091614 | ENSRNOT00000027360  | -0.960104563 | 7.44E-07 |
| TUCP_002190 | XLOC_091614 | ENSRNOT00000015318  | -0.955327608 | 1.30E-06 |
| TUCP_002190 | XLOC_091614 | ENSRNOT00000016372  | -0.953812022 | 1.53E-06 |

|             |             |                    |              |          |
|-------------|-------------|--------------------|--------------|----------|
| TUCP_002190 | XLOC_091614 | ENSRNOT00000088679 | -0.962213857 | 5.69E-07 |
| TUCP_002190 | XLOC_091614 | ENSRNOT00000028907 | 0.955540416  | 1.27E-06 |
| TUCP_002190 | XLOC_091614 | ENSRNOT00000027967 | 0.975311345  | 6.93E-08 |
| TUCP_002190 | XLOC_091614 | ENSRNOT00000013516 | 0.954412368  | 1.44E-06 |
| TUCP_002190 | XLOC_091614 | ENSRNOT00000016060 | 0.966572888  | 3.11E-07 |
| TUCP_002190 | XLOC_091614 | ENSRNOT00000016776 | -0.954792353 | 1.38E-06 |
| TUCP_002190 | XLOC_091614 | ENSRNOT00000090057 | 0.974080291  | 8.82E-08 |
| TUCP_002190 | XLOC_091614 | ENSRNOT00000081678 | 0.957328608  | 1.04E-06 |
| TUCP_002190 | XLOC_091614 | ENSRNOT00000036613 | -0.969993418 | 1.82E-07 |
| TUCP_002190 | XLOC_091614 | ENSRNOT00000083632 | -0.963554461 | 4.76E-07 |
| TUCP_002190 | XLOC_091614 | ENSRNOT00000021578 | 0.952836468  | 1.70E-06 |
| TUCP_002190 | XLOC_091614 | ENSRNOT00000025705 | 0.953926987  | 1.51E-06 |
| TUCP_002190 | XLOC_091614 | ENSRNOT00000054685 | 0.9578737    | 9.73E-07 |
| TUCP_002190 | XLOC_091614 | ENSRNOT00000052051 | 0.956968469  | 1.08E-06 |
| TUCP_002190 | XLOC_091614 | ENSRNOT00000092876 | -0.960458498 | 7.12E-07 |
| TUCP_002190 | XLOC_091614 | ENSRNOT0000005311  | 0.961589318  | 6.17E-07 |
| TUCP_002190 | XLOC_091614 | ENSRNOT00000031935 | -0.958786679 | 8.74E-07 |
| TUCP_002190 | XLOC_091614 | ENSRNOT00000046639 | 0.962593091  | 5.42E-07 |
| TUCP_002190 | XLOC_091614 | ENSRNOT00000015799 | 0.959764081  | 7.76E-07 |
| TUCP_002190 | XLOC_091614 | ENSRNOT00000088073 | -0.954621416 | 1.40E-06 |
| TUCP_002191 | XLOC_091633 | ENSRNOT00000006188 | -0.962366897 | 5.58E-07 |
| TUCP_002191 | XLOC_091633 | ENSRNOT00000090621 | 0.9645101    | 4.18E-07 |
| TUCP_002191 | XLOC_091633 | ENSRNOT00000013745 | -0.966799262 | 3.00E-07 |
| TUCP_002191 | XLOC_091633 | ENSRNOT00000075397 | 0.989863149  | 8.29E-10 |
| TUCP_002191 | XLOC_091633 | ENSRNOT00000032926 | -0.961017047 | 6.64E-07 |
| TUCP_002191 | XLOC_091633 | ENSRNOT00000019104 | -0.962884661 | 5.21E-07 |
| TUCP_002191 | XLOC_091633 | ENSRNOT00000006217 | 0.969050601  | 2.12E-07 |
| TUCP_002191 | XLOC_091633 | ENSRNOT00000049349 | 0.953461579  | 1.59E-06 |
| TUCP_002191 | XLOC_091633 | ENSRNOT00000001691 | 0.981177507  | 1.80E-08 |
| TUCP_002191 | XLOC_091633 | ENSRNOT00000079138 | 0.97132518   | 1.46E-07 |
| TUCP_002191 | XLOC_091633 | ENSRNOT00000086706 | 0.961876223  | 5.95E-07 |
| TUCP_002191 | XLOC_091633 | ENSRNOT00000029508 | 0.960674588  | 6.93E-07 |
| TUCP_002191 | XLOC_091633 | ENSRNOT00000085885 | -0.969530277 | 1.97E-07 |
| TUCP_002191 | XLOC_091633 | ENSRNOT00000045233 | -0.952701398 | 1.72E-06 |
| TUCP_002191 | XLOC_091633 | ENSRNOT00000011130 | -0.958298364 | 9.26E-07 |
| TUCP_002191 | XLOC_091633 | ENSRNOT00000025309 | 0.981139117  | 1.82E-08 |
| TUCP_002191 | XLOC_091633 | ENSRNOT00000052063 | 0.962087469  | 5.79E-07 |
| TUCP_002191 | XLOC_091633 | ENSRNOT00000042638 | 0.954349764  | 1.45E-06 |
| TUCP_002191 | XLOC_091633 | ENSRNOT00000055540 | 0.961278513  | 6.42E-07 |
| TUCP_002191 | XLOC_091633 | ENSRNOT00000021534 | -0.963415497 | 4.85E-07 |
| TUCP_002191 | XLOC_091633 | ENSRNOT00000027917 | 0.954873892  | 1.37E-06 |
| TUCP_002191 | XLOC_091633 | ENSRNOT00000015986 | -0.95043087  | 2.17E-06 |
| TUCP_002191 | XLOC_091633 | ENSRNOT00000025284 | -0.95767817  | 9.96E-07 |
| TUCP_002191 | XLOC_091633 | ENSRNOT00000083677 | -0.961612438 | 6.15E-07 |
| TUCP_002191 | XLOC_091633 | ENSRNOT00000072771 | 0.952501655  | 1.76E-06 |
| TUCP_002191 | XLOC_091633 | ENSRNOT00000073370 | 0.968269451  | 2.40E-07 |
| TUCP_002191 | XLOC_091633 | ENSRNOT00000036137 | 0.964141879  | 4.40E-07 |
| TUCP_002191 | XLOC_091633 | ENSRNOT00000065978 | 0.965326969  | 3.72E-07 |
| TUCP_002191 | XLOC_091633 | ENSRNOT00000065871 | 0.966998334  | 2.92E-07 |
| TUCP_002191 | XLOC_091633 | ENSRNOT00000019192 | -0.961172286 | 6.51E-07 |
| TUCP_002191 | XLOC_091633 | ENSRNOT00000046807 | -0.951872528 | 1.88E-06 |

|             |             |                     |              |          |
|-------------|-------------|---------------------|--------------|----------|
| TUCP_002191 | XLOC_091633 | ENSRNOT00000003412  | -0.962935279 | 5.18E-07 |
| TUCP_002191 | XLOC_091633 | ENSRNOT000000077856 | -0.961311409 | 6.40E-07 |
| TUCP_002191 | XLOC_091633 | ENSRNOT000000026391 | 0.973557921  | 9.74E-08 |
| TUCP_002191 | XLOC_091633 | ENSRNOT00000018488  | -0.962620016 | 5.40E-07 |
| TUCP_002191 | XLOC_091633 | ENSRNOT000000089673 | -0.986129266 | 3.95E-09 |
| TUCP_002191 | XLOC_091633 | ENSRNOT00000005686  | -0.965198836 | 3.79E-07 |
| TUCP_002191 | XLOC_091633 | ENSRNOT000000040629 | 0.960419147  | 7.16E-07 |
| TUCP_002191 | XLOC_091633 | ENSRNOT00000000048  | 0.97453785   | 8.08E-08 |
| TUCP_002191 | XLOC_091633 | ENSRNOT000000075934 | -0.961333189 | 6.38E-07 |
| TUCP_002191 | XLOC_091633 | ENSRNOT000000076181 | -0.960140451 | 7.41E-07 |
| TUCP_002191 | XLOC_091633 | ENSRNOT000000021802 | 0.967253202  | 2.81E-07 |
| TUCP_002191 | XLOC_091633 | ENSRNOT000000080410 | -0.955836623 | 1.23E-06 |
| TUCP_002191 | XLOC_091633 | ENSRNOT000000062057 | 0.95045663   | 2.16E-06 |
| TUCP_002191 | XLOC_091633 | ENSRNOT000000067391 | -0.95519034  | 1.32E-06 |
| TUCP_002191 | XLOC_091633 | ENSRNOT000000009150 | 0.951544113  | 1.94E-06 |
| TUCP_002191 | XLOC_091633 | ENSRNOT000000084709 | 0.964998669  | 3.90E-07 |
| TUCP_002191 | XLOC_091633 | ENSRNOT000000029179 | -0.957608658 | 1.00E-06 |
| TUCP_002191 | XLOC_091633 | ENSRNOT000000011082 | -0.950626152 | 2.13E-06 |
| TUCP_002191 | XLOC_091633 | ENSRNOT000000025856 | -0.98020354  | 2.32E-08 |
| TUCP_002191 | XLOC_091633 | ENSRNOT000000072299 | 0.974159438  | 8.69E-08 |
| TUCP_002191 | XLOC_091633 | ENSRNOT000000026643 | 0.961250023  | 6.45E-07 |
| TUCP_002191 | XLOC_091633 | ENSRNOT000000001401 | 0.961289681  | 6.41E-07 |
| TUCP_002191 | XLOC_091633 | ENSRNOT000000016132 | -0.964285193 | 4.31E-07 |
| TUCP_002191 | XLOC_091633 | ENSRNOT00000001366  | -0.951243868 | 2.00E-06 |
| TUCP_002191 | XLOC_091633 | ENSRNOT000000058495 | -0.967465821 | 2.72E-07 |
| TUCP_002191 | XLOC_091633 | ENSRNOT000000013067 | -0.972548044 | 1.17E-07 |
| TUCP_002191 | XLOC_091633 | ENSRNOT000000066952 | 0.974274045  | 8.50E-08 |
| TUCP_002191 | XLOC_091633 | ENSRNOT000000016220 | -0.955313659 | 1.30E-06 |
| TUCP_002191 | XLOC_091633 | ENSRNOT000000002313 | -0.958777537 | 8.75E-07 |
| TUCP_002191 | XLOC_091633 | ENSRNOT000000032363 | 0.963913953  | 4.54E-07 |
| TUCP_002191 | XLOC_091633 | ENSRNOT000000016637 | -0.962111149 | 5.77E-07 |
| TUCP_002191 | XLOC_091633 | ENSRNOT000000038994 | -0.950871631 | 2.07E-06 |
| TUCP_002191 | XLOC_091633 | ENSRNOT000000003780 | 0.962997665  | 5.13E-07 |
| TUCP_002191 | XLOC_091633 | ENSRNOT000000020910 | 0.956814663  | 1.10E-06 |
| TUCP_002191 | XLOC_091633 | ENSRNOT000000074586 | -0.952162132 | 1.82E-06 |
| TUCP_002191 | XLOC_091633 | ENSRNOT000000045765 | -0.958476186 | 9.07E-07 |
| TUCP_002191 | XLOC_091633 | ENSRNOT000000084031 | 0.959678417  | 7.84E-07 |
| TUCP_002191 | XLOC_091633 | ENSRNOT000000002465 | 0.965782151  | 3.49E-07 |
| TUCP_002191 | XLOC_091633 | ENSRNOT000000028290 | -0.954052974 | 1.49E-06 |
| TUCP_002191 | XLOC_091633 | ENSRNOT000000003992 | -0.957457177 | 1.02E-06 |
| TUCP_002191 | XLOC_091633 | ENSRNOT000000019028 | 0.954914049  | 1.36E-06 |
| TUCP_002191 | XLOC_091633 | ENSRNOT000000012767 | 0.955766659  | 1.24E-06 |
| TUCP_002191 | XLOC_091633 | ENSRNOT000000055602 | -0.962145932 | 5.74E-07 |
| TUCP_002191 | XLOC_091633 | ENSRNOT000000020951 | 0.951020072  | 2.04E-06 |
| TUCP_002191 | XLOC_091633 | ENSRNOT000000055607 | -0.950779633 | 2.09E-06 |
| TUCP_002191 | XLOC_091633 | ENSRNOT000000031555 | -0.950282394 | 2.20E-06 |
| TUCP_002191 | XLOC_091633 | ENSRNOT000000001490 | 0.951943134  | 1.86E-06 |
| TUCP_002191 | XLOC_091633 | ENSRNOT000000023876 | 0.972854773  | 1.11E-07 |
| TUCP_002191 | XLOC_091633 | ENSRNOT000000012625 | -0.961075184 | 6.59E-07 |
| TUCP_002191 | XLOC_091633 | ENSRNOT000000049285 | -0.982667899 | 1.20E-08 |
| TUCP_002191 | XLOC_091633 | ENSRNOT000000015239 | -0.970230593 | 1.75E-07 |

|             |             |                     |              |          |
|-------------|-------------|---------------------|--------------|----------|
| TUCP_002191 | XLOC_091633 | ENSRNOT00000006366  | -0.958359924 | 9.19E-07 |
| TUCP_002191 | XLOC_091633 | ENSRNOT000000024119 | 0.951681324  | 1.91E-06 |
| TUCP_002191 | XLOC_091633 | ENSRNOT000000077146 | -0.976538419 | 5.38E-08 |
| TUCP_002191 | XLOC_091633 | ENSRNOT000000060002 | -0.955344336 | 1.30E-06 |
| TUCP_002191 | XLOC_091633 | ENSRNOT000000086456 | -0.96873189  | 2.23E-07 |
| TUCP_002191 | XLOC_091633 | ENSRNOT000000010367 | 0.967395347  | 2.75E-07 |
| TUCP_002191 | XLOC_091633 | ENSRNOT000000057738 | 0.984782926  | 6.26E-09 |
| TUCP_002191 | XLOC_091633 | ENSRNOT000000023977 | -0.975152018 | 7.16E-08 |
| TUCP_002191 | XLOC_091633 | ENSRNOT000000056022 | 0.95745839   | 1.02E-06 |
| TUCP_002191 | XLOC_091633 | ENSRNOT000000066133 | -0.957824897 | 9.79E-07 |
| TUCP_002191 | XLOC_091633 | ENSRNOT000000067741 | -0.950065734 | 2.25E-06 |
| TUCP_002191 | XLOC_091633 | ENSRNOT00000006765  | -0.965193803 | 3.79E-07 |
| TUCP_002191 | XLOC_091633 | ENSRNOT000000035385 | 0.966647758  | 3.07E-07 |
| TUCP_002191 | XLOC_091633 | ENSRNOT000000009994 | -0.966582324 | 3.10E-07 |
| TUCP_002191 | XLOC_091633 | ENSRNOT000000014924 | -0.969819481 | 1.87E-07 |
| TUCP_002191 | XLOC_091633 | ENSRNOT000000030692 | -0.969705939 | 1.91E-07 |
| TUCP_002191 | XLOC_091633 | ENSRNOT000000014885 | -0.959956861 | 7.58E-07 |
| TUCP_002191 | XLOC_091633 | ENSRNOT000000022716 | 0.956297046  | 1.17E-06 |
| TUCP_002191 | XLOC_091633 | ENSRNOT000000015624 | 0.96632789   | 3.22E-07 |
| TUCP_002191 | XLOC_091633 | ENSRNOT000000085295 | -0.963394502 | 4.87E-07 |
| TUCP_002191 | XLOC_091633 | ENSRNOT000000008222 | -0.95114601  | 2.02E-06 |
| TUCP_002191 | XLOC_091633 | ENSRNOT000000059173 | -0.957636429 | 1.00E-06 |
| TUCP_002191 | XLOC_091633 | ENSRNOT000000081835 | -0.952478805 | 1.76E-06 |
| TUCP_002191 | XLOC_091633 | ENSRNOT000000039102 | 0.972209518  | 1.25E-07 |
| TUCP_002191 | XLOC_091633 | ENSRNOT000000082138 | -0.969566625 | 1.95E-07 |
| TUCP_002191 | XLOC_091633 | ENSRNOT000000078856 | -0.964107054 | 4.42E-07 |
| TUCP_002191 | XLOC_091633 | ENSRNOT000000009742 | -0.974862714 | 7.58E-08 |
| TUCP_002191 | XLOC_091633 | ENSRNOT00000007044  | -0.95353308  | 1.58E-06 |
| TUCP_002191 | XLOC_091633 | ENSRNOT000000007369 | 0.977789389  | 4.10E-08 |
| TUCP_002191 | XLOC_091633 | ENSRNOT000000085466 | 0.96336249   | 4.89E-07 |
| TUCP_002191 | XLOC_091633 | ENSRNOT000000060698 | -0.959254604 | 8.26E-07 |
| TUCP_002191 | XLOC_091633 | ENSRNOT000000045946 | 0.967666004  | 2.64E-07 |
| TUCP_002191 | XLOC_091633 | ENSRNOT000000083891 | -0.974963562 | 7.43E-08 |
| TUCP_002191 | XLOC_091633 | ENSRNOT000000017998 | 0.960747226  | 6.87E-07 |
| TUCP_002191 | XLOC_091633 | ENSRNOT000000070912 | -0.956606438 | 1.13E-06 |
| TUCP_002191 | XLOC_091633 | ENSRNOT000000060595 | -0.953641417 | 1.56E-06 |
| TUCP_002191 | XLOC_091633 | ENSRNOT000000028703 | -0.953543383 | 1.58E-06 |
| TUCP_002191 | XLOC_091633 | ENSRNOT000000088679 | -0.97591372  | 6.13E-08 |
| TUCP_002191 | XLOC_091633 | ENSRNOT000000023256 | 0.95893614   | 8.58E-07 |
| TUCP_002191 | XLOC_091633 | ENSRNOT000000037809 | -0.961487886 | 6.25E-07 |
| TUCP_002191 | XLOC_091633 | ENSRNOT000000002028 | 0.952962173  | 1.68E-06 |
| TUCP_002191 | XLOC_091633 | ENSRNOT000000016776 | -0.971085967 | 1.52E-07 |
| TUCP_002191 | XLOC_091633 | ENSRNOT00000008987  | -0.979045454 | 3.07E-08 |
| TUCP_002191 | XLOC_091633 | ENSRNOT000000092876 | -0.970330934 | 1.72E-07 |
| TUCP_002191 | XLOC_091633 | ENSRNOT000000031935 | -0.958466925 | 9.08E-07 |
| TUCP_002191 | XLOC_091633 | ENSRNOT000000024253 | 0.950734143  | 2.10E-06 |
| TUCP_002191 | XLOC_091633 | ENSRNOT000000088073 | -0.953998288 | 1.50E-06 |
| TUCP_002191 | XLOC_091633 | ENSRNOT000000019473 | -0.959943314 | 7.59E-07 |
| TUCP_002191 | XLOC_091633 | ENSRNOT000000007314 | -0.960643891 | 6.96E-07 |
| TUCP_002191 | XLOC_091633 | ENSRNOT000000040060 | -0.970552094 | 1.66E-07 |
| TUCP_002191 | XLOC_091633 | ENSRNOT000000039607 | -0.952499209 | 1.76E-06 |

|             |             |                    |              |          |
|-------------|-------------|--------------------|--------------|----------|
| TUCP_002191 | XLOC_091633 | ENSRNOT0000009080  | -0.95918442  | 8.33E-07 |
| TUCP_002191 | XLOC_091633 | ENSRNOT00000063930 | -0.97413549  | 8.73E-08 |
| TUCP_002191 | XLOC_091633 | ENSRNOT00000013116 | -0.969946241 | 1.84E-07 |
| TUCP_002191 | XLOC_091633 | ENSRNOT0000001855  | 0.966067484  | 3.35E-07 |
| TUCP_002191 | XLOC_091633 | ENSRNOT00000013025 | -0.970785893 | 1.60E-07 |
| TUCP_002191 | XLOC_091633 | ENSRNOT00000017147 | 0.950540096  | 2.14E-06 |
| TUCP_002191 | XLOC_091633 | ENSRNOT00000041237 | -0.951643615 | 1.92E-06 |
| TUCP_002191 | XLOC_091633 | ENSRNOT00000027301 | -0.962816408 | 5.26E-07 |
| TUCP_002191 | XLOC_091633 | ENSRNOT00000036051 | 0.972192721  | 1.25E-07 |
| TUCP_002191 | XLOC_091633 | ENSRNOT00000089418 | 0.962618252  | 5.40E-07 |
| TUCP_002191 | XLOC_091633 | ENSRNOT00000010419 | 0.951749812  | 1.90E-06 |
| TUCP_002191 | XLOC_091633 | ENSRNOT00000003326 | -0.976843717 | 5.04E-08 |
| TUCP_002191 | XLOC_091633 | ENSRNOT00000016306 | -0.970779335 | 1.60E-07 |
| TUCP_002191 | XLOC_091633 | ENSRNOT00000081351 | 0.972946129  | 1.09E-07 |
| TUCP_002191 | XLOC_091633 | ENSRNOT00000015476 | -0.963259915 | 4.96E-07 |
| TUCP_002191 | XLOC_091633 | ENSRNOT00000025079 | -0.950375622 | 2.18E-06 |
| TUCP_002191 | XLOC_091633 | ENSRNOT00000012755 | 0.952635718  | 1.73E-06 |
| TUCP_002191 | XLOC_091633 | ENSRNOT00000020929 | 0.974252884  | 8.53E-08 |
| TUCP_002191 | XLOC_091633 | ENSRNOT00000007824 | -0.950231683 | 2.21E-06 |
| TUCP_002191 | XLOC_091633 | ENSRNOT00000057898 | -0.968368182 | 2.37E-07 |
| TUCP_002191 | XLOC_091633 | ENSRNOT00000024677 | 0.968858584  | 2.19E-07 |
| TUCP_002191 | XLOC_091633 | ENSRNOT00000090338 | -0.971768566 | 1.35E-07 |
| TUCP_002191 | XLOC_091633 | ENSRNOT00000056100 | -0.974325603 | 8.42E-08 |
| TUCP_002191 | XLOC_091633 | ENSRNOT0000001077  | 0.977102265  | 4.77E-08 |
| TUCP_002191 | XLOC_091633 | ENSRNOT00000036838 | -0.972154908 | 1.26E-07 |
| TUCP_002191 | XLOC_091633 | ENSRNOT00000068663 | 0.951061828  | 2.04E-06 |
| TUCP_002191 | XLOC_091633 | ENSRNOT00000072762 | -0.951481171 | 1.95E-06 |
| TUCP_002191 | XLOC_091633 | ENSRNOT00000073643 | -0.983635186 | 8.99E-09 |
| TUCP_002191 | XLOC_091633 | ENSRNOT00000078349 | -0.958501855 | 9.04E-07 |
| TUCP_002191 | XLOC_091633 | ENSRNOT00000022502 | -0.967051883 | 2.89E-07 |
| TUCP_002191 | XLOC_091633 | ENSRNOT00000026928 | -0.956789076 | 1.10E-06 |
| TUCP_002191 | XLOC_091633 | ENSRNOT00000085545 | -0.952667383 | 1.73E-06 |
| TUCP_002191 | XLOC_091633 | ENSRNOT00000031384 | 0.951732016  | 1.90E-06 |
| TUCP_002191 | XLOC_091633 | ENSRNOT00000018640 | 0.954515615  | 1.42E-06 |
| TUCP_002191 | XLOC_091633 | ENSRNOT00000024352 | 0.954215365  | 1.47E-06 |
| TUCP_002191 | XLOC_091633 | ENSRNOT00000083344 | 0.952920163  | 1.68E-06 |
| TUCP_002191 | XLOC_091633 | ENSRNOT00000082627 | -0.952744664 | 1.71E-06 |
| TUCP_002191 | XLOC_091633 | ENSRNOT00000072118 | 0.958371632  | 9.18E-07 |
| TUCP_002191 | XLOC_091633 | ENSRNOT00000087748 | -0.958106286 | 9.47E-07 |
| TUCP_002191 | XLOC_091633 | ENSRNOT00000014506 | -0.966799796 | 3.00E-07 |
| TUCP_002191 | XLOC_091633 | ENSRNOT00000023262 | -0.973415126 | 1.00E-07 |
| TUCP_002191 | XLOC_091633 | ENSRNOT00000019172 | -0.952197546 | 1.81E-06 |
| TUCP_002191 | XLOC_091633 | ENSRNOT00000017254 | -0.955349613 | 1.30E-06 |
| TUCP_002191 | XLOC_091633 | ENSRNOT00000010674 | -0.951744441 | 1.90E-06 |
| TUCP_002191 | XLOC_091633 | ENSRNOT00000023667 | 0.953266073  | 1.62E-06 |
| TUCP_002191 | XLOC_091633 | ENSRNOT00000023664 | -0.962382659 | 5.57E-07 |
| TUCP_002191 | XLOC_091633 | ENSRNOT00000068026 | -0.972921819 | 1.10E-07 |
| TUCP_002191 | XLOC_091633 | ENSRNOT00000085621 | 0.958421607  | 9.13E-07 |
| TUCP_002191 | XLOC_091633 | ENSRNOT00000076400 | 0.953005875  | 1.67E-06 |
| TUCP_002191 | XLOC_091633 | ENSRNOT00000014821 | -0.964939997 | 3.93E-07 |
| TUCP_002191 | XLOC_091633 | ENSRNOT00000058382 | 0.961506493  | 6.24E-07 |

|             |             |                    |              |          |
|-------------|-------------|--------------------|--------------|----------|
| TUCP_002191 | XLOC_091633 | ENSRNOT00000055683 | 0.951912697  | 1.87E-06 |
| TUCP_002191 | XLOC_091633 | ENSRNOT00000026531 | -0.970424079 | 1.70E-07 |
| TUCP_002191 | XLOC_091633 | ENSRNOT00000035605 | 0.970931508  | 1.56E-07 |
| TUCP_002191 | XLOC_091633 | ENSRNOT00000005172 | 0.961106033  | 6.57E-07 |
| TUCP_002191 | XLOC_091633 | ENSRNOT00000017746 | -0.95573866  | 1.24E-06 |
| TUCP_002191 | XLOC_091633 | ENSRNOT00000092083 | 0.977644866  | 4.24E-08 |
| TUCP_002191 | XLOC_091633 | ENSRNOT00000023567 | -0.959223069 | 8.29E-07 |
| TUCP_002191 | XLOC_091633 | ENSRNOT00000028434 | -0.952561376 | 1.75E-06 |
| TUCP_002191 | XLOC_091633 | ENSRNOT00000083351 | -0.955767033 | 1.24E-06 |
| TUCP_002191 | XLOC_091633 | ENSRNOT00000071897 | -0.966856406 | 2.98E-07 |
| TUCP_002191 | XLOC_091633 | ENSRNOT00000050609 | -0.955761464 | 1.24E-06 |
| TUCP_002191 | XLOC_091633 | ENSRNOT00000066923 | -0.950818212 | 2.09E-06 |
| TUCP_002191 | XLOC_091633 | ENSRNOT00000005459 | 0.954347792  | 1.45E-06 |
| TUCP_002191 | XLOC_091633 | ENSRNOT00000037015 | 0.980469419  | 2.17E-08 |
| TUCP_002191 | XLOC_091633 | ENSRNOT00000068156 | 0.95662902   | 1.12E-06 |
| TUCP_002191 | XLOC_091633 | ENSRNOT00000068528 | -0.965489443 | 3.64E-07 |
| TUCP_002191 | XLOC_091633 | ENSRNOT00000010516 | -0.961813909 | 6.00E-07 |
| TUCP_002191 | XLOC_091633 | ENSRNOT00000067135 | -0.95844329  | 9.10E-07 |
| TUCP_002191 | XLOC_091633 | ENSRNOT00000081110 | -0.965816586 | 3.47E-07 |
| TUCP_002191 | XLOC_091633 | ENSRNOT00000039730 | -0.959991223 | 7.55E-07 |
| TUCP_002191 | XLOC_091633 | ENSRNOT00000088202 | -0.962939737 | 5.17E-07 |
| TUCP_002191 | XLOC_091633 | ENSRNOT00000006802 | 0.957413494  | 1.03E-06 |
| TUCP_002191 | XLOC_091633 | ENSRNOT00000082151 | -0.972061179 | 1.28E-07 |
| TUCP_002191 | XLOC_091633 | ENSRNOT00000011572 | -0.956682106 | 1.12E-06 |
| TUCP_002191 | XLOC_091633 | ENSRNOT00000085971 | -0.968460886 | 2.33E-07 |
| TUCP_002191 | XLOC_091633 | ENSRNOT00000057537 | 0.961715479  | 6.07E-07 |
| TUCP_002191 | XLOC_091633 | ENSRNOT00000077479 | -0.966249698 | 3.26E-07 |
| TUCP_002191 | XLOC_091633 | ENSRNOT00000033048 | -0.956286937 | 1.17E-06 |
| TUCP_002191 | XLOC_091633 | ENSRNOT00000015537 | 0.956934318  | 1.09E-06 |
| TUCP_002191 | XLOC_091633 | ENSRNOT00000030007 | -0.96646301  | 3.16E-07 |
| TUCP_002191 | XLOC_091633 | ENSRNOT00000015946 | -0.960886685 | 6.75E-07 |
| TUCP_002191 | XLOC_091633 | ENSRNOT00000023965 | -0.959106454 | 8.41E-07 |
| TUCP_002191 | XLOC_091633 | ENSRNOT00000090355 | -0.953617037 | 1.56E-06 |
| TUCP_002191 | XLOC_091633 | ENSRNOT00000074150 | 0.976224445  | 5.75E-08 |
| TUCP_002191 | XLOC_091633 | ENSRNOT00000000529 | -0.954753481 | 1.38E-06 |
| TUCP_002191 | XLOC_091633 | ENSRNOT00000015318 | -0.975734178 | 6.36E-08 |
| TUCP_002191 | XLOC_091633 | ENSRNOT00000028907 | 0.969529653  | 1.97E-07 |
| TUCP_002191 | XLOC_091633 | ENSRNOT00000045532 | -0.960704009 | 6.91E-07 |
| TUCP_002191 | XLOC_091633 | ENSRNOT00000004770 | -0.955801005 | 1.23E-06 |
| TUCP_002191 | XLOC_091633 | ENSRNOT00000066211 | -0.965918614 | 3.42E-07 |
| TUCP_002191 | XLOC_091633 | ENSRNOT00000005257 | 0.970048502  | 1.81E-07 |
| TUCP_002191 | XLOC_091633 | ENSRNOT00000039551 | -0.951087522 | 2.03E-06 |
| TUCP_002191 | XLOC_091633 | ENSRNOT00000075656 | -0.969434121 | 2.00E-07 |
| TUCP_002191 | XLOC_091633 | ENSRNOT00000026462 | -0.952444175 | 1.77E-06 |
| TUCP_002191 | XLOC_091633 | ENSRNOT00000007350 | 0.971323952  | 1.46E-07 |
| TUCP_002191 | XLOC_091633 | ENSRNOT00000083578 | 0.95903901   | 8.48E-07 |
| TUCP_002191 | XLOC_091633 | ENSRNOT00000008074 | -0.956004374 | 1.21E-06 |
| TUCP_002191 | XLOC_091633 | ENSRNOT00000074023 | 0.982038439  | 1.43E-08 |
| TUCP_002191 | XLOC_091633 | ENSRNOT00000019465 | -0.958254181 | 9.31E-07 |
| TUCP_002191 | XLOC_091633 | ENSRNOT00000018696 | -0.954861904 | 1.37E-06 |
| TUCP_002191 | XLOC_091633 | ENSRNOT00000009073 | -0.971517193 | 1.41E-07 |



|             |             |                    |              |          |
|-------------|-------------|--------------------|--------------|----------|
| TUCP_002191 | XLOC_091633 | ENSRNOT00000024710 | -0.95399337  | 1.50E-06 |
| TUCP_002191 | XLOC_091633 | ENSRNOT00000001586 | -0.951316439 | 1.98E-06 |
| TUCP_002191 | XLOC_091633 | ENSRNOT00000018341 | -0.952579678 | 1.74E-06 |
| TUCP_002191 | XLOC_091633 | ENSRNOT00000045926 | 0.956259901  | 1.17E-06 |
| TUCP_002191 | XLOC_091633 | ENSRNOT00000065076 | 0.977443107  | 4.43E-08 |
| TUCP_002191 | XLOC_091633 | ENSRNOT00000013516 | 0.969160498  | 2.09E-07 |
| TUCP_002191 | XLOC_091633 | ENSRNOT00000054685 | 0.967503255  | 2.70E-07 |
| TUCP_002191 | XLOC_091633 | ENSRNOT00000057953 | 0.954183913  | 1.47E-06 |
| TUCP_002191 | XLOC_091633 | ENSRNOT00000075480 | -0.973502047 | 9.84E-08 |
| TUCP_002191 | XLOC_091633 | ENSRNOT00000009000 | -0.962842126 | 5.24E-07 |
| TUCP_002191 | XLOC_091633 | ENSRNOT00000034282 | 0.953240167  | 1.63E-06 |
| TUCP_002191 | XLOC_091633 | ENSRNOT00000027760 | 0.968101695  | 2.47E-07 |
| TUCP_002191 | XLOC_091633 | ENSRNOT00000089545 | -0.963213783 | 4.99E-07 |
| TUCP_002191 | XLOC_091633 | ENSRNOT00000037681 | -0.953266473 | 1.62E-06 |
| TUCP_002191 | XLOC_091633 | ENSRNOT00000089933 | 0.960897791  | 6.74E-07 |
| TUCP_002191 | XLOC_091633 | ENSRNOT00000011948 | -0.952666479 | 1.73E-06 |
| TUCP_002191 | XLOC_091633 | ENSRNOT00000086775 | -0.952073355 | 1.84E-06 |
| TUCP_002191 | XLOC_091633 | ENSRNOT00000003087 | 0.967838409  | 2.57E-07 |
| TUCP_002191 | XLOC_091633 | ENSRNOT00000011832 | -0.975443647 | 6.75E-08 |
| TUCP_002191 | XLOC_091633 | ENSRNOT00000032301 | -0.953818117 | 1.53E-06 |
| TUCP_002191 | XLOC_091633 | ENSRNOT00000016428 | 0.960742982  | 6.87E-07 |
| TUCP_002191 | XLOC_091633 | ENSRNOT00000003940 | -0.972730066 | 1.13E-07 |
| TUCP_002191 | XLOC_091633 | ENSRNOT00000006835 | 0.952593589  | 1.74E-06 |
| TUCP_002191 | XLOC_091633 | ENSRNOT00000077727 | -0.954324507 | 1.45E-06 |
| TUCP_002191 | XLOC_091633 | ENSRNOT00000011930 | 0.970310196  | 1.73E-07 |
| TUCP_002191 | XLOC_091633 | ENSRNOT00000017949 | -0.97390183  | 9.13E-08 |
| TUCP_002191 | XLOC_091633 | ENSRNOT00000090156 | -0.950847119 | 2.08E-06 |
| TUCP_002191 | XLOC_091633 | ENSRNOT00000048781 | 0.977090847  | 4.78E-08 |
| TUCP_002191 | XLOC_091633 | ENSRNOT00000013867 | 0.960646161  | 6.96E-07 |
| TUCP_002191 | XLOC_091633 | ENSRNOT00000013864 | -0.975476644 | 6.70E-08 |
| TUCP_002191 | XLOC_091633 | ENSRNOT00000082709 | -0.958168826 | 9.40E-07 |
| TUCP_002191 | XLOC_091633 | ENSRNOT00000003544 | -0.978365606 | 3.60E-08 |
| TUCP_002191 | XLOC_091633 | ENSRNOT00000022194 | -0.9695927   | 1.95E-07 |
| TUCP_002191 | XLOC_091633 | ENSRNOT00000085334 | 0.962524083  | 5.47E-07 |
| TUCP_002191 | XLOC_091633 | ENSRNOT00000022190 | -0.973031541 | 1.07E-07 |
| TUCP_002191 | XLOC_091633 | ENSRNOT00000025913 | -0.983523283 | 9.30E-09 |
| TUCP_002191 | XLOC_091633 | ENSRNOT00000019386 | -0.955532734 | 1.27E-06 |
| TUCP_002191 | XLOC_091633 | ENSRNOT00000076230 | 0.976350967  | 5.60E-08 |
| TUCP_002191 | XLOC_091633 | ENSRNOT00000073919 | 0.950119776  | 2.24E-06 |
| TUCP_002191 | XLOC_091633 | ENSRNOT00000038178 | -0.96083711  | 6.79E-07 |
| TUCP_002191 | XLOC_091633 | ENSRNOT00000086577 | 0.950896676  | 2.07E-06 |
| TUCP_002191 | XLOC_091633 | ENSRNOT00000036658 | -0.979323688 | 2.87E-08 |
| TUCP_002191 | XLOC_091633 | ENSRNOT00000089611 | 0.975774965  | 6.31E-08 |
| TUCP_002191 | XLOC_091633 | ENSRNOT00000007738 | -0.967163686 | 2.85E-07 |
| TUCP_002191 | XLOC_091633 | ENSRNOT00000065600 | 0.954162552  | 1.48E-06 |
| TUCP_002191 | XLOC_091633 | ENSRNOT00000066098 | -0.955716647 | 1.24E-06 |
| TUCP_002191 | XLOC_091633 | ENSRNOT00000008253 | -0.969360238 | 2.02E-07 |
| TUCP_002191 | XLOC_091633 | ENSRNOT00000034883 | -0.972415657 | 1.20E-07 |
| TUCP_002191 | XLOC_091633 | ENSRNOT00000072357 | -0.955833219 | 1.23E-06 |
| TUCP_002191 | XLOC_091633 | ENSRNOT00000000707 | -0.974523972 | 8.10E-08 |
| TUCP_002191 | XLOC_091633 | ENSRNOT00000005910 | -0.974411812 | 8.28E-08 |

|             |             |                    |              |          |
|-------------|-------------|--------------------|--------------|----------|
| TUCP_002191 | XL0C_091633 | ENSRNOT00000017624 | 0.955174063  | 1.32E-06 |
| TUCP_002191 | XL0C_091633 | ENSRNOT00000090987 | -0.960183473 | 7.37E-07 |
| TUCP_002191 | XL0C_091633 | ENSRNOT00000075917 | -0.960851833 | 6.78E-07 |
| TUCP_002191 | XL0C_091633 | ENSRNOT00000029701 | 0.977760445  | 4.13E-08 |
| TUCP_002191 | XL0C_091633 | ENSRNOT00000014585 | -0.959531069 | 7.99E-07 |
| TUCP_002191 | XL0C_091633 | ENSRNOT00000072580 | -0.951071454 | 2.03E-06 |
| TUCP_002191 | XL0C_091633 | ENSRNOT00000028685 | 0.968754874  | 2.23E-07 |
| TUCP_002191 | XL0C_091633 | ENSRNOT00000080591 | 0.964384606  | 4.25E-07 |
| TUCP_002191 | XL0C_091633 | ENSRNOT00000072031 | -0.951238676 | 2.00E-06 |
| TUCP_002191 | XL0C_091633 | ENSRNOT00000030329 | -0.952873573 | 1.69E-06 |
| TUCP_002191 | XL0C_091633 | ENSRNOT00000037955 | -0.957524786 | 1.01E-06 |
| TUCP_002191 | XL0C_091633 | ENSRNOT00000028057 | 0.951440783  | 1.96E-06 |
| TUCP_002191 | XL0C_091633 | ENSRNOT00000004999 | 0.968718525  | 2.24E-07 |
| TUCP_002191 | XL0C_091633 | ENSRNOT00000009122 | 0.954843515  | 1.37E-06 |
| TUCP_002191 | XL0C_091633 | ENSRNOT00000013463 | 0.985386148  | 5.12E-09 |
| TUCP_002191 | XL0C_091633 | ENSRNOT00000000886 | 0.955360715  | 1.29E-06 |
| TUCP_002191 | XL0C_091633 | ENSRNOT00000007889 | -0.957350048 | 1.03E-06 |
| TUCP_002191 | XL0C_091633 | ENSRNOT00000047663 | -0.96531784  | 3.73E-07 |
| TUCP_002191 | XL0C_091633 | ENSRNOT00000000532 | -0.960822584 | 6.81E-07 |
| TUCP_002191 | XL0C_091633 | ENSRNOT00000029202 | -0.963678566 | 4.68E-07 |
| TUCP_002191 | XL0C_091633 | ENSRNOT00000017907 | -0.967497298 | 2.71E-07 |
| TUCP_002191 | XL0C_091633 | ENSRNOT00000013524 | 0.953782448  | 1.54E-06 |
| TUCP_002191 | XL0C_091633 | ENSRNOT00000025794 | -0.983103542 | 1.05E-08 |
| TUCP_002191 | XL0C_091633 | ENSRNOT00000058111 | -0.964401458 | 4.24E-07 |
| TUCP_002191 | XL0C_091633 | ENSRNOT00000027370 | 0.951641212  | 1.92E-06 |
| TUCP_002191 | XL0C_091633 | ENSRNOT00000002443 | 0.95621148   | 1.18E-06 |
| TUCP_002191 | XL0C_091633 | ENSRNOT00000006160 | 0.964576748  | 4.14E-07 |
| TUCP_002191 | XL0C_091633 | ENSRNOT00000002114 | -0.982477192 | 1.26E-08 |
| TUCP_002191 | XL0C_091633 | ENSRNOT00000002445 | -0.963695158 | 4.67E-07 |
| TUCP_002191 | XL0C_091633 | ENSRNOT00000009993 | -0.951048952 | 2.04E-06 |
| TUCP_002191 | XL0C_091633 | ENSRNOT00000027970 | 0.955796801  | 1.23E-06 |
| TUCP_002191 | XL0C_091633 | ENSRNOT00000046215 | -0.980337111 | 2.24E-08 |
| TUCP_002191 | XL0C_091633 | ENSRNOT00000000083 | -0.970356457 | 1.72E-07 |
| TUCP_002191 | XL0C_091633 | ENSRNOT00000087838 | -0.966209225 | 3.28E-07 |
| TUCP_002191 | XL0C_091633 | ENSRNOT00000014127 | 0.961332437  | 6.38E-07 |
| TUCP_002191 | XL0C_091633 | ENSRNOT00000037679 | 0.953503559  | 1.58E-06 |
| TUCP_002191 | XL0C_091633 | ENSRNOT00000000120 | 0.977884813  | 4.01E-08 |
| TUCP_002191 | XL0C_091633 | ENSRNOT00000013632 | 0.954064606  | 1.49E-06 |
| TUCP_002191 | XL0C_091633 | ENSRNOT00000028545 | -0.964190497 | 4.37E-07 |
| TUCP_002191 | XL0C_091633 | ENSRNOT00000028225 | 0.964752576  | 4.04E-07 |
| TUCP_002191 | XL0C_091633 | ENSRNOT00000027476 | 0.950957669  | 2.06E-06 |
| TUCP_002191 | XL0C_091633 | ENSRNOT00000020994 | -0.964244296 | 4.33E-07 |
| TUCP_002191 | XL0C_091633 | ENSRNOT00000032244 | 0.961927052  | 5.91E-07 |
| TUCP_002191 | XL0C_091633 | ENSRNOT00000032248 | 0.95016362   | 2.23E-06 |
| TUCP_002191 | XL0C_091633 | ENSRNOT00000032236 | -0.961670461 | 6.11E-07 |
| TUCP_002191 | XL0C_091633 | ENSRNOT00000016372 | -0.963404493 | 4.86E-07 |
| TUCP_002191 | XL0C_091633 | ENSRNOT00000079128 | 0.956788467  | 1.10E-06 |
| TUCP_002191 | XL0C_091633 | ENSRNOT00000036613 | -0.970245619 | 1.75E-07 |
| TUCP_002191 | XL0C_091633 | ENSRNOT00000025705 | 0.954014089  | 1.50E-06 |
| TUCP_002191 | XL0C_091633 | ENSRNOT00000052051 | 0.951373065  | 1.97E-06 |
| TUCP_002191 | XL0C_091633 | ENSRNOT00000008113 | -0.952189113 | 1.82E-06 |

|             |             |                     |              |          |
|-------------|-------------|---------------------|--------------|----------|
| TUCP_002191 | XL0C_091633 | ENSRNOT00000032802  | -0.960048474 | 7.50E-07 |
| TUCP_002191 | XL0C_091633 | ENSRNOT00000006460  | 0.975614808  | 6.52E-08 |
| TUCP_002191 | XL0C_091633 | ENSRNOT00000020051  | 0.959797938  | 7.73E-07 |
| TUCP_002191 | XL0C_091633 | ENSRNOT00000026279  | -0.970946541 | 1.55E-07 |
| TUCP_002191 | XL0C_091633 | ENSRNOT00000040525  | 0.979591323  | 2.69E-08 |
| TUCP_002191 | XL0C_091633 | ENSRNOT000000082914 | 0.9614788    | 6.26E-07 |
| TUCP_002191 | XL0C_091633 | ENSRNOT00000073492  | -0.957061743 | 1.07E-06 |
| TUCP_002191 | XL0C_091633 | ENSRNOT00000021858  | 0.961724427  | 6.07E-07 |
| TUCP_002191 | XL0C_091633 | ENSRNOT00000065942  | -0.969471192 | 1.98E-07 |
| TUCP_002191 | XL0C_091633 | ENSRNOT00000014309  | -0.956681568 | 1.12E-06 |
| TUCP_002191 | XL0C_091633 | ENSRNOT00000012060  | 0.976709589  | 5.19E-08 |
| TUCP_002191 | XL0C_091633 | ENSRNOT00000084567  | 0.973860641  | 9.20E-08 |
| TUCP_002191 | XL0C_091633 | ENSRNOT00000013851  | -0.966831895 | 2.99E-07 |
| TUCP_002191 | XL0C_091633 | ENSRNOT00000066204  | -0.95369123  | 1.55E-06 |
| TUCP_002191 | XL0C_091633 | ENSRNOT00000021826  | 0.960708418  | 6.90E-07 |
| TUCP_002191 | XL0C_091633 | ENSRNOT00000018101  | -0.963347941 | 4.90E-07 |
| TUCP_002191 | XL0C_091633 | ENSRNOT00000022746  | -0.96789683  | 2.54E-07 |
| TUCP_002191 | XL0C_091633 | ENSRNOT00000087604  | 0.965225809  | 3.78E-07 |
| TUCP_002191 | XL0C_091633 | ENSRNOT00000083568  | 0.969785824  | 1.88E-07 |
| TUCP_002191 | XL0C_091633 | ENSRNOT00000039177  | -0.968330249 | 2.38E-07 |
| TUCP_002191 | XL0C_091633 | ENSRNOT00000005620  | -0.963574351 | 4.75E-07 |
| TUCP_002191 | XL0C_091633 | ENSRNOT00000019759  | 0.951931675  | 1.86E-06 |
| TUCP_002191 | XL0C_091633 | ENSRNOT00000042903  | 0.965910333  | 3.42E-07 |
| TUCP_002191 | XL0C_091633 | ENSRNOT00000030082  | 0.952095156  | 1.83E-06 |
| TUCP_002191 | XL0C_091633 | ENSRNOT00000000477  | -0.95353711  | 1.58E-06 |
| TUCP_002191 | XL0C_091633 | ENSRNOT00000012881  | -0.951612505 | 1.93E-06 |
| TUCP_002191 | XL0C_091633 | ENSRNOT00000000577  | 0.952379012  | 1.78E-06 |
| TUCP_002191 | XL0C_091633 | ENSRNOT00000025966  | 0.956193103  | 1.18E-06 |
| TUCP_002191 | XL0C_091633 | ENSRNOT00000081226  | 0.974761537  | 7.73E-08 |
| TUCP_002191 | XL0C_091633 | ENSRNOT00000065045  | 0.964515093  | 4.17E-07 |
| TUCP_002191 | XL0C_091633 | ENSRNOT00000088133  | -0.967201967 | 2.83E-07 |
| TUCP_002191 | XL0C_091633 | ENSRNOT00000080677  | -0.976204692 | 5.77E-08 |
| TUCP_002191 | XL0C_091633 | ENSRNOT00000016629  | 0.9530486    | 1.66E-06 |
| TUCP_002191 | XL0C_091633 | ENSRNOT00000046552  | 0.959341679  | 8.17E-07 |
| TUCP_002191 | XL0C_091633 | ENSRNOT00000075209  | -0.974028818 | 8.91E-08 |
| TUCP_002191 | XL0C_091633 | ENSRNOT00000083968  | -0.971627417 | 1.38E-07 |
| TUCP_002191 | XL0C_091633 | ENSRNOT00000037133  | 0.976574317  | 5.34E-08 |
| TUCP_002191 | XL0C_091633 | ENSRNOT00000033806  | 0.951825978  | 1.88E-06 |
| TUCP_002191 | XL0C_091633 | ENSRNOT00000083964  | -0.971637099 | 1.38E-07 |
| TUCP_002191 | XL0C_091633 | ENSRNOT00000026831  | 0.955305193  | 1.30E-06 |
| TUCP_002191 | XL0C_091633 | ENSRNOT00000079609  | 0.979342237  | 2.86E-08 |
| TUCP_002191 | XL0C_091633 | ENSRNOT00000016445  | 0.966923569  | 2.95E-07 |
| TUCP_002191 | XL0C_091633 | ENSRNOT00000011956  | 0.967717706  | 2.62E-07 |
| TUCP_002191 | XL0C_091633 | ENSRNOT00000078185  | -0.955150627 | 1.33E-06 |
| TUCP_002191 | XL0C_091633 | ENSRNOT00000002151  | -0.956795519 | 1.10E-06 |
| TUCP_002191 | XL0C_091633 | ENSRNOT00000006824  | -0.954380796 | 1.44E-06 |
| TUCP_002191 | XL0C_091633 | ENSRNOT00000012775  | -0.957093972 | 1.07E-06 |
| TUCP_002191 | XL0C_091633 | ENSRNOT00000032667  | -0.966358184 | 3.21E-07 |
| TUCP_002191 | XL0C_091633 | ENSRNOT00000086260  | -0.980774513 | 2.00E-08 |
| TUCP_002191 | XL0C_091633 | ENSRNOT00000018328  | -0.975954601 | 6.08E-08 |
| TUCP_002191 | XL0C_091633 | ENSRNOT00000038610  | -0.959729033 | 7.80E-07 |

|             |             |                      |              |          |
|-------------|-------------|----------------------|--------------|----------|
| TUCP_002191 | XLOC_091633 | ENSRNOT00000001099   | -0.969055595 | 2.12E-07 |
| TUCP_002191 | XLOC_091633 | ENSRNOT000000013817  | 0.959935685  | 7.60E-07 |
| TUCP_002191 | XLOC_091633 | ENSRNOT000000010683  | -0.955358566 | 1.30E-06 |
| TUCP_002191 | XLOC_091633 | ENSRNOT00000001158   | 0.952807542  | 1.70E-06 |
| TUCP_002191 | XLOC_091633 | ENSRNOT000000026988  | -0.967626387 | 2.65E-07 |
| TUCP_002191 | XLOC_091633 | ENSRNOT000000050119  | -0.958742888 | 8.78E-07 |
| TUCP_002191 | XLOC_091633 | ENSRNOT000000090853  | -0.97576303  | 6.32E-08 |
| TUCP_002191 | XLOC_091633 | ENSRNOT000000089265  | -0.950237025 | 2.21E-06 |
| TUCP_002191 | XLOC_091633 | ENSRNOT000000018864  | -0.952738254 | 1.72E-06 |
| TUCP_002191 | XLOC_091633 | ENSRNOT000000019816  | -0.963085693 | 5.07E-07 |
| TUCP_002191 | XLOC_091633 | ENSRNOT000000020383  | 0.95951111   | 8.01E-07 |
| TUCP_002191 | XLOC_091633 | ENSRNOT000000073847  | -0.952056307 | 1.84E-06 |
| TUCP_002191 | XLOC_091633 | ENSRNOT000000025222  | -0.95821379  | 9.35E-07 |
| TUCP_002191 | XLOC_091633 | ENSRNOT000000056015  | -0.953792674 | 1.53E-06 |
| TUCP_002191 | XLOC_091633 | ENSRNOT000000030706  | -0.960783188 | 6.84E-07 |
| TUCP_002191 | XLOC_091633 | ENSRNOT000000065615  | 0.954598987  | 1.41E-06 |
| TUCP_002191 | XLOC_091633 | ENSRNOT000000011675  | 0.984242021  | 7.45E-09 |
| TUCP_002191 | XLOC_091633 | ENSRNOT000000020794  | 0.952250789  | 1.80E-06 |
| TUCP_002191 | XLOC_091633 | ENSRNOT000000004290  | 0.964366885  | 4.26E-07 |
| TUCP_002191 | XLOC_091633 | ENSRNOT000000008244  | 0.952196465  | 1.81E-06 |
| TUCP_002191 | XLOC_091633 | ENSRNOT000000019713  | -0.954466413 | 1.43E-06 |
| TUCP_002191 | XLOC_091633 | ENSRNOT000000083632  | -0.969827759 | 1.87E-07 |
| TUCP_002191 | XLOC_091633 | ENSRNOT000000093385  | 0.962006352  | 5.85E-07 |
| TUCP_002191 | XLOC_091633 | ENSRNOT000000049725  | -0.965398121 | 3.69E-07 |
| TUCP_002191 | XLOC_091633 | ENSRNOT000000026235  | -0.971766372 | 1.35E-07 |
| TUCP_002191 | XLOC_091633 | ENSRNOT000000017504  | 0.952419341  | 1.77E-06 |
| TUCP_002191 | XLOC_091633 | ENSRNOT000000023763  | -0.956363582 | 1.16E-06 |
| TUCP_002191 | XLOC_091633 | ENSRNOT000000009202  | 0.978654806  | 3.37E-08 |
| TUCP_002191 | XLOC_091633 | ENSRNOT0000000059181 | 0.960423229  | 7.15E-07 |
| TUCP_002191 | XLOC_091633 | ENSRNOT000000017291  | -0.972990725 | 1.08E-07 |
| TUCP_002191 | XLOC_091633 | ENSRNOT000000083256  | 0.958518414  | 9.02E-07 |
| TUCP_002191 | XLOC_091633 | ENSRNOT000000003691  | -0.981919173 | 1.48E-08 |
| TUCP_002191 | XLOC_091633 | ENSRNOT000000010852  | 0.971617958  | 1.38E-07 |
| TUCP_002191 | XLOC_091633 | ENSRNOT000000080216  | -0.953915203 | 1.51E-06 |
| TUCP_002191 | XLOC_091633 | ENSRNOT000000064849  | -0.956610378 | 1.13E-06 |
| TUCP_002191 | XLOC_091633 | ENSRNOT000000005873  | -0.951480386 | 1.95E-06 |
| TUCP_002191 | XLOC_091633 | ENSRNOT000000017765  | 0.968014429  | 2.50E-07 |
| TUCP_002191 | XLOC_091633 | ENSRNOT000000017761  | 0.954051866  | 1.49E-06 |
| TUCP_002191 | XLOC_091633 | ENSRNOT000000035309  | -0.95357982  | 1.57E-06 |
| TUCP_002191 | XLOC_091633 | ENSRNOT000000023014  | 0.954849144  | 1.37E-06 |
| TUCP_002191 | XLOC_091633 | ENSRNOT000000026518  | 0.966427882  | 3.17E-07 |
| TUCP_002191 | XLOC_091633 | ENSRNOT000000018634  | -0.971870508 | 1.32E-07 |
| TUCP_002191 | XLOC_091633 | ENSRNOT000000035145  | -0.956061104 | 1.20E-06 |
| TUCP_002191 | XLOC_091633 | ENSRNOT000000004351  | -0.954929588 | 1.36E-06 |
| TUCP_002191 | XLOC_091633 | ENSRNOT000000055386  | 0.967252787  | 2.81E-07 |
| TUCP_002191 | XLOC_091633 | ENSRNOT000000085517  | 0.954168179  | 1.47E-06 |
| TUCP_002191 | XLOC_091633 | ENSRNOT000000038212  | -0.959870784 | 7.66E-07 |
| TUCP_002191 | XLOC_091633 | ENSRNOT000000037409  | 0.970238707  | 1.75E-07 |
| TUCP_002191 | XLOC_091633 | ENSRNOT000000042125  | 0.953864844  | 1.52E-06 |
| TUCP_002191 | XLOC_091633 | ENSRNOT000000025460  | 0.957987738  | 9.60E-07 |
| TUCP_002191 | XLOC_091633 | ENSRNOT000000026760  | -0.968889048 | 2.18E-07 |

|             |             |                     |              |          |
|-------------|-------------|---------------------|--------------|----------|
| TUCP_002191 | XLOC_091633 | ENSRNOT00000075800  | -0.963683494 | 4.68E-07 |
| TUCP_002191 | XLOC_091633 | ENSRNOT00000016568  | 0.978606409  | 3.41E-08 |
| TUCP_002191 | XLOC_091633 | ENSRNOT00000027360  | -0.963042047 | 5.10E-07 |
| TUCP_002191 | XLOC_091633 | ENSRNOT00000024947  | -0.970157114 | 1.77E-07 |
| TUCP_002191 | XLOC_091633 | ENSRNOT00000027967  | 0.981854279  | 1.50E-08 |
| TUCP_002191 | XLOC_091633 | ENSRNOT00000016060  | 0.951824682  | 1.88E-06 |
| TUCP_002191 | XLOC_091633 | ENSRNOT00000081678  | 0.97870255   | 3.33E-08 |
| TUCP_002191 | XLOC_091633 | ENSRNOT00000079414  | -0.964852701 | 3.98E-07 |
| TUCP_002191 | XLOC_091633 | ENSRNOT00000024011  | 0.965088192  | 3.85E-07 |
| TUCP_002191 | XLOC_091633 | ENSRNOT00000046639  | 0.95756479   | 1.01E-06 |
| TUCP_002191 | XLOC_091633 | ENSRNOT00000005885  | -0.965466284 | 3.65E-07 |
| TUCP_002191 | XLOC_091633 | ENSRNOT00000011326  | -0.950099249 | 2.24E-06 |
| TUCP_002192 | XLOC_091638 | ENSRNOT00000006460  | 0.965565306  | 3.60E-07 |
| TUCP_002192 | XLOC_091638 | ENSRNOT00000075397  | 0.96557242   | 3.59E-07 |
| TUCP_002192 | XLOC_091638 | ENSRNOT00000020051  | 0.950746034  | 2.10E-06 |
| TUCP_002192 | XLOC_091638 | ENSRNOT00000068212  | 0.962740515  | 5.31E-07 |
| TUCP_002192 | XLOC_091638 | ENSRNOT00000003087  | 0.954346678  | 1.45E-06 |
| TUCP_002192 | XLOC_091638 | ENSRNOT00000082914  | 0.952150803  | 1.82E-06 |
| TUCP_002192 | XLOC_091638 | ENSRNOT00000001855  | 0.966018432  | 3.37E-07 |
| TUCP_002192 | XLOC_091638 | ENSRNOT00000001691  | 0.969844075  | 1.87E-07 |
| TUCP_002192 | XLOC_091638 | ENSRNOT00000057953  | 0.958022578  | 9.57E-07 |
| TUCP_002192 | XLOC_091638 | ENSRNOT000000071998 | 0.953938346  | 1.51E-06 |
| TUCP_002192 | XLOC_091638 | ENSRNOT00000086706  | 0.950616716  | 2.13E-06 |
| TUCP_002192 | XLOC_091638 | ENSRNOT00000016485  | 0.954902077  | 1.36E-06 |
| TUCP_002192 | XLOC_091638 | ENSRNOT00000084567  | 0.966419101  | 3.18E-07 |
| TUCP_002192 | XLOC_091638 | ENSRNOT00000074023  | 0.967459177  | 2.72E-07 |
| TUCP_002192 | XLOC_091638 | ENSRNOT00000008361  | 0.960926623  | 6.72E-07 |
| TUCP_002192 | XLOC_091638 | ENSRNOT00000025309  | 0.959685044  | 7.84E-07 |
| TUCP_002192 | XLOC_091638 | ENSRNOT00000042638  | 0.976204075  | 5.77E-08 |
| TUCP_002192 | XLOC_091638 | ENSRNOT00000017384  | 0.955150355  | 1.33E-06 |
| TUCP_002192 | XLOC_091638 | ENSRNOT00000045926  | 0.958974688  | 8.54E-07 |
| TUCP_002192 | XLOC_091638 | ENSRNOT00000065076  | 0.977900833  | 4.00E-08 |
| TUCP_002192 | XLOC_091638 | ENSRNOT00000054685  | 0.973845406  | 9.22E-08 |
| TUCP_002192 | XLOC_091638 | ENSRNOT00000004238  | 0.952102354  | 1.83E-06 |
| TUCP_002192 | XLOC_091638 | ENSRNOT00000079742  | 0.951049539  | 2.04E-06 |
| TUCP_002192 | XLOC_091638 | ENSRNOT00000073370  | 0.957507975  | 1.02E-06 |
| TUCP_002192 | XLOC_091638 | ENSRNOT00000083568  | 0.958668303  | 8.86E-07 |
| TUCP_002192 | XLOC_091638 | ENSRNOT00000009009  | 0.951376711  | 1.97E-06 |
| TUCP_002192 | XLOC_091638 | ENSRNOT00000075480  | -0.958615726 | 8.92E-07 |
| TUCP_002192 | XLOC_091638 | ENSRNOT00000027760  | 0.963363289  | 4.89E-07 |
| TUCP_002192 | XLOC_091638 | ENSRNOT00000065871  | 0.966556819  | 3.11E-07 |
| TUCP_002192 | XLOC_091638 | ENSRNOT00000042903  | 0.956638295  | 1.12E-06 |
| TUCP_002192 | XLOC_091638 | ENSRNOT00000089933  | 0.951011023  | 2.05E-06 |
| TUCP_002192 | XLOC_091638 | ENSRNOT00000056100  | -0.95350893  | 1.58E-06 |
| TUCP_002192 | XLOC_091638 | ENSRNOT00000001077  | 0.955518849  | 1.27E-06 |
| TUCP_002192 | XLOC_091638 | ENSRNOT00000026391  | 0.95663263   | 1.12E-06 |
| TUCP_002192 | XLOC_091638 | ENSRNOT00000081226  | 0.963725722  | 4.65E-07 |
| TUCP_002192 | XLOC_091638 | ENSRNOT00000007369  | 0.968813551  | 2.20E-07 |
| TUCP_002192 | XLOC_091638 | ENSRNOT00000018634  | -0.954749233 | 1.38E-06 |
| TUCP_002192 | XLOC_091638 | ENSRNOT00000000048  | 0.962219241  | 5.69E-07 |
| TUCP_002192 | XLOC_091638 | ENSRNOT00000040525  | 0.960970017  | 6.68E-07 |

|             |             |                    |              |          |
|-------------|-------------|--------------------|--------------|----------|
| TUCP_002192 | XLOC_091638 | ENSRNOT00000011832 | -0.955744965 | 1.24E-06 |
| TUCP_002192 | XLOC_091638 | ENSRNOT00000073643 | -0.962782757 | 5.28E-07 |
| TUCP_002192 | XLOC_091638 | ENSRNOT00000046552 | 0.956609257  | 1.13E-06 |
| TUCP_002192 | XLOC_091638 | ENSRNOT00000037133 | 0.964276339  | 4.32E-07 |
| TUCP_002192 | XLOC_091638 | ENSRNOT00000064772 | 0.953437811  | 1.59E-06 |
| TUCP_002192 | XLOC_091638 | ENSRNOT00000049349 | 0.952713865  | 1.72E-06 |
| TUCP_002192 | XLOC_091638 | ENSRNOT00000000469 | 0.950903297  | 2.07E-06 |
| TUCP_002192 | XLOC_091638 | ENSRNOT00000048781 | 0.958862321  | 8.66E-07 |
| TUCP_002192 | XLOC_091638 | ENSRNOT00000031384 | 0.953711892  | 1.55E-06 |
| TUCP_002192 | XLOC_091638 | ENSRNOT00000018640 | 0.955285808  | 1.31E-06 |
| TUCP_002192 | XLOC_091638 | ENSRNOT00000072299 | 0.953238358  | 1.63E-06 |
| TUCP_002192 | XLOC_091638 | ENSRNOT00000079609 | 0.955136255  | 1.33E-06 |
| TUCP_002192 | XLOC_091638 | ENSRNOT00000003780 | 0.96059608   | 7.00E-07 |
| TUCP_002192 | XLOC_091638 | ENSRNOT00000085334 | 0.970824044  | 1.59E-07 |
| TUCP_002192 | XLOC_091638 | ENSRNOT00000025913 | -0.952503635 | 1.76E-06 |
| TUCP_002192 | XLOC_091638 | ENSRNOT00000011956 | 0.953770576  | 1.54E-06 |
| TUCP_002192 | XLOC_091638 | ENSRNOT00000066952 | 0.964187769  | 4.37E-07 |
| TUCP_002192 | XLOC_091638 | ENSRNOT00000036658 | -0.950184639 | 2.22E-06 |
| TUCP_002192 | XLOC_091638 | ENSRNOT00000089611 | 0.954471249  | 1.43E-06 |
| TUCP_002192 | XLOC_091638 | ENSRNOT00000072118 | 0.954154994  | 1.48E-06 |
| TUCP_002192 | XLOC_091638 | ENSRNOT00000065600 | 0.977615983  | 4.26E-08 |
| TUCP_002192 | XLOC_091638 | ENSRNOT00000086260 | -0.963577785 | 4.75E-07 |
| TUCP_002192 | XLOC_091638 | ENSRNOT00000068026 | -0.955193588 | 1.32E-06 |
| TUCP_002192 | XLOC_091638 | ENSRNOT00000029701 | 0.970250281  | 1.75E-07 |
| TUCP_002192 | XLOC_091638 | ENSRNOT00000076400 | 0.954543772  | 1.42E-06 |
| TUCP_002192 | XLOC_091638 | ENSRNOT00000017805 | 0.957406305  | 1.03E-06 |
| TUCP_002192 | XLOC_091638 | ENSRNOT00000035605 | 0.950458223  | 2.16E-06 |
| TUCP_002192 | XLOC_091638 | ENSRNOT00000012767 | 0.953908069  | 1.52E-06 |
| TUCP_002192 | XLOC_091638 | ENSRNOT00000005343 | -0.952298379 | 1.80E-06 |
| TUCP_002192 | XLOC_091638 | ENSRNOT00000065615 | 0.960742648  | 6.87E-07 |
| TUCP_002192 | XLOC_091638 | ENSRNOT00000011675 | 0.969432382  | 2.00E-07 |
| TUCP_002192 | XLOC_091638 | ENSRNOT00000008244 | 0.965954722  | 3.40E-07 |
| TUCP_002192 | XLOC_091638 | ENSRNOT00000037015 | 0.979272114  | 2.91E-08 |
| TUCP_002192 | XLOC_091638 | ENSRNOT00000028685 | 0.959761299  | 7.76E-07 |
| TUCP_002192 | XLOC_091638 | ENSRNOT0000003568  | 0.955014982  | 1.35E-06 |
| TUCP_002192 | XLOC_091638 | ENSRNOT00000077146 | -0.951529502 | 1.94E-06 |
| TUCP_002192 | XLOC_091638 | ENSRNOT00000011773 | 0.950397616  | 2.18E-06 |
| TUCP_002192 | XLOC_091638 | ENSRNOT00000013463 | 0.956059228  | 1.20E-06 |
| TUCP_002192 | XLOC_091638 | ENSRNOT00000089673 | -0.953592853 | 1.57E-06 |
| TUCP_002192 | XLOC_091638 | ENSRNOT00000010367 | 0.957230506  | 1.05E-06 |
| TUCP_002192 | XLOC_091638 | ENSRNOT00000055630 | 0.957448075  | 1.02E-06 |
| TUCP_002192 | XLOC_091638 | ENSRNOT00000006802 | 0.953130183  | 1.65E-06 |
| TUCP_002192 | XLOC_091638 | ENSRNOT00000009202 | 0.961774986  | 6.03E-07 |
| TUCP_002192 | XLOC_091638 | ENSRNOT00000082151 | -0.950056629 | 2.25E-06 |
| TUCP_002192 | XLOC_091638 | ENSRNOT00000022578 | 0.975440677  | 6.75E-08 |
| TUCP_002192 | XLOC_091638 | ENSRNOT00000087934 | 0.950357436  | 2.18E-06 |
| TUCP_002192 | XLOC_091638 | ENSRNOT00000010852 | 0.972021698  | 1.29E-07 |
| TUCP_002192 | XLOC_091638 | ENSRNOT00000013524 | 0.970208707  | 1.76E-07 |
| TUCP_002192 | XLOC_091638 | ENSRNOT00000057738 | 0.980109695  | 2.37E-08 |
| TUCP_002192 | XLOC_091638 | ENSRNOT00000022716 | 0.962151557  | 5.74E-07 |
| TUCP_002192 | XLOC_091638 | ENSRNOT0000002114  | -0.95037311  | 2.18E-06 |

|             |             |                    |              |          |
|-------------|-------------|--------------------|--------------|----------|
| TUCP_002192 | XLOC_091638 | ENSRNOT00000026518 | 0.959867318  | 7.66E-07 |
| TUCP_002192 | XLOC_091638 | ENSRNOT00000036137 | 0.962314387  | 5.62E-07 |
| TUCP_002192 | XLOC_091638 | ENSRNOT00000023014 | 0.957576814  | 1.01E-06 |
| TUCP_002192 | XLOC_091638 | ENSRNOT00000014127 | 0.950919273  | 2.07E-06 |
| TUCP_002192 | XLOC_091638 | ENSRNOT00000037409 | 0.959388474  | 8.13E-07 |
| TUCP_002192 | XLOC_091638 | ENSRNOT00000000120 | 0.953433785  | 1.59E-06 |
| TUCP_002192 | XLOC_091638 | ENSRNOT00000074150 | 0.955626642  | 1.26E-06 |
| TUCP_002192 | XLOC_091638 | ENSRNOT00000068663 | 0.959772     | 7.75E-07 |
| TUCP_002192 | XLOC_091638 | ENSRNOT00000085466 | 0.953764217  | 1.54E-06 |
| TUCP_002192 | XLOC_091638 | ENSRNOT00000083891 | -0.950718222 | 2.11E-06 |
| TUCP_002192 | XLOC_091638 | ENSRNOT00000016568 | 0.961651083  | 6.12E-07 |
| TUCP_002192 | XLOC_091638 | ENSRNOT00000008764 | 0.954882066  | 1.36E-06 |
| TUCP_002192 | XLOC_091638 | ENSRNOT00000051494 | 0.9607956    | 6.83E-07 |
| TUCP_002192 | XLOC_091638 | ENSRNOT00000027967 | 0.969114902  | 2.10E-07 |
| TUCP_002192 | XLOC_091638 | ENSRNOT00000016060 | 0.968172962  | 2.44E-07 |
| TUCP_002192 | XLOC_091638 | ENSRNOT00000090057 | 0.956202866  | 1.18E-06 |
| TUCP_002192 | XLOC_091638 | ENSRNOT00000081678 | 0.956415957  | 1.15E-06 |
| TUCP_002192 | XLOC_091638 | ENSRNOT00000020929 | 0.97032354   | 1.72E-07 |
| TUCP_002192 | XLOC_091638 | ENSRNOT00000005257 | 0.963866508  | 4.57E-07 |
| TUCP_002193 | XLOC_091693 | ENSRNOT00000055536 | 0.97485746   | 7.59E-08 |
| TUCP_002193 | XLOC_091693 | ENSRNOT00000016088 | 0.96641253   | 3.18E-07 |
| TUCP_002193 | XLOC_091693 | ENSRNOT00000009975 | 0.958459914  | 9.08E-07 |
| TUCP_002193 | XLOC_091693 | ENSRNOT00000006460 | 0.962063217  | 5.81E-07 |
| TUCP_002193 | XLOC_091693 | ENSRNOT00000075397 | 0.961417599  | 6.31E-07 |
| TUCP_002193 | XLOC_091693 | ENSRNOT00000020051 | 0.961605556  | 6.16E-07 |
| TUCP_002193 | XLOC_091693 | ENSRNOT00000013343 | 0.960815968  | 6.81E-07 |
| TUCP_002193 | XLOC_091693 | ENSRNOT00000082914 | 0.968185293  | 2.43E-07 |
| TUCP_002193 | XLOC_091693 | ENSRNOT00000073493 | 0.9728448    | 1.11E-07 |
| TUCP_002193 | XLOC_091693 | ENSRNOT00000013025 | -0.956442672 | 1.15E-06 |
| TUCP_002193 | XLOC_091693 | ENSRNOT00000056050 | 0.950095754  | 2.24E-06 |
| TUCP_002193 | XLOC_091693 | ENSRNOT00000029508 | 0.950746815  | 2.10E-06 |
| TUCP_002193 | XLOC_091693 | ENSRNOT00000036051 | 0.961317088  | 6.39E-07 |
| TUCP_002193 | XLOC_091693 | ENSRNOT00000016485 | 0.969730964  | 1.90E-07 |
| TUCP_002193 | XLOC_091693 | ENSRNOT00000084567 | 0.953648297  | 1.56E-06 |
| TUCP_002193 | XLOC_091693 | ENSRNOT00000013851 | -0.961645739 | 6.13E-07 |
| TUCP_002193 | XLOC_091693 | ENSRNOT00000042638 | 0.968563565  | 2.29E-07 |
| TUCP_002193 | XLOC_091693 | ENSRNOT00000081123 | 0.95223467   | 1.81E-06 |
| TUCP_002193 | XLOC_091693 | ENSRNOT00000036357 | 0.964209323  | 4.36E-07 |
| TUCP_002193 | XLOC_091693 | ENSRNOT00000045926 | 0.954316044  | 1.45E-06 |
| TUCP_002193 | XLOC_091693 | ENSRNOT00000065076 | 0.96639512   | 3.19E-07 |
| TUCP_002193 | XLOC_091693 | ENSRNOT00000013516 | 0.959127423  | 8.39E-07 |
| TUCP_002193 | XLOC_091693 | ENSRNOT00000087762 | 0.968173634  | 2.44E-07 |
| TUCP_002193 | XLOC_091693 | ENSRNOT00000057953 | 0.96618922   | 3.29E-07 |
| TUCP_002193 | XLOC_091693 | ENSRNOT00000073370 | 0.970794007  | 1.59E-07 |
| TUCP_002193 | XLOC_091693 | ENSRNOT00000077060 | 0.968022229  | 2.50E-07 |
| TUCP_002193 | XLOC_091693 | ENSRNOT00000009009 | 0.971104613  | 1.51E-07 |
| TUCP_002193 | XLOC_091693 | ENSRNOT00000020929 | 0.967375405  | 2.76E-07 |
| TUCP_002193 | XLOC_091693 | ENSRNOT00000034282 | 0.962610338  | 5.40E-07 |
| TUCP_002193 | XLOC_091693 | ENSRNOT00000012755 | 0.958871569  | 8.65E-07 |
| TUCP_002193 | XLOC_091693 | ENSRNOT00000065871 | 0.970185239  | 1.76E-07 |
| TUCP_002193 | XLOC_091693 | ENSRNOT00000024677 | 0.951230138  | 2.00E-06 |

|             |             |                     |              |          |
|-------------|-------------|---------------------|--------------|----------|
| TUCP_002193 | XLOC_091693 | ENSRNOT00000030082  | 0.95465689   | 1.40E-06 |
| TUCP_002193 | XLOC_091693 | ENSRNOT00000087287  | 0.956308516  | 1.17E-06 |
| TUCP_002193 | XLOC_091693 | ENSRNOT00000081226  | 0.987448702  | 2.40E-09 |
| TUCP_002193 | XLOC_091693 | ENSRNOT00000027544  | 0.974596148  | 7.98E-08 |
| TUCP_002193 | XLOC_091693 | ENSRNOT00000005686  | -0.951077005 | 2.03E-06 |
| TUCP_002193 | XLOC_091693 | ENSRNOT000000081631 | 0.956922936  | 1.09E-06 |
| TUCP_002193 | XLOC_091693 | ENSRNOT00000000048  | 0.955610336  | 1.26E-06 |
| TUCP_002193 | XLOC_091693 | ENSRNOT00000011832  | -0.965181054 | 3.80E-07 |
| TUCP_002193 | XLOC_091693 | ENSRNOT00000073643  | -0.955064003 | 1.34E-06 |
| TUCP_002193 | XLOC_091693 | ENSRNOT00000046552  | 0.962467446  | 5.51E-07 |
| TUCP_002193 | XLOC_091693 | ENSRNOT00000025037  | 0.961920192  | 5.92E-07 |
| TUCP_002193 | XLOC_091693 | ENSRNOT00000092066  | -0.97183177  | 1.33E-07 |
| TUCP_002193 | XLOC_091693 | ENSRNOT00000048781  | 0.965692999  | 3.53E-07 |
| TUCP_002193 | XLOC_091693 | ENSRNOT00000013867  | 0.9509688    | 2.05E-06 |
| TUCP_002193 | XLOC_091693 | ENSRNOT00000018640  | 0.962196179  | 5.71E-07 |
| TUCP_002193 | XLOC_091693 | ENSRNOT00000007821  | 0.956682393  | 1.12E-06 |
| TUCP_002193 | XLOC_091693 | ENSRNOT00000072118  | 0.957831922  | 9.78E-07 |
| TUCP_002193 | XLOC_091693 | ENSRNOT00000085334  | 0.976130093  | 5.86E-08 |
| TUCP_002193 | XLOC_091693 | ENSRNOT00000027739  | 0.951010613  | 2.05E-06 |
| TUCP_002193 | XLOC_091693 | ENSRNOT00000081604  | 0.961163472  | 6.52E-07 |
| TUCP_002193 | XLOC_091693 | ENSRNOT00000025913  | -0.953839501 | 1.53E-06 |
| TUCP_002193 | XLOC_091693 | ENSRNOT00000059246  | 0.953726982  | 1.55E-06 |
| TUCP_002193 | XLOC_091693 | ENSRNOT00000011956  | 0.961868397  | 5.95E-07 |
| TUCP_002193 | XLOC_091693 | ENSRNOT00000066952  | 0.961916073  | 5.92E-07 |
| TUCP_002193 | XLOC_091693 | ENSRNOT00000026075  | 0.984929305  | 5.97E-09 |
| TUCP_002193 | XLOC_091693 | ENSRNOT00000089611  | 0.962615065  | 5.40E-07 |
| TUCP_002193 | XLOC_091693 | ENSRNOT00000086260  | -0.968688551 | 2.25E-07 |
| TUCP_002193 | XLOC_091693 | ENSRNOT00000045063  | 0.962189513  | 5.71E-07 |
| TUCP_002193 | XLOC_091693 | ENSRNOT00000025355  | 0.969998939  | 1.82E-07 |
| TUCP_002193 | XLOC_091693 | ENSRNOT00000076400  | 0.956873955  | 1.09E-06 |
| TUCP_002193 | XLOC_091693 | ENSRNOT00000058382  | 0.951699994  | 1.91E-06 |
| TUCP_002193 | XLOC_091693 | ENSRNOT00000082711  | 0.964452184  | 4.21E-07 |
| TUCP_002193 | XLOC_091693 | ENSRNOT00000026531  | -0.952444442 | 1.77E-06 |
| TUCP_002193 | XLOC_091693 | ENSRNOT00000005172  | 0.955774876  | 1.24E-06 |
| TUCP_002193 | XLOC_091693 | ENSRNOT00000092083  | 0.95511749   | 1.33E-06 |
| TUCP_002193 | XLOC_091693 | ENSRNOT00000005910  | -0.955120025 | 1.33E-06 |
| TUCP_002193 | XLOC_091693 | ENSRNOT00000039911  | 0.955200552  | 1.32E-06 |
| TUCP_002193 | XLOC_091693 | ENSRNOT00000007461  | 0.965989419  | 3.38E-07 |
| TUCP_002193 | XLOC_091693 | ENSRNOT00000029701  | 0.954052961  | 1.49E-06 |
| TUCP_002193 | XLOC_091693 | ENSRNOT00000060977  | 0.958411302  | 9.14E-07 |
| TUCP_002193 | XLOC_091693 | ENSRNOT00000078366  | 0.950930745  | 2.06E-06 |
| TUCP_002193 | XLOC_091693 | ENSRNOT00000065615  | 0.978399519  | 3.57E-08 |
| TUCP_002193 | XLOC_091693 | ENSRNOT00000072580  | -0.953475652 | 1.59E-06 |
| TUCP_002193 | XLOC_091693 | ENSRNOT00000027917  | 0.953148453  | 1.64E-06 |
| TUCP_002193 | XLOC_091693 | ENSRNOT00000011675  | 0.98066629   | 2.06E-08 |
| TUCP_002193 | XLOC_091693 | ENSRNOT00000023876  | 0.955717897  | 1.24E-06 |
| TUCP_002193 | XLOC_091693 | ENSRNOT00000033359  | 0.960220318  | 7.34E-07 |
| TUCP_002193 | XLOC_091693 | ENSRNOT00000028685  | 0.963134236  | 5.04E-07 |
| TUCP_002193 | XLOC_091693 | ENSRNOT00000068156  | 0.958978105  | 8.54E-07 |
| TUCP_002193 | XLOC_091693 | ENSRNOT00000049285  | -0.951483258 | 1.95E-06 |
| TUCP_002193 | XLOC_091693 | ENSRNOT00000015239  | -0.958589221 | 8.95E-07 |



|             |             |                     |              |          |
|-------------|-------------|---------------------|--------------|----------|
| TUCP_002193 | XLOC_091693 | ENSRNOT00000011589  | 0.970197403  | 1.76E-07 |
| TUCP_002193 | XLOC_091693 | ENSRNOT00000005770  | 0.972861398  | 1.11E-07 |
| TUCP_002193 | XLOC_091693 | ENSRNOT00000017504  | 0.955853746  | 1.23E-06 |
| TUCP_002193 | XLOC_091693 | ENSRNOT00000083134  | 0.961821816  | 5.99E-07 |
| TUCP_002193 | XLOC_091693 | ENSRNOT00000089673  | -0.950477784 | 2.16E-06 |
| TUCP_002193 | XLOC_091693 | ENSRNOT00000000886  | 0.955111553  | 1.33E-06 |
| TUCP_002193 | XLOC_091693 | ENSRNOT000000052033 | -0.962098784 | 5.78E-07 |
| TUCP_002193 | XLOC_091693 | ENSRNOT00000075209  | -0.951203069 | 2.01E-06 |
| TUCP_002193 | XLOC_091693 | ENSRNOT00000012386  | 0.97744601   | 4.43E-08 |
| TUCP_002193 | XLOC_091693 | ENSRNOT00000009202  | 0.952037193  | 1.84E-06 |
| TUCP_002193 | XLOC_091693 | ENSRNOT00000026212  | 0.966741921  | 3.03E-07 |
| TUCP_002193 | XLOC_091693 | ENSRNOT00000010993  | 0.95770422   | 9.93E-07 |
| TUCP_002193 | XLOC_091693 | ENSRNOT00000083256  | 0.960256606  | 7.30E-07 |
| TUCP_002193 | XLOC_091693 | ENSRNOT00000010852  | 0.97174038   | 1.35E-07 |
| TUCP_002193 | XLOC_091693 | ENSRNOT00000017765  | 0.960542658  | 7.05E-07 |
| TUCP_002193 | XLOC_091693 | ENSRNOT00000057738  | 0.971337303  | 1.45E-07 |
| TUCP_002193 | XLOC_091693 | ENSRNOT00000006168  | 0.960415743  | 7.16E-07 |
| TUCP_002193 | XLOC_091693 | ENSRNOT00000017829  | 0.953139925  | 1.64E-06 |
| TUCP_002193 | XLOC_091693 | ENSRNOT00000065897  | 0.960423642  | 7.15E-07 |
| TUCP_002193 | XLOC_091693 | ENSRNOT00000023014  | 0.953674406  | 1.55E-06 |
| TUCP_002193 | XLOC_091693 | ENSRNOT00000036137  | 0.958071243  | 9.51E-07 |
| TUCP_002193 | XLOC_091693 | ENSRNOT00000027752  | 0.959277291  | 8.24E-07 |
| TUCP_002193 | XLOC_091693 | ENSRNOT00000021578  | 0.961110042  | 6.56E-07 |
| TUCP_002193 | XLOC_091693 | ENSRNOT00000030007  | -0.950635551 | 2.12E-06 |
| TUCP_002193 | XLOC_091693 | ENSRNOT00000039102  | 0.954555679  | 1.41E-06 |
| TUCP_002193 | XLOC_091693 | ENSRNOT00000009742  | -0.966176447 | 3.29E-07 |
| TUCP_002193 | XLOC_091693 | ENSRNOT00000027476  | 0.955886937  | 1.22E-06 |
| TUCP_002193 | XLOC_091693 | ENSRNOT00000017998  | 0.962088339  | 5.79E-07 |
| TUCP_002193 | XLOC_091693 | ENSRNOT00000016568  | 0.963668099  | 4.69E-07 |
| TUCP_002193 | XLOC_091693 | ENSRNOT00000005343  | -0.962287866 | 5.64E-07 |
| TUCP_002193 | XLOC_091693 | ENSRNOT00000082904  | 0.952737524  | 1.72E-06 |
| TUCP_002193 | XLOC_091693 | ENSRNOT00000008764  | 0.980692195  | 2.05E-08 |
| TUCP_002193 | XLOC_091693 | ENSRNOT00000028907  | 0.95229223   | 1.80E-06 |
| TUCP_002193 | XLOC_091693 | ENSRNOT00000079128  | 0.966103764  | 3.33E-07 |
| TUCP_002193 | XLOC_091693 | ENSRNOT00000035309  | -0.975690279 | 6.42E-08 |
| TUCP_002193 | XLOC_091693 | ENSRNOT00000024011  | 0.967876611  | 2.55E-07 |
| TUCP_002193 | XLOC_091693 | ENSRNOT000000054685 | 0.963175035  | 5.01E-07 |
| TUCP_003221 | XLOC_138410 | ENSRNOT00000025981  | 0.955557936  | 1.27E-06 |
| TUCP_003221 | XLOC_138410 | ENSRNOT00000050138  | 0.95445529   | 1.43E-06 |
| TUCP_003221 | XLOC_138410 | ENSRNOT00000083215  | 0.957921952  | 9.68E-07 |
| TUCP_003221 | XLOC_138410 | ENSRNOT00000000743  | 0.971488709  | 1.41E-07 |
| TUCP_003221 | XLOC_138410 | ENSRNOT00000085596  | 0.963966872  | 4.50E-07 |
| TUCP_003221 | XLOC_138410 | ENSRNOT00000029125  | 0.95531245   | 1.30E-06 |
| TUCP_003221 | XLOC_138410 | ENSRNOT00000012093  | 0.956392352  | 1.15E-06 |
| TUCP_003221 | XLOC_138410 | ENSRNOT00000084088  | 0.973633194  | 9.60E-08 |
| TUCP_003221 | XLOC_138410 | ENSRNOT000000055187 | 0.951694982  | 1.91E-06 |
| TUCP_003221 | XLOC_138410 | ENSRNOT00000074939  | 0.951144546  | 2.02E-06 |
| TUCP_003221 | XLOC_138410 | ENSRNOT00000017629  | 0.96269415   | 5.34E-07 |
| TUCP_003221 | XLOC_138410 | ENSRNOT000000050834 | -0.952563424 | 1.75E-06 |
| TUCP_003221 | XLOC_138410 | ENSRNOT00000014814  | 0.964751234  | 4.04E-07 |
| TUCP_003221 | XLOC_138410 | ENSRNOT00000073675  | -0.950203181 | 2.22E-06 |

|             |             |                    |              |          |
|-------------|-------------|--------------------|--------------|----------|
| TUCP_003221 | XLOC_138410 | ENSRNOT0000006828  | 0.95812336   | 9.45E-07 |
| TUCP_003221 | XLOC_138410 | ENSRNOT00000031230 | 0.959990687  | 7.55E-07 |
| TUCP_003221 | XLOC_138410 | ENSRNOT00000078445 | -0.967870775 | 2.55E-07 |
| TUCP_003221 | XLOC_138410 | ENSRNOT00000059458 | 0.973074685  | 1.07E-07 |
| TUCP_003221 | XLOC_138410 | ENSRNOT00000058312 | 0.953976182  | 1.51E-06 |
| TUCP_003221 | XLOC_138410 | ENSRNOT00000003991 | 0.956480341  | 1.14E-06 |
| TUCP_003221 | XLOC_138410 | ENSRNOT00000040069 | 0.957815829  | 9.80E-07 |
| TUCP_003221 | XLOC_138410 | ENSRNOT00000087429 | 0.950451641  | 2.16E-06 |
| TUCP_003221 | XLOC_138410 | ENSRNOT00000010992 | 0.964742327  | 4.04E-07 |
| TUCP_003221 | XLOC_138410 | ENSRNOT00000052288 | 0.967001854  | 2.92E-07 |
| TUCP_003221 | XLOC_138410 | ENSRNOT00000023144 | 0.970657103  | 1.63E-07 |
| TUCP_003221 | XLOC_138410 | ENSRNOT00000080695 | 0.963581034  | 4.75E-07 |
| TUCP_003221 | XLOC_138410 | ENSRNOT00000027910 | 0.950717     | 2.11E-06 |
| TUCP_003221 | XLOC_138410 | ENSRNOT00000039809 | 0.961468556  | 6.27E-07 |
| TUCP_003221 | XLOC_138410 | ENSRNOT00000078070 | 0.970672202  | 1.63E-07 |
| TUCP_003221 | XLOC_138410 | ENSRNOT00000067867 | 0.96349652   | 4.80E-07 |
| TUCP_003221 | XLOC_138410 | ENSRNOT00000076669 | 0.976654505  | 5.25E-08 |
| TUCP_003221 | XLOC_138410 | ENSRNOT00000076729 | 0.967049293  | 2.89E-07 |
| TUCP_003221 | XLOC_138410 | ENSRNOT00000028646 | 0.956775042  | 1.11E-06 |
| TUCP_003221 | XLOC_138410 | ENSRNOT00000017948 | 0.953469124  | 1.59E-06 |
| TUCP_003221 | XLOC_138410 | ENSRNOT00000058852 | -0.958465534 | 9.08E-07 |
| TUCP_003221 | XLOC_138410 | ENSRNOT00000024406 | -0.960311966 | 7.25E-07 |
| TUCP_003221 | XLOC_138410 | ENSRNOT00000091128 | -0.961574398 | 6.18E-07 |
| TUCP_003221 | XLOC_138410 | ENSRNOT00000022610 | 0.953468499  | 1.59E-06 |
| TUCP_003221 | XLOC_138410 | ENSRNOT00000025859 | 0.954076404  | 1.49E-06 |
| TUCP_003221 | XLOC_138410 | ENSRNOT00000021348 | 0.960322888  | 7.24E-07 |
| TUCP_003221 | XLOC_138410 | ENSRNOT00000026543 | 0.976111077  | 5.89E-08 |
| TUCP_003221 | XLOC_138410 | ENSRNOT0000004942  | -0.959733859 | 7.79E-07 |
| TUCP_003221 | XLOC_138410 | ENSRNOT00000068633 | 0.952909575  | 1.68E-06 |
| TUCP_003221 | XLOC_138410 | ENSRNOT00000005228 | 0.962873983  | 5.22E-07 |
| TUCP_003221 | XLOC_138410 | ENSRNOT00000081400 | 0.957671115  | 9.97E-07 |
| TUCP_003221 | XLOC_138410 | ENSRNOT00000015073 | 0.955042297  | 1.34E-06 |
| TUCP_003221 | XLOC_138410 | ENSRNOT00000004412 | 0.967721369  | 2.61E-07 |
| TUCP_003221 | XLOC_138410 | ENSRNOT00000067181 | 0.964571742  | 4.14E-07 |
| TUCP_003221 | XLOC_138410 | ENSRNOT00000073564 | -0.95333674  | 1.61E-06 |
| TUCP_003221 | XLOC_138410 | ENSRNOT00000013046 | -0.950298713 | 2.20E-06 |
| TUCP_003221 | XLOC_138410 | ENSRNOT00000006055 | 0.959281268  | 8.23E-07 |
| TUCP_003221 | XLOC_138410 | ENSRNOT00000071573 | 0.962996854  | 5.13E-07 |
| TUCP_003221 | XLOC_138410 | ENSRNOT00000025832 | 0.964134939  | 4.40E-07 |
| TUCP_003221 | XLOC_138410 | ENSRNOT00000060362 | 0.961907927  | 5.92E-07 |
| TUCP_003221 | XLOC_138410 | ENSRNOT00000034704 | 0.952049898  | 1.84E-06 |
| TUCP_003221 | XLOC_138410 | ENSRNOT00000013274 | 0.953709549  | 1.55E-06 |
| TUCP_003221 | XLOC_138410 | ENSRNOT00000065300 | 0.957983196  | 9.61E-07 |
| TUCP_003221 | XLOC_138410 | ENSRNOT00000009129 | 0.964040232  | 4.46E-07 |
| TUCP_003221 | XLOC_138410 | ENSRNOT00000020437 | 0.956723979  | 1.11E-06 |
| TUCP_003221 | XLOC_138410 | ENSRNOT00000003296 | 0.969021205  | 2.13E-07 |
| TUCP_003221 | XLOC_138410 | ENSRNOT00000025092 | 0.966726773  | 3.04E-07 |
| TUCP_003221 | XLOC_138410 | ENSRNOT00000010898 | 0.967626253  | 2.65E-07 |
| TUCP_003221 | XLOC_138410 | ENSRNOT00000090376 | 0.984719873  | 6.39E-09 |
| TUCP_003221 | XLOC_138410 | ENSRNOT00000024420 | 0.953661634  | 1.56E-06 |
| TUCP_003221 | XLOC_138410 | ENSRNOT00000035989 | 0.978939046  | 3.15E-08 |

|             |             |                    |              |          |
|-------------|-------------|--------------------|--------------|----------|
| TUCP_003221 | XLOC_138410 | ENSRNOT00000057160 | 0.952389733  | 1.78E-06 |
| TUCP_003221 | XLOC_138410 | ENSRNOT00000005355 | 0.969153787  | 2.09E-07 |
| TUCP_003221 | XLOC_138410 | ENSRNOT00000016739 | 0.963187278  | 5.01E-07 |
| TUCP_003221 | XLOC_138410 | ENSRNOT00000090420 | -0.957825349 | 9.79E-07 |
| TUCP_003221 | XLOC_138410 | ENSRNOT00000027964 | 0.961093084  | 6.58E-07 |
| TUCP_003221 | XLOC_138410 | ENSRNOT00000055992 | -0.959284489 | 8.23E-07 |
| TUCP_003221 | XLOC_138410 | ENSRNOT00000023858 | 0.954986351  | 1.35E-06 |
| TUCP_003221 | XLOC_138410 | ENSRNOT00000057313 | 0.974201555  | 8.62E-08 |
| TUCP_003221 | XLOC_138410 | ENSRNOT00000051550 | 0.955139893  | 1.33E-06 |
| TUCP_003221 | XLOC_138410 | ENSRNOT00000080207 | 0.96399636   | 4.48E-07 |
| TUCP_003221 | XLOC_138410 | ENSRNOT0000001222  | 0.950422162  | 2.17E-06 |
| TUCP_003221 | XLOC_138410 | ENSRNOT00000083799 | 0.957375967  | 1.03E-06 |
| TUCP_003074 | XLOC_131875 | ENSRNOT00000031904 | 0.971140621  | 1.50E-07 |
| TUCP_003074 | XLOC_131875 | ENSRNOT00000068405 | 0.953352869  | 1.61E-06 |
| TUCP_003074 | XLOC_131875 | ENSRNOT00000039809 | 0.974767273  | 7.72E-08 |
| TUCP_003074 | XLOC_131875 | ENSRNOT00000082998 | 0.951752762  | 1.90E-06 |
| TUCP_003074 | XLOC_131875 | ENSRNOT00000081246 | 0.965391061  | 3.69E-07 |
| TUCP_003074 | XLOC_131875 | ENSRNOT00000048910 | -0.955086365 | 1.33E-06 |
| TUCP_003074 | XLOC_131875 | ENSRNOT00000027083 | 0.95212134   | 1.83E-06 |
| TUCP_003074 | XLOC_131875 | ENSRNOT00000003296 | 0.957937876  | 9.66E-07 |
| TUCP_003074 | XLOC_131875 | ENSRNOT00000007351 | -0.96784162  | 2.57E-07 |
| TUCP_003074 | XLOC_131875 | ENSRNOT00000074939 | 0.980361145  | 2.23E-08 |
| TUCP_003074 | XLOC_131875 | ENSRNOT00000066041 | -0.951944209 | 1.86E-06 |
| TUCP_003074 | XLOC_131875 | ENSRNOT0000006055  | 0.975021461  | 7.34E-08 |
| TUCP_003074 | XLOC_131875 | ENSRNOT00000073559 | 0.958879124  | 8.64E-07 |
| TUCP_003074 | XLOC_131875 | ENSRNOT00000071560 | 0.97156528   | 1.40E-07 |
| TUCP_003074 | XLOC_131875 | ENSRNOT00000078445 | -0.955097    | 1.33E-06 |
| TUCP_003074 | XLOC_131875 | ENSRNOT00000027615 | 0.965907285  | 3.43E-07 |
| TUCP_003074 | XLOC_131875 | ENSRNOT00000023638 | 0.970228548  | 1.75E-07 |
| TUCP_003074 | XLOC_131875 | ENSRNOT00000005228 | 0.9685549    | 2.30E-07 |
| TUCP_003074 | XLOC_131875 | ENSRNOT00000088125 | 0.969422908  | 2.00E-07 |
| TUCP_003074 | XLOC_131875 | ENSRNOT00000006175 | 0.971918112  | 1.31E-07 |
| TUCP_003074 | XLOC_131875 | ENSRNOT00000021592 | 0.952180979  | 1.82E-06 |
| TUCP_003074 | XLOC_131875 | ENSRNOT00000005220 | 0.971502411  | 1.41E-07 |
| TUCP_003074 | XLOC_131875 | ENSRNOT00000044635 | 0.963657964  | 4.70E-07 |
| TUCP_003074 | XLOC_131875 | ENSRNOT00000021116 | 0.971127786  | 1.51E-07 |
| TUCP_003074 | XLOC_131875 | ENSRNOT00000016649 | 0.9616538    | 6.12E-07 |
| TUCP_003074 | XLOC_131875 | ENSRNOT00000082100 | 0.971401213  | 1.44E-07 |
| TUCP_003074 | XLOC_131875 | ENSRNOT00000000743 | 0.957136567  | 1.06E-06 |
| TUCP_003074 | XLOC_131875 | ENSRNOT00000065300 | 0.970530802  | 1.67E-07 |
| TUCP_003074 | XLOC_131875 | ENSRNOT00000076763 | 0.967594314  | 2.67E-07 |
| TUCP_003074 | XLOC_131875 | ENSRNOT00000043216 | 0.980265387  | 2.28E-08 |
| TUCP_003074 | XLOC_131875 | ENSRNOT00000091128 | -0.968980248 | 2.15E-07 |
| TUCP_003074 | XLOC_131875 | ENSRNOT00000044742 | 0.963051407  | 5.10E-07 |
| TUCP_003074 | XLOC_131875 | ENSRNOT00000081981 | 0.957005671  | 1.08E-06 |
| TUCP_003074 | XLOC_131875 | ENSRNOT00000013758 | 0.976942682  | 4.94E-08 |
| TUCP_003074 | XLOC_131875 | ENSRNOT00000028563 | 0.951042131  | 2.04E-06 |
| TUCP_003074 | XLOC_131875 | ENSRNOT00000015076 | 0.961519735  | 6.23E-07 |
| TUCP_003074 | XLOC_131875 | ENSRNOT00000066670 | 0.952094882  | 1.83E-06 |
| TUCP_003074 | XLOC_131875 | ENSRNOT00000010418 | 0.956533196  | 1.14E-06 |
| TUCP_003074 | XLOC_131875 | ENSRNOT00000015073 | 0.975842775  | 6.22E-08 |

|             |             |                    |              |          |
|-------------|-------------|--------------------|--------------|----------|
| TUCP_003074 | XLOC_131875 | ENSRNOT00000019213 | 0.975899563  | 6.15E-08 |
| TUCP_003074 | XLOC_131875 | ENSRNOT00000012187 | 0.96667861   | 3.06E-07 |
| TUCP_003074 | XLOC_131875 | ENSRNOT00000073564 | -0.951757543 | 1.90E-06 |
| TUCP_003074 | XLOC_131875 | ENSRNOT00000024969 | 0.954052551  | 1.49E-06 |
| TUCP_003074 | XLOC_131875 | ENSRNOT00000029001 | 0.954880163  | 1.37E-06 |
| TUCP_003074 | XLOC_131875 | ENSRNOT00000001507 | 0.959969491  | 7.57E-07 |
| TUCP_003074 | XLOC_131875 | ENSRNOT00000026783 | 0.953353106  | 1.61E-06 |
| TUCP_003074 | XLOC_131875 | ENSRNOT00000071573 | 0.970048345  | 1.81E-07 |
| TUCP_003074 | XLOC_131875 | ENSRNOT00000005126 | -0.958124844 | 9.45E-07 |
| TUCP_003074 | XLOC_131875 | ENSRNOT00000028646 | 0.960866287  | 6.77E-07 |
| TUCP_003074 | XLOC_131875 | ENSRNOT00000011384 | 0.965874103  | 3.44E-07 |
| TUCP_003074 | XLOC_131875 | ENSRNOT00000048754 | -0.956014125 | 1.20E-06 |
| TUCP_003074 | XLOC_131875 | ENSRNOT00000038247 | 0.967361831  | 2.76E-07 |
| TUCP_003074 | XLOC_131875 | ENSRNOT00000029439 | 0.957339008  | 1.04E-06 |
| TUCP_003074 | XLOC_131875 | ENSRNOT00000093174 | 0.958446137  | 9.10E-07 |
| TUCP_003074 | XLOC_131875 | ENSRNOT00000036951 | 0.964147376  | 4.39E-07 |
| TUCP_003074 | XLOC_131875 | ENSRNOT00000071764 | 0.973707266  | 9.47E-08 |
| TUCP_003074 | XLOC_131875 | ENSRNOT00000035989 | 0.985368007  | 5.15E-09 |
| TUCP_003074 | XLOC_131875 | ENSRNOT00000057160 | 0.966589805  | 3.10E-07 |
| TUCP_003074 | XLOC_131875 | ENSRNOT00000082699 | 0.963811229  | 4.60E-07 |
| TUCP_003074 | XLOC_131875 | ENSRNOT00000024402 | 0.97236923   | 1.21E-07 |
| TUCP_003074 | XLOC_131875 | ENSRNOT00000021348 | 0.994485379  | 3.98E-11 |
| TUCP_003074 | XLOC_131875 | ENSRNOT00000089933 | 0.954755025  | 1.38E-06 |
| TUCP_003074 | XLOC_131875 | ENSRNOT00000024941 | 0.959643897  | 7.88E-07 |
| TUCP_003074 | XLOC_131875 | ENSRNOT00000037456 | 0.952954307  | 1.68E-06 |
| TUCP_003074 | XLOC_131875 | ENSRNOT00000012671 | 0.973071638  | 1.07E-07 |
| TUCP_003074 | XLOC_131875 | ENSRNOT00000026481 | 0.957951663  | 9.65E-07 |
| TUCP_003074 | XLOC_131875 | ENSRNOT00000065168 | 0.952817298  | 1.70E-06 |
| TUCP_003074 | XLOC_131875 | ENSRNOT00000083215 | 0.972444341  | 1.19E-07 |
| TUCP_003074 | XLOC_131875 | ENSRNOT00000026718 | 0.952505228  | 1.76E-06 |
| TUCP_003074 | XLOC_131875 | ENSRNOT00000085228 | 0.968590034  | 2.28E-07 |
| TUCP_003074 | XLOC_131875 | ENSRNOT00000084012 | 0.960064422  | 7.48E-07 |
| TUCP_003074 | XLOC_131875 | ENSRNOT00000020134 | 0.951915869  | 1.87E-06 |
| TUCP_003074 | XLOC_131875 | ENSRNOT00000017319 | 0.957286475  | 1.04E-06 |
| TUCP_003074 | XLOC_131875 | ENSRNOT00000055187 | 0.978959503  | 3.14E-08 |
| TUCP_003074 | XLOC_131875 | ENSRNOT00000075424 | 0.963639249  | 4.71E-07 |
| TUCP_003074 | XLOC_131875 | ENSRNOT00000079866 | 0.970362335  | 1.71E-07 |
| TUCP_003074 | XLOC_131875 | ENSRNOT00000041513 | 0.965550546  | 3.61E-07 |
| TUCP_003074 | XLOC_131875 | ENSRNOT00000009811 | 0.957503909  | 1.02E-06 |
| TUCP_003074 | XLOC_131875 | ENSRNOT00000024548 | 0.960170464  | 7.38E-07 |
| TUCP_003074 | XLOC_131875 | ENSRNOT00000087592 | 0.956021597  | 1.20E-06 |
| TUCP_003074 | XLOC_131875 | ENSRNOT00000008803 | 0.964968029  | 3.92E-07 |
| TUCP_003074 | XLOC_131875 | ENSRNOT00000067822 | 0.966276208  | 3.25E-07 |
| TUCP_003074 | XLOC_131875 | ENSRNOT00000032274 | 0.96479696   | 4.01E-07 |
| TUCP_003074 | XLOC_131875 | ENSRNOT00000010927 | 0.95900196   | 8.51E-07 |
| TUCP_003074 | XLOC_131875 | ENSRNOT00000087371 | 0.96615414   | 3.30E-07 |
| TUCP_003074 | XLOC_131875 | ENSRNOT00000017021 | 0.961528137  | 6.22E-07 |
| TUCP_003074 | XLOC_131875 | ENSRNOT00000088054 | 0.976821125  | 5.07E-08 |
| TUCP_003074 | XLOC_131875 | ENSRNOT00000039842 | 0.971262063  | 1.47E-07 |
| TUCP_003074 | XLOC_131875 | ENSRNOT00000021496 | -0.950981531 | 2.05E-06 |
| TUCP_003074 | XLOC_131875 | ENSRNOT00000013747 | 0.950142437  | 2.23E-06 |

|             |             |                    |              |          |
|-------------|-------------|--------------------|--------------|----------|
| TUCP_003074 | XLOC_131875 | ENSRNOT00000088279 | 0.961415726  | 6.31E-07 |
| TUCP_003074 | XLOC_131875 | ENSRNOT00000068633 | 0.961532163  | 6.22E-07 |
| TUCP_003074 | XLOC_131875 | ENSRNOT00000010541 | 0.970659683  | 1.63E-07 |
| TUCP_003074 | XLOC_131875 | ENSRNOT00000037446 | 0.968690868  | 2.25E-07 |
| TUCP_003074 | XLOC_131875 | ENSRNOT00000004032 | 0.970581649  | 1.65E-07 |
| TUCP_003074 | XLOC_131875 | ENSRNOT00000017948 | 0.978251228  | 3.70E-08 |
| TUCP_003074 | XLOC_131875 | ENSRNOT00000012895 | 0.96541634   | 3.68E-07 |
| TUCP_003074 | XLOC_131875 | ENSRNOT00000025859 | 0.972924467  | 1.10E-07 |
| TUCP_003074 | XLOC_131875 | ENSRNOT00000066526 | 0.95869128   | 8.84E-07 |
| TUCP_003074 | XLOC_131875 | ENSRNOT00000091909 | 0.968816863  | 2.20E-07 |
| TUCP_003074 | XLOC_131875 | ENSRNOT00000090918 | 0.964368322  | 4.26E-07 |
| TUCP_003074 | XLOC_131875 | ENSRNOT0000001081  | 0.957350235  | 1.03E-06 |
| TUCP_003074 | XLOC_131875 | ENSRNOT00000000676 | 0.968147302  | 2.45E-07 |
| TUCP_003074 | XLOC_131875 | ENSRNOT00000024352 | 0.956640383  | 1.12E-06 |
| TUCP_003074 | XLOC_131875 | ENSRNOT00000083220 | 0.95585171   | 1.23E-06 |
| TUCP_003074 | XLOC_131875 | ENSRNOT00000086119 | -0.955270418 | 1.31E-06 |
| TUCP_003074 | XLOC_131875 | ENSRNOT00000019222 | 0.958003725  | 9.59E-07 |
| TUCP_003074 | XLOC_131875 | ENSRNOT00000028070 | 0.951412813  | 1.96E-06 |
| TUCP_003074 | XLOC_131875 | ENSRNOT00000004359 | 0.952480256  | 1.76E-06 |
| TUCP_003074 | XLOC_131875 | ENSRNOT00000058312 | 0.957723796  | 9.91E-07 |
| TUCP_003074 | XLOC_131875 | ENSRNOT00000060362 | 0.974984358  | 7.40E-08 |
| TUCP_003074 | XLOC_131875 | ENSRNOT00000065983 | 0.959146083  | 8.37E-07 |
| TUCP_003074 | XLOC_131875 | ENSRNOT00000022213 | 0.964184301  | 4.37E-07 |
| TUCP_003074 | XLOC_131875 | ENSRNOT00000022610 | 0.956065059  | 1.20E-06 |
| TUCP_003074 | XLOC_131875 | ENSRNOT00000020437 | 0.969544325  | 1.96E-07 |
| TUCP_003074 | XLOC_131875 | ENSRNOT00000006828 | 0.952521005  | 1.75E-06 |
| TUCP_003074 | XLOC_131875 | ENSRNOT00000010898 | 0.976153317  | 5.84E-08 |
| TUCP_003074 | XLOC_131875 | ENSRNOT00000047093 | 0.958371201  | 9.18E-07 |
| TUCP_003074 | XLOC_131875 | ENSRNOT00000001222 | 0.967091224  | 2.88E-07 |
| TUCP_003074 | XLOC_131875 | ENSRNOT00000015265 | 0.952358358  | 1.78E-06 |
| TUCP_003074 | XLOC_131875 | ENSRNOT00000067181 | 0.962302687  | 5.63E-07 |
| TUCP_003074 | XLOC_131875 | ENSRNOT00000005355 | 0.979132733  | 3.01E-08 |
| TUCP_003074 | XLOC_131875 | ENSRNOT00000048063 | 0.957083377  | 1.07E-06 |
| TUCP_003074 | XLOC_131875 | ENSRNOT00000016739 | 0.956899926  | 1.09E-06 |
| TUCP_003074 | XLOC_131875 | ENSRNOT00000008982 | 0.96019796   | 7.36E-07 |
| TUCP_003074 | XLOC_131875 | ENSRNOT00000001242 | 0.950909864  | 2.07E-06 |
| TUCP_003074 | XLOC_131875 | ENSRNOT00000078675 | 0.963666483  | 4.69E-07 |
| TUCP_003074 | XLOC_131875 | ENSRNOT00000079895 | 0.97595394   | 6.08E-08 |
| TUCP_003074 | XLOC_131875 | ENSRNOT00000078102 | 0.952752148  | 1.71E-06 |
| TUCP_003074 | XLOC_131875 | ENSRNOT00000019820 | 0.951001969  | 2.05E-06 |
| TUCP_003074 | XLOC_131875 | ENSRNOT00000025981 | 0.968610559  | 2.28E-07 |
| TUCP_003074 | XLOC_131875 | ENSRNOT00000027520 | 0.95246997   | 1.76E-06 |
| TUCP_003074 | XLOC_131875 | ENSRNOT00000023144 | 0.986293159  | 3.72E-09 |
| TUCP_003074 | XLOC_131875 | ENSRNOT00000047387 | 0.97972807   | 2.61E-08 |
| TUCP_003074 | XLOC_131875 | ENSRNOT00000088599 | 0.951072846  | 2.03E-06 |
| TUCP_003074 | XLOC_131875 | ENSRNOT00000025092 | 0.983329422  | 9.86E-09 |
| TUCP_003074 | XLOC_131875 | ENSRNOT00000004698 | 0.971822915  | 1.33E-07 |
| TUCP_003074 | XLOC_131875 | ENSRNOT00000091910 | 0.958594814  | 8.94E-07 |
| TUCP_003074 | XLOC_131875 | ENSRNOT00000045488 | 0.968188619  | 2.43E-07 |
| TUCP_003074 | XLOC_131875 | ENSRNOT00000058072 | 0.959194433  | 8.32E-07 |
| TUCP_003074 | XLOC_131875 | ENSRNOT00000081047 | 0.970420804  | 1.70E-07 |

|             |             |                    |              |          |
|-------------|-------------|--------------------|--------------|----------|
| TUCP_003074 | XLOC_131875 | ENSRNOT00000084240 | 0.96212671   | 5.76E-07 |
| TUCP_003074 | XLOC_131875 | ENSRNOT00000017629 | 0.99144731   | 3.55E-10 |
| TUCP_003074 | XLOC_131875 | ENSRNOT00000026174 | 0.964987033  | 3.91E-07 |
| TUCP_003074 | XLOC_131875 | ENSRNOT00000033998 | 0.950098132  | 2.24E-06 |
| TUCP_003074 | XLOC_131875 | ENSRNOT00000015203 | 0.952865009  | 1.69E-06 |
| TUCP_003074 | XLOC_131875 | ENSRNOT00000005664 | 0.954016926  | 1.50E-06 |
| TUCP_003074 | XLOC_131875 | ENSRNOT00000003991 | 0.973332108  | 1.02E-07 |
| TUCP_003074 | XLOC_131875 | ENSRNOT00000004508 | 0.976471377  | 5.46E-08 |
| TUCP_003074 | XLOC_131875 | ENSRNOT00000034744 | 0.950175446  | 2.22E-06 |
| TUCP_003074 | XLOC_131875 | ENSRNOT00000078475 | 0.980696972  | 2.04E-08 |
| TUCP_003074 | XLOC_131875 | ENSRNOT00000087429 | 0.970135141  | 1.78E-07 |
| TUCP_003074 | XLOC_131875 | ENSRNOT00000040513 | 0.965565823  | 3.60E-07 |
| TUCP_003074 | XLOC_131875 | ENSRNOT00000009683 | 0.981652882  | 1.59E-08 |
| TUCP_003074 | XLOC_131875 | ENSRNOT00000083127 | 0.971825972  | 1.33E-07 |
| TUCP_003074 | XLOC_131875 | ENSRNOT00000076953 | 0.950603016  | 2.13E-06 |
| TUCP_003074 | XLOC_131875 | ENSRNOT00000080207 | 0.976338916  | 5.61E-08 |
| TUCP_003074 | XLOC_131875 | ENSRNOT00000084088 | 0.975813805  | 6.26E-08 |
| TUCP_003074 | XLOC_131875 | ENSRNOT00000034704 | 0.982794546  | 1.15E-08 |
| TUCP_003074 | XLOC_131875 | ENSRNOT00000064902 | 0.969427599  | 2.00E-07 |
| TUCP_003074 | XLOC_131875 | ENSRNOT00000078070 | 0.970637327  | 1.64E-07 |
| TUCP_003074 | XLOC_131875 | ENSRNOT00000005262 | 0.966690866  | 3.05E-07 |
| TUCP_003074 | XLOC_131875 | ENSRNOT00000013274 | 0.991794371  | 2.89E-10 |
| TUCP_003074 | XLOC_131875 | ENSRNOT00000079442 | 0.96109547   | 6.57E-07 |
| TUCP_003074 | XLOC_131875 | ENSRNOT00000076729 | 0.987913297  | 1.99E-09 |
| TUCP_003074 | XLOC_131875 | ENSRNOT00000002771 | 0.95411884   | 1.48E-06 |
| TUCP_003074 | XLOC_131875 | ENSRNOT00000016722 | 0.960175259  | 7.38E-07 |
| TUCP_003074 | XLOC_131875 | ENSRNOT00000091265 | 0.979586006  | 2.70E-08 |
| TUCP_003074 | XLOC_131875 | ENSRNOT00000046745 | 0.953530517  | 1.58E-06 |
| TUCP_003074 | XLOC_131875 | ENSRNOT00000073526 | 0.961436519  | 6.30E-07 |
| TUCP_003074 | XLOC_131875 | ENSRNOT00000015609 | 0.952408482  | 1.77E-06 |
| TUCP_003074 | XLOC_131875 | ENSRNOT00000016191 | 0.965188572  | 3.80E-07 |
| TUCP_003074 | XLOC_131875 | ENSRNOT00000078390 | -0.961964401 | 5.88E-07 |
| TUCP_003074 | XLOC_131875 | ENSRNOT00000065501 | 0.97490678   | 7.51E-08 |
| TUCP_003074 | XLOC_131875 | ENSRNOT00000027454 | 0.960773906  | 6.85E-07 |
| TUCP_003074 | XLOC_131875 | ENSRNOT00000091488 | 0.954317258  | 1.45E-06 |
| TUCP_003074 | XLOC_131875 | ENSRNOT00000025832 | 0.989531513  | 9.73E-10 |
| TUCP_003074 | XLOC_131875 | ENSRNOT00000024322 | 0.963448202  | 4.83E-07 |
| TUCP_003074 | XLOC_131875 | ENSRNOT00000017753 | 0.954383281  | 1.44E-06 |
| TUCP_003074 | XLOC_131875 | ENSRNOT00000005909 | 0.967399488  | 2.75E-07 |
| TUCP_003074 | XLOC_131875 | ENSRNOT00000090665 | 0.981167362  | 1.81E-08 |
| TUCP_003074 | XLOC_131875 | ENSRNOT00000045882 | 0.973120716  | 1.06E-07 |
| TUCP_003074 | XLOC_131875 | ENSRNOT00000036750 | 0.985061115  | 5.71E-09 |
| TUCP_003074 | XLOC_131875 | ENSRNOT00000025936 | -0.954575994 | 1.41E-06 |
| TUCP_003074 | XLOC_131875 | ENSRNOT00000009198 | 0.954812676  | 1.38E-06 |
| TUCP_003074 | XLOC_131875 | ENSRNOT00000027964 | 0.979310114  | 2.88E-08 |
| TUCP_003074 | XLOC_131875 | ENSRNOT00000009129 | 0.966410077  | 3.18E-07 |
| TUCP_003074 | XLOC_131875 | ENSRNOT00000086122 | 0.956164613  | 1.18E-06 |
| TUCP_003074 | XLOC_131875 | ENSRNOT00000037790 | 0.960166906  | 7.39E-07 |
| TUCP_003074 | XLOC_131875 | ENSRNOT00000090376 | 0.950741614  | 2.10E-06 |
| TUCP_003074 | XLOC_131875 | ENSRNOT00000027337 | 0.952157454  | 1.82E-06 |
| TUCP_003074 | XLOC_131875 | ENSRNOT00000024420 | 0.963236971  | 4.97E-07 |

|             |             |                    |              |          |
|-------------|-------------|--------------------|--------------|----------|
| TUCP_003074 | XLOC_131875 | ENSRNOT0000006969  | 0.950364396  | 2.18E-06 |
| TUCP_003074 | XLOC_131875 | ENSRNOT00000090420 | -0.954134036 | 1.48E-06 |
| TUCP_003074 | XLOC_131875 | ENSRNOT00000026293 | 0.971167884  | 1.50E-07 |
| TUCP_003074 | XLOC_131875 | ENSRNOT00000081897 | 0.954679845  | 1.40E-06 |
| TUCP_003074 | XLOC_131875 | ENSRNOT00000057313 | 0.985087855  | 5.66E-09 |
| TUCP_003074 | XLOC_131875 | ENSRNOT00000072081 | 0.952998797  | 1.67E-06 |
| TUCP_003074 | XLOC_131875 | ENSRNOT00000025075 | 0.961318273  | 6.39E-07 |
| TUCP_003074 | XLOC_131875 | ENSRNOT0000000157  | 0.967569331  | 2.68E-07 |
| TUCP_003074 | XLOC_131875 | ENSRNOT00000023645 | 0.960061275  | 7.48E-07 |
| TUCP_003074 | XLOC_131875 | ENSRNOT00000084734 | 0.955130781  | 1.33E-06 |
| TUCP_003074 | XLOC_131875 | ENSRNOT00000050138 | 0.952671874  | 1.73E-06 |
| TUCP_003074 | XLOC_131875 | ENSRNOT00000035700 | 0.953217062  | 1.63E-06 |
| TUCP_003074 | XLOC_131875 | ENSRNOT00000038647 | 0.971212817  | 1.48E-07 |
| TUCP_003074 | XLOC_131875 | ENSRNOT00000020379 | 0.952761875  | 1.71E-06 |
| TUCP_003074 | XLOC_131875 | ENSRNOT00000076669 | 0.989881378  | 8.21E-10 |
| TUCP_003074 | XLOC_131875 | ENSRNOT00000011984 | 0.972783873  | 1.12E-07 |
| TUCP_003074 | XLOC_131875 | ENSRNOT00000026941 | 0.969887317  | 1.85E-07 |
| TUCP_003074 | XLOC_131875 | ENSRNOT00000043872 | 0.957155672  | 1.06E-06 |
| TUCP_003074 | XLOC_131875 | ENSRNOT00000074653 | 0.963493698  | 4.80E-07 |
| TUCP_003074 | XLOC_131875 | ENSRNOT00000066024 | 0.951740806  | 1.90E-06 |
| TUCP_003074 | XLOC_131875 | ENSRNOT00000000658 | 0.957884989  | 9.72E-07 |
| TUCP_003074 | XLOC_131875 | ENSRNOT00000012736 | 0.964464158  | 4.20E-07 |
| TUCP_003074 | XLOC_131875 | ENSRNOT00000059458 | 0.957577067  | 1.01E-06 |
| TUCP_003074 | XLOC_131875 | ENSRNOT00000031230 | 0.988106193  | 1.84E-09 |
| TUCP_003074 | XLOC_131875 | ENSRNOT00000080110 | 0.954776224  | 1.38E-06 |
| TUCP_003074 | XLOC_131875 | ENSRNOT00000005659 | 0.959020106  | 8.50E-07 |
| TUCP_003074 | XLOC_131875 | ENSRNOT00000040069 | 0.961853927  | 5.97E-07 |
| TUCP_003074 | XLOC_131875 | ENSRNOT00000000302 | 0.970606219  | 1.64E-07 |
| TUCP_003074 | XLOC_131875 | ENSRNOT00000010992 | 0.989573305  | 9.54E-10 |
| TUCP_003074 | XLOC_131875 | ENSRNOT00000080928 | 0.961367504  | 6.35E-07 |
| TUCP_003074 | XLOC_131875 | ENSRNOT00000052288 | 0.971627521  | 1.38E-07 |
| TUCP_003074 | XLOC_131875 | ENSRNOT00000026543 | 0.986539966  | 3.40E-09 |
| TUCP_003074 | XLOC_131875 | ENSRNOT00000035474 | 0.966148947  | 3.31E-07 |
| TUCP_003074 | XLOC_131875 | ENSRNOT00000080695 | 0.964567262  | 4.14E-07 |
| TUCP_003074 | XLOC_131875 | ENSRNOT00000039341 | 0.951641946  | 1.92E-06 |
| TUCP_003074 | XLOC_131875 | ENSRNOT00000068322 | 0.956304868  | 1.17E-06 |
| TUCP_003074 | XLOC_131875 | ENSRNOT00000076872 | 0.953115861  | 1.65E-06 |
| TUCP_003074 | XLOC_131875 | ENSRNOT00000091205 | 0.955555435  | 1.27E-06 |
| TUCP_003074 | XLOC_131875 | ENSRNOT00000058852 | -0.952110138 | 1.83E-06 |
| TUCP_003074 | XLOC_131875 | ENSRNOT00000027910 | 0.977061277  | 4.81E-08 |
| TUCP_003074 | XLOC_131875 | ENSRNOT00000055992 | -0.95533726  | 1.30E-06 |
| TUCP_003074 | XLOC_131875 | ENSRNOT00000043345 | 0.975066453  | 7.28E-08 |
| TUCP_003074 | XLOC_131875 | ENSRNOT00000085596 | 0.986736971  | 3.16E-09 |
| TUCP_003074 | XLOC_131875 | ENSRNOT00000083957 | 0.956244782  | 1.17E-06 |
| TUCP_003074 | XLOC_131875 | ENSRNOT00000071694 | 0.959851851  | 7.68E-07 |
| TUCP_003074 | XLOC_131875 | ENSRNOT00000029125 | 0.970050621  | 1.80E-07 |
| TUCP_003074 | XLOC_131875 | ENSRNOT00000082174 | 0.970485933  | 1.68E-07 |
| TUCP_003074 | XLOC_131875 | ENSRNOT00000060696 | 0.970982041  | 1.54E-07 |
| TUCP_003074 | XLOC_131875 | ENSRNOT00000042125 | 0.954729294  | 1.39E-06 |
| TUCP_003074 | XLOC_131875 | ENSRNOT00000009900 | -0.952001366 | 1.85E-06 |
| TUCP_003074 | XLOC_131875 | ENSRNOT00000014814 | 0.963313403  | 4.92E-07 |

|             |             |                     |              |          |
|-------------|-------------|---------------------|--------------|----------|
| TUCP_003074 | XLOC_131875 | ENSRNOT00000004412  | 0.989251602  | 1.11E-09 |
| TUCP_003074 | XLOC_131875 | ENSRNOT00000012048  | 0.957077825  | 1.07E-06 |
| TUCP_003074 | XLOC_131875 | ENSRNOT000000064798 | 0.972955729  | 1.09E-07 |
| TUCP_003074 | XLOC_131875 | ENSRNOT00000019177  | 0.952954465  | 1.68E-06 |
| TUCP_003074 | XLOC_131875 | ENSRNOT000000026280 | 0.955524437  | 1.27E-06 |
| TUCP_003074 | XLOC_131875 | ENSRNOT000000022485 | 0.953811563  | 1.53E-06 |
| TUCP_003074 | XLOC_131875 | ENSRNOT000000061100 | 0.965849658  | 3.45E-07 |
| TUCP_003074 | XLOC_131875 | ENSRNOT00000005387  | 0.963311981  | 4.92E-07 |
| TUCP_003074 | XLOC_131875 | ENSRNOT000000027452 | 0.979722547  | 2.61E-08 |
| TUCP_003074 | XLOC_131875 | ENSRNOT00000017776  | 0.954102991  | 1.48E-06 |
| TUCP_003074 | XLOC_131875 | ENSRNOT000000040393 | 0.968347992  | 2.37E-07 |
| TUCP_003074 | XLOC_131875 | ENSRNOT00000005144  | 0.950711503  | 2.11E-06 |
| TUCP_003074 | XLOC_131875 | ENSRNOT000000026457 | 0.9735867    | 9.69E-08 |
| TUCP_003074 | XLOC_131875 | ENSRNOT00000004463  | 0.965042972  | 3.88E-07 |
| TUCP_003074 | XLOC_131875 | ENSRNOT000000086336 | 0.955633904  | 1.26E-06 |
| TUCP_003074 | XLOC_131875 | ENSRNOT00000009877  | 0.958483338  | 9.06E-07 |
| TUCP_003074 | XLOC_131875 | ENSRNOT000000065229 | 0.954181836  | 1.47E-06 |
| TUCP_003074 | XLOC_131875 | ENSRNOT000000023428 | 0.960934294  | 6.71E-07 |
| TUCP_003074 | XLOC_131875 | ENSRNOT000000051550 | 0.96117377   | 6.51E-07 |
| TUCP_003074 | XLOC_131875 | ENSRNOT00000011041  | 0.971454745  | 1.42E-07 |
| TUCP_003074 | XLOC_131875 | ENSRNOT000000021674 | 0.985579593  | 4.79E-09 |
| TUCP_003074 | XLOC_131875 | ENSRNOT000000047192 | -0.966116257 | 3.32E-07 |
| TUCP_003074 | XLOC_131875 | ENSRNOT000000047210 | 0.964128696  | 4.40E-07 |
| TUCP_003074 | XLOC_131875 | ENSRNOT00000002292  | 0.966251319  | 3.26E-07 |
| TUCP_003074 | XLOC_131875 | ENSRNOT00000010748  | 0.962889914  | 5.21E-07 |
| TUCP_003074 | XLOC_131875 | ENSRNOT00000009342  | 0.954612052  | 1.41E-06 |
| TUCP_003074 | XLOC_131875 | ENSRNOT00000004140  | 0.969033844  | 2.13E-07 |
| TUCP_003074 | XLOC_131875 | ENSRNOT00000015799  | 0.970993083  | 1.54E-07 |
| TUCP_003074 | XLOC_131875 | ENSRNOT00000015092  | 0.957122865  | 1.06E-06 |
| TUCP_003074 | XLOC_131875 | ENSRNOT000000083799 | 0.980476238  | 2.16E-08 |
| TUCP_003074 | XLOC_131875 | ENSRNOT00000009066  | 0.95316328   | 1.64E-06 |
| TUCP_001921 | XLOC_078987 | ENSRNOT00000001774  | 0.950990641  | 2.05E-06 |
| TUCP_001921 | XLOC_078987 | ENSRNOT000000054936 | 0.950373735  | 2.18E-06 |
| TUCP_001921 | XLOC_078987 | ENSRNOT000000049967 | 0.952022337  | 1.85E-06 |
| TUCP_001921 | XLOC_078987 | ENSRNOT00000007681  | 0.962982053  | 5.14E-07 |
| TUCP_001921 | XLOC_078987 | ENSRNOT00000010303  | 0.95374288   | 1.54E-06 |
| TUCP_001921 | XLOC_078987 | ENSRNOT00000019966  | 0.950604892  | 2.13E-06 |
| TUCP_001921 | XLOC_078987 | ENSRNOT000000074544 | 0.953101957  | 1.65E-06 |
| TUCP_001921 | XLOC_078987 | ENSRNOT000000035875 | 0.954231942  | 1.46E-06 |
| TUCP_001921 | XLOC_078987 | ENSRNOT00000002510  | 0.955126729  | 1.33E-06 |
| TUCP_002296 | XLOC_096071 | ENSRNOT000000092026 | 0.958200316  | 9.37E-07 |
| TUCP_002296 | XLOC_096071 | ENSRNOT000000093075 | 0.983470119  | 9.45E-09 |
| TUCP_002296 | XLOC_096071 | ENSRNOT000000058260 | 0.983470119  | 9.45E-09 |
| TUCP_002296 | XLOC_096071 | ENSRNOT000000088887 | 0.983470119  | 9.45E-09 |
| TUCP_002296 | XLOC_096071 | ENSRNOT000000084986 | 0.983470119  | 9.45E-09 |
| TUCP_002296 | XLOC_096071 | ENSRNOT000000074346 | 0.964742509  | 4.04E-07 |
| TUCP_002296 | XLOC_096071 | ENSRNOT000000073209 | 0.965572164  | 3.60E-07 |
| TUCP_002296 | XLOC_096071 | ENSRNOT000000080155 | 0.950849047  | 2.08E-06 |
| TUCP_002296 | XLOC_096071 | ENSRNOT000000072573 | 0.978565     | 3.44E-08 |
| TUCP_002296 | XLOC_096071 | ENSRNOT00000017828  | 0.977424555  | 4.45E-08 |
| TUCP_002296 | XLOC_096071 | ENSRNOT000000080444 | 0.965685933  | 3.54E-07 |



|             |             |                    |             |          |
|-------------|-------------|--------------------|-------------|----------|
| TUCP_002296 | XLOC_096071 | ENSRNOT00000071312 | 0.983470119 | 9.45E-09 |
| TUCP_002296 | XLOC_096071 | ENSRNOT00000088245 | 0.983470119 | 9.45E-09 |
| TUCP_002296 | XLOC_096071 | ENSRNOT00000057051 | 0.955145858 | 1.33E-06 |
| TUCP_002296 | XLOC_096071 | ENSRNOT00000058833 | 0.980947196 | 1.92E-08 |
| TUCP_002296 | XLOC_096071 | ENSRNOT00000078052 | 0.983470119 | 9.45E-09 |
| TUCP_002296 | XLOC_096071 | ENSRNOT00000078494 | 0.983112778 | 1.05E-08 |
| TUCP_002296 | XLOC_096071 | ENSRNOT00000085653 | 0.983470119 | 9.45E-09 |
| TUCP_002296 | XLOC_096071 | ENSRNOT00000057950 | 0.959867234 | 7.66E-07 |
| TUCP_002296 | XLOC_096071 | ENSRNOT00000081992 | 0.981706447 | 1.56E-08 |
| TUCP_002296 | XLOC_096071 | ENSRNOT00000055406 | 0.983470119 | 9.45E-09 |
| TUCP_002296 | XLOC_096071 | ENSRNOT00000070817 | 0.981380894 | 1.71E-08 |
| TUCP_002296 | XLOC_096071 | ENSRNOT00000026753 | 0.983470119 | 9.45E-09 |
| TUCP_002296 | XLOC_096071 | ENSRNOT00000080533 | 0.978282256 | 3.67E-08 |
| TUCP_002296 | XLOC_096071 | ENSRNOT00000004279 | 0.954419534 | 1.44E-06 |
| TUCP_002296 | XLOC_096071 | ENSRNOT00000072774 | 0.958725382 | 8.80E-07 |
| TUCP_002296 | XLOC_096071 | ENSRNOT00000086031 | 0.983470119 | 9.45E-09 |
| TUCP_002296 | XLOC_096071 | ENSRNOT00000014312 | 0.983470119 | 9.45E-09 |
| TUCP_002296 | XLOC_096071 | ENSRNOT00000042882 | 0.950288903 | 2.20E-06 |
| TUCP_002296 | XLOC_096071 | ENSRNOT00000051231 | 0.9843506   | 7.20E-09 |
| TUCP_002296 | XLOC_096071 | ENSRNOT00000089407 | 0.973770345 | 9.36E-08 |
| TUCP_002296 | XLOC_096071 | ENSRNOT00000055034 | 0.978928279 | 3.16E-08 |
| TUCP_002296 | XLOC_096071 | ENSRNOT00000046837 | 0.9780295   | 3.89E-08 |
| TUCP_002293 | XLOC_095391 | ENSRNOT00000084034 | -0.95901997 | 8.50E-07 |
| TUCP_002293 | XLOC_095391 | ENSRNOT00000054975 | 0.951432884 | 1.96E-06 |
| TUCP_002293 | XLOC_095391 | ENSRNOT00000026803 | 0.961839923 | 5.98E-07 |
| TUCP_002291 | XLOC_095375 | ENSRNOT00000073840 | 0.954675783 | 1.40E-06 |
| TUCP_001258 | XLOC_047458 | ENSRNOT00000085943 | 0.950123401 | 2.24E-06 |
| TUCP_001258 | XLOC_047458 | ENSRNOT00000072396 | 0.965206195 | 3.79E-07 |
| TUCP_001258 | XLOC_047458 | ENSRNOT00000076466 | 0.950176818 | 2.22E-06 |
| TUCP_001258 | XLOC_047458 | ENSRNOT00000052377 | 0.963054261 | 5.09E-07 |
| TUCP_001316 | XLOC_050182 | ENSRNOT00000085195 | 0.981534436 | 1.64E-08 |
| TUCP_001316 | XLOC_050182 | ENSRNOT00000013705 | 0.983041585 | 1.07E-08 |
| TUCP_001316 | XLOC_050182 | ENSRNOT00000040851 | 0.983041585 | 1.07E-08 |
| TUCP_001316 | XLOC_050182 | ENSRNOT00000058389 | 0.983041585 | 1.07E-08 |
| TUCP_001316 | XLOC_050182 | ENSRNOT00000023542 | 0.983041585 | 1.07E-08 |
| TUCP_001316 | XLOC_050182 | ENSRNOT00000028653 | 0.983041585 | 1.07E-08 |
| TUCP_001316 | XLOC_050182 | ENSRNOT00000017230 | 0.96182113  | 5.99E-07 |
| TUCP_001316 | XLOC_050182 | ENSRNOT00000012174 | 0.983041585 | 1.07E-08 |
| TUCP_001316 | XLOC_050182 | ENSRNOT00000080185 | 0.980272518 | 2.28E-08 |
| TUCP_001316 | XLOC_050182 | ENSRNOT00000089118 | 0.983041585 | 1.07E-08 |
| TUCP_001316 | XLOC_050182 | ENSRNOT00000025245 | 0.983755681 | 8.67E-09 |
| TUCP_001316 | XLOC_050182 | ENSRNOT00000082316 | 0.952045037 | 1.84E-06 |
| TUCP_001316 | XLOC_050182 | ENSRNOT00000015138 | 0.982282564 | 1.33E-08 |
| TUCP_001316 | XLOC_050182 | ENSRNOT00000051680 | 0.969721664 | 1.90E-07 |
| TUCP_001316 | XLOC_050182 | ENSRNOT00000049165 | 0.950811471 | 2.09E-06 |
| TUCP_001316 | XLOC_050182 | ENSRNOT00000079661 | 0.983041585 | 1.07E-08 |
| TUCP_001316 | XLOC_050182 | ENSRNOT00000076338 | 0.964287868 | 4.31E-07 |
| TUCP_001316 | XLOC_050182 | ENSRNOT00000042220 | 0.983041585 | 1.07E-08 |
| TUCP_001316 | XLOC_050182 | ENSRNOT00000079167 | 0.957860237 | 9.75E-07 |
| TUCP_001316 | XLOC_050182 | ENSRNOT00000086710 | 0.983232284 | 1.01E-08 |
| TUCP_001316 | XLOC_050182 | ENSRNOT00000075226 | 0.983041585 | 1.07E-08 |

|             |             |                     |              |          |
|-------------|-------------|---------------------|--------------|----------|
| TUCP_001316 | XLOC_050182 | ENSRNOT0000000351   | 0.983041585  | 1.07E-08 |
| TUCP_001316 | XLOC_050182 | ENSRNOT00000092294  | 0.96535999   | 3.71E-07 |
| TUCP_001315 | XLOC_050155 | ENSRNOT00000014821  | 0.952549011  | 1.75E-06 |
| TUCP_001315 | XLOC_050155 | ENSRNOT00000083351  | 0.96015007   | 7.40E-07 |
| TUCP_001315 | XLOC_050155 | ENSRNOT00000088599  | -0.95071515  | 2.11E-06 |
| TUCP_001315 | XLOC_050155 | ENSRNOT00000086244  | -0.979001075 | 3.10E-08 |
| TUCP_001315 | XLOC_050155 | ENSRNOT00000019644  | 0.956856426  | 1.09E-06 |
| TUCP_001315 | XLOC_050155 | ENSRNOT00000082427  | 0.966486173  | 3.15E-07 |
| TUCP_001315 | XLOC_050155 | ENSRNOT00000021850  | -0.950966647 | 2.06E-06 |
| TUCP_001315 | XLOC_050155 | ENSRNOT00000030692  | 0.952338897  | 1.79E-06 |
| TUCP_001315 | XLOC_050155 | ENSRNOT00000065230  | -0.951233765 | 2.00E-06 |
| TUCP_001315 | XLOC_050155 | ENSRNOT00000009563  | 0.960246523  | 7.31E-07 |
| TUCP_001315 | XLOC_050155 | ENSRNOT00000050609  | 0.954546733  | 1.42E-06 |
| TUCP_001315 | XLOC_050155 | ENSRNOT00000007949  | 0.956666363  | 1.12E-06 |
| TUCP_001315 | XLOC_050155 | ENSRNOT00000016263  | 0.952932768  | 1.68E-06 |
| TUCP_001315 | XLOC_050155 | ENSRNOT00000017420  | 0.958486851  | 9.06E-07 |
| TUCP_001315 | XLOC_050155 | ENSRNOT00000020272  | 0.957847674  | 9.76E-07 |
| TUCP_001315 | XLOC_050155 | ENSRNOT00000045233  | 0.952193435  | 1.81E-06 |
| TUCP_001315 | XLOC_050155 | ENSRNOT00000025362  | 0.95095925   | 2.06E-06 |
| TUCP_001315 | XLOC_050155 | ENSRNOT00000075656  | 0.966467883  | 3.16E-07 |
| TUCP_001315 | XLOC_050155 | ENSRNOT00000044467  | 0.959259849  | 8.25E-07 |
| TUCP_001315 | XLOC_050155 | ENSRNOT00000001759  | 0.962315191  | 5.62E-07 |
| TUCP_001315 | XLOC_050155 | ENSRNOT000000081327 | 0.959312733  | 8.20E-07 |
| TUCP_001315 | XLOC_050155 | ENSRNOT00000039730  | 0.964176673  | 4.37E-07 |
| TUCP_001315 | XLOC_050155 | ENSRNOT00000022000  | 0.960148625  | 7.40E-07 |
| TUCP_001315 | XLOC_050155 | ENSRNOT00000003327  | 0.96149751   | 6.25E-07 |
| TUCP_001315 | XLOC_050155 | ENSRNOT00000030373  | 0.952671857  | 1.73E-06 |
| TUCP_001315 | XLOC_050155 | ENSRNOT00000087481  | 0.968605187  | 2.28E-07 |
| TUCP_001315 | XLOC_050155 | ENSRNOT00000039232  | -0.967969475 | 2.52E-07 |
| TUCP_001315 | XLOC_050155 | ENSRNOT00000032236  | 0.953154581  | 1.64E-06 |
| TUCP_001315 | XLOC_050155 | ENSRNOT00000011794  | 0.96356915   | 4.75E-07 |
| TUCP_001315 | XLOC_050155 | ENSRNOT00000027846  | -0.950750313 | 2.10E-06 |
| TUCP_001315 | XLOC_050155 | ENSRNOT00000059679  | 0.95380387   | 1.53E-06 |
| TUCP_001315 | XLOC_050155 | ENSRNOT00000083632  | 0.950384923  | 2.18E-06 |
| TUCP_001315 | XLOC_050155 | ENSRNOT00000060005  | -0.951746274 | 1.90E-06 |
| TUCP_001315 | XLOC_050155 | ENSRNOT00000084927  | 0.961487852  | 6.25E-07 |
| TUCP_001315 | XLOC_050155 | ENSRNOT00000015387  | 0.951011377  | 2.05E-06 |
| TUCP_001315 | XLOC_050155 | ENSRNOT00000083891  | 0.959493763  | 8.02E-07 |
| TUCP_001315 | XLOC_050155 | ENSRNOT00000078128  | 0.9682284    | 2.42E-07 |
| TUCP_001315 | XLOC_050155 | ENSRNOT00000090355  | 0.950489196  | 2.16E-06 |
| TUCP_001315 | XLOC_050155 | ENSRNOT00000015935  | -0.953675659 | 1.55E-06 |
| TUCP_001315 | XLOC_050155 | ENSRNOT00000005885  | 0.954588201  | 1.41E-06 |
| TUCP_001315 | XLOC_050155 | ENSRNOT00000012286  | 0.951563666  | 1.94E-06 |
| TUCP_001315 | XLOC_050155 | ENSRNOT00000026057  | 0.951855582  | 1.88E-06 |
| TUCP_001313 | XLOC_050042 | ENSRNOT00000090659  | 0.952349647  | 1.79E-06 |
| TUCP_001313 | XLOC_050042 | ENSRNOT00000091911  | 0.977200612  | 4.67E-08 |
| TUCP_001313 | XLOC_050042 | ENSRNOT00000020855  | 0.95429254   | 1.45E-06 |
| TUCP_003489 | XLOC_151345 | ENSRNOT00000082711  | 0.952040911  | 1.84E-06 |
| TUCP_003489 | XLOC_151345 | ENSRNOT00000081226  | 0.953057604  | 1.66E-06 |
| TUCP_003489 | XLOC_151345 | ENSRNOT00000065897  | 0.956316272  | 1.16E-06 |
| TUCP_003489 | XLOC_151345 | ENSRNOT00000000048  | 0.954530797  | 1.42E-06 |

|             |             |                    |              |          |
|-------------|-------------|--------------------|--------------|----------|
| TUCP_003489 | XLOC_151345 | ENSRNOT00000056050 | 0.984035642  | 7.95E-09 |
| TUCP_003489 | XLOC_151345 | ENSRNOT00000092066 | -0.958382492 | 9.17E-07 |
| TUCP_003489 | XLOC_151345 | ENSRNOT00000016485 | 0.97707592   | 4.80E-08 |
| TUCP_003489 | XLOC_151345 | ENSRNOT00000008451 | 0.951053774  | 2.04E-06 |
| TUCP_003489 | XLOC_151345 | ENSRNOT00000040904 | 0.963610147  | 4.73E-07 |
| TUCP_003489 | XLOC_151345 | ENSRNOT00000018640 | 0.952036744  | 1.84E-06 |
| TUCP_003489 | XLOC_151345 | ENSRNOT00000035808 | 0.96232675   | 5.61E-07 |
| TUCP_003489 | XLOC_151345 | ENSRNOT00000059984 | 0.960189075  | 7.37E-07 |
| TUCP_003489 | XLOC_151345 | ENSRNOT00000085334 | 0.95077099   | 2.10E-06 |
| TUCP_003489 | XLOC_151345 | ENSRNOT00000043827 | 0.956506204  | 1.14E-06 |
| TUCP_003489 | XLOC_151345 | ENSRNOT00000079742 | 0.960977084  | 6.67E-07 |
| TUCP_003489 | XLOC_151345 | ENSRNOT00000005770 | 0.970878677  | 1.57E-07 |
| TUCP_003489 | XLOC_151345 | ENSRNOT00000009009 | 0.960640537  | 6.96E-07 |
| TUCP_003489 | XLOC_151345 | ENSRNOT00000056234 | 0.952668065  | 1.73E-06 |
| TUCP_003489 | XLOC_151345 | ENSRNOT00000012247 | 0.965022345  | 3.89E-07 |
| TUCP_003489 | XLOC_151345 | ENSRNOT00000050321 | 0.950734982  | 2.10E-06 |
| TUCP_003489 | XLOC_151345 | ENSRNOT00000057953 | 0.951231514  | 2.00E-06 |
| TUCP_003489 | XLOC_151345 | ENSRNOT00000022578 | 0.950150273  | 2.23E-06 |
| TUCP_003489 | XLOC_151345 | ENSRNOT00000078800 | 0.952898788  | 1.69E-06 |
| TUCP_001311 | XLOC_049946 | ENSRNOT00000024640 | 0.951578074  | 1.93E-06 |
| TUCP_001311 | XLOC_049946 | ENSRNOT00000078278 | 0.954843499  | 1.37E-06 |
| TUCP_004825 | XLOC_214370 | ENSRNOT00000084133 | 1            | 0        |
| TUCP_004825 | XLOC_214370 | ENSRNOT00000093745 | 0.981891039  | 1.49E-08 |
| TUCP_004825 | XLOC_214370 | ENSRNOT00000065542 | 0.99828699   | 1.16E-13 |
| TUCP_004825 | XLOC_214370 | ENSRNOT00000082464 | 1            | 0        |
| TUCP_004825 | XLOC_214370 | ENSRNOT00000087659 | 1            | 0        |
| TUCP_004825 | XLOC_214370 | ENSRNOT00000084582 | 0.976633579  | 5.28E-08 |
| TUCP_004825 | XLOC_214370 | ENSRNOT00000085078 | 1            | 0        |
| TUCP_004825 | XLOC_214370 | ENSRNOT00000014028 | 1            | 0        |
| TUCP_004825 | XLOC_214370 | ENSRNOT00000049363 | 1            | 0        |
| TUCP_004825 | XLOC_214370 | ENSRNOT00000065473 | 0.999949098  | 2.69E-21 |
| TUCP_004825 | XLOC_214370 | ENSRNOT00000000142 | 0.998996155  | 8.01E-15 |
| TUCP_004825 | XLOC_214370 | ENSRNOT00000082288 | 0.999998398  | 8.30E-29 |
| TUCP_004825 | XLOC_214370 | ENSRNOT00000039664 | 1            | 0        |
| TUCP_004825 | XLOC_214370 | ENSRNOT00000065402 | 1            | 0        |
| TUCP_004825 | XLOC_214370 | ENSRNOT00000064551 | 0.965365872  | 3.70E-07 |
| TUCP_004825 | XLOC_214370 | ENSRNOT00000084141 | 1            | 0        |
| TUCP_004825 | XLOC_214370 | ENSRNOT00000082435 | 1            | 0        |
| TUCP_004825 | XLOC_214370 | ENSRNOT00000082928 | 0.996801059  | 2.62E-12 |
| TUCP_004825 | XLOC_214370 | ENSRNOT00000066546 | 0.956953619  | 1.08E-06 |
| TUCP_004825 | XLOC_214370 | ENSRNOT00000046013 | 0.988138626  | 1.81E-09 |
| TUCP_004825 | XLOC_214370 | ENSRNOT00000067931 | 0.978893628  | 3.18E-08 |
| TUCP_004825 | XLOC_214370 | ENSRNOT00000086425 | 0.992023315  | 2.51E-10 |
| TUCP_004825 | XLOC_214370 | ENSRNOT00000093696 | 0.956927219  | 1.09E-06 |
| TUCP_004825 | XLOC_214370 | ENSRNOT00000036228 | 0.982337157  | 1.31E-08 |
| TUCP_004825 | XLOC_214370 | ENSRNOT00000014030 | 1            | 0        |
| TUCP_004825 | XLOC_214370 | ENSRNOT00000081966 | 1            | 0        |
| TUCP_004825 | XLOC_214370 | ENSRNOT00000075906 | 1            | 0        |
| TUCP_004825 | XLOC_214370 | ENSRNOT00000088396 | 0.981336994  | 1.73E-08 |
| TUCP_004825 | XLOC_214370 | ENSRNOT00000049259 | 0.965500259  | 3.63E-07 |
| TUCP_004825 | XLOC_214370 | ENSRNOT00000092838 | 0.982579749  | 1.23E-08 |

|             |             |                    |             |          |
|-------------|-------------|--------------------|-------------|----------|
| TUCP_004825 | XLOC_214370 | ENSRNOT00000093442 | 0.959217317 | 8.30E-07 |
| TUCP_001519 | XLOC_058767 | ENSRNOT00000008962 | 0.968077721 | 2.47E-07 |
| TUCP_001519 | XLOC_058767 | ENSRNOT00000071697 | 0.959157745 | 8.36E-07 |
| TUCP_001519 | XLOC_058767 | ENSRNOT00000009712 | 0.950145671 | 2.23E-06 |
| TUCP_001519 | XLOC_058767 | ENSRNOT00000025878 | 0.953531024 | 1.58E-06 |
| TUCP_001519 | XLOC_058767 | ENSRNOT00000014664 | 0.965973867 | 3.39E-07 |
| TUCP_001519 | XLOC_058767 | ENSRNOT00000066739 | 0.952104733 | 1.83E-06 |
| TUCP_001519 | XLOC_058767 | ENSRNOT00000072534 | 0.956128531 | 1.19E-06 |
| TUCP_001635 | XLOC_064916 | ENSRNOT00000084500 | 0.984887141 | 6.05E-09 |
| TUCP_001635 | XLOC_064916 | ENSRNOT00000093467 | 0.996134431 | 6.75E-12 |
| TUCP_001635 | XLOC_064916 | ENSRNOT00000029340 | 0.999116572 | 4.23E-15 |
| TUCP_001635 | XLOC_064916 | ENSRNOT00000077972 | 0.962758032 | 5.30E-07 |
| TUCP_001635 | XLOC_064916 | ENSRNOT00000038646 | 1           | 1.33E-79 |
| TUCP_001635 | XLOC_064916 | ENSRNOT00000012095 | 0.957750287 | 9.88E-07 |
| TUCP_001635 | XLOC_064916 | ENSRNOT00000017909 | 0.975587192 | 6.56E-08 |
| TUCP_001635 | XLOC_064916 | ENSRNOT00000092579 | 1           | 0        |
| TUCP_001635 | XLOC_064916 | ENSRNOT00000089235 | 0.998661162 | 3.38E-14 |
| TUCP_001635 | XLOC_064916 | ENSRNOT00000036383 | 0.988460809 | 1.58E-09 |
| TUCP_001635 | XLOC_064916 | ENSRNOT00000076528 | 0.997115373 | 1.57E-12 |
| TUCP_001635 | XLOC_064916 | ENSRNOT00000075193 | 0.964326971 | 4.29E-07 |
| TUCP_001635 | XLOC_064916 | ENSRNOT00000083034 | 0.990934646 | 4.75E-10 |
| TUCP_001635 | XLOC_064916 | ENSRNOT00000089607 | 0.995091455 | 2.23E-11 |
| TUCP_001635 | XLOC_064916 | ENSRNOT00000086014 | 0.960893638 | 6.74E-07 |
| TUCP_001635 | XLOC_064916 | ENSRNOT00000054939 | 0.958021495 | 9.57E-07 |
| TUCP_001635 | XLOC_064916 | ENSRNOT00000052315 | 0.983687082 | 8.85E-09 |
| TUCP_001635 | XLOC_064916 | ENSRNOT00000088168 | 1           | 1.33E-79 |
| TUCP_001635 | XLOC_064916 | ENSRNOT00000046231 | 0.96225463  | 5.66E-07 |
| TUCP_001635 | XLOC_064916 | ENSRNOT00000013459 | 0.979098017 | 3.03E-08 |
| TUCP_001635 | XLOC_064916 | ENSRNOT00000078137 | 1           | 4.25E-78 |
| TUCP_001635 | XLOC_064916 | ENSRNOT00000077764 | 0.977143528 | 4.73E-08 |
| TUCP_001635 | XLOC_064916 | ENSRNOT00000043661 | 0.966975951 | 2.93E-07 |
| TUCP_001635 | XLOC_064916 | ENSRNOT00000092740 | 1           | 0        |
| TUCP_001635 | XLOC_064916 | ENSRNOT00000000117 | 0.990989174 | 4.61E-10 |
| TUCP_001635 | XLOC_064916 | ENSRNOT00000071877 | 0.967113583 | 2.87E-07 |
| TUCP_001635 | XLOC_064916 | ENSRNOT00000070958 | 1           | 1.33E-79 |
| TUCP_001635 | XLOC_064916 | ENSRNOT00000076757 | 0.959205354 | 8.31E-07 |
| TUCP_001635 | XLOC_064916 | ENSRNOT00000085310 | 0.965230243 | 3.78E-07 |
| TUCP_001635 | XLOC_064916 | ENSRNOT00000047241 | 0.966576993 | 3.11E-07 |
| TUCP_001635 | XLOC_064916 | ENSRNOT00000027268 | 1           | 0        |
| TUCP_001635 | XLOC_064916 | ENSRNOT00000004459 | 1           | 0        |
| TUCP_001635 | XLOC_064916 | ENSRNOT00000048373 | 0.959096578 | 8.42E-07 |
| TUCP_001635 | XLOC_064916 | ENSRNOT00000061516 | 0.987595648 | 2.27E-09 |
| TUCP_001635 | XLOC_064916 | ENSRNOT00000088148 | 1           | 0        |
| TUCP_001635 | XLOC_064916 | ENSRNOT00000088527 | 1           | 0        |
| TUCP_001635 | XLOC_064916 | ENSRNOT00000078701 | 1           | 0        |
| TUCP_001635 | XLOC_064916 | ENSRNOT00000052308 | 0.962646127 | 5.38E-07 |
| TUCP_001635 | XLOC_064916 | ENSRNOT00000021748 | 1           | 0        |
| TUCP_001635 | XLOC_064916 | ENSRNOT00000089085 | 1           | 0        |
| TUCP_001635 | XLOC_064916 | ENSRNOT00000008153 | 0.999703506 | 1.80E-17 |
| TUCP_001635 | XLOC_064916 | ENSRNOT00000085896 | 0.971605382 | 1.39E-07 |
| TUCP_001635 | XLOC_064916 | ENSRNOT00000079189 | 0.984972387 | 5.89E-09 |

|             |             |                    |              |          |
|-------------|-------------|--------------------|--------------|----------|
| TUCP_001635 | XLOC_064916 | ENSRNOT00000090078 | 1            | 0        |
| TUCP_001635 | XLOC_064916 | ENSRNOT00000078020 | 0.958421666  | 9.13E-07 |
| TUCP_001635 | XLOC_064916 | ENSRNOT00000092425 | 0.956092273  | 1.19E-06 |
| TUCP_001635 | XLOC_064916 | ENSRNOT0000009776  | 1            | 4.25E-78 |
| TUCP_001319 | XLOC_050434 | ENSRNOT0000000117  | 0.952038547  | 1.84E-06 |
| TUCP_001319 | XLOC_050434 | ENSRNOT00000054939 | 0.962784111  | 5.28E-07 |
| TUCP_001318 | XLOC_050434 | ENSRNOT00000033695 | -0.954790658 | 1.38E-06 |
| TUCP_001318 | XLOC_050434 | ENSRNOT00000087619 | 0.975593138  | 6.55E-08 |
| TUCP_001318 | XLOC_050434 | ENSRNOT00000057872 | 0.999418602  | 5.23E-16 |
| TUCP_000826 | XLOC_031848 | ENSRNOT00000082612 | 0.979126029  | 3.01E-08 |
| TUCP_000826 | XLOC_031848 | ENSRNOT00000024793 | 0.955970592  | 1.21E-06 |
| TUCP_000826 | XLOC_031848 | ENSRNOT00000086096 | 0.96414891   | 4.39E-07 |
| TUCP_000824 | XLOC_031804 | ENSRNOT00000074990 | 0.975544153  | 6.61E-08 |
| TUCP_000824 | XLOC_031804 | ENSRNOT00000068444 | 0.975544153  | 6.61E-08 |
| TUCP_000824 | XLOC_031804 | ENSRNOT00000081370 | 0.977587825  | 4.29E-08 |
| TUCP_000824 | XLOC_031804 | ENSRNOT00000073716 | -0.958195884 | 9.37E-07 |
| TUCP_000824 | XLOC_031804 | ENSRNOT00000075987 | 0.966553888  | 3.12E-07 |
| TUCP_000824 | XLOC_031804 | ENSRNOT00000082043 | 0.976480477  | 5.45E-08 |
| TUCP_000824 | XLOC_031804 | ENSRNOT00000087323 | 0.981791636  | 1.53E-08 |
| TUCP_000824 | XLOC_031804 | ENSRNOT00000074930 | 0.975544153  | 6.61E-08 |
| TUCP_000824 | XLOC_031804 | ENSRNOT00000080575 | 0.975046708  | 7.31E-08 |
| TUCP_000824 | XLOC_031804 | ENSRNOT00000057761 | 0.954903902  | 1.36E-06 |
| TUCP_000824 | XLOC_031804 | ENSRNOT00000078369 | 0.973977384  | 9.00E-08 |
| TUCP_000824 | XLOC_031804 | ENSRNOT00000092982 | 0.975544153  | 6.61E-08 |
| TUCP_000824 | XLOC_031804 | ENSRNOT00000088367 | 0.975544153  | 6.61E-08 |
| TUCP_000824 | XLOC_031804 | ENSRNOT00000078153 | 0.975528603  | 6.63E-08 |
| TUCP_000824 | XLOC_031804 | ENSRNOT00000081996 | 0.975544153  | 6.61E-08 |
| TUCP_000824 | XLOC_031804 | ENSRNOT00000022280 | 0.952523245  | 1.75E-06 |
| TUCP_000824 | XLOC_031804 | ENSRNOT00000082058 | 0.975544153  | 6.61E-08 |
| TUCP_000824 | XLOC_031804 | ENSRNOT00000088905 | 0.975544153  | 6.61E-08 |
| TUCP_000824 | XLOC_031804 | ENSRNOT00000086831 | 0.975544153  | 6.61E-08 |
| TUCP_000824 | XLOC_031804 | ENSRNOT00000045099 | 0.975544153  | 6.61E-08 |
| TUCP_000824 | XLOC_031804 | ENSRNOT00000086745 | 0.969277743  | 2.05E-07 |
| TUCP_000824 | XLOC_031804 | ENSRNOT00000085849 | 0.968964608  | 2.15E-07 |
| TUCP_000824 | XLOC_031804 | ENSRNOT00000077789 | 0.972620786  | 1.16E-07 |
| TUCP_000824 | XLOC_031804 | ENSRNOT00000090207 | 0.990493143  | 6.02E-10 |
| TUCP_000824 | XLOC_031804 | ENSRNOT00000087025 | 0.975544153  | 6.61E-08 |
| TUCP_000824 | XLOC_031804 | ENSRNOT00000019853 | 0.975544153  | 6.61E-08 |
| TUCP_000824 | XLOC_031804 | ENSRNOT00000073853 | 0.96236687   | 5.58E-07 |
| TUCP_000824 | XLOC_031804 | ENSRNOT00000065912 | 0.963078957  | 5.08E-07 |
| TUCP_000824 | XLOC_031804 | ENSRNOT00000093083 | 0.972291399  | 1.23E-07 |
| TUCP_000825 | XLOC_031805 | ENSRNOT00000050393 | 0.95520752   | 1.32E-06 |
| TUCP_000825 | XLOC_031805 | ENSRNOT00000037303 | 0.955468875  | 1.28E-06 |
| TUCP_000822 | XLOC_031787 | ENSRNOT00000071840 | 0.962278694  | 5.65E-07 |
| TUCP_000822 | XLOC_031787 | ENSRNOT00000071714 | 0.95157627   | 1.93E-06 |
| TUCP_000822 | XLOC_031787 | ENSRNOT00000086969 | 0.969123433  | 2.10E-07 |
| TUCP_000822 | XLOC_031787 | ENSRNOT00000045584 | 0.962278694  | 5.65E-07 |
| TUCP_000822 | XLOC_031787 | ENSRNOT00000077995 | 0.954826862  | 1.37E-06 |
| TUCP_000822 | XLOC_031787 | ENSRNOT00000066004 | 0.961058147  | 6.61E-07 |
| TUCP_000822 | XLOC_031787 | ENSRNOT00000075836 | 0.962278694  | 5.65E-07 |
| TUCP_000822 | XLOC_031787 | ENSRNOT00000073229 | 0.962278694  | 5.65E-07 |

|             |             |                    |             |          |
|-------------|-------------|--------------------|-------------|----------|
| TUCP_000822 | XLOC_031787 | ENSRNOT00000089494 | 0.956251099 | 1.17E-06 |
| TUCP_000822 | XLOC_031787 | ENSRNOT00000092182 | 0.962278694 | 5.65E-07 |
| TUCP_000822 | XLOC_031787 | ENSRNOT00000084461 | 0.962278694 | 5.65E-07 |
| TUCP_000822 | XLOC_031787 | ENSRNOT00000060448 | 0.962278694 | 5.65E-07 |
| TUCP_000822 | XLOC_031787 | ENSRNOT00000032631 | 0.962278694 | 5.65E-07 |
| TUCP_000822 | XLOC_031787 | ENSRNOT00000054910 | 0.954562776 | 1.41E-06 |
| TUCP_000822 | XLOC_031787 | ENSRNOT00000057176 | 0.962203765 | 5.70E-07 |
| TUCP_000822 | XLOC_031787 | ENSRNOT00000078176 | 0.950898554 | 2.07E-06 |
| TUCP_000822 | XLOC_031787 | ENSRNOT00000056364 | 0.966931326 | 2.95E-07 |
| TUCP_000822 | XLOC_031787 | ENSRNOT00000093431 | 0.962278694 | 5.65E-07 |
| TUCP_000822 | XLOC_031787 | ENSRNOT00000032121 | 0.960527855 | 7.06E-07 |
| TUCP_000822 | XLOC_031787 | ENSRNOT00000089290 | 0.962284909 | 5.64E-07 |
| TUCP_000822 | XLOC_031787 | ENSRNOT00000071603 | 0.962781004 | 5.28E-07 |
| TUCP_000822 | XLOC_031787 | ENSRNOT00000075244 | 0.957340914 | 1.04E-06 |
| TUCP_000822 | XLOC_031787 | ENSRNOT00000091828 | 0.956770987 | 1.11E-06 |
| TUCP_000822 | XLOC_031787 | ENSRNOT00000091944 | 0.96180081  | 6.01E-07 |
| TUCP_000822 | XLOC_031787 | ENSRNOT00000070855 | 0.962278694 | 5.65E-07 |
| TUCP_000822 | XLOC_031787 | ENSRNOT00000084109 | 0.961072772 | 6.59E-07 |
| TUCP_000822 | XLOC_031787 | ENSRNOT0000007683  | 0.961168279 | 6.51E-07 |
| TUCP_000822 | XLOC_031787 | ENSRNOT00000041569 | 0.962278694 | 5.65E-07 |
| TUCP_000822 | XLOC_031787 | ENSRNOT00000087091 | 0.962278694 | 5.65E-07 |
| TUCP_000822 | XLOC_031787 | ENSRNOT00000018890 | 0.970336332 | 1.72E-07 |
| TUCP_000822 | XLOC_031787 | ENSRNOT00000026113 | 0.961254594 | 6.44E-07 |
| TUCP_000822 | XLOC_031787 | ENSRNOT00000014939 | 0.961635389 | 6.14E-07 |
| TUCP_000822 | XLOC_031787 | ENSRNOT00000047870 | 0.967190417 | 2.83E-07 |
| TUCP_000822 | XLOC_031787 | ENSRNOT00000090211 | 0.968366398 | 2.37E-07 |
| TUCP_000822 | XLOC_031787 | ENSRNOT00000088376 | 0.964500214 | 4.18E-07 |
| TUCP_000822 | XLOC_031787 | ENSRNOT00000039313 | 0.970645133 | 1.63E-07 |
| TUCP_000822 | XLOC_031787 | ENSRNOT00000044232 | 0.96078501  | 6.84E-07 |
| TUCP_000822 | XLOC_031787 | ENSRNOT00000023287 | 0.979217874 | 2.95E-08 |
| TUCP_000822 | XLOC_031787 | ENSRNOT00000068197 | 0.972238002 | 1.24E-07 |
| TUCP_000822 | XLOC_031787 | ENSRNOT00000003308 | 0.971038612 | 1.53E-07 |
| TUCP_000822 | XLOC_031787 | ENSRNOT00000092901 | 0.962278694 | 5.65E-07 |
| TUCP_000822 | XLOC_031787 | ENSRNOT00000060454 | 0.962278694 | 5.65E-07 |
| TUCP_000822 | XLOC_031787 | ENSRNOT00000039652 | 0.976563851 | 5.35E-08 |
| TUCP_000822 | XLOC_031787 | ENSRNOT00000009295 | 0.962606405 | 5.41E-07 |
| TUCP_001640 | XLOC_064928 | ENSRNOT00000079256 | 0.964614429 | 4.12E-07 |
| TUCP_001640 | XLOC_064928 | ENSRNOT00000047947 | 0.953470015 | 1.59E-06 |
| TUCP_000821 | XLOC_031787 | ENSRNOT00000001996 | 0.957282495 | 1.04E-06 |
| TUCP_000821 | XLOC_031787 | ENSRNOT00000081527 | 0.951238451 | 2.00E-06 |
| TUCP_000821 | XLOC_031787 | ENSRNOT00000093689 | 0.974063908 | 8.85E-08 |
| TUCP_001426 | XLOC_055593 | ENSRNOT00000048457 | 0.950101286 | 2.24E-06 |
| TUCP_001426 | XLOC_055593 | ENSRNOT00000082497 | 0.955028319 | 1.34E-06 |
| TUCP_004203 | XLOC_184547 | ENSRNOT00000085344 | 0.978400121 | 3.57E-08 |
| TUCP_004203 | XLOC_184547 | ENSRNOT00000010994 | 0.972157726 | 1.26E-07 |
| TUCP_004203 | XLOC_184547 | ENSRNOT00000033123 | 0.966814885 | 3.00E-07 |
| TUCP_004203 | XLOC_184547 | ENSRNOT00000012454 | 0.956430964 | 1.15E-06 |
| TUCP_004203 | XLOC_184547 | ENSRNOT00000083765 | 0.951447164 | 1.96E-06 |
| TUCP_004203 | XLOC_184547 | ENSRNOT00000088172 | 0.975184008 | 7.11E-08 |
| TUCP_004203 | XLOC_184547 | ENSRNOT00000084303 | 0.957412099 | 1.03E-06 |
| TUCP_004203 | XLOC_184547 | ENSRNOT00000016797 | 0.963206946 | 4.99E-07 |

|             |             |                    |              |          |
|-------------|-------------|--------------------|--------------|----------|
| TUCP_004203 | XLOC_184547 | ENSRNOT00000025903 | 0.961381586  | 6.34E-07 |
| TUCP_004203 | XLOC_184547 | ENSRNOT00000014270 | 0.967022766  | 2.91E-07 |
| TUCP_004203 | XLOC_184547 | ENSRNOT00000017314 | 0.956327995  | 1.16E-06 |
| TUCP_004203 | XLOC_184547 | ENSRNOT00000029526 | 0.961538315  | 6.21E-07 |
| TUCP_004203 | XLOC_184547 | ENSRNOT00000075065 | 0.97353144   | 9.79E-08 |
| TUCP_004203 | XLOC_184547 | ENSRNOT00000004525 | 0.955150778  | 1.33E-06 |
| TUCP_004203 | XLOC_184547 | ENSRNOT00000038176 | 0.971779312  | 1.34E-07 |
| TUCP_004203 | XLOC_184547 | ENSRNOT00000052289 | 0.960927006  | 6.72E-07 |
| TUCP_004203 | XLOC_184547 | ENSRNOT00000016152 | 0.959716633  | 7.81E-07 |
| TUCP_004203 | XLOC_184547 | ENSRNOT00000017532 | 0.960382351  | 7.19E-07 |
| TUCP_004203 | XLOC_184547 | ENSRNOT00000021156 | 0.950158818  | 2.23E-06 |
| TUCP_004203 | XLOC_184547 | ENSRNOT00000064306 | 0.976549594  | 5.37E-08 |
| TUCP_004203 | XLOC_184547 | ENSRNOT00000074109 | 0.95617397   | 1.18E-06 |
| TUCP_004203 | XLOC_184547 | ENSRNOT00000036702 | 0.963279793  | 4.94E-07 |
| TUCP_004203 | XLOC_184547 | ENSRNOT00000013931 | 0.954049781  | 1.49E-06 |
| TUCP_004203 | XLOC_184547 | ENSRNOT00000029266 | 0.954443112  | 1.43E-06 |
| TUCP_004203 | XLOC_184547 | ENSRNOT00000018055 | 0.961663863  | 6.11E-07 |
| TUCP_004203 | XLOC_184547 | ENSRNOT00000088481 | 0.97429589   | 8.46E-08 |
| TUCP_004203 | XLOC_184547 | ENSRNOT00000073188 | 0.96383964   | 4.58E-07 |
| TUCP_004203 | XLOC_184547 | ENSRNOT00000072195 | 0.957040867  | 1.07E-06 |
| TUCP_004203 | XLOC_184547 | ENSRNOT00000034565 | 0.951352279  | 1.98E-06 |
| TUCP_004203 | XLOC_184547 | ENSRNOT00000077985 | 0.966529052  | 3.13E-07 |
| TUCP_004203 | XLOC_184547 | ENSRNOT00000079726 | 0.966239202  | 3.26E-07 |
| TUCP_004203 | XLOC_184547 | ENSRNOT00000072119 | 0.973938086  | 9.06E-08 |
| TUCP_004203 | XLOC_184547 | ENSRNOT00000051065 | 0.950637358  | 2.12E-06 |
| TUCP_004203 | XLOC_184547 | ENSRNOT00000031163 | 0.956823558  | 1.10E-06 |
| TUCP_004203 | XLOC_184547 | ENSRNOT00000015553 | 0.959086895  | 8.43E-07 |
| TUCP_004203 | XLOC_184547 | ENSRNOT0000003980  | 0.95170432   | 1.91E-06 |
| TUCP_004203 | XLOC_184547 | ENSRNOT00000089448 | 0.951204213  | 2.01E-06 |
| TUCP_004203 | XLOC_184547 | ENSRNOT00000072387 | 0.965118793  | 3.84E-07 |
| TUCP_004203 | XLOC_184547 | ENSRNOT00000031336 | 0.968852043  | 2.19E-07 |
| TUCP_004203 | XLOC_184547 | ENSRNOT00000012038 | 0.954439836  | 1.43E-06 |
| TUCP_004203 | XLOC_184547 | ENSRNOT00000010975 | 0.967813783  | 2.58E-07 |
| TUCP_004203 | XLOC_184547 | ENSRNOT00000036151 | 0.958749504  | 8.78E-07 |
| TUCP_004203 | XLOC_184547 | ENSRNOT00000020803 | 0.963611258  | 4.73E-07 |
| TUCP_004203 | XLOC_184547 | ENSRNOT00000033784 | 0.964623018  | 4.11E-07 |
| TUCP_004203 | XLOC_184547 | ENSRNOT00000038589 | 0.972666725  | 1.15E-07 |
| TUCP_004203 | XLOC_184547 | ENSRNOT00000051783 | 0.965888287  | 3.43E-07 |
| TUCP_000829 | XLOC_032172 | ENSRNOT00000033695 | -0.961545724 | 6.21E-07 |
| TUCP_000829 | XLOC_032172 | ENSRNOT00000087619 | 0.980147825  | 2.35E-08 |
| TUCP_000829 | XLOC_032172 | ENSRNOT00000093462 | 0.956376093  | 1.16E-06 |
| TUCP_000829 | XLOC_032172 | ENSRNOT00000057872 | 0.999998904  | 1.24E-29 |
| TUCP_002680 | XLOC_113218 | ENSRNOT00000068308 | 0.953943831  | 1.51E-06 |
| TUCP_002680 | XLOC_113218 | ENSRNOT00000085310 | 0.965774333  | 3.49E-07 |
| TUCP_002681 | XLOC_113418 | ENSRNOT00000003703 | 0.977734058  | 4.15E-08 |
| TUCP_002681 | XLOC_113418 | ENSRNOT00000090449 | 0.950572796  | 2.14E-06 |
| TUCP_002681 | XLOC_113418 | ENSRNOT00000091574 | 0.978311329  | 3.64E-08 |
| TUCP_002681 | XLOC_113418 | ENSRNOT00000093001 | 0.964982402  | 3.91E-07 |
| TUCP_002682 | XLOC_113729 | ENSRNOT00000003630 | -0.950254783 | 2.21E-06 |
| TUCP_002682 | XLOC_113729 | ENSRNOT00000083254 | -0.953348607 | 1.61E-06 |
| TUCP_002682 | XLOC_113729 | ENSRNOT00000019302 | -0.953114994 | 1.65E-06 |

|             |             |                    |              |          |
|-------------|-------------|--------------------|--------------|----------|
| TUCP_002682 | XLOC_113729 | ENSRNOT00000080190 | -0.950707574 | 2.11E-06 |
| TUCP_002682 | XLOC_113729 | ENSRNOT00000009327 | -0.966393345 | 3.19E-07 |
| TUCP_002682 | XLOC_113729 | ENSRNOT00000020297 | 0.954203337  | 1.47E-06 |
| TUCP_002682 | XLOC_113729 | ENSRNOT00000057422 | -0.968941423 | 2.16E-07 |
| TUCP_002682 | XLOC_113729 | ENSRNOT00000088555 | -0.950052145 | 2.25E-06 |
| TUCP_002682 | XLOC_113729 | ENSRNOT00000004391 | 0.955347403  | 1.30E-06 |
| TUCP_002682 | XLOC_113729 | ENSRNOT00000018233 | -0.954346143 | 1.45E-06 |
| TUCP_002682 | XLOC_113729 | ENSRNOT00000031701 | -0.961409107 | 6.32E-07 |
| TUCP_002682 | XLOC_113729 | ENSRNOT00000090499 | -0.960927027 | 6.72E-07 |
| TUCP_002682 | XLOC_113729 | ENSRNOT00000004305 | -0.975181664 | 7.11E-08 |
| TUCP_002682 | XLOC_113729 | ENSRNOT00000067374 | -0.966771988 | 3.02E-07 |
| TUCP_002682 | XLOC_113729 | ENSRNOT00000024710 | -0.953501794 | 1.58E-06 |
| TUCP_002682 | XLOC_113729 | ENSRNOT00000064013 | -0.952260516 | 1.80E-06 |
| TUCP_002683 | XLOC_113889 | ENSRNOT00000016356 | 0.953695063  | 1.55E-06 |
| TUCP_002683 | XLOC_113889 | ENSRNOT00000075517 | 0.956953273  | 1.08E-06 |
| TUCP_002683 | XLOC_113889 | ENSRNOT00000016993 | 0.979216732  | 2.95E-08 |
| TUCP_003434 | XLOC_148237 | ENSRNOT00000039540 | 0.969718483  | 1.91E-07 |
| TUCP_003434 | XLOC_148237 | ENSRNOT00000080660 | 0.954594521  | 1.41E-06 |
| TUCP_003434 | XLOC_148237 | ENSRNOT00000080577 | 0.961846683  | 5.97E-07 |
| TUCP_003434 | XLOC_148237 | ENSRNOT00000025081 | 0.953835511  | 1.53E-06 |
| TUCP_003434 | XLOC_148237 | ENSRNOT00000016060 | 0.964038133  | 4.46E-07 |
| TUCP_003434 | XLOC_148237 | ENSRNOT00000010852 | 0.963211262  | 4.99E-07 |
| TUCP_003434 | XLOC_148237 | ENSRNOT00000028624 | 0.950447477  | 2.16E-06 |
| TUCP_003434 | XLOC_148237 | ENSRNOT00000061054 | 0.955445443  | 1.28E-06 |
| TUCP_003434 | XLOC_148237 | ENSRNOT00000090700 | 0.967329457  | 2.77E-07 |
| TUCP_003434 | XLOC_148237 | ENSRNOT00000054685 | 0.954742908  | 1.39E-06 |
| TUCP_003434 | XLOC_148237 | ENSRNOT00000064625 | 0.964741883  | 4.04E-07 |
| TUCP_003434 | XLOC_148237 | ENSRNOT00000008244 | 0.968627087  | 2.27E-07 |
| TUCP_003434 | XLOC_148237 | ENSRNOT00000042638 | 0.95300817   | 1.67E-06 |
| TUCP_003434 | XLOC_148237 | ENSRNOT00000002621 | 0.968060466  | 2.48E-07 |
| TUCP_003435 | XLOC_148246 | ENSRNOT00000034907 | 0.953980662  | 1.50E-06 |
| TUCP_003435 | XLOC_148246 | ENSRNOT00000004876 | 0.952285847  | 1.80E-06 |
| TUCP_003435 | XLOC_148246 | ENSRNOT00000083487 | 0.961423695  | 6.31E-07 |
| TUCP_003435 | XLOC_148246 | ENSRNOT00000079260 | 0.958604414  | 8.93E-07 |
| TUCP_003435 | XLOC_148246 | ENSRNOT00000046842 | 0.964466779  | 4.20E-07 |
| TUCP_003435 | XLOC_148246 | ENSRNOT00000011743 | 0.964550569  | 4.15E-07 |
| TUCP_003435 | XLOC_148246 | ENSRNOT00000081235 | 0.950874249  | 2.07E-06 |
| TUCP_003435 | XLOC_148246 | ENSRNOT00000006921 | 0.961933582  | 5.90E-07 |
| TUCP_003435 | XLOC_148246 | ENSRNOT0000002797  | 0.965370693  | 3.70E-07 |
| TUCP_003435 | XLOC_148246 | ENSRNOT00000064250 | 0.952969852  | 1.67E-06 |
| TUCP_003436 | XLOC_148422 | ENSRNOT00000085195 | 0.999404969  | 5.87E-16 |
| TUCP_003436 | XLOC_148422 | ENSRNOT00000013705 | 1            | 0        |
| TUCP_003436 | XLOC_148422 | ENSRNOT00000040851 | 1            | 1.33E-79 |
| TUCP_003436 | XLOC_148422 | ENSRNOT00000075676 | 0.958697783  | 8.83E-07 |
| TUCP_003436 | XLOC_148422 | ENSRNOT00000058389 | 1            | 0        |
| TUCP_003436 | XLOC_148422 | ENSRNOT00000086827 | 0.95592964   | 1.22E-06 |
| TUCP_003436 | XLOC_148422 | ENSRNOT00000023542 | 1            | 0        |
| TUCP_003436 | XLOC_148422 | ENSRNOT00000028653 | 1            | 0        |
| TUCP_003436 | XLOC_148422 | ENSRNOT00000017230 | 0.955378945  | 1.29E-06 |
| TUCP_003436 | XLOC_148422 | ENSRNOT00000092890 | 0.955137645  | 1.33E-06 |
| TUCP_003436 | XLOC_148422 | ENSRNOT00000012174 | 1            | 0        |



|             |             |                     |              |          |
|-------------|-------------|---------------------|--------------|----------|
| TUCP_003436 | XLOC_148422 | ENSRNOT00000051680  | 0.994991197  | 2.46E-11 |
| TUCP_003436 | XLOC_148422 | ENSRNOT00000089118  | 1            | 0        |
| TUCP_003436 | XLOC_148422 | ENSRNOT00000025245  | 0.999967061  | 3.05E-22 |
| TUCP_003436 | XLOC_148422 | ENSRNOT00000015138  | 0.999902179  | 7.05E-20 |
| TUCP_003436 | XLOC_148422 | ENSRNOT00000080185  | 0.99902259   | 7.01E-15 |
| TUCP_003436 | XLOC_148422 | ENSRNOT00000090729  | 0.965956282  | 3.40E-07 |
| TUCP_003436 | XLOC_148422 | ENSRNOT00000049165  | 0.973440588  | 9.95E-08 |
| TUCP_003436 | XLOC_148422 | ENSRNOT00000086502  | 0.96495109   | 3.93E-07 |
| TUCP_003436 | XLOC_148422 | ENSRNOT00000079661  | 1            | 1.33E-79 |
| TUCP_003436 | XLOC_148422 | ENSRNOT00000076338  | 0.985532463  | 4.87E-09 |
| TUCP_003436 | XLOC_148422 | ENSRNOT00000042220  | 1            | 0        |
| TUCP_003436 | XLOC_148422 | ENSRNOT00000005031  | 0.952974465  | 1.67E-06 |
| TUCP_003436 | XLOC_148422 | ENSRNOT00000079167  | 0.979848988  | 2.53E-08 |
| TUCP_003436 | XLOC_148422 | ENSRNOT000000061950 | 0.962035217  | 5.83E-07 |
| TUCP_003436 | XLOC_148422 | ENSRNOT00000086710  | 0.999839781  | 8.31E-19 |
| TUCP_003436 | XLOC_148422 | ENSRNOT00000075226  | 1            | 0        |
| TUCP_003436 | XLOC_148422 | ENSRNOT00000000351  | 1            | 0        |
| TUCP_003436 | XLOC_148422 | ENSRNOT00000092294  | 0.986520908  | 3.43E-09 |
| TUCP_002121 | XLOC_087967 | ENSRNOT00000027173  | -0.956547428 | 1.13E-06 |
| TUCP_002121 | XLOC_087967 | ENSRNOT00000028247  | -0.956197801 | 1.18E-06 |
| TUCP_002689 | XLOC_114191 | ENSRNOT00000073951  | 0.950059398  | 2.25E-06 |
| TUCP_002689 | XLOC_114191 | ENSRNOT00000088306  | 0.967763161  | 2.60E-07 |
| TUCP_002689 | XLOC_114191 | ENSRNOT00000021671  | 0.959879518  | 7.65E-07 |
| TUCP_002689 | XLOC_114191 | ENSRNOT00000003515  | 0.951007075  | 2.05E-06 |
| TUCP_002122 | XLOC_088207 | ENSRNOT00000000008  | 1            | 0        |
| TUCP_002122 | XLOC_088207 | ENSRNOT00000060048  | 0.998711457  | 2.79E-14 |
| TUCP_002122 | XLOC_088207 | ENSRNOT00000082304  | 0.996875989  | 2.33E-12 |
| TUCP_002122 | XLOC_088207 | ENSRNOT00000006219  | 1            | 0        |
| TUCP_002122 | XLOC_088207 | ENSRNOT00000065376  | 1            | 0        |
| TUCP_002122 | XLOC_088207 | ENSRNOT00000081433  | 0.984469223  | 6.93E-09 |
| TUCP_002122 | XLOC_088207 | ENSRNOT00000083575  | 1            | 0        |
| TUCP_002122 | XLOC_088207 | ENSRNOT00000087739  | 1            | 0        |
| TUCP_002122 | XLOC_088207 | ENSRNOT00000079826  | 1            | 0        |
| TUCP_002122 | XLOC_088207 | ENSRNOT00000025770  | 0.993828251  | 6.98E-11 |
| TUCP_002122 | XLOC_088207 | ENSRNOT00000088244  | 0.973479481  | 9.88E-08 |
| TUCP_002122 | XLOC_088207 | ENSRNOT00000048523  | 1            | 0        |
| TUCP_002122 | XLOC_088207 | ENSRNOT00000079365  | 0.958936699  | 8.58E-07 |
| TUCP_002122 | XLOC_088207 | ENSRNOT00000020229  | 0.960002785  | 7.54E-07 |
| TUCP_002122 | XLOC_088207 | ENSRNOT00000026428  | 0.996986683  | 1.95E-12 |
| TUCP_002122 | XLOC_088207 | ENSRNOT00000085673  | 1            | 0        |
| TUCP_002122 | XLOC_088207 | ENSRNOT00000072972  | 0.981476166  | 1.67E-08 |
| TUCP_002122 | XLOC_088207 | ENSRNOT00000050573  | 1            | 0        |
| TUCP_002122 | XLOC_088207 | ENSRNOT00000089876  | -0.953630353 | 1.56E-06 |
| TUCP_002122 | XLOC_088207 | ENSRNOT00000074378  | 0.998901807  | 1.26E-14 |
| TUCP_002122 | XLOC_088207 | ENSRNOT00000093571  | 1            | 0        |
| TUCP_002122 | XLOC_088207 | ENSRNOT00000090581  | 1            | 0        |
| TUCP_002122 | XLOC_088207 | ENSRNOT00000076239  | 0.98020752   | 2.31E-08 |
| TUCP_002122 | XLOC_088207 | ENSRNOT00000065485  | 1            | 0        |
| TUCP_002122 | XLOC_088207 | ENSRNOT00000006356  | 0.999544279  | 1.55E-16 |
| TUCP_002122 | XLOC_088207 | ENSRNOT00000087199  | 0.974421555  | 8.26E-08 |
| TUCP_002122 | XLOC_088207 | ENSRNOT00000022091  | 1            | 0        |

|             |             |                    |              |          |
|-------------|-------------|--------------------|--------------|----------|
| TUCP_002122 | XLOC_088207 | ENSRNOT00000064764 | 0.98460888   | 6.63E-09 |
| TUCP_002122 | XLOC_088207 | ENSRNOT00000076927 | 0.971163156  | 1.50E-07 |
| TUCP_002122 | XLOC_088207 | ENSRNOT00000092395 | 0.999522978  | 1.94E-16 |
| TUCP_002124 | XLOC_088499 | ENSRNOT00000008909 | 0.967306939  | 2.78E-07 |
| TUCP_002124 | XLOC_088499 | ENSRNOT00000001794 | 0.958244694  | 9.32E-07 |
| TUCP_002124 | XLOC_088499 | ENSRNOT00000073287 | 0.952878912  | 1.69E-06 |
| TUCP_002127 | XLOC_088669 | ENSRNOT00000093672 | -0.960113521 | 7.44E-07 |
| TUCP_002127 | XLOC_088669 | ENSRNOT00000031083 | 0.951131727  | 2.02E-06 |
| TUCP_002127 | XLOC_088669 | ENSRNOT00000026988 | -0.958474798 | 9.07E-07 |
| TUCP_002127 | XLOC_088669 | ENSRNOT00000085516 | -0.954222986 | 1.47E-06 |
| TUCP_002127 | XLOC_088669 | ENSRNOT00000081351 | 0.950127267  | 2.23E-06 |
| TUCP_002127 | XLOC_088669 | ENSRNOT00000017949 | -0.952797206 | 1.70E-06 |
| TUCP_002127 | XLOC_088669 | ENSRNOT00000055386 | 0.965611373  | 3.57E-07 |
| TUCP_002127 | XLOC_088669 | ENSRNOT00000014924 | -0.959557566 | 7.96E-07 |
| TUCP_002127 | XLOC_088669 | ENSRNOT00000018488 | -0.95311034  | 1.65E-06 |
| TUCP_002127 | XLOC_088669 | ENSRNOT00000086608 | -0.962226759 | 5.68E-07 |
| TUCP_002127 | XLOC_088669 | ENSRNOT00000039296 | 0.957334305  | 1.04E-06 |
| TUCP_002127 | XLOC_088669 | ENSRNOT00000089614 | 0.950764573  | 2.10E-06 |
| TUCP_002127 | XLOC_088669 | ENSRNOT00000002432 | -0.963630442 | 4.71E-07 |
| TUCP_002127 | XLOC_088669 | ENSRNOT00000066098 | -0.957696141 | 9.94E-07 |
| TUCP_002127 | XLOC_088669 | ENSRNOT00000040890 | 0.951571846  | 1.93E-06 |
| TUCP_002127 | XLOC_088669 | ENSRNOT00000008074 | -0.963992824 | 4.49E-07 |
| TUCP_002126 | XLOC_088592 | ENSRNOT00000017571 | -0.959964368 | 7.57E-07 |
| TUCP_002126 | XLOC_088592 | ENSRNOT00000068167 | 0.950337706  | 2.19E-06 |
| TUCP_002126 | XLOC_088592 | ENSRNOT00000018488 | -0.953885403 | 1.52E-06 |
| TUCP_002126 | XLOC_088592 | ENSRNOT00000064588 | 0.956270266  | 1.17E-06 |
| TUCP_002126 | XLOC_088592 | ENSRNOT00000026988 | -0.96584067  | 3.46E-07 |
| TUCP_002042 | XLOC_082840 | ENSRNOT00000085326 | 0.953088778  | 1.65E-06 |
| TUCP_002043 | XLOC_082841 | ENSRNOT00000091994 | 0.962039314  | 5.82E-07 |
| TUCP_002043 | XLOC_082841 | ENSRNOT00000015448 | 0.964664504  | 4.09E-07 |
| TUCP_002043 | XLOC_082841 | ENSRNOT00000006697 | 0.961163083  | 6.52E-07 |
| TUCP_002043 | XLOC_082841 | ENSRNOT00000064983 | 0.95765566   | 9.98E-07 |
| TUCP_002043 | XLOC_082841 | ENSRNOT00000011773 | 0.951441286  | 1.96E-06 |
| TUCP_002043 | XLOC_082841 | ENSRNOT00000066598 | 0.95287406   | 1.69E-06 |
| TUCP_002043 | XLOC_082841 | ENSRNOT00000016626 | -0.95122812  | 2.00E-06 |
| TUCP_002043 | XLOC_082841 | ENSRNOT00000023613 | 0.952371911  | 1.78E-06 |
| TUCP_002043 | XLOC_082841 | ENSRNOT00000003489 | 0.960386457  | 7.19E-07 |
| TUCP_002043 | XLOC_082841 | ENSRNOT00000068028 | 0.958225197  | 9.34E-07 |
| TUCP_002043 | XLOC_082841 | ENSRNOT00000010701 | 0.962981908  | 5.14E-07 |
| TUCP_002043 | XLOC_082841 | ENSRNOT00000034482 | 0.955191932  | 1.32E-06 |
| TUCP_002043 | XLOC_082841 | ENSRNOT00000021715 | 0.970187057  | 1.76E-07 |
| TUCP_002043 | XLOC_082841 | ENSRNOT00000071068 | -0.954796348 | 1.38E-06 |
| TUCP_002043 | XLOC_082841 | ENSRNOT00000064122 | 0.956852096  | 1.10E-06 |
| TUCP_002043 | XLOC_082841 | ENSRNOT00000019660 | 0.954240278  | 1.46E-06 |
| TUCP_002046 | XLOC_083173 | ENSRNOT00000076508 | -0.952588205 | 1.74E-06 |
| TUCP_002046 | XLOC_083173 | ENSRNOT00000040169 | 0.961496809  | 6.25E-07 |
| TUCP_002046 | XLOC_083173 | ENSRNOT00000090923 | 0.981691655  | 1.57E-08 |
| TUCP_002046 | XLOC_083173 | ENSRNOT00000084299 | 0.969187574  | 2.08E-07 |
| TUCP_002046 | XLOC_083173 | ENSRNOT00000024083 | 0.956313219  | 1.16E-06 |
| TUCP_002046 | XLOC_083173 | ENSRNOT00000004888 | 0.955065296  | 1.34E-06 |
| TUCP_002046 | XLOC_083173 | ENSRNOT00000015062 | 0.959433279  | 8.08E-07 |

|             |             |                    |              |          |
|-------------|-------------|--------------------|--------------|----------|
| TUCP_002046 | XLOC_083173 | ENSRNOT00000018844 | 0.951197553  | 2.01E-06 |
| TUCP_002046 | XLOC_083173 | ENSRNOT00000064983 | 0.968642445  | 2.27E-07 |
| TUCP_002046 | XLOC_083173 | ENSRNOT00000060494 | 0.972188546  | 1.25E-07 |
| TUCP_002046 | XLOC_083173 | ENSRNOT00000014627 | 0.963532891  | 4.78E-07 |
| TUCP_002046 | XLOC_083173 | ENSRNOT00000001490 | 0.954182808  | 1.47E-06 |
| TUCP_002047 | XLOC_083174 | ENSRNOT00000090923 | 0.963494677  | 4.80E-07 |
| TUCP_002047 | XLOC_083174 | ENSRNOT00000076508 | -0.958291553 | 9.27E-07 |
| TUCP_002047 | XLOC_083174 | ENSRNOT00000064331 | 0.953093922  | 1.65E-06 |
| TUCP_002047 | XLOC_083174 | ENSRNOT0000004888  | 0.95217196   | 1.82E-06 |
| TUCP_002047 | XLOC_083174 | ENSRNOT00000057924 | 0.95517171   | 1.32E-06 |
| TUCP_002898 | XLOC_124621 | ENSRNOT00000019346 | 0.962237421  | 5.68E-07 |
| TUCP_000590 | XLOC_021534 | ENSRNOT00000029757 | 0.970741915  | 1.61E-07 |
| TUCP_002048 | XLOC_083539 | ENSRNOT00000028730 | -0.951634079 | 1.92E-06 |
| TUCP_002049 | XLOC_083635 | ENSRNOT00000086399 | 0.951674876  | 1.91E-06 |
| TUCP_001490 | XLOC_057675 | ENSRNOT00000014941 | 0.956093832  | 1.19E-06 |
| TUCP_001490 | XLOC_057675 | ENSRNOT0000003671  | 0.964680456  | 4.08E-07 |
| TUCP_001490 | XLOC_057675 | ENSRNOT00000047387 | 0.958784455  | 8.74E-07 |
| TUCP_001490 | XLOC_057675 | ENSRNOT00000055680 | 0.951997003  | 1.85E-06 |
| TUCP_001490 | XLOC_057675 | ENSRNOT00000026653 | 0.965922463  | 3.42E-07 |
| TUCP_001490 | XLOC_057675 | ENSRNOT00000060696 | 0.953376598  | 1.60E-06 |
| TUCP_001490 | XLOC_057675 | ENSRNOT00000041096 | 0.957630607  | 1.00E-06 |
| TUCP_001490 | XLOC_057675 | ENSRNOT00000040650 | 0.959863573  | 7.67E-07 |
| TUCP_001490 | XLOC_057675 | ENSRNOT0000009681  | 0.965590161  | 3.59E-07 |
| TUCP_001490 | XLOC_057675 | ENSRNOT00000079072 | 0.95101708   | 2.04E-06 |
| TUCP_001490 | XLOC_057675 | ENSRNOT0000009683  | 0.958469347  | 9.07E-07 |
| TUCP_001490 | XLOC_057675 | ENSRNOT00000008018 | 0.974537399  | 8.08E-08 |
| TUCP_001490 | XLOC_057675 | ENSRNOT00000016384 | -0.954045042 | 1.49E-06 |
| TUCP_001490 | XLOC_057675 | ENSRNOT00000037699 | 0.960458516  | 7.12E-07 |
| TUCP_001490 | XLOC_057675 | ENSRNOT00000002771 | 0.953014083  | 1.67E-06 |
| TUCP_001490 | XLOC_057675 | ENSRNOT00000003779 | 0.95645369   | 1.15E-06 |
| TUCP_001490 | XLOC_057675 | ENSRNOT00000076729 | 0.950356198  | 2.18E-06 |
| TUCP_001490 | XLOC_057675 | ENSRNOT00000086352 | 0.951553172  | 1.94E-06 |
| TUCP_001490 | XLOC_057675 | ENSRNOT00000081897 | 0.955543962  | 1.27E-06 |
| TUCP_001490 | XLOC_057675 | ENSRNOT0000000658  | 0.959756278  | 7.77E-07 |
| TUCP_001490 | XLOC_057675 | ENSRNOT00000065501 | 0.957813922  | 9.80E-07 |
| TUCP_001490 | XLOC_057675 | ENSRNOT00000071971 | 0.951769427  | 1.90E-06 |
| TUCP_001490 | XLOC_057675 | ENSRNOT00000029994 | 0.958198317  | 9.37E-07 |
| TUCP_001490 | XLOC_057675 | ENSRNOT00000000676 | 0.962832304  | 5.25E-07 |
| TUCP_001490 | XLOC_057675 | ENSRNOT00000066968 | 0.952750275  | 1.71E-06 |
| TUCP_001490 | XLOC_057675 | ENSRNOT00000026789 | 0.963444872  | 4.83E-07 |
| TUCP_001490 | XLOC_057675 | ENSRNOT00000066739 | 0.96875081   | 2.23E-07 |
| TUCP_001490 | XLOC_057675 | ENSRNOT00000026280 | 0.963235375  | 4.97E-07 |
| TUCP_001490 | XLOC_057675 | ENSRNOT0000005387  | 0.956260181  | 1.17E-06 |
| TUCP_001490 | XLOC_057675 | ENSRNOT0000005381  | 0.955893702  | 1.22E-06 |
| TUCP_001490 | XLOC_057675 | ENSRNOT00000034704 | 0.952631105  | 1.73E-06 |
| TUCP_001490 | XLOC_057675 | ENSRNOT00000023350 | 0.95544362   | 1.28E-06 |
| TUCP_001490 | XLOC_057675 | ENSRNOT00000034146 | 0.969329318  | 2.03E-07 |
| TUCP_001490 | XLOC_057675 | ENSRNOT00000012977 | 0.952810537  | 1.70E-06 |
| TUCP_001490 | XLOC_057675 | ENSRNOT00000028636 | 0.950002531  | 2.26E-06 |
| TUCP_001490 | XLOC_057675 | ENSRNOT00000022796 | 0.953005126  | 1.67E-06 |
| TUCP_001490 | XLOC_057675 | ENSRNOT0000001222  | 0.957117348  | 1.06E-06 |

|             |             |                    |              |          |
|-------------|-------------|--------------------|--------------|----------|
| TUCP_003222 | XLOC_138410 | ENSRNOT00000033695 | -0.950588464 | 2.13E-06 |
| TUCP_001228 | XLOC_045692 | ENSRNOT00000075072 | 0.955478023  | 1.28E-06 |
| TUCP_001228 | XLOC_045692 | ENSRNOT00000008760 | 0.975742982  | 6.35E-08 |
| TUCP_001228 | XLOC_045692 | ENSRNOT00000083433 | 0.974572984  | 8.02E-08 |
| TUCP_003429 | XLOC_148229 | ENSRNOT00000008999 | 0.960325265  | 7.24E-07 |
| TUCP_003429 | XLOC_148229 | ENSRNOT00000067090 | 0.957660426  | 9.98E-07 |
| TUCP_003429 | XLOC_148229 | ENSRNOT00000083623 | 0.957986305  | 9.61E-07 |
| TUCP_003429 | XLOC_148229 | ENSRNOT00000012474 | 0.954377979  | 1.44E-06 |
| TUCP_003429 | XLOC_148229 | ENSRNOT00000018521 | 0.966250403  | 3.26E-07 |
| TUCP_003429 | XLOC_148229 | ENSRNOT00000078572 | 0.953882819  | 1.52E-06 |
| TUCP_003429 | XLOC_148229 | ENSRNOT00000082592 | 0.965609621  | 3.58E-07 |
| TUCP_001497 | XLOC_057857 | ENSRNOT00000018535 | 0.974622171  | 7.94E-08 |
| TUCP_001498 | XLOC_057858 | ENSRNOT00000006175 | 0.961765556  | 6.03E-07 |
| TUCP_001498 | XLOC_057858 | ENSRNOT00000024156 | 0.951764577  | 1.90E-06 |
| TUCP_001498 | XLOC_057858 | ENSRNOT00000049582 | 0.960355696  | 7.22E-07 |
| TUCP_001498 | XLOC_057858 | ENSRNOT00000026543 | 0.963493555  | 4.80E-07 |
| TUCP_001498 | XLOC_057858 | ENSRNOT00000050180 | 0.962978728  | 5.15E-07 |
| TUCP_001498 | XLOC_057858 | ENSRNOT00000078274 | 0.950367223  | 2.18E-06 |
| TUCP_001498 | XLOC_057858 | ENSRNOT00000005537 | 0.963170731  | 5.02E-07 |
| TUCP_002954 | XLOC_127185 | ENSRNOT00000003286 | 0.961634321  | 6.14E-07 |
| TUCP_001555 | XLOC_060268 | ENSRNOT00000038123 | -0.952259518 | 1.80E-06 |
| TUCP_001555 | XLOC_060268 | ENSRNOT00000057945 | -0.962797954 | 5.27E-07 |
| TUCP_001557 | XLOC_060268 | ENSRNOT00000039551 | 0.960390767  | 7.18E-07 |
| TUCP_001557 | XLOC_060268 | ENSRNOT00000006460 | -0.96760099  | 2.66E-07 |
| TUCP_001557 | XLOC_060268 | ENSRNOT00000075397 | -0.959702508 | 7.82E-07 |
| TUCP_001557 | XLOC_060268 | ENSRNOT00000031935 | 0.980412715  | 2.20E-08 |
| TUCP_001557 | XLOC_060268 | ENSRNOT00000009080 | 0.95746603   | 1.02E-06 |
| TUCP_001557 | XLOC_060268 | ENSRNOT00000026279 | 0.961044478  | 6.62E-07 |
| TUCP_001557 | XLOC_060268 | ENSRNOT00000021506 | 0.958482636  | 9.06E-07 |
| TUCP_001557 | XLOC_060268 | ENSRNOT00000013116 | 0.97525      | 7.02E-08 |
| TUCP_001557 | XLOC_060268 | ENSRNOT00000013025 | 0.960200518  | 7.36E-07 |
| TUCP_001557 | XLOC_060268 | ENSRNOT00000009565 | 0.963309641  | 4.92E-07 |
| TUCP_001557 | XLOC_060268 | ENSRNOT00000038178 | 0.954536843  | 1.42E-06 |
| TUCP_001557 | XLOC_060268 | ENSRNOT00000065942 | 0.982460769  | 1.27E-08 |
| TUCP_001557 | XLOC_060268 | ENSRNOT0000003800  | 0.955555356  | 1.27E-06 |
| TUCP_001557 | XLOC_060268 | ENSRNOT00000064305 | 0.952662495  | 1.73E-06 |
| TUCP_001557 | XLOC_060268 | ENSRNOT00000013182 | 0.957934029  | 9.67E-07 |
| TUCP_001557 | XLOC_060268 | ENSRNOT00000030914 | 0.957295871  | 1.04E-06 |
| TUCP_001557 | XLOC_060268 | ENSRNOT00000085885 | 0.960048228  | 7.50E-07 |
| TUCP_001557 | XLOC_060268 | ENSRNOT00000019465 | 0.956681494  | 1.12E-06 |
| TUCP_001557 | XLOC_060268 | ENSRNOT00000025309 | -0.952732256 | 1.72E-06 |
| TUCP_001557 | XLOC_060268 | ENSRNOT00000018696 | 0.955370999  | 1.29E-06 |
| TUCP_001557 | XLOC_060268 | ENSRNOT00000075209 | 0.976324499  | 5.63E-08 |
| TUCP_001557 | XLOC_060268 | ENSRNOT00000087838 | 0.962318869  | 5.62E-07 |
| TUCP_001557 | XLOC_060268 | ENSRNOT00000039836 | 0.952140978  | 1.82E-06 |
| TUCP_001557 | XLOC_060268 | ENSRNOT00000080651 | 0.952249948  | 1.80E-06 |
| TUCP_001557 | XLOC_060268 | ENSRNOT00000018101 | 0.978571076  | 3.43E-08 |
| TUCP_001557 | XLOC_060268 | ENSRNOT00000014479 | 0.952793353  | 1.71E-06 |
| TUCP_001557 | XLOC_060268 | ENSRNOT00000003326 | 0.963824096  | 4.59E-07 |
| TUCP_001557 | XLOC_060268 | ENSRNOT00000000052 | 0.95665592   | 1.12E-06 |
| TUCP_001557 | XLOC_060268 | ENSRNOT00000025284 | 0.959165881  | 8.35E-07 |

|             |             |                    |              |          |
|-------------|-------------|--------------------|--------------|----------|
| TUCP_001557 | XLOC_060268 | ENSRNOT00000016306 | 0.965345688  | 3.71E-07 |
| TUCP_001557 | XLOC_060268 | ENSRNOT00000083568 | -0.963332412 | 4.91E-07 |
| TUCP_001557 | XLOC_060268 | ENSRNOT00000022126 | 0.953389788  | 1.60E-06 |
| TUCP_001557 | XLOC_060268 | ENSRNOT00000088615 | 0.950766579  | 2.10E-06 |
| TUCP_001557 | XLOC_060268 | ENSRNOT00000054922 | 0.962775057  | 5.29E-07 |
| TUCP_001557 | XLOC_060268 | ENSRNOT00000004007 | 0.950171546  | 2.22E-06 |
| TUCP_001557 | XLOC_060268 | ENSRNOT00000089545 | 0.953704001  | 1.55E-06 |
| TUCP_001557 | XLOC_060268 | ENSRNOT00000037681 | 0.985853975  | 4.36E-09 |
| TUCP_001557 | XLOC_060268 | ENSRNOT00000017469 | 0.959238256  | 8.28E-07 |
| TUCP_001557 | XLOC_060268 | ENSRNOT00000067009 | 0.95174648   | 1.90E-06 |
| TUCP_001557 | XLOC_060268 | ENSRNOT00000046807 | 0.966780803  | 3.01E-07 |
| TUCP_001557 | XLOC_060268 | ENSRNOT00000089265 | 0.960303634  | 7.26E-07 |
| TUCP_001557 | XLOC_060268 | ENSRNOT00000006443 | 0.954801161  | 1.38E-06 |
| TUCP_001557 | XLOC_060268 | ENSRNOT00000018888 | 0.951953369  | 1.86E-06 |
| TUCP_001557 | XLOC_060268 | ENSRNOT00000019121 | 0.958765723  | 8.76E-07 |
| TUCP_001557 | XLOC_060268 | ENSRNOT00000072762 | 0.963292535  | 4.93E-07 |
| TUCP_001557 | XLOC_060268 | ENSRNOT00000086775 | 0.968484047  | 2.32E-07 |
| TUCP_001557 | XLOC_060268 | ENSRNOT00000030007 | 0.980300226  | 2.26E-08 |
| TUCP_001557 | XLOC_060268 | ENSRNOT00000012963 | 0.969786821  | 1.88E-07 |
| TUCP_001557 | XLOC_060268 | ENSRNOT00000082686 | 0.956891648  | 1.09E-06 |
| TUCP_001557 | XLOC_060268 | ENSRNOT00000011832 | 0.956822563  | 1.10E-06 |
| TUCP_001557 | XLOC_060268 | ENSRNOT00000020446 | -0.956116158 | 1.19E-06 |
| TUCP_001557 | XLOC_060268 | ENSRNOT00000032301 | 0.978758618  | 3.29E-08 |
| TUCP_001557 | XLOC_060268 | ENSRNOT00000024069 | 0.954804691  | 1.38E-06 |
| TUCP_001557 | XLOC_060268 | ENSRNOT00000017269 | 0.951153062  | 2.02E-06 |
| TUCP_001557 | XLOC_060268 | ENSRNOT00000026462 | 0.956820659  | 1.10E-06 |
| TUCP_001557 | XLOC_060268 | ENSRNOT00000011930 | -0.957948007 | 9.65E-07 |
| TUCP_001557 | XLOC_060268 | ENSRNOT00000026928 | 0.950210703  | 2.22E-06 |
| TUCP_001557 | XLOC_060268 | ENSRNOT00000083968 | 0.954678418  | 1.40E-06 |
| TUCP_001557 | XLOC_060268 | ENSRNOT00000083967 | -0.970316188 | 1.73E-07 |
| TUCP_001557 | XLOC_060268 | ENSRNOT00000017949 | 0.955123838  | 1.33E-06 |
| TUCP_001557 | XLOC_060268 | ENSRNOT00000012775 | 0.95266921   | 1.73E-06 |
| TUCP_001557 | XLOC_060268 | ENSRNOT00000013864 | 0.967102451  | 2.87E-07 |
| TUCP_001557 | XLOC_060268 | ENSRNOT00000072299 | -0.95705278  | 1.07E-06 |
| TUCP_001557 | XLOC_060268 | ENSRNOT00000079609 | -0.981242509 | 1.77E-08 |
| TUCP_001557 | XLOC_060268 | ENSRNOT00000022194 | 0.956798215  | 1.10E-06 |
| TUCP_001557 | XLOC_060268 | ENSRNOT00000019389 | 0.950321021  | 2.19E-06 |
| TUCP_001557 | XLOC_060268 | ENSRNOT00000060098 | 0.973555068  | 9.74E-08 |
| TUCP_001557 | XLOC_060268 | ENSRNOT00000025913 | 0.96370643   | 4.67E-07 |
| TUCP_001557 | XLOC_060268 | ENSRNOT00000006308 | 0.960279379  | 7.28E-07 |
| TUCP_001557 | XLOC_060268 | ENSRNOT00000076230 | -0.967298901 | 2.79E-07 |
| TUCP_001557 | XLOC_060268 | ENSRNOT00000019816 | 0.95506828   | 1.34E-06 |
| TUCP_001557 | XLOC_060268 | ENSRNOT00000083110 | 0.953778998  | 1.54E-06 |
| TUCP_001557 | XLOC_060268 | ENSRNOT00000036658 | 0.96191414   | 5.92E-07 |
| TUCP_001557 | XLOC_060268 | ENSRNOT00000002313 | 0.964164848  | 4.38E-07 |
| TUCP_001557 | XLOC_060268 | ENSRNOT00000029845 | 0.961480345  | 6.26E-07 |
| TUCP_001557 | XLOC_060268 | ENSRNOT00000016637 | 0.9651047    | 3.84E-07 |
| TUCP_001557 | XLOC_060268 | ENSRNOT00000089614 | -0.952904028 | 1.69E-06 |
| TUCP_001557 | XLOC_060268 | ENSRNOT00000038994 | 0.957027983  | 1.07E-06 |
| TUCP_001557 | XLOC_060268 | ENSRNOT00000030803 | 0.953416083  | 1.60E-06 |
| TUCP_001557 | XLOC_060268 | ENSRNOT00000086260 | 0.95401635   | 1.50E-06 |

|             |             |                    |              |          |
|-------------|-------------|--------------------|--------------|----------|
| TUCP_001557 | XLOC_060268 | ENSRNOT00000064667 | 0.951070989  | 2.03E-06 |
| TUCP_001557 | XLOC_060268 | ENSRNOT00000018328 | 0.983932728  | 8.21E-09 |
| TUCP_001557 | XLOC_060268 | ENSRNOT00000038610 | 0.977511773  | 4.36E-08 |
| TUCP_001557 | XLOC_060268 | ENSRNOT00000007314 | 0.952477333  | 1.76E-06 |
| TUCP_001557 | XLOC_060268 | ENSRNOT00000018634 | 0.952606947  | 1.74E-06 |
| TUCP_001557 | XLOC_060268 | ENSRNOT00000010683 | 0.955171625  | 1.32E-06 |
| TUCP_001557 | XLOC_060268 | ENSRNOT00000009136 | 0.954607462  | 1.41E-06 |
| TUCP_001557 | XLOC_060268 | ENSRNOT00000065103 | 0.958593967  | 8.94E-07 |
| TUCP_001557 | XLOC_060268 | ENSRNOT00000064068 | 0.967530661  | 2.69E-07 |
| TUCP_001557 | XLOC_060268 | ENSRNOT00000090853 | 0.970657306  | 1.63E-07 |
| TUCP_001557 | XLOC_060268 | ENSRNOT00000000707 | 0.96416986   | 4.38E-07 |
| TUCP_001557 | XLOC_060268 | ENSRNOT00000016455 | 0.953798756  | 1.53E-06 |
| TUCP_001557 | XLOC_060268 | ENSRNOT00000014309 | 0.973121133  | 1.06E-07 |
| TUCP_001557 | XLOC_060268 | ENSRNOT00000071239 | 0.955137645  | 1.33E-06 |
| TUCP_001557 | XLOC_060268 | ENSRNOT00000005910 | 0.959375648  | 8.14E-07 |
| TUCP_001557 | XLOC_060268 | ENSRNOT00000079677 | 0.976536117  | 5.39E-08 |
| TUCP_001557 | XLOC_060268 | ENSRNOT00000003992 | 0.951282158  | 1.99E-06 |
| TUCP_001557 | XLOC_060268 | ENSRNOT00000071897 | 0.982578885  | 1.23E-08 |
| TUCP_001557 | XLOC_060268 | ENSRNOT00000031261 | -0.961215986 | 6.47E-07 |
| TUCP_001557 | XLOC_060268 | ENSRNOT00000067836 | 0.960786119  | 6.84E-07 |
| TUCP_001557 | XLOC_060268 | ENSRNOT00000013146 | -0.950051487 | 2.25E-06 |
| TUCP_001557 | XLOC_060268 | ENSRNOT00000018494 | 0.963502222  | 4.80E-07 |
| TUCP_001557 | XLOC_060268 | ENSRNOT00000075917 | 0.968830885  | 2.20E-07 |
| TUCP_001557 | XLOC_060268 | ENSRNOT00000014585 | 0.959628564  | 7.89E-07 |
| TUCP_001557 | XLOC_060268 | ENSRNOT00000078366 | -0.975916926 | 6.13E-08 |
| TUCP_001557 | XLOC_060268 | ENSRNOT00000025222 | 0.971664478  | 1.37E-07 |
| TUCP_001557 | XLOC_060268 | ENSRNOT00000023067 | 0.964233461  | 4.34E-07 |
| TUCP_001557 | XLOC_060268 | ENSRNOT00000074261 | 0.964903237  | 3.95E-07 |
| TUCP_001557 | XLOC_060268 | ENSRNOT00000068528 | 0.992201469  | 2.24E-10 |
| TUCP_001557 | XLOC_060268 | ENSRNOT00000011675 | -0.952404521 | 1.78E-06 |
| TUCP_001557 | XLOC_060268 | ENSRNOT00000027917 | -0.956544732 | 1.13E-06 |
| TUCP_001557 | XLOC_060268 | ENSRNOT00000004290 | -0.969881797 | 1.86E-07 |
| TUCP_001557 | XLOC_060268 | ENSRNOT00000039000 | 0.984116036  | 7.75E-09 |
| TUCP_001557 | XLOC_060268 | ENSRNOT00000027575 | 0.956807364  | 1.10E-06 |
| TUCP_001557 | XLOC_060268 | ENSRNOT00000034401 | 0.967505147  | 2.70E-07 |
| TUCP_001557 | XLOC_060268 | ENSRNOT00000000527 | 0.957837227  | 9.78E-07 |
| TUCP_001557 | XLOC_060268 | ENSRNOT00000008813 | 0.950043387  | 2.25E-06 |
| TUCP_001557 | XLOC_060268 | ENSRNOT00000000529 | 0.953624955  | 1.56E-06 |
| TUCP_001557 | XLOC_060268 | ENSRNOT00000081110 | 0.958250127  | 9.31E-07 |
| TUCP_001557 | XLOC_060268 | ENSRNOT00000003207 | 0.95847987   | 9.06E-07 |
| TUCP_001557 | XLOC_060268 | ENSRNOT00000093385 | -0.951063348 | 2.04E-06 |
| TUCP_001557 | XLOC_060268 | ENSRNOT00000033450 | 0.956658518  | 1.12E-06 |
| TUCP_001557 | XLOC_060268 | ENSRNOT00000017224 | 0.953418148  | 1.60E-06 |
| TUCP_001557 | XLOC_060268 | ENSRNOT00000085911 | 0.971178851  | 1.49E-07 |
| TUCP_001557 | XLOC_060268 | ENSRNOT00000044662 | 0.985917012  | 4.26E-09 |
| TUCP_001557 | XLOC_060268 | ENSRNOT00000024033 | -0.961856487 | 5.96E-07 |
| TUCP_001557 | XLOC_060268 | ENSRNOT00000086456 | 0.964828042  | 4.00E-07 |
| TUCP_001557 | XLOC_060268 | ENSRNOT00000010367 | -0.9555937   | 1.26E-06 |
| TUCP_001557 | XLOC_060268 | ENSRNOT00000011572 | 0.951397694  | 1.97E-06 |
| TUCP_001557 | XLOC_060268 | ENSRNOT00000000155 | -0.952517384 | 1.75E-06 |
| TUCP_001557 | XLOC_060268 | ENSRNOT00000067741 | 0.966126483  | 3.32E-07 |

|             |             |                    |              |          |
|-------------|-------------|--------------------|--------------|----------|
| TUCP_001557 | XLOC_060268 | ENSRNOT00000015020 | 0.964979148  | 3.91E-07 |
| TUCP_001557 | XLOC_060268 | ENSRNOT00000048933 | 0.955959188  | 1.21E-06 |
| TUCP_001557 | XLOC_060268 | ENSRNOT00000000532 | 0.952168909  | 1.82E-06 |
| TUCP_001557 | XLOC_060268 | ENSRNOT00000003691 | 0.959745395  | 7.78E-07 |
| TUCP_001557 | XLOC_060268 | ENSRNOT00000028434 | 0.950668276  | 2.12E-06 |
| TUCP_001557 | XLOC_060268 | ENSRNOT00000022389 | 0.972553503  | 1.17E-07 |
| TUCP_001557 | XLOC_060268 | ENSRNOT00000025794 | 0.965460759  | 3.65E-07 |
| TUCP_001557 | XLOC_060268 | ENSRNOT00000064849 | 0.972028443  | 1.29E-07 |
| TUCP_001557 | XLOC_060268 | ENSRNOT00000058111 | 0.955976528  | 1.21E-06 |
| TUCP_001557 | XLOC_060268 | ENSRNOT00000011869 | 0.968456282  | 2.33E-07 |
| TUCP_001557 | XLOC_060268 | ENSRNOT00000080522 | 0.98230096   | 1.33E-08 |
| TUCP_001557 | XLOC_060268 | ENSRNOT00000009994 | 0.955600271  | 1.26E-06 |
| TUCP_001557 | XLOC_060268 | ENSRNOT00000030692 | 0.951205043  | 2.01E-06 |
| TUCP_001557 | XLOC_060268 | ENSRNOT00000008399 | 0.95671629   | 1.11E-06 |
| TUCP_001557 | XLOC_060268 | ENSRNOT00000018173 | 0.954990645  | 1.35E-06 |
| TUCP_001557 | XLOC_060268 | ENSRNOT00000016260 | 0.975640057  | 6.49E-08 |
| TUCP_001557 | XLOC_060268 | ENSRNOT00000042973 | 0.951130054  | 2.02E-06 |
| TUCP_001557 | XLOC_060268 | ENSRNOT00000016265 | 0.985292299  | 5.29E-09 |
| TUCP_001557 | XLOC_060268 | ENSRNOT00000037072 | -0.953012481 | 1.67E-06 |
| TUCP_001557 | XLOC_060268 | ENSRNOT00000077479 | 0.957651641  | 9.99E-07 |
| TUCP_001557 | XLOC_060268 | ENSRNOT00000027753 | 0.95653361   | 1.14E-06 |
| TUCP_001557 | XLOC_060268 | ENSRNOT00000017340 | 0.959442066  | 8.07E-07 |
| TUCP_001557 | XLOC_060268 | ENSRNOT00000073847 | 0.95336945   | 1.61E-06 |
| TUCP_001557 | XLOC_060268 | ENSRNOT00000073239 | 0.954431832  | 1.43E-06 |
| TUCP_001557 | XLOC_060268 | ENSRNOT00000040060 | 0.968282926  | 2.40E-07 |
| TUCP_001557 | XLOC_060268 | ENSRNOT00000081835 | 0.972405304  | 1.20E-07 |
| TUCP_001557 | XLOC_060268 | ENSRNOT00000046215 | 0.961481257  | 6.26E-07 |
| TUCP_001557 | XLOC_060268 | ENSRNOT00000015946 | 0.976162674  | 5.82E-08 |
| TUCP_001557 | XLOC_060268 | ENSRNOT00000079304 | 0.957051376  | 1.07E-06 |
| TUCP_001557 | XLOC_060268 | ENSRNOT00000076467 | 0.958808528  | 8.71E-07 |
| TUCP_001557 | XLOC_060268 | ENSRNOT00000013768 | 0.965181376  | 3.80E-07 |
| TUCP_001557 | XLOC_060268 | ENSRNOT00000009742 | 0.966068579  | 3.35E-07 |
| TUCP_001557 | XLOC_060268 | ENSRNOT00000023962 | 0.975009055  | 7.36E-08 |
| TUCP_001557 | XLOC_060268 | ENSRNOT00000007044 | 0.969075244  | 2.11E-07 |
| TUCP_001557 | XLOC_060268 | ENSRNOT00000080677 | 0.964055689  | 4.45E-07 |
| TUCP_001557 | XLOC_060268 | ENSRNOT00000025784 | 0.961292673  | 6.41E-07 |
| TUCP_001557 | XLOC_060268 | ENSRNOT00000028225 | -0.9504254   | 2.17E-06 |
| TUCP_001557 | XLOC_060268 | ENSRNOT00000019172 | 0.958689377  | 8.84E-07 |
| TUCP_001557 | XLOC_060268 | ENSRNOT00000020994 | 0.961726588  | 6.06E-07 |
| TUCP_001557 | XLOC_060268 | ENSRNOT00000027360 | 0.961383201  | 6.34E-07 |
| TUCP_001557 | XLOC_060268 | ENSRNOT00000015318 | 0.953523516  | 1.58E-06 |
| TUCP_001557 | XLOC_060268 | ENSRNOT00000014533 | 0.951802168  | 1.89E-06 |
| TUCP_001557 | XLOC_060268 | ENSRNOT00000016372 | 0.955310778  | 1.30E-06 |
| TUCP_001557 | XLOC_060268 | ENSRNOT00000088679 | 0.971858051  | 1.33E-07 |
| TUCP_001557 | XLOC_060268 | ENSRNOT00000073643 | 0.961456596  | 6.28E-07 |
| TUCP_001557 | XLOC_060268 | ENSRNOT00000027967 | -0.953350147 | 1.61E-06 |
| TUCP_001557 | XLOC_060268 | ENSRNOT00000014317 | 0.97015842   | 1.77E-07 |
| TUCP_001557 | XLOC_060268 | ENSRNOT00000016776 | 0.961728225  | 6.06E-07 |
| TUCP_001557 | XLOC_060268 | ENSRNOT00000079414 | 0.980481214  | 2.16E-08 |
| TUCP_001557 | XLOC_060268 | ENSRNOT00000004770 | 0.980307553  | 2.26E-08 |
| TUCP_001557 | XLOC_060268 | ENSRNOT00000045226 | 0.957606126  | 1.00E-06 |

|             |             |                    |              |          |
|-------------|-------------|--------------------|--------------|----------|
| TUCP_001557 | XLOC_060268 | ENSRNOT00000024011 | -0.96067542  | 6.93E-07 |
| TUCP_001557 | XLOC_060268 | ENSRNOT00000066211 | 0.952466411  | 1.76E-06 |
| TUCP_001557 | XLOC_060268 | ENSRNOT00000058453 | 0.959332716  | 8.18E-07 |
| TUCP_001557 | XLOC_060268 | ENSRNOT00000000134 | 0.967954869  | 2.52E-07 |
| TUCP_001557 | XLOC_060268 | ENSRNOT00000001366 | 0.97591695   | 6.13E-08 |
| TUCP_001557 | XLOC_060268 | ENSRNOT00000019473 | 0.950736091  | 2.10E-06 |
| TUCP_002955 | XLOC_127423 | ENSRNOT00000050485 | 0.972443834  | 1.19E-07 |
| TUCP_002955 | XLOC_127423 | ENSRNOT00000092026 | 0.960776094  | 6.85E-07 |
| TUCP_002955 | XLOC_127423 | ENSRNOT00000087134 | 0.974192013  | 8.63E-08 |
| TUCP_002955 | XLOC_127423 | ENSRNOT00000073925 | 0.967875424  | 2.55E-07 |
| TUCP_002955 | XLOC_127423 | ENSRNOT00000078502 | 0.951044956  | 2.04E-06 |
| TUCP_002955 | XLOC_127423 | ENSRNOT00000076227 | 0.969707065  | 1.91E-07 |
| TUCP_002484 | XLOC_105179 | ENSRNOT00000025651 | 0.957499913  | 1.02E-06 |
| TUCP_002484 | XLOC_105179 | ENSRNOT00000028234 | 0.952717244  | 1.72E-06 |
| TUCP_002484 | XLOC_105179 | ENSRNOT00000056278 | 0.968737888  | 2.23E-07 |
| TUCP_002484 | XLOC_105179 | ENSRNOT0000007681  | 0.952326988  | 1.79E-06 |
| TUCP_002484 | XLOC_105179 | ENSRNOT00000011432 | 0.964084743  | 4.43E-07 |
| TUCP_002484 | XLOC_105179 | ENSRNOT00000047126 | 0.953452994  | 1.59E-06 |
| TUCP_002484 | XLOC_105179 | ENSRNOT00000008301 | 0.956732603  | 1.11E-06 |
| TUCP_002484 | XLOC_105179 | ENSRNOT00000024933 | 0.952017774  | 1.85E-06 |
| TUCP_002484 | XLOC_105179 | ENSRNOT00000044435 | 0.96268501   | 5.35E-07 |
| TUCP_002484 | XLOC_105179 | ENSRNOT00000072864 | 0.953977538  | 1.50E-06 |
| TUCP_002484 | XLOC_105179 | ENSRNOT00000024981 | 0.950531957  | 2.15E-06 |
| TUCP_002484 | XLOC_105179 | ENSRNOT00000010621 | 0.961068101  | 6.60E-07 |
| TUCP_002484 | XLOC_105179 | ENSRNOT00000082982 | 0.972340323  | 1.22E-07 |
| TUCP_002484 | XLOC_105179 | ENSRNOT00000029193 | 0.971106311  | 1.51E-07 |
| TUCP_002484 | XLOC_105179 | ENSRNOT00000090268 | 0.957989661  | 9.60E-07 |
| TUCP_002484 | XLOC_105179 | ENSRNOT00000019358 | 0.951961312  | 1.86E-06 |
| TUCP_002484 | XLOC_105179 | ENSRNOT00000013587 | 0.954101195  | 1.49E-06 |
| TUCP_002484 | XLOC_105179 | ENSRNOT00000025013 | 0.954720806  | 1.39E-06 |
| TUCP_002484 | XLOC_105179 | ENSRNOT00000084202 | 0.951624969  | 1.92E-06 |
| TUCP_002484 | XLOC_105179 | ENSRNOT00000017955 | 0.958892895  | 8.63E-07 |
| TUCP_002484 | XLOC_105179 | ENSRNOT00000009779 | 0.965542391  | 3.61E-07 |
| TUCP_000320 | XLOC_010466 | ENSRNOT00000006034 | -0.951047072 | 2.04E-06 |
| TUCP_000320 | XLOC_010466 | ENSRNOT00000046229 | 0.951825683  | 1.88E-06 |
| TUCP_000912 | XLOC_033903 | ENSRNOT00000080232 | 0.95329587   | 1.62E-06 |
| TUCP_000300 | XLOC_009417 | ENSRNOT00000085692 | 0.957800955  | 9.82E-07 |
| TUCP_000910 | XLOC_033903 | ENSRNOT00000026966 | 0.970322306  | 1.73E-07 |
| TUCP_000910 | XLOC_033903 | ENSRNOT00000068416 | 0.999999782  | 3.88E-33 |
| TUCP_000910 | XLOC_033903 | ENSRNOT00000086036 | 0.999958274  | 9.96E-22 |
| TUCP_000910 | XLOC_033903 | ENSRNOT00000026803 | 0.985046075  | 5.74E-09 |
| TUCP_000910 | XLOC_033903 | ENSRNOT00000047527 | 0.963071698  | 5.08E-07 |
| TUCP_000910 | XLOC_033903 | ENSRNOT00000042251 | 0.999344295  | 9.53E-16 |
| TUCP_000910 | XLOC_033903 | ENSRNOT00000002984 | 0.998397069  | 8.31E-14 |
| TUCP_000910 | XLOC_033903 | ENSRNOT00000083764 | 0.999541808  | 1.59E-16 |
| TUCP_000910 | XLOC_033903 | ENSRNOT00000076802 | 0.962695843  | 5.34E-07 |
| TUCP_000910 | XLOC_033903 | ENSRNOT00000092365 | 0.999161651  | 3.26E-15 |
| TUCP_000910 | XLOC_033903 | ENSRNOT00000079275 | 0.999901911  | 7.15E-20 |
| TUCP_000910 | XLOC_033903 | ENSRNOT00000066062 | -0.959706712 | 7.82E-07 |
| TUCP_000910 | XLOC_033903 | ENSRNOT00000045301 | 1            | 0        |
| TUCP_000910 | XLOC_033903 | ENSRNOT00000041186 | 0.999975782  | 6.56E-23 |



|             |             |                    |             |          |
|-------------|-------------|--------------------|-------------|----------|
| TUCP_000910 | XLOC_033903 | ENSRNOT00000010092 | 0.977711778 | 4.17E-08 |
| TUCP_000910 | XLOC_033903 | ENSRNOT00000076182 | 1           | 0        |
| TUCP_000910 | XLOC_033903 | ENSRNOT00000087404 | 0.951157664 | 2.02E-06 |
| TUCP_000910 | XLOC_033903 | ENSRNOT00000052003 | 0.95837331  | 9.18E-07 |
| TUCP_000910 | XLOC_033903 | ENSRNOT00000081709 | 0.998485154 | 6.27E-14 |
| TUCP_000910 | XLOC_033903 | ENSRNOT00000005726 | 0.959610119 | 7.91E-07 |
| TUCP_000910 | XLOC_033903 | ENSRNOT00000014103 | 1           | 1.33E-79 |
| TUCP_000910 | XLOC_033903 | ENSRNOT00000057433 | 0.964930601 | 3.94E-07 |
| TUCP_000910 | XLOC_033903 | ENSRNOT00000082289 | 0.998931566 | 1.09E-14 |
| TUCP_000910 | XLOC_033903 | ENSRNOT00000092516 | 0.957459323 | 1.02E-06 |
| TUCP_000910 | XLOC_033903 | ENSRNOT00000008898 | 0.990039768 | 7.59E-10 |
| TUCP_000910 | XLOC_033903 | ENSRNOT00000083493 | 0.995461232 | 1.51E-11 |
| TUCP_000910 | XLOC_033903 | ENSRNOT00000092563 | 0.987201084 | 2.65E-09 |
| TUCP_000910 | XLOC_033903 | ENSRNOT00000088893 | 1           | 0        |
| TUCP_000910 | XLOC_033903 | ENSRNOT00000076693 | 0.955029582 | 1.34E-06 |
| TUCP_000910 | XLOC_033903 | ENSRNOT00000081014 | 1           | 0        |
| TUCP_000910 | XLOC_033903 | ENSRNOT00000067543 | 1           | 0        |
| TUCP_000910 | XLOC_033903 | ENSRNOT00000050968 | 0.996816433 | 2.56E-12 |
| TUCP_000910 | XLOC_033903 | ENSRNOT00000042201 | 0.960235595 | 7.32E-07 |
| TUCP_000910 | XLOC_033903 | ENSRNOT00000004373 | 0.957315473 | 1.04E-06 |
| TUCP_000910 | XLOC_033903 | ENSRNOT00000063929 | 1           | 0        |
| TUCP_000910 | XLOC_033903 | ENSRNOT00000057472 | 1           | 0        |
| TUCP_000910 | XLOC_033903 | ENSRNOT00000041617 | 0.952449765 | 1.77E-06 |
| TUCP_000910 | XLOC_033903 | ENSRNOT00000091763 | 0.986310385 | 3.70E-09 |
| TUCP_000910 | XLOC_033903 | ENSRNOT00000022200 | 0.998491303 | 6.14E-14 |
| TUCP_000910 | XLOC_033903 | ENSRNOT00000067379 | 0.997260967 | 1.21E-12 |
| TUCP_000910 | XLOC_033903 | ENSRNOT00000020786 | 0.976428448 | 5.51E-08 |
| TUCP_000910 | XLOC_033903 | ENSRNOT00000050543 | 0.999722223 | 1.30E-17 |
| TUCP_000910 | XLOC_033903 | ENSRNOT00000089306 | 0.999866649 | 3.32E-19 |
| TUCP_000910 | XLOC_033903 | ENSRNOT00000052367 | 0.997268394 | 1.19E-12 |
| TUCP_000910 | XLOC_033903 | ENSRNOT00000090658 | 1           | 0        |
| TUCP_000910 | XLOC_033903 | ENSRNOT00000022571 | 0.995290013 | 1.81E-11 |
| TUCP_000910 | XLOC_033903 | ENSRNOT00000044520 | 0.981817158 | 1.52E-08 |
| TUCP_000910 | XLOC_033903 | ENSRNOT00000065448 | 0.963648868 | 4.70E-07 |
| TUCP_002485 | XLOC_105179 | ENSRNOT00000084500 | 0.969081107 | 2.11E-07 |
| TUCP_002485 | XLOC_105179 | ENSRNOT00000071877 | 0.96572385  | 3.52E-07 |
| TUCP_002485 | XLOC_105179 | ENSRNOT00000076757 | 0.959236013 | 8.28E-07 |
| TUCP_002485 | XLOC_105179 | ENSRNOT00000052308 | 0.971256604 | 1.47E-07 |
| TUCP_002485 | XLOC_105179 | ENSRNOT00000048858 | 0.955596512 | 1.26E-06 |
| TUCP_002485 | XLOC_105179 | ENSRNOT00000047241 | 0.9715496   | 1.40E-07 |
| TUCP_002485 | XLOC_105179 | ENSRNOT00000043661 | 0.971026612 | 1.53E-07 |
| TUCP_002485 | XLOC_105179 | ENSRNOT00000048373 | 0.954241009 | 1.46E-06 |
| TUCP_000916 | XLOC_033903 | ENSRNOT00000087027 | 0.999006448 | 7.61E-15 |
| TUCP_000916 | XLOC_033903 | ENSRNOT00000092435 | 0.989195129 | 1.14E-09 |
| TUCP_000916 | XLOC_033903 | ENSRNOT00000027770 | 0.963022843 | 5.12E-07 |
| TUCP_000916 | XLOC_033903 | ENSRNOT00000085704 | 0.983917828 | 8.25E-09 |
| TUCP_000916 | XLOC_033903 | ENSRNOT00000079498 | 0.987501217 | 2.35E-09 |
| TUCP_000916 | XLOC_033903 | ENSRNOT00000088065 | 0.957783879 | 9.84E-07 |
| TUCP_000914 | XLOC_033903 | ENSRNOT00000085599 | 0.999938502 | 6.93E-21 |
| TUCP_000914 | XLOC_033903 | ENSRNOT00000006689 | 0.9944189   | 4.22E-11 |
| TUCP_000914 | XLOC_033903 | ENSRNOT00000081534 | 0.987999291 | 1.92E-09 |

|             |             |                    |             |          |
|-------------|-------------|--------------------|-------------|----------|
| TUCP_000914 | XLOC_033903 | ENSRNOT00000085301 | 0.99793679  | 2.93E-13 |
| TUCP_000914 | XLOC_033903 | ENSRNOT00000038729 | 1           | 0        |
| TUCP_000914 | XLOC_033903 | ENSRNOT00000086385 | 1           | 0        |
| TUCP_000914 | XLOC_033903 | ENSRNOT00000077695 | 0.96038616  | 7.19E-07 |
| TUCP_000914 | XLOC_033903 | ENSRNOT00000078561 | 0.986503348 | 3.45E-09 |
| TUCP_000914 | XLOC_033903 | ENSRNOT00000087613 | 1           | 0        |
| TUCP_000914 | XLOC_033903 | ENSRNOT00000026032 | 0.953050675 | 1.66E-06 |
| TUCP_000914 | XLOC_033903 | ENSRNOT00000073350 | 0.9658754   | 3.44E-07 |
| TUCP_000914 | XLOC_033903 | ENSRNOT00000023062 | 1           | 0        |
| TUCP_000914 | XLOC_033903 | ENSRNOT00000058834 | 1           | 4.25E-78 |
| TUCP_000914 | XLOC_033903 | ENSRNOT00000079420 | 1           | 0        |
| TUCP_000914 | XLOC_033903 | ENSRNOT00000090761 | 1           | 4.25E-78 |
| TUCP_000914 | XLOC_033903 | ENSRNOT00000055923 | 1           | 0        |
| TUCP_000914 | XLOC_033903 | ENSRNOT00000092416 | 0.963085379 | 5.07E-07 |
| TUCP_000914 | XLOC_033903 | ENSRNOT00000071930 | 1           | 4.25E-78 |
| TUCP_000914 | XLOC_033903 | ENSRNOT00000001996 | 0.974721715 | 7.79E-08 |
| TUCP_000914 | XLOC_033903 | ENSRNOT00000076756 | 1           | 0        |
| TUCP_000914 | XLOC_033903 | ENSRNOT00000081527 | 0.999420479 | 5.14E-16 |
| TUCP_000914 | XLOC_033903 | ENSRNOT00000085067 | 0.960262084 | 7.30E-07 |
| TUCP_000914 | XLOC_033903 | ENSRNOT00000091663 | 0.99642667  | 4.56E-12 |
| TUCP_000914 | XLOC_033903 | ENSRNOT00000081780 | 1           | 0        |
| TUCP_000914 | XLOC_033903 | ENSRNOT00000093689 | 0.953599805 | 1.57E-06 |
| TUCP_000914 | XLOC_033903 | ENSRNOT00000089114 | 1           | 0        |
| TUCP_000914 | XLOC_033903 | ENSRNOT00000021609 | 0.977017895 | 4.86E-08 |
| TUCP_000914 | XLOC_033903 | ENSRNOT00000073316 | 1           | 1.33E-79 |
| TUCP_000914 | XLOC_033903 | ENSRNOT00000086557 | 0.977413455 | 4.46E-08 |
| TUCP_000914 | XLOC_033903 | ENSRNOT00000071663 | 1           | 0        |
| TUCP_000914 | XLOC_033903 | ENSRNOT00000042860 | 1           | 1.33E-79 |
| TUCP_000914 | XLOC_033903 | ENSRNOT00000072962 | 0.971287317 | 1.46E-07 |
| TUCP_000914 | XLOC_033903 | ENSRNOT00000088421 | 1           | 0        |
| TUCP_000914 | XLOC_033903 | ENSRNOT00000038898 | 1           | 4.25E-78 |
| TUCP_000914 | XLOC_033903 | ENSRNOT00000015840 | 0.959452012 | 8.06E-07 |
| TUCP_000914 | XLOC_033903 | ENSRNOT00000064936 | 0.985957557 | 4.20E-09 |
| TUCP_000914 | XLOC_033903 | ENSRNOT00000042777 | 0.990642579 | 5.56E-10 |
| TUCP_000914 | XLOC_033903 | ENSRNOT00000010029 | 1           | 0        |
| TUCP_000915 | XLOC_033903 | ENSRNOT00000006502 | 0.969498442 | 1.98E-07 |
| TUCP_000915 | XLOC_033903 | ENSRNOT00000079606 | 0.969121898 | 2.10E-07 |
| TUCP_000853 | XLOC_032536 | ENSRNOT00000091652 | 0.967889878 | 2.55E-07 |
| TUCP_000853 | XLOC_032536 | ENSRNOT00000085266 | 0.978913021 | 3.17E-08 |
| TUCP_000853 | XLOC_032536 | ENSRNOT00000080865 | 0.971821041 | 1.33E-07 |
| TUCP_000853 | XLOC_032536 | ENSRNOT00000038687 | 0.960000837 | 7.54E-07 |
| TUCP_000853 | XLOC_032536 | ENSRNOT00000073534 | 0.969530268 | 1.97E-07 |
| TUCP_000853 | XLOC_032536 | ENSRNOT00000006249 | 0.953590009 | 1.57E-06 |
| TUCP_000853 | XLOC_032536 | ENSRNOT00000093019 | 0.971821041 | 1.33E-07 |
| TUCP_000853 | XLOC_032536 | ENSRNOT00000059266 | 0.952255046 | 1.80E-06 |
| TUCP_000853 | XLOC_032536 | ENSRNOT00000085908 | 0.970578956 | 1.65E-07 |
| TUCP_000853 | XLOC_032536 | ENSRNOT00000046744 | 0.971821041 | 1.33E-07 |
| TUCP_000853 | XLOC_032536 | ENSRNOT00000076429 | 0.971821041 | 1.33E-07 |
| TUCP_000853 | XLOC_032536 | ENSRNOT00000084667 | 0.972370459 | 1.21E-07 |
| TUCP_000853 | XLOC_032536 | ENSRNOT00000055412 | 0.971821041 | 1.33E-07 |
| TUCP_000853 | XLOC_032536 | ENSRNOT00000093201 | 0.969466988 | 1.99E-07 |

|             |             |                    |             |          |
|-------------|-------------|--------------------|-------------|----------|
| TUCP_000853 | XLOC_032536 | ENSRNOT00000072724 | 0.971821041 | 1.33E-07 |
| TUCP_000853 | XLOC_032536 | ENSRNOT00000066017 | 0.966505686 | 3.14E-07 |
| TUCP_000853 | XLOC_032536 | ENSRNOT00000082760 | 0.959531303 | 7.99E-07 |
| TUCP_000853 | XLOC_032536 | ENSRNOT00000073148 | 0.954292391 | 1.45E-06 |
| TUCP_000853 | XLOC_032536 | ENSRNOT00000054858 | 0.958535596 | 9.00E-07 |
| TUCP_000853 | XLOC_032536 | ENSRNOT00000084375 | 0.971821041 | 1.33E-07 |
| TUCP_000853 | XLOC_032536 | ENSRNOT00000012161 | 0.97441195  | 8.28E-08 |
| TUCP_000853 | XLOC_032536 | ENSRNOT00000042369 | 0.966963749 | 2.93E-07 |
| TUCP_000853 | XLOC_032536 | ENSRNOT00000086554 | 0.971821041 | 1.33E-07 |
| TUCP_000853 | XLOC_032536 | ENSRNOT00000047921 | 0.971821041 | 1.33E-07 |
| TUCP_000853 | XLOC_032536 | ENSRNOT00000064261 | 0.971664313 | 1.37E-07 |
| TUCP_000853 | XLOC_032536 | ENSRNOT00000086660 | 0.968442776 | 2.34E-07 |
| TUCP_000853 | XLOC_032536 | ENSRNOT00000078707 | 0.977901968 | 4.00E-08 |
| TUCP_000853 | XLOC_032536 | ENSRNOT00000083977 | 0.971821041 | 1.33E-07 |
| TUCP_000853 | XLOC_032536 | ENSRNOT00000092933 | 0.971821041 | 1.33E-07 |
| TUCP_000853 | XLOC_032536 | ENSRNOT00000075346 | 0.961968674 | 5.88E-07 |
| TUCP_000853 | XLOC_032536 | ENSRNOT00000085447 | 0.967785785 | 2.59E-07 |
| TUCP_000853 | XLOC_032536 | ENSRNOT00000041281 | 0.950598036 | 2.13E-06 |
| TUCP_000852 | XLOC_032536 | ENSRNOT00000081570 | 0.951083304 | 2.03E-06 |
| TUCP_000852 | XLOC_032536 | ENSRNOT00000091652 | 0.990937586 | 4.74E-10 |
| TUCP_000852 | XLOC_032536 | ENSRNOT00000036564 | 0.962106205 | 5.77E-07 |
| TUCP_000852 | XLOC_032536 | ENSRNOT00000000109 | 0.952652245 | 1.73E-06 |
| TUCP_000852 | XLOC_032536 | ENSRNOT00000080865 | 0.9933561   | 1.01E-10 |
| TUCP_000852 | XLOC_032536 | ENSRNOT00000073534 | 0.986358629 | 3.64E-09 |
| TUCP_000852 | XLOC_032536 | ENSRNOT00000012161 | 0.973157551 | 1.05E-07 |
| TUCP_000852 | XLOC_032536 | ENSRNOT00000087758 | 0.954422672 | 1.43E-06 |
| TUCP_000852 | XLOC_032536 | ENSRNOT00000049832 | 0.973790564 | 9.32E-08 |
| TUCP_000852 | XLOC_032536 | ENSRNOT00000093019 | 0.9933561   | 1.01E-10 |
| TUCP_000852 | XLOC_032536 | ENSRNOT00000024825 | 0.979824551 | 2.55E-08 |
| TUCP_000852 | XLOC_032536 | ENSRNOT00000085908 | 0.98904597  | 1.22E-09 |
| TUCP_000852 | XLOC_032536 | ENSRNOT00000046744 | 0.9933561   | 1.01E-10 |
| TUCP_000852 | XLOC_032536 | ENSRNOT00000076429 | 0.9933561   | 1.01E-10 |
| TUCP_000852 | XLOC_032536 | ENSRNOT00000084667 | 0.992442443 | 1.92E-10 |
| TUCP_000852 | XLOC_032536 | ENSRNOT00000055412 | 0.9933561   | 1.01E-10 |
| TUCP_000852 | XLOC_032536 | ENSRNOT00000093201 | 0.99256398  | 1.77E-10 |
| TUCP_000852 | XLOC_032536 | ENSRNOT00000072724 | 0.9933561   | 1.01E-10 |
| TUCP_000852 | XLOC_032536 | ENSRNOT00000066017 | 0.979493398 | 2.76E-08 |
| TUCP_000852 | XLOC_032536 | ENSRNOT00000082760 | 0.977841845 | 4.05E-08 |
| TUCP_000852 | XLOC_032536 | ENSRNOT00000073148 | 0.992744643 | 1.56E-10 |
| TUCP_000852 | XLOC_032536 | ENSRNOT00000077462 | 0.950500992 | 2.15E-06 |
| TUCP_000852 | XLOC_032536 | ENSRNOT00000084375 | 0.9933561   | 1.01E-10 |
| TUCP_000852 | XLOC_032536 | ENSRNOT00000085447 | 0.989906767 | 8.11E-10 |
| TUCP_000852 | XLOC_032536 | ENSRNOT0000006249  | 0.955572854 | 1.26E-06 |
| TUCP_000852 | XLOC_032536 | ENSRNOT00000087073 | 0.971809998 | 1.34E-07 |
| TUCP_000852 | XLOC_032536 | ENSRNOT00000042369 | 0.987069927 | 2.79E-09 |
| TUCP_000852 | XLOC_032536 | ENSRNOT00000086554 | 0.9933561   | 1.01E-10 |
| TUCP_000852 | XLOC_032536 | ENSRNOT00000054858 | 0.976712378 | 5.19E-08 |
| TUCP_000852 | XLOC_032536 | ENSRNOT00000047921 | 0.9933561   | 1.01E-10 |
| TUCP_000852 | XLOC_032536 | ENSRNOT00000064261 | 0.993176876 | 1.15E-10 |
| TUCP_000852 | XLOC_032536 | ENSRNOT00000086660 | 0.994537555 | 3.80E-11 |
| TUCP_000852 | XLOC_032536 | ENSRNOT00000080933 | 0.96903969  | 2.13E-07 |

|             |             |                    |             |          |
|-------------|-------------|--------------------|-------------|----------|
| TUCP_000852 | XLOC_032536 | ENSRNOT00000083977 | 0.9933561   | 1.01E-10 |
| TUCP_000852 | XLOC_032536 | ENSRNOT00000092933 | 0.9933561   | 1.01E-10 |
| TUCP_000852 | XLOC_032536 | ENSRNOT0000009061  | 0.981684751 | 1.57E-08 |
| TUCP_000852 | XLOC_032536 | ENSRNOT00000041281 | 0.977137119 | 4.73E-08 |
| TUCP_000851 | XLOC_032529 | ENSRNOT00000021435 | 0.965898949 | 3.43E-07 |
| TUCP_000851 | XLOC_032529 | ENSRNOT00000092105 | 0.997452204 | 8.42E-13 |
| TUCP_000851 | XLOC_032529 | ENSRNOT00000007194 | 0.983016282 | 1.08E-08 |
| TUCP_000851 | XLOC_032529 | ENSRNOT00000031076 | 0.95517136  | 1.32E-06 |
| TUCP_000851 | XLOC_032529 | ENSRNOT00000082850 | 0.953009415 | 1.67E-06 |
| TUCP_000851 | XLOC_032529 | ENSRNOT00000072306 | 0.979802833 | 2.56E-08 |
| TUCP_000851 | XLOC_032529 | ENSRNOT00000087907 | 0.987702711 | 2.17E-09 |
| TUCP_000851 | XLOC_032529 | ENSRNOT00000000215 | 0.952039156 | 1.84E-06 |
| TUCP_000851 | XLOC_032529 | ENSRNOT00000078672 | 0.996948486 | 2.07E-12 |
| TUCP_000857 | XLOC_032536 | ENSRNOT00000082043 | 0.990664674 | 5.50E-10 |
| TUCP_000857 | XLOC_032536 | ENSRNOT00000090080 | 0.968194938 | 2.43E-07 |
| TUCP_000857 | XLOC_032536 | ENSRNOT00000076074 | 0.973866964 | 9.19E-08 |
| TUCP_000857 | XLOC_032536 | ENSRNOT00000068444 | 0.990694022 | 5.41E-10 |
| TUCP_000857 | XLOC_032536 | ENSRNOT00000081370 | 0.989520927 | 9.78E-10 |
| TUCP_000857 | XLOC_032536 | ENSRNOT00000078645 | 0.971724183 | 1.36E-07 |
| TUCP_000857 | XLOC_032536 | ENSRNOT00000075987 | 0.971779996 | 1.34E-07 |
| TUCP_000857 | XLOC_032536 | ENSRNOT00000074990 | 0.990694022 | 5.41E-10 |
| TUCP_000857 | XLOC_032536 | ENSRNOT00000087323 | 0.982174358 | 1.38E-08 |
| TUCP_000857 | XLOC_032536 | ENSRNOT00000074930 | 0.990694022 | 5.41E-10 |
| TUCP_000857 | XLOC_032536 | ENSRNOT00000080575 | 0.990712669 | 5.36E-10 |
| TUCP_000857 | XLOC_032536 | ENSRNOT00000057761 | 0.971951814 | 1.30E-07 |
| TUCP_000857 | XLOC_032536 | ENSRNOT00000078369 | 0.983086255 | 1.06E-08 |
| TUCP_000857 | XLOC_032536 | ENSRNOT00000092982 | 0.990694022 | 5.41E-10 |
| TUCP_000857 | XLOC_032536 | ENSRNOT00000088367 | 0.990694022 | 5.41E-10 |
| TUCP_000857 | XLOC_032536 | ENSRNOT00000061874 | 0.97286617  | 1.11E-07 |
| TUCP_000857 | XLOC_032536 | ENSRNOT00000081996 | 0.990694022 | 5.41E-10 |
| TUCP_000857 | XLOC_032536 | ENSRNOT00000022280 | 0.967820074 | 2.57E-07 |
| TUCP_000857 | XLOC_032536 | ENSRNOT00000082058 | 0.990694022 | 5.41E-10 |
| TUCP_000857 | XLOC_032536 | ENSRNOT00000088905 | 0.990694022 | 5.41E-10 |
| TUCP_000857 | XLOC_032536 | ENSRNOT00000086831 | 0.990694022 | 5.41E-10 |
| TUCP_000857 | XLOC_032536 | ENSRNOT00000045099 | 0.990694022 | 5.41E-10 |
| TUCP_000857 | XLOC_032536 | ENSRNOT00000086745 | 0.964438511 | 4.22E-07 |
| TUCP_000857 | XLOC_032536 | ENSRNOT00000085849 | 0.965353113 | 3.71E-07 |
| TUCP_000857 | XLOC_032536 | ENSRNOT00000086397 | 0.9588145   | 8.71E-07 |
| TUCP_000857 | XLOC_032536 | ENSRNOT00000077789 | 0.994731721 | 3.17E-11 |
| TUCP_000857 | XLOC_032536 | ENSRNOT00000073828 | 0.960182987 | 7.37E-07 |
| TUCP_000857 | XLOC_032536 | ENSRNOT00000087025 | 0.990694022 | 5.41E-10 |
| TUCP_000857 | XLOC_032536 | ENSRNOT00000019853 | 0.990694022 | 5.41E-10 |
| TUCP_000857 | XLOC_032536 | ENSRNOT00000073853 | 0.977593654 | 4.28E-08 |
| TUCP_000857 | XLOC_032536 | ENSRNOT00000065912 | 0.965253209 | 3.76E-07 |
| TUCP_000857 | XLOC_032536 | ENSRNOT00000078683 | 0.987220212 | 2.63E-09 |
| TUCP_000857 | XLOC_032536 | ENSRNOT00000093083 | 0.990755463 | 5.24E-10 |
| TUCP_000856 | XLOC_032536 | ENSRNOT00000054686 | 0.951280433 | 1.99E-06 |
| TUCP_000856 | XLOC_032536 | ENSRNOT00000043510 | 0.972019375 | 1.29E-07 |
| TUCP_000854 | XLOC_032536 | ENSRNOT00000084500 | 0.967387582 | 2.75E-07 |
| TUCP_000854 | XLOC_032536 | ENSRNOT00000093467 | 0.97949874  | 2.76E-08 |
| TUCP_000854 | XLOC_032536 | ENSRNOT00000029340 | 0.987175059 | 2.67E-09 |

|             |             |                    |             |          |
|-------------|-------------|--------------------|-------------|----------|
| TUCP_000854 | XLOC_032536 | ENSRNOT00000038646 | 0.986521484 | 3.43E-09 |
| TUCP_000854 | XLOC_032536 | ENSRNOT00000012095 | 0.962510848 | 5.48E-07 |
| TUCP_000854 | XLOC_032536 | ENSRNOT00000017909 | 0.957080795 | 1.07E-06 |
| TUCP_000854 | XLOC_032536 | ENSRNOT00000092579 | 0.986521484 | 3.43E-09 |
| TUCP_000854 | XLOC_032536 | ENSRNOT00000061516 | 0.962841087 | 5.24E-07 |
| TUCP_000854 | XLOC_032536 | ENSRNOT00000036383 | 0.972767626 | 1.13E-07 |
| TUCP_000854 | XLOC_032536 | ENSRNOT00000076528 | 0.981442203 | 1.68E-08 |
| TUCP_000854 | XLOC_032536 | ENSRNOT00000083034 | 0.980717936 | 2.03E-08 |
| TUCP_000854 | XLOC_032536 | ENSRNOT00000089607 | 0.978876477 | 3.20E-08 |
| TUCP_000854 | XLOC_032536 | ENSRNOT00000054939 | 0.975960404 | 6.07E-08 |
| TUCP_000854 | XLOC_032536 | ENSRNOT00000052315 | 0.966040494 | 3.36E-07 |
| TUCP_000854 | XLOC_032536 | ENSRNOT00000071484 | 0.951219736 | 2.00E-06 |
| TUCP_000854 | XLOC_032536 | ENSRNOT00000013459 | 0.960940034 | 6.71E-07 |
| TUCP_000854 | XLOC_032536 | ENSRNOT00000078137 | 0.986521484 | 3.43E-09 |
| TUCP_000854 | XLOC_032536 | ENSRNOT00000077764 | 0.955179981 | 1.32E-06 |
| TUCP_000854 | XLOC_032536 | ENSRNOT00000092740 | 0.986521484 | 3.43E-09 |
| TUCP_000854 | XLOC_032536 | ENSRNOT00000067034 | 0.964502209 | 4.18E-07 |
| TUCP_000854 | XLOC_032536 | ENSRNOT00000000117 | 0.992279336 | 2.13E-10 |
| TUCP_000854 | XLOC_032536 | ENSRNOT00000070958 | 0.986521484 | 3.43E-09 |
| TUCP_000854 | XLOC_032536 | ENSRNOT00000027268 | 0.986521484 | 3.43E-09 |
| TUCP_000854 | XLOC_032536 | ENSRNOT00000004459 | 0.986521484 | 3.43E-09 |
| TUCP_000854 | XLOC_032536 | ENSRNOT00000089235 | 0.980007988 | 2.43E-08 |
| TUCP_000854 | XLOC_032536 | ENSRNOT00000088168 | 0.986521484 | 3.43E-09 |
| TUCP_000854 | XLOC_032536 | ENSRNOT00000088148 | 0.986521484 | 3.43E-09 |
| TUCP_000854 | XLOC_032536 | ENSRNOT00000088527 | 0.986521484 | 3.43E-09 |
| TUCP_000854 | XLOC_032536 | ENSRNOT00000078701 | 0.986521484 | 3.43E-09 |
| TUCP_000854 | XLOC_032536 | ENSRNOT00000090078 | 0.986521484 | 3.43E-09 |
| TUCP_000854 | XLOC_032536 | ENSRNOT00000021748 | 0.986521484 | 3.43E-09 |
| TUCP_000854 | XLOC_032536 | ENSRNOT00000089085 | 0.986521484 | 3.43E-09 |
| TUCP_000854 | XLOC_032536 | ENSRNOT00000008153 | 0.985301721 | 5.27E-09 |
| TUCP_000854 | XLOC_032536 | ENSRNOT00000085896 | 0.963364874 | 4.89E-07 |
| TUCP_000854 | XLOC_032536 | ENSRNOT00000079189 | 0.966162023 | 3.30E-07 |
| TUCP_000854 | XLOC_032536 | ENSRNOT00000092425 | 0.961440954 | 6.29E-07 |
| TUCP_000854 | XLOC_032536 | ENSRNOT00000009776 | 0.986521484 | 3.43E-09 |
| TUCP_000858 | XLOC_032536 | ENSRNOT00000085195 | 0.990980759 | 4.63E-10 |
| TUCP_000858 | XLOC_032536 | ENSRNOT00000013705 | 0.987738008 | 2.14E-09 |
| TUCP_000858 | XLOC_032536 | ENSRNOT00000040851 | 0.987738008 | 2.14E-09 |
| TUCP_000858 | XLOC_032536 | ENSRNOT00000058389 | 0.987738008 | 2.14E-09 |
| TUCP_000858 | XLOC_032536 | ENSRNOT00000023542 | 0.987738008 | 2.14E-09 |
| TUCP_000858 | XLOC_032536 | ENSRNOT00000028653 | 0.987738008 | 2.14E-09 |
| TUCP_000858 | XLOC_032536 | ENSRNOT00000017230 | 0.962812407 | 5.26E-07 |
| TUCP_000858 | XLOC_032536 | ENSRNOT00000092890 | 0.960221842 | 7.34E-07 |
| TUCP_000858 | XLOC_032536 | ENSRNOT00000012174 | 0.987738008 | 2.14E-09 |
| TUCP_000858 | XLOC_032536 | ENSRNOT00000051680 | 0.979142552 | 3.00E-08 |
| TUCP_000858 | XLOC_032536 | ENSRNOT00000089118 | 0.987738008 | 2.14E-09 |
| TUCP_000858 | XLOC_032536 | ENSRNOT00000025245 | 0.987516873 | 2.34E-09 |
| TUCP_000858 | XLOC_032536 | ENSRNOT00000015138 | 0.98724954  | 2.60E-09 |
| TUCP_000858 | XLOC_032536 | ENSRNOT00000080185 | 0.990487704 | 6.04E-10 |
| TUCP_000858 | XLOC_032536 | ENSRNOT00000049165 | 0.95618451  | 1.18E-06 |
| TUCP_000858 | XLOC_032536 | ENSRNOT00000086502 | 0.978856553 | 3.21E-08 |
| TUCP_000858 | XLOC_032536 | ENSRNOT00000079661 | 0.987738008 | 2.14E-09 |

|             |             |                     |              |          |
|-------------|-------------|---------------------|--------------|----------|
| TUCP_000858 | XLOC_032536 | ENSRNOT00000076338  | 0.969509593  | 1.97E-07 |
| TUCP_000858 | XLOC_032536 | ENSRNOT00000042220  | 0.987738008  | 2.14E-09 |
| TUCP_000858 | XLOC_032536 | ENSRNOT00000088441  | 0.959041125  | 8.47E-07 |
| TUCP_000858 | XLOC_032536 | ENSRNOT00000005031  | 0.950367131  | 2.18E-06 |
| TUCP_000858 | XLOC_032536 | ENSRNOT00000079167  | 0.98266014   | 1.20E-08 |
| TUCP_000858 | XLOC_032536 | ENSRNOT00000061950  | 0.955507671  | 1.27E-06 |
| TUCP_000858 | XLOC_032536 | ENSRNOT00000086710  | 0.987424495  | 2.43E-09 |
| TUCP_000858 | XLOC_032536 | ENSRNOT00000075226  | 0.987738008  | 2.14E-09 |
| TUCP_000858 | XLOC_032536 | ENSRNOT00000000351  | 0.987738008  | 2.14E-09 |
| TUCP_000858 | XLOC_032536 | ENSRNOT00000092294  | 0.970573208  | 1.65E-07 |
| TUCP_001604 | XLOC_063405 | ENSRNOT00000007314  | -0.954818097 | 1.37E-06 |
| TUCP_001604 | XLOC_063405 | ENSRNOT00000024366  | 0.954452089  | 1.43E-06 |
| TUCP_001604 | XLOC_063405 | ENSRNOT000000031904 | 0.954941667  | 1.36E-06 |
| TUCP_001604 | XLOC_063405 | ENSRNOT00000067400  | 0.953739981  | 1.54E-06 |
| TUCP_001604 | XLOC_063405 | ENSRNOT00000017907  | -0.954594948 | 1.41E-06 |
| TUCP_001604 | XLOC_063405 | ENSRNOT00000003794  | -0.963146884 | 5.03E-07 |
| TUCP_001604 | XLOC_063405 | ENSRNOT00000027083  | 0.95085953   | 2.08E-06 |
| TUCP_001604 | XLOC_063405 | ENSRNOT00000061253  | 0.965891412  | 3.43E-07 |
| TUCP_001604 | XLOC_063405 | ENSRNOT00000050834  | -0.953381485 | 1.60E-06 |
| TUCP_001604 | XLOC_063405 | ENSRNOT00000066024  | 0.964778895  | 4.02E-07 |
| TUCP_001604 | XLOC_063405 | ENSRNOT000000022714 | 0.958087587  | 9.49E-07 |
| TUCP_001604 | XLOC_063405 | ENSRNOT00000057537  | 0.953029292  | 1.66E-06 |
| TUCP_001604 | XLOC_063405 | ENSRNOT00000019386  | -0.95614729  | 1.19E-06 |
| TUCP_001604 | XLOC_063405 | ENSRNOT00000005958  | 0.951645632  | 1.92E-06 |
| TUCP_001604 | XLOC_063405 | ENSRNOT00000001855  | 0.959480018  | 8.04E-07 |
| TUCP_001604 | XLOC_063405 | ENSRNOT00000059524  | -0.954772662 | 1.38E-06 |
| TUCP_001604 | XLOC_063405 | ENSRNOT00000090688  | 0.950710643  | 2.11E-06 |
| TUCP_001604 | XLOC_063405 | ENSRNOT00000078306  | 0.96593656   | 3.41E-07 |
| TUCP_001604 | XLOC_063405 | ENSRNOT000000082869 | 0.952862983  | 1.69E-06 |
| TUCP_001604 | XLOC_063405 | ENSRNOT00000080695  | 0.952056054  | 1.84E-06 |
| TUCP_001604 | XLOC_063405 | ENSRNOT00000041044  | 0.957719106  | 9.91E-07 |
| TUCP_001604 | XLOC_063405 | ENSRNOT00000088353  | -0.967854074 | 2.56E-07 |
| TUCP_001604 | XLOC_063405 | ENSRNOT00000001586  | -0.950114099 | 2.24E-06 |
| TUCP_001604 | XLOC_063405 | ENSRNOT00000042125  | 0.956380345  | 1.16E-06 |
| TUCP_001604 | XLOC_063405 | ENSRNOT00000038807  | 0.962000901  | 5.85E-07 |
| TUCP_001604 | XLOC_063405 | ENSRNOT00000026641  | 0.969819996  | 1.87E-07 |
| TUCP_001604 | XLOC_063405 | ENSRNOT000000085765 | 0.954965601  | 1.35E-06 |
| TUCP_001604 | XLOC_063405 | ENSRNOT000000033450 | -0.951467879 | 1.95E-06 |
| TUCP_001604 | XLOC_063405 | ENSRNOT00000022620  | 0.953931296  | 1.51E-06 |
| TUCP_001604 | XLOC_063405 | ENSRNOT00000085403  | 0.953783755  | 1.54E-06 |
| TUCP_001604 | XLOC_063405 | ENSRNOT00000010367  | 0.969062144  | 2.12E-07 |
| TUCP_001604 | XLOC_063405 | ENSRNOT00000002837  | -0.959954323 | 7.58E-07 |
| TUCP_001604 | XLOC_063405 | ENSRNOT00000005257  | 0.966858241  | 2.98E-07 |
| TUCP_001604 | XLOC_063405 | ENSRNOT00000019886  | 0.960030321  | 7.51E-07 |
| TUCP_001604 | XLOC_063405 | ENSRNOT000000033975 | 0.951148953  | 2.02E-06 |
| TUCP_000600 | XLOC_021899 | ENSRNOT000000084500 | 0.984887141  | 6.05E-09 |
| TUCP_000600 | XLOC_021899 | ENSRNOT00000093467  | 0.996134431  | 6.75E-12 |
| TUCP_000600 | XLOC_021899 | ENSRNOT00000029340  | 0.999116572  | 4.23E-15 |
| TUCP_000600 | XLOC_021899 | ENSRNOT00000077972  | 0.962758032  | 5.30E-07 |
| TUCP_000600 | XLOC_021899 | ENSRNOT00000038646  | 1            | 1.33E-79 |
| TUCP_000600 | XLOC_021899 | ENSRNOT00000012095  | 0.957750287  | 9.88E-07 |

|             |             |                    |             |          |
|-------------|-------------|--------------------|-------------|----------|
| TUCP_000600 | XLOC_021899 | ENSRNOT00000017909 | 0.975587192 | 6.56E-08 |
| TUCP_000600 | XLOC_021899 | ENSRNOT00000092579 | 1           | 1.33E-79 |
| TUCP_000600 | XLOC_021899 | ENSRNOT00000089235 | 0.998661162 | 3.38E-14 |
| TUCP_000600 | XLOC_021899 | ENSRNOT00000036383 | 0.988460809 | 1.58E-09 |
| TUCP_000600 | XLOC_021899 | ENSRNOT00000076528 | 0.997115373 | 1.57E-12 |
| TUCP_000600 | XLOC_021899 | ENSRNOT00000075193 | 0.964326971 | 4.29E-07 |
| TUCP_000600 | XLOC_021899 | ENSRNOT00000083034 | 0.990934646 | 4.75E-10 |
| TUCP_000600 | XLOC_021899 | ENSRNOT00000089607 | 0.995091455 | 2.23E-11 |
| TUCP_000600 | XLOC_021899 | ENSRNOT00000086014 | 0.960893638 | 6.74E-07 |
| TUCP_000600 | XLOC_021899 | ENSRNOT00000054939 | 0.958021495 | 9.57E-07 |
| TUCP_000600 | XLOC_021899 | ENSRNOT00000052315 | 0.983687082 | 8.85E-09 |
| TUCP_000600 | XLOC_021899 | ENSRNOT00000088168 | 1           | 0        |
| TUCP_000600 | XLOC_021899 | ENSRNOT00000046231 | 0.96225463  | 5.66E-07 |
| TUCP_000600 | XLOC_021899 | ENSRNOT00000013459 | 0.979098017 | 3.03E-08 |
| TUCP_000600 | XLOC_021899 | ENSRNOT00000078137 | 1           | 0        |
| TUCP_000600 | XLOC_021899 | ENSRNOT00000077764 | 0.977143528 | 4.73E-08 |
| TUCP_000600 | XLOC_021899 | ENSRNOT00000043661 | 0.966975951 | 2.93E-07 |
| TUCP_000600 | XLOC_021899 | ENSRNOT00000092740 | 1           | 0        |
| TUCP_000600 | XLOC_021899 | ENSRNOT00000000117 | 0.990989174 | 4.61E-10 |
| TUCP_000600 | XLOC_021899 | ENSRNOT00000071877 | 0.967113583 | 2.87E-07 |
| TUCP_000600 | XLOC_021899 | ENSRNOT00000070958 | 1           | 0        |
| TUCP_000600 | XLOC_021899 | ENSRNOT00000076757 | 0.959205354 | 8.31E-07 |
| TUCP_000600 | XLOC_021899 | ENSRNOT00000085310 | 0.965230243 | 3.78E-07 |
| TUCP_000600 | XLOC_021899 | ENSRNOT00000047241 | 0.966576993 | 3.11E-07 |
| TUCP_000600 | XLOC_021899 | ENSRNOT00000027268 | 1           | 0        |
| TUCP_000600 | XLOC_021899 | ENSRNOT00000004459 | 1           | 0        |
| TUCP_000600 | XLOC_021899 | ENSRNOT00000048373 | 0.959096578 | 8.42E-07 |
| TUCP_000600 | XLOC_021899 | ENSRNOT00000061516 | 0.987595648 | 2.27E-09 |
| TUCP_000600 | XLOC_021899 | ENSRNOT00000088148 | 1           | 0        |
| TUCP_000600 | XLOC_021899 | ENSRNOT00000088527 | 1           | 0        |
| TUCP_000600 | XLOC_021899 | ENSRNOT00000078701 | 1           | 0        |
| TUCP_000600 | XLOC_021899 | ENSRNOT00000052308 | 0.962646127 | 5.38E-07 |
| TUCP_000600 | XLOC_021899 | ENSRNOT00000021748 | 1           | 0        |
| TUCP_000600 | XLOC_021899 | ENSRNOT00000089085 | 1           | 0        |
| TUCP_000600 | XLOC_021899 | ENSRNOT00000008153 | 0.999703506 | 1.80E-17 |
| TUCP_000600 | XLOC_021899 | ENSRNOT00000085896 | 0.971605382 | 1.39E-07 |
| TUCP_000600 | XLOC_021899 | ENSRNOT00000079189 | 0.984972387 | 5.89E-09 |
| TUCP_000600 | XLOC_021899 | ENSRNOT00000090078 | 1           | 0        |
| TUCP_000600 | XLOC_021899 | ENSRNOT00000078020 | 0.958421666 | 9.13E-07 |
| TUCP_000600 | XLOC_021899 | ENSRNOT00000092425 | 0.956092273 | 1.19E-06 |
| TUCP_000600 | XLOC_021899 | ENSRNOT00000009776 | 1           | 4.25E-78 |
| TUCP_003725 | XLOC_162370 | ENSRNOT00000018860 | 0.968370683 | 2.36E-07 |
| TUCP_003725 | XLOC_162370 | ENSRNOT00000066244 | 0.951835397 | 1.88E-06 |
| TUCP_003725 | XLOC_162370 | ENSRNOT00000007312 | 0.957047006 | 1.07E-06 |
| TUCP_003726 | XLOC_162375 | ENSRNOT00000063905 | 0.956687549 | 1.12E-06 |
| TUCP_000775 | XLOC_029079 | ENSRNOT00000008154 | 0.956727608 | 1.11E-06 |
| TUCP_000775 | XLOC_029079 | ENSRNOT00000016087 | 0.95416142  | 1.48E-06 |
| TUCP_000775 | XLOC_029079 | ENSRNOT00000013836 | 0.956852333 | 1.10E-06 |
| TUCP_000775 | XLOC_029079 | ENSRNOT00000059172 | 0.957938458 | 9.66E-07 |
| TUCP_002639 | XLOC_111701 | ENSRNOT00000028234 | 0.951479075 | 1.95E-06 |
| TUCP_002639 | XLOC_111701 | ENSRNOT00000016083 | 0.977420512 | 4.45E-08 |

|             |             |                    |              |          |
|-------------|-------------|--------------------|--------------|----------|
| TUCP_002639 | XLOC_111701 | ENSRNOT00000074448 | 0.958875113  | 8.65E-07 |
| TUCP_002639 | XLOC_111701 | ENSRNOT00000030823 | 0.954108507  | 1.48E-06 |
| TUCP_002639 | XLOC_111701 | ENSRNOT00000049973 | 0.96174128   | 6.05E-07 |
| TUCP_002639 | XLOC_111701 | ENSRNOT00000034096 | 0.95392447   | 1.51E-06 |
| TUCP_002639 | XLOC_111701 | ENSRNOT00000003514 | 0.954342343  | 1.45E-06 |
| TUCP_002639 | XLOC_111701 | ENSRNOT00000029097 | 0.964428871  | 4.22E-07 |
| TUCP_002639 | XLOC_111701 | ENSRNOT00000022637 | 0.954936507  | 1.36E-06 |
| TUCP_002639 | XLOC_111701 | ENSRNOT00000009113 | 0.963210554  | 4.99E-07 |
| TUCP_002639 | XLOC_111701 | ENSRNOT00000010932 | 0.959787663  | 7.74E-07 |
| TUCP_002639 | XLOC_111701 | ENSRNOT00000075494 | 0.957923327  | 9.68E-07 |
| TUCP_002639 | XLOC_111701 | ENSRNOT00000078599 | 0.975454516  | 6.73E-08 |
| TUCP_002639 | XLOC_111701 | ENSRNOT00000023149 | 0.962472415  | 5.50E-07 |
| TUCP_002639 | XLOC_111701 | ENSRNOT00000017204 | 0.963611756  | 4.73E-07 |
| TUCP_002639 | XLOC_111701 | ENSRNOT00000089313 | 0.951081602  | 2.03E-06 |
| TUCP_002639 | XLOC_111701 | ENSRNOT00000021403 | 0.966168298  | 3.30E-07 |
| TUCP_002639 | XLOC_111701 | ENSRNOT00000009544 | 0.956430353  | 1.15E-06 |
| TUCP_002639 | XLOC_111701 | ENSRNOT00000051525 | 0.951136013  | 2.02E-06 |
| TUCP_002639 | XLOC_111701 | ENSRNOT00000023736 | 0.973485501  | 9.87E-08 |
| TUCP_002639 | XLOC_111701 | ENSRNOT00000026748 | 0.974387956  | 8.31E-08 |
| TUCP_002639 | XLOC_111701 | ENSRNOT00000007326 | 0.966287097  | 3.24E-07 |
| TUCP_002639 | XLOC_111701 | ENSRNOT00000015130 | 0.959685619  | 7.84E-07 |
| TUCP_002639 | XLOC_111701 | ENSRNOT00000028034 | 0.961169539  | 6.51E-07 |
| TUCP_002639 | XLOC_111701 | ENSRNOT00000007577 | 0.961250505  | 6.45E-07 |
| TUCP_002639 | XLOC_111701 | ENSRNOT00000003792 | 0.972541043  | 1.17E-07 |
| TUCP_002639 | XLOC_111701 | ENSRNOT00000057978 | 0.969336265  | 2.03E-07 |
| TUCP_002639 | XLOC_111701 | ENSRNOT00000072297 | 0.961484891  | 6.26E-07 |
| TUCP_002639 | XLOC_111701 | ENSRNOT00000001973 | 0.958619109  | 8.91E-07 |
| TUCP_002639 | XLOC_111701 | ENSRNOT00000006946 | 0.961199591  | 6.49E-07 |
| TUCP_002639 | XLOC_111701 | ENSRNOT00000016376 | 0.952774157  | 1.71E-06 |
| TUCP_002639 | XLOC_111701 | ENSRNOT00000006484 | 0.951971401  | 1.86E-06 |
| TUCP_002639 | XLOC_111701 | ENSRNOT00000072733 | 0.975990209  | 6.04E-08 |
| TUCP_002639 | XLOC_111701 | ENSRNOT00000017339 | 0.968788454  | 2.21E-07 |
| TUCP_002639 | XLOC_111701 | ENSRNOT00000087342 | 0.966786561  | 3.01E-07 |
| TUCP_002639 | XLOC_111701 | ENSRNOT00000015759 | 0.967461954  | 2.72E-07 |
| TUCP_002639 | XLOC_111701 | ENSRNOT00000091541 | 0.950463975  | 2.16E-06 |
| TUCP_002639 | XLOC_111701 | ENSRNOT00000017564 | 0.973436123  | 9.96E-08 |
| TUCP_002639 | XLOC_111701 | ENSRNOT00000050227 | 0.978162725  | 3.77E-08 |
| TUCP_002639 | XLOC_111701 | ENSRNOT00000088856 | 0.970171461  | 1.77E-07 |
| TUCP_002639 | XLOC_111701 | ENSRNOT00000003728 | 0.963492292  | 4.80E-07 |
| TUCP_002639 | XLOC_111701 | ENSRNOT00000007802 | 0.950287869  | 2.20E-06 |
| TUCP_002638 | XLOC_111630 | ENSRNOT00000092105 | 0.964083497  | 4.43E-07 |
| TUCP_002638 | XLOC_111630 | ENSRNOT00000045827 | 0.97274359   | 1.13E-07 |
| TUCP_002638 | XLOC_111630 | ENSRNOT00000087907 | 0.956758994  | 1.11E-06 |
| TUCP_002638 | XLOC_111630 | ENSRNOT00000072306 | 0.950205527  | 2.22E-06 |
| TUCP_002638 | XLOC_111630 | ENSRNOT00000078672 | 0.963762189  | 4.63E-07 |
| TUCP_002635 | XLOC_111409 | ENSRNOT00000019392 | 0.960319327  | 7.25E-07 |
| TUCP_002635 | XLOC_111409 | ENSRNOT00000027809 | -0.950094712 | 2.24E-06 |
| TUCP_002635 | XLOC_111409 | ENSRNOT00000011802 | 0.959499739  | 8.02E-07 |
| TUCP_002635 | XLOC_111409 | ENSRNOT00000024413 | -0.953934954 | 1.51E-06 |
| TUCP_002635 | XLOC_111409 | ENSRNOT00000010712 | 0.963954853  | 4.51E-07 |
| TUCP_002635 | XLOC_111409 | ENSRNOT00000059577 | -0.955917683 | 1.22E-06 |



|             |             |                    |              |          |
|-------------|-------------|--------------------|--------------|----------|
| TUCP_002634 | XLOC_111375 | ENSRNOT00000039045 | 0.956653099  | 1.12E-06 |
| TUCP_002634 | XLOC_111375 | ENSRNOT00000000713 | 0.982809994  | 1.15E-08 |
| TUCP_002634 | XLOC_111375 | ENSRNOT00000011230 | 0.952263125  | 1.80E-06 |
| TUCP_002634 | XLOC_111375 | ENSRNOT00000041908 | 0.954850611  | 1.37E-06 |
| TUCP_002634 | XLOC_111375 | ENSRNOT00000074939 | 0.969025087  | 2.13E-07 |
| TUCP_002634 | XLOC_111375 | ENSRNOT00000076052 | 0.971056595  | 1.52E-07 |
| TUCP_002634 | XLOC_111375 | ENSRNOT00000026783 | 0.955067312  | 1.34E-06 |
| TUCP_002634 | XLOC_111375 | ENSRNOT00000078445 | -0.952246464 | 1.80E-06 |
| TUCP_002634 | XLOC_111375 | ENSRNOT00000023326 | 0.958750566  | 8.77E-07 |
| TUCP_002634 | XLOC_111375 | ENSRNOT00000026065 | 0.962127035  | 5.76E-07 |
| TUCP_002634 | XLOC_111375 | ENSRNOT00000012056 | 0.95859685   | 8.94E-07 |
| TUCP_002634 | XLOC_111375 | ENSRNOT00000005228 | 0.950333491  | 2.19E-06 |
| TUCP_002634 | XLOC_111375 | ENSRNOT00000000343 | 0.963151182  | 5.03E-07 |
| TUCP_002634 | XLOC_111375 | ENSRNOT00000080654 | 0.951885711  | 1.87E-06 |
| TUCP_002634 | XLOC_111375 | ENSRNOT00000044742 | 0.950693151  | 2.11E-06 |
| TUCP_002634 | XLOC_111375 | ENSRNOT00000009497 | 0.953241385  | 1.63E-06 |
| TUCP_002634 | XLOC_111375 | ENSRNOT00000027414 | 0.958768418  | 8.76E-07 |
| TUCP_002634 | XLOC_111375 | ENSRNOT00000028563 | 0.958992134  | 8.52E-07 |
| TUCP_002634 | XLOC_111375 | ENSRNOT00000015076 | 0.956845806  | 1.10E-06 |
| TUCP_002634 | XLOC_111375 | ENSRNOT00000066670 | 0.952527113  | 1.75E-06 |
| TUCP_002634 | XLOC_111375 | ENSRNOT00000043554 | 0.96192307   | 5.91E-07 |
| TUCP_002634 | XLOC_111375 | ENSRNOT00000091807 | 0.951110667  | 2.03E-06 |
| TUCP_002634 | XLOC_111375 | ENSRNOT00000005942 | 0.953608783  | 1.57E-06 |
| TUCP_002634 | XLOC_111375 | ENSRNOT00000012463 | -0.96530524  | 3.73E-07 |
| TUCP_002634 | XLOC_111375 | ENSRNOT00000006055 | 0.953021845  | 1.67E-06 |
| TUCP_002634 | XLOC_111375 | ENSRNOT00000012379 | 0.956528668  | 1.14E-06 |
| TUCP_002634 | XLOC_111375 | ENSRNOT00000028646 | 0.952284064  | 1.80E-06 |
| TUCP_002634 | XLOC_111375 | ENSRNOT00000011384 | 0.97056949   | 1.66E-07 |
| TUCP_002634 | XLOC_111375 | ENSRNOT00000026755 | 0.956938486  | 1.08E-06 |
| TUCP_002634 | XLOC_111375 | ENSRNOT00000038247 | 0.954591666  | 1.41E-06 |
| TUCP_002634 | XLOC_111375 | ENSRNOT00000021582 | 0.960680275  | 6.93E-07 |
| TUCP_002634 | XLOC_111375 | ENSRNOT00000071764 | 0.952584647  | 1.74E-06 |
| TUCP_002634 | XLOC_111375 | ENSRNOT00000027944 | 0.968170697  | 2.44E-07 |
| TUCP_002634 | XLOC_111375 | ENSRNOT00000052075 | 0.971440855  | 1.43E-07 |
| TUCP_002634 | XLOC_111375 | ENSRNOT00000026718 | 0.954279057  | 1.46E-06 |
| TUCP_002634 | XLOC_111375 | ENSRNOT00000093640 | 0.964942569  | 3.93E-07 |
| TUCP_002634 | XLOC_111375 | ENSRNOT00000017319 | 0.963084526  | 5.07E-07 |
| TUCP_002634 | XLOC_111375 | ENSRNOT00000057807 | -0.957435071 | 1.02E-06 |
| TUCP_002634 | XLOC_111375 | ENSRNOT0000001809  | 0.966892389  | 2.96E-07 |
| TUCP_002634 | XLOC_111375 | ENSRNOT00000078500 | 0.965889702  | 3.43E-07 |
| TUCP_002634 | XLOC_111375 | ENSRNOT00000067822 | 0.950970871  | 2.05E-06 |
| TUCP_002634 | XLOC_111375 | ENSRNOT00000034722 | 0.963617352  | 4.72E-07 |
| TUCP_002634 | XLOC_111375 | ENSRNOT00000010149 | 0.95752177   | 1.01E-06 |
| TUCP_002634 | XLOC_111375 | ENSRNOT00000016384 | -0.963340226 | 4.90E-07 |
| TUCP_002634 | XLOC_111375 | ENSRNOT00000021037 | 0.95025545   | 2.21E-06 |
| TUCP_002634 | XLOC_111375 | ENSRNOT00000054955 | -0.965055627 | 3.87E-07 |
| TUCP_002634 | XLOC_111375 | ENSRNOT00000011663 | 0.96488429   | 3.96E-07 |
| TUCP_002634 | XLOC_111375 | ENSRNOT00000017948 | 0.965806033  | 3.48E-07 |
| TUCP_002634 | XLOC_111375 | ENSRNOT00000012895 | 0.95005555   | 2.25E-06 |
| TUCP_002634 | XLOC_111375 | ENSRNOT00000039852 | 0.969934263  | 1.84E-07 |
| TUCP_002634 | XLOC_111375 | ENSRNOT00000090918 | 0.961256479  | 6.44E-07 |

|             |             |                    |              |          |
|-------------|-------------|--------------------|--------------|----------|
| TUCP_002634 | XLOC_111375 | ENSRNOT00000023180 | 0.976088016  | 5.91E-08 |
| TUCP_002634 | XLOC_111375 | ENSRNOT00000000676 | 0.951812484  | 1.89E-06 |
| TUCP_002634 | XLOC_111375 | ENSRNOT00000031267 | 0.950534266  | 2.15E-06 |
| TUCP_002634 | XLOC_111375 | ENSRNOT00000015609 | 0.957397614  | 1.03E-06 |
| TUCP_002634 | XLOC_111375 | ENSRNOT00000028070 | 0.978309718  | 3.65E-08 |
| TUCP_002634 | XLOC_111375 | ENSRNOT00000022610 | 0.959199673  | 8.31E-07 |
| TUCP_002634 | XLOC_111375 | ENSRNOT00000020437 | 0.96461647   | 4.12E-07 |
| TUCP_002634 | XLOC_111375 | ENSRNOT00000010898 | 0.961833411  | 5.98E-07 |
| TUCP_002634 | XLOC_111375 | ENSRNOT00000001242 | 0.963454679  | 4.83E-07 |
| TUCP_002634 | XLOC_111375 | ENSRNOT00000019177 | 0.964835655  | 3.99E-07 |
| TUCP_002634 | XLOC_111375 | ENSRNOT00000078589 | -0.956617205 | 1.13E-06 |
| TUCP_002634 | XLOC_111375 | ENSRNOT00000029419 | 0.952091029  | 1.83E-06 |
| TUCP_002634 | XLOC_111375 | ENSRNOT00000027520 | 0.96826051   | 2.41E-07 |
| TUCP_002634 | XLOC_111375 | ENSRNOT00000006549 | -0.96453812  | 4.16E-07 |
| TUCP_002634 | XLOC_111375 | ENSRNOT00000004698 | 0.971318456  | 1.46E-07 |
| TUCP_002634 | XLOC_111375 | ENSRNOT00000082388 | 0.954832919  | 1.37E-06 |
| TUCP_002634 | XLOC_111375 | ENSRNOT00000045083 | 0.962844572  | 5.24E-07 |
| TUCP_002634 | XLOC_111375 | ENSRNOT00000084240 | 0.966448679  | 3.16E-07 |
| TUCP_002634 | XLOC_111375 | ENSRNOT00000020098 | -0.951542467 | 1.94E-06 |
| TUCP_002634 | XLOC_111375 | ENSRNOT00000009280 | 0.961233811  | 6.46E-07 |
| TUCP_002634 | XLOC_111375 | ENSRNOT00000005911 | 0.962428941  | 5.54E-07 |
| TUCP_002634 | XLOC_111375 | ENSRNOT00000003991 | 0.9541928    | 1.47E-06 |
| TUCP_002634 | XLOC_111375 | ENSRNOT00000034744 | 0.959374886  | 8.14E-07 |
| TUCP_002634 | XLOC_111375 | ENSRNOT00000009440 | -0.955503139 | 1.27E-06 |
| TUCP_002634 | XLOC_111375 | ENSRNOT00000079767 | -0.954415342 | 1.44E-06 |
| TUCP_002634 | XLOC_111375 | ENSRNOT00000021153 | 0.95193741   | 1.86E-06 |
| TUCP_002634 | XLOC_111375 | ENSRNOT00000024281 | 0.956006776  | 1.21E-06 |
| TUCP_002634 | XLOC_111375 | ENSRNOT00000078175 | 0.961430905  | 6.30E-07 |
| TUCP_002634 | XLOC_111375 | ENSRNOT00000025027 | 0.956059181  | 1.20E-06 |
| TUCP_002634 | XLOC_111375 | ENSRNOT00000088995 | 0.960655769  | 6.95E-07 |
| TUCP_002634 | XLOC_111375 | ENSRNOT00000091265 | 0.953960631  | 1.51E-06 |
| TUCP_002634 | XLOC_111375 | ENSRNOT00000074075 | 0.957461777  | 1.02E-06 |
| TUCP_002634 | XLOC_111375 | ENSRNOT00000090170 | 0.965114568  | 3.84E-07 |
| TUCP_002634 | XLOC_111375 | ENSRNOT00000024060 | 0.965319561  | 3.73E-07 |
| TUCP_002634 | XLOC_111375 | ENSRNOT00000027985 | -0.957046246 | 1.07E-06 |
| TUCP_002634 | XLOC_111375 | ENSRNOT00000025832 | 0.951097534  | 2.03E-06 |
| TUCP_002634 | XLOC_111375 | ENSRNOT00000049538 | 0.974652294  | 7.90E-08 |
| TUCP_002634 | XLOC_111375 | ENSRNOT00000026231 | 0.956835181  | 1.10E-06 |
| TUCP_002634 | XLOC_111375 | ENSRNOT00000006499 | 0.967912962  | 2.54E-07 |
| TUCP_002634 | XLOC_111375 | ENSRNOT00000005909 | 0.954530981  | 1.42E-06 |
| TUCP_002634 | XLOC_111375 | ENSRNOT00000020168 | 0.950524177  | 2.15E-06 |
| TUCP_002634 | XLOC_111375 | ENSRNOT00000019011 | 0.956589547  | 1.13E-06 |
| TUCP_002634 | XLOC_111375 | ENSRNOT00000023330 | 0.954907715  | 1.36E-06 |
| TUCP_002634 | XLOC_111375 | ENSRNOT00000027054 | 0.965116672  | 3.84E-07 |
| TUCP_002634 | XLOC_111375 | ENSRNOT00000009129 | 0.967245085  | 2.81E-07 |
| TUCP_002634 | XLOC_111375 | ENSRNOT00000036951 | 0.967713882  | 2.62E-07 |
| TUCP_002634 | XLOC_111375 | ENSRNOT00000026186 | 0.962465164  | 5.51E-07 |
| TUCP_002634 | XLOC_111375 | ENSRNOT00000044177 | 0.961653963  | 6.12E-07 |
| TUCP_002634 | XLOC_111375 | ENSRNOT00000011442 | -0.951084999 | 2.03E-06 |
| TUCP_002634 | XLOC_111375 | ENSRNOT00000078929 | 0.962959583  | 5.16E-07 |
| TUCP_002634 | XLOC_111375 | ENSRNOT00000043953 | 0.957622191  | 1.00E-06 |

|             |             |                    |              |          |
|-------------|-------------|--------------------|--------------|----------|
| TUCP_002634 | XLOC_111375 | ENSRNOT0000002876  | 0.953603279  | 1.57E-06 |
| TUCP_002634 | XLOC_111375 | ENSRNOT00000088196 | 0.954782764  | 1.38E-06 |
| TUCP_002634 | XLOC_111375 | ENSRNOT00000023645 | 0.960741509  | 6.88E-07 |
| TUCP_002634 | XLOC_111375 | ENSRNOT00000084734 | 0.967932303  | 2.53E-07 |
| TUCP_002634 | XLOC_111375 | ENSRNOT00000066736 | 0.961443536  | 6.29E-07 |
| TUCP_002634 | XLOC_111375 | ENSRNOT00000064840 | 0.965424684  | 3.67E-07 |
| TUCP_002634 | XLOC_111375 | ENSRNOT00000058116 | -0.964695701 | 4.07E-07 |
| TUCP_002634 | XLOC_111375 | ENSRNOT0000005977  | 0.950375623  | 2.18E-06 |
| TUCP_002634 | XLOC_111375 | ENSRNOT00000090925 | 0.958557193  | 8.98E-07 |
| TUCP_002634 | XLOC_111375 | ENSRNOT00000025394 | 0.954259159  | 1.46E-06 |
| TUCP_002634 | XLOC_111375 | ENSRNOT00000074653 | 0.95278147   | 1.71E-06 |
| TUCP_002634 | XLOC_111375 | ENSRNOT00000025391 | 0.961741318  | 6.05E-07 |
| TUCP_002634 | XLOC_111375 | ENSRNOT00000031230 | 0.953912319  | 1.52E-06 |
| TUCP_002634 | XLOC_111375 | ENSRNOT00000066028 | 0.962077489  | 5.80E-07 |
| TUCP_002634 | XLOC_111375 | ENSRNOT00000077406 | 0.952987642  | 1.67E-06 |
| TUCP_002634 | XLOC_111375 | ENSRNOT00000014887 | 0.980004239  | 2.43E-08 |
| TUCP_002634 | XLOC_111375 | ENSRNOT00000010588 | 0.969406631  | 2.00E-07 |
| TUCP_002634 | XLOC_111375 | ENSRNOT00000002292 | 0.958587095  | 8.95E-07 |
| TUCP_002634 | XLOC_111375 | ENSRNOT00000039344 | 0.961040271  | 6.62E-07 |
| TUCP_002634 | XLOC_111375 | ENSRNOT00000086336 | 0.967288314  | 2.79E-07 |
| TUCP_002634 | XLOC_111375 | ENSRNOT00000068322 | 0.967688077  | 2.63E-07 |
| TUCP_002634 | XLOC_111375 | ENSRNOT00000082174 | 0.951799264  | 1.89E-06 |
| TUCP_002634 | XLOC_111375 | ENSRNOT00000010218 | 0.969734854  | 1.90E-07 |
| TUCP_002634 | XLOC_111375 | ENSRNOT00000004412 | 0.964263863  | 4.32E-07 |
| TUCP_002634 | XLOC_111375 | ENSRNOT00000014496 | 0.960987926  | 6.66E-07 |
| TUCP_002634 | XLOC_111375 | ENSRNOT00000064798 | 0.954985727  | 1.35E-06 |
| TUCP_002634 | XLOC_111375 | ENSRNOT00000077465 | 0.978961473  | 3.13E-08 |
| TUCP_002634 | XLOC_111375 | ENSRNOT00000027452 | 0.954066818  | 1.49E-06 |
| TUCP_002634 | XLOC_111375 | ENSRNOT00000034704 | 0.958548284  | 8.99E-07 |
| TUCP_002634 | XLOC_111375 | ENSRNOT00000030343 | 0.95089889   | 2.07E-06 |
| TUCP_002634 | XLOC_111375 | ENSRNOT00000023428 | 0.954701782  | 1.39E-06 |
| TUCP_002634 | XLOC_111375 | ENSRNOT00000024420 | 0.952823754  | 1.70E-06 |
| TUCP_002634 | XLOC_111375 | ENSRNOT00000022947 | -0.950663633 | 2.12E-06 |
| TUCP_002634 | XLOC_111375 | ENSRNOT00000048029 | 0.957162395  | 1.06E-06 |
| TUCP_002634 | XLOC_111375 | ENSRNOT00000010433 | 0.972735773  | 1.13E-07 |
| TUCP_002634 | XLOC_111375 | ENSRNOT00000083799 | 0.957706744  | 9.93E-07 |
| TUCP_002634 | XLOC_111375 | ENSRNOT00000024548 | 0.958902876  | 8.62E-07 |
| TUCP_003481 | XLOC_150624 | ENSRNOT00000012880 | 0.976337198  | 5.62E-08 |
| TUCP_003481 | XLOC_150624 | ENSRNOT00000074465 | 0.95029931   | 2.20E-06 |
| TUCP_003481 | XLOC_150624 | ENSRNOT00000040912 | 0.95029931   | 2.20E-06 |
| TUCP_003481 | XLOC_150624 | ENSRNOT00000072648 | 0.95029931   | 2.20E-06 |
| TUCP_003481 | XLOC_150624 | ENSRNOT00000070803 | 0.95029931   | 2.20E-06 |
| TUCP_003481 | XLOC_150624 | ENSRNOT00000012196 | 0.95029931   | 2.20E-06 |
| TUCP_003481 | XLOC_150624 | ENSRNOT00000085772 | 0.95029931   | 2.20E-06 |
| TUCP_003481 | XLOC_150624 | ENSRNOT00000015270 | 0.95029931   | 2.20E-06 |
| TUCP_003481 | XLOC_150624 | ENSRNOT00000046192 | 0.95029931   | 2.20E-06 |
| TUCP_003481 | XLOC_150624 | ENSRNOT00000044226 | 0.95029931   | 2.20E-06 |
| TUCP_003481 | XLOC_150624 | ENSRNOT00000086374 | 0.952561926  | 1.75E-06 |
| TUCP_003481 | XLOC_150624 | ENSRNOT00000001464 | 0.95029931   | 2.20E-06 |
| TUCP_003481 | XLOC_150624 | ENSRNOT00000057873 | 0.95029931   | 2.20E-06 |
| TUCP_003481 | XLOC_150624 | ENSRNOT00000076044 | 0.95029931   | 2.20E-06 |

|             |             |                     |              |          |
|-------------|-------------|---------------------|--------------|----------|
| TUCP_003481 | XLOC_150624 | ENSRNOT00000074353  | 0.95029931   | 2.20E-06 |
| TUCP_003481 | XLOC_150624 | ENSRNOT00000083002  | 0.961002034  | 6.65E-07 |
| TUCP_003481 | XLOC_150624 | ENSRNOT00000088399  | 0.950322641  | 2.19E-06 |
| TUCP_003481 | XLOC_150624 | ENSRNOT00000086248  | 0.95029931   | 2.20E-06 |
| TUCP_003481 | XLOC_150624 | ENSRNOT00000089750  | 0.950043538  | 2.25E-06 |
| TUCP_003481 | XLOC_150624 | ENSRNOT00000064601  | 0.969069899  | 2.12E-07 |
| TUCP_003481 | XLOC_150624 | ENSRNOT00000002834  | 0.95029931   | 2.20E-06 |
| TUCP_003481 | XLOC_150624 | ENSRNOT00000092755  | 0.95029931   | 2.20E-06 |
| TUCP_003481 | XLOC_150624 | ENSRNOT00000031683  | 0.95029931   | 2.20E-06 |
| TUCP_003481 | XLOC_150624 | ENSRNOT00000087764  | 0.952113122  | 1.83E-06 |
| TUCP_003480 | XLOC_150495 | ENSRNOT00000010316  | -0.951819731 | 1.89E-06 |
| TUCP_002632 | XLOC_111249 | ENSRNOT00000014721  | 0.974066185  | 8.85E-08 |
| TUCP_002632 | XLOC_111249 | ENSRNOT00000066416  | 0.956219635  | 1.18E-06 |
| TUCP_000771 | XLOC_028981 | ENSRNOT00000082388  | 0.968907815  | 2.17E-07 |
| TUCP_000771 | XLOC_028981 | ENSRNOT00000005042  | 0.969743938  | 1.90E-07 |
| TUCP_000771 | XLOC_028981 | ENSRNOT00000092158  | 0.950162158  | 2.23E-06 |
| TUCP_000771 | XLOC_028981 | ENSRNOT00000075241  | 0.95451885   | 1.42E-06 |
| TUCP_000360 | XLOC_011980 | ENSRNOT00000088012  | 0.96929215   | 2.04E-07 |
| TUCP_000360 | XLOC_011980 | ENSRNOT00000042882  | 0.972151276  | 1.26E-07 |
| TUCP_000360 | XLOC_011980 | ENSRNOT00000072774  | 0.964857492  | 3.98E-07 |
| TUCP_004213 | XLOC_184900 | ENSRNOT00000026710  | -0.950288462 | 2.20E-06 |
| TUCP_004213 | XLOC_184900 | ENSRNOT00000058611  | -0.950627314 | 2.13E-06 |
| TUCP_004213 | XLOC_184900 | ENSRNOT00000060186  | 0.951377785  | 1.97E-06 |
| TUCP_004213 | XLOC_184900 | ENSRNOT00000082869  | 0.968029295  | 2.49E-07 |
| TUCP_004213 | XLOC_184900 | ENSRNOT00000088599  | 0.965156181  | 3.81E-07 |
| TUCP_004213 | XLOC_184900 | ENSRNOT00000044174  | 0.951436278  | 1.96E-06 |
| TUCP_004213 | XLOC_184900 | ENSRNOT00000056998  | 0.97265507   | 1.15E-07 |
| TUCP_004213 | XLOC_184900 | ENSRNOT00000000554  | 0.963042445  | 5.10E-07 |
| TUCP_004213 | XLOC_184900 | ENSRNOT00000017665  | 0.959261985  | 8.25E-07 |
| TUCP_004213 | XLOC_184900 | ENSRNOT000000051294 | 0.983156049  | 1.04E-08 |
| TUCP_004213 | XLOC_184900 | ENSRNOT00000021850  | 0.955105123  | 1.33E-06 |
| TUCP_004213 | XLOC_184900 | ENSRNOT00000021471  | -0.9584496   | 9.10E-07 |
| TUCP_004213 | XLOC_184900 | ENSRNOT00000027212  | -0.953993276 | 1.50E-06 |
| TUCP_004213 | XLOC_184900 | ENSRNOT00000001826  | 0.983325571  | 9.87E-09 |
| TUCP_004213 | XLOC_184900 | ENSRNOT00000021321  | 0.955417829  | 1.29E-06 |
| TUCP_004213 | XLOC_184900 | ENSRNOT00000059548  | 0.958955642  | 8.56E-07 |
| TUCP_004213 | XLOC_184900 | ENSRNOT00000001290  | 0.957933604  | 9.67E-07 |
| TUCP_004213 | XLOC_184900 | ENSRNOT00000007144  | 0.973408443  | 1.00E-07 |
| TUCP_004213 | XLOC_184900 | ENSRNOT00000008677  | 0.952544156  | 1.75E-06 |
| TUCP_004213 | XLOC_184900 | ENSRNOT00000090688  | 0.966791588  | 3.01E-07 |
| TUCP_004213 | XLOC_184900 | ENSRNOT00000056622  | 0.967578056  | 2.67E-07 |
| TUCP_004213 | XLOC_184900 | ENSRNOT00000029819  | -0.955925903 | 1.22E-06 |
| TUCP_004213 | XLOC_184900 | ENSRNOT00000021769  | 0.957307793  | 1.04E-06 |
| TUCP_004213 | XLOC_184900 | ENSRNOT00000050179  | 0.980514446  | 2.14E-08 |
| TUCP_004213 | XLOC_184900 | ENSRNOT00000019687  | 0.95541632   | 1.29E-06 |
| TUCP_004213 | XLOC_184900 | ENSRNOT00000025362  | -0.971456908 | 1.42E-07 |
| TUCP_004213 | XLOC_184900 | ENSRNOT00000023678  | 0.959129321  | 8.38E-07 |
| TUCP_004213 | XLOC_184900 | ENSRNOT00000016248  | 0.958655195  | 8.88E-07 |
| TUCP_004213 | XLOC_184900 | ENSRNOT00000092535  | 0.965524746  | 3.62E-07 |
| TUCP_004213 | XLOC_184900 | ENSRNOT00000066520  | 0.963595951  | 4.74E-07 |
| TUCP_004213 | XLOC_184900 | ENSRNOT00000021001  | 0.956323839  | 1.16E-06 |

|             |             |                    |              |          |
|-------------|-------------|--------------------|--------------|----------|
| TUCP_004213 | XLOC_184900 | ENSRNOT00000066525 | 0.9501383    | 2.23E-06 |
| TUCP_004213 | XLOC_184900 | ENSRNOT00000028244 | 0.953475904  | 1.59E-06 |
| TUCP_004213 | XLOC_184900 | ENSRNOT00000015131 | -0.951886609 | 1.87E-06 |
| TUCP_004213 | XLOC_184900 | ENSRNOT00000081272 | -0.959543243 | 7.97E-07 |
| TUCP_004213 | XLOC_184900 | ENSRNOT00000020322 | 0.964272203  | 4.32E-07 |
| TUCP_004213 | XLOC_184900 | ENSRNOT00000045735 | 0.969842139  | 1.87E-07 |
| TUCP_004213 | XLOC_184900 | ENSRNOT00000075006 | -0.952500968 | 1.76E-06 |
| TUCP_004213 | XLOC_184900 | ENSRNOT00000017181 | -0.964500584 | 4.18E-07 |
| TUCP_004213 | XLOC_184900 | ENSRNOT00000021925 | 0.953458732  | 1.59E-06 |
| TUCP_004213 | XLOC_184900 | ENSRNOT00000019630 | 0.95971082   | 7.81E-07 |
| TUCP_004213 | XLOC_184900 | ENSRNOT00000086812 | 0.95662523   | 1.12E-06 |
| TUCP_004213 | XLOC_184900 | ENSRNOT00000056430 | 0.974580868  | 8.01E-08 |
| TUCP_004213 | XLOC_184900 | ENSRNOT00000022862 | 0.965992326  | 3.38E-07 |
| TUCP_004213 | XLOC_184900 | ENSRNOT00000001912 | 0.967435215  | 2.73E-07 |
| TUCP_004213 | XLOC_184900 | ENSRNOT00000023033 | -0.954004174 | 1.50E-06 |
| TUCP_004213 | XLOC_184900 | ENSRNOT00000063772 | 0.95256847   | 1.75E-06 |
| TUCP_004213 | XLOC_184900 | ENSRNOT00000027580 | 0.951313151  | 1.98E-06 |
| TUCP_004213 | XLOC_184900 | ENSRNOT00000067904 | 0.961871127  | 5.95E-07 |
| TUCP_004213 | XLOC_184900 | ENSRNOT00000015520 | 0.972364387  | 1.21E-07 |
| TUCP_004213 | XLOC_184900 | ENSRNOT00000028801 | 0.952058869  | 1.84E-06 |
| TUCP_004213 | XLOC_184900 | ENSRNOT00000009247 | -0.950168439 | 2.23E-06 |
| TUCP_004213 | XLOC_184900 | ENSRNOT00000015525 | -0.957268838 | 1.04E-06 |
| TUCP_004213 | XLOC_184900 | ENSRNOT00000003837 | 0.952126843  | 1.83E-06 |
| TUCP_004213 | XLOC_184900 | ENSRNOT00000081906 | 0.96731315   | 2.78E-07 |
| TUCP_004213 | XLOC_184900 | ENSRNOT00000026597 | 0.957781432  | 9.84E-07 |
| TUCP_004213 | XLOC_184900 | ENSRNOT00000018368 | 0.950700385  | 2.11E-06 |
| TUCP_004213 | XLOC_184900 | ENSRNOT00000019652 | 0.965865921  | 3.45E-07 |
| TUCP_004213 | XLOC_184900 | ENSRNOT0000007954  | 0.953029501  | 1.66E-06 |
| TUCP_002272 | XLOC_094506 | ENSRNOT00000084944 | 0.981452592  | 1.68E-08 |
| TUCP_000247 | XLOC_007621 | ENSRNOT00000082031 | 0.955414384  | 1.29E-06 |
| TUCP_000247 | XLOC_007621 | ENSRNOT00000075676 | 0.956925829  | 1.09E-06 |
| TUCP_000247 | XLOC_007621 | ENSRNOT00000088394 | 0.954183124  | 1.47E-06 |
| TUCP_002451 | XLOC_104063 | ENSRNOT00000008961 | 0.969722997  | 1.90E-07 |
| TUCP_002451 | XLOC_104063 | ENSRNOT00000039876 | 0.984375584  | 7.14E-09 |
| TUCP_002451 | XLOC_104063 | ENSRNOT00000060765 | 0.978970544  | 3.13E-08 |
| TUCP_002451 | XLOC_104063 | ENSRNOT00000001570 | 0.959976116  | 7.56E-07 |
| TUCP_002451 | XLOC_104063 | ENSRNOT00000043258 | 0.958987813  | 8.53E-07 |
| TUCP_002451 | XLOC_104063 | ENSRNOT00000033719 | 0.95077028   | 2.10E-06 |
| TUCP_002451 | XLOC_104063 | ENSRNOT0000002695  | 0.984371153  | 7.15E-09 |
| TUCP_002451 | XLOC_104063 | ENSRNOT00000039263 | 0.983447604  | 9.52E-09 |
| TUCP_002451 | XLOC_104063 | ENSRNOT00000074738 | 0.982222359  | 1.36E-08 |
| TUCP_002451 | XLOC_104063 | ENSRNOT00000084429 | 0.978060192  | 3.86E-08 |
| TUCP_002451 | XLOC_104063 | ENSRNOT00000081108 | 0.972883687  | 1.10E-07 |
| TUCP_002451 | XLOC_104063 | ENSRNOT00000071258 | -0.95593922  | 1.21E-06 |
| TUCP_002451 | XLOC_104063 | ENSRNOT00000031025 | 0.988290706  | 1.70E-09 |
| TUCP_002451 | XLOC_104063 | ENSRNOT00000056551 | 0.969115298  | 2.10E-07 |
| TUCP_002451 | XLOC_104063 | ENSRNOT00000077022 | 0.965864241  | 3.45E-07 |
| TUCP_002451 | XLOC_104063 | ENSRNOT00000010092 | 0.961602694  | 6.16E-07 |
| TUCP_002451 | XLOC_104063 | ENSRNOT00000001853 | 0.971755129  | 1.35E-07 |
| TUCP_002451 | XLOC_104063 | ENSRNOT00000077134 | 0.976116225  | 5.88E-08 |
| TUCP_002451 | XLOC_104063 | ENSRNOT00000038494 | 0.968674167  | 2.25E-07 |

|             |             |                    |             |          |
|-------------|-------------|--------------------|-------------|----------|
| TUCP_002451 | XLOC_104063 | ENSRNOT00000083943 | 0.958930235 | 8.59E-07 |
| TUCP_002451 | XLOC_104063 | ENSRNOT00000056174 | 0.962377029 | 5.57E-07 |
| TUCP_002451 | XLOC_104063 | ENSRNOT00000078478 | 0.959426221 | 8.09E-07 |
| TUCP_002451 | XLOC_104063 | ENSRNOT00000088707 | 0.985066923 | 5.70E-09 |
| TUCP_002451 | XLOC_104063 | ENSRNOT00000043486 | 0.993102794 | 1.22E-10 |
| TUCP_002451 | XLOC_104063 | ENSRNOT00000059660 | 0.968526378 | 2.31E-07 |
| TUCP_002451 | XLOC_104063 | ENSRNOT00000041741 | 0.989707712 | 8.94E-10 |
| TUCP_002451 | XLOC_104063 | ENSRNOT00000034152 | 0.969086022 | 2.11E-07 |
| TUCP_002451 | XLOC_104063 | ENSRNOT00000076910 | 0.951762317 | 1.90E-06 |
| TUCP_002451 | XLOC_104063 | ENSRNOT00000024718 | 0.964389327 | 4.25E-07 |
| TUCP_002451 | XLOC_104063 | ENSRNOT00000076802 | 0.967940847 | 2.53E-07 |
| TUCP_002451 | XLOC_104063 | ENSRNOT00000009620 | 0.97646923  | 5.46E-08 |
| TUCP_002451 | XLOC_104063 | ENSRNOT00000085570 | 0.973227081 | 1.04E-07 |
| TUCP_002451 | XLOC_104063 | ENSRNOT00000025564 | 0.982620069 | 1.21E-08 |
| TUCP_002451 | XLOC_104063 | ENSRNOT00000073547 | 0.96114993  | 6.53E-07 |
| TUCP_002451 | XLOC_104063 | ENSRNOT00000043434 | 0.957808989 | 9.81E-07 |
| TUCP_002451 | XLOC_104063 | ENSRNOT00000038426 | 0.9769704   | 4.91E-08 |
| TUCP_002451 | XLOC_104063 | ENSRNOT00000017071 | 0.963373389 | 4.88E-07 |
| TUCP_002451 | XLOC_104063 | ENSRNOT00000023504 | 0.962775961 | 5.29E-07 |
| TUCP_002451 | XLOC_104063 | ENSRNOT00000083067 | 0.986048374 | 4.07E-09 |
| TUCP_002451 | XLOC_104063 | ENSRNOT00000080340 | 0.954518238 | 1.42E-06 |
| TUCP_002451 | XLOC_104063 | ENSRNOT00000016449 | 0.96497969  | 3.91E-07 |
| TUCP_002451 | XLOC_104063 | ENSRNOT00000005726 | 0.9719713   | 1.30E-07 |
| TUCP_002451 | XLOC_104063 | ENSRNOT00000087603 | 0.977002285 | 4.87E-08 |
| TUCP_002451 | XLOC_104063 | ENSRNOT00000029990 | 0.976657334 | 5.25E-08 |
| TUCP_002451 | XLOC_104063 | ENSRNOT00000012957 | 0.960735159 | 6.88E-07 |
| TUCP_002451 | XLOC_104063 | ENSRNOT00000051363 | 0.963327468 | 4.91E-07 |
| TUCP_002451 | XLOC_104063 | ENSRNOT00000020786 | 0.958291543 | 9.27E-07 |
| TUCP_002451 | XLOC_104063 | ENSRNOT00000047564 | 0.978316299 | 3.64E-08 |
| TUCP_002451 | XLOC_104063 | ENSRNOT00000084847 | 0.96425667  | 4.33E-07 |
| TUCP_002451 | XLOC_104063 | ENSRNOT00000057433 | 0.961718874 | 6.07E-07 |
| TUCP_002451 | XLOC_104063 | ENSRNOT00000050656 | 0.959807474 | 7.72E-07 |
| TUCP_002451 | XLOC_104063 | ENSRNOT00000052003 | 0.975756225 | 6.33E-08 |
| TUCP_002451 | XLOC_104063 | ENSRNOT00000054757 | 0.96547902  | 3.64E-07 |
| TUCP_002453 | XLOC_104063 | ENSRNOT00000082043 | 0.998965531 | 9.31E-15 |
| TUCP_002453 | XLOC_104063 | ENSRNOT00000090080 | 0.970514074 | 1.67E-07 |
| TUCP_002453 | XLOC_104063 | ENSRNOT00000068444 | 1           | 0        |
| TUCP_002453 | XLOC_104063 | ENSRNOT00000081370 | 0.999740797 | 9.21E-18 |
| TUCP_002453 | XLOC_104063 | ENSRNOT00000078645 | 0.989717078 | 8.90E-10 |
| TUCP_002453 | XLOC_104063 | ENSRNOT00000075987 | 0.987945283 | 1.96E-09 |
| TUCP_002453 | XLOC_104063 | ENSRNOT00000074990 | 1           | 0        |
| TUCP_002453 | XLOC_104063 | ENSRNOT00000087323 | 0.995029331 | 2.37E-11 |
| TUCP_002453 | XLOC_104063 | ENSRNOT00000074930 | 1           | 0        |
| TUCP_002453 | XLOC_104063 | ENSRNOT00000080575 | 0.999929267 | 1.39E-20 |
| TUCP_002453 | XLOC_104063 | ENSRNOT00000057761 | 0.982981445 | 1.09E-08 |
| TUCP_002453 | XLOC_104063 | ENSRNOT00000078369 | 0.993028032 | 1.28E-10 |
| TUCP_002453 | XLOC_104063 | ENSRNOT00000092982 | 1           | 0        |
| TUCP_002453 | XLOC_104063 | ENSRNOT00000088367 | 1           | 0        |
| TUCP_002453 | XLOC_104063 | ENSRNOT00000061874 | 0.968405099 | 2.35E-07 |
| TUCP_002453 | XLOC_104063 | ENSRNOT00000077789 | 0.99346224  | 9.30E-11 |
| TUCP_002453 | XLOC_104063 | ENSRNOT00000081996 | 1           | 0        |

|             |             |                    |             |          |
|-------------|-------------|--------------------|-------------|----------|
| TUCP_002453 | XLOC_104063 | ENSRNOT00000022280 | 0.982176915 | 1.37E-08 |
| TUCP_002453 | XLOC_104063 | ENSRNOT00000082058 | 1           | 0        |
| TUCP_002453 | XLOC_104063 | ENSRNOT00000088905 | 1           | 0        |
| TUCP_002453 | XLOC_104063 | ENSRNOT00000086831 | 1           | 0        |
| TUCP_002453 | XLOC_104063 | ENSRNOT00000045099 | 1           | 0        |
| TUCP_002453 | XLOC_104063 | ENSRNOT00000086745 | 0.978585655 | 3.42E-08 |
| TUCP_002453 | XLOC_104063 | ENSRNOT00000085849 | 0.988270765 | 1.71E-09 |
| TUCP_002453 | XLOC_104063 | ENSRNOT00000086397 | 0.957188178 | 1.05E-06 |
| TUCP_002453 | XLOC_104063 | ENSRNOT00000079606 | 0.960472013 | 7.11E-07 |
| TUCP_002453 | XLOC_104063 | ENSRNOT00000090207 | 0.953487741 | 1.59E-06 |
| TUCP_002453 | XLOC_104063 | ENSRNOT00000087025 | 1           | 1.33E-79 |
| TUCP_002453 | XLOC_104063 | ENSRNOT00000019853 | 1           | 0        |
| TUCP_002453 | XLOC_104063 | ENSRNOT00000073853 | 0.989715487 | 8.91E-10 |
| TUCP_002453 | XLOC_104063 | ENSRNOT00000065912 | 0.974234118 | 8.57E-08 |
| TUCP_002453 | XLOC_104063 | ENSRNOT00000073828 | 0.971647353 | 1.38E-07 |
| TUCP_002453 | XLOC_104063 | ENSRNOT00000078683 | 0.966682958 | 3.06E-07 |
| TUCP_002453 | XLOC_104063 | ENSRNOT00000093083 | 0.999140292 | 3.69E-15 |
| TUCP_002452 | XLOC_104063 | ENSRNOT00000000101 | 0.956203663 | 1.18E-06 |
| TUCP_002452 | XLOC_104063 | ENSRNOT00000050820 | 0.962002491 | 5.85E-07 |
| TUCP_002452 | XLOC_104063 | ENSRNOT00000012725 | 0.950911341 | 2.07E-06 |
| TUCP_002454 | XLOC_104064 | ENSRNOT00000023872 | 0.962162305 | 5.73E-07 |
| TUCP_002454 | XLOC_104064 | ENSRNOT00000018500 | 0.973888671 | 9.15E-08 |
| TUCP_002454 | XLOC_104064 | ENSRNOT00000045545 | 0.953921483 | 1.51E-06 |
| TUCP_002454 | XLOC_104064 | ENSRNOT00000011891 | 0.95128394  | 1.99E-06 |
| TUCP_002454 | XLOC_104064 | ENSRNOT00000012462 | 0.951506814 | 1.95E-06 |
| TUCP_002454 | XLOC_104064 | ENSRNOT00000016263 | 0.965708052 | 3.53E-07 |
| TUCP_002454 | XLOC_104064 | ENSRNOT00000016842 | 0.952446431 | 1.77E-06 |
| TUCP_002457 | XLOC_104287 | ENSRNOT00000084799 | 0.968506778 | 2.31E-07 |
| TUCP_002457 | XLOC_104287 | ENSRNOT00000064193 | 0.954976139 | 1.35E-06 |
| TUCP_002457 | XLOC_104287 | ENSRNOT00000085849 | 0.962408536 | 5.55E-07 |
| TUCP_002457 | XLOC_104287 | ENSRNOT00000073853 | 0.953282793 | 1.62E-06 |
| TUCP_002457 | XLOC_104287 | ENSRNOT00000090080 | 0.953131569 | 1.65E-06 |
| TUCP_002457 | XLOC_104287 | ENSRNOT00000078645 | 0.96020823  | 7.35E-07 |
| TUCP_002457 | XLOC_104287 | ENSRNOT00000089931 | 0.961961118 | 5.88E-07 |
| TUCP_002456 | XLOC_104261 | ENSRNOT00000071840 | 0.998920284 | 1.15E-14 |
| TUCP_002456 | XLOC_104261 | ENSRNOT00000083608 | 0.990025612 | 7.65E-10 |
| TUCP_002456 | XLOC_104261 | ENSRNOT00000076035 | 0.955636229 | 1.26E-06 |
| TUCP_002456 | XLOC_104261 | ENSRNOT00000085476 | 0.95879571  | 8.73E-07 |
| TUCP_002456 | XLOC_104261 | ENSRNOT00000066382 | 0.958960208 | 8.56E-07 |
| TUCP_002456 | XLOC_104261 | ENSRNOT00000045584 | 0.998920284 | 1.15E-14 |
| TUCP_002456 | XLOC_104261 | ENSRNOT00000077995 | 0.996207526 | 6.14E-12 |
| TUCP_002456 | XLOC_104261 | ENSRNOT00000066004 | 0.998663064 | 3.36E-14 |
| TUCP_002456 | XLOC_104261 | ENSRNOT00000064284 | 0.966584279 | 3.10E-07 |
| TUCP_002456 | XLOC_104261 | ENSRNOT00000068197 | 0.951217338 | 2.00E-06 |
| TUCP_002456 | XLOC_104261 | ENSRNOT00000082086 | 0.967858006 | 2.56E-07 |
| TUCP_002456 | XLOC_104261 | ENSRNOT00000089494 | 0.987091899 | 2.76E-09 |
| TUCP_002456 | XLOC_104261 | ENSRNOT00000083747 | 0.959848038 | 7.68E-07 |
| TUCP_002456 | XLOC_104261 | ENSRNOT00000092182 | 0.998920284 | 1.15E-14 |
| TUCP_002456 | XLOC_104261 | ENSRNOT00000084461 | 0.998920284 | 1.15E-14 |
| TUCP_002456 | XLOC_104261 | ENSRNOT00000060448 | 0.998920284 | 1.15E-14 |
| TUCP_002456 | XLOC_104261 | ENSRNOT00000032631 | 0.998920284 | 1.15E-14 |

|             |             |                    |             |          |
|-------------|-------------|--------------------|-------------|----------|
| TUCP_002456 | XLOC_104261 | ENSRNOT00000079503 | 0.952664357 | 1.73E-06 |
| TUCP_002456 | XLOC_104261 | ENSRNOT00000027950 | 0.970449404 | 1.69E-07 |
| TUCP_002456 | XLOC_104261 | ENSRNOT00000060113 | 0.97275925  | 1.13E-07 |
| TUCP_002456 | XLOC_104261 | ENSRNOT00000054910 | 0.989037372 | 1.22E-09 |
| TUCP_002456 | XLOC_104261 | ENSRNOT00000057176 | 0.998912522 | 1.20E-14 |
| TUCP_002456 | XLOC_104261 | ENSRNOT00000078176 | 0.992784053 | 1.52E-10 |
| TUCP_002456 | XLOC_104261 | ENSRNOT00000056364 | 0.9883711   | 1.64E-09 |
| TUCP_002456 | XLOC_104261 | ENSRNOT00000093431 | 0.998920284 | 1.15E-14 |
| TUCP_002456 | XLOC_104261 | ENSRNOT00000024758 | 0.978980735 | 3.12E-08 |
| TUCP_002456 | XLOC_104261 | ENSRNOT00000092901 | 0.998920284 | 1.15E-14 |
| TUCP_002456 | XLOC_104261 | ENSRNOT00000089290 | 0.998876886 | 1.40E-14 |
| TUCP_002456 | XLOC_104261 | ENSRNOT00000090211 | 0.997397831 | 9.36E-13 |
| TUCP_002456 | XLOC_104261 | ENSRNOT00000075244 | 0.958654111 | 8.88E-07 |
| TUCP_002456 | XLOC_104261 | ENSRNOT00000091828 | 0.995564774 | 1.34E-11 |
| TUCP_002456 | XLOC_104261 | ENSRNOT00000091944 | 0.998534825 | 5.30E-14 |
| TUCP_002456 | XLOC_104261 | ENSRNOT00000070855 | 0.998920284 | 1.15E-14 |
| TUCP_002456 | XLOC_104261 | ENSRNOT0000009295  | 0.994390876 | 4.33E-11 |
| TUCP_002456 | XLOC_104261 | ENSRNOT00000084109 | 0.998947499 | 1.02E-14 |
| TUCP_002456 | XLOC_104261 | ENSRNOT00000060645 | 0.974152038 | 8.70E-08 |
| TUCP_002456 | XLOC_104261 | ENSRNOT00000041569 | 0.998920284 | 1.15E-14 |
| TUCP_002456 | XLOC_104261 | ENSRNOT00000087091 | 0.998920284 | 1.15E-14 |
| TUCP_002456 | XLOC_104261 | ENSRNOT00000003308 | 0.987992421 | 1.93E-09 |
| TUCP_002456 | XLOC_104261 | ENSRNOT00000026113 | 0.998691825 | 3.01E-14 |
| TUCP_002456 | XLOC_104261 | ENSRNOT00000014939 | 0.99900674  | 7.60E-15 |
| TUCP_002456 | XLOC_104261 | ENSRNOT00000058314 | 0.9891887   | 1.14E-09 |
| TUCP_002456 | XLOC_104261 | ENSRNOT00000047870 | 0.979194622 | 2.96E-08 |
| TUCP_002456 | XLOC_104261 | ENSRNOT00000071603 | 0.99890282  | 1.25E-14 |
| TUCP_002456 | XLOC_104261 | ENSRNOT00000088376 | 0.969099149 | 2.11E-07 |
| TUCP_002456 | XLOC_104261 | ENSRNOT00000060454 | 0.998920284 | 1.15E-14 |
| TUCP_002456 | XLOC_104261 | ENSRNOT00000029298 | 0.953716528 | 1.55E-06 |
| TUCP_002456 | XLOC_104261 | ENSRNOT00000044232 | 0.98159312  | 1.61E-08 |
| TUCP_002456 | XLOC_104261 | ENSRNOT00000023287 | 0.970743617 | 1.61E-07 |
| TUCP_002456 | XLOC_104261 | ENSRNOT00000071714 | 0.976805596 | 5.09E-08 |
| TUCP_002456 | XLOC_104261 | ENSRNOT00000075836 | 0.998920284 | 1.15E-14 |
| TUCP_002456 | XLOC_104261 | ENSRNOT00000073229 | 0.998920284 | 1.15E-14 |
| TUCP_002456 | XLOC_104261 | ENSRNOT00000077731 | 0.968380874 | 2.36E-07 |
| TUCP_002456 | XLOC_104261 | ENSRNOT00000046980 | 0.980744958 | 2.02E-08 |
| TUCP_002456 | XLOC_104261 | ENSRNOT00000039652 | 0.970122741 | 1.78E-07 |
| TUCP_002456 | XLOC_104261 | ENSRNOT00000066685 | 0.985819599 | 4.41E-09 |
| TUCP_002456 | XLOC_104261 | ENSRNOT00000082776 | 0.96414204  | 4.40E-07 |
| TUCP_002456 | XLOC_104261 | ENSRNOT00000088719 | 0.962914005 | 5.19E-07 |
| TUCP_002456 | XLOC_104261 | ENSRNOT0000007683  | 0.998312323 | 1.08E-13 |
| TUCP_002456 | XLOC_104261 | ENSRNOT00000092916 | 0.962569815 | 5.43E-07 |
| TUCP_002456 | XLOC_104261 | ENSRNOT00000081106 | 0.951335073 | 1.98E-06 |
| TUCP_002750 | XLOC_116763 | ENSRNOT00000032116 | 0.95994881  | 7.59E-07 |
| TUCP_002756 | XLOC_117079 | ENSRNOT00000024186 | 0.983200502 | 1.02E-08 |
| TUCP_002756 | XLOC_117079 | ENSRNOT00000074753 | 0.998182349 | 1.56E-13 |
| TUCP_002756 | XLOC_117079 | ENSRNOT00000004876 | 0.959071443 | 8.44E-07 |
| TUCP_002756 | XLOC_117079 | ENSRNOT00000041904 | 1           | 4.25E-78 |
| TUCP_002756 | XLOC_117079 | ENSRNOT00000083487 | 0.989515314 | 9.80E-10 |
| TUCP_002756 | XLOC_117079 | ENSRNOT00000077990 | 1           | 0        |



|             |             |                    |             |          |
|-------------|-------------|--------------------|-------------|----------|
| TUCP_002756 | XLOC_117079 | ENSRNOT00000038826 | 0.99977672  | 4.37E-18 |
| TUCP_002756 | XLOC_117079 | ENSRNOT00000046842 | 0.973644314 | 9.58E-08 |
| TUCP_002756 | XLOC_117079 | ENSRNOT00000037169 | 0.980329406 | 2.24E-08 |
| TUCP_002756 | XLOC_117079 | ENSRNOT00000021243 | 0.987425406 | 2.42E-09 |
| TUCP_002756 | XLOC_117079 | ENSRNOT00000060250 | 0.999933853 | 9.97E-21 |
| TUCP_002756 | XLOC_117079 | ENSRNOT00000091934 | 1           | 0        |
| TUCP_002756 | XLOC_117079 | ENSRNOT00000046585 | 0.982941597 | 1.11E-08 |
| TUCP_002756 | XLOC_117079 | ENSRNOT00000080794 | 0.990839253 | 5.00E-10 |
| TUCP_002756 | XLOC_117079 | ENSRNOT00000014456 | 0.991697153 | 3.06E-10 |
| TUCP_002756 | XLOC_117079 | ENSRNOT00000031205 | 0.991394766 | 3.66E-10 |
| TUCP_002756 | XLOC_117079 | ENSRNOT00000044145 | 1           | 0        |
| TUCP_002756 | XLOC_117079 | ENSRNOT00000088381 | 0.989013276 | 1.24E-09 |
| TUCP_002756 | XLOC_117079 | ENSRNOT00000011743 | 0.98678427  | 3.11E-09 |
| TUCP_002756 | XLOC_117079 | ENSRNOT00000089929 | 1           | 1.33E-79 |
| TUCP_002756 | XLOC_117079 | ENSRNOT00000088624 | 1           | 0        |
| TUCP_002756 | XLOC_117079 | ENSRNOT00000085659 | 0.989908621 | 8.10E-10 |
| TUCP_002756 | XLOC_117079 | ENSRNOT00000015866 | 0.994066664 | 5.73E-11 |
| TUCP_002756 | XLOC_117079 | ENSRNOT00000078633 | 1           | 0        |
| TUCP_002756 | XLOC_117079 | ENSRNOT00000034907 | 0.995318542 | 1.76E-11 |
| TUCP_002756 | XLOC_117079 | ENSRNOT00000093230 | 0.958295175 | 9.26E-07 |
| TUCP_002756 | XLOC_117079 | ENSRNOT00000051835 | 1           | 0        |
| TUCP_002756 | XLOC_117079 | ENSRNOT00000079087 | 1           | 0        |
| TUCP_002756 | XLOC_117079 | ENSRNOT00000037206 | 1           | 0        |
| TUCP_002756 | XLOC_117079 | ENSRNOT00000083261 | 0.970991658 | 1.54E-07 |
| TUCP_002756 | XLOC_117079 | ENSRNOT00000080590 | 0.999889216 | 1.31E-19 |
| TUCP_002756 | XLOC_117079 | ENSRNOT00000027552 | 0.999801024 | 2.46E-18 |
| TUCP_002756 | XLOC_117079 | ENSRNOT00000077014 | 0.995074376 | 2.26E-11 |
| TUCP_002756 | XLOC_117079 | ENSRNOT00000080453 | 0.99994332  | 4.61E-21 |
| TUCP_002756 | XLOC_117079 | ENSRNOT00000089057 | 0.968243551 | 2.41E-07 |
| TUCP_002756 | XLOC_117079 | ENSRNOT00000066839 | 0.991868612 | 2.76E-10 |
| TUCP_002756 | XLOC_117079 | ENSRNOT00000061284 | 0.955566942 | 1.27E-06 |
| TUCP_002756 | XLOC_117079 | ENSRNOT00000013423 | 0.959677621 | 7.84E-07 |
| TUCP_002756 | XLOC_117079 | ENSRNOT00000071884 | 0.974769955 | 7.72E-08 |
| TUCP_002756 | XLOC_117079 | ENSRNOT00000004128 | 0.961829362 | 5.99E-07 |
| TUCP_002756 | XLOC_117079 | ENSRNOT00000026316 | 0.964408046 | 4.24E-07 |
| TUCP_002756 | XLOC_117079 | ENSRNOT00000057729 | 0.999384184 | 6.97E-16 |
| TUCP_002756 | XLOC_117079 | ENSRNOT00000078663 | 0.975192577 | 7.10E-08 |
| TUCP_002756 | XLOC_117079 | ENSRNOT00000064250 | 0.983131977 | 1.05E-08 |
| TUCP_002756 | XLOC_117079 | ENSRNOT00000021608 | 0.965228881 | 3.78E-07 |
| TUCP_002756 | XLOC_117079 | ENSRNOT00000029634 | 0.995816134 | 1.00E-11 |
| TUCP_002756 | XLOC_117079 | ENSRNOT00000093579 | 0.958564264 | 8.97E-07 |
| TUCP_002756 | XLOC_117079 | ENSRNOT00000086349 | 0.957242511 | 1.05E-06 |
| TUCP_002756 | XLOC_117079 | ENSRNOT00000065460 | 1           | 0        |
| TUCP_002756 | XLOC_117079 | ENSRNOT00000003817 | 0.996778712 | 2.72E-12 |
| TUCP_002756 | XLOC_117079 | ENSRNOT00000016713 | 1           | 4.25E-78 |
| TUCP_002756 | XLOC_117079 | ENSRNOT00000079260 | 0.996448245 | 4.42E-12 |
| TUCP_002756 | XLOC_117079 | ENSRNOT00000039294 | 1           | 4.25E-78 |
| TUCP_002756 | XLOC_117079 | ENSRNOT00000092913 | 0.952980228 | 1.67E-06 |
| TUCP_002755 | XLOC_117023 | ENSRNOT00000049973 | 0.974806732 | 7.66E-08 |
| TUCP_002755 | XLOC_117023 | ENSRNOT00000092343 | 0.968202692 | 2.43E-07 |
| TUCP_002755 | XLOC_117023 | ENSRNOT00000034096 | 0.959423663 | 8.09E-07 |

|             |             |                    |             |          |
|-------------|-------------|--------------------|-------------|----------|
| TUCP_002755 | XLOC_117023 | ENSRNOT00000043271 | 0.969043847 | 2.13E-07 |
| TUCP_002755 | XLOC_117023 | ENSRNOT00000022095 | 0.959244739 | 8.27E-07 |
| TUCP_002755 | XLOC_117023 | ENSRNOT00000002247 | 0.958410013 | 9.14E-07 |
| TUCP_002755 | XLOC_117023 | ENSRNOT00000009544 | 0.954603896 | 1.41E-06 |
| TUCP_002755 | XLOC_117023 | ENSRNOT00000073915 | 0.957042158 | 1.07E-06 |
| TUCP_002755 | XLOC_117023 | ENSRNOT00000075494 | 0.969911163 | 1.85E-07 |
| TUCP_002755 | XLOC_117023 | ENSRNOT00000078599 | 0.980271671 | 2.28E-08 |
| TUCP_002755 | XLOC_117023 | ENSRNOT00000023149 | 0.961147039 | 6.53E-07 |
| TUCP_002755 | XLOC_117023 | ENSRNOT00000021403 | 0.952787607 | 1.71E-06 |
| TUCP_002755 | XLOC_117023 | ENSRNOT00000035238 | 0.956245288 | 1.17E-06 |
| TUCP_002755 | XLOC_117023 | ENSRNOT00000009113 | 0.966182467 | 3.29E-07 |
| TUCP_002755 | XLOC_117023 | ENSRNOT00000032388 | 0.969748319 | 1.90E-07 |
| TUCP_002755 | XLOC_117023 | ENSRNOT00000051525 | 0.97187156  | 1.32E-07 |
| TUCP_002755 | XLOC_117023 | ENSRNOT00000060690 | 0.959765722 | 7.76E-07 |
| TUCP_002755 | XLOC_117023 | ENSRNOT00000077195 | 0.956159309 | 1.18E-06 |
| TUCP_002755 | XLOC_117023 | ENSRNOT0000007326  | 0.956868884 | 1.09E-06 |
| TUCP_002755 | XLOC_117023 | ENSRNOT00000030823 | 0.95849336  | 9.05E-07 |
| TUCP_002755 | XLOC_117023 | ENSRNOT00000003792 | 0.954060966 | 1.49E-06 |
| TUCP_002755 | XLOC_117023 | ENSRNOT00000023456 | 0.953077233 | 1.66E-06 |
| TUCP_002755 | XLOC_117023 | ENSRNOT00000059447 | 0.987168405 | 2.68E-09 |
| TUCP_002755 | XLOC_117023 | ENSRNOT00000072297 | 0.960448784 | 7.13E-07 |
| TUCP_002755 | XLOC_117023 | ENSRNOT00000006946 | 0.951745232 | 1.90E-06 |
| TUCP_002755 | XLOC_117023 | ENSRNOT00000011511 | 0.952870455 | 1.69E-06 |
| TUCP_002755 | XLOC_117023 | ENSRNOT00000087342 | 0.957227337 | 1.05E-06 |
| TUCP_002755 | XLOC_117023 | ENSRNOT00000032173 | 0.959637814 | 7.88E-07 |
| TUCP_002755 | XLOC_117023 | ENSRNOT00000087192 | 0.969634881 | 1.93E-07 |
| TUCP_002755 | XLOC_117023 | ENSRNOT00000067000 | 0.951138508 | 2.02E-06 |
| TUCP_002755 | XLOC_117023 | ENSRNOT00000050227 | 0.965269446 | 3.75E-07 |
| TUCP_002755 | XLOC_117023 | ENSRNOT00000003728 | 0.95227662  | 1.80E-06 |
| TUCP_003658 | XLOC_160236 | ENSRNOT00000081570 | 0.962996114 | 5.13E-07 |
| TUCP_003658 | XLOC_160236 | ENSRNOT00000091652 | 0.998201834 | 1.48E-13 |
| TUCP_003658 | XLOC_160236 | ENSRNOT00000036564 | 0.972271691 | 1.23E-07 |
| TUCP_003658 | XLOC_160236 | ENSRNOT00000000109 | 0.962124849 | 5.76E-07 |
| TUCP_003658 | XLOC_160236 | ENSRNOT00000080865 | 0.999998095 | 1.98E-28 |
| TUCP_003658 | XLOC_160236 | ENSRNOT00000073534 | 0.9958036   | 1.02E-11 |
| TUCP_003658 | XLOC_160236 | ENSRNOT00000012161 | 0.987720056 | 2.15E-09 |
| TUCP_003658 | XLOC_160236 | ENSRNOT00000078707 | 0.960578169 | 7.02E-07 |
| TUCP_003658 | XLOC_160236 | ENSRNOT00000087758 | 0.968753108 | 2.23E-07 |
| TUCP_003658 | XLOC_160236 | ENSRNOT00000049832 | 0.969018948 | 2.13E-07 |
| TUCP_003658 | XLOC_160236 | ENSRNOT00000093019 | 0.999998095 | 1.98E-28 |
| TUCP_003658 | XLOC_160236 | ENSRNOT00000024825 | 0.980397271 | 2.21E-08 |
| TUCP_003658 | XLOC_160236 | ENSRNOT00000059266 | 0.960648771 | 6.96E-07 |
| TUCP_003658 | XLOC_160236 | ENSRNOT00000072734 | 0.964926341 | 3.94E-07 |
| TUCP_003658 | XLOC_160236 | ENSRNOT00000085908 | 0.99670928  | 3.02E-12 |
| TUCP_003658 | XLOC_160236 | ENSRNOT00000046744 | 0.999998095 | 1.98E-28 |
| TUCP_003658 | XLOC_160236 | ENSRNOT00000076429 | 0.999998095 | 1.98E-28 |
| TUCP_003658 | XLOC_160236 | ENSRNOT00000084667 | 0.999682507 | 2.54E-17 |
| TUCP_003658 | XLOC_160236 | ENSRNOT00000055412 | 0.999998095 | 1.98E-28 |
| TUCP_003658 | XLOC_160236 | ENSRNOT00000093201 | 0.999691878 | 2.19E-17 |
| TUCP_003658 | XLOC_160236 | ENSRNOT00000072724 | 0.999998095 | 1.98E-28 |
| TUCP_003658 | XLOC_160236 | ENSRNOT00000090323 | 0.955951263 | 1.21E-06 |

|             |             |                     |              |          |
|-------------|-------------|---------------------|--------------|----------|
| TUCP_003658 | XLOC_160236 | ENSRNOT00000082760  | 0.986259437  | 3.77E-09 |
| TUCP_003658 | XLOC_160236 | ENSRNOT00000066017  | 0.989799826  | 8.55E-10 |
| TUCP_003658 | XLOC_160236 | ENSRNOT00000073148  | 0.985645669  | 4.69E-09 |
| TUCP_003658 | XLOC_160236 | ENSRNOT00000077462  | 0.960041767  | 7.50E-07 |
| TUCP_003658 | XLOC_160236 | ENSRNOT00000084375  | 0.999998095  | 1.98E-28 |
| TUCP_003658 | XLOC_160236 | ENSRNOT00000085447  | 0.998395663  | 8.35E-14 |
| TUCP_003658 | XLOC_160236 | ENSRNOT00000006249  | 0.966428756  | 3.17E-07 |
| TUCP_003658 | XLOC_160236 | ENSRNOT00000087073  | 0.952360562  | 1.78E-06 |
| TUCP_003658 | XLOC_160236 | ENSRNOT00000042369  | 0.995700457  | 1.15E-11 |
| TUCP_003658 | XLOC_160236 | ENSRNOT00000086554  | 0.999998095  | 1.98E-28 |
| TUCP_003658 | XLOC_160236 | ENSRNOT00000054858  | 0.985193522  | 5.47E-09 |
| TUCP_003658 | XLOC_160236 | ENSRNOT00000047921  | 0.999998095  | 1.98E-28 |
| TUCP_003658 | XLOC_160236 | ENSRNOT00000064261  | 0.99997659   | 5.54E-23 |
| TUCP_003658 | XLOC_160236 | ENSRNOT00000086660  | 0.999207604  | 2.46E-15 |
| TUCP_003658 | XLOC_160236 | ENSRNOT00000080933  | 0.967473062  | 2.72E-07 |
| TUCP_003658 | XLOC_160236 | ENSRNOT00000083977  | 0.999998095  | 1.98E-28 |
| TUCP_003658 | XLOC_160236 | ENSRNOT00000092933  | 0.999998095  | 1.98E-28 |
| TUCP_003658 | XLOC_160236 | ENSRNOT0000009061   | 0.953264466  | 1.62E-06 |
| TUCP_003658 | XLOC_160236 | ENSRNOT00000041281  | 0.987778265  | 2.10E-09 |
| TUCP_003156 | XLOC_135685 | ENSRNOT0000007077   | 0.953607481  | 1.57E-06 |
| TUCP_003156 | XLOC_135685 | ENSRNOT00000000513  | -0.95489205  | 1.36E-06 |
| TUCP_003156 | XLOC_135685 | ENSRNOT00000083452  | 0.958013909  | 9.58E-07 |
| TUCP_003156 | XLOC_135685 | ENSRNOT00000088799  | 0.962544636  | 5.45E-07 |
| TUCP_003156 | XLOC_135685 | ENSRNOT00000079449  | 0.959822615  | 7.71E-07 |
| TUCP_003156 | XLOC_135685 | ENSRNOT00000066581  | 0.972713416  | 1.14E-07 |
| TUCP_003156 | XLOC_135685 | ENSRNOT00000071388  | -0.952502878 | 1.76E-06 |
| TUCP_003812 | XLOC_166671 | ENSRNOT00000031904  | 0.953024452  | 1.66E-06 |
| TUCP_003812 | XLOC_166671 | ENSRNOT00000026941  | 0.956770701  | 1.11E-06 |
| TUCP_003812 | XLOC_166671 | ENSRNOT00000030445  | 0.957674278  | 9.96E-07 |
| TUCP_003812 | XLOC_166671 | ENSRNOT00000075397  | 0.961653441  | 6.12E-07 |
| TUCP_003812 | XLOC_166671 | ENSRNOT00000001855  | 0.95966352   | 7.86E-07 |
| TUCP_003812 | XLOC_166671 | ENSRNOT00000001691  | 0.965451309  | 3.66E-07 |
| TUCP_003812 | XLOC_166671 | ENSRNOT000000023144 | 0.953399319  | 1.60E-06 |
| TUCP_003812 | XLOC_166671 | ENSRNOT00000086706  | 0.963408432  | 4.86E-07 |
| TUCP_003812 | XLOC_166671 | ENSRNOT00000074023  | 0.96168511   | 6.10E-07 |
| TUCP_003812 | XLOC_166671 | ENSRNOT00000016975  | 0.951295651  | 1.99E-06 |
| TUCP_003812 | XLOC_166671 | ENSRNOT00000033017  | 0.980909938  | 1.93E-08 |
| TUCP_003812 | XLOC_166671 | ENSRNOT00000017384  | 0.954370575  | 1.44E-06 |
| TUCP_003812 | XLOC_166671 | ENSRNOT00000066370  | 0.959847285  | 7.68E-07 |
| TUCP_003812 | XLOC_166671 | ENSRNOT00000065076  | 0.956585476  | 1.13E-06 |
| TUCP_003812 | XLOC_166671 | ENSRNOT00000060943  | 0.950858941  | 2.08E-06 |
| TUCP_003812 | XLOC_166671 | ENSRNOT00000044628  | 0.953352216  | 1.61E-06 |
| TUCP_003812 | XLOC_166671 | ENSRNOT00000013580  | 0.960708288  | 6.90E-07 |
| TUCP_003812 | XLOC_166671 | ENSRNOT00000090338  | -0.956548214 | 1.13E-06 |
| TUCP_003812 | XLOC_166671 | ENSRNOT00000025075  | 0.958638314  | 8.89E-07 |
| TUCP_003812 | XLOC_166671 | ENSRNOT00000057160  | 0.952837814  | 1.70E-06 |
| TUCP_003812 | XLOC_166671 | ENSRNOT00000024402  | 0.950243951  | 2.21E-06 |
| TUCP_003812 | XLOC_166671 | ENSRNOT00000024393  | 0.961010198  | 6.65E-07 |
| TUCP_003812 | XLOC_166671 | ENSRNOT00000089933  | 0.956949026  | 1.08E-06 |
| TUCP_003812 | XLOC_166671 | ENSRNOT00000090123  | 0.950758383  | 2.10E-06 |
| TUCP_003812 | XLOC_166671 | ENSRNOT00000065168  | 0.952407408  | 1.77E-06 |

|             |             |                    |              |          |
|-------------|-------------|--------------------|--------------|----------|
| TUCP_003812 | XLOC_166671 | ENSRNOT00000083214 | 0.953535341  | 1.58E-06 |
| TUCP_003812 | XLOC_166671 | ENSRNOT00000026391 | 0.952875163  | 1.69E-06 |
| TUCP_003812 | XLOC_166671 | ENSRNOT00000077231 | 0.964671457  | 4.08E-07 |
| TUCP_003812 | XLOC_166671 | ENSRNOT00000077526 | 0.961266456  | 6.43E-07 |
| TUCP_003812 | XLOC_166671 | ENSRNOT00000016428 | 0.955430237  | 1.29E-06 |
| TUCP_003812 | XLOC_166671 | ENSRNOT00000037133 | 0.977957917  | 3.95E-08 |
| TUCP_003812 | XLOC_166671 | ENSRNOT00000010541 | 0.963719232  | 4.66E-07 |
| TUCP_003812 | XLOC_166671 | ENSRNOT00000026831 | 0.953506412  | 1.58E-06 |
| TUCP_003812 | XLOC_166671 | ENSRNOT00000003780 | 0.962793439  | 5.28E-07 |
| TUCP_003812 | XLOC_166671 | ENSRNOT00000026643 | 0.950792811  | 2.09E-06 |
| TUCP_003812 | XLOC_166671 | ENSRNOT00000022190 | -0.964322783 | 4.29E-07 |
| TUCP_003812 | XLOC_166671 | ENSRNOT00000025913 | -0.955560958 | 1.27E-06 |
| TUCP_003812 | XLOC_166671 | ENSRNOT00000019133 | 0.954494844  | 1.42E-06 |
| TUCP_003812 | XLOC_166671 | ENSRNOT00000002403 | 0.953061423  | 1.66E-06 |
| TUCP_003812 | XLOC_166671 | ENSRNOT00000086577 | 0.951407103  | 1.97E-06 |
| TUCP_003812 | XLOC_166671 | ENSRNOT00000017254 | -0.959764464 | 7.76E-07 |
| TUCP_003812 | XLOC_166671 | ENSRNOT00000089524 | 0.966970124  | 2.93E-07 |
| TUCP_003812 | XLOC_166671 | ENSRNOT00000065600 | 0.956637819  | 1.12E-06 |
| TUCP_003812 | XLOC_166671 | ENSRNOT00000086260 | -0.950029388 | 2.26E-06 |
| TUCP_003812 | XLOC_166671 | ENSRNOT00000033975 | 0.951196476  | 2.01E-06 |
| TUCP_003812 | XLOC_166671 | ENSRNOT00000085621 | 0.954123746  | 1.48E-06 |
| TUCP_003812 | XLOC_166671 | ENSRNOT00000007314 | -0.953928212 | 1.51E-06 |
| TUCP_003812 | XLOC_166671 | ENSRNOT00000009811 | 0.96165542   | 6.12E-07 |
| TUCP_003812 | XLOC_166671 | ENSRNOT00000016445 | 0.964273022  | 4.32E-07 |
| TUCP_003812 | XLOC_166671 | ENSRNOT00000081512 | 0.958452315  | 9.09E-07 |
| TUCP_003812 | XLOC_166671 | ENSRNOT00000032843 | 0.95369752   | 1.55E-06 |
| TUCP_003812 | XLOC_166671 | ENSRNOT00000047093 | 0.960533094  | 7.06E-07 |
| TUCP_003812 | XLOC_166671 | ENSRNOT00000005910 | -0.951870687 | 1.88E-06 |
| TUCP_003812 | XLOC_166671 | ENSRNOT00000000060 | 0.95335627   | 1.61E-06 |
| TUCP_003812 | XLOC_166671 | ENSRNOT00000087429 | 0.951812783  | 1.89E-06 |
| TUCP_003812 | XLOC_166671 | ENSRNOT00000078070 | 0.950671272  | 2.12E-06 |
| TUCP_003812 | XLOC_166671 | ENSRNOT00000023876 | 0.955479098  | 1.28E-06 |
| TUCP_003812 | XLOC_166671 | ENSRNOT00000000658 | 0.953325634  | 1.61E-06 |
| TUCP_003812 | XLOC_166671 | ENSRNOT00000065501 | 0.952205473  | 1.81E-06 |
| TUCP_003812 | XLOC_166671 | ENSRNOT00000027344 | 0.952491589  | 1.76E-06 |
| TUCP_003812 | XLOC_166671 | ENSRNOT00000003568 | 0.966811343  | 3.00E-07 |
| TUCP_003812 | XLOC_166671 | ENSRNOT00000027057 | 0.960460536  | 7.12E-07 |
| TUCP_003812 | XLOC_166671 | ENSRNOT00000028057 | 0.977478509  | 4.39E-08 |
| TUCP_003812 | XLOC_166671 | ENSRNOT00000022074 | 0.951092545  | 2.03E-06 |
| TUCP_003812 | XLOC_166671 | ENSRNOT00000058962 | 0.960406503  | 7.17E-07 |
| TUCP_003812 | XLOC_166671 | ENSRNOT00000010367 | 0.966286762  | 3.24E-07 |
| TUCP_003812 | XLOC_166671 | ENSRNOT00000055630 | 0.95013823   | 2.23E-06 |
| TUCP_003812 | XLOC_166671 | ENSRNOT00000082151 | -0.955605612 | 1.26E-06 |
| TUCP_003812 | XLOC_166671 | ENSRNOT00000022578 | 0.950199285  | 2.22E-06 |
| TUCP_003812 | XLOC_166671 | ENSRNOT00000010852 | 0.957422518  | 1.03E-06 |
| TUCP_003812 | XLOC_166671 | ENSRNOT00000081678 | 0.952065511  | 1.84E-06 |
| TUCP_003812 | XLOC_166671 | ENSRNOT00000014926 | 0.953297634  | 1.62E-06 |
| TUCP_003812 | XLOC_166671 | ENSRNOT00000012736 | 0.962945995  | 5.17E-07 |
| TUCP_003812 | XLOC_166671 | ENSRNOT00000002114 | -0.951293118 | 1.99E-06 |
| TUCP_003812 | XLOC_166671 | ENSRNOT00000015624 | 0.966605293  | 3.09E-07 |
| TUCP_003812 | XLOC_166671 | ENSRNOT00000026426 | 0.953334252  | 1.61E-06 |

|             |             |                    |              |          |
|-------------|-------------|--------------------|--------------|----------|
| TUCP_003812 | XLOC_166671 | ENSRNOT00000080695 | 0.951514005  | 1.94E-06 |
| TUCP_003812 | XLOC_166671 | ENSRNOT00000055386 | 0.951671431  | 1.91E-06 |
| TUCP_003812 | XLOC_166671 | ENSRNOT00000037679 | 0.954631649  | 1.40E-06 |
| TUCP_003812 | XLOC_166671 | ENSRNOT00000000120 | 0.950349126  | 2.19E-06 |
| TUCP_003812 | XLOC_166671 | ENSRNOT00000060696 | 0.962211681  | 5.69E-07 |
| TUCP_003812 | XLOC_166671 | ENSRNOT00000042125 | 0.959126666  | 8.39E-07 |
| TUCP_003812 | XLOC_166671 | ENSRNOT00000080207 | 0.953780145  | 1.54E-06 |
| TUCP_003812 | XLOC_166671 | ENSRNOT00000005387 | 0.955595551  | 1.26E-06 |
| TUCP_003812 | XLOC_166671 | ENSRNOT00000016060 | 0.970156558  | 1.77E-07 |
| TUCP_003812 | XLOC_166671 | ENSRNOT00000041494 | 0.970666939  | 1.63E-07 |
| TUCP_003812 | XLOC_166671 | ENSRNOT00000008987 | -0.952324572 | 1.79E-06 |
| TUCP_003812 | XLOC_166671 | ENSRNOT00000022796 | 0.970794975  | 1.59E-07 |
| TUCP_003812 | XLOC_166671 | ENSRNOT00000005257 | 0.961563122  | 6.19E-07 |
| TUCP_003812 | XLOC_166671 | ENSRNOT00000046639 | 0.953639545  | 1.56E-06 |
| TUCP_003812 | XLOC_166671 | ENSRNOT00000015799 | 0.961850252  | 5.97E-07 |
| TUCP_004494 | XLOC_197669 | ENSRNOT00000020030 | 0.959352838  | 8.16E-07 |
| TUCP_004494 | XLOC_197669 | ENSRNOT00000068134 | -0.953137813 | 1.64E-06 |
| TUCP_004494 | XLOC_197669 | ENSRNOT00000048910 | 0.960071537  | 7.47E-07 |
| TUCP_004494 | XLOC_197669 | ENSRNOT00000055669 | -0.951979408 | 1.85E-06 |
| TUCP_004494 | XLOC_197669 | ENSRNOT00000007175 | -0.96085342  | 6.78E-07 |
| TUCP_004494 | XLOC_197669 | ENSRNOT00000017319 | -0.950031351 | 2.26E-06 |
| TUCP_004494 | XLOC_197669 | ENSRNOT00000034201 | -0.953773132 | 1.54E-06 |
| TUCP_004494 | XLOC_197669 | ENSRNOT00000016333 | 0.951512668  | 1.95E-06 |
| TUCP_004494 | XLOC_197669 | ENSRNOT00000005073 | -0.950645425 | 2.12E-06 |
| TUCP_004494 | XLOC_197669 | ENSRNOT00000026065 | -0.951903909 | 1.87E-06 |
| TUCP_004494 | XLOC_197669 | ENSRNOT00000066947 | 0.950170365  | 2.22E-06 |
| TUCP_004494 | XLOC_197669 | ENSRNOT00000057175 | 0.967899951  | 2.54E-07 |
| TUCP_004494 | XLOC_197669 | ENSRNOT00000008873 | -0.966862302 | 2.98E-07 |
| TUCP_004494 | XLOC_197669 | ENSRNOT00000077311 | -0.955727371 | 1.24E-06 |
| TUCP_004494 | XLOC_197669 | ENSRNOT00000051181 | -0.951185645 | 2.01E-06 |
| TUCP_004494 | XLOC_197669 | ENSRNOT00000018057 | -0.95323909  | 1.63E-06 |
| TUCP_004494 | XLOC_197669 | ENSRNOT00000046973 | -0.953741173 | 1.54E-06 |
| TUCP_004494 | XLOC_197669 | ENSRNOT00000016948 | 0.954176719  | 1.47E-06 |
| TUCP_004494 | XLOC_197669 | ENSRNOT00000032505 | 0.959568139  | 7.95E-07 |
| TUCP_004494 | XLOC_197669 | ENSRNOT00000026783 | -0.954197948 | 1.47E-06 |
| TUCP_004494 | XLOC_197669 | ENSRNOT00000078650 | 0.96006096   | 7.48E-07 |
| TUCP_004494 | XLOC_197669 | ENSRNOT00000034487 | 0.954619647  | 1.40E-06 |
| TUCP_004494 | XLOC_197669 | ENSRNOT00000014701 | -0.954342357 | 1.45E-06 |
| TUCP_004494 | XLOC_197669 | ENSRNOT00000087306 | -0.952104736 | 1.83E-06 |
| TUCP_004494 | XLOC_197669 | ENSRNOT00000017379 | 0.96224757   | 5.67E-07 |
| TUCP_004494 | XLOC_197669 | ENSRNOT00000089086 | 0.954096145  | 1.49E-06 |
| TUCP_004494 | XLOC_197669 | ENSRNOT00000009696 | -0.958565332 | 8.97E-07 |
| TUCP_003912 | XLOC_172232 | ENSRNOT00000010084 | 0.952987931  | 1.67E-06 |
| TUCP_003912 | XLOC_172232 | ENSRNOT00000007544 | 0.951067181  | 2.03E-06 |
| TUCP_003912 | XLOC_172232 | ENSRNOT00000008149 | -0.971447622 | 1.42E-07 |
| TUCP_003652 | XLOC_160075 | ENSRNOT00000021941 | 0.950658949  | 2.12E-06 |
| TUCP_003655 | XLOC_160085 | ENSRNOT00000009879 | 0.956967531  | 1.08E-06 |
| TUCP_003159 | XLOC_135726 | ENSRNOT00000009094 | 0.977724761  | 4.16E-08 |
| TUCP_002278 | XLOC_094576 | ENSRNOT00000072794 | 0.962078073  | 5.80E-07 |
| TUCP_001576 | XLOC_060941 | ENSRNOT00000047264 | 0.976691254  | 5.21E-08 |
| TUCP_001576 | XLOC_060941 | ENSRNOT00000089010 | 0.958374525  | 9.18E-07 |

|             |             |                    |             |          |
|-------------|-------------|--------------------|-------------|----------|
| TUCP_001576 | XLOC_060941 | ENSRNOT00000010263 | 0.968031064 | 2.49E-07 |
| TUCP_001576 | XLOC_060941 | ENSRNOT00000000060 | 0.951186702 | 2.01E-06 |
| TUCP_002541 | XLOC_107677 | ENSRNOT00000084500 | 0.99698119  | 1.96E-12 |
| TUCP_002541 | XLOC_107677 | ENSRNOT00000093467 | 0.967603808 | 2.66E-07 |
| TUCP_002541 | XLOC_107677 | ENSRNOT00000029340 | 0.96494395  | 3.93E-07 |
| TUCP_002541 | XLOC_107677 | ENSRNOT00000077972 | 0.978772463 | 3.28E-08 |
| TUCP_002541 | XLOC_107677 | ENSRNOT00000038646 | 0.968466314 | 2.33E-07 |
| TUCP_002541 | XLOC_107677 | ENSRNOT00000048858 | 0.990150928 | 7.18E-10 |
| TUCP_002541 | XLOC_107677 | ENSRNOT00000092579 | 0.968466314 | 2.33E-07 |
| TUCP_002541 | XLOC_107677 | ENSRNOT00000048373 | 0.97819281  | 3.74E-08 |
| TUCP_002541 | XLOC_107677 | ENSRNOT00000076528 | 0.962913391 | 5.19E-07 |
| TUCP_002541 | XLOC_107677 | ENSRNOT00000083034 | 0.971101558 | 1.51E-07 |
| TUCP_002541 | XLOC_107677 | ENSRNOT00000089607 | 0.959370294 | 8.14E-07 |
| TUCP_002541 | XLOC_107677 | ENSRNOT00000086014 | 0.952350438 | 1.79E-06 |
| TUCP_002541 | XLOC_107677 | ENSRNOT00000021748 | 0.968466314 | 2.33E-07 |
| TUCP_002541 | XLOC_107677 | ENSRNOT00000088148 | 0.968466314 | 2.33E-07 |
| TUCP_002541 | XLOC_107677 | ENSRNOT00000076833 | 0.960503843 | 7.08E-07 |
| TUCP_002541 | XLOC_107677 | ENSRNOT00000078137 | 0.968466314 | 2.33E-07 |
| TUCP_002541 | XLOC_107677 | ENSRNOT00000043661 | 0.999957737 | 1.06E-21 |
| TUCP_002541 | XLOC_107677 | ENSRNOT00000092740 | 0.968466314 | 2.33E-07 |
| TUCP_002541 | XLOC_107677 | ENSRNOT00000000117 | 0.956402541 | 1.15E-06 |
| TUCP_002541 | XLOC_107677 | ENSRNOT00000071877 | 0.985469198 | 4.98E-09 |
| TUCP_002541 | XLOC_107677 | ENSRNOT00000070958 | 0.968466314 | 2.33E-07 |
| TUCP_002541 | XLOC_107677 | ENSRNOT00000076757 | 0.985049964 | 5.74E-09 |
| TUCP_002541 | XLOC_107677 | ENSRNOT00000047241 | 0.999972064 | 1.34E-22 |
| TUCP_002541 | XLOC_107677 | ENSRNOT00000072426 | 0.957818646 | 9.80E-07 |
| TUCP_002541 | XLOC_107677 | ENSRNOT00000027268 | 0.968466314 | 2.33E-07 |
| TUCP_002541 | XLOC_107677 | ENSRNOT00000004459 | 0.968466314 | 2.33E-07 |
| TUCP_002541 | XLOC_107677 | ENSRNOT00000089235 | 0.966792363 | 3.01E-07 |
| TUCP_002541 | XLOC_107677 | ENSRNOT00000088168 | 0.968466314 | 2.33E-07 |
| TUCP_002541 | XLOC_107677 | ENSRNOT00000085024 | 0.958698684 | 8.83E-07 |
| TUCP_002541 | XLOC_107677 | ENSRNOT00000088527 | 0.968466314 | 2.33E-07 |
| TUCP_002541 | XLOC_107677 | ENSRNOT00000078701 | 0.968466314 | 2.33E-07 |
| TUCP_002541 | XLOC_107677 | ENSRNOT00000052308 | 0.99974939  | 7.78E-18 |
| TUCP_002541 | XLOC_107677 | ENSRNOT00000052130 | 0.955033349 | 1.34E-06 |
| TUCP_002541 | XLOC_107677 | ENSRNOT00000089085 | 0.968466314 | 2.33E-07 |
| TUCP_002541 | XLOC_107677 | ENSRNOT00000008153 | 0.968850847 | 2.19E-07 |
| TUCP_002541 | XLOC_107677 | ENSRNOT00000090078 | 0.968466314 | 2.33E-07 |
| TUCP_002541 | XLOC_107677 | ENSRNOT00000078020 | 0.951145247 | 2.02E-06 |
| TUCP_002541 | XLOC_107677 | ENSRNOT00000009776 | 0.968466314 | 2.33E-07 |
| TUCP_003019 | XLOC_128446 | ENSRNOT00000012671 | 0.957637609 | 1.00E-06 |
| TUCP_003019 | XLOC_128446 | ENSRNOT00000014941 | 0.951285373 | 1.99E-06 |
| TUCP_003019 | XLOC_128446 | ENSRNOT00000065168 | 0.96718018  | 2.84E-07 |
| TUCP_003019 | XLOC_128446 | ENSRNOT00000073559 | 0.963674814 | 4.69E-07 |
| TUCP_003019 | XLOC_128446 | ENSRNOT00000047387 | 0.961736058 | 6.06E-07 |
| TUCP_003019 | XLOC_128446 | ENSRNOT00000076669 | 0.962279015 | 5.65E-07 |
| TUCP_003019 | XLOC_128446 | ENSRNOT00000085228 | 0.951628425 | 1.92E-06 |
| TUCP_003019 | XLOC_128446 | ENSRNOT00000020134 | 0.96907209  | 2.12E-07 |
| TUCP_003019 | XLOC_128446 | ENSRNOT00000027452 | 0.955002892 | 1.35E-06 |
| TUCP_003019 | XLOC_128446 | ENSRNOT00000074939 | 0.96558785  | 3.59E-07 |
| TUCP_003019 | XLOC_128446 | ENSRNOT00000039809 | 0.95445177  | 1.43E-06 |

|             |             |                    |              |          |
|-------------|-------------|--------------------|--------------|----------|
| TUCP_003019 | XLOC_128446 | ENSRNOT0000000743  | 0.959584102  | 7.93E-07 |
| TUCP_003019 | XLOC_128446 | ENSRNOT00000060696 | 0.972785639  | 1.12E-07 |
| TUCP_003019 | XLOC_128446 | ENSRNOT00000017021 | 0.954565469  | 1.41E-06 |
| TUCP_003019 | XLOC_128446 | ENSRNOT00000078445 | -0.959285897 | 8.23E-07 |
| TUCP_003019 | XLOC_128446 | ENSRNOT00000087592 | 0.961708557  | 6.08E-07 |
| TUCP_003019 | XLOC_128446 | ENSRNOT00000031230 | 0.953073731  | 1.66E-06 |
| TUCP_003019 | XLOC_128446 | ENSRNOT00000032274 | 0.97295656   | 1.09E-07 |
| TUCP_003019 | XLOC_128446 | ENSRNOT0000002410  | 0.965898886  | 3.43E-07 |
| TUCP_003019 | XLOC_128446 | ENSRNOT00000071764 | 0.978156389  | 3.78E-08 |
| TUCP_003019 | XLOC_128446 | ENSRNOT00000031267 | 0.955780046  | 1.24E-06 |
| TUCP_003019 | XLOC_128446 | ENSRNOT00000041096 | 0.950610042  | 2.13E-06 |
| TUCP_003019 | XLOC_128446 | ENSRNOT00000029167 | 0.976727106  | 5.17E-08 |
| TUCP_003019 | XLOC_128446 | ENSRNOT00000006175 | 0.984653121  | 6.53E-09 |
| TUCP_003019 | XLOC_128446 | ENSRNOT00000009683 | 0.959375284  | 8.14E-07 |
| TUCP_003019 | XLOC_128446 | ENSRNOT00000083127 | 0.965780499  | 3.49E-07 |
| TUCP_003019 | XLOC_128446 | ENSRNOT00000023144 | 0.951491658  | 1.95E-06 |
| TUCP_003019 | XLOC_128446 | ENSRNOT00000027411 | 0.952416242  | 1.77E-06 |
| TUCP_003019 | XLOC_128446 | ENSRNOT00000043535 | 0.950540782  | 2.14E-06 |
| TUCP_003019 | XLOC_128446 | ENSRNOT00000011230 | 0.954130785  | 1.48E-06 |
| TUCP_003019 | XLOC_128446 | ENSRNOT00000019997 | 0.953324529  | 1.61E-06 |
| TUCP_003019 | XLOC_128446 | ENSRNOT00000024719 | 0.958601146  | 8.93E-07 |
| TUCP_003019 | XLOC_128446 | ENSRNOT00000027454 | 0.958607168  | 8.93E-07 |
| TUCP_003019 | XLOC_128446 | ENSRNOT00000024322 | 0.968556599  | 2.30E-07 |
| TUCP_003019 | XLOC_128446 | ENSRNOT00000034704 | 0.961369164  | 6.35E-07 |
| TUCP_003019 | XLOC_128446 | ENSRNOT00000016975 | 0.95684985   | 1.10E-06 |
| TUCP_003019 | XLOC_128446 | ENSRNOT00000081246 | 0.952661245  | 1.73E-06 |
| TUCP_003019 | XLOC_128446 | ENSRNOT00000091265 | 0.965341192  | 3.72E-07 |
| TUCP_003019 | XLOC_128446 | ENSRNOT00000012895 | 0.952616754  | 1.74E-06 |
| TUCP_003019 | XLOC_128446 | ENSRNOT00000083093 | 0.969496411  | 1.98E-07 |
| TUCP_003019 | XLOC_128446 | ENSRNOT00000072196 | 0.958589194  | 8.95E-07 |
| TUCP_003019 | XLOC_128446 | ENSRNOT00000089971 | 0.965643879  | 3.56E-07 |
| TUCP_003019 | XLOC_128446 | ENSRNOT00000065501 | 0.953385688  | 1.60E-06 |
| TUCP_003019 | XLOC_128446 | ENSRNOT00000020028 | 0.966118203  | 3.32E-07 |
| TUCP_003019 | XLOC_128446 | ENSRNOT00000066670 | 0.963811045  | 4.60E-07 |
| TUCP_003019 | XLOC_128446 | ENSRNOT00000023180 | 0.951275774  | 1.99E-06 |
| TUCP_003019 | XLOC_128446 | ENSRNOT00000000676 | 0.970145438  | 1.78E-07 |
| TUCP_003019 | XLOC_128446 | ENSRNOT00000028759 | 0.950798726  | 2.09E-06 |
| TUCP_003019 | XLOC_128446 | ENSRNOT00000075326 | 0.956046142  | 1.20E-06 |
| TUCP_003019 | XLOC_128446 | ENSRNOT00000025832 | 0.96317764   | 5.01E-07 |
| TUCP_003019 | XLOC_128446 | ENSRNOT00000071971 | 0.963363988  | 4.89E-07 |
| TUCP_003019 | XLOC_128446 | ENSRNOT00000076729 | 0.961986081  | 5.86E-07 |
| TUCP_003019 | XLOC_128446 | ENSRNOT00000064798 | 0.950148083  | 2.23E-06 |
| TUCP_003019 | XLOC_128446 | ENSRNOT00000073991 | 0.960982654  | 6.67E-07 |
| TUCP_003019 | XLOC_128446 | ENSRNOT00000084088 | 0.964539235  | 4.16E-07 |
| TUCP_003019 | XLOC_128446 | ENSRNOT00000015799 | 0.954402336  | 1.44E-06 |
| TUCP_003019 | XLOC_128446 | ENSRNOT00000026280 | 0.951350459  | 1.98E-06 |
| TUCP_003019 | XLOC_128446 | ENSRNOT00000058072 | 0.958180924  | 9.39E-07 |
| TUCP_003019 | XLOC_128446 | ENSRNOT00000060362 | 0.956372069  | 1.16E-06 |
| TUCP_003019 | XLOC_128446 | ENSRNOT00000005537 | 0.950124264  | 2.23E-06 |
| TUCP_003019 | XLOC_128446 | ENSRNOT00000013274 | 0.95449409   | 1.42E-06 |
| TUCP_003019 | XLOC_128446 | ENSRNOT00000044742 | 0.965584536  | 3.59E-07 |

|             |             |                    |              |          |
|-------------|-------------|--------------------|--------------|----------|
| TUCP_003019 | XLOC_128446 | ENSRNOT00000013985 | 0.953203215  | 1.63E-06 |
| TUCP_003019 | XLOC_128446 | ENSRNOT00000011052 | 0.955981934  | 1.21E-06 |
| TUCP_003019 | XLOC_128446 | ENSRNOT00000058095 | 0.955704559  | 1.25E-06 |
| TUCP_003019 | XLOC_128446 | ENSRNOT00000010898 | 0.959338515  | 8.18E-07 |
| TUCP_003019 | XLOC_128446 | ENSRNOT00000047093 | 0.969134129  | 2.09E-07 |
| TUCP_003019 | XLOC_128446 | ENSRNOT00000052018 | 0.961715281  | 6.07E-07 |
| TUCP_003019 | XLOC_128446 | ENSRNOT00000031904 | 0.961610531  | 6.16E-07 |
| TUCP_003019 | XLOC_128446 | ENSRNOT00000027337 | 0.951634069  | 1.92E-06 |
| TUCP_003019 | XLOC_128446 | ENSRNOT00000047192 | -0.956779471 | 1.10E-06 |
| TUCP_003019 | XLOC_128446 | ENSRNOT00000081906 | 0.950131879  | 2.23E-06 |
| TUCP_003019 | XLOC_128446 | ENSRNOT0000003991  | 0.951277832  | 1.99E-06 |
| TUCP_003019 | XLOC_128446 | ENSRNOT00000023428 | 0.970952966  | 1.55E-07 |
| TUCP_003019 | XLOC_128446 | ENSRNOT00000090420 | -0.963791494 | 4.61E-07 |
| TUCP_003019 | XLOC_128446 | ENSRNOT00000021348 | 0.962454644  | 5.52E-07 |
| TUCP_003019 | XLOC_128446 | ENSRNOT00000004412 | 0.950992544  | 2.05E-06 |
| TUCP_003019 | XLOC_128446 | ENSRNOT00000029001 | 0.950166157  | 2.23E-06 |
| TUCP_003019 | XLOC_128446 | ENSRNOT00000025075 | 0.966535871  | 3.12E-07 |
| TUCP_003019 | XLOC_128446 | ENSRNOT00000026543 | 0.980435419  | 2.18E-08 |
| TUCP_003019 | XLOC_128446 | ENSRNOT00000000157 | 0.968073946  | 2.48E-07 |
| TUCP_003019 | XLOC_128446 | ENSRNOT00000083799 | 0.974383472  | 8.32E-08 |
| TUCP_003019 | XLOC_128446 | ENSRNOT00000006499 | 0.950830618  | 2.08E-06 |
| TUCP_001678 | XLOC_067031 | ENSRNOT00000085110 | 0.980769774  | 2.01E-08 |
| TUCP_001678 | XLOC_067031 | ENSRNOT00000008037 | 0.975963986  | 6.07E-08 |
| TUCP_001678 | XLOC_067031 | ENSRNOT00000087720 | 0.957565908  | 1.01E-06 |
| TUCP_002420 | XLOC_102344 | ENSRNOT00000020329 | 0.958367611  | 9.18E-07 |
| TUCP_003915 | XLOC_172396 | ENSRNOT00000085599 | 0.999938502  | 6.93E-21 |
| TUCP_003915 | XLOC_172396 | ENSRNOT00000006689 | 0.9944189    | 4.22E-11 |
| TUCP_003915 | XLOC_172396 | ENSRNOT00000081534 | 0.987999291  | 1.92E-09 |
| TUCP_003915 | XLOC_172396 | ENSRNOT00000085301 | 0.99793679   | 2.93E-13 |
| TUCP_003915 | XLOC_172396 | ENSRNOT00000038729 | 1            | 1.33E-79 |
| TUCP_003915 | XLOC_172396 | ENSRNOT00000086385 | 1            | 1.33E-79 |
| TUCP_003915 | XLOC_172396 | ENSRNOT00000077695 | 0.96038616   | 7.19E-07 |
| TUCP_003915 | XLOC_172396 | ENSRNOT00000078561 | 0.986503348  | 3.45E-09 |
| TUCP_003915 | XLOC_172396 | ENSRNOT00000087613 | 1            | 1.33E-79 |
| TUCP_003915 | XLOC_172396 | ENSRNOT00000026032 | 0.953050675  | 1.66E-06 |
| TUCP_003915 | XLOC_172396 | ENSRNOT00000073350 | 0.9658754    | 3.44E-07 |
| TUCP_003915 | XLOC_172396 | ENSRNOT00000023062 | 1            | 1.33E-79 |
| TUCP_003915 | XLOC_172396 | ENSRNOT00000058834 | 1            | 1.33E-79 |
| TUCP_003915 | XLOC_172396 | ENSRNOT00000079420 | 1            | 0        |
| TUCP_003915 | XLOC_172396 | ENSRNOT00000090761 | 1            | 1.33E-79 |
| TUCP_003915 | XLOC_172396 | ENSRNOT00000055923 | 1            | 0        |
| TUCP_003915 | XLOC_172396 | ENSRNOT00000092416 | 0.963085379  | 5.07E-07 |
| TUCP_003915 | XLOC_172396 | ENSRNOT00000071930 | 1            | 1.33E-79 |
| TUCP_003915 | XLOC_172396 | ENSRNOT00000001996 | 0.974721715  | 7.79E-08 |
| TUCP_003915 | XLOC_172396 | ENSRNOT00000076756 | 1            | 0        |
| TUCP_003915 | XLOC_172396 | ENSRNOT00000081527 | 0.999420479  | 5.14E-16 |
| TUCP_003915 | XLOC_172396 | ENSRNOT00000085067 | 0.960262084  | 7.30E-07 |
| TUCP_003915 | XLOC_172396 | ENSRNOT00000091663 | 0.99642667   | 4.56E-12 |
| TUCP_003915 | XLOC_172396 | ENSRNOT00000081780 | 1            | 0        |
| TUCP_003915 | XLOC_172396 | ENSRNOT00000093689 | 0.953599805  | 1.57E-06 |
| TUCP_003915 | XLOC_172396 | ENSRNOT00000089114 | 1            | 4.25E-78 |



|             |             |                     |              |          |
|-------------|-------------|---------------------|--------------|----------|
| TUCP_003915 | XLOC_172396 | ENSRNOT00000021609  | 0.977017895  | 4.86E-08 |
| TUCP_003915 | XLOC_172396 | ENSRNOT00000073316  | 1            | 1.33E-79 |
| TUCP_003915 | XLOC_172396 | ENSRNOT00000086557  | 0.977413455  | 4.46E-08 |
| TUCP_003915 | XLOC_172396 | ENSRNOT00000071663  | 1            | 0        |
| TUCP_003915 | XLOC_172396 | ENSRNOT00000042860  | 1            | 1.33E-79 |
| TUCP_003915 | XLOC_172396 | ENSRNOT00000072962  | 0.971287317  | 1.46E-07 |
| TUCP_003915 | XLOC_172396 | ENSRNOT00000088421  | 1            | 0        |
| TUCP_003915 | XLOC_172396 | ENSRNOT00000038898  | 1            | 0        |
| TUCP_003915 | XLOC_172396 | ENSRNOT00000015840  | 0.959452012  | 8.06E-07 |
| TUCP_003915 | XLOC_172396 | ENSRNOT00000064936  | 0.985957557  | 4.20E-09 |
| TUCP_003915 | XLOC_172396 | ENSRNOT00000042777  | 0.990642579  | 5.56E-10 |
| TUCP_003915 | XLOC_172396 | ENSRNOT00000010029  | 1            | 1.33E-79 |
| TUCP_001889 | XLOC_078243 | ENSRNOT00000067181  | 0.978664277  | 3.36E-08 |
| TUCP_001889 | XLOC_078243 | ENSRNOT00000031904  | 0.95712002   | 1.06E-06 |
| TUCP_001889 | XLOC_078243 | ENSRNOT00000039809  | 0.974371927  | 8.34E-08 |
| TUCP_001889 | XLOC_078243 | ENSRNOT00000000743  | 0.979421675  | 2.81E-08 |
| TUCP_001889 | XLOC_078243 | ENSRNOT00000027083  | 0.95797725   | 9.62E-07 |
| TUCP_001889 | XLOC_078243 | ENSRNOT00000048914  | 0.952777302  | 1.71E-06 |
| TUCP_001889 | XLOC_078243 | ENSRNOT00000074939  | 0.956239143  | 1.17E-06 |
| TUCP_001889 | XLOC_078243 | ENSRNOT00000078445  | -0.965221826 | 3.78E-07 |
| TUCP_001889 | XLOC_078243 | ENSRNOT00000013026  | 0.954992421  | 1.35E-06 |
| TUCP_001889 | XLOC_078243 | ENSRNOT00000005228  | 0.964852452  | 3.98E-07 |
| TUCP_001889 | XLOC_078243 | ENSRNOT00000006175  | 0.95507605   | 1.34E-06 |
| TUCP_001889 | XLOC_078243 | ENSRNOT00000021592  | 0.956792876  | 1.10E-06 |
| TUCP_001889 | XLOC_078243 | ENSRNOT00000023144  | 0.963170817  | 5.02E-07 |
| TUCP_001889 | XLOC_078243 | ENSRNOT00000016649  | 0.953299891  | 1.62E-06 |
| TUCP_001889 | XLOC_078243 | ENSRNOT00000091128  | -0.956390319 | 1.15E-06 |
| TUCP_001889 | XLOC_078243 | ENSRNOT00000009129  | 0.961564657  | 6.19E-07 |
| TUCP_001889 | XLOC_078243 | ENSRNOT00000026543  | 0.974692563  | 7.84E-08 |
| TUCP_001889 | XLOC_078243 | ENSRNOT00000066670  | 0.953246008  | 1.63E-06 |
| TUCP_001889 | XLOC_078243 | ENSRNOT00000012187  | 0.957044777  | 1.07E-06 |
| TUCP_001889 | XLOC_078243 | ENSRNOT00000006055  | 0.963413464  | 4.85E-07 |
| TUCP_001889 | XLOC_078243 | ENSRNOT00000028646  | 0.961696721  | 6.09E-07 |
| TUCP_001889 | XLOC_078243 | ENSRNOT00000011384  | 0.950063553  | 2.25E-06 |
| TUCP_001889 | XLOC_078243 | ENSRNOT00000035989  | 0.980132685  | 2.36E-08 |
| TUCP_001889 | XLOC_078243 | ENSRNOT00000057160  | 0.950566704  | 2.14E-06 |
| TUCP_001889 | XLOC_078243 | ENSRNOT000000082699 | 0.970463147  | 1.68E-07 |
| TUCP_001889 | XLOC_078243 | ENSRNOT00000021348  | 0.956886613  | 1.09E-06 |
| TUCP_001889 | XLOC_078243 | ENSRNOT00000010242  | 0.95348731   | 1.59E-06 |
| TUCP_001889 | XLOC_078243 | ENSRNOT00000028842  | 0.956534052  | 1.14E-06 |
| TUCP_001889 | XLOC_078243 | ENSRNOT00000083215  | 0.956791219  | 1.10E-06 |
| TUCP_001889 | XLOC_078243 | ENSRNOT00000032274  | 0.951766391  | 1.90E-06 |
| TUCP_001889 | XLOC_078243 | ENSRNOT00000010541  | 0.952236917  | 1.81E-06 |
| TUCP_001889 | XLOC_078243 | ENSRNOT00000017948  | 0.961499291  | 6.24E-07 |
| TUCP_001889 | XLOC_078243 | ENSRNOT00000012895  | 0.961903519  | 5.93E-07 |
| TUCP_001889 | XLOC_078243 | ENSRNOT00000025859  | 0.96302565   | 5.11E-07 |
| TUCP_001889 | XLOC_078243 | ENSRNOT00000034503  | 0.962917826  | 5.19E-07 |
| TUCP_001889 | XLOC_078243 | ENSRNOT00000029049  | 0.95413176   | 1.48E-06 |
| TUCP_001889 | XLOC_078243 | ENSRNOT00000000676  | 0.952994271  | 1.67E-06 |
| TUCP_001889 | XLOC_078243 | ENSRNOT00000060362  | 0.954273442  | 1.46E-06 |
| TUCP_001889 | XLOC_078243 | ENSRNOT00000013274  | 0.958355143  | 9.20E-07 |

|             |             |                    |              |          |
|-------------|-------------|--------------------|--------------|----------|
| TUCP_001889 | XLOC_078243 | ENSRNOT00000085027 | 0.95607526   | 1.20E-06 |
| TUCP_001889 | XLOC_078243 | ENSRNOT00000020437 | 0.960674552  | 6.93E-07 |
| TUCP_001889 | XLOC_078243 | ENSRNOT00000010898 | 0.983886496  | 8.33E-09 |
| TUCP_001889 | XLOC_078243 | ENSRNOT00000047093 | 0.954418712  | 1.44E-06 |
| TUCP_001889 | XLOC_078243 | ENSRNOT00000001222 | 0.955050465  | 1.34E-06 |
| TUCP_001889 | XLOC_078243 | ENSRNOT00000073675 | -0.959561685 | 7.96E-07 |
| TUCP_001889 | XLOC_078243 | ENSRNOT00000005355 | 0.969263414  | 2.05E-07 |
| TUCP_001889 | XLOC_078243 | ENSRNOT00000025981 | 0.968179018  | 2.44E-07 |
| TUCP_001889 | XLOC_078243 | ENSRNOT00000047387 | 0.9542445    | 1.46E-06 |
| TUCP_001889 | XLOC_078243 | ENSRNOT00000004698 | 0.953825531  | 1.53E-06 |
| TUCP_001889 | XLOC_078243 | ENSRNOT00000012093 | 0.953274853  | 1.62E-06 |
| TUCP_001889 | XLOC_078243 | ENSRNOT00000017629 | 0.962652485  | 5.37E-07 |
| TUCP_001889 | XLOC_078243 | ENSRNOT00000017021 | 0.953240686  | 1.63E-06 |
| TUCP_001889 | XLOC_078243 | ENSRNOT00000003991 | 0.964640937  | 4.10E-07 |
| TUCP_001889 | XLOC_078243 | ENSRNOT00000087429 | 0.953718141  | 1.55E-06 |
| TUCP_001889 | XLOC_078243 | ENSRNOT00000009683 | 0.951237611  | 2.00E-06 |
| TUCP_001889 | XLOC_078243 | ENSRNOT00000084088 | 0.978334983  | 3.62E-08 |
| TUCP_001889 | XLOC_078243 | ENSRNOT00000043535 | 0.950704256  | 2.11E-06 |
| TUCP_001889 | XLOC_078243 | ENSRNOT00000078070 | 0.95792351   | 9.68E-07 |
| TUCP_001889 | XLOC_078243 | ENSRNOT00000029664 | 0.957553659  | 1.01E-06 |
| TUCP_001889 | XLOC_078243 | ENSRNOT00000076729 | 0.979978603  | 2.45E-08 |
| TUCP_001889 | XLOC_078243 | ENSRNOT00000005262 | 0.95056963   | 2.14E-06 |
| TUCP_001889 | XLOC_078243 | ENSRNOT00000085596 | 0.963903147  | 4.54E-07 |
| TUCP_001889 | XLOC_078243 | ENSRNOT00000091265 | 0.954196637  | 1.47E-06 |
| TUCP_001889 | XLOC_078243 | ENSRNOT00000078390 | -0.953991127 | 1.50E-06 |
| TUCP_001889 | XLOC_078243 | ENSRNOT00000027454 | 0.954419054  | 1.44E-06 |
| TUCP_001889 | XLOC_078243 | ENSRNOT00000025832 | 0.958750831  | 8.77E-07 |
| TUCP_001889 | XLOC_078243 | ENSRNOT00000090665 | 0.952722092  | 1.72E-06 |
| TUCP_001889 | XLOC_078243 | ENSRNOT00000025936 | -0.965472269 | 3.65E-07 |
| TUCP_001889 | XLOC_078243 | ENSRNOT00000009280 | 0.954497987  | 1.42E-06 |
| TUCP_001889 | XLOC_078243 | ENSRNOT00000090376 | 0.96032842   | 7.24E-07 |
| TUCP_001889 | XLOC_078243 | ENSRNOT00000090420 | -0.970029398 | 1.81E-07 |
| TUCP_001889 | XLOC_078243 | ENSRNOT00000057313 | 0.961023348  | 6.64E-07 |
| TUCP_001889 | XLOC_078243 | ENSRNOT00000092158 | 0.951573701  | 1.93E-06 |
| TUCP_001889 | XLOC_078243 | ENSRNOT00000017422 | -0.971505038 | 1.41E-07 |
| TUCP_001889 | XLOC_078243 | ENSRNOT00000010992 | 0.966496032  | 3.14E-07 |
| TUCP_001889 | XLOC_078243 | ENSRNOT00000076669 | 0.986582905  | 3.35E-09 |
| TUCP_001889 | XLOC_078243 | ENSRNOT00000006401 | -0.95583667  | 1.23E-06 |
| TUCP_001889 | XLOC_078243 | ENSRNOT00000050834 | -0.951357511 | 1.98E-06 |
| TUCP_001889 | XLOC_078243 | ENSRNOT00000066024 | 0.953880536  | 1.52E-06 |
| TUCP_001889 | XLOC_078243 | ENSRNOT00000031230 | 0.959308079  | 8.21E-07 |
| TUCP_001889 | XLOC_078243 | ENSRNOT00000059458 | 0.956221931  | 1.18E-06 |
| TUCP_001889 | XLOC_078243 | ENSRNOT00000080110 | 0.953811902  | 1.53E-06 |
| TUCP_001889 | XLOC_078243 | ENSRNOT00000080695 | 0.956585162  | 1.13E-06 |
| TUCP_001889 | XLOC_078243 | ENSRNOT00000021073 | -0.95818488  | 9.38E-07 |
| TUCP_001889 | XLOC_078243 | ENSRNOT00000085988 | 0.95552431   | 1.27E-06 |
| TUCP_001889 | XLOC_078243 | ENSRNOT00000025550 | -0.951939143 | 1.86E-06 |
| TUCP_001889 | XLOC_078243 | ENSRNOT00000003296 | 0.959515215  | 8.00E-07 |
| TUCP_001889 | XLOC_078243 | ENSRNOT00000058852 | -0.968709629 | 2.24E-07 |
| TUCP_001889 | XLOC_078243 | ENSRNOT00000060696 | 0.95425128   | 1.46E-06 |
| TUCP_001889 | XLOC_078243 | ENSRNOT00000081400 | 0.975160612  | 7.14E-08 |

|             |             |                    |              |          |
|-------------|-------------|--------------------|--------------|----------|
| TUCP_001889 | XLOC_078243 | ENSRNOT0000004412  | 0.970085059  | 1.79E-07 |
| TUCP_001889 | XLOC_078243 | ENSRNOT0000004942  | -0.957844694 | 9.77E-07 |
| TUCP_001889 | XLOC_078243 | ENSRNOT00000080207 | 0.956006552  | 1.21E-06 |
| TUCP_001889 | XLOC_078243 | ENSRNOT00000093000 | 0.952699188  | 1.72E-06 |
| TUCP_001889 | XLOC_078243 | ENSRNOT00000034704 | 0.966719309  | 3.04E-07 |
| TUCP_001889 | XLOC_078243 | ENSRNOT00000025092 | 0.9524212    | 1.77E-06 |
| TUCP_001889 | XLOC_078243 | ENSRNOT00000051496 | 0.966865744  | 2.98E-07 |
| TUCP_001889 | XLOC_078243 | ENSRNOT00000024156 | 0.961088389  | 6.58E-07 |
| TUCP_001889 | XLOC_078243 | ENSRNOT00000023428 | 0.951023186  | 2.04E-06 |
| TUCP_001889 | XLOC_078243 | ENSRNOT00000024420 | 0.953140646  | 1.64E-06 |
| TUCP_001889 | XLOC_078243 | ENSRNOT00000047192 | -0.95588396  | 1.22E-06 |
| TUCP_001889 | XLOC_078243 | ENSRNOT00000006900 | -0.955345163 | 1.30E-06 |
| TUCP_001889 | XLOC_078243 | ENSRNOT00000083799 | 0.964768576  | 4.03E-07 |
| TUCP_001888 | XLOC_078238 | ENSRNOT00000011682 | -0.961870467 | 5.95E-07 |
| TUCP_001888 | XLOC_078238 | ENSRNOT00000042125 | 0.951145962  | 2.02E-06 |
| TUCP_001888 | XLOC_078238 | ENSRNOT00000028625 | -0.969099423 | 2.11E-07 |
| TUCP_001888 | XLOC_078238 | ENSRNOT00000082869 | 0.972855774  | 1.11E-07 |
| TUCP_001888 | XLOC_078238 | ENSRNOT00000052224 | 0.964044392  | 4.46E-07 |
| TUCP_001888 | XLOC_078238 | ENSRNOT00000081400 | 0.951106607  | 2.03E-06 |
| TUCP_001888 | XLOC_078238 | ENSRNOT00000017181 | -0.957272983 | 1.04E-06 |
| TUCP_001888 | XLOC_078238 | ENSRNOT00000038448 | -0.950235143 | 2.21E-06 |
| TUCP_001888 | XLOC_078238 | ENSRNOT00000088353 | -0.98752579  | 2.33E-09 |
| TUCP_001888 | XLOC_078238 | ENSRNOT00000021471 | -0.960062934 | 7.48E-07 |
| TUCP_001888 | XLOC_078238 | ENSRNOT00000019886 | 0.958723023  | 8.80E-07 |
| TUCP_001888 | XLOC_078238 | ENSRNOT00000056430 | 0.955694198  | 1.25E-06 |
| TUCP_001888 | XLOC_078238 | ENSRNOT00000031568 | 0.963711479  | 4.66E-07 |
| TUCP_001888 | XLOC_078238 | ENSRNOT00000008677 | 0.953299196  | 1.62E-06 |
| TUCP_001887 | XLOC_078234 | ENSRNOT00000042114 | 0.964867621  | 3.97E-07 |
| TUCP_001887 | XLOC_078234 | ENSRNOT00000034089 | 0.955448835  | 1.28E-06 |
| TUCP_001887 | XLOC_078234 | ENSRNOT00000055680 | 0.971281737  | 1.47E-07 |
| TUCP_001887 | XLOC_078234 | ENSRNOT00000024517 | 0.966914195  | 2.95E-07 |
| TUCP_001887 | XLOC_078234 | ENSRNOT00000048817 | 0.959714062  | 7.81E-07 |
| TUCP_001885 | XLOC_078206 | ENSRNOT00000092026 | 0.96620614   | 3.28E-07 |
| TUCP_001885 | XLOC_078206 | ENSRNOT00000093075 | 1            | 0        |
| TUCP_001885 | XLOC_078206 | ENSRNOT00000058260 | 1            | 0        |
| TUCP_001885 | XLOC_078206 | ENSRNOT00000088887 | 1            | 0        |
| TUCP_001885 | XLOC_078206 | ENSRNOT00000084986 | 1            | 0        |
| TUCP_001885 | XLOC_078206 | ENSRNOT00000074346 | 0.9702256    | 1.75E-07 |
| TUCP_001885 | XLOC_078206 | ENSRNOT00000073209 | 0.983711602  | 8.79E-09 |
| TUCP_001885 | XLOC_078206 | ENSRNOT00000080155 | 0.973069673  | 1.07E-07 |
| TUCP_001885 | XLOC_078206 | ENSRNOT00000072573 | 0.996213272  | 6.09E-12 |
| TUCP_001885 | XLOC_078206 | ENSRNOT00000017828 | 0.996001583  | 7.99E-12 |
| TUCP_001885 | XLOC_078206 | ENSRNOT00000080444 | 0.969625907  | 1.93E-07 |
| TUCP_001885 | XLOC_078206 | ENSRNOT00000071312 | 1            | 0        |
| TUCP_001885 | XLOC_078206 | ENSRNOT00000088245 | 1            | 0        |
| TUCP_001885 | XLOC_078206 | ENSRNOT00000036565 | 0.969065335  | 2.12E-07 |
| TUCP_001885 | XLOC_078206 | ENSRNOT00000058833 | 0.998673261  | 3.23E-14 |
| TUCP_001885 | XLOC_078206 | ENSRNOT00000078052 | 1            | 0        |
| TUCP_001885 | XLOC_078206 | ENSRNOT00000078494 | 0.999927093  | 1.62E-20 |
| TUCP_001885 | XLOC_078206 | ENSRNOT00000085653 | 1            | 0        |
| TUCP_001885 | XLOC_078206 | ENSRNOT00000057950 | 0.969329371  | 2.03E-07 |

|             |             |                    |              |          |
|-------------|-------------|--------------------|--------------|----------|
| TUCP_001885 | XLOC_078206 | ENSRNOT00000081992 | 0.999320526  | 1.14E-15 |
| TUCP_001885 | XLOC_078206 | ENSRNOT00000038553 | 0.955765808  | 1.24E-06 |
| TUCP_001885 | XLOC_078206 | ENSRNOT00000084120 | 0.958115447  | 9.46E-07 |
| TUCP_001885 | XLOC_078206 | ENSRNOT00000055406 | 1            | 1.33E-79 |
| TUCP_001885 | XLOC_078206 | ENSRNOT00000070817 | 0.998968079  | 9.20E-15 |
| TUCP_001885 | XLOC_078206 | ENSRNOT00000026753 | 1            | 0        |
| TUCP_001885 | XLOC_078206 | ENSRNOT00000080533 | 0.996682529  | 3.15E-12 |
| TUCP_001885 | XLOC_078206 | ENSRNOT00000072774 | 0.979665261  | 2.65E-08 |
| TUCP_001885 | XLOC_078206 | ENSRNOT00000086031 | 1            | 0        |
| TUCP_001885 | XLOC_078206 | ENSRNOT00000014312 | 1            | 0        |
| TUCP_001885 | XLOC_078206 | ENSRNOT00000042882 | 0.963218427  | 4.98E-07 |
| TUCP_001885 | XLOC_078206 | ENSRNOT00000088012 | 0.956765806  | 1.11E-06 |
| TUCP_001885 | XLOC_078206 | ENSRNOT00000051231 | 0.999242378  | 1.96E-15 |
| TUCP_001885 | XLOC_078206 | ENSRNOT00000089407 | 0.992986194  | 1.32E-10 |
| TUCP_001885 | XLOC_078206 | ENSRNOT00000055034 | 0.998331441  | 1.02E-13 |
| TUCP_001885 | XLOC_078206 | ENSRNOT00000046837 | 0.97252559   | 1.18E-07 |
| TUCP_001420 | XLOC_055508 | ENSRNOT00000001893 | 0.954291333  | 1.46E-06 |
| TUCP_001420 | XLOC_055508 | ENSRNOT00000089319 | 0.954385167  | 1.44E-06 |
| TUCP_001420 | XLOC_055508 | ENSRNOT00000002188 | 0.950534266  | 2.15E-06 |
| TUCP_001420 | XLOC_055508 | ENSRNOT00000015769 | 0.962750117  | 5.31E-07 |
| TUCP_001420 | XLOC_055508 | ENSRNOT00000086706 | 0.951665007  | 1.92E-06 |
| TUCP_001420 | XLOC_055508 | ENSRNOT00000057562 | 0.958506034  | 9.03E-07 |
| TUCP_001420 | XLOC_055508 | ENSRNOT00000021114 | 0.986562986  | 3.37E-09 |
| TUCP_001420 | XLOC_055508 | ENSRNOT00000059810 | -0.952641906 | 1.73E-06 |
| TUCP_001420 | XLOC_055508 | ENSRNOT00000008630 | 0.958419895  | 9.13E-07 |
| TUCP_001420 | XLOC_055508 | ENSRNOT00000085619 | 0.971389319  | 1.44E-07 |
| TUCP_001420 | XLOC_055508 | ENSRNOT00000007821 | 0.954126151  | 1.48E-06 |
| TUCP_001420 | XLOC_055508 | ENSRNOT00000057953 | 0.963689813  | 4.68E-07 |
| TUCP_001420 | XLOC_055508 | ENSRNOT00000011874 | 0.952088474  | 1.83E-06 |
| TUCP_001575 | XLOC_060876 | ENSRNOT00000079283 | 0.958419409  | 9.13E-07 |
| TUCP_001575 | XLOC_060876 | ENSRNOT00000044237 | 0.974198398  | 8.62E-08 |
| TUCP_001575 | XLOC_060876 | ENSRNOT00000034450 | 0.967047991  | 2.90E-07 |
| TUCP_001575 | XLOC_060876 | ENSRNOT00000067059 | 0.963172137  | 5.02E-07 |
| TUCP_001575 | XLOC_060876 | ENSRNOT00000070933 | 0.959017936  | 8.50E-07 |
| TUCP_001575 | XLOC_060876 | ENSRNOT00000089736 | -0.951053501 | 2.04E-06 |
| TUCP_001575 | XLOC_060876 | ENSRNOT00000042086 | -0.955259049 | 1.31E-06 |
| TUCP_003317 | XLOC_142947 | ENSRNOT00000082043 | 0.998818659  | 1.81E-14 |
| TUCP_003317 | XLOC_142947 | ENSRNOT00000090080 | 0.974549669  | 8.06E-08 |
| TUCP_003317 | XLOC_142947 | ENSRNOT00000068444 | 0.999462446  | 3.53E-16 |
| TUCP_003317 | XLOC_142947 | ENSRNOT00000081370 | 0.999243883  | 1.94E-15 |
| TUCP_003317 | XLOC_142947 | ENSRNOT00000078645 | 0.989301755  | 1.08E-09 |
| TUCP_003317 | XLOC_142947 | ENSRNOT00000075987 | 0.986942337  | 2.92E-09 |
| TUCP_003317 | XLOC_142947 | ENSRNOT00000074990 | 0.999462446  | 3.53E-16 |
| TUCP_003317 | XLOC_142947 | ENSRNOT00000087323 | 0.995759295  | 1.07E-11 |
| TUCP_003317 | XLOC_142947 | ENSRNOT00000074930 | 0.999462446  | 3.53E-16 |
| TUCP_003317 | XLOC_142947 | ENSRNOT00000080575 | 0.999411588  | 5.55E-16 |
| TUCP_003317 | XLOC_142947 | ENSRNOT00000057761 | 0.981380312  | 1.71E-08 |
| TUCP_003317 | XLOC_142947 | ENSRNOT00000078369 | 0.993150493  | 1.17E-10 |
| TUCP_003317 | XLOC_142947 | ENSRNOT00000092982 | 0.999462446  | 3.53E-16 |
| TUCP_003317 | XLOC_142947 | ENSRNOT00000088367 | 0.999462446  | 3.53E-16 |
| TUCP_003317 | XLOC_142947 | ENSRNOT00000061874 | 0.965734084  | 3.51E-07 |

|             |             |                    |              |          |
|-------------|-------------|--------------------|--------------|----------|
| TUCP_003317 | XLOC_142947 | ENSRNOT00000077789 | 0.993335938  | 1.02E-10 |
| TUCP_003317 | XLOC_142947 | ENSRNOT00000081996 | 0.999462446  | 3.53E-16 |
| TUCP_003317 | XLOC_142947 | ENSRNOT00000022280 | 0.979770838  | 2.58E-08 |
| TUCP_003317 | XLOC_142947 | ENSRNOT00000082058 | 0.999462446  | 3.53E-16 |
| TUCP_003317 | XLOC_142947 | ENSRNOT00000088905 | 0.999462446  | 3.53E-16 |
| TUCP_003317 | XLOC_142947 | ENSRNOT00000086831 | 0.999462446  | 3.53E-16 |
| TUCP_003317 | XLOC_142947 | ENSRNOT00000045099 | 0.999462446  | 3.53E-16 |
| TUCP_003317 | XLOC_142947 | ENSRNOT00000086745 | 0.976316429  | 5.64E-08 |
| TUCP_003317 | XLOC_142947 | ENSRNOT00000085849 | 0.987969694  | 1.94E-09 |
| TUCP_003317 | XLOC_142947 | ENSRNOT00000086397 | 0.955386199  | 1.29E-06 |
| TUCP_003317 | XLOC_142947 | ENSRNOT00000079606 | 0.958112698  | 9.46E-07 |
| TUCP_003317 | XLOC_142947 | ENSRNOT00000090207 | 0.951766652  | 1.90E-06 |
| TUCP_003317 | XLOC_142947 | ENSRNOT00000087025 | 0.999462446  | 3.53E-16 |
| TUCP_003317 | XLOC_142947 | ENSRNOT00000019853 | 0.999462446  | 3.53E-16 |
| TUCP_003317 | XLOC_142947 | ENSRNOT00000073853 | 0.988094114  | 1.85E-09 |
| TUCP_003317 | XLOC_142947 | ENSRNOT00000065912 | 0.971716288  | 1.36E-07 |
| TUCP_003317 | XLOC_142947 | ENSRNOT00000073828 | 0.9697444    | 1.90E-07 |
| TUCP_003317 | XLOC_142947 | ENSRNOT00000078683 | 0.963960611  | 4.51E-07 |
| TUCP_003317 | XLOC_142947 | ENSRNOT00000093083 | 0.998666241  | 3.32E-14 |
| TUCP_001494 | XLOC_057848 | ENSRNOT00000027454 | 0.959900577  | 7.63E-07 |
| TUCP_001494 | XLOC_057848 | ENSRNOT00000005537 | 0.955764433  | 1.24E-06 |
| TUCP_001494 | XLOC_057848 | ENSRNOT00000026915 | 0.954147813  | 1.48E-06 |
| TUCP_001494 | XLOC_057848 | ENSRNOT00000024156 | 0.950083163  | 2.24E-06 |
| TUCP_003038 | XLOC_129267 | ENSRNOT00000091060 | 0.963242549  | 4.97E-07 |
| TUCP_003038 | XLOC_129267 | ENSRNOT00000084918 | 0.982431179  | 1.28E-08 |
| TUCP_003039 | XLOC_129272 | ENSRNOT00000078944 | 0.950625262  | 2.13E-06 |
| TUCP_002426 | XLOC_102690 | ENSRNOT00000082095 | 0.95961354   | 7.91E-07 |
| TUCP_001422 | XLOC_055546 | ENSRNOT00000092916 | 0.958218976  | 9.35E-07 |
| TUCP_001422 | XLOC_055546 | ENSRNOT00000078176 | 0.950104714  | 2.24E-06 |
| TUCP_001422 | XLOC_055546 | ENSRNOT00000091828 | 0.954752409  | 1.38E-06 |
| TUCP_001422 | XLOC_055546 | ENSRNOT00000060113 | 0.959999512  | 7.54E-07 |
| TUCP_001422 | XLOC_055546 | ENSRNOT00000056364 | 0.95564454   | 1.25E-06 |
| TUCP_003030 | XLOC_129061 | ENSRNOT00000075890 | 0.992320733  | 2.08E-10 |
| TUCP_003030 | XLOC_129061 | ENSRNOT00000037100 | 0.977411511  | 4.46E-08 |
| TUCP_003030 | XLOC_129061 | ENSRNOT00000041777 | 0.953658194  | 1.56E-06 |
| TUCP_003919 | XLOC_172539 | ENSRNOT00000027411 | 0.955506122  | 1.27E-06 |
| TUCP_003919 | XLOC_172539 | ENSRNOT00000002403 | 0.955690262  | 1.25E-06 |
| TUCP_003919 | XLOC_172539 | ENSRNOT00000003671 | 0.968166485  | 2.44E-07 |
| TUCP_003919 | XLOC_172539 | ENSRNOT00000089637 | 0.957157669  | 1.06E-06 |
| TUCP_003919 | XLOC_172539 | ENSRNOT00000041494 | 0.95427867   | 1.46E-06 |
| TUCP_003919 | XLOC_172539 | ENSRNOT00000023302 | 0.950163506  | 2.23E-06 |
| TUCP_003919 | XLOC_172539 | ENSRNOT00000086905 | 0.952352427  | 1.79E-06 |
| TUCP_003919 | XLOC_172539 | ENSRNOT00000016975 | 0.962085375  | 5.79E-07 |
| TUCP_003919 | XLOC_172539 | ENSRNOT00000074361 | 0.963035852  | 5.11E-07 |
| TUCP_003919 | XLOC_172539 | ENSRNOT00000022419 | 0.954143908  | 1.48E-06 |
| TUCP_002010 | XLOC_081837 | ENSRNOT00000047234 | 0.962218566  | 5.69E-07 |
| TUCP_002010 | XLOC_081837 | ENSRNOT00000022336 | -0.955769891 | 1.24E-06 |
| TUCP_002010 | XLOC_081837 | ENSRNOT00000064983 | 0.952809258  | 1.70E-06 |
| TUCP_002010 | XLOC_081837 | ENSRNOT00000065801 | 0.962405352  | 5.55E-07 |
| TUCP_002010 | XLOC_081837 | ENSRNOT00000065811 | 0.952888915  | 1.69E-06 |
| TUCP_002010 | XLOC_081837 | ENSRNOT00000032106 | 0.950105419  | 2.24E-06 |

|             |             |                    |              |          |
|-------------|-------------|--------------------|--------------|----------|
| TUCP_002010 | XLOC_081837 | ENSRNOT00000079152 | 0.959630407  | 7.89E-07 |
| TUCP_002010 | XLOC_081837 | ENSRNOT00000075786 | 0.953682338  | 1.55E-06 |
| TUCP_002010 | XLOC_081837 | ENSRNOT00000038780 | 0.951395594  | 1.97E-06 |
| TUCP_002129 | XLOC_088674 | ENSRNOT00000007314 | -0.951421248 | 1.96E-06 |
| TUCP_002129 | XLOC_088674 | ENSRNOT00000061191 | -0.954990453 | 1.35E-06 |
| TUCP_002129 | XLOC_088674 | ENSRNOT00000026988 | -0.96311088  | 5.06E-07 |
| TUCP_002129 | XLOC_088674 | ENSRNOT00000079002 | -0.955117625 | 1.33E-06 |
| TUCP_002129 | XLOC_088674 | ENSRNOT00000003714 | 0.954415791  | 1.44E-06 |
| TUCP_002129 | XLOC_088674 | ENSRNOT00000055386 | 0.961130055  | 6.55E-07 |
| TUCP_002129 | XLOC_088674 | ENSRNOT00000050609 | -0.952259102 | 1.80E-06 |
| TUCP_002129 | XLOC_088674 | ENSRNOT00000017571 | -0.952460281 | 1.77E-06 |
| TUCP_002129 | XLOC_088674 | ENSRNOT00000064588 | 0.96082116   | 6.81E-07 |
| TUCP_002129 | XLOC_088674 | ENSRNOT00000030692 | -0.950287575 | 2.20E-06 |
| TUCP_002129 | XLOC_088674 | ENSRNOT00000046594 | 0.959828622  | 7.70E-07 |
| TUCP_002129 | XLOC_088674 | ENSRNOT00000018488 | -0.96244619  | 5.52E-07 |
| TUCP_002129 | XLOC_088674 | ENSRNOT00000032667 | -0.952395626 | 1.78E-06 |
| TUCP_002129 | XLOC_088674 | ENSRNOT00000017949 | -0.956221711 | 1.18E-06 |
| TUCP_002129 | XLOC_088674 | ENSRNOT00000040890 | 0.954823936  | 1.37E-06 |
| TUCP_002527 | XLOC_107038 | ENSRNOT00000027454 | 0.950458119  | 2.16E-06 |
| TUCP_002527 | XLOC_107038 | ENSRNOT00000093000 | 0.955027258  | 1.34E-06 |
| TUCP_002527 | XLOC_107038 | ENSRNOT00000000246 | 0.952673532  | 1.73E-06 |
| TUCP_002526 | XLOC_106841 | ENSRNOT00000071840 | 0.962025695  | 5.83E-07 |
| TUCP_002526 | XLOC_106841 | ENSRNOT00000045584 | 0.962025695  | 5.83E-07 |
| TUCP_002526 | XLOC_106841 | ENSRNOT00000077995 | 0.962606932  | 5.41E-07 |
| TUCP_002526 | XLOC_106841 | ENSRNOT00000066004 | 0.960229475  | 7.33E-07 |
| TUCP_002526 | XLOC_106841 | ENSRNOT00000075836 | 0.962025695  | 5.83E-07 |
| TUCP_002526 | XLOC_106841 | ENSRNOT00000082086 | 0.950346645  | 2.19E-06 |
| TUCP_002526 | XLOC_106841 | ENSRNOT00000089494 | 0.956198138  | 1.18E-06 |
| TUCP_002526 | XLOC_106841 | ENSRNOT00000047870 | 0.979775443  | 2.58E-08 |
| TUCP_002526 | XLOC_106841 | ENSRNOT00000092182 | 0.962025695  | 5.83E-07 |
| TUCP_002526 | XLOC_106841 | ENSRNOT00000084461 | 0.962025695  | 5.83E-07 |
| TUCP_002526 | XLOC_106841 | ENSRNOT00000060448 | 0.962025695  | 5.83E-07 |
| TUCP_002526 | XLOC_106841 | ENSRNOT00000008034 | 0.950127243  | 2.23E-06 |
| TUCP_002526 | XLOC_106841 | ENSRNOT00000032631 | 0.962025695  | 5.83E-07 |
| TUCP_002526 | XLOC_106841 | ENSRNOT00000027950 | 0.968469784  | 2.33E-07 |
| TUCP_002526 | XLOC_106841 | ENSRNOT00000054910 | 0.959248134  | 8.27E-07 |
| TUCP_002526 | XLOC_106841 | ENSRNOT00000057176 | 0.961927444  | 5.91E-07 |
| TUCP_002526 | XLOC_106841 | ENSRNOT00000056364 | 0.958482162  | 9.06E-07 |
| TUCP_002526 | XLOC_106841 | ENSRNOT00000093431 | 0.962025695  | 5.83E-07 |
| TUCP_002526 | XLOC_106841 | ENSRNOT00000092901 | 0.962025695  | 5.83E-07 |
| TUCP_002526 | XLOC_106841 | ENSRNOT00000089290 | 0.961788691  | 6.02E-07 |
| TUCP_002526 | XLOC_106841 | ENSRNOT00000071603 | 0.96208822   | 5.79E-07 |
| TUCP_002526 | XLOC_106841 | ENSRNOT00000082776 | 0.955048696  | 1.34E-06 |
| TUCP_002526 | XLOC_106841 | ENSRNOT00000091828 | 0.957462317  | 1.02E-06 |
| TUCP_002526 | XLOC_106841 | ENSRNOT00000091944 | 0.959332936  | 8.18E-07 |
| TUCP_002526 | XLOC_106841 | ENSRNOT00000070855 | 0.962025695  | 5.83E-07 |
| TUCP_002526 | XLOC_106841 | ENSRNOT0000007604  | 0.950432728  | 2.17E-06 |
| TUCP_002526 | XLOC_106841 | ENSRNOT00000084109 | 0.965434973  | 3.67E-07 |
| TUCP_002526 | XLOC_106841 | ENSRNOT00000041569 | 0.962025695  | 5.83E-07 |
| TUCP_002526 | XLOC_106841 | ENSRNOT00000087091 | 0.962025695  | 5.83E-07 |
| TUCP_002526 | XLOC_106841 | ENSRNOT0000003308  | 0.971879392  | 1.32E-07 |

|             |             |                    |              |          |
|-------------|-------------|--------------------|--------------|----------|
| TUCP_002526 | XLOC_106841 | ENSRNOT00000026113 | 0.960723634  | 6.89E-07 |
| TUCP_002526 | XLOC_106841 | ENSRNOT00000014939 | 0.96215587   | 5.74E-07 |
| TUCP_002526 | XLOC_106841 | ENSRNOT00000071714 | 0.983359114  | 9.77E-09 |
| TUCP_002526 | XLOC_106841 | ENSRNOT00000090211 | 0.966318139  | 3.23E-07 |
| TUCP_002526 | XLOC_106841 | ENSRNOT00000077731 | 0.95517058   | 1.32E-06 |
| TUCP_002526 | XLOC_106841 | ENSRNOT00000023287 | 0.960199228  | 7.36E-07 |
| TUCP_002526 | XLOC_106841 | ENSRNOT00000068197 | 0.975384548  | 6.83E-08 |
| TUCP_002526 | XLOC_106841 | ENSRNOT00000073229 | 0.962025695  | 5.83E-07 |
| TUCP_002526 | XLOC_106841 | ENSRNOT00000021193 | 0.951596181  | 1.93E-06 |
| TUCP_002526 | XLOC_106841 | ENSRNOT00000060454 | 0.962025695  | 5.83E-07 |
| TUCP_002526 | XLOC_106841 | ENSRNOT0000007683  | 0.962506753  | 5.48E-07 |
| TUCP_002526 | XLOC_106841 | ENSRNOT00000009295 | 0.976527937  | 5.39E-08 |
| TUCP_002521 | XLOC_106585 | ENSRNOT00000060692 | 0.965278367  | 3.75E-07 |
| TUCP_002521 | XLOC_106585 | ENSRNOT00000060185 | 0.961263236  | 6.44E-07 |
| TUCP_002521 | XLOC_106585 | ENSRNOT00000028887 | 0.971957031  | 1.30E-07 |
| TUCP_002521 | XLOC_106585 | ENSRNOT00000023872 | 0.954356646  | 1.44E-06 |
| TUCP_002521 | XLOC_106585 | ENSRNOT00000077163 | 0.958379403  | 9.17E-07 |
| TUCP_002521 | XLOC_106585 | ENSRNOT00000014912 | 0.957808169  | 9.81E-07 |
| TUCP_002521 | XLOC_106585 | ENSRNOT00000018500 | 0.951650435  | 1.92E-06 |
| TUCP_002521 | XLOC_106585 | ENSRNOT00000028423 | 0.968939434  | 2.16E-07 |
| TUCP_002521 | XLOC_106585 | ENSRNOT00000021816 | 0.957702678  | 9.93E-07 |
| TUCP_002521 | XLOC_106585 | ENSRNOT00000080900 | 0.956741644  | 1.11E-06 |
| TUCP_002521 | XLOC_106585 | ENSRNOT00000028067 | 0.957742857  | 9.88E-07 |
| TUCP_002521 | XLOC_106585 | ENSRNOT00000026654 | 0.986019051  | 4.11E-09 |
| TUCP_002521 | XLOC_106585 | ENSRNOT00000032015 | 0.955898559  | 1.22E-06 |
| TUCP_002521 | XLOC_106585 | ENSRNOT00000030344 | 0.951213153  | 2.01E-06 |
| TUCP_002521 | XLOC_106585 | ENSRNOT00000065764 | 0.953114654  | 1.65E-06 |
| TUCP_002521 | XLOC_106585 | ENSRNOT0000001916  | 0.955701124  | 1.25E-06 |
| TUCP_002521 | XLOC_106585 | ENSRNOT00000027759 | 0.953911587  | 1.52E-06 |
| TUCP_002521 | XLOC_106585 | ENSRNOT00000016842 | 0.977038881  | 4.84E-08 |
| TUCP_002521 | XLOC_106585 | ENSRNOT00000016112 | 0.959431937  | 8.08E-07 |
| TUCP_002521 | XLOC_106585 | ENSRNOT00000049247 | 0.951467208  | 1.95E-06 |
| TUCP_002520 | XLOC_106507 | ENSRNOT00000084465 | 0.957377832  | 1.03E-06 |
| TUCP_002520 | XLOC_106507 | ENSRNOT00000073877 | 0.955088456  | 1.33E-06 |
| TUCP_003431 | XLOC_148233 | ENSRNOT00000087934 | 0.953915793  | 1.51E-06 |
| TUCP_003431 | XLOC_148233 | ENSRNOT00000000383 | -0.951186713 | 2.01E-06 |
| TUCP_003431 | XLOC_148233 | ENSRNOT00000032843 | 0.952223857  | 1.81E-06 |
| TUCP_003431 | XLOC_148233 | ENSRNOT00000008244 | 0.958838431  | 8.68E-07 |
| TUCP_003431 | XLOC_148233 | ENSRNOT00000004676 | 0.952929443  | 1.68E-06 |
| TUCP_002914 | XLOC_125404 | ENSRNOT00000006188 | -0.964449455 | 4.21E-07 |
| TUCP_002914 | XLOC_125404 | ENSRNOT00000006186 | 0.984287109  | 7.35E-09 |
| TUCP_002914 | XLOC_125404 | ENSRNOT00000026941 | 0.970474327  | 1.68E-07 |
| TUCP_002914 | XLOC_125404 | ENSRNOT00000075397 | 0.959784311  | 7.74E-07 |
| TUCP_002914 | XLOC_125404 | ENSRNOT00000032926 | -0.955944351 | 1.21E-06 |
| TUCP_002914 | XLOC_125404 | ENSRNOT00000019104 | -0.973161489 | 1.05E-07 |
| TUCP_002914 | XLOC_125404 | ENSRNOT00000021348 | 0.968527754  | 2.31E-07 |
| TUCP_002914 | XLOC_125404 | ENSRNOT00000006217 | 0.959522922  | 7.99E-07 |
| TUCP_002914 | XLOC_125404 | ENSRNOT00000015566 | 0.953920585  | 1.51E-06 |
| TUCP_002914 | XLOC_125404 | ENSRNOT00000020910 | 0.950017539  | 2.26E-06 |
| TUCP_002914 | XLOC_125404 | ENSRNOT00000025067 | -0.958857994 | 8.66E-07 |
| TUCP_002914 | XLOC_125404 | ENSRNOT00000081678 | 0.951977905  | 1.86E-06 |

|             |             |                     |              |          |
|-------------|-------------|---------------------|--------------|----------|
| TUCP_002914 | XLOC_125404 | ENSRNOT00000086310  | -0.967248145 | 2.81E-07 |
| TUCP_002914 | XLOC_125404 | ENSRNOT00000010030  | -0.951193217 | 2.01E-06 |
| TUCP_002914 | XLOC_125404 | ENSRNOT00000028856  | 0.956074262  | 1.20E-06 |
| TUCP_002914 | XLOC_125404 | ENSRNOT00000014384  | -0.951315167 | 1.98E-06 |
| TUCP_002914 | XLOC_125404 | ENSRNOT00000030850  | 0.956650882  | 1.12E-06 |
| TUCP_002914 | XLOC_125404 | ENSRNOT00000086893  | -0.951262991 | 1.99E-06 |
| TUCP_002914 | XLOC_125404 | ENSRNOT00000055540  | 0.967367798  | 2.76E-07 |
| TUCP_002914 | XLOC_125404 | ENSRNOT00000066370  | 0.957548504  | 1.01E-06 |
| TUCP_002914 | XLOC_125404 | ENSRNOT00000006752  | 0.952169832  | 1.82E-06 |
| TUCP_002914 | XLOC_125404 | ENSRNOT00000021534  | -0.955037401 | 1.34E-06 |
| TUCP_002914 | XLOC_125404 | ENSRNOT00000085251  | -0.967264322 | 2.80E-07 |
| TUCP_002914 | XLOC_125404 | ENSRNOT00000072771  | 0.951409337  | 1.97E-06 |
| TUCP_002914 | XLOC_125404 | ENSRNOT00000065300  | 0.987479925  | 2.37E-09 |
| TUCP_002914 | XLOC_125404 | ENSRNOT00000044742  | 0.962085577  | 5.79E-07 |
| TUCP_002914 | XLOC_125404 | ENSRNOT00000045699  | 0.950757378  | 2.10E-06 |
| TUCP_002914 | XLOC_125404 | ENSRNOT00000035320  | -0.963748312 | 4.64E-07 |
| TUCP_002914 | XLOC_125404 | ENSRNOT00000035989  | 0.961521932  | 6.23E-07 |
| TUCP_002914 | XLOC_125404 | ENSRNOT00000057160  | 0.951886137  | 1.87E-06 |
| TUCP_002914 | XLOC_125404 | ENSRNOT00000008274  | -0.950624058 | 2.13E-06 |
| TUCP_002914 | XLOC_125404 | ENSRNOT00000004999  | 0.96584488   | 3.46E-07 |
| TUCP_002914 | XLOC_125404 | ENSRNOT000000091448 | -0.973786543 | 9.33E-08 |
| TUCP_002914 | XLOC_125404 | ENSRNOT00000077999  | 0.98138539   | 1.71E-08 |
| TUCP_002914 | XLOC_125404 | ENSRNOT00000068134  | 0.966682651  | 3.06E-07 |
| TUCP_002914 | XLOC_125404 | ENSRNOT00000026398  | -0.957924692 | 9.68E-07 |
| TUCP_002914 | XLOC_125404 | ENSRNOT00000024264  | -0.953298603 | 1.62E-06 |
| TUCP_002914 | XLOC_125404 | ENSRNOT00000085228  | 0.976503739  | 5.42E-08 |
| TUCP_002914 | XLOC_125404 | ENSRNOT00000026391  | 0.954947882  | 1.35E-06 |
| TUCP_002914 | XLOC_125404 | ENSRNOT00000060002  | -0.970584493 | 1.65E-07 |
| TUCP_002914 | XLOC_125404 | ENSRNOT00000017319  | 0.964735934  | 4.05E-07 |
| TUCP_002914 | XLOC_125404 | ENSRNOT00000015188  | 0.959964954  | 7.57E-07 |
| TUCP_002914 | XLOC_125404 | ENSRNOT00000079866  | 0.952939637  | 1.68E-06 |
| TUCP_002914 | XLOC_125404 | ENSRNOT0000005686   | -0.963872399 | 4.56E-07 |
| TUCP_002914 | XLOC_125404 | ENSRNOT00000008655  | 0.950172583  | 2.22E-06 |
| TUCP_002914 | XLOC_125404 | ENSRNOT00000010927  | 0.967514381  | 2.70E-07 |
| TUCP_002914 | XLOC_125404 | ENSRNOT00000087371  | 0.977980618  | 3.93E-08 |
| TUCP_002914 | XLOC_125404 | ENSRNOT00000010141  | 0.954399488  | 1.44E-06 |
| TUCP_002914 | XLOC_125404 | ENSRNOT00000067391  | -0.953946527 | 1.51E-06 |
| TUCP_002914 | XLOC_125404 | ENSRNOT00000092945  | -0.952841003 | 1.70E-06 |
| TUCP_002914 | XLOC_125404 | ENSRNOT00000037446  | 0.978515305  | 3.48E-08 |
| TUCP_002914 | XLOC_125404 | ENSRNOT00000023619  | 0.965950541  | 3.40E-07 |
| TUCP_002914 | XLOC_125404 | ENSRNOT00000084709  | 0.976017503  | 6.00E-08 |
| TUCP_002914 | XLOC_125404 | ENSRNOT00000009156  | 0.961771402  | 6.03E-07 |
| TUCP_002914 | XLOC_125404 | ENSRNOT00000026481  | 0.988276306  | 1.71E-09 |
| TUCP_002914 | XLOC_125404 | ENSRNOT00000043752  | -0.953896001 | 1.52E-06 |
| TUCP_002914 | XLOC_125404 | ENSRNOT00000018413  | -0.951787047 | 1.89E-06 |
| TUCP_002914 | XLOC_125404 | ENSRNOT00000025856  | -0.954391991 | 1.44E-06 |
| TUCP_002914 | XLOC_125404 | ENSRNOT00000028074  | -0.959919825 | 7.61E-07 |
| TUCP_002914 | XLOC_125404 | ENSRNOT00000026643  | 0.964408917  | 4.24E-07 |
| TUCP_002914 | XLOC_125404 | ENSRNOT00000028070  | 0.950956436  | 2.06E-06 |
| TUCP_002914 | XLOC_125404 | ENSRNOT00000072357  | -0.957265782 | 1.04E-06 |
| TUCP_002914 | XLOC_125404 | ENSRNOT00000016132  | -0.978245212 | 3.70E-08 |



|             |             |                    |              |          |
|-------------|-------------|--------------------|--------------|----------|
| TUCP_002914 | XLOC_125404 | ENSRNOT00000058495 | -0.969740162 | 1.90E-07 |
| TUCP_002914 | XLOC_125404 | ENSRNOT00000013067 | -0.972786886 | 1.12E-07 |
| TUCP_002914 | XLOC_125404 | ENSRNOT00000016220 | -0.963667132 | 4.69E-07 |
| TUCP_002914 | XLOC_125404 | ENSRNOT00000047093 | 0.963293515  | 4.93E-07 |
| TUCP_002914 | XLOC_125404 | ENSRNOT00000034692 | -0.961571445 | 6.19E-07 |
| TUCP_002914 | XLOC_125404 | ENSRNOT00000031979 | -0.961746175 | 6.05E-07 |
| TUCP_002914 | XLOC_125404 | ENSRNOT00000079895 | 0.975902792  | 6.15E-08 |
| TUCP_002914 | XLOC_125404 | ENSRNOT00000078102 | 0.962407041  | 5.55E-07 |
| TUCP_002914 | XLOC_125404 | ENSRNOT00000074586 | -0.964195202 | 4.36E-07 |
| TUCP_002914 | XLOC_125404 | ENSRNOT00000071929 | -0.950439485 | 2.17E-06 |
| TUCP_002914 | XLOC_125404 | ENSRNOT00000021496 | -0.968346491 | 2.37E-07 |
| TUCP_002914 | XLOC_125404 | ENSRNOT00000011880 | 0.979144126  | 3.00E-08 |
| TUCP_002914 | XLOC_125404 | ENSRNOT00000028290 | -0.950086082 | 2.24E-06 |
| TUCP_002914 | XLOC_125404 | ENSRNOT00000003992 | -0.959760965 | 7.76E-07 |
| TUCP_002914 | XLOC_125404 | ENSRNOT00000019554 | 0.97715059   | 4.72E-08 |
| TUCP_002914 | XLOC_125404 | ENSRNOT00000021408 | 0.966148717  | 3.31E-07 |
| TUCP_002914 | XLOC_125404 | ENSRNOT00000050515 | 0.96674044   | 3.03E-07 |
| TUCP_002914 | XLOC_125404 | ENSRNOT00000038032 | -0.951980216 | 1.85E-06 |
| TUCP_002914 | XLOC_125404 | ENSRNOT00000089980 | -0.952776241 | 1.71E-06 |
| TUCP_002914 | XLOC_125404 | ENSRNOT00000084088 | 0.971200224  | 1.49E-07 |
| TUCP_002914 | XLOC_125404 | ENSRNOT00000028589 | -0.957701778 | 9.93E-07 |
| TUCP_002914 | XLOC_125404 | ENSRNOT00000064902 | 0.959697333  | 7.83E-07 |
| TUCP_002914 | XLOC_125404 | ENSRNOT00000052224 | 0.966710043  | 3.04E-07 |
| TUCP_002914 | XLOC_125404 | ENSRNOT00000055602 | -0.954996231 | 1.35E-06 |
| TUCP_002914 | XLOC_125404 | ENSRNOT00000046745 | 0.954971284  | 1.35E-06 |
| TUCP_002914 | XLOC_125404 | ENSRNOT00000023876 | 0.952194355  | 1.81E-06 |
| TUCP_002914 | XLOC_125404 | ENSRNOT00000002187 | -0.956944649 | 1.08E-06 |
| TUCP_002914 | XLOC_125404 | ENSRNOT00000091488 | 0.971711588  | 1.36E-07 |
| TUCP_002914 | XLOC_125404 | ENSRNOT00000027452 | 0.953424908  | 1.60E-06 |
| TUCP_002914 | XLOC_125404 | ENSRNOT00000019656 | -0.967428995 | 2.73E-07 |
| TUCP_002914 | XLOC_125404 | ENSRNOT00000032505 | -0.977225105 | 4.64E-08 |
| TUCP_002914 | XLOC_125404 | ENSRNOT00000006499 | 0.951677417  | 1.91E-06 |
| TUCP_002914 | XLOC_125404 | ENSRNOT00000074649 | 0.960671381  | 6.94E-07 |
| TUCP_002914 | XLOC_125404 | ENSRNOT00000007855 | 0.957994808  | 9.60E-07 |
| TUCP_002914 | XLOC_125404 | ENSRNOT00000077146 | -0.97178392  | 1.34E-07 |
| TUCP_002914 | XLOC_125404 | ENSRNOT00000052063 | 0.985139362  | 5.57E-09 |
| TUCP_002914 | XLOC_125404 | ENSRNOT00000036951 | 0.954757767  | 1.38E-06 |
| TUCP_002914 | XLOC_125404 | ENSRNOT00000064723 | -0.956930037 | 1.09E-06 |
| TUCP_002914 | XLOC_125404 | ENSRNOT0000006969  | 0.95832132   | 9.23E-07 |
| TUCP_002914 | XLOC_125404 | ENSRNOT00000036959 | -0.957468433 | 1.02E-06 |
| TUCP_002914 | XLOC_125404 | ENSRNOT00000067170 | -0.951680929 | 1.91E-06 |
| TUCP_002914 | XLOC_125404 | ENSRNOT00000006395 | -0.962093198 | 5.78E-07 |
| TUCP_002914 | XLOC_125404 | ENSRNOT00000023977 | -0.961450351 | 6.28E-07 |
| TUCP_002914 | XLOC_125404 | ENSRNOT00000001222 | 0.96223508   | 5.68E-07 |
| TUCP_002914 | XLOC_125404 | ENSRNOT00000066133 | -0.980666318 | 2.06E-08 |
| TUCP_002914 | XLOC_125404 | ENSRNOT00000068184 | -0.950119571 | 2.24E-06 |
| TUCP_002914 | XLOC_125404 | ENSRNOT00000051953 | -0.95092715  | 2.06E-06 |
| TUCP_002914 | XLOC_125404 | ENSRNOT00000085596 | 0.97533057   | 6.90E-08 |
| TUCP_002914 | XLOC_125404 | ENSRNOT00000035385 | 0.950602239  | 2.13E-06 |
| TUCP_002914 | XLOC_125404 | ENSRNOT00000088509 | 0.954304193  | 1.45E-06 |
| TUCP_002914 | XLOC_125404 | ENSRNOT00000026293 | 0.97642962   | 5.51E-08 |

|             |             |                    |              |          |
|-------------|-------------|--------------------|--------------|----------|
| TUCP_002914 | XL0C_125404 | ENSRNOT00000019487 | 0.980176476  | 2.33E-08 |
| TUCP_002914 | XL0C_125404 | ENSRNOT00000089007 | -0.957033737 | 1.07E-06 |
| TUCP_002914 | XL0C_125404 | ENSRNOT00000018170 | -0.953646561 | 1.56E-06 |
| TUCP_002914 | XL0C_125404 | ENSRNOT00000010915 | -0.965619349 | 3.57E-07 |
| TUCP_002914 | XL0C_125404 | ENSRNOT00000010218 | 0.95854935   | 8.99E-07 |
| TUCP_002914 | XL0C_125404 | ENSRNOT00000040069 | 0.955414982  | 1.29E-06 |
| TUCP_002914 | XL0C_125404 | ENSRNOT00000015624 | 0.969387043  | 2.01E-07 |
| TUCP_002914 | XL0C_125404 | ENSRNOT00000073235 | 0.953788822  | 1.54E-06 |
| TUCP_002914 | XL0C_125404 | ENSRNOT00000087033 | -0.960994072 | 6.66E-07 |
| TUCP_002914 | XL0C_125404 | ENSRNOT00000035474 | 0.966886083  | 2.97E-07 |
| TUCP_002914 | XL0C_125404 | ENSRNOT00000078856 | -0.952211684 | 1.81E-06 |
| TUCP_002914 | XL0C_125404 | ENSRNOT00000091205 | 0.955646907  | 1.25E-06 |
| TUCP_002914 | XL0C_125404 | ENSRNOT00000002866 | -0.958190423 | 9.38E-07 |
| TUCP_002914 | XL0C_125404 | ENSRNOT00000060696 | 0.964871546  | 3.97E-07 |
| TUCP_002914 | XL0C_125404 | ENSRNOT00000004787 | -0.976037876 | 5.98E-08 |
| TUCP_002914 | XL0C_125404 | ENSRNOT00000010986 | 0.976750635  | 5.15E-08 |
| TUCP_002914 | XL0C_125404 | ENSRNOT00000021145 | -0.955411687 | 1.29E-06 |
| TUCP_002914 | XL0C_125404 | ENSRNOT00000060698 | -0.97639268  | 5.55E-08 |
| TUCP_002914 | XL0C_125404 | ENSRNOT00000064535 | -0.968965382 | 2.15E-07 |
| TUCP_002914 | XL0C_125404 | ENSRNOT00000014814 | 0.969526292  | 1.97E-07 |
| TUCP_002914 | XL0C_125404 | ENSRNOT00000004412 | 0.963340126  | 4.90E-07 |
| TUCP_002914 | XL0C_125404 | ENSRNOT00000066968 | 0.963529904  | 4.78E-07 |
| TUCP_002914 | XL0C_125404 | ENSRNOT00000010748 | 0.979313651  | 2.88E-08 |
| TUCP_002914 | XL0C_125404 | ENSRNOT00000080207 | 0.991315002  | 3.84E-10 |
| TUCP_002914 | XL0C_125404 | ENSRNOT00000061100 | 0.983766855  | 8.64E-09 |
| TUCP_002914 | XL0C_125404 | ENSRNOT00000017995 | 0.955979381  | 1.21E-06 |
| TUCP_002914 | XL0C_125404 | ENSRNOT00000017776 | 0.973403137  | 1.00E-07 |
| TUCP_002914 | XL0C_125404 | ENSRNOT00000005144 | 0.956656108  | 1.12E-06 |
| TUCP_002914 | XL0C_125404 | ENSRNOT00000026457 | 0.985086562  | 5.67E-09 |
| TUCP_002914 | XL0C_125404 | ENSRNOT00000004463 | 0.980503831  | 2.15E-08 |
| TUCP_002914 | XL0C_125404 | ENSRNOT00000016776 | -0.951207799 | 2.01E-06 |
| TUCP_002914 | XL0C_125404 | ENSRNOT00000047192 | -0.967673646 | 2.63E-07 |
| TUCP_002914 | XL0C_125404 | ENSRNOT00000022097 | 0.975683265  | 6.43E-08 |
| TUCP_002914 | XL0C_125404 | ENSRNOT00000008987 | -0.964901877 | 3.95E-07 |
| TUCP_002914 | XL0C_125404 | ENSRNOT00000055992 | -0.979830163 | 2.54E-08 |
| TUCP_002914 | XL0C_125404 | ENSRNOT00000092876 | -0.964324565 | 4.29E-07 |
| TUCP_002914 | XL0C_125404 | ENSRNOT00000048029 | 0.959999692  | 7.54E-07 |
| TUCP_002914 | XL0C_125404 | ENSRNOT00000024253 | 0.950691387  | 2.11E-06 |
| TUCP_002914 | XL0C_125404 | ENSRNOT00000083799 | 0.96676516   | 3.02E-07 |
| TUCP_002914 | XL0C_125404 | ENSRNOT00000027083 | 0.970123     | 1.78E-07 |
| TUCP_002914 | XL0C_125404 | ENSRNOT00000074939 | 0.964163405  | 4.38E-07 |
| TUCP_002914 | XL0C_125404 | ENSRNOT00000066041 | -0.959013155 | 8.50E-07 |
| TUCP_002914 | XL0C_125404 | ENSRNOT00000063930 | -0.960141155 | 7.41E-07 |
| TUCP_002914 | XL0C_125404 | ENSRNOT00000006055 | 0.980916716  | 1.93E-08 |
| TUCP_002914 | XL0C_125404 | ENSRNOT00000013116 | -0.950338284 | 2.19E-06 |
| TUCP_002914 | XL0C_125404 | ENSRNOT00000013025 | -0.955002906 | 1.35E-06 |
| TUCP_002914 | XL0C_125404 | ENSRNOT00000016012 | -0.950882344 | 2.07E-06 |
| TUCP_002914 | XL0C_125404 | ENSRNOT00000041237 | -0.950350435 | 2.19E-06 |
| TUCP_002914 | XL0C_125404 | ENSRNOT00000019502 | 0.950636513  | 2.12E-06 |
| TUCP_002914 | XL0C_125404 | ENSRNOT00000018057 | 0.963006439  | 5.13E-07 |
| TUCP_002914 | XL0C_125404 | ENSRNOT00000055683 | 0.954991161  | 1.35E-06 |

|             |             |                     |              |          |
|-------------|-------------|---------------------|--------------|----------|
| TUCP_002914 | XLOC_125404 | ENSRNOT00000043216  | 0.951005167  | 2.05E-06 |
| TUCP_002914 | XLOC_125404 | ENSRNOT00000084069  | 0.963627062  | 4.72E-07 |
| TUCP_002914 | XLOC_125404 | ENSRNOT00000019057  | -0.956646442 | 1.12E-06 |
| TUCP_002914 | XLOC_125404 | ENSRNOT00000014479  | -0.958523491 | 9.02E-07 |
| TUCP_002914 | XLOC_125404 | ENSRNOT00000021629  | -0.962456081 | 5.52E-07 |
| TUCP_002914 | XLOC_125404 | ENSRNOT00000047836  | -0.966140434 | 3.31E-07 |
| TUCP_002914 | XLOC_125404 | ENSRNOT00000015476  | -0.960104525 | 7.44E-07 |
| TUCP_002914 | XLOC_125404 | ENSRNOT00000025079  | -0.986342314 | 3.66E-09 |
| TUCP_002914 | XLOC_125404 | ENSRNOT00000048754  | -0.983481721 | 9.42E-09 |
| TUCP_002914 | XLOC_125404 | ENSRNOT00000044628  | 0.971620859  | 1.38E-07 |
| TUCP_002914 | XLOC_125404 | ENSRNOT00000006843  | -0.950448405 | 2.16E-06 |
| TUCP_002914 | XLOC_125404 | ENSRNOT00000025075  | 0.95864001   | 8.89E-07 |
| TUCP_002914 | XLOC_125404 | ENSRNOT00000004007  | -0.96234667  | 5.60E-07 |
| TUCP_002914 | XLOC_125404 | ENSRNOT00000020681  | -0.966090272 | 3.34E-07 |
| TUCP_002914 | XLOC_125404 | ENSRNOT00000057898  | -0.962799075 | 5.27E-07 |
| TUCP_002914 | XLOC_125404 | ENSRNOT00000024677  | 0.955662715  | 1.25E-06 |
| TUCP_002914 | XLOC_125404 | ENSRNOT00000091602  | -0.967421667 | 2.74E-07 |
| TUCP_002914 | XLOC_125404 | ENSRNOT00000012671  | 0.959223356  | 8.29E-07 |
| TUCP_002914 | XLOC_125404 | ENSRNOT00000009708  | -0.955152833 | 1.32E-06 |
| TUCP_002914 | XLOC_125404 | ENSRNOT00000077231  | 0.978370404  | 3.60E-08 |
| TUCP_002914 | XLOC_125404 | ENSRNOT00000009811  | 0.981883591  | 1.49E-08 |
| TUCP_002914 | XLOC_125404 | ENSRNOT000000071540 | 0.959190079  | 8.32E-07 |
| TUCP_002914 | XLOC_125404 | ENSRNOT00000014605  | -0.968589844 | 2.28E-07 |
| TUCP_002914 | XLOC_125404 | ENSRNOT00000012583  | -0.954957505 | 1.35E-06 |
| TUCP_002914 | XLOC_125404 | ENSRNOT00000078349  | -0.952224914 | 1.81E-06 |
| TUCP_002914 | XLOC_125404 | ENSRNOT00000022502  | -0.971727092 | 1.36E-07 |
| TUCP_002914 | XLOC_125404 | ENSRNOT00000017556  | 0.953257265  | 1.62E-06 |
| TUCP_002914 | XLOC_125404 | ENSRNOT00000087443  | 0.97336816   | 1.01E-07 |
| TUCP_002914 | XLOC_125404 | ENSRNOT00000000036  | 0.963379332  | 4.88E-07 |
| TUCP_002914 | XLOC_125404 | ENSRNOT00000021803  | -0.978353581 | 3.61E-08 |
| TUCP_002914 | XLOC_125404 | ENSRNOT00000039857  | -0.951760603 | 1.90E-06 |
| TUCP_002914 | XLOC_125404 | ENSRNOT00000024352  | 0.971455038  | 1.42E-07 |
| TUCP_002914 | XLOC_125404 | ENSRNOT00000058351  | 0.969443353  | 1.99E-07 |
| TUCP_002914 | XLOC_125404 | ENSRNOT00000083220  | 0.955907487  | 1.22E-06 |
| TUCP_002914 | XLOC_125404 | ENSRNOT00000003780  | 0.960836803  | 6.79E-07 |
| TUCP_002914 | XLOC_125404 | ENSRNOT00000003787  | -0.958802011 | 8.72E-07 |
| TUCP_002914 | XLOC_125404 | ENSRNOT00000058312  | 0.951258156  | 2.00E-06 |
| TUCP_002914 | XLOC_125404 | ENSRNOT00000013274  | 0.959932936  | 7.60E-07 |
| TUCP_002914 | XLOC_125404 | ENSRNOT00000019816  | -0.963387401 | 4.87E-07 |
| TUCP_002914 | XLOC_125404 | ENSRNOT00000005355  | 0.956718896  | 1.11E-06 |
| TUCP_002914 | XLOC_125404 | ENSRNOT00000068381  | 0.954204217  | 1.47E-06 |
| TUCP_002914 | XLOC_125404 | ENSRNOT00000068026  | -0.95212339  | 1.83E-06 |
| TUCP_002914 | XLOC_125404 | ENSRNOT00000026089  | 0.952027231  | 1.85E-06 |
| TUCP_002914 | XLOC_125404 | ENSRNOT00000085621  | 0.96488376   | 3.96E-07 |
| TUCP_002914 | XLOC_125404 | ENSRNOT00000007314  | -0.954305342 | 1.45E-06 |
| TUCP_002914 | XLOC_125404 | ENSRNOT00000090456  | 0.965143872  | 3.82E-07 |
| TUCP_002914 | XLOC_125404 | ENSRNOT00000010873  | -0.950397052 | 2.18E-06 |
| TUCP_002914 | XLOC_125404 | ENSRNOT00000014821  | -0.951865549 | 1.88E-06 |
| TUCP_002914 | XLOC_125404 | ENSRNOT00000088599  | 0.950689111  | 2.11E-06 |
| TUCP_002914 | XLOC_125404 | ENSRNOT00000026531  | -0.956076543 | 1.20E-06 |
| TUCP_002914 | XLOC_125404 | ENSRNOT00000083127  | 0.97517571   | 7.12E-08 |

|             |             |                    |              |          |
|-------------|-------------|--------------------|--------------|----------|
| TUCP_002914 | XL0C_125404 | ENSRNOT00000023567 | -0.957392903 | 1.03E-06 |
| TUCP_002914 | XL0C_125404 | ENSRNOT00000023537 | -0.961234448 | 6.46E-07 |
| TUCP_002914 | XL0C_125404 | ENSRNOT00000017021 | 0.96223954   | 5.67E-07 |
| TUCP_002914 | XL0C_125404 | ENSRNOT00000000898 | 0.957574928  | 1.01E-06 |
| TUCP_002914 | XL0C_125404 | ENSRNOT00000013375 | -0.951085365 | 2.03E-06 |
| TUCP_002914 | XL0C_125404 | ENSRNOT00000009683 | 0.964241414  | 4.34E-07 |
| TUCP_002914 | XL0C_125404 | ENSRNOT00000003146 | -0.967756589 | 2.60E-07 |
| TUCP_002914 | XL0C_125404 | ENSRNOT00000043535 | 0.950132385  | 2.23E-06 |
| TUCP_002914 | XL0C_125404 | ENSRNOT00000027910 | 0.972431051  | 1.20E-07 |
| TUCP_002914 | XL0C_125404 | ENSRNOT00000002771 | 0.971050969  | 1.53E-07 |
| TUCP_002914 | XL0C_125404 | ENSRNOT00000024322 | 0.962991213  | 5.14E-07 |
| TUCP_002914 | XL0C_125404 | ENSRNOT00000025097 | 0.985771028  | 4.49E-09 |
| TUCP_002914 | XL0C_125404 | ENSRNOT00000016191 | 0.952112026  | 1.83E-06 |
| TUCP_002914 | XL0C_125404 | ENSRNOT00000028885 | -0.958372787 | 9.18E-07 |
| TUCP_002914 | XL0C_125404 | ENSRNOT00000008427 | -0.971725872 | 1.36E-07 |
| TUCP_002914 | XL0C_125404 | ENSRNOT00000028888 | 0.959578931  | 7.94E-07 |
| TUCP_002914 | XL0C_125404 | ENSRNOT00000027616 | -0.954906503 | 1.36E-06 |
| TUCP_002914 | XL0C_125404 | ENSRNOT00000029833 | 0.968902203  | 2.17E-07 |
| TUCP_002914 | XL0C_125404 | ENSRNOT00000012702 | -0.973132958 | 1.05E-07 |
| TUCP_002914 | XL0C_125404 | ENSRNOT00000034487 | -0.96946905  | 1.98E-07 |
| TUCP_002914 | XL0C_125404 | ENSRNOT00000001783 | 0.953206014  | 1.63E-06 |
| TUCP_002914 | XL0C_125404 | ENSRNOT00000021143 | 0.955306201  | 1.30E-06 |
| TUCP_002914 | XL0C_125404 | ENSRNOT00000002173 | -0.950547656 | 2.14E-06 |
| TUCP_002914 | XL0C_125404 | ENSRNOT00000020417 | -0.959492982 | 8.02E-07 |
| TUCP_002914 | XL0C_125404 | ENSRNOT00000090420 | -0.960592063 | 7.01E-07 |
| TUCP_002914 | XL0C_125404 | ENSRNOT00000031401 | -0.954210041 | 1.47E-06 |
| TUCP_002914 | XL0C_125404 | ENSRNOT00000057313 | 0.965513055  | 3.63E-07 |
| TUCP_002914 | XL0C_125404 | ENSRNOT00000021061 | -0.95499973  | 1.35E-06 |
| TUCP_002914 | XL0C_125404 | ENSRNOT00000038212 | -0.958187002 | 9.38E-07 |
| TUCP_002914 | XL0C_125404 | ENSRNOT00000082151 | -0.959740162 | 7.78E-07 |
| TUCP_002914 | XL0C_125404 | ENSRNOT00000008982 | 0.968824776  | 2.20E-07 |
| TUCP_002914 | XL0C_125404 | ENSRNOT0000001607  | 0.955506031  | 1.27E-06 |
| TUCP_002914 | XL0C_125404 | ENSRNOT00000003359 | -0.959372369 | 8.14E-07 |
| TUCP_002914 | XL0C_125404 | ENSRNOT00000038511 | -0.955527689 | 1.27E-06 |
| TUCP_002914 | XL0C_125404 | ENSRNOT00000011984 | 0.980701513  | 2.04E-08 |
| TUCP_002914 | XL0C_125404 | ENSRNOT00000019647 | -0.962126568 | 5.76E-07 |
| TUCP_002914 | XL0C_125404 | ENSRNOT00000085971 | -0.965034654 | 3.88E-07 |
| TUCP_002914 | XL0C_125404 | ENSRNOT00000044395 | 0.958428391  | 9.12E-07 |
| TUCP_002914 | XL0C_125404 | ENSRNOT00000031230 | 0.961032786  | 6.63E-07 |
| TUCP_002914 | XL0C_125404 | ENSRNOT00000022142 | 0.953368964  | 1.61E-06 |
| TUCP_002914 | XL0C_125404 | ENSRNOT00000076300 | -0.958469167 | 9.07E-07 |
| TUCP_002914 | XL0C_125404 | ENSRNOT00000078390 | -0.967181928 | 2.84E-07 |
| TUCP_002914 | XL0C_125404 | ENSRNOT00000025086 | -0.965897175 | 3.43E-07 |
| TUCP_002914 | XL0C_125404 | ENSRNOT00000028876 | -0.965873595 | 3.44E-07 |
| TUCP_002914 | XL0C_125404 | ENSRNOT00000016445 | 0.980356824  | 2.23E-08 |
| TUCP_002914 | XL0C_125404 | ENSRNOT00000036931 | -0.957499714 | 1.02E-06 |
| TUCP_002914 | XL0C_125404 | ENSRNOT00000015946 | -0.953923495 | 1.51E-06 |
| TUCP_002914 | XL0C_125404 | ENSRNOT00000004172 | 0.961252463  | 6.44E-07 |
| TUCP_002914 | XL0C_125404 | ENSRNOT00000016389 | -0.959593316 | 7.93E-07 |
| TUCP_002914 | XL0C_125404 | ENSRNOT00000029125 | 0.963111467  | 5.06E-07 |
| TUCP_002914 | XL0C_125404 | ENSRNOT00000024060 | 0.960335125  | 7.23E-07 |

|             |             |                     |              |          |
|-------------|-------------|---------------------|--------------|----------|
| TUCP_002914 | XLOC_125404 | ENSRNOT00000067181  | 0.950401137  | 2.17E-06 |
| TUCP_002914 | XLOC_125404 | ENSRNOT00000004319  | -0.956728352 | 1.11E-06 |
| TUCP_002914 | XLOC_125404 | ENSRNOT00000026280  | 0.952526831  | 1.75E-06 |
| TUCP_002914 | XLOC_125404 | ENSRNOT00000005387  | 0.976097163  | 5.90E-08 |
| TUCP_002914 | XLOC_125404 | ENSRNOT00000028907  | 0.952722129  | 1.72E-06 |
| TUCP_002914 | XLOC_125404 | ENSRNOT00000072890  | -0.954253676 | 1.46E-06 |
| TUCP_002914 | XLOC_125404 | ENSRNOT00000010224  | 0.958763747  | 8.76E-07 |
| TUCP_002914 | XLOC_125404 | ENSRNOT00000087278  | -0.964303172 | 4.30E-07 |
| TUCP_002914 | XLOC_125404 | ENSRNOT00000007175  | 0.950306612  | 2.19E-06 |
| TUCP_002914 | XLOC_125404 | ENSRNOT00000078862  | 0.982218307  | 1.36E-08 |
| TUCP_002914 | XLOC_125404 | ENSRNOT00000003940  | -0.950782064 | 2.09E-06 |
| TUCP_002914 | XLOC_125404 | ENSRNOT00000017687  | -0.954462373 | 1.43E-06 |
| TUCP_002914 | XLOC_125404 | ENSRNOT00000015799  | 0.965438291  | 3.66E-07 |
| TUCP_002914 | XLOC_125404 | ENSRNOT000000031904 | 0.952581551  | 1.74E-06 |
| TUCP_002914 | XLOC_125404 | ENSRNOT000000039551 | -0.971815906 | 1.34E-07 |
| TUCP_002914 | XLOC_125404 | ENSRNOT000000082999 | -0.950860344 | 2.08E-06 |
| TUCP_002914 | XLOC_125404 | ENSRNOT000000082998 | 0.959014752  | 8.50E-07 |
| TUCP_002914 | XLOC_125404 | ENSRNOT00000004400  | 0.951587388  | 1.93E-06 |
| TUCP_002914 | XLOC_125404 | ENSRNOT00000018936  | -0.958884188 | 8.64E-07 |
| TUCP_002914 | XLOC_125404 | ENSRNOT000000083578 | 0.961562484  | 6.19E-07 |
| TUCP_002914 | XLOC_125404 | ENSRNOT000000023638 | 0.97284312   | 1.11E-07 |
| TUCP_002914 | XLOC_125404 | ENSRNOT000000005228 | 0.96855709   | 2.30E-07 |
| TUCP_002914 | XLOC_125404 | ENSRNOT000000059524 | -0.951657272 | 1.92E-06 |
| TUCP_002914 | XLOC_125404 | ENSRNOT000000028628 | -0.96321907  | 4.98E-07 |
| TUCP_002914 | XLOC_125404 | ENSRNOT000000005220 | 0.976030298  | 5.99E-08 |
| TUCP_002914 | XLOC_125404 | ENSRNOT000000023144 | 0.974557086  | 8.05E-08 |
| TUCP_002914 | XLOC_125404 | ENSRNOT000000045326 | 0.969366249  | 2.02E-07 |
| TUCP_002914 | XLOC_125404 | ENSRNOT00000016649  | 0.977410105  | 4.46E-08 |
| TUCP_002914 | XLOC_125404 | ENSRNOT000000074023 | 0.963901012  | 4.54E-07 |
| TUCP_002914 | XLOC_125404 | ENSRNOT000000056813 | 0.972881824  | 1.10E-07 |
| TUCP_002914 | XLOC_125404 | ENSRNOT000000091128 | -0.970202844 | 1.76E-07 |
| TUCP_002914 | XLOC_125404 | ENSRNOT00000001586  | -0.954750351 | 1.38E-06 |
| TUCP_002914 | XLOC_125404 | ENSRNOT00000018341  | -0.955293172 | 1.30E-06 |
| TUCP_002914 | XLOC_125404 | ENSRNOT000000026543 | 0.953366916  | 1.61E-06 |
| TUCP_002914 | XLOC_125404 | ENSRNOT000000043554 | 0.955289423  | 1.31E-06 |
| TUCP_002914 | XLOC_125404 | ENSRNOT00000019213  | 0.973067562  | 1.07E-07 |
| TUCP_002914 | XLOC_125404 | ENSRNOT00000012187  | 0.973825942  | 9.26E-08 |
| TUCP_002914 | XLOC_125404 | ENSRNOT000000028405 | -0.951389436 | 1.97E-06 |
| TUCP_002914 | XLOC_125404 | ENSRNOT000000050868 | 0.959667662  | 7.85E-07 |
| TUCP_002914 | XLOC_125404 | ENSRNOT00000013695  | -0.965260278 | 3.76E-07 |
| TUCP_002914 | XLOC_125404 | ENSRNOT000000080677 | -0.953013737 | 1.67E-06 |
| TUCP_002914 | XLOC_125404 | ENSRNOT000000088125 | 0.975969351  | 6.06E-08 |
| TUCP_002914 | XLOC_125404 | ENSRNOT000000038247 | 0.981331469  | 1.73E-08 |
| TUCP_002914 | XLOC_125404 | ENSRNOT000000024402 | 0.965418391  | 3.68E-07 |
| TUCP_002914 | XLOC_125404 | ENSRNOT000000024406 | -0.954333519 | 1.45E-06 |
| TUCP_002914 | XLOC_125404 | ENSRNOT000000089933 | 0.971924491  | 1.31E-07 |
| TUCP_002914 | XLOC_125404 | ENSRNOT000000077908 | 0.975849457  | 6.21E-08 |
| TUCP_002914 | XLOC_125404 | ENSRNOT000000067009 | -0.954855272 | 1.37E-06 |
| TUCP_002914 | XLOC_125404 | ENSRNOT000000090461 | 0.956971022  | 1.08E-06 |
| TUCP_002914 | XLOC_125404 | ENSRNOT000000090912 | 0.954869388  | 1.37E-06 |
| TUCP_002914 | XLOC_125404 | ENSRNOT00000010463  | 0.954790632  | 1.38E-06 |

|             |             |                     |              |          |
|-------------|-------------|---------------------|--------------|----------|
| TUCP_002914 | XLOC_125404 | ENSRNOT00000026718  | 0.979557548  | 2.72E-08 |
| TUCP_002914 | XLOC_125404 | ENSRNOT00000032780  | 0.976090173  | 5.91E-08 |
| TUCP_002914 | XLOC_125404 | ENSRNOT00000084012  | 0.979971005  | 2.45E-08 |
| TUCP_002914 | XLOC_125404 | ENSRNOT00000033677  | -0.979918504 | 2.49E-08 |
| TUCP_002914 | XLOC_125404 | ENSRNOT00000027234  | 0.956376775  | 1.16E-06 |
| TUCP_002914 | XLOC_125404 | ENSRNOT00000016333  | -0.958835049 | 8.69E-07 |
| TUCP_002914 | XLOC_125404 | ENSRNOT00000002292  | 0.966193064  | 3.29E-07 |
| TUCP_002914 | XLOC_125404 | ENSRNOT00000019820  | 0.96622503   | 3.27E-07 |
| TUCP_002914 | XLOC_125404 | ENSRNOT00000067822  | 0.962029321  | 5.83E-07 |
| TUCP_002914 | XLOC_125404 | ENSRNOT00000002410  | 0.950494704  | 2.15E-06 |
| TUCP_002914 | XLOC_125404 | ENSRNOT00000074847  | -0.956055564 | 1.20E-06 |
| TUCP_002914 | XLOC_125404 | ENSRNOT00000021030  | -0.956201061 | 1.18E-06 |
| TUCP_002914 | XLOC_125404 | ENSRNOT00000006835  | 0.972526096  | 1.18E-07 |
| TUCP_002914 | XLOC_125404 | ENSRNOT00000077727  | -0.971935987 | 1.31E-07 |
| TUCP_002914 | XLOC_125404 | ENSRNOT00000044346  | -0.974033194 | 8.90E-08 |
| TUCP_002914 | XLOC_125404 | ENSRNOT00000020197  | -0.951659554 | 1.92E-06 |
| TUCP_002914 | XLOC_125404 | ENSRNOT00000010541  | 0.970300082  | 1.73E-07 |
| TUCP_002914 | XLOC_125404 | ENSRNOT00000016947  | 0.951221149  | 2.00E-06 |
| TUCP_002914 | XLOC_125404 | ENSRNOT00000091909  | 0.975584754  | 6.56E-08 |
| TUCP_002914 | XLOC_125404 | ENSRNOT00000001081  | 0.977060721  | 4.81E-08 |
| TUCP_002914 | XLOC_125404 | ENSRNOT00000009563  | -0.953579164 | 1.57E-06 |
| TUCP_002914 | XLOC_125404 | ENSRNOT00000003544  | -0.966465415 | 3.16E-07 |
| TUCP_002914 | XLOC_125404 | ENSRNOT00000015609  | 0.964643676  | 4.10E-07 |
| TUCP_002914 | XLOC_125404 | ENSRNOT00000022190  | -0.974096807 | 8.79E-08 |
| TUCP_002914 | XLOC_125404 | ENSRNOT00000025913  | -0.96233043  | 5.61E-07 |
| TUCP_002914 | XLOC_125404 | ENSRNOT00000019386  | -0.950148254 | 2.23E-06 |
| TUCP_002914 | XLOC_125404 | ENSRNOT00000077220  | -0.976363445 | 5.58E-08 |
| TUCP_002914 | XLOC_125404 | ENSRNOT00000065983  | 0.981123694  | 1.83E-08 |
| TUCP_002914 | XLOC_125404 | ENSRNOT00000030782  | -0.970282467 | 1.74E-07 |
| TUCP_002914 | XLOC_125404 | ENSRNOT000000052018 | 0.95000888   | 2.26E-06 |
| TUCP_002914 | XLOC_125404 | ENSRNOT00000073919  | 0.96015351   | 7.40E-07 |
| TUCP_002914 | XLOC_125404 | ENSRNOT00000067780  | -0.974203978 | 8.61E-08 |
| TUCP_002914 | XLOC_125404 | ENSRNOT00000059807  | 0.960725521  | 6.89E-07 |
| TUCP_002914 | XLOC_125404 | ENSRNOT00000015265  | 0.952989397  | 1.67E-06 |
| TUCP_002914 | XLOC_125404 | ENSRNOT00000073675  | -0.956360349 | 1.16E-06 |
| TUCP_002914 | XLOC_125404 | ENSRNOT00000052422  | 0.973357818  | 1.01E-07 |
| TUCP_002914 | XLOC_125404 | ENSRNOT00000086119  | -0.98965213  | 9.18E-10 |
| TUCP_002914 | XLOC_125404 | ENSRNOT00000086590  | 0.969993481  | 1.82E-07 |
| TUCP_002914 | XLOC_125404 | ENSRNOT00000026174  | 0.951468618  | 1.95E-06 |
| TUCP_002914 | XLOC_125404 | ENSRNOT00000034883  | -0.96348793  | 4.81E-07 |
| TUCP_002914 | XLOC_125404 | ENSRNOT00000020155  | 0.962245502  | 5.67E-07 |
| TUCP_002914 | XLOC_125404 | ENSRNOT00000015325  | -0.961926021 | 5.91E-07 |
| TUCP_002914 | XLOC_125404 | ENSRNOT00000004698  | 0.969139815  | 2.09E-07 |
| TUCP_002914 | XLOC_125404 | ENSRNOT00000017629  | 0.959282617  | 8.23E-07 |
| TUCP_002914 | XLOC_125404 | ENSRNOT00000005910  | -0.955500935 | 1.28E-06 |
| TUCP_002914 | XLOC_125404 | ENSRNOT00000076485  | -0.96049534  | 7.09E-07 |
| TUCP_002914 | XLOC_125404 | ENSRNOT00000090987  | -0.950240261 | 2.21E-06 |
| TUCP_002914 | XLOC_125404 | ENSRNOT00000075311  | 0.950570953  | 2.14E-06 |
| TUCP_002914 | XLOC_125404 | ENSRNOT00000078475  | 0.971911824  | 1.31E-07 |
| TUCP_002914 | XLOC_125404 | ENSRNOT00000087429  | 0.986885562  | 2.99E-09 |
| TUCP_002914 | XLOC_125404 | ENSRNOT00000016722  | 0.975227762  | 7.05E-08 |

|             |             |                    |              |          |
|-------------|-------------|--------------------|--------------|----------|
| TUCP_002914 | XLOC_125404 | ENSRNOT00000065501 | 0.972098403  | 1.27E-07 |
| TUCP_002914 | XLOC_125404 | ENSRNOT00000000013 | 0.963676524  | 4.69E-07 |
| TUCP_002914 | XLOC_125404 | ENSRNOT00000025523 | 0.962402753  | 5.55E-07 |
| TUCP_002914 | XLOC_125404 | ENSRNOT00000016111 | -0.953106666 | 1.65E-06 |
| TUCP_002914 | XLOC_125404 | ENSRNOT00000028057 | 0.960871309  | 6.76E-07 |
| TUCP_002914 | XLOC_125404 | ENSRNOT00000027125 | -0.952216002 | 1.81E-06 |
| TUCP_002914 | XLOC_125404 | ENSRNOT00000022074 | 0.966723159  | 3.04E-07 |
| TUCP_002914 | XLOC_125404 | ENSRNOT00000009691 | 0.963567476  | 4.75E-07 |
| TUCP_002914 | XLOC_125404 | ENSRNOT00000009122 | 0.951275052  | 1.99E-06 |
| TUCP_002914 | XLOC_125404 | ENSRNOT00000088054 | 0.96292542   | 5.18E-07 |
| TUCP_002914 | XLOC_125404 | ENSRNOT00000025966 | 0.953746909  | 1.54E-06 |
| TUCP_002914 | XLOC_125404 | ENSRNOT00000074653 | 0.968722922  | 2.24E-07 |
| TUCP_002914 | XLOC_125404 | ENSRNOT00000047663 | -0.956176086 | 1.18E-06 |
| TUCP_002914 | XLOC_125404 | ENSRNOT00000080602 | 0.955206736  | 1.32E-06 |
| TUCP_002914 | XLOC_125404 | ENSRNOT00000029202 | -0.977771908 | 4.12E-08 |
| TUCP_002914 | XLOC_125404 | ENSRNOT00000025791 | -0.957331259 | 1.04E-06 |
| TUCP_002914 | XLOC_125404 | ENSRNOT00000005489 | 0.979825213  | 2.54E-08 |
| TUCP_002914 | XLOC_125404 | ENSRNOT00000081981 | 0.95411643   | 1.48E-06 |
| TUCP_002914 | XLOC_125404 | ENSRNOT00000073910 | -0.962566515 | 5.44E-07 |
| TUCP_002914 | XLOC_125404 | ENSRNOT00000050834 | -0.964671489 | 4.08E-07 |
| TUCP_002914 | XLOC_125404 | ENSRNOT00000054828 | 0.968766779  | 2.22E-07 |
| TUCP_002914 | XLOC_125404 | ENSRNOT00000012736 | 0.961474526  | 6.26E-07 |
| TUCP_002914 | XLOC_125404 | ENSRNOT00000002114 | -0.962339697 | 5.60E-07 |
| TUCP_002914 | XLOC_125404 | ENSRNOT00000027970 | 0.960586315  | 7.01E-07 |
| TUCP_002914 | XLOC_125404 | ENSRNOT00000080928 | 0.952335988  | 1.79E-06 |
| TUCP_002914 | XLOC_125404 | ENSRNOT00000079011 | -0.96127291  | 6.43E-07 |
| TUCP_002914 | XLOC_125404 | ENSRNOT00000000083 | -0.950503447 | 2.15E-06 |
| TUCP_002914 | XLOC_125404 | ENSRNOT00000018074 | -0.979549713 | 2.72E-08 |
| TUCP_002914 | XLOC_125404 | ENSRNOT00000037679 | 0.983425513  | 9.58E-09 |
| TUCP_002914 | XLOC_125404 | ENSRNOT00000014124 | 0.978884264  | 3.19E-08 |
| TUCP_002914 | XLOC_125404 | ENSRNOT00000000120 | 0.963087514  | 5.07E-07 |
| TUCP_002914 | XLOC_125404 | ENSRNOT00000013632 | 0.96124118   | 6.45E-07 |
| TUCP_002914 | XLOC_125404 | ENSRNOT00000078906 | -0.967811517 | 2.58E-07 |
| TUCP_002914 | XLOC_125404 | ENSRNOT00000010418 | 0.962237893  | 5.68E-07 |
| TUCP_002914 | XLOC_125404 | ENSRNOT00000009900 | -0.976554552 | 5.36E-08 |
| TUCP_002914 | XLOC_125404 | ENSRNOT00000066561 | -0.957548175 | 1.01E-06 |
| TUCP_002914 | XLOC_125404 | ENSRNOT00000019172 | -0.96217396  | 5.72E-07 |
| TUCP_002914 | XLOC_125404 | ENSRNOT00000064798 | 0.964726803  | 4.05E-07 |
| TUCP_002914 | XLOC_125404 | ENSRNOT00000019177 | 0.958445157  | 9.10E-07 |
| TUCP_002914 | XLOC_125404 | ENSRNOT00000015495 | -0.955627075 | 1.26E-06 |
| TUCP_002914 | XLOC_125404 | ENSRNOT00000019910 | -0.957074794 | 1.07E-06 |
| TUCP_002914 | XLOC_125404 | ENSRNOT00000040393 | 0.978137489  | 3.79E-08 |
| TUCP_002914 | XLOC_125404 | ENSRNOT00000066593 | 0.957172427  | 1.06E-06 |
| TUCP_002914 | XLOC_125404 | ENSRNOT00000067901 | -0.977651169 | 4.23E-08 |
| TUCP_002914 | XLOC_125404 | ENSRNOT00000036750 | 0.954500302  | 1.42E-06 |
| TUCP_002914 | XLOC_125404 | ENSRNOT00000011041 | 0.961046079  | 6.62E-07 |
| TUCP_002914 | XLOC_125404 | ENSRNOT00000021674 | 0.972009562  | 1.29E-07 |
| TUCP_002914 | XLOC_125404 | ENSRNOT00000064700 | 0.956665583  | 1.12E-06 |
| TUCP_002914 | XLOC_125404 | ENSRNOT00000036613 | -0.979329666 | 2.87E-08 |
| TUCP_002914 | XLOC_125404 | ENSRNOT00000015537 | 0.958073532  | 9.51E-07 |
| TUCP_002914 | XLOC_125404 | ENSRNOT00000025705 | 0.960532685  | 7.06E-07 |

|             |             |                    |              |          |
|-------------|-------------|--------------------|--------------|----------|
| TUCP_002914 | XL0C_125404 | ENSRNOT00000019983 | -0.957192919 | 1.05E-06 |
| TUCP_002914 | XL0C_125404 | ENSRNOT00000004140 | 0.961328596  | 6.38E-07 |
| TUCP_002914 | XL0C_125404 | ENSRNOT00000008113 | -0.965855588 | 3.45E-07 |
| TUCP_002914 | XL0C_125404 | ENSRNOT00000022552 | -0.977759562 | 4.13E-08 |
| TUCP_002914 | XL0C_125404 | ENSRNOT00000048910 | -0.972035688 | 1.29E-07 |
| TUCP_002914 | XL0C_125404 | ENSRNOT00000020357 | 0.95242516   | 1.77E-06 |
| TUCP_002914 | XL0C_125404 | ENSRNOT00000009645 | -0.96066961  | 6.94E-07 |
| TUCP_002914 | XL0C_125404 | ENSRNOT00000071560 | 0.964988881  | 3.91E-07 |
| TUCP_002914 | XL0C_125404 | ENSRNOT00000015678 | -0.95593745  | 1.21E-06 |
| TUCP_002914 | XL0C_125404 | ENSRNOT00000082508 | -0.957503578 | 1.02E-06 |
| TUCP_002914 | XL0C_125404 | ENSRNOT00000005126 | -0.965753717 | 3.50E-07 |
| TUCP_002914 | XL0C_125404 | ENSRNOT00000010728 | 0.967576065  | 2.67E-07 |
| TUCP_002914 | XL0C_125404 | ENSRNOT00000082863 | 0.985451873  | 5.01E-09 |
| TUCP_002914 | XL0C_125404 | ENSRNOT00000091698 | -0.959925399 | 7.61E-07 |
| TUCP_002914 | XL0C_125404 | ENSRNOT00000007164 | 0.960568349  | 7.03E-07 |
| TUCP_002914 | XL0C_125404 | ENSRNOT00000049459 | -0.970312358 | 1.73E-07 |
| TUCP_002914 | XL0C_125404 | ENSRNOT00000065947 | 0.965037205  | 3.88E-07 |
| TUCP_002914 | XL0C_125404 | ENSRNOT00000071166 | 0.962849355  | 5.24E-07 |
| TUCP_002914 | XL0C_125404 | ENSRNOT00000047387 | 0.95852093   | 9.02E-07 |
| TUCP_002914 | XL0C_125404 | ENSRNOT00000074389 | -0.959425808 | 8.09E-07 |
| TUCP_002914 | XL0C_125404 | ENSRNOT00000078872 | -0.95177451  | 1.89E-06 |
| TUCP_002914 | XL0C_125404 | ENSRNOT00000055437 | -0.97064874  | 1.63E-07 |
| TUCP_002914 | XL0C_125404 | ENSRNOT00000091596 | -0.96422376  | 4.35E-07 |
| TUCP_002914 | XL0C_125404 | ENSRNOT00000011384 | 0.954586841  | 1.41E-06 |
| TUCP_002914 | XL0C_125404 | ENSRNOT00000039836 | -0.95295457  | 1.68E-06 |
| TUCP_002914 | XL0C_125404 | ENSRNOT00000015076 | 0.953585117  | 1.57E-06 |
| TUCP_002914 | XL0C_125404 | ENSRNOT00000076872 | 0.958298587  | 9.26E-07 |
| TUCP_002914 | XL0C_125404 | ENSRNOT00000018533 | 0.950448691  | 2.16E-06 |
| TUCP_002914 | XL0C_125404 | ENSRNOT00000073564 | -0.953616267 | 1.56E-06 |
| TUCP_002914 | XL0C_125404 | ENSRNOT00000010806 | -0.952514139 | 1.76E-06 |
| TUCP_002914 | XL0C_125404 | ENSRNOT00000015170 | -0.96462435  | 4.11E-07 |
| TUCP_002914 | XL0C_125404 | ENSRNOT0000001507  | 0.977557269  | 4.32E-08 |
| TUCP_002914 | XL0C_125404 | ENSRNOT00000066947 | -0.956895297 | 1.09E-06 |
| TUCP_002914 | XL0C_125404 | ENSRNOT00000028646 | 0.962389349  | 5.56E-07 |
| TUCP_002914 | XL0C_125404 | ENSRNOT00000018584 | 0.952317086  | 1.79E-06 |
| TUCP_002914 | XL0C_125404 | ENSRNOT00000039177 | -0.962071338 | 5.80E-07 |
| TUCP_002914 | XL0C_125404 | ENSRNOT00000081047 | 0.970861809  | 1.58E-07 |
| TUCP_002914 | XL0C_125404 | ENSRNOT00000022676 | -0.952229995 | 1.81E-06 |
| TUCP_002914 | XL0C_125404 | ENSRNOT00000037456 | 0.965374808  | 3.70E-07 |
| TUCP_002914 | XL0C_125404 | ENSRNOT00000025517 | 0.951588385  | 1.93E-06 |
| TUCP_002914 | XL0C_125404 | ENSRNOT00000025510 | -0.964817896 | 4.00E-07 |
| TUCP_002914 | XL0C_125404 | ENSRNOT00000012881 | -0.958292118 | 9.27E-07 |
| TUCP_002914 | XL0C_125404 | ENSRNOT00000000577 | 0.974405153  | 8.29E-08 |
| TUCP_002914 | XL0C_125404 | ENSRNOT00000003605 | -0.95326789  | 1.62E-06 |
| TUCP_002914 | XL0C_125404 | ENSRNOT00000012177 | -0.951902708 | 1.87E-06 |
| TUCP_002914 | XL0C_125404 | ENSRNOT00000061392 | 0.971310057  | 1.46E-07 |
| TUCP_002914 | XL0C_125404 | ENSRNOT00000063917 | -0.951731902 | 1.90E-06 |
| TUCP_002914 | XL0C_125404 | ENSRNOT00000037039 | -0.954555293 | 1.41E-06 |
| TUCP_002914 | XL0C_125404 | ENSRNOT00000007824 | -0.965883893 | 3.44E-07 |
| TUCP_002914 | XL0C_125404 | ENSRNOT00000001979 | -0.951514231 | 1.94E-06 |
| TUCP_002914 | XL0C_125404 | ENSRNOT00000083968 | -0.957948691 | 9.65E-07 |



|             |             |                    |              |          |
|-------------|-------------|--------------------|--------------|----------|
| TUCP_002914 | XLOC_125404 | ENSRNOT00000037133 | 0.970908382  | 1.56E-07 |
| TUCP_002914 | XLOC_125404 | ENSRNOT00000068633 | 0.972215266  | 1.24E-07 |
| TUCP_002914 | XLOC_125404 | ENSRNOT00000026831 | 0.951600002  | 1.93E-06 |
| TUCP_002914 | XLOC_125404 | ENSRNOT00000020892 | -0.95265468  | 1.73E-06 |
| TUCP_002914 | XLOC_125404 | ENSRNOT00000061267 | 0.956876744  | 1.09E-06 |
| TUCP_002914 | XLOC_125404 | ENSRNOT00000011898 | -0.950062934 | 2.25E-06 |
| TUCP_002914 | XLOC_125404 | ENSRNOT00000019133 | 0.98212431   | 1.40E-08 |
| TUCP_002914 | XLOC_125404 | ENSRNOT00000079698 | -0.963971958 | 4.50E-07 |
| TUCP_002914 | XLOC_125404 | ENSRNOT00000006824 | -0.974481594 | 8.17E-08 |
| TUCP_002914 | XLOC_125404 | ENSRNOT00000012775 | -0.953918541 | 1.51E-06 |
| TUCP_002914 | XLOC_125404 | ENSRNOT00000005389 | 0.950432625  | 2.17E-06 |
| TUCP_002914 | XLOC_125404 | ENSRNOT00000044608 | -0.960096572 | 7.45E-07 |
| TUCP_002914 | XLOC_125404 | ENSRNOT00000090123 | 0.96021814   | 7.34E-07 |
| TUCP_002914 | XLOC_125404 | ENSRNOT00000010683 | -0.958885299 | 8.63E-07 |
| TUCP_002914 | XLOC_125404 | ENSRNOT00000045488 | 0.968353525  | 2.37E-07 |
| TUCP_002914 | XLOC_125404 | ENSRNOT00000093174 | 0.957309849  | 1.04E-06 |
| TUCP_002914 | XLOC_125404 | ENSRNOT00000077555 | 0.975218143  | 7.06E-08 |
| TUCP_002914 | XLOC_125404 | ENSRNOT00000026783 | 0.954368205  | 1.44E-06 |
| TUCP_002914 | XLOC_125404 | ENSRNOT00000089211 | 0.964610593  | 4.12E-07 |
| TUCP_002914 | XLOC_125404 | ENSRNOT00000020383 | 0.974970657  | 7.42E-08 |
| TUCP_002914 | XLOC_125404 | ENSRNOT00000011174 | -0.95093057  | 2.06E-06 |
| TUCP_002914 | XLOC_125404 | ENSRNOT00000000302 | 0.972280996  | 1.23E-07 |
| TUCP_002914 | XLOC_125404 | ENSRNOT00000078070 | 0.987892949  | 2.01E-09 |
| TUCP_002914 | XLOC_125404 | ENSRNOT00000026909 | -0.960105261 | 7.44E-07 |
| TUCP_002914 | XLOC_125404 | ENSRNOT00000012424 | 0.982595552  | 1.22E-08 |
| TUCP_002914 | XLOC_125404 | ENSRNOT00000000658 | 0.968116886  | 2.46E-07 |
| TUCP_002914 | XLOC_125404 | ENSRNOT00000025832 | 0.95220167   | 1.81E-06 |
| TUCP_002914 | XLOC_125404 | ENSRNOT00000000717 | -0.960579977 | 7.02E-07 |
| TUCP_002914 | XLOC_125404 | ENSRNOT00000005909 | 0.964065447  | 4.44E-07 |
| TUCP_002914 | XLOC_125404 | ENSRNOT00000000718 | 0.969971677  | 1.83E-07 |
| TUCP_002914 | XLOC_125404 | ENSRNOT00000072518 | 0.962020784  | 5.84E-07 |
| TUCP_002914 | XLOC_125404 | ENSRNOT00000086122 | 0.958759064  | 8.77E-07 |
| TUCP_002914 | XLOC_125404 | ENSRNOT00000023763 | -0.959031855 | 8.48E-07 |
| TUCP_002914 | XLOC_125404 | ENSRNOT00000044009 | 0.958842827  | 8.68E-07 |
| TUCP_002914 | XLOC_125404 | ENSRNOT00000075424 | 0.971676066  | 1.37E-07 |
| TUCP_002914 | XLOC_125404 | ENSRNOT00000058842 | 0.956727772  | 1.11E-06 |
| TUCP_002914 | XLOC_125404 | ENSRNOT00000088133 | -0.958876304 | 8.64E-07 |
| TUCP_002914 | XLOC_125404 | ENSRNOT00000003691 | -0.954965689 | 1.35E-06 |
| TUCP_002914 | XLOC_125404 | ENSRNOT00000003690 | 0.963742834  | 4.64E-07 |
| TUCP_002914 | XLOC_125404 | ENSRNOT00000011350 | 0.958141497  | 9.43E-07 |
| TUCP_002914 | XLOC_125404 | ENSRNOT00000008901 | -0.968281024 | 2.40E-07 |
| TUCP_002914 | XLOC_125404 | ENSRNOT00000081621 | 0.952107044  | 1.83E-06 |
| TUCP_002914 | XLOC_125404 | ENSRNOT00000005659 | 0.982069489  | 1.42E-08 |
| TUCP_002914 | XLOC_125404 | ENSRNOT00000081077 | -0.969746027 | 1.90E-07 |
| TUCP_002914 | XLOC_125404 | ENSRNOT00000017761 | 0.966713762  | 3.04E-07 |
| TUCP_002914 | XLOC_125404 | ENSRNOT00000023543 | -0.967563593 | 2.68E-07 |
| TUCP_002914 | XLOC_125404 | ENSRNOT0000001923  | 0.967315863  | 2.78E-07 |
| TUCP_002914 | XLOC_125404 | ENSRNOT00000005478 | -0.955330208 | 1.30E-06 |
| TUCP_002914 | XLOC_125404 | ENSRNOT00000087592 | 0.95547833   | 1.28E-06 |
| TUCP_002914 | XLOC_125404 | ENSRNOT00000080695 | 0.952516907  | 1.75E-06 |
| TUCP_002914 | XLOC_125404 | ENSRNOT00000027117 | -0.950215749 | 2.21E-06 |

|             |             |                    |              |          |
|-------------|-------------|--------------------|--------------|----------|
| TUCP_002914 | XLOC_125404 | ENSRNOT00000055386 | 0.973067493  | 1.07E-07 |
| TUCP_002914 | XLOC_125404 | ENSRNOT00000085458 | -0.953499057 | 1.58E-06 |
| TUCP_002914 | XLOC_125404 | ENSRNOT00000085519 | 0.962972192  | 5.15E-07 |
| TUCP_002914 | XLOC_125404 | ENSRNOT00000071853 | -0.955314606 | 1.30E-06 |
| TUCP_002914 | XLOC_125404 | ENSRNOT00000082174 | 0.969294744  | 2.04E-07 |
| TUCP_002914 | XLOC_125404 | ENSRNOT00000042125 | 0.976852738  | 5.03E-08 |
| TUCP_002914 | XLOC_125404 | ENSRNOT00000026760 | -0.974356283 | 8.37E-08 |
| TUCP_002914 | XLOC_125404 | ENSRNOT00000023330 | 0.970573529  | 1.65E-07 |
| TUCP_002914 | XLOC_125404 | ENSRNOT00000024491 | -0.971905959 | 1.31E-07 |
| TUCP_002914 | XLOC_125404 | ENSRNOT00000084597 | -0.963121557 | 5.05E-07 |
| TUCP_002914 | XLOC_125404 | ENSRNOT00000037588 | -0.960005622 | 7.53E-07 |
| TUCP_002914 | XLOC_125404 | ENSRNOT00000024941 | 0.956770662  | 1.11E-06 |
| TUCP_002914 | XLOC_125404 | ENSRNOT00000016401 | 0.974360528  | 8.36E-08 |
| TUCP_002914 | XLOC_125404 | ENSRNOT00000027967 | 0.955994448  | 1.21E-06 |
| TUCP_002914 | XLOC_125404 | ENSRNOT00000002053 | -0.954650109 | 1.40E-06 |
| TUCP_002914 | XLOC_125404 | ENSRNOT00000047210 | 0.979307255  | 2.89E-08 |
| TUCP_002914 | XLOC_125404 | ENSRNOT00000079002 | -0.959110833 | 8.40E-07 |
| TUCP_002914 | XLOC_125404 | ENSRNOT00000080110 | 0.969690135  | 1.91E-07 |
| TUCP_002914 | XLOC_125404 | ENSRNOT00000083957 | 0.964885708  | 3.96E-07 |
| TUCP_002914 | XLOC_125404 | ENSRNOT00000046639 | 0.965815402  | 3.47E-07 |
| TUCP_002914 | XLOC_125404 | ENSRNOT00000064930 | 0.965473146  | 3.65E-07 |
| TUCP_002914 | XLOC_125404 | ENSRNOT00000079996 | 0.97427384   | 8.50E-08 |
| TUCP_002914 | XLOC_125404 | ENSRNOT00000024548 | 0.984820981  | 6.19E-09 |
| TUCP_002838 | XLOC_120254 | ENSRNOT00000050655 | 0.961386953  | 6.34E-07 |
| TUCP_002838 | XLOC_120254 | ENSRNOT00000061249 | 0.96096337   | 6.69E-07 |
| TUCP_002529 | XLOC_107072 | ENSRNOT00000035672 | 0.957796249  | 9.82E-07 |
| TUCP_003432 | XLOC_148234 | ENSRNOT00000054685 | 0.953228275  | 1.63E-06 |
| TUCP_003432 | XLOC_148234 | ENSRNOT0000001893  | 0.95219261   | 1.81E-06 |
| TUCP_003432 | XLOC_148234 | ENSRNOT00000087934 | 0.964012369  | 4.47E-07 |
| TUCP_003432 | XLOC_148234 | ENSRNOT00000057953 | 0.954026749  | 1.50E-06 |
| TUCP_003432 | XLOC_148234 | ENSRNOT00000002188 | 0.960347001  | 7.22E-07 |
| TUCP_003432 | XLOC_148234 | ENSRNOT00000016485 | 0.958199896  | 9.37E-07 |
| TUCP_003432 | XLOC_148234 | ENSRNOT00000032843 | 0.956408425  | 1.15E-06 |
| TUCP_003432 | XLOC_148234 | ENSRNOT00000064625 | 0.959489924  | 8.03E-07 |
| TUCP_003432 | XLOC_148234 | ENSRNOT00000008244 | 0.958989729  | 8.53E-07 |
| TUCP_003432 | XLOC_148234 | ENSRNOT00000042638 | 0.952943129  | 1.68E-06 |
| TUCP_003432 | XLOC_148234 | ENSRNOT00000022578 | 0.953650675  | 1.56E-06 |
| TUCP_002912 | XLOC_125173 | ENSRNOT00000000474 | 0.958416539  | 9.13E-07 |
| TUCP_002912 | XLOC_125173 | ENSRNOT00000009436 | 0.950735669  | 2.10E-06 |
| TUCP_002912 | XLOC_125173 | ENSRNOT00000009532 | 0.960572615  | 7.02E-07 |
| TUCP_002912 | XLOC_125173 | ENSRNOT00000024413 | 0.984492204  | 6.88E-09 |
| TUCP_002913 | XLOC_125403 | ENSRNOT00000055735 | 0.950225795  | 2.21E-06 |
| TUCP_002913 | XLOC_125403 | ENSRNOT00000068405 | 0.966064358  | 3.35E-07 |
| TUCP_002913 | XLOC_125403 | ENSRNOT00000026941 | 0.950418594  | 2.17E-06 |
| TUCP_002913 | XLOC_125403 | ENSRNOT00000019213 | 0.960425655  | 7.15E-07 |
| TUCP_002913 | XLOC_125403 | ENSRNOT00000021592 | 0.960762313  | 6.86E-07 |
| TUCP_002913 | XLOC_125403 | ENSRNOT00000005220 | 0.950285747  | 2.20E-06 |
| TUCP_002913 | XLOC_125403 | ENSRNOT00000044635 | 0.967695656  | 2.62E-07 |
| TUCP_002913 | XLOC_125403 | ENSRNOT00000065947 | 0.950602714  | 2.13E-06 |
| TUCP_002913 | XLOC_125403 | ENSRNOT00000021116 | 0.964042878  | 4.46E-07 |
| TUCP_002913 | XLOC_125403 | ENSRNOT00000092418 | 0.963622169  | 4.72E-07 |

|             |             |                    |              |          |
|-------------|-------------|--------------------|--------------|----------|
| TUCP_002913 | XLOC_125403 | ENSRNOT00000082100 | 0.965964016  | 3.40E-07 |
| TUCP_002913 | XLOC_125403 | ENSRNOT00000076285 | 0.952798454  | 1.70E-06 |
| TUCP_002913 | XLOC_125403 | ENSRNOT00000054674 | 0.97582426   | 6.25E-08 |
| TUCP_002913 | XLOC_125403 | ENSRNOT00000013758 | 0.966660453  | 3.07E-07 |
| TUCP_002913 | XLOC_125403 | ENSRNOT00000015076 | 0.9694691    | 1.98E-07 |
| TUCP_002913 | XLOC_125403 | ENSRNOT00000015073 | 0.962845709  | 5.24E-07 |
| TUCP_002913 | XLOC_125403 | ENSRNOT00000013046 | -0.955178884 | 1.32E-06 |
| TUCP_002913 | XLOC_125403 | ENSRNOT00000079746 | 0.960234784  | 7.32E-07 |
| TUCP_002913 | XLOC_125403 | ENSRNOT00000071573 | 0.961669668  | 6.11E-07 |
| TUCP_002913 | XLOC_125403 | ENSRNOT00000088125 | 0.950935291  | 2.06E-06 |
| TUCP_002913 | XLOC_125403 | ENSRNOT00000023696 | 0.951101556  | 2.03E-06 |
| TUCP_002913 | XLOC_125403 | ENSRNOT00000065300 | 0.95896947   | 8.55E-07 |
| TUCP_002913 | XLOC_125403 | ENSRNOT00000082691 | 0.963931922  | 4.52E-07 |
| TUCP_002913 | XLOC_125403 | ENSRNOT00000035989 | 0.986016128  | 4.11E-09 |
| TUCP_002913 | XLOC_125403 | ENSRNOT00000082699 | 0.95109838   | 2.03E-06 |
| TUCP_002913 | XLOC_125403 | ENSRNOT00000010242 | 0.963866992  | 4.56E-07 |
| TUCP_002913 | XLOC_125403 | ENSRNOT00000028842 | 0.950331302  | 2.19E-06 |
| TUCP_002913 | XLOC_125403 | ENSRNOT00000027828 | 0.968337176  | 2.38E-07 |
| TUCP_002913 | XLOC_125403 | ENSRNOT00000083215 | 0.967804384  | 2.58E-07 |
| TUCP_002913 | XLOC_125403 | ENSRNOT00000084012 | 0.970753246  | 1.60E-07 |
| TUCP_002913 | XLOC_125403 | ENSRNOT00000022534 | 0.95452952   | 1.42E-06 |
| TUCP_002913 | XLOC_125403 | ENSRNOT00000055187 | 0.976720936  | 5.18E-08 |
| TUCP_002913 | XLOC_125403 | ENSRNOT00000005684 | 0.956103842  | 1.19E-06 |
| TUCP_002913 | XLOC_125403 | ENSRNOT00000013260 | 0.95652936   | 1.14E-06 |
| TUCP_002913 | XLOC_125403 | ENSRNOT00000015203 | 0.952430252  | 1.77E-06 |
| TUCP_002913 | XLOC_125403 | ENSRNOT00000067822 | 0.955382557  | 1.29E-06 |
| TUCP_002913 | XLOC_125403 | ENSRNOT00000068633 | 0.964883516  | 3.96E-07 |
| TUCP_002913 | XLOC_125403 | ENSRNOT00000057313 | 0.973896934  | 9.14E-08 |
| TUCP_002913 | XLOC_125403 | ENSRNOT00000091909 | 0.953788438  | 1.54E-06 |
| TUCP_002913 | XLOC_125403 | ENSRNOT00000034503 | 0.95050765   | 2.15E-06 |
| TUCP_002913 | XLOC_125403 | ENSRNOT00000022213 | 0.950666616  | 2.12E-06 |
| TUCP_002913 | XLOC_125403 | ENSRNOT00000022342 | 0.960616955  | 6.98E-07 |
| TUCP_002913 | XLOC_125403 | ENSRNOT00000088509 | 0.961437125  | 6.29E-07 |
| TUCP_002913 | XLOC_125403 | ENSRNOT00000005355 | 0.952981968  | 1.67E-06 |
| TUCP_002913 | XLOC_125403 | ENSRNOT00000016739 | 0.991254651  | 3.97E-10 |
| TUCP_002913 | XLOC_125403 | ENSRNOT00000042799 | 0.965635027  | 3.56E-07 |
| TUCP_002913 | XLOC_125403 | ENSRNOT00000009221 | 0.99045901   | 6.13E-10 |
| TUCP_002913 | XLOC_125403 | ENSRNOT00000079895 | 0.958091055  | 9.49E-07 |
| TUCP_002913 | XLOC_125403 | ENSRNOT00000025981 | 0.966026896  | 3.37E-07 |
| TUCP_002913 | XLOC_125403 | ENSRNOT00000050138 | 0.963973174  | 4.50E-07 |
| TUCP_002913 | XLOC_125403 | ENSRNOT00000045488 | 0.95162536   | 1.92E-06 |
| TUCP_002913 | XLOC_125403 | ENSRNOT00000039842 | 0.980254085  | 2.29E-08 |
| TUCP_002913 | XLOC_125403 | ENSRNOT00000093174 | 0.952423535  | 1.77E-06 |
| TUCP_002913 | XLOC_125403 | ENSRNOT00000017629 | 0.971019887  | 1.53E-07 |
| TUCP_002913 | XLOC_125403 | ENSRNOT00000057826 | 0.962198245  | 5.70E-07 |
| TUCP_002913 | XLOC_125403 | ENSRNOT00000087226 | 0.967314614  | 2.78E-07 |
| TUCP_002913 | XLOC_125403 | ENSRNOT00000004508 | 0.963445936  | 4.83E-07 |
| TUCP_002913 | XLOC_125403 | ENSRNOT00000027910 | 0.954108855  | 1.48E-06 |
| TUCP_002913 | XLOC_125403 | ENSRNOT00000078475 | 0.956484465  | 1.14E-06 |
| TUCP_002913 | XLOC_125403 | ENSRNOT00000040513 | 0.97277466   | 1.13E-07 |
| TUCP_002913 | XLOC_125403 | ENSRNOT00000004740 | 0.985183202  | 5.49E-09 |

|             |             |                    |              |          |
|-------------|-------------|--------------------|--------------|----------|
| TUCP_002913 | XLOC_125403 | ENSRNOT0000000302  | 0.966745758  | 3.03E-07 |
| TUCP_002913 | XLOC_125403 | ENSRNOT00000064900 | 0.952602461  | 1.74E-06 |
| TUCP_002913 | XLOC_125403 | ENSRNOT00000003840 | 0.950674422  | 2.12E-06 |
| TUCP_002913 | XLOC_125403 | ENSRNOT00000076729 | 0.961642297  | 6.13E-07 |
| TUCP_002913 | XLOC_125403 | ENSRNOT00000027615 | 0.967702562  | 2.62E-07 |
| TUCP_002913 | XLOC_125403 | ENSRNOT00000028431 | 0.962601378  | 5.41E-07 |
| TUCP_002913 | XLOC_125403 | ENSRNOT00000025092 | 0.955114464  | 1.33E-06 |
| TUCP_002913 | XLOC_125403 | ENSRNOT00000090376 | 0.962776921  | 5.29E-07 |
| TUCP_002913 | XLOC_125403 | ENSRNOT00000024639 | 0.951219511  | 2.00E-06 |
| TUCP_002913 | XLOC_125403 | ENSRNOT00000007091 | 0.954300305  | 1.45E-06 |
| TUCP_002913 | XLOC_125403 | ENSRNOT00000031891 | -0.954173295 | 1.47E-06 |
| TUCP_002913 | XLOC_125403 | ENSRNOT00000090424 | 0.957677167  | 9.96E-07 |
| TUCP_002913 | XLOC_125403 | ENSRNOT00000088196 | 0.957083329  | 1.07E-06 |
| TUCP_002913 | XLOC_125403 | ENSRNOT00000088191 | 0.982724985  | 1.18E-08 |
| TUCP_002913 | XLOC_125403 | ENSRNOT00000010992 | 0.96660891   | 3.09E-07 |
| TUCP_002913 | XLOC_125403 | ENSRNOT00000076669 | 0.961704726  | 6.08E-07 |
| TUCP_002913 | XLOC_125403 | ENSRNOT00000085596 | 0.968575491  | 2.29E-07 |
| TUCP_002913 | XLOC_125403 | ENSRNOT00000067984 | 0.950856569  | 2.08E-06 |
| TUCP_002913 | XLOC_125403 | ENSRNOT00000031230 | 0.953534554  | 1.58E-06 |
| TUCP_002913 | XLOC_125403 | ENSRNOT00000059458 | 0.953863333  | 1.52E-06 |
| TUCP_002913 | XLOC_125403 | ENSRNOT00000052288 | 0.974626065  | 7.94E-08 |
| TUCP_002913 | XLOC_125403 | ENSRNOT00000016740 | 0.950887101  | 2.07E-06 |
| TUCP_002913 | XLOC_125403 | ENSRNOT00000080695 | 0.951178165  | 2.01E-06 |
| TUCP_002913 | XLOC_125403 | ENSRNOT00000009342 | 0.959722405  | 7.80E-07 |
| TUCP_002913 | XLOC_125403 | ENSRNOT00000075279 | 0.95255077   | 1.75E-06 |
| TUCP_002913 | XLOC_125403 | ENSRNOT00000004412 | 0.959882161  | 7.65E-07 |
| TUCP_002913 | XLOC_125403 | ENSRNOT00000067181 | 0.950774694  | 2.10E-06 |
| TUCP_002913 | XLOC_125403 | ENSRNOT00000005389 | 0.955053811  | 1.34E-06 |
| TUCP_002913 | XLOC_125403 | ENSRNOT00000084595 | 0.960965409  | 6.68E-07 |
| TUCP_002913 | XLOC_125403 | ENSRNOT00000034704 | 0.950062903  | 2.25E-06 |
| TUCP_002913 | XLOC_125403 | ENSRNOT00000066593 | 0.971703723  | 1.36E-07 |
| TUCP_002913 | XLOC_125403 | ENSRNOT00000036750 | 0.954246863  | 1.46E-06 |
| TUCP_002913 | XLOC_125403 | ENSRNOT00000027964 | 0.973521277  | 9.81E-08 |
| TUCP_002913 | XLOC_125403 | ENSRNOT00000003182 | 0.968418103  | 2.35E-07 |
| TUCP_002913 | XLOC_125403 | ENSRNOT00000021674 | 0.959662508  | 7.86E-07 |
| TUCP_002913 | XLOC_125403 | ENSRNOT00000067867 | 0.957404633  | 1.03E-06 |
| TUCP_002913 | XLOC_125403 | ENSRNOT00000004140 | 0.952808722  | 1.70E-06 |
| TUCP_002855 | XLOC_120912 | ENSRNOT00000021650 | 0.965964964  | 3.40E-07 |
| TUCP_002855 | XLOC_120912 | ENSRNOT00000021851 | 0.952426623  | 1.77E-06 |
| TUCP_002855 | XLOC_120912 | ENSRNOT00000072592 | 0.972294656  | 1.23E-07 |
| TUCP_002855 | XLOC_120912 | ENSRNOT00000051445 | 0.956469987  | 1.14E-06 |
| TUCP_002855 | XLOC_120912 | ENSRNOT00000044376 | 0.952369053  | 1.78E-06 |
| TUCP_002855 | XLOC_120912 | ENSRNOT00000035346 | -0.961716548 | 6.07E-07 |
| TUCP_002851 | XLOC_120694 | ENSRNOT00000009803 | 0.96353356   | 4.78E-07 |
| TUCP_002851 | XLOC_120694 | ENSRNOT00000004524 | 0.951404631  | 1.97E-06 |
| TUCP_002851 | XLOC_120694 | ENSRNOT00000007379 | 0.950968976  | 2.05E-06 |
| TUCP_002851 | XLOC_120694 | ENSRNOT00000016519 | 0.955350854  | 1.30E-06 |
| TUCP_002851 | XLOC_120694 | ENSRNOT00000012560 | 0.957770723  | 9.85E-07 |
| TUCP_002851 | XLOC_120694 | ENSRNOT00000085756 | 0.965776172  | 3.49E-07 |
| TUCP_002851 | XLOC_120694 | ENSRNOT00000025372 | 0.962193728  | 5.71E-07 |
| TUCP_002851 | XLOC_120694 | ENSRNOT00000065618 | 0.950489139  | 2.16E-06 |

|             |             |                    |              |          |
|-------------|-------------|--------------------|--------------|----------|
| TUCP_002851 | XLOC_120694 | ENSRNOT00000017668 | 0.969083411  | 2.11E-07 |
| TUCP_002850 | XLOC_120694 | ENSRNOT00000025983 | 0.958132088  | 9.44E-07 |
| TUCP_002850 | XLOC_120694 | ENSRNOT00000044885 | 0.951909197  | 1.87E-06 |
| TUCP_002850 | XLOC_120694 | ENSRNOT00000074323 | 0.961401182  | 6.32E-07 |
| TUCP_002850 | XLOC_120694 | ENSRNOT00000058362 | 0.967693309  | 2.63E-07 |
| TUCP_002850 | XLOC_120694 | ENSRNOT00000009708 | -0.951760615 | 1.90E-06 |
| TUCP_002850 | XLOC_120694 | ENSRNOT00000055669 | 0.950964669  | 2.06E-06 |
| TUCP_002850 | XLOC_120694 | ENSRNOT00000011350 | 0.970449547  | 1.69E-07 |
| TUCP_002850 | XLOC_120694 | ENSRNOT00000016129 | 0.960465346  | 7.12E-07 |
| TUCP_002850 | XLOC_120694 | ENSRNOT00000017668 | 0.954726707  | 1.39E-06 |
| TUCP_002850 | XLOC_120694 | ENSRNOT00000017312 | 0.978572713  | 3.43E-08 |
| TUCP_002850 | XLOC_120694 | ENSRNOT00000040069 | 0.959211689  | 8.30E-07 |
| TUCP_002850 | XLOC_120694 | ENSRNOT00000008757 | 0.95221584   | 1.81E-06 |
| TUCP_002850 | XLOC_120694 | ENSRNOT00000004762 | 0.960122989  | 7.43E-07 |
| TUCP_002850 | XLOC_120694 | ENSRNOT00000025223 | 0.954380975  | 1.44E-06 |
| TUCP_002850 | XLOC_120694 | ENSRNOT00000076872 | 0.956792107  | 1.10E-06 |
| TUCP_002850 | XLOC_120694 | ENSRNOT00000085519 | 0.951894354  | 1.87E-06 |
| TUCP_002850 | XLOC_120694 | ENSRNOT00000040476 | 0.961625682  | 6.14E-07 |
| TUCP_002850 | XLOC_120694 | ENSRNOT00000009803 | 0.964960619  | 3.92E-07 |
| TUCP_002850 | XLOC_120694 | ENSRNOT00000029125 | 0.953395752  | 1.60E-06 |
| TUCP_002850 | XLOC_120694 | ENSRNOT00000032780 | 0.95278028   | 1.71E-06 |
| TUCP_002850 | XLOC_120694 | ENSRNOT00000027537 | 0.960411678  | 7.16E-07 |
| TUCP_002850 | XLOC_120694 | ENSRNOT00000083369 | 0.972029286  | 1.29E-07 |
| TUCP_002850 | XLOC_120694 | ENSRNOT00000014814 | 0.960404678  | 7.17E-07 |
| TUCP_002850 | XLOC_120694 | ENSRNOT00000087095 | 0.956997127  | 1.08E-06 |
| TUCP_002850 | XLOC_120694 | ENSRNOT00000018533 | 0.974201976  | 8.62E-08 |
| TUCP_002850 | XLOC_120694 | ENSRNOT00000081981 | 0.952173811  | 1.82E-06 |
| TUCP_002850 | XLOC_120694 | ENSRNOT00000086633 | 0.959700092  | 7.82E-07 |
| TUCP_002850 | XLOC_120694 | ENSRNOT00000085756 | 0.987355718  | 2.49E-09 |
| TUCP_002850 | XLOC_120694 | ENSRNOT00000016519 | 0.956686223  | 1.12E-06 |
| TUCP_002850 | XLOC_120694 | ENSRNOT00000008982 | 0.960455374  | 7.13E-07 |
| TUCP_002850 | XLOC_120694 | ENSRNOT00000025372 | 0.951466208  | 1.95E-06 |
| TUCP_002850 | XLOC_120694 | ENSRNOT00000019519 | 0.962572943  | 5.43E-07 |
| TUCP_002850 | XLOC_120694 | ENSRNOT00000078102 | 0.957596614  | 1.01E-06 |
| TUCP_001745 | XLOC_072232 | ENSRNOT00000050038 | 0.970042555  | 1.81E-07 |
| TUCP_001745 | XLOC_072232 | ENSRNOT00000012413 | 0.959125688  | 8.39E-07 |
| TUCP_001745 | XLOC_072232 | ENSRNOT00000029531 | -0.973510536 | 9.83E-08 |
| TUCP_001745 | XLOC_072232 | ENSRNOT00000073792 | 0.958693332  | 8.84E-07 |
| TUCP_002859 | XLOC_121721 | ENSRNOT00000076169 | -0.952046247 | 1.84E-06 |
| TUCP_002859 | XLOC_121721 | ENSRNOT00000077458 | 0.974685742  | 7.85E-08 |
| TUCP_001062 | XLOC_040481 | ENSRNOT00000026949 | -0.950267744 | 2.20E-06 |
| TUCP_001062 | XLOC_040481 | ENSRNOT00000048914 | 0.954869175  | 1.37E-06 |
| TUCP_001062 | XLOC_040481 | ENSRNOT00000074939 | 0.950143696  | 2.23E-06 |
| TUCP_001062 | XLOC_040481 | ENSRNOT00000078445 | -0.955374146 | 1.29E-06 |
| TUCP_001062 | XLOC_040481 | ENSRNOT00000023326 | 0.967009955  | 2.91E-07 |
| TUCP_001062 | XLOC_040481 | ENSRNOT00000012056 | 0.956280917  | 1.17E-06 |
| TUCP_001062 | XLOC_040481 | ENSRNOT00000013026 | 0.951273986  | 1.99E-06 |
| TUCP_001062 | XLOC_040481 | ENSRNOT00000005228 | 0.962106218  | 5.77E-07 |
| TUCP_001062 | XLOC_040481 | ENSRNOT00000021592 | 0.962081812  | 5.79E-07 |
| TUCP_001062 | XLOC_040481 | ENSRNOT00000082699 | 0.950814667  | 2.09E-06 |
| TUCP_001062 | XLOC_040481 | ENSRNOT00000000343 | 0.958955992  | 8.56E-07 |

|             |             |                    |              |          |
|-------------|-------------|--------------------|--------------|----------|
| TUCP_001062 | XLOC_040481 | ENSRNOT00000009129 | 0.966325226  | 3.22E-07 |
| TUCP_001062 | XLOC_040481 | ENSRNOT00000006195 | 0.957094608  | 1.07E-06 |
| TUCP_001062 | XLOC_040481 | ENSRNOT00000004698 | 0.963506421  | 4.79E-07 |
| TUCP_001062 | XLOC_040481 | ENSRNOT00000066670 | 0.963929846  | 4.53E-07 |
| TUCP_001062 | XLOC_040481 | ENSRNOT00000026382 | 0.965330809  | 3.72E-07 |
| TUCP_001062 | XLOC_040481 | ENSRNOT00000017012 | 0.957751099  | 9.87E-07 |
| TUCP_001062 | XLOC_040481 | ENSRNOT00000005942 | 0.963156336  | 5.03E-07 |
| TUCP_001062 | XLOC_040481 | ENSRNOT00000057814 | 0.954031586  | 1.50E-06 |
| TUCP_001062 | XLOC_040481 | ENSRNOT00000012463 | -0.959882026 | 7.65E-07 |
| TUCP_001062 | XLOC_040481 | ENSRNOT00000013046 | -0.96362994  | 4.71E-07 |
| TUCP_001062 | XLOC_040481 | ENSRNOT00000086812 | 0.968201301  | 2.43E-07 |
| TUCP_001062 | XLOC_040481 | ENSRNOT00000028646 | 0.962906581  | 5.20E-07 |
| TUCP_001062 | XLOC_040481 | ENSRNOT00000011384 | 0.968935159  | 2.16E-07 |
| TUCP_001062 | XLOC_040481 | ENSRNOT00000084661 | 0.952596852  | 1.74E-06 |
| TUCP_001062 | XLOC_040481 | ENSRNOT00000027944 | 0.954664923  | 1.40E-06 |
| TUCP_001062 | XLOC_040481 | ENSRNOT00000010242 | 0.963323268  | 4.91E-07 |
| TUCP_001062 | XLOC_040481 | ENSRNOT00000028842 | 0.990543207  | 5.86E-10 |
| TUCP_001062 | XLOC_040481 | ENSRNOT00000004003 | 0.960162856  | 7.39E-07 |
| TUCP_001062 | XLOC_040481 | ENSRNOT00000011622 | 0.981927323  | 1.47E-08 |
| TUCP_001062 | XLOC_040481 | ENSRNOT00000085648 | 0.953852801  | 1.53E-06 |
| TUCP_001062 | XLOC_040481 | ENSRNOT00000016954 | 0.950753893  | 2.10E-06 |
| TUCP_001062 | XLOC_040481 | ENSRNOT00000022839 | 0.955080802  | 1.34E-06 |
| TUCP_001062 | XLOC_040481 | ENSRNOT00000083215 | 0.954843066  | 1.37E-06 |
| TUCP_001062 | XLOC_040481 | ENSRNOT00000093640 | 0.978044202  | 3.87E-08 |
| TUCP_001062 | XLOC_040481 | ENSRNOT00000005684 | 0.954607574  | 1.41E-06 |
| TUCP_001062 | XLOC_040481 | ENSRNOT00000078500 | 0.95976285   | 7.76E-07 |
| TUCP_001062 | XLOC_040481 | ENSRNOT00000010385 | -0.9757475   | 6.34E-08 |
| TUCP_001062 | XLOC_040481 | ENSRNOT00000036646 | 0.963629839  | 4.71E-07 |
| TUCP_001062 | XLOC_040481 | ENSRNOT00000025196 | -0.97838258  | 3.59E-08 |
| TUCP_001062 | XLOC_040481 | ENSRNOT00000012895 | 0.966844979  | 2.98E-07 |
| TUCP_001062 | XLOC_040481 | ENSRNOT00000034503 | 0.952408295  | 1.77E-06 |
| TUCP_001062 | XLOC_040481 | ENSRNOT00000090918 | 0.952667868  | 1.73E-06 |
| TUCP_001062 | XLOC_040481 | ENSRNOT00000039852 | 0.964312639  | 4.29E-07 |
| TUCP_001062 | XLOC_040481 | ENSRNOT00000059157 | 0.963181144  | 5.01E-07 |
| TUCP_001062 | XLOC_040481 | ENSRNOT00000054874 | 0.958366091  | 9.19E-07 |
| TUCP_001062 | XLOC_040481 | ENSRNOT00000028070 | 0.958452642  | 9.09E-07 |
| TUCP_001062 | XLOC_040481 | ENSRNOT00000022213 | 0.950998902  | 2.05E-06 |
| TUCP_001062 | XLOC_040481 | ENSRNOT00000020437 | 0.970093556  | 1.79E-07 |
| TUCP_001062 | XLOC_040481 | ENSRNOT00000073346 | 0.959855763  | 7.68E-07 |
| TUCP_001062 | XLOC_040481 | ENSRNOT00000010898 | 0.977557891  | 4.32E-08 |
| TUCP_001062 | XLOC_040481 | ENSRNOT00000005355 | 0.961178945  | 6.51E-07 |
| TUCP_001062 | XLOC_040481 | ENSRNOT00000026087 | -0.967082842 | 2.88E-07 |
| TUCP_001062 | XLOC_040481 | ENSRNOT0000001242  | 0.95955351   | 7.96E-07 |
| TUCP_001062 | XLOC_040481 | ENSRNOT00000078639 | 0.952922826  | 1.68E-06 |
| TUCP_001062 | XLOC_040481 | ENSRNOT00000078589 | -0.955627059 | 1.26E-06 |
| TUCP_001062 | XLOC_040481 | ENSRNOT00000029419 | 0.951507907  | 1.95E-06 |
| TUCP_001062 | XLOC_040481 | ENSRNOT00000085730 | 0.956200802  | 1.18E-06 |
| TUCP_001062 | XLOC_040481 | ENSRNOT00000084240 | 0.960374149  | 7.20E-07 |
| TUCP_001062 | XLOC_040481 | ENSRNOT00000005911 | 0.95879188   | 8.73E-07 |
| TUCP_001062 | XLOC_040481 | ENSRNOT00000003991 | 0.951680687  | 1.91E-06 |
| TUCP_001062 | XLOC_040481 | ENSRNOT00000009440 | -0.974988    | 7.39E-08 |

|             |             |                    |              |          |
|-------------|-------------|--------------------|--------------|----------|
| TUCP_001062 | XLOC_040481 | ENSRNOT00000045984 | 0.961925476  | 5.91E-07 |
| TUCP_001062 | XLOC_040481 | ENSRNOT00000022646 | 0.970963075  | 1.55E-07 |
| TUCP_001062 | XLOC_040481 | ENSRNOT00000064900 | 0.975252346  | 7.01E-08 |
| TUCP_001062 | XLOC_040481 | ENSRNOT00000005262 | 0.961588706  | 6.17E-07 |
| TUCP_001062 | XLOC_040481 | ENSRNOT00000076729 | 0.951564669  | 1.93E-06 |
| TUCP_001062 | XLOC_040481 | ENSRNOT00000046273 | 0.962664924  | 5.37E-07 |
| TUCP_001062 | XLOC_040481 | ENSRNOT00000074075 | 0.954815365  | 1.37E-06 |
| TUCP_001062 | XLOC_040481 | ENSRNOT00000090170 | 0.956791964  | 1.10E-06 |
| TUCP_001062 | XLOC_040481 | ENSRNOT00000049538 | 0.974083625  | 8.82E-08 |
| TUCP_001062 | XLOC_040481 | ENSRNOT00000087725 | 0.967114857  | 2.87E-07 |
| TUCP_001062 | XLOC_040481 | ENSRNOT00000066736 | 0.965720635  | 3.52E-07 |
| TUCP_001062 | XLOC_040481 | ENSRNOT00000025936 | -0.962368404 | 5.58E-07 |
| TUCP_001062 | XLOC_040481 | ENSRNOT00000009280 | 0.966347017  | 3.21E-07 |
| TUCP_001062 | XLOC_040481 | ENSRNOT00000015529 | 0.952713813  | 1.72E-06 |
| TUCP_001062 | XLOC_040481 | ENSRNOT00000024156 | 0.950990681  | 2.05E-06 |
| TUCP_001062 | XLOC_040481 | ENSRNOT00000044177 | 0.975267429  | 6.99E-08 |
| TUCP_001062 | XLOC_040481 | ENSRNOT00000017948 | 0.971794111  | 1.34E-07 |
| TUCP_001062 | XLOC_040481 | ENSRNOT00000090424 | 0.956529007  | 1.14E-06 |
| TUCP_001062 | XLOC_040481 | ENSRNOT00000006800 | 0.973347204  | 1.01E-07 |
| TUCP_001062 | XLOC_040481 | ENSRNOT00000092158 | 0.966640181  | 3.08E-07 |
| TUCP_001062 | XLOC_040481 | ENSRNOT00000017422 | -0.962708613 | 5.33E-07 |
| TUCP_001062 | XLOC_040481 | ENSRNOT00000084734 | 0.952915291  | 1.68E-06 |
| TUCP_001062 | XLOC_040481 | ENSRNOT00000020379 | 0.958366209  | 9.19E-07 |
| TUCP_001062 | XLOC_040481 | ENSRNOT00000076669 | 0.957315512  | 1.04E-06 |
| TUCP_001062 | XLOC_040481 | ENSRNOT00000006401 | -0.954669022 | 1.40E-06 |
| TUCP_001062 | XLOC_040481 | ENSRNOT00000025394 | 0.970273658  | 1.74E-07 |
| TUCP_001062 | XLOC_040481 | ENSRNOT00000025391 | 0.976093238  | 5.91E-08 |
| TUCP_001062 | XLOC_040481 | ENSRNOT00000086336 | 0.958832357  | 8.69E-07 |
| TUCP_001062 | XLOC_040481 | ENSRNOT00000021073 | -0.955417541 | 1.29E-06 |
| TUCP_001062 | XLOC_040481 | ENSRNOT00000025550 | -0.958486147 | 9.06E-07 |
| TUCP_001062 | XLOC_040481 | ENSRNOT00000058852 | -0.960050886 | 7.49E-07 |
| TUCP_001062 | XLOC_040481 | ENSRNOT00000004412 | 0.964005165  | 4.48E-07 |
| TUCP_001062 | XLOC_040481 | ENSRNOT00000067181 | 0.959345059  | 8.17E-07 |
| TUCP_001062 | XLOC_040481 | ENSRNOT00000077465 | 0.958359304  | 9.19E-07 |
| TUCP_001062 | XLOC_040481 | ENSRNOT00000014261 | 0.954360726  | 1.44E-06 |
| TUCP_001062 | XLOC_040481 | ENSRNOT00000024942 | 0.954735677  | 1.39E-06 |
| TUCP_001062 | XLOC_040481 | ENSRNOT00000084595 | 0.95017945   | 2.22E-06 |
| TUCP_001062 | XLOC_040481 | ENSRNOT00000034704 | 0.959316801  | 8.20E-07 |
| TUCP_001062 | XLOC_040481 | ENSRNOT00000091807 | 0.962459242  | 5.51E-07 |
| TUCP_001062 | XLOC_040481 | ENSRNOT00000011682 | -0.950228097 | 2.21E-06 |
| TUCP_001062 | XLOC_040481 | ENSRNOT00000051496 | 0.974515706  | 8.11E-08 |
| TUCP_001062 | XLOC_040481 | ENSRNOT00000067904 | 0.953023181  | 1.66E-06 |
| TUCP_001062 | XLOC_040481 | ENSRNOT00000024420 | 0.964148124  | 4.39E-07 |
| TUCP_001062 | XLOC_040481 | ENSRNOT00000074725 | 0.958695895  | 8.83E-07 |
| TUCP_001062 | XLOC_040481 | ENSRNOT00000007991 | 0.963060074  | 5.09E-07 |
| TUCP_004686 | XLOC_205932 | ENSRNOT00000093581 | 0.998299399  | 1.12E-13 |
| TUCP_004686 | XLOC_205932 | ENSRNOT00000076554 | -0.984249834 | 7.43E-09 |
| TUCP_004686 | XLOC_205932 | ENSRNOT00000077390 | 0.999959847  | 8.22E-22 |
| TUCP_004686 | XLOC_205932 | ENSRNOT00000043737 | 0.95992745   | 7.61E-07 |
| TUCP_004687 | XLOC_205978 | ENSRNOT00000060683 | -0.958134328 | 9.44E-07 |
| TUCP_004687 | XLOC_205978 | ENSRNOT00000075521 | 0.950363636  | 2.18E-06 |

|             |             |                     |              |          |
|-------------|-------------|---------------------|--------------|----------|
| TUCP_004687 | XLOC_205978 | ENSRNOT00000059854  | -0.950392283 | 2.18E-06 |
| TUCP_004687 | XLOC_205978 | ENSRNOT00000086491  | -0.957770538 | 9.85E-07 |
| TUCP_004687 | XLOC_205978 | ENSRNOT00000001597  | -0.952107043 | 1.83E-06 |
| TUCP_004687 | XLOC_205978 | ENSRNOT00000039607  | -0.953976306 | 1.51E-06 |
| TUCP_004687 | XLOC_205978 | ENSRNOT00000009468  | -0.968315959 | 2.38E-07 |
| TUCP_004687 | XLOC_205978 | ENSRNOT00000030996  | -0.956086059 | 1.19E-06 |
| TUCP_004687 | XLOC_205978 | ENSRNOT00000080174  | -0.963128471 | 5.04E-07 |
| TUCP_004687 | XLOC_205978 | ENSRNOT00000011237  | -0.96746306  | 2.72E-07 |
| TUCP_004687 | XLOC_205978 | ENSRNOT00000080418  | -0.956724137 | 1.11E-06 |
| TUCP_004687 | XLOC_205978 | ENSRNOT00000035400  | -0.961468078 | 6.27E-07 |
| TUCP_004687 | XLOC_205978 | ENSRNOT00000003087  | 0.9594704    | 8.05E-07 |
| TUCP_004687 | XLOC_205978 | ENSRNOT00000067375  | -0.95879355  | 8.73E-07 |
| TUCP_004687 | XLOC_205978 | ENSRNOT00000020197  | -0.966643116 | 3.08E-07 |
| TUCP_004687 | XLOC_205978 | ENSRNOT00000019358  | -0.960148482 | 7.40E-07 |
| TUCP_004687 | XLOC_205978 | ENSRNOT00000049349  | 0.964337854  | 4.28E-07 |
| TUCP_004687 | XLOC_205978 | ENSRNOT00000001697  | 0.959897416  | 7.64E-07 |
| TUCP_004687 | XLOC_205978 | ENSRNOT00000041237  | -0.953005151 | 1.67E-06 |
| TUCP_004687 | XLOC_205978 | ENSRNOT00000017204  | -0.975431259 | 6.77E-08 |
| TUCP_004687 | XLOC_205978 | ENSRNOT00000015476  | -0.951622573 | 1.92E-06 |
| TUCP_004687 | XLOC_205978 | ENSRNOT00000005658  | -0.954891169 | 1.36E-06 |
| TUCP_004687 | XLOC_205978 | ENSRNOT00000001859  | -0.956093986 | 1.19E-06 |
| TUCP_004687 | XLOC_205978 | ENSRNOT00000010720  | -0.955443145 | 1.28E-06 |
| TUCP_004687 | XLOC_205978 | ENSRNOT00000087011  | -0.965116549 | 3.84E-07 |
| TUCP_004687 | XLOC_205978 | ENSRNOT00000022086  | -0.968307249 | 2.39E-07 |
| TUCP_004687 | XLOC_205978 | ENSRNOT00000077727  | -0.955728426 | 1.24E-06 |
| TUCP_004687 | XLOC_205978 | ENSRNOT00000007851  | -0.963066121 | 5.09E-07 |
| TUCP_004687 | XLOC_205978 | ENSRNOT00000004391  | 0.958163326  | 9.41E-07 |
| TUCP_004687 | XLOC_205978 | ENSRNOT00000004159  | -0.957314345 | 1.04E-06 |
| TUCP_004687 | XLOC_205978 | ENSRNOT00000011130  | -0.956366189 | 1.16E-06 |
| TUCP_004687 | XLOC_205978 | ENSRNOT000000031692 | -0.96675259  | 3.03E-07 |
| TUCP_004687 | XLOC_205978 | ENSRNOT00000080013  | -0.955333935 | 1.30E-06 |
| TUCP_004687 | XLOC_205978 | ENSRNOT00000028695  | -0.976497069 | 5.43E-08 |
| TUCP_004687 | XLOC_205978 | ENSRNOT00000025683  | -0.951009284 | 2.05E-06 |
| TUCP_004687 | XLOC_205978 | ENSRNOT00000037203  | -0.961073318 | 6.59E-07 |
| TUCP_004687 | XLOC_205978 | ENSRNOT00000019056  | -0.956294675 | 1.17E-06 |
| TUCP_004687 | XLOC_205978 | ENSRNOT00000081547  | -0.95270901  | 1.72E-06 |
| TUCP_004687 | XLOC_205978 | ENSRNOT00000075400  | -0.955139106 | 1.33E-06 |
| TUCP_004687 | XLOC_205978 | ENSRNOT000000031672 | -0.962745173 | 5.31E-07 |
| TUCP_004687 | XLOC_205978 | ENSRNOT00000078884  | -0.968148774 | 2.45E-07 |
| TUCP_004687 | XLOC_205978 | ENSRNOT00000027553  | -0.970634316 | 1.64E-07 |
| TUCP_004687 | XLOC_205978 | ENSRNOT00000013295  | -0.962405437 | 5.55E-07 |
| TUCP_004687 | XLOC_205978 | ENSRNOT00000023456  | -0.960760779 | 6.86E-07 |
| TUCP_004687 | XLOC_205978 | ENSRNOT00000016012  | -0.955927962 | 1.22E-06 |
| TUCP_004687 | XLOC_205978 | ENSRNOT00000087075  | -0.957912817 | 9.69E-07 |
| TUCP_004687 | XLOC_205978 | ENSRNOT00000021621  | -0.975865777 | 6.19E-08 |
| TUCP_004687 | XLOC_205978 | ENSRNOT00000000617  | -0.971793151 | 1.34E-07 |
| TUCP_004687 | XLOC_205978 | ENSRNOT00000039177  | -0.955891056 | 1.22E-06 |
| TUCP_004687 | XLOC_205978 | ENSRNOT00000077063  | -0.954734115 | 1.39E-06 |
| TUCP_004687 | XLOC_205978 | ENSRNOT00000011432  | -0.959153821 | 8.36E-07 |
| TUCP_004687 | XLOC_205978 | ENSRNOT00000014177  | -0.96049038  | 7.09E-07 |
| TUCP_004687 | XLOC_205978 | ENSRNOT00000008274  | -0.967019801 | 2.91E-07 |



|             |             |                    |              |          |
|-------------|-------------|--------------------|--------------|----------|
| TUCP_004687 | XLOC_205978 | ENSRNOT00000019620 | -0.951209033 | 2.01E-06 |
| TUCP_004687 | XLOC_205978 | ENSRNOT00000064636 | -0.953756755 | 1.54E-06 |
| TUCP_004687 | XLOC_205978 | ENSRNOT00000018028 | -0.959325952 | 8.19E-07 |
| TUCP_004687 | XLOC_205978 | ENSRNOT00000045041 | -0.953170797 | 1.64E-06 |
| TUCP_004687 | XLOC_205978 | ENSRNOT00000079801 | -0.961008864 | 6.65E-07 |
| TUCP_004687 | XLOC_205978 | ENSRNOT00000026846 | -0.954859785 | 1.37E-06 |
| TUCP_004687 | XLOC_205978 | ENSRNOT00000001891 | -0.960492694 | 7.09E-07 |
| TUCP_004687 | XLOC_205978 | ENSRNOT0000007588  | -0.951604478 | 1.93E-06 |
| TUCP_004687 | XLOC_205978 | ENSRNOT00000030082 | 0.951712895  | 1.91E-06 |
| TUCP_004687 | XLOC_205978 | ENSRNOT00000082730 | -0.952328022 | 1.79E-06 |
| TUCP_004687 | XLOC_205978 | ENSRNOT00000082739 | -0.965119206 | 3.84E-07 |
| TUCP_004687 | XLOC_205978 | ENSRNOT00000034983 | -0.965558772 | 3.60E-07 |
| TUCP_004687 | XLOC_205978 | ENSRNOT00000056644 | -0.954513952 | 1.42E-06 |
| TUCP_004687 | XLOC_205978 | ENSRNOT00000012179 | -0.962626753 | 5.39E-07 |
| TUCP_004687 | XLOC_205978 | ENSRNOT00000075630 | -0.958890184 | 8.63E-07 |
| TUCP_004687 | XLOC_205978 | ENSRNOT00000023463 | -0.965761845 | 3.50E-07 |
| TUCP_004687 | XLOC_205978 | ENSRNOT00000034266 | -0.952533962 | 1.75E-06 |
| TUCP_004687 | XLOC_205978 | ENSRNOT00000014211 | -0.952662083 | 1.73E-06 |
| TUCP_004687 | XLOC_205978 | ENSRNOT00000046490 | -0.972025699 | 1.29E-07 |
| TUCP_004687 | XLOC_205978 | ENSRNOT00000022637 | -0.952993671 | 1.67E-06 |
| TUCP_004687 | XLOC_205978 | ENSRNOT00000012495 | -0.971309381 | 1.46E-07 |
| TUCP_004687 | XLOC_205978 | ENSRNOT00000073005 | -0.957102527 | 1.06E-06 |
| TUCP_004687 | XLOC_205978 | ENSRNOT00000072841 | -0.956094033 | 1.19E-06 |
| TUCP_004687 | XLOC_205978 | ENSRNOT00000024801 | -0.960453122 | 7.13E-07 |
| TUCP_004687 | XLOC_205978 | ENSRNOT00000084202 | -0.951395465 | 1.97E-06 |
| TUCP_004687 | XLOC_205978 | ENSRNOT00000082124 | -0.954326179 | 1.45E-06 |
| TUCP_004687 | XLOC_205978 | ENSRNOT00000013535 | -0.967129855 | 2.86E-07 |
| TUCP_004687 | XLOC_205978 | ENSRNOT00000067391 | -0.951355143 | 1.98E-06 |
| TUCP_004687 | XLOC_205978 | ENSRNOT00000013344 | -0.956455327 | 1.15E-06 |
| TUCP_004687 | XLOC_205978 | ENSRNOT00000070886 | -0.950190122 | 2.22E-06 |
| TUCP_004687 | XLOC_205978 | ENSRNOT00000056079 | -0.965450966 | 3.66E-07 |
| TUCP_004687 | XLOC_205978 | ENSRNOT00000014044 | -0.95852582  | 9.01E-07 |
| TUCP_004687 | XLOC_205978 | ENSRNOT00000029179 | -0.953773896 | 1.54E-06 |
| TUCP_004687 | XLOC_205978 | ENSRNOT00000026724 | -0.953055013 | 1.66E-06 |
| TUCP_004687 | XLOC_205978 | ENSRNOT00000003106 | -0.960412302 | 7.16E-07 |
| TUCP_004687 | XLOC_205978 | ENSRNOT00000015297 | -0.974186628 | 8.64E-08 |
| TUCP_004687 | XLOC_205978 | ENSRNOT00000003667 | -0.96054837  | 7.04E-07 |
| TUCP_004687 | XLOC_205978 | ENSRNOT00000012260 | -0.950686328 | 2.11E-06 |
| TUCP_004687 | XLOC_205978 | ENSRNOT00000073466 | 0.961059797  | 6.60E-07 |
| TUCP_004687 | XLOC_205978 | ENSRNOT00000024981 | -0.970832502 | 1.58E-07 |
| TUCP_004687 | XLOC_205978 | ENSRNOT00000004351 | -0.951205649 | 2.01E-06 |
| TUCP_004687 | XLOC_205978 | ENSRNOT00000035513 | -0.956866161 | 1.09E-06 |
| TUCP_004687 | XLOC_205978 | ENSRNOT00000089016 | -0.979524823 | 2.74E-08 |
| TUCP_004687 | XLOC_205978 | ENSRNOT00000020543 | -0.952954562 | 1.68E-06 |
| TUCP_004687 | XLOC_205978 | ENSRNOT00000004196 | 0.958342757  | 9.21E-07 |
| TUCP_004687 | XLOC_205978 | ENSRNOT00000013778 | -0.952405972 | 1.78E-06 |
| TUCP_004687 | XLOC_205978 | ENSRNOT00000005608 | -0.956302729 | 1.17E-06 |
| TUCP_004687 | XLOC_205978 | ENSRNOT00000000812 | -0.966034228 | 3.36E-07 |
| TUCP_004687 | XLOC_205978 | ENSRNOT00000007882 | -0.973105007 | 1.06E-07 |
| TUCP_004687 | XLOC_205978 | ENSRNOT00000006946 | -0.967903981 | 2.54E-07 |
| TUCP_004687 | XLOC_205978 | ENSRNOT00000025104 | -0.965828169 | 3.46E-07 |

|             |             |                    |              |          |
|-------------|-------------|--------------------|--------------|----------|
| TUCP_004687 | XLOC_205978 | ENSRNOT00000088502 | -0.954506133 | 1.42E-06 |
| TUCP_004687 | XLOC_205978 | ENSRNOT00000002645 | -0.960087618 | 7.46E-07 |
| TUCP_004687 | XLOC_205978 | ENSRNOT00000015759 | -0.963293773 | 4.93E-07 |
| TUCP_004687 | XLOC_205978 | ENSRNOT00000091541 | -0.970542481 | 1.66E-07 |
| TUCP_004687 | XLOC_205978 | ENSRNOT00000011556 | -0.953363958 | 1.61E-06 |
| TUCP_004687 | XLOC_205978 | ENSRNOT00000006217 | 0.950489162  | 2.16E-06 |
| TUCP_004687 | XLOC_205978 | ENSRNOT00000039012 | -0.978027682 | 3.89E-08 |
| TUCP_004687 | XLOC_205978 | ENSRNOT00000023854 | -0.968681534 | 2.25E-07 |
| TUCP_004687 | XLOC_205978 | ENSRNOT00000068026 | -0.960036175 | 7.51E-07 |
| TUCP_004687 | XLOC_205978 | ENSRNOT00000032893 | -0.958238877 | 9.32E-07 |
| TUCP_004687 | XLOC_205978 | ENSRNOT00000066793 | -0.956154163 | 1.19E-06 |
| TUCP_004687 | XLOC_205978 | ENSRNOT00000082894 | -0.954059032 | 1.49E-06 |
| TUCP_004687 | XLOC_205978 | ENSRNOT00000074586 | -0.960836275 | 6.79E-07 |
| TUCP_004687 | XLOC_205978 | ENSRNOT00000018405 | -0.959098823 | 8.42E-07 |
| TUCP_004687 | XLOC_205978 | ENSRNOT00000009275 | -0.979899907 | 2.50E-08 |
| TUCP_004687 | XLOC_205978 | ENSRNOT00000071929 | -0.954241093 | 1.46E-06 |
| TUCP_004687 | XLOC_205978 | ENSRNOT00000075057 | -0.958046034 | 9.54E-07 |
| TUCP_004687 | XLOC_205978 | ENSRNOT00000018155 | -0.957983347 | 9.61E-07 |
| TUCP_004687 | XLOC_205978 | ENSRNOT00000017746 | -0.956547271 | 1.13E-06 |
| TUCP_004687 | XLOC_205978 | ENSRNOT00000016286 | -0.960897542 | 6.74E-07 |
| TUCP_004687 | XLOC_205978 | ENSRNOT00000007549 | -0.967168108 | 2.84E-07 |
| TUCP_004687 | XLOC_205978 | ENSRNOT00000006709 | -0.973647292 | 9.58E-08 |
| TUCP_004687 | XLOC_205978 | ENSRNOT00000017626 | -0.971265923 | 1.47E-07 |
| TUCP_004687 | XLOC_205978 | ENSRNOT00000037946 | -0.957109576 | 1.06E-06 |
| TUCP_004687 | XLOC_205978 | ENSRNOT00000070825 | -0.957483425 | 1.02E-06 |
| TUCP_004687 | XLOC_205978 | ENSRNOT00000025134 | -0.960645977 | 6.96E-07 |
| TUCP_004687 | XLOC_205978 | ENSRNOT00000087359 | 0.95401606   | 1.50E-06 |
| TUCP_004687 | XLOC_205978 | ENSRNOT00000009345 | -0.955873959 | 1.22E-06 |
| TUCP_004687 | XLOC_205978 | ENSRNOT00000077706 | 0.975040742  | 7.32E-08 |
| TUCP_004687 | XLOC_205978 | ENSRNOT00000009327 | -0.960527668 | 7.06E-07 |
| TUCP_004687 | XLOC_205978 | ENSRNOT00000025221 | -0.961087924 | 6.58E-07 |
| TUCP_004687 | XLOC_205978 | ENSRNOT00000029704 | -0.958555478 | 8.98E-07 |
| TUCP_004687 | XLOC_205978 | ENSRNOT00000003277 | -0.956484944 | 1.14E-06 |
| TUCP_004687 | XLOC_205978 | ENSRNOT00000074515 | -0.970785092 | 1.60E-07 |
| TUCP_004687 | XLOC_205978 | ENSRNOT00000025634 | -0.95689793  | 1.09E-06 |
| TUCP_004687 | XLOC_205978 | ENSRNOT00000010031 | -0.953773461 | 1.54E-06 |
| TUCP_004687 | XLOC_205978 | ENSRNOT00000024452 | -0.980119536 | 2.37E-08 |
| TUCP_004687 | XLOC_205978 | ENSRNOT00000089294 | -0.955130108 | 1.33E-06 |
| TUCP_004687 | XLOC_205978 | ENSRNOT00000082627 | -0.969726845 | 1.90E-07 |
| TUCP_004687 | XLOC_205978 | ENSRNOT00000066120 | -0.952841733 | 1.70E-06 |
| TUCP_004687 | XLOC_205978 | ENSRNOT00000001631 | -0.959550456 | 7.97E-07 |
| TUCP_004687 | XLOC_205978 | ENSRNOT00000011797 | -0.965187635 | 3.80E-07 |
| TUCP_004687 | XLOC_205978 | ENSRNOT00000000253 | -0.965201522 | 3.79E-07 |
| TUCP_004687 | XLOC_205978 | ENSRNOT00000007855 | 0.966613732  | 3.09E-07 |
| TUCP_004687 | XLOC_205978 | ENSRNOT00000000258 | -0.950610408 | 2.13E-06 |
| TUCP_004687 | XLOC_205978 | ENSRNOT00000080222 | -0.95841253  | 9.14E-07 |
| TUCP_004687 | XLOC_205978 | ENSRNOT00000018473 | -0.970481508 | 1.68E-07 |
| TUCP_004687 | XLOC_205978 | ENSRNOT00000075283 | -0.951011513 | 2.05E-06 |
| TUCP_004687 | XLOC_205978 | ENSRNOT00000067524 | 0.961997356  | 5.86E-07 |
| TUCP_004687 | XLOC_205978 | ENSRNOT00000000717 | -0.953948749 | 1.51E-06 |
| TUCP_004687 | XLOC_205978 | ENSRNOT00000026118 | -0.952036677 | 1.84E-06 |

|             |             |                     |              |          |
|-------------|-------------|---------------------|--------------|----------|
| TUCP_004687 | XLOC_205978 | ENSRNOT00000079085  | -0.96028881  | 7.28E-07 |
| TUCP_004687 | XLOC_205978 | ENSRNOT00000025934  | -0.970963617 | 1.55E-07 |
| TUCP_004687 | XLOC_205978 | ENSRNOT00000004560  | -0.951410056 | 1.97E-06 |
| TUCP_004687 | XLOC_205978 | ENSRNOT00000019759  | 0.951105946  | 2.03E-06 |
| TUCP_004687 | XLOC_205978 | ENSRNOT00000018149  | -0.962090128 | 5.79E-07 |
| TUCP_004687 | XLOC_205978 | ENSRNOT000000082108 | -0.95711854  | 1.06E-06 |
| TUCP_004687 | XLOC_205978 | ENSRNOT00000018877  | -0.965125551 | 3.83E-07 |
| TUCP_004687 | XLOC_205978 | ENSRNOT00000029115  | -0.976158787 | 5.83E-08 |
| TUCP_004687 | XLOC_205978 | ENSRNOT00000030222  | -0.955247263 | 1.31E-06 |
| TUCP_004687 | XLOC_205978 | ENSRNOT00000016376  | -0.960420234 | 7.16E-07 |
| TUCP_004687 | XLOC_205978 | ENSRNOT00000089066  | 0.986413089  | 3.56E-09 |
| TUCP_004687 | XLOC_205978 | ENSRNOT00000017504  | 0.959453805  | 8.06E-07 |
| TUCP_004687 | XLOC_205978 | ENSRNOT00000017339  | -0.956114649 | 1.19E-06 |
| TUCP_004687 | XLOC_205978 | ENSRNOT00000020417  | -0.970500396 | 1.67E-07 |
| TUCP_004687 | XLOC_205978 | ENSRNOT00000047571  | -0.954758006 | 1.38E-06 |
| TUCP_004687 | XLOC_205978 | ENSRNOT00000017648  | -0.951177089 | 2.01E-06 |
| TUCP_004687 | XLOC_205978 | ENSRNOT00000020809  | -0.970885938 | 1.57E-07 |
| TUCP_004687 | XLOC_205978 | ENSRNOT00000072129  | -0.956030348 | 1.20E-06 |
| TUCP_004687 | XLOC_205978 | ENSRNOT00000086147  | -0.955743838 | 1.24E-06 |
| TUCP_004687 | XLOC_205978 | ENSRNOT00000001309  | -0.951517251 | 1.94E-06 |
| TUCP_004687 | XLOC_205978 | ENSRNOT00000005961  | -0.954388441 | 1.44E-06 |
| TUCP_004687 | XLOC_205978 | ENSRNOT00000015351  | -0.955660977 | 1.25E-06 |
| TUCP_004687 | XLOC_205978 | ENSRNOT00000002198  | -0.958102005 | 9.48E-07 |
| TUCP_004687 | XLOC_205978 | ENSRNOT00000080216  | -0.960240591 | 7.32E-07 |
| TUCP_004687 | XLOC_205978 | ENSRNOT00000035385  | 0.957301948  | 1.04E-06 |
| TUCP_004687 | XLOC_205978 | ENSRNOT00000074564  | 0.954753754  | 1.38E-06 |
| TUCP_004687 | XLOC_205978 | ENSRNOT00000076388  | -0.962096061 | 5.78E-07 |
| TUCP_004687 | XLOC_205978 | ENSRNOT00000014832  | -0.970165784 | 1.77E-07 |
| TUCP_004687 | XLOC_205978 | ENSRNOT00000008317  | -0.972581269 | 1.17E-07 |
| TUCP_004687 | XLOC_205978 | ENSRNOT00000023543  | -0.961757455 | 6.04E-07 |
| TUCP_004687 | XLOC_205978 | ENSRNOT00000077040  | -0.950585027 | 2.14E-06 |
| TUCP_004687 | XLOC_205978 | ENSRNOT00000028737  | -0.952285975 | 1.80E-06 |
| TUCP_004687 | XLOC_205978 | ENSRNOT00000024841  | -0.955282872 | 1.31E-06 |
| TUCP_004687 | XLOC_205978 | ENSRNOT00000018341  | -0.961887036 | 5.94E-07 |
| TUCP_004687 | XLOC_205978 | ENSRNOT00000002511  | -0.979093208 | 3.04E-08 |
| TUCP_004687 | XLOC_205978 | ENSRNOT00000082963  | -0.979020641 | 3.09E-08 |
| TUCP_004687 | XLOC_205978 | ENSRNOT00000024924  | -0.974515428 | 8.11E-08 |
| TUCP_004687 | XLOC_205978 | ENSRNOT00000072632  | -0.97507685  | 7.26E-08 |
| TUCP_004687 | XLOC_205978 | ENSRNOT00000014002  | -0.953245828 | 1.63E-06 |
| TUCP_004687 | XLOC_205978 | ENSRNOT00000086238  | 0.952941768  | 1.68E-06 |
| TUCP_004687 | XLOC_205978 | ENSRNOT00000013553  | 0.958892142  | 8.63E-07 |
| TUCP_004687 | XLOC_205978 | ENSRNOT00000010127  | 0.95236798   | 1.78E-06 |
| TUCP_004687 | XLOC_205978 | ENSRNOT00000035277  | 0.961277227  | 6.42E-07 |
| TUCP_004687 | XLOC_205978 | ENSRNOT00000035486  | -0.958913178 | 8.61E-07 |
| TUCP_004687 | XLOC_205978 | ENSRNOT00000016856  | -0.964815176 | 4.00E-07 |
| TUCP_004687 | XLOC_205978 | ENSRNOT00000010419  | 0.951032431  | 2.04E-06 |
| TUCP_004687 | XLOC_205978 | ENSRNOT00000011694  | -0.960643692 | 6.96E-07 |
| TUCP_004687 | XLOC_205978 | ENSRNOT00000024753  | -0.962633691 | 5.39E-07 |
| TUCP_004687 | XLOC_205978 | ENSRNOT00000001605  | -0.965892341 | 3.43E-07 |
| TUCP_004687 | XLOC_205978 | ENSRNOT00000068666  | -0.951991905 | 1.85E-06 |
| TUCP_004687 | XLOC_205978 | ENSRNOT00000013733  | -0.961634064 | 6.14E-07 |

|             |             |                     |              |          |
|-------------|-------------|---------------------|--------------|----------|
| TUCP_004687 | XLOC_205978 | ENSRNOT00000018043  | -0.957701309 | 9.93E-07 |
| TUCP_004687 | XLOC_205978 | ENSRNOT00000066561  | -0.954049074 | 1.49E-06 |
| TUCP_004687 | XLOC_205978 | ENSRNOT00000020990  | -0.956521119 | 1.14E-06 |
| TUCP_004687 | XLOC_205978 | ENSRNOT00000068184  | -0.961122836 | 6.55E-07 |
| TUCP_004687 | XLOC_205978 | ENSRNOT00000076485  | -0.958147477 | 9.43E-07 |
| TUCP_004687 | XLOC_205978 | ENSRNOT00000066199  | -0.967561538 | 2.68E-07 |
| TUCP_004687 | XLOC_205978 | ENSRNOT00000017998  | 0.965014004  | 3.89E-07 |
| TUCP_004687 | XLOC_205978 | ENSRNOT00000047698  | -0.95500734  | 1.35E-06 |
| TUCP_004687 | XLOC_205978 | ENSRNOT00000073294  | -0.950448956 | 2.16E-06 |
| TUCP_004687 | XLOC_205978 | ENSRNOT00000012847  | -0.956415543 | 1.15E-06 |
| TUCP_004687 | XLOC_205978 | ENSRNOT00000075474  | -0.961673333 | 6.11E-07 |
| TUCP_004687 | XLOC_205978 | ENSRNOT00000071745  | -0.959308519 | 8.21E-07 |
| TUCP_004687 | XLOC_205978 | ENSRNOT00000087556  | -0.970464819 | 1.68E-07 |
| TUCP_004687 | XLOC_205978 | ENSRNOT00000007917  | -0.950485375 | 2.16E-06 |
| TUCP_004687 | XLOC_205978 | ENSRNOT00000067905  | -0.955973058 | 1.21E-06 |
| TUCP_004687 | XLOC_205978 | ENSRNOT00000024938  | -0.961971462 | 5.88E-07 |
| TUCP_004687 | XLOC_205978 | ENSRNOT00000021677  | -0.952273721 | 1.80E-06 |
| TUCP_004687 | XLOC_205978 | ENSRNOT00000065642  | -0.971374531 | 1.44E-07 |
| TUCP_004687 | XLOC_205978 | ENSRNOT00000049048  | -0.96059815  | 7.00E-07 |
| TUCP_004687 | XLOC_205978 | ENSRNOT00000066913  | -0.973912504 | 9.11E-08 |
| TUCP_004687 | XLOC_205978 | ENSRNOT00000005286  | -0.964694339 | 4.07E-07 |
| TUCP_004687 | XLOC_205978 | ENSRNOT00000036042  | -0.956786478 | 1.10E-06 |
| TUCP_004687 | XLOC_205978 | ENSRNOT00000017618  | -0.965485459 | 3.64E-07 |
| TUCP_004687 | XLOC_205978 | ENSRNOT00000065722  | -0.97092672  | 1.56E-07 |
| TUCP_004687 | XLOC_205978 | ENSRNOT00000040981  | -0.952052871 | 1.84E-06 |
| TUCP_004687 | XLOC_205978 | ENSRNOT00000010630  | 0.968959212  | 2.15E-07 |
| TUCP_004687 | XLOC_205978 | ENSRNOT00000005255  | -0.959551278 | 7.97E-07 |
| TUCP_004687 | XLOC_205978 | ENSRNOT00000008359  | -0.98008565  | 2.39E-08 |
| TUCP_004687 | XLOC_205978 | ENSRNOT000000092641 | -0.950041626 | 2.25E-06 |
| TUCP_004687 | XLOC_205978 | ENSRNOT00000024882  | -0.95238231  | 1.78E-06 |
| TUCP_004684 | XLOC_205932 | ENSRNOT00000085310  | 0.969119567  | 2.10E-07 |
| TUCP_004682 | XLOC_205932 | ENSRNOT00000024186  | 0.973280238  | 1.03E-07 |
| TUCP_004682 | XLOC_205932 | ENSRNOT00000074753  | 0.976986389  | 4.89E-08 |
| TUCP_004682 | XLOC_205932 | ENSRNOT00000004876  | 0.964799336  | 4.01E-07 |
| TUCP_004682 | XLOC_205932 | ENSRNOT00000041904  | 0.984069335  | 7.87E-09 |
| TUCP_004682 | XLOC_205932 | ENSRNOT00000083487  | 0.973553335  | 9.75E-08 |
| TUCP_004682 | XLOC_205932 | ENSRNOT00000077990  | 0.984069335  | 7.87E-09 |
| TUCP_004682 | XLOC_205932 | ENSRNOT00000038826  | 0.98261552   | 1.21E-08 |
| TUCP_004682 | XLOC_205932 | ENSRNOT00000046842  | 0.951777452  | 1.89E-06 |
| TUCP_004682 | XLOC_205932 | ENSRNOT00000021243  | 0.967289425  | 2.79E-07 |
| TUCP_004682 | XLOC_205932 | ENSRNOT00000060250  | 0.983683704  | 8.86E-09 |
| TUCP_004682 | XLOC_205932 | ENSRNOT00000091934  | 0.984069335  | 7.87E-09 |
| TUCP_004682 | XLOC_205932 | ENSRNOT00000046585  | 0.961601874  | 6.16E-07 |
| TUCP_004682 | XLOC_205932 | ENSRNOT00000089057  | 0.965167071  | 3.81E-07 |
| TUCP_004682 | XLOC_205932 | ENSRNOT00000080794  | 0.970937536  | 1.56E-07 |
| TUCP_004682 | XLOC_205932 | ENSRNOT00000014456  | 0.972314975  | 1.22E-07 |
| TUCP_004682 | XLOC_205932 | ENSRNOT00000031205  | 0.981407942  | 1.70E-08 |
| TUCP_004682 | XLOC_205932 | ENSRNOT00000044145  | 0.984069335  | 7.87E-09 |
| TUCP_004682 | XLOC_205932 | ENSRNOT00000088381  | 0.969137901  | 2.09E-07 |
| TUCP_004682 | XLOC_205932 | ENSRNOT00000011743  | 0.966548313  | 3.12E-07 |
| TUCP_004682 | XLOC_205932 | ENSRNOT00000034907  | 0.971977011  | 1.30E-07 |

|             |             |                    |              |          |
|-------------|-------------|--------------------|--------------|----------|
| TUCP_004682 | XLOC_205932 | ENSRNOT00000088624 | 0.984069335  | 7.87E-09 |
| TUCP_004682 | XLOC_205932 | ENSRNOT00000085659 | 0.98719451   | 2.65E-09 |
| TUCP_004682 | XLOC_205932 | ENSRNOT00000015866 | 0.971204927  | 1.49E-07 |
| TUCP_004682 | XLOC_205932 | ENSRNOT00000064250 | 0.976375647  | 5.57E-08 |
| TUCP_004682 | XLOC_205932 | ENSRNOT00000051835 | 0.984069335  | 7.87E-09 |
| TUCP_004682 | XLOC_205932 | ENSRNOT00000079087 | 0.984069335  | 7.87E-09 |
| TUCP_004682 | XLOC_205932 | ENSRNOT00000037206 | 0.984069335  | 7.87E-09 |
| TUCP_004682 | XLOC_205932 | ENSRNOT00000080590 | 0.986064521  | 4.04E-09 |
| TUCP_004682 | XLOC_205932 | ENSRNOT00000027552 | 0.985989324  | 4.15E-09 |
| TUCP_004682 | XLOC_205932 | ENSRNOT00000077014 | 0.975217435  | 7.06E-08 |
| TUCP_004682 | XLOC_205932 | ENSRNOT00000080453 | 0.98487039   | 6.09E-09 |
| TUCP_004682 | XLOC_205932 | ENSRNOT00000083415 | -0.956869744 | 1.09E-06 |
| TUCP_004682 | XLOC_205932 | ENSRNOT00000066839 | 0.972053964  | 1.28E-07 |
| TUCP_004682 | XLOC_205932 | ENSRNOT00000078633 | 0.984069335  | 7.87E-09 |
| TUCP_004682 | XLOC_205932 | ENSRNOT00000071884 | 0.969852009  | 1.86E-07 |
| TUCP_004682 | XLOC_205932 | ENSRNOT00000004128 | 0.954993576  | 1.35E-06 |
| TUCP_004682 | XLOC_205932 | ENSRNOT00000057729 | 0.98248544   | 1.26E-08 |
| TUCP_004682 | XLOC_205932 | ENSRNOT00000089929 | 0.984069335  | 7.87E-09 |
| TUCP_004682 | XLOC_205932 | ENSRNOT00000037169 | 0.964493555  | 4.19E-07 |
| TUCP_004682 | XLOC_205932 | ENSRNOT00000029634 | 0.979018471  | 3.09E-08 |
| TUCP_004682 | XLOC_205932 | ENSRNOT00000093579 | 0.951044992  | 2.04E-06 |
| TUCP_004682 | XLOC_205932 | ENSRNOT00000065460 | 0.984069335  | 7.87E-09 |
| TUCP_004682 | XLOC_205932 | ENSRNOT00000003817 | 0.977700827  | 4.18E-08 |
| TUCP_004682 | XLOC_205932 | ENSRNOT00000016713 | 0.984069335  | 7.87E-09 |
| TUCP_004682 | XLOC_205932 | ENSRNOT00000079260 | 0.979145537  | 3.00E-08 |
| TUCP_004682 | XLOC_205932 | ENSRNOT00000039294 | 0.984069335  | 7.87E-09 |
| TUCP_004683 | XLOC_205932 | ENSRNOT00000071840 | 1            | 0        |
| TUCP_004683 | XLOC_205932 | ENSRNOT00000083608 | 0.992618428  | 1.70E-10 |
| TUCP_004683 | XLOC_205932 | ENSRNOT00000076035 | 0.956476518  | 1.14E-06 |
| TUCP_004683 | XLOC_205932 | ENSRNOT00000085476 | 0.96207118   | 5.80E-07 |
| TUCP_004683 | XLOC_205932 | ENSRNOT00000066382 | 0.96329105   | 4.94E-07 |
| TUCP_004683 | XLOC_205932 | ENSRNOT00000045584 | 1            | 0        |
| TUCP_004683 | XLOC_205932 | ENSRNOT00000077995 | 0.994428404  | 4.19E-11 |
| TUCP_004683 | XLOC_205932 | ENSRNOT00000066004 | 0.999857217  | 4.67E-19 |
| TUCP_004683 | XLOC_205932 | ENSRNOT00000064284 | 0.968782027  | 2.22E-07 |
| TUCP_004683 | XLOC_205932 | ENSRNOT00000068197 | 0.955470548  | 1.28E-06 |
| TUCP_004683 | XLOC_205932 | ENSRNOT00000082086 | 0.97275676   | 1.13E-07 |
| TUCP_004683 | XLOC_205932 | ENSRNOT00000089494 | 0.983505294  | 9.35E-09 |
| TUCP_004683 | XLOC_205932 | ENSRNOT00000083747 | 0.957764469  | 9.86E-07 |
| TUCP_004683 | XLOC_205932 | ENSRNOT00000092182 | 1            | 0        |
| TUCP_004683 | XLOC_205932 | ENSRNOT00000084461 | 1            | 0        |
| TUCP_004683 | XLOC_205932 | ENSRNOT00000060448 | 1            | 0        |
| TUCP_004683 | XLOC_205932 | ENSRNOT00000032631 | 1            | 0        |
| TUCP_004683 | XLOC_205932 | ENSRNOT00000079503 | 0.957317866  | 1.04E-06 |
| TUCP_004683 | XLOC_205932 | ENSRNOT00000027950 | 0.960989928  | 6.66E-07 |
| TUCP_004683 | XLOC_205932 | ENSRNOT00000060113 | 0.975275164  | 6.98E-08 |
| TUCP_004683 | XLOC_205932 | ENSRNOT00000054910 | 0.990580154  | 5.75E-10 |
| TUCP_004683 | XLOC_205932 | ENSRNOT00000057176 | 0.999998955  | 9.83E-30 |
| TUCP_004683 | XLOC_205932 | ENSRNOT00000078176 | 0.994350784  | 4.49E-11 |
| TUCP_004683 | XLOC_205932 | ENSRNOT00000056364 | 0.990647125  | 5.55E-10 |
| TUCP_004683 | XLOC_205932 | ENSRNOT00000093431 | 1            | 0        |

|             |             |                    |              |          |
|-------------|-------------|--------------------|--------------|----------|
| TUCP_004683 | XLOC_205932 | ENSRNOT00000024758 | 0.981367686  | 1.71E-08 |
| TUCP_004683 | XLOC_205932 | ENSRNOT00000092901 | 1            | 0        |
| TUCP_004683 | XLOC_205932 | ENSRNOT00000089290 | 0.999988082  | 1.89E-24 |
| TUCP_004683 | XLOC_205932 | ENSRNOT00000090211 | 0.998865151  | 1.48E-14 |
| TUCP_004683 | XLOC_205932 | ENSRNOT00000075244 | 0.962646865  | 5.38E-07 |
| TUCP_004683 | XLOC_205932 | ENSRNOT00000091828 | 0.996371069  | 4.93E-12 |
| TUCP_004683 | XLOC_205932 | ENSRNOT00000091944 | 0.999786107  | 3.52E-18 |
| TUCP_004683 | XLOC_205932 | ENSRNOT00000070855 | 1            | 0        |
| TUCP_004683 | XLOC_205932 | ENSRNOT00000009295 | 0.995887068  | 9.21E-12 |
| TUCP_004683 | XLOC_205932 | ENSRNOT00000084109 | 0.999673655  | 2.91E-17 |
| TUCP_004683 | XLOC_205932 | ENSRNOT00000060645 | 0.973934385  | 9.07E-08 |
| TUCP_004683 | XLOC_205932 | ENSRNOT00000041569 | 1            | 0        |
| TUCP_004683 | XLOC_205932 | ENSRNOT00000087091 | 1            | 0        |
| TUCP_004683 | XLOC_205932 | ENSRNOT00000003308 | 0.990930758  | 4.76E-10 |
| TUCP_004683 | XLOC_205932 | ENSRNOT00000026113 | 0.999851454  | 5.69E-19 |
| TUCP_004683 | XLOC_205932 | ENSRNOT00000014939 | 0.999846854  | 6.63E-19 |
| TUCP_004683 | XLOC_205932 | ENSRNOT00000058314 | 0.99088442   | 4.88E-10 |
| TUCP_004683 | XLOC_205932 | ENSRNOT00000047870 | 0.981575908  | 1.62E-08 |
| TUCP_004683 | XLOC_205932 | ENSRNOT00000071603 | 0.999995875  | 9.40E-27 |
| TUCP_004683 | XLOC_205932 | ENSRNOT00000088376 | 0.970305372  | 1.73E-07 |
| TUCP_004683 | XLOC_205932 | ENSRNOT00000060454 | 1            | 0        |
| TUCP_004683 | XLOC_205932 | ENSRNOT00000029298 | 0.957304374  | 1.04E-06 |
| TUCP_004683 | XLOC_205932 | ENSRNOT00000044232 | 0.98372207   | 8.76E-09 |
| TUCP_004683 | XLOC_205932 | ENSRNOT00000023287 | 0.974929583  | 7.48E-08 |
| TUCP_004683 | XLOC_205932 | ENSRNOT00000071714 | 0.978813661  | 3.24E-08 |
| TUCP_004683 | XLOC_205932 | ENSRNOT00000075836 | 1            | 0        |
| TUCP_004683 | XLOC_205932 | ENSRNOT00000073229 | 1            | 0        |
| TUCP_004683 | XLOC_205932 | ENSRNOT00000077731 | 0.965942857  | 3.41E-07 |
| TUCP_004683 | XLOC_205932 | ENSRNOT00000046980 | 0.982667176  | 1.20E-08 |
| TUCP_004683 | XLOC_205932 | ENSRNOT00000039652 | 0.972574547  | 1.17E-07 |
| TUCP_004683 | XLOC_205932 | ENSRNOT00000066685 | 0.981130123  | 1.83E-08 |
| TUCP_004683 | XLOC_205932 | ENSRNOT00000082776 | 0.966379954  | 3.20E-07 |
| TUCP_004683 | XLOC_205932 | ENSRNOT00000088719 | 0.965171519  | 3.81E-07 |
| TUCP_004683 | XLOC_205932 | ENSRNOT00000007683 | 0.999755897  | 6.82E-18 |
| TUCP_004683 | XLOC_205932 | ENSRNOT00000092916 | 0.96606874   | 3.35E-07 |
| TUCP_004683 | XLOC_205932 | ENSRNOT00000081106 | 0.95354262   | 1.58E-06 |
| TUCP_004680 | XLOC_205932 | ENSRNOT00000066416 | 0.970113571  | 1.79E-07 |
| TUCP_004680 | XLOC_205932 | ENSRNOT00000008196 | 0.950953336  | 2.06E-06 |
| TUCP_004680 | XLOC_205932 | ENSRNOT00000076978 | 0.952650633  | 1.73E-06 |
| TUCP_004680 | XLOC_205932 | ENSRNOT00000050345 | 0.952869678  | 1.69E-06 |
| TUCP_004681 | XLOC_205932 | ENSRNOT00000076978 | 0.950861175  | 2.08E-06 |
| TUCP_004681 | XLOC_205932 | ENSRNOT00000066416 | 0.967229787  | 2.82E-07 |
| TUCP_004681 | XLOC_205932 | ENSRNOT00000009542 | 0.976441575  | 5.49E-08 |
| TUCP_004681 | XLOC_205932 | ENSRNOT00000078446 | 0.971004917  | 1.54E-07 |
| TUCP_004681 | XLOC_205932 | ENSRNOT00000014721 | 0.958210672  | 9.36E-07 |
| TUCP_004681 | XLOC_205932 | ENSRNOT00000004235 | 0.957070067  | 1.07E-06 |
| TUCP_003247 | XLOC_139175 | ENSRNOT00000039313 | 0.957489007  | 1.02E-06 |
| TUCP_004565 | XLOC_200329 | ENSRNOT00000002498 | -0.957633043 | 1.00E-06 |
| TUCP_004565 | XLOC_200329 | ENSRNOT00000026580 | 0.95317761   | 1.64E-06 |
| TUCP_004565 | XLOC_200329 | ENSRNOT00000087190 | -0.96322704  | 4.98E-07 |
| TUCP_004565 | XLOC_200329 | ENSRNOT00000077398 | 0.957670408  | 9.97E-07 |

|             |             |                    |              |          |
|-------------|-------------|--------------------|--------------|----------|
| TUCP_004563 | XLOC_200329 | ENSRNOT0000009883  | -0.953974412 | 1.51E-06 |
| TUCP_002939 | XLOC_126648 | ENSRNOT00000083611 | 0.966314222  | 3.23E-07 |
| TUCP_002939 | XLOC_126648 | ENSRNOT00000090081 | 0.955563045  | 1.27E-06 |
| TUCP_002939 | XLOC_126648 | ENSRNOT0000008665  | 0.954805077  | 1.38E-06 |
| TUCP_004563 | XLOC_200318 | ENSRNOT00000026966 | 0.970322306  | 1.73E-07 |
| TUCP_004563 | XLOC_200318 | ENSRNOT00000068416 | 0.999999782  | 3.88E-33 |
| TUCP_004563 | XLOC_200318 | ENSRNOT00000086036 | 0.999958274  | 9.96E-22 |
| TUCP_004563 | XLOC_200318 | ENSRNOT00000026803 | 0.985046075  | 5.74E-09 |
| TUCP_004563 | XLOC_200318 | ENSRNOT00000047527 | 0.963071698  | 5.08E-07 |
| TUCP_004563 | XLOC_200318 | ENSRNOT00000042251 | 0.999344295  | 9.53E-16 |
| TUCP_004563 | XLOC_200318 | ENSRNOT0000002984  | 0.998397069  | 8.31E-14 |
| TUCP_004563 | XLOC_200318 | ENSRNOT00000083764 | 0.999541808  | 1.59E-16 |
| TUCP_004563 | XLOC_200318 | ENSRNOT00000076802 | 0.962695843  | 5.34E-07 |
| TUCP_004563 | XLOC_200318 | ENSRNOT00000092365 | 0.999161651  | 3.26E-15 |
| TUCP_004563 | XLOC_200318 | ENSRNOT00000079275 | 0.999901911  | 7.15E-20 |
| TUCP_004563 | XLOC_200318 | ENSRNOT00000066062 | -0.959706712 | 7.82E-07 |
| TUCP_004563 | XLOC_200318 | ENSRNOT00000045301 | 1            | 0        |
| TUCP_004563 | XLOC_200318 | ENSRNOT00000041186 | 0.999975782  | 6.56E-23 |
| TUCP_004563 | XLOC_200318 | ENSRNOT00000010092 | 0.977711778  | 4.17E-08 |
| TUCP_004563 | XLOC_200318 | ENSRNOT00000076182 | 1            | 0        |
| TUCP_004563 | XLOC_200318 | ENSRNOT00000087404 | 0.951157664  | 2.02E-06 |
| TUCP_004563 | XLOC_200318 | ENSRNOT00000052003 | 0.95837331   | 9.18E-07 |
| TUCP_004563 | XLOC_200318 | ENSRNOT00000081709 | 0.998485154  | 6.27E-14 |
| TUCP_004563 | XLOC_200318 | ENSRNOT0000005726  | 0.959610119  | 7.91E-07 |
| TUCP_004563 | XLOC_200318 | ENSRNOT00000014103 | 1            | 4.25E-78 |
| TUCP_004563 | XLOC_200318 | ENSRNOT00000057433 | 0.964930601  | 3.94E-07 |
| TUCP_004563 | XLOC_200318 | ENSRNOT00000082289 | 0.998931566  | 1.09E-14 |
| TUCP_004563 | XLOC_200318 | ENSRNOT00000092516 | 0.957459323  | 1.02E-06 |
| TUCP_004563 | XLOC_200318 | ENSRNOT00000008898 | 0.990039768  | 7.59E-10 |
| TUCP_004563 | XLOC_200318 | ENSRNOT00000083493 | 0.995461232  | 1.51E-11 |
| TUCP_004563 | XLOC_200318 | ENSRNOT00000092563 | 0.987201084  | 2.65E-09 |
| TUCP_004563 | XLOC_200318 | ENSRNOT00000088893 | 1            | 0        |
| TUCP_004563 | XLOC_200318 | ENSRNOT00000076693 | 0.955029582  | 1.34E-06 |
| TUCP_004563 | XLOC_200318 | ENSRNOT00000081014 | 1            | 0        |
| TUCP_004563 | XLOC_200318 | ENSRNOT00000067543 | 1            | 0        |
| TUCP_004563 | XLOC_200318 | ENSRNOT00000050968 | 0.996816433  | 2.56E-12 |
| TUCP_004563 | XLOC_200318 | ENSRNOT00000042201 | 0.960235595  | 7.32E-07 |
| TUCP_004563 | XLOC_200318 | ENSRNOT00000004373 | 0.957315473  | 1.04E-06 |
| TUCP_004563 | XLOC_200318 | ENSRNOT00000063929 | 1            | 0        |
| TUCP_004563 | XLOC_200318 | ENSRNOT00000057472 | 1            | 0        |
| TUCP_004563 | XLOC_200318 | ENSRNOT00000041617 | 0.952449765  | 1.77E-06 |
| TUCP_004563 | XLOC_200318 | ENSRNOT00000091763 | 0.986310385  | 3.70E-09 |
| TUCP_004563 | XLOC_200318 | ENSRNOT00000022200 | 0.998491303  | 6.14E-14 |
| TUCP_004563 | XLOC_200318 | ENSRNOT00000067379 | 0.997260967  | 1.21E-12 |
| TUCP_004563 | XLOC_200318 | ENSRNOT00000020786 | 0.976428448  | 5.51E-08 |
| TUCP_004563 | XLOC_200318 | ENSRNOT00000050543 | 0.999722223  | 1.30E-17 |
| TUCP_004563 | XLOC_200318 | ENSRNOT00000089306 | 0.999866649  | 3.32E-19 |
| TUCP_004563 | XLOC_200318 | ENSRNOT00000052367 | 0.997268394  | 1.19E-12 |
| TUCP_004563 | XLOC_200318 | ENSRNOT00000090658 | 1            | 0        |
| TUCP_004563 | XLOC_200318 | ENSRNOT00000022571 | 0.995290013  | 1.81E-11 |
| TUCP_004563 | XLOC_200318 | ENSRNOT00000044520 | 0.981817158  | 1.52E-08 |

|             |             |                     |             |          |
|-------------|-------------|---------------------|-------------|----------|
| TUCP_004563 | XLOC_200318 | ENSRNOT00000065448  | 0.963648868 | 4.70E-07 |
| TUCP_004688 | XLOC_205980 | ENSRNOT00000009556  | 0.954811586 | 1.38E-06 |
| TUCP_004688 | XLOC_205980 | ENSRNOT00000052293  | 0.971066195 | 1.52E-07 |
| TUCP_004688 | XLOC_205980 | ENSRNOT00000005619  | 0.957707569 | 9.92E-07 |
| TUCP_004688 | XLOC_205980 | ENSRNOT00000012094  | 0.967464264 | 2.72E-07 |
| TUCP_004688 | XLOC_205980 | ENSRNOT000000032481 | 0.954239326 | 1.46E-06 |
| TUCP_004688 | XLOC_205980 | ENSRNOT000000032289 | 0.953427434 | 1.60E-06 |
| TUCP_004560 | XLOC_200318 | ENSRNOT00000083464  | 0.985192761 | 5.47E-09 |
| TUCP_004116 | XLOC_179810 | ENSRNOT00000085599  | 0.999938502 | 6.93E-21 |
| TUCP_004116 | XLOC_179810 | ENSRNOT00000006689  | 0.9944189   | 4.22E-11 |
| TUCP_004116 | XLOC_179810 | ENSRNOT00000081534  | 0.987999291 | 1.92E-09 |
| TUCP_004116 | XLOC_179810 | ENSRNOT00000085301  | 0.99793679  | 2.93E-13 |
| TUCP_004116 | XLOC_179810 | ENSRNOT000000038729 | 1           | 0        |
| TUCP_004116 | XLOC_179810 | ENSRNOT00000086385  | 1           | 0        |
| TUCP_004116 | XLOC_179810 | ENSRNOT00000077695  | 0.96038616  | 7.19E-07 |
| TUCP_004116 | XLOC_179810 | ENSRNOT00000078561  | 0.986503348 | 3.45E-09 |
| TUCP_004116 | XLOC_179810 | ENSRNOT00000087613  | 1           | 0        |
| TUCP_004116 | XLOC_179810 | ENSRNOT00000026032  | 0.953050675 | 1.66E-06 |
| TUCP_004116 | XLOC_179810 | ENSRNOT00000073350  | 0.9658754   | 3.44E-07 |
| TUCP_004116 | XLOC_179810 | ENSRNOT00000023062  | 1           | 0        |
| TUCP_004116 | XLOC_179810 | ENSRNOT00000058834  | 1           | 0        |
| TUCP_004116 | XLOC_179810 | ENSRNOT00000079420  | 1           | 0        |
| TUCP_004116 | XLOC_179810 | ENSRNOT00000090761  | 1           | 0        |
| TUCP_004116 | XLOC_179810 | ENSRNOT00000055923  | 1           | 0        |
| TUCP_004116 | XLOC_179810 | ENSRNOT00000092416  | 0.963085379 | 5.07E-07 |
| TUCP_004116 | XLOC_179810 | ENSRNOT00000071930  | 1           | 0        |
| TUCP_004116 | XLOC_179810 | ENSRNOT00000001996  | 0.974721715 | 7.79E-08 |
| TUCP_004116 | XLOC_179810 | ENSRNOT00000076756  | 1           | 0        |
| TUCP_004116 | XLOC_179810 | ENSRNOT00000081527  | 0.999420479 | 5.14E-16 |
| TUCP_004116 | XLOC_179810 | ENSRNOT00000085067  | 0.960262084 | 7.30E-07 |
| TUCP_004116 | XLOC_179810 | ENSRNOT00000091663  | 0.99642667  | 4.56E-12 |
| TUCP_004116 | XLOC_179810 | ENSRNOT00000081780  | 1           | 0        |
| TUCP_004116 | XLOC_179810 | ENSRNOT00000093689  | 0.953599805 | 1.57E-06 |
| TUCP_004116 | XLOC_179810 | ENSRNOT00000089114  | 1           | 0        |
| TUCP_004116 | XLOC_179810 | ENSRNOT00000021609  | 0.977017895 | 4.86E-08 |
| TUCP_004116 | XLOC_179810 | ENSRNOT00000073316  | 1           | 0        |
| TUCP_004116 | XLOC_179810 | ENSRNOT00000086557  | 0.977413455 | 4.46E-08 |
| TUCP_004116 | XLOC_179810 | ENSRNOT00000071663  | 1           | 0        |
| TUCP_004116 | XLOC_179810 | ENSRNOT00000042860  | 1           | 0        |
| TUCP_004116 | XLOC_179810 | ENSRNOT00000072962  | 0.971287317 | 1.46E-07 |
| TUCP_004116 | XLOC_179810 | ENSRNOT00000088421  | 1           | 0        |
| TUCP_004116 | XLOC_179810 | ENSRNOT00000038898  | 1           | 0        |
| TUCP_004116 | XLOC_179810 | ENSRNOT00000015840  | 0.959452012 | 8.06E-07 |
| TUCP_004116 | XLOC_179810 | ENSRNOT00000064936  | 0.985957557 | 4.20E-09 |
| TUCP_004116 | XLOC_179810 | ENSRNOT00000042777  | 0.990642579 | 5.56E-10 |
| TUCP_004116 | XLOC_179810 | ENSRNOT00000010029  | 1           | 0        |
| TUCP_001065 | XLOC_040864 | ENSRNOT00000040509  | 0.966348681 | 3.21E-07 |
| TUCP_001065 | XLOC_040864 | ENSRNOT00000012170  | 0.961603899 | 6.16E-07 |
| TUCP_001065 | XLOC_040864 | ENSRNOT000000031205 | 0.950674542 | 2.12E-06 |
| TUCP_004114 | XLOC_179799 | ENSRNOT00000084500  | 0.96865672  | 2.26E-07 |
| TUCP_004114 | XLOC_179799 | ENSRNOT00000093467  | 0.980523218 | 2.14E-08 |



|             |             |                    |              |          |
|-------------|-------------|--------------------|--------------|----------|
| TUCP_004114 | XLOC_179799 | ENSRNOT00000029340 | 0.987555253  | 2.30E-09 |
| TUCP_004114 | XLOC_179799 | ENSRNOT00000038646 | 0.987391662  | 2.46E-09 |
| TUCP_004114 | XLOC_179799 | ENSRNOT00000017909 | 0.958452282  | 9.09E-07 |
| TUCP_004114 | XLOC_179799 | ENSRNOT00000092579 | 0.987391662  | 2.46E-09 |
| TUCP_004114 | XLOC_179799 | ENSRNOT00000048373 | 0.953394979  | 1.60E-06 |
| TUCP_004114 | XLOC_179799 | ENSRNOT00000036383 | 0.974371074  | 8.34E-08 |
| TUCP_004114 | XLOC_179799 | ENSRNOT00000076528 | 0.982105457  | 1.40E-08 |
| TUCP_004114 | XLOC_179799 | ENSRNOT00000083034 | 0.973751773  | 9.39E-08 |
| TUCP_004114 | XLOC_179799 | ENSRNOT00000089607 | 0.978910239  | 3.17E-08 |
| TUCP_004114 | XLOC_179799 | ENSRNOT00000086014 | 0.961930028  | 5.91E-07 |
| TUCP_004114 | XLOC_179799 | ENSRNOT00000052315 | 0.967324508  | 2.78E-07 |
| TUCP_004114 | XLOC_179799 | ENSRNOT00000088168 | 0.987391662  | 2.46E-09 |
| TUCP_004114 | XLOC_179799 | ENSRNOT00000013459 | 0.962275973  | 5.65E-07 |
| TUCP_004114 | XLOC_179799 | ENSRNOT00000078137 | 0.987391662  | 2.46E-09 |
| TUCP_004114 | XLOC_179799 | ENSRNOT00000077764 | 0.96470375   | 4.07E-07 |
| TUCP_004114 | XLOC_179799 | ENSRNOT00000092740 | 0.987391662  | 2.46E-09 |
| TUCP_004114 | XLOC_179799 | ENSRNOT00000000117 | 0.975545954  | 6.61E-08 |
| TUCP_004114 | XLOC_179799 | ENSRNOT00000070958 | 0.987391662  | 2.46E-09 |
| TUCP_004114 | XLOC_179799 | ENSRNOT00000085310 | 0.967973814  | 2.51E-07 |
| TUCP_004114 | XLOC_179799 | ENSRNOT00000027268 | 0.987391662  | 2.46E-09 |
| TUCP_004114 | XLOC_179799 | ENSRNOT00000004459 | 0.987391662  | 2.46E-09 |
| TUCP_004114 | XLOC_179799 | ENSRNOT00000089235 | 0.987912521  | 1.99E-09 |
| TUCP_004114 | XLOC_179799 | ENSRNOT00000061516 | 0.986450962  | 3.52E-09 |
| TUCP_004114 | XLOC_179799 | ENSRNOT00000088148 | 0.987391662  | 2.46E-09 |
| TUCP_004114 | XLOC_179799 | ENSRNOT00000088527 | 0.987391662  | 2.46E-09 |
| TUCP_004114 | XLOC_179799 | ENSRNOT00000078701 | 0.987391662  | 2.46E-09 |
| TUCP_004114 | XLOC_179799 | ENSRNOT00000090078 | 0.987391662  | 2.46E-09 |
| TUCP_004114 | XLOC_179799 | ENSRNOT00000021748 | 0.987391662  | 2.46E-09 |
| TUCP_004114 | XLOC_179799 | ENSRNOT00000089085 | 0.987391662  | 2.46E-09 |
| TUCP_004114 | XLOC_179799 | ENSRNOT00000008153 | 0.987568077  | 2.29E-09 |
| TUCP_004114 | XLOC_179799 | ENSRNOT00000085896 | 0.950939818  | 2.06E-06 |
| TUCP_004114 | XLOC_179799 | ENSRNOT00000079189 | 0.978780423  | 3.27E-08 |
| TUCP_004114 | XLOC_179799 | ENSRNOT00000078020 | 0.950418307  | 2.17E-06 |
| TUCP_004114 | XLOC_179799 | ENSRNOT00000009776 | 0.987391662  | 2.46E-09 |
| TUCP_004115 | XLOC_179799 | ENSRNOT00000072227 | 0.964411386  | 4.24E-07 |
| TUCP_004115 | XLOC_179799 | ENSRNOT00000054963 | 0.952285275  | 1.80E-06 |
| TUCP_004115 | XLOC_179799 | ENSRNOT00000048379 | 0.951994621  | 1.85E-06 |
| TUCP_004115 | XLOC_179799 | ENSRNOT00000047763 | 0.953174083  | 1.64E-06 |
| TUCP_004115 | XLOC_179799 | ENSRNOT00000002905 | 0.981901721  | 1.48E-08 |
| TUCP_004115 | XLOC_179799 | ENSRNOT00000067161 | 0.954673978  | 1.40E-06 |
| TUCP_001959 | XLOC_079154 | ENSRNOT00000008786 | -0.950997861 | 2.05E-06 |
| TUCP_001959 | XLOC_079154 | ENSRNOT00000001449 | 0.966823324  | 2.99E-07 |
| TUCP_001959 | XLOC_079154 | ENSRNOT00000008030 | 0.954100472  | 1.49E-06 |
| TUCP_001959 | XLOC_079154 | ENSRNOT00000027967 | 0.953526829  | 1.58E-06 |
| TUCP_001959 | XLOC_079154 | ENSRNOT00000025510 | -0.950393214 | 2.18E-06 |
| TUCP_001959 | XLOC_079154 | ENSRNOT00000003182 | 0.966709419  | 3.05E-07 |
| TUCP_001959 | XLOC_079154 | ENSRNOT00000025966 | 0.955125323  | 1.33E-06 |
| TUCP_001959 | XLOC_079154 | ENSRNOT00000010728 | 0.954752781  | 1.38E-06 |
| TUCP_001959 | XLOC_079154 | ENSRNOT00000077655 | 0.957665204  | 9.97E-07 |
| TUCP_001959 | XLOC_079154 | ENSRNOT00000014888 | 0.95694609   | 1.08E-06 |
| TUCP_001959 | XLOC_079154 | ENSRNOT00000021629 | -0.956673196 | 1.12E-06 |

|             |             |                    |              |          |
|-------------|-------------|--------------------|--------------|----------|
| TUCP_001959 | XLOC_079154 | ENSRNOT00000046035 | 0.960681967  | 6.93E-07 |
| TUCP_001959 | XLOC_079154 | ENSRNOT00000074047 | 0.972540884  | 1.17E-07 |
| TUCP_001959 | XLOC_079154 | ENSRNOT00000026691 | 0.954374606  | 1.44E-06 |
| TUCP_001959 | XLOC_079154 | ENSRNOT00000080602 | 0.95706606   | 1.07E-06 |
| TUCP_004445 | XLOC_195581 | ENSRNOT00000015127 | 0.975781923  | 6.30E-08 |
| TUCP_004445 | XLOC_195581 | ENSRNOT00000080747 | 0.95938203   | 8.13E-07 |
| TUCP_004445 | XLOC_195581 | ENSRNOT00000073350 | 0.955708955  | 1.25E-06 |
| TUCP_004445 | XLOC_195581 | ENSRNOT0000006689  | 0.960840205  | 6.79E-07 |
| TUCP_004445 | XLOC_195581 | ENSRNOT00000085301 | 0.955325322  | 1.30E-06 |
| TUCP_004445 | XLOC_195581 | ENSRNOT00000091663 | 0.950096408  | 2.24E-06 |
| TUCP_004445 | XLOC_195581 | ENSRNOT00000023184 | 0.992067528  | 2.44E-10 |
| TUCP_004445 | XLOC_195581 | ENSRNOT00000054875 | 0.973901084  | 9.13E-08 |
| TUCP_004445 | XLOC_195581 | ENSRNOT00000072962 | 0.955681289  | 1.25E-06 |
| TUCP_004445 | XLOC_195581 | ENSRNOT00000078561 | 0.951549277  | 1.94E-06 |
| TUCP_004445 | XLOC_195581 | ENSRNOT00000041605 | 0.962691886  | 5.35E-07 |
| TUCP_004110 | XLOC_179557 | ENSRNOT0000001373  | 0.975675171  | 6.44E-08 |
| TUCP_004110 | XLOC_179557 | ENSRNOT00000011913 | 0.969558796  | 1.96E-07 |
| TUCP_004110 | XLOC_179557 | ENSRNOT00000085482 | 0.959182377  | 8.33E-07 |
| TUCP_004110 | XLOC_179557 | ENSRNOT00000016626 | 0.967217569  | 2.82E-07 |
| TUCP_004110 | XLOC_179557 | ENSRNOT00000013587 | 0.968315958  | 2.38E-07 |
| TUCP_004110 | XLOC_179557 | ENSRNOT00000002487 | -0.954259043 | 1.46E-06 |
| TUCP_004110 | XLOC_179557 | ENSRNOT00000016262 | 0.971232705  | 1.48E-07 |
| TUCP_004110 | XLOC_179557 | ENSRNOT00000013255 | 0.973104192  | 1.06E-07 |
| TUCP_004110 | XLOC_179557 | ENSRNOT00000054850 | 0.951368836  | 1.97E-06 |
| TUCP_004110 | XLOC_179557 | ENSRNOT00000001248 | -0.955959353 | 1.21E-06 |
| TUCP_004447 | XLOC_195766 | ENSRNOT00000084500 | 0.983575984  | 9.16E-09 |
| TUCP_004447 | XLOC_195766 | ENSRNOT00000093467 | 0.995636431  | 1.24E-11 |
| TUCP_004447 | XLOC_195766 | ENSRNOT00000029340 | 0.997995608  | 2.54E-13 |
| TUCP_004447 | XLOC_195766 | ENSRNOT00000077972 | 0.963543128  | 4.77E-07 |
| TUCP_004447 | XLOC_195766 | ENSRNOT00000038646 | 0.999318059  | 1.16E-15 |
| TUCP_004447 | XLOC_195766 | ENSRNOT00000012095 | 0.961497914  | 6.25E-07 |
| TUCP_004447 | XLOC_195766 | ENSRNOT00000017909 | 0.983030971  | 1.08E-08 |
| TUCP_004447 | XLOC_195766 | ENSRNOT00000092579 | 0.999318059  | 1.16E-15 |
| TUCP_004447 | XLOC_195766 | ENSRNOT00000089235 | 0.998599013  | 4.24E-14 |
| TUCP_004447 | XLOC_195766 | ENSRNOT00000036383 | 0.986562792  | 3.37E-09 |
| TUCP_004447 | XLOC_195766 | ENSRNOT00000076528 | 0.996026464  | 7.75E-12 |
| TUCP_004447 | XLOC_195766 | ENSRNOT00000075193 | 0.969706401  | 1.91E-07 |
| TUCP_004447 | XLOC_195766 | ENSRNOT00000083034 | 0.992080102  | 2.42E-10 |
| TUCP_004447 | XLOC_195766 | ENSRNOT00000089607 | 0.994817622  | 2.92E-11 |
| TUCP_004447 | XLOC_195766 | ENSRNOT00000086014 | 0.958354763  | 9.20E-07 |
| TUCP_004447 | XLOC_195766 | ENSRNOT00000054939 | 0.956381011  | 1.16E-06 |
| TUCP_004447 | XLOC_195766 | ENSRNOT00000052315 | 0.982352039  | 1.31E-08 |
| TUCP_004447 | XLOC_195766 | ENSRNOT00000088168 | 0.999318059  | 1.16E-15 |
| TUCP_004447 | XLOC_195766 | ENSRNOT00000046231 | 0.97164745   | 1.38E-07 |
| TUCP_004447 | XLOC_195766 | ENSRNOT00000013459 | 0.977679327  | 4.20E-08 |
| TUCP_004447 | XLOC_195766 | ENSRNOT00000078137 | 0.999318059  | 1.16E-15 |
| TUCP_004447 | XLOC_195766 | ENSRNOT00000077764 | 0.980470284  | 2.17E-08 |
| TUCP_004447 | XLOC_195766 | ENSRNOT00000043661 | 0.965372671  | 3.70E-07 |
| TUCP_004447 | XLOC_195766 | ENSRNOT00000092740 | 0.999318059  | 1.16E-15 |
| TUCP_004447 | XLOC_195766 | ENSRNOT00000000117 | 0.989818805  | 8.47E-10 |
| TUCP_004447 | XLOC_195766 | ENSRNOT00000071877 | 0.963907822  | 4.54E-07 |

|             |             |                    |             |          |
|-------------|-------------|--------------------|-------------|----------|
| TUCP_004447 | XLOC_195766 | ENSRNOT00000070958 | 0.999318059 | 1.16E-15 |
| TUCP_004447 | XLOC_195766 | ENSRNOT00000076757 | 0.956572049 | 1.13E-06 |
| TUCP_004447 | XLOC_195766 | ENSRNOT00000085310 | 0.96360193  | 4.73E-07 |
| TUCP_004447 | XLOC_195766 | ENSRNOT00000047241 | 0.964971188 | 3.92E-07 |
| TUCP_004447 | XLOC_195766 | ENSRNOT00000027268 | 0.999318059 | 1.16E-15 |
| TUCP_004447 | XLOC_195766 | ENSRNOT00000004459 | 0.999318059 | 1.16E-15 |
| TUCP_004447 | XLOC_195766 | ENSRNOT00000048373 | 0.960999616 | 6.66E-07 |
| TUCP_004447 | XLOC_195766 | ENSRNOT00000061516 | 0.98569927  | 4.60E-09 |
| TUCP_004447 | XLOC_195766 | ENSRNOT00000088148 | 0.999318059 | 1.16E-15 |
| TUCP_004447 | XLOC_195766 | ENSRNOT00000088527 | 0.999318059 | 1.16E-15 |
| TUCP_004447 | XLOC_195766 | ENSRNOT00000078701 | 0.999318059 | 1.16E-15 |
| TUCP_004447 | XLOC_195766 | ENSRNOT00000052308 | 0.960989882 | 6.66E-07 |
| TUCP_004447 | XLOC_195766 | ENSRNOT00000021748 | 0.999318059 | 1.16E-15 |
| TUCP_004447 | XLOC_195766 | ENSRNOT00000089085 | 0.999318059 | 1.16E-15 |
| TUCP_004447 | XLOC_195766 | ENSRNOT00000008153 | 0.998593787 | 4.32E-14 |
| TUCP_004447 | XLOC_195766 | ENSRNOT00000085896 | 0.968963643 | 2.15E-07 |
| TUCP_004447 | XLOC_195766 | ENSRNOT00000079189 | 0.989409049 | 1.03E-09 |
| TUCP_004447 | XLOC_195766 | ENSRNOT00000090078 | 0.999318059 | 1.16E-15 |
| TUCP_004447 | XLOC_195766 | ENSRNOT00000078020 | 0.960379806 | 7.19E-07 |
| TUCP_004447 | XLOC_195766 | ENSRNOT00000092425 | 0.953827252 | 1.53E-06 |
| TUCP_004447 | XLOC_195766 | ENSRNOT00000009776 | 0.999318059 | 1.16E-15 |
| TUCP_001955 | XLOC_079046 | ENSRNOT00000012670 | 0.954642605 | 1.40E-06 |
| TUCP_001955 | XLOC_079046 | ENSRNOT00000048498 | 0.974376469 | 8.33E-08 |
| TUCP_001955 | XLOC_079046 | ENSRNOT00000072238 | 0.988536846 | 1.53E-09 |
| TUCP_001955 | XLOC_079046 | ENSRNOT00000033379 | 0.969380217 | 2.01E-07 |
| TUCP_001955 | XLOC_079046 | ENSRNOT00000057051 | 0.983206002 | 1.02E-08 |
| TUCP_001955 | XLOC_079046 | ENSRNOT00000046837 | 0.951201655 | 2.01E-06 |
| TUCP_004449 | XLOC_195965 | ENSRNOT00000084133 | 1           | 0        |
| TUCP_004449 | XLOC_195965 | ENSRNOT00000093745 | 0.981891039 | 1.49E-08 |
| TUCP_004449 | XLOC_195965 | ENSRNOT00000065542 | 0.99828699  | 1.16E-13 |
| TUCP_004449 | XLOC_195965 | ENSRNOT00000082464 | 1           | 0        |
| TUCP_004449 | XLOC_195965 | ENSRNOT00000087659 | 1           | 0        |
| TUCP_004449 | XLOC_195965 | ENSRNOT00000084582 | 0.976633579 | 5.28E-08 |
| TUCP_004449 | XLOC_195965 | ENSRNOT00000085078 | 1           | 1.33E-79 |
| TUCP_004449 | XLOC_195965 | ENSRNOT00000014028 | 1           | 4.25E-78 |
| TUCP_004449 | XLOC_195965 | ENSRNOT00000049363 | 1           | 0        |
| TUCP_004449 | XLOC_195965 | ENSRNOT00000065473 | 0.999949098 | 2.69E-21 |
| TUCP_004449 | XLOC_195965 | ENSRNOT00000000142 | 0.998996155 | 8.01E-15 |
| TUCP_004449 | XLOC_195965 | ENSRNOT00000082288 | 0.999998398 | 8.30E-29 |
| TUCP_004449 | XLOC_195965 | ENSRNOT00000039664 | 1           | 0        |
| TUCP_004449 | XLOC_195965 | ENSRNOT00000065402 | 1           | 0        |
| TUCP_004449 | XLOC_195965 | ENSRNOT00000064551 | 0.965365872 | 3.70E-07 |
| TUCP_004449 | XLOC_195965 | ENSRNOT00000084141 | 1           | 4.25E-78 |
| TUCP_004449 | XLOC_195965 | ENSRNOT00000082435 | 1           | 0        |
| TUCP_004449 | XLOC_195965 | ENSRNOT00000082928 | 0.996801059 | 2.62E-12 |
| TUCP_004449 | XLOC_195965 | ENSRNOT00000066546 | 0.956953619 | 1.08E-06 |
| TUCP_004449 | XLOC_195965 | ENSRNOT00000046013 | 0.988138626 | 1.81E-09 |
| TUCP_004449 | XLOC_195965 | ENSRNOT00000067931 | 0.978893628 | 3.18E-08 |
| TUCP_004449 | XLOC_195965 | ENSRNOT00000086425 | 0.992023315 | 2.51E-10 |
| TUCP_004449 | XLOC_195965 | ENSRNOT00000093696 | 0.956927219 | 1.09E-06 |
| TUCP_004449 | XLOC_195965 | ENSRNOT00000036228 | 0.982337157 | 1.31E-08 |

|             |             |                    |              |          |
|-------------|-------------|--------------------|--------------|----------|
| TUCP_004449 | XLOC_195965 | ENSRNOT00000014030 | 1            | 0        |
| TUCP_004449 | XLOC_195965 | ENSRNOT00000081966 | 1            | 4.25E-78 |
| TUCP_004449 | XLOC_195965 | ENSRNOT00000075906 | 1            | 1.33E-79 |
| TUCP_004449 | XLOC_195965 | ENSRNOT00000088396 | 0.981336994  | 1.73E-08 |
| TUCP_004449 | XLOC_195965 | ENSRNOT00000049259 | 0.965500259  | 3.63E-07 |
| TUCP_004449 | XLOC_195965 | ENSRNOT00000092838 | 0.982579749  | 1.23E-08 |
| TUCP_004449 | XLOC_195965 | ENSRNOT00000093442 | 0.959217317  | 8.30E-07 |
| TUCP_001957 | XLOC_079046 | ENSRNOT00000091355 | 0.969361339  | 2.02E-07 |
| TUCP_001957 | XLOC_079046 | ENSRNOT00000090600 | 0.970277711  | 1.74E-07 |
| TUCP_001957 | XLOC_079046 | ENSRNOT00000080170 | 0.977038585  | 4.84E-08 |
| TUCP_001957 | XLOC_079046 | ENSRNOT00000016442 | 0.983725278  | 8.75E-09 |
| TUCP_001957 | XLOC_079046 | ENSRNOT00000081106 | 0.966709327  | 3.05E-07 |
| TUCP_001957 | XLOC_079046 | ENSRNOT00000082084 | 0.972657836  | 1.15E-07 |
| TUCP_001957 | XLOC_079046 | ENSRNOT00000074800 | 0.976190861  | 5.79E-08 |
| TUCP_001957 | XLOC_079046 | ENSRNOT00000047784 | 0.983787029  | 8.59E-09 |
| TUCP_003082 | XLOC_132184 | ENSRNOT00000000008 | 1            | 0        |
| TUCP_003082 | XLOC_132184 | ENSRNOT00000060048 | 0.998711457  | 2.79E-14 |
| TUCP_003082 | XLOC_132184 | ENSRNOT00000082304 | 0.996875989  | 2.33E-12 |
| TUCP_003082 | XLOC_132184 | ENSRNOT00000006219 | 1            | 0        |
| TUCP_003082 | XLOC_132184 | ENSRNOT00000065376 | 1            | 0        |
| TUCP_003082 | XLOC_132184 | ENSRNOT00000081433 | 0.984469223  | 6.93E-09 |
| TUCP_003082 | XLOC_132184 | ENSRNOT00000083575 | 1            | 0        |
| TUCP_003082 | XLOC_132184 | ENSRNOT00000087739 | 1            | 1.33E-79 |
| TUCP_003082 | XLOC_132184 | ENSRNOT00000079826 | 1            | 0        |
| TUCP_003082 | XLOC_132184 | ENSRNOT00000025770 | 0.993828251  | 6.98E-11 |
| TUCP_003082 | XLOC_132184 | ENSRNOT00000088244 | 0.973479481  | 9.88E-08 |
| TUCP_003082 | XLOC_132184 | ENSRNOT00000048523 | 1            | 0        |
| TUCP_003082 | XLOC_132184 | ENSRNOT00000079365 | 0.958936699  | 8.58E-07 |
| TUCP_003082 | XLOC_132184 | ENSRNOT00000020229 | 0.960002785  | 7.54E-07 |
| TUCP_003082 | XLOC_132184 | ENSRNOT00000026428 | 0.996986683  | 1.95E-12 |
| TUCP_003082 | XLOC_132184 | ENSRNOT00000085673 | 1            | 0        |
| TUCP_003082 | XLOC_132184 | ENSRNOT00000072972 | 0.981476166  | 1.67E-08 |
| TUCP_003082 | XLOC_132184 | ENSRNOT00000050573 | 1            | 0        |
| TUCP_003082 | XLOC_132184 | ENSRNOT00000089876 | -0.953630353 | 1.56E-06 |
| TUCP_003082 | XLOC_132184 | ENSRNOT00000074378 | 0.998901807  | 1.26E-14 |
| TUCP_003082 | XLOC_132184 | ENSRNOT00000093571 | 1            | 0        |
| TUCP_003082 | XLOC_132184 | ENSRNOT00000090581 | 1            | 0        |
| TUCP_003082 | XLOC_132184 | ENSRNOT00000076239 | 0.98020752   | 2.31E-08 |
| TUCP_003082 | XLOC_132184 | ENSRNOT00000065485 | 1            | 0        |
| TUCP_003082 | XLOC_132184 | ENSRNOT0000006356  | 0.999544279  | 1.55E-16 |
| TUCP_003082 | XLOC_132184 | ENSRNOT00000087199 | 0.974421555  | 8.26E-08 |
| TUCP_003082 | XLOC_132184 | ENSRNOT00000022091 | 1            | 0        |
| TUCP_003082 | XLOC_132184 | ENSRNOT00000064764 | 0.98460888   | 6.63E-09 |
| TUCP_003082 | XLOC_132184 | ENSRNOT00000076927 | 0.971163156  | 1.50E-07 |
| TUCP_003082 | XLOC_132184 | ENSRNOT00000092395 | 0.999522978  | 1.94E-16 |
| TUCP_001067 | XLOC_040934 | ENSRNOT00000025075 | 0.960896824  | 6.74E-07 |
| TUCP_001067 | XLOC_040934 | ENSRNOT00000065168 | 0.962181455  | 5.72E-07 |
| TUCP_001067 | XLOC_040934 | ENSRNOT00000083214 | 0.963026733  | 5.11E-07 |
| TUCP_001067 | XLOC_040934 | ENSRNOT00000020134 | 0.961308822  | 6.40E-07 |
| TUCP_001067 | XLOC_040934 | ENSRNOT00000023302 | 0.951258848  | 2.00E-06 |
| TUCP_001067 | XLOC_040934 | ENSRNOT0000002410  | 0.963121821  | 5.05E-07 |

|             |             |                    |              |          |
|-------------|-------------|--------------------|--------------|----------|
| TUCP_001067 | XLOC_040934 | ENSRNOT0000006034  | -0.961038758 | 6.62E-07 |
| TUCP_001067 | XLOC_040934 | ENSRNOT00000056179 | 0.960839789  | 6.79E-07 |
| TUCP_001067 | XLOC_040934 | ENSRNOT00000089524 | 0.950733628  | 2.10E-06 |
| TUCP_001067 | XLOC_040934 | ENSRNOT00000008221 | 0.957538062  | 1.01E-06 |
| TUCP_001067 | XLOC_040934 | ENSRNOT00000080557 | 0.957340239  | 1.04E-06 |
| TUCP_001067 | XLOC_040934 | ENSRNOT00000016975 | 0.974616528  | 7.95E-08 |
| TUCP_001067 | XLOC_040934 | ENSRNOT00000033017 | 0.96319115   | 5.00E-07 |
| TUCP_001067 | XLOC_040934 | ENSRNOT00000060696 | 0.956614828  | 1.13E-06 |
| TUCP_001067 | XLOC_040934 | ENSRNOT00000066370 | 0.952952919  | 1.68E-06 |
| TUCP_001067 | XLOC_040934 | ENSRNOT00000012279 | 0.950911115  | 2.07E-06 |
| TUCP_001067 | XLOC_040934 | ENSRNOT00000030445 | 0.986225599  | 3.82E-09 |
| TUCP_001067 | XLOC_040934 | ENSRNOT00000027057 | 0.952942783  | 1.68E-06 |
| TUCP_001067 | XLOC_040934 | ENSRNOT00000028057 | 0.957077938  | 1.07E-06 |
| TUCP_001067 | XLOC_040934 | ENSRNOT00000052018 | 0.950867999  | 2.08E-06 |
| TUCP_001067 | XLOC_040934 | ENSRNOT00000047093 | 0.970586424  | 1.65E-07 |
| TUCP_001067 | XLOC_040934 | ENSRNOT00000012811 | 0.951227983  | 2.00E-06 |
| TUCP_001067 | XLOC_040934 | ENSRNOT00000041494 | 0.969014032  | 2.14E-07 |
| TUCP_001067 | XLOC_040934 | ENSRNOT00000058962 | 0.964282671  | 4.31E-07 |
| TUCP_001067 | XLOC_040934 | ENSRNOT00000022796 | 0.961454467  | 6.28E-07 |
| TUCP_004118 | XLOC_180016 | ENSRNOT00000010539 | 0.963444653  | 4.83E-07 |
| TUCP_004118 | XLOC_180016 | ENSRNOT00000035427 | 0.969619759  | 1.94E-07 |
| TUCP_004118 | XLOC_180016 | ENSRNOT00000055562 | 0.963789385  | 4.61E-07 |
| TUCP_004118 | XLOC_180016 | ENSRNOT00000023607 | 0.961153271  | 6.53E-07 |
| TUCP_004118 | XLOC_180016 | ENSRNOT00000028818 | 0.96191566   | 5.92E-07 |
| TUCP_004118 | XLOC_180016 | ENSRNOT00000010508 | 0.953890101  | 1.52E-06 |
| TUCP_004118 | XLOC_180016 | ENSRNOT00000076113 | 0.957472877  | 1.02E-06 |
| TUCP_004118 | XLOC_180016 | ENSRNOT00000038449 | 0.955969273  | 1.21E-06 |
| TUCP_004118 | XLOC_180016 | ENSRNOT00000079152 | 0.950809936  | 2.09E-06 |
| TUCP_004118 | XLOC_180016 | ENSRNOT00000081604 | 0.953393768  | 1.60E-06 |
| TUCP_004118 | XLOC_180016 | ENSRNOT00000006071 | 0.95776365   | 9.86E-07 |
| TUCP_004118 | XLOC_180016 | ENSRNOT00000022255 | 0.960059199  | 7.49E-07 |
| TUCP_004118 | XLOC_180016 | ENSRNOT00000057740 | 0.962541175  | 5.45E-07 |
| TUCP_003086 | XLOC_132420 | ENSRNOT00000044624 | 0.954457164  | 1.43E-06 |
| TUCP_003086 | XLOC_132420 | ENSRNOT00000012951 | 0.986470188  | 3.49E-09 |
| TUCP_000695 | XLOC_026243 | ENSRNOT00000012957 | 0.958203068  | 9.36E-07 |
| TUCP_000695 | XLOC_026243 | ENSRNOT00000039876 | 0.955622087  | 1.26E-06 |
| TUCP_000695 | XLOC_026243 | ENSRNOT00000080851 | 0.975119307  | 7.20E-08 |
| TUCP_000695 | XLOC_026243 | ENSRNOT00000086899 | 0.997092141  | 1.63E-12 |
| TUCP_000695 | XLOC_026243 | ENSRNOT00000067677 | 0.966536984  | 3.12E-07 |
| TUCP_000695 | XLOC_026243 | ENSRNOT00000028058 | 0.956645037  | 1.12E-06 |
| TUCP_000695 | XLOC_026243 | ENSRNOT00000092125 | 0.983683207  | 8.86E-09 |
| TUCP_000695 | XLOC_026243 | ENSRNOT00000022734 | 0.952048696  | 1.84E-06 |
| TUCP_000695 | XLOC_026243 | ENSRNOT00000049732 | 0.97467795   | 7.86E-08 |
| TUCP_000695 | XLOC_026243 | ENSRNOT00000009077 | 0.958635717  | 8.90E-07 |
| TUCP_000695 | XLOC_026243 | ENSRNOT00000077022 | 0.951654263  | 1.92E-06 |
| TUCP_000695 | XLOC_026243 | ENSRNOT00000071258 | -0.958319508 | 9.24E-07 |
| TUCP_000695 | XLOC_026243 | ENSRNOT00000023152 | 0.990288857  | 6.69E-10 |
| TUCP_000690 | XLOC_026119 | ENSRNOT00000002220 | 0.950730512  | 2.10E-06 |
| TUCP_000690 | XLOC_026119 | ENSRNOT00000029531 | -0.961698776 | 6.09E-07 |
| TUCP_001858 | XLOC_077299 | ENSRNOT00000000008 | 1            | 0        |
| TUCP_001858 | XLOC_077299 | ENSRNOT00000060048 | 0.998711457  | 2.79E-14 |

|             |             |                    |              |          |
|-------------|-------------|--------------------|--------------|----------|
| TUCP_001858 | XLOC_077299 | ENSRNOT00000082304 | 0.996875989  | 2.33E-12 |
| TUCP_001858 | XLOC_077299 | ENSRNOT00000006219 | 1            | 0        |
| TUCP_001858 | XLOC_077299 | ENSRNOT00000065376 | 1            | 0        |
| TUCP_001858 | XLOC_077299 | ENSRNOT00000081433 | 0.984469223  | 6.93E-09 |
| TUCP_001858 | XLOC_077299 | ENSRNOT00000083575 | 1            | 0        |
| TUCP_001858 | XLOC_077299 | ENSRNOT00000087739 | 1            | 0        |
| TUCP_001858 | XLOC_077299 | ENSRNOT00000079826 | 1            | 0        |
| TUCP_001858 | XLOC_077299 | ENSRNOT00000025770 | 0.993828251  | 6.98E-11 |
| TUCP_001858 | XLOC_077299 | ENSRNOT00000088244 | 0.973479481  | 9.88E-08 |
| TUCP_001858 | XLOC_077299 | ENSRNOT00000048523 | 1            | 0        |
| TUCP_001858 | XLOC_077299 | ENSRNOT00000079365 | 0.958936699  | 8.58E-07 |
| TUCP_001858 | XLOC_077299 | ENSRNOT00000020229 | 0.960002785  | 7.54E-07 |
| TUCP_001858 | XLOC_077299 | ENSRNOT00000026428 | 0.996986683  | 1.95E-12 |
| TUCP_001858 | XLOC_077299 | ENSRNOT00000085673 | 1            | 0        |
| TUCP_001858 | XLOC_077299 | ENSRNOT00000072972 | 0.981476166  | 1.67E-08 |
| TUCP_001858 | XLOC_077299 | ENSRNOT00000050573 | 1            | 0        |
| TUCP_001858 | XLOC_077299 | ENSRNOT00000089876 | -0.953630353 | 1.56E-06 |
| TUCP_001858 | XLOC_077299 | ENSRNOT00000074378 | 0.998901807  | 1.26E-14 |
| TUCP_001858 | XLOC_077299 | ENSRNOT00000093571 | 1            | 0        |
| TUCP_001858 | XLOC_077299 | ENSRNOT00000090581 | 1            | 0        |
| TUCP_001858 | XLOC_077299 | ENSRNOT00000076239 | 0.98020752   | 2.31E-08 |
| TUCP_001858 | XLOC_077299 | ENSRNOT00000065485 | 1            | 0        |
| TUCP_001858 | XLOC_077299 | ENSRNOT00000006356 | 0.999544279  | 1.55E-16 |
| TUCP_001858 | XLOC_077299 | ENSRNOT00000087199 | 0.974421555  | 8.26E-08 |
| TUCP_001858 | XLOC_077299 | ENSRNOT00000022091 | 1            | 0        |
| TUCP_001858 | XLOC_077299 | ENSRNOT00000064764 | 0.98460888   | 6.63E-09 |
| TUCP_001858 | XLOC_077299 | ENSRNOT00000076927 | 0.971163156  | 1.50E-07 |
| TUCP_001858 | XLOC_077299 | ENSRNOT00000092395 | 0.999522978  | 1.94E-16 |
| TUCP_000693 | XLOC_026192 | ENSRNOT00000017903 | 0.952685148  | 1.72E-06 |
| TUCP_000693 | XLOC_026192 | ENSRNOT00000060530 | 0.952444831  | 1.77E-06 |
| TUCP_000693 | XLOC_026192 | ENSRNOT00000037353 | 0.952767071  | 1.71E-06 |
| TUCP_000693 | XLOC_026192 | ENSRNOT00000013050 | -0.95515622  | 1.32E-06 |
| TUCP_000693 | XLOC_026192 | ENSRNOT00000074689 | 0.970180978  | 1.77E-07 |
| TUCP_000693 | XLOC_026192 | ENSRNOT00000092906 | 0.952623279  | 1.74E-06 |
| TUCP_000693 | XLOC_026192 | ENSRNOT00000011325 | 0.95394087   | 1.51E-06 |
| TUCP_000693 | XLOC_026192 | ENSRNOT00000051037 | 0.95356063   | 1.57E-06 |
| TUCP_001859 | XLOC_077299 | ENSRNOT00000087027 | 0.977890044  | 4.01E-08 |
| TUCP_001859 | XLOC_077299 | ENSRNOT00000079498 | 0.984075734  | 7.85E-09 |
| TUCP_001859 | XLOC_077299 | ENSRNOT00000092435 | 0.965127357  | 3.83E-07 |
| TUCP_000519 | XLOC_017719 | ENSRNOT00000085599 | 0.999394477  | 6.40E-16 |
| TUCP_000519 | XLOC_017719 | ENSRNOT00000006689 | 0.99325862   | 1.08E-10 |
| TUCP_000519 | XLOC_017719 | ENSRNOT00000081534 | 0.984919794  | 5.99E-09 |
| TUCP_000519 | XLOC_017719 | ENSRNOT00000085301 | 0.997001225  | 1.90E-12 |
| TUCP_000519 | XLOC_017719 | ENSRNOT00000038729 | 0.999346135  | 9.40E-16 |
| TUCP_000519 | XLOC_017719 | ENSRNOT00000086385 | 0.999346135  | 9.40E-16 |
| TUCP_000519 | XLOC_017719 | ENSRNOT00000077695 | 0.958868048  | 8.65E-07 |
| TUCP_000519 | XLOC_017719 | ENSRNOT00000078561 | 0.985010527  | 5.81E-09 |
| TUCP_000519 | XLOC_017719 | ENSRNOT00000087613 | 0.999346135  | 9.40E-16 |
| TUCP_000519 | XLOC_017719 | ENSRNOT00000026032 | 0.952778593  | 1.71E-06 |
| TUCP_000519 | XLOC_017719 | ENSRNOT00000073350 | 0.965403418  | 3.68E-07 |
| TUCP_000519 | XLOC_017719 | ENSRNOT00000023062 | 0.999346135  | 9.40E-16 |

|             |             |                    |             |          |
|-------------|-------------|--------------------|-------------|----------|
| TUCP_000519 | XLOC_017719 | ENSRNOT00000058834 | 0.999346135 | 9.40E-16 |
| TUCP_000519 | XLOC_017719 | ENSRNOT00000079420 | 0.999346135 | 9.40E-16 |
| TUCP_000519 | XLOC_017719 | ENSRNOT00000090761 | 0.999346135 | 9.40E-16 |
| TUCP_000519 | XLOC_017719 | ENSRNOT00000055923 | 0.999346135 | 9.40E-16 |
| TUCP_000519 | XLOC_017719 | ENSRNOT00000092416 | 0.968248794 | 2.41E-07 |
| TUCP_000519 | XLOC_017719 | ENSRNOT00000071930 | 0.999346135 | 9.40E-16 |
| TUCP_000519 | XLOC_017719 | ENSRNOT00000001996 | 0.972861133 | 1.11E-07 |
| TUCP_000519 | XLOC_017719 | ENSRNOT00000076756 | 0.999346135 | 9.40E-16 |
| TUCP_000519 | XLOC_017719 | ENSRNOT00000081527 | 0.998602426 | 4.19E-14 |
| TUCP_000519 | XLOC_017719 | ENSRNOT00000085067 | 0.959787278 | 7.74E-07 |
| TUCP_000519 | XLOC_017719 | ENSRNOT00000091663 | 0.995170591 | 2.05E-11 |
| TUCP_000519 | XLOC_017719 | ENSRNOT00000081780 | 0.999346135 | 9.40E-16 |
| TUCP_000519 | XLOC_017719 | ENSRNOT00000093689 | 0.951520706 | 1.94E-06 |
| TUCP_000519 | XLOC_017719 | ENSRNOT00000089114 | 0.999346135 | 9.40E-16 |
| TUCP_000519 | XLOC_017719 | ENSRNOT00000021609 | 0.983543342 | 9.25E-09 |
| TUCP_000519 | XLOC_017719 | ENSRNOT00000073316 | 0.999346135 | 9.40E-16 |
| TUCP_000519 | XLOC_017719 | ENSRNOT00000086557 | 0.974812161 | 7.65E-08 |
| TUCP_000519 | XLOC_017719 | ENSRNOT00000071663 | 0.999346135 | 9.40E-16 |
| TUCP_000519 | XLOC_017719 | ENSRNOT00000042860 | 0.999346135 | 9.40E-16 |
| TUCP_000519 | XLOC_017719 | ENSRNOT00000072962 | 0.969398031 | 2.01E-07 |
| TUCP_000519 | XLOC_017719 | ENSRNOT00000088421 | 0.999346135 | 9.40E-16 |
| TUCP_000519 | XLOC_017719 | ENSRNOT00000038898 | 0.999346135 | 9.40E-16 |
| TUCP_000519 | XLOC_017719 | ENSRNOT00000015840 | 0.964280787 | 4.31E-07 |
| TUCP_000519 | XLOC_017719 | ENSRNOT00000064936 | 0.986966248 | 2.90E-09 |
| TUCP_000519 | XLOC_017719 | ENSRNOT00000042777 | 0.989335003 | 1.07E-09 |
| TUCP_000519 | XLOC_017719 | ENSRNOT00000010029 | 0.999346135 | 9.40E-16 |
| TUCP_004158 | XLOC_181009 | ENSRNOT00000039045 | 0.953639497 | 1.56E-06 |
| TUCP_004158 | XLOC_181009 | ENSRNOT00000027407 | 0.956480063 | 1.14E-06 |
| TUCP_004158 | XLOC_181009 | ENSRNOT00000086590 | 0.961559928 | 6.20E-07 |
| TUCP_004158 | XLOC_181009 | ENSRNOT00000006186 | 0.95693361  | 1.09E-06 |
| TUCP_004158 | XLOC_181009 | ENSRNOT00000019213 | 0.955646548 | 1.25E-06 |
| TUCP_004158 | XLOC_181009 | ENSRNOT00000041908 | 0.987432255 | 2.42E-09 |
| TUCP_004158 | XLOC_181009 | ENSRNOT00000004400 | 0.969016762 | 2.13E-07 |
| TUCP_004158 | XLOC_181009 | ENSRNOT00000026065 | 0.97942     | 2.81E-08 |
| TUCP_004158 | XLOC_181009 | ENSRNOT00000048613 | 0.966233141 | 3.27E-07 |
| TUCP_004158 | XLOC_181009 | ENSRNOT00000022726 | 0.985970837 | 4.18E-09 |
| TUCP_004158 | XLOC_181009 | ENSRNOT00000005659 | 0.960832395 | 6.80E-07 |
| TUCP_004158 | XLOC_181009 | ENSRNOT00000044635 | 0.963638627 | 4.71E-07 |
| TUCP_004158 | XLOC_181009 | ENSRNOT00000019502 | 0.951098131 | 2.03E-06 |
| TUCP_004158 | XLOC_181009 | ENSRNOT00000072147 | 0.956173975 | 1.18E-06 |
| TUCP_004158 | XLOC_181009 | ENSRNOT00000028856 | 0.954996645 | 1.35E-06 |
| TUCP_004158 | XLOC_181009 | ENSRNOT00000007591 | 0.957371168 | 1.03E-06 |
| TUCP_004158 | XLOC_181009 | ENSRNOT0000001051  | 0.957170261 | 1.06E-06 |
| TUCP_004158 | XLOC_181009 | ENSRNOT00000038703 | 0.953644996 | 1.56E-06 |
| TUCP_004158 | XLOC_181009 | ENSRNOT00000043216 | 0.956052506 | 1.20E-06 |
| TUCP_004158 | XLOC_181009 | ENSRNOT00000080654 | 0.959991521 | 7.55E-07 |
| TUCP_004158 | XLOC_181009 | ENSRNOT00000027414 | 0.952542499 | 1.75E-06 |
| TUCP_004158 | XLOC_181009 | ENSRNOT00000028563 | 0.97290383  | 1.10E-07 |
| TUCP_004158 | XLOC_181009 | ENSRNOT00000015076 | 0.960750759 | 6.87E-07 |
| TUCP_004158 | XLOC_181009 | ENSRNOT00000010418 | 0.964212234 | 4.35E-07 |
| TUCP_004158 | XLOC_181009 | ENSRNOT00000014979 | 0.97336034  | 1.01E-07 |

|             |             |                    |              |          |
|-------------|-------------|--------------------|--------------|----------|
| TUCP_004158 | XLOC_181009 | ENSRNOT00000009718 | 0.972519529  | 1.18E-07 |
| TUCP_004158 | XLOC_181009 | ENSRNOT00000015479 | 0.97710208   | 4.77E-08 |
| TUCP_004158 | XLOC_181009 | ENSRNOT00000001507 | 0.953763076  | 1.54E-06 |
| TUCP_004158 | XLOC_181009 | ENSRNOT00000026783 | 0.974666573  | 7.88E-08 |
| TUCP_004158 | XLOC_181009 | ENSRNOT00000012379 | 0.956690674  | 1.12E-06 |
| TUCP_004158 | XLOC_181009 | ENSRNOT00000014701 | 0.955811425  | 1.23E-06 |
| TUCP_004158 | XLOC_181009 | ENSRNOT00000017379 | -0.951672614 | 1.91E-06 |
| TUCP_004158 | XLOC_181009 | ENSRNOT00000093174 | 0.962669087  | 5.36E-07 |
| TUCP_004158 | XLOC_181009 | ENSRNOT00000076820 | 0.977453025  | 4.42E-08 |
| TUCP_004158 | XLOC_181009 | ENSRNOT00000006963 | 0.955036603  | 1.34E-06 |
| TUCP_004158 | XLOC_181009 | ENSRNOT00000079109 | 0.968919348  | 2.17E-07 |
| TUCP_004158 | XLOC_181009 | ENSRNOT00000027944 | 0.961591591  | 6.17E-07 |
| TUCP_004158 | XLOC_181009 | ENSRNOT00000016801 | 0.955264781  | 1.31E-06 |
| TUCP_004158 | XLOC_181009 | ENSRNOT00000027611 | 0.957717905  | 9.91E-07 |
| TUCP_004158 | XLOC_181009 | ENSRNOT00000052075 | 0.973312356  | 1.02E-07 |
| TUCP_004158 | XLOC_181009 | ENSRNOT00000037456 | 0.963154852  | 5.03E-07 |
| TUCP_004158 | XLOC_181009 | ENSRNOT00000010463 | 0.964236185  | 4.34E-07 |
| TUCP_004158 | XLOC_181009 | ENSRNOT00000074323 | 0.95667361   | 1.12E-06 |
| TUCP_004158 | XLOC_181009 | ENSRNOT00000015188 | 0.959584526  | 7.93E-07 |
| TUCP_004158 | XLOC_181009 | ENSRNOT0000001809  | 0.972598931  | 1.16E-07 |
| TUCP_004158 | XLOC_181009 | ENSRNOT00000015612 | 0.95902284   | 8.49E-07 |
| TUCP_004158 | XLOC_181009 | ENSRNOT00000012177 | -0.955716143 | 1.24E-06 |
| TUCP_004158 | XLOC_181009 | ENSRNOT00000067822 | 0.96828881   | 2.39E-07 |
| TUCP_004158 | XLOC_181009 | ENSRNOT00000022594 | 0.973252256  | 1.03E-07 |
| TUCP_004158 | XLOC_181009 | ENSRNOT00000034722 | 0.971922956  | 1.31E-07 |
| TUCP_004158 | XLOC_181009 | ENSRNOT00000010149 | 0.979833121  | 2.54E-08 |
| TUCP_004158 | XLOC_181009 | ENSRNOT00000024771 | 0.956652581  | 1.12E-06 |
| TUCP_004158 | XLOC_181009 | ENSRNOT00000051181 | 0.971455413  | 1.42E-07 |
| TUCP_004158 | XLOC_181009 | ENSRNOT00000021037 | 0.955854837  | 1.23E-06 |
| TUCP_004158 | XLOC_181009 | ENSRNOT00000054955 | -0.958317192 | 9.24E-07 |
| TUCP_004158 | XLOC_181009 | ENSRNOT00000004032 | 0.952556349  | 1.75E-06 |
| TUCP_004158 | XLOC_181009 | ENSRNOT00000009156 | 0.969679711  | 1.92E-07 |
| TUCP_004158 | XLOC_181009 | ENSRNOT00000084005 | -0.957227064 | 1.05E-06 |
| TUCP_004158 | XLOC_181009 | ENSRNOT00000038349 | 0.956331799  | 1.16E-06 |
| TUCP_004158 | XLOC_181009 | ENSRNOT00000070815 | 0.968094408  | 2.47E-07 |
| TUCP_004158 | XLOC_181009 | ENSRNOT00000015609 | 0.950580023  | 2.14E-06 |
| TUCP_004158 | XLOC_181009 | ENSRNOT00000020892 | -0.95284646  | 1.70E-06 |
| TUCP_004158 | XLOC_181009 | ENSRNOT00000019554 | 0.954352489  | 1.45E-06 |
| TUCP_004158 | XLOC_181009 | ENSRNOT00000023477 | 0.964607641  | 4.12E-07 |
| TUCP_004158 | XLOC_181009 | ENSRNOT00000077908 | 0.963038067  | 5.11E-07 |
| TUCP_004158 | XLOC_181009 | ENSRNOT00000064264 | 0.954655781  | 1.40E-06 |
| TUCP_004158 | XLOC_181009 | ENSRNOT00000023330 | 0.966791923  | 3.01E-07 |
| TUCP_004158 | XLOC_181009 | ENSRNOT00000086868 | 0.973780025  | 9.34E-08 |
| TUCP_004158 | XLOC_181009 | ENSRNOT00000007164 | 0.951301518  | 1.99E-06 |
| TUCP_004158 | XLOC_181009 | ENSRNOT00000013661 | 0.978031374  | 3.88E-08 |
| TUCP_004158 | XLOC_181009 | ENSRNOT00000022286 | 0.974645352  | 7.91E-08 |
| TUCP_004158 | XLOC_181009 | ENSRNOT00000038431 | 0.964460807  | 4.21E-07 |
| TUCP_004158 | XLOC_181009 | ENSRNOT00000045083 | 0.989404384  | 1.03E-09 |
| TUCP_004158 | XLOC_181009 | ENSRNOT00000026174 | 0.961092087  | 6.58E-07 |
| TUCP_004158 | XLOC_181009 | ENSRNOT00000020648 | 0.970018662  | 1.81E-07 |
| TUCP_004158 | XLOC_181009 | ENSRNOT00000000713 | 0.964884526  | 3.96E-07 |



|             |             |                    |              |          |
|-------------|-------------|--------------------|--------------|----------|
| TUCP_004158 | XLOC_181009 | ENSRNOT00000082228 | 0.955116032  | 1.33E-06 |
| TUCP_004158 | XLOC_181009 | ENSRNOT00000034744 | 0.98151957   | 1.65E-08 |
| TUCP_004158 | XLOC_181009 | ENSRNOT00000036666 | 0.955695564  | 1.25E-06 |
| TUCP_004158 | XLOC_181009 | ENSRNOT00000021153 | 0.976834705  | 5.05E-08 |
| TUCP_004158 | XLOC_181009 | ENSRNOT00000025027 | 0.983484563  | 9.41E-09 |
| TUCP_004158 | XLOC_181009 | ENSRNOT00000090784 | -0.965699918 | 3.53E-07 |
| TUCP_004158 | XLOC_181009 | ENSRNOT00000087997 | 0.95802495   | 9.56E-07 |
| TUCP_004158 | XLOC_181009 | ENSRNOT00000021015 | 0.963643794  | 4.71E-07 |
| TUCP_004158 | XLOC_181009 | ENSRNOT00000087502 | 0.978455563  | 3.53E-08 |
| TUCP_004158 | XLOC_181009 | ENSRNOT00000016722 | 0.973205991  | 1.04E-07 |
| TUCP_004158 | XLOC_181009 | ENSRNOT00000012424 | 0.951088793  | 2.03E-06 |
| TUCP_004158 | XLOC_181009 | ENSRNOT00000010927 | 0.971787347  | 1.34E-07 |
| TUCP_004158 | XLOC_181009 | ENSRNOT00000039631 | 0.967588372  | 2.67E-07 |
| TUCP_004158 | XLOC_181009 | ENSRNOT00000000013 | 0.954722481  | 1.39E-06 |
| TUCP_004158 | XLOC_181009 | ENSRNOT00000019656 | -0.954454339 | 1.43E-06 |
| TUCP_004158 | XLOC_181009 | ENSRNOT00000005909 | 0.966788356  | 3.01E-07 |
| TUCP_004158 | XLOC_181009 | ENSRNOT00000009198 | 0.951953623  | 1.86E-06 |
| TUCP_004158 | XLOC_181009 | ENSRNOT00000027054 | 0.956260695  | 1.17E-06 |
| TUCP_004158 | XLOC_181009 | ENSRNOT00000017319 | 0.965422753  | 3.67E-07 |
| TUCP_004158 | XLOC_181009 | ENSRNOT00000036951 | 0.968245067  | 2.41E-07 |
| TUCP_004158 | XLOC_181009 | ENSRNOT00000018057 | 0.973095097  | 1.06E-07 |
| TUCP_004158 | XLOC_181009 | ENSRNOT00000026186 | 0.957219467  | 1.05E-06 |
| TUCP_004158 | XLOC_181009 | ENSRNOT00000036061 | 0.96361036   | 4.73E-07 |
| TUCP_004158 | XLOC_181009 | ENSRNOT00000006969 | 0.965435395  | 3.67E-07 |
| TUCP_004158 | XLOC_181009 | ENSRNOT00000007091 | 0.953845293  | 1.53E-06 |
| TUCP_004158 | XLOC_181009 | ENSRNOT00000064752 | -0.952739088 | 1.71E-06 |
| TUCP_004158 | XLOC_181009 | ENSRNOT00000009473 | 0.959875857  | 7.66E-07 |
| TUCP_004158 | XLOC_181009 | ENSRNOT00000075424 | 0.961991722  | 5.86E-07 |
| TUCP_004158 | XLOC_181009 | ENSRNOT00000011663 | 0.970664556  | 1.63E-07 |
| TUCP_004158 | XLOC_181009 | ENSRNOT00000088196 | 0.957543002  | 1.01E-06 |
| TUCP_004158 | XLOC_181009 | ENSRNOT00000023645 | 0.973621262  | 9.62E-08 |
| TUCP_004158 | XLOC_181009 | ENSRNOT00000076387 | 0.958836294  | 8.69E-07 |
| TUCP_004158 | XLOC_181009 | ENSRNOT00000035700 | 0.970709668  | 1.62E-07 |
| TUCP_004158 | XLOC_181009 | ENSRNOT00000064840 | 0.955103287  | 1.33E-06 |
| TUCP_004158 | XLOC_181009 | ENSRNOT00000007175 | 0.983205106  | 1.02E-08 |
| TUCP_004158 | XLOC_181009 | ENSRNOT00000020669 | 0.981926511  | 1.47E-08 |
| TUCP_004158 | XLOC_181009 | ENSRNOT00000074653 | 0.960142239  | 7.41E-07 |
| TUCP_004158 | XLOC_181009 | ENSRNOT00000010588 | 0.953947372  | 1.51E-06 |
| TUCP_004158 | XLOC_181009 | ENSRNOT0000002292  | 0.972937906  | 1.09E-07 |
| TUCP_004158 | XLOC_181009 | ENSRNOT00000077311 | 0.960390958  | 7.18E-07 |
| TUCP_004158 | XLOC_181009 | ENSRNOT00000083369 | 0.95002096   | 2.26E-06 |
| TUCP_004158 | XLOC_181009 | ENSRNOT00000037405 | 0.962036572  | 5.83E-07 |
| TUCP_004158 | XLOC_181009 | ENSRNOT00000004172 | 0.961504026  | 6.24E-07 |
| TUCP_004158 | XLOC_181009 | ENSRNOT00000035491 | 0.960083417  | 7.46E-07 |
| TUCP_004158 | XLOC_181009 | ENSRNOT00000085279 | 0.954870741  | 1.37E-06 |
| TUCP_004158 | XLOC_181009 | ENSRNOT00000024060 | 0.975740177  | 6.35E-08 |
| TUCP_004158 | XLOC_181009 | ENSRNOT00000085060 | 0.950034494  | 2.25E-06 |
| TUCP_004158 | XLOC_181009 | ENSRNOT00000015073 | 0.9650558    | 3.87E-07 |
| TUCP_004158 | XLOC_181009 | ENSRNOT00000064798 | 0.951232988  | 2.00E-06 |
| TUCP_004158 | XLOC_181009 | ENSRNOT00000019177 | 0.955618237  | 1.26E-06 |
| TUCP_004158 | XLOC_181009 | ENSRNOT00000061100 | 0.957170241  | 1.06E-06 |

|             |             |                     |              |          |
|-------------|-------------|---------------------|--------------|----------|
| TUCP_004158 | XLOC_181009 | ENSRNOT00000017776  | 0.955193246  | 1.32E-06 |
| TUCP_004158 | XLOC_181009 | ENSRNOT000000082174 | 0.960221672  | 7.34E-07 |
| TUCP_004158 | XLOC_181009 | ENSRNOT00000013985  | 0.955454419  | 1.28E-06 |
| TUCP_004158 | XLOC_181009 | ENSRNOT00000018998  | 0.958429676  | 9.12E-07 |
| TUCP_004158 | XLOC_181009 | ENSRNOT00000036750  | 0.957650594  | 9.99E-07 |
| TUCP_004158 | XLOC_181009 | ENSRNOT00000024659  | 0.985010101  | 5.81E-09 |
| TUCP_004158 | XLOC_181009 | ENSRNOT00000010224  | 0.962896888  | 5.20E-07 |
| TUCP_004158 | XLOC_181009 | ENSRNOT00000003189  | 0.985093035  | 5.65E-09 |
| TUCP_004158 | XLOC_181009 | ENSRNOT00000047210  | 0.952333293  | 1.79E-06 |
| TUCP_004158 | XLOC_181009 | ENSRNOT00000026216  | 0.985848295  | 4.37E-09 |
| TUCP_004158 | XLOC_181009 | ENSRNOT00000048029  | 0.979699056  | 2.62E-08 |
| TUCP_004158 | XLOC_181009 | ENSRNOT00000004140  | 0.961712567  | 6.08E-07 |
| TUCP_004158 | XLOC_181009 | ENSRNOT00000010433  | 0.983552905  | 9.22E-09 |
| TUCP_004158 | XLOC_181009 | ENSRNOT000000064930 | 0.96656695   | 3.11E-07 |
| TUCP_004158 | XLOC_181009 | ENSRNOT00000079996  | 0.96355436   | 4.76E-07 |
| TUCP_000369 | XLOC_012339 | ENSRNOT00000077741  | 0.991849574  | 2.79E-10 |
| TUCP_000369 | XLOC_012339 | ENSRNOT000000051450 | 0.968612747  | 2.28E-07 |
| TUCP_000369 | XLOC_012339 | ENSRNOT000000005479 | 0.995488272  | 1.46E-11 |
| TUCP_000369 | XLOC_012339 | ENSRNOT00000077782  | 0.989073498  | 1.20E-09 |
| TUCP_000369 | XLOC_012339 | ENSRNOT000000087753 | 0.958952616  | 8.57E-07 |
| TUCP_004520 | XLOC_199302 | ENSRNOT000000000593 | 0.977473657  | 4.40E-08 |
| TUCP_003975 | XLOC_174269 | ENSRNOT00000016167  | -0.966694216 | 3.05E-07 |
| TUCP_003975 | XLOC_174269 | ENSRNOT00000001579  | 0.956015003  | 1.20E-06 |
| TUCP_003975 | XLOC_174269 | ENSRNOT00000042968  | -0.969627798 | 1.93E-07 |
| TUCP_003975 | XLOC_174269 | ENSRNOT00000010712  | 0.953865884  | 1.52E-06 |
| TUCP_003975 | XLOC_174269 | ENSRNOT000000006148 | 0.964070992  | 4.44E-07 |
| TUCP_003975 | XLOC_174269 | ENSRNOT00000011802  | 0.971713521  | 1.36E-07 |
| TUCP_003975 | XLOC_174269 | ENSRNOT00000027630  | -0.962385634 | 5.57E-07 |
| TUCP_003975 | XLOC_174269 | ENSRNOT000000009436 | -0.965594969 | 3.58E-07 |
| TUCP_003975 | XLOC_174269 | ENSRNOT000000091320 | 0.972438762  | 1.20E-07 |
| TUCP_003975 | XLOC_174269 | ENSRNOT00000007583  | 0.963451524  | 4.83E-07 |
| TUCP_003975 | XLOC_174269 | ENSRNOT00000018449  | -0.953146368 | 1.64E-06 |
| TUCP_003975 | XLOC_174269 | ENSRNOT00000002209  | -0.968342795 | 2.37E-07 |
| TUCP_003975 | XLOC_174269 | ENSRNOT00000027640  | -0.97301769  | 1.08E-07 |
| TUCP_003975 | XLOC_174269 | ENSRNOT00000079942  | 0.964142069  | 4.40E-07 |
| TUCP_003975 | XLOC_174269 | ENSRNOT00000024413  | -0.961567524 | 6.19E-07 |
| TUCP_003975 | XLOC_174269 | ENSRNOT000000034157 | -0.963762742 | 4.63E-07 |
| TUCP_001184 | XLOC_044723 | ENSRNOT000000066917 | 0.999939082  | 6.61E-21 |
| TUCP_001184 | XLOC_044723 | ENSRNOT00000073021  | 0.976091452  | 5.91E-08 |
| TUCP_001184 | XLOC_044723 | ENSRNOT000000034790 | 0.978046431  | 3.87E-08 |
| TUCP_001184 | XLOC_044723 | ENSRNOT00000028854  | 0.951253647  | 2.00E-06 |
| TUCP_001184 | XLOC_044723 | ENSRNOT00000043056  | 0.985268601  | 5.33E-09 |
| TUCP_003206 | XLOC_138299 | ENSRNOT00000024186  | 0.978194633  | 3.74E-08 |
| TUCP_003206 | XLOC_138299 | ENSRNOT00000074753  | 0.9774097    | 4.46E-08 |
| TUCP_003206 | XLOC_138299 | ENSRNOT00000041904  | 0.978587805  | 3.42E-08 |
| TUCP_003206 | XLOC_138299 | ENSRNOT000000083487 | 0.967709514  | 2.62E-07 |
| TUCP_003206 | XLOC_138299 | ENSRNOT00000077990  | 0.978587805  | 3.42E-08 |
| TUCP_003206 | XLOC_138299 | ENSRNOT00000038826  | 0.977894326  | 4.01E-08 |
| TUCP_003206 | XLOC_138299 | ENSRNOT00000037094  | 0.957498792  | 1.02E-06 |
| TUCP_003206 | XLOC_138299 | ENSRNOT00000021243  | 0.969150603  | 2.09E-07 |
| TUCP_003206 | XLOC_138299 | ENSRNOT00000060250  | 0.978585733  | 3.42E-08 |

|             |             |                    |             |          |
|-------------|-------------|--------------------|-------------|----------|
| TUCP_003206 | XLOC_138299 | ENSRNOT00000091934 | 0.978587805 | 3.42E-08 |
| TUCP_003206 | XLOC_138299 | ENSRNOT00000093579 | 0.962784299 | 5.28E-07 |
| TUCP_003206 | XLOC_138299 | ENSRNOT00000086027 | 0.978041602 | 3.88E-08 |
| TUCP_003206 | XLOC_138299 | ENSRNOT00000046585 | 0.99678613  | 2.69E-12 |
| TUCP_003206 | XLOC_138299 | ENSRNOT00000080794 | 0.963669314 | 4.69E-07 |
| TUCP_003206 | XLOC_138299 | ENSRNOT00000014456 | 0.96800309  | 2.50E-07 |
| TUCP_003206 | XLOC_138299 | ENSRNOT00000031205 | 0.99304322  | 1.27E-10 |
| TUCP_003206 | XLOC_138299 | ENSRNOT00000044145 | 0.978587805 | 3.42E-08 |
| TUCP_003206 | XLOC_138299 | ENSRNOT00000088381 | 0.996400662 | 4.73E-12 |
| TUCP_003206 | XLOC_138299 | ENSRNOT00000028588 | 0.95509064  | 1.33E-06 |
| TUCP_003206 | XLOC_138299 | ENSRNOT00000011743 | 0.960985195 | 6.67E-07 |
| TUCP_003206 | XLOC_138299 | ENSRNOT00000089929 | 0.978587805 | 3.42E-08 |
| TUCP_003206 | XLOC_138299 | ENSRNOT00000088624 | 0.978587805 | 3.42E-08 |
| TUCP_003206 | XLOC_138299 | ENSRNOT00000085659 | 0.962554311 | 5.44E-07 |
| TUCP_003206 | XLOC_138299 | ENSRNOT00000015866 | 0.98771356  | 2.16E-09 |
| TUCP_003206 | XLOC_138299 | ENSRNOT00000064250 | 0.962776641 | 5.29E-07 |
| TUCP_003206 | XLOC_138299 | ENSRNOT00000024575 | 0.955008053 | 1.35E-06 |
| TUCP_003206 | XLOC_138299 | ENSRNOT00000034907 | 0.982327718 | 1.32E-08 |
| TUCP_003206 | XLOC_138299 | ENSRNOT00000093230 | 0.96535539  | 3.71E-07 |
| TUCP_003206 | XLOC_138299 | ENSRNOT00000051835 | 0.978587805 | 3.42E-08 |
| TUCP_003206 | XLOC_138299 | ENSRNOT00000009825 | 0.957314126 | 1.04E-06 |
| TUCP_003206 | XLOC_138299 | ENSRNOT00000079087 | 0.978587805 | 3.42E-08 |
| TUCP_003206 | XLOC_138299 | ENSRNOT00000037206 | 0.978587805 | 3.42E-08 |
| TUCP_003206 | XLOC_138299 | ENSRNOT00000011342 | 0.973048933 | 1.07E-07 |
| TUCP_003206 | XLOC_138299 | ENSRNOT00000080590 | 0.978390136 | 3.58E-08 |
| TUCP_003206 | XLOC_138299 | ENSRNOT00000081235 | 0.955801252 | 1.23E-06 |
| TUCP_003206 | XLOC_138299 | ENSRNOT00000027552 | 0.977830749 | 4.06E-08 |
| TUCP_003206 | XLOC_138299 | ENSRNOT00000015888 | 0.961300237 | 6.41E-07 |
| TUCP_003206 | XLOC_138299 | ENSRNOT00000085943 | 0.964287292 | 4.31E-07 |
| TUCP_003206 | XLOC_138299 | ENSRNOT00000080453 | 0.978535    | 3.46E-08 |
| TUCP_003206 | XLOC_138299 | ENSRNOT00000089057 | 0.954948212 | 1.35E-06 |
| TUCP_003206 | XLOC_138299 | ENSRNOT00000057729 | 0.976460297 | 5.47E-08 |
| TUCP_003206 | XLOC_138299 | ENSRNOT00000078633 | 0.978587805 | 3.42E-08 |
| TUCP_003206 | XLOC_138299 | ENSRNOT00000013423 | 0.980337735 | 2.24E-08 |
| TUCP_003206 | XLOC_138299 | ENSRNOT00000066839 | 0.964602209 | 4.12E-07 |
| TUCP_003206 | XLOC_138299 | ENSRNOT00000078663 | 0.967137485 | 2.86E-07 |
| TUCP_003206 | XLOC_138299 | ENSRNOT00000037169 | 0.973618891 | 9.63E-08 |
| TUCP_003206 | XLOC_138299 | ENSRNOT00000029634 | 0.974121392 | 8.75E-08 |
| TUCP_003206 | XLOC_138299 | ENSRNOT00000077014 | 0.985115505 | 5.61E-09 |
| TUCP_003206 | XLOC_138299 | ENSRNOT00000065460 | 0.978587805 | 3.42E-08 |
| TUCP_003206 | XLOC_138299 | ENSRNOT00000003817 | 0.976814535 | 5.08E-08 |
| TUCP_003206 | XLOC_138299 | ENSRNOT00000016713 | 0.978587805 | 3.42E-08 |
| TUCP_003206 | XLOC_138299 | ENSRNOT00000079260 | 0.980174918 | 2.33E-08 |
| TUCP_003206 | XLOC_138299 | ENSRNOT00000039294 | 0.978587805 | 3.42E-08 |
| TUCP_003206 | XLOC_138299 | ENSRNOT00000024337 | 0.967512521 | 2.70E-07 |
| TUCP_004361 | XLOC_192623 | ENSRNOT00000024575 | 0.957965094 | 9.63E-07 |
| TUCP_004361 | XLOC_192623 | ENSRNOT00000080183 | 0.95047376  | 2.16E-06 |
| TUCP_004361 | XLOC_192623 | ENSRNOT00000087937 | 0.960668303 | 6.94E-07 |
| TUCP_004361 | XLOC_192623 | ENSRNOT00000005505 | 0.955242552 | 1.31E-06 |
| TUCP_004361 | XLOC_192623 | ENSRNOT00000091315 | 0.958459906 | 9.08E-07 |
| TUCP_003928 | XLOC_172812 | ENSRNOT00000006460 | 0.962229127 | 5.68E-07 |

|             |             |                    |              |          |
|-------------|-------------|--------------------|--------------|----------|
| TUCP_003928 | XLOC_172812 | ENSRNOT00000075397 | 0.968715803  | 2.24E-07 |
| TUCP_003928 | XLOC_172812 | ENSRNOT00000032926 | -0.95090405  | 2.07E-06 |
| TUCP_003928 | XLOC_172812 | ENSRNOT00000068212 | 0.960298124  | 7.27E-07 |
| TUCP_003928 | XLOC_172812 | ENSRNOT00000063930 | -0.950447655 | 2.16E-06 |
| TUCP_003928 | XLOC_172812 | ENSRNOT00000003087 | 0.954090099  | 1.49E-06 |
| TUCP_003928 | XLOC_172812 | ENSRNOT00000001855 | 0.966601397  | 3.09E-07 |
| TUCP_003928 | XLOC_172812 | ENSRNOT00000001691 | 0.972055411  | 1.28E-07 |
| TUCP_003928 | XLOC_172812 | ENSRNOT00000084567 | 0.966079997  | 3.34E-07 |
| TUCP_003928 | XLOC_172812 | ENSRNOT00000074023 | 0.970529162  | 1.67E-07 |
| TUCP_003928 | XLOC_172812 | ENSRNOT00000008361 | 0.952888787  | 1.69E-06 |
| TUCP_003928 | XLOC_172812 | ENSRNOT00000025309 | 0.961372097  | 6.35E-07 |
| TUCP_003928 | XLOC_172812 | ENSRNOT00000042638 | 0.966814481  | 3.00E-07 |
| TUCP_003928 | XLOC_172812 | ENSRNOT00000045926 | 0.963295535  | 4.93E-07 |
| TUCP_003928 | XLOC_172812 | ENSRNOT00000065076 | 0.977065792  | 4.81E-08 |
| TUCP_003928 | XLOC_172812 | ENSRNOT00000054685 | 0.969123275  | 2.10E-07 |
| TUCP_003928 | XLOC_172812 | ENSRNOT0000004238  | 0.952846205  | 1.70E-06 |
| TUCP_003928 | XLOC_172812 | ENSRNOT00000012060 | 0.953845131  | 1.53E-06 |
| TUCP_003928 | XLOC_172812 | ENSRNOT00000073370 | 0.953859307  | 1.52E-06 |
| TUCP_003928 | XLOC_172812 | ENSRNOT00000083568 | 0.956782293  | 1.10E-06 |
| TUCP_003928 | XLOC_172812 | ENSRNOT00000036137 | 0.960869592  | 6.77E-07 |
| TUCP_003928 | XLOC_172812 | ENSRNOT00000075480 | -0.965442728 | 3.66E-07 |
| TUCP_003928 | XLOC_172812 | ENSRNOT00000027760 | 0.963132398  | 5.04E-07 |
| TUCP_003928 | XLOC_172812 | ENSRNOT00000065871 | 0.964088867  | 4.43E-07 |
| TUCP_003928 | XLOC_172812 | ENSRNOT00000042903 | 0.963536061  | 4.78E-07 |
| TUCP_003928 | XLOC_172812 | ENSRNOT00000089933 | 0.956221251  | 1.18E-06 |
| TUCP_003928 | XLOC_172812 | ENSRNOT00000056100 | -0.958911614 | 8.61E-07 |
| TUCP_003928 | XLOC_172812 | ENSRNOT00000001077 | 0.958722485  | 8.80E-07 |
| TUCP_003928 | XLOC_172812 | ENSRNOT00000026391 | 0.962666739  | 5.36E-07 |
| TUCP_003928 | XLOC_172812 | ENSRNOT00000081226 | 0.958624452  | 8.91E-07 |
| TUCP_003928 | XLOC_172812 | ENSRNOT00000068663 | 0.962628024  | 5.39E-07 |
| TUCP_003928 | XLOC_172812 | ENSRNOT00000018634 | -0.951099985 | 2.03E-06 |
| TUCP_003928 | XLOC_172812 | ENSRNOT00000000048 | 0.965257218  | 3.76E-07 |
| TUCP_003928 | XLOC_172812 | ENSRNOT00000040525 | 0.969794582  | 1.88E-07 |
| TUCP_003928 | XLOC_172812 | ENSRNOT00000011832 | -0.955044084 | 1.34E-06 |
| TUCP_003928 | XLOC_172812 | ENSRNOT00000073643 | -0.963146959 | 5.03E-07 |
| TUCP_003928 | XLOC_172812 | ENSRNOT00000011930 | 0.95106605   | 2.03E-06 |
| TUCP_003928 | XLOC_172812 | ENSRNOT00000037133 | 0.968219283  | 2.42E-07 |
| TUCP_003928 | XLOC_172812 | ENSRNOT00000064772 | 0.961261797  | 6.44E-07 |
| TUCP_003928 | XLOC_172812 | ENSRNOT00000028828 | 0.954288824  | 1.46E-06 |
| TUCP_003928 | XLOC_172812 | ENSRNOT00000048781 | 0.961961744  | 5.88E-07 |
| TUCP_003928 | XLOC_172812 | ENSRNOT00000031384 | 0.955023138  | 1.34E-06 |
| TUCP_003928 | XLOC_172812 | ENSRNOT00000046215 | -0.950997319 | 2.05E-06 |
| TUCP_003928 | XLOC_172812 | ENSRNOT00000025856 | -0.951511962 | 1.95E-06 |
| TUCP_003928 | XLOC_172812 | ENSRNOT00000072299 | 0.955455743  | 1.28E-06 |
| TUCP_003928 | XLOC_172812 | ENSRNOT00000003544 | -0.951357342 | 1.98E-06 |
| TUCP_003928 | XLOC_172812 | ENSRNOT00000079609 | 0.95948334   | 8.03E-07 |
| TUCP_003928 | XLOC_172812 | ENSRNOT00000003780 | 0.959014629  | 8.50E-07 |
| TUCP_003928 | XLOC_172812 | ENSRNOT00000026643 | 0.951685625  | 1.91E-06 |
| TUCP_003928 | XLOC_172812 | ENSRNOT00000016445 | 0.957213219  | 1.05E-06 |
| TUCP_003928 | XLOC_172812 | ENSRNOT00000025913 | -0.956477962 | 1.14E-06 |
| TUCP_003928 | XLOC_172812 | ENSRNOT00000011956 | 0.954431887  | 1.43E-06 |

|             |             |                    |              |          |
|-------------|-------------|--------------------|--------------|----------|
| TUCP_003928 | XLOC_172812 | ENSRNOT00000079517 | -0.952162299 | 1.82E-06 |
| TUCP_003928 | XLOC_172812 | ENSRNOT00000066952 | 0.965761032  | 3.50E-07 |
| TUCP_003928 | XLOC_172812 | ENSRNOT00000086577 | 0.952237227  | 1.81E-06 |
| TUCP_003928 | XLOC_172812 | ENSRNOT00000036658 | -0.954033117 | 1.50E-06 |
| TUCP_003928 | XLOC_172812 | ENSRNOT00000089611 | 0.953101639  | 1.65E-06 |
| TUCP_003928 | XLOC_172812 | ENSRNOT00000065600 | 0.97981234   | 2.55E-08 |
| TUCP_003928 | XLOC_172812 | ENSRNOT00000086260 | -0.960186741 | 7.37E-07 |
| TUCP_003928 | XLOC_172812 | ENSRNOT00000085334 | 0.96266786   | 5.36E-07 |
| TUCP_003928 | XLOC_172812 | ENSRNOT00000068026 | -0.954139161 | 1.48E-06 |
| TUCP_003928 | XLOC_172812 | ENSRNOT00000022190 | -0.95105514  | 2.04E-06 |
| TUCP_003928 | XLOC_172812 | ENSRNOT00000017805 | 0.950368661  | 2.18E-06 |
| TUCP_003928 | XLOC_172812 | ENSRNOT00000035605 | 0.955232187  | 1.31E-06 |
| TUCP_003928 | XLOC_172812 | ENSRNOT00000081351 | 0.950432267  | 2.17E-06 |
| TUCP_003928 | XLOC_172812 | ENSRNOT00000084031 | 0.950324517  | 2.19E-06 |
| TUCP_003928 | XLOC_172812 | ENSRNOT00000092083 | 0.952380251  | 1.78E-06 |
| TUCP_003928 | XLOC_172812 | ENSRNOT00000005910 | -0.954337599 | 1.45E-06 |
| TUCP_003928 | XLOC_172812 | ENSRNOT00000029701 | 0.965125812  | 3.83E-07 |
| TUCP_003928 | XLOC_172812 | ENSRNOT00000065615 | 0.954818424  | 1.37E-06 |
| TUCP_003928 | XLOC_172812 | ENSRNOT00000037015 | 0.978567349  | 3.44E-08 |
| TUCP_003928 | XLOC_172812 | ENSRNOT00000008244 | 0.95793456   | 9.66E-07 |
| TUCP_003928 | XLOC_172812 | ENSRNOT00000011675 | 0.968496906  | 2.32E-07 |
| TUCP_003928 | XLOC_172812 | ENSRNOT00000028685 | 0.95685784   | 1.09E-06 |
| TUCP_003928 | XLOC_172812 | ENSRNOT00000080591 | 0.953644689  | 1.56E-06 |
| TUCP_003928 | XLOC_172812 | ENSRNOT00000049285 | -0.952397349 | 1.78E-06 |
| TUCP_003928 | XLOC_172812 | ENSRNOT00000015239 | -0.950158673 | 2.23E-06 |
| TUCP_003928 | XLOC_172812 | ENSRNOT00000003568 | 0.961170003  | 6.51E-07 |
| TUCP_003928 | XLOC_172812 | ENSRNOT00000077146 | -0.956372812 | 1.16E-06 |
| TUCP_003928 | XLOC_172812 | ENSRNOT00000013463 | 0.963007407  | 5.13E-07 |
| TUCP_003928 | XLOC_172812 | ENSRNOT00000089673 | -0.960424684 | 7.15E-07 |
| TUCP_003928 | XLOC_172812 | ENSRNOT00000010367 | 0.957246297  | 1.05E-06 |
| TUCP_003928 | XLOC_172812 | ENSRNOT00000057738 | 0.978649827  | 3.37E-08 |
| TUCP_003928 | XLOC_172812 | ENSRNOT00000055630 | 0.953551465  | 1.57E-06 |
| TUCP_003928 | XLOC_172812 | ENSRNOT00000025966 | 0.953166251  | 1.64E-06 |
| TUCP_003928 | XLOC_172812 | ENSRNOT00000027370 | 0.953110249  | 1.65E-06 |
| TUCP_003928 | XLOC_172812 | ENSRNOT00000009202 | 0.961964413  | 5.88E-07 |
| TUCP_003928 | XLOC_172812 | ENSRNOT00000082151 | -0.95041021  | 2.17E-06 |
| TUCP_003928 | XLOC_172812 | ENSRNOT00000022578 | 0.969075223  | 2.11E-07 |
| TUCP_003928 | XLOC_172812 | ENSRNOT00000003691 | -0.951968197 | 1.86E-06 |
| TUCP_003928 | XLOC_172812 | ENSRNOT00000010852 | 0.963970614  | 4.50E-07 |
| TUCP_003928 | XLOC_172812 | ENSRNOT00000013524 | 0.966713896  | 3.04E-07 |
| TUCP_003928 | XLOC_172812 | ENSRNOT00000025794 | -0.953282064 | 1.62E-06 |
| TUCP_003928 | XLOC_172812 | ENSRNOT00000085971 | -0.9518526   | 1.88E-06 |
| TUCP_003928 | XLOC_172812 | ENSRNOT00000014888 | 0.953291653  | 1.62E-06 |
| TUCP_003928 | XLOC_172812 | ENSRNOT00000008987 | -0.95315994  | 1.64E-06 |
| TUCP_003928 | XLOC_172812 | ENSRNOT00000057537 | 0.956728148  | 1.11E-06 |
| TUCP_003928 | XLOC_172812 | ENSRNOT00000022716 | 0.961142633  | 6.54E-07 |
| TUCP_003928 | XLOC_172812 | ENSRNOT00000023014 | 0.952526141  | 1.75E-06 |
| TUCP_003928 | XLOC_172812 | ENSRNOT00000026518 | 0.959745244  | 7.78E-07 |
| TUCP_003928 | XLOC_172812 | ENSRNOT00000002114 | -0.957957978 | 9.64E-07 |
| TUCP_003928 | XLOC_172812 | ENSRNOT00000082138 | -0.950957323 | 2.06E-06 |
| TUCP_003928 | XLOC_172812 | ENSRNOT00000014127 | 0.95539728   | 1.29E-06 |

|             |             |                     |              |          |
|-------------|-------------|---------------------|--------------|----------|
| TUCP_003928 | XLOC_172812 | ENSRNOT00000037409  | 0.966193081  | 3.29E-07 |
| TUCP_003928 | XLOC_172812 | ENSRNOT00000000120  | 0.961764636  | 6.04E-07 |
| TUCP_003928 | XLOC_172812 | ENSRNOT000000074150 | 0.964335842  | 4.28E-07 |
| TUCP_003928 | XLOC_172812 | ENSRNOT00000007369  | 0.971061159  | 1.52E-07 |
| TUCP_003928 | XLOC_172812 | ENSRNOT000000085466 | 0.952831793  | 1.70E-06 |
| TUCP_003928 | XLOC_172812 | ENSRNOT000000083891 | -0.96305457  | 5.09E-07 |
| TUCP_003928 | XLOC_172812 | ENSRNOT00000016568  | 0.962195603  | 5.71E-07 |
| TUCP_003928 | XLOC_172812 | ENSRNOT00000024947  | -0.950825365 | 2.08E-06 |
| TUCP_003928 | XLOC_172812 | ENSRNOT000000051494 | 0.963434657  | 4.84E-07 |
| TUCP_003928 | XLOC_172812 | ENSRNOT00000027967  | 0.97492239   | 7.49E-08 |
| TUCP_003928 | XLOC_172812 | ENSRNOT000000083632 | -0.950470015 | 2.16E-06 |
| TUCP_003928 | XLOC_172812 | ENSRNOT00000016060  | 0.963135486  | 5.04E-07 |
| TUCP_003928 | XLOC_172812 | ENSRNOT000000081678 | 0.96162687   | 6.14E-07 |
| TUCP_003928 | XLOC_172812 | ENSRNOT00000020929  | 0.9663461    | 3.21E-07 |
| TUCP_003928 | XLOC_172812 | ENSRNOT00000033933  | 0.950585068  | 2.14E-06 |
| TUCP_003928 | XLOC_172812 | ENSRNOT000000052051 | 0.95302828   | 1.66E-06 |
| TUCP_003928 | XLOC_172812 | ENSRNOT00000005257  | 0.960638293  | 6.96E-07 |
| TUCP_003928 | XLOC_172812 | ENSRNOT00000046639  | 0.950105003  | 2.24E-06 |
| TUCP_000212 | XLOC_006687 | ENSRNOT00000003979  | 0.96082464   | 6.80E-07 |
| TUCP_000212 | XLOC_006687 | ENSRNOT00000008558  | -0.95655493  | 1.13E-06 |
| TUCP_004365 | XLOC_192757 | ENSRNOT000000086061 | 0.960155262  | 7.40E-07 |
| TUCP_003977 | XLOC_174297 | ENSRNOT00000023685  | 0.956960868  | 1.08E-06 |
| TUCP_003977 | XLOC_174297 | ENSRNOT000000054875 | 0.955313154  | 1.30E-06 |
| TUCP_001570 | XLOC_060661 | ENSRNOT000000087758 | 0.951782152  | 1.89E-06 |
| TUCP_001570 | XLOC_060661 | ENSRNOT000000041281 | 0.961006221  | 6.65E-07 |
| TUCP_004366 | XLOC_192781 | ENSRNOT00000015757  | 0.950188648  | 2.22E-06 |
| TUCP_004366 | XLOC_192781 | ENSRNOT00000014301  | 0.950600197  | 2.13E-06 |
| TUCP_004366 | XLOC_192781 | ENSRNOT000000091139 | 0.950415395  | 2.17E-06 |
| TUCP_004366 | XLOC_192781 | ENSRNOT000000045315 | 0.956373481  | 1.16E-06 |
| TUCP_004366 | XLOC_192781 | ENSRNOT000000008865 | 0.950879209  | 2.07E-06 |
| TUCP_004366 | XLOC_192781 | ENSRNOT00000079962  | -0.955317413 | 1.30E-06 |
| TUCP_004366 | XLOC_192781 | ENSRNOT000000056877 | 0.961711956  | 6.08E-07 |
| TUCP_004366 | XLOC_192781 | ENSRNOT000000077243 | 0.952846653  | 1.70E-06 |
| TUCP_003922 | XLOC_172594 | ENSRNOT000000044855 | 0.987136477  | 2.71E-09 |
| TUCP_003922 | XLOC_172594 | ENSRNOT00000026812  | 0.958881847  | 8.64E-07 |
| TUCP_003922 | XLOC_172594 | ENSRNOT000000050485 | 0.9561563    | 1.19E-06 |
| TUCP_003922 | XLOC_172594 | ENSRNOT000000076924 | 0.95554332   | 1.27E-06 |
| TUCP_003923 | XLOC_172687 | ENSRNOT000000076522 | 0.961890227  | 5.94E-07 |
| TUCP_004201 | XLOC_184475 | ENSRNOT000000091813 | 0.987323087  | 2.52E-09 |
| TUCP_004206 | XLOC_184637 | ENSRNOT000000008573 | 0.973015738  | 1.08E-07 |
| TUCP_004206 | XLOC_184637 | ENSRNOT000000006186 | 0.950942397  | 2.06E-06 |
| TUCP_004206 | XLOC_184637 | ENSRNOT000000005958 | 0.951557806  | 1.94E-06 |
| TUCP_004206 | XLOC_184637 | ENSRNOT00000029819  | -0.961133793 | 6.54E-07 |
| TUCP_004206 | XLOC_184637 | ENSRNOT000000085885 | -0.954546897 | 1.42E-06 |
| TUCP_004206 | XLOC_184637 | ENSRNOT00000028856  | 0.987107688  | 2.75E-09 |
| TUCP_004206 | XLOC_184637 | ENSRNOT00000030850  | 0.971131988  | 1.50E-07 |
| TUCP_004206 | XLOC_184637 | ENSRNOT000000055582 | 0.954574806  | 1.41E-06 |
| TUCP_004206 | XLOC_184637 | ENSRNOT000000086893 | -0.954380051 | 1.44E-06 |
| TUCP_004206 | XLOC_184637 | ENSRNOT000000055540 | 0.957833887  | 9.78E-07 |
| TUCP_004206 | XLOC_184637 | ENSRNOT00000020322  | 0.961743532  | 6.05E-07 |
| TUCP_004206 | XLOC_184637 | ENSRNOT000000085251 | -0.970338309 | 1.72E-07 |

|             |             |                    |              |          |
|-------------|-------------|--------------------|--------------|----------|
| TUCP_004206 | XLOC_184637 | ENSRNOT00000022074 | 0.977641907  | 4.24E-08 |
| TUCP_004206 | XLOC_184637 | ENSRNOT00000044742 | 0.954295249  | 1.45E-06 |
| TUCP_004206 | XLOC_184637 | ENSRNOT00000045699 | 0.977012086  | 4.86E-08 |
| TUCP_004206 | XLOC_184637 | ENSRNOT00000057045 | -0.969365453 | 2.02E-07 |
| TUCP_004206 | XLOC_184637 | ENSRNOT00000064401 | 0.976174801  | 5.81E-08 |
| TUCP_004206 | XLOC_184637 | ENSRNOT00000007351 | -0.953722755 | 1.55E-06 |
| TUCP_004206 | XLOC_184637 | ENSRNOT00000073971 | 0.981771688  | 1.54E-08 |
| TUCP_004206 | XLOC_184637 | ENSRNOT00000022534 | 0.953500195  | 1.58E-06 |
| TUCP_004206 | XLOC_184637 | ENSRNOT00000024266 | 0.957751296  | 9.87E-07 |
| TUCP_004206 | XLOC_184637 | ENSRNOT00000077856 | -0.952636945 | 1.73E-06 |
| TUCP_004206 | XLOC_184637 | ENSRNOT00000085228 | 0.962725041  | 5.32E-07 |
| TUCP_004206 | XLOC_184637 | ENSRNOT00000017319 | 0.960398944  | 7.18E-07 |
| TUCP_004206 | XLOC_184637 | ENSRNOT00000005934 | 0.969798159  | 1.88E-07 |
| TUCP_004206 | XLOC_184637 | ENSRNOT00000018488 | -0.960231348 | 7.33E-07 |
| TUCP_004206 | XLOC_184637 | ENSRNOT00000079866 | 0.972917922  | 1.10E-07 |
| TUCP_004206 | XLOC_184637 | ENSRNOT00000005839 | 0.95389225   | 1.52E-06 |
| TUCP_004206 | XLOC_184637 | ENSRNOT00000040629 | 0.950346516  | 2.19E-06 |
| TUCP_004206 | XLOC_184637 | ENSRNOT00000019687 | 0.954983924  | 1.35E-06 |
| TUCP_004206 | XLOC_184637 | ENSRNOT00000068033 | 0.976554985  | 5.36E-08 |
| TUCP_004206 | XLOC_184637 | ENSRNOT00000009156 | 0.960200883  | 7.36E-07 |
| TUCP_004206 | XLOC_184637 | ENSRNOT00000026481 | 0.96051909   | 7.07E-07 |
| TUCP_004206 | XLOC_184637 | ENSRNOT00000044562 | 0.97067153   | 1.63E-07 |
| TUCP_004206 | XLOC_184637 | ENSRNOT00000012892 | 0.961034631  | 6.63E-07 |
| TUCP_004206 | XLOC_184637 | ENSRNOT00000088196 | 0.950163531  | 2.23E-06 |
| TUCP_004206 | XLOC_184637 | ENSRNOT00000016132 | -0.971892137 | 1.32E-07 |
| TUCP_004206 | XLOC_184637 | ENSRNOT00000023506 | -0.95187394  | 1.87E-06 |
| TUCP_004206 | XLOC_184637 | ENSRNOT00000071493 | -0.954081484 | 1.49E-06 |
| TUCP_004206 | XLOC_184637 | ENSRNOT00000048063 | 0.955829283  | 1.23E-06 |
| TUCP_004206 | XLOC_184637 | ENSRNOT00000078102 | 0.962665043  | 5.37E-07 |
| TUCP_004206 | XLOC_184637 | ENSRNOT00000026633 | 0.959001594  | 8.51E-07 |
| TUCP_004206 | XLOC_184637 | ENSRNOT00000081047 | 0.968796766  | 2.21E-07 |
| TUCP_004206 | XLOC_184637 | ENSRNOT00000011880 | 0.96337793   | 4.88E-07 |
| TUCP_004206 | XLOC_184637 | ENSRNOT00000027212 | -0.958124252 | 9.45E-07 |
| TUCP_004206 | XLOC_184637 | ENSRNOT00000003991 | 0.962205848  | 5.70E-07 |
| TUCP_004206 | XLOC_184637 | ENSRNOT00000021408 | 0.952686028  | 1.72E-06 |
| TUCP_004206 | XLOC_184637 | ENSRNOT00000064900 | 0.954062388  | 1.49E-06 |
| TUCP_004206 | XLOC_184637 | ENSRNOT00000020951 | 0.95489331   | 1.36E-06 |
| TUCP_004206 | XLOC_184637 | ENSRNOT00000087997 | 0.959095382  | 8.42E-07 |
| TUCP_004206 | XLOC_184637 | ENSRNOT00000021015 | 0.983343716  | 9.82E-09 |
| TUCP_004206 | XLOC_184637 | ENSRNOT00000082146 | -0.983977102 | 8.10E-09 |
| TUCP_004206 | XLOC_184637 | ENSRNOT00000011408 | 0.962681384  | 5.35E-07 |
| TUCP_004206 | XLOC_184637 | ENSRNOT00000023876 | 0.950626159  | 2.13E-06 |
| TUCP_004206 | XLOC_184637 | ENSRNOT00000033359 | 0.951098188  | 2.03E-06 |
| TUCP_004206 | XLOC_184637 | ENSRNOT00000045233 | -0.970233763 | 1.75E-07 |
| TUCP_004206 | XLOC_184637 | ENSRNOT00000027452 | 0.954345774  | 1.45E-06 |
| TUCP_004206 | XLOC_184637 | ENSRNOT00000019656 | -0.957335764 | 1.04E-06 |
| TUCP_004206 | XLOC_184637 | ENSRNOT00000019652 | 0.959154476  | 8.36E-07 |
| TUCP_004206 | XLOC_184637 | ENSRNOT00000033196 | -0.959739433 | 7.79E-07 |
| TUCP_004206 | XLOC_184637 | ENSRNOT00000036951 | 0.959520858  | 8.00E-07 |
| TUCP_004206 | XLOC_184637 | ENSRNOT00000078250 | 0.957971787  | 9.62E-07 |
| TUCP_004206 | XLOC_184637 | ENSRNOT00000023977 | -0.954772266 | 1.38E-06 |

|             |             |                    |              |          |
|-------------|-------------|--------------------|--------------|----------|
| TUCP_004206 | XLOC_184637 | ENSRNOT00000029136 | -0.959706284 | 7.82E-07 |
| TUCP_004206 | XLOC_184637 | ENSRNOT00000077894 | -0.982506657 | 1.25E-08 |
| TUCP_004206 | XLOC_184637 | ENSRNOT00000000728 | -0.96476537  | 4.03E-07 |
| TUCP_004206 | XLOC_184637 | ENSRNOT00000021471 | -0.955316115 | 1.30E-06 |
| TUCP_004206 | XLOC_184637 | ENSRNOT00000005644 | -0.955749873 | 1.24E-06 |
| TUCP_004206 | XLOC_184637 | ENSRNOT00000030692 | -0.967317552 | 2.78E-07 |
| TUCP_004206 | XLOC_184637 | ENSRNOT00000080443 | 0.962473678  | 5.50E-07 |
| TUCP_004206 | XLOC_184637 | ENSRNOT00000040548 | -0.951655181 | 1.92E-06 |
| TUCP_004206 | XLOC_184637 | ENSRNOT00000010748 | 0.972722926  | 1.14E-07 |
| TUCP_004206 | XLOC_184637 | ENSRNOT00000040060 | -0.956553121 | 1.13E-06 |
| TUCP_004206 | XLOC_184637 | ENSRNOT00000035474 | 0.972512487  | 1.18E-07 |
| TUCP_004206 | XLOC_184637 | ENSRNOT00000046323 | 0.9593106    | 8.20E-07 |
| TUCP_004206 | XLOC_184637 | ENSRNOT00000023807 | -0.958558625 | 8.98E-07 |
| TUCP_004206 | XLOC_184637 | ENSRNOT00000078856 | -0.977858622 | 4.04E-08 |
| TUCP_004206 | XLOC_184637 | ENSRNOT00000009742 | -0.953416728 | 1.60E-06 |
| TUCP_004206 | XLOC_184637 | ENSRNOT00000010983 | 0.95309419   | 1.65E-06 |
| TUCP_004206 | XLOC_184637 | ENSRNOT00000004787 | -0.955529638 | 1.27E-06 |
| TUCP_004206 | XLOC_184637 | ENSRNOT00000004864 | 0.950432316  | 2.17E-06 |
| TUCP_004206 | XLOC_184637 | ENSRNOT00000022000 | -0.951393034 | 1.97E-06 |
| TUCP_004206 | XLOC_184637 | ENSRNOT00000079917 | 0.952332285  | 1.79E-06 |
| TUCP_004206 | XLOC_184637 | ENSRNOT00000026174 | 0.966306149  | 3.23E-07 |
| TUCP_004206 | XLOC_184637 | ENSRNOT00000070912 | -0.967235178 | 2.81E-07 |
| TUCP_004206 | XLOC_184637 | ENSRNOT00000017776 | 0.976788948  | 5.10E-08 |
| TUCP_004206 | XLOC_184637 | ENSRNOT00000018998 | 0.9569606    | 1.08E-06 |
| TUCP_004206 | XLOC_184637 | ENSRNOT00000004463 | 0.965467594  | 3.65E-07 |
| TUCP_004206 | XLOC_184637 | ENSRNOT00000026597 | 0.961920065  | 5.92E-07 |
| TUCP_004206 | XLOC_184637 | ENSRNOT00000008982 | 0.953418993  | 1.60E-06 |
| TUCP_004206 | XLOC_184637 | ENSRNOT00000047192 | -0.953328998 | 1.61E-06 |
| TUCP_004206 | XLOC_184637 | ENSRNOT00000008987 | -0.95854276  | 9.00E-07 |
| TUCP_004206 | XLOC_184637 | ENSRNOT00000090299 | 0.967896954  | 2.54E-07 |
| TUCP_004206 | XLOC_184637 | ENSRNOT00000065143 | 0.960664146  | 6.94E-07 |
| TUCP_004206 | XLOC_184637 | ENSRNOT00000081246 | 0.950271773  | 2.20E-06 |
| TUCP_004206 | XLOC_184637 | ENSRNOT00000027083 | 0.951110833  | 2.03E-06 |
| TUCP_004206 | XLOC_184637 | ENSRNOT00000066041 | -0.952827929 | 1.70E-06 |
| TUCP_004206 | XLOC_184637 | ENSRNOT00000013058 | 0.951424713  | 1.96E-06 |
| TUCP_004206 | XLOC_184637 | ENSRNOT00000001290 | 0.977951498  | 3.95E-08 |
| TUCP_004206 | XLOC_184637 | ENSRNOT00000003412 | -0.958959714 | 8.56E-07 |
| TUCP_004206 | XLOC_184637 | ENSRNOT00000009563 | -0.980893215 | 1.94E-08 |
| TUCP_004206 | XLOC_184637 | ENSRNOT00000038178 | -0.952625024 | 1.74E-06 |
| TUCP_004206 | XLOC_184637 | ENSRNOT00000081768 | 0.970771449  | 1.60E-07 |
| TUCP_004206 | XLOC_184637 | ENSRNOT00000019502 | 0.986187814  | 3.87E-09 |
| TUCP_004206 | XLOC_184637 | ENSRNOT00000043216 | 0.953292364  | 1.62E-06 |
| TUCP_004206 | XLOC_184637 | ENSRNOT00000081981 | 0.957137881  | 1.06E-06 |
| TUCP_004206 | XLOC_184637 | ENSRNOT00000010418 | 0.953839599  | 1.53E-06 |
| TUCP_004206 | XLOC_184637 | ENSRNOT00000040847 | -0.962191236 | 5.71E-07 |
| TUCP_004206 | XLOC_184637 | ENSRNOT00000027223 | 0.953296923  | 1.62E-06 |
| TUCP_004206 | XLOC_184637 | ENSRNOT00000003327 | -0.956834074 | 1.10E-06 |
| TUCP_004206 | XLOC_184637 | ENSRNOT00000015479 | 0.952307407  | 1.79E-06 |
| TUCP_004206 | XLOC_184637 | ENSRNOT00000029439 | 0.951649721  | 1.92E-06 |
| TUCP_004206 | XLOC_184637 | ENSRNOT00000073019 | 0.954076376  | 1.49E-06 |
| TUCP_004206 | XLOC_184637 | ENSRNOT00000044628 | 0.973414961  | 1.00E-07 |



|             |             |                    |              |          |
|-------------|-------------|--------------------|--------------|----------|
| TUCP_004206 | XLOC_184637 | ENSRNOT00000079109 | 0.958823473  | 8.70E-07 |
| TUCP_004206 | XLOC_184637 | ENSRNOT00000011926 | 0.960090006  | 7.46E-07 |
| TUCP_004206 | XLOC_184637 | ENSRNOT00000076611 | -0.976930828 | 4.95E-08 |
| TUCP_004206 | XLOC_184637 | ENSRNOT0000004007  | -0.951644995 | 1.92E-06 |
| TUCP_004206 | XLOC_184637 | ENSRNOT00000077555 | 0.962069117  | 5.80E-07 |
| TUCP_004206 | XLOC_184637 | ENSRNOT00000052075 | 0.956378675  | 1.16E-06 |
| TUCP_004206 | XLOC_184637 | ENSRNOT00000091602 | -0.958839973 | 8.68E-07 |
| TUCP_004206 | XLOC_184637 | ENSRNOT00000090123 | 0.950356147  | 2.18E-06 |
| TUCP_004206 | XLOC_184637 | ENSRNOT00000006680 | 0.953412023  | 1.60E-06 |
| TUCP_004206 | XLOC_184637 | ENSRNOT00000090129 | -0.983503587 | 9.36E-09 |
| TUCP_004206 | XLOC_184637 | ENSRNOT00000026258 | 0.952149419  | 1.82E-06 |
| TUCP_004206 | XLOC_184637 | ENSRNOT00000087443 | 0.957106491  | 1.06E-06 |
| TUCP_004206 | XLOC_184637 | ENSRNOT00000009900 | -0.962523959 | 5.47E-07 |
| TUCP_004206 | XLOC_184637 | ENSRNOT00000025856 | -0.952530836 | 1.75E-06 |
| TUCP_004206 | XLOC_184637 | ENSRNOT00000014508 | 0.974659024  | 7.89E-08 |
| TUCP_004206 | XLOC_184637 | ENSRNOT00000083876 | -0.967138311 | 2.86E-07 |
| TUCP_004206 | XLOC_184637 | ENSRNOT00000045946 | 0.963757296  | 4.63E-07 |
| TUCP_004206 | XLOC_184637 | ENSRNOT00000007954 | 0.964056397  | 4.45E-07 |
| TUCP_004206 | XLOC_184637 | ENSRNOT00000068381 | 0.957375431  | 1.03E-06 |
| TUCP_004206 | XLOC_184637 | ENSRNOT00000016730 | -0.962887476 | 5.21E-07 |
| TUCP_004206 | XLOC_184637 | ENSRNOT00000010873 | -0.981841226 | 1.51E-08 |
| TUCP_004206 | XLOC_184637 | ENSRNOT00000014821 | -0.959870561 | 7.66E-07 |
| TUCP_004206 | XLOC_184637 | ENSRNOT00000088599 | 0.976861777  | 5.02E-08 |
| TUCP_004206 | XLOC_184637 | ENSRNOT00000061100 | 0.96180765   | 6.00E-07 |
| TUCP_004206 | XLOC_184637 | ENSRNOT00000083351 | -0.967847656 | 2.56E-07 |
| TUCP_004206 | XLOC_184637 | ENSRNOT00000050609 | -0.960762146 | 6.86E-07 |
| TUCP_004206 | XLOC_184637 | ENSRNOT00000043535 | 0.967668442  | 2.64E-07 |
| TUCP_004206 | XLOC_184637 | ENSRNOT00000027910 | 0.956233843  | 1.17E-06 |
| TUCP_004206 | XLOC_184637 | ENSRNOT00000024322 | 0.961143444  | 6.53E-07 |
| TUCP_004206 | XLOC_184637 | ENSRNOT00000011270 | 0.96517886   | 3.80E-07 |
| TUCP_004206 | XLOC_184637 | ENSRNOT00000003770 | -0.983464818 | 9.47E-09 |
| TUCP_004206 | XLOC_184637 | ENSRNOT00000010516 | -0.951168118 | 2.01E-06 |
| TUCP_004206 | XLOC_184637 | ENSRNOT00000008427 | -0.961097424 | 6.57E-07 |
| TUCP_004206 | XLOC_184637 | ENSRNOT00000039730 | -0.955792887 | 1.23E-06 |
| TUCP_004206 | XLOC_184637 | ENSRNOT00000051022 | 0.981927305  | 1.47E-08 |
| TUCP_004206 | XLOC_184637 | ENSRNOT00000029833 | 0.958648907  | 8.88E-07 |
| TUCP_004206 | XLOC_184637 | ENSRNOT00000027860 | -0.953746634 | 1.54E-06 |
| TUCP_004206 | XLOC_184637 | ENSRNOT00000002173 | -0.970816451 | 1.59E-07 |
| TUCP_004206 | XLOC_184637 | ENSRNOT00000015188 | 0.971384691  | 1.44E-07 |
| TUCP_004206 | XLOC_184637 | ENSRNOT00000020272 | -0.960565404 | 7.03E-07 |
| TUCP_004206 | XLOC_184637 | ENSRNOT00000027666 | 0.970960371  | 1.55E-07 |
| TUCP_004206 | XLOC_184637 | ENSRNOT00000016991 | 0.951991962  | 1.85E-06 |
| TUCP_004206 | XLOC_184637 | ENSRNOT00000019644 | -0.951266698 | 1.99E-06 |
| TUCP_004206 | XLOC_184637 | ENSRNOT00000077479 | -0.96017536  | 7.38E-07 |
| TUCP_004206 | XLOC_184637 | ENSRNOT00000074659 | 0.964646885  | 4.10E-07 |
| TUCP_004206 | XLOC_184637 | ENSRNOT00000077406 | 0.962017007  | 5.84E-07 |
| TUCP_004206 | XLOC_184637 | ENSRNOT0000002292  | 0.957799414  | 9.82E-07 |
| TUCP_004206 | XLOC_184637 | ENSRNOT00000052120 | 0.960722048  | 6.89E-07 |
| TUCP_004206 | XLOC_184637 | ENSRNOT00000009894 | -0.97796734  | 3.94E-08 |
| TUCP_004206 | XLOC_184637 | ENSRNOT00000056130 | 0.953667928  | 1.56E-06 |
| TUCP_004206 | XLOC_184637 | ENSRNOT00000004172 | 0.976059679  | 5.95E-08 |

|             |             |                    |              |          |
|-------------|-------------|--------------------|--------------|----------|
| TUCP_004206 | XLOC_184637 | ENSRNOT00000085279 | 0.95360829   | 1.57E-06 |
| TUCP_004206 | XLOC_184637 | ENSRNOT00000087095 | 0.954364844  | 1.44E-06 |
| TUCP_004206 | XLOC_184637 | ENSRNOT00000005389 | 0.95618143   | 1.18E-06 |
| TUCP_004206 | XLOC_184637 | ENSRNOT00000026280 | 0.955118119  | 1.33E-06 |
| TUCP_004206 | XLOC_184637 | ENSRNOT00000022862 | 0.975363045  | 6.86E-08 |
| TUCP_004206 | XLOC_184637 | ENSRNOT00000015092 | 0.954592982  | 1.41E-06 |
| TUCP_004206 | XLOC_184637 | ENSRNOT00000083632 | -0.957827918 | 9.79E-07 |
| TUCP_004206 | XLOC_184637 | ENSRNOT00000010224 | 0.961393851  | 6.33E-07 |
| TUCP_004206 | XLOC_184637 | ENSRNOT00000008210 | 0.972887634  | 1.10E-07 |
| TUCP_004206 | XLOC_184637 | ENSRNOT00000058611 | -0.952042038 | 1.84E-06 |
| TUCP_004206 | XLOC_184637 | ENSRNOT00000002109 | 0.955380966  | 1.29E-06 |
| TUCP_004206 | XLOC_184637 | ENSRNOT00000073559 | 0.955597414  | 1.26E-06 |
| TUCP_004206 | XLOC_184637 | ENSRNOT00000049044 | 0.954858113  | 1.37E-06 |
| TUCP_004206 | XLOC_184637 | ENSRNOT00000039551 | -0.950011803 | 2.26E-06 |
| TUCP_004206 | XLOC_184637 | ENSRNOT00000082998 | 0.968796811  | 2.21E-07 |
| TUCP_004206 | XLOC_184637 | ENSRNOT00000075656 | -0.960772216 | 6.85E-07 |
| TUCP_004206 | XLOC_184637 | ENSRNOT00000015006 | 0.975360821  | 6.86E-08 |
| TUCP_004206 | XLOC_184637 | ENSRNOT00000004956 | 0.957280045  | 1.04E-06 |
| TUCP_004206 | XLOC_184637 | ENSRNOT00000017665 | 0.961909661  | 5.92E-07 |
| TUCP_004206 | XLOC_184637 | ENSRNOT00000023638 | 0.96754003   | 2.69E-07 |
| TUCP_004206 | XLOC_184637 | ENSRNOT00000005228 | 0.9511645    | 2.01E-06 |
| TUCP_004206 | XLOC_184637 | ENSRNOT00000008677 | 0.959399931  | 8.11E-07 |
| TUCP_004206 | XLOC_184637 | ENSRNOT00000022726 | 0.951487004  | 1.95E-06 |
| TUCP_004206 | XLOC_184637 | ENSRNOT00000017361 | 0.965921223  | 3.42E-07 |
| TUCP_004206 | XLOC_184637 | ENSRNOT00000005220 | 0.95086118   | 2.08E-06 |
| TUCP_004206 | XLOC_184637 | ENSRNOT00000045326 | 0.973253773  | 1.03E-07 |
| TUCP_004206 | XLOC_184637 | ENSRNOT00000016649 | 0.964088922  | 4.43E-07 |
| TUCP_004206 | XLOC_184637 | ENSRNOT00000067170 | -0.956201346 | 1.18E-06 |
| TUCP_004206 | XLOC_184637 | ENSRNOT00000077871 | 0.963865186  | 4.57E-07 |
| TUCP_004206 | XLOC_184637 | ENSRNOT00000080654 | 0.953603234  | 1.57E-06 |
| TUCP_004206 | XLOC_184637 | ENSRNOT0000001586  | -0.974849956 | 7.60E-08 |
| TUCP_004206 | XLOC_184637 | ENSRNOT00000092945 | -0.955924563 | 1.22E-06 |
| TUCP_004206 | XLOC_184637 | ENSRNOT00000043554 | 0.975173967  | 7.12E-08 |
| TUCP_004206 | XLOC_184637 | ENSRNOT00000075006 | -0.975780878 | 6.30E-08 |
| TUCP_004206 | XLOC_184637 | ENSRNOT00000012187 | 0.963637985  | 4.71E-07 |
| TUCP_004206 | XLOC_184637 | ENSRNOT00000057814 | 0.95668923   | 1.12E-06 |
| TUCP_004206 | XLOC_184637 | ENSRNOT00000026783 | 0.953207196  | 1.63E-06 |
| TUCP_004206 | XLOC_184637 | ENSRNOT00000081621 | 0.960010275  | 7.53E-07 |
| TUCP_004206 | XLOC_184637 | ENSRNOT00000032158 | 0.957412877  | 1.03E-06 |
| TUCP_004206 | XLOC_184637 | ENSRNOT00000038247 | 0.952157164  | 1.82E-06 |
| TUCP_004206 | XLOC_184637 | ENSRNOT00000011731 | -0.95618047  | 1.18E-06 |
| TUCP_004206 | XLOC_184637 | ENSRNOT00000016490 | 0.954186015  | 1.47E-06 |
| TUCP_004206 | XLOC_184637 | ENSRNOT00000077908 | 0.950831558  | 2.08E-06 |
| TUCP_004206 | XLOC_184637 | ENSRNOT00000067009 | -0.969534105 | 1.96E-07 |
| TUCP_004206 | XLOC_184637 | ENSRNOT00000010463 | 0.963792331  | 4.61E-07 |
| TUCP_004206 | XLOC_184637 | ENSRNOT00000026718 | 0.961221627  | 6.47E-07 |
| TUCP_004206 | XLOC_184637 | ENSRNOT00000072208 | 0.969651337  | 1.93E-07 |
| TUCP_004206 | XLOC_184637 | ENSRNOT00000010784 | 0.962266528  | 5.65E-07 |
| TUCP_004206 | XLOC_184637 | ENSRNOT00000013762 | 0.962894478  | 5.20E-07 |
| TUCP_004206 | XLOC_184637 | ENSRNOT00000012361 | -0.96249828  | 5.48E-07 |
| TUCP_004206 | XLOC_184637 | ENSRNOT00000019820 | 0.974072224  | 8.84E-08 |

|             |             |                    |              |          |
|-------------|-------------|--------------------|--------------|----------|
| TUCP_004206 | XLOC_184637 | ENSRNOT00000067822 | 0.950392287  | 2.18E-06 |
| TUCP_004206 | XLOC_184637 | ENSRNOT00000003940 | -0.958342062 | 9.21E-07 |
| TUCP_004206 | XLOC_184637 | ENSRNOT00000091909 | 0.952679166  | 1.73E-06 |
| TUCP_004206 | XLOC_184637 | ENSRNOT00000027684 | 0.958919506  | 8.60E-07 |
| TUCP_004206 | XLOC_184637 | ENSRNOT00000025362 | -0.97056636  | 1.66E-07 |
| TUCP_004206 | XLOC_184637 | ENSRNOT00000010541 | 0.963103116  | 5.06E-07 |
| TUCP_004206 | XLOC_184637 | ENSRNOT00000084385 | 0.981057761  | 1.86E-08 |
| TUCP_004206 | XLOC_184637 | ENSRNOT00000074212 | 0.971998324  | 1.29E-07 |
| TUCP_004206 | XLOC_184637 | ENSRNOT00000013864 | -0.953212833 | 1.63E-06 |
| TUCP_004206 | XLOC_184637 | ENSRNOT00000001081 | 0.952902382  | 1.69E-06 |
| TUCP_004206 | XLOC_184637 | ENSRNOT00000021925 | 0.954838881  | 1.37E-06 |
| TUCP_004206 | XLOC_184637 | ENSRNOT00000086119 | -0.951608967 | 1.93E-06 |
| TUCP_004206 | XLOC_184637 | ENSRNOT00000025913 | -0.955687098 | 1.25E-06 |
| TUCP_004206 | XLOC_184637 | ENSRNOT00000022213 | 0.958536012  | 9.00E-07 |
| TUCP_004206 | XLOC_184637 | ENSRNOT00000067780 | -0.954427039 | 1.43E-06 |
| TUCP_004206 | XLOC_184637 | ENSRNOT0000007889  | -0.951850287 | 1.88E-06 |
| TUCP_004206 | XLOC_184637 | ENSRNOT00000073675 | -0.952663598 | 1.73E-06 |
| TUCP_004206 | XLOC_184637 | ENSRNOT0000007738  | -0.952802402 | 1.70E-06 |
| TUCP_004206 | XLOC_184637 | ENSRNOT00000056166 | 0.950895108  | 2.07E-06 |
| TUCP_004206 | XLOC_184637 | ENSRNOT00000052422 | 0.961409606  | 6.32E-07 |
| TUCP_004206 | XLOC_184637 | ENSRNOT00000001242 | 0.961463941  | 6.27E-07 |
| TUCP_004206 | XLOC_184637 | ENSRNOT00000084552 | -0.956125893 | 1.19E-06 |
| TUCP_004206 | XLOC_184637 | ENSRNOT00000078589 | -0.954326139 | 1.45E-06 |
| TUCP_004206 | XLOC_184637 | ENSRNOT00000034883 | -0.95191402  | 1.87E-06 |
| TUCP_004206 | XLOC_184637 | ENSRNOT00000020155 | 0.971140126  | 1.50E-07 |
| TUCP_004206 | XLOC_184637 | ENSRNOT00000055321 | 0.955799041  | 1.23E-06 |
| TUCP_004206 | XLOC_184637 | ENSRNOT00000014537 | 0.96226327   | 5.66E-07 |
| TUCP_004206 | XLOC_184637 | ENSRNOT00000005910 | -0.951599863 | 1.93E-06 |
| TUCP_004206 | XLOC_184637 | ENSRNOT00000016722 | 0.957756446  | 9.87E-07 |
| TUCP_004206 | XLOC_184637 | ENSRNOT00000045443 | -0.950736538 | 2.10E-06 |
| TUCP_004206 | XLOC_184637 | ENSRNOT00000000013 | 0.962133142  | 5.75E-07 |
| TUCP_004206 | XLOC_184637 | ENSRNOT00000015131 | -0.964073253 | 4.44E-07 |
| TUCP_004206 | XLOC_184637 | ENSRNOT00000072031 | -0.955487992 | 1.28E-06 |
| TUCP_004206 | XLOC_184637 | ENSRNOT00000017753 | 0.963665845  | 4.69E-07 |
| TUCP_004206 | XLOC_184637 | ENSRNOT00000026057 | -0.951655371 | 1.92E-06 |
| TUCP_004206 | XLOC_184637 | ENSRNOT00000027125 | -0.957073692 | 1.07E-06 |
| TUCP_004206 | XLOC_184637 | ENSRNOT00000027121 | 0.952292216  | 1.80E-06 |
| TUCP_004206 | XLOC_184637 | ENSRNOT00000023078 | 0.953180254  | 1.64E-06 |
| TUCP_004206 | XLOC_184637 | ENSRNOT00000050223 | -0.953421903 | 1.60E-06 |
| TUCP_004206 | XLOC_184637 | ENSRNOT00000019554 | 0.953516769  | 1.58E-06 |
| TUCP_004206 | XLOC_184637 | ENSRNOT00000035700 | 0.955285382  | 1.31E-06 |
| TUCP_004206 | XLOC_184637 | ENSRNOT00000061191 | -0.958296333 | 9.26E-07 |
| TUCP_004206 | XLOC_184637 | ENSRNOT00000029202 | -0.952200772 | 1.81E-06 |
| TUCP_004206 | XLOC_184637 | ENSRNOT00000017907 | -0.955859162 | 1.23E-06 |
| TUCP_004206 | XLOC_184637 | ENSRNOT00000092029 | 0.976290259  | 5.67E-08 |
| TUCP_004206 | XLOC_184637 | ENSRNOT00000025794 | -0.954365214 | 1.44E-06 |
| TUCP_004206 | XLOC_184637 | ENSRNOT00000054980 | 0.972254626  | 1.24E-07 |
| TUCP_004206 | XLOC_184637 | ENSRNOT00000050834 | -0.952835731 | 1.70E-06 |
| TUCP_004206 | XLOC_184637 | ENSRNOT00000054828 | 0.953427936  | 1.60E-06 |
| TUCP_004206 | XLOC_184637 | ENSRNOT00000002443 | 0.951091585  | 2.03E-06 |
| TUCP_004206 | XLOC_184637 | ENSRNOT00000066028 | 0.953347229  | 1.61E-06 |

|             |             |                     |              |          |
|-------------|-------------|---------------------|--------------|----------|
| TUCP_004206 | XLOC_184637 | ENSRNOT00000002114  | -0.963576596 | 4.75E-07 |
| TUCP_004206 | XLOC_184637 | ENSRNOT00000002445  | -0.950583558 | 2.14E-06 |
| TUCP_004206 | XLOC_184637 | ENSRNOT000000027970 | 0.963199349  | 5.00E-07 |
| TUCP_004206 | XLOC_184637 | ENSRNOT000000084422 | 0.968873697  | 2.18E-07 |
| TUCP_004206 | XLOC_184637 | ENSRNOT000000022142 | 0.965868375  | 3.44E-07 |
| TUCP_004206 | XLOC_184637 | ENSRNOT000000014124 | 0.967814372  | 2.58E-07 |
| TUCP_004206 | XLOC_184637 | ENSRNOT00000000120  | 0.961588626  | 6.17E-07 |
| TUCP_004206 | XLOC_184637 | ENSRNOT00000013632  | 0.980877457  | 1.95E-08 |
| TUCP_004206 | XLOC_184637 | ENSRNOT00000001759  | -0.967145337 | 2.85E-07 |
| TUCP_004206 | XLOC_184637 | ENSRNOT000000064798 | 0.960914858  | 6.73E-07 |
| TUCP_004206 | XLOC_184637 | ENSRNOT00000019177  | 0.955819911  | 1.23E-06 |
| TUCP_004206 | XLOC_184637 | ENSRNOT00000020994  | -0.950080849 | 2.24E-06 |
| TUCP_004206 | XLOC_184637 | ENSRNOT00000019911  | -0.971414828 | 1.43E-07 |
| TUCP_004206 | XLOC_184637 | ENSRNOT00000040393  | 0.974236464  | 8.56E-08 |
| TUCP_004206 | XLOC_184637 | ENSRNOT000000032236 | -0.968038201 | 2.49E-07 |
| TUCP_004206 | XLOC_184637 | ENSRNOT00000011041  | 0.952740716  | 1.71E-06 |
| TUCP_004206 | XLOC_184637 | ENSRNOT000000064700 | 0.980820851  | 1.98E-08 |
| TUCP_004206 | XLOC_184637 | ENSRNOT000000003326 | -0.957827526 | 9.79E-07 |
| TUCP_004206 | XLOC_184637 | ENSRNOT00000019983  | -0.980252297 | 2.29E-08 |
| TUCP_004206 | XLOC_184637 | ENSRNOT000000004140 | 0.971130266  | 1.50E-07 |
| TUCP_004206 | XLOC_184637 | ENSRNOT000000011682 | -0.967491879 | 2.71E-07 |
| TUCP_004206 | XLOC_184637 | ENSRNOT000000075148 | -0.960294714 | 7.27E-07 |
| TUCP_004206 | XLOC_184637 | ENSRNOT000000000334 | -0.957775563 | 9.85E-07 |
| TUCP_004206 | XLOC_184637 | ENSRNOT000000027407 | 0.959643188  | 7.88E-07 |
| TUCP_004206 | XLOC_184637 | ENSRNOT00000019213  | 0.957540819  | 1.01E-06 |
| TUCP_004206 | XLOC_184637 | ENSRNOT000000030749 | -0.96671861  | 3.04E-07 |
| TUCP_004206 | XLOC_184637 | ENSRNOT000000082863 | 0.955840709  | 1.23E-06 |
| TUCP_004206 | XLOC_184637 | ENSRNOT000000007164 | 0.981838406  | 1.51E-08 |
| TUCP_004206 | XLOC_184637 | ENSRNOT000000049459 | -0.953574017 | 1.57E-06 |
| TUCP_004206 | XLOC_184637 | ENSRNOT000000086548 | 0.963562007  | 4.76E-07 |
| TUCP_004206 | XLOC_184637 | ENSRNOT000000067181 | 0.964491877  | 4.19E-07 |
| TUCP_004206 | XLOC_184637 | ENSRNOT000000009496 | 0.975310875  | 6.93E-08 |
| TUCP_004206 | XLOC_184637 | ENSRNOT00000014979  | 0.954437786  | 1.43E-06 |
| TUCP_004206 | XLOC_184637 | ENSRNOT000000005942 | 0.957569646  | 1.01E-06 |
| TUCP_004206 | XLOC_184637 | ENSRNOT00000016801  | 0.954927589  | 1.36E-06 |
| TUCP_004206 | XLOC_184637 | ENSRNOT000000037456 | 0.976695762  | 5.21E-08 |
| TUCP_004206 | XLOC_184637 | ENSRNOT000000055664 | 0.953496562  | 1.58E-06 |
| TUCP_004206 | XLOC_184637 | ENSRNOT00000012881  | -0.971843921 | 1.33E-07 |
| TUCP_004206 | XLOC_184637 | ENSRNOT000000057807 | -0.955313488 | 1.30E-06 |
| TUCP_004206 | XLOC_184637 | ENSRNOT000000051294 | 0.960769472  | 6.85E-07 |
| TUCP_004206 | XLOC_184637 | ENSRNOT000000041456 | -0.950680515 | 2.11E-06 |
| TUCP_004206 | XLOC_184637 | ENSRNOT000000088133 | -0.963793759 | 4.61E-07 |
| TUCP_004206 | XLOC_184637 | ENSRNOT000000080677 | -0.96235661  | 5.59E-07 |
| TUCP_004206 | XLOC_184637 | ENSRNOT000000024771 | 0.962743358  | 5.31E-07 |
| TUCP_004206 | XLOC_184637 | ENSRNOT000000028266 | 0.950599223  | 2.13E-06 |
| TUCP_004206 | XLOC_184637 | ENSRNOT00000012314  | -0.952493266 | 1.76E-06 |
| TUCP_004206 | XLOC_184637 | ENSRNOT000000020437 | 0.958466942  | 9.08E-07 |
| TUCP_004206 | XLOC_184637 | ENSRNOT000000024119 | 0.956291653  | 1.17E-06 |
| TUCP_004206 | XLOC_184637 | ENSRNOT000000002152 | -0.963305582 | 4.93E-07 |
| TUCP_004206 | XLOC_184637 | ENSRNOT000000003971 | 0.96205513   | 5.81E-07 |
| TUCP_004206 | XLOC_184637 | ENSRNOT000000032667 | -0.951261805 | 2.00E-06 |

|             |             |                    |              |          |
|-------------|-------------|--------------------|--------------|----------|
| TUCP_004206 | XLOC_184637 | ENSRNOT00000064667 | -0.955151224 | 1.33E-06 |
| TUCP_004206 | XLOC_184637 | ENSRNOT00000004319 | -0.956558344 | 1.13E-06 |
| TUCP_004206 | XLOC_184637 | ENSRNOT00000070893 | 0.961408888  | 6.32E-07 |
| TUCP_004206 | XLOC_184637 | ENSRNOT00000027526 | 0.95576979   | 1.24E-06 |
| TUCP_004206 | XLOC_184637 | ENSRNOT00000093174 | 0.967013826  | 2.91E-07 |
| TUCP_004206 | XLOC_184637 | ENSRNOT00000067688 | -0.984251516 | 7.43E-09 |
| TUCP_004206 | XLOC_184637 | ENSRNOT00000048490 | -0.960489127 | 7.10E-07 |
| TUCP_004206 | XLOC_184637 | ENSRNOT00000028181 | -0.951980301 | 1.85E-06 |
| TUCP_004206 | XLOC_184637 | ENSRNOT00000087502 | 0.959532534  | 7.98E-07 |
| TUCP_004206 | XLOC_184637 | ENSRNOT00000041106 | 0.972281415  | 1.23E-07 |
| TUCP_004206 | XLOC_184637 | ENSRNOT00000046745 | 0.96325708   | 4.96E-07 |
| TUCP_004206 | XLOC_184637 | ENSRNOT00000015609 | 0.978604395  | 3.41E-08 |
| TUCP_004206 | XLOC_184637 | ENSRNOT00000020005 | 0.951428244  | 1.96E-06 |
| TUCP_004206 | XLOC_184637 | ENSRNOT00000017181 | -0.977181227 | 4.69E-08 |
| TUCP_004206 | XLOC_184637 | ENSRNOT00000087481 | -0.953657899 | 1.56E-06 |
| TUCP_004206 | XLOC_184637 | ENSRNOT00000005909 | 0.968089485  | 2.47E-07 |
| TUCP_004206 | XLOC_184637 | ENSRNOT00000087725 | 0.970216541  | 1.76E-07 |
| TUCP_004206 | XLOC_184637 | ENSRNOT00000086122 | 0.960798829  | 6.83E-07 |
| TUCP_004206 | XLOC_184637 | ENSRNOT00000026235 | -0.96915437  | 2.09E-07 |
| TUCP_004206 | XLOC_184637 | ENSRNOT00000026231 | 0.953963566  | 1.51E-06 |
| TUCP_004206 | XLOC_184637 | ENSRNOT00000038448 | -0.957258639 | 1.05E-06 |
| TUCP_004206 | XLOC_184637 | ENSRNOT00000023645 | 0.951375014  | 1.97E-06 |
| TUCP_004206 | XLOC_184637 | ENSRNOT00000023537 | -0.975972345 | 6.06E-08 |
| TUCP_004206 | XLOC_184637 | ENSRNOT00000059181 | 0.961566705  | 6.19E-07 |
| TUCP_004206 | XLOC_184637 | ENSRNOT00000003691 | -0.95558063  | 1.26E-06 |
| TUCP_004206 | XLOC_184637 | ENSRNOT00000003690 | 0.975235783  | 7.04E-08 |
| TUCP_004206 | XLOC_184637 | ENSRNOT00000090925 | 0.975178411  | 7.12E-08 |
| TUCP_004206 | XLOC_184637 | ENSRNOT00000008901 | -0.953489769 | 1.58E-06 |
| TUCP_004206 | XLOC_184637 | ENSRNOT00000017761 | 0.967472462  | 2.72E-07 |
| TUCP_004206 | XLOC_184637 | ENSRNOT00000001923 | 0.955704575  | 1.25E-06 |
| TUCP_004206 | XLOC_184637 | ENSRNOT00000005405 | 0.960945698  | 6.70E-07 |
| TUCP_004206 | XLOC_184637 | ENSRNOT00000005478 | -0.954745741 | 1.39E-06 |
| TUCP_004206 | XLOC_184637 | ENSRNOT00000082174 | 0.958609677  | 8.92E-07 |
| TUCP_004206 | XLOC_184637 | ENSRNOT00000042125 | 0.954326857  | 1.45E-06 |
| TUCP_004206 | XLOC_184637 | ENSRNOT00000081272 | -0.968108085 | 2.46E-07 |
| TUCP_004206 | XLOC_184637 | ENSRNOT00000045735 | 0.958254135  | 9.31E-07 |
| TUCP_004206 | XLOC_184637 | ENSRNOT00000081077 | -0.957892008 | 9.71E-07 |
| TUCP_004206 | XLOC_184637 | ENSRNOT00000033235 | 0.959095995  | 8.42E-07 |
| TUCP_004206 | XLOC_184637 | ENSRNOT00000084595 | 0.963652248  | 4.70E-07 |
| TUCP_004206 | XLOC_184637 | ENSRNOT00000005885 | -0.969691311 | 1.91E-07 |
| TUCP_004206 | XLOC_184637 | ENSRNOT00000047210 | 0.976918256  | 4.96E-08 |
| TUCP_004206 | XLOC_184637 | ENSRNOT00000064930 | 0.957334791  | 1.04E-06 |
| TUCP_004206 | XLOC_184637 | ENSRNOT00000079996 | 0.95733432   | 1.04E-06 |
| TUCP_000368 | XLOC_012135 | ENSRNOT00000000008 | 1            | 0        |
| TUCP_000368 | XLOC_012135 | ENSRNOT00000060048 | 0.998711457  | 2.79E-14 |
| TUCP_000368 | XLOC_012135 | ENSRNOT00000082304 | 0.996875989  | 2.33E-12 |
| TUCP_000368 | XLOC_012135 | ENSRNOT00000006219 | 1            | 0        |
| TUCP_000368 | XLOC_012135 | ENSRNOT00000065376 | 1            | 0        |
| TUCP_000368 | XLOC_012135 | ENSRNOT00000081433 | 0.984469223  | 6.93E-09 |
| TUCP_000368 | XLOC_012135 | ENSRNOT00000083575 | 1            | 0        |
| TUCP_000368 | XLOC_012135 | ENSRNOT00000087739 | 1            | 0        |

|             |             |                    |              |          |
|-------------|-------------|--------------------|--------------|----------|
| TUCP_000368 | XLOC_012135 | ENSRNOT00000079826 | 1            | 0        |
| TUCP_000368 | XLOC_012135 | ENSRNOT00000025770 | 0.993828251  | 6.98E-11 |
| TUCP_000368 | XLOC_012135 | ENSRNOT00000088244 | 0.973479481  | 9.88E-08 |
| TUCP_000368 | XLOC_012135 | ENSRNOT00000048523 | 1            | 0        |
| TUCP_000368 | XLOC_012135 | ENSRNOT00000079365 | 0.958936699  | 8.58E-07 |
| TUCP_000368 | XLOC_012135 | ENSRNOT00000020229 | 0.960002785  | 7.54E-07 |
| TUCP_000368 | XLOC_012135 | ENSRNOT00000026428 | 0.996986683  | 1.95E-12 |
| TUCP_000368 | XLOC_012135 | ENSRNOT00000085673 | 1            | 0        |
| TUCP_000368 | XLOC_012135 | ENSRNOT00000072972 | 0.981476166  | 1.67E-08 |
| TUCP_000368 | XLOC_012135 | ENSRNOT00000050573 | 1            | 0        |
| TUCP_000368 | XLOC_012135 | ENSRNOT00000089876 | -0.953630353 | 1.56E-06 |
| TUCP_000368 | XLOC_012135 | ENSRNOT00000074378 | 0.998901807  | 1.26E-14 |
| TUCP_000368 | XLOC_012135 | ENSRNOT00000093571 | 1            | 0        |
| TUCP_000368 | XLOC_012135 | ENSRNOT00000090581 | 1            | 0        |
| TUCP_000368 | XLOC_012135 | ENSRNOT00000076239 | 0.98020752   | 2.31E-08 |
| TUCP_000368 | XLOC_012135 | ENSRNOT00000065485 | 1            | 0        |
| TUCP_000368 | XLOC_012135 | ENSRNOT0000006356  | 0.999544279  | 1.55E-16 |
| TUCP_000368 | XLOC_012135 | ENSRNOT00000087199 | 0.974421555  | 8.26E-08 |
| TUCP_000368 | XLOC_012135 | ENSRNOT00000022091 | 1            | 0        |
| TUCP_000368 | XLOC_012135 | ENSRNOT00000064764 | 0.98460888   | 6.63E-09 |
| TUCP_000368 | XLOC_012135 | ENSRNOT00000076927 | 0.971163156  | 1.50E-07 |
| TUCP_000368 | XLOC_012135 | ENSRNOT00000092395 | 0.999522978  | 1.94E-16 |
| TUCP_004204 | XLOC_184590 | ENSRNOT00000029184 | -0.950468558 | 2.16E-06 |
| TUCP_004205 | XLOC_184627 | ENSRNOT00000026803 | 0.963093596  | 5.07E-07 |
| TUCP_004205 | XLOC_184627 | ENSRNOT00000042251 | 0.965268259  | 3.75E-07 |
| TUCP_004205 | XLOC_184627 | ENSRNOT00000002984 | 0.967897774  | 2.54E-07 |
| TUCP_004205 | XLOC_184627 | ENSRNOT00000067379 | 0.966755745  | 3.02E-07 |
| TUCP_004205 | XLOC_184627 | ENSRNOT00000092365 | 0.966219554  | 3.27E-07 |
| TUCP_004205 | XLOC_184627 | ENSRNOT00000089306 | 0.967153547  | 2.85E-07 |
| TUCP_004205 | XLOC_184627 | ENSRNOT00000045301 | 0.968057577  | 2.48E-07 |
| TUCP_004205 | XLOC_184627 | ENSRNOT00000041186 | 0.968786603  | 2.21E-07 |
| TUCP_004205 | XLOC_184627 | ENSRNOT00000076182 | 0.968057577  | 2.48E-07 |
| TUCP_004205 | XLOC_184627 | ENSRNOT00000081709 | 0.966157523  | 3.30E-07 |
| TUCP_004205 | XLOC_184627 | ENSRNOT00000014103 | 0.968057577  | 2.48E-07 |
| TUCP_004205 | XLOC_184627 | ENSRNOT00000082289 | 0.965490739  | 3.64E-07 |
| TUCP_004205 | XLOC_184627 | ENSRNOT00000083493 | 0.953630222  | 1.56E-06 |
| TUCP_004205 | XLOC_184627 | ENSRNOT00000092563 | 0.951668868  | 1.91E-06 |
| TUCP_004205 | XLOC_184627 | ENSRNOT00000088893 | 0.968057577  | 2.48E-07 |
| TUCP_004205 | XLOC_184627 | ENSRNOT0000008898  | 0.982199539  | 1.37E-08 |
| TUCP_004205 | XLOC_184627 | ENSRNOT00000081014 | 0.968057577  | 2.48E-07 |
| TUCP_004205 | XLOC_184627 | ENSRNOT00000067543 | 0.968057577  | 2.48E-07 |
| TUCP_004205 | XLOC_184627 | ENSRNOT00000050968 | 0.95927565   | 8.24E-07 |
| TUCP_004205 | XLOC_184627 | ENSRNOT00000086036 | 0.967817899  | 2.58E-07 |
| TUCP_004205 | XLOC_184627 | ENSRNOT00000063929 | 0.968057577  | 2.48E-07 |
| TUCP_004205 | XLOC_184627 | ENSRNOT00000068416 | 0.968051945  | 2.48E-07 |
| TUCP_004205 | XLOC_184627 | ENSRNOT00000022200 | 0.965220322  | 3.78E-07 |
| TUCP_004205 | XLOC_184627 | ENSRNOT00000083764 | 0.966855108  | 2.98E-07 |
| TUCP_004205 | XLOC_184627 | ENSRNOT00000050543 | 0.968876537  | 2.18E-07 |
| TUCP_004205 | XLOC_184627 | ENSRNOT00000079275 | 0.966145663  | 3.31E-07 |
| TUCP_004205 | XLOC_184627 | ENSRNOT00000052367 | 0.963561272  | 4.76E-07 |
| TUCP_004205 | XLOC_184627 | ENSRNOT00000090658 | 0.968057577  | 2.48E-07 |

|             |             |                     |              |          |
|-------------|-------------|---------------------|--------------|----------|
| TUCP_004205 | XLOC_184627 | ENSRNOT00000075222  | 0.950828679  | 2.08E-06 |
| TUCP_004205 | XLOC_184627 | ENSRNOT00000022571  | 0.957154778  | 1.06E-06 |
| TUCP_004205 | XLOC_184627 | ENSRNOT00000057472  | 0.968057577  | 2.48E-07 |
| TUCP_003979 | XLOC_174391 | ENSRNOT00000085599  | 0.999938502  | 6.93E-21 |
| TUCP_003979 | XLOC_174391 | ENSRNOT00000006689  | 0.9944189    | 4.22E-11 |
| TUCP_003979 | XLOC_174391 | ENSRNOT000000081534 | 0.987999291  | 1.92E-09 |
| TUCP_003979 | XLOC_174391 | ENSRNOT000000085301 | 0.99793679   | 2.93E-13 |
| TUCP_003979 | XLOC_174391 | ENSRNOT00000038729  | 1            | 1.33E-79 |
| TUCP_003979 | XLOC_174391 | ENSRNOT000000086385 | 1            | 0        |
| TUCP_003979 | XLOC_174391 | ENSRNOT000000077695 | 0.96038616   | 7.19E-07 |
| TUCP_003979 | XLOC_174391 | ENSRNOT000000078561 | 0.986503348  | 3.45E-09 |
| TUCP_003979 | XLOC_174391 | ENSRNOT000000087613 | 1            | 0        |
| TUCP_003979 | XLOC_174391 | ENSRNOT000000026032 | 0.953050675  | 1.66E-06 |
| TUCP_003979 | XLOC_174391 | ENSRNOT000000073350 | 0.9658754    | 3.44E-07 |
| TUCP_003979 | XLOC_174391 | ENSRNOT000000023062 | 1            | 1.33E-79 |
| TUCP_003979 | XLOC_174391 | ENSRNOT000000058834 | 1            | 1.33E-79 |
| TUCP_003979 | XLOC_174391 | ENSRNOT000000079420 | 1            | 1.33E-79 |
| TUCP_003979 | XLOC_174391 | ENSRNOT000000090761 | 1            | 1.33E-79 |
| TUCP_003979 | XLOC_174391 | ENSRNOT000000055923 | 1            | 0        |
| TUCP_003979 | XLOC_174391 | ENSRNOT000000092416 | 0.963085379  | 5.07E-07 |
| TUCP_003979 | XLOC_174391 | ENSRNOT000000071930 | 1            | 1.33E-79 |
| TUCP_003979 | XLOC_174391 | ENSRNOT000000001996 | 0.974721715  | 7.79E-08 |
| TUCP_003979 | XLOC_174391 | ENSRNOT000000076756 | 1            | 0        |
| TUCP_003979 | XLOC_174391 | ENSRNOT000000081527 | 0.999420479  | 5.14E-16 |
| TUCP_003979 | XLOC_174391 | ENSRNOT000000085067 | 0.960262084  | 7.30E-07 |
| TUCP_003979 | XLOC_174391 | ENSRNOT000000091663 | 0.99642667   | 4.56E-12 |
| TUCP_003979 | XLOC_174391 | ENSRNOT000000081780 | 1            | 0        |
| TUCP_003979 | XLOC_174391 | ENSRNOT000000093689 | 0.953599805  | 1.57E-06 |
| TUCP_003979 | XLOC_174391 | ENSRNOT000000089114 | 1            | 4.25E-78 |
| TUCP_003979 | XLOC_174391 | ENSRNOT000000021609 | 0.977017895  | 4.86E-08 |
| TUCP_003979 | XLOC_174391 | ENSRNOT000000073316 | 1            | 0        |
| TUCP_003979 | XLOC_174391 | ENSRNOT000000086557 | 0.977413455  | 4.46E-08 |
| TUCP_003979 | XLOC_174391 | ENSRNOT000000071663 | 1            | 0        |
| TUCP_003979 | XLOC_174391 | ENSRNOT000000042860 | 1            | 0        |
| TUCP_003979 | XLOC_174391 | ENSRNOT000000072962 | 0.971287317  | 1.46E-07 |
| TUCP_003979 | XLOC_174391 | ENSRNOT000000088421 | 1            | 0        |
| TUCP_003979 | XLOC_174391 | ENSRNOT000000038898 | 1            | 0        |
| TUCP_003979 | XLOC_174391 | ENSRNOT000000015840 | 0.959452012  | 8.06E-07 |
| TUCP_003979 | XLOC_174391 | ENSRNOT000000064936 | 0.985957557  | 4.20E-09 |
| TUCP_003979 | XLOC_174391 | ENSRNOT000000042777 | 0.990642579  | 5.56E-10 |
| TUCP_003979 | XLOC_174391 | ENSRNOT000000010029 | 1            | 0        |
| TUCP_001180 | XLOC_044614 | ENSRNOT000000031036 | 0.956181383  | 1.18E-06 |
| TUCP_001180 | XLOC_044614 | ENSRNOT000000028075 | 0.969833579  | 1.87E-07 |
| TUCP_003277 | XLOC_140507 | ENSRNOT000000013291 | -0.951015623 | 2.05E-06 |
| TUCP_001851 | XLOC_076523 | ENSRNOT000000003511 | 0.954151434  | 1.48E-06 |
| TUCP_001851 | XLOC_076523 | ENSRNOT000000029768 | 0.959951181  | 7.59E-07 |
| TUCP_001851 | XLOC_076523 | ENSRNOT000000090914 | 0.954832325  | 1.37E-06 |
| TUCP_001851 | XLOC_076523 | ENSRNOT00000000697  | 0.976687265  | 5.22E-08 |
| TUCP_001851 | XLOC_076523 | ENSRNOT000000024583 | -0.982138696 | 1.39E-08 |
| TUCP_001851 | XLOC_076523 | ENSRNOT000000023623 | 0.954428675  | 1.43E-06 |
| TUCP_001851 | XLOC_076523 | ENSRNOT000000021590 | 0.972742843  | 1.13E-07 |

|             |             |                    |              |          |
|-------------|-------------|--------------------|--------------|----------|
| TUCP_001851 | XLOC_076523 | ENSRNOT00000023607 | 0.960371489  | 7.20E-07 |
| TUCP_001851 | XLOC_076523 | ENSRNOT00000055877 | 0.950607194  | 2.13E-06 |
| TUCP_001851 | XLOC_076523 | ENSRNOT00000002814 | 0.953423824  | 1.60E-06 |
| TUCP_001851 | XLOC_076523 | ENSRNOT00000015864 | 0.954069846  | 1.49E-06 |
| TUCP_001851 | XLOC_076523 | ENSRNOT00000010701 | 0.960253507  | 7.31E-07 |
| TUCP_001851 | XLOC_076523 | ENSRNOT00000023661 | 0.980864019  | 1.96E-08 |
| TUCP_001851 | XLOC_076523 | ENSRNOT00000074810 | 0.966406002  | 3.18E-07 |
| TUCP_001851 | XLOC_076523 | ENSRNOT00000041762 | 0.963459507  | 4.82E-07 |
| TUCP_003397 | XLOC_146849 | ENSRNOT00000068134 | 0.958998082  | 8.52E-07 |
| TUCP_003397 | XLOC_146849 | ENSRNOT00000092024 | 0.952959535  | 1.68E-06 |
| TUCP_003397 | XLOC_146849 | ENSRNOT00000010141 | 0.973980576  | 8.99E-08 |
| TUCP_003397 | XLOC_146849 | ENSRNOT00000000577 | 0.966212356  | 3.28E-07 |
| TUCP_003397 | XLOC_146849 | ENSRNOT00000011880 | 0.958625644  | 8.91E-07 |
| TUCP_003397 | XLOC_146849 | ENSRNOT00000020357 | 0.957291885  | 1.04E-06 |
| TUCP_003397 | XLOC_146849 | ENSRNOT00000075397 | 0.953035655  | 1.66E-06 |
| TUCP_003397 | XLOC_146849 | ENSRNOT00000081351 | 0.957590318  | 1.01E-06 |
| TUCP_003397 | XLOC_146849 | ENSRNOT00000075521 | 0.954165345  | 1.47E-06 |
| TUCP_003397 | XLOC_146849 | ENSRNOT00000019487 | 0.975620849  | 6.51E-08 |
| TUCP_003397 | XLOC_146849 | ENSRNOT00000077231 | 0.961808998  | 6.00E-07 |
| TUCP_003397 | XLOC_146849 | ENSRNOT00000005686 | -0.958589934 | 8.94E-07 |
| TUCP_003397 | XLOC_146849 | ENSRNOT00000074544 | -0.95002882  | 2.26E-06 |
| TUCP_003397 | XLOC_146849 | ENSRNOT00000023543 | -0.952503775 | 1.76E-06 |
| TUCP_003397 | XLOC_146849 | ENSRNOT00000006217 | 0.952626376  | 1.74E-06 |
| TUCP_003397 | XLOC_146849 | ENSRNOT00000001923 | 0.950148606  | 2.23E-06 |
| TUCP_003397 | XLOC_146849 | ENSRNOT00000020417 | -0.95656084  | 1.13E-06 |
| TUCP_003397 | XLOC_146849 | ENSRNOT00000015678 | -0.955766815 | 1.24E-06 |
| TUCP_003397 | XLOC_146849 | ENSRNOT00000077367 | -0.958033929 | 9.55E-07 |
| TUCP_003397 | XLOC_146849 | ENSRNOT00000013025 | -0.957419613 | 1.03E-06 |
| TUCP_003397 | XLOC_146849 | ENSRNOT00000011832 | -0.950709744 | 2.11E-06 |
| TUCP_003397 | XLOC_146849 | ENSRNOT00000082863 | 0.954601082  | 1.41E-06 |
| TUCP_003397 | XLOC_146849 | ENSRNOT00000015537 | 0.950294756  | 2.20E-06 |
| TUCP_003397 | XLOC_146849 | ENSRNOT00000019133 | 0.959113548  | 8.40E-07 |
| TUCP_003397 | XLOC_146849 | ENSRNOT00000006835 | 0.988366402  | 1.65E-09 |
| TUCP_003397 | XLOC_146849 | ENSRNOT00000049459 | -0.95697605  | 1.08E-06 |
| TUCP_003397 | XLOC_146849 | ENSRNOT00000016445 | 0.958097419  | 9.48E-07 |
| TUCP_003397 | XLOC_146849 | ENSRNOT00000021553 | 0.951517314  | 1.94E-06 |
| TUCP_003397 | XLOC_146849 | ENSRNOT00000044346 | -0.973101156 | 1.06E-07 |
| TUCP_003397 | XLOC_146849 | ENSRNOT00000055386 | 0.966404038  | 3.19E-07 |
| TUCP_003397 | XLOC_146849 | ENSRNOT00000083968 | -0.954562709 | 1.41E-06 |
| TUCP_003397 | XLOC_146849 | ENSRNOT00000018074 | -0.950042578 | 2.25E-06 |
| TUCP_003397 | XLOC_146849 | ENSRNOT00000007855 | 0.963389936  | 4.87E-07 |
| TUCP_003397 | XLOC_146849 | ENSRNOT00000024306 | -0.953651249 | 1.56E-06 |
| TUCP_003397 | XLOC_146849 | ENSRNOT00000084709 | 0.964053343  | 4.45E-07 |
| TUCP_003397 | XLOC_146849 | ENSRNOT00000025434 | 0.975415354  | 6.79E-08 |
| TUCP_003397 | XLOC_146849 | ENSRNOT00000012424 | 0.964592659  | 4.13E-07 |
| TUCP_003397 | XLOC_146849 | ENSRNOT00000078906 | -0.955338079 | 1.30E-06 |
| TUCP_003397 | XLOC_146849 | ENSRNOT00000084069 | 0.953591778  | 1.57E-06 |
| TUCP_003397 | XLOC_146849 | ENSRNOT00000010524 | 0.954047528  | 1.49E-06 |
| TUCP_003397 | XLOC_146849 | ENSRNOT00000013538 | 0.960877222  | 6.76E-07 |
| TUCP_003397 | XLOC_146849 | ENSRNOT00000026391 | 0.953371442  | 1.60E-06 |
| TUCP_003397 | XLOC_146849 | ENSRNOT00000060698 | -0.959799237 | 7.73E-07 |



|             |             |                    |              |          |
|-------------|-------------|--------------------|--------------|----------|
| TUCP_003397 | XLOC_146849 | ENSRNOT00000019057 | -0.951643354 | 1.92E-06 |
| TUCP_003397 | XLOC_146849 | ENSRNOT00000058351 | 0.950267497  | 2.20E-06 |
| TUCP_003397 | XLOC_146849 | ENSRNOT00000072299 | 0.960493889  | 7.09E-07 |
| TUCP_003397 | XLOC_146849 | ENSRNOT00000032505 | -0.960053927 | 7.49E-07 |
| TUCP_003397 | XLOC_146849 | ENSRNOT00000027344 | 0.979678092  | 2.64E-08 |
| TUCP_003397 | XLOC_146849 | ENSRNOT00000022190 | -0.957254688 | 1.05E-06 |
| TUCP_003397 | XLOC_146849 | ENSRNOT00000017325 | 0.973442221  | 9.95E-08 |
| TUCP_003397 | XLOC_146849 | ENSRNOT00000013067 | -0.952388447 | 1.78E-06 |
| TUCP_003397 | XLOC_146849 | ENSRNOT00000021621 | -0.964162016 | 4.38E-07 |
| TUCP_003397 | XLOC_146849 | ENSRNOT00000090461 | 0.95871736   | 8.81E-07 |
| TUCP_003397 | XLOC_146849 | ENSRNOT00000025097 | 0.972613284  | 1.16E-07 |
| TUCP_003397 | XLOC_146849 | ENSRNOT00000052063 | 0.968752228  | 2.23E-07 |
| TUCP_003397 | XLOC_146849 | ENSRNOT00000073919 | 0.959487743  | 8.03E-07 |
| TUCP_003397 | XLOC_146849 | ENSRNOT00000091742 | 0.96673905   | 3.03E-07 |
| TUCP_003397 | XLOC_146849 | ENSRNOT00000011466 | 0.951597381  | 1.93E-06 |
| TUCP_003397 | XLOC_146849 | ENSRNOT00000036613 | -0.956632782 | 1.12E-06 |
| TUCP_003397 | XLOC_146849 | ENSRNOT00000089614 | 0.954691593  | 1.39E-06 |
| TUCP_003397 | XLOC_146849 | ENSRNOT00000025079 | -0.953409222 | 1.60E-06 |
| TUCP_003397 | XLOC_146849 | ENSRNOT00000023667 | 0.965562266  | 3.60E-07 |
| TUCP_003397 | XLOC_146849 | ENSRNOT00000086260 | -0.952266614 | 1.80E-06 |
| TUCP_003397 | XLOC_146849 | ENSRNOT00000066133 | -0.95456407  | 1.41E-06 |
| TUCP_003397 | XLOC_146849 | ENSRNOT00000046639 | 0.952174957  | 1.82E-06 |
| TUCP_003397 | XLOC_146849 | ENSRNOT00000091448 | -0.950986767 | 2.05E-06 |
| TUCP_003397 | XLOC_146849 | ENSRNOT00000066793 | -0.958857169 | 8.66E-07 |
| TUCP_003397 | XLOC_146849 | ENSRNOT00000080602 | 0.965565389  | 3.60E-07 |
| TUCP_000511 | XLOC_017633 | ENSRNOT00000084390 | -0.958027589 | 9.56E-07 |
| TUCP_003209 | XLOC_138405 | ENSRNOT00000026966 | 0.970325542  | 1.72E-07 |
| TUCP_003209 | XLOC_138405 | ENSRNOT00000068416 | 0.999999756  | 6.80E-33 |
| TUCP_003209 | XLOC_138405 | ENSRNOT00000086036 | 0.999959362  | 8.73E-22 |
| TUCP_003209 | XLOC_138405 | ENSRNOT00000026803 | 0.985039433  | 5.76E-09 |
| TUCP_003209 | XLOC_138405 | ENSRNOT00000047527 | 0.963067584  | 5.09E-07 |
| TUCP_003209 | XLOC_138405 | ENSRNOT00000042251 | 0.999346264  | 9.39E-16 |
| TUCP_003209 | XLOC_138405 | ENSRNOT0000002984  | 0.998400297  | 8.23E-14 |
| TUCP_003209 | XLOC_138405 | ENSRNOT00000083764 | 0.999545582  | 1.52E-16 |
| TUCP_003209 | XLOC_138405 | ENSRNOT00000076802 | 0.962687786  | 5.35E-07 |
| TUCP_003209 | XLOC_138405 | ENSRNOT00000092365 | 0.999161067  | 3.27E-15 |
| TUCP_003209 | XLOC_138405 | ENSRNOT00000079275 | 0.999901645  | 7.25E-20 |
| TUCP_003209 | XLOC_138405 | ENSRNOT00000066062 | -0.959702594 | 7.82E-07 |
| TUCP_003209 | XLOC_138405 | ENSRNOT00000045301 | 0.999999992  | 2.44E-40 |
| TUCP_003209 | XLOC_138405 | ENSRNOT00000041186 | 0.999975539  | 6.90E-23 |
| TUCP_003209 | XLOC_138405 | ENSRNOT00000010092 | 0.977708533  | 4.18E-08 |
| TUCP_003209 | XLOC_138405 | ENSRNOT00000076182 | 0.999999992  | 2.44E-40 |
| TUCP_003209 | XLOC_138405 | ENSRNOT00000087404 | 0.951154704  | 2.02E-06 |
| TUCP_003209 | XLOC_138405 | ENSRNOT00000052003 | 0.958367693  | 9.18E-07 |
| TUCP_003209 | XLOC_138405 | ENSRNOT00000081709 | 0.998485015  | 6.27E-14 |
| TUCP_003209 | XLOC_138405 | ENSRNOT00000005726 | 0.959601528  | 7.92E-07 |
| TUCP_003209 | XLOC_138405 | ENSRNOT00000014103 | 0.999999992  | 2.44E-40 |
| TUCP_003209 | XLOC_138405 | ENSRNOT00000057433 | 0.964922504  | 3.94E-07 |
| TUCP_003209 | XLOC_138405 | ENSRNOT00000082289 | 0.998930697  | 1.10E-14 |
| TUCP_003209 | XLOC_138405 | ENSRNOT00000092516 | 0.957452721  | 1.02E-06 |
| TUCP_003209 | XLOC_138405 | ENSRNOT00000008898 | 0.990039287  | 7.59E-10 |

|             |             |                    |             |          |
|-------------|-------------|--------------------|-------------|----------|
| TUCP_003209 | XLOC_138405 | ENSRNOT00000083493 | 0.995464388 | 1.50E-11 |
| TUCP_003209 | XLOC_138405 | ENSRNOT00000092563 | 0.98719883  | 2.65E-09 |
| TUCP_003209 | XLOC_138405 | ENSRNOT00000088893 | 0.999999992 | 2.44E-40 |
| TUCP_003209 | XLOC_138405 | ENSRNOT00000076693 | 0.955032925 | 1.34E-06 |
| TUCP_003209 | XLOC_138405 | ENSRNOT00000081014 | 0.999999992 | 2.44E-40 |
| TUCP_003209 | XLOC_138405 | ENSRNOT00000067543 | 0.999999992 | 2.44E-40 |
| TUCP_003209 | XLOC_138405 | ENSRNOT00000050968 | 0.996817228 | 2.56E-12 |
| TUCP_003209 | XLOC_138405 | ENSRNOT00000042201 | 0.960223329 | 7.33E-07 |
| TUCP_003209 | XLOC_138405 | ENSRNOT00000004373 | 0.957313193 | 1.04E-06 |
| TUCP_003209 | XLOC_138405 | ENSRNOT00000063929 | 0.999999992 | 2.44E-40 |
| TUCP_003209 | XLOC_138405 | ENSRNOT00000057472 | 0.999999992 | 2.44E-40 |
| TUCP_003209 | XLOC_138405 | ENSRNOT00000041617 | 0.952436679 | 1.77E-06 |
| TUCP_003209 | XLOC_138405 | ENSRNOT00000091763 | 0.986309291 | 3.70E-09 |
| TUCP_003209 | XLOC_138405 | ENSRNOT00000022200 | 0.998490522 | 6.16E-14 |
| TUCP_003209 | XLOC_138405 | ENSRNOT00000067379 | 0.99726469  | 1.20E-12 |
| TUCP_003209 | XLOC_138405 | ENSRNOT00000020786 | 0.976423082 | 5.51E-08 |
| TUCP_003209 | XLOC_138405 | ENSRNOT00000050543 | 0.999721788 | 1.31E-17 |
| TUCP_003209 | XLOC_138405 | ENSRNOT00000089306 | 0.999867326 | 3.24E-19 |
| TUCP_003209 | XLOC_138405 | ENSRNOT00000052367 | 0.997267346 | 1.19E-12 |
| TUCP_003209 | XLOC_138405 | ENSRNOT00000090658 | 0.999999992 | 2.44E-40 |
| TUCP_003209 | XLOC_138405 | ENSRNOT00000022571 | 0.995287542 | 1.82E-11 |
| TUCP_003209 | XLOC_138405 | ENSRNOT00000044520 | 0.981827544 | 1.51E-08 |
| TUCP_003209 | XLOC_138405 | ENSRNOT00000065448 | 0.963639842 | 4.71E-07 |
| TUCP_001564 | XLOC_060389 | ENSRNOT00000014041 | 0.990301008 | 6.65E-10 |
| TUCP_001564 | XLOC_060389 | ENSRNOT00000078505 | 0.954768262 | 1.38E-06 |
| TUCP_004389 | XLOC_193572 | ENSRNOT00000081570 | 0.962961027 | 5.16E-07 |
| TUCP_004389 | XLOC_193572 | ENSRNOT00000091652 | 0.99819185  | 1.52E-13 |
| TUCP_004389 | XLOC_193572 | ENSRNOT00000036564 | 0.972337506 | 1.22E-07 |
| TUCP_004389 | XLOC_193572 | ENSRNOT00000000109 | 0.962179854 | 5.72E-07 |
| TUCP_004389 | XLOC_193572 | ENSRNOT00000080865 | 1           | 1.33E-79 |
| TUCP_004389 | XLOC_193572 | ENSRNOT00000073534 | 0.995808019 | 1.01E-11 |
| TUCP_004389 | XLOC_193572 | ENSRNOT00000012161 | 0.987544327 | 2.31E-09 |
| TUCP_004389 | XLOC_193572 | ENSRNOT00000078707 | 0.960060506 | 7.48E-07 |
| TUCP_004389 | XLOC_193572 | ENSRNOT00000087758 | 0.968778527 | 2.22E-07 |
| TUCP_004389 | XLOC_193572 | ENSRNOT00000049832 | 0.969039151 | 2.13E-07 |
| TUCP_004389 | XLOC_193572 | ENSRNOT00000093019 | 1           | 0        |
| TUCP_004389 | XLOC_193572 | ENSRNOT00000024825 | 0.980452701 | 2.18E-08 |
| TUCP_004389 | XLOC_193572 | ENSRNOT00000059266 | 0.96033506  | 7.23E-07 |
| TUCP_004389 | XLOC_193572 | ENSRNOT00000072734 | 0.965018115 | 3.89E-07 |
| TUCP_004389 | XLOC_193572 | ENSRNOT00000085908 | 0.996653227 | 3.29E-12 |
| TUCP_004389 | XLOC_193572 | ENSRNOT00000046744 | 1           | 0        |
| TUCP_004389 | XLOC_193572 | ENSRNOT00000076429 | 1           | 1.33E-79 |
| TUCP_004389 | XLOC_193572 | ENSRNOT00000084667 | 0.999660971 | 3.53E-17 |
| TUCP_004389 | XLOC_193572 | ENSRNOT00000055412 | 1           | 0        |
| TUCP_004389 | XLOC_193572 | ENSRNOT00000093201 | 0.9997022   | 1.84E-17 |
| TUCP_004389 | XLOC_193572 | ENSRNOT00000072724 | 1           | 1.33E-79 |
| TUCP_004389 | XLOC_193572 | ENSRNOT00000090323 | 0.95603782  | 1.20E-06 |
| TUCP_004389 | XLOC_193572 | ENSRNOT00000082760 | 0.986293522 | 3.72E-09 |
| TUCP_004389 | XLOC_193572 | ENSRNOT00000066017 | 0.989785653 | 8.61E-10 |
| TUCP_004389 | XLOC_193572 | ENSRNOT00000073148 | 0.985721397 | 4.56E-09 |
| TUCP_004389 | XLOC_193572 | ENSRNOT00000077462 | 0.960098183 | 7.45E-07 |

|             |             |                    |              |          |
|-------------|-------------|--------------------|--------------|----------|
| TUCP_004389 | XLOC_193572 | ENSRNOT00000084375 | 1            | 0        |
| TUCP_004389 | XLOC_193572 | ENSRNOT00000085447 | 0.998400682  | 8.22E-14 |
| TUCP_004389 | XLOC_193572 | ENSRNOT00000006249 | 0.966489607  | 3.15E-07 |
| TUCP_004389 | XLOC_193572 | ENSRNOT00000087073 | 0.952450698  | 1.77E-06 |
| TUCP_004389 | XLOC_193572 | ENSRNOT00000042369 | 0.995659369  | 1.20E-11 |
| TUCP_004389 | XLOC_193572 | ENSRNOT00000086554 | 1            | 4.25E-78 |
| TUCP_004389 | XLOC_193572 | ENSRNOT00000054858 | 0.985228824  | 5.40E-09 |
| TUCP_004389 | XLOC_193572 | ENSRNOT00000047921 | 1            | 0        |
| TUCP_004389 | XLOC_193572 | ENSRNOT00000064261 | 0.999977196  | 4.86E-23 |
| TUCP_004389 | XLOC_193572 | ENSRNOT00000086660 | 0.999208903  | 2.44E-15 |
| TUCP_004389 | XLOC_193572 | ENSRNOT00000080933 | 0.967360681  | 2.76E-07 |
| TUCP_004389 | XLOC_193572 | ENSRNOT00000083977 | 1            | 0        |
| TUCP_004389 | XLOC_193572 | ENSRNOT00000092933 | 1            | 0        |
| TUCP_004389 | XLOC_193572 | ENSRNOT00000009061 | 0.953300672  | 1.62E-06 |
| TUCP_004389 | XLOC_193572 | ENSRNOT00000041281 | 0.987828355  | 2.06E-09 |
| TUCP_001853 | XLOC_077084 | ENSRNOT00000000008 | 1            | 0        |
| TUCP_001853 | XLOC_077084 | ENSRNOT00000060048 | 0.998711457  | 2.79E-14 |
| TUCP_001853 | XLOC_077084 | ENSRNOT00000082304 | 0.996875989  | 2.33E-12 |
| TUCP_001853 | XLOC_077084 | ENSRNOT00000006219 | 1            | 0        |
| TUCP_001853 | XLOC_077084 | ENSRNOT00000065376 | 1            | 0        |
| TUCP_001853 | XLOC_077084 | ENSRNOT00000081433 | 0.984469223  | 6.93E-09 |
| TUCP_001853 | XLOC_077084 | ENSRNOT00000083575 | 1            | 1.33E-79 |
| TUCP_001853 | XLOC_077084 | ENSRNOT00000087739 | 1            | 1.33E-79 |
| TUCP_001853 | XLOC_077084 | ENSRNOT00000079826 | 1            | 0        |
| TUCP_001853 | XLOC_077084 | ENSRNOT00000025770 | 0.993828251  | 6.98E-11 |
| TUCP_001853 | XLOC_077084 | ENSRNOT00000088244 | 0.973479481  | 9.88E-08 |
| TUCP_001853 | XLOC_077084 | ENSRNOT00000048523 | 1            | 0        |
| TUCP_001853 | XLOC_077084 | ENSRNOT00000079365 | 0.958936699  | 8.58E-07 |
| TUCP_001853 | XLOC_077084 | ENSRNOT00000020229 | 0.960002785  | 7.54E-07 |
| TUCP_001853 | XLOC_077084 | ENSRNOT00000026428 | 0.996986683  | 1.95E-12 |
| TUCP_001853 | XLOC_077084 | ENSRNOT00000085673 | 1            | 0        |
| TUCP_001853 | XLOC_077084 | ENSRNOT00000072972 | 0.981476166  | 1.67E-08 |
| TUCP_001853 | XLOC_077084 | ENSRNOT00000050573 | 1            | 1.33E-79 |
| TUCP_001853 | XLOC_077084 | ENSRNOT00000089876 | -0.953630353 | 1.56E-06 |
| TUCP_001853 | XLOC_077084 | ENSRNOT00000074378 | 0.998901807  | 1.26E-14 |
| TUCP_001853 | XLOC_077084 | ENSRNOT00000093571 | 1            | 0        |
| TUCP_001853 | XLOC_077084 | ENSRNOT00000090581 | 1            | 0        |
| TUCP_001853 | XLOC_077084 | ENSRNOT00000076239 | 0.98020752   | 2.31E-08 |
| TUCP_001853 | XLOC_077084 | ENSRNOT00000065485 | 1            | 1.33E-79 |
| TUCP_001853 | XLOC_077084 | ENSRNOT00000006356 | 0.999544279  | 1.55E-16 |
| TUCP_001853 | XLOC_077084 | ENSRNOT00000087199 | 0.974421555  | 8.26E-08 |
| TUCP_001853 | XLOC_077084 | ENSRNOT00000022091 | 1            | 0        |
| TUCP_001853 | XLOC_077084 | ENSRNOT00000064764 | 0.98460888   | 6.63E-09 |
| TUCP_001853 | XLOC_077084 | ENSRNOT00000076927 | 0.971163156  | 1.50E-07 |
| TUCP_001853 | XLOC_077084 | ENSRNOT00000092395 | 0.999522978  | 1.94E-16 |
| TUCP_003457 | XLOC_149596 | ENSRNOT00000026966 | 0.970322306  | 1.73E-07 |
| TUCP_003457 | XLOC_149596 | ENSRNOT00000068416 | 0.999999782  | 3.88E-33 |
| TUCP_003457 | XLOC_149596 | ENSRNOT00000086036 | 0.999958274  | 9.96E-22 |
| TUCP_003457 | XLOC_149596 | ENSRNOT00000026803 | 0.985046075  | 5.74E-09 |
| TUCP_003457 | XLOC_149596 | ENSRNOT00000047527 | 0.963071698  | 5.08E-07 |
| TUCP_003457 | XLOC_149596 | ENSRNOT00000042251 | 0.999344295  | 9.53E-16 |

|             |             |                    |              |          |
|-------------|-------------|--------------------|--------------|----------|
| TUCP_003457 | XLOC_149596 | ENSRNOT0000002984  | 0.998397069  | 8.31E-14 |
| TUCP_003457 | XLOC_149596 | ENSRNOT00000083764 | 0.999541808  | 1.59E-16 |
| TUCP_003457 | XLOC_149596 | ENSRNOT00000076802 | 0.962695843  | 5.34E-07 |
| TUCP_003457 | XLOC_149596 | ENSRNOT00000092365 | 0.999161651  | 3.26E-15 |
| TUCP_003457 | XLOC_149596 | ENSRNOT00000079275 | 0.999901911  | 7.15E-20 |
| TUCP_003457 | XLOC_149596 | ENSRNOT00000066062 | -0.959706712 | 7.82E-07 |
| TUCP_003457 | XLOC_149596 | ENSRNOT00000045301 | 1            | 1.33E-79 |
| TUCP_003457 | XLOC_149596 | ENSRNOT00000041186 | 0.999975782  | 6.56E-23 |
| TUCP_003457 | XLOC_149596 | ENSRNOT00000010092 | 0.977711778  | 4.17E-08 |
| TUCP_003457 | XLOC_149596 | ENSRNOT00000076182 | 1            | 0        |
| TUCP_003457 | XLOC_149596 | ENSRNOT00000087404 | 0.951157664  | 2.02E-06 |
| TUCP_003457 | XLOC_149596 | ENSRNOT00000052003 | 0.95837331   | 9.18E-07 |
| TUCP_003457 | XLOC_149596 | ENSRNOT00000081709 | 0.998485154  | 6.27E-14 |
| TUCP_003457 | XLOC_149596 | ENSRNOT00000005726 | 0.959610119  | 7.91E-07 |
| TUCP_003457 | XLOC_149596 | ENSRNOT00000014103 | 1            | 0        |
| TUCP_003457 | XLOC_149596 | ENSRNOT00000057433 | 0.964930601  | 3.94E-07 |
| TUCP_003457 | XLOC_149596 | ENSRNOT00000082289 | 0.998931566  | 1.09E-14 |
| TUCP_003457 | XLOC_149596 | ENSRNOT00000092516 | 0.957459323  | 1.02E-06 |
| TUCP_003457 | XLOC_149596 | ENSRNOT00000008898 | 0.990039768  | 7.59E-10 |
| TUCP_003457 | XLOC_149596 | ENSRNOT00000083493 | 0.995461232  | 1.51E-11 |
| TUCP_003457 | XLOC_149596 | ENSRNOT00000092563 | 0.987201084  | 2.65E-09 |
| TUCP_003457 | XLOC_149596 | ENSRNOT00000088893 | 1            | 0        |
| TUCP_003457 | XLOC_149596 | ENSRNOT00000076693 | 0.955029582  | 1.34E-06 |
| TUCP_003457 | XLOC_149596 | ENSRNOT00000081014 | 1            | 0        |
| TUCP_003457 | XLOC_149596 | ENSRNOT00000067543 | 1            | 0        |
| TUCP_003457 | XLOC_149596 | ENSRNOT00000050968 | 0.996816433  | 2.56E-12 |
| TUCP_003457 | XLOC_149596 | ENSRNOT00000042201 | 0.960235595  | 7.32E-07 |
| TUCP_003457 | XLOC_149596 | ENSRNOT00000004373 | 0.957315473  | 1.04E-06 |
| TUCP_003457 | XLOC_149596 | ENSRNOT00000063929 | 1            | 0        |
| TUCP_003457 | XLOC_149596 | ENSRNOT00000057472 | 1            | 1.33E-79 |
| TUCP_003457 | XLOC_149596 | ENSRNOT00000041617 | 0.952449765  | 1.77E-06 |
| TUCP_003457 | XLOC_149596 | ENSRNOT00000091763 | 0.986310385  | 3.70E-09 |
| TUCP_003457 | XLOC_149596 | ENSRNOT00000022200 | 0.998491303  | 6.14E-14 |
| TUCP_003457 | XLOC_149596 | ENSRNOT00000067379 | 0.997260967  | 1.21E-12 |
| TUCP_003457 | XLOC_149596 | ENSRNOT00000020786 | 0.976428448  | 5.51E-08 |
| TUCP_003457 | XLOC_149596 | ENSRNOT00000050543 | 0.999722223  | 1.30E-17 |
| TUCP_003457 | XLOC_149596 | ENSRNOT00000089306 | 0.999866649  | 3.32E-19 |
| TUCP_003457 | XLOC_149596 | ENSRNOT00000052367 | 0.997268394  | 1.19E-12 |
| TUCP_003457 | XLOC_149596 | ENSRNOT00000090658 | 1            | 0        |
| TUCP_003457 | XLOC_149596 | ENSRNOT00000022571 | 0.995290013  | 1.81E-11 |
| TUCP_003457 | XLOC_149596 | ENSRNOT00000044520 | 0.981817158  | 1.52E-08 |
| TUCP_003457 | XLOC_149596 | ENSRNOT00000065448 | 0.963648868  | 4.70E-07 |
| TUCP_003863 | XLOC_169474 | ENSRNOT0000001215  | 0.961020724  | 6.64E-07 |
| TUCP_003863 | XLOC_169474 | ENSRNOT00000006188 | -0.967927386 | 2.53E-07 |
| TUCP_003863 | XLOC_169474 | ENSRNOT00000006186 | 0.961038527  | 6.62E-07 |
| TUCP_003863 | XLOC_169474 | ENSRNOT00000090621 | 0.98105097   | 1.86E-08 |
| TUCP_003863 | XLOC_169474 | ENSRNOT00000016088 | 0.965840345  | 3.46E-07 |
| TUCP_003863 | XLOC_169474 | ENSRNOT00000013743 | 0.955448618  | 1.28E-06 |
| TUCP_003863 | XLOC_169474 | ENSRNOT00000075397 | 0.972791474  | 1.12E-07 |
| TUCP_003863 | XLOC_169474 | ENSRNOT00000032926 | -0.964125411 | 4.41E-07 |
| TUCP_003863 | XLOC_169474 | ENSRNOT00000019104 | -0.953729804 | 1.55E-06 |

|             |             |                     |              |          |
|-------------|-------------|---------------------|--------------|----------|
| TUCP_003863 | XLOC_169474 | ENSRNOT00000006217  | 0.954990368  | 1.35E-06 |
| TUCP_003863 | XLOC_169474 | ENSRNOT000000068353 | 0.975554379  | 6.60E-08 |
| TUCP_003863 | XLOC_169474 | ENSRNOT000000049349 | 0.960115626  | 7.43E-07 |
| TUCP_003863 | XLOC_169474 | ENSRNOT000000089319 | 0.96523225   | 3.77E-07 |
| TUCP_003863 | XLOC_169474 | ENSRNOT000000079138 | 0.976680792  | 5.22E-08 |
| TUCP_003863 | XLOC_169474 | ENSRNOT000000078737 | -0.953026801 | 1.66E-06 |
| TUCP_003863 | XLOC_169474 | ENSRNOT000000086706 | 0.960429637  | 7.15E-07 |
| TUCP_003863 | XLOC_169474 | ENSRNOT00000004017  | 0.958525371  | 9.01E-07 |
| TUCP_003863 | XLOC_169474 | ENSRNOT000000010030 | -0.972820873 | 1.12E-07 |
| TUCP_003863 | XLOC_169474 | ENSRNOT000000031692 | -0.960615664 | 6.98E-07 |
| TUCP_003863 | XLOC_169474 | ENSRNOT000000014384 | -0.958770364 | 8.75E-07 |
| TUCP_003863 | XLOC_169474 | ENSRNOT000000042638 | 0.964249156  | 4.33E-07 |
| TUCP_003863 | XLOC_169474 | ENSRNOT000000030850 | 0.954395074  | 1.44E-06 |
| TUCP_003863 | XLOC_169474 | ENSRNOT000000006752 | 0.986580071  | 3.35E-09 |
| TUCP_003863 | XLOC_169474 | ENSRNOT000000057562 | 0.955967777  | 1.21E-06 |
| TUCP_003863 | XLOC_169474 | ENSRNOT000000072771 | 0.957499536  | 1.02E-06 |
| TUCP_003863 | XLOC_169474 | ENSRNOT000000073370 | 0.977935066  | 3.97E-08 |
| TUCP_003863 | XLOC_169474 | ENSRNOT000000019921 | 0.978013091  | 3.90E-08 |
| TUCP_003863 | XLOC_169474 | ENSRNOT000000065978 | 0.978529647  | 3.47E-08 |
| TUCP_003863 | XLOC_169474 | ENSRNOT000000035320 | -0.950292661 | 2.20E-06 |
| TUCP_003863 | XLOC_169474 | ENSRNOT000000008274 | -0.951846247 | 1.88E-06 |
| TUCP_003863 | XLOC_169474 | ENSRNOT000000065871 | 0.97662589   | 5.28E-08 |
| TUCP_003863 | XLOC_169474 | ENSRNOT000000067150 | 0.95428132   | 1.46E-06 |
| TUCP_003863 | XLOC_169474 | ENSRNOT000000067626 | -0.957961717 | 9.63E-07 |
| TUCP_003863 | XLOC_169474 | ENSRNOT000000001893 | 0.962809687  | 5.26E-07 |
| TUCP_003863 | XLOC_169474 | ENSRNOT000000013286 | 0.960179674  | 7.37E-07 |
| TUCP_003863 | XLOC_169474 | ENSRNOT000000015188 | 0.963763917  | 4.63E-07 |
| TUCP_003863 | XLOC_169474 | ENSRNOT000000089673 | -0.957644182 | 1.00E-06 |
| TUCP_003863 | XLOC_169474 | ENSRNOT000000005686 | -0.979418305 | 2.81E-08 |
| TUCP_003863 | XLOC_169474 | ENSRNOT000000005297 | 0.958219354  | 9.35E-07 |
| TUCP_003863 | XLOC_169474 | ENSRNOT000000000048 | 0.958384897  | 9.17E-07 |
| TUCP_003863 | XLOC_169474 | ENSRNOT000000087278 | -0.964804375 | 4.01E-07 |
| TUCP_003863 | XLOC_169474 | ENSRNOT000000030074 | 0.962897785  | 5.20E-07 |
| TUCP_003863 | XLOC_169474 | ENSRNOT000000067391 | -0.959332012 | 8.18E-07 |
| TUCP_003863 | XLOC_169474 | ENSRNOT000000009150 | 0.980709294  | 2.04E-08 |
| TUCP_003863 | XLOC_169474 | ENSRNOT000000084709 | 0.979899131  | 2.50E-08 |
| TUCP_003863 | XLOC_169474 | ENSRNOT000000026481 | 0.956641443  | 1.12E-06 |
| TUCP_003863 | XLOC_169474 | ENSRNOT000000000469 | 0.965662352  | 3.55E-07 |
| TUCP_003863 | XLOC_169474 | ENSRNOT00000007326  | -0.951996874 | 1.85E-06 |
| TUCP_003863 | XLOC_169474 | ENSRNOT000000025856 | -0.956692123 | 1.12E-06 |
| TUCP_003863 | XLOC_169474 | ENSRNOT000000072299 | 0.958248397  | 9.31E-07 |
| TUCP_003863 | XLOC_169474 | ENSRNOT000000026643 | 0.951893611  | 1.87E-06 |
| TUCP_003863 | XLOC_169474 | ENSRNOT00000001403  | 0.967286404  | 2.79E-07 |
| TUCP_003863 | XLOC_169474 | ENSRNOT000000072357 | -0.980301445 | 2.26E-08 |
| TUCP_003863 | XLOC_169474 | ENSRNOT000000016132 | -0.963670034 | 4.69E-07 |
| TUCP_003863 | XLOC_169474 | ENSRNOT000000013067 | -0.980113806 | 2.37E-08 |
| TUCP_003863 | XLOC_169474 | ENSRNOT000000074515 | -0.956212194 | 1.18E-06 |
| TUCP_003863 | XLOC_169474 | ENSRNOT000000066952 | 0.965318017  | 3.73E-07 |
| TUCP_003863 | XLOC_169474 | ENSRNOT000000027145 | -0.952285177 | 1.80E-06 |
| TUCP_003863 | XLOC_169474 | ENSRNOT00000002313  | -0.959039024 | 8.48E-07 |
| TUCP_003863 | XLOC_169474 | ENSRNOT000000016637 | -0.963128759 | 5.04E-07 |

|             |             |                     |              |          |
|-------------|-------------|---------------------|--------------|----------|
| TUCP_003863 | XLOC_169474 | ENSRNOT00000038994  | -0.963556121 | 4.76E-07 |
| TUCP_003863 | XLOC_169474 | ENSRNOT00000020910  | 0.953087226  | 1.65E-06 |
| TUCP_003863 | XLOC_169474 | ENSRNOT00000003787  | -0.958983433 | 8.53E-07 |
| TUCP_003863 | XLOC_169474 | ENSRNOT00000079895  | 0.950280561  | 2.20E-06 |
| TUCP_003863 | XLOC_169474 | ENSRNOT00000074586  | -0.967399398 | 2.75E-07 |
| TUCP_003863 | XLOC_169474 | ENSRNOT00000075444  | -0.951621013 | 1.92E-06 |
| TUCP_003863 | XLOC_169474 | ENSRNOT00000088214  | 0.952789959  | 1.71E-06 |
| TUCP_003863 | XLOC_169474 | ENSRNOT00000084031  | 0.966183055  | 3.29E-07 |
| TUCP_003863 | XLOC_169474 | ENSRNOT00000011880  | 0.960478334  | 7.11E-07 |
| TUCP_003863 | XLOC_169474 | ENSRNOT00000005486  | -0.952467205 | 1.76E-06 |
| TUCP_003863 | XLOC_169474 | ENSRNOT00000023989  | 0.961843786  | 5.97E-07 |
| TUCP_003863 | XLOC_169474 | ENSRNOT00000003992  | -0.962331848 | 5.61E-07 |
| TUCP_003863 | XLOC_169474 | ENSRNOT00000020885  | 0.957225638  | 1.05E-06 |
| TUCP_003863 | XLOC_169474 | ENSRNOT00000005015  | 0.969610425  | 1.94E-07 |
| TUCP_003863 | XLOC_169474 | ENSRNOT00000089980  | -0.952139613 | 1.82E-06 |
| TUCP_003863 | XLOC_169474 | ENSRNOT00000055602  | -0.972565179 | 1.17E-07 |
| TUCP_003863 | XLOC_169474 | ENSRNOT00000046745  | 0.972752811  | 1.13E-07 |
| TUCP_003863 | XLOC_169474 | ENSRNOT00000055607  | -0.952426861 | 1.77E-06 |
| TUCP_003863 | XLOC_169474 | ENSRNOT00000023876  | 0.960670948  | 6.94E-07 |
| TUCP_003863 | XLOC_169474 | ENSRNOT00000033359  | 0.956070139  | 1.20E-06 |
| TUCP_003863 | XLOC_169474 | ENSRNOT000000061201 | -0.967005254 | 2.91E-07 |
| TUCP_003863 | XLOC_169474 | ENSRNOT00000013801  | 0.968512873  | 2.31E-07 |
| TUCP_003863 | XLOC_169474 | ENSRNOT00000002187  | -0.954537103 | 1.42E-06 |
| TUCP_003863 | XLOC_169474 | ENSRNOT00000049285  | -0.967909513 | 2.54E-07 |
| TUCP_003863 | XLOC_169474 | ENSRNOT00000015239  | -0.978816578 | 3.24E-08 |
| TUCP_003863 | XLOC_169474 | ENSRNOT00000074649  | 0.988997939  | 1.25E-09 |
| TUCP_003863 | XLOC_169474 | ENSRNOT00000035277  | 0.964394328  | 4.25E-07 |
| TUCP_003863 | XLOC_169474 | ENSRNOT00000018877  | -0.957798607 | 9.82E-07 |
| TUCP_003863 | XLOC_169474 | ENSRNOT00000077146  | -0.981890819 | 1.49E-08 |
| TUCP_003863 | XLOC_169474 | ENSRNOT00000052063  | 0.962493571  | 5.49E-07 |
| TUCP_003863 | XLOC_169474 | ENSRNOT00000067840  | 0.964619576  | 4.11E-07 |
| TUCP_003863 | XLOC_169474 | ENSRNOT00000031672  | -0.957452192 | 1.02E-06 |
| TUCP_003863 | XLOC_169474 | ENSRNOT00000060002  | -0.965969417 | 3.39E-07 |
| TUCP_003863 | XLOC_169474 | ENSRNOT00000086456  | -0.962154865 | 5.74E-07 |
| TUCP_003863 | XLOC_169474 | ENSRNOT00000075209  | -0.969881242 | 1.86E-07 |
| TUCP_003863 | XLOC_169474 | ENSRNOT00000006395  | -0.956361101 | 1.16E-06 |
| TUCP_003863 | XLOC_169474 | ENSRNOT00000023977  | -0.963981688 | 4.49E-07 |
| TUCP_003863 | XLOC_169474 | ENSRNOT00000066133  | -0.975220019 | 7.06E-08 |
| TUCP_003863 | XLOC_169474 | ENSRNOT00000048933  | -0.971079228 | 1.52E-07 |
| TUCP_003863 | XLOC_169474 | ENSRNOT00000027970  | 0.966581459  | 3.10E-07 |
| TUCP_003863 | XLOC_169474 | ENSRNOT00000035385  | 0.960459597  | 7.12E-07 |
| TUCP_003863 | XLOC_169474 | ENSRNOT00000057738  | 0.981539555  | 1.64E-08 |
| TUCP_003863 | XLOC_169474 | ENSRNOT00000065897  | 0.967486757  | 2.71E-07 |
| TUCP_003863 | XLOC_169474 | ENSRNOT00000064535  | -0.976151584 | 5.84E-08 |
| TUCP_003863 | XLOC_169474 | ENSRNOT00000010748  | 0.959925633  | 7.61E-07 |
| TUCP_003863 | XLOC_169474 | ENSRNOT00000085295  | -0.952300526 | 1.79E-06 |
| TUCP_003863 | XLOC_169474 | ENSRNOT00000077367  | -0.955773627 | 1.24E-06 |
| TUCP_003863 | XLOC_169474 | ENSRNOT00000039102  | 0.982788911  | 1.16E-08 |
| TUCP_003863 | XLOC_169474 | ENSRNOT00000023807  | -0.954563047 | 1.41E-06 |
| TUCP_003863 | XLOC_169474 | ENSRNOT00000078856  | -0.950078209 | 2.25E-06 |
| TUCP_003863 | XLOC_169474 | ENSRNOT00000091205  | 0.978726629  | 3.31E-08 |

|             |             |                     |              |          |
|-------------|-------------|---------------------|--------------|----------|
| TUCP_003863 | XLOC_169474 | ENSRNOT00000009742  | -0.965976132 | 3.39E-07 |
| TUCP_003863 | XLOC_169474 | ENSRNOT00000010983  | 0.968926257  | 2.17E-07 |
| TUCP_003863 | XLOC_169474 | ENSRNOT00000007369  | 0.973384393  | 1.01E-07 |
| TUCP_003863 | XLOC_169474 | ENSRNOT00000060698  | -0.972378052 | 1.21E-07 |
| TUCP_003863 | XLOC_169474 | ENSRNOT00000058351  | 0.95846008   | 9.08E-07 |
| TUCP_003863 | XLOC_169474 | ENSRNOT00000045946  | 0.961788567  | 6.02E-07 |
| TUCP_003863 | XLOC_169474 | ENSRNOT00000015624  | 0.952294383  | 1.80E-06 |
| TUCP_003863 | XLOC_169474 | ENSRNOT00000017998  | 0.966567132  | 3.11E-07 |
| TUCP_003863 | XLOC_169474 | ENSRNOT00000065529  | 0.990384446  | 6.37E-10 |
| TUCP_003863 | XLOC_169474 | ENSRNOT00000017776  | 0.960397276  | 7.18E-07 |
| TUCP_003863 | XLOC_169474 | ENSRNOT00000008919  | -0.950468204 | 2.16E-06 |
| TUCP_003863 | XLOC_169474 | ENSRNOT00000021534  | -0.964053694 | 4.45E-07 |
| TUCP_003863 | XLOC_169474 | ENSRNOT00000088679  | -0.958651874 | 8.88E-07 |
| TUCP_003863 | XLOC_169474 | ENSRNOT00000023256  | 0.957235553  | 1.05E-06 |
| TUCP_003863 | XLOC_169474 | ENSRNOT00000037809  | -0.956361365 | 1.16E-06 |
| TUCP_003863 | XLOC_169474 | ENSRNOT00000008982  | 0.961878406  | 5.95E-07 |
| TUCP_003863 | XLOC_169474 | ENSRNOT00000022097  | 0.957044454  | 1.07E-06 |
| TUCP_003863 | XLOC_169474 | ENSRNOT00000008987  | -0.968702161 | 2.24E-07 |
| TUCP_003863 | XLOC_169474 | ENSRNOT00000092876  | -0.971810661 | 1.34E-07 |
| TUCP_003863 | XLOC_169474 | ENSRNOT00000024253  | 0.976109752  | 5.89E-08 |
| TUCP_003863 | XLOC_169474 | ENSRNOT00000088073  | -0.954837291 | 1.37E-06 |
| TUCP_003863 | XLOC_169474 | ENSRNOT000000081796 | 0.969171695  | 2.08E-07 |
| TUCP_003863 | XLOC_169474 | ENSRNOT00000075400  | -0.952529533 | 1.75E-06 |
| TUCP_003863 | XLOC_169474 | ENSRNOT00000009080  | -0.972221608 | 1.24E-07 |
| TUCP_003863 | XLOC_169474 | ENSRNOT00000063930  | -0.979091928 | 3.04E-08 |
| TUCP_003863 | XLOC_169474 | ENSRNOT00000013116  | -0.950412175 | 2.17E-06 |
| TUCP_003863 | XLOC_169474 | ENSRNOT00000048613  | 0.974685178  | 7.85E-08 |
| TUCP_003863 | XLOC_169474 | ENSRNOT0000001855   | 0.95501727   | 1.34E-06 |
| TUCP_003863 | XLOC_169474 | ENSRNOT00000013025  | -0.973229534 | 1.04E-07 |
| TUCP_003863 | XLOC_169474 | ENSRNOT00000041237  | -0.959905283 | 7.63E-07 |
| TUCP_003863 | XLOC_169474 | ENSRNOT00000023430  | -0.952460143 | 1.77E-06 |
| TUCP_003863 | XLOC_169474 | ENSRNOT00000057953  | 0.968895558  | 2.18E-07 |
| TUCP_003863 | XLOC_169474 | ENSRNOT00000036051  | 0.959847001  | 7.68E-07 |
| TUCP_003863 | XLOC_169474 | ENSRNOT00000089418  | 0.952050559  | 1.84E-06 |
| TUCP_003863 | XLOC_169474 | ENSRNOT00000087838  | -0.955050956 | 1.34E-06 |
| TUCP_003863 | XLOC_169474 | ENSRNOT00000081981  | 0.959721393  | 7.80E-07 |
| TUCP_003863 | XLOC_169474 | ENSRNOT00000001679  | 0.958661889  | 8.87E-07 |
| TUCP_003863 | XLOC_169474 | ENSRNOT00000013613  | -0.957250357 | 1.05E-06 |
| TUCP_003863 | XLOC_169474 | ENSRNOT00000026531  | -0.980912674 | 1.93E-08 |
| TUCP_003863 | XLOC_169474 | ENSRNOT00000010419  | 0.972427594  | 1.20E-07 |
| TUCP_003863 | XLOC_169474 | ENSRNOT00000003326  | -0.953777676 | 1.54E-06 |
| TUCP_003863 | XLOC_169474 | ENSRNOT00000016306  | -0.964668919 | 4.09E-07 |
| TUCP_003863 | XLOC_169474 | ENSRNOT00000015476  | -0.958948008 | 8.57E-07 |
| TUCP_003863 | XLOC_169474 | ENSRNOT00000036904  | 0.950934725  | 2.06E-06 |
| TUCP_003863 | XLOC_169474 | ENSRNOT00000025079  | -0.969831931 | 1.87E-07 |
| TUCP_003863 | XLOC_169474 | ENSRNOT00000048754  | -0.959275017 | 8.24E-07 |
| TUCP_003863 | XLOC_169474 | ENSRNOT00000064643  | 0.957475891  | 1.02E-06 |
| TUCP_003863 | XLOC_169474 | ENSRNOT00000021458  | -0.963296809 | 4.93E-07 |
| TUCP_003863 | XLOC_169474 | ENSRNOT00000011926  | 0.955826623  | 1.23E-06 |
| TUCP_003863 | XLOC_169474 | ENSRNOT00000054761  | -0.950087108 | 2.24E-06 |
| TUCP_003863 | XLOC_169474 | ENSRNOT00000007824  | -0.964886922 | 3.96E-07 |

|             |             |                    |              |          |
|-------------|-------------|--------------------|--------------|----------|
| TUCP_003863 | XLOC_169474 | ENSRNOT00000020681 | -0.951627552 | 1.92E-06 |
| TUCP_003863 | XLOC_169474 | ENSRNOT00000057898 | -0.96223583  | 5.68E-07 |
| TUCP_003863 | XLOC_169474 | ENSRNOT00000024677 | 0.977104508  | 4.77E-08 |
| TUCP_003863 | XLOC_169474 | ENSRNOT00000056100 | -0.971836698 | 1.33E-07 |
| TUCP_003863 | XLOC_169474 | ENSRNOT00000009811 | 0.960729935  | 6.89E-07 |
| TUCP_003863 | XLOC_169474 | ENSRNOT00000075800 | -0.955950163 | 1.21E-06 |
| TUCP_003863 | XLOC_169474 | ENSRNOT00000072762 | -0.96387902  | 4.56E-07 |
| TUCP_003863 | XLOC_169474 | ENSRNOT00000071540 | 0.957442169  | 1.02E-06 |
| TUCP_003863 | XLOC_169474 | ENSRNOT00000072849 | -0.950889804 | 2.07E-06 |
| TUCP_003863 | XLOC_169474 | ENSRNOT00000073643 | -0.977627285 | 4.25E-08 |
| TUCP_003863 | XLOC_169474 | ENSRNOT00000078349 | -0.95844063  | 9.10E-07 |
| TUCP_003863 | XLOC_169474 | ENSRNOT00000022502 | -0.956749998 | 1.11E-06 |
| TUCP_003863 | XLOC_169474 | ENSRNOT00000085545 | -0.952195127 | 1.81E-06 |
| TUCP_003863 | XLOC_169474 | ENSRNOT00000021802 | 0.964290977  | 4.31E-07 |
| TUCP_003863 | XLOC_169474 | ENSRNOT00000024352 | 0.979241482  | 2.93E-08 |
| TUCP_003863 | XLOC_169474 | ENSRNOT00000082627 | -0.966342847 | 3.21E-07 |
| TUCP_003863 | XLOC_169474 | ENSRNOT00000018122 | 0.95764714   | 9.99E-07 |
| TUCP_003863 | XLOC_169474 | ENSRNOT00000072118 | 0.978347299  | 3.61E-08 |
| TUCP_003863 | XLOC_169474 | ENSRNOT00000003780 | 0.973050005  | 1.07E-07 |
| TUCP_003863 | XLOC_169474 | ENSRNOT00000007004 | 0.951854219  | 1.88E-06 |
| TUCP_003863 | XLOC_169474 | ENSRNOT00000014506 | -0.960634671 | 6.97E-07 |
| TUCP_003863 | XLOC_169474 | ENSRNOT00000023262 | -0.96890327  | 2.17E-07 |
| TUCP_003863 | XLOC_169474 | ENSRNOT00000059246 | 0.977017993  | 4.86E-08 |
| TUCP_003863 | XLOC_169474 | ENSRNOT00000091427 | -0.972524116 | 1.18E-07 |
| TUCP_003863 | XLOC_169474 | ENSRNOT00000026312 | 0.969134291  | 2.09E-07 |
| TUCP_003863 | XLOC_169474 | ENSRNOT00000005604 | 0.953015883  | 1.67E-06 |
| TUCP_003863 | XLOC_169474 | ENSRNOT00000055957 | -0.952122872 | 1.83E-06 |
| TUCP_003863 | XLOC_169474 | ENSRNOT00000068381 | 0.970232011  | 1.75E-07 |
| TUCP_003863 | XLOC_169474 | ENSRNOT00000068026 | -0.970332455 | 1.72E-07 |
| TUCP_003863 | XLOC_169474 | ENSRNOT00000085621 | 0.955882078  | 1.22E-06 |
| TUCP_003863 | XLOC_169474 | ENSRNOT00000077999 | 0.965107235  | 3.84E-07 |
| TUCP_003863 | XLOC_169474 | ENSRNOT00000014821 | -0.958258834 | 9.30E-07 |
| TUCP_003863 | XLOC_169474 | ENSRNOT00000058382 | 0.995896236  | 9.10E-12 |
| TUCP_003863 | XLOC_169474 | ENSRNOT00000082711 | 0.957925926  | 9.67E-07 |
| TUCP_003863 | XLOC_169474 | ENSRNOT00000005587 | -0.957568974 | 1.01E-06 |
| TUCP_003863 | XLOC_169474 | ENSRNOT00000035605 | 0.959253849  | 8.26E-07 |
| TUCP_003863 | XLOC_169474 | ENSRNOT00000005172 | 0.95942046   | 8.09E-07 |
| TUCP_003863 | XLOC_169474 | ENSRNOT00000017746 | -0.960600585 | 7.00E-07 |
| TUCP_003863 | XLOC_169474 | ENSRNOT00000017995 | 0.976811854  | 5.08E-08 |
| TUCP_003863 | XLOC_169474 | ENSRNOT00000071897 | -0.956958662 | 1.08E-06 |
| TUCP_003863 | XLOC_169474 | ENSRNOT00000081725 | 0.975286067  | 6.97E-08 |
| TUCP_003863 | XLOC_169474 | ENSRNOT00000005459 | 0.985918569  | 4.26E-09 |
| TUCP_003863 | XLOC_169474 | ENSRNOT00000009135 | 0.957611122  | 1.00E-06 |
| TUCP_003863 | XLOC_169474 | ENSRNOT00000027910 | 0.968863133  | 2.19E-07 |
| TUCP_003863 | XLOC_169474 | ENSRNOT00000037015 | 0.971379408  | 1.44E-07 |
| TUCP_003863 | XLOC_169474 | ENSRNOT00000024452 | -0.952320039 | 1.79E-06 |
| TUCP_003863 | XLOC_169474 | ENSRNOT00000000258 | -0.952720846 | 1.72E-06 |
| TUCP_003863 | XLOC_169474 | ENSRNOT00000066032 | 0.962966004  | 5.16E-07 |
| TUCP_003863 | XLOC_169474 | ENSRNOT00000074972 | 0.957774318  | 9.85E-07 |
| TUCP_003863 | XLOC_169474 | ENSRNOT00000060494 | 0.966921457  | 2.95E-07 |
| TUCP_003863 | XLOC_169474 | ENSRNOT00000025314 | 0.963541371  | 4.77E-07 |



|             |             |                    |              |          |
|-------------|-------------|--------------------|--------------|----------|
| TUCP_003863 | XLOC_169474 | ENSRNOT00000033677 | -0.952797653 | 1.70E-06 |
| TUCP_003863 | XLOC_169474 | ENSRNOT00000006802 | 0.952580558  | 1.74E-06 |
| TUCP_003863 | XLOC_169474 | ENSRNOT00000082151 | -0.960375175 | 7.20E-07 |
| TUCP_003863 | XLOC_169474 | ENSRNOT00000016776 | -0.96098292  | 6.67E-07 |
| TUCP_003863 | XLOC_169474 | ENSRNOT00000034411 | 0.953298541  | 1.62E-06 |
| TUCP_003863 | XLOC_169474 | ENSRNOT00000075630 | -0.96438565  | 4.25E-07 |
| TUCP_003863 | XLOC_169474 | ENSRNOT00000085971 | -0.950458057 | 2.16E-06 |
| TUCP_003863 | XLOC_169474 | ENSRNOT00000022142 | 0.952174611  | 1.82E-06 |
| TUCP_003863 | XLOC_169474 | ENSRNOT00000076300 | -0.950552405 | 2.14E-06 |
| TUCP_003863 | XLOC_169474 | ENSRNOT00000012334 | 0.956850466  | 1.10E-06 |
| TUCP_003863 | XLOC_169474 | ENSRNOT00000015537 | 0.970113251  | 1.79E-07 |
| TUCP_003863 | XLOC_169474 | ENSRNOT00000052120 | 0.956131088  | 1.19E-06 |
| TUCP_003863 | XLOC_169474 | ENSRNOT00000007702 | -0.954907934 | 1.36E-06 |
| TUCP_003863 | XLOC_169474 | ENSRNOT00000022461 | -0.950718124 | 2.11E-06 |
| TUCP_003863 | XLOC_169474 | ENSRNOT00000023965 | -0.953970489 | 1.51E-06 |
| TUCP_003863 | XLOC_169474 | ENSRNOT00000040476 | 0.95103101   | 2.04E-06 |
| TUCP_003863 | XLOC_169474 | ENSRNOT00000061580 | -0.955841878 | 1.23E-06 |
| TUCP_003863 | XLOC_169474 | ENSRNOT00000029125 | 0.956763414  | 1.11E-06 |
| TUCP_003863 | XLOC_169474 | ENSRNOT00000085279 | 0.968307672  | 2.39E-07 |
| TUCP_003863 | XLOC_169474 | ENSRNOT00000012528 | 0.97608928   | 5.91E-08 |
| TUCP_003863 | XLOC_169474 | ENSRNOT00000068184 | -0.955441369 | 1.28E-06 |
| TUCP_003863 | XLOC_169474 | ENSRNOT00000082904 | 0.980996347  | 1.89E-08 |
| TUCP_003863 | XLOC_169474 | ENSRNOT00000015318 | -0.950215817 | 2.21E-06 |
| TUCP_003863 | XLOC_169474 | ENSRNOT00000015223 | 0.979348865  | 2.86E-08 |
| TUCP_003863 | XLOC_169474 | ENSRNOT00000085669 | 0.95572266   | 1.24E-06 |
| TUCP_003863 | XLOC_169474 | ENSRNOT00000028907 | 0.978664205  | 3.36E-08 |
| TUCP_003863 | XLOC_169474 | ENSRNOT00000010224 | 0.953438074  | 1.59E-06 |
| TUCP_003863 | XLOC_169474 | ENSRNOT00000025147 | 0.956193392  | 1.18E-06 |
| TUCP_003863 | XLOC_169474 | ENSRNOT00000025887 | -0.957054719 | 1.07E-06 |
| TUCP_003863 | XLOC_169474 | ENSRNOT00000003940 | -0.950665106 | 2.12E-06 |
| TUCP_003863 | XLOC_169474 | ENSRNOT00000017687 | -0.950593996 | 2.13E-06 |
| TUCP_003863 | XLOC_169474 | ENSRNOT00000015799 | 0.951871988  | 1.88E-06 |
| TUCP_003863 | XLOC_169474 | ENSRNOT00000082998 | 0.959352327  | 8.16E-07 |
| TUCP_003863 | XLOC_169474 | ENSRNOT00000090946 | 0.951041243  | 2.04E-06 |
| TUCP_003863 | XLOC_169474 | ENSRNOT00000015006 | 0.959159393  | 8.35E-07 |
| TUCP_003863 | XLOC_169474 | ENSRNOT00000007350 | 0.981439219  | 1.68E-08 |
| TUCP_003863 | XLOC_169474 | ENSRNOT00000083578 | 0.973370084  | 1.01E-07 |
| TUCP_003863 | XLOC_169474 | ENSRNOT00000000181 | 0.974667394  | 7.87E-08 |
| TUCP_003863 | XLOC_169474 | ENSRNOT00000020297 | 0.975074334  | 7.27E-08 |
| TUCP_003863 | XLOC_169474 | ENSRNOT00000023638 | 0.966671351  | 3.06E-07 |
| TUCP_003863 | XLOC_169474 | ENSRNOT00000017361 | 0.952432955  | 1.77E-06 |
| TUCP_003863 | XLOC_169474 | ENSRNOT00000005220 | 0.95390878   | 1.52E-06 |
| TUCP_003863 | XLOC_169474 | ENSRNOT00000045326 | 0.95056401   | 2.14E-06 |
| TUCP_003863 | XLOC_169474 | ENSRNOT00000039607 | -0.957828873 | 9.78E-07 |
| TUCP_003863 | XLOC_169474 | ENSRNOT00000074023 | 0.973939265  | 9.06E-08 |
| TUCP_003863 | XLOC_169474 | ENSRNOT00000009073 | -0.954571734 | 1.41E-06 |
| TUCP_003863 | XLOC_169474 | ENSRNOT00000018341 | -0.966364232 | 3.20E-07 |
| TUCP_003863 | XLOC_169474 | ENSRNOT00000045926 | 0.955838792  | 1.23E-06 |
| TUCP_003863 | XLOC_169474 | ENSRNOT00000065076 | 0.970249315  | 1.75E-07 |
| TUCP_003863 | XLOC_169474 | ENSRNOT00000013516 | 0.969227379  | 2.06E-07 |
| TUCP_003863 | XLOC_169474 | ENSRNOT00000054685 | 0.963546417  | 4.77E-07 |

|             |             |                    |              |          |
|-------------|-------------|--------------------|--------------|----------|
| TUCP_003863 | XLOC_169474 | ENSRNOT00000012060 | 0.955505297  | 1.27E-06 |
| TUCP_003863 | XLOC_169474 | ENSRNOT00000023037 | 0.960206882  | 7.35E-07 |
| TUCP_003863 | XLOC_169474 | ENSRNOT00000075480 | -0.95236523  | 1.78E-06 |
| TUCP_003863 | XLOC_169474 | ENSRNOT00000034282 | 0.975241243  | 7.03E-08 |
| TUCP_003863 | XLOC_169474 | ENSRNOT00000027760 | 0.981593867  | 1.61E-08 |
| TUCP_003863 | XLOC_169474 | ENSRNOT00000024402 | 0.963461541  | 4.82E-07 |
| TUCP_003863 | XLOC_169474 | ENSRNOT00000089545 | -0.954185543 | 1.47E-06 |
| TUCP_003863 | XLOC_169474 | ENSRNOT00000019519 | 0.961260545  | 6.44E-07 |
| TUCP_003863 | XLOC_169474 | ENSRNOT00000089933 | 0.975509217  | 6.66E-08 |
| TUCP_003863 | XLOC_169474 | ENSRNOT00000022924 | -0.960218177 | 7.34E-07 |
| TUCP_003863 | XLOC_169474 | ENSRNOT00000003641 | 0.956164913  | 1.18E-06 |
| TUCP_003863 | XLOC_169474 | ENSRNOT00000090912 | 0.967099346  | 2.87E-07 |
| TUCP_003863 | XLOC_169474 | ENSRNOT00000073983 | 0.972704726  | 1.14E-07 |
| TUCP_003863 | XLOC_169474 | ENSRNOT00000067554 | 0.958099083  | 9.48E-07 |
| TUCP_003863 | XLOC_169474 | ENSRNOT00000010784 | 0.957677125  | 9.96E-07 |
| TUCP_003863 | XLOC_169474 | ENSRNOT00000010783 | -0.964676552 | 4.08E-07 |
| TUCP_003863 | XLOC_169474 | ENSRNOT00000027232 | 0.956933522  | 1.09E-06 |
| TUCP_003863 | XLOC_169474 | ENSRNOT00000019820 | 0.968847912  | 2.19E-07 |
| TUCP_003863 | XLOC_169474 | ENSRNOT00000011832 | -0.985355517 | 5.18E-09 |
| TUCP_003863 | XLOC_169474 | ENSRNOT00000021030 | -0.950482444 | 2.16E-06 |
| TUCP_003863 | XLOC_169474 | ENSRNOT00000077727 | -0.971842558 | 1.33E-07 |
| TUCP_003863 | XLOC_169474 | ENSRNOT00000044346 | -0.95987179  | 7.66E-07 |
| TUCP_003863 | XLOC_169474 | ENSRNOT00000092066 | -0.958379271 | 9.17E-07 |
| TUCP_003863 | XLOC_169474 | ENSRNOT00000068745 | 0.951235953  | 2.00E-06 |
| TUCP_003863 | XLOC_169474 | ENSRNOT00000020453 | -0.959279432 | 8.23E-07 |
| TUCP_003863 | XLOC_169474 | ENSRNOT00000092068 | 0.968518809  | 2.31E-07 |
| TUCP_003863 | XLOC_169474 | ENSRNOT00000048781 | 0.957705682  | 9.93E-07 |
| TUCP_003863 | XLOC_169474 | ENSRNOT00000091909 | 0.968209533  | 2.42E-07 |
| TUCP_003863 | XLOC_169474 | ENSRNOT00000003265 | 0.957914927  | 9.69E-07 |
| TUCP_003863 | XLOC_169474 | ENSRNOT00000027435 | 0.956803055  | 1.10E-06 |
| TUCP_003863 | XLOC_169474 | ENSRNOT00000003544 | -0.952891852 | 1.69E-06 |
| TUCP_003863 | XLOC_169474 | ENSRNOT00000085334 | 0.955166614  | 1.32E-06 |
| TUCP_003863 | XLOC_169474 | ENSRNOT00000022190 | -0.969547955 | 1.96E-07 |
| TUCP_003863 | XLOC_169474 | ENSRNOT00000060098 | -0.951051796 | 2.04E-06 |
| TUCP_003863 | XLOC_169474 | ENSRNOT00000067739 | -0.952209491 | 1.81E-06 |
| TUCP_003863 | XLOC_169474 | ENSRNOT00000004196 | 0.9615427    | 6.21E-07 |
| TUCP_003863 | XLOC_169474 | ENSRNOT00000076230 | 0.955712251  | 1.25E-06 |
| TUCP_003863 | XLOC_169474 | ENSRNOT00000007882 | -0.954719885 | 1.39E-06 |
| TUCP_003863 | XLOC_169474 | ENSRNOT00000073919 | 0.954548504  | 1.42E-06 |
| TUCP_003863 | XLOC_169474 | ENSRNOT00000067780 | -0.958178554 | 9.39E-07 |
| TUCP_003863 | XLOC_169474 | ENSRNOT00000086577 | 0.955018027  | 1.34E-06 |
| TUCP_003863 | XLOC_169474 | ENSRNOT00000036658 | -0.967885042 | 2.55E-07 |
| TUCP_003863 | XLOC_169474 | ENSRNOT00000089611 | 0.966160479  | 3.30E-07 |
| TUCP_003863 | XLOC_169474 | ENSRNOT00000008253 | -0.954767199 | 1.38E-06 |
| TUCP_003863 | XLOC_169474 | ENSRNOT00000086590 | 0.957904803  | 9.70E-07 |
| TUCP_003863 | XLOC_169474 | ENSRNOT00000034883 | -0.968332097 | 2.38E-07 |
| TUCP_003863 | XLOC_169474 | ENSRNOT00000055321 | 0.955328373  | 1.30E-06 |
| TUCP_003863 | XLOC_169474 | ENSRNOT00000022676 | -0.952773821 | 1.71E-06 |
| TUCP_003863 | XLOC_169474 | ENSRNOT00000025913 | -0.969901424 | 1.85E-07 |
| TUCP_003863 | XLOC_169474 | ENSRNOT00000005910 | -0.962262423 | 5.66E-07 |
| TUCP_003863 | XLOC_169474 | ENSRNOT00000017624 | 0.972160862  | 1.26E-07 |

|             |             |                    |              |          |
|-------------|-------------|--------------------|--------------|----------|
| TUCP_003863 | XLOC_169474 | ENSRNOT00000076485 | -0.951199306 | 2.01E-06 |
| TUCP_003863 | XLOC_169474 | ENSRNOT00000073356 | 0.958373219  | 9.18E-07 |
| TUCP_003863 | XLOC_169474 | ENSRNOT00000078475 | 0.958544951  | 8.99E-07 |
| TUCP_003863 | XLOC_169474 | ENSRNOT00000040169 | 0.981249694  | 1.77E-08 |
| TUCP_003863 | XLOC_169474 | ENSRNOT00000026249 | -0.967979062 | 2.51E-07 |
| TUCP_003863 | XLOC_169474 | ENSRNOT00000016722 | 0.952780515  | 1.71E-06 |
| TUCP_003863 | XLOC_169474 | ENSRNOT00000073526 | 0.954876393  | 1.37E-06 |
| TUCP_003863 | XLOC_169474 | ENSRNOT00000089970 | 0.961836895  | 5.98E-07 |
| TUCP_003863 | XLOC_169474 | ENSRNOT00000000013 | 0.970777845  | 1.60E-07 |
| TUCP_003863 | XLOC_169474 | ENSRNOT00000018477 | -0.958730839 | 8.80E-07 |
| TUCP_003863 | XLOC_169474 | ENSRNOT00000018473 | -0.95004785  | 2.25E-06 |
| TUCP_003863 | XLOC_169474 | ENSRNOT00000005161 | 0.98010394   | 2.37E-08 |
| TUCP_003863 | XLOC_169474 | ENSRNOT00000037955 | -0.97047285  | 1.68E-07 |
| TUCP_003863 | XLOC_169474 | ENSRNOT00000004999 | 0.967989933  | 2.51E-07 |
| TUCP_003863 | XLOC_169474 | ENSRNOT00000013463 | 0.962505565  | 5.48E-07 |
| TUCP_003863 | XLOC_169474 | ENSRNOT00000041365 | 0.955008676  | 1.35E-06 |
| TUCP_003863 | XLOC_169474 | ENSRNOT00000088054 | 0.957920201  | 9.68E-07 |
| TUCP_003863 | XLOC_169474 | ENSRNOT00000025966 | 0.963003675  | 5.13E-07 |
| TUCP_003863 | XLOC_169474 | ENSRNOT00000047663 | -0.965852125 | 3.45E-07 |
| TUCP_003863 | XLOC_169474 | ENSRNOT00000029202 | -0.961778666 | 6.02E-07 |
| TUCP_003863 | XLOC_169474 | ENSRNOT00000025791 | -0.957234439 | 1.05E-06 |
| TUCP_003863 | XLOC_169474 | ENSRNOT00000005489 | 0.962263006  | 5.66E-07 |
| TUCP_003863 | XLOC_169474 | ENSRNOT00000025794 | -0.966371649 | 3.20E-07 |
| TUCP_003863 | XLOC_169474 | ENSRNOT00000058111 | -0.967350634 | 2.77E-07 |
| TUCP_003863 | XLOC_169474 | ENSRNOT00000084422 | 0.961260964  | 6.44E-07 |
| TUCP_003863 | XLOC_169474 | ENSRNOT00000088279 | 0.958565924  | 8.97E-07 |
| TUCP_003863 | XLOC_169474 | ENSRNOT00000009994 | -0.972574776 | 1.17E-07 |
| TUCP_003863 | XLOC_169474 | ENSRNOT00000078994 | 0.950477569  | 2.16E-06 |
| TUCP_003863 | XLOC_169474 | ENSRNOT00000002114 | -0.969415123 | 2.00E-07 |
| TUCP_003863 | XLOC_169474 | ENSRNOT00000024841 | -0.970488877 | 1.68E-07 |
| TUCP_003863 | XLOC_169474 | ENSRNOT00000009462 | 0.964179296  | 4.37E-07 |
| TUCP_003863 | XLOC_169474 | ENSRNOT00000024924 | -0.950553942 | 2.14E-06 |
| TUCP_003863 | XLOC_169474 | ENSRNOT00000027875 | 0.971433375  | 1.43E-07 |
| TUCP_003863 | XLOC_169474 | ENSRNOT00000046215 | -0.962073439 | 5.80E-07 |
| TUCP_003863 | XLOC_169474 | ENSRNOT00000018074 | -0.96699691  | 2.92E-07 |
| TUCP_003863 | XLOC_169474 | ENSRNOT00000014124 | 0.95338818   | 1.60E-06 |
| TUCP_003863 | XLOC_169474 | ENSRNOT00000043581 | -0.959233587 | 8.28E-07 |
| TUCP_003863 | XLOC_169474 | ENSRNOT00000000120 | 0.974467931  | 8.19E-08 |
| TUCP_003863 | XLOC_169474 | ENSRNOT00000013632 | 0.959566795  | 7.95E-07 |
| TUCP_003863 | XLOC_169474 | ENSRNOT00000078906 | -0.959648269 | 7.87E-07 |
| TUCP_003863 | XLOC_169474 | ENSRNOT00000055442 | 0.955798104  | 1.23E-06 |
| TUCP_003863 | XLOC_169474 | ENSRNOT00000028225 | 0.966906033  | 2.96E-07 |
| TUCP_003863 | XLOC_169474 | ENSRNOT00000019172 | -0.953232604 | 1.63E-06 |
| TUCP_003863 | XLOC_169474 | ENSRNOT00000015495 | -0.980850083 | 1.96E-08 |
| TUCP_003863 | XLOC_169474 | ENSRNOT00000032248 | 0.967121642  | 2.86E-07 |
| TUCP_003863 | XLOC_169474 | ENSRNOT00000077503 | 0.955403221  | 1.29E-06 |
| TUCP_003863 | XLOC_169474 | ENSRNOT00000040393 | 0.960597529  | 7.00E-07 |
| TUCP_003863 | XLOC_169474 | ENSRNOT00000067901 | -0.951071709 | 2.03E-06 |
| TUCP_003863 | XLOC_169474 | ENSRNOT00000045063 | 0.953197295  | 1.63E-06 |
| TUCP_003863 | XLOC_169474 | ENSRNOT00000011511 | -0.954635672 | 1.40E-06 |
| TUCP_003863 | XLOC_169474 | ENSRNOT00000021674 | 0.955942309  | 1.21E-06 |

|             |             |                    |              |          |
|-------------|-------------|--------------------|--------------|----------|
| TUCP_003863 | XLOC_169474 | ENSRNOT00000036613 | -0.972008359 | 1.29E-07 |
| TUCP_003863 | XLOC_169474 | ENSRNOT00000025705 | 0.986148914  | 3.92E-09 |
| TUCP_003863 | XLOC_169474 | ENSRNOT00000008113 | -0.96180378  | 6.00E-07 |
| TUCP_003863 | XLOC_169474 | ENSRNOT00000047105 | 0.959633925  | 7.89E-07 |
| TUCP_003863 | XLOC_169474 | ENSRNOT00000007698 | -0.965979401 | 3.39E-07 |
| TUCP_003863 | XLOC_169474 | ENSRNOT00000006460 | 0.964766319  | 4.03E-07 |
| TUCP_003863 | XLOC_169474 | ENSRNOT00000020051 | 0.985253425  | 5.36E-09 |
| TUCP_003863 | XLOC_169474 | ENSRNOT00000026279 | -0.951916848 | 1.87E-06 |
| TUCP_003863 | XLOC_169474 | ENSRNOT00000087062 | 0.961197863  | 6.49E-07 |
| TUCP_003863 | XLOC_169474 | ENSRNOT00000015678 | -0.966902703 | 2.96E-07 |
| TUCP_003863 | XLOC_169474 | ENSRNOT00000082914 | 0.971366109  | 1.44E-07 |
| TUCP_003863 | XLOC_169474 | ENSRNOT00000021858 | 0.955789572  | 1.23E-06 |
| TUCP_003863 | XLOC_169474 | ENSRNOT00000006340 | 0.970050259  | 1.80E-07 |
| TUCP_003863 | XLOC_169474 | ENSRNOT00000049459 | -0.962284518 | 5.64E-07 |
| TUCP_003863 | XLOC_169474 | ENSRNOT00000087011 | -0.964527751 | 4.17E-07 |
| TUCP_003863 | XLOC_169474 | ENSRNOT00000004391 | 0.951158503  | 2.02E-06 |
| TUCP_003863 | XLOC_169474 | ENSRNOT00000084567 | 0.959426136  | 8.09E-07 |
| TUCP_003863 | XLOC_169474 | ENSRNOT00000008361 | 0.961472997  | 6.27E-07 |
| TUCP_003863 | XLOC_169474 | ENSRNOT00000013851 | -0.964524165 | 4.17E-07 |
| TUCP_003863 | XLOC_169474 | ENSRNOT00000001118 | 0.967883305  | 2.55E-07 |
| TUCP_003863 | XLOC_169474 | ENSRNOT00000019180 | -0.956741527 | 1.11E-06 |
| TUCP_003863 | XLOC_169474 | ENSRNOT00000045833 | 0.964996036  | 3.90E-07 |
| TUCP_003863 | XLOC_169474 | ENSRNOT00000001507 | 0.966328622  | 3.22E-07 |
| TUCP_003863 | XLOC_169474 | ENSRNOT00000087604 | 0.951959022  | 1.86E-06 |
| TUCP_003863 | XLOC_169474 | ENSRNOT00000083568 | 0.985166878  | 5.52E-09 |
| TUCP_003863 | XLOC_169474 | ENSRNOT00000039177 | -0.968381408 | 2.36E-07 |
| TUCP_003863 | XLOC_169474 | ENSRNOT00000005620 | -0.954342846 | 1.45E-06 |
| TUCP_003863 | XLOC_169474 | ENSRNOT00000037456 | 0.951620437  | 1.92E-06 |
| TUCP_003863 | XLOC_169474 | ENSRNOT00000030082 | 0.960980868  | 6.67E-07 |
| TUCP_003863 | XLOC_169474 | ENSRNOT00000000577 | 0.950407087  | 2.17E-06 |
| TUCP_003863 | XLOC_169474 | ENSRNOT00000081226 | 0.965046068  | 3.87E-07 |
| TUCP_003863 | XLOC_169474 | ENSRNOT00000065045 | 0.977785392  | 4.10E-08 |
| TUCP_003863 | XLOC_169474 | ENSRNOT00000066708 | 0.975195273  | 7.09E-08 |
| TUCP_003863 | XLOC_169474 | ENSRNOT00000080677 | -0.953927002 | 1.51E-06 |
| TUCP_003863 | XLOC_169474 | ENSRNOT00000046490 | -0.954908676 | 1.36E-06 |
| TUCP_003863 | XLOC_169474 | ENSRNOT00000016629 | 0.96226368   | 5.66E-07 |
| TUCP_003863 | XLOC_169474 | ENSRNOT00000046552 | 0.964901797  | 3.95E-07 |
| TUCP_003863 | XLOC_169474 | ENSRNOT00000005405 | 0.950130271  | 2.23E-06 |
| TUCP_003863 | XLOC_169474 | ENSRNOT0000001979  | -0.951649162 | 1.92E-06 |
| TUCP_003863 | XLOC_169474 | ENSRNOT00000083968 | -0.958618862 | 8.91E-07 |
| TUCP_003863 | XLOC_169474 | ENSRNOT00000037133 | 0.95033552   | 2.19E-06 |
| TUCP_003863 | XLOC_169474 | ENSRNOT00000033806 | 0.956944565  | 1.08E-06 |
| TUCP_003863 | XLOC_169474 | ENSRNOT00000083964 | -0.95306033  | 1.66E-06 |
| TUCP_003863 | XLOC_169474 | ENSRNOT00000026726 | -0.954673417 | 1.40E-06 |
| TUCP_003863 | XLOC_169474 | ENSRNOT00000026831 | 0.950749744  | 2.10E-06 |
| TUCP_003863 | XLOC_169474 | ENSRNOT00000068452 | 0.95782936   | 9.78E-07 |
| TUCP_003863 | XLOC_169474 | ENSRNOT00000007821 | 0.971196199  | 1.49E-07 |
| TUCP_003863 | XLOC_169474 | ENSRNOT00000028266 | 0.95587295   | 1.22E-06 |
| TUCP_003863 | XLOC_169474 | ENSRNOT00000011956 | 0.95490329   | 1.36E-06 |
| TUCP_003863 | XLOC_169474 | ENSRNOT00000024119 | 0.984665347  | 6.51E-09 |
| TUCP_003863 | XLOC_169474 | ENSRNOT0000001322  | -0.956010391 | 1.20E-06 |

|             |             |                    |              |          |
|-------------|-------------|--------------------|--------------|----------|
| TUCP_003863 | XLOC_169474 | ENSRNOT0000006824  | -0.962440248 | 5.53E-07 |
| TUCP_003863 | XLOC_169474 | ENSRNOT00000086260 | -0.975772505 | 6.31E-08 |
| TUCP_003863 | XLOC_169474 | ENSRNOT00000029701 | 0.973249541  | 1.03E-07 |
| TUCP_003863 | XLOC_169474 | ENSRNOT0000001099  | -0.953085689 | 1.65E-06 |
| TUCP_003863 | XLOC_169474 | ENSRNOT00000073193 | -0.953518034 | 1.58E-06 |
| TUCP_003863 | XLOC_169474 | ENSRNOT00000090853 | -0.955724444 | 1.24E-06 |
| TUCP_003863 | XLOC_169474 | ENSRNOT00000020316 | -0.955962561 | 1.21E-06 |
| TUCP_003863 | XLOC_169474 | ENSRNOT00000036666 | 0.953760221  | 1.54E-06 |
| TUCP_003863 | XLOC_169474 | ENSRNOT00000089211 | 0.954389985  | 1.44E-06 |
| TUCP_003863 | XLOC_169474 | ENSRNOT00000020383 | 0.97139171   | 1.44E-07 |
| TUCP_003863 | XLOC_169474 | ENSRNOT00000015518 | -0.96846141  | 2.33E-07 |
| TUCP_003863 | XLOC_169474 | ENSRNOT00000000302 | 0.957446183  | 1.02E-06 |
| TUCP_003863 | XLOC_169474 | ENSRNOT00000065615 | 0.955113935  | 1.33E-06 |
| TUCP_003863 | XLOC_169474 | ENSRNOT00000011675 | 0.97123053   | 1.48E-07 |
| TUCP_003863 | XLOC_169474 | ENSRNOT00000041106 | 0.962696991  | 5.34E-07 |
| TUCP_003863 | XLOC_169474 | ENSRNOT00000033116 | 0.964822426  | 4.00E-07 |
| TUCP_003863 | XLOC_169474 | ENSRNOT00000000717 | -0.957289826 | 1.04E-06 |
| TUCP_003863 | XLOC_169474 | ENSRNOT00000049048 | -0.950006306 | 2.26E-06 |
| TUCP_003863 | XLOC_169474 | ENSRNOT00000086122 | 0.970932605  | 1.56E-07 |
| TUCP_003863 | XLOC_169474 | ENSRNOT00000023763 | -0.957820611 | 9.79E-07 |
| TUCP_003863 | XLOC_169474 | ENSRNOT00000066230 | 0.956346142  | 1.16E-06 |
| TUCP_003863 | XLOC_169474 | ENSRNOT00000074177 | 0.955781682  | 1.24E-06 |
| TUCP_003863 | XLOC_169474 | ENSRNOT00000009202 | 0.960196968  | 7.36E-07 |
| TUCP_003863 | XLOC_169474 | ENSRNOT00000010993 | 0.989976934  | 7.83E-10 |
| TUCP_003863 | XLOC_169474 | ENSRNOT00000059181 | 0.971991778  | 1.30E-07 |
| TUCP_003863 | XLOC_169474 | ENSRNOT00000017291 | -0.960537124 | 7.05E-07 |
| TUCP_003863 | XLOC_169474 | ENSRNOT00000003691 | -0.964995774 | 3.90E-07 |
| TUCP_003863 | XLOC_169474 | ENSRNOT00000017765 | 0.970313096  | 1.73E-07 |
| TUCP_003863 | XLOC_169474 | ENSRNOT00000017761 | 0.981458987  | 1.67E-08 |
| TUCP_003863 | XLOC_169474 | ENSRNOT00000023543 | -0.972885403 | 1.10E-07 |
| TUCP_003863 | XLOC_169474 | ENSRNOT00000035309 | -0.956723228 | 1.11E-06 |
| TUCP_003863 | XLOC_169474 | ENSRNOT00000023014 | 0.960691079  | 6.92E-07 |
| TUCP_003863 | XLOC_169474 | ENSRNOT00000080608 | 0.95694832   | 1.08E-06 |
| TUCP_003863 | XLOC_169474 | ENSRNOT00000018634 | -0.975185206 | 7.11E-08 |
| TUCP_003863 | XLOC_169474 | ENSRNOT00000004351 | -0.959217207 | 8.30E-07 |
| TUCP_003863 | XLOC_169474 | ENSRNOT00000039341 | 0.968971363  | 2.15E-07 |
| TUCP_003863 | XLOC_169474 | ENSRNOT00000085517 | 0.960285865  | 7.28E-07 |
| TUCP_003863 | XLOC_169474 | ENSRNOT00000038212 | -0.952666007 | 1.73E-06 |
| TUCP_003863 | XLOC_169474 | ENSRNOT00000037405 | 0.958916399  | 8.60E-07 |
| TUCP_003863 | XLOC_169474 | ENSRNOT00000080591 | 0.96765728   | 2.64E-07 |
| TUCP_003863 | XLOC_169474 | ENSRNOT00000042125 | 0.951871751  | 1.88E-06 |
| TUCP_003863 | XLOC_169474 | ENSRNOT00000025460 | 0.97872177   | 3.31E-08 |
| TUCP_003863 | XLOC_169474 | ENSRNOT00000087033 | -0.956975639 | 1.08E-06 |
| TUCP_003863 | XLOC_169474 | ENSRNOT00000005311 | 0.954579757  | 1.41E-06 |
| TUCP_003863 | XLOC_169474 | ENSRNOT00000035808 | 0.950209388  | 2.22E-06 |
| TUCP_003863 | XLOC_169474 | ENSRNOT00000026760 | -0.977456463 | 4.42E-08 |
| TUCP_003863 | XLOC_169474 | ENSRNOT0000001289  | 0.959822567  | 7.71E-07 |
| TUCP_003863 | XLOC_169474 | ENSRNOT00000061345 | -0.95502968  | 1.34E-06 |
| TUCP_003863 | XLOC_169474 | ENSRNOT00000081077 | -0.953792724 | 1.53E-06 |
| TUCP_003863 | XLOC_169474 | ENSRNOT00000016568 | 0.980167823  | 2.34E-08 |
| TUCP_003863 | XLOC_169474 | ENSRNOT00000027360 | -0.966864888 | 2.98E-07 |

|             |             |                    |              |          |
|-------------|-------------|--------------------|--------------|----------|
| TUCP_003863 | XLOC_169474 | ENSRNOT00000023388 | -0.954828542 | 1.37E-06 |
| TUCP_003863 | XLOC_169474 | ENSRNOT00000027967 | 0.961182285  | 6.50E-07 |
| TUCP_003863 | XLOC_169474 | ENSRNOT00000024938 | -0.960319048 | 7.25E-07 |
| TUCP_003863 | XLOC_169474 | ENSRNOT00000024933 | -0.952202093 | 1.81E-06 |
| TUCP_003863 | XLOC_169474 | ENSRNOT00000047210 | 0.955730128  | 1.24E-06 |
| TUCP_003863 | XLOC_169474 | ENSRNOT00000024011 | 0.964671149  | 4.08E-07 |
| TUCP_003863 | XLOC_169474 | ENSRNOT00000046639 | 0.950796031  | 2.09E-06 |
| TUCP_004381 | XLOC_193414 | ENSRNOT00000012086 | -0.956616053 | 1.13E-06 |
| TUCP_004777 | XLOC_211058 | ENSRNOT00000026966 | 0.970322306  | 1.73E-07 |
| TUCP_004777 | XLOC_211058 | ENSRNOT00000068416 | 0.999999782  | 3.88E-33 |
| TUCP_004777 | XLOC_211058 | ENSRNOT00000086036 | 0.999958274  | 9.96E-22 |
| TUCP_004777 | XLOC_211058 | ENSRNOT00000026803 | 0.985046075  | 5.74E-09 |
| TUCP_004777 | XLOC_211058 | ENSRNOT00000047527 | 0.963071698  | 5.08E-07 |
| TUCP_004777 | XLOC_211058 | ENSRNOT00000042251 | 0.999344295  | 9.53E-16 |
| TUCP_004777 | XLOC_211058 | ENSRNOT0000002984  | 0.998397069  | 8.31E-14 |
| TUCP_004777 | XLOC_211058 | ENSRNOT00000083764 | 0.999541808  | 1.59E-16 |
| TUCP_004777 | XLOC_211058 | ENSRNOT00000076802 | 0.962695843  | 5.34E-07 |
| TUCP_004777 | XLOC_211058 | ENSRNOT00000092365 | 0.999161651  | 3.26E-15 |
| TUCP_004777 | XLOC_211058 | ENSRNOT00000079275 | 0.999901911  | 7.15E-20 |
| TUCP_004777 | XLOC_211058 | ENSRNOT00000066062 | -0.959706712 | 7.82E-07 |
| TUCP_004777 | XLOC_211058 | ENSRNOT00000045301 | 1            | 1.33E-79 |
| TUCP_004777 | XLOC_211058 | ENSRNOT00000041186 | 0.999975782  | 6.56E-23 |
| TUCP_004777 | XLOC_211058 | ENSRNOT00000010092 | 0.977711778  | 4.17E-08 |
| TUCP_004777 | XLOC_211058 | ENSRNOT00000076182 | 1            | 4.25E-78 |
| TUCP_004777 | XLOC_211058 | ENSRNOT00000087404 | 0.951157664  | 2.02E-06 |
| TUCP_004777 | XLOC_211058 | ENSRNOT00000052003 | 0.95837331   | 9.18E-07 |
| TUCP_004777 | XLOC_211058 | ENSRNOT00000081709 | 0.998485154  | 6.27E-14 |
| TUCP_004777 | XLOC_211058 | ENSRNOT0000005726  | 0.959610119  | 7.91E-07 |
| TUCP_004777 | XLOC_211058 | ENSRNOT00000014103 | 1            | 1.33E-79 |
| TUCP_004777 | XLOC_211058 | ENSRNOT00000057433 | 0.964930601  | 3.94E-07 |
| TUCP_004777 | XLOC_211058 | ENSRNOT00000082289 | 0.998931566  | 1.09E-14 |
| TUCP_004777 | XLOC_211058 | ENSRNOT00000092516 | 0.957459323  | 1.02E-06 |
| TUCP_004777 | XLOC_211058 | ENSRNOT00000008898 | 0.990039768  | 7.59E-10 |
| TUCP_004777 | XLOC_211058 | ENSRNOT00000083493 | 0.995461232  | 1.51E-11 |
| TUCP_004777 | XLOC_211058 | ENSRNOT00000092563 | 0.987201084  | 2.65E-09 |
| TUCP_004777 | XLOC_211058 | ENSRNOT00000088893 | 1            | 1.33E-79 |
| TUCP_004777 | XLOC_211058 | ENSRNOT00000076693 | 0.955029582  | 1.34E-06 |
| TUCP_004777 | XLOC_211058 | ENSRNOT00000081014 | 1            | 4.25E-78 |
| TUCP_004777 | XLOC_211058 | ENSRNOT00000067543 | 1            | 4.25E-78 |
| TUCP_004777 | XLOC_211058 | ENSRNOT00000050968 | 0.996816433  | 2.56E-12 |
| TUCP_004777 | XLOC_211058 | ENSRNOT00000042201 | 0.960235595  | 7.32E-07 |
| TUCP_004777 | XLOC_211058 | ENSRNOT00000004373 | 0.957315473  | 1.04E-06 |
| TUCP_004777 | XLOC_211058 | ENSRNOT00000063929 | 1            | 0        |
| TUCP_004777 | XLOC_211058 | ENSRNOT00000057472 | 1            | 1.33E-79 |
| TUCP_004777 | XLOC_211058 | ENSRNOT00000041617 | 0.952449765  | 1.77E-06 |
| TUCP_004777 | XLOC_211058 | ENSRNOT00000091763 | 0.986310385  | 3.70E-09 |
| TUCP_004777 | XLOC_211058 | ENSRNOT00000022200 | 0.998491303  | 6.14E-14 |
| TUCP_004777 | XLOC_211058 | ENSRNOT00000067379 | 0.997260967  | 1.21E-12 |
| TUCP_004777 | XLOC_211058 | ENSRNOT00000020786 | 0.976428448  | 5.51E-08 |
| TUCP_004777 | XLOC_211058 | ENSRNOT00000050543 | 0.999722223  | 1.30E-17 |
| TUCP_004777 | XLOC_211058 | ENSRNOT00000089306 | 0.999866649  | 3.32E-19 |

|             |             |                    |              |          |
|-------------|-------------|--------------------|--------------|----------|
| TUCP_004777 | XLOC_211058 | ENSRNOT00000052367 | 0.997268394  | 1.19E-12 |
| TUCP_004777 | XLOC_211058 | ENSRNOT00000090658 | 1            | 0        |
| TUCP_004777 | XLOC_211058 | ENSRNOT00000022571 | 0.995290013  | 1.81E-11 |
| TUCP_004777 | XLOC_211058 | ENSRNOT00000044520 | 0.981817158  | 1.52E-08 |
| TUCP_004777 | XLOC_211058 | ENSRNOT00000065448 | 0.963648868  | 4.70E-07 |
| TUCP_004386 | XLOC_193536 | ENSRNOT00000005958 | 0.977009116  | 4.87E-08 |
| TUCP_004386 | XLOC_193536 | ENSRNOT00000088599 | 0.952408725  | 1.77E-06 |
| TUCP_004386 | XLOC_193536 | ENSRNOT00000055321 | 0.962124124  | 5.76E-07 |
| TUCP_004386 | XLOC_193536 | ENSRNOT00000081981 | 0.967281193  | 2.80E-07 |
| TUCP_004386 | XLOC_193536 | ENSRNOT00000080024 | 0.96524997   | 3.76E-07 |
| TUCP_004386 | XLOC_193536 | ENSRNOT00000081047 | 0.956230581  | 1.18E-06 |
| TUCP_004386 | XLOC_193536 | ENSRNOT00000023133 | 0.973255748  | 1.03E-07 |
| TUCP_004386 | XLOC_193536 | ENSRNOT00000049819 | 0.958843113  | 8.68E-07 |
| TUCP_004386 | XLOC_193536 | ENSRNOT00000061392 | 0.951665684  | 1.92E-06 |
| TUCP_004386 | XLOC_193536 | ENSRNOT00000027970 | 0.953469535  | 1.59E-06 |
| TUCP_004386 | XLOC_193536 | ENSRNOT00000012966 | 0.955316623  | 1.30E-06 |
| TUCP_004386 | XLOC_193536 | ENSRNOT00000023144 | 0.955179553  | 1.32E-06 |
| TUCP_004386 | XLOC_193536 | ENSRNOT00000029125 | 0.956649537  | 1.12E-06 |
| TUCP_004386 | XLOC_193536 | ENSRNOT00000033017 | 0.955061611  | 1.34E-06 |
| TUCP_004386 | XLOC_193536 | ENSRNOT00000042125 | 0.954004896  | 1.50E-06 |
| TUCP_004386 | XLOC_193536 | ENSRNOT00000083220 | 0.97637365   | 5.57E-08 |
| TUCP_004386 | XLOC_193536 | ENSRNOT00000066810 | 0.962878808  | 5.22E-07 |
| TUCP_004386 | XLOC_193536 | ENSRNOT00000024969 | 0.980502379  | 2.15E-08 |
| TUCP_004386 | XLOC_193536 | ENSRNOT00000013049 | 0.965280636  | 3.75E-07 |
| TUCP_004386 | XLOC_193536 | ENSRNOT00000060362 | 0.963104877  | 5.06E-07 |
| TUCP_004386 | XLOC_193536 | ENSRNOT00000015799 | 0.971003417  | 1.54E-07 |
| TUCP_004386 | XLOC_193536 | ENSRNOT00000045285 | 0.960717946  | 6.90E-07 |
| TUCP_004386 | XLOC_193536 | ENSRNOT00000078274 | 0.959303565  | 8.21E-07 |
| TUCP_004386 | XLOC_193536 | ENSRNOT00000004046 | -0.956928245 | 1.09E-06 |
| TUCP_004386 | XLOC_193536 | ENSRNOT00000057146 | 0.953167124  | 1.64E-06 |
| TUCP_004386 | XLOC_193536 | ENSRNOT00000033975 | 0.963069057  | 5.08E-07 |
| TUCP_004385 | XLOC_193535 | ENSRNOT00000071407 | 0.953032352  | 1.66E-06 |
| TUCP_004385 | XLOC_193535 | ENSRNOT00000011008 | 0.959809437  | 7.72E-07 |
| TUCP_004384 | XLOC_193500 | ENSRNOT00000091652 | 0.969189472  | 2.08E-07 |
| TUCP_004384 | XLOC_193500 | ENSRNOT00000036564 | 0.966438856  | 3.17E-07 |
| TUCP_004384 | XLOC_193500 | ENSRNOT00000000109 | 0.953428005  | 1.60E-06 |
| TUCP_004384 | XLOC_193500 | ENSRNOT00000080865 | 0.976032684  | 5.98E-08 |
| TUCP_004384 | XLOC_193500 | ENSRNOT00000073534 | 0.970161614  | 1.77E-07 |
| TUCP_004384 | XLOC_193500 | ENSRNOT00000006249 | 0.962115243  | 5.77E-07 |
| TUCP_004384 | XLOC_193500 | ENSRNOT00000093019 | 0.976032684  | 5.98E-08 |
| TUCP_004384 | XLOC_193500 | ENSRNOT00000085908 | 0.963730926  | 4.65E-07 |
| TUCP_004384 | XLOC_193500 | ENSRNOT00000046744 | 0.976032684  | 5.98E-08 |
| TUCP_004384 | XLOC_193500 | ENSRNOT00000076429 | 0.976032684  | 5.98E-08 |
| TUCP_004384 | XLOC_193500 | ENSRNOT00000084667 | 0.975817612  | 6.25E-08 |
| TUCP_004384 | XLOC_193500 | ENSRNOT00000055412 | 0.976032684  | 5.98E-08 |
| TUCP_004384 | XLOC_193500 | ENSRNOT00000093201 | 0.974086884  | 8.81E-08 |
| TUCP_004384 | XLOC_193500 | ENSRNOT00000072724 | 0.976032684  | 5.98E-08 |
| TUCP_004384 | XLOC_193500 | ENSRNOT00000066017 | 0.959793444  | 7.73E-07 |
| TUCP_004384 | XLOC_193500 | ENSRNOT00000082760 | 0.971321608  | 1.46E-07 |
| TUCP_004384 | XLOC_193500 | ENSRNOT00000073148 | 0.963483584  | 4.81E-07 |
| TUCP_004384 | XLOC_193500 | ENSRNOT00000054858 | 0.970610337  | 1.64E-07 |

|             |             |                    |             |          |
|-------------|-------------|--------------------|-------------|----------|
| TUCP_004384 | XLOC_193500 | ENSRNOT00000084375 | 0.976032684 | 5.98E-08 |
| TUCP_004384 | XLOC_193500 | ENSRNOT00000012161 | 0.966762012 | 3.02E-07 |
| TUCP_004384 | XLOC_193500 | ENSRNOT00000042369 | 0.964310636 | 4.29E-07 |
| TUCP_004384 | XLOC_193500 | ENSRNOT00000086554 | 0.976032684 | 5.98E-08 |
| TUCP_004384 | XLOC_193500 | ENSRNOT00000047921 | 0.976032684 | 5.98E-08 |
| TUCP_004384 | XLOC_193500 | ENSRNOT00000064261 | 0.975641728 | 6.48E-08 |
| TUCP_004384 | XLOC_193500 | ENSRNOT00000086660 | 0.971563549 | 1.40E-07 |
| TUCP_004384 | XLOC_193500 | ENSRNOT00000083977 | 0.976032684 | 5.98E-08 |
| TUCP_004384 | XLOC_193500 | ENSRNOT00000092933 | 0.976032684 | 5.98E-08 |
| TUCP_004384 | XLOC_193500 | ENSRNOT00000085447 | 0.976451585 | 5.48E-08 |
| TUCP_004384 | XLOC_193500 | ENSRNOT00000041281 | 0.956059411 | 1.20E-06 |
| TUCP_001649 | XLOC_064983 | ENSRNOT00000017878 | 0.95008995  | 2.24E-06 |
| TUCP_001649 | XLOC_064983 | ENSRNOT00000028007 | 0.976003873 | 6.02E-08 |
| TUCP_001649 | XLOC_064983 | ENSRNOT00000072806 | 0.954321731 | 1.45E-06 |
| TUCP_004815 | XLOC_213931 | ENSRNOT00000071840 | 0.986377869 | 3.61E-09 |
| TUCP_004815 | XLOC_213931 | ENSRNOT00000083608 | 0.99460963  | 3.55E-11 |
| TUCP_004815 | XLOC_213931 | ENSRNOT00000076035 | 0.977800795 | 4.09E-08 |
| TUCP_004815 | XLOC_213931 | ENSRNOT00000085476 | 0.989113506 | 1.18E-09 |
| TUCP_004815 | XLOC_213931 | ENSRNOT00000045584 | 0.986377869 | 3.61E-09 |
| TUCP_004815 | XLOC_213931 | ENSRNOT00000077995 | 0.97717365  | 4.70E-08 |
| TUCP_004815 | XLOC_213931 | ENSRNOT00000066004 | 0.987644514 | 2.22E-09 |
| TUCP_004815 | XLOC_213931 | ENSRNOT00000064284 | 0.951507081 | 1.95E-06 |
| TUCP_004815 | XLOC_213931 | ENSRNOT00000066685 | 0.959936474 | 7.60E-07 |
| TUCP_004815 | XLOC_213931 | ENSRNOT00000082086 | 0.963569596 | 4.75E-07 |
| TUCP_004815 | XLOC_213931 | ENSRNOT00000089494 | 0.97636534  | 5.58E-08 |
| TUCP_004815 | XLOC_213931 | ENSRNOT00000092182 | 0.986377869 | 3.61E-09 |
| TUCP_004815 | XLOC_213931 | ENSRNOT00000084461 | 0.986377869 | 3.61E-09 |
| TUCP_004815 | XLOC_213931 | ENSRNOT00000060448 | 0.986377869 | 3.61E-09 |
| TUCP_004815 | XLOC_213931 | ENSRNOT00000032631 | 0.986377869 | 3.61E-09 |
| TUCP_004815 | XLOC_213931 | ENSRNOT00000060113 | 0.956810031 | 1.10E-06 |
| TUCP_004815 | XLOC_213931 | ENSRNOT00000054910 | 0.985413686 | 5.07E-09 |
| TUCP_004815 | XLOC_213931 | ENSRNOT00000057176 | 0.986353053 | 3.64E-09 |
| TUCP_004815 | XLOC_213931 | ENSRNOT00000078176 | 0.998265772 | 1.23E-13 |
| TUCP_004815 | XLOC_213931 | ENSRNOT00000056364 | 0.972880757 | 1.10E-07 |
| TUCP_004815 | XLOC_213931 | ENSRNOT00000093431 | 0.986377869 | 3.61E-09 |
| TUCP_004815 | XLOC_213931 | ENSRNOT00000047560 | 0.954941232 | 1.36E-06 |
| TUCP_004815 | XLOC_213931 | ENSRNOT00000024758 | 0.990796804 | 5.12E-10 |
| TUCP_004815 | XLOC_213931 | ENSRNOT00000092901 | 0.986377869 | 3.61E-09 |
| TUCP_004815 | XLOC_213931 | ENSRNOT00000089290 | 0.986254605 | 3.78E-09 |
| TUCP_004815 | XLOC_213931 | ENSRNOT00000090211 | 0.98285352  | 1.13E-08 |
| TUCP_004815 | XLOC_213931 | ENSRNOT00000091828 | 0.987910757 | 1.99E-09 |
| TUCP_004815 | XLOC_213931 | ENSRNOT00000091944 | 0.985558593 | 4.83E-09 |
| TUCP_004815 | XLOC_213931 | ENSRNOT00000070855 | 0.986377869 | 3.61E-09 |
| TUCP_004815 | XLOC_213931 | ENSRNOT00000046980 | 0.966231765 | 3.27E-07 |
| TUCP_004815 | XLOC_213931 | ENSRNOT00000084109 | 0.98683145  | 3.05E-09 |
| TUCP_004815 | XLOC_213931 | ENSRNOT00000060645 | 0.953177413 | 1.64E-06 |
| TUCP_004815 | XLOC_213931 | ENSRNOT00000041569 | 0.986377869 | 3.61E-09 |
| TUCP_004815 | XLOC_213931 | ENSRNOT00000087091 | 0.986377869 | 3.61E-09 |
| TUCP_004815 | XLOC_213931 | ENSRNOT00000003308 | 0.969065041 | 2.12E-07 |
| TUCP_004815 | XLOC_213931 | ENSRNOT00000026113 | 0.985947826 | 4.21E-09 |
| TUCP_004815 | XLOC_213931 | ENSRNOT00000014939 | 0.987395667 | 2.45E-09 |



|             |             |                    |              |          |
|-------------|-------------|--------------------|--------------|----------|
| TUCP_004815 | XLOC_213931 | ENSRNOT00000058314 | 0.975170469  | 7.13E-08 |
| TUCP_004815 | XLOC_213931 | ENSRNOT00000047870 | 0.963525724  | 4.78E-07 |
| TUCP_004815 | XLOC_213931 | ENSRNOT00000071603 | 0.986326555  | 3.68E-09 |
| TUCP_004815 | XLOC_213931 | ENSRNOT00000088376 | 0.959168727  | 8.35E-07 |
| TUCP_004815 | XLOC_213931 | ENSRNOT00000033187 | 0.954965268  | 1.35E-06 |
| TUCP_004815 | XLOC_213931 | ENSRNOT00000029298 | 0.972652201  | 1.15E-07 |
| TUCP_004815 | XLOC_213931 | ENSRNOT00000044232 | 0.966544328  | 3.12E-07 |
| TUCP_004815 | XLOC_213931 | ENSRNOT00000023287 | 0.957780961  | 9.84E-07 |
| TUCP_004815 | XLOC_213931 | ENSRNOT00000071714 | 0.962112042  | 5.77E-07 |
| TUCP_004815 | XLOC_213931 | ENSRNOT00000075836 | 0.986377869  | 3.61E-09 |
| TUCP_004815 | XLOC_213931 | ENSRNOT00000073229 | 0.986377869  | 3.61E-09 |
| TUCP_004815 | XLOC_213931 | ENSRNOT00000039652 | 0.954362871  | 1.44E-06 |
| TUCP_004815 | XLOC_213931 | ENSRNOT00000060454 | 0.986377869  | 3.61E-09 |
| TUCP_004815 | XLOC_213931 | ENSRNOT00000088719 | 0.995058742  | 2.30E-11 |
| TUCP_004815 | XLOC_213931 | ENSRNOT00000007683 | 0.987280763  | 2.57E-09 |
| TUCP_004815 | XLOC_213931 | ENSRNOT00000092916 | 0.951316372  | 1.98E-06 |
| TUCP_004815 | XLOC_213931 | ENSRNOT00000009295 | 0.980830584  | 1.97E-08 |
| TUCP_001561 | XLOC_060269 | ENSRNOT00000024186 | 0.98237699   | 1.30E-08 |
| TUCP_001561 | XLOC_060269 | ENSRNOT00000074753 | 0.997892138  | 3.27E-13 |
| TUCP_001561 | XLOC_060269 | ENSRNOT00000004876 | 0.958141487  | 9.43E-07 |
| TUCP_001561 | XLOC_060269 | ENSRNOT00000041904 | 0.999944112  | 4.29E-21 |
| TUCP_001561 | XLOC_060269 | ENSRNOT00000080193 | -0.950015317 | 2.26E-06 |
| TUCP_001561 | XLOC_060269 | ENSRNOT00000083487 | 0.989141452  | 1.17E-09 |
| TUCP_001561 | XLOC_060269 | ENSRNOT00000077990 | 0.999944112  | 4.29E-21 |
| TUCP_001561 | XLOC_060269 | ENSRNOT00000038826 | 0.99980754   | 2.08E-18 |
| TUCP_001561 | XLOC_060269 | ENSRNOT00000046842 | 0.973348777  | 1.01E-07 |
| TUCP_001561 | XLOC_060269 | ENSRNOT00000037169 | 0.979367832  | 2.84E-08 |
| TUCP_001561 | XLOC_060269 | ENSRNOT00000021243 | 0.98720309   | 2.65E-09 |
| TUCP_001561 | XLOC_060269 | ENSRNOT00000060250 | 0.999865809  | 3.43E-19 |
| TUCP_001561 | XLOC_060269 | ENSRNOT00000091934 | 0.999944112  | 4.29E-21 |
| TUCP_001561 | XLOC_060269 | ENSRNOT00000046585 | 0.982671157  | 1.20E-08 |
| TUCP_001561 | XLOC_060269 | ENSRNOT00000080794 | 0.99061013   | 5.66E-10 |
| TUCP_001561 | XLOC_060269 | ENSRNOT00000014456 | 0.993001268  | 1.31E-10 |
| TUCP_001561 | XLOC_060269 | ENSRNOT00000031205 | 0.991143548  | 4.23E-10 |
| TUCP_001561 | XLOC_060269 | ENSRNOT00000044145 | 0.999944112  | 4.29E-21 |
| TUCP_001561 | XLOC_060269 | ENSRNOT00000088381 | 0.988801716  | 1.36E-09 |
| TUCP_001561 | XLOC_060269 | ENSRNOT00000011743 | 0.98655781   | 3.38E-09 |
| TUCP_001561 | XLOC_060269 | ENSRNOT00000089929 | 0.999944112  | 4.29E-21 |
| TUCP_001561 | XLOC_060269 | ENSRNOT00000088624 | 0.999944112  | 4.29E-21 |
| TUCP_001561 | XLOC_060269 | ENSRNOT00000085659 | 0.989703481  | 8.96E-10 |
| TUCP_001561 | XLOC_060269 | ENSRNOT00000015866 | 0.994163897  | 5.28E-11 |
| TUCP_001561 | XLOC_060269 | ENSRNOT00000078633 | 0.999944112  | 4.29E-21 |
| TUCP_001561 | XLOC_060269 | ENSRNOT00000034907 | 0.995610657  | 1.27E-11 |
| TUCP_001561 | XLOC_060269 | ENSRNOT00000093230 | 0.957744672  | 9.88E-07 |
| TUCP_001561 | XLOC_060269 | ENSRNOT00000051835 | 0.999944112  | 4.29E-21 |
| TUCP_001561 | XLOC_060269 | ENSRNOT00000079087 | 0.999944112  | 4.29E-21 |
| TUCP_001561 | XLOC_060269 | ENSRNOT00000037206 | 0.999944112  | 4.29E-21 |
| TUCP_001561 | XLOC_060269 | ENSRNOT00000083261 | 0.970013157  | 1.82E-07 |
| TUCP_001561 | XLOC_060269 | ENSRNOT00000080590 | 0.999817599  | 1.59E-18 |
| TUCP_001561 | XLOC_060269 | ENSRNOT00000027552 | 0.999764467  | 5.71E-18 |
| TUCP_001561 | XLOC_060269 | ENSRNOT00000077014 | 0.99486684   | 2.78E-11 |

|             |             |                    |              |          |
|-------------|-------------|--------------------|--------------|----------|
| TUCP_001561 | XLOC_060269 | ENSRNOT00000080453 | 0.999863132  | 3.78E-19 |
| TUCP_001561 | XLOC_060269 | ENSRNOT00000089057 | 0.968100003  | 2.47E-07 |
| TUCP_001561 | XLOC_060269 | ENSRNOT00000066839 | 0.992407801  | 1.96E-10 |
| TUCP_001561 | XLOC_060269 | ENSRNOT00000061284 | 0.954394951  | 1.44E-06 |
| TUCP_001561 | XLOC_060269 | ENSRNOT00000013423 | 0.958998446  | 8.52E-07 |
| TUCP_001561 | XLOC_060269 | ENSRNOT00000071884 | 0.974410721  | 8.28E-08 |
| TUCP_001561 | XLOC_060269 | ENSRNOT00000004128 | 0.962704134  | 5.34E-07 |
| TUCP_001561 | XLOC_060269 | ENSRNOT00000026316 | 0.965867905  | 3.45E-07 |
| TUCP_001561 | XLOC_060269 | ENSRNOT00000057729 | 0.999291234  | 1.41E-15 |
| TUCP_001561 | XLOC_060269 | ENSRNOT00000078663 | 0.974521756  | 8.10E-08 |
| TUCP_001561 | XLOC_060269 | ENSRNOT00000064250 | 0.982335706  | 1.31E-08 |
| TUCP_001561 | XLOC_060269 | ENSRNOT00000021608 | 0.963087415  | 5.07E-07 |
| TUCP_001561 | XLOC_060269 | ENSRNOT00000029634 | 0.995630733  | 1.24E-11 |
| TUCP_001561 | XLOC_060269 | ENSRNOT00000093579 | 0.957579717  | 1.01E-06 |
| TUCP_001561 | XLOC_060269 | ENSRNOT00000086349 | 0.9564926    | 1.14E-06 |
| TUCP_001561 | XLOC_060269 | ENSRNOT00000065460 | 0.999944112  | 4.29E-21 |
| TUCP_001561 | XLOC_060269 | ENSRNOT00000003817 | 0.997007277  | 1.88E-12 |
| TUCP_001561 | XLOC_060269 | ENSRNOT00000016713 | 0.999944112  | 4.29E-21 |
| TUCP_001561 | XLOC_060269 | ENSRNOT00000079260 | 0.996486848  | 4.19E-12 |
| TUCP_001561 | XLOC_060269 | ENSRNOT00000039294 | 0.999944112  | 4.29E-21 |
| TUCP_001561 | XLOC_060269 | ENSRNOT00000092913 | 0.954893697  | 1.36E-06 |
| TUCP_001559 | XLOC_060268 | ENSRNOT00000082774 | 0.955772586  | 1.24E-06 |
| TUCP_001559 | XLOC_060268 | ENSRNOT00000021506 | 0.973681031  | 9.52E-08 |
| TUCP_001559 | XLOC_060268 | ENSRNOT00000011869 | 0.952903     | 1.69E-06 |
| TUCP_001559 | XLOC_060268 | ENSRNOT00000014533 | 0.950192667  | 2.22E-06 |
| TUCP_001559 | XLOC_060268 | ENSRNOT00000013768 | 0.952942126  | 1.68E-06 |
| TUCP_001559 | XLOC_060268 | ENSRNOT00000003082 | 0.950421217  | 2.17E-06 |
| TUCP_001559 | XLOC_060268 | ENSRNOT00000039221 | 0.952891082  | 1.69E-06 |
| TUCP_001559 | XLOC_060268 | ENSRNOT00000012963 | 0.974582644  | 8.01E-08 |
| TUCP_001559 | XLOC_060268 | ENSRNOT00000050350 | 0.950335037  | 2.19E-06 |
| TUCP_001559 | XLOC_060268 | ENSRNOT00000018494 | 0.976165003  | 5.82E-08 |
| TUCP_001559 | XLOC_060268 | ENSRNOT00000073239 | 0.952562585  | 1.75E-06 |
| TUCP_001559 | XLOC_060268 | ENSRNOT00000065942 | 0.951413487  | 1.96E-06 |
| TUCP_001559 | XLOC_060268 | ENSRNOT00000078366 | -0.950092297 | 2.24E-06 |
| TUCP_001559 | XLOC_060268 | ENSRNOT00000023067 | 0.972629037  | 1.16E-07 |
| TUCP_001559 | XLOC_060268 | ENSRNOT00000042973 | 0.956924503  | 1.09E-06 |
| TUCP_001559 | XLOC_060268 | ENSRNOT00000068528 | 0.955342513  | 1.30E-06 |
| TUCP_001559 | XLOC_060268 | ENSRNOT00000076467 | 0.973221679  | 1.04E-07 |
| TUCP_001559 | XLOC_060268 | ENSRNOT00000004290 | -0.956352323 | 1.16E-06 |
| TUCP_001559 | XLOC_060268 | ENSRNOT00000083967 | -0.971080406 | 1.52E-07 |
| TUCP_001559 | XLOC_060268 | ENSRNOT00000000527 | 0.950089027  | 2.24E-06 |
| TUCP_001559 | XLOC_060268 | ENSRNOT00000006196 | 0.958762579  | 8.76E-07 |
| TUCP_001559 | XLOC_060268 | ENSRNOT00000093046 | 0.957145823  | 1.06E-06 |
| TUCP_001559 | XLOC_060268 | ENSRNOT00000066776 | 0.965088957  | 3.85E-07 |
| TUCP_001559 | XLOC_060268 | ENSRNOT00000087963 | 0.959576258  | 7.94E-07 |
| TUCP_001559 | XLOC_060268 | ENSRNOT00000085911 | 0.960145087  | 7.41E-07 |
| TUCP_001559 | XLOC_060268 | ENSRNOT00000014317 | 0.961467127  | 6.27E-07 |
| TUCP_001559 | XLOC_060268 | ENSRNOT00000004770 | 0.950406215  | 2.17E-06 |
| TUCP_001559 | XLOC_060268 | ENSRNOT00000050415 | 0.953767554  | 1.54E-06 |
| TUCP_000449 | XLOC_015038 | ENSRNOT00000091532 | 0.953097545  | 1.65E-06 |
| TUCP_000449 | XLOC_015038 | ENSRNOT00000083993 | 0.965748498  | 3.51E-07 |

|             |             |                    |              |          |
|-------------|-------------|--------------------|--------------|----------|
| TUCP_000444 | XLOC_014631 | ENSRNOT00000087188 | -0.954636161 | 1.40E-06 |
| TUCP_000444 | XLOC_014631 | ENSRNOT00000087182 | 0.975161803  | 7.14E-08 |
| TUCP_000444 | XLOC_014631 | ENSRNOT00000032189 | 0.986652937  | 3.26E-09 |
| TUCP_000444 | XLOC_014631 | ENSRNOT00000067349 | 0.955603706  | 1.26E-06 |
| TUCP_000446 | XLOC_014721 | ENSRNOT00000092026 | 0.96620614   | 3.28E-07 |
| TUCP_000446 | XLOC_014721 | ENSRNOT00000093075 | 1            | 0        |
| TUCP_000446 | XLOC_014721 | ENSRNOT00000058260 | 1            | 0        |
| TUCP_000446 | XLOC_014721 | ENSRNOT00000088887 | 1            | 0        |
| TUCP_000446 | XLOC_014721 | ENSRNOT00000084986 | 1            | 0        |
| TUCP_000446 | XLOC_014721 | ENSRNOT00000074346 | 0.9702256    | 1.75E-07 |
| TUCP_000446 | XLOC_014721 | ENSRNOT00000073209 | 0.983711602  | 8.79E-09 |
| TUCP_000446 | XLOC_014721 | ENSRNOT00000080155 | 0.973069673  | 1.07E-07 |
| TUCP_000446 | XLOC_014721 | ENSRNOT00000072573 | 0.996213272  | 6.09E-12 |
| TUCP_000446 | XLOC_014721 | ENSRNOT00000017828 | 0.996001583  | 7.99E-12 |
| TUCP_000446 | XLOC_014721 | ENSRNOT00000080444 | 0.969625907  | 1.93E-07 |
| TUCP_000446 | XLOC_014721 | ENSRNOT00000071312 | 1            | 0        |
| TUCP_000446 | XLOC_014721 | ENSRNOT00000088245 | 1            | 0        |
| TUCP_000446 | XLOC_014721 | ENSRNOT00000036565 | 0.969065335  | 2.12E-07 |
| TUCP_000446 | XLOC_014721 | ENSRNOT00000058833 | 0.998673261  | 3.23E-14 |
| TUCP_000446 | XLOC_014721 | ENSRNOT00000078052 | 1            | 0        |
| TUCP_000446 | XLOC_014721 | ENSRNOT00000078494 | 0.999927093  | 1.62E-20 |
| TUCP_000446 | XLOC_014721 | ENSRNOT00000085653 | 1            | 0        |
| TUCP_000446 | XLOC_014721 | ENSRNOT00000057950 | 0.969329371  | 2.03E-07 |
| TUCP_000446 | XLOC_014721 | ENSRNOT00000081992 | 0.999320526  | 1.14E-15 |
| TUCP_000446 | XLOC_014721 | ENSRNOT00000038553 | 0.955765808  | 1.24E-06 |
| TUCP_000446 | XLOC_014721 | ENSRNOT00000084120 | 0.958115447  | 9.46E-07 |
| TUCP_000446 | XLOC_014721 | ENSRNOT00000055406 | 1            | 4.25E-78 |
| TUCP_000446 | XLOC_014721 | ENSRNOT00000070817 | 0.998968079  | 9.20E-15 |
| TUCP_000446 | XLOC_014721 | ENSRNOT00000026753 | 1            | 0        |
| TUCP_000446 | XLOC_014721 | ENSRNOT00000080533 | 0.996682529  | 3.15E-12 |
| TUCP_000446 | XLOC_014721 | ENSRNOT00000072774 | 0.979665261  | 2.65E-08 |
| TUCP_000446 | XLOC_014721 | ENSRNOT00000086031 | 1            | 0        |
| TUCP_000446 | XLOC_014721 | ENSRNOT00000014312 | 1            | 0        |
| TUCP_000446 | XLOC_014721 | ENSRNOT00000042882 | 0.963218427  | 4.98E-07 |
| TUCP_000446 | XLOC_014721 | ENSRNOT00000088012 | 0.956765806  | 1.11E-06 |
| TUCP_000446 | XLOC_014721 | ENSRNOT00000051231 | 0.999242378  | 1.96E-15 |
| TUCP_000446 | XLOC_014721 | ENSRNOT00000089407 | 0.992986194  | 1.32E-10 |
| TUCP_000446 | XLOC_014721 | ENSRNOT00000055034 | 0.998331441  | 1.02E-13 |
| TUCP_000446 | XLOC_014721 | ENSRNOT00000046837 | 0.97252559   | 1.18E-07 |
| TUCP_004062 | XLOC_178758 | ENSRNOT00000043895 | -0.951267433 | 1.99E-06 |
| TUCP_004062 | XLOC_178758 | ENSRNOT00000073105 | -0.953236097 | 1.63E-06 |
| TUCP_004707 | XLOC_207579 | ENSRNOT00000037459 | 0.965163549  | 3.81E-07 |
| TUCP_004707 | XLOC_207579 | ENSRNOT00000026812 | 0.957005101  | 1.08E-06 |
| TUCP_004707 | XLOC_207579 | ENSRNOT00000050485 | 0.954897274  | 1.36E-06 |
| TUCP_000364 | XLOC_012115 | ENSRNOT00000074157 | 0.957692615  | 9.94E-07 |
| TUCP_000366 | XLOC_012117 | ENSRNOT00000087673 | 0.95887028   | 8.65E-07 |
| TUCP_000366 | XLOC_012117 | ENSRNOT00000086985 | 0.962665046  | 5.37E-07 |
| TUCP_000366 | XLOC_012117 | ENSRNOT00000087182 | 0.991914003  | 2.69E-10 |
| TUCP_000366 | XLOC_012117 | ENSRNOT00000071856 | 0.951935691  | 1.86E-06 |
| TUCP_004849 | XLOC_215909 | ENSRNOT00000091060 | 0.964252558  | 4.33E-07 |
| TUCP_003818 | XLOC_167085 | ENSRNOT00000016420 | 0.96912513   | 2.10E-07 |

|             |             |                    |             |          |
|-------------|-------------|--------------------|-------------|----------|
| TUCP_003818 | XLOC_167085 | ENSRNOT00000016654 | 0.959063515 | 8.45E-07 |
| TUCP_003818 | XLOC_167085 | ENSRNOT00000020077 | 0.954294104 | 1.45E-06 |
| TUCP_003818 | XLOC_167085 | ENSRNOT00000019436 | 0.95617757  | 1.18E-06 |
| TUCP_003818 | XLOC_167085 | ENSRNOT00000005127 | 0.981333082 | 1.73E-08 |
| TUCP_003818 | XLOC_167085 | ENSRNOT00000018339 | 0.961738252 | 6.06E-07 |
| TUCP_003819 | XLOC_167149 | ENSRNOT00000078078 | 0.95453853  | 1.42E-06 |
| TUCP_003819 | XLOC_167149 | ENSRNOT00000047449 | 0.955775939 | 1.24E-06 |
| TUCP_003819 | XLOC_167149 | ENSRNOT00000036442 | 0.960164364 | 7.39E-07 |
| TUCP_003819 | XLOC_167149 | ENSRNOT00000088995 | 0.964443476 | 4.22E-07 |
| TUCP_003819 | XLOC_167149 | ENSRNOT00000082253 | 0.960874359 | 6.76E-07 |
| TUCP_003819 | XLOC_167149 | ENSRNOT00000092906 | 0.964957944 | 3.92E-07 |
| TUCP_003819 | XLOC_167149 | ENSRNOT00000058645 | 0.968588365 | 2.28E-07 |
| TUCP_004844 | XLOC_215514 | ENSRNOT00000017867 | 0.958659487 | 8.87E-07 |
| TUCP_004845 | XLOC_215618 | ENSRNOT00000065402 | 0.95347409  | 1.59E-06 |
| TUCP_004845 | XLOC_215618 | ENSRNOT00000085078 | 0.95347409  | 1.59E-06 |
| TUCP_004845 | XLOC_215618 | ENSRNOT00000036228 | 0.960328455 | 7.24E-07 |
| TUCP_004845 | XLOC_215618 | ENSRNOT00000000142 | 0.954429097 | 1.43E-06 |
| TUCP_004845 | XLOC_215618 | ENSRNOT00000014030 | 0.95347409  | 1.59E-06 |
| TUCP_004845 | XLOC_215618 | ENSRNOT00000081966 | 0.95347409  | 1.59E-06 |
| TUCP_004845 | XLOC_215618 | ENSRNOT00000014028 | 0.95347409  | 1.59E-06 |
| TUCP_004845 | XLOC_215618 | ENSRNOT00000075906 | 0.95347409  | 1.59E-06 |
| TUCP_004845 | XLOC_215618 | ENSRNOT00000082464 | 0.95347409  | 1.59E-06 |
| TUCP_004845 | XLOC_215618 | ENSRNOT00000049363 | 0.95347409  | 1.59E-06 |
| TUCP_004845 | XLOC_215618 | ENSRNOT00000084141 | 0.95347409  | 1.59E-06 |
| TUCP_004845 | XLOC_215618 | ENSRNOT00000065473 | 0.952905587 | 1.69E-06 |
| TUCP_004845 | XLOC_215618 | ENSRNOT00000082435 | 0.95347409  | 1.59E-06 |
| TUCP_004845 | XLOC_215618 | ENSRNOT00000049259 | 0.964058417 | 4.45E-07 |
| TUCP_004845 | XLOC_215618 | ENSRNOT00000087659 | 0.95347409  | 1.59E-06 |
| TUCP_004845 | XLOC_215618 | ENSRNOT00000082288 | 0.953427426 | 1.60E-06 |
| TUCP_004845 | XLOC_215618 | ENSRNOT00000084133 | 0.95347409  | 1.59E-06 |
| TUCP_004845 | XLOC_215618 | ENSRNOT00000088396 | 0.958518748 | 9.02E-07 |
| TUCP_004845 | XLOC_215618 | ENSRNOT00000039664 | 0.95347409  | 1.59E-06 |
| TUCP_004662 | XLOC_205067 | ENSRNOT00000084500 | 0.984887141 | 6.05E-09 |
| TUCP_004662 | XLOC_205067 | ENSRNOT00000093467 | 0.996134431 | 6.75E-12 |
| TUCP_004662 | XLOC_205067 | ENSRNOT00000029340 | 0.999116572 | 4.23E-15 |
| TUCP_004662 | XLOC_205067 | ENSRNOT00000077972 | 0.962758032 | 5.30E-07 |
| TUCP_004662 | XLOC_205067 | ENSRNOT00000038646 | 1           | 0        |
| TUCP_004662 | XLOC_205067 | ENSRNOT00000012095 | 0.957750287 | 9.88E-07 |
| TUCP_004662 | XLOC_205067 | ENSRNOT00000017909 | 0.975587192 | 6.56E-08 |
| TUCP_004662 | XLOC_205067 | ENSRNOT00000092579 | 1           | 0        |
| TUCP_004662 | XLOC_205067 | ENSRNOT00000089235 | 0.998661162 | 3.38E-14 |
| TUCP_004662 | XLOC_205067 | ENSRNOT00000036383 | 0.988460809 | 1.58E-09 |
| TUCP_004662 | XLOC_205067 | ENSRNOT00000076528 | 0.997115373 | 1.57E-12 |
| TUCP_004662 | XLOC_205067 | ENSRNOT00000075193 | 0.964326971 | 4.29E-07 |
| TUCP_004662 | XLOC_205067 | ENSRNOT00000083034 | 0.990934646 | 4.75E-10 |
| TUCP_004662 | XLOC_205067 | ENSRNOT00000089607 | 0.995091455 | 2.23E-11 |
| TUCP_004662 | XLOC_205067 | ENSRNOT00000086014 | 0.960893638 | 6.74E-07 |
| TUCP_004662 | XLOC_205067 | ENSRNOT00000054939 | 0.958021495 | 9.57E-07 |
| TUCP_004662 | XLOC_205067 | ENSRNOT00000052315 | 0.983687082 | 8.85E-09 |
| TUCP_004662 | XLOC_205067 | ENSRNOT00000088168 | 1           | 0        |
| TUCP_004662 | XLOC_205067 | ENSRNOT00000046231 | 0.96225463  | 5.66E-07 |

|             |             |                    |             |          |
|-------------|-------------|--------------------|-------------|----------|
| TUCP_004662 | XLOC_205067 | ENSRNOT00000013459 | 0.979098017 | 3.03E-08 |
| TUCP_004662 | XLOC_205067 | ENSRNOT00000078137 | 1           | 0        |
| TUCP_004662 | XLOC_205067 | ENSRNOT00000077764 | 0.977143528 | 4.73E-08 |
| TUCP_004662 | XLOC_205067 | ENSRNOT00000043661 | 0.966975951 | 2.93E-07 |
| TUCP_004662 | XLOC_205067 | ENSRNOT00000092740 | 1           | 0        |
| TUCP_004662 | XLOC_205067 | ENSRNOT00000000117 | 0.990989174 | 4.61E-10 |
| TUCP_004662 | XLOC_205067 | ENSRNOT00000071877 | 0.967113583 | 2.87E-07 |
| TUCP_004662 | XLOC_205067 | ENSRNOT00000070958 | 1           | 0        |
| TUCP_004662 | XLOC_205067 | ENSRNOT00000076757 | 0.959205354 | 8.31E-07 |
| TUCP_004662 | XLOC_205067 | ENSRNOT00000085310 | 0.965230243 | 3.78E-07 |
| TUCP_004662 | XLOC_205067 | ENSRNOT00000047241 | 0.966576993 | 3.11E-07 |
| TUCP_004662 | XLOC_205067 | ENSRNOT00000027268 | 1           | 0        |
| TUCP_004662 | XLOC_205067 | ENSRNOT00000004459 | 1           | 0        |
| TUCP_004662 | XLOC_205067 | ENSRNOT00000048373 | 0.959096578 | 8.42E-07 |
| TUCP_004662 | XLOC_205067 | ENSRNOT00000061516 | 0.987595648 | 2.27E-09 |
| TUCP_004662 | XLOC_205067 | ENSRNOT00000088148 | 1           | 0        |
| TUCP_004662 | XLOC_205067 | ENSRNOT00000088527 | 1           | 0        |
| TUCP_004662 | XLOC_205067 | ENSRNOT00000078701 | 1           | 0        |
| TUCP_004662 | XLOC_205067 | ENSRNOT00000052308 | 0.962646127 | 5.38E-07 |
| TUCP_004662 | XLOC_205067 | ENSRNOT00000021748 | 1           | 0        |
| TUCP_004662 | XLOC_205067 | ENSRNOT00000089085 | 1           | 0        |
| TUCP_004662 | XLOC_205067 | ENSRNOT00000008153 | 0.999703506 | 1.80E-17 |
| TUCP_004662 | XLOC_205067 | ENSRNOT00000085896 | 0.971605382 | 1.39E-07 |
| TUCP_004662 | XLOC_205067 | ENSRNOT00000079189 | 0.984972387 | 5.89E-09 |
| TUCP_004662 | XLOC_205067 | ENSRNOT00000090078 | 1           | 0        |
| TUCP_004662 | XLOC_205067 | ENSRNOT00000078020 | 0.958421666 | 9.13E-07 |
| TUCP_004662 | XLOC_205067 | ENSRNOT00000092425 | 0.956092273 | 1.19E-06 |
| TUCP_004662 | XLOC_205067 | ENSRNOT00000009776 | 1           | 0        |
| TUCP_004663 | XLOC_205229 | ENSRNOT00000082043 | 0.972080657 | 1.27E-07 |
| TUCP_004663 | XLOC_205229 | ENSRNOT00000076074 | 0.952502834 | 1.76E-06 |
| TUCP_004663 | XLOC_205229 | ENSRNOT00000068444 | 0.975920019 | 6.12E-08 |
| TUCP_004663 | XLOC_205229 | ENSRNOT00000081370 | 0.974793791 | 7.68E-08 |
| TUCP_004663 | XLOC_205229 | ENSRNOT00000078645 | 0.956166878 | 1.18E-06 |
| TUCP_004663 | XLOC_205229 | ENSRNOT00000075987 | 0.951302686 | 1.99E-06 |
| TUCP_004663 | XLOC_205229 | ENSRNOT00000015712 | 0.962509414 | 5.48E-07 |
| TUCP_004663 | XLOC_205229 | ENSRNOT00000087323 | 0.96298846  | 5.14E-07 |
| TUCP_004663 | XLOC_205229 | ENSRNOT00000074930 | 0.975920019 | 6.12E-08 |
| TUCP_004663 | XLOC_205229 | ENSRNOT00000080575 | 0.976305992 | 5.65E-08 |
| TUCP_004663 | XLOC_205229 | ENSRNOT00000057761 | 0.953022364 | 1.66E-06 |
| TUCP_004663 | XLOC_205229 | ENSRNOT00000078369 | 0.956573416 | 1.13E-06 |
| TUCP_004663 | XLOC_205229 | ENSRNOT00000092982 | 0.975920019 | 6.12E-08 |
| TUCP_004663 | XLOC_205229 | ENSRNOT00000088367 | 0.975920019 | 6.12E-08 |
| TUCP_004663 | XLOC_205229 | ENSRNOT00000086397 | 0.97468482  | 7.85E-08 |
| TUCP_004663 | XLOC_205229 | ENSRNOT00000061874 | 0.992287104 | 2.12E-10 |
| TUCP_004663 | XLOC_205229 | ENSRNOT00000081996 | 0.975920019 | 6.12E-08 |
| TUCP_004663 | XLOC_205229 | ENSRNOT00000022280 | 0.950573138 | 2.14E-06 |
| TUCP_004663 | XLOC_205229 | ENSRNOT00000082058 | 0.975920019 | 6.12E-08 |
| TUCP_004663 | XLOC_205229 | ENSRNOT00000088905 | 0.975920019 | 6.12E-08 |
| TUCP_004663 | XLOC_205229 | ENSRNOT00000086831 | 0.975920019 | 6.12E-08 |
| TUCP_004663 | XLOC_205229 | ENSRNOT00000045099 | 0.975920019 | 6.12E-08 |
| TUCP_004663 | XLOC_205229 | ENSRNOT00000067349 | 0.959892188 | 7.64E-07 |

|             |             |                    |              |          |
|-------------|-------------|--------------------|--------------|----------|
| TUCP_004663 | XLOC_205229 | ENSRNOT00000077789 | 0.97635025   | 5.60E-08 |
| TUCP_004663 | XLOC_205229 | ENSRNOT00000087025 | 0.975920019  | 6.12E-08 |
| TUCP_004663 | XLOC_205229 | ENSRNOT00000019853 | 0.975920019  | 6.12E-08 |
| TUCP_004663 | XLOC_205229 | ENSRNOT00000073853 | 0.960986025  | 6.67E-07 |
| TUCP_004663 | XLOC_205229 | ENSRNOT00000074990 | 0.975920019  | 6.12E-08 |
| TUCP_004663 | XLOC_205229 | ENSRNOT00000065912 | 0.977080658  | 4.79E-08 |
| TUCP_004663 | XLOC_205229 | ENSRNOT00000078683 | 0.989799219  | 8.55E-10 |
| TUCP_004663 | XLOC_205229 | ENSRNOT00000093083 | 0.978642218  | 3.38E-08 |
| TUCP_004664 | XLOC_205229 | ENSRNOT00000016875 | 0.950611443  | 2.13E-06 |
| TUCP_004665 | XLOC_205277 | ENSRNOT00000021871 | 0.96607872   | 3.34E-07 |
| TUCP_004842 | XLOC_215412 | ENSRNOT00000089196 | 0.983662251  | 8.92E-09 |
| TUCP_004708 | XLOC_207756 | ENSRNOT00000040509 | 0.953495996  | 1.58E-06 |
| TUCP_004708 | XLOC_207756 | ENSRNOT00000011342 | 0.954462575  | 1.43E-06 |
| TUCP_004708 | XLOC_207756 | ENSRNOT00000065111 | 0.952675179  | 1.73E-06 |
| TUCP_004708 | XLOC_207756 | ENSRNOT00000061569 | 0.952473054  | 1.76E-06 |
| TUCP_004708 | XLOC_207756 | ENSRNOT00000085943 | 0.958732916  | 8.79E-07 |
| TUCP_004708 | XLOC_207756 | ENSRNOT00000072396 | 0.961314603  | 6.39E-07 |
| TUCP_001094 | XLOC_041633 | ENSRNOT00000024575 | 0.961637471  | 6.13E-07 |
| TUCP_001094 | XLOC_041633 | ENSRNOT00000083261 | 0.957262919  | 1.04E-06 |
| TUCP_001094 | XLOC_041633 | ENSRNOT00000061284 | 0.966203112  | 3.28E-07 |
| TUCP_002357 | XLOC_099016 | ENSRNOT00000017561 | 0.956143104  | 1.19E-06 |
| TUCP_002357 | XLOC_099016 | ENSRNOT00000074401 | -0.955576611 | 1.26E-06 |
| TUCP_001096 | XLOC_041653 | ENSRNOT00000029136 | -0.962347439 | 5.59E-07 |
| TUCP_001096 | XLOC_041653 | ENSRNOT00000000513 | 0.95306188   | 1.66E-06 |
| TUCP_001096 | XLOC_041653 | ENSRNOT00000004878 | -0.973068355 | 1.07E-07 |
| TUCP_001096 | XLOC_041653 | ENSRNOT00000023562 | -0.967737161 | 2.61E-07 |
| TUCP_001096 | XLOC_041653 | ENSRNOT00000005630 | 0.959112802  | 8.40E-07 |
| TUCP_001096 | XLOC_041653 | ENSRNOT00000046058 | 0.962420235  | 5.54E-07 |
| TUCP_001096 | XLOC_041653 | ENSRNOT00000012942 | 0.95746164   | 1.02E-06 |
| TUCP_001096 | XLOC_041653 | ENSRNOT00000077701 | 0.965176681  | 3.80E-07 |
| TUCP_001096 | XLOC_041653 | ENSRNOT00000086548 | 0.963888569  | 4.55E-07 |
| TUCP_001096 | XLOC_041653 | ENSRNOT00000064774 | 0.970646759  | 1.63E-07 |
| TUCP_001096 | XLOC_041653 | ENSRNOT00000008786 | -0.954687417 | 1.39E-06 |
| TUCP_001096 | XLOC_041653 | ENSRNOT00000039836 | -0.953162996 | 1.64E-06 |
| TUCP_001096 | XLOC_041653 | ENSRNOT00000018475 | -0.961996446 | 5.86E-07 |
| TUCP_001096 | XLOC_041653 | ENSRNOT00000089859 | 0.953897226  | 1.52E-06 |
| TUCP_001096 | XLOC_041653 | ENSRNOT00000009963 | 0.95106567   | 2.04E-06 |
| TUCP_001096 | XLOC_041653 | ENSRNOT00000033704 | 0.952914327  | 1.68E-06 |
| TUCP_001096 | XLOC_041653 | ENSRNOT00000079917 | 0.952194608  | 1.81E-06 |
| TUCP_001096 | XLOC_041653 | ENSRNOT00000049044 | 0.962824049  | 5.25E-07 |
| TUCP_001096 | XLOC_041653 | ENSRNOT00000084595 | 0.967823222  | 2.57E-07 |
| TUCP_001096 | XLOC_041653 | ENSRNOT00000024296 | 0.962908604  | 5.19E-07 |
| TUCP_001096 | XLOC_041653 | ENSRNOT00000072922 | 0.957001612  | 1.08E-06 |
| TUCP_001096 | XLOC_041653 | ENSRNOT00000088509 | 0.952122912  | 1.83E-06 |
| TUCP_001096 | XLOC_041653 | ENSRNOT00000031891 | -0.95700686  | 1.08E-06 |
| TUCP_001096 | XLOC_041653 | ENSRNOT00000005389 | 0.972436487  | 1.20E-07 |
| TUCP_001096 | XLOC_041653 | ENSRNOT00000078685 | 0.958966996  | 8.55E-07 |
| TUCP_001096 | XLOC_041653 | ENSRNOT00000019880 | -0.959175116 | 8.34E-07 |
| TUCP_002355 | XLOC_098636 | ENSRNOT00000026966 | 0.970322306  | 1.73E-07 |
| TUCP_002355 | XLOC_098636 | ENSRNOT00000068416 | 0.999999782  | 3.88E-33 |
| TUCP_002355 | XLOC_098636 | ENSRNOT00000086036 | 0.999958274  | 9.96E-22 |

|             |             |                    |              |          |
|-------------|-------------|--------------------|--------------|----------|
| TUCP_002355 | XLOC_098636 | ENSRNOT00000026803 | 0.985046075  | 5.74E-09 |
| TUCP_002355 | XLOC_098636 | ENSRNOT00000047527 | 0.963071698  | 5.08E-07 |
| TUCP_002355 | XLOC_098636 | ENSRNOT00000042251 | 0.999344295  | 9.53E-16 |
| TUCP_002355 | XLOC_098636 | ENSRNOT0000002984  | 0.998397069  | 8.31E-14 |
| TUCP_002355 | XLOC_098636 | ENSRNOT00000083764 | 0.999541808  | 1.59E-16 |
| TUCP_002355 | XLOC_098636 | ENSRNOT00000076802 | 0.962695843  | 5.34E-07 |
| TUCP_002355 | XLOC_098636 | ENSRNOT00000092365 | 0.999161651  | 3.26E-15 |
| TUCP_002355 | XLOC_098636 | ENSRNOT00000079275 | 0.999901911  | 7.15E-20 |
| TUCP_002355 | XLOC_098636 | ENSRNOT00000066062 | -0.959706712 | 7.82E-07 |
| TUCP_002355 | XLOC_098636 | ENSRNOT00000045301 | 1            | 1.33E-79 |
| TUCP_002355 | XLOC_098636 | ENSRNOT00000041186 | 0.999975782  | 6.56E-23 |
| TUCP_002355 | XLOC_098636 | ENSRNOT00000010092 | 0.977711778  | 4.17E-08 |
| TUCP_002355 | XLOC_098636 | ENSRNOT00000076182 | 1            | 1.33E-79 |
| TUCP_002355 | XLOC_098636 | ENSRNOT00000087404 | 0.951157664  | 2.02E-06 |
| TUCP_002355 | XLOC_098636 | ENSRNOT00000052003 | 0.95837331   | 9.18E-07 |
| TUCP_002355 | XLOC_098636 | ENSRNOT00000081709 | 0.998485154  | 6.27E-14 |
| TUCP_002355 | XLOC_098636 | ENSRNOT00000005726 | 0.959610119  | 7.91E-07 |
| TUCP_002355 | XLOC_098636 | ENSRNOT00000014103 | 1            | 4.25E-78 |
| TUCP_002355 | XLOC_098636 | ENSRNOT00000057433 | 0.964930601  | 3.94E-07 |
| TUCP_002355 | XLOC_098636 | ENSRNOT00000082289 | 0.998931566  | 1.09E-14 |
| TUCP_002355 | XLOC_098636 | ENSRNOT00000092516 | 0.957459323  | 1.02E-06 |
| TUCP_002355 | XLOC_098636 | ENSRNOT00000008898 | 0.990039768  | 7.59E-10 |
| TUCP_002355 | XLOC_098636 | ENSRNOT00000083493 | 0.995461232  | 1.51E-11 |
| TUCP_002355 | XLOC_098636 | ENSRNOT00000092563 | 0.987201084  | 2.65E-09 |
| TUCP_002355 | XLOC_098636 | ENSRNOT00000088893 | 1            | 0        |
| TUCP_002355 | XLOC_098636 | ENSRNOT00000076693 | 0.955029582  | 1.34E-06 |
| TUCP_002355 | XLOC_098636 | ENSRNOT00000081014 | 1            | 0        |
| TUCP_002355 | XLOC_098636 | ENSRNOT00000067543 | 1            | 1.33E-79 |
| TUCP_002355 | XLOC_098636 | ENSRNOT00000050968 | 0.996816433  | 2.56E-12 |
| TUCP_002355 | XLOC_098636 | ENSRNOT00000042201 | 0.960235595  | 7.32E-07 |
| TUCP_002355 | XLOC_098636 | ENSRNOT00000004373 | 0.957315473  | 1.04E-06 |
| TUCP_002355 | XLOC_098636 | ENSRNOT00000063929 | 1            | 1.33E-79 |
| TUCP_002355 | XLOC_098636 | ENSRNOT00000057472 | 1            | 4.25E-78 |
| TUCP_002355 | XLOC_098636 | ENSRNOT00000041617 | 0.952449765  | 1.77E-06 |
| TUCP_002355 | XLOC_098636 | ENSRNOT00000091763 | 0.986310385  | 3.70E-09 |
| TUCP_002355 | XLOC_098636 | ENSRNOT00000022200 | 0.998491303  | 6.14E-14 |
| TUCP_002355 | XLOC_098636 | ENSRNOT00000067379 | 0.997260967  | 1.21E-12 |
| TUCP_002355 | XLOC_098636 | ENSRNOT00000020786 | 0.976428448  | 5.51E-08 |
| TUCP_002355 | XLOC_098636 | ENSRNOT00000050543 | 0.999722223  | 1.30E-17 |
| TUCP_002355 | XLOC_098636 | ENSRNOT00000089306 | 0.999866649  | 3.32E-19 |
| TUCP_002355 | XLOC_098636 | ENSRNOT00000052367 | 0.997268394  | 1.19E-12 |
| TUCP_002355 | XLOC_098636 | ENSRNOT00000090658 | 1            | 4.25E-78 |
| TUCP_002355 | XLOC_098636 | ENSRNOT00000022571 | 0.995290013  | 1.81E-11 |
| TUCP_002355 | XLOC_098636 | ENSRNOT00000044520 | 0.981817158  | 1.52E-08 |
| TUCP_002355 | XLOC_098636 | ENSRNOT00000065448 | 0.963648868  | 4.70E-07 |
| TUCP_001090 | XLOC_041595 | ENSRNOT00000072939 | 0.966031511  | 3.36E-07 |
| TUCP_002353 | XLOC_098185 | ENSRNOT00000084500 | 0.984887141  | 6.05E-09 |
| TUCP_002353 | XLOC_098185 | ENSRNOT00000093467 | 0.996134431  | 6.75E-12 |
| TUCP_002353 | XLOC_098185 | ENSRNOT00000029340 | 0.999116572  | 4.23E-15 |
| TUCP_002353 | XLOC_098185 | ENSRNOT00000077972 | 0.962758032  | 5.30E-07 |
| TUCP_002353 | XLOC_098185 | ENSRNOT00000038646 | 1            | 0        |

|             |             |                    |             |          |
|-------------|-------------|--------------------|-------------|----------|
| TUCP_002353 | XLOC_098185 | ENSRNOT00000012095 | 0.957750287 | 9.88E-07 |
| TUCP_002353 | XLOC_098185 | ENSRNOT00000017909 | 0.975587192 | 6.56E-08 |
| TUCP_002353 | XLOC_098185 | ENSRNOT00000092579 | 1           | 1.33E-79 |
| TUCP_002353 | XLOC_098185 | ENSRNOT00000089235 | 0.998661162 | 3.38E-14 |
| TUCP_002353 | XLOC_098185 | ENSRNOT00000036383 | 0.988460809 | 1.58E-09 |
| TUCP_002353 | XLOC_098185 | ENSRNOT00000076528 | 0.997115373 | 1.57E-12 |
| TUCP_002353 | XLOC_098185 | ENSRNOT00000075193 | 0.964326971 | 4.29E-07 |
| TUCP_002353 | XLOC_098185 | ENSRNOT00000083034 | 0.990934646 | 4.75E-10 |
| TUCP_002353 | XLOC_098185 | ENSRNOT00000089607 | 0.995091455 | 2.23E-11 |
| TUCP_002353 | XLOC_098185 | ENSRNOT00000086014 | 0.960893638 | 6.74E-07 |
| TUCP_002353 | XLOC_098185 | ENSRNOT00000054939 | 0.958021495 | 9.57E-07 |
| TUCP_002353 | XLOC_098185 | ENSRNOT00000052315 | 0.983687082 | 8.85E-09 |
| TUCP_002353 | XLOC_098185 | ENSRNOT00000088168 | 1           | 0        |
| TUCP_002353 | XLOC_098185 | ENSRNOT00000046231 | 0.96225463  | 5.66E-07 |
| TUCP_002353 | XLOC_098185 | ENSRNOT00000013459 | 0.979098017 | 3.03E-08 |
| TUCP_002353 | XLOC_098185 | ENSRNOT00000078137 | 1           | 0        |
| TUCP_002353 | XLOC_098185 | ENSRNOT00000077764 | 0.977143528 | 4.73E-08 |
| TUCP_002353 | XLOC_098185 | ENSRNOT00000043661 | 0.966975951 | 2.93E-07 |
| TUCP_002353 | XLOC_098185 | ENSRNOT00000092740 | 1           | 0        |
| TUCP_002353 | XLOC_098185 | ENSRNOT00000000117 | 0.990989174 | 4.61E-10 |
| TUCP_002353 | XLOC_098185 | ENSRNOT00000071877 | 0.967113583 | 2.87E-07 |
| TUCP_002353 | XLOC_098185 | ENSRNOT00000070958 | 1           | 0        |
| TUCP_002353 | XLOC_098185 | ENSRNOT00000076757 | 0.959205354 | 8.31E-07 |
| TUCP_002353 | XLOC_098185 | ENSRNOT00000085310 | 0.965230243 | 3.78E-07 |
| TUCP_002353 | XLOC_098185 | ENSRNOT00000047241 | 0.966576993 | 3.11E-07 |
| TUCP_002353 | XLOC_098185 | ENSRNOT00000027268 | 1           | 0        |
| TUCP_002353 | XLOC_098185 | ENSRNOT00000004459 | 1           | 0        |
| TUCP_002353 | XLOC_098185 | ENSRNOT00000048373 | 0.959096578 | 8.42E-07 |
| TUCP_002353 | XLOC_098185 | ENSRNOT00000061516 | 0.987595648 | 2.27E-09 |
| TUCP_002353 | XLOC_098185 | ENSRNOT00000088148 | 1           | 0        |
| TUCP_002353 | XLOC_098185 | ENSRNOT00000088527 | 1           | 0        |
| TUCP_002353 | XLOC_098185 | ENSRNOT00000078701 | 1           | 1.33E-79 |
| TUCP_002353 | XLOC_098185 | ENSRNOT00000052308 | 0.962646127 | 5.38E-07 |
| TUCP_002353 | XLOC_098185 | ENSRNOT00000021748 | 1           | 0        |
| TUCP_002353 | XLOC_098185 | ENSRNOT00000089085 | 1           | 0        |
| TUCP_002353 | XLOC_098185 | ENSRNOT00000008153 | 0.999703506 | 1.80E-17 |
| TUCP_002353 | XLOC_098185 | ENSRNOT00000085896 | 0.971605382 | 1.39E-07 |
| TUCP_002353 | XLOC_098185 | ENSRNOT00000079189 | 0.984972387 | 5.89E-09 |
| TUCP_002353 | XLOC_098185 | ENSRNOT00000090078 | 1           | 0        |
| TUCP_002353 | XLOC_098185 | ENSRNOT00000078020 | 0.958421666 | 9.13E-07 |
| TUCP_002353 | XLOC_098185 | ENSRNOT00000092425 | 0.956092273 | 1.19E-06 |
| TUCP_002353 | XLOC_098185 | ENSRNOT00000009776 | 1           | 1.33E-79 |
| TUCP_001092 | XLOC_041633 | ENSRNOT00000087937 | 0.954233028 | 1.46E-06 |
| TUCP_001092 | XLOC_041633 | ENSRNOT00000090914 | 0.967274972 | 2.80E-07 |
| TUCP_001092 | XLOC_041633 | ENSRNOT00000005505 | 0.953397937 | 1.60E-06 |
| TUCP_001092 | XLOC_041633 | ENSRNOT00000000697 | 0.9822223   | 1.36E-08 |
| TUCP_001092 | XLOC_041633 | ENSRNOT00000056558 | 0.950530476 | 2.15E-06 |
| TUCP_001092 | XLOC_041633 | ENSRNOT00000023623 | 0.971693946 | 1.36E-07 |
| TUCP_001092 | XLOC_041633 | ENSRNOT00000003511 | 0.954439598 | 1.43E-06 |
| TUCP_001092 | XLOC_041633 | ENSRNOT00000022585 | 0.951502878 | 1.95E-06 |
| TUCP_001092 | XLOC_041633 | ENSRNOT00000022559 | 0.965955923 | 3.40E-07 |



|             |             |                    |              |          |
|-------------|-------------|--------------------|--------------|----------|
| TUCP_001092 | XLOC_041633 | ENSRNOT00000023661 | 0.968195123  | 2.43E-07 |
| TUCP_001092 | XLOC_041633 | ENSRNOT00000074810 | 0.97556303   | 6.59E-08 |
| TUCP_001092 | XLOC_041633 | ENSRNOT00000054963 | 0.953117955  | 1.65E-06 |
| TUCP_001092 | XLOC_041633 | ENSRNOT00000041762 | 0.969435265  | 2.00E-07 |
| TUCP_002351 | XLOC_098119 | ENSRNOT00000082836 | 0.96851097   | 2.31E-07 |
| TUCP_002351 | XLOC_098119 | ENSRNOT00000013232 | 0.976152259  | 5.84E-08 |
| TUCP_002351 | XLOC_098119 | ENSRNOT00000005077 | 0.965235234  | 3.77E-07 |
| TUCP_000546 | XLOC_019470 | ENSRNOT00000026966 | 0.970322306  | 1.73E-07 |
| TUCP_000546 | XLOC_019470 | ENSRNOT00000068416 | 0.999999782  | 3.88E-33 |
| TUCP_000546 | XLOC_019470 | ENSRNOT00000086036 | 0.999958274  | 9.96E-22 |
| TUCP_000546 | XLOC_019470 | ENSRNOT00000026803 | 0.985046075  | 5.74E-09 |
| TUCP_000546 | XLOC_019470 | ENSRNOT00000047527 | 0.963071698  | 5.08E-07 |
| TUCP_000546 | XLOC_019470 | ENSRNOT00000042251 | 0.999344295  | 9.53E-16 |
| TUCP_000546 | XLOC_019470 | ENSRNOT00000002984 | 0.998397069  | 8.31E-14 |
| TUCP_000546 | XLOC_019470 | ENSRNOT00000083764 | 0.999541808  | 1.59E-16 |
| TUCP_000546 | XLOC_019470 | ENSRNOT00000076802 | 0.962695843  | 5.34E-07 |
| TUCP_000546 | XLOC_019470 | ENSRNOT00000092365 | 0.999161651  | 3.26E-15 |
| TUCP_000546 | XLOC_019470 | ENSRNOT00000079275 | 0.999901911  | 7.15E-20 |
| TUCP_000546 | XLOC_019470 | ENSRNOT00000066062 | -0.959706712 | 7.82E-07 |
| TUCP_000546 | XLOC_019470 | ENSRNOT00000045301 | 1            | 0        |
| TUCP_000546 | XLOC_019470 | ENSRNOT00000041186 | 0.999975782  | 6.56E-23 |
| TUCP_000546 | XLOC_019470 | ENSRNOT00000010092 | 0.977711778  | 4.17E-08 |
| TUCP_000546 | XLOC_019470 | ENSRNOT00000076182 | 1            | 0        |
| TUCP_000546 | XLOC_019470 | ENSRNOT00000087404 | 0.951157664  | 2.02E-06 |
| TUCP_000546 | XLOC_019470 | ENSRNOT00000052003 | 0.95837331   | 9.18E-07 |
| TUCP_000546 | XLOC_019470 | ENSRNOT00000081709 | 0.998485154  | 6.27E-14 |
| TUCP_000546 | XLOC_019470 | ENSRNOT00000005726 | 0.959610119  | 7.91E-07 |
| TUCP_000546 | XLOC_019470 | ENSRNOT00000014103 | 1            | 0        |
| TUCP_000546 | XLOC_019470 | ENSRNOT00000057433 | 0.964930601  | 3.94E-07 |
| TUCP_000546 | XLOC_019470 | ENSRNOT00000082289 | 0.998931566  | 1.09E-14 |
| TUCP_000546 | XLOC_019470 | ENSRNOT00000092516 | 0.957459323  | 1.02E-06 |
| TUCP_000546 | XLOC_019470 | ENSRNOT00000008898 | 0.990039768  | 7.59E-10 |
| TUCP_000546 | XLOC_019470 | ENSRNOT00000083493 | 0.995461232  | 1.51E-11 |
| TUCP_000546 | XLOC_019470 | ENSRNOT00000092563 | 0.987201084  | 2.65E-09 |
| TUCP_000546 | XLOC_019470 | ENSRNOT00000088893 | 1            | 0        |
| TUCP_000546 | XLOC_019470 | ENSRNOT00000076693 | 0.955029582  | 1.34E-06 |
| TUCP_000546 | XLOC_019470 | ENSRNOT00000081014 | 1            | 0        |
| TUCP_000546 | XLOC_019470 | ENSRNOT00000067543 | 1            | 0        |
| TUCP_000546 | XLOC_019470 | ENSRNOT00000050968 | 0.996816433  | 2.56E-12 |
| TUCP_000546 | XLOC_019470 | ENSRNOT00000042201 | 0.960235595  | 7.32E-07 |
| TUCP_000546 | XLOC_019470 | ENSRNOT00000004373 | 0.957315473  | 1.04E-06 |
| TUCP_000546 | XLOC_019470 | ENSRNOT00000063929 | 1            | 0        |
| TUCP_000546 | XLOC_019470 | ENSRNOT00000057472 | 1            | 1.33E-79 |
| TUCP_000546 | XLOC_019470 | ENSRNOT00000041617 | 0.952449765  | 1.77E-06 |
| TUCP_000546 | XLOC_019470 | ENSRNOT00000091763 | 0.986310385  | 3.70E-09 |
| TUCP_000546 | XLOC_019470 | ENSRNOT00000022200 | 0.998491303  | 6.14E-14 |
| TUCP_000546 | XLOC_019470 | ENSRNOT00000067379 | 0.997260967  | 1.21E-12 |
| TUCP_000546 | XLOC_019470 | ENSRNOT00000020786 | 0.976428448  | 5.51E-08 |
| TUCP_000546 | XLOC_019470 | ENSRNOT00000050543 | 0.999722223  | 1.30E-17 |
| TUCP_000546 | XLOC_019470 | ENSRNOT00000089306 | 0.999866649  | 3.32E-19 |
| TUCP_000546 | XLOC_019470 | ENSRNOT00000052367 | 0.997268394  | 1.19E-12 |

|             |             |                     |              |          |
|-------------|-------------|---------------------|--------------|----------|
| TUCP_000546 | XLOC_019470 | ENSRNOT00000090658  | 1            | 0        |
| TUCP_000546 | XLOC_019470 | ENSRNOT00000022571  | 0.995290013  | 1.81E-11 |
| TUCP_000546 | XLOC_019470 | ENSRNOT00000044520  | 0.981817158  | 1.52E-08 |
| TUCP_000546 | XLOC_019470 | ENSRNOT00000065448  | 0.963648868  | 4.70E-07 |
| TUCP_002213 | XLOC_092461 | ENSRNOT00000030327  | 0.974865916  | 7.57E-08 |
| TUCP_002213 | XLOC_092461 | ENSRNOT00000085380  | 0.9764895    | 5.44E-08 |
| TUCP_002213 | XLOC_092461 | ENSRNOT00000013296  | 0.965858158  | 3.45E-07 |
| TUCP_002212 | XLOC_092461 | ENSRNOT00000078752  | -0.951226028 | 2.00E-06 |
| TUCP_002358 | XLOC_099292 | ENSRNOT00000068520  | -0.954631942 | 1.40E-06 |
| TUCP_000542 | XLOC_019107 | ENSRNOT00000068094  | 0.956990764  | 1.08E-06 |
| TUCP_000542 | XLOC_019107 | ENSRNOT00000084758  | 0.996200091  | 6.20E-12 |
| TUCP_001940 | XLOC_078987 | ENSRNOT00000019478  | 0.950716035  | 2.11E-06 |
| TUCP_000186 | XLOC_006154 | ENSRNOT00000006992  | 0.956488062  | 1.14E-06 |
| TUCP_000186 | XLOC_006154 | ENSRNOT000000081796 | 0.95384681   | 1.53E-06 |
| TUCP_000186 | XLOC_006154 | ENSRNOT000000082998 | 0.958318665  | 9.24E-07 |
| TUCP_000186 | XLOC_006154 | ENSRNOT00000048910  | -0.950481247 | 2.16E-06 |
| TUCP_000186 | XLOC_006154 | ENSRNOT00000019213  | 0.972882339  | 1.10E-07 |
| TUCP_000186 | XLOC_006154 | ENSRNOT00000009877  | 0.962515232  | 5.47E-07 |
| TUCP_000186 | XLOC_006154 | ENSRNOT00000079746  | 0.964194809  | 4.36E-07 |
| TUCP_000186 | XLOC_006154 | ENSRNOT00000021348  | 0.966312991  | 3.23E-07 |
| TUCP_000186 | XLOC_006154 | ENSRNOT00000071560  | 0.959132208  | 8.38E-07 |
| TUCP_000186 | XLOC_006154 | ENSRNOT00000021614  | 0.970962632  | 1.55E-07 |
| TUCP_000186 | XLOC_006154 | ENSRNOT00000026065  | 0.962252776  | 5.66E-07 |
| TUCP_000186 | XLOC_006154 | ENSRNOT00000048613  | 0.962907224  | 5.20E-07 |
| TUCP_000186 | XLOC_006154 | ENSRNOT00000023638  | 0.958435537  | 9.11E-07 |
| TUCP_000186 | XLOC_006154 | ENSRNOT00000022726  | 0.964263766  | 4.32E-07 |
| TUCP_000186 | XLOC_006154 | ENSRNOT00000005220  | 0.959101503  | 8.41E-07 |
| TUCP_000186 | XLOC_006154 | ENSRNOT00000044635  | 0.985960742  | 4.20E-09 |
| TUCP_000186 | XLOC_006154 | ENSRNOT00000036750  | 0.977688425  | 4.19E-08 |
| TUCP_000186 | XLOC_006154 | ENSRNOT00000021116  | 0.983436447  | 9.55E-09 |
| TUCP_000186 | XLOC_006154 | ENSRNOT00000006186  | 0.955201241  | 1.32E-06 |
| TUCP_000186 | XLOC_006154 | ENSRNOT000000082100 | 0.97513736   | 7.18E-08 |
| TUCP_000186 | XLOC_006154 | ENSRNOT00000001118  | 0.956971954  | 1.08E-06 |
| TUCP_000186 | XLOC_006154 | ENSRNOT00000038703  | 0.955652049  | 1.25E-06 |
| TUCP_000186 | XLOC_006154 | ENSRNOT00000043216  | 0.97305929   | 1.07E-07 |
| TUCP_000186 | XLOC_006154 | ENSRNOT00000013758  | 0.962079074  | 5.79E-07 |
| TUCP_000186 | XLOC_006154 | ENSRNOT00000028563  | 0.965071981  | 3.86E-07 |
| TUCP_000186 | XLOC_006154 | ENSRNOT00000015076  | 0.971184769  | 1.49E-07 |
| TUCP_000186 | XLOC_006154 | ENSRNOT00000022800  | 0.952964951  | 1.67E-06 |
| TUCP_000186 | XLOC_006154 | ENSRNOT00000076516  | 0.968640645  | 2.27E-07 |
| TUCP_000186 | XLOC_006154 | ENSRNOT00000015073  | 0.992622401  | 1.70E-10 |
| TUCP_000186 | XLOC_006154 | ENSRNOT00000018533  | 0.963382505  | 4.88E-07 |
| TUCP_000186 | XLOC_006154 | ENSRNOT00000073564  | -0.951075029 | 2.03E-06 |
| TUCP_000186 | XLOC_006154 | ENSRNOT00000001507  | 0.958030004  | 9.56E-07 |
| TUCP_000186 | XLOC_006154 | ENSRNOT00000026783  | 0.957893171  | 9.71E-07 |
| TUCP_000186 | XLOC_006154 | ENSRNOT00000071573  | 0.964856229  | 3.98E-07 |
| TUCP_000186 | XLOC_006154 | ENSRNOT00000088125  | 0.95425175   | 1.46E-06 |
| TUCP_000186 | XLOC_006154 | ENSRNOT00000065300  | 0.968108747  | 2.46E-07 |
| TUCP_000186 | XLOC_006154 | ENSRNOT00000011384  | 0.95805127   | 9.53E-07 |
| TUCP_000186 | XLOC_006154 | ENSRNOT00000087306  | 0.965899273  | 3.43E-07 |
| TUCP_000186 | XLOC_006154 | ENSRNOT0000007351   | -0.957840485 | 9.77E-07 |

|             |             |                    |              |          |
|-------------|-------------|--------------------|--------------|----------|
| TUCP_000186 | XLOC_006154 | ENSRNOT00000076820 | 0.962245447  | 5.67E-07 |
| TUCP_000186 | XLOC_006154 | ENSRNOT00000006963 | 0.959224074  | 8.29E-07 |
| TUCP_000186 | XLOC_006154 | ENSRNOT00000035989 | 0.963244608  | 4.97E-07 |
| TUCP_000186 | XLOC_006154 | ENSRNOT00000027944 | 0.954734836  | 1.39E-06 |
| TUCP_000186 | XLOC_006154 | ENSRNOT00000024406 | -0.956252294 | 1.17E-06 |
| TUCP_000186 | XLOC_006154 | ENSRNOT00000026174 | 0.964396432  | 4.24E-07 |
| TUCP_000186 | XLOC_006154 | ENSRNOT00000037456 | 0.96098012   | 6.67E-07 |
| TUCP_000186 | XLOC_006154 | ENSRNOT00000025510 | -0.961381956 | 6.34E-07 |
| TUCP_000186 | XLOC_006154 | ENSRNOT00000083215 | 0.975349286  | 6.88E-08 |
| TUCP_000186 | XLOC_006154 | ENSRNOT00000084012 | 0.956599018  | 1.13E-06 |
| TUCP_000186 | XLOC_006154 | ENSRNOT00000079109 | 0.950677583  | 2.12E-06 |
| TUCP_000186 | XLOC_006154 | ENSRNOT00000055187 | 0.981737812  | 1.55E-08 |
| TUCP_000186 | XLOC_006154 | ENSRNOT00000075424 | 0.964810546  | 4.01E-07 |
| TUCP_000186 | XLOC_006154 | ENSRNOT00000015203 | 0.958573533  | 8.96E-07 |
| TUCP_000186 | XLOC_006154 | ENSRNOT00000067822 | 0.964792918  | 4.02E-07 |
| TUCP_000186 | XLOC_006154 | ENSRNOT00000024060 | 0.963811865  | 4.60E-07 |
| TUCP_000186 | XLOC_006154 | ENSRNOT00000010149 | 0.950762046  | 2.10E-06 |
| TUCP_000186 | XLOC_006154 | ENSRNOT00000064902 | 0.951654112  | 1.92E-06 |
| TUCP_000186 | XLOC_006154 | ENSRNOT00000020885 | 0.959882007  | 7.65E-07 |
| TUCP_000186 | XLOC_006154 | ENSRNOT00000093357 | 0.958855552  | 8.67E-07 |
| TUCP_000186 | XLOC_006154 | ENSRNOT00000068633 | 0.962248382  | 5.67E-07 |
| TUCP_000186 | XLOC_006154 | ENSRNOT00000004032 | 0.977795777  | 4.10E-08 |
| TUCP_000186 | XLOC_006154 | ENSRNOT00000017948 | 0.955154523  | 1.32E-06 |
| TUCP_000186 | XLOC_006154 | ENSRNOT00000052288 | 0.982994048  | 1.09E-08 |
| TUCP_000186 | XLOC_006154 | ENSRNOT00000091909 | 0.960577782  | 7.02E-07 |
| TUCP_000186 | XLOC_006154 | ENSRNOT00000020147 | 0.964277458  | 4.31E-07 |
| TUCP_000186 | XLOC_006154 | ENSRNOT00000024352 | 0.960641076  | 6.96E-07 |
| TUCP_000186 | XLOC_006154 | ENSRNOT00000085332 | -0.954653053 | 1.40E-06 |
| TUCP_000186 | XLOC_006154 | ENSRNOT00000058312 | 0.953477335  | 1.59E-06 |
| TUCP_000186 | XLOC_006154 | ENSRNOT00000013274 | 0.955573059  | 1.26E-06 |
| TUCP_000186 | XLOC_006154 | ENSRNOT00000022213 | 0.963045591  | 5.10E-07 |
| TUCP_000186 | XLOC_006154 | ENSRNOT00000022610 | 0.954500786  | 1.42E-06 |
| TUCP_000186 | XLOC_006154 | ENSRNOT00000020437 | 0.957479656  | 1.02E-06 |
| TUCP_000186 | XLOC_006154 | ENSRNOT00000006828 | 0.965503115  | 3.63E-07 |
| TUCP_000186 | XLOC_006154 | ENSRNOT00000088509 | 0.965359802  | 3.71E-07 |
| TUCP_000186 | XLOC_006154 | ENSRNOT00000005355 | 0.951894747  | 1.87E-06 |
| TUCP_000186 | XLOC_006154 | ENSRNOT00000016739 | 0.972159702  | 1.26E-07 |
| TUCP_000186 | XLOC_006154 | ENSRNOT00000088191 | 0.984652996  | 6.53E-09 |
| TUCP_000186 | XLOC_006154 | ENSRNOT00000009221 | 0.969714497  | 1.91E-07 |
| TUCP_000186 | XLOC_006154 | ENSRNOT00000079895 | 0.96991946   | 1.84E-07 |
| TUCP_000186 | XLOC_006154 | ENSRNOT00000005659 | 0.971676869  | 1.37E-07 |
| TUCP_000186 | XLOC_006154 | ENSRNOT00000086868 | 0.961410723  | 6.32E-07 |
| TUCP_000186 | XLOC_006154 | ENSRNOT00000025983 | 0.957017759  | 1.07E-06 |
| TUCP_000186 | XLOC_006154 | ENSRNOT00000047387 | 0.952557322  | 1.75E-06 |
| TUCP_000186 | XLOC_006154 | ENSRNOT00000013661 | 0.968731569  | 2.23E-07 |
| TUCP_000186 | XLOC_006154 | ENSRNOT00000045488 | 0.951031215  | 2.04E-06 |
| TUCP_000186 | XLOC_006154 | ENSRNOT00000039842 | 0.967017333  | 2.91E-07 |
| TUCP_000186 | XLOC_006154 | ENSRNOT00000093174 | 0.969079919  | 2.11E-07 |
| TUCP_000186 | XLOC_006154 | ENSRNOT00000017629 | 0.972164643  | 1.26E-07 |
| TUCP_000186 | XLOC_006154 | ENSRNOT00000061100 | 0.952367452  | 1.78E-06 |
| TUCP_000186 | XLOC_006154 | ENSRNOT00000020648 | 0.957388683  | 1.03E-06 |

|             |             |                     |              |          |
|-------------|-------------|---------------------|--------------|----------|
| TUCP_000186 | XLOC_006154 | ENSRNOT00000008803  | 0.959401444  | 8.11E-07 |
| TUCP_000186 | XLOC_006154 | ENSRNOT00000005664  | 0.954144009  | 1.48E-06 |
| TUCP_000186 | XLOC_006154 | ENSRNOT00000003991  | 0.953628301  | 1.56E-06 |
| TUCP_000186 | XLOC_006154 | ENSRNOT00000004508  | 0.964319885  | 4.29E-07 |
| TUCP_000186 | XLOC_006154 | ENSRNOT000000034744 | 0.967224779  | 2.82E-07 |
| TUCP_000186 | XLOC_006154 | ENSRNOT000000078475 | 0.977828323  | 4.07E-08 |
| TUCP_000186 | XLOC_006154 | ENSRNOT000000040513 | 0.953682929  | 1.55E-06 |
| TUCP_000186 | XLOC_006154 | ENSRNOT00000004740  | 0.954042607  | 1.49E-06 |
| TUCP_000186 | XLOC_006154 | ENSRNOT000000092418 | 0.968253179  | 2.41E-07 |
| TUCP_000186 | XLOC_006154 | ENSRNOT000000021153 | 0.976015508  | 6.00E-08 |
| TUCP_000186 | XLOC_006154 | ENSRNOT000000034704 | 0.95107898   | 2.03E-06 |
| TUCP_000186 | XLOC_006154 | ENSRNOT00000000302  | 0.970823729  | 1.59E-07 |
| TUCP_000186 | XLOC_006154 | ENSRNOT000000090262 | 0.964595689  | 4.13E-07 |
| TUCP_000186 | XLOC_006154 | ENSRNOT000000078070 | 0.950664094  | 2.12E-06 |
| TUCP_000186 | XLOC_006154 | ENSRNOT000000076729 | 0.952077315  | 1.84E-06 |
| TUCP_000186 | XLOC_006154 | ENSRNOT000000016722 | 0.967473228  | 2.71E-07 |
| TUCP_000186 | XLOC_006154 | ENSRNOT000000073526 | 0.959919752  | 7.61E-07 |
| TUCP_000186 | XLOC_006154 | ENSRNOT000000010927 | 0.974486195  | 8.16E-08 |
| TUCP_000186 | XLOC_006154 | ENSRNOT000000025832 | 0.964157293  | 4.39E-07 |
| TUCP_000186 | XLOC_006154 | ENSRNOT00000003840  | 0.953350735  | 1.61E-06 |
| TUCP_000186 | XLOC_006154 | ENSRNOT000000027615 | 0.970937215  | 1.56E-07 |
| TUCP_000186 | XLOC_006154 | ENSRNOT000000005909 | 0.969870488  | 1.86E-07 |
| TUCP_000186 | XLOC_006154 | ENSRNOT000000074649 | 0.95214269   | 1.82E-06 |
| TUCP_000186 | XLOC_006154 | ENSRNOT000000009198 | 0.967920272  | 2.54E-07 |
| TUCP_000186 | XLOC_006154 | ENSRNOT000000024659 | 0.96760944   | 2.66E-07 |
| TUCP_000186 | XLOC_006154 | ENSRNOT000000025092 | 0.964528622  | 4.17E-07 |
| TUCP_000186 | XLOC_006154 | ENSRNOT000000009129 | 0.962053067  | 5.81E-07 |
| TUCP_000186 | XLOC_006154 | ENSRNOT000000050138 | 0.977396342  | 4.47E-08 |
| TUCP_000186 | XLOC_006154 | ENSRNOT000000036951 | 0.959579214  | 7.94E-07 |
| TUCP_000186 | XLOC_006154 | ENSRNOT000000090376 | 0.955256909  | 1.31E-06 |
| TUCP_000186 | XLOC_006154 | ENSRNOT000000018057 | 0.954884488  | 1.36E-06 |
| TUCP_000186 | XLOC_006154 | ENSRNOT000000003182 | 0.958442199  | 9.10E-07 |
| TUCP_000186 | XLOC_006154 | ENSRNOT000000007091 | 0.973624299  | 9.62E-08 |
| TUCP_000186 | XLOC_006154 | ENSRNOT000000088054 | 0.950370415  | 2.18E-06 |
| TUCP_000186 | XLOC_006154 | ENSRNOT000000057313 | 0.983816707  | 8.51E-09 |
| TUCP_000186 | XLOC_006154 | ENSRNOT000000072081 | 0.972832738  | 1.11E-07 |
| TUCP_000186 | XLOC_006154 | ENSRNOT000000088196 | 0.959071748  | 8.44E-07 |
| TUCP_000186 | XLOC_006154 | ENSRNOT000000087534 | -0.950538654 | 2.15E-06 |
| TUCP_000186 | XLOC_006154 | ENSRNOT000000023645 | 0.959994837  | 7.54E-07 |
| TUCP_000186 | XLOC_006154 | ENSRNOT000000042799 | 0.970118717  | 1.78E-07 |
| TUCP_000186 | XLOC_006154 | ENSRNOT000000027910 | 0.975724196  | 6.37E-08 |
| TUCP_000186 | XLOC_006154 | ENSRNOT000000010992 | 0.960002601  | 7.54E-07 |
| TUCP_000186 | XLOC_006154 | ENSRNOT000000035700 | 0.965521395  | 3.62E-07 |
| TUCP_000186 | XLOC_006154 | ENSRNOT000000076669 | 0.955710286  | 1.25E-06 |
| TUCP_000186 | XLOC_006154 | ENSRNOT000000011984 | 0.952680401  | 1.73E-06 |
| TUCP_000186 | XLOC_006154 | ENSRNOT000000058362 | 0.959395638  | 8.12E-07 |
| TUCP_000186 | XLOC_006154 | ENSRNOT000000007175 | 0.957534492  | 1.01E-06 |
| TUCP_000186 | XLOC_006154 | ENSRNOT000000020669 | 0.953567418  | 1.57E-06 |
| TUCP_000186 | XLOC_006154 | ENSRNOT000000074653 | 0.952728592  | 1.72E-06 |
| TUCP_000186 | XLOC_006154 | ENSRNOT000000031230 | 0.967167639  | 2.84E-07 |
| TUCP_000186 | XLOC_006154 | ENSRNOT000000059458 | 0.971456955  | 1.42E-07 |

|             |             |                     |              |          |
|-------------|-------------|---------------------|--------------|----------|
| TUCP_000186 | XLOC_006154 | ENSRNOT00000001449  | 0.950249931  | 2.21E-06 |
| TUCP_000186 | XLOC_006154 | ENSRNOT000000040069 | 0.97376043   | 9.37E-08 |
| TUCP_000186 | XLOC_006154 | ENSRNOT000000080928 | 0.962194929  | 5.71E-07 |
| TUCP_000186 | XLOC_006154 | ENSRNOT000000046058 | 0.962863204  | 5.23E-07 |
| TUCP_000186 | XLOC_006154 | ENSRNOT000000045083 | 0.95060618   | 2.13E-06 |
| TUCP_000186 | XLOC_006154 | ENSRNOT000000009342 | 0.972075651  | 1.28E-07 |
| TUCP_000186 | XLOC_006154 | ENSRNOT000000068322 | 0.950213958  | 2.22E-06 |
| TUCP_000186 | XLOC_006154 | ENSRNOT000000091205 | 0.964568529  | 4.14E-07 |
| TUCP_000186 | XLOC_006154 | ENSRNOT000000085596 | 0.969462268  | 1.99E-07 |
| TUCP_000186 | XLOC_006154 | ENSRNOT000000029125 | 0.969353125  | 2.02E-07 |
| TUCP_000186 | XLOC_006154 | ENSRNOT000000082174 | 0.951661641  | 1.92E-06 |
| TUCP_000186 | XLOC_006154 | ENSRNOT000000044896 | 0.95968075   | 7.84E-07 |
| TUCP_000186 | XLOC_006154 | ENSRNOT000000014814 | 0.955650805  | 1.25E-06 |
| TUCP_000186 | XLOC_006154 | ENSRNOT000000004412 | 0.970693041  | 1.62E-07 |
| TUCP_000186 | XLOC_006154 | ENSRNOT000000025147 | 0.964708113  | 4.06E-07 |
| TUCP_000186 | XLOC_006154 | ENSRNOT000000064798 | 0.956070647  | 1.20E-06 |
| TUCP_000186 | XLOC_006154 | ENSRNOT000000019177 | 0.954484028  | 1.43E-06 |
| TUCP_000186 | XLOC_006154 | ENSRNOT000000011784 | 0.96945233   | 1.99E-07 |
| TUCP_000186 | XLOC_006154 | ENSRNOT000000084595 | 0.954828743  | 1.37E-06 |
| TUCP_000186 | XLOC_006154 | ENSRNOT000000077888 | -0.964714444 | 4.06E-07 |
| TUCP_000186 | XLOC_006154 | ENSRNOT000000019910 | -0.9573241   | 1.04E-06 |
| TUCP_000186 | XLOC_006154 | ENSRNOT000000040393 | 0.962000804  | 5.85E-07 |
| TUCP_000186 | XLOC_006154 | ENSRNOT000000066593 | 0.954345907  | 1.45E-06 |
| TUCP_000186 | XLOC_006154 | ENSRNOT000000064930 | 0.955632816  | 1.26E-06 |
| TUCP_000186 | XLOC_006154 | ENSRNOT000000004463 | 0.951971501  | 1.86E-06 |
| TUCP_000186 | XLOC_006154 | ENSRNOT000000027964 | 0.994454445  | 4.09E-11 |
| TUCP_000186 | XLOC_006154 | ENSRNOT000000047975 | 0.966081602  | 3.34E-07 |
| TUCP_000186 | XLOC_006154 | ENSRNOT000000051550 | 0.952669276  | 1.73E-06 |
| TUCP_000186 | XLOC_006154 | ENSRNOT000000008982 | 0.963695654  | 4.67E-07 |
| TUCP_000186 | XLOC_006154 | ENSRNOT000000021674 | 0.983202196  | 1.02E-08 |
| TUCP_000186 | XLOC_006154 | ENSRNOT000000047210 | 0.959015786  | 8.50E-07 |
| TUCP_000186 | XLOC_006154 | ENSRNOT00000002292  | 0.953586747  | 1.57E-06 |
| TUCP_000186 | XLOC_006154 | ENSRNOT000000089211 | 0.960549625  | 7.04E-07 |
| TUCP_000186 | XLOC_006154 | ENSRNOT000000048029 | 0.95888557   | 8.63E-07 |
| TUCP_000186 | XLOC_006154 | ENSRNOT000000004140 | 0.96932465   | 2.03E-07 |
| TUCP_000186 | XLOC_006154 | ENSRNOT000000035474 | 0.954398626  | 1.44E-06 |
| TUCP_000186 | XLOC_006154 | ENSRNOT000000079996 | 0.961364044  | 6.35E-07 |
| TUCP_000186 | XLOC_006154 | ENSRNOT000000084968 | 0.954315355  | 1.45E-06 |
| TUCP_001651 | XLOC_065026 | ENSRNOT000000029531 | -0.952580978 | 1.74E-06 |
| TUCP_001651 | XLOC_065026 | ENSRNOT000000061139 | 0.972137144  | 1.26E-07 |
| TUCP_001399 | XLOC_053666 | ENSRNOT000000024186 | 0.983200502  | 1.02E-08 |
| TUCP_001399 | XLOC_053666 | ENSRNOT000000074753 | 0.998182349  | 1.56E-13 |
| TUCP_001399 | XLOC_053666 | ENSRNOT000000004876 | 0.959071443  | 8.44E-07 |
| TUCP_001399 | XLOC_053666 | ENSRNOT000000041904 | 1            | 1.33E-79 |
| TUCP_001399 | XLOC_053666 | ENSRNOT000000083487 | 0.989515314  | 9.80E-10 |
| TUCP_001399 | XLOC_053666 | ENSRNOT000000077990 | 1            | 0        |
| TUCP_001399 | XLOC_053666 | ENSRNOT000000038826 | 0.99977672   | 4.37E-18 |
| TUCP_001399 | XLOC_053666 | ENSRNOT000000046842 | 0.973644314  | 9.58E-08 |
| TUCP_001399 | XLOC_053666 | ENSRNOT000000037169 | 0.980329406  | 2.24E-08 |
| TUCP_001399 | XLOC_053666 | ENSRNOT000000021243 | 0.987425406  | 2.42E-09 |
| TUCP_001399 | XLOC_053666 | ENSRNOT000000060250 | 0.999933853  | 9.97E-21 |

|             |             |                    |             |          |
|-------------|-------------|--------------------|-------------|----------|
| TUCP_001399 | XLOC_053666 | ENSRNOT00000091934 | 1           | 1.33E-79 |
| TUCP_001399 | XLOC_053666 | ENSRNOT00000046585 | 0.982941597 | 1.11E-08 |
| TUCP_001399 | XLOC_053666 | ENSRNOT00000080794 | 0.990839253 | 5.00E-10 |
| TUCP_001399 | XLOC_053666 | ENSRNOT00000014456 | 0.991697153 | 3.06E-10 |
| TUCP_001399 | XLOC_053666 | ENSRNOT00000031205 | 0.991394766 | 3.66E-10 |
| TUCP_001399 | XLOC_053666 | ENSRNOT00000044145 | 1           | 1.33E-79 |
| TUCP_001399 | XLOC_053666 | ENSRNOT00000088381 | 0.989013276 | 1.24E-09 |
| TUCP_001399 | XLOC_053666 | ENSRNOT00000011743 | 0.98678427  | 3.11E-09 |
| TUCP_001399 | XLOC_053666 | ENSRNOT00000089929 | 1           | 1.33E-79 |
| TUCP_001399 | XLOC_053666 | ENSRNOT00000088624 | 1           | 1.33E-79 |
| TUCP_001399 | XLOC_053666 | ENSRNOT00000085659 | 0.989908621 | 8.10E-10 |
| TUCP_001399 | XLOC_053666 | ENSRNOT00000015866 | 0.994066664 | 5.73E-11 |
| TUCP_001399 | XLOC_053666 | ENSRNOT00000078633 | 1           | 0        |
| TUCP_001399 | XLOC_053666 | ENSRNOT00000034907 | 0.995318542 | 1.76E-11 |
| TUCP_001399 | XLOC_053666 | ENSRNOT00000093230 | 0.958295175 | 9.26E-07 |
| TUCP_001399 | XLOC_053666 | ENSRNOT00000051835 | 1           | 0        |
| TUCP_001399 | XLOC_053666 | ENSRNOT00000079087 | 1           | 1.33E-79 |
| TUCP_001399 | XLOC_053666 | ENSRNOT00000037206 | 1           | 0        |
| TUCP_001399 | XLOC_053666 | ENSRNOT00000083261 | 0.970991658 | 1.54E-07 |
| TUCP_001399 | XLOC_053666 | ENSRNOT00000080590 | 0.999889216 | 1.31E-19 |
| TUCP_001399 | XLOC_053666 | ENSRNOT00000027552 | 0.999801024 | 2.46E-18 |
| TUCP_001399 | XLOC_053666 | ENSRNOT00000077014 | 0.995074376 | 2.26E-11 |
| TUCP_001399 | XLOC_053666 | ENSRNOT00000080453 | 0.99994332  | 4.61E-21 |
| TUCP_001399 | XLOC_053666 | ENSRNOT00000089057 | 0.968243551 | 2.41E-07 |
| TUCP_001399 | XLOC_053666 | ENSRNOT00000066839 | 0.991868612 | 2.76E-10 |
| TUCP_001399 | XLOC_053666 | ENSRNOT00000061284 | 0.955566942 | 1.27E-06 |
| TUCP_001399 | XLOC_053666 | ENSRNOT00000013423 | 0.959677621 | 7.84E-07 |
| TUCP_001399 | XLOC_053666 | ENSRNOT00000071884 | 0.974769955 | 7.72E-08 |
| TUCP_001399 | XLOC_053666 | ENSRNOT00000004128 | 0.961829362 | 5.99E-07 |
| TUCP_001399 | XLOC_053666 | ENSRNOT00000026316 | 0.964408046 | 4.24E-07 |
| TUCP_001399 | XLOC_053666 | ENSRNOT00000057729 | 0.999384184 | 6.97E-16 |
| TUCP_001399 | XLOC_053666 | ENSRNOT00000078663 | 0.975192577 | 7.10E-08 |
| TUCP_001399 | XLOC_053666 | ENSRNOT00000064250 | 0.983131977 | 1.05E-08 |
| TUCP_001399 | XLOC_053666 | ENSRNOT00000021608 | 0.965228881 | 3.78E-07 |
| TUCP_001399 | XLOC_053666 | ENSRNOT00000029634 | 0.995816134 | 1.00E-11 |
| TUCP_001399 | XLOC_053666 | ENSRNOT00000093579 | 0.958564264 | 8.97E-07 |
| TUCP_001399 | XLOC_053666 | ENSRNOT00000086349 | 0.957242511 | 1.05E-06 |
| TUCP_001399 | XLOC_053666 | ENSRNOT00000065460 | 1           | 1.33E-79 |
| TUCP_001399 | XLOC_053666 | ENSRNOT0000003817  | 0.996778712 | 2.72E-12 |
| TUCP_001399 | XLOC_053666 | ENSRNOT00000016713 | 1           | 1.33E-79 |
| TUCP_001399 | XLOC_053666 | ENSRNOT00000079260 | 0.996448245 | 4.42E-12 |
| TUCP_001399 | XLOC_053666 | ENSRNOT00000039294 | 1           | 1.33E-79 |
| TUCP_001399 | XLOC_053666 | ENSRNOT00000092913 | 0.952980228 | 1.67E-06 |
| TUCP_001499 | XLOC_057860 | ENSRNOT00000006175 | 0.957137889 | 1.06E-06 |
| TUCP_001499 | XLOC_057860 | ENSRNOT00000024156 | 0.958200553 | 9.37E-07 |
| TUCP_001499 | XLOC_057860 | ENSRNOT00000027454 | 0.954064875 | 1.49E-06 |
| TUCP_001499 | XLOC_057860 | ENSRNOT00000026543 | 0.962609511 | 5.41E-07 |
| TUCP_001499 | XLOC_057860 | ENSRNOT00000078274 | 0.954704312 | 1.39E-06 |
| TUCP_001499 | XLOC_057860 | ENSRNOT00000005537 | 0.968176366 | 2.44E-07 |
| TUCP_001128 | XLOC_042601 | ENSRNOT00000031161 | 0.956240183 | 1.17E-06 |
| TUCP_001128 | XLOC_042601 | ENSRNOT00000086329 | 0.958951864 | 8.57E-07 |

|             |             |                    |              |          |
|-------------|-------------|--------------------|--------------|----------|
| TUCP_001128 | XLOC_042601 | ENSRNOT00000075863 | 0.951301565  | 1.99E-06 |
| TUCP_001128 | XLOC_042601 | ENSRNOT00000019680 | -0.957043362 | 1.07E-06 |
| TUCP_001128 | XLOC_042601 | ENSRNOT00000021402 | 0.969858721  | 1.86E-07 |
| TUCP_001128 | XLOC_042601 | ENSRNOT00000055251 | 0.95089473   | 2.07E-06 |
| TUCP_001128 | XLOC_042601 | ENSRNOT00000004387 | 0.95861208   | 8.92E-07 |
| TUCP_001128 | XLOC_042601 | ENSRNOT00000059156 | -0.969294528 | 2.04E-07 |
| TUCP_001128 | XLOC_042601 | ENSRNOT00000084496 | 0.967792295  | 2.59E-07 |
| TUCP_001128 | XLOC_042601 | ENSRNOT00000049424 | -0.953891044 | 1.52E-06 |
| TUCP_001128 | XLOC_042601 | ENSRNOT00000002429 | -0.956031213 | 1.20E-06 |
| TUCP_001128 | XLOC_042601 | ENSRNOT00000007223 | -0.950772872 | 2.10E-06 |
| TUCP_001128 | XLOC_042601 | ENSRNOT00000079633 | -0.968186673 | 2.43E-07 |
| TUCP_001128 | XLOC_042601 | ENSRNOT00000010316 | -0.953001683 | 1.67E-06 |
| TUCP_003459 | XLOC_149631 | ENSRNOT00000076982 | 0.963532325  | 4.78E-07 |
| TUCP_001129 | XLOC_042604 | ENSRNOT00000061332 | 0.963850507  | 4.58E-07 |
| TUCP_001129 | XLOC_042604 | ENSRNOT00000026710 | -0.952891192 | 1.69E-06 |
| TUCP_001129 | XLOC_042604 | ENSRNOT00000006402 | -0.951566362 | 1.93E-06 |
| TUCP_001129 | XLOC_042604 | ENSRNOT00000025394 | 0.956991959  | 1.08E-06 |
| TUCP_001129 | XLOC_042604 | ENSRNOT00000079633 | -0.969428869 | 2.00E-07 |
| TUCP_001129 | XLOC_042604 | ENSRNOT00000067688 | -0.951490623 | 1.95E-06 |
| TUCP_001129 | XLOC_042604 | ENSRNOT00000022032 | 0.951895462  | 1.87E-06 |
| TUCP_001129 | XLOC_042604 | ENSRNOT00000012056 | 0.959171829  | 8.34E-07 |
| TUCP_001129 | XLOC_042604 | ENSRNOT00000059156 | -0.97329499  | 1.02E-07 |
| TUCP_001129 | XLOC_042604 | ENSRNOT00000016036 | 0.955313458  | 1.30E-06 |
| TUCP_001129 | XLOC_042604 | ENSRNOT00000064320 | 0.95068952   | 2.11E-06 |
| TUCP_001129 | XLOC_042604 | ENSRNOT00000021402 | 0.979552258  | 2.72E-08 |
| TUCP_001129 | XLOC_042604 | ENSRNOT00000021073 | -0.950135137 | 2.23E-06 |
| TUCP_001129 | XLOC_042604 | ENSRNOT00000005894 | 0.963937384  | 4.52E-07 |
| TUCP_001129 | XLOC_042604 | ENSRNOT00000025550 | -0.951022566 | 2.04E-06 |
| TUCP_001129 | XLOC_042604 | ENSRNOT00000077544 | 0.955796835  | 1.23E-06 |
| TUCP_001129 | XLOC_042604 | ENSRNOT00000031161 | 0.959898245  | 7.64E-07 |
| TUCP_001129 | XLOC_042604 | ENSRNOT00000028763 | -0.957253482 | 1.05E-06 |
| TUCP_001129 | XLOC_042604 | ENSRNOT00000086329 | 0.963832067  | 4.59E-07 |
| TUCP_001129 | XLOC_042604 | ENSRNOT00000014749 | 0.950185981  | 2.22E-06 |
| TUCP_001129 | XLOC_042604 | ENSRNOT00000075148 | -0.952335802 | 1.79E-06 |
| TUCP_001129 | XLOC_042604 | ENSRNOT00000008372 | 0.952342733  | 1.79E-06 |
| TUCP_001766 | XLOC_073075 | ENSRNOT00000003102 | 0.952498669  | 1.76E-06 |
| TUCP_001764 | XLOC_073075 | ENSRNOT00000047105 | 0.966401004  | 3.19E-07 |
| TUCP_001764 | XLOC_073075 | ENSRNOT00000001215 | 0.952855779  | 1.69E-06 |
| TUCP_001764 | XLOC_073075 | ENSRNOT00000036072 | 0.973327065  | 1.02E-07 |
| TUCP_001764 | XLOC_073075 | ENSRNOT00000031904 | 0.964792944  | 4.02E-07 |
| TUCP_001764 | XLOC_073075 | ENSRNOT00000082998 | 0.952776404  | 1.71E-06 |
| TUCP_001764 | XLOC_073075 | ENSRNOT00000003568 | 0.968855053  | 2.19E-07 |
| TUCP_001764 | XLOC_073075 | ENSRNOT00000015006 | 0.953891211  | 1.52E-06 |
| TUCP_001764 | XLOC_073075 | ENSRNOT00000007350 | 0.950386555  | 2.18E-06 |
| TUCP_001764 | XLOC_073075 | ENSRNOT00000013507 | 0.976968688  | 4.91E-08 |
| TUCP_001764 | XLOC_073075 | ENSRNOT00000083578 | 0.954259982  | 1.46E-06 |
| TUCP_001764 | XLOC_073075 | ENSRNOT00000021858 | 0.954356347  | 1.44E-06 |
| TUCP_001764 | XLOC_073075 | ENSRNOT00000001855 | 0.966137215  | 3.31E-07 |
| TUCP_001764 | XLOC_073075 | ENSRNOT00000023638 | 0.968294395  | 2.39E-07 |
| TUCP_001764 | XLOC_073075 | ENSRNOT00000001691 | 0.95197294   | 1.86E-06 |
| TUCP_001764 | XLOC_073075 | ENSRNOT00000072771 | 0.965146371  | 3.82E-07 |

|             |             |                    |             |          |
|-------------|-------------|--------------------|-------------|----------|
| TUCP_001764 | XLOC_073075 | ENSRNOT00000026643 | 0.953539569 | 1.58E-06 |
| TUCP_001764 | XLOC_073075 | ENSRNOT00000005220 | 0.961721048 | 6.07E-07 |
| TUCP_001764 | XLOC_073075 | ENSRNOT00000065947 | 0.954296475 | 1.45E-06 |
| TUCP_001764 | XLOC_073075 | ENSRNOT00000037699 | 0.962466159 | 5.51E-07 |
| TUCP_001764 | XLOC_073075 | ENSRNOT00000036054 | 0.950705149 | 2.11E-06 |
| TUCP_001764 | XLOC_073075 | ENSRNOT00000001118 | 0.969224413 | 2.06E-07 |
| TUCP_001764 | XLOC_073075 | ENSRNOT00000055683 | 0.960244186 | 7.32E-07 |
| TUCP_001764 | XLOC_073075 | ENSRNOT00000054674 | 0.95875694  | 8.77E-07 |
| TUCP_001764 | XLOC_073075 | ENSRNOT00000055582 | 0.969345222 | 2.02E-07 |
| TUCP_001764 | XLOC_073075 | ENSRNOT00000028561 | 0.955810139 | 1.23E-06 |
| TUCP_001764 | XLOC_073075 | ENSRNOT00000045926 | 0.958511343 | 9.03E-07 |
| TUCP_001764 | XLOC_073075 | ENSRNOT00000043345 | 0.974219776 | 8.59E-08 |
| TUCP_001764 | XLOC_073075 | ENSRNOT00000065076 | 0.973036248 | 1.07E-07 |
| TUCP_001764 | XLOC_073075 | ENSRNOT00000019213 | 0.957628342 | 1.00E-06 |
| TUCP_001764 | XLOC_073075 | ENSRNOT00000019820 | 0.956269722 | 1.17E-06 |
| TUCP_001764 | XLOC_073075 | ENSRNOT0000001507  | 0.95545486  | 1.28E-06 |
| TUCP_001764 | XLOC_073075 | ENSRNOT00000088125 | 0.955528212 | 1.27E-06 |
| TUCP_001764 | XLOC_073075 | ENSRNOT00000083568 | 0.966730981 | 3.04E-07 |
| TUCP_001764 | XLOC_073075 | ENSRNOT00000019923 | 0.950756264 | 2.10E-06 |
| TUCP_001764 | XLOC_073075 | ENSRNOT00000093174 | 0.959085712 | 8.43E-07 |
| TUCP_001764 | XLOC_073075 | ENSRNOT00000035989 | 0.960794475 | 6.83E-07 |
| TUCP_001764 | XLOC_073075 | ENSRNOT00000057160 | 0.971902315 | 1.32E-07 |
| TUCP_001764 | XLOC_073075 | ENSRNOT00000082699 | 0.95471495  | 1.39E-06 |
| TUCP_001764 | XLOC_073075 | ENSRNOT00000028847 | 0.955440445 | 1.28E-06 |
| TUCP_001764 | XLOC_073075 | ENSRNOT00000024402 | 0.970368346 | 1.71E-07 |
| TUCP_001764 | XLOC_073075 | ENSRNOT00000089933 | 0.958722436 | 8.80E-07 |
| TUCP_001764 | XLOC_073075 | ENSRNOT00000003641 | 0.962475456 | 5.50E-07 |
| TUCP_001764 | XLOC_073075 | ENSRNOT00000006680 | 0.95980028  | 7.73E-07 |
| TUCP_001764 | XLOC_073075 | ENSRNOT00000084012 | 0.959306257 | 8.21E-07 |
| TUCP_001764 | XLOC_073075 | ENSRNOT00000055187 | 0.956354209 | 1.16E-06 |
| TUCP_001764 | XLOC_073075 | ENSRNOT00000027232 | 0.965582386 | 3.59E-07 |
| TUCP_001764 | XLOC_073075 | ENSRNOT00000065045 | 0.95304816  | 1.66E-06 |
| TUCP_001764 | XLOC_073075 | ENSRNOT00000060696 | 0.952148538 | 1.82E-06 |
| TUCP_001764 | XLOC_073075 | ENSRNOT00000000048 | 0.957456561 | 1.02E-06 |
| TUCP_001764 | XLOC_073075 | ENSRNOT00000011429 | 0.950234852 | 2.21E-06 |
| TUCP_001764 | XLOC_073075 | ENSRNOT00000074156 | 0.967127544 | 2.86E-07 |
| TUCP_001764 | XLOC_073075 | ENSRNOT00000088054 | 0.966921358 | 2.95E-07 |
| TUCP_001764 | XLOC_073075 | ENSRNOT00000041044 | 0.969248162 | 2.06E-07 |
| TUCP_001764 | XLOC_073075 | ENSRNOT00000089928 | 0.962081273 | 5.79E-07 |
| TUCP_001764 | XLOC_073075 | ENSRNOT00000013747 | 0.959455936 | 8.06E-07 |
| TUCP_001764 | XLOC_073075 | ENSRNOT00000020885 | 0.956453192 | 1.15E-06 |
| TUCP_001764 | XLOC_073075 | ENSRNOT00000010541 | 0.969601155 | 1.94E-07 |
| TUCP_001764 | XLOC_073075 | ENSRNOT00000064802 | 0.952272011 | 1.80E-06 |
| TUCP_001764 | XLOC_073075 | ENSRNOT00000092741 | 0.982556932 | 1.24E-08 |
| TUCP_001764 | XLOC_073075 | ENSRNOT00000068033 | 0.951229495 | 2.00E-06 |
| TUCP_001764 | XLOC_073075 | ENSRNOT00000031384 | 0.967023727 | 2.91E-07 |
| TUCP_001764 | XLOC_073075 | ENSRNOT00000091909 | 0.971471024 | 1.42E-07 |
| TUCP_001764 | XLOC_073075 | ENSRNOT00000020147 | 0.950823983 | 2.08E-06 |
| TUCP_001764 | XLOC_073075 | ENSRNOT00000024352 | 0.969131026 | 2.10E-07 |
| TUCP_001764 | XLOC_073075 | ENSRNOT00000021729 | 0.958269601 | 9.29E-07 |
| TUCP_001764 | XLOC_073075 | ENSRNOT00000021925 | 0.95437421  | 1.44E-06 |



|             |             |                     |              |          |
|-------------|-------------|---------------------|--------------|----------|
| TUCP_001764 | XL0C_073075 | ENSRNOT00000003780  | 0.971553791  | 1.40E-07 |
| TUCP_001764 | XL0C_073075 | ENSRNOT00000078675  | 0.956265783  | 1.17E-06 |
| TUCP_001764 | XL0C_073075 | ENSRNOT00000025913  | -0.951280173 | 1.99E-06 |
| TUCP_001764 | XL0C_073075 | ENSRNOT00000013274  | 0.951230922  | 2.00E-06 |
| TUCP_001764 | XL0C_073075 | ENSRNOT00000011956  | 0.964609007  | 4.12E-07 |
| TUCP_001764 | XL0C_073075 | ENSRNOT000000081800 | 0.975162869  | 7.14E-08 |
| TUCP_001764 | XL0C_073075 | ENSRNOT00000022342  | 0.966498962  | 3.14E-07 |
| TUCP_001764 | XL0C_073075 | ENSRNOT00000027337  | 0.957895097  | 9.71E-07 |
| TUCP_001764 | XL0C_073075 | ENSRNOT000000086577 | 0.967904235  | 2.54E-07 |
| TUCP_001764 | XL0C_073075 | ENSRNOT000000078475 | 0.970423337  | 1.70E-07 |
| TUCP_001764 | XL0C_073075 | ENSRNOT00000023744  | 0.958056933  | 9.53E-07 |
| TUCP_001764 | XL0C_073075 | ENSRNOT00000048063  | 0.958055429  | 9.53E-07 |
| TUCP_001764 | XL0C_073075 | ENSRNOT00000016739  | 0.960120554  | 7.43E-07 |
| TUCP_001764 | XL0C_073075 | ENSRNOT000000065600 | 0.963975436  | 4.50E-07 |
| TUCP_001764 | XL0C_073075 | ENSRNOT00000009221  | 0.955985681  | 1.21E-06 |
| TUCP_001764 | XL0C_073075 | ENSRNOT00000074054  | 0.971557076  | 1.40E-07 |
| TUCP_001764 | XL0C_073075 | ENSRNOT00000079595  | 0.954288735  | 1.46E-06 |
| TUCP_001764 | XL0C_073075 | ENSRNOT00000079895  | 0.964191629  | 4.37E-07 |
| TUCP_001764 | XL0C_073075 | ENSRNOT00000076404  | 0.964548634  | 4.16E-07 |
| TUCP_001764 | XL0C_073075 | ENSRNOT00000025517  | 0.960906044  | 6.73E-07 |
| TUCP_001764 | XL0C_073075 | ENSRNOT00000020155  | 0.957201285  | 1.05E-06 |
| TUCP_001764 | XL0C_073075 | ENSRNOT000000088599 | 0.962743047  | 5.31E-07 |
| TUCP_001764 | XL0C_073075 | ENSRNOT000000081678 | 0.963345205  | 4.90E-07 |
| TUCP_001764 | XL0C_073075 | ENSRNOT00000045488  | 0.974586538  | 8.00E-08 |
| TUCP_001764 | XL0C_073075 | ENSRNOT00000039842  | 0.953896301  | 1.52E-06 |
| TUCP_001764 | XL0C_073075 | ENSRNOT000000081047 | 0.954053178  | 1.49E-06 |
| TUCP_001764 | XL0C_073075 | ENSRNOT00000017629  | 0.953068479  | 1.66E-06 |
| TUCP_001764 | XL0C_073075 | ENSRNOT00000026174  | 0.96356644   | 4.76E-07 |
| TUCP_001764 | XL0C_073075 | ENSRNOT00000013260  | 0.953260993  | 1.62E-06 |
| TUCP_001764 | XL0C_073075 | ENSRNOT000000031487 | 0.952436868  | 1.77E-06 |
| TUCP_001764 | XL0C_073075 | ENSRNOT00000005387  | 0.95257094   | 1.75E-06 |
| TUCP_001764 | XL0C_073075 | ENSRNOT00000005664  | 0.955882961  | 1.22E-06 |
| TUCP_001764 | XL0C_073075 | ENSRNOT00000004508  | 0.95021116   | 2.22E-06 |
| TUCP_001764 | XL0C_073075 | ENSRNOT00000027910  | 0.967945599  | 2.53E-07 |
| TUCP_001764 | XL0C_073075 | ENSRNOT00000021158  | 0.957063308  | 1.07E-06 |
| TUCP_001764 | XL0C_073075 | ENSRNOT00000040513  | 0.972617289  | 1.16E-07 |
| TUCP_001764 | XL0C_073075 | ENSRNOT00000004740  | 0.961880966  | 5.95E-07 |
| TUCP_001764 | XL0C_073075 | ENSRNOT00000020383  | 0.96699214   | 2.92E-07 |
| TUCP_001764 | XL0C_073075 | ENSRNOT00000000302  | 0.966776768  | 3.01E-07 |
| TUCP_001764 | XL0C_073075 | ENSRNOT00000037015  | 0.965355705  | 3.71E-07 |
| TUCP_001764 | XL0C_073075 | ENSRNOT00000079442  | 0.97128691   | 1.46E-07 |
| TUCP_001764 | XL0C_073075 | ENSRNOT00000003840  | 0.964330223  | 4.28E-07 |
| TUCP_001764 | XL0C_073075 | ENSRNOT00000090665  | 0.951225361  | 2.00E-06 |
| TUCP_001764 | XL0C_073075 | ENSRNOT000000088628 | 0.959250465  | 8.26E-07 |
| TUCP_001764 | XL0C_073075 | ENSRNOT00000073526  | 0.950155309  | 2.23E-06 |
| TUCP_001764 | XL0C_073075 | ENSRNOT00000000658  | 0.965497261  | 3.63E-07 |
| TUCP_001764 | XL0C_073075 | ENSRNOT00000016191  | 0.963064303  | 5.09E-07 |
| TUCP_001764 | XL0C_073075 | ENSRNOT000000089970 | 0.950002034  | 2.26E-06 |
| TUCP_001764 | XL0C_073075 | ENSRNOT000000080591 | 0.966601916  | 3.09E-07 |
| TUCP_001764 | XL0C_073075 | ENSRNOT00000005161  | 0.959777963  | 7.75E-07 |
| TUCP_001764 | XL0C_073075 | ENSRNOT00000083632  | -0.957398787 | 1.03E-06 |

|             |             |                     |             |          |
|-------------|-------------|---------------------|-------------|----------|
| TUCP_001764 | XL0C_073075 | ENSRNOT00000020673  | 0.954326418 | 1.45E-06 |
| TUCP_001764 | XL0C_073075 | ENSRNOT00000076729  | 0.95818075  | 9.39E-07 |
| TUCP_001764 | XL0C_073075 | ENSRNOT00000039232  | 0.955080556 | 1.34E-06 |
| TUCP_001764 | XL0C_073075 | ENSRNOT00000086122  | 0.965745667 | 3.51E-07 |
| TUCP_001764 | XL0C_073075 | ENSRNOT00000001783  | 0.956400772 | 1.15E-06 |
| TUCP_001764 | XL0C_073075 | ENSRNOT000000037790 | 0.973819974 | 9.27E-08 |
| TUCP_001764 | XL0C_073075 | ENSRNOT00000004999  | 0.951802182 | 1.89E-06 |
| TUCP_001764 | XL0C_073075 | ENSRNOT00000009122  | 0.969689386 | 1.91E-07 |
| TUCP_001764 | XL0C_073075 | ENSRNOT00000089418  | 0.964680809 | 4.08E-07 |
| TUCP_001764 | XL0C_073075 | ENSRNOT00000010367  | 0.96451066  | 4.18E-07 |
| TUCP_001764 | XL0C_073075 | ENSRNOT00000040393  | 0.965095721 | 3.85E-07 |
| TUCP_001764 | XL0C_073075 | ENSRNOT00000074177  | 0.960400712 | 7.17E-07 |
| TUCP_001764 | XL0C_073075 | ENSRNOT00000011926  | 0.959180649 | 8.33E-07 |
| TUCP_001764 | XL0C_073075 | ENSRNOT00000042799  | 0.950656494 | 2.12E-06 |
| TUCP_001764 | XL0C_073075 | ENSRNOT00000079866  | 0.952471363 | 1.76E-06 |
| TUCP_001764 | XL0C_073075 | ENSRNOT00000010992  | 0.951603413 | 1.93E-06 |
| TUCP_001764 | XL0C_073075 | ENSRNOT00000038647  | 0.955310399 | 1.30E-06 |
| TUCP_001764 | XL0C_073075 | ENSRNOT00000010853  | 0.964995607 | 3.90E-07 |
| TUCP_001764 | XL0C_073075 | ENSRNOT00000076669  | 0.950566625 | 2.14E-06 |
| TUCP_001764 | XL0C_073075 | ENSRNOT00000024224  | 0.966160915 | 3.30E-07 |
| TUCP_001764 | XL0C_073075 | ENSRNOT00000038807  | 0.979240559 | 2.93E-08 |
| TUCP_001764 | XL0C_073075 | ENSRNOT00000003102  | 0.970034489 | 1.81E-07 |
| TUCP_001764 | XL0C_073075 | ENSRNOT00000017761  | 0.965291613 | 3.74E-07 |
| TUCP_001764 | XL0C_073075 | ENSRNOT00000066024  | 0.957490712 | 1.02E-06 |
| TUCP_001764 | XL0C_073075 | ENSRNOT00000004570  | 0.959559367 | 7.96E-07 |
| TUCP_001764 | XL0C_073075 | ENSRNOT00000012736  | 0.971310463 | 1.46E-07 |
| TUCP_001764 | XL0C_073075 | ENSRNOT00000057537  | 0.953393242 | 1.60E-06 |
| TUCP_001764 | XL0C_073075 | ENSRNOT00000013758  | 0.978022883 | 3.89E-08 |
| TUCP_001764 | XL0C_073075 | ENSRNOT00000080928  | 0.962541245 | 5.45E-07 |
| TUCP_001764 | XL0C_073075 | ENSRNOT00000078306  | 0.968626421 | 2.27E-07 |
| TUCP_001764 | XL0C_073075 | ENSRNOT00000080695  | 0.962281894 | 5.64E-07 |
| TUCP_001764 | XL0C_073075 | ENSRNOT00000035890  | 0.963582658 | 4.75E-07 |
| TUCP_001764 | XL0C_073075 | ENSRNOT00000039341  | 0.964207673 | 4.36E-07 |
| TUCP_001764 | XL0C_073075 | ENSRNOT00000091205  | 0.951864985 | 1.88E-06 |
| TUCP_001764 | XL0C_073075 | ENSRNOT00000037679  | 0.957992411 | 9.60E-07 |
| TUCP_001764 | XL0C_073075 | ENSRNOT00000079464  | 0.968214659 | 2.42E-07 |
| TUCP_001764 | XL0C_073075 | ENSRNOT00000000120  | 0.950660628 | 2.12E-06 |
| TUCP_001764 | XL0C_073075 | ENSRNOT00000013632  | 0.953580757 | 1.57E-06 |
| TUCP_001764 | XL0C_073075 | ENSRNOT00000007369  | 0.981250285 | 1.77E-08 |
| TUCP_001764 | XL0C_073075 | ENSRNOT00000042125  | 0.950318295 | 2.19E-06 |
| TUCP_001764 | XL0C_073075 | ENSRNOT00000085466  | 0.951320908 | 1.98E-06 |
| TUCP_001764 | XL0C_073075 | ENSRNOT00000084049  | 0.958651318 | 8.88E-07 |
| TUCP_001764 | XL0C_073075 | ENSRNOT00000012528  | 0.955197752 | 1.32E-06 |
| TUCP_001764 | XL0C_073075 | ENSRNOT00000026941  | 0.981216782 | 1.78E-08 |
| TUCP_001764 | XL0C_073075 | ENSRNOT000000032244 | 0.979316619 | 2.88E-08 |
| TUCP_001764 | XL0C_073075 | ENSRNOT000000061100 | 0.953715109 | 1.55E-06 |
| TUCP_001764 | XL0C_073075 | ENSRNOT00000065529  | 0.966429144 | 3.17E-07 |
| TUCP_001764 | XL0C_073075 | ENSRNOT00000005381  | 0.959280024 | 8.23E-07 |
| TUCP_001764 | XL0C_073075 | ENSRNOT000000033975 | 0.960628832 | 6.97E-07 |
| TUCP_001764 | XL0C_073075 | ENSRNOT00000015092  | 0.965892329 | 3.43E-07 |
| TUCP_001764 | XL0C_073075 | ENSRNOT00000005144  | 0.964325093 | 4.29E-07 |

|             |             |                    |              |          |
|-------------|-------------|--------------------|--------------|----------|
| TUCP_001764 | XLOC_073075 | ENSRNOT00000011582 | 0.976919088  | 4.96E-08 |
| TUCP_001764 | XLOC_073075 | ENSRNOT00000088279 | 0.975826803  | 6.24E-08 |
| TUCP_001764 | XLOC_073075 | ENSRNOT00000065229 | 0.970572321  | 1.65E-07 |
| TUCP_001764 | XLOC_073075 | ENSRNOT00000011041 | 0.956384571  | 1.16E-06 |
| TUCP_001764 | XLOC_073075 | ENSRNOT00000021674 | 0.968593029  | 2.28E-07 |
| TUCP_001764 | XLOC_073075 | ENSRNOT00000047210 | 0.960837797  | 6.79E-07 |
| TUCP_001764 | XLOC_073075 | ENSRNOT00000008987 | -0.958869869 | 8.65E-07 |
| TUCP_001764 | XLOC_073075 | ENSRNOT00000090299 | 0.962720025  | 5.33E-07 |
| TUCP_001764 | XLOC_073075 | ENSRNOT00000052051 | 0.97642249   | 5.52E-08 |
| TUCP_001764 | XLOC_073075 | ENSRNOT00000005311 | 0.970653781  | 1.63E-07 |
| TUCP_001764 | XLOC_073075 | ENSRNOT00000004140 | 0.961837197  | 5.98E-07 |
| TUCP_001764 | XLOC_073075 | ENSRNOT00000046639 | 0.958470439  | 9.07E-07 |
| TUCP_001764 | XLOC_073075 | ENSRNOT00000015799 | 0.95112562   | 2.02E-06 |
| TUCP_001765 | XLOC_073075 | ENSRNOT00000025660 | -0.966277179 | 3.25E-07 |
| TUCP_001763 | XLOC_073063 | ENSRNOT00000012545 | 0.962280636  | 5.64E-07 |
| TUCP_001095 | XLOC_041636 | ENSRNOT00000024186 | 0.977178715  | 4.69E-08 |
| TUCP_001095 | XLOC_041636 | ENSRNOT00000074753 | 0.991353263  | 3.75E-10 |
| TUCP_001095 | XLOC_041636 | ENSRNOT00000041904 | 0.990752242  | 5.24E-10 |
| TUCP_001095 | XLOC_041636 | ENSRNOT00000083487 | 0.976907026  | 4.98E-08 |
| TUCP_001095 | XLOC_041636 | ENSRNOT00000077990 | 0.990752242  | 5.24E-10 |
| TUCP_001095 | XLOC_041636 | ENSRNOT00000038826 | 0.989651392  | 9.19E-10 |
| TUCP_001095 | XLOC_041636 | ENSRNOT00000037094 | 0.961599335  | 6.17E-07 |
| TUCP_001095 | XLOC_041636 | ENSRNOT00000046842 | 0.960600799  | 7.00E-07 |
| TUCP_001095 | XLOC_041636 | ENSRNOT00000037169 | 0.96782308   | 2.57E-07 |
| TUCP_001095 | XLOC_041636 | ENSRNOT00000021243 | 0.9888463    | 1.33E-09 |
| TUCP_001095 | XLOC_041636 | ENSRNOT00000060250 | 0.991671904  | 3.11E-10 |
| TUCP_001095 | XLOC_041636 | ENSRNOT00000091934 | 0.990752242  | 5.24E-10 |
| TUCP_001095 | XLOC_041636 | ENSRNOT00000086027 | 0.965314215  | 3.73E-07 |
| TUCP_001095 | XLOC_041636 | ENSRNOT00000046585 | 0.979990555  | 2.44E-08 |
| TUCP_001095 | XLOC_041636 | ENSRNOT00000080794 | 0.984365835  | 7.17E-09 |
| TUCP_001095 | XLOC_041636 | ENSRNOT00000014456 | 0.979115986  | 3.02E-08 |
| TUCP_001095 | XLOC_041636 | ENSRNOT00000031205 | 0.983780158  | 8.60E-09 |
| TUCP_001095 | XLOC_041636 | ENSRNOT00000044145 | 0.990752242  | 5.24E-10 |
| TUCP_001095 | XLOC_041636 | ENSRNOT00000088381 | 0.985600425  | 4.76E-09 |
| TUCP_001095 | XLOC_041636 | ENSRNOT00000011743 | 0.974788769  | 7.69E-08 |
| TUCP_001095 | XLOC_041636 | ENSRNOT00000089929 | 0.990752242  | 5.24E-10 |
| TUCP_001095 | XLOC_041636 | ENSRNOT00000088624 | 0.990752242  | 5.24E-10 |
| TUCP_001095 | XLOC_041636 | ENSRNOT00000085659 | 0.979406303  | 2.82E-08 |
| TUCP_001095 | XLOC_041636 | ENSRNOT00000015866 | 0.986752005  | 3.14E-09 |
| TUCP_001095 | XLOC_041636 | ENSRNOT00000078633 | 0.990752242  | 5.24E-10 |
| TUCP_001095 | XLOC_041636 | ENSRNOT00000024575 | 0.957797366  | 9.82E-07 |
| TUCP_001095 | XLOC_041636 | ENSRNOT00000034907 | 0.984050775  | 7.91E-09 |
| TUCP_001095 | XLOC_041636 | ENSRNOT00000051835 | 0.990752242  | 5.24E-10 |
| TUCP_001095 | XLOC_041636 | ENSRNOT00000009825 | 0.953037217  | 1.66E-06 |
| TUCP_001095 | XLOC_041636 | ENSRNOT00000079087 | 0.990752242  | 5.24E-10 |
| TUCP_001095 | XLOC_041636 | ENSRNOT00000037206 | 0.990752242  | 5.24E-10 |
| TUCP_001095 | XLOC_041636 | ENSRNOT00000061185 | 0.952261411  | 1.80E-06 |
| TUCP_001095 | XLOC_041636 | ENSRNOT00000083261 | 0.972672118  | 1.15E-07 |
| TUCP_001095 | XLOC_041636 | ENSRNOT00000080590 | 0.989926838  | 8.03E-10 |
| TUCP_001095 | XLOC_041636 | ENSRNOT00000027552 | 0.99070119   | 5.39E-10 |
| TUCP_001095 | XLOC_041636 | ENSRNOT00000077014 | 0.995543886  | 1.37E-11 |

|             |             |                    |             |          |
|-------------|-------------|--------------------|-------------|----------|
| TUCP_001095 | XLOC_041636 | ENSRNOT00000080453 | 0.990633816 | 5.59E-10 |
| TUCP_001095 | XLOC_041636 | ENSRNOT00000057729 | 0.988239727 | 1.74E-09 |
| TUCP_001095 | XLOC_041636 | ENSRNOT00000061284 | 0.957089791 | 1.07E-06 |
| TUCP_001095 | XLOC_041636 | ENSRNOT00000013423 | 0.970245235 | 1.75E-07 |
| TUCP_001095 | XLOC_041636 | ENSRNOT00000071884 | 0.960370038 | 7.20E-07 |
| TUCP_001095 | XLOC_041636 | ENSRNOT00000066839 | 0.983118661 | 1.05E-08 |
| TUCP_001095 | XLOC_041636 | ENSRNOT00000026316 | 0.956615    | 1.13E-06 |
| TUCP_001095 | XLOC_041636 | ENSRNOT00000078663 | 0.988161425 | 1.80E-09 |
| TUCP_001095 | XLOC_041636 | ENSRNOT00000064250 | 0.981867801 | 1.50E-08 |
| TUCP_001095 | XLOC_041636 | ENSRNOT00000021608 | 0.973540378 | 9.77E-08 |
| TUCP_001095 | XLOC_041636 | ENSRNOT00000029634 | 0.985045076 | 5.75E-09 |
| TUCP_001095 | XLOC_041636 | ENSRNOT00000093579 | 0.952558889 | 1.75E-06 |
| TUCP_001095 | XLOC_041636 | ENSRNOT00000065460 | 0.990752242 | 5.24E-10 |
| TUCP_001095 | XLOC_041636 | ENSRNOT00000003817 | 0.993618029 | 8.25E-11 |
| TUCP_001095 | XLOC_041636 | ENSRNOT00000016713 | 0.990752242 | 5.24E-10 |
| TUCP_001095 | XLOC_041636 | ENSRNOT00000079260 | 0.985941128 | 4.22E-09 |
| TUCP_001095 | XLOC_041636 | ENSRNOT00000039294 | 0.990752242 | 5.24E-10 |
| TUCP_001095 | XLOC_041636 | ENSRNOT00000026932 | 0.951152462 | 2.02E-06 |
| TUCP_000140 | XLOC_003977 | ENSRNOT00000081570 | 0.9604942   | 7.09E-07 |
| TUCP_000140 | XLOC_003977 | ENSRNOT00000091652 | 0.997284977 | 1.16E-12 |
| TUCP_000140 | XLOC_003977 | ENSRNOT00000036564 | 0.970421547 | 1.70E-07 |
| TUCP_000140 | XLOC_003977 | ENSRNOT00000000109 | 0.960478622 | 7.11E-07 |
| TUCP_000140 | XLOC_003977 | ENSRNOT00000080865 | 0.999294907 | 1.37E-15 |
| TUCP_000140 | XLOC_003977 | ENSRNOT00000073534 | 0.994181488 | 5.20E-11 |
| TUCP_000140 | XLOC_003977 | ENSRNOT00000012161 | 0.984294862 | 7.33E-09 |
| TUCP_000140 | XLOC_003977 | ENSRNOT00000078707 | 0.958143481 | 9.43E-07 |
| TUCP_000140 | XLOC_003977 | ENSRNOT00000087758 | 0.965511704 | 3.63E-07 |
| TUCP_000140 | XLOC_003977 | ENSRNOT00000049832 | 0.97200656  | 1.29E-07 |
| TUCP_000140 | XLOC_003977 | ENSRNOT00000093019 | 0.999294907 | 1.37E-15 |
| TUCP_000140 | XLOC_003977 | ENSRNOT00000024825 | 0.981681691 | 1.58E-08 |
| TUCP_000140 | XLOC_003977 | ENSRNOT00000059266 | 0.957931496 | 9.67E-07 |
| TUCP_000140 | XLOC_003977 | ENSRNOT00000072734 | 0.960940666 | 6.70E-07 |
| TUCP_000140 | XLOC_003977 | ENSRNOT00000085908 | 0.995628938 | 1.25E-11 |
| TUCP_000140 | XLOC_003977 | ENSRNOT00000046744 | 0.999294907 | 1.37E-15 |
| TUCP_000140 | XLOC_003977 | ENSRNOT00000076429 | 0.999294907 | 1.37E-15 |
| TUCP_000140 | XLOC_003977 | ENSRNOT00000084667 | 0.998767907 | 2.23E-14 |
| TUCP_000140 | XLOC_003977 | ENSRNOT00000055412 | 0.999294907 | 1.37E-15 |
| TUCP_000140 | XLOC_003977 | ENSRNOT00000093201 | 0.998835397 | 1.68E-14 |
| TUCP_000140 | XLOC_003977 | ENSRNOT00000072724 | 0.999294907 | 1.37E-15 |
| TUCP_000140 | XLOC_003977 | ENSRNOT00000090323 | 0.95373376  | 1.54E-06 |
| TUCP_000140 | XLOC_003977 | ENSRNOT00000082760 | 0.984978585 | 5.87E-09 |
| TUCP_000140 | XLOC_003977 | ENSRNOT00000066017 | 0.987875325 | 2.02E-09 |
| TUCP_000140 | XLOC_003977 | ENSRNOT00000073148 | 0.989454402 | 1.01E-09 |
| TUCP_000140 | XLOC_003977 | ENSRNOT00000077462 | 0.958371205 | 9.18E-07 |
| TUCP_000140 | XLOC_003977 | ENSRNOT00000084375 | 0.999294907 | 1.37E-15 |
| TUCP_000140 | XLOC_003977 | ENSRNOT00000085447 | 0.997089672 | 1.64E-12 |
| TUCP_000140 | XLOC_003977 | ENSRNOT0000006249  | 0.964341462 | 4.28E-07 |
| TUCP_000140 | XLOC_003977 | ENSRNOT00000087073 | 0.960159749 | 7.39E-07 |
| TUCP_000140 | XLOC_003977 | ENSRNOT00000042369 | 0.994313184 | 4.64E-11 |
| TUCP_000140 | XLOC_003977 | ENSRNOT00000086554 | 0.999294907 | 1.37E-15 |
| TUCP_000140 | XLOC_003977 | ENSRNOT00000054858 | 0.983891199 | 8.32E-09 |

|             |             |                     |              |          |
|-------------|-------------|---------------------|--------------|----------|
| TUCP_000140 | XLOC_003977 | ENSRNOT00000047921  | 0.999294907  | 1.37E-15 |
| TUCP_000140 | XLOC_003977 | ENSRNOT00000064261  | 0.999221037  | 2.26E-15 |
| TUCP_000140 | XLOC_003977 | ENSRNOT00000086660  | 0.999146208  | 3.57E-15 |
| TUCP_000140 | XLOC_003977 | ENSRNOT00000080933  | 0.969323247  | 2.03E-07 |
| TUCP_000140 | XLOC_003977 | ENSRNOT00000083977  | 0.999294907  | 1.37E-15 |
| TUCP_000140 | XLOC_003977 | ENSRNOT00000092933  | 0.999294907  | 1.37E-15 |
| TUCP_000140 | XLOC_003977 | ENSRNOT0000009061   | 0.963955349  | 4.51E-07 |
| TUCP_000140 | XLOC_003977 | ENSRNOT00000041281  | 0.985784995  | 4.46E-09 |
| TUCP_000142 | XLOC_003983 | ENSRNOT00000074472  | 0.971251183  | 1.47E-07 |
| TUCP_000145 | XLOC_003983 | ENSRNOT00000047207  | -0.976561691 | 5.36E-08 |
| TUCP_004543 | XLOC_200000 | ENSRNOT00000003451  | 0.956025491  | 1.20E-06 |
| TUCP_000147 | XLOC_003983 | ENSRNOT00000085599  | 0.979320407  | 2.88E-08 |
| TUCP_000147 | XLOC_003983 | ENSRNOT00000006689  | 0.971471285  | 1.42E-07 |
| TUCP_000147 | XLOC_003983 | ENSRNOT00000081534  | 0.957140429  | 1.06E-06 |
| TUCP_000147 | XLOC_003983 | ENSRNOT00000085301  | 0.975357829  | 6.87E-08 |
| TUCP_000147 | XLOC_003983 | ENSRNOT00000038729  | 0.979667473  | 2.65E-08 |
| TUCP_000147 | XLOC_003983 | ENSRNOT00000086385  | 0.979667473  | 2.65E-08 |
| TUCP_000147 | XLOC_003983 | ENSRNOT00000078561  | 0.960864419  | 6.77E-07 |
| TUCP_000147 | XLOC_003983 | ENSRNOT00000087613  | 0.979667473  | 2.65E-08 |
| TUCP_000147 | XLOC_003983 | ENSRNOT00000093689  | 0.991748863  | 2.97E-10 |
| TUCP_000147 | XLOC_003983 | ENSRNOT000000022441 | 0.950509288  | 2.15E-06 |
| TUCP_000147 | XLOC_003983 | ENSRNOT000000023062 | 0.979667473  | 2.65E-08 |
| TUCP_000147 | XLOC_003983 | ENSRNOT00000058834  | 0.979667473  | 2.65E-08 |
| TUCP_000147 | XLOC_003983 | ENSRNOT00000083624  | 0.961746328  | 6.05E-07 |
| TUCP_000147 | XLOC_003983 | ENSRNOT00000079420  | 0.979667473  | 2.65E-08 |
| TUCP_000147 | XLOC_003983 | ENSRNOT00000090761  | 0.979667473  | 2.65E-08 |
| TUCP_000147 | XLOC_003983 | ENSRNOT00000055923  | 0.979667473  | 2.65E-08 |
| TUCP_000147 | XLOC_003983 | ENSRNOT00000092416  | 0.960552595  | 7.04E-07 |
| TUCP_000147 | XLOC_003983 | ENSRNOT00000071930  | 0.979667473  | 2.65E-08 |
| TUCP_000147 | XLOC_003983 | ENSRNOT00000001996  | 0.985331134  | 5.22E-09 |
| TUCP_000147 | XLOC_003983 | ENSRNOT00000076756  | 0.979667473  | 2.65E-08 |
| TUCP_000147 | XLOC_003983 | ENSRNOT00000081527  | 0.978219391  | 3.72E-08 |
| TUCP_000147 | XLOC_003983 | ENSRNOT00000091663  | 0.972932782  | 1.09E-07 |
| TUCP_000147 | XLOC_003983 | ENSRNOT00000081780  | 0.979667473  | 2.65E-08 |
| TUCP_000147 | XLOC_003983 | ENSRNOT00000089114  | 0.979667473  | 2.65E-08 |
| TUCP_000147 | XLOC_003983 | ENSRNOT00000021609  | 0.951639923  | 1.92E-06 |
| TUCP_000147 | XLOC_003983 | ENSRNOT00000073316  | 0.979667473  | 2.65E-08 |
| TUCP_000147 | XLOC_003983 | ENSRNOT00000071663  | 0.979667473  | 2.65E-08 |
| TUCP_000147 | XLOC_003983 | ENSRNOT00000042860  | 0.979667473  | 2.65E-08 |
| TUCP_000147 | XLOC_003983 | ENSRNOT00000088421  | 0.979667473  | 2.65E-08 |
| TUCP_000147 | XLOC_003983 | ENSRNOT00000038898  | 0.979667473  | 2.65E-08 |
| TUCP_000147 | XLOC_003983 | ENSRNOT00000064936  | 0.961591653  | 6.17E-07 |
| TUCP_000147 | XLOC_003983 | ENSRNOT00000042777  | 0.966970584  | 2.93E-07 |
| TUCP_000147 | XLOC_003983 | ENSRNOT00000010029  | 0.979667473  | 2.65E-08 |
| TUCP_001769 | XLOC_073192 | ENSRNOT00000009068  | -0.954310854 | 1.45E-06 |
| TUCP_001160 | XLOC_043965 | ENSRNOT00000087199  | 0.959879449  | 7.65E-07 |
| TUCP_001160 | XLOC_043965 | ENSRNOT00000076072  | 0.955868862  | 1.22E-06 |
| TUCP_001160 | XLOC_043965 | ENSRNOT00000084374  | 0.973077588  | 1.06E-07 |
| TUCP_000026 | XLOC_000371 | ENSRNOT00000074972  | 0.95701719   | 1.07E-06 |
| TUCP_000026 | XLOC_000371 | ENSRNOT00000045285  | 0.955555871  | 1.27E-06 |
| TUCP_000026 | XLOC_000371 | ENSRNOT00000015786  | 0.980024332  | 2.42E-08 |

|             |             |                    |             |          |
|-------------|-------------|--------------------|-------------|----------|
| TUCP_000026 | XLOC_000371 | ENSRNOT00000085619 | 0.964515517 | 4.17E-07 |
| TUCP_000026 | XLOC_000371 | ENSRNOT00000080152 | 0.968618268 | 2.27E-07 |
| TUCP_000026 | XLOC_000371 | ENSRNOT00000093378 | 0.954132862 | 1.48E-06 |
| TUCP_000026 | XLOC_000371 | ENSRNOT00000088351 | 0.95351803  | 1.58E-06 |
| TUCP_000026 | XLOC_000371 | ENSRNOT00000075558 | 0.971775964 | 1.35E-07 |
| TUCP_000060 | XLOC_001127 | ENSRNOT00000082043 | 0.998965531 | 9.31E-15 |
| TUCP_000060 | XLOC_001127 | ENSRNOT00000090080 | 0.970514074 | 1.67E-07 |
| TUCP_000060 | XLOC_001127 | ENSRNOT00000068444 | 1           | 0        |
| TUCP_000060 | XLOC_001127 | ENSRNOT00000081370 | 0.999740797 | 9.21E-18 |
| TUCP_000060 | XLOC_001127 | ENSRNOT00000078645 | 0.989717078 | 8.90E-10 |
| TUCP_000060 | XLOC_001127 | ENSRNOT00000075987 | 0.987945283 | 1.96E-09 |
| TUCP_000060 | XLOC_001127 | ENSRNOT00000074990 | 1           | 0        |
| TUCP_000060 | XLOC_001127 | ENSRNOT00000087323 | 0.995029331 | 2.37E-11 |
| TUCP_000060 | XLOC_001127 | ENSRNOT00000074930 | 1           | 0        |
| TUCP_000060 | XLOC_001127 | ENSRNOT00000080575 | 0.999929267 | 1.39E-20 |
| TUCP_000060 | XLOC_001127 | ENSRNOT00000057761 | 0.982981445 | 1.09E-08 |
| TUCP_000060 | XLOC_001127 | ENSRNOT00000078369 | 0.993028032 | 1.28E-10 |
| TUCP_000060 | XLOC_001127 | ENSRNOT00000092982 | 1           | 1.33E-79 |
| TUCP_000060 | XLOC_001127 | ENSRNOT00000088367 | 1           | 0        |
| TUCP_000060 | XLOC_001127 | ENSRNOT00000061874 | 0.968405099 | 2.35E-07 |
| TUCP_000060 | XLOC_001127 | ENSRNOT00000077789 | 0.99346224  | 9.30E-11 |
| TUCP_000060 | XLOC_001127 | ENSRNOT00000081996 | 1           | 0        |
| TUCP_000060 | XLOC_001127 | ENSRNOT00000022280 | 0.982176915 | 1.37E-08 |
| TUCP_000060 | XLOC_001127 | ENSRNOT00000082058 | 1           | 0        |
| TUCP_000060 | XLOC_001127 | ENSRNOT00000088905 | 1           | 1.33E-79 |
| TUCP_000060 | XLOC_001127 | ENSRNOT00000086831 | 1           | 0        |
| TUCP_000060 | XLOC_001127 | ENSRNOT00000045099 | 1           | 4.25E-78 |
| TUCP_000060 | XLOC_001127 | ENSRNOT00000086745 | 0.978585655 | 3.42E-08 |
| TUCP_000060 | XLOC_001127 | ENSRNOT00000085849 | 0.988270765 | 1.71E-09 |
| TUCP_000060 | XLOC_001127 | ENSRNOT00000086397 | 0.957188178 | 1.05E-06 |
| TUCP_000060 | XLOC_001127 | ENSRNOT00000079606 | 0.960472013 | 7.11E-07 |
| TUCP_000060 | XLOC_001127 | ENSRNOT00000090207 | 0.953487741 | 1.59E-06 |
| TUCP_000060 | XLOC_001127 | ENSRNOT00000087025 | 1           | 1.33E-79 |
| TUCP_000060 | XLOC_001127 | ENSRNOT00000019853 | 1           | 0        |
| TUCP_000060 | XLOC_001127 | ENSRNOT00000073853 | 0.989715487 | 8.91E-10 |
| TUCP_000060 | XLOC_001127 | ENSRNOT00000065912 | 0.974234118 | 8.57E-08 |
| TUCP_000060 | XLOC_001127 | ENSRNOT00000073828 | 0.971647353 | 1.38E-07 |
| TUCP_000060 | XLOC_001127 | ENSRNOT00000078683 | 0.966682958 | 3.06E-07 |
| TUCP_000060 | XLOC_001127 | ENSRNOT00000093083 | 0.999140292 | 3.69E-15 |
| TUCP_000061 | XLOC_001127 | ENSRNOT00000024186 | 0.982998195 | 1.09E-08 |
| TUCP_000061 | XLOC_001127 | ENSRNOT00000074753 | 0.998140087 | 1.75E-13 |
| TUCP_000061 | XLOC_001127 | ENSRNOT00000004876 | 0.958352567 | 9.20E-07 |
| TUCP_000061 | XLOC_001127 | ENSRNOT00000041904 | 0.999971797 | 1.41E-22 |
| TUCP_000061 | XLOC_001127 | ENSRNOT00000083487 | 0.989618339 | 9.33E-10 |
| TUCP_000061 | XLOC_001127 | ENSRNOT00000077990 | 0.999971797 | 1.41E-22 |
| TUCP_000061 | XLOC_001127 | ENSRNOT00000038826 | 0.999817088 | 1.61E-18 |
| TUCP_000061 | XLOC_001127 | ENSRNOT00000046842 | 0.973445565 | 9.95E-08 |
| TUCP_000061 | XLOC_001127 | ENSRNOT00000037169 | 0.980912304 | 1.93E-08 |
| TUCP_000061 | XLOC_001127 | ENSRNOT00000021243 | 0.98727883  | 2.57E-09 |
| TUCP_000061 | XLOC_001127 | ENSRNOT00000060250 | 0.999897014 | 9.12E-20 |
| TUCP_000061 | XLOC_001127 | ENSRNOT00000091934 | 0.999971797 | 1.41E-22 |

|             |             |                    |              |          |
|-------------|-------------|--------------------|--------------|----------|
| TUCP_000061 | XLOC_001127 | ENSRNOT00000086027 | 0.950111114  | 2.24E-06 |
| TUCP_000061 | XLOC_001127 | ENSRNOT00000046585 | 0.982760783  | 1.16E-08 |
| TUCP_000061 | XLOC_001127 | ENSRNOT00000080794 | 0.991348163  | 3.76E-10 |
| TUCP_000061 | XLOC_001127 | ENSRNOT00000014456 | 0.991572604  | 3.30E-10 |
| TUCP_000061 | XLOC_001127 | ENSRNOT00000031205 | 0.991227704  | 4.03E-10 |
| TUCP_000061 | XLOC_001127 | ENSRNOT00000044145 | 0.999971797  | 1.41E-22 |
| TUCP_000061 | XLOC_001127 | ENSRNOT00000088381 | 0.98887436   | 1.32E-09 |
| TUCP_000061 | XLOC_001127 | ENSRNOT00000011743 | 0.986634743  | 3.28E-09 |
| TUCP_000061 | XLOC_001127 | ENSRNOT00000089929 | 0.999971797  | 1.41E-22 |
| TUCP_000061 | XLOC_001127 | ENSRNOT00000088624 | 0.999971797  | 1.41E-22 |
| TUCP_000061 | XLOC_001127 | ENSRNOT00000085659 | 0.989774276  | 8.66E-10 |
| TUCP_000061 | XLOC_001127 | ENSRNOT00000015866 | 0.993834094  | 6.95E-11 |
| TUCP_000061 | XLOC_001127 | ENSRNOT00000078633 | 0.999971797  | 1.41E-22 |
| TUCP_000061 | XLOC_001127 | ENSRNOT00000081085 | 0.951370214  | 1.97E-06 |
| TUCP_000061 | XLOC_001127 | ENSRNOT00000034907 | 0.995449693  | 1.52E-11 |
| TUCP_000061 | XLOC_001127 | ENSRNOT00000093230 | 0.957872822  | 9.73E-07 |
| TUCP_000061 | XLOC_001127 | ENSRNOT00000051835 | 0.999971797  | 1.41E-22 |
| TUCP_000061 | XLOC_001127 | ENSRNOT00000079087 | 0.999971797  | 1.41E-22 |
| TUCP_000061 | XLOC_001127 | ENSRNOT00000037206 | 0.999971797  | 1.41E-22 |
| TUCP_000061 | XLOC_001127 | ENSRNOT00000083261 | 0.97127158   | 1.47E-07 |
| TUCP_000061 | XLOC_001127 | ENSRNOT00000080590 | 0.999849838  | 6.01E-19 |
| TUCP_000061 | XLOC_001127 | ENSRNOT00000027552 | 0.9997504    | 7.63E-18 |
| TUCP_000061 | XLOC_001127 | ENSRNOT00000077014 | 0.994938388  | 2.59E-11 |
| TUCP_000061 | XLOC_001127 | ENSRNOT00000080453 | 0.999875672  | 2.34E-19 |
| TUCP_000061 | XLOC_001127 | ENSRNOT00000089057 | 0.969149445  | 2.09E-07 |
| TUCP_000061 | XLOC_001127 | ENSRNOT00000066839 | 0.991869489  | 2.76E-10 |
| TUCP_000061 | XLOC_001127 | ENSRNOT00000061284 | 0.956340043  | 1.16E-06 |
| TUCP_000061 | XLOC_001127 | ENSRNOT00000013423 | 0.959206181  | 8.31E-07 |
| TUCP_000061 | XLOC_001127 | ENSRNOT00000071884 | 0.974597687  | 7.98E-08 |
| TUCP_000061 | XLOC_001127 | ENSRNOT00000004128 | 0.961760812  | 6.04E-07 |
| TUCP_000061 | XLOC_001127 | ENSRNOT00000026316 | 0.964292796  | 4.31E-07 |
| TUCP_000061 | XLOC_001127 | ENSRNOT00000057729 | 0.999329645  | 1.06E-15 |
| TUCP_000061 | XLOC_001127 | ENSRNOT00000078663 | 0.97458591   | 8.00E-08 |
| TUCP_000061 | XLOC_001127 | ENSRNOT00000064250 | 0.98294352   | 1.10E-08 |
| TUCP_000061 | XLOC_001127 | ENSRNOT00000021608 | 0.965089533  | 3.85E-07 |
| TUCP_000061 | XLOC_001127 | ENSRNOT00000029634 | 0.996454638  | 4.39E-12 |
| TUCP_000061 | XLOC_001127 | ENSRNOT00000093579 | 0.957875879  | 9.73E-07 |
| TUCP_000061 | XLOC_001127 | ENSRNOT00000086349 | 0.957102227  | 1.06E-06 |
| TUCP_000061 | XLOC_001127 | ENSRNOT00000065460 | 0.999971797  | 1.41E-22 |
| TUCP_000061 | XLOC_001127 | ENSRNOT00000003817 | 0.996701445  | 3.06E-12 |
| TUCP_000061 | XLOC_001127 | ENSRNOT00000016713 | 0.999971797  | 1.41E-22 |
| TUCP_000061 | XLOC_001127 | ENSRNOT00000079260 | 0.99629926   | 5.43E-12 |
| TUCP_000061 | XLOC_001127 | ENSRNOT00000039294 | 0.999971797  | 1.41E-22 |
| TUCP_000061 | XLOC_001127 | ENSRNOT00000092913 | 0.952445786  | 1.77E-06 |
| TUCP_000066 | XLOC_001312 | ENSRNOT00000090142 | 0.961128467  | 6.55E-07 |
| TUCP_000067 | XLOC_001326 | ENSRNOT00000089177 | 0.971146438  | 1.50E-07 |
| TUCP_000064 | XLOC_001305 | ENSRNOT00000040509 | 0.954995035  | 1.35E-06 |
| TUCP_000064 | XLOC_001305 | ENSRNOT00000056068 | 0.950341217  | 2.19E-06 |
| TUCP_001168 | XLOC_044096 | ENSRNOT00000001638 | -0.953259544 | 1.62E-06 |
| TUCP_001168 | XLOC_044096 | ENSRNOT00000013191 | 0.95116984   | 2.01E-06 |
| TUCP_001168 | XLOC_044096 | ENSRNOT00000002727 | -0.964853198 | 3.98E-07 |

|             |             |                    |              |          |
|-------------|-------------|--------------------|--------------|----------|
| TUCP_001168 | XLOC_044096 | ENSRNOT00000055801 | -0.961478661 | 6.26E-07 |
| TUCP_001168 | XLOC_044096 | ENSRNOT00000066776 | 0.961447935  | 6.29E-07 |
| TUCP_004012 | XLOC_176114 | ENSRNOT00000085704 | 0.962176455  | 5.72E-07 |
| TUCP_004012 | XLOC_176114 | ENSRNOT00000078157 | 0.955780653  | 1.24E-06 |
| TUCP_004012 | XLOC_176114 | ENSRNOT00000092435 | 0.956738521  | 1.11E-06 |
| TUCP_004012 | XLOC_176114 | ENSRNOT00000023475 | 0.950616082  | 2.13E-06 |
| TUCP_004012 | XLOC_176114 | ENSRNOT00000083263 | 0.95354319   | 1.58E-06 |
| TUCP_004011 | XLOC_176057 | ENSRNOT00000012413 | 0.96079059   | 6.83E-07 |
| TUCP_004011 | XLOC_176057 | ENSRNOT00000082403 | -0.95363948  | 1.56E-06 |
| TUCP_001556 | XLOC_060268 | ENSRNOT00000088814 | 0.960514511  | 7.07E-07 |
| TUCP_001556 | XLOC_060268 | ENSRNOT00000005988 | 0.951615329  | 1.93E-06 |
| TUCP_001126 | XLOC_042600 | ENSRNOT00000061332 | 0.950439798  | 2.17E-06 |
| TUCP_001126 | XLOC_042600 | ENSRNOT00000026949 | -0.956082327 | 1.20E-06 |
| TUCP_001126 | XLOC_042600 | ENSRNOT00000025846 | -0.955464772 | 1.28E-06 |
| TUCP_001126 | XLOC_042600 | ENSRNOT00000021790 | 0.950752632  | 2.10E-06 |
| TUCP_001126 | XLOC_042600 | ENSRNOT00000007379 | 0.950538923  | 2.14E-06 |
| TUCP_001126 | XLOC_042600 | ENSRNOT00000026755 | 0.959983789  | 7.56E-07 |
| TUCP_001126 | XLOC_042600 | ENSRNOT00000048914 | 0.955857018  | 1.23E-06 |
| TUCP_001126 | XLOC_042600 | ENSRNOT00000025394 | 0.952827105  | 1.70E-06 |
| TUCP_001126 | XLOC_042600 | ENSRNOT00000079633 | -0.966935837 | 2.94E-07 |
| TUCP_001126 | XLOC_042600 | ENSRNOT00000057807 | -0.955830562 | 1.23E-06 |
| TUCP_001126 | XLOC_042600 | ENSRNOT00000022778 | -0.951444827 | 1.96E-06 |
| TUCP_001126 | XLOC_042600 | ENSRNOT00000067688 | -0.959913394 | 7.62E-07 |
| TUCP_001126 | XLOC_042600 | ENSRNOT00000025391 | 0.96345652   | 4.83E-07 |
| TUCP_001126 | XLOC_042600 | ENSRNOT00000005911 | 0.9607244    | 6.89E-07 |
| TUCP_001126 | XLOC_042600 | ENSRNOT00000073636 | 0.960254503  | 7.31E-07 |
| TUCP_001126 | XLOC_042600 | ENSRNOT00000025936 | -0.964473593 | 4.20E-07 |
| TUCP_001126 | XLOC_042600 | ENSRNOT00000012056 | 0.951439147  | 1.96E-06 |
| TUCP_001126 | XLOC_042600 | ENSRNOT00000009440 | -0.9723541   | 1.21E-07 |
| TUCP_001126 | XLOC_042600 | ENSRNOT00000059156 | -0.965049507 | 3.87E-07 |
| TUCP_001126 | XLOC_042600 | ENSRNOT00000016036 | 0.951054157  | 2.04E-06 |
| TUCP_001126 | XLOC_042600 | ENSRNOT00000070893 | 0.964472628  | 4.20E-07 |
| TUCP_001126 | XLOC_042600 | ENSRNOT00000021402 | 0.963732291  | 4.65E-07 |
| TUCP_001126 | XLOC_042600 | ENSRNOT00000024149 | 0.960180339  | 7.37E-07 |
| TUCP_001126 | XLOC_042600 | ENSRNOT00000006549 | -0.953360916 | 1.61E-06 |
| TUCP_001126 | XLOC_042600 | ENSRNOT00000008929 | 0.951161673  | 2.02E-06 |
| TUCP_001126 | XLOC_042600 | ENSRNOT00000011230 | 0.95708814   | 1.07E-06 |
| TUCP_001126 | XLOC_042600 | ENSRNOT00000021073 | -0.975998675 | 6.03E-08 |
| TUCP_001126 | XLOC_042600 | ENSRNOT00000085988 | 0.953939277  | 1.51E-06 |
| TUCP_001126 | XLOC_042600 | ENSRNOT00000025550 | -0.967336485 | 2.77E-07 |
| TUCP_001126 | XLOC_042600 | ENSRNOT00000019769 | -0.953190093 | 1.64E-06 |
| TUCP_001126 | XLOC_042600 | ENSRNOT00000070994 | -0.951393552 | 1.97E-06 |
| TUCP_001126 | XLOC_042600 | ENSRNOT0000007598  | 0.959438015  | 8.08E-07 |
| TUCP_001126 | XLOC_042600 | ENSRNOT00000028625 | -0.970224585 | 1.75E-07 |
| TUCP_001126 | XLOC_042600 | ENSRNOT00000025580 | -0.967635232 | 2.65E-07 |
| TUCP_001126 | XLOC_042600 | ENSRNOT00000007185 | -0.970945457 | 1.55E-07 |
| TUCP_001126 | XLOC_042600 | ENSRNOT00000026710 | -0.967870338 | 2.55E-07 |
| TUCP_001126 | XLOC_042600 | ENSRNOT00000026382 | 0.959662738  | 7.86E-07 |
| TUCP_001126 | XLOC_042600 | ENSRNOT00000003158 | -0.959485579 | 8.03E-07 |
| TUCP_001126 | XLOC_042600 | ENSRNOT00000060282 | 0.956800515  | 1.10E-06 |
| TUCP_001126 | XLOC_042600 | ENSRNOT00000020322 | 0.954410151  | 1.44E-06 |



|             |             |                    |              |          |
|-------------|-------------|--------------------|--------------|----------|
| TUCP_001126 | XLOC_042600 | ENSRNOT0000005228  | 0.958883968  | 8.64E-07 |
| TUCP_001126 | XLOC_042600 | ENSRNOT00000019157 | -0.955024998 | 1.34E-06 |
| TUCP_001126 | XLOC_042600 | ENSRNOT00000005942 | 0.952580989  | 1.74E-06 |
| TUCP_001126 | XLOC_042600 | ENSRNOT00000067181 | 0.95323643   | 1.63E-06 |
| TUCP_001126 | XLOC_042600 | ENSRNOT00000012463 | -0.9678372   | 2.57E-07 |
| TUCP_001126 | XLOC_042600 | ENSRNOT00000078639 | 0.97917498   | 2.98E-08 |
| TUCP_001126 | XLOC_042600 | ENSRNOT00000014261 | 0.955677614  | 1.25E-06 |
| TUCP_001126 | XLOC_042600 | ENSRNOT0000004274  | -0.971018497 | 1.53E-07 |
| TUCP_001126 | XLOC_042600 | ENSRNOT00000087725 | 0.970312728  | 1.73E-07 |
| TUCP_001126 | XLOC_042600 | ENSRNOT00000086812 | 0.952888585  | 1.69E-06 |
| TUCP_001126 | XLOC_042600 | ENSRNOT00000028646 | 0.956060801  | 1.20E-06 |
| TUCP_001126 | XLOC_042600 | ENSRNOT00000020437 | 0.95432276   | 1.45E-06 |
| TUCP_001126 | XLOC_042600 | ENSRNOT00000058116 | -0.95231631  | 1.79E-06 |
| TUCP_001126 | XLOC_042600 | ENSRNOT00000010898 | 0.951806765  | 1.89E-06 |
| TUCP_001126 | XLOC_042600 | ENSRNOT00000056608 | -0.959200949 | 8.31E-07 |
| TUCP_001126 | XLOC_042600 | ENSRNOT00000071493 | -0.956065234 | 1.20E-06 |
| TUCP_001126 | XLOC_042600 | ENSRNOT00000073971 | 0.95417862   | 1.47E-06 |
| TUCP_001126 | XLOC_042600 | ENSRNOT00000013301 | -0.960437153 | 7.14E-07 |
| TUCP_001126 | XLOC_042600 | ENSRNOT00000014738 | -0.964774402 | 4.03E-07 |
| TUCP_001126 | XLOC_042600 | ENSRNOT00000007002 | -0.96297283  | 5.15E-07 |
| TUCP_001126 | XLOC_042600 | ENSRNOT00000006900 | -0.95422963  | 1.46E-06 |
| TUCP_001126 | XLOC_042600 | ENSRNOT00000076611 | -0.951758455 | 1.90E-06 |
| TUCP_001126 | XLOC_042600 | ENSRNOT00000022947 | -0.974934078 | 7.47E-08 |
| TUCP_001126 | XLOC_042600 | ENSRNOT00000043953 | 0.955737383  | 1.24E-06 |
| TUCP_001126 | XLOC_042600 | ENSRNOT00000078589 | -0.953759191 | 1.54E-06 |
| TUCP_001126 | XLOC_042600 | ENSRNOT00000011682 | -0.981409237 | 1.70E-08 |
| TUCP_001126 | XLOC_042600 | ENSRNOT00000023326 | 0.963696624  | 4.67E-07 |
| TUCP_001126 | XLOC_042600 | ENSRNOT00000017422 | -0.953789502 | 1.54E-06 |
| TUCP_001126 | XLOC_042600 | ENSRNOT00000031568 | 0.958880809  | 8.64E-07 |
| TUCP_004015 | XLOC_176129 | ENSRNOT00000012170 | 0.955118637  | 1.33E-06 |
| TUCP_003531 | XLOC_153695 | ENSRNOT00000056652 | 0.952528881  | 1.75E-06 |
| TUCP_003531 | XLOC_153695 | ENSRNOT00000010689 | 0.956623795  | 1.12E-06 |
| TUCP_000719 | XLOC_026846 | ENSRNOT00000080794 | 0.955630978  | 1.26E-06 |
| TUCP_000719 | XLOC_026846 | ENSRNOT00000085380 | 0.96954416   | 1.96E-07 |
| TUCP_000719 | XLOC_026846 | ENSRNOT00000079260 | 0.967252994  | 2.81E-07 |
| TUCP_000719 | XLOC_026846 | ENSRNOT00000038826 | 0.950707916  | 2.11E-06 |
| TUCP_000719 | XLOC_026846 | ENSRNOT00000046842 | 0.991455372  | 3.54E-10 |
| TUCP_000719 | XLOC_026846 | ENSRNOT00000011743 | 0.984141567  | 7.69E-09 |
| TUCP_000719 | XLOC_026846 | ENSRNOT00000092913 | 0.9612321    | 6.46E-07 |
| TUCP_000719 | XLOC_026846 | ENSRNOT00000030327 | 0.969603811  | 1.94E-07 |
| TUCP_000719 | XLOC_026846 | ENSRNOT00000066839 | 0.96206062   | 5.81E-07 |
| TUCP_000330 | XLOC_010523 | ENSRNOT00000091652 | 0.975526982  | 6.64E-08 |
| TUCP_000330 | XLOC_010523 | ENSRNOT00000080865 | 0.979636237  | 2.67E-08 |
| TUCP_000330 | XLOC_010523 | ENSRNOT00000073534 | 0.97770061   | 4.18E-08 |
| TUCP_000330 | XLOC_010523 | ENSRNOT00000006249 | 0.977653219  | 4.23E-08 |
| TUCP_000330 | XLOC_010523 | ENSRNOT00000071825 | 0.961947056  | 5.89E-07 |
| TUCP_000330 | XLOC_010523 | ENSRNOT00000093019 | 0.979636237  | 2.67E-08 |
| TUCP_000330 | XLOC_010523 | ENSRNOT00000024825 | 0.951828007  | 1.88E-06 |
| TUCP_000330 | XLOC_010523 | ENSRNOT00000085908 | 0.971981242  | 1.30E-07 |
| TUCP_000330 | XLOC_010523 | ENSRNOT00000046744 | 0.979636237  | 2.67E-08 |
| TUCP_000330 | XLOC_010523 | ENSRNOT00000076429 | 0.979636237  | 2.67E-08 |

|             |             |                    |              |          |
|-------------|-------------|--------------------|--------------|----------|
| TUCP_000330 | XLOC_010523 | ENSRNOT00000084667 | 0.978297637  | 3.66E-08 |
| TUCP_000330 | XLOC_010523 | ENSRNOT00000055412 | 0.979636237  | 2.67E-08 |
| TUCP_000330 | XLOC_010523 | ENSRNOT00000093201 | 0.978478616  | 3.51E-08 |
| TUCP_000330 | XLOC_010523 | ENSRNOT00000072724 | 0.979636237  | 2.67E-08 |
| TUCP_000330 | XLOC_010523 | ENSRNOT00000066017 | 0.969773223  | 1.89E-07 |
| TUCP_000330 | XLOC_010523 | ENSRNOT00000082760 | 0.962895989  | 5.20E-07 |
| TUCP_000330 | XLOC_010523 | ENSRNOT00000073148 | 0.975913256  | 6.13E-08 |
| TUCP_000330 | XLOC_010523 | ENSRNOT00000054858 | 0.961727631  | 6.06E-07 |
| TUCP_000330 | XLOC_010523 | ENSRNOT00000084375 | 0.979636237  | 2.67E-08 |
| TUCP_000330 | XLOC_010523 | ENSRNOT00000012161 | 0.964578639  | 4.14E-07 |
| TUCP_000330 | XLOC_010523 | ENSRNOT00000042369 | 0.97193932   | 1.31E-07 |
| TUCP_000330 | XLOC_010523 | ENSRNOT00000086554 | 0.979636237  | 2.67E-08 |
| TUCP_000330 | XLOC_010523 | ENSRNOT00000047921 | 0.979636237  | 2.67E-08 |
| TUCP_000330 | XLOC_010523 | ENSRNOT00000064261 | 0.979340729  | 2.86E-08 |
| TUCP_000330 | XLOC_010523 | ENSRNOT00000086660 | 0.97705552   | 4.82E-08 |
| TUCP_000330 | XLOC_010523 | ENSRNOT00000083977 | 0.979636237  | 2.67E-08 |
| TUCP_000330 | XLOC_010523 | ENSRNOT00000092933 | 0.979636237  | 2.67E-08 |
| TUCP_000330 | XLOC_010523 | ENSRNOT00000085447 | 0.976144758  | 5.85E-08 |
| TUCP_000330 | XLOC_010523 | ENSRNOT00000041281 | 0.960510028  | 7.08E-07 |
| TUCP_003532 | XLOC_153788 | ENSRNOT00000076618 | 0.950333232  | 2.19E-06 |
| TUCP_003532 | XLOC_153788 | ENSRNOT00000078434 | 0.950115236  | 2.24E-06 |
| TUCP_003532 | XLOC_153788 | ENSRNOT00000040985 | 0.986858234  | 3.02E-09 |
| TUCP_003535 | XLOC_153831 | ENSRNOT00000026966 | 0.970322306  | 1.73E-07 |
| TUCP_003535 | XLOC_153831 | ENSRNOT00000068416 | 0.999999782  | 3.88E-33 |
| TUCP_003535 | XLOC_153831 | ENSRNOT00000086036 | 0.999958274  | 9.96E-22 |
| TUCP_003535 | XLOC_153831 | ENSRNOT00000026803 | 0.985046075  | 5.74E-09 |
| TUCP_003535 | XLOC_153831 | ENSRNOT00000047527 | 0.963071698  | 5.08E-07 |
| TUCP_003535 | XLOC_153831 | ENSRNOT00000042251 | 0.999344295  | 9.53E-16 |
| TUCP_003535 | XLOC_153831 | ENSRNOT00000002984 | 0.998397069  | 8.31E-14 |
| TUCP_003535 | XLOC_153831 | ENSRNOT00000083764 | 0.999541808  | 1.59E-16 |
| TUCP_003535 | XLOC_153831 | ENSRNOT00000076802 | 0.962695843  | 5.34E-07 |
| TUCP_003535 | XLOC_153831 | ENSRNOT00000092365 | 0.999161651  | 3.26E-15 |
| TUCP_003535 | XLOC_153831 | ENSRNOT00000079275 | 0.999901911  | 7.15E-20 |
| TUCP_003535 | XLOC_153831 | ENSRNOT00000066062 | -0.959706712 | 7.82E-07 |
| TUCP_003535 | XLOC_153831 | ENSRNOT00000045301 | 1            | 0        |
| TUCP_003535 | XLOC_153831 | ENSRNOT00000041186 | 0.999975782  | 6.56E-23 |
| TUCP_003535 | XLOC_153831 | ENSRNOT00000010092 | 0.977711778  | 4.17E-08 |
| TUCP_003535 | XLOC_153831 | ENSRNOT00000076182 | 1            | 0        |
| TUCP_003535 | XLOC_153831 | ENSRNOT00000087404 | 0.951157664  | 2.02E-06 |
| TUCP_003535 | XLOC_153831 | ENSRNOT00000052003 | 0.95837331   | 9.18E-07 |
| TUCP_003535 | XLOC_153831 | ENSRNOT00000081709 | 0.998485154  | 6.27E-14 |
| TUCP_003535 | XLOC_153831 | ENSRNOT00000005726 | 0.959610119  | 7.91E-07 |
| TUCP_003535 | XLOC_153831 | ENSRNOT00000014103 | 1            | 0        |
| TUCP_003535 | XLOC_153831 | ENSRNOT00000057433 | 0.964930601  | 3.94E-07 |
| TUCP_003535 | XLOC_153831 | ENSRNOT00000082289 | 0.998931566  | 1.09E-14 |
| TUCP_003535 | XLOC_153831 | ENSRNOT00000092516 | 0.957459323  | 1.02E-06 |
| TUCP_003535 | XLOC_153831 | ENSRNOT00000008898 | 0.990039768  | 7.59E-10 |
| TUCP_003535 | XLOC_153831 | ENSRNOT00000083493 | 0.995461232  | 1.51E-11 |
| TUCP_003535 | XLOC_153831 | ENSRNOT00000092563 | 0.987201084  | 2.65E-09 |
| TUCP_003535 | XLOC_153831 | ENSRNOT00000088893 | 1            | 0        |
| TUCP_003535 | XLOC_153831 | ENSRNOT00000076693 | 0.955029582  | 1.34E-06 |

|             |             |                    |             |          |
|-------------|-------------|--------------------|-------------|----------|
| TUCP_003535 | XLOC_153831 | ENSRNOT00000081014 | 1           | 0        |
| TUCP_003535 | XLOC_153831 | ENSRNOT00000067543 | 1           | 0        |
| TUCP_003535 | XLOC_153831 | ENSRNOT00000050968 | 0.996816433 | 2.56E-12 |
| TUCP_003535 | XLOC_153831 | ENSRNOT00000042201 | 0.960235595 | 7.32E-07 |
| TUCP_003535 | XLOC_153831 | ENSRNOT00000004373 | 0.957315473 | 1.04E-06 |
| TUCP_003535 | XLOC_153831 | ENSRNOT00000063929 | 1           | 0        |
| TUCP_003535 | XLOC_153831 | ENSRNOT00000057472 | 1           | 0        |
| TUCP_003535 | XLOC_153831 | ENSRNOT00000041617 | 0.952449765 | 1.77E-06 |
| TUCP_003535 | XLOC_153831 | ENSRNOT00000091763 | 0.986310385 | 3.70E-09 |
| TUCP_003535 | XLOC_153831 | ENSRNOT00000022200 | 0.998491303 | 6.14E-14 |
| TUCP_003535 | XLOC_153831 | ENSRNOT00000067379 | 0.997260967 | 1.21E-12 |
| TUCP_003535 | XLOC_153831 | ENSRNOT00000020786 | 0.976428448 | 5.51E-08 |
| TUCP_003535 | XLOC_153831 | ENSRNOT00000050543 | 0.999722223 | 1.30E-17 |
| TUCP_003535 | XLOC_153831 | ENSRNOT00000089306 | 0.999866649 | 3.32E-19 |
| TUCP_003535 | XLOC_153831 | ENSRNOT00000052367 | 0.997268394 | 1.19E-12 |
| TUCP_003535 | XLOC_153831 | ENSRNOT00000090658 | 1           | 0        |
| TUCP_003535 | XLOC_153831 | ENSRNOT00000022571 | 0.995290013 | 1.81E-11 |
| TUCP_003535 | XLOC_153831 | ENSRNOT00000044520 | 0.981817158 | 1.52E-08 |
| TUCP_003535 | XLOC_153831 | ENSRNOT00000065448 | 0.963648868 | 4.70E-07 |
| TUCP_003267 | XLOC_139917 | ENSRNOT00000006747 | 0.991343919 | 3.77E-10 |
| TUCP_003267 | XLOC_139917 | ENSRNOT00000027525 | 0.954092562 | 1.49E-06 |
| TUCP_003267 | XLOC_139917 | ENSRNOT00000029526 | 0.951683703 | 1.91E-06 |
| TUCP_003267 | XLOC_139917 | ENSRNOT00000082618 | 0.954258524 | 1.46E-06 |
| TUCP_003267 | XLOC_139917 | ENSRNOT00000033123 | 0.965671727 | 3.54E-07 |
| TUCP_003267 | XLOC_139917 | ENSRNOT00000012454 | 0.951921822 | 1.87E-06 |
| TUCP_003267 | XLOC_139917 | ENSRNOT00000012985 | 0.950824936 | 2.08E-06 |
| TUCP_003267 | XLOC_139917 | ENSRNOT00000000434 | 0.956794525 | 1.10E-06 |
| TUCP_003267 | XLOC_139917 | ENSRNOT00000016797 | 0.972813128 | 1.12E-07 |
| TUCP_003267 | XLOC_139917 | ENSRNOT00000005070 | 0.951100781 | 2.03E-06 |
| TUCP_003267 | XLOC_139917 | ENSRNOT00000041187 | 0.966831954 | 2.99E-07 |
| TUCP_003267 | XLOC_139917 | ENSRNOT00000033784 | 0.958678795 | 8.85E-07 |
| TUCP_003267 | XLOC_139917 | ENSRNOT00000017532 | 0.965820038 | 3.47E-07 |
| TUCP_003267 | XLOC_139917 | ENSRNOT00000029266 | 0.961936347 | 5.90E-07 |
| TUCP_003267 | XLOC_139917 | ENSRNOT00000088481 | 0.965962727 | 3.40E-07 |
| TUCP_003267 | XLOC_139917 | ENSRNOT00000021946 | 0.964424938 | 4.23E-07 |
| TUCP_003267 | XLOC_139917 | ENSRNOT00000072387 | 0.952193175 | 1.81E-06 |
| TUCP_003267 | XLOC_139917 | ENSRNOT00000039794 | 0.960155482 | 7.40E-07 |
| TUCP_003267 | XLOC_139917 | ENSRNOT00000036151 | 0.958303286 | 9.25E-07 |
| TUCP_003267 | XLOC_139917 | ENSRNOT00000065721 | 0.951231387 | 2.00E-06 |
| TUCP_003267 | XLOC_139917 | ENSRNOT00000076451 | 0.965626277 | 3.57E-07 |
| TUCP_003267 | XLOC_139917 | ENSRNOT00000038589 | 0.968776168 | 2.22E-07 |
| TUCP_003537 | XLOC_154041 | ENSRNOT00000000008 | 1           | 0        |
| TUCP_003537 | XLOC_154041 | ENSRNOT00000060048 | 0.998711457 | 2.79E-14 |
| TUCP_003537 | XLOC_154041 | ENSRNOT00000082304 | 0.996875989 | 2.33E-12 |
| TUCP_003537 | XLOC_154041 | ENSRNOT00000006219 | 1           | 1.33E-79 |
| TUCP_003537 | XLOC_154041 | ENSRNOT00000065376 | 1           | 0        |
| TUCP_003537 | XLOC_154041 | ENSRNOT00000081433 | 0.984469223 | 6.93E-09 |
| TUCP_003537 | XLOC_154041 | ENSRNOT00000083575 | 1           | 1.33E-79 |
| TUCP_003537 | XLOC_154041 | ENSRNOT00000087739 | 1           | 0        |
| TUCP_003537 | XLOC_154041 | ENSRNOT00000079826 | 1           | 0        |
| TUCP_003537 | XLOC_154041 | ENSRNOT00000025770 | 0.993828251 | 6.98E-11 |

|             |             |                    |              |          |
|-------------|-------------|--------------------|--------------|----------|
| TUCP_003537 | XLOC_154041 | ENSRNOT00000088244 | 0.973479481  | 9.88E-08 |
| TUCP_003537 | XLOC_154041 | ENSRNOT00000048523 | 1            | 0        |
| TUCP_003537 | XLOC_154041 | ENSRNOT00000079365 | 0.958936699  | 8.58E-07 |
| TUCP_003537 | XLOC_154041 | ENSRNOT00000020229 | 0.960002785  | 7.54E-07 |
| TUCP_003537 | XLOC_154041 | ENSRNOT00000026428 | 0.996986683  | 1.95E-12 |
| TUCP_003537 | XLOC_154041 | ENSRNOT00000085673 | 1            | 0        |
| TUCP_003537 | XLOC_154041 | ENSRNOT00000072972 | 0.981476166  | 1.67E-08 |
| TUCP_003537 | XLOC_154041 | ENSRNOT00000050573 | 1            | 0        |
| TUCP_003537 | XLOC_154041 | ENSRNOT00000089876 | -0.953630353 | 1.56E-06 |
| TUCP_003537 | XLOC_154041 | ENSRNOT00000074378 | 0.998901807  | 1.26E-14 |
| TUCP_003537 | XLOC_154041 | ENSRNOT00000093571 | 1            | 0        |
| TUCP_003537 | XLOC_154041 | ENSRNOT00000090581 | 1            | 0        |
| TUCP_003537 | XLOC_154041 | ENSRNOT00000076239 | 0.98020752   | 2.31E-08 |
| TUCP_003537 | XLOC_154041 | ENSRNOT00000065485 | 1            | 0        |
| TUCP_003537 | XLOC_154041 | ENSRNOT00000006356 | 0.999544279  | 1.55E-16 |
| TUCP_003537 | XLOC_154041 | ENSRNOT00000087199 | 0.974421555  | 8.26E-08 |
| TUCP_003537 | XLOC_154041 | ENSRNOT00000022091 | 1            | 0        |
| TUCP_003537 | XLOC_154041 | ENSRNOT00000064764 | 0.98460888   | 6.63E-09 |
| TUCP_003537 | XLOC_154041 | ENSRNOT00000076927 | 0.971163156  | 1.50E-07 |
| TUCP_003537 | XLOC_154041 | ENSRNOT00000092395 | 0.999522978  | 1.94E-16 |
| TUCP_003853 | XLOC_168994 | ENSRNOT00000014701 | 0.953588032  | 1.57E-06 |
| TUCP_003853 | XLOC_168994 | ENSRNOT00000003177 | 0.960583688  | 7.01E-07 |
| TUCP_003853 | XLOC_168994 | ENSRNOT00000025319 | 0.953442848  | 1.59E-06 |
| TUCP_003853 | XLOC_168994 | ENSRNOT00000018990 | 0.954846565  | 1.37E-06 |
| TUCP_003853 | XLOC_168994 | ENSRNOT00000014979 | 0.955904122  | 1.22E-06 |
| TUCP_003853 | XLOC_168994 | ENSRNOT00000025223 | 0.964962463  | 3.92E-07 |
| TUCP_003853 | XLOC_168994 | ENSRNOT00000071273 | 0.95604796   | 1.20E-06 |
| TUCP_003853 | XLOC_168994 | ENSRNOT00000024012 | -0.955272928 | 1.31E-06 |
| TUCP_001780 | XLOC_073517 | ENSRNOT00000020182 | 0.952532635  | 1.75E-06 |
| TUCP_000022 | XLOC_000371 | ENSRNOT00000029125 | 0.958313118  | 9.24E-07 |
| TUCP_000022 | XLOC_000371 | ENSRNOT00000074972 | 0.953724876  | 1.55E-06 |
| TUCP_000022 | XLOC_000371 | ENSRNOT00000045285 | 0.973054682  | 1.07E-07 |
| TUCP_000022 | XLOC_000371 | ENSRNOT00000023989 | 0.955684541  | 1.25E-06 |
| TUCP_000022 | XLOC_000371 | ENSRNOT00000081246 | 0.953908146  | 1.52E-06 |
| TUCP_000022 | XLOC_000371 | ENSRNOT00000080768 | 0.957350537  | 1.03E-06 |
| TUCP_000022 | XLOC_000371 | ENSRNOT00000073526 | 0.955855657  | 1.23E-06 |
| TUCP_000022 | XLOC_000371 | ENSRNOT00000057361 | 0.958764116  | 8.76E-07 |
| TUCP_000022 | XLOC_000371 | ENSRNOT00000081981 | 0.960052339  | 7.49E-07 |
| TUCP_000022 | XLOC_000371 | ENSRNOT00000046745 | 0.955094893  | 1.33E-06 |
| TUCP_000022 | XLOC_000371 | ENSRNOT00000005958 | 0.952167284  | 1.82E-06 |
| TUCP_000022 | XLOC_000371 | ENSRNOT00000065529 | 0.950210926  | 2.22E-06 |
| TUCP_000022 | XLOC_000371 | ENSRNOT00000025223 | 0.953056096  | 1.66E-06 |
| TUCP_000022 | XLOC_000371 | ENSRNOT00000015799 | 0.954331931  | 1.45E-06 |
| TUCP_000022 | XLOC_000371 | ENSRNOT00000075558 | 0.953226162  | 1.63E-06 |
| TUCP_001840 | XLOC_075760 | ENSRNOT00000090923 | 0.961564612  | 6.19E-07 |
| TUCP_001840 | XLOC_075760 | ENSRNOT00000076508 | -0.966814233 | 3.00E-07 |
| TUCP_001840 | XLOC_075760 | ENSRNOT00000004888 | 0.955621242  | 1.26E-06 |
| TUCP_000713 | XLOC_026809 | ENSRNOT00000085599 | 0.999938502  | 6.93E-21 |
| TUCP_000713 | XLOC_026809 | ENSRNOT00000006689 | 0.9944189    | 4.22E-11 |
| TUCP_000713 | XLOC_026809 | ENSRNOT00000081534 | 0.987999291  | 1.92E-09 |
| TUCP_000713 | XLOC_026809 | ENSRNOT00000085301 | 0.99793679   | 2.93E-13 |

|             |             |                    |             |          |
|-------------|-------------|--------------------|-------------|----------|
| TUCP_000713 | XLOC_026809 | ENSRNOT00000038729 | 1           | 0        |
| TUCP_000713 | XLOC_026809 | ENSRNOT00000086385 | 1           | 0        |
| TUCP_000713 | XLOC_026809 | ENSRNOT00000077695 | 0.96038616  | 7.19E-07 |
| TUCP_000713 | XLOC_026809 | ENSRNOT00000078561 | 0.986503348 | 3.45E-09 |
| TUCP_000713 | XLOC_026809 | ENSRNOT00000087613 | 1           | 0        |
| TUCP_000713 | XLOC_026809 | ENSRNOT00000026032 | 0.953050675 | 1.66E-06 |
| TUCP_000713 | XLOC_026809 | ENSRNOT00000073350 | 0.9658754   | 3.44E-07 |
| TUCP_000713 | XLOC_026809 | ENSRNOT00000023062 | 1           | 0        |
| TUCP_000713 | XLOC_026809 | ENSRNOT00000058834 | 1           | 0        |
| TUCP_000713 | XLOC_026809 | ENSRNOT00000079420 | 1           | 0        |
| TUCP_000713 | XLOC_026809 | ENSRNOT00000090761 | 1           | 0        |
| TUCP_000713 | XLOC_026809 | ENSRNOT00000055923 | 1           | 0        |
| TUCP_000713 | XLOC_026809 | ENSRNOT00000092416 | 0.963085379 | 5.07E-07 |
| TUCP_000713 | XLOC_026809 | ENSRNOT00000071930 | 1           | 0        |
| TUCP_000713 | XLOC_026809 | ENSRNOT00000001996 | 0.974721715 | 7.79E-08 |
| TUCP_000713 | XLOC_026809 | ENSRNOT00000076756 | 1           | 0        |
| TUCP_000713 | XLOC_026809 | ENSRNOT00000081527 | 0.999420479 | 5.14E-16 |
| TUCP_000713 | XLOC_026809 | ENSRNOT00000085067 | 0.960262084 | 7.30E-07 |
| TUCP_000713 | XLOC_026809 | ENSRNOT00000091663 | 0.99642667  | 4.56E-12 |
| TUCP_000713 | XLOC_026809 | ENSRNOT00000081780 | 1           | 0        |
| TUCP_000713 | XLOC_026809 | ENSRNOT00000093689 | 0.953599805 | 1.57E-06 |
| TUCP_000713 | XLOC_026809 | ENSRNOT00000089114 | 1           | 0        |
| TUCP_000713 | XLOC_026809 | ENSRNOT00000021609 | 0.977017895 | 4.86E-08 |
| TUCP_000713 | XLOC_026809 | ENSRNOT00000073316 | 1           | 0        |
| TUCP_000713 | XLOC_026809 | ENSRNOT00000086557 | 0.977413455 | 4.46E-08 |
| TUCP_000713 | XLOC_026809 | ENSRNOT00000071663 | 1           | 0        |
| TUCP_000713 | XLOC_026809 | ENSRNOT00000042860 | 1           | 0        |
| TUCP_000713 | XLOC_026809 | ENSRNOT00000072962 | 0.971287317 | 1.46E-07 |
| TUCP_000713 | XLOC_026809 | ENSRNOT00000088421 | 1           | 0        |
| TUCP_000713 | XLOC_026809 | ENSRNOT00000038898 | 1           | 0        |
| TUCP_000713 | XLOC_026809 | ENSRNOT00000015840 | 0.959452012 | 8.06E-07 |
| TUCP_000713 | XLOC_026809 | ENSRNOT00000064936 | 0.985957557 | 4.20E-09 |
| TUCP_000713 | XLOC_026809 | ENSRNOT00000042777 | 0.990642579 | 5.56E-10 |
| TUCP_000713 | XLOC_026809 | ENSRNOT00000010029 | 1           | 0        |
| TUCP_000714 | XLOC_026809 | ENSRNOT00000088111 | 0.961240166 | 6.45E-07 |
| TUCP_000714 | XLOC_026809 | ENSRNOT00000042201 | 0.96550014  | 3.63E-07 |
| TUCP_000714 | XLOC_026809 | ENSRNOT00000085875 | 0.953850862 | 1.53E-06 |
| TUCP_000714 | XLOC_026809 | ENSRNOT00000078372 | 0.964255625 | 4.33E-07 |
| TUCP_001785 | XLOC_073522 | ENSRNOT00000011263 | 0.959415853 | 8.10E-07 |
| TUCP_001785 | XLOC_073522 | ENSRNOT00000078221 | 0.9641202   | 4.41E-07 |
| TUCP_001785 | XLOC_073522 | ENSRNOT00000022724 | 0.960497596 | 7.09E-07 |
| TUCP_001785 | XLOC_073522 | ENSRNOT00000026303 | 0.960600254 | 7.00E-07 |
| TUCP_001785 | XLOC_073522 | ENSRNOT00000080851 | 0.964958525 | 3.92E-07 |
| TUCP_001785 | XLOC_073522 | ENSRNOT00000086899 | 0.969396892 | 2.01E-07 |
| TUCP_001785 | XLOC_073522 | ENSRNOT00000067677 | 0.972287657 | 1.23E-07 |
| TUCP_001785 | XLOC_073522 | ENSRNOT00000022734 | 0.954378472 | 1.44E-06 |
| TUCP_001785 | XLOC_073522 | ENSRNOT00000049732 | 0.95951572  | 8.00E-07 |
| TUCP_001785 | XLOC_073522 | ENSRNOT00000092125 | 0.968971892 | 2.15E-07 |
| TUCP_001785 | XLOC_073522 | ENSRNOT00000046313 | 0.962288789 | 5.64E-07 |
| TUCP_001785 | XLOC_073522 | ENSRNOT00000088151 | 0.963859808 | 4.57E-07 |
| TUCP_001785 | XLOC_073522 | ENSRNOT00000023152 | 0.961868981 | 5.95E-07 |

|             |             |                    |              |          |
|-------------|-------------|--------------------|--------------|----------|
| TUCP_001785 | XLOC_073522 | ENSRNOT00000017042 | 0.957970327  | 9.62E-07 |
| TUCP_001628 | XLOC_064650 | ENSRNOT00000093579 | 0.965531773  | 3.62E-07 |
| TUCP_001628 | XLOC_064650 | ENSRNOT00000040509 | 0.966796296  | 3.01E-07 |
| TUCP_001628 | XLOC_064650 | ENSRNOT00000012170 | 0.978147942  | 3.78E-08 |
| TUCP_001628 | XLOC_064650 | ENSRNOT00000002220 | 0.962652117  | 5.37E-07 |
| TUCP_001628 | XLOC_064650 | ENSRNOT00000020329 | 0.970817869  | 1.59E-07 |
| TUCP_002323 | XLOC_096958 | ENSRNOT00000060476 | 0.962335373  | 5.60E-07 |
| TUCP_002322 | XLOC_096920 | ENSRNOT00000008447 | 0.958441069  | 9.10E-07 |
| TUCP_002320 | XLOC_096888 | ENSRNOT00000034969 | 0.988636972  | 1.46E-09 |
| TUCP_002327 | XLOC_097103 | ENSRNOT00000012170 | 0.954443655  | 1.43E-06 |
| TUCP_002327 | XLOC_097103 | ENSRNOT00000002220 | 0.95445987   | 1.43E-06 |
| TUCP_002327 | XLOC_097103 | ENSRNOT00000029531 | -0.960049935 | 7.49E-07 |
| TUCP_002327 | XLOC_097103 | ENSRNOT00000020329 | 0.963014994  | 5.12E-07 |
| TUCP_002325 | XLOC_097051 | ENSRNOT00000084133 | 0.96804616   | 2.49E-07 |
| TUCP_002325 | XLOC_097051 | ENSRNOT00000065542 | 0.974589637  | 8.00E-08 |
| TUCP_002325 | XLOC_097051 | ENSRNOT00000082464 | 0.96804616   | 2.49E-07 |
| TUCP_002325 | XLOC_097051 | ENSRNOT00000087659 | 0.96804616   | 2.49E-07 |
| TUCP_002325 | XLOC_097051 | ENSRNOT00000085078 | 0.96804616   | 2.49E-07 |
| TUCP_002325 | XLOC_097051 | ENSRNOT00000014028 | 0.96804616   | 2.49E-07 |
| TUCP_002325 | XLOC_097051 | ENSRNOT00000086400 | 0.976653903  | 5.25E-08 |
| TUCP_002325 | XLOC_097051 | ENSRNOT00000010216 | 0.983992978  | 8.06E-09 |
| TUCP_002325 | XLOC_097051 | ENSRNOT00000049363 | 0.96804616   | 2.49E-07 |
| TUCP_002325 | XLOC_097051 | ENSRNOT00000065473 | 0.967700359  | 2.62E-07 |
| TUCP_002325 | XLOC_097051 | ENSRNOT00000065658 | 0.957970065  | 9.62E-07 |
| TUCP_002325 | XLOC_097051 | ENSRNOT00000000142 | 0.968685666  | 2.25E-07 |
| TUCP_002325 | XLOC_097051 | ENSRNOT00000082288 | 0.967952254  | 2.52E-07 |
| TUCP_002325 | XLOC_097051 | ENSRNOT00000039664 | 0.96804616   | 2.49E-07 |
| TUCP_002325 | XLOC_097051 | ENSRNOT00000065402 | 0.96804616   | 2.49E-07 |
| TUCP_002325 | XLOC_097051 | ENSRNOT00000044428 | 0.995171821  | 2.05E-11 |
| TUCP_002325 | XLOC_097051 | ENSRNOT00000044931 | 0.9651015    | 3.84E-07 |
| TUCP_002325 | XLOC_097051 | ENSRNOT00000084141 | 0.96804616   | 2.49E-07 |
| TUCP_002325 | XLOC_097051 | ENSRNOT00000082435 | 0.96804616   | 2.49E-07 |
| TUCP_002325 | XLOC_097051 | ENSRNOT00000082928 | 0.962738971  | 5.31E-07 |
| TUCP_002325 | XLOC_097051 | ENSRNOT00000046013 | 0.967354395  | 2.76E-07 |
| TUCP_002325 | XLOC_097051 | ENSRNOT00000086425 | 0.952166133  | 1.82E-06 |
| TUCP_002325 | XLOC_097051 | ENSRNOT00000014030 | 0.96804616   | 2.49E-07 |
| TUCP_002325 | XLOC_097051 | ENSRNOT00000081966 | 0.96804616   | 2.49E-07 |
| TUCP_002325 | XLOC_097051 | ENSRNOT00000075906 | 0.96804616   | 2.49E-07 |
| TUCP_002324 | XLOC_096982 | ENSRNOT00000013863 | -0.955836728 | 1.23E-06 |
| TUCP_002324 | XLOC_096982 | ENSRNOT00000073356 | 0.95312223   | 1.65E-06 |
| TUCP_002324 | XLOC_096982 | ENSRNOT00000027526 | 0.961490608  | 6.25E-07 |
| TUCP_002324 | XLOC_096982 | ENSRNOT00000024296 | 0.956319729  | 1.16E-06 |
| TUCP_002324 | XLOC_096982 | ENSRNOT00000052120 | 0.958273916  | 9.29E-07 |
| TUCP_002324 | XLOC_096982 | ENSRNOT00000017385 | -0.960742683 | 6.87E-07 |
| TUCP_002324 | XLOC_096982 | ENSRNOT00000031741 | -0.976667236 | 5.24E-08 |
| TUCP_002324 | XLOC_096982 | ENSRNOT00000016801 | 0.952667005  | 1.73E-06 |
| TUCP_002324 | XLOC_096982 | ENSRNOT00000079917 | 0.962702236  | 5.34E-07 |
| TUCP_002324 | XLOC_096982 | ENSRNOT00000090342 | 0.95516772   | 1.32E-06 |
| TUCP_002324 | XLOC_096982 | ENSRNOT00000017942 | 0.95717602   | 1.06E-06 |
| TUCP_002324 | XLOC_096982 | ENSRNOT00000040476 | 0.952777591  | 1.71E-06 |
| TUCP_002328 | XLOC_097141 | ENSRNOT00000082687 | -0.963569185 | 4.75E-07 |

|             |             |                    |              |          |
|-------------|-------------|--------------------|--------------|----------|
| TUCP_002328 | XLOC_097141 | ENSRNOT00000008184 | 0.972051191  | 1.28E-07 |
| TUCP_002328 | XLOC_097141 | ENSRNOT00000024420 | 0.952592226  | 1.74E-06 |
| TUCP_002328 | XLOC_097141 | ENSRNOT00000088995 | 0.966479382  | 3.15E-07 |
| TUCP_002328 | XLOC_097141 | ENSRNOT00000082253 | 0.962311722  | 5.62E-07 |
| TUCP_002328 | XLOC_097141 | ENSRNOT00000032199 | 0.953717935  | 1.55E-06 |
| TUCP_002328 | XLOC_097141 | ENSRNOT00000092906 | 0.95465575   | 1.40E-06 |
| TUCP_003300 | XLOC_141907 | ENSRNOT00000039284 | 0.961845053  | 5.97E-07 |
| TUCP_003300 | XLOC_141907 | ENSRNOT0000001570  | 0.957337752  | 1.04E-06 |
| TUCP_003300 | XLOC_141907 | ENSRNOT00000043258 | 0.953900252  | 1.52E-06 |
| TUCP_003300 | XLOC_141907 | ENSRNOT00000005726 | 0.963008692  | 5.13E-07 |
| TUCP_003300 | XLOC_141907 | ENSRNOT00000020071 | 0.972476954  | 1.19E-07 |
| TUCP_003300 | XLOC_141907 | ENSRNOT00000076802 | 0.962825815  | 5.25E-07 |
| TUCP_003300 | XLOC_141907 | ENSRNOT00000074738 | 0.966995738  | 2.92E-07 |
| TUCP_003300 | XLOC_141907 | ENSRNOT00000084429 | 0.968257009  | 2.41E-07 |
| TUCP_003300 | XLOC_141907 | ENSRNOT00000071258 | -0.958893433 | 8.63E-07 |
| TUCP_003300 | XLOC_141907 | ENSRNOT00000031025 | 0.967945061  | 2.53E-07 |
| TUCP_003300 | XLOC_141907 | ENSRNOT00000056551 | 0.959405619  | 8.11E-07 |
| TUCP_003300 | XLOC_141907 | ENSRNOT00000010092 | 0.956619246  | 1.12E-06 |
| TUCP_003300 | XLOC_141907 | ENSRNOT0000001853  | 0.960406118  | 7.17E-07 |
| TUCP_003300 | XLOC_141907 | ENSRNOT00000077134 | 0.989806847  | 8.52E-10 |
| TUCP_003300 | XLOC_141907 | ENSRNOT00000038494 | 0.983659239  | 8.93E-09 |
| TUCP_003300 | XLOC_141907 | ENSRNOT00000055127 | 0.958432685  | 9.11E-07 |
| TUCP_003300 | XLOC_141907 | ENSRNOT00000039263 | 0.977462651  | 4.41E-08 |
| TUCP_003300 | XLOC_141907 | ENSRNOT00000078478 | 0.967801822  | 2.58E-07 |
| TUCP_003300 | XLOC_141907 | ENSRNOT00000088707 | 0.971464487  | 1.42E-07 |
| TUCP_003300 | XLOC_141907 | ENSRNOT00000043486 | 0.955217967  | 1.32E-06 |
| TUCP_003300 | XLOC_141907 | ENSRNOT00000054757 | 0.963000909  | 5.13E-07 |
| TUCP_003300 | XLOC_141907 | ENSRNOT00000041741 | 0.96811139   | 2.46E-07 |
| TUCP_003300 | XLOC_141907 | ENSRNOT00000017071 | 0.950480832  | 2.16E-06 |
| TUCP_003300 | XLOC_141907 | ENSRNOT00000009620 | 0.962646167  | 5.38E-07 |
| TUCP_003300 | XLOC_141907 | ENSRNOT00000082143 | 0.962213479  | 5.69E-07 |
| TUCP_003300 | XLOC_141907 | ENSRNOT00000085570 | 0.964441011  | 4.22E-07 |
| TUCP_003300 | XLOC_141907 | ENSRNOT00000025564 | 0.959015135  | 8.50E-07 |
| TUCP_003300 | XLOC_141907 | ENSRNOT00000076693 | 0.955066317  | 1.34E-06 |
| TUCP_003300 | XLOC_141907 | ENSRNOT00000090867 | 0.950414468  | 2.17E-06 |
| TUCP_003300 | XLOC_141907 | ENSRNOT00000038426 | 0.971711035  | 1.36E-07 |
| TUCP_003300 | XLOC_141907 | ENSRNOT00000043434 | 0.967560055  | 2.68E-07 |
| TUCP_003300 | XLOC_141907 | ENSRNOT00000083067 | 0.972839002  | 1.11E-07 |
| TUCP_003300 | XLOC_141907 | ENSRNOT00000039876 | 0.96792665   | 2.53E-07 |
| TUCP_003300 | XLOC_141907 | ENSRNOT0000002695  | 0.965343881  | 3.71E-07 |
| TUCP_003300 | XLOC_141907 | ENSRNOT00000087603 | 0.975434817  | 6.76E-08 |
| TUCP_003300 | XLOC_141907 | ENSRNOT00000029990 | 0.956524603  | 1.14E-06 |
| TUCP_003300 | XLOC_141907 | ENSRNOT00000012957 | 0.956906342  | 1.09E-06 |
| TUCP_003300 | XLOC_141907 | ENSRNOT00000051892 | 0.96004956   | 7.49E-07 |
| TUCP_003300 | XLOC_141907 | ENSRNOT00000059162 | 0.95775337   | 9.87E-07 |
| TUCP_003300 | XLOC_141907 | ENSRNOT00000084847 | 0.957749834  | 9.88E-07 |
| TUCP_003300 | XLOC_141907 | ENSRNOT00000057433 | 0.960274075  | 7.29E-07 |
| TUCP_003300 | XLOC_141907 | ENSRNOT00000060765 | 0.959195354  | 8.32E-07 |
| TUCP_003300 | XLOC_141907 | ENSRNOT00000052003 | 0.963943782  | 4.52E-07 |
| TUCP_003300 | XLOC_141907 | ENSRNOT00000072810 | 0.966326091  | 3.22E-07 |
| TUCP_003857 | XLOC_169243 | ENSRNOT00000067150 | -0.961742854 | 6.05E-07 |

|             |             |                     |              |          |
|-------------|-------------|---------------------|--------------|----------|
| TUCP_003857 | XLOC_169243 | ENSRNOT00000005161  | -0.953987604 | 1.50E-06 |
| TUCP_003857 | XLOC_169243 | ENSRNOT000000021801 | 0.956190881  | 1.18E-06 |
| TUCP_003857 | XLOC_169243 | ENSRNOT000000087278 | 0.961619707  | 6.15E-07 |
| TUCP_003857 | XLOC_169243 | ENSRNOT00000019057  | 0.980382938  | 2.21E-08 |
| TUCP_003857 | XLOC_169243 | ENSRNOT000000049459 | 0.95611693   | 1.19E-06 |
| TUCP_003857 | XLOC_169243 | ENSRNOT00000007702  | 0.960620027  | 6.98E-07 |
| TUCP_003857 | XLOC_169243 | ENSRNOT00000000715  | -0.959069828 | 8.45E-07 |
| TUCP_003857 | XLOC_169243 | ENSRNOT00000000804  | 0.961016702  | 6.64E-07 |
| TUCP_003857 | XLOC_169243 | ENSRNOT000000022017 | 0.950820067  | 2.09E-06 |
| TUCP_003857 | XLOC_169243 | ENSRNOT000000055114 | 0.969763166  | 1.89E-07 |
| TUCP_003857 | XLOC_169243 | ENSRNOT00000007802  | 0.965722518  | 3.52E-07 |
| TUCP_003857 | XLOC_169243 | ENSRNOT000000077367 | 0.951308303  | 1.99E-06 |
| TUCP_003857 | XLOC_169243 | ENSRNOT000000072297 | 0.957192686  | 1.05E-06 |
| TUCP_003857 | XLOC_169243 | ENSRNOT000000015495 | 0.955698101  | 1.25E-06 |
| TUCP_002284 | XLOC_094960 | ENSRNOT000000077447 | -0.977396122 | 4.47E-08 |
| TUCP_002285 | XLOC_095253 | ENSRNOT000000092026 | 0.96620614   | 3.28E-07 |
| TUCP_002285 | XLOC_095253 | ENSRNOT000000093075 | 1            | 0        |
| TUCP_002285 | XLOC_095253 | ENSRNOT000000058260 | 1            | 0        |
| TUCP_002285 | XLOC_095253 | ENSRNOT000000088887 | 1            | 0        |
| TUCP_002285 | XLOC_095253 | ENSRNOT000000084986 | 1            | 0        |
| TUCP_002285 | XLOC_095253 | ENSRNOT000000074346 | 0.9702256    | 1.75E-07 |
| TUCP_002285 | XLOC_095253 | ENSRNOT000000073209 | 0.983711602  | 8.79E-09 |
| TUCP_002285 | XLOC_095253 | ENSRNOT000000080155 | 0.973069673  | 1.07E-07 |
| TUCP_002285 | XLOC_095253 | ENSRNOT000000072573 | 0.996213272  | 6.09E-12 |
| TUCP_002285 | XLOC_095253 | ENSRNOT000000017828 | 0.996001583  | 7.99E-12 |
| TUCP_002285 | XLOC_095253 | ENSRNOT000000080444 | 0.969625907  | 1.93E-07 |
| TUCP_002285 | XLOC_095253 | ENSRNOT000000071312 | 1            | 0        |
| TUCP_002285 | XLOC_095253 | ENSRNOT000000088245 | 1            | 0        |
| TUCP_002285 | XLOC_095253 | ENSRNOT000000036565 | 0.969065335  | 2.12E-07 |
| TUCP_002285 | XLOC_095253 | ENSRNOT000000058833 | 0.998673261  | 3.23E-14 |
| TUCP_002285 | XLOC_095253 | ENSRNOT000000078052 | 1            | 0        |
| TUCP_002285 | XLOC_095253 | ENSRNOT000000078494 | 0.999927093  | 1.62E-20 |
| TUCP_002285 | XLOC_095253 | ENSRNOT000000085653 | 1            | 0        |
| TUCP_002285 | XLOC_095253 | ENSRNOT000000057950 | 0.969329371  | 2.03E-07 |
| TUCP_002285 | XLOC_095253 | ENSRNOT000000081992 | 0.999320526  | 1.14E-15 |
| TUCP_002285 | XLOC_095253 | ENSRNOT000000038553 | 0.955765808  | 1.24E-06 |
| TUCP_002285 | XLOC_095253 | ENSRNOT000000084120 | 0.958115447  | 9.46E-07 |
| TUCP_002285 | XLOC_095253 | ENSRNOT000000055406 | 1            | 0        |
| TUCP_002285 | XLOC_095253 | ENSRNOT000000070817 | 0.998968079  | 9.20E-15 |
| TUCP_002285 | XLOC_095253 | ENSRNOT000000026753 | 1            | 0        |
| TUCP_002285 | XLOC_095253 | ENSRNOT000000080533 | 0.996682529  | 3.15E-12 |
| TUCP_002285 | XLOC_095253 | ENSRNOT000000072774 | 0.979665261  | 2.65E-08 |
| TUCP_002285 | XLOC_095253 | ENSRNOT000000086031 | 1            | 0        |
| TUCP_002285 | XLOC_095253 | ENSRNOT000000014312 | 1            | 0        |
| TUCP_002285 | XLOC_095253 | ENSRNOT000000042882 | 0.963218427  | 4.98E-07 |
| TUCP_002285 | XLOC_095253 | ENSRNOT000000088012 | 0.956765806  | 1.11E-06 |
| TUCP_002285 | XLOC_095253 | ENSRNOT000000051231 | 0.999242378  | 1.96E-15 |
| TUCP_002285 | XLOC_095253 | ENSRNOT000000089407 | 0.992986194  | 1.32E-10 |
| TUCP_002285 | XLOC_095253 | ENSRNOT000000055034 | 0.998331441  | 1.02E-13 |
| TUCP_002285 | XLOC_095253 | ENSRNOT000000046837 | 0.97252559   | 1.18E-07 |
| TUCP_001835 | XLOC_075637 | ENSRNOT000000084133 | 0.976278708  | 5.68E-08 |



|             |             |                    |              |          |
|-------------|-------------|--------------------|--------------|----------|
| TUCP_001835 | XLOC_075637 | ENSRNOT00000093745 | 0.95476742   | 1.38E-06 |
| TUCP_001835 | XLOC_075637 | ENSRNOT00000065542 | 0.971856508  | 1.33E-07 |
| TUCP_001835 | XLOC_075637 | ENSRNOT00000082464 | 0.976278708  | 5.68E-08 |
| TUCP_001835 | XLOC_075637 | ENSRNOT00000087659 | 0.976278708  | 5.68E-08 |
| TUCP_001835 | XLOC_075637 | ENSRNOT00000084582 | 0.950335332  | 2.19E-06 |
| TUCP_001835 | XLOC_075637 | ENSRNOT00000085078 | 0.976278708  | 5.68E-08 |
| TUCP_001835 | XLOC_075637 | ENSRNOT00000014028 | 0.976278708  | 5.68E-08 |
| TUCP_001835 | XLOC_075637 | ENSRNOT00000049363 | 0.976278708  | 5.68E-08 |
| TUCP_001835 | XLOC_075637 | ENSRNOT00000065473 | 0.975966956  | 6.06E-08 |
| TUCP_001835 | XLOC_075637 | ENSRNOT00000000142 | 0.973179512  | 1.04E-07 |
| TUCP_001835 | XLOC_075637 | ENSRNOT00000082288 | 0.976198935  | 5.78E-08 |
| TUCP_001835 | XLOC_075637 | ENSRNOT00000039664 | 0.976278708  | 5.68E-08 |
| TUCP_001835 | XLOC_075637 | ENSRNOT00000065402 | 0.976278708  | 5.68E-08 |
| TUCP_001835 | XLOC_075637 | ENSRNOT00000084141 | 0.976278708  | 5.68E-08 |
| TUCP_001835 | XLOC_075637 | ENSRNOT00000082435 | 0.976278708  | 5.68E-08 |
| TUCP_001835 | XLOC_075637 | ENSRNOT00000082928 | 0.971201615  | 1.49E-07 |
| TUCP_001835 | XLOC_075637 | ENSRNOT00000046013 | 0.955479171  | 1.28E-06 |
| TUCP_001835 | XLOC_075637 | ENSRNOT00000086425 | 0.967539869  | 2.69E-07 |
| TUCP_001835 | XLOC_075637 | ENSRNOT00000036228 | 0.953258697  | 1.62E-06 |
| TUCP_001835 | XLOC_075637 | ENSRNOT00000027058 | 0.950095979  | 2.24E-06 |
| TUCP_001835 | XLOC_075637 | ENSRNOT00000014030 | 0.976278708  | 5.68E-08 |
| TUCP_001835 | XLOC_075637 | ENSRNOT00000081966 | 0.976278708  | 5.68E-08 |
| TUCP_001835 | XLOC_075637 | ENSRNOT00000075906 | 0.976278708  | 5.68E-08 |
| TUCP_001835 | XLOC_075637 | ENSRNOT00000088396 | 0.967929337  | 2.53E-07 |
| TUCP_001835 | XLOC_075637 | ENSRNOT00000049259 | 0.971733644  | 1.36E-07 |
| TUCP_001835 | XLOC_075637 | ENSRNOT00000092838 | 0.953504197  | 1.58E-06 |
| TUCP_002280 | XLOC_094776 | ENSRNOT00000038802 | -0.955871526 | 1.22E-06 |
| TUCP_003854 | XLOC_169016 | ENSRNOT00000028176 | 0.96034697   | 7.22E-07 |
| TUCP_003854 | XLOC_169016 | ENSRNOT00000008161 | 0.952059916  | 1.84E-06 |
| TUCP_003854 | XLOC_169016 | ENSRNOT00000071712 | 0.968337159  | 2.38E-07 |
| TUCP_003854 | XLOC_169016 | ENSRNOT00000004891 | 0.958631176  | 8.90E-07 |
| TUCP_002282 | XLOC_094875 | ENSRNOT00000075401 | 0.965451302  | 3.66E-07 |
| TUCP_003855 | XLOC_169222 | ENSRNOT00000039588 | 0.964018323  | 4.47E-07 |
| TUCP_001304 | XLOC_049601 | ENSRNOT00000039045 | 0.952239961  | 1.81E-06 |
| TUCP_001304 | XLOC_049601 | ENSRNOT00000024149 | 0.957625942  | 1.00E-06 |
| TUCP_001304 | XLOC_049601 | ENSRNOT00000021790 | 0.954042621  | 1.49E-06 |
| TUCP_001304 | XLOC_049601 | ENSRNOT00000007379 | 0.952542969  | 1.75E-06 |
| TUCP_001304 | XLOC_049601 | ENSRNOT00000068018 | -0.952991773 | 1.67E-06 |
| TUCP_001304 | XLOC_049601 | ENSRNOT00000009877 | 0.954194422  | 1.47E-06 |
| TUCP_001304 | XLOC_049601 | ENSRNOT00000023290 | 0.963182909  | 5.01E-07 |
| TUCP_001304 | XLOC_049601 | ENSRNOT00000005911 | 0.95592637   | 1.22E-06 |
| TUCP_001304 | XLOC_049601 | ENSRNOT00000041709 | 0.951929253  | 1.86E-06 |
| TUCP_001304 | XLOC_049601 | ENSRNOT00000036212 | 0.962987634  | 5.14E-07 |
| TUCP_001304 | XLOC_049601 | ENSRNOT00000025372 | 0.957235721  | 1.05E-06 |
| TUCP_001304 | XLOC_049601 | ENSRNOT00000065921 | 0.97164184   | 1.38E-07 |
| TUCP_001304 | XLOC_049601 | ENSRNOT00000048843 | 0.954044506  | 1.49E-06 |
| TUCP_001304 | XLOC_049601 | ENSRNOT00000006195 | 0.973927007  | 9.08E-08 |
| TUCP_001304 | XLOC_049601 | ENSRNOT00000066670 | 0.955110623  | 1.33E-06 |
| TUCP_001304 | XLOC_049601 | ENSRNOT00000091807 | 0.953132951  | 1.65E-06 |
| TUCP_001304 | XLOC_049601 | ENSRNOT00000049538 | 0.954691234  | 1.39E-06 |
| TUCP_001304 | XLOC_049601 | ENSRNOT00000012463 | -0.955070783 | 1.34E-06 |

|             |             |                     |              |          |
|-------------|-------------|---------------------|--------------|----------|
| TUCP_001304 | XLOC_049601 | ENSRNOT00000012379  | 0.963381753  | 4.88E-07 |
| TUCP_001304 | XLOC_049601 | ENSRNOT00000021430  | 0.969469039  | 1.98E-07 |
| TUCP_001304 | XLOC_049601 | ENSRNOT00000006963  | 0.953313405  | 1.61E-06 |
| TUCP_001304 | XLOC_049601 | ENSRNOT00000018990  | 0.955266216  | 1.31E-06 |
| TUCP_001304 | XLOC_049601 | ENSRNOT00000011663  | 0.950979162  | 2.05E-06 |
| TUCP_001304 | XLOC_049601 | ENSRNOT00000057213  | -0.952793346 | 1.71E-06 |
| TUCP_001304 | XLOC_049601 | ENSRNOT00000023835  | 0.963463339  | 4.82E-07 |
| TUCP_001712 | XLOC_069799 | ENSRNOT00000008764  | 0.952020509  | 1.85E-06 |
| TUCP_001712 | XLOC_069799 | ENSRNOT000000082592 | 0.964008614  | 4.48E-07 |
| TUCP_001712 | XLOC_069799 | ENSRNOT00000016485  | 0.952527265  | 1.75E-06 |
| TUCP_001712 | XLOC_069799 | ENSRNOT00000009009  | 0.951693378  | 1.91E-06 |
| TUCP_001712 | XLOC_069799 | ENSRNOT00000061054  | 0.951571313  | 1.93E-06 |
| TUCP_000781 | XLOC_029215 | ENSRNOT00000038147  | 0.967420175  | 2.74E-07 |
| TUCP_000780 | XLOC_029193 | ENSRNOT00000011049  | 0.965133102  | 3.83E-07 |
| TUCP_000780 | XLOC_029193 | ENSRNOT00000077195  | 0.965952873  | 3.40E-07 |
| TUCP_000780 | XLOC_029193 | ENSRNOT00000021801  | 0.950280892  | 2.20E-06 |
| TUCP_000780 | XLOC_029193 | ENSRNOT00000092343  | 0.951220274  | 2.00E-06 |
| TUCP_000780 | XLOC_029193 | ENSRNOT00000013761  | 0.950910051  | 2.07E-06 |
| TUCP_000780 | XLOC_029193 | ENSRNOT000000084860 | 0.975513771  | 6.65E-08 |
| TUCP_000780 | XLOC_029193 | ENSRNOT00000009778  | 0.95123462   | 2.00E-06 |
| TUCP_000780 | XLOC_029193 | ENSRNOT00000072297  | 0.966172893  | 3.30E-07 |
| TUCP_001300 | XLOC_049263 | ENSRNOT00000090629  | 0.956279194  | 1.17E-06 |
| TUCP_001300 | XLOC_049263 | ENSRNOT00000055127  | 0.979693158  | 2.63E-08 |
| TUCP_001300 | XLOC_049263 | ENSRNOT00000066764  | 0.958963031  | 8.55E-07 |
| TUCP_001300 | XLOC_049263 | ENSRNOT00000026677  | 0.986793914  | 3.09E-09 |
| TUCP_001300 | XLOC_049263 | ENSRNOT00000001570  | 0.978946954  | 3.14E-08 |
| TUCP_001300 | XLOC_049263 | ENSRNOT00000035523  | 0.971827531  | 1.33E-07 |
| TUCP_001300 | XLOC_049263 | ENSRNOT00000083702  | 0.967424652  | 2.74E-07 |
| TUCP_001300 | XLOC_049263 | ENSRNOT00000028067  | 0.960934016  | 6.71E-07 |
| TUCP_001300 | XLOC_049263 | ENSRNOT00000000640  | 0.958019654  | 9.57E-07 |
| TUCP_001300 | XLOC_049263 | ENSRNOT00000074738  | 0.958268078  | 9.29E-07 |
| TUCP_001300 | XLOC_049263 | ENSRNOT00000016263  | 0.954487369  | 1.42E-06 |
| TUCP_001300 | XLOC_049263 | ENSRNOT000000084873 | 0.952199291  | 1.81E-06 |
| TUCP_001300 | XLOC_049263 | ENSRNOT00000056995  | 0.957191028  | 1.05E-06 |
| TUCP_001300 | XLOC_049263 | ENSRNOT00000031025  | 0.954045338  | 1.49E-06 |
| TUCP_001300 | XLOC_049263 | ENSRNOT00000020475  | 0.965518931  | 3.62E-07 |
| TUCP_001300 | XLOC_049263 | ENSRNOT00000056551  | 0.972010632  | 1.29E-07 |
| TUCP_001300 | XLOC_049263 | ENSRNOT000000086390 | 0.982835627  | 1.14E-08 |
| TUCP_001300 | XLOC_049263 | ENSRNOT00000015387  | 0.958365054  | 9.19E-07 |
| TUCP_001300 | XLOC_049263 | ENSRNOT00000090303  | 0.956958458  | 1.08E-06 |
| TUCP_001300 | XLOC_049263 | ENSRNOT00000003823  | 0.976867912  | 5.02E-08 |
| TUCP_001300 | XLOC_049263 | ENSRNOT00000076407  | 0.9533989    | 1.60E-06 |
| TUCP_001300 | XLOC_049263 | ENSRNOT00000027933  | 0.977903328  | 4.00E-08 |
| TUCP_001300 | XLOC_049263 | ENSRNOT00000039263  | 0.961214215  | 6.48E-07 |
| TUCP_001300 | XLOC_049263 | ENSRNOT00000004637  | 0.953339455  | 1.61E-06 |
| TUCP_001300 | XLOC_049263 | ENSRNOT00000059662  | 0.965963622  | 3.40E-07 |
| TUCP_001300 | XLOC_049263 | ENSRNOT00000054757  | 0.978965988  | 3.13E-08 |
| TUCP_001300 | XLOC_049263 | ENSRNOT00000091499  | 0.955871589  | 1.22E-06 |
| TUCP_001300 | XLOC_049263 | ENSRNOT00000007358  | 0.95133684   | 1.98E-06 |
| TUCP_001300 | XLOC_049263 | ENSRNOT00000039383  | 0.957354478  | 1.03E-06 |
| TUCP_001300 | XLOC_049263 | ENSRNOT00000009620  | 0.958947409  | 8.57E-07 |

|             |             |                    |              |          |
|-------------|-------------|--------------------|--------------|----------|
| TUCP_001300 | XLOC_049263 | ENSRNOT00000027214 | 0.969126994  | 2.10E-07 |
| TUCP_001300 | XLOC_049263 | ENSRNOT00000039005 | 0.950205289  | 2.22E-06 |
| TUCP_001300 | XLOC_049263 | ENSRNOT00000082143 | 0.976079805  | 5.92E-08 |
| TUCP_001300 | XLOC_049263 | ENSRNOT00000085570 | 0.96547871   | 3.64E-07 |
| TUCP_001300 | XLOC_049263 | ENSRNOT00000089309 | 0.954963154  | 1.35E-06 |
| TUCP_001300 | XLOC_049263 | ENSRNOT00000047011 | 0.978192705  | 3.74E-08 |
| TUCP_001300 | XLOC_049263 | ENSRNOT00000009969 | 0.957325319  | 1.04E-06 |
| TUCP_001300 | XLOC_049263 | ENSRNOT00000083067 | 0.953790889  | 1.54E-06 |
| TUCP_001300 | XLOC_049263 | ENSRNOT00000043434 | 0.954990561  | 1.35E-06 |
| TUCP_001300 | XLOC_049263 | ENSRNOT00000028423 | 0.955233575  | 1.31E-06 |
| TUCP_001300 | XLOC_049263 | ENSRNOT00000090867 | 0.974427249  | 8.25E-08 |
| TUCP_001300 | XLOC_049263 | ENSRNOT00000051363 | 0.957499962  | 1.02E-06 |
| TUCP_001300 | XLOC_049263 | ENSRNOT00000022648 | 0.956816163  | 1.10E-06 |
| TUCP_001300 | XLOC_049263 | ENSRNOT00000032719 | 0.957484006  | 1.02E-06 |
| TUCP_001300 | XLOC_049263 | ENSRNOT00000057384 | 0.970715647  | 1.61E-07 |
| TUCP_001300 | XLOC_049263 | ENSRNOT00000018511 | 0.97269323   | 1.14E-07 |
| TUCP_001300 | XLOC_049263 | ENSRNOT00000087603 | 0.955212279  | 1.32E-06 |
| TUCP_001300 | XLOC_049263 | ENSRNOT00000044319 | 0.955244511  | 1.31E-06 |
| TUCP_001300 | XLOC_049263 | ENSRNOT00000023504 | 0.969913118  | 1.85E-07 |
| TUCP_001300 | XLOC_049263 | ENSRNOT00000036753 | 0.97839938   | 3.57E-08 |
| TUCP_001300 | XLOC_049263 | ENSRNOT00000010673 | 0.972724458  | 1.14E-07 |
| TUCP_001300 | XLOC_049263 | ENSRNOT00000037806 | 0.965898778  | 3.43E-07 |
| TUCP_001300 | XLOC_049263 | ENSRNOT00000019501 | 0.957667478  | 9.97E-07 |
| TUCP_001300 | XLOC_049263 | ENSRNOT00000080956 | 0.959788631  | 7.74E-07 |
| TUCP_001300 | XLOC_049263 | ENSRNOT00000030228 | 0.990752784  | 5.24E-10 |
| TUCP_001300 | XLOC_049263 | ENSRNOT00000008365 | 0.957650992  | 9.99E-07 |
| TUCP_001300 | XLOC_049263 | ENSRNOT00000057016 | 0.955887626  | 1.22E-06 |
| TUCP_001300 | XLOC_049263 | ENSRNOT00000047700 | 0.986735692  | 3.16E-09 |
| TUCP_001300 | XLOC_049263 | ENSRNOT00000032015 | 0.960860396  | 6.77E-07 |
| TUCP_001300 | XLOC_049263 | ENSRNOT00000082116 | 0.954297804  | 1.45E-06 |
| TUCP_001300 | XLOC_049263 | ENSRNOT00000013904 | 0.952154659  | 1.82E-06 |
| TUCP_001300 | XLOC_049263 | ENSRNOT00000057992 | 0.956413044  | 1.15E-06 |
| TUCP_001300 | XLOC_049263 | ENSRNOT00000072810 | 0.981697198  | 1.57E-08 |
| TUCP_001300 | XLOC_049263 | ENSRNOT00000002936 | 0.95738829   | 1.03E-06 |
| TUCP_001300 | XLOC_049263 | ENSRNOT00000003346 | 0.961650766  | 6.12E-07 |
| TUCP_000786 | XLOC_029655 | ENSRNOT00000060143 | 0.950542621  | 2.14E-06 |
| TUCP_000785 | XLOC_029542 | ENSRNOT00000082076 | 0.957160463  | 1.06E-06 |
| TUCP_000785 | XLOC_029542 | ENSRNOT00000008523 | 0.954462784  | 1.43E-06 |
| TUCP_000785 | XLOC_029542 | ENSRNOT00000082346 | -0.981861618 | 1.50E-08 |
| TUCP_000785 | XLOC_029542 | ENSRNOT00000024640 | 0.952029173  | 1.85E-06 |
| TUCP_000785 | XLOC_029542 | ENSRNOT00000076050 | 0.950110085  | 2.24E-06 |
| TUCP_000913 | XLOC_033903 | ENSRNOT00000033379 | 0.952849109  | 1.70E-06 |
| TUCP_000913 | XLOC_033903 | ENSRNOT00000072238 | 0.956120204  | 1.19E-06 |
| TUCP_001308 | XLOC_049692 | ENSRNOT00000026032 | 0.963280709  | 4.94E-07 |
| TUCP_001308 | XLOC_049692 | ENSRNOT00000015127 | 0.963022968  | 5.12E-07 |
| TUCP_001308 | XLOC_049692 | ENSRNOT00000006689 | 0.953989324  | 1.50E-06 |
| TUCP_001308 | XLOC_049692 | ENSRNOT00000086557 | 0.95076273   | 2.10E-06 |
| TUCP_001308 | XLOC_049692 | ENSRNOT00000054875 | 0.951628226  | 1.92E-06 |
| TUCP_001308 | XLOC_049692 | ENSRNOT00000078561 | 0.962549428  | 5.45E-07 |
| TUCP_001309 | XLOC_049739 | ENSRNOT00000082730 | 0.959406467  | 8.11E-07 |
| TUCP_001309 | XLOC_049739 | ENSRNOT00000060683 | 0.950312884  | 2.19E-06 |

|             |             |                    |             |          |
|-------------|-------------|--------------------|-------------|----------|
| TUCP_001309 | XLOC_049739 | ENSRNOT00000080846 | 0.955856213 | 1.23E-06 |
| TUCP_001309 | XLOC_049739 | ENSRNOT00000001098 | 0.974154759 | 8.70E-08 |
| TUCP_001309 | XLOC_049739 | ENSRNOT00000070961 | 0.965016289 | 3.89E-07 |
| TUCP_001309 | XLOC_049739 | ENSRNOT00000009468 | 0.971981455 | 1.30E-07 |
| TUCP_001309 | XLOC_049739 | ENSRNOT00000019044 | 0.959189425 | 8.32E-07 |
| TUCP_001309 | XLOC_049739 | ENSRNOT00000003514 | 0.97277737  | 1.12E-07 |
| TUCP_001309 | XLOC_049739 | ENSRNOT00000039709 | 0.954895753 | 1.36E-06 |
| TUCP_001309 | XLOC_049739 | ENSRNOT00000056644 | 0.953543581 | 1.58E-06 |
| TUCP_001309 | XLOC_049739 | ENSRNOT00000012179 | 0.9514295   | 1.96E-06 |
| TUCP_001309 | XLOC_049739 | ENSRNOT00000003277 | 0.961439047 | 6.29E-07 |
| TUCP_001309 | XLOC_049739 | ENSRNOT00000021309 | 0.955053851 | 1.34E-06 |
| TUCP_001309 | XLOC_049739 | ENSRNOT00000018043 | 0.981179124 | 1.80E-08 |
| TUCP_001309 | XLOC_049739 | ENSRNOT00000019350 | 0.970205008 | 1.76E-07 |
| TUCP_001309 | XLOC_049739 | ENSRNOT00000016262 | 0.95361017  | 1.56E-06 |
| TUCP_001309 | XLOC_049739 | ENSRNOT00000020499 | 0.957152888 | 1.06E-06 |
| TUCP_001309 | XLOC_049739 | ENSRNOT0000001373  | 0.962509078 | 5.48E-07 |
| TUCP_001309 | XLOC_049739 | ENSRNOT00000027060 | 0.95400538  | 1.50E-06 |
| TUCP_001309 | XLOC_049739 | ENSRNOT00000092322 | 0.950010177 | 2.26E-06 |
| TUCP_001309 | XLOC_049739 | ENSRNOT00000085690 | 0.962932204 | 5.18E-07 |
| TUCP_001309 | XLOC_049739 | ENSRNOT00000015759 | 0.958866978 | 8.65E-07 |
| TUCP_001309 | XLOC_049739 | ENSRNOT00000064323 | 0.952887502 | 1.69E-06 |
| TUCP_001309 | XLOC_049739 | ENSRNOT00000023149 | 0.95390979  | 1.52E-06 |
| TUCP_001309 | XLOC_049739 | ENSRNOT00000017618 | 0.95802258  | 9.57E-07 |
| TUCP_001309 | XLOC_049739 | ENSRNOT0000005666  | 0.96556535  | 3.60E-07 |
| TUCP_001309 | XLOC_049739 | ENSRNOT00000016259 | 0.953252166 | 1.63E-06 |
| TUCP_001309 | XLOC_049739 | ENSRNOT00000018982 | 0.970363952 | 1.71E-07 |
| TUCP_001309 | XLOC_049739 | ENSRNOT00000009015 | 0.960926027 | 6.72E-07 |
| TUCP_001309 | XLOC_049739 | ENSRNOT00000014002 | 0.950145461 | 2.23E-06 |
| TUCP_001309 | XLOC_049739 | ENSRNOT00000071770 | 0.960862585 | 6.77E-07 |
| TUCP_001309 | XLOC_049739 | ENSRNOT00000064924 | 0.962163107 | 5.73E-07 |
| TUCP_001309 | XLOC_049739 | ENSRNOT00000004159 | 0.982802103 | 1.15E-08 |
| TUCP_001309 | XLOC_049739 | ENSRNOT00000002198 | 0.95940676  | 8.11E-07 |
| TUCP_001309 | XLOC_049739 | ENSRNOT00000035875 | 0.960772206 | 6.85E-07 |
| TUCP_001309 | XLOC_049739 | ENSRNOT00000020853 | 0.950156146 | 2.23E-06 |
| TUCP_001309 | XLOC_049739 | ENSRNOT00000051428 | 0.955812472 | 1.23E-06 |
| TUCP_001309 | XLOC_049739 | ENSRNOT00000054958 | 0.965592533 | 3.58E-07 |
| TUCP_001309 | XLOC_049739 | ENSRNOT00000065642 | 0.965186028 | 3.80E-07 |
| TUCP_001309 | XLOC_049739 | ENSRNOT00000064851 | 0.963957331 | 4.51E-07 |
| TUCP_001309 | XLOC_049739 | ENSRNOT00000000253 | 0.954922205 | 1.36E-06 |
| TUCP_001309 | XLOC_049739 | ENSRNOT00000073926 | 0.965692457 | 3.53E-07 |
| TUCP_001309 | XLOC_049739 | ENSRNOT00000027512 | 0.966812018 | 3.00E-07 |
| TUCP_001309 | XLOC_049739 | ENSRNOT00000016164 | 0.960086127 | 7.46E-07 |
| TUCP_001309 | XLOC_049739 | ENSRNOT00000013535 | 0.964815158 | 4.00E-07 |
| TUCP_001309 | XLOC_049739 | ENSRNOT00000019056 | 0.95131586  | 1.98E-06 |
| TUCP_001309 | XLOC_049739 | ENSRNOT00000015130 | 0.95435015  | 1.45E-06 |
| TUCP_001309 | XLOC_049739 | ENSRNOT00000084202 | 0.95201497  | 1.85E-06 |
| TUCP_001309 | XLOC_049739 | ENSRNOT00000027450 | 0.963032445 | 5.11E-07 |
| TUCP_001309 | XLOC_049739 | ENSRNOT00000024980 | 0.960140691 | 7.41E-07 |
| TUCP_001309 | XLOC_049739 | ENSRNOT00000024981 | 0.972034577 | 1.29E-07 |
| TUCP_001309 | XLOC_049739 | ENSRNOT00000003728 | 0.961225591 | 6.47E-07 |
| TUCP_001309 | XLOC_049739 | ENSRNOT00000013587 | 0.952760129 | 1.71E-06 |

|             |             |                    |              |          |
|-------------|-------------|--------------------|--------------|----------|
| TUCP_001309 | XLOC_049739 | ENSRNOT00000020543 | 0.952155187  | 1.82E-06 |
| TUCP_001309 | XLOC_049739 | ENSRNOT00000004560 | 0.961904962  | 5.93E-07 |
| TUCP_001309 | XLOC_049739 | ENSRNOT00000002511 | 0.957329668  | 1.04E-06 |
| TUCP_001309 | XLOC_049739 | ENSRNOT00000056656 | 0.965822424  | 3.47E-07 |
| TUCP_001309 | XLOC_049739 | ENSRNOT00000006860 | 0.952809164  | 1.70E-06 |
| TUCP_001309 | XLOC_049739 | ENSRNOT00000073035 | 0.963544506  | 4.77E-07 |
| TUCP_001309 | XLOC_049739 | ENSRNOT00000067905 | 0.972689074  | 1.14E-07 |
| TUCP_001309 | XLOC_049739 | ENSRNOT00000026552 | 0.962897788  | 5.20E-07 |
| TUCP_001309 | XLOC_049739 | ENSRNOT00000011432 | 0.95092673   | 2.06E-06 |
| TUCP_001309 | XLOC_049739 | ENSRNOT00000037946 | 0.951521639  | 1.94E-06 |
| TUCP_001309 | XLOC_049739 | ENSRNOT00000081593 | 0.974589712  | 7.99E-08 |
| TUCP_001309 | XLOC_049739 | ENSRNOT00000046318 | 0.954599312  | 1.41E-06 |
| TUCP_001309 | XLOC_049739 | ENSRNOT00000036042 | 0.962008439  | 5.85E-07 |
| TUCP_001309 | XLOC_049739 | ENSRNOT00000032173 | 0.960176972  | 7.38E-07 |
| TUCP_001309 | XLOC_049739 | ENSRNOT00000047698 | 0.973536635  | 9.78E-08 |
| TUCP_001309 | XLOC_049739 | ENSRNOT00000024578 | 0.955609558  | 1.26E-06 |
| TUCP_001309 | XLOC_049739 | ENSRNOT00000040981 | 0.957526542  | 1.01E-06 |
| TUCP_001309 | XLOC_049739 | ENSRNOT00000010630 | -0.969623997 | 1.94E-07 |
| TUCP_001309 | XLOC_049739 | ENSRNOT00000023854 | 0.962282157  | 5.64E-07 |
| TUCP_001309 | XLOC_049739 | ENSRNOT00000024690 | 0.968191597  | 2.43E-07 |
| TUCP_001309 | XLOC_049739 | ENSRNOT00000045041 | 0.95402539   | 1.50E-06 |
| TUCP_001309 | XLOC_049739 | ENSRNOT00000008359 | 0.964742768  | 4.04E-07 |
| TUCP_001309 | XLOC_049739 | ENSRNOT00000016856 | 0.96432946   | 4.28E-07 |
| TUCP_001309 | XLOC_049739 | ENSRNOT00000057758 | 0.96945014   | 1.99E-07 |
| TUCP_003859 | XLOC_169474 | ENSRNOT00000027411 | 0.968939219  | 2.16E-07 |
| TUCP_003859 | XLOC_169474 | ENSRNOT00000065168 | 0.96074145   | 6.88E-07 |
| TUCP_003859 | XLOC_169474 | ENSRNOT00000006175 | 0.959576325  | 7.94E-07 |
| TUCP_003859 | XLOC_169474 | ENSRNOT00000029237 | 0.957860556  | 9.75E-07 |
| TUCP_003859 | XLOC_169474 | ENSRNOT00000014664 | 0.957709983  | 9.92E-07 |
| TUCP_003859 | XLOC_169474 | ENSRNOT00000020134 | 0.97031143   | 1.73E-07 |
| TUCP_003859 | XLOC_169474 | ENSRNOT00000080557 | 0.963491943  | 4.80E-07 |
| TUCP_003859 | XLOC_169474 | ENSRNOT00000075326 | 0.959723224  | 7.80E-07 |
| TUCP_003859 | XLOC_169474 | ENSRNOT00000024128 | 0.95461268   | 1.41E-06 |
| TUCP_003859 | XLOC_169474 | ENSRNOT00000051265 | 0.9627079    | 5.34E-07 |
| TUCP_003859 | XLOC_169474 | ENSRNOT00000016975 | 0.985824904  | 4.40E-09 |
| TUCP_003214 | XLOC_138405 | ENSRNOT00000008212 | 0.964367966  | 4.26E-07 |
| TUCP_001532 | XLOC_059083 | ENSRNOT00000019639 | 0.969384118  | 2.01E-07 |
| TUCP_001439 | XLOC_055987 | ENSRNOT00000055284 | 0.96061036   | 6.99E-07 |
| TUCP_001439 | XLOC_055987 | ENSRNOT00000028109 | 0.950067978  | 2.25E-06 |
| TUCP_001439 | XLOC_055987 | ENSRNOT00000054962 | 0.968395992  | 2.35E-07 |
| TUCP_001439 | XLOC_055987 | ENSRNOT00000078237 | 0.951312442  | 1.99E-06 |
| TUCP_001535 | XLOC_059229 | ENSRNOT00000013585 | -0.957211528 | 1.05E-06 |
| TUCP_001534 | XLOC_059162 | ENSRNOT00000077458 | 0.963665077  | 4.69E-07 |
| TUCP_003407 | XLOC_147438 | ENSRNOT00000046213 | 0.957980845  | 9.61E-07 |
| TUCP_000291 | XLOC_009318 | ENSRNOT00000070864 | 0.962225056  | 5.68E-07 |
| TUCP_000291 | XLOC_009318 | ENSRNOT00000073792 | 0.957808844  | 9.81E-07 |
| TUCP_000291 | XLOC_009318 | ENSRNOT00000020329 | 0.968232091  | 2.42E-07 |
| TUCP_003401 | XLOC_147191 | ENSRNOT00000007144 | 0.950094879  | 2.24E-06 |
| TUCP_003401 | XLOC_147191 | ENSRNOT00000001912 | 0.980022058  | 2.42E-08 |
| TUCP_003400 | XLOC_147186 | ENSRNOT00000081981 | 0.951955301  | 1.86E-06 |
| TUCP_003400 | XLOC_147186 | ENSRNOT00000000495 | 0.966932465  | 2.95E-07 |

|             |             |                    |              |          |
|-------------|-------------|--------------------|--------------|----------|
| TUCP_003400 | XLOC_147186 | ENSRNOT00000005958 | 0.951558198  | 1.94E-06 |
| TUCP_003400 | XLOC_147186 | ENSRNOT00000028793 | 0.960216033  | 7.34E-07 |
| TUCP_003400 | XLOC_147186 | ENSRNOT00000092029 | 0.950693355  | 2.11E-06 |
| TUCP_003400 | XLOC_147186 | ENSRNOT00000082869 | 0.954945644  | 1.36E-06 |
| TUCP_003400 | XLOC_147186 | ENSRNOT00000017753 | 0.951243873  | 2.00E-06 |
| TUCP_003400 | XLOC_147186 | ENSRNOT00000025372 | 0.959860939  | 7.67E-07 |
| TUCP_002139 | XLOC_088824 | ENSRNOT00000068030 | 0.960534736  | 7.06E-07 |
| TUCP_002139 | XLOC_088824 | ENSRNOT00000050825 | 0.967808072  | 2.58E-07 |
| TUCP_002136 | XLOC_088824 | ENSRNOT00000091652 | 0.971282571  | 1.47E-07 |
| TUCP_002136 | XLOC_088824 | ENSRNOT00000075569 | 0.958978245  | 8.54E-07 |
| TUCP_002136 | XLOC_088824 | ENSRNOT00000080865 | 0.975693163  | 6.42E-08 |
| TUCP_002136 | XLOC_088824 | ENSRNOT00000073534 | 0.966173007  | 3.30E-07 |
| TUCP_002136 | XLOC_088824 | ENSRNOT00000093019 | 0.975693163  | 6.42E-08 |
| TUCP_002136 | XLOC_088824 | ENSRNOT00000024825 | 0.962450049  | 5.52E-07 |
| TUCP_002136 | XLOC_088824 | ENSRNOT00000059266 | 0.985840173  | 4.38E-09 |
| TUCP_002136 | XLOC_088824 | ENSRNOT00000072734 | 0.95355653   | 1.57E-06 |
| TUCP_002136 | XLOC_088824 | ENSRNOT00000085908 | 0.968155465  | 2.44E-07 |
| TUCP_002136 | XLOC_088824 | ENSRNOT00000083977 | 0.975693163  | 6.42E-08 |
| TUCP_002136 | XLOC_088824 | ENSRNOT00000046744 | 0.975693163  | 6.42E-08 |
| TUCP_002136 | XLOC_088824 | ENSRNOT00000076429 | 0.975693163  | 6.42E-08 |
| TUCP_002136 | XLOC_088824 | ENSRNOT00000084667 | 0.974480802  | 8.17E-08 |
| TUCP_002136 | XLOC_088824 | ENSRNOT00000055412 | 0.975693163  | 6.42E-08 |
| TUCP_002136 | XLOC_088824 | ENSRNOT00000093201 | 0.977059805  | 4.81E-08 |
| TUCP_002136 | XLOC_088824 | ENSRNOT00000072724 | 0.975693163  | 6.42E-08 |
| TUCP_002136 | XLOC_088824 | ENSRNOT00000019266 | 0.954176354  | 1.47E-06 |
| TUCP_002136 | XLOC_088824 | ENSRNOT00000082760 | 0.958326189  | 9.23E-07 |
| TUCP_002136 | XLOC_088824 | ENSRNOT00000066017 | 0.977271436  | 4.60E-08 |
| TUCP_002136 | XLOC_088824 | ENSRNOT00000073148 | 0.970507366  | 1.67E-07 |
| TUCP_002136 | XLOC_088824 | ENSRNOT00000077462 | 0.997809517  | 3.96E-13 |
| TUCP_002136 | XLOC_088824 | ENSRNOT00000084375 | 0.975693163  | 6.42E-08 |
| TUCP_002136 | XLOC_088824 | ENSRNOT00000012161 | 0.952587043  | 1.74E-06 |
| TUCP_002136 | XLOC_088824 | ENSRNOT00000042369 | 0.985655243  | 4.67E-09 |
| TUCP_002136 | XLOC_088824 | ENSRNOT00000086554 | 0.975693163  | 6.42E-08 |
| TUCP_002136 | XLOC_088824 | ENSRNOT00000047921 | 0.975693163  | 6.42E-08 |
| TUCP_002136 | XLOC_088824 | ENSRNOT00000064261 | 0.976019683  | 6.00E-08 |
| TUCP_002136 | XLOC_088824 | ENSRNOT00000086660 | 0.972979505  | 1.08E-07 |
| TUCP_002136 | XLOC_088824 | ENSRNOT00000054858 | 0.957136272  | 1.06E-06 |
| TUCP_002136 | XLOC_088824 | ENSRNOT00000092933 | 0.975693163  | 6.42E-08 |
| TUCP_002136 | XLOC_088824 | ENSRNOT00000085447 | 0.979391618  | 2.83E-08 |
| TUCP_002136 | XLOC_088824 | ENSRNOT00000041281 | 0.957874237  | 9.73E-07 |
| TUCP_003067 | XLOC_131550 | ENSRNOT00000038020 | 0.956659389  | 1.12E-06 |
| TUCP_002132 | XLOC_088824 | ENSRNOT00000009802 | 0.959307703  | 8.21E-07 |
| TUCP_002132 | XLOC_088824 | ENSRNOT00000001743 | 0.969245463  | 2.06E-07 |
| TUCP_002132 | XLOC_088824 | ENSRNOT00000076026 | 0.956682551  | 1.12E-06 |
| TUCP_002132 | XLOC_088824 | ENSRNOT00000012977 | 0.959182831  | 8.33E-07 |
| TUCP_002132 | XLOC_088824 | ENSRNOT00000072256 | 0.963196369  | 5.00E-07 |
| TUCP_002132 | XLOC_088824 | ENSRNOT00000016930 | 0.955319954  | 1.30E-06 |
| TUCP_002132 | XLOC_088824 | ENSRNOT00000089059 | 0.952857217  | 1.69E-06 |
| TUCP_002132 | XLOC_088824 | ENSRNOT00000030445 | 0.950828271  | 2.08E-06 |
| TUCP_002132 | XLOC_088824 | ENSRNOT00000046906 | -0.957674893 | 9.96E-07 |
| TUCP_002133 | XLOC_088824 | ENSRNOT00000025254 | 0.953900028  | 1.52E-06 |

|             |             |                     |              |          |
|-------------|-------------|---------------------|--------------|----------|
| TUCP_002133 | XLOC_088824 | ENSRNOT00000001672  | 0.961708768  | 6.08E-07 |
| TUCP_002036 | XLOC_082809 | ENSRNOT000000019919 | -0.962198629 | 5.70E-07 |
| TUCP_002036 | XLOC_082809 | ENSRNOT000000042498 | -0.956859812 | 1.09E-06 |
| TUCP_003215 | XLOC_138405 | ENSRNOT00000001774  | 0.953206599  | 1.63E-06 |
| TUCP_003215 | XLOC_138405 | ENSRNOT000000091965 | 0.95425217   | 1.46E-06 |
| TUCP_003215 | XLOC_138405 | ENSRNOT000000012017 | 0.967514123  | 2.70E-07 |
| TUCP_003215 | XLOC_138405 | ENSRNOT00000001973  | 0.978370615  | 3.60E-08 |
| TUCP_003215 | XLOC_138405 | ENSRNOT00000005155  | -0.954910377 | 1.36E-06 |
| TUCP_003215 | XLOC_138405 | ENSRNOT000000085651 | 0.960914723  | 6.73E-07 |
| TUCP_003215 | XLOC_138405 | ENSRNOT00000006029  | 0.952956473  | 1.68E-06 |
| TUCP_003215 | XLOC_138405 | ENSRNOT000000088884 | 0.986110956  | 3.98E-09 |
| TUCP_003215 | XLOC_138405 | ENSRNOT000000072864 | 0.955181714  | 1.32E-06 |
| TUCP_003215 | XLOC_138405 | ENSRNOT000000040202 | 0.967622124  | 2.65E-07 |
| TUCP_003215 | XLOC_138405 | ENSRNOT000000078793 | -0.956681528 | 1.12E-06 |
| TUCP_003215 | XLOC_138405 | ENSRNOT000000021129 | 0.987880559  | 2.02E-09 |
| TUCP_003215 | XLOC_138405 | ENSRNOT000000083983 | 0.952373382  | 1.78E-06 |
| TUCP_003215 | XLOC_138405 | ENSRNOT000000050227 | 0.956918989  | 1.09E-06 |
| TUCP_003215 | XLOC_138405 | ENSRNOT000000076349 | -0.956077254 | 1.20E-06 |
| TUCP_003215 | XLOC_138405 | ENSRNOT00000003636  | 0.960540757  | 7.05E-07 |
| TUCP_003215 | XLOC_138405 | ENSRNOT000000014095 | 0.958418134  | 9.13E-07 |
| TUCP_003215 | XLOC_138405 | ENSRNOT000000014694 | 0.956246454  | 1.17E-06 |
| TUCP_002033 | XLOC_082796 | ENSRNOT000000084133 | 0.985700595  | 4.60E-09 |
| TUCP_002033 | XLOC_082796 | ENSRNOT000000093745 | 0.963191714  | 5.00E-07 |
| TUCP_002033 | XLOC_082796 | ENSRNOT000000065542 | 0.984257189  | 7.42E-09 |
| TUCP_002033 | XLOC_082796 | ENSRNOT000000082464 | 0.985700595  | 4.60E-09 |
| TUCP_002033 | XLOC_082796 | ENSRNOT000000087659 | 0.985700595  | 4.60E-09 |
| TUCP_002033 | XLOC_082796 | ENSRNOT000000084582 | 0.973524505  | 9.80E-08 |
| TUCP_002033 | XLOC_082796 | ENSRNOT000000085078 | 0.985700595  | 4.60E-09 |
| TUCP_002033 | XLOC_082796 | ENSRNOT000000014028 | 0.985700595  | 4.60E-09 |
| TUCP_002033 | XLOC_082796 | ENSRNOT000000049363 | 0.985700595  | 4.60E-09 |
| TUCP_002033 | XLOC_082796 | ENSRNOT000000065473 | 0.985634189  | 4.70E-09 |
| TUCP_002033 | XLOC_082796 | ENSRNOT00000000142  | 0.983088182  | 1.06E-08 |
| TUCP_002033 | XLOC_082796 | ENSRNOT000000082288 | 0.985608449  | 4.75E-09 |
| TUCP_002033 | XLOC_082796 | ENSRNOT000000039664 | 0.985700595  | 4.60E-09 |
| TUCP_002033 | XLOC_082796 | ENSRNOT000000065402 | 0.985700595  | 4.60E-09 |
| TUCP_002033 | XLOC_082796 | ENSRNOT000000084141 | 0.985700595  | 4.60E-09 |
| TUCP_002033 | XLOC_082796 | ENSRNOT000000082435 | 0.985700595  | 4.60E-09 |
| TUCP_002033 | XLOC_082796 | ENSRNOT000000082928 | 0.980528048  | 2.13E-08 |
| TUCP_002033 | XLOC_082796 | ENSRNOT000000066546 | 0.955495002  | 1.28E-06 |
| TUCP_002033 | XLOC_082796 | ENSRNOT000000046013 | 0.973650571  | 9.57E-08 |
| TUCP_002033 | XLOC_082796 | ENSRNOT000000067931 | 0.984956801  | 5.92E-09 |
| TUCP_002033 | XLOC_082796 | ENSRNOT000000086425 | 0.982376149  | 1.30E-08 |
| TUCP_002033 | XLOC_082796 | ENSRNOT000000036228 | 0.962010394  | 5.85E-07 |
| TUCP_002033 | XLOC_082796 | ENSRNOT000000014030 | 0.985700595  | 4.60E-09 |
| TUCP_002033 | XLOC_082796 | ENSRNOT000000081966 | 0.985700595  | 4.60E-09 |
| TUCP_002033 | XLOC_082796 | ENSRNOT000000075906 | 0.985700595  | 4.60E-09 |
| TUCP_002033 | XLOC_082796 | ENSRNOT000000088396 | 0.983064831  | 1.07E-08 |
| TUCP_002033 | XLOC_082796 | ENSRNOT000000049259 | 0.954276094  | 1.46E-06 |
| TUCP_002033 | XLOC_082796 | ENSRNOT000000092838 | 0.961959173  | 5.89E-07 |
| TUCP_002033 | XLOC_082796 | ENSRNOT000000093442 | 0.969273616  | 2.05E-07 |
| TUCP_003972 | XLOC_174241 | ENSRNOT000000090755 | 0.957564697  | 1.01E-06 |

|             |             |                    |              |          |
|-------------|-------------|--------------------|--------------|----------|
| TUCP_003972 | XLOC_174241 | ENSRNOT00000036565 | 0.964865239  | 3.97E-07 |
| TUCP_002039 | XLOC_082827 | ENSRNOT00000061786 | -0.970443802 | 1.69E-07 |
| TUCP_001238 | XLOC_046072 | ENSRNOT00000077328 | 0.984558699  | 6.74E-09 |
| TUCP_001239 | XLOC_046143 | ENSRNOT00000045833 | 0.962092822  | 5.78E-07 |
| TUCP_001239 | XLOC_046143 | ENSRNOT00000090621 | 0.951527744  | 1.94E-06 |
| TUCP_001239 | XLOC_046143 | ENSRNOT00000063930 | -0.956176307 | 1.18E-06 |
| TUCP_001239 | XLOC_046143 | ENSRNOT00000000181 | 0.961464483  | 6.27E-07 |
| TUCP_001239 | XLOC_046143 | ENSRNOT00000031047 | 0.951087741  | 2.03E-06 |
| TUCP_001239 | XLOC_046143 | ENSRNOT00000056199 | -0.952253081 | 1.80E-06 |
| TUCP_001239 | XLOC_046143 | ENSRNOT00000008074 | -0.961921001 | 5.91E-07 |
| TUCP_001239 | XLOC_046143 | ENSRNOT00000042633 | -0.957356342 | 1.03E-06 |
| TUCP_001239 | XLOC_046143 | ENSRNOT00000074028 | 0.950810127  | 2.09E-06 |
| TUCP_001239 | XLOC_046143 | ENSRNOT00000019180 | -0.962982981 | 5.14E-07 |
| TUCP_001239 | XLOC_046143 | ENSRNOT00000017385 | -0.976720441 | 5.18E-08 |
| TUCP_001239 | XLOC_046143 | ENSRNOT00000006752 | 0.954250853  | 1.46E-06 |
| TUCP_001239 | XLOC_046143 | ENSRNOT00000022746 | -0.9722414   | 1.24E-07 |
| TUCP_001239 | XLOC_046143 | ENSRNOT00000016306 | -0.962933094 | 5.18E-07 |
| TUCP_001239 | XLOC_046143 | ENSRNOT00000087604 | 0.972955955  | 1.09E-07 |
| TUCP_001239 | XLOC_046143 | ENSRNOT00000019921 | 0.951758718  | 1.90E-06 |
| TUCP_001239 | XLOC_046143 | ENSRNOT00000065978 | 0.95395818   | 1.51E-06 |
| TUCP_001239 | XLOC_046143 | ENSRNOT00000005620 | -0.967299942 | 2.79E-07 |
| TUCP_001239 | XLOC_046143 | ENSRNOT00000020910 | 0.953049897  | 1.66E-06 |
| TUCP_001239 | XLOC_046143 | ENSRNOT00000003012 | -0.955098006 | 1.33E-06 |
| TUCP_001239 | XLOC_046143 | ENSRNOT00000026550 | 0.958858279  | 8.66E-07 |
| TUCP_001239 | XLOC_046143 | ENSRNOT00000013286 | 0.96736973   | 2.76E-07 |
| TUCP_001239 | XLOC_046143 | ENSRNOT00000017648 | -0.951562836 | 1.94E-06 |
| TUCP_001239 | XLOC_046143 | ENSRNOT00000026258 | 0.950957219  | 2.06E-06 |
| TUCP_001239 | XLOC_046143 | ENSRNOT00000018634 | -0.96318765  | 5.00E-07 |
| TUCP_001239 | XLOC_046143 | ENSRNOT00000075934 | -0.955851126 | 1.23E-06 |
| TUCP_001239 | XLOC_046143 | ENSRNOT00000021030 | -0.951169805 | 2.01E-06 |
| TUCP_001239 | XLOC_046143 | ENSRNOT00000064776 | -0.95367813  | 1.55E-06 |
| TUCP_001239 | XLOC_046143 | ENSRNOT00000033806 | 0.965623233  | 3.57E-07 |
| TUCP_001239 | XLOC_046143 | ENSRNOT00000009150 | 0.959235528  | 8.28E-07 |
| TUCP_001239 | XLOC_046143 | ENSRNOT00000029179 | -0.955497193 | 1.28E-06 |
| TUCP_001239 | XLOC_046143 | ENSRNOT00000087748 | -0.958940791 | 8.58E-07 |
| TUCP_001239 | XLOC_046143 | ENSRNOT00000034069 | 0.959779565  | 7.75E-07 |
| TUCP_001239 | XLOC_046143 | ENSRNOT00000014506 | -0.954513399 | 1.42E-06 |
| TUCP_001239 | XLOC_046143 | ENSRNOT00000023262 | -0.969939054 | 1.84E-07 |
| TUCP_001239 | XLOC_046143 | ENSRNOT00000059246 | 0.95549328   | 1.28E-06 |
| TUCP_001239 | XLOC_046143 | ENSRNOT00000078185 | -0.952503041 | 1.76E-06 |
| TUCP_001239 | XLOC_046143 | ENSRNOT00000020537 | -0.950746342 | 2.10E-06 |
| TUCP_001239 | XLOC_046143 | ENSRNOT00000036658 | -0.966196435 | 3.28E-07 |
| TUCP_001239 | XLOC_046143 | ENSRNOT00000089611 | 0.953553466  | 1.57E-06 |
| TUCP_001239 | XLOC_046143 | ENSRNOT00000005604 | 0.974385402  | 8.32E-08 |
| TUCP_001239 | XLOC_046143 | ENSRNOT00000037389 | -0.9517558   | 1.90E-06 |
| TUCP_001239 | XLOC_046143 | ENSRNOT00000055957 | -0.950814508 | 2.09E-06 |
| TUCP_001239 | XLOC_046143 | ENSRNOT00000008772 | -0.957586136 | 1.01E-06 |
| TUCP_001239 | XLOC_046143 | ENSRNOT00000066098 | -0.963333944 | 4.91E-07 |
| TUCP_001239 | XLOC_046143 | ENSRNOT00000008253 | -0.960905928 | 6.73E-07 |
| TUCP_001239 | XLOC_046143 | ENSRNOT00000045765 | -0.964623287 | 4.11E-07 |
| TUCP_001239 | XLOC_046143 | ENSRNOT00000085736 | -0.96071964  | 6.89E-07 |



|             |             |                    |              |          |
|-------------|-------------|--------------------|--------------|----------|
| TUCP_001239 | XLOC_046143 | ENSRNOT00000026531 | -0.955502104 | 1.27E-06 |
| TUCP_001239 | XLOC_046143 | ENSRNOT00000088214 | 0.965673546  | 3.54E-07 |
| TUCP_001239 | XLOC_046143 | ENSRNOT00000020316 | -0.951867541 | 1.88E-06 |
| TUCP_001239 | XLOC_046143 | ENSRNOT00000032324 | 0.952774386  | 1.71E-06 |
| TUCP_001239 | XLOC_046143 | ENSRNOT00000029701 | 0.956488398  | 1.14E-06 |
| TUCP_001239 | XLOC_046143 | ENSRNOT00000015518 | -0.96428549  | 4.31E-07 |
| TUCP_001239 | XLOC_046143 | ENSRNOT00000012216 | -0.965235023 | 3.77E-07 |
| TUCP_001239 | XLOC_046143 | ENSRNOT00000034400 | -0.951829967 | 1.88E-06 |
| TUCP_001239 | XLOC_046143 | ENSRNOT00000013801 | 0.960698642  | 6.91E-07 |
| TUCP_001239 | XLOC_046143 | ENSRNOT00000085355 | -0.956636207 | 1.12E-06 |
| TUCP_001239 | XLOC_046143 | ENSRNOT00000080222 | -0.952140615 | 1.82E-06 |
| TUCP_001239 | XLOC_046143 | ENSRNOT00000049725 | -0.952514566 | 1.76E-06 |
| TUCP_001239 | XLOC_046143 | ENSRNOT00000087329 | -0.974253848 | 8.53E-08 |
| TUCP_001239 | XLOC_046143 | ENSRNOT00000075209 | -0.962926877 | 5.18E-07 |
| TUCP_001239 | XLOC_046143 | ENSRNOT00000046268 | -0.958752223 | 8.77E-07 |
| TUCP_001239 | XLOC_046143 | ENSRNOT00000010993 | 0.954216818  | 1.47E-06 |
| TUCP_001239 | XLOC_046143 | ENSRNOT00000059181 | 0.954638971  | 1.40E-06 |
| TUCP_001239 | XLOC_046143 | ENSRNOT00000005873 | -0.959612269 | 7.91E-07 |
| TUCP_001239 | XLOC_046143 | ENSRNOT00000009994 | -0.952110871 | 1.83E-06 |
| TUCP_001239 | XLOC_046143 | ENSRNOT00000014885 | -0.952614906 | 1.74E-06 |
| TUCP_001239 | XLOC_046143 | ENSRNOT00000035145 | -0.964297798 | 4.30E-07 |
| TUCP_001239 | XLOC_046143 | ENSRNOT00000015537 | 0.95713294   | 1.06E-06 |
| TUCP_001239 | XLOC_046143 | ENSRNOT00000001135 | -0.959943973 | 7.59E-07 |
| TUCP_001239 | XLOC_046143 | ENSRNOT00000023965 | -0.950406137 | 2.17E-06 |
| TUCP_001239 | XLOC_046143 | ENSRNOT00000010983 | 0.957451224  | 1.02E-06 |
| TUCP_001239 | XLOC_046143 | ENSRNOT00000093672 | -0.956184094 | 1.18E-06 |
| TUCP_001239 | XLOC_046143 | ENSRNOT00000025460 | 0.952165771  | 1.82E-06 |
| TUCP_001239 | XLOC_046143 | ENSRNOT00000019076 | -0.953030934 | 1.66E-06 |
| TUCP_001239 | XLOC_046143 | ENSRNOT00000075800 | -0.951891523 | 1.87E-06 |
| TUCP_001239 | XLOC_046143 | ENSRNOT00000016568 | 0.951730602  | 1.90E-06 |
| TUCP_001239 | XLOC_046143 | ENSRNOT00000024947 | -0.955100818 | 1.33E-06 |
| TUCP_001239 | XLOC_046143 | ENSRNOT00000082904 | 0.964940212  | 3.93E-07 |
| TUCP_001239 | XLOC_046143 | ENSRNOT00000010906 | -0.952570405 | 1.75E-06 |
| TUCP_001239 | XLOC_046143 | ENSRNOT00000015223 | 0.967456382  | 2.72E-07 |
| TUCP_001239 | XLOC_046143 | ENSRNOT00000023628 | -0.952980867 | 1.67E-06 |
| TUCP_001239 | XLOC_046143 | ENSRNOT00000025314 | 0.963326624  | 4.91E-07 |
| TUCP_001239 | XLOC_046143 | ENSRNOT00000025887 | -0.95592987  | 1.22E-06 |
| TUCP_001239 | XLOC_046143 | ENSRNOT00000024253 | 0.952521083  | 1.75E-06 |
| TUCP_001230 | XLOC_045722 | ENSRNOT00000084075 | 0.996106112  | 7.00E-12 |
| TUCP_001230 | XLOC_045722 | ENSRNOT00000012880 | 0.968043129  | 2.49E-07 |
| TUCP_001230 | XLOC_045722 | ENSRNOT00000074465 | 1            | 0        |
| TUCP_001230 | XLOC_045722 | ENSRNOT00000090898 | 0.961670541  | 6.11E-07 |
| TUCP_001230 | XLOC_045722 | ENSRNOT00000079805 | 0.997980451  | 2.64E-13 |
| TUCP_001230 | XLOC_045722 | ENSRNOT00000040912 | 1            | 0        |
| TUCP_001230 | XLOC_045722 | ENSRNOT00000072648 | 1            | 1.33E-79 |
| TUCP_001230 | XLOC_045722 | ENSRNOT00000007398 | 0.989054103  | 1.21E-09 |
| TUCP_001230 | XLOC_045722 | ENSRNOT00000070803 | 1            | 0        |
| TUCP_001230 | XLOC_045722 | ENSRNOT00000012196 | 1            | 0        |
| TUCP_001230 | XLOC_045722 | ENSRNOT00000085772 | 1            | 0        |
| TUCP_001230 | XLOC_045722 | ENSRNOT00000093284 | 0.999975856  | 6.46E-23 |
| TUCP_001230 | XLOC_045722 | ENSRNOT00000086374 | 0.993568904  | 8.57E-11 |

|             |             |                    |              |          |
|-------------|-------------|--------------------|--------------|----------|
| TUCP_001230 | XLOC_045722 | ENSRNOT00000015270 | 1            | 0        |
| TUCP_001230 | XLOC_045722 | ENSRNOT00000046192 | 1            | 0        |
| TUCP_001230 | XLOC_045722 | ENSRNOT00000044226 | 1            | 0        |
| TUCP_001230 | XLOC_045722 | ENSRNOT00000081898 | 0.989837012  | 8.39E-10 |
| TUCP_001230 | XLOC_045722 | ENSRNOT00000081954 | 0.964005219  | 4.48E-07 |
| TUCP_001230 | XLOC_045722 | ENSRNOT00000080291 | 0.998427671  | 7.55E-14 |
| TUCP_001230 | XLOC_045722 | ENSRNOT00000004293 | 0.984239049  | 7.46E-09 |
| TUCP_001230 | XLOC_045722 | ENSRNOT00000078231 | 0.960455489  | 7.13E-07 |
| TUCP_001230 | XLOC_045722 | ENSRNOT00000002834 | 1            | 0        |
| TUCP_001230 | XLOC_045722 | ENSRNOT00000001464 | 1            | 0        |
| TUCP_001230 | XLOC_045722 | ENSRNOT00000090716 | 0.994769629  | 3.06E-11 |
| TUCP_001230 | XLOC_045722 | ENSRNOT00000083542 | 0.972568514  | 1.17E-07 |
| TUCP_001230 | XLOC_045722 | ENSRNOT00000076044 | 1            | 0        |
| TUCP_001230 | XLOC_045722 | ENSRNOT00000074353 | 1            | 0        |
| TUCP_001230 | XLOC_045722 | ENSRNOT00000043510 | 0.958144129  | 9.43E-07 |
| TUCP_001230 | XLOC_045722 | ENSRNOT00000087122 | 0.980089513  | 2.38E-08 |
| TUCP_001230 | XLOC_045722 | ENSRNOT00000074295 | 0.987777006  | 2.11E-09 |
| TUCP_001230 | XLOC_045722 | ENSRNOT00000057873 | 1            | 1.33E-79 |
| TUCP_001230 | XLOC_045722 | ENSRNOT00000083002 | 0.988874897  | 1.32E-09 |
| TUCP_001230 | XLOC_045722 | ENSRNOT00000088399 | 0.999999855  | 4.99E-34 |
| TUCP_001230 | XLOC_045722 | ENSRNOT00000086248 | 1            | 0        |
| TUCP_001230 | XLOC_045722 | ENSRNOT00000089750 | 0.999992758  | 1.57E-25 |
| TUCP_001230 | XLOC_045722 | ENSRNOT00000030517 | 0.971225224  | 1.48E-07 |
| TUCP_001230 | XLOC_045722 | ENSRNOT00000034772 | 0.994265187  | 4.84E-11 |
| TUCP_001230 | XLOC_045722 | ENSRNOT00000089305 | 0.969641693  | 1.93E-07 |
| TUCP_001230 | XLOC_045722 | ENSRNOT00000024580 | 0.954183021  | 1.47E-06 |
| TUCP_001230 | XLOC_045722 | ENSRNOT00000064601 | 0.966578038  | 3.11E-07 |
| TUCP_001230 | XLOC_045722 | ENSRNOT00000015870 | 0.965901306  | 3.43E-07 |
| TUCP_001230 | XLOC_045722 | ENSRNOT00000080812 | 0.992998865  | 1.31E-10 |
| TUCP_001230 | XLOC_045722 | ENSRNOT00000092755 | 1            | 0        |
| TUCP_001230 | XLOC_045722 | ENSRNOT00000031683 | 1            | 1.33E-79 |
| TUCP_001230 | XLOC_045722 | ENSRNOT00000087764 | 0.988156196  | 1.80E-09 |
| TUCP_001231 | XLOC_045784 | ENSRNOT00000065111 | 0.954337388  | 1.45E-06 |
| TUCP_001231 | XLOC_045784 | ENSRNOT00000006947 | 0.956346102  | 1.16E-06 |
| TUCP_001231 | XLOC_045784 | ENSRNOT00000005505 | 0.972066514  | 1.28E-07 |
| TUCP_001231 | XLOC_045784 | ENSRNOT00000021590 | 0.958876171  | 8.64E-07 |
| TUCP_001231 | XLOC_045784 | ENSRNOT00000091359 | -0.957317817 | 1.04E-06 |
| TUCP_001231 | XLOC_045784 | ENSRNOT00000010142 | 0.950696598  | 2.11E-06 |
| TUCP_001231 | XLOC_045784 | ENSRNOT00000024583 | -0.955521544 | 1.27E-06 |
| TUCP_001231 | XLOC_045784 | ENSRNOT00000006109 | 0.95309849   | 1.65E-06 |
| TUCP_001231 | XLOC_045784 | ENSRNOT00000091315 | 0.959118998  | 8.40E-07 |
| TUCP_001232 | XLOC_045802 | ENSRNOT00000091315 | 0.958794472  | 8.73E-07 |
| TUCP_001232 | XLOC_045802 | ENSRNOT00000089934 | 0.952583225  | 1.74E-06 |
| TUCP_001233 | XLOC_045870 | ENSRNOT00000010561 | 0.970821579  | 1.59E-07 |
| TUCP_001233 | XLOC_045870 | ENSRNOT00000010680 | 0.956188396  | 1.18E-06 |
| TUCP_001233 | XLOC_045870 | ENSRNOT00000020376 | 0.950215897  | 2.21E-06 |
| TUCP_001233 | XLOC_045870 | ENSRNOT00000072682 | 0.962319844  | 5.61E-07 |
| TUCP_001233 | XLOC_045870 | ENSRNOT00000044419 | 0.951215951  | 2.00E-06 |
| TUCP_001233 | XLOC_045870 | ENSRNOT00000022309 | 0.968961505  | 2.15E-07 |
| TUCP_001233 | XLOC_045870 | ENSRNOT00000010939 | 0.952497011  | 1.76E-06 |
| TUCP_001233 | XLOC_045870 | ENSRNOT00000081631 | 0.954181975  | 1.47E-06 |

|             |             |                    |              |          |
|-------------|-------------|--------------------|--------------|----------|
| TUCP_001233 | XLOC_045870 | ENSRNOT00000021715 | 0.951959099  | 1.86E-06 |
| TUCP_001233 | XLOC_045870 | ENSRNOT00000017829 | 0.957389053  | 1.03E-06 |
| TUCP_001233 | XLOC_045870 | ENSRNOT00000083344 | 0.958953246  | 8.56E-07 |
| TUCP_001233 | XLOC_045870 | ENSRNOT00000006160 | 0.950377087  | 2.18E-06 |
| TUCP_001233 | XLOC_045870 | ENSRNOT00000061132 | 0.953357156  | 1.61E-06 |
| TUCP_001233 | XLOC_045870 | ENSRNOT00000026518 | 0.959727723  | 7.80E-07 |
| TUCP_001233 | XLOC_045870 | ENSRNOT00000028624 | 0.953055452  | 1.66E-06 |
| TUCP_001233 | XLOC_045870 | ENSRNOT00000065801 | 0.960623011  | 6.98E-07 |
| TUCP_001233 | XLOC_045870 | ENSRNOT00000088385 | 0.96383575   | 4.58E-07 |
| TUCP_001233 | XLOC_045870 | ENSRNOT00000079152 | 0.957677312  | 9.96E-07 |
| TUCP_001233 | XLOC_045870 | ENSRNOT00000014382 | 0.954035359  | 1.50E-06 |
| TUCP_001233 | XLOC_045870 | ENSRNOT00000048687 | 0.96965993   | 1.92E-07 |
| TUCP_001233 | XLOC_045870 | ENSRNOT00000026381 | -0.9585667   | 8.97E-07 |
| TUCP_001233 | XLOC_045870 | ENSRNOT00000018892 | 0.953165599  | 1.64E-06 |
| TUCP_001233 | XLOC_045870 | ENSRNOT00000082513 | 0.950022035  | 2.26E-06 |
| TUCP_001233 | XLOC_045870 | ENSRNOT00000008440 | 0.950999496  | 2.05E-06 |
| TUCP_001233 | XLOC_045870 | ENSRNOT00000006071 | 0.951529963  | 1.94E-06 |
| TUCP_001233 | XLOC_045870 | ENSRNOT00000064122 | 0.966545432  | 3.12E-07 |
| TUCP_001233 | XLOC_045870 | ENSRNOT00000059169 | 0.953222712  | 1.63E-06 |
| TUCP_001233 | XLOC_045870 | ENSRNOT00000036137 | 0.954175199  | 1.47E-06 |
| TUCP_001233 | XLOC_045870 | ENSRNOT00000020929 | 0.959158233  | 8.36E-07 |
| TUCP_001233 | XLOC_045870 | ENSRNOT00000064070 | 0.952337379  | 1.79E-06 |
| TUCP_001233 | XLOC_045870 | ENSRNOT00000023623 | 0.958754629  | 8.77E-07 |
| TUCP_001233 | XLOC_045870 | ENSRNOT00000013582 | -0.960979543 | 6.67E-07 |
| TUCP_001233 | XLOC_045870 | ENSRNOT00000066598 | 0.963072691  | 5.08E-07 |
| TUCP_001233 | XLOC_045870 | ENSRNOT00000009398 | 0.968125535  | 2.46E-07 |
| TUCP_001233 | XLOC_045870 | ENSRNOT00000092757 | 0.957748497  | 9.88E-07 |
| TUCP_001233 | XLOC_045870 | ENSRNOT0000003932  | 0.95984542   | 7.68E-07 |
| TUCP_001233 | XLOC_045870 | ENSRNOT00000011773 | 0.955255894  | 1.31E-06 |
| TUCP_001234 | XLOC_045961 | ENSRNOT00000089305 | 0.961036254  | 6.62E-07 |
| TUCP_001234 | XLOC_045961 | ENSRNOT00000012880 | 0.956233993  | 1.17E-06 |
| TUCP_001236 | XLOC_046026 | ENSRNOT00000024689 | -0.952766111 | 1.71E-06 |
| TUCP_003216 | XLOC_138407 | ENSRNOT00000017199 | 0.965425058  | 3.67E-07 |
| TUCP_000969 | XLOC_035606 | ENSRNOT00000058885 | 0.978827179  | 3.23E-08 |
| TUCP_000963 | XLOC_035238 | ENSRNOT00000010799 | 0.96868245   | 2.25E-07 |
| TUCP_003719 | XLOC_162333 | ENSRNOT00000031625 | -0.955808148 | 1.23E-06 |
| TUCP_003719 | XLOC_162333 | ENSRNOT00000078743 | 0.951577311  | 1.93E-06 |
| TUCP_000845 | XLOC_032509 | ENSRNOT00000009706 | -0.970141849 | 1.78E-07 |
| TUCP_003711 | XLOC_162168 | ENSRNOT00000030373 | -0.951537826 | 1.94E-06 |
| TUCP_003711 | XLOC_162168 | ENSRNOT00000007949 | -0.953082664 | 1.65E-06 |
| TUCP_003711 | XLOC_162168 | ENSRNOT00000026641 | 0.953826518  | 1.53E-06 |
| TUCP_003711 | XLOC_162168 | ENSRNOT00000076105 | -0.952199156 | 1.81E-06 |
| TUCP_003711 | XLOC_162168 | ENSRNOT00000050885 | 0.951780057  | 1.89E-06 |
| TUCP_003711 | XLOC_162168 | ENSRNOT00000020272 | -0.950683857 | 2.11E-06 |
| TUCP_003711 | XLOC_162168 | ENSRNOT00000001759 | -0.953056904 | 1.66E-06 |
| TUCP_003711 | XLOC_162168 | ENSRNOT00000086350 | -0.957622477 | 1.00E-06 |
| TUCP_003711 | XLOC_162168 | ENSRNOT00000083891 | -0.966627446 | 3.08E-07 |
| TUCP_003711 | XLOC_162168 | ENSRNOT00000078746 | -0.960428268 | 7.15E-07 |
| TUCP_003711 | XLOC_162168 | ENSRNOT00000064452 | -0.952306933 | 1.79E-06 |
| TUCP_003711 | XLOC_162168 | ENSRNOT00000022714 | 0.969683861  | 1.92E-07 |
| TUCP_003711 | XLOC_162168 | ENSRNOT00000033048 | -0.950330012 | 2.19E-06 |

|             |             |                    |              |          |
|-------------|-------------|--------------------|--------------|----------|
| TUCP_003711 | XLOC_162168 | ENSRNOT00000015579 | -0.956440055 | 1.15E-06 |
| TUCP_003711 | XLOC_162168 | ENSRNOT00000017420 | -0.95095528  | 2.06E-06 |
| TUCP_000849 | XLOC_032509 | ENSRNOT00000092489 | 0.959494077  | 8.02E-07 |
| TUCP_003713 | XLOC_162197 | ENSRNOT00000036506 | 0.950817155  | 2.09E-06 |
| TUCP_003713 | XLOC_162197 | ENSRNOT00000031904 | 0.950584523  | 2.14E-06 |
| TUCP_003713 | XLOC_162197 | ENSRNOT00000026941 | 0.962963314  | 5.16E-07 |
| TUCP_003713 | XLOC_162197 | ENSRNOT00000075656 | -0.965544913 | 3.61E-07 |
| TUCP_003713 | XLOC_162197 | ENSRNOT00000027083 | 0.972049295  | 1.28E-07 |
| TUCP_003713 | XLOC_162197 | ENSRNOT00000075397 | 0.951872253  | 1.88E-06 |
| TUCP_003713 | XLOC_162197 | ENSRNOT00000021850 | 0.953769226  | 1.54E-06 |
| TUCP_003713 | XLOC_162197 | ENSRNOT00000023638 | 0.962641868  | 5.38E-07 |
| TUCP_003713 | XLOC_162197 | ENSRNOT0000001691  | 0.952539394  | 1.75E-06 |
| TUCP_003713 | XLOC_162197 | ENSRNOT00000082863 | 0.951193613  | 2.01E-06 |
| TUCP_003713 | XLOC_162197 | ENSRNOT00000005220 | 0.952208753  | 1.81E-06 |
| TUCP_003713 | XLOC_162197 | ENSRNOT00000023144 | 0.957528851  | 1.01E-06 |
| TUCP_003713 | XLOC_162197 | ENSRNOT00000082869 | 0.956261282  | 1.17E-06 |
| TUCP_003713 | XLOC_162197 | ENSRNOT00000016649 | 0.96963593   | 1.93E-07 |
| TUCP_003713 | XLOC_162197 | ENSRNOT00000045233 | -0.961387452 | 6.33E-07 |
| TUCP_003713 | XLOC_162197 | ENSRNOT00000074023 | 0.951701554  | 1.91E-06 |
| TUCP_003713 | XLOC_162197 | ENSRNOT00000055683 | 0.954083448  | 1.49E-06 |
| TUCP_003713 | XLOC_162197 | ENSRNOT00000001586 | -0.950883251 | 2.07E-06 |
| TUCP_003713 | XLOC_162197 | ENSRNOT00000033017 | 0.950476006  | 2.16E-06 |
| TUCP_003713 | XLOC_162197 | ENSRNOT00000055540 | 0.954021357  | 1.50E-06 |
| TUCP_003713 | XLOC_162197 | ENSRNOT00000012187 | 0.951020422  | 2.04E-06 |
| TUCP_003713 | XLOC_162197 | ENSRNOT00000057814 | 0.954068993  | 1.49E-06 |
| TUCP_003713 | XLOC_162197 | ENSRNOT00000085251 | -0.964859019 | 3.98E-07 |
| TUCP_003713 | XLOC_162197 | ENSRNOT00000015170 | -0.954210085 | 1.47E-06 |
| TUCP_003713 | XLOC_162197 | ENSRNOT00000065300 | 0.961469483  | 6.27E-07 |
| TUCP_003713 | XLOC_162197 | ENSRNOT00000044628 | 0.969494494  | 1.98E-07 |
| TUCP_003713 | XLOC_162197 | ENSRNOT00000090338 | -0.952715916 | 1.72E-06 |
| TUCP_003713 | XLOC_162197 | ENSRNOT00000035989 | 0.966576498  | 3.11E-07 |
| TUCP_003713 | XLOC_162197 | ENSRNOT00000057160 | 0.965458391  | 3.65E-07 |
| TUCP_003713 | XLOC_162197 | ENSRNOT00000089933 | 0.961883429  | 5.94E-07 |
| TUCP_003713 | XLOC_162197 | ENSRNOT00000067009 | -0.954229061 | 1.46E-06 |
| TUCP_003713 | XLOC_162197 | ENSRNOT00000003412 | -0.951306431 | 1.99E-06 |
| TUCP_003713 | XLOC_162197 | ENSRNOT00000012881 | -0.956169952 | 1.18E-06 |
| TUCP_003713 | XLOC_162197 | ENSRNOT00000090129 | -0.95267432  | 1.73E-06 |
| TUCP_003713 | XLOC_162197 | ENSRNOT00000084012 | 0.975409045  | 6.80E-08 |
| TUCP_003713 | XLOC_162197 | ENSRNOT0000002560  | 0.95433127   | 1.45E-06 |
| TUCP_003713 | XLOC_162197 | ENSRNOT00000005292 | 0.957241527  | 1.05E-06 |
| TUCP_003713 | XLOC_162197 | ENSRNOT00000088133 | -0.957766396 | 9.86E-07 |
| TUCP_003713 | XLOC_162197 | ENSRNOT00000080677 | -0.950609904 | 2.13E-06 |
| TUCP_003713 | XLOC_162197 | ENSRNOT00000016428 | 0.961002622  | 6.65E-07 |
| TUCP_003713 | XLOC_162197 | ENSRNOT00000003940 | -0.961640715 | 6.13E-07 |
| TUCP_003713 | XLOC_162197 | ENSRNOT00000081678 | 0.952525186  | 1.75E-06 |
| TUCP_003713 | XLOC_162197 | ENSRNOT00000037133 | 0.963011852  | 5.12E-07 |
| TUCP_003713 | XLOC_162197 | ENSRNOT00000025362 | -0.95897131  | 8.55E-07 |
| TUCP_003713 | XLOC_162197 | ENSRNOT00000010541 | 0.965754395  | 3.50E-07 |
| TUCP_003713 | XLOC_162197 | ENSRNOT00000023619 | 0.956215049  | 1.18E-06 |
| TUCP_003713 | XLOC_162197 | ENSRNOT00000017949 | -0.960393964 | 7.18E-07 |
| TUCP_003713 | XLOC_162197 | ENSRNOT00000009900 | -0.959577139 | 7.94E-07 |

|             |             |                    |              |          |
|-------------|-------------|--------------------|--------------|----------|
| TUCP_003713 | XLOC_162197 | ENSRNOT00000091909 | 0.9623725    | 5.58E-07 |
| TUCP_003713 | XLOC_162197 | ENSRNOT00000009563 | -0.965875988 | 3.44E-07 |
| TUCP_003713 | XLOC_162197 | ENSRNOT00000025856 | -0.955996802 | 1.21E-06 |
| TUCP_003713 | XLOC_162197 | ENSRNOT00000003544 | -0.95435369  | 1.45E-06 |
| TUCP_003713 | XLOC_162197 | ENSRNOT00000021925 | 0.957584614  | 1.01E-06 |
| TUCP_003713 | XLOC_162197 | ENSRNOT00000087429 | 0.97259281   | 1.16E-07 |
| TUCP_003713 | XLOC_162197 | ENSRNOT00000026643 | 0.968148858  | 2.45E-07 |
| TUCP_003713 | XLOC_162197 | ENSRNOT00000022190 | -0.951225437 | 2.00E-06 |
| TUCP_003713 | XLOC_162197 | ENSRNOT00000016132 | -0.957437106 | 1.02E-06 |
| TUCP_003713 | XLOC_162197 | ENSRNOT00000025913 | -0.953354168 | 1.61E-06 |
| TUCP_003713 | XLOC_162197 | ENSRNOT00000058495 | -0.959070991 | 8.44E-07 |
| TUCP_003713 | XLOC_162197 | ENSRNOT00000091602 | -0.959243365 | 8.27E-07 |
| TUCP_003713 | XLOC_162197 | ENSRNOT00000086577 | 0.954210338  | 1.47E-06 |
| TUCP_003713 | XLOC_162197 | ENSRNOT00000065600 | 0.950878704  | 2.07E-06 |
| TUCP_003713 | XLOC_162197 | ENSRNOT00000086119 | -0.955290096 | 1.31E-06 |
| TUCP_003713 | XLOC_162197 | ENSRNOT00000033975 | 0.953055528  | 1.66E-06 |
| TUCP_003713 | XLOC_162197 | ENSRNOT00000004319 | -0.955421392 | 1.29E-06 |
| TUCP_003713 | XLOC_162197 | ENSRNOT00000044608 | -0.968318029 | 2.38E-07 |
| TUCP_003713 | XLOC_162197 | ENSRNOT00000007314 | -0.962452187 | 5.52E-07 |
| TUCP_003713 | XLOC_162197 | ENSRNOT00000014821 | -0.956049556 | 1.20E-06 |
| TUCP_003713 | XLOC_162197 | ENSRNOT00000020155 | 0.950282568  | 2.20E-06 |
| TUCP_003713 | XLOC_162197 | ENSRNOT00000088599 | 0.970907154  | 1.56E-07 |
| TUCP_003713 | XLOC_162197 | ENSRNOT00000016445 | 0.970413215  | 1.70E-07 |
| TUCP_003713 | XLOC_162197 | ENSRNOT00000081047 | 0.965032873  | 3.88E-07 |
| TUCP_003713 | XLOC_162197 | ENSRNOT00000005387 | 0.95173038   | 1.90E-06 |
| TUCP_003713 | XLOC_162197 | ENSRNOT00000083351 | -0.955021232 | 1.34E-06 |
| TUCP_003713 | XLOC_162197 | ENSRNOT00000000302 | 0.957252582  | 1.05E-06 |
| TUCP_003713 | XLOC_162197 | ENSRNOT00000050609 | -0.96664614  | 3.07E-07 |
| TUCP_003713 | XLOC_162197 | ENSRNOT00000079072 | 0.9520328    | 1.84E-06 |
| TUCP_003713 | XLOC_162197 | ENSRNOT00000004787 | -0.963229882 | 4.98E-07 |
| TUCP_003713 | XLOC_162197 | ENSRNOT00000084088 | 0.956707334  | 1.11E-06 |
| TUCP_003713 | XLOC_162197 | ENSRNOT00000027910 | 0.95082944   | 2.08E-06 |
| TUCP_003713 | XLOC_162197 | ENSRNOT00000052224 | 0.962704543  | 5.34E-07 |
| TUCP_003713 | XLOC_162197 | ENSRNOT00000078070 | 0.970068093  | 1.80E-07 |
| TUCP_003713 | XLOC_162197 | ENSRNOT00000015092 | 0.952267897  | 1.80E-06 |
| TUCP_003713 | XLOC_162197 | ENSRNOT00000067135 | -0.95948331  | 8.03E-07 |
| TUCP_003713 | XLOC_162197 | ENSRNOT00000082146 | -0.956706854 | 1.11E-06 |
| TUCP_003713 | XLOC_162197 | ENSRNOT00000018787 | 0.954935634  | 1.36E-06 |
| TUCP_003713 | XLOC_162197 | ENSRNOT00000083632 | -0.964043527 | 4.46E-07 |
| TUCP_003713 | XLOC_162197 | ENSRNOT00000026057 | -0.958458996 | 9.09E-07 |
| TUCP_003713 | XLOC_162197 | ENSRNOT00000003568 | 0.971566934  | 1.40E-07 |
| TUCP_003713 | XLOC_162197 | ENSRNOT00000000718 | 0.951059933  | 2.04E-06 |
| TUCP_003713 | XLOC_162197 | ENSRNOT00000028057 | 0.958412397  | 9.14E-07 |
| TUCP_003713 | XLOC_162197 | ENSRNOT00000077146 | -0.950108489 | 2.24E-06 |
| TUCP_003713 | XLOC_162197 | ENSRNOT00000009122 | 0.951426564  | 1.96E-06 |
| TUCP_003713 | XLOC_162197 | ENSRNOT00000013463 | 0.954094338  | 1.49E-06 |
| TUCP_003713 | XLOC_162197 | ENSRNOT00000010367 | 0.958385532  | 9.16E-07 |
| TUCP_003713 | XLOC_162197 | ENSRNOT00000044395 | 0.950236441  | 2.21E-06 |
| TUCP_003713 | XLOC_162197 | ENSRNOT00000059807 | 0.959490894  | 8.03E-07 |
| TUCP_003713 | XLOC_162197 | ENSRNOT00000029202 | -0.954297974 | 1.45E-06 |
| TUCP_003713 | XLOC_162197 | ENSRNOT00000029136 | -0.951135963 | 2.02E-06 |

|             |             |                    |              |          |
|-------------|-------------|--------------------|--------------|----------|
| TUCP_003713 | XLOC_162197 | ENSRNOT00000017907 | -0.9515451   | 1.94E-06 |
| TUCP_003713 | XLOC_162197 | ENSRNOT00000003691 | -0.951251622 | 2.00E-06 |
| TUCP_003713 | XLOC_162197 | ENSRNOT00000047210 | 0.958484205  | 9.06E-07 |
| TUCP_003713 | XLOC_162197 | ENSRNOT00000085971 | -0.95479659  | 1.38E-06 |
| TUCP_003713 | XLOC_162197 | ENSRNOT00000014888 | 0.956795817  | 1.10E-06 |
| TUCP_003713 | XLOC_162197 | ENSRNOT00000050834 | -0.96440581  | 4.24E-07 |
| TUCP_003713 | XLOC_162197 | ENSRNOT00000030692 | -0.961052061 | 6.61E-07 |
| TUCP_003713 | XLOC_162197 | ENSRNOT00000057537 | 0.966740988  | 3.03E-07 |
| TUCP_003713 | XLOC_162197 | ENSRNOT00000002114 | -0.960922044 | 6.72E-07 |
| TUCP_003713 | XLOC_162197 | ENSRNOT00000002445 | -0.95694937  | 1.08E-06 |
| TUCP_003713 | XLOC_162197 | ENSRNOT00000080110 | 0.975656887  | 6.46E-08 |
| TUCP_003713 | XLOC_162197 | ENSRNOT00000015624 | 0.952046664  | 1.84E-06 |
| TUCP_003713 | XLOC_162197 | ENSRNOT00000073235 | 0.974147983  | 8.71E-08 |
| TUCP_003713 | XLOC_162197 | ENSRNOT00000078306 | 0.958117616  | 9.46E-07 |
| TUCP_003713 | XLOC_162197 | ENSRNOT00000080695 | 0.971718053  | 1.36E-07 |
| TUCP_003713 | XLOC_162197 | ENSRNOT00000025009 | 0.951161556  | 2.02E-06 |
| TUCP_003713 | XLOC_162197 | ENSRNOT00000055386 | 0.96122639   | 6.47E-07 |
| TUCP_003713 | XLOC_162197 | ENSRNOT00000078856 | -0.958039327 | 9.55E-07 |
| TUCP_003713 | XLOC_162197 | ENSRNOT00000037679 | 0.964027527  | 4.47E-07 |
| TUCP_003713 | XLOC_162197 | ENSRNOT00000000120 | 0.966104742  | 3.33E-07 |
| TUCP_003713 | XLOC_162197 | ENSRNOT00000060696 | 0.952104975  | 1.83E-06 |
| TUCP_003713 | XLOC_162197 | ENSRNOT00000042125 | 0.974467566  | 8.19E-08 |
| TUCP_003713 | XLOC_162197 | ENSRNOT00000010824 | 0.954359341  | 1.44E-06 |
| TUCP_003713 | XLOC_162197 | ENSRNOT00000001759 | -0.959560833 | 7.96E-07 |
| TUCP_003713 | XLOC_162197 | ENSRNOT00000022000 | -0.95736887  | 1.03E-06 |
| TUCP_003713 | XLOC_162197 | ENSRNOT00000067181 | 0.951747837  | 1.90E-06 |
| TUCP_003713 | XLOC_162197 | ENSRNOT00000080207 | 0.961519013  | 6.23E-07 |
| TUCP_003713 | XLOC_162197 | ENSRNOT00000032244 | 0.962215508  | 5.69E-07 |
| TUCP_003713 | XLOC_162197 | ENSRNOT00000023537 | -0.963493251 | 4.80E-07 |
| TUCP_003713 | XLOC_162197 | ENSRNOT00000070912 | -0.953239735 | 1.63E-06 |
| TUCP_003713 | XLOC_162197 | ENSRNOT00000019911 | -0.954581018 | 1.41E-06 |
| TUCP_003713 | XLOC_162197 | ENSRNOT00000040393 | 0.956974203  | 1.08E-06 |
| TUCP_003713 | XLOC_162197 | ENSRNOT00000032236 | -0.950568912 | 2.14E-06 |
| TUCP_003713 | XLOC_162197 | ENSRNOT00000027967 | 0.954056466  | 1.49E-06 |
| TUCP_003713 | XLOC_162197 | ENSRNOT00000017181 | -0.955019082 | 1.34E-06 |
| TUCP_003713 | XLOC_162197 | ENSRNOT00000024393 | 0.953850021  | 1.53E-06 |
| TUCP_003713 | XLOC_162197 | ENSRNOT00000047192 | -0.95796666  | 9.63E-07 |
| TUCP_003713 | XLOC_162197 | ENSRNOT00000003327 | -0.958644298 | 8.89E-07 |
| TUCP_003713 | XLOC_162197 | ENSRNOT00000036613 | -0.957726058 | 9.90E-07 |
| TUCP_003713 | XLOC_162197 | ENSRNOT00000008987 | -0.961231893 | 6.46E-07 |
| TUCP_003713 | XLOC_162197 | ENSRNOT00000021285 | 0.952130502  | 1.83E-06 |
| TUCP_003713 | XLOC_162197 | ENSRNOT00000005311 | 0.950332743  | 2.19E-06 |
| TUCP_001620 | XLOC_064395 | ENSRNOT00000024418 | -0.960558049 | 7.04E-07 |
| TUCP_001620 | XLOC_064395 | ENSRNOT00000044726 | 0.96429548   | 4.30E-07 |
| TUCP_001620 | XLOC_064395 | ENSRNOT00000001446 | 0.970661155  | 1.63E-07 |
| TUCP_001620 | XLOC_064395 | ENSRNOT00000009319 | -0.963679996 | 4.68E-07 |
| TUCP_001620 | XLOC_064395 | ENSRNOT00000083268 | -0.959934622 | 7.60E-07 |
| TUCP_001620 | XLOC_064395 | ENSRNOT00000078272 | 0.959997259  | 7.54E-07 |
| TUCP_001620 | XLOC_064395 | ENSRNOT00000057965 | 0.960318919  | 7.25E-07 |
| TUCP_001620 | XLOC_064395 | ENSRNOT00000023314 | 0.973615816  | 9.63E-08 |
| TUCP_001620 | XLOC_064395 | ENSRNOT00000080163 | -0.95231863  | 1.79E-06 |

|             |             |                     |              |          |
|-------------|-------------|---------------------|--------------|----------|
| TUCP_001620 | XLOC_064395 | ENSRNOT00000006491  | 0.953278278  | 1.62E-06 |
| TUCP_003714 | XLOC_162199 | ENSRNOT000000087429 | 0.951949221  | 1.86E-06 |
| TUCP_003714 | XLOC_162199 | ENSRNOT000000073235 | 0.970257888  | 1.74E-07 |
| TUCP_003714 | XLOC_162199 | ENSRNOT000000021769 | 0.955243011  | 1.31E-06 |
| TUCP_003714 | XLOC_162199 | ENSRNOT000000010824 | 0.951408313  | 1.97E-06 |
| TUCP_003714 | XLOC_162199 | ENSRNOT000000082869 | 0.955175378  | 1.32E-06 |
| TUCP_003714 | XLOC_162199 | ENSRNOT000000048914 | 0.957427742  | 1.03E-06 |
| TUCP_003714 | XLOC_162199 | ENSRNOT000000031462 | 0.959714271  | 7.81E-07 |
| TUCP_003714 | XLOC_162199 | ENSRNOT000000003327 | -0.951594821 | 1.93E-06 |
| TUCP_003714 | XLOC_162199 | ENSRNOT000000005355 | 0.952761163  | 1.71E-06 |
| TUCP_003714 | XLOC_162199 | ENSRNOT000000080110 | 0.969470242  | 1.98E-07 |
| TUCP_003717 | XLOC_162275 | ENSRNOT000000004128 | 0.955378519  | 1.29E-06 |
| TUCP_003717 | XLOC_162275 | ENSRNOT000000074141 | 0.959997025  | 7.54E-07 |
| TUCP_003717 | XLOC_162275 | ENSRNOT000000056733 | 0.955352688  | 1.30E-06 |
| TUCP_003717 | XLOC_162275 | ENSRNOT000000057218 | 0.969795928  | 1.88E-07 |
| TUCP_003717 | XLOC_162275 | ENSRNOT000000081085 | 0.954486623  | 1.42E-06 |
| TUCP_003717 | XLOC_162275 | ENSRNOT000000056771 | 0.989081787  | 1.20E-09 |
| TUCP_003717 | XLOC_162275 | ENSRNOT000000001672 | 0.966871203  | 2.97E-07 |
| TUCP_003716 | XLOC_162202 | ENSRNOT000000065112 | 0.955746547  | 1.24E-06 |
| TUCP_002622 | XLOC_110447 | ENSRNOT000000067460 | 0.957815274  | 9.80E-07 |
| TUCP_003490 | XLOC_151530 | ENSRNOT000000083162 | 0.95394568   | 1.51E-06 |
| TUCP_003490 | XLOC_151530 | ENSRNOT000000027752 | 0.953191907  | 1.64E-06 |
| TUCP_003490 | XLOC_151530 | ENSRNOT000000028818 | 0.95578771   | 1.24E-06 |
| TUCP_003490 | XLOC_151530 | ENSRNOT000000023890 | -0.961748291 | 6.05E-07 |
| TUCP_003490 | XLOC_151530 | ENSRNOT000000038188 | 0.962278538  | 5.65E-07 |
| TUCP_003490 | XLOC_151530 | ENSRNOT000000083134 | 0.951267941  | 1.99E-06 |
| TUCP_003490 | XLOC_151530 | ENSRNOT000000011651 | 0.956051084  | 1.20E-06 |
| TUCP_003490 | XLOC_151530 | ENSRNOT000000002814 | 0.955887424  | 1.22E-06 |
| TUCP_003490 | XLOC_151530 | ENSRNOT000000023623 | 0.957775104  | 9.85E-07 |
| TUCP_002621 | XLOC_110398 | ENSRNOT000000035538 | 0.974052418  | 8.87E-08 |
| TUCP_002621 | XLOC_110398 | ENSRNOT000000035915 | 0.975516151  | 6.65E-08 |
| TUCP_002621 | XLOC_110398 | ENSRNOT000000052315 | 0.983367651  | 9.75E-09 |
| TUCP_002621 | XLOC_110398 | ENSRNOT000000011761 | 0.973932143  | 9.07E-08 |
| TUCP_002621 | XLOC_110398 | ENSRNOT000000092918 | 0.959958009  | 7.58E-07 |
| TUCP_002621 | XLOC_110398 | ENSRNOT000000087416 | 0.954487902  | 1.42E-06 |
| TUCP_002621 | XLOC_110398 | ENSRNOT000000059593 | 0.986741726  | 3.16E-09 |
| TUCP_002621 | XLOC_110398 | ENSRNOT000000092425 | 0.964453395  | 4.21E-07 |
| TUCP_002621 | XLOC_110398 | ENSRNOT000000016026 | 0.952165289  | 1.82E-06 |
| TUCP_002626 | XLOC_110898 | ENSRNOT000000076129 | 0.954013233  | 1.50E-06 |
| TUCP_002369 | XLOC_099945 | ENSRNOT000000026966 | 0.954056711  | 1.49E-06 |
| TUCP_002369 | XLOC_099945 | ENSRNOT000000068416 | 0.989651661  | 9.19E-10 |
| TUCP_002369 | XLOC_099945 | ENSRNOT000000055124 | 0.954804747  | 1.38E-06 |
| TUCP_002369 | XLOC_099945 | ENSRNOT000000026803 | 0.966724297  | 3.04E-07 |
| TUCP_002369 | XLOC_099945 | ENSRNOT000000081709 | 0.98480442   | 6.22E-09 |
| TUCP_002369 | XLOC_099945 | ENSRNOT000000042251 | 0.989366919  | 1.05E-09 |
| TUCP_002369 | XLOC_099945 | ENSRNOT000000002984 | 0.987895207  | 2.01E-09 |
| TUCP_002369 | XLOC_099945 | ENSRNOT000000020071 | 0.963172778  | 5.01E-07 |
| TUCP_002369 | XLOC_099945 | ENSRNOT000000067379 | 0.982453645  | 1.27E-08 |
| TUCP_002369 | XLOC_099945 | ENSRNOT000000050543 | 0.989563977  | 9.58E-10 |
| TUCP_002369 | XLOC_099945 | ENSRNOT000000092365 | 0.990948491  | 4.71E-10 |
| TUCP_002369 | XLOC_099945 | ENSRNOT000000089306 | 0.989619943  | 9.33E-10 |

|             |             |                    |              |          |
|-------------|-------------|--------------------|--------------|----------|
| TUCP_002369 | XLOC_099945 | ENSRNOT00000086829 | 0.954054266  | 1.49E-06 |
| TUCP_002369 | XLOC_099945 | ENSRNOT00000066062 | -0.971892551 | 1.32E-07 |
| TUCP_002369 | XLOC_099945 | ENSRNOT00000045301 | 0.989664545  | 9.13E-10 |
| TUCP_002369 | XLOC_099945 | ENSRNOT00000041186 | 0.989195543  | 1.14E-09 |
| TUCP_002369 | XLOC_099945 | ENSRNOT00000010092 | 0.985985984  | 4.16E-09 |
| TUCP_002369 | XLOC_099945 | ENSRNOT00000076182 | 0.989664545  | 9.13E-10 |
| TUCP_002369 | XLOC_099945 | ENSRNOT00000038494 | 0.962887541  | 5.21E-07 |
| TUCP_002369 | XLOC_099945 | ENSRNOT00000081830 | 0.957740034  | 9.89E-07 |
| TUCP_002369 | XLOC_099945 | ENSRNOT00000047527 | 0.973662401  | 9.55E-08 |
| TUCP_002369 | XLOC_099945 | ENSRNOT00000005726 | 0.978564522  | 3.44E-08 |
| TUCP_002369 | XLOC_099945 | ENSRNOT00000014103 | 0.989664545  | 9.13E-10 |
| TUCP_002369 | XLOC_099945 | ENSRNOT00000057433 | 0.978639254  | 3.38E-08 |
| TUCP_002369 | XLOC_099945 | ENSRNOT00000082289 | 0.988022086  | 1.90E-09 |
| TUCP_002369 | XLOC_099945 | ENSRNOT00000082143 | 0.97071316   | 1.62E-07 |
| TUCP_002369 | XLOC_099945 | ENSRNOT00000085570 | 0.958240638  | 9.32E-07 |
| TUCP_002369 | XLOC_099945 | ENSRNOT00000083493 | 0.98234779   | 1.31E-08 |
| TUCP_002369 | XLOC_099945 | ENSRNOT00000092563 | 0.98523171   | 5.40E-09 |
| TUCP_002369 | XLOC_099945 | ENSRNOT00000088893 | 0.989664545  | 9.13E-10 |
| TUCP_002369 | XLOC_099945 | ENSRNOT00000076693 | 0.9696079    | 1.94E-07 |
| TUCP_002369 | XLOC_099945 | ENSRNOT00000081014 | 0.989664545  | 9.13E-10 |
| TUCP_002369 | XLOC_099945 | ENSRNOT00000067543 | 0.989664545  | 9.13E-10 |
| TUCP_002369 | XLOC_099945 | ENSRNOT00000076802 | 0.977026016  | 4.85E-08 |
| TUCP_002369 | XLOC_099945 | ENSRNOT00000050968 | 0.991577057  | 3.29E-10 |
| TUCP_002369 | XLOC_099945 | ENSRNOT00000042201 | 0.952652275  | 1.73E-06 |
| TUCP_002369 | XLOC_099945 | ENSRNOT00000035125 | 0.957938408  | 9.66E-07 |
| TUCP_002369 | XLOC_099945 | ENSRNOT00000086036 | 0.989219445  | 1.13E-09 |
| TUCP_002369 | XLOC_099945 | ENSRNOT00000063929 | 0.989664545  | 9.13E-10 |
| TUCP_002369 | XLOC_099945 | ENSRNOT00000044520 | 0.971617843  | 1.38E-07 |
| TUCP_002369 | XLOC_099945 | ENSRNOT00000041617 | 0.963817724  | 4.60E-07 |
| TUCP_002369 | XLOC_099945 | ENSRNOT00000091763 | 0.976000962  | 6.02E-08 |
| TUCP_002369 | XLOC_099945 | ENSRNOT00000022200 | 0.992455774  | 1.90E-10 |
| TUCP_002369 | XLOC_099945 | ENSRNOT00000083764 | 0.988185125  | 1.78E-09 |
| TUCP_002369 | XLOC_099945 | ENSRNOT00000020786 | 0.980298274  | 2.26E-08 |
| TUCP_002369 | XLOC_099945 | ENSRNOT00000084847 | 0.964215073  | 4.35E-07 |
| TUCP_002369 | XLOC_099945 | ENSRNOT00000079275 | 0.990378712  | 6.39E-10 |
| TUCP_002369 | XLOC_099945 | ENSRNOT00000052367 | 0.991241118  | 4.00E-10 |
| TUCP_002369 | XLOC_099945 | ENSRNOT00000090658 | 0.989664545  | 9.13E-10 |
| TUCP_002369 | XLOC_099945 | ENSRNOT00000022571 | 0.98830527   | 1.69E-09 |
| TUCP_002369 | XLOC_099945 | ENSRNOT00000052003 | 0.971936496  | 1.31E-07 |
| TUCP_002369 | XLOC_099945 | ENSRNOT00000008898 | 0.96897366   | 2.15E-07 |
| TUCP_002369 | XLOC_099945 | ENSRNOT00000057472 | 0.989664545  | 9.13E-10 |
| TUCP_002369 | XLOC_099945 | ENSRNOT00000065448 | 0.972917157  | 1.10E-07 |
| TUCP_002369 | XLOC_099945 | ENSRNOT00000072810 | 0.961573475  | 6.19E-07 |
| TUCP_002624 | XLOC_110487 | ENSRNOT00000088962 | 0.989715401  | 8.91E-10 |
| TUCP_002624 | XLOC_110487 | ENSRNOT00000074951 | 0.97127312   | 1.47E-07 |
| TUCP_002624 | XLOC_110487 | ENSRNOT00000090502 | 0.982284324  | 1.33E-08 |
| TUCP_002625 | XLOC_110599 | ENSRNOT00000093285 | 0.959034156  | 8.48E-07 |
| TUCP_002143 | XLOC_089051 | ENSRNOT00000091647 | 0.950699634  | 2.11E-06 |
| TUCP_002142 | XLOC_088990 | ENSRNOT00000026809 | 0.977706341  | 4.18E-08 |
| TUCP_002140 | XLOC_088824 | ENSRNOT00000020729 | 0.952360312  | 1.78E-06 |
| TUCP_002140 | XLOC_088824 | ENSRNOT00000072556 | 0.952996849  | 1.67E-06 |



|             |             |                    |              |          |
|-------------|-------------|--------------------|--------------|----------|
| TUCP_002146 | XLOC_089185 | ENSRNOT00000018422 | -0.953155418 | 1.64E-06 |
| TUCP_002146 | XLOC_089185 | ENSRNOT00000020297 | 0.969297867  | 2.04E-07 |
| TUCP_002146 | XLOC_089185 | ENSRNOT00000006188 | -0.957687542 | 9.95E-07 |
| TUCP_002146 | XLOC_089185 | ENSRNOT00000074586 | -0.952152087 | 1.82E-06 |
| TUCP_002146 | XLOC_089185 | ENSRNOT00000090621 | 0.977946792  | 3.96E-08 |
| TUCP_002146 | XLOC_089185 | ENSRNOT00000090946 | 0.965219976  | 3.78E-07 |
| TUCP_002146 | XLOC_089185 | ENSRNOT00000006460 | 0.954911066  | 1.36E-06 |
| TUCP_002146 | XLOC_089185 | ENSRNOT00000075397 | 0.965346362  | 3.71E-07 |
| TUCP_002146 | XLOC_089185 | ENSRNOT00000077727 | -0.953082099 | 1.65E-06 |
| TUCP_002146 | XLOC_089185 | ENSRNOT00000007350 | 0.976873372  | 5.01E-08 |
| TUCP_002146 | XLOC_089185 | ENSRNOT00000032926 | -0.964211049 | 4.35E-07 |
| TUCP_002146 | XLOC_089185 | ENSRNOT00000019104 | -0.953234365 | 1.63E-06 |
| TUCP_002146 | XLOC_089185 | ENSRNOT00000027875 | 0.950257267  | 2.21E-06 |
| TUCP_002146 | XLOC_089185 | ENSRNOT00000063930 | -0.967288091 | 2.79E-07 |
| TUCP_002146 | XLOC_089185 | ENSRNOT00000023543 | -0.955065208 | 1.34E-06 |
| TUCP_002146 | XLOC_089185 | ENSRNOT00000083578 | 0.95881159   | 8.71E-07 |
| TUCP_002146 | XLOC_089185 | ENSRNOT00000006217 | 0.984236711  | 7.47E-09 |
| TUCP_002146 | XLOC_089185 | ENSRNOT00000003087 | 0.975968627  | 6.06E-08 |
| TUCP_002146 | XLOC_089185 | ENSRNOT00000068353 | 0.959768832  | 7.76E-07 |
| TUCP_002146 | XLOC_089185 | ENSRNOT00000091399 | 0.960288061  | 7.28E-07 |
| TUCP_002146 | XLOC_089185 | ENSRNOT00000073492 | -0.952330654 | 1.79E-06 |
| TUCP_002146 | XLOC_089185 | ENSRNOT00000058382 | 0.95950441   | 8.01E-07 |
| TUCP_002146 | XLOC_089185 | ENSRNOT00000049349 | 0.950024962  | 2.26E-06 |
| TUCP_002146 | XLOC_089185 | ENSRNOT00000013025 | -0.959175873 | 8.34E-07 |
| TUCP_002146 | XLOC_089185 | ENSRNOT00000079138 | 0.976947216  | 4.93E-08 |
| TUCP_002146 | XLOC_089185 | ENSRNOT00000071998 | 0.956380988  | 1.16E-06 |
| TUCP_002146 | XLOC_089185 | ENSRNOT00000055386 | 0.95367797   | 1.55E-06 |
| TUCP_002146 | XLOC_089185 | ENSRNOT0000002638  | -0.954355379 | 1.45E-06 |
| TUCP_002146 | XLOC_089185 | ENSRNOT00000024005 | 0.979649862  | 2.66E-08 |
| TUCP_002146 | XLOC_089185 | ENSRNOT00000032106 | 0.983092806  | 1.06E-08 |
| TUCP_002146 | XLOC_089185 | ENSRNOT00000004391 | 0.960140513  | 7.41E-07 |
| TUCP_002146 | XLOC_089185 | ENSRNOT00000084567 | 0.982405836  | 1.29E-08 |
| TUCP_002146 | XLOC_089185 | ENSRNOT00000074023 | 0.967476989  | 2.71E-07 |
| TUCP_002146 | XLOC_089185 | ENSRNOT00000025309 | 0.964919616  | 3.94E-07 |
| TUCP_002146 | XLOC_089185 | ENSRNOT00000052063 | 0.967345579  | 2.77E-07 |
| TUCP_002146 | XLOC_089185 | ENSRNOT0000009073  | -0.957782044 | 9.84E-07 |
| TUCP_002146 | XLOC_089185 | ENSRNOT00000001401 | 0.952145644  | 1.82E-06 |
| TUCP_002146 | XLOC_089185 | ENSRNOT00000036357 | 0.95260101   | 1.74E-06 |
| TUCP_002146 | XLOC_089185 | ENSRNOT00000055540 | 0.954187867  | 1.47E-06 |
| TUCP_002146 | XLOC_089185 | ENSRNOT00000045926 | 0.950196185  | 2.22E-06 |
| TUCP_002146 | XLOC_089185 | ENSRNOT00000010419 | 0.97439271   | 8.31E-08 |
| TUCP_002146 | XLOC_089185 | ENSRNOT00000065076 | 0.975295096  | 6.95E-08 |
| TUCP_002146 | XLOC_089185 | ENSRNOT00000057738 | 0.980080582  | 2.39E-08 |
| TUCP_002146 | XLOC_089185 | ENSRNOT00000021534 | -0.954284714 | 1.46E-06 |
| TUCP_002146 | XLOC_089185 | ENSRNOT00000002028 | 0.957301057  | 1.04E-06 |
| TUCP_002146 | XLOC_089185 | ENSRNOT00000054685 | 0.966962897  | 2.93E-07 |
| TUCP_002146 | XLOC_089185 | ENSRNOT00000022746 | -0.961317474 | 6.39E-07 |
| TUCP_002146 | XLOC_089185 | ENSRNOT00000021629 | -0.951540333 | 1.94E-06 |
| TUCP_002146 | XLOC_089185 | ENSRNOT00000082513 | 0.965816072  | 3.47E-07 |
| TUCP_002146 | XLOC_089185 | ENSRNOT00000016306 | -0.962768958 | 5.29E-07 |
| TUCP_002146 | XLOC_089185 | ENSRNOT00000083677 | -0.950555164 | 2.14E-06 |

|             |             |                    |              |          |
|-------------|-------------|--------------------|--------------|----------|
| TUCP_002146 | XLOC_089185 | ENSRNOT00000087604 | 0.954636262  | 1.40E-06 |
| TUCP_002146 | XLOC_089185 | ENSRNOT00000012060 | 0.976785703  | 5.11E-08 |
| TUCP_002146 | XLOC_089185 | ENSRNOT00000073370 | 0.952527757  | 1.75E-06 |
| TUCP_002146 | XLOC_089185 | ENSRNOT00000083568 | 0.955831476  | 1.23E-06 |
| TUCP_002146 | XLOC_089185 | ENSRNOT00000012755 | 0.96415948   | 4.39E-07 |
| TUCP_002146 | XLOC_089185 | ENSRNOT00000065978 | 0.951590294  | 1.93E-06 |
| TUCP_002146 | XLOC_089185 | ENSRNOT00000075480 | -0.975878238 | 6.18E-08 |
| TUCP_002146 | XLOC_089185 | ENSRNOT00000039177 | -0.959993358 | 7.55E-07 |
| TUCP_002146 | XLOC_089185 | ENSRNOT00000017271 | 0.954201025  | 1.47E-06 |
| TUCP_002146 | XLOC_089185 | ENSRNOT00000030706 | -0.951872268 | 1.88E-06 |
| TUCP_002146 | XLOC_089185 | ENSRNOT00000080216 | -0.964887779 | 3.96E-07 |
| TUCP_002146 | XLOC_089185 | ENSRNOT00000027760 | 0.978074836  | 3.85E-08 |
| TUCP_002146 | XLOC_089185 | ENSRNOT00000047234 | 0.951571504  | 1.93E-06 |
| TUCP_002146 | XLOC_089185 | ENSRNOT00000065871 | 0.9704248    | 1.70E-07 |
| TUCP_002146 | XLOC_089185 | ENSRNOT00000042903 | 0.95400749   | 1.50E-06 |
| TUCP_002146 | XLOC_089185 | ENSRNOT00000057898 | -0.953555828 | 1.57E-06 |
| TUCP_002146 | XLOC_089185 | ENSRNOT00000024677 | 0.971862606  | 1.32E-07 |
| TUCP_002146 | XLOC_089185 | ENSRNOT00000004999 | 0.958803433  | 8.72E-07 |
| TUCP_002146 | XLOC_089185 | ENSRNOT00000056100 | -0.962910205 | 5.19E-07 |
| TUCP_002146 | XLOC_089185 | ENSRNOT00000001077 | 0.973203834  | 1.04E-07 |
| TUCP_002146 | XLOC_089185 | ENSRNOT00000025517 | 0.961703119  | 6.08E-07 |
| TUCP_002146 | XLOC_089185 | ENSRNOT00000067626 | -0.950554645 | 2.14E-06 |
| TUCP_002146 | XLOC_089185 | ENSRNOT00000014924 | -0.954637229 | 1.40E-06 |
| TUCP_002146 | XLOC_089185 | ENSRNOT00000005620 | -0.958201766 | 9.37E-07 |
| TUCP_002146 | XLOC_089185 | ENSRNOT00000026391 | 0.981101603  | 1.84E-08 |
| TUCP_002146 | XLOC_089185 | ENSRNOT00000081226 | 0.956231242  | 1.18E-06 |
| TUCP_002146 | XLOC_089185 | ENSRNOT00000076973 | 0.970361604  | 1.71E-07 |
| TUCP_002146 | XLOC_089185 | ENSRNOT00000065045 | 0.971944188  | 1.31E-07 |
| TUCP_002146 | XLOC_089185 | ENSRNOT00000005686 | -0.956602892 | 1.13E-06 |
| TUCP_002146 | XLOC_089185 | ENSRNOT00000002222 | 0.955854496  | 1.23E-06 |
| TUCP_002146 | XLOC_089185 | ENSRNOT00000018634 | -0.955502964 | 1.27E-06 |
| TUCP_002146 | XLOC_089185 | ENSRNOT00000031701 | -0.950522117 | 2.15E-06 |
| TUCP_002146 | XLOC_089185 | ENSRNOT00000040525 | 0.972371807  | 1.21E-07 |
| TUCP_002146 | XLOC_089185 | ENSRNOT00000011832 | -0.962883827 | 5.21E-07 |
| TUCP_002146 | XLOC_089185 | ENSRNOT00000073643 | -0.961207279 | 6.48E-07 |
| TUCP_002146 | XLOC_089185 | ENSRNOT00000087278 | -0.956127618 | 1.19E-06 |
| TUCP_002146 | XLOC_089185 | ENSRNOT00000003940 | -0.951667469 | 1.91E-06 |
| TUCP_002146 | XLOC_089185 | ENSRNOT00000046552 | 0.961274681  | 6.43E-07 |
| TUCP_002146 | XLOC_089185 | ENSRNOT0000004888  | 0.951109211  | 2.03E-06 |
| TUCP_002146 | XLOC_089185 | ENSRNOT00000022502 | -0.95205446  | 1.84E-06 |
| TUCP_002146 | XLOC_089185 | ENSRNOT00000011930 | 0.97654179   | 5.38E-08 |
| TUCP_002146 | XLOC_089185 | ENSRNOT00000083968 | -0.950255592 | 2.21E-06 |
| TUCP_002146 | XLOC_089185 | ENSRNOT00000037133 | 0.959480498  | 8.04E-07 |
| TUCP_002146 | XLOC_089185 | ENSRNOT00000033806 | 0.95789064   | 9.71E-07 |
| TUCP_002146 | XLOC_089185 | ENSRNOT00000027370 | 0.957844683  | 9.77E-07 |
| TUCP_002146 | XLOC_089185 | ENSRNOT00000009150 | 0.950065363  | 2.25E-06 |
| TUCP_002146 | XLOC_089185 | ENSRNOT00000068745 | 0.950837631  | 2.08E-06 |
| TUCP_002146 | XLOC_089185 | ENSRNOT00000037333 | -0.951870192 | 1.88E-06 |
| TUCP_002146 | XLOC_089185 | ENSRNOT00000034298 | 0.971958786  | 1.30E-07 |
| TUCP_002146 | XLOC_089185 | ENSRNOT00000017949 | -0.955204581 | 1.32E-06 |
| TUCP_002146 | XLOC_089185 | ENSRNOT00000018001 | 0.954597654  | 1.41E-06 |

|             |             |                    |              |          |
|-------------|-------------|--------------------|--------------|----------|
| TUCP_002146 | XLOC_089185 | ENSRNOT00000048781 | 0.960942808  | 6.70E-07 |
| TUCP_002146 | XLOC_089185 | ENSRNOT00000024352 | 0.957306758  | 1.04E-06 |
| TUCP_002146 | XLOC_089185 | ENSRNOT00000025856 | -0.9570814   | 1.07E-06 |
| TUCP_002146 | XLOC_089185 | ENSRNOT00000072299 | 0.963109158  | 5.06E-07 |
| TUCP_002146 | XLOC_089185 | ENSRNOT00000003544 | -0.971746055 | 1.35E-07 |
| TUCP_002146 | XLOC_089185 | ENSRNOT00000079609 | 0.95260281   | 1.74E-06 |
| TUCP_002146 | XLOC_089185 | ENSRNOT00000003780 | 0.951890442  | 1.87E-06 |
| TUCP_002146 | XLOC_089185 | ENSRNOT00000085334 | 0.956862672  | 1.09E-06 |
| TUCP_002146 | XLOC_089185 | ENSRNOT00000014506 | -0.966244673 | 3.26E-07 |
| TUCP_002146 | XLOC_089185 | ENSRNOT00000023262 | -0.966142891 | 3.31E-07 |
| TUCP_002146 | XLOC_089185 | ENSRNOT00000025913 | -0.95912525  | 8.39E-07 |
| TUCP_002146 | XLOC_089185 | ENSRNOT00000058495 | -0.955589576 | 1.26E-06 |
| TUCP_002146 | XLOC_089185 | ENSRNOT00000083344 | 0.969561299  | 1.96E-07 |
| TUCP_002146 | XLOC_089185 | ENSRNOT00000013067 | -0.962106063 | 5.77E-07 |
| TUCP_002146 | XLOC_089185 | ENSRNOT00000004196 | 0.963688596  | 4.68E-07 |
| TUCP_002146 | XLOC_089185 | ENSRNOT00000011956 | 0.962146742  | 5.74E-07 |
| TUCP_002146 | XLOC_089185 | ENSRNOT00000079517 | -0.964646362 | 4.10E-07 |
| TUCP_002146 | XLOC_089185 | ENSRNOT00000004351 | -0.961174509 | 6.51E-07 |
| TUCP_002146 | XLOC_089185 | ENSRNOT00000073919 | 0.961603852  | 6.16E-07 |
| TUCP_002146 | XLOC_089185 | ENSRNOT00000075800 | -0.965997144 | 3.38E-07 |
| TUCP_002146 | XLOC_089185 | ENSRNOT00000036658 | -0.965908979 | 3.42E-07 |
| TUCP_002146 | XLOC_089185 | ENSRNOT00000089611 | 0.976663601  | 5.24E-08 |
| TUCP_002146 | XLOC_089185 | ENSRNOT00000061345 | -0.952843212 | 1.70E-06 |
| TUCP_002146 | XLOC_089185 | ENSRNOT00000023667 | 0.973206701  | 1.04E-07 |
| TUCP_002146 | XLOC_089185 | ENSRNOT00000086260 | -0.960356677 | 7.21E-07 |
| TUCP_002146 | XLOC_089185 | ENSRNOT00000020910 | 0.952263268  | 1.80E-06 |
| TUCP_002146 | XLOC_089185 | ENSRNOT00000030082 | 0.957818872  | 9.80E-07 |
| TUCP_002146 | XLOC_089185 | ENSRNOT00000068026 | -0.968337358 | 2.38E-07 |
| TUCP_002146 | XLOC_089185 | ENSRNOT00000013817 | 0.951302773  | 1.99E-06 |
| TUCP_002146 | XLOC_089185 | ENSRNOT00000014821 | -0.951588286 | 1.93E-06 |
| TUCP_002146 | XLOC_089185 | ENSRNOT00000034883 | -0.953229755 | 1.63E-06 |
| TUCP_002146 | XLOC_089185 | ENSRNOT00000001158 | 0.967197076  | 2.83E-07 |
| TUCP_002146 | XLOC_089185 | ENSRNOT00000055683 | 0.954884924  | 1.36E-06 |
| TUCP_002146 | XLOC_089185 | ENSRNOT00000022190 | -0.952221066 | 1.81E-06 |
| TUCP_002146 | XLOC_089185 | ENSRNOT00000026531 | -0.957877092 | 9.73E-07 |
| TUCP_002146 | XLOC_089185 | ENSRNOT00000035605 | 0.967356556  | 2.76E-07 |
| TUCP_002146 | XLOC_089185 | ENSRNOT00000081351 | 0.969859834  | 1.86E-07 |
| TUCP_002146 | XLOC_089185 | ENSRNOT00000060494 | 0.954401985  | 1.44E-06 |
| TUCP_002146 | XLOC_089185 | ENSRNOT0000002465  | 0.963658058  | 4.70E-07 |
| TUCP_002146 | XLOC_089185 | ENSRNOT00000092083 | 0.964696532  | 4.07E-07 |
| TUCP_002146 | XLOC_089185 | ENSRNOT00000005910 | -0.953552182 | 1.57E-06 |
| TUCP_002146 | XLOC_089185 | ENSRNOT00000017624 | 0.962689004  | 5.35E-07 |
| TUCP_002146 | XLOC_089185 | ENSRNOT00000017626 | -0.954103225 | 1.48E-06 |
| TUCP_002146 | XLOC_089185 | ENSRNOT00000087138 | 0.950496693  | 2.15E-06 |
| TUCP_002146 | XLOC_089185 | ENSRNOT00000019028 | 0.951565037  | 1.93E-06 |
| TUCP_002146 | XLOC_089185 | ENSRNOT00000015476 | -0.957157213 | 1.06E-06 |
| TUCP_002146 | XLOC_089185 | ENSRNOT00000066923 | -0.95235974  | 1.78E-06 |
| TUCP_002146 | XLOC_089185 | ENSRNOT00000019816 | -0.958211577 | 9.35E-07 |
| TUCP_002146 | XLOC_089185 | ENSRNOT00000040169 | 0.968336634  | 2.38E-07 |
| TUCP_002146 | XLOC_089185 | ENSRNOT00000073667 | -0.967844666 | 2.57E-07 |
| TUCP_002146 | XLOC_089185 | ENSRNOT00000029701 | 0.960400624  | 7.17E-07 |

|             |             |                    |              |          |
|-------------|-------------|--------------------|--------------|----------|
| TUCP_002146 | XLOC_089185 | ENSRNOT00000020383 | 0.96452058   | 4.17E-07 |
| TUCP_002146 | XLOC_089185 | ENSRNOT00000036051 | 0.977784394  | 4.11E-08 |
| TUCP_002146 | XLOC_089185 | ENSRNOT00000024947 | -0.957756062 | 9.87E-07 |
| TUCP_002146 | XLOC_089185 | ENSRNOT00000055602 | -0.956379257 | 1.16E-06 |
| TUCP_002146 | XLOC_089185 | ENSRNOT00000011675 | 0.973403719  | 1.00E-07 |
| TUCP_002146 | XLOC_089185 | ENSRNOT00000027917 | 0.953484825  | 1.59E-06 |
| TUCP_002146 | XLOC_089185 | ENSRNOT00000008253 | -0.957778607 | 9.84E-07 |
| TUCP_002146 | XLOC_089185 | ENSRNOT00000076230 | 0.970489173  | 1.68E-07 |
| TUCP_002146 | XLOC_089185 | ENSRNOT00000082627 | -0.954990431 | 1.35E-06 |
| TUCP_002146 | XLOC_089185 | ENSRNOT00000001490 | 0.952815756  | 1.70E-06 |
| TUCP_002146 | XLOC_089185 | ENSRNOT00000072580 | -0.952290454 | 1.80E-06 |
| TUCP_002146 | XLOC_089185 | ENSRNOT00000005489 | 0.95560102   | 1.26E-06 |
| TUCP_002146 | XLOC_089185 | ENSRNOT00000086456 | -0.952160577 | 1.82E-06 |
| TUCP_002146 | XLOC_089185 | ENSRNOT00000015518 | -0.950357119 | 2.18E-06 |
| TUCP_002146 | XLOC_089185 | ENSRNOT00000066952 | 0.980816547  | 1.98E-08 |
| TUCP_002146 | XLOC_089185 | ENSRNOT00000028685 | 0.959962308  | 7.58E-07 |
| TUCP_002146 | XLOC_089185 | ENSRNOT00000082138 | -0.965448738 | 3.66E-07 |
| TUCP_002146 | XLOC_089185 | ENSRNOT00000080591 | 0.951480984  | 1.95E-06 |
| TUCP_002146 | XLOC_089185 | ENSRNOT00000068156 | 0.954386544  | 1.44E-06 |
| TUCP_002146 | XLOC_089185 | ENSRNOT00000049285 | -0.965796354 | 3.48E-07 |
| TUCP_002146 | XLOC_089185 | ENSRNOT00000093385 | 0.951590567  | 1.93E-06 |
| TUCP_002146 | XLOC_089185 | ENSRNOT00000015239 | -0.976964255 | 4.91E-08 |
| TUCP_002146 | XLOC_089185 | ENSRNOT00000027264 | 0.974173139  | 8.67E-08 |
| TUCP_002146 | XLOC_089185 | ENSRNOT00000014320 | 0.956610416  | 1.13E-06 |
| TUCP_002146 | XLOC_089185 | ENSRNOT00000023256 | 0.977523667  | 4.35E-08 |
| TUCP_002146 | XLOC_089185 | ENSRNOT00000077146 | -0.969214449 | 2.07E-07 |
| TUCP_002146 | XLOC_089185 | ENSRNOT00000087329 | -0.956328675 | 1.16E-06 |
| TUCP_002146 | XLOC_089185 | ENSRNOT00000008244 | 0.950512479  | 2.15E-06 |
| TUCP_002146 | XLOC_089185 | ENSRNOT00000017504 | 0.961607952  | 6.16E-07 |
| TUCP_002146 | XLOC_089185 | ENSRNOT00000011773 | 0.970108286  | 1.79E-07 |
| TUCP_002146 | XLOC_089185 | ENSRNOT00000013463 | 0.9608044    | 6.82E-07 |
| TUCP_002146 | XLOC_089185 | ENSRNOT00000060002 | -0.95541887  | 1.29E-06 |
| TUCP_002146 | XLOC_089185 | ENSRNOT00000089673 | -0.96221417  | 5.69E-07 |
| TUCP_002146 | XLOC_089185 | ENSRNOT00000036137 | 0.981003444  | 1.89E-08 |
| TUCP_002146 | XLOC_089185 | ENSRNOT00000075209 | -0.963370699 | 4.88E-07 |
| TUCP_002146 | XLOC_089185 | ENSRNOT00000064039 | 0.95818934   | 9.38E-07 |
| TUCP_002146 | XLOC_089185 | ENSRNOT00000025966 | 0.961135671  | 6.54E-07 |
| TUCP_002146 | XLOC_089185 | ENSRNOT00000023977 | -0.952445863 | 1.77E-06 |
| TUCP_002146 | XLOC_089185 | ENSRNOT00000009202 | 0.973754259  | 9.39E-08 |
| TUCP_002146 | XLOC_089185 | ENSRNOT00000047663 | -0.957631363 | 1.00E-06 |
| TUCP_002146 | XLOC_089185 | ENSRNOT00000010369 | 0.951922163  | 1.87E-06 |
| TUCP_002146 | XLOC_089185 | ENSRNOT00000066133 | -0.954481906 | 1.43E-06 |
| TUCP_002146 | XLOC_089185 | ENSRNOT00000091211 | 0.951244744  | 2.00E-06 |
| TUCP_002146 | XLOC_089185 | ENSRNOT00000002358 | -0.951139578 | 2.02E-06 |
| TUCP_002146 | XLOC_089185 | ENSRNOT00000029202 | -0.950918613 | 2.07E-06 |
| TUCP_002146 | XLOC_089185 | ENSRNOT00000017291 | -0.961401178 | 6.32E-07 |
| TUCP_002146 | XLOC_089185 | ENSRNOT00000083256 | 0.950758294  | 2.10E-06 |
| TUCP_002146 | XLOC_089185 | ENSRNOT00000003691 | -0.955646095 | 1.25E-06 |
| TUCP_002146 | XLOC_089185 | ENSRNOT00000013524 | 0.951141051  | 2.02E-06 |
| TUCP_002146 | XLOC_089185 | ENSRNOT00000035385 | 0.96079841   | 6.83E-07 |
| TUCP_002146 | XLOC_089185 | ENSRNOT00000025794 | -0.952740897 | 1.71E-06 |

|             |             |                    |              |          |
|-------------|-------------|--------------------|--------------|----------|
| TUCP_002146 | XLOC_089185 | ENSRNOT0000005873  | -0.951346334 | 1.98E-06 |
| TUCP_002146 | XLOC_089185 | ENSRNOT00000017765 | 0.977102752  | 4.77E-08 |
| TUCP_002146 | XLOC_089185 | ENSRNOT00000085971 | -0.955972654 | 1.21E-06 |
| TUCP_002146 | XLOC_089185 | ENSRNOT00000014888 | 0.966724966  | 3.04E-07 |
| TUCP_002146 | XLOC_089185 | ENSRNOT00000037015 | 0.9816688    | 1.58E-08 |
| TUCP_002146 | XLOC_089185 | ENSRNOT00000009994 | -0.95128248  | 1.99E-06 |
| TUCP_002146 | XLOC_089185 | ENSRNOT00000057537 | 0.95100157   | 2.05E-06 |
| TUCP_002146 | XLOC_089185 | ENSRNOT00000008987 | -0.957063771 | 1.07E-06 |
| TUCP_002146 | XLOC_089185 | ENSRNOT00000006160 | 0.971886439  | 1.32E-07 |
| TUCP_002146 | XLOC_089185 | ENSRNOT00000023014 | 0.97557998   | 6.56E-08 |
| TUCP_002146 | XLOC_089185 | ENSRNOT00000026518 | 0.968293597  | 2.39E-07 |
| TUCP_002146 | XLOC_089185 | ENSRNOT00000028677 | 0.95451873   | 1.42E-06 |
| TUCP_002146 | XLOC_089185 | ENSRNOT00000018341 | -0.954668529 | 1.40E-06 |
| TUCP_002146 | XLOC_089185 | ENSRNOT00000085295 | -0.957340379 | 1.04E-06 |
| TUCP_002146 | XLOC_089185 | ENSRNOT00000015537 | 0.952088055  | 1.83E-06 |
| TUCP_002146 | XLOC_089185 | ENSRNOT00000067524 | 0.952544789  | 1.75E-06 |
| TUCP_002146 | XLOC_089185 | ENSRNOT00000016445 | 0.968351836  | 2.37E-07 |
| TUCP_002146 | XLOC_089185 | ENSRNOT00000002114 | -0.961445513 | 6.29E-07 |
| TUCP_002146 | XLOC_089185 | ENSRNOT00000015946 | -0.950759937 | 2.10E-06 |
| TUCP_002146 | XLOC_089185 | ENSRNOT00000039102 | 0.954432135  | 1.43E-06 |
| TUCP_002146 | XLOC_089185 | ENSRNOT00000085517 | 0.976598568  | 5.31E-08 |
| TUCP_002146 | XLOC_089185 | ENSRNOT00000084709 | 0.953956903  | 1.51E-06 |
| TUCP_002146 | XLOC_089185 | ENSRNOT00000037679 | 0.954315408  | 1.45E-06 |
| TUCP_002146 | XLOC_089185 | ENSRNOT00000071068 | -0.951839861 | 1.88E-06 |
| TUCP_002146 | XLOC_089185 | ENSRNOT00000000120 | 0.957068001  | 1.07E-06 |
| TUCP_002146 | XLOC_089185 | ENSRNOT00000066211 | -0.955662182 | 1.25E-06 |
| TUCP_002146 | XLOC_089185 | ENSRNOT00000074150 | 0.977925658  | 3.98E-08 |
| TUCP_002146 | XLOC_089185 | ENSRNOT00000082108 | -0.957420211 | 1.03E-06 |
| TUCP_002146 | XLOC_089185 | ENSRNOT00000007369 | 0.971067251  | 1.52E-07 |
| TUCP_002146 | XLOC_089185 | ENSRNOT00000087033 | -0.951573201 | 1.93E-06 |
| TUCP_002146 | XLOC_089185 | ENSRNOT00000013733 | -0.959585316 | 7.93E-07 |
| TUCP_002146 | XLOC_089185 | ENSRNOT00000012528 | 0.970545744  | 1.66E-07 |
| TUCP_002146 | XLOC_089185 | ENSRNOT00000060698 | -0.960553949 | 7.04E-07 |
| TUCP_002146 | XLOC_089185 | ENSRNOT00000037409 | 0.960845044  | 6.79E-07 |
| TUCP_002146 | XLOC_089185 | ENSRNOT00000026760 | -0.964446112 | 4.21E-07 |
| TUCP_002146 | XLOC_089185 | ENSRNOT00000027476 | 0.957240706  | 1.05E-06 |
| TUCP_002146 | XLOC_089185 | ENSRNOT00000083891 | -0.954470172 | 1.43E-06 |
| TUCP_002146 | XLOC_089185 | ENSRNOT00000032244 | 0.956662065  | 1.12E-06 |
| TUCP_002146 | XLOC_089185 | ENSRNOT00000017998 | 0.960110627  | 7.44E-07 |
| TUCP_002146 | XLOC_089185 | ENSRNOT00000016568 | 0.970815715  | 1.59E-07 |
| TUCP_002146 | XLOC_089185 | ENSRNOT00000066098 | -0.954798838 | 1.38E-06 |
| TUCP_002146 | XLOC_089185 | ENSRNOT00000022461 | -0.961245475 | 6.45E-07 |
| TUCP_002146 | XLOC_089185 | ENSRNOT00000088679 | -0.956100998 | 1.19E-06 |
| TUCP_002146 | XLOC_089185 | ENSRNOT00000028907 | 0.966030502  | 3.36E-07 |
| TUCP_002146 | XLOC_089185 | ENSRNOT00000027967 | 0.980947473  | 1.92E-08 |
| TUCP_002146 | XLOC_089185 | ENSRNOT00000013516 | 0.95617099   | 1.18E-06 |
| TUCP_002146 | XLOC_089185 | ENSRNOT00000025314 | 0.952395247  | 1.78E-06 |
| TUCP_002146 | XLOC_089185 | ENSRNOT00000016776 | -0.950710772 | 2.11E-06 |
| TUCP_002146 | XLOC_089185 | ENSRNOT00000024066 | 0.96685165   | 2.98E-07 |
| TUCP_002146 | XLOC_089185 | ENSRNOT00000081678 | 0.979401617  | 2.82E-08 |
| TUCP_002146 | XLOC_089185 | ENSRNOT00000036613 | -0.961503791 | 6.24E-07 |

|             |             |                    |              |          |
|-------------|-------------|--------------------|--------------|----------|
| TUCP_002146 | XLOC_089185 | ENSRNOT00000020929 | 0.972635832  | 1.15E-07 |
| TUCP_002146 | XLOC_089185 | ENSRNOT00000025705 | 0.951958008  | 1.86E-06 |
| TUCP_002146 | XLOC_089185 | ENSRNOT00000020051 | 0.953334144  | 1.61E-06 |
| TUCP_002146 | XLOC_089185 | ENSRNOT00000092876 | -0.953028043 | 1.66E-06 |
| TUCP_002146 | XLOC_089185 | ENSRNOT00000046639 | 0.963172837  | 5.01E-07 |
| TUCP_002146 | XLOC_089185 | ENSRNOT00000008113 | -0.969924793 | 1.84E-07 |
| TUCP_002146 | XLOC_089185 | ENSRNOT00000025037 | 0.956182969  | 1.18E-06 |
| TUCP_002144 | XLOC_089099 | ENSRNOT00000016209 | 0.960322845  | 7.24E-07 |
| TUCP_002144 | XLOC_089099 | ENSRNOT00000022688 | 0.952028264  | 1.85E-06 |
| TUCP_002144 | XLOC_089099 | ENSRNOT00000074240 | 0.971201561  | 1.49E-07 |
| TUCP_002144 | XLOC_089099 | ENSRNOT00000091213 | 0.964427062  | 4.23E-07 |
| TUCP_002144 | XLOC_089099 | ENSRNOT00000023696 | 0.962635064  | 5.39E-07 |
| TUCP_003087 | XLOC_132420 | ENSRNOT00000084133 | 1            | 0        |
| TUCP_003087 | XLOC_132420 | ENSRNOT00000093745 | 0.981891039  | 1.49E-08 |
| TUCP_003087 | XLOC_132420 | ENSRNOT00000065542 | 0.99828699   | 1.16E-13 |
| TUCP_003087 | XLOC_132420 | ENSRNOT00000082464 | 1            | 0        |
| TUCP_003087 | XLOC_132420 | ENSRNOT00000087659 | 1            | 0        |
| TUCP_003087 | XLOC_132420 | ENSRNOT00000084582 | 0.976633579  | 5.28E-08 |
| TUCP_003087 | XLOC_132420 | ENSRNOT00000085078 | 1            | 0        |
| TUCP_003087 | XLOC_132420 | ENSRNOT00000014028 | 1            | 0        |
| TUCP_003087 | XLOC_132420 | ENSRNOT00000049363 | 1            | 0        |
| TUCP_003087 | XLOC_132420 | ENSRNOT00000065473 | 0.999949098  | 2.69E-21 |
| TUCP_003087 | XLOC_132420 | ENSRNOT00000000142 | 0.998996155  | 8.01E-15 |
| TUCP_003087 | XLOC_132420 | ENSRNOT00000082288 | 0.999998398  | 8.30E-29 |
| TUCP_003087 | XLOC_132420 | ENSRNOT00000039664 | 1            | 0        |
| TUCP_003087 | XLOC_132420 | ENSRNOT00000065402 | 1            | 0        |
| TUCP_003087 | XLOC_132420 | ENSRNOT00000064551 | 0.965365872  | 3.70E-07 |
| TUCP_003087 | XLOC_132420 | ENSRNOT00000084141 | 1            | 0        |
| TUCP_003087 | XLOC_132420 | ENSRNOT00000082435 | 1            | 0        |
| TUCP_003087 | XLOC_132420 | ENSRNOT00000082928 | 0.996801059  | 2.62E-12 |
| TUCP_003087 | XLOC_132420 | ENSRNOT00000066546 | 0.956953619  | 1.08E-06 |
| TUCP_003087 | XLOC_132420 | ENSRNOT00000046013 | 0.988138626  | 1.81E-09 |
| TUCP_003087 | XLOC_132420 | ENSRNOT00000067931 | 0.978893628  | 3.18E-08 |
| TUCP_003087 | XLOC_132420 | ENSRNOT00000086425 | 0.992023315  | 2.51E-10 |
| TUCP_003087 | XLOC_132420 | ENSRNOT00000093696 | 0.956927219  | 1.09E-06 |
| TUCP_003087 | XLOC_132420 | ENSRNOT00000036228 | 0.982337157  | 1.31E-08 |
| TUCP_003087 | XLOC_132420 | ENSRNOT00000014030 | 1            | 0        |
| TUCP_003087 | XLOC_132420 | ENSRNOT00000081966 | 1            | 0        |
| TUCP_003087 | XLOC_132420 | ENSRNOT00000075906 | 1            | 0        |
| TUCP_003087 | XLOC_132420 | ENSRNOT00000088396 | 0.981336994  | 1.73E-08 |
| TUCP_003087 | XLOC_132420 | ENSRNOT00000049259 | 0.965500259  | 3.63E-07 |
| TUCP_003087 | XLOC_132420 | ENSRNOT00000092838 | 0.982579749  | 1.23E-08 |
| TUCP_003087 | XLOC_132420 | ENSRNOT00000093442 | 0.959217317  | 8.30E-07 |
| TUCP_003680 | XLOC_160812 | ENSRNOT00000045950 | 0.960400346  | 7.18E-07 |
| TUCP_003680 | XLOC_160812 | ENSRNOT00000082429 | 0.955748055  | 1.24E-06 |
| TUCP_003680 | XLOC_160812 | ENSRNOT00000060607 | 0.952581296  | 1.74E-06 |
| TUCP_004371 | XLOC_192960 | ENSRNOT0000001077  | 0.951349323  | 1.98E-06 |
| TUCP_004371 | XLOC_192960 | ENSRNOT00000015020 | -0.959368024 | 8.15E-07 |
| TUCP_004371 | XLOC_192960 | ENSRNOT00000082513 | 0.957785235  | 9.83E-07 |
| TUCP_004371 | XLOC_192960 | ENSRNOT00000013817 | 0.950536965  | 2.15E-06 |
| TUCP_004371 | XLOC_192960 | ENSRNOT00000090621 | 0.957578616  | 1.01E-06 |

|             |             |                    |              |          |
|-------------|-------------|--------------------|--------------|----------|
| TUCP_004371 | XLOC_192960 | ENSRNOT00000026391 | 0.963794982  | 4.61E-07 |
| TUCP_004371 | XLOC_192960 | ENSRNOT00000081351 | 0.970332067  | 1.72E-07 |
| TUCP_004371 | XLOC_192960 | ENSRNOT00000007350 | 0.954544958  | 1.42E-06 |
| TUCP_004371 | XLOC_192960 | ENSRNOT00000017765 | 0.964164351  | 4.38E-07 |
| TUCP_004371 | XLOC_192960 | ENSRNOT00000057738 | 0.954270719  | 1.46E-06 |
| TUCP_004371 | XLOC_192960 | ENSRNOT00000002465 | 0.951011673  | 2.05E-06 |
| TUCP_004371 | XLOC_192960 | ENSRNOT00000092083 | 0.963939891  | 4.52E-07 |
| TUCP_004371 | XLOC_192960 | ENSRNOT00000039954 | 0.954641673  | 1.40E-06 |
| TUCP_004371 | XLOC_192960 | ENSRNOT00000079609 | 0.955927449  | 1.22E-06 |
| TUCP_004371 | XLOC_192960 | ENSRNOT00000006217 | 0.956930689  | 1.09E-06 |
| TUCP_004371 | XLOC_192960 | ENSRNOT00000040525 | 0.97156202   | 1.40E-07 |
| TUCP_004371 | XLOC_192960 | ENSRNOT00000006160 | 0.975124106  | 7.20E-08 |
| TUCP_004371 | XLOC_192960 | ENSRNOT00000026518 | 0.955067276  | 1.34E-06 |
| TUCP_004371 | XLOC_192960 | ENSRNOT00000006071 | 0.950679847  | 2.12E-06 |
| TUCP_004371 | XLOC_192960 | ENSRNOT00000079138 | 0.957640652  | 1.00E-06 |
| TUCP_004371 | XLOC_192960 | ENSRNOT00000014946 | 0.952226371  | 1.81E-06 |
| TUCP_004371 | XLOC_192960 | ENSRNOT00000059173 | -0.953986606 | 1.50E-06 |
| TUCP_004371 | XLOC_192960 | ENSRNOT00000027032 | -0.954525924 | 1.42E-06 |
| TUCP_004371 | XLOC_192960 | ENSRNOT00000072716 | 0.950648578  | 2.12E-06 |
| TUCP_004371 | XLOC_192960 | ENSRNOT00000011930 | 0.960477815  | 7.11E-07 |
| TUCP_004371 | XLOC_192960 | ENSRNOT00000036051 | 0.958114685  | 9.46E-07 |
| TUCP_004371 | XLOC_192960 | ENSRNOT00000024005 | 0.960172206  | 7.38E-07 |
| TUCP_004371 | XLOC_192960 | ENSRNOT00000084567 | 0.968542608  | 2.30E-07 |
| TUCP_004371 | XLOC_192960 | ENSRNOT00000017624 | 0.955385629  | 1.29E-06 |
| TUCP_004371 | XLOC_192960 | ENSRNOT00000027917 | 0.950447307  | 2.16E-06 |
| TUCP_004371 | XLOC_192960 | ENSRNOT00000037409 | 0.967708443  | 2.62E-07 |
| TUCP_004371 | XLOC_192960 | ENSRNOT00000001490 | 0.955091422  | 1.33E-06 |
| TUCP_004371 | XLOC_192960 | ENSRNOT00000037015 | 0.953589518  | 1.57E-06 |
| TUCP_004371 | XLOC_192960 | ENSRNOT00000074150 | 0.978987515  | 3.11E-08 |
| TUCP_004371 | XLOC_192960 | ENSRNOT00000021553 | 0.957864341  | 9.74E-07 |
| TUCP_004371 | XLOC_192960 | ENSRNOT00000043344 | -0.961273364 | 6.43E-07 |
| TUCP_004371 | XLOC_192960 | ENSRNOT00000011773 | 0.960028329  | 7.51E-07 |
| TUCP_004371 | XLOC_192960 | ENSRNOT00000083344 | 0.952762355  | 1.71E-06 |
| TUCP_004371 | XLOC_192960 | ENSRNOT00000003544 | -0.951117306 | 2.02E-06 |
| TUCP_004371 | XLOC_192960 | ENSRNOT00000061345 | -0.955541938 | 1.27E-06 |
| TUCP_004371 | XLOC_192960 | ENSRNOT00000093385 | 0.959984932  | 7.55E-07 |
| TUCP_004371 | XLOC_192960 | ENSRNOT00000015239 | -0.954379801 | 1.44E-06 |
| TUCP_004371 | XLOC_192960 | ENSRNOT00000068156 | 0.954367805  | 1.44E-06 |
| TUCP_004371 | XLOC_192960 | ENSRNOT00000048528 | 0.952940774  | 1.68E-06 |
| TUCP_004371 | XLOC_192960 | ENSRNOT00000027264 | 0.964195475  | 4.36E-07 |
| TUCP_004371 | XLOC_192960 | ENSRNOT00000017147 | 0.959831781  | 7.70E-07 |
| TUCP_004371 | XLOC_192960 | ENSRNOT00000012060 | 0.950565199  | 2.14E-06 |
| TUCP_004371 | XLOC_192960 | ENSRNOT00000025309 | 0.96246421   | 5.51E-07 |
| TUCP_004371 | XLOC_192960 | ENSRNOT00000057740 | 0.951308032  | 1.99E-06 |
| TUCP_004371 | XLOC_192960 | ENSRNOT00000076230 | 0.969825662  | 1.87E-07 |
| TUCP_004371 | XLOC_192960 | ENSRNOT00000066952 | 0.9507248    | 2.11E-06 |
| TUCP_004371 | XLOC_192960 | ENSRNOT00000036137 | 0.973993175  | 8.97E-08 |
| TUCP_004371 | XLOC_192960 | ENSRNOT00000075480 | -0.950383444 | 2.18E-06 |
| TUCP_004371 | XLOC_192960 | ENSRNOT00000027967 | 0.9558191    | 1.23E-06 |
| TUCP_004371 | XLOC_192960 | ENSRNOT00000027476 | 0.953086634  | 1.65E-06 |
| TUCP_004371 | XLOC_192960 | ENSRNOT00000089611 | 0.957344824  | 1.04E-06 |

|             |             |                    |              |          |
|-------------|-------------|--------------------|--------------|----------|
| TUCP_004371 | XLOC_192960 | ENSRNOT00000081678 | 0.963515516  | 4.79E-07 |
| TUCP_004371 | XLOC_192960 | ENSRNOT00000020929 | 0.970408633  | 1.70E-07 |
| TUCP_004371 | XLOC_192960 | ENSRNOT00000083891 | -0.953380517 | 1.60E-06 |
| TUCP_004371 | XLOC_192960 | ENSRNOT00000023667 | 0.962334449  | 5.60E-07 |
| TUCP_004371 | XLOC_192960 | ENSRNOT00000064039 | 0.962467195  | 5.51E-07 |
| TUCP_004371 | XLOC_192960 | ENSRNOT00000011675 | 0.958694982  | 8.83E-07 |
| TUCP_004371 | XLOC_192960 | ENSRNOT00000085517 | 0.953761039  | 1.54E-06 |
| TUCP_004371 | XLOC_192960 | ENSRNOT0000009202  | 0.951821919  | 1.88E-06 |
| TUCP_004371 | XLOC_192960 | ENSRNOT00000032106 | 0.977044704  | 4.83E-08 |
| TUCP_001365 | XLOC_052442 | ENSRNOT00000071694 | 0.951227671  | 2.00E-06 |
| TUCP_001365 | XLOC_052442 | ENSRNOT00000011984 | 0.954590171  | 1.41E-06 |
| TUCP_001365 | XLOC_052442 | ENSRNOT00000032780 | 0.951109652  | 2.03E-06 |
| TUCP_001365 | XLOC_052442 | ENSRNOT00000004698 | 0.950540212  | 2.14E-06 |
| TUCP_001365 | XLOC_052442 | ENSRNOT00000012093 | 0.956675678  | 1.12E-06 |
| TUCP_001365 | XLOC_052442 | ENSRNOT00000026293 | 0.962458881  | 5.51E-07 |
| TUCP_001365 | XLOC_052442 | ENSRNOT00000019487 | 0.95047141   | 2.16E-06 |
| TUCP_001365 | XLOC_052442 | ENSRNOT00000077231 | 0.951011517  | 2.05E-06 |
| TUCP_001365 | XLOC_052442 | ENSRNOT00000017021 | 0.965443863  | 3.66E-07 |
| TUCP_001365 | XLOC_052442 | ENSRNOT00000078445 | -0.962847024 | 5.24E-07 |
| TUCP_001365 | XLOC_052442 | ENSRNOT00000087592 | 0.977656477  | 4.22E-08 |
| TUCP_001365 | XLOC_052442 | ENSRNOT00000015116 | 0.955641739  | 1.26E-06 |
| TUCP_001365 | XLOC_052442 | ENSRNOT00000055992 | -0.966719008 | 3.04E-07 |
| TUCP_001365 | XLOC_052442 | ENSRNOT00000051991 | 0.955332688  | 1.30E-06 |
| TUCP_001365 | XLOC_052442 | ENSRNOT00000010218 | 0.951874341  | 1.87E-06 |
| TUCP_001365 | XLOC_052442 | ENSRNOT00000006034 | -0.962013885 | 5.84E-07 |
| TUCP_001365 | XLOC_052442 | ENSRNOT00000087429 | 0.967642858  | 2.65E-07 |
| TUCP_001365 | XLOC_052442 | ENSRNOT00000083127 | 0.951308053  | 1.99E-06 |
| TUCP_001365 | XLOC_052442 | ENSRNOT00000000184 | -0.95789287  | 9.71E-07 |
| TUCP_001365 | XLOC_052442 | ENSRNOT00000023144 | 0.96149133   | 6.25E-07 |
| TUCP_001365 | XLOC_052442 | ENSRNOT00000084088 | 0.963836065  | 4.58E-07 |
| TUCP_001365 | XLOC_052442 | ENSRNOT00000078070 | 0.967142203  | 2.85E-07 |
| TUCP_001365 | XLOC_052442 | ENSRNOT00000037446 | 0.951375285  | 1.97E-06 |
| TUCP_001365 | XLOC_052442 | ENSRNOT00000056813 | 0.96049818   | 7.09E-07 |
| TUCP_001365 | XLOC_052442 | ENSRNOT00000091128 | -0.95167812  | 1.91E-06 |
| TUCP_001365 | XLOC_052442 | ENSRNOT00000021408 | 0.956806633  | 1.10E-06 |
| TUCP_001365 | XLOC_052442 | ENSRNOT00000010986 | 0.958261633  | 9.30E-07 |
| TUCP_001365 | XLOC_052442 | ENSRNOT00000027454 | 0.962399393  | 5.56E-07 |
| TUCP_001365 | XLOC_052442 | ENSRNOT00000000036 | 0.955575609  | 1.26E-06 |
| TUCP_001365 | XLOC_052442 | ENSRNOT0000001081  | 0.95177267   | 1.89E-06 |
| TUCP_001365 | XLOC_052442 | ENSRNOT00000005228 | 0.954234584  | 1.46E-06 |
| TUCP_001365 | XLOC_052442 | ENSRNOT00000014814 | 0.954604237  | 1.41E-06 |
| TUCP_001365 | XLOC_052442 | ENSRNOT00000012187 | 0.950926454  | 2.06E-06 |
| TUCP_001365 | XLOC_052442 | ENSRNOT00000086119 | -0.950949718 | 2.06E-06 |
| TUCP_001365 | XLOC_052442 | ENSRNOT00000077555 | 0.955850856  | 1.23E-06 |
| TUCP_001365 | XLOC_052442 | ENSRNOT00000061267 | 0.957548274  | 1.01E-06 |
| TUCP_001365 | XLOC_052442 | ENSRNOT00000006055 | 0.970552258  | 1.66E-07 |
| TUCP_001365 | XLOC_052442 | ENSRNOT00000005126 | -0.961407589 | 6.32E-07 |
| TUCP_001365 | XLOC_052442 | ENSRNOT00000019133 | 0.964392414  | 4.25E-07 |
| TUCP_001365 | XLOC_052442 | ENSRNOT00000000718 | 0.950849626  | 2.08E-06 |
| TUCP_001365 | XLOC_052442 | ENSRNOT00000016401 | 0.955717309  | 1.24E-06 |
| TUCP_001365 | XLOC_052442 | ENSRNOT00000026457 | 0.971741368  | 1.35E-07 |



|             |             |                    |              |          |
|-------------|-------------|--------------------|--------------|----------|
| TUCP_001365 | XLOC_052442 | ENSRNOT00000038247 | 0.953921636  | 1.51E-06 |
| TUCP_001365 | XLOC_052442 | ENSRNOT00000047093 | 0.968641684  | 2.27E-07 |
| TUCP_001365 | XLOC_052442 | ENSRNOT00000090420 | -0.951309029 | 1.99E-06 |
| TUCP_001365 | XLOC_052442 | ENSRNOT00000080207 | 0.974970698  | 7.42E-08 |
| TUCP_001365 | XLOC_052442 | ENSRNOT00000000337 | 0.96281049   | 5.26E-07 |
| TUCP_001365 | XLOC_052442 | ENSRNOT00000083799 | 0.952200087  | 1.81E-06 |
| TUCP_001365 | XLOC_052442 | ENSRNOT00000024548 | 0.95937948   | 8.13E-07 |
| TUCP_002445 | XLOC_103731 | ENSRNOT00000006188 | -0.969524049 | 1.97E-07 |
| TUCP_002445 | XLOC_103731 | ENSRNOT00000006186 | 0.9749596    | 7.43E-08 |
| TUCP_002445 | XLOC_103731 | ENSRNOT00000013747 | 0.952737221  | 1.72E-06 |
| TUCP_002445 | XLOC_103731 | ENSRNOT00000013745 | -0.955018887 | 1.34E-06 |
| TUCP_002445 | XLOC_103731 | ENSRNOT00000013743 | 0.956783088  | 1.10E-06 |
| TUCP_002445 | XLOC_103731 | ENSRNOT00000075397 | 0.970712344  | 1.62E-07 |
| TUCP_002445 | XLOC_103731 | ENSRNOT00000019104 | -0.960400951 | 7.17E-07 |
| TUCP_002445 | XLOC_103731 | ENSRNOT00000021348 | 0.952082998  | 1.84E-06 |
| TUCP_002445 | XLOC_103731 | ENSRNOT00000074649 | 0.963216408  | 4.99E-07 |
| TUCP_002445 | XLOC_103731 | ENSRNOT00000031904 | 0.954287863  | 1.46E-06 |
| TUCP_002445 | XLOC_103731 | ENSRNOT00000020910 | 0.956041369  | 1.20E-06 |
| TUCP_002445 | XLOC_103731 | ENSRNOT00000064305 | -0.952661429 | 1.73E-06 |
| TUCP_002445 | XLOC_103731 | ENSRNOT00000086706 | 0.962081     | 5.79E-07 |
| TUCP_002445 | XLOC_103731 | ENSRNOT00000004017 | 0.964967693  | 3.92E-07 |
| TUCP_002445 | XLOC_103731 | ENSRNOT00000085885 | -0.957595601 | 1.01E-06 |
| TUCP_002445 | XLOC_103731 | ENSRNOT00000082998 | 0.978605363  | 3.41E-08 |
| TUCP_002445 | XLOC_103731 | ENSRNOT00000045233 | -0.973139545 | 1.05E-07 |
| TUCP_002445 | XLOC_103731 | ENSRNOT00000026941 | 0.958327152  | 9.23E-07 |
| TUCP_002445 | XLOC_103731 | ENSRNOT00000037955 | -0.966661246 | 3.07E-07 |
| TUCP_002445 | XLOC_103731 | ENSRNOT00000052063 | 0.963567482  | 4.75E-07 |
| TUCP_002445 | XLOC_103731 | ENSRNOT00000030850 | 0.974768405  | 7.72E-08 |
| TUCP_002445 | XLOC_103731 | ENSRNOT00000027125 | -0.978077198 | 3.84E-08 |
| TUCP_002445 | XLOC_103731 | ENSRNOT00000086893 | -0.959921619 | 7.61E-07 |
| TUCP_002445 | XLOC_103731 | ENSRNOT00000055540 | 0.971051969  | 1.53E-07 |
| TUCP_002445 | XLOC_103731 | ENSRNOT0000006752  | 0.96022719   | 7.33E-07 |
| TUCP_002445 | XLOC_103731 | ENSRNOT00000087386 | -0.951883323 | 1.87E-06 |
| TUCP_002445 | XLOC_103731 | ENSRNOT00000021534 | -0.969930365 | 1.84E-07 |
| TUCP_002445 | XLOC_103731 | ENSRNOT00000085251 | -0.964432242 | 4.22E-07 |
| TUCP_002445 | XLOC_103731 | ENSRNOT00000027121 | 0.954299968  | 1.45E-06 |
| TUCP_002445 | XLOC_103731 | ENSRNOT00000072771 | 0.970319511  | 1.73E-07 |
| TUCP_002445 | XLOC_103731 | ENSRNOT00000073370 | 0.953545574  | 1.58E-06 |
| TUCP_002445 | XLOC_103731 | ENSRNOT00000065300 | 0.968541736  | 2.30E-07 |
| TUCP_002445 | XLOC_103731 | ENSRNOT00000044742 | 0.956545791  | 1.13E-06 |
| TUCP_002445 | XLOC_103731 | ENSRNOT00000045699 | 0.97187159   | 1.32E-07 |
| TUCP_002445 | XLOC_103731 | ENSRNOT00000029439 | 0.950163685  | 2.23E-06 |
| TUCP_002445 | XLOC_103731 | ENSRNOT00000064401 | 0.967591733  | 2.67E-07 |
| TUCP_002445 | XLOC_103731 | ENSRNOT00000004400 | 0.952505189  | 1.76E-06 |
| TUCP_002445 | XLOC_103731 | ENSRNOT00000035320 | -0.971308761 | 1.46E-07 |
| TUCP_002445 | XLOC_103731 | ENSRNOT00000073971 | 0.971636205  | 1.38E-07 |
| TUCP_002445 | XLOC_103731 | ENSRNOT00000022534 | 0.950280377  | 2.20E-06 |
| TUCP_002445 | XLOC_103731 | ENSRNOT00000019848 | -0.965287663 | 3.74E-07 |
| TUCP_002445 | XLOC_103731 | ENSRNOT00000017469 | -0.960298327 | 7.27E-07 |
| TUCP_002445 | XLOC_103731 | ENSRNOT00000019192 | -0.967649044 | 2.64E-07 |
| TUCP_002445 | XLOC_103731 | ENSRNOT00000077999 | 0.970710352  | 1.62E-07 |

|             |             |                     |              |          |
|-------------|-------------|---------------------|--------------|----------|
| TUCP_002445 | XLOC_103731 | ENSRNOT00000068134  | 0.952730694  | 1.72E-06 |
| TUCP_002445 | XLOC_103731 | ENSRNOT00000046807  | -0.951876785 | 1.87E-06 |
| TUCP_002445 | XLOC_103731 | ENSRNOT00000003412  | -0.968702054 | 2.24E-07 |
| TUCP_002445 | XLOC_103731 | ENSRNOT00000077856  | -0.96930101  | 2.04E-07 |
| TUCP_002445 | XLOC_103731 | ENSRNOT00000024264  | -0.967667075 | 2.64E-07 |
| TUCP_002445 | XLOC_103731 | ENSRNOT00000085228  | 0.97174266   | 1.35E-07 |
| TUCP_002445 | XLOC_103731 | ENSRNOT00000017319  | 0.962660286  | 5.37E-07 |
| TUCP_002445 | XLOC_103731 | ENSRNOT00000015188  | 0.977160784  | 4.71E-08 |
| TUCP_002445 | XLOC_103731 | ENSRNOT00000018488  | -0.973605406 | 9.65E-08 |
| TUCP_002445 | XLOC_103731 | ENSRNOT00000079866  | 0.969646695  | 1.93E-07 |
| TUCP_002445 | XLOC_103731 | ENSRNOT00000005686  | -0.967050663 | 2.89E-07 |
| TUCP_002445 | XLOC_103731 | ENSRNOT00000040629  | 0.967892819  | 2.55E-07 |
| TUCP_002445 | XLOC_103731 | ENSRNOT00000030007  | -0.953678331 | 1.55E-06 |
| TUCP_002445 | XLOC_103731 | ENSRNOT00000015537  | 0.953272923  | 1.62E-06 |
| TUCP_002445 | XLOC_103731 | ENSRNOT00000010927  | 0.954641885  | 1.40E-06 |
| TUCP_002445 | XLOC_103731 | ENSRNOT00000080410  | -0.953094104 | 1.65E-06 |
| TUCP_002445 | XLOC_103731 | ENSRNOT00000087371  | 0.958584568  | 8.95E-07 |
| TUCP_002445 | XLOC_103731 | ENSRNOT00000030074  | 0.951915825  | 1.87E-06 |
| TUCP_002445 | XLOC_103731 | ENSRNOT00000067391  | -0.957583536 | 1.01E-06 |
| TUCP_002445 | XLOC_103731 | ENSRNOT00000072031  | -0.968581408 | 2.29E-07 |
| TUCP_002445 | XLOC_103731 | ENSRNOT00000092945  | -0.981166685 | 1.81E-08 |
| TUCP_002445 | XLOC_103731 | ENSRNOT00000084709  | 0.968833098  | 2.20E-07 |
| TUCP_002445 | XLOC_103731 | ENSRNOT00000068033  | 0.974634839  | 7.92E-08 |
| TUCP_002445 | XLOC_103731 | ENSRNOT00000009156  | 0.969573109  | 1.95E-07 |
| TUCP_002445 | XLOC_103731 | ENSRNOT00000026481  | 0.987399039  | 2.45E-09 |
| TUCP_002445 | XLOC_103731 | ENSRNOT00000015113  | -0.950796595 | 2.09E-06 |
| TUCP_002445 | XLOC_103731 | ENSRNOT00000044562  | 0.957618481  | 1.00E-06 |
| TUCP_002445 | XLOC_103731 | ENSRNOT00000012892  | 0.958410085  | 9.14E-07 |
| TUCP_002445 | XLOC_103731 | ENSRNOT00000018413  | -0.95268599  | 1.72E-06 |
| TUCP_002445 | XLOC_103731 | ENSRNOT00000026525  | -0.974066403 | 8.85E-08 |
| TUCP_002445 | XLOC_103731 | ENSRNOT00000003070  | -0.950571626 | 2.14E-06 |
| TUCP_002445 | XLOC_103731 | ENSRNOT00000026643  | 0.95391558   | 1.51E-06 |
| TUCP_002445 | XLOC_103731 | ENSRNOT00000001403  | 0.951767874  | 1.90E-06 |
| TUCP_002445 | XLOC_103731 | ENSRNOT00000001401  | 0.951055056  | 2.04E-06 |
| TUCP_002445 | XLOC_103731 | ENSRNOT00000016132  | -0.99139683  | 3.66E-10 |
| TUCP_002445 | XLOC_103731 | ENSRNOT00000001366  | -0.952405722 | 1.78E-06 |
| TUCP_002445 | XLOC_103731 | ENSRNOT000000058495 | -0.974638905 | 7.92E-08 |
| TUCP_002445 | XLOC_103731 | ENSRNOT00000013067  | -0.976374089 | 5.57E-08 |
| TUCP_002445 | XLOC_103731 | ENSRNOT00000023506  | -0.953786788 | 1.54E-06 |
| TUCP_002445 | XLOC_103731 | ENSRNOT00000027145  | -0.951812022 | 1.89E-06 |
| TUCP_002445 | XLOC_103731 | ENSRNOT00000002313  | -0.969476112 | 1.98E-07 |
| TUCP_002445 | XLOC_103731 | ENSRNOT00000016637  | -0.95593703  | 1.21E-06 |
| TUCP_002445 | XLOC_103731 | ENSRNOT00000048063  | 0.952335781  | 1.79E-06 |
| TUCP_002445 | XLOC_103731 | ENSRNOT000000031979 | -0.974187073 | 8.64E-08 |
| TUCP_002445 | XLOC_103731 | ENSRNOT000000033976 | 0.951238003  | 2.00E-06 |
| TUCP_002445 | XLOC_103731 | ENSRNOT00000079895  | 0.965987364  | 3.39E-07 |
| TUCP_002445 | XLOC_103731 | ENSRNOT00000078102  | 0.963129509  | 5.04E-07 |
| TUCP_002445 | XLOC_103731 | ENSRNOT00000074586  | -0.962913354 | 5.19E-07 |
| TUCP_002445 | XLOC_103731 | ENSRNOT00000045765  | -0.965832618 | 3.46E-07 |
| TUCP_002445 | XLOC_103731 | ENSRNOT00000025067  | -0.956992229 | 1.08E-06 |
| TUCP_002445 | XLOC_103731 | ENSRNOT00000081047  | 0.96648327   | 3.15E-07 |

|             |             |                    |              |          |
|-------------|-------------|--------------------|--------------|----------|
| TUCP_002445 | XLOC_103731 | ENSRNOT00000002465 | 0.955244477  | 1.31E-06 |
| TUCP_002445 | XLOC_103731 | ENSRNOT00000011880 | 0.981727761  | 1.56E-08 |
| TUCP_002445 | XLOC_103731 | ENSRNOT00000029202 | -0.982973659 | 1.10E-08 |
| TUCP_002445 | XLOC_103731 | ENSRNOT00000028290 | -0.959238413 | 8.28E-07 |
| TUCP_002445 | XLOC_103731 | ENSRNOT00000003992 | -0.958609858 | 8.92E-07 |
| TUCP_002445 | XLOC_103731 | ENSRNOT00000003991 | 0.961278816  | 6.42E-07 |
| TUCP_002445 | XLOC_103731 | ENSRNOT00000021408 | 0.959416011  | 8.10E-07 |
| TUCP_002445 | XLOC_103731 | ENSRNOT00000050515 | 0.965804169  | 3.48E-07 |
| TUCP_002445 | XLOC_103731 | ENSRNOT00000089980 | -0.973284408 | 1.02E-07 |
| TUCP_002445 | XLOC_103731 | ENSRNOT00000084088 | 0.952278597  | 1.80E-06 |
| TUCP_002445 | XLOC_103731 | ENSRNOT00000052224 | 0.950771113  | 2.10E-06 |
| TUCP_002445 | XLOC_103731 | ENSRNOT00000055602 | -0.957773502 | 9.85E-07 |
| TUCP_002445 | XLOC_103731 | ENSRNOT00000087997 | 0.961584574  | 6.18E-07 |
| TUCP_002445 | XLOC_103731 | ENSRNOT00000021015 | 0.975001359  | 7.37E-08 |
| TUCP_002445 | XLOC_103731 | ENSRNOT00000025791 | -0.952318961 | 1.79E-06 |
| TUCP_002445 | XLOC_103731 | ENSRNOT00000076729 | 0.950908792  | 2.07E-06 |
| TUCP_002445 | XLOC_103731 | ENSRNOT00000011408 | 0.9561803    | 1.18E-06 |
| TUCP_002445 | XLOC_103731 | ENSRNOT00000032289 | -0.952557413 | 1.75E-06 |
| TUCP_002445 | XLOC_103731 | ENSRNOT00000023876 | 0.969378989  | 2.01E-07 |
| TUCP_002445 | XLOC_103731 | ENSRNOT00000033359 | 0.953066125  | 1.66E-06 |
| TUCP_002445 | XLOC_103731 | ENSRNOT00000076300 | -0.955731029 | 1.24E-06 |
| TUCP_002445 | XLOC_103731 | ENSRNOT00000028856 | 0.974728107  | 7.78E-08 |
| TUCP_002445 | XLOC_103731 | ENSRNOT00000090170 | 0.954096423  | 1.49E-06 |
| TUCP_002445 | XLOC_103731 | ENSRNOT00000091488 | 0.956762143  | 1.11E-06 |
| TUCP_002445 | XLOC_103731 | ENSRNOT00000019157 | -0.956281544 | 1.17E-06 |
| TUCP_002445 | XLOC_103731 | ENSRNOT00000027452 | 0.957593902  | 1.01E-06 |
| TUCP_002445 | XLOC_103731 | ENSRNOT00000019656 | -0.970917073 | 1.56E-07 |
| TUCP_002445 | XLOC_103731 | ENSRNOT00000049285 | -0.967670348 | 2.63E-07 |
| TUCP_002445 | XLOC_103731 | ENSRNOT00000006366 | -0.951758755 | 1.90E-06 |
| TUCP_002445 | XLOC_103731 | ENSRNOT00000079698 | -0.955618346 | 1.26E-06 |
| TUCP_002445 | XLOC_103731 | ENSRNOT00000025936 | -0.952789956 | 1.71E-06 |
| TUCP_002445 | XLOC_103731 | ENSRNOT00000058111 | -0.957722255 | 9.91E-07 |
| TUCP_002445 | XLOC_103731 | ENSRNOT00000033196 | -0.977750584 | 4.14E-08 |
| TUCP_002445 | XLOC_103731 | ENSRNOT00000077146 | -0.973195387 | 1.04E-07 |
| TUCP_002445 | XLOC_103731 | ENSRNOT00000011041 | 0.969101509  | 2.11E-07 |
| TUCP_002445 | XLOC_103731 | ENSRNOT00000036951 | 0.954648552  | 1.40E-06 |
| TUCP_002445 | XLOC_103731 | ENSRNOT00000064723 | -0.954672494 | 1.40E-06 |
| TUCP_002445 | XLOC_103731 | ENSRNOT00000028807 | -0.955575817 | 1.26E-06 |
| TUCP_002445 | XLOC_103731 | ENSRNOT00000060002 | -0.969206723 | 2.07E-07 |
| TUCP_002445 | XLOC_103731 | ENSRNOT00000089673 | -0.964408361 | 4.24E-07 |
| TUCP_002445 | XLOC_103731 | ENSRNOT00000036959 | -0.959960178 | 7.58E-07 |
| TUCP_002445 | XLOC_103731 | ENSRNOT00000010367 | 0.962327168  | 5.61E-07 |
| TUCP_002445 | XLOC_103731 | ENSRNOT00000056813 | 0.956114837  | 1.19E-06 |
| TUCP_002445 | XLOC_103731 | ENSRNOT00000023977 | -0.983107831 | 1.05E-08 |
| TUCP_002445 | XLOC_103731 | ENSRNOT00000017422 | -0.951204206 | 2.01E-06 |
| TUCP_002445 | XLOC_103731 | ENSRNOT00000066133 | -0.968247212 | 2.41E-07 |
| TUCP_002445 | XLOC_103731 | ENSRNOT00000029136 | -0.956874902 | 1.09E-06 |
| TUCP_002445 | XLOC_103731 | ENSRNOT00000006765 | -0.963214201 | 4.99E-07 |
| TUCP_002445 | XLOC_103731 | ENSRNOT00000077894 | -0.955813284 | 1.23E-06 |
| TUCP_002445 | XLOC_103731 | ENSRNOT00000085596 | 0.961432338  | 6.30E-07 |
| TUCP_002445 | XLOC_103731 | ENSRNOT00000035385 | 0.956539034  | 1.14E-06 |

|             |             |                    |              |          |
|-------------|-------------|--------------------|--------------|----------|
| TUCP_002445 | XLOC_103731 | ENSRNOT0000000728  | -0.960875673 | 6.76E-07 |
| TUCP_002445 | XLOC_103731 | ENSRNOT00000009994 | -0.960628454 | 6.97E-07 |
| TUCP_002445 | XLOC_103731 | ENSRNOT00000019487 | 0.96577029   | 3.49E-07 |
| TUCP_002445 | XLOC_103731 | ENSRNOT00000089007 | -0.954914042 | 1.36E-06 |
| TUCP_002445 | XLOC_103731 | ENSRNOT00000017190 | 0.958990057  | 8.53E-07 |
| TUCP_002445 | XLOC_103731 | ENSRNOT00000005644 | -0.959288728 | 8.22E-07 |
| TUCP_002445 | XLOC_103731 | ENSRNOT00000030692 | -0.972071992 | 1.28E-07 |
| TUCP_002445 | XLOC_103731 | ENSRNOT00000080443 | 0.962358971  | 5.59E-07 |
| TUCP_002445 | XLOC_103731 | ENSRNOT00000023786 | -0.959070666 | 8.44E-07 |
| TUCP_002445 | XLOC_103731 | ENSRNOT00000040548 | -0.955235095 | 1.31E-06 |
| TUCP_002445 | XLOC_103731 | ENSRNOT00000010915 | -0.951413636 | 1.96E-06 |
| TUCP_002445 | XLOC_103731 | ENSRNOT00000064535 | -0.960377884 | 7.20E-07 |
| TUCP_002445 | XLOC_103731 | ENSRNOT00000015624 | 0.968145188  | 2.45E-07 |
| TUCP_002445 | XLOC_103731 | ENSRNOT00000087033 | -0.963853501 | 4.57E-07 |
| TUCP_002445 | XLOC_103731 | ENSRNOT00000008222 | -0.958311693 | 9.24E-07 |
| TUCP_002445 | XLOC_103731 | ENSRNOT00000035474 | 0.970346594  | 1.72E-07 |
| TUCP_002445 | XLOC_103731 | ENSRNOT00000081835 | -0.955656748 | 1.25E-06 |
| TUCP_002445 | XLOC_103731 | ENSRNOT00000039102 | 0.962070894  | 5.80E-07 |
| TUCP_002445 | XLOC_103731 | ENSRNOT00000078856 | -0.978469616 | 3.51E-08 |
| TUCP_002445 | XLOC_103731 | ENSRNOT00000091205 | 0.963920924  | 4.53E-07 |
| TUCP_002445 | XLOC_103731 | ENSRNOT00000064667 | -0.968682608 | 2.25E-07 |
| TUCP_002445 | XLOC_103731 | ENSRNOT00000017692 | -0.956112651 | 1.19E-06 |
| TUCP_002445 | XLOC_103731 | ENSRNOT00000009742 | -0.968055869 | 2.48E-07 |
| TUCP_002445 | XLOC_103731 | ENSRNOT00000010983 | 0.965029162  | 3.88E-07 |
| TUCP_002445 | XLOC_103731 | ENSRNOT00000060696 | 0.959166353  | 8.35E-07 |
| TUCP_002445 | XLOC_103731 | ENSRNOT00000004787 | -0.979193466 | 2.97E-08 |
| TUCP_002445 | XLOC_103731 | ENSRNOT00000010986 | 0.957985239  | 9.61E-07 |
| TUCP_002445 | XLOC_103731 | ENSRNOT00000038811 | -0.958065418 | 9.52E-07 |
| TUCP_002445 | XLOC_103731 | ENSRNOT00000007367 | -0.954634683 | 1.40E-06 |
| TUCP_002445 | XLOC_103731 | ENSRNOT00000058351 | 0.954571163  | 1.41E-06 |
| TUCP_002445 | XLOC_103731 | ENSRNOT00000004412 | 0.955742391  | 1.24E-06 |
| TUCP_002445 | XLOC_103731 | ENSRNOT00000045946 | 0.957886348  | 9.72E-07 |
| TUCP_002445 | XLOC_103731 | ENSRNOT00000066968 | 0.970155344  | 1.77E-07 |
| TUCP_002445 | XLOC_103731 | ENSRNOT00000010748 | 0.984926151  | 5.98E-09 |
| TUCP_002445 | XLOC_103731 | ENSRNOT00000080207 | 0.962651238  | 5.38E-07 |
| TUCP_002445 | XLOC_103731 | ENSRNOT00000018328 | -0.95529355  | 1.30E-06 |
| TUCP_002445 | XLOC_103731 | ENSRNOT00000061100 | 0.982938846  | 1.11E-08 |
| TUCP_002445 | XLOC_103731 | ENSRNOT00000070912 | -0.978180842 | 3.75E-08 |
| TUCP_002445 | XLOC_103731 | ENSRNOT00000043535 | 0.954874294  | 1.37E-06 |
| TUCP_002445 | XLOC_103731 | ENSRNOT00000028703 | -0.95188567  | 1.87E-06 |
| TUCP_002445 | XLOC_103731 | ENSRNOT00000026457 | 0.951436392  | 1.96E-06 |
| TUCP_002445 | XLOC_103731 | ENSRNOT00000068026 | -0.95262579  | 1.74E-06 |
| TUCP_002445 | XLOC_103731 | ENSRNOT00000004463 | 0.986444059  | 3.52E-09 |
| TUCP_002445 | XLOC_103731 | ENSRNOT00000013246 | 0.951645497  | 1.92E-06 |
| TUCP_002445 | XLOC_103731 | ENSRNOT00000037809 | -0.967727491 | 2.61E-07 |
| TUCP_002445 | XLOC_103731 | ENSRNOT00000008982 | 0.96597518   | 3.39E-07 |
| TUCP_002445 | XLOC_103731 | ENSRNOT00000047192 | -0.958901626 | 8.62E-07 |
| TUCP_002445 | XLOC_103731 | ENSRNOT00000022097 | 0.951076544  | 2.03E-06 |
| TUCP_002445 | XLOC_103731 | ENSRNOT00000008987 | -0.983901248 | 8.29E-09 |
| TUCP_002445 | XLOC_103731 | ENSRNOT00000090299 | 0.967206686  | 2.83E-07 |
| TUCP_002445 | XLOC_103731 | ENSRNOT00000061580 | -0.95032872  | 2.19E-06 |

|             |             |                    |              |          |
|-------------|-------------|--------------------|--------------|----------|
| TUCP_002445 | XLOC_103731 | ENSRNOT00000031935 | -0.958991511 | 8.53E-07 |
| TUCP_002445 | XLOC_103731 | ENSRNOT00000024253 | 0.956366378  | 1.16E-06 |
| TUCP_002445 | XLOC_103731 | ENSRNOT00000088073 | -0.954320372 | 1.45E-06 |
| TUCP_002445 | XLOC_103731 | ENSRNOT00000066247 | -0.964365014 | 4.26E-07 |
| TUCP_002445 | XLOC_103731 | ENSRNOT00000065143 | 0.955602268  | 1.26E-06 |
| TUCP_002445 | XLOC_103731 | ENSRNOT00000040060 | -0.981056835 | 1.86E-08 |
| TUCP_002445 | XLOC_103731 | ENSRNOT00000086868 | 0.950389317  | 2.18E-06 |
| TUCP_002445 | XLOC_103731 | ENSRNOT00000027083 | 0.971868803  | 1.32E-07 |
| TUCP_002445 | XLOC_103731 | ENSRNOT00000074939 | 0.951568791  | 1.93E-06 |
| TUCP_002445 | XLOC_103731 | ENSRNOT00000066041 | -0.97677186  | 5.12E-08 |
| TUCP_002445 | XLOC_103731 | ENSRNOT00000063930 | -0.973744335 | 9.40E-08 |
| TUCP_002445 | XLOC_103731 | ENSRNOT00000013695 | -0.962706751 | 5.34E-07 |
| TUCP_002445 | XLOC_103731 | ENSRNOT00000013058 | 0.950422689  | 2.17E-06 |
| TUCP_002445 | XLOC_103731 | ENSRNOT00000013116 | -0.979389819 | 2.83E-08 |
| TUCP_002445 | XLOC_103731 | ENSRNOT00000048613 | 0.957339264  | 1.04E-06 |
| TUCP_002445 | XLOC_103731 | ENSRNOT00000013025 | -0.963200597 | 5.00E-07 |
| TUCP_002445 | XLOC_103731 | ENSRNOT00000088125 | 0.967100516  | 2.87E-07 |
| TUCP_002445 | XLOC_103731 | ENSRNOT00000009565 | -0.950755447 | 2.10E-06 |
| TUCP_002445 | XLOC_103731 | ENSRNOT00000038178 | -0.950995565 | 2.05E-06 |
| TUCP_002445 | XLOC_103731 | ENSRNOT00000019502 | 0.978657845  | 3.36E-08 |
| TUCP_002445 | XLOC_103731 | ENSRNOT00000037699 | 0.959709662  | 7.81E-07 |
| TUCP_002445 | XLOC_103731 | ENSRNOT00000087838 | -0.957792419 | 9.83E-07 |
| TUCP_002445 | XLOC_103731 | ENSRNOT00000081981 | 0.961452124  | 6.28E-07 |
| TUCP_002445 | XLOC_103731 | ENSRNOT00000027653 | -0.950824221 | 2.08E-06 |
| TUCP_002445 | XLOC_103731 | ENSRNOT00000010418 | 0.966714409  | 3.04E-07 |
| TUCP_002445 | XLOC_103731 | ENSRNOT00000040847 | -0.960153187 | 7.40E-07 |
| TUCP_002445 | XLOC_103731 | ENSRNOT00000014479 | -0.976428713 | 5.51E-08 |
| TUCP_002445 | XLOC_103731 | ENSRNOT00000003326 | -0.972735255 | 1.13E-07 |
| TUCP_002445 | XLOC_103731 | ENSRNOT00000016306 | -0.964067649 | 4.44E-07 |
| TUCP_002445 | XLOC_103731 | ENSRNOT00000057045 | -0.974123682 | 8.75E-08 |
| TUCP_002445 | XLOC_103731 | ENSRNOT00000015476 | -0.960686173 | 6.92E-07 |
| TUCP_002445 | XLOC_103731 | ENSRNOT00000025079 | -0.970281825 | 1.74E-07 |
| TUCP_002445 | XLOC_103731 | ENSRNOT00000073019 | 0.959944094  | 7.59E-07 |
| TUCP_002445 | XLOC_103731 | ENSRNOT00000044628 | 0.975803432  | 6.27E-08 |
| TUCP_002445 | XLOC_103731 | ENSRNOT00000021455 | -0.950750623 | 2.10E-06 |
| TUCP_002445 | XLOC_103731 | ENSRNOT00000093174 | 0.973857788  | 9.20E-08 |
| TUCP_002445 | XLOC_103731 | ENSRNOT00000025075 | 0.962859173  | 5.23E-07 |
| TUCP_002445 | XLOC_103731 | ENSRNOT00000011926 | 0.958612394  | 8.92E-07 |
| TUCP_002445 | XLOC_103731 | ENSRNOT00000076611 | -0.969463166 | 1.99E-07 |
| TUCP_002445 | XLOC_103731 | ENSRNOT0000004007  | -0.973582701 | 9.69E-08 |
| TUCP_002445 | XLOC_103731 | ENSRNOT00000020681 | -0.95476465  | 1.38E-06 |
| TUCP_002445 | XLOC_103731 | ENSRNOT00000002151 | -0.961174292 | 6.51E-07 |
| TUCP_002445 | XLOC_103731 | ENSRNOT00000057898 | -0.972254294 | 1.24E-07 |
| TUCP_002445 | XLOC_103731 | ENSRNOT00000024677 | 0.954253854  | 1.46E-06 |
| TUCP_002445 | XLOC_103731 | ENSRNOT00000077555 | 0.970830827  | 1.58E-07 |
| TUCP_002445 | XLOC_103731 | ENSRNOT00000052075 | 0.950927977  | 2.06E-06 |
| TUCP_002445 | XLOC_103731 | ENSRNOT00000091602 | -0.968973664 | 2.15E-07 |
| TUCP_002445 | XLOC_103731 | ENSRNOT00000090338 | -0.968044129 | 2.49E-07 |
| TUCP_002445 | XLOC_103731 | ENSRNOT00000009811 | 0.966469323  | 3.16E-07 |
| TUCP_002445 | XLOC_103731 | ENSRNOT00000036838 | -0.957524751 | 1.01E-06 |
| TUCP_002445 | XLOC_103731 | ENSRNOT00000090129 | -0.977178175 | 4.69E-08 |

|             |             |                    |              |          |
|-------------|-------------|--------------------|--------------|----------|
| TUCP_002445 | XLOC_103731 | ENSRNOT00000021061 | -0.961544433 | 6.21E-07 |
| TUCP_002445 | XLOC_103731 | ENSRNOT00000077231 | 0.971173633  | 1.49E-07 |
| TUCP_002445 | XLOC_103731 | ENSRNOT00000017486 | 0.952442806  | 1.77E-06 |
| TUCP_002445 | XLOC_103731 | ENSRNOT00000071540 | 0.96251306   | 5.47E-07 |
| TUCP_002445 | XLOC_103731 | ENSRNOT00000014605 | -0.975145646 | 7.16E-08 |
| TUCP_002445 | XLOC_103731 | ENSRNOT00000012583 | -0.972016274 | 1.29E-07 |
| TUCP_002445 | XLOC_103731 | ENSRNOT00000073643 | -0.950708622 | 2.11E-06 |
| TUCP_002445 | XLOC_103731 | ENSRNOT00000024402 | 0.956226252  | 1.18E-06 |
| TUCP_002445 | XLOC_103731 | ENSRNOT00000022502 | -0.97148009  | 1.42E-07 |
| TUCP_002445 | XLOC_103731 | ENSRNOT00000026928 | -0.953585567 | 1.57E-06 |
| TUCP_002445 | XLOC_103731 | ENSRNOT00000017556 | 0.954218466  | 1.47E-06 |
| TUCP_002445 | XLOC_103731 | ENSRNOT00000087443 | 0.957902789  | 9.70E-07 |
| TUCP_002445 | XLOC_103731 | ENSRNOT00000060698 | -0.967727417 | 2.61E-07 |
| TUCP_002445 | XLOC_103731 | ENSRNOT00000083632 | -0.964532958 | 4.16E-07 |
| TUCP_002445 | XLOC_103731 | ENSRNOT00000009900 | -0.988947979 | 1.27E-09 |
| TUCP_002445 | XLOC_103731 | ENSRNOT00000021802 | 0.95071474   | 2.11E-06 |
| TUCP_002445 | XLOC_103731 | ENSRNOT00000021803 | -0.98465271  | 6.54E-09 |
| TUCP_002445 | XLOC_103731 | ENSRNOT00000018646 | -0.953997364 | 1.50E-06 |
| TUCP_002445 | XLOC_103731 | ENSRNOT00000025856 | -0.981959364 | 1.46E-08 |
| TUCP_002445 | XLOC_103731 | ENSRNOT00000018122 | 0.953269639  | 1.62E-06 |
| TUCP_002445 | XLOC_103731 | ENSRNOT00000072118 | 0.954171984  | 1.47E-06 |
| TUCP_002445 | XLOC_103731 | ENSRNOT00000003780 | 0.950466373  | 2.16E-06 |
| TUCP_002445 | XLOC_103731 | ENSRNOT00000003787 | -0.962121959 | 5.76E-07 |
| TUCP_002445 | XLOC_103731 | ENSRNOT00000023262 | -0.957604801 | 1.00E-06 |
| TUCP_002445 | XLOC_103731 | ENSRNOT00000083876 | -0.963088435 | 5.07E-07 |
| TUCP_002445 | XLOC_103731 | ENSRNOT00000019816 | -0.959002935 | 8.51E-07 |
| TUCP_002445 | XLOC_103731 | ENSRNOT00000004941 | -0.955085842 | 1.33E-06 |
| TUCP_002445 | XLOC_103731 | ENSRNOT0000007954  | 0.954102086  | 1.48E-06 |
| TUCP_002445 | XLOC_103731 | ENSRNOT00000017254 | -0.966400469 | 3.19E-07 |
| TUCP_002445 | XLOC_103731 | ENSRNOT00000055957 | -0.958524426 | 9.01E-07 |
| TUCP_002445 | XLOC_103731 | ENSRNOT00000010674 | -0.964260406 | 4.32E-07 |
| TUCP_002445 | XLOC_103731 | ENSRNOT00000023664 | -0.962375971 | 5.57E-07 |
| TUCP_002445 | XLOC_103731 | ENSRNOT00000068381 | 0.966954297  | 2.94E-07 |
| TUCP_002445 | XLOC_103731 | ENSRNOT00000016730 | -0.953369728 | 1.61E-06 |
| TUCP_002445 | XLOC_103731 | ENSRNOT00000091448 | -0.976790442 | 5.10E-08 |
| TUCP_002445 | XLOC_103731 | ENSRNOT00000026089 | 0.955517373  | 1.27E-06 |
| TUCP_002445 | XLOC_103731 | ENSRNOT00000085621 | 0.951695772  | 1.91E-06 |
| TUCP_002445 | XLOC_103731 | ENSRNOT00000007314 | -0.970797808 | 1.59E-07 |
| TUCP_002445 | XLOC_103731 | ENSRNOT00000090456 | 0.956203846  | 1.18E-06 |
| TUCP_002445 | XLOC_103731 | ENSRNOT00000010873 | -0.977100598 | 4.77E-08 |
| TUCP_002445 | XLOC_103731 | ENSRNOT00000014821 | -0.971072583 | 1.52E-07 |
| TUCP_002445 | XLOC_103731 | ENSRNOT00000088599 | 0.970843482  | 1.58E-07 |
| TUCP_002445 | XLOC_103731 | ENSRNOT00000026531 | -0.971176546 | 1.49E-07 |
| TUCP_002445 | XLOC_103731 | ENSRNOT00000017746 | -0.955016074 | 1.34E-06 |
| TUCP_002445 | XLOC_103731 | ENSRNOT00000023567 | -0.9784484   | 3.53E-08 |
| TUCP_002445 | XLOC_103731 | ENSRNOT00000023537 | -0.980539105 | 2.13E-08 |
| TUCP_002445 | XLOC_103731 | ENSRNOT00000005073 | 0.952679413  | 1.73E-06 |
| TUCP_002445 | XLOC_103731 | ENSRNOT00000017995 | 0.961290901  | 6.41E-07 |
| TUCP_002445 | XLOC_103731 | ENSRNOT00000026398 | -0.971707294 | 1.36E-07 |
| TUCP_002445 | XLOC_103731 | ENSRNOT00000000302 | 0.957582204  | 1.01E-06 |
| TUCP_002445 | XLOC_103731 | ENSRNOT00000000898 | 0.958997175  | 8.52E-07 |

|             |             |                     |              |          |
|-------------|-------------|---------------------|--------------|----------|
| TUCP_002445 | XLOC_103731 | ENSRNOT00000050609  | -0.971563793 | 1.40E-07 |
| TUCP_002445 | XLOC_103731 | ENSRNOT00000041277  | -0.953138225 | 1.64E-06 |
| TUCP_002445 | XLOC_103731 | ENSRNOT00000003146  | -0.957470944 | 1.02E-06 |
| TUCP_002445 | XLOC_103731 | ENSRNOT00000005459  | 0.96122655   | 6.47E-07 |
| TUCP_002445 | XLOC_103731 | ENSRNOT00000017776  | 0.978178691  | 3.76E-08 |
| TUCP_002445 | XLOC_103731 | ENSRNOT00000027910  | 0.97438004   | 8.33E-08 |
| TUCP_002445 | XLOC_103731 | ENSRNOT00000002771  | 0.966391392  | 3.19E-07 |
| TUCP_002445 | XLOC_103731 | ENSRNOT00000024322  | 0.961016395  | 6.64E-07 |
| TUCP_002445 | XLOC_103731 | ENSRNOT00000005144  | 0.958412752  | 9.14E-07 |
| TUCP_002445 | XLOC_103731 | ENSRNOT00000003770  | -0.955130503 | 1.33E-06 |
| TUCP_002445 | XLOC_103731 | ENSRNOT00000010516  | -0.955346334 | 1.30E-06 |
| TUCP_002445 | XLOC_103731 | ENSRNOT00000032780  | 0.959698124  | 7.82E-07 |
| TUCP_002445 | XLOC_103731 | ENSRNOT00000016191  | 0.955371933  | 1.29E-06 |
| TUCP_002445 | XLOC_103731 | ENSRNOT00000078390  | -0.971778728 | 1.34E-07 |
| TUCP_002445 | XLOC_103731 | ENSRNOT00000008427  | -0.980874244 | 1.95E-08 |
| TUCP_002445 | XLOC_103731 | ENSRNOT00000028888  | 0.961353371  | 6.36E-07 |
| TUCP_002445 | XLOC_103731 | ENSRNOT000000081110 | -0.95828344  | 9.28E-07 |
| TUCP_002445 | XLOC_103731 | ENSRNOT00000067901  | -0.960161789 | 7.39E-07 |
| TUCP_002445 | XLOC_103731 | ENSRNOT00000088679  | -0.963520903 | 4.78E-07 |
| TUCP_002445 | XLOC_103731 | ENSRNOT00000088202  | -0.958841321 | 8.68E-07 |
| TUCP_002445 | XLOC_103731 | ENSRNOT00000029833  | 0.96171536   | 6.07E-07 |
| TUCP_002445 | XLOC_103731 | ENSRNOT00000012702  | -0.957883407 | 9.72E-07 |
| TUCP_002445 | XLOC_103731 | ENSRNOT00000034487  | -0.955586893 | 1.26E-06 |
| TUCP_002445 | XLOC_103731 | ENSRNOT00000020272  | -0.956108203 | 1.19E-06 |
| TUCP_002445 | XLOC_103731 | ENSRNOT00000061916  | -0.954712855 | 1.39E-06 |
| TUCP_002445 | XLOC_103731 | ENSRNOT00000002173  | -0.965522144 | 3.62E-07 |
| TUCP_002445 | XLOC_103731 | ENSRNOT00000090420  | -0.959121059 | 8.39E-07 |
| TUCP_002445 | XLOC_103731 | ENSRNOT00000031401  | -0.957586401 | 1.01E-06 |
| TUCP_002445 | XLOC_103731 | ENSRNOT00000054976  | -0.955689629 | 1.25E-06 |
| TUCP_002445 | XLOC_103731 | ENSRNOT00000003605  | -0.955854575 | 1.23E-06 |
| TUCP_002445 | XLOC_103731 | ENSRNOT00000082151  | -0.971123943 | 1.51E-07 |
| TUCP_002445 | XLOC_103731 | ENSRNOT00000016776  | -0.967333445 | 2.77E-07 |
| TUCP_002445 | XLOC_103731 | ENSRNOT00000000155  | 0.954660563  | 1.40E-06 |
| TUCP_002445 | XLOC_103731 | ENSRNOT00000034411  | 0.950163971  | 2.23E-06 |
| TUCP_002445 | XLOC_103731 | ENSRNOT00000012424  | 0.958179081  | 9.39E-07 |
| TUCP_002445 | XLOC_103731 | ENSRNOT0000001607   | 0.962997488  | 5.13E-07 |
| TUCP_002445 | XLOC_103731 | ENSRNOT00000027666  | 0.955223124  | 1.31E-06 |
| TUCP_002445 | XLOC_103731 | ENSRNOT00000072518  | 0.951555663  | 1.94E-06 |
| TUCP_002445 | XLOC_103731 | ENSRNOT00000038511  | -0.953562705 | 1.57E-06 |
| TUCP_002445 | XLOC_103731 | ENSRNOT00000011984  | 0.955405637  | 1.29E-06 |
| TUCP_002445 | XLOC_103731 | ENSRNOT00000088677  | -0.950705575 | 2.11E-06 |
| TUCP_002445 | XLOC_103731 | ENSRNOT00000080522  | -0.95732486  | 1.04E-06 |
| TUCP_002445 | XLOC_103731 | ENSRNOT00000031230  | 0.951151826  | 2.02E-06 |
| TUCP_002445 | XLOC_103731 | ENSRNOT00000077479  | -0.965738701 | 3.51E-07 |
| TUCP_002445 | XLOC_103731 | ENSRNOT00000015898  | 0.953455881  | 1.59E-06 |
| TUCP_002445 | XLOC_103731 | ENSRNOT00000022142  | 0.970635283  | 1.64E-07 |
| TUCP_002445 | XLOC_103731 | ENSRNOT00000033048  | -0.957027662 | 1.07E-06 |
| TUCP_002445 | XLOC_103731 | ENSRNOT00000005405  | 0.957715054  | 9.92E-07 |
| TUCP_002445 | XLOC_103731 | ENSRNOT00000028885  | -0.958461231 | 9.08E-07 |
| TUCP_002445 | XLOC_103731 | ENSRNOT00000025086  | -0.957211746 | 1.05E-06 |
| TUCP_002445 | XLOC_103731 | ENSRNOT00000083127  | 0.955094632  | 1.33E-06 |

|             |             |                    |              |          |
|-------------|-------------|--------------------|--------------|----------|
| TUCP_002445 | XLOC_103731 | ENSRNOT00000052120 | 0.965285675  | 3.75E-07 |
| TUCP_002445 | XLOC_103731 | ENSRNOT00000078306 | 0.968521244  | 2.31E-07 |
| TUCP_002445 | XLOC_103731 | ENSRNOT00000010580 | -0.958366229 | 9.19E-07 |
| TUCP_002445 | XLOC_103731 | ENSRNOT00000011499 | -0.958363303 | 9.19E-07 |
| TUCP_002445 | XLOC_103731 | ENSRNOT00000015946 | -0.951778335 | 1.89E-06 |
| TUCP_002445 | XLOC_103731 | ENSRNOT00000004172 | 0.974775724  | 7.71E-08 |
| TUCP_002445 | XLOC_103731 | ENSRNOT00000023965 | -0.957939415 | 9.66E-07 |
| TUCP_002445 | XLOC_103731 | ENSRNOT0000001234  | -0.964317631 | 4.29E-07 |
| TUCP_002445 | XLOC_103731 | ENSRNOT00000009963 | 0.960968164  | 6.68E-07 |
| TUCP_002445 | XLOC_103731 | ENSRNOT00000092876 | -0.976209386 | 5.77E-08 |
| TUCP_002445 | XLOC_103731 | ENSRNOT00000002410 | 0.9582058    | 9.36E-07 |
| TUCP_002445 | XLOC_103731 | ENSRNOT00000029125 | 0.96347655   | 4.81E-07 |
| TUCP_002445 | XLOC_103731 | ENSRNOT00000085279 | 0.961266275  | 6.43E-07 |
| TUCP_002445 | XLOC_103731 | ENSRNOT00000067181 | 0.968353536  | 2.37E-07 |
| TUCP_002445 | XLOC_103731 | ENSRNOT00000004319 | -0.96118295  | 6.50E-07 |
| TUCP_002445 | XLOC_103731 | ENSRNOT00000026280 | 0.955691562  | 1.25E-06 |
| TUCP_002445 | XLOC_103731 | ENSRNOT00000076181 | -0.950713851 | 2.11E-06 |
| TUCP_002445 | XLOC_103731 | ENSRNOT00000005381 | 0.954239221  | 1.46E-06 |
| TUCP_002445 | XLOC_103731 | ENSRNOT00000015092 | 0.956841103  | 1.10E-06 |
| TUCP_002445 | XLOC_103731 | ENSRNOT00000015318 | -0.952978001 | 1.67E-06 |
| TUCP_002445 | XLOC_103731 | ENSRNOT00000028900 | -0.950409909 | 2.17E-06 |
| TUCP_002445 | XLOC_103731 | ENSRNOT00000028907 | 0.962775449  | 5.29E-07 |
| TUCP_002445 | XLOC_103731 | ENSRNOT00000017181 | -0.961826804 | 5.99E-07 |
| TUCP_002445 | XLOC_103731 | ENSRNOT00000010224 | 0.976954305  | 4.93E-08 |
| TUCP_002445 | XLOC_103731 | ENSRNOT00000056041 | -0.965786331 | 3.49E-07 |
| TUCP_002445 | XLOC_103731 | ENSRNOT00000008210 | 0.961225095  | 6.47E-07 |
| TUCP_002445 | XLOC_103731 | ENSRNOT00000025887 | -0.953159618 | 1.64E-06 |
| TUCP_002445 | XLOC_103731 | ENSRNOT00000051022 | 0.962743262  | 5.31E-07 |
| TUCP_002445 | XLOC_103731 | ENSRNOT00000078862 | 0.97380026   | 9.30E-08 |
| TUCP_002445 | XLOC_103731 | ENSRNOT00000005311 | 0.969822611  | 1.87E-07 |
| TUCP_002445 | XLOC_103731 | ENSRNOT00000017687 | -0.96218353  | 5.72E-07 |
| TUCP_002445 | XLOC_103731 | ENSRNOT00000015799 | 0.957962     | 9.63E-07 |
| TUCP_002445 | XLOC_103731 | ENSRNOT00000073559 | 0.956687442  | 1.12E-06 |
| TUCP_002445 | XLOC_103731 | ENSRNOT00000039551 | -0.98280476  | 1.15E-08 |
| TUCP_002445 | XLOC_103731 | ENSRNOT00000000743 | 0.955902701  | 1.22E-06 |
| TUCP_002445 | XLOC_103731 | ENSRNOT00000075656 | -0.965698631 | 3.53E-07 |
| TUCP_002445 | XLOC_103731 | ENSRNOT00000015006 | 0.966971374  | 2.93E-07 |
| TUCP_002445 | XLOC_103731 | ENSRNOT00000007350 | 0.959536055  | 7.98E-07 |
| TUCP_002445 | XLOC_103731 | ENSRNOT00000007351 | -0.969949476 | 1.83E-07 |
| TUCP_002445 | XLOC_103731 | ENSRNOT00000018936 | -0.960096008 | 7.45E-07 |
| TUCP_002445 | XLOC_103731 | ENSRNOT00000083578 | 0.972027243  | 1.29E-07 |
| TUCP_002445 | XLOC_103731 | ENSRNOT00000023638 | 0.979709892  | 2.62E-08 |
| TUCP_002445 | XLOC_103731 | ENSRNOT00000005228 | 0.953858982  | 1.52E-06 |
| TUCP_002445 | XLOC_103731 | ENSRNOT00000059524 | -0.96594189  | 3.41E-07 |
| TUCP_002445 | XLOC_103731 | ENSRNOT00000017361 | 0.97289652   | 1.10E-07 |
| TUCP_002445 | XLOC_103731 | ENSRNOT00000005220 | 0.972626821  | 1.16E-07 |
| TUCP_002445 | XLOC_103731 | ENSRNOT00000045326 | 0.973193001  | 1.04E-07 |
| TUCP_002445 | XLOC_103731 | ENSRNOT00000037291 | -0.951656101 | 1.92E-06 |
| TUCP_002445 | XLOC_103731 | ENSRNOT00000016649 | 0.98245444   | 1.27E-08 |
| TUCP_002445 | XLOC_103731 | ENSRNOT00000090342 | 0.951700995  | 1.91E-06 |
| TUCP_002445 | XLOC_103731 | ENSRNOT00000074023 | 0.957038509  | 1.07E-06 |



|             |             |                    |              |          |
|-------------|-------------|--------------------|--------------|----------|
| TUCP_002445 | XLOC_103731 | ENSRNOT00000019465 | -0.950641437 | 2.12E-06 |
| TUCP_002445 | XLOC_103731 | ENSRNOT00000009073 | -0.972336324 | 1.22E-07 |
| TUCP_002445 | XLOC_103731 | ENSRNOT00000067170 | -0.975148576 | 7.16E-08 |
| TUCP_002445 | XLOC_103731 | ENSRNOT00000091128 | -0.957997906 | 9.59E-07 |
| TUCP_002445 | XLOC_103731 | ENSRNOT00000001586 | -0.986769152 | 3.12E-09 |
| TUCP_002445 | XLOC_103731 | ENSRNOT00000081786 | -0.958510892 | 9.03E-07 |
| TUCP_002445 | XLOC_103731 | ENSRNOT00000043554 | 0.971848308  | 1.33E-07 |
| TUCP_002445 | XLOC_103731 | ENSRNOT00000019213 | 0.977030739  | 4.84E-08 |
| TUCP_002445 | XLOC_103731 | ENSRNOT00000012187 | 0.968093072  | 2.47E-07 |
| TUCP_002445 | XLOC_103731 | ENSRNOT00000013516 | 0.956575943  | 1.13E-06 |
| TUCP_002445 | XLOC_103731 | ENSRNOT00000026235 | -0.972890133 | 1.10E-07 |
| TUCP_002445 | XLOC_103731 | ENSRNOT00000006055 | 0.95154966   | 1.94E-06 |
| TUCP_002445 | XLOC_103731 | ENSRNOT00000081621 | 0.973795215  | 9.31E-08 |
| TUCP_002445 | XLOC_103731 | ENSRNOT00000038247 | 0.969481339  | 1.98E-07 |
| TUCP_002445 | XLOC_103731 | ENSRNOT00000080928 | 0.966053859  | 3.35E-07 |
| TUCP_002445 | XLOC_103731 | ENSRNOT0000009000  | -0.97048596  | 1.68E-07 |
| TUCP_002445 | XLOC_103731 | ENSRNOT00000026231 | 0.964084186  | 4.43E-07 |
| TUCP_002445 | XLOC_103731 | ENSRNOT00000085403 | 0.960499611  | 7.09E-07 |
| TUCP_002445 | XLOC_103731 | ENSRNOT00000011731 | -0.953465267 | 1.59E-06 |
| TUCP_002445 | XLOC_103731 | ENSRNOT00000054955 | -0.95276279  | 1.71E-06 |
| TUCP_002445 | XLOC_103731 | ENSRNOT00000089545 | -0.969218027 | 2.07E-07 |
| TUCP_002445 | XLOC_103731 | ENSRNOT00000089933 | 0.963441366  | 4.84E-07 |
| TUCP_002445 | XLOC_103731 | ENSRNOT00000077908 | 0.974678645  | 7.86E-08 |
| TUCP_002445 | XLOC_103731 | ENSRNOT00000067009 | -0.978438536 | 3.54E-08 |
| TUCP_002445 | XLOC_103731 | ENSRNOT00000090461 | 0.962434003  | 5.53E-07 |
| TUCP_002445 | XLOC_103731 | ENSRNOT00000010463 | 0.964165222  | 4.38E-07 |
| TUCP_002445 | XLOC_103731 | ENSRNOT00000074993 | -0.958499218 | 9.04E-07 |
| TUCP_002445 | XLOC_103731 | ENSRNOT00000026718 | 0.980083841  | 2.39E-08 |
| TUCP_002445 | XLOC_103731 | ENSRNOT00000072208 | 0.955913214  | 1.22E-06 |
| TUCP_002445 | XLOC_103731 | ENSRNOT00000010784 | 0.951839844  | 1.88E-06 |
| TUCP_002445 | XLOC_103731 | ENSRNOT00000084012 | 0.972653537  | 1.15E-07 |
| TUCP_002445 | XLOC_103731 | ENSRNOT00000013762 | 0.954069219  | 1.49E-06 |
| TUCP_002445 | XLOC_103731 | ENSRNOT00000033677 | -0.974740499 | 7.76E-08 |
| TUCP_002445 | XLOC_103731 | ENSRNOT00000012361 | -0.97028343  | 1.74E-07 |
| TUCP_002445 | XLOC_103731 | ENSRNOT0000002292  | 0.958579601  | 8.96E-07 |
| TUCP_002445 | XLOC_103731 | ENSRNOT0000009894  | -0.970331733 | 1.72E-07 |
| TUCP_002445 | XLOC_103731 | ENSRNOT00000067822 | 0.970844424  | 1.58E-07 |
| TUCP_002445 | XLOC_103731 | ENSRNOT00000012364 | -0.957058016 | 1.07E-06 |
| TUCP_002445 | XLOC_103731 | ENSRNOT00000016389 | -0.970360356 | 1.71E-07 |
| TUCP_002445 | XLOC_103731 | ENSRNOT00000024060 | 0.955508334  | 1.27E-06 |
| TUCP_002445 | XLOC_103731 | ENSRNOT00000011832 | -0.951735997 | 1.90E-06 |
| TUCP_002445 | XLOC_103731 | ENSRNOT00000003940 | -0.976974597 | 4.90E-08 |
| TUCP_002445 | XLOC_103731 | ENSRNOT00000091909 | 0.976630607  | 5.28E-08 |
| TUCP_002445 | XLOC_103731 | ENSRNOT00000077727 | -0.963114001 | 5.05E-07 |
| TUCP_002445 | XLOC_103731 | ENSRNOT00000044346 | -0.960755091 | 6.86E-07 |
| TUCP_002445 | XLOC_103731 | ENSRNOT00000025362 | -0.955933731 | 1.22E-06 |
| TUCP_002445 | XLOC_103731 | ENSRNOT0000000203  | -0.961396942 | 6.33E-07 |
| TUCP_002445 | XLOC_103731 | ENSRNOT00000068745 | 0.959292512  | 8.22E-07 |
| TUCP_002445 | XLOC_103731 | ENSRNOT00000004032 | 0.950323347  | 2.19E-06 |
| TUCP_002445 | XLOC_103731 | ENSRNOT00000084385 | 0.958836324  | 8.69E-07 |
| TUCP_002445 | XLOC_103731 | ENSRNOT00000017949 | -0.968589645 | 2.28E-07 |

|             |             |                     |              |          |
|-------------|-------------|---------------------|--------------|----------|
| TUCP_002445 | XLOC_103731 | ENSRNOT00000074212  | 0.959221442  | 8.29E-07 |
| TUCP_002445 | XLOC_103731 | ENSRNOT00000013864  | -0.974245487 | 8.55E-08 |
| TUCP_002445 | XLOC_103731 | ENSRNOT00000001081  | 0.967524941  | 2.69E-07 |
| TUCP_002445 | XLOC_103731 | ENSRNOT00000051843  | -0.953270522 | 1.62E-06 |
| TUCP_002445 | XLOC_103731 | ENSRNOT00000009563  | -0.977787414 | 4.10E-08 |
| TUCP_002445 | XLOC_103731 | ENSRNOT00000003544  | -0.971416642 | 1.43E-07 |
| TUCP_002445 | XLOC_103731 | ENSRNOT00000015609  | 0.973029567  | 1.07E-07 |
| TUCP_002445 | XLOC_103731 | ENSRNOT00000022190  | -0.982562223 | 1.23E-08 |
| TUCP_002445 | XLOC_103731 | ENSRNOT00000025913  | -0.983123419 | 1.05E-08 |
| TUCP_002445 | XLOC_103731 | ENSRNOT00000019386  | -0.967218168 | 2.82E-07 |
| TUCP_002445 | XLOC_103731 | ENSRNOT00000077220  | -0.953547527 | 1.58E-06 |
| TUCP_002445 | XLOC_103731 | ENSRNOT00000065983  | 0.950142423  | 2.23E-06 |
| TUCP_002445 | XLOC_103731 | ENSRNOT00000022213  | 0.955889454  | 1.22E-06 |
| TUCP_002445 | XLOC_103731 | ENSRNOT00000007736  | -0.954008755 | 1.50E-06 |
| TUCP_002445 | XLOC_103731 | ENSRNOT00000073919  | 0.952407735  | 1.77E-06 |
| TUCP_002445 | XLOC_103731 | ENSRNOT00000067780  | -0.970837931 | 1.58E-07 |
| TUCP_002445 | XLOC_103731 | ENSRNOT00000059807  | 0.955068008  | 1.34E-06 |
| TUCP_002445 | XLOC_103731 | ENSRNOT00000091864  | -0.952749197 | 1.71E-06 |
| TUCP_002445 | XLOC_103731 | ENSRNOT00000073910  | -0.967682481 | 2.63E-07 |
| TUCP_002445 | XLOC_103731 | ENSRNOT00000007738  | -0.977647601 | 4.23E-08 |
| TUCP_002445 | XLOC_103731 | ENSRNOT00000052422  | 0.966970376  | 2.93E-07 |
| TUCP_002445 | XLOC_103731 | ENSRNOT000000086119 | -0.982523113 | 1.25E-08 |
| TUCP_002445 | XLOC_103731 | ENSRNOT00000078589  | -0.953018871 | 1.67E-06 |
| TUCP_002445 | XLOC_103731 | ENSRNOT00000025980  | -0.961163835 | 6.52E-07 |
| TUCP_002445 | XLOC_103731 | ENSRNOT00000026174  | 0.975827558  | 6.24E-08 |
| TUCP_002445 | XLOC_103731 | ENSRNOT00000018634  | -0.957024454 | 1.07E-06 |
| TUCP_002445 | XLOC_103731 | ENSRNOT00000034883  | -0.98122156  | 1.78E-08 |
| TUCP_002445 | XLOC_103731 | ENSRNOT00000020155  | 0.978587445  | 3.42E-08 |
| TUCP_002445 | XLOC_103731 | ENSRNOT00000072357  | -0.971529994 | 1.40E-07 |
| TUCP_002445 | XLOC_103731 | ENSRNOT00000000707  | -0.960446389 | 7.13E-07 |
| TUCP_002445 | XLOC_103731 | ENSRNOT00000014537  | 0.950724037  | 2.11E-06 |
| TUCP_002445 | XLOC_103731 | ENSRNOT00000065947  | 0.976597816  | 5.32E-08 |
| TUCP_002445 | XLOC_103731 | ENSRNOT00000067739  | -0.954456339 | 1.43E-06 |
| TUCP_002445 | XLOC_103731 | ENSRNOT00000005910  | -0.969110518 | 2.10E-07 |
| TUCP_002445 | XLOC_103731 | ENSRNOT00000090987  | -0.958663603 | 8.87E-07 |
| TUCP_002445 | XLOC_103731 | ENSRNOT00000078475  | 0.962867207  | 5.22E-07 |
| TUCP_002445 | XLOC_103731 | ENSRNOT000000082945 | 0.951157221  | 2.02E-06 |
| TUCP_002445 | XLOC_103731 | ENSRNOT00000026988  | -0.969159235 | 2.09E-07 |
| TUCP_002445 | XLOC_103731 | ENSRNOT00000035591  | -0.953305121 | 1.62E-06 |
| TUCP_002445 | XLOC_103731 | ENSRNOT00000003691  | -0.980451259 | 2.18E-08 |
| TUCP_002445 | XLOC_103731 | ENSRNOT00000003690  | 0.969722462  | 1.90E-07 |
| TUCP_002445 | XLOC_103731 | ENSRNOT00000030782  | -0.964966426 | 3.92E-07 |
| TUCP_002445 | XLOC_103731 | ENSRNOT00000016722  | 0.976813669  | 5.08E-08 |
| TUCP_002445 | XLOC_103731 | ENSRNOT00000073526  | 0.953206802  | 1.63E-06 |
| TUCP_002445 | XLOC_103731 | ENSRNOT000000083351 | -0.965777636 | 3.49E-07 |
| TUCP_002445 | XLOC_103731 | ENSRNOT00000025523  | 0.958234758  | 9.33E-07 |
| TUCP_002445 | XLOC_103731 | ENSRNOT00000030329  | -0.956391799 | 1.15E-06 |
| TUCP_002445 | XLOC_103731 | ENSRNOT00000090925  | 0.954511342  | 1.42E-06 |
| TUCP_002445 | XLOC_103731 | ENSRNOT00000033450  | -0.954339962 | 1.45E-06 |
| TUCP_002445 | XLOC_103731 | ENSRNOT00000028057  | 0.950701219  | 2.11E-06 |
| TUCP_002445 | XLOC_103731 | ENSRNOT00000055582  | 0.95945177   | 8.06E-07 |

|             |             |                     |              |          |
|-------------|-------------|---------------------|--------------|----------|
| TUCP_002445 | XLOC_103731 | ENSRNOT00000022074  | 0.979372842  | 2.84E-08 |
| TUCP_002445 | XLOC_103731 | ENSRNOT00000016220  | -0.963165328 | 5.02E-07 |
| TUCP_002445 | XLOC_103731 | ENSRNOT00000023078  | 0.95471937   | 1.39E-06 |
| TUCP_002445 | XLOC_103731 | ENSRNOT0000004956   | 0.955405764  | 1.29E-06 |
| TUCP_002445 | XLOC_103731 | ENSRNOT0000004999   | 0.972444214  | 1.19E-07 |
| TUCP_002445 | XLOC_103731 | ENSRNOT00000009122  | 0.957320552  | 1.04E-06 |
| TUCP_002445 | XLOC_103731 | ENSRNOT00000013463  | 0.964761614  | 4.03E-07 |
| TUCP_002445 | XLOC_103731 | ENSRNOT00000019554  | 0.960597012  | 7.00E-07 |
| TUCP_002445 | XLOC_103731 | ENSRNOT00000066204  | -0.967350011 | 2.77E-07 |
| TUCP_002445 | XLOC_103731 | ENSRNOT00000061191  | -0.969001401 | 2.14E-07 |
| TUCP_002445 | XLOC_103731 | ENSRNOT00000005486  | -0.954249806 | 1.46E-06 |
| TUCP_002445 | XLOC_103731 | ENSRNOT00000017907  | -0.971349446 | 1.45E-07 |
| TUCP_002445 | XLOC_103731 | ENSRNOT00000092029  | 0.956297923  | 1.17E-06 |
| TUCP_002445 | XLOC_103731 | ENSRNOT00000028434  | -0.950435978 | 2.17E-06 |
| TUCP_002445 | XLOC_103731 | ENSRNOT00000005489  | 0.966590806  | 3.10E-07 |
| TUCP_002445 | XLOC_103731 | ENSRNOT00000025794  | -0.980838876 | 1.97E-08 |
| TUCP_002445 | XLOC_103731 | ENSRNOT00000073675  | -0.965396361 | 3.69E-07 |
| TUCP_002445 | XLOC_103731 | ENSRNOT000000054980 | 0.96503824   | 3.88E-07 |
| TUCP_002445 | XLOC_103731 | ENSRNOT00000009496  | 0.953760031  | 1.54E-06 |
| TUCP_002445 | XLOC_103731 | ENSRNOT000000050834 | -0.977739234 | 4.15E-08 |
| TUCP_002445 | XLOC_103731 | ENSRNOT000000054828 | 0.965243167  | 3.77E-07 |
| TUCP_002445 | XLOC_103731 | ENSRNOT000000021471 | -0.952093666 | 1.83E-06 |
| TUCP_002445 | XLOC_103731 | ENSRNOT00000012736  | 0.95256265   | 1.75E-06 |
| TUCP_002445 | XLOC_103731 | ENSRNOT00000002114  | -0.980749402 | 2.02E-08 |
| TUCP_002445 | XLOC_103731 | ENSRNOT00000002445  | -0.970864305 | 1.57E-07 |
| TUCP_002445 | XLOC_103731 | ENSRNOT000000027970 | 0.969168204  | 2.08E-07 |
| TUCP_002445 | XLOC_103731 | ENSRNOT00000009462  | 0.957168126  | 1.06E-06 |
| TUCP_002445 | XLOC_103731 | ENSRNOT00000046215  | -0.970511047 | 1.67E-07 |
| TUCP_002445 | XLOC_103731 | ENSRNOT000000084422 | 0.965704098  | 3.53E-07 |
| TUCP_002445 | XLOC_103731 | ENSRNOT000000000083 | -0.971891235 | 1.32E-07 |
| TUCP_002445 | XLOC_103731 | ENSRNOT00000015495  | -0.95117932  | 2.01E-06 |
| TUCP_002445 | XLOC_103731 | ENSRNOT00000018074  | -0.97220808  | 1.25E-07 |
| TUCP_002445 | XLOC_103731 | ENSRNOT000000037679 | 0.962671302  | 5.36E-07 |
| TUCP_002445 | XLOC_103731 | ENSRNOT00000014124  | 0.983239694  | 1.01E-08 |
| TUCP_002445 | XLOC_103731 | ENSRNOT00000000120  | 0.974651434  | 7.90E-08 |
| TUCP_002445 | XLOC_103731 | ENSRNOT00000013632  | 0.991134741  | 4.25E-10 |
| TUCP_002445 | XLOC_103731 | ENSRNOT000000028545 | -0.955576973 | 1.26E-06 |
| TUCP_002445 | XLOC_103731 | ENSRNOT000000008865 | -0.950130776 | 2.23E-06 |
| TUCP_002445 | XLOC_103731 | ENSRNOT00000027575  | -0.950373234 | 2.18E-06 |
| TUCP_002445 | XLOC_103731 | ENSRNOT000000055442 | 0.953312083  | 1.62E-06 |
| TUCP_002445 | XLOC_103731 | ENSRNOT000000039191 | -0.959151803 | 8.36E-07 |
| TUCP_002445 | XLOC_103731 | ENSRNOT00000019172  | -0.979377418 | 2.84E-08 |
| TUCP_002445 | XLOC_103731 | ENSRNOT00000064798  | 0.962968698  | 5.15E-07 |
| TUCP_002445 | XLOC_103731 | ENSRNOT00000019177  | 0.956984131  | 1.08E-06 |
| TUCP_002445 | XLOC_103731 | ENSRNOT00000020994  | -0.983517138 | 9.32E-09 |
| TUCP_002445 | XLOC_103731 | ENSRNOT000000032244 | 0.953273086  | 1.62E-06 |
| TUCP_002445 | XLOC_103731 | ENSRNOT00000068269  | -0.969384506 | 2.01E-07 |
| TUCP_002445 | XLOC_103731 | ENSRNOT000000021216 | 0.957589937  | 1.01E-06 |
| TUCP_002445 | XLOC_103731 | ENSRNOT00000019911  | -0.96617022  | 3.30E-07 |
| TUCP_002445 | XLOC_103731 | ENSRNOT00000040393  | 0.985269911  | 5.33E-09 |
| TUCP_002445 | XLOC_103731 | ENSRNOT00000025097  | 0.960233212  | 7.33E-07 |

|             |             |                    |              |          |
|-------------|-------------|--------------------|--------------|----------|
| TUCP_002445 | XLOC_103731 | ENSRNOT00000032236 | -0.966378285 | 3.20E-07 |
| TUCP_002445 | XLOC_103731 | ENSRNOT00000016372 | -0.965013149 | 3.89E-07 |
| TUCP_002445 | XLOC_103731 | ENSRNOT00000073135 | 0.950312369  | 2.19E-06 |
| TUCP_002445 | XLOC_103731 | ENSRNOT00000021674 | 0.956486749  | 1.14E-06 |
| TUCP_002445 | XLOC_103731 | ENSRNOT00000064700 | 0.987076501  | 2.78E-09 |
| TUCP_002445 | XLOC_103731 | ENSRNOT00000036613 | -0.973164452 | 1.05E-07 |
| TUCP_002445 | XLOC_103731 | ENSRNOT00000045226 | -0.953740578 | 1.54E-06 |
| TUCP_002445 | XLOC_103731 | ENSRNOT00000028876 | -0.95205719  | 1.84E-06 |
| TUCP_002445 | XLOC_103731 | ENSRNOT00000025705 | 0.957471167  | 1.02E-06 |
| TUCP_002445 | XLOC_103731 | ENSRNOT00000015479 | 0.954594843  | 1.41E-06 |
| TUCP_002445 | XLOC_103731 | ENSRNOT00000019983 | -0.978728471 | 3.31E-08 |
| TUCP_002445 | XLOC_103731 | ENSRNOT00000076230 | 0.951102364  | 2.03E-06 |
| TUCP_002445 | XLOC_103731 | ENSRNOT00000004140 | 0.972320435  | 1.22E-07 |
| TUCP_002445 | XLOC_103731 | ENSRNOT00000074494 | -0.968530023 | 2.31E-07 |
| TUCP_002445 | XLOC_103731 | ENSRNOT00000011682 | -0.957514416 | 1.01E-06 |
| TUCP_002445 | XLOC_103731 | ENSRNOT00000022552 | -0.961478839 | 6.26E-07 |
| TUCP_002445 | XLOC_103731 | ENSRNOT00000036194 | -0.956247933 | 1.17E-06 |
| TUCP_002445 | XLOC_103731 | ENSRNOT00000000334 | -0.95888667  | 8.63E-07 |
| TUCP_002445 | XLOC_103731 | ENSRNOT00000009763 | -0.959864961 | 7.67E-07 |
| TUCP_002445 | XLOC_103731 | ENSRNOT00000027407 | 0.955712886  | 1.25E-06 |
| TUCP_002445 | XLOC_103731 | ENSRNOT00000086590 | 0.965703427  | 3.53E-07 |
| TUCP_002445 | XLOC_103731 | ENSRNOT00000078070 | 0.966268504  | 3.25E-07 |
| TUCP_002445 | XLOC_103731 | ENSRNOT00000014780 | -0.971280516 | 1.47E-07 |
| TUCP_002445 | XLOC_103731 | ENSRNOT00000009645 | -0.974752334 | 7.74E-08 |
| TUCP_002445 | XLOC_103731 | ENSRNOT00000014373 | -0.953870538 | 1.52E-06 |
| TUCP_002445 | XLOC_103731 | ENSRNOT00000026279 | -0.963661854 | 4.69E-07 |
| TUCP_002445 | XLOC_103731 | ENSRNOT00000082508 | -0.966675057 | 3.06E-07 |
| TUCP_002445 | XLOC_103731 | ENSRNOT00000024352 | 0.9645757    | 4.14E-07 |
| TUCP_002445 | XLOC_103731 | ENSRNOT00000082863 | 0.981166645  | 1.81E-08 |
| TUCP_002445 | XLOC_103731 | ENSRNOT00000071482 | -0.970721019 | 1.61E-07 |
| TUCP_002445 | XLOC_103731 | ENSRNOT0000007164  | 0.979120084  | 3.02E-08 |
| TUCP_002445 | XLOC_103731 | ENSRNOT00000049459 | -0.971709172 | 1.36E-07 |
| TUCP_002445 | XLOC_103731 | ENSRNOT00000014309 | -0.965623592 | 3.57E-07 |
| TUCP_002445 | XLOC_103731 | ENSRNOT00000071166 | 0.959792646  | 7.73E-07 |
| TUCP_002445 | XLOC_103731 | ENSRNOT00000074389 | -0.962687488 | 5.35E-07 |
| TUCP_002445 | XLOC_103731 | ENSRNOT00000083568 | 0.958561888  | 8.97E-07 |
| TUCP_002445 | XLOC_103731 | ENSRNOT00000001118 | 0.95841728   | 9.13E-07 |
| TUCP_002445 | XLOC_103731 | ENSRNOT00000055437 | -0.972674205 | 1.15E-07 |
| TUCP_002445 | XLOC_103731 | ENSRNOT00000091596 | -0.95377253  | 1.54E-06 |
| TUCP_002445 | XLOC_103731 | ENSRNOT00000039836 | -0.95379331  | 1.53E-06 |
| TUCP_002445 | XLOC_103731 | ENSRNOT00000015325 | -0.953488792 | 1.59E-06 |
| TUCP_002445 | XLOC_103731 | ENSRNOT00000048754 | -0.966702721 | 3.05E-07 |
| TUCP_002445 | XLOC_103731 | ENSRNOT00000043345 | 0.953113969  | 1.65E-06 |
| TUCP_002445 | XLOC_103731 | ENSRNOT00000015170 | -0.964323227 | 4.29E-07 |
| TUCP_002445 | XLOC_103731 | ENSRNOT00000001507 | 0.972790842  | 1.12E-07 |
| TUCP_002445 | XLOC_103731 | ENSRNOT00000028646 | 0.950759316  | 2.10E-06 |
| TUCP_002445 | XLOC_103731 | ENSRNOT00000018584 | 0.955852174  | 1.23E-06 |
| TUCP_002445 | XLOC_103731 | ENSRNOT00000039177 | -0.957606137 | 1.00E-06 |
| TUCP_002445 | XLOC_103731 | ENSRNOT00000017271 | 0.950776456  | 2.09E-06 |
| TUCP_002445 | XLOC_103731 | ENSRNOT00000082699 | 0.95172214   | 1.90E-06 |
| TUCP_002445 | XLOC_103731 | ENSRNOT00000023962 | -0.951246269 | 2.00E-06 |

|             |             |                     |              |          |
|-------------|-------------|---------------------|--------------|----------|
| TUCP_002445 | XLOC_103731 | ENSRNOT00000037456  | 0.977238742  | 4.63E-08 |
| TUCP_002445 | XLOC_103731 | ENSRNOT00000032248  | 0.950306449  | 2.20E-06 |
| TUCP_002445 | XLOC_103731 | ENSRNOT00000012881  | -0.990096111 | 7.38E-10 |
| TUCP_002445 | XLOC_103731 | ENSRNOT00000000577  | 0.959144702  | 8.37E-07 |
| TUCP_002445 | XLOC_103731 | ENSRNOT00000075424  | 0.969770372  | 1.89E-07 |
| TUCP_002445 | XLOC_103731 | ENSRNOT000000081632 | 0.954815915  | 1.37E-06 |
| TUCP_002445 | XLOC_103731 | ENSRNOT00000023989  | 0.956697817  | 1.11E-06 |
| TUCP_002445 | XLOC_103731 | ENSRNOT00000061392  | 0.957044646  | 1.07E-06 |
| TUCP_002445 | XLOC_103731 | ENSRNOT00000042125  | 0.976665769  | 5.24E-08 |
| TUCP_002445 | XLOC_103731 | ENSRNOT00000037039  | -0.958489015 | 9.05E-07 |
| TUCP_002445 | XLOC_103731 | ENSRNOT00000007824  | -0.959922067 | 7.61E-07 |
| TUCP_002445 | XLOC_103731 | ENSRNOT00000001979  | -0.957776918 | 9.84E-07 |
| TUCP_002445 | XLOC_103731 | ENSRNOT000000083968 | -0.960313718 | 7.25E-07 |
| TUCP_002445 | XLOC_103731 | ENSRNOT00000037133  | 0.950803266  | 2.09E-06 |
| TUCP_002445 | XLOC_103731 | ENSRNOT00000016351  | -0.958509869 | 9.03E-07 |
| TUCP_002445 | XLOC_103731 | ENSRNOT000000083964 | -0.964321051 | 4.29E-07 |
| TUCP_002445 | XLOC_103731 | ENSRNOT00000026726  | -0.951234111 | 2.00E-06 |
| TUCP_002445 | XLOC_103731 | ENSRNOT00000026831  | 0.957216373  | 1.05E-06 |
| TUCP_002445 | XLOC_103731 | ENSRNOT00000007821  | 0.950867094  | 2.08E-06 |
| TUCP_002445 | XLOC_103731 | ENSRNOT00000061304  | -0.966979677 | 2.92E-07 |
| TUCP_002445 | XLOC_103731 | ENSRNOT000000087429 | 0.960255428  | 7.31E-07 |
| TUCP_002445 | XLOC_103731 | ENSRNOT00000019133  | 0.969090154  | 2.11E-07 |
| TUCP_002445 | XLOC_103731 | ENSRNOT00000019130  | -0.954720071 | 1.39E-06 |
| TUCP_002445 | XLOC_103731 | ENSRNOT00000020437  | 0.950188438  | 2.22E-06 |
| TUCP_002445 | XLOC_103731 | ENSRNOT000000078185 | -0.958589899 | 8.94E-07 |
| TUCP_002445 | XLOC_103731 | ENSRNOT00000024119  | 0.964186686  | 4.37E-07 |
| TUCP_002445 | XLOC_103731 | ENSRNOT00000002152  | -0.96925922  | 2.05E-07 |
| TUCP_002445 | XLOC_103731 | ENSRNOT00000006824  | -0.964370764 | 4.26E-07 |
| TUCP_002445 | XLOC_103731 | ENSRNOT000000088509 | 0.960191024  | 7.36E-07 |
| TUCP_002445 | XLOC_103731 | ENSRNOT000000032667 | -0.964326699 | 4.29E-07 |
| TUCP_002445 | XLOC_103731 | ENSRNOT00000000170  | -0.962150803 | 5.74E-07 |
| TUCP_002445 | XLOC_103731 | ENSRNOT000000086260 | -0.955780408 | 1.24E-06 |
| TUCP_002445 | XLOC_103731 | ENSRNOT00000011551  | -0.950763364 | 2.10E-06 |
| TUCP_002445 | XLOC_103731 | ENSRNOT00000005389  | 0.966924676  | 2.95E-07 |
| TUCP_002445 | XLOC_103731 | ENSRNOT00000038610  | -0.960985044 | 6.67E-07 |
| TUCP_002445 | XLOC_103731 | ENSRNOT00000001759  | -0.962903158 | 5.20E-07 |
| TUCP_002445 | XLOC_103731 | ENSRNOT00000001099  | -0.965257517 | 3.76E-07 |
| TUCP_002445 | XLOC_103731 | ENSRNOT000000090123 | 0.956495882  | 1.14E-06 |
| TUCP_002445 | XLOC_103731 | ENSRNOT00000010683  | -0.977588611 | 4.29E-08 |
| TUCP_002445 | XLOC_103731 | ENSRNOT00000022000  | -0.951552822 | 1.94E-06 |
| TUCP_002445 | XLOC_103731 | ENSRNOT00000045488  | 0.96173582   | 6.06E-07 |
| TUCP_002445 | XLOC_103731 | ENSRNOT000000090853 | -0.977541459 | 4.33E-08 |
| TUCP_002445 | XLOC_103731 | ENSRNOT00000020316  | -0.952208745 | 1.81E-06 |
| TUCP_002445 | XLOC_103731 | ENSRNOT00000067688  | -0.958067647 | 9.51E-07 |
| TUCP_002445 | XLOC_103731 | ENSRNOT000000089265 | -0.959724606 | 7.80E-07 |
| TUCP_002445 | XLOC_103731 | ENSRNOT00000037588  | -0.954427138 | 1.43E-06 |
| TUCP_002445 | XLOC_103731 | ENSRNOT00000031261  | 0.953308903  | 1.62E-06 |
| TUCP_002445 | XLOC_103731 | ENSRNOT000000089211 | 0.951460221  | 1.96E-06 |
| TUCP_002445 | XLOC_103731 | ENSRNOT00000048490  | -0.953110461 | 1.65E-06 |
| TUCP_002445 | XLOC_103731 | ENSRNOT00000020383  | 0.967629171  | 2.65E-07 |
| TUCP_002445 | XLOC_103731 | ENSRNOT00000064068  | -0.964675922 | 4.08E-07 |

|             |             |                     |              |          |
|-------------|-------------|---------------------|--------------|----------|
| TUCP_002445 | XLOC_103731 | ENSRNOT00000025222  | -0.965020507 | 3.89E-07 |
| TUCP_002445 | XLOC_103731 | ENSRNOT00000011174  | -0.95962115  | 7.90E-07 |
| TUCP_002445 | XLOC_103731 | ENSRNOT00000008126  | -0.952626956 | 1.74E-06 |
| TUCP_002445 | XLOC_103731 | ENSRNOT00000087502  | 0.96474202   | 4.04E-07 |
| TUCP_002445 | XLOC_103731 | ENSRNOT00000030706  | -0.957662913 | 9.98E-07 |
| TUCP_002445 | XLOC_103731 | ENSRNOT00000025819  | -0.960708926 | 6.90E-07 |
| TUCP_002445 | XLOC_103731 | ENSRNOT00000019820  | 0.987598784  | 2.26E-09 |
| TUCP_002445 | XLOC_103731 | ENSRNOT00000041106  | 0.97483111   | 7.63E-08 |
| TUCP_002445 | XLOC_103731 | ENSRNOT00000017165  | -0.950104588 | 2.24E-06 |
| TUCP_002445 | XLOC_103731 | ENSRNOT00000046745  | 0.970867819  | 1.57E-07 |
| TUCP_002445 | XLOC_103731 | ENSRNOT00000014885  | -0.95463368  | 1.40E-06 |
| TUCP_002445 | XLOC_103731 | ENSRNOT00000002443  | 0.954785171  | 1.38E-06 |
| TUCP_002445 | XLOC_103731 | ENSRNOT00000000658  | 0.968376477  | 2.36E-07 |
| TUCP_002445 | XLOC_103731 | ENSRNOT000000055607 | -0.963954639 | 4.51E-07 |
| TUCP_002445 | XLOC_103731 | ENSRNOT000000085214 | -0.958853593 | 8.67E-07 |
| TUCP_002445 | XLOC_103731 | ENSRNOT000000082146 | -0.987429168 | 2.42E-09 |
| TUCP_002445 | XLOC_103731 | ENSRNOT00000000717  | -0.951710244 | 1.91E-06 |
| TUCP_002445 | XLOC_103731 | ENSRNOT000000005909 | 0.970911138  | 1.56E-07 |
| TUCP_002445 | XLOC_103731 | ENSRNOT000000087725 | 0.950256385  | 2.21E-06 |
| TUCP_002445 | XLOC_103731 | ENSRNOT00000049725  | -0.972660446 | 1.15E-07 |
| TUCP_002445 | XLOC_103731 | ENSRNOT000000086122 | 0.967376319  | 2.76E-07 |
| TUCP_002445 | XLOC_103731 | ENSRNOT000000011563 | -0.956650378 | 1.12E-06 |
| TUCP_002445 | XLOC_103731 | ENSRNOT000000010753 | -0.955869143 | 1.22E-06 |
| TUCP_002445 | XLOC_103731 | ENSRNOT000000023763 | -0.955183947 | 1.32E-06 |
| TUCP_002445 | XLOC_103731 | ENSRNOT000000038448 | -0.963808828 | 4.60E-07 |
| TUCP_002445 | XLOC_103731 | ENSRNOT000000088133 | -0.985285219 | 5.30E-09 |
| TUCP_002445 | XLOC_103731 | ENSRNOT000000086310 | -0.978498251 | 3.49E-08 |
| TUCP_002445 | XLOC_103731 | ENSRNOT000000059181 | 0.972575598  | 1.17E-07 |
| TUCP_002445 | XLOC_103731 | ENSRNOT000000017291 | -0.972944171 | 1.09E-07 |
| TUCP_002445 | XLOC_103731 | ENSRNOT000000010853 | 0.951024526  | 2.04E-06 |
| TUCP_002445 | XLOC_103731 | ENSRNOT00000045532  | -0.961245235 | 6.45E-07 |
| TUCP_002445 | XLOC_103731 | ENSRNOT000000064849 | -0.957633203 | 1.00E-06 |
| TUCP_002445 | XLOC_103731 | ENSRNOT000000081678 | 0.951184802  | 2.01E-06 |
| TUCP_002445 | XLOC_103731 | ENSRNOT000000036931 | -0.965831483 | 3.46E-07 |
| TUCP_002445 | XLOC_103731 | ENSRNOT000000008901 | -0.97505141  | 7.30E-08 |
| TUCP_002445 | XLOC_103731 | ENSRNOT000000005659 | 0.965241112  | 3.77E-07 |
| TUCP_002445 | XLOC_103731 | ENSRNOT000000081077 | -0.980583245 | 2.10E-08 |
| TUCP_002445 | XLOC_103731 | ENSRNOT000000017761 | 0.987302081  | 2.55E-09 |
| TUCP_002445 | XLOC_103731 | ENSRNOT00000023543  | -0.9532982   | 1.62E-06 |
| TUCP_002445 | XLOC_103731 | ENSRNOT00000001923  | 0.967604564  | 2.66E-07 |
| TUCP_002445 | XLOC_103731 | ENSRNOT000000072416 | -0.964709929 | 4.06E-07 |
| TUCP_002445 | XLOC_103731 | ENSRNOT000000023017 | -0.95823027  | 9.33E-07 |
| TUCP_002445 | XLOC_103731 | ENSRNOT000000080608 | 0.963819484  | 4.59E-07 |
| TUCP_002445 | XLOC_103731 | ENSRNOT000000041456 | -0.967719393 | 2.61E-07 |
| TUCP_002445 | XLOC_103731 | ENSRNOT000000005478 | -0.957335419 | 1.04E-06 |
| TUCP_002445 | XLOC_103731 | ENSRNOT000000016740 | 0.954385757  | 1.44E-06 |
| TUCP_002445 | XLOC_103731 | ENSRNOT000000055386 | 0.958028609  | 9.56E-07 |
| TUCP_002445 | XLOC_103731 | ENSRNOT000000038212 | -0.971802466 | 1.34E-07 |
| TUCP_002445 | XLOC_103731 | ENSRNOT000000000013 | 0.972631152  | 1.16E-07 |
| TUCP_002445 | XLOC_103731 | ENSRNOT000000085458 | -0.953730567 | 1.55E-06 |
| TUCP_002445 | XLOC_103731 | ENSRNOT000000085519 | 0.952629579  | 1.73E-06 |

|             |             |                    |              |          |
|-------------|-------------|--------------------|--------------|----------|
| TUCP_002445 | XLOC_103731 | ENSRNOT00000012625 | -0.954625248 | 1.40E-06 |
| TUCP_002445 | XLOC_103731 | ENSRNOT00000080677 | -0.98152366  | 1.64E-08 |
| TUCP_002445 | XLOC_103731 | ENSRNOT00000025460 | 0.964469528  | 4.20E-07 |
| TUCP_002445 | XLOC_103731 | ENSRNOT00000010541 | 0.97966239   | 2.65E-08 |
| TUCP_002445 | XLOC_103731 | ENSRNOT00000025784 | -0.95163471  | 1.92E-06 |
| TUCP_002445 | XLOC_103731 | ENSRNOT00000026760 | -0.97421071  | 8.60E-08 |
| TUCP_002445 | XLOC_103731 | ENSRNOT00000023330 | 0.952409707  | 1.77E-06 |
| TUCP_002445 | XLOC_103731 | ENSRNOT00000024491 | -0.979348243 | 2.86E-08 |
| TUCP_002445 | XLOC_103731 | ENSRNOT00000084597 | -0.960147417 | 7.40E-07 |
| TUCP_002445 | XLOC_103731 | ENSRNOT00000084595 | 0.97031878   | 1.73E-07 |
| TUCP_002445 | XLOC_103731 | ENSRNOT00000024947 | -0.950592146 | 2.13E-06 |
| TUCP_002445 | XLOC_103731 | ENSRNOT00000082174 | 0.964530966  | 4.17E-07 |
| TUCP_002445 | XLOC_103731 | ENSRNOT00000064930 | 0.963640085  | 4.71E-07 |
| TUCP_002445 | XLOC_103731 | ENSRNOT00000002355 | -0.957570012 | 1.01E-06 |
| TUCP_002445 | XLOC_103731 | ENSRNOT00000002053 | -0.961958064 | 5.89E-07 |
| TUCP_002445 | XLOC_103731 | ENSRNOT00000047210 | 0.986807788  | 3.08E-09 |
| TUCP_002445 | XLOC_103731 | ENSRNOT00000079414 | -0.959992142 | 7.55E-07 |
| TUCP_002445 | XLOC_103731 | ENSRNOT00000079002 | -0.957786233 | 9.83E-07 |
| TUCP_002445 | XLOC_103731 | ENSRNOT00000083957 | 0.956497039  | 1.14E-06 |
| TUCP_002445 | XLOC_103731 | ENSRNOT0000005885  | -0.966138412 | 3.31E-07 |
| TUCP_002445 | XLOC_103731 | ENSRNOT00000079996 | 0.967003273  | 2.91E-07 |
| TUCP_002445 | XLOC_103731 | ENSRNOT00000024548 | 0.968919164  | 2.17E-07 |
| TUCP_002445 | XLOC_103731 | ENSRNOT00000026057 | -0.955807038 | 1.23E-06 |
| TUCP_002442 | XLOC_103519 | ENSRNOT00000084500 | 0.975346245  | 6.88E-08 |
| TUCP_002442 | XLOC_103519 | ENSRNOT00000093467 | 0.984545894  | 6.76E-09 |
| TUCP_002442 | XLOC_103519 | ENSRNOT00000029340 | 0.99035228   | 6.48E-10 |
| TUCP_002442 | XLOC_103519 | ENSRNOT00000077972 | 0.967105193  | 2.87E-07 |
| TUCP_002442 | XLOC_103519 | ENSRNOT00000038646 | 0.992656465  | 1.66E-10 |
| TUCP_002442 | XLOC_103519 | ENSRNOT00000017909 | 0.968121141  | 2.46E-07 |
| TUCP_002442 | XLOC_103519 | ENSRNOT00000085479 | 0.969473809  | 1.98E-07 |
| TUCP_002442 | XLOC_103519 | ENSRNOT00000092579 | 0.992656465  | 1.66E-10 |
| TUCP_002442 | XLOC_103519 | ENSRNOT00000048373 | 0.956167629  | 1.18E-06 |
| TUCP_002442 | XLOC_103519 | ENSRNOT00000036383 | 0.977112817  | 4.76E-08 |
| TUCP_002442 | XLOC_103519 | ENSRNOT00000076528 | 0.998365786  | 9.15E-14 |
| TUCP_002442 | XLOC_103519 | ENSRNOT00000077458 | 0.960015013  | 7.53E-07 |
| TUCP_002442 | XLOC_103519 | ENSRNOT00000083034 | 0.993306599  | 1.05E-10 |
| TUCP_002442 | XLOC_103519 | ENSRNOT00000089607 | 0.998909075  | 1.21E-14 |
| TUCP_002442 | XLOC_103519 | ENSRNOT00000035915 | 0.956532499  | 1.14E-06 |
| TUCP_002442 | XLOC_103519 | ENSRNOT00000052315 | 0.974076791  | 8.83E-08 |
| TUCP_002442 | XLOC_103519 | ENSRNOT00000075193 | 0.973138574  | 1.05E-07 |
| TUCP_002442 | XLOC_103519 | ENSRNOT00000088168 | 0.992656465  | 1.66E-10 |
| TUCP_002442 | XLOC_103519 | ENSRNOT00000046231 | 0.954814289  | 1.37E-06 |
| TUCP_002442 | XLOC_103519 | ENSRNOT00000013459 | 0.9692381    | 2.06E-07 |
| TUCP_002442 | XLOC_103519 | ENSRNOT00000078137 | 0.992656465  | 1.66E-10 |
| TUCP_002442 | XLOC_103519 | ENSRNOT00000077764 | 0.981526668  | 1.64E-08 |
| TUCP_002442 | XLOC_103519 | ENSRNOT00000043661 | 0.956636348  | 1.12E-06 |
| TUCP_002442 | XLOC_103519 | ENSRNOT00000092740 | 0.992656465  | 1.66E-10 |
| TUCP_002442 | XLOC_103519 | ENSRNOT00000000117 | 0.981225101  | 1.78E-08 |
| TUCP_002442 | XLOC_103519 | ENSRNOT00000071877 | 0.951127054  | 2.02E-06 |
| TUCP_002442 | XLOC_103519 | ENSRNOT00000070958 | 0.992656465  | 1.66E-10 |
| TUCP_002442 | XLOC_103519 | ENSRNOT00000076757 | 0.96650466   | 3.14E-07 |

|             |             |                    |              |          |
|-------------|-------------|--------------------|--------------|----------|
| TUCP_002442 | XLOC_103519 | ENSRNOT00000085310 | 0.958610182  | 8.92E-07 |
| TUCP_002442 | XLOC_103519 | ENSRNOT00000047241 | 0.956061962  | 1.20E-06 |
| TUCP_002442 | XLOC_103519 | ENSRNOT00000093748 | 0.951049388  | 2.04E-06 |
| TUCP_002442 | XLOC_103519 | ENSRNOT00000027268 | 0.992656465  | 1.66E-10 |
| TUCP_002442 | XLOC_103519 | ENSRNOT00000004459 | 0.992656465  | 1.66E-10 |
| TUCP_002442 | XLOC_103519 | ENSRNOT00000089235 | 0.989255215  | 1.11E-09 |
| TUCP_002442 | XLOC_103519 | ENSRNOT00000061516 | 0.983621505  | 9.03E-09 |
| TUCP_002442 | XLOC_103519 | ENSRNOT00000088148 | 0.992656465  | 1.66E-10 |
| TUCP_002442 | XLOC_103519 | ENSRNOT00000088527 | 0.992656465  | 1.66E-10 |
| TUCP_002442 | XLOC_103519 | ENSRNOT00000078701 | 0.992656465  | 1.66E-10 |
| TUCP_002442 | XLOC_103519 | ENSRNOT00000052308 | 0.951968226  | 1.86E-06 |
| TUCP_002442 | XLOC_103519 | ENSRNOT00000052130 | 0.950969159  | 2.05E-06 |
| TUCP_002442 | XLOC_103519 | ENSRNOT00000021748 | 0.992656465  | 1.66E-10 |
| TUCP_002442 | XLOC_103519 | ENSRNOT00000089085 | 0.992656465  | 1.66E-10 |
| TUCP_002442 | XLOC_103519 | ENSRNOT00000008153 | 0.994022879  | 5.95E-11 |
| TUCP_002442 | XLOC_103519 | ENSRNOT00000085896 | 0.963095623  | 5.07E-07 |
| TUCP_002442 | XLOC_103519 | ENSRNOT00000079189 | 0.972948795  | 1.09E-07 |
| TUCP_002442 | XLOC_103519 | ENSRNOT00000090078 | 0.992656465  | 1.66E-10 |
| TUCP_002442 | XLOC_103519 | ENSRNOT00000078020 | 0.962459313  | 5.51E-07 |
| TUCP_002442 | XLOC_103519 | ENSRNOT00000009776 | 0.992656465  | 1.66E-10 |
| TUCP_002440 | XLOC_103434 | ENSRNOT00000079261 | 0.963988951  | 4.49E-07 |
| TUCP_002441 | XLOC_103519 | ENSRNOT00000068354 | 0.966849957  | 2.98E-07 |
| TUCP_002441 | XLOC_103519 | ENSRNOT00000057504 | 0.951148192  | 2.02E-06 |
| TUCP_002441 | XLOC_103519 | ENSRNOT00000034421 | 0.950421271  | 2.17E-06 |
| TUCP_002441 | XLOC_103519 | ENSRNOT00000076757 | 0.962207362  | 5.70E-07 |
| TUCP_002441 | XLOC_103519 | ENSRNOT00000028877 | 0.968218352  | 2.42E-07 |
| TUCP_002441 | XLOC_103519 | ENSRNOT00000078299 | 0.95358264   | 1.57E-06 |
| TUCP_002441 | XLOC_103519 | ENSRNOT00000010968 | 0.953926372  | 1.51E-06 |
| TUCP_002441 | XLOC_103519 | ENSRNOT00000077764 | 0.966618477  | 3.09E-07 |
| TUCP_002441 | XLOC_103519 | ENSRNOT00000085479 | 0.976607771  | 5.30E-08 |
| TUCP_002441 | XLOC_103519 | ENSRNOT00000025731 | 0.973446453  | 9.94E-08 |
| TUCP_002441 | XLOC_103519 | ENSRNOT00000000995 | 0.961075668  | 6.59E-07 |
| TUCP_002441 | XLOC_103519 | ENSRNOT00000003458 | 0.963180197  | 5.01E-07 |
| TUCP_002441 | XLOC_103519 | ENSRNOT00000093748 | 0.963557877  | 4.76E-07 |
| TUCP_002441 | XLOC_103519 | ENSRNOT00000078020 | 0.959489121  | 8.03E-07 |
| TUCP_002441 | XLOC_103519 | ENSRNOT00000051028 | -0.959839505 | 7.69E-07 |
| TUCP_002441 | XLOC_103519 | ENSRNOT00000031693 | 0.977308409  | 4.56E-08 |
| TUCP_002441 | XLOC_103519 | ENSRNOT00000083034 | 0.950559573  | 2.14E-06 |
| TUCP_002441 | XLOC_103519 | ENSRNOT00000052130 | 0.980076646  | 2.39E-08 |
| TUCP_002441 | XLOC_103519 | ENSRNOT00000077972 | 0.961951694  | 5.89E-07 |
| TUCP_002727 | XLOC_115806 | ENSRNOT00000090923 | 0.95669953   | 1.11E-06 |
| TUCP_002727 | XLOC_115806 | ENSRNOT00000064331 | 0.96134696   | 6.37E-07 |
| TUCP_002726 | XLOC_115805 | ENSRNOT00000020401 | -0.968586094 | 2.29E-07 |
| TUCP_002725 | XLOC_115759 | ENSRNOT00000074990 | 0.960697558  | 6.91E-07 |
| TUCP_002725 | XLOC_115759 | ENSRNOT00000068444 | 0.960697558  | 6.91E-07 |
| TUCP_002725 | XLOC_115759 | ENSRNOT00000081370 | 0.962152527  | 5.74E-07 |
| TUCP_002725 | XLOC_115759 | ENSRNOT00000078645 | 0.956827864  | 1.10E-06 |
| TUCP_002725 | XLOC_115759 | ENSRNOT00000082043 | 0.957409094  | 1.03E-06 |
| TUCP_002725 | XLOC_115759 | ENSRNOT00000074930 | 0.960697558  | 6.91E-07 |
| TUCP_002725 | XLOC_115759 | ENSRNOT00000087323 | 0.952210715  | 1.81E-06 |
| TUCP_002725 | XLOC_115759 | ENSRNOT00000080575 | 0.961153799  | 6.53E-07 |



|             |             |                    |              |          |
|-------------|-------------|--------------------|--------------|----------|
| TUCP_002725 | XLOC_115759 | ENSRNOT00000092982 | 0.960697558  | 6.91E-07 |
| TUCP_002725 | XLOC_115759 | ENSRNOT00000086831 | 0.960697558  | 6.91E-07 |
| TUCP_002725 | XLOC_115759 | ENSRNOT00000088367 | 0.960697558  | 6.91E-07 |
| TUCP_002725 | XLOC_115759 | ENSRNOT00000086397 | 0.953417248  | 1.60E-06 |
| TUCP_002725 | XLOC_115759 | ENSRNOT00000061874 | 0.974329199  | 8.41E-08 |
| TUCP_002725 | XLOC_115759 | ENSRNOT00000081996 | 0.960697558  | 6.91E-07 |
| TUCP_002725 | XLOC_115759 | ENSRNOT00000082058 | 0.960697558  | 6.91E-07 |
| TUCP_002725 | XLOC_115759 | ENSRNOT00000088905 | 0.960697558  | 6.91E-07 |
| TUCP_002725 | XLOC_115759 | ENSRNOT00000019853 | 0.960697558  | 6.91E-07 |
| TUCP_002725 | XLOC_115759 | ENSRNOT00000045099 | 0.960697558  | 6.91E-07 |
| TUCP_002725 | XLOC_115759 | ENSRNOT00000089257 | 0.963941147  | 4.52E-07 |
| TUCP_002725 | XLOC_115759 | ENSRNOT00000087025 | 0.960697558  | 6.91E-07 |
| TUCP_002725 | XLOC_115759 | ENSRNOT00000065912 | 0.972264303  | 1.23E-07 |
| TUCP_002725 | XLOC_115759 | ENSRNOT00000093083 | 0.962314169  | 5.62E-07 |
| TUCP_000612 | XLOC_021911 | ENSRNOT00000026966 | 0.975783695  | 6.30E-08 |
| TUCP_000612 | XLOC_021911 | ENSRNOT00000068416 | 0.993479816  | 9.18E-11 |
| TUCP_000612 | XLOC_021911 | ENSRNOT00000026803 | 0.980712829  | 2.04E-08 |
| TUCP_000612 | XLOC_021911 | ENSRNOT00000047527 | 0.961643148  | 6.13E-07 |
| TUCP_000612 | XLOC_021911 | ENSRNOT00000042251 | 0.99202617   | 2.50E-10 |
| TUCP_000612 | XLOC_021911 | ENSRNOT0000002984  | 0.987983268  | 1.93E-09 |
| TUCP_000612 | XLOC_021911 | ENSRNOT00000067379 | 0.987860236  | 2.03E-09 |
| TUCP_000612 | XLOC_021911 | ENSRNOT00000092365 | 0.995695179  | 1.16E-11 |
| TUCP_000612 | XLOC_021911 | ENSRNOT00000079275 | 0.993594092  | 8.40E-11 |
| TUCP_000612 | XLOC_021911 | ENSRNOT00000066062 | -0.953690453 | 1.55E-06 |
| TUCP_000612 | XLOC_021911 | ENSRNOT00000045301 | 0.993476697  | 9.20E-11 |
| TUCP_000612 | XLOC_021911 | ENSRNOT00000041186 | 0.993441853  | 9.45E-11 |
| TUCP_000612 | XLOC_021911 | ENSRNOT00000010092 | 0.962095833  | 5.78E-07 |
| TUCP_000612 | XLOC_021911 | ENSRNOT00000076182 | 0.993476697  | 9.20E-11 |
| TUCP_000612 | XLOC_021911 | ENSRNOT00000081709 | 0.991516619  | 3.41E-10 |
| TUCP_000612 | XLOC_021911 | ENSRNOT00000014103 | 0.993476697  | 9.20E-11 |
| TUCP_000612 | XLOC_021911 | ENSRNOT00000057433 | 0.951600209  | 1.93E-06 |
| TUCP_000612 | XLOC_021911 | ENSRNOT00000082289 | 0.993729332  | 7.56E-11 |
| TUCP_000612 | XLOC_021911 | ENSRNOT00000092516 | 0.961001941  | 6.65E-07 |
| TUCP_000612 | XLOC_021911 | ENSRNOT00000083493 | 0.995294407  | 1.80E-11 |
| TUCP_000612 | XLOC_021911 | ENSRNOT00000092563 | 0.992648072  | 1.67E-10 |
| TUCP_000612 | XLOC_021911 | ENSRNOT00000088893 | 0.993476697  | 9.20E-11 |
| TUCP_000612 | XLOC_021911 | ENSRNOT00000008898 | 0.980525368  | 2.14E-08 |
| TUCP_000612 | XLOC_021911 | ENSRNOT00000081014 | 0.993476697  | 9.20E-11 |
| TUCP_000612 | XLOC_021911 | ENSRNOT00000067543 | 0.993476697  | 9.20E-11 |
| TUCP_000612 | XLOC_021911 | ENSRNOT00000050968 | 0.986676097  | 3.23E-09 |
| TUCP_000612 | XLOC_021911 | ENSRNOT00000042201 | 0.960180684  | 7.37E-07 |
| TUCP_000612 | XLOC_021911 | ENSRNOT00000086036 | 0.993206317  | 1.13E-10 |
| TUCP_000612 | XLOC_021911 | ENSRNOT00000063929 | 0.993476697  | 9.20E-11 |
| TUCP_000612 | XLOC_021911 | ENSRNOT00000044520 | 0.985984294  | 4.16E-09 |
| TUCP_000612 | XLOC_021911 | ENSRNOT00000091763 | 0.972614943  | 1.16E-07 |
| TUCP_000612 | XLOC_021911 | ENSRNOT00000022200 | 0.990316511  | 6.60E-10 |
| TUCP_000612 | XLOC_021911 | ENSRNOT00000083764 | 0.99210571   | 2.38E-10 |
| TUCP_000612 | XLOC_021911 | ENSRNOT00000020786 | 0.962506393  | 5.48E-07 |
| TUCP_000612 | XLOC_021911 | ENSRNOT00000050543 | 0.992003918  | 2.54E-10 |
| TUCP_000612 | XLOC_021911 | ENSRNOT00000089306 | 0.993303809  | 1.05E-10 |
| TUCP_000612 | XLOC_021911 | ENSRNOT00000052367 | 0.988528148  | 1.53E-09 |

|             |             |                    |             |          |
|-------------|-------------|--------------------|-------------|----------|
| TUCP_000612 | XLOC_021911 | ENSRNOT00000090658 | 0.993476697 | 9.20E-11 |
| TUCP_000612 | XLOC_021911 | ENSRNOT00000022571 | 0.995785964 | 1.04E-11 |
| TUCP_000612 | XLOC_021911 | ENSRNOT00000057472 | 0.993476697 | 9.20E-11 |
| TUCP_000612 | XLOC_021911 | ENSRNOT00000065448 | 0.960953055 | 6.69E-07 |
| TUCP_002448 | XLOC_104059 | ENSRNOT00000084075 | 0.996106112 | 7.00E-12 |
| TUCP_002448 | XLOC_104059 | ENSRNOT00000012880 | 0.968043129 | 2.49E-07 |
| TUCP_002448 | XLOC_104059 | ENSRNOT00000074465 | 1           | 0        |
| TUCP_002448 | XLOC_104059 | ENSRNOT00000090898 | 0.961670541 | 6.11E-07 |
| TUCP_002448 | XLOC_104059 | ENSRNOT00000079805 | 0.997980451 | 2.64E-13 |
| TUCP_002448 | XLOC_104059 | ENSRNOT00000040912 | 1           | 0        |
| TUCP_002448 | XLOC_104059 | ENSRNOT00000072648 | 1           | 0        |
| TUCP_002448 | XLOC_104059 | ENSRNOT00000007398 | 0.989054103 | 1.21E-09 |
| TUCP_002448 | XLOC_104059 | ENSRNOT00000070803 | 1           | 0        |
| TUCP_002448 | XLOC_104059 | ENSRNOT00000012196 | 1           | 0        |
| TUCP_002448 | XLOC_104059 | ENSRNOT00000085772 | 1           | 0        |
| TUCP_002448 | XLOC_104059 | ENSRNOT00000093284 | 0.999975856 | 6.46E-23 |
| TUCP_002448 | XLOC_104059 | ENSRNOT00000086374 | 0.993568904 | 8.57E-11 |
| TUCP_002448 | XLOC_104059 | ENSRNOT00000015270 | 1           | 0        |
| TUCP_002448 | XLOC_104059 | ENSRNOT00000046192 | 1           | 4.25E-78 |
| TUCP_002448 | XLOC_104059 | ENSRNOT00000044226 | 1           | 0        |
| TUCP_002448 | XLOC_104059 | ENSRNOT00000081898 | 0.989837012 | 8.39E-10 |
| TUCP_002448 | XLOC_104059 | ENSRNOT00000081954 | 0.964005219 | 4.48E-07 |
| TUCP_002448 | XLOC_104059 | ENSRNOT00000080291 | 0.998427671 | 7.55E-14 |
| TUCP_002448 | XLOC_104059 | ENSRNOT00000004293 | 0.984239049 | 7.46E-09 |
| TUCP_002448 | XLOC_104059 | ENSRNOT00000078231 | 0.960455489 | 7.13E-07 |
| TUCP_002448 | XLOC_104059 | ENSRNOT00000002834 | 1           | 0        |
| TUCP_002448 | XLOC_104059 | ENSRNOT00000001464 | 1           | 0        |
| TUCP_002448 | XLOC_104059 | ENSRNOT00000090716 | 0.994769629 | 3.06E-11 |
| TUCP_002448 | XLOC_104059 | ENSRNOT00000083542 | 0.972568514 | 1.17E-07 |
| TUCP_002448 | XLOC_104059 | ENSRNOT00000076044 | 1           | 0        |
| TUCP_002448 | XLOC_104059 | ENSRNOT00000074353 | 1           | 0        |
| TUCP_002448 | XLOC_104059 | ENSRNOT00000043510 | 0.958144129 | 9.43E-07 |
| TUCP_002448 | XLOC_104059 | ENSRNOT00000087122 | 0.980089513 | 2.38E-08 |
| TUCP_002448 | XLOC_104059 | ENSRNOT00000074295 | 0.987777006 | 2.11E-09 |
| TUCP_002448 | XLOC_104059 | ENSRNOT00000057873 | 1           | 0        |
| TUCP_002448 | XLOC_104059 | ENSRNOT00000083002 | 0.988874897 | 1.32E-09 |
| TUCP_002448 | XLOC_104059 | ENSRNOT00000088399 | 0.999999855 | 4.99E-34 |
| TUCP_002448 | XLOC_104059 | ENSRNOT00000086248 | 1           | 0        |
| TUCP_002448 | XLOC_104059 | ENSRNOT00000089750 | 0.999992758 | 1.57E-25 |
| TUCP_002448 | XLOC_104059 | ENSRNOT00000030517 | 0.971225224 | 1.48E-07 |
| TUCP_002448 | XLOC_104059 | ENSRNOT00000034772 | 0.994265187 | 4.84E-11 |
| TUCP_002448 | XLOC_104059 | ENSRNOT00000089305 | 0.969641693 | 1.93E-07 |
| TUCP_002448 | XLOC_104059 | ENSRNOT00000024580 | 0.954183021 | 1.47E-06 |
| TUCP_002448 | XLOC_104059 | ENSRNOT00000064601 | 0.966578038 | 3.11E-07 |
| TUCP_002448 | XLOC_104059 | ENSRNOT00000015870 | 0.965901306 | 3.43E-07 |
| TUCP_002448 | XLOC_104059 | ENSRNOT00000080812 | 0.992998865 | 1.31E-10 |
| TUCP_002448 | XLOC_104059 | ENSRNOT00000092755 | 1           | 0        |
| TUCP_002448 | XLOC_104059 | ENSRNOT00000031683 | 1           | 1.33E-79 |
| TUCP_002448 | XLOC_104059 | ENSRNOT00000087764 | 0.988156196 | 1.80E-09 |
| TUCP_002449 | XLOC_104062 | ENSRNOT00000084075 | 0.996106112 | 7.00E-12 |
| TUCP_002449 | XLOC_104062 | ENSRNOT00000012880 | 0.968043129 | 2.49E-07 |

|             |             |                    |             |          |
|-------------|-------------|--------------------|-------------|----------|
| TUCP_002449 | XLOC_104062 | ENSRNOT00000074465 | 1           | 0        |
| TUCP_002449 | XLOC_104062 | ENSRNOT00000090898 | 0.961670541 | 6.11E-07 |
| TUCP_002449 | XLOC_104062 | ENSRNOT00000079805 | 0.997980451 | 2.64E-13 |
| TUCP_002449 | XLOC_104062 | ENSRNOT00000040912 | 1           | 0        |
| TUCP_002449 | XLOC_104062 | ENSRNOT00000072648 | 1           | 1.33E-79 |
| TUCP_002449 | XLOC_104062 | ENSRNOT00000007398 | 0.989054103 | 1.21E-09 |
| TUCP_002449 | XLOC_104062 | ENSRNOT00000070803 | 1           | 0        |
| TUCP_002449 | XLOC_104062 | ENSRNOT00000012196 | 1           | 0        |
| TUCP_002449 | XLOC_104062 | ENSRNOT00000085772 | 1           | 1.33E-79 |
| TUCP_002449 | XLOC_104062 | ENSRNOT00000093284 | 0.999975856 | 6.46E-23 |
| TUCP_002449 | XLOC_104062 | ENSRNOT00000086374 | 0.993568904 | 8.57E-11 |
| TUCP_002449 | XLOC_104062 | ENSRNOT00000015270 | 1           | 0        |
| TUCP_002449 | XLOC_104062 | ENSRNOT00000046192 | 1           | 0        |
| TUCP_002449 | XLOC_104062 | ENSRNOT00000044226 | 1           | 0        |
| TUCP_002449 | XLOC_104062 | ENSRNOT00000081898 | 0.989837012 | 8.39E-10 |
| TUCP_002449 | XLOC_104062 | ENSRNOT00000081954 | 0.964005219 | 4.48E-07 |
| TUCP_002449 | XLOC_104062 | ENSRNOT00000080291 | 0.998427671 | 7.55E-14 |
| TUCP_002449 | XLOC_104062 | ENSRNOT00000004293 | 0.984239049 | 7.46E-09 |
| TUCP_002449 | XLOC_104062 | ENSRNOT00000078231 | 0.960455489 | 7.13E-07 |
| TUCP_002449 | XLOC_104062 | ENSRNOT00000002834 | 1           | 0        |
| TUCP_002449 | XLOC_104062 | ENSRNOT00000001464 | 1           | 0        |
| TUCP_002449 | XLOC_104062 | ENSRNOT00000090716 | 0.994769629 | 3.06E-11 |
| TUCP_002449 | XLOC_104062 | ENSRNOT00000083542 | 0.972568514 | 1.17E-07 |
| TUCP_002449 | XLOC_104062 | ENSRNOT00000076044 | 1           | 0        |
| TUCP_002449 | XLOC_104062 | ENSRNOT00000074353 | 1           | 0        |
| TUCP_002449 | XLOC_104062 | ENSRNOT00000043510 | 0.958144129 | 9.43E-07 |
| TUCP_002449 | XLOC_104062 | ENSRNOT00000087122 | 0.980089513 | 2.38E-08 |
| TUCP_002449 | XLOC_104062 | ENSRNOT00000074295 | 0.987777006 | 2.11E-09 |
| TUCP_002449 | XLOC_104062 | ENSRNOT00000057873 | 1           | 0        |
| TUCP_002449 | XLOC_104062 | ENSRNOT00000083002 | 0.988874897 | 1.32E-09 |
| TUCP_002449 | XLOC_104062 | ENSRNOT00000088399 | 0.999999855 | 4.99E-34 |
| TUCP_002449 | XLOC_104062 | ENSRNOT00000086248 | 1           | 0        |
| TUCP_002449 | XLOC_104062 | ENSRNOT00000089750 | 0.999992758 | 1.57E-25 |
| TUCP_002449 | XLOC_104062 | ENSRNOT00000030517 | 0.971225224 | 1.48E-07 |
| TUCP_002449 | XLOC_104062 | ENSRNOT00000034772 | 0.994265187 | 4.84E-11 |
| TUCP_002449 | XLOC_104062 | ENSRNOT00000089305 | 0.969641693 | 1.93E-07 |
| TUCP_002449 | XLOC_104062 | ENSRNOT00000024580 | 0.954183021 | 1.47E-06 |
| TUCP_002449 | XLOC_104062 | ENSRNOT00000064601 | 0.966578038 | 3.11E-07 |
| TUCP_002449 | XLOC_104062 | ENSRNOT00000015870 | 0.965901306 | 3.43E-07 |
| TUCP_002449 | XLOC_104062 | ENSRNOT00000080812 | 0.992998865 | 1.31E-10 |
| TUCP_002449 | XLOC_104062 | ENSRNOT00000092755 | 1           | 0        |
| TUCP_002449 | XLOC_104062 | ENSRNOT00000031683 | 1           | 0        |
| TUCP_002449 | XLOC_104062 | ENSRNOT00000087764 | 0.988156196 | 1.80E-09 |
| TUCP_003147 | XLOC_135399 | ENSRNOT00000064320 | 0.970633001 | 1.64E-07 |
| TUCP_003147 | XLOC_135399 | ENSRNOT00000009532 | 0.958388361 | 9.16E-07 |
| TUCP_003147 | XLOC_135399 | ENSRNOT00000025394 | 0.954449469 | 1.43E-06 |
| TUCP_003147 | XLOC_135399 | ENSRNOT00000004718 | 0.955874558 | 1.22E-06 |
| TUCP_003147 | XLOC_135399 | ENSRNOT00000013046 | -0.9512463  | 2.00E-06 |
| TUCP_003147 | XLOC_135399 | ENSRNOT00000085648 | 0.954979065 | 1.35E-06 |
| TUCP_003668 | XLOC_160258 | ENSRNOT00000064193 | 0.952631153 | 1.73E-06 |
| TUCP_003142 | XLOC_135137 | ENSRNOT00000027353 | 0.962388237 | 5.56E-07 |

|             |             |                    |             |          |
|-------------|-------------|--------------------|-------------|----------|
| TUCP_003142 | XLOC_135137 | ENSRNOT00000063973 | 0.959992789 | 7.55E-07 |
| TUCP_003667 | XLOC_160236 | ENSRNOT00000012725 | 0.966953382 | 2.94E-07 |
| TUCP_003666 | XLOC_160236 | ENSRNOT00000014948 | 0.95179548  | 1.89E-06 |
| TUCP_003661 | XLOC_160236 | ENSRNOT00000071754 | 0.981931822 | 1.47E-08 |
| TUCP_003661 | XLOC_160236 | ENSRNOT00000013316 | 0.952454499 | 1.77E-06 |
| TUCP_003661 | XLOC_160236 | ENSRNOT00000076168 | 0.951148592 | 2.02E-06 |
| TUCP_003661 | XLOC_160236 | ENSRNOT00000044642 | 0.974718119 | 7.80E-08 |
| TUCP_003660 | XLOC_160236 | ENSRNOT00000024186 | 0.984063237 | 7.88E-09 |
| TUCP_003660 | XLOC_160236 | ENSRNOT00000074753 | 0.99782362  | 3.83E-13 |
| TUCP_003660 | XLOC_160236 | ENSRNOT00000004876 | 0.96143469  | 6.30E-07 |
| TUCP_003660 | XLOC_160236 | ENSRNOT00000041904 | 0.999917445 | 3.02E-20 |
| TUCP_003660 | XLOC_160236 | ENSRNOT00000083487 | 0.991081766 | 4.38E-10 |
| TUCP_003660 | XLOC_160236 | ENSRNOT00000077990 | 0.999917445 | 3.02E-20 |
| TUCP_003660 | XLOC_160236 | ENSRNOT00000038826 | 0.99967227  | 2.98E-17 |
| TUCP_003660 | XLOC_160236 | ENSRNOT00000046842 | 0.973203427 | 1.04E-07 |
| TUCP_003660 | XLOC_160236 | ENSRNOT00000037169 | 0.979261643 | 2.92E-08 |
| TUCP_003660 | XLOC_160236 | ENSRNOT00000021243 | 0.987192058 | 2.66E-09 |
| TUCP_003660 | XLOC_160236 | ENSRNOT00000060250 | 0.999833123 | 1.02E-18 |
| TUCP_003660 | XLOC_160236 | ENSRNOT00000091934 | 0.999917445 | 3.02E-20 |
| TUCP_003660 | XLOC_160236 | ENSRNOT00000046585 | 0.983008956 | 1.08E-08 |
| TUCP_003660 | XLOC_160236 | ENSRNOT00000080794 | 0.990678663 | 5.46E-10 |
| TUCP_003660 | XLOC_160236 | ENSRNOT00000014456 | 0.991412015 | 3.63E-10 |
| TUCP_003660 | XLOC_160236 | ENSRNOT00000031205 | 0.991326768 | 3.81E-10 |
| TUCP_003660 | XLOC_160236 | ENSRNOT00000044145 | 0.999917445 | 3.02E-20 |
| TUCP_003660 | XLOC_160236 | ENSRNOT00000088381 | 0.98907441  | 1.20E-09 |
| TUCP_003660 | XLOC_160236 | ENSRNOT00000011743 | 0.986446674 | 3.52E-09 |
| TUCP_003660 | XLOC_160236 | ENSRNOT00000089929 | 0.999917445 | 3.02E-20 |
| TUCP_003660 | XLOC_160236 | ENSRNOT00000088624 | 0.999917445 | 3.02E-20 |
| TUCP_003660 | XLOC_160236 | ENSRNOT00000085659 | 0.989602906 | 9.40E-10 |
| TUCP_003660 | XLOC_160236 | ENSRNOT00000015866 | 0.993830311 | 6.97E-11 |
| TUCP_003660 | XLOC_160236 | ENSRNOT00000078633 | 0.999917445 | 3.02E-20 |
| TUCP_003660 | XLOC_160236 | ENSRNOT00000034907 | 0.995579418 | 1.32E-11 |
| TUCP_003660 | XLOC_160236 | ENSRNOT00000093230 | 0.959302186 | 8.21E-07 |
| TUCP_003660 | XLOC_160236 | ENSRNOT00000051835 | 0.999917445 | 3.02E-20 |
| TUCP_003660 | XLOC_160236 | ENSRNOT00000079087 | 0.999917445 | 3.02E-20 |
| TUCP_003660 | XLOC_160236 | ENSRNOT00000037206 | 0.999917445 | 3.02E-20 |
| TUCP_003660 | XLOC_160236 | ENSRNOT00000083261 | 0.971891852 | 1.32E-07 |
| TUCP_003660 | XLOC_160236 | ENSRNOT00000080590 | 0.999783143 | 3.78E-18 |
| TUCP_003660 | XLOC_160236 | ENSRNOT00000027552 | 0.99972862  | 1.16E-17 |
| TUCP_003660 | XLOC_160236 | ENSRNOT00000077014 | 0.994908359 | 2.67E-11 |
| TUCP_003660 | XLOC_160236 | ENSRNOT00000080453 | 0.999875083 | 2.39E-19 |
| TUCP_003660 | XLOC_160236 | ENSRNOT00000089057 | 0.968905636 | 2.17E-07 |
| TUCP_003660 | XLOC_160236 | ENSRNOT00000066839 | 0.991126499 | 4.27E-10 |
| TUCP_003660 | XLOC_160236 | ENSRNOT00000061284 | 0.954806174 | 1.38E-06 |
| TUCP_003660 | XLOC_160236 | ENSRNOT00000013423 | 0.959344503 | 8.17E-07 |
| TUCP_003660 | XLOC_160236 | ENSRNOT00000071884 | 0.974506544 | 8.13E-08 |
| TUCP_003660 | XLOC_160236 | ENSRNOT00000004128 | 0.960443197 | 7.14E-07 |
| TUCP_003660 | XLOC_160236 | ENSRNOT00000026316 | 0.96439643  | 4.24E-07 |
| TUCP_003660 | XLOC_160236 | ENSRNOT00000057729 | 0.999246215 | 1.91E-15 |
| TUCP_003660 | XLOC_160236 | ENSRNOT00000078663 | 0.975310972 | 6.93E-08 |
| TUCP_003660 | XLOC_160236 | ENSRNOT00000064250 | 0.984145266 | 7.68E-09 |

|             |             |                    |             |          |
|-------------|-------------|--------------------|-------------|----------|
| TUCP_003660 | XLOC_160236 | ENSRNOT00000021608 | 0.965555048 | 3.60E-07 |
| TUCP_003660 | XLOC_160236 | ENSRNOT00000029634 | 0.995508541 | 1.43E-11 |
| TUCP_003660 | XLOC_160236 | ENSRNOT00000093579 | 0.957716002 | 9.91E-07 |
| TUCP_003660 | XLOC_160236 | ENSRNOT00000086349 | 0.957432836 | 1.02E-06 |
| TUCP_003660 | XLOC_160236 | ENSRNOT00000065460 | 0.999917445 | 3.02E-20 |
| TUCP_003660 | XLOC_160236 | ENSRNOT00000003817 | 0.997013893 | 1.86E-12 |
| TUCP_003660 | XLOC_160236 | ENSRNOT00000016713 | 0.999917445 | 3.02E-20 |
| TUCP_003660 | XLOC_160236 | ENSRNOT00000079260 | 0.996215572 | 6.07E-12 |
| TUCP_003660 | XLOC_160236 | ENSRNOT00000039294 | 0.999917445 | 3.02E-20 |
| TUCP_003660 | XLOC_160236 | ENSRNOT00000092913 | 0.951833296 | 1.88E-06 |
| TUCP_003663 | XLOC_160236 | ENSRNOT00000084500 | 0.987558865 | 2.30E-09 |
| TUCP_003663 | XLOC_160236 | ENSRNOT00000093467 | 0.996146993 | 6.64E-12 |
| TUCP_003663 | XLOC_160236 | ENSRNOT00000029340 | 0.998842036 | 1.64E-14 |
| TUCP_003663 | XLOC_160236 | ENSRNOT00000077972 | 0.9656189   | 3.57E-07 |
| TUCP_003663 | XLOC_160236 | ENSRNOT00000038646 | 0.999867594 | 3.20E-19 |
| TUCP_003663 | XLOC_160236 | ENSRNOT00000012095 | 0.955461629 | 1.28E-06 |
| TUCP_003663 | XLOC_160236 | ENSRNOT00000017909 | 0.97512544  | 7.19E-08 |
| TUCP_003663 | XLOC_160236 | ENSRNOT00000092579 | 0.999867594 | 3.20E-19 |
| TUCP_003663 | XLOC_160236 | ENSRNOT00000089235 | 0.998474466 | 6.49E-14 |
| TUCP_003663 | XLOC_160236 | ENSRNOT00000036383 | 0.987800756 | 2.08E-09 |
| TUCP_003663 | XLOC_160236 | ENSRNOT00000076528 | 0.996779068 | 2.72E-12 |
| TUCP_003663 | XLOC_160236 | ENSRNOT00000075193 | 0.962967358 | 5.15E-07 |
| TUCP_003663 | XLOC_160236 | ENSRNOT00000083034 | 0.99159181  | 3.26E-10 |
| TUCP_003663 | XLOC_160236 | ENSRNOT00000089607 | 0.99465721  | 3.40E-11 |
| TUCP_003663 | XLOC_160236 | ENSRNOT00000086014 | 0.962092161 | 5.78E-07 |
| TUCP_003663 | XLOC_160236 | ENSRNOT00000054939 | 0.957378804 | 1.03E-06 |
| TUCP_003663 | XLOC_160236 | ENSRNOT00000052315 | 0.983225026 | 1.02E-08 |
| TUCP_003663 | XLOC_160236 | ENSRNOT00000088168 | 0.999867594 | 3.20E-19 |
| TUCP_003663 | XLOC_160236 | ENSRNOT00000046231 | 0.961715081 | 6.07E-07 |
| TUCP_003663 | XLOC_160236 | ENSRNOT00000013459 | 0.978593221 | 3.42E-08 |
| TUCP_003663 | XLOC_160236 | ENSRNOT00000078137 | 0.999867594 | 3.20E-19 |
| TUCP_003663 | XLOC_160236 | ENSRNOT00000077764 | 0.976924775 | 4.96E-08 |
| TUCP_003663 | XLOC_160236 | ENSRNOT00000043661 | 0.970969281 | 1.55E-07 |
| TUCP_003663 | XLOC_160236 | ENSRNOT00000092740 | 0.999867594 | 3.20E-19 |
| TUCP_003663 | XLOC_160236 | ENSRNOT00000000117 | 0.990610901 | 5.66E-10 |
| TUCP_003663 | XLOC_160236 | ENSRNOT00000071877 | 0.970117882 | 1.78E-07 |
| TUCP_003663 | XLOC_160236 | ENSRNOT00000070958 | 0.999867594 | 3.20E-19 |
| TUCP_003663 | XLOC_160236 | ENSRNOT00000076757 | 0.962662707 | 5.37E-07 |
| TUCP_003663 | XLOC_160236 | ENSRNOT00000085310 | 0.964603637 | 4.12E-07 |
| TUCP_003663 | XLOC_160236 | ENSRNOT00000047241 | 0.970596883 | 1.65E-07 |
| TUCP_003663 | XLOC_160236 | ENSRNOT00000027268 | 0.999867594 | 3.20E-19 |
| TUCP_003663 | XLOC_160236 | ENSRNOT00000004459 | 0.999867594 | 3.20E-19 |
| TUCP_003663 | XLOC_160236 | ENSRNOT00000048373 | 0.961996199 | 5.86E-07 |
| TUCP_003663 | XLOC_160236 | ENSRNOT00000061516 | 0.986104181 | 3.99E-09 |
| TUCP_003663 | XLOC_160236 | ENSRNOT00000088148 | 0.999867594 | 3.20E-19 |
| TUCP_003663 | XLOC_160236 | ENSRNOT00000088527 | 0.999867594 | 3.20E-19 |
| TUCP_003663 | XLOC_160236 | ENSRNOT00000078701 | 0.999867594 | 3.20E-19 |
| TUCP_003663 | XLOC_160236 | ENSRNOT00000052308 | 0.966899289 | 2.96E-07 |
| TUCP_003663 | XLOC_160236 | ENSRNOT00000021748 | 0.999867594 | 3.20E-19 |
| TUCP_003663 | XLOC_160236 | ENSRNOT00000089085 | 0.999867594 | 3.20E-19 |
| TUCP_003663 | XLOC_160236 | ENSRNOT00000008153 | 0.999594676 | 8.61E-17 |

|             |             |                    |              |          |
|-------------|-------------|--------------------|--------------|----------|
| TUCP_003663 | XLOC_160236 | ENSRNOT00000085896 | 0.969964498  | 1.83E-07 |
| TUCP_003663 | XLOC_160236 | ENSRNOT00000079189 | 0.984165969  | 7.63E-09 |
| TUCP_003663 | XLOC_160236 | ENSRNOT00000090078 | 0.999867594  | 3.20E-19 |
| TUCP_003663 | XLOC_160236 | ENSRNOT00000078020 | 0.959627829  | 7.89E-07 |
| TUCP_003663 | XLOC_160236 | ENSRNOT00000092425 | 0.955159908  | 1.32E-06 |
| TUCP_003663 | XLOC_160236 | ENSRNOT00000009776 | 0.999867594  | 3.20E-19 |
| TUCP_003662 | XLOC_160236 | ENSRNOT00000093467 | 0.961121728  | 6.55E-07 |
| TUCP_003662 | XLOC_160236 | ENSRNOT00000029340 | 0.959495229  | 8.02E-07 |
| TUCP_003662 | XLOC_160236 | ENSRNOT00000038646 | 0.963532411  | 4.78E-07 |
| TUCP_003662 | XLOC_160236 | ENSRNOT00000012095 | 0.954715723  | 1.39E-06 |
| TUCP_003662 | XLOC_160236 | ENSRNOT00000017909 | 0.99877634   | 2.16E-14 |
| TUCP_003662 | XLOC_160236 | ENSRNOT00000092579 | 0.963532411  | 4.78E-07 |
| TUCP_003662 | XLOC_160236 | ENSRNOT00000003572 | 0.953818587  | 1.53E-06 |
| TUCP_003662 | XLOC_160236 | ENSRNOT00000076528 | 0.957789421  | 9.83E-07 |
| TUCP_003662 | XLOC_160236 | ENSRNOT00000075193 | 0.972910752  | 1.10E-07 |
| TUCP_003662 | XLOC_160236 | ENSRNOT00000083034 | 0.967995993  | 2.51E-07 |
| TUCP_003662 | XLOC_160236 | ENSRNOT00000089607 | 0.961736167  | 6.06E-07 |
| TUCP_003662 | XLOC_160236 | ENSRNOT00000021748 | 0.963532411  | 4.78E-07 |
| TUCP_003662 | XLOC_160236 | ENSRNOT00000046231 | 0.999988791  | 1.39E-24 |
| TUCP_003662 | XLOC_160236 | ENSRNOT00000078137 | 0.963532411  | 4.78E-07 |
| TUCP_003662 | XLOC_160236 | ENSRNOT00000077764 | 0.970447537  | 1.69E-07 |
| TUCP_003662 | XLOC_160236 | ENSRNOT00000092740 | 0.963532411  | 4.78E-07 |
| TUCP_003662 | XLOC_160236 | ENSRNOT00000000117 | 0.951266013  | 1.99E-06 |
| TUCP_003662 | XLOC_160236 | ENSRNOT00000070958 | 0.963532411  | 4.78E-07 |
| TUCP_003662 | XLOC_160236 | ENSRNOT00000027268 | 0.963532411  | 4.78E-07 |
| TUCP_003662 | XLOC_160236 | ENSRNOT00000004459 | 0.963532411  | 4.78E-07 |
| TUCP_003662 | XLOC_160236 | ENSRNOT00000089235 | 0.966727412  | 3.04E-07 |
| TUCP_003662 | XLOC_160236 | ENSRNOT00000088168 | 0.963532411  | 4.78E-07 |
| TUCP_003662 | XLOC_160236 | ENSRNOT00000088148 | 0.963532411  | 4.78E-07 |
| TUCP_003662 | XLOC_160236 | ENSRNOT00000088527 | 0.963532411  | 4.78E-07 |
| TUCP_003662 | XLOC_160236 | ENSRNOT00000006351 | 0.996465281  | 4.32E-12 |
| TUCP_003662 | XLOC_160236 | ENSRNOT00000078701 | 0.963532411  | 4.78E-07 |
| TUCP_003662 | XLOC_160236 | ENSRNOT00000090078 | 0.963532411  | 4.78E-07 |
| TUCP_003662 | XLOC_160236 | ENSRNOT00000089085 | 0.963532411  | 4.78E-07 |
| TUCP_003662 | XLOC_160236 | ENSRNOT00000008153 | 0.960145158  | 7.41E-07 |
| TUCP_003662 | XLOC_160236 | ENSRNOT00000079189 | 0.986073078  | 4.03E-09 |
| TUCP_003662 | XLOC_160236 | ENSRNOT00000009776 | 0.963532411  | 4.78E-07 |
| TUCP_003485 | XLOC_151072 | ENSRNOT00000074810 | 0.963290831  | 4.94E-07 |
| TUCP_003485 | XLOC_151072 | ENSRNOT00000090914 | 0.981394479  | 1.70E-08 |
| TUCP_003485 | XLOC_151072 | ENSRNOT00000000697 | 0.95470256   | 1.39E-06 |
| TUCP_003485 | XLOC_151072 | ENSRNOT00000023623 | 0.96048746   | 7.10E-07 |
| TUCP_003485 | XLOC_151072 | ENSRNOT00000003511 | 0.973428434  | 9.98E-08 |
| TUCP_003485 | XLOC_151072 | ENSRNOT00000044419 | 0.95028856   | 2.20E-06 |
| TUCP_003485 | XLOC_151072 | ENSRNOT00000022585 | 0.9506455    | 2.12E-06 |
| TUCP_003485 | XLOC_151072 | ENSRNOT00000002905 | 0.954303373  | 1.45E-06 |
| TUCP_003485 | XLOC_151072 | ENSRNOT00000022559 | 0.978815233  | 3.24E-08 |
| TUCP_003485 | XLOC_151072 | ENSRNOT00000023661 | 0.950334293  | 2.19E-06 |
| TUCP_003485 | XLOC_151072 | ENSRNOT00000091367 | 0.974787213  | 7.69E-08 |
| TUCP_003485 | XLOC_151072 | ENSRNOT00000041762 | 0.95868174   | 8.85E-07 |
| TUCP_003484 | XLOC_150878 | ENSRNOT00000064983 | 0.954660824  | 1.40E-06 |
| TUCP_003484 | XLOC_150878 | ENSRNOT00000084177 | -0.954017233 | 1.50E-06 |

|             |             |                    |              |          |
|-------------|-------------|--------------------|--------------|----------|
| TUCP_003484 | XLOC_150878 | ENSRNOT0000009975  | 0.954693403  | 1.39E-06 |
| TUCP_003484 | XLOC_150878 | ENSRNOT00000072682 | 0.952150866  | 1.82E-06 |
| TUCP_003484 | XLOC_150878 | ENSRNOT00000081604 | 0.958598695  | 8.94E-07 |
| TUCP_003484 | XLOC_150878 | ENSRNOT00000026049 | -0.958899972 | 8.62E-07 |
| TUCP_003484 | XLOC_150878 | ENSRNOT00000021715 | 0.963392121  | 4.87E-07 |
| TUCP_003484 | XLOC_150878 | ENSRNOT00000017829 | 0.972606013  | 1.16E-07 |
| TUCP_003484 | XLOC_150878 | ENSRNOT00000003087 | 0.95924691   | 8.27E-07 |
| TUCP_003484 | XLOC_150878 | ENSRNOT00000023014 | 0.978564217  | 3.44E-08 |
| TUCP_003484 | XLOC_150878 | ENSRNOT00000026518 | 0.950063525  | 2.25E-06 |
| TUCP_003484 | XLOC_150878 | ENSRNOT00000087359 | 0.956875493  | 1.09E-06 |
| TUCP_003484 | XLOC_150878 | ENSRNOT00000007601 | 0.963187725  | 5.00E-07 |
| TUCP_003484 | XLOC_150878 | ENSRNOT00000046552 | 0.958761358  | 8.76E-07 |
| TUCP_003484 | XLOC_150878 | ENSRNOT00000060977 | 0.960679866  | 6.93E-07 |
| TUCP_003484 | XLOC_150878 | ENSRNOT00000065801 | 0.956935338  | 1.08E-06 |
| TUCP_003484 | XLOC_150878 | ENSRNOT00000004196 | 0.961457361  | 6.28E-07 |
| TUCP_003484 | XLOC_150878 | ENSRNOT00000023613 | 0.981618245  | 1.60E-08 |
| TUCP_003484 | XLOC_150878 | ENSRNOT00000032106 | 0.972655074  | 1.15E-07 |
| TUCP_003484 | XLOC_150878 | ENSRNOT00000004391 | 0.953806675  | 1.53E-06 |
| TUCP_003484 | XLOC_150878 | ENSRNOT00000033806 | 0.956719487  | 1.11E-06 |
| TUCP_003484 | XLOC_150878 | ENSRNOT00000090621 | 0.956366753  | 1.16E-06 |
| TUCP_003484 | XLOC_150878 | ENSRNOT00000038983 | 0.954337869  | 1.45E-06 |
| TUCP_003484 | XLOC_150878 | ENSRNOT00000025433 | -0.961730274 | 6.06E-07 |
| TUCP_003484 | XLOC_150878 | ENSRNOT00000071068 | -0.953924203 | 1.51E-06 |
| TUCP_003484 | XLOC_150878 | ENSRNOT00000055562 | 0.958918799  | 8.60E-07 |
| TUCP_003484 | XLOC_150878 | ENSRNOT00000075476 | 0.954055954  | 1.49E-06 |
| TUCP_003484 | XLOC_150878 | ENSRNOT00000089611 | 0.95597585   | 1.21E-06 |
| TUCP_003484 | XLOC_150878 | ENSRNOT00000010419 | 0.955289476  | 1.31E-06 |
| TUCP_003484 | XLOC_150878 | ENSRNOT00000073466 | 0.958001155  | 9.59E-07 |
| TUCP_003484 | XLOC_150878 | ENSRNOT00000011773 | 0.965840266  | 3.46E-07 |
| TUCP_003484 | XLOC_150878 | ENSRNOT00000024237 | 0.965803266  | 3.48E-07 |
| TUCP_003484 | XLOC_150878 | ENSRNOT00000026074 | 0.958775131  | 8.75E-07 |
| TUCP_003484 | XLOC_150878 | ENSRNOT00000067524 | 0.951933918  | 1.86E-06 |
| TUCP_003484 | XLOC_150878 | ENSRNOT00000085334 | 0.959054548  | 8.46E-07 |
| TUCP_003484 | XLOC_150878 | ENSRNOT00000017998 | 0.951240103  | 2.00E-06 |
| TUCP_003484 | XLOC_150878 | ENSRNOT00000019358 | -0.962479468 | 5.50E-07 |
| TUCP_003484 | XLOC_150878 | ENSRNOT00000035427 | 0.971256274  | 1.47E-07 |
| TUCP_003484 | XLOC_150878 | ENSRNOT00000006071 | 0.967538727  | 2.69E-07 |
| TUCP_003484 | XLOC_150878 | ENSRNOT00000015091 | 0.955187452  | 1.32E-06 |
| TUCP_003484 | XLOC_150878 | ENSRNOT00000057740 | 0.971360915  | 1.45E-07 |
| TUCP_003484 | XLOC_150878 | ENSRNOT00000066952 | 0.958240055  | 9.32E-07 |
| TUCP_003484 | XLOC_150878 | ENSRNOT00000036137 | 0.962507822  | 5.48E-07 |
| TUCP_003484 | XLOC_150878 | ENSRNOT00000037902 | 0.958123654  | 9.45E-07 |
| TUCP_003484 | XLOC_150878 | ENSRNOT00000020929 | 0.957004968  | 1.08E-06 |
| TUCP_003484 | XLOC_150878 | ENSRNOT00000064070 | 0.957616532  | 1.00E-06 |
| TUCP_003484 | XLOC_150878 | ENSRNOT00000017504 | 0.955460934  | 1.28E-06 |
| TUCP_003484 | XLOC_150878 | ENSRNOT00000079128 | 0.953416256  | 1.60E-06 |
| TUCP_003484 | XLOC_150878 | ENSRNOT00000015448 | 0.974999582  | 7.38E-08 |
| TUCP_003484 | XLOC_150878 | ENSRNOT00000027760 | 0.957777595  | 9.84E-07 |
| TUCP_003484 | XLOC_150878 | ENSRNOT00000064122 | 0.957722405  | 9.91E-07 |
| TUCP_003484 | XLOC_150878 | ENSRNOT00000008440 | 0.956321286  | 1.16E-06 |
| TUCP_003484 | XLOC_150878 | ENSRNOT00000025037 | 0.965473974  | 3.65E-07 |

|             |             |                    |              |          |
|-------------|-------------|--------------------|--------------|----------|
| TUCP_003484 | XLOC_150878 | ENSRNOT00000065871 | 0.956311866  | 1.16E-06 |
| TUCP_003484 | XLOC_150878 | ENSRNOT00000068028 | 0.950377355  | 2.18E-06 |
| TUCP_003484 | XLOC_150878 | ENSRNOT00000083344 | 0.959626984  | 7.89E-07 |
| TUCP_003484 | XLOC_150878 | ENSRNOT00000092757 | 0.969609576  | 1.94E-07 |
| TUCP_003484 | XLOC_150878 | ENSRNOT00000090506 | 0.957131359  | 1.06E-06 |
| TUCP_003484 | XLOC_150878 | ENSRNOT00000085517 | 0.953129711  | 1.65E-06 |
| TUCP_003484 | XLOC_150878 | ENSRNOT00000091211 | 0.963751977  | 4.64E-07 |
| TUCP_000316 | XLOC_010363 | ENSRNOT00000076530 | 0.970751318  | 1.61E-07 |
| TUCP_000316 | XLOC_010363 | ENSRNOT00000020855 | 0.955967809  | 1.21E-06 |
| TUCP_000316 | XLOC_010363 | ENSRNOT00000008558 | -0.974502539 | 8.13E-08 |
| TUCP_003320 | XLOC_143089 | ENSRNOT00000014217 | 0.958947601  | 8.57E-07 |
| TUCP_001899 | XLOC_078874 | ENSRNOT00000026966 | 0.970322306  | 1.73E-07 |
| TUCP_001899 | XLOC_078874 | ENSRNOT00000068416 | 0.999999782  | 3.88E-33 |
| TUCP_001899 | XLOC_078874 | ENSRNOT00000086036 | 0.999958274  | 9.96E-22 |
| TUCP_001899 | XLOC_078874 | ENSRNOT00000026803 | 0.985046075  | 5.74E-09 |
| TUCP_001899 | XLOC_078874 | ENSRNOT00000047527 | 0.963071698  | 5.08E-07 |
| TUCP_001899 | XLOC_078874 | ENSRNOT00000042251 | 0.999344295  | 9.53E-16 |
| TUCP_001899 | XLOC_078874 | ENSRNOT00000002984 | 0.998397069  | 8.31E-14 |
| TUCP_001899 | XLOC_078874 | ENSRNOT00000083764 | 0.999541808  | 1.59E-16 |
| TUCP_001899 | XLOC_078874 | ENSRNOT00000076802 | 0.962695843  | 5.34E-07 |
| TUCP_001899 | XLOC_078874 | ENSRNOT00000092365 | 0.999161651  | 3.26E-15 |
| TUCP_001899 | XLOC_078874 | ENSRNOT00000079275 | 0.999901911  | 7.15E-20 |
| TUCP_001899 | XLOC_078874 | ENSRNOT00000066062 | -0.959706712 | 7.82E-07 |
| TUCP_001899 | XLOC_078874 | ENSRNOT00000045301 | 1            | 0        |
| TUCP_001899 | XLOC_078874 | ENSRNOT00000041186 | 0.999975782  | 6.56E-23 |
| TUCP_001899 | XLOC_078874 | ENSRNOT00000010092 | 0.977711778  | 4.17E-08 |
| TUCP_001899 | XLOC_078874 | ENSRNOT00000076182 | 1            | 0        |
| TUCP_001899 | XLOC_078874 | ENSRNOT00000087404 | 0.951157664  | 2.02E-06 |
| TUCP_001899 | XLOC_078874 | ENSRNOT00000052003 | 0.95837331   | 9.18E-07 |
| TUCP_001899 | XLOC_078874 | ENSRNOT00000081709 | 0.998485154  | 6.27E-14 |
| TUCP_001899 | XLOC_078874 | ENSRNOT00000005726 | 0.959610119  | 7.91E-07 |
| TUCP_001899 | XLOC_078874 | ENSRNOT00000014103 | 1            | 0        |
| TUCP_001899 | XLOC_078874 | ENSRNOT00000057433 | 0.964930601  | 3.94E-07 |
| TUCP_001899 | XLOC_078874 | ENSRNOT00000082289 | 0.998931566  | 1.09E-14 |
| TUCP_001899 | XLOC_078874 | ENSRNOT00000092516 | 0.957459323  | 1.02E-06 |
| TUCP_001899 | XLOC_078874 | ENSRNOT00000008898 | 0.990039768  | 7.59E-10 |
| TUCP_001899 | XLOC_078874 | ENSRNOT00000083493 | 0.995461232  | 1.51E-11 |
| TUCP_001899 | XLOC_078874 | ENSRNOT00000092563 | 0.987201084  | 2.65E-09 |
| TUCP_001899 | XLOC_078874 | ENSRNOT00000088893 | 1            | 0        |
| TUCP_001899 | XLOC_078874 | ENSRNOT00000076693 | 0.955029582  | 1.34E-06 |
| TUCP_001899 | XLOC_078874 | ENSRNOT00000081014 | 1            | 0        |
| TUCP_001899 | XLOC_078874 | ENSRNOT00000067543 | 1            | 0        |
| TUCP_001899 | XLOC_078874 | ENSRNOT00000050968 | 0.996816433  | 2.56E-12 |
| TUCP_001899 | XLOC_078874 | ENSRNOT00000042201 | 0.960235595  | 7.32E-07 |
| TUCP_001899 | XLOC_078874 | ENSRNOT00000004373 | 0.957315473  | 1.04E-06 |
| TUCP_001899 | XLOC_078874 | ENSRNOT00000063929 | 1            | 0        |
| TUCP_001899 | XLOC_078874 | ENSRNOT00000057472 | 1            | 0        |
| TUCP_001899 | XLOC_078874 | ENSRNOT00000041617 | 0.952449765  | 1.77E-06 |
| TUCP_001899 | XLOC_078874 | ENSRNOT00000091763 | 0.986310385  | 3.70E-09 |
| TUCP_001899 | XLOC_078874 | ENSRNOT00000022200 | 0.998491303  | 6.14E-14 |
| TUCP_001899 | XLOC_078874 | ENSRNOT00000067379 | 0.997260967  | 1.21E-12 |



|             |             |                     |              |          |
|-------------|-------------|---------------------|--------------|----------|
| TUCP_001899 | XLOC_078874 | ENSRNOT00000020786  | 0.976428448  | 5.51E-08 |
| TUCP_001899 | XLOC_078874 | ENSRNOT00000050543  | 0.999722223  | 1.30E-17 |
| TUCP_001899 | XLOC_078874 | ENSRNOT00000089306  | 0.999866649  | 3.32E-19 |
| TUCP_001899 | XLOC_078874 | ENSRNOT00000052367  | 0.997268394  | 1.19E-12 |
| TUCP_001899 | XLOC_078874 | ENSRNOT00000090658  | 1            | 0        |
| TUCP_001899 | XLOC_078874 | ENSRNOT00000022571  | 0.995290013  | 1.81E-11 |
| TUCP_001899 | XLOC_078874 | ENSRNOT00000044520  | 0.981817158  | 1.52E-08 |
| TUCP_001899 | XLOC_078874 | ENSRNOT00000065448  | 0.963648868  | 4.70E-07 |
| TUCP_000830 | XLOC_032172 | ENSRNOT00000024583  | -0.952130641 | 1.83E-06 |
| TUCP_000830 | XLOC_032172 | ENSRNOT00000038188  | 0.962772271  | 5.29E-07 |
| TUCP_000830 | XLOC_032172 | ENSRNOT00000010142  | 0.963415565  | 4.85E-07 |
| TUCP_000830 | XLOC_032172 | ENSRNOT00000012757  | 0.952785624  | 1.71E-06 |
| TUCP_001895 | XLOC_078817 | ENSRNOT00000010210  | 0.951557125  | 1.94E-06 |
| TUCP_001895 | XLOC_078817 | ENSRNOT00000005255  | 0.956907457  | 1.09E-06 |
| TUCP_001895 | XLOC_078817 | ENSRNOT00000023020  | 0.952903551  | 1.69E-06 |
| TUCP_001895 | XLOC_078817 | ENSRNOT00000030885  | 0.955137214  | 1.33E-06 |
| TUCP_001896 | XLOC_078874 | ENSRNOT00000024423  | 0.952818618  | 1.70E-06 |
| TUCP_001896 | XLOC_078874 | ENSRNOT00000023395  | 0.965289899  | 3.74E-07 |
| TUCP_001890 | XLOC_078244 | ENSRNOT00000045882  | 0.957413888  | 1.03E-06 |
| TUCP_001890 | XLOC_078244 | ENSRNOT00000031904  | 0.958434936  | 9.11E-07 |
| TUCP_001890 | XLOC_078244 | ENSRNOT00000066739  | 0.95347506   | 1.59E-06 |
| TUCP_001890 | XLOC_078244 | ENSRNOT00000011230  | 0.964372725  | 4.26E-07 |
| TUCP_001890 | XLOC_078244 | ENSRNOT00000000743  | 0.971383153  | 1.44E-07 |
| TUCP_001890 | XLOC_078244 | ENSRNOT00000081246  | 0.974470426  | 8.18E-08 |
| TUCP_001890 | XLOC_078244 | ENSRNOT00000027083  | 0.958356076  | 9.20E-07 |
| TUCP_001890 | XLOC_078244 | ENSRNOT00000009877  | 0.955408261  | 1.29E-06 |
| TUCP_001890 | XLOC_078244 | ENSRNOT00000007351  | -0.960870358 | 6.76E-07 |
| TUCP_001890 | XLOC_078244 | ENSRNOT00000027452  | 0.970811168  | 1.59E-07 |
| TUCP_001890 | XLOC_078244 | ENSRNOT000000074939 | 0.977144953  | 4.73E-08 |
| TUCP_001890 | XLOC_078244 | ENSRNOT00000066041  | -0.954407063 | 1.44E-06 |
| TUCP_001890 | XLOC_078244 | ENSRNOT00000073559  | 0.972186296  | 1.25E-07 |
| TUCP_001890 | XLOC_078244 | ENSRNOT00000078445  | -0.957933312 | 9.67E-07 |
| TUCP_001890 | XLOC_078244 | ENSRNOT00000023326  | 0.954068913  | 1.49E-06 |
| TUCP_001890 | XLOC_078244 | ENSRNOT00000001290  | 0.950436673  | 2.17E-06 |
| TUCP_001890 | XLOC_078244 | ENSRNOT00000023638  | 0.964616548  | 4.12E-07 |
| TUCP_001890 | XLOC_078244 | ENSRNOT00000005228  | 0.976972173  | 4.91E-08 |
| TUCP_001890 | XLOC_078244 | ENSRNOT00000006175  | 0.966120059  | 3.32E-07 |
| TUCP_001890 | XLOC_078244 | ENSRNOT00000023144  | 0.965045485  | 3.88E-07 |
| TUCP_001890 | XLOC_078244 | ENSRNOT00000082869  | 0.964061219  | 4.45E-07 |
| TUCP_001890 | XLOC_078244 | ENSRNOT00000036750  | 0.953455422  | 1.59E-06 |
| TUCP_001890 | XLOC_078244 | ENSRNOT00000019502  | 0.959789606  | 7.74E-07 |
| TUCP_001890 | XLOC_078244 | ENSRNOT00000016649  | 0.970978243  | 1.54E-07 |
| TUCP_001890 | XLOC_078244 | ENSRNOT00000019997  | 0.950384725  | 2.18E-06 |
| TUCP_001890 | XLOC_078244 | ENSRNOT00000028856  | 0.954398921  | 1.44E-06 |
| TUCP_001890 | XLOC_078244 | ENSRNOT00000017776  | 0.953074848  | 1.66E-06 |
| TUCP_001890 | XLOC_078244 | ENSRNOT00000065300  | 0.951788203  | 1.89E-06 |
| TUCP_001890 | XLOC_078244 | ENSRNOT00000043216  | 0.969596969  | 1.94E-07 |
| TUCP_001890 | XLOC_078244 | ENSRNOT00000091128  | -0.963129417 | 5.04E-07 |
| TUCP_001890 | XLOC_078244 | ENSRNOT00000044742  | 0.97584455   | 6.22E-08 |
| TUCP_001890 | XLOC_078244 | ENSRNOT00000081981  | 0.956005657  | 1.21E-06 |
| TUCP_001890 | XLOC_078244 | ENSRNOT00000009496  | 0.950868322  | 2.08E-06 |

|             |             |                    |              |          |
|-------------|-------------|--------------------|--------------|----------|
| TUCP_001890 | XLOC_078244 | ENSRNOT00000013758 | 0.95002746   | 2.26E-06 |
| TUCP_001890 | XLOC_078244 | ENSRNOT00000026543 | 0.975024003  | 7.34E-08 |
| TUCP_001890 | XLOC_078244 | ENSRNOT00000066670 | 0.97460811   | 7.97E-08 |
| TUCP_001890 | XLOC_078244 | ENSRNOT00000071971 | 0.952870382  | 1.69E-06 |
| TUCP_001890 | XLOC_078244 | ENSRNOT00000043554 | 0.954717965  | 1.39E-06 |
| TUCP_001890 | XLOC_078244 | ENSRNOT00000019213 | 0.95095758   | 2.06E-06 |
| TUCP_001890 | XLOC_078244 | ENSRNOT00000012187 | 0.978544521  | 3.45E-08 |
| TUCP_001890 | XLOC_078244 | ENSRNOT00000005942 | 0.968696853  | 2.25E-07 |
| TUCP_001890 | XLOC_078244 | ENSRNOT00000026789 | 0.954354504  | 1.45E-06 |
| TUCP_001890 | XLOC_078244 | ENSRNOT00000085251 | -0.967078476 | 2.88E-07 |
| TUCP_001890 | XLOC_078244 | ENSRNOT00000006055 | 0.960855954  | 6.78E-07 |
| TUCP_001890 | XLOC_078244 | ENSRNOT00000028646 | 0.962842142  | 5.24E-07 |
| TUCP_001890 | XLOC_078244 | ENSRNOT00000011384 | 0.960770529  | 6.85E-07 |
| TUCP_001890 | XLOC_078244 | ENSRNOT00000038247 | 0.963621623  | 4.72E-07 |
| TUCP_001890 | XLOC_078244 | ENSRNOT00000029439 | 0.954163666  | 1.48E-06 |
| TUCP_001890 | XLOC_078244 | ENSRNOT00000044628 | 0.968257413  | 2.41E-07 |
| TUCP_001890 | XLOC_078244 | ENSRNOT00000071764 | 0.974100249  | 8.79E-08 |
| TUCP_001890 | XLOC_078244 | ENSRNOT00000081906 | 0.952613876  | 1.74E-06 |
| TUCP_001890 | XLOC_078244 | ENSRNOT00000082699 | 0.96907318   | 2.12E-07 |
| TUCP_001890 | XLOC_078244 | ENSRNOT00000075326 | 0.953857821  | 1.52E-06 |
| TUCP_001890 | XLOC_078244 | ENSRNOT00000021348 | 0.972751161  | 1.13E-07 |
| TUCP_001890 | XLOC_078244 | ENSRNOT00000067688 | -0.955098338 | 1.33E-06 |
| TUCP_001890 | XLOC_078244 | ENSRNOT00000091602 | -0.95939613  | 8.12E-07 |
| TUCP_001890 | XLOC_078244 | ENSRNOT00000009811 | 0.951244714  | 2.00E-06 |
| TUCP_001890 | XLOC_078244 | ENSRNOT00000065168 | 0.957756878  | 9.87E-07 |
| TUCP_001890 | XLOC_078244 | ENSRNOT00000083215 | 0.956277417  | 1.17E-06 |
| TUCP_001890 | XLOC_078244 | ENSRNOT00000026718 | 0.959334143  | 8.18E-07 |
| TUCP_001890 | XLOC_078244 | ENSRNOT00000085228 | 0.970265052  | 1.74E-07 |
| TUCP_001890 | XLOC_078244 | ENSRNOT00000020134 | 0.960490032  | 7.10E-07 |
| TUCP_001890 | XLOC_078244 | ENSRNOT00000017319 | 0.959940438  | 7.60E-07 |
| TUCP_001890 | XLOC_078244 | ENSRNOT00000079866 | 0.965324869  | 3.72E-07 |
| TUCP_001890 | XLOC_078244 | ENSRNOT00000051294 | 0.966239877  | 3.26E-07 |
| TUCP_001890 | XLOC_078244 | ENSRNOT00000041513 | 0.951574497  | 1.93E-06 |
| TUCP_001890 | XLOC_078244 | ENSRNOT00000073991 | 0.958360557  | 9.19E-07 |
| TUCP_001890 | XLOC_078244 | ENSRNOT00000087592 | 0.967515601  | 2.70E-07 |
| TUCP_001890 | XLOC_078244 | ENSRNOT00000061392 | 0.950069579  | 2.25E-06 |
| TUCP_001890 | XLOC_078244 | ENSRNOT00000032274 | 0.959226769  | 8.29E-07 |
| TUCP_001890 | XLOC_078244 | ENSRNOT00000002410 | 0.964754501  | 4.04E-07 |
| TUCP_001890 | XLOC_078244 | ENSRNOT00000004319 | -0.950687413 | 2.11E-06 |
| TUCP_001890 | XLOC_078244 | ENSRNOT00000025362 | -0.959397331 | 8.12E-07 |
| TUCP_001890 | XLOC_078244 | ENSRNOT00000010541 | 0.965553316  | 3.60E-07 |
| TUCP_001890 | XLOC_078244 | ENSRNOT00000004032 | 0.950339117  | 2.19E-06 |
| TUCP_001890 | XLOC_078244 | ENSRNOT00000084385 | 0.959030502  | 8.49E-07 |
| TUCP_001890 | XLOC_078244 | ENSRNOT00000017948 | 0.96199196   | 5.86E-07 |
| TUCP_001890 | XLOC_078244 | ENSRNOT00000047192 | -0.979028132 | 3.08E-08 |
| TUCP_001890 | XLOC_078244 | ENSRNOT00000012895 | 0.984136956  | 7.70E-09 |
| TUCP_001890 | XLOC_078244 | ENSRNOT0000001081  | 0.959971152  | 7.57E-07 |
| TUCP_001890 | XLOC_078244 | ENSRNOT00000072196 | 0.951049669  | 2.04E-06 |
| TUCP_001890 | XLOC_078244 | ENSRNOT00000091909 | 0.950200615  | 2.22E-06 |
| TUCP_001890 | XLOC_078244 | ENSRNOT00000090918 | 0.962435235  | 5.53E-07 |
| TUCP_001890 | XLOC_078244 | ENSRNOT00000023180 | 0.956982611  | 1.08E-06 |

|             |             |                    |              |          |
|-------------|-------------|--------------------|--------------|----------|
| TUCP_001890 | XLOC_078244 | ENSRNOT0000000676  | 0.958632802  | 8.90E-07 |
| TUCP_001890 | XLOC_078244 | ENSRNOT00000031267 | 0.951580379  | 1.93E-06 |
| TUCP_001890 | XLOC_078244 | ENSRNOT00000086119 | -0.952670582 | 1.73E-06 |
| TUCP_001890 | XLOC_078244 | ENSRNOT00000028070 | 0.961952145  | 5.89E-07 |
| TUCP_001890 | XLOC_078244 | ENSRNOT00000058312 | 0.957038973  | 1.07E-06 |
| TUCP_001890 | XLOC_078244 | ENSRNOT00000019133 | 0.950552717  | 2.14E-06 |
| TUCP_001890 | XLOC_078244 | ENSRNOT00000013274 | 0.971977461  | 1.30E-07 |
| TUCP_001890 | XLOC_078244 | ENSRNOT00000020437 | 0.977145793  | 4.73E-08 |
| TUCP_001890 | XLOC_078244 | ENSRNOT00000010898 | 0.986425733  | 3.55E-09 |
| TUCP_001890 | XLOC_078244 | ENSRNOT00000047093 | 0.9503809    | 2.18E-06 |
| TUCP_001890 | XLOC_078244 | ENSRNOT00000092158 | 0.961339038  | 6.37E-07 |
| TUCP_001890 | XLOC_078244 | ENSRNOT00000015265 | 0.951315617  | 1.98E-06 |
| TUCP_001890 | XLOC_078244 | ENSRNOT00000029833 | 0.954763822  | 1.38E-06 |
| TUCP_001890 | XLOC_078244 | ENSRNOT00000073675 | -0.967619083 | 2.66E-07 |
| TUCP_001890 | XLOC_078244 | ENSRNOT00000005355 | 0.964527236  | 4.17E-07 |
| TUCP_001890 | XLOC_078244 | ENSRNOT00000052422 | 0.959379745  | 8.13E-07 |
| TUCP_001890 | XLOC_078244 | ENSRNOT00000001242 | 0.957626336  | 1.00E-06 |
| TUCP_001890 | XLOC_078244 | ENSRNOT00000015609 | 0.965980618  | 3.39E-07 |
| TUCP_001890 | XLOC_078244 | ENSRNOT00000029167 | 0.965238276  | 3.77E-07 |
| TUCP_001890 | XLOC_078244 | ENSRNOT00000078102 | 0.959225739  | 8.29E-07 |
| TUCP_001890 | XLOC_078244 | ENSRNOT00000070893 | 0.9554629    | 1.28E-06 |
| TUCP_001890 | XLOC_078244 | ENSRNOT00000025981 | 0.953660429  | 1.56E-06 |
| TUCP_001890 | XLOC_078244 | ENSRNOT00000025075 | 0.958629819  | 8.90E-07 |
| TUCP_001890 | XLOC_078244 | ENSRNOT00000010873 | -0.955588451 | 1.26E-06 |
| TUCP_001890 | XLOC_078244 | ENSRNOT00000007164 | 0.952107103  | 1.83E-06 |
| TUCP_001890 | XLOC_078244 | ENSRNOT00000047387 | 0.955178472  | 1.32E-06 |
| TUCP_001890 | XLOC_078244 | ENSRNOT00000088599 | 0.963672005  | 4.69E-07 |
| TUCP_001890 | XLOC_078244 | ENSRNOT00000004698 | 0.963987742  | 4.49E-07 |
| TUCP_001890 | XLOC_078244 | ENSRNOT00000058072 | 0.965800625  | 3.48E-07 |
| TUCP_001890 | XLOC_078244 | ENSRNOT00000081047 | 0.971093489  | 1.51E-07 |
| TUCP_001890 | XLOC_078244 | ENSRNOT00000014537 | 0.964863847  | 3.98E-07 |
| TUCP_001890 | XLOC_078244 | ENSRNOT00000077555 | 0.9690425    | 2.13E-07 |
| TUCP_001890 | XLOC_078244 | ENSRNOT00000033235 | 0.968641819  | 2.27E-07 |
| TUCP_001890 | XLOC_078244 | ENSRNOT00000017021 | 0.979434805  | 2.80E-08 |
| TUCP_001890 | XLOC_078244 | ENSRNOT00000003991 | 0.980161447  | 2.34E-08 |
| TUCP_001890 | XLOC_078244 | ENSRNOT00000021408 | 0.965496929  | 3.63E-07 |
| TUCP_001890 | XLOC_078244 | ENSRNOT00000009440 | -0.951434922 | 1.96E-06 |
| TUCP_001890 | XLOC_078244 | ENSRNOT00000087429 | 0.968347101  | 2.37E-07 |
| TUCP_001890 | XLOC_078244 | ENSRNOT00000009683 | 0.967149352  | 2.85E-07 |
| TUCP_001890 | XLOC_078244 | ENSRNOT00000060362 | 0.970087533  | 1.79E-07 |
| TUCP_001890 | XLOC_078244 | ENSRNOT00000080207 | 0.961765713  | 6.03E-07 |
| TUCP_001890 | XLOC_078244 | ENSRNOT00000084088 | 0.976744911  | 5.15E-08 |
| TUCP_001890 | XLOC_078244 | ENSRNOT00000034704 | 0.971205286  | 1.49E-07 |
| TUCP_001890 | XLOC_078244 | ENSRNOT00000027910 | 0.954354165  | 1.45E-06 |
| TUCP_001890 | XLOC_078244 | ENSRNOT00000052224 | 0.951702688  | 1.91E-06 |
| TUCP_001890 | XLOC_078244 | ENSRNOT00000078070 | 0.961657714  | 6.12E-07 |
| TUCP_001890 | XLOC_078244 | ENSRNOT00000005262 | 0.956813577  | 1.10E-06 |
| TUCP_001890 | XLOC_078244 | ENSRNOT00000065983 | 0.952107294  | 1.83E-06 |
| TUCP_001890 | XLOC_078244 | ENSRNOT00000092029 | 0.954343256  | 1.45E-06 |
| TUCP_001890 | XLOC_078244 | ENSRNOT00000024322 | 0.982103605  | 1.40E-08 |
| TUCP_001890 | XLOC_078244 | ENSRNOT00000091265 | 0.971641657  | 1.38E-07 |

|             |             |                     |              |          |
|-------------|-------------|---------------------|--------------|----------|
| TUCP_001890 | XLOC_078244 | ENSRNOT00000078390  | -0.958736458 | 8.79E-07 |
| TUCP_001890 | XLOC_078244 | ENSRNOT00000052018  | 0.956353769  | 1.16E-06 |
| TUCP_001890 | XLOC_078244 | ENSRNOT00000065501  | 0.951744407  | 1.90E-06 |
| TUCP_001890 | XLOC_078244 | ENSRNOT00000027454  | 0.969936414  | 1.84E-07 |
| TUCP_001890 | XLOC_078244 | ENSRNOT00000035989  | 0.960495028  | 7.09E-07 |
| TUCP_001890 | XLOC_078244 | ENSRNOT00000017181  | -0.967428772 | 2.73E-07 |
| TUCP_001890 | XLOC_078244 | ENSRNOT00000049538  | 0.958060959  | 9.52E-07 |
| TUCP_001890 | XLOC_078244 | ENSRNOT00000051022  | 0.950649938  | 2.12E-06 |
| TUCP_001890 | XLOC_078244 | ENSRNOT00000006499  | 0.958243087  | 9.32E-07 |
| TUCP_001890 | XLOC_078244 | ENSRNOT00000005909  | 0.961946171  | 5.90E-07 |
| TUCP_001890 | XLOC_078244 | ENSRNOT00000087725  | 0.966703886  | 3.05E-07 |
| TUCP_001890 | XLOC_078244 | ENSRNOT00000066736  | 0.950514199  | 2.15E-06 |
| TUCP_001890 | XLOC_078244 | ENSRNOT00000025936  | -0.969754268 | 1.89E-07 |
| TUCP_001890 | XLOC_078244 | ENSRNOT00000076729  | 0.974180631  | 8.65E-08 |
| TUCP_001890 | XLOC_078244 | ENSRNOT00000009129  | 0.965795632  | 3.48E-07 |
| TUCP_001890 | XLOC_078244 | ENSRNOT00000022074  | 0.974301388  | 8.45E-08 |
| TUCP_001890 | XLOC_078244 | ENSRNOT00000036951  | 0.969116919  | 2.10E-07 |
| TUCP_001890 | XLOC_078244 | ENSRNOT00000090420  | -0.968412886 | 2.35E-07 |
| TUCP_001890 | XLOC_078244 | ENSRNOT00000026457  | 0.960503773  | 7.08E-07 |
| TUCP_001890 | XLOC_078244 | ENSRNOT00000000157  | 0.95698177   | 1.08E-06 |
| TUCP_001890 | XLOC_078244 | ENSRNOT00000017422  | -0.953280366 | 1.62E-06 |
| TUCP_001890 | XLOC_078244 | ENSRNOT000000072518 | 0.950974373  | 2.05E-06 |
| TUCP_001890 | XLOC_078244 | ENSRNOT00000017629  | 0.957363539  | 1.03E-06 |
| TUCP_001890 | XLOC_078244 | ENSRNOT00000076669  | 0.974004054  | 8.95E-08 |
| TUCP_001890 | XLOC_078244 | ENSRNOT00000085596  | 0.965252827  | 3.76E-07 |
| TUCP_001890 | XLOC_078244 | ENSRNOT00000077465  | 0.952426434  | 1.77E-06 |
| TUCP_001890 | XLOC_078244 | ENSRNOT00000090925  | 0.961717395  | 6.07E-07 |
| TUCP_001890 | XLOC_078244 | ENSRNOT00000047210  | 0.955286476  | 1.31E-06 |
| TUCP_001890 | XLOC_078244 | ENSRNOT00000000728  | -0.955423166 | 1.29E-06 |
| TUCP_001890 | XLOC_078244 | ENSRNOT00000090123  | 0.95313989   | 1.64E-06 |
| TUCP_001890 | XLOC_078244 | ENSRNOT00000074653  | 0.950854345  | 2.08E-06 |
| TUCP_001890 | XLOC_078244 | ENSRNOT00000050834  | -0.956000446 | 1.21E-06 |
| TUCP_001890 | XLOC_078244 | ENSRNOT00000039809  | 0.951684328  | 1.91E-06 |
| TUCP_001890 | XLOC_078244 | ENSRNOT00000021471  | -0.962807374 | 5.27E-07 |
| TUCP_001890 | XLOC_078244 | ENSRNOT00000031230  | 0.975163491  | 7.14E-08 |
| TUCP_001890 | XLOC_078244 | ENSRNOT00000041096  | 0.958715189  | 8.81E-07 |
| TUCP_001890 | XLOC_078244 | ENSRNOT00000080110  | 0.960222528  | 7.34E-07 |
| TUCP_001890 | XLOC_078244 | ENSRNOT00000071733  | 0.961525836  | 6.22E-07 |
| TUCP_001890 | XLOC_078244 | ENSRNOT00000077406  | 0.959920897  | 7.61E-07 |
| TUCP_001890 | XLOC_078244 | ENSRNOT00000010748  | 0.965883947  | 3.44E-07 |
| TUCP_001890 | XLOC_078244 | ENSRNOT00000026915  | 0.958668072  | 8.86E-07 |
| TUCP_001890 | XLOC_078244 | ENSRNOT00000011052  | 0.954991342  | 1.35E-06 |
| TUCP_001890 | XLOC_078244 | ENSRNOT00000005478  | -0.962729034 | 5.32E-07 |
| TUCP_001890 | XLOC_078244 | ENSRNOT00000002292  | 0.962303957  | 5.63E-07 |
| TUCP_001890 | XLOC_078244 | ENSRNOT00000035474  | 0.967579654  | 2.67E-07 |
| TUCP_001890 | XLOC_078244 | ENSRNOT00000086336  | 0.958367125  | 9.18E-07 |
| TUCP_001890 | XLOC_078244 | ENSRNOT00000021073  | -0.952503174 | 1.76E-06 |
| TUCP_001890 | XLOC_078244 | ENSRNOT00000076872  | 0.950743686  | 2.10E-06 |
| TUCP_001890 | XLOC_078244 | ENSRNOT00000025550  | -0.950148978 | 2.23E-06 |
| TUCP_001890 | XLOC_078244 | ENSRNOT00000043345  | 0.953992906  | 1.50E-06 |
| TUCP_001890 | XLOC_078244 | ENSRNOT00000071853  | -0.950470967 | 2.16E-06 |

|             |             |                    |              |          |
|-------------|-------------|--------------------|--------------|----------|
| TUCP_001890 | XLOC_078244 | ENSRNOT00000029125 | 0.956168446  | 1.18E-06 |
| TUCP_001890 | XLOC_078244 | ENSRNOT00000082174 | 0.957801513  | 9.82E-07 |
| TUCP_001890 | XLOC_078244 | ENSRNOT00000060696 | 0.972493153  | 1.18E-07 |
| TUCP_001890 | XLOC_078244 | ENSRNOT00000042125 | 0.954772661  | 1.38E-06 |
| TUCP_001890 | XLOC_078244 | ENSRNOT00000020322 | 0.955702361  | 1.25E-06 |
| TUCP_001890 | XLOC_078244 | ENSRNOT00000009900 | -0.959547454 | 7.97E-07 |
| TUCP_001890 | XLOC_078244 | ENSRNOT00000014814 | 0.95256911   | 1.75E-06 |
| TUCP_001890 | XLOC_078244 | ENSRNOT00000004412 | 0.974225195  | 8.58E-08 |
| TUCP_001890 | XLOC_078244 | ENSRNOT00000067181 | 0.983585656  | 9.13E-09 |
| TUCP_001890 | XLOC_078244 | ENSRNOT00000064798 | 0.972917439  | 1.10E-07 |
| TUCP_001890 | XLOC_078244 | ENSRNOT00000019177 | 0.956533279  | 1.14E-06 |
| TUCP_001890 | XLOC_078244 | ENSRNOT00000026280 | 0.965120155  | 3.83E-07 |
| TUCP_001890 | XLOC_078244 | ENSRNOT00000022485 | 0.964315788  | 4.29E-07 |
| TUCP_001890 | XLOC_078244 | ENSRNOT00000061100 | 0.951803178  | 1.89E-06 |
| TUCP_001890 | XLOC_078244 | ENSRNOT00000025832 | 0.966592038  | 3.10E-07 |
| TUCP_001890 | XLOC_078244 | ENSRNOT00000043535 | 0.986191148  | 3.86E-09 |
| TUCP_001890 | XLOC_078244 | ENSRNOT00000040393 | 0.955562073  | 1.27E-06 |
| TUCP_001890 | XLOC_078244 | ENSRNOT00000013985 | 0.957524988  | 1.01E-06 |
| TUCP_001890 | XLOC_078244 | ENSRNOT00000022862 | 0.954731123  | 1.39E-06 |
| TUCP_001890 | XLOC_078244 | ENSRNOT00000004463 | 0.954532459  | 1.42E-06 |
| TUCP_001890 | XLOC_078244 | ENSRNOT00000067904 | 0.951477665  | 1.95E-06 |
| TUCP_001890 | XLOC_078244 | ENSRNOT00000023428 | 0.979179175  | 2.98E-08 |
| TUCP_001890 | XLOC_078244 | ENSRNOT00000011041 | 0.957104007  | 1.06E-06 |
| TUCP_001890 | XLOC_078244 | ENSRNOT00000064700 | 0.952780307  | 1.71E-06 |
| TUCP_001890 | XLOC_078244 | ENSRNOT00000017753 | 0.981013585  | 1.88E-08 |
| TUCP_001890 | XLOC_078244 | ENSRNOT00000083127 | 0.954145729  | 1.48E-06 |
| TUCP_001890 | XLOC_078244 | ENSRNOT00000012463 | -0.954576346 | 1.41E-06 |
| TUCP_001890 | XLOC_078244 | ENSRNOT00000029001 | 0.951753018  | 1.90E-06 |
| TUCP_001890 | XLOC_078244 | ENSRNOT00000004140 | 0.952893851  | 1.69E-06 |
| TUCP_001890 | XLOC_078244 | ENSRNOT00000015799 | 0.965564103  | 3.60E-07 |
| TUCP_001890 | XLOC_078244 | ENSRNOT00000011682 | -0.966911726 | 2.95E-07 |
| TUCP_001890 | XLOC_078244 | ENSRNOT00000083799 | 0.976393253  | 5.55E-08 |
| TUCP_001890 | XLOC_078244 | ENSRNOT00000024548 | 0.957019512  | 1.07E-06 |
| TUCP_000778 | XLOC_029082 | ENSRNOT00000092976 | 0.96397537   | 4.50E-07 |
| TUCP_003001 | XLOC_128384 | ENSRNOT00000091542 | -0.95465398  | 1.40E-06 |
| TUCP_002538 | XLOC_107441 | ENSRNOT00000024186 | 0.983200502  | 1.02E-08 |
| TUCP_002538 | XLOC_107441 | ENSRNOT00000074753 | 0.998182349  | 1.56E-13 |
| TUCP_002538 | XLOC_107441 | ENSRNOT00000004876 | 0.959071443  | 8.44E-07 |
| TUCP_002538 | XLOC_107441 | ENSRNOT00000041904 | 1            | 1.33E-79 |
| TUCP_002538 | XLOC_107441 | ENSRNOT00000083487 | 0.989515314  | 9.80E-10 |
| TUCP_002538 | XLOC_107441 | ENSRNOT00000077990 | 1            | 0        |
| TUCP_002538 | XLOC_107441 | ENSRNOT00000038826 | 0.99977672   | 4.37E-18 |
| TUCP_002538 | XLOC_107441 | ENSRNOT00000046842 | 0.973644314  | 9.58E-08 |
| TUCP_002538 | XLOC_107441 | ENSRNOT00000037169 | 0.980329406  | 2.24E-08 |
| TUCP_002538 | XLOC_107441 | ENSRNOT00000021243 | 0.987425406  | 2.42E-09 |
| TUCP_002538 | XLOC_107441 | ENSRNOT00000060250 | 0.999933853  | 9.97E-21 |
| TUCP_002538 | XLOC_107441 | ENSRNOT00000091934 | 1            | 1.33E-79 |
| TUCP_002538 | XLOC_107441 | ENSRNOT00000046585 | 0.982941597  | 1.11E-08 |
| TUCP_002538 | XLOC_107441 | ENSRNOT00000080794 | 0.990839253  | 5.00E-10 |
| TUCP_002538 | XLOC_107441 | ENSRNOT00000014456 | 0.991697153  | 3.06E-10 |
| TUCP_002538 | XLOC_107441 | ENSRNOT00000031205 | 0.991394766  | 3.66E-10 |

|             |             |                    |              |          |
|-------------|-------------|--------------------|--------------|----------|
| TUCP_002538 | XLOC_107441 | ENSRNOT00000044145 | 1            | 1.33E-79 |
| TUCP_002538 | XLOC_107441 | ENSRNOT00000088381 | 0.989013276  | 1.24E-09 |
| TUCP_002538 | XLOC_107441 | ENSRNOT00000011743 | 0.98678427   | 3.11E-09 |
| TUCP_002538 | XLOC_107441 | ENSRNOT00000089929 | 1            | 1.33E-79 |
| TUCP_002538 | XLOC_107441 | ENSRNOT00000088624 | 1            | 0        |
| TUCP_002538 | XLOC_107441 | ENSRNOT00000085659 | 0.989908621  | 8.10E-10 |
| TUCP_002538 | XLOC_107441 | ENSRNOT00000015866 | 0.994066664  | 5.73E-11 |
| TUCP_002538 | XLOC_107441 | ENSRNOT00000078633 | 1            | 0        |
| TUCP_002538 | XLOC_107441 | ENSRNOT00000034907 | 0.995318542  | 1.76E-11 |
| TUCP_002538 | XLOC_107441 | ENSRNOT00000093230 | 0.958295175  | 9.26E-07 |
| TUCP_002538 | XLOC_107441 | ENSRNOT00000051835 | 1            | 0        |
| TUCP_002538 | XLOC_107441 | ENSRNOT00000079087 | 1            | 1.33E-79 |
| TUCP_002538 | XLOC_107441 | ENSRNOT00000037206 | 1            | 1.33E-79 |
| TUCP_002538 | XLOC_107441 | ENSRNOT00000083261 | 0.970991658  | 1.54E-07 |
| TUCP_002538 | XLOC_107441 | ENSRNOT00000080590 | 0.999889216  | 1.31E-19 |
| TUCP_002538 | XLOC_107441 | ENSRNOT00000027552 | 0.999801024  | 2.46E-18 |
| TUCP_002538 | XLOC_107441 | ENSRNOT00000077014 | 0.995074376  | 2.26E-11 |
| TUCP_002538 | XLOC_107441 | ENSRNOT00000080453 | 0.99994332   | 4.61E-21 |
| TUCP_002538 | XLOC_107441 | ENSRNOT00000089057 | 0.968243551  | 2.41E-07 |
| TUCP_002538 | XLOC_107441 | ENSRNOT00000066839 | 0.991868612  | 2.76E-10 |
| TUCP_002538 | XLOC_107441 | ENSRNOT00000061284 | 0.955566942  | 1.27E-06 |
| TUCP_002538 | XLOC_107441 | ENSRNOT00000013423 | 0.959677621  | 7.84E-07 |
| TUCP_002538 | XLOC_107441 | ENSRNOT00000071884 | 0.974769955  | 7.72E-08 |
| TUCP_002538 | XLOC_107441 | ENSRNOT00000004128 | 0.961829362  | 5.99E-07 |
| TUCP_002538 | XLOC_107441 | ENSRNOT00000026316 | 0.964408046  | 4.24E-07 |
| TUCP_002538 | XLOC_107441 | ENSRNOT00000057729 | 0.999384184  | 6.97E-16 |
| TUCP_002538 | XLOC_107441 | ENSRNOT00000078663 | 0.975192577  | 7.10E-08 |
| TUCP_002538 | XLOC_107441 | ENSRNOT00000064250 | 0.983131977  | 1.05E-08 |
| TUCP_002538 | XLOC_107441 | ENSRNOT00000021608 | 0.965228881  | 3.78E-07 |
| TUCP_002538 | XLOC_107441 | ENSRNOT00000029634 | 0.995816134  | 1.00E-11 |
| TUCP_002538 | XLOC_107441 | ENSRNOT00000093579 | 0.958564264  | 8.97E-07 |
| TUCP_002538 | XLOC_107441 | ENSRNOT00000086349 | 0.957242511  | 1.05E-06 |
| TUCP_002538 | XLOC_107441 | ENSRNOT00000065460 | 1            | 0        |
| TUCP_002538 | XLOC_107441 | ENSRNOT00000003817 | 0.996778712  | 2.72E-12 |
| TUCP_002538 | XLOC_107441 | ENSRNOT00000016713 | 1            | 1.33E-79 |
| TUCP_002538 | XLOC_107441 | ENSRNOT00000079260 | 0.996448245  | 4.42E-12 |
| TUCP_002538 | XLOC_107441 | ENSRNOT00000039294 | 1            | 1.33E-79 |
| TUCP_002538 | XLOC_107441 | ENSRNOT00000092913 | 0.952980228  | 1.67E-06 |
| TUCP_002539 | XLOC_107492 | ENSRNOT00000017909 | 0.955736056  | 1.24E-06 |
| TUCP_002539 | XLOC_107492 | ENSRNOT00000046231 | 0.96533298   | 3.72E-07 |
| TUCP_002539 | XLOC_107492 | ENSRNOT00000006351 | 0.974262018  | 8.52E-08 |
| TUCP_002539 | XLOC_107492 | ENSRNOT00000033512 | 0.982433272  | 1.28E-08 |
| TUCP_002531 | XLOC_107080 | ENSRNOT00000026710 | -0.958960374 | 8.56E-07 |
| TUCP_002531 | XLOC_107080 | ENSRNOT00000067688 | -0.954385545 | 1.44E-06 |
| TUCP_002531 | XLOC_107080 | ENSRNOT00000025391 | 0.96485673   | 3.98E-07 |
| TUCP_002531 | XLOC_107080 | ENSRNOT00000051294 | 0.952244967  | 1.80E-06 |
| TUCP_002531 | XLOC_107080 | ENSRNOT00000005911 | 0.960441184  | 7.14E-07 |
| TUCP_002531 | XLOC_107080 | ENSRNOT00000025936 | -0.965192845 | 3.80E-07 |
| TUCP_002531 | XLOC_107080 | ENSRNOT00000023326 | 0.957778661  | 9.84E-07 |
| TUCP_002531 | XLOC_107080 | ENSRNOT00000026382 | 0.95610227   | 1.19E-06 |
| TUCP_002531 | XLOC_107080 | ENSRNOT00000009440 | -0.972956504 | 1.09E-07 |

|             |             |                     |              |          |
|-------------|-------------|---------------------|--------------|----------|
| TUCP_002531 | XLOC_107080 | ENSRNOT00000011052  | 0.950835309  | 2.08E-06 |
| TUCP_002531 | XLOC_107080 | ENSRNOT00000028625  | -0.955922273 | 1.22E-06 |
| TUCP_002531 | XLOC_107080 | ENSRNOT00000024149  | 0.956745609  | 1.11E-06 |
| TUCP_002531 | XLOC_107080 | ENSRNOT00000010898  | 0.97114686   | 1.50E-07 |
| TUCP_002531 | XLOC_107080 | ENSRNOT00000021073  | -0.955535905 | 1.27E-06 |
| TUCP_002531 | XLOC_107080 | ENSRNOT00000085988  | 0.961776464  | 6.03E-07 |
| TUCP_002531 | XLOC_107080 | ENSRNOT00000025550  | -0.952958063 | 1.68E-06 |
| TUCP_002531 | XLOC_107080 | ENSRNOT00000025196  | -0.951930304 | 1.86E-06 |
| TUCP_002531 | XLOC_107080 | ENSRNOT0000007598   | 0.951261929  | 2.00E-06 |
| TUCP_002531 | XLOC_107080 | ENSRNOT00000012895  | 0.964977433  | 3.91E-07 |
| TUCP_002531 | XLOC_107080 | ENSRNOT0000007185   | -0.959520725 | 8.00E-07 |
| TUCP_002531 | XLOC_107080 | ENSRNOT00000029049  | 0.96020195   | 7.35E-07 |
| TUCP_002531 | XLOC_107080 | ENSRNOT00000066670  | 0.960076241  | 7.47E-07 |
| TUCP_002531 | XLOC_107080 | ENSRNOT00000020322  | 0.960359731  | 7.21E-07 |
| TUCP_002531 | XLOC_107080 | ENSRNOT00000005228  | 0.960745574  | 6.87E-07 |
| TUCP_002531 | XLOC_107080 | ENSRNOT00000081400  | 0.961268428  | 6.43E-07 |
| TUCP_002531 | XLOC_107080 | ENSRNOT00000012187  | 0.956482686  | 1.14E-06 |
| TUCP_002531 | XLOC_107080 | ENSRNOT00000005942  | 0.966280127  | 3.24E-07 |
| TUCP_002531 | XLOC_107080 | ENSRNOT00000067181  | 0.958838504  | 8.68E-07 |
| TUCP_002531 | XLOC_107080 | ENSRNOT00000012463  | -0.950078096 | 2.25E-06 |
| TUCP_002531 | XLOC_107080 | ENSRNOT00000019630  | 0.957658763  | 9.98E-07 |
| TUCP_002531 | XLOC_107080 | ENSRNOT00000014261  | 0.954111643  | 1.48E-06 |
| TUCP_002531 | XLOC_107080 | ENSRNOT00000087725  | 0.961809917  | 6.00E-07 |
| TUCP_002531 | XLOC_107080 | ENSRNOT00000086812  | 0.96852115   | 2.31E-07 |
| TUCP_002531 | XLOC_107080 | ENSRNOT00000043535  | 0.953987205  | 1.50E-06 |
| TUCP_002531 | XLOC_107080 | ENSRNOT00000028646  | 0.958206253  | 9.36E-07 |
| TUCP_002531 | XLOC_107080 | ENSRNOT00000020437  | 0.959734636  | 7.79E-07 |
| TUCP_002531 | XLOC_107080 | ENSRNOT00000033420  | 0.966539152  | 3.12E-07 |
| TUCP_002531 | XLOC_107080 | ENSRNOT000000051496 | 0.961902777  | 5.93E-07 |
| TUCP_002531 | XLOC_107080 | ENSRNOT00000067904  | 0.953184201  | 1.64E-06 |
| TUCP_002531 | XLOC_107080 | ENSRNOT00000024156  | 0.950234578  | 2.21E-06 |
| TUCP_002531 | XLOC_107080 | ENSRNOT00000008372  | 0.953177837  | 1.64E-06 |
| TUCP_002531 | XLOC_107080 | ENSRNOT00000076611  | -0.950749329 | 2.10E-06 |
| TUCP_002531 | XLOC_107080 | ENSRNOT00000085444  | 0.968139414  | 2.45E-07 |
| TUCP_002531 | XLOC_107080 | ENSRNOT00000011682  | -0.970169058 | 1.77E-07 |
| TUCP_002531 | XLOC_107080 | ENSRNOT00000092158  | 0.962009733  | 5.85E-07 |
| TUCP_002531 | XLOC_107080 | ENSRNOT00000017422  | -0.95319057  | 1.64E-06 |
| TUCP_002531 | XLOC_107080 | ENSRNOT00000070893  | 0.973766154  | 9.36E-08 |
| TUCP_002432 | XLOC_103121 | ENSRNOT00000045686  | 0.968471731  | 2.33E-07 |
| TUCP_002848 | XLOC_120634 | ENSRNOT00000009763  | 0.957965073  | 9.63E-07 |
| TUCP_002848 | XLOC_120634 | ENSRNOT00000026481  | -0.959303696 | 8.21E-07 |
| TUCP_002848 | XLOC_120634 | ENSRNOT00000068134  | -0.96024287  | 7.32E-07 |
| TUCP_002848 | XLOC_120634 | ENSRNOT00000046807  | 0.963640012  | 4.71E-07 |
| TUCP_002848 | XLOC_120634 | ENSRNOT00000034883  | 0.958456168  | 9.09E-07 |
| TUCP_002848 | XLOC_120634 | ENSRNOT00000039551  | 0.969346872  | 2.02E-07 |
| TUCP_002848 | XLOC_120634 | ENSRNOT00000024264  | 0.96011381   | 7.43E-07 |
| TUCP_002848 | XLOC_120634 | ENSRNOT00000013747  | -0.950624078 | 2.13E-06 |
| TUCP_002848 | XLOC_120634 | ENSRNOT00000048910  | 0.953138108  | 1.64E-06 |
| TUCP_002848 | XLOC_120634 | ENSRNOT00000019213  | -0.953913574 | 1.52E-06 |
| TUCP_002848 | XLOC_120634 | ENSRNOT00000090853  | 0.956522436  | 1.14E-06 |
| TUCP_002848 | XLOC_120634 | ENSRNOT00000019647  | 0.96505695   | 3.87E-07 |

|             |             |                    |              |          |
|-------------|-------------|--------------------|--------------|----------|
| TUCP_002848 | XLOC_120634 | ENSRNOT00000066041 | 0.955583173  | 1.26E-06 |
| TUCP_002848 | XLOC_120634 | ENSRNOT00000017761 | -0.957378875 | 1.03E-06 |
| TUCP_002848 | XLOC_120634 | ENSRNOT00000005073 | -0.961133074 | 6.54E-07 |
| TUCP_002848 | XLOC_120634 | ENSRNOT00000072762 | 0.956294744  | 1.17E-06 |
| TUCP_002848 | XLOC_120634 | ENSRNOT00000013116 | 0.958691775  | 8.84E-07 |
| TUCP_002848 | XLOC_120634 | ENSRNOT00000078650 | 0.950849345  | 2.08E-06 |
| TUCP_002848 | XLOC_120634 | ENSRNOT00000009565 | 0.961617113  | 6.15E-07 |
| TUCP_002848 | XLOC_120634 | ENSRNOT00000080928 | -0.953689163 | 1.55E-06 |
| TUCP_002848 | XLOC_120634 | ENSRNOT00000087371 | -0.951821155 | 1.89E-06 |
| TUCP_002848 | XLOC_120634 | ENSRNOT00000028876 | 0.955119176  | 1.33E-06 |
| TUCP_002848 | XLOC_120634 | ENSRNOT00000089980 | 0.954560319  | 1.41E-06 |
| TUCP_002848 | XLOC_120634 | ENSRNOT00000025222 | 0.96231411   | 5.62E-07 |
| TUCP_002848 | XLOC_120634 | ENSRNOT00000086310 | 0.963552396  | 4.76E-07 |
| TUCP_002848 | XLOC_120634 | ENSRNOT00000083957 | -0.957706237 | 9.93E-07 |
| TUCP_002848 | XLOC_120634 | ENSRNOT00000092945 | 0.968613585  | 2.28E-07 |
| TUCP_002848 | XLOC_120634 | ENSRNOT00000010541 | -0.964022079 | 4.47E-07 |
| TUCP_002848 | XLOC_120634 | ENSRNOT00000083568 | -0.960297317 | 7.27E-07 |
| TUCP_002848 | XLOC_120634 | ENSRNOT00000051402 | 0.95407219   | 1.49E-06 |
| TUCP_002848 | XLOC_120634 | ENSRNOT00000091596 | 0.951307884  | 1.99E-06 |
| TUCP_002848 | XLOC_120634 | ENSRNOT00000013632 | -0.957567733 | 1.01E-06 |
| TUCP_002848 | XLOC_120634 | ENSRNOT00000015113 | 0.958969036  | 8.55E-07 |
| TUCP_002848 | XLOC_120634 | ENSRNOT00000001583 | 0.963264216  | 4.95E-07 |
| TUCP_002848 | XLOC_120634 | ENSRNOT00000021110 | 0.958392736  | 9.16E-07 |
| TUCP_002848 | XLOC_120634 | ENSRNOT00000078390 | 0.959795028  | 7.73E-07 |
| TUCP_002848 | XLOC_120634 | ENSRNOT00000021803 | 0.950025391  | 2.26E-06 |
| TUCP_002848 | XLOC_120634 | ENSRNOT00000026525 | 0.950958657  | 2.06E-06 |
| TUCP_002848 | XLOC_120634 | ENSRNOT00000009645 | 0.954548233  | 1.42E-06 |
| TUCP_002848 | XLOC_120634 | ENSRNOT00000055285 | 0.95811669   | 9.46E-07 |
| TUCP_002848 | XLOC_120634 | ENSRNOT00000072118 | -0.961006874 | 6.65E-07 |
| TUCP_002848 | XLOC_120634 | ENSRNOT00000080207 | -0.951288398 | 1.99E-06 |
| TUCP_002848 | XLOC_120634 | ENSRNOT00000020994 | 0.951987971  | 1.85E-06 |
| TUCP_002848 | XLOC_120634 | ENSRNOT00000050868 | -0.952947399 | 1.68E-06 |
| TUCP_002848 | XLOC_120634 | ENSRNOT00000022190 | 0.954782546  | 1.38E-06 |
| TUCP_002848 | XLOC_120634 | ENSRNOT00000081077 | 0.960690655  | 6.92E-07 |
| TUCP_002848 | XLOC_120634 | ENSRNOT00000086116 | 0.951577566  | 1.93E-06 |
| TUCP_002848 | XLOC_120634 | ENSRNOT00000037955 | 0.961272758  | 6.43E-07 |
| TUCP_002848 | XLOC_120634 | ENSRNOT00000021359 | 0.951291946  | 1.99E-06 |
| TUCP_002848 | XLOC_120634 | ENSRNOT00000091808 | 0.95985175   | 7.68E-07 |
| TUCP_002848 | XLOC_120634 | ENSRNOT00000038247 | -0.956037891 | 1.20E-06 |
| TUCP_002848 | XLOC_120634 | ENSRNOT00000004463 | -0.9728258   | 1.11E-07 |
| TUCP_002848 | XLOC_120634 | ENSRNOT00000025925 | 0.961610835  | 6.16E-07 |
| TUCP_002848 | XLOC_120634 | ENSRNOT00000092876 | 0.967685179  | 2.63E-07 |
| TUCP_002848 | XLOC_120634 | ENSRNOT00000011041 | -0.959544719 | 7.97E-07 |
| TUCP_002848 | XLOC_120634 | ENSRNOT00000089086 | 0.959105661  | 8.41E-07 |
| TUCP_002848 | XLOC_120634 | ENSRNOT00000055437 | 0.982741709  | 1.17E-08 |
| TUCP_002848 | XLOC_120634 | ENSRNOT00000024402 | -0.950914175 | 2.07E-06 |
| TUCP_002848 | XLOC_120634 | ENSRNOT00000064667 | 0.962394901  | 5.56E-07 |
| TUCP_002848 | XLOC_120634 | ENSRNOT00000002313 | 0.956598925  | 1.13E-06 |
| TUCP_002848 | XLOC_120634 | ENSRNOT00000078862 | -0.956707442 | 1.11E-06 |
| TUCP_002848 | XLOC_120634 | ENSRNOT00000005311 | -0.976592651 | 5.32E-08 |
| TUCP_002848 | XLOC_120634 | ENSRNOT00000031979 | 0.955514384  | 1.27E-06 |



|             |             |                     |              |          |
|-------------|-------------|---------------------|--------------|----------|
| TUCP_002848 | XLOC_120634 | ENSRNOT00000046639  | -0.952355977 | 1.78E-06 |
| TUCP_002848 | XLOC_120634 | ENSRNOT00000067009  | 0.951018356  | 2.04E-06 |
| TUCP_002848 | XLOC_120634 | ENSRNOT00000091448  | 0.978505479  | 3.49E-08 |
| TUCP_002849 | XLOC_120664 | ENSRNOT00000084076  | 0.968393389  | 2.36E-07 |
| TUCP_002849 | XLOC_120664 | ENSRNOT00000009482  | 0.95942429   | 8.09E-07 |
| TUCP_002849 | XLOC_120664 | ENSRNOT00000006505  | 0.964357148  | 4.27E-07 |
| TUCP_002849 | XLOC_120664 | ENSRNOT00000049973  | 0.953497091  | 1.58E-06 |
| TUCP_002849 | XLOC_120664 | ENSRNOT00000003514  | 0.95678901   | 1.10E-06 |
| TUCP_002849 | XLOC_120664 | ENSRNOT00000004955  | 0.950911167  | 2.07E-06 |
| TUCP_002849 | XLOC_120664 | ENSRNOT00000012179  | 0.961264433  | 6.44E-07 |
| TUCP_002849 | XLOC_120664 | ENSRNOT00000043461  | 0.955365738  | 1.29E-06 |
| TUCP_002849 | XLOC_120664 | ENSRNOT00000032173  | 0.95284755   | 1.70E-06 |
| TUCP_002849 | XLOC_120664 | ENSRNOT00000005666  | 0.964275286  | 4.32E-07 |
| TUCP_002849 | XLOC_120664 | ENSRNOT00000025651  | 0.953140045  | 1.64E-06 |
| TUCP_002849 | XLOC_120664 | ENSRNOT00000075494  | 0.958351028  | 9.20E-07 |
| TUCP_002849 | XLOC_120664 | ENSRNOT00000064323  | 0.951231054  | 2.00E-06 |
| TUCP_002849 | XLOC_120664 | ENSRNOT00000021403  | 0.958849239  | 8.67E-07 |
| TUCP_002849 | XLOC_120664 | ENSRNOT00000009015  | 0.95533557   | 1.30E-06 |
| TUCP_002849 | XLOC_120664 | ENSRNOT00000015687  | 0.965796624  | 3.48E-07 |
| TUCP_002849 | XLOC_120664 | ENSRNOT00000038151  | 0.965961107  | 3.40E-07 |
| TUCP_002849 | XLOC_120664 | ENSRNOT00000007851  | 0.950809735  | 2.09E-06 |
| TUCP_002849 | XLOC_120664 | ENSRNOT000000051428 | 0.954520364  | 1.42E-06 |
| TUCP_002849 | XLOC_120664 | ENSRNOT00000044477  | 0.952452333  | 1.77E-06 |
| TUCP_002849 | XLOC_120664 | ENSRNOT000000051525 | 0.976622515  | 5.29E-08 |
| TUCP_002849 | XLOC_120664 | ENSRNOT00000064860  | 0.952382667  | 1.78E-06 |
| TUCP_002849 | XLOC_120664 | ENSRNOT00000043271  | 0.959166366  | 8.35E-07 |
| TUCP_002849 | XLOC_120664 | ENSRNOT00000023456  | 0.950658232  | 2.12E-06 |
| TUCP_002849 | XLOC_120664 | ENSRNOT00000015918  | 0.965612335  | 3.57E-07 |
| TUCP_002849 | XLOC_120664 | ENSRNOT00000016856  | 0.962554099  | 5.44E-07 |
| TUCP_002849 | XLOC_120664 | ENSRNOT00000046183  | 0.974242843  | 8.55E-08 |
| TUCP_002849 | XLOC_120664 | ENSRNOT00000036042  | 0.970884842  | 1.57E-07 |
| TUCP_002849 | XLOC_120664 | ENSRNOT00000022095  | 0.956178054  | 1.18E-06 |
| TUCP_002849 | XLOC_120664 | ENSRNOT00000067000  | 0.97919888   | 2.96E-08 |
| TUCP_002849 | XLOC_120664 | ENSRNOT00000030823  | 0.950470779  | 2.16E-06 |
| TUCP_002849 | XLOC_120664 | ENSRNOT00000017683  | 0.950503072  | 2.15E-06 |
| TUCP_002435 | XLOC_103308 | ENSRNOT00000027160  | 0.950988933  | 2.05E-06 |
| TUCP_002435 | XLOC_103308 | ENSRNOT00000078825  | 0.955667297  | 1.25E-06 |
| TUCP_002435 | XLOC_103308 | ENSRNOT00000071620  | 0.974075984  | 8.83E-08 |
| TUCP_002928 | XLOC_126045 | ENSRNOT00000081570  | 0.962961027  | 5.16E-07 |
| TUCP_002928 | XLOC_126045 | ENSRNOT00000091652  | 0.99819185   | 1.52E-13 |
| TUCP_002928 | XLOC_126045 | ENSRNOT00000036564  | 0.972337506  | 1.22E-07 |
| TUCP_002928 | XLOC_126045 | ENSRNOT00000000109  | 0.962179854  | 5.72E-07 |
| TUCP_002928 | XLOC_126045 | ENSRNOT00000080865  | 1            | 0        |
| TUCP_002928 | XLOC_126045 | ENSRNOT00000073534  | 0.995808019  | 1.01E-11 |
| TUCP_002928 | XLOC_126045 | ENSRNOT00000012161  | 0.987544327  | 2.31E-09 |
| TUCP_002928 | XLOC_126045 | ENSRNOT00000078707  | 0.960060506  | 7.48E-07 |
| TUCP_002928 | XLOC_126045 | ENSRNOT00000087758  | 0.968778527  | 2.22E-07 |
| TUCP_002928 | XLOC_126045 | ENSRNOT00000049832  | 0.969039151  | 2.13E-07 |
| TUCP_002928 | XLOC_126045 | ENSRNOT00000093019  | 1            | 0        |
| TUCP_002928 | XLOC_126045 | ENSRNOT00000024825  | 0.980452701  | 2.18E-08 |
| TUCP_002928 | XLOC_126045 | ENSRNOT00000059266  | 0.96033506   | 7.23E-07 |

|             |             |                    |              |          |
|-------------|-------------|--------------------|--------------|----------|
| TUCP_002928 | XLOC_126045 | ENSRNOT00000072734 | 0.965018115  | 3.89E-07 |
| TUCP_002928 | XLOC_126045 | ENSRNOT00000085908 | 0.996653227  | 3.29E-12 |
| TUCP_002928 | XLOC_126045 | ENSRNOT00000046744 | 1            | 0        |
| TUCP_002928 | XLOC_126045 | ENSRNOT00000076429 | 1            | 0        |
| TUCP_002928 | XLOC_126045 | ENSRNOT00000084667 | 0.999660971  | 3.53E-17 |
| TUCP_002928 | XLOC_126045 | ENSRNOT00000055412 | 1            | 0        |
| TUCP_002928 | XLOC_126045 | ENSRNOT00000093201 | 0.9997022    | 1.84E-17 |
| TUCP_002928 | XLOC_126045 | ENSRNOT00000072724 | 1            | 0        |
| TUCP_002928 | XLOC_126045 | ENSRNOT00000090323 | 0.95603782   | 1.20E-06 |
| TUCP_002928 | XLOC_126045 | ENSRNOT00000082760 | 0.986293522  | 3.72E-09 |
| TUCP_002928 | XLOC_126045 | ENSRNOT00000066017 | 0.989785653  | 8.61E-10 |
| TUCP_002928 | XLOC_126045 | ENSRNOT00000073148 | 0.985721397  | 4.56E-09 |
| TUCP_002928 | XLOC_126045 | ENSRNOT00000077462 | 0.960098183  | 7.45E-07 |
| TUCP_002928 | XLOC_126045 | ENSRNOT00000084375 | 1            | 0        |
| TUCP_002928 | XLOC_126045 | ENSRNOT00000085447 | 0.998400682  | 8.22E-14 |
| TUCP_002928 | XLOC_126045 | ENSRNOT0000006249  | 0.966489607  | 3.15E-07 |
| TUCP_002928 | XLOC_126045 | ENSRNOT00000087073 | 0.952450698  | 1.77E-06 |
| TUCP_002928 | XLOC_126045 | ENSRNOT00000042369 | 0.995659369  | 1.20E-11 |
| TUCP_002928 | XLOC_126045 | ENSRNOT00000086554 | 1            | 0        |
| TUCP_002928 | XLOC_126045 | ENSRNOT00000054858 | 0.985228824  | 5.40E-09 |
| TUCP_002928 | XLOC_126045 | ENSRNOT00000047921 | 1            | 0        |
| TUCP_002928 | XLOC_126045 | ENSRNOT00000064261 | 0.999977196  | 4.86E-23 |
| TUCP_002928 | XLOC_126045 | ENSRNOT00000086660 | 0.999208903  | 2.44E-15 |
| TUCP_002928 | XLOC_126045 | ENSRNOT00000080933 | 0.967360681  | 2.76E-07 |
| TUCP_002928 | XLOC_126045 | ENSRNOT00000083977 | 1            | 0        |
| TUCP_002928 | XLOC_126045 | ENSRNOT00000092933 | 1            | 0        |
| TUCP_002928 | XLOC_126045 | ENSRNOT0000009061  | 0.953300672  | 1.62E-06 |
| TUCP_002928 | XLOC_126045 | ENSRNOT00000041281 | 0.987828355  | 2.06E-09 |
| TUCP_002439 | XLOC_103308 | ENSRNOT00000025808 | -0.951632871 | 1.92E-06 |
| TUCP_002439 | XLOC_103308 | ENSRNOT00000080024 | -0.971319956 | 1.46E-07 |
| TUCP_002438 | XLOC_103308 | ENSRNOT00000088441 | 0.985451934  | 5.01E-09 |
| TUCP_002438 | XLOC_103308 | ENSRNOT00000015138 | 0.972368253  | 1.21E-07 |
| TUCP_002438 | XLOC_103308 | ENSRNOT00000051680 | 0.960990143  | 6.66E-07 |
| TUCP_002438 | XLOC_103308 | ENSRNOT00000089118 | 0.97309405   | 1.06E-07 |
| TUCP_002438 | XLOC_103308 | ENSRNOT00000013705 | 0.97309405   | 1.06E-07 |
| TUCP_002438 | XLOC_103308 | ENSRNOT00000079661 | 0.97309405   | 1.06E-07 |
| TUCP_002438 | XLOC_103308 | ENSRNOT00000042220 | 0.97309405   | 1.06E-07 |
| TUCP_002438 | XLOC_103308 | ENSRNOT00000040851 | 0.97309405   | 1.06E-07 |
| TUCP_002438 | XLOC_103308 | ENSRNOT00000058389 | 0.97309405   | 1.06E-07 |
| TUCP_002438 | XLOC_103308 | ENSRNOT00000086710 | 0.973546048  | 9.76E-08 |
| TUCP_002438 | XLOC_103308 | ENSRNOT00000076338 | 0.955145148  | 1.33E-06 |
| TUCP_002438 | XLOC_103308 | ENSRNOT00000025245 | 0.972876754  | 1.10E-07 |
| TUCP_002438 | XLOC_103308 | ENSRNOT00000028653 | 0.97309405   | 1.06E-07 |
| TUCP_002438 | XLOC_103308 | ENSRNOT00000075226 | 0.97309405   | 1.06E-07 |
| TUCP_002438 | XLOC_103308 | ENSRNOT00000079167 | 0.969149063  | 2.09E-07 |
| TUCP_002438 | XLOC_103308 | ENSRNOT00000085195 | 0.980462293  | 2.17E-08 |
| TUCP_002438 | XLOC_103308 | ENSRNOT00000023542 | 0.97309405   | 1.06E-07 |
| TUCP_002438 | XLOC_103308 | ENSRNOT00000092294 | 0.956181885  | 1.18E-06 |
| TUCP_002438 | XLOC_103308 | ENSRNOT00000000351 | 0.97309405   | 1.06E-07 |
| TUCP_002438 | XLOC_103308 | ENSRNOT00000012174 | 0.97309405   | 1.06E-07 |
| TUCP_002438 | XLOC_103308 | ENSRNOT00000080185 | 0.970380455  | 1.71E-07 |

|             |             |                    |              |          |
|-------------|-------------|--------------------|--------------|----------|
| TUCP_001410 | XLOC_055092 | ENSRNOT00000088167 | 0.95909453   | 8.42E-07 |
| TUCP_000407 | XLOC_013714 | ENSRNOT00000000246 | 0.958049761  | 9.53E-07 |
| TUCP_000407 | XLOC_013714 | ENSRNOT00000033420 | 0.971919325  | 1.31E-07 |
| TUCP_000407 | XLOC_013714 | ENSRNOT00000026915 | 0.974852823  | 7.59E-08 |
| TUCP_000407 | XLOC_013714 | ENSRNOT00000067904 | 0.953096841  | 1.65E-06 |
| TUCP_000407 | XLOC_013714 | ENSRNOT00000027454 | 0.951582968  | 1.93E-06 |
| TUCP_000407 | XLOC_013714 | ENSRNOT00000082869 | 0.95098213   | 2.05E-06 |
| TUCP_000407 | XLOC_013714 | ENSRNOT00000031462 | 0.958205923  | 9.36E-07 |
| TUCP_000407 | XLOC_013714 | ENSRNOT00000090270 | 0.955622634  | 1.26E-06 |
| TUCP_000407 | XLOC_013714 | ENSRNOT00000085444 | 0.965442659  | 3.66E-07 |
| TUCP_000407 | XLOC_013714 | ENSRNOT00000056430 | 0.958314085  | 9.24E-07 |
| TUCP_001411 | XLOC_055123 | ENSRNOT00000074753 | -0.962755023 | 5.30E-07 |
| TUCP_001411 | XLOC_055123 | ENSRNOT00000041904 | -0.971218361 | 1.48E-07 |
| TUCP_001411 | XLOC_055123 | ENSRNOT00000083487 | -0.983346831 | 9.81E-09 |
| TUCP_001411 | XLOC_055123 | ENSRNOT00000077990 | -0.971218361 | 1.48E-07 |
| TUCP_001411 | XLOC_055123 | ENSRNOT00000038826 | -0.972012487 | 1.29E-07 |
| TUCP_001411 | XLOC_055123 | ENSRNOT00000046842 | -0.954938311 | 1.36E-06 |
| TUCP_001411 | XLOC_055123 | ENSRNOT00000021243 | -0.965426001 | 3.67E-07 |
| TUCP_001411 | XLOC_055123 | ENSRNOT00000060250 | -0.968991282 | 2.14E-07 |
| TUCP_001411 | XLOC_055123 | ENSRNOT00000091934 | -0.971218361 | 1.48E-07 |
| TUCP_001411 | XLOC_055123 | ENSRNOT00000082403 | 0.958256448  | 9.31E-07 |
| TUCP_001411 | XLOC_055123 | ENSRNOT00000089929 | -0.971218361 | 1.48E-07 |
| TUCP_001411 | XLOC_055123 | ENSRNOT00000014456 | -0.967278797 | 2.80E-07 |
| TUCP_001411 | XLOC_055123 | ENSRNOT00000031205 | -0.954688143 | 1.39E-06 |
| TUCP_001411 | XLOC_055123 | ENSRNOT00000044145 | -0.971218361 | 1.48E-07 |
| TUCP_001411 | XLOC_055123 | ENSRNOT00000088381 | -0.952034423 | 1.84E-06 |
| TUCP_001411 | XLOC_055123 | ENSRNOT00000011743 | -0.965002559 | 3.90E-07 |
| TUCP_001411 | XLOC_055123 | ENSRNOT00000034907 | -0.976941635 | 4.94E-08 |
| TUCP_001411 | XLOC_055123 | ENSRNOT00000088624 | -0.971218361 | 1.48E-07 |
| TUCP_001411 | XLOC_055123 | ENSRNOT00000085659 | -0.964002348 | 4.48E-07 |
| TUCP_001411 | XLOC_055123 | ENSRNOT00000015866 | -0.962623824 | 5.39E-07 |
| TUCP_001411 | XLOC_055123 | ENSRNOT00000051835 | -0.971218361 | 1.48E-07 |
| TUCP_001411 | XLOC_055123 | ENSRNOT00000079087 | -0.971218361 | 1.48E-07 |
| TUCP_001411 | XLOC_055123 | ENSRNOT00000037206 | -0.971218361 | 1.48E-07 |
| TUCP_001411 | XLOC_055123 | ENSRNOT00000080794 | -0.976131238 | 5.86E-08 |
| TUCP_001411 | XLOC_055123 | ENSRNOT00000080590 | -0.970826296 | 1.58E-07 |
| TUCP_001411 | XLOC_055123 | ENSRNOT00000027552 | -0.969336819 | 2.03E-07 |
| TUCP_001411 | XLOC_055123 | ENSRNOT00000080453 | -0.969920115 | 1.84E-07 |
| TUCP_001411 | XLOC_055123 | ENSRNOT00000089057 | -0.954280447 | 1.46E-06 |
| TUCP_001411 | XLOC_055123 | ENSRNOT00000057729 | -0.971516803 | 1.41E-07 |
| TUCP_001411 | XLOC_055123 | ENSRNOT00000078633 | -0.971218361 | 1.48E-07 |
| TUCP_001411 | XLOC_055123 | ENSRNOT00000071884 | -0.958476934 | 9.07E-07 |
| TUCP_001411 | XLOC_055123 | ENSRNOT00000066839 | -0.970796287 | 1.59E-07 |
| TUCP_001411 | XLOC_055123 | ENSRNOT00000029634 | -0.97063634  | 1.64E-07 |
| TUCP_001411 | XLOC_055123 | ENSRNOT00000086349 | -0.955746489 | 1.24E-06 |
| TUCP_001411 | XLOC_055123 | ENSRNOT00000065460 | -0.971218361 | 1.48E-07 |
| TUCP_001411 | XLOC_055123 | ENSRNOT0000003817  | -0.960359954 | 7.21E-07 |
| TUCP_001411 | XLOC_055123 | ENSRNOT00000016713 | -0.971218361 | 1.48E-07 |
| TUCP_001411 | XLOC_055123 | ENSRNOT00000079260 | -0.969040759 | 2.13E-07 |
| TUCP_001411 | XLOC_055123 | ENSRNOT00000039294 | -0.971218361 | 1.48E-07 |
| TUCP_003615 | XLOC_158914 | ENSRNOT00000024160 | 0.950031468  | 2.26E-06 |

|             |             |                    |              |          |
|-------------|-------------|--------------------|--------------|----------|
| TUCP_001869 | XLOC_077795 | ENSRNOT00000085599 | 0.999934429  | 9.54E-21 |
| TUCP_001869 | XLOC_077795 | ENSRNOT00000006689 | 0.994396401  | 4.31E-11 |
| TUCP_001869 | XLOC_077795 | ENSRNOT00000081534 | 0.98808673   | 1.85E-09 |
| TUCP_001869 | XLOC_077795 | ENSRNOT00000085301 | 0.997907513  | 3.15E-13 |
| TUCP_001869 | XLOC_077795 | ENSRNOT00000038729 | 0.999998093  | 1.98E-28 |
| TUCP_001869 | XLOC_077795 | ENSRNOT00000086385 | 0.999998093  | 1.98E-28 |
| TUCP_001869 | XLOC_077795 | ENSRNOT00000077695 | 0.960322725  | 7.24E-07 |
| TUCP_001869 | XLOC_077795 | ENSRNOT00000078561 | 0.986444002  | 3.52E-09 |
| TUCP_001869 | XLOC_077795 | ENSRNOT00000087613 | 0.999998093  | 1.98E-28 |
| TUCP_001869 | XLOC_077795 | ENSRNOT00000026032 | 0.953224274  | 1.63E-06 |
| TUCP_001869 | XLOC_077795 | ENSRNOT00000073350 | 0.965934086  | 3.41E-07 |
| TUCP_001869 | XLOC_077795 | ENSRNOT00000023062 | 0.999998093  | 1.98E-28 |
| TUCP_001869 | XLOC_077795 | ENSRNOT00000058834 | 0.999998093  | 1.98E-28 |
| TUCP_001869 | XLOC_077795 | ENSRNOT00000079420 | 0.999998093  | 1.98E-28 |
| TUCP_001869 | XLOC_077795 | ENSRNOT00000090761 | 0.999998093  | 1.98E-28 |
| TUCP_001869 | XLOC_077795 | ENSRNOT00000055923 | 0.999998093  | 1.98E-28 |
| TUCP_001869 | XLOC_077795 | ENSRNOT00000092416 | 0.962930029  | 5.18E-07 |
| TUCP_001869 | XLOC_077795 | ENSRNOT00000071930 | 0.999998093  | 1.98E-28 |
| TUCP_001869 | XLOC_077795 | ENSRNOT0000001996  | 0.974722376  | 7.79E-08 |
| TUCP_001869 | XLOC_077795 | ENSRNOT00000076756 | 0.999998093  | 1.98E-28 |
| TUCP_001869 | XLOC_077795 | ENSRNOT00000081527 | 0.999411926  | 5.53E-16 |
| TUCP_001869 | XLOC_077795 | ENSRNOT00000085067 | 0.960672222  | 6.94E-07 |
| TUCP_001869 | XLOC_077795 | ENSRNOT00000091663 | 0.99640035   | 4.73E-12 |
| TUCP_001869 | XLOC_077795 | ENSRNOT00000081780 | 0.999998093  | 1.98E-28 |
| TUCP_001869 | XLOC_077795 | ENSRNOT00000093689 | 0.953539192  | 1.58E-06 |
| TUCP_001869 | XLOC_077795 | ENSRNOT00000089114 | 0.999998093  | 1.98E-28 |
| TUCP_001869 | XLOC_077795 | ENSRNOT00000021609 | 0.976974406  | 4.90E-08 |
| TUCP_001869 | XLOC_077795 | ENSRNOT00000073316 | 0.999998093  | 1.98E-28 |
| TUCP_001869 | XLOC_077795 | ENSRNOT00000086557 | 0.977332333  | 4.54E-08 |
| TUCP_001869 | XLOC_077795 | ENSRNOT00000071663 | 0.999998093  | 1.98E-28 |
| TUCP_001869 | XLOC_077795 | ENSRNOT00000042860 | 0.999998093  | 1.98E-28 |
| TUCP_001869 | XLOC_077795 | ENSRNOT00000072962 | 0.971234804  | 1.48E-07 |
| TUCP_001869 | XLOC_077795 | ENSRNOT00000088421 | 0.999998093  | 1.98E-28 |
| TUCP_001869 | XLOC_077795 | ENSRNOT00000038898 | 0.999998093  | 1.98E-28 |
| TUCP_001869 | XLOC_077795 | ENSRNOT00000015840 | 0.959595526  | 7.92E-07 |
| TUCP_001869 | XLOC_077795 | ENSRNOT00000064936 | 0.985923066  | 4.25E-09 |
| TUCP_001869 | XLOC_077795 | ENSRNOT00000042777 | 0.990614037  | 5.65E-10 |
| TUCP_001869 | XLOC_077795 | ENSRNOT00000010029 | 0.999998093  | 1.98E-28 |
| TUCP_001697 | XLOC_069431 | ENSRNOT00000017989 | 0.964015954  | 4.47E-07 |
| TUCP_001697 | XLOC_069431 | ENSRNOT00000079942 | -0.953684376 | 1.55E-06 |
| TUCP_001697 | XLOC_069431 | ENSRNOT00000001579 | -0.95719499  | 1.05E-06 |
| TUCP_001697 | XLOC_069431 | ENSRNOT00000027640 | 0.970821644  | 1.59E-07 |
| TUCP_001697 | XLOC_069431 | ENSRNOT00000003542 | 0.962769113  | 5.29E-07 |
| TUCP_004840 | XLOC_215374 | ENSRNOT00000024186 | 0.972941508  | 1.09E-07 |
| TUCP_004840 | XLOC_215374 | ENSRNOT00000074753 | 0.995242198  | 1.90E-11 |
| TUCP_004840 | XLOC_215374 | ENSRNOT00000004876 | 0.951588554  | 1.93E-06 |
| TUCP_004840 | XLOC_215374 | ENSRNOT00000041904 | 0.995925174  | 8.79E-12 |
| TUCP_004840 | XLOC_215374 | ENSRNOT00000080193 | -0.955371095 | 1.29E-06 |
| TUCP_004840 | XLOC_215374 | ENSRNOT00000083487 | 0.983703492  | 8.81E-09 |
| TUCP_004840 | XLOC_215374 | ENSRNOT00000077990 | 0.995925174  | 8.79E-12 |
| TUCP_004840 | XLOC_215374 | ENSRNOT00000038826 | 0.995222931  | 1.94E-11 |

|             |             |                    |             |          |
|-------------|-------------|--------------------|-------------|----------|
| TUCP_004840 | XLOC_215374 | ENSRNOT00000046842 | 0.967620054 | 2.65E-07 |
| TUCP_004840 | XLOC_215374 | ENSRNOT00000037169 | 0.98224992  | 1.35E-08 |
| TUCP_004840 | XLOC_215374 | ENSRNOT00000021243 | 0.98197615  | 1.45E-08 |
| TUCP_004840 | XLOC_215374 | ENSRNOT00000060250 | 0.99575557  | 1.08E-11 |
| TUCP_004840 | XLOC_215374 | ENSRNOT00000091934 | 0.995925174 | 8.79E-12 |
| TUCP_004840 | XLOC_215374 | ENSRNOT00000046585 | 0.978982627 | 3.12E-08 |
| TUCP_004840 | XLOC_215374 | ENSRNOT00000080794 | 0.982181057 | 1.37E-08 |
| TUCP_004840 | XLOC_215374 | ENSRNOT00000014456 | 0.986496443 | 3.46E-09 |
| TUCP_004840 | XLOC_215374 | ENSRNOT00000031076 | 0.971116359 | 1.51E-07 |
| TUCP_004840 | XLOC_215374 | ENSRNOT00000086349 | 0.974733847 | 7.77E-08 |
| TUCP_004840 | XLOC_215374 | ENSRNOT00000044145 | 0.995925174 | 8.79E-12 |
| TUCP_004840 | XLOC_215374 | ENSRNOT00000088381 | 0.983650067 | 8.95E-09 |
| TUCP_004840 | XLOC_215374 | ENSRNOT00000011743 | 0.981301969 | 1.74E-08 |
| TUCP_004840 | XLOC_215374 | ENSRNOT00000089929 | 0.995925174 | 8.79E-12 |
| TUCP_004840 | XLOC_215374 | ENSRNOT00000088624 | 0.995925174 | 8.79E-12 |
| TUCP_004840 | XLOC_215374 | ENSRNOT00000085659 | 0.984596952 | 6.65E-09 |
| TUCP_004840 | XLOC_215374 | ENSRNOT00000015866 | 0.993330576 | 1.03E-10 |
| TUCP_004840 | XLOC_215374 | ENSRNOT00000078633 | 0.995925174 | 8.79E-12 |
| TUCP_004840 | XLOC_215374 | ENSRNOT00000081085 | 0.952003508 | 1.85E-06 |
| TUCP_004840 | XLOC_215374 | ENSRNOT00000034907 | 0.990024955 | 7.65E-10 |
| TUCP_004840 | XLOC_215374 | ENSRNOT00000093230 | 0.96800925  | 2.50E-07 |
| TUCP_004840 | XLOC_215374 | ENSRNOT00000051835 | 0.995925174 | 8.79E-12 |
| TUCP_004840 | XLOC_215374 | ENSRNOT00000079087 | 0.995925174 | 8.79E-12 |
| TUCP_004840 | XLOC_215374 | ENSRNOT00000037206 | 0.995925174 | 8.79E-12 |
| TUCP_004840 | XLOC_215374 | ENSRNOT00000061185 | 0.952904064 | 1.69E-06 |
| TUCP_004840 | XLOC_215374 | ENSRNOT00000083261 | 0.960975503 | 6.68E-07 |
| TUCP_004840 | XLOC_215374 | ENSRNOT00000080590 | 0.995680607 | 1.18E-11 |
| TUCP_004840 | XLOC_215374 | ENSRNOT00000027552 | 0.99490452  | 2.68E-11 |
| TUCP_004840 | XLOC_215374 | ENSRNOT00000077014 | 0.989723681 | 8.87E-10 |
| TUCP_004840 | XLOC_215374 | ENSRNOT00000080453 | 0.995901482 | 9.05E-12 |
| TUCP_004840 | XLOC_215374 | ENSRNOT00000089057 | 0.961168073 | 6.51E-07 |
| TUCP_004840 | XLOC_215374 | ENSRNOT00000057729 | 0.998476332 | 6.45E-14 |
| TUCP_004840 | XLOC_215374 | ENSRNOT00000061284 | 0.950536296 | 2.15E-06 |
| TUCP_004840 | XLOC_215374 | ENSRNOT00000020206 | 0.951580921 | 1.93E-06 |
| TUCP_004840 | XLOC_215374 | ENSRNOT00000013423 | 0.950431102 | 2.17E-06 |
| TUCP_004840 | XLOC_215374 | ENSRNOT00000071884 | 0.979759794 | 2.59E-08 |
| TUCP_004840 | XLOC_215374 | ENSRNOT00000066839 | 0.985233791 | 5.39E-09 |
| TUCP_004840 | XLOC_215374 | ENSRNOT00000031205 | 0.98568469  | 4.62E-09 |
| TUCP_004840 | XLOC_215374 | ENSRNOT00000078663 | 0.976150915 | 5.84E-08 |
| TUCP_004840 | XLOC_215374 | ENSRNOT00000064250 | 0.974652252 | 7.90E-08 |
| TUCP_004840 | XLOC_215374 | ENSRNOT00000021608 | 0.964633557 | 4.11E-07 |
| TUCP_004840 | XLOC_215374 | ENSRNOT00000029634 | 0.990066072 | 7.49E-10 |
| TUCP_004840 | XLOC_215374 | ENSRNOT00000093579 | 0.964634849 | 4.11E-07 |
| TUCP_004840 | XLOC_215374 | ENSRNOT00000000215 | 0.973546534 | 9.76E-08 |
| TUCP_004840 | XLOC_215374 | ENSRNOT00000065460 | 0.995925174 | 8.79E-12 |
| TUCP_004840 | XLOC_215374 | ENSRNOT00000003817 | 0.989560092 | 9.60E-10 |
| TUCP_004840 | XLOC_215374 | ENSRNOT00000016713 | 0.995925174 | 8.79E-12 |
| TUCP_004840 | XLOC_215374 | ENSRNOT00000079260 | 0.990936353 | 4.74E-10 |
| TUCP_004840 | XLOC_215374 | ENSRNOT00000039294 | 0.995925174 | 8.79E-12 |
| TUCP_004840 | XLOC_215374 | ENSRNOT00000026932 | 0.9505747   | 2.14E-06 |
| TUCP_004024 | XLOC_177329 | ENSRNOT00000035922 | 0.953718825 | 1.55E-06 |

|             |             |                    |             |          |
|-------------|-------------|--------------------|-------------|----------|
| TUCP_004024 | XLOC_177329 | ENSRNOT00000075964 | 0.960541566 | 7.05E-07 |
| TUCP_004579 | XLOC_200678 | ENSRNOT00000091652 | 0.969731535 | 1.90E-07 |
| TUCP_004579 | XLOC_200678 | ENSRNOT00000036564 | 0.993756787 | 7.39E-11 |
| TUCP_004579 | XLOC_200678 | ENSRNOT00000080865 | 0.974293864 | 8.47E-08 |
| TUCP_004579 | XLOC_200678 | ENSRNOT00000073534 | 0.964663141 | 4.09E-07 |
| TUCP_004579 | XLOC_200678 | ENSRNOT00000087758 | 0.963941869 | 4.52E-07 |
| TUCP_004579 | XLOC_200678 | ENSRNOT00000049832 | 0.95586906  | 1.22E-06 |
| TUCP_004579 | XLOC_200678 | ENSRNOT00000093019 | 0.974293864 | 8.47E-08 |
| TUCP_004579 | XLOC_200678 | ENSRNOT00000085908 | 0.966122721 | 3.32E-07 |
| TUCP_004579 | XLOC_200678 | ENSRNOT00000046744 | 0.974293864 | 8.47E-08 |
| TUCP_004579 | XLOC_200678 | ENSRNOT00000076429 | 0.974293864 | 8.47E-08 |
| TUCP_004579 | XLOC_200678 | ENSRNOT00000084667 | 0.976742089 | 5.15E-08 |
| TUCP_004579 | XLOC_200678 | ENSRNOT00000055412 | 0.974293864 | 8.47E-08 |
| TUCP_004579 | XLOC_200678 | ENSRNOT00000093201 | 0.973032174 | 1.07E-07 |
| TUCP_004579 | XLOC_200678 | ENSRNOT00000072724 | 0.974293864 | 8.47E-08 |
| TUCP_004579 | XLOC_200678 | ENSRNOT00000066017 | 0.957265345 | 1.04E-06 |
| TUCP_004579 | XLOC_200678 | ENSRNOT00000082760 | 0.957222586 | 1.05E-06 |
| TUCP_004579 | XLOC_200678 | ENSRNOT00000073148 | 0.951858684 | 1.88E-06 |
| TUCP_004579 | XLOC_200678 | ENSRNOT00000054858 | 0.956044621 | 1.20E-06 |
| TUCP_004579 | XLOC_200678 | ENSRNOT00000084375 | 0.974293864 | 8.47E-08 |
| TUCP_004579 | XLOC_200678 | ENSRNOT00000012161 | 0.968939745 | 2.16E-07 |
| TUCP_004579 | XLOC_200678 | ENSRNOT00000042369 | 0.966199799 | 3.28E-07 |
| TUCP_004579 | XLOC_200678 | ENSRNOT00000059326 | 0.95419639  | 1.47E-06 |
| TUCP_004579 | XLOC_200678 | ENSRNOT00000086554 | 0.974293864 | 8.47E-08 |
| TUCP_004579 | XLOC_200678 | ENSRNOT00000047921 | 0.974293864 | 8.47E-08 |
| TUCP_004579 | XLOC_200678 | ENSRNOT00000064261 | 0.973965145 | 9.02E-08 |
| TUCP_004579 | XLOC_200678 | ENSRNOT00000086660 | 0.970841545 | 1.58E-07 |
| TUCP_004579 | XLOC_200678 | ENSRNOT00000083977 | 0.974293864 | 8.47E-08 |
| TUCP_004579 | XLOC_200678 | ENSRNOT00000092933 | 0.974293864 | 8.47E-08 |
| TUCP_004579 | XLOC_200678 | ENSRNOT00000085447 | 0.977215432 | 4.65E-08 |
| TUCP_004579 | XLOC_200678 | ENSRNOT00000041281 | 0.955194779 | 1.32E-06 |
| TUCP_004574 | XLOC_200423 | ENSRNOT00000084500 | 0.984887141 | 6.05E-09 |
| TUCP_004574 | XLOC_200423 | ENSRNOT00000093467 | 0.996134431 | 6.75E-12 |
| TUCP_004574 | XLOC_200423 | ENSRNOT00000029340 | 0.999116572 | 4.23E-15 |
| TUCP_004574 | XLOC_200423 | ENSRNOT00000077972 | 0.962758032 | 5.30E-07 |
| TUCP_004574 | XLOC_200423 | ENSRNOT00000038646 | 1           | 0        |
| TUCP_004574 | XLOC_200423 | ENSRNOT00000012095 | 0.957750287 | 9.88E-07 |
| TUCP_004574 | XLOC_200423 | ENSRNOT00000017909 | 0.975587192 | 6.56E-08 |
| TUCP_004574 | XLOC_200423 | ENSRNOT00000092579 | 1           | 0        |
| TUCP_004574 | XLOC_200423 | ENSRNOT00000089235 | 0.998661162 | 3.38E-14 |
| TUCP_004574 | XLOC_200423 | ENSRNOT00000036383 | 0.988460809 | 1.58E-09 |
| TUCP_004574 | XLOC_200423 | ENSRNOT00000076528 | 0.997115373 | 1.57E-12 |
| TUCP_004574 | XLOC_200423 | ENSRNOT00000075193 | 0.964326971 | 4.29E-07 |
| TUCP_004574 | XLOC_200423 | ENSRNOT00000083034 | 0.990934646 | 4.75E-10 |
| TUCP_004574 | XLOC_200423 | ENSRNOT00000089607 | 0.995091455 | 2.23E-11 |
| TUCP_004574 | XLOC_200423 | ENSRNOT00000086014 | 0.960893638 | 6.74E-07 |
| TUCP_004574 | XLOC_200423 | ENSRNOT00000054939 | 0.958021495 | 9.57E-07 |
| TUCP_004574 | XLOC_200423 | ENSRNOT00000052315 | 0.983687082 | 8.85E-09 |
| TUCP_004574 | XLOC_200423 | ENSRNOT00000088168 | 1           | 0        |
| TUCP_004574 | XLOC_200423 | ENSRNOT00000046231 | 0.96225463  | 5.66E-07 |
| TUCP_004574 | XLOC_200423 | ENSRNOT00000013459 | 0.979098017 | 3.03E-08 |

|             |             |                    |             |          |
|-------------|-------------|--------------------|-------------|----------|
| TUCP_004574 | XLOC_200423 | ENSRNOT00000078137 | 1           | 1.33E-79 |
| TUCP_004574 | XLOC_200423 | ENSRNOT00000077764 | 0.977143528 | 4.73E-08 |
| TUCP_004574 | XLOC_200423 | ENSRNOT00000043661 | 0.966975951 | 2.93E-07 |
| TUCP_004574 | XLOC_200423 | ENSRNOT00000092740 | 1           | 0        |
| TUCP_004574 | XLOC_200423 | ENSRNOT00000000117 | 0.990989174 | 4.61E-10 |
| TUCP_004574 | XLOC_200423 | ENSRNOT00000071877 | 0.967113583 | 2.87E-07 |
| TUCP_004574 | XLOC_200423 | ENSRNOT00000070958 | 1           | 4.25E-78 |
| TUCP_004574 | XLOC_200423 | ENSRNOT00000076757 | 0.959205354 | 8.31E-07 |
| TUCP_004574 | XLOC_200423 | ENSRNOT00000085310 | 0.965230243 | 3.78E-07 |
| TUCP_004574 | XLOC_200423 | ENSRNOT00000047241 | 0.966576993 | 3.11E-07 |
| TUCP_004574 | XLOC_200423 | ENSRNOT00000027268 | 1           | 1.33E-79 |
| TUCP_004574 | XLOC_200423 | ENSRNOT00000004459 | 1           | 0        |
| TUCP_004574 | XLOC_200423 | ENSRNOT00000048373 | 0.959096578 | 8.42E-07 |
| TUCP_004574 | XLOC_200423 | ENSRNOT00000061516 | 0.987595648 | 2.27E-09 |
| TUCP_004574 | XLOC_200423 | ENSRNOT00000088148 | 1           | 0        |
| TUCP_004574 | XLOC_200423 | ENSRNOT00000088527 | 1           | 0        |
| TUCP_004574 | XLOC_200423 | ENSRNOT00000078701 | 1           | 0        |
| TUCP_004574 | XLOC_200423 | ENSRNOT00000052308 | 0.962646127 | 5.38E-07 |
| TUCP_004574 | XLOC_200423 | ENSRNOT00000021748 | 1           | 0        |
| TUCP_004574 | XLOC_200423 | ENSRNOT00000089085 | 1           | 0        |
| TUCP_004574 | XLOC_200423 | ENSRNOT00000008153 | 0.999703506 | 1.80E-17 |
| TUCP_004574 | XLOC_200423 | ENSRNOT00000085896 | 0.971605382 | 1.39E-07 |
| TUCP_004574 | XLOC_200423 | ENSRNOT00000079189 | 0.984972387 | 5.89E-09 |
| TUCP_004574 | XLOC_200423 | ENSRNOT00000090078 | 1           | 0        |
| TUCP_004574 | XLOC_200423 | ENSRNOT00000078020 | 0.958421666 | 9.13E-07 |
| TUCP_004574 | XLOC_200423 | ENSRNOT00000092425 | 0.956092273 | 1.19E-06 |
| TUCP_004574 | XLOC_200423 | ENSRNOT00000009776 | 1           | 0        |
| TUCP_004575 | XLOC_200423 | ENSRNOT00000071840 | 0.964300697 | 4.30E-07 |
| TUCP_004575 | XLOC_200423 | ENSRNOT00000083608 | 0.95091517  | 2.07E-06 |
| TUCP_004575 | XLOC_200423 | ENSRNOT00000066382 | 0.954992883 | 1.35E-06 |
| TUCP_004575 | XLOC_200423 | ENSRNOT00000045584 | 0.964300697 | 4.30E-07 |
| TUCP_004575 | XLOC_200423 | ENSRNOT00000077995 | 0.957241966 | 1.05E-06 |
| TUCP_004575 | XLOC_200423 | ENSRNOT00000066004 | 0.963509834 | 4.79E-07 |
| TUCP_004575 | XLOC_200423 | ENSRNOT00000075836 | 0.964300697 | 4.30E-07 |
| TUCP_004575 | XLOC_200423 | ENSRNOT00000082086 | 0.951418257 | 1.96E-06 |
| TUCP_004575 | XLOC_200423 | ENSRNOT00000092186 | 0.981108211 | 1.84E-08 |
| TUCP_004575 | XLOC_200423 | ENSRNOT00000092182 | 0.964300697 | 4.30E-07 |
| TUCP_004575 | XLOC_200423 | ENSRNOT00000084461 | 0.964300697 | 4.30E-07 |
| TUCP_004575 | XLOC_200423 | ENSRNOT00000060448 | 0.964300697 | 4.30E-07 |
| TUCP_004575 | XLOC_200423 | ENSRNOT00000032631 | 0.964300697 | 4.30E-07 |
| TUCP_004575 | XLOC_200423 | ENSRNOT00000057176 | 0.964261399 | 4.32E-07 |
| TUCP_004575 | XLOC_200423 | ENSRNOT00000078176 | 0.956042362 | 1.20E-06 |
| TUCP_004575 | XLOC_200423 | ENSRNOT00000056364 | 0.964379884 | 4.25E-07 |
| TUCP_004575 | XLOC_200423 | ENSRNOT00000093431 | 0.964300697 | 4.30E-07 |
| TUCP_004575 | XLOC_200423 | ENSRNOT00000092901 | 0.964300697 | 4.30E-07 |
| TUCP_004575 | XLOC_200423 | ENSRNOT00000089290 | 0.964748029 | 4.04E-07 |
| TUCP_004575 | XLOC_200423 | ENSRNOT00000090211 | 0.963925144 | 4.53E-07 |
| TUCP_004575 | XLOC_200423 | ENSRNOT00000091828 | 0.971726224 | 1.36E-07 |
| TUCP_004575 | XLOC_200423 | ENSRNOT00000091944 | 0.963115185 | 5.05E-07 |
| TUCP_004575 | XLOC_200423 | ENSRNOT00000070855 | 0.964300697 | 4.30E-07 |
| TUCP_004575 | XLOC_200423 | ENSRNOT00000084109 | 0.962862706 | 5.23E-07 |

|             |             |                    |              |          |
|-------------|-------------|--------------------|--------------|----------|
| TUCP_004575 | XLOC_200423 | ENSRNOT0000007683  | 0.965233486  | 3.77E-07 |
| TUCP_004575 | XLOC_200423 | ENSRNOT00000060645 | 0.966071198  | 3.34E-07 |
| TUCP_004575 | XLOC_200423 | ENSRNOT00000041569 | 0.964300697  | 4.30E-07 |
| TUCP_004575 | XLOC_200423 | ENSRNOT00000087091 | 0.964300697  | 4.30E-07 |
| TUCP_004575 | XLOC_200423 | ENSRNOT00000003308 | 0.961236254  | 6.46E-07 |
| TUCP_004575 | XLOC_200423 | ENSRNOT00000026113 | 0.963701035  | 4.67E-07 |
| TUCP_004575 | XLOC_200423 | ENSRNOT00000014939 | 0.961930601  | 5.91E-07 |
| TUCP_004575 | XLOC_200423 | ENSRNOT00000058314 | 0.951943161  | 1.86E-06 |
| TUCP_004575 | XLOC_200423 | ENSRNOT00000047870 | 0.978475806  | 3.51E-08 |
| TUCP_004575 | XLOC_200423 | ENSRNOT00000071603 | 0.964220663  | 4.35E-07 |
| TUCP_004575 | XLOC_200423 | ENSRNOT00000088376 | 0.985663355  | 4.66E-09 |
| TUCP_004575 | XLOC_200423 | ENSRNOT00000039313 | 0.97027626   | 1.74E-07 |
| TUCP_004575 | XLOC_200423 | ENSRNOT00000044232 | 0.994139758  | 5.39E-11 |
| TUCP_004575 | XLOC_200423 | ENSRNOT00000023287 | 0.953385674  | 1.60E-06 |
| TUCP_004575 | XLOC_200423 | ENSRNOT00000073229 | 0.964300697  | 4.30E-07 |
| TUCP_004575 | XLOC_200423 | ENSRNOT00000060454 | 0.964300697  | 4.30E-07 |
| TUCP_004575 | XLOC_200423 | ENSRNOT00000009295 | 0.957935333  | 9.66E-07 |
| TUCP_004577 | XLOC_200583 | ENSRNOT00000074753 | 0.957813404  | 9.80E-07 |
| TUCP_004577 | XLOC_200583 | ENSRNOT00000004876 | 0.950559833  | 2.14E-06 |
| TUCP_004577 | XLOC_200583 | ENSRNOT00000041904 | 0.965627007  | 3.57E-07 |
| TUCP_004577 | XLOC_200583 | ENSRNOT00000061194 | 0.962729898  | 5.32E-07 |
| TUCP_004577 | XLOC_200583 | ENSRNOT00000083487 | 0.95855191   | 8.99E-07 |
| TUCP_004577 | XLOC_200583 | ENSRNOT00000077990 | 0.965627007  | 3.57E-07 |
| TUCP_004577 | XLOC_200583 | ENSRNOT00000038826 | 0.964773968  | 4.03E-07 |
| TUCP_004577 | XLOC_200583 | ENSRNOT00000078663 | 0.958724214  | 8.80E-07 |
| TUCP_004577 | XLOC_200583 | ENSRNOT00000060250 | 0.965113689  | 3.84E-07 |
| TUCP_004577 | XLOC_200583 | ENSRNOT00000091934 | 0.965627007  | 3.57E-07 |
| TUCP_004577 | XLOC_200583 | ENSRNOT00000012170 | 0.95345687   | 1.59E-06 |
| TUCP_004577 | XLOC_200583 | ENSRNOT00000046585 | 0.959769692  | 7.76E-07 |
| TUCP_004577 | XLOC_200583 | ENSRNOT00000082403 | -0.958716984 | 8.81E-07 |
| TUCP_004577 | XLOC_200583 | ENSRNOT00000034907 | 0.966254767  | 3.26E-07 |
| TUCP_004577 | XLOC_200583 | ENSRNOT0000002220  | 0.962857965  | 5.23E-07 |
| TUCP_004577 | XLOC_200583 | ENSRNOT00000014456 | 0.954814838  | 1.37E-06 |
| TUCP_004577 | XLOC_200583 | ENSRNOT00000031205 | 0.960239517  | 7.32E-07 |
| TUCP_004577 | XLOC_200583 | ENSRNOT00000086349 | 0.955616083  | 1.26E-06 |
| TUCP_004577 | XLOC_200583 | ENSRNOT00000044145 | 0.965627007  | 3.57E-07 |
| TUCP_004577 | XLOC_200583 | ENSRNOT00000040270 | 0.96188318   | 5.94E-07 |
| TUCP_004577 | XLOC_200583 | ENSRNOT00000088381 | 0.962937153  | 5.18E-07 |
| TUCP_004577 | XLOC_200583 | ENSRNOT00000011743 | 0.959389572  | 8.12E-07 |
| TUCP_004577 | XLOC_200583 | ENSRNOT00000089929 | 0.965627007  | 3.57E-07 |
| TUCP_004577 | XLOC_200583 | ENSRNOT00000088624 | 0.965627007  | 3.57E-07 |
| TUCP_004577 | XLOC_200583 | ENSRNOT00000085659 | 0.981444329  | 1.68E-08 |
| TUCP_004577 | XLOC_200583 | ENSRNOT00000015866 | 0.961680333  | 6.10E-07 |
| TUCP_004577 | XLOC_200583 | ENSRNOT00000078633 | 0.965627007  | 3.57E-07 |
| TUCP_004577 | XLOC_200583 | ENSRNOT00000051835 | 0.965627007  | 3.57E-07 |
| TUCP_004577 | XLOC_200583 | ENSRNOT00000079087 | 0.965627007  | 3.57E-07 |
| TUCP_004577 | XLOC_200583 | ENSRNOT00000037206 | 0.965627007  | 3.57E-07 |
| TUCP_004577 | XLOC_200583 | ENSRNOT00000083261 | 0.962323748  | 5.61E-07 |
| TUCP_004577 | XLOC_200583 | ENSRNOT00000020329 | 0.952380528  | 1.78E-06 |
| TUCP_004577 | XLOC_200583 | ENSRNOT00000080590 | 0.964709765  | 4.06E-07 |
| TUCP_004577 | XLOC_200583 | ENSRNOT00000027552 | 0.965530814  | 3.62E-07 |



|             |             |                    |              |          |
|-------------|-------------|--------------------|--------------|----------|
| TUCP_004577 | XLOC_200583 | ENSRNOT00000077014 | 0.960467971  | 7.11E-07 |
| TUCP_004577 | XLOC_200583 | ENSRNOT00000080453 | 0.965704231  | 3.53E-07 |
| TUCP_004577 | XLOC_200583 | ENSRNOT00000057729 | 0.966348277  | 3.21E-07 |
| TUCP_004577 | XLOC_200583 | ENSRNOT00000061284 | 0.952477383  | 1.76E-06 |
| TUCP_004577 | XLOC_200583 | ENSRNOT00000071884 | 0.984312111  | 7.29E-09 |
| TUCP_004577 | XLOC_200583 | ENSRNOT00000066839 | 0.954821371  | 1.37E-06 |
| TUCP_004577 | XLOC_200583 | ENSRNOT00000064250 | 0.950857011  | 2.08E-06 |
| TUCP_004577 | XLOC_200583 | ENSRNOT00000093579 | 0.975360824  | 6.86E-08 |
| TUCP_004577 | XLOC_200583 | ENSRNOT00000091330 | 0.956609928  | 1.13E-06 |
| TUCP_004577 | XLOC_200583 | ENSRNOT00000065460 | 0.965627007  | 3.57E-07 |
| TUCP_004577 | XLOC_200583 | ENSRNOT00000003817 | 0.960511247  | 7.08E-07 |
| TUCP_004577 | XLOC_200583 | ENSRNOT00000016713 | 0.965627007  | 3.57E-07 |
| TUCP_004577 | XLOC_200583 | ENSRNOT00000079260 | 0.966100898  | 3.33E-07 |
| TUCP_004577 | XLOC_200583 | ENSRNOT00000039294 | 0.965627007  | 3.57E-07 |
| TUCP_004570 | XLOC_200360 | ENSRNOT00000004274 | -0.968032729 | 2.49E-07 |
| TUCP_004570 | XLOC_200360 | ENSRNOT00000011230 | 0.975979301  | 6.05E-08 |
| TUCP_004570 | XLOC_200360 | ENSRNOT00000025983 | 0.955684161  | 1.25E-06 |
| TUCP_004570 | XLOC_200360 | ENSRNOT00000027526 | 0.959081247  | 8.43E-07 |
| TUCP_004570 | XLOC_200360 | ENSRNOT00000074939 | 0.952563119  | 1.75E-06 |
| TUCP_004570 | XLOC_200360 | ENSRNOT00000064840 | 0.952610107  | 1.74E-06 |
| TUCP_004570 | XLOC_200360 | ENSRNOT00000017668 | 0.960309758  | 7.26E-07 |
| TUCP_004570 | XLOC_200360 | ENSRNOT00000078445 | -0.952942773 | 1.68E-06 |
| TUCP_004570 | XLOC_200360 | ENSRNOT00000023326 | 0.959145724  | 8.37E-07 |
| TUCP_004570 | XLOC_200360 | ENSRNOT00000041709 | 0.951581563  | 1.93E-06 |
| TUCP_004570 | XLOC_200360 | ENSRNOT00000005228 | 0.975351605  | 6.87E-08 |
| TUCP_004570 | XLOC_200360 | ENSRNOT00000008677 | 0.961831559  | 5.98E-07 |
| TUCP_004570 | XLOC_200360 | ENSRNOT00000028628 | -0.963205195 | 4.99E-07 |
| TUCP_004570 | XLOC_200360 | ENSRNOT00000081768 | 0.97339614   | 1.00E-07 |
| TUCP_004570 | XLOC_200360 | ENSRNOT00000019502 | 0.954347866  | 1.45E-06 |
| TUCP_004570 | XLOC_200360 | ENSRNOT00000016649 | 0.950552005  | 2.14E-06 |
| TUCP_004570 | XLOC_200360 | ENSRNOT00000090342 | 0.953393422  | 1.60E-06 |
| TUCP_004570 | XLOC_200360 | ENSRNOT00000028856 | 0.962219762  | 5.69E-07 |
| TUCP_004570 | XLOC_200360 | ENSRNOT00000060282 | 0.958642718  | 8.89E-07 |
| TUCP_004570 | XLOC_200360 | ENSRNOT00000007598 | 0.951179741  | 2.01E-06 |
| TUCP_004570 | XLOC_200360 | ENSRNOT00000009368 | -0.951183147 | 2.01E-06 |
| TUCP_004570 | XLOC_200360 | ENSRNOT00000091128 | -0.953620428 | 1.56E-06 |
| TUCP_004570 | XLOC_200360 | ENSRNOT00000044742 | 0.95620537   | 1.18E-06 |
| TUCP_004570 | XLOC_200360 | ENSRNOT00000006195 | 0.95516052   | 1.32E-06 |
| TUCP_004570 | XLOC_200360 | ENSRNOT00000003158 | -0.953280087 | 1.62E-06 |
| TUCP_004570 | XLOC_200360 | ENSRNOT00000020322 | 0.958621942  | 8.91E-07 |
| TUCP_004570 | XLOC_200360 | ENSRNOT00000043554 | 0.954744419  | 1.39E-06 |
| TUCP_004570 | XLOC_200360 | ENSRNOT00000091807 | 0.955915355  | 1.22E-06 |
| TUCP_004570 | XLOC_200360 | ENSRNOT00000005942 | 0.970848157  | 1.58E-07 |
| TUCP_004570 | XLOC_200360 | ENSRNOT00000012463 | -0.982049999 | 1.42E-08 |
| TUCP_004570 | XLOC_200360 | ENSRNOT00000085251 | -0.955353413 | 1.30E-06 |
| TUCP_004570 | XLOC_200360 | ENSRNOT00000026783 | 0.95141056   | 1.97E-06 |
| TUCP_004570 | XLOC_200360 | ENSRNOT00000012379 | 0.95736092   | 1.03E-06 |
| TUCP_004570 | XLOC_200360 | ENSRNOT00000028646 | 0.969688961  | 1.92E-07 |
| TUCP_004570 | XLOC_200360 | ENSRNOT00000011384 | 0.961168217  | 6.51E-07 |
| TUCP_004570 | XLOC_200360 | ENSRNOT00000032158 | 0.953726005  | 1.55E-06 |
| TUCP_004570 | XLOC_200360 | ENSRNOT00000038247 | 0.960467253  | 7.12E-07 |

|             |             |                    |              |          |
|-------------|-------------|--------------------|--------------|----------|
| TUCP_004570 | XLOC_200360 | ENSRNOT00000044628 | 0.955996148  | 1.21E-06 |
| TUCP_004570 | XLOC_200360 | ENSRNOT00000073971 | 0.958085486  | 9.49E-07 |
| TUCP_004570 | XLOC_200360 | ENSRNOT00000021582 | 0.953184704  | 1.64E-06 |
| TUCP_004570 | XLOC_200360 | ENSRNOT00000071764 | 0.955401169  | 1.29E-06 |
| TUCP_004570 | XLOC_200360 | ENSRNOT00000076611 | -0.956318849 | 1.16E-06 |
| TUCP_004570 | XLOC_200360 | ENSRNOT00000052075 | 0.964802654  | 4.01E-07 |
| TUCP_004570 | XLOC_200360 | ENSRNOT00000031568 | 0.962249752  | 5.67E-07 |
| TUCP_004570 | XLOC_200360 | ENSRNOT00000087095 | 0.957455414  | 1.02E-06 |
| TUCP_004570 | XLOC_200360 | ENSRNOT00000026718 | 0.951402817  | 1.97E-06 |
| TUCP_004570 | XLOC_200360 | ENSRNOT00000085228 | 0.954913708  | 1.36E-06 |
| TUCP_004570 | XLOC_200360 | ENSRNOT00000032780 | 0.9597125    | 7.81E-07 |
| TUCP_004570 | XLOC_200360 | ENSRNOT00000017319 | 0.961094178  | 6.58E-07 |
| TUCP_004570 | XLOC_200360 | ENSRNOT00000057807 | -0.96041825  | 7.16E-07 |
| TUCP_004570 | XLOC_200360 | ENSRNOT00000072518 | 0.961029303  | 6.63E-07 |
| TUCP_004570 | XLOC_200360 | ENSRNOT00000087592 | 0.961425244  | 6.30E-07 |
| TUCP_004570 | XLOC_200360 | ENSRNOT00000061392 | 0.951194467  | 2.01E-06 |
| TUCP_004570 | XLOC_200360 | ENSRNOT00000080797 | -0.958562187 | 8.97E-07 |
| TUCP_004570 | XLOC_200360 | ENSRNOT00000023649 | -0.956964567 | 1.08E-06 |
| TUCP_004570 | XLOC_200360 | ENSRNOT00000021037 | 0.950522806  | 2.15E-06 |
| TUCP_004570 | XLOC_200360 | ENSRNOT00000025362 | -0.951299851 | 1.99E-06 |
| TUCP_004570 | XLOC_200360 | ENSRNOT00000084385 | 0.961960422  | 5.88E-07 |
| TUCP_004570 | XLOC_200360 | ENSRNOT00000012895 | 0.965282615  | 3.75E-07 |
| TUCP_004570 | XLOC_200360 | ENSRNOT00000015116 | 0.962272895  | 5.65E-07 |
| TUCP_004570 | XLOC_200360 | ENSRNOT00000090918 | 0.955288923  | 1.31E-06 |
| TUCP_004570 | XLOC_200360 | ENSRNOT00000023180 | 0.964158788  | 4.39E-07 |
| TUCP_004570 | XLOC_200360 | ENSRNOT00000031267 | 0.980507506  | 2.14E-08 |
| TUCP_004570 | XLOC_200360 | ENSRNOT0000007002  | -0.955514982 | 1.27E-06 |
| TUCP_004570 | XLOC_200360 | ENSRNOT00000015609 | 0.968622119  | 2.27E-07 |
| TUCP_004570 | XLOC_200360 | ENSRNOT00000054874 | 0.953508993  | 1.58E-06 |
| TUCP_004570 | XLOC_200360 | ENSRNOT00000028070 | 0.960203275  | 7.35E-07 |
| TUCP_004570 | XLOC_200360 | ENSRNOT00000060362 | 0.953380349  | 1.60E-06 |
| TUCP_004570 | XLOC_200360 | ENSRNOT00000008817 | 0.957678     | 9.96E-07 |
| TUCP_004570 | XLOC_200360 | ENSRNOT00000020437 | 0.965731031  | 3.51E-07 |
| TUCP_004570 | XLOC_200360 | ENSRNOT00000010898 | 0.968879113  | 2.18E-07 |
| TUCP_004570 | XLOC_200360 | ENSRNOT00000071493 | -0.958537879 | 9.00E-07 |
| TUCP_004570 | XLOC_200360 | ENSRNOT00000015265 | 0.959512502  | 8.00E-07 |
| TUCP_004570 | XLOC_200360 | ENSRNOT00000073675 | -0.96129673  | 6.41E-07 |
| TUCP_004570 | XLOC_200360 | ENSRNOT00000052422 | 0.967947964  | 2.52E-07 |
| TUCP_004570 | XLOC_200360 | ENSRNOT0000001242  | 0.965853382  | 3.45E-07 |
| TUCP_004570 | XLOC_200360 | ENSRNOT00000019177 | 0.972392795  | 1.21E-07 |
| TUCP_004570 | XLOC_200360 | ENSRNOT00000078589 | -0.952338355 | 1.79E-06 |
| TUCP_004570 | XLOC_200360 | ENSRNOT00000078102 | 0.965140429  | 3.82E-07 |
| TUCP_004570 | XLOC_200360 | ENSRNOT00000070893 | 0.950349877  | 2.19E-06 |
| TUCP_004570 | XLOC_200360 | ENSRNOT00000010873 | -0.95705411  | 1.07E-06 |
| TUCP_004570 | XLOC_200360 | ENSRNOT00000021790 | 0.969384912  | 2.01E-07 |
| TUCP_004570 | XLOC_200360 | ENSRNOT00000008929 | 0.958425492  | 9.12E-07 |
| TUCP_004570 | XLOC_200360 | ENSRNOT00000004698 | 0.955281737  | 1.31E-06 |
| TUCP_004570 | XLOC_200360 | ENSRNOT00000014537 | 0.957675041  | 9.96E-07 |
| TUCP_004570 | XLOC_200360 | ENSRNOT00000005911 | 0.969574066  | 1.95E-07 |
| TUCP_004570 | XLOC_200360 | ENSRNOT00000025936 | -0.958386332 | 9.16E-07 |
| TUCP_004570 | XLOC_200360 | ENSRNOT00000003991 | 0.958764675  | 8.76E-07 |

|             |             |                    |              |          |
|-------------|-------------|--------------------|--------------|----------|
| TUCP_004570 | XLOC_200360 | ENSRNOT00000021408 | 0.977373126  | 4.50E-08 |
| TUCP_004570 | XLOC_200360 | ENSRNOT00000009440 | -0.962937294 | 5.18E-07 |
| TUCP_004570 | XLOC_200360 | ENSRNOT00000016036 | 0.959148124  | 8.37E-07 |
| TUCP_004570 | XLOC_200360 | ENSRNOT00000048490 | -0.957362007 | 1.03E-06 |
| TUCP_004570 | XLOC_200360 | ENSRNOT00000007379 | 0.95109942   | 2.03E-06 |
| TUCP_004570 | XLOC_200360 | ENSRNOT00000001968 | -0.955506385 | 1.27E-06 |
| TUCP_004570 | XLOC_200360 | ENSRNOT00000043535 | 0.962761926  | 5.30E-07 |
| TUCP_004570 | XLOC_200360 | ENSRNOT00000026755 | 0.966264574  | 3.25E-07 |
| TUCP_004570 | XLOC_200360 | ENSRNOT00000052224 | 0.956392392  | 1.15E-06 |
| TUCP_004570 | XLOC_200360 | ENSRNOT00000024322 | 0.952779766  | 1.71E-06 |
| TUCP_004570 | XLOC_200360 | ENSRNOT00000078639 | 0.953176086  | 1.64E-06 |
| TUCP_004570 | XLOC_200360 | ENSRNOT00000026915 | 0.955119779  | 1.33E-06 |
| TUCP_004570 | XLOC_200360 | ENSRNOT00000019157 | -0.95251876  | 1.75E-06 |
| TUCP_004570 | XLOC_200360 | ENSRNOT00000017181 | -0.960158196 | 7.39E-07 |
| TUCP_004570 | XLOC_200360 | ENSRNOT00000017753 | 0.969456015  | 1.99E-07 |
| TUCP_004570 | XLOC_200360 | ENSRNOT00000051022 | 0.968799676  | 2.21E-07 |
| TUCP_004570 | XLOC_200360 | ENSRNOT00000006499 | 0.977249154  | 4.62E-08 |
| TUCP_004570 | XLOC_200360 | ENSRNOT00000005909 | 0.954135521  | 1.48E-06 |
| TUCP_004570 | XLOC_200360 | ENSRNOT00000087725 | 0.964173094  | 4.38E-07 |
| TUCP_004570 | XLOC_200360 | ENSRNOT00000029833 | 0.965274673  | 3.75E-07 |
| TUCP_004570 | XLOC_200360 | ENSRNOT00000009129 | 0.960163876  | 7.39E-07 |
| TUCP_004570 | XLOC_200360 | ENSRNOT00000036951 | 0.966145686  | 3.31E-07 |
| TUCP_004570 | XLOC_200360 | ENSRNOT00000016519 | 0.974742566  | 7.76E-08 |
| TUCP_004570 | XLOC_200360 | ENSRNOT00000026186 | 0.957624713  | 1.00E-06 |
| TUCP_004570 | XLOC_200360 | ENSRNOT00000013762 | 0.961116361  | 6.56E-07 |
| TUCP_004570 | XLOC_200360 | ENSRNOT00000022963 | 0.971819512  | 1.34E-07 |
| TUCP_004570 | XLOC_200360 | ENSRNOT00000090420 | -0.955698825 | 1.25E-06 |
| TUCP_004570 | XLOC_200360 | ENSRNOT00000011663 | 0.951597123  | 1.93E-06 |
| TUCP_004570 | XLOC_200360 | ENSRNOT00000043953 | 0.968633286  | 2.27E-07 |
| TUCP_004570 | XLOC_200360 | ENSRNOT00000058842 | 0.96563787   | 3.56E-07 |
| TUCP_004570 | XLOC_200360 | ENSRNOT00000083255 | 0.953365539  | 1.61E-06 |
| TUCP_004570 | XLOC_200360 | ENSRNOT00000051953 | -0.955110318 | 1.33E-06 |
| TUCP_004570 | XLOC_200360 | ENSRNOT00000084055 | -0.95708787  | 1.07E-06 |
| TUCP_004570 | XLOC_200360 | ENSRNOT00000058116 | -0.959659496 | 7.86E-07 |
| TUCP_004570 | XLOC_200360 | ENSRNOT00000090925 | 0.953758004  | 1.54E-06 |
| TUCP_004570 | XLOC_200360 | ENSRNOT00000025580 | -0.96454685  | 4.16E-07 |
| TUCP_004570 | XLOC_200360 | ENSRNOT00000025391 | 0.96042308   | 7.15E-07 |
| TUCP_004570 | XLOC_200360 | ENSRNOT00000054828 | 0.953502036  | 1.58E-06 |
| TUCP_004570 | XLOC_200360 | ENSRNOT00000021471 | -0.954496425 | 1.42E-06 |
| TUCP_004570 | XLOC_200360 | ENSRNOT00000066028 | 0.955645222  | 1.25E-06 |
| TUCP_004570 | XLOC_200360 | ENSRNOT00000010218 | 0.965836561  | 3.46E-07 |
| TUCP_004570 | XLOC_200360 | ENSRNOT00000011052 | 0.955147413  | 1.33E-06 |
| TUCP_004570 | XLOC_200360 | ENSRNOT00000005478 | -0.964468262 | 4.20E-07 |
| TUCP_004570 | XLOC_200360 | ENSRNOT00000024149 | 0.970688216  | 1.62E-07 |
| TUCP_004570 | XLOC_200360 | ENSRNOT00000035474 | 0.954893899  | 1.36E-06 |
| TUCP_004570 | XLOC_200360 | ENSRNOT00000086336 | 0.957659111  | 9.98E-07 |
| TUCP_004570 | XLOC_200360 | ENSRNOT00000021073 | -0.965521347 | 3.62E-07 |
| TUCP_004570 | XLOC_200360 | ENSRNOT00000076872 | 0.957885531  | 9.72E-07 |
| TUCP_004570 | XLOC_200360 | ENSRNOT00000025550 | -0.95440487  | 1.44E-06 |
| TUCP_004570 | XLOC_200360 | ENSRNOT00000059744 | 0.960877212  | 6.76E-07 |
| TUCP_004570 | XLOC_200360 | ENSRNOT00000066670 | 0.965434473  | 3.67E-07 |

|             |             |                    |              |          |
|-------------|-------------|--------------------|--------------|----------|
| TUCP_004570 | XLOC_200360 | ENSRNOT00000066440 | -0.954325603 | 1.45E-06 |
| TUCP_004570 | XLOC_200360 | ENSRNOT00000070994 | -0.964196677 | 4.36E-07 |
| TUCP_004570 | XLOC_200360 | ENSRNOT00000077406 | 0.971694923  | 1.36E-07 |
| TUCP_004570 | XLOC_200360 | ENSRNOT00000014814 | 0.95100391   | 2.05E-06 |
| TUCP_004570 | XLOC_200360 | ENSRNOT00000007768 | 0.957843989  | 9.77E-07 |
| TUCP_004570 | XLOC_200360 | ENSRNOT00000067181 | 0.96223208   | 5.68E-07 |
| TUCP_004570 | XLOC_200360 | ENSRNOT00000064798 | 0.964233891  | 4.34E-07 |
| TUCP_004570 | XLOC_200360 | ENSRNOT00000077465 | 0.961312314  | 6.40E-07 |
| TUCP_004570 | XLOC_200360 | ENSRNOT00000014261 | 0.968655634  | 2.26E-07 |
| TUCP_004570 | XLOC_200360 | ENSRNOT00000022485 | 0.960575107  | 7.02E-07 |
| TUCP_004570 | XLOC_200360 | ENSRNOT00000033235 | 0.970798037  | 1.59E-07 |
| TUCP_004570 | XLOC_200360 | ENSRNOT00000083414 | 0.950743457  | 2.10E-06 |
| TUCP_004570 | XLOC_200360 | ENSRNOT00000022862 | 0.951140762  | 2.02E-06 |
| TUCP_004570 | XLOC_200360 | ENSRNOT00000030343 | 0.968704555  | 2.24E-07 |
| TUCP_004570 | XLOC_200360 | ENSRNOT00000012187 | 0.973619645  | 9.63E-08 |
| TUCP_004570 | XLOC_200360 | ENSRNOT00000023428 | 0.961969347  | 5.88E-07 |
| TUCP_004570 | XLOC_200360 | ENSRNOT00000049538 | 0.95156093   | 1.94E-06 |
| TUCP_004570 | XLOC_200360 | ENSRNOT00000022947 | -0.969302066 | 2.04E-07 |
| TUCP_004570 | XLOC_200360 | ENSRNOT00000011682 | -0.978631242 | 3.39E-08 |
| TUCP_004570 | XLOC_200360 | ENSRNOT00000083799 | 0.95053698   | 2.15E-06 |
| TUCP_004570 | XLOC_200360 | ENSRNOT00000024548 | 0.951123352  | 2.02E-06 |
| TUCP_004571 | XLOC_200387 | ENSRNOT00000039045 | 0.954413818  | 1.44E-06 |
| TUCP_004571 | XLOC_200387 | ENSRNOT00000084055 | -0.955966783 | 1.21E-06 |
| TUCP_004571 | XLOC_200387 | ENSRNOT00000016991 | 0.950862627  | 2.08E-06 |
| TUCP_004571 | XLOC_200387 | ENSRNOT00000085152 | 0.960526129  | 7.06E-07 |
| TUCP_004571 | XLOC_200387 | ENSRNOT00000080271 | 0.962709101  | 5.33E-07 |
| TUCP_004571 | XLOC_200387 | ENSRNOT00000041709 | 0.954064602  | 1.49E-06 |
| TUCP_004571 | XLOC_200387 | ENSRNOT00000024021 | 0.952538332  | 1.75E-06 |
| TUCP_004571 | XLOC_200387 | ENSRNOT00000033235 | 0.950029802  | 2.26E-06 |
| TUCP_004571 | XLOC_200387 | ENSRNOT00000016859 | 0.979635639  | 2.67E-08 |
| TUCP_004571 | XLOC_200387 | ENSRNOT00000084385 | 0.950949379  | 2.06E-06 |
| TUCP_004571 | XLOC_200387 | ENSRNOT00000059744 | 0.970041437  | 1.81E-07 |
| TUCP_004571 | XLOC_200387 | ENSRNOT00000081297 | 0.969029607  | 2.13E-07 |
| TUCP_004571 | XLOC_200387 | ENSRNOT00000003177 | 0.964763695  | 4.03E-07 |
| TUCP_004571 | XLOC_200387 | ENSRNOT00000014701 | 0.956024014  | 1.20E-06 |
| TUCP_004571 | XLOC_200387 | ENSRNOT00000021445 | 0.969904307  | 1.85E-07 |
| TUCP_004571 | XLOC_200387 | ENSRNOT00000040731 | 0.969324465  | 2.03E-07 |
| TUCP_004571 | XLOC_200387 | ENSRNOT00000012379 | 0.967196237  | 2.83E-07 |
| TUCP_004571 | XLOC_200387 | ENSRNOT00000030343 | 0.954810707  | 1.38E-06 |
| TUCP_004571 | XLOC_200387 | ENSRNOT00000032158 | 0.958434079  | 9.11E-07 |
| TUCP_004571 | XLOC_200387 | ENSRNOT00000025319 | 0.966388197  | 3.19E-07 |
| TUCP_004571 | XLOC_200387 | ENSRNOT00000018990 | 0.969672397  | 1.92E-07 |
| TUCP_004571 | XLOC_200387 | ENSRNOT00000079109 | 0.950738424  | 2.10E-06 |
| TUCP_004571 | XLOC_200387 | ENSRNOT00000015874 | 0.966800073  | 3.00E-07 |
| TUCP_004571 | XLOC_200387 | ENSRNOT00000041938 | 0.959690793  | 7.83E-07 |
| TUCP_003252 | XLOC_139346 | ENSRNOT00000071840 | 0.999115585  | 4.25E-15 |
| TUCP_003252 | XLOC_139346 | ENSRNOT00000083608 | 0.991342617  | 3.77E-10 |
| TUCP_003252 | XLOC_139346 | ENSRNOT00000076035 | 0.953221873  | 1.63E-06 |
| TUCP_003252 | XLOC_139346 | ENSRNOT00000086969 | 0.953005385  | 1.67E-06 |
| TUCP_003252 | XLOC_139346 | ENSRNOT00000085476 | 0.959820804  | 7.71E-07 |
| TUCP_003252 | XLOC_139346 | ENSRNOT00000066382 | 0.965724133  | 3.52E-07 |

|             |             |                    |             |          |
|-------------|-------------|--------------------|-------------|----------|
| TUCP_003252 | XLOC_139346 | ENSRNOT00000045584 | 0.999115585 | 4.25E-15 |
| TUCP_003252 | XLOC_139346 | ENSRNOT00000077995 | 0.99573539  | 1.10E-11 |
| TUCP_003252 | XLOC_139346 | ENSRNOT00000066004 | 0.998869213 | 1.45E-14 |
| TUCP_003252 | XLOC_139346 | ENSRNOT00000064284 | 0.966882788 | 2.97E-07 |
| TUCP_003252 | XLOC_139346 | ENSRNOT00000068197 | 0.953697945 | 1.55E-06 |
| TUCP_003252 | XLOC_139346 | ENSRNOT00000082086 | 0.968413221 | 2.35E-07 |
| TUCP_003252 | XLOC_139346 | ENSRNOT00000089494 | 0.981731418 | 1.55E-08 |
| TUCP_003252 | XLOC_139346 | ENSRNOT00000083747 | 0.966754315 | 3.02E-07 |
| TUCP_003252 | XLOC_139346 | ENSRNOT00000092182 | 0.999115585 | 4.25E-15 |
| TUCP_003252 | XLOC_139346 | ENSRNOT00000084461 | 0.999115585 | 4.25E-15 |
| TUCP_003252 | XLOC_139346 | ENSRNOT00000060448 | 0.999115585 | 4.25E-15 |
| TUCP_003252 | XLOC_139346 | ENSRNOT00000032631 | 0.999115585 | 4.25E-15 |
| TUCP_003252 | XLOC_139346 | ENSRNOT00000079503 | 0.961841048 | 5.98E-07 |
| TUCP_003252 | XLOC_139346 | ENSRNOT00000027950 | 0.958224449 | 9.34E-07 |
| TUCP_003252 | XLOC_139346 | ENSRNOT00000060113 | 0.978345608 | 3.62E-08 |
| TUCP_003252 | XLOC_139346 | ENSRNOT00000054910 | 0.991210376 | 4.07E-10 |
| TUCP_003252 | XLOC_139346 | ENSRNOT00000057176 | 0.99910846  | 4.43E-15 |
| TUCP_003252 | XLOC_139346 | ENSRNOT00000078176 | 0.993025049 | 1.28E-10 |
| TUCP_003252 | XLOC_139346 | ENSRNOT00000056364 | 0.988679067 | 1.44E-09 |
| TUCP_003252 | XLOC_139346 | ENSRNOT00000093431 | 0.999115585 | 4.25E-15 |
| TUCP_003252 | XLOC_139346 | ENSRNOT00000024758 | 0.979298368 | 2.89E-08 |
| TUCP_003252 | XLOC_139346 | ENSRNOT00000092901 | 0.999115585 | 4.25E-15 |
| TUCP_003252 | XLOC_139346 | ENSRNOT00000089290 | 0.999075174 | 5.32E-15 |
| TUCP_003252 | XLOC_139346 | ENSRNOT00000090211 | 0.998529397 | 5.40E-14 |
| TUCP_003252 | XLOC_139346 | ENSRNOT00000075244 | 0.966081752 | 3.34E-07 |
| TUCP_003252 | XLOC_139346 | ENSRNOT00000091828 | 0.995022815 | 2.39E-11 |
| TUCP_003252 | XLOC_139346 | ENSRNOT00000091944 | 0.998746389 | 2.43E-14 |
| TUCP_003252 | XLOC_139346 | ENSRNOT00000070855 | 0.999115585 | 4.25E-15 |
| TUCP_003252 | XLOC_139346 | ENSRNOT00000009295 | 0.994625321 | 3.50E-11 |
| TUCP_003252 | XLOC_139346 | ENSRNOT00000084109 | 0.99888251  | 1.37E-14 |
| TUCP_003252 | XLOC_139346 | ENSRNOT00000060645 | 0.971089714 | 1.52E-07 |
| TUCP_003252 | XLOC_139346 | ENSRNOT00000041569 | 0.999115585 | 4.25E-15 |
| TUCP_003252 | XLOC_139346 | ENSRNOT00000087091 | 0.999115585 | 4.25E-15 |
| TUCP_003252 | XLOC_139346 | ENSRNOT00000003308 | 0.991121224 | 4.28E-10 |
| TUCP_003252 | XLOC_139346 | ENSRNOT00000026113 | 0.998894696 | 1.30E-14 |
| TUCP_003252 | XLOC_139346 | ENSRNOT00000014939 | 0.998822181 | 1.78E-14 |
| TUCP_003252 | XLOC_139346 | ENSRNOT00000058314 | 0.989441616 | 1.02E-09 |
| TUCP_003252 | XLOC_139346 | ENSRNOT00000047870 | 0.979511737 | 2.75E-08 |
| TUCP_003252 | XLOC_139346 | ENSRNOT00000071603 | 0.999099387 | 4.66E-15 |
| TUCP_003252 | XLOC_139346 | ENSRNOT00000088376 | 0.96719231  | 2.83E-07 |
| TUCP_003252 | XLOC_139346 | ENSRNOT00000060454 | 0.999115585 | 4.25E-15 |
| TUCP_003252 | XLOC_139346 | ENSRNOT00000029298 | 0.954145898 | 1.48E-06 |
| TUCP_003252 | XLOC_139346 | ENSRNOT00000044232 | 0.981886487 | 1.49E-08 |
| TUCP_003252 | XLOC_139346 | ENSRNOT00000023287 | 0.975910867 | 6.14E-08 |
| TUCP_003252 | XLOC_139346 | ENSRNOT00000071714 | 0.977087034 | 4.79E-08 |
| TUCP_003252 | XLOC_139346 | ENSRNOT00000075836 | 0.999115585 | 4.25E-15 |
| TUCP_003252 | XLOC_139346 | ENSRNOT00000073229 | 0.999115585 | 4.25E-15 |
| TUCP_003252 | XLOC_139346 | ENSRNOT00000077731 | 0.967092835 | 2.88E-07 |
| TUCP_003252 | XLOC_139346 | ENSRNOT00000046980 | 0.981018607 | 1.88E-08 |
| TUCP_003252 | XLOC_139346 | ENSRNOT00000039652 | 0.973849749 | 9.22E-08 |
| TUCP_003252 | XLOC_139346 | ENSRNOT00000066685 | 0.977448193 | 4.42E-08 |

|             |             |                    |              |          |
|-------------|-------------|--------------------|--------------|----------|
| TUCP_003252 | XLOC_139346 | ENSRNOT00000082776 | 0.976336624  | 5.62E-08 |
| TUCP_003252 | XLOC_139346 | ENSRNOT00000088719 | 0.963217851  | 4.98E-07 |
| TUCP_003252 | XLOC_139346 | ENSRNOT00000007683 | 0.99882856   | 1.73E-14 |
| TUCP_003252 | XLOC_139346 | ENSRNOT00000092916 | 0.965367317  | 3.70E-07 |
| TUCP_003252 | XLOC_139346 | ENSRNOT00000081106 | 0.95063169   | 2.13E-06 |
| TUCP_004573 | XLOC_200421 | ENSRNOT00000021790 | 0.96698941   | 2.92E-07 |
| TUCP_004573 | XLOC_200421 | ENSRNOT00000090526 | -0.953357806 | 1.61E-06 |
| TUCP_004573 | XLOC_200421 | ENSRNOT00000058116 | -0.95116491  | 2.01E-06 |
| TUCP_004573 | XLOC_200421 | ENSRNOT00000025580 | -0.969570751 | 1.95E-07 |
| TUCP_004573 | XLOC_200421 | ENSRNOT00000017319 | 0.950217543  | 2.21E-06 |
| TUCP_004573 | XLOC_200421 | ENSRNOT00000014537 | 0.951352616  | 1.98E-06 |
| TUCP_004573 | XLOC_200421 | ENSRNOT00000072518 | 0.959092378  | 8.42E-07 |
| TUCP_004573 | XLOC_200421 | ENSRNOT00000005911 | 0.951755097  | 1.90E-06 |
| TUCP_004573 | XLOC_200421 | ENSRNOT00000017668 | 0.962870785  | 5.22E-07 |
| TUCP_004573 | XLOC_200421 | ENSRNOT00000087592 | 0.955232418  | 1.31E-06 |
| TUCP_004573 | XLOC_200421 | ENSRNOT00000071733 | 0.951525139  | 1.94E-06 |
| TUCP_004573 | XLOC_200421 | ENSRNOT00000010218 | 0.953940062  | 1.51E-06 |
| TUCP_004573 | XLOC_200421 | ENSRNOT00000009440 | -0.951868896 | 1.88E-06 |
| TUCP_004573 | XLOC_200421 | ENSRNOT00000005228 | 0.955322606  | 1.30E-06 |
| TUCP_004573 | XLOC_200421 | ENSRNOT00000008677 | 0.950255569  | 2.21E-06 |
| TUCP_004573 | XLOC_200421 | ENSRNOT00000011052 | 0.950387354  | 2.18E-06 |
| TUCP_004573 | XLOC_200421 | ENSRNOT00000005478 | -0.950598041 | 2.13E-06 |
| TUCP_004573 | XLOC_200421 | ENSRNOT00000081768 | 0.955710053  | 1.25E-06 |
| TUCP_004573 | XLOC_200421 | ENSRNOT00000090420 | -0.952436889 | 1.77E-06 |
| TUCP_004573 | XLOC_200421 | ENSRNOT00000008817 | 0.967649123  | 2.64E-07 |
| TUCP_004573 | XLOC_200421 | ENSRNOT00000011230 | 0.984245817  | 7.44E-09 |
| TUCP_004573 | XLOC_200421 | ENSRNOT00000021073 | -0.95805757  | 9.53E-07 |
| TUCP_004573 | XLOC_200421 | ENSRNOT00000076872 | 0.950085057  | 2.24E-06 |
| TUCP_004573 | XLOC_200421 | ENSRNOT00000009368 | -0.960408074 | 7.17E-07 |
| TUCP_004573 | XLOC_200421 | ENSRNOT00000066440 | -0.951425547 | 1.96E-06 |
| TUCP_004573 | XLOC_200421 | ENSRNOT00000070994 | -0.969496264 | 1.98E-07 |
| TUCP_004573 | XLOC_200421 | ENSRNOT00000015116 | 0.955808432  | 1.23E-06 |
| TUCP_004573 | XLOC_200421 | ENSRNOT00000066670 | 0.957249447  | 1.05E-06 |
| TUCP_004573 | XLOC_200421 | ENSRNOT00000023180 | 0.961879284  | 5.95E-07 |
| TUCP_004573 | XLOC_200421 | ENSRNOT00000017753 | 0.960819232  | 6.81E-07 |
| TUCP_004573 | XLOC_200421 | ENSRNOT00000031267 | 0.977386393  | 4.48E-08 |
| TUCP_004573 | XLOC_200421 | ENSRNOT00000021408 | 0.97053147   | 1.67E-07 |
| TUCP_004573 | XLOC_200421 | ENSRNOT00000012187 | 0.954086231  | 1.49E-06 |
| TUCP_004573 | XLOC_200421 | ENSRNOT0000007002  | -0.951351328 | 1.98E-06 |
| TUCP_004573 | XLOC_200421 | ENSRNOT00000012463 | -0.976496844 | 5.43E-08 |
| TUCP_004573 | XLOC_200421 | ENSRNOT00000019177 | 0.952677842  | 1.73E-06 |
| TUCP_004573 | XLOC_200421 | ENSRNOT00000006499 | 0.971590604  | 1.39E-07 |
| TUCP_004573 | XLOC_200421 | ENSRNOT0000004274  | -0.969808108 | 1.88E-07 |
| TUCP_004573 | XLOC_200421 | ENSRNOT00000033235 | 0.963318348  | 4.92E-07 |
| TUCP_004573 | XLOC_200421 | ENSRNOT00000029833 | 0.959281221  | 8.23E-07 |
| TUCP_004573 | XLOC_200421 | ENSRNOT00000043535 | 0.950921412  | 2.06E-06 |
| TUCP_004573 | XLOC_200421 | ENSRNOT00000030343 | 0.964575742  | 4.14E-07 |
| TUCP_004573 | XLOC_200421 | ENSRNOT00000044742 | 0.950688366  | 2.11E-06 |
| TUCP_004573 | XLOC_200421 | ENSRNOT00000026755 | 0.951551288  | 1.94E-06 |
| TUCP_004573 | XLOC_200421 | ENSRNOT00000023428 | 0.952069464  | 1.84E-06 |
| TUCP_004573 | XLOC_200421 | ENSRNOT00000016519 | 0.956546459  | 1.13E-06 |

|             |             |                    |              |          |
|-------------|-------------|--------------------|--------------|----------|
| TUCP_004573 | XLOC_200421 | ENSRNOT00000002121 | -0.953808505 | 1.53E-06 |
| TUCP_004573 | XLOC_200421 | ENSRNOT00000002410 | 0.950968604  | 2.05E-06 |
| TUCP_004573 | XLOC_200421 | ENSRNOT00000001968 | -0.963941995 | 4.52E-07 |
| TUCP_004573 | XLOC_200421 | ENSRNOT00000022963 | 0.954188591  | 1.47E-06 |
| TUCP_004573 | XLOC_200421 | ENSRNOT00000052422 | 0.963197616  | 5.00E-07 |
| TUCP_004573 | XLOC_200421 | ENSRNOT00000011682 | -0.965683061 | 3.54E-07 |
| TUCP_004475 | XLOC_196922 | ENSRNOT00000040202 | 0.96767214   | 2.63E-07 |
| TUCP_004475 | XLOC_196922 | ENSRNOT00000071222 | -0.953763286 | 1.54E-06 |
| TUCP_003423 | XLOC_148139 | ENSRNOT00000010743 | 0.973323789  | 1.02E-07 |
| TUCP_003423 | XLOC_148139 | ENSRNOT00000091060 | 0.983477673  | 9.43E-09 |
| TUCP_003423 | XLOC_148139 | ENSRNOT00000084918 | 0.997966382  | 2.73E-13 |
| TUCP_003423 | XLOC_148139 | ENSRNOT00000051916 | 0.950075413  | 2.25E-06 |
| TUCP_004477 | XLOC_197096 | ENSRNOT00000021590 | 0.967922493  | 2.53E-07 |
| TUCP_004477 | XLOC_197096 | ENSRNOT00000065111 | 0.961686983  | 6.10E-07 |
| TUCP_004477 | XLOC_197096 | ENSRNOT00000024583 | -0.956283414 | 1.17E-06 |
| TUCP_004477 | XLOC_197096 | ENSRNOT00000015888 | 0.969982469  | 1.83E-07 |
| TUCP_004477 | XLOC_197096 | ENSRNOT00000041762 | 0.950655488  | 2.12E-06 |
| TUCP_004477 | XLOC_197096 | ENSRNOT00000091315 | 0.963671518  | 4.69E-07 |
| TUCP_004476 | XLOC_196922 | ENSRNOT00000033015 | 0.950232312  | 2.21E-06 |
| TUCP_004476 | XLOC_196922 | ENSRNOT00000025493 | 0.952065245  | 1.84E-06 |
| TUCP_004476 | XLOC_196922 | ENSRNOT00000002040 | 0.952331717  | 1.79E-06 |
| TUCP_004476 | XLOC_196922 | ENSRNOT00000045950 | 0.95604254   | 1.20E-06 |
| TUCP_004476 | XLOC_196922 | ENSRNOT00000087873 | -0.951521195 | 1.94E-06 |
| TUCP_004476 | XLOC_196922 | ENSRNOT00000010634 | 0.965842998  | 3.46E-07 |
| TUCP_004476 | XLOC_196922 | ENSRNOT00000005280 | 0.951564371  | 1.94E-06 |
| TUCP_004476 | XLOC_196922 | ENSRNOT00000018953 | 0.972698709  | 1.14E-07 |
| TUCP_003310 | XLOC_142366 | ENSRNOT00000024313 | 0.953547476  | 1.58E-06 |
| TUCP_003098 | XLOC_132578 | ENSRNOT00000082043 | 0.998965531  | 9.31E-15 |
| TUCP_003098 | XLOC_132578 | ENSRNOT00000090080 | 0.970514074  | 1.67E-07 |
| TUCP_003098 | XLOC_132578 | ENSRNOT00000068444 | 1            | 0        |
| TUCP_003098 | XLOC_132578 | ENSRNOT00000081370 | 0.999740797  | 9.21E-18 |
| TUCP_003098 | XLOC_132578 | ENSRNOT00000078645 | 0.989717078  | 8.90E-10 |
| TUCP_003098 | XLOC_132578 | ENSRNOT00000075987 | 0.987945283  | 1.96E-09 |
| TUCP_003098 | XLOC_132578 | ENSRNOT00000074990 | 1            | 0        |
| TUCP_003098 | XLOC_132578 | ENSRNOT00000087323 | 0.995029331  | 2.37E-11 |
| TUCP_003098 | XLOC_132578 | ENSRNOT00000074930 | 1            | 0        |
| TUCP_003098 | XLOC_132578 | ENSRNOT00000080575 | 0.999929267  | 1.39E-20 |
| TUCP_003098 | XLOC_132578 | ENSRNOT00000057761 | 0.982981445  | 1.09E-08 |
| TUCP_003098 | XLOC_132578 | ENSRNOT00000078369 | 0.993028032  | 1.28E-10 |
| TUCP_003098 | XLOC_132578 | ENSRNOT00000092982 | 1            | 0        |
| TUCP_003098 | XLOC_132578 | ENSRNOT00000088367 | 1            | 0        |
| TUCP_003098 | XLOC_132578 | ENSRNOT00000061874 | 0.968405099  | 2.35E-07 |
| TUCP_003098 | XLOC_132578 | ENSRNOT00000077789 | 0.99346224   | 9.30E-11 |
| TUCP_003098 | XLOC_132578 | ENSRNOT00000081996 | 1            | 0        |
| TUCP_003098 | XLOC_132578 | ENSRNOT00000022280 | 0.982176915  | 1.37E-08 |
| TUCP_003098 | XLOC_132578 | ENSRNOT00000082058 | 1            | 0        |
| TUCP_003098 | XLOC_132578 | ENSRNOT00000088905 | 1            | 1.33E-79 |
| TUCP_003098 | XLOC_132578 | ENSRNOT00000086831 | 1            | 0        |
| TUCP_003098 | XLOC_132578 | ENSRNOT00000045099 | 1            | 0        |
| TUCP_003098 | XLOC_132578 | ENSRNOT00000086745 | 0.978585655  | 3.42E-08 |
| TUCP_003098 | XLOC_132578 | ENSRNOT00000085849 | 0.988270765  | 1.71E-09 |

|             |             |                    |             |          |
|-------------|-------------|--------------------|-------------|----------|
| TUCP_003098 | XLOC_132578 | ENSRNOT00000086397 | 0.957188178 | 1.05E-06 |
| TUCP_003098 | XLOC_132578 | ENSRNOT00000079606 | 0.960472013 | 7.11E-07 |
| TUCP_003098 | XLOC_132578 | ENSRNOT00000090207 | 0.953487741 | 1.59E-06 |
| TUCP_003098 | XLOC_132578 | ENSRNOT00000087025 | 1           | 0        |
| TUCP_003098 | XLOC_132578 | ENSRNOT00000019853 | 1           | 0        |
| TUCP_003098 | XLOC_132578 | ENSRNOT00000073853 | 0.989715487 | 8.91E-10 |
| TUCP_003098 | XLOC_132578 | ENSRNOT00000065912 | 0.974234118 | 8.57E-08 |
| TUCP_003098 | XLOC_132578 | ENSRNOT00000073828 | 0.971647353 | 1.38E-07 |
| TUCP_003098 | XLOC_132578 | ENSRNOT00000078683 | 0.966682958 | 3.06E-07 |
| TUCP_003098 | XLOC_132578 | ENSRNOT00000093083 | 0.999140292 | 3.69E-15 |
| TUCP_003422 | XLOC_148139 | ENSRNOT00000081570 | 0.962961027 | 5.16E-07 |
| TUCP_003422 | XLOC_148139 | ENSRNOT00000091652 | 0.99819185  | 1.52E-13 |
| TUCP_003422 | XLOC_148139 | ENSRNOT00000036564 | 0.972337506 | 1.22E-07 |
| TUCP_003422 | XLOC_148139 | ENSRNOT00000000109 | 0.962179854 | 5.72E-07 |
| TUCP_003422 | XLOC_148139 | ENSRNOT00000080865 | 1           | 4.25E-78 |
| TUCP_003422 | XLOC_148139 | ENSRNOT00000073534 | 0.995808019 | 1.01E-11 |
| TUCP_003422 | XLOC_148139 | ENSRNOT00000012161 | 0.987544327 | 2.31E-09 |
| TUCP_003422 | XLOC_148139 | ENSRNOT00000078707 | 0.960060506 | 7.48E-07 |
| TUCP_003422 | XLOC_148139 | ENSRNOT00000087758 | 0.968778527 | 2.22E-07 |
| TUCP_003422 | XLOC_148139 | ENSRNOT00000049832 | 0.969039151 | 2.13E-07 |
| TUCP_003422 | XLOC_148139 | ENSRNOT00000093019 | 1           | 0        |
| TUCP_003422 | XLOC_148139 | ENSRNOT00000024825 | 0.980452701 | 2.18E-08 |
| TUCP_003422 | XLOC_148139 | ENSRNOT00000059266 | 0.96033506  | 7.23E-07 |
| TUCP_003422 | XLOC_148139 | ENSRNOT00000072734 | 0.965018115 | 3.89E-07 |
| TUCP_003422 | XLOC_148139 | ENSRNOT00000085908 | 0.996653227 | 3.29E-12 |
| TUCP_003422 | XLOC_148139 | ENSRNOT00000046744 | 1           | 4.25E-78 |
| TUCP_003422 | XLOC_148139 | ENSRNOT00000076429 | 1           | 4.25E-78 |
| TUCP_003422 | XLOC_148139 | ENSRNOT00000084667 | 0.999660971 | 3.53E-17 |
| TUCP_003422 | XLOC_148139 | ENSRNOT00000055412 | 1           | 0        |
| TUCP_003422 | XLOC_148139 | ENSRNOT00000093201 | 0.9997022   | 1.84E-17 |
| TUCP_003422 | XLOC_148139 | ENSRNOT00000072724 | 1           | 0        |
| TUCP_003422 | XLOC_148139 | ENSRNOT00000090323 | 0.95603782  | 1.20E-06 |
| TUCP_003422 | XLOC_148139 | ENSRNOT00000082760 | 0.986293522 | 3.72E-09 |
| TUCP_003422 | XLOC_148139 | ENSRNOT00000066017 | 0.989785653 | 8.61E-10 |
| TUCP_003422 | XLOC_148139 | ENSRNOT00000073148 | 0.985721397 | 4.56E-09 |
| TUCP_003422 | XLOC_148139 | ENSRNOT00000077462 | 0.960098183 | 7.45E-07 |
| TUCP_003422 | XLOC_148139 | ENSRNOT00000084375 | 1           | 1.33E-79 |
| TUCP_003422 | XLOC_148139 | ENSRNOT00000085447 | 0.998400682 | 8.22E-14 |
| TUCP_003422 | XLOC_148139 | ENSRNOT0000006249  | 0.966489607 | 3.15E-07 |
| TUCP_003422 | XLOC_148139 | ENSRNOT00000087073 | 0.952450698 | 1.77E-06 |
| TUCP_003422 | XLOC_148139 | ENSRNOT00000042369 | 0.995659369 | 1.20E-11 |
| TUCP_003422 | XLOC_148139 | ENSRNOT00000086554 | 1           | 1.33E-79 |
| TUCP_003422 | XLOC_148139 | ENSRNOT00000054858 | 0.985228824 | 5.40E-09 |
| TUCP_003422 | XLOC_148139 | ENSRNOT00000047921 | 1           | 0        |
| TUCP_003422 | XLOC_148139 | ENSRNOT00000064261 | 0.999977196 | 4.86E-23 |
| TUCP_003422 | XLOC_148139 | ENSRNOT00000086660 | 0.999208903 | 2.44E-15 |
| TUCP_003422 | XLOC_148139 | ENSRNOT00000080933 | 0.967360681 | 2.76E-07 |
| TUCP_003422 | XLOC_148139 | ENSRNOT00000083977 | 1           | 4.25E-78 |
| TUCP_003422 | XLOC_148139 | ENSRNOT00000092933 | 1           | 0        |
| TUCP_003422 | XLOC_148139 | ENSRNOT0000009061  | 0.953300672 | 1.62E-06 |
| TUCP_003422 | XLOC_148139 | ENSRNOT00000041281 | 0.987828355 | 2.06E-09 |



|             |             |                    |             |          |
|-------------|-------------|--------------------|-------------|----------|
| TUCP_003294 | XLOC_141782 | ENSRNOT00000081570 | 0.960144642 | 7.41E-07 |
| TUCP_003294 | XLOC_141782 | ENSRNOT00000091652 | 0.997863766 | 3.49E-13 |
| TUCP_003294 | XLOC_141782 | ENSRNOT00000036564 | 0.969362152 | 2.02E-07 |
| TUCP_003294 | XLOC_141782 | ENSRNOT00000000109 | 0.959502499 | 8.01E-07 |
| TUCP_003294 | XLOC_141782 | ENSRNOT00000080865 | 0.998674605 | 3.21E-14 |
| TUCP_003294 | XLOC_141782 | ENSRNOT00000073534 | 0.993220999 | 1.11E-10 |
| TUCP_003294 | XLOC_141782 | ENSRNOT00000012161 | 0.982982233 | 1.09E-08 |
| TUCP_003294 | XLOC_141782 | ENSRNOT00000078707 | 0.956239301 | 1.17E-06 |
| TUCP_003294 | XLOC_141782 | ENSRNOT00000087758 | 0.974414158 | 8.27E-08 |
| TUCP_003294 | XLOC_141782 | ENSRNOT00000049832 | 0.961062634 | 6.60E-07 |
| TUCP_003294 | XLOC_141782 | ENSRNOT00000093019 | 0.998674605 | 3.21E-14 |
| TUCP_003294 | XLOC_141782 | ENSRNOT00000024825 | 0.985859426 | 4.35E-09 |
| TUCP_003294 | XLOC_141782 | ENSRNOT00000059266 | 0.956185784 | 1.18E-06 |
| TUCP_003294 | XLOC_141782 | ENSRNOT00000072734 | 0.959461525 | 8.05E-07 |
| TUCP_003294 | XLOC_141782 | ENSRNOT00000085908 | 0.998489842 | 6.17E-14 |
| TUCP_003294 | XLOC_141782 | ENSRNOT00000046744 | 0.998674605 | 3.21E-14 |
| TUCP_003294 | XLOC_141782 | ENSRNOT00000076429 | 0.998674605 | 3.21E-14 |
| TUCP_003294 | XLOC_141782 | ENSRNOT00000084667 | 0.999147178 | 3.55E-15 |
| TUCP_003294 | XLOC_141782 | ENSRNOT00000055412 | 0.998674605 | 3.21E-14 |
| TUCP_003294 | XLOC_141782 | ENSRNOT00000093201 | 0.999406934 | 5.77E-16 |
| TUCP_003294 | XLOC_141782 | ENSRNOT00000072724 | 0.998674605 | 3.21E-14 |
| TUCP_003294 | XLOC_141782 | ENSRNOT00000090323 | 0.963513133 | 4.79E-07 |
| TUCP_003294 | XLOC_141782 | ENSRNOT00000082760 | 0.984137057 | 7.70E-09 |
| TUCP_003294 | XLOC_141782 | ENSRNOT00000066017 | 0.986818998 | 3.06E-09 |
| TUCP_003294 | XLOC_141782 | ENSRNOT00000073148 | 0.982467578 | 1.27E-08 |
| TUCP_003294 | XLOC_141782 | ENSRNOT00000077462 | 0.957386282 | 1.03E-06 |
| TUCP_003294 | XLOC_141782 | ENSRNOT00000084375 | 0.998674605 | 3.21E-14 |
| TUCP_003294 | XLOC_141782 | ENSRNOT00000085447 | 0.996361923 | 4.99E-12 |
| TUCP_003294 | XLOC_141782 | ENSRNOT00000006249 | 0.963198067 | 5.00E-07 |
| TUCP_003294 | XLOC_141782 | ENSRNOT00000054858 | 0.98304164  | 1.07E-08 |
| TUCP_003294 | XLOC_141782 | ENSRNOT00000042369 | 0.993456707 | 9.34E-11 |
| TUCP_003294 | XLOC_141782 | ENSRNOT00000086554 | 0.998674605 | 3.21E-14 |
| TUCP_003294 | XLOC_141782 | ENSRNOT00000047921 | 0.998674605 | 3.21E-14 |
| TUCP_003294 | XLOC_141782 | ENSRNOT00000064261 | 0.998950522 | 1.00E-14 |
| TUCP_003294 | XLOC_141782 | ENSRNOT00000086660 | 0.998579942 | 4.54E-14 |
| TUCP_003294 | XLOC_141782 | ENSRNOT00000080933 | 0.973815073 | 9.28E-08 |
| TUCP_003294 | XLOC_141782 | ENSRNOT00000083977 | 0.998674605 | 3.21E-14 |
| TUCP_003294 | XLOC_141782 | ENSRNOT00000092933 | 0.998674605 | 3.21E-14 |
| TUCP_003294 | XLOC_141782 | ENSRNOT0000009061  | 0.950368767 | 2.18E-06 |
| TUCP_003294 | XLOC_141782 | ENSRNOT00000041281 | 0.985189436 | 5.47E-09 |
| TUCP_003094 | XLOC_132420 | ENSRNOT00000092026 | 0.965926295 | 3.42E-07 |
| TUCP_003094 | XLOC_132420 | ENSRNOT00000093075 | 0.999975104 | 7.53E-23 |
| TUCP_003094 | XLOC_132420 | ENSRNOT00000058260 | 0.999975104 | 7.53E-23 |
| TUCP_003094 | XLOC_132420 | ENSRNOT00000088887 | 0.999975104 | 7.53E-23 |
| TUCP_003094 | XLOC_132420 | ENSRNOT00000084986 | 0.999975104 | 7.53E-23 |
| TUCP_003094 | XLOC_132420 | ENSRNOT00000074346 | 0.97096185  | 1.55E-07 |
| TUCP_003094 | XLOC_132420 | ENSRNOT00000073209 | 0.983517236 | 9.32E-09 |
| TUCP_003094 | XLOC_132420 | ENSRNOT00000080155 | 0.97334178  | 1.01E-07 |
| TUCP_003094 | XLOC_132420 | ENSRNOT00000072573 | 0.99623723  | 5.90E-12 |
| TUCP_003094 | XLOC_132420 | ENSRNOT00000017828 | 0.995911315 | 8.94E-12 |
| TUCP_003094 | XLOC_132420 | ENSRNOT00000080444 | 0.969188869 | 2.08E-07 |

|             |             |                    |             |          |
|-------------|-------------|--------------------|-------------|----------|
| TUCP_003094 | XLOC_132420 | ENSRNOT00000071312 | 0.999975104 | 7.53E-23 |
| TUCP_003094 | XLOC_132420 | ENSRNOT00000088245 | 0.999975104 | 7.53E-23 |
| TUCP_003094 | XLOC_132420 | ENSRNOT00000036565 | 0.968780887 | 2.22E-07 |
| TUCP_003094 | XLOC_132420 | ENSRNOT00000058833 | 0.998610659 | 4.07E-14 |
| TUCP_003094 | XLOC_132420 | ENSRNOT00000078052 | 0.999975104 | 7.53E-23 |
| TUCP_003094 | XLOC_132420 | ENSRNOT00000078494 | 0.999893349 | 1.09E-19 |
| TUCP_003094 | XLOC_132420 | ENSRNOT00000085653 | 0.999975104 | 7.53E-23 |
| TUCP_003094 | XLOC_132420 | ENSRNOT00000057950 | 0.969494352 | 1.98E-07 |
| TUCP_003094 | XLOC_132420 | ENSRNOT00000081992 | 0.999290681 | 1.41E-15 |
| TUCP_003094 | XLOC_132420 | ENSRNOT00000038553 | 0.955435188 | 1.28E-06 |
| TUCP_003094 | XLOC_132420 | ENSRNOT00000084120 | 0.957680108 | 9.96E-07 |
| TUCP_003094 | XLOC_132420 | ENSRNOT00000055406 | 0.999975104 | 7.53E-23 |
| TUCP_003094 | XLOC_132420 | ENSRNOT00000070817 | 0.998922498 | 1.14E-14 |
| TUCP_003094 | XLOC_132420 | ENSRNOT00000026753 | 0.999975104 | 7.53E-23 |
| TUCP_003094 | XLOC_132420 | ENSRNOT00000080533 | 0.996598069 | 3.57E-12 |
| TUCP_003094 | XLOC_132420 | ENSRNOT00000072774 | 0.979493829 | 2.76E-08 |
| TUCP_003094 | XLOC_132420 | ENSRNOT00000086031 | 0.999975104 | 7.53E-23 |
| TUCP_003094 | XLOC_132420 | ENSRNOT00000014312 | 0.999975104 | 7.53E-23 |
| TUCP_003094 | XLOC_132420 | ENSRNOT00000042882 | 0.962829003 | 5.25E-07 |
| TUCP_003094 | XLOC_132420 | ENSRNOT00000088012 | 0.956528823 | 1.14E-06 |
| TUCP_003094 | XLOC_132420 | ENSRNOT00000051231 | 0.999188978 | 2.76E-15 |
| TUCP_003094 | XLOC_132420 | ENSRNOT00000089407 | 0.992875437 | 1.43E-10 |
| TUCP_003094 | XLOC_132420 | ENSRNOT00000055034 | 0.998436521 | 7.34E-14 |
| TUCP_003094 | XLOC_132420 | ENSRNOT00000046837 | 0.973349511 | 1.01E-07 |
| TUCP_001949 | XLOC_078994 | ENSRNOT00000002330 | 0.955686858 | 1.25E-06 |
| TUCP_003092 | XLOC_132420 | ENSRNOT00000079365 | 0.959235103 | 8.28E-07 |
| TUCP_004478 | XLOC_197235 | ENSRNOT00000082043 | 0.981853795 | 1.50E-08 |
| TUCP_004478 | XLOC_197235 | ENSRNOT00000090080 | 0.953323253 | 1.61E-06 |
| TUCP_004478 | XLOC_197235 | ENSRNOT00000068444 | 0.984329684 | 7.25E-09 |
| TUCP_004478 | XLOC_197235 | ENSRNOT00000081370 | 0.985156964 | 5.53E-09 |
| TUCP_004478 | XLOC_197235 | ENSRNOT00000078645 | 0.978025046 | 3.89E-08 |
| TUCP_004478 | XLOC_197235 | ENSRNOT00000075987 | 0.967780413 | 2.59E-07 |
| TUCP_004478 | XLOC_197235 | ENSRNOT00000074990 | 0.984329684 | 7.25E-09 |
| TUCP_004478 | XLOC_197235 | ENSRNOT00000087323 | 0.977079231 | 4.79E-08 |
| TUCP_004478 | XLOC_197235 | ENSRNOT00000074930 | 0.984329684 | 7.25E-09 |
| TUCP_004478 | XLOC_197235 | ENSRNOT00000080575 | 0.984593043 | 6.66E-09 |
| TUCP_004478 | XLOC_197235 | ENSRNOT00000057761 | 0.964338401 | 4.28E-07 |
| TUCP_004478 | XLOC_197235 | ENSRNOT00000078369 | 0.972642595 | 1.15E-07 |
| TUCP_004478 | XLOC_197235 | ENSRNOT00000092982 | 0.984329684 | 7.25E-09 |
| TUCP_004478 | XLOC_197235 | ENSRNOT00000088367 | 0.984329684 | 7.25E-09 |
| TUCP_004478 | XLOC_197235 | ENSRNOT00000089257 | 0.962855952 | 5.23E-07 |
| TUCP_004478 | XLOC_197235 | ENSRNOT00000061874 | 0.981170322 | 1.81E-08 |
| TUCP_004478 | XLOC_197235 | ENSRNOT00000081996 | 0.984329684 | 7.25E-09 |
| TUCP_004478 | XLOC_197235 | ENSRNOT00000022280 | 0.962266242 | 5.65E-07 |
| TUCP_004478 | XLOC_197235 | ENSRNOT00000082058 | 0.984329684 | 7.25E-09 |
| TUCP_004478 | XLOC_197235 | ENSRNOT00000088905 | 0.984329684 | 7.25E-09 |
| TUCP_004478 | XLOC_197235 | ENSRNOT00000086831 | 0.984329684 | 7.25E-09 |
| TUCP_004478 | XLOC_197235 | ENSRNOT00000045099 | 0.984329684 | 7.25E-09 |
| TUCP_004478 | XLOC_197235 | ENSRNOT00000086745 | 0.959000768 | 8.52E-07 |
| TUCP_004478 | XLOC_197235 | ENSRNOT00000085849 | 0.968007819 | 2.50E-07 |
| TUCP_004478 | XLOC_197235 | ENSRNOT00000086397 | 0.963690561 | 4.68E-07 |

|             |             |                    |             |          |
|-------------|-------------|--------------------|-------------|----------|
| TUCP_004478 | XLOC_197235 | ENSRNOT00000077789 | 0.968989529 | 2.14E-07 |
| TUCP_004478 | XLOC_197235 | ENSRNOT00000073828 | 0.952252088 | 1.80E-06 |
| TUCP_004478 | XLOC_197235 | ENSRNOT00000087025 | 0.984329684 | 7.25E-09 |
| TUCP_004478 | XLOC_197235 | ENSRNOT00000019853 | 0.984329684 | 7.25E-09 |
| TUCP_004478 | XLOC_197235 | ENSRNOT00000073853 | 0.971683821 | 1.37E-07 |
| TUCP_004478 | XLOC_197235 | ENSRNOT00000065912 | 0.982039078 | 1.43E-08 |
| TUCP_004478 | XLOC_197235 | ENSRNOT00000093083 | 0.985035015 | 5.76E-09 |
| TUCP_003091 | XLOC_132420 | ENSRNOT00000087219 | 0.967161841 | 2.85E-07 |
| TUCP_003420 | XLOC_148139 | ENSRNOT00000087803 | 0.961644653 | 6.13E-07 |
| TUCP_003296 | XLOC_141782 | ENSRNOT00000024186 | 0.983200502 | 1.02E-08 |
| TUCP_003296 | XLOC_141782 | ENSRNOT00000074753 | 0.998182349 | 1.56E-13 |
| TUCP_003296 | XLOC_141782 | ENSRNOT00000004876 | 0.959071443 | 8.44E-07 |
| TUCP_003296 | XLOC_141782 | ENSRNOT00000041904 | 1           | 0        |
| TUCP_003296 | XLOC_141782 | ENSRNOT00000083487 | 0.989515314 | 9.80E-10 |
| TUCP_003296 | XLOC_141782 | ENSRNOT00000077990 | 1           | 0        |
| TUCP_003296 | XLOC_141782 | ENSRNOT00000038826 | 0.99977672  | 4.37E-18 |
| TUCP_003296 | XLOC_141782 | ENSRNOT00000046842 | 0.973644314 | 9.58E-08 |
| TUCP_003296 | XLOC_141782 | ENSRNOT00000037169 | 0.980329406 | 2.24E-08 |
| TUCP_003296 | XLOC_141782 | ENSRNOT00000021243 | 0.987425406 | 2.42E-09 |
| TUCP_003296 | XLOC_141782 | ENSRNOT00000060250 | 0.999933853 | 9.97E-21 |
| TUCP_003296 | XLOC_141782 | ENSRNOT00000091934 | 1           | 0        |
| TUCP_003296 | XLOC_141782 | ENSRNOT00000046585 | 0.982941597 | 1.11E-08 |
| TUCP_003296 | XLOC_141782 | ENSRNOT00000080794 | 0.990839253 | 5.00E-10 |
| TUCP_003296 | XLOC_141782 | ENSRNOT00000014456 | 0.991697153 | 3.06E-10 |
| TUCP_003296 | XLOC_141782 | ENSRNOT00000031205 | 0.991394766 | 3.66E-10 |
| TUCP_003296 | XLOC_141782 | ENSRNOT00000044145 | 1           | 0        |
| TUCP_003296 | XLOC_141782 | ENSRNOT00000088381 | 0.989013276 | 1.24E-09 |
| TUCP_003296 | XLOC_141782 | ENSRNOT00000011743 | 0.98678427  | 3.11E-09 |
| TUCP_003296 | XLOC_141782 | ENSRNOT00000089929 | 1           | 0        |
| TUCP_003296 | XLOC_141782 | ENSRNOT00000088624 | 1           | 0        |
| TUCP_003296 | XLOC_141782 | ENSRNOT00000085659 | 0.989908621 | 8.10E-10 |
| TUCP_003296 | XLOC_141782 | ENSRNOT00000015866 | 0.994066664 | 5.73E-11 |
| TUCP_003296 | XLOC_141782 | ENSRNOT00000078633 | 1           | 0        |
| TUCP_003296 | XLOC_141782 | ENSRNOT00000034907 | 0.995318542 | 1.76E-11 |
| TUCP_003296 | XLOC_141782 | ENSRNOT00000093230 | 0.958295175 | 9.26E-07 |
| TUCP_003296 | XLOC_141782 | ENSRNOT00000051835 | 1           | 0        |
| TUCP_003296 | XLOC_141782 | ENSRNOT00000079087 | 1           | 0        |
| TUCP_003296 | XLOC_141782 | ENSRNOT00000037206 | 1           | 0        |
| TUCP_003296 | XLOC_141782 | ENSRNOT00000083261 | 0.970991658 | 1.54E-07 |
| TUCP_003296 | XLOC_141782 | ENSRNOT00000080590 | 0.999889216 | 1.31E-19 |
| TUCP_003296 | XLOC_141782 | ENSRNOT00000027552 | 0.999801024 | 2.46E-18 |
| TUCP_003296 | XLOC_141782 | ENSRNOT00000077014 | 0.995074376 | 2.26E-11 |
| TUCP_003296 | XLOC_141782 | ENSRNOT00000080453 | 0.99994332  | 4.61E-21 |
| TUCP_003296 | XLOC_141782 | ENSRNOT00000089057 | 0.968243551 | 2.41E-07 |
| TUCP_003296 | XLOC_141782 | ENSRNOT00000066839 | 0.991868612 | 2.76E-10 |
| TUCP_003296 | XLOC_141782 | ENSRNOT00000061284 | 0.955566942 | 1.27E-06 |
| TUCP_003296 | XLOC_141782 | ENSRNOT00000013423 | 0.959677621 | 7.84E-07 |
| TUCP_003296 | XLOC_141782 | ENSRNOT00000071884 | 0.974769955 | 7.72E-08 |
| TUCP_003296 | XLOC_141782 | ENSRNOT00000004128 | 0.961829362 | 5.99E-07 |
| TUCP_003296 | XLOC_141782 | ENSRNOT00000026316 | 0.964408046 | 4.24E-07 |
| TUCP_003296 | XLOC_141782 | ENSRNOT00000057729 | 0.999384184 | 6.97E-16 |

|             |             |                    |              |          |
|-------------|-------------|--------------------|--------------|----------|
| TUCP_003296 | XLOC_141782 | ENSRNOT00000078663 | 0.975192577  | 7.10E-08 |
| TUCP_003296 | XLOC_141782 | ENSRNOT00000064250 | 0.983131977  | 1.05E-08 |
| TUCP_003296 | XLOC_141782 | ENSRNOT00000021608 | 0.965228881  | 3.78E-07 |
| TUCP_003296 | XLOC_141782 | ENSRNOT00000029634 | 0.995816134  | 1.00E-11 |
| TUCP_003296 | XLOC_141782 | ENSRNOT00000093579 | 0.958564264  | 8.97E-07 |
| TUCP_003296 | XLOC_141782 | ENSRNOT00000086349 | 0.957242511  | 1.05E-06 |
| TUCP_003296 | XLOC_141782 | ENSRNOT00000065460 | 1            | 0        |
| TUCP_003296 | XLOC_141782 | ENSRNOT00000003817 | 0.996778712  | 2.72E-12 |
| TUCP_003296 | XLOC_141782 | ENSRNOT00000016713 | 1            | 0        |
| TUCP_003296 | XLOC_141782 | ENSRNOT00000079260 | 0.996448245  | 4.42E-12 |
| TUCP_003296 | XLOC_141782 | ENSRNOT00000039294 | 1            | 0        |
| TUCP_003296 | XLOC_141782 | ENSRNOT00000092913 | 0.952980228  | 1.67E-06 |
| TUCP_001617 | XLOC_064083 | ENSRNOT00000005505 | 0.952734211  | 1.72E-06 |
| TUCP_001617 | XLOC_064083 | ENSRNOT00000026757 | 0.95083947   | 2.08E-06 |
| TUCP_001617 | XLOC_064083 | ENSRNOT00000077025 | 0.964767668  | 4.03E-07 |
| TUCP_001617 | XLOC_064083 | ENSRNOT00000021590 | 0.953022689  | 1.66E-06 |
| TUCP_001617 | XLOC_064083 | ENSRNOT00000086144 | 0.957824778  | 9.79E-07 |
| TUCP_000836 | XLOC_032410 | ENSRNOT00000021402 | 0.955344367  | 1.30E-06 |
| TUCP_000836 | XLOC_032410 | ENSRNOT00000073970 | -0.952938867 | 1.68E-06 |
| TUCP_000836 | XLOC_032410 | ENSRNOT00000008372 | 0.954399426  | 1.44E-06 |
| TUCP_003425 | XLOC_148213 | ENSRNOT00000047105 | 0.959375158  | 8.14E-07 |
| TUCP_003425 | XLOC_148213 | ENSRNOT00000082183 | 0.963329714  | 4.91E-07 |
| TUCP_003425 | XLOC_148213 | ENSRNOT00000075397 | 0.957262747  | 1.04E-06 |
| TUCP_003425 | XLOC_148213 | ENSRNOT00000068212 | 0.96308836   | 5.07E-07 |
| TUCP_003425 | XLOC_148213 | ENSRNOT00000006217 | 0.958307     | 9.25E-07 |
| TUCP_003425 | XLOC_148213 | ENSRNOT00000040525 | 0.962064821  | 5.81E-07 |
| TUCP_003425 | XLOC_148213 | ENSRNOT00000071998 | 0.963386635  | 4.87E-07 |
| TUCP_003425 | XLOC_148213 | ENSRNOT00000086706 | 0.952759806  | 1.71E-06 |
| TUCP_003425 | XLOC_148213 | ENSRNOT00000084567 | 0.968480795  | 2.32E-07 |
| TUCP_003425 | XLOC_148213 | ENSRNOT00000074023 | 0.962968106  | 5.15E-07 |
| TUCP_003425 | XLOC_148213 | ENSRNOT00000052063 | 0.969589167  | 1.95E-07 |
| TUCP_003425 | XLOC_148213 | ENSRNOT00000084069 | 0.95016153   | 2.23E-06 |
| TUCP_003425 | XLOC_148213 | ENSRNOT00000033017 | 0.957175329  | 1.06E-06 |
| TUCP_003425 | XLOC_148213 | ENSRNOT00000017384 | 0.975448087  | 6.74E-08 |
| TUCP_003425 | XLOC_148213 | ENSRNOT00000066370 | 0.950638325  | 2.12E-06 |
| TUCP_003425 | XLOC_148213 | ENSRNOT00000065076 | 0.977473011  | 4.40E-08 |
| TUCP_003425 | XLOC_148213 | ENSRNOT00000054685 | 0.965750832  | 3.50E-07 |
| TUCP_003425 | XLOC_148213 | ENSRNOT00000012060 | 0.95049736   | 2.15E-06 |
| TUCP_003425 | XLOC_148213 | ENSRNOT00000073370 | 0.957601526  | 1.00E-06 |
| TUCP_003425 | XLOC_148213 | ENSRNOT00000025079 | -0.956903621 | 1.09E-06 |
| TUCP_003425 | XLOC_148213 | ENSRNOT00000034298 | 0.954157742  | 1.48E-06 |
| TUCP_003425 | XLOC_148213 | ENSRNOT00000013580 | 0.952109786  | 1.83E-06 |
| TUCP_003425 | XLOC_148213 | ENSRNOT00000057160 | 0.950655653  | 2.12E-06 |
| TUCP_003425 | XLOC_148213 | ENSRNOT00000090579 | 0.955776961  | 1.24E-06 |
| TUCP_003425 | XLOC_148213 | ENSRNOT00000024402 | 0.954247392  | 1.46E-06 |
| TUCP_003425 | XLOC_148213 | ENSRNOT00000019759 | 0.959350243  | 8.16E-07 |
| TUCP_003425 | XLOC_148213 | ENSRNOT00000089933 | 0.951032237  | 2.04E-06 |
| TUCP_003425 | XLOC_148213 | ENSRNOT00000002621 | 0.961085523  | 6.58E-07 |
| TUCP_003425 | XLOC_148213 | ENSRNOT00000009811 | 0.951808548  | 1.89E-06 |
| TUCP_003425 | XLOC_148213 | ENSRNOT00000025517 | 0.974711698  | 7.81E-08 |
| TUCP_003425 | XLOC_148213 | ENSRNOT00000026391 | 0.984062244  | 7.89E-09 |

|             |             |                    |              |          |
|-------------|-------------|--------------------|--------------|----------|
| TUCP_003425 | XLOC_148213 | ENSRNOT00000026259 | 0.96211746   | 5.77E-07 |
| TUCP_003425 | XLOC_148213 | ENSRNOT00000005686 | -0.953624    | 1.56E-06 |
| TUCP_003425 | XLOC_148213 | ENSRNOT00000077526 | 0.967115639  | 2.87E-07 |
| TUCP_003425 | XLOC_148213 | ENSRNOT00000024066 | 0.958995898  | 8.52E-07 |
| TUCP_003425 | XLOC_148213 | ENSRNOT00000016428 | 0.950772315  | 2.10E-06 |
| TUCP_003425 | XLOC_148213 | ENSRNOT00000006835 | 0.950869962  | 2.08E-06 |
| TUCP_003425 | XLOC_148213 | ENSRNOT00000012801 | 0.9532664    | 1.62E-06 |
| TUCP_003425 | XLOC_148213 | ENSRNOT00000044275 | 0.950576781  | 2.14E-06 |
| TUCP_003425 | XLOC_148213 | ENSRNOT00000037133 | 0.981791123  | 1.53E-08 |
| TUCP_003425 | XLOC_148213 | ENSRNOT00000084709 | 0.951549192  | 1.94E-06 |
| TUCP_003425 | XLOC_148213 | ENSRNOT00000049245 | 0.963980551  | 4.49E-07 |
| TUCP_003425 | XLOC_148213 | ENSRNOT00000031384 | 0.955467102  | 1.28E-06 |
| TUCP_003425 | XLOC_148213 | ENSRNOT00000003544 | -0.95542732  | 1.29E-06 |
| TUCP_003425 | XLOC_148213 | ENSRNOT00000003780 | 0.973600028  | 9.66E-08 |
| TUCP_003425 | XLOC_148213 | ENSRNOT00000016445 | 0.97926409   | 2.92E-08 |
| TUCP_003425 | XLOC_148213 | ENSRNOT00000013067 | -0.951564544 | 1.94E-06 |
| TUCP_003425 | XLOC_148213 | ENSRNOT00000011956 | 0.963026737  | 5.11E-07 |
| TUCP_003425 | XLOC_148213 | ENSRNOT00000047093 | 0.951934612  | 1.86E-06 |
| TUCP_003425 | XLOC_148213 | ENSRNOT00000089524 | 0.969715232  | 1.91E-07 |
| TUCP_003425 | XLOC_148213 | ENSRNOT00000065600 | 0.95160256   | 1.93E-06 |
| TUCP_003425 | XLOC_148213 | ENSRNOT00000086260 | -0.955324826 | 1.30E-06 |
| TUCP_003425 | XLOC_148213 | ENSRNOT00000068026 | -0.951062167 | 2.04E-06 |
| TUCP_003425 | XLOC_148213 | ENSRNOT00000085621 | 0.956833452  | 1.10E-06 |
| TUCP_003425 | XLOC_148213 | ENSRNOT00000013817 | 0.953863765  | 1.52E-06 |
| TUCP_003425 | XLOC_148213 | ENSRNOT00000001153 | 0.964232652  | 4.34E-07 |
| TUCP_003425 | XLOC_148213 | ENSRNOT00000076404 | 0.961277869  | 6.42E-07 |
| TUCP_003425 | XLOC_148213 | ENSRNOT00000055683 | 0.956665214  | 1.12E-06 |
| TUCP_003425 | XLOC_148213 | ENSRNOT00000022190 | -0.961635047 | 6.14E-07 |
| TUCP_003425 | XLOC_148213 | ENSRNOT00000017805 | 0.979177422  | 2.98E-08 |
| TUCP_003425 | XLOC_148213 | ENSRNOT00000045488 | 0.95065794   | 2.12E-06 |
| TUCP_003425 | XLOC_148213 | ENSRNOT00000081512 | 0.95277347   | 1.71E-06 |
| TUCP_003425 | XLOC_148213 | ENSRNOT00000032843 | 0.965520366  | 3.62E-07 |
| TUCP_003425 | XLOC_148213 | ENSRNOT00000073327 | 0.959455923  | 8.06E-07 |
| TUCP_003425 | XLOC_148213 | ENSRNOT00000005387 | 0.959212523  | 8.30E-07 |
| TUCP_003425 | XLOC_148213 | ENSRNOT00000012767 | 0.959329732  | 8.18E-07 |
| TUCP_003425 | XLOC_148213 | ENSRNOT00000020383 | 0.959656752  | 7.86E-07 |
| TUCP_003425 | XLOC_148213 | ENSRNOT00000037015 | 0.963586778  | 4.74E-07 |
| TUCP_003425 | XLOC_148213 | ENSRNOT00000008244 | 0.962716655  | 5.33E-07 |
| TUCP_003425 | XLOC_148213 | ENSRNOT00000013524 | 0.975689784  | 6.42E-08 |
| TUCP_003425 | XLOC_148213 | ENSRNOT00000000658 | 0.953039444  | 1.66E-06 |
| TUCP_003425 | XLOC_148213 | ENSRNOT00000065501 | 0.952796382  | 1.70E-06 |
| TUCP_003425 | XLOC_148213 | ENSRNOT00000027344 | 0.96538493   | 3.69E-07 |
| TUCP_003425 | XLOC_148213 | ENSRNOT00000003568 | 0.961545637  | 6.21E-07 |
| TUCP_003425 | XLOC_148213 | ENSRNOT00000000718 | 0.956772781  | 1.11E-06 |
| TUCP_003425 | XLOC_148213 | ENSRNOT00000028057 | 0.960684782  | 6.92E-07 |
| TUCP_003425 | XLOC_148213 | ENSRNOT00000077146 | -0.953363043 | 1.61E-06 |
| TUCP_003425 | XLOC_148213 | ENSRNOT00000010593 | 0.950757719  | 2.10E-06 |
| TUCP_003425 | XLOC_148213 | ENSRNOT00000088628 | 0.958795133  | 8.73E-07 |
| TUCP_003425 | XLOC_148213 | ENSRNOT00000088054 | 0.952222817  | 1.81E-06 |
| TUCP_003425 | XLOC_148213 | ENSRNOT00000006804 | 0.959047502  | 8.47E-07 |
| TUCP_003425 | XLOC_148213 | ENSRNOT00000082151 | -0.950421942 | 2.17E-06 |

|             |             |                    |              |          |
|-------------|-------------|--------------------|--------------|----------|
| TUCP_003425 | XLOC_148213 | ENSRNOT0000002982  | 0.950434626  | 2.17E-06 |
| TUCP_003425 | XLOC_148213 | ENSRNOT00000010852 | 0.96533535   | 3.72E-07 |
| TUCP_003425 | XLOC_148213 | ENSRNOT00000080216 | -0.951343411 | 1.98E-06 |
| TUCP_003425 | XLOC_148213 | ENSRNOT00000041494 | 0.963071795  | 5.08E-07 |
| TUCP_003425 | XLOC_148213 | ENSRNOT00000026293 | 0.957654124  | 9.99E-07 |
| TUCP_003425 | XLOC_148213 | ENSRNOT00000044395 | 0.959815588  | 7.71E-07 |
| TUCP_003425 | XLOC_148213 | ENSRNOT00000012736 | 0.968541675  | 2.30E-07 |
| TUCP_003425 | XLOC_148213 | ENSRNOT00000073041 | 0.972472664  | 1.19E-07 |
| TUCP_003425 | XLOC_148213 | ENSRNOT00000015624 | 0.965687765  | 3.54E-07 |
| TUCP_003425 | XLOC_148213 | ENSRNOT00000026426 | 0.962478287  | 5.50E-07 |
| TUCP_003425 | XLOC_148213 | ENSRNOT00000076973 | 0.951006193  | 2.05E-06 |
| TUCP_003425 | XLOC_148213 | ENSRNOT00000028685 | 0.960984205  | 6.67E-07 |
| TUCP_003425 | XLOC_148213 | ENSRNOT00000055386 | 0.952159332  | 1.82E-06 |
| TUCP_003425 | XLOC_148213 | ENSRNOT00000014127 | 0.965100163  | 3.85E-07 |
| TUCP_003425 | XLOC_148213 | ENSRNOT00000037679 | 0.970802099  | 1.59E-07 |
| TUCP_003425 | XLOC_148213 | ENSRNOT0000007369  | 0.957101372  | 1.06E-06 |
| TUCP_003425 | XLOC_148213 | ENSRNOT0000002996  | 0.957570185  | 1.01E-06 |
| TUCP_003425 | XLOC_148213 | ENSRNOT00000026941 | 0.968412845  | 2.35E-07 |
| TUCP_003425 | XLOC_148213 | ENSRNOT00000032244 | 0.953747592  | 1.54E-06 |
| TUCP_003425 | XLOC_148213 | ENSRNOT00000027170 | 0.96003666   | 7.51E-07 |
| TUCP_003425 | XLOC_148213 | ENSRNOT00000025097 | 0.951617804  | 1.92E-06 |
| TUCP_003425 | XLOC_148213 | ENSRNOT00000027967 | 0.966815609  | 3.00E-07 |
| TUCP_003425 | XLOC_148213 | ENSRNOT00000016060 | 0.971384582  | 1.44E-07 |
| TUCP_003425 | XLOC_148213 | ENSRNOT00000081678 | 0.974144223  | 8.71E-08 |
| TUCP_003425 | XLOC_148213 | ENSRNOT00000022796 | 0.960320044  | 7.25E-07 |
| TUCP_003425 | XLOC_148213 | ENSRNOT00000046639 | 0.980500802  | 2.15E-08 |
| TUCP_003379 | XLOC_146338 | ENSRNOT00000056651 | 0.957400395  | 1.03E-06 |
| TUCP_003379 | XLOC_146338 | ENSRNOT00000021537 | 0.952033008  | 1.84E-06 |
| TUCP_003379 | XLOC_146338 | ENSRNOT00000068212 | 0.953424581  | 1.60E-06 |
| TUCP_003379 | XLOC_146338 | ENSRNOT00000001602 | 0.967925084  | 2.53E-07 |
| TUCP_004788 | XLOC_211449 | ENSRNOT00000026966 | 0.970322306  | 1.73E-07 |
| TUCP_004788 | XLOC_211449 | ENSRNOT00000068416 | 0.999999782  | 3.88E-33 |
| TUCP_004788 | XLOC_211449 | ENSRNOT00000086036 | 0.999958274  | 9.96E-22 |
| TUCP_004788 | XLOC_211449 | ENSRNOT00000026803 | 0.985046075  | 5.74E-09 |
| TUCP_004788 | XLOC_211449 | ENSRNOT00000047527 | 0.963071698  | 5.08E-07 |
| TUCP_004788 | XLOC_211449 | ENSRNOT00000042251 | 0.999344295  | 9.53E-16 |
| TUCP_004788 | XLOC_211449 | ENSRNOT0000002984  | 0.998397069  | 8.31E-14 |
| TUCP_004788 | XLOC_211449 | ENSRNOT00000083764 | 0.999541808  | 1.59E-16 |
| TUCP_004788 | XLOC_211449 | ENSRNOT00000076802 | 0.962695843  | 5.34E-07 |
| TUCP_004788 | XLOC_211449 | ENSRNOT00000092365 | 0.999161651  | 3.26E-15 |
| TUCP_004788 | XLOC_211449 | ENSRNOT00000079275 | 0.999901911  | 7.15E-20 |
| TUCP_004788 | XLOC_211449 | ENSRNOT00000066062 | -0.959706712 | 7.82E-07 |
| TUCP_004788 | XLOC_211449 | ENSRNOT00000045301 | 1            | 0        |
| TUCP_004788 | XLOC_211449 | ENSRNOT00000041186 | 0.999975782  | 6.56E-23 |
| TUCP_004788 | XLOC_211449 | ENSRNOT00000010092 | 0.977711778  | 4.17E-08 |
| TUCP_004788 | XLOC_211449 | ENSRNOT00000076182 | 1            | 0        |
| TUCP_004788 | XLOC_211449 | ENSRNOT00000087404 | 0.951157664  | 2.02E-06 |
| TUCP_004788 | XLOC_211449 | ENSRNOT00000052003 | 0.95837331   | 9.18E-07 |
| TUCP_004788 | XLOC_211449 | ENSRNOT00000081709 | 0.998485154  | 6.27E-14 |
| TUCP_004788 | XLOC_211449 | ENSRNOT00000005726 | 0.959610119  | 7.91E-07 |
| TUCP_004788 | XLOC_211449 | ENSRNOT00000014103 | 1            | 4.25E-78 |

|             |             |                    |             |          |
|-------------|-------------|--------------------|-------------|----------|
| TUCP_004788 | XLOC_211449 | ENSRNOT00000057433 | 0.964930601 | 3.94E-07 |
| TUCP_004788 | XLOC_211449 | ENSRNOT00000082289 | 0.998931566 | 1.09E-14 |
| TUCP_004788 | XLOC_211449 | ENSRNOT00000092516 | 0.957459323 | 1.02E-06 |
| TUCP_004788 | XLOC_211449 | ENSRNOT00000008898 | 0.990039768 | 7.59E-10 |
| TUCP_004788 | XLOC_211449 | ENSRNOT00000083493 | 0.995461232 | 1.51E-11 |
| TUCP_004788 | XLOC_211449 | ENSRNOT00000092563 | 0.987201084 | 2.65E-09 |
| TUCP_004788 | XLOC_211449 | ENSRNOT00000088893 | 1           | 0        |
| TUCP_004788 | XLOC_211449 | ENSRNOT00000076693 | 0.955029582 | 1.34E-06 |
| TUCP_004788 | XLOC_211449 | ENSRNOT00000081014 | 1           | 0        |
| TUCP_004788 | XLOC_211449 | ENSRNOT00000067543 | 1           | 0        |
| TUCP_004788 | XLOC_211449 | ENSRNOT00000050968 | 0.996816433 | 2.56E-12 |
| TUCP_004788 | XLOC_211449 | ENSRNOT00000042201 | 0.960235595 | 7.32E-07 |
| TUCP_004788 | XLOC_211449 | ENSRNOT00000004373 | 0.957315473 | 1.04E-06 |
| TUCP_004788 | XLOC_211449 | ENSRNOT00000063929 | 1           | 0        |
| TUCP_004788 | XLOC_211449 | ENSRNOT00000057472 | 1           | 4.25E-78 |
| TUCP_004788 | XLOC_211449 | ENSRNOT00000041617 | 0.952449765 | 1.77E-06 |
| TUCP_004788 | XLOC_211449 | ENSRNOT00000091763 | 0.986310385 | 3.70E-09 |
| TUCP_004788 | XLOC_211449 | ENSRNOT00000022200 | 0.998491303 | 6.14E-14 |
| TUCP_004788 | XLOC_211449 | ENSRNOT00000067379 | 0.997260967 | 1.21E-12 |
| TUCP_004788 | XLOC_211449 | ENSRNOT00000020786 | 0.976428448 | 5.51E-08 |
| TUCP_004788 | XLOC_211449 | ENSRNOT00000050543 | 0.999722223 | 1.30E-17 |
| TUCP_004788 | XLOC_211449 | ENSRNOT00000089306 | 0.999866649 | 3.32E-19 |
| TUCP_004788 | XLOC_211449 | ENSRNOT00000052367 | 0.997268394 | 1.19E-12 |
| TUCP_004788 | XLOC_211449 | ENSRNOT00000090658 | 1           | 0        |
| TUCP_004788 | XLOC_211449 | ENSRNOT00000022571 | 0.995290013 | 1.81E-11 |
| TUCP_004788 | XLOC_211449 | ENSRNOT00000044520 | 0.981817158 | 1.52E-08 |
| TUCP_004788 | XLOC_211449 | ENSRNOT00000065448 | 0.963648868 | 4.70E-07 |
| TUCP_002222 | XLOC_092536 | ENSRNOT00000073966 | 0.952883464 | 1.69E-06 |
| TUCP_004783 | XLOC_211270 | ENSRNOT00000084500 | 0.984887141 | 6.05E-09 |
| TUCP_004783 | XLOC_211270 | ENSRNOT00000093467 | 0.996134431 | 6.75E-12 |
| TUCP_004783 | XLOC_211270 | ENSRNOT00000029340 | 0.999116572 | 4.23E-15 |
| TUCP_004783 | XLOC_211270 | ENSRNOT00000077972 | 0.962758032 | 5.30E-07 |
| TUCP_004783 | XLOC_211270 | ENSRNOT00000038646 | 1           | 0        |
| TUCP_004783 | XLOC_211270 | ENSRNOT00000012095 | 0.957750287 | 9.88E-07 |
| TUCP_004783 | XLOC_211270 | ENSRNOT00000017909 | 0.975587192 | 6.56E-08 |
| TUCP_004783 | XLOC_211270 | ENSRNOT00000092579 | 1           | 0        |
| TUCP_004783 | XLOC_211270 | ENSRNOT00000089235 | 0.998661162 | 3.38E-14 |
| TUCP_004783 | XLOC_211270 | ENSRNOT00000036383 | 0.988460809 | 1.58E-09 |
| TUCP_004783 | XLOC_211270 | ENSRNOT00000076528 | 0.997115373 | 1.57E-12 |
| TUCP_004783 | XLOC_211270 | ENSRNOT00000075193 | 0.964326971 | 4.29E-07 |
| TUCP_004783 | XLOC_211270 | ENSRNOT00000083034 | 0.990934646 | 4.75E-10 |
| TUCP_004783 | XLOC_211270 | ENSRNOT00000089607 | 0.995091455 | 2.23E-11 |
| TUCP_004783 | XLOC_211270 | ENSRNOT00000086014 | 0.960893638 | 6.74E-07 |
| TUCP_004783 | XLOC_211270 | ENSRNOT00000054939 | 0.958021495 | 9.57E-07 |
| TUCP_004783 | XLOC_211270 | ENSRNOT00000052315 | 0.983687082 | 8.85E-09 |
| TUCP_004783 | XLOC_211270 | ENSRNOT00000088168 | 1           | 1.33E-79 |
| TUCP_004783 | XLOC_211270 | ENSRNOT00000046231 | 0.96225463  | 5.66E-07 |
| TUCP_004783 | XLOC_211270 | ENSRNOT00000013459 | 0.979098017 | 3.03E-08 |
| TUCP_004783 | XLOC_211270 | ENSRNOT00000078137 | 1           | 0        |
| TUCP_004783 | XLOC_211270 | ENSRNOT00000077764 | 0.977143528 | 4.73E-08 |
| TUCP_004783 | XLOC_211270 | ENSRNOT00000043661 | 0.966975951 | 2.93E-07 |

|             |             |                    |              |          |
|-------------|-------------|--------------------|--------------|----------|
| TUCP_004783 | XLOC_211270 | ENSRNOT00000092740 | 1            | 0        |
| TUCP_004783 | XLOC_211270 | ENSRNOT00000000117 | 0.990989174  | 4.61E-10 |
| TUCP_004783 | XLOC_211270 | ENSRNOT00000071877 | 0.967113583  | 2.87E-07 |
| TUCP_004783 | XLOC_211270 | ENSRNOT00000070958 | 1            | 0        |
| TUCP_004783 | XLOC_211270 | ENSRNOT00000076757 | 0.959205354  | 8.31E-07 |
| TUCP_004783 | XLOC_211270 | ENSRNOT00000085310 | 0.965230243  | 3.78E-07 |
| TUCP_004783 | XLOC_211270 | ENSRNOT00000047241 | 0.966576993  | 3.11E-07 |
| TUCP_004783 | XLOC_211270 | ENSRNOT00000027268 | 1            | 0        |
| TUCP_004783 | XLOC_211270 | ENSRNOT00000004459 | 1            | 0        |
| TUCP_004783 | XLOC_211270 | ENSRNOT00000048373 | 0.959096578  | 8.42E-07 |
| TUCP_004783 | XLOC_211270 | ENSRNOT00000061516 | 0.987595648  | 2.27E-09 |
| TUCP_004783 | XLOC_211270 | ENSRNOT00000088148 | 1            | 0        |
| TUCP_004783 | XLOC_211270 | ENSRNOT00000088527 | 1            | 0        |
| TUCP_004783 | XLOC_211270 | ENSRNOT00000078701 | 1            | 0        |
| TUCP_004783 | XLOC_211270 | ENSRNOT00000052308 | 0.962646127  | 5.38E-07 |
| TUCP_004783 | XLOC_211270 | ENSRNOT00000021748 | 1            | 0        |
| TUCP_004783 | XLOC_211270 | ENSRNOT00000089085 | 1            | 0        |
| TUCP_004783 | XLOC_211270 | ENSRNOT00000008153 | 0.999703506  | 1.80E-17 |
| TUCP_004783 | XLOC_211270 | ENSRNOT00000085896 | 0.971605382  | 1.39E-07 |
| TUCP_004783 | XLOC_211270 | ENSRNOT00000079189 | 0.984972387  | 5.89E-09 |
| TUCP_004783 | XLOC_211270 | ENSRNOT00000090078 | 1            | 0        |
| TUCP_004783 | XLOC_211270 | ENSRNOT00000078020 | 0.958421666  | 9.13E-07 |
| TUCP_004783 | XLOC_211270 | ENSRNOT00000092425 | 0.956092273  | 1.19E-06 |
| TUCP_004783 | XLOC_211270 | ENSRNOT00000009776 | 1            | 0        |
| TUCP_004782 | XLOC_211260 | ENSRNOT00000093730 | 0.965854535  | 3.45E-07 |
| TUCP_004782 | XLOC_211260 | ENSRNOT00000016418 | 0.959682988  | 7.84E-07 |
| TUCP_004782 | XLOC_211260 | ENSRNOT00000057378 | 0.984498966  | 6.87E-09 |
| TUCP_004781 | XLOC_211254 | ENSRNOT00000015961 | 0.969969762  | 1.83E-07 |
| TUCP_004376 | XLOC_193231 | ENSRNOT00000031904 | 0.954599682  | 1.41E-06 |
| TUCP_004376 | XLOC_193231 | ENSRNOT00000039809 | 0.971107538  | 1.51E-07 |
| TUCP_004376 | XLOC_193231 | ENSRNOT00000081246 | 0.951488397  | 1.95E-06 |
| TUCP_004376 | XLOC_193231 | ENSRNOT00000019213 | 0.95818166   | 9.39E-07 |
| TUCP_004376 | XLOC_193231 | ENSRNOT00000009877 | 0.959425962  | 8.09E-07 |
| TUCP_004376 | XLOC_193231 | ENSRNOT00000074939 | 0.958028633  | 9.56E-07 |
| TUCP_004376 | XLOC_193231 | ENSRNOT00000071560 | 0.962758338  | 5.30E-07 |
| TUCP_004376 | XLOC_193231 | ENSRNOT00000005228 | 0.965898064  | 3.43E-07 |
| TUCP_004376 | XLOC_193231 | ENSRNOT00000006175 | 0.951838648  | 1.88E-06 |
| TUCP_004376 | XLOC_193231 | ENSRNOT00000021592 | 0.963618407  | 4.72E-07 |
| TUCP_004376 | XLOC_193231 | ENSRNOT00000005220 | 0.955376278  | 1.29E-06 |
| TUCP_004376 | XLOC_193231 | ENSRNOT00000023144 | 0.979840355  | 2.54E-08 |
| TUCP_004376 | XLOC_193231 | ENSRNOT00000021116 | 0.953007522  | 1.67E-06 |
| TUCP_004376 | XLOC_193231 | ENSRNOT00000092418 | 0.952777966  | 1.71E-06 |
| TUCP_004376 | XLOC_193231 | ENSRNOT00000082107 | 0.963030559  | 5.11E-07 |
| TUCP_004376 | XLOC_193231 | ENSRNOT00000065300 | 0.950403329  | 2.17E-06 |
| TUCP_004376 | XLOC_193231 | ENSRNOT00000076763 | 0.964232546  | 4.34E-07 |
| TUCP_004376 | XLOC_193231 | ENSRNOT00000043216 | 0.96888286   | 2.18E-07 |
| TUCP_004376 | XLOC_193231 | ENSRNOT00000091128 | -0.956499108 | 1.14E-06 |
| TUCP_004376 | XLOC_193231 | ENSRNOT00000009280 | 0.9605395    | 7.05E-07 |
| TUCP_004376 | XLOC_193231 | ENSRNOT00000081981 | 0.950900779  | 2.07E-06 |
| TUCP_004376 | XLOC_193231 | ENSRNOT00000013758 | 0.966800174  | 3.00E-07 |
| TUCP_004376 | XLOC_193231 | ENSRNOT00000026543 | 0.978829507  | 3.23E-08 |



|             |             |                    |             |          |
|-------------|-------------|--------------------|-------------|----------|
| TUCP_004376 | XLOC_193231 | ENSRNOT00000066670 | 0.95455935  | 1.41E-06 |
| TUCP_004376 | XLOC_193231 | ENSRNOT00000015073 | 0.954815027 | 1.37E-06 |
| TUCP_004376 | XLOC_193231 | ENSRNOT00000012187 | 0.964105893 | 4.42E-07 |
| TUCP_004376 | XLOC_193231 | ENSRNOT00000005942 | 0.957988387 | 9.60E-07 |
| TUCP_004376 | XLOC_193231 | ENSRNOT00000066810 | 0.969015632 | 2.14E-07 |
| TUCP_004376 | XLOC_193231 | ENSRNOT00000024969 | 0.964575299 | 4.14E-07 |
| TUCP_004376 | XLOC_193231 | ENSRNOT00000006055 | 0.957070999 | 1.07E-06 |
| TUCP_004376 | XLOC_193231 | ENSRNOT00000071573 | 0.966442362 | 3.17E-07 |
| TUCP_004376 | XLOC_193231 | ENSRNOT00000028646 | 0.966809295 | 3.00E-07 |
| TUCP_004376 | XLOC_193231 | ENSRNOT00000011384 | 0.963865776 | 4.57E-07 |
| TUCP_004376 | XLOC_193231 | ENSRNOT00000038247 | 0.957167967 | 1.06E-06 |
| TUCP_004376 | XLOC_193231 | ENSRNOT00000071764 | 0.967877094 | 2.55E-07 |
| TUCP_004376 | XLOC_193231 | ENSRNOT00000035989 | 0.97344045  | 9.95E-08 |
| TUCP_004376 | XLOC_193231 | ENSRNOT00000057160 | 0.95239277  | 1.78E-06 |
| TUCP_004376 | XLOC_193231 | ENSRNOT00000082699 | 0.957888639 | 9.72E-07 |
| TUCP_004376 | XLOC_193231 | ENSRNOT00000024402 | 0.951817479 | 1.89E-06 |
| TUCP_004376 | XLOC_193231 | ENSRNOT00000021348 | 0.975002404 | 7.37E-08 |
| TUCP_004376 | XLOC_193231 | ENSRNOT00000028842 | 0.954987882 | 1.35E-06 |
| TUCP_004376 | XLOC_193231 | ENSRNOT00000043156 | 0.962329348 | 5.61E-07 |
| TUCP_004376 | XLOC_193231 | ENSRNOT00000006680 | 0.952476971 | 1.76E-06 |
| TUCP_004376 | XLOC_193231 | ENSRNOT00000083215 | 0.964263187 | 4.32E-07 |
| TUCP_004376 | XLOC_193231 | ENSRNOT00000055187 | 0.960432241 | 7.15E-07 |
| TUCP_004376 | XLOC_193231 | ENSRNOT00000079866 | 0.956859131 | 1.09E-06 |
| TUCP_004376 | XLOC_193231 | ENSRNOT00000041513 | 0.97967335  | 2.64E-08 |
| TUCP_004376 | XLOC_193231 | ENSRNOT00000034267 | 0.966597495 | 3.10E-07 |
| TUCP_004376 | XLOC_193231 | ENSRNOT00000032274 | 0.962093775 | 5.78E-07 |
| TUCP_004376 | XLOC_193231 | ENSRNOT00000010541 | 0.960217715 | 7.34E-07 |
| TUCP_004376 | XLOC_193231 | ENSRNOT00000004032 | 0.960664083 | 6.94E-07 |
| TUCP_004376 | XLOC_193231 | ENSRNOT00000017948 | 0.962692832 | 5.35E-07 |
| TUCP_004376 | XLOC_193231 | ENSRNOT00000012895 | 0.970425626 | 1.70E-07 |
| TUCP_004376 | XLOC_193231 | ENSRNOT00000025859 | 0.96660793  | 3.09E-07 |
| TUCP_004376 | XLOC_193231 | ENSRNOT00000066526 | 0.950172792 | 2.22E-06 |
| TUCP_004376 | XLOC_193231 | ENSRNOT00000034503 | 0.950431536 | 2.17E-06 |
| TUCP_004376 | XLOC_193231 | ENSRNOT00000090918 | 0.975024607 | 7.34E-08 |
| TUCP_004376 | XLOC_193231 | ENSRNOT00000000676 | 0.964356885 | 4.27E-07 |
| TUCP_004376 | XLOC_193231 | ENSRNOT00000083220 | 0.964642085 | 4.10E-07 |
| TUCP_004376 | XLOC_193231 | ENSRNOT00000060362 | 0.979148297 | 3.00E-08 |
| TUCP_004376 | XLOC_193231 | ENSRNOT00000013274 | 0.972891439 | 1.10E-07 |
| TUCP_004376 | XLOC_193231 | ENSRNOT00000022213 | 0.962321502 | 5.61E-07 |
| TUCP_004376 | XLOC_193231 | ENSRNOT00000020437 | 0.96253863  | 5.46E-07 |
| TUCP_004376 | XLOC_193231 | ENSRNOT00000010898 | 0.978349455 | 3.61E-08 |
| TUCP_004376 | XLOC_193231 | ENSRNOT00000015265 | 0.960238957 | 7.32E-07 |
| TUCP_004376 | XLOC_193231 | ENSRNOT00000005355 | 0.974864113 | 7.58E-08 |
| TUCP_004376 | XLOC_193231 | ENSRNOT00000048063 | 0.966563089 | 3.11E-07 |
| TUCP_004376 | XLOC_193231 | ENSRNOT00000001242 | 0.956733765 | 1.11E-06 |
| TUCP_004376 | XLOC_193231 | ENSRNOT00000033975 | 0.951289172 | 1.99E-06 |
| TUCP_004376 | XLOC_193231 | ENSRNOT00000078102 | 0.952331511 | 1.79E-06 |
| TUCP_004376 | XLOC_193231 | ENSRNOT00000025981 | 0.970891944 | 1.57E-07 |
| TUCP_004376 | XLOC_193231 | ENSRNOT00000047387 | 0.956816559 | 1.10E-06 |
| TUCP_004376 | XLOC_193231 | ENSRNOT00000004698 | 0.961856953 | 5.96E-07 |
| TUCP_004376 | XLOC_193231 | ENSRNOT00000081047 | 0.96433158  | 4.28E-07 |

|             |             |                    |              |          |
|-------------|-------------|--------------------|--------------|----------|
| TUCP_004376 | XLOC_193231 | ENSRNOT00000084240 | 0.970699963  | 1.62E-07 |
| TUCP_004376 | XLOC_193231 | ENSRNOT00000017629 | 0.968867478  | 2.19E-07 |
| TUCP_004376 | XLOC_193231 | ENSRNOT00000033998 | 0.956410249  | 1.15E-06 |
| TUCP_004376 | XLOC_193231 | ENSRNOT00000003991 | 0.967164832  | 2.84E-07 |
| TUCP_004376 | XLOC_193231 | ENSRNOT00000004508 | 0.966901327  | 2.96E-07 |
| TUCP_004376 | XLOC_193231 | ENSRNOT00000000302 | 0.955177906  | 1.32E-06 |
| TUCP_004376 | XLOC_193231 | ENSRNOT00000078475 | 0.961621509  | 6.15E-07 |
| TUCP_004376 | XLOC_193231 | ENSRNOT00000087429 | 0.956678798  | 1.12E-06 |
| TUCP_004376 | XLOC_193231 | ENSRNOT00000040513 | 0.950088246  | 2.24E-06 |
| TUCP_004376 | XLOC_193231 | ENSRNOT00000009683 | 0.959323725  | 8.19E-07 |
| TUCP_004376 | XLOC_193231 | ENSRNOT00000022646 | 0.960955565  | 6.69E-07 |
| TUCP_004376 | XLOC_193231 | ENSRNOT00000027910 | 0.958164733  | 9.41E-07 |
| TUCP_004376 | XLOC_193231 | ENSRNOT00000078070 | 0.953285691  | 1.62E-06 |
| TUCP_004376 | XLOC_193231 | ENSRNOT00000005262 | 0.977165718  | 4.71E-08 |
| TUCP_004376 | XLOC_193231 | ENSRNOT00000076729 | 0.971841787  | 1.33E-07 |
| TUCP_004376 | XLOC_193231 | ENSRNOT00000090665 | 0.967021535  | 2.91E-07 |
| TUCP_004376 | XLOC_193231 | ENSRNOT00000088182 | 0.953114478  | 1.65E-06 |
| TUCP_004376 | XLOC_193231 | ENSRNOT00000091265 | 0.983635565  | 8.99E-09 |
| TUCP_004376 | XLOC_193231 | ENSRNOT00000016191 | 0.965499936  | 3.63E-07 |
| TUCP_004376 | XLOC_193231 | ENSRNOT00000078390 | -0.952715485 | 1.72E-06 |
| TUCP_004376 | XLOC_193231 | ENSRNOT00000065501 | 0.9529633    | 1.68E-06 |
| TUCP_004376 | XLOC_193231 | ENSRNOT00000027454 | 0.956282912  | 1.17E-06 |
| TUCP_004376 | XLOC_193231 | ENSRNOT00000025832 | 0.984501     | 6.86E-09 |
| TUCP_004376 | XLOC_193231 | ENSRNOT00000027615 | 0.952943453  | 1.68E-06 |
| TUCP_004376 | XLOC_193231 | ENSRNOT00000005909 | 0.952746307  | 1.71E-06 |
| TUCP_004376 | XLOC_193231 | ENSRNOT00000045882 | 0.963539636  | 4.77E-07 |
| TUCP_004376 | XLOC_193231 | ENSRNOT00000009198 | 0.950724116  | 2.11E-06 |
| TUCP_004376 | XLOC_193231 | ENSRNOT00000027964 | 0.969371102  | 2.02E-07 |
| TUCP_004376 | XLOC_193231 | ENSRNOT00000009129 | 0.957742376  | 9.88E-07 |
| TUCP_004376 | XLOC_193231 | ENSRNOT00000076285 | 0.963583708  | 4.74E-07 |
| TUCP_004376 | XLOC_193231 | ENSRNOT00000024156 | 0.961606505  | 6.16E-07 |
| TUCP_004376 | XLOC_193231 | ENSRNOT00000057313 | 0.968883113  | 2.18E-07 |
| TUCP_004376 | XLOC_193231 | ENSRNOT00000024420 | 0.953633382  | 1.56E-06 |
| TUCP_004376 | XLOC_193231 | ENSRNOT00000000157 | 0.96311936   | 5.05E-07 |
| TUCP_004376 | XLOC_193231 | ENSRNOT00000084734 | 0.96102075   | 6.64E-07 |
| TUCP_004376 | XLOC_193231 | ENSRNOT00000010992 | 0.978431281  | 3.55E-08 |
| TUCP_004376 | XLOC_193231 | ENSRNOT00000020379 | 0.964280095  | 4.31E-07 |
| TUCP_004376 | XLOC_193231 | ENSRNOT00000076669 | 0.983592978  | 9.11E-09 |
| TUCP_004376 | XLOC_193231 | ENSRNOT00000085596 | 0.958565345  | 8.97E-07 |
| TUCP_004376 | XLOC_193231 | ENSRNOT00000043872 | 0.95296636   | 1.67E-06 |
| TUCP_004376 | XLOC_193231 | ENSRNOT00000025808 | 0.967806103  | 2.58E-07 |
| TUCP_004376 | XLOC_193231 | ENSRNOT00000031230 | 0.963997352  | 4.48E-07 |
| TUCP_004376 | XLOC_193231 | ENSRNOT00000080110 | 0.9542072    | 1.47E-06 |
| TUCP_004376 | XLOC_193231 | ENSRNOT00000040069 | 0.963228836  | 4.98E-07 |
| TUCP_004376 | XLOC_193231 | ENSRNOT00000052288 | 0.952149672  | 1.82E-06 |
| TUCP_004376 | XLOC_193231 | ENSRNOT00000035474 | 0.953924632  | 1.51E-06 |
| TUCP_004376 | XLOC_193231 | ENSRNOT00000080695 | 0.963848461  | 4.58E-07 |
| TUCP_004376 | XLOC_193231 | ENSRNOT00000086336 | 0.956185474  | 1.18E-06 |
| TUCP_004376 | XLOC_193231 | ENSRNOT00000029125 | 0.962008156  | 5.85E-07 |
| TUCP_004376 | XLOC_193231 | ENSRNOT00000044896 | 0.950526597  | 2.15E-06 |
| TUCP_004376 | XLOC_193231 | ENSRNOT00000060696 | 0.950264205  | 2.20E-06 |

|             |             |                     |              |          |
|-------------|-------------|---------------------|--------------|----------|
| TUCP_004376 | XLOC_193231 | ENSRNOT00000014814  | 0.958718485  | 8.81E-07 |
| TUCP_004376 | XLOC_193231 | ENSRNOT00000004412  | 0.973029347  | 1.07E-07 |
| TUCP_004376 | XLOC_193231 | ENSRNOT000000067181 | 0.950722875  | 2.11E-06 |
| TUCP_004376 | XLOC_193231 | ENSRNOT000000064798 | 0.962010684  | 5.85E-07 |
| TUCP_004376 | XLOC_193231 | ENSRNOT000000080207 | 0.961911909  | 5.92E-07 |
| TUCP_004376 | XLOC_193231 | ENSRNOT000000024942 | 0.956112348  | 1.19E-06 |
| TUCP_004376 | XLOC_193231 | ENSRNOT000000027452 | 0.971744887  | 1.35E-07 |
| TUCP_004376 | XLOC_193231 | ENSRNOT000000034704 | 0.96800101   | 2.50E-07 |
| TUCP_004376 | XLOC_193231 | ENSRNOT000000015092 | 0.960445282  | 7.13E-07 |
| TUCP_004376 | XLOC_193231 | ENSRNOT000000026457 | 0.95263326   | 1.73E-06 |
| TUCP_004376 | XLOC_193231 | ENSRNOT000000036750 | 0.95605029   | 1.20E-06 |
| TUCP_004376 | XLOC_193231 | ENSRNOT000000025092 | 0.965262475  | 3.76E-07 |
| TUCP_004376 | XLOC_193231 | ENSRNOT000000051496 | 0.963838853  | 4.58E-07 |
| TUCP_004376 | XLOC_193231 | ENSRNOT000000067904 | 0.951218189  | 2.00E-06 |
| TUCP_004376 | XLOC_193231 | ENSRNOT000000023428 | 0.955003496  | 1.35E-06 |
| TUCP_004376 | XLOC_193231 | ENSRNOT000000051550 | 0.962191921  | 5.71E-07 |
| TUCP_004376 | XLOC_193231 | ENSRNOT000000011041 | 0.967148757  | 2.85E-07 |
| TUCP_004376 | XLOC_193231 | ENSRNOT000000021674 | 0.963093806  | 5.07E-07 |
| TUCP_004376 | XLOC_193231 | ENSRNOT000000047192 | -0.950169287 | 2.22E-06 |
| TUCP_004376 | XLOC_193231 | ENSRNOT000000074725 | 0.951307924  | 1.99E-06 |
| TUCP_004376 | XLOC_193231 | ENSRNOT000000067866 | 0.95484051   | 1.37E-06 |
| TUCP_004376 | XLOC_193231 | ENSRNOT000000015793 | 0.952685221  | 1.72E-06 |
| TUCP_004376 | XLOC_193231 | ENSRNOT000000083957 | 0.962191687  | 5.71E-07 |
| TUCP_004376 | XLOC_193231 | ENSRNOT000000015799 | 0.961144711  | 6.53E-07 |
| TUCP_004376 | XLOC_193231 | ENSRNOT000000083799 | 0.963792761  | 4.61E-07 |
| TUCP_000207 | XLOC_006687 | ENSRNOT000000041502 | 0.950863877  | 2.08E-06 |
| TUCP_000204 | XLOC_006687 | ENSRNOT000000087836 | 0.958658306  | 8.87E-07 |
| TUCP_000204 | XLOC_006687 | ENSRNOT000000078300 | 0.964111125  | 4.41E-07 |
| TUCP_000339 | XLOC_010729 | ENSRNOT000000022811 | 0.95968346   | 7.84E-07 |
| TUCP_000339 | XLOC_010729 | ENSRNOT000000012757 | 0.961915636  | 5.92E-07 |
| TUCP_000339 | XLOC_010729 | ENSRNOT000000005306 | 0.971981063  | 1.30E-07 |
| TUCP_004372 | XLOC_193032 | ENSRNOT000000005522 | 0.955487127  | 1.28E-06 |
| TUCP_000200 | XLOC_006526 | ENSRNOT000000020297 | 0.960522377  | 7.07E-07 |
| TUCP_000200 | XLOC_006526 | ENSRNOT000000006188 | -0.951929112 | 1.86E-06 |
| TUCP_000200 | XLOC_006526 | ENSRNOT000000039607 | -0.964472234 | 4.20E-07 |
| TUCP_000200 | XLOC_006526 | ENSRNOT000000090621 | 0.971021696  | 1.53E-07 |
| TUCP_000200 | XLOC_006526 | ENSRNOT000000016088 | 0.954255576  | 1.46E-06 |
| TUCP_000200 | XLOC_006526 | ENSRNOT000000090946 | 0.950117089  | 2.24E-06 |
| TUCP_000200 | XLOC_006526 | ENSRNOT000000006460 | 0.973973534  | 9.00E-08 |
| TUCP_000200 | XLOC_006526 | ENSRNOT000000075397 | 0.962667995  | 5.36E-07 |
| TUCP_000200 | XLOC_006526 | ENSRNOT000000008253 | -0.964826677 | 4.00E-07 |
| TUCP_000200 | XLOC_006526 | ENSRNOT000000007350 | 0.952667981  | 1.73E-06 |
| TUCP_000200 | XLOC_006526 | ENSRNOT000000032926 | -0.962657312 | 5.37E-07 |
| TUCP_000200 | XLOC_006526 | ENSRNOT000000009080 | -0.95294873  | 1.68E-06 |
| TUCP_000200 | XLOC_006526 | ENSRNOT000000026279 | -0.953040662 | 1.66E-06 |
| TUCP_000200 | XLOC_006526 | ENSRNOT000000010939 | 0.967820246  | 2.57E-07 |
| TUCP_000200 | XLOC_006526 | ENSRNOT000000063930 | -0.963910229 | 4.54E-07 |
| TUCP_000200 | XLOC_006526 | ENSRNOT000000006217 | 0.96060823   | 6.99E-07 |
| TUCP_000200 | XLOC_006526 | ENSRNOT000000067479 | 0.95431923   | 1.45E-06 |
| TUCP_000200 | XLOC_006526 | ENSRNOT000000003087 | 0.987766368  | 2.11E-09 |
| TUCP_000200 | XLOC_006526 | ENSRNOT000000017624 | 0.950824823  | 2.08E-06 |

|             |             |                    |              |          |
|-------------|-------------|--------------------|--------------|----------|
| TUCP_000200 | XL0C_006526 | ENSRNOT00000082914 | 0.961850203  | 5.97E-07 |
| TUCP_000200 | XL0C_006526 | ENSRNOT00000061132 | 0.951287438  | 1.99E-06 |
| TUCP_000200 | XL0C_006526 | ENSRNOT00000055536 | 0.965931778  | 3.41E-07 |
| TUCP_000200 | XL0C_006526 | ENSRNOT0000001855  | 0.950216857  | 2.21E-06 |
| TUCP_000200 | XL0C_006526 | ENSRNOT0000001691  | 0.965630002  | 3.57E-07 |
| TUCP_000200 | XL0C_006526 | ENSRNOT00000089319 | 0.957263658  | 1.04E-06 |
| TUCP_000200 | XL0C_006526 | ENSRNOT0000001697  | 0.956488517  | 1.14E-06 |
| TUCP_000200 | XL0C_006526 | ENSRNOT00000041237 | -0.955354304 | 1.30E-06 |
| TUCP_000200 | XL0C_006526 | ENSRNOT00000079138 | 0.973029274  | 1.07E-07 |
| TUCP_000200 | XL0C_006526 | ENSRNOT00000028624 | 0.954252769  | 1.46E-06 |
| TUCP_000200 | XL0C_006526 | ENSRNOT00000087329 | -0.962104019 | 5.78E-07 |
| TUCP_000200 | XL0C_006526 | ENSRNOT00000087011 | -0.955463417 | 1.28E-06 |
| TUCP_000200 | XL0C_006526 | ENSRNOT00000029508 | 0.953059079  | 1.66E-06 |
| TUCP_000200 | XL0C_006526 | ENSRNOT00000036051 | 0.977064999  | 4.81E-08 |
| TUCP_000200 | XL0C_006526 | ENSRNOT00000083968 | -0.952156872 | 1.82E-06 |
| TUCP_000200 | XL0C_006526 | ENSRNOT0000004391  | 0.967640225  | 2.65E-07 |
| TUCP_000200 | XL0C_006526 | ENSRNOT00000084567 | 0.97511763   | 7.20E-08 |
| TUCP_000200 | XL0C_006526 | ENSRNOT00000074023 | 0.972629725  | 1.16E-07 |
| TUCP_000200 | XL0C_006526 | ENSRNOT00000008361 | 0.975385038  | 6.83E-08 |
| TUCP_000200 | XL0C_006526 | ENSRNOT00000025309 | 0.973215295  | 1.04E-07 |
| TUCP_000200 | XL0C_006526 | ENSRNOT00000013851 | -0.953228668 | 1.63E-06 |
| TUCP_000200 | XL0C_006526 | ENSRNOT00000009073 | -0.955864668 | 1.22E-06 |
| TUCP_000200 | XL0C_006526 | ENSRNOT00000014382 | 0.953898725  | 1.52E-06 |
| TUCP_000200 | XL0C_006526 | ENSRNOT00000019180 | -0.955462059 | 1.28E-06 |
| TUCP_000200 | XL0C_006526 | ENSRNOT00000036357 | 0.963711145  | 4.66E-07 |
| TUCP_000200 | XL0C_006526 | ENSRNOT00000005770 | 0.958310643  | 9.25E-07 |
| TUCP_000200 | XL0C_006526 | ENSRNOT00000009975 | 0.960047558  | 7.50E-07 |
| TUCP_000200 | XL0C_006526 | ENSRNOT00000046951 | 0.96302671   | 5.11E-07 |
| TUCP_000200 | XL0C_006526 | ENSRNOT00000018341 | -0.9578554   | 9.75E-07 |
| TUCP_000200 | XL0C_006526 | ENSRNOT00000017805 | 0.951142092  | 2.02E-06 |
| TUCP_000200 | XL0C_006526 | ENSRNOT00000010419 | 0.973532151  | 9.79E-08 |
| TUCP_000200 | XL0C_006526 | ENSRNOT00000065076 | 0.972807313  | 1.12E-07 |
| TUCP_000200 | XL0C_006526 | ENSRNOT00000048687 | 0.960247728  | 7.31E-07 |
| TUCP_000200 | XL0C_006526 | ENSRNOT00000021534 | -0.955743867 | 1.24E-06 |
| TUCP_000200 | XL0C_006526 | ENSRNOT00000003489 | 0.954447475  | 1.43E-06 |
| TUCP_000200 | XL0C_006526 | ENSRNOT00000009009 | 0.962977287  | 5.15E-07 |
| TUCP_000200 | XL0C_006526 | ENSRNOT00000022746 | -0.972779152 | 1.12E-07 |
| TUCP_000200 | XL0C_006526 | ENSRNOT00000082513 | 0.952917504  | 1.68E-06 |
| TUCP_000200 | XL0C_006526 | ENSRNOT00000016306 | -0.951637802 | 1.92E-06 |
| TUCP_000200 | XL0C_006526 | ENSRNOT00000073493 | 0.967757261  | 2.60E-07 |
| TUCP_000200 | XL0C_006526 | ENSRNOT00000037902 | 0.951394303  | 1.97E-06 |
| TUCP_000200 | XL0C_006526 | ENSRNOT00000087604 | 0.960722051  | 6.89E-07 |
| TUCP_000200 | XL0C_006526 | ENSRNOT00000012060 | 0.973051829  | 1.07E-07 |
| TUCP_000200 | XL0C_006526 | ENSRNOT00000073370 | 0.965071659  | 3.86E-07 |
| TUCP_000200 | XL0C_006526 | ENSRNOT00000020929 | 0.984177637  | 7.61E-09 |
| TUCP_000200 | XL0C_006526 | ENSRNOT00000004551 | 0.950020469  | 2.26E-06 |
| TUCP_000200 | XL0C_006526 | ENSRNOT00000036137 | 0.980324063  | 2.25E-08 |
| TUCP_000200 | XL0C_006526 | ENSRNOT00000065978 | 0.950327613  | 2.19E-06 |
| TUCP_000200 | XL0C_006526 | ENSRNOT00000075480 | -0.980983169 | 1.90E-08 |
| TUCP_000200 | XL0C_006526 | ENSRNOT00000039177 | -0.963381375 | 4.88E-07 |
| TUCP_000200 | XL0C_006526 | ENSRNOT00000020051 | 0.970188272  | 1.76E-07 |

|             |             |                     |              |          |
|-------------|-------------|---------------------|--------------|----------|
| TUCP_000200 | XL0C_006526 | ENSRNOT00000060494  | 0.961557482  | 6.20E-07 |
| TUCP_000200 | XL0C_006526 | ENSRNOT00000064643  | 0.951273541  | 1.99E-06 |
| TUCP_000200 | XL0C_006526 | ENSRNOT00000023256  | 0.961636551  | 6.14E-07 |
| TUCP_000200 | XL0C_006526 | ENSRNOT00000013228  | 0.954636753  | 1.40E-06 |
| TUCP_000200 | XL0C_006526 | ENSRNOT00000034282  | 0.952421431  | 1.77E-06 |
| TUCP_000200 | XL0C_006526 | ENSRNOT00000027760  | 0.983079295  | 1.06E-08 |
| TUCP_000200 | XL0C_006526 | ENSRNOT00000019759  | 0.961176876  | 6.51E-07 |
| TUCP_000200 | XL0C_006526 | ENSRNOT00000012755  | 0.971464589  | 1.42E-07 |
| TUCP_000200 | XL0C_006526 | ENSRNOT00000065871  | 0.979718643  | 2.61E-08 |
| TUCP_000200 | XL0C_006526 | ENSRNOT00000042903  | 0.974535483  | 8.08E-08 |
| TUCP_000200 | XL0C_006526 | ENSRNOT00000057898  | -0.954014192 | 1.50E-06 |
| TUCP_000200 | XL0C_006526 | ENSRNOT00000024677  | 0.962280637  | 5.64E-07 |
| TUCP_000200 | XL0C_006526 | ENSRNOT00000092757  | 0.968934751  | 2.16E-07 |
| TUCP_000200 | XL0C_006526 | ENSRNOT00000009169  | 0.951418472  | 1.96E-06 |
| TUCP_000200 | XL0C_006526 | ENSRNOT00000004999  | 0.95526771   | 1.31E-06 |
| TUCP_000200 | XL0C_006526 | ENSRNOT00000002621  | 0.954373714  | 1.44E-06 |
| TUCP_000200 | XL0C_006526 | ENSRNOT00000056100  | -0.967861341 | 2.56E-07 |
| TUCP_000200 | XL0C_006526 | ENSRNOT00000001077  | 0.98352395   | 9.30E-09 |
| TUCP_000200 | XL0C_006526 | ENSRNOT00000000477  | -0.95864818  | 8.88E-07 |
| TUCP_000200 | XL0C_006526 | ENSRNOT00000005620  | -0.968867264 | 2.19E-07 |
| TUCP_000200 | XL0C_006526 | ENSRNOT000000082739 | -0.950129532 | 2.23E-06 |
| TUCP_000200 | XL0C_006526 | ENSRNOT000000026391 | 0.95846178   | 9.08E-07 |
| TUCP_000200 | XL0C_006526 | ENSRNOT00000000469  | 0.954678107  | 1.40E-06 |
| TUCP_000200 | XL0C_006526 | ENSRNOT00000015062  | 0.955914483  | 1.22E-06 |
| TUCP_000200 | XL0C_006526 | ENSRNOT000000081226 | 0.980282136  | 2.27E-08 |
| TUCP_000200 | XL0C_006526 | ENSRNOT000000011948 | -0.951616919 | 1.92E-06 |
| TUCP_000200 | XL0C_006526 | ENSRNOT00000017648  | -0.955938054 | 1.21E-06 |
| TUCP_000200 | XL0C_006526 | ENSRNOT00000065045  | 0.969023478  | 2.13E-07 |
| TUCP_000200 | XL0C_006526 | ENSRNOT00000075630  | -0.953167523 | 1.64E-06 |
| TUCP_000200 | XL0C_006526 | ENSRNOT00000002222  | 0.960778253  | 6.84E-07 |
| TUCP_000200 | XL0C_006526 | ENSRNOT000000081631 | 0.976395738  | 5.55E-08 |
| TUCP_000200 | XL0C_006526 | ENSRNOT00000018634  | -0.967818014 | 2.58E-07 |
| TUCP_000200 | XL0C_006526 | ENSRNOT00000000048  | 0.953753484  | 1.54E-06 |
| TUCP_000200 | XL0C_006526 | ENSRNOT00000046490  | -0.953124698 | 1.65E-06 |
| TUCP_000200 | XL0C_006526 | ENSRNOT00000023763  | -0.954460573 | 1.43E-06 |
| TUCP_000200 | XL0C_006526 | ENSRNOT00000040525  | 0.958414848  | 9.13E-07 |
| TUCP_000200 | XL0C_006526 | ENSRNOT00000076181  | -0.951547998 | 1.94E-06 |
| TUCP_000200 | XL0C_006526 | ENSRNOT00000073643  | -0.971082356 | 1.52E-07 |
| TUCP_000200 | XL0C_006526 | ENSRNOT00000024066  | 0.964804717  | 4.01E-07 |
| TUCP_000200 | XL0C_006526 | ENSRNOT00000078349  | -0.951823845 | 1.88E-06 |
| TUCP_000200 | XL0C_006526 | ENSRNOT00000024947  | -0.958677769 | 8.85E-07 |
| TUCP_000200 | XL0C_006526 | ENSRNOT00000046552  | 0.986240662  | 3.80E-09 |
| TUCP_000200 | XL0C_006526 | ENSRNOT00000062057  | 0.952702297  | 1.72E-06 |
| TUCP_000200 | XL0C_006526 | ENSRNOT00000024801  | -0.957604225 | 1.00E-06 |
| TUCP_000200 | XL0C_006526 | ENSRNOT000000081678 | 0.965232236  | 3.77E-07 |
| TUCP_000200 | XL0C_006526 | ENSRNOT00000023613  | 0.96935313   | 2.02E-07 |
| TUCP_000200 | XL0C_006526 | ENSRNOT00000092066  | -0.955024389 | 1.34E-06 |
| TUCP_000200 | XL0C_006526 | ENSRNOT00000067391  | -0.957754293 | 9.87E-07 |
| TUCP_000200 | XL0C_006526 | ENSRNOT00000037133  | 0.955863393  | 1.22E-06 |
| TUCP_000200 | XL0C_006526 | ENSRNOT00000033806  | 0.962683472  | 5.35E-07 |
| TUCP_000200 | XL0C_006526 | ENSRNOT00000064772  | 0.951798333  | 1.89E-06 |

|             |             |                    |              |          |
|-------------|-------------|--------------------|--------------|----------|
| TUCP_000200 | XLOC_006526 | ENSRNOT00000037333 | -0.967992394 | 2.51E-07 |
| TUCP_000200 | XLOC_006526 | ENSRNOT00000019358 | -0.95070954  | 2.11E-06 |
| TUCP_000200 | XLOC_006526 | ENSRNOT00000029179 | -0.958054503 | 9.53E-07 |
| TUCP_000200 | XLOC_006526 | ENSRNOT00000090156 | -0.953157578 | 1.64E-06 |
| TUCP_000200 | XLOC_006526 | ENSRNOT00000049349 | 0.978390464  | 3.58E-08 |
| TUCP_000200 | XLOC_006526 | ENSRNOT00000085545 | -0.968056242 | 2.48E-07 |
| TUCP_000200 | XLOC_006526 | ENSRNOT00000048781 | 0.971045954  | 1.53E-07 |
| TUCP_000200 | XLOC_006526 | ENSRNOT00000013867 | 0.970832381  | 1.58E-07 |
| TUCP_000200 | XLOC_006526 | ENSRNOT00000021802 | 0.962602749  | 5.41E-07 |
| TUCP_000200 | XLOC_006526 | ENSRNOT00000055602 | -0.964147864 | 4.39E-07 |
| TUCP_000200 | XLOC_006526 | ENSRNOT00000018640 | 0.970291584  | 1.73E-07 |
| TUCP_000200 | XLOC_006526 | ENSRNOT00000025856 | -0.952715188 | 1.72E-06 |
| TUCP_000200 | XLOC_006526 | ENSRNOT00000049285 | -0.965240485 | 3.77E-07 |
| TUCP_000200 | XLOC_006526 | ENSRNOT00000083344 | 0.982773965  | 1.16E-08 |
| TUCP_000200 | XLOC_006526 | ENSRNOT00000072299 | 0.960503284  | 7.08E-07 |
| TUCP_000200 | XLOC_006526 | ENSRNOT0000003544  | -0.959792266 | 7.74E-07 |
| TUCP_000200 | XLOC_006526 | ENSRNOT00000011082 | -0.96250417  | 5.48E-07 |
| TUCP_000200 | XLOC_006526 | ENSRNOT00000003780 | 0.955950175  | 1.21E-06 |
| TUCP_000200 | XLOC_006526 | ENSRNOT00000085334 | 0.984413568  | 7.06E-09 |
| TUCP_000200 | XLOC_006526 | ENSRNOT00000000817 | -0.963031887 | 5.11E-07 |
| TUCP_000200 | XLOC_006526 | ENSRNOT00000001401 | 0.950167289  | 2.23E-06 |
| TUCP_000200 | XLOC_006526 | ENSRNOT00000023262 | -0.966964172 | 2.93E-07 |
| TUCP_000200 | XLOC_006526 | ENSRNOT00000025913 | -0.951370492 | 1.97E-06 |
| TUCP_000200 | XLOC_006526 | ENSRNOT00000059246 | 0.96120773   | 6.48E-07 |
| TUCP_000200 | XLOC_006526 | ENSRNOT00000013067 | -0.956181922 | 1.18E-06 |
| TUCP_000200 | XLOC_006526 | ENSRNOT00000004196 | 0.964261827  | 4.32E-07 |
| TUCP_000200 | XLOC_006526 | ENSRNOT00000011956 | 0.963132913  | 5.04E-07 |
| TUCP_000200 | XLOC_006526 | ENSRNOT00000004351 | -0.968529753 | 2.31E-07 |
| TUCP_000200 | XLOC_006526 | ENSRNOT00000078185 | -0.951938088 | 1.86E-06 |
| TUCP_000200 | XLOC_006526 | ENSRNOT00000035427 | 0.957058225  | 1.07E-06 |
| TUCP_000200 | XLOC_006526 | ENSRNOT00000075800 | -0.974942378 | 7.46E-08 |
| TUCP_000200 | XLOC_006526 | ENSRNOT00000036658 | -0.971204669 | 1.49E-07 |
| TUCP_000200 | XLOC_006526 | ENSRNOT00000089611 | 0.98617272   | 3.89E-09 |
| TUCP_000200 | XLOC_006526 | ENSRNOT00000054685 | 0.985451625  | 5.01E-09 |
| TUCP_000200 | XLOC_006526 | ENSRNOT00000083891 | -0.952916003 | 1.68E-06 |
| TUCP_000200 | XLOC_006526 | ENSRNOT00000087517 | 0.954590618  | 1.41E-06 |
| TUCP_000200 | XLOC_006526 | ENSRNOT00000086260 | -0.970770797 | 1.60E-07 |
| TUCP_000200 | XLOC_006526 | ENSRNOT00000056199 | -0.952038283 | 1.84E-06 |
| TUCP_000200 | XLOC_006526 | ENSRNOT00000018328 | -0.95138997  | 1.97E-06 |
| TUCP_000200 | XLOC_006526 | ENSRNOT00000066098 | -0.951346668 | 1.98E-06 |
| TUCP_000200 | XLOC_006526 | ENSRNOT00000068026 | -0.972975249 | 1.08E-07 |
| TUCP_000200 | XLOC_006526 | ENSRNOT00000029701 | 0.986026737  | 4.10E-09 |
| TUCP_000200 | XLOC_006526 | ENSRNOT00000018892 | 0.952137542  | 1.82E-06 |
| TUCP_000200 | XLOC_006526 | ENSRNOT00000076400 | 0.976915345  | 4.97E-08 |
| TUCP_000200 | XLOC_006526 | ENSRNOT00000074586 | -0.950883536 | 2.07E-06 |
| TUCP_000200 | XLOC_006526 | ENSRNOT00000024938 | -0.950815386 | 2.09E-06 |
| TUCP_000200 | XLOC_006526 | ENSRNOT00000071998 | 0.950087964  | 2.24E-06 |
| TUCP_000200 | XLOC_006526 | ENSRNOT00000010680 | 0.965691353  | 3.53E-07 |
| TUCP_000200 | XLOC_006526 | ENSRNOT00000064983 | 0.956790635  | 1.10E-06 |
| TUCP_000200 | XLOC_006526 | ENSRNOT00000071068 | -0.952630912 | 1.73E-06 |
| TUCP_000200 | XLOC_006526 | ENSRNOT00000014506 | -0.96403407  | 4.46E-07 |

|             |             |                    |              |          |
|-------------|-------------|--------------------|--------------|----------|
| TUCP_000200 | XL0C_006526 | ENSRNOT00000026531 | -0.959122364 | 8.39E-07 |
| TUCP_000200 | XL0C_006526 | ENSRNOT00000035605 | 0.966830828  | 2.99E-07 |
| TUCP_000200 | XL0C_006526 | ENSRNOT00000005172 | 0.973157528  | 1.05E-07 |
| TUCP_000200 | XL0C_006526 | ENSRNOT00000000707 | -0.950037588 | 2.25E-06 |
| TUCP_000200 | XL0C_006526 | ENSRNOT00000005170 | -0.958078764 | 9.50E-07 |
| TUCP_000200 | XL0C_006526 | ENSRNOT00000002465 | 0.955391315  | 1.29E-06 |
| TUCP_000200 | XL0C_006526 | ENSRNOT00000092083 | 0.958713015  | 8.81E-07 |
| TUCP_000200 | XL0C_006526 | ENSRNOT00000016568 | 0.965171516  | 3.81E-07 |
| TUCP_000200 | XL0C_006526 | ENSRNOT00000021715 | 0.965493176  | 3.64E-07 |
| TUCP_000200 | XL0C_006526 | ENSRNOT00000012216 | -0.951295374 | 1.99E-06 |
| TUCP_000200 | XL0C_006526 | ENSRNOT00000017626 | -0.952632315 | 1.73E-06 |
| TUCP_000200 | XL0C_006526 | ENSRNOT00000012495 | -0.954755069 | 1.38E-06 |
| TUCP_000200 | XL0C_006526 | ENSRNOT00000018864 | -0.951715867 | 1.91E-06 |
| TUCP_000200 | XL0C_006526 | ENSRNOT00000017291 | -0.952087255 | 1.83E-06 |
| TUCP_000200 | XL0C_006526 | ENSRNOT00000015476 | -0.953156532 | 1.64E-06 |
| TUCP_000200 | XL0C_006526 | ENSRNOT00000071897 | -0.957417878 | 1.03E-06 |
| TUCP_000200 | XL0C_006526 | ENSRNOT00000075209 | -0.956728771 | 1.11E-06 |
| TUCP_000200 | XL0C_006526 | ENSRNOT00000066923 | -0.96279898  | 5.27E-07 |
| TUCP_000200 | XL0C_006526 | ENSRNOT00000040169 | 0.950421107  | 2.17E-06 |
| TUCP_000200 | XL0C_006526 | ENSRNOT00000012767 | 0.964434061  | 4.22E-07 |
| TUCP_000200 | XL0C_006526 | ENSRNOT00000064290 | -0.952955072 | 1.68E-06 |
| TUCP_000200 | XL0C_006526 | ENSRNOT00000020376 | 0.959266259  | 8.25E-07 |
| TUCP_000200 | XL0C_006526 | ENSRNOT00000060977 | 0.950939846  | 2.06E-06 |
| TUCP_000200 | XL0C_006526 | ENSRNOT00000017746 | -0.959759789 | 7.77E-07 |
| TUCP_000200 | XL0C_006526 | ENSRNOT00000056015 | -0.950730093 | 2.10E-06 |
| TUCP_000200 | XL0C_006526 | ENSRNOT00000001013 | -0.955716281 | 1.24E-06 |
| TUCP_000200 | XL0C_006526 | ENSRNOT00000025634 | -0.962902492 | 5.20E-07 |
| TUCP_000200 | XL0C_006526 | ENSRNOT00000065615 | 0.968689302  | 2.25E-07 |
| TUCP_000200 | XL0C_006526 | ENSRNOT00000011675 | 0.980725895  | 2.03E-08 |
| TUCP_000200 | XL0C_006526 | ENSRNOT00000068156 | 0.957173186  | 1.06E-06 |
| TUCP_000200 | XL0C_006526 | ENSRNOT00000008074 | -0.954289082 | 1.46E-06 |
| TUCP_000200 | XL0C_006526 | ENSRNOT00000024452 | -0.960037505 | 7.51E-07 |
| TUCP_000200 | XL0C_006526 | ENSRNOT00000076230 | 0.956304847  | 1.17E-06 |
| TUCP_000200 | XL0C_006526 | ENSRNOT00000082627 | -0.964173264 | 4.38E-07 |
| TUCP_000200 | XL0C_006526 | ENSRNOT00000080216 | -0.957480904 | 1.02E-06 |
| TUCP_000200 | XL0C_006526 | ENSRNOT00000037015 | 0.986591738  | 3.34E-09 |
| TUCP_000200 | XL0C_006526 | ENSRNOT00000023876 | 0.950059842  | 2.25E-06 |
| TUCP_000200 | XL0C_006526 | ENSRNOT00000003106 | -0.955557299 | 1.27E-06 |
| TUCP_000200 | XL0C_006526 | ENSRNOT00000089879 | -0.950480548 | 2.16E-06 |
| TUCP_000200 | XL0C_006526 | ENSRNOT00000066952 | 0.992213261  | 2.23E-10 |
| TUCP_000200 | XL0C_006526 | ENSRNOT00000028685 | 0.979082578  | 3.05E-08 |
| TUCP_000200 | XL0C_006526 | ENSRNOT00000072682 | 0.953187271  | 1.64E-06 |
| TUCP_000200 | XL0C_006526 | ENSRNOT00000018477 | -0.955352695 | 1.30E-06 |
| TUCP_000200 | XL0C_006526 | ENSRNOT00000011130 | -0.962884038 | 5.21E-07 |
| TUCP_000200 | XL0C_006526 | ENSRNOT00000087905 | -0.958122777 | 9.45E-07 |
| TUCP_000200 | XL0C_006526 | ENSRNOT00000018473 | -0.951320965 | 1.98E-06 |
| TUCP_000200 | XL0C_006526 | ENSRNOT00000076973 | 0.966583291  | 3.10E-07 |
| TUCP_000200 | XL0C_006526 | ENSRNOT00000067524 | 0.963093131  | 5.07E-07 |
| TUCP_000200 | XL0C_006526 | ENSRNOT00000081604 | 0.950768458  | 2.10E-06 |
| TUCP_000200 | XL0C_006526 | ENSRNOT00000087748 | -0.956906829 | 1.09E-06 |
| TUCP_000200 | XL0C_006526 | ENSRNOT00000027875 | 0.968788469  | 2.21E-07 |

|             |             |                    |              |          |
|-------------|-------------|--------------------|--------------|----------|
| TUCP_000200 | XLOC_006526 | ENSRNOT00000030082 | 0.956446252  | 1.15E-06 |
| TUCP_000200 | XLOC_006526 | ENSRNOT00000027264 | 0.950160768  | 2.23E-06 |
| TUCP_000200 | XLOC_006526 | ENSRNOT00000014320 | 0.975514608  | 6.65E-08 |
| TUCP_000200 | XLOC_006526 | ENSRNOT00000064122 | 0.963678717  | 4.68E-07 |
| TUCP_000200 | XLOC_006526 | ENSRNOT00000064431 | 0.954061224  | 1.49E-06 |
| TUCP_000200 | XLOC_006526 | ENSRNOT00000077146 | -0.957310379 | 1.04E-06 |
| TUCP_000200 | XLOC_006526 | ENSRNOT00000059169 | 0.960648554  | 6.96E-07 |
| TUCP_000200 | XLOC_006526 | ENSRNOT00000008244 | 0.977960117  | 3.95E-08 |
| TUCP_000200 | XLOC_006526 | ENSRNOT00000017504 | 0.968796376  | 2.21E-07 |
| TUCP_000200 | XLOC_006526 | ENSRNOT00000042638 | 0.967255222  | 2.81E-07 |
| TUCP_000200 | XLOC_006526 | ENSRNOT00000011773 | 0.968036966  | 2.49E-07 |
| TUCP_000200 | XLOC_006526 | ENSRNOT00000086706 | 0.954236406  | 1.46E-06 |
| TUCP_000200 | XLOC_006526 | ENSRNOT00000013463 | 0.96573795   | 3.51E-07 |
| TUCP_000200 | XLOC_006526 | ENSRNOT00000086456 | -0.965614458 | 3.57E-07 |
| TUCP_000200 | XLOC_006526 | ENSRNOT00000057953 | 0.961402265  | 6.32E-07 |
| TUCP_000200 | XLOC_006526 | ENSRNOT00000029704 | -0.961213037 | 6.48E-07 |
| TUCP_000200 | XLOC_006526 | ENSRNOT00000025037 | 0.966526667  | 3.13E-07 |
| TUCP_000200 | XLOC_006526 | ENSRNOT00000022309 | 0.961853554  | 5.97E-07 |
| TUCP_000200 | XLOC_006526 | ENSRNOT00000006802 | 0.972161607  | 1.26E-07 |
| TUCP_000200 | XLOC_006526 | ENSRNOT00000009202 | 0.990885912  | 4.88E-10 |
| TUCP_000200 | XLOC_006526 | ENSRNOT00000047663 | -0.957059173 | 1.07E-06 |
| TUCP_000200 | XLOC_006526 | ENSRNOT00000010369 | 0.975766007  | 6.32E-08 |
| TUCP_000200 | XLOC_006526 | ENSRNOT00000016776 | -0.957887859 | 9.72E-07 |
| TUCP_000200 | XLOC_006526 | ENSRNOT00000091211 | 0.955711825  | 1.25E-06 |
| TUCP_000200 | XLOC_006526 | ENSRNOT00000010993 | 0.956558576  | 1.13E-06 |
| TUCP_000200 | XLOC_006526 | ENSRNOT00000030798 | -0.957057197 | 1.07E-06 |
| TUCP_000200 | XLOC_006526 | ENSRNOT00000083256 | 0.961744668  | 6.05E-07 |
| TUCP_000200 | XLOC_006526 | ENSRNOT00000003691 | -0.95620347  | 1.18E-06 |
| TUCP_000200 | XLOC_006526 | ENSRNOT00000010852 | 0.96874642   | 2.23E-07 |
| TUCP_000200 | XLOC_006526 | ENSRNOT00000013524 | 0.958323804  | 9.23E-07 |
| TUCP_000200 | XLOC_006526 | ENSRNOT00000035385 | 0.964311266  | 4.29E-07 |
| TUCP_000200 | XLOC_006526 | ENSRNOT00000025794 | -0.950831435 | 2.08E-06 |
| TUCP_000200 | XLOC_006526 | ENSRNOT00000008772 | -0.962353715 | 5.59E-07 |
| TUCP_000200 | XLOC_006526 | ENSRNOT00000061054 | 0.951485304  | 1.95E-06 |
| TUCP_000200 | XLOC_006526 | ENSRNOT00000005873 | -0.977756977 | 4.13E-08 |
| TUCP_000200 | XLOC_006526 | ENSRNOT00000017765 | 0.955206972  | 1.32E-06 |
| TUCP_000200 | XLOC_006526 | ENSRNOT00000039911 | 0.952385789  | 1.78E-06 |
| TUCP_000200 | XLOC_006526 | ENSRNOT00000057738 | 0.985757406  | 4.51E-09 |
| TUCP_000200 | XLOC_006526 | ENSRNOT00000027370 | 0.959510216  | 8.01E-07 |
| TUCP_000200 | XLOC_006526 | ENSRNOT00000009994 | -0.959066237 | 8.45E-07 |
| TUCP_000200 | XLOC_006526 | ENSRNOT00000021826 | 0.976700235  | 5.20E-08 |
| TUCP_000200 | XLOC_006526 | ENSRNOT00000017829 | 0.952484006  | 1.76E-06 |
| TUCP_000200 | XLOC_006526 | ENSRNOT00000022716 | 0.968572516  | 2.29E-07 |
| TUCP_000200 | XLOC_006526 | ENSRNOT00000006160 | 0.958643955  | 8.89E-07 |
| TUCP_000200 | XLOC_006526 | ENSRNOT00000023014 | 0.984897873  | 6.03E-09 |
| TUCP_000200 | XLOC_006526 | ENSRNOT00000028737 | -0.959998083 | 7.54E-07 |
| TUCP_000200 | XLOC_006526 | ENSRNOT00000026518 | 0.989062516  | 1.21E-09 |
| TUCP_000200 | XLOC_006526 | ENSRNOT00000035145 | -0.96066099  | 6.95E-07 |
| TUCP_000200 | XLOC_006526 | ENSRNOT00000085295 | -0.966465856 | 3.16E-07 |
| TUCP_000200 | XLOC_006526 | ENSRNOT00000065897 | 0.950206303  | 2.22E-06 |
| TUCP_000200 | XLOC_006526 | ENSRNOT00000044147 | -0.955826355 | 1.23E-06 |



|             |             |                    |              |          |
|-------------|-------------|--------------------|--------------|----------|
| TUCP_000200 | XLOC_006526 | ENSRNOT00000016485 | 0.957209434  | 1.05E-06 |
| TUCP_000200 | XLOC_006526 | ENSRNOT00000046215 | -0.958342897 | 9.21E-07 |
| TUCP_000200 | XLOC_006526 | ENSRNOT00000003593 | 0.95795268   | 9.64E-07 |
| TUCP_000200 | XLOC_006526 | ENSRNOT00000039102 | 0.956096224  | 1.19E-06 |
| TUCP_000200 | XLOC_006526 | ENSRNOT00000032106 | 0.958887572  | 8.63E-07 |
| TUCP_000200 | XLOC_006526 | ENSRNOT00000006071 | 0.957437523  | 1.02E-06 |
| TUCP_000200 | XLOC_006526 | ENSRNOT00000023965 | -0.957191274 | 1.05E-06 |
| TUCP_000200 | XLOC_006526 | ENSRNOT00000037409 | 0.952444928  | 1.77E-06 |
| TUCP_000200 | XLOC_006526 | ENSRNOT00000002188 | 0.956427175  | 1.15E-06 |
| TUCP_000200 | XLOC_006526 | ENSRNOT00000064636 | -0.962879705 | 5.21E-07 |
| TUCP_000200 | XLOC_006526 | ENSRNOT00000066211 | -0.958643818 | 8.89E-07 |
| TUCP_000200 | XLOC_006526 | ENSRNOT00000074150 | 0.968794494  | 2.21E-07 |
| TUCP_000200 | XLOC_006526 | ENSRNOT00000052033 | -0.950852431 | 2.08E-06 |
| TUCP_000200 | XLOC_006526 | ENSRNOT00000007369 | 0.971733605  | 1.36E-07 |
| TUCP_000200 | XLOC_006526 | ENSRNOT00000085466 | 0.968450439  | 2.33E-07 |
| TUCP_000200 | XLOC_006526 | ENSRNOT00000075934 | -0.956101101 | 1.19E-06 |
| TUCP_000200 | XLOC_006526 | ENSRNOT00000013733 | -0.956788899 | 1.10E-06 |
| TUCP_000200 | XLOC_006526 | ENSRNOT00000012528 | 0.955830912  | 1.23E-06 |
| TUCP_000200 | XLOC_006526 | ENSRNOT00000035808 | 0.950789904  | 2.09E-06 |
| TUCP_000200 | XLOC_006526 | ENSRNOT00000074515 | -0.961170359 | 6.51E-07 |
| TUCP_000200 | XLOC_006526 | ENSRNOT00000026760 | -0.954559426 | 1.41E-06 |
| TUCP_000200 | XLOC_006526 | ENSRNOT00000027476 | 0.964272918  | 4.32E-07 |
| TUCP_000200 | XLOC_006526 | ENSRNOT00000082709 | -0.959278524 | 8.23E-07 |
| TUCP_000200 | XLOC_006526 | ENSRNOT00000031692 | -0.951847151 | 1.88E-06 |
| TUCP_000200 | XLOC_006526 | ENSRNOT00000014502 | -0.952909615 | 1.68E-06 |
| TUCP_000200 | XLOC_006526 | ENSRNOT00000017998 | 0.975803078  | 6.27E-08 |
| TUCP_000200 | XLOC_006526 | ENSRNOT00000002114 | -0.954948108 | 1.35E-06 |
| TUCP_000200 | XLOC_006526 | ENSRNOT00000011832 | -0.959867315 | 7.66E-07 |
| TUCP_000200 | XLOC_006526 | ENSRNOT00000027360 | -0.963765884 | 4.63E-07 |
| TUCP_000200 | XLOC_006526 | ENSRNOT00000013431 | -0.960220769 | 7.34E-07 |
| TUCP_000200 | XLOC_006526 | ENSRNOT00000008919 | -0.959005659 | 8.51E-07 |
| TUCP_000200 | XLOC_006526 | ENSRNOT00000013745 | -0.953532979 | 1.58E-06 |
| TUCP_000200 | XLOC_006526 | ENSRNOT00000008764 | 0.975081034  | 7.26E-08 |
| TUCP_000200 | XLOC_006526 | ENSRNOT00000088679 | -0.955660662 | 1.25E-06 |
| TUCP_000200 | XLOC_006526 | ENSRNOT00000082151 | -0.95758863  | 1.01E-06 |
| TUCP_000200 | XLOC_006526 | ENSRNOT00000028907 | 0.954380717  | 1.44E-06 |
| TUCP_000200 | XLOC_006526 | ENSRNOT00000027967 | 0.964730035  | 4.05E-07 |
| TUCP_000200 | XLOC_006526 | ENSRNOT00000013516 | 0.950251128  | 2.21E-06 |
| TUCP_000200 | XLOC_006526 | ENSRNOT00000079128 | 0.979524115  | 2.74E-08 |
| TUCP_000200 | XLOC_006526 | ENSRNOT00000066598 | 0.955263687  | 1.31E-06 |
| TUCP_000200 | XLOC_006526 | ENSRNOT00000026075 | 0.950270179  | 2.20E-06 |
| TUCP_000200 | XLOC_006526 | ENSRNOT00000035309 | -0.95237817  | 1.78E-06 |
| TUCP_000200 | XLOC_006526 | ENSRNOT00000024011 | 0.950989179  | 2.05E-06 |
| TUCP_000200 | XLOC_006526 | ENSRNOT00000025705 | 0.953251066  | 1.63E-06 |
| TUCP_000200 | XLOC_006526 | ENSRNOT00000021537 | 0.950992427  | 2.05E-06 |
| TUCP_000200 | XLOC_006526 | ENSRNOT00000089673 | -0.963120698 | 5.05E-07 |
| TUCP_000200 | XLOC_006526 | ENSRNOT00000085517 | 0.961009892  | 6.65E-07 |
| TUCP_000200 | XLOC_006526 | ENSRNOT00000015239 | -0.954743027 | 1.39E-06 |
| TUCP_001051 | XLOC_040152 | ENSRNOT00000016827 | 0.962882631  | 5.21E-07 |
| TUCP_004277 | XLOC_188172 | ENSRNOT00000038780 | 0.956818049  | 1.10E-06 |
| TUCP_004276 | XLOC_188171 | ENSRNOT00000091865 | 0.962050065  | 5.82E-07 |

|             |             |                     |              |          |
|-------------|-------------|---------------------|--------------|----------|
| TUCP_003955 | XLOC_173560 | ENSRNOT00000013560  | 0.969403377  | 2.01E-07 |
| TUCP_003954 | XLOC_173516 | ENSRNOT000000032189 | 0.952168426  | 1.82E-06 |
| TUCP_003953 | XLOC_173508 | ENSRNOT000000090816 | 0.950443204  | 2.17E-06 |
| TUCP_003953 | XLOC_173508 | ENSRNOT00000048264  | -0.952629041 | 1.73E-06 |
| TUCP_004272 | XLOC_187897 | ENSRNOT00000087764  | 0.960673051  | 6.93E-07 |
| TUCP_004272 | XLOC_187897 | ENSRNOT00000090716  | 0.951453599  | 1.96E-06 |
| TUCP_004378 | XLOC_193362 | ENSRNOT00000025981  | 0.953850422  | 1.53E-06 |
| TUCP_004378 | XLOC_193362 | ENSRNOT00000012895  | 0.952588805  | 1.74E-06 |
| TUCP_004378 | XLOC_193362 | ENSRNOT00000025859  | 0.963194915  | 5.00E-07 |
| TUCP_004378 | XLOC_193362 | ENSRNOT00000010898  | 0.954084892  | 1.49E-06 |
| TUCP_004378 | XLOC_193362 | ENSRNOT00000060186  | 0.954945637  | 1.36E-06 |
| TUCP_004378 | XLOC_193362 | ENSRNOT00000021917  | 0.962074322  | 5.80E-07 |
| TUCP_004378 | XLOC_193362 | ENSRNOT00000006401  | -0.967049448 | 2.89E-07 |
| TUCP_004378 | XLOC_193362 | ENSRNOT00000090671  | 0.954880296  | 1.37E-06 |
| TUCP_004378 | XLOC_193362 | ENSRNOT00000027762  | 0.953010282  | 1.67E-06 |
| TUCP_004378 | XLOC_193362 | ENSRNOT00000039117  | 0.95071287   | 2.11E-06 |
| TUCP_004378 | XLOC_193362 | ENSRNOT00000039809  | 0.951467447  | 1.95E-06 |
| TUCP_004378 | XLOC_193362 | ENSRNOT00000030024  | 0.964286539  | 4.31E-07 |
| TUCP_004378 | XLOC_193362 | ENSRNOT00000071241  | 0.966232302  | 3.27E-07 |
| TUCP_004378 | XLOC_193362 | ENSRNOT00000085027  | 0.95696473   | 1.08E-06 |
| TUCP_003899 | XLOC_171531 | ENSRNOT00000027950  | 0.950673112  | 2.12E-06 |
| TUCP_004170 | XLOC_181360 | ENSRNOT00000006780  | 0.973492646  | 9.86E-08 |
| TUCP_004172 | XLOC_181926 | ENSRNOT00000021135  | 0.986695124  | 3.21E-09 |
| TUCP_004172 | XLOC_181926 | ENSRNOT00000091470  | 0.970615991  | 1.64E-07 |
| TUCP_001053 | XLOC_040185 | ENSRNOT00000001215  | -0.954117686 | 1.48E-06 |
| TUCP_001053 | XLOC_040185 | ENSRNOT00000006188  | 0.95837511   | 9.18E-07 |
| TUCP_001053 | XLOC_040185 | ENSRNOT00000006186  | -0.96417243  | 4.38E-07 |
| TUCP_001053 | XLOC_040185 | ENSRNOT00000090621  | -0.960976943 | 6.67E-07 |
| TUCP_001053 | XLOC_040185 | ENSRNOT00000078349  | 0.961959643  | 5.88E-07 |
| TUCP_001053 | XLOC_040185 | ENSRNOT00000075397  | -0.971247714 | 1.47E-07 |
| TUCP_001053 | XLOC_040185 | ENSRNOT00000032926  | 0.965737716  | 3.51E-07 |
| TUCP_001053 | XLOC_040185 | ENSRNOT00000019104  | 0.971805328  | 1.34E-07 |
| TUCP_001053 | XLOC_040185 | ENSRNOT00000002222  | -0.966246225 | 3.26E-07 |
| TUCP_001053 | XLOC_040185 | ENSRNOT00000067479  | -0.950529302 | 2.15E-06 |
| TUCP_001053 | XLOC_040185 | ENSRNOT00000068353  | -0.957052646 | 1.07E-06 |
| TUCP_001053 | XLOC_040185 | ENSRNOT00000049349  | -0.957930306 | 9.67E-07 |
| TUCP_001053 | XLOC_040185 | ENSRNOT00000001697  | -0.952307117 | 1.79E-06 |
| TUCP_001053 | XLOC_040185 | ENSRNOT00000079138  | -0.969299828 | 2.04E-07 |
| TUCP_001053 | XLOC_040185 | ENSRNOT00000086706  | -0.953297798 | 1.62E-06 |
| TUCP_001053 | XLOC_040185 | ENSRNOT00000030914  | 0.953486862  | 1.59E-06 |
| TUCP_001053 | XLOC_040185 | ENSRNOT00000007855  | -0.955579733 | 1.26E-06 |
| TUCP_001053 | XLOC_040185 | ENSRNOT00000026941  | -0.962363084 | 5.58E-07 |
| TUCP_001053 | XLOC_040185 | ENSRNOT00000082108  | 0.960613896  | 6.99E-07 |
| TUCP_001053 | XLOC_040185 | ENSRNOT00000052063  | -0.986182582 | 3.88E-09 |
| TUCP_001053 | XLOC_040185 | ENSRNOT00000042638  | -0.956616175 | 1.13E-06 |
| TUCP_001053 | XLOC_040185 | ENSRNOT00000055540  | -0.96129299  | 6.41E-07 |
| TUCP_001053 | XLOC_040185 | ENSRNOT00000006752  | -0.952121152 | 1.83E-06 |
| TUCP_001053 | XLOC_040185 | ENSRNOT00000031672  | 0.967840082  | 2.57E-07 |
| TUCP_001053 | XLOC_040185 | ENSRNOT00000072771  | -0.952098759 | 1.83E-06 |
| TUCP_001053 | XLOC_040185 | ENSRNOT00000073370  | -0.976161582 | 5.83E-08 |
| TUCP_001053 | XLOC_040185 | ENSRNOT00000036137  | -0.956505337 | 1.14E-06 |

|             |             |                    |              |          |
|-------------|-------------|--------------------|--------------|----------|
| TUCP_001053 | XLOC_040185 | ENSRNOT00000065978 | -0.956541257 | 1.13E-06 |
| TUCP_001053 | XLOC_040185 | ENSRNOT00000035320 | 0.951705962  | 1.91E-06 |
| TUCP_001053 | XLOC_040185 | ENSRNOT00000008274 | 0.957326318  | 1.04E-06 |
| TUCP_001053 | XLOC_040185 | ENSRNOT00000065871 | -0.981749621 | 1.55E-08 |
| TUCP_001053 | XLOC_040185 | ENSRNOT00000077999 | -0.964268784 | 4.32E-07 |
| TUCP_001053 | XLOC_040185 | ENSRNOT00000003146 | 0.955489191  | 1.28E-06 |
| TUCP_001053 | XLOC_040185 | ENSRNOT00000026391 | -0.985906279 | 4.28E-09 |
| TUCP_001053 | XLOC_040185 | ENSRNOT00000005686 | 0.971188333  | 1.49E-07 |
| TUCP_001053 | XLOC_040185 | ENSRNOT00000006217 | -0.989951092 | 7.94E-10 |
| TUCP_001053 | XLOC_040185 | ENSRNOT00000028677 | -0.953363474 | 1.61E-06 |
| TUCP_001053 | XLOC_040185 | ENSRNOT00000087278 | 0.969395496  | 2.01E-07 |
| TUCP_001053 | XLOC_040185 | ENSRNOT00000030074 | -0.965326449 | 3.72E-07 |
| TUCP_001053 | XLOC_040185 | ENSRNOT00000067391 | 0.951966671  | 1.86E-06 |
| TUCP_001053 | XLOC_040185 | ENSRNOT00000009150 | -0.954109066 | 1.48E-06 |
| TUCP_001053 | XLOC_040185 | ENSRNOT00000084709 | -0.982420677 | 1.28E-08 |
| TUCP_001053 | XLOC_040185 | ENSRNOT00000026481 | -0.964244783 | 4.33E-07 |
| TUCP_001053 | XLOC_040185 | ENSRNOT00000072299 | -0.983512836 | 9.33E-09 |
| TUCP_001053 | XLOC_040185 | ENSRNOT00000028074 | 0.960217501  | 7.34E-07 |
| TUCP_001053 | XLOC_040185 | ENSRNOT00000026643 | -0.953925351 | 1.51E-06 |
| TUCP_001053 | XLOC_040185 | ENSRNOT00000001403 | -0.957378759 | 1.03E-06 |
| TUCP_001053 | XLOC_040185 | ENSRNOT00000001401 | -0.970231655 | 1.75E-07 |
| TUCP_001053 | XLOC_040185 | ENSRNOT00000016132 | 0.96143818   | 6.29E-07 |
| TUCP_001053 | XLOC_040185 | ENSRNOT00000013067 | 0.973087278  | 1.06E-07 |
| TUCP_001053 | XLOC_040185 | ENSRNOT00000074515 | 0.958391206  | 9.16E-07 |
| TUCP_001053 | XLOC_040185 | ENSRNOT00000066952 | -0.963875442 | 4.56E-07 |
| TUCP_001053 | XLOC_040185 | ENSRNOT00000016637 | 0.956815455  | 1.10E-06 |
| TUCP_001053 | XLOC_040185 | ENSRNOT00000089524 | -0.950916535 | 2.07E-06 |
| TUCP_001053 | XLOC_040185 | ENSRNOT00000079895 | -0.960596489 | 7.00E-07 |
| TUCP_001053 | XLOC_040185 | ENSRNOT00000074586 | 0.960336152  | 7.23E-07 |
| TUCP_001053 | XLOC_040185 | ENSRNOT00000071929 | 0.959922358  | 7.61E-07 |
| TUCP_001053 | XLOC_040185 | ENSRNOT00000084031 | -0.950241167 | 2.21E-06 |
| TUCP_001053 | XLOC_040185 | ENSRNOT00000011880 | -0.965340082 | 3.72E-07 |
| TUCP_001053 | XLOC_040185 | ENSRNOT00000003992 | 0.968537656  | 2.30E-07 |
| TUCP_001053 | XLOC_040185 | ENSRNOT00000050515 | -0.957851764 | 9.76E-07 |
| TUCP_001053 | XLOC_040185 | ENSRNOT00000077706 | -0.962995156 | 5.14E-07 |
| TUCP_001053 | XLOC_040185 | ENSRNOT00000012760 | 0.961919287  | 5.92E-07 |
| TUCP_001053 | XLOC_040185 | ENSRNOT00000055602 | 0.962533349  | 5.46E-07 |
| TUCP_001053 | XLOC_040185 | ENSRNOT00000089294 | 0.950535817  | 2.15E-06 |
| TUCP_001053 | XLOC_040185 | ENSRNOT00000023876 | -0.966397291 | 3.19E-07 |
| TUCP_001053 | XLOC_040185 | ENSRNOT00000003106 | 0.955019635  | 1.34E-06 |
| TUCP_001053 | XLOC_040185 | ENSRNOT00000091488 | -0.954623283 | 1.40E-06 |
| TUCP_001053 | XLOC_040185 | ENSRNOT00000049285 | 0.966663095  | 3.07E-07 |
| TUCP_001053 | XLOC_040185 | ENSRNOT00000015239 | 0.96612856   | 3.32E-07 |
| TUCP_001053 | XLOC_040185 | ENSRNOT00000006366 | 0.961342457  | 6.37E-07 |
| TUCP_001053 | XLOC_040185 | ENSRNOT00000074649 | -0.964026095 | 4.47E-07 |
| TUCP_001053 | XLOC_040185 | ENSRNOT00000035277 | -0.967665546 | 2.64E-07 |
| TUCP_001053 | XLOC_040185 | ENSRNOT00000077146 | 0.979662565  | 2.65E-08 |
| TUCP_001053 | XLOC_040185 | ENSRNOT00000067840 | -0.951062576 | 2.04E-06 |
| TUCP_001053 | XLOC_040185 | ENSRNOT00000060002 | 0.956185601  | 1.18E-06 |
| TUCP_001053 | XLOC_040185 | ENSRNOT00000086456 | 0.965133703  | 3.83E-07 |
| TUCP_001053 | XLOC_040185 | ENSRNOT00000075209 | 0.956172743  | 1.18E-06 |

|             |             |                    |              |          |
|-------------|-------------|--------------------|--------------|----------|
| TUCP_001053 | XLOC_040185 | ENSRNOT00000023977 | 0.956463636  | 1.14E-06 |
| TUCP_001053 | XLOC_040185 | ENSRNOT00000066133 | 0.975750096  | 6.34E-08 |
| TUCP_001053 | XLOC_040185 | ENSRNOT00000048933 | 0.95772187   | 9.91E-07 |
| TUCP_001053 | XLOC_040185 | ENSRNOT00000035385 | -0.967013792 | 2.91E-07 |
| TUCP_001053 | XLOC_040185 | ENSRNOT00000057738 | -0.969746904 | 1.90E-07 |
| TUCP_001053 | XLOC_040185 | ENSRNOT00000019487 | -0.955684236 | 1.25E-06 |
| TUCP_001053 | XLOC_040185 | ENSRNOT00000018170 | 0.95528594   | 1.31E-06 |
| TUCP_001053 | XLOC_040185 | ENSRNOT00000022716 | -0.951024967 | 2.04E-06 |
| TUCP_001053 | XLOC_040185 | ENSRNOT00000064535 | 0.969335227  | 2.03E-07 |
| TUCP_001053 | XLOC_040185 | ENSRNOT00000015624 | -0.969014674 | 2.14E-07 |
| TUCP_001053 | XLOC_040185 | ENSRNOT00000085295 | 0.954933314  | 1.36E-06 |
| TUCP_001053 | XLOC_040185 | ENSRNOT00000039102 | -0.965534251 | 3.61E-07 |
| TUCP_001053 | XLOC_040185 | ENSRNOT00000086260 | 0.972927362  | 1.09E-07 |
| TUCP_001053 | XLOC_040185 | ENSRNOT00000009742 | 0.953184217  | 1.64E-06 |
| TUCP_001053 | XLOC_040185 | ENSRNOT00000007369 | -0.969361801 | 2.02E-07 |
| TUCP_001053 | XLOC_040185 | ENSRNOT00000085465 | 0.953415706  | 1.60E-06 |
| TUCP_001053 | XLOC_040185 | ENSRNOT00000066521 | 0.95342309   | 1.60E-06 |
| TUCP_001053 | XLOC_040185 | ENSRNOT00000060698 | 0.96809108   | 2.47E-07 |
| TUCP_001053 | XLOC_040185 | ENSRNOT00000017998 | -0.974043774 | 8.88E-08 |
| TUCP_001053 | XLOC_040185 | ENSRNOT00000061100 | -0.956617279 | 1.13E-06 |
| TUCP_001053 | XLOC_040185 | ENSRNOT00000027170 | -0.959472066 | 8.04E-07 |
| TUCP_001053 | XLOC_040185 | ENSRNOT00000005144 | -0.954040805 | 1.49E-06 |
| TUCP_001053 | XLOC_040185 | ENSRNOT00000023256 | -0.960349314 | 7.22E-07 |
| TUCP_001053 | XLOC_040185 | ENSRNOT0000002028  | -0.958612406 | 8.92E-07 |
| TUCP_001053 | XLOC_040185 | ENSRNOT00000016776 | 0.95848364   | 9.06E-07 |
| TUCP_001053 | XLOC_040185 | ENSRNOT00000022097 | -0.967896951 | 2.54E-07 |
| TUCP_001053 | XLOC_040185 | ENSRNOT00000008987 | 0.962442546  | 5.53E-07 |
| TUCP_001053 | XLOC_040185 | ENSRNOT00000092876 | 0.970969064  | 1.55E-07 |
| TUCP_001053 | XLOC_040185 | ENSRNOT00000024253 | -0.967687093 | 2.63E-07 |
| TUCP_001053 | XLOC_040185 | ENSRNOT00000039607 | 0.972795882  | 1.12E-07 |
| TUCP_001053 | XLOC_040185 | ENSRNOT00000075400 | 0.954070978  | 1.49E-06 |
| TUCP_001053 | XLOC_040185 | ENSRNOT0000009080  | 0.955563189  | 1.27E-06 |
| TUCP_001053 | XLOC_040185 | ENSRNOT00000063930 | 0.963564306  | 4.76E-07 |
| TUCP_001053 | XLOC_040185 | ENSRNOT00000001855 | -0.953125286 | 1.65E-06 |
| TUCP_001053 | XLOC_040185 | ENSRNOT00000013025 | 0.966037829  | 3.36E-07 |
| TUCP_001053 | XLOC_040185 | ENSRNOT00000041237 | 0.959463749  | 8.05E-07 |
| TUCP_001053 | XLOC_040185 | ENSRNOT00000036051 | -0.964544368 | 4.16E-07 |
| TUCP_001053 | XLOC_040185 | ENSRNOT00000036357 | -0.956676442 | 1.12E-06 |
| TUCP_001053 | XLOC_040185 | ENSRNOT00000084069 | -0.96444346  | 4.22E-07 |
| TUCP_001053 | XLOC_040185 | ENSRNOT00000001679 | -0.960430532 | 7.15E-07 |
| TUCP_001053 | XLOC_040185 | ENSRNOT00000026531 | 0.960985278  | 6.67E-07 |
| TUCP_001053 | XLOC_040185 | ENSRNOT00000010419 | -0.966994281 | 2.92E-07 |
| TUCP_001053 | XLOC_040185 | ENSRNOT00000019057 | 0.953279631  | 1.62E-06 |
| TUCP_001053 | XLOC_040185 | ENSRNOT00000081351 | -0.956824272 | 1.10E-06 |
| TUCP_001053 | XLOC_040185 | ENSRNOT00000015476 | 0.955760419  | 1.24E-06 |
| TUCP_001053 | XLOC_040185 | ENSRNOT00000025079 | 0.980481637  | 2.16E-08 |
| TUCP_001053 | XLOC_040185 | ENSRNOT00000012755 | -0.958985515 | 8.53E-07 |
| TUCP_001053 | XLOC_040185 | ENSRNOT00000020929 | -0.954150342 | 1.48E-06 |
| TUCP_001053 | XLOC_040185 | ENSRNOT00000011432 | 0.950128378  | 2.23E-06 |
| TUCP_001053 | XLOC_040185 | ENSRNOT00000007824 | 0.968730698  | 2.23E-07 |
| TUCP_001053 | XLOC_040185 | ENSRNOT00000057898 | 0.959297673  | 8.22E-07 |

|             |             |                    |              |          |
|-------------|-------------|--------------------|--------------|----------|
| TUCP_001053 | XLOC_040185 | ENSRNOT00000024677 | -0.989080471 | 1.20E-09 |
| TUCP_001053 | XLOC_040185 | ENSRNOT00000056100 | 0.976837147  | 5.05E-08 |
| TUCP_001053 | XLOC_040185 | ENSRNOT00000001077 | -0.970387071 | 1.71E-07 |
| TUCP_001053 | XLOC_040185 | ENSRNOT00000084782 | 0.95116785   | 2.01E-06 |
| TUCP_001053 | XLOC_040185 | ENSRNOT00000047126 | 0.96367775   | 4.68E-07 |
| TUCP_001053 | XLOC_040185 | ENSRNOT00000077231 | -0.950563743 | 2.14E-06 |
| TUCP_001053 | XLOC_040185 | ENSRNOT00000072762 | 0.958215111  | 9.35E-07 |
| TUCP_001053 | XLOC_040185 | ENSRNOT00000071540 | -0.963132983 | 5.04E-07 |
| TUCP_001053 | XLOC_040185 | ENSRNOT00000073643 | 0.976138832  | 5.85E-08 |
| TUCP_001053 | XLOC_040185 | ENSRNOT00000052002 | -0.953284461 | 1.62E-06 |
| TUCP_001053 | XLOC_040185 | ENSRNOT00000022502 | 0.967216029  | 2.82E-07 |
| TUCP_001053 | XLOC_040185 | ENSRNOT00000021802 | -0.96088494  | 6.75E-07 |
| TUCP_001053 | XLOC_040185 | ENSRNOT00000024352 | -0.978634219 | 3.38E-08 |
| TUCP_001053 | XLOC_040185 | ENSRNOT00000082627 | 0.962806587  | 5.27E-07 |
| TUCP_001053 | XLOC_040185 | ENSRNOT00000018122 | -0.962815246 | 5.26E-07 |
| TUCP_001053 | XLOC_040185 | ENSRNOT00000003780 | -0.979627225 | 2.67E-08 |
| TUCP_001053 | XLOC_040185 | ENSRNOT00000014506 | 0.958854853  | 8.67E-07 |
| TUCP_001053 | XLOC_040185 | ENSRNOT00000023262 | 0.954161122  | 1.48E-06 |
| TUCP_001053 | XLOC_040185 | ENSRNOT00000022924 | 0.954335259  | 1.45E-06 |
| TUCP_001053 | XLOC_040185 | ENSRNOT00000019816 | 0.966598777  | 3.10E-07 |
| TUCP_001053 | XLOC_040185 | ENSRNOT00000019172 | 0.950126576  | 2.23E-06 |
| TUCP_001053 | XLOC_040185 | ENSRNOT00000023667 | -0.971518667 | 1.41E-07 |
| TUCP_001053 | XLOC_040185 | ENSRNOT00000068381 | -0.953909712 | 1.52E-06 |
| TUCP_001053 | XLOC_040185 | ENSRNOT00000074054 | -0.951066512 | 2.03E-06 |
| TUCP_001053 | XLOC_040185 | ENSRNOT00000068026 | 0.96560056   | 3.58E-07 |
| TUCP_001053 | XLOC_040185 | ENSRNOT00000085621 | -0.979734291 | 2.60E-08 |
| TUCP_001053 | XLOC_040185 | ENSRNOT00000076404 | -0.953268646 | 1.62E-06 |
| TUCP_001053 | XLOC_040185 | ENSRNOT00000058382 | -0.969831042 | 1.87E-07 |
| TUCP_001053 | XLOC_040185 | ENSRNOT00000055683 | -0.975190499 | 7.10E-08 |
| TUCP_001053 | XLOC_040185 | ENSRNOT00000017805 | -0.958688431 | 8.84E-07 |
| TUCP_001053 | XLOC_040185 | ENSRNOT00000035605 | -0.981423716 | 1.69E-08 |
| TUCP_001053 | XLOC_040185 | ENSRNOT00000005172 | -0.950823315 | 2.09E-06 |
| TUCP_001053 | XLOC_040185 | ENSRNOT00000092083 | -0.959053333 | 8.46E-07 |
| TUCP_001053 | XLOC_040185 | ENSRNOT00000017995 | -0.959082437 | 8.43E-07 |
| TUCP_001053 | XLOC_040185 | ENSRNOT00000000898 | -0.968433224 | 2.34E-07 |
| TUCP_001053 | XLOC_040185 | ENSRNOT00000081725 | -0.970445499 | 1.69E-07 |
| TUCP_001053 | XLOC_040185 | ENSRNOT00000005459 | -0.959530927 | 7.99E-07 |
| TUCP_001053 | XLOC_040185 | ENSRNOT00000002771 | -0.952479046 | 1.76E-06 |
| TUCP_001053 | XLOC_040185 | ENSRNOT00000037015 | -0.966168429 | 3.30E-07 |
| TUCP_001053 | XLOC_040185 | ENSRNOT00000027917 | -0.952195846 | 1.81E-06 |
| TUCP_001053 | XLOC_040185 | ENSRNOT00000090268 | 0.954086446  | 1.49E-06 |
| TUCP_001053 | XLOC_040185 | ENSRNOT00000024452 | 0.959782351  | 7.74E-07 |
| TUCP_001053 | XLOC_040185 | ENSRNOT00000013553 | -0.963428609 | 4.85E-07 |
| TUCP_001053 | XLOC_040185 | ENSRNOT00000028888 | -0.959591506 | 7.93E-07 |
| TUCP_001053 | XLOC_040185 | ENSRNOT00000066032 | -0.966576764 | 3.11E-07 |
| TUCP_001053 | XLOC_040185 | ENSRNOT00000027344 | -0.951789214 | 1.89E-06 |
| TUCP_001053 | XLOC_040185 | ENSRNOT00000027264 | -0.957709448 | 9.92E-07 |
| TUCP_001053 | XLOC_040185 | ENSRNOT00000001783 | -0.961808834 | 6.00E-07 |
| TUCP_001053 | XLOC_040185 | ENSRNOT00000021143 | -0.97840081  | 3.57E-08 |
| TUCP_001053 | XLOC_040185 | ENSRNOT00000020417 | 0.950356193  | 2.18E-06 |
| TUCP_001053 | XLOC_040185 | ENSRNOT00000025037 | -0.960743155 | 6.87E-07 |

|             |             |                    |              |          |
|-------------|-------------|--------------------|--------------|----------|
| TUCP_001053 | XLOC_040185 | ENSRNOT0000006804  | -0.963941532 | 4.52E-07 |
| TUCP_001053 | XLOC_040185 | ENSRNOT0000006802  | -0.953888847 | 1.52E-06 |
| TUCP_001053 | XLOC_040185 | ENSRNOT00000020809 | 0.952799988  | 1.70E-06 |
| TUCP_001053 | XLOC_040185 | ENSRNOT00000082151 | 0.955920685  | 1.22E-06 |
| TUCP_001053 | XLOC_040185 | ENSRNOT00000085971 | 0.972083224  | 1.27E-07 |
| TUCP_001053 | XLOC_040185 | ENSRNOT00000044395 | -0.951053087 | 2.04E-06 |
| TUCP_001053 | XLOC_040185 | ENSRNOT00000031625 | -0.967068107 | 2.89E-07 |
| TUCP_001053 | XLOC_040185 | ENSRNOT00000076300 | 0.956445044  | 1.15E-06 |
| TUCP_001053 | XLOC_040185 | ENSRNOT00000073041 | -0.959851569 | 7.68E-07 |
| TUCP_001053 | XLOC_040185 | ENSRNOT00000015537 | -0.959833518 | 7.70E-07 |
| TUCP_001053 | XLOC_040185 | ENSRNOT00000007702 | 0.972073694  | 1.28E-07 |
| TUCP_001053 | XLOC_040185 | ENSRNOT00000076973 | -0.952520656 | 1.75E-06 |
| TUCP_001053 | XLOC_040185 | ENSRNOT00000015946 | 0.959084442  | 8.43E-07 |
| TUCP_001053 | XLOC_040185 | ENSRNOT00000012528 | -0.96887788  | 2.18E-07 |
| TUCP_001053 | XLOC_040185 | ENSRNOT00000005387 | -0.966162318 | 3.30E-07 |
| TUCP_001053 | XLOC_040185 | ENSRNOT00000005381 | -0.953063969 | 1.66E-06 |
| TUCP_001053 | XLOC_040185 | ENSRNOT00000015318 | 0.958205525  | 9.36E-07 |
| TUCP_001053 | XLOC_040185 | ENSRNOT00000028907 | -0.980201427 | 2.32E-08 |
| TUCP_001053 | XLOC_040185 | ENSRNOT00000091742 | -0.966732486 | 3.03E-07 |
| TUCP_001053 | XLOC_040185 | ENSRNOT00000078862 | -0.956848145 | 1.10E-06 |
| TUCP_001053 | XLOC_040185 | ENSRNOT00000011237 | 0.952829078  | 1.70E-06 |
| TUCP_001053 | XLOC_040185 | ENSRNOT00000007350 | -0.974671955 | 7.87E-08 |
| TUCP_001053 | XLOC_040185 | ENSRNOT00000083578 | -0.966770852 | 3.02E-07 |
| TUCP_001053 | XLOC_040185 | ENSRNOT00000020297 | -0.974608748 | 7.97E-08 |
| TUCP_001053 | XLOC_040185 | ENSRNOT00000005658 | 0.95092644   | 2.06E-06 |
| TUCP_001053 | XLOC_040185 | ENSRNOT00000010127 | -0.952554805 | 1.75E-06 |
| TUCP_001053 | XLOC_040185 | ENSRNOT00000002638 | 0.951523278  | 1.94E-06 |
| TUCP_001053 | XLOC_040185 | ENSRNOT00000074023 | -0.979520311 | 2.74E-08 |
| TUCP_001053 | XLOC_040185 | ENSRNOT00000018341 | 0.961274588  | 6.43E-07 |
| TUCP_001053 | XLOC_040185 | ENSRNOT00000065076 | -0.972521955 | 1.18E-07 |
| TUCP_001053 | XLOC_040185 | ENSRNOT00000013516 | -0.976747637 | 5.15E-08 |
| TUCP_001053 | XLOC_040185 | ENSRNOT00000054685 | -0.970339344 | 1.72E-07 |
| TUCP_001053 | XLOC_040185 | ENSRNOT00000012060 | -0.99082899  | 5.03E-10 |
| TUCP_001053 | XLOC_040185 | ENSRNOT00000075480 | 0.957883878  | 9.72E-07 |
| TUCP_001053 | XLOC_040185 | ENSRNOT00000027760 | -0.976349045 | 5.60E-08 |
| TUCP_001053 | XLOC_040185 | ENSRNOT00000024402 | -0.954931989 | 1.36E-06 |
| TUCP_001053 | XLOC_040185 | ENSRNOT00000089933 | -0.961807065 | 6.00E-07 |
| TUCP_001053 | XLOC_040185 | ENSRNOT00000077908 | -0.955094563 | 1.33E-06 |
| TUCP_001053 | XLOC_040185 | ENSRNOT00000090912 | -0.966742067 | 3.03E-07 |
| TUCP_001053 | XLOC_040185 | ENSRNOT00000073983 | -0.966166804 | 3.30E-07 |
| TUCP_001053 | XLOC_040185 | ENSRNOT00000010783 | 0.963697156  | 4.67E-07 |
| TUCP_001053 | XLOC_040185 | ENSRNOT00000033677 | 0.950485566  | 2.16E-06 |
| TUCP_001053 | XLOC_040185 | ENSRNOT0000003087  | -0.973971036 | 9.01E-08 |
| TUCP_001053 | XLOC_040185 | ENSRNOT00000011832 | 0.981709598  | 1.56E-08 |
| TUCP_001053 | XLOC_040185 | ENSRNOT00000024066 | -0.975923677 | 6.12E-08 |
| TUCP_001053 | XLOC_040185 | ENSRNOT00000006835 | -0.981865479 | 1.50E-08 |
| TUCP_001053 | XLOC_040185 | ENSRNOT00000077727 | 0.969875031  | 1.86E-07 |
| TUCP_001053 | XLOC_040185 | ENSRNOT00000044346 | 0.968121807  | 2.46E-07 |
| TUCP_001053 | XLOC_040185 | ENSRNOT00000068745 | -0.955955827 | 1.21E-06 |
| TUCP_001053 | XLOC_040185 | ENSRNOT00000048781 | -0.954859376 | 1.37E-06 |
| TUCP_001053 | XLOC_040185 | ENSRNOT00000013867 | -0.96238416  | 5.57E-07 |

|             |             |                     |              |          |
|-------------|-------------|---------------------|--------------|----------|
| TUCP_001053 | XLOC_040185 | ENSRNOT00000091909  | -0.952169257 | 1.82E-06 |
| TUCP_001053 | XLOC_040185 | ENSRNOT00000003544  | 0.961744202  | 6.05E-07 |
| TUCP_001053 | XLOC_040185 | ENSRNOT00000022190  | 0.962777686  | 5.29E-07 |
| TUCP_001053 | XLOC_040185 | ENSRNOT00000060098  | 0.950965894  | 2.06E-06 |
| TUCP_001053 | XLOC_040185 | ENSRNOT00000025913  | 0.962690671  | 5.35E-07 |
| TUCP_001053 | XLOC_040185 | ENSRNOT00000077220  | 0.963274673  | 4.95E-07 |
| TUCP_001053 | XLOC_040185 | ENSRNOT00000004196  | -0.965684076 | 3.54E-07 |
| TUCP_001053 | XLOC_040185 | ENSRNOT00000076230  | -0.961700791 | 6.09E-07 |
| TUCP_001053 | XLOC_040185 | ENSRNOT00000007882  | 0.950480138  | 2.16E-06 |
| TUCP_001053 | XLOC_040185 | ENSRNOT000000073919 | -0.981593063 | 1.61E-08 |
| TUCP_001053 | XLOC_040185 | ENSRNOT00000086577  | -0.959454321 | 8.06E-07 |
| TUCP_001053 | XLOC_040185 | ENSRNOT00000036658  | 0.960937858  | 6.71E-07 |
| TUCP_001053 | XLOC_040185 | ENSRNOT00000089611  | -0.960907753 | 6.73E-07 |
| TUCP_001053 | XLOC_040185 | ENSRNOT00000039012  | 0.955759886  | 1.24E-06 |
| TUCP_001053 | XLOC_040185 | ENSRNOT00000045063  | -0.953318429 | 1.61E-06 |
| TUCP_001053 | XLOC_040185 | ENSRNOT00000034883  | 0.959169938  | 8.34E-07 |
| TUCP_001053 | XLOC_040185 | ENSRNOT00000020155  | -0.952959229 | 1.68E-06 |
| TUCP_001053 | XLOC_040185 | ENSRNOT00000072357  | 0.957189459  | 1.05E-06 |
| TUCP_001053 | XLOC_040185 | ENSRNOT00000079801  | 0.950797851  | 2.09E-06 |
| TUCP_001053 | XLOC_040185 | ENSRNOT00000073327  | -0.965546294 | 3.61E-07 |
| TUCP_001053 | XLOC_040185 | ENSRNOT00000005910  | 0.957545097  | 1.01E-06 |
| TUCP_001053 | XLOC_040185 | ENSRNOT00000017626  | 0.954243643  | 1.46E-06 |
| TUCP_001053 | XLOC_040185 | ENSRNOT00000076485  | 0.95041838   | 2.17E-06 |
| TUCP_001053 | XLOC_040185 | ENSRNOT00000040169  | -0.950285718 | 2.20E-06 |
| TUCP_001053 | XLOC_040185 | ENSRNOT00000016722  | -0.952538526 | 1.75E-06 |
| TUCP_001053 | XLOC_040185 | ENSRNOT00000028685  | -0.973178923 | 1.05E-07 |
| TUCP_001053 | XLOC_040185 | ENSRNOT00000018477  | 0.9512982    | 1.99E-06 |
| TUCP_001053 | XLOC_040185 | ENSRNOT00000080222  | 0.952355808  | 1.78E-06 |
| TUCP_001053 | XLOC_040185 | ENSRNOT00000025523  | -0.952675942 | 1.73E-06 |
| TUCP_001053 | XLOC_040185 | ENSRNOT00000018473  | 0.960366573  | 7.21E-07 |
| TUCP_001053 | XLOC_040185 | ENSRNOT00000005161  | -0.960473123 | 7.11E-07 |
| TUCP_001053 | XLOC_040185 | ENSRNOT00000037955  | 0.959926648  | 7.61E-07 |
| TUCP_001053 | XLOC_040185 | ENSRNOT00000055582  | -0.9623076   | 5.62E-07 |
| TUCP_001053 | XLOC_040185 | ENSRNOT00000004999  | -0.975762702 | 6.32E-08 |
| TUCP_001053 | XLOC_040185 | ENSRNOT00000009122  | -0.954292116 | 1.45E-06 |
| TUCP_001053 | XLOC_040185 | ENSRNOT00000013463  | -0.962407902 | 5.55E-07 |
| TUCP_001053 | XLOC_040185 | ENSRNOT00000025966  | -0.963796377 | 4.61E-07 |
| TUCP_001053 | XLOC_040185 | ENSRNOT00000047663  | 0.980017459  | 2.43E-08 |
| TUCP_001053 | XLOC_040185 | ENSRNOT00000080602  | -0.952482571 | 1.76E-06 |
| TUCP_001053 | XLOC_040185 | ENSRNOT00000029202  | 0.95952805   | 7.99E-07 |
| TUCP_001053 | XLOC_040185 | ENSRNOT00000025791  | 0.95001714   | 2.26E-06 |
| TUCP_001053 | XLOC_040185 | ENSRNOT00000005489  | -0.974806549 | 7.66E-08 |
| TUCP_001053 | XLOC_040185 | ENSRNOT00000025794  | 0.950876715  | 2.07E-06 |
| TUCP_001053 | XLOC_040185 | ENSRNOT00000058111  | 0.970155144  | 1.77E-07 |
| TUCP_001053 | XLOC_040185 | ENSRNOT00000027370  | -0.959740912 | 7.78E-07 |
| TUCP_001053 | XLOC_040185 | ENSRNOT00000088279  | -0.958337132 | 9.22E-07 |
| TUCP_001053 | XLOC_040185 | ENSRNOT00000009994  | 0.957055884  | 1.07E-06 |
| TUCP_001053 | XLOC_040185 | ENSRNOT00000002114  | 0.961867308  | 5.96E-07 |
| TUCP_001053 | XLOC_040185 | ENSRNOT00000024841  | 0.965231278  | 3.77E-07 |
| TUCP_001053 | XLOC_040185 | ENSRNOT00000046215  | 0.955407192  | 1.29E-06 |
| TUCP_001053 | XLOC_040185 | ENSRNOT00000087838  | 0.955334216  | 1.30E-06 |

|             |             |                     |              |          |
|-------------|-------------|---------------------|--------------|----------|
| TUCP_001053 | XLOC_040185 | ENSRNOT00000014127  | -0.95177671  | 1.89E-06 |
| TUCP_001053 | XLOC_040185 | ENSRNOT00000037679  | -0.977234493 | 4.64E-08 |
| TUCP_001053 | XLOC_040185 | ENSRNOT00000043581  | 0.951933469  | 1.86E-06 |
| TUCP_001053 | XLOC_040185 | ENSRNOT00000000120  | -0.956095325 | 1.19E-06 |
| TUCP_001053 | XLOC_040185 | ENSRNOT00000078906  | 0.971273669  | 1.47E-07 |
| TUCP_001053 | XLOC_040185 | ENSRNOT00000028545  | 0.954018298  | 1.50E-06 |
| TUCP_001053 | XLOC_040185 | ENSRNOT00000013733  | 0.956911543  | 1.09E-06 |
| TUCP_001053 | XLOC_040185 | ENSRNOT00000028225  | -0.974308779 | 8.44E-08 |
| TUCP_001053 | XLOC_040185 | ENSRNOT00000027476  | -0.950065127 | 2.25E-06 |
| TUCP_001053 | XLOC_040185 | ENSRNOT00000015495  | 0.958319342  | 9.24E-07 |
| TUCP_001053 | XLOC_040185 | ENSRNOT00000032244  | -0.950983088 | 2.05E-06 |
| TUCP_001053 | XLOC_040185 | ENSRNOT00000021216  | -0.950927945 | 2.06E-06 |
| TUCP_001053 | XLOC_040185 | ENSRNOT00000040393  | -0.954570428 | 1.41E-06 |
| TUCP_001053 | XLOC_040185 | ENSRNOT00000025097  | -0.97271308  | 1.14E-07 |
| TUCP_001053 | XLOC_040185 | ENSRNOT00000067901  | 0.958637522  | 8.89E-07 |
| TUCP_001053 | XLOC_040185 | ENSRNOT00000021674  | -0.955204315 | 1.32E-06 |
| TUCP_001053 | XLOC_040185 | ENSRNOT00000036613  | 0.977068814  | 4.81E-08 |
| TUCP_001053 | XLOC_040185 | ENSRNOT00000025705  | -0.970033281 | 1.81E-07 |
| TUCP_001053 | XLOC_040185 | ENSRNOT00000065722  | 0.961360753  | 6.36E-07 |
| TUCP_001053 | XLOC_040185 | ENSRNOT00000008113  | 0.972716629  | 1.14E-07 |
| TUCP_001053 | XLOC_040185 | ENSRNOT00000047105  | -0.958717254 | 8.81E-07 |
| TUCP_001053 | XLOC_040185 | ENSRNOT00000007698  | 0.957242779  | 1.05E-06 |
| TUCP_001053 | XLOC_040185 | ENSRNOT00000048910  | 0.953811698  | 1.53E-06 |
| TUCP_001053 | XLOC_040185 | ENSRNOT00000020357  | -0.952353984 | 1.78E-06 |
| TUCP_001053 | XLOC_040185 | ENSRNOT00000006460  | -0.953066988 | 1.66E-06 |
| TUCP_001053 | XLOC_040185 | ENSRNOT00000020051  | -0.974959068 | 7.44E-08 |
| TUCP_001053 | XLOC_040185 | ENSRNOT00000040525  | -0.962536911 | 5.46E-07 |
| TUCP_001053 | XLOC_040185 | ENSRNOT00000015678  | 0.968891734  | 2.18E-07 |
| TUCP_001053 | XLOC_040185 | ENSRNOT000000082914 | -0.954125233 | 1.48E-06 |
| TUCP_001053 | XLOC_040185 | ENSRNOT00000020197  | 0.961680284  | 6.10E-07 |
| TUCP_001053 | XLOC_040185 | ENSRNOT00000019358  | 0.95744948   | 1.02E-06 |
| TUCP_001053 | XLOC_040185 | ENSRNOT000000082863 | -0.952872843 | 1.69E-06 |
| TUCP_001053 | XLOC_040185 | ENSRNOT00000065942  | 0.954917621  | 1.36E-06 |
| TUCP_001053 | XLOC_040185 | ENSRNOT00000049459  | 0.951797415  | 1.89E-06 |
| TUCP_001053 | XLOC_040185 | ENSRNOT000000087011 | 0.963801833  | 4.61E-07 |
| TUCP_001053 | XLOC_040185 | ENSRNOT000000084567 | -0.978341979 | 3.62E-08 |
| TUCP_001053 | XLOC_040185 | ENSRNOT000000008361 | -0.96433544  | 4.28E-07 |
| TUCP_001053 | XLOC_040185 | ENSRNOT00000013851  | 0.965805874  | 3.48E-07 |
| TUCP_001053 | XLOC_040185 | ENSRNOT00000001507  | -0.969064964 | 2.12E-07 |
| TUCP_001053 | XLOC_040185 | ENSRNOT000000083568 | -0.964950144 | 3.93E-07 |
| TUCP_001053 | XLOC_040185 | ENSRNOT00000018584  | -0.959607305 | 7.91E-07 |
| TUCP_001053 | XLOC_040185 | ENSRNOT00000039177  | 0.977400413  | 4.47E-08 |
| TUCP_001053 | XLOC_040185 | ENSRNOT00000017271  | -0.973138192 | 1.05E-07 |
| TUCP_001053 | XLOC_040185 | ENSRNOT00000019759  | -0.952701628 | 1.72E-06 |
| TUCP_001053 | XLOC_040185 | ENSRNOT00000022676  | 0.951707598  | 1.91E-06 |
| TUCP_001053 | XLOC_040185 | ENSRNOT00000030082  | -0.984867545 | 6.09E-09 |
| TUCP_001053 | XLOC_040185 | ENSRNOT00000025517  | -0.959082573 | 8.43E-07 |
| TUCP_001053 | XLOC_040185 | ENSRNOT00000025510  | 0.962974419  | 5.15E-07 |
| TUCP_001053 | XLOC_040185 | ENSRNOT00000000577  | -0.974782427 | 7.70E-08 |
| TUCP_001053 | XLOC_040185 | ENSRNOT00000065045  | -0.968792936 | 2.21E-07 |
| TUCP_001053 | XLOC_040185 | ENSRNOT00000046490  | 0.95105826   | 2.04E-06 |



|             |             |                     |              |          |
|-------------|-------------|---------------------|--------------|----------|
| TUCP_001053 | XLOC_040185 | ENSRNOT00000046552  | -0.955025144 | 1.34E-06 |
| TUCP_001053 | XLOC_040185 | ENSRNOT00000001979  | 0.950282168  | 2.20E-06 |
| TUCP_001053 | XLOC_040185 | ENSRNOT000000067011 | -0.955162745 | 1.32E-06 |
| TUCP_001053 | XLOC_040185 | ENSRNOT00000083968  | 0.978171956  | 3.76E-08 |
| TUCP_001053 | XLOC_040185 | ENSRNOT000000037133 | -0.974845837 | 7.60E-08 |
| TUCP_001053 | XLOC_040185 | ENSRNOT000000034298 | -0.964932221 | 3.94E-07 |
| TUCP_001053 | XLOC_040185 | ENSRNOT000000083964 | 0.952068432  | 1.84E-06 |
| TUCP_001053 | XLOC_040185 | ENSRNOT000000026831 | -0.963638292 | 4.71E-07 |
| TUCP_001053 | XLOC_040185 | ENSRNOT000000068452 | -0.965142455 | 3.82E-07 |
| TUCP_001053 | XLOC_040185 | ENSRNOT000000016445 | -0.985596094 | 4.77E-09 |
| TUCP_001053 | XLOC_040185 | ENSRNOT000000011956 | -0.968641602 | 2.27E-07 |
| TUCP_001053 | XLOC_040185 | ENSRNOT000000024119 | -0.956048757 | 1.20E-06 |
| TUCP_001053 | XLOC_040185 | ENSRNOT000000006824 | 0.971598758  | 1.39E-07 |
| TUCP_001053 | XLOC_040185 | ENSRNOT000000012775 | 0.952312675  | 1.79E-06 |
| TUCP_001053 | XLOC_040185 | ENSRNOT000000082138 | 0.970755276  | 1.60E-07 |
| TUCP_001053 | XLOC_040185 | ENSRNOT000000078743 | 0.976774799  | 5.12E-08 |
| TUCP_001053 | XLOC_040185 | ENSRNOT000000020941 | -0.951556906 | 1.94E-06 |
| TUCP_001053 | XLOC_040185 | ENSRNOT000000009811 | -0.956724831 | 1.11E-06 |
| TUCP_001053 | XLOC_040185 | ENSRNOT00000001158  | -0.973698115 | 9.49E-08 |
| TUCP_001053 | XLOC_040185 | ENSRNOT000000045488 | -0.96228569  | 5.64E-07 |
| TUCP_001053 | XLOC_040185 | ENSRNOT000000050119 | 0.950064879  | 2.25E-06 |
| TUCP_001053 | XLOC_040185 | ENSRNOT000000089211 | -0.954679717 | 1.40E-06 |
| TUCP_001053 | XLOC_040185 | ENSRNOT000000020383 | -0.985160443 | 5.53E-09 |
| TUCP_001053 | XLOC_040185 | ENSRNOT000000015518 | 0.951540478  | 1.94E-06 |
| TUCP_001053 | XLOC_040185 | ENSRNOT000000000302 | -0.952734886 | 1.72E-06 |
| TUCP_001053 | XLOC_040185 | ENSRNOT000000065615 | -0.959774349 | 7.75E-07 |
| TUCP_001053 | XLOC_040185 | ENSRNOT000000011675 | -0.969741921 | 1.90E-07 |
| TUCP_001053 | XLOC_040185 | ENSRNOT000000004290 | -0.960455382 | 7.13E-07 |
| TUCP_001053 | XLOC_040185 | ENSRNOT000000008244 | -0.962111231 | 5.77E-07 |
| TUCP_001053 | XLOC_040185 | ENSRNOT000000002974 | -0.959571299 | 7.95E-07 |
| TUCP_001053 | XLOC_040185 | ENSRNOT000000000658 | -0.960004122 | 7.54E-07 |
| TUCP_001053 | XLOC_040185 | ENSRNOT000000000717 | 0.957797348  | 9.82E-07 |
| TUCP_001053 | XLOC_040185 | ENSRNOT000000093385 | -0.956418445 | 1.15E-06 |
| TUCP_001053 | XLOC_040185 | ENSRNOT000000086122 | -0.960216464 | 7.34E-07 |
| TUCP_001053 | XLOC_040185 | ENSRNOT000000017504 | -0.98051024  | 2.14E-08 |
| TUCP_001053 | XLOC_040185 | ENSRNOT000000087346 | -0.961350687 | 6.36E-07 |
| TUCP_001053 | XLOC_040185 | ENSRNOT000000088628 | -0.954578069 | 1.41E-06 |
| TUCP_001053 | XLOC_040185 | ENSRNOT000000023763 | 0.962244401  | 5.67E-07 |
| TUCP_001053 | XLOC_040185 | ENSRNOT000000009202 | -0.950226301 | 2.21E-06 |
| TUCP_001053 | XLOC_040185 | ENSRNOT000000010993 | -0.958582636 | 8.95E-07 |
| TUCP_001053 | XLOC_040185 | ENSRNOT000000059181 | -0.950262831 | 2.20E-06 |
| TUCP_001053 | XLOC_040185 | ENSRNOT000000003691 | 0.956449276  | 1.15E-06 |
| TUCP_001053 | XLOC_040185 | ENSRNOT000000010852 | -0.962197039 | 5.71E-07 |
| TUCP_001053 | XLOC_040185 | ENSRNOT000000080216 | 0.952004275  | 1.85E-06 |
| TUCP_001053 | XLOC_040185 | ENSRNOT000000081678 | -0.972713375 | 1.14E-07 |
| TUCP_001053 | XLOC_040185 | ENSRNOT000000017765 | -0.971723406 | 1.36E-07 |
| TUCP_001053 | XLOC_040185 | ENSRNOT000000017761 | -0.955277904 | 1.31E-06 |
| TUCP_001053 | XLOC_040185 | ENSRNOT000000023543 | 0.969791309  | 1.88E-07 |
| TUCP_001053 | XLOC_040185 | ENSRNOT000000023014 | -0.958666026 | 8.86E-07 |
| TUCP_001053 | XLOC_040185 | ENSRNOT000000018074 | 0.959865544  | 7.67E-07 |
| TUCP_001053 | XLOC_040185 | ENSRNOT000000039341 | -0.9527773   | 1.71E-06 |

|             |             |                    |              |          |
|-------------|-------------|--------------------|--------------|----------|
| TUCP_001053 | XLOC_040185 | ENSRNOT00000055386 | -0.951169525 | 2.01E-06 |
| TUCP_001053 | XLOC_040185 | ENSRNOT00000085517 | -0.976626147 | 5.28E-08 |
| TUCP_001053 | XLOC_040185 | ENSRNOT00000037405 | -0.950726999 | 2.11E-06 |
| TUCP_001053 | XLOC_040185 | ENSRNOT00000080677 | 0.950895325  | 2.07E-06 |
| TUCP_001053 | XLOC_040185 | ENSRNOT00000025460 | -0.963495477 | 4.80E-07 |
| TUCP_001053 | XLOC_040185 | ENSRNOT00000087033 | 0.953179031  | 1.64E-06 |
| TUCP_001053 | XLOC_040185 | ENSRNOT00000026760 | 0.976764362  | 5.13E-08 |
| TUCP_001053 | XLOC_040185 | ENSRNOT00000026767 | -0.953940818 | 1.51E-06 |
| TUCP_001053 | XLOC_040185 | ENSRNOT00000081077 | 0.954748064  | 1.38E-06 |
| TUCP_001053 | XLOC_040185 | ENSRNOT00000016568 | -0.96177682  | 6.03E-07 |
| TUCP_001053 | XLOC_040185 | ENSRNOT00000027360 | 0.963029718  | 5.11E-07 |
| TUCP_001053 | XLOC_040185 | ENSRNOT00000023388 | 0.960384345  | 7.19E-07 |
| TUCP_001053 | XLOC_040185 | ENSRNOT00000027967 | -0.978491731 | 3.50E-08 |
| TUCP_001053 | XLOC_040185 | ENSRNOT00000024938 | 0.952719886  | 1.72E-06 |
| TUCP_001053 | XLOC_040185 | ENSRNOT00000024933 | 0.960137842  | 7.41E-07 |
| TUCP_001053 | XLOC_040185 | ENSRNOT00000047210 | -0.953299691 | 1.62E-06 |
| TUCP_001053 | XLOC_040185 | ENSRNOT00000024011 | -0.950939862 | 2.06E-06 |
| TUCP_001053 | XLOC_040185 | ENSRNOT00000046639 | -0.965843667 | 3.46E-07 |
| TUCP_003386 | XLOC_146424 | ENSRNOT00000000438 | 0.954188535  | 1.47E-06 |
| TUCP_003386 | XLOC_146424 | ENSRNOT00000064043 | 0.951324573  | 1.98E-06 |
| TUCP_003386 | XLOC_146424 | ENSRNOT00000088589 | 0.955461479  | 1.28E-06 |
| TUCP_004176 | XLOC_182536 | ENSRNOT00000000008 | 1            | 0        |
| TUCP_004176 | XLOC_182536 | ENSRNOT00000060048 | 0.998711457  | 2.79E-14 |
| TUCP_004176 | XLOC_182536 | ENSRNOT00000082304 | 0.996875989  | 2.33E-12 |
| TUCP_004176 | XLOC_182536 | ENSRNOT00000006219 | 1            | 0        |
| TUCP_004176 | XLOC_182536 | ENSRNOT00000065376 | 1            | 0        |
| TUCP_004176 | XLOC_182536 | ENSRNOT00000081433 | 0.984469223  | 6.93E-09 |
| TUCP_004176 | XLOC_182536 | ENSRNOT00000083575 | 1            | 0        |
| TUCP_004176 | XLOC_182536 | ENSRNOT00000087739 | 1            | 4.25E-78 |
| TUCP_004176 | XLOC_182536 | ENSRNOT00000079826 | 1            | 0        |
| TUCP_004176 | XLOC_182536 | ENSRNOT00000025770 | 0.993828251  | 6.98E-11 |
| TUCP_004176 | XLOC_182536 | ENSRNOT00000088244 | 0.973479481  | 9.88E-08 |
| TUCP_004176 | XLOC_182536 | ENSRNOT00000048523 | 1            | 0        |
| TUCP_004176 | XLOC_182536 | ENSRNOT00000079365 | 0.958936699  | 8.58E-07 |
| TUCP_004176 | XLOC_182536 | ENSRNOT00000020229 | 0.960002785  | 7.54E-07 |
| TUCP_004176 | XLOC_182536 | ENSRNOT00000026428 | 0.996986683  | 1.95E-12 |
| TUCP_004176 | XLOC_182536 | ENSRNOT00000085673 | 1            | 0        |
| TUCP_004176 | XLOC_182536 | ENSRNOT00000072972 | 0.981476166  | 1.67E-08 |
| TUCP_004176 | XLOC_182536 | ENSRNOT00000050573 | 1            | 0        |
| TUCP_004176 | XLOC_182536 | ENSRNOT00000089876 | -0.953630353 | 1.56E-06 |
| TUCP_004176 | XLOC_182536 | ENSRNOT00000074378 | 0.998901807  | 1.26E-14 |
| TUCP_004176 | XLOC_182536 | ENSRNOT00000093571 | 1            | 0        |
| TUCP_004176 | XLOC_182536 | ENSRNOT00000090581 | 1            | 0        |
| TUCP_004176 | XLOC_182536 | ENSRNOT00000076239 | 0.98020752   | 2.31E-08 |
| TUCP_004176 | XLOC_182536 | ENSRNOT00000065485 | 1            | 4.25E-78 |
| TUCP_004176 | XLOC_182536 | ENSRNOT00000006356 | 0.999544279  | 1.55E-16 |
| TUCP_004176 | XLOC_182536 | ENSRNOT00000087199 | 0.974421555  | 8.26E-08 |
| TUCP_004176 | XLOC_182536 | ENSRNOT00000022091 | 1            | 0        |
| TUCP_004176 | XLOC_182536 | ENSRNOT00000064764 | 0.98460888   | 6.63E-09 |
| TUCP_004176 | XLOC_182536 | ENSRNOT00000076927 | 0.971163156  | 1.50E-07 |
| TUCP_004176 | XLOC_182536 | ENSRNOT00000092395 | 0.999522978  | 1.94E-16 |

|             |             |                    |              |          |
|-------------|-------------|--------------------|--------------|----------|
| TUCP_004177 | XLOC_182785 | ENSRNOT00000046775 | 0.951604576  | 1.93E-06 |
| TUCP_004177 | XLOC_182785 | ENSRNOT00000079933 | 0.966149189  | 3.31E-07 |
| TUCP_004177 | XLOC_182785 | ENSRNOT00000020329 | 0.969325173  | 2.03E-07 |
| TUCP_003388 | XLOC_146559 | ENSRNOT0000003004  | 0.951714877  | 1.91E-06 |
| TUCP_003388 | XLOC_146559 | ENSRNOT00000008573 | 0.952847608  | 1.70E-06 |
| TUCP_003388 | XLOC_146559 | ENSRNOT00000072208 | 0.952840564  | 1.70E-06 |
| TUCP_003388 | XLOC_146559 | ENSRNOT00000000554 | 0.963625005  | 4.72E-07 |
| TUCP_003388 | XLOC_146559 | ENSRNOT00000021850 | 0.953132822  | 1.65E-06 |
| TUCP_003388 | XLOC_146559 | ENSRNOT00000024872 | 0.958002282  | 9.59E-07 |
| TUCP_003388 | XLOC_146559 | ENSRNOT00000001826 | 0.959032665  | 8.48E-07 |
| TUCP_003388 | XLOC_146559 | ENSRNOT00000056622 | 0.959318849  | 8.19E-07 |
| TUCP_003388 | XLOC_146559 | ENSRNOT00000001290 | 0.964908209  | 3.95E-07 |
| TUCP_003388 | XLOC_146559 | ENSRNOT00000030251 | 0.955732289  | 1.24E-06 |
| TUCP_003388 | XLOC_146559 | ENSRNOT00000008677 | 0.973175607  | 1.05E-07 |
| TUCP_003388 | XLOC_146559 | ENSRNOT00000025656 | 0.966551636  | 3.12E-07 |
| TUCP_003388 | XLOC_146559 | ENSRNOT00000079177 | 0.959350299  | 8.16E-07 |
| TUCP_003388 | XLOC_146559 | ENSRNOT00000081768 | 0.95915312   | 8.36E-07 |
| TUCP_003388 | XLOC_146559 | ENSRNOT00000015763 | -0.951521463 | 1.94E-06 |
| TUCP_003388 | XLOC_146559 | ENSRNOT00000081899 | -0.953314863 | 1.61E-06 |
| TUCP_003388 | XLOC_146559 | ENSRNOT00000020951 | 0.951639054  | 1.92E-06 |
| TUCP_003388 | XLOC_146559 | ENSRNOT00000050179 | 0.9758216    | 6.25E-08 |
| TUCP_003388 | XLOC_146559 | ENSRNOT00000019687 | 0.962431447  | 5.53E-07 |
| TUCP_003388 | XLOC_146559 | ENSRNOT00000019262 | 0.952547015  | 1.75E-06 |
| TUCP_003388 | XLOC_146559 | ENSRNOT00000054897 | 0.950268278  | 2.20E-06 |
| TUCP_003388 | XLOC_146559 | ENSRNOT00000019768 | 0.957616622  | 1.00E-06 |
| TUCP_003388 | XLOC_146559 | ENSRNOT00000057752 | 0.950072506  | 2.25E-06 |
| TUCP_003388 | XLOC_146559 | ENSRNOT00000077871 | 0.950290837  | 2.20E-06 |
| TUCP_003388 | XLOC_146559 | ENSRNOT00000027511 | 0.960308134  | 7.26E-07 |
| TUCP_003388 | XLOC_146559 | ENSRNOT00000001638 | 0.961600404  | 6.16E-07 |
| TUCP_003388 | XLOC_146559 | ENSRNOT00000015131 | -0.952940179 | 1.68E-06 |
| TUCP_003388 | XLOC_146559 | ENSRNOT00000081272 | -0.962041348 | 5.82E-07 |
| TUCP_003388 | XLOC_146559 | ENSRNOT00000020322 | 0.968925738  | 2.17E-07 |
| TUCP_003388 | XLOC_146559 | ENSRNOT00000045735 | 0.960080141  | 7.47E-07 |
| TUCP_003388 | XLOC_146559 | ENSRNOT00000005942 | 0.950902221  | 2.07E-06 |
| TUCP_003388 | XLOC_146559 | ENSRNOT00000019630 | 0.957344539  | 1.04E-06 |
| TUCP_003388 | XLOC_146559 | ENSRNOT00000031851 | -0.962782725 | 5.28E-07 |
| TUCP_003388 | XLOC_146559 | ENSRNOT00000001912 | 0.951715214  | 1.91E-06 |
| TUCP_003388 | XLOC_146559 | ENSRNOT00000022862 | 0.962954904  | 5.16E-07 |
| TUCP_003388 | XLOC_146559 | ENSRNOT00000072132 | 0.954553993  | 1.41E-06 |
| TUCP_003388 | XLOC_146559 | ENSRNOT00000015520 | 0.967695718  | 2.62E-07 |
| TUCP_003388 | XLOC_146559 | ENSRNOT00000028801 | 0.952961208  | 1.68E-06 |
| TUCP_003388 | XLOC_146559 | ENSRNOT00000015525 | -0.970235704 | 1.75E-07 |
| TUCP_003388 | XLOC_146559 | ENSRNOT00000058611 | -0.959839791 | 7.69E-07 |
| TUCP_003388 | XLOC_146559 | ENSRNOT00000026597 | 0.965671107  | 3.54E-07 |
| TUCP_003388 | XLOC_146559 | ENSRNOT00000046227 | 0.969526813  | 1.97E-07 |
| TUCP_003388 | XLOC_146559 | ENSRNOT00000019652 | 0.974586328  | 8.00E-08 |
| TUCP_003388 | XLOC_146559 | ENSRNOT00000018234 | 0.953445014  | 1.59E-06 |
| TUCP_003388 | XLOC_146559 | ENSRNOT00000029819 | -0.965434805 | 3.67E-07 |
| TUCP_003388 | XLOC_146559 | ENSRNOT00000031568 | 0.953138216  | 1.64E-06 |
| TUCP_003389 | XLOC_146751 | ENSRNOT00000013914 | 0.964869364  | 3.97E-07 |
| TUCP_003389 | XLOC_146751 | ENSRNOT00000027083 | -0.954534211 | 1.42E-06 |

|             |             |                    |              |          |
|-------------|-------------|--------------------|--------------|----------|
| TUCP_003389 | XLOC_146751 | ENSRNOT00000049857 | 0.953574332  | 1.57E-06 |
| TUCP_003389 | XLOC_146751 | ENSRNOT00000050795 | -0.951577975 | 1.93E-06 |
| TUCP_003389 | XLOC_146751 | ENSRNOT00000019848 | 0.954593937  | 1.41E-06 |
| TUCP_003389 | XLOC_146751 | ENSRNOT00000014377 | 0.95422292   | 1.47E-06 |
| TUCP_003389 | XLOC_146751 | ENSRNOT00000002037 | 0.969311278  | 2.04E-07 |
| TUCP_003389 | XLOC_146751 | ENSRNOT00000060607 | 0.951013076  | 2.05E-06 |
| TUCP_003389 | XLOC_146751 | ENSRNOT00000022259 | 0.955626243  | 1.26E-06 |
| TUCP_003389 | XLOC_146751 | ENSRNOT00000061916 | 0.959082467  | 8.43E-07 |
| TUCP_003389 | XLOC_146751 | ENSRNOT00000059524 | 0.966857246  | 2.98E-07 |
| TUCP_003389 | XLOC_146751 | ENSRNOT00000003715 | 0.968291772  | 2.39E-07 |
| TUCP_003389 | XLOC_146751 | ENSRNOT00000050721 | 0.969151289  | 2.09E-07 |
| TUCP_003389 | XLOC_146751 | ENSRNOT00000028625 | 0.959382578  | 8.13E-07 |
| TUCP_003389 | XLOC_146751 | ENSRNOT00000064305 | 0.962771447  | 5.29E-07 |
| TUCP_003389 | XLOC_146751 | ENSRNOT00000002040 | 0.969016995  | 2.13E-07 |
| TUCP_003389 | XLOC_146751 | ENSRNOT00000009726 | 0.955630132  | 1.26E-06 |
| TUCP_003389 | XLOC_146751 | ENSRNOT00000025308 | 0.951596991  | 1.93E-06 |
| TUCP_003389 | XLOC_146751 | ENSRNOT00000019463 | 0.956925648  | 1.09E-06 |
| TUCP_003389 | XLOC_146751 | ENSRNOT00000066204 | 0.95724033   | 1.05E-06 |
| TUCP_003389 | XLOC_146751 | ENSRNOT00000060432 | 0.955407029  | 1.29E-06 |
| TUCP_003389 | XLOC_146751 | ENSRNOT00000033015 | 0.979564828  | 2.71E-08 |
| TUCP_003389 | XLOC_146751 | ENSRNOT00000001468 | 0.971130601  | 1.50E-07 |
| TUCP_003389 | XLOC_146751 | ENSRNOT00000027653 | 0.954832116  | 1.37E-06 |
| TUCP_003389 | XLOC_146751 | ENSRNOT00000003158 | 0.954610467  | 1.41E-06 |
| TUCP_003389 | XLOC_146751 | ENSRNOT00000003247 | 0.96983446   | 1.87E-07 |
| TUCP_003389 | XLOC_146751 | ENSRNOT00000085311 | 0.962616464  | 5.40E-07 |
| TUCP_003389 | XLOC_146751 | ENSRNOT00000014479 | 0.95750866   | 1.02E-06 |
| TUCP_003389 | XLOC_146751 | ENSRNOT00000013695 | 0.951525946  | 1.94E-06 |
| TUCP_003389 | XLOC_146751 | ENSRNOT00000016541 | 0.958688282  | 8.84E-07 |
| TUCP_003389 | XLOC_146751 | ENSRNOT00000015471 | 0.955999279  | 1.21E-06 |
| TUCP_003389 | XLOC_146751 | ENSRNOT00000017692 | 0.959993838  | 7.55E-07 |
| TUCP_003389 | XLOC_146751 | ENSRNOT00000014373 | 0.97806897   | 3.85E-08 |
| TUCP_003389 | XLOC_146751 | ENSRNOT00000085403 | -0.969152312 | 2.09E-07 |
| TUCP_003389 | XLOC_146751 | ENSRNOT00000004007 | 0.950366901  | 2.18E-06 |
| TUCP_003389 | XLOC_146751 | ENSRNOT00000002837 | 0.951275858  | 1.99E-06 |
| TUCP_003389 | XLOC_146751 | ENSRNOT00000017469 | 0.961795631  | 6.01E-07 |
| TUCP_003389 | XLOC_146751 | ENSRNOT00000078685 | -0.963398702 | 4.86E-07 |
| TUCP_003389 | XLOC_146751 | ENSRNOT00000025846 | 0.978428036  | 3.55E-08 |
| TUCP_003389 | XLOC_146751 | ENSRNOT00000026398 | 0.958549323  | 8.99E-07 |
| TUCP_003389 | XLOC_146751 | ENSRNOT00000024264 | 0.954625667  | 1.40E-06 |
| TUCP_003389 | XLOC_146751 | ENSRNOT00000020702 | 0.956469217  | 1.14E-06 |
| TUCP_003389 | XLOC_146751 | ENSRNOT00000012583 | 0.970333858  | 1.72E-07 |
| TUCP_003389 | XLOC_146751 | ENSRNOT00000036338 | 0.954843554  | 1.37E-06 |
| TUCP_003389 | XLOC_146751 | ENSRNOT00000082686 | 0.950989822  | 2.05E-06 |
| TUCP_003389 | XLOC_146751 | ENSRNOT00000017269 | 0.965526252  | 3.62E-07 |
| TUCP_003389 | XLOC_146751 | ENSRNOT00000016386 | 0.971125865  | 1.51E-07 |
| TUCP_003389 | XLOC_146751 | ENSRNOT00000020932 | 0.963720897  | 4.66E-07 |
| TUCP_003389 | XLOC_146751 | ENSRNOT00000082508 | 0.958422343  | 9.12E-07 |
| TUCP_003389 | XLOC_146751 | ENSRNOT00000013863 | 0.971254258  | 1.47E-07 |
| TUCP_003389 | XLOC_146751 | ENSRNOT00000091864 | 0.961218262  | 6.47E-07 |
| TUCP_003389 | XLOC_146751 | ENSRNOT00000051843 | 0.952121731  | 1.83E-06 |
| TUCP_003389 | XLOC_146751 | ENSRNOT00000018646 | 0.963246251  | 4.97E-07 |

|             |             |                    |              |          |
|-------------|-------------|--------------------|--------------|----------|
| TUCP_003389 | XLOC_146751 | ENSRNOT00000061304 | 0.952721335  | 1.72E-06 |
| TUCP_003389 | XLOC_146751 | ENSRNOT00000007002 | 0.966349482  | 3.21E-07 |
| TUCP_003389 | XLOC_146751 | ENSRNOT00000003540 | 0.959157007  | 8.36E-07 |
| TUCP_003389 | XLOC_146751 | ENSRNOT00000019386 | 0.956246908  | 1.17E-06 |
| TUCP_003389 | XLOC_146751 | ENSRNOT00000025916 | 0.977752643  | 4.13E-08 |
| TUCP_003389 | XLOC_146751 | ENSRNOT00000019130 | 0.953913208  | 1.52E-06 |
| TUCP_003389 | XLOC_146751 | ENSRNOT00000024296 | -0.962226587 | 5.68E-07 |
| TUCP_003389 | XLOC_146751 | ENSRNOT00000010893 | 0.955157861  | 1.32E-06 |
| TUCP_003389 | XLOC_146751 | ENSRNOT00000010674 | 0.954354004  | 1.45E-06 |
| TUCP_003389 | XLOC_146751 | ENSRNOT00000020267 | -0.958310015 | 9.25E-07 |
| TUCP_003389 | XLOC_146751 | ENSRNOT00000011551 | 0.968329033  | 2.38E-07 |
| TUCP_003389 | XLOC_146751 | ENSRNOT00000089329 | 0.968464342  | 2.33E-07 |
| TUCP_003389 | XLOC_146751 | ENSRNOT00000017476 | 0.961642123  | 6.13E-07 |
| TUCP_003389 | XLOC_146751 | ENSRNOT00000066247 | 0.960481296  | 7.10E-07 |
| TUCP_003389 | XLOC_146751 | ENSRNOT00000006549 | 0.95926684   | 8.25E-07 |
| TUCP_003389 | XLOC_146751 | ENSRNOT00000004912 | 0.953896866  | 1.52E-06 |
| TUCP_003389 | XLOC_146751 | ENSRNOT00000023567 | 0.952121842  | 1.83E-06 |
| TUCP_003389 | XLOC_146751 | ENSRNOT00000016351 | 0.975445986  | 6.75E-08 |
| TUCP_003389 | XLOC_146751 | ENSRNOT00000041277 | 0.950256792  | 2.21E-06 |
| TUCP_003389 | XLOC_146751 | ENSRNOT00000010602 | 0.956562983  | 1.13E-06 |
| TUCP_003389 | XLOC_146751 | ENSRNOT00000064068 | 0.959720846  | 7.80E-07 |
| TUCP_003389 | XLOC_146751 | ENSRNOT00000058116 | 0.959090446  | 8.42E-07 |
| TUCP_003389 | XLOC_146751 | ENSRNOT00000085214 | 0.954887053  | 1.36E-06 |
| TUCP_003389 | XLOC_146751 | ENSRNOT00000023414 | -0.958369017 | 9.18E-07 |
| TUCP_003389 | XLOC_146751 | ENSRNOT00000033450 | 0.954940888  | 1.36E-06 |
| TUCP_003389 | XLOC_146751 | ENSRNOT00000033196 | 0.96010656   | 7.44E-07 |
| TUCP_003389 | XLOC_146751 | ENSRNOT00000027125 | 0.954381208  | 1.44E-06 |
| TUCP_003389 | XLOC_146751 | ENSRNOT00000027121 | -0.950954761 | 2.06E-06 |
| TUCP_003389 | XLOC_146751 | ENSRNOT00000010753 | 0.956487144  | 1.14E-06 |
| TUCP_003389 | XLOC_146751 | ENSRNOT00000064723 | 0.95820513   | 9.36E-07 |
| TUCP_003389 | XLOC_146751 | ENSRNOT00000073834 | 0.959574001  | 7.94E-07 |
| TUCP_003389 | XLOC_146751 | ENSRNOT00000028807 | 0.954632284  | 1.40E-06 |
| TUCP_003389 | XLOC_146751 | ENSRNOT00000003600 | 0.950728063  | 2.10E-06 |
| TUCP_003389 | XLOC_146751 | ENSRNOT00000005272 | 0.950802493  | 2.09E-06 |
| TUCP_003389 | XLOC_146751 | ENSRNOT00000009666 | 0.975269088  | 6.99E-08 |
| TUCP_003389 | XLOC_146751 | ENSRNOT00000061191 | 0.951647559  | 1.92E-06 |
| TUCP_003389 | XLOC_146751 | ENSRNOT00000007077 | 0.954196821  | 1.47E-06 |
| TUCP_003389 | XLOC_146751 | ENSRNOT00000012635 | 0.978193059  | 3.74E-08 |
| TUCP_003389 | XLOC_146751 | ENSRNOT00000028434 | 0.962576403  | 5.43E-07 |
| TUCP_003389 | XLOC_146751 | ENSRNOT00000074081 | 0.966930134  | 2.95E-07 |
| TUCP_003389 | XLOC_146751 | ENSRNOT00000004878 | 0.955826487  | 1.23E-06 |
| TUCP_003389 | XLOC_146751 | ENSRNOT00000039186 | 0.955399014  | 1.29E-06 |
| TUCP_003389 | XLOC_146751 | ENSRNOT00000045950 | 0.951114924  | 2.02E-06 |
| TUCP_003389 | XLOC_146751 | ENSRNOT00000050834 | 0.952310989  | 1.79E-06 |
| TUCP_003389 | XLOC_146751 | ENSRNOT00000020663 | 0.95000382   | 2.26E-06 |
| TUCP_003389 | XLOC_146751 | ENSRNOT00000023786 | 0.964944012  | 3.93E-07 |
| TUCP_003389 | XLOC_146751 | ENSRNOT00000041091 | 0.953395388  | 1.60E-06 |
| TUCP_003389 | XLOC_146751 | ENSRNOT00000072416 | 0.961151693  | 6.53E-07 |
| TUCP_003389 | XLOC_146751 | ENSRNOT00000023017 | 0.964830712  | 3.99E-07 |
| TUCP_003389 | XLOC_146751 | ENSRNOT00000022377 | 0.962397102  | 5.56E-07 |
| TUCP_003389 | XLOC_146751 | ENSRNOT00000016740 | -0.956444008 | 1.15E-06 |

|             |             |                    |              |          |
|-------------|-------------|--------------------|--------------|----------|
| TUCP_003389 | XLOC_146751 | ENSRNOT00000010962 | 0.956463018  | 1.14E-06 |
| TUCP_003389 | XLOC_146751 | ENSRNOT00000021075 | 0.967761687  | 2.60E-07 |
| TUCP_003389 | XLOC_146751 | ENSRNOT00000001135 | 0.954311025  | 1.45E-06 |
| TUCP_003389 | XLOC_146751 | ENSRNOT00000001234 | 0.973462867  | 9.91E-08 |
| TUCP_003389 | XLOC_146751 | ENSRNOT00000025550 | 0.967558968  | 2.68E-07 |
| TUCP_003389 | XLOC_146751 | ENSRNOT00000009645 | 0.964166697  | 4.38E-07 |
| TUCP_003389 | XLOC_146751 | ENSRNOT00000092037 | 0.967212462  | 2.82E-07 |
| TUCP_003389 | XLOC_146751 | ENSRNOT00000091941 | 0.950129377  | 2.23E-06 |
| TUCP_003389 | XLOC_146751 | ENSRNOT00000007367 | 0.974007779  | 8.94E-08 |
| TUCP_003389 | XLOC_146751 | ENSRNOT00000009900 | 0.95285646   | 1.69E-06 |
| TUCP_003389 | XLOC_146751 | ENSRNOT00000080797 | 0.955970748  | 1.21E-06 |
| TUCP_003389 | XLOC_146751 | ENSRNOT00000004941 | 0.961782047  | 6.02E-07 |
| TUCP_003389 | XLOC_146751 | ENSRNOT00000004942 | 0.959954796  | 7.58E-07 |
| TUCP_003389 | XLOC_146751 | ENSRNOT00000005148 | 0.966006467  | 3.38E-07 |
| TUCP_003389 | XLOC_146751 | ENSRNOT00000068269 | 0.955547148  | 1.27E-06 |
| TUCP_003389 | XLOC_146751 | ENSRNOT00000087146 | -0.968312835 | 2.39E-07 |
| TUCP_003389 | XLOC_146751 | ENSRNOT00000025819 | 0.961788861  | 6.02E-07 |
| TUCP_003389 | XLOC_146751 | ENSRNOT00000041227 | 0.977400162  | 4.47E-08 |
| TUCP_003389 | XLOC_146751 | ENSRNOT00000002355 | 0.958177824  | 9.39E-07 |
| TUCP_003389 | XLOC_146751 | ENSRNOT00000056608 | 0.950586855  | 2.13E-06 |
| TUCP_003389 | XLOC_146751 | ENSRNOT00000044866 | 0.964495522  | 4.19E-07 |
| TUCP_003389 | XLOC_146751 | ENSRNOT00000059599 | 0.968902869  | 2.17E-07 |
| TUCP_003389 | XLOC_146751 | ENSRNOT00000080285 | 0.961050911  | 6.61E-07 |
| TUCP_000387 | XLOC_013218 | ENSRNOT00000073254 | 0.952805261  | 1.70E-06 |
| TUCP_000386 | XLOC_013187 | ENSRNOT00000047105 | 0.960786433  | 6.84E-07 |
| TUCP_000386 | XLOC_013187 | ENSRNOT00000026860 | 0.951912375  | 1.87E-06 |
| TUCP_000386 | XLOC_013187 | ENSRNOT00000031904 | 0.976475489  | 5.45E-08 |
| TUCP_000386 | XLOC_013187 | ENSRNOT00000039809 | 0.950031367  | 2.26E-06 |
| TUCP_000386 | XLOC_013187 | ENSRNOT00000000743 | 0.9642283    | 4.34E-07 |
| TUCP_000386 | XLOC_013187 | ENSRNOT00000081246 | 0.959373664  | 8.14E-07 |
| TUCP_000386 | XLOC_013187 | ENSRNOT00000015006 | 0.959058896  | 8.46E-07 |
| TUCP_000386 | XLOC_013187 | ENSRNOT00000007351 | -0.964781174 | 4.02E-07 |
| TUCP_000386 | XLOC_013187 | ENSRNOT00000074939 | 0.964055755  | 4.45E-07 |
| TUCP_000386 | XLOC_013187 | ENSRNOT00000073559 | 0.971826738  | 1.33E-07 |
| TUCP_000386 | XLOC_013187 | ENSRNOT00000043856 | 0.955745716  | 1.24E-06 |
| TUCP_000386 | XLOC_013187 | ENSRNOT00000023638 | 0.973284034  | 1.02E-07 |
| TUCP_000386 | XLOC_013187 | ENSRNOT00000072771 | 0.955169115  | 1.32E-06 |
| TUCP_000386 | XLOC_013187 | ENSRNOT00000006175 | 0.982352207  | 1.31E-08 |
| TUCP_000386 | XLOC_013187 | ENSRNOT00000005220 | 0.96904799   | 2.12E-07 |
| TUCP_000386 | XLOC_013187 | ENSRNOT00000023144 | 0.970405218  | 1.70E-07 |
| TUCP_000386 | XLOC_013187 | ENSRNOT00000086706 | 0.957166739  | 1.06E-06 |
| TUCP_000386 | XLOC_013187 | ENSRNOT00000071166 | 0.961888958  | 5.94E-07 |
| TUCP_000386 | XLOC_013187 | ENSRNOT00000016649 | 0.979402097  | 2.82E-08 |
| TUCP_000386 | XLOC_013187 | ENSRNOT00000037699 | 0.9509936    | 2.05E-06 |
| TUCP_000386 | XLOC_013187 | ENSRNOT00000026941 | 0.976128478  | 5.87E-08 |
| TUCP_000386 | XLOC_013187 | ENSRNOT00000017776 | 0.95337338   | 1.60E-06 |
| TUCP_000386 | XLOC_013187 | ENSRNOT00000016975 | 0.963089641  | 5.07E-07 |
| TUCP_000386 | XLOC_013187 | ENSRNOT00000056813 | 0.954189977  | 1.47E-06 |
| TUCP_000386 | XLOC_013187 | ENSRNOT00000043216 | 0.955917849  | 1.22E-06 |
| TUCP_000386 | XLOC_013187 | ENSRNOT00000044742 | 0.967165703  | 2.84E-07 |
| TUCP_000386 | XLOC_013187 | ENSRNOT00000033017 | 0.972237548  | 1.24E-07 |

|             |             |                    |              |          |
|-------------|-------------|--------------------|--------------|----------|
| TUCP_000386 | XLOC_013187 | ENSRNOT00000066370 | 0.96001831   | 7.52E-07 |
| TUCP_000386 | XLOC_013187 | ENSRNOT00000026457 | 0.956493391  | 1.14E-06 |
| TUCP_000386 | XLOC_013187 | ENSRNOT00000043345 | 0.978871967  | 3.20E-08 |
| TUCP_000386 | XLOC_013187 | ENSRNOT00000010418 | 0.957720185  | 9.91E-07 |
| TUCP_000386 | XLOC_013187 | ENSRNOT00000019213 | 0.955911712  | 1.22E-06 |
| TUCP_000386 | XLOC_013187 | ENSRNOT00000012187 | 0.953329075  | 1.61E-06 |
| TUCP_000386 | XLOC_013187 | ENSRNOT00000085251 | -0.958194902 | 9.37E-07 |
| TUCP_000386 | XLOC_013187 | ENSRNOT00000037446 | 0.962755059  | 5.30E-07 |
| TUCP_000386 | XLOC_013187 | ENSRNOT00000001507 | 0.961709393  | 6.08E-07 |
| TUCP_000386 | XLOC_013187 | ENSRNOT00000006055 | 0.951316743  | 1.98E-06 |
| TUCP_000386 | XLOC_013187 | ENSRNOT00000088125 | 0.971426527  | 1.43E-07 |
| TUCP_000386 | XLOC_013187 | ENSRNOT00000025079 | -0.95528136  | 1.31E-06 |
| TUCP_000386 | XLOC_013187 | ENSRNOT00000048754 | -0.966504028 | 3.14E-07 |
| TUCP_000386 | XLOC_013187 | ENSRNOT00000029439 | 0.973201467  | 1.04E-07 |
| TUCP_000386 | XLOC_013187 | ENSRNOT00000044628 | 0.953562293  | 1.57E-06 |
| TUCP_000386 | XLOC_013187 | ENSRNOT00000071764 | 0.962009969  | 5.85E-07 |
| TUCP_000386 | XLOC_013187 | ENSRNOT00000035989 | 0.96115303   | 6.53E-07 |
| TUCP_000386 | XLOC_013187 | ENSRNOT00000057160 | 0.97366181   | 9.55E-08 |
| TUCP_000386 | XLOC_013187 | ENSRNOT00000082699 | 0.952232729  | 1.81E-06 |
| TUCP_000386 | XLOC_013187 | ENSRNOT00000024402 | 0.965914792  | 3.42E-07 |
| TUCP_000386 | XLOC_013187 | ENSRNOT00000075326 | 0.960893988  | 6.74E-07 |
| TUCP_000386 | XLOC_013187 | ENSRNOT00000021348 | 0.976020432  | 6.00E-08 |
| TUCP_000386 | XLOC_013187 | ENSRNOT00000089933 | 0.958022912  | 9.56E-07 |
| TUCP_000386 | XLOC_013187 | ENSRNOT00000077908 | 0.951436881  | 1.96E-06 |
| TUCP_000386 | XLOC_013187 | ENSRNOT00000091602 | -0.953056732 | 1.66E-06 |
| TUCP_000386 | XLOC_013187 | ENSRNOT00000003641 | 0.952200174  | 1.81E-06 |
| TUCP_000386 | XLOC_013187 | ENSRNOT00000012671 | 0.968331105  | 2.38E-07 |
| TUCP_000386 | XLOC_013187 | ENSRNOT00000016947 | 0.951616366  | 1.92E-06 |
| TUCP_000386 | XLOC_013187 | ENSRNOT00000065168 | 0.982304719  | 1.33E-08 |
| TUCP_000386 | XLOC_013187 | ENSRNOT00000026718 | 0.95453549   | 1.42E-06 |
| TUCP_000386 | XLOC_013187 | ENSRNOT00000085228 | 0.971662262  | 1.37E-07 |
| TUCP_000386 | XLOC_013187 | ENSRNOT00000020134 | 0.976122635  | 5.87E-08 |
| TUCP_000386 | XLOC_013187 | ENSRNOT00000028271 | 0.95143644   | 1.96E-06 |
| TUCP_000386 | XLOC_013187 | ENSRNOT00000033677 | -0.952171185 | 1.82E-06 |
| TUCP_000386 | XLOC_013187 | ENSRNOT00000079866 | 0.962639263  | 5.38E-07 |
| TUCP_000386 | XLOC_013187 | ENSRNOT00000004486 | 0.966166583  | 3.30E-07 |
| TUCP_000386 | XLOC_013187 | ENSRNOT00000019820 | 0.957441392  | 1.02E-06 |
| TUCP_000386 | XLOC_013187 | ENSRNOT00000067822 | 0.952082774  | 1.84E-06 |
| TUCP_000386 | XLOC_013187 | ENSRNOT00000004787 | -0.954581125 | 1.41E-06 |
| TUCP_000386 | XLOC_013187 | ENSRNOT00000002410 | 0.964972603  | 3.92E-07 |
| TUCP_000386 | XLOC_013187 | ENSRNOT00000087371 | 0.963189154  | 5.00E-07 |
| TUCP_000386 | XLOC_013187 | ENSRNOT00000012892 | 0.952502405  | 1.76E-06 |
| TUCP_000386 | XLOC_013187 | ENSRNOT00000088054 | 0.979239548  | 2.93E-08 |
| TUCP_000386 | XLOC_013187 | ENSRNOT00000041044 | 0.963057626  | 5.09E-07 |
| TUCP_000386 | XLOC_013187 | ENSRNOT00000047192 | -0.963950212 | 4.51E-07 |
| TUCP_000386 | XLOC_013187 | ENSRNOT00000026831 | 0.956332284  | 1.16E-06 |
| TUCP_000386 | XLOC_013187 | ENSRNOT00000010541 | 0.966426758  | 3.18E-07 |
| TUCP_000386 | XLOC_013187 | ENSRNOT00000017556 | 0.962291401  | 5.64E-07 |
| TUCP_000386 | XLOC_013187 | ENSRNOT00000010748 | 0.967931541  | 2.53E-07 |
| TUCP_000386 | XLOC_013187 | ENSRNOT00000009627 | 0.955865342  | 1.22E-06 |
| TUCP_000386 | XLOC_013187 | ENSRNOT00000026481 | 0.956317008  | 1.16E-06 |

|             |             |                    |              |          |
|-------------|-------------|--------------------|--------------|----------|
| TUCP_000386 | XLOC_013187 | ENSRNOT00000073991 | 0.956919336  | 1.09E-06 |
| TUCP_000386 | XLOC_013187 | ENSRNOT00000006969 | 0.954919946  | 1.36E-06 |
| TUCP_000386 | XLOC_013187 | ENSRNOT00000021803 | -0.95072784  | 2.11E-06 |
| TUCP_000386 | XLOC_013187 | ENSRNOT00000020028 | 0.958657604  | 8.87E-07 |
| TUCP_000386 | XLOC_013187 | ENSRNOT00000029994 | 0.954385925  | 1.44E-06 |
| TUCP_000386 | XLOC_013187 | ENSRNOT00000001081 | 0.953175317  | 1.64E-06 |
| TUCP_000386 | XLOC_013187 | ENSRNOT00000003780 | 0.959220008  | 8.29E-07 |
| TUCP_000386 | XLOC_013187 | ENSRNOT00000078675 | 0.953540878  | 1.58E-06 |
| TUCP_000386 | XLOC_013187 | ENSRNOT00000019222 | 0.954303369  | 1.45E-06 |
| TUCP_000386 | XLOC_013187 | ENSRNOT00000022190 | -0.952491855 | 1.76E-06 |
| TUCP_000386 | XLOC_013187 | ENSRNOT00000016132 | -0.957156284 | 1.06E-06 |
| TUCP_000386 | XLOC_013187 | ENSRNOT00000058312 | 0.959894198  | 7.64E-07 |
| TUCP_000386 | XLOC_013187 | ENSRNOT00000019133 | 0.953714215  | 1.55E-06 |
| TUCP_000386 | XLOC_013187 | ENSRNOT00000013274 | 0.975478656  | 6.70E-08 |
| TUCP_000386 | XLOC_013187 | ENSRNOT00000002403 | 0.954764601  | 1.38E-06 |
| TUCP_000386 | XLOC_013187 | ENSRNOT00000067780 | -0.963950641 | 4.51E-07 |
| TUCP_000386 | XLOC_013187 | ENSRNOT00000010898 | 0.957209292  | 1.05E-06 |
| TUCP_000386 | XLOC_013187 | ENSRNOT00000047093 | 0.967750251  | 2.60E-07 |
| TUCP_000386 | XLOC_013187 | ENSRNOT00000073675 | -0.95461958  | 1.40E-06 |
| TUCP_000386 | XLOC_013187 | ENSRNOT00000086119 | -0.962706292 | 5.34E-07 |
| TUCP_000386 | XLOC_013187 | ENSRNOT00000079895 | 0.962316449  | 5.62E-07 |
| TUCP_000386 | XLOC_013187 | ENSRNOT00000009811 | 0.96940742   | 2.00E-07 |
| TUCP_000386 | XLOC_013187 | ENSRNOT00000026174 | 0.957765755  | 9.86E-07 |
| TUCP_000386 | XLOC_013187 | ENSRNOT00000047387 | 0.960193364  | 7.36E-07 |
| TUCP_000386 | XLOC_013187 | ENSRNOT00000088599 | 0.967182759  | 2.84E-07 |
| TUCP_000386 | XLOC_013187 | ENSRNOT00000045488 | 0.968878686  | 2.18E-07 |
| TUCP_000386 | XLOC_013187 | ENSRNOT00000058072 | 0.956770671  | 1.11E-06 |
| TUCP_000386 | XLOC_013187 | ENSRNOT00000081047 | 0.958271855  | 9.29E-07 |
| TUCP_000386 | XLOC_013187 | ENSRNOT00000081512 | 0.960248697  | 7.31E-07 |
| TUCP_000386 | XLOC_013187 | ENSRNOT00000014537 | 0.959079021  | 8.44E-07 |
| TUCP_000386 | XLOC_013187 | ENSRNOT00000077555 | 0.964868622  | 3.97E-07 |
| TUCP_000386 | XLOC_013187 | ENSRNOT00000011880 | 0.95083168   | 2.08E-06 |
| TUCP_000386 | XLOC_013187 | ENSRNOT00000017021 | 0.972506902  | 1.18E-07 |
| TUCP_000386 | XLOC_013187 | ENSRNOT00000017995 | 0.954027792  | 1.50E-06 |
| TUCP_000386 | XLOC_013187 | ENSRNOT00000003991 | 0.963725789  | 4.65E-07 |
| TUCP_000386 | XLOC_013187 | ENSRNOT00000027910 | 0.96246226   | 5.51E-07 |
| TUCP_000386 | XLOC_013187 | ENSRNOT00000078475 | 0.960903306  | 6.74E-07 |
| TUCP_000386 | XLOC_013187 | ENSRNOT00000087429 | 0.963387246  | 4.87E-07 |
| TUCP_000386 | XLOC_013187 | ENSRNOT00000009683 | 0.964566672  | 4.14E-07 |
| TUCP_000386 | XLOC_013187 | ENSRNOT00000060362 | 0.955915833  | 1.22E-06 |
| TUCP_000386 | XLOC_013187 | ENSRNOT00000084088 | 0.969678756  | 1.92E-07 |
| TUCP_000386 | XLOC_013187 | ENSRNOT00000034704 | 0.958842205  | 8.68E-07 |
| TUCP_000386 | XLOC_013187 | ENSRNOT00000000302 | 0.953585832  | 1.57E-06 |
| TUCP_000386 | XLOC_013187 | ENSRNOT00000078070 | 0.964558366  | 4.15E-07 |
| TUCP_000386 | XLOC_013187 | ENSRNOT00000002771 | 0.950184186  | 2.22E-06 |
| TUCP_000386 | XLOC_013187 | ENSRNOT00000065983 | 0.951058476  | 2.04E-06 |
| TUCP_000386 | XLOC_013187 | ENSRNOT00000079442 | 0.967167404  | 2.84E-07 |
| TUCP_000386 | XLOC_013187 | ENSRNOT00000024322 | 0.978983966  | 3.12E-08 |
| TUCP_000386 | XLOC_013187 | ENSRNOT00000090665 | 0.95924368   | 8.27E-07 |
| TUCP_000386 | XLOC_013187 | ENSRNOT00000085596 | 0.966984239  | 2.92E-07 |
| TUCP_000386 | XLOC_013187 | ENSRNOT00000091265 | 0.957999428  | 9.59E-07 |



|             |             |                    |              |          |
|-------------|-------------|--------------------|--------------|----------|
| TUCP_000386 | XLOC_013187 | ENSRNOT00000046745 | 0.960551926  | 7.04E-07 |
| TUCP_000386 | XLOC_013187 | ENSRNOT00000073526 | 0.955231256  | 1.31E-06 |
| TUCP_000386 | XLOC_013187 | ENSRNOT00000000658 | 0.969630162  | 1.93E-07 |
| TUCP_000386 | XLOC_013187 | ENSRNOT00000016191 | 0.950486968  | 2.16E-06 |
| TUCP_000386 | XLOC_013187 | ENSRNOT00000089971 | 0.956350646  | 1.16E-06 |
| TUCP_000386 | XLOC_013187 | ENSRNOT00000065501 | 0.972991174  | 1.08E-07 |
| TUCP_000386 | XLOC_013187 | ENSRNOT00000077999 | 0.953786822  | 1.54E-06 |
| TUCP_000386 | XLOC_013187 | ENSRNOT00000091488 | 0.964518898  | 4.17E-07 |
| TUCP_000386 | XLOC_013187 | ENSRNOT00000025832 | 0.955381345  | 1.29E-06 |
| TUCP_000386 | XLOC_013187 | ENSRNOT00000076729 | 0.969514281  | 1.97E-07 |
| TUCP_000386 | XLOC_013187 | ENSRNOT00000017753 | 0.950879558  | 2.07E-06 |
| TUCP_000386 | XLOC_013187 | ENSRNOT00000066739 | 0.954950126  | 1.35E-06 |
| TUCP_000386 | XLOC_013187 | ENSRNOT00000003568 | 0.958504463  | 9.04E-07 |
| TUCP_000386 | XLOC_013187 | ENSRNOT00000045882 | 0.971215199  | 1.48E-07 |
| TUCP_000386 | XLOC_013187 | ENSRNOT00000036750 | 0.956957129  | 1.08E-06 |
| TUCP_000386 | XLOC_013187 | ENSRNOT00000023989 | 0.963986196  | 4.49E-07 |
| TUCP_000386 | XLOC_013187 | ENSRNOT00000055582 | 0.950427569  | 2.17E-06 |
| TUCP_000386 | XLOC_013187 | ENSRNOT00000086122 | 0.962301114  | 5.63E-07 |
| TUCP_000386 | XLOC_013187 | ENSRNOT00000022074 | 0.978419954  | 3.55E-08 |
| TUCP_000386 | XLOC_013187 | ENSRNOT00000037790 | 0.969432002  | 2.00E-07 |
| TUCP_000386 | XLOC_013187 | ENSRNOT00000061100 | 0.967144035  | 2.85E-07 |
| TUCP_000386 | XLOC_013187 | ENSRNOT00000027337 | 0.976472336  | 5.46E-08 |
| TUCP_000386 | XLOC_013187 | ENSRNOT00000060002 | -0.954654988 | 1.40E-06 |
| TUCP_000386 | XLOC_013187 | ENSRNOT00000086577 | 0.950551563  | 2.14E-06 |
| TUCP_000386 | XLOC_013187 | ENSRNOT00000090420 | -0.95434314  | 1.45E-06 |
| TUCP_000386 | XLOC_013187 | ENSRNOT00000026293 | 0.967818617  | 2.58E-07 |
| TUCP_000386 | XLOC_013187 | ENSRNOT00000076763 | 0.963166649  | 5.02E-07 |
| TUCP_000386 | XLOC_013187 | ENSRNOT00000025075 | 0.980448495  | 2.18E-08 |
| TUCP_000386 | XLOC_013187 | ENSRNOT00000091909 | 0.976004109  | 6.02E-08 |
| TUCP_000386 | XLOC_013187 | ENSRNOT00000077231 | 0.951505494  | 1.95E-06 |
| TUCP_000386 | XLOC_013187 | ENSRNOT00000010992 | 0.952029086  | 1.85E-06 |
| TUCP_000386 | XLOC_013187 | ENSRNOT00000029202 | -0.950890467 | 2.07E-06 |
| TUCP_000386 | XLOC_013187 | ENSRNOT00000089007 | -0.958643451 | 8.89E-07 |
| TUCP_000386 | XLOC_013187 | ENSRNOT00000017629 | 0.961793126  | 6.01E-07 |
| TUCP_000386 | XLOC_013187 | ENSRNOT00000038647 | 0.972562779  | 1.17E-07 |
| TUCP_000386 | XLOC_013187 | ENSRNOT00000083093 | 0.952742492  | 1.71E-06 |
| TUCP_000386 | XLOC_013187 | ENSRNOT00000076669 | 0.963839462  | 4.58E-07 |
| TUCP_000386 | XLOC_013187 | ENSRNOT00000011984 | 0.963087109  | 5.07E-07 |
| TUCP_000386 | XLOC_013187 | ENSRNOT00000088279 | 0.959925417  | 7.61E-07 |
| TUCP_000386 | XLOC_013187 | ENSRNOT00000041494 | 0.952306274  | 1.79E-06 |
| TUCP_000386 | XLOC_013187 | ENSRNOT00000043872 | 0.950368533  | 2.18E-06 |
| TUCP_000386 | XLOC_013187 | ENSRNOT00000050834 | -0.956523774 | 1.14E-06 |
| TUCP_000386 | XLOC_013187 | ENSRNOT00000066024 | 0.960287278  | 7.28E-07 |
| TUCP_000386 | XLOC_013187 | ENSRNOT00000012736 | 0.983253411  | 1.01E-08 |
| TUCP_000386 | XLOC_013187 | ENSRNOT00000041096 | 0.961002563  | 6.65E-07 |
| TUCP_000386 | XLOC_013187 | ENSRNOT00000031230 | 0.972496288  | 1.18E-07 |
| TUCP_000386 | XLOC_013187 | ENSRNOT00000013800 | 0.953572407  | 1.57E-06 |
| TUCP_000386 | XLOC_013187 | ENSRNOT00000015624 | 0.956679037  | 1.12E-06 |
| TUCP_000386 | XLOC_013187 | ENSRNOT00000002292 | 0.95669328   | 1.12E-06 |
| TUCP_000386 | XLOC_013187 | ENSRNOT00000078306 | 0.963087629  | 5.07E-07 |
| TUCP_000386 | XLOC_013187 | ENSRNOT00000023302 | 0.956433389  | 1.15E-06 |

|             |             |                    |              |          |
|-------------|-------------|--------------------|--------------|----------|
| TUCP_000386 | XLOC_013187 | ENSRNOT00000014664 | 0.954396959  | 1.44E-06 |
| TUCP_000386 | XLOC_013187 | ENSRNOT00000027232 | 0.959078896  | 8.44E-07 |
| TUCP_000386 | XLOC_013187 | ENSRNOT00000018074 | -0.961616374 | 6.15E-07 |
| TUCP_000386 | XLOC_013187 | ENSRNOT00000017761 | 0.960555489  | 7.04E-07 |
| TUCP_000386 | XLOC_013187 | ENSRNOT00000014124 | 0.957947305  | 9.65E-07 |
| TUCP_000386 | XLOC_013187 | ENSRNOT00000013632 | 0.951162532  | 2.02E-06 |
| TUCP_000386 | XLOC_013187 | ENSRNOT00000029125 | 0.952263113  | 1.80E-06 |
| TUCP_000386 | XLOC_013187 | ENSRNOT00000082174 | 0.952735535  | 1.72E-06 |
| TUCP_000386 | XLOC_013187 | ENSRNOT00000060696 | 0.981982893  | 1.45E-08 |
| TUCP_000386 | XLOC_013187 | ENSRNOT00000042125 | 0.957339216  | 1.04E-06 |
| TUCP_000386 | XLOC_013187 | ENSRNOT00000009900 | -0.96052828  | 7.06E-07 |
| TUCP_000386 | XLOC_013187 | ENSRNOT00000004412 | 0.959838124  | 7.69E-07 |
| TUCP_000386 | XLOC_013187 | ENSRNOT00000067181 | 0.964853787  | 3.98E-07 |
| TUCP_000386 | XLOC_013187 | ENSRNOT00000064798 | 0.957593773  | 1.01E-06 |
| TUCP_000386 | XLOC_013187 | ENSRNOT00000080207 | 0.96302727   | 5.11E-07 |
| TUCP_000386 | XLOC_013187 | ENSRNOT00000015799 | 0.977358277  | 4.51E-08 |
| TUCP_000386 | XLOC_013187 | ENSRNOT00000026280 | 0.957443657  | 1.02E-06 |
| TUCP_000386 | XLOC_013187 | ENSRNOT00000023537 | -0.95622716  | 1.18E-06 |
| TUCP_000386 | XLOC_013187 | ENSRNOT00000005387 | 0.964784654  | 4.02E-07 |
| TUCP_000386 | XLOC_013187 | ENSRNOT00000027452 | 0.964499267  | 4.18E-07 |
| TUCP_000386 | XLOC_013187 | ENSRNOT00000005381 | 0.954762782  | 1.38E-06 |
| TUCP_000386 | XLOC_013187 | ENSRNOT00000043535 | 0.961229141  | 6.46E-07 |
| TUCP_000386 | XLOC_013187 | ENSRNOT00000040393 | 0.960698523  | 6.91E-07 |
| TUCP_000386 | XLOC_013187 | ENSRNOT00000005144 | 0.954247344  | 1.46E-06 |
| TUCP_000386 | XLOC_013187 | ENSRNOT00000012048 | 0.963540688  | 4.77E-07 |
| TUCP_000386 | XLOC_013187 | ENSRNOT00000013985 | 0.95240449   | 1.78E-06 |
| TUCP_000386 | XLOC_013187 | ENSRNOT00000004463 | 0.958814852  | 8.71E-07 |
| TUCP_000386 | XLOC_013187 | ENSRNOT00000023428 | 0.953293369  | 1.62E-06 |
| TUCP_000386 | XLOC_013187 | ENSRNOT00000011041 | 0.958784854  | 8.74E-07 |
| TUCP_000386 | XLOC_013187 | ENSRNOT00000021674 | 0.956883404  | 1.09E-06 |
| TUCP_000386 | XLOC_013187 | ENSRNOT00000064700 | 0.956369641  | 1.16E-06 |
| TUCP_000386 | XLOC_013187 | ENSRNOT00000047210 | 0.959307331  | 8.21E-07 |
| TUCP_000386 | XLOC_013187 | ENSRNOT00000083127 | 0.984420669  | 7.04E-09 |
| TUCP_000386 | XLOC_013187 | ENSRNOT00000025705 | 0.950666958  | 2.12E-06 |
| TUCP_000386 | XLOC_013187 | ENSRNOT00000022796 | 0.963530739  | 4.78E-07 |
| TUCP_000386 | XLOC_013187 | ENSRNOT00000075424 | 0.956336891  | 1.16E-06 |
| TUCP_000386 | XLOC_013187 | ENSRNOT00000029001 | 0.962029053  | 5.83E-07 |
| TUCP_000386 | XLOC_013187 | ENSRNOT00000004140 | 0.953687824  | 1.55E-06 |
| TUCP_000386 | XLOC_013187 | ENSRNOT00000026543 | 0.973988981  | 8.98E-08 |
| TUCP_000386 | XLOC_013187 | ENSRNOT00000035474 | 0.954514676  | 1.42E-06 |
| TUCP_000386 | XLOC_013187 | ENSRNOT00000083799 | 0.966100857  | 3.33E-07 |
| TUCP_000386 | XLOC_013187 | ENSRNOT00000024548 | 0.954998978  | 1.35E-06 |
| TUCP_000386 | XLOC_013187 | ENSRNOT00000048020 | 0.953078454  | 1.66E-06 |
| TUCP_000384 | XLOC_013147 | ENSRNOT00000074814 | -0.956778584 | 1.10E-06 |
| TUCP_000381 | XLOC_013138 | ENSRNOT00000075786 | 0.950273925  | 2.20E-06 |
| TUCP_000381 | XLOC_013138 | ENSRNOT00000005873 | -0.957396045 | 1.03E-06 |
| TUCP_000381 | XLOC_013138 | ENSRNOT00000013577 | -0.962557507 | 5.44E-07 |
| TUCP_003870 | XLOC_169986 | ENSRNOT00000035347 | 0.953295451  | 1.62E-06 |
| TUCP_003875 | XLOC_170611 | ENSRNOT00000058143 | -0.961117656 | 6.56E-07 |
| TUCP_003875 | XLOC_170611 | ENSRNOT00000091057 | 0.978965917  | 3.13E-08 |
| TUCP_003875 | XLOC_170611 | ENSRNOT00000077435 | 0.961254736  | 6.44E-07 |

|             |             |                    |              |          |
|-------------|-------------|--------------------|--------------|----------|
| TUCP_003875 | XLOC_170611 | ENSRNOT00000086221 | 0.964200973  | 4.36E-07 |
| TUCP_004396 | XLOC_193962 | ENSRNOT00000006188 | -0.964396002 | 4.24E-07 |
| TUCP_004396 | XLOC_193962 | ENSRNOT00000045833 | 0.951548073  | 1.94E-06 |
| TUCP_004396 | XLOC_193962 | ENSRNOT00000090621 | 0.958203624  | 9.36E-07 |
| TUCP_004396 | XLOC_193962 | ENSRNOT00000013745 | -0.950184105 | 2.22E-06 |
| TUCP_004396 | XLOC_193962 | ENSRNOT00000007350 | 0.956761342  | 1.11E-06 |
| TUCP_004396 | XLOC_193962 | ENSRNOT00000063930 | -0.958680451 | 8.85E-07 |
| TUCP_004396 | XLOC_193962 | ENSRNOT00000073492 | -0.959960501 | 7.58E-07 |
| TUCP_004396 | XLOC_193962 | ENSRNOT00000064013 | -0.955952089 | 1.21E-06 |
| TUCP_004396 | XLOC_193962 | ENSRNOT00000084766 | 0.960602228  | 7.00E-07 |
| TUCP_004396 | XLOC_193962 | ENSRNOT00000079138 | 0.959223882  | 8.29E-07 |
| TUCP_004396 | XLOC_193962 | ENSRNOT00000017362 | -0.955241385 | 1.31E-06 |
| TUCP_004396 | XLOC_193962 | ENSRNOT00000036051 | 0.959981792  | 7.56E-07 |
| TUCP_004396 | XLOC_193962 | ENSRNOT00000064776 | -0.961957672 | 5.89E-07 |
| TUCP_004396 | XLOC_193962 | ENSRNOT00000008074 | -0.954207159 | 1.47E-06 |
| TUCP_004396 | XLOC_193962 | ENSRNOT00000077243 | -0.959018392 | 8.50E-07 |
| TUCP_004396 | XLOC_193962 | ENSRNOT00000042633 | -0.961713697 | 6.08E-07 |
| TUCP_004396 | XLOC_193962 | ENSRNOT00000009073 | -0.967816588 | 2.58E-07 |
| TUCP_004396 | XLOC_193962 | ENSRNOT00000019180 | -0.954381916 | 1.44E-06 |
| TUCP_004396 | XLOC_193962 | ENSRNOT00000017385 | -0.960706462 | 6.91E-07 |
| TUCP_004396 | XLOC_193962 | ENSRNOT00000031672 | -0.958152974 | 9.42E-07 |
| TUCP_004396 | XLOC_193962 | ENSRNOT00000002028 | 0.982708488  | 1.18E-08 |
| TUCP_004396 | XLOC_193962 | ENSRNOT00000000052 | -0.951188571 | 2.01E-06 |
| TUCP_004396 | XLOC_193962 | ENSRNOT00000083677 | -0.957134463 | 1.06E-06 |
| TUCP_004396 | XLOC_193962 | ENSRNOT00000087604 | 0.968028204  | 2.49E-07 |
| TUCP_004396 | XLOC_193962 | ENSRNOT00000037333 | -0.960216167 | 7.34E-07 |
| TUCP_004396 | XLOC_193962 | ENSRNOT00000004722 | -0.957086729 | 1.07E-06 |
| TUCP_004396 | XLOC_193962 | ENSRNOT00000021455 | -0.955598103 | 1.26E-06 |
| TUCP_004396 | XLOC_193962 | ENSRNOT00000005620 | -0.960656787 | 6.95E-07 |
| TUCP_004396 | XLOC_193962 | ENSRNOT00000009000 | -0.952666686 | 1.73E-06 |
| TUCP_004396 | XLOC_193962 | ENSRNOT00000087572 | -0.959908927 | 7.63E-07 |
| TUCP_004396 | XLOC_193962 | ENSRNOT00000057898 | -0.962915891 | 5.19E-07 |
| TUCP_004396 | XLOC_193962 | ENSRNOT00000024677 | 0.9502863    | 2.20E-06 |
| TUCP_004396 | XLOC_193962 | ENSRNOT00000019192 | -0.95944333  | 8.07E-07 |
| TUCP_004396 | XLOC_193962 | ENSRNOT00000067626 | -0.966135157 | 3.31E-07 |
| TUCP_004396 | XLOC_193962 | ENSRNOT00000036838 | -0.956244048 | 1.17E-06 |
| TUCP_004396 | XLOC_193962 | ENSRNOT00000091139 | -0.954011477 | 1.50E-06 |
| TUCP_004396 | XLOC_193962 | ENSRNOT00000026550 | 0.952069925  | 1.84E-06 |
| TUCP_004396 | XLOC_193962 | ENSRNOT00000081226 | 0.950405941  | 2.17E-06 |
| TUCP_004396 | XLOC_193962 | ENSRNOT00000013286 | 0.955101773  | 1.33E-06 |
| TUCP_004396 | XLOC_193962 | ENSRNOT00000011948 | -0.981241914 | 1.77E-08 |
| TUCP_004396 | XLOC_193962 | ENSRNOT00000018488 | -0.95721634  | 1.05E-06 |
| TUCP_004396 | XLOC_193962 | ENSRNOT00000065045 | 0.950100196  | 2.24E-06 |
| TUCP_004396 | XLOC_193962 | ENSRNOT00000054864 | -0.95742482  | 1.03E-06 |
| TUCP_004396 | XLOC_193962 | ENSRNOT00000014605 | -0.957141815 | 1.06E-06 |
| TUCP_004396 | XLOC_193962 | ENSRNOT00000016389 | -0.951779666 | 1.89E-06 |
| TUCP_004396 | XLOC_193962 | ENSRNOT00000075934 | -0.960822218 | 6.81E-07 |
| TUCP_004396 | XLOC_193962 | ENSRNOT00000076181 | -0.965157387 | 3.81E-07 |
| TUCP_004396 | XLOC_193962 | ENSRNOT00000080410 | -0.966284922 | 3.24E-07 |
| TUCP_004396 | XLOC_193962 | ENSRNOT00000016254 | -0.963140415 | 5.04E-07 |
| TUCP_004396 | XLOC_193962 | ENSRNOT00000013613 | -0.953793234 | 1.53E-06 |

|             |             |                    |              |          |
|-------------|-------------|--------------------|--------------|----------|
| TUCP_004396 | XLOC_193962 | ENSRNOT00000030074 | 0.954294011  | 1.45E-06 |
| TUCP_004396 | XLOC_193962 | ENSRNOT00000022502 | -0.951233929 | 2.00E-06 |
| TUCP_004396 | XLOC_193962 | ENSRNOT00000028089 | 0.950297765  | 2.20E-06 |
| TUCP_004396 | XLOC_193962 | ENSRNOT00000067391 | -0.953848152 | 1.53E-06 |
| TUCP_004396 | XLOC_193962 | ENSRNOT00000033806 | 0.968370594  | 2.36E-07 |
| TUCP_004396 | XLOC_193962 | ENSRNOT00000026920 | -0.961028984 | 6.63E-07 |
| TUCP_004396 | XLOC_193962 | ENSRNOT00000083964 | -0.956118771 | 1.19E-06 |
| TUCP_004396 | XLOC_193962 | ENSRNOT00000085545 | -0.959769723 | 7.76E-07 |
| TUCP_004396 | XLOC_193962 | ENSRNOT00000054717 | -0.952210216 | 1.81E-06 |
| TUCP_004396 | XLOC_193962 | ENSRNOT00000025856 | -0.959321743 | 8.19E-07 |
| TUCP_004396 | XLOC_193962 | ENSRNOT00000011082 | -0.968543394 | 2.30E-07 |
| TUCP_004396 | XLOC_193962 | ENSRNOT00000003544 | -0.95412703  | 1.48E-06 |
| TUCP_004396 | XLOC_193962 | ENSRNOT00000087748 | -0.960837838 | 6.79E-07 |
| TUCP_004396 | XLOC_193962 | ENSRNOT00000064452 | -0.953164086 | 1.64E-06 |
| TUCP_004396 | XLOC_193962 | ENSRNOT00000014506 | -0.981545728 | 1.63E-08 |
| TUCP_004396 | XLOC_193962 | ENSRNOT00000023262 | -0.961651505 | 6.12E-07 |
| TUCP_004396 | XLOC_193962 | ENSRNOT00000015213 | -0.951070638 | 2.03E-06 |
| TUCP_004396 | XLOC_193962 | ENSRNOT00000058495 | -0.953322107 | 1.61E-06 |
| TUCP_004396 | XLOC_193962 | ENSRNOT00000013067 | -0.950530587 | 2.15E-06 |
| TUCP_004396 | XLOC_193962 | ENSRNOT00000075843 | -0.960401705 | 7.17E-07 |
| TUCP_004396 | XLOC_193962 | ENSRNOT00000076230 | 0.959748669  | 7.78E-07 |
| TUCP_004396 | XLOC_193962 | ENSRNOT00000066952 | 0.954734791  | 1.39E-06 |
| TUCP_004396 | XLOC_193962 | ENSRNOT00000088502 | -0.974377326 | 8.33E-08 |
| TUCP_004396 | XLOC_193962 | ENSRNOT00000020537 | -0.961527745 | 6.22E-07 |
| TUCP_004396 | XLOC_193962 | ENSRNOT00000036658 | -0.965837084 | 3.46E-07 |
| TUCP_004396 | XLOC_193962 | ENSRNOT00000089611 | 0.968036563  | 2.49E-07 |
| TUCP_004396 | XLOC_193962 | ENSRNOT00000005604 | 0.971162006  | 1.50E-07 |
| TUCP_004396 | XLOC_193962 | ENSRNOT00000073910 | -0.953157066 | 1.64E-06 |
| TUCP_004396 | XLOC_193962 | ENSRNOT00000055957 | -0.956560679 | 1.13E-06 |
| TUCP_004396 | XLOC_193962 | ENSRNOT00000010674 | -0.951778029 | 1.89E-06 |
| TUCP_004396 | XLOC_193962 | ENSRNOT00000008772 | -0.956423337 | 1.15E-06 |
| TUCP_004396 | XLOC_193962 | ENSRNOT00000066098 | -0.974977103 | 7.41E-08 |
| TUCP_004396 | XLOC_193962 | ENSRNOT00000068026 | -0.950888701 | 2.07E-06 |
| TUCP_004396 | XLOC_193962 | ENSRNOT00000077706 | 0.950568878  | 2.14E-06 |
| TUCP_004396 | XLOC_193962 | ENSRNOT00000008256 | -0.955601184 | 1.26E-06 |
| TUCP_004396 | XLOC_193962 | ENSRNOT00000001099 | -0.972873888 | 1.11E-07 |
| TUCP_004396 | XLOC_193962 | ENSRNOT00000014821 | -0.956359179 | 1.16E-06 |
| TUCP_004396 | XLOC_193962 | ENSRNOT00000007259 | -0.955114425 | 1.33E-06 |
| TUCP_004396 | XLOC_193962 | ENSRNOT00000034883 | -0.955101274 | 1.33E-06 |
| TUCP_004396 | XLOC_193962 | ENSRNOT00000045765 | -0.961072395 | 6.59E-07 |
| TUCP_004396 | XLOC_193962 | ENSRNOT00000025824 | -0.952258877 | 1.80E-06 |
| TUCP_004396 | XLOC_193962 | ENSRNOT00000072357 | -0.954285466 | 1.46E-06 |
| TUCP_004396 | XLOC_193962 | ENSRNOT00000026531 | -0.955935222 | 1.21E-06 |
| TUCP_004396 | XLOC_193962 | ENSRNOT00000027032 | -0.968639989 | 2.27E-07 |
| TUCP_004396 | XLOC_193962 | ENSRNOT00000005172 | 0.96243868   | 5.53E-07 |
| TUCP_004396 | XLOC_193962 | ENSRNOT00000092083 | 0.951034383  | 2.04E-06 |
| TUCP_004396 | XLOC_193962 | ENSRNOT00000067739 | -0.966032238 | 3.36E-07 |
| TUCP_004396 | XLOC_193962 | ENSRNOT00000086608 | -0.957029043 | 1.07E-06 |
| TUCP_004396 | XLOC_193962 | ENSRNOT00000028290 | -0.954313538 | 1.45E-06 |
| TUCP_004396 | XLOC_193962 | ENSRNOT00000073596 | 0.951913926  | 1.87E-06 |
| TUCP_004396 | XLOC_193962 | ENSRNOT00000022117 | -0.974547048 | 8.06E-08 |

|             |             |                    |              |          |
|-------------|-------------|--------------------|--------------|----------|
| TUCP_004396 | XLOC_193962 | ENSRNOT00000029701 | 0.951474351  | 1.95E-06 |
| TUCP_004396 | XLOC_193962 | ENSRNOT00000071482 | -0.963826971 | 4.59E-07 |
| TUCP_004396 | XLOC_193962 | ENSRNOT00000015518 | -0.956912469 | 1.09E-06 |
| TUCP_004396 | XLOC_193962 | ENSRNOT00000029704 | -0.957221966 | 1.05E-06 |
| TUCP_004396 | XLOC_193962 | ENSRNOT00000008126 | -0.956898838 | 1.09E-06 |
| TUCP_004396 | XLOC_193962 | ENSRNOT00000007079 | -0.952446799 | 1.77E-06 |
| TUCP_004396 | XLOC_193962 | ENSRNOT00000011401 | -0.951923744 | 1.87E-06 |
| TUCP_004396 | XLOC_193962 | ENSRNOT00000055602 | -0.961790331 | 6.02E-07 |
| TUCP_004396 | XLOC_193962 | ENSRNOT00000068156 | 0.959988732  | 7.55E-07 |
| TUCP_004396 | XLOC_193962 | ENSRNOT00000011277 | 0.950840768  | 2.08E-06 |
| TUCP_004396 | XLOC_193962 | ENSRNOT00000054976 | -0.962489755 | 5.49E-07 |
| TUCP_004396 | XLOC_193962 | ENSRNOT0000002353  | 0.969387058  | 2.01E-07 |
| TUCP_004396 | XLOC_193962 | ENSRNOT00000019713 | -0.958490211 | 9.05E-07 |
| TUCP_004396 | XLOC_193962 | ENSRNOT00000018477 | -0.969214004 | 2.07E-07 |
| TUCP_004396 | XLOC_193962 | ENSRNOT00000080222 | -0.961800583 | 6.01E-07 |
| TUCP_004396 | XLOC_193962 | ENSRNOT00000081110 | -0.962998618 | 5.13E-07 |
| TUCP_004396 | XLOC_193962 | ENSRNOT00000049285 | -0.973981984 | 8.99E-08 |
| TUCP_004396 | XLOC_193962 | ENSRNOT00000027195 | 0.954761322  | 1.38E-06 |
| TUCP_004396 | XLOC_193962 | ENSRNOT00000088202 | -0.956859497 | 1.09E-06 |
| TUCP_004396 | XLOC_193962 | ENSRNOT00000037955 | -0.95353746  | 1.58E-06 |
| TUCP_004396 | XLOC_193962 | ENSRNOT00000049725 | -0.951208979 | 2.01E-06 |
| TUCP_004396 | XLOC_193962 | ENSRNOT00000077146 | -0.955249024 | 1.31E-06 |
| TUCP_004396 | XLOC_193962 | ENSRNOT00000039177 | -0.953222272 | 1.63E-06 |
| TUCP_004396 | XLOC_193962 | ENSRNOT00000089673 | -0.95931867  | 8.20E-07 |
| TUCP_004396 | XLOC_193962 | ENSRNOT00000023763 | -0.952657283 | 1.73E-06 |
| TUCP_004396 | XLOC_193962 | ENSRNOT00000075209 | -0.957446043 | 1.02E-06 |
| TUCP_004396 | XLOC_193962 | ENSRNOT00000023977 | -0.965836664 | 3.46E-07 |
| TUCP_004396 | XLOC_193962 | ENSRNOT00000009202 | 0.95970053   | 7.82E-07 |
| TUCP_004396 | XLOC_193962 | ENSRNOT00000000155 | 0.966971261  | 2.93E-07 |
| TUCP_004396 | XLOC_193962 | ENSRNOT00000059181 | 0.950560188  | 2.14E-06 |
| TUCP_004396 | XLOC_193962 | ENSRNOT00000017291 | -0.952790322 | 1.71E-06 |
| TUCP_004396 | XLOC_193962 | ENSRNOT00000083256 | 0.955366872  | 1.29E-06 |
| TUCP_004396 | XLOC_193962 | ENSRNOT00000003691 | -0.951579542 | 1.93E-06 |
| TUCP_004396 | XLOC_193962 | ENSRNOT00000035385 | 0.957785688  | 9.83E-07 |
| TUCP_004396 | XLOC_193962 | ENSRNOT00000087329 | -0.970248828 | 1.75E-07 |
| TUCP_004396 | XLOC_193962 | ENSRNOT00000014924 | -0.96394909  | 4.51E-07 |
| TUCP_004396 | XLOC_193962 | ENSRNOT00000007738 | -0.956857277 | 1.09E-06 |
| TUCP_004396 | XLOC_193962 | ENSRNOT00000009994 | -0.962721796 | 5.33E-07 |
| TUCP_004396 | XLOC_193962 | ENSRNOT00000014885 | -0.970208134 | 1.76E-07 |
| TUCP_004396 | XLOC_193962 | ENSRNOT00000002114 | -0.95279472  | 1.71E-06 |
| TUCP_004396 | XLOC_193962 | ENSRNOT00000028737 | -0.95645518  | 1.15E-06 |
| TUCP_004396 | XLOC_193962 | ENSRNOT00000033048 | -0.952933739 | 1.68E-06 |
| TUCP_004396 | XLOC_193962 | ENSRNOT00000024841 | -0.95604137  | 1.20E-06 |
| TUCP_004396 | XLOC_193962 | ENSRNOT00000035145 | -0.964852985 | 3.98E-07 |
| TUCP_004396 | XLOC_193962 | ENSRNOT00000087033 | -0.957008083 | 1.08E-06 |
| TUCP_004396 | XLOC_193962 | ENSRNOT00000008222 | -0.960168858 | 7.38E-07 |
| TUCP_004396 | XLOC_193962 | ENSRNOT00000039102 | 0.953583224  | 1.57E-06 |
| TUCP_004396 | XLOC_193962 | ENSRNOT00000038212 | -0.963698649 | 4.67E-07 |
| TUCP_004396 | XLOC_193962 | ENSRNOT00000001135 | -0.962262788 | 5.66E-07 |
| TUCP_004396 | XLOC_193962 | ENSRNOT00000023965 | -0.957537372 | 1.01E-06 |
| TUCP_004396 | XLOC_193962 | ENSRNOT00000011694 | -0.950065831 | 2.25E-06 |

|             |             |                    |              |          |
|-------------|-------------|--------------------|--------------|----------|
| TUCP_004396 | XLOC_193962 | ENSRNOT00000010983 | 0.951274351  | 1.99E-06 |
| TUCP_004396 | XLOC_193962 | ENSRNOT00000025460 | 0.958109066  | 9.47E-07 |
| TUCP_004396 | XLOC_193962 | ENSRNOT00000028545 | -0.952830572 | 1.70E-06 |
| TUCP_004396 | XLOC_193962 | ENSRNOT00000026760 | -0.956413395 | 1.15E-06 |
| TUCP_004396 | XLOC_193962 | ENSRNOT00000075800 | -0.967456403 | 2.72E-07 |
| TUCP_004396 | XLOC_193962 | ENSRNOT00000082709 | -0.952592784 | 1.74E-06 |
| TUCP_004396 | XLOC_193962 | ENSRNOT00000074494 | -0.958240327 | 9.32E-07 |
| TUCP_004396 | XLOC_193962 | ENSRNOT00000016568 | 0.955421176  | 1.29E-06 |
| TUCP_004396 | XLOC_193962 | ENSRNOT00000075630 | -0.965871486 | 3.44E-07 |
| TUCP_004396 | XLOC_193962 | ENSRNOT00000015223 | 0.952527033  | 1.75E-06 |
| TUCP_004396 | XLOC_193962 | ENSRNOT00000021534 | -0.962263753 | 5.66E-07 |
| TUCP_004396 | XLOC_193962 | ENSRNOT00000023628 | -0.960298763 | 7.27E-07 |
| TUCP_004396 | XLOC_193962 | ENSRNOT00000008253 | -0.975011146 | 7.36E-08 |
| TUCP_004396 | XLOC_193962 | ENSRNOT00000028907 | 0.959214464  | 8.30E-07 |
| TUCP_004396 | XLOC_193962 | ENSRNOT00000037809 | -0.968831548 | 2.20E-07 |
| TUCP_004396 | XLOC_193962 | ENSRNOT00000024938 | -0.95546427  | 1.28E-06 |
| TUCP_004396 | XLOC_193962 | ENSRNOT00000025314 | 0.962064562  | 5.81E-07 |
| TUCP_004396 | XLOC_193962 | ENSRNOT00000013516 | 0.952699764  | 1.72E-06 |
| TUCP_004396 | XLOC_193962 | ENSRNOT00000045532 | -0.954049752 | 1.49E-06 |
| TUCP_004396 | XLOC_193962 | ENSRNOT00000008987 | -0.951536562 | 1.94E-06 |
| TUCP_004396 | XLOC_193962 | ENSRNOT00000022746 | -0.969332977 | 2.03E-07 |
| TUCP_004397 | XLOC_194286 | ENSRNOT00000085195 | 0.999404969  | 5.87E-16 |
| TUCP_004397 | XLOC_194286 | ENSRNOT00000013705 | 1            | 0        |
| TUCP_004397 | XLOC_194286 | ENSRNOT00000040851 | 1            | 4.25E-78 |
| TUCP_004397 | XLOC_194286 | ENSRNOT00000075676 | 0.958697783  | 8.83E-07 |
| TUCP_004397 | XLOC_194286 | ENSRNOT00000058389 | 1            | 0        |
| TUCP_004397 | XLOC_194286 | ENSRNOT00000086827 | 0.95592964   | 1.22E-06 |
| TUCP_004397 | XLOC_194286 | ENSRNOT00000023542 | 1            | 0        |
| TUCP_004397 | XLOC_194286 | ENSRNOT00000028653 | 1            | 0        |
| TUCP_004397 | XLOC_194286 | ENSRNOT00000017230 | 0.955378945  | 1.29E-06 |
| TUCP_004397 | XLOC_194286 | ENSRNOT00000092890 | 0.955137645  | 1.33E-06 |
| TUCP_004397 | XLOC_194286 | ENSRNOT00000012174 | 1            | 0        |
| TUCP_004397 | XLOC_194286 | ENSRNOT00000051680 | 0.994991197  | 2.46E-11 |
| TUCP_004397 | XLOC_194286 | ENSRNOT00000089118 | 1            | 1.33E-79 |
| TUCP_004397 | XLOC_194286 | ENSRNOT00000025245 | 0.999967061  | 3.05E-22 |
| TUCP_004397 | XLOC_194286 | ENSRNOT00000015138 | 0.999902179  | 7.05E-20 |
| TUCP_004397 | XLOC_194286 | ENSRNOT00000080185 | 0.99902259   | 7.01E-15 |
| TUCP_004397 | XLOC_194286 | ENSRNOT00000090729 | 0.965956282  | 3.40E-07 |
| TUCP_004397 | XLOC_194286 | ENSRNOT00000049165 | 0.973440588  | 9.95E-08 |
| TUCP_004397 | XLOC_194286 | ENSRNOT00000086502 | 0.96495109   | 3.93E-07 |
| TUCP_004397 | XLOC_194286 | ENSRNOT00000079661 | 1            | 0        |
| TUCP_004397 | XLOC_194286 | ENSRNOT00000076338 | 0.985532463  | 4.87E-09 |
| TUCP_004397 | XLOC_194286 | ENSRNOT00000042220 | 1            | 0        |
| TUCP_004397 | XLOC_194286 | ENSRNOT00000005031 | 0.952974465  | 1.67E-06 |
| TUCP_004397 | XLOC_194286 | ENSRNOT00000079167 | 0.979848988  | 2.53E-08 |
| TUCP_004397 | XLOC_194286 | ENSRNOT00000061950 | 0.962035217  | 5.83E-07 |
| TUCP_004397 | XLOC_194286 | ENSRNOT00000086710 | 0.999839781  | 8.31E-19 |
| TUCP_004397 | XLOC_194286 | ENSRNOT00000075226 | 1            | 0        |
| TUCP_004397 | XLOC_194286 | ENSRNOT00000000351 | 1            | 0        |
| TUCP_004397 | XLOC_194286 | ENSRNOT00000092294 | 0.986520908  | 3.43E-09 |
| TUCP_001191 | XLOC_044762 | ENSRNOT00000072230 | 0.96467338   | 4.08E-07 |

|             |             |                    |              |          |
|-------------|-------------|--------------------|--------------|----------|
| TUCP_001191 | XLOC_044762 | ENSRNOT00000060074 | 0.97800972   | 3.90E-08 |
| TUCP_003587 | XLOC_157610 | ENSRNOT00000009908 | -0.959268432 | 8.25E-07 |
| TUCP_003587 | XLOC_157610 | ENSRNOT00000019126 | -0.952903417 | 1.69E-06 |
| TUCP_003587 | XLOC_157610 | ENSRNOT00000004252 | -0.969176236 | 2.08E-07 |
| TUCP_003587 | XLOC_157610 | ENSRNOT00000035770 | -0.97155388  | 1.40E-07 |
| TUCP_004772 | XLOC_210658 | ENSRNOT00000026966 | 0.970322306  | 1.73E-07 |
| TUCP_004772 | XLOC_210658 | ENSRNOT00000068416 | 0.999999782  | 3.88E-33 |
| TUCP_004772 | XLOC_210658 | ENSRNOT00000086036 | 0.999958274  | 9.96E-22 |
| TUCP_004772 | XLOC_210658 | ENSRNOT00000026803 | 0.985046075  | 5.74E-09 |
| TUCP_004772 | XLOC_210658 | ENSRNOT00000047527 | 0.963071698  | 5.08E-07 |
| TUCP_004772 | XLOC_210658 | ENSRNOT00000042251 | 0.999344295  | 9.53E-16 |
| TUCP_004772 | XLOC_210658 | ENSRNOT0000002984  | 0.998397069  | 8.31E-14 |
| TUCP_004772 | XLOC_210658 | ENSRNOT00000083764 | 0.999541808  | 1.59E-16 |
| TUCP_004772 | XLOC_210658 | ENSRNOT00000076802 | 0.962695843  | 5.34E-07 |
| TUCP_004772 | XLOC_210658 | ENSRNOT00000092365 | 0.999161651  | 3.26E-15 |
| TUCP_004772 | XLOC_210658 | ENSRNOT00000079275 | 0.999901911  | 7.15E-20 |
| TUCP_004772 | XLOC_210658 | ENSRNOT00000066062 | -0.959706712 | 7.82E-07 |
| TUCP_004772 | XLOC_210658 | ENSRNOT00000045301 | 1            | 0        |
| TUCP_004772 | XLOC_210658 | ENSRNOT00000041186 | 0.999975782  | 6.56E-23 |
| TUCP_004772 | XLOC_210658 | ENSRNOT00000010092 | 0.977711778  | 4.17E-08 |
| TUCP_004772 | XLOC_210658 | ENSRNOT00000076182 | 1            | 0        |
| TUCP_004772 | XLOC_210658 | ENSRNOT00000087404 | 0.951157664  | 2.02E-06 |
| TUCP_004772 | XLOC_210658 | ENSRNOT00000052003 | 0.95837331   | 9.18E-07 |
| TUCP_004772 | XLOC_210658 | ENSRNOT00000081709 | 0.998485154  | 6.27E-14 |
| TUCP_004772 | XLOC_210658 | ENSRNOT00000005726 | 0.959610119  | 7.91E-07 |
| TUCP_004772 | XLOC_210658 | ENSRNOT00000014103 | 1            | 0        |
| TUCP_004772 | XLOC_210658 | ENSRNOT00000057433 | 0.964930601  | 3.94E-07 |
| TUCP_004772 | XLOC_210658 | ENSRNOT00000082289 | 0.998931566  | 1.09E-14 |
| TUCP_004772 | XLOC_210658 | ENSRNOT00000092516 | 0.957459323  | 1.02E-06 |
| TUCP_004772 | XLOC_210658 | ENSRNOT00000008898 | 0.990039768  | 7.59E-10 |
| TUCP_004772 | XLOC_210658 | ENSRNOT00000083493 | 0.995461232  | 1.51E-11 |
| TUCP_004772 | XLOC_210658 | ENSRNOT00000092563 | 0.987201084  | 2.65E-09 |
| TUCP_004772 | XLOC_210658 | ENSRNOT00000088893 | 1            | 0        |
| TUCP_004772 | XLOC_210658 | ENSRNOT00000076693 | 0.955029582  | 1.34E-06 |
| TUCP_004772 | XLOC_210658 | ENSRNOT00000081014 | 1            | 0        |
| TUCP_004772 | XLOC_210658 | ENSRNOT00000067543 | 1            | 0        |
| TUCP_004772 | XLOC_210658 | ENSRNOT00000050968 | 0.996816433  | 2.56E-12 |
| TUCP_004772 | XLOC_210658 | ENSRNOT00000042201 | 0.960235595  | 7.32E-07 |
| TUCP_004772 | XLOC_210658 | ENSRNOT00000004373 | 0.957315473  | 1.04E-06 |
| TUCP_004772 | XLOC_210658 | ENSRNOT00000063929 | 1            | 0        |
| TUCP_004772 | XLOC_210658 | ENSRNOT00000057472 | 1            | 0        |
| TUCP_004772 | XLOC_210658 | ENSRNOT00000041617 | 0.952449765  | 1.77E-06 |
| TUCP_004772 | XLOC_210658 | ENSRNOT00000091763 | 0.986310385  | 3.70E-09 |
| TUCP_004772 | XLOC_210658 | ENSRNOT00000022200 | 0.998491303  | 6.14E-14 |
| TUCP_004772 | XLOC_210658 | ENSRNOT00000067379 | 0.997260967  | 1.21E-12 |
| TUCP_004772 | XLOC_210658 | ENSRNOT00000020786 | 0.976428448  | 5.51E-08 |
| TUCP_004772 | XLOC_210658 | ENSRNOT00000050543 | 0.999722223  | 1.30E-17 |
| TUCP_004772 | XLOC_210658 | ENSRNOT00000089306 | 0.999866649  | 3.32E-19 |
| TUCP_004772 | XLOC_210658 | ENSRNOT00000052367 | 0.997268394  | 1.19E-12 |
| TUCP_004772 | XLOC_210658 | ENSRNOT00000090658 | 1            | 0        |
| TUCP_004772 | XLOC_210658 | ENSRNOT00000022571 | 0.995290013  | 1.81E-11 |

|             |             |                    |              |          |
|-------------|-------------|--------------------|--------------|----------|
| TUCP_004772 | XLOC_210658 | ENSRNOT00000044520 | 0.981817158  | 1.52E-08 |
| TUCP_004772 | XLOC_210658 | ENSRNOT00000065448 | 0.963648868  | 4.70E-07 |
| TUCP_000500 | XLOC_017168 | ENSRNOT00000082695 | 0.992053498  | 2.46E-10 |
| TUCP_000500 | XLOC_017168 | ENSRNOT00000067500 | 0.966861987  | 2.98E-07 |
| TUCP_002059 | XLOC_084075 | ENSRNOT00000081590 | 0.952361834  | 1.78E-06 |
| TUCP_000503 | XLOC_017313 | ENSRNOT00000013913 | 0.973252063  | 1.03E-07 |
| TUCP_000503 | XLOC_017313 | ENSRNOT00000083255 | 0.956642983  | 1.12E-06 |
| TUCP_000503 | XLOC_017313 | ENSRNOT00000037372 | 0.96496686   | 3.92E-07 |
| TUCP_000503 | XLOC_017313 | ENSRNOT00000087725 | 0.953662695  | 1.56E-06 |
| TUCP_000503 | XLOC_017313 | ENSRNOT00000023290 | 0.963624239  | 4.72E-07 |
| TUCP_000503 | XLOC_017313 | ENSRNOT00000005911 | 0.970079329  | 1.80E-07 |
| TUCP_000503 | XLOC_017313 | ENSRNOT00000009440 | -0.962195949 | 5.71E-07 |
| TUCP_000503 | XLOC_017313 | ENSRNOT00000029810 | 0.957799138  | 9.82E-07 |
| TUCP_000503 | XLOC_017313 | ENSRNOT00000064840 | 0.950269841  | 2.20E-06 |
| TUCP_000503 | XLOC_017313 | ENSRNOT00000086336 | 0.950417     | 2.17E-06 |
| TUCP_000503 | XLOC_017313 | ENSRNOT00000046251 | 0.957182347  | 1.05E-06 |
| TUCP_000503 | XLOC_017313 | ENSRNOT00000084601 | 0.953199367  | 1.63E-06 |
| TUCP_000503 | XLOC_017313 | ENSRNOT00000046273 | 0.968148407  | 2.45E-07 |
| TUCP_000503 | XLOC_017313 | ENSRNOT00000043953 | 0.953794727  | 1.53E-06 |
| TUCP_000503 | XLOC_017313 | ENSRNOT00000080654 | 0.964549495  | 4.15E-07 |
| TUCP_000503 | XLOC_017313 | ENSRNOT00000019453 | 0.952531397  | 1.75E-06 |
| TUCP_000503 | XLOC_017313 | ENSRNOT00000006195 | 0.953507501  | 1.58E-06 |
| TUCP_000503 | XLOC_017313 | ENSRNOT00000039852 | 0.959690932  | 7.83E-07 |
| TUCP_000503 | XLOC_017313 | ENSRNOT00000022485 | 0.952164266  | 1.82E-06 |
| TUCP_000503 | XLOC_017313 | ENSRNOT00000025641 | 0.964079936  | 4.43E-07 |
| TUCP_000503 | XLOC_017313 | ENSRNOT00000014988 | 0.950455085  | 2.16E-06 |
| TUCP_000503 | XLOC_017313 | ENSRNOT00000087697 | 0.962750857  | 5.30E-07 |
| TUCP_000503 | XLOC_017313 | ENSRNOT00000008350 | 0.98002979   | 2.42E-08 |
| TUCP_000503 | XLOC_017313 | ENSRNOT00000004003 | 0.950267998  | 2.20E-06 |
| TUCP_000503 | XLOC_017313 | ENSRNOT00000023835 | 0.958985332  | 8.53E-07 |
| TUCP_004093 | XLOC_179241 | ENSRNOT00000024186 | 0.974087048  | 8.81E-08 |
| TUCP_004093 | XLOC_179241 | ENSRNOT00000074753 | 0.991965516  | 2.60E-10 |
| TUCP_004093 | XLOC_179241 | ENSRNOT00000041904 | 0.991459692  | 3.53E-10 |
| TUCP_004093 | XLOC_179241 | ENSRNOT00000083487 | 0.973009668  | 1.08E-07 |
| TUCP_004093 | XLOC_179241 | ENSRNOT00000077990 | 0.991459692  | 3.53E-10 |
| TUCP_004093 | XLOC_179241 | ENSRNOT00000038826 | 0.990809166  | 5.09E-10 |
| TUCP_004093 | XLOC_179241 | ENSRNOT00000037094 | 0.969977383  | 1.83E-07 |
| TUCP_004093 | XLOC_179241 | ENSRNOT00000046842 | 0.962354728  | 5.59E-07 |
| TUCP_004093 | XLOC_179241 | ENSRNOT00000037169 | 0.970315051  | 1.73E-07 |
| TUCP_004093 | XLOC_179241 | ENSRNOT00000021243 | 0.976930839  | 4.95E-08 |
| TUCP_004093 | XLOC_179241 | ENSRNOT00000060250 | 0.99289409   | 1.41E-10 |
| TUCP_004093 | XLOC_179241 | ENSRNOT00000091934 | 0.991459692  | 3.53E-10 |
| TUCP_004093 | XLOC_179241 | ENSRNOT00000086027 | 0.962706679  | 5.34E-07 |
| TUCP_004093 | XLOC_179241 | ENSRNOT00000046585 | 0.971888598  | 1.32E-07 |
| TUCP_004093 | XLOC_179241 | ENSRNOT00000080794 | 0.979397636  | 2.82E-08 |
| TUCP_004093 | XLOC_179241 | ENSRNOT00000014456 | 0.981550697  | 1.63E-08 |
| TUCP_004093 | XLOC_179241 | ENSRNOT00000031205 | 0.980512519  | 2.14E-08 |
| TUCP_004093 | XLOC_179241 | ENSRNOT00000044145 | 0.991459692  | 3.53E-10 |
| TUCP_004093 | XLOC_179241 | ENSRNOT00000088381 | 0.978638938  | 3.38E-08 |
| TUCP_004093 | XLOC_179241 | ENSRNOT00000011743 | 0.976243615  | 5.73E-08 |
| TUCP_004093 | XLOC_179241 | ENSRNOT00000089929 | 0.991459692  | 3.53E-10 |



|             |             |                    |             |          |
|-------------|-------------|--------------------|-------------|----------|
| TUCP_004093 | XLOC_179241 | ENSRNOT00000088624 | 0.991459692 | 3.53E-10 |
| TUCP_004093 | XLOC_179241 | ENSRNOT00000085659 | 0.979606444 | 2.68E-08 |
| TUCP_004093 | XLOC_179241 | ENSRNOT00000015866 | 0.982025374 | 1.43E-08 |
| TUCP_004093 | XLOC_179241 | ENSRNOT00000078633 | 0.991459692 | 3.53E-10 |
| TUCP_004093 | XLOC_179241 | ENSRNOT00000024575 | 0.950921085 | 2.06E-06 |
| TUCP_004093 | XLOC_179241 | ENSRNOT00000034907 | 0.980582632 | 2.10E-08 |
| TUCP_004093 | XLOC_179241 | ENSRNOT00000051835 | 0.991459692 | 3.53E-10 |
| TUCP_004093 | XLOC_179241 | ENSRNOT00000079087 | 0.991459692 | 3.53E-10 |
| TUCP_004093 | XLOC_179241 | ENSRNOT00000037206 | 0.991459692 | 3.53E-10 |
| TUCP_004093 | XLOC_179241 | ENSRNOT00000083261 | 0.971314114 | 1.46E-07 |
| TUCP_004093 | XLOC_179241 | ENSRNOT00000080590 | 0.991155738 | 4.20E-10 |
| TUCP_004093 | XLOC_179241 | ENSRNOT00000027552 | 0.992510166 | 1.83E-10 |
| TUCP_004093 | XLOC_179241 | ENSRNOT00000077014 | 0.997245501 | 1.24E-12 |
| TUCP_004093 | XLOC_179241 | ENSRNOT00000080453 | 0.991743479 | 2.98E-10 |
| TUCP_004093 | XLOC_179241 | ENSRNOT00000057729 | 0.990391525 | 6.35E-10 |
| TUCP_004093 | XLOC_179241 | ENSRNOT00000061284 | 0.959622563 | 7.90E-07 |
| TUCP_004093 | XLOC_179241 | ENSRNOT00000020206 | 0.958815989 | 8.71E-07 |
| TUCP_004093 | XLOC_179241 | ENSRNOT00000013423 | 0.952874814 | 1.69E-06 |
| TUCP_004093 | XLOC_179241 | ENSRNOT00000071884 | 0.962154238 | 5.74E-07 |
| TUCP_004093 | XLOC_179241 | ENSRNOT00000066839 | 0.981375882 | 1.71E-08 |
| TUCP_004093 | XLOC_179241 | ENSRNOT00000026316 | 0.953181787 | 1.64E-06 |
| TUCP_004093 | XLOC_179241 | ENSRNOT00000078663 | 0.980942397 | 1.92E-08 |
| TUCP_004093 | XLOC_179241 | ENSRNOT00000064250 | 0.987534915 | 2.32E-09 |
| TUCP_004093 | XLOC_179241 | ENSRNOT00000021608 | 0.969965474 | 1.83E-07 |
| TUCP_004093 | XLOC_179241 | ENSRNOT00000029634 | 0.985801261 | 4.44E-09 |
| TUCP_004093 | XLOC_179241 | ENSRNOT00000065460 | 0.991459692 | 3.53E-10 |
| TUCP_004093 | XLOC_179241 | ENSRNOT00000003817 | 0.99594636  | 8.56E-12 |
| TUCP_004093 | XLOC_179241 | ENSRNOT00000016713 | 0.991459692 | 3.53E-10 |
| TUCP_004093 | XLOC_179241 | ENSRNOT00000079260 | 0.985839211 | 4.38E-09 |
| TUCP_004093 | XLOC_179241 | ENSRNOT00000039294 | 0.991459692 | 3.53E-10 |
| TUCP_004093 | XLOC_179241 | ENSRNOT00000092913 | 0.952551212 | 1.75E-06 |
| TUCP_000470 | XLOC_016133 | ENSRNOT00000085599 | 0.999938502 | 6.93E-21 |
| TUCP_000470 | XLOC_016133 | ENSRNOT00000006689 | 0.9944189   | 4.22E-11 |
| TUCP_000470 | XLOC_016133 | ENSRNOT00000081534 | 0.987999291 | 1.92E-09 |
| TUCP_000470 | XLOC_016133 | ENSRNOT00000085301 | 0.99793679  | 2.93E-13 |
| TUCP_000470 | XLOC_016133 | ENSRNOT00000038729 | 1           | 0        |
| TUCP_000470 | XLOC_016133 | ENSRNOT00000086385 | 1           | 1.33E-79 |
| TUCP_000470 | XLOC_016133 | ENSRNOT00000077695 | 0.96038616  | 7.19E-07 |
| TUCP_000470 | XLOC_016133 | ENSRNOT00000078561 | 0.986503348 | 3.45E-09 |
| TUCP_000470 | XLOC_016133 | ENSRNOT00000087613 | 1           | 0        |
| TUCP_000470 | XLOC_016133 | ENSRNOT00000026032 | 0.953050675 | 1.66E-06 |
| TUCP_000470 | XLOC_016133 | ENSRNOT00000073350 | 0.9658754   | 3.44E-07 |
| TUCP_000470 | XLOC_016133 | ENSRNOT00000023062 | 1           | 0        |
| TUCP_000470 | XLOC_016133 | ENSRNOT00000058834 | 1           | 1.33E-79 |
| TUCP_000470 | XLOC_016133 | ENSRNOT00000079420 | 1           | 0        |
| TUCP_000470 | XLOC_016133 | ENSRNOT00000090761 | 1           | 1.33E-79 |
| TUCP_000470 | XLOC_016133 | ENSRNOT00000055923 | 1           | 0        |
| TUCP_000470 | XLOC_016133 | ENSRNOT00000092416 | 0.963085379 | 5.07E-07 |
| TUCP_000470 | XLOC_016133 | ENSRNOT00000071930 | 1           | 1.33E-79 |
| TUCP_000470 | XLOC_016133 | ENSRNOT00000001996 | 0.974721715 | 7.79E-08 |
| TUCP_000470 | XLOC_016133 | ENSRNOT00000076756 | 1           | 0        |

|             |             |                    |             |          |
|-------------|-------------|--------------------|-------------|----------|
| TUCP_000470 | XLOC_016133 | ENSRNOT00000081527 | 0.999420479 | 5.14E-16 |
| TUCP_000470 | XLOC_016133 | ENSRNOT00000085067 | 0.960262084 | 7.30E-07 |
| TUCP_000470 | XLOC_016133 | ENSRNOT00000091663 | 0.99642667  | 4.56E-12 |
| TUCP_000470 | XLOC_016133 | ENSRNOT00000081780 | 1           | 0        |
| TUCP_000470 | XLOC_016133 | ENSRNOT00000093689 | 0.953599805 | 1.57E-06 |
| TUCP_000470 | XLOC_016133 | ENSRNOT00000089114 | 1           | 4.25E-78 |
| TUCP_000470 | XLOC_016133 | ENSRNOT00000021609 | 0.977017895 | 4.86E-08 |
| TUCP_000470 | XLOC_016133 | ENSRNOT00000073316 | 1           | 0        |
| TUCP_000470 | XLOC_016133 | ENSRNOT00000086557 | 0.977413455 | 4.46E-08 |
| TUCP_000470 | XLOC_016133 | ENSRNOT00000071663 | 1           | 0        |
| TUCP_000470 | XLOC_016133 | ENSRNOT00000042860 | 1           | 0        |
| TUCP_000470 | XLOC_016133 | ENSRNOT00000072962 | 0.971287317 | 1.46E-07 |
| TUCP_000470 | XLOC_016133 | ENSRNOT00000088421 | 1           | 0        |
| TUCP_000470 | XLOC_016133 | ENSRNOT00000038898 | 1           | 0        |
| TUCP_000470 | XLOC_016133 | ENSRNOT00000015840 | 0.959452012 | 8.06E-07 |
| TUCP_000470 | XLOC_016133 | ENSRNOT00000064936 | 0.985957557 | 4.20E-09 |
| TUCP_000470 | XLOC_016133 | ENSRNOT00000042777 | 0.990642579 | 5.56E-10 |
| TUCP_000470 | XLOC_016133 | ENSRNOT00000010029 | 1           | 0        |
| TUCP_000473 | XLOC_016244 | ENSRNOT00000007923 | 0.9738253   | 9.26E-08 |
| TUCP_000472 | XLOC_016184 | ENSRNOT00000084075 | 0.996106112 | 7.00E-12 |
| TUCP_000472 | XLOC_016184 | ENSRNOT00000012880 | 0.968043129 | 2.49E-07 |
| TUCP_000472 | XLOC_016184 | ENSRNOT00000074465 | 1           | 0        |
| TUCP_000472 | XLOC_016184 | ENSRNOT00000090898 | 0.961670541 | 6.11E-07 |
| TUCP_000472 | XLOC_016184 | ENSRNOT00000079805 | 0.997980451 | 2.64E-13 |
| TUCP_000472 | XLOC_016184 | ENSRNOT00000040912 | 1           | 4.25E-78 |
| TUCP_000472 | XLOC_016184 | ENSRNOT00000072648 | 1           | 4.25E-78 |
| TUCP_000472 | XLOC_016184 | ENSRNOT00000007398 | 0.989054103 | 1.21E-09 |
| TUCP_000472 | XLOC_016184 | ENSRNOT00000070803 | 1           | 0        |
| TUCP_000472 | XLOC_016184 | ENSRNOT00000012196 | 1           | 0        |
| TUCP_000472 | XLOC_016184 | ENSRNOT00000085772 | 1           | 4.25E-78 |
| TUCP_000472 | XLOC_016184 | ENSRNOT00000093284 | 0.999975856 | 6.46E-23 |
| TUCP_000472 | XLOC_016184 | ENSRNOT00000086374 | 0.993568904 | 8.57E-11 |
| TUCP_000472 | XLOC_016184 | ENSRNOT00000015270 | 1           | 0        |
| TUCP_000472 | XLOC_016184 | ENSRNOT00000046192 | 1           | 4.25E-78 |
| TUCP_000472 | XLOC_016184 | ENSRNOT00000044226 | 1           | 0        |
| TUCP_000472 | XLOC_016184 | ENSRNOT00000081898 | 0.989837012 | 8.39E-10 |
| TUCP_000472 | XLOC_016184 | ENSRNOT00000081954 | 0.964005219 | 4.48E-07 |
| TUCP_000472 | XLOC_016184 | ENSRNOT00000080291 | 0.998427671 | 7.55E-14 |
| TUCP_000472 | XLOC_016184 | ENSRNOT0000004293  | 0.984239049 | 7.46E-09 |
| TUCP_000472 | XLOC_016184 | ENSRNOT00000078231 | 0.960455489 | 7.13E-07 |
| TUCP_000472 | XLOC_016184 | ENSRNOT0000002834  | 1           | 0        |
| TUCP_000472 | XLOC_016184 | ENSRNOT00000001464 | 1           | 0        |
| TUCP_000472 | XLOC_016184 | ENSRNOT00000090716 | 0.994769629 | 3.06E-11 |
| TUCP_000472 | XLOC_016184 | ENSRNOT00000083542 | 0.972568514 | 1.17E-07 |
| TUCP_000472 | XLOC_016184 | ENSRNOT00000076044 | 1           | 0        |
| TUCP_000472 | XLOC_016184 | ENSRNOT00000074353 | 1           | 0        |
| TUCP_000472 | XLOC_016184 | ENSRNOT00000043510 | 0.958144129 | 9.43E-07 |
| TUCP_000472 | XLOC_016184 | ENSRNOT00000087122 | 0.980089513 | 2.38E-08 |
| TUCP_000472 | XLOC_016184 | ENSRNOT00000074295 | 0.987777006 | 2.11E-09 |
| TUCP_000472 | XLOC_016184 | ENSRNOT00000057873 | 1           | 0        |
| TUCP_000472 | XLOC_016184 | ENSRNOT00000083002 | 0.988874897 | 1.32E-09 |

|             |             |                    |             |          |
|-------------|-------------|--------------------|-------------|----------|
| TUCP_000472 | XLOC_016184 | ENSRNOT00000088399 | 0.999999855 | 4.99E-34 |
| TUCP_000472 | XLOC_016184 | ENSRNOT00000086248 | 1           | 0        |
| TUCP_000472 | XLOC_016184 | ENSRNOT00000089750 | 0.999992758 | 1.57E-25 |
| TUCP_000472 | XLOC_016184 | ENSRNOT00000030517 | 0.971225224 | 1.48E-07 |
| TUCP_000472 | XLOC_016184 | ENSRNOT00000034772 | 0.994265187 | 4.84E-11 |
| TUCP_000472 | XLOC_016184 | ENSRNOT00000089305 | 0.969641693 | 1.93E-07 |
| TUCP_000472 | XLOC_016184 | ENSRNOT00000024580 | 0.954183021 | 1.47E-06 |
| TUCP_000472 | XLOC_016184 | ENSRNOT00000064601 | 0.966578038 | 3.11E-07 |
| TUCP_000472 | XLOC_016184 | ENSRNOT00000015870 | 0.965901306 | 3.43E-07 |
| TUCP_000472 | XLOC_016184 | ENSRNOT00000080812 | 0.992998865 | 1.31E-10 |
| TUCP_000472 | XLOC_016184 | ENSRNOT00000092755 | 1           | 0        |
| TUCP_000472 | XLOC_016184 | ENSRNOT00000031683 | 1           | 0        |
| TUCP_000472 | XLOC_016184 | ENSRNOT00000087764 | 0.988156196 | 1.80E-09 |
| TUCP_004097 | XLOC_179262 | ENSRNOT00000010743 | 0.96062837  | 6.97E-07 |
| TUCP_004097 | XLOC_179262 | ENSRNOT00000091060 | 0.955888699 | 1.22E-06 |
| TUCP_004097 | XLOC_179262 | ENSRNOT00000084918 | 0.975315506 | 6.93E-08 |
| TUCP_004096 | XLOC_179248 | ENSRNOT00000052018 | 0.966672957 | 3.06E-07 |
| TUCP_004096 | XLOC_179248 | ENSRNOT00000019618 | 0.958658897 | 8.87E-07 |
| TUCP_004096 | XLOC_179248 | ENSRNOT00000016975 | 0.960770651 | 6.85E-07 |
| TUCP_004096 | XLOC_179248 | ENSRNOT00000026915 | 0.970536221 | 1.66E-07 |
| TUCP_004096 | XLOC_179248 | ENSRNOT00000080557 | 0.953842984 | 1.53E-06 |
| TUCP_004096 | XLOC_179248 | ENSRNOT00000083214 | 0.950376196 | 2.18E-06 |
| TUCP_004096 | XLOC_179248 | ENSRNOT00000020134 | 0.952352824 | 1.78E-06 |
| TUCP_004096 | XLOC_179248 | ENSRNOT00000008221 | 0.951720547 | 1.90E-06 |
| TUCP_004096 | XLOC_179248 | ENSRNOT00000030445 | 0.96828086  | 2.40E-07 |
| TUCP_004096 | XLOC_179248 | ENSRNOT00000043784 | 0.956720872 | 1.11E-06 |
| TUCP_004096 | XLOC_179248 | ENSRNOT00000022863 | 0.966179156 | 3.29E-07 |
| TUCP_004095 | XLOC_179241 | ENSRNOT00000038347 | 0.977975394 | 3.93E-08 |
| TUCP_004095 | XLOC_179241 | ENSRNOT00000013356 | 0.956359103 | 1.16E-06 |
| TUCP_004094 | XLOC_179241 | ENSRNOT00000024186 | 0.983012155 | 1.08E-08 |
| TUCP_004094 | XLOC_179241 | ENSRNOT00000074753 | 0.998234553 | 1.35E-13 |
| TUCP_004094 | XLOC_179241 | ENSRNOT00000004876 | 0.958906143 | 8.61E-07 |
| TUCP_004094 | XLOC_179241 | ENSRNOT00000041904 | 0.999979581 | 2.80E-23 |
| TUCP_004094 | XLOC_179241 | ENSRNOT00000083487 | 0.989400252 | 1.04E-09 |
| TUCP_004094 | XLOC_179241 | ENSRNOT00000077990 | 0.999979581 | 2.80E-23 |
| TUCP_004094 | XLOC_179241 | ENSRNOT00000038826 | 0.999829004 | 1.15E-18 |
| TUCP_004094 | XLOC_179241 | ENSRNOT00000046842 | 0.975081925 | 7.26E-08 |
| TUCP_004094 | XLOC_179241 | ENSRNOT00000037169 | 0.980098326 | 2.38E-08 |
| TUCP_004094 | XLOC_179241 | ENSRNOT00000021243 | 0.987304219 | 2.54E-09 |
| TUCP_004094 | XLOC_179241 | ENSRNOT00000060250 | 0.999906085 | 5.75E-20 |
| TUCP_004094 | XLOC_179241 | ENSRNOT00000091934 | 0.999979581 | 2.80E-23 |
| TUCP_004094 | XLOC_179241 | ENSRNOT00000046585 | 0.982791261 | 1.15E-08 |
| TUCP_004094 | XLOC_179241 | ENSRNOT00000080794 | 0.9912165   | 4.06E-10 |
| TUCP_004094 | XLOC_179241 | ENSRNOT00000014456 | 0.991594724 | 3.26E-10 |
| TUCP_004094 | XLOC_179241 | ENSRNOT00000031205 | 0.991256162 | 3.97E-10 |
| TUCP_004094 | XLOC_179241 | ENSRNOT00000044145 | 0.999979581 | 2.80E-23 |
| TUCP_004094 | XLOC_179241 | ENSRNOT00000088381 | 0.988898612 | 1.30E-09 |
| TUCP_004094 | XLOC_179241 | ENSRNOT00000011743 | 0.987799633 | 2.09E-09 |
| TUCP_004094 | XLOC_179241 | ENSRNOT00000089929 | 0.999979581 | 2.80E-23 |
| TUCP_004094 | XLOC_179241 | ENSRNOT00000088624 | 0.999979581 | 2.80E-23 |
| TUCP_004094 | XLOC_179241 | ENSRNOT00000085659 | 0.98979785  | 8.56E-10 |

|             |             |                    |              |          |
|-------------|-------------|--------------------|--------------|----------|
| TUCP_004094 | XLOC_179241 | ENSRNOT00000015866 | 0.993872329  | 6.73E-11 |
| TUCP_004094 | XLOC_179241 | ENSRNOT00000078633 | 0.999979581  | 2.80E-23 |
| TUCP_004094 | XLOC_179241 | ENSRNOT00000034907 | 0.995475423  | 1.48E-11 |
| TUCP_004094 | XLOC_179241 | ENSRNOT00000093230 | 0.957558393  | 1.01E-06 |
| TUCP_004094 | XLOC_179241 | ENSRNOT00000051835 | 0.999979581  | 2.80E-23 |
| TUCP_004094 | XLOC_179241 | ENSRNOT00000079087 | 0.999979581  | 2.80E-23 |
| TUCP_004094 | XLOC_179241 | ENSRNOT00000037206 | 0.999979581  | 2.80E-23 |
| TUCP_004094 | XLOC_179241 | ENSRNOT00000083261 | 0.971610426  | 1.38E-07 |
| TUCP_004094 | XLOC_179241 | ENSRNOT00000080590 | 0.999859287  | 4.34E-19 |
| TUCP_004094 | XLOC_179241 | ENSRNOT00000027552 | 0.9997797    | 4.08E-18 |
| TUCP_004094 | XLOC_179241 | ENSRNOT00000077014 | 0.994962225  | 2.53E-11 |
| TUCP_004094 | XLOC_179241 | ENSRNOT00000080453 | 0.999890968  | 1.21E-19 |
| TUCP_004094 | XLOC_179241 | ENSRNOT00000089057 | 0.967500786  | 2.70E-07 |
| TUCP_004094 | XLOC_179241 | ENSRNOT00000066839 | 0.992343698  | 2.05E-10 |
| TUCP_004094 | XLOC_179241 | ENSRNOT00000061284 | 0.955606854  | 1.26E-06 |
| TUCP_004094 | XLOC_179241 | ENSRNOT00000013423 | 0.95927991   | 8.23E-07 |
| TUCP_004094 | XLOC_179241 | ENSRNOT00000071884 | 0.974536331  | 8.08E-08 |
| TUCP_004094 | XLOC_179241 | ENSRNOT00000004128 | 0.962453019  | 5.52E-07 |
| TUCP_004094 | XLOC_179241 | ENSRNOT00000026316 | 0.96459183   | 4.13E-07 |
| TUCP_004094 | XLOC_179241 | ENSRNOT00000057729 | 0.999341354  | 9.75E-16 |
| TUCP_004094 | XLOC_179241 | ENSRNOT00000078663 | 0.974844328  | 7.61E-08 |
| TUCP_004094 | XLOC_179241 | ENSRNOT00000064250 | 0.983095537  | 1.06E-08 |
| TUCP_004094 | XLOC_179241 | ENSRNOT00000021608 | 0.965448163  | 3.66E-07 |
| TUCP_004094 | XLOC_179241 | ENSRNOT00000029634 | 0.99580649   | 1.01E-11 |
| TUCP_004094 | XLOC_179241 | ENSRNOT00000093579 | 0.958623477  | 8.91E-07 |
| TUCP_004094 | XLOC_179241 | ENSRNOT00000086349 | 0.95786597   | 9.74E-07 |
| TUCP_004094 | XLOC_179241 | ENSRNOT00000065460 | 0.999979581  | 2.80E-23 |
| TUCP_004094 | XLOC_179241 | ENSRNOT0000003817  | 0.996661987  | 3.25E-12 |
| TUCP_004094 | XLOC_179241 | ENSRNOT00000016713 | 0.999979581  | 2.80E-23 |
| TUCP_004094 | XLOC_179241 | ENSRNOT00000079260 | 0.996882549  | 2.31E-12 |
| TUCP_004094 | XLOC_179241 | ENSRNOT00000039294 | 0.999979581  | 2.80E-23 |
| TUCP_004094 | XLOC_179241 | ENSRNOT00000092913 | 0.954007393  | 1.50E-06 |
| TUCP_000373 | XLOC_012341 | ENSRNOT00000026641 | 0.951365936  | 1.97E-06 |
| TUCP_004099 | XLOC_179361 | ENSRNOT00000089179 | 0.970570152  | 1.65E-07 |
| TUCP_000376 | XLOC_012805 | ENSRNOT00000081292 | -0.965440669 | 3.66E-07 |
| TUCP_000376 | XLOC_012805 | ENSRNOT0000001672  | 0.967985418  | 2.51E-07 |
| TUCP_002069 | XLOC_084795 | ENSRNOT00000084133 | 1            | 0        |
| TUCP_002069 | XLOC_084795 | ENSRNOT00000093745 | 0.981891039  | 1.49E-08 |
| TUCP_002069 | XLOC_084795 | ENSRNOT00000065542 | 0.99828699   | 1.16E-13 |
| TUCP_002069 | XLOC_084795 | ENSRNOT00000082464 | 1            | 0        |
| TUCP_002069 | XLOC_084795 | ENSRNOT00000087659 | 1            | 0        |
| TUCP_002069 | XLOC_084795 | ENSRNOT00000084582 | 0.976633579  | 5.28E-08 |
| TUCP_002069 | XLOC_084795 | ENSRNOT00000085078 | 1            | 1.33E-79 |
| TUCP_002069 | XLOC_084795 | ENSRNOT00000014028 | 1            | 0        |
| TUCP_002069 | XLOC_084795 | ENSRNOT00000049363 | 1            | 0        |
| TUCP_002069 | XLOC_084795 | ENSRNOT00000065473 | 0.999949098  | 2.69E-21 |
| TUCP_002069 | XLOC_084795 | ENSRNOT0000000142  | 0.998996155  | 8.01E-15 |
| TUCP_002069 | XLOC_084795 | ENSRNOT00000082288 | 0.999998398  | 8.30E-29 |
| TUCP_002069 | XLOC_084795 | ENSRNOT00000039664 | 1            | 0        |
| TUCP_002069 | XLOC_084795 | ENSRNOT00000065402 | 1            | 0        |
| TUCP_002069 | XLOC_084795 | ENSRNOT00000064551 | 0.965365872  | 3.70E-07 |

|             |             |                    |              |          |
|-------------|-------------|--------------------|--------------|----------|
| TUCP_002069 | XLOC_084795 | ENSRNOT00000084141 | 1            | 0        |
| TUCP_002069 | XLOC_084795 | ENSRNOT00000082435 | 1            | 0        |
| TUCP_002069 | XLOC_084795 | ENSRNOT00000082928 | 0.996801059  | 2.62E-12 |
| TUCP_002069 | XLOC_084795 | ENSRNOT00000066546 | 0.956953619  | 1.08E-06 |
| TUCP_002069 | XLOC_084795 | ENSRNOT00000046013 | 0.988138626  | 1.81E-09 |
| TUCP_002069 | XLOC_084795 | ENSRNOT00000067931 | 0.978893628  | 3.18E-08 |
| TUCP_002069 | XLOC_084795 | ENSRNOT00000086425 | 0.992023315  | 2.51E-10 |
| TUCP_002069 | XLOC_084795 | ENSRNOT00000093696 | 0.956927219  | 1.09E-06 |
| TUCP_002069 | XLOC_084795 | ENSRNOT00000036228 | 0.982337157  | 1.31E-08 |
| TUCP_002069 | XLOC_084795 | ENSRNOT00000014030 | 1            | 0        |
| TUCP_002069 | XLOC_084795 | ENSRNOT00000081966 | 1            | 1.33E-79 |
| TUCP_002069 | XLOC_084795 | ENSRNOT00000075906 | 1            | 0        |
| TUCP_002069 | XLOC_084795 | ENSRNOT00000088396 | 0.981336994  | 1.73E-08 |
| TUCP_002069 | XLOC_084795 | ENSRNOT00000049259 | 0.965500259  | 3.63E-07 |
| TUCP_002069 | XLOC_084795 | ENSRNOT00000092838 | 0.982579749  | 1.23E-08 |
| TUCP_002069 | XLOC_084795 | ENSRNOT00000093442 | 0.959217317  | 8.30E-07 |
| TUCP_000273 | XLOC_008439 | ENSRNOT00000038775 | 0.951332556  | 1.98E-06 |
| TUCP_000273 | XLOC_008439 | ENSRNOT00000024580 | 0.952875945  | 1.69E-06 |
| TUCP_000273 | XLOC_008439 | ENSRNOT00000008542 | 0.958534486  | 9.00E-07 |
| TUCP_004300 | XLOC_189393 | ENSRNOT00000060121 | 0.966649501  | 3.07E-07 |
| TUCP_004300 | XLOC_189393 | ENSRNOT00000002432 | 0.973957642  | 9.03E-08 |
| TUCP_004300 | XLOC_189393 | ENSRNOT00000024030 | -0.959080905 | 8.43E-07 |
| TUCP_004300 | XLOC_189393 | ENSRNOT00000027499 | 0.959042312  | 8.47E-07 |
| TUCP_004300 | XLOC_189393 | ENSRNOT00000014924 | 0.957007419  | 1.08E-06 |
| TUCP_004300 | XLOC_189393 | ENSRNOT00000089491 | 0.95378874   | 1.54E-06 |
| TUCP_004300 | XLOC_189393 | ENSRNOT00000078128 | 0.955282903  | 1.31E-06 |
| TUCP_000277 | XLOC_008439 | ENSRNOT00000085599 | 0.991411086  | 3.63E-10 |
| TUCP_000277 | XLOC_008439 | ENSRNOT00000006689 | 0.984134547  | 7.71E-09 |
| TUCP_000277 | XLOC_008439 | ENSRNOT00000081534 | 0.975904705  | 6.14E-08 |
| TUCP_000277 | XLOC_008439 | ENSRNOT00000085301 | 0.991769816  | 2.93E-10 |
| TUCP_000277 | XLOC_008439 | ENSRNOT00000038729 | 0.991683842  | 3.09E-10 |
| TUCP_000277 | XLOC_008439 | ENSRNOT00000086385 | 0.991683842  | 3.09E-10 |
| TUCP_000277 | XLOC_008439 | ENSRNOT00000075072 | 0.951935118  | 1.86E-06 |
| TUCP_000277 | XLOC_008439 | ENSRNOT00000048446 | 0.969102937  | 2.11E-07 |
| TUCP_000277 | XLOC_008439 | ENSRNOT00000078561 | 0.972680349  | 1.14E-07 |
| TUCP_000277 | XLOC_008439 | ENSRNOT00000087613 | 0.991683842  | 3.09E-10 |
| TUCP_000277 | XLOC_008439 | ENSRNOT00000077695 | 0.960734544  | 6.88E-07 |
| TUCP_000277 | XLOC_008439 | ENSRNOT00000073350 | 0.971041862  | 1.53E-07 |
| TUCP_000277 | XLOC_008439 | ENSRNOT00000023062 | 0.991683842  | 3.09E-10 |
| TUCP_000277 | XLOC_008439 | ENSRNOT00000058834 | 0.991683842  | 3.09E-10 |
| TUCP_000277 | XLOC_008439 | ENSRNOT00000079420 | 0.991683842  | 3.09E-10 |
| TUCP_000277 | XLOC_008439 | ENSRNOT00000090761 | 0.991683842  | 3.09E-10 |
| TUCP_000277 | XLOC_008439 | ENSRNOT00000055923 | 0.991683842  | 3.09E-10 |
| TUCP_000277 | XLOC_008439 | ENSRNOT00000071930 | 0.991683842  | 3.09E-10 |
| TUCP_000277 | XLOC_008439 | ENSRNOT00000001996 | 0.956932533  | 1.09E-06 |
| TUCP_000277 | XLOC_008439 | ENSRNOT00000076756 | 0.991683842  | 3.09E-10 |
| TUCP_000277 | XLOC_008439 | ENSRNOT00000081527 | 0.994348489  | 4.50E-11 |
| TUCP_000277 | XLOC_008439 | ENSRNOT00000085067 | 0.951660684  | 1.92E-06 |
| TUCP_000277 | XLOC_008439 | ENSRNOT00000091663 | 0.985752426  | 4.51E-09 |
| TUCP_000277 | XLOC_008439 | ENSRNOT00000081780 | 0.991683842  | 3.09E-10 |
| TUCP_000277 | XLOC_008439 | ENSRNOT00000089114 | 0.991683842  | 3.09E-10 |

|             |             |                    |             |          |
|-------------|-------------|--------------------|-------------|----------|
| TUCP_000277 | XLOC_008439 | ENSRNOT00000021609 | 0.964822593 | 4.00E-07 |
| TUCP_000277 | XLOC_008439 | ENSRNOT00000073316 | 0.991683842 | 3.09E-10 |
| TUCP_000277 | XLOC_008439 | ENSRNOT00000086557 | 0.961535003 | 6.22E-07 |
| TUCP_000277 | XLOC_008439 | ENSRNOT00000071663 | 0.991683842 | 3.09E-10 |
| TUCP_000277 | XLOC_008439 | ENSRNOT00000042860 | 0.991683842 | 3.09E-10 |
| TUCP_000277 | XLOC_008439 | ENSRNOT00000072962 | 0.985573353 | 4.80E-09 |
| TUCP_000277 | XLOC_008439 | ENSRNOT00000088421 | 0.991683842 | 3.09E-10 |
| TUCP_000277 | XLOC_008439 | ENSRNOT00000038898 | 0.991683842 | 3.09E-10 |
| TUCP_000277 | XLOC_008439 | ENSRNOT00000064936 | 0.974569367 | 8.03E-08 |
| TUCP_000277 | XLOC_008439 | ENSRNOT00000042777 | 0.992871366 | 1.43E-10 |
| TUCP_000277 | XLOC_008439 | ENSRNOT00000010029 | 0.991683842 | 3.09E-10 |
| TUCP_004306 | XLOC_189958 | ENSRNOT00000024186 | 0.977759947 | 4.13E-08 |
| TUCP_004306 | XLOC_189958 | ENSRNOT00000074753 | 0.9922225   | 2.21E-10 |
| TUCP_004306 | XLOC_189958 | ENSRNOT00000004876 | 0.95215752  | 1.82E-06 |
| TUCP_004306 | XLOC_189958 | ENSRNOT00000041904 | 0.99232704  | 2.07E-10 |
| TUCP_004306 | XLOC_189958 | ENSRNOT00000083487 | 0.979462425 | 2.78E-08 |
| TUCP_004306 | XLOC_189958 | ENSRNOT00000077990 | 0.99232704  | 2.07E-10 |
| TUCP_004306 | XLOC_189958 | ENSRNOT00000038826 | 0.992222473 | 2.21E-10 |
| TUCP_004306 | XLOC_189958 | ENSRNOT00000037094 | 0.952850284 | 1.70E-06 |
| TUCP_004306 | XLOC_189958 | ENSRNOT00000046842 | 0.983186272 | 1.03E-08 |
| TUCP_004306 | XLOC_189958 | ENSRNOT00000037169 | 0.972836152 | 1.11E-07 |
| TUCP_004306 | XLOC_189958 | ENSRNOT00000021243 | 0.985182771 | 5.49E-09 |
| TUCP_004306 | XLOC_189958 | ENSRNOT00000060250 | 0.992289933 | 2.12E-10 |
| TUCP_004306 | XLOC_189958 | ENSRNOT00000091934 | 0.99232704  | 2.07E-10 |
| TUCP_004306 | XLOC_189958 | ENSRNOT00000086027 | 0.95524754  | 1.31E-06 |
| TUCP_004306 | XLOC_189958 | ENSRNOT00000046585 | 0.987678772 | 2.19E-09 |
| TUCP_004306 | XLOC_189958 | ENSRNOT00000080794 | 0.98751865  | 2.34E-09 |
| TUCP_004306 | XLOC_189958 | ENSRNOT00000014456 | 0.979160431 | 2.99E-08 |
| TUCP_004306 | XLOC_189958 | ENSRNOT00000031205 | 0.990388867 | 6.36E-10 |
| TUCP_004306 | XLOC_189958 | ENSRNOT00000044145 | 0.99232704  | 2.07E-10 |
| TUCP_004306 | XLOC_189958 | ENSRNOT00000088381 | 0.991583087 | 3.28E-10 |
| TUCP_004306 | XLOC_189958 | ENSRNOT00000011743 | 0.991299821 | 3.87E-10 |
| TUCP_004306 | XLOC_189958 | ENSRNOT00000089929 | 0.99232704  | 2.07E-10 |
| TUCP_004306 | XLOC_189958 | ENSRNOT00000088624 | 0.99232704  | 2.07E-10 |
| TUCP_004306 | XLOC_189958 | ENSRNOT00000085659 | 0.981673651 | 1.58E-08 |
| TUCP_004306 | XLOC_189958 | ENSRNOT00000015866 | 0.990582028 | 5.74E-10 |
| TUCP_004306 | XLOC_189958 | ENSRNOT00000078633 | 0.99232704  | 2.07E-10 |
| TUCP_004306 | XLOC_189958 | ENSRNOT00000024575 | 0.955800117 | 1.23E-06 |
| TUCP_004306 | XLOC_189958 | ENSRNOT00000034907 | 0.991687521 | 3.08E-10 |
| TUCP_004306 | XLOC_189958 | ENSRNOT00000093230 | 0.950699176 | 2.11E-06 |
| TUCP_004306 | XLOC_189958 | ENSRNOT00000051835 | 0.99232704  | 2.07E-10 |
| TUCP_004306 | XLOC_189958 | ENSRNOT00000009825 | 0.963809867 | 4.60E-07 |
| TUCP_004306 | XLOC_189958 | ENSRNOT00000079087 | 0.99232704  | 2.07E-10 |
| TUCP_004306 | XLOC_189958 | ENSRNOT00000037206 | 0.99232704  | 2.07E-10 |
| TUCP_004306 | XLOC_189958 | ENSRNOT00000083261 | 0.972785879 | 1.12E-07 |
| TUCP_004306 | XLOC_189958 | ENSRNOT00000080590 | 0.991832922 | 2.82E-10 |
| TUCP_004306 | XLOC_189958 | ENSRNOT00000027552 | 0.991682011 | 3.09E-10 |
| TUCP_004306 | XLOC_189958 | ENSRNOT00000077014 | 0.991522406 | 3.40E-10 |
| TUCP_004306 | XLOC_189958 | ENSRNOT00000080453 | 0.991802039 | 2.88E-10 |
| TUCP_004306 | XLOC_189958 | ENSRNOT00000066839 | 0.989181504 | 1.15E-09 |
| TUCP_004306 | XLOC_189958 | ENSRNOT00000061284 | 0.957522011 | 1.01E-06 |

|             |             |                     |              |          |
|-------------|-------------|---------------------|--------------|----------|
| TUCP_004306 | XLOC_189958 | ENSRNOT00000013423  | 0.966543016  | 3.12E-07 |
| TUCP_004306 | XLOC_189958 | ENSRNOT00000071884  | 0.96598255   | 3.39E-07 |
| TUCP_004306 | XLOC_189958 | ENSRNOT00000004128  | 0.953371753  | 1.60E-06 |
| TUCP_004306 | XLOC_189958 | ENSRNOT00000057729  | 0.990934699  | 4.75E-10 |
| TUCP_004306 | XLOC_189958 | ENSRNOT00000078663  | 0.9779271    | 3.98E-08 |
| TUCP_004306 | XLOC_189958 | ENSRNOT00000064250  | 0.976441213  | 5.49E-08 |
| TUCP_004306 | XLOC_189958 | ENSRNOT00000021608  | 0.969046708  | 2.12E-07 |
| TUCP_004306 | XLOC_189958 | ENSRNOT00000029634  | 0.986245931  | 3.79E-09 |
| TUCP_004306 | XLOC_189958 | ENSRNOT00000093579  | 0.970595081  | 1.65E-07 |
| TUCP_004306 | XLOC_189958 | ENSRNOT00000086349  | 0.952432546  | 1.77E-06 |
| TUCP_004306 | XLOC_189958 | ENSRNOT00000065460  | 0.99232704   | 2.07E-10 |
| TUCP_004306 | XLOC_189958 | ENSRNOT00000003817  | 0.988033043  | 1.89E-09 |
| TUCP_004306 | XLOC_189958 | ENSRNOT00000016713  | 0.99232704   | 2.07E-10 |
| TUCP_004306 | XLOC_189958 | ENSRNOT00000022559  | 0.959873911  | 7.66E-07 |
| TUCP_004306 | XLOC_189958 | ENSRNOT00000079260  | 0.996187496  | 6.30E-12 |
| TUCP_004306 | XLOC_189958 | ENSRNOT00000039294  | 0.99232704   | 2.07E-10 |
| TUCP_004306 | XLOC_189958 | ENSRNOT00000026932  | 0.956161211  | 1.18E-06 |
| TUCP_004306 | XLOC_189958 | ENSRNOT00000024337  | 0.961215383  | 6.48E-07 |
| TUCP_004305 | XLOC_189808 | ENSRNOT00000093187  | 0.950054223  | 2.25E-06 |
| TUCP_004304 | XLOC_189659 | ENSRNOT00000008961  | 0.963343089  | 4.90E-07 |
| TUCP_004304 | XLOC_189659 | ENSRNOT00000033984  | 0.951828087  | 1.88E-06 |
| TUCP_004304 | XLOC_189659 | ENSRNOT00000060765  | 0.961380243  | 6.34E-07 |
| TUCP_004304 | XLOC_189659 | ENSRNOT00000001570  | 0.957371724  | 1.03E-06 |
| TUCP_004304 | XLOC_189659 | ENSRNOT00000035523  | 0.956301135  | 1.17E-06 |
| TUCP_004304 | XLOC_189659 | ENSRNOT000000082611 | 0.960160029  | 7.39E-07 |
| TUCP_004304 | XLOC_189659 | ENSRNOT00000024959  | 0.954046927  | 1.49E-06 |
| TUCP_004304 | XLOC_189659 | ENSRNOT00000013053  | 0.96128065   | 6.42E-07 |
| TUCP_004304 | XLOC_189659 | ENSRNOT00000033719  | 0.960858818  | 6.77E-07 |
| TUCP_004304 | XLOC_189659 | ENSRNOT00000000640  | 0.959325152  | 8.19E-07 |
| TUCP_004304 | XLOC_189659 | ENSRNOT000000088151 | 0.954417255  | 1.44E-06 |
| TUCP_004304 | XLOC_189659 | ENSRNOT00000004637  | 0.970427596  | 1.69E-07 |
| TUCP_004304 | XLOC_189659 | ENSRNOT00000030251  | -0.959068849 | 8.45E-07 |
| TUCP_004304 | XLOC_189659 | ENSRNOT00000022724  | 0.950159021  | 2.23E-06 |
| TUCP_004304 | XLOC_189659 | ENSRNOT00000015576  | 0.967082803  | 2.88E-07 |
| TUCP_004304 | XLOC_189659 | ENSRNOT00000001853  | 0.953577798  | 1.57E-06 |
| TUCP_004304 | XLOC_189659 | ENSRNOT00000057016  | 0.9731864    | 1.04E-07 |
| TUCP_004304 | XLOC_189659 | ENSRNOT000000056174 | 0.95303029   | 1.66E-06 |
| TUCP_004304 | XLOC_189659 | ENSRNOT000000084873 | 0.953652103  | 1.56E-06 |
| TUCP_004304 | XLOC_189659 | ENSRNOT000000083943 | 0.955806959  | 1.23E-06 |
| TUCP_004304 | XLOC_189659 | ENSRNOT00000024718  | 0.96174799   | 6.05E-07 |
| TUCP_004304 | XLOC_189659 | ENSRNOT00000044452  | 0.95963421   | 7.89E-07 |
| TUCP_004304 | XLOC_189659 | ENSRNOT00000009620  | 0.960647274  | 6.96E-07 |
| TUCP_004304 | XLOC_189659 | ENSRNOT00000077935  | 0.959522606  | 7.99E-07 |
| TUCP_004304 | XLOC_189659 | ENSRNOT00000012999  | 0.957274506  | 1.04E-06 |
| TUCP_004304 | XLOC_189659 | ENSRNOT00000025564  | 0.952257525  | 1.80E-06 |
| TUCP_004304 | XLOC_189659 | ENSRNOT00000019262  | -0.966594121 | 3.10E-07 |
| TUCP_004304 | XLOC_189659 | ENSRNOT00000043434  | 0.951112834  | 2.03E-06 |
| TUCP_004304 | XLOC_189659 | ENSRNOT00000029990  | 0.954895578  | 1.36E-06 |
| TUCP_004304 | XLOC_189659 | ENSRNOT00000092211  | 0.952731071  | 1.72E-06 |
| TUCP_004304 | XLOC_189659 | ENSRNOT00000022648  | 0.959871329  | 7.66E-07 |
| TUCP_004304 | XLOC_189659 | ENSRNOT00000032719  | 0.972098167  | 1.27E-07 |

|             |             |                     |              |          |
|-------------|-------------|---------------------|--------------|----------|
| TUCP_004304 | XLOC_189659 | ENSRNOT00000084021  | 0.97020451   | 1.76E-07 |
| TUCP_004304 | XLOC_189659 | ENSRNOT00000073547  | 0.964057783  | 4.45E-07 |
| TUCP_004304 | XLOC_189659 | ENSRNOT00000016449  | 0.960518242  | 7.07E-07 |
| TUCP_004304 | XLOC_189659 | ENSRNOT00000027949  | 0.964438381  | 4.22E-07 |
| TUCP_004304 | XLOC_189659 | ENSRNOT00000056995  | 0.950496109  | 2.15E-06 |
| TUCP_004304 | XLOC_189659 | ENSRNOT00000080935  | 0.950405493  | 2.17E-06 |
| TUCP_004304 | XLOC_189659 | ENSRNOT00000044983  | 0.959470123  | 8.05E-07 |
| TUCP_004304 | XLOC_189659 | ENSRNOT00000024464  | 0.958533943  | 9.00E-07 |
| TUCP_004304 | XLOC_189659 | ENSRNOT00000000448  | 0.957351544  | 1.03E-06 |
| TUCP_004304 | XLOC_189659 | ENSRNOT000000031951 | 0.955926324  | 1.22E-06 |
| TUCP_004304 | XLOC_189659 | ENSRNOT00000010264  | 0.96873143   | 2.23E-07 |
| TUCP_004304 | XLOC_189659 | ENSRNOT00000090654  | 0.96081824   | 6.81E-07 |
| TUCP_004654 | XLOC_204889 | ENSRNOT00000026966  | 0.970322306  | 1.73E-07 |
| TUCP_004654 | XLOC_204889 | ENSRNOT00000068416  | 0.999999782  | 3.88E-33 |
| TUCP_004654 | XLOC_204889 | ENSRNOT00000086036  | 0.999958274  | 9.96E-22 |
| TUCP_004654 | XLOC_204889 | ENSRNOT00000026803  | 0.985046075  | 5.74E-09 |
| TUCP_004654 | XLOC_204889 | ENSRNOT00000047527  | 0.963071698  | 5.08E-07 |
| TUCP_004654 | XLOC_204889 | ENSRNOT00000042251  | 0.999344295  | 9.53E-16 |
| TUCP_004654 | XLOC_204889 | ENSRNOT00000002984  | 0.998397069  | 8.31E-14 |
| TUCP_004654 | XLOC_204889 | ENSRNOT00000083764  | 0.999541808  | 1.59E-16 |
| TUCP_004654 | XLOC_204889 | ENSRNOT00000076802  | 0.962695843  | 5.34E-07 |
| TUCP_004654 | XLOC_204889 | ENSRNOT00000092365  | 0.999161651  | 3.26E-15 |
| TUCP_004654 | XLOC_204889 | ENSRNOT00000079275  | 0.999901911  | 7.15E-20 |
| TUCP_004654 | XLOC_204889 | ENSRNOT00000066062  | -0.959706712 | 7.82E-07 |
| TUCP_004654 | XLOC_204889 | ENSRNOT00000045301  | 1            | 4.25E-78 |
| TUCP_004654 | XLOC_204889 | ENSRNOT00000041186  | 0.999975782  | 6.56E-23 |
| TUCP_004654 | XLOC_204889 | ENSRNOT00000010092  | 0.977711778  | 4.17E-08 |
| TUCP_004654 | XLOC_204889 | ENSRNOT00000076182  | 1            | 0        |
| TUCP_004654 | XLOC_204889 | ENSRNOT00000087404  | 0.951157664  | 2.02E-06 |
| TUCP_004654 | XLOC_204889 | ENSRNOT00000052003  | 0.95837331   | 9.18E-07 |
| TUCP_004654 | XLOC_204889 | ENSRNOT00000081709  | 0.998485154  | 6.27E-14 |
| TUCP_004654 | XLOC_204889 | ENSRNOT0000005726   | 0.959610119  | 7.91E-07 |
| TUCP_004654 | XLOC_204889 | ENSRNOT00000014103  | 1            | 4.25E-78 |
| TUCP_004654 | XLOC_204889 | ENSRNOT00000057433  | 0.964930601  | 3.94E-07 |
| TUCP_004654 | XLOC_204889 | ENSRNOT00000082289  | 0.998931566  | 1.09E-14 |
| TUCP_004654 | XLOC_204889 | ENSRNOT00000092516  | 0.957459323  | 1.02E-06 |
| TUCP_004654 | XLOC_204889 | ENSRNOT00000008898  | 0.990039768  | 7.59E-10 |
| TUCP_004654 | XLOC_204889 | ENSRNOT00000083493  | 0.995461232  | 1.51E-11 |
| TUCP_004654 | XLOC_204889 | ENSRNOT00000092563  | 0.987201084  | 2.65E-09 |
| TUCP_004654 | XLOC_204889 | ENSRNOT00000088893  | 1            | 0        |
| TUCP_004654 | XLOC_204889 | ENSRNOT00000076693  | 0.955029582  | 1.34E-06 |
| TUCP_004654 | XLOC_204889 | ENSRNOT00000081014  | 1            | 0        |
| TUCP_004654 | XLOC_204889 | ENSRNOT00000067543  | 1            | 0        |
| TUCP_004654 | XLOC_204889 | ENSRNOT00000050968  | 0.996816433  | 2.56E-12 |
| TUCP_004654 | XLOC_204889 | ENSRNOT00000042201  | 0.960235595  | 7.32E-07 |
| TUCP_004654 | XLOC_204889 | ENSRNOT00000004373  | 0.957315473  | 1.04E-06 |
| TUCP_004654 | XLOC_204889 | ENSRNOT00000063929  | 1            | 0        |
| TUCP_004654 | XLOC_204889 | ENSRNOT00000057472  | 1            | 0        |
| TUCP_004654 | XLOC_204889 | ENSRNOT00000041617  | 0.952449765  | 1.77E-06 |
| TUCP_004654 | XLOC_204889 | ENSRNOT00000091763  | 0.986310385  | 3.70E-09 |
| TUCP_004654 | XLOC_204889 | ENSRNOT00000022200  | 0.998491303  | 6.14E-14 |



|             |             |                    |              |          |
|-------------|-------------|--------------------|--------------|----------|
| TUCP_004654 | XLOC_204889 | ENSRNOT00000067379 | 0.997260967  | 1.21E-12 |
| TUCP_004654 | XLOC_204889 | ENSRNOT00000020786 | 0.976428448  | 5.51E-08 |
| TUCP_004654 | XLOC_204889 | ENSRNOT00000050543 | 0.999722223  | 1.30E-17 |
| TUCP_004654 | XLOC_204889 | ENSRNOT00000089306 | 0.999866649  | 3.32E-19 |
| TUCP_004654 | XLOC_204889 | ENSRNOT00000052367 | 0.997268394  | 1.19E-12 |
| TUCP_004654 | XLOC_204889 | ENSRNOT00000090658 | 1            | 0        |
| TUCP_004654 | XLOC_204889 | ENSRNOT00000022571 | 0.995290013  | 1.81E-11 |
| TUCP_004654 | XLOC_204889 | ENSRNOT00000044520 | 0.981817158  | 1.52E-08 |
| TUCP_004654 | XLOC_204889 | ENSRNOT00000065448 | 0.963648868  | 4.70E-07 |
| TUCP_004308 | XLOC_189982 | ENSRNOT00000083624 | 0.958953427  | 8.56E-07 |
| TUCP_004651 | XLOC_204676 | ENSRNOT00000074753 | 0.95749426   | 1.02E-06 |
| TUCP_004651 | XLOC_204676 | ENSRNOT00000041904 | 0.965058635  | 3.87E-07 |
| TUCP_004651 | XLOC_204676 | ENSRNOT00000080193 | -0.953148292 | 1.64E-06 |
| TUCP_004651 | XLOC_204676 | ENSRNOT00000081798 | 0.983015564  | 1.08E-08 |
| TUCP_004651 | XLOC_204676 | ENSRNOT00000077990 | 0.965058635  | 3.87E-07 |
| TUCP_004651 | XLOC_204676 | ENSRNOT00000038826 | 0.966991906  | 2.92E-07 |
| TUCP_004651 | XLOC_204676 | ENSRNOT00000081020 | 0.974962288  | 7.43E-08 |
| TUCP_004651 | XLOC_204676 | ENSRNOT00000077014 | 0.956539676  | 1.13E-06 |
| TUCP_004651 | XLOC_204676 | ENSRNOT00000060250 | 0.964693415  | 4.07E-07 |
| TUCP_004651 | XLOC_204676 | ENSRNOT00000091934 | 0.965058635  | 3.87E-07 |
| TUCP_004651 | XLOC_204676 | ENSRNOT00000080794 | 0.951911616  | 1.87E-06 |
| TUCP_004651 | XLOC_204676 | ENSRNOT00000014456 | 0.990742251  | 5.27E-10 |
| TUCP_004651 | XLOC_204676 | ENSRNOT00000031205 | 0.951900864  | 1.87E-06 |
| TUCP_004651 | XLOC_204676 | ENSRNOT00000079260 | 0.963968008  | 4.50E-07 |
| TUCP_004651 | XLOC_204676 | ENSRNOT00000044145 | 0.965058635  | 3.87E-07 |
| TUCP_004651 | XLOC_204676 | ENSRNOT00000088381 | 0.950582239  | 2.14E-06 |
| TUCP_004651 | XLOC_204676 | ENSRNOT00000057729 | 0.96354488   | 4.77E-07 |
| TUCP_004651 | XLOC_204676 | ENSRNOT00000089929 | 0.965058635  | 3.87E-07 |
| TUCP_004651 | XLOC_204676 | ENSRNOT00000088624 | 0.965058635  | 3.87E-07 |
| TUCP_004651 | XLOC_204676 | ENSRNOT00000085659 | 0.951606652  | 1.93E-06 |
| TUCP_004651 | XLOC_204676 | ENSRNOT00000015866 | 0.963119507  | 5.05E-07 |
| TUCP_004651 | XLOC_204676 | ENSRNOT00000034907 | 0.969159538  | 2.09E-07 |
| TUCP_004651 | XLOC_204676 | ENSRNOT00000051835 | 0.965058635  | 3.87E-07 |
| TUCP_004651 | XLOC_204676 | ENSRNOT00000079087 | 0.965058635  | 3.87E-07 |
| TUCP_004651 | XLOC_204676 | ENSRNOT00000037206 | 0.965058635  | 3.87E-07 |
| TUCP_004651 | XLOC_204676 | ENSRNOT00000015353 | 0.961497941  | 6.25E-07 |
| TUCP_004651 | XLOC_204676 | ENSRNOT00000080590 | 0.964561692  | 4.15E-07 |
| TUCP_004651 | XLOC_204676 | ENSRNOT00000027552 | 0.965345431  | 3.71E-07 |
| TUCP_004651 | XLOC_204676 | ENSRNOT00000047694 | 0.972014187  | 1.29E-07 |
| TUCP_004651 | XLOC_204676 | ENSRNOT00000018923 | 0.964056434  | 4.45E-07 |
| TUCP_004651 | XLOC_204676 | ENSRNOT00000080453 | 0.964401568  | 4.24E-07 |
| TUCP_004651 | XLOC_204676 | ENSRNOT00000066839 | 0.971949137  | 1.30E-07 |
| TUCP_004651 | XLOC_204676 | ENSRNOT00000078633 | 0.965058635  | 3.87E-07 |
| TUCP_004651 | XLOC_204676 | ENSRNOT00000004128 | 0.951235379  | 2.00E-06 |
| TUCP_004651 | XLOC_204676 | ENSRNOT00000026316 | 0.968228994  | 2.42E-07 |
| TUCP_004651 | XLOC_204676 | ENSRNOT00000008763 | 0.954574893  | 1.41E-06 |
| TUCP_004651 | XLOC_204676 | ENSRNOT00000029634 | 0.957805146  | 9.81E-07 |
| TUCP_004651 | XLOC_204676 | ENSRNOT00000065460 | 0.965058635  | 3.87E-07 |
| TUCP_004651 | XLOC_204676 | ENSRNOT00000003817 | 0.968995632  | 2.14E-07 |
| TUCP_004651 | XLOC_204676 | ENSRNOT00000016713 | 0.965058635  | 3.87E-07 |
| TUCP_004651 | XLOC_204676 | ENSRNOT00000041074 | 0.996787729  | 2.68E-12 |

|             |             |                    |              |          |
|-------------|-------------|--------------------|--------------|----------|
| TUCP_004651 | XLOC_204676 | ENSRNOT00000039294 | 0.965058635  | 3.87E-07 |
| TUCP_004651 | XLOC_204676 | ENSRNOT00000092913 | 0.968427404  | 2.34E-07 |
| TUCP_004650 | XLOC_204608 | ENSRNOT00000000008 | 1            | 0        |
| TUCP_004650 | XLOC_204608 | ENSRNOT00000060048 | 0.998711457  | 2.79E-14 |
| TUCP_004650 | XLOC_204608 | ENSRNOT00000082304 | 0.996875989  | 2.33E-12 |
| TUCP_004650 | XLOC_204608 | ENSRNOT00000006219 | 1            | 0        |
| TUCP_004650 | XLOC_204608 | ENSRNOT00000065376 | 1            | 0        |
| TUCP_004650 | XLOC_204608 | ENSRNOT00000081433 | 0.984469223  | 6.93E-09 |
| TUCP_004650 | XLOC_204608 | ENSRNOT00000083575 | 1            | 0        |
| TUCP_004650 | XLOC_204608 | ENSRNOT00000087739 | 1            | 0        |
| TUCP_004650 | XLOC_204608 | ENSRNOT00000079826 | 1            | 0        |
| TUCP_004650 | XLOC_204608 | ENSRNOT00000025770 | 0.993828251  | 6.98E-11 |
| TUCP_004650 | XLOC_204608 | ENSRNOT00000088244 | 0.973479481  | 9.88E-08 |
| TUCP_004650 | XLOC_204608 | ENSRNOT00000048523 | 1            | 0        |
| TUCP_004650 | XLOC_204608 | ENSRNOT00000079365 | 0.958936699  | 8.58E-07 |
| TUCP_004650 | XLOC_204608 | ENSRNOT00000020229 | 0.960002785  | 7.54E-07 |
| TUCP_004650 | XLOC_204608 | ENSRNOT00000026428 | 0.996986683  | 1.95E-12 |
| TUCP_004650 | XLOC_204608 | ENSRNOT00000085673 | 1            | 1.33E-79 |
| TUCP_004650 | XLOC_204608 | ENSRNOT00000072972 | 0.981476166  | 1.67E-08 |
| TUCP_004650 | XLOC_204608 | ENSRNOT00000050573 | 1            | 0        |
| TUCP_004650 | XLOC_204608 | ENSRNOT00000089876 | -0.953630353 | 1.56E-06 |
| TUCP_004650 | XLOC_204608 | ENSRNOT00000074378 | 0.998901807  | 1.26E-14 |
| TUCP_004650 | XLOC_204608 | ENSRNOT00000093571 | 1            | 0        |
| TUCP_004650 | XLOC_204608 | ENSRNOT00000090581 | 1            | 1.33E-79 |
| TUCP_004650 | XLOC_204608 | ENSRNOT00000076239 | 0.98020752   | 2.31E-08 |
| TUCP_004650 | XLOC_204608 | ENSRNOT00000065485 | 1            | 0        |
| TUCP_004650 | XLOC_204608 | ENSRNOT0000006356  | 0.999544279  | 1.55E-16 |
| TUCP_004650 | XLOC_204608 | ENSRNOT00000087199 | 0.974421555  | 8.26E-08 |
| TUCP_004650 | XLOC_204608 | ENSRNOT00000022091 | 1            | 0        |
| TUCP_004650 | XLOC_204608 | ENSRNOT00000064764 | 0.98460888   | 6.63E-09 |
| TUCP_004650 | XLOC_204608 | ENSRNOT00000076927 | 0.971163156  | 1.50E-07 |
| TUCP_004650 | XLOC_204608 | ENSRNOT00000092395 | 0.999522978  | 1.94E-16 |
| TUCP_004653 | XLOC_204745 | ENSRNOT00000024580 | 0.956855653  | 1.09E-06 |
| TUCP_000552 | XLOC_019575 | ENSRNOT00000008961 | 0.957945117  | 9.65E-07 |
| TUCP_000552 | XLOC_019575 | ENSRNOT00000045937 | 0.979001993  | 3.10E-08 |
| TUCP_000552 | XLOC_019575 | ENSRNOT00000026677 | 0.957067337  | 1.07E-06 |
| TUCP_000552 | XLOC_019575 | ENSRNOT00000001196 | 0.964196784  | 4.36E-07 |
| TUCP_000552 | XLOC_019575 | ENSRNOT00000035523 | 0.969163775  | 2.08E-07 |
| TUCP_000552 | XLOC_019575 | ENSRNOT00000082611 | 0.955792181  | 1.23E-06 |
| TUCP_000552 | XLOC_019575 | ENSRNOT00000024959 | 0.987053995  | 2.80E-09 |
| TUCP_000552 | XLOC_019575 | ENSRNOT00000033719 | 0.952082719  | 1.84E-06 |
| TUCP_000552 | XLOC_019575 | ENSRNOT00000018931 | -0.954637162 | 1.40E-06 |
| TUCP_000552 | XLOC_019575 | ENSRNOT00000022633 | 0.970281132  | 1.74E-07 |
| TUCP_000552 | XLOC_019575 | ENSRNOT00000029620 | 0.972240573  | 1.24E-07 |
| TUCP_000552 | XLOC_019575 | ENSRNOT00000086541 | 0.968551412  | 2.30E-07 |
| TUCP_000552 | XLOC_019575 | ENSRNOT00000029819 | 0.958615648  | 8.92E-07 |
| TUCP_000552 | XLOC_019575 | ENSRNOT00000058626 | 0.983556276  | 9.21E-09 |
| TUCP_000552 | XLOC_019575 | ENSRNOT00000019501 | 0.959523834  | 7.99E-07 |
| TUCP_000552 | XLOC_019575 | ENSRNOT00000016768 | 0.956086386  | 1.19E-06 |
| TUCP_000552 | XLOC_019575 | ENSRNOT00000008365 | 0.963065548  | 5.09E-07 |
| TUCP_000552 | XLOC_019575 | ENSRNOT00000000448 | 0.951580404  | 1.93E-06 |

|             |             |                    |              |          |
|-------------|-------------|--------------------|--------------|----------|
| TUCP_000552 | XLOC_019575 | ENSRNOT00000068683 | 0.974629305  | 7.93E-08 |
| TUCP_000552 | XLOC_019575 | ENSRNOT00000010252 | 0.967822758  | 2.57E-07 |
| TUCP_000552 | XLOC_019575 | ENSRNOT00000013043 | 0.957601182  | 1.00E-06 |
| TUCP_000552 | XLOC_019575 | ENSRNOT00000034603 | 0.96682763   | 2.99E-07 |
| TUCP_000552 | XLOC_019575 | ENSRNOT00000015986 | 0.953878722  | 1.52E-06 |
| TUCP_000552 | XLOC_019575 | ENSRNOT00000015320 | 0.967332106  | 2.77E-07 |
| TUCP_000552 | XLOC_019575 | ENSRNOT00000051349 | 0.970865426  | 1.57E-07 |
| TUCP_000552 | XLOC_019575 | ENSRNOT00000089309 | 0.978759733  | 3.29E-08 |
| TUCP_000552 | XLOC_019575 | ENSRNOT00000009313 | 0.97666582   | 5.24E-08 |
| TUCP_000552 | XLOC_019575 | ENSRNOT00000027949 | 0.958717415  | 8.81E-07 |
| TUCP_000552 | XLOC_019575 | ENSRNOT00000017375 | 0.951536883  | 1.94E-06 |
| TUCP_000552 | XLOC_019575 | ENSRNOT00000009319 | 0.976650296  | 5.26E-08 |
| TUCP_000552 | XLOC_019575 | ENSRNOT00000042865 | -0.9632903   | 4.94E-07 |
| TUCP_000552 | XLOC_019575 | ENSRNOT00000029635 | 0.965619619  | 3.57E-07 |
| TUCP_000552 | XLOC_019575 | ENSRNOT00000082116 | 0.954597397  | 1.41E-06 |
| TUCP_000552 | XLOC_019575 | ENSRNOT00000014684 | 0.968287567  | 2.39E-07 |
| TUCP_000552 | XLOC_019575 | ENSRNOT00000001570 | 0.951655124  | 1.92E-06 |
| TUCP_000552 | XLOC_019575 | ENSRNOT00000081530 | -0.963999588 | 4.48E-07 |
| TUCP_000552 | XLOC_019575 | ENSRNOT00000031667 | 0.964441908  | 4.22E-07 |
| TUCP_000552 | XLOC_019575 | ENSRNOT00000046888 | 0.977591241  | 4.29E-08 |
| TUCP_000552 | XLOC_019575 | ENSRNOT00000006111 | 0.973996013  | 8.96E-08 |
| TUCP_000552 | XLOC_019575 | ENSRNOT00000015576 | 0.968118712  | 2.46E-07 |
| TUCP_000552 | XLOC_019575 | ENSRNOT00000037339 | 0.987189387  | 2.66E-09 |
| TUCP_000552 | XLOC_019575 | ENSRNOT00000055062 | 0.969304656  | 2.04E-07 |
| TUCP_000552 | XLOC_019575 | ENSRNOT00000047634 | 0.959377658  | 8.14E-07 |
| TUCP_000552 | XLOC_019575 | ENSRNOT00000054897 | -0.972183476 | 1.25E-07 |
| TUCP_000552 | XLOC_019575 | ENSRNOT00000030975 | 0.95964102   | 7.88E-07 |
| TUCP_000552 | XLOC_019575 | ENSRNOT00000025197 | 0.976100859  | 5.90E-08 |
| TUCP_000552 | XLOC_019575 | ENSRNOT00000012646 | 0.955736922  | 1.24E-06 |
| TUCP_000552 | XLOC_019575 | ENSRNOT00000055194 | -0.960612773 | 6.99E-07 |
| TUCP_000552 | XLOC_019575 | ENSRNOT00000033984 | 0.963759792  | 4.63E-07 |
| TUCP_000552 | XLOC_019575 | ENSRNOT00000024418 | 0.955885984  | 1.22E-06 |
| TUCP_000552 | XLOC_019575 | ENSRNOT00000021550 | 0.971428182  | 1.43E-07 |
| TUCP_000552 | XLOC_019575 | ENSRNOT00000074517 | 0.955532006  | 1.27E-06 |
| TUCP_000552 | XLOC_019575 | ENSRNOT00000066888 | 0.954034857  | 1.50E-06 |
| TUCP_000552 | XLOC_019575 | ENSRNOT00000077530 | -0.958928428 | 8.59E-07 |
| TUCP_000552 | XLOC_019575 | ENSRNOT00000007889 | 0.957260649  | 1.05E-06 |
| TUCP_000552 | XLOC_019575 | ENSRNOT00000002530 | -0.960275941 | 7.29E-07 |
| TUCP_000552 | XLOC_019575 | ENSRNOT00000021400 | 0.957475383  | 1.02E-06 |
| TUCP_000552 | XLOC_019575 | ENSRNOT00000061973 | 0.972870935  | 1.11E-07 |
| TUCP_000552 | XLOC_019575 | ENSRNOT00000016730 | 0.953312354  | 1.61E-06 |
| TUCP_000552 | XLOC_019575 | ENSRNOT00000023856 | 0.98006902   | 2.40E-08 |
| TUCP_000552 | XLOC_019575 | ENSRNOT00000010264 | 0.978991558  | 3.11E-08 |
| TUCP_000552 | XLOC_019575 | ENSRNOT00000014824 | 0.972457116  | 1.19E-07 |
| TUCP_000552 | XLOC_019575 | ENSRNOT00000065103 | 0.953983949  | 1.50E-06 |
| TUCP_000552 | XLOC_019575 | ENSRNOT00000024992 | 0.966993813  | 2.92E-07 |
| TUCP_000552 | XLOC_019575 | ENSRNOT00000082427 | 0.975465472  | 6.72E-08 |
| TUCP_000552 | XLOC_019575 | ENSRNOT00000004363 | 0.964487151  | 4.19E-07 |
| TUCP_000552 | XLOC_019575 | ENSRNOT00000030251 | -0.958965296 | 8.55E-07 |
| TUCP_000552 | XLOC_019575 | ENSRNOT00000023100 | 0.960247194  | 7.31E-07 |
| TUCP_000552 | XLOC_019575 | ENSRNOT00000057016 | 0.964010652  | 4.48E-07 |

|             |             |                    |              |          |
|-------------|-------------|--------------------|--------------|----------|
| TUCP_000552 | XLOC_019575 | ENSRNOT00000024286 | 0.965025414  | 3.89E-07 |
| TUCP_000552 | XLOC_019575 | ENSRNOT00000037397 | 0.955940873  | 1.21E-06 |
| TUCP_000552 | XLOC_019575 | ENSRNOT00000089457 | 0.951104498  | 2.03E-06 |
| TUCP_000552 | XLOC_019575 | ENSRNOT00000055888 | 0.952702668  | 1.72E-06 |
| TUCP_000552 | XLOC_019575 | ENSRNOT00000039215 | 0.962980213  | 5.15E-07 |
| TUCP_000552 | XLOC_019575 | ENSRNOT00000089513 | -0.964760223 | 4.03E-07 |
| TUCP_000552 | XLOC_019575 | ENSRNOT00000055148 | 0.954987449  | 1.35E-06 |
| TUCP_000552 | XLOC_019575 | ENSRNOT00000044975 | 0.971049838  | 1.53E-07 |
| TUCP_000552 | XLOC_019575 | ENSRNOT00000018782 | 0.975424498  | 6.77E-08 |
| TUCP_000552 | XLOC_019575 | ENSRNOT00000011907 | 0.959902946  | 7.63E-07 |
| TUCP_000552 | XLOC_019575 | ENSRNOT00000015131 | 0.96211982   | 5.76E-07 |
| TUCP_000552 | XLOC_019575 | ENSRNOT00000014158 | 0.959793371  | 7.73E-07 |
| TUCP_000552 | XLOC_019575 | ENSRNOT00000044788 | 0.959651911  | 7.87E-07 |
| TUCP_000552 | XLOC_019575 | ENSRNOT00000084021 | 0.976549301  | 5.37E-08 |
| TUCP_000552 | XLOC_019575 | ENSRNOT00000003567 | 0.984248375  | 7.44E-09 |
| TUCP_000552 | XLOC_019575 | ENSRNOT00000088201 | 0.963604422  | 4.73E-07 |
| TUCP_000552 | XLOC_019575 | ENSRNOT00000071133 | 0.988127001  | 1.82E-09 |
| TUCP_000552 | XLOC_019575 | ENSRNOT00000015525 | 0.958289516  | 9.27E-07 |
| TUCP_000552 | XLOC_019575 | ENSRNOT00000092857 | 0.972125777  | 1.26E-07 |
| TUCP_000552 | XLOC_019575 | ENSRNOT00000018061 | 0.980969394  | 1.90E-08 |
| TUCP_000552 | XLOC_019575 | ENSRNOT00000031951 | 0.978897891  | 3.18E-08 |
| TUCP_000552 | XLOC_019575 | ENSRNOT00000036972 | 0.961719984  | 6.07E-07 |
| TUCP_000552 | XLOC_019575 | ENSRNOT00000044983 | 0.97476685   | 7.72E-08 |
| TUCP_000552 | XLOC_019575 | ENSRNOT00000015618 | 0.953312023  | 1.62E-06 |
| TUCP_000552 | XLOC_019575 | ENSRNOT00000019644 | 0.954768915  | 1.38E-06 |
| TUCP_000552 | XLOC_019575 | ENSRNOT00000044467 | 0.978352993  | 3.61E-08 |
| TUCP_000552 | XLOC_019575 | ENSRNOT00000006376 | 0.961649579  | 6.13E-07 |
| TUCP_000552 | XLOC_019575 | ENSRNOT00000032333 | 0.963626634  | 4.72E-07 |
| TUCP_000552 | XLOC_019575 | ENSRNOT00000011509 | 0.95225055   | 1.80E-06 |
| TUCP_000552 | XLOC_019575 | ENSRNOT00000029443 | 0.976274267  | 5.69E-08 |
| TUCP_000552 | XLOC_019575 | ENSRNOT00000073239 | 0.952048277  | 1.84E-06 |
| TUCP_000552 | XLOC_019575 | ENSRNOT00000010620 | 0.967723565  | 2.61E-07 |
| TUCP_000552 | XLOC_019575 | ENSRNOT00000005085 | 0.956804834  | 1.10E-06 |
| TUCP_000552 | XLOC_019575 | ENSRNOT00000019768 | -0.966286112 | 3.24E-07 |
| TUCP_000552 | XLOC_019575 | ENSRNOT00000003745 | 0.955728064  | 1.24E-06 |
| TUCP_000552 | XLOC_019575 | ENSRNOT00000037181 | 0.992160942  | 2.30E-10 |
| TUCP_000552 | XLOC_019575 | ENSRNOT00000073547 | 0.96027594   | 7.29E-07 |
| TUCP_000552 | XLOC_019575 | ENSRNOT00000024464 | 0.964040219  | 4.46E-07 |
| TUCP_000552 | XLOC_019575 | ENSRNOT0000001446  | -0.954623198 | 1.40E-06 |
| TUCP_000552 | XLOC_019575 | ENSRNOT00000012996 | -0.952974519 | 1.67E-06 |
| TUCP_000552 | XLOC_019575 | ENSRNOT00000018511 | 0.962720525  | 5.33E-07 |
| TUCP_000552 | XLOC_019575 | ENSRNOT00000003343 | 0.951727802  | 1.90E-06 |
| TUCP_000552 | XLOC_019575 | ENSRNOT00000051363 | 0.955549552  | 1.27E-06 |
| TUCP_000552 | XLOC_019575 | ENSRNOT00000022648 | 0.977360886  | 4.51E-08 |
| TUCP_000552 | XLOC_019575 | ENSRNOT00000086390 | 0.958427453  | 9.12E-07 |
| TUCP_000552 | XLOC_019575 | ENSRNOT00000015763 | 0.956685129  | 1.12E-06 |
| TUCP_000552 | XLOC_019575 | ENSRNOT00000023252 | 0.965662066  | 3.55E-07 |
| TUCP_000552 | XLOC_019575 | ENSRNOT00000000637 | 0.951210921  | 2.01E-06 |
| TUCP_000552 | XLOC_019575 | ENSRNOT00000009260 | 0.959565261  | 7.95E-07 |
| TUCP_000552 | XLOC_019575 | ENSRNOT00000013989 | 0.967333809  | 2.77E-07 |
| TUCP_000552 | XLOC_019575 | ENSRNOT00000015387 | 0.973662853  | 9.55E-08 |

|             |             |                    |             |          |
|-------------|-------------|--------------------|-------------|----------|
| TUCP_000552 | XLOC_019575 | ENSRNOT00000025252 | 0.953346559 | 1.61E-06 |
| TUCP_000552 | XLOC_019575 | ENSRNOT00000043736 | 0.950198939 | 2.22E-06 |
| TUCP_000552 | XLOC_019575 | ENSRNOT00000029510 | -0.95178983 | 1.89E-06 |
| TUCP_000552 | XLOC_019575 | ENSRNOT00000083814 | 0.962840692 | 5.24E-07 |
| TUCP_000552 | XLOC_019575 | ENSRNOT00000032719 | 0.975476253 | 6.70E-08 |
| TUCP_001577 | XLOC_060986 | ENSRNOT00000084075 | 0.961692827 | 6.09E-07 |
| TUCP_001577 | XLOC_060986 | ENSRNOT00000012196 | 0.953053538 | 1.66E-06 |
| TUCP_001577 | XLOC_060986 | ENSRNOT00000074465 | 0.953053538 | 1.66E-06 |
| TUCP_001577 | XLOC_060986 | ENSRNOT00000079805 | 0.950088088 | 2.24E-06 |
| TUCP_001577 | XLOC_060986 | ENSRNOT00000040912 | 0.953053538 | 1.66E-06 |
| TUCP_001577 | XLOC_060986 | ENSRNOT00000072648 | 0.953053538 | 1.66E-06 |
| TUCP_001577 | XLOC_060986 | ENSRNOT00000007398 | 0.966750172 | 3.03E-07 |
| TUCP_001577 | XLOC_060986 | ENSRNOT00000070803 | 0.953053538 | 1.66E-06 |
| TUCP_001577 | XLOC_060986 | ENSRNOT00000083542 | 0.965106007 | 3.84E-07 |
| TUCP_001577 | XLOC_060986 | ENSRNOT00000085772 | 0.953053538 | 1.66E-06 |
| TUCP_001577 | XLOC_060986 | ENSRNOT00000015270 | 0.953053538 | 1.66E-06 |
| TUCP_001577 | XLOC_060986 | ENSRNOT00000046192 | 0.953053538 | 1.66E-06 |
| TUCP_001577 | XLOC_060986 | ENSRNOT00000044226 | 0.953053538 | 1.66E-06 |
| TUCP_001577 | XLOC_060986 | ENSRNOT00000086374 | 0.953048467 | 1.66E-06 |
| TUCP_001577 | XLOC_060986 | ENSRNOT00000080291 | 0.961334272 | 6.38E-07 |
| TUCP_001577 | XLOC_060986 | ENSRNOT00000001464 | 0.953053538 | 1.66E-06 |
| TUCP_001577 | XLOC_060986 | ENSRNOT00000090716 | 0.9580122   | 9.58E-07 |
| TUCP_001577 | XLOC_060986 | ENSRNOT00000057873 | 0.953053538 | 1.66E-06 |
| TUCP_001577 | XLOC_060986 | ENSRNOT00000076044 | 0.953053538 | 1.66E-06 |
| TUCP_001577 | XLOC_060986 | ENSRNOT00000074353 | 0.953053538 | 1.66E-06 |
| TUCP_001577 | XLOC_060986 | ENSRNOT00000087122 | 0.972104966 | 1.27E-07 |
| TUCP_001577 | XLOC_060986 | ENSRNOT00000093284 | 0.954003985 | 1.50E-06 |
| TUCP_001577 | XLOC_060986 | ENSRNOT00000088399 | 0.952986736 | 1.67E-06 |
| TUCP_001577 | XLOC_060986 | ENSRNOT00000086248 | 0.953053538 | 1.66E-06 |
| TUCP_001577 | XLOC_060986 | ENSRNOT00000089750 | 0.953009847 | 1.67E-06 |
| TUCP_001577 | XLOC_060986 | ENSRNOT00000034772 | 0.964520934 | 4.17E-07 |
| TUCP_001577 | XLOC_060986 | ENSRNOT00000026473 | 0.952772119 | 1.71E-06 |
| TUCP_001577 | XLOC_060986 | ENSRNOT00000002834 | 0.953053538 | 1.66E-06 |
| TUCP_001577 | XLOC_060986 | ENSRNOT00000082076 | 0.9568133   | 1.10E-06 |
| TUCP_001577 | XLOC_060986 | ENSRNOT00000092755 | 0.953053538 | 1.66E-06 |
| TUCP_001577 | XLOC_060986 | ENSRNOT00000031683 | 0.953053538 | 1.66E-06 |
| TUCP_001577 | XLOC_060986 | ENSRNOT00000087764 | 0.965500315 | 3.63E-07 |
| TUCP_003263 | XLOC_139890 | ENSRNOT00000000008 | 0.998230963 | 1.36E-13 |
| TUCP_003263 | XLOC_139890 | ENSRNOT00000060048 | 0.996473948 | 4.27E-12 |
| TUCP_003263 | XLOC_139890 | ENSRNOT00000082304 | 0.994335851 | 4.55E-11 |
| TUCP_003263 | XLOC_139890 | ENSRNOT00000006219 | 0.998230963 | 1.36E-13 |
| TUCP_003263 | XLOC_139890 | ENSRNOT00000065376 | 0.998230963 | 1.36E-13 |
| TUCP_003263 | XLOC_139890 | ENSRNOT00000081433 | 0.981001427 | 1.89E-08 |
| TUCP_003263 | XLOC_139890 | ENSRNOT00000083575 | 0.998230963 | 1.36E-13 |
| TUCP_003263 | XLOC_139890 | ENSRNOT00000087739 | 0.998230963 | 1.36E-13 |
| TUCP_003263 | XLOC_139890 | ENSRNOT00000079826 | 0.998230963 | 1.36E-13 |
| TUCP_003263 | XLOC_139890 | ENSRNOT00000025770 | 0.991570234 | 3.31E-10 |
| TUCP_003263 | XLOC_139890 | ENSRNOT00000088244 | 0.971773345 | 1.35E-07 |
| TUCP_003263 | XLOC_139890 | ENSRNOT00000048523 | 0.998230963 | 1.36E-13 |
| TUCP_003263 | XLOC_139890 | ENSRNOT00000079365 | 0.95332447  | 1.61E-06 |
| TUCP_003263 | XLOC_139890 | ENSRNOT00000020229 | 0.961474907 | 6.26E-07 |

|             |             |                    |              |          |
|-------------|-------------|--------------------|--------------|----------|
| TUCP_003263 | XLOC_139890 | ENSRNOT00000026428 | 0.995587558  | 1.31E-11 |
| TUCP_003263 | XLOC_139890 | ENSRNOT00000085673 | 0.998230963  | 1.36E-13 |
| TUCP_003263 | XLOC_139890 | ENSRNOT00000072972 | 0.978254091  | 3.69E-08 |
| TUCP_003263 | XLOC_139890 | ENSRNOT00000050573 | 0.998230963  | 1.36E-13 |
| TUCP_003263 | XLOC_139890 | ENSRNOT00000089876 | -0.957580217 | 1.01E-06 |
| TUCP_003263 | XLOC_139890 | ENSRNOT00000074378 | 0.996217293  | 6.06E-12 |
| TUCP_003263 | XLOC_139890 | ENSRNOT00000093571 | 0.998230963  | 1.36E-13 |
| TUCP_003263 | XLOC_139890 | ENSRNOT00000090581 | 0.998230963  | 1.36E-13 |
| TUCP_003263 | XLOC_139890 | ENSRNOT00000076239 | 0.97853916   | 3.46E-08 |
| TUCP_003263 | XLOC_139890 | ENSRNOT00000065485 | 0.998230963  | 1.36E-13 |
| TUCP_003263 | XLOC_139890 | ENSRNOT0000006356  | 0.999210482  | 2.41E-15 |
| TUCP_003263 | XLOC_139890 | ENSRNOT00000087199 | 0.972586583  | 1.16E-07 |
| TUCP_003263 | XLOC_139890 | ENSRNOT00000022091 | 0.998230963  | 1.36E-13 |
| TUCP_003263 | XLOC_139890 | ENSRNOT00000064764 | 0.979879302  | 2.51E-08 |
| TUCP_003263 | XLOC_139890 | ENSRNOT00000076927 | 0.964593403  | 4.13E-07 |
| TUCP_003263 | XLOC_139890 | ENSRNOT00000092395 | 0.997912664  | 3.11E-13 |
| TUCP_000498 | XLOC_017168 | ENSRNOT00000088016 | 0.963108604  | 5.06E-07 |
| TUCP_000556 | XLOC_019871 | ENSRNOT00000040509 | 0.953160341  | 1.64E-06 |
| TUCP_000556 | XLOC_019871 | ENSRNOT00000072939 | 0.956327621  | 1.16E-06 |
| TUCP_000556 | XLOC_019871 | ENSRNOT00000010601 | 0.950527279  | 2.15E-06 |
| TUCP_000556 | XLOC_019871 | ENSRNOT00000015889 | 0.967764146  | 2.60E-07 |
| TUCP_000556 | XLOC_019871 | ENSRNOT00000073792 | 0.975103329  | 7.23E-08 |
| TUCP_000556 | XLOC_019871 | ENSRNOT00000074042 | 0.952628271  | 1.73E-06 |
| TUCP_001711 | XLOC_069797 | ENSRNOT00000000383 | -0.964694844 | 4.07E-07 |
| TUCP_001711 | XLOC_069797 | ENSRNOT00000001893 | 0.961842787  | 5.97E-07 |
| TUCP_001711 | XLOC_069797 | ENSRNOT00000080577 | 0.954252955  | 1.46E-06 |
| TUCP_000063 | XLOC_001304 | ENSRNOT00000070864 | 0.978706772  | 3.33E-08 |
| TUCP_000063 | XLOC_001304 | ENSRNOT00000020220 | 0.955784055  | 1.24E-06 |
| TUCP_002205 | XLOC_092067 | ENSRNOT00000054932 | 0.956419763  | 1.15E-06 |
| TUCP_002205 | XLOC_092067 | ENSRNOT00000075869 | 0.95568325   | 1.25E-06 |
| TUCP_002205 | XLOC_092067 | ENSRNOT00000002574 | -0.955370177 | 1.29E-06 |
| TUCP_003217 | XLOC_138409 | ENSRNOT00000011263 | 0.962277011  | 5.65E-07 |
| TUCP_003217 | XLOC_138409 | ENSRNOT00000016167 | -0.957455907 | 1.02E-06 |
| TUCP_003217 | XLOC_138409 | ENSRNOT00000007523 | 0.951065779  | 2.03E-06 |
| TUCP_003217 | XLOC_138409 | ENSRNOT00000089070 | -0.952922957 | 1.68E-06 |
| TUCP_003217 | XLOC_138409 | ENSRNOT00000013868 | 0.957255952  | 1.05E-06 |
| TUCP_003217 | XLOC_138409 | ENSRNOT00000067455 | 0.961077325  | 6.59E-07 |
| TUCP_003217 | XLOC_138409 | ENSRNOT00000091470 | 0.984338334  | 7.23E-09 |
| TUCP_003217 | XLOC_138409 | ENSRNOT00000080340 | 0.965777121  | 3.49E-07 |
| TUCP_003217 | XLOC_138409 | ENSRNOT00000021981 | -0.973107687 | 1.06E-07 |
| TUCP_002201 | XLOC_091835 | ENSRNOT00000072077 | -0.953577229 | 1.57E-06 |
| TUCP_002201 | XLOC_091835 | ENSRNOT00000017561 | -0.950123019 | 2.24E-06 |
| TUCP_002202 | XLOC_091835 | ENSRNOT00000071840 | 1            | 1.33E-79 |
| TUCP_002202 | XLOC_091835 | ENSRNOT00000083608 | 0.992618428  | 1.70E-10 |
| TUCP_002202 | XLOC_091835 | ENSRNOT00000076035 | 0.956476518  | 1.14E-06 |
| TUCP_002202 | XLOC_091835 | ENSRNOT00000085476 | 0.96207118   | 5.80E-07 |
| TUCP_002202 | XLOC_091835 | ENSRNOT00000066382 | 0.96329105   | 4.94E-07 |
| TUCP_002202 | XLOC_091835 | ENSRNOT00000045584 | 1            | 4.25E-78 |
| TUCP_002202 | XLOC_091835 | ENSRNOT00000077995 | 0.994428404  | 4.19E-11 |
| TUCP_002202 | XLOC_091835 | ENSRNOT00000066004 | 0.999857217  | 4.67E-19 |
| TUCP_002202 | XLOC_091835 | ENSRNOT00000064284 | 0.968782027  | 2.22E-07 |

|             |             |                    |             |          |
|-------------|-------------|--------------------|-------------|----------|
| TUCP_002202 | XLOC_091835 | ENSRNOT00000068197 | 0.955470548 | 1.28E-06 |
| TUCP_002202 | XLOC_091835 | ENSRNOT00000082086 | 0.97275676  | 1.13E-07 |
| TUCP_002202 | XLOC_091835 | ENSRNOT00000089494 | 0.983505294 | 9.35E-09 |
| TUCP_002202 | XLOC_091835 | ENSRNOT00000083747 | 0.957764469 | 9.86E-07 |
| TUCP_002202 | XLOC_091835 | ENSRNOT00000092182 | 1           | 0        |
| TUCP_002202 | XLOC_091835 | ENSRNOT00000084461 | 1           | 0        |
| TUCP_002202 | XLOC_091835 | ENSRNOT00000060448 | 1           | 0        |
| TUCP_002202 | XLOC_091835 | ENSRNOT00000032631 | 1           | 1.33E-79 |
| TUCP_002202 | XLOC_091835 | ENSRNOT00000079503 | 0.957317866 | 1.04E-06 |
| TUCP_002202 | XLOC_091835 | ENSRNOT00000027950 | 0.960989928 | 6.66E-07 |
| TUCP_002202 | XLOC_091835 | ENSRNOT00000060113 | 0.975275164 | 6.98E-08 |
| TUCP_002202 | XLOC_091835 | ENSRNOT00000054910 | 0.990580154 | 5.75E-10 |
| TUCP_002202 | XLOC_091835 | ENSRNOT00000057176 | 0.999998955 | 9.83E-30 |
| TUCP_002202 | XLOC_091835 | ENSRNOT00000078176 | 0.994350784 | 4.49E-11 |
| TUCP_002202 | XLOC_091835 | ENSRNOT00000056364 | 0.990647125 | 5.55E-10 |
| TUCP_002202 | XLOC_091835 | ENSRNOT00000093431 | 1           | 0        |
| TUCP_002202 | XLOC_091835 | ENSRNOT00000024758 | 0.981367686 | 1.71E-08 |
| TUCP_002202 | XLOC_091835 | ENSRNOT00000092901 | 1           | 0        |
| TUCP_002202 | XLOC_091835 | ENSRNOT00000089290 | 0.999988082 | 1.89E-24 |
| TUCP_002202 | XLOC_091835 | ENSRNOT00000090211 | 0.998865151 | 1.48E-14 |
| TUCP_002202 | XLOC_091835 | ENSRNOT00000075244 | 0.962646865 | 5.38E-07 |
| TUCP_002202 | XLOC_091835 | ENSRNOT00000091828 | 0.996371069 | 4.93E-12 |
| TUCP_002202 | XLOC_091835 | ENSRNOT00000091944 | 0.999786107 | 3.52E-18 |
| TUCP_002202 | XLOC_091835 | ENSRNOT00000070855 | 1           | 1.33E-79 |
| TUCP_002202 | XLOC_091835 | ENSRNOT0000009295  | 0.995887068 | 9.21E-12 |
| TUCP_002202 | XLOC_091835 | ENSRNOT00000084109 | 0.999673655 | 2.91E-17 |
| TUCP_002202 | XLOC_091835 | ENSRNOT00000060645 | 0.973934385 | 9.07E-08 |
| TUCP_002202 | XLOC_091835 | ENSRNOT00000041569 | 1           | 0        |
| TUCP_002202 | XLOC_091835 | ENSRNOT00000087091 | 1           | 1.33E-79 |
| TUCP_002202 | XLOC_091835 | ENSRNOT00000003308 | 0.990930758 | 4.76E-10 |
| TUCP_002202 | XLOC_091835 | ENSRNOT00000026113 | 0.999851454 | 5.69E-19 |
| TUCP_002202 | XLOC_091835 | ENSRNOT00000014939 | 0.999846854 | 6.63E-19 |
| TUCP_002202 | XLOC_091835 | ENSRNOT00000058314 | 0.99088442  | 4.88E-10 |
| TUCP_002202 | XLOC_091835 | ENSRNOT00000047870 | 0.981575908 | 1.62E-08 |
| TUCP_002202 | XLOC_091835 | ENSRNOT00000071603 | 0.999995875 | 9.40E-27 |
| TUCP_002202 | XLOC_091835 | ENSRNOT00000088376 | 0.970305372 | 1.73E-07 |
| TUCP_002202 | XLOC_091835 | ENSRNOT00000060454 | 1           | 0        |
| TUCP_002202 | XLOC_091835 | ENSRNOT00000029298 | 0.957304374 | 1.04E-06 |
| TUCP_002202 | XLOC_091835 | ENSRNOT00000044232 | 0.98372207  | 8.76E-09 |
| TUCP_002202 | XLOC_091835 | ENSRNOT00000023287 | 0.974929583 | 7.48E-08 |
| TUCP_002202 | XLOC_091835 | ENSRNOT00000071714 | 0.978813661 | 3.24E-08 |
| TUCP_002202 | XLOC_091835 | ENSRNOT00000075836 | 1           | 1.33E-79 |
| TUCP_002202 | XLOC_091835 | ENSRNOT00000073229 | 1           | 0        |
| TUCP_002202 | XLOC_091835 | ENSRNOT00000077731 | 0.965942857 | 3.41E-07 |
| TUCP_002202 | XLOC_091835 | ENSRNOT00000046980 | 0.982667176 | 1.20E-08 |
| TUCP_002202 | XLOC_091835 | ENSRNOT00000039652 | 0.972574547 | 1.17E-07 |
| TUCP_002202 | XLOC_091835 | ENSRNOT00000066685 | 0.981130123 | 1.83E-08 |
| TUCP_002202 | XLOC_091835 | ENSRNOT00000082776 | 0.966379954 | 3.20E-07 |
| TUCP_002202 | XLOC_091835 | ENSRNOT00000088719 | 0.965171519 | 3.81E-07 |
| TUCP_002202 | XLOC_091835 | ENSRNOT0000007683  | 0.999755897 | 6.82E-18 |
| TUCP_002202 | XLOC_091835 | ENSRNOT00000092916 | 0.96606874  | 3.35E-07 |

|             |             |                    |              |          |
|-------------|-------------|--------------------|--------------|----------|
| TUCP_002202 | XLOC_091835 | ENSRNOT00000081106 | 0.95354262   | 1.58E-06 |
| TUCP_002050 | XLOC_083635 | ENSRNOT00000007698 | 0.962878584  | 5.22E-07 |
| TUCP_002050 | XLOC_083635 | ENSRNOT00000084766 | -0.964944009 | 3.93E-07 |
| TUCP_002050 | XLOC_083635 | ENSRNOT00000020357 | -0.958269161 | 9.29E-07 |
| TUCP_002050 | XLOC_083635 | ENSRNOT00000075397 | -0.965173711 | 3.81E-07 |
| TUCP_002050 | XLOC_083635 | ENSRNOT00000038652 | 0.957804371  | 9.81E-07 |
| TUCP_002050 | XLOC_083635 | ENSRNOT00000015678 | 0.952661968  | 1.73E-06 |
| TUCP_002050 | XLOC_083635 | ENSRNOT00000013116 | 0.952595632  | 1.74E-06 |
| TUCP_002050 | XLOC_083635 | ENSRNOT00000086813 | 0.958846778  | 8.67E-07 |
| TUCP_002050 | XLOC_083635 | ENSRNOT00000009565 | 0.950332569  | 2.19E-06 |
| TUCP_002050 | XLOC_083635 | ENSRNOT00000082863 | -0.953624809 | 1.56E-06 |
| TUCP_002050 | XLOC_083635 | ENSRNOT00000032439 | 0.957089273  | 1.07E-06 |
| TUCP_002050 | XLOC_083635 | ENSRNOT00000076916 | -0.951095293 | 2.03E-06 |
| TUCP_002050 | XLOC_083635 | ENSRNOT00000004017 | -0.961524327 | 6.22E-07 |
| TUCP_002050 | XLOC_083635 | ENSRNOT00000086310 | 0.950835367  | 2.08E-06 |
| TUCP_002050 | XLOC_083635 | ENSRNOT00000017571 | 0.959383932  | 8.13E-07 |
| TUCP_002050 | XLOC_083635 | ENSRNOT00000021110 | 0.950349197  | 2.19E-06 |
| TUCP_002050 | XLOC_083635 | ENSRNOT00000014384 | 0.953580043  | 1.57E-06 |
| TUCP_002050 | XLOC_083635 | ENSRNOT00000093552 | 0.95417867   | 1.47E-06 |
| TUCP_002050 | XLOC_083635 | ENSRNOT00000029332 | 0.950792859  | 2.09E-06 |
| TUCP_002050 | XLOC_083635 | ENSRNOT00000089943 | 0.955685851  | 1.25E-06 |
| TUCP_002050 | XLOC_083635 | ENSRNOT00000031672 | 0.963514583  | 4.79E-07 |
| TUCP_002050 | XLOC_083635 | ENSRNOT00000013516 | -0.963712173 | 4.66E-07 |
| TUCP_002050 | XLOC_083635 | ENSRNOT00000017147 | -0.951728357 | 1.90E-06 |
| TUCP_002050 | XLOC_083635 | ENSRNOT00000021621 | 0.958789422  | 8.73E-07 |
| TUCP_002050 | XLOC_083635 | ENSRNOT00000020207 | -0.958447465 | 9.10E-07 |
| TUCP_002050 | XLOC_083635 | ENSRNOT00000023037 | -0.952922868 | 1.68E-06 |
| TUCP_002050 | XLOC_083635 | ENSRNOT00000039177 | 0.955877485  | 1.22E-06 |
| TUCP_002050 | XLOC_083635 | ENSRNOT00000018237 | 0.954436798  | 1.43E-06 |
| TUCP_002050 | XLOC_083635 | ENSRNOT00000024677 | -0.952573462 | 1.74E-06 |
| TUCP_002050 | XLOC_083635 | ENSRNOT00000019192 | 0.953360451  | 1.61E-06 |
| TUCP_002050 | XLOC_083635 | ENSRNOT00000046807 | 0.97430156   | 8.45E-08 |
| TUCP_002050 | XLOC_083635 | ENSRNOT00000087287 | -0.951771826 | 1.89E-06 |
| TUCP_002050 | XLOC_083635 | ENSRNOT00000047126 | 0.95229176   | 1.80E-06 |
| TUCP_002050 | XLOC_083635 | ENSRNOT00000000577 | -0.96115423  | 6.53E-07 |
| TUCP_002050 | XLOC_083635 | ENSRNOT00000011948 | 0.955776771  | 1.24E-06 |
| TUCP_002050 | XLOC_083635 | ENSRNOT00000018488 | 0.961248735  | 6.45E-07 |
| TUCP_002050 | XLOC_083635 | ENSRNOT00000077231 | -0.954841995 | 1.37E-06 |
| TUCP_002050 | XLOC_083635 | ENSRNOT00000005686 | 0.950054881  | 2.25E-06 |
| TUCP_002050 | XLOC_083635 | ENSRNOT00000072762 | 0.967620067  | 2.65E-07 |
| TUCP_002050 | XLOC_083635 | ENSRNOT00000014605 | 0.952759133  | 1.71E-06 |
| TUCP_002050 | XLOC_083635 | ENSRNOT00000073860 | 0.952413526  | 1.77E-06 |
| TUCP_002050 | XLOC_083635 | ENSRNOT00000011832 | 0.963704084  | 4.67E-07 |
| TUCP_002050 | XLOC_083635 | ENSRNOT00000073643 | 0.951835545  | 1.88E-06 |
| TUCP_002050 | XLOC_083635 | ENSRNOT00000006835 | -0.958084321 | 9.50E-07 |
| TUCP_002050 | XLOC_083635 | ENSRNOT00000001979 | 0.960017254  | 7.52E-07 |
| TUCP_002050 | XLOC_083635 | ENSRNOT00000044346 | 0.951343712  | 1.98E-06 |
| TUCP_002050 | XLOC_083635 | ENSRNOT00000083968 | 0.9716104    | 1.38E-07 |
| TUCP_002050 | XLOC_083635 | ENSRNOT00000084709 | -0.958703293 | 8.82E-07 |
| TUCP_002050 | XLOC_083635 | ENSRNOT00000083967 | -0.958194183 | 9.37E-07 |
| TUCP_002050 | XLOC_083635 | ENSRNOT00000066793 | 0.952401779  | 1.78E-06 |



|             |             |                    |              |          |
|-------------|-------------|--------------------|--------------|----------|
| TUCP_002050 | XLOC_083635 | ENSRNOT00000026525 | 0.96043058   | 7.15E-07 |
| TUCP_002050 | XLOC_083635 | ENSRNOT00000081688 | 0.955987889  | 1.21E-06 |
| TUCP_002050 | XLOC_083635 | ENSRNOT00000072299 | -0.955987042 | 1.21E-06 |
| TUCP_002050 | XLOC_083635 | ENSRNOT00000018122 | -0.970618848 | 1.64E-07 |
| TUCP_002050 | XLOC_083635 | ENSRNOT00000072118 | -0.961832911 | 5.98E-07 |
| TUCP_002050 | XLOC_083635 | ENSRNOT00000022190 | 0.960999386  | 6.66E-07 |
| TUCP_002050 | XLOC_083635 | ENSRNOT00000067739 | 0.965596064  | 3.58E-07 |
| TUCP_002050 | XLOC_083635 | ENSRNOT00000013067 | 0.958343072  | 9.21E-07 |
| TUCP_002050 | XLOC_083635 | ENSRNOT00000075843 | 0.957082947  | 1.07E-06 |
| TUCP_002050 | XLOC_083635 | ENSRNOT00000076230 | -0.950231037 | 2.21E-06 |
| TUCP_002050 | XLOC_083635 | ENSRNOT00000027145 | 0.961753549  | 6.04E-07 |
| TUCP_002050 | XLOC_083635 | ENSRNOT00000020537 | 0.955204962  | 1.32E-06 |
| TUCP_002050 | XLOC_083635 | ENSRNOT00000002313 | 0.959217963  | 8.30E-07 |
| TUCP_002050 | XLOC_083635 | ENSRNOT00000007738 | 0.955380108  | 1.29E-06 |
| TUCP_002050 | XLOC_083635 | ENSRNOT00000086260 | 0.969187958  | 2.08E-07 |
| TUCP_002050 | XLOC_083635 | ENSRNOT00000068381 | -0.951875528 | 1.87E-06 |
| TUCP_002050 | XLOC_083635 | ENSRNOT00000008253 | 0.955179698  | 1.32E-06 |
| TUCP_002050 | XLOC_083635 | ENSRNOT00000064588 | -0.964696838 | 4.07E-07 |
| TUCP_002050 | XLOC_083635 | ENSRNOT00000034411 | -0.954834797 | 1.37E-06 |
| TUCP_002050 | XLOC_083635 | ENSRNOT00000071482 | 0.952748976  | 1.71E-06 |
| TUCP_002050 | XLOC_083635 | ENSRNOT00000034883 | 0.966116623  | 3.32E-07 |
| TUCP_002050 | XLOC_083635 | ENSRNOT00000072357 | 0.956712445  | 1.11E-06 |
| TUCP_002050 | XLOC_083635 | ENSRNOT00000026531 | 0.953983066  | 1.50E-06 |
| TUCP_002050 | XLOC_083635 | ENSRNOT00000090853 | 0.952365505  | 1.78E-06 |
| TUCP_002050 | XLOC_083635 | ENSRNOT00000081077 | 0.967942095  | 2.53E-07 |
| TUCP_002050 | XLOC_083635 | ENSRNOT00000011880 | -0.95996587  | 7.57E-07 |
| TUCP_002050 | XLOC_083635 | ENSRNOT00000021717 | -0.9505745   | 2.14E-06 |
| TUCP_002050 | XLOC_083635 | ENSRNOT0000003992  | 0.955752306  | 1.24E-06 |
| TUCP_002050 | XLOC_083635 | ENSRNOT00000049423 | 0.957101562  | 1.06E-06 |
| TUCP_002050 | XLOC_083635 | ENSRNOT00000031261 | -0.967131993 | 2.86E-07 |
| TUCP_002050 | XLOC_083635 | ENSRNOT00000081725 | -0.95808253  | 9.50E-07 |
| TUCP_002050 | XLOC_083635 | ENSRNOT00000089980 | 0.975643879  | 6.48E-08 |
| TUCP_002050 | XLOC_083635 | ENSRNOT00000026988 | 0.954748767  | 1.38E-06 |
| TUCP_002050 | XLOC_083635 | ENSRNOT00000025222 | 0.954055746  | 1.49E-06 |
| TUCP_002050 | XLOC_083635 | ENSRNOT0000008256  | 0.967294326  | 2.79E-07 |
| TUCP_002050 | XLOC_083635 | ENSRNOT00000055607 | 0.959159172  | 8.35E-07 |
| TUCP_002050 | XLOC_083635 | ENSRNOT00000008074 | 0.952813425  | 1.70E-06 |
| TUCP_002050 | XLOC_083635 | ENSRNOT00000011277 | -0.955644995 | 1.25E-06 |
| TUCP_002050 | XLOC_083635 | ENSRNOT00000025434 | -0.952376565 | 1.78E-06 |
| TUCP_002050 | XLOC_083635 | ENSRNOT00000023876 | -0.964722552 | 4.06E-07 |
| TUCP_002050 | XLOC_083635 | ENSRNOT00000018477 | 0.963805914  | 4.60E-07 |
| TUCP_002050 | XLOC_083635 | ENSRNOT00000028888 | -0.967715746 | 2.62E-07 |
| TUCP_002050 | XLOC_083635 | ENSRNOT00000081110 | 0.9648292    | 4.00E-07 |
| TUCP_002050 | XLOC_083635 | ENSRNOT00000049285 | 0.96470556   | 4.07E-07 |
| TUCP_002050 | XLOC_083635 | ENSRNOT00000037955 | 0.977561615  | 4.31E-08 |
| TUCP_002050 | XLOC_083635 | ENSRNOT00000077146 | 0.955952031  | 1.21E-06 |
| TUCP_002050 | XLOC_083635 | ENSRNOT00000086456 | 0.953359211  | 1.61E-06 |
| TUCP_002050 | XLOC_083635 | ENSRNOT00000023977 | 0.96092931   | 6.71E-07 |
| TUCP_002050 | XLOC_083635 | ENSRNOT00000067741 | 0.951415565  | 1.96E-06 |
| TUCP_002050 | XLOC_083635 | ENSRNOT00000083256 | -0.950876028 | 2.07E-06 |
| TUCP_002050 | XLOC_083635 | ENSRNOT00000010852 | -0.953280021 | 1.62E-06 |

|             |             |                    |              |          |
|-------------|-------------|--------------------|--------------|----------|
| TUCP_002050 | XLOC_083635 | ENSRNOT00000025794 | 0.956082563  | 1.20E-06 |
| TUCP_002050 | XLOC_083635 | ENSRNOT00000058111 | 0.958881808  | 8.64E-07 |
| TUCP_002050 | XLOC_083635 | ENSRNOT00000019487 | -0.958269001 | 9.29E-07 |
| TUCP_002050 | XLOC_083635 | ENSRNOT00000016637 | 0.954035191  | 1.50E-06 |
| TUCP_002050 | XLOC_083635 | ENSRNOT00000009994 | 0.963762412  | 4.63E-07 |
| TUCP_002050 | XLOC_083635 | ENSRNOT00000005405 | -0.951120066 | 2.02E-06 |
| TUCP_002050 | XLOC_083635 | ENSRNOT00000024841 | 0.952869484  | 1.69E-06 |
| TUCP_002050 | XLOC_083635 | ENSRNOT00000012924 | 0.969871603  | 1.86E-07 |
| TUCP_002050 | XLOC_083635 | ENSRNOT00000075270 | 0.954758563  | 1.38E-06 |
| TUCP_002050 | XLOC_083635 | ENSRNOT00000072856 | 0.96542754   | 3.67E-07 |
| TUCP_002050 | XLOC_083635 | ENSRNOT00000080677 | 0.951174144  | 2.01E-06 |
| TUCP_002050 | XLOC_083635 | ENSRNOT00000025460 | -0.955783651 | 1.24E-06 |
| TUCP_002050 | XLOC_083635 | ENSRNOT00000005143 | -0.957845527 | 9.77E-07 |
| TUCP_002050 | XLOC_083635 | ENSRNOT00000016568 | -0.954378801 | 1.44E-06 |
| TUCP_002050 | XLOC_083635 | ENSRNOT00000025913 | 0.957384901  | 1.03E-06 |
| TUCP_002050 | XLOC_083635 | ENSRNOT00000015318 | 0.95572662   | 1.24E-06 |
| TUCP_002050 | XLOC_083635 | ENSRNOT00000028907 | -0.959065123 | 8.45E-07 |
| TUCP_002050 | XLOC_083635 | ENSRNOT00000037809 | 0.973310387  | 1.02E-07 |
| TUCP_002050 | XLOC_083635 | ENSRNOT00000073135 | -0.961977346 | 5.87E-07 |
| TUCP_002050 | XLOC_083635 | ENSRNOT00000089086 | 0.957979539  | 9.61E-07 |
| TUCP_002050 | XLOC_083635 | ENSRNOT00000079414 | 0.962730821  | 5.32E-07 |
| TUCP_002050 | XLOC_083635 | ENSRNOT00000024011 | -0.959303811 | 8.21E-07 |
| TUCP_002050 | XLOC_083635 | ENSRNOT00000016677 | 0.958713153  | 8.81E-07 |
| TUCP_002050 | XLOC_083635 | ENSRNOT00000092876 | 0.971202579  | 1.49E-07 |
| TUCP_002050 | XLOC_083635 | ENSRNOT00000091448 | 0.956102592  | 1.19E-06 |
| TUCP_001845 | XLOC_075992 | ENSRNOT00000029340 | 0.961488452  | 6.25E-07 |
| TUCP_001845 | XLOC_075992 | ENSRNOT00000038646 | 0.961087618  | 6.58E-07 |
| TUCP_001845 | XLOC_075992 | ENSRNOT00000092579 | 0.961087618  | 6.58E-07 |
| TUCP_001845 | XLOC_075992 | ENSRNOT00000061516 | 0.966070319  | 3.35E-07 |
| TUCP_001845 | XLOC_075992 | ENSRNOT00000076528 | 0.972568274  | 1.17E-07 |
| TUCP_001845 | XLOC_075992 | ENSRNOT00000077458 | 0.965518936  | 3.62E-07 |
| TUCP_001845 | XLOC_075992 | ENSRNOT00000083034 | 0.956537491  | 1.14E-06 |
| TUCP_001845 | XLOC_075992 | ENSRNOT00000089607 | 0.971545358  | 1.40E-07 |
| TUCP_001845 | XLOC_075992 | ENSRNOT00000054939 | 0.950397693  | 2.18E-06 |
| TUCP_001845 | XLOC_075992 | ENSRNOT00000021748 | 0.961087618  | 6.58E-07 |
| TUCP_001845 | XLOC_075992 | ENSRNOT00000078137 | 0.961087618  | 6.58E-07 |
| TUCP_001845 | XLOC_075992 | ENSRNOT00000092740 | 0.961087618  | 6.58E-07 |
| TUCP_001845 | XLOC_075992 | ENSRNOT00000000117 | 0.965824341  | 3.47E-07 |
| TUCP_001845 | XLOC_075992 | ENSRNOT00000084776 | 0.953470661  | 1.59E-06 |
| TUCP_001845 | XLOC_075992 | ENSRNOT00000070958 | 0.961087618  | 6.58E-07 |
| TUCP_001845 | XLOC_075992 | ENSRNOT00000027268 | 0.961087618  | 6.58E-07 |
| TUCP_001845 | XLOC_075992 | ENSRNOT00000004459 | 0.961087618  | 6.58E-07 |
| TUCP_001845 | XLOC_075992 | ENSRNOT00000089235 | 0.956504426  | 1.14E-06 |
| TUCP_001845 | XLOC_075992 | ENSRNOT00000088168 | 0.961087618  | 6.58E-07 |
| TUCP_001845 | XLOC_075992 | ENSRNOT00000088148 | 0.961087618  | 6.58E-07 |
| TUCP_001845 | XLOC_075992 | ENSRNOT00000088527 | 0.961087618  | 6.58E-07 |
| TUCP_001845 | XLOC_075992 | ENSRNOT00000078701 | 0.961087618  | 6.58E-07 |
| TUCP_001845 | XLOC_075992 | ENSRNOT00000090078 | 0.961087618  | 6.58E-07 |
| TUCP_001845 | XLOC_075992 | ENSRNOT00000089085 | 0.961087618  | 6.58E-07 |
| TUCP_001845 | XLOC_075992 | ENSRNOT00000008153 | 0.963542387  | 4.77E-07 |
| TUCP_001845 | XLOC_075992 | ENSRNOT00000085896 | 0.974308792  | 8.44E-08 |

|             |             |                    |              |          |
|-------------|-------------|--------------------|--------------|----------|
| TUCP_001845 | XLOC_075992 | ENSRNOT00000009776 | 0.961087618  | 6.58E-07 |
| TUCP_001516 | XLOC_058505 | ENSRNOT00000025981 | 0.967651357  | 2.64E-07 |
| TUCP_001516 | XLOC_058505 | ENSRNOT00000016209 | 0.953739011  | 1.54E-06 |
| TUCP_001516 | XLOC_058505 | ENSRNOT00000026543 | 0.95435472   | 1.45E-06 |
| TUCP_001516 | XLOC_058505 | ENSRNOT00000083215 | 0.9502596    | 2.21E-06 |
| TUCP_001516 | XLOC_058505 | ENSRNOT00000000743 | 0.967972443  | 2.52E-07 |
| TUCP_001516 | XLOC_058505 | ENSRNOT00000081246 | 0.964763135  | 4.03E-07 |
| TUCP_001516 | XLOC_058505 | ENSRNOT00000010898 | 0.950735408  | 2.10E-06 |
| TUCP_001516 | XLOC_058505 | ENSRNOT00000012895 | 0.955286138  | 1.31E-06 |
| TUCP_001516 | XLOC_058505 | ENSRNOT00000058072 | 0.962374674  | 5.57E-07 |
| TUCP_001516 | XLOC_058505 | ENSRNOT00000003991 | 0.965487572  | 3.64E-07 |
| TUCP_001516 | XLOC_058505 | ENSRNOT00000067181 | 0.967294736  | 2.79E-07 |
| TUCP_001516 | XLOC_058505 | ENSRNOT00000076669 | 0.9579173    | 9.68E-07 |
| TUCP_001516 | XLOC_058505 | ENSRNOT00000076729 | 0.958927845  | 8.59E-07 |
| TUCP_001516 | XLOC_058505 | ENSRNOT00000058312 | 0.95516905   | 1.32E-06 |
| TUCP_001516 | XLOC_058505 | ENSRNOT00000082699 | 0.957663967  | 9.97E-07 |
| TUCP_001516 | XLOC_058505 | ENSRNOT00000031230 | 0.954554302  | 1.41E-06 |
| TUCP_001516 | XLOC_058505 | ENSRNOT00000082869 | 0.952877949  | 1.69E-06 |
| TUCP_001572 | XLOC_060822 | ENSRNOT00000084133 | 1            | 0        |
| TUCP_001572 | XLOC_060822 | ENSRNOT00000093745 | 0.981891039  | 1.49E-08 |
| TUCP_001572 | XLOC_060822 | ENSRNOT00000065542 | 0.99828699   | 1.16E-13 |
| TUCP_001572 | XLOC_060822 | ENSRNOT00000082464 | 1            | 0        |
| TUCP_001572 | XLOC_060822 | ENSRNOT00000087659 | 1            | 0        |
| TUCP_001572 | XLOC_060822 | ENSRNOT00000084582 | 0.976633579  | 5.28E-08 |
| TUCP_001572 | XLOC_060822 | ENSRNOT00000085078 | 1            | 0        |
| TUCP_001572 | XLOC_060822 | ENSRNOT00000014028 | 1            | 0        |
| TUCP_001572 | XLOC_060822 | ENSRNOT00000049363 | 1            | 1.33E-79 |
| TUCP_001572 | XLOC_060822 | ENSRNOT00000065473 | 0.999949098  | 2.69E-21 |
| TUCP_001572 | XLOC_060822 | ENSRNOT00000000142 | 0.998996155  | 8.01E-15 |
| TUCP_001572 | XLOC_060822 | ENSRNOT00000082288 | 0.999998398  | 8.30E-29 |
| TUCP_001572 | XLOC_060822 | ENSRNOT00000039664 | 1            | 0        |
| TUCP_001572 | XLOC_060822 | ENSRNOT00000065402 | 1            | 0        |
| TUCP_001572 | XLOC_060822 | ENSRNOT00000064551 | 0.965365872  | 3.70E-07 |
| TUCP_001572 | XLOC_060822 | ENSRNOT00000084141 | 1            | 4.25E-78 |
| TUCP_001572 | XLOC_060822 | ENSRNOT00000082435 | 1            | 0        |
| TUCP_001572 | XLOC_060822 | ENSRNOT00000082928 | 0.996801059  | 2.62E-12 |
| TUCP_001572 | XLOC_060822 | ENSRNOT00000066546 | 0.956953619  | 1.08E-06 |
| TUCP_001572 | XLOC_060822 | ENSRNOT00000046013 | 0.988138626  | 1.81E-09 |
| TUCP_001572 | XLOC_060822 | ENSRNOT00000067931 | 0.978893628  | 3.18E-08 |
| TUCP_001572 | XLOC_060822 | ENSRNOT00000086425 | 0.992023315  | 2.51E-10 |
| TUCP_001572 | XLOC_060822 | ENSRNOT00000093696 | 0.956927219  | 1.09E-06 |
| TUCP_001572 | XLOC_060822 | ENSRNOT00000036228 | 0.982337157  | 1.31E-08 |
| TUCP_001572 | XLOC_060822 | ENSRNOT00000014030 | 1            | 0        |
| TUCP_001572 | XLOC_060822 | ENSRNOT00000081966 | 1            | 0        |
| TUCP_001572 | XLOC_060822 | ENSRNOT00000075906 | 1            | 1.33E-79 |
| TUCP_001572 | XLOC_060822 | ENSRNOT00000088396 | 0.981336994  | 1.73E-08 |
| TUCP_001572 | XLOC_060822 | ENSRNOT00000049259 | 0.965500259  | 3.63E-07 |
| TUCP_001572 | XLOC_060822 | ENSRNOT00000092838 | 0.982579749  | 1.23E-08 |
| TUCP_001572 | XLOC_060822 | ENSRNOT00000093442 | 0.959217317  | 8.30E-07 |
| TUCP_004497 | XLOC_197751 | ENSRNOT00000015969 | 0.951103549  | 2.03E-06 |
| TUCP_001018 | XLOC_038541 | ENSRNOT00000012837 | -0.956461438 | 1.15E-06 |

|             |             |                     |              |          |
|-------------|-------------|---------------------|--------------|----------|
| TUCP_001018 | XLOC_038541 | ENSRNOT00000081995  | -0.955973344 | 1.21E-06 |
| TUCP_001019 | XLOC_038673 | ENSRNOT00000067618  | 0.959526425  | 7.99E-07 |
| TUCP_000158 | XLOC_004211 | ENSRNOT00000060048  | 0.951264311  | 1.99E-06 |
| TUCP_000158 | XLOC_004211 | ENSRNOT00000087199  | 0.992755613  | 1.55E-10 |
| TUCP_000158 | XLOC_004211 | ENSRNOT00000076072  | 0.971768166  | 1.35E-07 |
| TUCP_000158 | XLOC_004211 | ENSRNOT00000084374  | 0.999867928  | 3.16E-19 |
| TUCP_000159 | XLOC_004211 | ENSRNOT00000015944  | 0.98562095   | 4.73E-09 |
| TUCP_000159 | XLOC_004211 | ENSRNOT00000022559  | 0.950325865  | 2.19E-06 |
| TUCP_000159 | XLOC_004211 | ENSRNOT00000002905  | 0.95224408   | 1.81E-06 |
| TUCP_000157 | XLOC_004211 | ENSRNOT00000004525  | 0.95706344   | 1.07E-06 |
| TUCP_000157 | XLOC_004211 | ENSRNOT00000029526  | 0.962158808  | 5.73E-07 |
| TUCP_000157 | XLOC_004211 | ENSRNOT00000033784  | 0.958699432  | 8.83E-07 |
| TUCP_000157 | XLOC_004211 | ENSRNOT00000064306  | 0.950332364  | 2.19E-06 |
| TUCP_000157 | XLOC_004211 | ENSRNOT00000034565  | 0.972787672  | 1.12E-07 |
| TUCP_000157 | XLOC_004211 | ENSRNOT00000036702  | 0.960590287  | 7.01E-07 |
| TUCP_000157 | XLOC_004211 | ENSRNOT00000051065  | 0.95536853   | 1.29E-06 |
| TUCP_000157 | XLOC_004211 | ENSRNOT00000017314  | 0.95633446   | 1.16E-06 |
| TUCP_001016 | XLOC_038541 | ENSRNOT00000012413  | 0.95386247   | 1.52E-06 |
| TUCP_000155 | XLOC_004044 | ENSRNOT00000006597  | 0.950227281  | 2.21E-06 |
| TUCP_000155 | XLOC_004044 | ENSRNOT00000001912  | 0.950464437  | 2.16E-06 |
| TUCP_000155 | XLOC_004044 | ENSRNOT00000010961  | 0.957944743  | 9.65E-07 |
| TUCP_001010 | XLOC_038028 | ENSRNOT00000085424  | 0.950410369  | 2.17E-06 |
| TUCP_001010 | XLOC_038028 | ENSRNOT00000016036  | 0.959497712  | 8.02E-07 |
| TUCP_000150 | XLOC_003983 | ENSRNOT00000048010  | 0.955462136  | 1.28E-06 |
| TUCP_000017 | XLOC_000293 | ENSRNOT00000005165  | -0.955620465 | 1.26E-06 |
| TUCP_000017 | XLOC_000293 | ENSRNOT000000048125 | -0.950291945 | 2.20E-06 |
| TUCP_002883 | XLOC_123057 | ENSRNOT00000066081  | 0.976347723  | 5.60E-08 |
| TUCP_001157 | XLOC_043459 | ENSRNOT00000025026  | 0.961971722  | 5.88E-07 |
| TUCP_001156 | XLOC_043424 | ENSRNOT00000043196  | 0.950797379  | 2.09E-06 |
| TUCP_001156 | XLOC_043424 | ENSRNOT00000037191  | 0.986537898  | 3.40E-09 |
| TUCP_000013 | XLOC_000293 | ENSRNOT00000092186  | 0.974840813  | 7.61E-08 |
| TUCP_000013 | XLOC_000293 | ENSRNOT00000000299  | 0.955525154  | 1.27E-06 |
| TUCP_000013 | XLOC_000293 | ENSRNOT00000036656  | 0.959422345  | 8.09E-07 |
| TUCP_000010 | XLOC_000293 | ENSRNOT00000084075  | 0.970192328  | 1.76E-07 |
| TUCP_000010 | XLOC_000293 | ENSRNOT00000088492  | 0.954025228  | 1.50E-06 |
| TUCP_000010 | XLOC_000293 | ENSRNOT00000074465  | 0.976157979  | 5.83E-08 |
| TUCP_000010 | XLOC_000293 | ENSRNOT00000070964  | 0.968550034  | 2.30E-07 |
| TUCP_000010 | XLOC_000293 | ENSRNOT00000079805  | 0.971225626  | 1.48E-07 |
| TUCP_000010 | XLOC_000293 | ENSRNOT00000040912  | 0.976157979  | 5.83E-08 |
| TUCP_000010 | XLOC_000293 | ENSRNOT00000072648  | 0.976157979  | 5.83E-08 |
| TUCP_000010 | XLOC_000293 | ENSRNOT00000007398  | 0.964014787  | 4.47E-07 |
| TUCP_000010 | XLOC_000293 | ENSRNOT00000070803  | 0.976157979  | 5.83E-08 |
| TUCP_000010 | XLOC_000293 | ENSRNOT00000012196  | 0.976157979  | 5.83E-08 |
| TUCP_000010 | XLOC_000293 | ENSRNOT00000085772  | 0.976157979  | 5.83E-08 |
| TUCP_000010 | XLOC_000293 | ENSRNOT00000086374  | 0.962567033  | 5.44E-07 |
| TUCP_000010 | XLOC_000293 | ENSRNOT00000015270  | 0.976157979  | 5.83E-08 |
| TUCP_000010 | XLOC_000293 | ENSRNOT00000046192  | 0.976157979  | 5.83E-08 |
| TUCP_000010 | XLOC_000293 | ENSRNOT00000044226  | 0.976157979  | 5.83E-08 |
| TUCP_000010 | XLOC_000293 | ENSRNOT00000081898  | 0.970543693  | 1.66E-07 |
| TUCP_000010 | XLOC_000293 | ENSRNOT00000080291  | 0.973550802  | 9.75E-08 |
| TUCP_000010 | XLOC_000293 | ENSRNOT00000004293  | 0.983136035  | 1.04E-08 |

|             |             |                     |              |          |
|-------------|-------------|---------------------|--------------|----------|
| TUCP_000010 | XLOC_000293 | ENSRNOT00000001464  | 0.976157979  | 5.83E-08 |
| TUCP_000010 | XLOC_000293 | ENSRNOT000000090716 | 0.983510544  | 9.34E-09 |
| TUCP_000010 | XLOC_000293 | ENSRNOT000000057873 | 0.976157979  | 5.83E-08 |
| TUCP_000010 | XLOC_000293 | ENSRNOT000000076044 | 0.976157979  | 5.83E-08 |
| TUCP_000010 | XLOC_000293 | ENSRNOT000000074353 | 0.976157979  | 5.83E-08 |
| TUCP_000010 | XLOC_000293 | ENSRNOT000000087122 | 0.953262749  | 1.62E-06 |
| TUCP_000010 | XLOC_000293 | ENSRNOT000000074295 | 0.958719359  | 8.81E-07 |
| TUCP_000010 | XLOC_000293 | ENSRNOT000000093284 | 0.975963796  | 6.07E-08 |
| TUCP_000010 | XLOC_000293 | ENSRNOT000000083002 | 0.958715375  | 8.81E-07 |
| TUCP_000010 | XLOC_000293 | ENSRNOT000000088399 | 0.976129761  | 5.86E-08 |
| TUCP_000010 | XLOC_000293 | ENSRNOT000000086248 | 0.976157979  | 5.83E-08 |
| TUCP_000010 | XLOC_000293 | ENSRNOT000000089750 | 0.975874884  | 6.18E-08 |
| TUCP_000010 | XLOC_000293 | ENSRNOT000000034772 | 0.97869226   | 3.34E-08 |
| TUCP_000010 | XLOC_000293 | ENSRNOT000000079000 | 0.951661608  | 1.92E-06 |
| TUCP_000010 | XLOC_000293 | ENSRNOT00000002834  | 0.976157979  | 5.83E-08 |
| TUCP_000010 | XLOC_000293 | ENSRNOT000000080812 | 0.977061339  | 4.81E-08 |
| TUCP_000010 | XLOC_000293 | ENSRNOT000000092755 | 0.976157979  | 5.83E-08 |
| TUCP_000010 | XLOC_000293 | ENSRNOT000000031683 | 0.976157979  | 5.83E-08 |
| TUCP_000010 | XLOC_000293 | ENSRNOT000000087764 | 0.964546309  | 4.16E-07 |
| TUCP_004001 | XLOC_175439 | ENSRNOT000000090456 | 0.96208293   | 5.79E-07 |
| TUCP_004001 | XLOC_175439 | ENSRNOT000000006186 | 0.966788343  | 3.01E-07 |
| TUCP_004001 | XLOC_175439 | ENSRNOT000000028483 | 0.964544624  | 4.16E-07 |
| TUCP_004001 | XLOC_175439 | ENSRNOT000000020357 | 0.962760236  | 5.30E-07 |
| TUCP_004001 | XLOC_175439 | ENSRNOT000000019213 | 0.954625185  | 1.40E-06 |
| TUCP_004001 | XLOC_175439 | ENSRNOT000000041908 | 0.960394674  | 7.18E-07 |
| TUCP_004001 | XLOC_175439 | ENSRNOT000000004400 | 0.970182722  | 1.77E-07 |
| TUCP_004001 | XLOC_175439 | ENSRNOT000000013050 | -0.969849126 | 1.87E-07 |
| TUCP_004001 | XLOC_175439 | ENSRNOT000000033651 | 0.953940497  | 1.51E-06 |
| TUCP_004001 | XLOC_175439 | ENSRNOT000000071560 | 0.9510059    | 2.05E-06 |
| TUCP_004001 | XLOC_175439 | ENSRNOT000000026065 | 0.985233569  | 5.39E-09 |
| TUCP_004001 | XLOC_175439 | ENSRNOT000000073967 | 0.955719937  | 1.24E-06 |
| TUCP_004001 | XLOC_175439 | ENSRNOT000000010728 | 0.954681963  | 1.39E-06 |
| TUCP_004001 | XLOC_175439 | ENSRNOT000000022726 | 0.959830726  | 7.70E-07 |
| TUCP_004001 | XLOC_175439 | ENSRNOT000000005659 | 0.97520389   | 7.08E-08 |
| TUCP_004001 | XLOC_175439 | ENSRNOT00000007164  | 0.958739671  | 8.79E-07 |
| TUCP_004001 | XLOC_175439 | ENSRNOT000000045326 | 0.953139869  | 1.64E-06 |
| TUCP_004001 | XLOC_175439 | ENSRNOT000000060282 | 0.954977713  | 1.35E-06 |
| TUCP_004001 | XLOC_175439 | ENSRNOT000000018057 | 0.989404716  | 1.03E-09 |
| TUCP_004001 | XLOC_175439 | ENSRNOT000000011442 | -0.953120967 | 1.65E-06 |
| TUCP_004001 | XLOC_175439 | ENSRNOT000000036187 | -0.958133909 | 9.44E-07 |
| TUCP_004001 | XLOC_175439 | ENSRNOT000000080654 | 0.954792256  | 1.38E-06 |
| TUCP_004001 | XLOC_175439 | ENSRNOT000000015076 | 0.970046929  | 1.81E-07 |
| TUCP_004001 | XLOC_175439 | ENSRNOT00000004698  | 0.95797843   | 9.62E-07 |
| TUCP_004001 | XLOC_175439 | ENSRNOT000000010418 | 0.953498132  | 1.58E-06 |
| TUCP_004001 | XLOC_175439 | ENSRNOT000000015073 | 0.950280143  | 2.20E-06 |
| TUCP_004001 | XLOC_175439 | ENSRNOT000000043554 | 0.952100816  | 1.83E-06 |
| TUCP_004001 | XLOC_175439 | ENSRNOT000000026783 | 0.965147751  | 3.82E-07 |
| TUCP_004001 | XLOC_175439 | ENSRNOT000000005126 | -0.956490696 | 1.14E-06 |
| TUCP_004001 | XLOC_175439 | ENSRNOT000000065300 | 0.958995388  | 8.52E-07 |
| TUCP_004001 | XLOC_175439 | ENSRNOT000000011384 | 0.954479199  | 1.43E-06 |
| TUCP_004001 | XLOC_175439 | ENSRNOT000000038247 | 0.954819803  | 1.37E-06 |

|             |             |                    |              |          |
|-------------|-------------|--------------------|--------------|----------|
| TUCP_004001 | XLOC_175439 | ENSRNOT00000076820 | 0.958008921  | 9.58E-07 |
| TUCP_004001 | XLOC_175439 | ENSRNOT00000027944 | 0.979226177  | 2.94E-08 |
| TUCP_004001 | XLOC_175439 | ENSRNOT00000068322 | 0.960848218  | 6.78E-07 |
| TUCP_004001 | XLOC_175439 | ENSRNOT00000052075 | 0.975038291  | 7.32E-08 |
| TUCP_004001 | XLOC_175439 | ENSRNOT00000026186 | 0.977185806  | 4.68E-08 |
| TUCP_004001 | XLOC_175439 | ENSRNOT00000037456 | 0.954923664  | 1.36E-06 |
| TUCP_004001 | XLOC_175439 | ENSRNOT00000090461 | 0.954194871  | 1.47E-06 |
| TUCP_004001 | XLOC_175439 | ENSRNOT00000010463 | 0.960291553  | 7.27E-07 |
| TUCP_004001 | XLOC_175439 | ENSRNOT00000025510 | -0.954540317 | 1.42E-06 |
| TUCP_004001 | XLOC_175439 | ENSRNOT00000026718 | 0.954499652  | 1.42E-06 |
| TUCP_004001 | XLOC_175439 | ENSRNOT00000074323 | 0.951026323  | 2.04E-06 |
| TUCP_004001 | XLOC_175439 | ENSRNOT00000013762 | 0.9526109    | 1.74E-06 |
| TUCP_004001 | XLOC_175439 | ENSRNOT00000075424 | 0.95384175   | 1.53E-06 |
| TUCP_004001 | XLOC_175439 | ENSRNOT00000016333 | -0.97698289  | 4.90E-08 |
| TUCP_004001 | XLOC_175439 | ENSRNOT00000015612 | 0.989793569  | 8.57E-10 |
| TUCP_004001 | XLOC_175439 | ENSRNOT00000012177 | -0.960908947 | 6.73E-07 |
| TUCP_004001 | XLOC_175439 | ENSRNOT00000067822 | 0.959475902  | 8.04E-07 |
| TUCP_004001 | XLOC_175439 | ENSRNOT00000022594 | 0.952477637  | 1.76E-06 |
| TUCP_004001 | XLOC_175439 | ENSRNOT00000024060 | 0.987012603  | 2.85E-09 |
| TUCP_004001 | XLOC_175439 | ENSRNOT00000010149 | 0.955812633  | 1.23E-06 |
| TUCP_004001 | XLOC_175439 | ENSRNOT00000007175 | 0.97623272   | 5.74E-08 |
| TUCP_004001 | XLOC_175439 | ENSRNOT00000051181 | 0.959813842  | 7.71E-07 |
| TUCP_004001 | XLOC_175439 | ENSRNOT00000010141 | 0.96282561   | 5.25E-07 |
| TUCP_004001 | XLOC_175439 | ENSRNOT00000021037 | 0.954842122  | 1.37E-06 |
| TUCP_004001 | XLOC_175439 | ENSRNOT00000071386 | -0.966807251 | 3.00E-07 |
| TUCP_004001 | XLOC_175439 | ENSRNOT00000054955 | -0.958608141 | 8.93E-07 |
| TUCP_004001 | XLOC_175439 | ENSRNOT00000068633 | 0.970643418  | 1.63E-07 |
| TUCP_004001 | XLOC_175439 | ENSRNOT00000037446 | 0.950792306  | 2.09E-06 |
| TUCP_004001 | XLOC_175439 | ENSRNOT00000058645 | 0.958661486  | 8.87E-07 |
| TUCP_004001 | XLOC_175439 | ENSRNOT00000009156 | 0.959355017  | 8.16E-07 |
| TUCP_004001 | XLOC_175439 | ENSRNOT00000026481 | 0.958180833  | 9.39E-07 |
| TUCP_004001 | XLOC_175439 | ENSRNOT00000084005 | -0.974360289 | 8.36E-08 |
| TUCP_004001 | XLOC_175439 | ENSRNOT00000023180 | 0.951931311  | 1.86E-06 |
| TUCP_004001 | XLOC_175439 | ENSRNOT00000051843 | -0.958784716 | 8.74E-07 |
| TUCP_004001 | XLOC_175439 | ENSRNOT00000015609 | 0.951906065  | 1.87E-06 |
| TUCP_004001 | XLOC_175439 | ENSRNOT00000020892 | -0.975163609 | 7.14E-08 |
| TUCP_004001 | XLOC_175439 | ENSRNOT00000019554 | 0.972867907  | 1.11E-07 |
| TUCP_004001 | XLOC_175439 | ENSRNOT00000077908 | 0.960124496  | 7.43E-07 |
| TUCP_004001 | XLOC_175439 | ENSRNOT00000065983 | 0.952871365  | 1.69E-06 |
| TUCP_004001 | XLOC_175439 | ENSRNOT00000064264 | 0.977333858  | 4.54E-08 |
| TUCP_004001 | XLOC_175439 | ENSRNOT00000079698 | -0.963672763 | 4.69E-07 |
| TUCP_004001 | XLOC_175439 | ENSRNOT00000027335 | 0.951032546  | 2.04E-06 |
| TUCP_004001 | XLOC_175439 | ENSRNOT00000031979 | -0.956613284 | 1.13E-06 |
| TUCP_004001 | XLOC_175439 | ENSRNOT00000023330 | 0.988234104  | 1.74E-09 |
| TUCP_004001 | XLOC_175439 | ENSRNOT00000086590 | 0.962660052  | 5.37E-07 |
| TUCP_004001 | XLOC_175439 | ENSRNOT00000090451 | -0.964100941 | 4.42E-07 |
| TUCP_004001 | XLOC_175439 | ENSRNOT00000015325 | -0.977353366 | 4.52E-08 |
| TUCP_004001 | XLOC_175439 | ENSRNOT00000013661 | 0.951585726  | 1.93E-06 |
| TUCP_004001 | XLOC_175439 | ENSRNOT00000022286 | 0.962673288  | 5.36E-07 |
| TUCP_004001 | XLOC_175439 | ENSRNOT00000045083 | 0.982679244  | 1.19E-08 |
| TUCP_004001 | XLOC_175439 | ENSRNOT00000020648 | 0.966718607  | 3.04E-07 |

|             |             |                     |              |          |
|-------------|-------------|---------------------|--------------|----------|
| TUCP_004001 | XLOC_175439 | ENSRNOT00000082228  | 0.955264983  | 1.31E-06 |
| TUCP_004001 | XLOC_175439 | ENSRNOT00000034744  | 0.957326321  | 1.04E-06 |
| TUCP_004001 | XLOC_175439 | ENSRNOT00000000898  | 0.953877346  | 1.52E-06 |
| TUCP_004001 | XLOC_175439 | ENSRNOT00000009328  | 0.952994952  | 1.67E-06 |
| TUCP_004001 | XLOC_175439 | ENSRNOT00000012253  | -0.950890664 | 2.07E-06 |
| TUCP_004001 | XLOC_175439 | ENSRNOT00000021153  | 0.957534847  | 1.01E-06 |
| TUCP_004001 | XLOC_175439 | ENSRNOT00000082863  | 0.950011004  | 2.26E-06 |
| TUCP_004001 | XLOC_175439 | ENSRNOT00000064902  | 0.952954326  | 1.68E-06 |
| TUCP_004001 | XLOC_175439 | ENSRNOT00000025027  | 0.957088856  | 1.07E-06 |
| TUCP_004001 | XLOC_175439 | ENSRNOT00000088995  | 0.962247423  | 5.67E-07 |
| TUCP_004001 | XLOC_175439 | ENSRNOT00000090784  | -0.958986383 | 8.53E-07 |
| TUCP_004001 | XLOC_175439 | ENSRNOT00000002771  | 0.952755086  | 1.71E-06 |
| TUCP_004001 | XLOC_175439 | ENSRNOT00000087997  | 0.957210597  | 1.05E-06 |
| TUCP_004001 | XLOC_175439 | ENSRNOT00000087502  | 0.957380741  | 1.03E-06 |
| TUCP_004001 | XLOC_175439 | ENSRNOT00000016722  | 0.970091903  | 1.79E-07 |
| TUCP_004001 | XLOC_175439 | ENSRNOT00000012424  | 0.978548525  | 3.45E-08 |
| TUCP_004001 | XLOC_175439 | ENSRNOT00000025097  | 0.955407777  | 1.29E-06 |
| TUCP_004001 | XLOC_175439 | ENSRNOT00000010927  | 0.970267734  | 1.74E-07 |
| TUCP_004001 | XLOC_175439 | ENSRNOT00000013031  | -0.957464059 | 1.02E-06 |
| TUCP_004001 | XLOC_175439 | ENSRNOT00000008427  | -0.963062308 | 5.09E-07 |
| TUCP_004001 | XLOC_175439 | ENSRNOT000000032505 | -0.974600741 | 7.98E-08 |
| TUCP_004001 | XLOC_175439 | ENSRNOT00000005909  | 0.959056962  | 8.46E-07 |
| TUCP_004001 | XLOC_175439 | ENSRNOT00000020168  | 0.950659907  | 2.12E-06 |
| TUCP_004001 | XLOC_175439 | ENSRNOT00000029833  | 0.952450939  | 1.77E-06 |
| TUCP_004001 | XLOC_175439 | ENSRNOT00000034487  | -0.95472504  | 1.39E-06 |
| TUCP_004001 | XLOC_175439 | ENSRNOT00000017319  | 0.969142462  | 2.09E-07 |
| TUCP_004001 | XLOC_175439 | ENSRNOT00000015635  | -0.970416251 | 1.70E-07 |
| TUCP_004001 | XLOC_175439 | ENSRNOT00000036951  | 0.958562746  | 8.97E-07 |
| TUCP_004001 | XLOC_175439 | ENSRNOT00000083369  | 0.952162551  | 1.82E-06 |
| TUCP_004001 | XLOC_175439 | ENSRNOT00000009691  | 0.954423364  | 1.43E-06 |
| TUCP_004001 | XLOC_175439 | ENSRNOT00000009696  | 0.952852495  | 1.69E-06 |
| TUCP_004001 | XLOC_175439 | ENSRNOT00000007091  | 0.956126725  | 1.19E-06 |
| TUCP_004001 | XLOC_175439 | ENSRNOT00000009473  | 0.967895538  | 2.55E-07 |
| TUCP_004001 | XLOC_175439 | ENSRNOT00000088196  | 0.951795676  | 1.89E-06 |
| TUCP_004001 | XLOC_175439 | ENSRNOT00000023645  | 0.961267186  | 6.43E-07 |
| TUCP_004001 | XLOC_175439 | ENSRNOT00000024336  | 0.963948651  | 4.51E-07 |
| TUCP_004001 | XLOC_175439 | ENSRNOT00000076387  | 0.966771017  | 3.02E-07 |
| TUCP_004001 | XLOC_175439 | ENSRNOT00000064840  | 0.969309448  | 2.04E-07 |
| TUCP_004001 | XLOC_175439 | ENSRNOT00000003690  | 0.957450084  | 1.02E-06 |
| TUCP_004001 | XLOC_175439 | ENSRNOT00000011984  | 0.953548424  | 1.58E-06 |
| TUCP_004001 | XLOC_175439 | ENSRNOT00000058362  | 0.954095533  | 1.49E-06 |
| TUCP_004001 | XLOC_175439 | ENSRNOT00000005977  | 0.959518515  | 8.00E-07 |
| TUCP_004001 | XLOC_175439 | ENSRNOT00000047210  | 0.951196831  | 2.01E-06 |
| TUCP_004001 | XLOC_175439 | ENSRNOT00000054980  | 0.954446374  | 1.43E-06 |
| TUCP_004001 | XLOC_175439 | ENSRNOT00000020669  | 0.967472895  | 2.72E-07 |
| TUCP_004001 | XLOC_175439 | ENSRNOT00000074653  | 0.973666312  | 9.54E-08 |
| TUCP_004001 | XLOC_175439 | ENSRNOT00000005876  | 0.96239505   | 5.56E-07 |
| TUCP_004001 | XLOC_175439 | ENSRNOT00000054828  | 0.957322963  | 1.04E-06 |
| TUCP_004001 | XLOC_175439 | ENSRNOT00000040543  | -0.957563122 | 1.01E-06 |
| TUCP_004001 | XLOC_175439 | ENSRNOT00000001923  | 0.965059128  | 3.87E-07 |
| TUCP_004001 | XLOC_175439 | ENSRNOT00000072416  | -0.950735323 | 2.10E-06 |

|             |             |                     |              |          |
|-------------|-------------|---------------------|--------------|----------|
| TUCP_004001 | XLOC_175439 | ENSRNOT00000010218  | 0.971967038  | 1.30E-07 |
| TUCP_004001 | XLOC_175439 | ENSRNOT00000010588  | 0.964243267  | 4.33E-07 |
| TUCP_004001 | XLOC_175439 | ENSRNOT00000002292  | 0.968544357  | 2.30E-07 |
| TUCP_004001 | XLOC_175439 | ENSRNOT00000021176  | -0.958705458 | 8.82E-07 |
| TUCP_004001 | XLOC_175439 | ENSRNOT00000077311  | 0.951328545  | 1.98E-06 |
| TUCP_004001 | XLOC_175439 | ENSRNOT00000090170  | 0.96263208   | 5.39E-07 |
| TUCP_004001 | XLOC_175439 | ENSRNOT00000060530  | 0.951714607  | 1.91E-06 |
| TUCP_004001 | XLOC_175439 | ENSRNOT00000004172  | 0.951989222  | 1.85E-06 |
| TUCP_004001 | XLOC_175439 | ENSRNOT00000080800  | 0.960060654  | 7.48E-07 |
| TUCP_004001 | XLOC_175439 | ENSRNOT00000085519  | 0.955228254  | 1.31E-06 |
| TUCP_004001 | XLOC_175439 | ENSRNOT00000085596  | 0.952108973  | 1.83E-06 |
| TUCP_004001 | XLOC_175439 | ENSRNOT00000035491  | 0.950837081  | 2.08E-06 |
| TUCP_004001 | XLOC_175439 | ENSRNOT00000034722  | 0.977304433  | 4.57E-08 |
| TUCP_004001 | XLOC_175439 | ENSRNOT00000019177  | 0.957715684  | 9.91E-07 |
| TUCP_004001 | XLOC_175439 | ENSRNOT00000009718  | 0.961242878  | 6.45E-07 |
| TUCP_004001 | XLOC_175439 | ENSRNOT00000006570  | -0.950757061 | 2.10E-06 |
| TUCP_004001 | XLOC_175439 | ENSRNOT000000061100 | 0.960838509  | 6.79E-07 |
| TUCP_004001 | XLOC_175439 | ENSRNOT00000024941  | 0.957458726  | 1.02E-06 |
| TUCP_004001 | XLOC_175439 | ENSRNOT00000082174  | 0.96634058   | 3.22E-07 |
| TUCP_004001 | XLOC_175439 | ENSRNOT00000066593  | 0.950286803  | 2.20E-06 |
| TUCP_004001 | XLOC_175439 | ENSRNOT00000026457  | 0.954537892  | 1.42E-06 |
| TUCP_004001 | XLOC_175439 | ENSRNOT00000004463  | 0.951067274  | 2.03E-06 |
| TUCP_004001 | XLOC_175439 | ENSRNOT00000044009  | 0.955554688  | 1.27E-06 |
| TUCP_004001 | XLOC_175439 | ENSRNOT00000003834  | -0.950782212 | 2.09E-06 |
| TUCP_004001 | XLOC_175439 | ENSRNOT00000048029  | 0.992941293  | 1.36E-10 |
| TUCP_004001 | XLOC_175439 | ENSRNOT00000010433  | 0.972908459  | 1.10E-07 |
| TUCP_004001 | XLOC_175439 | ENSRNOT00000064930  | 0.971419513  | 1.43E-07 |
| TUCP_004001 | XLOC_175439 | ENSRNOT00000079996  | 0.967493761  | 2.71E-07 |
| TUCP_004001 | XLOC_175439 | ENSRNOT00000024548  | 0.956330202  | 1.16E-06 |
| TUCP_004001 | XLOC_175439 | ENSRNOT00000011325  | 0.967028169  | 2.90E-07 |
| TUCP_003203 | XLOC_138072 | ENSRNOT00000093466  | -0.950376203 | 2.18E-06 |
| TUCP_001159 | XLOC_043908 | ENSRNOT00000073346  | -0.953432107 | 1.59E-06 |
| TUCP_001159 | XLOC_043908 | ENSRNOT00000021245  | -0.963675617 | 4.69E-07 |
| TUCP_001158 | XLOC_043492 | ENSRNOT00000077317  | 0.951254124  | 2.00E-06 |
| TUCP_001158 | XLOC_043492 | ENSRNOT00000086223  | 0.951538283  | 1.94E-06 |
| TUCP_001158 | XLOC_043492 | ENSRNOT00000006517  | 0.960598211  | 7.00E-07 |
| TUCP_004492 | XLOC_197551 | ENSRNOT00000006188  | -0.951489185 | 1.95E-06 |
| TUCP_004492 | XLOC_197551 | ENSRNOT00000006186  | 0.95772977   | 9.90E-07 |
| TUCP_004492 | XLOC_197551 | ENSRNOT00000026941  | 0.955472165  | 1.28E-06 |
| TUCP_004492 | XLOC_197551 | ENSRNOT00000075397  | 0.957249382  | 1.05E-06 |
| TUCP_004492 | XLOC_197551 | ENSRNOT00000032926  | -0.951745463 | 1.90E-06 |
| TUCP_004492 | XLOC_197551 | ENSRNOT00000019104  | -0.974993726 | 7.38E-08 |
| TUCP_004492 | XLOC_197551 | ENSRNOT00000015566  | 0.962464126  | 5.51E-07 |
| TUCP_004492 | XLOC_197551 | ENSRNOT00000020910  | 0.968402344  | 2.35E-07 |
| TUCP_004492 | XLOC_197551 | ENSRNOT00000025067  | -0.959017981 | 8.50E-07 |
| TUCP_004492 | XLOC_197551 | ENSRNOT00000086310  | -0.962658761 | 5.37E-07 |
| TUCP_004492 | XLOC_197551 | ENSRNOT00000045233  | -0.956317514 | 1.16E-06 |
| TUCP_004492 | XLOC_197551 | ENSRNOT00000052063  | 0.968993459  | 2.14E-07 |
| TUCP_004492 | XLOC_197551 | ENSRNOT00000077146  | -0.955272332 | 1.31E-06 |
| TUCP_004492 | XLOC_197551 | ENSRNOT00000086893  | -0.961005325 | 6.65E-07 |
| TUCP_004492 | XLOC_197551 | ENSRNOT00000055540  | 0.968123341  | 2.46E-07 |



|             |             |                    |              |          |
|-------------|-------------|--------------------|--------------|----------|
| TUCP_004492 | XLOC_197551 | ENSRNOT00000085251 | -0.960373198 | 7.20E-07 |
| TUCP_004492 | XLOC_197551 | ENSRNOT00000065300 | 0.982204008  | 1.36E-08 |
| TUCP_004492 | XLOC_197551 | ENSRNOT00000035320 | -0.962528246 | 5.46E-07 |
| TUCP_004492 | XLOC_197551 | ENSRNOT00000035989 | 0.95592105   | 1.22E-06 |
| TUCP_004492 | XLOC_197551 | ENSRNOT00000067486 | -0.959768247 | 7.76E-07 |
| TUCP_004492 | XLOC_197551 | ENSRNOT00000091448 | -0.964102258 | 4.42E-07 |
| TUCP_004492 | XLOC_197551 | ENSRNOT00000077999 | 0.968797574  | 2.21E-07 |
| TUCP_004492 | XLOC_197551 | ENSRNOT00000003412 | -0.950045659 | 2.25E-06 |
| TUCP_004492 | XLOC_197551 | ENSRNOT00000024264 | -0.955777703 | 1.24E-06 |
| TUCP_004492 | XLOC_197551 | ENSRNOT00000085228 | 0.950803098  | 2.09E-06 |
| TUCP_004492 | XLOC_197551 | ENSRNOT00000036959 | -0.963792045 | 4.61E-07 |
| TUCP_004492 | XLOC_197551 | ENSRNOT00000008655 | 0.951366102  | 1.97E-06 |
| TUCP_004492 | XLOC_197551 | ENSRNOT00000067391 | -0.950784849 | 2.09E-06 |
| TUCP_004492 | XLOC_197551 | ENSRNOT00000092945 | -0.955659647 | 1.25E-06 |
| TUCP_004492 | XLOC_197551 | ENSRNOT00000084709 | 0.956784892  | 1.10E-06 |
| TUCP_004492 | XLOC_197551 | ENSRNOT00000026481 | 0.969295121  | 2.04E-07 |
| TUCP_004492 | XLOC_197551 | ENSRNOT00000015116 | 0.951948092  | 1.86E-06 |
| TUCP_004492 | XLOC_197551 | ENSRNOT00000026525 | -0.957172088 | 1.06E-06 |
| TUCP_004492 | XLOC_197551 | ENSRNOT00000026643 | 0.965606649  | 3.58E-07 |
| TUCP_004492 | XLOC_197551 | ENSRNOT00000016132 | -0.968793674 | 2.21E-07 |
| TUCP_004492 | XLOC_197551 | ENSRNOT00000058495 | -0.976112956 | 5.88E-08 |
| TUCP_004492 | XLOC_197551 | ENSRNOT00000013067 | -0.961834867 | 5.98E-07 |
| TUCP_004492 | XLOC_197551 | ENSRNOT00000027141 | -0.973880584 | 9.16E-08 |
| TUCP_004492 | XLOC_197551 | ENSRNOT00000016220 | -0.974303562 | 8.45E-08 |
| TUCP_004492 | XLOC_197551 | ENSRNOT00000047093 | 0.954598271  | 1.41E-06 |
| TUCP_004492 | XLOC_197551 | ENSRNOT00000031979 | -0.954338465 | 1.45E-06 |
| TUCP_004492 | XLOC_197551 | ENSRNOT00000079895 | 0.953130837  | 1.65E-06 |
| TUCP_004492 | XLOC_197551 | ENSRNOT00000078102 | 0.9518822    | 1.87E-06 |
| TUCP_004492 | XLOC_197551 | ENSRNOT00000007367 | -0.963407106 | 4.86E-07 |
| TUCP_004492 | XLOC_197551 | ENSRNOT00000071929 | -0.952728345 | 1.72E-06 |
| TUCP_004492 | XLOC_197551 | ENSRNOT00000081047 | 0.959250449  | 8.26E-07 |
| TUCP_004492 | XLOC_197551 | ENSRNOT00000011880 | 0.951467667  | 1.95E-06 |
| TUCP_004492 | XLOC_197551 | ENSRNOT00000005486 | -0.951127165 | 2.02E-06 |
| TUCP_004492 | XLOC_197551 | ENSRNOT00000028290 | -0.95734806  | 1.03E-06 |
| TUCP_004492 | XLOC_197551 | ENSRNOT00000003992 | -0.953517146 | 1.58E-06 |
| TUCP_004492 | XLOC_197551 | ENSRNOT00000006034 | -0.954102806 | 1.48E-06 |
| TUCP_004492 | XLOC_197551 | ENSRNOT00000084088 | 0.97058768   | 1.65E-07 |
| TUCP_004492 | XLOC_197551 | ENSRNOT00000028589 | -0.9776826   | 4.20E-08 |
| TUCP_004492 | XLOC_197551 | ENSRNOT00000052224 | 0.974349936  | 8.38E-08 |
| TUCP_004492 | XLOC_197551 | ENSRNOT00000078070 | 0.988276317  | 1.71E-09 |
| TUCP_004492 | XLOC_197551 | ENSRNOT00000082146 | -0.954094611 | 1.49E-06 |
| TUCP_004492 | XLOC_197551 | ENSRNOT00000089293 | 0.950903513  | 2.07E-06 |
| TUCP_004492 | XLOC_197551 | ENSRNOT00000019656 | -0.963961316 | 4.51E-07 |
| TUCP_004492 | XLOC_197551 | ENSRNOT00000006366 | -0.952088944 | 1.83E-06 |
| TUCP_004492 | XLOC_197551 | ENSRNOT00000079698 | -0.959683251 | 7.84E-07 |
| TUCP_004492 | XLOC_197551 | ENSRNOT00000025936 | -0.950231324 | 2.21E-06 |
| TUCP_004492 | XLOC_197551 | ENSRNOT00000033196 | -0.96086787  | 6.77E-07 |
| TUCP_004492 | XLOC_197551 | ENSRNOT00000067846 | -0.95362386  | 1.56E-06 |
| TUCP_004492 | XLOC_197551 | ENSRNOT00000064723 | -0.961713066 | 6.08E-07 |
| TUCP_004492 | XLOC_197551 | ENSRNOT00000073834 | -0.953184236 | 1.64E-06 |
| TUCP_004492 | XLOC_197551 | ENSRNOT00000060002 | -0.962704613 | 5.34E-07 |

|             |             |                    |              |          |
|-------------|-------------|--------------------|--------------|----------|
| TUCP_004492 | XLOC_197551 | ENSRNOT0000004046  | -0.951459097 | 1.96E-06 |
| TUCP_004492 | XLOC_197551 | ENSRNOT00000067170 | -0.960038314 | 7.50E-07 |
| TUCP_004492 | XLOC_197551 | ENSRNOT00000023977 | -0.959496338 | 8.02E-07 |
| TUCP_004492 | XLOC_197551 | ENSRNOT0000001222  | 0.957668783  | 9.97E-07 |
| TUCP_004492 | XLOC_197551 | ENSRNOT00000066133 | -0.964614302 | 4.12E-07 |
| TUCP_004492 | XLOC_197551 | ENSRNOT00000051953 | -0.952685386 | 1.72E-06 |
| TUCP_004492 | XLOC_197551 | ENSRNOT00000085596 | 0.953267318  | 1.62E-06 |
| TUCP_004492 | XLOC_197551 | ENSRNOT00000088509 | 0.959347127  | 8.17E-07 |
| TUCP_004492 | XLOC_197551 | ENSRNOT00000019487 | 0.969121578  | 2.10E-07 |
| TUCP_004492 | XLOC_197551 | ENSRNOT00000089007 | -0.955068193 | 1.34E-06 |
| TUCP_004492 | XLOC_197551 | ENSRNOT00000030692 | -0.955102104 | 1.33E-06 |
| TUCP_004492 | XLOC_197551 | ENSRNOT00000055992 | -0.980942825 | 1.92E-08 |
| TUCP_004492 | XLOC_197551 | ENSRNOT00000064535 | -0.950987062 | 2.05E-06 |
| TUCP_004492 | XLOC_197551 | ENSRNOT00000015624 | 0.954487742  | 1.42E-06 |
| TUCP_004492 | XLOC_197551 | ENSRNOT00000073235 | 0.962480968  | 5.50E-07 |
| TUCP_004492 | XLOC_197551 | ENSRNOT00000087033 | -0.95447756  | 1.43E-06 |
| TUCP_004492 | XLOC_197551 | ENSRNOT00000040060 | -0.952380041 | 1.78E-06 |
| TUCP_004492 | XLOC_197551 | ENSRNOT00000080110 | 0.966641397  | 3.08E-07 |
| TUCP_004492 | XLOC_197551 | ENSRNOT00000038182 | -0.959408426 | 8.11E-07 |
| TUCP_004492 | XLOC_197551 | ENSRNOT00000060696 | 0.953581119  | 1.57E-06 |
| TUCP_004492 | XLOC_197551 | ENSRNOT00000004787 | -0.982886243 | 1.12E-08 |
| TUCP_004492 | XLOC_197551 | ENSRNOT00000010986 | 0.971909793  | 1.31E-07 |
| TUCP_004492 | XLOC_197551 | ENSRNOT00000060698 | -0.959286657 | 8.23E-07 |
| TUCP_004492 | XLOC_197551 | ENSRNOT00000058351 | 0.963939009  | 4.52E-07 |
| TUCP_004492 | XLOC_197551 | ENSRNOT00000014814 | 0.961905998  | 5.93E-07 |
| TUCP_004492 | XLOC_197551 | ENSRNOT00000022000 | -0.952346992 | 1.79E-06 |
| TUCP_004492 | XLOC_197551 | ENSRNOT00000066968 | 0.964756758  | 4.04E-07 |
| TUCP_004492 | XLOC_197551 | ENSRNOT00000010748 | 0.960519399  | 7.07E-07 |
| TUCP_004492 | XLOC_197551 | ENSRNOT00000080207 | 0.980128493  | 2.36E-08 |
| TUCP_004492 | XLOC_197551 | ENSRNOT00000008911 | -0.953970689 | 1.51E-06 |
| TUCP_004492 | XLOC_197551 | ENSRNOT00000023537 | -0.951898121 | 1.87E-06 |
| TUCP_004492 | XLOC_197551 | ENSRNOT00000070912 | -0.956949863 | 1.08E-06 |
| TUCP_004492 | XLOC_197551 | ENSRNOT00000087146 | 0.956240182  | 1.17E-06 |
| TUCP_004492 | XLOC_197551 | ENSRNOT00000026457 | 0.955766362  | 1.24E-06 |
| TUCP_004492 | XLOC_197551 | ENSRNOT0000004463  | 0.954654844  | 1.40E-06 |
| TUCP_004492 | XLOC_197551 | ENSRNOT00000059807 | 0.961389394  | 6.33E-07 |
| TUCP_004492 | XLOC_197551 | ENSRNOT00000008982 | 0.956144719  | 1.19E-06 |
| TUCP_004492 | XLOC_197551 | ENSRNOT00000047192 | -0.967411984 | 2.74E-07 |
| TUCP_004492 | XLOC_197551 | ENSRNOT00000022097 | 0.951679365  | 1.91E-06 |
| TUCP_004492 | XLOC_197551 | ENSRNOT00000008987 | -0.960215731 | 7.34E-07 |
| TUCP_004492 | XLOC_197551 | ENSRNOT00000027083 | 0.981806463  | 1.52E-08 |
| TUCP_004492 | XLOC_197551 | ENSRNOT00000066041 | -0.962768471 | 5.29E-07 |
| TUCP_004492 | XLOC_197551 | ENSRNOT00000063930 | -0.956829328 | 1.10E-06 |
| TUCP_004492 | XLOC_197551 | ENSRNOT00000006055 | 0.96282548   | 5.25E-07 |
| TUCP_004492 | XLOC_197551 | ENSRNOT00000013116 | -0.953772756 | 1.54E-06 |
| TUCP_004492 | XLOC_197551 | ENSRNOT00000009563 | -0.952436437 | 1.77E-06 |
| TUCP_004492 | XLOC_197551 | ENSRNOT00000018074 | -0.963011727 | 5.12E-07 |
| TUCP_004492 | XLOC_197551 | ENSRNOT00000027653 | -0.951031767 | 2.04E-06 |
| TUCP_004492 | XLOC_197551 | ENSRNOT00000014479 | -0.963997613 | 4.48E-07 |
| TUCP_004492 | XLOC_197551 | ENSRNOT00000003326 | -0.957762678 | 9.86E-07 |
| TUCP_004492 | XLOC_197551 | ENSRNOT00000021629 | -0.970568797 | 1.66E-07 |

|             |             |                    |              |          |
|-------------|-------------|--------------------|--------------|----------|
| TUCP_004492 | XLOC_197551 | ENSRNOT00000016306 | -0.956716464 | 1.11E-06 |
| TUCP_004492 | XLOC_197551 | ENSRNOT00000015471 | -0.965329219 | 3.72E-07 |
| TUCP_004492 | XLOC_197551 | ENSRNOT00000015476 | -0.962647771 | 5.38E-07 |
| TUCP_004492 | XLOC_197551 | ENSRNOT00000025079 | -0.961048052 | 6.61E-07 |
| TUCP_004492 | XLOC_197551 | ENSRNOT00000048754 | -0.955724981 | 1.24E-06 |
| TUCP_004492 | XLOC_197551 | ENSRNOT00000044628 | 0.970662186  | 1.63E-07 |
| TUCP_004492 | XLOC_197551 | ENSRNOT00000004007 | -0.973171311 | 1.05E-07 |
| TUCP_004492 | XLOC_197551 | ENSRNOT00000020681 | -0.961675301 | 6.11E-07 |
| TUCP_004492 | XLOC_197551 | ENSRNOT00000057898 | -0.958633274 | 8.90E-07 |
| TUCP_004492 | XLOC_197551 | ENSRNOT00000091602 | -0.973705199 | 9.47E-08 |
| TUCP_004492 | XLOC_197551 | ENSRNOT00000009811 | 0.95830372   | 9.25E-07 |
| TUCP_004492 | XLOC_197551 | ENSRNOT00000009817 | -0.956991583 | 1.08E-06 |
| TUCP_004492 | XLOC_197551 | ENSRNOT00000009708 | -0.958353014 | 9.20E-07 |
| TUCP_004492 | XLOC_197551 | ENSRNOT00000077231 | 0.965435782  | 3.67E-07 |
| TUCP_004492 | XLOC_197551 | ENSRNOT00000021523 | 0.951420698  | 1.96E-06 |
| TUCP_004492 | XLOC_197551 | ENSRNOT00000014605 | -0.958907797 | 8.61E-07 |
| TUCP_004492 | XLOC_197551 | ENSRNOT00000012583 | -0.971653007 | 1.37E-07 |
| TUCP_004492 | XLOC_197551 | ENSRNOT00000078349 | -0.955164986 | 1.32E-06 |
| TUCP_004492 | XLOC_197551 | ENSRNOT00000022502 | -0.973147035 | 1.05E-07 |
| TUCP_004492 | XLOC_197551 | ENSRNOT00000026928 | -0.950103182 | 2.24E-06 |
| TUCP_004492 | XLOC_197551 | ENSRNOT00000005329 | -0.953675973 | 1.55E-06 |
| TUCP_004492 | XLOC_197551 | ENSRNOT00000087443 | 0.961708613  | 6.08E-07 |
| TUCP_004492 | XLOC_197551 | ENSRNOT00000000036 | 0.956866834  | 1.09E-06 |
| TUCP_004492 | XLOC_197551 | ENSRNOT00000039423 | -0.952817658 | 1.70E-06 |
| TUCP_004492 | XLOC_197551 | ENSRNOT00000021803 | -0.970430218 | 1.69E-07 |
| TUCP_004492 | XLOC_197551 | ENSRNOT00000025856 | -0.961432102 | 6.30E-07 |
| TUCP_004492 | XLOC_197551 | ENSRNOT00000004350 | -0.950597808 | 2.13E-06 |
| TUCP_004492 | XLOC_197551 | ENSRNOT00000003787 | -0.951439059 | 1.96E-06 |
| TUCP_004492 | XLOC_197551 | ENSRNOT00000015757 | -0.956741118 | 1.11E-06 |
| TUCP_004492 | XLOC_197551 | ENSRNOT00000089211 | 0.951940531  | 1.86E-06 |
| TUCP_004492 | XLOC_197551 | ENSRNOT00000083293 | -0.954749625 | 1.38E-06 |
| TUCP_004492 | XLOC_197551 | ENSRNOT00000019172 | -0.961822377 | 5.99E-07 |
| TUCP_004492 | XLOC_197551 | ENSRNOT00000004942 | -0.966190516 | 3.29E-07 |
| TUCP_004492 | XLOC_197551 | ENSRNOT00000023664 | -0.95399979  | 1.50E-06 |
| TUCP_004492 | XLOC_197551 | ENSRNOT00000007314 | -0.982338473 | 1.31E-08 |
| TUCP_004492 | XLOC_197551 | ENSRNOT00000090456 | 0.964326071  | 4.29E-07 |
| TUCP_004492 | XLOC_197551 | ENSRNOT00000023567 | -0.971854812 | 1.33E-07 |
| TUCP_004492 | XLOC_197551 | ENSRNOT00000061100 | 0.95831714   | 9.24E-07 |
| TUCP_004492 | XLOC_197551 | ENSRNOT00000026398 | -0.96505068  | 3.87E-07 |
| TUCP_004492 | XLOC_197551 | ENSRNOT00000050609 | -0.966677764 | 3.06E-07 |
| TUCP_004492 | XLOC_197551 | ENSRNOT00000041277 | -0.955825983 | 1.23E-06 |
| TUCP_004492 | XLOC_197551 | ENSRNOT00000003146 | -0.966267476 | 3.25E-07 |
| TUCP_004492 | XLOC_197551 | ENSRNOT00000027910 | 0.957019162  | 1.07E-06 |
| TUCP_004492 | XLOC_197551 | ENSRNOT00000067135 | -0.952472608 | 1.76E-06 |
| TUCP_004492 | XLOC_197551 | ENSRNOT00000066593 | 0.9610862    | 6.58E-07 |
| TUCP_004492 | XLOC_197551 | ENSRNOT00000028885 | -0.960741191 | 6.88E-07 |
| TUCP_004492 | XLOC_197551 | ENSRNOT00000008427 | -0.954184345 | 1.47E-06 |
| TUCP_004492 | XLOC_197551 | ENSRNOT00000067901 | -0.968844499 | 2.19E-07 |
| TUCP_004492 | XLOC_197551 | ENSRNOT00000029833 | 0.958210702  | 9.36E-07 |
| TUCP_004492 | XLOC_197551 | ENSRNOT00000012702 | -0.967743279 | 2.61E-07 |
| TUCP_004492 | XLOC_197551 | ENSRNOT00000061916 | -0.952417419 | 1.77E-06 |

|             |             |                    |              |          |
|-------------|-------------|--------------------|--------------|----------|
| TUCP_004492 | XLOC_197551 | ENSRNOT00000021145 | -0.960530234 | 7.06E-07 |
| TUCP_004492 | XLOC_197551 | ENSRNOT00000020417 | -0.962487945 | 5.49E-07 |
| TUCP_004492 | XLOC_197551 | ENSRNOT00000090420 | -0.965426983 | 3.67E-07 |
| TUCP_004492 | XLOC_197551 | ENSRNOT00000021061 | -0.95334461  | 1.61E-06 |
| TUCP_004492 | XLOC_197551 | ENSRNOT00000082151 | -0.961476476 | 6.26E-07 |
| TUCP_004492 | XLOC_197551 | ENSRNOT00000016776 | -0.955280029 | 1.31E-06 |
| TUCP_004492 | XLOC_197551 | ENSRNOT00000001607 | 0.955719466  | 1.24E-06 |
| TUCP_004492 | XLOC_197551 | ENSRNOT00000051554 | -0.952285623 | 1.80E-06 |
| TUCP_004492 | XLOC_197551 | ENSRNOT00000019647 | -0.954767758 | 1.38E-06 |
| TUCP_004492 | XLOC_197551 | ENSRNOT00000085971 | -0.967168556 | 2.84E-07 |
| TUCP_004492 | XLOC_197551 | ENSRNOT00000044395 | 0.961253454  | 6.44E-07 |
| TUCP_004492 | XLOC_197551 | ENSRNOT00000020663 | -0.955395284 | 1.29E-06 |
| TUCP_004492 | XLOC_197551 | ENSRNOT00000022142 | 0.954356536  | 1.44E-06 |
| TUCP_004492 | XLOC_197551 | ENSRNOT00000076300 | -0.95009062  | 2.24E-06 |
| TUCP_004492 | XLOC_197551 | ENSRNOT00000078390 | -0.965865308 | 3.45E-07 |
| TUCP_004492 | XLOC_197551 | ENSRNOT00000015537 | 0.953718293  | 1.55E-06 |
| TUCP_004492 | XLOC_197551 | ENSRNOT00000078306 | 0.954344268  | 1.45E-06 |
| TUCP_004492 | XLOC_197551 | ENSRNOT00000011499 | -0.955971225 | 1.21E-06 |
| TUCP_004492 | XLOC_197551 | ENSRNOT00000015946 | -0.965069018 | 3.86E-07 |
| TUCP_004492 | XLOC_197551 | ENSRNOT00000029125 | 0.950154714  | 2.23E-06 |
| TUCP_004492 | XLOC_197551 | ENSRNOT00000091941 | -0.954428533 | 1.43E-06 |
| TUCP_004492 | XLOC_197551 | ENSRNOT00000004319 | -0.967588206 | 2.67E-07 |
| TUCP_004492 | XLOC_197551 | ENSRNOT00000005387 | 0.952676747  | 1.73E-06 |
| TUCP_004492 | XLOC_197551 | ENSRNOT00000078862 | 0.976843984  | 5.04E-08 |
| TUCP_004492 | XLOC_197551 | ENSRNOT00000003940 | -0.960328136 | 7.24E-07 |
| TUCP_004492 | XLOC_197551 | ENSRNOT00000039551 | -0.969537293 | 1.96E-07 |
| TUCP_004492 | XLOC_197551 | ENSRNOT00000082999 | -0.961733131 | 6.06E-07 |
| TUCP_004492 | XLOC_197551 | ENSRNOT00000082998 | 0.95008726   | 2.24E-06 |
| TUCP_004492 | XLOC_197551 | ENSRNOT00000083578 | 0.951763701  | 1.90E-06 |
| TUCP_004492 | XLOC_197551 | ENSRNOT00000023638 | 0.963356462  | 4.89E-07 |
| TUCP_004492 | XLOC_197551 | ENSRNOT00000005228 | 0.962664925  | 5.37E-07 |
| TUCP_004492 | XLOC_197551 | ENSRNOT00000059524 | -0.966069652 | 3.35E-07 |
| TUCP_004492 | XLOC_197551 | ENSRNOT00000005220 | 0.951838663  | 1.88E-06 |
| TUCP_004492 | XLOC_197551 | ENSRNOT00000023144 | 0.959995376  | 7.54E-07 |
| TUCP_004492 | XLOC_197551 | ENSRNOT00000016649 | 0.969657179  | 1.93E-07 |
| TUCP_004492 | XLOC_197551 | ENSRNOT00000074023 | 0.957733741  | 9.89E-07 |
| TUCP_004492 | XLOC_197551 | ENSRNOT00000056813 | 0.955905407  | 1.22E-06 |
| TUCP_004492 | XLOC_197551 | ENSRNOT00000091128 | -0.966162785 | 3.30E-07 |
| TUCP_004492 | XLOC_197551 | ENSRNOT0000001586  | -0.960322707 | 7.24E-07 |
| TUCP_004492 | XLOC_197551 | ENSRNOT00000012187 | 0.963393622  | 4.87E-07 |
| TUCP_004492 | XLOC_197551 | ENSRNOT00000050868 | 0.950838219  | 2.08E-06 |
| TUCP_004492 | XLOC_197551 | ENSRNOT00000013695 | -0.961340142 | 6.37E-07 |
| TUCP_004492 | XLOC_197551 | ENSRNOT00000038247 | 0.964094972  | 4.42E-07 |
| TUCP_004492 | XLOC_197551 | ENSRNOT00000024406 | -0.952895021 | 1.69E-06 |
| TUCP_004492 | XLOC_197551 | ENSRNOT00000089545 | -0.955873765 | 1.22E-06 |
| TUCP_004492 | XLOC_197551 | ENSRNOT00000089933 | 0.965505892  | 3.63E-07 |
| TUCP_004492 | XLOC_197551 | ENSRNOT00000077908 | 0.957509228  | 1.02E-06 |
| TUCP_004492 | XLOC_197551 | ENSRNOT00000067009 | -0.959174994 | 8.34E-07 |
| TUCP_004492 | XLOC_197551 | ENSRNOT00000026718 | 0.966869826  | 2.97E-07 |
| TUCP_004492 | XLOC_197551 | ENSRNOT00000032780 | 0.959379394  | 8.13E-07 |
| TUCP_004492 | XLOC_197551 | ENSRNOT00000084012 | 0.981909846  | 1.48E-08 |

|             |             |                    |              |          |
|-------------|-------------|--------------------|--------------|----------|
| TUCP_004492 | XLOC_197551 | ENSRNOT00000033677 | -0.964849937 | 3.98E-07 |
| TUCP_004492 | XLOC_197551 | ENSRNOT00000002568 | -0.955581687 | 1.26E-06 |
| TUCP_004492 | XLOC_197551 | ENSRNOT00000019820 | 0.950711295  | 2.11E-06 |
| TUCP_004492 | XLOC_197551 | ENSRNOT00000016389 | -0.956580797 | 1.13E-06 |
| TUCP_004492 | XLOC_197551 | ENSRNOT00000074847 | -0.955621439 | 1.26E-06 |
| TUCP_004492 | XLOC_197551 | ENSRNOT00000016428 | 0.975649432  | 6.47E-08 |
| TUCP_004492 | XLOC_197551 | ENSRNOT00000021030 | -0.959883901 | 7.65E-07 |
| TUCP_004492 | XLOC_197551 | ENSRNOT00000006835 | 0.95408264   | 1.49E-06 |
| TUCP_004492 | XLOC_197551 | ENSRNOT00000077727 | -0.959489342 | 8.03E-07 |
| TUCP_004492 | XLOC_197551 | ENSRNOT00000011930 | 0.967780206  | 2.59E-07 |
| TUCP_004492 | XLOC_197551 | ENSRNOT00000044346 | -0.958382792 | 9.17E-07 |
| TUCP_004492 | XLOC_197551 | ENSRNOT00000073492 | -0.955922455 | 1.22E-06 |
| TUCP_004492 | XLOC_197551 | ENSRNOT00000010541 | 0.960667959  | 6.94E-07 |
| TUCP_004492 | XLOC_197551 | ENSRNOT00000017949 | -0.964211134 | 4.35E-07 |
| TUCP_004492 | XLOC_197551 | ENSRNOT00000038543 | 0.951828628  | 1.88E-06 |
| TUCP_004492 | XLOC_197551 | ENSRNOT00000091864 | -0.970014939 | 1.82E-07 |
| TUCP_004492 | XLOC_197551 | ENSRNOT00000091909 | 0.959760528  | 7.77E-07 |
| TUCP_004492 | XLOC_197551 | ENSRNOT00000001081 | 0.96559085   | 3.59E-07 |
| TUCP_004492 | XLOC_197551 | ENSRNOT00000003544 | -0.974076668 | 8.83E-08 |
| TUCP_004492 | XLOC_197551 | ENSRNOT00000086119 | -0.980457056 | 2.17E-08 |
| TUCP_004492 | XLOC_197551 | ENSRNOT00000067735 | -0.950281711 | 2.20E-06 |
| TUCP_004492 | XLOC_197551 | ENSRNOT00000022190 | -0.964820886 | 4.00E-07 |
| TUCP_004492 | XLOC_197551 | ENSRNOT00000025913 | -0.960886453 | 6.75E-07 |
| TUCP_004492 | XLOC_197551 | ENSRNOT00000019386 | -0.963567926 | 4.75E-07 |
| TUCP_004492 | XLOC_197551 | ENSRNOT00000077220 | -0.957289149 | 1.04E-06 |
| TUCP_004492 | XLOC_197551 | ENSRNOT00000025916 | -0.95463034  | 1.40E-06 |
| TUCP_004492 | XLOC_197551 | ENSRNOT00000065983 | 0.96167449   | 6.11E-07 |
| TUCP_004492 | XLOC_197551 | ENSRNOT00000030782 | -0.961332759 | 6.38E-07 |
| TUCP_004492 | XLOC_197551 | ENSRNOT00000007736 | -0.957093009 | 1.07E-06 |
| TUCP_004492 | XLOC_197551 | ENSRNOT00000025966 | 0.951693197  | 1.91E-06 |
| TUCP_004492 | XLOC_197551 | ENSRNOT00000073910 | -0.951908635 | 1.87E-06 |
| TUCP_004492 | XLOC_197551 | ENSRNOT00000052422 | 0.959822807  | 7.71E-07 |
| TUCP_004492 | XLOC_197551 | ENSRNOT00000025980 | -0.950820615 | 2.09E-06 |
| TUCP_004492 | XLOC_197551 | ENSRNOT00000034883 | -0.955074278 | 1.34E-06 |
| TUCP_004492 | XLOC_197551 | ENSRNOT00000015325 | -0.955026414 | 1.34E-06 |
| TUCP_004492 | XLOC_197551 | ENSRNOT00000005910 | -0.953079612 | 1.65E-06 |
| TUCP_004492 | XLOC_197551 | ENSRNOT00000086608 | -0.956463056 | 1.14E-06 |
| TUCP_004492 | XLOC_197551 | ENSRNOT00000090987 | -0.962942727 | 5.17E-07 |
| TUCP_004492 | XLOC_197551 | ENSRNOT00000087429 | 0.972013005  | 1.29E-07 |
| TUCP_004492 | XLOC_197551 | ENSRNOT00000003691 | -0.959991828 | 7.55E-07 |
| TUCP_004492 | XLOC_197551 | ENSRNOT00000016722 | 0.950468707  | 2.16E-06 |
| TUCP_004492 | XLOC_197551 | ENSRNOT00000028057 | 0.961534831  | 6.22E-07 |
| TUCP_004492 | XLOC_197551 | ENSRNOT00000027125 | -0.955698754 | 1.25E-06 |
| TUCP_004492 | XLOC_197551 | ENSRNOT00000004999 | 0.953979242  | 1.50E-06 |
| TUCP_004492 | XLOC_197551 | ENSRNOT00000009122 | 0.954772329  | 1.38E-06 |
| TUCP_004492 | XLOC_197551 | ENSRNOT00000019554 | 0.959527697  | 7.99E-07 |
| TUCP_004492 | XLOC_197551 | ENSRNOT00000066204 | -0.955269145 | 1.31E-06 |
| TUCP_004492 | XLOC_197551 | ENSRNOT00000061191 | -0.958714805 | 8.81E-07 |
| TUCP_004492 | XLOC_197551 | ENSRNOT00000029202 | -0.977171344 | 4.70E-08 |
| TUCP_004492 | XLOC_197551 | ENSRNOT00000017907 | -0.956184832 | 1.18E-06 |
| TUCP_004492 | XLOC_197551 | ENSRNOT00000028434 | -0.964774221 | 4.03E-07 |

|             |             |                     |              |          |
|-------------|-------------|---------------------|--------------|----------|
| TUCP_004492 | XLOC_197551 | ENSRNOT00000005489  | 0.954151799  | 1.48E-06 |
| TUCP_004492 | XLOC_197551 | ENSRNOT000000025794 | -0.954146028 | 1.48E-06 |
| TUCP_004492 | XLOC_197551 | ENSRNOT000000073675 | -0.960740866 | 6.88E-07 |
| TUCP_004492 | XLOC_197551 | ENSRNOT000000050834 | -0.978069065 | 3.85E-08 |
| TUCP_004492 | XLOC_197551 | ENSRNOT000000054828 | 0.95548258   | 1.28E-06 |
| TUCP_004492 | XLOC_197551 | ENSRNOT00000002114  | -0.960906187 | 6.73E-07 |
| TUCP_004492 | XLOC_197551 | ENSRNOT00000002445  | -0.954911939 | 1.36E-06 |
| TUCP_004492 | XLOC_197551 | ENSRNOT000000027970 | 0.950550941  | 2.14E-06 |
| TUCP_004492 | XLOC_197551 | ENSRNOT00000005762  | -0.95434764  | 1.45E-06 |
| TUCP_004492 | XLOC_197551 | ENSRNOT000000046215 | -0.953222609 | 1.63E-06 |
| TUCP_004492 | XLOC_197551 | ENSRNOT00000000083  | -0.961534899 | 6.22E-07 |
| TUCP_004492 | XLOC_197551 | ENSRNOT000000087838 | -0.951350537 | 1.98E-06 |
| TUCP_004492 | XLOC_197551 | ENSRNOT000000037679 | 0.967318647  | 2.78E-07 |
| TUCP_004492 | XLOC_197551 | ENSRNOT000000014124 | 0.954084877  | 1.49E-06 |
| TUCP_004492 | XLOC_197551 | ENSRNOT00000000120  | 0.96489953   | 3.96E-07 |
| TUCP_004492 | XLOC_197551 | ENSRNOT00000009900  | -0.978274707 | 3.68E-08 |
| TUCP_004492 | XLOC_197551 | ENSRNOT000000039191 | -0.952877673 | 1.69E-06 |
| TUCP_004492 | XLOC_197551 | ENSRNOT000000020990 | -0.951213131 | 2.01E-06 |
| TUCP_004492 | XLOC_197551 | ENSRNOT000000020994 | -0.955234305 | 1.31E-06 |
| TUCP_004492 | XLOC_197551 | ENSRNOT000000019911 | -0.953147533 | 1.64E-06 |
| TUCP_004492 | XLOC_197551 | ENSRNOT000000019910 | -0.954372651 | 1.44E-06 |
| TUCP_004492 | XLOC_197551 | ENSRNOT000000040393 | 0.960468802  | 7.11E-07 |
| TUCP_004492 | XLOC_197551 | ENSRNOT000000025097 | 0.959578234  | 7.94E-07 |
| TUCP_004492 | XLOC_197551 | ENSRNOT000000016372 | -0.958081511 | 9.50E-07 |
| TUCP_004492 | XLOC_197551 | ENSRNOT000000036613 | -0.96900594  | 2.14E-07 |
| TUCP_004492 | XLOC_197551 | ENSRNOT000000067867 | 0.955507499  | 1.27E-06 |
| TUCP_004492 | XLOC_197551 | ENSRNOT000000074494 | -0.958699346 | 8.83E-07 |
| TUCP_004492 | XLOC_197551 | ENSRNOT00000000337  | 0.951707033  | 1.91E-06 |
| TUCP_004492 | XLOC_197551 | ENSRNOT000000022552 | -0.975115729 | 7.21E-08 |
| TUCP_004492 | XLOC_197551 | ENSRNOT000000009645 | -0.971145443 | 1.50E-07 |
| TUCP_004492 | XLOC_197551 | ENSRNOT000000026279 | -0.955495068 | 1.28E-06 |
| TUCP_004492 | XLOC_197551 | ENSRNOT000000071560 | 0.955825168  | 1.23E-06 |
| TUCP_004492 | XLOC_197551 | ENSRNOT000000082508 | -0.962960115 | 5.16E-07 |
| TUCP_004492 | XLOC_197551 | ENSRNOT000000010728 | 0.974242115  | 8.55E-08 |
| TUCP_004492 | XLOC_197551 | ENSRNOT000000082863 | 0.977365951  | 4.50E-08 |
| TUCP_004492 | XLOC_197551 | ENSRNOT000000091698 | -0.956240528 | 1.17E-06 |
| TUCP_004492 | XLOC_197551 | ENSRNOT000000071166 | 0.951520527  | 1.94E-06 |
| TUCP_004492 | XLOC_197551 | ENSRNOT000000074389 | -0.957013809 | 1.08E-06 |
| TUCP_004492 | XLOC_197551 | ENSRNOT000000078872 | -0.96108662  | 6.58E-07 |
| TUCP_004492 | XLOC_197551 | ENSRNOT000000055437 | -0.955674171 | 1.25E-06 |
| TUCP_004492 | XLOC_197551 | ENSRNOT000000091596 | -0.952595673 | 1.74E-06 |
| TUCP_004492 | XLOC_197551 | ENSRNOT000000039836 | -0.96492455  | 3.94E-07 |
| TUCP_004492 | XLOC_197551 | ENSRNOT000000073564 | -0.962627226 | 5.39E-07 |
| TUCP_004492 | XLOC_197551 | ENSRNOT000000015170 | -0.979957133 | 2.46E-08 |
| TUCP_004492 | XLOC_197551 | ENSRNOT000000001507 | 0.950608285  | 2.13E-06 |
| TUCP_004492 | XLOC_197551 | ENSRNOT000000022022 | 0.958158282  | 9.41E-07 |
| TUCP_004492 | XLOC_197551 | ENSRNOT000000028646 | 0.958400318  | 9.15E-07 |
| TUCP_004492 | XLOC_197551 | ENSRNOT000000039177 | -0.954169297 | 1.47E-06 |
| TUCP_004492 | XLOC_197551 | ENSRNOT000000002837 | -0.951492661 | 1.95E-06 |
| TUCP_004492 | XLOC_197551 | ENSRNOT000000025510 | -0.954291451 | 1.45E-06 |
| TUCP_004492 | XLOC_197551 | ENSRNOT000000012881 | -0.96315391  | 5.03E-07 |

|             |             |                     |              |          |
|-------------|-------------|---------------------|--------------|----------|
| TUCP_004492 | XLOC_197551 | ENSRNOT00000035628  | -0.952343796 | 1.79E-06 |
| TUCP_004492 | XLOC_197551 | ENSRNOT00000000577  | 0.959607331  | 7.91E-07 |
| TUCP_004492 | XLOC_197551 | ENSRNOT00000075424  | 0.952923689  | 1.68E-06 |
| TUCP_004492 | XLOC_197551 | ENSRNOT00000088133  | -0.962820747 | 5.26E-07 |
| TUCP_004492 | XLOC_197551 | ENSRNOT00000080677  | -0.956954666 | 1.08E-06 |
| TUCP_004492 | XLOC_197551 | ENSRNOT00000037039  | -0.96398865  | 4.49E-07 |
| TUCP_004492 | XLOC_197551 | ENSRNOT00000007824  | -0.951583982 | 1.93E-06 |
| TUCP_004492 | XLOC_197551 | ENSRNOT00000003714  | 0.966982451  | 2.92E-07 |
| TUCP_004492 | XLOC_197551 | ENSRNOT00000003715  | -0.964888972 | 3.96E-07 |
| TUCP_004492 | XLOC_197551 | ENSRNOT000000037133 | 0.965742118  | 3.51E-07 |
| TUCP_004492 | XLOC_197551 | ENSRNOT00000068633  | 0.958938537  | 8.58E-07 |
| TUCP_004492 | XLOC_197551 | ENSRNOT00000083964  | -0.951092576 | 2.03E-06 |
| TUCP_004492 | XLOC_197551 | ENSRNOT00000075452  | 0.958034572  | 9.55E-07 |
| TUCP_004492 | XLOC_197551 | ENSRNOT00000016445  | 0.969556695  | 1.96E-07 |
| TUCP_004492 | XLOC_197551 | ENSRNOT00000019133  | 0.970501851  | 1.67E-07 |
| TUCP_004492 | XLOC_197551 | ENSRNOT00000002151  | -0.95367312  | 1.55E-06 |
| TUCP_004492 | XLOC_197551 | ENSRNOT00000006824  | -0.9642235   | 4.35E-07 |
| TUCP_004492 | XLOC_197551 | ENSRNOT00000012775  | -0.964163954 | 4.38E-07 |
| TUCP_004492 | XLOC_197551 | ENSRNOT00000000177  | -0.957612231 | 1.00E-06 |
| TUCP_004492 | XLOC_197551 | ENSRNOT00000005389  | 0.954128079  | 1.48E-06 |
| TUCP_004492 | XLOC_197551 | ENSRNOT000000061392 | 0.957314038  | 1.04E-06 |
| TUCP_004492 | XLOC_197551 | ENSRNOT000000044608 | -0.961175371 | 6.51E-07 |
| TUCP_004492 | XLOC_197551 | ENSRNOT00000010683  | -0.961897019 | 5.93E-07 |
| TUCP_004492 | XLOC_197551 | ENSRNOT00000077555  | 0.951649721  | 1.92E-06 |
| TUCP_004492 | XLOC_197551 | ENSRNOT000000067836 | -0.950991817 | 2.05E-06 |
| TUCP_004492 | XLOC_197551 | ENSRNOT00000019816  | -0.967474335 | 2.71E-07 |
| TUCP_004492 | XLOC_197551 | ENSRNOT000000064068 | -0.953981812 | 1.50E-06 |
| TUCP_004492 | XLOC_197551 | ENSRNOT00000000302  | 0.960659241  | 6.95E-07 |
| TUCP_004492 | XLOC_197551 | ENSRNOT000000026909 | -0.974668425 | 7.87E-08 |
| TUCP_004492 | XLOC_197551 | ENSRNOT000000068524 | -0.957032565 | 1.07E-06 |
| TUCP_004492 | XLOC_197551 | ENSRNOT00000012424  | 0.957868746  | 9.74E-07 |
| TUCP_004492 | XLOC_197551 | ENSRNOT000000083632 | -0.956505147 | 1.14E-06 |
| TUCP_004492 | XLOC_197551 | ENSRNOT00000000718  | 0.969218516  | 2.07E-07 |
| TUCP_004492 | XLOC_197551 | ENSRNOT00000010753  | -0.952960929 | 1.68E-06 |
| TUCP_004492 | XLOC_197551 | ENSRNOT00000023763  | -0.954286022 | 1.46E-06 |
| TUCP_004492 | XLOC_197551 | ENSRNOT00000007079  | -0.955612659 | 1.26E-06 |
| TUCP_004492 | XLOC_197551 | ENSRNOT00000004878  | -0.953424941 | 1.60E-06 |
| TUCP_004492 | XLOC_197551 | ENSRNOT000000047210 | 0.963145432  | 5.03E-07 |
| TUCP_004492 | XLOC_197551 | ENSRNOT00000008901  | -0.967151012 | 2.85E-07 |
| TUCP_004492 | XLOC_197551 | ENSRNOT00000005659  | 0.96171052   | 6.08E-07 |
| TUCP_004492 | XLOC_197551 | ENSRNOT00000023543  | -0.951027257 | 2.04E-06 |
| TUCP_004492 | XLOC_197551 | ENSRNOT00000005478  | -0.958250379 | 9.31E-07 |
| TUCP_004492 | XLOC_197551 | ENSRNOT00000080695  | 0.963740122  | 4.64E-07 |
| TUCP_004492 | XLOC_197551 | ENSRNOT000000055386 | 0.98770326   | 2.17E-09 |
| TUCP_004492 | XLOC_197551 | ENSRNOT000000038212 | -0.955612373 | 1.26E-06 |
| TUCP_004492 | XLOC_197551 | ENSRNOT000000085519 | 0.962310665  | 5.62E-07 |
| TUCP_004492 | XLOC_197551 | ENSRNOT000000042125 | 0.980175976  | 2.33E-08 |
| TUCP_004492 | XLOC_197551 | ENSRNOT000000026760 | -0.961558512 | 6.20E-07 |
| TUCP_004492 | XLOC_197551 | ENSRNOT000000024491 | -0.983822279 | 8.49E-09 |
| TUCP_004492 | XLOC_197551 | ENSRNOT000000084597 | -0.950573284 | 2.14E-06 |
| TUCP_004492 | XLOC_197551 | ENSRNOT000000037588 | -0.959052403 | 8.46E-07 |

|             |             |                    |              |          |
|-------------|-------------|--------------------|--------------|----------|
| TUCP_004492 | XLOC_197551 | ENSRNOT00000024947 | -0.962037712 | 5.83E-07 |
| TUCP_004492 | XLOC_197551 | ENSRNOT00000027967 | 0.96286266   | 5.23E-07 |
| TUCP_004492 | XLOC_197551 | ENSRNOT0000002053  | -0.951547123 | 1.94E-06 |
| TUCP_004492 | XLOC_197551 | ENSRNOT00000081678 | 0.950671067  | 2.12E-06 |
| TUCP_004492 | XLOC_197551 | ENSRNOT00000079002 | -0.972660702 | 1.15E-07 |
| TUCP_004492 | XLOC_197551 | ENSRNOT00000024016 | -0.971436632 | 1.43E-07 |
| TUCP_004492 | XLOC_197551 | ENSRNOT00000046639 | 0.955994601  | 1.21E-06 |
| TUCP_004492 | XLOC_197551 | ENSRNOT00000079996 | 0.958131094  | 9.44E-07 |
| TUCP_004492 | XLOC_197551 | ENSRNOT00000024548 | 0.964368349  | 4.26E-07 |
| TUCP_003526 | XLOC_153572 | ENSRNOT00000031904 | 0.959267584  | 8.25E-07 |
| TUCP_003526 | XLOC_153572 | ENSRNOT00000077856 | -0.951067703 | 2.03E-06 |
| TUCP_003526 | XLOC_153572 | ENSRNOT00000012881 | -0.961539104 | 6.21E-07 |
| TUCP_003526 | XLOC_153572 | ENSRNOT00000000743 | 0.956453959  | 1.15E-06 |
| TUCP_003526 | XLOC_153572 | ENSRNOT00000088599 | 0.959648992  | 7.87E-07 |
| TUCP_003526 | XLOC_153572 | ENSRNOT00000038807 | 0.957884966  | 9.72E-07 |
| TUCP_003526 | XLOC_153572 | ENSRNOT00000081906 | 0.952799881  | 1.70E-06 |
| TUCP_003526 | XLOC_153572 | ENSRNOT00000066041 | -0.959404671 | 8.11E-07 |
| TUCP_003526 | XLOC_153572 | ENSRNOT00000017761 | 0.95187372   | 1.88E-06 |
| TUCP_003526 | XLOC_153572 | ENSRNOT00000060696 | 0.951189409  | 2.01E-06 |
| TUCP_003526 | XLOC_153572 | ENSRNOT00000010381 | 0.961291526  | 6.41E-07 |
| TUCP_003526 | XLOC_153572 | ENSRNOT00000017254 | -0.970419377 | 1.70E-07 |
| TUCP_003526 | XLOC_153572 | ENSRNOT00000064700 | 0.95938463   | 8.13E-07 |
| TUCP_003526 | XLOC_153572 | ENSRNOT00000088133 | -0.953165757 | 1.64E-06 |
| TUCP_003526 | XLOC_153572 | ENSRNOT00000042125 | 0.951331858  | 1.98E-06 |
| TUCP_003526 | XLOC_153572 | ENSRNOT00000076611 | -0.950172822 | 2.22E-06 |
| TUCP_003526 | XLOC_153572 | ENSRNOT00000017361 | 0.95860991   | 8.92E-07 |
| TUCP_003526 | XLOC_153572 | ENSRNOT00000078306 | 0.966775444  | 3.02E-07 |
| TUCP_003526 | XLOC_153572 | ENSRNOT00000041044 | 0.969426254  | 2.00E-07 |
| TUCP_003526 | XLOC_153572 | ENSRNOT00000019820 | 0.953498959  | 1.58E-06 |
| TUCP_003526 | XLOC_153572 | ENSRNOT00000016649 | 0.953373482  | 1.60E-06 |
| TUCP_003526 | XLOC_153572 | ENSRNOT00000092945 | -0.961370748 | 6.35E-07 |
| TUCP_003526 | XLOC_153572 | ENSRNOT00000010541 | 0.970232621  | 1.75E-07 |
| TUCP_003526 | XLOC_153572 | ENSRNOT00000030850 | 0.950245638  | 2.21E-06 |
| TUCP_003526 | XLOC_153572 | ENSRNOT00000013632 | 0.957214319  | 1.05E-06 |
| TUCP_003526 | XLOC_153572 | ENSRNOT0000001586  | -0.964025657 | 4.47E-07 |
| TUCP_003526 | XLOC_153572 | ENSRNOT00000024196 | 0.953946666  | 1.51E-06 |
| TUCP_003526 | XLOC_153572 | ENSRNOT00000073991 | 0.950585747  | 2.14E-06 |
| TUCP_003526 | XLOC_153572 | ENSRNOT00000016191 | 0.953547957  | 1.58E-06 |
| TUCP_003526 | XLOC_153572 | ENSRNOT00000078390 | -0.951960776 | 1.86E-06 |
| TUCP_003526 | XLOC_153572 | ENSRNOT00000009900 | -0.952520478 | 1.75E-06 |
| TUCP_003526 | XLOC_153572 | ENSRNOT00000072031 | -0.950866877 | 2.08E-06 |
| TUCP_003526 | XLOC_153572 | ENSRNOT00000027436 | 0.953232037  | 1.63E-06 |
| TUCP_003526 | XLOC_153572 | ENSRNOT00000082146 | -0.952429686 | 1.77E-06 |
| TUCP_003526 | XLOC_153572 | ENSRNOT00000020994 | -0.951426111 | 1.96E-06 |
| TUCP_003526 | XLOC_153572 | ENSRNOT00000057045 | -0.951229829 | 2.00E-06 |
| TUCP_003526 | XLOC_153572 | ENSRNOT00000068269 | -0.957876343 | 9.73E-07 |
| TUCP_003526 | XLOC_153572 | ENSRNOT00000072771 | 0.950589306  | 2.13E-06 |
| TUCP_003526 | XLOC_153572 | ENSRNOT00000015799 | 0.953519901  | 1.58E-06 |
| TUCP_003526 | XLOC_153572 | ENSRNOT00000027125 | -0.951748995 | 1.90E-06 |
| TUCP_003526 | XLOC_153572 | ENSRNOT00000011041 | 0.957694695  | 9.94E-07 |
| TUCP_003526 | XLOC_153572 | ENSRNOT00000040348 | -0.958708362 | 8.82E-07 |



|             |             |                    |              |          |
|-------------|-------------|--------------------|--------------|----------|
| TUCP_003526 | XLOC_153572 | ENSRNOT00000022074 | 0.950103381  | 2.24E-06 |
| TUCP_003526 | XLOC_153572 | ENSRNOT00000013246 | 0.960587835  | 7.01E-07 |
| TUCP_003526 | XLOC_153572 | ENSRNOT00000027337 | 0.952575292  | 1.74E-06 |
| TUCP_003526 | XLOC_153572 | ENSRNOT00000090338 | -0.958235107 | 9.33E-07 |
| TUCP_003526 | XLOC_153572 | ENSRNOT00000025075 | 0.965287798  | 3.74E-07 |
| TUCP_003526 | XLOC_153572 | ENSRNOT00000021001 | 0.971605325  | 1.39E-07 |
| TUCP_003526 | XLOC_153572 | ENSRNOT00000082699 | 0.957203337  | 1.05E-06 |
| TUCP_003526 | XLOC_153572 | ENSRNOT00000090299 | 0.960667937  | 6.94E-07 |
| TUCP_003526 | XLOC_153572 | ENSRNOT00000085403 | 0.953673282  | 1.55E-06 |
| TUCP_003526 | XLOC_153572 | ENSRNOT00000010367 | 0.972084517  | 1.27E-07 |
| TUCP_003526 | XLOC_153572 | ENSRNOT00000005311 | 0.970250519  | 1.75E-07 |
| TUCP_003526 | XLOC_153572 | ENSRNOT00000033975 | 0.95131054   | 1.99E-06 |
| TUCP_003526 | XLOC_153572 | ENSRNOT00000026871 | -0.964000091 | 4.48E-07 |
| TUCP_003526 | XLOC_153572 | ENSRNOT00000048020 | 0.965078063  | 3.86E-07 |
| TUCP_003527 | XLOC_153572 | ENSRNOT00000085599 | 0.99874367   | 2.46E-14 |
| TUCP_003527 | XLOC_153572 | ENSRNOT00000006689 | 0.992746327  | 1.56E-10 |
| TUCP_003527 | XLOC_153572 | ENSRNOT00000081534 | 0.987663926  | 2.20E-09 |
| TUCP_003527 | XLOC_153572 | ENSRNOT00000085301 | 0.996097397  | 7.08E-12 |
| TUCP_003527 | XLOC_153572 | ENSRNOT00000038729 | 0.998860127  | 1.51E-14 |
| TUCP_003527 | XLOC_153572 | ENSRNOT00000086385 | 0.998860127  | 1.51E-14 |
| TUCP_003527 | XLOC_153572 | ENSRNOT00000077695 | 0.965315631  | 3.73E-07 |
| TUCP_003527 | XLOC_153572 | ENSRNOT00000078561 | 0.990212594  | 6.96E-10 |
| TUCP_003527 | XLOC_153572 | ENSRNOT00000087613 | 0.998860127  | 1.51E-14 |
| TUCP_003527 | XLOC_153572 | ENSRNOT00000026032 | 0.950583165  | 2.14E-06 |
| TUCP_003527 | XLOC_153572 | ENSRNOT00000073350 | 0.961391515  | 6.33E-07 |
| TUCP_003527 | XLOC_153572 | ENSRNOT00000023062 | 0.998860127  | 1.51E-14 |
| TUCP_003527 | XLOC_153572 | ENSRNOT00000058834 | 0.998860127  | 1.51E-14 |
| TUCP_003527 | XLOC_153572 | ENSRNOT00000079420 | 0.998860127  | 1.51E-14 |
| TUCP_003527 | XLOC_153572 | ENSRNOT00000090761 | 0.998860127  | 1.51E-14 |
| TUCP_003527 | XLOC_153572 | ENSRNOT00000055923 | 0.998860127  | 1.51E-14 |
| TUCP_003527 | XLOC_153572 | ENSRNOT00000092416 | 0.968271099  | 2.40E-07 |
| TUCP_003527 | XLOC_153572 | ENSRNOT00000071930 | 0.998860127  | 1.51E-14 |
| TUCP_003527 | XLOC_153572 | ENSRNOT00000001996 | 0.974253475  | 8.53E-08 |
| TUCP_003527 | XLOC_153572 | ENSRNOT00000076756 | 0.998860127  | 1.51E-14 |
| TUCP_003527 | XLOC_153572 | ENSRNOT00000081527 | 0.998110213  | 1.89E-13 |
| TUCP_003527 | XLOC_153572 | ENSRNOT00000085067 | 0.956572868  | 1.13E-06 |
| TUCP_003527 | XLOC_153572 | ENSRNOT00000091663 | 0.99466627   | 3.37E-11 |
| TUCP_003527 | XLOC_153572 | ENSRNOT00000081780 | 0.998860127  | 1.51E-14 |
| TUCP_003527 | XLOC_153572 | ENSRNOT00000093689 | 0.951311624  | 1.99E-06 |
| TUCP_003527 | XLOC_153572 | ENSRNOT00000089114 | 0.998860127  | 1.51E-14 |
| TUCP_003527 | XLOC_153572 | ENSRNOT00000021609 | 0.975121934  | 7.20E-08 |
| TUCP_003527 | XLOC_153572 | ENSRNOT00000093444 | 0.956196626  | 1.18E-06 |
| TUCP_003527 | XLOC_153572 | ENSRNOT00000073316 | 0.998860127  | 1.51E-14 |
| TUCP_003527 | XLOC_153572 | ENSRNOT00000086557 | 0.980644428  | 2.07E-08 |
| TUCP_003527 | XLOC_153572 | ENSRNOT00000071663 | 0.998860127  | 1.51E-14 |
| TUCP_003527 | XLOC_153572 | ENSRNOT00000042860 | 0.998860127  | 1.51E-14 |
| TUCP_003527 | XLOC_153572 | ENSRNOT00000072962 | 0.968870974  | 2.18E-07 |
| TUCP_003527 | XLOC_153572 | ENSRNOT00000088421 | 0.998860127  | 1.51E-14 |
| TUCP_003527 | XLOC_153572 | ENSRNOT00000038898 | 0.998860127  | 1.51E-14 |
| TUCP_003527 | XLOC_153572 | ENSRNOT00000015840 | 0.95445223   | 1.43E-06 |
| TUCP_003527 | XLOC_153572 | ENSRNOT00000064936 | 0.984005075  | 8.03E-09 |

|             |             |                    |              |          |
|-------------|-------------|--------------------|--------------|----------|
| TUCP_003527 | XLOC_153572 | ENSRNOT00000042777 | 0.988866579  | 1.32E-09 |
| TUCP_003527 | XLOC_153572 | ENSRNOT00000010029 | 0.998860127  | 1.51E-14 |
| TUCP_003524 | XLOC_153456 | ENSRNOT00000048446 | 0.951512543  | 1.95E-06 |
| TUCP_003524 | XLOC_153456 | ENSRNOT00000021609 | 0.952488075  | 1.76E-06 |
| TUCP_001637 | XLOC_064928 | ENSRNOT00000061157 | -0.958377786 | 9.17E-07 |
| TUCP_000729 | XLOC_027208 | ENSRNOT00000001775 | 0.975178134  | 7.12E-08 |
| TUCP_000729 | XLOC_027208 | ENSRNOT00000019396 | 0.959943159  | 7.59E-07 |
| TUCP_000729 | XLOC_027208 | ENSRNOT00000025493 | 0.953523381  | 1.58E-06 |
| TUCP_000729 | XLOC_027208 | ENSRNOT00000018755 | 0.96861064   | 2.28E-07 |
| TUCP_000729 | XLOC_027208 | ENSRNOT00000006196 | 0.960076066  | 7.47E-07 |
| TUCP_000729 | XLOC_027208 | ENSRNOT00000022167 | 0.95367644   | 1.55E-06 |
| TUCP_000729 | XLOC_027208 | ENSRNOT00000042973 | 0.95665518   | 1.12E-06 |
| TUCP_000729 | XLOC_027208 | ENSRNOT00000091476 | 0.979502199  | 2.75E-08 |
| TUCP_000729 | XLOC_027208 | ENSRNOT00000025257 | 0.972285574  | 1.23E-07 |
| TUCP_000729 | XLOC_027208 | ENSRNOT00000010634 | 0.960756593  | 6.86E-07 |
| TUCP_000729 | XLOC_027208 | ENSRNOT00000023483 | 0.950632365  | 2.13E-06 |
| TUCP_000729 | XLOC_027208 | ENSRNOT00000028527 | 0.962365094  | 5.58E-07 |
| TUCP_000729 | XLOC_027208 | ENSRNOT00000086340 | 0.951311227  | 1.99E-06 |
| TUCP_000729 | XLOC_027208 | ENSRNOT00000086090 | 0.962383534  | 5.57E-07 |
| TUCP_000729 | XLOC_027208 | ENSRNOT00000088615 | 0.95487683   | 1.37E-06 |
| TUCP_000729 | XLOC_027208 | ENSRNOT00000066776 | 0.950724775  | 2.11E-06 |
| TUCP_000729 | XLOC_027208 | ENSRNOT00000045993 | 0.973148135  | 1.05E-07 |
| TUCP_004491 | XLOC_197549 | ENSRNOT00000084075 | 0.992977203  | 1.33E-10 |
| TUCP_004491 | XLOC_197549 | ENSRNOT00000012880 | 0.963832383  | 4.59E-07 |
| TUCP_004491 | XLOC_197549 | ENSRNOT00000074465 | 0.997486049  | 7.87E-13 |
| TUCP_004491 | XLOC_197549 | ENSRNOT00000090898 | 0.972295306  | 1.23E-07 |
| TUCP_004491 | XLOC_197549 | ENSRNOT00000079805 | 0.994536843  | 3.80E-11 |
| TUCP_004491 | XLOC_197549 | ENSRNOT00000040912 | 0.997486049  | 7.87E-13 |
| TUCP_004491 | XLOC_197549 | ENSRNOT00000072648 | 0.997486049  | 7.87E-13 |
| TUCP_004491 | XLOC_197549 | ENSRNOT00000007398 | 0.985441609  | 5.03E-09 |
| TUCP_004491 | XLOC_197549 | ENSRNOT00000070803 | 0.997486049  | 7.87E-13 |
| TUCP_004491 | XLOC_197549 | ENSRNOT00000012196 | 0.997486049  | 7.87E-13 |
| TUCP_004491 | XLOC_197549 | ENSRNOT00000085772 | 0.997486049  | 7.87E-13 |
| TUCP_004491 | XLOC_197549 | ENSRNOT00000093284 | 0.997412722  | 9.09E-13 |
| TUCP_004491 | XLOC_197549 | ENSRNOT00000086374 | 0.987231826  | 2.62E-09 |
| TUCP_004491 | XLOC_197549 | ENSRNOT00000015270 | 0.997486049  | 7.87E-13 |
| TUCP_004491 | XLOC_197549 | ENSRNOT00000046192 | 0.997486049  | 7.87E-13 |
| TUCP_004491 | XLOC_197549 | ENSRNOT00000044226 | 0.997486049  | 7.87E-13 |
| TUCP_004491 | XLOC_197549 | ENSRNOT00000081898 | 0.984030328  | 7.96E-09 |
| TUCP_004491 | XLOC_197549 | ENSRNOT00000081954 | 0.970939021  | 1.55E-07 |
| TUCP_004491 | XLOC_197549 | ENSRNOT00000080291 | 0.994462931  | 4.06E-11 |
| TUCP_004491 | XLOC_197549 | ENSRNOT00000004293 | 0.980018079  | 2.43E-08 |
| TUCP_004491 | XLOC_197549 | ENSRNOT00000078231 | 0.953518104  | 1.58E-06 |
| TUCP_004491 | XLOC_197549 | ENSRNOT00000015870 | 0.96926154   | 2.05E-07 |
| TUCP_004491 | XLOC_197549 | ENSRNOT00000001464 | 0.997486049  | 7.87E-13 |
| TUCP_004491 | XLOC_197549 | ENSRNOT00000090716 | 0.990096331  | 7.38E-10 |
| TUCP_004491 | XLOC_197549 | ENSRNOT00000083542 | 0.969419511  | 2.00E-07 |
| TUCP_004491 | XLOC_197549 | ENSRNOT00000076044 | 0.997486049  | 7.87E-13 |
| TUCP_004491 | XLOC_197549 | ENSRNOT00000074353 | 0.997486049  | 7.87E-13 |
| TUCP_004491 | XLOC_197549 | ENSRNOT00000043510 | 0.95281045   | 1.70E-06 |
| TUCP_004491 | XLOC_197549 | ENSRNOT00000087122 | 0.971279102  | 1.47E-07 |

|             |             |                    |              |          |
|-------------|-------------|--------------------|--------------|----------|
| TUCP_004491 | XLOC_197549 | ENSRNOT00000074295 | 0.990069048  | 7.48E-10 |
| TUCP_004491 | XLOC_197549 | ENSRNOT00000057873 | 0.997486049  | 7.87E-13 |
| TUCP_004491 | XLOC_197549 | ENSRNOT00000083002 | 0.98500067   | 5.83E-09 |
| TUCP_004491 | XLOC_197549 | ENSRNOT00000088399 | 0.997477132  | 8.01E-13 |
| TUCP_004491 | XLOC_197549 | ENSRNOT00000086248 | 0.997486049  | 7.87E-13 |
| TUCP_004491 | XLOC_197549 | ENSRNOT00000089750 | 0.997469014  | 8.14E-13 |
| TUCP_004491 | XLOC_197549 | ENSRNOT00000030517 | 0.967923088  | 2.53E-07 |
| TUCP_004491 | XLOC_197549 | ENSRNOT00000034772 | 0.990019194  | 7.67E-10 |
| TUCP_004491 | XLOC_197549 | ENSRNOT00000089305 | 0.966147884  | 3.31E-07 |
| TUCP_004491 | XLOC_197549 | ENSRNOT00000064601 | 0.957961132  | 9.63E-07 |
| TUCP_004491 | XLOC_197549 | ENSRNOT0000002834  | 0.997486049  | 7.87E-13 |
| TUCP_004491 | XLOC_197549 | ENSRNOT00000080812 | 0.99538618   | 1.63E-11 |
| TUCP_004491 | XLOC_197549 | ENSRNOT00000092755 | 0.997486049  | 7.87E-13 |
| TUCP_004491 | XLOC_197549 | ENSRNOT00000031683 | 0.997486049  | 7.87E-13 |
| TUCP_004491 | XLOC_197549 | ENSRNOT00000087764 | 0.980117486  | 2.37E-08 |
| TUCP_001632 | XLOC_064808 | ENSRNOT00000085840 | 0.950899781  | 2.07E-06 |
| TUCP_003521 | XLOC_153371 | ENSRNOT00000013913 | 0.964076209  | 4.44E-07 |
| TUCP_003521 | XLOC_153371 | ENSRNOT00000013620 | 0.964565945  | 4.15E-07 |
| TUCP_003521 | XLOC_153371 | ENSRNOT00000022839 | 0.952990742  | 1.67E-06 |
| TUCP_003521 | XLOC_153371 | ENSRNOT00000027054 | 0.951708425  | 1.91E-06 |
| TUCP_003521 | XLOC_153371 | ENSRNOT00000093640 | 0.960683387  | 6.93E-07 |
| TUCP_003521 | XLOC_153371 | ENSRNOT00000023326 | 0.960053876  | 7.49E-07 |
| TUCP_003521 | XLOC_153371 | ENSRNOT00000009440 | -0.962601455 | 5.41E-07 |
| TUCP_003521 | XLOC_153371 | ENSRNOT00000029810 | 0.968840144  | 2.20E-07 |
| TUCP_003521 | XLOC_153371 | ENSRNOT00000086336 | 0.959964199  | 7.57E-07 |
| TUCP_003521 | XLOC_153371 | ENSRNOT00000046251 | 0.956218835  | 1.18E-06 |
| TUCP_003521 | XLOC_153371 | ENSRNOT00000084601 | 0.950755201  | 2.10E-06 |
| TUCP_003521 | XLOC_153371 | ENSRNOT00000058645 | 0.956379228  | 1.16E-06 |
| TUCP_003521 | XLOC_153371 | ENSRNOT00000084661 | 0.961544856  | 6.21E-07 |
| TUCP_003521 | XLOC_153371 | ENSRNOT00000027414 | 0.953435005  | 1.59E-06 |
| TUCP_003521 | XLOC_153371 | ENSRNOT00000006195 | 0.950910643  | 2.07E-06 |
| TUCP_003521 | XLOC_153371 | ENSRNOT00000026227 | 0.970885411  | 1.57E-07 |
| TUCP_003521 | XLOC_153371 | ENSRNOT00000091807 | 0.956712722  | 1.11E-06 |
| TUCP_003521 | XLOC_153371 | ENSRNOT00000074725 | 0.953480003  | 1.59E-06 |
| TUCP_003521 | XLOC_153371 | ENSRNOT00000073337 | 0.990423442  | 6.24E-10 |
| TUCP_003521 | XLOC_153371 | ENSRNOT00000022646 | 0.959930617  | 7.60E-07 |
| TUCP_003521 | XLOC_153371 | ENSRNOT00000046273 | 0.954515677  | 1.42E-06 |
| TUCP_003521 | XLOC_153371 | ENSRNOT00000050364 | 0.962469515  | 5.51E-07 |
| TUCP_003521 | XLOC_153371 | ENSRNOT0000007104  | 0.951410619  | 1.97E-06 |
| TUCP_003521 | XLOC_153371 | ENSRNOT00000087697 | 0.950190676  | 2.22E-06 |
| TUCP_003521 | XLOC_153371 | ENSRNOT00000004003 | 0.9683394    | 2.38E-07 |
| TUCP_003521 | XLOC_153371 | ENSRNOT00000006800 | 0.968756278  | 2.22E-07 |
| TUCP_003521 | XLOC_153371 | ENSRNOT00000058619 | 0.967613546  | 2.66E-07 |
| TUCP_003521 | XLOC_153371 | ENSRNOT00000007991 | 0.95427634   | 1.46E-06 |
| TUCP_003385 | XLOC_146416 | ENSRNOT00000009666 | -0.960114165 | 7.43E-07 |
| TUCP_003385 | XLOC_146416 | ENSRNOT00000007634 | 0.953230305  | 1.63E-06 |
| TUCP_003385 | XLOC_146416 | ENSRNOT00000027891 | -0.961103317 | 6.57E-07 |
| TUCP_003385 | XLOC_146416 | ENSRNOT00000060185 | -0.9552402   | 1.31E-06 |
| TUCP_003385 | XLOC_146416 | ENSRNOT00000028067 | -0.960319127 | 7.25E-07 |
| TUCP_003385 | XLOC_146416 | ENSRNOT00000015568 | -0.955094883 | 1.33E-06 |
| TUCP_003385 | XLOC_146416 | ENSRNOT0000003085  | -0.952447289 | 1.77E-06 |

|             |             |                    |              |          |
|-------------|-------------|--------------------|--------------|----------|
| TUCP_003385 | XLOC_146416 | ENSRNOT0000002037  | -0.959942011 | 7.59E-07 |
| TUCP_003385 | XLOC_146416 | ENSRNOT00000060607 | -0.952317926 | 1.79E-06 |
| TUCP_003385 | XLOC_146416 | ENSRNOT00000032249 | -0.951509115 | 1.95E-06 |
| TUCP_003385 | XLOC_146416 | ENSRNOT00000019680 | -0.953845543 | 1.53E-06 |
| TUCP_003385 | XLOC_146416 | ENSRNOT00000016112 | -0.965907714 | 3.43E-07 |
| TUCP_003385 | XLOC_146416 | ENSRNOT00000017965 | 0.954519302  | 1.42E-06 |
| TUCP_003385 | XLOC_146416 | ENSRNOT00000028423 | -0.952728364 | 1.72E-06 |
| TUCP_003385 | XLOC_146416 | ENSRNOT00000003320 | -0.956318114 | 1.16E-06 |
| TUCP_003385 | XLOC_146416 | ENSRNOT00000030344 | -0.978493522 | 3.50E-08 |
| TUCP_003385 | XLOC_146416 | ENSRNOT00000019916 | -0.957968817 | 9.63E-07 |
| TUCP_003385 | XLOC_146416 | ENSRNOT00000067912 | -0.953787689 | 1.54E-06 |
| TUCP_003385 | XLOC_146416 | ENSRNOT00000037844 | -0.958125096 | 9.45E-07 |
| TUCP_003385 | XLOC_146416 | ENSRNOT00000086459 | -0.950318721 | 2.19E-06 |
| TUCP_003385 | XLOC_146416 | ENSRNOT00000022478 | -0.953586172 | 1.57E-06 |
| TUCP_003385 | XLOC_146416 | ENSRNOT00000009333 | -0.974174811 | 8.66E-08 |
| TUCP_003385 | XLOC_146416 | ENSRNOT00000077163 | -0.966075255 | 3.34E-07 |
| TUCP_003385 | XLOC_146416 | ENSRNOT00000079310 | -0.980681582 | 2.05E-08 |
| TUCP_003385 | XLOC_146416 | ENSRNOT00000065288 | -0.964179889 | 4.37E-07 |
| TUCP_003385 | XLOC_146416 | ENSRNOT00000016842 | -0.950935999 | 2.06E-06 |
| TUCP_004490 | XLOC_197549 | ENSRNOT00000006034 | -0.951624143 | 1.92E-06 |
| TUCP_004490 | XLOC_197549 | ENSRNOT00000019930 | 0.965664887  | 3.55E-07 |
| TUCP_004490 | XLOC_197549 | ENSRNOT00000025434 | 0.957493072  | 1.02E-06 |
| TUCP_004490 | XLOC_197549 | ENSRNOT00000009151 | -0.953733286 | 1.54E-06 |
| TUCP_004490 | XLOC_197549 | ENSRNOT00000000206 | -0.951107978 | 2.03E-06 |
| TUCP_004490 | XLOC_197549 | ENSRNOT00000064588 | 0.954153543  | 1.48E-06 |
| TUCP_004490 | XLOC_197549 | ENSRNOT00000092665 | 0.962194027  | 5.71E-07 |
| TUCP_003155 | XLOC_135683 | ENSRNOT00000025618 | -0.954832257 | 1.37E-06 |
| TUCP_003528 | XLOC_153608 | ENSRNOT00000044800 | -0.952741625 | 1.71E-06 |
| TUCP_003528 | XLOC_153608 | ENSRNOT00000091359 | 0.965781442  | 3.49E-07 |
| TUCP_000722 | XLOC_026889 | ENSRNOT00000001295 | 0.954463477  | 1.43E-06 |
| TUCP_002330 | XLOC_097249 | ENSRNOT00000084075 | 0.978155029  | 3.78E-08 |
| TUCP_002330 | XLOC_097249 | ENSRNOT00000012880 | 0.997408977  | 9.16E-13 |
| TUCP_002330 | XLOC_097249 | ENSRNOT00000074465 | 0.983576236  | 9.16E-09 |
| TUCP_002330 | XLOC_097249 | ENSRNOT00000079805 | 0.979417791  | 2.81E-08 |
| TUCP_002330 | XLOC_097249 | ENSRNOT00000040912 | 0.983576236  | 9.16E-09 |
| TUCP_002330 | XLOC_097249 | ENSRNOT00000072648 | 0.983576236  | 9.16E-09 |
| TUCP_002330 | XLOC_097249 | ENSRNOT00000007398 | 0.96994196   | 1.84E-07 |
| TUCP_002330 | XLOC_097249 | ENSRNOT00000070803 | 0.983576236  | 9.16E-09 |
| TUCP_002330 | XLOC_097249 | ENSRNOT00000012196 | 0.983576236  | 9.16E-09 |
| TUCP_002330 | XLOC_097249 | ENSRNOT00000085772 | 0.983576236  | 9.16E-09 |
| TUCP_002330 | XLOC_097249 | ENSRNOT00000093284 | 0.983427064  | 9.58E-09 |
| TUCP_002330 | XLOC_097249 | ENSRNOT00000086374 | 0.987884318  | 2.01E-09 |
| TUCP_002330 | XLOC_097249 | ENSRNOT00000015270 | 0.983576236  | 9.16E-09 |
| TUCP_002330 | XLOC_097249 | ENSRNOT00000046192 | 0.983576236  | 9.16E-09 |
| TUCP_002330 | XLOC_097249 | ENSRNOT00000044226 | 0.983576236  | 9.16E-09 |
| TUCP_002330 | XLOC_097249 | ENSRNOT00000081898 | 0.965128273  | 3.83E-07 |
| TUCP_002330 | XLOC_097249 | ENSRNOT00000080291 | 0.980926653  | 1.93E-08 |
| TUCP_002330 | XLOC_097249 | ENSRNOT00000004293 | 0.97456892   | 8.03E-08 |
| TUCP_002330 | XLOC_097249 | ENSRNOT00000078231 | 0.968204255  | 2.43E-07 |
| TUCP_002330 | XLOC_097249 | ENSRNOT00000001464 | 0.983576236  | 9.16E-09 |
| TUCP_002330 | XLOC_097249 | ENSRNOT00000090716 | 0.978305914  | 3.65E-08 |

|             |             |                     |              |          |
|-------------|-------------|---------------------|--------------|----------|
| TUCP_002330 | XLOC_097249 | ENSRNOT00000083542  | 0.952126929  | 1.83E-06 |
| TUCP_002330 | XLOC_097249 | ENSRNOT00000054686  | 0.96804563   | 2.49E-07 |
| TUCP_002330 | XLOC_097249 | ENSRNOT00000076044  | 0.983576236  | 9.16E-09 |
| TUCP_002330 | XLOC_097249 | ENSRNOT00000074353  | 0.983576236  | 9.16E-09 |
| TUCP_002330 | XLOC_097249 | ENSRNOT00000043510  | 0.966194713  | 3.29E-07 |
| TUCP_002330 | XLOC_097249 | ENSRNOT00000087122  | 0.971986243  | 1.30E-07 |
| TUCP_002330 | XLOC_097249 | ENSRNOT00000074295  | 0.973976318  | 9.00E-08 |
| TUCP_002330 | XLOC_097249 | ENSRNOT00000057873  | 0.983576236  | 9.16E-09 |
| TUCP_002330 | XLOC_097249 | ENSRNOT00000083002  | 0.991205081  | 4.08E-10 |
| TUCP_002330 | XLOC_097249 | ENSRNOT00000088399  | 0.983560191  | 9.20E-09 |
| TUCP_002330 | XLOC_097249 | ENSRNOT00000086248  | 0.983576236  | 9.16E-09 |
| TUCP_002330 | XLOC_097249 | ENSRNOT00000089750  | 0.98352914   | 9.29E-09 |
| TUCP_002330 | XLOC_097249 | ENSRNOT00000030517  | 0.963549613  | 4.77E-07 |
| TUCP_002330 | XLOC_097249 | ENSRNOT00000034772  | 0.970052274  | 1.80E-07 |
| TUCP_002330 | XLOC_097249 | ENSRNOT00000089305  | 0.987703627  | 2.17E-09 |
| TUCP_002330 | XLOC_097249 | ENSRNOT00000064601  | 0.979763834  | 2.58E-08 |
| TUCP_002330 | XLOC_097249 | ENSRNOT00000002834  | 0.983576236  | 9.16E-09 |
| TUCP_002330 | XLOC_097249 | ENSRNOT00000080812  | 0.974866643  | 7.57E-08 |
| TUCP_002330 | XLOC_097249 | ENSRNOT00000092755  | 0.983576236  | 9.16E-09 |
| TUCP_002330 | XLOC_097249 | ENSRNOT00000031683  | 0.983576236  | 9.16E-09 |
| TUCP_002330 | XLOC_097249 | ENSRNOT00000087764  | 0.979458933  | 2.78E-08 |
| TUCP_002334 | XLOC_097399 | ENSRNOT00000078719  | 0.96042445   | 7.15E-07 |
| TUCP_002334 | XLOC_097399 | ENSRNOT00000017337  | 0.972583533  | 1.17E-07 |
| TUCP_002336 | XLOC_097407 | ENSRNOT00000084199  | 0.950194404  | 2.22E-06 |
| TUCP_002336 | XLOC_097407 | ENSRNOT00000021528  | -0.96449222  | 4.19E-07 |
| TUCP_002336 | XLOC_097407 | ENSRNOT00000093730  | 0.975828509  | 6.24E-08 |
| TUCP_002336 | XLOC_097407 | ENSRNOT00000057378  | 0.950066863  | 2.25E-06 |
| TUCP_002339 | XLOC_097513 | ENSRNOT00000066508  | 0.962465094  | 5.51E-07 |
| TUCP_001970 | XLOC_079682 | ENSRNOT00000027836  | 0.964759741  | 4.03E-07 |
| TUCP_001970 | XLOC_079682 | ENSRNOT00000008312  | 0.955609147  | 1.26E-06 |
| TUCP_001578 | XLOC_061359 | ENSRNOT00000012413  | 0.959589257  | 7.93E-07 |
| TUCP_001578 | XLOC_061359 | ENSRNOT00000029531  | -0.957009791 | 1.08E-06 |
| TUCP_001339 | XLOC_051310 | ENSRNOT00000050063  | 0.952851896  | 1.69E-06 |
| TUCP_001339 | XLOC_051310 | ENSRNOT00000044870  | 0.953630369  | 1.56E-06 |
| TUCP_001339 | XLOC_051310 | ENSRNOT00000074629  | 0.95908717   | 8.43E-07 |
| TUCP_001339 | XLOC_051310 | ENSRNOT00000009094  | 0.950964244  | 2.06E-06 |
| TUCP_001339 | XLOC_051310 | ENSRNOT000000091328 | 0.967660188  | 2.64E-07 |
| TUCP_001339 | XLOC_051310 | ENSRNOT00000071612  | 0.957704246  | 9.93E-07 |
| TUCP_001338 | XLOC_051303 | ENSRNOT00000086335  | 0.962506703  | 5.48E-07 |
| TUCP_001338 | XLOC_051303 | ENSRNOT00000009094  | 0.965688514  | 3.54E-07 |
| TUCP_001331 | XLOC_051180 | ENSRNOT00000033379  | 0.968179878  | 2.44E-07 |
| TUCP_001331 | XLOC_051180 | ENSRNOT00000057051  | 0.989196616  | 1.14E-09 |
| TUCP_001331 | XLOC_051180 | ENSRNOT00000048498  | 0.98801358   | 1.91E-09 |
| TUCP_001331 | XLOC_051180 | ENSRNOT00000072238  | 0.997480617  | 7.96E-13 |
| TUCP_001330 | XLOC_051180 | ENSRNOT00000027956  | -0.954178835 | 1.47E-06 |
| TUCP_001330 | XLOC_051180 | ENSRNOT00000003834  | -0.952485624 | 1.76E-06 |
| TUCP_001330 | XLOC_051180 | ENSRNOT00000008703  | 0.961293019  | 6.41E-07 |
| TUCP_001330 | XLOC_051180 | ENSRNOT00000022947  | -0.957134549 | 1.06E-06 |
| TUCP_001330 | XLOC_051180 | ENSRNOT00000078639  | 0.973764842  | 9.37E-08 |
| TUCP_001330 | XLOC_051180 | ENSRNOT00000092168  | 0.963509362  | 4.79E-07 |
| TUCP_001330 | XLOC_051180 | ENSRNOT00000067281  | 0.956802589  | 1.10E-06 |

|             |             |                    |              |          |
|-------------|-------------|--------------------|--------------|----------|
| TUCP_001330 | XLOC_051180 | ENSRNOT00000048543 | 0.957955632  | 9.64E-07 |
| TUCP_001332 | XLOC_051199 | ENSRNOT00000000607 | 0.959546782  | 7.97E-07 |
| TUCP_001332 | XLOC_051199 | ENSRNOT00000011747 | 0.960922193  | 6.72E-07 |
| TUCP_001332 | XLOC_051199 | ENSRNOT00000009113 | 0.956384952  | 1.16E-06 |
| TUCP_001332 | XLOC_051199 | ENSRNOT00000011688 | 0.963617779  | 4.72E-07 |
| TUCP_001332 | XLOC_051199 | ENSRNOT00000012558 | 0.95021857   | 2.21E-06 |
| TUCP_001332 | XLOC_051199 | ENSRNOT00000057978 | 0.95152252   | 1.94E-06 |
| TUCP_001334 | XLOC_051295 | ENSRNOT00000024098 | -0.987920732 | 1.98E-09 |
| TUCP_001334 | XLOC_051295 | ENSRNOT00000065673 | 0.957387676  | 1.03E-06 |
| TUCP_001334 | XLOC_051295 | ENSRNOT00000026941 | -0.950780332 | 2.09E-06 |
| TUCP_001334 | XLOC_051295 | ENSRNOT00000085619 | -0.962109453 | 5.77E-07 |
| TUCP_001334 | XLOC_051295 | ENSRNOT00000028271 | -0.951012846 | 2.05E-06 |
| TUCP_001334 | XLOC_051295 | ENSRNOT00000002465 | -0.95477081  | 1.38E-06 |
| TUCP_001334 | XLOC_051295 | ENSRNOT00000089007 | 0.951789537  | 1.89E-06 |
| TUCP_001334 | XLOC_051295 | ENSRNOT00000089226 | -0.956530083 | 1.14E-06 |
| TUCP_001334 | XLOC_051295 | ENSRNOT00000018711 | 0.953787975  | 1.54E-06 |
| TUCP_001334 | XLOC_051295 | ENSRNOT00000031487 | -0.960953308 | 6.69E-07 |
| TUCP_001334 | XLOC_051295 | ENSRNOT00000090987 | 0.958302876  | 9.25E-07 |
| TUCP_001334 | XLOC_051295 | ENSRNOT00000050549 | -0.950144836 | 2.23E-06 |
| TUCP_001334 | XLOC_051295 | ENSRNOT00000072849 | 0.950734078  | 2.10E-06 |
| TUCP_001334 | XLOC_051295 | ENSRNOT00000085295 | 0.957887544  | 9.72E-07 |
| TUCP_001334 | XLOC_051295 | ENSRNOT00000078306 | -0.952439941 | 1.77E-06 |
| TUCP_001334 | XLOC_051295 | ENSRNOT00000020428 | -0.954980006 | 1.35E-06 |
| TUCP_001334 | XLOC_051295 | ENSRNOT00000076973 | -0.953001856 | 1.67E-06 |
| TUCP_001334 | XLOC_051295 | ENSRNOT00000093378 | -0.958871993 | 8.65E-07 |
| TUCP_001334 | XLOC_051295 | ENSRNOT00000071381 | -0.957553125 | 1.01E-06 |
| TUCP_001334 | XLOC_051295 | ENSRNOT00000011956 | -0.964766791 | 4.03E-07 |
| TUCP_001334 | XLOC_051295 | ENSRNOT00000090156 | 0.958273989  | 9.29E-07 |
| TUCP_001334 | XLOC_051295 | ENSRNOT00000007369 | -0.95376407  | 1.54E-06 |
| TUCP_001334 | XLOC_051295 | ENSRNOT00000085466 | -0.964364118 | 4.26E-07 |
| TUCP_001334 | XLOC_051295 | ENSRNOT00000029994 | -0.95599039  | 1.21E-06 |
| TUCP_001334 | XLOC_051295 | ENSRNOT00000025523 | -0.956474883 | 1.14E-06 |
| TUCP_001334 | XLOC_051295 | ENSRNOT00000084417 | 0.956121263  | 1.19E-06 |
| TUCP_001334 | XLOC_051295 | ENSRNOT00000006205 | 0.958593031  | 8.94E-07 |
| TUCP_001334 | XLOC_051295 | ENSRNOT00000067907 | 0.970050254  | 1.80E-07 |
| TUCP_001334 | XLOC_051295 | ENSRNOT00000072771 | -0.951650671 | 1.92E-06 |
| TUCP_001334 | XLOC_051295 | ENSRNOT00000005381 | -0.95718205  | 1.05E-06 |
| TUCP_001334 | XLOC_051295 | ENSRNOT00000011874 | -0.960821063 | 6.81E-07 |
| TUCP_001334 | XLOC_051295 | ENSRNOT00000005144 | -0.955930042 | 1.22E-06 |
| TUCP_001334 | XLOC_051295 | ENSRNOT00000004551 | -0.958744875 | 8.78E-07 |
| TUCP_001334 | XLOC_051295 | ENSRNOT00000091527 | 0.950696774  | 2.11E-06 |
| TUCP_001334 | XLOC_051295 | ENSRNOT00000009028 | -0.954615017 | 1.40E-06 |
| TUCP_001334 | XLOC_051295 | ENSRNOT00000085362 | -0.971197652 | 1.49E-07 |
| TUCP_001334 | XLOC_051295 | ENSRNOT00000027337 | -0.954512437 | 1.42E-06 |
| TUCP_001334 | XLOC_051295 | ENSRNOT00000023601 | -0.972156718 | 1.26E-07 |
| TUCP_001334 | XLOC_051295 | ENSRNOT00000019759 | -0.950565405 | 2.14E-06 |
| TUCP_001334 | XLOC_051295 | ENSRNOT00000066211 | 0.95716807   | 1.06E-06 |
| TUCP_001334 | XLOC_051295 | ENSRNOT00000074054 | -0.95336491  | 1.61E-06 |
| TUCP_001337 | XLOC_051303 | ENSRNOT00000055124 | 0.96480914   | 4.01E-07 |
| TUCP_001337 | XLOC_051303 | ENSRNOT00000010092 | 0.959915012  | 7.62E-07 |
| TUCP_001337 | XLOC_051303 | ENSRNOT00000052003 | 0.958778145  | 8.75E-07 |

|             |             |                    |              |          |
|-------------|-------------|--------------------|--------------|----------|
| TUCP_001337 | XLOC_051303 | ENSRNOT00000081830 | 0.971867067  | 1.32E-07 |
| TUCP_001337 | XLOC_051303 | ENSRNOT00000047527 | 0.966026344  | 3.37E-07 |
| TUCP_001337 | XLOC_051303 | ENSRNOT00000027933 | 0.959436288  | 8.08E-07 |
| TUCP_001337 | XLOC_051303 | ENSRNOT00000076802 | 0.950047768  | 2.25E-06 |
| TUCP_001337 | XLOC_051303 | ENSRNOT00000005726 | 0.95756991   | 1.01E-06 |
| TUCP_001337 | XLOC_051303 | ENSRNOT00000052367 | 0.956544022  | 1.13E-06 |
| TUCP_001337 | XLOC_051303 | ENSRNOT00000082289 | 0.95711201   | 1.06E-06 |
| TUCP_001337 | XLOC_051303 | ENSRNOT00000050968 | 0.954809822  | 1.38E-06 |
| TUCP_001337 | XLOC_051303 | ENSRNOT00000082143 | 0.974026855  | 8.91E-08 |
| TUCP_001337 | XLOC_051303 | ENSRNOT00000047700 | 0.951395048  | 1.97E-06 |
| TUCP_001337 | XLOC_051303 | ENSRNOT00000092516 | 0.97396696   | 9.01E-08 |
| TUCP_001337 | XLOC_051303 | ENSRNOT00000057433 | 0.977383778  | 4.49E-08 |
| TUCP_001337 | XLOC_051303 | ENSRNOT00000066062 | -0.958898362 | 8.62E-07 |
| TUCP_001337 | XLOC_051303 | ENSRNOT00000072810 | 0.965552461  | 3.61E-07 |
| TUCP_001336 | XLOC_051303 | ENSRNOT00000008961 | 0.960510971  | 7.08E-07 |
| TUCP_001336 | XLOC_051303 | ENSRNOT00000039284 | 0.9540259    | 1.50E-06 |
| TUCP_001336 | XLOC_051303 | ENSRNOT00000001570 | 0.955056079  | 1.34E-06 |
| TUCP_001336 | XLOC_051303 | ENSRNOT00000043258 | 0.959734123  | 7.79E-07 |
| TUCP_001336 | XLOC_051303 | ENSRNOT00000020071 | 0.957526618  | 1.01E-06 |
| TUCP_001336 | XLOC_051303 | ENSRNOT00000076802 | 0.960149195  | 7.40E-07 |
| TUCP_001336 | XLOC_051303 | ENSRNOT00000074738 | 0.979402392  | 2.82E-08 |
| TUCP_001336 | XLOC_051303 | ENSRNOT00000084429 | 0.986203864  | 3.85E-09 |
| TUCP_001336 | XLOC_051303 | ENSRNOT00000081108 | 0.972829549  | 1.11E-07 |
| TUCP_001336 | XLOC_051303 | ENSRNOT00000030532 | 0.967381591  | 2.75E-07 |
| TUCP_001336 | XLOC_051303 | ENSRNOT00000031025 | 0.975593173  | 6.55E-08 |
| TUCP_001336 | XLOC_051303 | ENSRNOT00000056551 | 0.968856544  | 2.19E-07 |
| TUCP_001336 | XLOC_051303 | ENSRNOT00000054757 | 0.959942151  | 7.59E-07 |
| TUCP_001336 | XLOC_051303 | ENSRNOT0000001853  | 0.966190427  | 3.29E-07 |
| TUCP_001336 | XLOC_051303 | ENSRNOT00000077134 | 0.977616686  | 4.26E-08 |
| TUCP_001336 | XLOC_051303 | ENSRNOT00000038494 | 0.967206415  | 2.83E-07 |
| TUCP_001336 | XLOC_051303 | ENSRNOT00000055127 | 0.954852515  | 1.37E-06 |
| TUCP_001336 | XLOC_051303 | ENSRNOT00000039263 | 0.975562952  | 6.59E-08 |
| TUCP_001336 | XLOC_051303 | ENSRNOT00000078478 | 0.966839077  | 2.99E-07 |
| TUCP_001336 | XLOC_051303 | ENSRNOT00000088707 | 0.969478271  | 1.98E-07 |
| TUCP_001336 | XLOC_051303 | ENSRNOT00000043486 | 0.99151388   | 3.42E-10 |
| TUCP_001336 | XLOC_051303 | ENSRNOT00000059660 | 0.958828532  | 8.69E-07 |
| TUCP_001336 | XLOC_051303 | ENSRNOT00000041741 | 0.975525503  | 6.64E-08 |
| TUCP_001336 | XLOC_051303 | ENSRNOT00000076910 | 0.967718606  | 2.62E-07 |
| TUCP_001336 | XLOC_051303 | ENSRNOT00000024718 | 0.964605732  | 4.12E-07 |
| TUCP_001336 | XLOC_051303 | ENSRNOT00000009620 | 0.963778634  | 4.62E-07 |
| TUCP_001336 | XLOC_051303 | ENSRNOT00000085570 | 0.964470136  | 4.20E-07 |
| TUCP_001336 | XLOC_051303 | ENSRNOT00000025564 | 0.969182759  | 2.08E-07 |
| TUCP_001336 | XLOC_051303 | ENSRNOT00000073547 | 0.962550136  | 5.45E-07 |
| TUCP_001336 | XLOC_051303 | ENSRNOT00000043434 | 0.959589455  | 7.93E-07 |
| TUCP_001336 | XLOC_051303 | ENSRNOT00000038426 | 0.986359632  | 3.63E-09 |
| TUCP_001336 | XLOC_051303 | ENSRNOT00000083067 | 0.978618652  | 3.40E-08 |
| TUCP_001336 | XLOC_051303 | ENSRNOT00000039876 | 0.963272092  | 4.95E-07 |
| TUCP_001336 | XLOC_051303 | ENSRNOT00000092272 | 0.955584747  | 1.26E-06 |
| TUCP_001336 | XLOC_051303 | ENSRNOT00000002695 | 0.970030378  | 1.81E-07 |
| TUCP_001336 | XLOC_051303 | ENSRNOT00000005726 | 0.953623522  | 1.56E-06 |
| TUCP_001336 | XLOC_051303 | ENSRNOT00000087603 | 0.966522288  | 3.13E-07 |

|             |             |                    |              |          |
|-------------|-------------|--------------------|--------------|----------|
| TUCP_001336 | XLOC_051303 | ENSRNOT00000015556 | 0.953690149  | 1.55E-06 |
| TUCP_001336 | XLOC_051303 | ENSRNOT00000029990 | 0.98110163   | 1.84E-08 |
| TUCP_001336 | XLOC_051303 | ENSRNOT00000023504 | 0.963146669  | 5.03E-07 |
| TUCP_001336 | XLOC_051303 | ENSRNOT00000059162 | 0.951170473  | 2.01E-06 |
| TUCP_001336 | XLOC_051303 | ENSRNOT00000047564 | 0.967711374  | 2.62E-07 |
| TUCP_001336 | XLOC_051303 | ENSRNOT00000084847 | 0.964982076  | 3.91E-07 |
| TUCP_001336 | XLOC_051303 | ENSRNOT00000060765 | 0.974502777  | 8.13E-08 |
| TUCP_001336 | XLOC_051303 | ENSRNOT00000050656 | 0.965152593  | 3.82E-07 |
| TUCP_001336 | XLOC_051303 | ENSRNOT00000052003 | 0.951992247  | 1.85E-06 |
| TUCP_001336 | XLOC_051303 | ENSRNOT00000090654 | 0.951140363  | 2.02E-06 |
| TUCP_000790 | XLOC_029885 | ENSRNOT00000019738 | 0.959352108  | 8.16E-07 |
| TUCP_000658 | XLOC_025072 | ENSRNOT00000055271 | 0.968352582  | 2.37E-07 |
| TUCP_000129 | XLOC_003437 | ENSRNOT00000006188 | -0.974492528 | 8.15E-08 |
| TUCP_000129 | XLOC_003437 | ENSRNOT00000025314 | 0.956448922  | 1.15E-06 |
| TUCP_000129 | XLOC_003437 | ENSRNOT00000006186 | 0.967022494  | 2.91E-07 |
| TUCP_000129 | XLOC_003437 | ENSRNOT00000078349 | -0.962152285 | 5.74E-07 |
| TUCP_000129 | XLOC_003437 | ENSRNOT00000013743 | 0.963764659  | 4.63E-07 |
| TUCP_000129 | XLOC_003437 | ENSRNOT00000075397 | 0.967329507  | 2.77E-07 |
| TUCP_000129 | XLOC_003437 | ENSRNOT00000032926 | -0.964868839 | 3.97E-07 |
| TUCP_000129 | XLOC_003437 | ENSRNOT00000019104 | -0.960542789 | 7.05E-07 |
| TUCP_000129 | XLOC_003437 | ENSRNOT00000089319 | 0.955078583  | 1.34E-06 |
| TUCP_000129 | XLOC_003437 | ENSRNOT00000086706 | 0.963626779  | 4.72E-07 |
| TUCP_000129 | XLOC_003437 | ENSRNOT00000076916 | 0.960975439  | 6.68E-07 |
| TUCP_000129 | XLOC_003437 | ENSRNOT00000004017 | 0.987027381  | 2.83E-09 |
| TUCP_000129 | XLOC_003437 | ENSRNOT00000010030 | -0.965527967 | 3.62E-07 |
| TUCP_000129 | XLOC_003437 | ENSRNOT00000011130 | -0.957712693 | 9.92E-07 |
| TUCP_000129 | XLOC_003437 | ENSRNOT00000031692 | -0.962642094 | 5.38E-07 |
| TUCP_000129 | XLOC_003437 | ENSRNOT00000014384 | -0.963408698 | 4.86E-07 |
| TUCP_000129 | XLOC_003437 | ENSRNOT00000030850 | 0.958936782  | 8.58E-07 |
| TUCP_000129 | XLOC_003437 | ENSRNOT00000037203 | -0.955467448 | 1.28E-06 |
| TUCP_000129 | XLOC_003437 | ENSRNOT00000006752 | 0.976991896  | 4.89E-08 |
| TUCP_000129 | XLOC_003437 | ENSRNOT00000031672 | -0.971236878 | 1.48E-07 |
| TUCP_000129 | XLOC_003437 | ENSRNOT00000073370 | 0.966618306  | 3.09E-07 |
| TUCP_000129 | XLOC_003437 | ENSRNOT00000019921 | 0.964952641  | 3.93E-07 |
| TUCP_000129 | XLOC_003437 | ENSRNOT00000065978 | 0.965339437  | 3.72E-07 |
| TUCP_000129 | XLOC_003437 | ENSRNOT00000025767 | 0.957915314  | 9.69E-07 |
| TUCP_000129 | XLOC_003437 | ENSRNOT00000035320 | -0.95277613  | 1.71E-06 |
| TUCP_000129 | XLOC_003437 | ENSRNOT00000077999 | 0.969259618  | 2.05E-07 |
| TUCP_000129 | XLOC_003437 | ENSRNOT00000085228 | 0.953203127  | 1.63E-06 |
| TUCP_000129 | XLOC_003437 | ENSRNOT00000013286 | 0.982237326  | 1.35E-08 |
| TUCP_000129 | XLOC_003437 | ENSRNOT00000015188 | 0.966220943  | 3.27E-07 |
| TUCP_000129 | XLOC_003437 | ENSRNOT00000017648 | -0.954466971 | 1.43E-06 |
| TUCP_000129 | XLOC_003437 | ENSRNOT00000018488 | -0.969563791 | 1.95E-07 |
| TUCP_000129 | XLOC_003437 | ENSRNOT00000072518 | 0.951979793  | 1.85E-06 |
| TUCP_000129 | XLOC_003437 | ENSRNOT00000018952 | 0.955676867  | 1.25E-06 |
| TUCP_000129 | XLOC_003437 | ENSRNOT00000075934 | -0.952023538 | 1.85E-06 |
| TUCP_000129 | XLOC_003437 | ENSRNOT00000030074 | 0.965285856  | 3.75E-07 |
| TUCP_000129 | XLOC_003437 | ENSRNOT00000010141 | 0.950157907  | 2.23E-06 |
| TUCP_000129 | XLOC_003437 | ENSRNOT00000067391 | -0.963687459 | 4.68E-07 |
| TUCP_000129 | XLOC_003437 | ENSRNOT00000009150 | 0.965629936  | 3.57E-07 |
| TUCP_000129 | XLOC_003437 | ENSRNOT00000084709 | 0.978726568  | 3.31E-08 |



|             |             |                    |              |          |
|-------------|-------------|--------------------|--------------|----------|
| TUCP_000129 | XLOC_003437 | ENSRNOT00000029179 | -0.960279381 | 7.28E-07 |
| TUCP_000129 | XLOC_003437 | ENSRNOT00000009156 | 0.968511217  | 2.31E-07 |
| TUCP_000129 | XLOC_003437 | ENSRNOT00000026481 | 0.959044903  | 8.47E-07 |
| TUCP_000129 | XLOC_003437 | ENSRNOT00000043752 | -0.952877719 | 1.69E-06 |
| TUCP_000129 | XLOC_003437 | ENSRNOT00000087297 | -0.95118213  | 2.01E-06 |
| TUCP_000129 | XLOC_003437 | ENSRNOT00000082709 | -0.963794878 | 4.61E-07 |
| TUCP_000129 | XLOC_003437 | ENSRNOT00000072299 | 0.952732374  | 1.72E-06 |
| TUCP_000129 | XLOC_003437 | ENSRNOT00000072357 | -0.978122005 | 3.81E-08 |
| TUCP_000129 | XLOC_003437 | ENSRNOT00000016132 | -0.970985973 | 1.54E-07 |
| TUCP_000129 | XLOC_003437 | ENSRNOT00000013067 | -0.980760941 | 2.01E-08 |
| TUCP_000129 | XLOC_003437 | ENSRNOT00000074515 | -0.956721705 | 1.11E-06 |
| TUCP_000129 | XLOC_003437 | ENSRNOT00000075843 | -0.952116556 | 1.83E-06 |
| TUCP_000129 | XLOC_003437 | ENSRNOT00000046486 | -0.95747645  | 1.02E-06 |
| TUCP_000129 | XLOC_003437 | ENSRNOT00000027145 | -0.96340013  | 4.86E-07 |
| TUCP_000129 | XLOC_003437 | ENSRNOT00000002313 | -0.955480964 | 1.28E-06 |
| TUCP_000129 | XLOC_003437 | ENSRNOT00000034692 | -0.959965058 | 7.57E-07 |
| TUCP_000129 | XLOC_003437 | ENSRNOT00000016637 | -0.970476678 | 1.68E-07 |
| TUCP_000129 | XLOC_003437 | ENSRNOT00000038994 | -0.958087048 | 9.49E-07 |
| TUCP_000129 | XLOC_003437 | ENSRNOT00000019531 | -0.963207136 | 4.99E-07 |
| TUCP_000129 | XLOC_003437 | ENSRNOT00000074586 | -0.976574323 | 5.34E-08 |
| TUCP_000129 | XLOC_003437 | ENSRNOT00000075444 | -0.956011052 | 1.20E-06 |
| TUCP_000129 | XLOC_003437 | ENSRNOT00000045765 | -0.961877178 | 5.95E-07 |
| TUCP_000129 | XLOC_003437 | ENSRNOT00000088214 | 0.982891297  | 1.12E-08 |
| TUCP_000129 | XLOC_003437 | ENSRNOT00000084031 | 0.952835652  | 1.70E-06 |
| TUCP_000129 | XLOC_003437 | ENSRNOT00000011880 | 0.975998666  | 6.03E-08 |
| TUCP_000129 | XLOC_003437 | ENSRNOT00000005486 | -0.962229121 | 5.68E-07 |
| TUCP_000129 | XLOC_003437 | ENSRNOT00000023989 | 0.955003377  | 1.35E-06 |
| TUCP_000129 | XLOC_003437 | ENSRNOT00000003992 | -0.959426933 | 8.09E-07 |
| TUCP_000129 | XLOC_003437 | ENSRNOT00000050515 | 0.977678244  | 4.20E-08 |
| TUCP_000129 | XLOC_003437 | ENSRNOT00000077706 | 0.95246628   | 1.76E-06 |
| TUCP_000129 | XLOC_003437 | ENSRNOT00000089980 | -0.971874479 | 1.32E-07 |
| TUCP_000129 | XLOC_003437 | ENSRNOT00000078073 | -0.950969296 | 2.05E-06 |
| TUCP_000129 | XLOC_003437 | ENSRNOT00000055602 | -0.971815156 | 1.34E-07 |
| TUCP_000129 | XLOC_003437 | ENSRNOT00000046745 | 0.961787291  | 6.02E-07 |
| TUCP_000129 | XLOC_003437 | ENSRNOT00000055607 | -0.974900853 | 7.52E-08 |
| TUCP_000129 | XLOC_003437 | ENSRNOT00000089294 | -0.958509418 | 9.03E-07 |
| TUCP_000129 | XLOC_003437 | ENSRNOT00000082627 | -0.964314969 | 4.29E-07 |
| TUCP_000129 | XLOC_003437 | ENSRNOT00000023876 | 0.970667855  | 1.63E-07 |
| TUCP_000129 | XLOC_003437 | ENSRNOT00000061201 | -0.975515128 | 6.65E-08 |
| TUCP_000129 | XLOC_003437 | ENSRNOT00000013801 | 0.960686723  | 6.92E-07 |
| TUCP_000129 | XLOC_003437 | ENSRNOT00000002187 | -0.969788503 | 1.88E-07 |
| TUCP_000129 | XLOC_003437 | ENSRNOT00000091488 | 0.950758966  | 2.10E-06 |
| TUCP_000129 | XLOC_003437 | ENSRNOT00000049285 | -0.969913911 | 1.85E-07 |
| TUCP_000129 | XLOC_003437 | ENSRNOT00000015239 | -0.959505128 | 8.01E-07 |
| TUCP_000129 | XLOC_003437 | ENSRNOT00000025934 | -0.968408139 | 2.35E-07 |
| TUCP_000129 | XLOC_003437 | ENSRNOT00000074649 | 0.971599106  | 1.39E-07 |
| TUCP_000129 | XLOC_003437 | ENSRNOT00000035277 | 0.9754149    | 6.79E-08 |
| TUCP_000129 | XLOC_003437 | ENSRNOT00000018877 | -0.953145029 | 1.64E-06 |
| TUCP_000129 | XLOC_003437 | ENSRNOT00000077146 | -0.976689778 | 5.21E-08 |
| TUCP_000129 | XLOC_003437 | ENSRNOT00000044847 | -0.963901851 | 4.54E-07 |
| TUCP_000129 | XLOC_003437 | ENSRNOT00000052063 | 0.952006727  | 1.85E-06 |

|             |             |                    |              |          |
|-------------|-------------|--------------------|--------------|----------|
| TUCP_000129 | XLOC_003437 | ENSRNOT00000060002 | -0.971293968 | 1.46E-07 |
| TUCP_000129 | XLOC_003437 | ENSRNOT00000086456 | -0.95475515  | 1.38E-06 |
| TUCP_000129 | XLOC_003437 | ENSRNOT00000036959 | -0.953377496 | 1.60E-06 |
| TUCP_000129 | XLOC_003437 | ENSRNOT00000075209 | -0.95819534  | 9.37E-07 |
| TUCP_000129 | XLOC_003437 | ENSRNOT00000006395 | -0.960657051 | 6.95E-07 |
| TUCP_000129 | XLOC_003437 | ENSRNOT00000023977 | -0.97080474  | 1.59E-07 |
| TUCP_000129 | XLOC_003437 | ENSRNOT00000066133 | -0.982895316 | 1.12E-08 |
| TUCP_000129 | XLOC_003437 | ENSRNOT00000048933 | -0.957681465 | 9.95E-07 |
| TUCP_000129 | XLOC_003437 | ENSRNOT00000027970 | 0.962634163  | 5.39E-07 |
| TUCP_000129 | XLOC_003437 | ENSRNOT00000035385 | 0.975252505  | 7.01E-08 |
| TUCP_000129 | XLOC_003437 | ENSRNOT00000057738 | 0.953671049  | 1.55E-06 |
| TUCP_000129 | XLOC_003437 | ENSRNOT00000019487 | 0.953667686  | 1.56E-06 |
| TUCP_000129 | XLOC_003437 | ENSRNOT00000018170 | -0.952072706 | 1.84E-06 |
| TUCP_000129 | XLOC_003437 | ENSRNOT00000080443 | 0.954760533  | 1.38E-06 |
| TUCP_000129 | XLOC_003437 | ENSRNOT00000010915 | -0.955266855 | 1.31E-06 |
| TUCP_000129 | XLOC_003437 | ENSRNOT00000064535 | -0.982748707 | 1.17E-08 |
| TUCP_000129 | XLOC_003437 | ENSRNOT00000010748 | 0.964994806  | 3.90E-07 |
| TUCP_000129 | XLOC_003437 | ENSRNOT00000087408 | 0.971585376  | 1.39E-07 |
| TUCP_000129 | XLOC_003437 | ENSRNOT00000085295 | -0.954988737 | 1.35E-06 |
| TUCP_000129 | XLOC_003437 | ENSRNOT00000072632 | -0.978413701 | 3.56E-08 |
| TUCP_000129 | XLOC_003437 | ENSRNOT00000002114 | -0.968988732 | 2.14E-07 |
| TUCP_000129 | XLOC_003437 | ENSRNOT00000039102 | 0.971229325  | 1.48E-07 |
| TUCP_000129 | XLOC_003437 | ENSRNOT00000086260 | -0.972740543 | 1.13E-07 |
| TUCP_000129 | XLOC_003437 | ENSRNOT00000009742 | -0.954738215 | 1.39E-06 |
| TUCP_000129 | XLOC_003437 | ENSRNOT00000010983 | 0.977370648  | 4.50E-08 |
| TUCP_000129 | XLOC_003437 | ENSRNOT00000060698 | -0.980601856 | 2.09E-08 |
| TUCP_000129 | XLOC_003437 | ENSRNOT00000058351 | 0.972649826  | 1.15E-07 |
| TUCP_000129 | XLOC_003437 | ENSRNOT00000045946 | 0.956103647  | 1.19E-06 |
| TUCP_000129 | XLOC_003437 | ENSRNOT00000017998 | 0.968670146  | 2.26E-07 |
| TUCP_000129 | XLOC_003437 | ENSRNOT00000017995 | 0.961246288  | 6.45E-07 |
| TUCP_000129 | XLOC_003437 | ENSRNOT00000017776 | 0.965747384  | 3.51E-07 |
| TUCP_000129 | XLOC_003437 | ENSRNOT00000005686 | -0.969095002 | 2.11E-07 |
| TUCP_000129 | XLOC_003437 | ENSRNOT00000021534 | -0.956103568 | 1.19E-06 |
| TUCP_000129 | XLOC_003437 | ENSRNOT00000023628 | -0.977152658 | 4.72E-08 |
| TUCP_000129 | XLOC_003437 | ENSRNOT00000087033 | -0.955049244 | 1.34E-06 |
| TUCP_000129 | XLOC_003437 | ENSRNOT00000037809 | -0.961084713 | 6.58E-07 |
| TUCP_000129 | XLOC_003437 | ENSRNOT00000002028 | 0.95628797   | 1.17E-06 |
| TUCP_000129 | XLOC_003437 | ENSRNOT00000013321 | 0.963575745  | 4.75E-07 |
| TUCP_000129 | XLOC_003437 | ENSRNOT00000016776 | -0.950952614 | 2.06E-06 |
| TUCP_000129 | XLOC_003437 | ENSRNOT00000008987 | -0.956314187 | 1.16E-06 |
| TUCP_000129 | XLOC_003437 | ENSRNOT00000092876 | -0.957931615 | 9.67E-07 |
| TUCP_000129 | XLOC_003437 | ENSRNOT00000024253 | 0.982678636  | 1.19E-08 |
| TUCP_000129 | XLOC_003437 | ENSRNOT00000059854 | -0.951649374 | 1.92E-06 |
| TUCP_000129 | XLOC_003437 | ENSRNOT00000045833 | 0.986705707  | 3.20E-09 |
| TUCP_000129 | XLOC_003437 | ENSRNOT00000009080 | -0.957991899 | 9.60E-07 |
| TUCP_000129 | XLOC_003437 | ENSRNOT00000063930 | -0.973126267 | 1.06E-07 |
| TUCP_000129 | XLOC_003437 | ENSRNOT00000048613 | 0.956851573  | 1.10E-06 |
| TUCP_000129 | XLOC_003437 | ENSRNOT00000013025 | -0.96789117  | 2.55E-07 |
| TUCP_000129 | XLOC_003437 | ENSRNOT00000041237 | -0.959668125 | 7.85E-07 |
| TUCP_000129 | XLOC_003437 | ENSRNOT00000023430 | -0.96017886  | 7.38E-07 |
| TUCP_000129 | XLOC_003437 | ENSRNOT00000021114 | 0.958896868  | 8.62E-07 |

|             |             |                    |              |          |
|-------------|-------------|--------------------|--------------|----------|
| TUCP_000129 | XLOC_003437 | ENSRNOT00000087838 | -0.957145463 | 1.06E-06 |
| TUCP_000129 | XLOC_003437 | ENSRNOT00000013613 | -0.957264704 | 1.04E-06 |
| TUCP_000129 | XLOC_003437 | ENSRNOT00000078884 | -0.975713137 | 6.39E-08 |
| TUCP_000129 | XLOC_003437 | ENSRNOT00000003326 | -0.954214475 | 1.47E-06 |
| TUCP_000129 | XLOC_003437 | ENSRNOT00000047836 | -0.956307774 | 1.17E-06 |
| TUCP_000129 | XLOC_003437 | ENSRNOT00000015476 | -0.965948083 | 3.41E-07 |
| TUCP_000129 | XLOC_003437 | ENSRNOT00000021621 | -0.96325295  | 4.96E-07 |
| TUCP_000129 | XLOC_003437 | ENSRNOT00000020207 | 0.975067406  | 7.28E-08 |
| TUCP_000129 | XLOC_003437 | ENSRNOT00000074683 | 0.997234756  | 1.27E-12 |
| TUCP_000129 | XLOC_003437 | ENSRNOT00000025079 | -0.967080947 | 2.88E-07 |
| TUCP_000129 | XLOC_003437 | ENSRNOT00000048754 | -0.963605516 | 4.73E-07 |
| TUCP_000129 | XLOC_003437 | ENSRNOT00000077060 | 0.952234361  | 1.81E-06 |
| TUCP_000129 | XLOC_003437 | ENSRNOT00000003950 | -0.950777979 | 2.09E-06 |
| TUCP_000129 | XLOC_003437 | ENSRNOT00000021458 | -0.953070871 | 1.66E-06 |
| TUCP_000129 | XLOC_003437 | ENSRNOT00000007824 | -0.9617246   | 6.07E-07 |
| TUCP_000129 | XLOC_003437 | ENSRNOT00000020681 | -0.973220678 | 1.04E-07 |
| TUCP_000129 | XLOC_003437 | ENSRNOT00000057898 | -0.9665415   | 3.12E-07 |
| TUCP_000129 | XLOC_003437 | ENSRNOT00000024677 | 0.968638247  | 2.27E-07 |
| TUCP_000129 | XLOC_003437 | ENSRNOT00000022432 | -0.95332413  | 1.61E-06 |
| TUCP_000129 | XLOC_003437 | ENSRNOT00000056100 | -0.954596652 | 1.41E-06 |
| TUCP_000129 | XLOC_003437 | ENSRNOT00000009811 | 0.962777597  | 5.29E-07 |
| TUCP_000129 | XLOC_003437 | ENSRNOT00000077231 | 0.962765628  | 5.29E-07 |
| TUCP_000129 | XLOC_003437 | ENSRNOT00000030798 | -0.957306782 | 1.04E-06 |
| TUCP_000129 | XLOC_003437 | ENSRNOT00000017486 | 0.979974808  | 2.45E-08 |
| TUCP_000129 | XLOC_003437 | ENSRNOT00000071540 | 0.952342021  | 1.79E-06 |
| TUCP_000129 | XLOC_003437 | ENSRNOT00000031701 | -0.954784247 | 1.38E-06 |
| TUCP_000129 | XLOC_003437 | ENSRNOT00000072849 | -0.965514944 | 3.62E-07 |
| TUCP_000129 | XLOC_003437 | ENSRNOT00000073643 | -0.958758353 | 8.77E-07 |
| TUCP_000129 | XLOC_003437 | ENSRNOT00000052002 | 0.96444648   | 4.21E-07 |
| TUCP_000129 | XLOC_003437 | ENSRNOT00000022502 | -0.965931894 | 3.41E-07 |
| TUCP_000129 | XLOC_003437 | ENSRNOT00000017556 | 0.963805386  | 4.60E-07 |
| TUCP_000129 | XLOC_003437 | ENSRNOT00000085545 | -0.956549699 | 1.13E-06 |
| TUCP_000129 | XLOC_003437 | ENSRNOT00000089545 | -0.953295439 | 1.62E-06 |
| TUCP_000129 | XLOC_003437 | ENSRNOT00000021803 | -0.956882188 | 1.09E-06 |
| TUCP_000129 | XLOC_003437 | ENSRNOT00000025856 | -0.958480449 | 9.06E-07 |
| TUCP_000129 | XLOC_003437 | ENSRNOT00000004351 | -0.95790234  | 9.70E-07 |
| TUCP_000129 | XLOC_003437 | ENSRNOT00000018122 | 0.977561336  | 4.31E-08 |
| TUCP_000129 | XLOC_003437 | ENSRNOT00000072118 | 0.956964677  | 1.08E-06 |
| TUCP_000129 | XLOC_003437 | ENSRNOT00000003787 | -0.97119042  | 1.49E-07 |
| TUCP_000129 | XLOC_003437 | ENSRNOT00000014506 | -0.963824113 | 4.59E-07 |
| TUCP_000129 | XLOC_003437 | ENSRNOT00000023262 | -0.971965551 | 1.30E-07 |
| TUCP_000129 | XLOC_003437 | ENSRNOT00000059246 | 0.951647588  | 1.92E-06 |
| TUCP_000129 | XLOC_003437 | ENSRNOT00000077908 | 0.959587872  | 7.93E-07 |
| TUCP_000129 | XLOC_003437 | ENSRNOT00000014859 | -0.953884543 | 1.52E-06 |
| TUCP_000129 | XLOC_003437 | ENSRNOT00000025104 | -0.958633154 | 8.90E-07 |
| TUCP_000129 | XLOC_003437 | ENSRNOT00000026312 | 0.993969632  | 6.22E-11 |
| TUCP_000129 | XLOC_003437 | ENSRNOT00000005604 | 0.986169837  | 3.89E-09 |
| TUCP_000129 | XLOC_003437 | ENSRNOT00000008317 | -0.951699661 | 1.91E-06 |
| TUCP_000129 | XLOC_003437 | ENSRNOT00000068381 | 0.980223921  | 2.30E-08 |
| TUCP_000129 | XLOC_003437 | ENSRNOT00000068026 | -0.970307797 | 1.73E-07 |
| TUCP_000129 | XLOC_003437 | ENSRNOT00000085621 | 0.967442242  | 2.73E-07 |

|             |             |                    |              |          |
|-------------|-------------|--------------------|--------------|----------|
| TUCP_000129 | XLOC_003437 | ENSRNOT00000014821 | -0.960804774 | 6.82E-07 |
| TUCP_000129 | XLOC_003437 | ENSRNOT00000007259 | -0.951362277 | 1.98E-06 |
| TUCP_000129 | XLOC_003437 | ENSRNOT00000058382 | 0.965485185  | 3.64E-07 |
| TUCP_000129 | XLOC_003437 | ENSRNOT00000005459 | 0.966285565  | 3.24E-07 |
| TUCP_000129 | XLOC_003437 | ENSRNOT00000026531 | -0.985738425 | 4.54E-09 |
| TUCP_000129 | XLOC_003437 | ENSRNOT00000035605 | 0.957503277  | 1.02E-06 |
| TUCP_000129 | XLOC_003437 | ENSRNOT00000025221 | -0.953775247 | 1.54E-06 |
| TUCP_000129 | XLOC_003437 | ENSRNOT00000017746 | -0.963103988 | 5.06E-07 |
| TUCP_000129 | XLOC_003437 | ENSRNOT00000081725 | 0.96766382   | 2.64E-07 |
| TUCP_000129 | XLOC_003437 | ENSRNOT00000028744 | -0.951037144 | 2.04E-06 |
| TUCP_000129 | XLOC_003437 | ENSRNOT00000009135 | 0.952683079  | 1.72E-06 |
| TUCP_000129 | XLOC_003437 | ENSRNOT00000024452 | -0.966272355 | 3.25E-07 |
| TUCP_000129 | XLOC_003437 | ENSRNOT00000011277 | 0.954112492  | 1.48E-06 |
| TUCP_000129 | XLOC_003437 | ENSRNOT00000054976 | -0.952866526 | 1.69E-06 |
| TUCP_000129 | XLOC_003437 | ENSRNOT00000028885 | -0.960689268 | 6.92E-07 |
| TUCP_000129 | XLOC_003437 | ENSRNOT00000028888 | 0.962592441  | 5.42E-07 |
| TUCP_000129 | XLOC_003437 | ENSRNOT00000002109 | 0.96349014   | 4.80E-07 |
| TUCP_000129 | XLOC_003437 | ENSRNOT00000029833 | 0.954153375  | 1.48E-06 |
| TUCP_000129 | XLOC_003437 | ENSRNOT00000034487 | -0.952085244 | 1.83E-06 |
| TUCP_000129 | XLOC_003437 | ENSRNOT00000047571 | -0.953833992 | 1.53E-06 |
| TUCP_000129 | XLOC_003437 | ENSRNOT00000003605 | -0.954966755 | 1.35E-06 |
| TUCP_000129 | XLOC_003437 | ENSRNOT00000020809 | -0.950026139 | 2.26E-06 |
| TUCP_000129 | XLOC_003437 | ENSRNOT00000034411 | 0.971023995  | 1.53E-07 |
| TUCP_000129 | XLOC_003437 | ENSRNOT00000001607 | 0.959878701  | 7.65E-07 |
| TUCP_000129 | XLOC_003437 | ENSRNOT00000005839 | 0.952926439  | 1.68E-06 |
| TUCP_000129 | XLOC_003437 | ENSRNOT00000038511 | -0.962352093 | 5.59E-07 |
| TUCP_000129 | XLOC_003437 | ENSRNOT00000085971 | -0.957230818 | 1.05E-06 |
| TUCP_000129 | XLOC_003437 | ENSRNOT00000084597 | -0.965718234 | 3.52E-07 |
| TUCP_000129 | XLOC_003437 | ENSRNOT00000015898 | 0.956580649  | 1.13E-06 |
| TUCP_000129 | XLOC_003437 | ENSRNOT00000022142 | 0.950568422  | 2.14E-06 |
| TUCP_000129 | XLOC_003437 | ENSRNOT00000076300 | -0.953553079 | 1.57E-06 |
| TUCP_000129 | XLOC_003437 | ENSRNOT00000005405 | 0.982012247  | 1.44E-08 |
| TUCP_000129 | XLOC_003437 | ENSRNOT00000077152 | 0.965204737  | 3.79E-07 |
| TUCP_000129 | XLOC_003437 | ENSRNOT00000015537 | 0.975844886  | 6.22E-08 |
| TUCP_000129 | XLOC_003437 | ENSRNOT00000025705 | 0.973219054  | 1.04E-07 |
| TUCP_000129 | XLOC_003437 | ENSRNOT00000019820 | 0.962565158  | 5.44E-07 |
| TUCP_000129 | XLOC_003437 | ENSRNOT00000004172 | 0.964409544  | 4.24E-07 |
| TUCP_000129 | XLOC_003437 | ENSRNOT00000023965 | -0.966277531 | 3.25E-07 |
| TUCP_000129 | XLOC_003437 | ENSRNOT00000011694 | -0.952792869 | 1.71E-06 |
| TUCP_000129 | XLOC_003437 | ENSRNOT00000085279 | 0.984963369  | 5.90E-09 |
| TUCP_000129 | XLOC_003437 | ENSRNOT00000068184 | -0.962034572 | 5.83E-07 |
| TUCP_000129 | XLOC_003437 | ENSRNOT00000015769 | 0.950878166  | 2.07E-06 |
| TUCP_000129 | XLOC_003437 | ENSRNOT00000082904 | 0.980176308  | 2.33E-08 |
| TUCP_000129 | XLOC_003437 | ENSRNOT00000015318 | -0.953365847 | 1.61E-06 |
| TUCP_000129 | XLOC_003437 | ENSRNOT00000015223 | 0.988333662  | 1.67E-09 |
| TUCP_000129 | XLOC_003437 | ENSRNOT00000028907 | 0.974383292  | 8.32E-08 |
| TUCP_000129 | XLOC_003437 | ENSRNOT00000010224 | 0.967739836  | 2.61E-07 |
| TUCP_000129 | XLOC_003437 | ENSRNOT00000087556 | -0.951581594 | 1.93E-06 |
| TUCP_000129 | XLOC_003437 | ENSRNOT00000025887 | -0.968545912 | 2.30E-07 |
| TUCP_000129 | XLOC_003437 | ENSRNOT00000003940 | -0.953646643 | 1.56E-06 |
| TUCP_000129 | XLOC_003437 | ENSRNOT00000017687 | -0.980831999 | 1.97E-08 |

|             |             |                    |              |          |
|-------------|-------------|--------------------|--------------|----------|
| TUCP_000129 | XLOC_003437 | ENSRNOT00000011237 | -0.95493938  | 1.36E-06 |
| TUCP_000129 | XLOC_003437 | ENSRNOT00000007350 | 0.9550492    | 1.34E-06 |
| TUCP_000129 | XLOC_003437 | ENSRNOT00000083578 | 0.960063578  | 7.48E-07 |
| TUCP_000129 | XLOC_003437 | ENSRNOT00000000181 | 0.992303985  | 2.10E-10 |
| TUCP_000129 | XLOC_003437 | ENSRNOT00000090499 | -0.957995974 | 9.60E-07 |
| TUCP_000129 | XLOC_003437 | ENSRNOT00000020297 | 0.960137534  | 7.41E-07 |
| TUCP_000129 | XLOC_003437 | ENSRNOT00000017361 | 0.958085298  | 9.50E-07 |
| TUCP_000129 | XLOC_003437 | ENSRNOT00000045326 | 0.964003941  | 4.48E-07 |
| TUCP_000129 | XLOC_003437 | ENSRNOT00000008074 | -0.971861162 | 1.33E-07 |
| TUCP_000129 | XLOC_003437 | ENSRNOT00000005901 | 0.956927783  | 1.09E-06 |
| TUCP_000129 | XLOC_003437 | ENSRNOT00000074023 | 0.971852128  | 1.33E-07 |
| TUCP_000129 | XLOC_003437 | ENSRNOT00000067170 | -0.956352859 | 1.16E-06 |
| TUCP_000129 | XLOC_003437 | ENSRNOT00000029332 | -0.951218609 | 2.00E-06 |
| TUCP_000129 | XLOC_003437 | ENSRNOT00000018341 | -0.960584028 | 7.01E-07 |
| TUCP_000129 | XLOC_003437 | ENSRNOT00000017385 | -0.952097331 | 1.83E-06 |
| TUCP_000129 | XLOC_003437 | ENSRNOT00000013516 | 0.972792717  | 1.12E-07 |
| TUCP_000129 | XLOC_003437 | ENSRNOT00000057953 | 0.953411718  | 1.60E-06 |
| TUCP_000129 | XLOC_003437 | ENSRNOT00000023037 | 0.967829887  | 2.57E-07 |
| TUCP_000129 | XLOC_003437 | ENSRNOT00000027760 | 0.952919338  | 1.68E-06 |
| TUCP_000129 | XLOC_003437 | ENSRNOT00000018028 | -0.957453118 | 1.02E-06 |
| TUCP_000129 | XLOC_003437 | ENSRNOT00000019519 | 0.960305919  | 7.26E-07 |
| TUCP_000129 | XLOC_003437 | ENSRNOT00000079185 | -0.95421198  | 1.47E-06 |
| TUCP_000129 | XLOC_003437 | ENSRNOT00000022924 | -0.961767613 | 6.03E-07 |
| TUCP_000129 | XLOC_003437 | ENSRNOT00000090461 | 0.965946051  | 3.41E-07 |
| TUCP_000129 | XLOC_003437 | ENSRNOT00000090912 | 0.955722478  | 1.24E-06 |
| TUCP_000129 | XLOC_003437 | ENSRNOT00000010784 | 0.964805338  | 4.01E-07 |
| TUCP_000129 | XLOC_003437 | ENSRNOT00000010783 | -0.964519703 | 4.17E-07 |
| TUCP_000129 | XLOC_003437 | ENSRNOT00000011948 | -0.950228189 | 2.21E-06 |
| TUCP_000129 | XLOC_003437 | ENSRNOT00000033677 | -0.958219342 | 9.35E-07 |
| TUCP_000129 | XLOC_003437 | ENSRNOT00000036931 | -0.964843409 | 3.99E-07 |
| TUCP_000129 | XLOC_003437 | ENSRNOT00000016389 | -0.962972033 | 5.15E-07 |
| TUCP_000129 | XLOC_003437 | ENSRNOT00000011832 | -0.969828871 | 1.87E-07 |
| TUCP_000129 | XLOC_003437 | ENSRNOT00000021030 | -0.971754074 | 1.35E-07 |
| TUCP_000129 | XLOC_003437 | ENSRNOT00000006835 | 0.954125891  | 1.48E-06 |
| TUCP_000129 | XLOC_003437 | ENSRNOT00000077727 | -0.972364949 | 1.21E-07 |
| TUCP_000129 | XLOC_003437 | ENSRNOT00000044346 | -0.983122154 | 1.05E-08 |
| TUCP_000129 | XLOC_003437 | ENSRNOT00000064776 | -0.957022302 | 1.07E-06 |
| TUCP_000129 | XLOC_003437 | ENSRNOT00000020453 | -0.952666457 | 1.73E-06 |
| TUCP_000129 | XLOC_003437 | ENSRNOT00000092068 | 0.959089783  | 8.42E-07 |
| TUCP_000129 | XLOC_003437 | ENSRNOT00000003265 | 0.968304316  | 2.39E-07 |
| TUCP_000129 | XLOC_003437 | ENSRNOT00000086119 | -0.952164541 | 1.82E-06 |
| TUCP_000129 | XLOC_003437 | ENSRNOT00000022190 | -0.971181322 | 1.49E-07 |
| TUCP_000129 | XLOC_003437 | ENSRNOT00000067739 | -0.965902047 | 3.43E-07 |
| TUCP_000129 | XLOC_003437 | ENSRNOT00000030782 | -0.976380228 | 5.56E-08 |
| TUCP_000129 | XLOC_003437 | ENSRNOT00000007882 | -0.957326083 | 1.04E-06 |
| TUCP_000129 | XLOC_003437 | ENSRNOT00000073919 | 0.958848421  | 8.67E-07 |
| TUCP_000129 | XLOC_003437 | ENSRNOT00000067780 | -0.967052604 | 2.89E-07 |
| TUCP_000129 | XLOC_003437 | ENSRNOT00000036658 | -0.963418386 | 4.85E-07 |
| TUCP_000129 | XLOC_003437 | ENSRNOT00000089611 | 0.954692312  | 1.39E-06 |
| TUCP_000129 | XLOC_003437 | ENSRNOT00000073910 | -0.961168797 | 6.51E-07 |
| TUCP_000129 | XLOC_003437 | ENSRNOT00000052422 | 0.958829719  | 8.69E-07 |

|             |             |                    |              |          |
|-------------|-------------|--------------------|--------------|----------|
| TUCP_000129 | XLOC_003437 | ENSRNOT00000039012 | -0.953385609 | 1.60E-06 |
| TUCP_000129 | XLOC_003437 | ENSRNOT00000066098 | -0.962523732 | 5.47E-07 |
| TUCP_000129 | XLOC_003437 | ENSRNOT00000008253 | -0.953657797 | 1.56E-06 |
| TUCP_000129 | XLOC_003437 | ENSRNOT00000064588 | 0.962087392  | 5.79E-07 |
| TUCP_000129 | XLOC_003437 | ENSRNOT00000086590 | 0.974835725  | 7.62E-08 |
| TUCP_000129 | XLOC_003437 | ENSRNOT00000034883 | -0.961943682 | 5.90E-07 |
| TUCP_000129 | XLOC_003437 | ENSRNOT00000049459 | -0.971530655 | 1.40E-07 |
| TUCP_000129 | XLOC_003437 | ENSRNOT00000079801 | -0.961538849 | 6.21E-07 |
| TUCP_000129 | XLOC_003437 | ENSRNOT00000025913 | -0.963493026 | 4.80E-07 |
| TUCP_000129 | XLOC_003437 | ENSRNOT00000005910 | -0.956168646 | 1.18E-06 |
| TUCP_000129 | XLOC_003437 | ENSRNOT00000076485 | -0.958975322 | 8.54E-07 |
| TUCP_000129 | XLOC_003437 | ENSRNOT00000055886 | 0.958133096  | 9.44E-07 |
| TUCP_000129 | XLOC_003437 | ENSRNOT00000029701 | 0.952272594  | 1.80E-06 |
| TUCP_000129 | XLOC_003437 | ENSRNOT00000026988 | -0.953936638 | 1.51E-06 |
| TUCP_000129 | XLOC_003437 | ENSRNOT00000088555 | -0.957333875 | 1.04E-06 |
| TUCP_000129 | XLOC_003437 | ENSRNOT00000029704 | -0.952882113 | 1.69E-06 |
| TUCP_000129 | XLOC_003437 | ENSRNOT00000016722 | 0.950212243  | 2.22E-06 |
| TUCP_000129 | XLOC_003437 | ENSRNOT00000014832 | -0.964076713 | 4.44E-07 |
| TUCP_000129 | XLOC_003437 | ENSRNOT00000000013 | 0.97597863   | 6.05E-08 |
| TUCP_000129 | XLOC_003437 | ENSRNOT00000018477 | -0.97386556  | 9.19E-08 |
| TUCP_000129 | XLOC_003437 | ENSRNOT00000080222 | -0.965502303 | 3.63E-07 |
| TUCP_000129 | XLOC_003437 | ENSRNOT00000018473 | -0.954986653 | 1.35E-06 |
| TUCP_000129 | XLOC_003437 | ENSRNOT00000037955 | -0.965748998 | 3.50E-07 |
| TUCP_000129 | XLOC_003437 | ENSRNOT00000016220 | -0.956641903 | 1.12E-06 |
| TUCP_000129 | XLOC_003437 | ENSRNOT00000004999 | 0.966173842  | 3.30E-07 |
| TUCP_000129 | XLOC_003437 | ENSRNOT00000013463 | 0.956832855  | 1.10E-06 |
| TUCP_000129 | XLOC_003437 | ENSRNOT00000047663 | -0.965828467 | 3.46E-07 |
| TUCP_000129 | XLOC_003437 | ENSRNOT00000029202 | -0.966191353 | 3.29E-07 |
| TUCP_000129 | XLOC_003437 | ENSRNOT00000025791 | -0.960916709 | 6.73E-07 |
| TUCP_000129 | XLOC_003437 | ENSRNOT00000005489 | 0.9573046    | 1.04E-06 |
| TUCP_000129 | XLOC_003437 | ENSRNOT00000025794 | -0.957140922 | 1.06E-06 |
| TUCP_000129 | XLOC_003437 | ENSRNOT00000063951 | 0.976575192  | 5.34E-08 |
| TUCP_000129 | XLOC_003437 | ENSRNOT00000058111 | -0.958016211 | 9.57E-07 |
| TUCP_000129 | XLOC_003437 | ENSRNOT00000084422 | 0.959458913  | 8.06E-07 |
| TUCP_000129 | XLOC_003437 | ENSRNOT00000089933 | 0.954914375  | 1.36E-06 |
| TUCP_000129 | XLOC_003437 | ENSRNOT00000009994 | -0.969039326 | 2.13E-07 |
| TUCP_000129 | XLOC_003437 | ENSRNOT00000078994 | 0.975045823  | 7.31E-08 |
| TUCP_000129 | XLOC_003437 | ENSRNOT00000077367 | -0.954970988 | 1.35E-06 |
| TUCP_000129 | XLOC_003437 | ENSRNOT00000024841 | -0.973687181 | 9.50E-08 |
| TUCP_000129 | XLOC_003437 | ENSRNOT00000009462 | 0.957330394  | 1.04E-06 |
| TUCP_000129 | XLOC_003437 | ENSRNOT00000024924 | -0.961314942 | 6.39E-07 |
| TUCP_000129 | XLOC_003437 | ENSRNOT00000046215 | -0.95532082  | 1.30E-06 |
| TUCP_000129 | XLOC_003437 | ENSRNOT00000018074 | -0.968966285 | 2.15E-07 |
| TUCP_000129 | XLOC_003437 | ENSRNOT00000000124 | -0.954583025 | 1.41E-06 |
| TUCP_000129 | XLOC_003437 | ENSRNOT00000014124 | 0.971884625  | 1.32E-07 |
| TUCP_000129 | XLOC_003437 | ENSRNOT00000043581 | -0.951309149 | 1.99E-06 |
| TUCP_000129 | XLOC_003437 | ENSRNOT00000000120 | 0.963099136  | 5.06E-07 |
| TUCP_000129 | XLOC_003437 | ENSRNOT00000013632 | 0.957918523  | 9.68E-07 |
| TUCP_000129 | XLOC_003437 | ENSRNOT00000078906 | -0.95112778  | 2.02E-06 |
| TUCP_000129 | XLOC_003437 | ENSRNOT00000055442 | 0.966774531  | 3.02E-07 |
| TUCP_000129 | XLOC_003437 | ENSRNOT00000028225 | 0.961667677  | 6.11E-07 |

|             |             |                     |              |          |
|-------------|-------------|---------------------|--------------|----------|
| TUCP_000129 | XLOC_003437 | ENSRNOT00000066561  | -0.952039459 | 1.84E-06 |
| TUCP_000129 | XLOC_003437 | ENSRNOT00000015495  | -0.979125437 | 3.01E-08 |
| TUCP_000129 | XLOC_003437 | ENSRNOT00000067901  | -0.963002166 | 5.13E-07 |
| TUCP_000129 | XLOC_003437 | ENSRNOT00000011511  | -0.95372362  | 1.55E-06 |
| TUCP_000129 | XLOC_003437 | ENSRNOT00000064700  | 0.950858563  | 2.08E-06 |
| TUCP_000129 | XLOC_003437 | ENSRNOT00000036613  | -0.96049681  | 7.09E-07 |
| TUCP_000129 | XLOC_003437 | ENSRNOT00000010024  | 0.953415868  | 1.60E-06 |
| TUCP_000129 | XLOC_003437 | ENSRNOT00000015479  | 0.951548024  | 1.94E-06 |
| TUCP_000129 | XLOC_003437 | ENSRNOT00000019983  | -0.954473268 | 1.43E-06 |
| TUCP_000129 | XLOC_003437 | ENSRNOT00000044885  | 0.953938381  | 1.51E-06 |
| TUCP_000129 | XLOC_003437 | ENSRNOT00000007698  | -0.966824194 | 2.99E-07 |
| TUCP_000129 | XLOC_003437 | ENSRNOT00000020357  | 0.961311704  | 6.40E-07 |
| TUCP_000129 | XLOC_003437 | ENSRNOT00000020051  | 0.967275994  | 2.80E-07 |
| TUCP_000129 | XLOC_003437 | ENSRNOT00000026279  | -0.950603883 | 2.13E-06 |
| TUCP_000129 | XLOC_003437 | ENSRNOT00000087062  | 0.988974502  | 1.26E-09 |
| TUCP_000129 | XLOC_003437 | ENSRNOT00000015678  | -0.969877747 | 1.86E-07 |
| TUCP_000129 | XLOC_003437 | ENSRNOT00000006340  | 0.951508664  | 1.95E-06 |
| TUCP_000129 | XLOC_003437 | ENSRNOT00000082863  | 0.955669032  | 1.25E-06 |
| TUCP_000129 | XLOC_003437 | ENSRNOT00000015393  | -0.953023298 | 1.66E-06 |
| TUCP_000129 | XLOC_003437 | ENSRNOT00000087011  | -0.959136334 | 8.38E-07 |
| TUCP_000129 | XLOC_003437 | ENSRNOT000000071166 | 0.956183776  | 1.18E-06 |
| TUCP_000129 | XLOC_003437 | ENSRNOT00000013851  | -0.973429747 | 9.97E-08 |
| TUCP_000129 | XLOC_003437 | ENSRNOT00000007028  | -0.968790639 | 2.21E-07 |
| TUCP_000129 | XLOC_003437 | ENSRNOT00000022746  | -0.954125014 | 1.48E-06 |
| TUCP_000129 | XLOC_003437 | ENSRNOT00000001507  | 0.957410419  | 1.03E-06 |
| TUCP_000129 | XLOC_003437 | ENSRNOT00000087604  | 0.963866246  | 4.57E-07 |
| TUCP_000129 | XLOC_003437 | ENSRNOT00000039177  | -0.969575553 | 1.95E-07 |
| TUCP_000129 | XLOC_003437 | ENSRNOT00000005620  | -0.950670447 | 2.12E-06 |
| TUCP_000129 | XLOC_003437 | ENSRNOT00000040476  | 0.960349222  | 7.22E-07 |
| TUCP_000129 | XLOC_003437 | ENSRNOT00000022676  | -0.96179851  | 6.01E-07 |
| TUCP_000129 | XLOC_003437 | ENSRNOT00000030082  | 0.960874133  | 6.76E-07 |
| TUCP_000129 | XLOC_003437 | ENSRNOT00000000477  | -0.951485496 | 1.95E-06 |
| TUCP_000129 | XLOC_003437 | ENSRNOT00000000577  | 0.969434001  | 2.00E-07 |
| TUCP_000129 | XLOC_003437 | ENSRNOT00000029328  | 0.972690098  | 1.14E-07 |
| TUCP_000129 | XLOC_003437 | ENSRNOT00000028290  | -0.958672061 | 8.86E-07 |
| TUCP_000129 | XLOC_003437 | ENSRNOT00000061392  | 0.95526051   | 1.31E-06 |
| TUCP_000129 | XLOC_003437 | ENSRNOT00000046490  | -0.958300925 | 9.26E-07 |
| TUCP_000129 | XLOC_003437 | ENSRNOT00000027012  | 0.965101812  | 3.84E-07 |
| TUCP_000129 | XLOC_003437 | ENSRNOT0000001979   | -0.955575032 | 1.26E-06 |
| TUCP_000129 | XLOC_003437 | ENSRNOT00000083968  | -0.971515257 | 1.41E-07 |
| TUCP_000129 | XLOC_003437 | ENSRNOT00000083964  | -0.950063891 | 2.25E-06 |
| TUCP_000129 | XLOC_003437 | ENSRNOT00000026724  | -0.953150333 | 1.64E-06 |
| TUCP_000129 | XLOC_003437 | ENSRNOT00000026831  | 0.955518354  | 1.27E-06 |
| TUCP_000129 | XLOC_003437 | ENSRNOT00000007821  | 0.96271687   | 5.33E-07 |
| TUCP_000129 | XLOC_003437 | ENSRNOT00000037039  | -0.950873957 | 2.07E-06 |
| TUCP_000129 | XLOC_003437 | ENSRNOT00000019133  | 0.95689862   | 1.09E-06 |
| TUCP_000129 | XLOC_003437 | ENSRNOT00000078185  | -0.956204396 | 1.18E-06 |
| TUCP_000129 | XLOC_003437 | ENSRNOT00000024119  | 0.972248758  | 1.24E-07 |
| TUCP_000129 | XLOC_003437 | ENSRNOT00000075800  | -0.954905835 | 1.36E-06 |
| TUCP_000129 | XLOC_003437 | ENSRNOT00000020537  | -0.955789993 | 1.23E-06 |
| TUCP_000129 | XLOC_003437 | ENSRNOT00000006824  | -0.958606335 | 8.93E-07 |

|             |             |                    |              |          |
|-------------|-------------|--------------------|--------------|----------|
| TUCP_000129 | XLOC_003437 | ENSRNOT0000000170  | -0.953356571 | 1.61E-06 |
| TUCP_000129 | XLOC_003437 | ENSRNOT00000036051 | 0.950426095  | 2.17E-06 |
| TUCP_000129 | XLOC_003437 | ENSRNOT00000026249 | -0.973097552 | 1.06E-07 |
| TUCP_000129 | XLOC_003437 | ENSRNOT0000001099  | -0.955386812 | 1.29E-06 |
| TUCP_000129 | XLOC_003437 | ENSRNOT00000085736 | -0.960977665 | 6.67E-07 |
| TUCP_000129 | XLOC_003437 | ENSRNOT00000073193 | -0.954221166 | 1.47E-06 |
| TUCP_000129 | XLOC_003437 | ENSRNOT00000020316 | -0.950412246 | 2.17E-06 |
| TUCP_000129 | XLOC_003437 | ENSRNOT00000006709 | -0.954344218 | 1.45E-06 |
| TUCP_000129 | XLOC_003437 | ENSRNOT00000036666 | 0.952468584  | 1.76E-06 |
| TUCP_000129 | XLOC_003437 | ENSRNOT00000031261 | 0.95834662   | 9.21E-07 |
| TUCP_000129 | XLOC_003437 | ENSRNOT00000040540 | 0.953916017  | 1.51E-06 |
| TUCP_000129 | XLOC_003437 | ENSRNOT00000015518 | -0.969497906 | 1.98E-07 |
| TUCP_000129 | XLOC_003437 | ENSRNOT00000008126 | -0.956626299 | 1.12E-06 |
| TUCP_000129 | XLOC_003437 | ENSRNOT00000087502 | 0.962279063  | 5.64E-07 |
| TUCP_000129 | XLOC_003437 | ENSRNOT00000041106 | 0.966187513  | 3.29E-07 |
| TUCP_000129 | XLOC_003437 | ENSRNOT00000010906 | -0.955606876 | 1.26E-06 |
| TUCP_000129 | XLOC_003437 | ENSRNOT00000012424 | 0.953288904  | 1.62E-06 |
| TUCP_000129 | XLOC_003437 | ENSRNOT00000067610 | -0.956297663 | 1.17E-06 |
| TUCP_000129 | XLOC_003437 | ENSRNOT00000000717 | -0.958711475 | 8.82E-07 |
| TUCP_000129 | XLOC_003437 | ENSRNOT00000049048 | -0.955704557 | 1.25E-06 |
| TUCP_000129 | XLOC_003437 | ENSRNOT00000049725 | -0.953281407 | 1.62E-06 |
| TUCP_000129 | XLOC_003437 | ENSRNOT00000086122 | 0.951207103  | 2.01E-06 |
| TUCP_000129 | XLOC_003437 | ENSRNOT00000023763 | -0.965836629 | 3.46E-07 |
| TUCP_000129 | XLOC_003437 | ENSRNOT00000044009 | 0.967561643  | 2.68E-07 |
| TUCP_000129 | XLOC_003437 | ENSRNOT00000086995 | 0.958138491  | 9.44E-07 |
| TUCP_000129 | XLOC_003437 | ENSRNOT00000010993 | 0.977608291  | 4.27E-08 |
| TUCP_000129 | XLOC_003437 | ENSRNOT00000059181 | 0.977799431  | 4.09E-08 |
| TUCP_000129 | XLOC_003437 | ENSRNOT00000017291 | -0.953365376 | 1.61E-06 |
| TUCP_000129 | XLOC_003437 | ENSRNOT00000083256 | 0.953163409  | 1.64E-06 |
| TUCP_000129 | XLOC_003437 | ENSRNOT00000003691 | -0.961389831 | 6.33E-07 |
| TUCP_000129 | XLOC_003437 | ENSRNOT00000003690 | 0.960270125  | 7.29E-07 |
| TUCP_000129 | XLOC_003437 | ENSRNOT00000007276 | -0.968955263 | 2.16E-07 |
| TUCP_000129 | XLOC_003437 | ENSRNOT00000017761 | 0.965180347  | 3.80E-07 |
| TUCP_000129 | XLOC_003437 | ENSRNOT00000023543 | -0.975382051 | 6.83E-08 |
| TUCP_000129 | XLOC_003437 | ENSRNOT00000035309 | -0.965991295 | 3.38E-07 |
| TUCP_000129 | XLOC_003437 | ENSRNOT00000080608 | 0.968089994  | 2.47E-07 |
| TUCP_000129 | XLOC_003437 | ENSRNOT00000018634 | -0.962734604 | 5.32E-07 |
| TUCP_000129 | XLOC_003437 | ENSRNOT00000079264 | -0.952572646 | 1.74E-06 |
| TUCP_000129 | XLOC_003437 | ENSRNOT00000038212 | -0.961175548 | 6.51E-07 |
| TUCP_000129 | XLOC_003437 | ENSRNOT00000037405 | 0.975216211  | 7.06E-08 |
| TUCP_000129 | XLOC_003437 | ENSRNOT00000014605 | -0.955230869 | 1.31E-06 |
| TUCP_000129 | XLOC_003437 | ENSRNOT00000025460 | 0.979831246  | 2.54E-08 |
| TUCP_000129 | XLOC_003437 | ENSRNOT00000071917 | 0.955631763  | 1.26E-06 |
| TUCP_000129 | XLOC_003437 | ENSRNOT00000026760 | -0.98057729  | 2.11E-08 |
| TUCP_000129 | XLOC_003437 | ENSRNOT00000001289 | 0.967531915  | 2.69E-07 |
| TUCP_000129 | XLOC_003437 | ENSRNOT00000081077 | -0.9617087   | 6.08E-07 |
| TUCP_000129 | XLOC_003437 | ENSRNOT00000016568 | 0.967519622  | 2.70E-07 |
| TUCP_000129 | XLOC_003437 | ENSRNOT00000037588 | -0.95537811  | 1.29E-06 |
| TUCP_000129 | XLOC_003437 | ENSRNOT00000027360 | -0.951176959 | 2.01E-06 |
| TUCP_000129 | XLOC_003437 | ENSRNOT00000075630 | -0.971857929 | 1.33E-07 |
| TUCP_000129 | XLOC_003437 | ENSRNOT00000023388 | -0.95426732  | 1.46E-06 |



|             |             |                     |              |          |
|-------------|-------------|---------------------|--------------|----------|
| TUCP_000129 | XLOC_003437 | ENSRNOT00000024938  | -0.966695108 | 3.05E-07 |
| TUCP_000129 | XLOC_003437 | ENSRNOT00000016254  | -0.950461891 | 2.16E-06 |
| TUCP_000129 | XLOC_003437 | ENSRNOT00000024933  | -0.958642301 | 8.89E-07 |
| TUCP_000129 | XLOC_003437 | ENSRNOT00000024011  | 0.964802717  | 4.01E-07 |
| TUCP_000129 | XLOC_003437 | ENSRNOT00000037665  | 0.958417154  | 9.13E-07 |
| TUCP_000129 | XLOC_003437 | ENSRNOT00000079996  | 0.952067174  | 1.84E-06 |
| TUCP_000793 | XLOC_029885 | ENSRNOT00000013569  | 0.960695699  | 6.91E-07 |
| TUCP_000796 | XLOC_029912 | ENSRNOT00000047731  | 0.9570041    | 1.08E-06 |
| TUCP_000796 | XLOC_029912 | ENSRNOT00000019738  | 0.95647818   | 1.14E-06 |
| TUCP_003201 | XLOC_137961 | ENSRNOT00000057350  | 0.953048705  | 1.66E-06 |
| TUCP_003201 | XLOC_137961 | ENSRNOT00000008879  | 0.958109257  | 9.47E-07 |
| TUCP_000798 | XLOC_029941 | ENSRNOT00000016083  | 0.950249986  | 2.21E-06 |
| TUCP_000798 | XLOC_029941 | ENSRNOT00000023691  | 0.988574257  | 1.50E-09 |
| TUCP_000798 | XLOC_029941 | ENSRNOT000000084860 | 0.962826189  | 5.25E-07 |
| TUCP_000798 | XLOC_029941 | ENSRNOT00000021801  | 0.956971921  | 1.08E-06 |
| TUCP_000798 | XLOC_029941 | ENSRNOT00000087762  | -0.950053054 | 2.25E-06 |
| TUCP_000799 | XLOC_030031 | ENSRNOT00000083900  | 0.967086606  | 2.88E-07 |
| TUCP_000121 | XLOC_003033 | ENSRNOT00000077274  | 0.965646161  | 3.56E-07 |
| TUCP_000121 | XLOC_003033 | ENSRNOT00000003001  | 0.963999256  | 4.48E-07 |
| TUCP_000121 | XLOC_003033 | ENSRNOT00000010835  | -0.976327284 | 5.63E-08 |
| TUCP_000121 | XLOC_003033 | ENSRNOT000000091282 | 0.978148876  | 3.78E-08 |
| TUCP_000121 | XLOC_003033 | ENSRNOT00000077803  | -0.964851944 | 3.98E-07 |
| TUCP_000121 | XLOC_003033 | ENSRNOT00000082570  | 0.951740884  | 1.90E-06 |
| TUCP_000121 | XLOC_003033 | ENSRNOT00000001110  | 0.957609311  | 1.00E-06 |
| TUCP_000121 | XLOC_003033 | ENSRNOT00000066776  | 0.95004008   | 2.25E-06 |
| TUCP_000121 | XLOC_003033 | ENSRNOT00000002916  | -0.950873146 | 2.07E-06 |
| TUCP_000121 | XLOC_003033 | ENSRNOT00000005143  | -0.955398569 | 1.29E-06 |
| TUCP_000121 | XLOC_003033 | ENSRNOT00000074583  | 0.962302053  | 5.63E-07 |
| TUCP_000121 | XLOC_003033 | ENSRNOT00000012314  | 0.952490014  | 1.76E-06 |
| TUCP_000121 | XLOC_003033 | ENSRNOT000000031492 | 0.952905847  | 1.69E-06 |
| TUCP_000121 | XLOC_003033 | ENSRNOT00000040736  | 0.958282563  | 9.28E-07 |
| TUCP_000121 | XLOC_003033 | ENSRNOT00000090774  | 0.952111556  | 1.83E-06 |
| TUCP_000121 | XLOC_003033 | ENSRNOT00000038546  | 0.97437908   | 8.33E-08 |
| TUCP_000120 | XLOC_003033 | ENSRNOT00000082694  | 0.971429518  | 1.43E-07 |
| TUCP_000120 | XLOC_003033 | ENSRNOT00000026152  | 0.965834351  | 3.46E-07 |
| TUCP_000120 | XLOC_003033 | ENSRNOT00000025843  | 0.985986533  | 4.16E-09 |
| TUCP_000120 | XLOC_003033 | ENSRNOT00000016039  | 0.95815801   | 9.41E-07 |
| TUCP_000120 | XLOC_003033 | ENSRNOT00000041631  | 0.999337176  | 1.01E-15 |
| TUCP_000120 | XLOC_003033 | ENSRNOT00000024867  | 0.991649394  | 3.15E-10 |
| TUCP_000120 | XLOC_003033 | ENSRNOT00000025638  | 0.953447213  | 1.59E-06 |
| TUCP_000127 | XLOC_003417 | ENSRNOT00000084133  | 1            | 0        |
| TUCP_000127 | XLOC_003417 | ENSRNOT00000093745  | 0.981891039  | 1.49E-08 |
| TUCP_000127 | XLOC_003417 | ENSRNOT00000065542  | 0.99828699   | 1.16E-13 |
| TUCP_000127 | XLOC_003417 | ENSRNOT00000082464  | 1            | 0        |
| TUCP_000127 | XLOC_003417 | ENSRNOT00000087659  | 1            | 0        |
| TUCP_000127 | XLOC_003417 | ENSRNOT00000084582  | 0.976633579  | 5.28E-08 |
| TUCP_000127 | XLOC_003417 | ENSRNOT00000085078  | 1            | 0        |
| TUCP_000127 | XLOC_003417 | ENSRNOT00000014028  | 1            | 4.25E-78 |
| TUCP_000127 | XLOC_003417 | ENSRNOT00000049363  | 1            | 0        |
| TUCP_000127 | XLOC_003417 | ENSRNOT00000065473  | 0.999949098  | 2.69E-21 |
| TUCP_000127 | XLOC_003417 | ENSRNOT00000000142  | 0.998996155  | 8.01E-15 |

|             |             |                    |             |          |
|-------------|-------------|--------------------|-------------|----------|
| TUCP_000127 | XLOC_003417 | ENSRNOT00000082288 | 0.999998398 | 8.30E-29 |
| TUCP_000127 | XLOC_003417 | ENSRNOT00000039664 | 1           | 0        |
| TUCP_000127 | XLOC_003417 | ENSRNOT00000065402 | 1           | 1.33E-79 |
| TUCP_000127 | XLOC_003417 | ENSRNOT00000064551 | 0.965365872 | 3.70E-07 |
| TUCP_000127 | XLOC_003417 | ENSRNOT00000084141 | 1           | 4.25E-78 |
| TUCP_000127 | XLOC_003417 | ENSRNOT00000082435 | 1           | 0        |
| TUCP_000127 | XLOC_003417 | ENSRNOT00000082928 | 0.996801059 | 2.62E-12 |
| TUCP_000127 | XLOC_003417 | ENSRNOT00000066546 | 0.956953619 | 1.08E-06 |
| TUCP_000127 | XLOC_003417 | ENSRNOT00000046013 | 0.988138626 | 1.81E-09 |
| TUCP_000127 | XLOC_003417 | ENSRNOT00000067931 | 0.978893628 | 3.18E-08 |
| TUCP_000127 | XLOC_003417 | ENSRNOT00000086425 | 0.992023315 | 2.51E-10 |
| TUCP_000127 | XLOC_003417 | ENSRNOT00000093696 | 0.956927219 | 1.09E-06 |
| TUCP_000127 | XLOC_003417 | ENSRNOT00000036228 | 0.982337157 | 1.31E-08 |
| TUCP_000127 | XLOC_003417 | ENSRNOT00000014030 | 1           | 0        |
| TUCP_000127 | XLOC_003417 | ENSRNOT00000081966 | 1           | 4.25E-78 |
| TUCP_000127 | XLOC_003417 | ENSRNOT00000075906 | 1           | 4.25E-78 |
| TUCP_000127 | XLOC_003417 | ENSRNOT00000088396 | 0.981336994 | 1.73E-08 |
| TUCP_000127 | XLOC_003417 | ENSRNOT00000049259 | 0.965500259 | 3.63E-07 |
| TUCP_000127 | XLOC_003417 | ENSRNOT00000092838 | 0.982579749 | 1.23E-08 |
| TUCP_000127 | XLOC_003417 | ENSRNOT00000093442 | 0.959217317 | 8.30E-07 |
| TUCP_003791 | XLOC_165898 | ENSRNOT00000033017 | 0.957156839 | 1.06E-06 |
| TUCP_003791 | XLOC_165898 | ENSRNOT00000026426 | 0.955290887 | 1.30E-06 |
| TUCP_003791 | XLOC_165898 | ENSRNOT00000013580 | 0.950242496 | 2.21E-06 |
| TUCP_003791 | XLOC_165898 | ENSRNOT00000065600 | 0.969539968 | 1.96E-07 |
| TUCP_003791 | XLOC_165898 | ENSRNOT00000041494 | 0.961368648 | 6.35E-07 |
| TUCP_003791 | XLOC_165898 | ENSRNOT00000081512 | 0.951720636 | 1.90E-06 |
| TUCP_003791 | XLOC_165898 | ENSRNOT00000038074 | 0.951388119 | 1.97E-06 |
| TUCP_003791 | XLOC_165898 | ENSRNOT00000032843 | 0.96393318  | 4.52E-07 |
| TUCP_003791 | XLOC_165898 | ENSRNOT00000022578 | 0.965535081 | 3.61E-07 |
| TUCP_003791 | XLOC_165898 | ENSRNOT00000022419 | 0.956338586 | 1.16E-06 |
| TUCP_001529 | XLOC_059064 | ENSRNOT00000024186 | 0.983200502 | 1.02E-08 |
| TUCP_001529 | XLOC_059064 | ENSRNOT00000074753 | 0.998182349 | 1.56E-13 |
| TUCP_001529 | XLOC_059064 | ENSRNOT00000004876 | 0.959071443 | 8.44E-07 |
| TUCP_001529 | XLOC_059064 | ENSRNOT00000041904 | 1           | 0        |
| TUCP_001529 | XLOC_059064 | ENSRNOT00000083487 | 0.989515314 | 9.80E-10 |
| TUCP_001529 | XLOC_059064 | ENSRNOT00000077990 | 1           | 0        |
| TUCP_001529 | XLOC_059064 | ENSRNOT00000038826 | 0.99977672  | 4.37E-18 |
| TUCP_001529 | XLOC_059064 | ENSRNOT00000046842 | 0.973644314 | 9.58E-08 |
| TUCP_001529 | XLOC_059064 | ENSRNOT00000037169 | 0.980329406 | 2.24E-08 |
| TUCP_001529 | XLOC_059064 | ENSRNOT00000021243 | 0.987425406 | 2.42E-09 |
| TUCP_001529 | XLOC_059064 | ENSRNOT00000060250 | 0.999933853 | 9.97E-21 |
| TUCP_001529 | XLOC_059064 | ENSRNOT00000091934 | 1           | 0        |
| TUCP_001529 | XLOC_059064 | ENSRNOT00000046585 | 0.982941597 | 1.11E-08 |
| TUCP_001529 | XLOC_059064 | ENSRNOT00000080794 | 0.990839253 | 5.00E-10 |
| TUCP_001529 | XLOC_059064 | ENSRNOT00000014456 | 0.991697153 | 3.06E-10 |
| TUCP_001529 | XLOC_059064 | ENSRNOT00000031205 | 0.991394766 | 3.66E-10 |
| TUCP_001529 | XLOC_059064 | ENSRNOT00000044145 | 1           | 0        |
| TUCP_001529 | XLOC_059064 | ENSRNOT00000088381 | 0.989013276 | 1.24E-09 |
| TUCP_001529 | XLOC_059064 | ENSRNOT00000011743 | 0.98678427  | 3.11E-09 |
| TUCP_001529 | XLOC_059064 | ENSRNOT00000089929 | 1           | 0        |
| TUCP_001529 | XLOC_059064 | ENSRNOT00000088624 | 1           | 0        |

|             |             |                    |              |          |
|-------------|-------------|--------------------|--------------|----------|
| TUCP_001529 | XLOC_059064 | ENSRNOT00000085659 | 0.989908621  | 8.10E-10 |
| TUCP_001529 | XLOC_059064 | ENSRNOT00000015866 | 0.994066664  | 5.73E-11 |
| TUCP_001529 | XLOC_059064 | ENSRNOT00000078633 | 1            | 0        |
| TUCP_001529 | XLOC_059064 | ENSRNOT00000034907 | 0.995318542  | 1.76E-11 |
| TUCP_001529 | XLOC_059064 | ENSRNOT00000093230 | 0.958295175  | 9.26E-07 |
| TUCP_001529 | XLOC_059064 | ENSRNOT00000051835 | 1            | 0        |
| TUCP_001529 | XLOC_059064 | ENSRNOT00000079087 | 1            | 0        |
| TUCP_001529 | XLOC_059064 | ENSRNOT00000037206 | 1            | 0        |
| TUCP_001529 | XLOC_059064 | ENSRNOT00000083261 | 0.970991658  | 1.54E-07 |
| TUCP_001529 | XLOC_059064 | ENSRNOT00000080590 | 0.999889216  | 1.31E-19 |
| TUCP_001529 | XLOC_059064 | ENSRNOT00000027552 | 0.999801024  | 2.46E-18 |
| TUCP_001529 | XLOC_059064 | ENSRNOT00000077014 | 0.995074376  | 2.26E-11 |
| TUCP_001529 | XLOC_059064 | ENSRNOT00000080453 | 0.99994332   | 4.61E-21 |
| TUCP_001529 | XLOC_059064 | ENSRNOT00000089057 | 0.968243551  | 2.41E-07 |
| TUCP_001529 | XLOC_059064 | ENSRNOT00000066839 | 0.991868612  | 2.76E-10 |
| TUCP_001529 | XLOC_059064 | ENSRNOT00000061284 | 0.955566942  | 1.27E-06 |
| TUCP_001529 | XLOC_059064 | ENSRNOT00000013423 | 0.959677621  | 7.84E-07 |
| TUCP_001529 | XLOC_059064 | ENSRNOT00000071884 | 0.974769955  | 7.72E-08 |
| TUCP_001529 | XLOC_059064 | ENSRNOT00000004128 | 0.961829362  | 5.99E-07 |
| TUCP_001529 | XLOC_059064 | ENSRNOT00000026316 | 0.964408046  | 4.24E-07 |
| TUCP_001529 | XLOC_059064 | ENSRNOT00000057729 | 0.999384184  | 6.97E-16 |
| TUCP_001529 | XLOC_059064 | ENSRNOT00000078663 | 0.975192577  | 7.10E-08 |
| TUCP_001529 | XLOC_059064 | ENSRNOT00000064250 | 0.983131977  | 1.05E-08 |
| TUCP_001529 | XLOC_059064 | ENSRNOT00000021608 | 0.965228881  | 3.78E-07 |
| TUCP_001529 | XLOC_059064 | ENSRNOT00000029634 | 0.995816134  | 1.00E-11 |
| TUCP_001529 | XLOC_059064 | ENSRNOT00000093579 | 0.958564264  | 8.97E-07 |
| TUCP_001529 | XLOC_059064 | ENSRNOT00000086349 | 0.957242511  | 1.05E-06 |
| TUCP_001529 | XLOC_059064 | ENSRNOT00000065460 | 1            | 0        |
| TUCP_001529 | XLOC_059064 | ENSRNOT00000003817 | 0.996778712  | 2.72E-12 |
| TUCP_001529 | XLOC_059064 | ENSRNOT00000016713 | 1            | 0        |
| TUCP_001529 | XLOC_059064 | ENSRNOT00000079260 | 0.996448245  | 4.42E-12 |
| TUCP_001529 | XLOC_059064 | ENSRNOT00000039294 | 1            | 0        |
| TUCP_001529 | XLOC_059064 | ENSRNOT00000092913 | 0.952980228  | 1.67E-06 |
| TUCP_001445 | XLOC_056204 | ENSRNOT00000058331 | 0.95089431   | 2.07E-06 |
| TUCP_001445 | XLOC_056204 | ENSRNOT00000087753 | 0.987074133  | 2.78E-09 |
| TUCP_003792 | XLOC_165940 | ENSRNOT00000028833 | 0.962869178  | 5.22E-07 |
| TUCP_003792 | XLOC_165940 | ENSRNOT00000045223 | 0.952339733  | 1.79E-06 |
| TUCP_001443 | XLOC_056151 | ENSRNOT00000028234 | 0.974882303  | 7.55E-08 |
| TUCP_001443 | XLOC_056151 | ENSRNOT00000023945 | 0.951757989  | 1.90E-06 |
| TUCP_001443 | XLOC_056151 | ENSRNOT00000005463 | 0.97722141   | 4.65E-08 |
| TUCP_001443 | XLOC_056151 | ENSRNOT00000066104 | 0.969046544  | 2.12E-07 |
| TUCP_001443 | XLOC_056151 | ENSRNOT00000018776 | 0.967179852  | 2.84E-07 |
| TUCP_001443 | XLOC_056151 | ENSRNOT00000003792 | 0.959360069  | 8.15E-07 |
| TUCP_001443 | XLOC_056151 | ENSRNOT00000068214 | -0.961245066 | 6.45E-07 |
| TUCP_001443 | XLOC_056151 | ENSRNOT00000000804 | 0.961893517  | 5.94E-07 |
| TUCP_001443 | XLOC_056151 | ENSRNOT00000002247 | 0.960002964  | 7.54E-07 |
| TUCP_001443 | XLOC_056151 | ENSRNOT00000023149 | 0.953131559  | 1.65E-06 |
| TUCP_001443 | XLOC_056151 | ENSRNOT00000038250 | 0.964202333  | 4.36E-07 |
| TUCP_001443 | XLOC_056151 | ENSRNOT00000064041 | 0.958285622  | 9.27E-07 |
| TUCP_001443 | XLOC_056151 | ENSRNOT00000064924 | 0.961381028  | 6.34E-07 |
| TUCP_001443 | XLOC_056151 | ENSRNOT00000024755 | 0.97885799   | 3.21E-08 |

|             |             |                    |              |          |
|-------------|-------------|--------------------|--------------|----------|
| TUCP_001443 | XLOC_056151 | ENSRNOT0000002867  | 0.955961311  | 1.21E-06 |
| TUCP_001443 | XLOC_056151 | ENSRNOT00000064860 | 0.952412673  | 1.77E-06 |
| TUCP_001443 | XLOC_056151 | ENSRNOT00000082451 | 0.953453687  | 1.59E-06 |
| TUCP_001443 | XLOC_056151 | ENSRNOT0000007577  | 0.957026376  | 1.07E-06 |
| TUCP_001443 | XLOC_056151 | ENSRNOT00000024917 | 0.977646837  | 4.23E-08 |
| TUCP_001443 | XLOC_056151 | ENSRNOT00000081593 | 0.953512144  | 1.58E-06 |
| TUCP_001443 | XLOC_056151 | ENSRNOT00000008212 | 0.958536816  | 9.00E-07 |
| TUCP_001443 | XLOC_056151 | ENSRNOT00000077926 | 0.960041646  | 7.50E-07 |
| TUCP_001443 | XLOC_056151 | ENSRNOT00000025013 | 0.961941272  | 5.90E-07 |
| TUCP_001442 | XLOC_056135 | ENSRNOT00000028234 | 0.980207775  | 2.31E-08 |
| TUCP_001442 | XLOC_056135 | ENSRNOT00000060683 | 0.971247714  | 1.47E-07 |
| TUCP_001442 | XLOC_056135 | ENSRNOT00000082963 | 0.952680315  | 1.73E-06 |
| TUCP_001442 | XLOC_056135 | ENSRNOT00000075444 | 0.960618615  | 6.98E-07 |
| TUCP_001442 | XLOC_056135 | ENSRNOT00000070961 | 0.958397364  | 9.15E-07 |
| TUCP_001442 | XLOC_056135 | ENSRNOT00000049973 | 0.959072223  | 8.44E-07 |
| TUCP_001442 | XLOC_056135 | ENSRNOT00000034096 | 0.950310833  | 2.19E-06 |
| TUCP_001442 | XLOC_056135 | ENSRNOT00000018776 | 0.976859746  | 5.03E-08 |
| TUCP_001442 | XLOC_056135 | ENSRNOT00000075400 | 0.95582191   | 1.23E-06 |
| TUCP_001442 | XLOC_056135 | ENSRNOT00000003514 | 0.951820503  | 1.89E-06 |
| TUCP_001442 | XLOC_056135 | ENSRNOT00000007299 | 0.954672433  | 1.40E-06 |
| TUCP_001442 | XLOC_056135 | ENSRNOT00000075057 | 0.952984438  | 1.67E-06 |
| TUCP_001442 | XLOC_056135 | ENSRNOT00000000804 | 0.974866491  | 7.57E-08 |
| TUCP_001442 | XLOC_056135 | ENSRNOT00000008212 | 0.967126898  | 2.86E-07 |
| TUCP_001442 | XLOC_056135 | ENSRNOT00000026297 | 0.957771859  | 9.85E-07 |
| TUCP_001442 | XLOC_056135 | ENSRNOT00000018170 | 0.95816824   | 9.40E-07 |
| TUCP_001442 | XLOC_056135 | ENSRNOT00000002247 | 0.967414406  | 2.74E-07 |
| TUCP_001442 | XLOC_056135 | ENSRNOT00000054869 | -0.956195754 | 1.18E-06 |
| TUCP_001442 | XLOC_056135 | ENSRNOT00000005666 | 0.960298489  | 7.27E-07 |
| TUCP_001442 | XLOC_056135 | ENSRNOT00000084202 | 0.968495674  | 2.32E-07 |
| TUCP_001442 | XLOC_056135 | ENSRNOT00000020197 | 0.96574968   | 3.50E-07 |
| TUCP_001442 | XLOC_056135 | ENSRNOT00000086238 | -0.957316497 | 1.04E-06 |
| TUCP_001442 | XLOC_056135 | ENSRNOT00000023149 | 0.961783087  | 6.02E-07 |
| TUCP_001442 | XLOC_056135 | ENSRNOT00000017204 | 0.951793386  | 1.89E-06 |
| TUCP_001442 | XLOC_056135 | ENSRNOT00000016259 | 0.956916878  | 1.09E-06 |
| TUCP_001442 | XLOC_056135 | ENSRNOT00000021403 | 0.956488556  | 1.14E-06 |
| TUCP_001442 | XLOC_056135 | ENSRNOT00000009015 | 0.964638436  | 4.10E-07 |
| TUCP_001442 | XLOC_056135 | ENSRNOT00000064041 | 0.968994899  | 2.14E-07 |
| TUCP_001442 | XLOC_056135 | ENSRNOT00000071770 | 0.961787328  | 6.02E-07 |
| TUCP_001442 | XLOC_056135 | ENSRNOT00000064924 | 0.981803128  | 1.52E-08 |
| TUCP_001442 | XLOC_056135 | ENSRNOT00000017883 | -0.950489996 | 2.16E-06 |
| TUCP_001442 | XLOC_056135 | ENSRNOT00000004159 | 0.981746075  | 1.55E-08 |
| TUCP_001442 | XLOC_056135 | ENSRNOT00000024578 | 0.958987034  | 8.53E-07 |
| TUCP_001442 | XLOC_056135 | ENSRNOT0000002867  | 0.967683028  | 2.63E-07 |
| TUCP_001442 | XLOC_056135 | ENSRNOT00000064860 | 0.966804225  | 3.00E-07 |
| TUCP_001442 | XLOC_056135 | ENSRNOT00000054958 | 0.955410422  | 1.29E-06 |
| TUCP_001442 | XLOC_056135 | ENSRNOT00000075474 | 0.965775631  | 3.49E-07 |
| TUCP_001442 | XLOC_056135 | ENSRNOT00000015759 | 0.966563166  | 3.11E-07 |
| TUCP_001442 | XLOC_056135 | ENSRNOT00000076753 | 0.95808196   | 9.50E-07 |
| TUCP_001442 | XLOC_056135 | ENSRNOT00000026748 | 0.954867675  | 1.37E-06 |
| TUCP_001442 | XLOC_056135 | ENSRNOT00000044895 | 0.97012661   | 1.78E-07 |
| TUCP_001442 | XLOC_056135 | ENSRNOT00000013553 | -0.950510612 | 2.15E-06 |

|             |             |                     |              |          |
|-------------|-------------|---------------------|--------------|----------|
| TUCP_001442 | XLOC_056135 | ENSRNOT00000039857  | 0.963937027  | 4.52E-07 |
| TUCP_001442 | XLOC_056135 | ENSRNOT00000019056  | 0.956893757  | 1.09E-06 |
| TUCP_001442 | XLOC_056135 | ENSRNOT00000015130  | 0.953803156  | 1.53E-06 |
| TUCP_001442 | XLOC_056135 | ENSRNOT00000081547  | 0.980082113  | 2.39E-08 |
| TUCP_001442 | XLOC_056135 | ENSRNOT00000082451  | 0.964818604  | 4.00E-07 |
| TUCP_001442 | XLOC_056135 | ENSRNOT00000024981  | 0.97824871   | 3.70E-08 |
| TUCP_001442 | XLOC_056135 | ENSRNOT00000007577  | 0.975478404  | 6.70E-08 |
| TUCP_001442 | XLOC_056135 | ENSRNOT00000003792  | 0.960263805  | 7.30E-07 |
| TUCP_001442 | XLOC_056135 | ENSRNOT00000047698  | 0.952484385  | 1.76E-06 |
| TUCP_001442 | XLOC_056135 | ENSRNOT00000002511  | 0.950872953  | 2.07E-06 |
| TUCP_001442 | XLOC_056135 | ENSRNOT00000000617  | 0.950957877  | 2.06E-06 |
| TUCP_001442 | XLOC_056135 | ENSRNOT00000016164  | 0.957044523  | 1.07E-06 |
| TUCP_001442 | XLOC_056135 | ENSRNOT00000023365  | -0.961472836 | 6.27E-07 |
| TUCP_001442 | XLOC_056135 | ENSRNOT00000006946  | 0.952056082  | 1.84E-06 |
| TUCP_001442 | XLOC_056135 | ENSRNOT00000067905  | 0.980579126  | 2.11E-08 |
| TUCP_001442 | XLOC_056135 | ENSRNOT00000011432  | 0.970493726  | 1.68E-07 |
| TUCP_001442 | XLOC_056135 | ENSRNOT00000065642  | 0.957311839  | 1.04E-06 |
| TUCP_001442 | XLOC_056135 | ENSRNOT00000005463  | 0.960017708  | 7.52E-07 |
| TUCP_001442 | XLOC_056135 | ENSRNOT00000081593  | 0.98257747   | 1.23E-08 |
| TUCP_001442 | XLOC_056135 | ENSRNOT00000024933  | 0.961373553  | 6.35E-07 |
| TUCP_001442 | XLOC_056135 | ENSRNOT00000036042  | 0.951366417  | 1.97E-06 |
| TUCP_001442 | XLOC_056135 | ENSRNOT000000032173 | 0.95169273   | 1.91E-06 |
| TUCP_001442 | XLOC_056135 | ENSRNOT00000008509  | 0.957938115  | 9.66E-07 |
| TUCP_001442 | XLOC_056135 | ENSRNOT00000010630  | -0.963302767 | 4.93E-07 |
| TUCP_001442 | XLOC_056135 | ENSRNOT00000020809  | 0.953272621  | 1.62E-06 |
| TUCP_001442 | XLOC_056135 | ENSRNOT00000025013  | 0.96579005   | 3.48E-07 |
| TUCP_001442 | XLOC_056135 | ENSRNOT00000017955  | 0.951724317  | 1.90E-06 |
| TUCP_001442 | XLOC_056135 | ENSRNOT00000029193  | 0.9585519    | 8.99E-07 |
| TUCP_003797 | XLOC_166052 | ENSRNOT00000071853  | -0.953013895 | 1.67E-06 |
| TUCP_003797 | XLOC_166052 | ENSRNOT00000016036  | 0.952496019  | 1.76E-06 |
| TUCP_003797 | XLOC_166052 | ENSRNOT00000019415  | -0.96793949  | 2.53E-07 |
| TUCP_003799 | XLOC_166074 | ENSRNOT00000005958  | 0.958616272  | 8.92E-07 |
| TUCP_003799 | XLOC_166074 | ENSRNOT00000075397  | 0.955245893  | 1.31E-06 |
| TUCP_003799 | XLOC_166074 | ENSRNOT00000009080  | -0.956797131 | 1.10E-06 |
| TUCP_003799 | XLOC_166074 | ENSRNOT00000063930  | -0.953331827 | 1.61E-06 |
| TUCP_003799 | XLOC_166074 | ENSRNOT00000068353  | 0.972100128  | 1.27E-07 |
| TUCP_003799 | XLOC_166074 | ENSRNOT00000023638  | 0.952266949  | 1.80E-06 |
| TUCP_003799 | XLOC_166074 | ENSRNOT00000020910  | 0.967613723  | 2.66E-07 |
| TUCP_003799 | XLOC_166074 | ENSRNOT00000023144  | 0.95163685   | 1.92E-06 |
| TUCP_003799 | XLOC_166074 | ENSRNOT00000010030  | -0.955335903 | 1.30E-06 |
| TUCP_003799 | XLOC_166074 | ENSRNOT00000074023  | 0.959307389  | 8.21E-07 |
| TUCP_003799 | XLOC_166074 | ENSRNOT00000014384  | -0.961213742 | 6.48E-07 |
| TUCP_003799 | XLOC_166074 | ENSRNOT00000019180  | -0.958816531 | 8.71E-07 |
| TUCP_003799 | XLOC_166074 | ENSRNOT00000081981  | 0.964123211  | 4.41E-07 |
| TUCP_003799 | XLOC_166074 | ENSRNOT00000018341  | -0.953328949 | 1.61E-06 |
| TUCP_003799 | XLOC_166074 | ENSRNOT00000006752  | 0.954779656  | 1.38E-06 |
| TUCP_003799 | XLOC_166074 | ENSRNOT00000024969  | 0.960981343  | 6.67E-07 |
| TUCP_003799 | XLOC_166074 | ENSRNOT00000091399  | 0.954744348  | 1.39E-06 |
| TUCP_003799 | XLOC_166074 | ENSRNOT00000015476  | -0.950177936 | 2.22E-06 |
| TUCP_003799 | XLOC_166074 | ENSRNOT00000083568  | 0.961079425  | 6.59E-07 |
| TUCP_003799 | XLOC_166074 | ENSRNOT00000024402  | 0.955257496  | 1.31E-06 |

|             |             |                    |              |          |
|-------------|-------------|--------------------|--------------|----------|
| TUCP_003799 | XLOC_166074 | ENSRNOT0000002837  | -0.958024954 | 9.56E-07 |
| TUCP_003799 | XLOC_166074 | ENSRNOT00000089933 | 0.975395286  | 6.81E-08 |
| TUCP_003799 | XLOC_166074 | ENSRNOT00000009811 | 0.960903236  | 6.74E-07 |
| TUCP_003799 | XLOC_166074 | ENSRNOT00000003391 | 0.953486177  | 1.59E-06 |
| TUCP_003799 | XLOC_166074 | ENSRNOT00000037597 | 0.955225796  | 1.31E-06 |
| TUCP_003799 | XLOC_166074 | ENSRNOT00000067554 | 0.95165962   | 1.92E-06 |
| TUCP_003799 | XLOC_166074 | ENSRNOT00000061253 | 0.963850055  | 4.58E-07 |
| TUCP_003799 | XLOC_166074 | ENSRNOT00000005686 | -0.953228914 | 1.63E-06 |
| TUCP_003799 | XLOC_166074 | ENSRNOT00000018634 | -0.957352075 | 1.03E-06 |
| TUCP_003799 | XLOC_166074 | ENSRNOT00000021030 | -0.95460004  | 1.41E-06 |
| TUCP_003799 | XLOC_166074 | ENSRNOT00000077727 | -0.954320134 | 1.45E-06 |
| TUCP_003799 | XLOC_166074 | ENSRNOT00000037133 | 0.956267761  | 1.17E-06 |
| TUCP_003799 | XLOC_166074 | ENSRNOT00000017556 | 0.954413934  | 1.44E-06 |
| TUCP_003799 | XLOC_166074 | ENSRNOT00000084709 | 0.95538032   | 1.29E-06 |
| TUCP_003799 | XLOC_166074 | ENSRNOT00000001893 | 0.953504326  | 1.58E-06 |
| TUCP_003799 | XLOC_166074 | ENSRNOT00000064535 | -0.951785614 | 1.89E-06 |
| TUCP_003799 | XLOC_166074 | ENSRNOT00000004351 | -0.950800778 | 2.09E-06 |
| TUCP_003799 | XLOC_166074 | ENSRNOT00000072118 | 0.958796175  | 8.73E-07 |
| TUCP_003799 | XLOC_166074 | ENSRNOT00000026643 | 0.961728902  | 6.06E-07 |
| TUCP_003799 | XLOC_166074 | ENSRNOT00000072357 | -0.951554461 | 1.94E-06 |
| TUCP_003799 | XLOC_166074 | ENSRNOT00000019133 | 0.954466242  | 1.43E-06 |
| TUCP_003799 | XLOC_166074 | ENSRNOT00000083220 | 0.968410036  | 2.35E-07 |
| TUCP_003799 | XLOC_166074 | ENSRNOT00000025966 | 0.974418312  | 8.27E-08 |
| TUCP_003799 | XLOC_166074 | ENSRNOT00000086260 | -0.950070484 | 2.25E-06 |
| TUCP_003799 | XLOC_166074 | ENSRNOT00000042799 | 0.950514132  | 2.15E-06 |
| TUCP_003799 | XLOC_166074 | ENSRNOT00000068026 | -0.955132413 | 1.33E-06 |
| TUCP_003799 | XLOC_166074 | ENSRNOT00000077999 | 0.956116848  | 1.19E-06 |
| TUCP_003799 | XLOC_166074 | ENSRNOT00000058382 | 0.958956716  | 8.56E-07 |
| TUCP_003799 | XLOC_166074 | ENSRNOT00000025517 | 0.950649989  | 2.12E-06 |
| TUCP_003799 | XLOC_166074 | ENSRNOT00000000383 | -0.955222311 | 1.31E-06 |
| TUCP_003799 | XLOC_166074 | ENSRNOT00000022190 | -0.957630588 | 1.00E-06 |
| TUCP_003799 | XLOC_166074 | ENSRNOT00000026531 | -0.953122416 | 1.65E-06 |
| TUCP_003799 | XLOC_166074 | ENSRNOT00000084031 | 0.952952539  | 1.68E-06 |
| TUCP_003799 | XLOC_166074 | ENSRNOT00000081512 | 0.951157778  | 2.02E-06 |
| TUCP_003799 | XLOC_166074 | ENSRNOT00000027910 | 0.9507376    | 2.10E-06 |
| TUCP_003799 | XLOC_166074 | ENSRNOT00000040169 | 0.957375219  | 1.03E-06 |
| TUCP_003799 | XLOC_166074 | ENSRNOT00000013067 | -0.959562746 | 7.96E-07 |
| TUCP_003799 | XLOC_166074 | ENSRNOT00000029701 | 0.955471602  | 1.28E-06 |
| TUCP_003799 | XLOC_166074 | ENSRNOT00000015518 | -0.952560972 | 1.75E-06 |
| TUCP_003799 | XLOC_166074 | ENSRNOT00000014586 | -0.950149393 | 2.23E-06 |
| TUCP_003799 | XLOC_166074 | ENSRNOT00000000302 | 0.951690509  | 1.91E-06 |
| TUCP_003799 | XLOC_166074 | ENSRNOT00000078070 | 0.96702447   | 2.91E-07 |
| TUCP_003799 | XLOC_166074 | ENSRNOT00000089293 | 0.951811711  | 1.89E-06 |
| TUCP_003799 | XLOC_166074 | ENSRNOT00000061201 | -0.961738299 | 6.06E-07 |
| TUCP_003799 | XLOC_166074 | ENSRNOT00000073372 | 0.95139658   | 1.97E-06 |
| TUCP_003799 | XLOC_166074 | ENSRNOT00000003568 | 0.950016844  | 2.26E-06 |
| TUCP_003799 | XLOC_166074 | ENSRNOT00000074649 | 0.955966554  | 1.21E-06 |
| TUCP_003799 | XLOC_166074 | ENSRNOT00000077146 | -0.953731735 | 1.54E-06 |
| TUCP_003799 | XLOC_166074 | ENSRNOT00000060002 | -0.952421708 | 1.77E-06 |
| TUCP_003799 | XLOC_166074 | ENSRNOT00000004046 | -0.983831983 | 8.47E-09 |
| TUCP_003799 | XLOC_166074 | ENSRNOT00000006395 | -0.951908255 | 1.87E-06 |

|             |             |                    |              |          |
|-------------|-------------|--------------------|--------------|----------|
| TUCP_003799 | XLOC_166074 | ENSRNOT00000066133 | -0.957740717 | 9.89E-07 |
| TUCP_003799 | XLOC_166074 | ENSRNOT00000048933 | -0.955269991 | 1.31E-06 |
| TUCP_003799 | XLOC_166074 | ENSRNOT00000005486 | -0.953767337 | 1.54E-06 |
| TUCP_003799 | XLOC_166074 | ENSRNOT00000057738 | 0.95947968   | 8.04E-07 |
| TUCP_003799 | XLOC_166074 | ENSRNOT00000023543 | -0.956095131 | 1.19E-06 |
| TUCP_003799 | XLOC_166074 | ENSRNOT00000026691 | 0.965544323  | 3.61E-07 |
| TUCP_003799 | XLOC_166074 | ENSRNOT00000080608 | 0.956302011  | 1.17E-06 |
| TUCP_003799 | XLOC_166074 | ENSRNOT00000027970 | 0.955468794  | 1.28E-06 |
| TUCP_003799 | XLOC_166074 | ENSRNOT00000028876 | -0.961210736 | 6.48E-07 |
| TUCP_003799 | XLOC_166074 | ENSRNOT00000080695 | 0.957635226  | 1.00E-06 |
| TUCP_003799 | XLOC_166074 | ENSRNOT00000018074 | -0.954708051 | 1.39E-06 |
| TUCP_003799 | XLOC_166074 | ENSRNOT00000091205 | 0.958375258  | 9.18E-07 |
| TUCP_003799 | XLOC_166074 | ENSRNOT00000000120 | 0.965627329  | 3.57E-07 |
| TUCP_003799 | XLOC_166074 | ENSRNOT00000029125 | 0.958932659  | 8.59E-07 |
| TUCP_003799 | XLOC_166074 | ENSRNOT00000042125 | 0.969114766  | 2.10E-07 |
| TUCP_003799 | XLOC_166074 | ENSRNOT00000060698 | -0.957538515 | 1.01E-06 |
| TUCP_003799 | XLOC_166074 | ENSRNOT00000058351 | 0.969085526  | 2.11E-07 |
| TUCP_003799 | XLOC_166074 | ENSRNOT00000080207 | 0.951954422  | 1.86E-06 |
| TUCP_003799 | XLOC_166074 | ENSRNOT00000015495 | -0.952027749 | 1.85E-06 |
| TUCP_003799 | XLOC_166074 | ENSRNOT00000016568 | 0.959863176  | 7.67E-07 |
| TUCP_003799 | XLOC_166074 | ENSRNOT00000065529 | 0.959606419  | 7.91E-07 |
| TUCP_003799 | XLOC_166074 | ENSRNOT00000024947 | -0.953399052 | 1.60E-06 |
| TUCP_003799 | XLOC_166074 | ENSRNOT00000075708 | 0.958567589  | 8.97E-07 |
| TUCP_003799 | XLOC_166074 | ENSRNOT00000051494 | 0.978510725  | 3.48E-08 |
| TUCP_003799 | XLOC_166074 | ENSRNOT00000027967 | 0.964980251  | 3.91E-07 |
| TUCP_003799 | XLOC_166074 | ENSRNOT00000008982 | 0.962668189  | 5.36E-07 |
| TUCP_003799 | XLOC_166074 | ENSRNOT00000090057 | 0.950164648  | 2.23E-06 |
| TUCP_003799 | XLOC_166074 | ENSRNOT00000036613 | -0.955834672 | 1.23E-06 |
| TUCP_003799 | XLOC_166074 | ENSRNOT00000015537 | 0.958422305  | 9.12E-07 |
| TUCP_003799 | XLOC_166074 | ENSRNOT00000025705 | 0.955163798  | 1.32E-06 |
| TUCP_003799 | XLOC_166074 | ENSRNOT00000005257 | 0.952127889  | 1.83E-06 |
| TUCP_003799 | XLOC_166074 | ENSRNOT00000015799 | 0.961442237  | 6.29E-07 |
| TUCP_003799 | XLOC_166074 | ENSRNOT00000008113 | -0.957565064 | 1.01E-06 |
| TUCP_000035 | XLOC_000589 | ENSRNOT00000024186 | 0.966345411  | 3.21E-07 |
| TUCP_000035 | XLOC_000589 | ENSRNOT00000074753 | 0.956959313  | 1.08E-06 |
| TUCP_000035 | XLOC_000589 | ENSRNOT00000041904 | 0.954753005  | 1.38E-06 |
| TUCP_000035 | XLOC_000589 | ENSRNOT00000077990 | 0.954753005  | 1.38E-06 |
| TUCP_000035 | XLOC_000589 | ENSRNOT00000038826 | 0.95468408   | 1.39E-06 |
| TUCP_000035 | XLOC_000589 | ENSRNOT00000037094 | 0.952790219  | 1.71E-06 |
| TUCP_000035 | XLOC_000589 | ENSRNOT00000077014 | 0.968182395  | 2.43E-07 |
| TUCP_000035 | XLOC_000589 | ENSRNOT00000060250 | 0.95506067   | 1.34E-06 |
| TUCP_000035 | XLOC_000589 | ENSRNOT00000091934 | 0.954753005  | 1.38E-06 |
| TUCP_000035 | XLOC_000589 | ENSRNOT00000086027 | 0.972871073  | 1.11E-07 |
| TUCP_000035 | XLOC_000589 | ENSRNOT00000046585 | 0.987234415  | 2.61E-09 |
| TUCP_000035 | XLOC_000589 | ENSRNOT00000034907 | 0.96337973   | 4.88E-07 |
| TUCP_000035 | XLOC_000589 | ENSRNOT00000031205 | 0.975437198  | 6.76E-08 |
| TUCP_000035 | XLOC_000589 | ENSRNOT00000079260 | 0.962820051  | 5.26E-07 |
| TUCP_000035 | XLOC_000589 | ENSRNOT00000044145 | 0.954753005  | 1.38E-06 |
| TUCP_000035 | XLOC_000589 | ENSRNOT00000088381 | 0.984497817  | 6.87E-09 |
| TUCP_000035 | XLOC_000589 | ENSRNOT00000065460 | 0.954753005  | 1.38E-06 |
| TUCP_000035 | XLOC_000589 | ENSRNOT00000028588 | 0.96091245   | 6.73E-07 |

|             |             |                    |              |          |
|-------------|-------------|--------------------|--------------|----------|
| TUCP_000035 | XLOC_000589 | ENSRNOT00000089929 | 0.954753005  | 1.38E-06 |
| TUCP_000035 | XLOC_000589 | ENSRNOT00000088624 | 0.954753005  | 1.38E-06 |
| TUCP_000035 | XLOC_000589 | ENSRNOT00000015866 | 0.966639793  | 3.08E-07 |
| TUCP_000035 | XLOC_000589 | ENSRNOT00000076466 | 0.957098384  | 1.06E-06 |
| TUCP_000035 | XLOC_000589 | ENSRNOT00000024575 | 0.964013656  | 4.47E-07 |
| TUCP_000035 | XLOC_000589 | ENSRNOT00000091315 | 0.964038089  | 4.46E-07 |
| TUCP_000035 | XLOC_000589 | ENSRNOT00000051835 | 0.954753005  | 1.38E-06 |
| TUCP_000035 | XLOC_000589 | ENSRNOT00000079087 | 0.954753005  | 1.38E-06 |
| TUCP_000035 | XLOC_000589 | ENSRNOT00000037206 | 0.954753005  | 1.38E-06 |
| TUCP_000035 | XLOC_000589 | ENSRNOT00000011342 | 0.983209376  | 1.02E-08 |
| TUCP_000035 | XLOC_000589 | ENSRNOT00000080590 | 0.953758441  | 1.54E-06 |
| TUCP_000035 | XLOC_000589 | ENSRNOT00000081235 | 0.962790563  | 5.28E-07 |
| TUCP_000035 | XLOC_000589 | ENSRNOT00000027552 | 0.953805402  | 1.53E-06 |
| TUCP_000035 | XLOC_000589 | ENSRNOT00000015888 | 0.978807544  | 3.25E-08 |
| TUCP_000035 | XLOC_000589 | ENSRNOT00000085943 | 0.977461252  | 4.41E-08 |
| TUCP_000035 | XLOC_000589 | ENSRNOT00000080453 | 0.954913451  | 1.36E-06 |
| TUCP_000035 | XLOC_000589 | ENSRNOT00000057729 | 0.951317974  | 1.98E-06 |
| TUCP_000035 | XLOC_000589 | ENSRNOT00000078633 | 0.954753005  | 1.38E-06 |
| TUCP_000035 | XLOC_000589 | ENSRNOT00000013423 | 0.978654789  | 3.37E-08 |
| TUCP_000035 | XLOC_000589 | ENSRNOT00000040509 | 0.953000327  | 1.67E-06 |
| TUCP_000035 | XLOC_000589 | ENSRNOT00000093579 | 0.951120981  | 2.02E-06 |
| TUCP_000035 | XLOC_000589 | ENSRNOT00000054947 | 0.951345491  | 1.98E-06 |
| TUCP_000035 | XLOC_000589 | ENSRNOT00000003817 | 0.95433014   | 1.45E-06 |
| TUCP_000035 | XLOC_000589 | ENSRNOT00000016713 | 0.954753005  | 1.38E-06 |
| TUCP_000035 | XLOC_000589 | ENSRNOT00000024337 | 0.967489398  | 2.71E-07 |
| TUCP_000035 | XLOC_000589 | ENSRNOT00000039294 | 0.954753005  | 1.38E-06 |
| TUCP_000035 | XLOC_000589 | ENSRNOT00000089934 | 0.952587817  | 1.74E-06 |
| TUCP_001522 | XLOC_058825 | ENSRNOT00000086985 | 0.963544058  | 4.77E-07 |
| TUCP_001523 | XLOC_058837 | ENSRNOT00000010993 | 0.955749545  | 1.24E-06 |
| TUCP_001523 | XLOC_058837 | ENSRNOT00000023889 | 0.950724251  | 2.11E-06 |
| TUCP_001523 | XLOC_058837 | ENSRNOT00000005901 | 0.970069887  | 1.80E-07 |
| TUCP_001523 | XLOC_058837 | ENSRNOT00000058382 | 0.954707644  | 1.39E-06 |
| TUCP_001523 | XLOC_058837 | ENSRNOT00000083256 | 0.956823604  | 1.10E-06 |
| TUCP_001523 | XLOC_058837 | ENSRNOT00000016088 | 0.958087335  | 9.49E-07 |
| TUCP_001523 | XLOC_058837 | ENSRNOT00000006542 | 0.96113283   | 6.54E-07 |
| TUCP_001523 | XLOC_058837 | ENSRNOT00000035605 | 0.956494301  | 1.14E-06 |
| TUCP_001523 | XLOC_058837 | ENSRNOT00000081226 | 0.953276403  | 1.62E-06 |
| TUCP_001523 | XLOC_058837 | ENSRNOT00000084031 | 0.967918991  | 2.54E-07 |
| TUCP_001523 | XLOC_058837 | ENSRNOT00000016568 | 0.952553049  | 1.75E-06 |
| TUCP_001523 | XLOC_058837 | ENSRNOT00000000181 | 0.965764112  | 3.50E-07 |
| TUCP_001523 | XLOC_058837 | ENSRNOT00000000886 | 0.958922678  | 8.60E-07 |
| TUCP_001523 | XLOC_058837 | ENSRNOT00000005297 | 0.953977731  | 1.50E-06 |
| TUCP_001523 | XLOC_058837 | ENSRNOT00000066708 | 0.962958089  | 5.16E-07 |
| TUCP_001523 | XLOC_058837 | ENSRNOT00000025355 | 0.953602767  | 1.57E-06 |
| TUCP_001523 | XLOC_058837 | ENSRNOT00000027752 | 0.952746822  | 1.71E-06 |
| TUCP_001523 | XLOC_058837 | ENSRNOT00000052002 | 0.951012429  | 2.05E-06 |
| TUCP_001523 | XLOC_058837 | ENSRNOT00000081725 | 0.955425031  | 1.29E-06 |
| TUCP_001523 | XLOC_058837 | ENSRNOT00000005459 | 0.955165072  | 1.32E-06 |
| TUCP_001523 | XLOC_058837 | ENSRNOT00000007702 | -0.951240453 | 2.00E-06 |
| TUCP_001523 | XLOC_058837 | ENSRNOT00000044595 | 0.950585593  | 2.14E-06 |
| TUCP_001523 | XLOC_058837 | ENSRNOT00000039102 | 0.950032921  | 2.26E-06 |



|             |             |                    |              |          |
|-------------|-------------|--------------------|--------------|----------|
| TUCP_001523 | XLOC_058837 | ENSRNOT00000006373 | 0.950162228  | 2.23E-06 |
| TUCP_001523 | XLOC_058837 | ENSRNOT00000009150 | 0.951570295  | 1.93E-06 |
| TUCP_001523 | XLOC_058837 | ENSRNOT00000011277 | 0.95984454   | 7.69E-07 |
| TUCP_001523 | XLOC_058837 | ENSRNOT00000092068 | 0.953453423  | 1.59E-06 |
| TUCP_001523 | XLOC_058837 | ENSRNOT00000082711 | 0.951374531  | 1.97E-06 |
| TUCP_001523 | XLOC_058837 | ENSRNOT00000048781 | 0.959932031  | 7.60E-07 |
| TUCP_001523 | XLOC_058837 | ENSRNOT00000085465 | -0.951702917 | 1.91E-06 |
| TUCP_001523 | XLOC_058837 | ENSRNOT00000003265 | 0.959280787  | 8.23E-07 |
| TUCP_001523 | XLOC_058837 | ENSRNOT00000071917 | 0.953429193  | 1.60E-06 |
| TUCP_001523 | XLOC_058837 | ENSRNOT00000028225 | 0.951016735  | 2.05E-06 |
| TUCP_001523 | XLOC_058837 | ENSRNOT00000013516 | 0.952913801  | 1.68E-06 |
| TUCP_001523 | XLOC_058837 | ENSRNOT00000087762 | 0.966708557  | 3.05E-07 |
| TUCP_001523 | XLOC_058837 | ENSRNOT00000055114 | -0.952473579 | 1.76E-06 |
| TUCP_001523 | XLOC_058837 | ENSRNOT00000011832 | -0.956920286 | 1.09E-06 |
| TUCP_001523 | XLOC_058837 | ENSRNOT00000020207 | 0.952276546  | 1.80E-06 |
| TUCP_001523 | XLOC_058837 | ENSRNOT00000077060 | 0.980726488  | 2.03E-08 |
| TUCP_001523 | XLOC_058837 | ENSRNOT00000015223 | 0.967904437  | 2.54E-07 |
| TUCP_001523 | XLOC_058837 | ENSRNOT00000013851 | -0.967929065 | 2.53E-07 |
| TUCP_001523 | XLOC_058837 | ENSRNOT00000065978 | 0.973335005  | 1.02E-07 |
| TUCP_001523 | XLOC_058837 | ENSRNOT00000092066 | -0.967490455 | 2.71E-07 |
| TUCP_001523 | XLOC_058837 | ENSRNOT00000025767 | 0.968558046  | 2.30E-07 |
| TUCP_001523 | XLOC_058837 | ENSRNOT00000013286 | 0.959482093  | 8.03E-07 |
| TUCP_001523 | XLOC_058837 | ENSRNOT00000013321 | 0.950837576  | 2.08E-06 |
| TUCP_001523 | XLOC_058837 | ENSRNOT00000026212 | 0.966599816  | 3.10E-07 |
| TUCP_001523 | XLOC_058837 | ENSRNOT00000026312 | 0.953661146  | 1.56E-06 |
| TUCP_001523 | XLOC_058837 | ENSRNOT00000035309 | -0.965189964 | 3.80E-07 |
| TUCP_001523 | XLOC_058837 | ENSRNOT00000045068 | 0.981739144  | 1.55E-08 |
| TUCP_001523 | XLOC_058837 | ENSRNOT00000024011 | 0.952618595  | 1.74E-06 |
| TUCP_001523 | XLOC_058837 | ENSRNOT00000082904 | 0.969660288  | 1.92E-07 |
| TUCP_001523 | XLOC_058837 | ENSRNOT00000002486 | 0.956538336  | 1.14E-06 |
| TUCP_001523 | XLOC_058837 | ENSRNOT00000056022 | 0.95508495   | 1.33E-06 |
| TUCP_001523 | XLOC_058837 | ENSRNOT00000030109 | 0.956708554  | 1.11E-06 |
| TUCP_003988 | XLOC_175146 | ENSRNOT00000076187 | 0.958767043  | 8.76E-07 |
| TUCP_003988 | XLOC_175146 | ENSRNOT00000018762 | 0.956191762  | 1.18E-06 |
| TUCP_003988 | XLOC_175146 | ENSRNOT00000084120 | 0.952477368  | 1.76E-06 |
| TUCP_003988 | XLOC_175146 | ENSRNOT00000092974 | 0.957919408  | 9.68E-07 |
| TUCP_003988 | XLOC_175146 | ENSRNOT00000080533 | 0.957784345  | 9.84E-07 |
| TUCP_003988 | XLOC_175146 | ENSRNOT00000091052 | 0.956197173  | 1.18E-06 |
| TUCP_003988 | XLOC_175146 | ENSRNOT00000038553 | 0.957518134  | 1.01E-06 |
| TUCP_001448 | XLOC_056230 | ENSRNOT00000087799 | 0.958601161  | 8.93E-07 |
| TUCP_001448 | XLOC_056230 | ENSRNOT00000080945 | 0.954186186  | 1.47E-06 |
| TUCP_003553 | XLOC_155889 | ENSRNOT00000008961 | 0.991814812  | 2.85E-10 |
| TUCP_003553 | XLOC_155889 | ENSRNOT00000080340 | 0.95897761   | 8.54E-07 |
| TUCP_003553 | XLOC_155889 | ENSRNOT00000055127 | 0.969182196  | 2.08E-07 |
| TUCP_003553 | XLOC_155889 | ENSRNOT00000019311 | 0.955458689  | 1.28E-06 |
| TUCP_003553 | XLOC_155889 | ENSRNOT00000082116 | 0.950190831  | 2.22E-06 |
| TUCP_003553 | XLOC_155889 | ENSRNOT00000035523 | 0.974483547  | 8.16E-08 |
| TUCP_003553 | XLOC_155889 | ENSRNOT00000082611 | 0.962688218  | 5.35E-07 |
| TUCP_003553 | XLOC_155889 | ENSRNOT00000033984 | 0.957091822  | 1.07E-06 |
| TUCP_003553 | XLOC_155889 | ENSRNOT00000025564 | 0.962746181  | 5.31E-07 |
| TUCP_003553 | XLOC_155889 | ENSRNOT00000033719 | 0.986862151  | 3.02E-09 |

|             |             |                    |              |          |
|-------------|-------------|--------------------|--------------|----------|
| TUCP_003553 | XLOC_155889 | ENSRNOT0000000640  | 0.973480057  | 9.88E-08 |
| TUCP_003553 | XLOC_155889 | ENSRNOT0000002695  | 0.988023013  | 1.90E-09 |
| TUCP_003553 | XLOC_155889 | ENSRNOT00000056174 | 0.990092566  | 7.39E-10 |
| TUCP_003553 | XLOC_155889 | ENSRNOT00000074738 | 0.983788947  | 8.58E-09 |
| TUCP_003553 | XLOC_155889 | ENSRNOT00000088151 | 0.95580544   | 1.23E-06 |
| TUCP_003553 | XLOC_155889 | ENSRNOT00000081108 | 0.951142756  | 2.02E-06 |
| TUCP_003553 | XLOC_155889 | ENSRNOT00000071258 | -0.954119613 | 1.48E-06 |
| TUCP_003553 | XLOC_155889 | ENSRNOT00000032333 | 0.960645419  | 6.96E-07 |
| TUCP_003553 | XLOC_155889 | ENSRNOT00000031025 | 0.986910858  | 2.96E-09 |
| TUCP_003553 | XLOC_155889 | ENSRNOT00000056551 | 0.979008069  | 3.10E-08 |
| TUCP_003553 | XLOC_155889 | ENSRNOT00000036753 | 0.963648788  | 4.70E-07 |
| TUCP_003553 | XLOC_155889 | ENSRNOT00000077022 | 0.964430531  | 4.22E-07 |
| TUCP_003553 | XLOC_155889 | ENSRNOT00000015576 | 0.956012524  | 1.20E-06 |
| TUCP_003553 | XLOC_155889 | ENSRNOT00000001853 | 0.99317603   | 1.15E-10 |
| TUCP_003553 | XLOC_155889 | ENSRNOT00000086541 | 0.95515951   | 1.32E-06 |
| TUCP_003553 | XLOC_155889 | ENSRNOT00000057016 | 0.983961297  | 8.14E-09 |
| TUCP_003553 | XLOC_155889 | ENSRNOT00000083067 | 0.975332474  | 6.90E-08 |
| TUCP_003553 | XLOC_155889 | ENSRNOT00000076407 | 0.960296941  | 7.27E-07 |
| TUCP_003553 | XLOC_155889 | ENSRNOT00000040162 | 0.973832694  | 9.25E-08 |
| TUCP_003553 | XLOC_155889 | ENSRNOT00000043486 | 0.959555019  | 7.96E-07 |
| TUCP_003553 | XLOC_155889 | ENSRNOT00000039263 | 0.970452377  | 1.69E-07 |
| TUCP_003553 | XLOC_155889 | ENSRNOT00000056995 | 0.977215981  | 4.65E-08 |
| TUCP_003553 | XLOC_155889 | ENSRNOT00000088707 | 0.972418595  | 1.20E-07 |
| TUCP_003553 | XLOC_155889 | ENSRNOT00000058626 | 0.951760474  | 1.90E-06 |
| TUCP_003553 | XLOC_155889 | ENSRNOT00000019501 | 0.957663415  | 9.98E-07 |
| TUCP_003553 | XLOC_155889 | ENSRNOT00000041741 | 0.978274501  | 3.68E-08 |
| TUCP_003553 | XLOC_155889 | ENSRNOT00000034152 | 0.990566762  | 5.79E-10 |
| TUCP_003553 | XLOC_155889 | ENSRNOT00000076910 | 0.952159505  | 1.82E-06 |
| TUCP_003553 | XLOC_155889 | ENSRNOT00000024718 | 0.993863912  | 6.78E-11 |
| TUCP_003553 | XLOC_155889 | ENSRNOT00000009077 | 0.953041441  | 1.66E-06 |
| TUCP_003553 | XLOC_155889 | ENSRNOT00000043660 | 0.950005428  | 2.26E-06 |
| TUCP_003553 | XLOC_155889 | ENSRNOT00000009620 | 0.987483352  | 2.37E-09 |
| TUCP_003553 | XLOC_155889 | ENSRNOT00000001570 | 0.978940055  | 3.15E-08 |
| TUCP_003553 | XLOC_155889 | ENSRNOT00000085570 | 0.959715162  | 7.81E-07 |
| TUCP_003553 | XLOC_155889 | ENSRNOT0000004637  | 0.984391162  | 7.11E-09 |
| TUCP_003553 | XLOC_155889 | ENSRNOT0000004320  | 0.952108563  | 1.83E-06 |
| TUCP_003553 | XLOC_155889 | ENSRNOT00000084021 | 0.980544709  | 2.12E-08 |
| TUCP_003553 | XLOC_155889 | ENSRNOT00000091237 | 0.954048669  | 1.49E-06 |
| TUCP_003553 | XLOC_155889 | ENSRNOT00000073547 | 0.987153766  | 2.70E-09 |
| TUCP_003553 | XLOC_155889 | ENSRNOT00000058148 | -0.961730438 | 6.06E-07 |
| TUCP_003553 | XLOC_155889 | ENSRNOT00000024464 | 0.968905649  | 2.17E-07 |
| TUCP_003553 | XLOC_155889 | ENSRNOT00000090867 | 0.95811064   | 9.47E-07 |
| TUCP_003553 | XLOC_155889 | ENSRNOT00000029990 | 0.991347732  | 3.76E-10 |
| TUCP_003553 | XLOC_155889 | ENSRNOT00000043434 | 0.985949813  | 4.21E-09 |
| TUCP_003553 | XLOC_155889 | ENSRNOT00000017071 | 0.953591919  | 1.57E-06 |
| TUCP_003553 | XLOC_155889 | ENSRNOT00000022648 | 0.969504278  | 1.97E-07 |
| TUCP_003553 | XLOC_155889 | ENSRNOT00000038426 | 0.975010478  | 7.36E-08 |
| TUCP_003553 | XLOC_155889 | ENSRNOT00000039876 | 0.971785377  | 1.34E-07 |
| TUCP_003553 | XLOC_155889 | ENSRNOT00000016449 | 0.973188829  | 1.04E-07 |
| TUCP_003553 | XLOC_155889 | ENSRNOT00000087603 | 0.969889325  | 1.85E-07 |
| TUCP_003553 | XLOC_155889 | ENSRNOT00000044319 | 0.956990162  | 1.08E-06 |

|             |             |                    |              |          |
|-------------|-------------|--------------------|--------------|----------|
| TUCP_003553 | XLOC_155889 | ENSRNOT00000027949 | 0.977767884  | 4.12E-08 |
| TUCP_003553 | XLOC_155889 | ENSRNOT00000023504 | 0.98241921   | 1.28E-08 |
| TUCP_003553 | XLOC_155889 | ENSRNOT00000051363 | 0.970457247  | 1.69E-07 |
| TUCP_003553 | XLOC_155889 | ENSRNOT00000025880 | 0.971420848  | 1.43E-07 |
| TUCP_003553 | XLOC_155889 | ENSRNOT00000084873 | 0.985364515  | 5.16E-09 |
| TUCP_003553 | XLOC_155889 | ENSRNOT00000010594 | 0.964593647  | 4.13E-07 |
| TUCP_003553 | XLOC_155889 | ENSRNOT00000077134 | 0.9685009    | 2.32E-07 |
| TUCP_003553 | XLOC_155889 | ENSRNOT00000084429 | 0.983604167  | 9.08E-09 |
| TUCP_003553 | XLOC_155889 | ENSRNOT00000026331 | 0.952957951  | 1.68E-06 |
| TUCP_003553 | XLOC_155889 | ENSRNOT00000083943 | 0.989130961  | 1.17E-09 |
| TUCP_003553 | XLOC_155889 | ENSRNOT00000060765 | 0.997453713  | 8.39E-13 |
| TUCP_003553 | XLOC_155889 | ENSRNOT00000014158 | 0.95468144   | 1.39E-06 |
| TUCP_003553 | XLOC_155889 | ENSRNOT00000081036 | 0.961499201  | 6.24E-07 |
| TUCP_003553 | XLOC_155889 | ENSRNOT00000050656 | 0.979746127  | 2.59E-08 |
| TUCP_003553 | XLOC_155889 | ENSRNOT00000044983 | 0.978097602  | 3.83E-08 |
| TUCP_003553 | XLOC_155889 | ENSRNOT00000008365 | 0.950097091  | 2.24E-06 |
| TUCP_003553 | XLOC_155889 | ENSRNOT00000031951 | 0.953549646  | 1.57E-06 |
| TUCP_003553 | XLOC_155889 | ENSRNOT00000010264 | 0.970414585  | 1.70E-07 |
| TUCP_003553 | XLOC_155889 | ENSRNOT00000090654 | 0.965919009  | 3.42E-07 |
| TUCP_003553 | XLOC_155889 | ENSRNOT00000059660 | 0.962976569  | 5.15E-07 |
| TUCP_003553 | XLOC_155889 | ENSRNOT00000054757 | 0.980535384  | 2.13E-08 |
| TUCP_003551 | XLOC_155479 | ENSRNOT00000085005 | 0.953739158  | 1.54E-06 |
| TUCP_003551 | XLOC_155479 | ENSRNOT00000065421 | 0.954867867  | 1.37E-06 |
| TUCP_003225 | XLOC_138410 | ENSRNOT00000066477 | -0.962639963 | 5.38E-07 |
| TUCP_003225 | XLOC_138410 | ENSRNOT00000006188 | -0.966392447 | 3.19E-07 |
| TUCP_003225 | XLOC_138410 | ENSRNOT00000026941 | 0.958581781  | 8.95E-07 |
| TUCP_003225 | XLOC_138410 | ENSRNOT00000013745 | -0.965251934 | 3.76E-07 |
| TUCP_003225 | XLOC_138410 | ENSRNOT00000075397 | 0.959226529  | 8.29E-07 |
| TUCP_003225 | XLOC_138410 | ENSRNOT00000032926 | -0.97346679  | 9.91E-08 |
| TUCP_003225 | XLOC_138410 | ENSRNOT00000019104 | -0.962116806 | 5.77E-07 |
| TUCP_003225 | XLOC_138410 | ENSRNOT00000005958 | 0.963147999  | 5.03E-07 |
| TUCP_003225 | XLOC_138410 | ENSRNOT00000068353 | 0.966618769  | 3.09E-07 |
| TUCP_003225 | XLOC_138410 | ENSRNOT00000001691 | 0.956136701  | 1.19E-06 |
| TUCP_003225 | XLOC_138410 | ENSRNOT00000089319 | 0.966495894  | 3.14E-07 |
| TUCP_003225 | XLOC_138410 | ENSRNOT00000079138 | 0.951517975  | 1.94E-06 |
| TUCP_003225 | XLOC_138410 | ENSRNOT00000078737 | -0.95932895  | 8.18E-07 |
| TUCP_003225 | XLOC_138410 | ENSRNOT00000025067 | -0.953660139 | 1.56E-06 |
| TUCP_003225 | XLOC_138410 | ENSRNOT00000086706 | 0.956861504  | 1.09E-06 |
| TUCP_003225 | XLOC_138410 | ENSRNOT00000000743 | 0.951846504  | 1.88E-06 |
| TUCP_003225 | XLOC_138410 | ENSRNOT00000031692 | -0.950234026 | 2.21E-06 |
| TUCP_003225 | XLOC_138410 | ENSRNOT00000078282 | -0.961917222 | 5.92E-07 |
| TUCP_003225 | XLOC_138410 | ENSRNOT00000042459 | -0.951207189 | 2.01E-06 |
| TUCP_003225 | XLOC_138410 | ENSRNOT00000006752 | 0.967237779  | 2.81E-07 |
| TUCP_003225 | XLOC_138410 | ENSRNOT00000021534 | -0.966075965 | 3.34E-07 |
| TUCP_003225 | XLOC_138410 | ENSRNOT00000072771 | 0.957279998  | 1.04E-06 |
| TUCP_003225 | XLOC_138410 | ENSRNOT00000065300 | 0.950489774  | 2.16E-06 |
| TUCP_003225 | XLOC_138410 | ENSRNOT00000035320 | -0.956274869 | 1.17E-06 |
| TUCP_003225 | XLOC_138410 | ENSRNOT00000057160 | 0.966530716  | 3.13E-07 |
| TUCP_003225 | XLOC_138410 | ENSRNOT00000077999 | 0.967580317  | 2.67E-07 |
| TUCP_003225 | XLOC_138410 | ENSRNOT00000003412 | -0.95388802  | 1.52E-06 |
| TUCP_003225 | XLOC_138410 | ENSRNOT00000005686 | -0.953807301 | 1.53E-06 |

|             |             |                    |              |          |
|-------------|-------------|--------------------|--------------|----------|
| TUCP_003225 | XLOC_138410 | ENSRNOT00000036959 | -0.958521546 | 9.02E-07 |
| TUCP_003225 | XLOC_138410 | ENSRNOT00000000048 | 0.951174922  | 2.01E-06 |
| TUCP_003225 | XLOC_138410 | ENSRNOT00000076181 | -0.962079063 | 5.79E-07 |
| TUCP_003225 | XLOC_138410 | ENSRNOT00000080410 | -0.958027567 | 9.56E-07 |
| TUCP_003225 | XLOC_138410 | ENSRNOT00000041044 | 0.966017687  | 3.37E-07 |
| TUCP_003225 | XLOC_138410 | ENSRNOT00000067391 | -0.967572963 | 2.67E-07 |
| TUCP_003225 | XLOC_138410 | ENSRNOT00000084709 | 0.953842188  | 1.53E-06 |
| TUCP_003225 | XLOC_138410 | ENSRNOT00000029179 | -0.958656762 | 8.87E-07 |
| TUCP_003225 | XLOC_138410 | ENSRNOT00000090912 | 0.959714245  | 7.81E-07 |
| TUCP_003225 | XLOC_138410 | ENSRNOT00000011082 | -0.951982073 | 1.85E-06 |
| TUCP_003225 | XLOC_138410 | ENSRNOT00000025856 | -0.968041074 | 2.49E-07 |
| TUCP_003225 | XLOC_138410 | ENSRNOT00000026643 | 0.952788405  | 1.71E-06 |
| TUCP_003225 | XLOC_138410 | ENSRNOT00000072357 | -0.96339421  | 4.87E-07 |
| TUCP_003225 | XLOC_138410 | ENSRNOT00000016132 | -0.96525643  | 3.76E-07 |
| TUCP_003225 | XLOC_138410 | ENSRNOT00000058495 | -0.951992064 | 1.85E-06 |
| TUCP_003225 | XLOC_138410 | ENSRNOT00000013067 | -0.968336261 | 2.38E-07 |
| TUCP_003225 | XLOC_138410 | ENSRNOT00000004351 | -0.971022038 | 1.53E-07 |
| TUCP_003225 | XLOC_138410 | ENSRNOT00000016220 | -0.962749335 | 5.31E-07 |
| TUCP_003225 | XLOC_138410 | ENSRNOT00000003780 | 0.955105667  | 1.33E-06 |
| TUCP_003225 | XLOC_138410 | ENSRNOT00000020910 | 0.978623643  | 3.39E-08 |
| TUCP_003225 | XLOC_138410 | ENSRNOT00000033975 | 0.950688706  | 2.11E-06 |
| TUCP_003225 | XLOC_138410 | ENSRNOT00000017362 | -0.951282664 | 1.99E-06 |
| TUCP_003225 | XLOC_138410 | ENSRNOT00000074586 | -0.963787273 | 4.61E-07 |
| TUCP_003225 | XLOC_138410 | ENSRNOT00000080028 | -0.950603329 | 2.13E-06 |
| TUCP_003225 | XLOC_138410 | ENSRNOT00000045765 | -0.956671446 | 1.12E-06 |
| TUCP_003225 | XLOC_138410 | ENSRNOT00000005486 | -0.96517514  | 3.80E-07 |
| TUCP_003225 | XLOC_138410 | ENSRNOT00000028290 | -0.973307318 | 1.02E-07 |
| TUCP_003225 | XLOC_138410 | ENSRNOT00000050515 | 0.961096957  | 6.57E-07 |
| TUCP_003225 | XLOC_138410 | ENSRNOT00000055602 | -0.971388892 | 1.44E-07 |
| TUCP_003225 | XLOC_138410 | ENSRNOT00000046745 | 0.959426653  | 8.09E-07 |
| TUCP_003225 | XLOC_138410 | ENSRNOT00000061201 | -0.960324696 | 7.24E-07 |
| TUCP_003225 | XLOC_138410 | ENSRNOT0000002187  | -0.963470706 | 4.82E-07 |
| TUCP_003225 | XLOC_138410 | ENSRNOT00000011130 | -0.96256972  | 5.43E-07 |
| TUCP_003225 | XLOC_138410 | ENSRNOT00000019656 | -0.955797299 | 1.23E-06 |
| TUCP_003225 | XLOC_138410 | ENSRNOT00000049285 | -0.95274851  | 1.71E-06 |
| TUCP_003225 | XLOC_138410 | ENSRNOT00000006366 | -0.951267873 | 1.99E-06 |
| TUCP_003225 | XLOC_138410 | ENSRNOT00000074649 | 0.96893217   | 2.16E-07 |
| TUCP_003225 | XLOC_138410 | ENSRNOT00000033196 | -0.952112028 | 1.83E-06 |
| TUCP_003225 | XLOC_138410 | ENSRNOT00000077146 | -0.962882684 | 5.21E-07 |
| TUCP_003225 | XLOC_138410 | ENSRNOT00000060002 | -0.977672188 | 4.21E-08 |
| TUCP_003225 | XLOC_138410 | ENSRNOT00000089673 | -0.962225747 | 5.68E-07 |
| TUCP_003225 | XLOC_138410 | ENSRNOT00000004046 | -0.96337676  | 4.88E-07 |
| TUCP_003225 | XLOC_138410 | ENSRNOT00000010367 | 0.964190996  | 4.37E-07 |
| TUCP_003225 | XLOC_138410 | ENSRNOT00000023977 | -0.962278699 | 5.65E-07 |
| TUCP_003225 | XLOC_138410 | ENSRNOT00000066133 | -0.965759659 | 3.50E-07 |
| TUCP_003225 | XLOC_138410 | ENSRNOT00000068435 | -0.960502073 | 7.08E-07 |
| TUCP_003225 | XLOC_138410 | ENSRNOT00000048933 | -0.95381223  | 1.53E-06 |
| TUCP_003225 | XLOC_138410 | ENSRNOT00000006765 | -0.956113129 | 1.19E-06 |
| TUCP_003225 | XLOC_138410 | ENSRNOT00000012432 | -0.952585575 | 1.74E-06 |
| TUCP_003225 | XLOC_138410 | ENSRNOT00000035385 | 0.95624856   | 1.17E-06 |
| TUCP_003225 | XLOC_138410 | ENSRNOT00000057738 | 0.955114856  | 1.33E-06 |

|             |             |                     |              |          |
|-------------|-------------|---------------------|--------------|----------|
| TUCP_003225 | XLOC_138410 | ENSRNOT00000030692  | -0.956331925 | 1.16E-06 |
| TUCP_003225 | XLOC_138410 | ENSRNOT00000014885  | -0.953895755 | 1.52E-06 |
| TUCP_003225 | XLOC_138410 | ENSRNOT00000064535  | -0.958346671 | 9.21E-07 |
| TUCP_003225 | XLOC_138410 | ENSRNOT00000010748  | 0.959611426  | 7.91E-07 |
| TUCP_003225 | XLOC_138410 | ENSRNOT00000085295  | -0.970692724 | 1.62E-07 |
| TUCP_003225 | XLOC_138410 | ENSRNOT00000008222  | -0.962674736 | 5.36E-07 |
| TUCP_003225 | XLOC_138410 | ENSRNOT00000009749  | -0.963489182 | 4.81E-07 |
| TUCP_003225 | XLOC_138410 | ENSRNOT00000039102  | 0.955742575  | 1.24E-06 |
| TUCP_003225 | XLOC_138410 | ENSRNOT00000023807  | -0.960159749 | 7.39E-07 |
| TUCP_003225 | XLOC_138410 | ENSRNOT00000001135  | -0.956205775 | 1.18E-06 |
| TUCP_003225 | XLOC_138410 | ENSRNOT00000091205  | 0.968633298  | 2.27E-07 |
| TUCP_003225 | XLOC_138410 | ENSRNOT00000017692  | -0.962165348 | 5.73E-07 |
| TUCP_003225 | XLOC_138410 | ENSRNOT00000010983  | 0.955318771  | 1.30E-06 |
| TUCP_003225 | XLOC_138410 | ENSRNOT00000007369  | 0.967900753  | 2.54E-07 |
| TUCP_003225 | XLOC_138410 | ENSRNOT00000004787  | -0.973692802 | 9.49E-08 |
| TUCP_003225 | XLOC_138410 | ENSRNOT00000085466  | 0.956363252  | 1.16E-06 |
| TUCP_003225 | XLOC_138410 | ENSRNOT00000038811  | -0.95004343  | 2.25E-06 |
| TUCP_003225 | XLOC_138410 | ENSRNOT00000007367  | -0.950348708 | 2.19E-06 |
| TUCP_003225 | XLOC_138410 | ENSRNOT00000058351  | 0.960027829  | 7.51E-07 |
| TUCP_003225 | XLOC_138410 | ENSRNOT00000004941  | -0.95937196  | 8.14E-07 |
| TUCP_003225 | XLOC_138410 | ENSRNOT00000065529  | 0.968319695  | 2.38E-07 |
| TUCP_003225 | XLOC_138410 | ENSRNOT00000013431  | -0.959830611 | 7.70E-07 |
| TUCP_003225 | XLOC_138410 | ENSRNOT00000028703  | -0.961405959 | 6.32E-07 |
| TUCP_003225 | XLOC_138410 | ENSRNOT00000017995  | 0.965297675  | 3.74E-07 |
| TUCP_003225 | XLOC_138410 | ENSRNOT00000088679  | -0.965873191 | 3.44E-07 |
| TUCP_003225 | XLOC_138410 | ENSRNOT000000051494 | 0.95246402   | 1.76E-06 |
| TUCP_003225 | XLOC_138410 | ENSRNOT00000023256  | 0.961370993  | 6.35E-07 |
| TUCP_003225 | XLOC_138410 | ENSRNOT00000008982  | 0.965331214  | 3.72E-07 |
| TUCP_003225 | XLOC_138410 | ENSRNOT00000047192  | -0.952376628 | 1.78E-06 |
| TUCP_003225 | XLOC_138410 | ENSRNOT00000008987  | -0.965919381 | 3.42E-07 |
| TUCP_003225 | XLOC_138410 | ENSRNOT00000090355  | -0.959337557 | 8.18E-07 |
| TUCP_003225 | XLOC_138410 | ENSRNOT00000018684  | -0.956920644 | 1.09E-06 |
| TUCP_003225 | XLOC_138410 | ENSRNOT00000088073  | -0.95724846  | 1.05E-06 |
| TUCP_003225 | XLOC_138410 | ENSRNOT00000059854  | -0.950544914 | 2.14E-06 |
| TUCP_003225 | XLOC_138410 | ENSRNOT00000072069  | -0.951317662 | 1.98E-06 |
| TUCP_003225 | XLOC_138410 | ENSRNOT00000027083  | 0.952697491  | 1.72E-06 |
| TUCP_003225 | XLOC_138410 | ENSRNOT00000063930  | -0.978484555 | 3.50E-08 |
| TUCP_003225 | XLOC_138410 | ENSRNOT00000020453  | -0.95014152  | 2.23E-06 |
| TUCP_003225 | XLOC_138410 | ENSRNOT0000001855   | 0.959306009  | 8.21E-07 |
| TUCP_003225 | XLOC_138410 | ENSRNOT00000009563  | -0.960793477 | 6.83E-07 |
| TUCP_003225 | XLOC_138410 | ENSRNOT00000041237  | -0.95544656  | 1.28E-06 |
| TUCP_003225 | XLOC_138410 | ENSRNOT00000087838  | -0.952289927 | 1.80E-06 |
| TUCP_003225 | XLOC_138410 | ENSRNOT00000081981  | 0.972095908  | 1.27E-07 |
| TUCP_003225 | XLOC_138410 | ENSRNOT00000013759  | -0.96321703  | 4.99E-07 |
| TUCP_003225 | XLOC_138410 | ENSRNOT00000005587  | -0.962853768 | 5.23E-07 |
| TUCP_003225 | XLOC_138410 | ENSRNOT00000003326  | -0.966130197 | 3.32E-07 |
| TUCP_003225 | XLOC_138410 | ENSRNOT00000021629  | -0.957709577 | 9.92E-07 |
| TUCP_003225 | XLOC_138410 | ENSRNOT00000016306  | -0.976410568 | 5.53E-08 |
| TUCP_003225 | XLOC_138410 | ENSRNOT00000015476  | -0.968345274 | 2.37E-07 |
| TUCP_003225 | XLOC_138410 | ENSRNOT00000025079  | -0.95085131  | 2.08E-06 |
| TUCP_003225 | XLOC_138410 | ENSRNOT00000048754  | -0.956897624 | 1.09E-06 |

|             |             |                    |              |          |
|-------------|-------------|--------------------|--------------|----------|
| TUCP_003225 | XLOC_138410 | ENSRNOT00000021455 | -0.95050287  | 2.15E-06 |
| TUCP_003225 | XLOC_138410 | ENSRNOT00000064643 | 0.970421149  | 1.70E-07 |
| TUCP_003225 | XLOC_138410 | ENSRNOT00000004007 | -0.952514354 | 1.76E-06 |
| TUCP_003225 | XLOC_138410 | ENSRNOT00000019816 | -0.955356727 | 1.30E-06 |
| TUCP_003225 | XLOC_138410 | ENSRNOT00000020681 | -0.959994721 | 7.54E-07 |
| TUCP_003225 | XLOC_138410 | ENSRNOT00000057898 | -0.969716597 | 1.91E-07 |
| TUCP_003225 | XLOC_138410 | ENSRNOT00000091602 | -0.966883946 | 2.97E-07 |
| TUCP_003225 | XLOC_138410 | ENSRNOT00000056100 | -0.954714807 | 1.39E-06 |
| TUCP_003225 | XLOC_138410 | ENSRNOT00000009811 | 0.950936692  | 2.06E-06 |
| TUCP_003225 | XLOC_138410 | ENSRNOT00000075800 | -0.968041414 | 2.49E-07 |
| TUCP_003225 | XLOC_138410 | ENSRNOT00000036838 | -0.958197356 | 9.37E-07 |
| TUCP_003225 | XLOC_138410 | ENSRNOT00000009817 | -0.964409559 | 4.24E-07 |
| TUCP_003225 | XLOC_138410 | ENSRNOT00000009708 | -0.962150555 | 5.74E-07 |
| TUCP_003225 | XLOC_138410 | ENSRNOT00000030798 | -0.959962995 | 7.57E-07 |
| TUCP_003225 | XLOC_138410 | ENSRNOT00000018634 | -0.974122941 | 8.75E-08 |
| TUCP_003225 | XLOC_138410 | ENSRNOT00000071540 | 0.954056479  | 1.49E-06 |
| TUCP_003225 | XLOC_138410 | ENSRNOT00000031701 | -0.954991203 | 1.35E-06 |
| TUCP_003225 | XLOC_138410 | ENSRNOT00000012583 | -0.953372656 | 1.60E-06 |
| TUCP_003225 | XLOC_138410 | ENSRNOT00000072849 | -0.964948542 | 3.93E-07 |
| TUCP_003225 | XLOC_138410 | ENSRNOT00000073643 | -0.955166605 | 1.32E-06 |
| TUCP_003225 | XLOC_138410 | ENSRNOT00000024402 | 0.962815257  | 5.26E-07 |
| TUCP_003225 | XLOC_138410 | ENSRNOT00000078349 | -0.969795432 | 1.88E-07 |
| TUCP_003225 | XLOC_138410 | ENSRNOT00000022502 | -0.96346805  | 4.82E-07 |
| TUCP_003225 | XLOC_138410 | ENSRNOT00000017556 | 0.959412521  | 8.10E-07 |
| TUCP_003225 | XLOC_138410 | ENSRNOT00000060698 | -0.959688834 | 7.83E-07 |
| TUCP_003225 | XLOC_138410 | ENSRNOT00000019302 | -0.950786472 | 2.09E-06 |
| TUCP_003225 | XLOC_138410 | ENSRNOT00000021803 | -0.958910254 | 8.61E-07 |
| TUCP_003225 | XLOC_138410 | ENSRNOT00000020147 | 0.95170479   | 1.91E-06 |
| TUCP_003225 | XLOC_138410 | ENSRNOT00000024352 | 0.960192826  | 7.36E-07 |
| TUCP_003225 | XLOC_138410 | ENSRNOT00000082627 | -0.957354284 | 1.03E-06 |
| TUCP_003225 | XLOC_138410 | ENSRNOT00000087748 | -0.96050542  | 7.08E-07 |
| TUCP_003225 | XLOC_138410 | ENSRNOT0000003787  | -0.964334223 | 4.28E-07 |
| TUCP_003225 | XLOC_138410 | ENSRNOT00000014506 | -0.951492319 | 1.95E-06 |
| TUCP_003225 | XLOC_138410 | ENSRNOT00000023262 | -0.968822306 | 2.20E-07 |
| TUCP_003225 | XLOC_138410 | ENSRNOT00000058312 | 0.95096515   | 2.06E-06 |
| TUCP_003225 | XLOC_138410 | ENSRNOT00000015757 | -0.958891635 | 8.63E-07 |
| TUCP_003225 | XLOC_138410 | ENSRNOT00000025104 | -0.9503996   | 2.17E-06 |
| TUCP_003225 | XLOC_138410 | ENSRNOT00000022000 | -0.961518196 | 6.23E-07 |
| TUCP_003225 | XLOC_138410 | ENSRNOT00000008865 | -0.950677401 | 2.12E-06 |
| TUCP_003225 | XLOC_138410 | ENSRNOT00000055957 | -0.967249967 | 2.81E-07 |
| TUCP_003225 | XLOC_138410 | ENSRNOT00000023664 | -0.964435209 | 4.22E-07 |
| TUCP_003225 | XLOC_138410 | ENSRNOT00000068026 | -0.965755112 | 3.50E-07 |
| TUCP_003225 | XLOC_138410 | ENSRNOT00000007314 | -0.962801488 | 5.27E-07 |
| TUCP_003225 | XLOC_138410 | ENSRNOT00000014821 | -0.964233628 | 4.34E-07 |
| TUCP_003225 | XLOC_138410 | ENSRNOT00000058382 | 0.955395741  | 1.29E-06 |
| TUCP_003225 | XLOC_138410 | ENSRNOT00000088599 | 0.953664261  | 1.56E-06 |
| TUCP_003225 | XLOC_138410 | ENSRNOT00000026531 | -0.967336483 | 2.77E-07 |
| TUCP_003225 | XLOC_138410 | ENSRNOT00000064068 | -0.958367557 | 9.18E-07 |
| TUCP_003225 | XLOC_138410 | ENSRNOT00000017746 | -0.961529195 | 6.22E-07 |
| TUCP_003225 | XLOC_138410 | ENSRNOT00000023567 | -0.963989895 | 4.49E-07 |
| TUCP_003225 | XLOC_138410 | ENSRNOT00000070912 | -0.953776869 | 1.54E-06 |

|             |             |                    |              |          |
|-------------|-------------|--------------------|--------------|----------|
| TUCP_003225 | XLOC_138410 | ENSRNOT00000026398 | -0.953334467 | 1.61E-06 |
| TUCP_003225 | XLOC_138410 | ENSRNOT00000000302 | 0.967331133  | 2.77E-07 |
| TUCP_003225 | XLOC_138410 | ENSRNOT00000050609 | -0.959074173 | 8.44E-07 |
| TUCP_003225 | XLOC_138410 | ENSRNOT00000066923 | -0.96326152  | 4.96E-07 |
| TUCP_003225 | XLOC_138410 | ENSRNOT00000041277 | -0.952766472 | 1.71E-06 |
| TUCP_003225 | XLOC_138410 | ENSRNOT00000027910 | 0.97073788   | 1.61E-07 |
| TUCP_003225 | XLOC_138410 | ENSRNOT00000037015 | 0.966773232  | 3.02E-07 |
| TUCP_003225 | XLOC_138410 | ENSRNOT00000067135 | -0.972415526 | 1.20E-07 |
| TUCP_003225 | XLOC_138410 | ENSRNOT0000002779  | -0.95560514  | 1.26E-06 |
| TUCP_003225 | XLOC_138410 | ENSRNOT00000054976 | -0.968900122 | 2.17E-07 |
| TUCP_003225 | XLOC_138410 | ENSRNOT00000010510 | -0.955995337 | 1.21E-06 |
| TUCP_003225 | XLOC_138410 | ENSRNOT00000067901 | -0.960766454 | 6.85E-07 |
| TUCP_003225 | XLOC_138410 | ENSRNOT00000061253 | 0.953921382  | 1.51E-06 |
| TUCP_003225 | XLOC_138410 | ENSRNOT00000021145 | -0.966028729 | 3.37E-07 |
| TUCP_003225 | XLOC_138410 | ENSRNOT00000003605 | -0.955079538 | 1.34E-06 |
| TUCP_003225 | XLOC_138410 | ENSRNOT00000082151 | -0.971852736 | 1.33E-07 |
| TUCP_003225 | XLOC_138410 | ENSRNOT00000016776 | -0.962060354 | 5.81E-07 |
| TUCP_003225 | XLOC_138410 | ENSRNOT00000050138 | 0.950093049  | 2.24E-06 |
| TUCP_003225 | XLOC_138410 | ENSRNOT00000085971 | -0.962301102 | 5.63E-07 |
| TUCP_003225 | XLOC_138410 | ENSRNOT00000057537 | 0.957623715  | 1.00E-06 |
| TUCP_003225 | XLOC_138410 | ENSRNOT00000007771 | -0.950234449 | 2.21E-06 |
| TUCP_003225 | XLOC_138410 | ENSRNOT00000022142 | 0.956796658  | 1.10E-06 |
| TUCP_003225 | XLOC_138410 | ENSRNOT00000076300 | -0.952426349 | 1.77E-06 |
| TUCP_003225 | XLOC_138410 | ENSRNOT00000028885 | -0.967613584 | 2.66E-07 |
| TUCP_003225 | XLOC_138410 | ENSRNOT00000015537 | 0.957057494  | 1.07E-06 |
| TUCP_003225 | XLOC_138410 | ENSRNOT00000052120 | 0.961272091  | 6.43E-07 |
| TUCP_003225 | XLOC_138410 | ENSRNOT00000078306 | 0.971982946  | 1.30E-07 |
| TUCP_003225 | XLOC_138410 | ENSRNOT00000036931 | -0.956620076 | 1.12E-06 |
| TUCP_003225 | XLOC_138410 | ENSRNOT00000015946 | -0.953556977 | 1.57E-06 |
| TUCP_003225 | XLOC_138410 | ENSRNOT00000023965 | -0.971341904 | 1.45E-07 |
| TUCP_003225 | XLOC_138410 | ENSRNOT00000029125 | 0.966392396  | 3.19E-07 |
| TUCP_003225 | XLOC_138410 | ENSRNOT00000004319 | -0.967178766 | 2.84E-07 |
| TUCP_003225 | XLOC_138410 | ENSRNOT00000045532 | -0.956200434 | 1.18E-06 |
| TUCP_003225 | XLOC_138410 | ENSRNOT00000025887 | -0.966330562 | 3.22E-07 |
| TUCP_003225 | XLOC_138410 | ENSRNOT00000021030 | -0.967477066 | 2.71E-07 |
| TUCP_003225 | XLOC_138410 | ENSRNOT00000017687 | -0.957172144 | 1.06E-06 |
| TUCP_003225 | XLOC_138410 | ENSRNOT00000015799 | 0.956817971  | 1.10E-06 |
| TUCP_003225 | XLOC_138410 | ENSRNOT00000031904 | 0.958674062  | 8.86E-07 |
| TUCP_003225 | XLOC_138410 | ENSRNOT00000082999 | -0.959539092 | 7.98E-07 |
| TUCP_003225 | XLOC_138410 | ENSRNOT00000082998 | 0.962329677  | 5.61E-07 |
| TUCP_003225 | XLOC_138410 | ENSRNOT00000007350 | 0.95343653   | 1.59E-06 |
| TUCP_003225 | XLOC_138410 | ENSRNOT00000083578 | 0.966789652  | 3.01E-07 |
| TUCP_003225 | XLOC_138410 | ENSRNOT00000023638 | 0.980734335  | 2.02E-08 |
| TUCP_003225 | XLOC_138410 | ENSRNOT00000059524 | -0.958009481 | 9.58E-07 |
| TUCP_003225 | XLOC_138410 | ENSRNOT00000005220 | 0.953675999  | 1.55E-06 |
| TUCP_003225 | XLOC_138410 | ENSRNOT00000016649 | 0.960196879  | 7.36E-07 |
| TUCP_003225 | XLOC_138410 | ENSRNOT00000074023 | 0.970377339  | 1.71E-07 |
| TUCP_003225 | XLOC_138410 | ENSRNOT00000019465 | -0.950034147 | 2.25E-06 |
| TUCP_003225 | XLOC_138410 | ENSRNOT00000009073 | -0.962436745 | 5.53E-07 |
| TUCP_003225 | XLOC_138410 | ENSRNOT00000067170 | -0.975345164 | 6.88E-08 |
| TUCP_003225 | XLOC_138410 | ENSRNOT0000001586  | -0.958031619 | 9.56E-07 |

|             |             |                    |              |          |
|-------------|-------------|--------------------|--------------|----------|
| TUCP_003225 | XLOC_138410 | ENSRNOT00000018341 | -0.957531829 | 1.01E-06 |
| TUCP_003225 | XLOC_138410 | ENSRNOT00000028405 | -0.952484633 | 1.76E-06 |
| TUCP_003225 | XLOC_138410 | ENSRNOT00000081621 | 0.957658849  | 9.98E-07 |
| TUCP_003225 | XLOC_138410 | ENSRNOT0000009000  | -0.95598683  | 1.21E-06 |
| TUCP_003225 | XLOC_138410 | ENSRNOT00000027760 | 0.955089144  | 1.33E-06 |
| TUCP_003225 | XLOC_138410 | ENSRNOT00000085403 | 0.955831599  | 1.23E-06 |
| TUCP_003225 | XLOC_138410 | ENSRNOT00000089545 | -0.961302434 | 6.40E-07 |
| TUCP_003225 | XLOC_138410 | ENSRNOT00000089933 | 0.97944568   | 2.79E-08 |
| TUCP_003225 | XLOC_138410 | ENSRNOT00000077908 | 0.950106949  | 2.24E-06 |
| TUCP_003225 | XLOC_138410 | ENSRNOT00000003641 | 0.955247883  | 1.31E-06 |
| TUCP_003225 | XLOC_138410 | ENSRNOT00000065673 | -0.951051585 | 2.04E-06 |
| TUCP_003225 | XLOC_138410 | ENSRNOT00000057924 | 0.953276575  | 1.62E-06 |
| TUCP_003225 | XLOC_138410 | ENSRNOT00000033677 | -0.957546637 | 1.01E-06 |
| TUCP_003225 | XLOC_138410 | ENSRNOT00000019820 | 0.961857474  | 5.96E-07 |
| TUCP_003225 | XLOC_138410 | ENSRNOT00000011429 | 0.957530086  | 1.01E-06 |
| TUCP_003225 | XLOC_138410 | ENSRNOT00000003940 | -0.975599086 | 6.54E-08 |
| TUCP_003225 | XLOC_138410 | ENSRNOT00000077727 | -0.9684653   | 2.33E-07 |
| TUCP_003225 | XLOC_138410 | ENSRNOT00000011930 | 0.964396577  | 4.24E-07 |
| TUCP_003225 | XLOC_138410 | ENSRNOT00000073492 | -0.963888502 | 4.55E-07 |
| TUCP_003225 | XLOC_138410 | ENSRNOT00000000203 | -0.955924406 | 1.22E-06 |
| TUCP_003225 | XLOC_138410 | ENSRNOT00000014044 | -0.950128903 | 2.23E-06 |
| TUCP_003225 | XLOC_138410 | ENSRNOT00000017949 | -0.952926534 | 1.68E-06 |
| TUCP_003225 | XLOC_138410 | ENSRNOT00000090156 | -0.958695144 | 8.83E-07 |
| TUCP_003225 | XLOC_138410 | ENSRNOT00000091909 | 0.977541973  | 4.33E-08 |
| TUCP_003225 | XLOC_138410 | ENSRNOT00000013025 | -0.953166428 | 1.64E-06 |
| TUCP_003225 | XLOC_138410 | ENSRNOT00000082709 | -0.961579647 | 6.18E-07 |
| TUCP_003225 | XLOC_138410 | ENSRNOT00000003544 | -0.966584373 | 3.10E-07 |
| TUCP_003225 | XLOC_138410 | ENSRNOT00000086119 | -0.957779337 | 9.84E-07 |
| TUCP_003225 | XLOC_138410 | ENSRNOT00000064452 | -0.952576459 | 1.74E-06 |
| TUCP_003225 | XLOC_138410 | ENSRNOT00000022190 | -0.961997383 | 5.86E-07 |
| TUCP_003225 | XLOC_138410 | ENSRNOT00000025913 | -0.96166829  | 6.11E-07 |
| TUCP_003225 | XLOC_138410 | ENSRNOT00000019386 | -0.955357396 | 1.30E-06 |
| TUCP_003225 | XLOC_138410 | ENSRNOT00000030782 | -0.951362776 | 1.97E-06 |
| TUCP_003225 | XLOC_138410 | ENSRNOT00000021636 | -0.957899509 | 9.70E-07 |
| TUCP_003225 | XLOC_138410 | ENSRNOT00000025966 | 0.950979731  | 2.05E-06 |
| TUCP_003225 | XLOC_138410 | ENSRNOT00000073910 | -0.950445945 | 2.16E-06 |
| TUCP_003225 | XLOC_138410 | ENSRNOT00000025980 | -0.950477107 | 2.16E-06 |
| TUCP_003225 | XLOC_138410 | ENSRNOT00000034883 | -0.95101413  | 2.05E-06 |
| TUCP_003225 | XLOC_138410 | ENSRNOT00000055321 | 0.953163493  | 1.64E-06 |
| TUCP_003225 | XLOC_138410 | ENSRNOT00000022676 | -0.950502431 | 2.15E-06 |
| TUCP_003225 | XLOC_138410 | ENSRNOT00000005910 | -0.953383977 | 1.60E-06 |
| TUCP_003225 | XLOC_138410 | ENSRNOT00000090987 | -0.955257881 | 1.31E-06 |
| TUCP_003225 | XLOC_138410 | ENSRNOT00000040169 | 0.961117916  | 6.56E-07 |
| TUCP_003225 | XLOC_138410 | ENSRNOT00000029701 | 0.971475373  | 1.42E-07 |
| TUCP_003225 | XLOC_138410 | ENSRNOT00000035591 | -0.965539155 | 3.61E-07 |
| TUCP_003225 | XLOC_138410 | ENSRNOT00000029704 | -0.955384494 | 1.29E-06 |
| TUCP_003225 | XLOC_138410 | ENSRNOT00000089879 | -0.953269532 | 1.62E-06 |
| TUCP_003225 | XLOC_138410 | ENSRNOT00000000013 | 0.95054214   | 2.14E-06 |
| TUCP_003225 | XLOC_138410 | ENSRNOT00000030329 | -0.953496803 | 1.58E-06 |
| TUCP_003225 | XLOC_138410 | ENSRNOT00000067780 | -0.954519904 | 1.42E-06 |
| TUCP_003225 | XLOC_138410 | ENSRNOT00000004999 | 0.961952327  | 5.89E-07 |



|             |             |                     |              |          |
|-------------|-------------|---------------------|--------------|----------|
| TUCP_003225 | XLOC_138410 | ENSRNOT00000009122  | 0.960119653  | 7.43E-07 |
| TUCP_003225 | XLOC_138410 | ENSRNOT00000013463  | 0.965320552  | 3.73E-07 |
| TUCP_003225 | XLOC_138410 | ENSRNOT00000088054  | 0.952792938  | 1.71E-06 |
| TUCP_003225 | XLOC_138410 | ENSRNOT00000036658  | -0.957524656 | 1.01E-06 |
| TUCP_003225 | XLOC_138410 | ENSRNOT00000047663  | -0.956512198 | 1.14E-06 |
| TUCP_003225 | XLOC_138410 | ENSRNOT00000000532  | -0.954048109 | 1.49E-06 |
| TUCP_003225 | XLOC_138410 | ENSRNOT00000029202  | -0.974126568 | 8.74E-08 |
| TUCP_003225 | XLOC_138410 | ENSRNOT00000017907  | -0.963209526 | 4.99E-07 |
| TUCP_003225 | XLOC_138410 | ENSRNOT00000025791  | -0.953065671 | 1.66E-06 |
| TUCP_003225 | XLOC_138410 | ENSRNOT00000025794  | -0.962392566 | 5.56E-07 |
| TUCP_003225 | XLOC_138410 | ENSRNOT00000050834  | -0.979933464 | 2.48E-08 |
| TUCP_003225 | XLOC_138410 | ENSRNOT00000066024  | 0.953245984  | 1.63E-06 |
| TUCP_003225 | XLOC_138410 | ENSRNOT00000002114  | -0.970353464 | 1.72E-07 |
| TUCP_003225 | XLOC_138410 | ENSRNOT00000002445  | -0.973901757 | 9.13E-08 |
| TUCP_003225 | XLOC_138410 | ENSRNOT00000027970  | 0.96006994   | 7.48E-07 |
| TUCP_003225 | XLOC_138410 | ENSRNOT00000027875  | 0.954066695  | 1.49E-06 |
| TUCP_003225 | XLOC_138410 | ENSRNOT00000046215  | -0.96464434  | 4.10E-07 |
| TUCP_003225 | XLOC_138410 | ENSRNOT00000000083  | -0.954207873 | 1.47E-06 |
| TUCP_003225 | XLOC_138410 | ENSRNOT00000018074  | -0.96370841  | 4.66E-07 |
| TUCP_003225 | XLOC_138410 | ENSRNOT00000033048  | -0.958557891 | 8.98E-07 |
| TUCP_003225 | XLOC_138410 | ENSRNOT00000000120  | 0.979483632  | 2.77E-08 |
| TUCP_003225 | XLOC_138410 | ENSRNOT00000028545  | -0.955019051 | 1.34E-06 |
| TUCP_003225 | XLOC_138410 | ENSRNOT00000009900  | -0.959912955 | 7.62E-07 |
| TUCP_003225 | XLOC_138410 | ENSRNOT00000019172  | -0.955696229 | 1.25E-06 |
| TUCP_003225 | XLOC_138410 | ENSRNOT00000020994  | -0.951196496 | 2.01E-06 |
| TUCP_003225 | XLOC_138410 | ENSRNOT00000032248  | 0.954618908  | 1.40E-06 |
| TUCP_003225 | XLOC_138410 | ENSRNOT00000040393  | 0.956862173  | 1.09E-06 |
| TUCP_003225 | XLOC_138410 | ENSRNOT00000016372  | -0.967846329 | 2.56E-07 |
| TUCP_003225 | XLOC_138410 | ENSRNOT00000012286  | -0.95443119  | 1.43E-06 |
| TUCP_003225 | XLOC_138410 | ENSRNOT000000064700 | 0.951584881  | 1.93E-06 |
| TUCP_003225 | XLOC_138410 | ENSRNOT00000036613  | -0.957537159 | 1.01E-06 |
| TUCP_003225 | XLOC_138410 | ENSRNOT00000025705  | 0.96986944   | 1.86E-07 |
| TUCP_003225 | XLOC_138410 | ENSRNOT00000073564  | -0.964151252 | 4.39E-07 |
| TUCP_003225 | XLOC_138410 | ENSRNOT00000008113  | -0.953362964 | 1.61E-06 |
| TUCP_003225 | XLOC_138410 | ENSRNOT00000036194  | -0.956718722 | 1.11E-06 |
| TUCP_003225 | XLOC_138410 | ENSRNOT00000026279  | -0.97041483  | 1.70E-07 |
| TUCP_003225 | XLOC_138410 | ENSRNOT000000082508 | -0.968675057 | 2.25E-07 |
| TUCP_003225 | XLOC_138410 | ENSRNOT000000087011 | -0.951849092 | 1.88E-06 |
| TUCP_003225 | XLOC_138410 | ENSRNOT00000071166  | 0.959664379  | 7.86E-07 |
| TUCP_003225 | XLOC_138410 | ENSRNOT00000001118  | 0.954541623  | 1.42E-06 |
| TUCP_003225 | XLOC_138410 | ENSRNOT00000019180  | -0.974642973 | 7.91E-08 |
| TUCP_003225 | XLOC_138410 | ENSRNOT00000038212  | -0.967727172 | 2.61E-07 |
| TUCP_003225 | XLOC_138410 | ENSRNOT00000076105  | -0.951636593 | 1.92E-06 |
| TUCP_003225 | XLOC_138410 | ENSRNOT00000022746  | -0.961478086 | 6.26E-07 |
| TUCP_003225 | XLOC_138410 | ENSRNOT00000001507  | 0.953141306  | 1.64E-06 |
| TUCP_003225 | XLOC_138410 | ENSRNOT000000083568 | 0.959062342  | 8.45E-07 |
| TUCP_003225 | XLOC_138410 | ENSRNOT00000039177  | -0.956983162 | 1.08E-06 |
| TUCP_003225 | XLOC_138410 | ENSRNOT00000005620  | -0.968526834 | 2.31E-07 |
| TUCP_003225 | XLOC_138410 | ENSRNOT00000002837  | -0.981515051 | 1.65E-08 |
| TUCP_003225 | XLOC_138410 | ENSRNOT00000000477  | -0.966847356 | 2.98E-07 |
| TUCP_003225 | XLOC_138410 | ENSRNOT00000012881  | -0.954322753 | 1.45E-06 |

|             |             |                    |              |          |
|-------------|-------------|--------------------|--------------|----------|
| TUCP_003225 | XLOC_138410 | ENSRNOT00000035628 | -0.958436909 | 9.11E-07 |
| TUCP_003225 | XLOC_138410 | ENSRNOT00000011499 | -0.973844196 | 9.23E-08 |
| TUCP_003225 | XLOC_138410 | ENSRNOT00000065045 | 0.960965513  | 6.68E-07 |
| TUCP_003225 | XLOC_138410 | ENSRNOT00000023989 | 0.957902618  | 9.70E-07 |
| TUCP_003225 | XLOC_138410 | ENSRNOT00000088133 | -0.955003079 | 1.35E-06 |
| TUCP_003225 | XLOC_138410 | ENSRNOT00000080677 | -0.952183781 | 1.82E-06 |
| TUCP_003225 | XLOC_138410 | ENSRNOT00000016254 | -0.960270988 | 7.29E-07 |
| TUCP_003225 | XLOC_138410 | ENSRNOT0000007824  | -0.955869152 | 1.22E-06 |
| TUCP_003225 | XLOC_138410 | ENSRNOT00000037133 | 0.951572281  | 1.93E-06 |
| TUCP_003225 | XLOC_138410 | ENSRNOT00000083964 | -0.958275468 | 9.28E-07 |
| TUCP_003225 | XLOC_138410 | ENSRNOT00000037039 | -0.970295165 | 1.73E-07 |
| TUCP_003225 | XLOC_138410 | ENSRNOT00000074985 | -0.95679538  | 1.10E-06 |
| TUCP_003225 | XLOC_138410 | ENSRNOT00000078185 | -0.971822932 | 1.33E-07 |
| TUCP_003225 | XLOC_138410 | ENSRNOT00000024119 | 0.955640647  | 1.26E-06 |
| TUCP_003225 | XLOC_138410 | ENSRNOT00000001322 | -0.965700164 | 3.53E-07 |
| TUCP_003225 | XLOC_138410 | ENSRNOT00000006824 | -0.956100913 | 1.19E-06 |
| TUCP_003225 | XLOC_138410 | ENSRNOT00000088509 | 0.957413261  | 1.03E-06 |
| TUCP_003225 | XLOC_138410 | ENSRNOT00000086260 | -0.950023508 | 2.26E-06 |
| TUCP_003225 | XLOC_138410 | ENSRNOT00000000177 | -0.954276347 | 1.46E-06 |
| TUCP_003225 | XLOC_138410 | ENSRNOT00000044608 | -0.952031914 | 1.84E-06 |
| TUCP_003225 | XLOC_138410 | ENSRNOT00000001099 | -0.953750547 | 1.54E-06 |
| TUCP_003225 | XLOC_138410 | ENSRNOT00000020316 | -0.95110295  | 2.03E-06 |
| TUCP_003225 | XLOC_138410 | ENSRNOT00000089211 | 0.955392211  | 1.29E-06 |
| TUCP_003225 | XLOC_138410 | ENSRNOT00000015518 | -0.96960546  | 1.94E-07 |
| TUCP_003225 | XLOC_138410 | ENSRNOT00000056015 | -0.95263255  | 1.73E-06 |
| TUCP_003225 | XLOC_138410 | ENSRNOT00000078070 | 0.971240143  | 1.48E-07 |
| TUCP_003225 | XLOC_138410 | ENSRNOT00000026909 | -0.956422909 | 1.15E-06 |
| TUCP_003225 | XLOC_138410 | ENSRNOT00000083632 | -0.967051232 | 2.89E-07 |
| TUCP_003225 | XLOC_138410 | ENSRNOT00000000717 | -0.955323958 | 1.30E-06 |
| TUCP_003225 | XLOC_138410 | ENSRNOT00000049725 | -0.962485838 | 5.49E-07 |
| TUCP_003225 | XLOC_138410 | ENSRNOT00000010753 | -0.953786724 | 1.54E-06 |
| TUCP_003225 | XLOC_138410 | ENSRNOT00000023763 | -0.967562682 | 2.68E-07 |
| TUCP_003225 | XLOC_138410 | ENSRNOT00000009202 | 0.957508906  | 1.02E-06 |
| TUCP_003225 | XLOC_138410 | ENSRNOT00000042799 | 0.958763797  | 8.76E-07 |
| TUCP_003225 | XLOC_138410 | ENSRNOT00000059181 | 0.957728742  | 9.90E-07 |
| TUCP_003225 | XLOC_138410 | ENSRNOT00000017291 | -0.967876873 | 2.55E-07 |
| TUCP_003225 | XLOC_138410 | ENSRNOT00000003691 | -0.969243234 | 2.06E-07 |
| TUCP_003225 | XLOC_138410 | ENSRNOT00000038807 | 0.95474647   | 1.39E-06 |
| TUCP_003225 | XLOC_138410 | ENSRNOT00000005873 | -0.950205806 | 2.22E-06 |
| TUCP_003225 | XLOC_138410 | ENSRNOT00000017761 | 0.96495657   | 3.92E-07 |
| TUCP_003225 | XLOC_138410 | ENSRNOT00000023543 | -0.959153509 | 8.36E-07 |
| TUCP_003225 | XLOC_138410 | ENSRNOT00000026691 | 0.959954719  | 7.58E-07 |
| TUCP_003225 | XLOC_138410 | ENSRNOT00000028737 | -0.954331667 | 1.45E-06 |
| TUCP_003225 | XLOC_138410 | ENSRNOT00000080608 | 0.968364484  | 2.37E-07 |
| TUCP_003225 | XLOC_138410 | ENSRNOT00000016740 | 0.957553382  | 1.01E-06 |
| TUCP_003225 | XLOC_138410 | ENSRNOT00000080695 | 0.956905598  | 1.09E-06 |
| TUCP_003225 | XLOC_138410 | ENSRNOT00000085458 | -0.95439703  | 1.44E-06 |
| TUCP_003225 | XLOC_138410 | ENSRNOT00000042125 | 0.97679145   | 5.10E-08 |
| TUCP_003225 | XLOC_138410 | ENSRNOT00000087033 | -0.957578447 | 1.01E-06 |
| TUCP_003225 | XLOC_138410 | ENSRNOT00000026760 | -0.969273127 | 2.05E-07 |
| TUCP_003225 | XLOC_138410 | ENSRNOT00000005257 | 0.954617866  | 1.40E-06 |

|             |             |                     |              |          |
|-------------|-------------|---------------------|--------------|----------|
| TUCP_003225 | XLOC_138410 | ENSRNOT00000024491  | -0.963762502 | 4.63E-07 |
| TUCP_003225 | XLOC_138410 | ENSRNOT000000084597 | -0.954825211 | 1.37E-06 |
| TUCP_003225 | XLOC_138410 | ENSRNOT00000016568  | 0.953092945  | 1.65E-06 |
| TUCP_003225 | XLOC_138410 | ENSRNOT00000027360  | -0.952110707 | 1.83E-06 |
| TUCP_003225 | XLOC_138410 | ENSRNOT00000024947  | -0.98069942  | 2.04E-08 |
| TUCP_003225 | XLOC_138410 | ENSRNOT00000027967  | 0.961399897  | 6.32E-07 |
| TUCP_003225 | XLOC_138410 | ENSRNOT00000002053  | -0.95863547  | 8.90E-07 |
| TUCP_003225 | XLOC_138410 | ENSRNOT00000047210  | 0.955425089  | 1.29E-06 |
| TUCP_003557 | XLOC_155937 | ENSRNOT00000084075  | 0.996106112  | 7.00E-12 |
| TUCP_003557 | XLOC_155937 | ENSRNOT00000012880  | 0.968043129  | 2.49E-07 |
| TUCP_003557 | XLOC_155937 | ENSRNOT00000074465  | 1            | 0        |
| TUCP_003557 | XLOC_155937 | ENSRNOT00000090898  | 0.961670541  | 6.11E-07 |
| TUCP_003557 | XLOC_155937 | ENSRNOT00000079805  | 0.997980451  | 2.64E-13 |
| TUCP_003557 | XLOC_155937 | ENSRNOT00000040912  | 1            | 0        |
| TUCP_003557 | XLOC_155937 | ENSRNOT00000072648  | 1            | 0        |
| TUCP_003557 | XLOC_155937 | ENSRNOT0000007398   | 0.989054103  | 1.21E-09 |
| TUCP_003557 | XLOC_155937 | ENSRNOT00000070803  | 1            | 0        |
| TUCP_003557 | XLOC_155937 | ENSRNOT00000012196  | 1            | 0        |
| TUCP_003557 | XLOC_155937 | ENSRNOT00000085772  | 1            | 0        |
| TUCP_003557 | XLOC_155937 | ENSRNOT00000093284  | 0.999975856  | 6.46E-23 |
| TUCP_003557 | XLOC_155937 | ENSRNOT00000086374  | 0.993568904  | 8.57E-11 |
| TUCP_003557 | XLOC_155937 | ENSRNOT00000015270  | 1            | 0        |
| TUCP_003557 | XLOC_155937 | ENSRNOT00000046192  | 1            | 0        |
| TUCP_003557 | XLOC_155937 | ENSRNOT00000044226  | 1            | 0        |
| TUCP_003557 | XLOC_155937 | ENSRNOT00000081898  | 0.989837012  | 8.39E-10 |
| TUCP_003557 | XLOC_155937 | ENSRNOT00000081954  | 0.964005219  | 4.48E-07 |
| TUCP_003557 | XLOC_155937 | ENSRNOT00000080291  | 0.998427671  | 7.55E-14 |
| TUCP_003557 | XLOC_155937 | ENSRNOT0000004293   | 0.984239049  | 7.46E-09 |
| TUCP_003557 | XLOC_155937 | ENSRNOT00000078231  | 0.960455489  | 7.13E-07 |
| TUCP_003557 | XLOC_155937 | ENSRNOT00000002834  | 1            | 0        |
| TUCP_003557 | XLOC_155937 | ENSRNOT00000001464  | 1            | 0        |
| TUCP_003557 | XLOC_155937 | ENSRNOT00000090716  | 0.994769629  | 3.06E-11 |
| TUCP_003557 | XLOC_155937 | ENSRNOT00000083542  | 0.972568514  | 1.17E-07 |
| TUCP_003557 | XLOC_155937 | ENSRNOT00000076044  | 1            | 0        |
| TUCP_003557 | XLOC_155937 | ENSRNOT00000074353  | 1            | 0        |
| TUCP_003557 | XLOC_155937 | ENSRNOT00000043510  | 0.958144129  | 9.43E-07 |
| TUCP_003557 | XLOC_155937 | ENSRNOT00000087122  | 0.980089513  | 2.38E-08 |
| TUCP_003557 | XLOC_155937 | ENSRNOT00000074295  | 0.987777006  | 2.11E-09 |
| TUCP_003557 | XLOC_155937 | ENSRNOT00000057873  | 1            | 0        |
| TUCP_003557 | XLOC_155937 | ENSRNOT00000083002  | 0.988874897  | 1.32E-09 |
| TUCP_003557 | XLOC_155937 | ENSRNOT00000088399  | 0.999999855  | 4.99E-34 |
| TUCP_003557 | XLOC_155937 | ENSRNOT00000086248  | 1            | 0        |
| TUCP_003557 | XLOC_155937 | ENSRNOT00000089750  | 0.999992758  | 1.57E-25 |
| TUCP_003557 | XLOC_155937 | ENSRNOT00000030517  | 0.971225224  | 1.48E-07 |
| TUCP_003557 | XLOC_155937 | ENSRNOT00000034772  | 0.994265187  | 4.84E-11 |
| TUCP_003557 | XLOC_155937 | ENSRNOT00000089305  | 0.969641693  | 1.93E-07 |
| TUCP_003557 | XLOC_155937 | ENSRNOT00000024580  | 0.954183021  | 1.47E-06 |
| TUCP_003557 | XLOC_155937 | ENSRNOT00000064601  | 0.966578038  | 3.11E-07 |
| TUCP_003557 | XLOC_155937 | ENSRNOT00000015870  | 0.965901306  | 3.43E-07 |
| TUCP_003557 | XLOC_155937 | ENSRNOT00000080812  | 0.992998865  | 1.31E-10 |
| TUCP_003557 | XLOC_155937 | ENSRNOT00000092755  | 1            | 0        |

|             |             |                     |              |          |
|-------------|-------------|---------------------|--------------|----------|
| TUCP_003557 | XLOC_155937 | ENSRNOT00000031683  | 1            | 0        |
| TUCP_003557 | XLOC_155937 | ENSRNOT00000087764  | 0.988156196  | 1.80E-09 |
| TUCP_003396 | XLOC_146849 | ENSRNOT00000081519  | 0.954405337  | 1.44E-06 |
| TUCP_003559 | XLOC_156051 | ENSRNOT00000013620  | 0.952276331  | 1.80E-06 |
| TUCP_003559 | XLOC_156051 | ENSRNOT00000012463  | -0.983532381 | 9.28E-09 |
| TUCP_003559 | XLOC_156051 | ENSRNOT00000004274  | -0.954197954 | 1.47E-06 |
| TUCP_003559 | XLOC_156051 | ENSRNOT00000011230  | 0.95368371   | 1.55E-06 |
| TUCP_003559 | XLOC_156051 | ENSRNOT00000009877  | 0.958815817  | 8.71E-07 |
| TUCP_003559 | XLOC_156051 | ENSRNOT00000016555  | 0.952269845  | 1.80E-06 |
| TUCP_003559 | XLOC_156051 | ENSRNOT000000074939 | 0.971325764  | 1.45E-07 |
| TUCP_003559 | XLOC_156051 | ENSRNOT000000071573 | 0.952430004  | 1.77E-06 |
| TUCP_003559 | XLOC_156051 | ENSRNOT00000087725  | 0.965676034  | 3.54E-07 |
| TUCP_003559 | XLOC_156051 | ENSRNOT00000006055  | 0.966158152  | 3.30E-07 |
| TUCP_003559 | XLOC_156051 | ENSRNOT000000071560 | 0.97528828   | 6.96E-08 |
| TUCP_003559 | XLOC_156051 | ENSRNOT000000078445 | -0.978019767 | 3.89E-08 |
| TUCP_003559 | XLOC_156051 | ENSRNOT00000023326  | 0.976970218  | 4.91E-08 |
| TUCP_003559 | XLOC_156051 | ENSRNOT00000026065  | 0.960112022  | 7.44E-07 |
| TUCP_003559 | XLOC_156051 | ENSRNOT00000012056  | 0.960563405  | 7.03E-07 |
| TUCP_003559 | XLOC_156051 | ENSRNOT00000005228  | 0.986442328  | 3.53E-09 |
| TUCP_003559 | XLOC_156051 | ENSRNOT00000021592  | 0.950549855  | 2.14E-06 |
| TUCP_003559 | XLOC_156051 | ENSRNOT00000005659  | 0.952871964  | 1.69E-06 |
| TUCP_003559 | XLOC_156051 | ENSRNOT00000006549  | -0.955046773 | 1.34E-06 |
| TUCP_003559 | XLOC_156051 | ENSRNOT00000019502  | 0.951152469  | 2.02E-06 |
| TUCP_003559 | XLOC_156051 | ENSRNOT000000065300 | 0.958735184  | 8.79E-07 |
| TUCP_003559 | XLOC_156051 | ENSRNOT00000011442  | -0.955564836 | 1.27E-06 |
| TUCP_003559 | XLOC_156051 | ENSRNOT000000043216 | 0.964057714  | 4.45E-07 |
| TUCP_003559 | XLOC_156051 | ENSRNOT000000091128 | -0.972245722 | 1.24E-07 |
| TUCP_003559 | XLOC_156051 | ENSRNOT000000044742 | 0.953905775  | 1.52E-06 |
| TUCP_003559 | XLOC_156051 | ENSRNOT000000027414 | 0.971029747  | 1.53E-07 |
| TUCP_003559 | XLOC_156051 | ENSRNOT000000028563 | 0.963037161  | 5.11E-07 |
| TUCP_003559 | XLOC_156051 | ENSRNOT000000068322 | 0.965694399  | 3.53E-07 |
| TUCP_003559 | XLOC_156051 | ENSRNOT000000066670 | 0.97978318   | 2.57E-08 |
| TUCP_003559 | XLOC_156051 | ENSRNOT000000076516 | 0.956268343  | 1.17E-06 |
| TUCP_003559 | XLOC_156051 | ENSRNOT00000015073  | 0.953827044  | 1.53E-06 |
| TUCP_003559 | XLOC_156051 | ENSRNOT000000043554 | 0.961796403  | 6.01E-07 |
| TUCP_003559 | XLOC_156051 | ENSRNOT00000012187  | 0.973775676  | 9.35E-08 |
| TUCP_003559 | XLOC_156051 | ENSRNOT000000005942 | 0.974940478  | 7.46E-08 |
| TUCP_003559 | XLOC_156051 | ENSRNOT00000018533  | 0.965127545  | 3.83E-07 |
| TUCP_003559 | XLOC_156051 | ENSRNOT00000013046  | -0.953719456 | 1.55E-06 |
| TUCP_003559 | XLOC_156051 | ENSRNOT00000026783  | 0.961876202  | 5.95E-07 |
| TUCP_003559 | XLOC_156051 | ENSRNOT000000086812 | 0.95100777   | 2.05E-06 |
| TUCP_003559 | XLOC_156051 | ENSRNOT000000005126 | -0.968983573 | 2.15E-07 |
| TUCP_003559 | XLOC_156051 | ENSRNOT00000012379  | 0.958665496  | 8.86E-07 |
| TUCP_003559 | XLOC_156051 | ENSRNOT00000028646  | 0.98114978   | 1.82E-08 |
| TUCP_003559 | XLOC_156051 | ENSRNOT00000011384  | 0.990544327  | 5.86E-10 |
| TUCP_003559 | XLOC_156051 | ENSRNOT00000026755  | 0.974124306  | 8.75E-08 |
| TUCP_003559 | XLOC_156051 | ENSRNOT000000038247 | 0.971921985  | 1.31E-07 |
| TUCP_003559 | XLOC_156051 | ENSRNOT000000087306 | 0.953387482  | 1.60E-06 |
| TUCP_003559 | XLOC_156051 | ENSRNOT000000071764 | 0.959488713  | 8.03E-07 |
| TUCP_003559 | XLOC_156051 | ENSRNOT00000027944  | 0.981556016  | 1.63E-08 |
| TUCP_003559 | XLOC_156051 | ENSRNOT00000021348  | 0.955421945  | 1.29E-06 |

|             |             |                     |              |          |
|-------------|-------------|---------------------|--------------|----------|
| TUCP_003559 | XLOC_156051 | ENSRNOT00000028842  | 0.9643671    | 4.26E-07 |
| TUCP_003559 | XLOC_156051 | ENSRNOT00000004003  | 0.965658033  | 3.55E-07 |
| TUCP_003559 | XLOC_156051 | ENSRNOT000000052075 | 0.970130559  | 1.78E-07 |
| TUCP_003559 | XLOC_156051 | ENSRNOT00000078685  | 0.95763996   | 1.00E-06 |
| TUCP_003559 | XLOC_156051 | ENSRNOT00000022839  | 0.950796531  | 2.09E-06 |
| TUCP_003559 | XLOC_156051 | ENSRNOT00000083215  | 0.960868368  | 6.77E-07 |
| TUCP_003559 | XLOC_156051 | ENSRNOT00000026718  | 0.953356671  | 1.61E-06 |
| TUCP_003559 | XLOC_156051 | ENSRNOT00000085228  | 0.950839933  | 2.08E-06 |
| TUCP_003559 | XLOC_156051 | ENSRNOT00000093640  | 0.95955889   | 7.96E-07 |
| TUCP_003559 | XLOC_156051 | ENSRNOT00000017319  | 0.974868312  | 7.57E-08 |
| TUCP_003559 | XLOC_156051 | ENSRNOT00000005934  | 0.954626851  | 1.40E-06 |
| TUCP_003559 | XLOC_156051 | ENSRNOT00000024420  | 0.964006501  | 4.48E-07 |
| TUCP_003559 | XLOC_156051 | ENSRNOT00000005909  | 0.96831811   | 2.38E-07 |
| TUCP_003559 | XLOC_156051 | ENSRNOT00000041513  | 0.954199693  | 1.47E-06 |
| TUCP_003559 | XLOC_156051 | ENSRNOT00000078500  | 0.958989116  | 8.53E-07 |
| TUCP_003559 | XLOC_156051 | ENSRNOT00000087592  | 0.962883356  | 5.21E-07 |
| TUCP_003559 | XLOC_156051 | ENSRNOT00000015566  | 0.957398988  | 1.03E-06 |
| TUCP_003559 | XLOC_156051 | ENSRNOT00000024060  | 0.962173426  | 5.72E-07 |
| TUCP_003559 | XLOC_156051 | ENSRNOT00000082687  | -0.950904219 | 2.07E-06 |
| TUCP_003559 | XLOC_156051 | ENSRNOT00000010927  | 0.955412325  | 1.29E-06 |
| TUCP_003559 | XLOC_156051 | ENSRNOT00000016384  | -0.951355575 | 1.98E-06 |
| TUCP_003559 | XLOC_156051 | ENSRNOT00000068633  | 0.95470684   | 1.39E-06 |
| TUCP_003559 | XLOC_156051 | ENSRNOT00000017948  | 0.978835082  | 3.23E-08 |
| TUCP_003559 | XLOC_156051 | ENSRNOT00000000337  | 0.952743238  | 1.71E-06 |
| TUCP_003559 | XLOC_156051 | ENSRNOT00000012895  | 0.973072085  | 1.07E-07 |
| TUCP_003559 | XLOC_156051 | ENSRNOT00000013570  | -0.952875961 | 1.69E-06 |
| TUCP_003559 | XLOC_156051 | ENSRNOT00000015116  | 0.972852612  | 1.11E-07 |
| TUCP_003559 | XLOC_156051 | ENSRNOT00000039852  | 0.962184025  | 5.72E-07 |
| TUCP_003559 | XLOC_156051 | ENSRNOT00000090918  | 0.971844691  | 1.33E-07 |
| TUCP_003559 | XLOC_156051 | ENSRNOT00000023180  | 0.972816708  | 1.12E-07 |
| TUCP_003559 | XLOC_156051 | ENSRNOT00000000676  | 0.956475834  | 1.14E-06 |
| TUCP_003559 | XLOC_156051 | ENSRNOT00000009440  | -0.976172606 | 5.81E-08 |
| TUCP_003559 | XLOC_156051 | ENSRNOT00000016948  | -0.971143356 | 1.50E-07 |
| TUCP_003559 | XLOC_156051 | ENSRNOT00000015609  | 0.957911292  | 9.69E-07 |
| TUCP_003559 | XLOC_156051 | ENSRNOT00000028070  | 0.974544854  | 8.07E-08 |
| TUCP_003559 | XLOC_156051 | ENSRNOT00000082537  | -0.959958957 | 7.58E-07 |
| TUCP_003559 | XLOC_156051 | ENSRNOT00000060362  | 0.954482347  | 1.43E-06 |
| TUCP_003559 | XLOC_156051 | ENSRNOT00000022213  | 0.966703572  | 3.05E-07 |
| TUCP_003559 | XLOC_156051 | ENSRNOT00000022610  | 0.971676118  | 1.37E-07 |
| TUCP_003559 | XLOC_156051 | ENSRNOT00000020437  | 0.979287942  | 2.90E-08 |
| TUCP_003559 | XLOC_156051 | ENSRNOT00000079698  | -0.952708652 | 1.72E-06 |
| TUCP_003559 | XLOC_156051 | ENSRNOT00000006828  | 0.964054433  | 4.45E-07 |
| TUCP_003559 | XLOC_156051 | ENSRNOT00000073346  | 0.962151114  | 5.74E-07 |
| TUCP_003559 | XLOC_156051 | ENSRNOT00000010898  | 0.974530982  | 8.09E-08 |
| TUCP_003559 | XLOC_156051 | ENSRNOT00000071493  | -0.951289308 | 1.99E-06 |
| TUCP_003559 | XLOC_156051 | ENSRNOT00000015265  | 0.955860792  | 1.23E-06 |
| TUCP_003559 | XLOC_156051 | ENSRNOT00000029833  | 0.957805428  | 9.81E-07 |
| TUCP_003559 | XLOC_156051 | ENSRNOT00000007768  | 0.97064642   | 1.63E-07 |
| TUCP_003559 | XLOC_156051 | ENSRNOT00000005355  | 0.975153999  | 7.15E-08 |
| TUCP_003559 | XLOC_156051 | ENSRNOT00000052422  | 0.952874825  | 1.69E-06 |
| TUCP_003559 | XLOC_156051 | ENSRNOT0000001242   | 0.979827505  | 2.54E-08 |

|             |             |                    |              |          |
|-------------|-------------|--------------------|--------------|----------|
| TUCP_003559 | XLOC_156051 | ENSRNOT00000078639 | 0.95776352   | 9.86E-07 |
| TUCP_003559 | XLOC_156051 | ENSRNOT00000078589 | -0.961450373 | 6.28E-07 |
| TUCP_003559 | XLOC_156051 | ENSRNOT00000078102 | 0.958368594  | 9.18E-07 |
| TUCP_003559 | XLOC_156051 | ENSRNOT00000027520 | 0.969154753  | 2.09E-07 |
| TUCP_003559 | XLOC_156051 | ENSRNOT00000025983 | 0.980132144  | 2.36E-08 |
| TUCP_003559 | XLOC_156051 | ENSRNOT00000090451 | -0.953347724 | 1.61E-06 |
| TUCP_003559 | XLOC_156051 | ENSRNOT00000008929 | 0.952561395  | 1.75E-06 |
| TUCP_003559 | XLOC_156051 | ENSRNOT00000047387 | 0.952806375  | 1.70E-06 |
| TUCP_003559 | XLOC_156051 | ENSRNOT00000004698 | 0.978928361  | 3.16E-08 |
| TUCP_003559 | XLOC_156051 | ENSRNOT00000016129 | 0.952226097  | 1.81E-06 |
| TUCP_003559 | XLOC_156051 | ENSRNOT00000084240 | 0.953563806  | 1.57E-06 |
| TUCP_003559 | XLOC_156051 | ENSRNOT00000017629 | 0.950116405  | 2.24E-06 |
| TUCP_003559 | XLOC_156051 | ENSRNOT00000009280 | 0.972386744  | 1.21E-07 |
| TUCP_003559 | XLOC_156051 | ENSRNOT00000005911 | 0.970466647  | 1.68E-07 |
| TUCP_003559 | XLOC_156051 | ENSRNOT00000003991 | 0.958231321  | 9.33E-07 |
| TUCP_003559 | XLOC_156051 | ENSRNOT00000021408 | 0.955442311  | 1.28E-06 |
| TUCP_003559 | XLOC_156051 | ENSRNOT00000031267 | 0.954609779  | 1.41E-06 |
| TUCP_003559 | XLOC_156051 | ENSRNOT00000082672 | 0.964372273  | 4.26E-07 |
| TUCP_003559 | XLOC_156051 | ENSRNOT00000009683 | 0.957937267  | 9.66E-07 |
| TUCP_003559 | XLOC_156051 | ENSRNOT00000021153 | 0.95453965   | 1.42E-06 |
| TUCP_003559 | XLOC_156051 | ENSRNOT00000084088 | 0.952891012  | 1.69E-06 |
| TUCP_003559 | XLOC_156051 | ENSRNOT00000034704 | 0.962969843  | 5.15E-07 |
| TUCP_003559 | XLOC_156051 | ENSRNOT00000064902 | 0.958075861  | 9.51E-07 |
| TUCP_003559 | XLOC_156051 | ENSRNOT00000020379 | 0.965816583  | 3.47E-07 |
| TUCP_003559 | XLOC_156051 | ENSRNOT00000088995 | 0.953530034  | 1.58E-06 |
| TUCP_003559 | XLOC_156051 | ENSRNOT00000005262 | 0.963990274  | 4.49E-07 |
| TUCP_003559 | XLOC_156051 | ENSRNOT00000076729 | 0.950324463  | 2.19E-06 |
| TUCP_003559 | XLOC_156051 | ENSRNOT00000088182 | 0.956695433  | 1.12E-06 |
| TUCP_003559 | XLOC_156051 | ENSRNOT00000091265 | 0.968985887  | 2.15E-07 |
| TUCP_003559 | XLOC_156051 | ENSRNOT00000078390 | -0.960504529 | 7.08E-07 |
| TUCP_003559 | XLOC_156051 | ENSRNOT00000026457 | 0.962182678  | 5.72E-07 |
| TUCP_003559 | XLOC_156051 | ENSRNOT00000090170 | 0.956360109  | 1.16E-06 |
| TUCP_003559 | XLOC_156051 | ENSRNOT00000027454 | 0.953910874  | 1.52E-06 |
| TUCP_003559 | XLOC_156051 | ENSRNOT00000025832 | 0.970119128  | 1.78E-07 |
| TUCP_003559 | XLOC_156051 | ENSRNOT00000049538 | 0.967576455  | 2.67E-07 |
| TUCP_003559 | XLOC_156051 | ENSRNOT00000051022 | 0.950461805  | 2.16E-06 |
| TUCP_003559 | XLOC_156051 | ENSRNOT00000006499 | 0.972247912  | 1.24E-07 |
| TUCP_003559 | XLOC_156051 | ENSRNOT00000000713 | 0.953394979  | 1.60E-06 |
| TUCP_003559 | XLOC_156051 | ENSRNOT00000073337 | 0.954989629  | 1.35E-06 |
| TUCP_003559 | XLOC_156051 | ENSRNOT00000066736 | 0.957347005  | 1.03E-06 |
| TUCP_003559 | XLOC_156051 | ENSRNOT00000025936 | -0.976427442 | 5.51E-08 |
| TUCP_003559 | XLOC_156051 | ENSRNOT00000012702 | -0.951573325 | 1.93E-06 |
| TUCP_003559 | XLOC_156051 | ENSRNOT00000009198 | 0.958106224  | 9.47E-07 |
| TUCP_003559 | XLOC_156051 | ENSRNOT00000009129 | 0.983722827  | 8.76E-09 |
| TUCP_003559 | XLOC_156051 | ENSRNOT00000072534 | 0.952549514  | 1.75E-06 |
| TUCP_003559 | XLOC_156051 | ENSRNOT00000015635 | -0.963195853 | 5.00E-07 |
| TUCP_003559 | XLOC_156051 | ENSRNOT00000036951 | 0.97427268   | 8.50E-08 |
| TUCP_003559 | XLOC_156051 | ENSRNOT00000026186 | 0.967219214  | 2.82E-07 |
| TUCP_003559 | XLOC_156051 | ENSRNOT00000002173 | -0.955481278 | 1.28E-06 |
| TUCP_003559 | XLOC_156051 | ENSRNOT00000044177 | 0.963496437  | 4.80E-07 |
| TUCP_003559 | XLOC_156051 | ENSRNOT00000090420 | -0.956100294 | 1.19E-06 |

|             |             |                    |              |          |
|-------------|-------------|--------------------|--------------|----------|
| TUCP_003559 | XLOC_156051 | ENSRNOT00000011663 | 0.95135521   | 1.98E-06 |
| TUCP_003559 | XLOC_156051 | ENSRNOT00000043953 | 0.972210058  | 1.25E-07 |
| TUCP_003559 | XLOC_156051 | ENSRNOT00000057313 | 0.964605383  | 4.12E-07 |
| TUCP_003559 | XLOC_156051 | ENSRNOT0000006800  | 0.952651855  | 1.73E-06 |
| TUCP_003559 | XLOC_156051 | ENSRNOT00000058842 | 0.961273021  | 6.43E-07 |
| TUCP_003559 | XLOC_156051 | ENSRNOT00000000157 | 0.952914942  | 1.68E-06 |
| TUCP_003559 | XLOC_156051 | ENSRNOT00000023645 | 0.957294286  | 1.04E-06 |
| TUCP_003559 | XLOC_156051 | ENSRNOT00000019553 | 0.95526741   | 1.31E-06 |
| TUCP_003559 | XLOC_156051 | ENSRNOT00000084734 | 0.973753485  | 9.39E-08 |
| TUCP_003559 | XLOC_156051 | ENSRNOT00000023330 | 0.957488739  | 1.02E-06 |
| TUCP_003559 | XLOC_156051 | ENSRNOT00000035700 | 0.954993516  | 1.35E-06 |
| TUCP_003559 | XLOC_156051 | ENSRNOT00000083255 | 0.951958484  | 1.86E-06 |
| TUCP_003559 | XLOC_156051 | ENSRNOT00000051953 | -0.95671828  | 1.11E-06 |
| TUCP_003559 | XLOC_156051 | ENSRNOT00000064840 | 0.966554899  | 3.12E-07 |
| TUCP_003559 | XLOC_156051 | ENSRNOT00000058116 | -0.954267317 | 1.46E-06 |
| TUCP_003559 | XLOC_156051 | ENSRNOT00000076669 | 0.956279956  | 1.17E-06 |
| TUCP_003559 | XLOC_156051 | ENSRNOT00000085596 | 0.955485317  | 1.28E-06 |
| TUCP_003559 | XLOC_156051 | ENSRNOT00000005977 | 0.950109304  | 2.24E-06 |
| TUCP_003559 | XLOC_156051 | ENSRNOT00000090925 | 0.959198888  | 8.31E-07 |
| TUCP_003559 | XLOC_156051 | ENSRNOT00000025394 | 0.959277543  | 8.24E-07 |
| TUCP_003559 | XLOC_156051 | ENSRNOT00000074653 | 0.954954392  | 1.35E-06 |
| TUCP_003559 | XLOC_156051 | ENSRNOT00000025391 | 0.975574092  | 6.57E-08 |
| TUCP_003559 | XLOC_156051 | ENSRNOT00000054828 | 0.963213081  | 4.99E-07 |
| TUCP_003559 | XLOC_156051 | ENSRNOT00000073636 | 0.954308334  | 1.45E-06 |
| TUCP_003559 | XLOC_156051 | ENSRNOT00000014887 | 0.957363541  | 1.03E-06 |
| TUCP_003559 | XLOC_156051 | ENSRNOT00000059458 | 0.960825391  | 6.80E-07 |
| TUCP_003559 | XLOC_156051 | ENSRNOT00000031230 | 0.955528306  | 1.27E-06 |
| TUCP_003559 | XLOC_156051 | ENSRNOT00000010218 | 0.969363507  | 2.02E-07 |
| TUCP_003559 | XLOC_156051 | ENSRNOT00000026227 | 0.964404539  | 4.24E-07 |
| TUCP_003559 | XLOC_156051 | ENSRNOT00000010588 | 0.952398154  | 1.78E-06 |
| TUCP_003559 | XLOC_156051 | ENSRNOT0000002292  | 0.953810841  | 1.53E-06 |
| TUCP_003559 | XLOC_156051 | ENSRNOT00000058852 | -0.953228978 | 1.63E-06 |
| TUCP_003559 | XLOC_156051 | ENSRNOT00000024149 | 0.968905858  | 2.17E-07 |
| TUCP_003559 | XLOC_156051 | ENSRNOT00000035474 | 0.957507799  | 1.02E-06 |
| TUCP_003559 | XLOC_156051 | ENSRNOT00000086336 | 0.985626132  | 4.72E-09 |
| TUCP_003559 | XLOC_156051 | ENSRNOT00000006195 | 0.976194441  | 5.79E-08 |
| TUCP_003559 | XLOC_156051 | ENSRNOT00000076872 | 0.956372045  | 1.16E-06 |
| TUCP_003559 | XLOC_156051 | ENSRNOT00000080800 | 0.977868473  | 4.03E-08 |
| TUCP_003559 | XLOC_156051 | ENSRNOT00000025550 | -0.966299761 | 3.23E-07 |
| TUCP_003559 | XLOC_156051 | ENSRNOT00000003158 | -0.967456416 | 2.72E-07 |
| TUCP_003559 | XLOC_156051 | ENSRNOT00000066440 | -0.952668877 | 1.73E-06 |
| TUCP_003559 | XLOC_156051 | ENSRNOT00000082174 | 0.956239103  | 1.17E-06 |
| TUCP_003559 | XLOC_156051 | ENSRNOT00000077406 | 0.96123188   | 6.46E-07 |
| TUCP_003559 | XLOC_156051 | ENSRNOT00000020322 | 0.954876504  | 1.37E-06 |
| TUCP_003559 | XLOC_156051 | ENSRNOT00000014814 | 0.960592821  | 7.00E-07 |
| TUCP_003559 | XLOC_156051 | ENSRNOT00000004412 | 0.973211444  | 1.04E-07 |
| TUCP_003559 | XLOC_156051 | ENSRNOT00000014496 | 0.955092769  | 1.33E-06 |
| TUCP_003559 | XLOC_156051 | ENSRNOT00000087095 | 0.954926079  | 1.36E-06 |
| TUCP_003559 | XLOC_156051 | ENSRNOT00000064798 | 0.970359858  | 1.71E-07 |
| TUCP_003559 | XLOC_156051 | ENSRNOT00000019177 | 0.977695321  | 4.19E-08 |
| TUCP_003559 | XLOC_156051 | ENSRNOT00000014261 | 0.977077516  | 4.80E-08 |

|             |             |                    |              |          |
|-------------|-------------|--------------------|--------------|----------|
| TUCP_003559 | XLOC_156051 | ENSRNOT00000022485 | 0.96479065   | 4.02E-07 |
| TUCP_003559 | XLOC_156051 | ENSRNOT00000033235 | 0.952679024  | 1.73E-06 |
| TUCP_003559 | XLOC_156051 | ENSRNOT00000084595 | 0.951569122  | 1.93E-06 |
| TUCP_003559 | XLOC_156051 | ENSRNOT00000027452 | 0.958600353  | 8.93E-07 |
| TUCP_003559 | XLOC_156051 | ENSRNOT00000022646 | 0.961564194  | 6.19E-07 |
| TUCP_003559 | XLOC_156051 | ENSRNOT00000066593 | 0.951953147  | 1.86E-06 |
| TUCP_003559 | XLOC_156051 | ENSRNOT00000091807 | 0.978517297  | 3.48E-08 |
| TUCP_003559 | XLOC_156051 | ENSRNOT00000027964 | 0.956675691  | 1.12E-06 |
| TUCP_003559 | XLOC_156051 | ENSRNOT00000023428 | 0.964043557  | 4.46E-07 |
| TUCP_003559 | XLOC_156051 | ENSRNOT00000051550 | 0.963823578  | 4.59E-07 |
| TUCP_003559 | XLOC_156051 | ENSRNOT00000047192 | -0.956128157 | 1.19E-06 |
| TUCP_003559 | XLOC_156051 | ENSRNOT00000017753 | 0.95649068   | 1.14E-06 |
| TUCP_003559 | XLOC_156051 | ENSRNOT00000021285 | 0.957334947  | 1.04E-06 |
| TUCP_003559 | XLOC_156051 | ENSRNOT00000048029 | 0.950910695  | 2.07E-06 |
| TUCP_003559 | XLOC_156051 | ENSRNOT00000010433 | 0.953652284  | 1.56E-06 |
| TUCP_003559 | XLOC_156051 | ENSRNOT00000011682 | -0.96453003  | 4.17E-07 |
| TUCP_003559 | XLOC_156051 | ENSRNOT00000027615 | 0.95389029   | 1.52E-06 |
| TUCP_003559 | XLOC_156051 | ENSRNOT00000083799 | 0.97375582   | 9.38E-08 |
| TUCP_003559 | XLOC_156051 | ENSRNOT00000024548 | 0.959328411  | 8.19E-07 |
| TUCP_003558 | XLOC_155958 | ENSRNOT00000065143 | 0.956290856  | 1.17E-06 |
| TUCP_003558 | XLOC_155958 | ENSRNOT00000044885 | 0.962993869  | 5.14E-07 |
| TUCP_003558 | XLOC_155958 | ENSRNOT00000004274 | -0.951449589 | 1.96E-06 |
| TUCP_003558 | XLOC_155958 | ENSRNOT00000039551 | -0.951238536 | 2.00E-06 |
| TUCP_003558 | XLOC_155958 | ENSRNOT00000086590 | 0.962014649  | 5.84E-07 |
| TUCP_003558 | XLOC_155958 | ENSRNOT00000006186 | 0.962476239  | 5.50E-07 |
| TUCP_003558 | XLOC_155958 | ENSRNOT00000082998 | 0.962714714  | 5.33E-07 |
| TUCP_003558 | XLOC_155958 | ENSRNOT00000081246 | 0.951828863  | 1.88E-06 |
| TUCP_003558 | XLOC_155958 | ENSRNOT00000048910 | -0.955413066 | 1.29E-06 |
| TUCP_003558 | XLOC_155958 | ENSRNOT00000027083 | 0.956751598  | 1.11E-06 |
| TUCP_003558 | XLOC_155958 | ENSRNOT00000009877 | 0.958536069  | 9.00E-07 |
| TUCP_003558 | XLOC_155958 | ENSRNOT00000075714 | 0.96129826   | 6.41E-07 |
| TUCP_003558 | XLOC_155958 | ENSRNOT00000019104 | -0.950400103 | 2.17E-06 |
| TUCP_003558 | XLOC_155958 | ENSRNOT00000064840 | 0.95425896   | 1.46E-06 |
| TUCP_003558 | XLOC_155958 | ENSRNOT00000023180 | 0.95145285   | 1.96E-06 |
| TUCP_003558 | XLOC_155958 | ENSRNOT00000017668 | 0.966191285  | 3.29E-07 |
| TUCP_003558 | XLOC_155958 | ENSRNOT00000071560 | 0.951306465  | 1.99E-06 |
| TUCP_003558 | XLOC_155958 | ENSRNOT00000025936 | -0.958202543 | 9.36E-07 |
| TUCP_003558 | XLOC_155958 | ENSRNOT00000026065 | 0.95062893   | 2.13E-06 |
| TUCP_003558 | XLOC_155958 | ENSRNOT00000023638 | 0.961355282  | 6.36E-07 |
| TUCP_003558 | XLOC_155958 | ENSRNOT00000005228 | 0.983269111  | 1.00E-08 |
| TUCP_003558 | XLOC_155958 | ENSRNOT00000059524 | -0.956050304 | 1.20E-06 |
| TUCP_003558 | XLOC_155958 | ENSRNOT00000082863 | 0.968787604  | 2.21E-07 |
| TUCP_003558 | XLOC_155958 | ENSRNOT00000028628 | -0.964131995 | 4.40E-07 |
| TUCP_003558 | XLOC_155958 | ENSRNOT00000005659 | 0.97546046   | 6.73E-08 |
| TUCP_003558 | XLOC_155958 | ENSRNOT00000081768 | 0.964517999  | 4.17E-07 |
| TUCP_003558 | XLOC_155958 | ENSRNOT00000042125 | 0.97046401   | 1.68E-07 |
| TUCP_003558 | XLOC_155958 | ENSRNOT00000045326 | 0.973895049  | 9.14E-08 |
| TUCP_003558 | XLOC_155958 | ENSRNOT00000019502 | 0.971345271  | 1.45E-07 |
| TUCP_003558 | XLOC_155958 | ENSRNOT00000016649 | 0.955848004  | 1.23E-06 |
| TUCP_003558 | XLOC_155958 | ENSRNOT00000086310 | -0.950173478 | 2.22E-06 |
| TUCP_003558 | XLOC_155958 | ENSRNOT00000090342 | 0.97639621   | 5.55E-08 |



|             |             |                     |              |          |
|-------------|-------------|---------------------|--------------|----------|
| TUCP_003558 | XLOC_155958 | ENSRNOT00000028856  | 0.980185333  | 2.33E-08 |
| TUCP_003558 | XLOC_155958 | ENSRNOT00000060282  | 0.974882295  | 7.55E-08 |
| TUCP_003558 | XLOC_155958 | ENSRNOT00000065300  | 0.968822237  | 2.20E-07 |
| TUCP_003558 | XLOC_155958 | ENSRNOT00000030850  | 0.95321078   | 1.63E-06 |
| TUCP_003558 | XLOC_155958 | ENSRNOT00000067170  | -0.96687543  | 2.97E-07 |
| TUCP_003558 | XLOC_155958 | ENSRNOT00000043216  | 0.958199325  | 9.37E-07 |
| TUCP_003558 | XLOC_155958 | ENSRNOT00000091128  | -0.980550897 | 2.12E-08 |
| TUCP_003558 | XLOC_155958 | ENSRNOT00000001586  | -0.956488847 | 1.14E-06 |
| TUCP_003558 | XLOC_155958 | ENSRNOT00000081981  | 0.976291921  | 5.67E-08 |
| TUCP_003558 | XLOC_155958 | ENSRNOT00000086893  | -0.967832766 | 2.57E-07 |
| TUCP_003558 | XLOC_155958 | ENSRNOT00000006195  | 0.9500671    | 2.25E-06 |
| TUCP_003558 | XLOC_155958 | ENSRNOT00000006752  | 0.951895989  | 1.87E-06 |
| TUCP_003558 | XLOC_155958 | ENSRNOT00000003158  | -0.957835091 | 9.78E-07 |
| TUCP_003558 | XLOC_155958 | ENSRNOT00000004172  | 0.977098009  | 4.77E-08 |
| TUCP_003558 | XLOC_155958 | ENSRNOT00000014979  | 0.967537613  | 2.69E-07 |
| TUCP_003558 | XLOC_155958 | ENSRNOT00000043554  | 0.954297159  | 1.45E-06 |
| TUCP_003558 | XLOC_155958 | ENSRNOT00000009645  | -0.9537244   | 1.55E-06 |
| TUCP_003558 | XLOC_155958 | ENSRNOT00000077201  | -0.958854753 | 8.67E-07 |
| TUCP_003558 | XLOC_155958 | ENSRNOT00000005942  | 0.952538266  | 1.75E-06 |
| TUCP_003558 | XLOC_155958 | ENSRNOT00000012463  | -0.96362596  | 4.72E-07 |
| TUCP_003558 | XLOC_155958 | ENSRNOT000000024969 | 0.965384173  | 3.69E-07 |
| TUCP_003558 | XLOC_155958 | ENSRNOT00000085251  | -0.959924366 | 7.61E-07 |
| TUCP_003558 | XLOC_155958 | ENSRNOT000000026783 | 0.973012288  | 1.08E-07 |
| TUCP_003558 | XLOC_155958 | ENSRNOT00000003690  | 0.978192918  | 3.74E-08 |
| TUCP_003558 | XLOC_155958 | ENSRNOT000000025819 | -0.950269763 | 2.20E-06 |
| TUCP_003558 | XLOC_155958 | ENSRNOT00000012379  | 0.951968706  | 1.86E-06 |
| TUCP_003558 | XLOC_155958 | ENSRNOT00000028646  | 0.974880438  | 7.55E-08 |
| TUCP_003558 | XLOC_155958 | ENSRNOT00000011384  | 0.962906423  | 5.20E-07 |
| TUCP_003558 | XLOC_155958 | ENSRNOT00000048754  | -0.957430205 | 1.02E-06 |
| TUCP_003558 | XLOC_155958 | ENSRNOT00000045699  | 0.951799774  | 1.89E-06 |
| TUCP_003558 | XLOC_155958 | ENSRNOT00000087443  | 0.974578425  | 8.01E-08 |
| TUCP_003558 | XLOC_155958 | ENSRNOT00000044628  | 0.952282677  | 1.80E-06 |
| TUCP_003558 | XLOC_155958 | ENSRNOT00000017379  | -0.950622125 | 2.13E-06 |
| TUCP_003558 | XLOC_155958 | ENSRNOT00000035286  | 0.957078086  | 1.07E-06 |
| TUCP_003558 | XLOC_155958 | ENSRNOT00000076820  | 0.955200617  | 1.32E-06 |
| TUCP_003558 | XLOC_155958 | ENSRNOT00000079109  | 0.966515772  | 3.13E-07 |
| TUCP_003558 | XLOC_155958 | ENSRNOT00000027944  | 0.963362964  | 4.89E-07 |
| TUCP_003558 | XLOC_155958 | ENSRNOT00000076611  | -0.954836085 | 1.37E-06 |
| TUCP_003558 | XLOC_155958 | ENSRNOT00000004007  | -0.969981441 | 1.83E-07 |
| TUCP_003558 | XLOC_155958 | ENSRNOT00000016801  | 0.96007955   | 7.47E-07 |
| TUCP_003558 | XLOC_155958 | ENSRNOT00000000120  | 0.953183911  | 1.64E-06 |
| TUCP_003558 | XLOC_155958 | ENSRNOT00000008022  | 0.95621173   | 1.18E-06 |
| TUCP_003558 | XLOC_155958 | ENSRNOT00000019519  | 0.962577546  | 5.43E-07 |
| TUCP_003558 | XLOC_155958 | ENSRNOT00000089933  | 0.956566243  | 1.13E-06 |
| TUCP_003558 | XLOC_155958 | ENSRNOT00000077908  | 0.951137024  | 2.02E-06 |
| TUCP_003558 | XLOC_155958 | ENSRNOT00000091602  | -0.963895459 | 4.55E-07 |
| TUCP_003558 | XLOC_155958 | ENSRNOT00000073971  | 0.95530932   | 1.30E-06 |
| TUCP_003558 | XLOC_155958 | ENSRNOT00000037456  | 0.962372499  | 5.58E-07 |
| TUCP_003558 | XLOC_155958 | ENSRNOT00000090123  | 0.96093302   | 6.71E-07 |
| TUCP_003558 | XLOC_155958 | ENSRNOT00000026481  | 0.961949277  | 5.89E-07 |
| TUCP_003558 | XLOC_155958 | ENSRNOT00000024264  | -0.95627933  | 1.17E-06 |

|             |             |                    |              |          |
|-------------|-------------|--------------------|--------------|----------|
| TUCP_003558 | XLOC_155958 | ENSRNOT00000026718 | 0.955802703  | 1.23E-06 |
| TUCP_003558 | XLOC_155958 | ENSRNOT00000072208 | 0.959440108  | 8.08E-07 |
| TUCP_003558 | XLOC_155958 | ENSRNOT00000032780 | 0.989955166  | 7.92E-10 |
| TUCP_003558 | XLOC_155958 | ENSRNOT00000009708 | -0.979607016 | 2.68E-08 |
| TUCP_003558 | XLOC_155958 | ENSRNOT00000055669 | 0.965329637  | 3.72E-07 |
| TUCP_003558 | XLOC_155958 | ENSRNOT00000074323 | 0.962097526  | 5.78E-07 |
| TUCP_003558 | XLOC_155958 | ENSRNOT00000014261 | 0.951576905  | 1.93E-06 |
| TUCP_003558 | XLOC_155958 | ENSRNOT00000013762 | 0.973249263  | 1.03E-07 |
| TUCP_003558 | XLOC_155958 | ENSRNOT00000033677 | -0.957585841 | 1.01E-06 |
| TUCP_003558 | XLOC_155958 | ENSRNOT00000077231 | 0.958681345  | 8.85E-07 |
| TUCP_003558 | XLOC_155958 | ENSRNOT00000072518 | 0.97822369   | 3.72E-08 |
| TUCP_003558 | XLOC_155958 | ENSRNOT00000016333 | -0.962197776 | 5.71E-07 |
| TUCP_003558 | XLOC_155958 | ENSRNOT00000009811 | 0.960484265  | 7.10E-07 |
| TUCP_003558 | XLOC_155958 | ENSRNOT00000017486 | 0.951601378  | 1.93E-06 |
| TUCP_003558 | XLOC_155958 | ENSRNOT00000087592 | 0.956917931  | 1.09E-06 |
| TUCP_003558 | XLOC_155958 | ENSRNOT00000019820 | 0.959181847  | 8.33E-07 |
| TUCP_003558 | XLOC_155958 | ENSRNOT00000005958 | 0.969115904  | 2.10E-07 |
| TUCP_003558 | XLOC_155958 | ENSRNOT00000038247 | 0.973867196  | 9.19E-08 |
| TUCP_003558 | XLOC_155958 | ENSRNOT00000016389 | -0.957306205 | 1.04E-06 |
| TUCP_003558 | XLOC_155958 | ENSRNOT00000008655 | 0.956376721  | 1.16E-06 |
| TUCP_003558 | XLOC_155958 | ENSRNOT00000080797 | -0.951386923 | 1.97E-06 |
| TUCP_003558 | XLOC_155958 | ENSRNOT00000010927 | 0.97024716   | 1.75E-07 |
| TUCP_003558 | XLOC_155958 | ENSRNOT00000021030 | -0.956668266 | 1.12E-06 |
| TUCP_003558 | XLOC_155958 | ENSRNOT00000015116 | 0.975156707  | 7.15E-08 |
| TUCP_003558 | XLOC_155958 | ENSRNOT00000021037 | 0.961002403  | 6.65E-07 |
| TUCP_003558 | XLOC_155958 | ENSRNOT00000003714 | 0.957725098  | 9.90E-07 |
| TUCP_003558 | XLOC_155958 | ENSRNOT00000082508 | -0.961030924 | 6.63E-07 |
| TUCP_003558 | XLOC_155958 | ENSRNOT00000005329 | -0.951726113 | 1.90E-06 |
| TUCP_003558 | XLOC_155958 | ENSRNOT00000084385 | 0.968892832  | 2.18E-07 |
| TUCP_003558 | XLOC_155958 | ENSRNOT00000013863 | -0.95211205  | 1.83E-06 |
| TUCP_003558 | XLOC_155958 | ENSRNOT00000001081 | 0.977054477  | 4.82E-08 |
| TUCP_003558 | XLOC_155958 | ENSRNOT00000044562 | 0.974930135  | 7.48E-08 |
| TUCP_003558 | XLOC_155958 | ENSRNOT00000027537 | 0.964784171  | 4.02E-07 |
| TUCP_003558 | XLOC_155958 | ENSRNOT00000021803 | -0.960615722 | 6.98E-07 |
| TUCP_003558 | XLOC_155958 | ENSRNOT00000004942 | -0.952911245 | 1.68E-06 |
| TUCP_003558 | XLOC_155958 | ENSRNOT00000044346 | -0.954194267 | 1.47E-06 |
| TUCP_003558 | XLOC_155958 | ENSRNOT00000008210 | 0.950513019  | 2.15E-06 |
| TUCP_003558 | XLOC_155958 | ENSRNOT00000016948 | -0.958438465 | 9.11E-07 |
| TUCP_003558 | XLOC_155958 | ENSRNOT00000083220 | 0.95757785   | 1.01E-06 |
| TUCP_003558 | XLOC_155958 | ENSRNOT00000067486 | -0.968644283 | 2.26E-07 |
| TUCP_003558 | XLOC_155958 | ENSRNOT00000082945 | 0.964503007  | 4.18E-07 |
| TUCP_003558 | XLOC_155958 | ENSRNOT00000086119 | -0.966362507 | 3.21E-07 |
| TUCP_003558 | XLOC_155958 | ENSRNOT00000016722 | 0.956041358  | 1.20E-06 |
| TUCP_003558 | XLOC_155958 | ENSRNOT00000016132 | -0.954556421 | 1.41E-06 |
| TUCP_003558 | XLOC_155958 | ENSRNOT00000014508 | 0.961224241  | 6.47E-07 |
| TUCP_003558 | XLOC_155958 | ENSRNOT00000058312 | 0.952277727  | 1.80E-06 |
| TUCP_003558 | XLOC_155958 | ENSRNOT00000019133 | 0.973864368  | 9.19E-08 |
| TUCP_003558 | XLOC_155958 | ENSRNOT00000052075 | 0.974082612  | 8.82E-08 |
| TUCP_003558 | XLOC_155958 | ENSRNOT00000065983 | 0.964322666  | 4.29E-07 |
| TUCP_003558 | XLOC_155958 | ENSRNOT00000030782 | -0.958254418 | 9.31E-07 |
| TUCP_003558 | XLOC_155958 | ENSRNOT00000020437 | 0.964515642  | 4.17E-07 |

|             |             |                     |              |          |
|-------------|-------------|---------------------|--------------|----------|
| TUCP_003558 | XLOC_155958 | ENSRNOT00000079698  | -0.976285845 | 5.68E-08 |
| TUCP_003558 | XLOC_155958 | ENSRNOT00000074659  | 0.960843257  | 6.79E-07 |
| TUCP_003558 | XLOC_155958 | ENSRNOT00000071493  | -0.963993211 | 4.49E-07 |
| TUCP_003558 | XLOC_155958 | ENSRNOT00000015265  | 0.973266752  | 1.03E-07 |
| TUCP_003558 | XLOC_155958 | ENSRNOT00000001968  | -0.95377431  | 1.54E-06 |
| TUCP_003558 | XLOC_155958 | ENSRNOT000000052422 | 0.988606094  | 1.48E-09 |
| TUCP_003558 | XLOC_155958 | ENSRNOT000000064798 | 0.977924359  | 3.98E-08 |
| TUCP_003558 | XLOC_155958 | ENSRNOT000000068381 | 0.954112134  | 1.48E-06 |
| TUCP_003558 | XLOC_155958 | ENSRNOT00000001242  | 0.965495091  | 3.64E-07 |
| TUCP_003558 | XLOC_155958 | ENSRNOT000000031979 | -0.967207024 | 2.83E-07 |
| TUCP_003558 | XLOC_155958 | ENSRNOT000000015609 | 0.975233666  | 7.04E-08 |
| TUCP_003558 | XLOC_155958 | ENSRNOT000000004319 | -0.96512804  | 3.83E-07 |
| TUCP_003558 | XLOC_155958 | ENSRNOT000000078102 | 0.991207415  | 4.08E-10 |
| TUCP_003558 | XLOC_155958 | ENSRNOT000000070893 | 0.956442918  | 1.15E-06 |
| TUCP_003558 | XLOC_155958 | ENSRNOT000000010873 | -0.961070995 | 6.60E-07 |
| TUCP_003558 | XLOC_155958 | ENSRNOT000000026633 | 0.951841624  | 1.88E-06 |
| TUCP_003558 | XLOC_155958 | ENSRNOT000000025983 | 0.975992459  | 6.03E-08 |
| TUCP_003558 | XLOC_155958 | ENSRNOT000000007164 | 0.95936984   | 8.14E-07 |
| TUCP_003558 | XLOC_155958 | ENSRNOT000000014701 | 0.954251911  | 1.46E-06 |
| TUCP_003558 | XLOC_155958 | ENSRNOT000000087095 | 0.982091793  | 1.41E-08 |
| TUCP_003558 | XLOC_155958 | ENSRNOT000000008929 | 0.96948125   | 1.98E-07 |
| TUCP_003558 | XLOC_155958 | ENSRNOT000000027526 | 0.975704578  | 6.40E-08 |
| TUCP_003558 | XLOC_155958 | ENSRNOT000000004698 | 0.952987428  | 1.67E-06 |
| TUCP_003558 | XLOC_155958 | ENSRNOT000000016129 | 0.974450722  | 8.21E-08 |
| TUCP_003558 | XLOC_155958 | ENSRNOT000000081047 | 0.968083685  | 2.47E-07 |
| TUCP_003558 | XLOC_155958 | ENSRNOT000000067688 | -0.950047875 | 2.25E-06 |
| TUCP_003558 | XLOC_155958 | ENSRNOT000000011880 | 0.951114127  | 2.03E-06 |
| TUCP_003558 | XLOC_155958 | ENSRNOT000000020648 | 0.957460888  | 1.02E-06 |
| TUCP_003558 | XLOC_155958 | ENSRNOT000000058351 | 0.974034576  | 8.90E-08 |
| TUCP_003558 | XLOC_155958 | ENSRNOT000000011174 | -0.950899506 | 2.07E-06 |
| TUCP_003558 | XLOC_155958 | ENSRNOT000000003991 | 0.953380409  | 1.60E-06 |
| TUCP_003558 | XLOC_155958 | ENSRNOT000000021408 | 0.980646941  | 2.07E-08 |
| TUCP_003558 | XLOC_155958 | ENSRNOT000000087429 | 0.952806405  | 1.70E-06 |
| TUCP_003558 | XLOC_155958 | ENSRNOT000000029136 | -0.953903932 | 1.52E-06 |
| TUCP_003558 | XLOC_155958 | ENSRNOT000000089211 | 0.950290646  | 2.20E-06 |
| TUCP_003558 | XLOC_155958 | ENSRNOT000000050515 | 0.957938528  | 9.66E-07 |
| TUCP_003558 | XLOC_155958 | ENSRNOT000000060362 | 0.965368933  | 3.70E-07 |
| TUCP_003558 | XLOC_155958 | ENSRNOT000000041277 | -0.951951089 | 1.86E-06 |
| TUCP_003558 | XLOC_155958 | ENSRNOT000000084055 | -0.959343651 | 8.17E-07 |
| TUCP_003558 | XLOC_155958 | ENSRNOT000000080207 | 0.966838538  | 2.99E-07 |
| TUCP_003558 | XLOC_155958 | ENSRNOT000000035591 | -0.953802873 | 1.53E-06 |
| TUCP_003558 | XLOC_155958 | ENSRNOT000000008817 | 0.958767014  | 8.76E-07 |
| TUCP_003558 | XLOC_155958 | ENSRNOT000000027910 | 0.960783429  | 6.84E-07 |
| TUCP_003558 | XLOC_155958 | ENSRNOT000000010218 | 0.963970515  | 4.50E-07 |
| TUCP_003558 | XLOC_155958 | ENSRNOT000000052224 | 0.971900306  | 1.32E-07 |
| TUCP_003558 | XLOC_155958 | ENSRNOT000000078070 | 0.972167     | 1.26E-07 |
| TUCP_003558 | XLOC_155958 | ENSRNOT000000018533 | 0.982629528  | 1.21E-08 |
| TUCP_003558 | XLOC_155958 | ENSRNOT000000087997 | 0.954628324  | 1.40E-06 |
| TUCP_003558 | XLOC_155958 | ENSRNOT000000087502 | 0.963851923  | 4.57E-07 |
| TUCP_003558 | XLOC_155958 | ENSRNOT000000024322 | 0.953365181  | 1.61E-06 |
| TUCP_003558 | XLOC_155958 | ENSRNOT000000065618 | 0.952625144  | 1.74E-06 |

|             |             |                    |              |          |
|-------------|-------------|--------------------|--------------|----------|
| TUCP_003558 | XLOC_155958 | ENSRNOT00000088182 | 0.96662813   | 3.08E-07 |
| TUCP_003558 | XLOC_155958 | ENSRNOT00000022213 | 0.953473585  | 1.59E-06 |
| TUCP_003558 | XLOC_155958 | ENSRNOT00000000577 | 0.951456102  | 1.96E-06 |
| TUCP_003558 | XLOC_155958 | ENSRNOT00000046745 | 0.960341811  | 7.23E-07 |
| TUCP_003558 | XLOC_155958 | ENSRNOT00000012424 | 0.95481032   | 1.38E-06 |
| TUCP_003558 | XLOC_155958 | ENSRNOT00000002443 | 0.951272516  | 1.99E-06 |
| TUCP_003558 | XLOC_155958 | ENSRNOT00000021944 | 0.954274112  | 1.46E-06 |
| TUCP_003558 | XLOC_155958 | ENSRNOT00000078390 | -0.95940905  | 8.11E-07 |
| TUCP_003558 | XLOC_155958 | ENSRNOT00000026457 | 0.956303011  | 1.17E-06 |
| TUCP_003558 | XLOC_155958 | ENSRNOT00000012187 | 0.977731929  | 4.15E-08 |
| TUCP_003558 | XLOC_155958 | ENSRNOT00000000013 | 0.971395119  | 1.44E-07 |
| TUCP_003558 | XLOC_155958 | ENSRNOT00000092029 | 0.963270216  | 4.95E-07 |
| TUCP_003558 | XLOC_155958 | ENSRNOT00000019157 | -0.962362067 | 5.58E-07 |
| TUCP_003558 | XLOC_155958 | ENSRNOT00000019656 | -0.965348288 | 3.71E-07 |
| TUCP_003558 | XLOC_155958 | ENSRNOT00000017181 | -0.951921855 | 1.87E-06 |
| TUCP_003558 | XLOC_155958 | ENSRNOT00000017753 | 0.976314493  | 5.64E-08 |
| TUCP_003558 | XLOC_155958 | ENSRNOT00000002109 | 0.965425568  | 3.67E-07 |
| TUCP_003558 | XLOC_155958 | ENSRNOT00000006499 | 0.972231271  | 1.24E-07 |
| TUCP_003558 | XLOC_155958 | ENSRNOT00000005909 | 0.976090463  | 5.91E-08 |
| TUCP_003558 | XLOC_155958 | ENSRNOT00000087725 | 0.954039534  | 1.49E-06 |
| TUCP_003558 | XLOC_155958 | ENSRNOT00000029833 | 0.991442187  | 3.56E-10 |
| TUCP_003558 | XLOC_155958 | ENSRNOT00000012702 | -0.954103663 | 1.48E-06 |
| TUCP_003558 | XLOC_155958 | ENSRNOT00000023330 | 0.96910609   | 2.10E-07 |
| TUCP_003558 | XLOC_155958 | ENSRNOT00000034487 | -0.957842933 | 9.77E-07 |
| TUCP_003558 | XLOC_155958 | ENSRNOT00000007175 | 0.960996452  | 6.66E-07 |
| TUCP_003558 | XLOC_155958 | ENSRNOT00000009129 | 0.961514034  | 6.23E-07 |
| TUCP_003558 | XLOC_155958 | ENSRNOT00000017319 | 0.976364764  | 5.58E-08 |
| TUCP_003558 | XLOC_155958 | ENSRNOT00000022074 | 0.956285773  | 1.17E-06 |
| TUCP_003558 | XLOC_155958 | ENSRNOT00000015635 | -0.951785793 | 1.89E-06 |
| TUCP_003558 | XLOC_155958 | ENSRNOT00000036951 | 0.973999136  | 8.96E-08 |
| TUCP_003558 | XLOC_155958 | ENSRNOT00000016519 | 0.984629868  | 6.58E-09 |
| TUCP_003558 | XLOC_155958 | ENSRNOT00000026186 | 0.969397665  | 2.01E-07 |
| TUCP_003558 | XLOC_155958 | ENSRNOT00000002173 | -0.951358968 | 1.98E-06 |
| TUCP_003558 | XLOC_155958 | ENSRNOT00000015188 | 0.968469471  | 2.33E-07 |
| TUCP_003558 | XLOC_155958 | ENSRNOT00000036959 | -0.955100009 | 1.33E-06 |
| TUCP_003558 | XLOC_155958 | ENSRNOT00000022963 | 0.971729041  | 1.36E-07 |
| TUCP_003558 | XLOC_155958 | ENSRNOT00000090420 | -0.95259623  | 1.74E-06 |
| TUCP_003558 | XLOC_155958 | ENSRNOT00000090526 | -0.953017004 | 1.67E-06 |
| TUCP_003558 | XLOC_155958 | ENSRNOT00000031401 | -0.951139049 | 2.02E-06 |
| TUCP_003558 | XLOC_155958 | ENSRNOT00000043953 | 0.965977246  | 3.39E-07 |
| TUCP_003558 | XLOC_155958 | ENSRNOT00000085228 | 0.973019946  | 1.08E-07 |
| TUCP_003558 | XLOC_155958 | ENSRNOT00000078250 | 0.960085917  | 7.46E-07 |
| TUCP_003558 | XLOC_155958 | ENSRNOT00000079996 | 0.982986216  | 1.09E-08 |
| TUCP_003558 | XLOC_155958 | ENSRNOT00000019554 | 0.958351344  | 9.20E-07 |
| TUCP_003558 | XLOC_155958 | ENSRNOT00000058842 | 0.985900082  | 4.29E-09 |
| TUCP_003558 | XLOC_155958 | ENSRNOT00000009368 | -0.952930166 | 1.68E-06 |
| TUCP_003558 | XLOC_155958 | ENSRNOT00000008982 | 0.981529651  | 1.64E-08 |
| TUCP_003558 | XLOC_155958 | ENSRNOT00000066133 | -0.953635137 | 1.56E-06 |
| TUCP_003558 | XLOC_155958 | ENSRNOT00000050834 | -0.958629495 | 8.90E-07 |
| TUCP_003558 | XLOC_155958 | ENSRNOT00000076387 | 0.961957941  | 5.89E-07 |
| TUCP_003558 | XLOC_155958 | ENSRNOT00000035700 | 0.971966641  | 1.30E-07 |

|             |             |                     |              |          |
|-------------|-------------|---------------------|--------------|----------|
| TUCP_003558 | XLOC_155958 | ENSRNOT00000061191  | -0.954790889 | 1.38E-06 |
| TUCP_003558 | XLOC_155958 | ENSRNOT00000029202  | -0.954585794 | 1.41E-06 |
| TUCP_003558 | XLOC_155958 | ENSRNOT00000051953  | -0.966548824 | 3.12E-07 |
| TUCP_003558 | XLOC_155958 | ENSRNOT00000009803  | 0.978671211  | 3.35E-08 |
| TUCP_003558 | XLOC_155958 | ENSRNOT00000026755  | 0.969898383  | 1.85E-07 |
| TUCP_003558 | XLOC_155958 | ENSRNOT00000064700  | 0.950802385  | 2.09E-06 |
| TUCP_003558 | XLOC_155958 | ENSRNOT00000058362  | 0.961663522  | 6.11E-07 |
| TUCP_003558 | XLOC_155958 | ENSRNOT00000016289  | 0.954743836  | 1.39E-06 |
| TUCP_003558 | XLOC_155958 | ENSRNOT00000016991  | 0.956318458  | 1.16E-06 |
| TUCP_003558 | XLOC_155958 | ENSRNOT00000011350  | 0.987961323  | 1.95E-09 |
| TUCP_003558 | XLOC_155958 | ENSRNOT00000085756  | 0.964964501  | 3.92E-07 |
| TUCP_003558 | XLOC_155958 | ENSRNOT00000008901  | -0.982847205 | 1.14E-08 |
| TUCP_003558 | XLOC_155958 | ENSRNOT00000020669  | 0.955537914  | 1.27E-06 |
| TUCP_003558 | XLOC_155958 | ENSRNOT00000004046  | -0.959925455 | 7.61E-07 |
| TUCP_003558 | XLOC_155958 | ENSRNOT00000019487  | 0.951783354  | 1.89E-06 |
| TUCP_003558 | XLOC_155958 | ENSRNOT00000005876  | 0.958302352  | 9.26E-07 |
| TUCP_003558 | XLOC_155958 | ENSRNOT00000054828  | 0.982107092  | 1.40E-08 |
| TUCP_003558 | XLOC_155958 | ENSRNOT00000020663  | -0.950111308 | 2.24E-06 |
| TUCP_003558 | XLOC_155958 | ENSRNOT00000008427  | -0.954413353 | 1.44E-06 |
| TUCP_003558 | XLOC_155958 | ENSRNOT00000079002  | -0.962142671 | 5.75E-07 |
| TUCP_003558 | XLOC_155958 | ENSRNOT00000078994  | 0.951250972  | 2.00E-06 |
| TUCP_003558 | XLOC_155958 | ENSRNOT00000022142  | 0.969121699  | 2.10E-07 |
| TUCP_003558 | XLOC_155958 | ENSRNOT00000055992  | -0.965369029 | 3.70E-07 |
| TUCP_003558 | XLOC_155958 | ENSRNOT00000077406  | 0.965050009  | 3.87E-07 |
| TUCP_003558 | XLOC_155958 | ENSRNOT00000040069  | 0.96569278   | 3.53E-07 |
| TUCP_003558 | XLOC_155958 | ENSRNOT00000017312  | 0.956664287  | 1.12E-06 |
| TUCP_003558 | XLOC_155958 | ENSRNOT00000028885  | -0.953341241 | 1.61E-06 |
| TUCP_003558 | XLOC_155958 | ENSRNOT00000044742  | 0.95180479   | 1.89E-06 |
| TUCP_003558 | XLOC_155958 | ENSRNOT00000005478  | -0.96437657  | 4.26E-07 |
| TUCP_003558 | XLOC_155958 | ENSRNOT00000015537  | 0.952681448  | 1.73E-06 |
| TUCP_003558 | XLOC_155958 | ENSRNOT00000052120  | 0.952473332  | 1.76E-06 |
| TUCP_003558 | XLOC_155958 | ENSRNOT00000004762  | 0.983779379  | 8.61E-09 |
| TUCP_003558 | XLOC_155958 | ENSRNOT00000024149  | 0.952278745  | 1.80E-06 |
| TUCP_003558 | XLOC_155958 | ENSRNOT00000035474  | 0.980728738  | 2.03E-08 |
| TUCP_003558 | XLOC_155958 | ENSRNOT00000077555  | 0.950500956  | 2.15E-06 |
| TUCP_003558 | XLOC_155958 | ENSRNOT00000077311  | 0.962489268  | 5.49E-07 |
| TUCP_003558 | XLOC_155958 | ENSRNOT00000086336  | 0.955108576  | 1.33E-06 |
| TUCP_003558 | XLOC_155958 | ENSRNOT00000084422  | 0.967833358  | 2.57E-07 |
| TUCP_003558 | XLOC_155958 | ENSRNOT00000083369  | 0.980073062  | 2.39E-08 |
| TUCP_003558 | XLOC_155958 | ENSRNOT00000000728  | -0.958535263 | 9.00E-07 |
| TUCP_003558 | XLOC_155958 | ENSRNOT00000024060  | 0.953434159  | 1.59E-06 |
| TUCP_003558 | XLOC_155958 | ENSRNOT00000061392  | 0.974726601  | 7.78E-08 |
| TUCP_003558 | XLOC_155958 | ENSRNOT00000056130  | 0.968495981  | 2.32E-07 |
| TUCP_003558 | XLOC_155958 | ENSRNOT00000076872  | 0.981145167  | 1.82E-08 |
| TUCP_003558 | XLOC_155958 | ENSRNOT000000091205 | 0.961262973  | 6.44E-07 |
| TUCP_003558 | XLOC_155958 | ENSRNOT00000001234  | -0.961344568 | 6.37E-07 |
| TUCP_003558 | XLOC_155958 | ENSRNOT00000080608  | 0.96482279   | 4.00E-07 |
| TUCP_003558 | XLOC_155958 | ENSRNOT00000059744  | 0.966205162  | 3.28E-07 |
| TUCP_003558 | XLOC_155958 | ENSRNOT00000085519  | 0.977239989  | 4.63E-08 |
| TUCP_003558 | XLOC_155958 | ENSRNOT00000040476  | 0.971787619  | 1.34E-07 |
| TUCP_003558 | XLOC_155958 | ENSRNOT00000038182  | -0.953148918 | 1.64E-06 |

|             |             |                    |              |          |
|-------------|-------------|--------------------|--------------|----------|
| TUCP_003558 | XLOC_155958 | ENSRNOT00000029125 | 0.976357833  | 5.59E-08 |
| TUCP_003558 | XLOC_155958 | ENSRNOT00000085279 | 0.957280482  | 1.04E-06 |
| TUCP_003558 | XLOC_155958 | ENSRNOT00000004787 | -0.959600352 | 7.92E-07 |
| TUCP_003558 | XLOC_155958 | ENSRNOT00000074847 | -0.957271004 | 1.04E-06 |
| TUCP_003558 | XLOC_155958 | ENSRNOT00000009900 | -0.962103335 | 5.78E-07 |
| TUCP_003558 | XLOC_155958 | ENSRNOT00000027970 | 0.962990223  | 5.14E-07 |
| TUCP_003558 | XLOC_155958 | ENSRNOT00000014814 | 0.983263642  | 1.01E-08 |
| TUCP_003558 | XLOC_155958 | ENSRNOT00000007768 | 0.965741146  | 3.51E-07 |
| TUCP_003558 | XLOC_155958 | ENSRNOT00000067181 | 0.950087664  | 2.24E-06 |
| TUCP_003558 | XLOC_155958 | ENSRNOT00000010748 | 0.979147484  | 3.00E-08 |
| TUCP_003558 | XLOC_155958 | ENSRNOT00000019177 | 0.986037436  | 4.08E-09 |
| TUCP_003558 | XLOC_155958 | ENSRNOT00000024491 | -0.958387097 | 9.16E-07 |
| TUCP_003558 | XLOC_155958 | ENSRNOT00000006570 | -0.974077393 | 8.83E-08 |
| TUCP_003558 | XLOC_155958 | ENSRNOT00000022485 | 0.959134303  | 8.38E-07 |
| TUCP_003558 | XLOC_155958 | ENSRNOT00000033235 | 0.974047006  | 8.88E-08 |
| TUCP_003558 | XLOC_155958 | ENSRNOT00000084595 | 0.953699949  | 1.55E-06 |
| TUCP_003558 | XLOC_155958 | ENSRNOT00000083414 | 0.962077376  | 5.80E-07 |
| TUCP_003558 | XLOC_155958 | ENSRNOT00000017776 | 0.972563416  | 1.17E-07 |
| TUCP_003558 | XLOC_155958 | ENSRNOT00000040393 | 0.960455255  | 7.13E-07 |
| TUCP_003558 | XLOC_155958 | ENSRNOT00000014479 | -0.95206173  | 1.84E-06 |
| TUCP_003558 | XLOC_155958 | ENSRNOT00000067901 | -0.964897817 | 3.96E-07 |
| TUCP_003558 | XLOC_155958 | ENSRNOT00000064930 | 0.961015713  | 6.64E-07 |
| TUCP_003558 | XLOC_155958 | ENSRNOT00000004463 | 0.967178735  | 2.84E-07 |
| TUCP_003558 | XLOC_155958 | ENSRNOT00000008757 | 0.97880821   | 3.25E-08 |
| TUCP_003558 | XLOC_155958 | ENSRNOT00000009979 | 0.950729564  | 2.10E-06 |
| TUCP_003558 | XLOC_155958 | ENSRNOT00000044009 | 0.955628487  | 1.26E-06 |
| TUCP_003558 | XLOC_155958 | ENSRNOT00000004878 | -0.950715112 | 2.11E-06 |
| TUCP_003558 | XLOC_155958 | ENSRNOT00000047192 | -0.96643509  | 3.17E-07 |
| TUCP_003558 | XLOC_155958 | ENSRNOT00000047210 | 0.960778426  | 6.84E-07 |
| TUCP_003558 | XLOC_155958 | ENSRNOT00000036613 | -0.951661956 | 1.92E-06 |
| TUCP_003558 | XLOC_155958 | ENSRNOT00000022259 | -0.952723062 | 1.72E-06 |
| TUCP_003558 | XLOC_155958 | ENSRNOT00000046058 | 0.958282625  | 9.28E-07 |
| TUCP_003558 | XLOC_155958 | ENSRNOT00000073675 | -0.953161125 | 1.64E-06 |
| TUCP_003558 | XLOC_155958 | ENSRNOT00000051022 | 0.977736631  | 4.15E-08 |
| TUCP_003558 | XLOC_155958 | ENSRNOT00000038066 | 0.951297447  | 1.99E-06 |
| TUCP_003558 | XLOC_155958 | ENSRNOT00000014124 | 0.970187639  | 1.76E-07 |
| TUCP_003558 | XLOC_155958 | ENSRNOT00000015799 | 0.953359235  | 1.61E-06 |
| TUCP_003558 | XLOC_155958 | ENSRNOT00000011682 | -0.970414729 | 1.70E-07 |
| TUCP_003558 | XLOC_155958 | ENSRNOT00000009496 | 0.967648451  | 2.64E-07 |
| TUCP_003558 | XLOC_155958 | ENSRNOT00000024548 | 0.956333702  | 1.16E-06 |
| TUCP_003848 | XLOC_168518 | ENSRNOT00000034843 | 0.955678073  | 1.25E-06 |
| TUCP_003848 | XLOC_168518 | ENSRNOT00000073105 | 0.953901228  | 1.52E-06 |
| TUCP_003848 | XLOC_168518 | ENSRNOT00000026496 | 0.965178418  | 3.80E-07 |
| TUCP_003848 | XLOC_168518 | ENSRNOT00000025683 | 0.956014444  | 1.20E-06 |
| TUCP_003848 | XLOC_168518 | ENSRNOT00000018695 | 0.95523431   | 1.31E-06 |
| TUCP_003848 | XLOC_168518 | ENSRNOT00000006307 | 0.960439247  | 7.14E-07 |
| TUCP_003848 | XLOC_168518 | ENSRNOT00000015890 | 0.964454444  | 4.21E-07 |
| TUCP_003848 | XLOC_168518 | ENSRNOT00000010952 | 0.950381808  | 2.18E-06 |
| TUCP_003848 | XLOC_168518 | ENSRNOT00000017889 | 0.966355776  | 3.21E-07 |
| TUCP_003848 | XLOC_168518 | ENSRNOT00000005693 | 0.950038112  | 2.25E-06 |
| TUCP_003848 | XLOC_168518 | ENSRNOT00000074435 | 0.967241859  | 2.81E-07 |

|             |             |                    |              |          |
|-------------|-------------|--------------------|--------------|----------|
| TUCP_003848 | XLOC_168518 | ENSRNOT00000012216 | 0.952525244  | 1.75E-06 |
| TUCP_003257 | XLOC_139692 | ENSRNOT00000091965 | 0.951323731  | 1.98E-06 |
| TUCP_003257 | XLOC_139692 | ENSRNOT00000034401 | 0.957433121  | 1.02E-06 |
| TUCP_003257 | XLOC_139692 | ENSRNOT00000009815 | -0.95142123  | 1.96E-06 |
| TUCP_003257 | XLOC_139692 | ENSRNOT00000035245 | 0.960013423  | 7.53E-07 |
| TUCP_003257 | XLOC_139692 | ENSRNOT00000077303 | 0.952812577  | 1.70E-06 |
| TUCP_003257 | XLOC_139692 | ENSRNOT00000078366 | -0.962511468 | 5.48E-07 |
| TUCP_003257 | XLOC_139692 | ENSRNOT00000024993 | 0.970678293  | 1.63E-07 |
| TUCP_003257 | XLOC_139692 | ENSRNOT00000042973 | 0.951051235  | 2.04E-06 |
| TUCP_003257 | XLOC_139692 | ENSRNOT00000037681 | 0.954883285  | 1.36E-06 |
| TUCP_003257 | XLOC_139692 | ENSRNOT00000079304 | 0.951658082  | 1.92E-06 |
| TUCP_003257 | XLOC_139692 | ENSRNOT00000002853 | 0.975109772  | 7.22E-08 |
| TUCP_003257 | XLOC_139692 | ENSRNOT00000073087 | 0.955054452  | 1.34E-06 |
| TUCP_003257 | XLOC_139692 | ENSRNOT00000079677 | 0.971906982  | 1.31E-07 |
| TUCP_002020 | XLOC_082204 | ENSRNOT00000007698 | 0.965096378  | 3.85E-07 |
| TUCP_002020 | XLOC_082204 | ENSRNOT00000084766 | -0.955690514 | 1.25E-06 |
| TUCP_002020 | XLOC_082204 | ENSRNOT00000010835 | -0.953739403 | 1.54E-06 |
| TUCP_002020 | XLOC_082204 | ENSRNOT00000020357 | -0.950492701 | 2.15E-06 |
| TUCP_002020 | XLOC_082204 | ENSRNOT00000075397 | -0.960801184 | 6.82E-07 |
| TUCP_002020 | XLOC_082204 | ENSRNOT00000007350 | -0.955192271 | 1.32E-06 |
| TUCP_002020 | XLOC_082204 | ENSRNOT00000015678 | 0.958748351  | 8.78E-07 |
| TUCP_002020 | XLOC_082204 | ENSRNOT00000013116 | 0.956397548  | 1.15E-06 |
| TUCP_002020 | XLOC_082204 | ENSRNOT00000086798 | 0.956855224  | 1.09E-06 |
| TUCP_002020 | XLOC_082204 | ENSRNOT00000013025 | 0.950915737  | 2.07E-06 |
| TUCP_002020 | XLOC_082204 | ENSRNOT00000009565 | 0.952770418  | 1.71E-06 |
| TUCP_002020 | XLOC_082204 | ENSRNOT00000049459 | 0.957786472  | 9.83E-07 |
| TUCP_002020 | XLOC_082204 | ENSRNOT00000014309 | 0.953373151  | 1.60E-06 |
| TUCP_002020 | XLOC_082204 | ENSRNOT00000001110 | 0.955905593  | 1.22E-06 |
| TUCP_002020 | XLOC_082204 | ENSRNOT00000055437 | 0.955577515  | 1.26E-06 |
| TUCP_002020 | XLOC_082204 | ENSRNOT00000001679 | -0.960570086 | 7.02E-07 |
| TUCP_002020 | XLOC_082204 | ENSRNOT00000040847 | 0.960648794  | 6.96E-07 |
| TUCP_002020 | XLOC_082204 | ENSRNOT00000013516 | -0.966758157 | 3.02E-07 |
| TUCP_002020 | XLOC_082204 | ENSRNOT00000087762 | -0.953263284 | 1.62E-06 |
| TUCP_002020 | XLOC_082204 | ENSRNOT00000023037 | -0.955224031 | 1.31E-06 |
| TUCP_002020 | XLOC_082204 | ENSRNOT00000017147 | -0.954521309 | 1.42E-06 |
| TUCP_002020 | XLOC_082204 | ENSRNOT00000020207 | -0.95276389  | 1.71E-06 |
| TUCP_002020 | XLOC_082204 | ENSRNOT00000083568 | -0.957916493 | 9.69E-07 |
| TUCP_002020 | XLOC_082204 | ENSRNOT00000073019 | -0.951675073 | 1.91E-06 |
| TUCP_002020 | XLOC_082204 | ENSRNOT00000065978 | -0.950984776 | 2.05E-06 |
| TUCP_002020 | XLOC_082204 | ENSRNOT00000077060 | -0.952848788 | 1.70E-06 |
| TUCP_002020 | XLOC_082204 | ENSRNOT00000030109 | -0.956889531 | 1.09E-06 |
| TUCP_002020 | XLOC_082204 | ENSRNOT00000024677 | -0.95526469  | 1.31E-06 |
| TUCP_002020 | XLOC_082204 | ENSRNOT00000037681 | 0.950277969  | 2.20E-06 |
| TUCP_002020 | XLOC_082204 | ENSRNOT00000093715 | 0.958371683  | 9.18E-07 |
| TUCP_002020 | XLOC_082204 | ENSRNOT00000091448 | 0.958604625  | 8.93E-07 |
| TUCP_002020 | XLOC_082204 | ENSRNOT00000068134 | -0.955550849 | 1.27E-06 |
| TUCP_002020 | XLOC_082204 | ENSRNOT00000046807 | 0.970146859  | 1.78E-07 |
| TUCP_002020 | XLOC_082204 | ENSRNOT00000047126 | 0.955994778  | 1.21E-06 |
| TUCP_002020 | XLOC_082204 | ENSRNOT00000001412 | -0.952126648 | 1.83E-06 |
| TUCP_002020 | XLOC_082204 | ENSRNOT00000005686 | 0.957849121  | 9.76E-07 |
| TUCP_002020 | XLOC_082204 | ENSRNOT00000072762 | 0.96933149   | 2.03E-07 |

|             |             |                    |              |          |
|-------------|-------------|--------------------|--------------|----------|
| TUCP_002020 | XL0C_082204 | ENSRNOT00000066708 | -0.955388882 | 1.29E-06 |
| TUCP_002020 | XL0C_082204 | ENSRNOT00000085465 | 0.955045733  | 1.34E-06 |
| TUCP_002020 | XL0C_082204 | ENSRNOT00000073860 | 0.956071632  | 1.20E-06 |
| TUCP_002020 | XL0C_082204 | ENSRNOT00000011832 | 0.972907447  | 1.10E-07 |
| TUCP_002020 | XL0C_082204 | ENSRNOT00000079414 | 0.954680652  | 1.40E-06 |
| TUCP_002020 | XL0C_082204 | ENSRNOT00000030074 | -0.96613757  | 3.31E-07 |
| TUCP_002020 | XL0C_082204 | ENSRNOT00000028089 | -0.96432009  | 4.29E-07 |
| TUCP_002020 | XL0C_082204 | ENSRNOT00000083968 | 0.952974334  | 1.67E-06 |
| TUCP_002020 | XL0C_082204 | ENSRNOT00000009150 | -0.952353375 | 1.78E-06 |
| TUCP_002020 | XL0C_082204 | ENSRNOT00000019688 | -0.959685842 | 7.84E-07 |
| TUCP_002020 | XL0C_082204 | ENSRNOT00000084709 | -0.960738892 | 6.88E-07 |
| TUCP_002020 | XL0C_082204 | ENSRNOT00000083967 | -0.95684835  | 1.10E-06 |
| TUCP_002020 | XL0C_082204 | ENSRNOT00000013864 | 0.953312037  | 1.62E-06 |
| TUCP_002020 | XL0C_082204 | ENSRNOT00000003265 | -0.952890136 | 1.69E-06 |
| TUCP_002020 | XL0C_082204 | ENSRNOT00000068452 | -0.959251698 | 8.26E-07 |
| TUCP_002020 | XL0C_082204 | ENSRNOT00000018122 | -0.958757855 | 8.77E-07 |
| TUCP_002020 | XL0C_082204 | ENSRNOT00000072118 | -0.968002901 | 2.50E-07 |
| TUCP_002020 | XL0C_082204 | ENSRNOT00000072357 | 0.951016351  | 2.05E-06 |
| TUCP_002020 | XL0C_082204 | ENSRNOT00000025913 | 0.958315808  | 9.24E-07 |
| TUCP_002020 | XL0C_082204 | ENSRNOT00000013067 | 0.951903654  | 1.87E-06 |
| TUCP_002020 | XL0C_082204 | ENSRNOT00000075843 | 0.971279404  | 1.47E-07 |
| TUCP_002020 | XL0C_082204 | ENSRNOT00000076230 | -0.957634038 | 1.00E-06 |
| TUCP_002020 | XL0C_082204 | ENSRNOT00000002313 | 0.950762318  | 2.10E-06 |
| TUCP_002020 | XL0C_082204 | ENSRNOT00000086260 | 0.958289925  | 9.27E-07 |
| TUCP_002020 | XL0C_082204 | ENSRNOT00000064667 | 0.972105098  | 1.27E-07 |
| TUCP_002020 | XL0C_082204 | ENSRNOT00000068381 | -0.960345691 | 7.22E-07 |
| TUCP_002020 | XL0C_082204 | ENSRNOT00000090461 | -0.951285743 | 1.99E-06 |
| TUCP_002020 | XL0C_082204 | ENSRNOT00000008256 | 0.962763357  | 5.30E-07 |
| TUCP_002020 | XL0C_082204 | ENSRNOT00000089980 | 0.960351224  | 7.22E-07 |
| TUCP_002020 | XL0C_082204 | ENSRNOT00000034883 | 0.97300978   | 1.08E-07 |
| TUCP_002020 | XL0C_082204 | ENSRNOT00000022190 | 0.954527811  | 1.42E-06 |
| TUCP_002020 | XL0C_082204 | ENSRNOT00000090853 | 0.958051314  | 9.53E-07 |
| TUCP_002020 | XL0C_082204 | ENSRNOT00000081077 | 0.974428924  | 8.25E-08 |
| TUCP_002020 | XL0C_082204 | ENSRNOT00000011880 | -0.962686907 | 5.35E-07 |
| TUCP_002020 | XL0C_082204 | ENSRNOT00000005073 | -0.95499056  | 1.28E-06 |
| TUCP_002020 | XL0C_082204 | ENSRNOT00000017624 | -0.958586014 | 8.95E-07 |
| TUCP_002020 | XL0C_082204 | ENSRNOT00000031261 | -0.960480413 | 7.10E-07 |
| TUCP_002020 | XL0C_082204 | ENSRNOT00000081725 | -0.969340405 | 2.03E-07 |
| TUCP_002020 | XL0C_082204 | ENSRNOT00000020383 | -0.951643597 | 1.92E-06 |
| TUCP_002020 | XL0C_082204 | ENSRNOT00000005459 | -0.966783903 | 3.01E-07 |
| TUCP_002020 | XL0C_082204 | ENSRNOT00000078366 | -0.954441512 | 1.43E-06 |
| TUCP_002020 | XL0C_082204 | ENSRNOT00000025222 | 0.968458631  | 2.33E-07 |
| TUCP_002020 | XL0C_082204 | ENSRNOT00000027917 | -0.951762133 | 1.90E-06 |
| TUCP_002020 | XL0C_082204 | ENSRNOT00000004290 | -0.953718705 | 1.55E-06 |
| TUCP_002020 | XL0C_082204 | ENSRNOT00000023876 | -0.950085574 | 2.24E-06 |
| TUCP_002020 | XL0C_082204 | ENSRNOT00000033359 | -0.957804763 | 9.81E-07 |
| TUCP_002020 | XL0C_082204 | ENSRNOT00000081110 | 0.953314925  | 1.61E-06 |
| TUCP_002020 | XL0C_082204 | ENSRNOT00000049285 | 0.954544091  | 1.42E-06 |
| TUCP_002020 | XL0C_082204 | ENSRNOT00000015239 | 0.953025911  | 1.66E-06 |
| TUCP_002020 | XL0C_082204 | ENSRNOT00000037955 | 0.977997764  | 3.91E-08 |
| TUCP_002020 | XL0C_082204 | ENSRNOT00000077146 | 0.957401887  | 1.03E-06 |



|             |             |                    |              |          |
|-------------|-------------|--------------------|--------------|----------|
| TUCP_002020 | XL0C_082204 | ENSRNOT00000030850 | -0.952530427 | 1.75E-06 |
| TUCP_002020 | XL0C_082204 | ENSRNOT00000075209 | 0.951107514  | 2.03E-06 |
| TUCP_002020 | XL0C_082204 | ENSRNOT00000058382 | -0.960461101 | 7.12E-07 |
| TUCP_002020 | XL0C_082204 | ENSRNOT00000025794 | 0.9552181    | 1.32E-06 |
| TUCP_002020 | XL0C_082204 | ENSRNOT00000058111 | 0.950624357  | 2.13E-06 |
| TUCP_002020 | XL0C_082204 | ENSRNOT00000085118 | -0.957838406 | 9.77E-07 |
| TUCP_002020 | XL0C_082204 | ENSRNOT00000017765 | -0.965283401 | 3.75E-07 |
| TUCP_002020 | XL0C_082204 | ENSRNOT00000017761 | -0.952100549 | 1.83E-06 |
| TUCP_002020 | XL0C_082204 | ENSRNOT00000091282 | 0.96658242   | 3.10E-07 |
| TUCP_002020 | XL0C_082204 | ENSRNOT00000009994 | 0.95566593   | 1.25E-06 |
| TUCP_002020 | XL0C_082204 | ENSRNOT00000077367 | 0.95458109   | 1.41E-06 |
| TUCP_002020 | XL0C_082204 | ENSRNOT00000005405 | -0.950944261 | 2.06E-06 |
| TUCP_002020 | XL0C_082204 | ENSRNOT00000012924 | 0.981231506  | 1.78E-08 |
| TUCP_002020 | XL0C_082204 | ENSRNOT00000039102 | -0.953163936 | 1.64E-06 |
| TUCP_002020 | XL0C_082204 | ENSRNOT00000009742 | 0.962932577  | 5.18E-07 |
| TUCP_002020 | XL0C_082204 | ENSRNOT00000013632 | -0.961088739 | 6.58E-07 |
| TUCP_002020 | XL0C_082204 | ENSRNOT00000078906 | 0.952799379  | 1.70E-06 |
| TUCP_002020 | XL0C_082204 | ENSRNOT00000038652 | 0.955868252  | 1.22E-06 |
| TUCP_002020 | XL0C_082204 | ENSRNOT00000025460 | -0.965273894 | 3.75E-07 |
| TUCP_002020 | XL0C_082204 | ENSRNOT00000061345 | 0.956031111  | 1.20E-06 |
| TUCP_002020 | XL0C_082204 | ENSRNOT00000005143 | -0.979159606 | 2.99E-08 |
| TUCP_002020 | XL0C_082204 | ENSRNOT00000016568 | -0.959717168 | 7.81E-07 |
| TUCP_002020 | XL0C_082204 | ENSRNOT00000021211 | 0.972254008  | 1.24E-07 |
| TUCP_002020 | XL0C_082204 | ENSRNOT00000015223 | -0.950204989 | 2.22E-06 |
| TUCP_002020 | XL0C_082204 | ENSRNOT00000028907 | -0.965960924 | 3.40E-07 |
| TUCP_002020 | XL0C_082204 | ENSRNOT00000037809 | 0.965865208  | 3.45E-07 |
| TUCP_002020 | XL0C_082204 | ENSRNOT00000078793 | -0.954651562 | 1.40E-06 |
| TUCP_002020 | XL0C_082204 | ENSRNOT00000089086 | 0.969609613  | 1.94E-07 |
| TUCP_002020 | XL0C_082204 | ENSRNOT00000036613 | 0.957876318  | 9.73E-07 |
| TUCP_002020 | XL0C_082204 | ENSRNOT00000024011 | -0.956722201 | 1.11E-06 |
| TUCP_002020 | XL0C_082204 | ENSRNOT00000016677 | 0.959069713  | 8.45E-07 |
| TUCP_002020 | XL0C_082204 | ENSRNOT00000092876 | 0.979417244  | 2.81E-08 |
| TUCP_002020 | XL0C_082204 | ENSRNOT00000024253 | -0.952701497 | 1.72E-06 |
| TUCP_002021 | XL0C_082210 | ENSRNOT00000032248 | -0.950686716 | 2.11E-06 |
| TUCP_002021 | XL0C_082210 | ENSRNOT00000074583 | 0.959057189  | 8.46E-07 |
| TUCP_002021 | XL0C_082210 | ENSRNOT00000003001 | 0.957105305  | 1.06E-06 |
| TUCP_002021 | XL0C_082210 | ENSRNOT00000084766 | -0.951740131 | 1.90E-06 |
| TUCP_002021 | XL0C_082210 | ENSRNOT00000013191 | 0.95423007   | 1.46E-06 |
| TUCP_002021 | XL0C_082210 | ENSRNOT00000010835 | -0.965871089 | 3.44E-07 |
| TUCP_002021 | XL0C_082210 | ENSRNOT00000081123 | -0.980591204 | 2.10E-08 |
| TUCP_002021 | XL0C_082210 | ENSRNOT00000091282 | 0.97959529   | 2.69E-08 |
| TUCP_002021 | XL0C_082210 | ENSRNOT00000065103 | 0.956382875  | 1.16E-06 |
| TUCP_002021 | XL0C_082210 | ENSRNOT00000004956 | -0.966997318 | 2.92E-07 |
| TUCP_002021 | XL0C_082210 | ENSRNOT00000028066 | 0.960425877  | 7.15E-07 |
| TUCP_002021 | XL0C_082210 | ENSRNOT00000001412 | -0.974584657 | 8.00E-08 |
| TUCP_002021 | XL0C_082210 | ENSRNOT00000002443 | -0.955974569 | 1.21E-06 |
| TUCP_002021 | XL0C_082210 | ENSRNOT00000010056 | -0.952488314 | 1.76E-06 |
| TUCP_002021 | XL0C_082210 | ENSRNOT00000034264 | -0.961804946 | 6.00E-07 |
| TUCP_002021 | XL0C_082210 | ENSRNOT00000021717 | -0.950249756 | 2.21E-06 |
| TUCP_002021 | XL0C_082210 | ENSRNOT00000003219 | -0.960199364 | 7.36E-07 |
| TUCP_002021 | XL0C_082210 | ENSRNOT00000004713 | 0.955143793  | 1.33E-06 |

|             |             |                    |              |          |
|-------------|-------------|--------------------|--------------|----------|
| TUCP_002021 | XL0C_082210 | ENSRNOT00000074286 | -0.954286063 | 1.46E-06 |
| TUCP_002021 | XL0C_082210 | ENSRNOT00000034883 | 0.952359945  | 1.78E-06 |
| TUCP_002021 | XL0C_082210 | ENSRNOT00000012963 | 0.950684549  | 2.11E-06 |
| TUCP_002021 | XL0C_082210 | ENSRNOT00000077479 | 0.965118077  | 3.84E-07 |
| TUCP_002021 | XL0C_082210 | ENSRNOT00000006111 | 0.966574575  | 3.11E-07 |
| TUCP_002021 | XL0C_082210 | ENSRNOT00000077856 | 0.964770278  | 4.03E-07 |
| TUCP_002021 | XL0C_082210 | ENSRNOT00000038178 | 0.966466017  | 3.16E-07 |
| TUCP_002021 | XL0C_082210 | ENSRNOT00000014560 | 0.952870429  | 1.69E-06 |
| TUCP_002021 | XL0C_082210 | ENSRNOT00000021400 | 0.956436162  | 1.15E-06 |
| TUCP_002021 | XL0C_082210 | ENSRNOT00000073239 | 0.960155738  | 7.40E-07 |
| TUCP_002021 | XL0C_082210 | ENSRNOT00000012314 | 0.96767644   | 2.63E-07 |
| TUCP_002021 | XL0C_082210 | ENSRNOT00000064735 | -0.962316145 | 5.62E-07 |
| TUCP_002021 | XL0C_082210 | ENSRNOT00000016677 | 0.962244542  | 5.67E-07 |
| TUCP_002021 | XL0C_082210 | ENSRNOT00000025222 | 0.962398071  | 5.56E-07 |
| TUCP_002021 | XL0C_082210 | ENSRNOT00000028089 | -0.970727481 | 1.61E-07 |
| TUCP_002021 | XL0C_082210 | ENSRNOT00000055062 | 0.959709152  | 7.81E-07 |
| TUCP_002021 | XL0C_082210 | ENSRNOT00000006373 | -0.969371013 | 2.02E-07 |
| TUCP_002021 | XL0C_082210 | ENSRNOT00000078856 | 0.955122603  | 1.33E-06 |
| TUCP_002021 | XL0C_082210 | ENSRNOT00000004290 | -0.951678139 | 1.91E-06 |
| TUCP_002021 | XL0C_082210 | ENSRNOT00000031555 | 0.959135753  | 8.38E-07 |
| TUCP_002021 | XL0C_082210 | ENSRNOT00000008104 | -0.95051119  | 2.15E-06 |
| TUCP_002021 | XL0C_082210 | ENSRNOT00000076467 | 0.956568817  | 1.13E-06 |
| TUCP_002021 | XL0C_082210 | ENSRNOT00000085231 | -0.958498841 | 9.04E-07 |
| TUCP_002021 | XL0C_082210 | ENSRNOT00000014780 | 0.950329136  | 2.19E-06 |
| TUCP_002021 | XL0C_082210 | ENSRNOT00000074212 | -0.957620994 | 1.00E-06 |
| TUCP_002021 | XL0C_082210 | ENSRNOT00000013864 | 0.953672151  | 1.55E-06 |
| TUCP_002021 | XL0C_082210 | ENSRNOT00000025252 | 0.968990203  | 2.14E-07 |
| TUCP_002021 | XL0C_082210 | ENSRNOT00000072031 | 0.951066893  | 2.03E-06 |
| TUCP_002021 | XL0C_082210 | ENSRNOT00000055442 | -0.950374795 | 2.18E-06 |
| TUCP_002021 | XL0C_082210 | ENSRNOT00000040847 | 0.975288492  | 6.96E-08 |
| TUCP_002021 | XL0C_082210 | ENSRNOT00000044452 | 0.965548056  | 3.61E-07 |
| TUCP_002021 | XL0C_082210 | ENSRNOT00000022029 | -0.969981018 | 1.83E-07 |
| TUCP_002021 | XL0C_082210 | ENSRNOT00000079644 | 0.963803454  | 4.60E-07 |
| TUCP_002021 | XL0C_082210 | ENSRNOT00000066776 | 0.982491739  | 1.26E-08 |
| TUCP_002021 | XL0C_082210 | ENSRNOT00000050350 | 0.974490892  | 8.15E-08 |
| TUCP_002021 | XL0C_082210 | ENSRNOT00000080677 | 0.951861953  | 1.88E-06 |
| TUCP_002021 | XL0C_082210 | ENSRNOT00000091866 | 0.95624749   | 1.17E-06 |
| TUCP_002021 | XL0C_082210 | ENSRNOT00000073019 | -0.951532542 | 1.94E-06 |
| TUCP_002021 | XL0C_082210 | ENSRNOT00000015318 | 0.959300511  | 8.21E-07 |
| TUCP_002021 | XL0C_082210 | ENSRNOT00000039215 | 0.954229469  | 1.46E-06 |
| TUCP_002021 | XL0C_082210 | ENSRNOT00000013058 | -0.978014415 | 3.90E-08 |
| TUCP_002021 | XL0C_082210 | ENSRNOT00000026235 | 0.950145896  | 2.23E-06 |
| TUCP_002021 | XL0C_082210 | ENSRNOT00000091050 | 0.953683722  | 1.55E-06 |
| TUCP_002021 | XL0C_082210 | ENSRNOT00000009551 | -0.964230743 | 4.34E-07 |
| TUCP_002021 | XL0C_082210 | ENSRNOT00000064849 | 0.951574564  | 1.93E-06 |
| TUCP_002021 | XL0C_082210 | ENSRNOT00000092068 | -0.955605908 | 1.26E-06 |
| TUCP_002021 | XL0C_082210 | ENSRNOT00000073135 | -0.951025755 | 2.04E-06 |
| TUCP_002021 | XL0C_082210 | ENSRNOT00000009319 | 0.955274544  | 1.31E-06 |
| TUCP_002021 | XL0C_082210 | ENSRNOT00000007738 | 0.952356717  | 1.78E-06 |
| TUCP_002021 | XL0C_082210 | ENSRNOT00000000886 | -0.962605426 | 5.41E-07 |
| TUCP_002021 | XL0C_082210 | ENSRNOT00000050415 | 0.963541719  | 4.77E-07 |

|             |             |                    |              |          |
|-------------|-------------|--------------------|--------------|----------|
| TUCP_002021 | XLOC_082210 | ENSRNOT00000086775 | 0.960666903  | 6.94E-07 |
| TUCP_002021 | XLOC_082210 | ENSRNOT00000028130 | 0.95413848   | 1.48E-06 |
| TUCP_002021 | XLOC_082210 | ENSRNOT00000064667 | 0.959299781  | 8.21E-07 |
| TUCP_002021 | XLOC_082210 | ENSRNOT00000056022 | -0.973291165 | 1.02E-07 |
| TUCP_002021 | XLOC_082210 | ENSRNOT00000038066 | -0.951459422 | 1.96E-06 |
| TUCP_002021 | XLOC_082210 | ENSRNOT00000007889 | 0.958221406  | 9.34E-07 |
| TUCP_002021 | XLOC_082210 | ENSRNOT00000077803 | -0.975683432 | 6.43E-08 |
| TUCP_002021 | XLOC_082210 | ENSRNOT00000029510 | -0.981234336 | 1.78E-08 |
| TUCP_002021 | XLOC_082210 | ENSRNOT00000019473 | 0.952486332  | 1.76E-06 |
| TUCP_002021 | XLOC_082210 | ENSRNOT00000090774 | 0.964386255  | 4.25E-07 |
| TUCP_002023 | XLOC_082236 | ENSRNOT00000046273 | 0.950732648  | 2.10E-06 |
| TUCP_002023 | XLOC_082236 | ENSRNOT00000089724 | 0.956580378  | 1.13E-06 |
| TUCP_002385 | XLOC_100792 | ENSRNOT00000076387 | 0.951554417  | 1.94E-06 |
| TUCP_002385 | XLOC_100792 | ENSRNOT00000025983 | 0.967162437  | 2.85E-07 |
| TUCP_002385 | XLOC_100792 | ENSRNOT00000002158 | 0.962211021  | 5.70E-07 |
| TUCP_002385 | XLOC_100792 | ENSRNOT00000090451 | -0.958375017 | 9.18E-07 |
| TUCP_002385 | XLOC_100792 | ENSRNOT00000058362 | 0.95625648   | 1.17E-06 |
| TUCP_002385 | XLOC_100792 | ENSRNOT00000030991 | 0.963644058  | 4.71E-07 |
| TUCP_002385 | XLOC_100792 | ENSRNOT00000011350 | 0.957583474  | 1.01E-06 |
| TUCP_002385 | XLOC_100792 | ENSRNOT00000035286 | 0.953276173  | 1.62E-06 |
| TUCP_002385 | XLOC_100792 | ENSRNOT00000013050 | -0.959876325 | 7.66E-07 |
| TUCP_002385 | XLOC_100792 | ENSRNOT00000077518 | -0.959424119 | 8.09E-07 |
| TUCP_002385 | XLOC_100792 | ENSRNOT00000016333 | -0.967053363 | 2.89E-07 |
| TUCP_002385 | XLOC_100792 | ENSRNOT00000027944 | 0.966483421  | 3.15E-07 |
| TUCP_002385 | XLOC_100792 | ENSRNOT00000015612 | 0.962187016  | 5.71E-07 |
| TUCP_002385 | XLOC_100792 | ENSRNOT00000024060 | 0.950770899  | 2.10E-06 |
| TUCP_002385 | XLOC_100792 | ENSRNOT00000010927 | 0.951837249  | 1.88E-06 |
| TUCP_002385 | XLOC_100792 | ENSRNOT00000010728 | 0.964303941  | 4.30E-07 |
| TUCP_002385 | XLOC_100792 | ENSRNOT00000046058 | 0.953615671  | 1.56E-06 |
| TUCP_002385 | XLOC_100792 | ENSRNOT00000005659 | 0.95859047   | 8.94E-07 |
| TUCP_002385 | XLOC_100792 | ENSRNOT00000015116 | 0.9520369    | 1.84E-06 |
| TUCP_002385 | XLOC_100792 | ENSRNOT00000028483 | 0.979478085  | 2.77E-08 |
| TUCP_002385 | XLOC_100792 | ENSRNOT00000046232 | -0.958511187 | 9.03E-07 |
| TUCP_002385 | XLOC_100792 | ENSRNOT00000071386 | -0.967768117 | 2.60E-07 |
| TUCP_002385 | XLOC_100792 | ENSRNOT00000008736 | -0.952048361 | 1.84E-06 |
| TUCP_002385 | XLOC_100792 | ENSRNOT00000010373 | -0.983113143 | 1.05E-08 |
| TUCP_002385 | XLOC_100792 | ENSRNOT00000080800 | 0.968939938  | 2.16E-07 |
| TUCP_002385 | XLOC_100792 | ENSRNOT00000085519 | 0.959287403  | 8.23E-07 |
| TUCP_002385 | XLOC_100792 | ENSRNOT00000036187 | -0.969081605 | 2.11E-07 |
| TUCP_002385 | XLOC_100792 | ENSRNOT00000038543 | 0.976124313  | 5.87E-08 |
| TUCP_002385 | XLOC_100792 | ENSRNOT00000027537 | 0.96399135   | 4.49E-07 |
| TUCP_002385 | XLOC_100792 | ENSRNOT00000010218 | 0.959458665  | 8.06E-07 |
| TUCP_002385 | XLOC_100792 | ENSRNOT00000083369 | 0.957003309  | 1.08E-06 |
| TUCP_002385 | XLOC_100792 | ENSRNOT00000076516 | 0.951032719  | 2.04E-06 |
| TUCP_002385 | XLOC_100792 | ENSRNOT00000016948 | -0.961442087 | 6.29E-07 |
| TUCP_002385 | XLOC_100792 | ENSRNOT00000018533 | 0.966867931  | 2.97E-07 |
| TUCP_002385 | XLOC_100792 | ENSRNOT00000023330 | 0.960196721  | 7.36E-07 |
| TUCP_002385 | XLOC_100792 | ENSRNOT00000006570 | -0.951592023 | 1.93E-06 |
| TUCP_002385 | XLOC_100792 | ENSRNOT00000067281 | 0.96655423   | 3.12E-07 |
| TUCP_002385 | XLOC_100792 | ENSRNOT00000016325 | -0.971694636 | 1.36E-07 |
| TUCP_002385 | XLOC_100792 | ENSRNOT00000079996 | 0.950322813  | 2.19E-06 |

|             |             |                     |              |          |
|-------------|-------------|---------------------|--------------|----------|
| TUCP_002385 | XLOC_100792 | ENSRNOT00000018475  | -0.950184724 | 2.22E-06 |
| TUCP_002385 | XLOC_100792 | ENSRNOT00000015635  | -0.963707152 | 4.67E-07 |
| TUCP_002385 | XLOC_100792 | ENSRNOT00000026186  | 0.970827711  | 1.58E-07 |
| TUCP_002385 | XLOC_100792 | ENSRNOT00000003834  | -0.965929975 | 3.41E-07 |
| TUCP_002385 | XLOC_100792 | ENSRNOT00000059167  | 0.968666069  | 2.26E-07 |
| TUCP_002385 | XLOC_100792 | ENSRNOT00000043953  | 0.95342948   | 1.60E-06 |
| TUCP_002385 | XLOC_100792 | ENSRNOT00000048029  | 0.952961815  | 1.68E-06 |
| TUCP_002385 | XLOC_100792 | ENSRNOT00000067486  | -0.963284089 | 4.94E-07 |
| TUCP_002385 | XLOC_100792 | ENSRNOT00000052075  | 0.95041379   | 2.17E-06 |
| TUCP_002385 | XLOC_100792 | ENSRNOT00000011325  | 0.97459166   | 7.99E-08 |
| TUCP_002385 | XLOC_100792 | ENSRNOT00000004762  | 0.966823321  | 2.99E-07 |
| TUCP_002385 | XLOC_100792 | ENSRNOT00000005876  | 0.967880032  | 2.55E-07 |
| TUCP_003250 | XLOC_139233 | ENSRNOT000000082043 | 0.998965531  | 9.31E-15 |
| TUCP_003250 | XLOC_139233 | ENSRNOT00000090080  | 0.970514074  | 1.67E-07 |
| TUCP_003250 | XLOC_139233 | ENSRNOT00000068444  | 1            | 0        |
| TUCP_003250 | XLOC_139233 | ENSRNOT00000081370  | 0.999740797  | 9.21E-18 |
| TUCP_003250 | XLOC_139233 | ENSRNOT00000078645  | 0.989717078  | 8.90E-10 |
| TUCP_003250 | XLOC_139233 | ENSRNOT00000075987  | 0.987945283  | 1.96E-09 |
| TUCP_003250 | XLOC_139233 | ENSRNOT00000074990  | 1            | 0        |
| TUCP_003250 | XLOC_139233 | ENSRNOT00000087323  | 0.995029331  | 2.37E-11 |
| TUCP_003250 | XLOC_139233 | ENSRNOT00000074930  | 1            | 0        |
| TUCP_003250 | XLOC_139233 | ENSRNOT00000080575  | 0.999929267  | 1.39E-20 |
| TUCP_003250 | XLOC_139233 | ENSRNOT00000057761  | 0.982981445  | 1.09E-08 |
| TUCP_003250 | XLOC_139233 | ENSRNOT00000078369  | 0.993028032  | 1.28E-10 |
| TUCP_003250 | XLOC_139233 | ENSRNOT00000092982  | 1            | 4.25E-78 |
| TUCP_003250 | XLOC_139233 | ENSRNOT00000088367  | 1            | 0        |
| TUCP_003250 | XLOC_139233 | ENSRNOT00000061874  | 0.968405099  | 2.35E-07 |
| TUCP_003250 | XLOC_139233 | ENSRNOT00000077789  | 0.99346224   | 9.30E-11 |
| TUCP_003250 | XLOC_139233 | ENSRNOT00000081996  | 1            | 0        |
| TUCP_003250 | XLOC_139233 | ENSRNOT00000022280  | 0.982176915  | 1.37E-08 |
| TUCP_003250 | XLOC_139233 | ENSRNOT00000082058  | 1            | 0        |
| TUCP_003250 | XLOC_139233 | ENSRNOT00000088905  | 1            | 0        |
| TUCP_003250 | XLOC_139233 | ENSRNOT00000086831  | 1            | 0        |
| TUCP_003250 | XLOC_139233 | ENSRNOT00000045099  | 1            | 1.33E-79 |
| TUCP_003250 | XLOC_139233 | ENSRNOT00000086745  | 0.978585655  | 3.42E-08 |
| TUCP_003250 | XLOC_139233 | ENSRNOT00000085849  | 0.988270765  | 1.71E-09 |
| TUCP_003250 | XLOC_139233 | ENSRNOT00000086397  | 0.957188178  | 1.05E-06 |
| TUCP_003250 | XLOC_139233 | ENSRNOT00000079606  | 0.960472013  | 7.11E-07 |
| TUCP_003250 | XLOC_139233 | ENSRNOT00000090207  | 0.953487741  | 1.59E-06 |
| TUCP_003250 | XLOC_139233 | ENSRNOT00000087025  | 1            | 0        |
| TUCP_003250 | XLOC_139233 | ENSRNOT00000019853  | 1            | 0        |
| TUCP_003250 | XLOC_139233 | ENSRNOT00000073853  | 0.989715487  | 8.91E-10 |
| TUCP_003250 | XLOC_139233 | ENSRNOT00000065912  | 0.974234118  | 8.57E-08 |
| TUCP_003250 | XLOC_139233 | ENSRNOT00000073828  | 0.971647353  | 1.38E-07 |
| TUCP_003250 | XLOC_139233 | ENSRNOT00000078683  | 0.966682958  | 3.06E-07 |
| TUCP_003250 | XLOC_139233 | ENSRNOT00000093083  | 0.999140292  | 3.69E-15 |
| TUCP_002381 | XLOC_100545 | ENSRNOT00000081570  | 0.962960204  | 5.16E-07 |
| TUCP_002381 | XLOC_100545 | ENSRNOT00000091652  | 0.998190179  | 1.52E-13 |
| TUCP_002381 | XLOC_100545 | ENSRNOT00000036564  | 0.97233249   | 1.22E-07 |
| TUCP_002381 | XLOC_100545 | ENSRNOT00000000109  | 0.962221448  | 5.69E-07 |
| TUCP_002381 | XLOC_100545 | ENSRNOT00000080865  | 0.999999988  | 1.70E-39 |

|             |             |                    |              |          |
|-------------|-------------|--------------------|--------------|----------|
| TUCP_002381 | XLOC_100545 | ENSRNOT00000073534 | 0.995807447  | 1.01E-11 |
| TUCP_002381 | XLOC_100545 | ENSRNOT00000012161 | 0.987548242  | 2.31E-09 |
| TUCP_002381 | XLOC_100545 | ENSRNOT00000078707 | 0.960065922  | 7.48E-07 |
| TUCP_002381 | XLOC_100545 | ENSRNOT00000087758 | 0.96877092   | 2.22E-07 |
| TUCP_002381 | XLOC_100545 | ENSRNOT00000049832 | 0.969052752  | 2.12E-07 |
| TUCP_002381 | XLOC_100545 | ENSRNOT00000093019 | 0.999999988  | 1.70E-39 |
| TUCP_002381 | XLOC_100545 | ENSRNOT00000024825 | 0.980466361  | 2.17E-08 |
| TUCP_002381 | XLOC_100545 | ENSRNOT00000059266 | 0.960328024  | 7.24E-07 |
| TUCP_002381 | XLOC_100545 | ENSRNOT00000072734 | 0.96504732   | 3.87E-07 |
| TUCP_002381 | XLOC_100545 | ENSRNOT00000085908 | 0.99665048   | 3.30E-12 |
| TUCP_002381 | XLOC_100545 | ENSRNOT00000046744 | 0.999999988  | 1.70E-39 |
| TUCP_002381 | XLOC_100545 | ENSRNOT00000076429 | 0.999999988  | 1.70E-39 |
| TUCP_002381 | XLOC_100545 | ENSRNOT00000084667 | 0.999660194  | 3.57E-17 |
| TUCP_002381 | XLOC_100545 | ENSRNOT00000055412 | 0.999999988  | 1.70E-39 |
| TUCP_002381 | XLOC_100545 | ENSRNOT00000093201 | 0.99970153   | 1.86E-17 |
| TUCP_002381 | XLOC_100545 | ENSRNOT00000072724 | 0.999999988  | 1.70E-39 |
| TUCP_002381 | XLOC_100545 | ENSRNOT00000090323 | 0.95607154   | 1.20E-06 |
| TUCP_002381 | XLOC_100545 | ENSRNOT00000082760 | 0.98631871   | 3.69E-09 |
| TUCP_002381 | XLOC_100545 | ENSRNOT00000066017 | 0.989784608  | 8.61E-10 |
| TUCP_002381 | XLOC_100545 | ENSRNOT00000073148 | 0.985715607  | 4.57E-09 |
| TUCP_002381 | XLOC_100545 | ENSRNOT00000077462 | 0.9600939    | 7.45E-07 |
| TUCP_002381 | XLOC_100545 | ENSRNOT00000084375 | 0.999999988  | 1.70E-39 |
| TUCP_002381 | XLOC_100545 | ENSRNOT00000085447 | 0.998401586  | 8.19E-14 |
| TUCP_002381 | XLOC_100545 | ENSRNOT0000006249  | 0.966483629  | 3.15E-07 |
| TUCP_002381 | XLOC_100545 | ENSRNOT00000087073 | 0.952478795  | 1.76E-06 |
| TUCP_002381 | XLOC_100545 | ENSRNOT00000042369 | 0.995656737  | 1.21E-11 |
| TUCP_002381 | XLOC_100545 | ENSRNOT00000086554 | 0.999999988  | 1.70E-39 |
| TUCP_002381 | XLOC_100545 | ENSRNOT00000054858 | 0.985254966  | 5.36E-09 |
| TUCP_002381 | XLOC_100545 | ENSRNOT00000047921 | 0.999999988  | 1.70E-39 |
| TUCP_002381 | XLOC_100545 | ENSRNOT00000064261 | 0.99997737   | 4.67E-23 |
| TUCP_002381 | XLOC_100545 | ENSRNOT00000086660 | 0.999206928  | 2.47E-15 |
| TUCP_002381 | XLOC_100545 | ENSRNOT00000080933 | 0.967346422  | 2.77E-07 |
| TUCP_002381 | XLOC_100545 | ENSRNOT00000083977 | 0.999999988  | 1.70E-39 |
| TUCP_002381 | XLOC_100545 | ENSRNOT00000092933 | 0.999999988  | 1.70E-39 |
| TUCP_002381 | XLOC_100545 | ENSRNOT0000009061  | 0.953296883  | 1.62E-06 |
| TUCP_002381 | XLOC_100545 | ENSRNOT00000041281 | 0.98783494   | 2.06E-09 |
| TUCP_002029 | XLOC_082532 | ENSRNOT00000080706 | 0.978217633  | 3.72E-08 |
| TUCP_002382 | XLOC_100546 | ENSRNOT00000001215 | 0.953293939  | 1.62E-06 |
| TUCP_002382 | XLOC_100546 | ENSRNOT00000020297 | 0.954652439  | 1.40E-06 |
| TUCP_002382 | XLOC_100546 | ENSRNOT00000090621 | 0.959053289  | 8.46E-07 |
| TUCP_002382 | XLOC_100546 | ENSRNOT00000006460 | 0.966481414  | 3.15E-07 |
| TUCP_002382 | XLOC_100546 | ENSRNOT00000075397 | 0.967338875  | 2.77E-07 |
| TUCP_002382 | XLOC_100546 | ENSRNOT0000007350  | 0.954948137  | 1.35E-06 |
| TUCP_002382 | XLOC_100546 | ENSRNOT00000032926 | -0.950911367 | 2.07E-06 |
| TUCP_002382 | XLOC_100546 | ENSRNOT00000009080 | -0.957371749 | 1.03E-06 |
| TUCP_002382 | XLOC_100546 | ENSRNOT00000063930 | -0.95777046  | 9.85E-07 |
| TUCP_002382 | XLOC_100546 | ENSRNOT00000046215 | -0.956175164 | 1.18E-06 |
| TUCP_002382 | XLOC_100546 | ENSRNOT00000068353 | 0.964449976  | 4.21E-07 |
| TUCP_002382 | XLOC_100546 | ENSRNOT00000082914 | 0.953633099  | 1.56E-06 |
| TUCP_002382 | XLOC_100546 | ENSRNOT00000021858 | 0.950421672  | 2.17E-06 |
| TUCP_002382 | XLOC_100546 | ENSRNOT0000001855  | 0.97273201   | 1.13E-07 |

|             |             |                    |              |          |
|-------------|-------------|--------------------|--------------|----------|
| TUCP_002382 | XLOC_100546 | ENSRNOT00000033437 | 0.952893474  | 1.69E-06 |
| TUCP_002382 | XLOC_100546 | ENSRNOT00000001691 | 0.962734323  | 5.32E-07 |
| TUCP_002382 | XLOC_100546 | ENSRNOT00000089319 | 0.954276121  | 1.46E-06 |
| TUCP_002382 | XLOC_100546 | ENSRNOT00000079138 | 0.958080427  | 9.50E-07 |
| TUCP_002382 | XLOC_100546 | ENSRNOT00000016485 | 0.95024207   | 2.21E-06 |
| TUCP_002382 | XLOC_100546 | ENSRNOT00000084567 | 0.958914885  | 8.60E-07 |
| TUCP_002382 | XLOC_100546 | ENSRNOT00000074023 | 0.969887015  | 1.85E-07 |
| TUCP_002382 | XLOC_100546 | ENSRNOT00000008361 | 0.961126354  | 6.55E-07 |
| TUCP_002382 | XLOC_100546 | ENSRNOT00000025309 | 0.950249346  | 2.21E-06 |
| TUCP_002382 | XLOC_100546 | ENSRNOT00000025966 | 0.969224086  | 2.06E-07 |
| TUCP_002382 | XLOC_100546 | ENSRNOT00000042638 | 0.972874186  | 1.11E-07 |
| TUCP_002382 | XLOC_100546 | ENSRNOT00000045926 | 0.958481817  | 9.06E-07 |
| TUCP_002382 | XLOC_100546 | ENSRNOT00000006752 | 0.951328773  | 1.98E-06 |
| TUCP_002382 | XLOC_100546 | ENSRNOT00000010419 | 0.951478034  | 1.95E-06 |
| TUCP_002382 | XLOC_100546 | ENSRNOT00000065076 | 0.970119695  | 1.78E-07 |
| TUCP_002382 | XLOC_100546 | ENSRNOT00000054685 | 0.962634667  | 5.39E-07 |
| TUCP_002382 | XLOC_100546 | ENSRNOT00000091399 | 0.96002468   | 7.52E-07 |
| TUCP_002382 | XLOC_100546 | ENSRNOT00000079742 | 0.960959132  | 6.69E-07 |
| TUCP_002382 | XLOC_100546 | ENSRNOT00000073370 | 0.956560661  | 1.13E-06 |
| TUCP_002382 | XLOC_100546 | ENSRNOT00000083568 | 0.976487577  | 5.44E-08 |
| TUCP_002382 | XLOC_100546 | ENSRNOT00000026141 | 0.950299616  | 2.20E-06 |
| TUCP_002382 | XLOC_100546 | ENSRNOT00000065978 | 0.963438557  | 4.84E-07 |
| TUCP_002382 | XLOC_100546 | ENSRNOT00000075480 | -0.958400273 | 9.15E-07 |
| TUCP_002382 | XLOC_100546 | ENSRNOT00000039177 | -0.952185627 | 1.82E-06 |
| TUCP_002382 | XLOC_100546 | ENSRNOT00000020051 | 0.959942826  | 7.59E-07 |
| TUCP_002382 | XLOC_100546 | ENSRNOT00000064643 | 0.967823565  | 2.57E-07 |
| TUCP_002382 | XLOC_100546 | ENSRNOT00000027760 | 0.973286373  | 1.02E-07 |
| TUCP_002382 | XLOC_100546 | ENSRNOT00000024402 | 0.959990848  | 7.55E-07 |
| TUCP_002382 | XLOC_100546 | ENSRNOT00000065871 | 0.96501796   | 3.89E-07 |
| TUCP_002382 | XLOC_100546 | ENSRNOT00000089933 | 0.971313504  | 1.46E-07 |
| TUCP_002382 | XLOC_100546 | ENSRNOT00000056100 | -0.963976986 | 4.50E-07 |
| TUCP_002382 | XLOC_100546 | ENSRNOT00000003391 | 0.962967692  | 5.15E-07 |
| TUCP_002382 | XLOC_100546 | ENSRNOT00000067554 | 0.963116836  | 5.05E-07 |
| TUCP_002382 | XLOC_100546 | ENSRNOT00000000469 | 0.957921217  | 9.68E-07 |
| TUCP_002382 | XLOC_100546 | ENSRNOT00000061253 | 0.957448919  | 1.02E-06 |
| TUCP_002382 | XLOC_100546 | ENSRNOT00000081226 | 0.95439397   | 1.44E-06 |
| TUCP_002382 | XLOC_100546 | ENSRNOT00000065045 | 0.963688144  | 4.68E-07 |
| TUCP_002382 | XLOC_100546 | ENSRNOT00000005686 | -0.955214499 | 1.32E-06 |
| TUCP_002382 | XLOC_100546 | ENSRNOT00000018634 | -0.961502836 | 6.24E-07 |
| TUCP_002382 | XLOC_100546 | ENSRNOT00000005297 | 0.95033267   | 2.19E-06 |
| TUCP_002382 | XLOC_100546 | ENSRNOT00000000048 | 0.963507642  | 4.79E-07 |
| TUCP_002382 | XLOC_100546 | ENSRNOT00000011832 | -0.966436155 | 3.17E-07 |
| TUCP_002382 | XLOC_100546 | ENSRNOT00000073643 | -0.971662958 | 1.37E-07 |
| TUCP_002382 | XLOC_100546 | ENSRNOT00000037133 | 0.964912747  | 3.95E-07 |
| TUCP_002382 | XLOC_100546 | ENSRNOT00000009150 | 0.950773735  | 2.10E-06 |
| TUCP_002382 | XLOC_100546 | ENSRNOT00000084709 | 0.95734554   | 1.04E-06 |
| TUCP_002382 | XLOC_100546 | ENSRNOT00000090912 | 0.953602033  | 1.57E-06 |
| TUCP_002382 | XLOC_100546 | ENSRNOT00000001893 | 0.953057808  | 1.66E-06 |
| TUCP_002382 | XLOC_100546 | ENSRNOT00000048781 | 0.956620993  | 1.12E-06 |
| TUCP_002382 | XLOC_100546 | ENSRNOT00000021802 | 0.951522194  | 1.94E-06 |
| TUCP_002382 | XLOC_100546 | ENSRNOT00000013025 | -0.95142394  | 1.96E-06 |

|             |             |                    |              |          |
|-------------|-------------|--------------------|--------------|----------|
| TUCP_002382 | XLOC_100546 | ENSRNOT00000024352 | 0.95846934   | 9.07E-07 |
| TUCP_002382 | XLOC_100546 | ENSRNOT00000072299 | 0.957994918  | 9.60E-07 |
| TUCP_002382 | XLOC_100546 | ENSRNOT00000032363 | 0.950703924  | 2.11E-06 |
| TUCP_002382 | XLOC_100546 | ENSRNOT00000003780 | 0.970128829  | 1.78E-07 |
| TUCP_002382 | XLOC_100546 | ENSRNOT00000026643 | 0.964885779  | 3.96E-07 |
| TUCP_002382 | XLOC_100546 | ENSRNOT00000022190 | -0.954773842 | 1.38E-06 |
| TUCP_002382 | XLOC_100546 | ENSRNOT00000025913 | -0.956069339 | 1.20E-06 |
| TUCP_002382 | XLOC_100546 | ENSRNOT00000013067 | -0.959173755 | 8.34E-07 |
| TUCP_002382 | XLOC_100546 | ENSRNOT00000066952 | 0.956169883  | 1.18E-06 |
| TUCP_002382 | XLOC_100546 | ENSRNOT00000024119 | 0.953040667  | 1.66E-06 |
| TUCP_002382 | XLOC_100546 | ENSRNOT00000086577 | 0.959958914  | 7.58E-07 |
| TUCP_002382 | XLOC_100546 | ENSRNOT00000036658 | -0.957961602 | 9.63E-07 |
| TUCP_002382 | XLOC_100546 | ENSRNOT00000072118 | 0.965663542  | 3.55E-07 |
| TUCP_002382 | XLOC_100546 | ENSRNOT00000065600 | 0.970134786  | 1.78E-07 |
| TUCP_002382 | XLOC_100546 | ENSRNOT00000086260 | -0.963476337 | 4.81E-07 |
| TUCP_002382 | XLOC_100546 | ENSRNOT00000020910 | 0.951454907  | 1.96E-06 |
| TUCP_002382 | XLOC_100546 | ENSRNOT00000085334 | 0.959845214  | 7.69E-07 |
| TUCP_002382 | XLOC_100546 | ENSRNOT00000033975 | 0.956295203  | 1.17E-06 |
| TUCP_002382 | XLOC_100546 | ENSRNOT00000068026 | -0.956528036 | 1.14E-06 |
| TUCP_002382 | XLOC_100546 | ENSRNOT00000083220 | 0.952725316  | 1.72E-06 |
| TUCP_002382 | XLOC_100546 | ENSRNOT00000034883 | -0.950572493 | 2.14E-06 |
| TUCP_002382 | XLOC_100546 | ENSRNOT00000025517 | 0.956063643  | 1.20E-06 |
| TUCP_002382 | XLOC_100546 | ENSRNOT00000000383 | -0.955503873 | 1.27E-06 |
| TUCP_002382 | XLOC_100546 | ENSRNOT00000014506 | -0.950119922 | 2.24E-06 |
| TUCP_002382 | XLOC_100546 | ENSRNOT00000026531 | -0.95514078  | 1.33E-06 |
| TUCP_002382 | XLOC_100546 | ENSRNOT00000035605 | 0.952128746  | 1.83E-06 |
| TUCP_002382 | XLOC_100546 | ENSRNOT00000084031 | 0.966345957  | 3.21E-07 |
| TUCP_002382 | XLOC_100546 | ENSRNOT00000017624 | 0.957746067  | 9.88E-07 |
| TUCP_002382 | XLOC_100546 | ENSRNOT00000017995 | 0.951347406  | 1.98E-06 |
| TUCP_002382 | XLOC_100546 | ENSRNOT00000040169 | 0.964443399  | 4.22E-07 |
| TUCP_002382 | XLOC_100546 | ENSRNOT00000029701 | 0.972553224  | 1.17E-07 |
| TUCP_002382 | XLOC_100546 | ENSRNOT00000005459 | 0.962324035  | 5.61E-07 |
| TUCP_002382 | XLOC_100546 | ENSRNOT00000000302 | 0.951103375  | 2.03E-06 |
| TUCP_002382 | XLOC_100546 | ENSRNOT00000055602 | -0.955173401 | 1.32E-06 |
| TUCP_002382 | XLOC_100546 | ENSRNOT00000037015 | 0.976643447  | 5.26E-08 |
| TUCP_002382 | XLOC_100546 | ENSRNOT00000004290 | 0.952494272  | 1.76E-06 |
| TUCP_002382 | XLOC_100546 | ENSRNOT00000008244 | 0.953244814  | 1.63E-06 |
| TUCP_002382 | XLOC_100546 | ENSRNOT00000011675 | 0.962898149  | 5.20E-07 |
| TUCP_002382 | XLOC_100546 | ENSRNOT00000086456 | -0.950862415 | 2.08E-06 |
| TUCP_002382 | XLOC_100546 | ENSRNOT00000080591 | 0.969217625  | 2.07E-07 |
| TUCP_002382 | XLOC_100546 | ENSRNOT00000049285 | -0.951028809 | 2.04E-06 |
| TUCP_002382 | XLOC_100546 | ENSRNOT00000015239 | -0.952135765 | 1.83E-06 |
| TUCP_002382 | XLOC_100546 | ENSRNOT0000003568  | 0.957982523  | 9.61E-07 |
| TUCP_002382 | XLOC_100546 | ENSRNOT00000074649 | 0.957952994  | 9.64E-07 |
| TUCP_002382 | XLOC_100546 | ENSRNOT00000077146 | -0.962887584 | 5.21E-07 |
| TUCP_002382 | XLOC_100546 | ENSRNOT00000074972 | 0.957304044  | 1.04E-06 |
| TUCP_002382 | XLOC_100546 | ENSRNOT00000013463 | 0.957069876  | 1.07E-06 |
| TUCP_002382 | XLOC_100546 | ENSRNOT00000089673 | -0.95126025  | 2.00E-06 |
| TUCP_002382 | XLOC_100546 | ENSRNOT00000057953 | 0.962541214  | 5.45E-07 |
| TUCP_002382 | XLOC_100546 | ENSRNOT00000010367 | 0.958911369  | 8.61E-07 |
| TUCP_002382 | XLOC_100546 | ENSRNOT00000057738 | 0.981047811  | 1.87E-08 |

|             |             |                     |              |          |
|-------------|-------------|---------------------|--------------|----------|
| TUCP_002382 | XLOC_100546 | ENSRNOT00000058382  | 0.972413904  | 1.20E-07 |
| TUCP_002382 | XLOC_100546 | ENSRNOT00000006802  | 0.951050329  | 2.04E-06 |
| TUCP_002382 | XLOC_100546 | ENSRNOT00000028828  | 0.958227367  | 9.34E-07 |
| TUCP_002382 | XLOC_100546 | ENSRNOT00000009202  | 0.954862838  | 1.37E-06 |
| TUCP_002382 | XLOC_100546 | ENSRNOT00000047663  | -0.952789869 | 1.71E-06 |
| TUCP_002382 | XLOC_100546 | ENSRNOT000000082151 | -0.95949408  | 8.02E-07 |
| TUCP_002382 | XLOC_100546 | ENSRNOT00000022578  | 0.972342317  | 1.22E-07 |
| TUCP_002382 | XLOC_100546 | ENSRNOT00000066133  | -0.95072271  | 2.11E-06 |
| TUCP_002382 | XLOC_100546 | ENSRNOT00000010993  | 0.952438768  | 1.77E-06 |
| TUCP_002382 | XLOC_100546 | ENSRNOT00000048933  | -0.951420267 | 1.96E-06 |
| TUCP_002382 | XLOC_100546 | ENSRNOT00000003691  | -0.952576655 | 1.74E-06 |
| TUCP_002382 | XLOC_100546 | ENSRNOT00000010852  | 0.954572462  | 1.41E-06 |
| TUCP_002382 | XLOC_100546 | ENSRNOT00000025794  | -0.955757736 | 1.24E-06 |
| TUCP_002382 | XLOC_100546 | ENSRNOT00000038807  | 0.953580402  | 1.57E-06 |
| TUCP_002382 | XLOC_100546 | ENSRNOT00000058111  | -0.950032381 | 2.26E-06 |
| TUCP_002382 | XLOC_100546 | ENSRNOT00000085971  | -0.950121715 | 2.24E-06 |
| TUCP_002382 | XLOC_100546 | ENSRNOT00000017761  | 0.951218305  | 2.00E-06 |
| TUCP_002382 | XLOC_100546 | ENSRNOT00000002443  | 0.95402291   | 1.50E-06 |
| TUCP_002382 | XLOC_100546 | ENSRNOT00000008987  | -0.957776066 | 9.85E-07 |
| TUCP_002382 | XLOC_100546 | ENSRNOT00000023014  | 0.951714658  | 1.91E-06 |
| TUCP_002382 | XLOC_100546 | ENSRNOT00000027970  | 0.95802344   | 9.56E-07 |
| TUCP_002382 | XLOC_100546 | ENSRNOT00000080695  | 0.951363964  | 1.97E-06 |
| TUCP_002382 | XLOC_100546 | ENSRNOT00000027875  | 0.950046453  | 2.25E-06 |
| TUCP_002382 | XLOC_100546 | ENSRNOT00000002114  | -0.955816603 | 1.23E-06 |
| TUCP_002382 | XLOC_100546 | ENSRNOT00000039102  | 0.958181594  | 9.39E-07 |
| TUCP_002382 | XLOC_100546 | ENSRNOT00000091205  | 0.953324426  | 1.61E-06 |
| TUCP_002382 | XLOC_100546 | ENSRNOT00000037409  | 0.952816824  | 1.70E-06 |
| TUCP_002382 | XLOC_100546 | ENSRNOT00000000120  | 0.968441862  | 2.34E-07 |
| TUCP_002382 | XLOC_100546 | ENSRNOT00000007369  | 0.971123889  | 1.51E-07 |
| TUCP_002382 | XLOC_100546 | ENSRNOT00000042125  | 0.957517234  | 1.01E-06 |
| TUCP_002382 | XLOC_100546 | ENSRNOT00000012528  | 0.954284139  | 1.46E-06 |
| TUCP_002382 | XLOC_100546 | ENSRNOT00000028225  | 0.950181974  | 2.22E-06 |
| TUCP_002382 | XLOC_100546 | ENSRNOT00000026760  | -0.953083821 | 1.65E-06 |
| TUCP_002382 | XLOC_100546 | ENSRNOT00000016568  | 0.96829402   | 2.39E-07 |
| TUCP_002382 | XLOC_100546 | ENSRNOT00000032248  | 0.960889819  | 6.75E-07 |
| TUCP_002382 | XLOC_100546 | ENSRNOT00000027360  | -0.958737864 | 8.79E-07 |
| TUCP_002382 | XLOC_100546 | ENSRNOT00000077503  | 0.952211958  | 1.81E-06 |
| TUCP_002382 | XLOC_100546 | ENSRNOT00000065529  | 0.974386298  | 8.32E-08 |
| TUCP_002382 | XLOC_100546 | ENSRNOT00000051494  | 0.971159077  | 1.50E-07 |
| TUCP_002382 | XLOC_100546 | ENSRNOT00000027967  | 0.977140903  | 4.73E-08 |
| TUCP_002382 | XLOC_100546 | ENSRNOT00000090057  | 0.96592177   | 3.42E-07 |
| TUCP_002382 | XLOC_100546 | ENSRNOT00000036613  | -0.958403331 | 9.15E-07 |
| TUCP_002382 | XLOC_100546 | ENSRNOT00000020929  | 0.952794802  | 1.70E-06 |
| TUCP_002382 | XLOC_100546 | ENSRNOT00000025705  | 0.963300243  | 4.93E-07 |
| TUCP_002382 | XLOC_100546 | ENSRNOT00000092876  | -0.952760414 | 1.71E-06 |
| TUCP_002382 | XLOC_100546 | ENSRNOT00000005311  | 0.953562178  | 1.57E-06 |
| TUCP_002382 | XLOC_100546 | ENSRNOT00000005257  | 0.968731277  | 2.23E-07 |
| TUCP_002382 | XLOC_100546 | ENSRNOT00000046639  | 0.950569409  | 2.14E-06 |
| TUCP_002382 | XLOC_100546 | ENSRNOT00000015799  | 0.951838389  | 1.88E-06 |
| TUCP_002382 | XLOC_100546 | ENSRNOT00000085669  | 0.952735755  | 1.72E-06 |
| TUCP_002382 | XLOC_100546 | ENSRNOT00000008113  | -0.956248364 | 1.17E-06 |



|             |             |                    |              |          |
|-------------|-------------|--------------------|--------------|----------|
| TUCP_002382 | XLOC_100546 | ENSRNOT00000072357 | -0.951191091 | 2.01E-06 |
| TUCP_000403 | XLOC_013625 | ENSRNOT00000003774 | -0.952969568 | 1.67E-06 |
| TUCP_001205 | XLOC_045178 | ENSRNOT00000065396 | 0.967012759  | 2.91E-07 |
| TUCP_003464 | XLOC_149648 | ENSRNOT00000049363 | 0.953895614  | 1.52E-06 |
| TUCP_003464 | XLOC_149648 | ENSRNOT00000065402 | 0.953895614  | 1.52E-06 |
| TUCP_003464 | XLOC_149648 | ENSRNOT00000066546 | 0.965046574  | 3.87E-07 |
| TUCP_003464 | XLOC_149648 | ENSRNOT00000014030 | 0.953895614  | 1.52E-06 |
| TUCP_003464 | XLOC_149648 | ENSRNOT00000081966 | 0.953895614  | 1.52E-06 |
| TUCP_003464 | XLOC_149648 | ENSRNOT00000044931 | 0.960923623  | 6.72E-07 |
| TUCP_003464 | XLOC_149648 | ENSRNOT00000014028 | 0.953895614  | 1.52E-06 |
| TUCP_003464 | XLOC_149648 | ENSRNOT00000075906 | 0.953895614  | 1.52E-06 |
| TUCP_003464 | XLOC_149648 | ENSRNOT00000082464 | 0.953895614  | 1.52E-06 |
| TUCP_003464 | XLOC_149648 | ENSRNOT00000064551 | 0.978704201  | 3.33E-08 |
| TUCP_003464 | XLOC_149648 | ENSRNOT00000084141 | 0.953895614  | 1.52E-06 |
| TUCP_003464 | XLOC_149648 | ENSRNOT00000065473 | 0.95336205   | 1.61E-06 |
| TUCP_003464 | XLOC_149648 | ENSRNOT00000082435 | 0.953895614  | 1.52E-06 |
| TUCP_003464 | XLOC_149648 | ENSRNOT00000000142 | 0.953007624  | 1.67E-06 |
| TUCP_003464 | XLOC_149648 | ENSRNOT00000087659 | 0.953895614  | 1.52E-06 |
| TUCP_003464 | XLOC_149648 | ENSRNOT00000082288 | 0.95384288   | 1.53E-06 |
| TUCP_003464 | XLOC_149648 | ENSRNOT00000084133 | 0.953895614  | 1.52E-06 |
| TUCP_003464 | XLOC_149648 | ENSRNOT00000085078 | 0.953895614  | 1.52E-06 |
| TUCP_003464 | XLOC_149648 | ENSRNOT00000086425 | 0.952206148  | 1.81E-06 |
| TUCP_003464 | XLOC_149648 | ENSRNOT00000039664 | 0.953895614  | 1.52E-06 |
| TUCP_000208 | XLOC_006687 | ENSRNOT00000090142 | 0.963508323  | 4.79E-07 |
| TUCP_001200 | XLOC_045178 | ENSRNOT00000081570 | 0.962950996  | 5.17E-07 |
| TUCP_001200 | XLOC_045178 | ENSRNOT00000091652 | 0.998263479  | 1.24E-13 |
| TUCP_001200 | XLOC_045178 | ENSRNOT00000036564 | 0.972290435  | 1.23E-07 |
| TUCP_001200 | XLOC_045178 | ENSRNOT00000000109 | 0.962140571  | 5.75E-07 |
| TUCP_001200 | XLOC_045178 | ENSRNOT00000080865 | 0.99999901   | 7.48E-30 |
| TUCP_001200 | XLOC_045178 | ENSRNOT00000073534 | 0.995814518  | 1.00E-11 |
| TUCP_001200 | XLOC_045178 | ENSRNOT00000012161 | 0.98757313   | 2.29E-09 |
| TUCP_001200 | XLOC_045178 | ENSRNOT00000078707 | 0.960010383  | 7.53E-07 |
| TUCP_001200 | XLOC_045178 | ENSRNOT00000087758 | 0.968982713  | 2.15E-07 |
| TUCP_001200 | XLOC_045178 | ENSRNOT00000049832 | 0.968968717  | 2.15E-07 |
| TUCP_001200 | XLOC_045178 | ENSRNOT00000093019 | 0.99999901   | 7.48E-30 |
| TUCP_001200 | XLOC_045178 | ENSRNOT00000024825 | 0.980421765  | 2.19E-08 |
| TUCP_001200 | XLOC_045178 | ENSRNOT00000059266 | 0.96026506   | 7.30E-07 |
| TUCP_001200 | XLOC_045178 | ENSRNOT00000072734 | 0.964960888  | 3.92E-07 |
| TUCP_001200 | XLOC_045178 | ENSRNOT00000085908 | 0.99664628   | 3.32E-12 |
| TUCP_001200 | XLOC_045178 | ENSRNOT00000046744 | 0.99999901   | 7.48E-30 |
| TUCP_001200 | XLOC_045178 | ENSRNOT00000076429 | 0.99999901   | 7.48E-30 |
| TUCP_001200 | XLOC_045178 | ENSRNOT00000084667 | 0.999652928  | 3.96E-17 |
| TUCP_001200 | XLOC_045178 | ENSRNOT00000055412 | 0.99999901   | 7.48E-30 |
| TUCP_001200 | XLOC_045178 | ENSRNOT00000093201 | 0.999695142  | 2.07E-17 |
| TUCP_001200 | XLOC_045178 | ENSRNOT00000072724 | 0.99999901   | 7.48E-30 |
| TUCP_001200 | XLOC_045178 | ENSRNOT00000090323 | 0.95597579   | 1.21E-06 |
| TUCP_001200 | XLOC_045178 | ENSRNOT00000082760 | 0.986269329  | 3.76E-09 |
| TUCP_001200 | XLOC_045178 | ENSRNOT00000066017 | 0.989741412  | 8.80E-10 |
| TUCP_001200 | XLOC_045178 | ENSRNOT00000073148 | 0.985667185  | 4.65E-09 |
| TUCP_001200 | XLOC_045178 | ENSRNOT00000077462 | 0.960057883  | 7.49E-07 |
| TUCP_001200 | XLOC_045178 | ENSRNOT00000084375 | 0.99999901   | 7.48E-30 |

|             |             |                    |             |          |
|-------------|-------------|--------------------|-------------|----------|
| TUCP_001200 | XLOC_045178 | ENSRNOT00000085447 | 0.998376944 | 8.85E-14 |
| TUCP_001200 | XLOC_045178 | ENSRNOT00000006249 | 0.966433686 | 3.17E-07 |
| TUCP_001200 | XLOC_045178 | ENSRNOT00000087073 | 0.952386087 | 1.78E-06 |
| TUCP_001200 | XLOC_045178 | ENSRNOT00000042369 | 0.995634243 | 1.24E-11 |
| TUCP_001200 | XLOC_045178 | ENSRNOT00000086554 | 0.99999901  | 7.48E-30 |
| TUCP_001200 | XLOC_045178 | ENSRNOT00000054858 | 0.985203754 | 5.45E-09 |
| TUCP_001200 | XLOC_045178 | ENSRNOT00000047921 | 0.99999901  | 7.48E-30 |
| TUCP_001200 | XLOC_045178 | ENSRNOT00000064261 | 0.999974723 | 8.12E-23 |
| TUCP_001200 | XLOC_045178 | ENSRNOT00000086660 | 0.999195928 | 2.64E-15 |
| TUCP_001200 | XLOC_045178 | ENSRNOT00000080933 | 0.967228456 | 2.82E-07 |
| TUCP_001200 | XLOC_045178 | ENSRNOT00000083977 | 0.99999901  | 7.48E-30 |
| TUCP_001200 | XLOC_045178 | ENSRNOT00000092933 | 0.99999901  | 7.48E-30 |
| TUCP_001200 | XLOC_045178 | ENSRNOT00000009061 | 0.953254117 | 1.62E-06 |
| TUCP_001200 | XLOC_045178 | ENSRNOT00000041281 | 0.988001311 | 1.92E-09 |
| TUCP_001203 | XLOC_045178 | ENSRNOT00000092026 | 0.956537332 | 1.14E-06 |
| TUCP_001203 | XLOC_045178 | ENSRNOT00000093075 | 0.993957937 | 6.28E-11 |
| TUCP_001203 | XLOC_045178 | ENSRNOT00000058260 | 0.993957937 | 6.28E-11 |
| TUCP_001203 | XLOC_045178 | ENSRNOT00000088887 | 0.993957937 | 6.28E-11 |
| TUCP_001203 | XLOC_045178 | ENSRNOT00000084986 | 0.993957937 | 6.28E-11 |
| TUCP_001203 | XLOC_045178 | ENSRNOT00000074346 | 0.972562667 | 1.17E-07 |
| TUCP_001203 | XLOC_045178 | ENSRNOT00000073209 | 0.975223759 | 7.05E-08 |
| TUCP_001203 | XLOC_045178 | ENSRNOT00000080155 | 0.962780454 | 5.28E-07 |
| TUCP_001203 | XLOC_045178 | ENSRNOT00000072573 | 0.988926325 | 1.29E-09 |
| TUCP_001203 | XLOC_045178 | ENSRNOT00000017828 | 0.989003116 | 1.24E-09 |
| TUCP_001203 | XLOC_045178 | ENSRNOT00000080444 | 0.971246174 | 1.48E-07 |
| TUCP_001203 | XLOC_045178 | ENSRNOT00000071312 | 0.993957937 | 6.28E-11 |
| TUCP_001203 | XLOC_045178 | ENSRNOT00000088245 | 0.993957937 | 6.28E-11 |
| TUCP_001203 | XLOC_045178 | ENSRNOT00000036565 | 0.959311369 | 8.20E-07 |
| TUCP_001203 | XLOC_045178 | ENSRNOT00000058833 | 0.992073998 | 2.43E-10 |
| TUCP_001203 | XLOC_045178 | ENSRNOT00000078052 | 0.993957937 | 6.28E-11 |
| TUCP_001203 | XLOC_045178 | ENSRNOT00000078494 | 0.993752931 | 7.41E-11 |
| TUCP_001203 | XLOC_045178 | ENSRNOT00000085653 | 0.993957937 | 6.28E-11 |
| TUCP_001203 | XLOC_045178 | ENSRNOT00000057950 | 0.968328453 | 2.38E-07 |
| TUCP_001203 | XLOC_045178 | ENSRNOT00000081992 | 0.992606299 | 1.72E-10 |
| TUCP_001203 | XLOC_045178 | ENSRNOT00000055406 | 0.993957937 | 6.28E-11 |
| TUCP_001203 | XLOC_045178 | ENSRNOT00000070817 | 0.992433737 | 1.93E-10 |
| TUCP_001203 | XLOC_045178 | ENSRNOT00000026753 | 0.993957937 | 6.28E-11 |
| TUCP_001203 | XLOC_045178 | ENSRNOT00000080533 | 0.989767187 | 8.69E-10 |
| TUCP_001203 | XLOC_045178 | ENSRNOT0000004279  | 0.950934257 | 2.06E-06 |
| TUCP_001203 | XLOC_045178 | ENSRNOT00000072774 | 0.971543816 | 1.40E-07 |
| TUCP_001203 | XLOC_045178 | ENSRNOT00000086031 | 0.993957937 | 6.28E-11 |
| TUCP_001203 | XLOC_045178 | ENSRNOT00000014312 | 0.993957937 | 6.28E-11 |
| TUCP_001203 | XLOC_045178 | ENSRNOT00000042882 | 0.951925394 | 1.87E-06 |
| TUCP_001203 | XLOC_045178 | ENSRNOT00000051231 | 0.992777713 | 1.53E-10 |
| TUCP_001203 | XLOC_045178 | ENSRNOT00000089407 | 0.985688636 | 4.62E-09 |
| TUCP_001203 | XLOC_045178 | ENSRNOT00000055034 | 0.991201153 | 4.09E-10 |
| TUCP_001203 | XLOC_045178 | ENSRNOT00000046837 | 0.98183623  | 1.51E-08 |
| TUCP_002315 | XLOC_096644 | ENSRNOT00000056557 | 0.987679499 | 2.19E-09 |
| TUCP_002315 | XLOC_096644 | ENSRNOT00000084784 | 0.971537539 | 1.40E-07 |
| TUCP_002315 | XLOC_096644 | ENSRNOT00000088078 | 0.953068078 | 1.66E-06 |
| TUCP_002315 | XLOC_096644 | ENSRNOT00000017412 | 0.982969888 | 1.10E-08 |

|             |             |                    |              |          |
|-------------|-------------|--------------------|--------------|----------|
| TUCP_002315 | XLOC_096644 | ENSRNOT00000076618 | 0.986885388  | 2.99E-09 |
| TUCP_002315 | XLOC_096644 | ENSRNOT00000082002 | 0.968247936  | 2.41E-07 |
| TUCP_003846 | XLOC_168518 | ENSRNOT00000085195 | 0.999404969  | 5.87E-16 |
| TUCP_003846 | XLOC_168518 | ENSRNOT00000013705 | 1            | 4.25E-78 |
| TUCP_003846 | XLOC_168518 | ENSRNOT00000040851 | 1            | 0        |
| TUCP_003846 | XLOC_168518 | ENSRNOT00000075676 | 0.958697783  | 8.83E-07 |
| TUCP_003846 | XLOC_168518 | ENSRNOT00000058389 | 1            | 4.25E-78 |
| TUCP_003846 | XLOC_168518 | ENSRNOT00000086827 | 0.95592964   | 1.22E-06 |
| TUCP_003846 | XLOC_168518 | ENSRNOT00000023542 | 1            | 4.25E-78 |
| TUCP_003846 | XLOC_168518 | ENSRNOT00000028653 | 1            | 4.25E-78 |
| TUCP_003846 | XLOC_168518 | ENSRNOT00000017230 | 0.955378945  | 1.29E-06 |
| TUCP_003846 | XLOC_168518 | ENSRNOT00000092890 | 0.955137645  | 1.33E-06 |
| TUCP_003846 | XLOC_168518 | ENSRNOT00000012174 | 1            | 1.33E-79 |
| TUCP_003846 | XLOC_168518 | ENSRNOT00000051680 | 0.994991197  | 2.46E-11 |
| TUCP_003846 | XLOC_168518 | ENSRNOT00000089118 | 1            | 1.33E-79 |
| TUCP_003846 | XLOC_168518 | ENSRNOT00000025245 | 0.999967061  | 3.05E-22 |
| TUCP_003846 | XLOC_168518 | ENSRNOT00000015138 | 0.999902179  | 7.05E-20 |
| TUCP_003846 | XLOC_168518 | ENSRNOT00000080185 | 0.99902259   | 7.01E-15 |
| TUCP_003846 | XLOC_168518 | ENSRNOT00000090729 | 0.965956282  | 3.40E-07 |
| TUCP_003846 | XLOC_168518 | ENSRNOT00000049165 | 0.973440588  | 9.95E-08 |
| TUCP_003846 | XLOC_168518 | ENSRNOT00000086502 | 0.96495109   | 3.93E-07 |
| TUCP_003846 | XLOC_168518 | ENSRNOT00000079661 | 1            | 4.25E-78 |
| TUCP_003846 | XLOC_168518 | ENSRNOT00000076338 | 0.985532463  | 4.87E-09 |
| TUCP_003846 | XLOC_168518 | ENSRNOT00000042220 | 1            | 4.25E-78 |
| TUCP_003846 | XLOC_168518 | ENSRNOT00000005031 | 0.952974465  | 1.67E-06 |
| TUCP_003846 | XLOC_168518 | ENSRNOT00000079167 | 0.979848988  | 2.53E-08 |
| TUCP_003846 | XLOC_168518 | ENSRNOT00000061950 | 0.962035217  | 5.83E-07 |
| TUCP_003846 | XLOC_168518 | ENSRNOT00000086710 | 0.999839781  | 8.31E-19 |
| TUCP_003846 | XLOC_168518 | ENSRNOT00000075226 | 1            | 1.33E-79 |
| TUCP_003846 | XLOC_168518 | ENSRNOT00000000351 | 1            | 4.25E-78 |
| TUCP_003846 | XLOC_168518 | ENSRNOT00000092294 | 0.986520908  | 3.43E-09 |
| TUCP_000979 | XLOC_035740 | ENSRNOT00000002814 | 0.954734249  | 1.39E-06 |
| TUCP_000979 | XLOC_035740 | ENSRNOT00000024583 | -0.962420143 | 5.54E-07 |
| TUCP_000979 | XLOC_035740 | ENSRNOT00000074810 | 0.964898606  | 3.96E-07 |
| TUCP_000979 | XLOC_035740 | ENSRNOT00000022932 | 0.951667079  | 1.91E-06 |
| TUCP_000974 | XLOC_035685 | ENSRNOT00000037998 | 0.95365255   | 1.56E-06 |
| TUCP_000975 | XLOC_035685 | ENSRNOT00000066391 | 0.952184046  | 1.82E-06 |
| TUCP_000975 | XLOC_035685 | ENSRNOT00000072802 | 0.963405269  | 4.86E-07 |
| TUCP_000977 | XLOC_035740 | ENSRNOT00000028645 | 0.966668089  | 3.06E-07 |
| TUCP_000977 | XLOC_035740 | ENSRNOT00000085152 | 0.956606907  | 1.13E-06 |
| TUCP_000971 | XLOC_035677 | ENSRNOT00000091963 | -0.953634281 | 1.56E-06 |
| TUCP_000972 | XLOC_035683 | ENSRNOT00000008387 | 0.950107935  | 2.24E-06 |
| TUCP_000973 | XLOC_035683 | ENSRNOT00000072724 | 0.951169794  | 2.01E-06 |
| TUCP_000973 | XLOC_035683 | ENSRNOT00000091652 | 0.95760782   | 1.00E-06 |
| TUCP_000973 | XLOC_035683 | ENSRNOT00000047921 | 0.951169794  | 2.01E-06 |
| TUCP_000973 | XLOC_035683 | ENSRNOT00000093201 | 0.954249302  | 1.46E-06 |
| TUCP_000973 | XLOC_035683 | ENSRNOT00000086660 | 0.951027311  | 2.04E-06 |
| TUCP_000973 | XLOC_035683 | ENSRNOT00000080865 | 0.951169794  | 2.01E-06 |
| TUCP_000973 | XLOC_035683 | ENSRNOT00000080933 | 0.966230249  | 3.27E-07 |
| TUCP_000973 | XLOC_035683 | ENSRNOT00000085908 | 0.964616698  | 4.12E-07 |
| TUCP_000973 | XLOC_035683 | ENSRNOT00000064261 | 0.952143584  | 1.82E-06 |

|             |             |                    |              |          |
|-------------|-------------|--------------------|--------------|----------|
| TUCP_000973 | XLOC_035683 | ENSRNOT00000083977 | 0.951169794  | 2.01E-06 |
| TUCP_000973 | XLOC_035683 | ENSRNOT00000046744 | 0.951169794  | 2.01E-06 |
| TUCP_000973 | XLOC_035683 | ENSRNOT00000092933 | 0.951169794  | 2.01E-06 |
| TUCP_000973 | XLOC_035683 | ENSRNOT00000084375 | 0.951169794  | 2.01E-06 |
| TUCP_000973 | XLOC_035683 | ENSRNOT00000076429 | 0.951169794  | 2.01E-06 |
| TUCP_000973 | XLOC_035683 | ENSRNOT00000086554 | 0.951169794  | 2.01E-06 |
| TUCP_000973 | XLOC_035683 | ENSRNOT00000084667 | 0.953125243  | 1.65E-06 |
| TUCP_000973 | XLOC_035683 | ENSRNOT00000087758 | 0.96279231   | 5.28E-07 |
| TUCP_000973 | XLOC_035683 | ENSRNOT00000055412 | 0.951169794  | 2.01E-06 |
| TUCP_000973 | XLOC_035683 | ENSRNOT00000093019 | 0.951169794  | 2.01E-06 |
| TUCP_000875 | XLOC_032616 | ENSRNOT00000093581 | 0.97673268   | 5.16E-08 |
| TUCP_000875 | XLOC_032616 | ENSRNOT00000076554 | -0.979749384 | 2.59E-08 |
| TUCP_000875 | XLOC_032616 | ENSRNOT00000085797 | 0.963028421  | 5.11E-07 |
| TUCP_000875 | XLOC_032616 | ENSRNOT00000077390 | 0.964192212  | 4.37E-07 |
| TUCP_004743 | XLOC_209420 | ENSRNOT00000082982 | 0.952021097  | 1.85E-06 |
| TUCP_004743 | XLOC_209420 | ENSRNOT00000044435 | 0.95388909   | 1.52E-06 |
| TUCP_000877 | XLOC_032616 | ENSRNOT00000057350 | 0.960482605  | 7.10E-07 |
| TUCP_000877 | XLOC_032616 | ENSRNOT00000083991 | 0.967191907  | 2.83E-07 |
| TUCP_001941 | XLOC_078987 | ENSRNOT00000026966 | 0.970322306  | 1.73E-07 |
| TUCP_001941 | XLOC_078987 | ENSRNOT00000068416 | 0.999999782  | 3.88E-33 |
| TUCP_001941 | XLOC_078987 | ENSRNOT00000086036 | 0.999958274  | 9.96E-22 |
| TUCP_001941 | XLOC_078987 | ENSRNOT00000026803 | 0.985046075  | 5.74E-09 |
| TUCP_001941 | XLOC_078987 | ENSRNOT00000047527 | 0.963071698  | 5.08E-07 |
| TUCP_001941 | XLOC_078987 | ENSRNOT00000042251 | 0.999344295  | 9.53E-16 |
| TUCP_001941 | XLOC_078987 | ENSRNOT00000002984 | 0.998397069  | 8.31E-14 |
| TUCP_001941 | XLOC_078987 | ENSRNOT00000083764 | 0.999541808  | 1.59E-16 |
| TUCP_001941 | XLOC_078987 | ENSRNOT00000076802 | 0.962695843  | 5.34E-07 |
| TUCP_001941 | XLOC_078987 | ENSRNOT00000092365 | 0.999161651  | 3.26E-15 |
| TUCP_001941 | XLOC_078987 | ENSRNOT00000079275 | 0.999901911  | 7.15E-20 |
| TUCP_001941 | XLOC_078987 | ENSRNOT00000066062 | -0.959706712 | 7.82E-07 |
| TUCP_001941 | XLOC_078987 | ENSRNOT00000045301 | 1            | 0        |
| TUCP_001941 | XLOC_078987 | ENSRNOT00000041186 | 0.999975782  | 6.56E-23 |
| TUCP_001941 | XLOC_078987 | ENSRNOT00000010092 | 0.977711778  | 4.17E-08 |
| TUCP_001941 | XLOC_078987 | ENSRNOT00000076182 | 1            | 0        |
| TUCP_001941 | XLOC_078987 | ENSRNOT00000087404 | 0.951157664  | 2.02E-06 |
| TUCP_001941 | XLOC_078987 | ENSRNOT00000052003 | 0.95837331   | 9.18E-07 |
| TUCP_001941 | XLOC_078987 | ENSRNOT00000081709 | 0.998485154  | 6.27E-14 |
| TUCP_001941 | XLOC_078987 | ENSRNOT00000005726 | 0.959610119  | 7.91E-07 |
| TUCP_001941 | XLOC_078987 | ENSRNOT00000014103 | 1            | 0        |
| TUCP_001941 | XLOC_078987 | ENSRNOT00000057433 | 0.964930601  | 3.94E-07 |
| TUCP_001941 | XLOC_078987 | ENSRNOT00000082289 | 0.998931566  | 1.09E-14 |
| TUCP_001941 | XLOC_078987 | ENSRNOT00000092516 | 0.957459323  | 1.02E-06 |
| TUCP_001941 | XLOC_078987 | ENSRNOT0000008898  | 0.990039768  | 7.59E-10 |
| TUCP_001941 | XLOC_078987 | ENSRNOT00000083493 | 0.995461232  | 1.51E-11 |
| TUCP_001941 | XLOC_078987 | ENSRNOT00000092563 | 0.987201084  | 2.65E-09 |
| TUCP_001941 | XLOC_078987 | ENSRNOT00000088893 | 1            | 0        |
| TUCP_001941 | XLOC_078987 | ENSRNOT00000076693 | 0.955029582  | 1.34E-06 |
| TUCP_001941 | XLOC_078987 | ENSRNOT00000081014 | 1            | 0        |
| TUCP_001941 | XLOC_078987 | ENSRNOT00000067543 | 1            | 0        |
| TUCP_001941 | XLOC_078987 | ENSRNOT00000050968 | 0.996816433  | 2.56E-12 |
| TUCP_001941 | XLOC_078987 | ENSRNOT00000042201 | 0.960235595  | 7.32E-07 |

|             |             |                    |              |          |
|-------------|-------------|--------------------|--------------|----------|
| TUCP_001941 | XLOC_078987 | ENSRNOT0000004373  | 0.957315473  | 1.04E-06 |
| TUCP_001941 | XLOC_078987 | ENSRNOT00000063929 | 1            | 0        |
| TUCP_001941 | XLOC_078987 | ENSRNOT00000057472 | 1            | 0        |
| TUCP_001941 | XLOC_078987 | ENSRNOT00000041617 | 0.952449765  | 1.77E-06 |
| TUCP_001941 | XLOC_078987 | ENSRNOT00000091763 | 0.986310385  | 3.70E-09 |
| TUCP_001941 | XLOC_078987 | ENSRNOT00000022200 | 0.998491303  | 6.14E-14 |
| TUCP_001941 | XLOC_078987 | ENSRNOT00000067379 | 0.997260967  | 1.21E-12 |
| TUCP_001941 | XLOC_078987 | ENSRNOT00000020786 | 0.976428448  | 5.51E-08 |
| TUCP_001941 | XLOC_078987 | ENSRNOT00000050543 | 0.999722223  | 1.30E-17 |
| TUCP_001941 | XLOC_078987 | ENSRNOT00000089306 | 0.999866649  | 3.32E-19 |
| TUCP_001941 | XLOC_078987 | ENSRNOT00000052367 | 0.997268394  | 1.19E-12 |
| TUCP_001941 | XLOC_078987 | ENSRNOT00000090658 | 1            | 0        |
| TUCP_001941 | XLOC_078987 | ENSRNOT00000022571 | 0.995290013  | 1.81E-11 |
| TUCP_001941 | XLOC_078987 | ENSRNOT00000044520 | 0.981817158  | 1.52E-08 |
| TUCP_001941 | XLOC_078987 | ENSRNOT00000065448 | 0.963648868  | 4.70E-07 |
| TUCP_003708 | XLOC_162167 | ENSRNOT00000011761 | 0.951075818  | 2.03E-06 |
| TUCP_000872 | XLOC_032614 | ENSRNOT00000040543 | -0.956788117 | 1.10E-06 |
| TUCP_000872 | XLOC_032614 | ENSRNOT00000051701 | -0.960932858 | 6.71E-07 |
| TUCP_000872 | XLOC_032614 | ENSRNOT00000010986 | 0.963468182  | 4.82E-07 |
| TUCP_000872 | XLOC_032614 | ENSRNOT00000090170 | 0.952349363  | 1.79E-06 |
| TUCP_000872 | XLOC_032614 | ENSRNOT00000018293 | 0.954429747  | 1.43E-06 |
| TUCP_000872 | XLOC_032614 | ENSRNOT00000060530 | 0.95198276   | 1.85E-06 |
| TUCP_000872 | XLOC_032614 | ENSRNOT00000051452 | 0.950382877  | 2.18E-06 |
| TUCP_000872 | XLOC_032614 | ENSRNOT00000091287 | -0.958836973 | 8.68E-07 |
| TUCP_000872 | XLOC_032614 | ENSRNOT00000070933 | 0.967241877  | 2.81E-07 |
| TUCP_000872 | XLOC_032614 | ENSRNOT00000015170 | -0.952037318 | 1.84E-06 |
| TUCP_000872 | XLOC_032614 | ENSRNOT00000072416 | -0.954169455 | 1.47E-06 |
| TUCP_003707 | XLOC_162167 | ENSRNOT00000016352 | 0.962684452  | 5.35E-07 |
| TUCP_003707 | XLOC_162167 | ENSRNOT00000056450 | 0.975571019  | 6.58E-08 |
| TUCP_003704 | XLOC_161884 | ENSRNOT00000055582 | 0.952907564  | 1.69E-06 |
| TUCP_003704 | XLOC_161884 | ENSRNOT00000023876 | 0.954266339  | 1.46E-06 |
| TUCP_003704 | XLOC_161884 | ENSRNOT00000026789 | 0.954323488  | 1.45E-06 |
| TUCP_003704 | XLOC_161884 | ENSRNOT00000027666 | 0.969128225  | 2.10E-07 |
| TUCP_003704 | XLOC_161884 | ENSRNOT00000027407 | 0.951048128  | 2.04E-06 |
| TUCP_003704 | XLOC_161884 | ENSRNOT00000012892 | 0.957032596  | 1.07E-06 |
| TUCP_003704 | XLOC_161884 | ENSRNOT00000026280 | 0.952826417  | 1.70E-06 |
| TUCP_003704 | XLOC_161884 | ENSRNOT00000017254 | -0.954701504 | 1.39E-06 |
| TUCP_003704 | XLOC_161884 | ENSRNOT00000013743 | 0.954813016  | 1.38E-06 |
| TUCP_003704 | XLOC_161884 | ENSRNOT00000046323 | 0.976247377  | 5.72E-08 |
| TUCP_003704 | XLOC_161884 | ENSRNOT00000037699 | 0.963145782  | 5.03E-07 |
| TUCP_003704 | XLOC_161884 | ENSRNOT00000084317 | 0.964068738  | 4.44E-07 |
| TUCP_003704 | XLOC_161884 | ENSRNOT00000068167 | 0.951068981  | 2.03E-06 |
| TUCP_003704 | XLOC_161884 | ENSRNOT00000045443 | -0.964848368 | 3.98E-07 |
| TUCP_003704 | XLOC_161884 | ENSRNOT00000061005 | 0.950294317  | 2.20E-06 |
| TUCP_003704 | XLOC_161884 | ENSRNOT00000006995 | 0.954537277  | 1.42E-06 |
| TUCP_003704 | XLOC_161884 | ENSRNOT00000015769 | 0.951368418  | 1.97E-06 |
| TUCP_003704 | XLOC_161884 | ENSRNOT00000040629 | 0.953970761  | 1.51E-06 |
| TUCP_003704 | XLOC_161884 | ENSRNOT00000006209 | 0.968152334  | 2.45E-07 |
| TUCP_003704 | XLOC_161884 | ENSRNOT00000080443 | 0.976429601  | 5.51E-08 |
| TUCP_003704 | XLOC_161884 | ENSRNOT00000030850 | 0.950771381  | 2.10E-06 |
| TUCP_003705 | XLOC_162035 | ENSRNOT00000023661 | 0.955294781  | 1.30E-06 |

|             |             |                     |              |          |
|-------------|-------------|---------------------|--------------|----------|
| TUCP_003705 | XLOC_162035 | ENSRNOT00000004780  | 0.954474674  | 1.43E-06 |
| TUCP_003705 | XLOC_162035 | ENSRNOT000000080183 | 0.980538431  | 2.13E-08 |
| TUCP_003705 | XLOC_162035 | ENSRNOT000000037902 | 0.953742267  | 1.54E-06 |
| TUCP_003705 | XLOC_162035 | ENSRNOT00000005505  | 0.984275371  | 7.37E-09 |
| TUCP_003705 | XLOC_162035 | ENSRNOT00000000697  | 0.953446781  | 1.59E-06 |
| TUCP_003705 | XLOC_162035 | ENSRNOT000000023623 | 0.959900218  | 7.63E-07 |
| TUCP_003705 | XLOC_162035 | ENSRNOT000000026757 | 0.969734864  | 1.90E-07 |
| TUCP_003705 | XLOC_162035 | ENSRNOT00000009975  | 0.964615669  | 4.12E-07 |
| TUCP_003705 | XLOC_162035 | ENSRNOT000000072682 | 0.953376551  | 1.60E-06 |
| TUCP_003705 | XLOC_162035 | ENSRNOT000000006109 | 0.961403716  | 6.32E-07 |
| TUCP_003705 | XLOC_162035 | ENSRNOT000000075144 | 0.955555814  | 1.27E-06 |
| TUCP_003705 | XLOC_162035 | ENSRNOT00000001642  | 0.962600316  | 5.41E-07 |
| TUCP_003705 | XLOC_162035 | ENSRNOT000000086144 | 0.957232377  | 1.05E-06 |
| TUCP_003705 | XLOC_162035 | ENSRNOT000000037608 | 0.953080053  | 1.65E-06 |
| TUCP_003705 | XLOC_162035 | ENSRNOT000000074810 | 0.958433353  | 9.11E-07 |
| TUCP_003705 | XLOC_162035 | ENSRNOT000000054963 | 0.957903664  | 9.70E-07 |
| TUCP_003702 | XLOC_161829 | ENSRNOT000000060683 | 0.965401918  | 3.68E-07 |
| TUCP_003702 | XLOC_161829 | ENSRNOT00000009482  | 0.95847491   | 9.07E-07 |
| TUCP_003702 | XLOC_161829 | ENSRNOT00000009015  | 0.960674871  | 6.93E-07 |
| TUCP_003702 | XLOC_161829 | ENSRNOT000000057758 | 0.954842571  | 1.37E-06 |
| TUCP_003702 | XLOC_161829 | ENSRNOT000000074544 | 0.970875063  | 1.57E-07 |
| TUCP_003702 | XLOC_161829 | ENSRNOT000000004241 | 0.964852431  | 3.98E-07 |
| TUCP_003702 | XLOC_161829 | ENSRNOT000000013341 | 0.959373018  | 8.14E-07 |
| TUCP_003702 | XLOC_161829 | ENSRNOT000000084202 | 0.977129953  | 4.74E-08 |
| TUCP_003702 | XLOC_161829 | ENSRNOT000000019358 | 0.957206618  | 1.05E-06 |
| TUCP_003702 | XLOC_161829 | ENSRNOT000000030501 | 0.951880498  | 1.87E-06 |
| TUCP_003702 | XLOC_161829 | ENSRNOT000000008161 | 0.969829161  | 1.87E-07 |
| TUCP_003702 | XLOC_161829 | ENSRNOT000000072864 | 0.95536231   | 1.29E-06 |
| TUCP_003702 | XLOC_161829 | ENSRNOT000000004159 | 0.976516473  | 5.41E-08 |
| TUCP_003702 | XLOC_161829 | ENSRNOT000000022952 | 0.973796538  | 9.31E-08 |
| TUCP_003702 | XLOC_161829 | ENSRNOT000000083864 | 0.958104449  | 9.47E-07 |
| TUCP_003702 | XLOC_161829 | ENSRNOT00000001774  | 0.960136275  | 7.41E-07 |
| TUCP_003702 | XLOC_161829 | ENSRNOT000000037203 | 0.956180416  | 1.18E-06 |
| TUCP_003702 | XLOC_161829 | ENSRNOT000000000753 | 0.961003616  | 6.65E-07 |
| TUCP_003702 | XLOC_161829 | ENSRNOT000000043822 | 0.952346949  | 1.79E-06 |
| TUCP_003702 | XLOC_161829 | ENSRNOT000000056278 | 0.979257646  | 2.92E-08 |
| TUCP_003702 | XLOC_161829 | ENSRNOT000000011432 | 0.976250901  | 5.72E-08 |
| TUCP_003702 | XLOC_161829 | ENSRNOT000000013587 | 0.976548182  | 5.37E-08 |
| TUCP_003702 | XLOC_161829 | ENSRNOT000000029193 | 0.968149739  | 2.45E-07 |
| TUCP_003702 | XLOC_161829 | ENSRNOT000000082730 | 0.9558799    | 1.22E-06 |
| TUCP_003702 | XLOC_161829 | ENSRNOT000000002851 | 0.962370489  | 5.58E-07 |
| TUCP_003702 | XLOC_161829 | ENSRNOT000000070961 | 0.968343262  | 2.37E-07 |
| TUCP_003702 | XLOC_161829 | ENSRNOT000000026552 | 0.95637363   | 1.16E-06 |
| TUCP_003702 | XLOC_161829 | ENSRNOT000000019044 | 0.950781748  | 2.09E-06 |
| TUCP_003702 | XLOC_161829 | ENSRNOT000000001373 | 0.952892477  | 1.69E-06 |
| TUCP_003702 | XLOC_161829 | ENSRNOT000000064007 | 0.96398235   | 4.49E-07 |
| TUCP_003702 | XLOC_161829 | ENSRNOT00000005666  | 0.950958913  | 2.06E-06 |
| TUCP_003702 | XLOC_161829 | ENSRNOT000000024775 | 0.954346975  | 1.45E-06 |
| TUCP_003702 | XLOC_161829 | ENSRNOT000000071770 | 0.96521385   | 3.78E-07 |
| TUCP_003702 | XLOC_161829 | ENSRNOT000000067011 | -0.960970396 | 6.68E-07 |
| TUCP_003702 | XLOC_161829 | ENSRNOT00000001891  | 0.95996499   | 7.57E-07 |

|             |             |                     |             |          |
|-------------|-------------|---------------------|-------------|----------|
| TUCP_003702 | XLOC_161829 | ENSRNOT00000080035  | 0.954622037 | 1.40E-06 |
| TUCP_003702 | XLOC_161829 | ENSRNOT00000025506  | 0.951135961 | 2.02E-06 |
| TUCP_003702 | XLOC_161829 | ENSRNOT00000015297  | 0.956001196 | 1.21E-06 |
| TUCP_003702 | XLOC_161829 | ENSRNOT00000007326  | 0.950314862 | 2.19E-06 |
| TUCP_003702 | XLOC_161829 | ENSRNOT00000039857  | 0.952509019 | 1.76E-06 |
| TUCP_003702 | XLOC_161829 | ENSRNOT00000024980  | 0.951732444 | 1.90E-06 |
| TUCP_003702 | XLOC_161829 | ENSRNOT00000024981  | 0.980667785 | 2.06E-08 |
| TUCP_003702 | XLOC_161829 | ENSRNOT00000000812  | 0.95343649  | 1.59E-06 |
| TUCP_003702 | XLOC_161829 | ENSRNOT00000035513  | 0.950842498 | 2.08E-06 |
| TUCP_003702 | XLOC_161829 | ENSRNOT00000009468  | 0.971813456 | 1.34E-07 |
| TUCP_003702 | XLOC_161829 | ENSRNOT00000020543  | 0.963644801 | 4.71E-07 |
| TUCP_003702 | XLOC_161829 | ENSRNOT00000074515  | 0.953444507 | 1.59E-06 |
| TUCP_003702 | XLOC_161829 | ENSRNOT00000006946  | 0.952508575 | 1.76E-06 |
| TUCP_003702 | XLOC_161829 | ENSRNOT00000023149  | 0.961667972 | 6.11E-07 |
| TUCP_003702 | XLOC_161829 | ENSRNOT00000022452  | 0.951112416 | 2.03E-06 |
| TUCP_003702 | XLOC_161829 | ENSRNOT00000021036  | 0.953821499 | 1.53E-06 |
| TUCP_003702 | XLOC_161829 | ENSRNOT00000032173  | 0.956425313 | 1.15E-06 |
| TUCP_003702 | XLOC_161829 | ENSRNOT00000050774  | 0.950983031 | 2.05E-06 |
| TUCP_003702 | XLOC_161829 | ENSRNOT00000081037  | 0.970614169 | 1.64E-07 |
| TUCP_003702 | XLOC_161829 | ENSRNOT00000024690  | 0.95686536  | 1.09E-06 |
| TUCP_003702 | XLOC_161829 | ENSRNOT00000029166  | 0.950048456 | 2.25E-06 |
| TUCP_003702 | XLOC_161829 | ENSRNOT00000017955  | 0.979520739 | 2.74E-08 |
| TUCP_003702 | XLOC_161829 | ENSRNOT00000075444  | 0.950377617 | 2.18E-06 |
| TUCP_003702 | XLOC_161829 | ENSRNOT00000008889  | 0.956950297 | 1.08E-06 |
| TUCP_003702 | XLOC_161829 | ENSRNOT00000057902  | 0.965570389 | 3.60E-07 |
| TUCP_003702 | XLOC_161829 | ENSRNOT00000079801  | 0.974894961 | 7.53E-08 |
| TUCP_003702 | XLOC_161829 | ENSRNOT00000000804  | 0.957900487 | 9.70E-07 |
| TUCP_003702 | XLOC_161829 | ENSRNOT00000006709  | 0.95372566  | 1.55E-06 |
| TUCP_003702 | XLOC_161829 | ENSRNOT00000037946  | 0.95735713  | 1.03E-06 |
| TUCP_003702 | XLOC_161829 | ENSRNOT00000025221  | 0.953731581 | 1.54E-06 |
| TUCP_003702 | XLOC_161829 | ENSRNOT00000024753  | 0.965876317 | 3.44E-07 |
| TUCP_003702 | XLOC_161829 | ENSRNOT00000073926  | 0.950346768 | 2.19E-06 |
| TUCP_003702 | XLOC_161829 | ENSRNOT00000047126  | 0.954807694 | 1.38E-06 |
| TUCP_003702 | XLOC_161829 | ENSRNOT00000090268  | 0.968088695 | 2.47E-07 |
| TUCP_003702 | XLOC_161829 | ENSRNOT00000035875  | 0.960284199 | 7.28E-07 |
| TUCP_003702 | XLOC_161829 | ENSRNOT00000089294  | 0.969152832 | 2.09E-07 |
| TUCP_003702 | XLOC_161829 | ENSRNOT00000064860  | 0.960225299 | 7.33E-07 |
| TUCP_003702 | XLOC_161829 | ENSRNOT00000065642  | 0.960133542 | 7.42E-07 |
| TUCP_003702 | XLOC_161829 | ENSRNOT00000000253  | 0.961446193 | 6.29E-07 |
| TUCP_003702 | XLOC_161829 | ENSRNOT00000019175  | 0.961790641 | 6.02E-07 |
| TUCP_003702 | XLOC_161829 | ENSRNOT00000018473  | 0.955094916 | 1.33E-06 |
| TUCP_003702 | XLOC_161829 | ENSRNOT00000075283  | 0.957233457 | 1.05E-06 |
| TUCP_003702 | XLOC_161829 | ENSRNOT00000013255  | 0.950356143 | 2.18E-06 |
| TUCP_003702 | XLOC_161829 | ENSRNOT00000017339  | 0.953020714 | 1.67E-06 |
| TUCP_003702 | XLOC_161829 | ENSRNOT000000081593 | 0.965550753 | 3.61E-07 |
| TUCP_003702 | XLOC_161829 | ENSRNOT00000006395  | 0.957518453 | 1.01E-06 |
| TUCP_003702 | XLOC_161829 | ENSRNOT00000030823  | 0.963387204 | 4.87E-07 |
| TUCP_003702 | XLOC_161829 | ENSRNOT00000020809  | 0.958181379 | 9.39E-07 |
| TUCP_003702 | XLOC_161829 | ENSRNOT00000028234  | 0.966514146 | 3.13E-07 |
| TUCP_003702 | XLOC_161829 | ENSRNOT00000002198  | 0.955749903 | 1.24E-06 |
| TUCP_003702 | XLOC_161829 | ENSRNOT00000018776  | 0.950461826 | 2.16E-06 |

|             |             |                      |             |          |
|-------------|-------------|----------------------|-------------|----------|
| TUCP_003702 | XLOC_161829 | ENSRNOT00000016262   | 0.958632636 | 8.90E-07 |
| TUCP_003702 | XLOC_161829 | ENSRNOT000000085690  | 0.966010382 | 3.37E-07 |
| TUCP_003702 | XLOC_161829 | ENSRNOT000000025651  | 0.973659729 | 9.55E-08 |
| TUCP_003702 | XLOC_161829 | ENSRNOT000000020409  | 0.967122702 | 2.86E-07 |
| TUCP_003702 | XLOC_161829 | ENSRNOT000000049973  | 0.959342468 | 8.17E-07 |
| TUCP_003702 | XLOC_161829 | ENSRNOT000000024924  | 0.965633142 | 3.56E-07 |
| TUCP_003702 | XLOC_161829 | ENSRNOT000000014002  | 0.967114285 | 2.87E-07 |
| TUCP_003702 | XLOC_161829 | ENSRNOT000000064924  | 0.957597693 | 1.01E-06 |
| TUCP_003702 | XLOC_161829 | ENSRNOT000000010621  | 0.975933208 | 6.11E-08 |
| TUCP_003702 | XLOC_161829 | ENSRNOT000000000124  | 0.95964131  | 7.88E-07 |
| TUCP_003702 | XLOC_161829 | ENSRNOT000000043581  | 0.950967279 | 2.06E-06 |
| TUCP_003702 | XLOC_161829 | ENSRNOT000000082982  | 0.970497136 | 1.68E-07 |
| TUCP_003702 | XLOC_161829 | ENSRNOT000000068666  | 0.957547099 | 1.01E-06 |
| TUCP_003702 | XLOC_161829 | ENSRNOT000000013535  | 0.963905324 | 4.54E-07 |
| TUCP_003702 | XLOC_161829 | ENSRNOT000000055250  | 0.952054647 | 1.84E-06 |
| TUCP_003702 | XLOC_161829 | ENSRNOT00000007681   | 0.97258855  | 1.16E-07 |
| TUCP_003702 | XLOC_161829 | ENSRNOT000000066199  | 0.960465525 | 7.12E-07 |
| TUCP_003702 | XLOC_161829 | ENSRNOT000000089016  | 0.955910511 | 1.22E-06 |
| TUCP_003702 | XLOC_161829 | ENSRNOT000000047698  | 0.965198463 | 3.79E-07 |
| TUCP_003702 | XLOC_161829 | ENSRNOT000000023388  | 0.95121493  | 2.00E-06 |
| TUCP_003702 | XLOC_161829 | ENSRNOT000000020909  | 0.954986867 | 1.35E-06 |
| TUCP_003702 | XLOC_161829 | ENSRNOT000000067905  | 0.955078735 | 1.34E-06 |
| TUCP_003702 | XLOC_161829 | ENSRNOT000000011511  | 0.950526201 | 2.15E-06 |
| TUCP_003702 | XLOC_161829 | ENSRNOT000000008359  | 0.953835038 | 1.53E-06 |
| TUCP_003702 | XLOC_161829 | ENSRNOT000000024933  | 0.966668615 | 3.06E-07 |
| TUCP_003702 | XLOC_161829 | ENSRNOT000000036042  | 0.974010303 | 8.94E-08 |
| TUCP_003702 | XLOC_161829 | ENSRNOT000000040981  | 0.951051445 | 2.04E-06 |
| TUCP_003702 | XLOC_161829 | ENSRNOT000000019778  | 0.953781721 | 1.54E-06 |
| TUCP_003702 | XLOC_161829 | ENSRNOT000000011320  | 0.965149732 | 3.82E-07 |
| TUCP_003702 | XLOC_161829 | ENSRNOT000000017683  | 0.967177453 | 2.84E-07 |
| TUCP_000878 | XLOC_032616 | ENSRNOT000000033661  | 0.951626426 | 1.92E-06 |
| TUCP_002158 | XLOC_090225 | ENSRNOT000000085479  | 0.95961285  | 7.91E-07 |
| TUCP_002158 | XLOC_090225 | ENSRNOT000000000995  | 0.991316177 | 3.83E-10 |
| TUCP_002158 | XLOC_090225 | ENSRNOT000000014533  | 0.953325041 | 1.61E-06 |
| TUCP_002158 | XLOC_090225 | ENSRNOT000000068354  | 0.985362905 | 5.16E-09 |
| TUCP_002158 | XLOC_090225 | ENSRNOT000000022167  | 0.952349614 | 1.79E-06 |
| TUCP_002158 | XLOC_090225 | ENSRNOT000000003082  | 0.984012468 | 8.01E-09 |
| TUCP_002158 | XLOC_090225 | ENSRNOT000000012963  | 0.951646592 | 1.92E-06 |
| TUCP_002158 | XLOC_090225 | ENSRNOT000000057504  | 0.964154175 | 4.39E-07 |
| TUCP_002158 | XLOC_090225 | ENSRNOT000000010968  | 0.989428209 | 1.02E-09 |
| TUCP_002158 | XLOC_090225 | ENSRNOT000000028877  | 0.982465746 | 1.27E-08 |
| TUCP_002158 | XLOC_090225 | ENSRNOT000000009448  | 0.958172097 | 9.40E-07 |
| TUCP_002158 | XLOC_090225 | ENSRNOT000000013182  | 0.966174893 | 3.29E-07 |
| TUCP_002158 | XLOC_090225 | ENSRNOT000000025731  | 0.979042469 | 3.07E-08 |
| TUCP_002158 | XLOC_090225 | ENSRNOT000000042973  | 0.955184655 | 1.32E-06 |
| TUCP_002158 | XLOC_090225 | ENSRNOT000000008813  | 0.962604989 | 5.41E-07 |
| TUCP_002158 | XLOC_090225 | ENSRNOT000000003458  | 0.984931738 | 5.97E-09 |
| TUCP_002158 | XLOC_090225 | ENSRNOT000000042117  | 0.959082324 | 8.43E-07 |
| TUCP_002158 | XLOC_090225 | ENSRNOT0000000031693 | 0.957894701 | 9.71E-07 |
| TUCP_002158 | XLOC_090225 | ENSRNOT000000078299  | 0.966609365 | 3.09E-07 |
| TUCP_002158 | XLOC_090225 | ENSRNOT000000006196  | 0.969451265 | 1.99E-07 |



|             |             |                    |              |          |
|-------------|-------------|--------------------|--------------|----------|
| TUCP_002158 | XLOC_090225 | ENSRNOT00000013809 | 0.967667988  | 2.64E-07 |
| TUCP_002158 | XLOC_090225 | ENSRNOT00000073087 | 0.95900023   | 8.52E-07 |
| TUCP_002158 | XLOC_090225 | ENSRNOT00000021487 | 0.975678565  | 6.43E-08 |
| TUCP_002158 | XLOC_090225 | ENSRNOT00000051028 | -0.972384346 | 1.21E-07 |
| TUCP_002158 | XLOC_090225 | ENSRNOT00000051067 | 0.988637529  | 1.46E-09 |
| TUCP_002158 | XLOC_090225 | ENSRNOT00000082393 | 0.955318013  | 1.30E-06 |
| TUCP_002158 | XLOC_090225 | ENSRNOT00000073138 | 0.958645224  | 8.89E-07 |
| TUCP_002158 | XLOC_090225 | ENSRNOT00000014560 | 0.954869606  | 1.37E-06 |
| TUCP_002158 | XLOC_090225 | ENSRNOT00000022128 | 0.986730165  | 3.17E-09 |
| TUCP_002158 | XLOC_090225 | ENSRNOT00000019738 | 0.965998276  | 3.38E-07 |
| TUCP_002158 | XLOC_090225 | ENSRNOT00000089912 | 0.951245124  | 2.00E-06 |
| TUCP_002656 | XLOC_112717 | ENSRNOT00000017147 | -0.954724713 | 1.39E-06 |
| TUCP_002655 | XLOC_112559 | ENSRNOT00000047105 | 0.958855083  | 8.67E-07 |
| TUCP_002655 | XLOC_112559 | ENSRNOT00000031904 | 0.965521781  | 3.62E-07 |
| TUCP_002655 | XLOC_112559 | ENSRNOT00000013747 | 0.952036441  | 1.84E-06 |
| TUCP_002655 | XLOC_112559 | ENSRNOT00000007351 | -0.954595143 | 1.41E-06 |
| TUCP_002655 | XLOC_112559 | ENSRNOT00000021348 | 0.958351227  | 9.20E-07 |
| TUCP_002655 | XLOC_112559 | ENSRNOT00000013507 | 0.951447354  | 1.96E-06 |
| TUCP_002655 | XLOC_112559 | ENSRNOT00000039341 | 0.960233011  | 7.33E-07 |
| TUCP_002655 | XLOC_112559 | ENSRNOT00000023638 | 0.95351462   | 1.58E-06 |
| TUCP_002655 | XLOC_112559 | ENSRNOT00000005220 | 0.953165316  | 1.64E-06 |
| TUCP_002655 | XLOC_112559 | ENSRNOT00000021116 | 0.950552755  | 2.14E-06 |
| TUCP_002655 | XLOC_112559 | ENSRNOT00000082100 | 0.956518985  | 1.14E-06 |
| TUCP_002655 | XLOC_112559 | ENSRNOT00000036054 | 0.972257377  | 1.24E-07 |
| TUCP_002655 | XLOC_112559 | ENSRNOT00000076763 | 0.977017775  | 4.86E-08 |
| TUCP_002655 | XLOC_112559 | ENSRNOT00000043216 | 0.951344975  | 1.98E-06 |
| TUCP_002655 | XLOC_112559 | ENSRNOT00000027411 | 0.954726824  | 1.39E-06 |
| TUCP_002655 | XLOC_112559 | ENSRNOT00000013758 | 0.965271732  | 3.75E-07 |
| TUCP_002655 | XLOC_112559 | ENSRNOT00000000696 | 0.950996042  | 2.05E-06 |
| TUCP_002655 | XLOC_112559 | ENSRNOT00000026543 | 0.951372975  | 1.97E-06 |
| TUCP_002655 | XLOC_112559 | ENSRNOT00000043345 | 0.977542011  | 4.33E-08 |
| TUCP_002655 | XLOC_112559 | ENSRNOT00000039842 | 0.950119001  | 2.24E-06 |
| TUCP_002655 | XLOC_112559 | ENSRNOT00000019923 | 0.976309896  | 5.65E-08 |
| TUCP_002655 | XLOC_112559 | ENSRNOT00000029439 | 0.964010582  | 4.48E-07 |
| TUCP_002655 | XLOC_112559 | ENSRNOT00000045285 | 0.960599834  | 7.00E-07 |
| TUCP_002655 | XLOC_112559 | ENSRNOT00000057160 | 0.961925333  | 5.91E-07 |
| TUCP_002655 | XLOC_112559 | ENSRNOT00000082699 | 0.95081603   | 2.09E-06 |
| TUCP_002655 | XLOC_112559 | ENSRNOT00000024402 | 0.969086601  | 2.11E-07 |
| TUCP_002655 | XLOC_112559 | ENSRNOT0000003641  | 0.961757956  | 6.04E-07 |
| TUCP_002655 | XLOC_112559 | ENSRNOT00000012671 | 0.952238961  | 1.81E-06 |
| TUCP_002655 | XLOC_112559 | ENSRNOT00000006680 | 0.954336223  | 1.45E-06 |
| TUCP_002655 | XLOC_112559 | ENSRNOT00000083215 | 0.950545587  | 2.14E-06 |
| TUCP_002655 | XLOC_112559 | ENSRNOT00000055187 | 0.965779322  | 3.49E-07 |
| TUCP_002655 | XLOC_112559 | ENSRNOT00000079866 | 0.957453956  | 1.02E-06 |
| TUCP_002655 | XLOC_112559 | ENSRNOT00000015203 | 0.972907424  | 1.10E-07 |
| TUCP_002655 | XLOC_112559 | ENSRNOT00000041044 | 0.961608612  | 6.16E-07 |
| TUCP_002655 | XLOC_112559 | ENSRNOT00000004032 | 0.963030562  | 5.11E-07 |
| TUCP_002655 | XLOC_112559 | ENSRNOT00000092741 | 0.959935675  | 7.60E-07 |
| TUCP_002655 | XLOC_112559 | ENSRNOT00000066526 | 0.956187625  | 1.18E-06 |
| TUCP_002655 | XLOC_112559 | ENSRNOT00000091909 | 0.95672516   | 1.11E-06 |
| TUCP_002655 | XLOC_112559 | ENSRNOT0000003780  | 0.95076263   | 2.10E-06 |

|             |             |                    |             |          |
|-------------|-------------|--------------------|-------------|----------|
| TUCP_002655 | XLOC_112559 | ENSRNOT00000078675 | 0.964033965 | 4.46E-07 |
| TUCP_002655 | XLOC_112559 | ENSRNOT00000013274 | 0.957147487 | 1.06E-06 |
| TUCP_002655 | XLOC_112559 | ENSRNOT00000022342 | 0.953399513 | 1.60E-06 |
| TUCP_002655 | XLOC_112559 | ENSRNOT00000027337 | 0.955061443 | 1.34E-06 |
| TUCP_002655 | XLOC_112559 | ENSRNOT00000048063 | 0.95071743  | 2.11E-06 |
| TUCP_002655 | XLOC_112559 | ENSRNOT00000079595 | 0.952834837 | 1.70E-06 |
| TUCP_002655 | XLOC_112559 | ENSRNOT00000079895 | 0.954818641 | 1.37E-06 |
| TUCP_002655 | XLOC_112559 | ENSRNOT00000025981 | 0.962920153 | 5.19E-07 |
| TUCP_002655 | XLOC_112559 | ENSRNOT00000047387 | 0.951654876 | 1.92E-06 |
| TUCP_002655 | XLOC_112559 | ENSRNOT00000045488 | 0.960352229 | 7.22E-07 |
| TUCP_002655 | XLOC_112559 | ENSRNOT00000058072 | 0.951030047 | 2.04E-06 |
| TUCP_002655 | XLOC_112559 | ENSRNOT00000017629 | 0.957290528 | 1.04E-06 |
| TUCP_002655 | XLOC_112559 | ENSRNOT00000008803 | 0.976466409 | 5.46E-08 |
| TUCP_002655 | XLOC_112559 | ENSRNOT00000005664 | 0.972980142 | 1.08E-07 |
| TUCP_002655 | XLOC_112559 | ENSRNOT00000004508 | 0.967954902 | 2.52E-07 |
| TUCP_002655 | XLOC_112559 | ENSRNOT00000027910 | 0.960904295 | 6.74E-07 |
| TUCP_002655 | XLOC_112559 | ENSRNOT00000078475 | 0.957846023 | 9.77E-07 |
| TUCP_002655 | XLOC_112559 | ENSRNOT00000040513 | 0.958805125 | 8.72E-07 |
| TUCP_002655 | XLOC_112559 | ENSRNOT00000000302 | 0.953536807 | 1.58E-06 |
| TUCP_002655 | XLOC_112559 | ENSRNOT00000079442 | 0.976112546 | 5.88E-08 |
| TUCP_002655 | XLOC_112559 | ENSRNOT00000076729 | 0.96256885  | 5.43E-07 |
| TUCP_002655 | XLOC_112559 | ENSRNOT00000090665 | 0.961406029 | 6.32E-07 |
| TUCP_002655 | XLOC_112559 | ENSRNOT00000073526 | 0.97017295  | 1.77E-07 |
| TUCP_002655 | XLOC_112559 | ENSRNOT00000016191 | 0.956172086 | 1.18E-06 |
| TUCP_002655 | XLOC_112559 | ENSRNOT00000089970 | 0.961969115 | 5.88E-07 |
| TUCP_002655 | XLOC_112559 | ENSRNOT00000038807 | 0.968461971 | 2.33E-07 |
| TUCP_002655 | XLOC_112559 | ENSRNOT00000065229 | 0.964772886 | 4.03E-07 |
| TUCP_002655 | XLOC_112559 | ENSRNOT00000020673 | 0.955409602 | 1.29E-06 |
| TUCP_002655 | XLOC_112559 | ENSRNOT00000045882 | 0.964086369 | 4.43E-07 |
| TUCP_002655 | XLOC_112559 | ENSRNOT00000023989 | 0.950046388 | 2.25E-06 |
| TUCP_002655 | XLOC_112559 | ENSRNOT00000003102 | 0.953397819 | 1.60E-06 |
| TUCP_002655 | XLOC_112559 | ENSRNOT00000016209 | 0.956821661 | 1.10E-06 |
| TUCP_002655 | XLOC_112559 | ENSRNOT00000086122 | 0.956644956 | 1.12E-06 |
| TUCP_002655 | XLOC_112559 | ENSRNOT00000074972 | 0.952059068 | 1.84E-06 |
| TUCP_002655 | XLOC_112559 | ENSRNOT00000037790 | 0.979833264 | 2.54E-08 |
| TUCP_002655 | XLOC_112559 | ENSRNOT00000088054 | 0.97286216  | 1.11E-07 |
| TUCP_002655 | XLOC_112559 | ENSRNOT00000074177 | 0.966495316 | 3.14E-07 |
| TUCP_002655 | XLOC_112559 | ENSRNOT00000000157 | 0.957929615 | 9.67E-07 |
| TUCP_002655 | XLOC_112559 | ENSRNOT00000011926 | 0.953075511 | 1.66E-06 |
| TUCP_002655 | XLOC_112559 | ENSRNOT00000010992 | 0.967307263 | 2.78E-07 |
| TUCP_002655 | XLOC_112559 | ENSRNOT00000038647 | 0.969857956 | 1.86E-07 |
| TUCP_002655 | XLOC_112559 | ENSRNOT00000076669 | 0.960099781 | 7.45E-07 |
| TUCP_002655 | XLOC_112559 | ENSRNOT00000063956 | 0.956481519 | 1.14E-06 |
| TUCP_002655 | XLOC_112559 | ENSRNOT00000066024 | 0.955726642 | 1.24E-06 |
| TUCP_002655 | XLOC_112559 | ENSRNOT00000067663 | 0.963715615 | 4.66E-07 |
| TUCP_002655 | XLOC_112559 | ENSRNOT00000072241 | 0.953443684 | 1.59E-06 |
| TUCP_002655 | XLOC_112559 | ENSRNOT00000088279 | 0.975981212 | 6.05E-08 |
| TUCP_002655 | XLOC_112559 | ENSRNOT00000004570 | 0.963375727 | 4.88E-07 |
| TUCP_002655 | XLOC_112559 | ENSRNOT00000012736 | 0.956284138 | 1.17E-06 |
| TUCP_002655 | XLOC_112559 | ENSRNOT00000080928 | 0.954753946 | 1.38E-06 |
| TUCP_002655 | XLOC_112559 | ENSRNOT00000036072 | 0.9636184   | 4.72E-07 |

|             |             |                    |              |          |
|-------------|-------------|--------------------|--------------|----------|
| TUCP_002655 | XLOC_112559 | ENSRNOT0000009342  | 0.952779465  | 1.71E-06 |
| TUCP_002655 | XLOC_112559 | ENSRNOT00000079464 | 0.953979345  | 1.50E-06 |
| TUCP_002655 | XLOC_112559 | ENSRNOT00000012048 | 0.977259477  | 4.61E-08 |
| TUCP_002655 | XLOC_112559 | ENSRNOT00000026941 | 0.960091004  | 7.46E-07 |
| TUCP_002655 | XLOC_112559 | ENSRNOT00000026174 | 0.960852203  | 6.78E-07 |
| TUCP_002655 | XLOC_112559 | ENSRNOT00000065529 | 0.963336437  | 4.91E-07 |
| TUCP_002655 | XLOC_112559 | ENSRNOT00000027452 | 0.955452855  | 1.28E-06 |
| TUCP_002655 | XLOC_112559 | ENSRNOT00000034704 | 0.952765191  | 1.71E-06 |
| TUCP_002655 | XLOC_112559 | ENSRNOT00000075558 | 0.972121117  | 1.27E-07 |
| TUCP_002655 | XLOC_112559 | ENSRNOT00000036750 | 0.960573385  | 7.02E-07 |
| TUCP_002655 | XLOC_112559 | ENSRNOT00000025092 | 0.972460172  | 1.19E-07 |
| TUCP_002655 | XLOC_112559 | ENSRNOT00000047975 | 0.957207778  | 1.05E-06 |
| TUCP_002655 | XLOC_112559 | ENSRNOT00000021674 | 0.965392856  | 3.69E-07 |
| TUCP_002655 | XLOC_112559 | ENSRNOT00000067866 | 0.96233919   | 5.60E-07 |
| TUCP_002655 | XLOC_112559 | ENSRNOT00000090299 | 0.953384527  | 1.60E-06 |
| TUCP_002655 | XLOC_112559 | ENSRNOT00000004140 | 0.952105323  | 1.83E-06 |
| TUCP_002655 | XLOC_112559 | ENSRNOT00000015799 | 0.951303982  | 1.99E-06 |
| TUCP_002654 | XLOC_112556 | ENSRNOT00000055536 | 0.950269527  | 2.20E-06 |
| TUCP_002654 | XLOC_112556 | ENSRNOT00000083256 | 0.968721917  | 2.24E-07 |
| TUCP_002654 | XLOC_112556 | ENSRNOT00000016088 | 0.959251457  | 8.26E-07 |
| TUCP_002654 | XLOC_112556 | ENSRNOT00000061054 | 0.957528018  | 1.01E-06 |
| TUCP_002654 | XLOC_112556 | ENSRNOT00000085954 | 0.954552338  | 1.41E-06 |
| TUCP_002654 | XLOC_112556 | ENSRNOT00000027752 | 0.959114351  | 8.40E-07 |
| TUCP_002654 | XLOC_112556 | ENSRNOT00000028818 | 0.959512717  | 8.00E-07 |
| TUCP_002654 | XLOC_112556 | ENSRNOT00000022255 | 0.966541765  | 3.12E-07 |
| TUCP_002654 | XLOC_112556 | ENSRNOT00000064776 | -0.958184783 | 9.38E-07 |
| TUCP_002654 | XLOC_112556 | ENSRNOT00000079152 | 0.953028948  | 1.66E-06 |
| TUCP_002654 | XLOC_112556 | ENSRNOT00000081958 | 0.951780415  | 1.89E-06 |
| TUCP_002654 | XLOC_112556 | ENSRNOT00000038449 | 0.968106681  | 2.46E-07 |
| TUCP_002654 | XLOC_112556 | ENSRNOT00000013088 | 0.975120398  | 7.20E-08 |
| TUCP_002654 | XLOC_112556 | ENSRNOT00000075793 | 0.952668712  | 1.73E-06 |
| TUCP_002654 | XLOC_112556 | ENSRNOT00000038188 | 0.951007313  | 2.05E-06 |
| TUCP_002654 | XLOC_112556 | ENSRNOT00000085334 | 0.962326876  | 5.61E-07 |
| TUCP_002654 | XLOC_112556 | ENSRNOT00000043827 | 0.966935395  | 2.94E-07 |
| TUCP_002654 | XLOC_112556 | ENSRNOT00000012757 | 0.978018627  | 3.90E-08 |
| TUCP_002654 | XLOC_112556 | ENSRNOT00000035427 | 0.971521002  | 1.41E-07 |
| TUCP_002654 | XLOC_112556 | ENSRNOT00000091990 | -0.960278659 | 7.28E-07 |
| TUCP_002654 | XLOC_112556 | ENSRNOT00000012247 | 0.968440172  | 2.34E-07 |
| TUCP_002654 | XLOC_112556 | ENSRNOT00000031083 | 0.971594539  | 1.39E-07 |
| TUCP_002654 | XLOC_112556 | ENSRNOT00000006109 | 0.951054612  | 2.04E-06 |
| TUCP_002654 | XLOC_112556 | ENSRNOT00000065811 | 0.950809405  | 2.09E-06 |
| TUCP_002654 | XLOC_112556 | ENSRNOT00000074131 | 0.952072725  | 1.84E-06 |
| TUCP_002654 | XLOC_112556 | ENSRNOT00000046268 | -0.953112615 | 1.65E-06 |
| TUCP_002653 | XLOC_112508 | ENSRNOT00000055124 | 0.95139099   | 1.97E-06 |
| TUCP_002653 | XLOC_112508 | ENSRNOT00000009969 | 0.954846936  | 1.37E-06 |
| TUCP_002653 | XLOC_112508 | ENSRNOT00000048495 | 0.959407658  | 8.11E-07 |
| TUCP_003313 | XLOC_142946 | ENSRNOT00000009649 | 0.957414456  | 1.03E-06 |
| TUCP_003313 | XLOC_142946 | ENSRNOT00000009839 | -0.958711464 | 8.82E-07 |
| TUCP_003313 | XLOC_142946 | ENSRNOT00000089966 | 0.969297249  | 2.04E-07 |
| TUCP_003313 | XLOC_142946 | ENSRNOT00000006402 | 0.974120837  | 8.75E-08 |
| TUCP_003313 | XLOC_142946 | ENSRNOT00000067455 | 0.961516306  | 6.23E-07 |

|             |             |                     |              |          |
|-------------|-------------|---------------------|--------------|----------|
| TUCP_003313 | XLOC_142946 | ENSRNOT00000022778  | 0.971943284  | 1.31E-07 |
| TUCP_003313 | XLOC_142946 | ENSRNOT00000025391  | -0.960923965 | 6.72E-07 |
| TUCP_003313 | XLOC_142946 | ENSRNOT00000054987  | -0.953920083 | 1.51E-06 |
| TUCP_003313 | XLOC_142946 | ENSRNOT00000014603  | 0.97654764   | 5.37E-08 |
| TUCP_003313 | XLOC_142946 | ENSRNOT00000018449  | -0.972451829 | 1.19E-07 |
| TUCP_003313 | XLOC_142946 | ENSRNOT00000056622  | -0.954671923 | 1.40E-06 |
| TUCP_003313 | XLOC_142946 | ENSRNOT00000057752  | -0.958903574 | 8.62E-07 |
| TUCP_003313 | XLOC_142946 | ENSRNOT00000032588  | -0.970007653 | 1.82E-07 |
| TUCP_003313 | XLOC_142946 | ENSRNOT00000009687  | 0.974490689  | 8.15E-08 |
| TUCP_003313 | XLOC_142946 | ENSRNOT000000087625 | -0.955507016 | 1.27E-06 |
| TUCP_003313 | XLOC_142946 | ENSRNOT00000064160  | -0.964504946 | 4.18E-07 |
| TUCP_003313 | XLOC_142946 | ENSRNOT00000008464  | 0.964248235  | 4.33E-07 |
| TUCP_003313 | XLOC_142946 | ENSRNOT00000035996  | 0.960269063  | 7.29E-07 |
| TUCP_003313 | XLOC_142946 | ENSRNOT000000081899 | 0.961756871  | 6.04E-07 |
| TUCP_003313 | XLOC_142946 | ENSRNOT00000000448  | 0.963295043  | 4.93E-07 |
| TUCP_003313 | XLOC_142946 | ENSRNOT00000028084  | -0.971811049 | 1.34E-07 |
| TUCP_003313 | XLOC_142946 | ENSRNOT000000083189 | 0.950562772  | 2.14E-06 |
| TUCP_003313 | XLOC_142946 | ENSRNOT00000066484  | 0.971208484  | 1.48E-07 |
| TUCP_003313 | XLOC_142946 | ENSRNOT00000001638  | -0.954382414 | 1.44E-06 |
| TUCP_003313 | XLOC_142946 | ENSRNOT00000055251  | -0.966428208 | 3.17E-07 |
| TUCP_003313 | XLOC_142946 | ENSRNOT00000019630  | -0.966532591 | 3.13E-07 |
| TUCP_003313 | XLOC_142946 | ENSRNOT00000014738  | 0.952899634  | 1.69E-06 |
| TUCP_003313 | XLOC_142946 | ENSRNOT00000019652  | -0.958124664 | 9.45E-07 |
| TUCP_003313 | XLOC_142946 | ENSRNOT000000086812 | -0.959902186 | 7.63E-07 |
| TUCP_003313 | XLOC_142946 | ENSRNOT00000023033  | 0.95999297   | 7.55E-07 |
| TUCP_003313 | XLOC_142946 | ENSRNOT00000019392  | 0.954746219  | 1.39E-06 |
| TUCP_003313 | XLOC_142946 | ENSRNOT00000011827  | -0.959809049 | 7.72E-07 |
| TUCP_003313 | XLOC_142946 | ENSRNOT00000041033  | 0.951763353  | 1.90E-06 |
| TUCP_003313 | XLOC_142946 | ENSRNOT00000041177  | 0.959913785  | 7.62E-07 |
| TUCP_003313 | XLOC_142946 | ENSRNOT00000010712  | 0.95255115   | 1.75E-06 |
| TUCP_003313 | XLOC_142946 | ENSRNOT00000078589  | 0.952545808  | 1.75E-06 |
| TUCP_003313 | XLOC_142946 | ENSRNOT00000091065  | -0.963419532 | 4.85E-07 |
| TUCP_003313 | XLOC_142946 | ENSRNOT00000024694  | -0.972856802 | 1.11E-07 |
| TUCP_002651 | XLOC_112412 | ENSRNOT00000001215  | 0.975214261  | 7.07E-08 |
| TUCP_002651 | XLOC_112412 | ENSRNOT00000030074  | 0.964408372  | 4.24E-07 |
| TUCP_002651 | XLOC_112412 | ENSRNOT00000005958  | 0.951197884  | 2.01E-06 |
| TUCP_002651 | XLOC_112412 | ENSRNOT00000007698  | -0.963590654 | 4.74E-07 |
| TUCP_002651 | XLOC_112412 | ENSRNOT00000039551  | -0.960565451 | 7.03E-07 |
| TUCP_002651 | XLOC_112412 | ENSRNOT00000086590  | 0.968868764  | 2.19E-07 |
| TUCP_002651 | XLOC_112412 | ENSRNOT00000081796  | 0.973229054  | 1.04E-07 |
| TUCP_002651 | XLOC_112412 | ENSRNOT000000082998 | 0.961261116  | 6.44E-07 |
| TUCP_002651 | XLOC_112412 | ENSRNOT00000048910  | -0.986225507 | 3.82E-09 |
| TUCP_002651 | XLOC_112412 | ENSRNOT00000015006  | 0.954415526  | 1.44E-06 |
| TUCP_002651 | XLOC_112412 | ENSRNOT00000075397  | 0.964268108  | 4.32E-07 |
| TUCP_002651 | XLOC_112412 | ENSRNOT00000007350  | 0.971578067  | 1.39E-07 |
| TUCP_002651 | XLOC_112412 | ENSRNOT00000020051  | 0.955722933  | 1.24E-06 |
| TUCP_002651 | XLOC_112412 | ENSRNOT00000009080  | -0.956329546 | 1.16E-06 |
| TUCP_002651 | XLOC_112412 | ENSRNOT00000063930  | -0.95087815  | 2.07E-06 |
| TUCP_002651 | XLOC_112412 | ENSRNOT000000087062 | 0.952397205  | 1.78E-06 |
| TUCP_002651 | XLOC_112412 | ENSRNOT00000000181  | 0.957579125  | 1.01E-06 |
| TUCP_002651 | XLOC_112412 | ENSRNOT00000003891  | 0.962610327  | 5.40E-07 |

|             |             |                    |              |          |
|-------------|-------------|--------------------|--------------|----------|
| TUCP_002651 | XLOC_112412 | ENSRNOT00000068353 | 0.959536085  | 7.98E-07 |
| TUCP_002651 | XLOC_112412 | ENSRNOT00000013116 | -0.951682274 | 1.91E-06 |
| TUCP_002651 | XLOC_112412 | ENSRNOT00000048613 | 0.968959831  | 2.15E-07 |
| TUCP_002651 | XLOC_112412 | ENSRNOT00000006340 | 0.954252147  | 1.46E-06 |
| TUCP_002651 | XLOC_112412 | ENSRNOT00000023638 | 0.957085969  | 1.07E-06 |
| TUCP_002651 | XLOC_112412 | ENSRNOT00000013025 | -0.962022198 | 5.84E-07 |
| TUCP_002651 | XLOC_112412 | ENSRNOT00000082863 | 0.956908402  | 1.09E-06 |
| TUCP_002651 | XLOC_112412 | ENSRNOT00000005220 | 0.957755409  | 9.87E-07 |
| TUCP_002651 | XLOC_112412 | ENSRNOT00000049459 | -0.968728436 | 2.23E-07 |
| TUCP_002651 | XLOC_112412 | ENSRNOT00000045326 | 0.972074427  | 1.28E-07 |
| TUCP_002651 | XLOC_112412 | ENSRNOT00000014309 | -0.951238704 | 2.00E-06 |
| TUCP_002651 | XLOC_112412 | ENSRNOT00000010399 | 0.963892509  | 4.55E-07 |
| TUCP_002651 | XLOC_112412 | ENSRNOT00000045833 | 0.95312125   | 1.65E-06 |
| TUCP_002651 | XLOC_112412 | ENSRNOT00000086310 | -0.955241706 | 1.31E-06 |
| TUCP_002651 | XLOC_112412 | ENSRNOT00000010030 | -0.960463492 | 7.12E-07 |
| TUCP_002651 | XLOC_112412 | ENSRNOT00000074023 | 0.951642931  | 1.92E-06 |
| TUCP_002651 | XLOC_112412 | ENSRNOT00000015092 | 0.960371486  | 7.20E-07 |
| TUCP_002651 | XLOC_112412 | ENSRNOT00000065300 | 0.950776621  | 2.09E-06 |
| TUCP_002651 | XLOC_112412 | ENSRNOT00000030850 | 0.968717888  | 2.24E-07 |
| TUCP_002651 | XLOC_112412 | ENSRNOT00000055582 | 0.951218819  | 2.00E-06 |
| TUCP_002651 | XLOC_112412 | ENSRNOT00000081981 | 0.962130951  | 5.76E-07 |
| TUCP_002651 | XLOC_112412 | ENSRNOT00000001679 | 0.970774749  | 1.60E-07 |
| TUCP_002651 | XLOC_112412 | ENSRNOT00000048754 | -0.957539245 | 1.01E-06 |
| TUCP_002651 | XLOC_112412 | ENSRNOT00000006752 | 0.975025167  | 7.34E-08 |
| TUCP_002651 | XLOC_112412 | ENSRNOT00000019057 | -0.952699002 | 1.72E-06 |
| TUCP_002651 | XLOC_112412 | ENSRNOT00000019213 | 0.959290261  | 8.22E-07 |
| TUCP_002651 | XLOC_112412 | ENSRNOT00000010541 | 0.951047661  | 2.04E-06 |
| TUCP_002651 | XLOC_112412 | ENSRNOT00000001507 | 0.961316954  | 6.39E-07 |
| TUCP_002651 | XLOC_112412 | ENSRNOT00000081077 | -0.969573752 | 1.95E-07 |
| TUCP_002651 | XLOC_112412 | ENSRNOT00000022097 | 0.961606785  | 6.16E-07 |
| TUCP_002651 | XLOC_112412 | ENSRNOT00000073370 | 0.957055746  | 1.07E-06 |
| TUCP_002651 | XLOC_112412 | ENSRNOT00000083568 | 0.982946091  | 1.10E-08 |
| TUCP_002651 | XLOC_112412 | ENSRNOT00000025079 | -0.972722078 | 1.14E-07 |
| TUCP_002651 | XLOC_112412 | ENSRNOT00000073019 | 0.963849278  | 4.58E-07 |
| TUCP_002651 | XLOC_112412 | ENSRNOT00000084709 | 0.98207455   | 1.41E-08 |
| TUCP_002651 | XLOC_112412 | ENSRNOT00000065978 | 0.96691642   | 2.95E-07 |
| TUCP_002651 | XLOC_112412 | ENSRNOT00000039177 | -0.951341299 | 1.98E-06 |
| TUCP_002651 | XLOC_112412 | ENSRNOT00000081047 | 0.963785926  | 4.62E-07 |
| TUCP_002651 | XLOC_112412 | ENSRNOT00000092068 | 0.962460421  | 5.51E-07 |
| TUCP_002651 | XLOC_112412 | ENSRNOT00000076820 | 0.957315019  | 1.04E-06 |
| TUCP_002651 | XLOC_112412 | ENSRNOT00000021458 | -0.954015886 | 1.50E-06 |
| TUCP_002651 | XLOC_112412 | ENSRNOT00000011926 | 0.965130903  | 3.83E-07 |
| TUCP_002651 | XLOC_112412 | ENSRNOT00000054761 | -0.950085234 | 2.24E-06 |
| TUCP_002651 | XLOC_112412 | ENSRNOT00000024402 | 0.959793766  | 7.73E-07 |
| TUCP_002651 | XLOC_112412 | ENSRNOT00000007824 | -0.951718172 | 1.91E-06 |
| TUCP_002651 | XLOC_112412 | ENSRNOT00000017995 | 0.950753895  | 2.10E-06 |
| TUCP_002651 | XLOC_112412 | ENSRNOT00000000120 | 0.963837796  | 4.58E-07 |
| TUCP_002651 | XLOC_112412 | ENSRNOT00000024677 | 0.965039654  | 3.88E-07 |
| TUCP_002651 | XLOC_112412 | ENSRNOT00000019519 | 0.973054877  | 1.07E-07 |
| TUCP_002651 | XLOC_112412 | ENSRNOT00000089933 | 0.970125014  | 1.78E-07 |
| TUCP_002651 | XLOC_112412 | ENSRNOT00000064930 | 0.96111056   | 6.56E-07 |

|             |             |                    |              |          |
|-------------|-------------|--------------------|--------------|----------|
| TUCP_002651 | XLOC_112412 | ENSRNOT00000030109 | 0.972573324  | 1.17E-07 |
| TUCP_002651 | XLOC_112412 | ENSRNOT00000037456 | 0.964992726  | 3.90E-07 |
| TUCP_002651 | XLOC_112412 | ENSRNOT00000090461 | 0.95269222   | 1.72E-06 |
| TUCP_002651 | XLOC_112412 | ENSRNOT00000067150 | 0.972808433  | 1.12E-07 |
| TUCP_002651 | XLOC_112412 | ENSRNOT00000026481 | 0.969518065  | 1.97E-07 |
| TUCP_002651 | XLOC_112412 | ENSRNOT00000068134 | 0.974491652  | 8.15E-08 |
| TUCP_002651 | XLOC_112412 | ENSRNOT00000046807 | -0.951878092 | 1.87E-06 |
| TUCP_002651 | XLOC_112412 | ENSRNOT00000073983 | 0.964533925  | 4.16E-07 |
| TUCP_002651 | XLOC_112412 | ENSRNOT00000047126 | -0.968108218 | 2.46E-07 |
| TUCP_002651 | XLOC_112412 | ENSRNOT00000000577 | 0.965719421  | 3.52E-07 |
| TUCP_002651 | XLOC_112412 | ENSRNOT00000032780 | 0.957013119  | 1.08E-06 |
| TUCP_002651 | XLOC_112412 | ENSRNOT00000010783 | -0.962115172 | 5.77E-07 |
| TUCP_002651 | XLOC_112412 | ENSRNOT00000083578 | 0.954645314  | 1.40E-06 |
| TUCP_002651 | XLOC_112412 | ENSRNOT00000015188 | 0.968602625  | 2.28E-07 |
| TUCP_002651 | XLOC_112412 | ENSRNOT00000033677 | -0.951293298 | 1.99E-06 |
| TUCP_002651 | XLOC_112412 | ENSRNOT00000065045 | 0.950406093  | 2.17E-06 |
| TUCP_002651 | XLOC_112412 | ENSRNOT00000005686 | -0.972242135 | 1.24E-07 |
| TUCP_002651 | XLOC_112412 | ENSRNOT00000077367 | -0.955874291 | 1.22E-06 |
| TUCP_002651 | XLOC_112412 | ENSRNOT00000072762 | -0.970522885 | 1.67E-07 |
| TUCP_002651 | XLOC_112412 | ENSRNOT00000019820 | 0.966753096  | 3.03E-07 |
| TUCP_002651 | XLOC_112412 | ENSRNOT00000066708 | 0.961495808  | 6.25E-07 |
| TUCP_002651 | XLOC_112412 | ENSRNOT00000042125 | 0.95477834   | 1.38E-06 |
| TUCP_002651 | XLOC_112412 | ENSRNOT00000016629 | 0.952724869  | 1.72E-06 |
| TUCP_002651 | XLOC_112412 | ENSRNOT00000011832 | -0.981358337 | 1.72E-08 |
| TUCP_002651 | XLOC_112412 | ENSRNOT00000073919 | 0.954378227  | 1.44E-06 |
| TUCP_002651 | XLOC_112412 | ENSRNOT00000073643 | -0.963928765 | 4.53E-07 |
| TUCP_002651 | XLOC_112412 | ENSRNOT00000087278 | -0.9823809   | 1.30E-08 |
| TUCP_002651 | XLOC_112412 | ENSRNOT00000052002 | 0.965009365  | 3.90E-07 |
| TUCP_002651 | XLOC_112412 | ENSRNOT00000015678 | -0.975068236 | 7.28E-08 |
| TUCP_002651 | XLOC_112412 | ENSRNOT00000006835 | 0.958639434  | 8.89E-07 |
| TUCP_002651 | XLOC_112412 | ENSRNOT00000077727 | -0.951791424 | 1.89E-06 |
| TUCP_002651 | XLOC_112412 | ENSRNOT00000024841 | -0.955792751 | 1.23E-06 |
| TUCP_002651 | XLOC_112412 | ENSRNOT00000044346 | -0.963848014 | 4.58E-07 |
| TUCP_002651 | XLOC_112412 | ENSRNOT00000016568 | 0.96236559   | 5.58E-07 |
| TUCP_002651 | XLOC_112412 | ENSRNOT00000083968 | -0.954907452 | 1.36E-06 |
| TUCP_002651 | XLOC_112412 | ENSRNOT00000009150 | 0.975307689  | 6.94E-08 |
| TUCP_002651 | XLOC_112412 | ENSRNOT00000068745 | 0.9576749    | 9.96E-07 |
| TUCP_002651 | XLOC_112412 | ENSRNOT00000023619 | 0.950047508  | 2.25E-06 |
| TUCP_002651 | XLOC_112412 | ENSRNOT00000086798 | -0.977518711 | 4.36E-08 |
| TUCP_002651 | XLOC_112412 | ENSRNOT00000083967 | 0.955289658  | 1.31E-06 |
| TUCP_002651 | XLOC_112412 | ENSRNOT00000009156 | 0.951676263  | 1.91E-06 |
| TUCP_002651 | XLOC_112412 | ENSRNOT00000090912 | 0.952505216  | 1.76E-06 |
| TUCP_002651 | XLOC_112412 | ENSRNOT00000009462 | 0.960361481  | 7.21E-07 |
| TUCP_002651 | XLOC_112412 | ENSRNOT00000074212 | 0.957471808  | 1.02E-06 |
| TUCP_002651 | XLOC_112412 | ENSRNOT00000091909 | 0.955184284  | 1.32E-06 |
| TUCP_002651 | XLOC_112412 | ENSRNOT00000068452 | 0.972017867  | 1.29E-07 |
| TUCP_002651 | XLOC_112412 | ENSRNOT00000046973 | 0.970800551  | 1.59E-07 |
| TUCP_002651 | XLOC_112412 | ENSRNOT00000024352 | 0.978357374  | 3.61E-08 |
| TUCP_002651 | XLOC_112412 | ENSRNOT00000058351 | 0.961361518  | 6.36E-07 |
| TUCP_002651 | XLOC_112412 | ENSRNOT00000021729 | 0.952332241  | 1.79E-06 |
| TUCP_002651 | XLOC_112412 | ENSRNOT00000028266 | 0.953792183  | 1.53E-06 |

|             |             |                    |              |          |
|-------------|-------------|--------------------|--------------|----------|
| TUCP_002651 | XLOC_112412 | ENSRNOT00000072118 | 0.967040419  | 2.90E-07 |
| TUCP_002651 | XLOC_112412 | ENSRNOT00000003780 | 0.96142168   | 6.31E-07 |
| TUCP_002651 | XLOC_112412 | ENSRNOT00000026643 | 0.971856877  | 1.33E-07 |
| TUCP_002651 | XLOC_112412 | ENSRNOT00000001403 | 0.968031346  | 2.49E-07 |
| TUCP_002651 | XLOC_112412 | ENSRNOT00000022190 | -0.960631944 | 6.97E-07 |
| TUCP_002651 | XLOC_112412 | ENSRNOT00000016132 | -0.955825332 | 1.23E-06 |
| TUCP_002651 | XLOC_112412 | ENSRNOT00000025913 | -0.961439187 | 6.29E-07 |
| TUCP_002651 | XLOC_112412 | ENSRNOT00000090123 | 0.950984031  | 2.05E-06 |
| TUCP_002651 | XLOC_112412 | ENSRNOT00000019133 | 0.954553087  | 1.41E-06 |
| TUCP_002651 | XLOC_112412 | ENSRNOT00000072299 | 0.957598514  | 1.01E-06 |
| TUCP_002651 | XLOC_112412 | ENSRNOT00000024119 | 0.969825695  | 1.87E-07 |
| TUCP_002651 | XLOC_112412 | ENSRNOT00000091448 | -0.959886367 | 7.65E-07 |
| TUCP_002651 | XLOC_112412 | ENSRNOT00000018122 | 0.954877029  | 1.37E-06 |
| TUCP_002651 | XLOC_112412 | ENSRNOT00000025966 | 0.97092391   | 1.56E-07 |
| TUCP_002651 | XLOC_112412 | ENSRNOT00000050515 | 0.963373342  | 4.88E-07 |
| TUCP_002651 | XLOC_112412 | ENSRNOT00000024933 | -0.953254523 | 1.62E-06 |
| TUCP_002651 | XLOC_112412 | ENSRNOT00000008982 | 0.971832871  | 1.33E-07 |
| TUCP_002651 | XLOC_112412 | ENSRNOT00000086260 | -0.958859813 | 8.66E-07 |
| TUCP_002651 | XLOC_112412 | ENSRNOT00000064667 | -0.962773746 | 5.29E-07 |
| TUCP_002651 | XLOC_112412 | ENSRNOT00000068381 | 0.978601854  | 3.41E-08 |
| TUCP_002651 | XLOC_112412 | ENSRNOT00000031977 | 0.955763024  | 1.24E-06 |
| TUCP_002651 | XLOC_112412 | ENSRNOT00000020941 | 0.95012885   | 2.23E-06 |
| TUCP_002651 | XLOC_112412 | ENSRNOT00000080207 | 0.952806828  | 1.70E-06 |
| TUCP_002651 | XLOC_112412 | ENSRNOT00000056100 | -0.951594191 | 1.93E-06 |
| TUCP_002651 | XLOC_112412 | ENSRNOT00000083220 | 0.964159564  | 4.39E-07 |
| TUCP_002651 | XLOC_112412 | ENSRNOT00000078102 | 0.954871079  | 1.37E-06 |
| TUCP_002651 | XLOC_112412 | ENSRNOT00000009811 | 0.97092064   | 1.56E-07 |
| TUCP_002651 | XLOC_112412 | ENSRNOT00000034883 | -0.970777836 | 1.60E-07 |
| TUCP_002651 | XLOC_112412 | ENSRNOT00000020155 | 0.953150646  | 1.64E-06 |
| TUCP_002651 | XLOC_112412 | ENSRNOT00000025827 | 0.959920231  | 7.61E-07 |
| TUCP_002651 | XLOC_112412 | ENSRNOT00000072357 | -0.962188512 | 5.71E-07 |
| TUCP_002651 | XLOC_112412 | ENSRNOT00000026531 | -0.95625564  | 1.17E-06 |
| TUCP_002651 | XLOC_112412 | ENSRNOT00000084031 | 0.973159225  | 1.05E-07 |
| TUCP_002651 | XLOC_112412 | ENSRNOT00000008113 | -0.952177314 | 1.82E-06 |
| TUCP_002651 | XLOC_112412 | ENSRNOT00000018584 | 0.957987069  | 9.61E-07 |
| TUCP_002651 | XLOC_112412 | ENSRNOT00000005910 | -0.954709249 | 1.39E-06 |
| TUCP_002651 | XLOC_112412 | ENSRNOT00000017624 | 0.958829912  | 8.69E-07 |
| TUCP_002651 | XLOC_112412 | ENSRNOT00000003992 | -0.957403771 | 1.03E-06 |
| TUCP_002651 | XLOC_112412 | ENSRNOT00000055437 | -0.954455872 | 1.43E-06 |
| TUCP_002651 | XLOC_112412 | ENSRNOT00000010463 | 0.953706229  | 1.55E-06 |
| TUCP_002651 | XLOC_112412 | ENSRNOT00000027910 | 0.970976924  | 1.54E-07 |
| TUCP_002651 | XLOC_112412 | ENSRNOT00000078475 | 0.9761207    | 5.87E-08 |
| TUCP_002651 | XLOC_112412 | ENSRNOT00000004956 | 0.95087351   | 2.07E-06 |
| TUCP_002651 | XLOC_112412 | ENSRNOT00000089211 | 0.958256159  | 9.31E-07 |
| TUCP_002651 | XLOC_112412 | ENSRNOT00000040169 | 0.952402846  | 1.78E-06 |
| TUCP_002651 | XLOC_112412 | ENSRNOT00000013067 | -0.966247471 | 3.26E-07 |
| TUCP_002651 | XLOC_112412 | ENSRNOT00000081725 | 0.985678609  | 4.63E-09 |
| TUCP_002651 | XLOC_112412 | ENSRNOT00000020383 | 0.975663555  | 6.45E-08 |
| TUCP_002651 | XLOC_112412 | ENSRNOT00000005459 | 0.987629035  | 2.24E-09 |
| TUCP_002651 | XLOC_112412 | ENSRNOT00000064535 | -0.965533149 | 3.62E-07 |
| TUCP_002651 | XLOC_112412 | ENSRNOT00000005073 | 0.976200302  | 5.78E-08 |

|             |             |                    |              |          |
|-------------|-------------|--------------------|--------------|----------|
| TUCP_002651 | XLOC_112412 | ENSRNOT00000012760 | -0.955313901 | 1.30E-06 |
| TUCP_002651 | XLOC_112412 | ENSRNOT00000000302 | 0.956290213  | 1.17E-06 |
| TUCP_002651 | XLOC_112412 | ENSRNOT00000040393 | 0.969641888  | 1.93E-07 |
| TUCP_002651 | XLOC_112412 | ENSRNOT00000021015 | 0.958789662  | 8.73E-07 |
| TUCP_002651 | XLOC_112412 | ENSRNOT00000087502 | 0.955809385  | 1.23E-06 |
| TUCP_002651 | XLOC_112412 | ENSRNOT00000004290 | 0.972954414  | 1.09E-07 |
| TUCP_002651 | XLOC_112412 | ENSRNOT00000041106 | 0.954339717  | 1.45E-06 |
| TUCP_002651 | XLOC_112412 | ENSRNOT00000085228 | 0.952922823  | 1.68E-06 |
| TUCP_002651 | XLOC_112412 | ENSRNOT00000046745 | 0.968809326  | 2.21E-07 |
| TUCP_002651 | XLOC_112412 | ENSRNOT00000023876 | 0.950985522  | 2.05E-06 |
| TUCP_002651 | XLOC_112412 | ENSRNOT00000073526 | 0.954970807  | 1.35E-06 |
| TUCP_002651 | XLOC_112412 | ENSRNOT00000005489 | 0.969904606  | 1.85E-07 |
| TUCP_002651 | XLOC_112412 | ENSRNOT00000016191 | 0.953041559  | 1.66E-06 |
| TUCP_002651 | XLOC_112412 | ENSRNOT00000002443 | 0.963672164  | 4.69E-07 |
| TUCP_002651 | XLOC_112412 | ENSRNOT00000000013 | 0.977006913  | 4.87E-08 |
| TUCP_002651 | XLOC_112412 | ENSRNOT00000077999 | 0.95350037   | 1.58E-06 |
| TUCP_002651 | XLOC_112412 | ENSRNOT00000040069 | 0.954007991  | 1.50E-06 |
| TUCP_002651 | XLOC_112412 | ENSRNOT00000005161 | 0.97894839   | 3.14E-08 |
| TUCP_002651 | XLOC_112412 | ENSRNOT00000065229 | 0.954824684  | 1.37E-06 |
| TUCP_002651 | XLOC_112412 | ENSRNOT00000032505 | -0.950784088 | 2.09E-06 |
| TUCP_002651 | XLOC_112412 | ENSRNOT00000015239 | -0.962557702 | 5.44E-07 |
| TUCP_002651 | XLOC_112412 | ENSRNOT00000074649 | 0.980621633  | 2.08E-08 |
| TUCP_002651 | XLOC_112412 | ENSRNOT00000037955 | -0.969166192 | 2.08E-07 |
| TUCP_002651 | XLOC_112412 | ENSRNOT00000002510 | -0.960440793 | 7.14E-07 |
| TUCP_002651 | XLOC_112412 | ENSRNOT00000077146 | -0.971692533 | 1.37E-07 |
| TUCP_002651 | XLOC_112412 | ENSRNOT00000086122 | 0.971151453  | 1.50E-07 |
| TUCP_002651 | XLOC_112412 | ENSRNOT00000052063 | 0.965063874  | 3.87E-07 |
| TUCP_002651 | XLOC_112412 | ENSRNOT00000091427 | -0.952746055 | 1.71E-06 |
| TUCP_002651 | XLOC_112412 | ENSRNOT00000001783 | 0.958340321  | 9.21E-07 |
| TUCP_002651 | XLOC_112412 | ENSRNOT00000017765 | 0.958969233  | 8.55E-07 |
| TUCP_002651 | XLOC_112412 | ENSRNOT00000087346 | 0.953898886  | 1.52E-06 |
| TUCP_002651 | XLOC_112412 | ENSRNOT00000041365 | 0.954533268  | 1.42E-06 |
| TUCP_002651 | XLOC_112412 | ENSRNOT00000016722 | 0.962519986  | 5.47E-07 |
| TUCP_002651 | XLOC_112412 | ENSRNOT00000027375 | 0.955210785  | 1.32E-06 |
| TUCP_002651 | XLOC_112412 | ENSRNOT00000075209 | -0.953062796 | 1.66E-06 |
| TUCP_002651 | XLOC_112412 | ENSRNOT00000058382 | 0.987447807  | 2.40E-09 |
| TUCP_002651 | XLOC_112412 | ENSRNOT00000006395 | -0.950476577 | 2.16E-06 |
| TUCP_002651 | XLOC_112412 | ENSRNOT00000006824 | -0.956258893 | 1.17E-06 |
| TUCP_002651 | XLOC_112412 | ENSRNOT00000086995 | 0.96495766   | 3.92E-07 |
| TUCP_002651 | XLOC_112412 | ENSRNOT00000025147 | 0.961743182  | 6.05E-07 |
| TUCP_002651 | XLOC_112412 | ENSRNOT00000066133 | -0.967479586 | 2.71E-07 |
| TUCP_002651 | XLOC_112412 | ENSRNOT00000079866 | 0.956240417  | 1.17E-06 |
| TUCP_002651 | XLOC_112412 | ENSRNOT00000011880 | 0.97247643   | 1.19E-07 |
| TUCP_002651 | XLOC_112412 | ENSRNOT00000010993 | 0.962256732  | 5.66E-07 |
| TUCP_002651 | XLOC_112412 | ENSRNOT00000048933 | -0.964308058 | 4.30E-07 |
| TUCP_002651 | XLOC_112412 | ENSRNOT00000059181 | 0.961792437  | 6.01E-07 |
| TUCP_002651 | XLOC_112412 | ENSRNOT00000009742 | -0.961318031 | 6.39E-07 |
| TUCP_002651 | XLOC_112412 | ENSRNOT00000003690 | 0.951689824  | 1.91E-06 |
| TUCP_002651 | XLOC_112412 | ENSRNOT00000058362 | 0.955031831  | 1.34E-06 |
| TUCP_002651 | XLOC_112412 | ENSRNOT00000025794 | -0.954432572 | 1.43E-06 |
| TUCP_002651 | XLOC_112412 | ENSRNOT00000084069 | 0.961974786  | 5.87E-07 |



|             |             |                    |              |          |
|-------------|-------------|--------------------|--------------|----------|
| TUCP_002651 | XLOC_112412 | ENSRNOT00000058111 | -0.962323347 | 5.61E-07 |
| TUCP_002651 | XLOC_112412 | ENSRNOT00000085118 | 0.955980686  | 1.21E-06 |
| TUCP_002651 | XLOC_112412 | ENSRNOT00000008901 | -0.955957176 | 1.21E-06 |
| TUCP_002651 | XLOC_112412 | ENSRNOT00000057738 | 0.952993067  | 1.67E-06 |
| TUCP_002651 | XLOC_112412 | ENSRNOT00000005659 | 0.956658156  | 1.12E-06 |
| TUCP_002651 | XLOC_112412 | ENSRNOT00000017761 | 0.976174403  | 5.81E-08 |
| TUCP_002651 | XLOC_112412 | ENSRNOT00000009994 | -0.951358406 | 1.98E-06 |
| TUCP_002651 | XLOC_112412 | ENSRNOT00000004172 | 0.966324669  | 3.22E-07 |
| TUCP_002651 | XLOC_112412 | ENSRNOT00000078994 | 0.96185187   | 5.97E-07 |
| TUCP_002651 | XLOC_112412 | ENSRNOT00000036666 | 0.95584858   | 1.23E-06 |
| TUCP_002651 | XLOC_112412 | ENSRNOT00000022142 | 0.956592315  | 1.13E-06 |
| TUCP_002651 | XLOC_112412 | ENSRNOT00000005405 | 0.955824489  | 1.23E-06 |
| TUCP_002651 | XLOC_112412 | ENSRNOT00000027970 | 0.971560578  | 1.40E-07 |
| TUCP_002651 | XLOC_112412 | ENSRNOT00000017486 | 0.953095429  | 1.65E-06 |
| TUCP_002651 | XLOC_112412 | ENSRNOT00000012334 | 0.957557919  | 1.01E-06 |
| TUCP_002651 | XLOC_112412 | ENSRNOT00000080928 | 0.957361446  | 1.03E-06 |
| TUCP_002651 | XLOC_112412 | ENSRNOT00000015537 | 0.967288347  | 2.79E-07 |
| TUCP_002651 | XLOC_112412 | ENSRNOT00000035474 | 0.962198496  | 5.70E-07 |
| TUCP_002651 | XLOC_112412 | ENSRNOT00000007702 | -0.966821648 | 2.99E-07 |
| TUCP_002651 | XLOC_112412 | ENSRNOT00000039341 | 0.966946712  | 2.94E-07 |
| TUCP_002651 | XLOC_112412 | ENSRNOT00000084422 | 0.96782661   | 2.57E-07 |
| TUCP_002651 | XLOC_112412 | ENSRNOT00000039102 | 0.966390953  | 3.19E-07 |
| TUCP_002651 | XLOC_112412 | ENSRNOT00000018074 | -0.95664694  | 1.12E-06 |
| TUCP_002651 | XLOC_112412 | ENSRNOT00000078856 | -0.955121523 | 1.33E-06 |
| TUCP_002651 | XLOC_112412 | ENSRNOT00000091205 | 0.979446857  | 2.79E-08 |
| TUCP_002651 | XLOC_112412 | ENSRNOT00000024306 | -0.954422945 | 1.43E-06 |
| TUCP_002651 | XLOC_112412 | ENSRNOT00000014124 | 0.9638453    | 4.58E-07 |
| TUCP_002651 | XLOC_112412 | ENSRNOT00000008104 | 0.962201304  | 5.70E-07 |
| TUCP_002651 | XLOC_112412 | ENSRNOT00000080591 | 0.9581714    | 9.40E-07 |
| TUCP_002651 | XLOC_112412 | ENSRNOT00000040476 | 0.956369684  | 1.16E-06 |
| TUCP_002651 | XLOC_112412 | ENSRNOT00000092876 | -0.978138916 | 3.79E-08 |
| TUCP_002651 | XLOC_112412 | ENSRNOT00000013632 | 0.96410065   | 4.42E-07 |
| TUCP_002651 | XLOC_112412 | ENSRNOT00000078906 | -0.978964712 | 3.13E-08 |
| TUCP_002651 | XLOC_112412 | ENSRNOT00000029125 | 0.964448489  | 4.21E-07 |
| TUCP_002651 | XLOC_112412 | ENSRNOT00000077981 | 0.958490911  | 9.05E-07 |
| TUCP_002651 | XLOC_112412 | ENSRNOT00000085279 | 0.967289806  | 2.79E-07 |
| TUCP_002651 | XLOC_112412 | ENSRNOT00000080677 | -0.951755428 | 1.90E-06 |
| TUCP_002651 | XLOC_112412 | ENSRNOT00000025460 | 0.971817702  | 1.34E-07 |
| TUCP_002651 | XLOC_112412 | ENSRNOT00000075708 | 0.954508901  | 1.42E-06 |
| TUCP_002651 | XLOC_112412 | ENSRNOT00000060698 | -0.962433164 | 5.53E-07 |
| TUCP_002651 | XLOC_112412 | ENSRNOT00000055442 | 0.953977198  | 1.50E-06 |
| TUCP_002651 | XLOC_112412 | ENSRNOT00000028225 | 0.959607053  | 7.91E-07 |
| TUCP_002651 | XLOC_112412 | ENSRNOT00000026760 | -0.961372414 | 6.35E-07 |
| TUCP_002651 | XLOC_112412 | ENSRNOT00000019172 | -0.95114767  | 2.02E-06 |
| TUCP_002651 | XLOC_112412 | ENSRNOT00000023543 | -0.955318381 | 1.30E-06 |
| TUCP_002651 | XLOC_112412 | ENSRNOT00000010748 | 0.966489909  | 3.15E-07 |
| TUCP_002651 | XLOC_112412 | ENSRNOT00000090621 | 0.950108665  | 2.24E-06 |
| TUCP_002651 | XLOC_112412 | ENSRNOT00000015495 | -0.96455674  | 4.15E-07 |
| TUCP_002651 | XLOC_112412 | ENSRNOT00000024253 | 0.968426818  | 2.34E-07 |
| TUCP_002651 | XLOC_112412 | ENSRNOT00000002114 | -0.952360854 | 1.78E-06 |
| TUCP_002651 | XLOC_112412 | ENSRNOT00000061100 | 0.951653929  | 1.92E-06 |

|             |             |                    |              |          |
|-------------|-------------|--------------------|--------------|----------|
| TUCP_002651 | XLOC_112412 | ENSRNOT00000032248 | 0.966052895  | 3.35E-07 |
| TUCP_002651 | XLOC_112412 | ENSRNOT00000017776 | 0.973883585  | 9.16E-08 |
| TUCP_002651 | XLOC_112412 | ENSRNOT00000082904 | 0.953672742  | 1.55E-06 |
| TUCP_002651 | XLOC_112412 | ENSRNOT00000065529 | 0.972900852  | 1.10E-07 |
| TUCP_002651 | XLOC_112412 | ENSRNOT00000015223 | 0.957799988  | 9.82E-07 |
| TUCP_002651 | XLOC_112412 | ENSRNOT00000079895 | 0.953302445  | 1.62E-06 |
| TUCP_002651 | XLOC_112412 | ENSRNOT00000004463 | 0.971043056  | 1.53E-07 |
| TUCP_002651 | XLOC_112412 | ENSRNOT00000028907 | 0.969805731  | 1.88E-07 |
| TUCP_002651 | XLOC_112412 | ENSRNOT00000027967 | 0.953680231  | 1.55E-06 |
| TUCP_002651 | XLOC_112412 | ENSRNOT00000013516 | 0.963202874  | 4.99E-07 |
| TUCP_002651 | XLOC_112412 | ENSRNOT00000013321 | 0.955361975  | 1.29E-06 |
| TUCP_002651 | XLOC_112412 | ENSRNOT00000087443 | 0.96424683   | 4.33E-07 |
| TUCP_002651 | XLOC_112412 | ENSRNOT00000021674 | 0.971398714  | 1.44E-07 |
| TUCP_002651 | XLOC_112412 | ENSRNOT00000089086 | -0.96927773  | 2.05E-07 |
| TUCP_002651 | XLOC_112412 | ENSRNOT00000047210 | 0.963416344  | 4.85E-07 |
| TUCP_002651 | XLOC_112412 | ENSRNOT00000036613 | -0.982089759 | 1.41E-08 |
| TUCP_002651 | XLOC_112412 | ENSRNOT00000008987 | -0.95924752  | 8.27E-07 |
| TUCP_002651 | XLOC_112412 | ENSRNOT00000015793 | 0.952705728  | 1.72E-06 |
| TUCP_002651 | XLOC_112412 | ENSRNOT00000025705 | 0.963060209  | 5.09E-07 |
| TUCP_002651 | XLOC_112412 | ENSRNOT00000083957 | 0.965659373  | 3.55E-07 |
| TUCP_002651 | XLOC_112412 | ENSRNOT00000006186 | 0.975745878  | 6.35E-08 |
| TUCP_002651 | XLOC_112412 | ENSRNOT00000005311 | 0.970519558  | 1.67E-07 |
| TUCP_002651 | XLOC_112412 | ENSRNOT00000004140 | 0.958235263  | 9.33E-07 |
| TUCP_002651 | XLOC_112412 | ENSRNOT00000046639 | 0.95356385   | 1.57E-06 |
| TUCP_002651 | XLOC_112412 | ENSRNOT00000015799 | 0.958296789  | 9.26E-07 |
| TUCP_002651 | XLOC_112412 | ENSRNOT00000077231 | 0.952992822  | 1.67E-06 |
| TUCP_002651 | XLOC_112412 | ENSRNOT00000093174 | 0.958000769  | 9.59E-07 |
| TUCP_002651 | XLOC_112412 | ENSRNOT00000079996 | 0.956196706  | 1.18E-06 |
| TUCP_002150 | XLOC_089875 | ENSRNOT00000006186 | 0.954235023  | 1.46E-06 |
| TUCP_002150 | XLOC_089875 | ENSRNOT00000048910 | -0.96719644  | 2.83E-07 |
| TUCP_002150 | XLOC_089875 | ENSRNOT00000016555 | 0.962261201  | 5.66E-07 |
| TUCP_002150 | XLOC_089875 | ENSRNOT00000027452 | 0.952678133  | 1.73E-06 |
| TUCP_002150 | XLOC_089875 | ENSRNOT00000074939 | 0.976687891  | 5.21E-08 |
| TUCP_002150 | XLOC_089875 | ENSRNOT00000006055 | 0.983299216  | 9.95E-09 |
| TUCP_002150 | XLOC_089875 | ENSRNOT00000071560 | 0.9562996    | 1.17E-06 |
| TUCP_002150 | XLOC_089875 | ENSRNOT00000078445 | -0.970162165 | 1.77E-07 |
| TUCP_002150 | XLOC_089875 | ENSRNOT00000075952 | 0.957701111  | 9.93E-07 |
| TUCP_002150 | XLOC_089875 | ENSRNOT00000005228 | 0.972603563  | 1.16E-07 |
| TUCP_002150 | XLOC_089875 | ENSRNOT00000028628 | -0.957427951 | 1.03E-06 |
| TUCP_002150 | XLOC_089875 | ENSRNOT00000005659 | 0.96999992   | 1.82E-07 |
| TUCP_002150 | XLOC_089875 | ENSRNOT00000023144 | 0.970472858  | 1.68E-07 |
| TUCP_002150 | XLOC_089875 | ENSRNOT00000028646 | 0.967403253  | 2.74E-07 |
| TUCP_002150 | XLOC_089875 | ENSRNOT00000018057 | 0.956929003  | 1.09E-06 |
| TUCP_002150 | XLOC_089875 | ENSRNOT00000056813 | 0.951499626  | 1.95E-06 |
| TUCP_002150 | XLOC_089875 | ENSRNOT00000043216 | 0.951296707  | 1.99E-06 |
| TUCP_002150 | XLOC_089875 | ENSRNOT00000091128 | -0.971601193 | 1.39E-07 |
| TUCP_002150 | XLOC_089875 | ENSRNOT00000044742 | 0.969652251  | 1.93E-07 |
| TUCP_002150 | XLOC_089875 | ENSRNOT00000019618 | 0.95541706   | 1.29E-06 |
| TUCP_002150 | XLOC_089875 | ENSRNOT00000026543 | 0.953973245  | 1.51E-06 |
| TUCP_002150 | XLOC_089875 | ENSRNOT00000068322 | 0.970152357  | 1.77E-07 |
| TUCP_002150 | XLOC_089875 | ENSRNOT00000012187 | 0.969413673  | 2.00E-07 |

|             |             |                    |              |          |
|-------------|-------------|--------------------|--------------|----------|
| TUCP_002150 | XLOC_089875 | ENSRNOT00000018533 | 0.963683981  | 4.68E-07 |
| TUCP_002150 | XLOC_089875 | ENSRNOT00000026783 | 0.964477377  | 4.20E-07 |
| TUCP_002150 | XLOC_089875 | ENSRNOT00000071573 | 0.951079981  | 2.03E-06 |
| TUCP_002150 | XLOC_089875 | ENSRNOT00000005126 | -0.983231249 | 1.02E-08 |
| TUCP_002150 | XLOC_089875 | ENSRNOT00000065300 | 0.958657221  | 8.87E-07 |
| TUCP_002150 | XLOC_089875 | ENSRNOT00000011384 | 0.957393057  | 1.03E-06 |
| TUCP_002150 | XLOC_089875 | ENSRNOT00000048754 | -0.956967901 | 1.08E-06 |
| TUCP_002150 | XLOC_089875 | ENSRNOT00000038247 | 0.980726853  | 2.03E-08 |
| TUCP_002150 | XLOC_089875 | ENSRNOT00000071764 | 0.969898619  | 1.85E-07 |
| TUCP_002150 | XLOC_089875 | ENSRNOT00000027944 | 0.95925867   | 8.25E-07 |
| TUCP_002150 | XLOC_089875 | ENSRNOT00000021348 | 0.973056727  | 1.07E-07 |
| TUCP_002150 | XLOC_089875 | ENSRNOT00000009811 | 0.962793359  | 5.28E-07 |
| TUCP_002150 | XLOC_089875 | ENSRNOT00000068134 | 0.960087559  | 7.46E-07 |
| TUCP_002150 | XLOC_089875 | ENSRNOT00000086119 | -0.952467634 | 1.76E-06 |
| TUCP_002150 | XLOC_089875 | ENSRNOT00000026718 | 0.950536724  | 2.15E-06 |
| TUCP_002150 | XLOC_089875 | ENSRNOT00000085228 | 0.962016385  | 5.84E-07 |
| TUCP_002150 | XLOC_089875 | ENSRNOT00000032780 | 0.973644437  | 9.58E-08 |
| TUCP_002150 | XLOC_089875 | ENSRNOT00000017319 | 0.963251381  | 4.96E-07 |
| TUCP_002150 | XLOC_089875 | ENSRNOT00000077231 | 0.9513155    | 1.98E-06 |
| TUCP_002150 | XLOC_089875 | ENSRNOT00000072518 | 0.973538011  | 9.77E-08 |
| TUCP_002150 | XLOC_089875 | ENSRNOT00000016333 | -0.978672794 | 3.35E-08 |
| TUCP_002150 | XLOC_089875 | ENSRNOT00000087592 | 0.989949127  | 7.94E-10 |
| TUCP_002150 | XLOC_089875 | ENSRNOT00000061392 | 0.951564593  | 1.93E-06 |
| TUCP_002150 | XLOC_089875 | ENSRNOT00000032274 | 0.954902882  | 1.36E-06 |
| TUCP_002150 | XLOC_089875 | ENSRNOT00000051991 | 0.956575678  | 1.13E-06 |
| TUCP_002150 | XLOC_089875 | ENSRNOT00000010927 | 0.962423702  | 5.54E-07 |
| TUCP_002150 | XLOC_089875 | ENSRNOT00000087371 | 0.964657235  | 4.09E-07 |
| TUCP_002150 | XLOC_089875 | ENSRNOT00000021037 | 0.964084671  | 4.43E-07 |
| TUCP_002150 | XLOC_089875 | ENSRNOT00000071386 | -0.956403215 | 1.15E-06 |
| TUCP_002150 | XLOC_089875 | ENSRNOT00000068633 | 0.951912158  | 1.87E-06 |
| TUCP_002150 | XLOC_089875 | ENSRNOT00000037446 | 0.961102767  | 6.57E-07 |
| TUCP_002150 | XLOC_089875 | ENSRNOT00000017948 | 0.959896533  | 7.64E-07 |
| TUCP_002150 | XLOC_089875 | ENSRNOT00000026481 | 0.95359814   | 1.57E-06 |
| TUCP_002150 | XLOC_089875 | ENSRNOT00000023180 | 0.968626818  | 2.27E-07 |
| TUCP_002150 | XLOC_089875 | ENSRNOT00000015116 | 0.958834681  | 8.69E-07 |
| TUCP_002150 | XLOC_089875 | ENSRNOT00000090918 | 0.950303814  | 2.20E-06 |
| TUCP_002150 | XLOC_089875 | ENSRNOT00000001081 | 0.962002053  | 5.85E-07 |
| TUCP_002150 | XLOC_089875 | ENSRNOT00000077888 | -0.951001052 | 2.05E-06 |
| TUCP_002150 | XLOC_089875 | ENSRNOT00000016948 | -0.954362941 | 1.44E-06 |
| TUCP_002150 | XLOC_089875 | ENSRNOT00000015609 | 0.962621866  | 5.40E-07 |
| TUCP_002150 | XLOC_089875 | ENSRNOT00000019222 | 0.9512194    | 2.00E-06 |
| TUCP_002150 | XLOC_089875 | ENSRNOT00000028070 | 0.959304824  | 8.21E-07 |
| TUCP_002150 | XLOC_089875 | ENSRNOT00000061267 | 0.978710949  | 3.32E-08 |
| TUCP_002150 | XLOC_089875 | ENSRNOT00000090123 | 0.95700805   | 1.08E-06 |
| TUCP_002150 | XLOC_089875 | ENSRNOT00000019133 | 0.966774253  | 3.02E-07 |
| TUCP_002150 | XLOC_089875 | ENSRNOT00000008817 | 0.9516732    | 1.91E-06 |
| TUCP_002150 | XLOC_089875 | ENSRNOT00000013274 | 0.96148063   | 6.26E-07 |
| TUCP_002150 | XLOC_089875 | ENSRNOT00000022610 | 0.964135224  | 4.40E-07 |
| TUCP_002150 | XLOC_089875 | ENSRNOT00000006828 | 0.95144135   | 1.96E-06 |
| TUCP_002150 | XLOC_089875 | ENSRNOT00000010898 | 0.951304874  | 1.99E-06 |
| TUCP_002150 | XLOC_089875 | ENSRNOT00000015265 | 0.974161184  | 8.69E-08 |

|             |             |                    |              |          |
|-------------|-------------|--------------------|--------------|----------|
| TUCP_002150 | XLOC_089875 | ENSRNOT00000005355 | 0.958797916  | 8.73E-07 |
| TUCP_002150 | XLOC_089875 | ENSRNOT00000010303 | -0.970976918 | 1.54E-07 |
| TUCP_002150 | XLOC_089875 | ENSRNOT00000052422 | 0.961496414  | 6.25E-07 |
| TUCP_002150 | XLOC_089875 | ENSRNOT00000019177 | 0.960568555  | 7.03E-07 |
| TUCP_002150 | XLOC_089875 | ENSRNOT00000078102 | 0.957416618  | 1.03E-06 |
| TUCP_002150 | XLOC_089875 | ENSRNOT00000027520 | 0.963421672  | 4.85E-07 |
| TUCP_002150 | XLOC_089875 | ENSRNOT00000025983 | 0.9663666    | 3.20E-07 |
| TUCP_002150 | XLOC_089875 | ENSRNOT0000004698  | 0.981638499  | 1.59E-08 |
| TUCP_002150 | XLOC_089875 | ENSRNOT00000021496 | -0.973563791 | 9.73E-08 |
| TUCP_002150 | XLOC_089875 | ENSRNOT00000014537 | 0.950710935  | 2.11E-06 |
| TUCP_002150 | XLOC_089875 | ENSRNOT00000077555 | 0.962064937  | 5.80E-07 |
| TUCP_002150 | XLOC_089875 | ENSRNOT00000017021 | 0.964613352  | 4.12E-07 |
| TUCP_002150 | XLOC_089875 | ENSRNOT00000021408 | 0.978057245  | 3.86E-08 |
| TUCP_002150 | XLOC_089875 | ENSRNOT00000087429 | 0.969077797  | 2.11E-07 |
| TUCP_002150 | XLOC_089875 | ENSRNOT00000009683 | 0.966923564  | 2.95E-07 |
| TUCP_002150 | XLOC_089875 | ENSRNOT00000060362 | 0.969068495  | 2.12E-07 |
| TUCP_002150 | XLOC_089875 | ENSRNOT00000064902 | 0.953427508  | 1.60E-06 |
| TUCP_002150 | XLOC_089875 | ENSRNOT00000009280 | 0.958351708  | 9.20E-07 |
| TUCP_002150 | XLOC_089875 | ENSRNOT00000078070 | 0.961404883  | 6.32E-07 |
| TUCP_002150 | XLOC_089875 | ENSRNOT00000065983 | 0.957650488  | 9.99E-07 |
| TUCP_002150 | XLOC_089875 | ENSRNOT00000024322 | 0.956970106  | 1.08E-06 |
| TUCP_002150 | XLOC_089875 | ENSRNOT00000085596 | 0.95864922   | 8.88E-07 |
| TUCP_002150 | XLOC_089875 | ENSRNOT00000091265 | 0.961477406  | 6.26E-07 |
| TUCP_002150 | XLOC_089875 | ENSRNOT00000012424 | 0.962714574  | 5.33E-07 |
| TUCP_002150 | XLOC_089875 | ENSRNOT00000083247 | -0.961109191 | 6.56E-07 |
| TUCP_002150 | XLOC_089875 | ENSRNOT00000027454 | 0.966505809  | 3.14E-07 |
| TUCP_002150 | XLOC_089875 | ENSRNOT00000025832 | 0.976403166  | 5.54E-08 |
| TUCP_002150 | XLOC_089875 | ENSRNOT00000032505 | -0.971867188 | 1.32E-07 |
| TUCP_002150 | XLOC_089875 | ENSRNOT00000006499 | 0.957042744  | 1.07E-06 |
| TUCP_002150 | XLOC_089875 | ENSRNOT00000005909 | 0.951108839  | 2.03E-06 |
| TUCP_002150 | XLOC_089875 | ENSRNOT00000029833 | 0.957453564  | 1.02E-06 |
| TUCP_002150 | XLOC_089875 | ENSRNOT00000012702 | -0.956905637 | 1.09E-06 |
| TUCP_002150 | XLOC_089875 | ENSRNOT00000023330 | 0.966464866  | 3.16E-07 |
| TUCP_002150 | XLOC_089875 | ENSRNOT00000034487 | -0.961840503 | 5.98E-07 |
| TUCP_002150 | XLOC_089875 | ENSRNOT00000009129 | 0.950249368  | 2.21E-06 |
| TUCP_002150 | XLOC_089875 | ENSRNOT00000036951 | 0.96612444   | 3.32E-07 |
| TUCP_002150 | XLOC_089875 | ENSRNOT00000026186 | 0.965286348  | 3.75E-07 |
| TUCP_002150 | XLOC_089875 | ENSRNOT00000023428 | 0.969804161  | 1.88E-07 |
| TUCP_002150 | XLOC_089875 | ENSRNOT00000057313 | 0.966057206  | 3.35E-07 |
| TUCP_002150 | XLOC_089875 | ENSRNOT00000073930 | 0.954021253  | 1.50E-06 |
| TUCP_002150 | XLOC_089875 | ENSRNOT00000074653 | 0.95235082   | 1.79E-06 |
| TUCP_002150 | XLOC_089875 | ENSRNOT00000064840 | 0.974894633  | 7.53E-08 |
| TUCP_002150 | XLOC_089875 | ENSRNOT00000011984 | 0.973137098  | 1.05E-07 |
| TUCP_002150 | XLOC_089875 | ENSRNOT00000011350 | 0.966362258  | 3.21E-07 |
| TUCP_002150 | XLOC_089875 | ENSRNOT00000026293 | 0.96264777   | 5.38E-07 |
| TUCP_002150 | XLOC_089875 | ENSRNOT00000019487 | 0.950935126  | 2.06E-06 |
| TUCP_002150 | XLOC_089875 | ENSRNOT00000054828 | 0.959056328  | 8.46E-07 |
| TUCP_002150 | XLOC_089875 | ENSRNOT00000031230 | 0.958368603  | 9.18E-07 |
| TUCP_002150 | XLOC_089875 | ENSRNOT00000055992 | -0.969632975 | 1.93E-07 |
| TUCP_002150 | XLOC_089875 | ENSRNOT00000010218 | 0.975172816  | 7.13E-08 |
| TUCP_002150 | XLOC_089875 | ENSRNOT00000010748 | 0.956513827  | 1.14E-06 |

|             |             |                    |              |          |
|-------------|-------------|--------------------|--------------|----------|
| TUCP_002150 | XLOC_089875 | ENSRNOT0000002292  | 0.956205142  | 1.18E-06 |
| TUCP_002150 | XLOC_089875 | ENSRNOT00000035474 | 0.952677556  | 1.73E-06 |
| TUCP_002150 | XLOC_089875 | ENSRNOT00000083369 | 0.95277636   | 1.71E-06 |
| TUCP_002150 | XLOC_089875 | ENSRNOT00000076872 | 0.975136349  | 7.18E-08 |
| TUCP_002150 | XLOC_089875 | ENSRNOT00000080800 | 0.960965084  | 6.68E-07 |
| TUCP_002150 | XLOC_089875 | ENSRNOT00000014124 | 0.951067662  | 2.03E-06 |
| TUCP_002150 | XLOC_089875 | ENSRNOT00000071694 | 0.964168525  | 4.38E-07 |
| TUCP_002150 | XLOC_089875 | ENSRNOT00000082174 | 0.958530005  | 9.01E-07 |
| TUCP_002150 | XLOC_089875 | ENSRNOT00000014814 | 0.973121122  | 1.06E-07 |
| TUCP_002150 | XLOC_089875 | ENSRNOT00000004412 | 0.965592092  | 3.58E-07 |
| TUCP_002150 | XLOC_089875 | ENSRNOT00000064798 | 0.96710402   | 2.87E-07 |
| TUCP_002150 | XLOC_089875 | ENSRNOT00000080207 | 0.98154747   | 1.63E-08 |
| TUCP_002150 | XLOC_089875 | ENSRNOT00000022485 | 0.977727212  | 4.16E-08 |
| TUCP_002150 | XLOC_089875 | ENSRNOT00000024941 | 0.966130275  | 3.32E-07 |
| TUCP_002150 | XLOC_089875 | ENSRNOT00000016401 | 0.964859252  | 3.98E-07 |
| TUCP_002150 | XLOC_089875 | ENSRNOT00000026457 | 0.993723639  | 7.59E-11 |
| TUCP_002150 | XLOC_089875 | ENSRNOT00000004463 | 0.964301118  | 4.30E-07 |
| TUCP_002150 | XLOC_089875 | ENSRNOT00000044009 | 0.958356629  | 9.20E-07 |
| TUCP_002150 | XLOC_089875 | ENSRNOT00000051550 | 0.966047745  | 3.36E-07 |
| TUCP_002150 | XLOC_089875 | ENSRNOT00000008982 | 0.95024659   | 2.21E-06 |
| TUCP_002150 | XLOC_089875 | ENSRNOT00000021674 | 0.950852404  | 2.08E-06 |
| TUCP_002150 | XLOC_089875 | ENSRNOT00000007175 | 0.957012121  | 1.08E-06 |
| TUCP_002150 | XLOC_089875 | ENSRNOT00000079996 | 0.957382066  | 1.03E-06 |
| TUCP_002150 | XLOC_089875 | ENSRNOT00000083127 | 0.954254552  | 1.46E-06 |
| TUCP_002150 | XLOC_089875 | ENSRNOT00000003582 | -0.951898479 | 1.87E-06 |
| TUCP_002150 | XLOC_089875 | ENSRNOT00000048029 | 0.956027429  | 1.20E-06 |
| TUCP_002150 | XLOC_089875 | ENSRNOT00000003989 | 0.953132114  | 1.65E-06 |
| TUCP_002150 | XLOC_089875 | ENSRNOT00000015799 | 0.950116319  | 2.24E-06 |
| TUCP_002150 | XLOC_089875 | ENSRNOT00000064930 | 0.952374773  | 1.78E-06 |
| TUCP_002150 | XLOC_089875 | ENSRNOT00000083799 | 0.965059925  | 3.87E-07 |
| TUCP_002150 | XLOC_089875 | ENSRNOT00000024548 | 0.973810168  | 9.29E-08 |
| TUCP_002151 | XLOC_089944 | ENSRNOT00000014533 | 0.95370348   | 1.55E-06 |
| TUCP_002151 | XLOC_089944 | ENSRNOT00000024993 | 0.952363641  | 1.78E-06 |
| TUCP_002151 | XLOC_089944 | ENSRNOT00000000995 | 0.970796298  | 1.59E-07 |
| TUCP_002151 | XLOC_089944 | ENSRNOT00000082408 | 0.956141274  | 1.19E-06 |
| TUCP_002151 | XLOC_089944 | ENSRNOT00000018888 | 0.959030945  | 8.48E-07 |
| TUCP_002151 | XLOC_089944 | ENSRNOT00000068354 | 0.961345804  | 6.37E-07 |
| TUCP_002151 | XLOC_089944 | ENSRNOT00000003082 | 0.974595919  | 7.99E-08 |
| TUCP_002151 | XLOC_089944 | ENSRNOT00000012963 | 0.957640397  | 1.00E-06 |
| TUCP_002151 | XLOC_089944 | ENSRNOT00000057504 | 0.966016441  | 3.37E-07 |
| TUCP_002151 | XLOC_089944 | ENSRNOT00000010968 | 0.986491226  | 3.46E-09 |
| TUCP_002151 | XLOC_089944 | ENSRNOT00000028877 | 0.968345678  | 2.37E-07 |
| TUCP_002151 | XLOC_089944 | ENSRNOT00000013182 | 0.97452397   | 8.10E-08 |
| TUCP_002151 | XLOC_089944 | ENSRNOT00000025731 | 0.955908423  | 1.22E-06 |
| TUCP_002151 | XLOC_089944 | ENSRNOT00000042973 | 0.974457244  | 8.20E-08 |
| TUCP_002151 | XLOC_089944 | ENSRNOT00000003458 | 0.973468728  | 9.90E-08 |
| TUCP_002151 | XLOC_089944 | ENSRNOT00000002853 | 0.965675404  | 3.54E-07 |
| TUCP_002151 | XLOC_089944 | ENSRNOT00000006196 | 0.974960353  | 7.43E-08 |
| TUCP_002151 | XLOC_089944 | ENSRNOT00000013809 | 0.977096909  | 4.78E-08 |
| TUCP_002151 | XLOC_089944 | ENSRNOT00000073087 | 0.975153619  | 7.15E-08 |
| TUCP_002151 | XLOC_089944 | ENSRNOT00000021487 | 0.984085822  | 7.83E-09 |

|             |             |                     |              |          |
|-------------|-------------|---------------------|--------------|----------|
| TUCP_002151 | XLOC_089944 | ENSRNOT00000008813  | 0.96364452   | 4.71E-07 |
| TUCP_002151 | XLOC_089944 | ENSRNOT000000051067 | 0.977474617  | 4.40E-08 |
| TUCP_002151 | XLOC_089944 | ENSRNOT000000077303 | 0.959093369  | 8.42E-07 |
| TUCP_002151 | XLOC_089944 | ENSRNOT000000029845 | 0.95324987   | 1.63E-06 |
| TUCP_002151 | XLOC_089944 | ENSRNOT000000022128 | 0.987162996  | 2.69E-09 |
| TUCP_002151 | XLOC_089944 | ENSRNOT000000019738 | 0.979655793  | 2.65E-08 |
| TUCP_002152 | XLOC_089972 | ENSRNOT000000044751 | 0.957229328  | 1.05E-06 |
| TUCP_002152 | XLOC_089972 | ENSRNOT000000025731 | 0.964736913  | 4.05E-07 |
| TUCP_002152 | XLOC_089972 | ENSRNOT000000047731 | 0.950475202  | 2.16E-06 |
| TUCP_002152 | XLOC_089972 | ENSRNOT000000010968 | 0.972510706  | 1.18E-07 |
| TUCP_002152 | XLOC_089972 | ENSRNOT000000003075 | 0.974918623  | 7.49E-08 |
| TUCP_002152 | XLOC_089972 | ENSRNOT000000045357 | 0.950703913  | 2.11E-06 |
| TUCP_002152 | XLOC_089972 | ENSRNOT000000009448 | 0.952898704  | 1.69E-06 |
| TUCP_002152 | XLOC_089972 | ENSRNOT000000006196 | 0.964280585  | 4.31E-07 |
| TUCP_002152 | XLOC_089972 | ENSRNOT000000093046 | 0.968945279  | 2.16E-07 |
| TUCP_002152 | XLOC_089972 | ENSRNOT000000082497 | 0.969666715  | 1.92E-07 |
| TUCP_002152 | XLOC_089972 | ENSRNOT000000003458 | 0.97222127   | 1.24E-07 |
| TUCP_002152 | XLOC_089972 | ENSRNOT000000090544 | 0.958059763  | 9.52E-07 |
| TUCP_002152 | XLOC_089972 | ENSRNOT000000004965 | 0.978279751  | 3.67E-08 |
| TUCP_002152 | XLOC_089972 | ENSRNOT000000068354 | 0.966904288  | 2.96E-07 |
| TUCP_002152 | XLOC_089972 | ENSRNOT000000003082 | 0.972792612  | 1.12E-07 |
| TUCP_002152 | XLOC_089972 | ENSRNOT000000066776 | 0.957279241  | 1.04E-06 |
| TUCP_003099 | XLOC_132611 | ENSRNOT000000034411 | 0.960242213  | 7.32E-07 |
| TUCP_003099 | XLOC_132611 | ENSRNOT00000001607  | 0.963131284  | 5.04E-07 |
| TUCP_003099 | XLOC_132611 | ENSRNOT000000027666 | 0.955133103  | 1.33E-06 |
| TUCP_003099 | XLOC_132611 | ENSRNOT000000026398 | -0.950347496 | 2.19E-06 |
| TUCP_003099 | XLOC_132611 | ENSRNOT000000018549 | -0.950975193 | 2.05E-06 |
| TUCP_003099 | XLOC_132611 | ENSRNOT000000080173 | -0.956654485 | 1.12E-06 |
| TUCP_003099 | XLOC_132611 | ENSRNOT000000012052 | 0.975264239  | 7.00E-08 |
| TUCP_003099 | XLOC_132611 | ENSRNOT000000020174 | -0.965690793 | 3.53E-07 |
| TUCP_003099 | XLOC_132611 | ENSRNOT000000040629 | 0.950514145  | 2.15E-06 |
| TUCP_003099 | XLOC_132611 | ENSRNOT000000080443 | 0.962237214  | 5.68E-07 |
| TUCP_003099 | XLOC_132611 | ENSRNOT000000021717 | 0.961361896  | 6.36E-07 |
| TUCP_003099 | XLOC_132611 | ENSRNOT000000015898 | 0.951622907  | 1.92E-06 |
| TUCP_003099 | XLOC_132611 | ENSRNOT000000046323 | 0.966671331  | 3.06E-07 |
| TUCP_003099 | XLOC_132611 | ENSRNOT000000063917 | -0.962044598 | 5.82E-07 |
| TUCP_003099 | XLOC_132611 | ENSRNOT000000002410 | 0.959870039  | 7.66E-07 |
| TUCP_003099 | XLOC_132611 | ENSRNOT000000023786 | -0.957644128 | 1.00E-06 |
| TUCP_003099 | XLOC_132611 | ENSRNOT000000008677 | 0.96235412   | 5.59E-07 |
| TUCP_003099 | XLOC_132611 | ENSRNOT000000081768 | 0.950336003  | 2.19E-06 |
| TUCP_003099 | XLOC_132611 | ENSRNOT000000004017 | 0.957404232  | 1.03E-06 |
| TUCP_003099 | XLOC_132611 | ENSRNOT000000089829 | -0.957031364 | 1.07E-06 |
| TUCP_003099 | XLOC_132611 | ENSRNOT000000009151 | -0.962499779 | 5.48E-07 |
| TUCP_003099 | XLOC_132611 | ENSRNOT000000049423 | -0.962937262 | 5.18E-07 |
| TUCP_003099 | XLOC_132611 | ENSRNOT000000061224 | 0.952445174  | 1.77E-06 |
| TUCP_003099 | XLOC_132611 | ENSRNOT000000029223 | 0.960360605  | 7.21E-07 |
| TUCP_003099 | XLOC_132611 | ENSRNOT000000037363 | -0.9551234   | 1.33E-06 |
| TUCP_003099 | XLOC_132611 | ENSRNOT000000007223 | -0.956341036 | 1.16E-06 |
| TUCP_003099 | XLOC_132611 | ENSRNOT000000081688 | -0.950553783 | 2.14E-06 |
| TUCP_003099 | XLOC_132611 | ENSRNOT000000061304 | -0.950777216 | 2.09E-06 |
| TUCP_003099 | XLOC_132611 | ENSRNOT000000080124 | 0.966408722  | 3.18E-07 |

|             |             |                    |              |          |
|-------------|-------------|--------------------|--------------|----------|
| TUCP_003099 | XLOC_132611 | ENSRNOT00000027200 | -0.954098636 | 1.49E-06 |
| TUCP_003099 | XLOC_132611 | ENSRNOT00000015769 | 0.950812146  | 2.09E-06 |
| TUCP_003099 | XLOC_132611 | ENSRNOT00000002151 | -0.961334039 | 6.38E-07 |
| TUCP_003099 | XLOC_132611 | ENSRNOT00000083414 | 0.95453306   | 1.42E-06 |
| TUCP_003099 | XLOC_132611 | ENSRNOT00000087583 | 0.955840301  | 1.23E-06 |
| TUCP_003099 | XLOC_132611 | ENSRNOT00000046486 | -0.95263133  | 1.73E-06 |
| TUCP_003099 | XLOC_132611 | ENSRNOT00000080608 | 0.95145225   | 1.96E-06 |
| TUCP_003099 | XLOC_132611 | ENSRNOT0000004387  | 0.957424948  | 1.03E-06 |
| TUCP_003099 | XLOC_132611 | ENSRNOT00000068167 | 0.952277848  | 1.80E-06 |
| TUCP_003099 | XLOC_132611 | ENSRNOT00000006209 | 0.953463518  | 1.59E-06 |
| TUCP_003099 | XLOC_132611 | ENSRNOT00000083876 | -0.951022462 | 2.04E-06 |
| TUCP_002155 | XLOC_090164 | ENSRNOT00000088012 | 0.996792108  | 2.66E-12 |
| TUCP_002155 | XLOC_090164 | ENSRNOT00000084066 | 0.980082176  | 2.39E-08 |
| TUCP_002155 | XLOC_090164 | ENSRNOT00000038946 | 0.956506372  | 1.14E-06 |
| TUCP_002155 | XLOC_090164 | ENSRNOT00000017828 | 0.959439205  | 8.08E-07 |
| TUCP_002155 | XLOC_090164 | ENSRNOT00000072774 | 0.985032322  | 5.77E-09 |
| TUCP_002155 | XLOC_090164 | ENSRNOT00000057950 | 0.953430406  | 1.59E-06 |
| TUCP_002658 | XLOC_112842 | ENSRNOT00000045882 | 0.954840077  | 1.37E-06 |
| TUCP_002658 | XLOC_112842 | ENSRNOT00000027520 | 0.973766574  | 9.36E-08 |
| TUCP_002658 | XLOC_112842 | ENSRNOT00000073559 | 0.95487204   | 1.37E-06 |
| TUCP_002658 | XLOC_112842 | ENSRNOT00000064840 | 0.961509123  | 6.24E-07 |
| TUCP_002658 | XLOC_112842 | ENSRNOT00000071764 | 0.988552787  | 1.52E-09 |
| TUCP_002658 | XLOC_112842 | ENSRNOT00000081246 | 0.967545366  | 2.69E-07 |
| TUCP_002658 | XLOC_112842 | ENSRNOT0000004698  | 0.954997715  | 1.35E-06 |
| TUCP_002658 | XLOC_112842 | ENSRNOT00000058072 | 0.95302132   | 1.67E-06 |
| TUCP_002658 | XLOC_112842 | ENSRNOT00000009877 | 0.956821247  | 1.10E-06 |
| TUCP_002658 | XLOC_112842 | ENSRNOT00000016555 | 0.987727607  | 2.15E-09 |
| TUCP_002658 | XLOC_112842 | ENSRNOT00000021348 | 0.967818996  | 2.58E-07 |
| TUCP_002658 | XLOC_112842 | ENSRNOT00000009280 | 0.959962642  | 7.57E-07 |
| TUCP_002658 | XLOC_112842 | ENSRNOT00000026783 | 0.95211516   | 1.83E-06 |
| TUCP_002658 | XLOC_112842 | ENSRNOT00000033235 | 0.95511585   | 1.33E-06 |
| TUCP_002658 | XLOC_112842 | ENSRNOT00000017668 | 0.950461534  | 2.16E-06 |
| TUCP_002658 | XLOC_112842 | ENSRNOT00000031230 | 0.962566623  | 5.44E-07 |
| TUCP_002658 | XLOC_112842 | ENSRNOT00000078445 | -0.960543801 | 7.05E-07 |
| TUCP_002658 | XLOC_112842 | ENSRNOT00000087592 | 0.97015348   | 1.77E-07 |
| TUCP_002658 | XLOC_112842 | ENSRNOT00000022610 | 0.972802478  | 1.12E-07 |
| TUCP_002658 | XLOC_112842 | ENSRNOT00000032274 | 0.990287607  | 6.70E-10 |
| TUCP_002658 | XLOC_112842 | ENSRNOT00000071733 | 0.963682675  | 4.68E-07 |
| TUCP_002658 | XLOC_112842 | ENSRNOT00000010149 | 0.950205162  | 2.22E-06 |
| TUCP_002658 | XLOC_112842 | ENSRNOT00000006175 | 0.952173846  | 1.82E-06 |
| TUCP_002658 | XLOC_112842 | ENSRNOT00000009683 | 0.956401356  | 1.15E-06 |
| TUCP_002658 | XLOC_112842 | ENSRNOT00000058956 | 0.961422212  | 6.31E-07 |
| TUCP_002658 | XLOC_112842 | ENSRNOT00000000676 | 0.956882364  | 1.09E-06 |
| TUCP_002658 | XLOC_112842 | ENSRNOT00000064798 | 0.962123734  | 5.76E-07 |
| TUCP_002658 | XLOC_112842 | ENSRNOT00000086336 | 0.952319962  | 1.79E-06 |
| TUCP_002658 | XLOC_112842 | ENSRNOT00000009129 | 0.962025803  | 5.83E-07 |
| TUCP_002658 | XLOC_112842 | ENSRNOT0000001809  | 0.967743262  | 2.61E-07 |
| TUCP_002658 | XLOC_112842 | ENSRNOT00000023490 | 0.974406826  | 8.28E-08 |
| TUCP_002658 | XLOC_112842 | ENSRNOT00000076872 | 0.952607429  | 1.74E-06 |
| TUCP_002658 | XLOC_112842 | ENSRNOT00000024322 | 0.960979822  | 6.67E-07 |
| TUCP_002658 | XLOC_112842 | ENSRNOT00000034704 | 0.956913756  | 1.09E-06 |

|             |             |                    |              |          |
|-------------|-------------|--------------------|--------------|----------|
| TUCP_002658 | XLOC_112842 | ENSRNOT00000017948 | 0.957139853  | 1.06E-06 |
| TUCP_002658 | XLOC_112842 | ENSRNOT00000091265 | 0.966775742  | 3.02E-07 |
| TUCP_002658 | XLOC_112842 | ENSRNOT00000043216 | 0.960293765  | 7.27E-07 |
| TUCP_002658 | XLOC_112842 | ENSRNOT00000012895 | 0.963008354  | 5.13E-07 |
| TUCP_002658 | XLOC_112842 | ENSRNOT00000041384 | -0.981656295 | 1.59E-08 |
| TUCP_002658 | XLOC_112842 | ENSRNOT00000055401 | 0.957029063  | 1.07E-06 |
| TUCP_002658 | XLOC_112842 | ENSRNOT00000000468 | 0.955679926  | 1.25E-06 |
| TUCP_002658 | XLOC_112842 | ENSRNOT00000072196 | 0.969739172  | 1.90E-07 |
| TUCP_002658 | XLOC_112842 | ENSRNOT00000026543 | 0.954016194  | 1.50E-06 |
| TUCP_002658 | XLOC_112842 | ENSRNOT00000026457 | 0.952300689  | 1.79E-06 |
| TUCP_002658 | XLOC_112842 | ENSRNOT00000027454 | 0.958890773  | 8.63E-07 |
| TUCP_002658 | XLOC_112842 | ENSRNOT00000066670 | 0.985267268  | 5.33E-09 |
| TUCP_002658 | XLOC_112842 | ENSRNOT00000023180 | 0.973738925  | 9.41E-08 |
| TUCP_002658 | XLOC_112842 | ENSRNOT00000039852 | 0.964492862  | 4.19E-07 |
| TUCP_002658 | XLOC_112842 | ENSRNOT00000025832 | 0.978684718  | 3.34E-08 |
| TUCP_002658 | XLOC_112842 | ENSRNOT00000004412 | 0.961395109  | 6.33E-07 |
| TUCP_002658 | XLOC_112842 | ENSRNOT00000017753 | 0.959672464  | 7.85E-07 |
| TUCP_002658 | XLOC_112842 | ENSRNOT00000012463 | -0.956603334 | 1.13E-06 |
| TUCP_002658 | XLOC_112842 | ENSRNOT00000028070 | 0.950648071  | 2.12E-06 |
| TUCP_002658 | XLOC_112842 | ENSRNOT00000022485 | 0.973244566  | 1.03E-07 |
| TUCP_002658 | XLOC_112842 | ENSRNOT00000066736 | 0.95924431   | 8.27E-07 |
| TUCP_002658 | XLOC_112842 | ENSRNOT00000027452 | 0.960089006  | 7.46E-07 |
| TUCP_002658 | XLOC_112842 | ENSRNOT00000060362 | 0.964601698  | 4.12E-07 |
| TUCP_002658 | XLOC_112842 | ENSRNOT00000012379 | 0.959829404  | 7.70E-07 |
| TUCP_002658 | XLOC_112842 | ENSRNOT00000013274 | 0.961021859  | 6.64E-07 |
| TUCP_002658 | XLOC_112842 | ENSRNOT00000021430 | 0.953468372  | 1.59E-06 |
| TUCP_002658 | XLOC_112842 | ENSRNOT00000044742 | 0.96791712   | 2.54E-07 |
| TUCP_002658 | XLOC_112842 | ENSRNOT00000020437 | 0.963275919  | 4.95E-07 |
| TUCP_002658 | XLOC_112842 | ENSRNOT00000002522 | -0.960984322 | 6.67E-07 |
| TUCP_002658 | XLOC_112842 | ENSRNOT00000072534 | 0.959145084  | 8.37E-07 |
| TUCP_002658 | XLOC_112842 | ENSRNOT00000006828 | 0.955545646  | 1.27E-06 |
| TUCP_002658 | XLOC_112842 | ENSRNOT00000028759 | 0.95089896   | 2.07E-06 |
| TUCP_002658 | XLOC_112842 | ENSRNOT00000036951 | 0.965220575  | 3.78E-07 |
| TUCP_002658 | XLOC_112842 | ENSRNOT00000023428 | 0.980491474  | 2.15E-08 |
| TUCP_002658 | XLOC_112842 | ENSRNOT00000029167 | 0.976190049  | 5.79E-08 |
| TUCP_002658 | XLOC_112842 | ENSRNOT00000010898 | 0.95984796   | 7.68E-07 |
| TUCP_002658 | XLOC_112842 | ENSRNOT00000070815 | 0.96372643   | 4.65E-07 |
| TUCP_002658 | XLOC_112842 | ENSRNOT00000049538 | 0.953955817  | 1.51E-06 |
| TUCP_002658 | XLOC_112842 | ENSRNOT00000075326 | 0.961705963  | 6.08E-07 |
| TUCP_002658 | XLOC_112842 | ENSRNOT00000074939 | 0.976806926  | 5.08E-08 |
| TUCP_002658 | XLOC_112842 | ENSRNOT00000011663 | 0.950185144  | 2.22E-06 |
| TUCP_002658 | XLOC_112842 | ENSRNOT00000000157 | 0.955921705  | 1.22E-06 |
| TUCP_002658 | XLOC_112842 | ENSRNOT00000083799 | 0.95959964   | 7.92E-07 |
| TUCP_002658 | XLOC_112842 | ENSRNOT00000009066 | 0.963411708  | 4.86E-07 |
| TUCP_001977 | XLOC_079764 | ENSRNOT00000036061 | 0.967317524  | 2.78E-07 |
| TUCP_001977 | XLOC_079764 | ENSRNOT00000083381 | 0.953834892  | 1.53E-06 |
| TUCP_001977 | XLOC_079764 | ENSRNOT00000082691 | 0.957511944  | 1.02E-06 |
| TUCP_000628 | XLOC_022987 | ENSRNOT00000025660 | -0.951990794 | 1.85E-06 |
| TUCP_000747 | XLOC_028161 | ENSRNOT00000001215 | -0.959295781 | 8.22E-07 |
| TUCP_000747 | XLOC_028161 | ENSRNOT00000006188 | 0.980279403  | 2.27E-08 |
| TUCP_000747 | XLOC_028161 | ENSRNOT00000006186 | -0.983533418 | 9.27E-09 |



|             |             |                    |              |          |
|-------------|-------------|--------------------|--------------|----------|
| TUCP_000747 | XLOC_028161 | ENSRNOT00000090621 | -0.972272979 | 1.23E-07 |
| TUCP_000747 | XLOC_028161 | ENSRNOT00000013743 | -0.950345771 | 2.19E-06 |
| TUCP_000747 | XLOC_028161 | ENSRNOT00000075397 | -0.980937547 | 1.92E-08 |
| TUCP_000747 | XLOC_028161 | ENSRNOT00000032926 | 0.967299059  | 2.79E-07 |
| TUCP_000747 | XLOC_028161 | ENSRNOT00000019104 | 0.968829625  | 2.20E-07 |
| TUCP_000747 | XLOC_028161 | ENSRNOT00000006217 | -0.981361602 | 1.72E-08 |
| TUCP_000747 | XLOC_028161 | ENSRNOT00000038652 | 0.950510386  | 2.15E-06 |
| TUCP_000747 | XLOC_028161 | ENSRNOT00000068353 | -0.971737634 | 1.35E-07 |
| TUCP_000747 | XLOC_028161 | ENSRNOT00000049349 | -0.954162262 | 1.48E-06 |
| TUCP_000747 | XLOC_028161 | ENSRNOT00000079138 | -0.969671025 | 1.92E-07 |
| TUCP_000747 | XLOC_028161 | ENSRNOT00000086706 | -0.956867014 | 1.09E-06 |
| TUCP_000747 | XLOC_028161 | ENSRNOT00000004017 | -0.963187438 | 5.00E-07 |
| TUCP_000747 | XLOC_028161 | ENSRNOT00000086310 | 0.957216559  | 1.05E-06 |
| TUCP_000747 | XLOC_028161 | ENSRNOT00000010030 | 0.976878454  | 5.01E-08 |
| TUCP_000747 | XLOC_028161 | ENSRNOT00000007855 | -0.954976315 | 1.35E-06 |
| TUCP_000747 | XLOC_028161 | ENSRNOT00000026941 | -0.954628828 | 1.40E-06 |
| TUCP_000747 | XLOC_028161 | ENSRNOT00000031692 | 0.960340306  | 7.23E-07 |
| TUCP_000747 | XLOC_028161 | ENSRNOT00000014384 | 0.963477962  | 4.81E-07 |
| TUCP_000747 | XLOC_028161 | ENSRNOT00000042638 | -0.950272594 | 2.20E-06 |
| TUCP_000747 | XLOC_028161 | ENSRNOT00000030850 | -0.959210736 | 8.30E-07 |
| TUCP_000747 | XLOC_028161 | ENSRNOT00000037203 | 0.955511003  | 1.27E-06 |
| TUCP_000747 | XLOC_028161 | ENSRNOT00000006752 | -0.979070258 | 3.05E-08 |
| TUCP_000747 | XLOC_028161 | ENSRNOT00000000618 | 0.959014651  | 8.50E-07 |
| TUCP_000747 | XLOC_028161 | ENSRNOT00000083677 | 0.950611652  | 2.13E-06 |
| TUCP_000747 | XLOC_028161 | ENSRNOT00000073370 | -0.977235051 | 4.63E-08 |
| TUCP_000747 | XLOC_028161 | ENSRNOT00000065300 | -0.953543125 | 1.58E-06 |
| TUCP_000747 | XLOC_028161 | ENSRNOT00000065978 | -0.973288736 | 1.02E-07 |
| TUCP_000747 | XLOC_028161 | ENSRNOT00000035320 | 0.956099885  | 1.19E-06 |
| TUCP_000747 | XLOC_028161 | ENSRNOT00000008274 | 0.966841915  | 2.99E-07 |
| TUCP_000747 | XLOC_028161 | ENSRNOT00000065871 | -0.971301612 | 1.46E-07 |
| TUCP_000747 | XLOC_028161 | ENSRNOT00000091448 | 0.958160209  | 9.41E-07 |
| TUCP_000747 | XLOC_028161 | ENSRNOT00000077999 | -0.975858491 | 6.20E-08 |
| TUCP_000747 | XLOC_028161 | ENSRNOT00000068134 | -0.966714227 | 3.04E-07 |
| TUCP_000747 | XLOC_028161 | ENSRNOT00000067626 | 0.962504035  | 5.48E-07 |
| TUCP_000747 | XLOC_028161 | ENSRNOT00000085228 | -0.953673716 | 1.55E-06 |
| TUCP_000747 | XLOC_028161 | ENSRNOT00000026391 | -0.969218477 | 2.07E-07 |
| TUCP_000747 | XLOC_028161 | ENSRNOT00000026726 | 0.953478617  | 1.59E-06 |
| TUCP_000747 | XLOC_028161 | ENSRNOT00000060002 | 0.97279252   | 1.12E-07 |
| TUCP_000747 | XLOC_028161 | ENSRNOT00000013286 | -0.9563336   | 1.16E-06 |
| TUCP_000747 | XLOC_028161 | ENSRNOT00000015188 | -0.963357443 | 4.89E-07 |
| TUCP_000747 | XLOC_028161 | ENSRNOT00000018488 | 0.956965382  | 1.08E-06 |
| TUCP_000747 | XLOC_028161 | ENSRNOT00000089673 | 0.952893183  | 1.69E-06 |
| TUCP_000747 | XLOC_028161 | ENSRNOT00000005686 | 0.983876722  | 8.35E-09 |
| TUCP_000747 | XLOC_028161 | ENSRNOT00000005297 | -0.96030388  | 7.26E-07 |
| TUCP_000747 | XLOC_028161 | ENSRNOT00000000302 | -0.961507121 | 6.24E-07 |
| TUCP_000747 | XLOC_028161 | ENSRNOT00000087371 | -0.952238179 | 1.81E-06 |
| TUCP_000747 | XLOC_028161 | ENSRNOT00000030074 | -0.978212868 | 3.73E-08 |
| TUCP_000747 | XLOC_028161 | ENSRNOT00000010141 | -0.956405123 | 1.15E-06 |
| TUCP_000747 | XLOC_028161 | ENSRNOT00000067391 | 0.962289682  | 5.64E-07 |
| TUCP_000747 | XLOC_028161 | ENSRNOT00000009150 | -0.977055428 | 4.82E-08 |
| TUCP_000747 | XLOC_028161 | ENSRNOT00000084709 | -0.992356622 | 2.03E-10 |

|             |             |                    |              |          |
|-------------|-------------|--------------------|--------------|----------|
| TUCP_000747 | XLOC_028161 | ENSRNOT00000009156 | -0.963946583 | 4.52E-07 |
| TUCP_000747 | XLOC_028161 | ENSRNOT00000026481 | -0.975553709 | 6.60E-08 |
| TUCP_000747 | XLOC_028161 | ENSRNOT00000007326 | 0.963374825  | 4.88E-07 |
| TUCP_000747 | XLOC_028161 | ENSRNOT00000025856 | 0.962028503  | 5.83E-07 |
| TUCP_000747 | XLOC_028161 | ENSRNOT00000072299 | -0.97491076  | 7.51E-08 |
| TUCP_000747 | XLOC_028161 | ENSRNOT00000028074 | 0.955409626  | 1.29E-06 |
| TUCP_000747 | XLOC_028161 | ENSRNOT00000026643 | -0.962053234 | 5.81E-07 |
| TUCP_000747 | XLOC_028161 | ENSRNOT0000001403  | -0.972004503 | 1.29E-07 |
| TUCP_000747 | XLOC_028161 | ENSRNOT0000001401  | -0.95335283  | 1.61E-06 |
| TUCP_000747 | XLOC_028161 | ENSRNOT00000016132 | 0.974644355  | 7.91E-08 |
| TUCP_000747 | XLOC_028161 | ENSRNOT00000058495 | 0.956487196  | 1.14E-06 |
| TUCP_000747 | XLOC_028161 | ENSRNOT00000013067 | 0.988208321  | 1.76E-09 |
| TUCP_000747 | XLOC_028161 | ENSRNOT00000074515 | 0.959558074  | 7.96E-07 |
| TUCP_000747 | XLOC_028161 | ENSRNOT00000075843 | 0.956940079  | 1.08E-06 |
| TUCP_000747 | XLOC_028161 | ENSRNOT00000066952 | -0.959578931 | 7.94E-07 |
| TUCP_000747 | XLOC_028161 | ENSRNOT00000027145 | 0.962828515  | 5.25E-07 |
| TUCP_000747 | XLOC_028161 | ENSRNOT00000002313 | 0.957878235  | 9.73E-07 |
| TUCP_000747 | XLOC_028161 | ENSRNOT00000034692 | 0.963791834  | 4.61E-07 |
| TUCP_000747 | XLOC_028161 | ENSRNOT00000016637 | 0.961770646  | 6.03E-07 |
| TUCP_000747 | XLOC_028161 | ENSRNOT00000038994 | 0.961285276  | 6.42E-07 |
| TUCP_000747 | XLOC_028161 | ENSRNOT00000020910 | -0.952955579 | 1.68E-06 |
| TUCP_000747 | XLOC_028161 | ENSRNOT00000079895 | -0.959496686 | 8.02E-07 |
| TUCP_000747 | XLOC_028161 | ENSRNOT00000005220 | -0.963641994 | 4.71E-07 |
| TUCP_000747 | XLOC_028161 | ENSRNOT00000074586 | 0.975305529  | 6.94E-08 |
| TUCP_000747 | XLOC_028161 | ENSRNOT00000075444 | 0.95870889   | 8.82E-07 |
| TUCP_000747 | XLOC_028161 | ENSRNOT00000071929 | 0.95202788   | 1.85E-06 |
| TUCP_000747 | XLOC_028161 | ENSRNOT00000084031 | -0.965260978 | 3.76E-07 |
| TUCP_000747 | XLOC_028161 | ENSRNOT00000032218 | 0.956289322  | 1.17E-06 |
| TUCP_000747 | XLOC_028161 | ENSRNOT00000011880 | -0.98211055  | 1.40E-08 |
| TUCP_000747 | XLOC_028161 | ENSRNOT00000003992 | 0.970190264  | 1.76E-07 |
| TUCP_000747 | XLOC_028161 | ENSRNOT00000050515 | -0.97567279  | 6.44E-08 |
| TUCP_000747 | XLOC_028161 | ENSRNOT00000077706 | -0.965646865 | 3.56E-07 |
| TUCP_000747 | XLOC_028161 | ENSRNOT00000089980 | 0.96354912   | 4.77E-07 |
| TUCP_000747 | XLOC_028161 | ENSRNOT00000078070 | -0.951149166 | 2.02E-06 |
| TUCP_000747 | XLOC_028161 | ENSRNOT00000046745 | -0.961356484 | 6.36E-07 |
| TUCP_000747 | XLOC_028161 | ENSRNOT00000055607 | 0.954107795  | 1.48E-06 |
| TUCP_000747 | XLOC_028161 | ENSRNOT00000089294 | 0.972373056  | 1.21E-07 |
| TUCP_000747 | XLOC_028161 | ENSRNOT00000023876 | -0.968662089 | 2.26E-07 |
| TUCP_000747 | XLOC_028161 | ENSRNOT00000033359 | -0.950555322 | 2.14E-06 |
| TUCP_000747 | XLOC_028161 | ENSRNOT00000061201 | 0.967731962  | 2.61E-07 |
| TUCP_000747 | XLOC_028161 | ENSRNOT00000002187 | 0.966327684  | 3.22E-07 |
| TUCP_000747 | XLOC_028161 | ENSRNOT00000091488 | -0.957536609 | 1.01E-06 |
| TUCP_000747 | XLOC_028161 | ENSRNOT00000049285 | 0.977640568  | 4.24E-08 |
| TUCP_000747 | XLOC_028161 | ENSRNOT00000032505 | 0.954658354  | 1.40E-06 |
| TUCP_000747 | XLOC_028161 | ENSRNOT00000015239 | 0.981803998  | 1.52E-08 |
| TUCP_000747 | XLOC_028161 | ENSRNOT00000074649 | -0.984122715 | 7.74E-09 |
| TUCP_000747 | XLOC_028161 | ENSRNOT00000035277 | -0.968939188 | 2.16E-07 |
| TUCP_000747 | XLOC_028161 | ENSRNOT00000018877 | 0.964840507  | 3.99E-07 |
| TUCP_000747 | XLOC_028161 | ENSRNOT00000077146 | 0.994538342  | 3.79E-11 |
| TUCP_000747 | XLOC_028161 | ENSRNOT00000052063 | -0.986630007 | 3.29E-09 |
| TUCP_000747 | XLOC_028161 | ENSRNOT00000031672 | 0.975172692  | 7.13E-08 |

|             |             |                    |              |          |
|-------------|-------------|--------------------|--------------|----------|
| TUCP_000747 | XLOC_028161 | ENSRNOT0000006969  | -0.950528088 | 2.15E-06 |
| TUCP_000747 | XLOC_028161 | ENSRNOT00000086456 | 0.960768462  | 6.85E-07 |
| TUCP_000747 | XLOC_028161 | ENSRNOT00000036959 | 0.950098576  | 2.24E-06 |
| TUCP_000747 | XLOC_028161 | ENSRNOT00000075209 | 0.965726961  | 3.52E-07 |
| TUCP_000747 | XLOC_028161 | ENSRNOT00000006395 | 0.971474515  | 1.42E-07 |
| TUCP_000747 | XLOC_028161 | ENSRNOT00000023977 | 0.973020017  | 1.08E-07 |
| TUCP_000747 | XLOC_028161 | ENSRNOT00000066133 | 0.988936114  | 1.28E-09 |
| TUCP_000747 | XLOC_028161 | ENSRNOT00000048933 | 0.963925131  | 4.53E-07 |
| TUCP_000747 | XLOC_028161 | ENSRNOT00000027970 | -0.969096337 | 2.11E-07 |
| TUCP_000747 | XLOC_028161 | ENSRNOT00000035385 | -0.968369237 | 2.36E-07 |
| TUCP_000747 | XLOC_028161 | ENSRNOT00000002443 | -0.952823218 | 1.70E-06 |
| TUCP_000747 | XLOC_028161 | ENSRNOT00000057738 | -0.976230195 | 5.74E-08 |
| TUCP_000747 | XLOC_028161 | ENSRNOT00000019487 | -0.958556733 | 8.98E-07 |
| TUCP_000747 | XLOC_028161 | ENSRNOT00000018170 | 0.958670462  | 8.86E-07 |
| TUCP_000747 | XLOC_028161 | ENSRNOT00000010915 | 0.958309841  | 9.25E-07 |
| TUCP_000747 | XLOC_028161 | ENSRNOT00000064535 | 0.986633376  | 3.29E-09 |
| TUCP_000747 | XLOC_028161 | ENSRNOT00000015624 | -0.969745829 | 1.90E-07 |
| TUCP_000747 | XLOC_028161 | ENSRNOT00000055540 | -0.96382461  | 4.59E-07 |
| TUCP_000747 | XLOC_028161 | ENSRNOT00000085295 | 0.950240483  | 2.21E-06 |
| TUCP_000747 | XLOC_028161 | ENSRNOT00000072632 | 0.966130998  | 3.32E-07 |
| TUCP_000747 | XLOC_028161 | ENSRNOT00000002114 | 0.974798233  | 7.67E-08 |
| TUCP_000747 | XLOC_028161 | ENSRNOT00000039102 | -0.977380466 | 4.49E-08 |
| TUCP_000747 | XLOC_028161 | ENSRNOT00000086260 | 0.979312058  | 2.88E-08 |
| TUCP_000747 | XLOC_028161 | ENSRNOT00000078856 | 0.961326401  | 6.38E-07 |
| TUCP_000747 | XLOC_028161 | ENSRNOT00000091205 | -0.964370861 | 4.26E-07 |
| TUCP_000747 | XLOC_028161 | ENSRNOT00000009742 | 0.9651795    | 3.80E-07 |
| TUCP_000747 | XLOC_028161 | ENSRNOT00000010983 | -0.957531068 | 1.01E-06 |
| TUCP_000747 | XLOC_028161 | ENSRNOT00000007369 | -0.959401477 | 8.11E-07 |
| TUCP_000747 | XLOC_028161 | ENSRNOT00000060698 | 0.99178411   | 2.91E-10 |
| TUCP_000747 | XLOC_028161 | ENSRNOT00000058351 | -0.97245106  | 1.19E-07 |
| TUCP_000747 | XLOC_028161 | ENSRNOT00000045946 | -0.958227586 | 9.34E-07 |
| TUCP_000747 | XLOC_028161 | ENSRNOT00000010748 | -0.964951387 | 3.93E-07 |
| TUCP_000747 | XLOC_028161 | ENSRNOT00000080207 | -0.950506041 | 2.15E-06 |
| TUCP_000747 | XLOC_028161 | ENSRNOT00000017998 | -0.969347604 | 2.02E-07 |
| TUCP_000747 | XLOC_028161 | ENSRNOT00000061100 | -0.963077067 | 5.08E-07 |
| TUCP_000747 | XLOC_028161 | ENSRNOT00000027170 | -0.950877609 | 2.07E-06 |
| TUCP_000747 | XLOC_028161 | ENSRNOT00000017776 | -0.970218132 | 1.76E-07 |
| TUCP_000747 | XLOC_028161 | ENSRNOT00000021534 | 0.968414694  | 2.35E-07 |
| TUCP_000747 | XLOC_028161 | ENSRNOT00000004463 | -0.962692061 | 5.35E-07 |
| TUCP_000747 | XLOC_028161 | ENSRNOT00000023256 | -0.952333953 | 1.79E-06 |
| TUCP_000747 | XLOC_028161 | ENSRNOT00000037809 | 0.966124805  | 3.32E-07 |
| TUCP_000747 | XLOC_028161 | ENSRNOT00000002028 | -0.970658104 | 1.63E-07 |
| TUCP_000747 | XLOC_028161 | ENSRNOT00000016776 | 0.95813573   | 9.44E-07 |
| TUCP_000747 | XLOC_028161 | ENSRNOT00000022097 | -0.985889868 | 4.30E-09 |
| TUCP_000747 | XLOC_028161 | ENSRNOT00000008987 | 0.974768828  | 7.72E-08 |
| TUCP_000747 | XLOC_028161 | ENSRNOT00000092876 | 0.984689764  | 6.46E-09 |
| TUCP_000747 | XLOC_028161 | ENSRNOT00000024253 | -0.982096659 | 1.41E-08 |
| TUCP_000747 | XLOC_028161 | ENSRNOT00000088073 | 0.951709289  | 1.91E-06 |
| TUCP_000747 | XLOC_028161 | ENSRNOT00000059854 | 0.953443569  | 1.59E-06 |
| TUCP_000747 | XLOC_028161 | ENSRNOT00000081796 | -0.954736407 | 1.39E-06 |
| TUCP_000747 | XLOC_028161 | ENSRNOT00000010524 | -0.956008825 | 1.20E-06 |

|             |             |                    |              |          |
|-------------|-------------|--------------------|--------------|----------|
| TUCP_000747 | XLOC_028161 | ENSRNOT00000009080 | 0.967145525  | 2.85E-07 |
| TUCP_000747 | XLOC_028161 | ENSRNOT00000063930 | 0.977443391  | 4.43E-08 |
| TUCP_000747 | XLOC_028161 | ENSRNOT00000074544 | 0.952422804  | 1.77E-06 |
| TUCP_000747 | XLOC_028161 | ENSRNOT00000046215 | 0.958569069  | 8.97E-07 |
| TUCP_000747 | XLOC_028161 | ENSRNOT00000013116 | 0.95376079   | 1.54E-06 |
| TUCP_000747 | XLOC_028161 | ENSRNOT00000020453 | 0.961227069  | 6.47E-07 |
| TUCP_000747 | XLOC_028161 | ENSRNOT00000013025 | 0.976440121  | 5.50E-08 |
| TUCP_000747 | XLOC_028161 | ENSRNOT00000088125 | -0.950780613 | 2.09E-06 |
| TUCP_000747 | XLOC_028161 | ENSRNOT00000041237 | 0.962947754  | 5.17E-07 |
| TUCP_000747 | XLOC_028161 | ENSRNOT00000088555 | 0.967127464  | 2.86E-07 |
| TUCP_000747 | XLOC_028161 | ENSRNOT00000021110 | 0.951849791  | 1.88E-06 |
| TUCP_000747 | XLOC_028161 | ENSRNOT00000022952 | 0.955029972  | 1.34E-06 |
| TUCP_000747 | XLOC_028161 | ENSRNOT00000087838 | 0.954883343  | 1.36E-06 |
| TUCP_000747 | XLOC_028161 | ENSRNOT00000001774 | 0.953193606  | 1.64E-06 |
| TUCP_000747 | XLOC_028161 | ENSRNOT00000084069 | -0.966678737 | 3.06E-07 |
| TUCP_000747 | XLOC_028161 | ENSRNOT00000001679 | -0.964436242 | 4.22E-07 |
| TUCP_000747 | XLOC_028161 | ENSRNOT00000013613 | 0.958503105  | 9.04E-07 |
| TUCP_000747 | XLOC_028161 | ENSRNOT00000026531 | 0.982013851  | 1.44E-08 |
| TUCP_000747 | XLOC_028161 | ENSRNOT00000010419 | -0.96943618  | 2.00E-07 |
| TUCP_000747 | XLOC_028161 | ENSRNOT00000019057 | 0.97721912   | 4.65E-08 |
| TUCP_000747 | XLOC_028161 | ENSRNOT00000078884 | 0.960593964  | 7.00E-07 |
| TUCP_000747 | XLOC_028161 | ENSRNOT00000003326 | 0.95180121   | 1.89E-06 |
| TUCP_000747 | XLOC_028161 | ENSRNOT00000021629 | 0.952833871  | 1.70E-06 |
| TUCP_000747 | XLOC_028161 | ENSRNOT00000016306 | 0.956265154  | 1.17E-06 |
| TUCP_000747 | XLOC_028161 | ENSRNOT00000015476 | 0.963919403  | 4.53E-07 |
| TUCP_000747 | XLOC_028161 | ENSRNOT00000021621 | 0.956477807  | 1.14E-06 |
| TUCP_000747 | XLOC_028161 | ENSRNOT00000020207 | -0.970832442 | 1.58E-07 |
| TUCP_000747 | XLOC_028161 | ENSRNOT00000091808 | 0.95514139   | 1.33E-06 |
| TUCP_000747 | XLOC_028161 | ENSRNOT00000025079 | 0.988833324  | 1.34E-09 |
| TUCP_000747 | XLOC_028161 | ENSRNOT00000048754 | 0.975508952  | 6.66E-08 |
| TUCP_000747 | XLOC_028161 | ENSRNOT00000011432 | 0.957906324  | 9.70E-07 |
| TUCP_000747 | XLOC_028161 | ENSRNOT00000021458 | 0.959949667  | 7.59E-07 |
| TUCP_000747 | XLOC_028161 | ENSRNOT00000054761 | 0.961763691  | 6.04E-07 |
| TUCP_000747 | XLOC_028161 | ENSRNOT00000007824 | 0.975301836  | 6.94E-08 |
| TUCP_000747 | XLOC_028161 | ENSRNOT00000019816 | 0.958792066  | 8.73E-07 |
| TUCP_000747 | XLOC_028161 | ENSRNOT00000020681 | 0.971401387  | 1.44E-07 |
| TUCP_000747 | XLOC_028161 | ENSRNOT00000057898 | 0.970637494  | 1.64E-07 |
| TUCP_000747 | XLOC_028161 | ENSRNOT00000024677 | -0.989047034 | 1.22E-09 |
| TUCP_000747 | XLOC_028161 | ENSRNOT00000000804 | 0.961964779  | 5.88E-07 |
| TUCP_000747 | XLOC_028161 | ENSRNOT00000009811 | -0.972932172 | 1.09E-07 |
| TUCP_000747 | XLOC_028161 | ENSRNOT00000047126 | 0.967447506  | 2.73E-07 |
| TUCP_000747 | XLOC_028161 | ENSRNOT00000077231 | -0.961395817 | 6.33E-07 |
| TUCP_000747 | XLOC_028161 | ENSRNOT00000072762 | 0.965340201  | 3.72E-07 |
| TUCP_000747 | XLOC_028161 | ENSRNOT00000071540 | -0.960342273 | 7.23E-07 |
| TUCP_000747 | XLOC_028161 | ENSRNOT00000031701 | 0.954809252  | 1.38E-06 |
| TUCP_000747 | XLOC_028161 | ENSRNOT00000072849 | 0.952566169  | 1.75E-06 |
| TUCP_000747 | XLOC_028161 | ENSRNOT00000073643 | 0.973864925  | 9.19E-08 |
| TUCP_000747 | XLOC_028161 | ENSRNOT00000078349 | 0.957572163  | 1.01E-06 |
| TUCP_000747 | XLOC_028161 | ENSRNOT00000022502 | 0.970189878  | 1.76E-07 |
| TUCP_000747 | XLOC_028161 | ENSRNOT00000087443 | -0.958306504 | 9.25E-07 |
| TUCP_000747 | XLOC_028161 | ENSRNOT00000089545 | 0.953131538  | 1.65E-06 |

|             |             |                    |              |          |
|-------------|-------------|--------------------|--------------|----------|
| TUCP_000747 | XLOC_028161 | ENSRNOT00000021802 | -0.959062885 | 8.45E-07 |
| TUCP_000747 | XLOC_028161 | ENSRNOT00000021803 | 0.959132987  | 8.38E-07 |
| TUCP_000747 | XLOC_028161 | ENSRNOT00000039857 | 0.961911455  | 5.92E-07 |
| TUCP_000747 | XLOC_028161 | ENSRNOT00000046973 | -0.9601818   | 7.37E-07 |
| TUCP_000747 | XLOC_028161 | ENSRNOT00000024352 | -0.983549013 | 9.23E-09 |
| TUCP_000747 | XLOC_028161 | ENSRNOT00000082627 | 0.965610726  | 3.58E-07 |
| TUCP_000747 | XLOC_028161 | ENSRNOT00000018122 | -0.970333469 | 1.72E-07 |
| TUCP_000747 | XLOC_028161 | ENSRNOT00000072118 | -0.970656978 | 1.63E-07 |
| TUCP_000747 | XLOC_028161 | ENSRNOT00000003780 | -0.973643864 | 9.58E-08 |
| TUCP_000747 | XLOC_028161 | ENSRNOT00000003787 | 0.962593027  | 5.42E-07 |
| TUCP_000747 | XLOC_028161 | ENSRNOT00000014506 | 0.972794433  | 1.12E-07 |
| TUCP_000747 | XLOC_028161 | ENSRNOT00000023262 | 0.966168977  | 3.30E-07 |
| TUCP_000747 | XLOC_028161 | ENSRNOT00000077908 | -0.961983743 | 5.87E-07 |
| TUCP_000747 | XLOC_028161 | ENSRNOT00000025104 | 0.952458453  | 1.77E-06 |
| TUCP_000747 | XLOC_028161 | ENSRNOT00000026312 | -0.969686794 | 1.92E-07 |
| TUCP_000747 | XLOC_028161 | ENSRNOT00000005604 | -0.955905955 | 1.22E-06 |
| TUCP_000747 | XLOC_028161 | ENSRNOT00000008317 | 0.950359499  | 2.18E-06 |
| TUCP_000747 | XLOC_028161 | ENSRNOT00000023667 | -0.968931385 | 2.16E-07 |
| TUCP_000747 | XLOC_028161 | ENSRNOT00000068381 | -0.973152361 | 1.05E-07 |
| TUCP_000747 | XLOC_028161 | ENSRNOT00000068026 | 0.974045336  | 8.88E-08 |
| TUCP_000747 | XLOC_028161 | ENSRNOT00000085621 | -0.979657798 | 2.65E-08 |
| TUCP_000747 | XLOC_028161 | ENSRNOT00000014821 | 0.966296148  | 3.24E-07 |
| TUCP_000747 | XLOC_028161 | ENSRNOT00000058382 | -0.988415363 | 1.61E-09 |
| TUCP_000747 | XLOC_028161 | ENSRNOT00000008889 | 0.953166198  | 1.64E-06 |
| TUCP_000747 | XLOC_028161 | ENSRNOT00000055683 | -0.962312885 | 5.62E-07 |
| TUCP_000747 | XLOC_028161 | ENSRNOT00000005587 | 0.957180435  | 1.05E-06 |
| TUCP_000747 | XLOC_028161 | ENSRNOT00000035605 | -0.973742621 | 9.41E-08 |
| TUCP_000747 | XLOC_028161 | ENSRNOT00000025221 | 0.952550657  | 1.75E-06 |
| TUCP_000747 | XLOC_028161 | ENSRNOT00000005172 | -0.950462427 | 2.16E-06 |
| TUCP_000747 | XLOC_028161 | ENSRNOT00000017746 | 0.96145792   | 6.28E-07 |
| TUCP_000747 | XLOC_028161 | ENSRNOT00000092083 | -0.953186314 | 1.64E-06 |
| TUCP_000747 | XLOC_028161 | ENSRNOT00000017995 | -0.970702595 | 1.62E-07 |
| TUCP_000747 | XLOC_028161 | ENSRNOT00000027910 | -0.963654789 | 4.70E-07 |
| TUCP_000747 | XLOC_028161 | ENSRNOT00000000898 | -0.965516424 | 3.62E-07 |
| TUCP_000747 | XLOC_028161 | ENSRNOT00000081725 | -0.983179225 | 1.03E-08 |
| TUCP_000747 | XLOC_028161 | ENSRNOT00000005459 | -0.979651172 | 2.66E-08 |
| TUCP_000747 | XLOC_028161 | ENSRNOT00000009135 | -0.950850058 | 2.08E-06 |
| TUCP_000747 | XLOC_028161 | ENSRNOT00000024753 | 0.956843719  | 1.10E-06 |
| TUCP_000747 | XLOC_028161 | ENSRNOT00000037015 | -0.959410805 | 8.10E-07 |
| TUCP_000747 | XLOC_028161 | ENSRNOT00000024452 | 0.961772167  | 6.03E-07 |
| TUCP_000747 | XLOC_028161 | ENSRNOT00000054976 | 0.951746283  | 1.90E-06 |
| TUCP_000747 | XLOC_028161 | ENSRNOT00000028888 | -0.958438022 | 9.11E-07 |
| TUCP_000747 | XLOC_028161 | ENSRNOT00000066032 | -0.966454327 | 3.16E-07 |
| TUCP_000747 | XLOC_028161 | ENSRNOT00000088202 | 0.950439671  | 2.17E-06 |
| TUCP_000747 | XLOC_028161 | ENSRNOT00000034487 | 0.950663979  | 2.12E-06 |
| TUCP_000747 | XLOC_028161 | ENSRNOT00000001783 | -0.962601885 | 5.41E-07 |
| TUCP_000747 | XLOC_028161 | ENSRNOT00000021143 | -0.956378015 | 1.16E-06 |
| TUCP_000747 | XLOC_028161 | ENSRNOT00000025314 | -0.960068578 | 7.48E-07 |
| TUCP_000747 | XLOC_028161 | ENSRNOT00000020809 | 0.960763862  | 6.86E-07 |
| TUCP_000747 | XLOC_028161 | ENSRNOT00000082151 | 0.960405866  | 7.17E-07 |
| TUCP_000747 | XLOC_028161 | ENSRNOT00000008982 | -0.960651952 | 6.95E-07 |

|             |             |                    |              |          |
|-------------|-------------|--------------------|--------------|----------|
| TUCP_000747 | XLOC_028161 | ENSRNOT00000034411 | -0.951723405 | 1.90E-06 |
| TUCP_000747 | XLOC_028161 | ENSRNOT00000003359 | 0.957893447  | 9.71E-07 |
| TUCP_000747 | XLOC_028161 | ENSRNOT00000038511 | 0.96646491   | 3.16E-07 |
| TUCP_000747 | XLOC_028161 | ENSRNOT00000085971 | 0.965616782  | 3.57E-07 |
| TUCP_000747 | XLOC_028161 | ENSRNOT00000022142 | -0.954453332 | 1.43E-06 |
| TUCP_000747 | XLOC_028161 | ENSRNOT00000076300 | 0.955876286  | 1.22E-06 |
| TUCP_000747 | XLOC_028161 | ENSRNOT00000005405 | -0.959929952 | 7.61E-07 |
| TUCP_000747 | XLOC_028161 | ENSRNOT00000025086 | 0.961923049  | 5.91E-07 |
| TUCP_000747 | XLOC_028161 | ENSRNOT00000015537 | -0.98085583  | 1.96E-08 |
| TUCP_000747 | XLOC_028161 | ENSRNOT00000045833 | -0.970408176 | 1.70E-07 |
| TUCP_000747 | XLOC_028161 | ENSRNOT00000007702 | 0.968714982  | 2.24E-07 |
| TUCP_000747 | XLOC_028161 | ENSRNOT00000015946 | 0.95347205   | 1.59E-06 |
| TUCP_000747 | XLOC_028161 | ENSRNOT00000022461 | 0.956475571  | 1.14E-06 |
| TUCP_000747 | XLOC_028161 | ENSRNOT00000004172 | -0.957776314 | 9.85E-07 |
| TUCP_000747 | XLOC_028161 | ENSRNOT00000023965 | 0.953594367  | 1.57E-06 |
| TUCP_000747 | XLOC_028161 | ENSRNOT00000011694 | 0.954113491  | 1.48E-06 |
| TUCP_000747 | XLOC_028161 | ENSRNOT00000085279 | -0.969650354 | 1.93E-07 |
| TUCP_000747 | XLOC_028161 | ENSRNOT00000012528 | -0.970232499 | 1.75E-07 |
| TUCP_000747 | XLOC_028161 | ENSRNOT00000068184 | 0.965056216  | 3.87E-07 |
| TUCP_000747 | XLOC_028161 | ENSRNOT00000089016 | 0.951539973  | 1.94E-06 |
| TUCP_000747 | XLOC_028161 | ENSRNOT00000082904 | -0.966533889 | 3.13E-07 |
| TUCP_000747 | XLOC_028161 | ENSRNOT00000015318 | 0.95719096   | 1.05E-06 |
| TUCP_000747 | XLOC_028161 | ENSRNOT00000065529 | -0.962833189 | 5.25E-07 |
| TUCP_000747 | XLOC_028161 | ENSRNOT00000085669 | -0.96900529  | 2.14E-07 |
| TUCP_000747 | XLOC_028161 | ENSRNOT00000028907 | -0.988444931 | 1.59E-09 |
| TUCP_000747 | XLOC_028161 | ENSRNOT00000010224 | -0.959060404 | 8.45E-07 |
| TUCP_000747 | XLOC_028161 | ENSRNOT00000025147 | -0.9608646   | 6.77E-07 |
| TUCP_000747 | XLOC_028161 | ENSRNOT00000087278 | 0.985627724  | 4.71E-09 |
| TUCP_000747 | XLOC_028161 | ENSRNOT00000089086 | 0.9564207    | 1.15E-06 |
| TUCP_000747 | XLOC_028161 | ENSRNOT00000035309 | 0.955788807  | 1.23E-06 |
| TUCP_000747 | XLOC_028161 | ENSRNOT00000078862 | -0.958820378 | 8.70E-07 |
| TUCP_000747 | XLOC_028161 | ENSRNOT0000003940  | 0.9510203    | 2.04E-06 |
| TUCP_000747 | XLOC_028161 | ENSRNOT00000017687 | 0.954094068  | 1.49E-06 |
| TUCP_000747 | XLOC_028161 | ENSRNOT00000047105 | -0.953026062 | 1.66E-06 |
| TUCP_000747 | XLOC_028161 | ENSRNOT00000039551 | 0.955652206  | 1.25E-06 |
| TUCP_000747 | XLOC_028161 | ENSRNOT00000082998 | -0.954278476 | 1.46E-06 |
| TUCP_000747 | XLOC_028161 | ENSRNOT00000011237 | 0.953251341  | 1.63E-06 |
| TUCP_000747 | XLOC_028161 | ENSRNOT00000007350 | -0.984927257 | 5.97E-09 |
| TUCP_000747 | XLOC_028161 | ENSRNOT00000004400 | -0.961945645 | 5.90E-07 |
| TUCP_000747 | XLOC_028161 | ENSRNOT00000018936 | 0.962841681  | 5.24E-07 |
| TUCP_000747 | XLOC_028161 | ENSRNOT00000083578 | -0.971731272 | 1.36E-07 |
| TUCP_000747 | XLOC_028161 | ENSRNOT00000000181 | -0.972226959 | 1.24E-07 |
| TUCP_000747 | XLOC_028161 | ENSRNOT00000084202 | 0.951838504  | 1.88E-06 |
| TUCP_000747 | XLOC_028161 | ENSRNOT00000020297 | -0.984059008 | 7.89E-09 |
| TUCP_000747 | XLOC_028161 | ENSRNOT00000023638 | -0.960601786 | 7.00E-07 |
| TUCP_000747 | XLOC_028161 | ENSRNOT00000005659 | -0.956961026 | 1.08E-06 |
| TUCP_000747 | XLOC_028161 | ENSRNOT00000045326 | -0.968978107 | 2.15E-07 |
| TUCP_000747 | XLOC_028161 | ENSRNOT00000002510 | 0.959814681  | 7.71E-07 |
| TUCP_000747 | XLOC_028161 | ENSRNOT00000039607 | 0.956300706  | 1.17E-06 |
| TUCP_000747 | XLOC_028161 | ENSRNOT00000074023 | -0.980289671 | 2.27E-08 |
| TUCP_000747 | XLOC_028161 | ENSRNOT00000009073 | 0.952959277  | 1.68E-06 |

|             |             |                    |              |          |
|-------------|-------------|--------------------|--------------|----------|
| TUCP_000747 | XLOC_028161 | ENSRNOT00000048910 | 0.967216354  | 2.82E-07 |
| TUCP_000747 | XLOC_028161 | ENSRNOT00000018341 | 0.972727841  | 1.14E-07 |
| TUCP_000747 | XLOC_028161 | ENSRNOT00000065076 | -0.967430946 | 2.73E-07 |
| TUCP_000747 | XLOC_028161 | ENSRNOT00000013516 | -0.982081481 | 1.41E-08 |
| TUCP_000747 | XLOC_028161 | ENSRNOT00000054685 | -0.963996124 | 4.48E-07 |
| TUCP_000747 | XLOC_028161 | ENSRNOT00000016012 | 0.955475613  | 1.28E-06 |
| TUCP_000747 | XLOC_028161 | ENSRNOT00000012060 | -0.971158314 | 1.50E-07 |
| TUCP_000747 | XLOC_028161 | ENSRNOT00000023037 | -0.955782731 | 1.24E-06 |
| TUCP_000747 | XLOC_028161 | ENSRNOT00000027760 | -0.976779444 | 5.11E-08 |
| TUCP_000747 | XLOC_028161 | ENSRNOT00000024402 | -0.956859638 | 1.09E-06 |
| TUCP_000747 | XLOC_028161 | ENSRNOT00000018028 | 0.951940337  | 1.86E-06 |
| TUCP_000747 | XLOC_028161 | ENSRNOT00000019519 | -0.95756169  | 1.01E-06 |
| TUCP_000747 | XLOC_028161 | ENSRNOT00000089933 | -0.972035455 | 1.29E-07 |
| TUCP_000747 | XLOC_028161 | ENSRNOT00000022924 | 0.95287389   | 1.69E-06 |
| TUCP_000747 | XLOC_028161 | ENSRNOT00000090461 | -0.961408356 | 6.32E-07 |
| TUCP_000747 | XLOC_028161 | ENSRNOT00000090912 | -0.972416806 | 1.20E-07 |
| TUCP_000747 | XLOC_028161 | ENSRNOT00000073983 | -0.961174443 | 6.51E-07 |
| TUCP_000747 | XLOC_028161 | ENSRNOT00000032780 | -0.951967526 | 1.86E-06 |
| TUCP_000747 | XLOC_028161 | ENSRNOT00000010783 | 0.966612979  | 3.09E-07 |
| TUCP_000747 | XLOC_028161 | ENSRNOT00000033677 | 0.966579212  | 3.10E-07 |
| TUCP_000747 | XLOC_028161 | ENSRNOT00000019820 | -0.965008668 | 3.90E-07 |
| TUCP_000747 | XLOC_028161 | ENSRNOT00000016389 | 0.950211018  | 2.22E-06 |
| TUCP_000747 | XLOC_028161 | ENSRNOT00000011832 | 0.988876892  | 1.32E-09 |
| TUCP_000747 | XLOC_028161 | ENSRNOT00000024066 | -0.956914557 | 1.09E-06 |
| TUCP_000747 | XLOC_028161 | ENSRNOT00000021030 | 0.956208875  | 1.18E-06 |
| TUCP_000747 | XLOC_028161 | ENSRNOT00000006835 | -0.979876655 | 2.51E-08 |
| TUCP_000747 | XLOC_028161 | ENSRNOT00000077727 | 0.977885259  | 4.01E-08 |
| TUCP_000747 | XLOC_028161 | ENSRNOT00000044346 | 0.983175964  | 1.03E-08 |
| TUCP_000747 | XLOC_028161 | ENSRNOT00000068745 | -0.964573107 | 4.14E-07 |
| TUCP_000747 | XLOC_028161 | ENSRNOT00000048613 | -0.968484388 | 2.32E-07 |
| TUCP_000747 | XLOC_028161 | ENSRNOT00000092068 | -0.955175621 | 1.32E-06 |
| TUCP_000747 | XLOC_028161 | ENSRNOT00000048781 | -0.953532926 | 1.58E-06 |
| TUCP_000747 | XLOC_028161 | ENSRNOT00000091909 | -0.968354747 | 2.37E-07 |
| TUCP_000747 | XLOC_028161 | ENSRNOT00000003265 | -0.951824682 | 1.88E-06 |
| TUCP_000747 | XLOC_028161 | ENSRNOT00000003544 | 0.965851981  | 3.45E-07 |
| TUCP_000747 | XLOC_028161 | ENSRNOT00000086119 | 0.961033316  | 6.63E-07 |
| TUCP_000747 | XLOC_028161 | ENSRNOT00000022190 | 0.980336537  | 2.24E-08 |
| TUCP_000747 | XLOC_028161 | ENSRNOT00000025913 | 0.974623019  | 7.94E-08 |
| TUCP_000747 | XLOC_028161 | ENSRNOT00000077220 | 0.963538395  | 4.77E-07 |
| TUCP_000747 | XLOC_028161 | ENSRNOT00000004196 | -0.968739904 | 2.23E-07 |
| TUCP_000747 | XLOC_028161 | ENSRNOT00000065983 | -0.952648574 | 1.73E-06 |
| TUCP_000747 | XLOC_028161 | ENSRNOT00000030782 | 0.959864676  | 7.67E-07 |
| TUCP_000747 | XLOC_028161 | ENSRNOT0000007882  | 0.956656254  | 1.12E-06 |
| TUCP_000747 | XLOC_028161 | ENSRNOT00000073919 | -0.980662972 | 2.06E-08 |
| TUCP_000747 | XLOC_028161 | ENSRNOT00000067780 | 0.976672061  | 5.23E-08 |
| TUCP_000747 | XLOC_028161 | ENSRNOT00000086577 | -0.958218136 | 9.35E-07 |
| TUCP_000747 | XLOC_028161 | ENSRNOT00000036658 | 0.964674848  | 4.08E-07 |
| TUCP_000747 | XLOC_028161 | ENSRNOT00000089611 | -0.963137764 | 5.04E-07 |
| TUCP_000747 | XLOC_028161 | ENSRNOT00000073910 | 0.956911448  | 1.09E-06 |
| TUCP_000747 | XLOC_028161 | ENSRNOT0000007738  | 0.954838523  | 1.37E-06 |
| TUCP_000747 | XLOC_028161 | ENSRNOT00000039012 | 0.96359651   | 4.74E-07 |

|             |             |                    |              |          |
|-------------|-------------|--------------------|--------------|----------|
| TUCP_000747 | XLOC_028161 | ENSRNOT00000066098 | 0.95092069   | 2.06E-06 |
| TUCP_000747 | XLOC_028161 | ENSRNOT00000008253 | 0.954816825  | 1.37E-06 |
| TUCP_000747 | XLOC_028161 | ENSRNOT00000008256 | 0.961970549  | 5.88E-07 |
| TUCP_000747 | XLOC_028161 | ENSRNOT00000086590 | -0.975594039 | 6.55E-08 |
| TUCP_000747 | XLOC_028161 | ENSRNOT00000018634 | 0.959946291  | 7.59E-07 |
| TUCP_000747 | XLOC_028161 | ENSRNOT00000034883 | 0.981329646  | 1.73E-08 |
| TUCP_000747 | XLOC_028161 | ENSRNOT00000020155 | -0.952439565 | 1.77E-06 |
| TUCP_000747 | XLOC_028161 | ENSRNOT00000072357 | 0.979294614  | 2.89E-08 |
| TUCP_000747 | XLOC_028161 | ENSRNOT00000079801 | 0.959930716  | 7.60E-07 |
| TUCP_000747 | XLOC_028161 | ENSRNOT00000065947 | -0.955736867 | 1.24E-06 |
| TUCP_000747 | XLOC_028161 | ENSRNOT00000067739 | 0.960451544  | 7.13E-07 |
| TUCP_000747 | XLOC_028161 | ENSRNOT00000005910 | 0.966319852  | 3.23E-07 |
| TUCP_000747 | XLOC_028161 | ENSRNOT00000017624 | -0.966425063 | 3.18E-07 |
| TUCP_000747 | XLOC_028161 | ENSRNOT00000017626 | 0.954416441  | 1.44E-06 |
| TUCP_000747 | XLOC_028161 | ENSRNOT00000076485 | 0.970732878  | 1.61E-07 |
| TUCP_000747 | XLOC_028161 | ENSRNOT00000078475 | -0.965920936 | 3.42E-07 |
| TUCP_000747 | XLOC_028161 | ENSRNOT00000040169 | -0.964145865 | 4.39E-07 |
| TUCP_000747 | XLOC_028161 | ENSRNOT00000026249 | 0.964757505  | 4.04E-07 |
| TUCP_000747 | XLOC_028161 | ENSRNOT00000036051 | -0.963306129 | 4.93E-07 |
| TUCP_000747 | XLOC_028161 | ENSRNOT00000003690 | -0.952237189 | 1.81E-06 |
| TUCP_000747 | XLOC_028161 | ENSRNOT00000076230 | -0.962520669 | 5.47E-07 |
| TUCP_000747 | XLOC_028161 | ENSRNOT00000016722 | -0.96471419  | 4.06E-07 |
| TUCP_000747 | XLOC_028161 | ENSRNOT00000028685 | -0.954696334 | 1.39E-06 |
| TUCP_000747 | XLOC_028161 | ENSRNOT00000000013 | -0.974208067 | 8.61E-08 |
| TUCP_000747 | XLOC_028161 | ENSRNOT00000018477 | 0.967922871  | 2.53E-07 |
| TUCP_000747 | XLOC_028161 | ENSRNOT00000080222 | 0.956301935  | 1.17E-06 |
| TUCP_000747 | XLOC_028161 | ENSRNOT00000018473 | 0.961368202  | 6.35E-07 |
| TUCP_000747 | XLOC_028161 | ENSRNOT00000005161 | -0.974842774 | 7.61E-08 |
| TUCP_000747 | XLOC_028161 | ENSRNOT00000026118 | 0.951301761  | 1.99E-06 |
| TUCP_000747 | XLOC_028161 | ENSRNOT00000037955 | 0.978276645  | 3.67E-08 |
| TUCP_000747 | XLOC_028161 | ENSRNOT00000055582 | -0.951691935 | 1.91E-06 |
| TUCP_000747 | XLOC_028161 | ENSRNOT00000013851 | 0.974834695  | 7.62E-08 |
| TUCP_000747 | XLOC_028161 | ENSRNOT00000004999 | -0.974898557 | 7.52E-08 |
| TUCP_000747 | XLOC_028161 | ENSRNOT00000013463 | -0.963092467 | 5.07E-07 |
| TUCP_000747 | XLOC_028161 | ENSRNOT00000088054 | -0.953137416 | 1.64E-06 |
| TUCP_000747 | XLOC_028161 | ENSRNOT00000025966 | -0.973315993 | 1.02E-07 |
| TUCP_000747 | XLOC_028161 | ENSRNOT00000047663 | 0.975284242  | 6.97E-08 |
| TUCP_000747 | XLOC_028161 | ENSRNOT00000029202 | 0.96904838   | 2.12E-07 |
| TUCP_000747 | XLOC_028161 | ENSRNOT00000025791 | 0.962047826  | 5.82E-07 |
| TUCP_000747 | XLOC_028161 | ENSRNOT00000005489 | -0.990111617 | 7.32E-10 |
| TUCP_000747 | XLOC_028161 | ENSRNOT00000025794 | 0.96533394   | 3.72E-07 |
| TUCP_000747 | XLOC_028161 | ENSRNOT00000058111 | 0.969817086  | 1.88E-07 |
| TUCP_000747 | XLOC_028161 | ENSRNOT00000084422 | -0.957021219 | 1.07E-06 |
| TUCP_000747 | XLOC_028161 | ENSRNOT00000088279 | -0.951997666 | 1.85E-06 |
| TUCP_000747 | XLOC_028161 | ENSRNOT00000009994 | 0.969506805  | 1.97E-07 |
| TUCP_000747 | XLOC_028161 | ENSRNOT00000077367 | 0.981344063  | 1.72E-08 |
| TUCP_000747 | XLOC_028161 | ENSRNOT00000024841 | 0.979904718  | 2.50E-08 |
| TUCP_000747 | XLOC_028161 | ENSRNOT00000009462 | -0.960718292 | 6.90E-07 |
| TUCP_000747 | XLOC_028161 | ENSRNOT00000012924 | 0.951625753  | 1.92E-06 |
| TUCP_000747 | XLOC_028161 | ENSRNOT00000024924 | 0.960900378  | 6.74E-07 |
| TUCP_000747 | XLOC_028161 | ENSRNOT00000079011 | 0.966912919  | 2.95E-07 |



|             |             |                     |              |          |
|-------------|-------------|---------------------|--------------|----------|
| TUCP_000747 | XLOC_028161 | ENSRNOT00000011466  | -0.950571905 | 2.14E-06 |
| TUCP_000747 | XLOC_028161 | ENSRNOT00000018074  | 0.976664509  | 5.24E-08 |
| TUCP_000747 | XLOC_028161 | ENSRNOT00000037679  | -0.96573969  | 3.51E-07 |
| TUCP_000747 | XLOC_028161 | ENSRNOT0000000124   | 0.956312799  | 1.16E-06 |
| TUCP_000747 | XLOC_028161 | ENSRNOT00000014124  | -0.970789833 | 1.59E-07 |
| TUCP_000747 | XLOC_028161 | ENSRNOT00000043581  | 0.96630419   | 3.23E-07 |
| TUCP_000747 | XLOC_028161 | ENSRNOT00000000120  | -0.974303179 | 8.45E-08 |
| TUCP_000747 | XLOC_028161 | ENSRNOT00000013632  | -0.965330426 | 3.72E-07 |
| TUCP_000747 | XLOC_028161 | ENSRNOT00000078906  | 0.981828697  | 1.51E-08 |
| TUCP_000747 | XLOC_028161 | ENSRNOT00000028545  | 0.9518666    | 1.88E-06 |
| TUCP_000747 | XLOC_028161 | ENSRNOT00000013733  | 0.957913111  | 9.69E-07 |
| TUCP_000747 | XLOC_028161 | ENSRNOT00000028225  | -0.967553569 | 2.68E-07 |
| TUCP_000747 | XLOC_028161 | ENSRNOT00000066561  | 0.959457117  | 8.06E-07 |
| TUCP_000747 | XLOC_028161 | ENSRNOT00000019172  | 0.954099264  | 1.49E-06 |
| TUCP_000747 | XLOC_028161 | ENSRNOT00000015495  | 0.989112324  | 1.18E-09 |
| TUCP_000747 | XLOC_028161 | ENSRNOT00000040393  | -0.96788684  | 2.55E-07 |
| TUCP_000747 | XLOC_028161 | ENSRNOT00000025097  | -0.969333145 | 2.03E-07 |
| TUCP_000747 | XLOC_028161 | ENSRNOT00000067901  | 0.962529524  | 5.46E-07 |
| TUCP_000747 | XLOC_028161 | ENSRNOT00000011511  | 0.965603424  | 3.58E-07 |
| TUCP_000747 | XLOC_028161 | ENSRNOT00000021674  | -0.960355114 | 7.22E-07 |
| TUCP_000747 | XLOC_028161 | ENSRNOT00000036613  | 0.988946908  | 1.28E-09 |
| TUCP_000747 | XLOC_028161 | ENSRNOT00000028876  | 0.957963576  | 9.63E-07 |
| TUCP_000747 | XLOC_028161 | ENSRNOT00000025705  | -0.985083125 | 5.67E-09 |
| TUCP_000747 | XLOC_028161 | ENSRNOT00000019983  | 0.955808645  | 1.23E-06 |
| TUCP_000747 | XLOC_028161 | ENSRNOT00000004140  | -0.950668996 | 2.12E-06 |
| TUCP_000747 | XLOC_028161 | ENSRNOT00000008113  | 0.984685003  | 6.47E-09 |
| TUCP_000747 | XLOC_028161 | ENSRNOT00000009763  | 0.951144659  | 2.02E-06 |
| TUCP_000747 | XLOC_028161 | ENSRNOT00000007698  | 0.986917875  | 2.95E-09 |
| TUCP_000747 | XLOC_028161 | ENSRNOT00000047836  | 0.959607705  | 7.91E-07 |
| TUCP_000747 | XLOC_028161 | ENSRNOT00000020357  | -0.965409035 | 3.68E-07 |
| TUCP_000747 | XLOC_028161 | ENSRNOT00000019213  | -0.952042665 | 1.84E-06 |
| TUCP_000747 | XLOC_028161 | ENSRNOT00000020051  | -0.973699481 | 9.48E-08 |
| TUCP_000747 | XLOC_028161 | ENSRNOT00000087062  | -0.970208677 | 1.76E-07 |
| TUCP_000747 | XLOC_028161 | ENSRNOT00000004241  | 0.959818014  | 7.71E-07 |
| TUCP_000747 | XLOC_028161 | ENSRNOT00000003087  | -0.955042166 | 1.34E-06 |
| TUCP_000747 | XLOC_028161 | ENSRNOT00000015678  | 0.990416878  | 6.26E-10 |
| TUCP_000747 | XLOC_028161 | ENSRNOT000000082914 | -0.966422443 | 3.18E-07 |
| TUCP_000747 | XLOC_028161 | ENSRNOT00000020197  | 0.964973838  | 3.91E-07 |
| TUCP_000747 | XLOC_028161 | ENSRNOT00000019358  | 0.952625226  | 1.74E-06 |
| TUCP_000747 | XLOC_028161 | ENSRNOT00000073193  | 0.969209287  | 2.07E-07 |
| TUCP_000747 | XLOC_028161 | ENSRNOT000000082863 | -0.968338505 | 2.38E-07 |
| TUCP_000747 | XLOC_028161 | ENSRNOT00000049459  | 0.984633263  | 6.58E-09 |
| TUCP_000747 | XLOC_028161 | ENSRNOT00000087011  | 0.965157617  | 3.81E-07 |
| TUCP_000747 | XLOC_028161 | ENSRNOT00000004391  | -0.956181136 | 1.18E-06 |
| TUCP_000747 | XLOC_028161 | ENSRNOT000000084567 | -0.969716136 | 1.91E-07 |
| TUCP_000747 | XLOC_028161 | ENSRNOT000000074683 | -0.960516728 | 7.07E-07 |
| TUCP_000747 | XLOC_028161 | ENSRNOT00000001118  | -0.954772362 | 1.38E-06 |
| TUCP_000747 | XLOC_028161 | ENSRNOT000000055437 | 0.953193514  | 1.64E-06 |
| TUCP_000747 | XLOC_028161 | ENSRNOT000000091596 | 0.955014539  | 1.35E-06 |
| TUCP_000747 | XLOC_028161 | ENSRNOT00000007028  | 0.951994328  | 1.85E-06 |
| TUCP_000747 | XLOC_028161 | ENSRNOT00000001507  | -0.975574055 | 6.57E-08 |

|             |             |                     |              |          |
|-------------|-------------|---------------------|--------------|----------|
| TUCP_000747 | XLOC_028161 | ENSRNOT00000087604  | -0.953011748 | 1.67E-06 |
| TUCP_000747 | XLOC_028161 | ENSRNOT00000083568  | -0.974011549 | 8.94E-08 |
| TUCP_000747 | XLOC_028161 | ENSRNOT00000018584  | -0.959585634 | 7.93E-07 |
| TUCP_000747 | XLOC_028161 | ENSRNOT00000039177  | 0.978137979  | 3.79E-08 |
| TUCP_000747 | XLOC_028161 | ENSRNOT00000021496  | 0.950910751  | 2.07E-06 |
| TUCP_000747 | XLOC_028161 | ENSRNOT00000030109  | -0.95182605  | 1.88E-06 |
| TUCP_000747 | XLOC_028161 | ENSRNOT00000017271  | -0.966317587 | 3.23E-07 |
| TUCP_000747 | XLOC_028161 | ENSRNOT00000022676  | 0.958316252  | 9.24E-07 |
| TUCP_000747 | XLOC_028161 | ENSRNOT00000037456  | -0.960169666 | 7.38E-07 |
| TUCP_000747 | XLOC_028161 | ENSRNOT00000030082  | -0.974648122 | 7.90E-08 |
| TUCP_000747 | XLOC_028161 | ENSRNOT00000025517  | -0.954467871 | 1.43E-06 |
| TUCP_000747 | XLOC_028161 | ENSRNOT00000025510  | 0.955714117  | 1.25E-06 |
| TUCP_000747 | XLOC_028161 | ENSRNOT00000000577  | -0.975532356 | 6.63E-08 |
| TUCP_000747 | XLOC_028161 | ENSRNOT000000081226 | -0.955751961 | 1.24E-06 |
| TUCP_000747 | XLOC_028161 | ENSRNOT00000075424  | -0.951001684 | 2.05E-06 |
| TUCP_000747 | XLOC_028161 | ENSRNOT00000065045  | -0.972353456 | 1.21E-07 |
| TUCP_000747 | XLOC_028161 | ENSRNOT00000056405  | -0.960953654 | 6.69E-07 |
| TUCP_000747 | XLOC_028161 | ENSRNOT00000012177  | 0.954893991  | 1.36E-06 |
| TUCP_000747 | XLOC_028161 | ENSRNOT00000088133  | 0.951792603  | 1.89E-06 |
| TUCP_000747 | XLOC_028161 | ENSRNOT00000080677  | 0.958205312  | 9.36E-07 |
| TUCP_000747 | XLOC_028161 | ENSRNOT00000046490  | 0.961679972  | 6.10E-07 |
| TUCP_000747 | XLOC_028161 | ENSRNOT00000001979  | 0.959740492  | 7.78E-07 |
| TUCP_000747 | XLOC_028161 | ENSRNOT00000067011  | -0.962621974 | 5.40E-07 |
| TUCP_000747 | XLOC_028161 | ENSRNOT00000083968  | 0.974997505  | 7.38E-08 |
| TUCP_000747 | XLOC_028161 | ENSRNOT00000037133  | -0.972188813 | 1.25E-07 |
| TUCP_000747 | XLOC_028161 | ENSRNOT00000034298  | -0.957448174 | 1.02E-06 |
| TUCP_000747 | XLOC_028161 | ENSRNOT00000083964  | 0.956945274  | 1.08E-06 |
| TUCP_000747 | XLOC_028161 | ENSRNOT00000001891  | 0.950127791  | 2.23E-06 |
| TUCP_000747 | XLOC_028161 | ENSRNOT00000027117  | 0.953602462  | 1.57E-06 |
| TUCP_000747 | XLOC_028161 | ENSRNOT00000001893  | -0.950191128 | 2.22E-06 |
| TUCP_000747 | XLOC_028161 | ENSRNOT00000026831  | -0.956864123 | 1.09E-06 |
| TUCP_000747 | XLOC_028161 | ENSRNOT00000068452  | -0.962218255 | 5.69E-07 |
| TUCP_000747 | XLOC_028161 | ENSRNOT00000016445  | -0.973828525 | 9.25E-08 |
| TUCP_000747 | XLOC_028161 | ENSRNOT00000019133  | -0.958482404 | 9.06E-07 |
| TUCP_000747 | XLOC_028161 | ENSRNOT00000011956  | -0.956374888 | 1.16E-06 |
| TUCP_000747 | XLOC_028161 | ENSRNOT00000024119  | -0.972664002 | 1.15E-07 |
| TUCP_000747 | XLOC_028161 | ENSRNOT00000006824  | 0.975479302  | 6.70E-08 |
| TUCP_000747 | XLOC_028161 | ENSRNOT00000012775  | 0.950272263  | 2.20E-06 |
| TUCP_000747 | XLOC_028161 | ENSRNOT00000082138  | 0.955570597  | 1.27E-06 |
| TUCP_000747 | XLOC_028161 | ENSRNOT00000056100  | 0.971040938  | 1.53E-07 |
| TUCP_000747 | XLOC_028161 | ENSRNOT00000029701  | -0.953661519 | 1.56E-06 |
| TUCP_000747 | XLOC_028161 | ENSRNOT00000061392  | -0.952415492 | 1.77E-06 |
| TUCP_000747 | XLOC_028161 | ENSRNOT00000001099  | 0.961193169  | 6.49E-07 |
| TUCP_000747 | XLOC_028161 | ENSRNOT00000001158  | -0.973920011 | 9.10E-08 |
| TUCP_000747 | XLOC_028161 | ENSRNOT00000085736  | 0.956321985  | 1.16E-06 |
| TUCP_000747 | XLOC_028161 | ENSRNOT00000045488  | -0.955286569 | 1.31E-06 |
| TUCP_000747 | XLOC_028161 | ENSRNOT00000081351  | -0.9613304   | 6.38E-07 |
| TUCP_000747 | XLOC_028161 | ENSRNOT00000090853  | 0.956203966  | 1.18E-06 |
| TUCP_000747 | XLOC_028161 | ENSRNOT00000020316  | 0.950269724  | 2.20E-06 |
| TUCP_000747 | XLOC_028161 | ENSRNOT00000006709  | 0.95545179   | 1.28E-06 |
| TUCP_000747 | XLOC_028161 | ENSRNOT00000036666  | -0.954693877 | 1.39E-06 |

|             |             |                    |              |          |
|-------------|-------------|--------------------|--------------|----------|
| TUCP_000747 | XLOC_028161 | ENSRNOT00000089211 | -0.965006967 | 3.90E-07 |
| TUCP_000747 | XLOC_028161 | ENSRNOT00000020383 | -0.986899995 | 2.97E-09 |
| TUCP_000747 | XLOC_028161 | ENSRNOT00000015518 | 0.968222885  | 2.42E-07 |
| TUCP_000747 | XLOC_028161 | ENSRNOT00000008126 | 0.9530561    | 1.66E-06 |
| TUCP_000747 | XLOC_028161 | ENSRNOT00000055602 | 0.974626869  | 7.94E-08 |
| TUCP_000747 | XLOC_028161 | ENSRNOT00000065615 | -0.950106742 | 2.24E-06 |
| TUCP_000747 | XLOC_028161 | ENSRNOT00000011675 | -0.962952543 | 5.16E-07 |
| TUCP_000747 | XLOC_028161 | ENSRNOT00000087502 | -0.950591113 | 2.13E-06 |
| TUCP_000747 | XLOC_028161 | ENSRNOT00000004290 | -0.955190331 | 1.32E-06 |
| TUCP_000747 | XLOC_028161 | ENSRNOT00000041106 | -0.956794506 | 1.10E-06 |
| TUCP_000747 | XLOC_028161 | ENSRNOT00000012424 | -0.962829622 | 5.25E-07 |
| TUCP_000747 | XLOC_028161 | ENSRNOT00000015223 | -0.973424313 | 9.98E-08 |
| TUCP_000747 | XLOC_028161 | ENSRNOT00000000658 | -0.950113284 | 2.24E-06 |
| TUCP_000747 | XLOC_028161 | ENSRNOT00000000717 | 0.967594681  | 2.67E-07 |
| TUCP_000747 | XLOC_028161 | ENSRNOT00000049048 | 0.957522534  | 1.01E-06 |
| TUCP_000747 | XLOC_028161 | ENSRNOT00000086122 | -0.968943676 | 2.16E-07 |
| TUCP_000747 | XLOC_028161 | ENSRNOT00000017504 | -0.964878267 | 3.97E-07 |
| TUCP_000747 | XLOC_028161 | ENSRNOT00000023763 | 0.964868314  | 3.97E-07 |
| TUCP_000747 | XLOC_028161 | ENSRNOT00000010993 | -0.978857947 | 3.21E-08 |
| TUCP_000747 | XLOC_028161 | ENSRNOT00000059181 | -0.969445762 | 1.99E-07 |
| TUCP_000747 | XLOC_028161 | ENSRNOT00000017291 | 0.958898939  | 8.62E-07 |
| TUCP_000747 | XLOC_028161 | ENSRNOT00000083256 | -0.951522717 | 1.94E-06 |
| TUCP_000747 | XLOC_028161 | ENSRNOT00000003691 | 0.964375012  | 4.26E-07 |
| TUCP_000747 | XLOC_028161 | ENSRNOT00000087556 | 0.952590121  | 1.74E-06 |
| TUCP_000747 | XLOC_028161 | ENSRNOT00000081678 | -0.95866095  | 8.87E-07 |
| TUCP_000747 | XLOC_028161 | ENSRNOT00000017765 | -0.98180207  | 1.52E-08 |
| TUCP_000747 | XLOC_028161 | ENSRNOT00000081077 | 0.979120043  | 3.02E-08 |
| TUCP_000747 | XLOC_028161 | ENSRNOT00000017761 | -0.976692173 | 5.21E-08 |
| TUCP_000747 | XLOC_028161 | ENSRNOT00000023543 | 0.982507614  | 1.25E-08 |
| TUCP_000747 | XLOC_028161 | ENSRNOT00000023014 | -0.953916104 | 1.51E-06 |
| TUCP_000747 | XLOC_028161 | ENSRNOT00000080608 | -0.950408804 | 2.17E-06 |
| TUCP_000747 | XLOC_028161 | ENSRNOT00000017486 | -0.96040814  | 7.17E-07 |
| TUCP_000747 | XLOC_028161 | ENSRNOT00000024011 | -0.955984711 | 1.21E-06 |
| TUCP_000747 | XLOC_028161 | ENSRNOT00000004351 | 0.956423008  | 1.15E-06 |
| TUCP_000747 | XLOC_028161 | ENSRNOT00000039341 | -0.955156328 | 1.32E-06 |
| TUCP_000747 | XLOC_028161 | ENSRNOT00000055386 | -0.955253842 | 1.31E-06 |
| TUCP_000747 | XLOC_028161 | ENSRNOT00000085517 | -0.968253344 | 2.41E-07 |
| TUCP_000747 | XLOC_028161 | ENSRNOT00000038212 | 0.962039194  | 5.82E-07 |
| TUCP_000747 | XLOC_028161 | ENSRNOT00000037405 | -0.967079002 | 2.88E-07 |
| TUCP_000747 | XLOC_028161 | ENSRNOT00000085458 | 0.952247223  | 1.80E-06 |
| TUCP_000747 | XLOC_028161 | ENSRNOT00000024306 | 0.954946835  | 1.36E-06 |
| TUCP_000747 | XLOC_028161 | ENSRNOT00000014605 | 0.961617808  | 6.15E-07 |
| TUCP_000747 | XLOC_028161 | ENSRNOT00000042125 | -0.957024415 | 1.07E-06 |
| TUCP_000747 | XLOC_028161 | ENSRNOT00000025460 | -0.981698106 | 1.57E-08 |
| TUCP_000747 | XLOC_028161 | ENSRNOT00000087033 | 0.967200875  | 2.83E-07 |
| TUCP_000747 | XLOC_028161 | ENSRNOT00000026760 | 0.988045417  | 1.88E-09 |
| TUCP_000747 | XLOC_028161 | ENSRNOT00000075800 | 0.954499919  | 1.42E-06 |
| TUCP_000747 | XLOC_028161 | ENSRNOT00000061345 | 0.95163586   | 1.92E-06 |
| TUCP_000747 | XLOC_028161 | ENSRNOT00000026767 | -0.950102353 | 2.24E-06 |
| TUCP_000747 | XLOC_028161 | ENSRNOT00000084597 | 0.955691773  | 1.25E-06 |
| TUCP_000747 | XLOC_028161 | ENSRNOT00000016568 | -0.982355911 | 1.31E-08 |

|             |             |                     |              |          |
|-------------|-------------|---------------------|--------------|----------|
| TUCP_000747 | XLOC_028161 | ENSRNOT00000037588  | 0.950240668  | 2.21E-06 |
| TUCP_000747 | XLOC_028161 | ENSRNOT00000027360  | 0.953332312  | 1.61E-06 |
| TUCP_000747 | XLOC_028161 | ENSRNOT00000075630  | 0.968513025  | 2.31E-07 |
| TUCP_000747 | XLOC_028161 | ENSRNOT00000023388  | 0.97607446   | 5.93E-08 |
| TUCP_000747 | XLOC_028161 | ENSRNOT00000027967  | -0.96988825  | 1.85E-07 |
| TUCP_000747 | XLOC_028161 | ENSRNOT00000024938  | 0.968264459  | 2.40E-07 |
| TUCP_000747 | XLOC_028161 | ENSRNOT00000024933  | 0.971486833  | 1.41E-07 |
| TUCP_000747 | XLOC_028161 | ENSRNOT00000047210  | -0.966542257 | 3.12E-07 |
| TUCP_000747 | XLOC_028161 | ENSRNOT00000052002  | -0.960471358 | 7.11E-07 |
| TUCP_000747 | XLOC_028161 | ENSRNOT00000083957  | -0.950875636 | 2.07E-06 |
| TUCP_000747 | XLOC_028161 | ENSRNOT00000046639  | -0.96613835  | 3.31E-07 |
| TUCP_000747 | XLOC_028161 | ENSRNOT00000064930  | -0.954119868 | 1.48E-06 |
| TUCP_000747 | XLOC_028161 | ENSRNOT00000079996  | -0.955801907 | 1.23E-06 |
| TUCP_003319 | XLOC_143088 | ENSRNOT00000020832  | 0.968427181  | 2.34E-07 |
| TUCP_003319 | XLOC_143088 | ENSRNOT00000014217  | 0.956503758  | 1.14E-06 |
| TUCP_003319 | XLOC_143088 | ENSRNOT00000034545  | 0.950292356  | 2.20E-06 |
| TUCP_003319 | XLOC_143088 | ENSRNOT00000020401  | -0.957759107 | 9.86E-07 |
| TUCP_001587 | XLOC_061713 | ENSRNOT00000044511  | 0.960190425  | 7.36E-07 |
| TUCP_001587 | XLOC_061713 | ENSRNOT00000055536  | 0.962207778  | 5.70E-07 |
| TUCP_001587 | XLOC_061713 | ENSRNOT00000010680  | 0.954604692  | 1.41E-06 |
| TUCP_001587 | XLOC_061713 | ENSRNOT00000020376  | 0.95695401   | 1.08E-06 |
| TUCP_001587 | XLOC_061713 | ENSRNOT00000009975  | 0.980932597  | 1.92E-08 |
| TUCP_001587 | XLOC_061713 | ENSRNOT00000072682  | 0.980012203  | 2.43E-08 |
| TUCP_001587 | XLOC_061713 | ENSRNOT00000061054  | 0.95951912   | 8.00E-07 |
| TUCP_001587 | XLOC_061713 | ENSRNOT00000045875  | 0.953628546  | 1.56E-06 |
| TUCP_001587 | XLOC_061713 | ENSRNOT00000010939  | 0.960422575  | 7.16E-07 |
| TUCP_001587 | XLOC_061713 | ENSRNOT00000081631  | 0.961837244  | 5.98E-07 |
| TUCP_001587 | XLOC_061713 | ENSRNOT00000021715  | 0.950386004  | 2.18E-06 |
| TUCP_001587 | XLOC_061713 | ENSRNOT00000017829  | 0.957299194  | 1.04E-06 |
| TUCP_001587 | XLOC_061713 | ENSRNOT00000016037  | 0.970863393  | 1.57E-07 |
| TUCP_001587 | XLOC_061713 | ENSRNOT00000072915  | 0.951180883  | 2.01E-06 |
| TUCP_001587 | XLOC_061713 | ENSRNOT00000004764  | 0.953385005  | 1.60E-06 |
| TUCP_001587 | XLOC_061713 | ENSRNOT00000065801  | 0.956540026  | 1.13E-06 |
| TUCP_001587 | XLOC_061713 | ENSRNOT00000088385  | 0.960186094  | 7.37E-07 |
| TUCP_001587 | XLOC_061713 | ENSRNOT00000010701  | 0.96917155   | 2.08E-07 |
| TUCP_001587 | XLOC_061713 | ENSRNOT00000002905  | 0.952179377  | 1.82E-06 |
| TUCP_001587 | XLOC_061713 | ENSRNOT000000091367 | 0.951067125  | 2.03E-06 |
| TUCP_001587 | XLOC_061713 | ENSRNOT000000041762 | 0.962741141  | 5.31E-07 |
| TUCP_001587 | XLOC_061713 | ENSRNOT00000006697  | 0.980323285  | 2.25E-08 |
| TUCP_001587 | XLOC_061713 | ENSRNOT00000085334  | 0.950833572  | 2.08E-06 |
| TUCP_001587 | XLOC_061713 | ENSRNOT00000034482  | 0.950788604  | 2.09E-06 |
| TUCP_001587 | XLOC_061713 | ENSRNOT00000064122  | 0.962125445  | 5.76E-07 |
| TUCP_001587 | XLOC_061713 | ENSRNOT00000008764  | 0.964266869  | 4.32E-07 |
| TUCP_001587 | XLOC_061713 | ENSRNOT00000023623  | 0.95715418   | 1.06E-06 |
| TUCP_001587 | XLOC_061713 | ENSRNOT00000016390  | 0.959830338  | 7.70E-07 |
| TUCP_001587 | XLOC_061713 | ENSRNOT00000087799  | 0.953324277  | 1.61E-06 |
| TUCP_001587 | XLOC_061713 | ENSRNOT00000021168  | 0.961245268  | 6.45E-07 |
| TUCP_000744 | XLOC_027932 | ENSRNOT00000082273  | 0.976698201  | 5.20E-08 |
| TUCP_000744 | XLOC_027932 | ENSRNOT00000079283  | 0.966439776  | 3.17E-07 |
| TUCP_000744 | XLOC_027932 | ENSRNOT00000027335  | 0.96128182   | 6.42E-07 |
| TUCP_000744 | XLOC_027932 | ENSRNOT00000070933  | 0.961737266  | 6.06E-07 |

|             |             |                    |             |          |
|-------------|-------------|--------------------|-------------|----------|
| TUCP_000744 | XLOC_027932 | ENSRNOT0000002292  | 0.950520946 | 2.15E-06 |
| TUCP_000744 | XLOC_027932 | ENSRNOT0000006554  | 0.953031578 | 1.66E-06 |
| TUCP_000744 | XLOC_027932 | ENSRNOT00000019554 | 0.951338278 | 1.98E-06 |
| TUCP_000744 | XLOC_027932 | ENSRNOT00000035491 | 0.958720118 | 8.81E-07 |
| TUCP_000744 | XLOC_027932 | ENSRNOT00000073967 | 0.957873209 | 9.73E-07 |
| TUCP_000744 | XLOC_027932 | ENSRNOT00000074653 | 0.959642142 | 7.88E-07 |
| TUCP_000744 | XLOC_027932 | ENSRNOT00000051037 | 0.953472452 | 1.59E-06 |
| TUCP_000744 | XLOC_027932 | ENSRNOT00000048029 | 0.954275619 | 1.46E-06 |
| TUCP_000744 | XLOC_027932 | ENSRNOT00000068633 | 0.958175254 | 9.40E-07 |
| TUCP_000744 | XLOC_027932 | ENSRNOT00000082228 | 0.950771575 | 2.10E-06 |
| TUCP_000744 | XLOC_027932 | ENSRNOT00000092906 | 0.95147097  | 1.95E-06 |
| TUCP_000744 | XLOC_027932 | ENSRNOT0000001923  | 0.952346826 | 1.79E-06 |
| TUCP_000744 | XLOC_027932 | ENSRNOT00000024941 | 0.958104758 | 9.47E-07 |
| TUCP_000744 | XLOC_027932 | ENSRNOT00000056813 | 0.954853312 | 1.37E-06 |
| TUCP_000744 | XLOC_027932 | ENSRNOT00000012977 | 0.950959492 | 2.06E-06 |
| TUCP_002738 | XLOC_116217 | ENSRNOT00000073652 | 0.960415962 | 7.16E-07 |
| TUCP_002738 | XLOC_116217 | ENSRNOT00000010481 | 0.961535273 | 6.22E-07 |
| TUCP_002738 | XLOC_116217 | ENSRNOT00000085390 | 0.956273154 | 1.17E-06 |
| TUCP_002738 | XLOC_116217 | ENSRNOT00000023935 | 0.953322698 | 1.61E-06 |
| TUCP_002738 | XLOC_116217 | ENSRNOT00000012734 | 0.958313323 | 9.24E-07 |
| TUCP_002738 | XLOC_116217 | ENSRNOT00000073270 | 0.981236459 | 1.77E-08 |
| TUCP_002738 | XLOC_116217 | ENSRNOT00000090977 | 0.951173669 | 2.01E-06 |
| TUCP_002738 | XLOC_116217 | ENSRNOT00000083750 | 0.957726382 | 9.90E-07 |
| TUCP_002738 | XLOC_116217 | ENSRNOT00000014489 | 0.950915572 | 2.07E-06 |
| TUCP_002738 | XLOC_116217 | ENSRNOT0000000603  | 0.951517098 | 1.94E-06 |
| TUCP_003171 | XLOC_136254 | ENSRNOT00000024207 | 0.958372376 | 9.18E-07 |
| TUCP_003171 | XLOC_136254 | ENSRNOT00000082482 | 0.954888335 | 1.36E-06 |
| TUCP_003171 | XLOC_136254 | ENSRNOT00000012019 | 0.963581779 | 4.75E-07 |
| TUCP_003171 | XLOC_136254 | ENSRNOT00000083363 | 0.96258842  | 5.42E-07 |
| TUCP_003171 | XLOC_136254 | ENSRNOT00000045905 | 0.956431535 | 1.15E-06 |
| TUCP_003171 | XLOC_136254 | ENSRNOT00000075072 | 0.95384288  | 1.53E-06 |
| TUCP_002735 | XLOC_116042 | ENSRNOT00000026966 | 0.966042175 | 3.36E-07 |
| TUCP_002735 | XLOC_116042 | ENSRNOT00000068416 | 0.978585683 | 3.42E-08 |
| TUCP_002735 | XLOC_116042 | ENSRNOT00000042251 | 0.978301859 | 3.65E-08 |
| TUCP_002735 | XLOC_116042 | ENSRNOT0000002984  | 0.975196998 | 7.09E-08 |
| TUCP_002735 | XLOC_116042 | ENSRNOT00000067379 | 0.975601543 | 6.54E-08 |
| TUCP_002735 | XLOC_116042 | ENSRNOT00000092365 | 0.983293094 | 9.97E-09 |
| TUCP_002735 | XLOC_116042 | ENSRNOT00000089306 | 0.977678327 | 4.20E-08 |
| TUCP_002735 | XLOC_116042 | ENSRNOT00000045301 | 0.978565055 | 3.44E-08 |
| TUCP_002735 | XLOC_116042 | ENSRNOT00000041186 | 0.978643997 | 3.38E-08 |
| TUCP_002735 | XLOC_116042 | ENSRNOT00000076182 | 0.978565055 | 3.44E-08 |
| TUCP_002735 | XLOC_116042 | ENSRNOT00000081709 | 0.979430726 | 2.80E-08 |
| TUCP_002735 | XLOC_116042 | ENSRNOT00000014103 | 0.978565055 | 3.44E-08 |
| TUCP_002735 | XLOC_116042 | ENSRNOT00000082289 | 0.973877564 | 9.17E-08 |
| TUCP_002735 | XLOC_116042 | ENSRNOT00000083493 | 0.980989215 | 1.89E-08 |
| TUCP_002735 | XLOC_116042 | ENSRNOT00000092563 | 0.987654741 | 2.21E-09 |
| TUCP_002735 | XLOC_116042 | ENSRNOT00000088893 | 0.978565055 | 3.44E-08 |
| TUCP_002735 | XLOC_116042 | ENSRNOT00000008898 | 0.966478476 | 3.15E-07 |
| TUCP_002735 | XLOC_116042 | ENSRNOT00000081014 | 0.978565055 | 3.44E-08 |
| TUCP_002735 | XLOC_116042 | ENSRNOT00000067543 | 0.978565055 | 3.44E-08 |
| TUCP_002735 | XLOC_116042 | ENSRNOT00000050968 | 0.97080166  | 1.59E-07 |

|             |             |                    |              |          |
|-------------|-------------|--------------------|--------------|----------|
| TUCP_002735 | XLOC_116042 | ENSRNOT00000086036 | 0.979193148  | 2.97E-08 |
| TUCP_002735 | XLOC_116042 | ENSRNOT00000063929 | 0.978565055  | 3.44E-08 |
| TUCP_002735 | XLOC_116042 | ENSRNOT00000044520 | 0.997806693  | 3.98E-13 |
| TUCP_002735 | XLOC_116042 | ENSRNOT00000091763 | 0.964982128  | 3.91E-07 |
| TUCP_002735 | XLOC_116042 | ENSRNOT00000022200 | 0.974040357  | 8.89E-08 |
| TUCP_002735 | XLOC_116042 | ENSRNOT00000083764 | 0.980391389  | 2.21E-08 |
| TUCP_002735 | XLOC_116042 | ENSRNOT00000050543 | 0.974782128  | 7.70E-08 |
| TUCP_002735 | XLOC_116042 | ENSRNOT00000079275 | 0.977979235  | 3.93E-08 |
| TUCP_002735 | XLOC_116042 | ENSRNOT00000052367 | 0.972160668  | 1.26E-07 |
| TUCP_002735 | XLOC_116042 | ENSRNOT00000090658 | 0.978565055  | 3.44E-08 |
| TUCP_002735 | XLOC_116042 | ENSRNOT00000022571 | 0.98486587   | 6.10E-09 |
| TUCP_002735 | XLOC_116042 | ENSRNOT00000057472 | 0.978565055  | 3.44E-08 |
| TUCP_003173 | XLOC_136347 | ENSRNOT00000004320 | 0.961817737  | 5.99E-07 |
| TUCP_003173 | XLOC_136347 | ENSRNOT00000090629 | 0.952228     | 1.81E-06 |
| TUCP_003173 | XLOC_136347 | ENSRNOT00000089966 | 0.955949315  | 1.21E-06 |
| TUCP_003173 | XLOC_136347 | ENSRNOT00000076407 | 0.96632684   | 3.22E-07 |
| TUCP_003173 | XLOC_136347 | ENSRNOT00000019501 | 0.953642469  | 1.56E-06 |
| TUCP_003173 | XLOC_136347 | ENSRNOT00000090186 | 0.952128949  | 1.83E-06 |
| TUCP_003173 | XLOC_136347 | ENSRNOT00000035123 | 0.959071422  | 8.44E-07 |
| TUCP_003173 | XLOC_136347 | ENSRNOT00000011134 | 0.954553408  | 1.41E-06 |
| TUCP_003173 | XLOC_136347 | ENSRNOT00000000640 | 0.953876132  | 1.52E-06 |
| TUCP_003173 | XLOC_136347 | ENSRNOT00000044319 | 0.960964126  | 6.69E-07 |
| TUCP_003173 | XLOC_136347 | ENSRNOT00000091237 | 0.973711259  | 9.46E-08 |
| TUCP_003173 | XLOC_136347 | ENSRNOT00000088712 | 0.95060046   | 2.13E-06 |
| TUCP_003173 | XLOC_136347 | ENSRNOT00000088355 | 0.953356927  | 1.61E-06 |
| TUCP_003173 | XLOC_136347 | ENSRNOT00000000331 | -0.966856517 | 2.98E-07 |
| TUCP_003173 | XLOC_136347 | ENSRNOT00000004637 | 0.956731146  | 1.11E-06 |
| TUCP_002730 | XLOC_115861 | ENSRNOT00000025651 | 0.950421235  | 2.17E-06 |
| TUCP_002730 | XLOC_115861 | ENSRNOT00000038144 | 0.952969933  | 1.67E-06 |
| TUCP_002732 | XLOC_115901 | ENSRNOT00000091856 | 0.995402581  | 1.61E-11 |
| TUCP_002732 | XLOC_115901 | ENSRNOT00000086400 | 0.963995496  | 4.49E-07 |
| TUCP_002732 | XLOC_115901 | ENSRNOT00000044428 | 0.963936801  | 4.52E-07 |
| TUCP_002732 | XLOC_115901 | ENSRNOT00000010216 | 0.966238544  | 3.26E-07 |
| TUCP_003670 | XLOC_160319 | ENSRNOT00000040509 | 0.96460418   | 4.12E-07 |
| TUCP_003670 | XLOC_160319 | ENSRNOT00000012170 | 0.976924278  | 4.96E-08 |
| TUCP_003670 | XLOC_160319 | ENSRNOT00000048996 | 0.962034739  | 5.83E-07 |
| TUCP_003670 | XLOC_160319 | ENSRNOT00000090142 | 0.954927025  | 1.36E-06 |
| TUCP_003778 | XLOC_165873 | ENSRNOT00000013857 | -0.965832152 | 3.46E-07 |
| TUCP_003676 | XLOC_160477 | ENSRNOT00000073966 | 0.955169196  | 1.32E-06 |
| TUCP_003676 | XLOC_160477 | ENSRNOT00000090671 | 0.965369518  | 3.70E-07 |
| TUCP_003676 | XLOC_160477 | ENSRNOT00000031792 | 0.950711258  | 2.11E-06 |
| TUCP_000741 | XLOC_027871 | ENSRNOT00000082697 | 0.960239493  | 7.32E-07 |
| TUCP_000741 | XLOC_027871 | ENSRNOT00000082228 | 0.951738978  | 1.90E-06 |
| TUCP_000741 | XLOC_027871 | ENSRNOT00000020070 | 0.955265331  | 1.31E-06 |
| TUCP_000741 | XLOC_027871 | ENSRNOT00000035491 | 0.95312537   | 1.65E-06 |
| TUCP_003675 | XLOC_160475 | ENSRNOT00000023903 | 0.953574636  | 1.57E-06 |
| TUCP_003675 | XLOC_160475 | ENSRNOT00000046229 | 0.960763291  | 6.86E-07 |
| TUCP_003773 | XLOC_165824 | ENSRNOT00000065168 | 0.960703543  | 6.91E-07 |
| TUCP_003773 | XLOC_165824 | ENSRNOT00000031904 | 0.955774641  | 1.24E-06 |
| TUCP_003773 | XLOC_165824 | ENSRNOT00000006727 | 0.951473212  | 1.95E-06 |
| TUCP_003773 | XLOC_165824 | ENSRNOT00000020134 | 0.952177053  | 1.82E-06 |

|             |             |                     |              |          |
|-------------|-------------|---------------------|--------------|----------|
| TUCP_003773 | XLOC_165824 | ENSRNOT00000033468  | 0.95679991   | 1.10E-06 |
| TUCP_003773 | XLOC_165824 | ENSRNOT00000081512  | 0.983000543  | 1.09E-08 |
| TUCP_003773 | XLOC_165824 | ENSRNOT00000057160  | 0.959413061  | 8.10E-07 |
| TUCP_003773 | XLOC_165824 | ENSRNOT00000066024  | 0.955702349  | 1.25E-06 |
| TUCP_003773 | XLOC_165824 | ENSRNOT00000025808  | 0.958486558  | 9.06E-07 |
| TUCP_003773 | XLOC_165824 | ENSRNOT00000006175  | 0.964406716  | 4.24E-07 |
| TUCP_003773 | XLOC_165824 | ENSRNOT00000008221  | 0.960141784  | 7.41E-07 |
| TUCP_003773 | XLOC_165824 | ENSRNOT00000023144  | 0.967957543  | 2.52E-07 |
| TUCP_003773 | XLOC_165824 | ENSRNOT00000080695  | 0.951510238  | 1.95E-06 |
| TUCP_003773 | XLOC_165824 | ENSRNOT00000041044  | 0.954869952  | 1.37E-06 |
| TUCP_003773 | XLOC_165824 | ENSRNOT00000016975  | 0.960389179  | 7.19E-07 |
| TUCP_003773 | XLOC_165824 | ENSRNOT00000027411  | 0.961145525  | 6.53E-07 |
| TUCP_003773 | XLOC_165824 | ENSRNOT00000033017  | 0.970133753  | 1.78E-07 |
| TUCP_003773 | XLOC_165824 | ENSRNOT00000060696  | 0.95009634   | 2.24E-06 |
| TUCP_003773 | XLOC_165824 | ENSRNOT00000026543  | 0.970081858  | 1.80E-07 |
| TUCP_003773 | XLOC_165824 | ENSRNOT00000066810  | 0.950432347  | 2.17E-06 |
| TUCP_003773 | XLOC_165824 | ENSRNOT00000067400  | 0.962528076  | 5.46E-07 |
| TUCP_003773 | XLOC_165824 | ENSRNOT00000080024  | 0.982449541  | 1.27E-08 |
| TUCP_003773 | XLOC_165824 | ENSRNOT00000047093  | 0.950619389  | 2.13E-06 |
| TUCP_003773 | XLOC_165824 | ENSRNOT00000078274  | 0.951629869  | 1.92E-06 |
| TUCP_003773 | XLOC_165824 | ENSRNOT00000067866  | 0.955044792  | 1.34E-06 |
| TUCP_003773 | XLOC_165824 | ENSRNOT00000015799  | 0.966674285  | 3.06E-07 |
| TUCP_003772 | XLOC_165824 | ENSRNOT00000077314  | 0.963426135  | 4.85E-07 |
| TUCP_003678 | XLOC_160555 | ENSRNOT00000014865  | 0.954696186  | 1.39E-06 |
| TUCP_003770 | XLOC_165335 | ENSRNOT00000009649  | 0.981790825  | 1.53E-08 |
| TUCP_003770 | XLOC_165335 | ENSRNOT00000083189  | 0.963472296  | 4.82E-07 |
| TUCP_003770 | XLOC_165335 | ENSRNOT00000014738  | 0.95757249   | 1.01E-06 |
| TUCP_003770 | XLOC_165335 | ENSRNOT0000001059   | 0.958836541  | 8.69E-07 |
| TUCP_003770 | XLOC_165335 | ENSRNOT00000018449  | -0.955499157 | 1.28E-06 |
| TUCP_003770 | XLOC_165335 | ENSRNOT00000037271  | 0.955967477  | 1.21E-06 |
| TUCP_003775 | XLOC_165824 | ENSRNOT00000086126  | 0.950135301  | 2.23E-06 |
| TUCP_003774 | XLOC_165824 | ENSRNOT00000015181  | 0.951273835  | 1.99E-06 |
| TUCP_001603 | XLOC_063403 | ENSRNOT00000079962  | 0.958048907  | 9.54E-07 |
| TUCP_000621 | XLOC_022441 | ENSRNOT00000005486  | -0.952220892 | 1.81E-06 |
| TUCP_000621 | XLOC_022441 | ENSRNOT00000017907  | -0.952872758 | 1.69E-06 |
| TUCP_000621 | XLOC_022441 | ENSRNOT00000067554  | 0.952435672  | 1.77E-06 |
| TUCP_000621 | XLOC_022441 | ENSRNOT00000084031  | 0.951379666  | 1.97E-06 |
| TUCP_000621 | XLOC_022441 | ENSRNOT00000002443  | 0.968608365  | 2.28E-07 |
| TUCP_000621 | XLOC_022441 | ENSRNOT00000005958  | 0.951592912  | 1.93E-06 |
| TUCP_000621 | XLOC_022441 | ENSRNOT00000021717  | 0.958377121  | 9.17E-07 |
| TUCP_000621 | XLOC_022441 | ENSRNOT00000061392  | 0.961358344  | 6.36E-07 |
| TUCP_000621 | XLOC_022441 | ENSRNOT00000080608  | 0.973193735  | 1.04E-07 |
| TUCP_000621 | XLOC_022441 | ENSRNOT00000027970  | 0.962919059  | 5.19E-07 |
| TUCP_000621 | XLOC_022441 | ENSRNOT000000059524 | -0.958160192 | 9.41E-07 |
| TUCP_000621 | XLOC_022441 | ENSRNOT00000008677  | 0.952304189  | 1.79E-06 |
| TUCP_000621 | XLOC_022441 | ENSRNOT00000017362  | -0.950703901 | 2.11E-06 |
| TUCP_000621 | XLOC_022441 | ENSRNOT00000003714  | 0.973169181  | 1.05E-07 |
| TUCP_000621 | XLOC_022441 | ENSRNOT00000052224  | 0.973471869  | 9.90E-08 |
| TUCP_000621 | XLOC_022441 | ENSRNOT00000089829  | -0.954828807 | 1.37E-06 |
| TUCP_000621 | XLOC_022441 | ENSRNOT00000009151  | -0.96120666  | 6.48E-07 |
| TUCP_000621 | XLOC_022441 | ENSRNOT00000083964  | -0.952062688 | 1.84E-06 |

|             |             |                    |              |          |
|-------------|-------------|--------------------|--------------|----------|
| TUCP_000621 | XLOC_022441 | ENSRNOT00000042125 | 0.96313296   | 5.04E-07 |
| TUCP_000621 | XLOC_022441 | ENSRNOT00000026525 | -0.955128886 | 1.33E-06 |
| TUCP_000621 | XLOC_022441 | ENSRNOT00000081688 | -0.969971888 | 1.83E-07 |
| TUCP_000621 | XLOC_022441 | ENSRNOT0000006034  | -0.958556862 | 8.98E-07 |
| TUCP_000621 | XLOC_022441 | ENSRNOT00000061304 | -0.960124892 | 7.42E-07 |
| TUCP_000621 | XLOC_022441 | ENSRNOT00000032363 | 0.958253062  | 9.31E-07 |
| TUCP_000621 | XLOC_022441 | ENSRNOT00000025284 | -0.952007198 | 1.85E-06 |
| TUCP_000621 | XLOC_022441 | ENSRNOT0000002151  | -0.954208772 | 1.47E-06 |
| TUCP_000621 | XLOC_022441 | ENSRNOT00000015318 | -0.9501302   | 2.23E-06 |
| TUCP_000621 | XLOC_022441 | ENSRNOT00000057045 | -0.953013202 | 1.67E-06 |
| TUCP_000621 | XLOC_022441 | ENSRNOT00000014926 | 0.957795831  | 9.82E-07 |
| TUCP_000621 | XLOC_022441 | ENSRNOT00000090338 | -0.95263192  | 1.73E-06 |
| TUCP_000621 | XLOC_022441 | ENSRNOT00000024568 | -0.953466813 | 1.59E-06 |
| TUCP_000621 | XLOC_022441 | ENSRNOT00000038448 | -0.955658264 | 1.25E-06 |
| TUCP_000621 | XLOC_022441 | ENSRNOT00000038066 | 0.9501392    | 2.23E-06 |
| TUCP_000621 | XLOC_022441 | ENSRNOT0000005257  | 0.972459451  | 1.19E-07 |
| TUCP_000621 | XLOC_022441 | ENSRNOT00000083876 | -0.957128206 | 1.06E-06 |
| TUCP_004080 | XLOC_179112 | ENSRNOT00000071840 | 1            | 0        |
| TUCP_004080 | XLOC_179112 | ENSRNOT00000083608 | 0.992618428  | 1.70E-10 |
| TUCP_004080 | XLOC_179112 | ENSRNOT00000076035 | 0.956476518  | 1.14E-06 |
| TUCP_004080 | XLOC_179112 | ENSRNOT00000085476 | 0.96207118   | 5.80E-07 |
| TUCP_004080 | XLOC_179112 | ENSRNOT00000066382 | 0.96329105   | 4.94E-07 |
| TUCP_004080 | XLOC_179112 | ENSRNOT00000045584 | 1            | 1.33E-79 |
| TUCP_004080 | XLOC_179112 | ENSRNOT00000077995 | 0.994428404  | 4.19E-11 |
| TUCP_004080 | XLOC_179112 | ENSRNOT00000066004 | 0.999857217  | 4.67E-19 |
| TUCP_004080 | XLOC_179112 | ENSRNOT00000064284 | 0.968782027  | 2.22E-07 |
| TUCP_004080 | XLOC_179112 | ENSRNOT00000068197 | 0.955470548  | 1.28E-06 |
| TUCP_004080 | XLOC_179112 | ENSRNOT00000082086 | 0.97275676   | 1.13E-07 |
| TUCP_004080 | XLOC_179112 | ENSRNOT00000089494 | 0.983505294  | 9.35E-09 |
| TUCP_004080 | XLOC_179112 | ENSRNOT00000083747 | 0.957764469  | 9.86E-07 |
| TUCP_004080 | XLOC_179112 | ENSRNOT00000092182 | 1            | 0        |
| TUCP_004080 | XLOC_179112 | ENSRNOT00000084461 | 1            | 1.33E-79 |
| TUCP_004080 | XLOC_179112 | ENSRNOT00000060448 | 1            | 0        |
| TUCP_004080 | XLOC_179112 | ENSRNOT00000032631 | 1            | 4.25E-78 |
| TUCP_004080 | XLOC_179112 | ENSRNOT00000079503 | 0.957317866  | 1.04E-06 |
| TUCP_004080 | XLOC_179112 | ENSRNOT00000027950 | 0.960989928  | 6.66E-07 |
| TUCP_004080 | XLOC_179112 | ENSRNOT00000060113 | 0.975275164  | 6.98E-08 |
| TUCP_004080 | XLOC_179112 | ENSRNOT00000054910 | 0.990580154  | 5.75E-10 |
| TUCP_004080 | XLOC_179112 | ENSRNOT00000057176 | 0.999998955  | 9.83E-30 |
| TUCP_004080 | XLOC_179112 | ENSRNOT00000078176 | 0.994350784  | 4.49E-11 |
| TUCP_004080 | XLOC_179112 | ENSRNOT00000056364 | 0.990647125  | 5.55E-10 |
| TUCP_004080 | XLOC_179112 | ENSRNOT00000093431 | 1            | 0        |
| TUCP_004080 | XLOC_179112 | ENSRNOT00000024758 | 0.981367686  | 1.71E-08 |
| TUCP_004080 | XLOC_179112 | ENSRNOT00000092901 | 1            | 1.33E-79 |
| TUCP_004080 | XLOC_179112 | ENSRNOT00000089290 | 0.999988082  | 1.89E-24 |
| TUCP_004080 | XLOC_179112 | ENSRNOT00000090211 | 0.998865151  | 1.48E-14 |
| TUCP_004080 | XLOC_179112 | ENSRNOT00000075244 | 0.962646865  | 5.38E-07 |
| TUCP_004080 | XLOC_179112 | ENSRNOT00000091828 | 0.996371069  | 4.93E-12 |
| TUCP_004080 | XLOC_179112 | ENSRNOT00000091944 | 0.999786107  | 3.52E-18 |
| TUCP_004080 | XLOC_179112 | ENSRNOT00000070855 | 1            | 4.25E-78 |
| TUCP_004080 | XLOC_179112 | ENSRNOT0000009295  | 0.995887068  | 9.21E-12 |



|             |             |                    |              |          |
|-------------|-------------|--------------------|--------------|----------|
| TUCP_004080 | XLOC_179112 | ENSRNOT00000084109 | 0.999673655  | 2.91E-17 |
| TUCP_004080 | XLOC_179112 | ENSRNOT00000060645 | 0.973934385  | 9.07E-08 |
| TUCP_004080 | XLOC_179112 | ENSRNOT00000041569 | 1            | 4.25E-78 |
| TUCP_004080 | XLOC_179112 | ENSRNOT00000087091 | 1            | 0        |
| TUCP_004080 | XLOC_179112 | ENSRNOT00000003308 | 0.990930758  | 4.76E-10 |
| TUCP_004080 | XLOC_179112 | ENSRNOT00000026113 | 0.999851454  | 5.69E-19 |
| TUCP_004080 | XLOC_179112 | ENSRNOT00000014939 | 0.999846854  | 6.63E-19 |
| TUCP_004080 | XLOC_179112 | ENSRNOT00000058314 | 0.99088442   | 4.88E-10 |
| TUCP_004080 | XLOC_179112 | ENSRNOT00000047870 | 0.981575908  | 1.62E-08 |
| TUCP_004080 | XLOC_179112 | ENSRNOT00000071603 | 0.999995875  | 9.40E-27 |
| TUCP_004080 | XLOC_179112 | ENSRNOT00000088376 | 0.970305372  | 1.73E-07 |
| TUCP_004080 | XLOC_179112 | ENSRNOT00000060454 | 1            | 0        |
| TUCP_004080 | XLOC_179112 | ENSRNOT00000029298 | 0.957304374  | 1.04E-06 |
| TUCP_004080 | XLOC_179112 | ENSRNOT00000044232 | 0.98372207   | 8.76E-09 |
| TUCP_004080 | XLOC_179112 | ENSRNOT00000023287 | 0.974929583  | 7.48E-08 |
| TUCP_004080 | XLOC_179112 | ENSRNOT00000071714 | 0.978813661  | 3.24E-08 |
| TUCP_004080 | XLOC_179112 | ENSRNOT00000075836 | 1            | 0        |
| TUCP_004080 | XLOC_179112 | ENSRNOT00000073229 | 1            | 4.25E-78 |
| TUCP_004080 | XLOC_179112 | ENSRNOT00000077731 | 0.965942857  | 3.41E-07 |
| TUCP_004080 | XLOC_179112 | ENSRNOT00000046980 | 0.982667176  | 1.20E-08 |
| TUCP_004080 | XLOC_179112 | ENSRNOT00000039652 | 0.972574547  | 1.17E-07 |
| TUCP_004080 | XLOC_179112 | ENSRNOT00000066685 | 0.981130123  | 1.83E-08 |
| TUCP_004080 | XLOC_179112 | ENSRNOT00000082776 | 0.966379954  | 3.20E-07 |
| TUCP_004080 | XLOC_179112 | ENSRNOT00000088719 | 0.965171519  | 3.81E-07 |
| TUCP_004080 | XLOC_179112 | ENSRNOT00000007683 | 0.999755897  | 6.82E-18 |
| TUCP_004080 | XLOC_179112 | ENSRNOT00000092916 | 0.96606874   | 3.35E-07 |
| TUCP_004080 | XLOC_179112 | ENSRNOT00000081106 | 0.95354262   | 1.58E-06 |
| TUCP_003801 | XLOC_166074 | ENSRNOT00000009811 | 0.96275593   | 5.30E-07 |
| TUCP_003801 | XLOC_166074 | ENSRNOT00000080660 | 0.957065088  | 1.07E-06 |
| TUCP_003801 | XLOC_166074 | ENSRNOT00000065168 | 0.96214551   | 5.74E-07 |
| TUCP_003801 | XLOC_166074 | ENSRNOT00000005486 | -0.960740778 | 6.88E-07 |
| TUCP_003801 | XLOC_166074 | ENSRNOT00000023876 | 0.959772668  | 7.75E-07 |
| TUCP_003801 | XLOC_166074 | ENSRNOT00000067554 | 0.959701881  | 7.82E-07 |
| TUCP_003801 | XLOC_166074 | ENSRNOT00000010852 | 0.965799694  | 3.48E-07 |
| TUCP_003801 | XLOC_166074 | ENSRNOT00000026831 | 0.963953468  | 4.51E-07 |
| TUCP_003801 | XLOC_166074 | ENSRNOT00000015769 | 0.966313172  | 3.23E-07 |
| TUCP_003801 | XLOC_166074 | ENSRNOT00000013522 | 0.957451486  | 1.02E-06 |
| TUCP_003801 | XLOC_166074 | ENSRNOT00000001893 | 0.974693565  | 7.83E-08 |
| TUCP_003801 | XLOC_166074 | ENSRNOT00000014926 | 0.960327882  | 7.24E-07 |
| TUCP_003801 | XLOC_166074 | ENSRNOT00000032843 | 0.964380339  | 4.25E-07 |
| TUCP_003801 | XLOC_166074 | ENSRNOT00000077231 | 0.964046248  | 4.45E-07 |
| TUCP_003801 | XLOC_166074 | ENSRNOT00000006709 | -0.959393725 | 8.12E-07 |
| TUCP_003801 | XLOC_166074 | ENSRNOT00000080443 | 0.955482962  | 1.28E-06 |
| TUCP_003801 | XLOC_166074 | ENSRNOT00000015898 | 0.962411772  | 5.55E-07 |
| TUCP_003801 | XLOC_166074 | ENSRNOT00000067479 | 0.950991986  | 2.05E-06 |
| TUCP_003801 | XLOC_166074 | ENSRNOT00000002410 | 0.957074749  | 1.07E-06 |
| TUCP_003801 | XLOC_166074 | ENSRNOT00000080577 | 0.978751316  | 3.29E-08 |
| TUCP_003801 | XLOC_166074 | ENSRNOT00000056179 | 0.975848263  | 6.21E-08 |
| TUCP_003801 | XLOC_166074 | ENSRNOT00000071672 | 0.968645549  | 2.26E-07 |
| TUCP_003801 | XLOC_166074 | ENSRNOT00000026426 | 0.967332073  | 2.77E-07 |
| TUCP_003801 | XLOC_166074 | ENSRNOT00000009462 | 0.952725992  | 1.72E-06 |

|             |             |                    |              |          |
|-------------|-------------|--------------------|--------------|----------|
| TUCP_003801 | XLOC_166074 | ENSRNOT00000057953 | 0.962370876  | 5.58E-07 |
| TUCP_003801 | XLOC_166074 | ENSRNOT00000007028 | -0.9756608   | 6.46E-08 |
| TUCP_003801 | XLOC_166074 | ENSRNOT00000086706 | 0.978769013  | 3.28E-08 |
| TUCP_003801 | XLOC_166074 | ENSRNOT00000073370 | 0.962512205  | 5.47E-07 |
| TUCP_003801 | XLOC_166074 | ENSRNOT00000071166 | 0.957885796  | 9.72E-07 |
| TUCP_003801 | XLOC_166074 | ENSRNOT00000004017 | 0.971014324  | 1.53E-07 |
| TUCP_003801 | XLOC_166074 | ENSRNOT00000021114 | 0.953079422  | 1.66E-06 |
| TUCP_003801 | XLOC_166074 | ENSRNOT00000086260 | -0.960625704 | 6.98E-07 |
| TUCP_003801 | XLOC_166074 | ENSRNOT00000037133 | 0.956279291  | 1.17E-06 |
| TUCP_003801 | XLOC_166074 | ENSRNOT00000055607 | -0.956357806 | 1.16E-06 |
| TUCP_003801 | XLOC_166074 | ENSRNOT00000083214 | 0.978802097  | 3.25E-08 |
| TUCP_003801 | XLOC_166074 | ENSRNOT00000065615 | 0.955752649  | 1.24E-06 |
| TUCP_003801 | XLOC_166074 | ENSRNOT00000024452 | -0.95505221  | 1.34E-06 |
| TUCP_003801 | XLOC_166074 | ENSRNOT00000014384 | -0.95785543  | 9.75E-07 |
| TUCP_003801 | XLOC_166074 | ENSRNOT00000042638 | 0.957243927  | 1.05E-06 |
| TUCP_003801 | XLOC_166074 | ENSRNOT00000025434 | 0.952359362  | 1.78E-06 |
| TUCP_003801 | XLOC_166074 | ENSRNOT00000039540 | 0.968578209  | 2.29E-07 |
| TUCP_003801 | XLOC_166074 | ENSRNOT00000047264 | 0.961879291  | 5.95E-07 |
| TUCP_003801 | XLOC_166074 | ENSRNOT00000000469 | 0.956552702  | 1.13E-06 |
| TUCP_003801 | XLOC_166074 | ENSRNOT00000033017 | 0.961598573  | 6.17E-07 |
| TUCP_003801 | XLOC_166074 | ENSRNOT00000017384 | 0.953816743  | 1.53E-06 |
| TUCP_003801 | XLOC_166074 | ENSRNOT00000066370 | 0.96008609   | 7.46E-07 |
| TUCP_003801 | XLOC_166074 | ENSRNOT00000049349 | 0.956070162  | 1.20E-06 |
| TUCP_003801 | XLOC_166074 | ENSRNOT00000017556 | 0.970877715  | 1.57E-07 |
| TUCP_003801 | XLOC_166074 | ENSRNOT00000074023 | 0.964428625  | 4.23E-07 |
| TUCP_003801 | XLOC_166074 | ENSRNOT00000081688 | -0.957118701 | 1.06E-06 |
| TUCP_003801 | XLOC_166074 | ENSRNOT00000029328 | 0.976822105  | 5.07E-08 |
| TUCP_003801 | XLOC_166074 | ENSRNOT00000057562 | 0.962948435  | 5.17E-07 |
| TUCP_003801 | XLOC_166074 | ENSRNOT00000001289 | 0.954340443  | 1.45E-06 |
| TUCP_003801 | XLOC_166074 | ENSRNOT00000072118 | 0.951505748  | 1.95E-06 |
| TUCP_003801 | XLOC_166074 | ENSRNOT00000015624 | 0.956596832  | 1.13E-06 |
| TUCP_003801 | XLOC_166074 | ENSRNOT0000003787  | -0.951786726 | 1.89E-06 |
| TUCP_003801 | XLOC_166074 | ENSRNOT00000003780 | 0.952252182  | 1.80E-06 |
| TUCP_003801 | XLOC_166074 | ENSRNOT00000022190 | -0.954732673 | 1.39E-06 |
| TUCP_003801 | XLOC_166074 | ENSRNOT00000023411 | 0.950776882  | 2.09E-06 |
| TUCP_003801 | XLOC_166074 | ENSRNOT00000035277 | 0.96133879   | 6.37E-07 |
| TUCP_003801 | XLOC_166074 | ENSRNOT00000027057 | 0.96364073   | 4.71E-07 |
| TUCP_003801 | XLOC_166074 | ENSRNOT00000054685 | 0.954820756  | 1.37E-06 |
| TUCP_003801 | XLOC_166074 | ENSRNOT00000008244 | 0.959088602  | 8.43E-07 |
| TUCP_003801 | XLOC_166074 | ENSRNOT00000018122 | 0.958696366  | 8.83E-07 |
| TUCP_003801 | XLOC_166074 | ENSRNOT00000005601 | -0.96997386  | 1.83E-07 |
| TUCP_003801 | XLOC_166074 | ENSRNOT00000090057 | 0.954509789  | 1.42E-06 |
| TUCP_003801 | XLOC_166074 | ENSRNOT00000041494 | 0.967234818  | 2.81E-07 |
| TUCP_003801 | XLOC_166074 | ENSRNOT00000041365 | 0.952566522  | 1.75E-06 |
| TUCP_003801 | XLOC_166074 | ENSRNOT00000089524 | 0.976528408  | 5.39E-08 |
| TUCP_003801 | XLOC_166074 | ENSRNOT00000019759 | 0.957212797  | 1.05E-06 |
| TUCP_003801 | XLOC_166074 | ENSRNOT00000022796 | 0.95219014   | 1.82E-06 |
| TUCP_003801 | XLOC_166074 | ENSRNOT00000061580 | -0.957803039 | 9.81E-07 |
| TUCP_003801 | XLOC_166074 | ENSRNOT00000017687 | -0.954592744 | 1.41E-06 |
| TUCP_003801 | XLOC_166074 | ENSRNOT00000068026 | -0.950176254 | 2.22E-06 |
| TUCP_003801 | XLOC_166074 | ENSRNOT00000085621 | 0.963740387  | 4.64E-07 |

|             |             |                    |             |          |
|-------------|-------------|--------------------|-------------|----------|
| TUCP_000624 | XL0C_022722 | ENSRNOT00000065168 | 0.964695958 | 4.07E-07 |
| TUCP_000624 | XL0C_022722 | ENSRNOT00000073559 | 0.954620783 | 1.40E-06 |
| TUCP_000624 | XL0C_022722 | ENSRNOT00000038647 | 0.965239375 | 3.77E-07 |
| TUCP_000624 | XL0C_022722 | ENSRNOT00000020134 | 0.983428584 | 9.57E-09 |
| TUCP_000624 | XL0C_022722 | ENSRNOT00000080088 | 0.950557007 | 2.14E-06 |
| TUCP_000624 | XL0C_022722 | ENSRNOT00000071697 | 0.965969145 | 3.39E-07 |
| TUCP_000624 | XL0C_022722 | ENSRNOT00000060696 | 0.958412336 | 9.14E-07 |
| TUCP_000624 | XL0C_022722 | ENSRNOT00000041096 | 0.954750254 | 1.38E-06 |
| TUCP_000624 | XL0C_022722 | ENSRNOT00000006175 | 0.966178681 | 3.29E-07 |
| TUCP_000624 | XL0C_022722 | ENSRNOT00000080557 | 0.954126297 | 1.48E-06 |
| TUCP_000624 | XL0C_022722 | ENSRNOT00000075326 | 0.972663795 | 1.15E-07 |
| TUCP_000624 | XL0C_022722 | ENSRNOT00000016975 | 0.984236945 | 7.46E-09 |
| TUCP_000624 | XL0C_022722 | ENSRNOT00000091265 | 0.956157933 | 1.18E-06 |
| TUCP_000624 | XL0C_022722 | ENSRNOT00000027411 | 0.975834199 | 6.23E-08 |
| TUCP_000624 | XL0C_022722 | ENSRNOT00000033017 | 0.957189256 | 1.05E-06 |
| TUCP_000624 | XL0C_022722 | ENSRNOT00000009712 | 0.97316934  | 1.05E-07 |
| TUCP_000624 | XL0C_022722 | ENSRNOT00000089971 | 0.965628118 | 3.57E-07 |
| TUCP_000624 | XL0C_022722 | ENSRNOT00000029237 | 0.961032672 | 6.63E-07 |
| TUCP_000624 | XL0C_022722 | ENSRNOT00000043345 | 0.954358274 | 1.44E-06 |
| TUCP_000624 | XL0C_022722 | ENSRNOT00000000676 | 0.96127519  | 6.43E-07 |
| TUCP_000624 | XL0C_022722 | ENSRNOT00000027452 | 0.9534621   | 1.59E-06 |
| TUCP_000624 | XL0C_022722 | ENSRNOT00000012048 | 0.96109702  | 6.57E-07 |
| TUCP_000624 | XL0C_022722 | ENSRNOT00000066739 | 0.981934386 | 1.47E-08 |
| TUCP_000624 | XL0C_022722 | ENSRNOT00000045882 | 0.969065338 | 2.12E-07 |
| TUCP_000624 | XL0C_022722 | ENSRNOT00000059548 | 0.951779132 | 1.89E-06 |
| TUCP_000624 | XL0C_022722 | ENSRNOT00000022863 | 0.953686501 | 1.55E-06 |
| TUCP_000624 | XL0C_022722 | ENSRNOT00000013274 | 0.951606864 | 1.93E-06 |
| TUCP_000624 | XL0C_022722 | ENSRNOT00000044742 | 0.954325859 | 1.45E-06 |
| TUCP_000624 | XL0C_022722 | ENSRNOT00000011052 | 0.951451067 | 1.96E-06 |
| TUCP_000624 | XL0C_022722 | ENSRNOT00000015520 | 0.950285612 | 2.20E-06 |
| TUCP_000624 | XL0C_022722 | ENSRNOT00000078868 | 0.957165162 | 1.06E-06 |
| TUCP_000624 | XL0C_022722 | ENSRNOT00000014664 | 0.987817116 | 2.07E-09 |
| TUCP_000624 | XL0C_022722 | ENSRNOT00000081906 | 0.954044828 | 1.49E-06 |
| TUCP_000624 | XL0C_022722 | ENSRNOT00000037800 | 0.973322247 | 1.02E-07 |
| TUCP_000624 | XL0C_022722 | ENSRNOT00000023428 | 0.958769582 | 8.76E-07 |
| TUCP_000624 | XL0C_022722 | ENSRNOT00000091319 | 0.95414679  | 1.48E-06 |
| TUCP_000624 | XL0C_022722 | ENSRNOT00000022796 | 0.963501517 | 4.80E-07 |
| TUCP_000624 | XL0C_022722 | ENSRNOT00000073991 | 0.966922465 | 2.95E-07 |
| TUCP_000624 | XL0C_022722 | ENSRNOT00000029167 | 0.968531688 | 2.31E-07 |
| TUCP_000625 | XL0C_022839 | ENSRNOT00000065345 | 0.961213279 | 6.48E-07 |
| TUCP_003017 | XL0C_128436 | ENSRNOT00000021348 | 0.950230283 | 2.21E-06 |
| TUCP_003017 | XL0C_128436 | ENSRNOT00000065168 | 0.959034787 | 8.48E-07 |
| TUCP_003017 | XL0C_128436 | ENSRNOT00000031904 | 0.967396608 | 2.75E-07 |
| TUCP_003017 | XL0C_128436 | ENSRNOT00000083093 | 0.959496429 | 8.02E-07 |
| TUCP_003017 | XL0C_128436 | ENSRNOT00000076669 | 0.962958082 | 5.16E-07 |
| TUCP_003017 | XL0C_128436 | ENSRNOT00000020134 | 0.95751248  | 1.02E-06 |
| TUCP_003017 | XL0C_128436 | ENSRNOT00000081512 | 0.960056042 | 7.49E-07 |
| TUCP_003017 | XL0C_128436 | ENSRNOT00000023302 | 0.963266623 | 4.95E-07 |
| TUCP_003017 | XL0C_128436 | ENSRNOT00000066024 | 0.964216582 | 4.35E-07 |
| TUCP_003017 | XL0C_128436 | ENSRNOT00000025808 | 0.952560046 | 1.75E-06 |
| TUCP_003017 | XL0C_128436 | ENSRNOT00000032274 | 0.957521696 | 1.01E-06 |

|             |             |                    |              |          |
|-------------|-------------|--------------------|--------------|----------|
| TUCP_003017 | XLOC_128436 | ENSRNOT00000071764 | 0.954867724  | 1.37E-06 |
| TUCP_003017 | XLOC_128436 | ENSRNOT00000006175 | 0.986225553  | 3.82E-09 |
| TUCP_003017 | XLOC_128436 | ENSRNOT00000083127 | 0.961516772  | 6.23E-07 |
| TUCP_003017 | XLOC_128436 | ENSRNOT00000060362 | 0.951091813  | 2.03E-06 |
| TUCP_003017 | XLOC_128436 | ENSRNOT00000023144 | 0.96494809   | 3.93E-07 |
| TUCP_003017 | XLOC_128436 | ENSRNOT00000084088 | 0.963056587  | 5.09E-07 |
| TUCP_003017 | XLOC_128436 | ENSRNOT00000039809 | 0.957132767  | 1.06E-06 |
| TUCP_003017 | XLOC_128436 | ENSRNOT00000000743 | 0.964599437  | 4.13E-07 |
| TUCP_003017 | XLOC_128436 | ENSRNOT00000076729 | 0.958174414  | 9.40E-07 |
| TUCP_003017 | XLOC_128436 | ENSRNOT00000090665 | 0.959366279  | 8.15E-07 |
| TUCP_003017 | XLOC_128436 | ENSRNOT00000016975 | 0.966808249  | 3.00E-07 |
| TUCP_003017 | XLOC_128436 | ENSRNOT00000027411 | 0.954363923  | 1.44E-06 |
| TUCP_003017 | XLOC_128436 | ENSRNOT00000060696 | 0.968155255  | 2.44E-07 |
| TUCP_003017 | XLOC_128436 | ENSRNOT00000026543 | 0.983933298  | 8.21E-09 |
| TUCP_003017 | XLOC_128436 | ENSRNOT00000065501 | 0.953408874  | 1.60E-06 |
| TUCP_003017 | XLOC_128436 | ENSRNOT00000027454 | 0.955118661  | 1.33E-06 |
| TUCP_003017 | XLOC_128436 | ENSRNOT00000000676 | 0.952461967  | 1.76E-06 |
| TUCP_003017 | XLOC_128436 | ENSRNOT00000049582 | 0.953491181  | 1.58E-06 |
| TUCP_003017 | XLOC_128436 | ENSRNOT00000005537 | 0.952453442  | 1.77E-06 |
| TUCP_003017 | XLOC_128436 | ENSRNOT00000052018 | 0.950403272  | 2.17E-06 |
| TUCP_003017 | XLOC_128436 | ENSRNOT00000027337 | 0.953732299  | 1.54E-06 |
| TUCP_003017 | XLOC_128436 | ENSRNOT00000047093 | 0.97920543   | 2.96E-08 |
| TUCP_003017 | XLOC_128436 | ENSRNOT00000025075 | 0.963905269  | 4.54E-07 |
| TUCP_003017 | XLOC_128436 | ENSRNOT00000050180 | 0.961278118  | 6.42E-07 |
| TUCP_003017 | XLOC_128436 | ENSRNOT00000057160 | 0.953936885  | 1.51E-06 |
| TUCP_003017 | XLOC_128436 | ENSRNOT00000008221 | 0.955045263  | 1.34E-06 |
| TUCP_003017 | XLOC_128436 | ENSRNOT00000090420 | -0.951045424 | 2.04E-06 |
| TUCP_003017 | XLOC_128436 | ENSRNOT00000022796 | 0.951299053  | 1.99E-06 |
| TUCP_003017 | XLOC_128436 | ENSRNOT00000015799 | 0.95513326   | 1.33E-06 |
| TUCP_003017 | XLOC_128436 | ENSRNOT00000083799 | 0.956354779  | 1.16E-06 |
| TUCP_003015 | XLOC_128384 | ENSRNOT00000010680 | 0.963407235  | 4.86E-07 |
| TUCP_003015 | XLOC_128384 | ENSRNOT0000005873  | -0.950544138 | 2.14E-06 |
| TUCP_003015 | XLOC_128384 | ENSRNOT00000068212 | 0.95025819   | 2.21E-06 |
| TUCP_003015 | XLOC_128384 | ENSRNOT00000010939 | 0.961993762  | 5.86E-07 |
| TUCP_003015 | XLOC_128384 | ENSRNOT00000081631 | 0.962603039  | 5.41E-07 |
| TUCP_003015 | XLOC_128384 | ENSRNOT00000018711 | -0.954888759 | 1.36E-06 |
| TUCP_003015 | XLOC_128384 | ENSRNOT00000003087 | 0.953407296  | 1.60E-06 |
| TUCP_003015 | XLOC_128384 | ENSRNOT00000018864 | -0.955739988 | 1.24E-06 |
| TUCP_003015 | XLOC_128384 | ENSRNOT00000026518 | 0.968658132  | 2.26E-07 |
| TUCP_003015 | XLOC_128384 | ENSRNOT00000049349 | 0.951488782  | 1.95E-06 |
| TUCP_003015 | XLOC_128384 | ENSRNOT00000025081 | 0.965969638  | 3.39E-07 |
| TUCP_003015 | XLOC_128384 | ENSRNOT00000066923 | -0.951377216 | 1.97E-06 |
| TUCP_003015 | XLOC_128384 | ENSRNOT00000012767 | 0.959546406  | 7.97E-07 |
| TUCP_003015 | XLOC_128384 | ENSRNOT00000029701 | 0.951664191  | 1.92E-06 |
| TUCP_003015 | XLOC_128384 | ENSRNOT00000028624 | 0.95155507   | 1.94E-06 |
| TUCP_003015 | XLOC_128384 | ENSRNOT00000076973 | 0.954167087  | 1.47E-06 |
| TUCP_003015 | XLOC_128384 | ENSRNOT00000001013 | -0.958533149 | 9.01E-07 |
| TUCP_003015 | XLOC_128384 | ENSRNOT00000037015 | 0.954013206  | 1.50E-06 |
| TUCP_003015 | XLOC_128384 | ENSRNOT00000008244 | 0.961499406  | 6.24E-07 |
| TUCP_003015 | XLOC_128384 | ENSRNOT00000090156 | -0.952615528 | 1.74E-06 |
| TUCP_003015 | XLOC_128384 | ENSRNOT00000021826 | 0.958302491  | 9.26E-07 |

|             |             |                    |              |          |
|-------------|-------------|--------------------|--------------|----------|
| TUCP_003015 | XLOC_128384 | ENSRNOT00000048687 | 0.956471827  | 1.14E-06 |
| TUCP_003015 | XLOC_128384 | ENSRNOT00000083344 | 0.966459595  | 3.16E-07 |
| TUCP_003015 | XLOC_128384 | ENSRNOT00000004351 | -0.952842756 | 1.70E-06 |
| TUCP_003015 | XLOC_128384 | ENSRNOT00000054685 | 0.959242952  | 8.27E-07 |
| TUCP_003015 | XLOC_128384 | ENSRNOT00000082513 | 0.951672309  | 1.91E-06 |
| TUCP_003015 | XLOC_128384 | ENSRNOT00000026381 | -0.952223338 | 1.81E-06 |
| TUCP_003015 | XLOC_128384 | ENSRNOT00000064625 | 0.985327487  | 5.23E-09 |
| TUCP_003015 | XLOC_128384 | ENSRNOT00000059169 | 0.962064171  | 5.81E-07 |
| TUCP_003015 | XLOC_128384 | ENSRNOT00000067900 | -0.9569797   | 1.08E-06 |
| TUCP_003015 | XLOC_128384 | ENSRNOT00000067949 | 0.957009708  | 1.08E-06 |
| TUCP_003015 | XLOC_128384 | ENSRNOT00000010369 | 0.952794983  | 1.70E-06 |
| TUCP_003015 | XLOC_128384 | ENSRNOT00000061132 | 0.977859432  | 4.04E-08 |
| TUCP_003015 | XLOC_128384 | ENSRNOT00000010061 | -0.957089344 | 1.07E-06 |
| TUCP_003015 | XLOC_128384 | ENSRNOT00000019759 | 0.959418478  | 8.10E-07 |
| TUCP_003015 | XLOC_128384 | ENSRNOT00000055630 | 0.979657126  | 2.65E-08 |
| TUCP_003015 | XLOC_128384 | ENSRNOT00000009202 | 0.950392727  | 2.18E-06 |
| TUCP_003015 | XLOC_128384 | ENSRNOT00000024564 | -0.950995869 | 2.05E-06 |
| TUCP_003015 | XLOC_128384 | ENSRNOT00000013582 | -0.964014068 | 4.47E-07 |
| TUCP_003015 | XLOC_128384 | ENSRNOT00000002621 | 0.95704607   | 1.07E-06 |
| TUCP_003302 | XLOC_141907 | ENSRNOT00000091506 | 0.960899966  | 6.74E-07 |
| TUCP_003302 | XLOC_141907 | ENSRNOT00000026580 | -0.95028651  | 2.20E-06 |
| TUCP_003302 | XLOC_141907 | ENSRNOT00000025880 | 0.950737977  | 2.10E-06 |
| TUCP_003302 | XLOC_141907 | ENSRNOT00000058626 | 0.951700689  | 1.91E-06 |
| TUCP_003302 | XLOC_141907 | ENSRNOT0000005085  | 0.957495628  | 1.02E-06 |
| TUCP_003302 | XLOC_141907 | ENSRNOT00000088151 | 0.950325906  | 2.19E-06 |
| TUCP_002548 | XLOC_107845 | ENSRNOT00000001215 | -0.960057317 | 7.49E-07 |
| TUCP_002548 | XLOC_107845 | ENSRNOT00000077186 | 0.957884179  | 9.72E-07 |
| TUCP_002548 | XLOC_107845 | ENSRNOT00000039551 | 0.956446032  | 1.15E-06 |
| TUCP_002548 | XLOC_107845 | ENSRNOT00000014946 | -0.950429972 | 2.17E-06 |
| TUCP_002548 | XLOC_107845 | ENSRNOT00000006460 | -0.967431568 | 2.73E-07 |
| TUCP_002548 | XLOC_107845 | ENSRNOT00000075397 | -0.961031127 | 6.63E-07 |
| TUCP_002548 | XLOC_107845 | ENSRNOT00000013058 | -0.962930251 | 5.18E-07 |
| TUCP_002548 | XLOC_107845 | ENSRNOT00000013116 | 0.960886185  | 6.75E-07 |
| TUCP_002548 | XLOC_107845 | ENSRNOT00000021858 | -0.972281107 | 1.23E-07 |
| TUCP_002548 | XLOC_107845 | ENSRNOT00000079644 | 0.958165227  | 9.41E-07 |
| TUCP_002548 | XLOC_107845 | ENSRNOT00000038178 | 0.960104618  | 7.44E-07 |
| TUCP_002548 | XLOC_107845 | ENSRNOT00000079138 | -0.950246378 | 2.21E-06 |
| TUCP_002548 | XLOC_107845 | ENSRNOT00000065942 | 0.980810367  | 1.98E-08 |
| TUCP_002548 | XLOC_107845 | ENSRNOT00000064305 | 0.952732865  | 1.72E-06 |
| TUCP_002548 | XLOC_107845 | ENSRNOT00000054932 | 0.954741174  | 1.39E-06 |
| TUCP_002548 | XLOC_107845 | ENSRNOT00000012060 | -0.959739856 | 7.79E-07 |
| TUCP_002548 | XLOC_107845 | ENSRNOT00000029508 | -0.963766117 | 4.63E-07 |
| TUCP_002548 | XLOC_107845 | ENSRNOT00000086310 | 0.959290086  | 8.22E-07 |
| TUCP_002548 | XLOC_107845 | ENSRNOT00000089829 | 0.952196583  | 1.81E-06 |
| TUCP_002548 | XLOC_107845 | ENSRNOT00000019465 | 0.950928016  | 2.06E-06 |
| TUCP_002548 | XLOC_107845 | ENSRNOT00000030850 | -0.958834767 | 8.69E-07 |
| TUCP_002548 | XLOC_107845 | ENSRNOT00000066204 | 0.952088497  | 1.83E-06 |
| TUCP_002548 | XLOC_107845 | ENSRNOT00000018101 | 0.955667855  | 1.25E-06 |
| TUCP_002548 | XLOC_107845 | ENSRNOT00000040847 | 0.954560193  | 1.41E-06 |
| TUCP_002548 | XLOC_107845 | ENSRNOT00000014479 | 0.952334665  | 1.79E-06 |
| TUCP_002548 | XLOC_107845 | ENSRNOT00000013516 | -0.965838818 | 3.46E-07 |

|             |             |                    |              |          |
|-------------|-------------|--------------------|--------------|----------|
| TUCP_002548 | XLOC_107845 | ENSRNOT00000015986 | 0.959429469  | 8.09E-07 |
| TUCP_002548 | XLOC_107845 | ENSRNOT00000066776 | 0.962852552  | 5.23E-07 |
| TUCP_002548 | XLOC_107845 | ENSRNOT00000025284 | 0.952176738  | 1.82E-06 |
| TUCP_002548 | XLOC_107845 | ENSRNOT00000086813 | 0.960584135  | 7.01E-07 |
| TUCP_002548 | XLOC_107845 | ENSRNOT00000021729 | -0.959825362 | 7.70E-07 |
| TUCP_002548 | XLOC_107845 | ENSRNOT00000083568 | -0.959775833 | 7.75E-07 |
| TUCP_002548 | XLOC_107845 | ENSRNOT00000073019 | -0.953436737 | 1.59E-06 |
| TUCP_002548 | XLOC_107845 | ENSRNOT00000084709 | -0.952344312 | 1.79E-06 |
| TUCP_002548 | XLOC_107845 | ENSRNOT00000092068 | -0.957942716 | 9.66E-07 |
| TUCP_002548 | XLOC_107845 | ENSRNOT00000090338 | 0.964378989  | 4.25E-07 |
| TUCP_002548 | XLOC_107845 | ENSRNOT00000034282 | -0.958190146 | 9.38E-07 |
| TUCP_002548 | XLOC_107845 | ENSRNOT00000039523 | -0.956834562 | 1.10E-06 |
| TUCP_002548 | XLOC_107845 | ENSRNOT00000024677 | -0.954612509 | 1.41E-06 |
| TUCP_002548 | XLOC_107845 | ENSRNOT00000037681 | 0.952884116  | 1.69E-06 |
| TUCP_002548 | XLOC_107845 | ENSRNOT00000050415 | 0.950813553  | 2.09E-06 |
| TUCP_002548 | XLOC_107845 | ENSRNOT00000091448 | 0.956984023  | 1.08E-06 |
| TUCP_002548 | XLOC_107845 | ENSRNOT00000046807 | 0.975577316  | 6.57E-08 |
| TUCP_002548 | XLOC_107845 | ENSRNOT00000077856 | 0.95874208   | 8.78E-07 |
| TUCP_002548 | XLOC_107845 | ENSRNOT00000000577 | -0.956947716 | 1.08E-06 |
| TUCP_002548 | XLOC_107845 | ENSRNOT00000079609 | -0.963756797 | 4.63E-07 |
| TUCP_002548 | XLOC_107845 | ENSRNOT00000006443 | 0.95860156   | 8.93E-07 |
| TUCP_002548 | XLOC_107845 | ENSRNOT00000040629 | -0.954715965 | 1.39E-06 |
| TUCP_002548 | XLOC_107845 | ENSRNOT00000019121 | 0.965120217  | 3.83E-07 |
| TUCP_002548 | XLOC_107845 | ENSRNOT00000072762 | 0.970672347  | 1.63E-07 |
| TUCP_002548 | XLOC_107845 | ENSRNOT00000086775 | 0.955178359  | 1.32E-06 |
| TUCP_002548 | XLOC_107845 | ENSRNOT00000030007 | 0.969724748  | 1.90E-07 |
| TUCP_002548 | XLOC_107845 | ENSRNOT00000012963 | 0.958278079  | 9.28E-07 |
| TUCP_002548 | XLOC_107845 | ENSRNOT00000011832 | 0.96968181   | 1.92E-07 |
| TUCP_002548 | XLOC_107845 | ENSRNOT00000073643 | 0.976959671  | 4.92E-08 |
| TUCP_002548 | XLOC_107845 | ENSRNOT00000052002 | -0.954203667 | 1.47E-06 |
| TUCP_002548 | XLOC_107845 | ENSRNOT00000030074 | -0.952317852 | 1.79E-06 |
| TUCP_002548 | XLOC_107845 | ENSRNOT00000062057 | -0.954826661 | 1.37E-06 |
| TUCP_002548 | XLOC_107845 | ENSRNOT00000001979 | 0.954389858  | 1.44E-06 |
| TUCP_002548 | XLOC_107845 | ENSRNOT00000028089 | -0.953780707 | 1.54E-06 |
| TUCP_002548 | XLOC_107845 | ENSRNOT00000083968 | 0.97073032   | 1.61E-07 |
| TUCP_002548 | XLOC_107845 | ENSRNOT00000092945 | 0.952518545  | 1.75E-06 |
| TUCP_002548 | XLOC_107845 | ENSRNOT00000086798 | 0.967529486  | 2.69E-07 |
| TUCP_002548 | XLOC_107845 | ENSRNOT00000083967 | -0.988465771 | 1.58E-09 |
| TUCP_002548 | XLOC_107845 | ENSRNOT00000005172 | -0.95058975  | 2.13E-06 |
| TUCP_002548 | XLOC_107845 | ENSRNOT00000083964 | 0.955906866  | 1.22E-06 |
| TUCP_002548 | XLOC_107845 | ENSRNOT00000020472 | 0.953828604  | 1.53E-06 |
| TUCP_002548 | XLOC_107845 | ENSRNOT00000048781 | -0.956341266 | 1.16E-06 |
| TUCP_002548 | XLOC_107845 | ENSRNOT00000074212 | -0.955285078 | 1.31E-06 |
| TUCP_002548 | XLOC_107845 | ENSRNOT00000021802 | -0.967787328 | 2.59E-07 |
| TUCP_002548 | XLOC_107845 | ENSRNOT00000013864 | 0.95829541   | 9.26E-07 |
| TUCP_002548 | XLOC_107845 | ENSRNOT00000068452 | -0.965944953 | 3.41E-07 |
| TUCP_002548 | XLOC_107845 | ENSRNOT00000027435 | -0.957151385 | 1.06E-06 |
| TUCP_002548 | XLOC_107845 | ENSRNOT00000072299 | -0.964058803 | 4.45E-07 |
| TUCP_002548 | XLOC_107845 | ENSRNOT00000018122 | -0.959857528 | 7.67E-07 |
| TUCP_002548 | XLOC_107845 | ENSRNOT00000032363 | -0.953956216 | 1.51E-06 |
| TUCP_002548 | XLOC_107845 | ENSRNOT0000001401  | -0.954450872 | 1.43E-06 |

|             |             |                    |              |          |
|-------------|-------------|--------------------|--------------|----------|
| TUCP_002548 | XLOC_107845 | ENSRNOT00000067739 | 0.95883503   | 8.69E-07 |
| TUCP_002548 | XLOC_107845 | ENSRNOT00000076230 | -0.966010168 | 3.37E-07 |
| TUCP_002548 | XLOC_107845 | ENSRNOT00000066888 | 0.952957153  | 1.68E-06 |
| TUCP_002548 | XLOC_107845 | ENSRNOT00000036658 | 0.950241988  | 2.21E-06 |
| TUCP_002548 | XLOC_107845 | ENSRNOT00000002313 | 0.951911161  | 1.87E-06 |
| TUCP_002548 | XLOC_107845 | ENSRNOT00000028074 | 0.962883243  | 5.21E-07 |
| TUCP_002548 | XLOC_107845 | ENSRNOT00000007738 | 0.958265432  | 9.30E-07 |
| TUCP_002548 | XLOC_107845 | ENSRNOT00000086260 | 0.957771633  | 9.85E-07 |
| TUCP_002548 | XLOC_107845 | ENSRNOT00000064667 | 0.957887828  | 9.72E-07 |
| TUCP_002548 | XLOC_107845 | ENSRNOT00000072856 | 0.961115556  | 6.56E-07 |
| TUCP_002548 | XLOC_107845 | ENSRNOT00000018328 | 0.965006335  | 3.90E-07 |
| TUCP_002548 | XLOC_107845 | ENSRNOT00000056100 | 0.954134416  | 1.48E-06 |
| TUCP_002548 | XLOC_107845 | ENSRNOT00000034411 | -0.951463285 | 1.95E-06 |
| TUCP_002548 | XLOC_107845 | ENSRNOT00000034883 | 0.957958271  | 9.64E-07 |
| TUCP_002548 | XLOC_107845 | ENSRNOT00000020155 | -0.95769074  | 9.94E-07 |
| TUCP_002548 | XLOC_107845 | ENSRNOT00000025827 | -0.958555027 | 8.98E-07 |
| TUCP_002548 | XLOC_107845 | ENSRNOT00000030893 | 0.957656207  | 9.98E-07 |
| TUCP_002548 | XLOC_107845 | ENSRNOT00000065103 | 0.955784194  | 1.24E-06 |
| TUCP_002548 | XLOC_107845 | ENSRNOT00000090853 | 0.952593522  | 1.74E-06 |
| TUCP_002548 | XLOC_107845 | ENSRNOT00000084031 | -0.950474361 | 2.16E-06 |
| TUCP_002548 | XLOC_107845 | ENSRNOT00000092083 | -0.957469874 | 1.02E-06 |
| TUCP_002548 | XLOC_107845 | ENSRNOT00000025913 | 0.956290013  | 1.17E-06 |
| TUCP_002548 | XLOC_107845 | ENSRNOT00000021717 | -0.956710391 | 1.11E-06 |
| TUCP_002548 | XLOC_107845 | ENSRNOT0000003992  | 0.95984286   | 7.69E-07 |
| TUCP_002548 | XLOC_107845 | ENSRNOT00000050350 | 0.959926836  | 7.61E-07 |
| TUCP_002548 | XLOC_107845 | ENSRNOT00000018494 | 0.969046224  | 2.12E-07 |
| TUCP_002548 | XLOC_107845 | ENSRNOT00000021400 | 0.957620393  | 1.00E-06 |
| TUCP_002548 | XLOC_107845 | ENSRNOT00000081725 | -0.95844162  | 9.10E-07 |
| TUCP_002548 | XLOC_107845 | ENSRNOT00000005459 | -0.96165623  | 6.12E-07 |
| TUCP_002548 | XLOC_107845 | ENSRNOT00000078366 | -0.95840581  | 9.14E-07 |
| TUCP_002548 | XLOC_107845 | ENSRNOT00000025222 | 0.969635788  | 1.93E-07 |
| TUCP_002548 | XLOC_107845 | ENSRNOT00000012760 | 0.953769903  | 1.54E-06 |
| TUCP_002548 | XLOC_107845 | ENSRNOT00000003691 | 0.953825295  | 1.53E-06 |
| TUCP_002548 | XLOC_107845 | ENSRNOT00000074261 | 0.954917008  | 1.36E-06 |
| TUCP_002548 | XLOC_107845 | ENSRNOT00000068528 | 0.970677402  | 1.63E-07 |
| TUCP_002548 | XLOC_107845 | ENSRNOT00000011675 | -0.96574616  | 3.51E-07 |
| TUCP_002548 | XLOC_107845 | ENSRNOT00000027917 | -0.961477556 | 6.26E-07 |
| TUCP_002548 | XLOC_107845 | ENSRNOT00000004290 | -0.977875021 | 4.02E-08 |
| TUCP_002548 | XLOC_107845 | ENSRNOT00000020951 | -0.958196198 | 9.37E-07 |
| TUCP_002548 | XLOC_107845 | ENSRNOT00000031555 | 0.95253389   | 1.75E-06 |
| TUCP_002548 | XLOC_107845 | ENSRNOT00000023876 | -0.964232688 | 4.34E-07 |
| TUCP_002548 | XLOC_107845 | ENSRNOT00000002443 | -0.951679682 | 1.91E-06 |
| TUCP_002548 | XLOC_107845 | ENSRNOT00000000527 | 0.959043817  | 8.47E-07 |
| TUCP_002548 | XLOC_107845 | ENSRNOT00000080591 | -0.958023041 | 9.56E-07 |
| TUCP_002548 | XLOC_107845 | ENSRNOT00000012625 | 0.954824767  | 1.37E-06 |
| TUCP_002548 | XLOC_107845 | ENSRNOT00000049285 | 0.956949473  | 1.08E-06 |
| TUCP_002548 | XLOC_107845 | ENSRNOT00000093385 | -0.9684261   | 2.34E-07 |
| TUCP_002548 | XLOC_107845 | ENSRNOT00000039000 | 0.951571913  | 1.93E-06 |
| TUCP_002548 | XLOC_107845 | ENSRNOT00000088202 | 0.963474126  | 4.82E-07 |
| TUCP_002548 | XLOC_107845 | ENSRNOT00000037955 | 0.965843966  | 3.46E-07 |
| TUCP_002548 | XLOC_107845 | ENSRNOT00000017224 | 0.952273629  | 1.80E-06 |

|             |             |                    |              |          |
|-------------|-------------|--------------------|--------------|----------|
| TUCP_002548 | XLOC_107845 | ENSRNOT00000085911 | 0.982261007  | 1.34E-08 |
| TUCP_002548 | XLOC_107845 | ENSRNOT00000044662 | 0.953366658  | 1.61E-06 |
| TUCP_002548 | XLOC_107845 | ENSRNOT00000078161 | 0.964113376  | 4.41E-07 |
| TUCP_002548 | XLOC_107845 | ENSRNOT00000087346 | -0.965615473 | 3.57E-07 |
| TUCP_002548 | XLOC_107845 | ENSRNOT00000013463 | -0.950274098 | 2.20E-06 |
| TUCP_002548 | XLOC_107845 | ENSRNOT00000086456 | 0.95948063   | 8.04E-07 |
| TUCP_002548 | XLOC_107845 | ENSRNOT00000000886 | -0.950924193 | 2.06E-06 |
| TUCP_002548 | XLOC_107845 | ENSRNOT00000075209 | 0.955077731  | 1.34E-06 |
| TUCP_002548 | XLOC_107845 | ENSRNOT00000044275 | -0.958105432 | 9.47E-07 |
| TUCP_002548 | XLOC_107845 | ENSRNOT00000031261 | -0.964525331 | 4.17E-07 |
| TUCP_002548 | XLOC_107845 | ENSRNOT00000023977 | 0.950035288  | 2.25E-06 |
| TUCP_002548 | XLOC_107845 | ENSRNOT00000056022 | -0.961447432 | 6.29E-07 |
| TUCP_002548 | XLOC_107845 | ENSRNOT00000088615 | 0.955012503  | 1.35E-06 |
| TUCP_002548 | XLOC_107845 | ENSRNOT00000067741 | 0.963107794  | 5.06E-07 |
| TUCP_002548 | XLOC_107845 | ENSRNOT00000059181 | -0.951848221 | 1.88E-06 |
| TUCP_002548 | XLOC_107845 | ENSRNOT00000010853 | -0.952702792 | 1.72E-06 |
| TUCP_002548 | XLOC_107845 | ENSRNOT00000010852 | -0.954120303 | 1.48E-06 |
| TUCP_002548 | XLOC_107845 | ENSRNOT00000077080 | 0.95672516   | 1.11E-06 |
| TUCP_002548 | XLOC_107845 | ENSRNOT00000025794 | 0.96060768   | 6.99E-07 |
| TUCP_002548 | XLOC_107845 | ENSRNOT00000064849 | 0.966464585  | 3.16E-07 |
| TUCP_002548 | XLOC_107845 | ENSRNOT00000058111 | 0.977156266  | 4.71E-08 |
| TUCP_002548 | XLOC_107845 | ENSRNOT00000080522 | 0.963574411  | 4.75E-07 |
| TUCP_002548 | XLOC_107845 | ENSRNOT00000036613 | 0.952171549  | 1.82E-06 |
| TUCP_002548 | XLOC_107845 | ENSRNOT00000009994 | 0.957349385  | 1.03E-06 |
| TUCP_002548 | XLOC_107845 | ENSRNOT00000077479 | 0.958696087  | 8.83E-07 |
| TUCP_002548 | XLOC_107845 | ENSRNOT00000040548 | 0.950667795  | 2.12E-06 |
| TUCP_002548 | XLOC_107845 | ENSRNOT00000039221 | 0.953569445  | 1.57E-06 |
| TUCP_002548 | XLOC_107845 | ENSRNOT00000017340 | 0.96897173   | 2.15E-07 |
| TUCP_002548 | XLOC_107845 | ENSRNOT00000021578 | -0.961301458 | 6.40E-07 |
| TUCP_002548 | XLOC_107845 | ENSRNOT00000073239 | 0.966342504  | 3.21E-07 |
| TUCP_002548 | XLOC_107845 | ENSRNOT00000040060 | 0.954789073  | 1.38E-06 |
| TUCP_002548 | XLOC_107845 | ENSRNOT00000046215 | 0.96484553   | 3.99E-07 |
| TUCP_002548 | XLOC_107845 | ENSRNOT00000039102 | -0.960403328 | 7.17E-07 |
| TUCP_002548 | XLOC_107845 | ENSRNOT00000076467 | 0.977421612  | 4.45E-08 |
| TUCP_002548 | XLOC_107845 | ENSRNOT00000081123 | -0.962745286 | 5.31E-07 |
| TUCP_002548 | XLOC_107845 | ENSRNOT00000009742 | 0.956865988  | 1.09E-06 |
| TUCP_002548 | XLOC_107845 | ENSRNOT00000023962 | 0.95198831   | 1.85E-06 |
| TUCP_002548 | XLOC_107845 | ENSRNOT00000028888 | -0.950690475 | 2.11E-06 |
| TUCP_002548 | XLOC_107845 | ENSRNOT00000080677 | 0.967916078  | 2.54E-07 |
| TUCP_002548 | XLOC_107845 | ENSRNOT00000025460 | -0.95592109  | 1.22E-06 |
| TUCP_002548 | XLOC_107845 | ENSRNOT00000028225 | -0.965026274 | 3.89E-07 |
| TUCP_002548 | XLOC_107845 | ENSRNOT00000019172 | 0.951896767  | 1.87E-06 |
| TUCP_002548 | XLOC_107845 | ENSRNOT0000004703  | -0.954472385 | 1.43E-06 |
| TUCP_002548 | XLOC_107845 | ENSRNOT00000027360 | 0.958179566  | 9.39E-07 |
| TUCP_002548 | XLOC_107845 | ENSRNOT00000004770 | 0.972155791  | 1.26E-07 |
| TUCP_002548 | XLOC_107845 | ENSRNOT00000015318 | 0.974591825  | 7.99E-08 |
| TUCP_002548 | XLOC_107845 | ENSRNOT00000023067 | 0.966772004  | 3.02E-07 |
| TUCP_002548 | XLOC_107845 | ENSRNOT00000045063 | -0.964249573 | 4.33E-07 |
| TUCP_002548 | XLOC_107845 | ENSRNOT00000028907 | -0.960019589 | 7.52E-07 |
| TUCP_002548 | XLOC_107845 | ENSRNOT00000014317 | 0.958542272  | 9.00E-07 |
| TUCP_002548 | XLOC_107845 | ENSRNOT00000016776 | 0.954137279  | 1.48E-06 |



|             |             |                    |              |          |
|-------------|-------------|--------------------|--------------|----------|
| TUCP_002548 | XLOC_107845 | ENSRNOT00000089086 | 0.952764236  | 1.71E-06 |
| TUCP_002548 | XLOC_107845 | ENSRNOT00000079414 | 0.963306016  | 4.93E-07 |
| TUCP_002548 | XLOC_107845 | ENSRNOT00000008987 | 0.955800107  | 1.23E-06 |
| TUCP_002548 | XLOC_107845 | ENSRNOT00000024011 | -0.97184525  | 1.33E-07 |
| TUCP_002548 | XLOC_107845 | ENSRNOT00000092876 | 0.971692776  | 1.37E-07 |
| TUCP_002548 | XLOC_107845 | ENSRNOT00000025252 | 0.95901906   | 8.50E-07 |
| TUCP_002548 | XLOC_107845 | ENSRNOT00000011326 | 0.961717247  | 6.07E-07 |
| TUCP_002548 | XLOC_107845 | ENSRNOT00000019473 | 0.958379738  | 9.17E-07 |
| TUCP_002545 | XLOC_107700 | ENSRNOT00000045209 | 0.953629041  | 1.56E-06 |
| TUCP_002545 | XLOC_107700 | ENSRNOT00000025157 | 0.960278949  | 7.28E-07 |
| TUCP_002544 | XLOC_107683 | ENSRNOT00000010968 | 0.955840853  | 1.23E-06 |
| TUCP_002544 | XLOC_107683 | ENSRNOT00000003759 | 0.959764235  | 7.76E-07 |
| TUCP_002544 | XLOC_107683 | ENSRNOT00000078299 | 0.956034086  | 1.20E-06 |
| TUCP_002544 | XLOC_107683 | ENSRNOT00000013809 | 0.972728092  | 1.13E-07 |
| TUCP_002544 | XLOC_107683 | ENSRNOT00000022128 | 0.968707804  | 2.24E-07 |
| TUCP_002544 | XLOC_107683 | ENSRNOT00000019738 | 0.96392372   | 4.53E-07 |
| TUCP_002544 | XLOC_107683 | ENSRNOT00000028877 | 0.970385743  | 1.71E-07 |
| TUCP_002544 | XLOC_107683 | ENSRNOT00000078020 | 0.955427529  | 1.29E-06 |
| TUCP_002544 | XLOC_107683 | ENSRNOT00000051028 | -0.955359074 | 1.30E-06 |
| TUCP_002544 | XLOC_107683 | ENSRNOT00000068354 | 0.952238634  | 1.81E-06 |
| TUCP_002544 | XLOC_107683 | ENSRNOT00000076879 | 0.958380456  | 9.17E-07 |
| TUCP_002544 | XLOC_107683 | ENSRNOT00000089912 | 0.986618564  | 3.30E-09 |
| TUCP_002543 | XLOC_107683 | ENSRNOT00000001775 | 0.976030261  | 5.99E-08 |
| TUCP_002543 | XLOC_107683 | ENSRNOT00000077303 | 0.952422029  | 1.77E-06 |
| TUCP_002543 | XLOC_107683 | ENSRNOT00000057504 | 0.959396374  | 8.12E-07 |
| TUCP_002543 | XLOC_107683 | ENSRNOT00000019396 | 0.972168853  | 1.26E-07 |
| TUCP_002543 | XLOC_107683 | ENSRNOT00000010968 | 0.960141691  | 7.41E-07 |
| TUCP_002543 | XLOC_107683 | ENSRNOT00000091476 | 0.973544599  | 9.76E-08 |
| TUCP_002543 | XLOC_107683 | ENSRNOT00000009448 | 0.952887872  | 1.69E-06 |
| TUCP_002543 | XLOC_107683 | ENSRNOT00000006196 | 0.965182597  | 3.80E-07 |
| TUCP_002543 | XLOC_107683 | ENSRNOT00000000528 | 0.953387466  | 1.60E-06 |
| TUCP_002543 | XLOC_107683 | ENSRNOT00000028527 | 0.966961584  | 2.93E-07 |
| TUCP_002543 | XLOC_107683 | ENSRNOT00000021487 | 0.953590467  | 1.57E-06 |
| TUCP_002543 | XLOC_107683 | ENSRNOT00000022167 | 0.961497032  | 6.25E-07 |
| TUCP_002543 | XLOC_107683 | ENSRNOT00000073087 | 0.959645993  | 7.87E-07 |
| TUCP_002543 | XLOC_107683 | ENSRNOT00000083452 | 0.953305431  | 1.62E-06 |
| TUCP_002543 | XLOC_107683 | ENSRNOT00000025257 | 0.950898109  | 2.07E-06 |
| TUCP_002543 | XLOC_107683 | ENSRNOT00000003458 | 0.961265688  | 6.43E-07 |
| TUCP_002543 | XLOC_107683 | ENSRNOT00000014533 | 0.954824765  | 1.37E-06 |
| TUCP_002543 | XLOC_107683 | ENSRNOT00000086090 | 0.962240152  | 5.67E-07 |
| TUCP_002543 | XLOC_107683 | ENSRNOT00000073138 | 0.952349342  | 1.79E-06 |
| TUCP_002543 | XLOC_107683 | ENSRNOT00000042973 | 0.967635958  | 2.65E-07 |
| TUCP_002543 | XLOC_107683 | ENSRNOT00000045993 | 0.973987333  | 8.98E-08 |
| TUCP_002542 | XLOC_107683 | ENSRNOT00000061333 | -0.955959569 | 1.21E-06 |
| TUCP_002542 | XLOC_107683 | ENSRNOT00000045937 | 0.961703481  | 6.08E-07 |
| TUCP_002542 | XLOC_107683 | ENSRNOT00000000513 | -0.964429133 | 4.22E-07 |
| TUCP_002542 | XLOC_107683 | ENSRNOT0000001196  | 0.978060548  | 3.86E-08 |
| TUCP_002542 | XLOC_107683 | ENSRNOT00000014780 | 0.955065941  | 1.34E-06 |
| TUCP_002542 | XLOC_107683 | ENSRNOT00000040856 | 0.956680681  | 1.12E-06 |
| TUCP_002542 | XLOC_107683 | ENSRNOT00000011907 | 0.971001456  | 1.54E-07 |
| TUCP_002542 | XLOC_107683 | ENSRNOT00000024959 | 0.979002077  | 3.10E-08 |

|             |             |                    |              |          |
|-------------|-------------|--------------------|--------------|----------|
| TUCP_002542 | XLOC_107683 | ENSRNOT00000004956 | -0.950712931 | 2.11E-06 |
| TUCP_002542 | XLOC_107683 | ENSRNOT00000018931 | -0.967699624 | 2.62E-07 |
| TUCP_002542 | XLOC_107683 | ENSRNOT00000000990 | 0.980587545  | 2.10E-08 |
| TUCP_002542 | XLOC_107683 | ENSRNOT00000026273 | -0.956352841 | 1.16E-06 |
| TUCP_002542 | XLOC_107683 | ENSRNOT00000004713 | 0.981404201  | 1.70E-08 |
| TUCP_002542 | XLOC_107683 | ENSRNOT00000026235 | 0.954719389  | 1.39E-06 |
| TUCP_002542 | XLOC_107683 | ENSRNOT00000022633 | 0.955276586  | 1.31E-06 |
| TUCP_002542 | XLOC_107683 | ENSRNOT0000003082  | 0.951959256  | 1.86E-06 |
| TUCP_002542 | XLOC_107683 | ENSRNOT00000031109 | 0.973765932  | 9.36E-08 |
| TUCP_002542 | XLOC_107683 | ENSRNOT00000079644 | 0.970391189  | 1.71E-07 |
| TUCP_002542 | XLOC_107683 | ENSRNOT00000024418 | 0.967816051  | 2.58E-07 |
| TUCP_002542 | XLOC_107683 | ENSRNOT00000038178 | 0.986228892  | 3.81E-09 |
| TUCP_002542 | XLOC_107683 | ENSRNOT00000020267 | -0.963342699 | 4.90E-07 |
| TUCP_002542 | XLOC_107683 | ENSRNOT00000082393 | 0.969374424  | 2.02E-07 |
| TUCP_002542 | XLOC_107683 | ENSRNOT00000064305 | 0.955112589  | 1.33E-06 |
| TUCP_002542 | XLOC_107683 | ENSRNOT00000085885 | 0.952837633  | 1.70E-06 |
| TUCP_002542 | XLOC_107683 | ENSRNOT00000045233 | 0.959702659  | 7.82E-07 |
| TUCP_002542 | XLOC_107683 | ENSRNOT00000018696 | 0.98523964   | 5.38E-09 |
| TUCP_002542 | XLOC_107683 | ENSRNOT00000091050 | 0.978755467  | 3.29E-08 |
| TUCP_002542 | XLOC_107683 | ENSRNOT00000066204 | 0.954793499  | 1.38E-06 |
| TUCP_002542 | XLOC_107683 | ENSRNOT00000063849 | 0.957025259  | 1.07E-06 |
| TUCP_002542 | XLOC_107683 | ENSRNOT00000001468 | 0.951030443  | 2.04E-06 |
| TUCP_002542 | XLOC_107683 | ENSRNOT00000050063 | 0.972710231  | 1.14E-07 |
| TUCP_002542 | XLOC_107683 | ENSRNOT00000000110 | 0.965633351  | 3.56E-07 |
| TUCP_002542 | XLOC_107683 | ENSRNOT00000018101 | 0.959844927  | 7.69E-07 |
| TUCP_002542 | XLOC_107683 | ENSRNOT00000068683 | 0.980433061  | 2.19E-08 |
| TUCP_002542 | XLOC_107683 | ENSRNOT00000006196 | 0.953422941  | 1.60E-06 |
| TUCP_002542 | XLOC_107683 | ENSRNOT00000020272 | 0.957960083  | 9.64E-07 |
| TUCP_002542 | XLOC_107683 | ENSRNOT00000013043 | 0.985223579  | 5.41E-09 |
| TUCP_002542 | XLOC_107683 | ENSRNOT00000034603 | 0.968688894  | 2.25E-07 |
| TUCP_002542 | XLOC_107683 | ENSRNOT00000060300 | 0.98169758   | 1.57E-08 |
| TUCP_002542 | XLOC_107683 | ENSRNOT00000066776 | 0.977503789  | 4.37E-08 |
| TUCP_002542 | XLOC_107683 | ENSRNOT00000027301 | 0.957863408  | 9.75E-07 |
| TUCP_002542 | XLOC_107683 | ENSRNOT00000040736 | 0.95499007   | 1.35E-06 |
| TUCP_002542 | XLOC_107683 | ENSRNOT00000023033 | 0.967899382  | 2.54E-07 |
| TUCP_002542 | XLOC_107683 | ENSRNOT00000009313 | 0.950648133  | 2.12E-06 |
| TUCP_002542 | XLOC_107683 | ENSRNOT00000013058 | -0.973166767 | 1.05E-07 |
| TUCP_002542 | XLOC_107683 | ENSRNOT00000057045 | 0.960978633  | 6.67E-07 |
| TUCP_002542 | XLOC_107683 | ENSRNOT00000082686 | 0.95154737   | 1.94E-06 |
| TUCP_002542 | XLOC_107683 | ENSRNOT00000007949 | 0.962548898  | 5.45E-07 |
| TUCP_002542 | XLOC_107683 | ENSRNOT00000017375 | 0.973590949  | 9.68E-08 |
| TUCP_002542 | XLOC_107683 | ENSRNOT00000009247 | 0.9507972    | 2.09E-06 |
| TUCP_002542 | XLOC_107683 | ENSRNOT00000029635 | 0.969086961  | 2.11E-07 |
| TUCP_002542 | XLOC_107683 | ENSRNOT00000018506 | 0.965096711  | 3.85E-07 |
| TUCP_002542 | XLOC_107683 | ENSRNOT00000013191 | 0.977735159  | 4.15E-08 |
| TUCP_002542 | XLOC_107683 | ENSRNOT00000023562 | 0.959897217  | 7.64E-07 |
| TUCP_002542 | XLOC_107683 | ENSRNOT00000011731 | 0.981351546  | 1.72E-08 |
| TUCP_002542 | XLOC_107683 | ENSRNOT00000084674 | 0.956365076  | 1.16E-06 |
| TUCP_002542 | XLOC_107683 | ENSRNOT00000090338 | 0.955367935  | 1.29E-06 |
| TUCP_002542 | XLOC_107683 | ENSRNOT00000040548 | 0.968354508  | 2.37E-07 |
| TUCP_002542 | XLOC_107683 | ENSRNOT00000009319 | 0.9721245    | 1.26E-07 |

|             |             |                    |              |          |
|-------------|-------------|--------------------|--------------|----------|
| TUCP_002542 | XLOC_107683 | ENSRNOT00000003412 | 0.959711359  | 7.81E-07 |
| TUCP_002542 | XLOC_107683 | ENSRNOT00000014684 | 0.961864337  | 5.96E-07 |
| TUCP_002542 | XLOC_107683 | ENSRNOT00000045855 | 0.96663964   | 3.08E-07 |
| TUCP_002542 | XLOC_107683 | ENSRNOT00000028363 | 0.968408122  | 2.35E-07 |
| TUCP_002542 | XLOC_107683 | ENSRNOT00000014533 | 0.979971361  | 2.45E-08 |
| TUCP_002542 | XLOC_107683 | ENSRNOT00000085151 | 0.981614799  | 1.60E-08 |
| TUCP_002542 | XLOC_107683 | ENSRNOT00000000911 | 0.953291791  | 1.62E-06 |
| TUCP_002542 | XLOC_107683 | ENSRNOT00000031667 | 0.954622108  | 1.40E-06 |
| TUCP_002542 | XLOC_107683 | ENSRNOT00000080522 | 0.954281273  | 1.46E-06 |
| TUCP_002542 | XLOC_107683 | ENSRNOT00000019121 | 0.967436587  | 2.73E-07 |
| TUCP_002542 | XLOC_107683 | ENSRNOT00000012361 | 0.958347862  | 9.21E-07 |
| TUCP_002542 | XLOC_107683 | ENSRNOT00000000049 | 0.976282322  | 5.68E-08 |
| TUCP_002542 | XLOC_107683 | ENSRNOT00000030007 | 0.95409504   | 1.49E-06 |
| TUCP_002542 | XLOC_107683 | ENSRNOT00000045993 | 0.967124858  | 2.86E-07 |
| TUCP_002542 | XLOC_107683 | ENSRNOT00000044751 | 0.978252961  | 3.69E-08 |
| TUCP_002542 | XLOC_107683 | ENSRNOT00000012963 | 0.969585585  | 1.95E-07 |
| TUCP_002542 | XLOC_107683 | ENSRNOT00000046888 | 0.983136429  | 1.04E-08 |
| TUCP_002542 | XLOC_107683 | ENSRNOT00000006111 | 0.984806887  | 6.22E-09 |
| TUCP_002542 | XLOC_107683 | ENSRNOT00000014560 | 0.964834737  | 3.99E-07 |
| TUCP_002542 | XLOC_107683 | ENSRNOT00000070792 | 0.989151584  | 1.16E-09 |
| TUCP_002542 | XLOC_107683 | ENSRNOT00000076467 | 0.965288557  | 3.74E-07 |
| TUCP_002542 | XLOC_107683 | ENSRNOT00000015579 | 0.957961349  | 9.63E-07 |
| TUCP_002542 | XLOC_107683 | ENSRNOT00000091866 | 0.958118254  | 9.46E-07 |
| TUCP_002542 | XLOC_107683 | ENSRNOT00000035996 | 0.950584115  | 2.14E-06 |
| TUCP_002542 | XLOC_107683 | ENSRNOT00000014163 | 0.96999104   | 1.82E-07 |
| TUCP_002542 | XLOC_107683 | ENSRNOT00000055062 | 0.994512644  | 3.88E-11 |
| TUCP_002542 | XLOC_107683 | ENSRNOT00000010252 | 0.98107365   | 1.85E-08 |
| TUCP_002542 | XLOC_107683 | ENSRNOT00000044452 | 0.957457465  | 1.02E-06 |
| TUCP_002542 | XLOC_107683 | ENSRNOT00000030975 | 0.981884327  | 1.49E-08 |
| TUCP_002542 | XLOC_107683 | ENSRNOT00000025197 | 0.962719261  | 5.33E-07 |
| TUCP_002542 | XLOC_107683 | ENSRNOT00000071388 | -0.951374002 | 1.97E-06 |
| TUCP_002542 | XLOC_107683 | ENSRNOT00000012646 | 0.972860309  | 1.11E-07 |
| TUCP_002542 | XLOC_107683 | ENSRNOT00000074629 | 0.970380825  | 1.71E-07 |
| TUCP_002542 | XLOC_107683 | ENSRNOT00000074212 | -0.952751105 | 1.71E-06 |
| TUCP_002542 | XLOC_107683 | ENSRNOT00000013864 | 0.95425347   | 1.29E-06 |
| TUCP_002542 | XLOC_107683 | ENSRNOT00000081327 | 0.956096803  | 1.19E-06 |
| TUCP_002542 | XLOC_107683 | ENSRNOT00000011369 | 0.959386626  | 8.13E-07 |
| TUCP_002542 | XLOC_107683 | ENSRNOT00000083452 | 0.968316444  | 2.38E-07 |
| TUCP_002542 | XLOC_107683 | ENSRNOT00000032363 | -0.95006294  | 2.25E-06 |
| TUCP_002542 | XLOC_107683 | ENSRNOT00000022194 | 0.965872219  | 3.44E-07 |
| TUCP_002542 | XLOC_107683 | ENSRNOT00000019389 | 0.959780768  | 7.75E-07 |
| TUCP_002542 | XLOC_107683 | ENSRNOT00000008813 | 0.956544261  | 1.13E-06 |
| TUCP_002542 | XLOC_107683 | ENSRNOT00000012314 | 0.982754737  | 1.17E-08 |
| TUCP_002542 | XLOC_107683 | ENSRNOT00000050415 | 0.984196077  | 7.56E-09 |
| TUCP_002542 | XLOC_107683 | ENSRNOT00000021550 | 0.967040566  | 2.90E-07 |
| TUCP_002542 | XLOC_107683 | ENSRNOT00000074517 | 0.955722258  | 1.24E-06 |
| TUCP_002542 | XLOC_107683 | ENSRNOT00000023506 | 0.978080905  | 3.84E-08 |
| TUCP_002542 | XLOC_107683 | ENSRNOT00000007889 | 0.979236898  | 2.94E-08 |
| TUCP_002542 | XLOC_107683 | ENSRNOT00000087190 | 0.954513395  | 1.42E-06 |
| TUCP_002542 | XLOC_107683 | ENSRNOT00000037339 | 0.986660261  | 3.25E-09 |
| TUCP_002542 | XLOC_107683 | ENSRNOT00000040116 | 0.960595856  | 7.00E-07 |

|             |             |                    |              |          |
|-------------|-------------|--------------------|--------------|----------|
| TUCP_002542 | XLOC_107683 | ENSRNOT00000036585 | -0.953375696 | 1.60E-06 |
| TUCP_002542 | XLOC_107683 | ENSRNOT00000061973 | 0.980201177  | 2.32E-08 |
| TUCP_002542 | XLOC_107683 | ENSRNOT00000045107 | 0.965208665  | 3.79E-07 |
| TUCP_002542 | XLOC_107683 | ENSRNOT00000091272 | 0.990546166  | 5.85E-10 |
| TUCP_002542 | XLOC_107683 | ENSRNOT00000016730 | 0.982161422  | 1.38E-08 |
| TUCP_002542 | XLOC_107683 | ENSRNOT00000084552 | 0.987990778  | 1.93E-09 |
| TUCP_002542 | XLOC_107683 | ENSRNOT00000038610 | 0.951186676  | 2.01E-06 |
| TUCP_002542 | XLOC_107683 | ENSRNOT00000092075 | 0.963244649  | 4.97E-07 |
| TUCP_002542 | XLOC_107683 | ENSRNOT00000042117 | 0.96404286   | 4.46E-07 |
| TUCP_002542 | XLOC_107683 | ENSRNOT00000074583 | 0.974718946  | 7.80E-08 |
| TUCP_002542 | XLOC_107683 | ENSRNOT00000014824 | 0.956357785  | 1.16E-06 |
| TUCP_002542 | XLOC_107683 | ENSRNOT00000037397 | 0.952923509  | 1.68E-06 |
| TUCP_002542 | XLOC_107683 | ENSRNOT00000081123 | -0.955133189 | 1.33E-06 |
| TUCP_002542 | XLOC_107683 | ENSRNOT00000015320 | 0.990918114  | 4.79E-10 |
| TUCP_002542 | XLOC_107683 | ENSRNOT00000024992 | 0.960749576  | 6.87E-07 |
| TUCP_002542 | XLOC_107683 | ENSRNOT00000078644 | -0.958400326 | 9.15E-07 |
| TUCP_002542 | XLOC_107683 | ENSRNOT00000082427 | 0.954749894  | 1.38E-06 |
| TUCP_002542 | XLOC_107683 | ENSRNOT00000028066 | 0.984106457  | 7.78E-09 |
| TUCP_002542 | XLOC_107683 | ENSRNOT00000005694 | 0.961577291  | 6.18E-07 |
| TUCP_002542 | XLOC_107683 | ENSRNOT00000001366 | 0.962533637  | 5.46E-07 |
| TUCP_002542 | XLOC_107683 | ENSRNOT00000068269 | 0.964465399  | 4.20E-07 |
| TUCP_002542 | XLOC_107683 | ENSRNOT00000083351 | 0.959022496  | 8.49E-07 |
| TUCP_002542 | XLOC_107683 | ENSRNOT00000050350 | 0.992932919  | 1.37E-10 |
| TUCP_002542 | XLOC_107683 | ENSRNOT00000077856 | 0.973277238  | 1.03E-07 |
| TUCP_002542 | XLOC_107683 | ENSRNOT00000013146 | -0.95175053  | 1.90E-06 |
| TUCP_002542 | XLOC_107683 | ENSRNOT00000021400 | 0.991010676  | 4.55E-10 |
| TUCP_002542 | XLOC_107683 | ENSRNOT00000009448 | 0.976127531  | 5.87E-08 |
| TUCP_002542 | XLOC_107683 | ENSRNOT00000024286 | 0.974186308  | 8.64E-08 |
| TUCP_002542 | XLOC_107683 | ENSRNOT00000009136 | 0.968879876  | 2.18E-07 |
| TUCP_002542 | XLOC_107683 | ENSRNOT00000047634 | 0.961862707  | 5.96E-07 |
| TUCP_002542 | XLOC_107683 | ENSRNOT00000089457 | 0.986178372  | 3.88E-09 |
| TUCP_002542 | XLOC_107683 | ENSRNOT00000023067 | 0.963351708  | 4.90E-07 |
| TUCP_002542 | XLOC_107683 | ENSRNOT00000032236 | 0.965711888  | 3.52E-07 |
| TUCP_002542 | XLOC_107683 | ENSRNOT00000074261 | 0.968936198  | 2.16E-07 |
| TUCP_002542 | XLOC_107683 | ENSRNOT00000020951 | -0.968639847 | 2.27E-07 |
| TUCP_002542 | XLOC_107683 | ENSRNOT00000003778 | 0.973155695  | 1.05E-07 |
| TUCP_002542 | XLOC_107683 | ENSRNOT00000011714 | 0.96830849   | 2.39E-07 |
| TUCP_002542 | XLOC_107683 | ENSRNOT00000082146 | 0.950601265  | 2.13E-06 |
| TUCP_002542 | XLOC_107683 | ENSRNOT00000051522 | -0.955443894 | 1.28E-06 |
| TUCP_002542 | XLOC_107683 | ENSRNOT00000010516 | 0.971726604  | 1.36E-07 |
| TUCP_002542 | XLOC_107683 | ENSRNOT00000065103 | 0.976761234  | 5.13E-08 |
| TUCP_002542 | XLOC_107683 | ENSRNOT00000044975 | 0.963265527  | 4.95E-07 |
| TUCP_002542 | XLOC_107683 | ENSRNOT00000000527 | 0.961973091  | 5.87E-07 |
| TUCP_002542 | XLOC_107683 | ENSRNOT00000000256 | 0.980894256  | 1.94E-08 |
| TUCP_002542 | XLOC_107683 | ENSRNOT00000066888 | 0.981985412  | 1.45E-08 |
| TUCP_002542 | XLOC_107683 | ENSRNOT00000015131 | 0.974107106  | 8.78E-08 |
| TUCP_002542 | XLOC_107683 | ENSRNOT00000000529 | 0.981965012  | 1.46E-08 |
| TUCP_002542 | XLOC_107683 | ENSRNOT00000072031 | 0.960286951  | 7.28E-07 |
| TUCP_002542 | XLOC_107683 | ENSRNOT00000044788 | 0.957283395  | 1.04E-06 |
| TUCP_002542 | XLOC_107683 | ENSRNOT00000039730 | 0.962064879  | 5.80E-07 |
| TUCP_002542 | XLOC_107683 | ENSRNOT00000003207 | 0.957902246  | 9.70E-07 |

|             |             |                    |              |          |
|-------------|-------------|--------------------|--------------|----------|
| TUCP_002542 | XLOC_107683 | ENSRNOT00000018782 | 0.977666591  | 4.21E-08 |
| TUCP_002542 | XLOC_107683 | ENSRNOT00000028527 | 0.953332442  | 1.61E-06 |
| TUCP_002542 | XLOC_107683 | ENSRNOT00000073388 | 0.978806874  | 3.25E-08 |
| TUCP_002542 | XLOC_107683 | ENSRNOT00000088201 | 0.962633843  | 5.39E-07 |
| TUCP_002542 | XLOC_107683 | ENSRNOT00000033450 | 0.957179718  | 1.05E-06 |
| TUCP_002542 | XLOC_107683 | ENSRNOT00000029620 | 0.971277366  | 1.47E-07 |
| TUCP_002542 | XLOC_107683 | ENSRNOT00000000039 | 0.963997452  | 4.48E-07 |
| TUCP_002542 | XLOC_107683 | ENSRNOT00000045311 | 0.968463718  | 2.33E-07 |
| TUCP_002542 | XLOC_107683 | ENSRNOT00000006172 | 0.957413095  | 1.03E-06 |
| TUCP_002542 | XLOC_107683 | ENSRNOT00000023078 | -0.963073732 | 5.08E-07 |
| TUCP_002542 | XLOC_107683 | ENSRNOT00000091863 | 0.950551672  | 2.14E-06 |
| TUCP_002542 | XLOC_107683 | ENSRNOT00000071133 | 0.979194136  | 2.97E-08 |
| TUCP_002542 | XLOC_107683 | ENSRNOT00000073138 | 0.97911137   | 3.02E-08 |
| TUCP_002542 | XLOC_107683 | ENSRNOT00000019644 | 0.969280991  | 2.05E-07 |
| TUCP_002542 | XLOC_107683 | ENSRNOT00000050223 | 0.970417559  | 1.70E-07 |
| TUCP_002542 | XLOC_107683 | ENSRNOT00000023483 | 0.973964739  | 9.02E-08 |
| TUCP_002542 | XLOC_107683 | ENSRNOT00000089185 | 0.957067886  | 1.07E-06 |
| TUCP_002542 | XLOC_107683 | ENSRNOT00000031951 | 0.960479228  | 7.10E-07 |
| TUCP_002542 | XLOC_107683 | ENSRNOT00000014134 | 0.962025324  | 5.83E-07 |
| TUCP_002542 | XLOC_107683 | ENSRNOT00000009260 | 0.991805013  | 2.87E-10 |
| TUCP_002542 | XLOC_107683 | ENSRNOT00000090774 | 0.97235691   | 1.21E-07 |
| TUCP_002542 | XLOC_107683 | ENSRNOT00000017420 | 0.953890414  | 1.52E-06 |
| TUCP_002542 | XLOC_107683 | ENSRNOT00000009318 | -0.956819009 | 1.10E-06 |
| TUCP_002542 | XLOC_107683 | ENSRNOT00000007077 | 0.965400388  | 3.68E-07 |
| TUCP_002542 | XLOC_107683 | ENSRNOT00000017907 | 0.950254423  | 2.21E-06 |
| TUCP_002542 | XLOC_107683 | ENSRNOT00000014809 | 0.965312638  | 3.73E-07 |
| TUCP_002542 | XLOC_107683 | ENSRNOT00000064849 | 0.964993942  | 3.90E-07 |
| TUCP_002542 | XLOC_107683 | ENSRNOT00000012632 | 0.954431012  | 1.43E-06 |
| TUCP_002542 | XLOC_107683 | ENSRNOT00000014481 | 0.959219735  | 8.29E-07 |
| TUCP_002542 | XLOC_107683 | ENSRNOT00000046126 | 0.975063944  | 7.28E-08 |
| TUCP_002542 | XLOC_107683 | ENSRNOT0000001720  | 0.975039576  | 7.32E-08 |
| TUCP_002542 | XLOC_107683 | ENSRNOT0000005644  | 0.971907436  | 1.31E-07 |
| TUCP_002542 | XLOC_107683 | ENSRNOT00000013496 | 0.984694559  | 6.45E-09 |
| TUCP_002542 | XLOC_107683 | ENSRNOT00000006376 | 0.963755299  | 4.64E-07 |
| TUCP_002542 | XLOC_107683 | ENSRNOT00000041091 | 0.976529862  | 5.39E-08 |
| TUCP_002542 | XLOC_107683 | ENSRNOT00000032333 | 0.952159964  | 1.82E-06 |
| TUCP_002542 | XLOC_107683 | ENSRNOT00000023017 | 0.958571956  | 8.96E-07 |
| TUCP_002542 | XLOC_107683 | ENSRNOT00000009993 | 0.951995506  | 1.85E-06 |
| TUCP_002542 | XLOC_107683 | ENSRNOT00000014435 | 0.952538215  | 1.75E-06 |
| TUCP_002542 | XLOC_107683 | ENSRNOT00000077479 | 0.978796702  | 3.26E-08 |
| TUCP_002542 | XLOC_107683 | ENSRNOT00000045443 | 0.977171169  | 4.70E-08 |
| TUCP_002542 | XLOC_107683 | ENSRNOT00000077401 | 0.973865921  | 9.19E-08 |
| TUCP_002542 | XLOC_107683 | ENSRNOT00000029443 | 0.963815023  | 4.60E-07 |
| TUCP_002542 | XLOC_107683 | ENSRNOT00000073239 | 0.988380521  | 1.64E-09 |
| TUCP_002542 | XLOC_107683 | ENSRNOT00000040060 | 0.951161668  | 2.02E-06 |
| TUCP_002542 | XLOC_107683 | ENSRNOT00000081835 | 0.953633864  | 1.56E-06 |
| TUCP_002542 | XLOC_107683 | ENSRNOT00000010620 | 0.990747544  | 5.26E-10 |
| TUCP_002542 | XLOC_107683 | ENSRNOT00000010050 | 0.970273077  | 1.74E-07 |
| TUCP_002542 | XLOC_107683 | ENSRNOT00000010056 | -0.988245045 | 1.73E-09 |
| TUCP_002542 | XLOC_107683 | ENSRNOT00000068078 | 0.954226453  | 1.47E-06 |
| TUCP_002542 | XLOC_107683 | ENSRNOT0000001036  | 0.955108784  | 1.33E-06 |

|             |             |                     |              |          |
|-------------|-------------|---------------------|--------------|----------|
| TUCP_002542 | XLOC_107683 | ENSRNOT00000028130  | 0.977621059  | 4.26E-08 |
| TUCP_002542 | XLOC_107683 | ENSRNOT00000007044  | 0.958905278  | 8.61E-07 |
| TUCP_002542 | XLOC_107683 | ENSRNOT00000003745  | 0.951406724  | 1.97E-06 |
| TUCP_002542 | XLOC_107683 | ENSRNOT00000012625  | 0.957664572  | 9.97E-07 |
| TUCP_002542 | XLOC_107683 | ENSRNOT00000080677  | 0.956934368  | 1.09E-06 |
| TUCP_002542 | XLOC_107683 | ENSRNOT00000037181  | 0.98691749   | 2.95E-09 |
| TUCP_002542 | XLOC_107683 | ENSRNOT00000080163  | 0.966088799  | 3.34E-07 |
| TUCP_002542 | XLOC_107683 | ENSRNOT0000001759   | 0.952070899  | 1.84E-06 |
| TUCP_002542 | XLOC_107683 | ENSRNOT0000001446   | -0.956025923 | 1.20E-06 |
| TUCP_002542 | XLOC_107683 | ENSRNOT00000012996  | -0.97156897  | 1.39E-07 |
| TUCP_002542 | XLOC_107683 | ENSRNOT00000019768  | -0.966582393 | 3.10E-07 |
| TUCP_002542 | XLOC_107683 | ENSRNOT00000003343  | 0.978846452  | 3.22E-08 |
| TUCP_002542 | XLOC_107683 | ENSRNOT00000000637  | 0.989421143  | 1.03E-09 |
| TUCP_002542 | XLOC_107683 | ENSRNOT00000011509  | 0.988848294  | 1.33E-09 |
| TUCP_002542 | XLOC_107683 | ENSRNOT00000070912  | 0.950835397  | 2.08E-06 |
| TUCP_002542 | XLOC_107683 | ENSRNOT00000018061  | 0.980436908  | 2.18E-08 |
| TUCP_002542 | XLOC_107683 | ENSRNOT00000060595  | 0.959858074  | 7.67E-07 |
| TUCP_002542 | XLOC_107683 | ENSRNOT00000015763  | 0.976186856  | 5.79E-08 |
| TUCP_002542 | XLOC_107683 | ENSRNOT00000071612  | 0.954672031  | 1.40E-06 |
| TUCP_002542 | XLOC_107683 | ENSRNOT00000015318  | 0.951451943  | 1.96E-06 |
| TUCP_002542 | XLOC_107683 | ENSRNOT000000039215 | 0.996869627  | 2.35E-12 |
| TUCP_002542 | XLOC_107683 | ENSRNOT00000023856  | 0.988124595  | 1.82E-09 |
| TUCP_002542 | XLOC_107683 | ENSRNOT00000003414  | 0.989205876  | 1.13E-09 |
| TUCP_002542 | XLOC_107683 | ENSRNOT00000014317  | 0.969241184  | 2.06E-07 |
| TUCP_002542 | XLOC_107683 | ENSRNOT00000044467  | 0.963458871  | 4.83E-07 |
| TUCP_002542 | XLOC_107683 | ENSRNOT00000086223  | 0.968940588  | 2.16E-07 |
| TUCP_002542 | XLOC_107683 | ENSRNOT00000036972  | 0.966955512  | 2.94E-07 |
| TUCP_002542 | XLOC_107683 | ENSRNOT00000013989  | 0.98470099   | 6.43E-09 |
| TUCP_002542 | XLOC_107683 | ENSRNOT00000015618  | 0.957328667  | 1.04E-06 |
| TUCP_002542 | XLOC_107683 | ENSRNOT00000058611  | 0.973186163  | 1.04E-07 |
| TUCP_002542 | XLOC_107683 | ENSRNOT00000086775  | 0.976655359  | 5.25E-08 |
| TUCP_002542 | XLOC_107683 | ENSRNOT00000023252  | 0.984321361  | 7.27E-09 |
| TUCP_002542 | XLOC_107683 | ENSRNOT00000025252  | 0.988367078  | 1.65E-09 |
| TUCP_002542 | XLOC_107683 | ENSRNOT00000043736  | 0.98138417   | 1.71E-08 |
| TUCP_002542 | XLOC_107683 | ENSRNOT00000015986  | 0.970733006  | 1.61E-07 |
| TUCP_002542 | XLOC_107683 | ENSRNOT00000029510  | -0.962287347 | 5.64E-07 |
| TUCP_002542 | XLOC_107683 | ENSRNOT00000005885  | 0.959085748  | 8.43E-07 |
| TUCP_002542 | XLOC_107683 | ENSRNOT00000011326  | 0.974649094  | 7.90E-08 |
| TUCP_002542 | XLOC_107683 | ENSRNOT00000005085  | 0.960013042  | 7.53E-07 |
| TUCP_002542 | XLOC_107683 | ENSRNOT00000083814  | 0.952045991  | 1.84E-06 |
| TUCP_002803 | XLOC_118462 | ENSRNOT00000080988  | 0.956115846  | 1.19E-06 |
| TUCP_002803 | XLOC_118462 | ENSRNOT00000031904  | 0.957001059  | 1.08E-06 |
| TUCP_002803 | XLOC_118462 | ENSRNOT00000039809  | 0.962413616  | 5.55E-07 |
| TUCP_002803 | XLOC_118462 | ENSRNOT00000026941  | 0.952353401  | 1.78E-06 |
| TUCP_002803 | XLOC_118462 | ENSRNOT00000074939  | 0.961308548  | 6.40E-07 |
| TUCP_002803 | XLOC_118462 | ENSRNOT00000034146  | 0.977153211  | 4.72E-08 |
| TUCP_002803 | XLOC_118462 | ENSRNOT00000006175  | 0.966876054  | 2.97E-07 |
| TUCP_002803 | XLOC_118462 | ENSRNOT00000010035  | 0.952245592  | 1.80E-06 |
| TUCP_002803 | XLOC_118462 | ENSRNOT00000037699  | 0.963627497  | 4.72E-07 |
| TUCP_002803 | XLOC_118462 | ENSRNOT00000016975  | 0.954724742  | 1.39E-06 |
| TUCP_002803 | XLOC_118462 | ENSRNOT00000009712  | 0.973062431  | 1.07E-07 |

|             |             |                     |             |          |
|-------------|-------------|---------------------|-------------|----------|
| TUCP_002803 | XLOC_118462 | ENSRNOT00000026543  | 0.952147287 | 1.82E-06 |
| TUCP_002803 | XLOC_118462 | ENSRNOT00000043345  | 0.965771028 | 3.49E-07 |
| TUCP_002803 | XLOC_118462 | ENSRNOT00000071971  | 0.952541201 | 1.75E-06 |
| TUCP_002803 | XLOC_118462 | ENSRNOT00000074725  | 0.952893101 | 1.69E-06 |
| TUCP_002803 | XLOC_118462 | ENSRNOT00000026789  | 0.966875929 | 2.97E-07 |
| TUCP_002803 | XLOC_118462 | ENSRNOT00000006055  | 0.952219554 | 1.81E-06 |
| TUCP_002803 | XLOC_118462 | ENSRNOT000000088125 | 0.957015857 | 1.08E-06 |
| TUCP_002803 | XLOC_118462 | ENSRNOT00000044742  | 0.959720943 | 7.80E-07 |
| TUCP_002803 | XLOC_118462 | ENSRNOT00000012977  | 0.956817265 | 1.10E-06 |
| TUCP_002803 | XLOC_118462 | ENSRNOT00000014664  | 0.971298699 | 1.46E-07 |
| TUCP_002803 | XLOC_118462 | ENSRNOT00000035989  | 0.955404887 | 1.29E-06 |
| TUCP_002803 | XLOC_118462 | ENSRNOT000000082699 | 0.959574322 | 7.94E-07 |
| TUCP_002803 | XLOC_118462 | ENSRNOT00000075326  | 0.959274431 | 8.24E-07 |
| TUCP_002803 | XLOC_118462 | ENSRNOT00000021348  | 0.959860989 | 7.67E-07 |
| TUCP_002803 | XLOC_118462 | ENSRNOT00000017629  | 0.967946745 | 2.53E-07 |
| TUCP_002803 | XLOC_118462 | ENSRNOT00000052072  | 0.951562774 | 1.94E-06 |
| TUCP_002803 | XLOC_118462 | ENSRNOT00000012671  | 0.958621173 | 8.91E-07 |
| TUCP_002803 | XLOC_118462 | ENSRNOT000000085158 | 0.965059624 | 3.87E-07 |
| TUCP_002803 | XLOC_118462 | ENSRNOT00000026718  | 0.957322656 | 1.04E-06 |
| TUCP_002803 | XLOC_118462 | ENSRNOT00000020134  | 0.963940699 | 4.52E-07 |
| TUCP_002803 | XLOC_118462 | ENSRNOT00000026653  | 0.968200258 | 2.43E-07 |
| TUCP_002803 | XLOC_118462 | ENSRNOT00000004834  | 0.961348182 | 6.37E-07 |
| TUCP_002803 | XLOC_118462 | ENSRNOT000000051294 | 0.958079956 | 9.50E-07 |
| TUCP_002803 | XLOC_118462 | ENSRNOT00000043784  | 0.954015999 | 1.50E-06 |
| TUCP_002803 | XLOC_118462 | ENSRNOT000000087371 | 0.952741904 | 1.71E-06 |
| TUCP_002803 | XLOC_118462 | ENSRNOT000000008018 | 0.972498641 | 1.18E-07 |
| TUCP_002803 | XLOC_118462 | ENSRNOT00000010541  | 0.959688485 | 7.83E-07 |
| TUCP_002803 | XLOC_118462 | ENSRNOT00000037446  | 0.960253532 | 7.31E-07 |
| TUCP_002803 | XLOC_118462 | ENSRNOT00000017948  | 0.960466271 | 7.12E-07 |
| TUCP_002803 | XLOC_118462 | ENSRNOT00000029994  | 0.961995661 | 5.86E-07 |
| TUCP_002803 | XLOC_118462 | ENSRNOT00000016947  | 0.95805861  | 9.52E-07 |
| TUCP_002803 | XLOC_118462 | ENSRNOT00000025859  | 0.953348953 | 1.61E-06 |
| TUCP_002803 | XLOC_118462 | ENSRNOT000000073991 | 0.951533448 | 1.94E-06 |
| TUCP_002803 | XLOC_118462 | ENSRNOT000000090918 | 0.950145409 | 2.23E-06 |
| TUCP_002803 | XLOC_118462 | ENSRNOT00000000676  | 0.985047548 | 5.74E-09 |
| TUCP_002803 | XLOC_118462 | ENSRNOT00000078675  | 0.95213948  | 1.82E-06 |
| TUCP_002803 | XLOC_118462 | ENSRNOT00000028070  | 0.960146435 | 7.40E-07 |
| TUCP_002803 | XLOC_118462 | ENSRNOT00000004359  | 0.951558382 | 1.94E-06 |
| TUCP_002803 | XLOC_118462 | ENSRNOT00000013274  | 0.967776572 | 2.59E-07 |
| TUCP_002803 | XLOC_118462 | ENSRNOT000000085027 | 0.97963438  | 2.67E-08 |
| TUCP_002803 | XLOC_118462 | ENSRNOT000000052018 | 0.956694778 | 1.12E-06 |
| TUCP_002803 | XLOC_118462 | ENSRNOT00000002403  | 0.964336517 | 4.28E-07 |
| TUCP_002803 | XLOC_118462 | ENSRNOT00000010898  | 0.953356776 | 1.61E-06 |
| TUCP_002803 | XLOC_118462 | ENSRNOT00000047093  | 0.959566102 | 7.95E-07 |
| TUCP_002803 | XLOC_118462 | ENSRNOT00000001222  | 0.961329861 | 6.38E-07 |
| TUCP_002803 | XLOC_118462 | ENSRNOT00000021001  | 0.950302124 | 2.20E-06 |
| TUCP_002803 | XLOC_118462 | ENSRNOT00000005355  | 0.954701446 | 1.39E-06 |
| TUCP_002803 | XLOC_118462 | ENSRNOT00000025075  | 0.965635397 | 3.56E-07 |
| TUCP_002803 | XLOC_118462 | ENSRNOT00000003671  | 0.95179418  | 1.89E-06 |
| TUCP_002803 | XLOC_118462 | ENSRNOT00000047387  | 0.970744348 | 1.61E-07 |
| TUCP_002803 | XLOC_118462 | ENSRNOT00000055680  | 0.958936549 | 8.58E-07 |

|             |             |                     |             |          |
|-------------|-------------|---------------------|-------------|----------|
| TUCP_002803 | XLOC_118462 | ENSRNOT00000091910  | 0.978284668 | 3.67E-08 |
| TUCP_002803 | XLOC_118462 | ENSRNOT00000045488  | 0.953332338 | 1.61E-06 |
| TUCP_002803 | XLOC_118462 | ENSRNOT00000077555  | 0.953470212 | 1.59E-06 |
| TUCP_002803 | XLOC_118462 | ENSRNOT00000017021  | 0.959643584 | 7.88E-07 |
| TUCP_002803 | XLOC_118462 | ENSRNOT00000079072  | 0.967194755 | 2.83E-07 |
| TUCP_002803 | XLOC_118462 | ENSRNOT00000009683  | 0.982987578 | 1.09E-08 |
| TUCP_002803 | XLOC_118462 | ENSRNOT00000084088  | 0.964382306 | 4.25E-07 |
| TUCP_002803 | XLOC_118462 | ENSRNOT00000043535  | 0.965037779 | 3.88E-07 |
| TUCP_002803 | XLOC_118462 | ENSRNOT00000064902  | 0.961436942 | 6.29E-07 |
| TUCP_002803 | XLOC_118462 | ENSRNOT00000020379  | 0.95132249  | 1.98E-06 |
| TUCP_002803 | XLOC_118462 | ENSRNOT00000005262  | 0.956484066 | 1.14E-06 |
| TUCP_002803 | XLOC_118462 | ENSRNOT00000079442  | 0.952383912 | 1.78E-06 |
| TUCP_002803 | XLOC_118462 | ENSRNOT00000024322  | 0.956478625 | 1.14E-06 |
| TUCP_002803 | XLOC_118462 | ENSRNOT00000002771  | 0.958479295 | 9.06E-07 |
| TUCP_002803 | XLOC_118462 | ENSRNOT00000091265  | 0.966143108 | 3.31E-07 |
| TUCP_002803 | XLOC_118462 | ENSRNOT00000074075  | 0.954348217 | 1.45E-06 |
| TUCP_002803 | XLOC_118462 | ENSRNOT00000000658  | 0.969374038 | 2.02E-07 |
| TUCP_002803 | XLOC_118462 | ENSRNOT00000016191  | 0.954089127 | 1.49E-06 |
| TUCP_002803 | XLOC_118462 | ENSRNOT00000089971  | 0.97581731  | 6.25E-08 |
| TUCP_002803 | XLOC_118462 | ENSRNOT00000065501  | 0.981957332 | 1.46E-08 |
| TUCP_002803 | XLOC_118462 | ENSRNOT00000027454  | 0.952746336 | 1.71E-06 |
| TUCP_002803 | XLOC_118462 | ENSRNOT00000027452  | 0.963965125 | 4.50E-07 |
| TUCP_002803 | XLOC_118462 | ENSRNOT00000076729  | 0.974553052 | 8.05E-08 |
| TUCP_002803 | XLOC_118462 | ENSRNOT00000066739  | 0.994312548 | 4.64E-11 |
| TUCP_002803 | XLOC_118462 | ENSRNOT00000090665  | 0.964156206 | 4.39E-07 |
| TUCP_002803 | XLOC_118462 | ENSRNOT00000045882  | 0.958447001 | 9.10E-07 |
| TUCP_002803 | XLOC_118462 | ENSRNOT00000055582  | 0.950570993 | 2.14E-06 |
| TUCP_002803 | XLOC_118462 | ENSRNOT00000072534  | 0.950991657 | 2.05E-06 |
| TUCP_002803 | XLOC_118462 | ENSRNOT00000092158  | 0.963296128 | 4.93E-07 |
| TUCP_002803 | XLOC_118462 | ENSRNOT00000027337  | 0.954860061 | 1.37E-06 |
| TUCP_002803 | XLOC_118462 | ENSRNOT00000024639  | 0.957130921 | 1.06E-06 |
| TUCP_002803 | XLOC_118462 | ENSRNOT00000026210  | 0.959810472 | 7.72E-07 |
| TUCP_002803 | XLOC_118462 | ENSRNOT00000078929  | 0.961264209 | 6.44E-07 |
| TUCP_002803 | XLOC_118462 | ENSRNOT00000090424  | 0.95103657  | 2.04E-06 |
| TUCP_002803 | XLOC_118462 | ENSRNOT00000000157  | 0.951079653 | 2.03E-06 |
| TUCP_002803 | XLOC_118462 | ENSRNOT00000010992  | 0.960274517 | 7.29E-07 |
| TUCP_002803 | XLOC_118462 | ENSRNOT00000038647  | 0.974575268 | 8.02E-08 |
| TUCP_002803 | XLOC_118462 | ENSRNOT00000010853  | 0.951056364 | 2.04E-06 |
| TUCP_002803 | XLOC_118462 | ENSRNOT00000076669  | 0.960833241 | 6.80E-07 |
| TUCP_002803 | XLOC_118462 | ENSRNOT00000085596  | 0.964855409 | 3.98E-07 |
| TUCP_002803 | XLOC_118462 | ENSRNOT00000026293  | 0.956982301 | 1.08E-06 |
| TUCP_002803 | XLOC_118462 | ENSRNOT00000074653  | 0.955004596 | 1.35E-06 |
| TUCP_002803 | XLOC_118462 | ENSRNOT00000012736  | 0.963668029 | 4.69E-07 |
| TUCP_002803 | XLOC_118462 | ENSRNOT00000041096  | 0.984017125 | 8.00E-09 |
| TUCP_002803 | XLOC_118462 | ENSRNOT000000031230 | 0.961884425 | 5.94E-07 |
| TUCP_002803 | XLOC_118462 | ENSRNOT00000002292  | 0.951281451 | 1.99E-06 |
| TUCP_002803 | XLOC_118462 | ENSRNOT00000021285  | 0.950441852 | 2.17E-06 |
| TUCP_002803 | XLOC_118462 | ENSRNOT00000027762  | 0.961139846 | 6.54E-07 |
| TUCP_002803 | XLOC_118462 | ENSRNOT000000071694 | 0.951888897 | 1.87E-06 |
| TUCP_002803 | XLOC_118462 | ENSRNOT00000082174  | 0.956863778 | 1.09E-06 |
| TUCP_002803 | XLOC_118462 | ENSRNOT00000060696  | 0.974281696 | 8.49E-08 |



|             |             |                    |              |          |
|-------------|-------------|--------------------|--------------|----------|
| TUCP_002803 | XLOC_118462 | ENSRNOT0000004412  | 0.957614211  | 1.00E-06 |
| TUCP_002803 | XLOC_118462 | ENSRNOT00000026280 | 0.972403536  | 1.20E-07 |
| TUCP_002803 | XLOC_118462 | ENSRNOT00000024942 | 0.962912285  | 5.19E-07 |
| TUCP_002803 | XLOC_118462 | ENSRNOT00000005387 | 0.972827554  | 1.11E-07 |
| TUCP_002803 | XLOC_118462 | ENSRNOT00000024941 | 0.95222234   | 1.81E-06 |
| TUCP_002803 | XLOC_118462 | ENSRNOT00000022863 | 0.955849315  | 1.23E-06 |
| TUCP_002803 | XLOC_118462 | ENSRNOT00000034704 | 0.97518626   | 7.11E-08 |
| TUCP_002803 | XLOC_118462 | ENSRNOT00000067904 | 0.960179232  | 7.37E-07 |
| TUCP_002803 | XLOC_118462 | ENSRNOT00000023428 | 0.960106529  | 7.44E-07 |
| TUCP_002803 | XLOC_118462 | ENSRNOT00000011041 | 0.962908277  | 5.20E-07 |
| TUCP_002803 | XLOC_118462 | ENSRNOT00000047192 | -0.952400583 | 1.78E-06 |
| TUCP_002803 | XLOC_118462 | ENSRNOT00000037800 | 0.956493689  | 1.14E-06 |
| TUCP_002803 | XLOC_118462 | ENSRNOT00000081906 | 0.955001838  | 1.35E-06 |
| TUCP_002803 | XLOC_118462 | ENSRNOT00000083127 | 0.959185389  | 8.33E-07 |
| TUCP_002803 | XLOC_118462 | ENSRNOT00000022796 | 0.962491567  | 5.49E-07 |
| TUCP_002803 | XLOC_118462 | ENSRNOT00000029001 | 0.965931177  | 3.41E-07 |
| TUCP_002803 | XLOC_118462 | ENSRNOT00000083799 | 0.973881577  | 9.16E-08 |
| TUCP_002803 | XLOC_118462 | ENSRNOT00000024548 | 0.954924509  | 1.36E-06 |
| TUCP_002540 | XLOC_107493 | ENSRNOT00000086279 | 0.97182723   | 1.33E-07 |
| TUCP_002936 | XLOC_126452 | ENSRNOT00000093442 | 0.955129978  | 1.33E-06 |
| TUCP_002421 | XLOC_102344 | ENSRNOT00000083732 | 0.956421271  | 1.15E-06 |
| TUCP_002422 | XLOC_102344 | ENSRNOT00000024186 | 0.983200502  | 1.02E-08 |
| TUCP_002422 | XLOC_102344 | ENSRNOT00000074753 | 0.998182349  | 1.56E-13 |
| TUCP_002422 | XLOC_102344 | ENSRNOT00000004876 | 0.959071443  | 8.44E-07 |
| TUCP_002422 | XLOC_102344 | ENSRNOT00000041904 | 1            | 0        |
| TUCP_002422 | XLOC_102344 | ENSRNOT00000083487 | 0.989515314  | 9.80E-10 |
| TUCP_002422 | XLOC_102344 | ENSRNOT00000077990 | 1            | 0        |
| TUCP_002422 | XLOC_102344 | ENSRNOT00000038826 | 0.99977672   | 4.37E-18 |
| TUCP_002422 | XLOC_102344 | ENSRNOT00000046842 | 0.973644314  | 9.58E-08 |
| TUCP_002422 | XLOC_102344 | ENSRNOT00000037169 | 0.980329406  | 2.24E-08 |
| TUCP_002422 | XLOC_102344 | ENSRNOT00000021243 | 0.987425406  | 2.42E-09 |
| TUCP_002422 | XLOC_102344 | ENSRNOT00000060250 | 0.999933853  | 9.97E-21 |
| TUCP_002422 | XLOC_102344 | ENSRNOT00000091934 | 1            | 0        |
| TUCP_002422 | XLOC_102344 | ENSRNOT00000046585 | 0.982941597  | 1.11E-08 |
| TUCP_002422 | XLOC_102344 | ENSRNOT00000080794 | 0.990839253  | 5.00E-10 |
| TUCP_002422 | XLOC_102344 | ENSRNOT00000014456 | 0.991697153  | 3.06E-10 |
| TUCP_002422 | XLOC_102344 | ENSRNOT00000031205 | 0.991394766  | 3.66E-10 |
| TUCP_002422 | XLOC_102344 | ENSRNOT00000044145 | 1            | 0        |
| TUCP_002422 | XLOC_102344 | ENSRNOT00000088381 | 0.989013276  | 1.24E-09 |
| TUCP_002422 | XLOC_102344 | ENSRNOT00000011743 | 0.98678427   | 3.11E-09 |
| TUCP_002422 | XLOC_102344 | ENSRNOT00000089929 | 1            | 0        |
| TUCP_002422 | XLOC_102344 | ENSRNOT00000088624 | 1            | 0        |
| TUCP_002422 | XLOC_102344 | ENSRNOT00000085659 | 0.989908621  | 8.10E-10 |
| TUCP_002422 | XLOC_102344 | ENSRNOT00000015866 | 0.994066664  | 5.73E-11 |
| TUCP_002422 | XLOC_102344 | ENSRNOT00000078633 | 1            | 0        |
| TUCP_002422 | XLOC_102344 | ENSRNOT00000034907 | 0.995318542  | 1.76E-11 |
| TUCP_002422 | XLOC_102344 | ENSRNOT00000093230 | 0.958295175  | 9.26E-07 |
| TUCP_002422 | XLOC_102344 | ENSRNOT00000051835 | 1            | 0        |
| TUCP_002422 | XLOC_102344 | ENSRNOT00000079087 | 1            | 0        |
| TUCP_002422 | XLOC_102344 | ENSRNOT00000037206 | 1            | 0        |
| TUCP_002422 | XLOC_102344 | ENSRNOT00000083261 | 0.970991658  | 1.54E-07 |

|             |             |                    |             |          |
|-------------|-------------|--------------------|-------------|----------|
| TUCP_002422 | XLOC_102344 | ENSRNOT00000080590 | 0.999889216 | 1.31E-19 |
| TUCP_002422 | XLOC_102344 | ENSRNOT00000027552 | 0.999801024 | 2.46E-18 |
| TUCP_002422 | XLOC_102344 | ENSRNOT00000077014 | 0.995074376 | 2.26E-11 |
| TUCP_002422 | XLOC_102344 | ENSRNOT00000080453 | 0.99994332  | 4.61E-21 |
| TUCP_002422 | XLOC_102344 | ENSRNOT00000089057 | 0.968243551 | 2.41E-07 |
| TUCP_002422 | XLOC_102344 | ENSRNOT00000066839 | 0.991868612 | 2.76E-10 |
| TUCP_002422 | XLOC_102344 | ENSRNOT00000061284 | 0.955566942 | 1.27E-06 |
| TUCP_002422 | XLOC_102344 | ENSRNOT00000013423 | 0.959677621 | 7.84E-07 |
| TUCP_002422 | XLOC_102344 | ENSRNOT00000071884 | 0.974769955 | 7.72E-08 |
| TUCP_002422 | XLOC_102344 | ENSRNOT00000004128 | 0.961829362 | 5.99E-07 |
| TUCP_002422 | XLOC_102344 | ENSRNOT00000026316 | 0.964408046 | 4.24E-07 |
| TUCP_002422 | XLOC_102344 | ENSRNOT00000057729 | 0.999384184 | 6.97E-16 |
| TUCP_002422 | XLOC_102344 | ENSRNOT00000078663 | 0.975192577 | 7.10E-08 |
| TUCP_002422 | XLOC_102344 | ENSRNOT00000064250 | 0.983131977 | 1.05E-08 |
| TUCP_002422 | XLOC_102344 | ENSRNOT00000021608 | 0.965228881 | 3.78E-07 |
| TUCP_002422 | XLOC_102344 | ENSRNOT00000029634 | 0.995816134 | 1.00E-11 |
| TUCP_002422 | XLOC_102344 | ENSRNOT00000093579 | 0.958564264 | 8.97E-07 |
| TUCP_002422 | XLOC_102344 | ENSRNOT00000086349 | 0.957242511 | 1.05E-06 |
| TUCP_002422 | XLOC_102344 | ENSRNOT00000065460 | 1           | 0        |
| TUCP_002422 | XLOC_102344 | ENSRNOT00000003817 | 0.996778712 | 2.72E-12 |
| TUCP_002422 | XLOC_102344 | ENSRNOT00000016713 | 1           | 0        |
| TUCP_002422 | XLOC_102344 | ENSRNOT00000079260 | 0.996448245 | 4.42E-12 |
| TUCP_002422 | XLOC_102344 | ENSRNOT00000039294 | 1           | 0        |
| TUCP_002422 | XLOC_102344 | ENSRNOT00000092913 | 0.952980228 | 1.67E-06 |
| TUCP_002423 | XLOC_102351 | ENSRNOT00000005349 | 0.961209761 | 6.48E-07 |
| TUCP_002423 | XLOC_102351 | ENSRNOT00000011342 | 0.958031663 | 9.56E-07 |
| TUCP_002423 | XLOC_102351 | ENSRNOT00000017139 | 0.952313322 | 1.79E-06 |
| TUCP_002423 | XLOC_102351 | ENSRNOT00000076466 | 0.964860222 | 3.98E-07 |
| TUCP_002423 | XLOC_102351 | ENSRNOT00000085943 | 0.963276182 | 4.95E-07 |
| TUCP_002423 | XLOC_102351 | ENSRNOT00000072396 | 0.970310613 | 1.73E-07 |
| TUCP_002424 | XLOC_102358 | ENSRNOT00000005349 | 0.961347487 | 6.37E-07 |
| TUCP_002424 | XLOC_102358 | ENSRNOT00000011342 | 0.982636822 | 1.21E-08 |
| TUCP_002424 | XLOC_102358 | ENSRNOT00000017139 | 0.950137114 | 2.23E-06 |
| TUCP_002424 | XLOC_102358 | ENSRNOT00000076466 | 0.983890853 | 8.32E-09 |
| TUCP_002424 | XLOC_102358 | ENSRNOT00000085943 | 0.984662574 | 6.51E-09 |
| TUCP_002424 | XLOC_102358 | ENSRNOT00000072396 | 0.976328121 | 5.63E-08 |
| TUCP_002839 | XLOC_120254 | ENSRNOT00000084075 | 0.995854888 | 9.57E-12 |
| TUCP_002839 | XLOC_120254 | ENSRNOT00000065379 | 0.953191111 | 1.64E-06 |
| TUCP_002839 | XLOC_120254 | ENSRNOT00000012880 | 0.967751822 | 2.60E-07 |
| TUCP_002839 | XLOC_120254 | ENSRNOT00000074465 | 0.999877025 | 2.21E-19 |
| TUCP_002839 | XLOC_120254 | ENSRNOT00000090898 | 0.95914021  | 8.37E-07 |
| TUCP_002839 | XLOC_120254 | ENSRNOT00000079805 | 0.998200274 | 1.48E-13 |
| TUCP_002839 | XLOC_120254 | ENSRNOT00000040912 | 0.999877025 | 2.21E-19 |
| TUCP_002839 | XLOC_120254 | ENSRNOT00000072648 | 0.999877025 | 2.21E-19 |
| TUCP_002839 | XLOC_120254 | ENSRNOT00000007398 | 0.988858525 | 1.33E-09 |
| TUCP_002839 | XLOC_120254 | ENSRNOT00000070803 | 0.999877025 | 2.21E-19 |
| TUCP_002839 | XLOC_120254 | ENSRNOT00000012196 | 0.999877025 | 2.21E-19 |
| TUCP_002839 | XLOC_120254 | ENSRNOT00000085772 | 0.999877025 | 2.21E-19 |
| TUCP_002839 | XLOC_120254 | ENSRNOT00000093284 | 0.999842737 | 7.57E-19 |
| TUCP_002839 | XLOC_120254 | ENSRNOT00000086374 | 0.994391144 | 4.33E-11 |
| TUCP_002839 | XLOC_120254 | ENSRNOT00000015270 | 0.999877025 | 2.21E-19 |

|             |             |                    |             |          |
|-------------|-------------|--------------------|-------------|----------|
| TUCP_002839 | XLOC_120254 | ENSRNOT00000046192 | 0.999877025 | 2.21E-19 |
| TUCP_002839 | XLOC_120254 | ENSRNOT00000044226 | 0.999877025 | 2.21E-19 |
| TUCP_002839 | XLOC_120254 | ENSRNOT00000081898 | 0.989100412 | 1.19E-09 |
| TUCP_002839 | XLOC_120254 | ENSRNOT00000081954 | 0.962378858 | 5.57E-07 |
| TUCP_002839 | XLOC_120254 | ENSRNOT00000080291 | 0.99838218  | 8.70E-14 |
| TUCP_002839 | XLOC_120254 | ENSRNOT00000004293 | 0.984432519 | 7.02E-09 |
| TUCP_002839 | XLOC_120254 | ENSRNOT00000078231 | 0.960953754 | 6.69E-07 |
| TUCP_002839 | XLOC_120254 | ENSRNOT00000002834 | 0.999877025 | 2.21E-19 |
| TUCP_002839 | XLOC_120254 | ENSRNOT00000001464 | 0.999877025 | 2.21E-19 |
| TUCP_002839 | XLOC_120254 | ENSRNOT00000008542 | 0.950843429 | 2.08E-06 |
| TUCP_002839 | XLOC_120254 | ENSRNOT00000090716 | 0.99543302  | 1.55E-11 |
| TUCP_002839 | XLOC_120254 | ENSRNOT00000083542 | 0.972091463 | 1.27E-07 |
| TUCP_002839 | XLOC_120254 | ENSRNOT00000076044 | 0.999877025 | 2.21E-19 |
| TUCP_002839 | XLOC_120254 | ENSRNOT00000074353 | 0.999877025 | 2.21E-19 |
| TUCP_002839 | XLOC_120254 | ENSRNOT00000043510 | 0.957639145 | 1.00E-06 |
| TUCP_002839 | XLOC_120254 | ENSRNOT00000087122 | 0.980310007 | 2.26E-08 |
| TUCP_002839 | XLOC_120254 | ENSRNOT00000074295 | 0.98795735  | 1.95E-09 |
| TUCP_002839 | XLOC_120254 | ENSRNOT00000057873 | 0.999877025 | 2.21E-19 |
| TUCP_002839 | XLOC_120254 | ENSRNOT00000083002 | 0.988341439 | 1.66E-09 |
| TUCP_002839 | XLOC_120254 | ENSRNOT00000088399 | 0.999875298 | 2.37E-19 |
| TUCP_002839 | XLOC_120254 | ENSRNOT00000086248 | 0.999877025 | 2.21E-19 |
| TUCP_002839 | XLOC_120254 | ENSRNOT00000089750 | 0.999869491 | 2.98E-19 |
| TUCP_002839 | XLOC_120254 | ENSRNOT00000030517 | 0.972391457 | 1.21E-07 |
| TUCP_002839 | XLOC_120254 | ENSRNOT00000034772 | 0.994386911 | 4.35E-11 |
| TUCP_002839 | XLOC_120254 | ENSRNOT00000089305 | 0.969747742 | 1.90E-07 |
| TUCP_002839 | XLOC_120254 | ENSRNOT00000024580 | 0.956553514 | 1.13E-06 |
| TUCP_002839 | XLOC_120254 | ENSRNOT00000064601 | 0.967761322 | 2.60E-07 |
| TUCP_002839 | XLOC_120254 | ENSRNOT00000015870 | 0.965289036 | 3.74E-07 |
| TUCP_002839 | XLOC_120254 | ENSRNOT00000080812 | 0.992862127 | 1.44E-10 |
| TUCP_002839 | XLOC_120254 | ENSRNOT00000092755 | 0.999877025 | 2.21E-19 |
| TUCP_002839 | XLOC_120254 | ENSRNOT00000031683 | 0.999877025 | 2.21E-19 |
| TUCP_002839 | XLOC_120254 | ENSRNOT00000087764 | 0.988923535 | 1.29E-09 |
| TUCP_002427 | XLOC_102855 | ENSRNOT00000075752 | 0.957684928 | 9.95E-07 |
| TUCP_002427 | XLOC_102855 | ENSRNOT00000041215 | 0.950109927 | 2.24E-06 |
| TUCP_002427 | XLOC_102855 | ENSRNOT00000048770 | 0.952560811 | 1.75E-06 |
| TUCP_003018 | XLOC_128436 | ENSRNOT00000092026 | 0.963615542 | 4.72E-07 |
| TUCP_003018 | XLOC_128436 | ENSRNOT00000093075 | 0.998963252 | 9.42E-15 |
| TUCP_003018 | XLOC_128436 | ENSRNOT00000058260 | 0.998963252 | 9.42E-15 |
| TUCP_003018 | XLOC_128436 | ENSRNOT00000088887 | 0.998963252 | 9.42E-15 |
| TUCP_003018 | XLOC_128436 | ENSRNOT00000084986 | 0.998963252 | 9.42E-15 |
| TUCP_003018 | XLOC_128436 | ENSRNOT00000074346 | 0.967173826 | 2.84E-07 |
| TUCP_003018 | XLOC_128436 | ENSRNOT00000073209 | 0.981636531 | 1.59E-08 |
| TUCP_003018 | XLOC_128436 | ENSRNOT00000080155 | 0.970494914 | 1.68E-07 |
| TUCP_003018 | XLOC_128436 | ENSRNOT00000072573 | 0.997460413 | 8.28E-13 |
| TUCP_003018 | XLOC_128436 | ENSRNOT00000017828 | 0.99456229  | 3.71E-11 |
| TUCP_003018 | XLOC_128436 | ENSRNOT00000080444 | 0.964721052 | 4.06E-07 |
| TUCP_003018 | XLOC_128436 | ENSRNOT00000071312 | 0.998963252 | 9.42E-15 |
| TUCP_003018 | XLOC_128436 | ENSRNOT00000088245 | 0.998963252 | 9.42E-15 |
| TUCP_003018 | XLOC_128436 | ENSRNOT00000036565 | 0.977508309 | 4.37E-08 |
| TUCP_003018 | XLOC_128436 | ENSRNOT00000058833 | 0.997403464 | 9.25E-13 |
| TUCP_003018 | XLOC_128436 | ENSRNOT00000078052 | 0.998963252 | 9.42E-15 |

|             |             |                    |             |          |
|-------------|-------------|--------------------|-------------|----------|
| TUCP_003018 | XLOC_128436 | ENSRNOT00000078494 | 0.998835449 | 1.68E-14 |
| TUCP_003018 | XLOC_128436 | ENSRNOT00000085653 | 0.998963252 | 9.42E-15 |
| TUCP_003018 | XLOC_128436 | ENSRNOT00000057950 | 0.968468527 | 2.33E-07 |
| TUCP_003018 | XLOC_128436 | ENSRNOT00000081992 | 0.997733233 | 4.70E-13 |
| TUCP_003018 | XLOC_128436 | ENSRNOT00000038553 | 0.952869015 | 1.69E-06 |
| TUCP_003018 | XLOC_128436 | ENSRNOT00000084120 | 0.95430295  | 1.45E-06 |
| TUCP_003018 | XLOC_128436 | ENSRNOT00000055406 | 0.998963252 | 9.42E-15 |
| TUCP_003018 | XLOC_128436 | ENSRNOT00000070817 | 0.997725641 | 4.77E-13 |
| TUCP_003018 | XLOC_128436 | ENSRNOT00000026753 | 0.998963252 | 9.42E-15 |
| TUCP_003018 | XLOC_128436 | ENSRNOT00000080533 | 0.995278713 | 1.83E-11 |
| TUCP_003018 | XLOC_128436 | ENSRNOT00000072774 | 0.977736209 | 4.15E-08 |
| TUCP_003018 | XLOC_128436 | ENSRNOT00000086031 | 0.998963252 | 9.42E-15 |
| TUCP_003018 | XLOC_128436 | ENSRNOT00000014312 | 0.998963252 | 9.42E-15 |
| TUCP_003018 | XLOC_128436 | ENSRNOT00000042882 | 0.959949789 | 7.59E-07 |
| TUCP_003018 | XLOC_128436 | ENSRNOT00000088012 | 0.954449776 | 1.43E-06 |
| TUCP_003018 | XLOC_128436 | ENSRNOT00000051231 | 0.998029242 | 2.33E-13 |
| TUCP_003018 | XLOC_128436 | ENSRNOT00000089407 | 0.991419702 | 3.61E-10 |
| TUCP_003018 | XLOC_128436 | ENSRNOT00000090755 | 0.955579093 | 1.26E-06 |
| TUCP_003018 | XLOC_128436 | ENSRNOT00000055034 | 0.997234178 | 1.27E-12 |
| TUCP_003018 | XLOC_128436 | ENSRNOT00000046837 | 0.969281894 | 2.05E-07 |
| TUCP_002429 | XLOC_102934 | ENSRNOT00000013620 | 0.950721526 | 2.11E-06 |
| TUCP_002429 | XLOC_102934 | ENSRNOT00000084601 | 0.951061226 | 2.04E-06 |
| TUCP_002429 | XLOC_102934 | ENSRNOT00000032944 | 0.978719188 | 3.32E-08 |
| TUCP_002429 | XLOC_102934 | ENSRNOT00000017629 | 0.951173238 | 2.01E-06 |
| TUCP_002429 | XLOC_102934 | ENSRNOT00000083215 | 0.97381265  | 9.28E-08 |
| TUCP_002429 | XLOC_102934 | ENSRNOT00000024420 | 0.952673199 | 1.73E-06 |
| TUCP_002429 | XLOC_102934 | ENSRNOT00000063956 | 0.953394574 | 1.60E-06 |
| TUCP_002429 | XLOC_102934 | ENSRNOT00000013661 | 0.977587021 | 4.29E-08 |
| TUCP_002429 | XLOC_102934 | ENSRNOT00000058072 | 0.951420313 | 1.96E-06 |
| TUCP_002429 | XLOC_102934 | ENSRNOT00000055187 | 0.974641525 | 7.91E-08 |
| TUCP_002429 | XLOC_102934 | ENSRNOT0000001809  | 0.950511615 | 2.15E-06 |
| TUCP_002429 | XLOC_102934 | ENSRNOT0000005684  | 0.958165098 | 9.41E-07 |
| TUCP_002429 | XLOC_102934 | ENSRNOT00000034201 | 0.950133728 | 2.23E-06 |
| TUCP_002429 | XLOC_102934 | ENSRNOT00000032199 | 0.962957496 | 5.16E-07 |
| TUCP_002429 | XLOC_102934 | ENSRNOT00000044896 | 0.971745589 | 1.35E-07 |
| TUCP_002429 | XLOC_102934 | ENSRNOT00000015203 | 0.965592338 | 3.58E-07 |
| TUCP_002429 | XLOC_102934 | ENSRNOT00000009342 | 0.962141924 | 5.75E-07 |
| TUCP_002429 | XLOC_102934 | ENSRNOT00000021614 | 0.975950965 | 6.08E-08 |
| TUCP_002429 | XLOC_102934 | ENSRNOT00000067822 | 0.951208606 | 2.01E-06 |
| TUCP_002429 | XLOC_102934 | ENSRNOT00000022839 | 0.955661627 | 1.25E-06 |
| TUCP_002429 | XLOC_102934 | ENSRNOT00000004508 | 0.974558285 | 8.04E-08 |
| TUCP_002429 | XLOC_102934 | ENSRNOT00000034744 | 0.961895566 | 5.93E-07 |
| TUCP_002429 | XLOC_102934 | ENSRNOT00000022726 | 0.958752783 | 8.77E-07 |
| TUCP_002429 | XLOC_102934 | ENSRNOT00000015271 | 0.950786553 | 2.09E-06 |
| TUCP_002429 | XLOC_102934 | ENSRNOT00000044635 | 0.958515926 | 9.02E-07 |
| TUCP_002429 | XLOC_102934 | ENSRNOT00000034704 | 0.960903774 | 6.74E-07 |
| TUCP_002429 | XLOC_102934 | ENSRNOT00000021116 | 0.985398372 | 5.10E-09 |
| TUCP_002429 | XLOC_102934 | ENSRNOT00000082100 | 0.964894691 | 3.96E-07 |
| TUCP_002429 | XLOC_102934 | ENSRNOT00000004032 | 0.956408476 | 1.15E-06 |
| TUCP_002429 | XLOC_102934 | ENSRNOT00000017948 | 0.951058638 | 2.04E-06 |
| TUCP_002429 | XLOC_102934 | ENSRNOT00000036442 | 0.951156574 | 2.02E-06 |

|             |             |                     |             |          |
|-------------|-------------|---------------------|-------------|----------|
| TUCP_002429 | XLOC_102934 | ENSRNOT00000043216  | 0.951933995 | 1.86E-06 |
| TUCP_002429 | XLOC_102934 | ENSRNOT00000080465  | 0.968933214 | 2.16E-07 |
| TUCP_002429 | XLOC_102934 | ENSRNOT00000066526  | 0.956329767 | 1.16E-06 |
| TUCP_002429 | XLOC_102934 | ENSRNOT00000027414  | 0.953024098 | 1.66E-06 |
| TUCP_002429 | XLOC_102934 | ENSRNOT00000039631  | 0.962575248 | 5.43E-07 |
| TUCP_002429 | XLOC_102934 | ENSRNOT00000015076  | 0.955781032 | 1.24E-06 |
| TUCP_002429 | XLOC_102934 | ENSRNOT00000022800  | 0.975361426 | 6.86E-08 |
| TUCP_002429 | XLOC_102934 | ENSRNOT00000006800  | 0.96507457  | 3.86E-07 |
| TUCP_002429 | XLOC_102934 | ENSRNOT00000039852  | 0.952652002 | 1.73E-06 |
| TUCP_002429 | XLOC_102934 | ENSRNOT00000015073  | 0.968472113 | 2.33E-07 |
| TUCP_002429 | XLOC_102934 | ENSRNOT00000004412  | 0.952338673 | 1.79E-06 |
| TUCP_002429 | XLOC_102934 | ENSRNOT00000004581  | 0.952818986 | 1.70E-06 |
| TUCP_002429 | XLOC_102934 | ENSRNOT00000027615  | 0.950536206 | 2.15E-06 |
| TUCP_002429 | XLOC_102934 | ENSRNOT00000000713  | 0.962090741 | 5.79E-07 |
| TUCP_002429 | XLOC_102934 | ENSRNOT000000066736 | 0.958907391 | 8.61E-07 |
| TUCP_002429 | XLOC_102934 | ENSRNOT00000009198  | 0.969618364 | 1.94E-07 |
| TUCP_002429 | XLOC_102934 | ENSRNOT00000027054  | 0.962775839 | 5.29E-07 |
| TUCP_002429 | XLOC_102934 | ENSRNOT000000067761 | 0.975845303 | 6.22E-08 |
| TUCP_002429 | XLOC_102934 | ENSRNOT00000009129  | 0.956590494 | 1.13E-06 |
| TUCP_002429 | XLOC_102934 | ENSRNOT00000020437  | 0.952335626 | 1.79E-06 |
| TUCP_002429 | XLOC_102934 | ENSRNOT000000051720 | 0.973952777 | 9.04E-08 |
| TUCP_002429 | XLOC_102934 | ENSRNOT000000036750 | 0.960667666 | 6.94E-07 |
| TUCP_002429 | XLOC_102934 | ENSRNOT00000027964  | 0.964357744 | 4.27E-07 |
| TUCP_002429 | XLOC_102934 | ENSRNOT000000060669 | 0.980687736 | 2.05E-08 |
| TUCP_002429 | XLOC_102934 | ENSRNOT00000047975  | 0.960904032 | 6.74E-07 |
| TUCP_002429 | XLOC_102934 | ENSRNOT000000072081 | 0.970432282 | 1.69E-07 |
| TUCP_002429 | XLOC_102934 | ENSRNOT00000028563  | 0.967549545 | 2.68E-07 |
| TUCP_002429 | XLOC_102934 | ENSRNOT00000024659  | 0.951153259 | 2.02E-06 |
| TUCP_002429 | XLOC_102934 | ENSRNOT000000070815 | 0.957150057 | 1.06E-06 |
| TUCP_002429 | XLOC_102934 | ENSRNOT00000049538  | 0.960268375 | 7.29E-07 |
| TUCP_002429 | XLOC_102934 | ENSRNOT000000082691 | 0.955893287 | 1.22E-06 |
| TUCP_002429 | XLOC_102934 | ENSRNOT00000021153  | 0.974197842 | 8.63E-08 |
| TUCP_002429 | XLOC_102934 | ENSRNOT000000076453 | 0.979370889 | 2.84E-08 |
| TUCP_002429 | XLOC_102934 | ENSRNOT000000088196 | 0.953577451 | 1.57E-06 |
| TUCP_002429 | XLOC_102934 | ENSRNOT00000010433  | 0.952308204 | 1.79E-06 |
| TUCP_002429 | XLOC_102934 | ENSRNOT00000023645  | 0.964398252 | 4.24E-07 |
| TUCP_002429 | XLOC_102934 | ENSRNOT000000084734 | 0.958316458 | 9.24E-07 |
| TUCP_002834 | XLOC_119975 | ENSRNOT000000084944 | 0.976431413 | 5.51E-08 |
| TUCP_002784 | XLOC_117398 | ENSRNOT00000003630  | 0.96082667  | 6.80E-07 |
| TUCP_002784 | XLOC_117398 | ENSRNOT000000050609 | 0.954496027 | 1.42E-06 |
| TUCP_002784 | XLOC_117398 | ENSRNOT000000059679 | 0.956844802 | 1.10E-06 |
| TUCP_002784 | XLOC_117398 | ENSRNOT000000080410 | 0.959818048 | 7.71E-07 |
| TUCP_002784 | XLOC_117398 | ENSRNOT00000012286  | 0.969089099 | 2.11E-07 |
| TUCP_002784 | XLOC_117398 | ENSRNOT00000018500  | 0.95643064  | 1.15E-06 |
| TUCP_002784 | XLOC_117398 | ENSRNOT00000022000  | 0.959446156 | 8.07E-07 |
| TUCP_002784 | XLOC_117398 | ENSRNOT00000014924  | 0.952216201 | 1.81E-06 |
| TUCP_002784 | XLOC_117398 | ENSRNOT00000002445  | 0.952868028 | 1.69E-06 |
| TUCP_002784 | XLOC_117398 | ENSRNOT000000064452 | 0.951791807 | 1.89E-06 |
| TUCP_002784 | XLOC_117398 | ENSRNOT000000078806 | 0.950133932 | 2.23E-06 |
| TUCP_002784 | XLOC_117398 | ENSRNOT00000024679  | 0.964018492 | 4.47E-07 |
| TUCP_002784 | XLOC_117398 | ENSRNOT00000090499  | 0.959626568 | 7.89E-07 |

|             |             |                    |              |          |
|-------------|-------------|--------------------|--------------|----------|
| TUCP_002784 | XLOC_117398 | ENSRNOT00000011563 | 0.959952627  | 7.58E-07 |
| TUCP_002784 | XLOC_117398 | ENSRNOT00000067374 | 0.951003474  | 2.05E-06 |
| TUCP_002784 | XLOC_117398 | ENSRNOT00000078128 | 0.968827476  | 2.20E-07 |
| TUCP_002784 | XLOC_117398 | ENSRNOT00000026098 | 0.95761153   | 1.00E-06 |
| TUCP_002831 | XLOC_119723 | ENSRNOT00000075476 | -0.984430377 | 7.02E-09 |
| TUCP_002831 | XLOC_119723 | ENSRNOT00000037509 | 0.95168344   | 1.91E-06 |
| TUCP_002831 | XLOC_119723 | ENSRNOT00000011832 | 0.952901036  | 1.69E-06 |
| TUCP_002831 | XLOC_119723 | ENSRNOT00000038652 | 0.952969745  | 1.67E-06 |
| TUCP_002831 | XLOC_119723 | ENSRNOT00000004196 | -0.951270891 | 1.99E-06 |
| TUCP_002831 | XLOC_119723 | ENSRNOT00000047126 | 0.953981744  | 1.50E-06 |
| TUCP_002831 | XLOC_119723 | ENSRNOT00000039954 | -0.962201327 | 5.70E-07 |
| TUCP_002831 | XLOC_119723 | ENSRNOT00000022255 | -0.952995844 | 1.67E-06 |
| TUCP_002831 | XLOC_119723 | ENSRNOT00000090268 | 0.952007319  | 1.85E-06 |
| TUCP_002831 | XLOC_119723 | ENSRNOT00000078793 | -0.958802724 | 8.72E-07 |
| TUCP_002831 | XLOC_119723 | ENSRNOT00000061345 | 0.964446144  | 4.21E-07 |
| TUCP_002831 | XLOC_119723 | ENSRNOT00000072856 | 0.959195055  | 8.32E-07 |
| TUCP_002831 | XLOC_119723 | ENSRNOT00000004703 | -0.952401111 | 1.78E-06 |
| TUCP_002831 | XLOC_119723 | ENSRNOT00000018849 | 0.963504234  | 4.80E-07 |
| TUCP_002831 | XLOC_119723 | ENSRNOT00000023037 | -0.95253408  | 1.75E-06 |
| TUCP_002831 | XLOC_119723 | ENSRNOT00000019358 | 0.964080603  | 4.43E-07 |
| TUCP_002831 | XLOC_119723 | ENSRNOT00000072762 | 0.955377128  | 1.29E-06 |
| TUCP_002831 | XLOC_119723 | ENSRNOT00000017624 | -0.9523489   | 1.79E-06 |
| TUCP_002831 | XLOC_119723 | ENSRNOT00000074515 | 0.95332402   | 1.61E-06 |
| TUCP_002831 | XLOC_119723 | ENSRNOT00000075843 | 0.950410374  | 2.17E-06 |
| TUCP_002831 | XLOC_119723 | ENSRNOT00000085465 | 0.966158272  | 3.30E-07 |
| TUCP_002830 | XLOC_119720 | ENSRNOT00000065023 | 0.959415139  | 8.10E-07 |
| TUCP_002830 | XLOC_119720 | ENSRNOT00000047126 | 0.958657464  | 8.87E-07 |
| TUCP_002830 | XLOC_119720 | ENSRNOT00000005155 | -0.950554706 | 2.14E-06 |
| TUCP_002830 | XLOC_119720 | ENSRNOT00000017624 | -0.957174297 | 1.06E-06 |
| TUCP_002830 | XLOC_119720 | ENSRNOT00000072762 | 0.953416915  | 1.60E-06 |
| TUCP_002830 | XLOC_119720 | ENSRNOT00000038652 | 0.963234309  | 4.97E-07 |
| TUCP_002830 | XLOC_119720 | ENSRNOT00000037509 | 0.965243948  | 3.77E-07 |
| TUCP_002830 | XLOC_119720 | ENSRNOT00000022255 | -0.961990825 | 5.86E-07 |
| TUCP_002830 | XLOC_119720 | ENSRNOT00000072864 | 0.963073332  | 5.08E-07 |
| TUCP_002830 | XLOC_119720 | ENSRNOT00000004196 | -0.967840674 | 2.57E-07 |
| TUCP_002830 | XLOC_119720 | ENSRNOT00000010621 | 0.950260536  | 2.20E-06 |
| TUCP_002830 | XLOC_119720 | ENSRNOT00000090268 | 0.956304301  | 1.17E-06 |
| TUCP_002830 | XLOC_119720 | ENSRNOT00000019358 | 0.978850152  | 3.22E-08 |
| TUCP_002830 | XLOC_119720 | ENSRNOT00000055137 | -0.956493582 | 1.14E-06 |
| TUCP_002830 | XLOC_119720 | ENSRNOT00000093552 | 0.953708413  | 1.55E-06 |
| TUCP_002830 | XLOC_119720 | ENSRNOT00000075476 | -0.967701404 | 2.62E-07 |
| TUCP_002830 | XLOC_119720 | ENSRNOT00000014694 | 0.955879122  | 1.22E-06 |
| TUCP_002830 | XLOC_119720 | ENSRNOT00000003265 | -0.951489587 | 1.95E-06 |
| TUCP_002830 | XLOC_119720 | ENSRNOT00000078793 | -0.977270076 | 4.60E-08 |
| TUCP_002830 | XLOC_119720 | ENSRNOT00000061345 | 0.960255021  | 7.31E-07 |
| TUCP_002830 | XLOC_119720 | ENSRNOT00000081037 | 0.951347475  | 1.98E-06 |
| TUCP_002830 | XLOC_119720 | ENSRNOT00000074515 | 0.965808524  | 3.47E-07 |
| TUCP_002830 | XLOC_119720 | ENSRNOT00000023037 | -0.950573836 | 2.14E-06 |
| TUCP_002830 | XLOC_119720 | ENSRNOT00000013587 | 0.958287574  | 9.27E-07 |
| TUCP_002830 | XLOC_119720 | ENSRNOT00000025355 | -0.955459988 | 1.28E-06 |
| TUCP_001659 | XLOC_065725 | ENSRNOT00000076294 | 0.961004473  | 6.65E-07 |

|             |             |                    |             |          |
|-------------|-------------|--------------------|-------------|----------|
| TUCP_001659 | XLOC_065725 | ENSRNOT00000078157 | 0.958626614 | 8.91E-07 |
| TUCP_001659 | XLOC_065725 | ENSRNOT00000040840 | 0.961275333 | 6.43E-07 |
| TUCP_001659 | XLOC_065725 | ENSRNOT00000083263 | 0.959879004 | 7.65E-07 |
| TUCP_003208 | XLOC_138405 | ENSRNOT00000084075 | 0.996216584 | 6.07E-12 |
| TUCP_003208 | XLOC_138405 | ENSRNOT00000012880 | 0.968006654 | 2.50E-07 |
| TUCP_003208 | XLOC_138405 | ENSRNOT00000074465 | 0.999999193 | 2.70E-30 |
| TUCP_003208 | XLOC_138405 | ENSRNOT00000090898 | 0.961680677 | 6.10E-07 |
| TUCP_003208 | XLOC_138405 | ENSRNOT00000079805 | 0.997972955 | 2.69E-13 |
| TUCP_003208 | XLOC_138405 | ENSRNOT00000040912 | 0.999999193 | 2.70E-30 |
| TUCP_003208 | XLOC_138405 | ENSRNOT00000072648 | 0.999999193 | 2.70E-30 |
| TUCP_003208 | XLOC_138405 | ENSRNOT00000007398 | 0.989054595 | 1.21E-09 |
| TUCP_003208 | XLOC_138405 | ENSRNOT00000070803 | 0.999999193 | 2.70E-30 |
| TUCP_003208 | XLOC_138405 | ENSRNOT00000012196 | 0.999999193 | 2.70E-30 |
| TUCP_003208 | XLOC_138405 | ENSRNOT00000085772 | 0.999999193 | 2.70E-30 |
| TUCP_003208 | XLOC_138405 | ENSRNOT00000093284 | 0.999983819 | 8.73E-24 |
| TUCP_003208 | XLOC_138405 | ENSRNOT00000086374 | 0.993529931 | 8.83E-11 |
| TUCP_003208 | XLOC_138405 | ENSRNOT00000015270 | 0.999999193 | 2.70E-30 |
| TUCP_003208 | XLOC_138405 | ENSRNOT00000046192 | 0.999999193 | 2.70E-30 |
| TUCP_003208 | XLOC_138405 | ENSRNOT00000044226 | 0.999999193 | 2.70E-30 |
| TUCP_003208 | XLOC_138405 | ENSRNOT00000081898 | 0.989893838 | 8.16E-10 |
| TUCP_003208 | XLOC_138405 | ENSRNOT00000081954 | 0.964275093 | 4.32E-07 |
| TUCP_003208 | XLOC_138405 | ENSRNOT00000080291 | 0.998492946 | 6.11E-14 |
| TUCP_003208 | XLOC_138405 | ENSRNOT00000004293 | 0.984128733 | 7.72E-09 |
| TUCP_003208 | XLOC_138405 | ENSRNOT00000078231 | 0.960363873 | 7.21E-07 |
| TUCP_003208 | XLOC_138405 | ENSRNOT00000002834 | 0.999999193 | 2.70E-30 |
| TUCP_003208 | XLOC_138405 | ENSRNOT00000001464 | 0.999999193 | 2.70E-30 |
| TUCP_003208 | XLOC_138405 | ENSRNOT00000090716 | 0.99475351  | 3.10E-11 |
| TUCP_003208 | XLOC_138405 | ENSRNOT00000083542 | 0.972570132 | 1.17E-07 |
| TUCP_003208 | XLOC_138405 | ENSRNOT00000076044 | 0.999999193 | 2.70E-30 |
| TUCP_003208 | XLOC_138405 | ENSRNOT00000074353 | 0.999999193 | 2.70E-30 |
| TUCP_003208 | XLOC_138405 | ENSRNOT00000043510 | 0.958125759 | 9.45E-07 |
| TUCP_003208 | XLOC_138405 | ENSRNOT00000087122 | 0.980124373 | 2.36E-08 |
| TUCP_003208 | XLOC_138405 | ENSRNOT00000074295 | 0.987694684 | 2.18E-09 |
| TUCP_003208 | XLOC_138405 | ENSRNOT00000057873 | 0.999999193 | 2.70E-30 |
| TUCP_003208 | XLOC_138405 | ENSRNOT00000083002 | 0.988990509 | 1.25E-09 |
| TUCP_003208 | XLOC_138405 | ENSRNOT00000088399 | 0.999998881 | 1.38E-29 |
| TUCP_003208 | XLOC_138405 | ENSRNOT00000086248 | 0.999999193 | 2.70E-30 |
| TUCP_003208 | XLOC_138405 | ENSRNOT00000089750 | 0.999992718 | 1.61E-25 |
| TUCP_003208 | XLOC_138405 | ENSRNOT00000030517 | 0.970971963 | 1.55E-07 |
| TUCP_003208 | XLOC_138405 | ENSRNOT00000034772 | 0.994354649 | 4.47E-11 |
| TUCP_003208 | XLOC_138405 | ENSRNOT00000089305 | 0.969672217 | 1.92E-07 |
| TUCP_003208 | XLOC_138405 | ENSRNOT00000024580 | 0.954114567 | 1.48E-06 |
| TUCP_003208 | XLOC_138405 | ENSRNOT00000064601 | 0.966585665 | 3.10E-07 |
| TUCP_003208 | XLOC_138405 | ENSRNOT00000015870 | 0.965864528 | 3.45E-07 |
| TUCP_003208 | XLOC_138405 | ENSRNOT00000080812 | 0.99293485  | 1.37E-10 |
| TUCP_003208 | XLOC_138405 | ENSRNOT00000092755 | 0.999999193 | 2.70E-30 |
| TUCP_003208 | XLOC_138405 | ENSRNOT00000031683 | 0.999999193 | 2.70E-30 |
| TUCP_003208 | XLOC_138405 | ENSRNOT00000087764 | 0.98816142  | 1.80E-09 |
| TUCP_001976 | XLOC_079764 | ENSRNOT00000070972 | 0.953295559 | 1.62E-06 |
| TUCP_001976 | XLOC_079764 | ENSRNOT00000013088 | 0.950213034 | 2.22E-06 |
| TUCP_001976 | XLOC_079764 | ENSRNOT00000090547 | 0.953209051 | 1.63E-06 |

|             |             |                    |              |          |
|-------------|-------------|--------------------|--------------|----------|
| TUCP_000303 | XLOC_009515 | ENSRNOT00000013747 | -0.957514427 | 1.01E-06 |
| TUCP_000303 | XLOC_009515 | ENSRNOT00000027083 | -0.954350338 | 1.45E-06 |
| TUCP_000303 | XLOC_009515 | ENSRNOT00000014785 | 0.956981571  | 1.08E-06 |
| TUCP_000303 | XLOC_009515 | ENSRNOT00000014373 | 0.973413022  | 1.00E-07 |
| TUCP_000303 | XLOC_009515 | ENSRNOT00000083573 | 0.950990671  | 2.05E-06 |
| TUCP_000303 | XLOC_009515 | ENSRNOT00000002429 | 0.962667581  | 5.36E-07 |
| TUCP_000303 | XLOC_009515 | ENSRNOT00000015566 | -0.959450617 | 8.06E-07 |
| TUCP_000303 | XLOC_009515 | ENSRNOT00000079644 | 0.972118449  | 1.27E-07 |
| TUCP_000303 | XLOC_009515 | ENSRNOT00000059524 | 0.968870629  | 2.18E-07 |
| TUCP_000303 | XLOC_009515 | ENSRNOT00000050721 | 0.963651318  | 4.70E-07 |
| TUCP_000303 | XLOC_009515 | ENSRNOT00000020265 | 0.952090082  | 1.83E-06 |
| TUCP_000303 | XLOC_009515 | ENSRNOT00000022253 | 0.950240454  | 2.21E-06 |
| TUCP_000303 | XLOC_009515 | ENSRNOT00000064305 | 0.957650753  | 9.99E-07 |
| TUCP_000303 | XLOC_009515 | ENSRNOT00000054932 | 0.955987755  | 1.21E-06 |
| TUCP_000303 | XLOC_009515 | ENSRNOT00000086310 | 0.959544142  | 7.97E-07 |
| TUCP_000303 | XLOC_009515 | ENSRNOT00000089829 | 0.983180237  | 1.03E-08 |
| TUCP_000303 | XLOC_009515 | ENSRNOT00000074389 | 0.970476376  | 1.68E-07 |
| TUCP_000303 | XLOC_009515 | ENSRNOT00000025308 | 0.98082039   | 1.98E-08 |
| TUCP_000303 | XLOC_009515 | ENSRNOT00000066204 | 0.97165478   | 1.37E-07 |
| TUCP_000303 | XLOC_009515 | ENSRNOT00000001468 | 0.952968285  | 1.67E-06 |
| TUCP_000303 | XLOC_009515 | ENSRNOT00000003247 | 0.967526659  | 2.69E-07 |
| TUCP_000303 | XLOC_009515 | ENSRNOT00000043554 | -0.954522447 | 1.42E-06 |
| TUCP_000303 | XLOC_009515 | ENSRNOT00000014479 | 0.954332115  | 1.45E-06 |
| TUCP_000303 | XLOC_009515 | ENSRNOT00000028405 | 0.951614982  | 1.93E-06 |
| TUCP_000303 | XLOC_009515 | ENSRNOT00000040637 | -0.970700267 | 1.62E-07 |
| TUCP_000303 | XLOC_009515 | ENSRNOT00000031851 | 0.95518858   | 1.32E-06 |
| TUCP_000303 | XLOC_009515 | ENSRNOT00000013695 | 0.975277213  | 6.98E-08 |
| TUCP_000303 | XLOC_009515 | ENSRNOT00000065304 | 0.951041204  | 2.04E-06 |
| TUCP_000303 | XLOC_009515 | ENSRNOT00000025550 | 0.951824467  | 1.88E-06 |
| TUCP_000303 | XLOC_009515 | ENSRNOT00000045699 | -0.960182706 | 7.37E-07 |
| TUCP_000303 | XLOC_009515 | ENSRNOT00000013053 | 0.958325471  | 9.23E-07 |
| TUCP_000303 | XLOC_009515 | ENSRNOT00000035320 | 0.957594336  | 1.01E-06 |
| TUCP_000303 | XLOC_009515 | ENSRNOT00000026231 | -0.974676472 | 7.86E-08 |
| TUCP_000303 | XLOC_009515 | ENSRNOT00000024568 | 0.972543939  | 1.17E-07 |
| TUCP_000303 | XLOC_009515 | ENSRNOT00000039523 | -0.971026855 | 1.53E-07 |
| TUCP_000303 | XLOC_009515 | ENSRNOT00000083876 | 0.956866439  | 1.09E-06 |
| TUCP_000303 | XLOC_009515 | ENSRNOT00000026398 | 0.957943649  | 9.65E-07 |
| TUCP_000303 | XLOC_009515 | ENSRNOT00000045855 | 0.955579281  | 1.26E-06 |
| TUCP_000303 | XLOC_009515 | ENSRNOT00000026718 | -0.951839884 | 1.88E-06 |
| TUCP_000303 | XLOC_009515 | ENSRNOT00000001577 | -0.953515449 | 1.58E-06 |
| TUCP_000303 | XLOC_009515 | ENSRNOT00000025294 | 0.950283884  | 2.20E-06 |
| TUCP_000303 | XLOC_009515 | ENSRNOT00000020702 | 0.951089803  | 2.03E-06 |
| TUCP_000303 | XLOC_009515 | ENSRNOT00000040629 | -0.956155669 | 1.19E-06 |
| TUCP_000303 | XLOC_009515 | ENSRNOT00000005426 | 0.957505844  | 1.02E-06 |
| TUCP_000303 | XLOC_009515 | ENSRNOT00000088133 | 0.951374012  | 1.97E-06 |
| TUCP_000303 | XLOC_009515 | ENSRNOT00000080797 | 0.957608453  | 1.00E-06 |
| TUCP_000303 | XLOC_009515 | ENSRNOT00000011654 | 0.954660753  | 1.40E-06 |
| TUCP_000303 | XLOC_009515 | ENSRNOT00000003600 | 0.965202292  | 3.79E-07 |
| TUCP_000303 | XLOC_009515 | ENSRNOT00000026928 | 0.953659263  | 1.56E-06 |
| TUCP_000303 | XLOC_009515 | ENSRNOT00000002715 | 0.976848695  | 5.04E-08 |
| TUCP_000303 | XLOC_009515 | ENSRNOT00000047634 | 0.951977918  | 1.86E-06 |



|             |             |                    |              |          |
|-------------|-------------|--------------------|--------------|----------|
| TUCP_000303 | XLOC_009515 | ENSRNOT00000068033 | -0.953594617 | 1.57E-06 |
| TUCP_000303 | XLOC_009515 | ENSRNOT00000083964 | 0.956368567  | 1.16E-06 |
| TUCP_000303 | XLOC_009515 | ENSRNOT00000016947 | -0.964674823 | 4.08E-07 |
| TUCP_000303 | XLOC_009515 | ENSRNOT00000091863 | 0.950998477  | 2.05E-06 |
| TUCP_000303 | XLOC_009515 | ENSRNOT00000061304 | 0.952330208  | 1.79E-06 |
| TUCP_000303 | XLOC_009515 | ENSRNOT00000028074 | 0.967485642  | 2.71E-07 |
| TUCP_000303 | XLOC_009515 | ENSRNOT00000064450 | 0.957160452  | 1.06E-06 |
| TUCP_000303 | XLOC_009515 | ENSRNOT00000035048 | 0.959045633  | 8.47E-07 |
| TUCP_000303 | XLOC_009515 | ENSRNOT00000019386 | 0.961183662  | 6.50E-07 |
| TUCP_000303 | XLOC_009515 | ENSRNOT00000077220 | 0.958447161  | 9.10E-07 |
| TUCP_000303 | XLOC_009515 | ENSRNOT00000032202 | 0.957578197  | 1.01E-06 |
| TUCP_000303 | XLOC_009515 | ENSRNOT00000005740 | 0.95409764   | 1.49E-06 |
| TUCP_000303 | XLOC_009515 | ENSRNOT00000001360 | 0.953581095  | 1.57E-06 |
| TUCP_000303 | XLOC_009515 | ENSRNOT00000040348 | 0.957172097  | 1.06E-06 |
| TUCP_000303 | XLOC_009515 | ENSRNOT00000010674 | 0.952560353  | 1.75E-06 |
| TUCP_000303 | XLOC_009515 | ENSRNOT00000020267 | -0.957206563 | 1.05E-06 |
| TUCP_000303 | XLOC_009515 | ENSRNOT00000065288 | 0.963173938  | 5.01E-07 |
| TUCP_000303 | XLOC_009515 | ENSRNOT00000041815 | 0.955622229  | 1.26E-06 |
| TUCP_000303 | XLOC_009515 | ENSRNOT00000027200 | 0.966711944  | 3.04E-07 |
| TUCP_000303 | XLOC_009515 | ENSRNOT00000081881 | -0.955937062 | 1.21E-06 |
| TUCP_000303 | XLOC_009515 | ENSRNOT00000024694 | -0.957936277 | 9.66E-07 |
| TUCP_000303 | XLOC_009515 | ENSRNOT00000039729 | 0.96560457   | 3.58E-07 |
| TUCP_000303 | XLOC_009515 | ENSRNOT00000009839 | -0.96432452  | 4.29E-07 |
| TUCP_000303 | XLOC_009515 | ENSRNOT00000020155 | -0.957177247 | 1.06E-06 |
| TUCP_000303 | XLOC_009515 | ENSRNOT00000025827 | -0.967873432 | 2.55E-07 |
| TUCP_000303 | XLOC_009515 | ENSRNOT00000030893 | 0.964028171  | 4.47E-07 |
| TUCP_000303 | XLOC_009515 | ENSRNOT00000015325 | 0.951606259  | 1.93E-06 |
| TUCP_000303 | XLOC_009515 | ENSRNOT00000024992 | 0.951585671  | 1.93E-06 |
| TUCP_000303 | XLOC_009515 | ENSRNOT00000017232 | 0.952524881  | 1.75E-06 |
| TUCP_000303 | XLOC_009515 | ENSRNOT00000021716 | -0.961746047 | 6.05E-07 |
| TUCP_000303 | XLOC_009515 | ENSRNOT00000016351 | 0.974359527  | 8.36E-08 |
| TUCP_000303 | XLOC_009515 | ENSRNOT00000024285 | 0.956005381  | 1.21E-06 |
| TUCP_000303 | XLOC_009515 | ENSRNOT00000055888 | 0.954444664  | 1.43E-06 |
| TUCP_000303 | XLOC_009515 | ENSRNOT00000044073 | 0.950674253  | 2.12E-06 |
| TUCP_000303 | XLOC_009515 | ENSRNOT0000002771  | -0.961372785 | 6.35E-07 |
| TUCP_000303 | XLOC_009515 | ENSRNOT00000059487 | 0.964735948  | 4.05E-07 |
| TUCP_000303 | XLOC_009515 | ENSRNOT00000051522 | -0.953960465 | 1.51E-06 |
| TUCP_000303 | XLOC_009515 | ENSRNOT00000011408 | -0.955277176 | 1.31E-06 |
| TUCP_000303 | XLOC_009515 | ENSRNOT00000077935 | 0.96427564   | 4.32E-07 |
| TUCP_000303 | XLOC_009515 | ENSRNOT00000028893 | 0.9592718    | 8.24E-07 |
| TUCP_000303 | XLOC_009515 | ENSRNOT0000004842  | 0.962536129  | 5.46E-07 |
| TUCP_000303 | XLOC_009515 | ENSRNOT00000016191 | -0.956375841 | 1.16E-06 |
| TUCP_000303 | XLOC_009515 | ENSRNOT00000044254 | 0.958915628  | 8.60E-07 |
| TUCP_000303 | XLOC_009515 | ENSRNOT00000011344 | 0.957628566  | 1.00E-06 |
| TUCP_000303 | XLOC_009515 | ENSRNOT00000006499 | -0.951005829 | 2.05E-06 |
| TUCP_000303 | XLOC_009515 | ENSRNOT00000088202 | 0.9626402    | 5.38E-07 |
| TUCP_000303 | XLOC_009515 | ENSRNOT00000088201 | 0.950295967  | 2.20E-06 |
| TUCP_000303 | XLOC_009515 | ENSRNOT00000049536 | 0.955281124  | 1.31E-06 |
| TUCP_000303 | XLOC_009515 | ENSRNOT00000043451 | -0.952970634 | 1.67E-06 |
| TUCP_000303 | XLOC_009515 | ENSRNOT00000027125 | 0.958584362  | 8.95E-07 |
| TUCP_000303 | XLOC_009515 | ENSRNOT00000022478 | 0.957246287  | 1.05E-06 |

|             |             |                    |              |          |
|-------------|-------------|--------------------|--------------|----------|
| TUCP_000303 | XLOC_009515 | ENSRNOT00000010753 | 0.960303499  | 7.26E-07 |
| TUCP_000303 | XLOC_009515 | ENSRNOT00000078161 | 0.969084828  | 2.11E-07 |
| TUCP_000303 | XLOC_009515 | ENSRNOT00000064723 | 0.966184229  | 3.29E-07 |
| TUCP_000303 | XLOC_009515 | ENSRNOT00000002173 | 0.957416831  | 1.03E-06 |
| TUCP_000303 | XLOC_009515 | ENSRNOT00000038448 | 0.961803289  | 6.01E-07 |
| TUCP_000303 | XLOC_009515 | ENSRNOT00000050223 | 0.954815428  | 1.37E-06 |
| TUCP_000303 | XLOC_009515 | ENSRNOT00000089185 | 0.969896546  | 1.85E-07 |
| TUCP_000303 | XLOC_009515 | ENSRNOT00000059807 | -0.956099957 | 1.19E-06 |
| TUCP_000303 | XLOC_009515 | ENSRNOT00000009666 | 0.954366749  | 1.44E-06 |
| TUCP_000303 | XLOC_009515 | ENSRNOT00000001607 | -0.952663677 | 1.73E-06 |
| TUCP_000303 | XLOC_009515 | ENSRNOT00000015618 | 0.964328557  | 4.28E-07 |
| TUCP_000303 | XLOC_009515 | ENSRNOT00000051953 | 0.964286772  | 4.31E-07 |
| TUCP_000303 | XLOC_009515 | ENSRNOT00000017907 | 0.952949921  | 1.68E-06 |
| TUCP_000303 | XLOC_009515 | ENSRNOT00000028434 | 0.954249323  | 1.46E-06 |
| TUCP_000303 | XLOC_009515 | ENSRNOT00000074081 | 0.974445611  | 8.22E-08 |
| TUCP_000303 | XLOC_009515 | ENSRNOT00000090162 | 0.953294914  | 1.62E-06 |
| TUCP_000303 | XLOC_009515 | ENSRNOT00000046126 | 0.965179601  | 3.80E-07 |
| TUCP_000303 | XLOC_009515 | ENSRNOT00000040543 | 0.959274323  | 8.24E-07 |
| TUCP_000303 | XLOC_009515 | ENSRNOT00000023786 | 0.972987969  | 1.08E-07 |
| TUCP_000303 | XLOC_009515 | ENSRNOT00000040548 | 0.969580065  | 1.95E-07 |
| TUCP_000303 | XLOC_009515 | ENSRNOT00000076300 | 0.955790644  | 1.23E-06 |
| TUCP_000303 | XLOC_009515 | ENSRNOT00000021705 | 0.95421023   | 1.47E-06 |
| TUCP_000303 | XLOC_009515 | ENSRNOT00000041091 | 0.957893214  | 9.71E-07 |
| TUCP_000303 | XLOC_009515 | ENSRNOT00000001234 | 0.961363595  | 6.35E-07 |
| TUCP_000303 | XLOC_009515 | ENSRNOT00000068078 | 0.959367754  | 8.15E-07 |
| TUCP_000303 | XLOC_009515 | ENSRNOT00000058763 | 0.961085354  | 6.58E-07 |
| TUCP_000303 | XLOC_009515 | ENSRNOT00000092037 | 0.970798914  | 1.59E-07 |
| TUCP_000303 | XLOC_009515 | ENSRNOT00000081621 | -0.956387068 | 1.15E-06 |
| TUCP_000303 | XLOC_009515 | ENSRNOT00000007688 | 0.970114065  | 1.79E-07 |
| TUCP_000303 | XLOC_009515 | ENSRNOT00000028545 | 0.964557944  | 4.15E-07 |
| TUCP_000303 | XLOC_009515 | ENSRNOT00000055251 | -0.952200328 | 1.81E-06 |
| TUCP_000303 | XLOC_009515 | ENSRNOT00000060757 | 0.952380513  | 1.78E-06 |
| TUCP_000303 | XLOC_009515 | ENSRNOT00000005148 | 0.958183875  | 9.39E-07 |
| TUCP_000303 | XLOC_009515 | ENSRNOT00000092211 | 0.954425021  | 1.43E-06 |
| TUCP_000303 | XLOC_009515 | ENSRNOT00000063821 | 0.967044897  | 2.90E-07 |
| TUCP_000303 | XLOC_009515 | ENSRNOT00000068269 | 0.954347988  | 1.45E-06 |
| TUCP_000303 | XLOC_009515 | ENSRNOT00000025819 | 0.960294707  | 7.27E-07 |
| TUCP_000303 | XLOC_009515 | ENSRNOT00000041227 | 0.952757235  | 1.71E-06 |
| TUCP_000303 | XLOC_009515 | ENSRNOT0000002355  | 0.960253426  | 7.31E-07 |
| TUCP_000303 | XLOC_009515 | ENSRNOT00000044866 | 0.984221212  | 7.50E-09 |
| TUCP_000303 | XLOC_009515 | ENSRNOT00000045532 | 0.961053812  | 6.61E-07 |
| TUCP_000303 | XLOC_009515 | ENSRNOT00000088677 | 0.981656692  | 1.59E-08 |
| TUCP_000303 | XLOC_009515 | ENSRNOT00000083957 | -0.954519419 | 1.42E-06 |
| TUCP_000303 | XLOC_009515 | ENSRNOT00000010020 | 0.955183331  | 1.32E-06 |
| TUCP_000303 | XLOC_009515 | ENSRNOT00000011326 | 0.961532907  | 6.22E-07 |
| TUCP_000303 | XLOC_009515 | ENSRNOT00000036194 | 0.95168033   | 1.91E-06 |
| TUCP_000303 | XLOC_009515 | ENSRNOT00000000334 | 0.969095366  | 2.11E-07 |
| TUCP_004541 | XLOC_199938 | ENSRNOT00000028234 | 0.958860074  | 8.66E-07 |
| TUCP_004541 | XLOC_199938 | ENSRNOT00000082982 | 0.953733843  | 1.54E-06 |
| TUCP_004541 | XLOC_199938 | ENSRNOT00000023149 | 0.953893362  | 1.52E-06 |
| TUCP_004541 | XLOC_199938 | ENSRNOT00000038250 | 0.962567869  | 5.43E-07 |

|             |             |                    |              |          |
|-------------|-------------|--------------------|--------------|----------|
| TUCP_004541 | XLOC_199938 | ENSRNOT0000002247  | 0.961219587  | 6.47E-07 |
| TUCP_004541 | XLOC_199938 | ENSRNOT00000059447 | 0.955344595  | 1.30E-06 |
| TUCP_003260 | XLOC_139816 | ENSRNOT00000085364 | -0.97336247  | 1.01E-07 |
| TUCP_004468 | XLOC_196692 | ENSRNOT00000058295 | 0.954305515  | 1.45E-06 |
| TUCP_004468 | XLOC_196692 | ENSRNOT00000090449 | 0.967360336  | 2.76E-07 |
| TUCP_004468 | XLOC_196692 | ENSRNOT00000091574 | 0.954723378  | 1.39E-06 |
| TUCP_004468 | XLOC_196692 | ENSRNOT00000093001 | 0.998746372  | 2.43E-14 |
| TUCP_004468 | XLOC_196692 | ENSRNOT00000029757 | 0.952565802  | 1.75E-06 |
| TUCP_001408 | XLOC_055092 | ENSRNOT00000058803 | 0.981636989  | 1.59E-08 |
| TUCP_001408 | XLOC_055092 | ENSRNOT00000038038 | 0.95745469   | 1.02E-06 |
| TUCP_001408 | XLOC_055092 | ENSRNOT00000021320 | 0.958906199  | 8.61E-07 |
| TUCP_001408 | XLOC_055092 | ENSRNOT00000024390 | 0.950087868  | 2.24E-06 |
| TUCP_003135 | XLOC_134311 | ENSRNOT00000031904 | 0.950776517  | 2.09E-06 |
| TUCP_003135 | XLOC_134311 | ENSRNOT00000039809 | 0.951556173  | 1.94E-06 |
| TUCP_003135 | XLOC_134311 | ENSRNOT00000000743 | 0.950254159  | 2.21E-06 |
| TUCP_003135 | XLOC_134311 | ENSRNOT00000081246 | 0.953845422  | 1.53E-06 |
| TUCP_003135 | XLOC_134311 | ENSRNOT00000048910 | -0.962382932 | 5.57E-07 |
| TUCP_003135 | XLOC_134311 | ENSRNOT00000009877 | 0.952832938  | 1.70E-06 |
| TUCP_003135 | XLOC_134311 | ENSRNOT00000016555 | 0.951681043  | 1.91E-06 |
| TUCP_003135 | XLOC_134311 | ENSRNOT00000074939 | 0.965906161  | 3.43E-07 |
| TUCP_003135 | XLOC_134311 | ENSRNOT00000006055 | 0.970601936  | 1.65E-07 |
| TUCP_003135 | XLOC_134311 | ENSRNOT00000073559 | 0.956372997  | 1.16E-06 |
| TUCP_003135 | XLOC_134311 | ENSRNOT00000071560 | 0.956155912  | 1.19E-06 |
| TUCP_003135 | XLOC_134311 | ENSRNOT00000078445 | -0.965118057 | 3.84E-07 |
| TUCP_003135 | XLOC_134311 | ENSRNOT00000023638 | 0.952300593  | 1.79E-06 |
| TUCP_003135 | XLOC_134311 | ENSRNOT00000005228 | 0.977411008  | 4.46E-08 |
| TUCP_003135 | XLOC_134311 | ENSRNOT00000006175 | 0.960176801  | 7.38E-07 |
| TUCP_003135 | XLOC_134311 | ENSRNOT00000028628 | -0.955982867 | 1.21E-06 |
| TUCP_003135 | XLOC_134311 | ENSRNOT00000005220 | 0.950780679  | 2.09E-06 |
| TUCP_003135 | XLOC_134311 | ENSRNOT00000023144 | 0.992837708  | 1.47E-10 |
| TUCP_003135 | XLOC_134311 | ENSRNOT00000016649 | 0.954230049  | 1.46E-06 |
| TUCP_003135 | XLOC_134311 | ENSRNOT00000065300 | 0.960496751  | 7.09E-07 |
| TUCP_003135 | XLOC_134311 | ENSRNOT00000043216 | 0.960183163  | 7.37E-07 |
| TUCP_003135 | XLOC_134311 | ENSRNOT00000091128 | -0.979395586 | 2.83E-08 |
| TUCP_003135 | XLOC_134311 | ENSRNOT00000009803 | 0.962305787  | 5.63E-07 |
| TUCP_003135 | XLOC_134311 | ENSRNOT00000019618 | 0.951635224  | 1.92E-06 |
| TUCP_003135 | XLOC_134311 | ENSRNOT00000026543 | 0.984028411  | 7.97E-09 |
| TUCP_003135 | XLOC_134311 | ENSRNOT00000066670 | 0.955023716  | 1.34E-06 |
| TUCP_003135 | XLOC_134311 | ENSRNOT00000012187 | 0.975078932  | 7.26E-08 |
| TUCP_003135 | XLOC_134311 | ENSRNOT00000066810 | 0.962633351  | 5.39E-07 |
| TUCP_003135 | XLOC_134311 | ENSRNOT00000018533 | 0.963611555  | 4.73E-07 |
| TUCP_003135 | XLOC_134311 | ENSRNOT00000024969 | 0.977173994  | 4.70E-08 |
| TUCP_003135 | XLOC_134311 | ENSRNOT00000026783 | 0.951099377  | 2.03E-06 |
| TUCP_003135 | XLOC_134311 | ENSRNOT00000005126 | -0.962002786 | 5.85E-07 |
| TUCP_003135 | XLOC_134311 | ENSRNOT00000002866 | -0.951328098 | 1.98E-06 |
| TUCP_003135 | XLOC_134311 | ENSRNOT00000028646 | 0.971952595  | 1.30E-07 |
| TUCP_003135 | XLOC_134311 | ENSRNOT00000044742 | 0.961823066  | 5.99E-07 |
| TUCP_003135 | XLOC_134311 | ENSRNOT00000048754 | -0.960620249 | 6.98E-07 |
| TUCP_003135 | XLOC_134311 | ENSRNOT00000038247 | 0.973269708  | 1.03E-07 |
| TUCP_003135 | XLOC_134311 | ENSRNOT00000021496 | -0.96102635  | 6.63E-07 |
| TUCP_003135 | XLOC_134311 | ENSRNOT00000071764 | 0.977922094  | 3.98E-08 |

|             |             |                    |              |          |
|-------------|-------------|--------------------|--------------|----------|
| TUCP_003135 | XLOC_134311 | ENSRNOT00000035989 | 0.950573477  | 2.14E-06 |
| TUCP_003135 | XLOC_134311 | ENSRNOT00000024402 | 0.955894141  | 1.22E-06 |
| TUCP_003135 | XLOC_134311 | ENSRNOT00000021348 | 0.975427285  | 6.77E-08 |
| TUCP_003135 | XLOC_134311 | ENSRNOT00000089933 | 0.954026991  | 1.50E-06 |
| TUCP_003135 | XLOC_134311 | ENSRNOT00000009811 | 0.971884029  | 1.32E-07 |
| TUCP_003135 | XLOC_134311 | ENSRNOT00000065168 | 0.96011451   | 7.43E-07 |
| TUCP_003135 | XLOC_134311 | ENSRNOT00000085228 | 0.968741293  | 2.23E-07 |
| TUCP_003135 | XLOC_134311 | ENSRNOT00000032780 | 0.974612147  | 7.96E-08 |
| TUCP_003135 | XLOC_134311 | ENSRNOT00000009708 | -0.950121067 | 2.24E-06 |
| TUCP_003135 | XLOC_134311 | ENSRNOT00000017319 | 0.952455421  | 1.77E-06 |
| TUCP_003135 | XLOC_134311 | ENSRNOT00000077231 | 0.950821207  | 2.09E-06 |
| TUCP_003135 | XLOC_134311 | ENSRNOT00000072518 | 0.958257364  | 9.30E-07 |
| TUCP_003135 | XLOC_134311 | ENSRNOT00000087592 | 0.986590724  | 3.34E-09 |
| TUCP_003135 | XLOC_134311 | ENSRNOT00000017021 | 0.960704928  | 6.91E-07 |
| TUCP_003135 | XLOC_134311 | ENSRNOT00000005958 | 0.952450247  | 1.77E-06 |
| TUCP_003135 | XLOC_134311 | ENSRNOT00000032274 | 0.960068592  | 7.48E-07 |
| TUCP_003135 | XLOC_134311 | ENSRNOT00000008655 | 0.956069426  | 1.20E-06 |
| TUCP_003135 | XLOC_134311 | ENSRNOT00000010927 | 0.950264981  | 2.20E-06 |
| TUCP_003135 | XLOC_134311 | ENSRNOT00000087371 | 0.952730567  | 1.72E-06 |
| TUCP_003135 | XLOC_134311 | ENSRNOT00000010541 | 0.952014688  | 1.85E-06 |
| TUCP_003135 | XLOC_134311 | ENSRNOT00000012895 | 0.950965112  | 2.06E-06 |
| TUCP_003135 | XLOC_134311 | ENSRNOT00000015116 | 0.956403471  | 1.15E-06 |
| TUCP_003135 | XLOC_134311 | ENSRNOT00000090918 | 0.955266342  | 1.31E-06 |
| TUCP_003135 | XLOC_134311 | ENSRNOT0000001081  | 0.961048159  | 6.61E-07 |
| TUCP_003135 | XLOC_134311 | ENSRNOT00000083220 | 0.978123874  | 3.80E-08 |
| TUCP_003135 | XLOC_134311 | ENSRNOT00000086119 | -0.955263393 | 1.31E-06 |
| TUCP_003135 | XLOC_134311 | ENSRNOT00000061267 | 0.95513676   | 1.33E-06 |
| TUCP_003135 | XLOC_134311 | ENSRNOT00000058312 | 0.954584206  | 1.41E-06 |
| TUCP_003135 | XLOC_134311 | ENSRNOT00000019133 | 0.968525509  | 2.31E-07 |
| TUCP_003135 | XLOC_134311 | ENSRNOT00000013274 | 0.962468171  | 5.51E-07 |
| TUCP_003135 | XLOC_134311 | ENSRNOT00000022610 | 0.952406061  | 1.78E-06 |
| TUCP_003135 | XLOC_134311 | ENSRNOT00000052018 | 0.964467959  | 4.20E-07 |
| TUCP_003135 | XLOC_134311 | ENSRNOT00000006828 | 0.953672108  | 1.55E-06 |
| TUCP_003135 | XLOC_134311 | ENSRNOT00000010898 | 0.965852039  | 3.45E-07 |
| TUCP_003135 | XLOC_134311 | ENSRNOT00000047093 | 0.961381586  | 6.34E-07 |
| TUCP_003135 | XLOC_134311 | ENSRNOT00000078274 | 0.953872011  | 1.52E-06 |
| TUCP_003135 | XLOC_134311 | ENSRNOT00000015265 | 0.979083355  | 3.04E-08 |
| TUCP_003135 | XLOC_134311 | ENSRNOT00000005355 | 0.965969318  | 3.39E-07 |
| TUCP_003135 | XLOC_134311 | ENSRNOT00000010303 | -0.952553511 | 1.75E-06 |
| TUCP_003135 | XLOC_134311 | ENSRNOT00000052422 | 0.958485487  | 9.06E-07 |
| TUCP_003135 | XLOC_134311 | ENSRNOT00000057146 | 0.966544378  | 3.12E-07 |
| TUCP_003135 | XLOC_134311 | ENSRNOT00000015609 | 0.953231189  | 1.63E-06 |
| TUCP_003135 | XLOC_134311 | ENSRNOT00000078102 | 0.968430736  | 2.34E-07 |
| TUCP_003135 | XLOC_134311 | ENSRNOT00000090123 | 0.963749646  | 4.64E-07 |
| TUCP_003135 | XLOC_134311 | ENSRNOT00000025983 | 0.959860417  | 7.67E-07 |
| TUCP_003135 | XLOC_134311 | ENSRNOT00000001559 | 0.957531478  | 1.01E-06 |
| TUCP_003135 | XLOC_134311 | ENSRNOT00000004698 | 0.965678747  | 3.54E-07 |
| TUCP_003135 | XLOC_134311 | ENSRNOT00000081047 | 0.967146618  | 2.85E-07 |
| TUCP_003135 | XLOC_134311 | ENSRNOT00000081512 | 0.961351138  | 6.36E-07 |
| TUCP_003135 | XLOC_134311 | ENSRNOT00000033235 | 0.954633335  | 1.40E-06 |
| TUCP_003135 | XLOC_134311 | ENSRNOT00000012156 | 0.954701107  | 1.39E-06 |

|             |             |                    |              |          |
|-------------|-------------|--------------------|--------------|----------|
| TUCP_003135 | XLOC_134311 | ENSRNOT00000049819 | 0.969977446  | 1.83E-07 |
| TUCP_003135 | XLOC_134311 | ENSRNOT00000003991 | 0.951636878  | 1.92E-06 |
| TUCP_003135 | XLOC_134311 | ENSRNOT00000021408 | 0.969938059  | 1.84E-07 |
| TUCP_003135 | XLOC_134311 | ENSRNOT00000000302 | 0.950057142  | 2.25E-06 |
| TUCP_003135 | XLOC_134311 | ENSRNOT00000078475 | 0.953380596  | 1.60E-06 |
| TUCP_003135 | XLOC_134311 | ENSRNOT00000087429 | 0.969898023  | 1.85E-07 |
| TUCP_003135 | XLOC_134311 | ENSRNOT00000009683 | 0.958951139  | 8.57E-07 |
| TUCP_003135 | XLOC_134311 | ENSRNOT00000060362 | 0.992531866  | 1.81E-10 |
| TUCP_003135 | XLOC_134311 | ENSRNOT00000080207 | 0.988338943  | 1.67E-09 |
| TUCP_003135 | XLOC_134311 | ENSRNOT00000084088 | 0.960257818  | 7.30E-07 |
| TUCP_003135 | XLOC_134311 | ENSRNOT00000027910 | 0.958034266  | 9.55E-07 |
| TUCP_003135 | XLOC_134311 | ENSRNOT00000009280 | 0.956151851  | 1.19E-06 |
| TUCP_003135 | XLOC_134311 | ENSRNOT00000052224 | 0.959792219  | 7.74E-07 |
| TUCP_003135 | XLOC_134311 | ENSRNOT00000078070 | 0.980443962  | 2.18E-08 |
| TUCP_003135 | XLOC_134311 | ENSRNOT00000065983 | 0.956818072  | 1.10E-06 |
| TUCP_003135 | XLOC_134311 | ENSRNOT00000024322 | 0.956193527  | 1.18E-06 |
| TUCP_003135 | XLOC_134311 | ENSRNOT00000088182 | 0.971488192  | 1.41E-07 |
| TUCP_003135 | XLOC_134311 | ENSRNOT00000085596 | 0.953064865  | 1.66E-06 |
| TUCP_003135 | XLOC_134311 | ENSRNOT00000091265 | 0.972805105  | 1.12E-07 |
| TUCP_003135 | XLOC_134311 | ENSRNOT00000078390 | -0.955930283 | 1.22E-06 |
| TUCP_003135 | XLOC_134311 | ENSRNOT00000020437 | 0.953320284  | 1.61E-06 |
| TUCP_003135 | XLOC_134311 | ENSRNOT00000065501 | 0.95525312   | 1.31E-06 |
| TUCP_003135 | XLOC_134311 | ENSRNOT00000027454 | 0.971614946  | 1.38E-07 |
| TUCP_003135 | XLOC_134311 | ENSRNOT00000025832 | 0.982842355  | 1.14E-08 |
| TUCP_003135 | XLOC_134311 | ENSRNOT00000017753 | 0.960943111  | 6.70E-07 |
| TUCP_003135 | XLOC_134311 | ENSRNOT00000006499 | 0.956385933  | 1.15E-06 |
| TUCP_003135 | XLOC_134311 | ENSRNOT00000005909 | 0.952501979  | 1.76E-06 |
| TUCP_003135 | XLOC_134311 | ENSRNOT00000029833 | 0.954117332  | 1.48E-06 |
| TUCP_003135 | XLOC_134311 | ENSRNOT00000012702 | -0.954297623 | 1.45E-06 |
| TUCP_003135 | XLOC_134311 | ENSRNOT00000009129 | 0.954571676  | 1.41E-06 |
| TUCP_003135 | XLOC_134311 | ENSRNOT00000036951 | 0.957255787  | 1.05E-06 |
| TUCP_003135 | XLOC_134311 | ENSRNOT00000004046 | -0.963162255 | 5.02E-07 |
| TUCP_003135 | XLOC_134311 | ENSRNOT00000088054 | 0.954357574  | 1.44E-06 |
| TUCP_003135 | XLOC_134311 | ENSRNOT00000057313 | 0.961346262  | 6.37E-07 |
| TUCP_003135 | XLOC_134311 | ENSRNOT00000058842 | 0.951316808  | 1.98E-06 |
| TUCP_003135 | XLOC_134311 | ENSRNOT00000076669 | 0.96144506   | 6.29E-07 |
| TUCP_003135 | XLOC_134311 | ENSRNOT00000011984 | 0.956455494  | 1.15E-06 |
| TUCP_003135 | XLOC_134311 | ENSRNOT00000081981 | 0.962064828  | 5.81E-07 |
| TUCP_003135 | XLOC_134311 | ENSRNOT00000011350 | 0.959487099  | 8.03E-07 |
| TUCP_003135 | XLOC_134311 | ENSRNOT00000026293 | 0.956475637  | 1.14E-06 |
| TUCP_003135 | XLOC_134311 | ENSRNOT00000005659 | 0.957623982  | 1.00E-06 |
| TUCP_003135 | XLOC_134311 | ENSRNOT00000054828 | 0.954434978  | 1.43E-06 |
| TUCP_003135 | XLOC_134311 | ENSRNOT00000031230 | 0.956383562  | 1.16E-06 |
| TUCP_003135 | XLOC_134311 | ENSRNOT00000055992 | -0.971311877 | 1.46E-07 |
| TUCP_003135 | XLOC_134311 | ENSRNOT00000040069 | 0.96817539   | 2.44E-07 |
| TUCP_003135 | XLOC_134311 | ENSRNOT00000010748 | 0.963554725  | 4.76E-07 |
| TUCP_003135 | XLOC_134311 | ENSRNOT00000083127 | 0.961281598  | 6.42E-07 |
| TUCP_003135 | XLOC_134311 | ENSRNOT00000035474 | 0.962757204  | 5.30E-07 |
| TUCP_003135 | XLOC_134311 | ENSRNOT00000080695 | 0.955452775  | 1.28E-06 |
| TUCP_003135 | XLOC_134311 | ENSRNOT00000061392 | 0.965564614  | 3.60E-07 |
| TUCP_003135 | XLOC_134311 | ENSRNOT00000076872 | 0.983328077  | 9.86E-09 |

|             |             |                    |              |          |
|-------------|-------------|--------------------|--------------|----------|
| TUCP_003135 | XLOC_134311 | ENSRNOT00000014124 | 0.950611851  | 2.13E-06 |
| TUCP_003135 | XLOC_134311 | ENSRNOT00000029125 | 0.971567318  | 1.40E-07 |
| TUCP_003135 | XLOC_134311 | ENSRNOT00000060696 | 0.958646609  | 8.88E-07 |
| TUCP_003135 | XLOC_134311 | ENSRNOT00000042125 | 0.963029071  | 5.11E-07 |
| TUCP_003135 | XLOC_134311 | ENSRNOT00000014814 | 0.987586434  | 2.27E-09 |
| TUCP_003135 | XLOC_134311 | ENSRNOT00000004412 | 0.963154879  | 5.03E-07 |
| TUCP_003135 | XLOC_134311 | ENSRNOT00000064798 | 0.971924436  | 1.31E-07 |
| TUCP_003135 | XLOC_134311 | ENSRNOT00000019177 | 0.958299252  | 9.26E-07 |
| TUCP_003135 | XLOC_134311 | ENSRNOT00000022485 | 0.964759153  | 4.03E-07 |
| TUCP_003135 | XLOC_134311 | ENSRNOT00000011384 | 0.955136977  | 1.33E-06 |
| TUCP_003135 | XLOC_134311 | ENSRNOT00000027452 | 0.958531397  | 9.01E-07 |
| TUCP_003135 | XLOC_134311 | ENSRNOT00000016401 | 0.950687211  | 2.11E-06 |
| TUCP_003135 | XLOC_134311 | ENSRNOT00000026457 | 0.97856444   | 3.44E-08 |
| TUCP_003135 | XLOC_134311 | ENSRNOT00000004463 | 0.960047269  | 7.50E-07 |
| TUCP_003135 | XLOC_134311 | ENSRNOT00000023428 | 0.966059398  | 3.35E-07 |
| TUCP_003135 | XLOC_134311 | ENSRNOT00000051550 | 0.957295995  | 1.04E-06 |
| TUCP_003135 | XLOC_134311 | ENSRNOT00000008982 | 0.966711861  | 3.04E-07 |
| TUCP_003135 | XLOC_134311 | ENSRNOT00000021674 | 0.956914741  | 1.09E-06 |
| TUCP_003135 | XLOC_134311 | ENSRNOT00000047192 | -0.964966668 | 3.92E-07 |
| TUCP_003135 | XLOC_134311 | ENSRNOT00000079996 | 0.950036186  | 2.25E-06 |
| TUCP_003135 | XLOC_134311 | ENSRNOT00000080110 | 0.950310532  | 2.19E-06 |
| TUCP_003135 | XLOC_134311 | ENSRNOT00000083957 | 0.959221396  | 8.29E-07 |
| TUCP_003135 | XLOC_134311 | ENSRNOT00000015799 | 0.979046149  | 3.07E-08 |
| TUCP_003135 | XLOC_134311 | ENSRNOT00000083799 | 0.968844777  | 2.19E-07 |
| TUCP_003135 | XLOC_134311 | ENSRNOT00000024548 | 0.96095939   | 6.69E-07 |
| TUCP_004544 | XLOC_200020 | ENSRNOT00000055254 | -0.950595579 | 2.13E-06 |
| TUCP_004547 | XLOC_200021 | ENSRNOT00000080170 | 0.998294628  | 1.13E-13 |
| TUCP_004547 | XLOC_200021 | ENSRNOT00000091355 | 0.968265596  | 2.40E-07 |
| TUCP_004547 | XLOC_200021 | ENSRNOT00000090600 | 0.957769316  | 9.85E-07 |
| TUCP_004546 | XLOC_200021 | ENSRNOT00000089043 | 0.957708557  | 9.92E-07 |
| TUCP_001836 | XLOC_075637 | ENSRNOT00000000008 | 1            | 0        |
| TUCP_001836 | XLOC_075637 | ENSRNOT00000060048 | 0.998711457  | 2.79E-14 |
| TUCP_001836 | XLOC_075637 | ENSRNOT00000082304 | 0.996875989  | 2.33E-12 |
| TUCP_001836 | XLOC_075637 | ENSRNOT00000006219 | 1            | 0        |
| TUCP_001836 | XLOC_075637 | ENSRNOT00000065376 | 1            | 0        |
| TUCP_001836 | XLOC_075637 | ENSRNOT00000081433 | 0.984469223  | 6.93E-09 |
| TUCP_001836 | XLOC_075637 | ENSRNOT00000083575 | 1            | 0        |
| TUCP_001836 | XLOC_075637 | ENSRNOT00000087739 | 1            | 0        |
| TUCP_001836 | XLOC_075637 | ENSRNOT00000079826 | 1            | 0        |
| TUCP_001836 | XLOC_075637 | ENSRNOT00000025770 | 0.993828251  | 6.98E-11 |
| TUCP_001836 | XLOC_075637 | ENSRNOT00000088244 | 0.973479481  | 9.88E-08 |
| TUCP_001836 | XLOC_075637 | ENSRNOT00000048523 | 1            | 0        |
| TUCP_001836 | XLOC_075637 | ENSRNOT00000079365 | 0.958936699  | 8.58E-07 |
| TUCP_001836 | XLOC_075637 | ENSRNOT00000020229 | 0.960002785  | 7.54E-07 |
| TUCP_001836 | XLOC_075637 | ENSRNOT00000026428 | 0.996986683  | 1.95E-12 |
| TUCP_001836 | XLOC_075637 | ENSRNOT00000085673 | 1            | 0        |
| TUCP_001836 | XLOC_075637 | ENSRNOT00000072972 | 0.981476166  | 1.67E-08 |
| TUCP_001836 | XLOC_075637 | ENSRNOT00000050573 | 1            | 0        |
| TUCP_001836 | XLOC_075637 | ENSRNOT00000089876 | -0.953630353 | 1.56E-06 |
| TUCP_001836 | XLOC_075637 | ENSRNOT00000074378 | 0.998901807  | 1.26E-14 |
| TUCP_001836 | XLOC_075637 | ENSRNOT00000093571 | 1            | 0        |

|             |             |                    |              |          |
|-------------|-------------|--------------------|--------------|----------|
| TUCP_001836 | XLOC_075637 | ENSRNOT00000090581 | 1            | 0        |
| TUCP_001836 | XLOC_075637 | ENSRNOT00000076239 | 0.98020752   | 2.31E-08 |
| TUCP_001836 | XLOC_075637 | ENSRNOT00000065485 | 1            | 0        |
| TUCP_001836 | XLOC_075637 | ENSRNOT0000006356  | 0.999544279  | 1.55E-16 |
| TUCP_001836 | XLOC_075637 | ENSRNOT00000087199 | 0.974421555  | 8.26E-08 |
| TUCP_001836 | XLOC_075637 | ENSRNOT00000022091 | 1            | 0        |
| TUCP_001836 | XLOC_075637 | ENSRNOT00000064764 | 0.98460888   | 6.63E-09 |
| TUCP_001836 | XLOC_075637 | ENSRNOT00000076927 | 0.971163156  | 1.50E-07 |
| TUCP_001836 | XLOC_075637 | ENSRNOT00000092395 | 0.999522978  | 1.94E-16 |
| TUCP_004463 | XLOC_196512 | ENSRNOT00000084148 | -0.965081862 | 3.86E-07 |
| TUCP_001834 | XLOC_075637 | ENSRNOT00000085599 | 0.999804951  | 2.22E-18 |
| TUCP_001834 | XLOC_075637 | ENSRNOT0000006689  | 0.995367101  | 1.67E-11 |
| TUCP_001834 | XLOC_075637 | ENSRNOT00000081534 | 0.988341665  | 1.66E-09 |
| TUCP_001834 | XLOC_075637 | ENSRNOT00000085301 | 0.998280572  | 1.18E-13 |
| TUCP_001834 | XLOC_075637 | ENSRNOT00000038729 | 0.999899774  | 7.96E-20 |
| TUCP_001834 | XLOC_075637 | ENSRNOT00000086385 | 0.999899774  | 7.96E-20 |
| TUCP_001834 | XLOC_075637 | ENSRNOT00000077695 | 0.962491721  | 5.49E-07 |
| TUCP_001834 | XLOC_075637 | ENSRNOT00000078561 | 0.98840691   | 1.62E-09 |
| TUCP_001834 | XLOC_075637 | ENSRNOT00000087613 | 0.999899774  | 7.96E-20 |
| TUCP_001834 | XLOC_075637 | ENSRNOT00000026032 | 0.954503135  | 1.42E-06 |
| TUCP_001834 | XLOC_075637 | ENSRNOT00000073350 | 0.965871188  | 3.44E-07 |
| TUCP_001834 | XLOC_075637 | ENSRNOT00000023062 | 0.999899774  | 7.96E-20 |
| TUCP_001834 | XLOC_075637 | ENSRNOT00000058834 | 0.999899774  | 7.96E-20 |
| TUCP_001834 | XLOC_075637 | ENSRNOT00000079420 | 0.999899774  | 7.96E-20 |
| TUCP_001834 | XLOC_075637 | ENSRNOT00000090761 | 0.999899774  | 7.96E-20 |
| TUCP_001834 | XLOC_075637 | ENSRNOT00000055923 | 0.999899774  | 7.96E-20 |
| TUCP_001834 | XLOC_075637 | ENSRNOT00000092416 | 0.962976879  | 5.15E-07 |
| TUCP_001834 | XLOC_075637 | ENSRNOT00000071930 | 0.999899774  | 7.96E-20 |
| TUCP_001834 | XLOC_075637 | ENSRNOT00000001996 | 0.973000477  | 1.08E-07 |
| TUCP_001834 | XLOC_075637 | ENSRNOT00000076756 | 0.999899774  | 7.96E-20 |
| TUCP_001834 | XLOC_075637 | ENSRNOT00000081527 | 0.99937874   | 7.28E-16 |
| TUCP_001834 | XLOC_075637 | ENSRNOT00000085067 | 0.959018895  | 8.50E-07 |
| TUCP_001834 | XLOC_075637 | ENSRNOT00000091663 | 0.996845909  | 2.45E-12 |
| TUCP_001834 | XLOC_075637 | ENSRNOT00000081780 | 0.999899774  | 7.96E-20 |
| TUCP_001834 | XLOC_075637 | ENSRNOT00000093689 | 0.952599373  | 1.74E-06 |
| TUCP_001834 | XLOC_075637 | ENSRNOT00000089114 | 0.999899774  | 7.96E-20 |
| TUCP_001834 | XLOC_075637 | ENSRNOT00000021609 | 0.976279349  | 5.68E-08 |
| TUCP_001834 | XLOC_075637 | ENSRNOT00000073316 | 0.999899774  | 7.96E-20 |
| TUCP_001834 | XLOC_075637 | ENSRNOT00000086557 | 0.98002474   | 2.42E-08 |
| TUCP_001834 | XLOC_075637 | ENSRNOT00000071663 | 0.999899774  | 7.96E-20 |
| TUCP_001834 | XLOC_075637 | ENSRNOT00000042860 | 0.999899774  | 7.96E-20 |
| TUCP_001834 | XLOC_075637 | ENSRNOT00000072962 | 0.971646881  | 1.38E-07 |
| TUCP_001834 | XLOC_075637 | ENSRNOT00000088421 | 0.999899774  | 7.96E-20 |
| TUCP_001834 | XLOC_075637 | ENSRNOT00000038898 | 0.999899774  | 7.96E-20 |
| TUCP_001834 | XLOC_075637 | ENSRNOT00000015840 | 0.957707198  | 9.92E-07 |
| TUCP_001834 | XLOC_075637 | ENSRNOT00000064936 | 0.985356849  | 5.17E-09 |
| TUCP_001834 | XLOC_075637 | ENSRNOT00000042777 | 0.990133108  | 7.24E-10 |
| TUCP_001834 | XLOC_075637 | ENSRNOT00000010029 | 0.999899774  | 7.96E-20 |
| TUCP_004461 | XLOC_196288 | ENSRNOT00000085084 | 0.988445667  | 1.59E-09 |
| TUCP_003306 | XLOC_142030 | ENSRNOT00000027891 | 0.979493576  | 2.76E-08 |
| TUCP_003306 | XLOC_142030 | ENSRNOT00000066764 | 0.954995767  | 1.35E-06 |

|             |             |                    |              |          |
|-------------|-------------|--------------------|--------------|----------|
| TUCP_003306 | XLOC_142030 | ENSRNOT00000014785 | 0.962793406  | 5.28E-07 |
| TUCP_003306 | XLOC_142030 | ENSRNOT00000083702 | 0.96726525   | 2.80E-07 |
| TUCP_003306 | XLOC_142030 | ENSRNOT00000002429 | 0.960545581  | 7.05E-07 |
| TUCP_003306 | XLOC_142030 | ENSRNOT00000003085 | 0.966823667  | 2.99E-07 |
| TUCP_003306 | XLOC_142030 | ENSRNOT00000002037 | 0.970297223  | 1.73E-07 |
| TUCP_003306 | XLOC_142030 | ENSRNOT00000060607 | 0.957698887  | 9.93E-07 |
| TUCP_003306 | XLOC_142030 | ENSRNOT00000059524 | 0.952187162  | 1.82E-06 |
| TUCP_003306 | XLOC_142030 | ENSRNOT00000007169 | 0.960651814  | 6.95E-07 |
| TUCP_003306 | XLOC_142030 | ENSRNOT00000019680 | 0.961307074  | 6.40E-07 |
| TUCP_003306 | XLOC_142030 | ENSRNOT00000050721 | 0.963970001  | 4.50E-07 |
| TUCP_003306 | XLOC_142030 | ENSRNOT00000020265 | 0.961924634  | 5.91E-07 |
| TUCP_003306 | XLOC_142030 | ENSRNOT00000022253 | 0.966419491  | 3.18E-07 |
| TUCP_003306 | XLOC_142030 | ENSRNOT00000082999 | 0.950485724  | 2.16E-06 |
| TUCP_003306 | XLOC_142030 | ENSRNOT00000025308 | 0.950483319  | 2.16E-06 |
| TUCP_003306 | XLOC_142030 | ENSRNOT00000076105 | 0.950758142  | 2.10E-06 |
| TUCP_003306 | XLOC_142030 | ENSRNOT00000003409 | 0.95368072   | 1.55E-06 |
| TUCP_003306 | XLOC_142030 | ENSRNOT00000006355 | 0.951401794  | 1.97E-06 |
| TUCP_003306 | XLOC_142030 | ENSRNOT00000085311 | 0.950187401  | 2.22E-06 |
| TUCP_003306 | XLOC_142030 | ENSRNOT00000003320 | 0.981644283  | 1.59E-08 |
| TUCP_003306 | XLOC_142030 | ENSRNOT00000073569 | 0.954225372  | 1.47E-06 |
| TUCP_003306 | XLOC_142030 | ENSRNOT00000065304 | 0.97489133   | 7.54E-08 |
| TUCP_003306 | XLOC_142030 | ENSRNOT00000022620 | -0.960002577 | 7.54E-07 |
| TUCP_003306 | XLOC_142030 | ENSRNOT00000015247 | 0.962272041  | 5.65E-07 |
| TUCP_003306 | XLOC_142030 | ENSRNOT00000014373 | 0.954614578  | 1.41E-06 |
| TUCP_003306 | XLOC_142030 | ENSRNOT00000012114 | 0.951808026  | 1.89E-06 |
| TUCP_003306 | XLOC_142030 | ENSRNOT00000022241 | 0.957065006  | 1.07E-06 |
| TUCP_003306 | XLOC_142030 | ENSRNOT00000039377 | 0.968793689  | 2.21E-07 |
| TUCP_003306 | XLOC_142030 | ENSRNOT00000023728 | 0.964311701  | 4.29E-07 |
| TUCP_003306 | XLOC_142030 | ENSRNOT00000015568 | 0.961292335  | 6.41E-07 |
| TUCP_003306 | XLOC_142030 | ENSRNOT00000002936 | 0.971287406  | 1.46E-07 |
| TUCP_003306 | XLOC_142030 | ENSRNOT00000092037 | 0.959582986  | 7.94E-07 |
| TUCP_003306 | XLOC_142030 | ENSRNOT00000013609 | 0.954701342  | 1.39E-06 |
| TUCP_003306 | XLOC_142030 | ENSRNOT00000032782 | -0.97718082  | 4.69E-08 |
| TUCP_003306 | XLOC_142030 | ENSRNOT00000026654 | 0.963009581  | 5.13E-07 |
| TUCP_003306 | XLOC_142030 | ENSRNOT00000020702 | 0.966867964  | 2.97E-07 |
| TUCP_003306 | XLOC_142030 | ENSRNOT00000024568 | 0.962064208  | 5.81E-07 |
| TUCP_003306 | XLOC_142030 | ENSRNOT00000080797 | 0.961105332  | 6.57E-07 |
| TUCP_003306 | XLOC_142030 | ENSRNOT00000076181 | 0.951180031  | 2.01E-06 |
| TUCP_003306 | XLOC_142030 | ENSRNOT00000037039 | 0.951244804  | 2.00E-06 |
| TUCP_003306 | XLOC_142030 | ENSRNOT00000070794 | 0.9601688    | 7.38E-07 |
| TUCP_003306 | XLOC_142030 | ENSRNOT00000003715 | 0.951013871  | 2.05E-06 |
| TUCP_003306 | XLOC_142030 | ENSRNOT00000047634 | 0.953384099  | 1.60E-06 |
| TUCP_003306 | XLOC_142030 | ENSRNOT00000014912 | 0.970870126  | 1.57E-07 |
| TUCP_003306 | XLOC_142030 | ENSRNOT00000083995 | 0.950652764  | 2.12E-06 |
| TUCP_003306 | XLOC_142030 | ENSRNOT00000016447 | 0.957732406  | 9.90E-07 |
| TUCP_003306 | XLOC_142030 | ENSRNOT00000084313 | 0.95394346   | 1.51E-06 |
| TUCP_003306 | XLOC_142030 | ENSRNOT00000035048 | 0.960509679  | 7.08E-07 |
| TUCP_003306 | XLOC_142030 | ENSRNOT00000011481 | 0.963639658  | 4.71E-07 |
| TUCP_003306 | XLOC_142030 | ENSRNOT00000025916 | 0.950621299  | 2.13E-06 |
| TUCP_003306 | XLOC_142030 | ENSRNOT00000009333 | 0.95359934   | 1.57E-06 |
| TUCP_003306 | XLOC_142030 | ENSRNOT00000048770 | 0.951513999  | 1.94E-06 |



|             |             |                    |              |          |
|-------------|-------------|--------------------|--------------|----------|
| TUCP_003306 | XLOC_142030 | ENSRNOT00000065288 | 0.988090189  | 1.85E-09 |
| TUCP_003306 | XLOC_142030 | ENSRNOT00000039729 | 0.971921132  | 1.31E-07 |
| TUCP_003306 | XLOC_142030 | ENSRNOT00000018549 | 0.966945744  | 2.94E-07 |
| TUCP_003306 | XLOC_142030 | ENSRNOT00000024992 | 0.951138125  | 2.02E-06 |
| TUCP_003306 | XLOC_142030 | ENSRNOT00000028067 | 0.962722422  | 5.32E-07 |
| TUCP_003306 | XLOC_142030 | ENSRNOT00000063821 | 0.967529286  | 2.69E-07 |
| TUCP_003306 | XLOC_142030 | ENSRNOT00000017232 | 0.965485873  | 3.64E-07 |
| TUCP_003306 | XLOC_142030 | ENSRNOT00000017692 | 0.965239227  | 3.77E-07 |
| TUCP_003306 | XLOC_142030 | ENSRNOT00000010079 | 0.967067207  | 2.89E-07 |
| TUCP_003306 | XLOC_142030 | ENSRNOT00000055888 | 0.950554851  | 2.14E-06 |
| TUCP_003306 | XLOC_142030 | ENSRNOT00000011401 | 0.956830923  | 1.10E-06 |
| TUCP_003306 | XLOC_142030 | ENSRNOT00000044073 | 0.956009343  | 1.20E-06 |
| TUCP_003306 | XLOC_142030 | ENSRNOT00000059487 | 0.964847596  | 3.98E-07 |
| TUCP_003306 | XLOC_142030 | ENSRNOT00000039005 | 0.968233485  | 2.42E-07 |
| TUCP_003306 | XLOC_142030 | ENSRNOT00000004842 | 0.960716726  | 6.90E-07 |
| TUCP_003306 | XLOC_142030 | ENSRNOT00000028887 | 0.975766738  | 6.32E-08 |
| TUCP_003306 | XLOC_142030 | ENSRNOT00000037363 | 0.959377015  | 8.14E-07 |
| TUCP_003306 | XLOC_142030 | ENSRNOT00000009840 | 0.983869882  | 8.37E-09 |
| TUCP_003306 | XLOC_142030 | ENSRNOT00000019361 | 0.950004135  | 2.26E-06 |
| TUCP_003306 | XLOC_142030 | ENSRNOT00000030329 | 0.954558181  | 1.41E-06 |
| TUCP_003306 | XLOC_142030 | ENSRNOT00000060692 | 0.965902017  | 3.43E-07 |
| TUCP_003306 | XLOC_142030 | ENSRNOT00000006246 | 0.968138713  | 2.45E-07 |
| TUCP_003306 | XLOC_142030 | ENSRNOT00000049536 | 0.959899606  | 7.63E-07 |
| TUCP_003306 | XLOC_142030 | ENSRNOT00000016112 | 0.981380781  | 1.71E-08 |
| TUCP_003306 | XLOC_142030 | ENSRNOT00000086459 | 0.965836107  | 3.46E-07 |
| TUCP_003306 | XLOC_142030 | ENSRNOT00000022478 | 0.974654454  | 7.89E-08 |
| TUCP_003306 | XLOC_142030 | ENSRNOT00000010753 | 0.964061656  | 4.44E-07 |
| TUCP_003306 | XLOC_142030 | ENSRNOT00000022341 | 0.95045442   | 2.16E-06 |
| TUCP_003306 | XLOC_142030 | ENSRNOT00000003600 | 0.95386684   | 1.52E-06 |
| TUCP_003306 | XLOC_142030 | ENSRNOT00000089185 | 0.950985359  | 2.05E-06 |
| TUCP_003306 | XLOC_142030 | ENSRNOT00000019886 | -0.957883504 | 9.72E-07 |
| TUCP_003306 | XLOC_142030 | ENSRNOT00000016842 | 0.956347543  | 1.16E-06 |
| TUCP_003306 | XLOC_142030 | ENSRNOT00000009666 | 0.975803985  | 6.27E-08 |
| TUCP_003306 | XLOC_142030 | ENSRNOT00000012635 | 0.953714283  | 1.55E-06 |
| TUCP_003306 | XLOC_142030 | ENSRNOT00000074081 | 0.963593364  | 4.74E-07 |
| TUCP_003306 | XLOC_142030 | ENSRNOT00000004972 | -0.967186117 | 2.84E-07 |
| TUCP_003306 | XLOC_142030 | ENSRNOT00000059210 | 0.956977381  | 1.08E-06 |
| TUCP_003306 | XLOC_142030 | ENSRNOT00000014559 | 0.962591721  | 5.42E-07 |
| TUCP_003306 | XLOC_142030 | ENSRNOT00000082645 | 0.958217941  | 9.35E-07 |
| TUCP_003306 | XLOC_142030 | ENSRNOT00000007771 | 0.968831865  | 2.20E-07 |
| TUCP_003306 | XLOC_142030 | ENSRNOT00000013933 | 0.951621556  | 1.92E-06 |
| TUCP_003306 | XLOC_142030 | ENSRNOT00000088474 | 0.952806676  | 1.70E-06 |
| TUCP_003306 | XLOC_142030 | ENSRNOT00000023786 | 0.958290291  | 9.27E-07 |
| TUCP_003306 | XLOC_142030 | ENSRNOT00000027759 | 0.950067704  | 2.25E-06 |
| TUCP_003306 | XLOC_142030 | ENSRNOT00000068078 | 0.957951275  | 9.65E-07 |
| TUCP_003306 | XLOC_142030 | ENSRNOT00000020475 | 0.951689546  | 1.91E-06 |
| TUCP_003306 | XLOC_142030 | ENSRNOT00000024313 | -0.957384052 | 1.03E-06 |
| TUCP_003306 | XLOC_142030 | ENSRNOT00000007688 | 0.963159459  | 5.02E-07 |
| TUCP_003306 | XLOC_142030 | ENSRNOT00000028423 | 0.9538463    | 1.53E-06 |
| TUCP_003306 | XLOC_142030 | ENSRNOT00000049927 | 0.952563117  | 1.75E-06 |
| TUCP_003306 | XLOC_142030 | ENSRNOT00000005148 | 0.951954266  | 1.86E-06 |

|             |             |                    |             |          |
|-------------|-------------|--------------------|-------------|----------|
| TUCP_003306 | XLOC_142030 | ENSRNOT00000068267 | 0.961716101 | 6.07E-07 |
| TUCP_003306 | XLOC_142030 | ENSRNOT00000068183 | 0.959240667 | 8.27E-07 |
| TUCP_003306 | XLOC_142030 | ENSRNOT00000026364 | 0.964171239 | 4.38E-07 |
| TUCP_003306 | XLOC_142030 | ENSRNOT00000030344 | 0.988924675 | 1.29E-09 |
| TUCP_003306 | XLOC_142030 | ENSRNOT00000001916 | 0.9732675   | 1.03E-07 |
| TUCP_003306 | XLOC_142030 | ENSRNOT00000019916 | 0.983066992 | 1.07E-08 |
| TUCP_003306 | XLOC_142030 | ENSRNOT00000002355 | 0.96422356  | 4.35E-07 |
| TUCP_003306 | XLOC_142030 | ENSRNOT00000044254 | 0.965933194 | 3.41E-07 |
| TUCP_003306 | XLOC_142030 | ENSRNOT00000077163 | 0.968790385 | 2.21E-07 |
| TUCP_003306 | XLOC_142030 | ENSRNOT00000088677 | 0.955555993 | 1.27E-06 |
| TUCP_003306 | XLOC_142030 | ENSRNOT00000059599 | 0.96509367  | 3.85E-07 |
| TUCP_001833 | XLOC_075637 | ENSRNOT00000057378 | 0.956286044 | 1.17E-06 |
| TUCP_001833 | XLOC_075637 | ENSRNOT00000016418 | 0.978873853 | 3.20E-08 |
| TUCP_001833 | XLOC_075637 | ENSRNOT00000016843 | 0.959031971 | 8.48E-07 |
| TUCP_003305 | XLOC_141928 | ENSRNOT00000028833 | 0.952335885 | 1.79E-06 |
| TUCP_001937 | XLOC_078987 | ENSRNOT00000081570 | 0.962961027 | 5.16E-07 |
| TUCP_001937 | XLOC_078987 | ENSRNOT00000091652 | 0.99819185  | 1.52E-13 |
| TUCP_001937 | XLOC_078987 | ENSRNOT00000036564 | 0.972337506 | 1.22E-07 |
| TUCP_001937 | XLOC_078987 | ENSRNOT00000000109 | 0.962179854 | 5.72E-07 |
| TUCP_001937 | XLOC_078987 | ENSRNOT00000080865 | 1           | 0        |
| TUCP_001937 | XLOC_078987 | ENSRNOT00000073534 | 0.995808019 | 1.01E-11 |
| TUCP_001937 | XLOC_078987 | ENSRNOT00000012161 | 0.987544327 | 2.31E-09 |
| TUCP_001937 | XLOC_078987 | ENSRNOT00000078707 | 0.960060506 | 7.48E-07 |
| TUCP_001937 | XLOC_078987 | ENSRNOT00000087758 | 0.968778527 | 2.22E-07 |
| TUCP_001937 | XLOC_078987 | ENSRNOT00000049832 | 0.969039151 | 2.13E-07 |
| TUCP_001937 | XLOC_078987 | ENSRNOT00000093019 | 1           | 0        |
| TUCP_001937 | XLOC_078987 | ENSRNOT00000024825 | 0.980452701 | 2.18E-08 |
| TUCP_001937 | XLOC_078987 | ENSRNOT00000059266 | 0.96033506  | 7.23E-07 |
| TUCP_001937 | XLOC_078987 | ENSRNOT00000072734 | 0.965018115 | 3.89E-07 |
| TUCP_001937 | XLOC_078987 | ENSRNOT00000085908 | 0.996653227 | 3.29E-12 |
| TUCP_001937 | XLOC_078987 | ENSRNOT00000046744 | 1           | 0        |
| TUCP_001937 | XLOC_078987 | ENSRNOT00000076429 | 1           | 0        |
| TUCP_001937 | XLOC_078987 | ENSRNOT00000084667 | 0.999660971 | 3.53E-17 |
| TUCP_001937 | XLOC_078987 | ENSRNOT00000055412 | 1           | 0        |
| TUCP_001937 | XLOC_078987 | ENSRNOT00000093201 | 0.9997022   | 1.84E-17 |
| TUCP_001937 | XLOC_078987 | ENSRNOT00000072724 | 1           | 0        |
| TUCP_001937 | XLOC_078987 | ENSRNOT00000090323 | 0.95603782  | 1.20E-06 |
| TUCP_001937 | XLOC_078987 | ENSRNOT00000082760 | 0.986293522 | 3.72E-09 |
| TUCP_001937 | XLOC_078987 | ENSRNOT00000066017 | 0.989785653 | 8.61E-10 |
| TUCP_001937 | XLOC_078987 | ENSRNOT00000073148 | 0.985721397 | 4.56E-09 |
| TUCP_001937 | XLOC_078987 | ENSRNOT00000077462 | 0.960098183 | 7.45E-07 |
| TUCP_001937 | XLOC_078987 | ENSRNOT00000084375 | 1           | 0        |
| TUCP_001937 | XLOC_078987 | ENSRNOT00000085447 | 0.998400682 | 8.22E-14 |
| TUCP_001937 | XLOC_078987 | ENSRNOT00000006249 | 0.966489607 | 3.15E-07 |
| TUCP_001937 | XLOC_078987 | ENSRNOT00000087073 | 0.952450698 | 1.77E-06 |
| TUCP_001937 | XLOC_078987 | ENSRNOT00000042369 | 0.995659369 | 1.20E-11 |
| TUCP_001937 | XLOC_078987 | ENSRNOT00000086554 | 1           | 0        |
| TUCP_001937 | XLOC_078987 | ENSRNOT00000054858 | 0.985228824 | 5.40E-09 |
| TUCP_001937 | XLOC_078987 | ENSRNOT00000047921 | 1           | 0        |
| TUCP_001937 | XLOC_078987 | ENSRNOT00000064261 | 0.999977196 | 4.86E-23 |
| TUCP_001937 | XLOC_078987 | ENSRNOT00000086660 | 0.999208903 | 2.44E-15 |

|             |             |                    |              |          |
|-------------|-------------|--------------------|--------------|----------|
| TUCP_001937 | XLOC_078987 | ENSRNOT00000080933 | 0.967360681  | 2.76E-07 |
| TUCP_001937 | XLOC_078987 | ENSRNOT00000083977 | 1            | 0        |
| TUCP_001937 | XLOC_078987 | ENSRNOT00000092933 | 1            | 0        |
| TUCP_001937 | XLOC_078987 | ENSRNOT0000009061  | 0.953300672  | 1.62E-06 |
| TUCP_001937 | XLOC_078987 | ENSRNOT00000041281 | 0.987828355  | 2.06E-09 |
| TUCP_003061 | XLOC_130780 | ENSRNOT00000018787 | 0.954286217  | 1.46E-06 |
| TUCP_003061 | XLOC_130780 | ENSRNOT00000037409 | 0.952714376  | 1.72E-06 |
| TUCP_003061 | XLOC_130780 | ENSRNOT00000059173 | -0.950353927 | 2.18E-06 |
| TUCP_003061 | XLOC_130780 | ENSRNOT00000057537 | 0.954981906  | 1.35E-06 |
| TUCP_003061 | XLOC_130780 | ENSRNOT00000031384 | 0.950112771  | 2.24E-06 |
| TUCP_003037 | XLOC_129267 | ENSRNOT00000084133 | 1            | 0        |
| TUCP_003037 | XLOC_129267 | ENSRNOT00000093745 | 0.981891039  | 1.49E-08 |
| TUCP_003037 | XLOC_129267 | ENSRNOT00000065542 | 0.99828699   | 1.16E-13 |
| TUCP_003037 | XLOC_129267 | ENSRNOT00000082464 | 1            | 0        |
| TUCP_003037 | XLOC_129267 | ENSRNOT00000087659 | 1            | 0        |
| TUCP_003037 | XLOC_129267 | ENSRNOT00000084582 | 0.976633579  | 5.28E-08 |
| TUCP_003037 | XLOC_129267 | ENSRNOT00000085078 | 1            | 0        |
| TUCP_003037 | XLOC_129267 | ENSRNOT00000014028 | 1            | 0        |
| TUCP_003037 | XLOC_129267 | ENSRNOT00000049363 | 1            | 0        |
| TUCP_003037 | XLOC_129267 | ENSRNOT00000065473 | 0.999949098  | 2.69E-21 |
| TUCP_003037 | XLOC_129267 | ENSRNOT00000000142 | 0.998996155  | 8.01E-15 |
| TUCP_003037 | XLOC_129267 | ENSRNOT00000082288 | 0.999998398  | 8.30E-29 |
| TUCP_003037 | XLOC_129267 | ENSRNOT00000039664 | 1            | 0        |
| TUCP_003037 | XLOC_129267 | ENSRNOT00000065402 | 1            | 0        |
| TUCP_003037 | XLOC_129267 | ENSRNOT00000064551 | 0.965365872  | 3.70E-07 |
| TUCP_003037 | XLOC_129267 | ENSRNOT00000084141 | 1            | 0        |
| TUCP_003037 | XLOC_129267 | ENSRNOT00000082435 | 1            | 0        |
| TUCP_003037 | XLOC_129267 | ENSRNOT00000082928 | 0.996801059  | 2.62E-12 |
| TUCP_003037 | XLOC_129267 | ENSRNOT00000066546 | 0.956953619  | 1.08E-06 |
| TUCP_003037 | XLOC_129267 | ENSRNOT00000046013 | 0.988138626  | 1.81E-09 |
| TUCP_003037 | XLOC_129267 | ENSRNOT00000067931 | 0.978893628  | 3.18E-08 |
| TUCP_003037 | XLOC_129267 | ENSRNOT00000086425 | 0.992023315  | 2.51E-10 |
| TUCP_003037 | XLOC_129267 | ENSRNOT00000093696 | 0.956927219  | 1.09E-06 |
| TUCP_003037 | XLOC_129267 | ENSRNOT00000036228 | 0.982337157  | 1.31E-08 |
| TUCP_003037 | XLOC_129267 | ENSRNOT00000014030 | 1            | 0        |
| TUCP_003037 | XLOC_129267 | ENSRNOT00000081966 | 1            | 1.33E-79 |
| TUCP_003037 | XLOC_129267 | ENSRNOT00000075906 | 1            | 0        |
| TUCP_003037 | XLOC_129267 | ENSRNOT00000088396 | 0.981336994  | 1.73E-08 |
| TUCP_003037 | XLOC_129267 | ENSRNOT00000049259 | 0.965500259  | 3.63E-07 |
| TUCP_003037 | XLOC_129267 | ENSRNOT00000092838 | 0.982579749  | 1.23E-08 |
| TUCP_003037 | XLOC_129267 | ENSRNOT00000093442 | 0.959217317  | 8.30E-07 |
| TUCP_001933 | XLOC_078987 | ENSRNOT00000085599 | 0.999856625  | 4.77E-19 |
| TUCP_001933 | XLOC_078987 | ENSRNOT0000006689  | 0.995019613  | 2.39E-11 |
| TUCP_001933 | XLOC_078987 | ENSRNOT00000081534 | 0.98849657   | 1.56E-09 |
| TUCP_001933 | XLOC_078987 | ENSRNOT00000085301 | 0.998143198  | 1.73E-13 |
| TUCP_001933 | XLOC_078987 | ENSRNOT00000038729 | 0.999827128  | 1.22E-18 |
| TUCP_001933 | XLOC_078987 | ENSRNOT00000086385 | 0.999827128  | 1.22E-18 |
| TUCP_001933 | XLOC_078987 | ENSRNOT00000077695 | 0.961826946  | 5.99E-07 |
| TUCP_001933 | XLOC_078987 | ENSRNOT00000078561 | 0.986704826  | 3.20E-09 |
| TUCP_001933 | XLOC_078987 | ENSRNOT00000087613 | 0.999827128  | 1.22E-18 |
| TUCP_001933 | XLOC_078987 | ENSRNOT00000026032 | 0.957314575  | 1.04E-06 |

|             |             |                    |             |          |
|-------------|-------------|--------------------|-------------|----------|
| TUCP_001933 | XLOC_078987 | ENSRNOT00000073350 | 0.966853571 | 2.98E-07 |
| TUCP_001933 | XLOC_078987 | ENSRNOT00000023062 | 0.999827128 | 1.22E-18 |
| TUCP_001933 | XLOC_078987 | ENSRNOT00000058834 | 0.999827128 | 1.22E-18 |
| TUCP_001933 | XLOC_078987 | ENSRNOT00000079420 | 0.999827128 | 1.22E-18 |
| TUCP_001933 | XLOC_078987 | ENSRNOT00000090761 | 0.999827128 | 1.22E-18 |
| TUCP_001933 | XLOC_078987 | ENSRNOT00000055923 | 0.999827128 | 1.22E-18 |
| TUCP_001933 | XLOC_078987 | ENSRNOT00000092416 | 0.960732129 | 6.88E-07 |
| TUCP_001933 | XLOC_078987 | ENSRNOT00000071930 | 0.999827128 | 1.22E-18 |
| TUCP_001933 | XLOC_078987 | ENSRNOT00000001996 | 0.973651742 | 9.57E-08 |
| TUCP_001933 | XLOC_078987 | ENSRNOT00000076756 | 0.999827128 | 1.22E-18 |
| TUCP_001933 | XLOC_078987 | ENSRNOT00000081527 | 0.999127804 | 3.97E-15 |
| TUCP_001933 | XLOC_078987 | ENSRNOT00000085067 | 0.964228539 | 4.34E-07 |
| TUCP_001933 | XLOC_078987 | ENSRNOT00000091663 | 0.996564166 | 3.75E-12 |
| TUCP_001933 | XLOC_078987 | ENSRNOT00000081780 | 0.999827128 | 1.22E-18 |
| TUCP_001933 | XLOC_078987 | ENSRNOT00000093689 | 0.95237442  | 1.78E-06 |
| TUCP_001933 | XLOC_078987 | ENSRNOT00000089114 | 0.999827128 | 1.22E-18 |
| TUCP_001933 | XLOC_078987 | ENSRNOT00000021609 | 0.976098156 | 5.90E-08 |
| TUCP_001933 | XLOC_078987 | ENSRNOT00000073316 | 0.999827128 | 1.22E-18 |
| TUCP_001933 | XLOC_078987 | ENSRNOT00000086557 | 0.97750816  | 4.37E-08 |
| TUCP_001933 | XLOC_078987 | ENSRNOT00000071663 | 0.999827128 | 1.22E-18 |
| TUCP_001933 | XLOC_078987 | ENSRNOT00000042860 | 0.999827128 | 1.22E-18 |
| TUCP_001933 | XLOC_078987 | ENSRNOT00000072962 | 0.970205599 | 1.76E-07 |
| TUCP_001933 | XLOC_078987 | ENSRNOT00000088421 | 0.999827128 | 1.22E-18 |
| TUCP_001933 | XLOC_078987 | ENSRNOT00000038898 | 0.999827128 | 1.22E-18 |
| TUCP_001933 | XLOC_078987 | ENSRNOT00000015840 | 0.961955336 | 5.89E-07 |
| TUCP_001933 | XLOC_078987 | ENSRNOT00000064936 | 0.987157153 | 2.69E-09 |
| TUCP_001933 | XLOC_078987 | ENSRNOT00000042777 | 0.989990571 | 7.78E-10 |
| TUCP_001933 | XLOC_078987 | ENSRNOT00000010029 | 0.999827128 | 1.22E-18 |
| TUCP_001932 | XLOC_078987 | ENSRNOT00000071840 | 0.957241584 | 1.05E-06 |
| TUCP_001932 | XLOC_078987 | ENSRNOT00000060448 | 0.957241584 | 1.05E-06 |
| TUCP_001932 | XLOC_078987 | ENSRNOT00000045584 | 0.957241584 | 1.05E-06 |
| TUCP_001932 | XLOC_078987 | ENSRNOT00000066004 | 0.955806633 | 1.23E-06 |
| TUCP_001932 | XLOC_078987 | ENSRNOT00000075836 | 0.957241584 | 1.05E-06 |
| TUCP_001932 | XLOC_078987 | ENSRNOT00000082086 | 0.975460176 | 6.73E-08 |
| TUCP_001932 | XLOC_078987 | ENSRNOT00000082084 | 0.978673009 | 3.35E-08 |
| TUCP_001932 | XLOC_078987 | ENSRNOT00000092182 | 0.957241584 | 1.05E-06 |
| TUCP_001932 | XLOC_078987 | ENSRNOT00000084461 | 0.957241584 | 1.05E-06 |
| TUCP_001932 | XLOC_078987 | ENSRNOT00000047784 | 0.968966544 | 2.15E-07 |
| TUCP_001932 | XLOC_078987 | ENSRNOT00000032631 | 0.957241584 | 1.05E-06 |
| TUCP_001932 | XLOC_078987 | ENSRNOT00000057176 | 0.957142585 | 1.06E-06 |
| TUCP_001932 | XLOC_078987 | ENSRNOT00000093431 | 0.957241584 | 1.05E-06 |
| TUCP_001932 | XLOC_078987 | ENSRNOT00000024758 | 0.961232799 | 6.46E-07 |
| TUCP_001932 | XLOC_078987 | ENSRNOT00000092901 | 0.957241584 | 1.05E-06 |
| TUCP_001932 | XLOC_078987 | ENSRNOT00000089290 | 0.957176819 | 1.06E-06 |
| TUCP_001932 | XLOC_078987 | ENSRNOT00000071603 | 0.957501173 | 1.02E-06 |
| TUCP_001932 | XLOC_078987 | ENSRNOT00000075244 | 0.964496066 | 4.19E-07 |
| TUCP_001932 | XLOC_078987 | ENSRNOT00000091828 | 0.95163232  | 1.92E-06 |
| TUCP_001932 | XLOC_078987 | ENSRNOT00000091944 | 0.955342519 | 1.30E-06 |
| TUCP_001932 | XLOC_078987 | ENSRNOT00000022801 | 0.958024958 | 9.56E-07 |
| TUCP_001932 | XLOC_078987 | ENSRNOT00000070855 | 0.957241584 | 1.05E-06 |
| TUCP_001932 | XLOC_078987 | ENSRNOT00000084109 | 0.952458011 | 1.77E-06 |

|             |             |                    |              |          |
|-------------|-------------|--------------------|--------------|----------|
| TUCP_001932 | XLOC_078987 | ENSRNOT0000007683  | 0.956934923  | 1.09E-06 |
| TUCP_001932 | XLOC_078987 | ENSRNOT00000016442 | 0.960460377  | 7.12E-07 |
| TUCP_001932 | XLOC_078987 | ENSRNOT00000041569 | 0.957241584  | 1.05E-06 |
| TUCP_001932 | XLOC_078987 | ENSRNOT00000087091 | 0.957241584  | 1.05E-06 |
| TUCP_001932 | XLOC_078987 | ENSRNOT00000023287 | 0.975752265  | 6.34E-08 |
| TUCP_001932 | XLOC_078987 | ENSRNOT00000026113 | 0.955931254  | 1.22E-06 |
| TUCP_001932 | XLOC_078987 | ENSRNOT00000014939 | 0.956339312  | 1.16E-06 |
| TUCP_001932 | XLOC_078987 | ENSRNOT00000056450 | 0.977717924  | 4.17E-08 |
| TUCP_001932 | XLOC_078987 | ENSRNOT00000090211 | 0.955000951  | 1.35E-06 |
| TUCP_001932 | XLOC_078987 | ENSRNOT00000044232 | 0.959192456  | 8.32E-07 |
| TUCP_001932 | XLOC_078987 | ENSRNOT00000073229 | 0.957241584  | 1.05E-06 |
| TUCP_001932 | XLOC_078987 | ENSRNOT00000060454 | 0.957241584  | 1.05E-06 |
| TUCP_001932 | XLOC_078987 | ENSRNOT00000081106 | 0.979979983  | 2.45E-08 |
| TUCP_003064 | XLOC_131422 | ENSRNOT00000005958 | 0.957961623  | 9.63E-07 |
| TUCP_003064 | XLOC_131422 | ENSRNOT00000006186 | 0.958378247  | 9.17E-07 |
| TUCP_003064 | XLOC_131422 | ENSRNOT00000048910 | -0.970900309 | 1.56E-07 |
| TUCP_003064 | XLOC_131422 | ENSRNOT00000090912 | 0.951522193  | 1.94E-06 |
| TUCP_003064 | XLOC_131422 | ENSRNOT00000019104 | -0.951547836 | 1.94E-06 |
| TUCP_003064 | XLOC_131422 | ENSRNOT00000037597 | 0.953879172  | 1.52E-06 |
| TUCP_003064 | XLOC_131422 | ENSRNOT00000068353 | 0.975676915  | 6.44E-08 |
| TUCP_003064 | XLOC_131422 | ENSRNOT00000023638 | 0.95628573   | 1.17E-06 |
| TUCP_003064 | XLOC_131422 | ENSRNOT00000010728 | 0.955960917  | 1.21E-06 |
| TUCP_003064 | XLOC_131422 | ENSRNOT00000020910 | 0.965624666  | 3.57E-07 |
| TUCP_003064 | XLOC_131422 | ENSRNOT0000005659  | 0.967071536  | 2.88E-07 |
| TUCP_003064 | XLOC_131422 | ENSRNOT00000023144 | 0.963141259  | 5.04E-07 |
| TUCP_003064 | XLOC_131422 | ENSRNOT00000045326 | 0.95011461   | 2.24E-06 |
| TUCP_003064 | XLOC_131422 | ENSRNOT00000052063 | 0.952281904  | 1.80E-06 |
| TUCP_003064 | XLOC_131422 | ENSRNOT00000091596 | -0.951018649 | 2.04E-06 |
| TUCP_003064 | XLOC_131422 | ENSRNOT00000091128 | -0.95655709  | 1.13E-06 |
| TUCP_003064 | XLOC_131422 | ENSRNOT00000084069 | 0.954801433  | 1.38E-06 |
| TUCP_003064 | XLOC_131422 | ENSRNOT00000006752 | 0.959865411  | 7.67E-07 |
| TUCP_003064 | XLOC_131422 | ENSRNOT00000018533 | 0.967639986  | 2.65E-07 |
| TUCP_003064 | XLOC_131422 | ENSRNOT00000024969 | 0.975619151  | 6.51E-08 |
| TUCP_003064 | XLOC_131422 | ENSRNOT00000083568 | 0.952258865  | 1.80E-06 |
| TUCP_003064 | XLOC_131422 | ENSRNOT00000025079 | -0.95001345  | 2.26E-06 |
| TUCP_003064 | XLOC_131422 | ENSRNOT00000048754 | -0.955329286 | 1.30E-06 |
| TUCP_003064 | XLOC_131422 | ENSRNOT00000084709 | 0.953974499  | 1.51E-06 |
| TUCP_003064 | XLOC_131422 | ENSRNOT00000027970 | 0.951061619  | 2.04E-06 |
| TUCP_003064 | XLOC_131422 | ENSRNOT00000019519 | 0.959999841  | 7.54E-07 |
| TUCP_003064 | XLOC_131422 | ENSRNOT00000089933 | 0.971862234  | 1.33E-07 |
| TUCP_003064 | XLOC_131422 | ENSRNOT00000009811 | 0.953526265  | 1.58E-06 |
| TUCP_003064 | XLOC_131422 | ENSRNOT00000025517 | 0.950004298  | 2.26E-06 |
| TUCP_003064 | XLOC_131422 | ENSRNOT00000025510 | -0.966503776 | 3.14E-07 |
| TUCP_003064 | XLOC_131422 | ENSRNOT00000032780 | 0.965193587  | 3.79E-07 |
| TUCP_003064 | XLOC_131422 | ENSRNOT00000084012 | 0.956059537  | 1.20E-06 |
| TUCP_003064 | XLOC_131422 | ENSRNOT00000009708 | -0.954999018 | 1.35E-06 |
| TUCP_003064 | XLOC_131422 | ENSRNOT00000074323 | 0.953367647  | 1.61E-06 |
| TUCP_003064 | XLOC_131422 | ENSRNOT00000017312 | 0.958661786  | 8.87E-07 |
| TUCP_003064 | XLOC_131422 | ENSRNOT00000010927 | 0.951372579  | 1.97E-06 |
| TUCP_003064 | XLOC_131422 | ENSRNOT00000087278 | -0.967703676 | 2.62E-07 |
| TUCP_003064 | XLOC_131422 | ENSRNOT00000015678 | -0.952807486 | 1.70E-06 |

|             |             |                    |              |          |
|-------------|-------------|--------------------|--------------|----------|
| TUCP_003064 | XLOC_131422 | ENSRNOT00000044346 | -0.950149915 | 2.23E-06 |
| TUCP_003064 | XLOC_131422 | ENSRNOT00000009150 | 0.95341987   | 1.60E-06 |
| TUCP_003064 | XLOC_131422 | ENSRNOT00000074047 | 0.956217884  | 1.18E-06 |
| TUCP_003064 | XLOC_131422 | ENSRNOT00000087443 | 0.964718645  | 4.06E-07 |
| TUCP_003064 | XLOC_131422 | ENSRNOT00000075452 | 0.960656793  | 6.95E-07 |
| TUCP_003064 | XLOC_131422 | ENSRNOT00000091909 | 0.951656718  | 1.92E-06 |
| TUCP_003064 | XLOC_131422 | ENSRNOT00000020147 | 0.956831945  | 1.10E-06 |
| TUCP_003064 | XLOC_131422 | ENSRNOT0000001081  | 0.956142466  | 1.19E-06 |
| TUCP_003064 | XLOC_131422 | ENSRNOT00000024352 | 0.957862049  | 9.75E-07 |
| TUCP_003064 | XLOC_131422 | ENSRNOT00000058351 | 0.974108184  | 8.77E-08 |
| TUCP_003064 | XLOC_131422 | ENSRNOT00000083220 | 0.9760231    | 5.99E-08 |
| TUCP_003064 | XLOC_131422 | ENSRNOT00000026643 | 0.974854332  | 7.59E-08 |
| TUCP_003064 | XLOC_131422 | ENSRNOT00000019133 | 0.951833862  | 1.88E-06 |
| TUCP_003064 | XLOC_131422 | ENSRNOT00000065983 | 0.952369055  | 1.78E-06 |
| TUCP_003064 | XLOC_131422 | ENSRNOT00000025966 | 0.985568021  | 4.81E-09 |
| TUCP_003064 | XLOC_131422 | ENSRNOT00000015265 | 0.950366992  | 2.18E-06 |
| TUCP_003064 | XLOC_131422 | ENSRNOT00000088509 | 0.958021704  | 9.57E-07 |
| TUCP_003064 | XLOC_131422 | ENSRNOT00000016739 | 0.952396477  | 1.78E-06 |
| TUCP_003064 | XLOC_131422 | ENSRNOT00000042799 | 0.979309337  | 2.88E-08 |
| TUCP_003064 | XLOC_131422 | ENSRNOT00000078102 | 0.965401539  | 3.68E-07 |
| TUCP_003064 | XLOC_131422 | ENSRNOT00000086590 | 0.950007671  | 2.26E-06 |
| TUCP_003064 | XLOC_131422 | ENSRNOT00000058382 | 0.954084273  | 1.49E-06 |
| TUCP_003064 | XLOC_131422 | ENSRNOT00000081047 | 0.959791037  | 7.74E-07 |
| TUCP_003064 | XLOC_131422 | ENSRNOT00000027910 | 0.967433251  | 2.73E-07 |
| TUCP_003064 | XLOC_131422 | ENSRNOT00000078475 | 0.961923405  | 5.91E-07 |
| TUCP_003064 | XLOC_131422 | ENSRNOT00000008030 | 0.957369467  | 1.03E-06 |
| TUCP_003064 | XLOC_131422 | ENSRNOT00000089211 | 0.967555882  | 2.68E-07 |
| TUCP_003064 | XLOC_131422 | ENSRNOT00000040169 | 0.953049625  | 1.66E-06 |
| TUCP_003064 | XLOC_131422 | ENSRNOT00000065300 | 0.970587445  | 1.65E-07 |
| TUCP_003064 | XLOC_131422 | ENSRNOT00000019910 | -0.959918644 | 7.62E-07 |
| TUCP_003064 | XLOC_131422 | ENSRNOT00000000302 | 0.967232412  | 2.82E-07 |
| TUCP_003064 | XLOC_131422 | ENSRNOT00000078070 | 0.976258783  | 5.71E-08 |
| TUCP_003064 | XLOC_131422 | ENSRNOT00000040393 | 0.95158988   | 1.93E-06 |
| TUCP_003064 | XLOC_131422 | ENSRNOT00000089293 | 0.955785602  | 1.24E-06 |
| TUCP_003064 | XLOC_131422 | ENSRNOT00000058362 | 0.965745207  | 3.51E-07 |
| TUCP_003064 | XLOC_131422 | ENSRNOT00000000013 | 0.955095928  | 1.33E-06 |
| TUCP_003064 | XLOC_131422 | ENSRNOT00000074649 | 0.964076064  | 4.44E-07 |
| TUCP_003064 | XLOC_131422 | ENSRNOT00000004046 | -0.983666974 | 8.91E-09 |
| TUCP_003064 | XLOC_131422 | ENSRNOT00000008982 | 0.981920681  | 1.48E-08 |
| TUCP_003064 | XLOC_131422 | ENSRNOT00000066133 | -0.958334617 | 9.22E-07 |
| TUCP_003064 | XLOC_131422 | ENSRNOT00000005489 | 0.950754609  | 2.10E-06 |
| TUCP_003064 | XLOC_131422 | ENSRNOT00000081981 | 0.971184122  | 1.49E-07 |
| TUCP_003064 | XLOC_131422 | ENSRNOT00000011350 | 0.958681489  | 8.85E-07 |
| TUCP_003064 | XLOC_131422 | ENSRNOT00000085756 | 0.957788459  | 9.83E-07 |
| TUCP_003064 | XLOC_131422 | ENSRNOT00000008901 | -0.953170231 | 1.64E-06 |
| TUCP_003064 | XLOC_131422 | ENSRNOT00000026691 | 0.969591371  | 1.95E-07 |
| TUCP_003064 | XLOC_131422 | ENSRNOT00000022142 | 0.95134688   | 1.98E-06 |
| TUCP_003064 | XLOC_131422 | ENSRNOT00000055992 | -0.969647903 | 1.93E-07 |
| TUCP_003064 | XLOC_131422 | ENSRNOT00000064535 | -0.952703928 | 1.72E-06 |
| TUCP_003064 | XLOC_131422 | ENSRNOT00000010748 | 0.951886213  | 1.87E-06 |
| TUCP_003064 | XLOC_131422 | ENSRNOT00000015537 | 0.964871923  | 3.97E-07 |

|             |             |                     |              |          |
|-------------|-------------|---------------------|--------------|----------|
| TUCP_003064 | XLOC_131422 | ENSRNOT00000035474  | 0.952554353  | 1.75E-06 |
| TUCP_003064 | XLOC_131422 | ENSRNOT00000080695  | 0.962410427  | 5.55E-07 |
| TUCP_003064 | XLOC_131422 | ENSRNOT00000025009  | 0.967367019  | 2.76E-07 |
| TUCP_003064 | XLOC_131422 | ENSRNOT00000076872  | 0.951771428  | 1.89E-06 |
| TUCP_003064 | XLOC_131422 | ENSRNOT00000091205  | 0.970946144  | 1.55E-07 |
| TUCP_003064 | XLOC_131422 | ENSRNOT00000085519  | 0.964031804  | 4.46E-07 |
| TUCP_003064 | XLOC_131422 | ENSRNOT00000000120  | 0.957091662  | 1.07E-06 |
| TUCP_003064 | XLOC_131422 | ENSRNOT00000029125  | 0.975441461  | 6.75E-08 |
| TUCP_003064 | XLOC_131422 | ENSRNOT00000001449  | 0.961272773  | 6.43E-07 |
| TUCP_003064 | XLOC_131422 | ENSRNOT00000042125  | 0.966322841  | 3.22E-07 |
| TUCP_003064 | XLOC_131422 | ENSRNOT00000060698  | -0.950649516 | 2.12E-06 |
| TUCP_003064 | XLOC_131422 | ENSRNOT00000040069  | 0.988635795  | 1.46E-09 |
| TUCP_003064 | XLOC_131422 | ENSRNOT00000014814  | 0.979047319  | 3.07E-08 |
| TUCP_003064 | XLOC_131422 | ENSRNOT00000080207  | 0.969806213  | 1.88E-07 |
| TUCP_003064 | XLOC_131422 | ENSRNOT00000065529  | 0.950434932  | 2.17E-06 |
| TUCP_003064 | XLOC_131422 | ENSRNOT00000077503  | 0.955339765  | 1.30E-06 |
| TUCP_003064 | XLOC_131422 | ENSRNOT00000075708  | 0.975521493  | 6.64E-08 |
| TUCP_003064 | XLOC_131422 | ENSRNOT00000067901  | -0.955310199 | 1.30E-06 |
| TUCP_003064 | XLOC_131422 | ENSRNOT00000027967  | 0.960008354  | 7.53E-07 |
| TUCP_003064 | XLOC_131422 | ENSRNOT00000003182  | 0.95091794   | 2.07E-06 |
| TUCP_003064 | XLOC_131422 | ENSRNOT00000025147  | 0.983192538  | 1.03E-08 |
| TUCP_003064 | XLOC_131422 | ENSRNOT00000021674  | 0.961500825  | 6.24E-07 |
| TUCP_003064 | XLOC_131422 | ENSRNOT00000022097  | 0.951002964  | 2.05E-06 |
| TUCP_003064 | XLOC_131422 | ENSRNOT00000036613  | -0.968230945 | 2.42E-07 |
| TUCP_003064 | XLOC_131422 | ENSRNOT00000008113  | -0.959727186 | 7.80E-07 |
| TUCP_003064 | XLOC_131422 | ENSRNOT00000079996  | 0.963187931  | 5.00E-07 |
| TUCP_003064 | XLOC_131422 | ENSRNOT00000021629  | -0.966391977 | 3.19E-07 |
| TUCP_003357 | XLOC_145348 | ENSRNOT00000025981  | 0.959469248  | 8.05E-07 |
| TUCP_003357 | XLOC_145348 | ENSRNOT00000065143  | 0.951175264  | 2.01E-06 |
| TUCP_003357 | XLOC_145348 | ENSRNOT000000031904 | 0.977411812  | 4.46E-08 |
| TUCP_003357 | XLOC_145348 | ENSRNOT00000067400  | 0.966054039  | 3.35E-07 |
| TUCP_003357 | XLOC_145348 | ENSRNOT00000000743  | 0.985492702  | 4.94E-09 |
| TUCP_003357 | XLOC_145348 | ENSRNOT00000027083  | 0.97176771   | 1.35E-07 |
| TUCP_003357 | XLOC_145348 | ENSRNOT00000005958  | 0.95762101   | 1.00E-06 |
| TUCP_003357 | XLOC_145348 | ENSRNOT00000082508  | -0.957147286 | 1.06E-06 |
| TUCP_003357 | XLOC_145348 | ENSRNOT00000023638  | 0.966164004  | 3.30E-07 |
| TUCP_003357 | XLOC_145348 | ENSRNOT00000005228  | 0.950258338  | 2.21E-06 |
| TUCP_003357 | XLOC_145348 | ENSRNOT00000059524  | -0.951852287 | 1.88E-06 |
| TUCP_003357 | XLOC_145348 | ENSRNOT00000028625  | -0.963299074 | 4.93E-07 |
| TUCP_003357 | XLOC_145348 | ENSRNOT00000023144  | 0.961415579  | 6.31E-07 |
| TUCP_003357 | XLOC_145348 | ENSRNOT00000082869  | 0.981955054  | 1.46E-08 |
| TUCP_003357 | XLOC_145348 | ENSRNOT00000016649  | 0.972494509  | 1.18E-07 |
| TUCP_003357 | XLOC_145348 | ENSRNOT00000091128  | -0.950183046 | 2.22E-06 |
| TUCP_003357 | XLOC_145348 | ENSRNOT00000001586  | -0.951938015 | 1.86E-06 |
| TUCP_003357 | XLOC_145348 | ENSRNOT000000081981 | 0.95749502   | 1.02E-06 |
| TUCP_003357 | XLOC_145348 | ENSRNOT00000033017  | 0.953261671  | 1.62E-06 |
| TUCP_003357 | XLOC_145348 | ENSRNOT00000026543  | 0.974472454  | 8.18E-08 |
| TUCP_003357 | XLOC_145348 | ENSRNOT00000012187  | 0.951727806  | 1.90E-06 |
| TUCP_003357 | XLOC_145348 | ENSRNOT00000073564  | -0.959959452 | 7.58E-07 |
| TUCP_003357 | XLOC_145348 | ENSRNOT00000024969  | 0.951220728  | 2.00E-06 |
| TUCP_003357 | XLOC_145348 | ENSRNOT00000085251  | -0.958269875 | 9.29E-07 |

|             |             |                    |              |          |
|-------------|-------------|--------------------|--------------|----------|
| TUCP_003357 | XLOC_145348 | ENSRNOT00000025075 | 0.961018934  | 6.64E-07 |
| TUCP_003357 | XLOC_145348 | ENSRNOT00000035989 | 0.963292365  | 4.93E-07 |
| TUCP_003357 | XLOC_145348 | ENSRNOT00000057160 | 0.974955062  | 7.44E-08 |
| TUCP_003357 | XLOC_145348 | ENSRNOT00000082699 | 0.96897095   | 2.15E-07 |
| TUCP_003357 | XLOC_145348 | ENSRNOT00000089933 | 0.950408431  | 2.17E-06 |
| TUCP_003357 | XLOC_145348 | ENSRNOT00000091602 | -0.964858491 | 3.98E-07 |
| TUCP_003357 | XLOC_145348 | ENSRNOT00000051294 | 0.950129801  | 2.23E-06 |
| TUCP_003357 | XLOC_145348 | ENSRNOT00000042125 | 0.970901487  | 1.56E-07 |
| TUCP_003357 | XLOC_145348 | ENSRNOT00000090420 | -0.965411632 | 3.68E-07 |
| TUCP_003357 | XLOC_145348 | ENSRNOT00000041044 | 0.971802512  | 1.34E-07 |
| TUCP_003357 | XLOC_145348 | ENSRNOT00000025362 | -0.953348285 | 1.61E-06 |
| TUCP_003357 | XLOC_145348 | ENSRNOT00000010541 | 0.957586056  | 1.01E-06 |
| TUCP_003357 | XLOC_145348 | ENSRNOT00000012895 | 0.953046003  | 1.66E-06 |
| TUCP_003357 | XLOC_145348 | ENSRNOT00000091909 | 0.957841958  | 9.77E-07 |
| TUCP_003357 | XLOC_145348 | ENSRNOT00000058312 | 0.952168969  | 1.82E-06 |
| TUCP_003357 | XLOC_145348 | ENSRNOT00000060362 | 0.951749334  | 1.90E-06 |
| TUCP_003357 | XLOC_145348 | ENSRNOT00000010898 | 0.961850707  | 5.97E-07 |
| TUCP_003357 | XLOC_145348 | ENSRNOT00000073675 | -0.964156982 | 4.39E-07 |
| TUCP_003357 | XLOC_145348 | ENSRNOT00000048063 | 0.952535724  | 1.75E-06 |
| TUCP_003357 | XLOC_145348 | ENSRNOT00000004319 | -0.962370803 | 5.58E-07 |
| TUCP_003357 | XLOC_145348 | ENSRNOT00000033975 | 0.954964211  | 1.35E-06 |
| TUCP_003357 | XLOC_145348 | ENSRNOT00000044608 | -0.960961189 | 6.69E-07 |
| TUCP_003357 | XLOC_145348 | ENSRNOT00000007314 | -0.951008536 | 2.05E-06 |
| TUCP_003357 | XLOC_145348 | ENSRNOT00000088599 | 0.964027022  | 4.47E-07 |
| TUCP_003357 | XLOC_145348 | ENSRNOT00000081047 | 0.954072969  | 1.49E-06 |
| TUCP_003357 | XLOC_145348 | ENSRNOT00000088353 | -0.969851276 | 1.86E-07 |
| TUCP_003357 | XLOC_145348 | ENSRNOT00000003991 | 0.963687146  | 4.68E-07 |
| TUCP_003357 | XLOC_145348 | ENSRNOT00000084088 | 0.969348001  | 2.02E-07 |
| TUCP_003357 | XLOC_145348 | ENSRNOT00000027910 | 0.952805788  | 1.70E-06 |
| TUCP_003357 | XLOC_145348 | ENSRNOT00000052224 | 0.958003757  | 9.59E-07 |
| TUCP_003357 | XLOC_145348 | ENSRNOT00000078070 | 0.970031134  | 1.81E-07 |
| TUCP_003357 | XLOC_145348 | ENSRNOT00000076729 | 0.962117242  | 5.77E-07 |
| TUCP_003357 | XLOC_145348 | ENSRNOT00000017181 | -0.965259971 | 3.76E-07 |
| TUCP_003357 | XLOC_145348 | ENSRNOT00000025936 | -0.955866639 | 1.22E-06 |
| TUCP_003357 | XLOC_145348 | ENSRNOT00000056430 | 0.955501646  | 1.27E-06 |
| TUCP_003357 | XLOC_145348 | ENSRNOT00000067846 | -0.955504927 | 1.27E-06 |
| TUCP_003357 | XLOC_145348 | ENSRNOT00000089062 | 0.955230342  | 1.31E-06 |
| TUCP_003357 | XLOC_145348 | ENSRNOT00000037844 | -0.95101898  | 2.04E-06 |
| TUCP_003357 | XLOC_145348 | ENSRNOT00000010367 | 0.953099584  | 1.65E-06 |
| TUCP_003357 | XLOC_145348 | ENSRNOT00000019886 | 0.96318308   | 5.01E-07 |
| TUCP_003357 | XLOC_145348 | ENSRNOT00000076669 | 0.964988217  | 3.91E-07 |
| TUCP_003357 | XLOC_145348 | ENSRNOT00000038807 | 0.957726463  | 9.90E-07 |
| TUCP_003357 | XLOC_145348 | ENSRNOT00000023744 | 0.951000098  | 2.05E-06 |
| TUCP_003357 | XLOC_145348 | ENSRNOT00000023302 | 0.950359609  | 2.18E-06 |
| TUCP_003357 | XLOC_145348 | ENSRNOT00000050834 | -0.976285284 | 5.68E-08 |
| TUCP_003357 | XLOC_145348 | ENSRNOT00000066024 | 0.980351639  | 2.23E-08 |
| TUCP_003357 | XLOC_145348 | ENSRNOT00000021471 | -0.973131813 | 1.05E-07 |
| TUCP_003357 | XLOC_145348 | ENSRNOT00000032992 | 0.953799121  | 1.53E-06 |
| TUCP_003357 | XLOC_145348 | ENSRNOT00000090688 | 0.955789275  | 1.23E-06 |
| TUCP_003357 | XLOC_145348 | ENSRNOT00000005478 | -0.960878129 | 6.76E-07 |
| TUCP_003357 | XLOC_145348 | ENSRNOT00000078306 | 0.975010998  | 7.36E-08 |



|             |             |                    |              |          |
|-------------|-------------|--------------------|--------------|----------|
| TUCP_003357 | XLOC_145348 | ENSRNOT00000080695 | 0.967791887  | 2.59E-07 |
| TUCP_003357 | XLOC_145348 | ENSRNOT00000029125 | 0.95375009   | 1.54E-06 |
| TUCP_003357 | XLOC_145348 | ENSRNOT00000060696 | 0.970225838  | 1.75E-07 |
| TUCP_003357 | XLOC_145348 | ENSRNOT0000004787  | -0.958875427 | 8.64E-07 |
| TUCP_003357 | XLOC_145348 | ENSRNOT00000009900 | -0.963041117 | 5.10E-07 |
| TUCP_003357 | XLOC_145348 | ENSRNOT00000081400 | 0.957259228  | 1.05E-06 |
| TUCP_003357 | XLOC_145348 | ENSRNOT00000022000 | -0.950627235 | 2.13E-06 |
| TUCP_003357 | XLOC_145348 | ENSRNOT00000067181 | 0.972014959  | 1.29E-07 |
| TUCP_003357 | XLOC_145348 | ENSRNOT00000080207 | 0.951087698  | 2.03E-06 |
| TUCP_003357 | XLOC_145348 | ENSRNOT00000002052 | -0.957624122 | 1.00E-06 |
| TUCP_003357 | XLOC_145348 | ENSRNOT00000047192 | -0.973686413 | 9.51E-08 |
| TUCP_003357 | XLOC_145348 | ENSRNOT00000015799 | 0.962495742  | 5.49E-07 |
| TUCP_003357 | XLOC_145348 | ENSRNOT00000011682 | -0.952170927 | 1.82E-06 |
| TUCP_003357 | XLOC_145348 | ENSRNOT00000083799 | 0.953025997  | 1.66E-06 |
| TUCP_002942 | XLOC_126698 | ENSRNOT00000084075 | 0.996106112  | 7.00E-12 |
| TUCP_002942 | XLOC_126698 | ENSRNOT00000012880 | 0.968043129  | 2.49E-07 |
| TUCP_002942 | XLOC_126698 | ENSRNOT00000074465 | 1            | 0        |
| TUCP_002942 | XLOC_126698 | ENSRNOT00000090898 | 0.961670541  | 6.11E-07 |
| TUCP_002942 | XLOC_126698 | ENSRNOT00000079805 | 0.997980451  | 2.64E-13 |
| TUCP_002942 | XLOC_126698 | ENSRNOT00000040912 | 1            | 0        |
| TUCP_002942 | XLOC_126698 | ENSRNOT00000072648 | 1            | 4.25E-78 |
| TUCP_002942 | XLOC_126698 | ENSRNOT00000007398 | 0.989054103  | 1.21E-09 |
| TUCP_002942 | XLOC_126698 | ENSRNOT00000070803 | 1            | 4.25E-78 |
| TUCP_002942 | XLOC_126698 | ENSRNOT00000012196 | 1            | 0        |
| TUCP_002942 | XLOC_126698 | ENSRNOT00000085772 | 1            | 0        |
| TUCP_002942 | XLOC_126698 | ENSRNOT00000093284 | 0.999975856  | 6.46E-23 |
| TUCP_002942 | XLOC_126698 | ENSRNOT00000086374 | 0.993568904  | 8.57E-11 |
| TUCP_002942 | XLOC_126698 | ENSRNOT00000015270 | 1            | 0        |
| TUCP_002942 | XLOC_126698 | ENSRNOT00000046192 | 1            | 1.33E-79 |
| TUCP_002942 | XLOC_126698 | ENSRNOT00000044226 | 1            | 1.33E-79 |
| TUCP_002942 | XLOC_126698 | ENSRNOT00000081898 | 0.989837012  | 8.39E-10 |
| TUCP_002942 | XLOC_126698 | ENSRNOT00000081954 | 0.964005219  | 4.48E-07 |
| TUCP_002942 | XLOC_126698 | ENSRNOT00000080291 | 0.998427671  | 7.55E-14 |
| TUCP_002942 | XLOC_126698 | ENSRNOT00000004293 | 0.984239049  | 7.46E-09 |
| TUCP_002942 | XLOC_126698 | ENSRNOT00000078231 | 0.960455489  | 7.13E-07 |
| TUCP_002942 | XLOC_126698 | ENSRNOT00000002834 | 1            | 0        |
| TUCP_002942 | XLOC_126698 | ENSRNOT00000001464 | 1            | 0        |
| TUCP_002942 | XLOC_126698 | ENSRNOT00000090716 | 0.994769629  | 3.06E-11 |
| TUCP_002942 | XLOC_126698 | ENSRNOT00000083542 | 0.972568514  | 1.17E-07 |
| TUCP_002942 | XLOC_126698 | ENSRNOT00000076044 | 1            | 0        |
| TUCP_002942 | XLOC_126698 | ENSRNOT00000074353 | 1            | 0        |
| TUCP_002942 | XLOC_126698 | ENSRNOT00000043510 | 0.958144129  | 9.43E-07 |
| TUCP_002942 | XLOC_126698 | ENSRNOT00000087122 | 0.980089513  | 2.38E-08 |
| TUCP_002942 | XLOC_126698 | ENSRNOT00000074295 | 0.987777006  | 2.11E-09 |
| TUCP_002942 | XLOC_126698 | ENSRNOT00000057873 | 1            | 0        |
| TUCP_002942 | XLOC_126698 | ENSRNOT00000083002 | 0.988874897  | 1.32E-09 |
| TUCP_002942 | XLOC_126698 | ENSRNOT00000088399 | 0.999999855  | 4.99E-34 |
| TUCP_002942 | XLOC_126698 | ENSRNOT00000086248 | 1            | 0        |
| TUCP_002942 | XLOC_126698 | ENSRNOT00000089750 | 0.999992758  | 1.57E-25 |
| TUCP_002942 | XLOC_126698 | ENSRNOT00000030517 | 0.971225224  | 1.48E-07 |
| TUCP_002942 | XLOC_126698 | ENSRNOT00000034772 | 0.994265187  | 4.84E-11 |

|             |             |                    |              |          |
|-------------|-------------|--------------------|--------------|----------|
| TUCP_002942 | XLOC_126698 | ENSRNOT00000089305 | 0.969641693  | 1.93E-07 |
| TUCP_002942 | XLOC_126698 | ENSRNOT00000024580 | 0.954183021  | 1.47E-06 |
| TUCP_002942 | XLOC_126698 | ENSRNOT00000064601 | 0.966578038  | 3.11E-07 |
| TUCP_002942 | XLOC_126698 | ENSRNOT00000015870 | 0.965901306  | 3.43E-07 |
| TUCP_002942 | XLOC_126698 | ENSRNOT00000080812 | 0.992998865  | 1.31E-10 |
| TUCP_002942 | XLOC_126698 | ENSRNOT00000092755 | 1            | 0        |
| TUCP_002942 | XLOC_126698 | ENSRNOT00000031683 | 1            | 1.33E-79 |
| TUCP_002942 | XLOC_126698 | ENSRNOT00000087764 | 0.988156196  | 1.80E-09 |
| TUCP_002941 | XLOC_126648 | ENSRNOT00000013625 | 0.950907645  | 2.07E-06 |
| TUCP_002941 | XLOC_126648 | ENSRNOT00000086491 | 0.978616347  | 3.40E-08 |
| TUCP_002941 | XLOC_126648 | ENSRNOT00000080190 | 0.963745615  | 4.64E-07 |
| TUCP_002941 | XLOC_126648 | ENSRNOT00000071965 | 0.954671946  | 1.40E-06 |
| TUCP_002941 | XLOC_126648 | ENSRNOT00000082612 | 0.963940314  | 4.52E-07 |
| TUCP_002941 | XLOC_126648 | ENSRNOT00000090085 | 0.957544217  | 1.01E-06 |
| TUCP_002941 | XLOC_126648 | ENSRNOT00000019620 | 0.954512438  | 1.42E-06 |
| TUCP_002941 | XLOC_126648 | ENSRNOT00000016419 | 0.952914765  | 1.68E-06 |
| TUCP_002941 | XLOC_126648 | ENSRNOT00000026297 | 0.954215541  | 1.47E-06 |
| TUCP_002941 | XLOC_126648 | ENSRNOT00000012260 | 0.952681305  | 1.73E-06 |
| TUCP_002941 | XLOC_126648 | ENSRNOT00000016259 | 0.985768994  | 4.49E-09 |
| TUCP_002941 | XLOC_126648 | ENSRNOT00000082963 | 0.956054234  | 1.20E-06 |
| TUCP_002941 | XLOC_126648 | ENSRNOT00000091300 | 0.960593893  | 7.00E-07 |
| TUCP_002941 | XLOC_126648 | ENSRNOT00000091456 | 0.959690994  | 7.83E-07 |
| TUCP_002941 | XLOC_126648 | ENSRNOT00000024578 | 0.974063749  | 8.85E-08 |
| TUCP_002941 | XLOC_126648 | ENSRNOT00000074226 | 0.97159598   | 1.39E-07 |
| TUCP_002941 | XLOC_126648 | ENSRNOT00000064756 | 0.953817202  | 1.53E-06 |
| TUCP_002941 | XLOC_126648 | ENSRNOT00000016856 | 0.950595999  | 2.13E-06 |
| TUCP_002941 | XLOC_126648 | ENSRNOT00000075474 | 0.965385603  | 3.69E-07 |
| TUCP_002941 | XLOC_126648 | ENSRNOT00000028509 | 0.955051797  | 1.34E-06 |
| TUCP_002941 | XLOC_126648 | ENSRNOT00000019056 | 0.957249032  | 1.05E-06 |
| TUCP_002941 | XLOC_126648 | ENSRNOT00000081547 | 0.95823436   | 9.33E-07 |
| TUCP_002941 | XLOC_126648 | ENSRNOT00000019363 | 0.974209904  | 8.61E-08 |
| TUCP_002941 | XLOC_126648 | ENSRNOT00000018233 | 0.96687135   | 2.97E-07 |
| TUCP_002941 | XLOC_126648 | ENSRNOT00000005693 | 0.955427237  | 1.29E-06 |
| TUCP_002941 | XLOC_126648 | ENSRNOT00000012608 | 0.955821224  | 1.23E-06 |
| TUCP_002941 | XLOC_126648 | ENSRNOT00000000617 | 0.967371341  | 2.76E-07 |
| TUCP_002941 | XLOC_126648 | ENSRNOT00000011797 | 0.968996442  | 2.14E-07 |
| TUCP_002941 | XLOC_126648 | ENSRNOT00000036770 | 0.955626254  | 1.26E-06 |
| TUCP_002941 | XLOC_126648 | ENSRNOT00000004204 | 0.951853526  | 1.88E-06 |
| TUCP_002941 | XLOC_126648 | ENSRNOT00000067905 | 0.951953834  | 1.86E-06 |
| TUCP_002941 | XLOC_126648 | ENSRNOT00000020925 | 0.965186134  | 3.80E-07 |
| TUCP_002941 | XLOC_126648 | ENSRNOT00000066913 | 0.9561384    | 1.19E-06 |
| TUCP_002941 | XLOC_126648 | ENSRNOT00000021309 | 0.965534929  | 3.61E-07 |
| TUCP_002941 | XLOC_126648 | ENSRNOT00000010579 | 0.956239961  | 1.17E-06 |
| TUCP_002941 | XLOC_126648 | ENSRNOT00000075128 | 0.968639075  | 2.27E-07 |
| TUCP_002941 | XLOC_126648 | ENSRNOT00000010630 | -0.952913813 | 1.68E-06 |
| TUCP_002941 | XLOC_126648 | ENSRNOT00000031005 | 0.953782851  | 1.54E-06 |
| TUCP_002940 | XLOC_126648 | ENSRNOT00000032922 | 0.979888854  | 2.51E-08 |
| TUCP_002940 | XLOC_126648 | ENSRNOT00000067375 | 0.977841271  | 4.05E-08 |
| TUCP_002940 | XLOC_126648 | ENSRNOT00000049349 | -0.974187917 | 8.64E-08 |
| TUCP_002940 | XLOC_126648 | ENSRNOT00000078737 | 0.963241123  | 4.97E-07 |
| TUCP_002940 | XLOC_126648 | ENSRNOT00000078326 | 0.97935751   | 2.85E-08 |

|             |             |                     |              |          |
|-------------|-------------|---------------------|--------------|----------|
| TUCP_002940 | XLOC_126648 | ENSRNOT00000010031  | 0.97091225   | 1.56E-07 |
| TUCP_002940 | XLOC_126648 | ENSRNOT00000014063  | 0.971798681  | 1.34E-07 |
| TUCP_002940 | XLOC_126648 | ENSRNOT00000004159  | 0.953090569  | 1.65E-06 |
| TUCP_002940 | XLOC_126648 | ENSRNOT00000015962  | 0.958346009  | 9.21E-07 |
| TUCP_002940 | XLOC_126648 | ENSRNOT00000014384  | 0.973038224  | 1.07E-07 |
| TUCP_002940 | XLOC_126648 | ENSRNOT000000042459 | 0.963849663  | 4.58E-07 |
| TUCP_002940 | XLOC_126648 | ENSRNOT000000074606 | 0.957235003  | 1.05E-06 |
| TUCP_002940 | XLOC_126648 | ENSRNOT000000037203 | 0.973309818  | 1.02E-07 |
| TUCP_002940 | XLOC_126648 | ENSRNOT00000000618  | 0.958837649  | 8.68E-07 |
| TUCP_002940 | XLOC_126648 | ENSRNOT000000006591 | 0.970363054  | 1.71E-07 |
| TUCP_002940 | XLOC_126648 | ENSRNOT000000018622 | 0.977037476  | 4.84E-08 |
| TUCP_002940 | XLOC_126648 | ENSRNOT000000087075 | 0.959457045  | 8.06E-07 |
| TUCP_002940 | XLOC_126648 | ENSRNOT000000008274 | 0.95556814   | 1.27E-06 |
| TUCP_002940 | XLOC_126648 | ENSRNOT000000045041 | 0.958578478  | 8.96E-07 |
| TUCP_002940 | XLOC_126648 | ENSRNOT000000007588 | 0.961872231  | 5.95E-07 |
| TUCP_002940 | XLOC_126648 | ENSRNOT000000077999 | -0.953539546 | 1.58E-06 |
| TUCP_002940 | XLOC_126648 | ENSRNOT000000001891 | 0.967541853  | 2.69E-07 |
| TUCP_002940 | XLOC_126648 | ENSRNOT000000015831 | 0.973440277  | 9.96E-08 |
| TUCP_002940 | XLOC_126648 | ENSRNOT000000067626 | 0.953975435  | 1.51E-06 |
| TUCP_002940 | XLOC_126648 | ENSRNOT000000056644 | 0.962194768  | 5.71E-07 |
| TUCP_002940 | XLOC_126648 | ENSRNOT000000017648 | 0.956770874  | 1.11E-06 |
| TUCP_002940 | XLOC_126648 | ENSRNOT000000075630 | 0.964688916  | 4.07E-07 |
| TUCP_002940 | XLOC_126648 | ENSRNOT000000015297 | 0.967007813  | 2.91E-07 |
| TUCP_002940 | XLOC_126648 | ENSRNOT000000080418 | 0.986478504  | 3.48E-09 |
| TUCP_002940 | XLOC_126648 | ENSRNOT000000067391 | 0.963850908  | 4.57E-07 |
| TUCP_002940 | XLOC_126648 | ENSRNOT000000090004 | 0.966243351  | 3.26E-07 |
| TUCP_002940 | XLOC_126648 | ENSRNOT000000037333 | 0.952940168  | 1.68E-06 |
| TUCP_002940 | XLOC_126648 | ENSRNOT000000029179 | 0.953021391  | 1.67E-06 |
| TUCP_002940 | XLOC_126648 | ENSRNOT000000000469 | -0.967855421 | 2.56E-07 |
| TUCP_002940 | XLOC_126648 | ENSRNOT000000025506 | 0.97209428   | 1.27E-07 |
| TUCP_002940 | XLOC_126648 | ENSRNOT000000006395 | 0.953154021  | 1.64E-06 |
| TUCP_002940 | XLOC_126648 | ENSRNOT000000003667 | 0.974197114  | 8.63E-08 |
| TUCP_002940 | XLOC_126648 | ENSRNOT000000017813 | 0.954201835  | 1.47E-06 |
| TUCP_002940 | XLOC_126648 | ENSRNOT000000011082 | 0.953361298  | 1.61E-06 |
| TUCP_002940 | XLOC_126648 | ENSRNOT000000000812 | 0.989421974  | 1.02E-09 |
| TUCP_002940 | XLOC_126648 | ENSRNOT000000001404 | 0.953490367  | 1.58E-06 |
| TUCP_002940 | XLOC_126648 | ENSRNOT000000001402 | 0.951334985  | 1.98E-06 |
| TUCP_002940 | XLOC_126648 | ENSRNOT000000072357 | 0.954701416  | 1.39E-06 |
| TUCP_002940 | XLOC_126648 | ENSRNOT000000074515 | 0.973441044  | 9.95E-08 |
| TUCP_002940 | XLOC_126648 | ENSRNOT000000027145 | 0.969786902  | 1.88E-07 |
| TUCP_002940 | XLOC_126648 | ENSRNOT000000002645 | 0.953713494  | 1.55E-06 |
| TUCP_002940 | XLOC_126648 | ENSRNOT000000044449 | 0.974372543  | 8.34E-08 |
| TUCP_002940 | XLOC_126648 | ENSRNOT000000035513 | 0.980973704  | 1.90E-08 |
| TUCP_002940 | XLOC_126648 | ENSRNOT000000019531 | 0.977882873  | 4.02E-08 |
| TUCP_002940 | XLOC_126648 | ENSRNOT000000076430 | 0.973464755  | 9.91E-08 |
| TUCP_002940 | XLOC_126648 | ENSRNOT000000065023 | 0.95652271   | 1.14E-06 |
| TUCP_002940 | XLOC_126648 | ENSRNOT000000071929 | 0.97019631   | 1.76E-07 |
| TUCP_002940 | XLOC_126648 | ENSRNOT000000057902 | 0.957565262  | 1.01E-06 |
| TUCP_002940 | XLOC_126648 | ENSRNOT000000027604 | 0.963382339  | 4.88E-07 |
| TUCP_002940 | XLOC_126648 | ENSRNOT000000063875 | 0.983246823  | 1.01E-08 |
| TUCP_002940 | XLOC_126648 | ENSRNOT000000027609 | 0.962769571  | 5.29E-07 |

|             |             |                     |              |          |
|-------------|-------------|---------------------|--------------|----------|
| TUCP_002940 | XLOC_126648 | ENSRNOT00000003992  | 0.962013276  | 5.84E-07 |
| TUCP_002940 | XLOC_126648 | ENSRNOT00000002169  | 0.96041252   | 7.16E-07 |
| TUCP_002940 | XLOC_126648 | ENSRNOT000000075598 | 0.9507485    | 2.10E-06 |
| TUCP_002940 | XLOC_126648 | ENSRNOT000000078073 | 0.951572577  | 1.93E-06 |
| TUCP_002940 | XLOC_126648 | ENSRNOT000000064901 | -0.954237221 | 1.46E-06 |
| TUCP_002940 | XLOC_126648 | ENSRNOT000000077646 | 0.957965992  | 9.63E-07 |
| TUCP_002940 | XLOC_126648 | ENSRNOT000000024126 | 0.957965378  | 9.63E-07 |
| TUCP_002940 | XLOC_126648 | ENSRNOT000000089294 | 0.956830527  | 1.10E-06 |
| TUCP_002940 | XLOC_126648 | ENSRNOT00000001631  | 0.971077231  | 1.52E-07 |
| TUCP_002940 | XLOC_126648 | ENSRNOT000000027512 | 0.952126123  | 1.83E-06 |
| TUCP_002940 | XLOC_126648 | ENSRNOT000000064438 | 0.960239761  | 7.32E-07 |
| TUCP_002940 | XLOC_126648 | ENSRNOT000000022170 | 0.971604131  | 1.39E-07 |
| TUCP_002940 | XLOC_126648 | ENSRNOT000000035277 | -0.954703426 | 1.39E-06 |
| TUCP_002940 | XLOC_126648 | ENSRNOT000000018877 | 0.959578327  | 7.94E-07 |
| TUCP_002940 | XLOC_126648 | ENSRNOT000000025104 | 0.969100685  | 2.11E-07 |
| TUCP_002940 | XLOC_126648 | ENSRNOT000000052131 | 0.955013978  | 1.35E-06 |
| TUCP_002940 | XLOC_126648 | ENSRNOT000000086456 | 0.965185465  | 3.80E-07 |
| TUCP_002940 | XLOC_126648 | ENSRNOT000000056145 | 0.952674972  | 1.73E-06 |
| TUCP_002940 | XLOC_126648 | ENSRNOT000000030823 | 0.951907638  | 1.87E-06 |
| TUCP_002940 | XLOC_126648 | ENSRNOT00000001227  | 0.987253394  | 2.59E-09 |
| TUCP_002940 | XLOC_126648 | ENSRNOT000000019486 | 0.965386671  | 3.69E-07 |
| TUCP_002940 | XLOC_126648 | ENSRNOT000000048933 | 0.953429913  | 1.60E-06 |
| TUCP_002940 | XLOC_126648 | ENSRNOT000000003106 | 0.959658729  | 7.86E-07 |
| TUCP_002940 | XLOC_126648 | ENSRNOT000000076388 | 0.970602437  | 1.65E-07 |
| TUCP_002940 | XLOC_126648 | ENSRNOT000000023211 | 0.954948509  | 1.35E-06 |
| TUCP_002940 | XLOC_126648 | ENSRNOT000000018674 | 0.965800404  | 3.48E-07 |
| TUCP_002940 | XLOC_126648 | ENSRNOT000000087033 | 0.956584468  | 1.13E-06 |
| TUCP_002940 | XLOC_126648 | ENSRNOT000000082963 | 0.966952055  | 2.94E-07 |
| TUCP_002940 | XLOC_126648 | ENSRNOT000000072632 | 0.96524505   | 3.77E-07 |
| TUCP_002940 | XLOC_126648 | ENSRNOT000000068666 | 0.954398186  | 1.44E-06 |
| TUCP_002940 | XLOC_126648 | ENSRNOT00000005961  | 0.969757731  | 1.89E-07 |
| TUCP_002940 | XLOC_126648 | ENSRNOT000000017995 | -0.955507095 | 1.27E-06 |
| TUCP_002940 | XLOC_126648 | ENSRNOT000000070916 | 0.968620874  | 2.27E-07 |
| TUCP_002940 | XLOC_126648 | ENSRNOT000000031672 | 0.972004907  | 1.29E-07 |
| TUCP_002940 | XLOC_126648 | ENSRNOT000000023628 | 0.959812534  | 7.72E-07 |
| TUCP_002940 | XLOC_126648 | ENSRNOT000000071745 | 0.964217394  | 4.35E-07 |
| TUCP_002940 | XLOC_126648 | ENSRNOT000000007917 | 0.980446962  | 2.18E-08 |
| TUCP_002940 | XLOC_126648 | ENSRNOT000000072129 | 0.96881417   | 2.20E-07 |
| TUCP_002940 | XLOC_126648 | ENSRNOT000000061619 | 0.96223875   | 5.67E-07 |
| TUCP_002940 | XLOC_126648 | ENSRNOT000000034386 | 0.96569305   | 3.53E-07 |
| TUCP_002940 | XLOC_126648 | ENSRNOT000000061580 | 0.958677893  | 8.85E-07 |
| TUCP_002940 | XLOC_126648 | ENSRNOT000000019778 | 0.980750176  | 2.02E-08 |
| TUCP_002940 | XLOC_126648 | ENSRNOT000000048022 | 0.988211392  | 1.76E-09 |
| TUCP_002940 | XLOC_126648 | ENSRNOT000000091116 | 0.966699514  | 3.05E-07 |
| TUCP_002940 | XLOC_126648 | ENSRNOT000000059854 | 0.950892093  | 2.07E-06 |
| TUCP_002940 | XLOC_126648 | ENSRNOT00000001597  | 0.959241945  | 8.27E-07 |
| TUCP_002940 | XLOC_126648 | ENSRNOT000000039607 | 0.96525325   | 3.76E-07 |
| TUCP_002940 | XLOC_126648 | ENSRNOT000000009468 | 0.979793758  | 2.56E-08 |
| TUCP_002940 | XLOC_126648 | ENSRNOT000000030996 | 0.964989928  | 3.91E-07 |
| TUCP_002940 | XLOC_126648 | ENSRNOT000000075400 | 0.958343202  | 9.21E-07 |
| TUCP_002940 | XLOC_126648 | ENSRNOT000000074420 | 0.954078866  | 1.49E-06 |

|             |             |                     |              |          |
|-------------|-------------|---------------------|--------------|----------|
| TUCP_002940 | XLOC_126648 | ENSRNOT00000023320  | 0.974029168  | 8.91E-08 |
| TUCP_002940 | XLOC_126648 | ENSRNOT00000020453  | 0.952524694  | 1.75E-06 |
| TUCP_002940 | XLOC_126648 | ENSRNOT00000009564  | 0.962585087  | 5.42E-07 |
| TUCP_002940 | XLOC_126648 | ENSRNOT00000041237  | 0.978212499  | 3.73E-08 |
| TUCP_002940 | XLOC_126648 | ENSRNOT00000023430  | 0.971834927  | 1.33E-07 |
| TUCP_002940 | XLOC_126648 | ENSRNOT00000001859  | 0.976836303  | 5.05E-08 |
| TUCP_002940 | XLOC_126648 | ENSRNOT00000002329  | -0.959192867 | 8.32E-07 |
| TUCP_002940 | XLOC_126648 | ENSRNOT00000003733  | 0.987455542  | 2.40E-09 |
| TUCP_002940 | XLOC_126648 | ENSRNOT00000021110  | 0.950960128  | 2.06E-06 |
| TUCP_002940 | XLOC_126648 | ENSRNOT000000083864 | 0.974524816  | 8.10E-08 |
| TUCP_002940 | XLOC_126648 | ENSRNOT00000020853  | 0.980762028  | 2.01E-08 |
| TUCP_002940 | XLOC_126648 | ENSRNOT00000001774  | 0.963175437  | 5.01E-07 |
| TUCP_002940 | XLOC_126648 | ENSRNOT000000080013 | 0.976817506  | 5.07E-08 |
| TUCP_002940 | XLOC_126648 | ENSRNOT000000013759 | 0.952266724  | 1.80E-06 |
| TUCP_002940 | XLOC_126648 | ENSRNOT000000013613 | 0.970097313  | 1.79E-07 |
| TUCP_002940 | XLOC_126648 | ENSRNOT000000019056 | 0.956029622  | 1.20E-06 |
| TUCP_002940 | XLOC_126648 | ENSRNOT000000027553 | 0.988966816  | 1.26E-09 |
| TUCP_002940 | XLOC_126648 | ENSRNOT000000021621 | 0.952182735  | 1.82E-06 |
| TUCP_002940 | XLOC_126648 | ENSRNOT00000006203  | -0.950917604 | 2.07E-06 |
| TUCP_002940 | XLOC_126648 | ENSRNOT000000021455 | 0.958754347  | 8.77E-07 |
| TUCP_002940 | XLOC_126648 | ENSRNOT000000011432 | 0.953719541  | 1.55E-06 |
| TUCP_002940 | XLOC_126648 | ENSRNOT000000014177 | 0.95752748   | 1.01E-06 |
| TUCP_002940 | XLOC_126648 | ENSRNOT00000007824  | 0.960857006  | 6.78E-07 |
| TUCP_002940 | XLOC_126648 | ENSRNOT000000033795 | 0.977274454  | 4.60E-08 |
| TUCP_002940 | XLOC_126648 | ENSRNOT000000022432 | 0.950015069  | 2.26E-06 |
| TUCP_002940 | XLOC_126648 | ENSRNOT000000006725 | 0.950730882  | 2.10E-06 |
| TUCP_002940 | XLOC_126648 | ENSRNOT000000034983 | 0.960627701  | 6.97E-07 |
| TUCP_002940 | XLOC_126648 | ENSRNOT000000021937 | 0.976910373  | 4.97E-08 |
| TUCP_002940 | XLOC_126648 | ENSRNOT000000052098 | 0.967454429  | 2.72E-07 |
| TUCP_002940 | XLOC_126648 | ENSRNOT000000014211 | 0.964910697  | 3.95E-07 |
| TUCP_002940 | XLOC_126648 | ENSRNOT000000015573 | 0.958384304  | 9.17E-07 |
| TUCP_002940 | XLOC_126648 | ENSRNOT000000008140 | 0.971274692  | 1.47E-07 |
| TUCP_002940 | XLOC_126648 | ENSRNOT000000026724 | 0.974571375  | 8.02E-08 |
| TUCP_002940 | XLOC_126648 | ENSRNOT000000085545 | 0.95619122   | 1.18E-06 |
| TUCP_002940 | XLOC_126648 | ENSRNOT000000018028 | 0.955217427  | 1.32E-06 |
| TUCP_002940 | XLOC_126648 | ENSRNOT000000015351 | 0.969828518  | 1.87E-07 |
| TUCP_002940 | XLOC_126648 | ENSRNOT000000082627 | 0.96663155   | 3.08E-07 |
| TUCP_002940 | XLOC_126648 | ENSRNOT000000003787 | 0.967636949  | 2.65E-07 |
| TUCP_002940 | XLOC_126648 | ENSRNOT000000015192 | 0.950617092  | 2.13E-06 |
| TUCP_002940 | XLOC_126648 | ENSRNOT000000056656 | 0.95890893   | 8.61E-07 |
| TUCP_002940 | XLOC_126648 | ENSRNOT000000014859 | 0.977867093  | 4.03E-08 |
| TUCP_002940 | XLOC_126648 | ENSRNOT000000022987 | 0.962014876  | 5.84E-07 |
| TUCP_002940 | XLOC_126648 | ENSRNOT00000005608  | 0.953318146  | 1.61E-06 |
| TUCP_002940 | XLOC_126648 | ENSRNOT000000022343 | 0.961778683  | 6.02E-07 |
| TUCP_002940 | XLOC_126648 | ENSRNOT000000072165 | 0.95520865   | 1.32E-06 |
| TUCP_002940 | XLOC_126648 | ENSRNOT000000008317 | 0.98388191   | 8.34E-09 |
| TUCP_002940 | XLOC_126648 | ENSRNOT000000068026 | 0.952244786  | 1.80E-06 |
| TUCP_002940 | XLOC_126648 | ENSRNOT000000029166 | 0.975682579  | 6.43E-08 |
| TUCP_002940 | XLOC_126648 | ENSRNOT000000056923 | 0.969826614  | 1.87E-07 |
| TUCP_002940 | XLOC_126648 | ENSRNOT000000005996 | 0.980958787  | 1.91E-08 |
| TUCP_002940 | XLOC_126648 | ENSRNOT000000075057 | 0.959484546  | 8.03E-07 |

|             |             |                    |              |          |
|-------------|-------------|--------------------|--------------|----------|
| TUCP_002940 | XLOC_126648 | ENSRNOT00000005170 | 0.955215681  | 1.32E-06 |
| TUCP_002940 | XLOC_126648 | ENSRNOT00000017746 | 0.962690381  | 5.35E-07 |
| TUCP_002940 | XLOC_126648 | ENSRNOT00000000552 | 0.986247547  | 3.79E-09 |
| TUCP_002940 | XLOC_126648 | ENSRNOT00000016286 | 0.967160793  | 2.85E-07 |
| TUCP_002940 | XLOC_126648 | ENSRNOT00000037946 | 0.967408377  | 2.74E-07 |
| TUCP_002940 | XLOC_126648 | ENSRNOT00000070825 | 0.985523337  | 4.89E-09 |
| TUCP_002940 | XLOC_126648 | ENSRNOT00000034961 | 0.95855456   | 8.98E-07 |
| TUCP_002940 | XLOC_126648 | ENSRNOT00000041371 | 0.963675355  | 4.69E-07 |
| TUCP_002940 | XLOC_126648 | ENSRNOT00000013375 | 0.961540922  | 6.21E-07 |
| TUCP_002940 | XLOC_126648 | ENSRNOT00000024285 | 0.95174504   | 1.90E-06 |
| TUCP_002940 | XLOC_126648 | ENSRNOT00000028744 | 0.962102826  | 5.78E-07 |
| TUCP_002940 | XLOC_126648 | ENSRNOT00000024753 | 0.982567283  | 1.23E-08 |
| TUCP_002940 | XLOC_126648 | ENSRNOT00000032162 | 0.962947946  | 5.17E-07 |
| TUCP_002940 | XLOC_126648 | ENSRNOT00000022827 | 0.960517675  | 7.07E-07 |
| TUCP_002940 | XLOC_126648 | ENSRNOT00000024326 | 0.971668077  | 1.37E-07 |
| TUCP_002940 | XLOC_126648 | ENSRNOT00000024456 | 0.963252469  | 4.96E-07 |
| TUCP_002940 | XLOC_126648 | ENSRNOT00000000253 | 0.972118451  | 1.27E-07 |
| TUCP_002940 | XLOC_126648 | ENSRNOT00000000258 | 0.985222213  | 5.41E-09 |
| TUCP_002940 | XLOC_126648 | ENSRNOT00000075283 | 0.961143188  | 6.54E-07 |
| TUCP_002940 | XLOC_126648 | ENSRNOT00000002511 | 0.954480408  | 1.43E-06 |
| TUCP_002940 | XLOC_126648 | ENSRNOT00000047571 | 0.950861689  | 2.08E-06 |
| TUCP_002940 | XLOC_126648 | ENSRNOT00000047572 | 0.973441143  | 9.95E-08 |
| TUCP_002940 | XLOC_126648 | ENSRNOT00000006804 | -0.955138392 | 1.33E-06 |
| TUCP_002940 | XLOC_126648 | ENSRNOT00000020809 | 0.967646542  | 2.64E-07 |
| TUCP_002940 | XLOC_126648 | ENSRNOT00000016776 | 0.950372329  | 2.18E-06 |
| TUCP_002940 | XLOC_126648 | ENSRNOT00000001605 | 0.972772334  | 1.13E-07 |
| TUCP_002940 | XLOC_126648 | ENSRNOT00000038511 | 0.950675622  | 2.12E-06 |
| TUCP_002940 | XLOC_126648 | ENSRNOT00000020982 | 0.955851508  | 1.23E-06 |
| TUCP_002940 | XLOC_126648 | ENSRNOT00000086847 | 0.971895287  | 1.32E-07 |
| TUCP_002940 | XLOC_126648 | ENSRNOT00000018846 | 0.975822786  | 6.25E-08 |
| TUCP_002940 | XLOC_126648 | ENSRNOT00000064323 | 0.952446712  | 1.77E-06 |
| TUCP_002940 | XLOC_126648 | ENSRNOT00000025086 | 0.954367592  | 1.44E-06 |
| TUCP_002940 | XLOC_126648 | ENSRNOT00000014002 | 0.984242972  | 7.45E-09 |
| TUCP_002940 | XLOC_126648 | ENSRNOT00000013553 | -0.951169881 | 2.01E-06 |
| TUCP_002940 | XLOC_126648 | ENSRNOT00000023963 | 0.95427155   | 1.46E-06 |
| TUCP_002940 | XLOC_126648 | ENSRNOT00000002851 | 0.960725942  | 6.89E-07 |
| TUCP_002940 | XLOC_126648 | ENSRNOT00000055250 | 0.960973907  | 6.68E-07 |
| TUCP_002940 | XLOC_126648 | ENSRNOT00000068184 | 0.978416336  | 3.56E-08 |
| TUCP_002940 | XLOC_126648 | ENSRNOT00000031692 | 0.961402962  | 6.32E-07 |
| TUCP_002940 | XLOC_126648 | ENSRNOT00000089016 | 0.976874667  | 5.01E-08 |
| TUCP_002940 | XLOC_126648 | ENSRNOT00000022864 | 0.974133324  | 8.73E-08 |
| TUCP_002940 | XLOC_126648 | ENSRNOT00000006578 | 0.969473776  | 1.98E-07 |
| TUCP_002940 | XLOC_126648 | ENSRNOT00000028900 | 0.957566601  | 1.01E-06 |
| TUCP_002940 | XLOC_126648 | ENSRNOT00000025149 | 0.957803109  | 9.81E-07 |
| TUCP_002940 | XLOC_126648 | ENSRNOT00000072890 | 0.957088175  | 1.07E-06 |
| TUCP_002940 | XLOC_126648 | ENSRNOT00000087556 | 0.955413469  | 1.29E-06 |
| TUCP_002940 | XLOC_126648 | ENSRNOT00000029753 | 0.9666344    | 3.08E-07 |
| TUCP_002940 | XLOC_126648 | ENSRNOT00000040981 | 0.968768491  | 2.22E-07 |
| TUCP_002940 | XLOC_126648 | ENSRNOT00000056725 | 0.976913582  | 4.97E-08 |
| TUCP_002940 | XLOC_126648 | ENSRNOT00000017687 | 0.955794941  | 1.23E-06 |
| TUCP_002940 | XLOC_126648 | ENSRNOT00000017684 | 0.950039805  | 2.25E-06 |

|             |             |                     |             |          |
|-------------|-------------|---------------------|-------------|----------|
| TUCP_002940 | XLOC_126648 | ENSRNOT00000008359  | 0.977691461 | 4.19E-08 |
| TUCP_002940 | XLOC_126648 | ENSRNOT000000039291 | 0.969514032 | 1.97E-07 |
| TUCP_002940 | XLOC_126648 | ENSRNOT000000035486 | 0.979355742 | 2.85E-08 |
| TUCP_002940 | XLOC_126648 | ENSRNOT000000080174 | 0.985098021 | 5.64E-09 |
| TUCP_002940 | XLOC_126648 | ENSRNOT000000011237 | 0.979406333 | 2.82E-08 |
| TUCP_002940 | XLOC_126648 | ENSRNOT000000060444 | 0.954621262 | 1.40E-06 |
| TUCP_002940 | XLOC_126648 | ENSRNOT000000013344 | 0.954942845 | 1.36E-06 |
| TUCP_002940 | XLOC_126648 | ENSRNOT000000030501 | 0.96870435  | 2.24E-07 |
| TUCP_002940 | XLOC_126648 | ENSRNOT00000005658  | 0.979807907 | 2.56E-08 |
| TUCP_002940 | XLOC_126648 | ENSRNOT00000009275  | 0.958106995 | 9.47E-07 |
| TUCP_002940 | XLOC_126648 | ENSRNOT000000022086 | 0.957995505 | 9.60E-07 |
| TUCP_002940 | XLOC_126648 | ENSRNOT000000024712 | 0.976691232 | 5.21E-08 |
| TUCP_002940 | XLOC_126648 | ENSRNOT000000029332 | 0.953764541 | 1.54E-06 |
| TUCP_002940 | XLOC_126648 | ENSRNOT000000018341 | 0.970958115 | 1.55E-07 |
| TUCP_002940 | XLOC_126648 | ENSRNOT000000081787 | 0.971123229 | 1.51E-07 |
| TUCP_002940 | XLOC_126648 | ENSRNOT00000002799  | 0.956071938 | 1.20E-06 |
| TUCP_002940 | XLOC_126648 | ENSRNOT000000024882 | 0.973348607 | 1.01E-07 |
| TUCP_002940 | XLOC_126648 | ENSRNOT000000030222 | 0.976982562 | 4.90E-08 |
| TUCP_002940 | XLOC_126648 | ENSRNOT00000002334  | 0.981097501 | 1.84E-08 |
| TUCP_002940 | XLOC_126648 | ENSRNOT00000005033  | 0.954985128 | 1.35E-06 |
| TUCP_002940 | XLOC_126648 | ENSRNOT000000018237 | 0.958982742 | 8.53E-07 |
| TUCP_002940 | XLOC_126648 | ENSRNOT000000013587 | 0.952893397 | 1.69E-06 |
| TUCP_002940 | XLOC_126648 | ENSRNOT000000089545 | 0.95134207  | 1.98E-06 |
| TUCP_002940 | XLOC_126648 | ENSRNOT000000010783 | 0.969416601 | 2.00E-07 |
| TUCP_002940 | XLOC_126648 | ENSRNOT000000019040 | 0.956870603 | 1.09E-06 |
| TUCP_002940 | XLOC_126648 | ENSRNOT000000013764 | 0.972901851 | 1.10E-07 |
| TUCP_002940 | XLOC_126648 | ENSRNOT000000019044 | 0.962424704 | 5.54E-07 |
| TUCP_002940 | XLOC_126648 | ENSRNOT000000011940 | 0.972305531 | 1.22E-07 |
| TUCP_002940 | XLOC_126648 | ENSRNOT000000073005 | 0.972443395 | 1.19E-07 |
| TUCP_002940 | XLOC_126648 | ENSRNOT000000021744 | 0.959595684 | 7.92E-07 |
| TUCP_002940 | XLOC_126648 | ENSRNOT000000077727 | 0.957097636 | 1.06E-06 |
| TUCP_002940 | XLOC_126648 | ENSRNOT000000079115 | 0.95110377  | 2.03E-06 |
| TUCP_002940 | XLOC_126648 | ENSRNOT000000021036 | 0.961808276 | 6.00E-07 |
| TUCP_002940 | XLOC_126648 | ENSRNOT000000082124 | 0.962477417 | 5.50E-07 |
| TUCP_002940 | XLOC_126648 | ENSRNOT000000070886 | 0.961922658 | 5.91E-07 |
| TUCP_002940 | XLOC_126648 | ENSRNOT000000014044 | 0.959554242 | 7.96E-07 |
| TUCP_002940 | XLOC_126648 | ENSRNOT000000066521 | 0.962233035 | 5.68E-07 |
| TUCP_002940 | XLOC_126648 | ENSRNOT000000086147 | 0.973945612 | 9.05E-08 |
| TUCP_002940 | XLOC_126648 | ENSRNOT00000001084  | 0.954233655 | 1.46E-06 |
| TUCP_002940 | XLOC_126648 | ENSRNOT000000031653 | 0.96620206  | 3.28E-07 |
| TUCP_002940 | XLOC_126648 | ENSRNOT00000007882  | 0.964722919 | 4.06E-07 |
| TUCP_002940 | XLOC_126648 | ENSRNOT00000006946  | 0.954959726 | 1.35E-06 |
| TUCP_002940 | XLOC_126648 | ENSRNOT00000001247  | 0.965444602 | 3.66E-07 |
| TUCP_002940 | XLOC_126648 | ENSRNOT000000023854 | 0.953599729 | 1.57E-06 |
| TUCP_002940 | XLOC_126648 | ENSRNOT000000001160 | 0.969624772 | 1.94E-07 |
| TUCP_002940 | XLOC_126648 | ENSRNOT000000041116 | 0.969191195 | 2.08E-07 |
| TUCP_002940 | XLOC_126648 | ENSRNOT000000082894 | 0.983389318 | 9.69E-09 |
| TUCP_002940 | XLOC_126648 | ENSRNOT000000056918 | 0.961106207 | 6.57E-07 |
| TUCP_002940 | XLOC_126648 | ENSRNOT000000025824 | 0.964656164 | 4.09E-07 |
| TUCP_002940 | XLOC_126648 | ENSRNOT000000056780 | 0.965194353 | 3.79E-07 |
| TUCP_002940 | XLOC_126648 | ENSRNOT000000079801 | 0.967141545 | 2.85E-07 |

|             |             |                    |             |          |
|-------------|-------------|--------------------|-------------|----------|
| TUCP_002940 | XLOC_126648 | ENSRNOT00000083983 | 0.959493229 | 8.02E-07 |
| TUCP_002940 | XLOC_126648 | ENSRNOT00000007549 | 0.959563418 | 7.95E-07 |
| TUCP_002940 | XLOC_126648 | ENSRNOT00000017626 | 0.961775403 | 6.03E-07 |
| TUCP_002940 | XLOC_126648 | ENSRNOT00000025134 | 0.982789347 | 1.16E-08 |
| TUCP_002940 | XLOC_126648 | ENSRNOT00000013899 | 0.955647604 | 1.25E-06 |
| TUCP_002940 | XLOC_126648 | ENSRNOT00000030623 | 0.951038119 | 2.04E-06 |
| TUCP_002940 | XLOC_126648 | ENSRNOT00000064290 | 0.952280002 | 1.80E-06 |
| TUCP_002940 | XLOC_126648 | ENSRNOT00000014586 | 0.964571966 | 4.14E-07 |
| TUCP_002940 | XLOC_126648 | ENSRNOT00000002198 | 0.960071557 | 7.47E-07 |
| TUCP_002940 | XLOC_126648 | ENSRNOT00000014832 | 0.973530869 | 9.79E-08 |
| TUCP_002940 | XLOC_126648 | ENSRNOT00000089879 | 0.97833363  | 3.63E-08 |
| TUCP_002940 | XLOC_126648 | ENSRNOT00000018477 | 0.955178478 | 1.32E-06 |
| TUCP_002940 | XLOC_126648 | ENSRNOT00000080222 | 0.950366958 | 2.18E-06 |
| TUCP_002940 | XLOC_126648 | ENSRNOT00000090939 | 0.959552879 | 7.96E-07 |
| TUCP_002940 | XLOC_126648 | ENSRNOT00000018473 | 0.978887048 | 3.19E-08 |
| TUCP_002940 | XLOC_126648 | ENSRNOT00000026118 | 0.966393995 | 3.19E-07 |
| TUCP_002940 | XLOC_126648 | ENSRNOT00000026021 | 0.964329048 | 4.28E-07 |
| TUCP_002940 | XLOC_126648 | ENSRNOT00000072926 | 0.953294671 | 1.62E-06 |
| TUCP_002940 | XLOC_126648 | ENSRNOT00000029021 | 0.952577725 | 1.74E-06 |
| TUCP_002940 | XLOC_126648 | ENSRNOT00000005486 | 0.956281162 | 1.17E-06 |
| TUCP_002940 | XLOC_126648 | ENSRNOT00000093552 | 0.957472357 | 1.02E-06 |
| TUCP_002940 | XLOC_126648 | ENSRNOT00000025791 | 0.971752618 | 1.35E-07 |
| TUCP_002940 | XLOC_126648 | ENSRNOT00000020478 | 0.959173683 | 8.34E-07 |
| TUCP_002940 | XLOC_126648 | ENSRNOT00000009994 | 0.950220644 | 2.21E-06 |
| TUCP_002940 | XLOC_126648 | ENSRNOT00000077363 | 0.968543388 | 2.30E-07 |
| TUCP_002940 | XLOC_126648 | ENSRNOT00000027973 | 0.964152869 | 4.39E-07 |
| TUCP_002940 | XLOC_126648 | ENSRNOT00000024841 | 0.966535044 | 3.12E-07 |
| TUCP_002940 | XLOC_126648 | ENSRNOT00000009345 | 0.956121734 | 1.19E-06 |
| TUCP_002940 | XLOC_126648 | ENSRNOT00000024924 | 0.98344711  | 9.52E-09 |
| TUCP_002940 | XLOC_126648 | ENSRNOT00000048529 | 0.959018282 | 8.50E-07 |
| TUCP_002940 | XLOC_126648 | ENSRNOT00000036374 | 0.957865911 | 9.74E-07 |
| TUCP_002940 | XLOC_126648 | ENSRNOT00000000124 | 0.962677938 | 5.36E-07 |
| TUCP_002940 | XLOC_126648 | ENSRNOT00000043581 | 0.976208594 | 5.77E-08 |
| TUCP_002940 | XLOC_126648 | ENSRNOT00000064636 | 0.979809586 | 2.55E-08 |
| TUCP_002940 | XLOC_126648 | ENSRNOT00000001752 | 0.967634652 | 2.65E-07 |
| TUCP_002940 | XLOC_126648 | ENSRNOT00000013733 | 0.956616836 | 1.13E-06 |
| TUCP_002940 | XLOC_126648 | ENSRNOT00000066561 | 0.977634952 | 4.24E-08 |
| TUCP_002940 | XLOC_126648 | ENSRNOT00000019175 | 0.964597607 | 4.13E-07 |
| TUCP_002940 | XLOC_126648 | ENSRNOT00000012608 | 0.95700035  | 1.08E-06 |
| TUCP_002940 | XLOC_126648 | ENSRNOT00000004094 | 0.967325161 | 2.78E-07 |
| TUCP_002940 | XLOC_126648 | ENSRNOT00000015886 | 0.955436108 | 1.28E-06 |
| TUCP_002940 | XLOC_126648 | ENSRNOT00000012847 | 0.985580193 | 4.79E-09 |
| TUCP_002940 | XLOC_126648 | ENSRNOT00000020909 | 0.984008087 | 8.02E-09 |
| TUCP_002940 | XLOC_126648 | ENSRNOT00000065722 | 0.960883    | 6.75E-07 |
| TUCP_002940 | XLOC_126648 | ENSRNOT00000065642 | 0.977471122 | 4.40E-08 |
| TUCP_002940 | XLOC_126648 | ENSRNOT00000036194 | 0.954425094 | 1.43E-06 |
| TUCP_002940 | XLOC_126648 | ENSRNOT00000036195 | 0.974538607 | 8.07E-08 |
| TUCP_002940 | XLOC_126648 | ENSRNOT00000081312 | 0.966938016 | 2.94E-07 |
| TUCP_002940 | XLOC_126648 | ENSRNOT00000074586 | 0.950258162 | 2.21E-06 |
| TUCP_002940 | XLOC_126648 | ENSRNOT00000057758 | 0.950585882 | 2.14E-06 |
| TUCP_002940 | XLOC_126648 | ENSRNOT00000035400 | 0.972357022 | 1.21E-07 |



|             |             |                    |              |          |
|-------------|-------------|--------------------|--------------|----------|
| TUCP_002940 | XLOC_126648 | ENSRNOT0000004241  | 0.959485736  | 8.03E-07 |
| TUCP_002940 | XLOC_126648 | ENSRNOT00000019358 | 0.961676598  | 6.10E-07 |
| TUCP_002940 | XLOC_126648 | ENSRNOT00000010333 | 0.950959157  | 2.06E-06 |
| TUCP_002940 | XLOC_126648 | ENSRNOT00000087011 | 0.979277486  | 2.91E-08 |
| TUCP_002940 | XLOC_126648 | ENSRNOT00000076101 | 0.965248251  | 3.77E-07 |
| TUCP_002940 | XLOC_126648 | ENSRNOT00000005286 | 0.98423128   | 7.48E-09 |
| TUCP_002940 | XLOC_126648 | ENSRNOT00000056675 | 0.987241337  | 2.61E-09 |
| TUCP_002940 | XLOC_126648 | ENSRNOT00000013295 | 0.985153786  | 5.54E-09 |
| TUCP_002940 | XLOC_126648 | ENSRNOT00000066947 | 0.961119609  | 6.55E-07 |
| TUCP_002940 | XLOC_126648 | ENSRNOT00000077063 | 0.969514799  | 1.97E-07 |
| TUCP_002940 | XLOC_126648 | ENSRNOT00000039177 | 0.964685886  | 4.08E-07 |
| TUCP_002940 | XLOC_126648 | ENSRNOT00000076191 | 0.961368566  | 6.35E-07 |
| TUCP_002940 | XLOC_126648 | ENSRNOT00000013228 | -0.959311667 | 8.20E-07 |
| TUCP_002940 | XLOC_126648 | ENSRNOT00000017784 | 0.980688426  | 2.05E-08 |
| TUCP_002940 | XLOC_126648 | ENSRNOT00000011694 | 0.964125497  | 4.41E-07 |
| TUCP_002940 | XLOC_126648 | ENSRNOT00000022676 | 0.977136224  | 4.74E-08 |
| TUCP_002940 | XLOC_126648 | ENSRNOT00000018405 | 0.952054491  | 1.84E-06 |
| TUCP_002940 | XLOC_126648 | ENSRNOT00000083843 | 0.958930588  | 8.59E-07 |
| TUCP_002940 | XLOC_126648 | ENSRNOT00000072368 | 0.951653807  | 1.92E-06 |
| TUCP_002940 | XLOC_126648 | ENSRNOT00000082739 | 0.960607231  | 6.99E-07 |
| TUCP_002940 | XLOC_126648 | ENSRNOT00000026552 | 0.967846722  | 2.56E-07 |
| TUCP_002940 | XLOC_126648 | ENSRNOT00000023463 | 0.984983542  | 5.86E-09 |
| TUCP_002940 | XLOC_126648 | ENSRNOT00000034266 | 0.963787976  | 4.61E-07 |
| TUCP_002940 | XLOC_126648 | ENSRNOT00000046490 | 0.978017945  | 3.90E-08 |
| TUCP_002940 | XLOC_126648 | ENSRNOT00000005432 | 0.959817109  | 7.71E-07 |
| TUCP_002940 | XLOC_126648 | ENSRNOT00000005661 | 0.968445679  | 2.34E-07 |
| TUCP_002940 | XLOC_126648 | ENSRNOT00000024775 | 0.964594369  | 4.13E-07 |
| TUCP_002940 | XLOC_126648 | ENSRNOT00000024801 | 0.967967815  | 2.52E-07 |
| TUCP_002940 | XLOC_126648 | ENSRNOT00000001979 | 0.960380193  | 7.19E-07 |
| TUCP_002940 | XLOC_126648 | ENSRNOT00000054957 | 0.966690914  | 3.05E-07 |
| TUCP_002940 | XLOC_126648 | ENSRNOT00000079011 | 0.950329642  | 2.19E-06 |
| TUCP_002940 | XLOC_126648 | ENSRNOT00000041808 | 0.974931136  | 7.48E-08 |
| TUCP_002940 | XLOC_126648 | ENSRNOT00000021134 | 0.982222909  | 1.36E-08 |
| TUCP_002940 | XLOC_126648 | ENSRNOT00000013571 | 0.959816341  | 7.71E-07 |
| TUCP_002940 | XLOC_126648 | ENSRNOT00000026726 | 0.972511282  | 1.18E-07 |
| TUCP_002940 | XLOC_126648 | ENSRNOT00000024981 | 0.96208779   | 5.79E-07 |
| TUCP_002940 | XLOC_126648 | ENSRNOT00000081037 | 0.950332736  | 2.19E-06 |
| TUCP_002940 | XLOC_126648 | ENSRNOT00000020543 | 0.961286831  | 6.42E-07 |
| TUCP_002940 | XLOC_126648 | ENSRNOT00000016324 | 0.987059282  | 2.80E-09 |
| TUCP_002940 | XLOC_126648 | ENSRNOT00000089449 | 0.959247919  | 8.27E-07 |
| TUCP_002940 | XLOC_126648 | ENSRNOT00000001322 | 0.951523537  | 1.94E-06 |
| TUCP_002940 | XLOC_126648 | ENSRNOT00000006824 | 0.96252228   | 5.47E-07 |
| TUCP_002940 | XLOC_126648 | ENSRNOT00000012775 | 0.960691889  | 6.92E-07 |
| TUCP_002940 | XLOC_126648 | ENSRNOT00000077040 | 0.989414398  | 1.03E-09 |
| TUCP_002940 | XLOC_126648 | ENSRNOT00000011556 | 0.958103314  | 9.47E-07 |
| TUCP_002940 | XLOC_126648 | ENSRNOT00000064744 | 0.964012609  | 4.47E-07 |
| TUCP_002940 | XLOC_126648 | ENSRNOT00000017955 | 0.976035188  | 5.98E-08 |
| TUCP_002940 | XLOC_126648 | ENSRNOT00000028217 | 0.972371113  | 1.21E-07 |
| TUCP_002940 | XLOC_126648 | ENSRNOT00000073193 | 0.958567966  | 8.97E-07 |
| TUCP_002940 | XLOC_126648 | ENSRNOT00000067725 | 0.958044301  | 9.54E-07 |
| TUCP_002940 | XLOC_126648 | ENSRNOT00000006709 | 0.971615738  | 1.38E-07 |

|             |             |                    |              |          |
|-------------|-------------|--------------------|--------------|----------|
| TUCP_002940 | XLOC_126648 | ENSRNOT00000029704 | 0.962757499  | 5.30E-07 |
| TUCP_002940 | XLOC_126648 | ENSRNOT00000012495 | 0.952826672  | 1.70E-06 |
| TUCP_002940 | XLOC_126648 | ENSRNOT00000025221 | 0.983824671  | 8.49E-09 |
| TUCP_002940 | XLOC_126648 | ENSRNOT00000056015 | 0.957854497  | 9.76E-07 |
| TUCP_002940 | XLOC_126648 | ENSRNOT00000025634 | 0.96852746   | 2.31E-07 |
| TUCP_002940 | XLOC_126648 | ENSRNOT00000073926 | 0.958869696  | 8.65E-07 |
| TUCP_002940 | XLOC_126648 | ENSRNOT00000055607 | 0.959083595  | 8.43E-07 |
| TUCP_002940 | XLOC_126648 | ENSRNOT00000077730 | 0.973380409  | 1.01E-07 |
| TUCP_002940 | XLOC_126648 | ENSRNOT00000012428 | 0.972046537  | 1.28E-07 |
| TUCP_002940 | XLOC_126648 | ENSRNOT00000000717 | 0.970285423  | 1.74E-07 |
| TUCP_002940 | XLOC_126648 | ENSRNOT00000022846 | 0.954262472  | 1.46E-06 |
| TUCP_002940 | XLOC_126648 | ENSRNOT00000049048 | 0.980611103  | 2.09E-08 |
| TUCP_002940 | XLOC_126648 | ENSRNOT00000018149 | 0.971579835  | 1.39E-07 |
| TUCP_002940 | XLOC_126648 | ENSRNOT00000075602 | 0.959356539  | 8.16E-07 |
| TUCP_002940 | XLOC_126648 | ENSRNOT00000087022 | 0.954532474  | 1.42E-06 |
| TUCP_002940 | XLOC_126648 | ENSRNOT00000089066 | -0.963248573 | 4.96E-07 |
| TUCP_002940 | XLOC_126648 | ENSRNOT00000072722 | 0.95093127   | 2.06E-06 |
| TUCP_002940 | XLOC_126648 | ENSRNOT00000023641 | 0.975743697  | 6.35E-08 |
| TUCP_002940 | XLOC_126648 | ENSRNOT00000027187 | 0.957797276  | 9.82E-07 |
| TUCP_002940 | XLOC_126648 | ENSRNOT0000007276  | 0.978249902  | 3.70E-08 |
| TUCP_002940 | XLOC_126648 | ENSRNOT00000023543 | 0.951944123  | 1.86E-06 |
| TUCP_002940 | XLOC_126648 | ENSRNOT00000028737 | 0.967787511  | 2.59E-07 |
| TUCP_002940 | XLOC_126648 | ENSRNOT00000022065 | 0.967250504  | 2.81E-07 |
| TUCP_002940 | XLOC_126648 | ENSRNOT00000017618 | 0.962248928  | 5.67E-07 |
| TUCP_002940 | XLOC_126648 | ENSRNOT00000085458 | 0.961837323  | 5.98E-07 |
| TUCP_002940 | XLOC_126648 | ENSRNOT00000016582 | 0.966315812  | 3.23E-07 |
| TUCP_002940 | XLOC_126648 | ENSRNOT00000039572 | 0.963920621  | 4.53E-07 |
| TUCP_002940 | XLOC_126648 | ENSRNOT00000032893 | 0.961814878  | 6.00E-07 |
| TUCP_002940 | XLOC_126648 | ENSRNOT00000007300 | 0.962373429  | 5.58E-07 |
| TUCP_002940 | XLOC_126648 | ENSRNOT00000028781 | -0.969781358 | 1.89E-07 |
| TUCP_002940 | XLOC_126648 | ENSRNOT00000013535 | 0.976179151  | 5.80E-08 |
| TUCP_002940 | XLOC_126648 | ENSRNOT00000025782 | 0.978354574  | 3.61E-08 |
| TUCP_002940 | XLOC_126648 | ENSRNOT00000038464 | 0.976062659  | 5.95E-08 |
| TUCP_002940 | XLOC_126648 | ENSRNOT00000066199 | 0.985319536  | 5.24E-09 |
| TUCP_002940 | XLOC_126648 | ENSRNOT00000047698 | 0.953190892  | 1.64E-06 |
| TUCP_002940 | XLOC_126648 | ENSRNOT00000027360 | 0.955178091  | 1.32E-06 |
| TUCP_002940 | XLOC_126648 | ENSRNOT00000024938 | 0.97589491   | 6.16E-08 |
| TUCP_002940 | XLOC_126648 | ENSRNOT00000017683 | 0.951785308  | 1.89E-06 |
| TUCP_002940 | XLOC_126648 | ENSRNOT00000018043 | 0.964573864  | 4.14E-07 |
| TUCP_002940 | XLOC_126648 | ENSRNOT00000011320 | 0.979904041  | 2.50E-08 |
| TUCP_002946 | XLOC_126889 | ENSRNOT00000002982 | 0.950680293  | 2.12E-06 |
| TUCP_002945 | XLOC_126846 | ENSRNOT00000024186 | 0.958040893  | 9.54E-07 |
| TUCP_002945 | XLOC_126846 | ENSRNOT00000074753 | 0.974653224  | 7.90E-08 |
| TUCP_002945 | XLOC_126846 | ENSRNOT00000041904 | 0.980649663  | 2.07E-08 |
| TUCP_002945 | XLOC_126846 | ENSRNOT00000083487 | 0.977169206  | 4.70E-08 |
| TUCP_002945 | XLOC_126846 | ENSRNOT00000077990 | 0.980649663  | 2.07E-08 |
| TUCP_002945 | XLOC_126846 | ENSRNOT00000038826 | 0.979206942  | 2.96E-08 |
| TUCP_002945 | XLOC_126846 | ENSRNOT00000021243 | 0.977361152  | 4.51E-08 |
| TUCP_002945 | XLOC_126846 | ENSRNOT00000060250 | 0.98133063   | 1.73E-08 |
| TUCP_002945 | XLOC_126846 | ENSRNOT00000091934 | 0.980649663  | 2.07E-08 |
| TUCP_002945 | XLOC_126846 | ENSRNOT00000046585 | 0.953001457  | 1.67E-06 |

|             |             |                    |              |          |
|-------------|-------------|--------------------|--------------|----------|
| TUCP_002945 | XLOC_126846 | ENSRNOT00000080794 | 0.974807823  | 7.66E-08 |
| TUCP_002945 | XLOC_126846 | ENSRNOT00000014456 | 0.974839033  | 7.61E-08 |
| TUCP_002945 | XLOC_126846 | ENSRNOT00000031205 | 0.962289009  | 5.64E-07 |
| TUCP_002945 | XLOC_126846 | ENSRNOT00000044145 | 0.980649663  | 2.07E-08 |
| TUCP_002945 | XLOC_126846 | ENSRNOT00000088381 | 0.961956407  | 5.89E-07 |
| TUCP_002945 | XLOC_126846 | ENSRNOT00000011743 | 0.95900915   | 8.51E-07 |
| TUCP_002945 | XLOC_126846 | ENSRNOT00000089929 | 0.980649663  | 2.07E-08 |
| TUCP_002945 | XLOC_126846 | ENSRNOT00000088624 | 0.980649663  | 2.07E-08 |
| TUCP_002945 | XLOC_126846 | ENSRNOT00000085659 | 0.980925785  | 1.93E-08 |
| TUCP_002945 | XLOC_126846 | ENSRNOT00000015866 | 0.967862141  | 2.56E-07 |
| TUCP_002945 | XLOC_126846 | ENSRNOT00000064250 | 0.977852261  | 4.04E-08 |
| TUCP_002945 | XLOC_126846 | ENSRNOT00000034907 | 0.972270183  | 1.23E-07 |
| TUCP_002945 | XLOC_126846 | ENSRNOT00000051835 | 0.980649663  | 2.07E-08 |
| TUCP_002945 | XLOC_126846 | ENSRNOT00000079087 | 0.980649663  | 2.07E-08 |
| TUCP_002945 | XLOC_126846 | ENSRNOT00000037206 | 0.980649663  | 2.07E-08 |
| TUCP_002945 | XLOC_126846 | ENSRNOT00000083261 | 0.973978814  | 8.99E-08 |
| TUCP_002945 | XLOC_126846 | ENSRNOT00000080590 | 0.979743643  | 2.60E-08 |
| TUCP_002945 | XLOC_126846 | ENSRNOT00000021608 | 0.951744786  | 1.90E-06 |
| TUCP_002945 | XLOC_126846 | ENSRNOT00000077014 | 0.978475314  | 3.51E-08 |
| TUCP_002945 | XLOC_126846 | ENSRNOT00000080453 | 0.980632092  | 2.08E-08 |
| TUCP_002945 | XLOC_126846 | ENSRNOT00000057729 | 0.978166023  | 3.77E-08 |
| TUCP_002945 | XLOC_126846 | ENSRNOT00000078633 | 0.980649663  | 2.07E-08 |
| TUCP_002945 | XLOC_126846 | ENSRNOT00000071884 | 0.968373649  | 2.36E-07 |
| TUCP_002945 | XLOC_126846 | ENSRNOT00000066839 | 0.972641042  | 1.15E-07 |
| TUCP_002945 | XLOC_126846 | ENSRNOT00000026316 | 0.963370626  | 4.88E-07 |
| TUCP_002945 | XLOC_126846 | ENSRNOT00000078663 | 0.977786426  | 4.10E-08 |
| TUCP_002945 | XLOC_126846 | ENSRNOT00000027552 | 0.98150055   | 1.65E-08 |
| TUCP_002945 | XLOC_126846 | ENSRNOT00000029634 | 0.97069475   | 1.62E-07 |
| TUCP_002945 | XLOC_126846 | ENSRNOT00000091330 | 0.950923909  | 2.06E-06 |
| TUCP_002945 | XLOC_126846 | ENSRNOT00000065460 | 0.980649663  | 2.07E-08 |
| TUCP_002945 | XLOC_126846 | ENSRNOT00000003817 | 0.986640362  | 3.28E-09 |
| TUCP_002945 | XLOC_126846 | ENSRNOT00000016713 | 0.980649663  | 2.07E-08 |
| TUCP_002945 | XLOC_126846 | ENSRNOT00000079260 | 0.970174765  | 1.77E-07 |
| TUCP_002945 | XLOC_126846 | ENSRNOT00000039294 | 0.980649663  | 2.07E-08 |
| TUCP_002944 | XLOC_126777 | ENSRNOT00000006186 | 0.952018604  | 1.85E-06 |
| TUCP_002944 | XLOC_126777 | ENSRNOT00000026941 | 0.96066547   | 6.94E-07 |
| TUCP_002944 | XLOC_126777 | ENSRNOT00000019213 | 0.968924728  | 2.17E-07 |
| TUCP_002944 | XLOC_126777 | ENSRNOT00000018936 | -0.951141005 | 2.02E-06 |
| TUCP_002944 | XLOC_126777 | ENSRNOT00000021348 | 0.952888077  | 1.69E-06 |
| TUCP_002944 | XLOC_126777 | ENSRNOT00000071560 | 0.953921708  | 1.51E-06 |
| TUCP_002944 | XLOC_126777 | ENSRNOT00000005220 | 0.970070771  | 1.80E-07 |
| TUCP_002944 | XLOC_126777 | ENSRNOT00000044635 | 0.96294824   | 5.17E-07 |
| TUCP_002944 | XLOC_126777 | ENSRNOT00000065947 | 0.962819804  | 5.26E-07 |
| TUCP_002944 | XLOC_126777 | ENSRNOT00000082100 | 0.959363802  | 8.15E-07 |
| TUCP_002944 | XLOC_126777 | ENSRNOT00000052063 | 0.951331236  | 1.98E-06 |
| TUCP_002944 | XLOC_126777 | ENSRNOT00000055437 | -0.958289325 | 9.27E-07 |
| TUCP_002944 | XLOC_126777 | ENSRNOT00000054674 | 0.950486291  | 2.16E-06 |
| TUCP_002944 | XLOC_126777 | ENSRNOT00000084069 | 0.950573266  | 2.14E-06 |
| TUCP_002944 | XLOC_126777 | ENSRNOT00000013758 | 0.952485012  | 1.76E-06 |
| TUCP_002944 | XLOC_126777 | ENSRNOT00000015076 | 0.970133723  | 1.78E-07 |
| TUCP_002944 | XLOC_126777 | ENSRNOT00000022097 | 0.955212621  | 1.32E-06 |

|             |             |                     |              |          |
|-------------|-------------|---------------------|--------------|----------|
| TUCP_002944 | XLOC_126777 | ENSRNOT00000001507  | 0.953356001  | 1.61E-06 |
| TUCP_002944 | XLOC_126777 | ENSRNOT00000006055  | 0.957455451  | 1.02E-06 |
| TUCP_002944 | XLOC_126777 | ENSRNOT000000071573 | 0.95859935   | 8.93E-07 |
| TUCP_002944 | XLOC_126777 | ENSRNOT000000088125 | 0.969785575  | 1.89E-07 |
| TUCP_002944 | XLOC_126777 | ENSRNOT000000065300 | 0.963121671  | 5.05E-07 |
| TUCP_002944 | XLOC_126777 | ENSRNOT000000018584 | 0.965203895  | 3.79E-07 |
| TUCP_002944 | XLOC_126777 | ENSRNOT000000035989 | 0.970938324  | 1.55E-07 |
| TUCP_002944 | XLOC_126777 | ENSRNOT000000010242 | 0.953222304  | 1.63E-06 |
| TUCP_002944 | XLOC_126777 | ENSRNOT000000037456 | 0.950733214  | 2.10E-06 |
| TUCP_002944 | XLOC_126777 | ENSRNOT000000025510 | -0.955587079 | 1.26E-06 |
| TUCP_002944 | XLOC_126777 | ENSRNOT000000084012 | 0.971461656  | 1.42E-07 |
| TUCP_002944 | XLOC_126777 | ENSRNOT000000022534 | 0.968171347  | 2.44E-07 |
| TUCP_002944 | XLOC_126777 | ENSRNOT000000055187 | 0.952503096  | 1.76E-06 |
| TUCP_002944 | XLOC_126777 | ENSRNOT000000004834 | 0.964891724  | 3.96E-07 |
| TUCP_002944 | XLOC_126777 | ENSRNOT000000041513 | 0.958439979  | 9.11E-07 |
| TUCP_002944 | XLOC_126777 | ENSRNOT000000005292 | 0.966533748  | 3.13E-07 |
| TUCP_002944 | XLOC_126777 | ENSRNOT000000013260 | 0.950258907  | 2.21E-06 |
| TUCP_002944 | XLOC_126777 | ENSRNOT000000067822 | 0.958472941  | 9.07E-07 |
| TUCP_002944 | XLOC_126777 | ENSRNOT000000024060 | 0.950981195  | 2.05E-06 |
| TUCP_002944 | XLOC_126777 | ENSRNOT000000087278 | -0.953229922 | 1.63E-06 |
| TUCP_002944 | XLOC_126777 | ENSRNOT000000068633 | 0.965509661  | 3.63E-07 |
| TUCP_002944 | XLOC_126777 | ENSRNOT000000010541 | 0.950467221  | 2.16E-06 |
| TUCP_002944 | XLOC_126777 | ENSRNOT000000037446 | 0.962304492  | 5.63E-07 |
| TUCP_002944 | XLOC_126777 | ENSRNOT000000023619 | 0.979270042  | 2.91E-08 |
| TUCP_002944 | XLOC_126777 | ENSRNOT000000034298 | 0.961635247  | 6.14E-07 |
| TUCP_002944 | XLOC_126777 | ENSRNOT000000026481 | 0.954182775  | 1.47E-06 |
| TUCP_002944 | XLOC_126777 | ENSRNOT000000057313 | 0.967387259  | 2.75E-07 |
| TUCP_002944 | XLOC_126777 | ENSRNOT000000091909 | 0.956434105  | 1.15E-06 |
| TUCP_002944 | XLOC_126777 | ENSRNOT000000024352 | 0.965026459  | 3.89E-07 |
| TUCP_002944 | XLOC_126777 | ENSRNOT000000021925 | 0.954428144  | 1.43E-06 |
| TUCP_002944 | XLOC_126777 | ENSRNOT00000001403  | 0.950128987  | 2.23E-06 |
| TUCP_002944 | XLOC_126777 | ENSRNOT000000016445 | 0.961778183  | 6.02E-07 |
| TUCP_002944 | XLOC_126777 | ENSRNOT000000077220 | -0.958273236 | 9.29E-07 |
| TUCP_002944 | XLOC_126777 | ENSRNOT000000013274 | 0.955366623  | 1.29E-06 |
| TUCP_002944 | XLOC_126777 | ENSRNOT000000022342 | 0.950327655  | 2.19E-06 |
| TUCP_002944 | XLOC_126777 | ENSRNOT000000004740 | 0.978177223  | 3.76E-08 |
| TUCP_002944 | XLOC_126777 | ENSRNOT000000086577 | 0.953611782  | 1.56E-06 |
| TUCP_002944 | XLOC_126777 | ENSRNOT000000059807 | 0.966642674  | 3.08E-07 |
| TUCP_002944 | XLOC_126777 | ENSRNOT000000005355 | 0.956940669  | 1.08E-06 |
| TUCP_002944 | XLOC_126777 | ENSRNOT000000086352 | 0.959315365  | 8.20E-07 |
| TUCP_002944 | XLOC_126777 | ENSRNOT000000009221 | 0.966953104  | 2.94E-07 |
| TUCP_002944 | XLOC_126777 | ENSRNOT000000079895 | 0.969471839  | 1.98E-07 |
| TUCP_002944 | XLOC_126777 | ENSRNOT000000055683 | 0.959693983  | 7.83E-07 |
| TUCP_002944 | XLOC_126777 | ENSRNOT000000004698 | 0.955236356  | 1.31E-06 |
| TUCP_002944 | XLOC_126777 | ENSRNOT000000045488 | 0.963205141  | 4.99E-07 |
| TUCP_002944 | XLOC_126777 | ENSRNOT000000039842 | 0.967925919  | 2.53E-07 |
| TUCP_002944 | XLOC_126777 | ENSRNOT000000017629 | 0.968779211  | 2.22E-07 |
| TUCP_002944 | XLOC_126777 | ENSRNOT000000071433 | 0.958360275  | 9.19E-07 |
| TUCP_002944 | XLOC_126777 | ENSRNOT000000081518 | 0.953923139  | 1.51E-06 |
| TUCP_002944 | XLOC_126777 | ENSRNOT000000057826 | 0.961570476  | 6.19E-07 |
| TUCP_002944 | XLOC_126777 | ENSRNOT000000064902 | 0.957283377  | 1.04E-06 |

|             |             |                     |              |          |
|-------------|-------------|---------------------|--------------|----------|
| TUCP_002944 | XL0C_126777 | ENSRNOT00000078475  | 0.971970309  | 1.30E-07 |
| TUCP_002944 | XL0C_126777 | ENSRNOT00000087429  | 0.963579177  | 4.75E-07 |
| TUCP_002944 | XL0C_126777 | ENSRNOT00000040513  | 0.967276502  | 2.80E-07 |
| TUCP_002944 | XL0C_126777 | ENSRNOT00000089211  | 0.956211919  | 1.18E-06 |
| TUCP_002944 | XL0C_126777 | ENSRNOT00000009683  | 0.955710035  | 1.25E-06 |
| TUCP_002944 | XL0C_126777 | ENSRNOT00000020383  | 0.962701483  | 5.34E-07 |
| TUCP_002944 | XL0C_126777 | ENSRNOT00000078175  | 0.952760467  | 1.71E-06 |
| TUCP_002944 | XL0C_126777 | ENSRNOT00000000302  | 0.969137218  | 2.09E-07 |
| TUCP_002944 | XL0C_126777 | ENSRNOT00000002771  | 0.954276524  | 1.46E-06 |
| TUCP_002944 | XL0C_126777 | ENSRNOT00000040393  | 0.960982776  | 6.67E-07 |
| TUCP_002944 | XL0C_126777 | ENSRNOT00000016722  | 0.950855114  | 2.08E-06 |
| TUCP_002944 | XL0C_126777 | ENSRNOT00000000658  | 0.955158885  | 1.32E-06 |
| TUCP_002944 | XL0C_126777 | ENSRNOT00000016191  | 0.954446064  | 1.43E-06 |
| TUCP_002944 | XL0C_126777 | ENSRNOT000000065501 | 0.963655762  | 4.70E-07 |
| TUCP_002944 | XL0C_126777 | ENSRNOT00000080189  | 0.956547838  | 1.13E-06 |
| TUCP_002944 | XL0C_126777 | ENSRNOT00000070933  | 0.959595058  | 7.92E-07 |
| TUCP_002944 | XL0C_126777 | ENSRNOT00000001783  | 0.984163084  | 7.64E-09 |
| TUCP_002944 | XL0C_126777 | ENSRNOT000000021143 | 0.969133613  | 2.10E-07 |
| TUCP_002944 | XL0C_126777 | ENSRNOT00000024639  | 0.955130561  | 1.33E-06 |
| TUCP_002944 | XL0C_126777 | ENSRNOT00000088628  | 0.962009771  | 5.85E-07 |
| TUCP_002944 | XL0C_126777 | ENSRNOT00000026293  | 0.958690799  | 8.84E-07 |
| TUCP_002944 | XL0C_126777 | ENSRNOT00000090424  | 0.973567437  | 9.72E-08 |
| TUCP_002944 | XL0C_126777 | ENSRNOT00000088196  | 0.95657088   | 1.13E-06 |
| TUCP_002944 | XL0C_126777 | ENSRNOT00000001222  | 0.955575375  | 1.26E-06 |
| TUCP_002944 | XL0C_126777 | ENSRNOT00000088191  | 0.956433678  | 1.15E-06 |
| TUCP_002944 | XL0C_126777 | ENSRNOT00000027910  | 0.950435712  | 2.17E-06 |
| TUCP_002944 | XL0C_126777 | ENSRNOT00000010992  | 0.954276367  | 1.46E-06 |
| TUCP_002944 | XL0C_126777 | ENSRNOT00000021674  | 0.969043216  | 2.13E-07 |
| TUCP_002944 | XL0C_126777 | ENSRNOT00000085596  | 0.969104349  | 2.10E-07 |
| TUCP_002944 | XL0C_126777 | ENSRNOT00000005489  | 0.966527914  | 3.13E-07 |
| TUCP_002944 | XL0C_126777 | ENSRNOT00000028431  | 0.963802538  | 4.61E-07 |
| TUCP_002944 | XL0C_126777 | ENSRNOT00000043872  | 0.963660283  | 4.70E-07 |
| TUCP_002944 | XL0C_126777 | ENSRNOT000000074653 | 0.958287822  | 9.27E-07 |
| TUCP_002944 | XL0C_126777 | ENSRNOT00000088279  | 0.954539447  | 1.42E-06 |
| TUCP_002944 | XL0C_126777 | ENSRNOT00000031230  | 0.954130472  | 1.48E-06 |
| TUCP_002944 | XL0C_126777 | ENSRNOT00000080110  | 0.962337273  | 5.60E-07 |
| TUCP_002944 | XL0C_126777 | ENSRNOT00000080928  | 0.950777917  | 2.09E-06 |
| TUCP_002944 | XL0C_126777 | ENSRNOT000000052288 | 0.959228677  | 8.28E-07 |
| TUCP_002944 | XL0C_126777 | ENSRNOT00000027117  | -0.953614587 | 1.56E-06 |
| TUCP_002944 | XL0C_126777 | ENSRNOT00000068322  | 0.95500704   | 1.35E-06 |
| TUCP_002944 | XL0C_126777 | ENSRNOT000000037679 | 0.976185433  | 5.80E-08 |
| TUCP_002944 | XL0C_126777 | ENSRNOT00000028542  | 0.951026879  | 2.04E-06 |
| TUCP_002944 | XL0C_126777 | ENSRNOT00000082174  | 0.954746744  | 1.39E-06 |
| TUCP_002944 | XL0C_126777 | ENSRNOT00000020941  | 0.959207795  | 8.31E-07 |
| TUCP_002944 | XL0C_126777 | ENSRNOT00000004412  | 0.954135474  | 1.48E-06 |
| TUCP_002944 | XL0C_126777 | ENSRNOT000000061100 | 0.961921381  | 5.91E-07 |
| TUCP_002944 | XL0C_126777 | ENSRNOT00000005387  | 0.966932232  | 2.95E-07 |
| TUCP_002944 | XL0C_126777 | ENSRNOT00000015092  | 0.955701776  | 1.25E-06 |
| TUCP_002944 | XL0C_126777 | ENSRNOT000000005144 | 0.952476278  | 1.76E-06 |
| TUCP_002944 | XL0C_126777 | ENSRNOT000000066593 | 0.955697394  | 1.25E-06 |
| TUCP_002944 | XL0C_126777 | ENSRNOT00000026457  | 0.951341217  | 1.98E-06 |

|             |             |                     |              |          |
|-------------|-------------|---------------------|--------------|----------|
| TUCP_002944 | XL0C_126777 | ENSRNOT00000036750  | 0.950812849  | 2.09E-06 |
| TUCP_002944 | XL0C_126777 | ENSRNOT00000027964  | 0.953854266  | 1.52E-06 |
| TUCP_002944 | XL0C_126777 | ENSRNOT00000003182  | 0.956640482  | 1.12E-06 |
| TUCP_002944 | XL0C_126777 | ENSRNOT00000051550  | 0.950182659  | 2.22E-06 |
| TUCP_002944 | XL0C_126777 | ENSRNOT00000011041  | 0.963951474  | 4.51E-07 |
| TUCP_002944 | XL0C_126777 | ENSRNOT00000087371  | 0.965320627  | 3.73E-07 |
| TUCP_002944 | XL0C_126777 | ENSRNOT00000047210  | 0.960824692  | 6.80E-07 |
| TUCP_002944 | XL0C_126777 | ENSRNOT00000083957  | 0.954631569  | 1.40E-06 |
| TUCP_002944 | XL0C_126777 | ENSRNOT00000078862  | 0.954249938  | 1.46E-06 |
| TUCP_002944 | XL0C_126777 | ENSRNOT00000004140  | 0.956593575  | 1.13E-06 |
| TUCP_002495 | XL0C_105300 | ENSRNOT00000084944  | 0.963679614  | 4.68E-07 |
| TUCP_002495 | XL0C_105300 | ENSRNOT00000076072  | 0.98481044   | 6.21E-09 |
| TUCP_002494 | XL0C_105247 | ENSRNOT00000008988  | 0.952459154  | 1.77E-06 |
| TUCP_002494 | XL0C_105247 | ENSRNOT000000091994 | 0.97793521   | 3.97E-08 |
| TUCP_002494 | XL0C_105247 | ENSRNOT00000006697  | 0.952020284  | 1.85E-06 |
| TUCP_002494 | XL0C_105247 | ENSRNOT00000010680  | 0.954336336  | 1.45E-06 |
| TUCP_002494 | XL0C_105247 | ENSRNOT00000020959  | 0.957976872  | 9.62E-07 |
| TUCP_002494 | XL0C_105247 | ENSRNOT00000019660  | 0.963528537  | 4.78E-07 |
| TUCP_002948 | XL0C_126943 | ENSRNOT00000028833  | 0.954474462  | 1.43E-06 |
| TUCP_002948 | XL0C_126943 | ENSRNOT00000045223  | 0.969737034  | 1.90E-07 |
| TUCP_002490 | XL0C_105199 | ENSRNOT00000047105  | 0.95010022   | 2.24E-06 |
| TUCP_002490 | XL0C_105199 | ENSRNOT00000080660  | 0.951723966  | 1.90E-06 |
| TUCP_002490 | XL0C_105199 | ENSRNOT00000065168  | 0.956082368  | 1.20E-06 |
| TUCP_002490 | XL0C_105199 | ENSRNOT00000010852  | 0.960688606  | 6.92E-07 |
| TUCP_002490 | XL0C_105199 | ENSRNOT00000022190  | -0.952683898 | 1.72E-06 |
| TUCP_002490 | XL0C_105199 | ENSRNOT00000017805  | 0.964886373  | 3.96E-07 |
| TUCP_002490 | XL0C_105199 | ENSRNOT00000081512  | 0.960058235  | 7.49E-07 |
| TUCP_002490 | XL0C_105199 | ENSRNOT00000032843  | 0.975987801  | 6.04E-08 |
| TUCP_002490 | XL0C_105199 | ENSRNOT00000006709  | -0.951552588 | 1.94E-06 |
| TUCP_002490 | XL0C_105199 | ENSRNOT00000012736  | 0.95083734   | 2.08E-06 |
| TUCP_002490 | XL0C_105199 | ENSRNOT00000066132  | 0.960721243  | 6.89E-07 |
| TUCP_002490 | XL0C_105199 | ENSRNOT00000080577  | 0.981728067  | 1.56E-08 |
| TUCP_002490 | XL0C_105199 | ENSRNOT00000056179  | 0.9567171    | 1.11E-06 |
| TUCP_002490 | XL0C_105199 | ENSRNOT00000071672  | 0.950192979  | 2.22E-06 |
| TUCP_002490 | XL0C_105199 | ENSRNOT00000026426  | 0.980188807  | 2.32E-08 |
| TUCP_002490 | XL0C_105199 | ENSRNOT00000007028  | -0.972040271 | 1.28E-07 |
| TUCP_002490 | XL0C_105199 | ENSRNOT00000086706  | 0.963095305  | 5.07E-07 |
| TUCP_002490 | XL0C_105199 | ENSRNOT00000037133  | 0.956283378  | 1.17E-06 |
| TUCP_002490 | XL0C_105199 | ENSRNOT00000083214  | 0.959886656  | 7.65E-07 |
| TUCP_002490 | XL0C_105199 | ENSRNOT00000065615  | 0.951367181  | 1.97E-06 |
| TUCP_002490 | XL0C_105199 | ENSRNOT00000008244  | 0.960649883  | 6.95E-07 |
| TUCP_002490 | XL0C_105199 | ENSRNOT00000090579  | 0.97095666   | 1.55E-07 |
| TUCP_002490 | XL0C_105199 | ENSRNOT0000001893   | 0.971789206  | 1.34E-07 |
| TUCP_002490 | XL0C_105199 | ENSRNOT00000033017  | 0.962080236  | 5.79E-07 |
| TUCP_002490 | XL0C_105199 | ENSRNOT00000017384  | 0.980339447  | 2.24E-08 |
| TUCP_002490 | XL0C_105199 | ENSRNOT00000066370  | 0.952694816  | 1.72E-06 |
| TUCP_002490 | XL0C_105199 | ENSRNOT00000017556  | 0.950046449  | 2.25E-06 |
| TUCP_002490 | XL0C_105199 | ENSRNOT00000057562  | 0.956513188  | 1.14E-06 |
| TUCP_002490 | XL0C_105199 | ENSRNOT00000054685  | 0.95867354   | 8.86E-07 |
| TUCP_002490 | XL0C_105199 | ENSRNOT00000003780  | 0.950193813  | 2.22E-06 |
| TUCP_002490 | XL0C_105199 | ENSRNOT00000064828  | 0.951726729  | 1.90E-06 |

|             |             |                    |              |          |
|-------------|-------------|--------------------|--------------|----------|
| TUCP_002490 | XLOC_105199 | ENSRNOT00000073370 | 0.953579922  | 1.57E-06 |
| TUCP_002490 | XLOC_105199 | ENSRNOT00000027057 | 0.95276892   | 1.71E-06 |
| TUCP_002490 | XLOC_105199 | ENSRNOT00000013580 | 0.953225945  | 1.63E-06 |
| TUCP_002490 | XLOC_105199 | ENSRNOT00000005601 | -0.950470964 | 2.16E-06 |
| TUCP_002490 | XLOC_105199 | ENSRNOT00000041494 | 0.982662305  | 1.20E-08 |
| TUCP_002490 | XLOC_105199 | ENSRNOT00000089524 | 0.981445208  | 1.68E-08 |
| TUCP_002490 | XLOC_105199 | ENSRNOT00000019759 | 0.953538496  | 1.58E-06 |
| TUCP_002490 | XLOC_105199 | ENSRNOT00000022796 | 0.957174183  | 1.06E-06 |
| TUCP_002490 | XLOC_105199 | ENSRNOT00000016060 | 0.969133402  | 2.10E-07 |
| TUCP_002490 | XLOC_105199 | ENSRNOT00000085621 | 0.950523269  | 2.15E-06 |
| TUCP_002490 | XLOC_105199 | ENSRNOT00000002621 | 0.951394144  | 1.97E-06 |
| TUCP_002490 | XLOC_105199 | ENSRNOT00000009811 | 0.952062778  | 1.84E-06 |
| TUCP_002493 | XLOC_105244 | ENSRNOT00000016037 | 0.955638913  | 1.26E-06 |
| TUCP_002493 | XLOC_105244 | ENSRNOT00000001697 | 0.9525649    | 1.75E-06 |
| TUCP_002493 | XLOC_105244 | ENSRNOT00000006697 | 0.96375769   | 4.63E-07 |
| TUCP_002493 | XLOC_105244 | ENSRNOT00000010680 | 0.964655732  | 4.09E-07 |
| TUCP_002493 | XLOC_105244 | ENSRNOT00000003489 | 0.959797303  | 7.73E-07 |
| TUCP_002493 | XLOC_105244 | ENSRNOT00000025606 | 0.951357964  | 1.98E-06 |
| TUCP_002493 | XLOC_105244 | ENSRNOT00000013582 | -0.973984605 | 8.98E-08 |
| TUCP_002493 | XLOC_105244 | ENSRNOT00000071998 | 0.951652095  | 1.92E-06 |
| TUCP_002493 | XLOC_105244 | ENSRNOT00000017805 | 0.95103655   | 2.04E-06 |
| TUCP_002493 | XLOC_105244 | ENSRNOT00000083344 | 0.952226964  | 1.81E-06 |
| TUCP_002493 | XLOC_105244 | ENSRNOT00000067524 | 0.953797173  | 1.53E-06 |
| TUCP_002493 | XLOC_105244 | ENSRNOT00000054685 | 0.951454576  | 1.96E-06 |
| TUCP_002493 | XLOC_105244 | ENSRNOT00000068212 | 0.963621345  | 4.72E-07 |
| TUCP_002493 | XLOC_105244 | ENSRNOT00000010939 | 0.971479443  | 1.42E-07 |
| TUCP_002493 | XLOC_105244 | ENSRNOT00000082513 | 0.953232683  | 1.63E-06 |
| TUCP_002493 | XLOC_105244 | ENSRNOT00000081631 | 0.963119342  | 5.05E-07 |
| TUCP_002493 | XLOC_105244 | ENSRNOT00000055630 | 0.958899059  | 8.62E-07 |
| TUCP_002493 | XLOC_105244 | ENSRNOT00000020959 | 0.962362135  | 5.58E-07 |
| TUCP_002493 | XLOC_105244 | ENSRNOT00000061132 | 0.954376747  | 1.44E-06 |
| TUCP_003226 | XLOC_138410 | ENSRNOT00000029340 | 0.951129316  | 2.02E-06 |
| TUCP_003226 | XLOC_138410 | ENSRNOT00000038646 | 0.955614935  | 1.26E-06 |
| TUCP_003226 | XLOC_138410 | ENSRNOT00000017909 | 0.95373871   | 1.54E-06 |
| TUCP_003226 | XLOC_138410 | ENSRNOT00000085479 | 0.98281211   | 1.15E-08 |
| TUCP_003226 | XLOC_138410 | ENSRNOT00000092579 | 0.955614935  | 1.26E-06 |
| TUCP_003226 | XLOC_138410 | ENSRNOT00000089235 | 0.951969424  | 1.86E-06 |
| TUCP_003226 | XLOC_138410 | ENSRNOT00000076528 | 0.967267163  | 2.80E-07 |
| TUCP_003226 | XLOC_138410 | ENSRNOT00000077458 | 0.959996519  | 7.54E-07 |
| TUCP_003226 | XLOC_138410 | ENSRNOT00000083034 | 0.967599157  | 2.66E-07 |
| TUCP_003226 | XLOC_138410 | ENSRNOT00000089607 | 0.973700914  | 9.48E-08 |
| TUCP_003226 | XLOC_138410 | ENSRNOT00000035915 | 0.95549056   | 1.28E-06 |
| TUCP_003226 | XLOC_138410 | ENSRNOT00000021748 | 0.955614935  | 1.26E-06 |
| TUCP_003226 | XLOC_138410 | ENSRNOT00000075193 | 0.973209963  | 1.04E-07 |
| TUCP_003226 | XLOC_138410 | ENSRNOT00000078137 | 0.955614935  | 1.26E-06 |
| TUCP_003226 | XLOC_138410 | ENSRNOT00000077764 | 0.976738791  | 5.16E-08 |
| TUCP_003226 | XLOC_138410 | ENSRNOT00000092740 | 0.955614935  | 1.26E-06 |
| TUCP_003226 | XLOC_138410 | ENSRNOT00000070958 | 0.955614935  | 1.26E-06 |
| TUCP_003226 | XLOC_138410 | ENSRNOT00000093748 | 0.961377261  | 6.34E-07 |
| TUCP_003226 | XLOC_138410 | ENSRNOT00000027268 | 0.955614935  | 1.26E-06 |
| TUCP_003226 | XLOC_138410 | ENSRNOT0000004459  | 0.955614935  | 1.26E-06 |

|             |             |                    |              |          |
|-------------|-------------|--------------------|--------------|----------|
| TUCP_003226 | XLOC_138410 | ENSRNOT00000061516 | 0.957146493  | 1.06E-06 |
| TUCP_003226 | XLOC_138410 | ENSRNOT00000088168 | 0.955614935  | 1.26E-06 |
| TUCP_003226 | XLOC_138410 | ENSRNOT00000088148 | 0.955614935  | 1.26E-06 |
| TUCP_003226 | XLOC_138410 | ENSRNOT00000088527 | 0.955614935  | 1.26E-06 |
| TUCP_003226 | XLOC_138410 | ENSRNOT00000078701 | 0.955614935  | 1.26E-06 |
| TUCP_003226 | XLOC_138410 | ENSRNOT00000090078 | 0.955614935  | 1.26E-06 |
| TUCP_003226 | XLOC_138410 | ENSRNOT00000089085 | 0.955614935  | 1.26E-06 |
| TUCP_003226 | XLOC_138410 | ENSRNOT00000008153 | 0.957764985  | 9.86E-07 |
| TUCP_003226 | XLOC_138410 | ENSRNOT00000009776 | 0.955614935  | 1.26E-06 |
| TUCP_003356 | XLOC_145347 | ENSRNOT00000065143 | 0.950683088  | 2.11E-06 |
| TUCP_003356 | XLOC_145347 | ENSRNOT00000036506 | 0.950686722  | 2.11E-06 |
| TUCP_003356 | XLOC_145347 | ENSRNOT00000031904 | 0.977077914  | 4.80E-08 |
| TUCP_003356 | XLOC_145347 | ENSRNOT00000085251 | -0.956147152 | 1.19E-06 |
| TUCP_003356 | XLOC_145347 | ENSRNOT00000082999 | -0.953127497 | 1.65E-06 |
| TUCP_003356 | XLOC_145347 | ENSRNOT00000000743 | 0.968851651  | 2.19E-07 |
| TUCP_003356 | XLOC_145347 | ENSRNOT00000027083 | 0.97496149   | 7.43E-08 |
| TUCP_003356 | XLOC_145347 | ENSRNOT00000005958 | 0.964322679  | 4.29E-07 |
| TUCP_003356 | XLOC_145347 | ENSRNOT00000082508 | -0.954811386 | 1.38E-06 |
| TUCP_003356 | XLOC_145347 | ENSRNOT00000001855 | 0.962448666  | 5.52E-07 |
| TUCP_003356 | XLOC_145347 | ENSRNOT00000023638 | 0.968146751  | 2.45E-07 |
| TUCP_003356 | XLOC_145347 | ENSRNOT00000001691 | 0.952635205  | 1.73E-06 |
| TUCP_003356 | XLOC_145347 | ENSRNOT00000059524 | -0.960169139 | 7.38E-07 |
| TUCP_003356 | XLOC_145347 | ENSRNOT00000005220 | 0.953372913  | 1.60E-06 |
| TUCP_003356 | XLOC_145347 | ENSRNOT00000023144 | 0.969779617  | 1.89E-07 |
| TUCP_003356 | XLOC_145347 | ENSRNOT00000082869 | 0.968964804  | 2.15E-07 |
| TUCP_003356 | XLOC_145347 | ENSRNOT00000071166 | 0.951578057  | 1.93E-06 |
| TUCP_003356 | XLOC_145347 | ENSRNOT00000016649 | 0.971728441  | 1.36E-07 |
| TUCP_003356 | XLOC_145347 | ENSRNOT00000026941 | 0.959368615  | 8.15E-07 |
| TUCP_003356 | XLOC_145347 | ENSRNOT00000091128 | -0.95013403  | 2.23E-06 |
| TUCP_003356 | XLOC_145347 | ENSRNOT00000001586 | -0.954727018 | 1.39E-06 |
| TUCP_003356 | XLOC_145347 | ENSRNOT00000081981 | 0.961199317  | 6.49E-07 |
| TUCP_003356 | XLOC_145347 | ENSRNOT00000033017 | 0.965790956  | 3.48E-07 |
| TUCP_003356 | XLOC_145347 | ENSRNOT00000026543 | 0.96782333   | 2.57E-07 |
| TUCP_003356 | XLOC_145347 | ENSRNOT00000012187 | 0.951675187  | 1.91E-06 |
| TUCP_003356 | XLOC_145347 | ENSRNOT00000073564 | -0.96243299  | 5.53E-07 |
| TUCP_003356 | XLOC_145347 | ENSRNOT00000024969 | 0.962140247  | 5.75E-07 |
| TUCP_003356 | XLOC_145347 | ENSRNOT00000067400 | 0.965924555  | 3.42E-07 |
| TUCP_003356 | XLOC_145347 | ENSRNOT00000065300 | 0.953404087  | 1.60E-06 |
| TUCP_003356 | XLOC_145347 | ENSRNOT00000025075 | 0.960710069  | 6.90E-07 |
| TUCP_003356 | XLOC_145347 | ENSRNOT00000035989 | 0.959273808  | 8.24E-07 |
| TUCP_003356 | XLOC_145347 | ENSRNOT00000057160 | 0.981714196  | 1.56E-08 |
| TUCP_003356 | XLOC_145347 | ENSRNOT00000082699 | 0.951163913  | 2.01E-06 |
| TUCP_003356 | XLOC_145347 | ENSRNOT00000024402 | 0.962306745  | 5.62E-07 |
| TUCP_003356 | XLOC_145347 | ENSRNOT00000002837 | -0.957643854 | 1.00E-06 |
| TUCP_003356 | XLOC_145347 | ENSRNOT00000089933 | 0.966108764  | 3.33E-07 |
| TUCP_003356 | XLOC_145347 | ENSRNOT00000091602 | -0.961286064 | 6.42E-07 |
| TUCP_003356 | XLOC_145347 | ENSRNOT00000009811 | 0.950979666  | 2.05E-06 |
| TUCP_003356 | XLOC_145347 | ENSRNOT00000012881 | -0.95164912  | 1.92E-06 |
| TUCP_003356 | XLOC_145347 | ENSRNOT00000084012 | 0.95406516   | 1.49E-06 |
| TUCP_003356 | XLOC_145347 | ENSRNOT00000061253 | 0.958748735  | 8.78E-07 |
| TUCP_003356 | XLOC_145347 | ENSRNOT0000002560  | 0.964076022  | 4.44E-07 |



|             |             |                    |              |          |
|-------------|-------------|--------------------|--------------|----------|
| TUCP_003356 | XLOC_145347 | ENSRNOT00000041513 | 0.950747156  | 2.10E-06 |
| TUCP_003356 | XLOC_145347 | ENSRNOT00000011499 | -0.950652677 | 2.12E-06 |
| TUCP_003356 | XLOC_145347 | ENSRNOT00000061392 | 0.954542821  | 1.42E-06 |
| TUCP_003356 | XLOC_145347 | ENSRNOT00000004787 | -0.961997014 | 5.86E-07 |
| TUCP_003356 | XLOC_145347 | ENSRNOT00000037039 | -0.958620396 | 8.91E-07 |
| TUCP_003356 | XLOC_145347 | ENSRNOT00000016428 | 0.955602781  | 1.26E-06 |
| TUCP_003356 | XLOC_145347 | ENSRNOT00000090420 | -0.95284666  | 1.70E-06 |
| TUCP_003356 | XLOC_145347 | ENSRNOT00000041044 | 0.971493407  | 1.41E-07 |
| TUCP_003356 | XLOC_145347 | ENSRNOT00000037133 | 0.956569507  | 1.13E-06 |
| TUCP_003356 | XLOC_145347 | ENSRNOT00000010541 | 0.962684272  | 5.35E-07 |
| TUCP_003356 | XLOC_145347 | ENSRNOT00000091909 | 0.96399159   | 4.49E-07 |
| TUCP_003356 | XLOC_145347 | ENSRNOT00000083220 | 0.962937411  | 5.18E-07 |
| TUCP_003356 | XLOC_145347 | ENSRNOT00000087429 | 0.951150769  | 2.02E-06 |
| TUCP_003356 | XLOC_145347 | ENSRNOT00000086119 | -0.957535111 | 1.01E-06 |
| TUCP_003356 | XLOC_145347 | ENSRNOT00000019386 | -0.956482861 | 1.14E-06 |
| TUCP_003356 | XLOC_145347 | ENSRNOT00000086577 | 0.951011033  | 2.05E-06 |
| TUCP_003356 | XLOC_145347 | ENSRNOT00000048063 | 0.952832875  | 1.70E-06 |
| TUCP_003356 | XLOC_145347 | ENSRNOT00000065600 | 0.952584288  | 1.74E-06 |
| TUCP_003356 | XLOC_145347 | ENSRNOT00000026643 | 0.960122951  | 7.43E-07 |
| TUCP_003356 | XLOC_145347 | ENSRNOT00000033975 | 0.969479746  | 1.98E-07 |
| TUCP_003356 | XLOC_145347 | ENSRNOT00000004319 | -0.961360469 | 6.36E-07 |
| TUCP_003356 | XLOC_145347 | ENSRNOT00000028625 | -0.951137487 | 2.02E-06 |
| TUCP_003356 | XLOC_145347 | ENSRNOT00000044608 | -0.966069801 | 3.35E-07 |
| TUCP_003356 | XLOC_145347 | ENSRNOT00000007314 | -0.961105595 | 6.57E-07 |
| TUCP_003356 | XLOC_145347 | ENSRNOT00000088599 | 0.964861351  | 3.98E-07 |
| TUCP_003356 | XLOC_145347 | ENSRNOT00000081047 | 0.960565669  | 7.03E-07 |
| TUCP_003356 | XLOC_145347 | ENSRNOT00000088353 | -0.962833335 | 5.25E-07 |
| TUCP_003356 | XLOC_145347 | ENSRNOT00000000302 | 0.962294296  | 5.63E-07 |
| TUCP_003356 | XLOC_145347 | ENSRNOT00000050609 | -0.951337201 | 1.98E-06 |
| TUCP_003356 | XLOC_145347 | ENSRNOT00000084088 | 0.961609027  | 6.16E-07 |
| TUCP_003356 | XLOC_145347 | ENSRNOT00000027910 | 0.95764822   | 9.99E-07 |
| TUCP_003356 | XLOC_145347 | ENSRNOT00000052224 | 0.971225457  | 1.48E-07 |
| TUCP_003356 | XLOC_145347 | ENSRNOT00000078070 | 0.978886882  | 3.19E-08 |
| TUCP_003356 | XLOC_145347 | ENSRNOT00000067135 | -0.957348899 | 1.03E-06 |
| TUCP_003356 | XLOC_145347 | ENSRNOT00000016191 | 0.950223468  | 2.21E-06 |
| TUCP_003356 | XLOC_145347 | ENSRNOT00000078390 | -0.951620752 | 1.92E-06 |
| TUCP_003356 | XLOC_145347 | ENSRNOT00000083632 | -0.950751981 | 2.10E-06 |
| TUCP_003356 | XLOC_145347 | ENSRNOT00000003568 | 0.95687912   | 1.09E-06 |
| TUCP_003356 | XLOC_145347 | ENSRNOT00000067846 | -0.953392472 | 1.60E-06 |
| TUCP_003356 | XLOC_145347 | ENSRNOT00000089062 | 0.951988179  | 1.85E-06 |
| TUCP_003356 | XLOC_145347 | ENSRNOT00000009122 | 0.950007778  | 2.26E-06 |
| TUCP_003356 | XLOC_145347 | ENSRNOT00000004046 | -0.956894148 | 1.09E-06 |
| TUCP_003356 | XLOC_145347 | ENSRNOT00000047093 | 0.954246966  | 1.46E-06 |
| TUCP_003356 | XLOC_145347 | ENSRNOT00000010367 | 0.964626269  | 4.11E-07 |
| TUCP_003356 | XLOC_145347 | ENSRNOT00000023302 | 0.950828262  | 2.08E-06 |
| TUCP_003356 | XLOC_145347 | ENSRNOT00000019886 | 0.956116909  | 1.19E-06 |
| TUCP_003356 | XLOC_145347 | ENSRNOT00000082151 | -0.959436551 | 8.08E-07 |
| TUCP_003356 | XLOC_145347 | ENSRNOT00000017907 | -0.954864667 | 1.37E-06 |
| TUCP_003356 | XLOC_145347 | ENSRNOT00000076669 | 0.95091523   | 2.07E-06 |
| TUCP_003356 | XLOC_145347 | ENSRNOT00000038807 | 0.964945687  | 3.93E-07 |
| TUCP_003356 | XLOC_145347 | ENSRNOT00000085971 | -0.950624701 | 2.13E-06 |

|             |             |                    |              |          |
|-------------|-------------|--------------------|--------------|----------|
| TUCP_003356 | XLOC_145347 | ENSRNOT00000050834 | -0.973630019 | 9.61E-08 |
| TUCP_003356 | XLOC_145347 | ENSRNOT00000066024 | 0.977657031  | 4.22E-08 |
| TUCP_003356 | XLOC_145347 | ENSRNOT00000021471 | -0.957296573 | 1.04E-06 |
| TUCP_003356 | XLOC_145347 | ENSRNOT00000057537 | 0.961335491  | 6.38E-07 |
| TUCP_003356 | XLOC_145347 | ENSRNOT00000080608 | 0.954097654  | 1.49E-06 |
| TUCP_003356 | XLOC_145347 | ENSRNOT00000027970 | 0.952900997  | 1.69E-06 |
| TUCP_003356 | XLOC_145347 | ENSRNOT00000032992 | 0.954607537  | 1.41E-06 |
| TUCP_003356 | XLOC_145347 | ENSRNOT00000082496 | -0.950481346 | 2.16E-06 |
| TUCP_003356 | XLOC_145347 | ENSRNOT00000005478 | -0.95153249  | 1.94E-06 |
| TUCP_003356 | XLOC_145347 | ENSRNOT00000078306 | 0.972645429  | 1.15E-07 |
| TUCP_003356 | XLOC_145347 | ENSRNOT00000080695 | 0.983304847  | 9.93E-09 |
| TUCP_003356 | XLOC_145347 | ENSRNOT00000080110 | 0.954080825  | 1.49E-06 |
| TUCP_003356 | XLOC_145347 | ENSRNOT00000000120 | 0.95831494   | 9.24E-07 |
| TUCP_003356 | XLOC_145347 | ENSRNOT00000029125 | 0.956125322  | 1.19E-06 |
| TUCP_003356 | XLOC_145347 | ENSRNOT00000060696 | 0.969820468  | 1.87E-07 |
| TUCP_003356 | XLOC_145347 | ENSRNOT00000042125 | 0.983470775  | 9.45E-09 |
| TUCP_003356 | XLOC_145347 | ENSRNOT00000009900 | -0.963168335 | 5.02E-07 |
| TUCP_003356 | XLOC_145347 | ENSRNOT00000014814 | 0.951080017  | 2.03E-06 |
| TUCP_003356 | XLOC_145347 | ENSRNOT00000022000 | -0.951869801 | 1.88E-06 |
| TUCP_003356 | XLOC_145347 | ENSRNOT00000067181 | 0.95230979   | 1.79E-06 |
| TUCP_003356 | XLOC_145347 | ENSRNOT00000080207 | 0.962104553  | 5.78E-07 |
| TUCP_003356 | XLOC_145347 | ENSRNOT00000024491 | -0.951083367 | 2.03E-06 |
| TUCP_003356 | XLOC_145347 | ENSRNOT00000073235 | 0.952133928  | 1.83E-06 |
| TUCP_003356 | XLOC_145347 | ENSRNOT00000017181 | -0.954442969 | 1.43E-06 |
| TUCP_003356 | XLOC_145347 | ENSRNOT00000024393 | 0.961778114  | 6.02E-07 |
| TUCP_003356 | XLOC_145347 | ENSRNOT00000047192 | -0.972912631 | 1.10E-07 |
| TUCP_003356 | XLOC_145347 | ENSRNOT00000008987 | -0.950423956 | 2.17E-06 |
| TUCP_003356 | XLOC_145347 | ENSRNOT00000005257 | 0.957078023  | 1.07E-06 |
| TUCP_003356 | XLOC_145347 | ENSRNOT00000015799 | 0.970090994  | 1.79E-07 |
| TUCP_001406 | XLOC_054950 | ENSRNOT00000024186 | 0.963019868  | 5.12E-07 |
| TUCP_001406 | XLOC_054950 | ENSRNOT00000004876 | 0.973142252  | 1.05E-07 |
| TUCP_001406 | XLOC_054950 | ENSRNOT00000031205 | 0.954301136  | 1.45E-06 |
| TUCP_001406 | XLOC_054950 | ENSRNOT00000083487 | 0.951336025  | 1.98E-06 |
| TUCP_001406 | XLOC_054950 | ENSRNOT00000072939 | 0.96881001   | 2.21E-07 |
| TUCP_001406 | XLOC_054950 | ENSRNOT00000061139 | 0.976326564  | 5.63E-08 |
| TUCP_001406 | XLOC_054950 | ENSRNOT00000012170 | 0.952314665  | 1.79E-06 |
| TUCP_003283 | XLOC_140919 | ENSRNOT00000056771 | 0.958890895  | 8.63E-07 |
| TUCP_003283 | XLOC_140919 | ENSRNOT00000001672 | 0.962462497  | 5.51E-07 |
| TUCP_003515 | XLOC_152757 | ENSRNOT00000080945 | 0.964016676  | 4.47E-07 |
| TUCP_003515 | XLOC_152757 | ENSRNOT00000056217 | 0.965797573  | 3.48E-07 |
| TUCP_001682 | XLOC_068195 | ENSRNOT00000082043 | 0.998965531  | 9.31E-15 |
| TUCP_001682 | XLOC_068195 | ENSRNOT00000090080 | 0.970514074  | 1.67E-07 |
| TUCP_001682 | XLOC_068195 | ENSRNOT00000068444 | 1            | 0        |
| TUCP_001682 | XLOC_068195 | ENSRNOT00000081370 | 0.999740797  | 9.21E-18 |
| TUCP_001682 | XLOC_068195 | ENSRNOT00000078645 | 0.989717078  | 8.90E-10 |
| TUCP_001682 | XLOC_068195 | ENSRNOT00000075987 | 0.987945283  | 1.96E-09 |
| TUCP_001682 | XLOC_068195 | ENSRNOT00000074990 | 1            | 0        |
| TUCP_001682 | XLOC_068195 | ENSRNOT00000087323 | 0.995029331  | 2.37E-11 |
| TUCP_001682 | XLOC_068195 | ENSRNOT00000074930 | 1            | 0        |
| TUCP_001682 | XLOC_068195 | ENSRNOT00000080575 | 0.999929267  | 1.39E-20 |
| TUCP_001682 | XLOC_068195 | ENSRNOT00000057761 | 0.982981445  | 1.09E-08 |

|             |             |                    |              |          |
|-------------|-------------|--------------------|--------------|----------|
| TUCP_001682 | XLOC_068195 | ENSRNOT00000078369 | 0.993028032  | 1.28E-10 |
| TUCP_001682 | XLOC_068195 | ENSRNOT00000092982 | 1            | 0        |
| TUCP_001682 | XLOC_068195 | ENSRNOT00000088367 | 1            | 0        |
| TUCP_001682 | XLOC_068195 | ENSRNOT00000061874 | 0.968405099  | 2.35E-07 |
| TUCP_001682 | XLOC_068195 | ENSRNOT00000077789 | 0.99346224   | 9.30E-11 |
| TUCP_001682 | XLOC_068195 | ENSRNOT00000081996 | 1            | 0        |
| TUCP_001682 | XLOC_068195 | ENSRNOT00000022280 | 0.982176915  | 1.37E-08 |
| TUCP_001682 | XLOC_068195 | ENSRNOT00000082058 | 1            | 0        |
| TUCP_001682 | XLOC_068195 | ENSRNOT00000088905 | 1            | 0        |
| TUCP_001682 | XLOC_068195 | ENSRNOT00000086831 | 1            | 0        |
| TUCP_001682 | XLOC_068195 | ENSRNOT00000045099 | 1            | 0        |
| TUCP_001682 | XLOC_068195 | ENSRNOT00000086745 | 0.978585655  | 3.42E-08 |
| TUCP_001682 | XLOC_068195 | ENSRNOT00000085849 | 0.988270765  | 1.71E-09 |
| TUCP_001682 | XLOC_068195 | ENSRNOT00000086397 | 0.957188178  | 1.05E-06 |
| TUCP_001682 | XLOC_068195 | ENSRNOT00000079606 | 0.960472013  | 7.11E-07 |
| TUCP_001682 | XLOC_068195 | ENSRNOT00000090207 | 0.953487741  | 1.59E-06 |
| TUCP_001682 | XLOC_068195 | ENSRNOT00000087025 | 1            | 1.33E-79 |
| TUCP_001682 | XLOC_068195 | ENSRNOT00000019853 | 1            | 0        |
| TUCP_001682 | XLOC_068195 | ENSRNOT00000073853 | 0.989715487  | 8.91E-10 |
| TUCP_001682 | XLOC_068195 | ENSRNOT00000065912 | 0.974234118  | 8.57E-08 |
| TUCP_001682 | XLOC_068195 | ENSRNOT00000073828 | 0.971647353  | 1.38E-07 |
| TUCP_001682 | XLOC_068195 | ENSRNOT00000078683 | 0.966682958  | 3.06E-07 |
| TUCP_001682 | XLOC_068195 | ENSRNOT00000093083 | 0.999140292  | 3.69E-15 |
| TUCP_004798 | XLOC_212289 | ENSRNOT00000061253 | 0.951702723  | 1.91E-06 |
| TUCP_004798 | XLOC_212289 | ENSRNOT00000041044 | 0.964867842  | 3.97E-07 |
| TUCP_004799 | XLOC_212490 | ENSRNOT00000087934 | 0.962241563  | 5.67E-07 |
| TUCP_004795 | XLOC_211920 | ENSRNOT00000084192 | 0.970071094  | 1.80E-07 |
| TUCP_004795 | XLOC_211920 | ENSRNOT00000035973 | -0.971775478 | 1.35E-07 |
| TUCP_004795 | XLOC_211920 | ENSRNOT00000079432 | 0.951102951  | 2.03E-06 |
| TUCP_004795 | XLOC_211920 | ENSRNOT00000026381 | -0.964489917 | 4.19E-07 |
| TUCP_004795 | XLOC_211920 | ENSRNOT00000018711 | -0.956364523 | 1.16E-06 |
| TUCP_004795 | XLOC_211920 | ENSRNOT00000086114 | -0.952932328 | 1.68E-06 |
| TUCP_004795 | XLOC_211920 | ENSRNOT00000064625 | 0.974313916  | 8.43E-08 |
| TUCP_004795 | XLOC_211920 | ENSRNOT00000018864 | -0.950556483 | 2.14E-06 |
| TUCP_004796 | XLOC_212095 | ENSRNOT00000090123 | 0.950749289  | 2.10E-06 |
| TUCP_004796 | XLOC_212095 | ENSRNOT00000026915 | 0.951962255  | 1.86E-06 |
| TUCP_004796 | XLOC_212095 | ENSRNOT00000008221 | 0.954789033  | 1.38E-06 |
| TUCP_004796 | XLOC_212095 | ENSRNOT00000078274 | 0.957455233  | 1.02E-06 |
| TUCP_004796 | XLOC_212095 | ENSRNOT00000027454 | 0.955457102  | 1.28E-06 |
| TUCP_004796 | XLOC_212095 | ENSRNOT00000017021 | 0.955678171  | 1.25E-06 |
| TUCP_004796 | XLOC_212095 | ENSRNOT00000087592 | 0.956130352  | 1.19E-06 |
| TUCP_004796 | XLOC_212095 | ENSRNOT00000067528 | 0.95137518   | 1.97E-06 |
| TUCP_004797 | XLOC_212231 | ENSRNOT00000091652 | 0.984389547  | 7.11E-09 |
| TUCP_004797 | XLOC_212231 | ENSRNOT00000080865 | 0.982573109  | 1.23E-08 |
| TUCP_004797 | XLOC_212231 | ENSRNOT00000073534 | 0.97387783   | 9.17E-08 |
| TUCP_004797 | XLOC_212231 | ENSRNOT00000087758 | 0.976885639  | 5.00E-08 |
| TUCP_004797 | XLOC_212231 | ENSRNOT00000093019 | 0.982573109  | 1.23E-08 |
| TUCP_004797 | XLOC_212231 | ENSRNOT00000024825 | 0.987585564  | 2.27E-09 |
| TUCP_004797 | XLOC_212231 | ENSRNOT00000090323 | 0.970949886  | 1.55E-07 |
| TUCP_004797 | XLOC_212231 | ENSRNOT00000085908 | 0.990688062  | 5.43E-10 |
| TUCP_004797 | XLOC_212231 | ENSRNOT00000046744 | 0.982573109  | 1.23E-08 |

|             |             |                    |              |          |
|-------------|-------------|--------------------|--------------|----------|
| TUCP_004797 | XLOC_212231 | ENSRNOT00000076429 | 0.982573109  | 1.23E-08 |
| TUCP_004797 | XLOC_212231 | ENSRNOT00000084667 | 0.985169421  | 5.51E-09 |
| TUCP_004797 | XLOC_212231 | ENSRNOT00000055412 | 0.982573109  | 1.23E-08 |
| TUCP_004797 | XLOC_212231 | ENSRNOT00000093201 | 0.985999327  | 4.14E-09 |
| TUCP_004797 | XLOC_212231 | ENSRNOT00000072724 | 0.982573109  | 1.23E-08 |
| TUCP_004797 | XLOC_212231 | ENSRNOT00000066017 | 0.966560559  | 3.11E-07 |
| TUCP_004797 | XLOC_212231 | ENSRNOT00000082760 | 0.966038524  | 3.36E-07 |
| TUCP_004797 | XLOC_212231 | ENSRNOT00000073148 | 0.961510597  | 6.24E-07 |
| TUCP_004797 | XLOC_212231 | ENSRNOT00000054858 | 0.964876343  | 3.97E-07 |
| TUCP_004797 | XLOC_212231 | ENSRNOT00000084375 | 0.982573109  | 1.23E-08 |
| TUCP_004797 | XLOC_212231 | ENSRNOT00000012161 | 0.958585725  | 8.95E-07 |
| TUCP_004797 | XLOC_212231 | ENSRNOT00000042369 | 0.975119144  | 7.20E-08 |
| TUCP_004797 | XLOC_212231 | ENSRNOT00000086554 | 0.982573109  | 1.23E-08 |
| TUCP_004797 | XLOC_212231 | ENSRNOT00000047921 | 0.982573109  | 1.23E-08 |
| TUCP_004797 | XLOC_212231 | ENSRNOT00000064261 | 0.983629406  | 9.01E-09 |
| TUCP_004797 | XLOC_212231 | ENSRNOT00000086660 | 0.984307144  | 7.30E-09 |
| TUCP_004797 | XLOC_212231 | ENSRNOT00000066932 | 0.95532999   | 1.30E-06 |
| TUCP_004797 | XLOC_212231 | ENSRNOT00000080933 | 0.978442621  | 3.54E-08 |
| TUCP_004797 | XLOC_212231 | ENSRNOT00000083977 | 0.982573109  | 1.23E-08 |
| TUCP_004797 | XLOC_212231 | ENSRNOT00000092933 | 0.982573109  | 1.23E-08 |
| TUCP_004797 | XLOC_212231 | ENSRNOT00000085447 | 0.978417735  | 3.56E-08 |
| TUCP_004797 | XLOC_212231 | ENSRNOT00000041281 | 0.965811601  | 3.47E-07 |
| TUCP_003281 | XLOC_140811 | ENSRNOT00000057827 | 0.971207241  | 1.48E-07 |
| TUCP_002919 | XLOC_125577 | ENSRNOT00000026966 | 0.956803366  | 1.10E-06 |
| TUCP_002919 | XLOC_125577 | ENSRNOT00000068416 | 0.981914275  | 1.48E-08 |
| TUCP_002919 | XLOC_125577 | ENSRNOT00000026803 | 0.987403541  | 2.45E-09 |
| TUCP_002919 | XLOC_125577 | ENSRNOT00000042251 | 0.982170291  | 1.38E-08 |
| TUCP_002919 | XLOC_125577 | ENSRNOT0000002984  | 0.97935846   | 2.85E-08 |
| TUCP_002919 | XLOC_125577 | ENSRNOT00000067379 | 0.982028982  | 1.43E-08 |
| TUCP_002919 | XLOC_125577 | ENSRNOT00000084034 | -0.964175157 | 4.38E-07 |
| TUCP_002919 | XLOC_125577 | ENSRNOT00000092365 | 0.980337848  | 2.24E-08 |
| TUCP_002919 | XLOC_125577 | ENSRNOT00000089306 | 0.981219941  | 1.78E-08 |
| TUCP_002919 | XLOC_125577 | ENSRNOT00000045301 | 0.981935766  | 1.47E-08 |
| TUCP_002919 | XLOC_125577 | ENSRNOT00000041186 | 0.981551838  | 1.63E-08 |
| TUCP_002919 | XLOC_125577 | ENSRNOT00000010092 | 0.952970413  | 1.67E-06 |
| TUCP_002919 | XLOC_125577 | ENSRNOT00000076182 | 0.981935766  | 1.47E-08 |
| TUCP_002919 | XLOC_125577 | ENSRNOT00000081709 | 0.98091059   | 1.93E-08 |
| TUCP_002919 | XLOC_125577 | ENSRNOT00000014103 | 0.981935766  | 1.47E-08 |
| TUCP_002919 | XLOC_125577 | ENSRNOT00000082289 | 0.979729957  | 2.60E-08 |
| TUCP_002919 | XLOC_125577 | ENSRNOT00000083493 | 0.980774071  | 2.00E-08 |
| TUCP_002919 | XLOC_125577 | ENSRNOT00000092563 | 0.966350101  | 3.21E-07 |
| TUCP_002919 | XLOC_125577 | ENSRNOT00000088893 | 0.981935766  | 1.47E-08 |
| TUCP_002919 | XLOC_125577 | ENSRNOT00000088898 | 0.970904749  | 1.56E-07 |
| TUCP_002919 | XLOC_125577 | ENSRNOT00000081014 | 0.981935766  | 1.47E-08 |
| TUCP_002919 | XLOC_125577 | ENSRNOT00000067543 | 0.981935766  | 1.47E-08 |
| TUCP_002919 | XLOC_125577 | ENSRNOT00000050968 | 0.977359695  | 4.51E-08 |
| TUCP_002919 | XLOC_125577 | ENSRNOT00000086036 | 0.981829675  | 1.51E-08 |
| TUCP_002919 | XLOC_125577 | ENSRNOT00000063929 | 0.981935766  | 1.47E-08 |
| TUCP_002919 | XLOC_125577 | ENSRNOT00000044520 | 0.95604669   | 1.20E-06 |
| TUCP_002919 | XLOC_125577 | ENSRNOT00000091763 | 0.963951691  | 4.51E-07 |
| TUCP_002919 | XLOC_125577 | ENSRNOT00000022200 | 0.979415224  | 2.81E-08 |

|             |             |                    |              |          |
|-------------|-------------|--------------------|--------------|----------|
| TUCP_002919 | XLOC_125577 | ENSRNOT00000083764 | 0.980913064  | 1.93E-08 |
| TUCP_002919 | XLOC_125577 | ENSRNOT00000020786 | 0.95159135   | 1.93E-06 |
| TUCP_002919 | XLOC_125577 | ENSRNOT00000050543 | 0.983265222  | 1.01E-08 |
| TUCP_002919 | XLOC_125577 | ENSRNOT00000079275 | 0.98171116   | 1.56E-08 |
| TUCP_002919 | XLOC_125577 | ENSRNOT00000052367 | 0.977855747  | 4.04E-08 |
| TUCP_002919 | XLOC_125577 | ENSRNOT00000090658 | 0.981935766  | 1.47E-08 |
| TUCP_002919 | XLOC_125577 | ENSRNOT00000022571 | 0.980474456  | 2.16E-08 |
| TUCP_002919 | XLOC_125577 | ENSRNOT00000093404 | 0.953088551  | 1.65E-06 |
| TUCP_002919 | XLOC_125577 | ENSRNOT00000057472 | 0.981935766  | 1.47E-08 |
| TUCP_003280 | XLOC_140790 | ENSRNOT00000073258 | -0.968095665 | 2.47E-07 |
| TUCP_003280 | XLOC_140790 | ENSRNOT00000020098 | -0.950901943 | 2.07E-06 |
| TUCP_004269 | XLOC_187894 | ENSRNOT00000084133 | 1            | 0        |
| TUCP_004269 | XLOC_187894 | ENSRNOT00000093745 | 0.981891039  | 1.49E-08 |
| TUCP_004269 | XLOC_187894 | ENSRNOT00000065542 | 0.99828699   | 1.16E-13 |
| TUCP_004269 | XLOC_187894 | ENSRNOT00000082464 | 1            | 0        |
| TUCP_004269 | XLOC_187894 | ENSRNOT00000087659 | 1            | 0        |
| TUCP_004269 | XLOC_187894 | ENSRNOT00000084582 | 0.976633579  | 5.28E-08 |
| TUCP_004269 | XLOC_187894 | ENSRNOT00000085078 | 1            | 0        |
| TUCP_004269 | XLOC_187894 | ENSRNOT00000014028 | 1            | 0        |
| TUCP_004269 | XLOC_187894 | ENSRNOT00000049363 | 1            | 0        |
| TUCP_004269 | XLOC_187894 | ENSRNOT00000065473 | 0.999949098  | 2.69E-21 |
| TUCP_004269 | XLOC_187894 | ENSRNOT00000000142 | 0.998996155  | 8.01E-15 |
| TUCP_004269 | XLOC_187894 | ENSRNOT00000082288 | 0.999998398  | 8.30E-29 |
| TUCP_004269 | XLOC_187894 | ENSRNOT00000039664 | 1            | 0        |
| TUCP_004269 | XLOC_187894 | ENSRNOT00000065402 | 1            | 0        |
| TUCP_004269 | XLOC_187894 | ENSRNOT00000064551 | 0.965365872  | 3.70E-07 |
| TUCP_004269 | XLOC_187894 | ENSRNOT00000084141 | 1            | 0        |
| TUCP_004269 | XLOC_187894 | ENSRNOT00000082435 | 1            | 0        |
| TUCP_004269 | XLOC_187894 | ENSRNOT00000082928 | 0.996801059  | 2.62E-12 |
| TUCP_004269 | XLOC_187894 | ENSRNOT00000066546 | 0.956953619  | 1.08E-06 |
| TUCP_004269 | XLOC_187894 | ENSRNOT00000046013 | 0.988138626  | 1.81E-09 |
| TUCP_004269 | XLOC_187894 | ENSRNOT00000067931 | 0.978893628  | 3.18E-08 |
| TUCP_004269 | XLOC_187894 | ENSRNOT00000086425 | 0.992023315  | 2.51E-10 |
| TUCP_004269 | XLOC_187894 | ENSRNOT00000093696 | 0.956927219  | 1.09E-06 |
| TUCP_004269 | XLOC_187894 | ENSRNOT00000036228 | 0.982337157  | 1.31E-08 |
| TUCP_004269 | XLOC_187894 | ENSRNOT00000014030 | 1            | 0        |
| TUCP_004269 | XLOC_187894 | ENSRNOT00000081966 | 1            | 0        |
| TUCP_004269 | XLOC_187894 | ENSRNOT00000075906 | 1            | 1.33E-79 |
| TUCP_004269 | XLOC_187894 | ENSRNOT00000088396 | 0.981336994  | 1.73E-08 |
| TUCP_004269 | XLOC_187894 | ENSRNOT00000049259 | 0.965500259  | 3.63E-07 |
| TUCP_004269 | XLOC_187894 | ENSRNOT00000092838 | 0.982579749  | 1.23E-08 |
| TUCP_004269 | XLOC_187894 | ENSRNOT00000093442 | 0.959217317  | 8.30E-07 |
| TUCP_003944 | XLOC_173336 | ENSRNOT00000093442 | 0.97049085   | 1.68E-07 |
| TUCP_003945 | XLOC_173336 | ENSRNOT00000028779 | -0.969116896 | 2.10E-07 |
| TUCP_004266 | XLOC_187710 | ENSRNOT00000060527 | 0.956703762  | 1.11E-06 |
| TUCP_004266 | XLOC_187710 | ENSRNOT00000031904 | 0.950656004  | 2.12E-06 |
| TUCP_004266 | XLOC_187710 | ENSRNOT00000068405 | 0.961307973  | 6.40E-07 |
| TUCP_004266 | XLOC_187710 | ENSRNOT00000039809 | 0.954323741  | 1.45E-06 |
| TUCP_004266 | XLOC_187710 | ENSRNOT00000082998 | 0.965777555  | 3.49E-07 |
| TUCP_004266 | XLOC_187710 | ENSRNOT00000081246 | 0.961430201  | 6.30E-07 |
| TUCP_004266 | XLOC_187710 | ENSRNOT00000019213 | 0.977229478  | 4.64E-08 |

|             |             |                    |              |          |
|-------------|-------------|--------------------|--------------|----------|
| TUCP_004266 | XLOC_187710 | ENSRNOT0000009877  | 0.966898854  | 2.96E-07 |
| TUCP_004266 | XLOC_187710 | ENSRNOT0000007351  | -0.962568172 | 5.43E-07 |
| TUCP_004266 | XLOC_187710 | ENSRNOT00000074939 | 0.959367268  | 8.15E-07 |
| TUCP_004266 | XLOC_187710 | ENSRNOT00000013507 | 0.95871075   | 8.82E-07 |
| TUCP_004266 | XLOC_187710 | ENSRNOT00000071560 | 0.961840551  | 5.98E-07 |
| TUCP_004266 | XLOC_187710 | ENSRNOT00000086336 | 0.96020226   | 7.35E-07 |
| TUCP_004266 | XLOC_187710 | ENSRNOT00000021614 | 0.970239983  | 1.75E-07 |
| TUCP_004266 | XLOC_187710 | ENSRNOT00000026065 | 0.953399917  | 1.60E-06 |
| TUCP_004266 | XLOC_187710 | ENSRNOT00000019687 | 0.950206562  | 2.22E-06 |
| TUCP_004266 | XLOC_187710 | ENSRNOT00000023638 | 0.968046072  | 2.49E-07 |
| TUCP_004266 | XLOC_187710 | ENSRNOT00000005228 | 0.956989338  | 1.08E-06 |
| TUCP_004266 | XLOC_187710 | ENSRNOT00000022726 | 0.96388095   | 4.56E-07 |
| TUCP_004266 | XLOC_187710 | ENSRNOT00000021592 | 0.980229164  | 2.30E-08 |
| TUCP_004266 | XLOC_187710 | ENSRNOT00000005220 | 0.965559599  | 3.60E-07 |
| TUCP_004266 | XLOC_187710 | ENSRNOT00000044635 | 0.976287486  | 5.67E-08 |
| TUCP_004266 | XLOC_187710 | ENSRNOT00000036750 | 0.978854661  | 3.21E-08 |
| TUCP_004266 | XLOC_187710 | ENSRNOT00000086548 | 0.961415641  | 6.31E-07 |
| TUCP_004266 | XLOC_187710 | ENSRNOT00000019502 | 0.958899091  | 8.62E-07 |
| TUCP_004266 | XLOC_187710 | ENSRNOT00000016649 | 0.95289474   | 1.69E-06 |
| TUCP_004266 | XLOC_187710 | ENSRNOT00000082100 | 0.975949679  | 6.09E-08 |
| TUCP_004266 | XLOC_187710 | ENSRNOT00000013747 | 0.951978257  | 1.86E-06 |
| TUCP_004266 | XLOC_187710 | ENSRNOT00000065300 | 0.96397011   | 4.50E-07 |
| TUCP_004266 | XLOC_187710 | ENSRNOT00000001118 | 0.956858187  | 1.09E-06 |
| TUCP_004266 | XLOC_187710 | ENSRNOT00000076763 | 0.954396814  | 1.44E-06 |
| TUCP_004266 | XLOC_187710 | ENSRNOT00000054674 | 0.961455606  | 6.28E-07 |
| TUCP_004266 | XLOC_187710 | ENSRNOT00000081981 | 0.954921131  | 1.36E-06 |
| TUCP_004266 | XLOC_187710 | ENSRNOT00000027414 | 0.9612074    | 6.48E-07 |
| TUCP_004266 | XLOC_187710 | ENSRNOT00000028563 | 0.969632807  | 1.93E-07 |
| TUCP_004266 | XLOC_187710 | ENSRNOT00000015076 | 0.969321529  | 2.03E-07 |
| TUCP_004266 | XLOC_187710 | ENSRNOT00000022800 | 0.965747402  | 3.51E-07 |
| TUCP_004266 | XLOC_187710 | ENSRNOT00000043345 | 0.96286595   | 5.22E-07 |
| TUCP_004266 | XLOC_187710 | ENSRNOT00000010418 | 0.951040964  | 2.04E-06 |
| TUCP_004266 | XLOC_187710 | ENSRNOT00000015073 | 0.981117725  | 1.83E-08 |
| TUCP_004266 | XLOC_187710 | ENSRNOT00000043554 | 0.954802423  | 1.38E-06 |
| TUCP_004266 | XLOC_187710 | ENSRNOT00000005942 | 0.952207252  | 1.81E-06 |
| TUCP_004266 | XLOC_187710 | ENSRNOT00000074725 | 0.964138314  | 4.40E-07 |
| TUCP_004266 | XLOC_187710 | ENSRNOT00000025832 | 0.966620456  | 3.09E-07 |
| TUCP_004266 | XLOC_187710 | ENSRNOT00000071573 | 0.956564512  | 1.13E-06 |
| TUCP_004266 | XLOC_187710 | ENSRNOT00000088125 | 0.956359015  | 1.16E-06 |
| TUCP_004266 | XLOC_187710 | ENSRNOT00000028646 | 0.951677872  | 1.91E-06 |
| TUCP_004266 | XLOC_187710 | ENSRNOT00000011384 | 0.968826914  | 2.20E-07 |
| TUCP_004266 | XLOC_187710 | ENSRNOT00000019923 | 0.953328471  | 1.61E-06 |
| TUCP_004266 | XLOC_187710 | ENSRNOT00000082691 | 0.957037716  | 1.07E-06 |
| TUCP_004266 | XLOC_187710 | ENSRNOT00000017948 | 0.969390335  | 2.01E-07 |
| TUCP_004266 | XLOC_187710 | ENSRNOT00000006963 | 0.962504032  | 5.48E-07 |
| TUCP_004266 | XLOC_187710 | ENSRNOT00000079109 | 0.95160522   | 1.93E-06 |
| TUCP_004266 | XLOC_187710 | ENSRNOT00000011926 | 0.958196658  | 9.37E-07 |
| TUCP_004266 | XLOC_187710 | ENSRNOT00000082699 | 0.97597822   | 6.05E-08 |
| TUCP_004266 | XLOC_187710 | ENSRNOT00000028847 | 0.970715007  | 1.61E-07 |
| TUCP_004266 | XLOC_187710 | ENSRNOT00000021348 | 0.971656753  | 1.37E-07 |
| TUCP_004266 | XLOC_187710 | ENSRNOT00000010242 | 0.954895138  | 1.36E-06 |

|             |             |                    |             |          |
|-------------|-------------|--------------------|-------------|----------|
| TUCP_004266 | XLOC_187710 | ENSRNOT00000028842 | 0.962427222 | 5.54E-07 |
| TUCP_004266 | XLOC_187710 | ENSRNOT00000027828 | 0.957719905 | 9.91E-07 |
| TUCP_004266 | XLOC_187710 | ENSRNOT00000037456 | 0.96563046  | 3.57E-07 |
| TUCP_004266 | XLOC_187710 | ENSRNOT00000012671 | 0.951358745 | 1.98E-06 |
| TUCP_004266 | XLOC_187710 | ENSRNOT00000006680 | 0.961393998 | 6.33E-07 |
| TUCP_004266 | XLOC_187710 | ENSRNOT00000032944 | 0.952050779 | 1.84E-06 |
| TUCP_004266 | XLOC_187710 | ENSRNOT00000083215 | 0.992410936 | 1.96E-10 |
| TUCP_004266 | XLOC_187710 | ENSRNOT00000085228 | 0.950383926 | 2.18E-06 |
| TUCP_004266 | XLOC_187710 | ENSRNOT00000084012 | 0.96352284  | 4.78E-07 |
| TUCP_004266 | XLOC_187710 | ENSRNOT00000022534 | 0.964785273 | 4.02E-07 |
| TUCP_004266 | XLOC_187710 | ENSRNOT00000055187 | 0.994566803 | 3.69E-11 |
| TUCP_004266 | XLOC_187710 | ENSRNOT0000005934  | 0.963656039 | 4.70E-07 |
| TUCP_004266 | XLOC_187710 | ENSRNOT00000075424 | 0.95464067  | 1.40E-06 |
| TUCP_004266 | XLOC_187710 | ENSRNOT00000005684 | 0.966535353 | 3.12E-07 |
| TUCP_004266 | XLOC_187710 | ENSRNOT00000079866 | 0.9694542   | 1.99E-07 |
| TUCP_004266 | XLOC_187710 | ENSRNOT00000041513 | 0.971259818 | 1.47E-07 |
| TUCP_004266 | XLOC_187710 | ENSRNOT00000034267 | 0.963677223 | 4.68E-07 |
| TUCP_004266 | XLOC_187710 | ENSRNOT00000067822 | 0.969468636 | 1.98E-07 |
| TUCP_004266 | XLOC_187710 | ENSRNOT00000024060 | 0.958210857 | 9.36E-07 |
| TUCP_004266 | XLOC_187710 | ENSRNOT00000010927 | 0.960652339 | 6.95E-07 |
| TUCP_004266 | XLOC_187710 | ENSRNOT00000064902 | 0.952555152 | 1.75E-06 |
| TUCP_004266 | XLOC_187710 | ENSRNOT00000039842 | 0.974995443 | 7.38E-08 |
| TUCP_004266 | XLOC_187710 | ENSRNOT00000093357 | 0.952054905 | 1.84E-06 |
| TUCP_004266 | XLOC_187710 | ENSRNOT00000068633 | 0.960236923 | 7.32E-07 |
| TUCP_004266 | XLOC_187710 | ENSRNOT00000010541 | 0.95791569  | 9.69E-07 |
| TUCP_004266 | XLOC_187710 | ENSRNOT00000004032 | 0.983036089 | 1.08E-08 |
| TUCP_004266 | XLOC_187710 | ENSRNOT00000084385 | 0.955798622 | 1.23E-06 |
| TUCP_004266 | XLOC_187710 | ENSRNOT00000092741 | 0.954358858 | 1.44E-06 |
| TUCP_004266 | XLOC_187710 | ENSRNOT00000068033 | 0.959689251 | 7.83E-07 |
| TUCP_004266 | XLOC_187710 | ENSRNOT00000012895 | 0.968184239 | 2.43E-07 |
| TUCP_004266 | XLOC_187710 | ENSRNOT00000025859 | 0.951781698 | 1.89E-06 |
| TUCP_004266 | XLOC_187710 | ENSRNOT00000066526 | 0.965122943 | 3.83E-07 |
| TUCP_004266 | XLOC_187710 | ENSRNOT00000057313 | 0.976799755 | 5.09E-08 |
| TUCP_004266 | XLOC_187710 | ENSRNOT00000091909 | 0.964872651 | 3.97E-07 |
| TUCP_004266 | XLOC_187710 | ENSRNOT00000020147 | 0.965398471 | 3.69E-07 |
| TUCP_004266 | XLOC_187710 | ENSRNOT00000090918 | 0.957006207 | 1.08E-06 |
| TUCP_004266 | XLOC_187710 | ENSRNOT00000047210 | 0.967896069 | 2.54E-07 |
| TUCP_004266 | XLOC_187710 | ENSRNOT00000024352 | 0.950353649 | 2.18E-06 |
| TUCP_004266 | XLOC_187710 | ENSRNOT00000076453 | 0.966026518 | 3.37E-07 |
| TUCP_004266 | XLOC_187710 | ENSRNOT00000054874 | 0.950667089 | 2.12E-06 |
| TUCP_004266 | XLOC_187710 | ENSRNOT00000058312 | 0.952441097 | 1.77E-06 |
| TUCP_004266 | XLOC_187710 | ENSRNOT00000013274 | 0.971765803 | 1.35E-07 |
| TUCP_004266 | XLOC_187710 | ENSRNOT00000022213 | 0.978800472 | 3.25E-08 |
| TUCP_004266 | XLOC_187710 | ENSRNOT00000020437 | 0.976563292 | 5.35E-08 |
| TUCP_004266 | XLOC_187710 | ENSRNOT00000081800 | 0.952170795 | 1.82E-06 |
| TUCP_004266 | XLOC_187710 | ENSRNOT00000022342 | 0.955643246 | 1.26E-06 |
| TUCP_004266 | XLOC_187710 | ENSRNOT00000006828 | 0.953816641 | 1.53E-06 |
| TUCP_004266 | XLOC_187710 | ENSRNOT00000010898 | 0.970427901 | 1.69E-07 |
| TUCP_004266 | XLOC_187710 | ENSRNOT00000016987 | 0.950107073 | 2.24E-06 |
| TUCP_004266 | XLOC_187710 | ENSRNOT00000088509 | 0.950818242 | 2.09E-06 |
| TUCP_004266 | XLOC_187710 | ENSRNOT00000005355 | 0.965578718 | 3.59E-07 |

|             |             |                     |             |          |
|-------------|-------------|---------------------|-------------|----------|
| TUCP_004266 | XLOC_187710 | ENSRNOT00000048063  | 0.973753969 | 9.39E-08 |
| TUCP_004266 | XLOC_187710 | ENSRNOT00000016739  | 0.974592813 | 7.99E-08 |
| TUCP_004266 | XLOC_187710 | ENSRNOT00000008982  | 0.954427934 | 1.43E-06 |
| TUCP_004266 | XLOC_187710 | ENSRNOT00000042799  | 0.952144226 | 1.82E-06 |
| TUCP_004266 | XLOC_187710 | ENSRNOT00000001242  | 0.960676895 | 6.93E-07 |
| TUCP_004266 | XLOC_187710 | ENSRNOT00000009221  | 0.974223282 | 8.58E-08 |
| TUCP_004266 | XLOC_187710 | ENSRNOT00000005389  | 0.950574468 | 2.14E-06 |
| TUCP_004266 | XLOC_187710 | ENSRNOT00000079895  | 0.969944822 | 1.84E-07 |
| TUCP_004266 | XLOC_187710 | ENSRNOT00000005659  | 0.95209195  | 1.83E-06 |
| TUCP_004266 | XLOC_187710 | ENSRNOT000000052288 | 0.969452019 | 1.99E-07 |
| TUCP_004266 | XLOC_187710 | ENSRNOT00000025981  | 0.98448072  | 6.91E-09 |
| TUCP_004266 | XLOC_187710 | ENSRNOT000000050138 | 0.961739167 | 6.06E-07 |
| TUCP_004266 | XLOC_187710 | ENSRNOT00000023144  | 0.950005634 | 2.26E-06 |
| TUCP_004266 | XLOC_187710 | ENSRNOT00000047387  | 0.962653544 | 5.37E-07 |
| TUCP_004266 | XLOC_187710 | ENSRNOT00000088599  | 0.957301355 | 1.04E-06 |
| TUCP_004266 | XLOC_187710 | ENSRNOT00000004698  | 0.954791539 | 1.38E-06 |
| TUCP_004266 | XLOC_187710 | ENSRNOT00000045488  | 0.955316071 | 1.30E-06 |
| TUCP_004266 | XLOC_187710 | ENSRNOT000000058072 | 0.960506117 | 7.08E-07 |
| TUCP_004266 | XLOC_187710 | ENSRNOT000000081047 | 0.959803432 | 7.72E-07 |
| TUCP_004266 | XLOC_187710 | ENSRNOT000000084240 | 0.962870173 | 5.22E-07 |
| TUCP_004266 | XLOC_187710 | ENSRNOT000000017629 | 0.981996738 | 1.45E-08 |
| TUCP_004266 | XLOC_187710 | ENSRNOT000000026174 | 0.976078131 | 5.93E-08 |
| TUCP_004266 | XLOC_187710 | ENSRNOT000000015203 | 0.974329023 | 8.41E-08 |
| TUCP_004266 | XLOC_187710 | ENSRNOT00000020885  | 0.957485621 | 1.02E-06 |
| TUCP_004266 | XLOC_187710 | ENSRNOT000000022839 | 0.970292768 | 1.73E-07 |
| TUCP_004266 | XLOC_187710 | ENSRNOT00000004508  | 0.991651165 | 3.15E-10 |
| TUCP_004266 | XLOC_187710 | ENSRNOT000000021116 | 0.984438468 | 7.00E-09 |
| TUCP_004266 | XLOC_187710 | ENSRNOT000000078475 | 0.976332627 | 5.62E-08 |
| TUCP_004266 | XLOC_187710 | ENSRNOT000000040513 | 0.956815456 | 1.10E-06 |
| TUCP_004266 | XLOC_187710 | ENSRNOT000000004740 | 0.970999141 | 1.54E-07 |
| TUCP_004266 | XLOC_187710 | ENSRNOT000000009683 | 0.951219341 | 2.00E-06 |
| TUCP_004266 | XLOC_187710 | ENSRNOT000000021153 | 0.968362559 | 2.37E-07 |
| TUCP_004266 | XLOC_187710 | ENSRNOT000000084088 | 0.954004662 | 1.50E-06 |
| TUCP_004266 | XLOC_187710 | ENSRNOT000000034704 | 0.97811112  | 3.81E-08 |
| TUCP_004266 | XLOC_187710 | ENSRNOT00000000302  | 0.964888737 | 3.96E-07 |
| TUCP_004266 | XLOC_187710 | ENSRNOT000000064900 | 0.968583965 | 2.29E-07 |
| TUCP_004266 | XLOC_187710 | ENSRNOT000000005262 | 0.974642331 | 7.91E-08 |
| TUCP_004266 | XLOC_187710 | ENSRNOT000000015092 | 0.971528369 | 1.40E-07 |
| TUCP_004266 | XLOC_187710 | ENSRNOT000000021015 | 0.960843568 | 6.79E-07 |
| TUCP_004266 | XLOC_187710 | ENSRNOT000000092029 | 0.963415257 | 4.85E-07 |
| TUCP_004266 | XLOC_187710 | ENSRNOT000000076729 | 0.980923281 | 1.93E-08 |
| TUCP_004266 | XLOC_187710 | ENSRNOT000000011408 | 0.950614529 | 2.13E-06 |
| TUCP_004266 | XLOC_187710 | ENSRNOT000000016722 | 0.958506373 | 9.03E-07 |
| TUCP_004266 | XLOC_187710 | ENSRNOT000000091265 | 0.956248948 | 1.17E-06 |
| TUCP_004266 | XLOC_187710 | ENSRNOT000000073526 | 0.958659353 | 8.87E-07 |
| TUCP_004266 | XLOC_187710 | ENSRNOT000000007164 | 0.951200455 | 2.01E-06 |
| TUCP_004266 | XLOC_187710 | ENSRNOT000000016191 | 0.954707368 | 1.39E-06 |
| TUCP_004266 | XLOC_187710 | ENSRNOT000000090170 | 0.950589924 | 2.13E-06 |
| TUCP_004266 | XLOC_187710 | ENSRNOT000000035989 | 0.983280047 | 1.00E-08 |
| TUCP_004266 | XLOC_187710 | ENSRNOT000000047975 | 0.979730672 | 2.60E-08 |
| TUCP_004266 | XLOC_187710 | ENSRNOT000000049538 | 0.963859581 | 4.57E-07 |



|             |             |                     |              |          |
|-------------|-------------|---------------------|--------------|----------|
| TUCP_004266 | XLOC_187710 | ENSRNOT0000005909   | 0.974070944  | 8.84E-08 |
| TUCP_004266 | XLOC_187710 | ENSRNOT00000045882  | 0.952050896  | 1.84E-06 |
| TUCP_004266 | XLOC_187710 | ENSRNOT00000066736  | 0.951882875  | 1.87E-06 |
| TUCP_004266 | XLOC_187710 | ENSRNOT00000025936  | -0.95167939  | 1.91E-06 |
| TUCP_004266 | XLOC_187710 | ENSRNOT00000003102  | 0.958232823  | 9.33E-07 |
| TUCP_004266 | XLOC_187710 | ENSRNOT00000009198  | 0.97585138   | 6.21E-08 |
| TUCP_004266 | XLOC_187710 | ENSRNOT00000025092  | 0.967073757  | 2.88E-07 |
| TUCP_004266 | XLOC_187710 | ENSRNOT00000009129  | 0.969947268  | 1.84E-07 |
| TUCP_004266 | XLOC_187710 | ENSRNOT00000016209  | 0.95077565   | 2.09E-06 |
| TUCP_004266 | XLOC_187710 | ENSRNOT00000027121  | 0.958618349  | 8.91E-07 |
| TUCP_004266 | XLOC_187710 | ENSRNOT00000036951  | 0.962437058  | 5.53E-07 |
| TUCP_004266 | XLOC_187710 | ENSRNOT00000002173  | -0.956767979 | 1.11E-06 |
| TUCP_004266 | XLOC_187710 | ENSRNOT00000024639  | 0.953181014  | 1.64E-06 |
| TUCP_004266 | XLOC_187710 | ENSRNOT000000031891 | -0.954320928 | 1.45E-06 |
| TUCP_004266 | XLOC_187710 | ENSRNOT00000090424  | 0.95956459   | 7.95E-07 |
| TUCP_004266 | XLOC_187710 | ENSRNOT00000024420  | 0.956792039  | 1.10E-06 |
| TUCP_004266 | XLOC_187710 | ENSRNOT00000088196  | 0.973150252  | 1.05E-07 |
| TUCP_004266 | XLOC_187710 | ENSRNOT00000043216  | 0.981278851  | 1.76E-08 |
| TUCP_004266 | XLOC_187710 | ENSRNOT00000000157  | 0.957773005  | 9.85E-07 |
| TUCP_004266 | XLOC_187710 | ENSRNOT00000023645  | 0.972350899  | 1.21E-07 |
| TUCP_004266 | XLOC_187710 | ENSRNOT00000088191  | 0.973054336  | 1.07E-07 |
| TUCP_004266 | XLOC_187710 | ENSRNOT00000084734  | 0.967512928  | 2.70E-07 |
| TUCP_004266 | XLOC_187710 | ENSRNOT00000010992  | 0.977496746  | 4.38E-08 |
| TUCP_004266 | XLOC_187710 | ENSRNOT00000035700  | 0.961524477  | 6.22E-07 |
| TUCP_004266 | XLOC_187710 | ENSRNOT00000029136  | -0.95026276  | 2.20E-06 |
| TUCP_004266 | XLOC_187710 | ENSRNOT00000076669  | 0.981627047  | 1.60E-08 |
| TUCP_004266 | XLOC_187710 | ENSRNOT00000063956  | 0.951791512  | 1.89E-06 |
| TUCP_004266 | XLOC_187710 | ENSRNOT00000026941  | 0.951034928  | 2.04E-06 |
| TUCP_004266 | XLOC_187710 | ENSRNOT00000038807  | 0.95009034   | 2.24E-06 |
| TUCP_004266 | XLOC_187710 | ENSRNOT00000090925  | 0.958202809  | 9.36E-07 |
| TUCP_004266 | XLOC_187710 | ENSRNOT00000023744  | 0.952588873  | 1.74E-06 |
| TUCP_004266 | XLOC_187710 | ENSRNOT00000025394  | 0.954465382  | 1.43E-06 |
| TUCP_004266 | XLOC_187710 | ENSRNOT00000043872  | 0.953012392  | 1.67E-06 |
| TUCP_004266 | XLOC_187710 | ENSRNOT00000074653  | 0.955720608  | 1.24E-06 |
| TUCP_004266 | XLOC_187710 | ENSRNOT00000004570  | 0.969713354  | 1.91E-07 |
| TUCP_004266 | XLOC_187710 | ENSRNOT00000031230  | 0.979378246  | 2.84E-08 |
| TUCP_004266 | XLOC_187710 | ENSRNOT00000059458  | 0.960820383  | 6.81E-07 |
| TUCP_004266 | XLOC_187710 | ENSRNOT00000013758  | 0.988876232  | 1.32E-09 |
| TUCP_004266 | XLOC_187710 | ENSRNOT00000040069  | 0.960265956  | 7.30E-07 |
| TUCP_004266 | XLOC_187710 | ENSRNOT00000092418  | 0.956094152  | 1.19E-06 |
| TUCP_004266 | XLOC_187710 | ENSRNOT00000080928  | 0.964197156  | 4.36E-07 |
| TUCP_004266 | XLOC_187710 | ENSRNOT00000022271  | 0.952322034  | 1.79E-06 |
| TUCP_004266 | XLOC_187710 | ENSRNOT00000046058  | 0.950028002  | 2.26E-06 |
| TUCP_004266 | XLOC_187710 | ENSRNOT00000016740  | 0.950402226  | 2.17E-06 |
| TUCP_004266 | XLOC_187710 | ENSRNOT00000026543  | 0.956213033  | 1.18E-06 |
| TUCP_004266 | XLOC_187710 | ENSRNOT00000035474  | 0.961942294  | 5.90E-07 |
| TUCP_004266 | XLOC_187710 | ENSRNOT00000009342  | 0.978777192  | 3.27E-08 |
| TUCP_004266 | XLOC_187710 | ENSRNOT00000019553  | 0.95676277   | 1.11E-06 |
| TUCP_004266 | XLOC_187710 | ENSRNOT00000075279  | 0.955459187  | 1.28E-06 |
| TUCP_004266 | XLOC_187710 | ENSRNOT00000091205  | 0.95573354   | 1.24E-06 |
| TUCP_004266 | XLOC_187710 | ENSRNOT00000027762  | 0.952079704  | 1.84E-06 |

|             |             |                    |              |          |
|-------------|-------------|--------------------|--------------|----------|
| TUCP_004266 | XLOC_187710 | ENSRNOT00000027910 | 0.975676647  | 6.44E-08 |
| TUCP_004266 | XLOC_187710 | ENSRNOT00000079464 | 0.951670465  | 1.91E-06 |
| TUCP_004266 | XLOC_187710 | ENSRNOT00000058852 | -0.959567942 | 7.95E-07 |
| TUCP_004266 | XLOC_187710 | ENSRNOT00000085596 | 0.977050076  | 4.82E-08 |
| TUCP_004266 | XLOC_187710 | ENSRNOT00000029125 | 0.9657574    | 3.50E-07 |
| TUCP_004266 | XLOC_187710 | ENSRNOT00000082174 | 0.959734281  | 7.79E-07 |
| TUCP_004266 | XLOC_187710 | ENSRNOT00000044896 | 0.970097817  | 1.79E-07 |
| TUCP_004266 | XLOC_187710 | ENSRNOT00000084049 | 0.950723977  | 2.11E-06 |
| TUCP_004266 | XLOC_187710 | ENSRNOT00000010824 | 0.95566054   | 1.25E-06 |
| TUCP_004266 | XLOC_187710 | ENSRNOT00000004412 | 0.982352339  | 1.31E-08 |
| TUCP_004266 | XLOC_187710 | ENSRNOT00000067181 | 0.968810898  | 2.21E-07 |
| TUCP_004266 | XLOC_187710 | ENSRNOT00000064798 | 0.962009845  | 5.85E-07 |
| TUCP_004266 | XLOC_187710 | ENSRNOT00000019177 | 0.954438139  | 1.43E-06 |
| TUCP_004266 | XLOC_187710 | ENSRNOT00000024942 | 0.951324234  | 1.98E-06 |
| TUCP_004266 | XLOC_187710 | ENSRNOT00000061100 | 0.955356772  | 1.30E-06 |
| TUCP_004266 | XLOC_187710 | ENSRNOT00000084595 | 0.971075991  | 1.52E-07 |
| TUCP_004266 | XLOC_187710 | ENSRNOT00000027452 | 0.967192424  | 2.83E-07 |
| TUCP_004266 | XLOC_187710 | ENSRNOT00000022646 | 0.962018163  | 5.84E-07 |
| TUCP_004266 | XLOC_187710 | ENSRNOT00000040393 | 0.970271685  | 1.74E-07 |
| TUCP_004266 | XLOC_187710 | ENSRNOT00000066593 | 0.962422471  | 5.54E-07 |
| TUCP_004266 | XLOC_187710 | ENSRNOT00000018998 | 0.954016161  | 1.50E-06 |
| TUCP_004266 | XLOC_187710 | ENSRNOT00000004463 | 0.951976159  | 1.86E-06 |
| TUCP_004266 | XLOC_187710 | ENSRNOT00000027964 | 0.989343405  | 1.06E-09 |
| TUCP_004266 | XLOC_187710 | ENSRNOT00000051496 | 0.956046297  | 1.20E-06 |
| TUCP_004266 | XLOC_187710 | ENSRNOT00000024659 | 0.958733035  | 8.79E-07 |
| TUCP_004266 | XLOC_187710 | ENSRNOT00000072081 | 0.966076978  | 3.34E-07 |
| TUCP_004266 | XLOC_187710 | ENSRNOT00000011041 | 0.965018556  | 3.89E-07 |
| TUCP_004266 | XLOC_187710 | ENSRNOT00000021674 | 0.974569436  | 8.03E-08 |
| TUCP_004266 | XLOC_187710 | ENSRNOT00000027615 | 0.977559697  | 4.32E-08 |
| TUCP_004266 | XLOC_187710 | ENSRNOT00000083799 | 0.957659141  | 9.98E-07 |
| TUCP_004266 | XLOC_187710 | ENSRNOT0000002292  | 0.959417567  | 8.10E-07 |
| TUCP_004266 | XLOC_187710 | ENSRNOT00000089211 | 0.955408426  | 1.29E-06 |
| TUCP_004266 | XLOC_187710 | ENSRNOT00000013661 | 0.955113081  | 1.33E-06 |
| TUCP_004266 | XLOC_187710 | ENSRNOT00000004140 | 0.979967646  | 2.46E-08 |
| TUCP_004266 | XLOC_187710 | ENSRNOT00000003991 | 0.981186177  | 1.80E-08 |
| TUCP_004266 | XLOC_187710 | ENSRNOT00000093174 | 0.972455694  | 1.19E-07 |
| TUCP_004266 | XLOC_187710 | ENSRNOT00000034744 | 0.966457046  | 3.16E-07 |
| TUCP_001211 | XLOC_045214 | ENSRNOT00000093075 | 0.964586147  | 4.13E-07 |
| TUCP_001211 | XLOC_045214 | ENSRNOT00000058260 | 0.964586147  | 4.13E-07 |
| TUCP_001211 | XLOC_045214 | ENSRNOT00000088887 | 0.964586147  | 4.13E-07 |
| TUCP_001211 | XLOC_045214 | ENSRNOT00000084986 | 0.964586147  | 4.13E-07 |
| TUCP_001211 | XLOC_045214 | ENSRNOT00000074346 | 0.960643183  | 6.96E-07 |
| TUCP_001211 | XLOC_045214 | ENSRNOT00000073209 | 0.956373396  | 1.16E-06 |
| TUCP_001211 | XLOC_045214 | ENSRNOT00000072573 | 0.95238444   | 1.78E-06 |
| TUCP_001211 | XLOC_045214 | ENSRNOT00000017828 | 0.961612421  | 6.15E-07 |
| TUCP_001211 | XLOC_045214 | ENSRNOT00000080444 | 0.98003735   | 2.41E-08 |
| TUCP_001211 | XLOC_045214 | ENSRNOT00000071312 | 0.964586147  | 4.13E-07 |
| TUCP_001211 | XLOC_045214 | ENSRNOT00000088245 | 0.964586147  | 4.13E-07 |
| TUCP_001211 | XLOC_045214 | ENSRNOT00000058833 | 0.958719443  | 8.81E-07 |
| TUCP_001211 | XLOC_045214 | ENSRNOT00000078052 | 0.964586147  | 4.13E-07 |
| TUCP_001211 | XLOC_045214 | ENSRNOT00000078494 | 0.964635186  | 4.11E-07 |

|             |             |                     |              |          |
|-------------|-------------|---------------------|--------------|----------|
| TUCP_001211 | XLOC_045214 | ENSRNOT00000085653  | 0.964586147  | 4.13E-07 |
| TUCP_001211 | XLOC_045214 | ENSRNOT00000081992  | 0.965982294  | 3.39E-07 |
| TUCP_001211 | XLOC_045214 | ENSRNOT00000038553  | 0.966727591  | 3.04E-07 |
| TUCP_001211 | XLOC_045214 | ENSRNOT00000055406  | 0.964586147  | 4.13E-07 |
| TUCP_001211 | XLOC_045214 | ENSRNOT00000070817  | 0.963940656  | 4.52E-07 |
| TUCP_001211 | XLOC_045214 | ENSRNOT00000026753  | 0.964586147  | 4.13E-07 |
| TUCP_001211 | XLOC_045214 | ENSRNOT00000080533  | 0.971983988  | 1.30E-07 |
| TUCP_001211 | XLOC_045214 | ENSRNOT00000004279  | 0.953451584  | 1.59E-06 |
| TUCP_001211 | XLOC_045214 | ENSRNOT00000086031  | 0.964586147  | 4.13E-07 |
| TUCP_001211 | XLOC_045214 | ENSRNOT00000014312  | 0.964586147  | 4.13E-07 |
| TUCP_001211 | XLOC_045214 | ENSRNOT000000051231 | 0.960953873  | 6.69E-07 |
| TUCP_001211 | XLOC_045214 | ENSRNOT00000055034  | 0.956766977  | 1.11E-06 |
| TUCP_001211 | XLOC_045214 | ENSRNOT00000046837  | 0.962334529  | 5.60E-07 |
| TUCP_004260 | XLOC_187269 | ENSRNOT00000077483  | 0.951424327  | 1.96E-06 |
| TUCP_001846 | XLOC_076075 | ENSRNOT00000088461  | -0.955106171 | 1.33E-06 |
| TUCP_004262 | XLOC_187474 | ENSRNOT00000002814  | 0.957356648  | 1.03E-06 |
| TUCP_004262 | XLOC_187474 | ENSRNOT00000024583  | -0.970521099 | 1.67E-07 |
| TUCP_004262 | XLOC_187474 | ENSRNOT00000021590  | 0.962276906  | 5.65E-07 |
| TUCP_004262 | XLOC_187474 | ENSRNOT00000023661  | 0.961962906  | 5.88E-07 |
| TUCP_004262 | XLOC_187474 | ENSRNOT00000010539  | 0.964363693  | 4.26E-07 |
| TUCP_004145 | XLOC_180737 | ENSRNOT00000080181  | 0.969588111  | 1.95E-07 |
| TUCP_004145 | XLOC_180737 | ENSRNOT00000023739  | 0.964686912  | 4.08E-07 |
| TUCP_004145 | XLOC_180737 | ENSRNOT00000090376  | 0.954110628  | 1.48E-06 |
| TUCP_004145 | XLOC_180737 | ENSRNOT00000033491  | 0.956754284  | 1.11E-06 |
| TUCP_004145 | XLOC_180737 | ENSRNOT00000025624  | 0.959572416  | 7.95E-07 |
| TUCP_004145 | XLOC_180737 | ENSRNOT00000076285  | 0.953312589  | 1.61E-06 |
| TUCP_004144 | XLOC_180737 | ENSRNOT00000010992  | 0.962930616  | 5.18E-07 |
| TUCP_004144 | XLOC_180737 | ENSRNOT00000085158  | 0.957772024  | 9.85E-07 |
| TUCP_004144 | XLOC_180737 | ENSRNOT00000039809  | 0.96970813   | 1.91E-07 |
| TUCP_004144 | XLOC_180737 | ENSRNOT00000076669  | 0.958655368  | 8.88E-07 |
| TUCP_004144 | XLOC_180737 | ENSRNOT00000091910  | 0.950048786  | 2.25E-06 |
| TUCP_004144 | XLOC_180737 | ENSRNOT00000050180  | 0.965737373  | 3.51E-07 |
| TUCP_004144 | XLOC_180737 | ENSRNOT00000026293  | 0.9512898    | 1.99E-06 |
| TUCP_004144 | XLOC_180737 | ENSRNOT00000002560  | 0.953766507  | 1.54E-06 |
| TUCP_004144 | XLOC_180737 | ENSRNOT00000025808  | 0.97673      | 5.17E-08 |
| TUCP_004144 | XLOC_180737 | ENSRNOT00000012156  | 0.958329825  | 9.23E-07 |
| TUCP_004144 | XLOC_180737 | ENSRNOT00000032274  | 0.958934459  | 8.58E-07 |
| TUCP_004144 | XLOC_180737 | ENSRNOT00000006175  | 0.967619871  | 2.65E-07 |
| TUCP_004144 | XLOC_180737 | ENSRNOT00000008221  | 0.952701461  | 1.72E-06 |
| TUCP_004144 | XLOC_180737 | ENSRNOT00000023144  | 0.9706329    | 1.64E-07 |
| TUCP_004144 | XLOC_180737 | ENSRNOT00000080695  | 0.950820342  | 2.09E-06 |
| TUCP_004144 | XLOC_180737 | ENSRNOT00000064946  | 0.967464961  | 2.72E-07 |
| TUCP_004144 | XLOC_180737 | ENSRNOT00000090665  | 0.975379988  | 6.84E-08 |
| TUCP_004144 | XLOC_180737 | ENSRNOT00000003296  | 0.964764892  | 4.03E-07 |
| TUCP_004144 | XLOC_180737 | ENSRNOT00000080181  | 0.952422823  | 1.77E-06 |
| TUCP_004144 | XLOC_180737 | ENSRNOT00000025859  | 0.974866891  | 7.57E-08 |
| TUCP_004144 | XLOC_180737 | ENSRNOT00000026543  | 0.972070975  | 1.28E-07 |
| TUCP_004144 | XLOC_180737 | ENSRNOT00000027454  | 0.963626008  | 4.72E-07 |
| TUCP_004144 | XLOC_180737 | ENSRNOT00000025832  | 0.952141334  | 1.82E-06 |
| TUCP_004144 | XLOC_180737 | ENSRNOT00000018535  | 0.968959475  | 2.15E-07 |
| TUCP_004144 | XLOC_180737 | ENSRNOT00000025092  | 0.954506956  | 1.42E-06 |

|             |             |                     |             |          |
|-------------|-------------|---------------------|-------------|----------|
| TUCP_004144 | XLOC_180737 | ENSRNOT00000024156  | 0.962097235 | 5.78E-07 |
| TUCP_004144 | XLOC_180737 | ENSRNOT00000047093  | 0.958709367 | 8.82E-07 |
| TUCP_004144 | XLOC_180737 | ENSRNOT00000035989  | 0.953795663 | 1.53E-06 |
| TUCP_004144 | XLOC_180737 | ENSRNOT00000005355  | 0.954621187 | 1.40E-06 |
| TUCP_004146 | XLOC_180737 | ENSRNOT00000001874  | 0.95128323  | 1.99E-06 |
| TUCP_004141 | XLOC_180732 | ENSRNOT00000010992  | 0.96689454  | 2.96E-07 |
| TUCP_004141 | XLOC_180732 | ENSRNOT000000085158 | 0.959791494 | 7.74E-07 |
| TUCP_004141 | XLOC_180732 | ENSRNOT00000039809  | 0.968597073 | 2.28E-07 |
| TUCP_004141 | XLOC_180732 | ENSRNOT00000076669  | 0.95889606  | 8.62E-07 |
| TUCP_004141 | XLOC_180732 | ENSRNOT00000091910  | 0.953974483 | 1.51E-06 |
| TUCP_004141 | XLOC_180732 | ENSRNOT00000050180  | 0.963825894 | 4.59E-07 |
| TUCP_004141 | XLOC_180732 | ENSRNOT00000026293  | 0.951945292 | 1.86E-06 |
| TUCP_004141 | XLOC_180732 | ENSRNOT00000002560  | 0.952620187 | 1.74E-06 |
| TUCP_004141 | XLOC_180732 | ENSRNOT00000025808  | 0.973120348 | 1.06E-07 |
| TUCP_004141 | XLOC_180732 | ENSRNOT00000032274  | 0.958709645 | 8.82E-07 |
| TUCP_004141 | XLOC_180732 | ENSRNOT00000006175  | 0.972117234 | 1.27E-07 |
| TUCP_004141 | XLOC_180732 | ENSRNOT00000023144  | 0.969746744 | 1.90E-07 |
| TUCP_004141 | XLOC_180732 | ENSRNOT00000080695  | 0.950367567 | 2.18E-06 |
| TUCP_004141 | XLOC_180732 | ENSRNOT00000064946  | 0.963435337 | 4.84E-07 |
| TUCP_004141 | XLOC_180732 | ENSRNOT00000090665  | 0.980074615 | 2.39E-08 |
| TUCP_004141 | XLOC_180732 | ENSRNOT00000003296  | 0.965043646 | 3.88E-07 |
| TUCP_004141 | XLOC_180732 | ENSRNOT00000080181  | 0.952207156 | 1.81E-06 |
| TUCP_004141 | XLOC_180732 | ENSRNOT00000025859  | 0.978249906 | 3.70E-08 |
| TUCP_004141 | XLOC_180732 | ENSRNOT00000026543  | 0.974269025 | 8.51E-08 |
| TUCP_004141 | XLOC_180732 | ENSRNOT00000065501  | 0.951017767 | 2.04E-06 |
| TUCP_004141 | XLOC_180732 | ENSRNOT00000027454  | 0.962315798 | 5.62E-07 |
| TUCP_004141 | XLOC_180732 | ENSRNOT00000025832  | 0.951950621 | 1.86E-06 |
| TUCP_004141 | XLOC_180732 | ENSRNOT00000018535  | 0.963124219 | 5.05E-07 |
| TUCP_004141 | XLOC_180732 | ENSRNOT00000025092  | 0.960367893 | 7.20E-07 |
| TUCP_004141 | XLOC_180732 | ENSRNOT00000024156  | 0.957011343 | 1.08E-06 |
| TUCP_004141 | XLOC_180732 | ENSRNOT00000047093  | 0.957898841 | 9.71E-07 |
| TUCP_004141 | XLOC_180732 | ENSRNOT00000035989  | 0.955801572 | 1.23E-06 |
| TUCP_004141 | XLOC_180732 | ENSRNOT00000005355  | 0.955658335 | 1.25E-06 |
| TUCP_004141 | XLOC_180732 | ENSRNOT00000045223  | 0.951870042 | 1.88E-06 |
| TUCP_004141 | XLOC_180732 | ENSRNOT00000001222  | 0.95097256  | 2.05E-06 |
| TUCP_004140 | XLOC_180726 | ENSRNOT00000028833  | 0.968118002 | 2.46E-07 |
| TUCP_004140 | XLOC_180726 | ENSRNOT00000045223  | 0.950730807 | 2.10E-06 |
| TUCP_004140 | XLOC_180726 | ENSRNOT00000060499  | 0.973083854 | 1.06E-07 |
| TUCP_004143 | XLOC_180737 | ENSRNOT00000010992  | 0.961028985 | 6.63E-07 |
| TUCP_004143 | XLOC_180737 | ENSRNOT000000085158 | 0.957085465 | 1.07E-06 |
| TUCP_004143 | XLOC_180737 | ENSRNOT00000050180  | 0.967233638 | 2.82E-07 |
| TUCP_004143 | XLOC_180737 | ENSRNOT00000039809  | 0.968737201 | 2.23E-07 |
| TUCP_004143 | XLOC_180737 | ENSRNOT00000076669  | 0.960341502 | 7.23E-07 |
| TUCP_004143 | XLOC_180737 | ENSRNOT00000084088  | 0.950926504 | 2.06E-06 |
| TUCP_004143 | XLOC_180737 | ENSRNOT000000081512 | 0.951924609 | 1.87E-06 |
| TUCP_004143 | XLOC_180737 | ENSRNOT00000026293  | 0.954345682 | 1.45E-06 |
| TUCP_004143 | XLOC_180737 | ENSRNOT00000002560  | 0.960417289 | 7.16E-07 |
| TUCP_004143 | XLOC_180737 | ENSRNOT00000025808  | 0.976466151 | 5.47E-08 |
| TUCP_004143 | XLOC_180737 | ENSRNOT000000012156 | 0.962422077 | 5.54E-07 |
| TUCP_004143 | XLOC_180737 | ENSRNOT00000087592  | 0.950537073 | 2.15E-06 |
| TUCP_004143 | XLOC_180737 | ENSRNOT00000032274  | 0.955620567 | 1.26E-06 |

|             |             |                    |             |          |
|-------------|-------------|--------------------|-------------|----------|
| TUCP_004143 | XLOC_180737 | ENSRNOT00000091417 | 0.950536379 | 2.15E-06 |
| TUCP_004143 | XLOC_180737 | ENSRNOT00000006175 | 0.966798116 | 3.01E-07 |
| TUCP_004143 | XLOC_180737 | ENSRNOT00000008221 | 0.954345037 | 1.45E-06 |
| TUCP_004143 | XLOC_180737 | ENSRNOT00000023144 | 0.976611674 | 5.30E-08 |
| TUCP_004143 | XLOC_180737 | ENSRNOT00000080695 | 0.959703151 | 7.82E-07 |
| TUCP_004143 | XLOC_180737 | ENSRNOT00000064946 | 0.964209549 | 4.36E-07 |
| TUCP_004143 | XLOC_180737 | ENSRNOT00000090665 | 0.971880764 | 1.32E-07 |
| TUCP_004143 | XLOC_180737 | ENSRNOT00000003296 | 0.968542613 | 2.30E-07 |
| TUCP_004143 | XLOC_180737 | ENSRNOT00000080181 | 0.951548679 | 1.94E-06 |
| TUCP_004143 | XLOC_180737 | ENSRNOT00000025859 | 0.968398541 | 2.35E-07 |
| TUCP_004143 | XLOC_180737 | ENSRNOT00000026543 | 0.976928171 | 4.95E-08 |
| TUCP_004143 | XLOC_180737 | ENSRNOT00000065501 | 0.951936585 | 1.86E-06 |
| TUCP_004143 | XLOC_180737 | ENSRNOT00000027454 | 0.965376811 | 3.70E-07 |
| TUCP_004143 | XLOC_180737 | ENSRNOT00000025832 | 0.954761026 | 1.38E-06 |
| TUCP_004143 | XLOC_180737 | ENSRNOT00000080207 | 0.953745883 | 1.54E-06 |
| TUCP_004143 | XLOC_180737 | ENSRNOT00000018535 | 0.964006221 | 4.48E-07 |
| TUCP_004143 | XLOC_180737 | ENSRNOT00000071573 | 0.951786357 | 1.89E-06 |
| TUCP_004143 | XLOC_180737 | ENSRNOT00000060362 | 0.950297515 | 2.20E-06 |
| TUCP_004143 | XLOC_180737 | ENSRNOT00000025092 | 0.953341819 | 1.61E-06 |
| TUCP_004143 | XLOC_180737 | ENSRNOT00000024156 | 0.962299824 | 5.63E-07 |
| TUCP_004143 | XLOC_180737 | ENSRNOT00000047093 | 0.964848977 | 3.98E-07 |
| TUCP_004143 | XLOC_180737 | ENSRNOT00000035989 | 0.956800382 | 1.10E-06 |
| TUCP_004143 | XLOC_180737 | ENSRNOT00000005355 | 0.958765739 | 8.76E-07 |
| TUCP_004143 | XLOC_180737 | ENSRNOT00000001222 | 0.956692543 | 1.12E-06 |
| TUCP_004142 | XLOC_180734 | ENSRNOT00000010992 | 0.97389484  | 9.14E-08 |
| TUCP_004142 | XLOC_180734 | ENSRNOT00000085158 | 0.950766972 | 2.10E-06 |
| TUCP_004142 | XLOC_180734 | ENSRNOT00000039809 | 0.969732392 | 1.90E-07 |
| TUCP_004142 | XLOC_180734 | ENSRNOT00000076669 | 0.956075706 | 1.20E-06 |
| TUCP_004142 | XLOC_180734 | ENSRNOT00000091910 | 0.954211884 | 1.47E-06 |
| TUCP_004142 | XLOC_180734 | ENSRNOT00000035989 | 0.964591712 | 4.13E-07 |
| TUCP_004142 | XLOC_180734 | ENSRNOT0000002560  | 0.951546043 | 1.94E-06 |
| TUCP_004142 | XLOC_180734 | ENSRNOT00000025808 | 0.962492734 | 5.49E-07 |
| TUCP_004142 | XLOC_180734 | ENSRNOT00000091417 | 0.957222971 | 1.05E-06 |
| TUCP_004142 | XLOC_180734 | ENSRNOT00000040513 | 0.951485525 | 1.95E-06 |
| TUCP_004142 | XLOC_180734 | ENSRNOT00000006175 | 0.952469943 | 1.76E-06 |
| TUCP_004142 | XLOC_180734 | ENSRNOT00000023144 | 0.957592212 | 1.01E-06 |
| TUCP_004142 | XLOC_180734 | ENSRNOT00000080695 | 0.950532785 | 2.15E-06 |
| TUCP_004142 | XLOC_180734 | ENSRNOT00000064946 | 0.959036882 | 8.48E-07 |
| TUCP_004142 | XLOC_180734 | ENSRNOT00000090665 | 0.980387074 | 2.21E-08 |
| TUCP_004142 | XLOC_180734 | ENSRNOT00000003296 | 0.976980007 | 4.90E-08 |
| TUCP_004142 | XLOC_180734 | ENSRNOT00000080181 | 0.972073625 | 1.28E-07 |
| TUCP_004142 | XLOC_180734 | ENSRNOT00000025859 | 0.983899834 | 8.29E-09 |
| TUCP_004142 | XLOC_180734 | ENSRNOT00000026543 | 0.959742818 | 7.78E-07 |
| TUCP_004142 | XLOC_180734 | ENSRNOT00000018535 | 0.950802013 | 2.09E-06 |
| TUCP_004142 | XLOC_180734 | ENSRNOT00000071573 | 0.965235746 | 3.77E-07 |
| TUCP_004142 | XLOC_180734 | ENSRNOT00000025092 | 0.965727291 | 3.52E-07 |
| TUCP_004142 | XLOC_180734 | ENSRNOT00000090376 | 0.954119465 | 1.48E-06 |
| TUCP_004142 | XLOC_180734 | ENSRNOT00000051550 | 0.950146944 | 2.23E-06 |
| TUCP_004142 | XLOC_180734 | ENSRNOT00000050180 | 0.956890867 | 1.09E-06 |
| TUCP_004142 | XLOC_180734 | ENSRNOT00000005355 | 0.958172848 | 9.40E-07 |
| TUCP_004142 | XLOC_180734 | ENSRNOT00000017629 | 0.95114357  | 2.02E-06 |

|             |             |                    |             |          |
|-------------|-------------|--------------------|-------------|----------|
| TUCP_004142 | XLOC_180734 | ENSRNOT00000001222 | 0.957664865 | 9.97E-07 |
| TUCP_004149 | XLOC_180738 | ENSRNOT00000006175 | 0.954042763 | 1.49E-06 |
| TUCP_004149 | XLOC_180738 | ENSRNOT00000067835 | 0.950572512 | 2.14E-06 |
| TUCP_004149 | XLOC_180738 | ENSRNOT00000026543 | 0.954440571 | 1.43E-06 |
| TUCP_004149 | XLOC_180738 | ENSRNOT00000083093 | 0.952649354 | 1.73E-06 |
| TUCP_004149 | XLOC_180738 | ENSRNOT00000067866 | 0.951226706 | 2.00E-06 |
| TUCP_004149 | XLOC_180738 | ENSRNOT00000035348 | 0.968753785 | 2.23E-07 |
| TUCP_000394 | XLOC_013487 | ENSRNOT00000004891 | 0.952693343 | 1.72E-06 |
| TUCP_000394 | XLOC_013487 | ENSRNOT00000006725 | 0.958150847 | 9.42E-07 |
| TUCP_000394 | XLOC_013487 | ENSRNOT00000043822 | 0.951757694 | 1.90E-06 |
| TUCP_000394 | XLOC_013487 | ENSRNOT00000045048 | 0.965710742 | 3.52E-07 |
| TUCP_000394 | XLOC_013487 | ENSRNOT00000005706 | 0.955140841 | 1.33E-06 |
| TUCP_004812 | XLOC_213615 | ENSRNOT00000038452 | 0.953767641 | 1.54E-06 |
| TUCP_000396 | XLOC_013489 | ENSRNOT00000084133 | 1           | 0        |
| TUCP_000396 | XLOC_013489 | ENSRNOT00000093745 | 0.981891039 | 1.49E-08 |
| TUCP_000396 | XLOC_013489 | ENSRNOT00000065542 | 0.99828699  | 1.16E-13 |
| TUCP_000396 | XLOC_013489 | ENSRNOT00000082464 | 1           | 0        |
| TUCP_000396 | XLOC_013489 | ENSRNOT00000087659 | 1           | 0        |
| TUCP_000396 | XLOC_013489 | ENSRNOT00000084582 | 0.976633579 | 5.28E-08 |
| TUCP_000396 | XLOC_013489 | ENSRNOT00000085078 | 1           | 0        |
| TUCP_000396 | XLOC_013489 | ENSRNOT00000014028 | 1           | 0        |
| TUCP_000396 | XLOC_013489 | ENSRNOT00000049363 | 1           | 0        |
| TUCP_000396 | XLOC_013489 | ENSRNOT00000065473 | 0.999949098 | 2.69E-21 |
| TUCP_000396 | XLOC_013489 | ENSRNOT00000000142 | 0.998996155 | 8.01E-15 |
| TUCP_000396 | XLOC_013489 | ENSRNOT00000082288 | 0.999998398 | 8.30E-29 |
| TUCP_000396 | XLOC_013489 | ENSRNOT00000039664 | 1           | 0        |
| TUCP_000396 | XLOC_013489 | ENSRNOT00000065402 | 1           | 0        |
| TUCP_000396 | XLOC_013489 | ENSRNOT00000064551 | 0.965365872 | 3.70E-07 |
| TUCP_000396 | XLOC_013489 | ENSRNOT00000084141 | 1           | 0        |
| TUCP_000396 | XLOC_013489 | ENSRNOT00000082435 | 1           | 0        |
| TUCP_000396 | XLOC_013489 | ENSRNOT00000082928 | 0.996801059 | 2.62E-12 |
| TUCP_000396 | XLOC_013489 | ENSRNOT00000066546 | 0.956953619 | 1.08E-06 |
| TUCP_000396 | XLOC_013489 | ENSRNOT00000046013 | 0.988138626 | 1.81E-09 |
| TUCP_000396 | XLOC_013489 | ENSRNOT00000067931 | 0.978893628 | 3.18E-08 |
| TUCP_000396 | XLOC_013489 | ENSRNOT00000086425 | 0.992023315 | 2.51E-10 |
| TUCP_000396 | XLOC_013489 | ENSRNOT00000093696 | 0.956927219 | 1.09E-06 |
| TUCP_000396 | XLOC_013489 | ENSRNOT00000036228 | 0.982337157 | 1.31E-08 |
| TUCP_000396 | XLOC_013489 | ENSRNOT00000014030 | 1           | 0        |
| TUCP_000396 | XLOC_013489 | ENSRNOT00000081966 | 1           | 0        |
| TUCP_000396 | XLOC_013489 | ENSRNOT00000075906 | 1           | 0        |
| TUCP_000396 | XLOC_013489 | ENSRNOT00000088396 | 0.981336994 | 1.73E-08 |
| TUCP_000396 | XLOC_013489 | ENSRNOT00000049259 | 0.965500259 | 3.63E-07 |
| TUCP_000396 | XLOC_013489 | ENSRNOT00000092838 | 0.982579749 | 1.23E-08 |
| TUCP_000396 | XLOC_013489 | ENSRNOT00000093442 | 0.959217317 | 8.30E-07 |
| TUCP_000397 | XLOC_013494 | ENSRNOT00000029486 | 0.954246851 | 1.46E-06 |
| TUCP_004817 | XLOC_214053 | ENSRNOT00000068354 | 0.983892483 | 8.31E-09 |
| TUCP_004817 | XLOC_214053 | ENSRNOT00000034421 | 0.966072214 | 3.34E-07 |
| TUCP_004817 | XLOC_214053 | ENSRNOT00000011845 | 0.975835287 | 6.23E-08 |
| TUCP_004817 | XLOC_214053 | ENSRNOT00000010968 | 0.950162347 | 2.23E-06 |
| TUCP_004817 | XLOC_214053 | ENSRNOT00000009448 | 0.954338492 | 1.45E-06 |
| TUCP_004817 | XLOC_214053 | ENSRNOT00000003778 | 0.960247702 | 7.31E-07 |

|             |             |                     |              |          |
|-------------|-------------|---------------------|--------------|----------|
| TUCP_004817 | XLOC_214053 | ENSRNOT00000085479  | 0.978853767  | 3.21E-08 |
| TUCP_004817 | XLOC_214053 | ENSRNOT00000025731  | 0.97627102   | 5.69E-08 |
| TUCP_004817 | XLOC_214053 | ENSRNOT00000000995  | 0.981040351  | 1.87E-08 |
| TUCP_004817 | XLOC_214053 | ENSRNOT00000003458  | 0.96418712   | 4.37E-07 |
| TUCP_004817 | XLOC_214053 | ENSRNOT00000084722  | 0.953820872  | 1.53E-06 |
| TUCP_004817 | XLOC_214053 | ENSRNOT000000051028 | -0.973099233 | 1.06E-07 |
| TUCP_004817 | XLOC_214053 | ENSRNOT000000051067 | 0.962233099  | 5.68E-07 |
| TUCP_004817 | XLOC_214053 | ENSRNOT000000031693 | 0.982597035  | 1.22E-08 |
| TUCP_004817 | XLOC_214053 | ENSRNOT000000082393 | 0.96869069   | 2.25E-07 |
| TUCP_004817 | XLOC_214053 | ENSRNOT000000078299 | 0.968627455  | 2.27E-07 |
| TUCP_004817 | XLOC_214053 | ENSRNOT00000003082  | 0.955670563  | 1.25E-06 |
| TUCP_000391 | XLOC_013430 | ENSRNOT00000076387  | 0.951902725  | 1.87E-06 |
| TUCP_000391 | XLOC_013430 | ENSRNOT00000026633  | 0.956838348  | 1.10E-06 |
| TUCP_000391 | XLOC_013430 | ENSRNOT00000023196  | 0.968541702  | 2.30E-07 |
| TUCP_000391 | XLOC_013430 | ENSRNOT00000044885  | 0.98202915   | 1.43E-08 |
| TUCP_000391 | XLOC_013430 | ENSRNOT00000027526  | 0.950132933  | 2.23E-06 |
| TUCP_000391 | XLOC_013430 | ENSRNOT00000003690  | 0.967366227  | 2.76E-07 |
| TUCP_000391 | XLOC_013430 | ENSRNOT00000010784  | 0.956179846  | 1.18E-06 |
| TUCP_000391 | XLOC_013430 | ENSRNOT00000022286  | 0.962824069  | 5.25E-07 |
| TUCP_000391 | XLOC_013430 | ENSRNOT00000011350  | 0.950921654  | 2.06E-06 |
| TUCP_000391 | XLOC_013430 | ENSRNOT00000016129  | 0.952317345  | 1.79E-06 |
| TUCP_000391 | XLOC_013430 | ENSRNOT000000084422 | 0.953562224  | 1.57E-06 |
| TUCP_000391 | XLOC_013430 | ENSRNOT00000013762  | 0.950508659  | 2.15E-06 |
| TUCP_000391 | XLOC_013430 | ENSRNOT00000003177  | 0.95528422   | 1.31E-06 |
| TUCP_000391 | XLOC_013430 | ENSRNOT00000004172  | 0.96384836   | 4.58E-07 |
| TUCP_000391 | XLOC_013430 | ENSRNOT000000072518 | 0.962058747  | 5.81E-07 |
| TUCP_000391 | XLOC_013430 | ENSRNOT000000080271 | 0.961082448  | 6.59E-07 |
| TUCP_000391 | XLOC_013430 | ENSRNOT000000087062 | 0.951709254  | 1.91E-06 |
| TUCP_000391 | XLOC_013430 | ENSRNOT00000016289  | 0.960689548  | 6.92E-07 |
| TUCP_000391 | XLOC_013430 | ENSRNOT000000051022 | 0.958933934  | 8.58E-07 |
| TUCP_000391 | XLOC_013430 | ENSRNOT00000017486  | 0.966407494  | 3.18E-07 |
| TUCP_000391 | XLOC_013430 | ENSRNOT00000078994  | 0.972079878  | 1.28E-07 |
| TUCP_000391 | XLOC_013430 | ENSRNOT00000016321  | -0.95011034  | 2.24E-06 |
| TUCP_000391 | XLOC_013430 | ENSRNOT000000074659 | 0.953822119  | 1.53E-06 |
| TUCP_000391 | XLOC_013430 | ENSRNOT00000005405  | 0.967150617  | 2.85E-07 |
| TUCP_000391 | XLOC_013430 | ENSRNOT000000083414 | 0.965054203  | 3.87E-07 |
| TUCP_000391 | XLOC_013430 | ENSRNOT000000085279 | 0.964410284  | 4.24E-07 |
| TUCP_000391 | XLOC_013430 | ENSRNOT000000008757 | 0.952470689  | 1.76E-06 |
| TUCP_000391 | XLOC_013430 | ENSRNOT00000027012  | 0.976159821  | 5.83E-08 |
| TUCP_000391 | XLOC_013430 | ENSRNOT000000052002 | 0.950231398  | 2.21E-06 |
| TUCP_000391 | XLOC_013430 | ENSRNOT00000004762  | 0.967225817  | 2.82E-07 |
| TUCP_000391 | XLOC_013430 | ENSRNOT000000081768 | 0.960113561  | 7.44E-07 |
| TUCP_000391 | XLOC_013430 | ENSRNOT00000024021  | 0.958261463  | 9.30E-07 |
| TUCP_000391 | XLOC_013430 | ENSRNOT00000045326  | 0.95731544   | 1.04E-06 |
| TUCP_000391 | XLOC_013430 | ENSRNOT000000021037 | 0.952253418  | 1.80E-06 |
| TUCP_000391 | XLOC_013430 | ENSRNOT00000022370  | 0.959339836  | 8.17E-07 |
| TUCP_000391 | XLOC_013430 | ENSRNOT00000015947  | 0.970253528  | 1.74E-07 |
| TUCP_000391 | XLOC_013430 | ENSRNOT00000028856  | 0.966590873  | 3.10E-07 |
| TUCP_000391 | XLOC_013430 | ENSRNOT000000087502 | 0.954883874  | 1.36E-06 |
| TUCP_000391 | XLOC_013430 | ENSRNOT000000065618 | 0.952933185  | 1.68E-06 |
| TUCP_000391 | XLOC_013430 | ENSRNOT00000017776  | 0.952011055  | 1.85E-06 |

|             |             |                     |              |          |
|-------------|-------------|---------------------|--------------|----------|
| TUCP_000391 | XLOC_013430 | ENSRNOT00000080608  | 0.950686858  | 2.11E-06 |
| TUCP_000391 | XLOC_013430 | ENSRNOT00000059744  | 0.971389534  | 1.44E-07 |
| TUCP_000391 | XLOC_013430 | ENSRNOT00000040476  | 0.967831888  | 2.57E-07 |
| TUCP_000391 | XLOC_013430 | ENSRNOT00000008022  | 0.969070761  | 2.12E-07 |
| TUCP_000391 | XLOC_013430 | ENSRNOT000000081297 | 0.954739428  | 1.39E-06 |
| TUCP_000391 | XLOC_013430 | ENSRNOT00000010983  | 0.950951329  | 2.06E-06 |
| TUCP_000391 | XLOC_013430 | ENSRNOT000000086893 | -0.950432103 | 2.17E-06 |
| TUCP_000391 | XLOC_013430 | ENSRNOT00000044562  | 0.958984866  | 8.53E-07 |
| TUCP_000391 | XLOC_013430 | ENSRNOT00000000013  | 0.957203995  | 1.05E-06 |
| TUCP_000391 | XLOC_013430 | ENSRNOT000000067610 | -0.953767478 | 1.54E-06 |
| TUCP_000391 | XLOC_013430 | ENSRNOT000000071917 | 0.952971822  | 1.67E-06 |
| TUCP_000391 | XLOC_013430 | ENSRNOT00000014979  | 0.960289013  | 7.28E-07 |
| TUCP_000391 | XLOC_013430 | ENSRNOT00000004864  | 0.970932372  | 1.56E-07 |
| TUCP_000391 | XLOC_013430 | ENSRNOT000000002109 | 0.977313783  | 4.56E-08 |
| TUCP_000391 | XLOC_013430 | ENSRNOT000000000181 | 0.957501663  | 1.02E-06 |
| TUCP_000391 | XLOC_013430 | ENSRNOT00000015725  | 0.950324539  | 2.19E-06 |
| TUCP_000391 | XLOC_013430 | ENSRNOT000000029833 | 0.963540975  | 4.77E-07 |
| TUCP_000391 | XLOC_013430 | ENSRNOT000000055318 | 0.951432718  | 1.96E-06 |
| TUCP_000391 | XLOC_013430 | ENSRNOT000000008817 | 0.9547698    | 1.38E-06 |
| TUCP_000391 | XLOC_013430 | ENSRNOT000000074683 | 0.962725617  | 5.32E-07 |
| TUCP_000391 | XLOC_013430 | ENSRNOT000000037665 | 0.950567273  | 2.14E-06 |
| TUCP_000391 | XLOC_013430 | ENSRNOT000000014124 | 0.95133526   | 1.98E-06 |
| TUCP_000391 | XLOC_013430 | ENSRNOT000000075714 | 0.972760228  | 1.13E-07 |
| TUCP_000391 | XLOC_013430 | ENSRNOT000000044009 | 0.955926105  | 1.22E-06 |
| TUCP_000391 | XLOC_013430 | ENSRNOT000000013321 | 0.96201739   | 5.84E-07 |
| TUCP_000391 | XLOC_013430 | ENSRNOT000000026312 | 0.959233403  | 8.28E-07 |
| TUCP_000391 | XLOC_013430 | ENSRNOT000000005604 | 0.951086046  | 2.03E-06 |
| TUCP_000391 | XLOC_013430 | ENSRNOT00000015188  | 0.950137287  | 2.23E-06 |
| TUCP_000391 | XLOC_013430 | ENSRNOT000000016519 | 0.950429749  | 2.17E-06 |
| TUCP_000391 | XLOC_013430 | ENSRNOT000000022963 | 0.956142297  | 1.19E-06 |
| TUCP_000391 | XLOC_013430 | ENSRNOT000000052422 | 0.963962647  | 4.51E-07 |
| TUCP_000391 | XLOC_013430 | ENSRNOT00000016801  | 0.950826818  | 2.08E-06 |
| TUCP_000391 | XLOC_013430 | ENSRNOT000000068381 | 0.95458545   | 1.41E-06 |
| TUCP_000391 | XLOC_013430 | ENSRNOT000000078250 | 0.960371017  | 7.20E-07 |
| TUCP_000391 | XLOC_013430 | ENSRNOT000000055442 | 0.957545485  | 1.01E-06 |
| TUCP_000391 | XLOC_013430 | ENSRNOT000000009496 | 0.950830366  | 2.08E-06 |
| TUCP_000391 | XLOC_013430 | ENSRNOT000000064588 | 0.963858899  | 4.57E-07 |
| TUCP_000392 | XLOC_013470 | ENSRNOT000000091116 | 0.960674382  | 6.93E-07 |
| TUCP_000392 | XLOC_013470 | ENSRNOT000000077186 | 0.981926099  | 1.47E-08 |
| TUCP_000392 | XLOC_013470 | ENSRNOT000000013914 | 0.958238462  | 9.33E-07 |
| TUCP_000392 | XLOC_013470 | ENSRNOT000000039607 | 0.96558905   | 3.59E-07 |
| TUCP_000392 | XLOC_013470 | ENSRNOT000000022410 | 0.963925702  | 4.53E-07 |
| TUCP_000392 | XLOC_013470 | ENSRNOT000000080174 | 0.950999192  | 2.05E-06 |
| TUCP_000392 | XLOC_013470 | ENSRNOT000000028545 | 0.959668086  | 7.85E-07 |
| TUCP_000392 | XLOC_013470 | ENSRNOT000000064671 | 0.977023575  | 4.85E-08 |
| TUCP_000392 | XLOC_013470 | ENSRNOT000000014373 | 0.958542487  | 9.00E-07 |
| TUCP_000392 | XLOC_013470 | ENSRNOT000000019104 | 0.969655712  | 1.93E-07 |
| TUCP_000392 | XLOC_013470 | ENSRNOT000000083573 | 0.967198985  | 2.83E-07 |
| TUCP_000392 | XLOC_013470 | ENSRNOT000000022502 | 0.968988333  | 2.14E-07 |
| TUCP_000392 | XLOC_013470 | ENSRNOT000000082999 | 0.957133733  | 1.06E-06 |
| TUCP_000392 | XLOC_013470 | ENSRNOT000000074420 | 0.966316993  | 3.23E-07 |



|             |             |                     |              |          |
|-------------|-------------|---------------------|--------------|----------|
| TUCP_000392 | XLOC_013470 | ENSRNOT00000015566  | -0.960841716 | 6.79E-07 |
| TUCP_000392 | XLOC_013470 | ENSRNOT00000046215  | 0.952213552  | 1.81E-06 |
| TUCP_000392 | XLOC_013470 | ENSRNOT00000082508  | 0.961496614  | 6.25E-07 |
| TUCP_000392 | XLOC_013470 | ENSRNOT00000022259  | 0.971257067  | 1.47E-07 |
| TUCP_000392 | XLOC_013470 | ENSRNOT00000015471  | 0.958702286  | 8.83E-07 |
| TUCP_000392 | XLOC_013470 | ENSRNOT00000059524  | 0.958563536  | 8.97E-07 |
| TUCP_000392 | XLOC_013470 | ENSRNOT00000041237  | 0.966697829  | 3.05E-07 |
| TUCP_000392 | XLOC_013470 | ENSRNOT00000025887  | 0.962137064  | 5.75E-07 |
| TUCP_000392 | XLOC_013470 | ENSRNOT00000012060  | -0.951397737 | 1.97E-06 |
| TUCP_000392 | XLOC_013470 | ENSRNOT00000017362  | 0.95862421   | 8.91E-07 |
| TUCP_000392 | XLOC_013470 | ENSRNOT00000005658  | 0.976453849  | 5.48E-08 |
| TUCP_000392 | XLOC_013470 | ENSRNOT00000064305  | 0.961024756  | 6.63E-07 |
| TUCP_000392 | XLOC_013470 | ENSRNOT00000087011  | 0.953379594  | 1.60E-06 |
| TUCP_000392 | XLOC_013470 | ENSRNOT00000002040  | 0.96137644   | 6.34E-07 |
| TUCP_000392 | XLOC_013470 | ENSRNOT00000030914  | 0.959319076  | 8.19E-07 |
| TUCP_000392 | XLOC_013470 | ENSRNOT00000003733  | 0.963683273  | 4.68E-07 |
| TUCP_000392 | XLOC_013470 | ENSRNOT00000083968  | 0.950676301  | 2.12E-06 |
| TUCP_000392 | XLOC_013470 | ENSRNOT00000068617  | 0.951507234  | 1.95E-06 |
| TUCP_000392 | XLOC_013470 | ENSRNOT00000074389  | 0.978067476  | 3.85E-08 |
| TUCP_000392 | XLOC_013470 | ENSRNOT00000078872  | 0.951432125  | 1.96E-06 |
| TUCP_000392 | XLOC_013470 | ENSRNOT00000025308  | 0.954758547  | 1.38E-06 |
| TUCP_000392 | XLOC_013470 | ENSRNOT00000024712  | 0.976025624  | 5.99E-08 |
| TUCP_000392 | XLOC_013470 | ENSRNOT00000066204  | 0.957403374  | 1.03E-06 |
| TUCP_000392 | XLOC_013470 | ENSRNOT00000060432  | 0.972266101  | 1.23E-07 |
| TUCP_000392 | XLOC_013470 | ENSRNOT00000071929  | 0.980016286  | 2.43E-08 |
| TUCP_000392 | XLOC_013470 | ENSRNOT00000017648  | 0.954612333  | 1.41E-06 |
| TUCP_000392 | XLOC_013470 | ENSRNOT00000072077  | 0.97405805   | 8.86E-08 |
| TUCP_000392 | XLOC_013470 | ENSRNOT00000064636  | 0.955790645  | 1.23E-06 |
| TUCP_000392 | XLOC_013470 | ENSRNOT00000027653  | 0.953462616  | 1.59E-06 |
| TUCP_000392 | XLOC_013470 | ENSRNOT00000003012  | 0.951021111  | 2.04E-06 |
| TUCP_000392 | XLOC_013470 | ENSRNOT00000076101  | 0.961614839  | 6.15E-07 |
| TUCP_000392 | XLOC_013470 | ENSRNOT00000003247  | 0.966955713  | 2.94E-07 |
| TUCP_000392 | XLOC_013470 | ENSRNOT000000031672 | 0.951782097  | 1.89E-06 |
| TUCP_000392 | XLOC_013470 | ENSRNOT00000028405  | 0.963121017  | 5.05E-07 |
| TUCP_000392 | XLOC_013470 | ENSRNOT00000073564  | 0.95993699   | 7.60E-07 |
| TUCP_000392 | XLOC_013470 | ENSRNOT00000021629  | 0.966935906  | 2.94E-07 |
| TUCP_000392 | XLOC_013470 | ENSRNOT00000025284  | 0.96422141   | 4.35E-07 |
| TUCP_000392 | XLOC_013470 | ENSRNOT00000006591  | 0.965427216  | 3.67E-07 |
| TUCP_000392 | XLOC_013470 | ENSRNOT00000013695  | 0.978045086  | 3.87E-08 |
| TUCP_000392 | XLOC_013470 | ENSRNOT00000018622  | 0.956276355  | 1.17E-06 |
| TUCP_000392 | XLOC_013470 | ENSRNOT00000066947  | 0.955319689  | 1.30E-06 |
| TUCP_000392 | XLOC_013470 | ENSRNOT00000006050  | 0.968003676  | 2.50E-07 |
| TUCP_000392 | XLOC_013470 | ENSRNOT00000022620  | -0.960668662 | 6.94E-07 |
| TUCP_000392 | XLOC_013470 | ENSRNOT00000005033  | 0.981569556  | 1.62E-08 |
| TUCP_000392 | XLOC_013470 | ENSRNOT00000005620  | 0.956014292  | 1.20E-06 |
| TUCP_000392 | XLOC_013470 | ENSRNOT00000039177  | 0.963668617  | 4.69E-07 |
| TUCP_000392 | XLOC_013470 | ENSRNOT00000035320  | 0.978334043  | 3.63E-08 |
| TUCP_000392 | XLOC_013470 | ENSRNOT00000023256  | -0.951042233 | 2.04E-06 |
| TUCP_000392 | XLOC_013470 | ENSRNOT00000030065  | 0.967397712  | 2.75E-07 |
| TUCP_000392 | XLOC_013470 | ENSRNOT00000026279  | 0.957919426  | 9.68E-07 |
| TUCP_000392 | XLOC_013470 | ENSRNOT00000023383  | 0.951008858  | 2.05E-06 |

|             |             |                     |              |          |
|-------------|-------------|---------------------|--------------|----------|
| TUCP_000392 | XLOC_013470 | ENSRNOT00000004007  | 0.959088223  | 8.43E-07 |
| TUCP_000392 | XLOC_013470 | ENSRNOT000000060444 | 0.973405298  | 1.00E-07 |
| TUCP_000392 | XLOC_013470 | ENSRNOT000000021705 | 0.981297667  | 1.75E-08 |
| TUCP_000392 | XLOC_013470 | ENSRNOT00000007824  | 0.966603957  | 3.09E-07 |
| TUCP_000392 | XLOC_013470 | ENSRNOT00000018028  | 0.960331142  | 7.24E-07 |
| TUCP_000392 | XLOC_013470 | ENSRNOT000000064723 | 0.987341672  | 2.51E-09 |
| TUCP_000392 | XLOC_013470 | ENSRNOT000000077908 | -0.952511498 | 1.76E-06 |
| TUCP_000392 | XLOC_013470 | ENSRNOT00000004999  | -0.950628105 | 2.13E-06 |
| TUCP_000392 | XLOC_013470 | ENSRNOT00000001077  | -0.95304551  | 1.66E-06 |
| TUCP_000392 | XLOC_013470 | ENSRNOT000000020030 | 0.96392944   | 4.53E-07 |
| TUCP_000392 | XLOC_013470 | ENSRNOT00000000477  | 0.954760537  | 1.38E-06 |
| TUCP_000392 | XLOC_013470 | ENSRNOT00000001227  | 0.971442008  | 1.43E-07 |
| TUCP_000392 | XLOC_013470 | ENSRNOT000000026398 | 0.96675299   | 3.03E-07 |
| TUCP_000392 | XLOC_013470 | ENSRNOT000000025510 | 0.950404854  | 2.17E-06 |
| TUCP_000392 | XLOC_013470 | ENSRNOT000000024264 | 0.953758079  | 1.54E-06 |
| TUCP_000392 | XLOC_013470 | ENSRNOT000000021145 | 0.96423025   | 4.34E-07 |
| TUCP_000392 | XLOC_013470 | ENSRNOT00000000576  | 0.958534508  | 9.00E-07 |
| TUCP_000392 | XLOC_013470 | ENSRNOT000000010783 | 0.961650435  | 6.12E-07 |
| TUCP_000392 | XLOC_013470 | ENSRNOT000000049927 | 0.950554751  | 2.14E-06 |
| TUCP_000392 | XLOC_013470 | ENSRNOT000000083578 | -0.951607372 | 1.93E-06 |
| TUCP_000392 | XLOC_013470 | ENSRNOT000000033677 | 0.954430959  | 1.43E-06 |
| TUCP_000392 | XLOC_013470 | ENSRNOT000000013764 | 0.951552643  | 1.94E-06 |
| TUCP_000392 | XLOC_013470 | ENSRNOT000000022342 | -0.951235898 | 2.00E-06 |
| TUCP_000392 | XLOC_013470 | ENSRNOT000000020702 | 0.961140439  | 6.54E-07 |
| TUCP_000392 | XLOC_013470 | ENSRNOT000000021937 | 0.950878516  | 2.07E-06 |
| TUCP_000392 | XLOC_013470 | ENSRNOT000000044486 | 0.951511817  | 1.95E-06 |
| TUCP_000392 | XLOC_013470 | ENSRNOT000000016027 | 0.969273299  | 2.05E-07 |
| TUCP_000392 | XLOC_013470 | ENSRNOT000000071540 | -0.954794997 | 1.38E-06 |
| TUCP_000392 | XLOC_013470 | ENSRNOT000000011499 | 0.956102678  | 1.19E-06 |
| TUCP_000392 | XLOC_013470 | ENSRNOT000000012175 | 0.953818636  | 1.53E-06 |
| TUCP_000392 | XLOC_013470 | ENSRNOT000000032893 | 0.958811298  | 8.71E-07 |
| TUCP_000392 | XLOC_013470 | ENSRNOT00000005432  | 0.953895412  | 1.52E-06 |
| TUCP_000392 | XLOC_013470 | ENSRNOT000000010318 | 0.954652049  | 1.40E-06 |
| TUCP_000392 | XLOC_013470 | ENSRNOT000000078349 | 0.965386679  | 3.69E-07 |
| TUCP_000392 | XLOC_013470 | ENSRNOT000000021030 | 0.954048155  | 1.49E-06 |
| TUCP_000392 | XLOC_013470 | ENSRNOT000000011654 | 0.95343037   | 1.59E-06 |
| TUCP_000392 | XLOC_013470 | ENSRNOT000000021803 | 0.959331648  | 8.18E-07 |
| TUCP_000392 | XLOC_013470 | ENSRNOT000000017269 | 0.97357406   | 9.71E-08 |
| TUCP_000392 | XLOC_013470 | ENSRNOT000000026462 | 0.958637091  | 8.89E-07 |
| TUCP_000392 | XLOC_013470 | ENSRNOT000000080418 | 0.974280747  | 8.49E-08 |
| TUCP_000392 | XLOC_013470 | ENSRNOT000000001979 | 0.970630164  | 1.64E-07 |
| TUCP_000392 | XLOC_013470 | ENSRNOT000000003715 | 0.956364029  | 1.16E-06 |
| TUCP_000392 | XLOC_013470 | ENSRNOT000000026928 | 0.963141797  | 5.04E-07 |
| TUCP_000392 | XLOC_013470 | ENSRNOT000000067391 | 0.952324358  | 1.79E-06 |
| TUCP_000392 | XLOC_013470 | ENSRNOT000000017340 | 0.962301803  | 5.63E-07 |
| TUCP_000392 | XLOC_013470 | ENSRNOT000000026920 | 0.96043479   | 7.14E-07 |
| TUCP_000392 | XLOC_013470 | ENSRNOT000000029076 | 0.959855881  | 7.68E-07 |
| TUCP_000392 | XLOC_013470 | ENSRNOT000000021134 | 0.955809352  | 1.23E-06 |
| TUCP_000392 | XLOC_013470 | ENSRNOT000000075452 | -0.957105007 | 1.06E-06 |
| TUCP_000392 | XLOC_013470 | ENSRNOT000000026726 | 0.970072609  | 1.80E-07 |
| TUCP_000392 | XLOC_013470 | ENSRNOT000000066561 | 0.954244189  | 1.46E-06 |

|             |             |                    |              |          |
|-------------|-------------|--------------------|--------------|----------|
| TUCP_000392 | XLOC_013470 | ENSRNOT00000033795 | 0.97173      | 1.36E-07 |
| TUCP_000392 | XLOC_013470 | ENSRNOT00000081682 | 0.973854045  | 9.21E-08 |
| TUCP_000392 | XLOC_013470 | ENSRNOT00000003667 | 0.967057614  | 2.89E-07 |
| TUCP_000392 | XLOC_013470 | ENSRNOT00000018646 | 0.953420438  | 1.60E-06 |
| TUCP_000392 | XLOC_013470 | ENSRNOT00000051843 | 0.954533523  | 1.42E-06 |
| TUCP_000392 | XLOC_013470 | ENSRNOT00000039850 | 0.960562223  | 7.03E-07 |
| TUCP_000392 | XLOC_013470 | ENSRNOT00000000812 | 0.954666394  | 1.40E-06 |
| TUCP_000392 | XLOC_013470 | ENSRNOT00000028074 | 0.957708214  | 9.92E-07 |
| TUCP_000392 | XLOC_013470 | ENSRNOT00000013279 | -0.971883235 | 1.32E-07 |
| TUCP_000392 | XLOC_013470 | ENSRNOT00000003787 | 0.951435415  | 1.96E-06 |
| TUCP_000392 | XLOC_013470 | ENSRNOT00000003540 | 0.964858578  | 3.98E-07 |
| TUCP_000392 | XLOC_013470 | ENSRNOT00000020892 | 0.957439355  | 1.02E-06 |
| TUCP_000392 | XLOC_013470 | ENSRNOT00000001401 | -0.970640708 | 1.64E-07 |
| TUCP_000392 | XLOC_013470 | ENSRNOT00000067739 | 0.962671374  | 5.36E-07 |
| TUCP_000392 | XLOC_013470 | ENSRNOT00000019386 | 0.964022638  | 4.47E-07 |
| TUCP_000392 | XLOC_013470 | ENSRNOT00000077220 | 0.951263028  | 1.99E-06 |
| TUCP_000392 | XLOC_013470 | ENSRNOT00000025916 | 0.962860017  | 5.23E-07 |
| TUCP_000392 | XLOC_013470 | ENSRNOT00000017469 | 0.9637179    | 4.66E-07 |
| TUCP_000392 | XLOC_013470 | ENSRNOT00000014859 | 0.970657886  | 1.63E-07 |
| TUCP_000392 | XLOC_013470 | ENSRNOT0000001360  | 0.982162024  | 1.38E-08 |
| TUCP_000392 | XLOC_013470 | ENSRNOT00000007736 | 0.950921873  | 2.06E-06 |
| TUCP_000392 | XLOC_013470 | ENSRNOT00000079698 | 0.953321378  | 1.61E-06 |
| TUCP_000392 | XLOC_013470 | ENSRNOT00000019816 | 0.96993452   | 1.84E-07 |
| TUCP_000392 | XLOC_013470 | ENSRNOT00000019172 | 0.967821607  | 2.57E-07 |
| TUCP_000392 | XLOC_013470 | ENSRNOT00000006824 | 0.967713244  | 2.62E-07 |
| TUCP_000392 | XLOC_013470 | ENSRNOT00000010893 | 0.955110599  | 1.33E-06 |
| TUCP_000392 | XLOC_013470 | ENSRNOT00000012775 | 0.962713653  | 5.33E-07 |
| TUCP_000392 | XLOC_013470 | ENSRNOT00000055957 | 0.953457416  | 1.59E-06 |
| TUCP_000392 | XLOC_013470 | ENSRNOT00000077040 | 0.959412834  | 8.10E-07 |
| TUCP_000392 | XLOC_013470 | ENSRNOT00000023664 | 0.959929754  | 7.61E-07 |
| TUCP_000392 | XLOC_013470 | ENSRNOT00000009225 | 0.95304189   | 1.66E-06 |
| TUCP_000392 | XLOC_013470 | ENSRNOT00000025086 | 0.953404659  | 1.60E-06 |
| TUCP_000392 | XLOC_013470 | ENSRNOT00000087346 | -0.963698645 | 4.67E-07 |
| TUCP_000392 | XLOC_013470 | ENSRNOT00000003992 | 0.974746798  | 7.75E-08 |
| TUCP_000392 | XLOC_013470 | ENSRNOT00000091698 | 0.950219331  | 2.21E-06 |
| TUCP_000392 | XLOC_013470 | ENSRNOT00000041116 | 0.969520002  | 1.97E-07 |
| TUCP_000392 | XLOC_013470 | ENSRNOT00000090456 | -0.965534745 | 3.61E-07 |
| TUCP_000392 | XLOC_013470 | ENSRNOT00000039291 | 0.967528076  | 2.69E-07 |
| TUCP_000392 | XLOC_013470 | ENSRNOT00000065942 | 0.962957139  | 5.16E-07 |
| TUCP_000392 | XLOC_013470 | ENSRNOT00000084313 | 0.960473006  | 7.11E-07 |
| TUCP_000392 | XLOC_013470 | ENSRNOT00000005996 | 0.952054834  | 1.84E-06 |
| TUCP_000392 | XLOC_013470 | ENSRNOT00000023641 | 0.969219843  | 2.07E-07 |
| TUCP_000392 | XLOC_013470 | ENSRNOT00000028744 | 0.981554828  | 1.63E-08 |
| TUCP_000392 | XLOC_013470 | ENSRNOT00000025824 | 0.967990951  | 2.51E-07 |
| TUCP_000392 | XLOC_013470 | ENSRNOT00000015325 | 0.959193759  | 8.32E-07 |
| TUCP_000392 | XLOC_013470 | ENSRNOT00000025067 | 0.967203098  | 2.83E-07 |
| TUCP_000392 | XLOC_013470 | ENSRNOT00000039593 | 0.951819627  | 1.89E-06 |
| TUCP_000392 | XLOC_013470 | ENSRNOT00000005170 | 0.975038526  | 7.32E-08 |
| TUCP_000392 | XLOC_013470 | ENSRNOT00000083843 | 0.962807681  | 5.27E-07 |
| TUCP_000392 | XLOC_013470 | ENSRNOT00000022676 | 0.968366876  | 2.37E-07 |
| TUCP_000392 | XLOC_013470 | ENSRNOT00000021548 | 0.96639485   | 3.19E-07 |

|             |             |                    |              |          |
|-------------|-------------|--------------------|--------------|----------|
| TUCP_000392 | XL0C_013470 | ENSRNOT00000023567 | 0.956729858  | 1.11E-06 |
| TUCP_000392 | XL0C_013470 | ENSRNOT00000017232 | 0.965274052  | 3.75E-07 |
| TUCP_000392 | XL0C_013470 | ENSRNOT00000086608 | 0.950706961  | 2.11E-06 |
| TUCP_000392 | XL0C_013470 | ENSRNOT00000019910 | 0.952220616  | 1.81E-06 |
| TUCP_000392 | XL0C_013470 | ENSRNOT00000082429 | 0.969482668  | 1.98E-07 |
| TUCP_000392 | XL0C_013470 | ENSRNOT00000070825 | 0.958577469  | 8.96E-07 |
| TUCP_000392 | XL0C_013470 | ENSRNOT00000016351 | 0.951211898  | 2.01E-06 |
| TUCP_000392 | XL0C_013470 | ENSRNOT00000034961 | 0.950589531  | 2.13E-06 |
| TUCP_000392 | XL0C_013470 | ENSRNOT00000056015 | 0.978680967  | 3.35E-08 |
| TUCP_000392 | XL0C_013470 | ENSRNOT00000027360 | 0.962175709  | 5.72E-07 |
| TUCP_000392 | XL0C_013470 | ENSRNOT00000041371 | 0.955687149  | 1.25E-06 |
| TUCP_000392 | XL0C_013470 | ENSRNOT00000013375 | 0.95127029   | 1.99E-06 |
| TUCP_000392 | XL0C_013470 | ENSRNOT00000024285 | 0.985842787  | 4.37E-09 |
| TUCP_000392 | XL0C_013470 | ENSRNOT00000041277 | 0.957120025  | 1.06E-06 |
| TUCP_000392 | XL0C_013470 | ENSRNOT00000016389 | 0.958725189  | 8.80E-07 |
| TUCP_000392 | XL0C_013470 | ENSRNOT00000014585 | 0.950956303  | 2.06E-06 |
| TUCP_000392 | XL0C_013470 | ENSRNOT00000015518 | 0.95067304   | 2.12E-06 |
| TUCP_000392 | XL0C_013470 | ENSRNOT00000028589 | 0.956416458  | 1.15E-06 |
| TUCP_000392 | XL0C_013470 | ENSRNOT00000078073 | 0.956134004  | 1.19E-06 |
| TUCP_000392 | XL0C_013470 | ENSRNOT00000007079 | 0.9503915    | 2.18E-06 |
| TUCP_000392 | XL0C_013470 | ENSRNOT00000086310 | 0.963758488  | 4.63E-07 |
| TUCP_000392 | XL0C_013470 | ENSRNOT00000061619 | 0.972018602  | 1.29E-07 |
| TUCP_000392 | XL0C_013470 | ENSRNOT00000077646 | 0.970680166  | 1.62E-07 |
| TUCP_000392 | XL0C_013470 | ENSRNOT00000025791 | 0.965301137  | 3.74E-07 |
| TUCP_000392 | XL0C_013470 | ENSRNOT00000068524 | 0.970738669  | 1.61E-07 |
| TUCP_000392 | XL0C_013470 | ENSRNOT00000028893 | 0.988546036  | 1.52E-09 |
| TUCP_000392 | XL0C_013470 | ENSRNOT00000016330 | 0.971742622  | 1.35E-07 |
| TUCP_000392 | XL0C_013470 | ENSRNOT00000004842 | 0.956293874  | 1.17E-06 |
| TUCP_000392 | XL0C_013470 | ENSRNOT00000086456 | 0.961904792  | 5.93E-07 |
| TUCP_000392 | XL0C_013470 | ENSRNOT00000021944 | -0.95286666  | 1.69E-06 |
| TUCP_000392 | XL0C_013470 | ENSRNOT00000089879 | 0.95908933   | 8.43E-07 |
| TUCP_000392 | XL0C_013470 | ENSRNOT00000000258 | 0.96298482   | 5.14E-07 |
| TUCP_000392 | XL0C_013470 | ENSRNOT00000077999 | -0.951518426 | 1.94E-06 |
| TUCP_000392 | XL0C_013470 | ENSRNOT00000080222 | 0.959375916  | 8.14E-07 |
| TUCP_000392 | XL0C_013470 | ENSRNOT00000011344 | 0.959113336  | 8.40E-07 |
| TUCP_000392 | XL0C_013470 | ENSRNOT00000009817 | 0.964142757  | 4.40E-07 |
| TUCP_000392 | XL0C_013470 | ENSRNOT00000047572 | 0.982005485  | 1.44E-08 |
| TUCP_000392 | XL0C_013470 | ENSRNOT00000039870 | 0.95204599   | 1.84E-06 |
| TUCP_000392 | XL0C_013470 | ENSRNOT00000019465 | 0.954323668  | 1.45E-06 |
| TUCP_000392 | XL0C_013470 | ENSRNOT00000026118 | 0.955917589  | 1.22E-06 |
| TUCP_000392 | XL0C_013470 | ENSRNOT00000001734 | 0.969723179  | 1.90E-07 |
| TUCP_000392 | XL0C_013470 | ENSRNOT00000033056 | 0.964728944  | 4.05E-07 |
| TUCP_000392 | XL0C_013470 | ENSRNOT00000006366 | 0.972352025  | 1.21E-07 |
| TUCP_000392 | XL0C_013470 | ENSRNOT00000088202 | 0.967789181  | 2.59E-07 |
| TUCP_000392 | XL0C_013470 | ENSRNOT00000049048 | 0.952824557  | 1.70E-06 |
| TUCP_000392 | XL0C_013470 | ENSRNOT00000012702 | 0.957457658  | 1.02E-06 |
| TUCP_000392 | XL0C_013470 | ENSRNOT00000017224 | 0.966890622  | 2.96E-07 |
| TUCP_000392 | XL0C_013470 | ENSRNOT00000001935 | 0.954327633  | 1.45E-06 |
| TUCP_000392 | XL0C_013470 | ENSRNOT00000085911 | 0.955696303  | 1.25E-06 |
| TUCP_000392 | XL0C_013470 | ENSRNOT00000089062 | -0.950201143 | 2.22E-06 |
| TUCP_000392 | XL0C_013470 | ENSRNOT00000044662 | 0.950625171  | 2.13E-06 |

|             |             |                     |              |          |
|-------------|-------------|---------------------|--------------|----------|
| TUCP_000392 | XLOC_013470 | ENSRNOT00000061916  | 0.963980047  | 4.49E-07 |
| TUCP_000392 | XLOC_013470 | ENSRNOT00000010753  | 0.957384091  | 1.03E-06 |
| TUCP_000392 | XLOC_013470 | ENSRNOT00000078161  | 0.979304984  | 2.89E-08 |
| TUCP_000392 | XLOC_013470 | ENSRNOT00000026992  | 0.95476814   | 1.38E-06 |
| TUCP_000392 | XLOC_013470 | ENSRNOT00000073834  | 0.988310736  | 1.69E-09 |
| TUCP_000392 | XLOC_013470 | ENSRNOT00000009122  | -0.962314585 | 5.62E-07 |
| TUCP_000392 | XLOC_013470 | ENSRNOT00000028807  | 0.953700937  | 1.55E-06 |
| TUCP_000392 | XLOC_013470 | ENSRNOT00000020478  | 0.967847569  | 2.56E-07 |
| TUCP_000392 | XLOC_013470 | ENSRNOT00000050617  | 0.966054123  | 3.35E-07 |
| TUCP_000392 | XLOC_013470 | ENSRNOT00000036959  | 0.977152219  | 4.72E-08 |
| TUCP_000392 | XLOC_013470 | ENSRNOT00000023763  | 0.960807817  | 6.82E-07 |
| TUCP_000392 | XLOC_013470 | ENSRNOT0000003600   | 0.959074141  | 8.44E-07 |
| TUCP_000392 | XLOC_013470 | ENSRNOT00000029021  | 0.956140524  | 1.19E-06 |
| TUCP_000392 | XLOC_013470 | ENSRNOT00000056145  | 0.970788878  | 1.59E-07 |
| TUCP_000392 | XLOC_013470 | ENSRNOT00000006443  | 0.950385583  | 2.18E-06 |
| TUCP_000392 | XLOC_013470 | ENSRNOT00000004941  | 0.979434857  | 2.80E-08 |
| TUCP_000392 | XLOC_013470 | ENSRNOT00000091596  | 0.957321259  | 1.04E-06 |
| TUCP_000392 | XLOC_013470 | ENSRNOT00000082151  | 0.953644155  | 1.56E-06 |
| TUCP_000392 | XLOC_013470 | ENSRNOT00000011572  | 0.968256551  | 2.41E-07 |
| TUCP_000392 | XLOC_013470 | ENSRNOT00000025294  | 0.983091943  | 1.06E-08 |
| TUCP_000392 | XLOC_013470 | ENSRNOT000000064290 | 0.958721259  | 8.81E-07 |
| TUCP_000392 | XLOC_013470 | ENSRNOT00000000532  | 0.965121218  | 3.83E-07 |
| TUCP_000392 | XLOC_013470 | ENSRNOT00000005486  | 0.953607473  | 1.57E-06 |
| TUCP_000392 | XLOC_013470 | ENSRNOT00000054717  | 0.956607549  | 1.13E-06 |
| TUCP_000392 | XLOC_013470 | ENSRNOT00000015218  | 0.950823325  | 2.09E-06 |
| TUCP_000392 | XLOC_013470 | ENSRNOT00000002645  | 0.951601136  | 1.93E-06 |
| TUCP_000392 | XLOC_013470 | ENSRNOT00000028434  | 0.967726606  | 2.61E-07 |
| TUCP_000392 | XLOC_013470 | ENSRNOT00000003106  | 0.958417065  | 9.13E-07 |
| TUCP_000392 | XLOC_013470 | ENSRNOT00000058111  | 0.968121791  | 2.46E-07 |
| TUCP_000392 | XLOC_013470 | ENSRNOT00000036931  | 0.957283635  | 1.04E-06 |
| TUCP_000392 | XLOC_013470 | ENSRNOT00000057739  | 0.970778829  | 1.60E-07 |
| TUCP_000392 | XLOC_013470 | ENSRNOT00000008317  | 0.960715969  | 6.90E-07 |
| TUCP_000392 | XLOC_013470 | ENSRNOT00000018674  | 0.974930621  | 7.48E-08 |
| TUCP_000392 | XLOC_013470 | ENSRNOT00000020663  | 0.965224155  | 3.78E-07 |
| TUCP_000392 | XLOC_013470 | ENSRNOT00000010674  | 0.9675049    | 2.70E-07 |
| TUCP_000392 | XLOC_013470 | ENSRNOT00000028737  | 0.955669309  | 1.25E-06 |
| TUCP_000392 | XLOC_013470 | ENSRNOT00000076300  | 0.982608193  | 1.22E-08 |
| TUCP_000392 | XLOC_013470 | ENSRNOT00000027973  | 0.956299961  | 1.17E-06 |
| TUCP_000392 | XLOC_013470 | ENSRNOT00000022065  | 0.961538099  | 6.21E-07 |
| TUCP_000392 | XLOC_013470 | ENSRNOT00000018173  | 0.955673974  | 1.25E-06 |
| TUCP_000392 | XLOC_013470 | ENSRNOT00000027753  | 0.956404482  | 1.15E-06 |
| TUCP_000392 | XLOC_013470 | ENSRNOT00000087033  | 0.954359235  | 1.44E-06 |
| TUCP_000392 | XLOC_013470 | ENSRNOT00000001404  | 0.961444689  | 6.29E-07 |
| TUCP_000392 | XLOC_013470 | ENSRNOT000000061166 | 0.963295895  | 4.93E-07 |
| TUCP_000392 | XLOC_013470 | ENSRNOT00000027759  | 0.954793668  | 1.38E-06 |
| TUCP_000392 | XLOC_013470 | ENSRNOT00000015946  | 0.965625147  | 3.57E-07 |
| TUCP_000392 | XLOC_013470 | ENSRNOT00000000083  | 0.951166478  | 2.01E-06 |
| TUCP_000392 | XLOC_013470 | ENSRNOT000000067836 | 0.968016417  | 2.50E-07 |
| TUCP_000392 | XLOC_013470 | ENSRNOT00000001234  | 0.950530429  | 2.15E-06 |
| TUCP_000392 | XLOC_013470 | ENSRNOT00000017692  | 0.950455252  | 2.16E-06 |
| TUCP_000392 | XLOC_013470 | ENSRNOT00000089545  | 0.96058196   | 7.01E-07 |

|             |             |                    |              |          |
|-------------|-------------|--------------------|--------------|----------|
| TUCP_000392 | XLOC_013470 | ENSRNOT00000058763 | 0.951987596  | 1.85E-06 |
| TUCP_000392 | XLOC_013470 | ENSRNOT00000039572 | 0.958302029  | 9.26E-07 |
| TUCP_000392 | XLOC_013470 | ENSRNOT00000012583 | 0.964733275  | 4.05E-07 |
| TUCP_000392 | XLOC_013470 | ENSRNOT00000091864 | 0.958799941  | 8.72E-07 |
| TUCP_000392 | XLOC_013470 | ENSRNOT00000010020 | 0.966384638  | 3.19E-07 |
| TUCP_000392 | XLOC_013470 | ENSRNOT00000083287 | 0.986843499  | 3.04E-09 |
| TUCP_000392 | XLOC_013470 | ENSRNOT00000005961 | 0.953473233  | 1.59E-06 |
| TUCP_000392 | XLOC_013470 | ENSRNOT00000007367 | 0.970688469  | 1.62E-07 |
| TUCP_000392 | XLOC_013470 | ENSRNOT00000025784 | 0.959577565  | 7.94E-07 |
| TUCP_000392 | XLOC_013470 | ENSRNOT00000060757 | 0.959223326  | 8.29E-07 |
| TUCP_000392 | XLOC_013470 | ENSRNOT00000025782 | 0.952664613  | 1.73E-06 |
| TUCP_000392 | XLOC_013470 | ENSRNOT00000079115 | 0.955614693  | 1.26E-06 |
| TUCP_000392 | XLOC_013470 | ENSRNOT00000001322 | 0.954082002  | 1.49E-06 |
| TUCP_000392 | XLOC_013470 | ENSRNOT00000066968 | -0.955484586 | 1.28E-06 |
| TUCP_000392 | XLOC_013470 | ENSRNOT00000002053 | 0.955641597  | 1.26E-06 |
| TUCP_000392 | XLOC_013470 | ENSRNOT00000063821 | 0.95020695   | 2.22E-06 |
| TUCP_000392 | XLOC_013470 | ENSRNOT00000037588 | 0.959266306  | 8.25E-07 |
| TUCP_000392 | XLOC_013470 | ENSRNOT00000022864 | 0.959165499  | 8.35E-07 |
| TUCP_000392 | XLOC_013470 | ENSRNOT00000013431 | 0.958680449  | 8.85E-07 |
| TUCP_000392 | XLOC_013470 | ENSRNOT00000025819 | 0.960872062  | 6.76E-07 |
| TUCP_000392 | XLOC_013470 | ENSRNOT00000005762 | 0.965700657  | 3.53E-07 |
| TUCP_000392 | XLOC_013470 | ENSRNOT00000014479 | 0.970117839  | 1.78E-07 |
| TUCP_000392 | XLOC_013470 | ENSRNOT00000041227 | 0.973492118  | 9.86E-08 |
| TUCP_000392 | XLOC_013470 | ENSRNOT00000072890 | 0.957158122  | 1.06E-06 |
| TUCP_000392 | XLOC_013470 | ENSRNOT00000011237 | 0.953633236  | 1.56E-06 |
| TUCP_000392 | XLOC_013470 | ENSRNOT00000044866 | 0.951299213  | 1.99E-06 |
| TUCP_000392 | XLOC_013470 | ENSRNOT00000016776 | 0.965840324  | 3.46E-07 |
| TUCP_000392 | XLOC_013470 | ENSRNOT00000006913 | 0.956559623  | 1.13E-06 |
| TUCP_000392 | XLOC_013470 | ENSRNOT00000045532 | 0.955815377  | 1.23E-06 |
| TUCP_000392 | XLOC_013470 | ENSRNOT00000088677 | 0.961659327  | 6.12E-07 |
| TUCP_000392 | XLOC_013470 | ENSRNOT00000022552 | 0.960536145  | 7.05E-07 |
| TUCP_000392 | XLOC_013470 | ENSRNOT00000078862 | -0.957427866 | 1.03E-06 |
| TUCP_000392 | XLOC_013470 | ENSRNOT00000000134 | 0.953073935  | 1.66E-06 |
| TUCP_000392 | XLOC_013470 | ENSRNOT00000016758 | 0.959834195  | 7.70E-07 |
| TUCP_000392 | XLOC_013470 | ENSRNOT0000001607  | -0.955124277 | 1.33E-06 |
| TUCP_000392 | XLOC_013470 | ENSRNOT00000064068 | 0.96666401   | 3.07E-07 |
| TUCP_000392 | XLOC_013470 | ENSRNOT00000036194 | 0.975905834  | 6.14E-08 |
| TUCP_000392 | XLOC_013470 | ENSRNOT00000036195 | 0.960188924  | 7.37E-07 |
| TUCP_003845 | XLOC_168480 | ENSRNOT00000061882 | -0.958514067 | 9.03E-07 |
| TUCP_003845 | XLOC_168480 | ENSRNOT00000025649 | 0.956948394  | 1.08E-06 |
| TUCP_003845 | XLOC_168480 | ENSRNOT00000073133 | 0.983234111  | 1.01E-08 |
| TUCP_003845 | XLOC_168480 | ENSRNOT00000001672 | 0.95804184   | 9.54E-07 |
| TUCP_003845 | XLOC_168480 | ENSRNOT00000072795 | 0.955874197  | 1.22E-06 |
| TUCP_003845 | XLOC_168480 | ENSRNOT00000056771 | 0.968532324  | 2.30E-07 |
| TUCP_003845 | XLOC_168480 | ENSRNOT00000077227 | 0.956564941  | 1.13E-06 |
| TUCP_002891 | XLOC_124320 | ENSRNOT00000007775 | 0.965003169  | 3.90E-07 |
| TUCP_003358 | XLOC_145356 | ENSRNOT00000004676 | 0.951015556  | 2.05E-06 |
| TUCP_003358 | XLOC_145356 | ENSRNOT00000035808 | 0.955259745  | 1.31E-06 |
| TUCP_002669 | XLOC_113213 | ENSRNOT00000077972 | 0.969758249  | 1.89E-07 |
| TUCP_002669 | XLOC_113213 | ENSRNOT00000076757 | 0.966875391  | 2.97E-07 |
| TUCP_002669 | XLOC_113213 | ENSRNOT00000048373 | 0.950428899  | 2.17E-06 |

|             |             |                    |              |          |
|-------------|-------------|--------------------|--------------|----------|
| TUCP_002669 | XLOC_113213 | ENSRNOT00000028877 | 0.966916587  | 2.95E-07 |
| TUCP_002669 | XLOC_113213 | ENSRNOT00000052130 | 0.975756742  | 6.33E-08 |
| TUCP_002669 | XLOC_113213 | ENSRNOT00000093748 | 0.952889473  | 1.69E-06 |
| TUCP_002669 | XLOC_113213 | ENSRNOT00000061516 | 0.95175824   | 1.90E-06 |
| TUCP_002669 | XLOC_113213 | ENSRNOT00000077764 | 0.975774713  | 6.31E-08 |
| TUCP_002669 | XLOC_113213 | ENSRNOT00000085479 | 0.954268117  | 1.46E-06 |
| TUCP_002669 | XLOC_113213 | ENSRNOT00000085310 | 0.981102876  | 1.84E-08 |
| TUCP_002669 | XLOC_113213 | ENSRNOT00000078020 | 0.964343846  | 4.28E-07 |
| TUCP_002669 | XLOC_113213 | ENSRNOT00000083034 | 0.953266337  | 1.62E-06 |
| TUCP_000398 | XLOC_013507 | ENSRNOT00000093001 | 0.991252385  | 3.98E-10 |
| TUCP_000398 | XLOC_013507 | ENSRNOT00000029757 | 0.968361005  | 2.37E-07 |
| TUCP_000099 | XLOC_002610 | ENSRNOT00000019246 | -0.979196598 | 2.96E-08 |
| TUCP_000098 | XLOC_002609 | ENSRNOT00000077186 | 0.95713083   | 1.06E-06 |
| TUCP_000098 | XLOC_002609 | ENSRNOT00000039551 | 0.964414013  | 4.23E-07 |
| TUCP_000098 | XLOC_002609 | ENSRNOT00000019848 | 0.95738299   | 1.03E-06 |
| TUCP_000098 | XLOC_002609 | ENSRNOT00000077451 | 0.957139057  | 1.06E-06 |
| TUCP_000098 | XLOC_002609 | ENSRNOT00000013116 | 0.963536287  | 4.78E-07 |
| TUCP_000098 | XLOC_002609 | ENSRNOT00000009565 | 0.958187097  | 9.38E-07 |
| TUCP_000098 | XLOC_002609 | ENSRNOT00000074261 | 0.956796844  | 1.10E-06 |
| TUCP_000098 | XLOC_002609 | ENSRNOT00000065942 | 0.972300043  | 1.23E-07 |
| TUCP_000098 | XLOC_002609 | ENSRNOT00000010127 | -0.953438804 | 1.59E-06 |
| TUCP_000098 | XLOC_002609 | ENSRNOT00000064305 | 0.952267927  | 1.80E-06 |
| TUCP_000098 | XLOC_002609 | ENSRNOT00000006913 | 0.972040745  | 1.28E-07 |
| TUCP_000098 | XLOC_002609 | ENSRNOT00000030914 | 0.952050474  | 1.84E-06 |
| TUCP_000098 | XLOC_002609 | ENSRNOT00000086310 | 0.951665406  | 1.92E-06 |
| TUCP_000098 | XLOC_002609 | ENSRNOT00000081786 | 0.956862069  | 1.09E-06 |
| TUCP_000098 | XLOC_002609 | ENSRNOT00000003247 | 0.954898031  | 1.36E-06 |
| TUCP_000098 | XLOC_002609 | ENSRNOT00000009963 | -0.969220239 | 2.07E-07 |
| TUCP_000098 | XLOC_002609 | ENSRNOT00000014479 | 0.96279819   | 5.27E-07 |
| TUCP_000098 | XLOC_002609 | ENSRNOT00000000052 | 0.955983259  | 1.21E-06 |
| TUCP_000098 | XLOC_002609 | ENSRNOT00000017271 | -0.961020743 | 6.64E-07 |
| TUCP_000098 | XLOC_002609 | ENSRNOT00000035320 | 0.951263173  | 1.99E-06 |
| TUCP_000098 | XLOC_002609 | ENSRNOT00000030065 | 0.952689299  | 1.72E-06 |
| TUCP_000098 | XLOC_002609 | ENSRNOT00000083573 | 0.956861761  | 1.09E-06 |
| TUCP_000098 | XLOC_002609 | ENSRNOT00000089545 | 0.95488289   | 1.36E-06 |
| TUCP_000098 | XLOC_002609 | ENSRNOT00000037681 | 0.961129161  | 6.55E-07 |
| TUCP_000098 | XLOC_002609 | ENSRNOT00000017469 | 0.962830181  | 5.25E-07 |
| TUCP_000098 | XLOC_002609 | ENSRNOT00000023962 | 0.98001051   | 2.43E-08 |
| TUCP_000098 | XLOC_002609 | ENSRNOT00000091448 | 0.953674735  | 1.55E-06 |
| TUCP_000098 | XLOC_002609 | ENSRNOT00000046807 | 0.968817479  | 2.20E-07 |
| TUCP_000098 | XLOC_002609 | ENSRNOT00000006443 | 0.961472107  | 6.27E-07 |
| TUCP_000098 | XLOC_002609 | ENSRNOT00000003551 | 0.954369627  | 1.44E-06 |
| TUCP_000098 | XLOC_002609 | ENSRNOT00000080522 | 0.961872639  | 5.95E-07 |
| TUCP_000098 | XLOC_002609 | ENSRNOT00000072762 | 0.95386031   | 1.52E-06 |
| TUCP_000098 | XLOC_002609 | ENSRNOT00000030007 | 0.958121102  | 9.46E-07 |
| TUCP_000098 | XLOC_002609 | ENSRNOT00000083287 | 0.955296552  | 1.30E-06 |
| TUCP_000098 | XLOC_002609 | ENSRNOT00000082686 | 0.95125921   | 2.00E-06 |
| TUCP_000098 | XLOC_002609 | ENSRNOT00000017269 | 0.959472909  | 8.04E-07 |
| TUCP_000098 | XLOC_002609 | ENSRNOT00000001979 | 0.957609572  | 1.00E-06 |
| TUCP_000098 | XLOC_002609 | ENSRNOT00000083968 | 0.950608298  | 2.13E-06 |
| TUCP_000098 | XLOC_002609 | ENSRNOT00000092945 | 0.950475311  | 2.16E-06 |

|             |             |                     |              |          |
|-------------|-------------|---------------------|--------------|----------|
| TUCP_000098 | XLOC_002609 | ENSRNOT00000083967  | -0.950642994 | 2.12E-06 |
| TUCP_000098 | XLOC_002609 | ENSRNOT00000083188  | 0.950842831  | 2.08E-06 |
| TUCP_000098 | XLOC_002609 | ENSRNOT00000081682  | 0.969976024  | 1.83E-07 |
| TUCP_000098 | XLOC_002609 | ENSRNOT00000051843  | 0.95976064   | 7.77E-07 |
| TUCP_000098 | XLOC_002609 | ENSRNOT00000001404  | 0.953301838  | 1.62E-06 |
| TUCP_000098 | XLOC_002609 | ENSRNOT00000020892  | 0.968897375  | 2.18E-07 |
| TUCP_000098 | XLOC_002609 | ENSRNOT00000001401  | -0.967100343 | 2.87E-07 |
| TUCP_000098 | XLOC_002609 | ENSRNOT00000060098  | 0.962340018  | 5.60E-07 |
| TUCP_000098 | XLOC_002609 | ENSRNOT00000001366  | 0.965413216  | 3.68E-07 |
| TUCP_000098 | XLOC_002609 | ENSRNOT00000016327  | 0.95156587   | 1.93E-06 |
| TUCP_000098 | XLOC_002609 | ENSRNOT00000076230  | -0.961357602 | 6.36E-07 |
| TUCP_000098 | XLOC_002609 | ENSRNOT00000021437  | 0.953352925  | 1.61E-06 |
| TUCP_000098 | XLOC_002609 | ENSRNOT00000083110  | 0.968843203  | 2.19E-07 |
| TUCP_000098 | XLOC_002609 | ENSRNOT00000002313  | 0.965216146  | 3.78E-07 |
| TUCP_000098 | XLOC_002609 | ENSRNOT00000016637  | 0.956034103  | 1.20E-06 |
| TUCP_000098 | XLOC_002609 | ENSRNOT00000018328  | 0.958100063  | 9.48E-07 |
| TUCP_000098 | XLOC_002609 | ENSRNOT00000090456  | -0.955275711 | 1.31E-06 |
| TUCP_000098 | XLOC_002609 | ENSRNOT00000010683  | 0.952143208  | 1.82E-06 |
| TUCP_000098 | XLOC_002609 | ENSRNOT00000009726  | 0.958302     | 9.26E-07 |
| TUCP_000098 | XLOC_002609 | ENSRNOT00000071929  | 0.954336197  | 1.45E-06 |
| TUCP_000098 | XLOC_002609 | ENSRNOT00000002465  | -0.956910832 | 1.09E-06 |
| TUCP_000098 | XLOC_002609 | ENSRNOT00000067739  | 0.953857888  | 1.52E-06 |
| TUCP_000098 | XLOC_002609 | ENSRNOT00000079677  | 0.967439236  | 2.73E-07 |
| TUCP_000098 | XLOC_002609 | ENSRNOT00000003992  | 0.957383548  | 1.03E-06 |
| TUCP_000098 | XLOC_002609 | ENSRNOT00000050511  | -0.956049805 | 1.20E-06 |
| TUCP_000098 | XLOC_002609 | ENSRNOT000000031261 | -0.967921095 | 2.54E-07 |
| TUCP_000098 | XLOC_002609 | ENSRNOT00000067836  | 0.95906573   | 8.45E-07 |
| TUCP_000098 | XLOC_002609 | ENSRNOT00000019816  | 0.96139007   | 6.33E-07 |
| TUCP_000098 | XLOC_002609 | ENSRNOT00000006308  | 0.950645019  | 2.12E-06 |
| TUCP_000098 | XLOC_002609 | ENSRNOT00000071482  | 0.950176246  | 2.22E-06 |
| TUCP_000098 | XLOC_002609 | ENSRNOT00000014585  | 0.956698526  | 1.11E-06 |
| TUCP_000098 | XLOC_002609 | ENSRNOT00000064068  | 0.964851378  | 3.98E-07 |
| TUCP_000098 | XLOC_002609 | ENSRNOT00000025222  | 0.951064873  | 2.04E-06 |
| TUCP_000098 | XLOC_002609 | ENSRNOT00000023067  | 0.963338614  | 4.90E-07 |
| TUCP_000098 | XLOC_002609 | ENSRNOT00000056015  | 0.957828992  | 9.78E-07 |
| TUCP_000098 | XLOC_002609 | ENSRNOT00000010375  | 0.963664358  | 4.69E-07 |
| TUCP_000098 | XLOC_002609 | ENSRNOT00000068528  | 0.964760218  | 4.03E-07 |
| TUCP_000098 | XLOC_002609 | ENSRNOT00000039000  | 0.971896939  | 1.32E-07 |
| TUCP_000098 | XLOC_002609 | ENSRNOT00000009238  | 0.957497354  | 1.02E-06 |
| TUCP_000098 | XLOC_002609 | ENSRNOT00000034401  | 0.969450425  | 1.99E-07 |
| TUCP_000098 | XLOC_002609 | ENSRNOT00000000527  | 0.953928238  | 1.51E-06 |
| TUCP_000098 | XLOC_002609 | ENSRNOT00000080222  | 0.952996761  | 1.67E-06 |
| TUCP_000098 | XLOC_002609 | ENSRNOT00000093385  | -0.964071214 | 4.44E-07 |
| TUCP_000098 | XLOC_002609 | ENSRNOT00000017224  | 0.950111598  | 2.24E-06 |
| TUCP_000098 | XLOC_002609 | ENSRNOT00000085911  | 0.973176773  | 1.05E-07 |
| TUCP_000098 | XLOC_002609 | ENSRNOT00000044662  | 0.957688992  | 9.95E-07 |
| TUCP_000098 | XLOC_002609 | ENSRNOT0000002072   | -0.955539452 | 1.27E-06 |
| TUCP_000098 | XLOC_002609 | ENSRNOT00000078161  | 0.957970368  | 9.62E-07 |
| TUCP_000098 | XLOC_002609 | ENSRNOT00000064723  | 0.955068704  | 1.34E-06 |
| TUCP_000098 | XLOC_002609 | ENSRNOT00000077080  | 0.953288753  | 1.62E-06 |
| TUCP_000098 | XLOC_002609 | ENSRNOT00000009696  | -0.951969358 | 1.86E-06 |



|             |             |                     |              |          |
|-------------|-------------|---------------------|--------------|----------|
| TUCP_000098 | XLOC_002609 | ENSRNOT00000086456  | 0.958676003  | 8.85E-07 |
| TUCP_000098 | XLOC_002609 | ENSRNOT00000056145  | 0.96385322   | 4.57E-07 |
| TUCP_000098 | XLOC_002609 | ENSRNOT00000021061  | 0.95068225   | 2.11E-06 |
| TUCP_000098 | XLOC_002609 | ENSRNOT00000011572  | 0.951232414  | 2.00E-06 |
| TUCP_000098 | XLOC_002609 | ENSRNOT00000000155  | -0.956574404 | 1.13E-06 |
| TUCP_000098 | XLOC_002609 | ENSRNOT00000067741  | 0.965805142  | 3.48E-07 |
| TUCP_000098 | XLOC_002609 | ENSRNOT00000022389  | 0.97444197   | 8.23E-08 |
| TUCP_000098 | XLOC_002609 | ENSRNOT00000064849  | 0.960707715  | 6.90E-07 |
| TUCP_000098 | XLOC_002609 | ENSRNOT00000058111  | 0.956724829  | 1.11E-06 |
| TUCP_000098 | XLOC_002609 | ENSRNOT00000011869  | 0.964790725  | 4.02E-07 |
| TUCP_000098 | XLOC_002609 | ENSRNOT00000018849  | 0.958972152  | 8.55E-07 |
| TUCP_000098 | XLOC_002609 | ENSRNOT00000017190  | -0.962908153 | 5.20E-07 |
| TUCP_000098 | XLOC_002609 | ENSRNOT00000009994  | 0.954510053  | 1.42E-06 |
| TUCP_000098 | XLOC_002609 | ENSRNOT00000018173  | 0.968398427  | 2.35E-07 |
| TUCP_000098 | XLOC_002609 | ENSRNOT00000016265  | 0.971140073  | 1.50E-07 |
| TUCP_000098 | XLOC_002609 | ENSRNOT00000080928  | -0.950695059 | 2.11E-06 |
| TUCP_000098 | XLOC_002609 | ENSRNOT00000077646  | 0.954741054  | 1.39E-06 |
| TUCP_000098 | XLOC_002609 | ENSRNOT00000015946  | 0.957480215  | 1.02E-06 |
| TUCP_000098 | XLOC_002609 | ENSRNOT00000079304  | 0.955877873  | 1.22E-06 |
| TUCP_000098 | XLOC_002609 | ENSRNOT00000039572  | 0.95858888   | 8.95E-07 |
| TUCP_000098 | XLOC_002609 | ENSRNOT00000007044  | 0.955225832  | 1.31E-06 |
| TUCP_000098 | XLOC_002609 | ENSRNOT00000025784  | 0.971668791  | 1.37E-07 |
| TUCP_000098 | XLOC_002609 | ENSRNOT00000019172  | 0.968730647  | 2.23E-07 |
| TUCP_000098 | XLOC_002609 | ENSRNOT00000020994  | 0.95581922   | 1.23E-06 |
| TUCP_000098 | XLOC_002609 | ENSRNOT00000017340  | 0.964380432  | 4.25E-07 |
| TUCP_000098 | XLOC_002609 | ENSRNOT00000014317  | 0.954384482  | 1.44E-06 |
| TUCP_000098 | XLOC_002609 | ENSRNOT00000016776  | 0.963120598  | 5.05E-07 |
| TUCP_000098 | XLOC_002609 | ENSRNOT00000079414  | 0.966329188  | 3.22E-07 |
| TUCP_000098 | XLOC_002609 | ENSRNOT00000004770  | 0.976933871  | 4.95E-08 |
| TUCP_000098 | XLOC_002609 | ENSRNOT000000031935 | 0.957016383  | 1.07E-06 |
| TUCP_001982 | XLOC_080301 | ENSRNOT00000025981  | 0.958413961  | 9.13E-07 |
| TUCP_001982 | XLOC_080301 | ENSRNOT00000010992  | 0.954506184  | 1.42E-06 |
| TUCP_001982 | XLOC_080301 | ENSRNOT00000022646  | 0.952946748  | 1.68E-06 |
| TUCP_001982 | XLOC_080301 | ENSRNOT00000068405  | 0.974420054  | 8.26E-08 |
| TUCP_001982 | XLOC_080301 | ENSRNOT00000083215  | 0.96608516   | 3.34E-07 |
| TUCP_001982 | XLOC_080301 | ENSRNOT00000076669  | 0.951149685  | 2.02E-06 |
| TUCP_001982 | XLOC_080301 | ENSRNOT00000067761  | 0.968243461  | 2.41E-07 |
| TUCP_001982 | XLOC_080301 | ENSRNOT00000013661  | 0.951951706  | 1.86E-06 |
| TUCP_001982 | XLOC_080301 | ENSRNOT00000039842  | 0.956965886  | 1.08E-06 |
| TUCP_001982 | XLOC_080301 | ENSRNOT00000055187  | 0.968648518  | 2.26E-07 |
| TUCP_001982 | XLOC_080301 | ENSRNOT00000005684  | 0.963049881  | 5.10E-07 |
| TUCP_001982 | XLOC_080301 | ENSRNOT00000032199  | 0.961182385  | 6.50E-07 |
| TUCP_001982 | XLOC_080301 | ENSRNOT00000015203  | 0.950102478  | 2.24E-06 |
| TUCP_001982 | XLOC_080301 | ENSRNOT00000078500  | 0.961824746  | 5.99E-07 |
| TUCP_001982 | XLOC_080301 | ENSRNOT00000059458  | 0.954333969  | 1.45E-06 |
| TUCP_001982 | XLOC_080301 | ENSRNOT00000031230  | 0.953040468  | 1.66E-06 |
| TUCP_001982 | XLOC_080301 | ENSRNOT00000004508  | 0.969069405  | 2.12E-07 |
| TUCP_001982 | XLOC_080301 | ENSRNOT00000052288  | 0.958442828  | 9.10E-07 |
| TUCP_001982 | XLOC_080301 | ENSRNOT00000082100  | 0.958018623  | 9.57E-07 |
| TUCP_001982 | XLOC_080301 | ENSRNOT00000009342  | 0.951833156  | 1.88E-06 |
| TUCP_001982 | XLOC_080301 | ENSRNOT00000021116  | 0.970940395  | 1.55E-07 |

|             |             |                    |              |          |
|-------------|-------------|--------------------|--------------|----------|
| TUCP_001982 | XLOC_080301 | ENSRNOT00000064900 | 0.951492207  | 1.95E-06 |
| TUCP_001982 | XLOC_080301 | ENSRNOT00000076729 | 0.957092406  | 1.07E-06 |
| TUCP_001982 | XLOC_080301 | ENSRNOT00000017948 | 0.958099857  | 9.48E-07 |
| TUCP_001982 | XLOC_080301 | ENSRNOT00000058852 | -0.958302333 | 9.26E-07 |
| TUCP_001982 | XLOC_080301 | ENSRNOT00000085596 | 0.953442412  | 1.59E-06 |
| TUCP_001982 | XLOC_080301 | ENSRNOT00000044896 | 0.958001235  | 9.59E-07 |
| TUCP_001982 | XLOC_080301 | ENSRNOT00000015076 | 0.960142096  | 7.41E-07 |
| TUCP_001982 | XLOC_080301 | ENSRNOT00000022800 | 0.981781563  | 1.53E-08 |
| TUCP_001982 | XLOC_080301 | ENSRNOT00000015073 | 0.955650861  | 1.25E-06 |
| TUCP_001982 | XLOC_080301 | ENSRNOT00000084002 | 0.960860736  | 6.77E-07 |
| TUCP_001982 | XLOC_080301 | ENSRNOT00000004412 | 0.955649054  | 1.25E-06 |
| TUCP_001982 | XLOC_080301 | ENSRNOT00000027828 | 0.965311218  | 3.73E-07 |
| TUCP_001982 | XLOC_080301 | ENSRNOT00000049538 | 0.959878684  | 7.65E-07 |
| TUCP_001982 | XLOC_080301 | ENSRNOT00000004359 | 0.951313665  | 1.98E-06 |
| TUCP_001982 | XLOC_080301 | ENSRNOT00000034704 | 0.961442721  | 6.29E-07 |
| TUCP_001982 | XLOC_080301 | ENSRNOT00000009129 | 0.953772604  | 1.54E-06 |
| TUCP_001982 | XLOC_080301 | ENSRNOT00000028155 | 0.971213081  | 1.48E-07 |
| TUCP_001982 | XLOC_080301 | ENSRNOT00000027964 | 0.953158769  | 1.64E-06 |
| TUCP_001982 | XLOC_080301 | ENSRNOT00000080465 | 0.956025257  | 1.20E-06 |
| TUCP_001982 | XLOC_080301 | ENSRNOT00000082691 | 0.964263669  | 4.32E-07 |
| TUCP_001982 | XLOC_080301 | ENSRNOT00000024420 | 0.972615396  | 1.16E-07 |
| TUCP_001982 | XLOC_080301 | ENSRNOT00000035989 | 0.95339382   | 1.60E-06 |
| TUCP_001982 | XLOC_080301 | ENSRNOT00000021592 | 0.95173462   | 1.90E-06 |
| TUCP_001982 | XLOC_080301 | ENSRNOT00000010242 | 0.95221783   | 1.81E-06 |
| TUCP_001982 | XLOC_080301 | ENSRNOT00000028842 | 0.964848361  | 3.98E-07 |
| TUCP_001982 | XLOC_080301 | ENSRNOT00000057313 | 0.951777263  | 1.89E-06 |
| TUCP_001982 | XLOC_080301 | ENSRNOT00000006800 | 0.954327214  | 1.45E-06 |
| TUCP_001982 | XLOC_080301 | ENSRNOT00000076453 | 0.951074628  | 2.03E-06 |
| TUCP_001982 | XLOC_080301 | ENSRNOT00000017629 | 0.960209942  | 7.35E-07 |
| TUCP_001982 | XLOC_080301 | ENSRNOT00000023645 | 0.951458705  | 1.96E-06 |
| TUCP_000092 | XLOC_002391 | ENSRNOT00000059326 | 0.955004661  | 1.35E-06 |
| TUCP_000092 | XLOC_002391 | ENSRNOT00000072724 | 0.951800402  | 1.89E-06 |
| TUCP_000092 | XLOC_002391 | ENSRNOT00000091652 | 0.953999772  | 1.50E-06 |
| TUCP_000092 | XLOC_002391 | ENSRNOT00000064261 | 0.950989112  | 2.05E-06 |
| TUCP_000092 | XLOC_002391 | ENSRNOT00000047921 | 0.951800402  | 1.89E-06 |
| TUCP_000092 | XLOC_002391 | ENSRNOT00000036564 | 0.982987278  | 1.09E-08 |
| TUCP_000092 | XLOC_002391 | ENSRNOT00000080865 | 0.951800402  | 1.89E-06 |
| TUCP_000092 | XLOC_002391 | ENSRNOT00000073534 | 0.954235916  | 1.46E-06 |
| TUCP_000092 | XLOC_002391 | ENSRNOT00000012161 | 0.968992515  | 2.14E-07 |
| TUCP_000092 | XLOC_002391 | ENSRNOT00000083977 | 0.951800402  | 1.89E-06 |
| TUCP_000092 | XLOC_002391 | ENSRNOT00000046744 | 0.951800402  | 1.89E-06 |
| TUCP_000092 | XLOC_002391 | ENSRNOT00000092933 | 0.951800402  | 1.89E-06 |
| TUCP_000092 | XLOC_002391 | ENSRNOT00000084375 | 0.951800402  | 1.89E-06 |
| TUCP_000092 | XLOC_002391 | ENSRNOT00000076429 | 0.951800402  | 1.89E-06 |
| TUCP_000092 | XLOC_002391 | ENSRNOT00000086554 | 0.951800402  | 1.89E-06 |
| TUCP_000092 | XLOC_002391 | ENSRNOT00000084667 | 0.954211736  | 1.47E-06 |
| TUCP_000092 | XLOC_002391 | ENSRNOT00000087758 | 0.959756906  | 7.77E-07 |
| TUCP_000092 | XLOC_002391 | ENSRNOT00000041281 | 0.951385386  | 1.97E-06 |
| TUCP_000092 | XLOC_002391 | ENSRNOT00000055412 | 0.951800402  | 1.89E-06 |
| TUCP_000092 | XLOC_002391 | ENSRNOT00000093019 | 0.951800402  | 1.89E-06 |
| TUCP_000091 | XLOC_002246 | ENSRNOT00000084090 | 0.952576722  | 1.74E-06 |

|             |             |                    |             |          |
|-------------|-------------|--------------------|-------------|----------|
| TUCP_000090 | XL0C_002152 | ENSRNOT00000024186 | 0.984070366 | 7.87E-09 |
| TUCP_000090 | XL0C_002152 | ENSRNOT00000074753 | 0.989880072 | 8.22E-10 |
| TUCP_000090 | XL0C_002152 | ENSRNOT00000004876 | 0.964391071 | 4.25E-07 |
| TUCP_000090 | XL0C_002152 | ENSRNOT00000041904 | 0.992835167 | 1.47E-10 |
| TUCP_000090 | XL0C_002152 | ENSRNOT00000083487 | 0.985623736 | 4.72E-09 |
| TUCP_000090 | XL0C_002152 | ENSRNOT00000077990 | 0.992835167 | 1.47E-10 |
| TUCP_000090 | XL0C_002152 | ENSRNOT00000038826 | 0.992337821 | 2.05E-10 |
| TUCP_000090 | XL0C_002152 | ENSRNOT00000037094 | 0.954056761 | 1.49E-06 |
| TUCP_000090 | XL0C_002152 | ENSRNOT00000046842 | 0.96513482  | 3.83E-07 |
| TUCP_000090 | XL0C_002152 | ENSRNOT00000037169 | 0.972546821 | 1.17E-07 |
| TUCP_000090 | XL0C_002152 | ENSRNOT00000021243 | 0.981296474 | 1.75E-08 |
| TUCP_000090 | XL0C_002152 | ENSRNOT00000060250 | 0.992599223 | 1.73E-10 |
| TUCP_000090 | XL0C_002152 | ENSRNOT00000091934 | 0.992835167 | 1.47E-10 |
| TUCP_000090 | XL0C_002152 | ENSRNOT00000086027 | 0.961937613 | 5.90E-07 |
| TUCP_000090 | XL0C_002152 | ENSRNOT00000046585 | 0.996106458 | 7.00E-12 |
| TUCP_000090 | XL0C_002152 | ENSRNOT00000089929 | 0.992835167 | 1.47E-10 |
| TUCP_000090 | XL0C_002152 | ENSRNOT00000080794 | 0.979252632 | 2.92E-08 |
| TUCP_000090 | XL0C_002152 | ENSRNOT00000014456 | 0.984479225 | 6.91E-09 |
| TUCP_000090 | XL0C_002152 | ENSRNOT00000031205 | 0.996414797 | 4.64E-12 |
| TUCP_000090 | XL0C_002152 | ENSRNOT00000044145 | 0.992835167 | 1.47E-10 |
| TUCP_000090 | XL0C_002152 | ENSRNOT00000088381 | 0.99840347  | 8.15E-14 |
| TUCP_000090 | XL0C_002152 | ENSRNOT00000011743 | 0.978624614 | 3.39E-08 |
| TUCP_000090 | XL0C_002152 | ENSRNOT00000034907 | 0.994879668 | 2.75E-11 |
| TUCP_000090 | XL0C_002152 | ENSRNOT00000088624 | 0.992835167 | 1.47E-10 |
| TUCP_000090 | XL0C_002152 | ENSRNOT00000085659 | 0.982318064 | 1.32E-08 |
| TUCP_000090 | XL0C_002152 | ENSRNOT00000015866 | 0.995659894 | 1.20E-11 |
| TUCP_000090 | XL0C_002152 | ENSRNOT00000078633 | 0.992835167 | 1.47E-10 |
| TUCP_000090 | XL0C_002152 | ENSRNOT00000093230 | 0.968390268 | 2.36E-07 |
| TUCP_000090 | XL0C_002152 | ENSRNOT00000051835 | 0.992835167 | 1.47E-10 |
| TUCP_000090 | XL0C_002152 | ENSRNOT00000009825 | 0.960998504 | 6.66E-07 |
| TUCP_000090 | XL0C_002152 | ENSRNOT00000079087 | 0.992835167 | 1.47E-10 |
| TUCP_000090 | XL0C_002152 | ENSRNOT00000037206 | 0.992835167 | 1.47E-10 |
| TUCP_000090 | XL0C_002152 | ENSRNOT00000083261 | 0.963071421 | 5.08E-07 |
| TUCP_000090 | XL0C_002152 | ENSRNOT00000011342 | 0.952977216 | 1.67E-06 |
| TUCP_000090 | XL0C_002152 | ENSRNOT00000080590 | 0.992427445 | 1.94E-10 |
| TUCP_000090 | XL0C_002152 | ENSRNOT00000081235 | 0.955370866 | 1.29E-06 |
| TUCP_000090 | XL0C_002152 | ENSRNOT00000027552 | 0.992237411 | 2.19E-10 |
| TUCP_000090 | XL0C_002152 | ENSRNOT00000077014 | 0.992921247 | 1.38E-10 |
| TUCP_000090 | XL0C_002152 | ENSRNOT00000080453 | 0.992778042 | 1.53E-10 |
| TUCP_000090 | XL0C_002152 | ENSRNOT00000089057 | 0.964189884 | 4.37E-07 |
| TUCP_000090 | XL0C_002152 | ENSRNOT00000066839 | 0.981362037 | 1.72E-08 |
| TUCP_000090 | XL0C_002152 | ENSRNOT00000061284 | 0.953475742 | 1.59E-06 |
| TUCP_000090 | XL0C_002152 | ENSRNOT00000013423 | 0.973252416 | 1.03E-07 |
| TUCP_000090 | XL0C_002152 | ENSRNOT00000071884 | 0.967569696 | 2.68E-07 |
| TUCP_000090 | XL0C_002152 | ENSRNOT00000004128 | 0.950802644 | 2.09E-06 |
| TUCP_000090 | XL0C_002152 | ENSRNOT00000057729 | 0.991494871 | 3.46E-10 |
| TUCP_000090 | XL0C_002152 | ENSRNOT00000078663 | 0.977228711 | 4.64E-08 |
| TUCP_000090 | XL0C_002152 | ENSRNOT00000064250 | 0.976667896 | 5.24E-08 |
| TUCP_000090 | XL0C_002152 | ENSRNOT00000021608 | 0.958818814 | 8.70E-07 |
| TUCP_000090 | XL0C_002152 | ENSRNOT00000029634 | 0.985028261 | 5.78E-09 |
| TUCP_000090 | XL0C_002152 | ENSRNOT00000093579 | 0.970127704 | 1.78E-07 |

|             |             |                    |             |          |
|-------------|-------------|--------------------|-------------|----------|
| TUCP_000090 | XLOC_002152 | ENSRNOT00000065460 | 0.992835167 | 1.47E-10 |
| TUCP_000090 | XLOC_002152 | ENSRNOT00000003817 | 0.990599732 | 5.69E-10 |
| TUCP_000090 | XLOC_002152 | ENSRNOT00000016713 | 0.992835167 | 1.47E-10 |
| TUCP_000090 | XLOC_002152 | ENSRNOT00000079260 | 0.992946441 | 1.36E-10 |
| TUCP_000090 | XLOC_002152 | ENSRNOT00000039294 | 0.992835167 | 1.47E-10 |
| TUCP_000090 | XLOC_002152 | ENSRNOT00000024337 | 0.962995848 | 5.13E-07 |
| TUCP_000466 | XLOC_015872 | ENSRNOT00000007790 | 0.979048213 | 3.07E-08 |
| TUCP_000466 | XLOC_015872 | ENSRNOT00000000552 | 0.954156188 | 1.48E-06 |
| TUCP_000466 | XLOC_015872 | ENSRNOT00000063875 | 0.951335734 | 1.98E-06 |
| TUCP_000466 | XLOC_015872 | ENSRNOT00000017232 | 0.962315121 | 5.62E-07 |
| TUCP_000466 | XLOC_015872 | ENSRNOT00000070825 | 0.954170157 | 1.47E-06 |
| TUCP_000466 | XLOC_015872 | ENSRNOT00000027973 | 0.95735778  | 1.03E-06 |
| TUCP_000466 | XLOC_015872 | ENSRNOT00000064290 | 0.95514114  | 1.33E-06 |
| TUCP_000466 | XLOC_015872 | ENSRNOT00000054931 | 0.9652984   | 3.74E-07 |
| TUCP_000466 | XLOC_015872 | ENSRNOT00000048298 | 0.985613554 | 4.74E-09 |
| TUCP_000466 | XLOC_015872 | ENSRNOT00000023712 | 0.953525154 | 1.58E-06 |
| TUCP_000466 | XLOC_015872 | ENSRNOT00000015680 | 0.959596937 | 7.92E-07 |
| TUCP_000466 | XLOC_015872 | ENSRNOT00000010031 | 0.950110822 | 2.24E-06 |
| TUCP_000466 | XLOC_015872 | ENSRNOT00000004842 | 0.952213434 | 1.81E-06 |
| TUCP_000466 | XLOC_015872 | ENSRNOT00000076101 | 0.955910844 | 1.22E-06 |
| TUCP_000466 | XLOC_015872 | ENSRNOT00000011344 | 0.954594741 | 1.41E-06 |
| TUCP_000466 | XLOC_015872 | ENSRNOT00000079545 | 0.952048966 | 1.84E-06 |
| TUCP_000466 | XLOC_015872 | ENSRNOT00000005706 | 0.963548956 | 4.77E-07 |
| TUCP_000466 | XLOC_015872 | ENSRNOT00000075602 | 0.952848125 | 1.70E-06 |
| TUCP_000466 | XLOC_015872 | ENSRNOT00000016758 | 0.950879114 | 2.07E-06 |
| TUCP_000466 | XLOC_015872 | ENSRNOT00000087022 | 0.955595834 | 1.26E-06 |
| TUCP_000466 | XLOC_015872 | ENSRNOT00000029021 | 0.965234982 | 3.77E-07 |
| TUCP_000466 | XLOC_015872 | ENSRNOT00000023641 | 0.95207893  | 1.84E-06 |
| TUCP_000467 | XLOC_015882 | ENSRNOT00000082043 | 0.998974584 | 8.91E-15 |
| TUCP_000467 | XLOC_015882 | ENSRNOT00000090080 | 0.97054674  | 1.66E-07 |
| TUCP_000467 | XLOC_015882 | ENSRNOT00000068444 | 0.999999952 | 1.92E-36 |
| TUCP_000467 | XLOC_015882 | ENSRNOT00000081370 | 0.999741505 | 9.08E-18 |
| TUCP_000467 | XLOC_015882 | ENSRNOT00000078645 | 0.989711116 | 8.93E-10 |
| TUCP_000467 | XLOC_015882 | ENSRNOT00000075987 | 0.987938376 | 1.97E-09 |
| TUCP_000467 | XLOC_015882 | ENSRNOT00000074990 | 0.999999952 | 1.92E-36 |
| TUCP_000467 | XLOC_015882 | ENSRNOT00000087323 | 0.995029483 | 2.37E-11 |
| TUCP_000467 | XLOC_015882 | ENSRNOT00000074930 | 0.999999952 | 1.92E-36 |
| TUCP_000467 | XLOC_015882 | ENSRNOT00000080575 | 0.999929279 | 1.39E-20 |
| TUCP_000467 | XLOC_015882 | ENSRNOT00000057761 | 0.982980715 | 1.09E-08 |
| TUCP_000467 | XLOC_015882 | ENSRNOT00000078369 | 0.993047813 | 1.26E-10 |
| TUCP_000467 | XLOC_015882 | ENSRNOT00000092982 | 0.999999952 | 1.92E-36 |
| TUCP_000467 | XLOC_015882 | ENSRNOT00000088367 | 0.999999952 | 1.92E-36 |
| TUCP_000467 | XLOC_015882 | ENSRNOT00000061874 | 0.968382996 | 2.36E-07 |
| TUCP_000467 | XLOC_015882 | ENSRNOT00000077789 | 0.993471079 | 9.24E-11 |
| TUCP_000467 | XLOC_015882 | ENSRNOT00000081996 | 0.999999952 | 1.92E-36 |
| TUCP_000467 | XLOC_015882 | ENSRNOT00000022280 | 0.98216731  | 1.38E-08 |
| TUCP_000467 | XLOC_015882 | ENSRNOT00000082058 | 0.999999952 | 1.92E-36 |
| TUCP_000467 | XLOC_015882 | ENSRNOT00000088905 | 0.999999952 | 1.92E-36 |
| TUCP_000467 | XLOC_015882 | ENSRNOT00000086831 | 0.999999952 | 1.92E-36 |
| TUCP_000467 | XLOC_015882 | ENSRNOT00000045099 | 0.999999952 | 1.92E-36 |
| TUCP_000467 | XLOC_015882 | ENSRNOT00000086745 | 0.978562508 | 3.44E-08 |

|             |             |                    |              |          |
|-------------|-------------|--------------------|--------------|----------|
| TUCP_000467 | XLOC_015882 | ENSRNOT00000085849 | 0.988254704  | 1.73E-09 |
| TUCP_000467 | XLOC_015882 | ENSRNOT00000086397 | 0.957168583  | 1.06E-06 |
| TUCP_000467 | XLOC_015882 | ENSRNOT00000079606 | 0.960461586  | 7.12E-07 |
| TUCP_000467 | XLOC_015882 | ENSRNOT00000090207 | 0.953470909  | 1.59E-06 |
| TUCP_000467 | XLOC_015882 | ENSRNOT00000087025 | 0.999999952  | 1.92E-36 |
| TUCP_000467 | XLOC_015882 | ENSRNOT00000019853 | 0.999999952  | 1.92E-36 |
| TUCP_000467 | XLOC_015882 | ENSRNOT00000073853 | 0.989710106  | 8.93E-10 |
| TUCP_000467 | XLOC_015882 | ENSRNOT00000065912 | 0.974202454  | 8.62E-08 |
| TUCP_000467 | XLOC_015882 | ENSRNOT00000073828 | 0.971646427  | 1.38E-07 |
| TUCP_000467 | XLOC_015882 | ENSRNOT00000078683 | 0.966670484  | 3.06E-07 |
| TUCP_000467 | XLOC_015882 | ENSRNOT00000093083 | 0.999137169  | 3.76E-15 |
| TUCP_000462 | XLOC_015648 | ENSRNOT00000000299 | 0.989320261  | 1.07E-09 |
| TUCP_000462 | XLOC_015648 | ENSRNOT00000036656 | 0.991028145  | 4.51E-10 |
| TUCP_000462 | XLOC_015648 | ENSRNOT00000036672 | 0.975766111  | 6.32E-08 |
| TUCP_000462 | XLOC_015648 | ENSRNOT00000021671 | 0.962672191  | 5.36E-07 |
| TUCP_000462 | XLOC_015648 | ENSRNOT00000083418 | 0.982278345  | 1.34E-08 |
| TUCP_000462 | XLOC_015648 | ENSRNOT00000092186 | 0.979192731  | 2.97E-08 |
| TUCP_000307 | XLOC_009857 | ENSRNOT00000042985 | 0.951143912  | 2.02E-06 |
| TUCP_000307 | XLOC_009857 | ENSRNOT00000076239 | 0.954178348  | 1.47E-06 |
| TUCP_004723 | XLOC_208750 | ENSRNOT00000084500 | 0.958123701  | 9.45E-07 |
| TUCP_004723 | XLOC_208750 | ENSRNOT00000071877 | 0.965523245  | 3.62E-07 |
| TUCP_004723 | XLOC_208750 | ENSRNOT00000076757 | 0.95724331   | 1.05E-06 |
| TUCP_004723 | XLOC_208750 | ENSRNOT00000052308 | 0.96112732   | 6.55E-07 |
| TUCP_004723 | XLOC_208750 | ENSRNOT00000047241 | 0.961290306  | 6.41E-07 |
| TUCP_004723 | XLOC_208750 | ENSRNOT00000043661 | 0.961309391  | 6.40E-07 |
| TUCP_004725 | XLOC_208986 | ENSRNOT00000006188 | -0.975241957 | 7.03E-08 |
| TUCP_004725 | XLOC_208986 | ENSRNOT00000006186 | 0.958231602  | 9.33E-07 |
| TUCP_004725 | XLOC_208986 | ENSRNOT00000026941 | 0.972214059  | 1.24E-07 |
| TUCP_004725 | XLOC_208986 | ENSRNOT00000013745 | -0.951348259 | 1.98E-06 |
| TUCP_004725 | XLOC_208986 | ENSRNOT00000075397 | 0.981859554  | 1.50E-08 |
| TUCP_004725 | XLOC_208986 | ENSRNOT00000032926 | -0.980006231 | 2.43E-08 |
| TUCP_004725 | XLOC_208986 | ENSRNOT00000019104 | -0.966984156 | 2.92E-07 |
| TUCP_004725 | XLOC_208986 | ENSRNOT00000006217 | 0.969876334  | 1.86E-07 |
| TUCP_004725 | XLOC_208986 | ENSRNOT00000067479 | 0.950499932  | 2.15E-06 |
| TUCP_004725 | XLOC_208986 | ENSRNOT00000068353 | 0.959255299  | 8.26E-07 |
| TUCP_004725 | XLOC_208986 | ENSRNOT00000049349 | 0.964882128  | 3.97E-07 |
| TUCP_004725 | XLOC_208986 | ENSRNOT00000001691 | 0.965551656  | 3.61E-07 |
| TUCP_004725 | XLOC_208986 | ENSRNOT00000089319 | 0.951002978  | 2.05E-06 |
| TUCP_004725 | XLOC_208986 | ENSRNOT00000086706 | 0.98217963   | 1.37E-08 |
| TUCP_004725 | XLOC_208986 | ENSRNOT00000004017 | 0.967538585  | 2.69E-07 |
| TUCP_004725 | XLOC_208986 | ENSRNOT00000086310 | -0.950029079 | 2.26E-06 |
| TUCP_004725 | XLOC_208986 | ENSRNOT00000010030 | -0.963930668 | 4.53E-07 |
| TUCP_004725 | XLOC_208986 | ENSRNOT00000011130 | -0.967034136 | 2.90E-07 |
| TUCP_004725 | XLOC_208986 | ENSRNOT00000031692 | -0.961155353 | 6.52E-07 |
| TUCP_004725 | XLOC_208986 | ENSRNOT00000014384 | -0.967318421 | 2.78E-07 |
| TUCP_004725 | XLOC_208986 | ENSRNOT00000042638 | 0.963580934  | 4.75E-07 |
| TUCP_004725 | XLOC_208986 | ENSRNOT00000030850 | 0.95714971   | 1.06E-06 |
| TUCP_004725 | XLOC_208986 | ENSRNOT00000033017 | 0.971646972  | 1.38E-07 |
| TUCP_004725 | XLOC_208986 | ENSRNOT00000066370 | 0.969018837  | 2.13E-07 |
| TUCP_004725 | XLOC_208986 | ENSRNOT00000006752 | 0.955556432  | 1.27E-06 |
| TUCP_004725 | XLOC_208986 | ENSRNOT00000057562 | 0.95483933   | 1.37E-06 |

|             |             |                    |              |          |
|-------------|-------------|--------------------|--------------|----------|
| TUCP_004725 | XLOC_208986 | ENSRNOT00000072771 | 0.960448459  | 7.13E-07 |
| TUCP_004725 | XLOC_208986 | ENSRNOT00000073370 | 0.982313133  | 1.32E-08 |
| TUCP_004725 | XLOC_208986 | ENSRNOT00000035320 | -0.951197964 | 2.01E-06 |
| TUCP_004725 | XLOC_208986 | ENSRNOT00000057160 | 0.954540637  | 1.42E-06 |
| TUCP_004725 | XLOC_208986 | ENSRNOT00000008274 | -0.963157874 | 5.02E-07 |
| TUCP_004725 | XLOC_208986 | ENSRNOT00000065871 | 0.963161056  | 5.02E-07 |
| TUCP_004725 | XLOC_208986 | ENSRNOT00000077999 | 0.978192865  | 3.74E-08 |
| TUCP_004725 | XLOC_208986 | ENSRNOT00000003146 | -0.953829028 | 1.53E-06 |
| TUCP_004725 | XLOC_208986 | ENSRNOT00000083214 | 0.950403995  | 2.17E-06 |
| TUCP_004725 | XLOC_208986 | ENSRNOT00000085228 | 0.954918518  | 1.36E-06 |
| TUCP_004725 | XLOC_208986 | ENSRNOT00000026391 | 0.970781776  | 1.60E-07 |
| TUCP_004725 | XLOC_208986 | ENSRNOT00000089673 | -0.953366245 | 1.61E-06 |
| TUCP_004725 | XLOC_208986 | ENSRNOT00000075630 | -0.955933939 | 1.22E-06 |
| TUCP_004725 | XLOC_208986 | ENSRNOT00000087278 | -0.956075467 | 1.20E-06 |
| TUCP_004725 | XLOC_208986 | ENSRNOT00000024841 | -0.955211759 | 1.32E-06 |
| TUCP_004725 | XLOC_208986 | ENSRNOT00000067391 | -0.967432071 | 2.73E-07 |
| TUCP_004725 | XLOC_208986 | ENSRNOT00000084709 | 0.982869442  | 1.13E-08 |
| TUCP_004725 | XLOC_208986 | ENSRNOT00000029179 | -0.957352877 | 1.03E-06 |
| TUCP_004725 | XLOC_208986 | ENSRNOT00000026481 | 0.965609101  | 3.58E-07 |
| TUCP_004725 | XLOC_208986 | ENSRNOT00000000469 | 0.961595114  | 6.17E-07 |
| TUCP_004725 | XLOC_208986 | ENSRNOT00000018413 | -0.951612203 | 1.93E-06 |
| TUCP_004725 | XLOC_208986 | ENSRNOT00000082709 | -0.954015403 | 1.50E-06 |
| TUCP_004725 | XLOC_208986 | ENSRNOT00000025856 | -0.967282571 | 2.79E-07 |
| TUCP_004725 | XLOC_208986 | ENSRNOT00000072299 | 0.96520339   | 3.79E-07 |
| TUCP_004725 | XLOC_208986 | ENSRNOT00000026643 | 0.957392035  | 1.03E-06 |
| TUCP_004725 | XLOC_208986 | ENSRNOT00000072357 | -0.967027738 | 2.90E-07 |
| TUCP_004725 | XLOC_208986 | ENSRNOT00000016132 | -0.973274227 | 1.03E-07 |
| TUCP_004725 | XLOC_208986 | ENSRNOT00000058495 | -0.962473039 | 5.50E-07 |
| TUCP_004725 | XLOC_208986 | ENSRNOT00000013067 | -0.984297445 | 7.32E-09 |
| TUCP_004725 | XLOC_208986 | ENSRNOT00000066952 | 0.956132104  | 1.19E-06 |
| TUCP_004725 | XLOC_208986 | ENSRNOT00000016220 | -0.964269081 | 4.32E-07 |
| TUCP_004725 | XLOC_208986 | ENSRNOT0000002313  | -0.957038211 | 1.07E-06 |
| TUCP_004725 | XLOC_208986 | ENSRNOT00000016637 | -0.961532076 | 6.22E-07 |
| TUCP_004725 | XLOC_208986 | ENSRNOT00000038994 | -0.953972402 | 1.51E-06 |
| TUCP_004725 | XLOC_208986 | ENSRNOT00000089524 | 0.970203611  | 1.76E-07 |
| TUCP_004725 | XLOC_208986 | ENSRNOT00000079895 | 0.95290111   | 1.69E-06 |
| TUCP_004725 | XLOC_208986 | ENSRNOT00000074586 | -0.97813902  | 3.79E-08 |
| TUCP_004725 | XLOC_208986 | ENSRNOT00000071929 | -0.951620307 | 1.92E-06 |
| TUCP_004725 | XLOC_208986 | ENSRNOT00000084031 | 0.958653897  | 8.88E-07 |
| TUCP_004725 | XLOC_208986 | ENSRNOT00000081512 | 0.955028379  | 1.34E-06 |
| TUCP_004725 | XLOC_208986 | ENSRNOT00000011880 | 0.971641708  | 1.38E-07 |
| TUCP_004725 | XLOC_208986 | ENSRNOT00000005486 | -0.963263751 | 4.95E-07 |
| TUCP_004725 | XLOC_208986 | ENSRNOT00000023989 | 0.954204735  | 1.47E-06 |
| TUCP_004725 | XLOC_208986 | ENSRNOT00000003992 | -0.959121078 | 8.39E-07 |
| TUCP_004725 | XLOC_208986 | ENSRNOT00000041494 | 0.956345873  | 1.16E-06 |
| TUCP_004725 | XLOC_208986 | ENSRNOT00000050515 | 0.964029582  | 4.46E-07 |
| TUCP_004725 | XLOC_208986 | ENSRNOT00000089980 | -0.960059556 | 7.48E-07 |
| TUCP_004725 | XLOC_208986 | ENSRNOT00000055602 | -0.97196246  | 1.30E-07 |
| TUCP_004725 | XLOC_208986 | ENSRNOT00000046745 | 0.9526965    | 1.72E-06 |
| TUCP_004725 | XLOC_208986 | ENSRNOT00000055607 | -0.962194038 | 5.71E-07 |
| TUCP_004725 | XLOC_208986 | ENSRNOT00000025434 | 0.951914839  | 1.87E-06 |

|             |             |                    |              |          |
|-------------|-------------|--------------------|--------------|----------|
| TUCP_004725 | XLOC_208986 | ENSRNOT00000023876 | 0.973331172  | 1.02E-07 |
| TUCP_004725 | XLOC_208986 | ENSRNOT00000061201 | -0.966555806 | 3.12E-07 |
| TUCP_004725 | XLOC_208986 | ENSRNOT00000002187 | -0.968481828 | 2.32E-07 |
| TUCP_004725 | XLOC_208986 | ENSRNOT00000091488 | 0.957254957  | 1.05E-06 |
| TUCP_004725 | XLOC_208986 | ENSRNOT00000049285 | -0.966131348 | 3.32E-07 |
| TUCP_004725 | XLOC_208986 | ENSRNOT00000015239 | -0.961567389 | 6.19E-07 |
| TUCP_004725 | XLOC_208986 | ENSRNOT00000003568 | 0.963189582  | 5.00E-07 |
| TUCP_004725 | XLOC_208986 | ENSRNOT00000006366 | -0.950333622 | 2.19E-06 |
| TUCP_004725 | XLOC_208986 | ENSRNOT00000074649 | 0.9626625    | 5.37E-07 |
| TUCP_004725 | XLOC_208986 | ENSRNOT00000035277 | 0.966770273  | 3.02E-07 |
| TUCP_004725 | XLOC_208986 | ENSRNOT00000018877 | -0.968493438 | 2.32E-07 |
| TUCP_004725 | XLOC_208986 | ENSRNOT00000077146 | -0.983543331 | 9.25E-09 |
| TUCP_004725 | XLOC_208986 | ENSRNOT00000052063 | 0.981279944  | 1.75E-08 |
| TUCP_004725 | XLOC_208986 | ENSRNOT00000031672 | -0.957656824 | 9.98E-07 |
| TUCP_004725 | XLOC_208986 | ENSRNOT00000060002 | -0.978658023 | 3.36E-08 |
| TUCP_004725 | XLOC_208986 | ENSRNOT00000086456 | -0.959818228 | 7.71E-07 |
| TUCP_004725 | XLOC_208986 | ENSRNOT00000010367 | 0.954615757  | 1.40E-06 |
| TUCP_004725 | XLOC_208986 | ENSRNOT00000006395 | -0.962545985 | 5.45E-07 |
| TUCP_004725 | XLOC_208986 | ENSRNOT00000023977 | -0.96608617  | 3.34E-07 |
| TUCP_004725 | XLOC_208986 | ENSRNOT00000066133 | -0.983404959 | 9.64E-09 |
| TUCP_004725 | XLOC_208986 | ENSRNOT00000048933 | -0.961910331 | 5.92E-07 |
| TUCP_004725 | XLOC_208986 | ENSRNOT00000012432 | -0.955713939 | 1.25E-06 |
| TUCP_004725 | XLOC_208986 | ENSRNOT00000035385 | 0.968645439  | 2.26E-07 |
| TUCP_004725 | XLOC_208986 | ENSRNOT00000057738 | 0.971655241  | 1.37E-07 |
| TUCP_004725 | XLOC_208986 | ENSRNOT00000019487 | 0.963717555  | 4.66E-07 |
| TUCP_004725 | XLOC_208986 | ENSRNOT00000018170 | -0.953522758 | 1.58E-06 |
| TUCP_004725 | XLOC_208986 | ENSRNOT00000030692 | -0.950192098 | 2.22E-06 |
| TUCP_004725 | XLOC_208986 | ENSRNOT00000080443 | 0.956114342  | 1.19E-06 |
| TUCP_004725 | XLOC_208986 | ENSRNOT00000064535 | -0.969459247 | 1.99E-07 |
| TUCP_004725 | XLOC_208986 | ENSRNOT00000015624 | 0.978644096  | 3.38E-08 |
| TUCP_004725 | XLOC_208986 | ENSRNOT00000018341 | -0.973709092 | 9.47E-08 |
| TUCP_004725 | XLOC_208986 | ENSRNOT00000085295 | -0.970320635 | 1.73E-07 |
| TUCP_004725 | XLOC_208986 | ENSRNOT00000072632 | -0.953975426 | 1.51E-06 |
| TUCP_004725 | XLOC_208986 | ENSRNOT00000002114 | -0.975229801 | 7.05E-08 |
| TUCP_004725 | XLOC_208986 | ENSRNOT00000039102 | 0.959463428  | 8.05E-07 |
| TUCP_004725 | XLOC_208986 | ENSRNOT00000078856 | -0.950478159 | 2.16E-06 |
| TUCP_004725 | XLOC_208986 | ENSRNOT00000091205 | 0.951165665  | 2.01E-06 |
| TUCP_004725 | XLOC_208986 | ENSRNOT00000009742 | -0.959671948 | 7.85E-07 |
| TUCP_004725 | XLOC_208986 | ENSRNOT00000007369 | 0.968582     | 2.29E-07 |
| TUCP_004725 | XLOC_208986 | ENSRNOT00000004787 | -0.96024616  | 7.31E-07 |
| TUCP_004725 | XLOC_208986 | ENSRNOT00000060698 | -0.982121209 | 1.40E-08 |
| TUCP_004725 | XLOC_208986 | ENSRNOT00000058351 | 0.966027806  | 3.37E-07 |
| TUCP_004725 | XLOC_208986 | ENSRNOT00000010748 | 0.96508529   | 3.85E-07 |
| TUCP_004725 | XLOC_208986 | ENSRNOT00000080207 | 0.96262919   | 5.39E-07 |
| TUCP_004725 | XLOC_208986 | ENSRNOT00000017998 | 0.962124056  | 5.76E-07 |
| TUCP_004725 | XLOC_208986 | ENSRNOT00000061100 | 0.957145218  | 1.06E-06 |
| TUCP_004725 | XLOC_208986 | ENSRNOT00000065529 | 0.950398202  | 2.18E-06 |
| TUCP_004725 | XLOC_208986 | ENSRNOT00000017776 | 0.955274999  | 1.31E-06 |
| TUCP_004725 | XLOC_208986 | ENSRNOT00000021534 | -0.966669038 | 3.06E-07 |
| TUCP_004725 | XLOC_208986 | ENSRNOT00000071745 | -0.950055577 | 2.25E-06 |
| TUCP_004725 | XLOC_208986 | ENSRNOT00000087033 | -0.958469802 | 9.07E-07 |

|             |             |                    |              |          |
|-------------|-------------|--------------------|--------------|----------|
| TUCP_004725 | XLOC_208986 | ENSRNOT00000037809 | -0.950239876 | 2.21E-06 |
| TUCP_004725 | XLOC_208986 | ENSRNOT00000008982 | 0.95146567   | 1.95E-06 |
| TUCP_004725 | XLOC_208986 | ENSRNOT00000090057 | 0.955908038  | 1.22E-06 |
| TUCP_004725 | XLOC_208986 | ENSRNOT00000022097 | 0.967339321  | 2.77E-07 |
| TUCP_004725 | XLOC_208986 | ENSRNOT00000008987 | -0.969384631 | 2.01E-07 |
| TUCP_004725 | XLOC_208986 | ENSRNOT00000092876 | -0.965331781 | 3.72E-07 |
| TUCP_004725 | XLOC_208986 | ENSRNOT00000024253 | 0.956332211  | 1.16E-06 |
| TUCP_004725 | XLOC_208986 | ENSRNOT00000088073 | -0.973203202 | 1.04E-07 |
| TUCP_004725 | XLOC_208986 | ENSRNOT00000059854 | -0.953978667 | 1.50E-06 |
| TUCP_004725 | XLOC_208986 | ENSRNOT00000039607 | -0.958666557 | 8.86E-07 |
| TUCP_004725 | XLOC_208986 | ENSRNOT00000075400 | -0.95369294  | 1.55E-06 |
| TUCP_004725 | XLOC_208986 | ENSRNOT0000009080  | -0.965566527 | 3.60E-07 |
| TUCP_004725 | XLOC_208986 | ENSRNOT00000063930 | -0.975585856 | 6.56E-08 |
| TUCP_004725 | XLOC_208986 | ENSRNOT00000046215 | -0.961156814 | 6.52E-07 |
| TUCP_004725 | XLOC_208986 | ENSRNOT00000013116 | -0.954254762 | 1.46E-06 |
| TUCP_004725 | XLOC_208986 | ENSRNOT00000020453 | -0.950788969 | 2.09E-06 |
| TUCP_004725 | XLOC_208986 | ENSRNOT00000001855 | 0.962813813  | 5.26E-07 |
| TUCP_004725 | XLOC_208986 | ENSRNOT00000009563 | -0.951269284 | 1.99E-06 |
| TUCP_004725 | XLOC_208986 | ENSRNOT00000041237 | -0.962205901 | 5.70E-07 |
| TUCP_004725 | XLOC_208986 | ENSRNOT00000057953 | 0.952842106  | 1.70E-06 |
| TUCP_004725 | XLOC_208986 | ENSRNOT00000088555 | -0.960736144 | 6.88E-07 |
| TUCP_004725 | XLOC_208986 | ENSRNOT00000087838 | -0.973152252 | 1.05E-07 |
| TUCP_004725 | XLOC_208986 | ENSRNOT00000013759 | -0.953962442 | 1.51E-06 |
| TUCP_004725 | XLOC_208986 | ENSRNOT00000017805 | 0.9684944    | 2.32E-07 |
| TUCP_004725 | XLOC_208986 | ENSRNOT00000010419 | 0.960694372  | 6.92E-07 |
| TUCP_004725 | XLOC_208986 | ENSRNOT00000019057 | -0.953444072 | 1.59E-06 |
| TUCP_004725 | XLOC_208986 | ENSRNOT00000003326 | -0.954191183 | 1.47E-06 |
| TUCP_004725 | XLOC_208986 | ENSRNOT00000016306 | -0.952851124 | 1.70E-06 |
| TUCP_004725 | XLOC_208986 | ENSRNOT00000015476 | -0.975789603 | 6.29E-08 |
| TUCP_004725 | XLOC_208986 | ENSRNOT00000025079 | -0.98090457  | 1.94E-08 |
| TUCP_004725 | XLOC_208986 | ENSRNOT00000048754 | -0.968272041 | 2.40E-07 |
| TUCP_004725 | XLOC_208986 | ENSRNOT00000047530 | 0.950447455  | 2.16E-06 |
| TUCP_004725 | XLOC_208986 | ENSRNOT00000021458 | -0.956485168 | 1.14E-06 |
| TUCP_004725 | XLOC_208986 | ENSRNOT00000025075 | 0.9513814    | 1.97E-06 |
| TUCP_004725 | XLOC_208986 | ENSRNOT00000007824 | -0.963231802 | 4.98E-07 |
| TUCP_004725 | XLOC_208986 | ENSRNOT00000020681 | -0.964427234 | 4.23E-07 |
| TUCP_004725 | XLOC_208986 | ENSRNOT00000057898 | -0.968928382 | 2.16E-07 |
| TUCP_004725 | XLOC_208986 | ENSRNOT00000024677 | 0.970495223  | 1.68E-07 |
| TUCP_004725 | XLOC_208986 | ENSRNOT00000056100 | -0.961844801 | 5.97E-07 |
| TUCP_004725 | XLOC_208986 | ENSRNOT00000001077 | 0.950146512  | 2.23E-06 |
| TUCP_004725 | XLOC_208986 | ENSRNOT00000077231 | 0.977114074  | 4.76E-08 |
| TUCP_004725 | XLOC_208986 | ENSRNOT00000030798 | -0.952869714 | 1.69E-06 |
| TUCP_004725 | XLOC_208986 | ENSRNOT00000060696 | 0.958459107  | 9.08E-07 |
| TUCP_004725 | XLOC_208986 | ENSRNOT00000072762 | -0.951931692 | 1.86E-06 |
| TUCP_004725 | XLOC_208986 | ENSRNOT00000071540 | 0.955949292  | 1.21E-06 |
| TUCP_004725 | XLOC_208986 | ENSRNOT00000031701 | -0.966264799 | 3.25E-07 |
| TUCP_004725 | XLOC_208986 | ENSRNOT00000072849 | -0.967625482 | 2.65E-07 |
| TUCP_004725 | XLOC_208986 | ENSRNOT00000077526 | 0.950297294  | 2.20E-06 |
| TUCP_004725 | XLOC_208986 | ENSRNOT00000078349 | -0.962716167 | 5.33E-07 |
| TUCP_004725 | XLOC_208986 | ENSRNOT00000022502 | -0.966575449 | 3.11E-07 |
| TUCP_004725 | XLOC_208986 | ENSRNOT00000017556 | 0.968553867  | 2.30E-07 |



|             |             |                    |              |          |
|-------------|-------------|--------------------|--------------|----------|
| TUCP_004725 | XLOC_208986 | ENSRNOT00000047192 | -0.952180081 | 1.82E-06 |
| TUCP_004725 | XLOC_208986 | ENSRNOT00000021802 | 0.956363954  | 1.16E-06 |
| TUCP_004725 | XLOC_208986 | ENSRNOT00000021803 | -0.957799659 | 9.82E-07 |
| TUCP_004725 | XLOC_208986 | ENSRNOT00000039857 | -0.952388883 | 1.78E-06 |
| TUCP_004725 | XLOC_208986 | ENSRNOT00000024352 | 0.966336792  | 3.22E-07 |
| TUCP_004725 | XLOC_208986 | ENSRNOT00000082627 | -0.972865493 | 1.11E-07 |
| TUCP_004725 | XLOC_208986 | ENSRNOT00000018122 | 0.960172227  | 7.38E-07 |
| TUCP_004725 | XLOC_208986 | ENSRNOT00000072118 | 0.969521539  | 1.97E-07 |
| TUCP_004725 | XLOC_208986 | ENSRNOT00000003780 | 0.982704428  | 1.18E-08 |
| TUCP_004725 | XLOC_208986 | ENSRNOT00000003787 | -0.966932995 | 2.95E-07 |
| TUCP_004725 | XLOC_208986 | ENSRNOT00000014506 | -0.955175439 | 1.32E-06 |
| TUCP_004725 | XLOC_208986 | ENSRNOT00000023262 | -0.965643967 | 3.56E-07 |
| TUCP_004725 | XLOC_208986 | ENSRNOT00000025104 | -0.955504179 | 1.27E-06 |
| TUCP_004725 | XLOC_208986 | ENSRNOT00000026312 | 0.953927575  | 1.51E-06 |
| TUCP_004725 | XLOC_208986 | ENSRNOT00000068381 | 0.956795458  | 1.10E-06 |
| TUCP_004725 | XLOC_208986 | ENSRNOT00000068026 | -0.980394002 | 2.21E-08 |
| TUCP_004725 | XLOC_208986 | ENSRNOT00000085621 | 0.981929337  | 1.47E-08 |
| TUCP_004725 | XLOC_208986 | ENSRNOT00000007314 | -0.952354474 | 1.78E-06 |
| TUCP_004725 | XLOC_208986 | ENSRNOT00000014821 | -0.962702809 | 5.34E-07 |
| TUCP_004725 | XLOC_208986 | ENSRNOT00000058382 | 0.965218204  | 3.78E-07 |
| TUCP_004725 | XLOC_208986 | ENSRNOT00000055683 | 0.964715604  | 4.06E-07 |
| TUCP_004725 | XLOC_208986 | ENSRNOT00000026531 | -0.978476997 | 3.51E-08 |
| TUCP_004725 | XLOC_208986 | ENSRNOT00000035605 | 0.958527218  | 9.01E-07 |
| TUCP_004725 | XLOC_208986 | ENSRNOT00000017746 | -0.969580642 | 1.95E-07 |
| TUCP_004725 | XLOC_208986 | ENSRNOT00000023567 | -0.950945538 | 2.06E-06 |
| TUCP_004725 | XLOC_208986 | ENSRNOT00000017995 | 0.969653177  | 1.93E-07 |
| TUCP_004725 | XLOC_208986 | ENSRNOT00000066923 | -0.951172753 | 2.01E-06 |
| TUCP_004725 | XLOC_208986 | ENSRNOT00000081725 | 0.961472388  | 6.27E-07 |
| TUCP_004725 | XLOC_208986 | ENSRNOT00000005459 | 0.959432846  | 8.08E-07 |
| TUCP_004725 | XLOC_208986 | ENSRNOT00000027910 | 0.957730139  | 9.90E-07 |
| TUCP_004725 | XLOC_208986 | ENSRNOT00000037015 | 0.969803877  | 1.88E-07 |
| TUCP_004725 | XLOC_208986 | ENSRNOT00000024452 | -0.971867205 | 1.32E-07 |
| TUCP_004725 | XLOC_208986 | ENSRNOT00000011675 | 0.953634378  | 1.56E-06 |
| TUCP_004725 | XLOC_208986 | ENSRNOT00000028885 | -0.952132504 | 1.83E-06 |
| TUCP_004725 | XLOC_208986 | ENSRNOT00000013553 | 0.955763017  | 1.24E-06 |
| TUCP_004725 | XLOC_208986 | ENSRNOT00000028888 | 0.952695264  | 1.72E-06 |
| TUCP_004725 | XLOC_208986 | ENSRNOT00000016372 | -0.954534074 | 1.42E-06 |
| TUCP_004725 | XLOC_208986 | ENSRNOT00000088679 | -0.958550014 | 8.99E-07 |
| TUCP_004725 | XLOC_208986 | ENSRNOT00000027344 | 0.953573823  | 1.57E-06 |
| TUCP_004725 | XLOC_208986 | ENSRNOT00000021145 | -0.950799629 | 2.09E-06 |
| TUCP_004725 | XLOC_208986 | ENSRNOT00000020417 | -0.95911203  | 8.40E-07 |
| TUCP_004725 | XLOC_208986 | ENSRNOT00000033677 | -0.960692195 | 6.92E-07 |
| TUCP_004725 | XLOC_208986 | ENSRNOT00000020809 | -0.953755467 | 1.54E-06 |
| TUCP_004725 | XLOC_208986 | ENSRNOT00000082151 | -0.970931877 | 1.56E-07 |
| TUCP_004725 | XLOC_208986 | ENSRNOT00000016776 | -0.962801937 | 5.27E-07 |
| TUCP_004725 | XLOC_208986 | ENSRNOT00000001607 | 0.951016407  | 2.05E-06 |
| TUCP_004725 | XLOC_208986 | ENSRNOT00000005686 | -0.980563671 | 2.11E-08 |
| TUCP_004725 | XLOC_208986 | ENSRNOT00000038511 | -0.951248787 | 2.00E-06 |
| TUCP_004725 | XLOC_208986 | ENSRNOT00000085971 | -0.972926023 | 1.09E-07 |
| TUCP_004725 | XLOC_208986 | ENSRNOT00000028876 | -0.962709683 | 5.33E-07 |
| TUCP_004725 | XLOC_208986 | ENSRNOT00000023965 | -0.961315604 | 6.39E-07 |

|             |             |                     |              |          |
|-------------|-------------|---------------------|--------------|----------|
| TUCP_004725 | XLOC_208986 | ENSRNOT00000061580  | -0.95280738  | 1.70E-06 |
| TUCP_004725 | XLOC_208986 | ENSRNOT00000012528  | 0.955310785  | 1.30E-06 |
| TUCP_004725 | XLOC_208986 | ENSRNOT00000068184  | -0.957496438 | 1.02E-06 |
| TUCP_004725 | XLOC_208986 | ENSRNOT00000005387  | 0.962423637  | 5.54E-07 |
| TUCP_004725 | XLOC_208986 | ENSRNOT00000005381  | 0.95675935   | 1.11E-06 |
| TUCP_004725 | XLOC_208986 | ENSRNOT00000028907  | 0.96369348   | 4.67E-07 |
| TUCP_004725 | XLOC_208986 | ENSRNOT00000025887  | -0.952253121 | 1.80E-06 |
| TUCP_004725 | XLOC_208986 | ENSRNOT00000022796  | 0.957285421  | 1.04E-06 |
| TUCP_004725 | XLOC_208986 | ENSRNOT00000078862  | 0.950699215  | 2.11E-06 |
| TUCP_004725 | XLOC_208986 | ENSRNOT00000003940  | -0.966471823 | 3.15E-07 |
| TUCP_004725 | XLOC_208986 | ENSRNOT00000005257  | 0.956333623  | 1.16E-06 |
| TUCP_004725 | XLOC_208986 | ENSRNOT00000015799  | 0.9700964    | 1.79E-07 |
| TUCP_004725 | XLOC_208986 | ENSRNOT000000031904 | 0.9509067    | 2.07E-06 |
| TUCP_004725 | XLOC_208986 | ENSRNOT00000011237  | -0.953216685 | 1.63E-06 |
| TUCP_004725 | XLOC_208986 | ENSRNOT00000007350  | 0.956697687  | 1.11E-06 |
| TUCP_004725 | XLOC_208986 | ENSRNOT00000083578  | 0.963063724  | 5.09E-07 |
| TUCP_004725 | XLOC_208986 | ENSRNOT00000000181  | 0.952646862  | 1.73E-06 |
| TUCP_004725 | XLOC_208986 | ENSRNOT00000090499  | -0.952897369 | 1.69E-06 |
| TUCP_004725 | XLOC_208986 | ENSRNOT00000020297  | 0.97029417   | 1.73E-07 |
| TUCP_004725 | XLOC_208986 | ENSRNOT00000023638  | 0.967462002  | 2.72E-07 |
| TUCP_004725 | XLOC_208986 | ENSRNOT00000080577  | 0.964743632  | 4.04E-07 |
| TUCP_004725 | XLOC_208986 | ENSRNOT00000005220  | 0.954803687  | 1.38E-06 |
| TUCP_004725 | XLOC_208986 | ENSRNOT00000023144  | 0.95568448   | 1.25E-06 |
| TUCP_004725 | XLOC_208986 | ENSRNOT00000016649  | 0.955001897  | 1.35E-06 |
| TUCP_004725 | XLOC_208986 | ENSRNOT00000008074  | -0.951008638 | 2.05E-06 |
| TUCP_004725 | XLOC_208986 | ENSRNOT00000074023  | 0.991818522  | 2.85E-10 |
| TUCP_004725 | XLOC_208986 | ENSRNOT00000004351  | -0.969012273 | 2.14E-07 |
| TUCP_004725 | XLOC_208986 | ENSRNOT00000024710  | -0.957167235 | 1.06E-06 |
| TUCP_004725 | XLOC_208986 | ENSRNOT00000017384  | 0.968241406  | 2.41E-07 |
| TUCP_004725 | XLOC_208986 | ENSRNOT00000065076  | 0.976431664  | 5.51E-08 |
| TUCP_004725 | XLOC_208986 | ENSRNOT00000013516  | 0.959229379  | 8.28E-07 |
| TUCP_004725 | XLOC_208986 | ENSRNOT00000054685  | 0.976723539  | 5.18E-08 |
| TUCP_004725 | XLOC_208986 | ENSRNOT00000016012  | -0.957948382 | 9.65E-07 |
| TUCP_004725 | XLOC_208986 | ENSRNOT00000012060  | 0.962668642  | 5.36E-07 |
| TUCP_004725 | XLOC_208986 | ENSRNOT00000027760  | 0.964547303  | 4.16E-07 |
| TUCP_004725 | XLOC_208986 | ENSRNOT00000024402  | 0.967955319  | 2.52E-07 |
| TUCP_004725 | XLOC_208986 | ENSRNOT00000089545  | -0.955438448 | 1.28E-06 |
| TUCP_004725 | XLOC_208986 | ENSRNOT00000089933  | 0.983981391  | 8.09E-09 |
| TUCP_004725 | XLOC_208986 | ENSRNOT00000077908  | 0.954432192  | 1.43E-06 |
| TUCP_004725 | XLOC_208986 | ENSRNOT00000090912  | 0.965240476  | 3.77E-07 |
| TUCP_004725 | XLOC_208986 | ENSRNOT00000067554  | 0.955101885  | 1.33E-06 |
| TUCP_004725 | XLOC_208986 | ENSRNOT00000010783  | -0.951677052 | 1.91E-06 |
| TUCP_004725 | XLOC_208986 | ENSRNOT00000027232  | 0.95023716   | 2.21E-06 |
| TUCP_004725 | XLOC_208986 | ENSRNOT00000027234  | 0.953663789  | 1.56E-06 |
| TUCP_004725 | XLOC_208986 | ENSRNOT00000019820  | 0.960518789  | 7.07E-07 |
| TUCP_004725 | XLOC_208986 | ENSRNOT00000011832  | -0.972235804 | 1.24E-07 |
| TUCP_004725 | XLOC_208986 | ENSRNOT00000024066  | 0.965984001  | 3.39E-07 |
| TUCP_004725 | XLOC_208986 | ENSRNOT00000021030  | -0.957491579 | 1.02E-06 |
| TUCP_004725 | XLOC_208986 | ENSRNOT00000006835  | 0.96728492   | 2.79E-07 |
| TUCP_004725 | XLOC_208986 | ENSRNOT00000077727  | -0.97990592  | 2.49E-08 |
| TUCP_004725 | XLOC_208986 | ENSRNOT00000011930  | 0.950216332  | 2.21E-06 |

|             |             |                    |              |          |
|-------------|-------------|--------------------|--------------|----------|
| TUCP_004725 | XLOC_208986 | ENSRNOT00000044346 | -0.97099483  | 1.54E-07 |
| TUCP_004725 | XLOC_208986 | ENSRNOT00000006804 | 0.957331424  | 1.04E-06 |
| TUCP_004725 | XLOC_208986 | ENSRNOT00000000203 | -0.954311073 | 1.45E-06 |
| TUCP_004725 | XLOC_208986 | ENSRNOT00000017949 | -0.9570327   | 1.07E-06 |
| TUCP_004725 | XLOC_208986 | ENSRNOT00000090156 | -0.961580835 | 6.18E-07 |
| TUCP_004725 | XLOC_208986 | ENSRNOT00000013867 | 0.955403678  | 1.29E-06 |
| TUCP_004725 | XLOC_208986 | ENSRNOT00000091909 | 0.968930253  | 2.16E-07 |
| TUCP_004725 | XLOC_208986 | ENSRNOT0000001081  | 0.956269145  | 1.17E-06 |
| TUCP_004725 | XLOC_208986 | ENSRNOT00000013025 | -0.975887414 | 6.17E-08 |
| TUCP_004725 | XLOC_208986 | ENSRNOT00000003544 | -0.972178938 | 1.25E-07 |
| TUCP_004725 | XLOC_208986 | ENSRNOT00000086119 | -0.964702205 | 4.07E-07 |
| TUCP_004725 | XLOC_208986 | ENSRNOT00000022190 | -0.987345102 | 2.50E-09 |
| TUCP_004725 | XLOC_208986 | ENSRNOT00000025913 | -0.975391307 | 6.82E-08 |
| TUCP_004725 | XLOC_208986 | ENSRNOT00000077220 | -0.956050165 | 1.20E-06 |
| TUCP_004725 | XLOC_208986 | ENSRNOT00000004196 | 0.951253132  | 2.00E-06 |
| TUCP_004725 | XLOC_208986 | ENSRNOT00000030782 | -0.954774186 | 1.38E-06 |
| TUCP_004725 | XLOC_208986 | ENSRNOT00000007882 | -0.962836385 | 5.25E-07 |
| TUCP_004725 | XLOC_208986 | ENSRNOT00000073919 | 0.955585331  | 1.26E-06 |
| TUCP_004725 | XLOC_208986 | ENSRNOT00000067780 | -0.971651194 | 1.37E-07 |
| TUCP_004725 | XLOC_208986 | ENSRNOT00000086577 | 0.961206005  | 6.48E-07 |
| TUCP_004725 | XLOC_208986 | ENSRNOT00000025966 | 0.961563434  | 6.19E-07 |
| TUCP_004725 | XLOC_208986 | ENSRNOT00000089611 | 0.954612181  | 1.41E-06 |
| TUCP_004725 | XLOC_208986 | ENSRNOT00000073910 | -0.9539944   | 1.50E-06 |
| TUCP_004725 | XLOC_208986 | ENSRNOT00000034883 | -0.962996186 | 5.13E-07 |
| TUCP_004725 | XLOC_208986 | ENSRNOT00000022676 | -0.955311969 | 1.30E-06 |
| TUCP_004725 | XLOC_208986 | ENSRNOT00000073327 | 0.955883468  | 1.22E-06 |
| TUCP_004725 | XLOC_208986 | ENSRNOT00000005910 | -0.974617088 | 7.95E-08 |
| TUCP_004725 | XLOC_208986 | ENSRNOT00000076485 | -0.968795579 | 2.21E-07 |
| TUCP_004725 | XLOC_208986 | ENSRNOT00000090987 | -0.963354216 | 4.89E-07 |
| TUCP_004725 | XLOC_208986 | ENSRNOT00000078475 | 0.951458351  | 1.96E-06 |
| TUCP_004725 | XLOC_208986 | ENSRNOT00000087429 | 0.950927384  | 2.06E-06 |
| TUCP_004725 | XLOC_208986 | ENSRNOT00000029701 | 0.962379716  | 5.57E-07 |
| TUCP_004725 | XLOC_208986 | ENSRNOT00000036051 | 0.955186781  | 1.32E-06 |
| TUCP_004725 | XLOC_208986 | ENSRNOT00000029704 | -0.953231298 | 1.63E-06 |
| TUCP_004725 | XLOC_208986 | ENSRNOT00000028685 | 0.965947786  | 3.41E-07 |
| TUCP_004725 | XLOC_208986 | ENSRNOT00000037955 | -0.954021421 | 1.50E-06 |
| TUCP_004725 | XLOC_208986 | ENSRNOT00000027057 | 0.951726231  | 1.90E-06 |
| TUCP_004725 | XLOC_208986 | ENSRNOT00000028057 | 0.965926659  | 3.42E-07 |
| TUCP_004725 | XLOC_208986 | ENSRNOT00000055582 | 0.951506619  | 1.95E-06 |
| TUCP_004725 | XLOC_208986 | ENSRNOT00000022074 | 0.960388133  | 7.19E-07 |
| TUCP_004725 | XLOC_208986 | ENSRNOT00000004999 | 0.972212637  | 1.25E-07 |
| TUCP_004725 | XLOC_208986 | ENSRNOT00000013463 | 0.967741513  | 2.61E-07 |
| TUCP_004725 | XLOC_208986 | ENSRNOT00000088054 | 0.968579197  | 2.29E-07 |
| TUCP_004725 | XLOC_208986 | ENSRNOT00000036658 | -0.953381465 | 1.60E-06 |
| TUCP_004725 | XLOC_208986 | ENSRNOT00000047663 | -0.969968993 | 1.83E-07 |
| TUCP_004725 | XLOC_208986 | ENSRNOT00000029202 | -0.975775871 | 6.31E-08 |
| TUCP_004725 | XLOC_208986 | ENSRNOT00000025791 | -0.953178082 | 1.64E-06 |
| TUCP_004725 | XLOC_208986 | ENSRNOT00000005489 | 0.961814029  | 6.00E-07 |
| TUCP_004725 | XLOC_208986 | ENSRNOT00000025794 | -0.963409326 | 4.86E-07 |
| TUCP_004725 | XLOC_208986 | ENSRNOT00000058111 | -0.954424891 | 1.43E-06 |
| TUCP_004725 | XLOC_208986 | ENSRNOT00000088279 | 0.954739063  | 1.39E-06 |

|             |             |                    |              |          |
|-------------|-------------|--------------------|--------------|----------|
| TUCP_004725 | XLOC_208986 | ENSRNOT00000009994 | -0.955084411 | 1.33E-06 |
| TUCP_004725 | XLOC_208986 | ENSRNOT00000012736 | 0.967154529  | 2.85E-07 |
| TUCP_004725 | XLOC_208986 | ENSRNOT00000077367 | -0.952576744 | 1.74E-06 |
| TUCP_004725 | XLOC_208986 | ENSRNOT0000002445  | -0.958089495 | 9.49E-07 |
| TUCP_004725 | XLOC_208986 | ENSRNOT00000027970 | 0.964283454  | 4.31E-07 |
| TUCP_004725 | XLOC_208986 | ENSRNOT00000009462 | 0.969254164  | 2.05E-07 |
| TUCP_004725 | XLOC_208986 | ENSRNOT00000024924 | -0.953323655 | 1.61E-06 |
| TUCP_004725 | XLOC_208986 | ENSRNOT00000079011 | -0.950068282 | 2.25E-06 |
| TUCP_004725 | XLOC_208986 | ENSRNOT00000000083 | -0.95610234  | 1.19E-06 |
| TUCP_004725 | XLOC_208986 | ENSRNOT00000018074 | -0.983112191 | 1.05E-08 |
| TUCP_004725 | XLOC_208986 | ENSRNOT00000037679 | 0.96661189   | 3.09E-07 |
| TUCP_004725 | XLOC_208986 | ENSRNOT00000014124 | 0.961320358  | 6.39E-07 |
| TUCP_004725 | XLOC_208986 | ENSRNOT00000043581 | -0.951383522 | 1.97E-06 |
| TUCP_004725 | XLOC_208986 | ENSRNOT00000000120 | 0.974888729  | 7.54E-08 |
| TUCP_004725 | XLOC_208986 | ENSRNOT00000013632 | 0.960405906  | 7.17E-07 |
| TUCP_004725 | XLOC_208986 | ENSRNOT00000078906 | -0.959989902 | 7.55E-07 |
| TUCP_004725 | XLOC_208986 | ENSRNOT00000009900 | -0.950297766 | 2.20E-06 |
| TUCP_004725 | XLOC_208986 | ENSRNOT00000028225 | 0.953467491  | 1.59E-06 |
| TUCP_004725 | XLOC_208986 | ENSRNOT00000066561 | -0.952999961 | 1.67E-06 |
| TUCP_004725 | XLOC_208986 | ENSRNOT00000015537 | 0.959692582  | 7.83E-07 |
| TUCP_004725 | XLOC_208986 | ENSRNOT00000015495 | -0.973396446 | 1.00E-07 |
| TUCP_004725 | XLOC_208986 | ENSRNOT00000040393 | 0.956856119  | 1.09E-06 |
| TUCP_004725 | XLOC_208986 | ENSRNOT00000025097 | 0.966061489  | 3.35E-07 |
| TUCP_004725 | XLOC_208986 | ENSRNOT00000067901 | -0.968392185 | 2.36E-07 |
| TUCP_004725 | XLOC_208986 | ENSRNOT00000016376 | -0.952940636 | 1.68E-06 |
| TUCP_004725 | XLOC_208986 | ENSRNOT00000012286 | -0.954856719 | 1.37E-06 |
| TUCP_004725 | XLOC_208986 | ENSRNOT00000021674 | 0.950077196  | 2.25E-06 |
| TUCP_004725 | XLOC_208986 | ENSRNOT00000036613 | -0.973004694 | 1.08E-07 |
| TUCP_004725 | XLOC_208986 | ENSRNOT00000083127 | 0.958375793  | 9.18E-07 |
| TUCP_004725 | XLOC_208986 | ENSRNOT00000025705 | 0.977454279  | 4.42E-08 |
| TUCP_004725 | XLOC_208986 | ENSRNOT00000008113 | -0.971901209 | 1.32E-07 |
| TUCP_004725 | XLOC_208986 | ENSRNOT00000022552 | -0.953471878 | 1.59E-06 |
| TUCP_004725 | XLOC_208986 | ENSRNOT00000047105 | 0.968462382  | 2.33E-07 |
| TUCP_004725 | XLOC_208986 | ENSRNOT00000007698 | -0.956825402 | 1.10E-06 |
| TUCP_004725 | XLOC_208986 | ENSRNOT00000078070 | 0.96734021   | 2.77E-07 |
| TUCP_004725 | XLOC_208986 | ENSRNOT00000020051 | 0.965863618  | 3.45E-07 |
| TUCP_004725 | XLOC_208986 | ENSRNOT00000026279 | -0.955737092 | 1.24E-06 |
| TUCP_004725 | XLOC_208986 | ENSRNOT00000004241 | -0.954727057 | 1.39E-06 |
| TUCP_004725 | XLOC_208986 | ENSRNOT0000003087  | 0.958468184  | 9.08E-07 |
| TUCP_004725 | XLOC_208986 | ENSRNOT00000015678 | -0.953314267 | 1.61E-06 |
| TUCP_004725 | XLOC_208986 | ENSRNOT00000082914 | 0.953799404  | 1.53E-06 |
| TUCP_004725 | XLOC_208986 | ENSRNOT00000020197 | -0.959291389 | 8.22E-07 |
| TUCP_004725 | XLOC_208986 | ENSRNOT00000082863 | 0.957564742  | 1.01E-06 |
| TUCP_004725 | XLOC_208986 | ENSRNOT00000049459 | -0.963212184 | 4.99E-07 |
| TUCP_004725 | XLOC_208986 | ENSRNOT00000087011 | -0.967626861 | 2.65E-07 |
| TUCP_004725 | XLOC_208986 | ENSRNOT00000071166 | 0.963884101  | 4.55E-07 |
| TUCP_004725 | XLOC_208986 | ENSRNOT00000084567 | 0.961650002  | 6.13E-07 |
| TUCP_004725 | XLOC_208986 | ENSRNOT00000008361 | 0.951956939  | 1.86E-06 |
| TUCP_004725 | XLOC_208986 | ENSRNOT00000013851 | -0.961304195 | 6.40E-07 |
| TUCP_004725 | XLOC_208986 | ENSRNOT00000085458 | -0.957342409 | 1.04E-06 |
| TUCP_004725 | XLOC_208986 | ENSRNOT0000007028  | -0.972820338 | 1.12E-07 |

|             |             |                     |              |          |
|-------------|-------------|---------------------|--------------|----------|
| TUCP_004725 | XLOC_208986 | ENSRNOT00000001507  | 0.965823248  | 3.47E-07 |
| TUCP_004725 | XLOC_208986 | ENSRNOT000000083568 | 0.966168758  | 3.30E-07 |
| TUCP_004725 | XLOC_208986 | ENSRNOT000000039177 | -0.973500699 | 9.84E-08 |
| TUCP_004725 | XLOC_208986 | ENSRNOT000000081047 | 0.954393027  | 1.44E-06 |
| TUCP_004725 | XLOC_208986 | ENSRNOT000000019759 | 0.966456136  | 3.16E-07 |
| TUCP_004725 | XLOC_208986 | ENSRNOT000000002621 | 0.950322573  | 2.19E-06 |
| TUCP_004725 | XLOC_208986 | ENSRNOT000000030082 | 0.967117838  | 2.86E-07 |
| TUCP_004725 | XLOC_208986 | ENSRNOT000000025517 | 0.960856802  | 6.78E-07 |
| TUCP_004725 | XLOC_208986 | ENSRNOT00000000477  | -0.954804422 | 1.38E-06 |
| TUCP_004725 | XLOC_208986 | ENSRNOT00000000577  | 0.968467454  | 2.33E-07 |
| TUCP_004725 | XLOC_208986 | ENSRNOT000000065045 | 0.958927355  | 8.59E-07 |
| TUCP_004725 | XLOC_208986 | ENSRNOT000000028290 | -0.96133417  | 6.38E-07 |
| TUCP_004725 | XLOC_208986 | ENSRNOT000000088133 | -0.952959358 | 1.68E-06 |
| TUCP_004725 | XLOC_208986 | ENSRNOT000000080677 | -0.954569529 | 1.41E-06 |
| TUCP_004725 | XLOC_208986 | ENSRNOT000000046490 | -0.957113757 | 1.06E-06 |
| TUCP_004725 | XLOC_208986 | ENSRNOT000000016254 | -0.951873561 | 1.88E-06 |
| TUCP_004725 | XLOC_208986 | ENSRNOT000000083968 | -0.967662623 | 2.64E-07 |
| TUCP_004725 | XLOC_208986 | ENSRNOT000000037133 | 0.986502517  | 3.45E-09 |
| TUCP_004725 | XLOC_208986 | ENSRNOT00000001893  | 0.96817374   | 2.44E-07 |
| TUCP_004725 | XLOC_208986 | ENSRNOT000000026831 | 0.973143065  | 1.05E-07 |
| TUCP_004725 | XLOC_208986 | ENSRNOT000000074985 | -0.952342459 | 1.79E-06 |
| TUCP_004725 | XLOC_208986 | ENSRNOT000000016445 | 0.980477282  | 2.16E-08 |
| TUCP_004725 | XLOC_208986 | ENSRNOT000000019133 | 0.972607841  | 1.16E-07 |
| TUCP_004725 | XLOC_208986 | ENSRNOT000000011956 | 0.966444437  | 3.17E-07 |
| TUCP_004725 | XLOC_208986 | ENSRNOT000000078185 | -0.959567326 | 7.95E-07 |
| TUCP_004725 | XLOC_208986 | ENSRNOT000000024119 | 0.959874154  | 7.66E-07 |
| TUCP_004725 | XLOC_208986 | ENSRNOT000000075800 | -0.959013483 | 8.50E-07 |
| TUCP_004725 | XLOC_208986 | ENSRNOT00000006824  | -0.96984627  | 1.87E-07 |
| TUCP_004725 | XLOC_208986 | ENSRNOT000000012775 | -0.959645065 | 7.88E-07 |
| TUCP_004725 | XLOC_208986 | ENSRNOT000000032667 | -0.950926072 | 2.06E-06 |
| TUCP_004725 | XLOC_208986 | ENSRNOT000000086260 | -0.981166457 | 1.81E-08 |
| TUCP_004725 | XLOC_208986 | ENSRNOT000000061392 | 0.958964676  | 8.55E-07 |
| TUCP_004725 | XLOC_208986 | ENSRNOT000000001099 | -0.954606037 | 1.41E-06 |
| TUCP_004725 | XLOC_208986 | ENSRNOT000000009811 | 0.983651956  | 8.95E-09 |
| TUCP_004725 | XLOC_208986 | ENSRNOT000000010683 | -0.957139034 | 1.06E-06 |
| TUCP_004725 | XLOC_208986 | ENSRNOT000000001158 | 0.954069693  | 1.49E-06 |
| TUCP_004725 | XLOC_208986 | ENSRNOT000000045488 | 0.960649544  | 6.96E-07 |
| TUCP_004725 | XLOC_208986 | ENSRNOT000000090853 | -0.957300468 | 1.04E-06 |
| TUCP_004725 | XLOC_208986 | ENSRNOT000000084597 | -0.959454105 | 8.06E-07 |
| TUCP_004725 | XLOC_208986 | ENSRNOT000000032843 | 0.965529123  | 3.62E-07 |
| TUCP_004725 | XLOC_208986 | ENSRNOT000000006709 | -0.960822669 | 6.81E-07 |
| TUCP_004725 | XLOC_208986 | ENSRNOT000000019816 | -0.963609557 | 4.73E-07 |
| TUCP_004725 | XLOC_208986 | ENSRNOT000000020383 | 0.972842593  | 1.11E-07 |
| TUCP_004725 | XLOC_208986 | ENSRNOT000000015518 | -0.952353206 | 1.78E-06 |
| TUCP_004725 | XLOC_208986 | ENSRNOT000000000302 | 0.955105811  | 1.33E-06 |
| TUCP_004725 | XLOC_208986 | ENSRNOT000000030706 | -0.952522625 | 1.75E-06 |
| TUCP_004725 | XLOC_208986 | ENSRNOT000000065615 | 0.964724599  | 4.05E-07 |
| TUCP_004725 | XLOC_208986 | ENSRNOT000000026909 | -0.954374337 | 1.44E-06 |
| TUCP_004725 | XLOC_208986 | ENSRNOT000000008244 | 0.966806465  | 3.00E-07 |
| TUCP_004725 | XLOC_208986 | ENSRNOT00000000658  | 0.960903665  | 6.74E-07 |
| TUCP_004725 | XLOC_208986 | ENSRNOT000000065168 | 0.959434342  | 8.08E-07 |

|             |             |                     |              |          |
|-------------|-------------|---------------------|--------------|----------|
| TUCP_004725 | XLOC_208986 | ENSRNOT00000083632  | -0.959373523 | 8.14E-07 |
| TUCP_004725 | XLOC_208986 | ENSRNOT00000000717  | -0.96719655  | 2.83E-07 |
| TUCP_004725 | XLOC_208986 | ENSRNOT00000049048  | -0.957131598 | 1.06E-06 |
| TUCP_004725 | XLOC_208986 | ENSRNOT00000000718  | 0.951477843  | 1.95E-06 |
| TUCP_004725 | XLOC_208986 | ENSRNOT00000049725  | -0.952268139 | 1.80E-06 |
| TUCP_004725 | XLOC_208986 | ENSRNOT00000086122  | 0.961032467  | 6.63E-07 |
| TUCP_004725 | XLOC_208986 | ENSRNOT00000017504  | 0.955955232  | 1.21E-06 |
| TUCP_004725 | XLOC_208986 | ENSRNOT00000023763  | -0.966157915 | 3.30E-07 |
| TUCP_004725 | XLOC_208986 | ENSRNOT00000010993  | 0.952384632  | 1.78E-06 |
| TUCP_004725 | XLOC_208986 | ENSRNOT00000059181  | 0.95279758   | 1.70E-06 |
| TUCP_004725 | XLOC_208986 | ENSRNOT00000017291  | -0.962934281 | 5.18E-07 |
| TUCP_004725 | XLOC_208986 | ENSRNOT00000003691  | -0.966728013 | 3.04E-07 |
| TUCP_004725 | XLOC_208986 | ENSRNOT00000010852  | 0.968625238  | 2.27E-07 |
| TUCP_004725 | XLOC_208986 | ENSRNOT00000080216  | -0.959286835 | 8.23E-07 |
| TUCP_004725 | XLOC_208986 | ENSRNOT00000081678  | 0.966939971  | 2.94E-07 |
| TUCP_004725 | XLOC_208986 | ENSRNOT00000017765  | 0.957973232  | 9.62E-07 |
| TUCP_004725 | XLOC_208986 | ENSRNOT00000017761  | 0.969747173  | 1.90E-07 |
| TUCP_004725 | XLOC_208986 | ENSRNOT00000023543  | -0.979655567 | 2.65E-08 |
| TUCP_004725 | XLOC_208986 | ENSRNOT00000028737  | -0.954037301 | 1.50E-06 |
| TUCP_004725 | XLOC_208986 | ENSRNOT00000080608  | 0.958430093  | 9.12E-07 |
| TUCP_004725 | XLOC_208986 | ENSRNOT00000018634  | -0.965101344 | 3.84E-07 |
| TUCP_004725 | XLOC_208986 | ENSRNOT00000026426  | 0.964191271  | 4.37E-07 |
| TUCP_004725 | XLOC_208986 | ENSRNOT00000039341  | 0.950982238  | 2.05E-06 |
| TUCP_004725 | XLOC_208986 | ENSRNOT00000065501  | 0.951732644  | 1.90E-06 |
| TUCP_004725 | XLOC_208986 | ENSRNOT00000055386  | 0.964815013  | 4.00E-07 |
| TUCP_004725 | XLOC_208986 | ENSRNOT00000038212  | -0.962082617 | 5.79E-07 |
| TUCP_004725 | XLOC_208986 | ENSRNOT00000042125  | 0.967385475  | 2.75E-07 |
| TUCP_004725 | XLOC_208986 | ENSRNOT00000025460  | 0.95159837   | 1.93E-06 |
| TUCP_004725 | XLOC_208986 | ENSRNOT00000010541  | 0.953165073  | 1.64E-06 |
| TUCP_004725 | XLOC_208986 | ENSRNOT00000026760  | -0.979873093 | 2.51E-08 |
| TUCP_004725 | XLOC_208986 | ENSRNOT00000017687  | -0.960668018 | 6.94E-07 |
| TUCP_004725 | XLOC_208986 | ENSRNOT00000081077  | -0.95695423  | 1.08E-06 |
| TUCP_004725 | XLOC_208986 | ENSRNOT00000016568  | 0.969295312  | 2.04E-07 |
| TUCP_004725 | XLOC_208986 | ENSRNOT00000027360  | -0.956730164 | 1.11E-06 |
| TUCP_004725 | XLOC_208986 | ENSRNOT00000024947  | -0.95810329  | 9.48E-07 |
| TUCP_004725 | XLOC_208986 | ENSRNOT00000023388  | -0.95278895  | 1.71E-06 |
| TUCP_004725 | XLOC_208986 | ENSRNOT00000073643  | -0.966807517 | 3.00E-07 |
| TUCP_004725 | XLOC_208986 | ENSRNOT00000027967  | 0.971396716  | 1.44E-07 |
| TUCP_004725 | XLOC_208986 | ENSRNOT00000024938  | -0.96069008  | 6.92E-07 |
| TUCP_004725 | XLOC_208986 | ENSRNOT00000016060  | 0.962251034  | 5.67E-07 |
| TUCP_004725 | XLOC_208986 | ENSRNOT00000037039  | -0.956457216 | 1.15E-06 |
| TUCP_004725 | XLOC_208986 | ENSRNOT00000024933  | -0.954236257 | 1.46E-06 |
| TUCP_004725 | XLOC_208986 | ENSRNOT00000047210  | 0.955268016  | 1.31E-06 |
| TUCP_004725 | XLOC_208986 | ENSRNOT00000046639  | 0.972229618  | 1.24E-07 |
| TUCP_004725 | XLOC_208986 | ENSRNOT00000070886  | -0.951278593 | 1.99E-06 |
| TUCP_000302 | XLOC_009503 | ENSRNOT00000024186  | 0.959240188  | 8.27E-07 |
| TUCP_000302 | XLOC_009503 | ENSRNOT00000074753  | 0.973913821  | 9.11E-08 |
| TUCP_000302 | XLOC_009503 | ENSRNOT00000004876  | 0.952003931  | 1.85E-06 |
| TUCP_000302 | XLOC_009503 | ENSRNOT000000041904 | 0.978307202  | 3.65E-08 |
| TUCP_000302 | XLOC_009503 | ENSRNOT00000083487  | 0.966147115  | 3.31E-07 |
| TUCP_000302 | XLOC_009503 | ENSRNOT00000077990  | 0.978307202  | 3.65E-08 |

|             |             |                    |              |          |
|-------------|-------------|--------------------|--------------|----------|
| TUCP_000302 | XLOC_009503 | ENSRNOT00000038826 | 0.977368309  | 4.50E-08 |
| TUCP_000302 | XLOC_009503 | ENSRNOT00000073792 | 0.952884661  | 1.69E-06 |
| TUCP_000302 | XLOC_009503 | ENSRNOT00000021243 | 0.956602191  | 1.13E-06 |
| TUCP_000302 | XLOC_009503 | ENSRNOT00000060250 | 0.977260129  | 4.61E-08 |
| TUCP_000302 | XLOC_009503 | ENSRNOT00000091934 | 0.978307202  | 3.65E-08 |
| TUCP_000302 | XLOC_009503 | ENSRNOT00000046585 | 0.980660753  | 2.06E-08 |
| TUCP_000302 | XLOC_009503 | ENSRNOT00000082403 | -0.956904821 | 1.09E-06 |
| TUCP_000302 | XLOC_009503 | ENSRNOT00000080794 | 0.955668792  | 1.25E-06 |
| TUCP_000302 | XLOC_009503 | ENSRNOT00000002220 | 0.952518833  | 1.75E-06 |
| TUCP_000302 | XLOC_009503 | ENSRNOT00000014456 | 0.967255766  | 2.81E-07 |
| TUCP_000302 | XLOC_009503 | ENSRNOT00000031076 | 0.950968055  | 2.06E-06 |
| TUCP_000302 | XLOC_009503 | ENSRNOT00000086349 | 0.961237209  | 6.46E-07 |
| TUCP_000302 | XLOC_009503 | ENSRNOT00000044145 | 0.978307202  | 3.65E-08 |
| TUCP_000302 | XLOC_009503 | ENSRNOT00000088381 | 0.981580103  | 1.62E-08 |
| TUCP_000302 | XLOC_009503 | ENSRNOT00000072939 | 0.95797735   | 9.62E-07 |
| TUCP_000302 | XLOC_009503 | ENSRNOT00000011743 | 0.962120598  | 5.76E-07 |
| TUCP_000302 | XLOC_009503 | ENSRNOT00000089929 | 0.978307202  | 3.65E-08 |
| TUCP_000302 | XLOC_009503 | ENSRNOT00000088624 | 0.978307202  | 3.65E-08 |
| TUCP_000302 | XLOC_009503 | ENSRNOT00000085659 | 0.985641399  | 4.69E-09 |
| TUCP_000302 | XLOC_009503 | ENSRNOT00000015866 | 0.982634834  | 1.21E-08 |
| TUCP_000302 | XLOC_009503 | ENSRNOT00000078633 | 0.978307202  | 3.65E-08 |
| TUCP_000302 | XLOC_009503 | ENSRNOT00000034907 | 0.978531415  | 3.46E-08 |
| TUCP_000302 | XLOC_009503 | ENSRNOT00000093230 | 0.962207636  | 5.70E-07 |
| TUCP_000302 | XLOC_009503 | ENSRNOT00000051835 | 0.978307202  | 3.65E-08 |
| TUCP_000302 | XLOC_009503 | ENSRNOT00000079087 | 0.978307202  | 3.65E-08 |
| TUCP_000302 | XLOC_009503 | ENSRNOT00000037206 | 0.978307202  | 3.65E-08 |
| TUCP_000302 | XLOC_009503 | ENSRNOT00000020329 | 0.950724117  | 2.11E-06 |
| TUCP_000302 | XLOC_009503 | ENSRNOT00000080590 | 0.978089911  | 3.83E-08 |
| TUCP_000302 | XLOC_009503 | ENSRNOT00000027552 | 0.977109718  | 4.76E-08 |
| TUCP_000302 | XLOC_009503 | ENSRNOT00000077014 | 0.971356821  | 1.45E-07 |
| TUCP_000302 | XLOC_009503 | ENSRNOT00000080453 | 0.978783009  | 3.27E-08 |
| TUCP_000302 | XLOC_009503 | ENSRNOT00000089057 | 0.962187035  | 5.71E-07 |
| TUCP_000302 | XLOC_009503 | ENSRNOT00000057729 | 0.980492864  | 2.15E-08 |
| TUCP_000302 | XLOC_009503 | ENSRNOT00000061284 | 0.95397004   | 1.51E-06 |
| TUCP_000302 | XLOC_009503 | ENSRNOT00000071884 | 0.985929998  | 4.24E-09 |
| TUCP_000302 | XLOC_009503 | ENSRNOT00000066839 | 0.961411479  | 6.32E-07 |
| TUCP_000302 | XLOC_009503 | ENSRNOT00000031205 | 0.980834463  | 1.97E-08 |
| TUCP_000302 | XLOC_009503 | ENSRNOT00000078663 | 0.957277749  | 1.04E-06 |
| TUCP_000302 | XLOC_009503 | ENSRNOT00000037169 | 0.958733424  | 8.79E-07 |
| TUCP_000302 | XLOC_009503 | ENSRNOT00000029634 | 0.966225876  | 3.27E-07 |
| TUCP_000302 | XLOC_009503 | ENSRNOT00000093579 | 0.985795828  | 4.45E-09 |
| TUCP_000302 | XLOC_009503 | ENSRNOT00000000215 | 0.953445236  | 1.59E-06 |
| TUCP_000302 | XLOC_009503 | ENSRNOT00000065460 | 0.978307202  | 3.65E-08 |
| TUCP_000302 | XLOC_009503 | ENSRNOT00000003817 | 0.966836389  | 2.99E-07 |
| TUCP_000302 | XLOC_009503 | ENSRNOT00000016713 | 0.978307202  | 3.65E-08 |
| TUCP_000302 | XLOC_009503 | ENSRNOT00000079260 | 0.976461823  | 5.47E-08 |
| TUCP_000302 | XLOC_009503 | ENSRNOT00000039294 | 0.978307202  | 3.65E-08 |
| TUCP_000302 | XLOC_009503 | ENSRNOT00000024337 | 0.966493882  | 3.14E-07 |
| TUCP_000301 | XLOC_009502 | ENSRNOT00000074753 | 0.951834789  | 1.88E-06 |
| TUCP_000301 | XLOC_009502 | ENSRNOT00000041904 | 0.956141355  | 1.19E-06 |
| TUCP_000301 | XLOC_009502 | ENSRNOT00000077990 | 0.956141355  | 1.19E-06 |

|             |             |                    |              |          |
|-------------|-------------|--------------------|--------------|----------|
| TUCP_000301 | XLOC_009502 | ENSRNOT00000038826 | 0.954433943  | 1.43E-06 |
| TUCP_000301 | XLOC_009502 | ENSRNOT00000072306 | 0.95359053   | 1.57E-06 |
| TUCP_000301 | XLOC_009502 | ENSRNOT00000071884 | 0.987832079  | 2.06E-09 |
| TUCP_000301 | XLOC_009502 | ENSRNOT00000060250 | 0.955624496  | 1.26E-06 |
| TUCP_000301 | XLOC_009502 | ENSRNOT00000091934 | 0.956141355  | 1.19E-06 |
| TUCP_000301 | XLOC_009502 | ENSRNOT00000082403 | -0.966018678 | 3.37E-07 |
| TUCP_000301 | XLOC_009502 | ENSRNOT00000031076 | 0.970158897  | 1.77E-07 |
| TUCP_000301 | XLOC_009502 | ENSRNOT00000086349 | 0.974193077  | 8.63E-08 |
| TUCP_000301 | XLOC_009502 | ENSRNOT00000044145 | 0.956141355  | 1.19E-06 |
| TUCP_000301 | XLOC_009502 | ENSRNOT00000089929 | 0.956141355  | 1.19E-06 |
| TUCP_000301 | XLOC_009502 | ENSRNOT00000088624 | 0.956141355  | 1.19E-06 |
| TUCP_000301 | XLOC_009502 | ENSRNOT00000085659 | 0.969887567  | 1.85E-07 |
| TUCP_000301 | XLOC_009502 | ENSRNOT00000015866 | 0.957512147  | 1.02E-06 |
| TUCP_000301 | XLOC_009502 | ENSRNOT00000051835 | 0.956141355  | 1.19E-06 |
| TUCP_000301 | XLOC_009502 | ENSRNOT00000079087 | 0.956141355  | 1.19E-06 |
| TUCP_000301 | XLOC_009502 | ENSRNOT00000037206 | 0.956141355  | 1.19E-06 |
| TUCP_000301 | XLOC_009502 | ENSRNOT00000020329 | 0.950982259  | 2.05E-06 |
| TUCP_000301 | XLOC_009502 | ENSRNOT00000080590 | 0.955745182  | 1.24E-06 |
| TUCP_000301 | XLOC_009502 | ENSRNOT00000027552 | 0.954993677  | 1.35E-06 |
| TUCP_000301 | XLOC_009502 | ENSRNOT00000080453 | 0.956521213  | 1.14E-06 |
| TUCP_000301 | XLOC_009502 | ENSRNOT00000057729 | 0.96267289   | 5.36E-07 |
| TUCP_000301 | XLOC_009502 | ENSRNOT00000078633 | 0.956141355  | 1.19E-06 |
| TUCP_000301 | XLOC_009502 | ENSRNOT00000013242 | -0.956677379 | 1.12E-06 |
| TUCP_000301 | XLOC_009502 | ENSRNOT00000073792 | 0.953124542  | 1.65E-06 |
| TUCP_000301 | XLOC_009502 | ENSRNOT00000093579 | 0.97934114   | 2.86E-08 |
| TUCP_000301 | XLOC_009502 | ENSRNOT00000000215 | 0.971345208  | 1.45E-07 |
| TUCP_000301 | XLOC_009502 | ENSRNOT00000065460 | 0.956141355  | 1.19E-06 |
| TUCP_000301 | XLOC_009502 | ENSRNOT00000016713 | 0.956141355  | 1.19E-06 |
| TUCP_000301 | XLOC_009502 | ENSRNOT00000079260 | 0.951817647  | 1.89E-06 |
| TUCP_000301 | XLOC_009502 | ENSRNOT00000039294 | 0.956141355  | 1.19E-06 |
| TUCP_000301 | XLOC_009502 | ENSRNOT00000068389 | 0.951629147  | 1.92E-06 |
| TUCP_000469 | XLOC_015900 | ENSRNOT00000086959 | -0.962962063 | 5.16E-07 |
| TUCP_004642 | XLOC_204272 | ENSRNOT00000004885 | 0.959183498  | 8.33E-07 |
| TUCP_004642 | XLOC_204272 | ENSRNOT00000048240 | 0.959714599  | 7.81E-07 |
| TUCP_004642 | XLOC_204272 | ENSRNOT00000089515 | 0.965428305  | 3.67E-07 |
| TUCP_004642 | XLOC_204272 | ENSRNOT00000074276 | 0.965408923  | 3.68E-07 |
| TUCP_000261 | XLOC_007664 | ENSRNOT00000016742 | -0.964359635 | 4.27E-07 |
| TUCP_004640 | XLOC_204204 | ENSRNOT00000083189 | 0.952815591  | 1.70E-06 |
| TUCP_000263 | XLOC_007669 | ENSRNOT0000002403  | 0.953561882  | 1.57E-06 |
| TUCP_000263 | XLOC_007669 | ENSRNOT00000026426 | 0.951785532  | 1.89E-06 |
| TUCP_000263 | XLOC_007669 | ENSRNOT00000041494 | 0.965331026  | 3.72E-07 |
| TUCP_000263 | XLOC_007669 | ENSRNOT00000081512 | 0.953578058  | 1.57E-06 |
| TUCP_000263 | XLOC_007669 | ENSRNOT00000022796 | 0.956346966  | 1.16E-06 |
| TUCP_000263 | XLOC_007669 | ENSRNOT00000090665 | 0.95273734   | 1.72E-06 |
| TUCP_000263 | XLOC_007669 | ENSRNOT00000012736 | 0.951668942  | 1.91E-06 |
| TUCP_000263 | XLOC_007669 | ENSRNOT00000016975 | 0.966982061  | 2.92E-07 |
| TUCP_000263 | XLOC_007669 | ENSRNOT00000074361 | 0.961727232  | 6.06E-07 |
| TUCP_000263 | XLOC_007669 | ENSRNOT00000022419 | 0.958499236  | 9.04E-07 |
| TUCP_000264 | XLOC_007846 | ENSRNOT00000090828 | 0.953916155  | 1.51E-06 |
| TUCP_004647 | XLOC_204403 | ENSRNOT00000084075 | 0.996106112  | 7.00E-12 |
| TUCP_004647 | XLOC_204403 | ENSRNOT00000012880 | 0.968043129  | 2.49E-07 |



|             |             |                    |             |          |
|-------------|-------------|--------------------|-------------|----------|
| TUCP_004647 | XLOC_204403 | ENSRNOT00000074465 | 1           | 0        |
| TUCP_004647 | XLOC_204403 | ENSRNOT00000090898 | 0.961670541 | 6.11E-07 |
| TUCP_004647 | XLOC_204403 | ENSRNOT00000079805 | 0.997980451 | 2.64E-13 |
| TUCP_004647 | XLOC_204403 | ENSRNOT00000040912 | 1           | 0        |
| TUCP_004647 | XLOC_204403 | ENSRNOT00000072648 | 1           | 0        |
| TUCP_004647 | XLOC_204403 | ENSRNOT00000007398 | 0.989054103 | 1.21E-09 |
| TUCP_004647 | XLOC_204403 | ENSRNOT00000070803 | 1           | 0        |
| TUCP_004647 | XLOC_204403 | ENSRNOT00000012196 | 1           | 0        |
| TUCP_004647 | XLOC_204403 | ENSRNOT00000085772 | 1           | 0        |
| TUCP_004647 | XLOC_204403 | ENSRNOT00000093284 | 0.999975856 | 6.46E-23 |
| TUCP_004647 | XLOC_204403 | ENSRNOT00000086374 | 0.993568904 | 8.57E-11 |
| TUCP_004647 | XLOC_204403 | ENSRNOT00000015270 | 1           | 0        |
| TUCP_004647 | XLOC_204403 | ENSRNOT00000046192 | 1           | 0        |
| TUCP_004647 | XLOC_204403 | ENSRNOT00000044226 | 1           | 0        |
| TUCP_004647 | XLOC_204403 | ENSRNOT00000081898 | 0.989837012 | 8.39E-10 |
| TUCP_004647 | XLOC_204403 | ENSRNOT00000081954 | 0.964005219 | 4.48E-07 |
| TUCP_004647 | XLOC_204403 | ENSRNOT00000080291 | 0.998427671 | 7.55E-14 |
| TUCP_004647 | XLOC_204403 | ENSRNOT00000004293 | 0.984239049 | 7.46E-09 |
| TUCP_004647 | XLOC_204403 | ENSRNOT00000078231 | 0.960455489 | 7.13E-07 |
| TUCP_004647 | XLOC_204403 | ENSRNOT00000002834 | 1           | 0        |
| TUCP_004647 | XLOC_204403 | ENSRNOT00000001464 | 1           | 0        |
| TUCP_004647 | XLOC_204403 | ENSRNOT00000090716 | 0.994769629 | 3.06E-11 |
| TUCP_004647 | XLOC_204403 | ENSRNOT00000083542 | 0.972568514 | 1.17E-07 |
| TUCP_004647 | XLOC_204403 | ENSRNOT00000076044 | 1           | 0        |
| TUCP_004647 | XLOC_204403 | ENSRNOT00000074353 | 1           | 0        |
| TUCP_004647 | XLOC_204403 | ENSRNOT00000043510 | 0.958144129 | 9.43E-07 |
| TUCP_004647 | XLOC_204403 | ENSRNOT00000087122 | 0.980089513 | 2.38E-08 |
| TUCP_004647 | XLOC_204403 | ENSRNOT00000074295 | 0.987777006 | 2.11E-09 |
| TUCP_004647 | XLOC_204403 | ENSRNOT00000057873 | 1           | 0        |
| TUCP_004647 | XLOC_204403 | ENSRNOT00000083002 | 0.988874897 | 1.32E-09 |
| TUCP_004647 | XLOC_204403 | ENSRNOT00000088399 | 0.999999855 | 4.99E-34 |
| TUCP_004647 | XLOC_204403 | ENSRNOT00000086248 | 1           | 0        |
| TUCP_004647 | XLOC_204403 | ENSRNOT00000089750 | 0.999992758 | 1.57E-25 |
| TUCP_004647 | XLOC_204403 | ENSRNOT00000030517 | 0.971225224 | 1.48E-07 |
| TUCP_004647 | XLOC_204403 | ENSRNOT00000034772 | 0.994265187 | 4.84E-11 |
| TUCP_004647 | XLOC_204403 | ENSRNOT00000089305 | 0.969641693 | 1.93E-07 |
| TUCP_004647 | XLOC_204403 | ENSRNOT00000024580 | 0.954183021 | 1.47E-06 |
| TUCP_004647 | XLOC_204403 | ENSRNOT00000064601 | 0.966578038 | 3.11E-07 |
| TUCP_004647 | XLOC_204403 | ENSRNOT00000015870 | 0.965901306 | 3.43E-07 |
| TUCP_004647 | XLOC_204403 | ENSRNOT00000080812 | 0.992998865 | 1.31E-10 |
| TUCP_004647 | XLOC_204403 | ENSRNOT00000092755 | 1           | 0        |
| TUCP_004647 | XLOC_204403 | ENSRNOT00000031683 | 1           | 0        |
| TUCP_004647 | XLOC_204403 | ENSRNOT00000087764 | 0.988156196 | 1.80E-09 |
| TUCP_000578 | XLOC_020570 | ENSRNOT00000000008 | 1           | 0        |
| TUCP_000578 | XLOC_020570 | ENSRNOT00000060048 | 0.998711457 | 2.79E-14 |
| TUCP_000578 | XLOC_020570 | ENSRNOT00000082304 | 0.996875989 | 2.33E-12 |
| TUCP_000578 | XLOC_020570 | ENSRNOT00000006219 | 1           | 0        |
| TUCP_000578 | XLOC_020570 | ENSRNOT00000065376 | 1           | 1.33E-79 |
| TUCP_000578 | XLOC_020570 | ENSRNOT00000081433 | 0.984469223 | 6.93E-09 |
| TUCP_000578 | XLOC_020570 | ENSRNOT00000083575 | 1           | 0        |
| TUCP_000578 | XLOC_020570 | ENSRNOT00000087739 | 1           | 1.33E-79 |

|             |             |                    |              |          |
|-------------|-------------|--------------------|--------------|----------|
| TUCP_000578 | XLOC_020570 | ENSRNOT00000079826 | 1            | 0        |
| TUCP_000578 | XLOC_020570 | ENSRNOT00000025770 | 0.993828251  | 6.98E-11 |
| TUCP_000578 | XLOC_020570 | ENSRNOT00000088244 | 0.973479481  | 9.88E-08 |
| TUCP_000578 | XLOC_020570 | ENSRNOT00000048523 | 1            | 0        |
| TUCP_000578 | XLOC_020570 | ENSRNOT00000079365 | 0.958936699  | 8.58E-07 |
| TUCP_000578 | XLOC_020570 | ENSRNOT00000020229 | 0.960002785  | 7.54E-07 |
| TUCP_000578 | XLOC_020570 | ENSRNOT00000026428 | 0.996986683  | 1.95E-12 |
| TUCP_000578 | XLOC_020570 | ENSRNOT00000085673 | 1            | 0        |
| TUCP_000578 | XLOC_020570 | ENSRNOT00000072972 | 0.981476166  | 1.67E-08 |
| TUCP_000578 | XLOC_020570 | ENSRNOT00000050573 | 1            | 0        |
| TUCP_000578 | XLOC_020570 | ENSRNOT00000089876 | -0.953630353 | 1.56E-06 |
| TUCP_000578 | XLOC_020570 | ENSRNOT00000074378 | 0.998901807  | 1.26E-14 |
| TUCP_000578 | XLOC_020570 | ENSRNOT00000093571 | 1            | 0        |
| TUCP_000578 | XLOC_020570 | ENSRNOT00000090581 | 1            | 0        |
| TUCP_000578 | XLOC_020570 | ENSRNOT00000076239 | 0.98020752   | 2.31E-08 |
| TUCP_000578 | XLOC_020570 | ENSRNOT00000065485 | 1            | 1.33E-79 |
| TUCP_000578 | XLOC_020570 | ENSRNOT0000006356  | 0.999544279  | 1.55E-16 |
| TUCP_000578 | XLOC_020570 | ENSRNOT00000087199 | 0.974421555  | 8.26E-08 |
| TUCP_000578 | XLOC_020570 | ENSRNOT00000022091 | 1            | 0        |
| TUCP_000578 | XLOC_020570 | ENSRNOT00000064764 | 0.98460888   | 6.63E-09 |
| TUCP_000578 | XLOC_020570 | ENSRNOT00000076927 | 0.971163156  | 1.50E-07 |
| TUCP_000578 | XLOC_020570 | ENSRNOT00000092395 | 0.999522978  | 1.94E-16 |
| TUCP_000268 | XLOC_008405 | ENSRNOT00000082545 | 0.963501991  | 4.80E-07 |
| TUCP_004648 | XLOC_204472 | ENSRNOT00000042201 | 0.950443333  | 2.17E-06 |
| TUCP_004649 | XLOC_204597 | ENSRNOT00000021243 | 0.962833072  | 5.25E-07 |
| TUCP_004649 | XLOC_204597 | ENSRNOT00000061047 | 0.99646948   | 4.29E-12 |
| TUCP_004649 | XLOC_204597 | ENSRNOT00000042721 | 0.995907896  | 8.97E-12 |
| TUCP_004649 | XLOC_204597 | ENSRNOT00000064613 | 0.969615903  | 1.94E-07 |
| TUCP_004649 | XLOC_204597 | ENSRNOT00000026932 | 0.974011301  | 8.94E-08 |
| TUCP_000488 | XLOC_016908 | ENSRNOT00000072303 | 0.961668681  | 6.11E-07 |
| TUCP_000488 | XLOC_016908 | ENSRNOT00000083701 | 0.956149969  | 1.19E-06 |
| TUCP_000526 | XLOC_018268 | ENSRNOT00000061047 | 0.959396048  | 8.12E-07 |
| TUCP_000526 | XLOC_018268 | ENSRNOT00000021243 | 0.955670204  | 1.25E-06 |
| TUCP_000526 | XLOC_018268 | ENSRNOT00000042721 | 0.958327776  | 9.23E-07 |
| TUCP_000526 | XLOC_018268 | ENSRNOT00000031365 | 0.957740815  | 9.89E-07 |
| TUCP_000526 | XLOC_018268 | ENSRNOT00000078663 | 0.951871856  | 1.88E-06 |
| TUCP_000526 | XLOC_018268 | ENSRNOT00000064613 | 0.986198402  | 3.85E-09 |
| TUCP_000526 | XLOC_018268 | ENSRNOT00000017770 | 0.95521975   | 1.32E-06 |
| TUCP_002235 | XLOC_093095 | ENSRNOT00000026032 | 0.954924728  | 1.36E-06 |
| TUCP_002235 | XLOC_093095 | ENSRNOT00000081455 | 0.980535869  | 2.13E-08 |
| TUCP_002235 | XLOC_093095 | ENSRNOT00000034090 | 0.985052998  | 5.73E-09 |
| TUCP_002235 | XLOC_093095 | ENSRNOT00000064936 | 0.960654668  | 6.95E-07 |
| TUCP_000520 | XLOC_017747 | ENSRNOT00000085195 | 0.999404969  | 5.87E-16 |
| TUCP_000520 | XLOC_017747 | ENSRNOT00000013705 | 1            | 0        |
| TUCP_000520 | XLOC_017747 | ENSRNOT00000040851 | 1            | 1.33E-79 |
| TUCP_000520 | XLOC_017747 | ENSRNOT00000075676 | 0.958697783  | 8.83E-07 |
| TUCP_000520 | XLOC_017747 | ENSRNOT00000058389 | 1            | 1.33E-79 |
| TUCP_000520 | XLOC_017747 | ENSRNOT00000086827 | 0.95592964   | 1.22E-06 |
| TUCP_000520 | XLOC_017747 | ENSRNOT00000023542 | 1            | 4.25E-78 |
| TUCP_000520 | XLOC_017747 | ENSRNOT00000028653 | 1            | 0        |
| TUCP_000520 | XLOC_017747 | ENSRNOT00000017230 | 0.955378945  | 1.29E-06 |

|             |             |                    |              |          |
|-------------|-------------|--------------------|--------------|----------|
| TUCP_000520 | XLOC_017747 | ENSRNOT00000092890 | 0.955137645  | 1.33E-06 |
| TUCP_000520 | XLOC_017747 | ENSRNOT00000012174 | 1            | 0        |
| TUCP_000520 | XLOC_017747 | ENSRNOT00000051680 | 0.994991197  | 2.46E-11 |
| TUCP_000520 | XLOC_017747 | ENSRNOT00000089118 | 1            | 0        |
| TUCP_000520 | XLOC_017747 | ENSRNOT00000025245 | 0.999967061  | 3.05E-22 |
| TUCP_000520 | XLOC_017747 | ENSRNOT00000015138 | 0.999902179  | 7.05E-20 |
| TUCP_000520 | XLOC_017747 | ENSRNOT00000080185 | 0.99902259   | 7.01E-15 |
| TUCP_000520 | XLOC_017747 | ENSRNOT00000090729 | 0.965956282  | 3.40E-07 |
| TUCP_000520 | XLOC_017747 | ENSRNOT00000049165 | 0.973440588  | 9.95E-08 |
| TUCP_000520 | XLOC_017747 | ENSRNOT00000086502 | 0.96495109   | 3.93E-07 |
| TUCP_000520 | XLOC_017747 | ENSRNOT00000079661 | 1            | 0        |
| TUCP_000520 | XLOC_017747 | ENSRNOT00000076338 | 0.985532463  | 4.87E-09 |
| TUCP_000520 | XLOC_017747 | ENSRNOT00000042220 | 1            | 4.25E-78 |
| TUCP_000520 | XLOC_017747 | ENSRNOT00000005031 | 0.952974465  | 1.67E-06 |
| TUCP_000520 | XLOC_017747 | ENSRNOT00000079167 | 0.979848988  | 2.53E-08 |
| TUCP_000520 | XLOC_017747 | ENSRNOT00000061950 | 0.962035217  | 5.83E-07 |
| TUCP_000520 | XLOC_017747 | ENSRNOT00000086710 | 0.999839781  | 8.31E-19 |
| TUCP_000520 | XLOC_017747 | ENSRNOT00000075226 | 1            | 0        |
| TUCP_000520 | XLOC_017747 | ENSRNOT00000000351 | 1            | 0        |
| TUCP_000520 | XLOC_017747 | ENSRNOT00000092294 | 0.986520908  | 3.43E-09 |
| TUCP_002239 | XLOC_093400 | ENSRNOT00000024564 | -0.956198424 | 1.18E-06 |
| TUCP_000482 | XLOC_016905 | ENSRNOT00000082535 | 0.966028913  | 3.37E-07 |
| TUCP_001044 | XLOC_039852 | ENSRNOT00000091652 | 0.967690823  | 2.63E-07 |
| TUCP_001044 | XLOC_039852 | ENSRNOT00000036564 | 0.957379401  | 1.03E-06 |
| TUCP_001044 | XLOC_039852 | ENSRNOT00000080865 | 0.968512941  | 2.31E-07 |
| TUCP_001044 | XLOC_039852 | ENSRNOT00000073534 | 0.98252058   | 1.25E-08 |
| TUCP_001044 | XLOC_039852 | ENSRNOT00000006249 | 0.974574243  | 8.02E-08 |
| TUCP_001044 | XLOC_039852 | ENSRNOT00000071825 | 0.959754354  | 7.77E-07 |
| TUCP_001044 | XLOC_039852 | ENSRNOT00000005077 | 0.973008773  | 1.08E-07 |
| TUCP_001044 | XLOC_039852 | ENSRNOT00000049832 | 0.966113007  | 3.32E-07 |
| TUCP_001044 | XLOC_039852 | ENSRNOT00000093019 | 0.968512941  | 2.31E-07 |
| TUCP_001044 | XLOC_039852 | ENSRNOT00000013232 | 0.953883337  | 1.52E-06 |
| TUCP_001044 | XLOC_039852 | ENSRNOT00000085908 | 0.973109078  | 1.06E-07 |
| TUCP_001044 | XLOC_039852 | ENSRNOT00000046744 | 0.968512941  | 2.31E-07 |
| TUCP_001044 | XLOC_039852 | ENSRNOT00000076429 | 0.968512941  | 2.31E-07 |
| TUCP_001044 | XLOC_039852 | ENSRNOT00000084667 | 0.968641941  | 2.27E-07 |
| TUCP_001044 | XLOC_039852 | ENSRNOT00000055412 | 0.968512941  | 2.31E-07 |
| TUCP_001044 | XLOC_039852 | ENSRNOT00000093201 | 0.966686409  | 3.06E-07 |
| TUCP_001044 | XLOC_039852 | ENSRNOT00000072724 | 0.968512941  | 2.31E-07 |
| TUCP_001044 | XLOC_039852 | ENSRNOT00000066017 | 0.981350534  | 1.72E-08 |
| TUCP_001044 | XLOC_039852 | ENSRNOT00000074472 | 0.9519096    | 1.87E-06 |
| TUCP_001044 | XLOC_039852 | ENSRNOT00000073148 | 0.961663046  | 6.11E-07 |
| TUCP_001044 | XLOC_039852 | ENSRNOT00000084375 | 0.968512941  | 2.31E-07 |
| TUCP_001044 | XLOC_039852 | ENSRNOT00000012161 | 0.982973624  | 1.10E-08 |
| TUCP_001044 | XLOC_039852 | ENSRNOT00000042369 | 0.979038405  | 3.08E-08 |
| TUCP_001044 | XLOC_039852 | ENSRNOT00000059326 | 0.954713542  | 1.39E-06 |
| TUCP_001044 | XLOC_039852 | ENSRNOT00000086554 | 0.968512941  | 2.31E-07 |
| TUCP_001044 | XLOC_039852 | ENSRNOT00000015752 | 0.953227855  | 1.63E-06 |
| TUCP_001044 | XLOC_039852 | ENSRNOT00000047921 | 0.968512941  | 2.31E-07 |
| TUCP_001044 | XLOC_039852 | ENSRNOT00000086660 | 0.968271556  | 2.40E-07 |
| TUCP_001044 | XLOC_039852 | ENSRNOT00000078707 | 0.954165553  | 1.47E-06 |

|             |             |                    |             |          |
|-------------|-------------|--------------------|-------------|----------|
| TUCP_001044 | XLOC_039852 | ENSRNOT00000083977 | 0.968512941 | 2.31E-07 |
| TUCP_001044 | XLOC_039852 | ENSRNOT00000092933 | 0.968512941 | 2.31E-07 |
| TUCP_001044 | XLOC_039852 | ENSRNOT00000085447 | 0.963119579 | 5.05E-07 |
| TUCP_001044 | XLOC_039852 | ENSRNOT00000041281 | 0.965689362 | 3.54E-07 |
| TUCP_001044 | XLOC_039852 | ENSRNOT00000064261 | 0.96827281  | 2.40E-07 |
| TUCP_000484 | XLOC_016908 | ENSRNOT00000084500 | 0.969144669 | 2.09E-07 |
| TUCP_000484 | XLOC_016908 | ENSRNOT00000093467 | 0.982353672 | 1.31E-08 |
| TUCP_000484 | XLOC_016908 | ENSRNOT00000029340 | 0.993935254 | 6.40E-11 |
| TUCP_000484 | XLOC_016908 | ENSRNOT00000038646 | 0.991215001 | 4.06E-10 |
| TUCP_000484 | XLOC_016908 | ENSRNOT00000012095 | 0.955075014 | 1.34E-06 |
| TUCP_000484 | XLOC_016908 | ENSRNOT00000017909 | 0.958026309 | 9.56E-07 |
| TUCP_000484 | XLOC_016908 | ENSRNOT00000092579 | 0.991215001 | 4.06E-10 |
| TUCP_000484 | XLOC_016908 | ENSRNOT00000061516 | 0.98784878  | 2.04E-09 |
| TUCP_000484 | XLOC_016908 | ENSRNOT00000036383 | 0.976124871 | 5.87E-08 |
| TUCP_000484 | XLOC_016908 | ENSRNOT00000016026 | 0.95188993  | 1.87E-06 |
| TUCP_000484 | XLOC_016908 | ENSRNOT00000076528 | 0.988598533 | 1.49E-09 |
| TUCP_000484 | XLOC_016908 | ENSRNOT00000075193 | 0.954816082 | 1.37E-06 |
| TUCP_000484 | XLOC_016908 | ENSRNOT00000083034 | 0.973573661 | 9.71E-08 |
| TUCP_000484 | XLOC_016908 | ENSRNOT00000089607 | 0.984350153 | 7.20E-09 |
| TUCP_000484 | XLOC_016908 | ENSRNOT00000086014 | 0.972993246 | 1.08E-07 |
| TUCP_000484 | XLOC_016908 | ENSRNOT00000054939 | 0.955019485 | 1.34E-06 |
| TUCP_000484 | XLOC_016908 | ENSRNOT00000052315 | 0.984097341 | 7.80E-09 |
| TUCP_000484 | XLOC_016908 | ENSRNOT00000011761 | 0.957182749 | 1.05E-06 |
| TUCP_000484 | XLOC_016908 | ENSRNOT00000013459 | 0.965685272 | 3.54E-07 |
| TUCP_000484 | XLOC_016908 | ENSRNOT00000078137 | 0.991215001 | 4.06E-10 |
| TUCP_000484 | XLOC_016908 | ENSRNOT00000077764 | 0.952123568 | 1.83E-06 |
| TUCP_000484 | XLOC_016908 | ENSRNOT00000092740 | 0.991215001 | 4.06E-10 |
| TUCP_000484 | XLOC_016908 | ENSRNOT00000000117 | 0.984464407 | 6.94E-09 |
| TUCP_000484 | XLOC_016908 | ENSRNOT00000071877 | 0.956553182 | 1.13E-06 |
| TUCP_000484 | XLOC_016908 | ENSRNOT00000070958 | 0.991215001 | 4.06E-10 |
| TUCP_000484 | XLOC_016908 | ENSRNOT00000035538 | 0.952937309 | 1.68E-06 |
| TUCP_000484 | XLOC_016908 | ENSRNOT00000027268 | 0.991215001 | 4.06E-10 |
| TUCP_000484 | XLOC_016908 | ENSRNOT00000004459 | 0.991215001 | 4.06E-10 |
| TUCP_000484 | XLOC_016908 | ENSRNOT00000089235 | 0.992973234 | 1.33E-10 |
| TUCP_000484 | XLOC_016908 | ENSRNOT00000088168 | 0.991215001 | 4.06E-10 |
| TUCP_000484 | XLOC_016908 | ENSRNOT00000088148 | 0.991215001 | 4.06E-10 |
| TUCP_000484 | XLOC_016908 | ENSRNOT00000035915 | 0.950150468 | 2.23E-06 |
| TUCP_000484 | XLOC_016908 | ENSRNOT00000088527 | 0.991215001 | 4.06E-10 |
| TUCP_000484 | XLOC_016908 | ENSRNOT00000078701 | 0.991215001 | 4.06E-10 |
| TUCP_000484 | XLOC_016908 | ENSRNOT00000090078 | 0.991215001 | 4.06E-10 |
| TUCP_000484 | XLOC_016908 | ENSRNOT00000021748 | 0.991215001 | 4.06E-10 |
| TUCP_000484 | XLOC_016908 | ENSRNOT00000089085 | 0.991215001 | 4.06E-10 |
| TUCP_000484 | XLOC_016908 | ENSRNOT00000008153 | 0.990135067 | 7.24E-10 |
| TUCP_000484 | XLOC_016908 | ENSRNOT00000085896 | 0.980095354 | 2.38E-08 |
| TUCP_000484 | XLOC_016908 | ENSRNOT00000079189 | 0.979066862 | 3.06E-08 |
| TUCP_000484 | XLOC_016908 | ENSRNOT00000092425 | 0.962322713 | 5.61E-07 |
| TUCP_000484 | XLOC_016908 | ENSRNOT00000009776 | 0.991215001 | 4.06E-10 |
| TUCP_003595 | XLOC_158306 | ENSRNOT00000091753 | 0.976356942 | 5.59E-08 |
| TUCP_003595 | XLOC_158306 | ENSRNOT00000029312 | 0.975060702 | 7.29E-08 |
| TUCP_003595 | XLOC_158306 | ENSRNOT00000050393 | 0.99441994  | 4.22E-11 |
| TUCP_003595 | XLOC_158306 | ENSRNOT00000074262 | 0.997948657 | 2.85E-13 |

|             |             |                    |              |          |
|-------------|-------------|--------------------|--------------|----------|
| TUCP_003595 | XLOC_158306 | ENSRNOT00000032495 | 0.956038637  | 1.20E-06 |
| TUCP_003595 | XLOC_158306 | ENSRNOT00000091242 | 0.999825248  | 1.28E-18 |
| TUCP_003595 | XLOC_158306 | ENSRNOT00000088167 | 0.963797787  | 4.61E-07 |
| TUCP_003595 | XLOC_158306 | ENSRNOT0000004010  | 0.968154968  | 2.44E-07 |
| TUCP_003595 | XLOC_158306 | ENSRNOT00000032193 | 0.982970791  | 1.10E-08 |
| TUCP_003595 | XLOC_158306 | ENSRNOT00000037303 | 0.990341553  | 6.51E-10 |
| TUCP_000529 | XLOC_018336 | ENSRNOT00000088623 | 0.955046315  | 1.34E-06 |
| TUCP_000487 | XLOC_016908 | ENSRNOT00000071210 | 0.98499713   | 5.84E-09 |
| TUCP_000486 | XLOC_016908 | ENSRNOT00000076560 | 0.979355807  | 2.85E-08 |
| TUCP_000528 | XLOC_018336 | ENSRNOT00000029842 | 0.983829611  | 8.47E-09 |
| TUCP_000528 | XLOC_018336 | ENSRNOT00000091387 | 0.9671802    | 2.84E-07 |
| TUCP_000528 | XLOC_018336 | ENSRNOT00000056554 | 0.977863138  | 4.03E-08 |
| TUCP_000528 | XLOC_018336 | ENSRNOT00000081157 | -0.956024267 | 1.20E-06 |
| TUCP_001021 | XLOC_038889 | ENSRNOT00000009129 | 0.953083679  | 1.65E-06 |
| TUCP_001021 | XLOC_038889 | ENSRNOT00000032944 | 0.952739032  | 1.71E-06 |
| TUCP_001021 | XLOC_038889 | ENSRNOT00000064320 | 0.965467068  | 3.65E-07 |
| TUCP_001021 | XLOC_038889 | ENSRNOT00000006426 | 0.974181999  | 8.65E-08 |
| TUCP_001021 | XLOC_038889 | ENSRNOT00000067761 | 0.953474803  | 1.59E-06 |
| TUCP_001021 | XLOC_038889 | ENSRNOT00000028563 | 0.951705428  | 1.91E-06 |
| TUCP_001021 | XLOC_038889 | ENSRNOT00000049538 | 0.95547206   | 1.28E-06 |
| TUCP_001021 | XLOC_038889 | ENSRNOT00000087660 | 0.9688805    | 2.18E-07 |
| TUCP_001021 | XLOC_038889 | ENSRNOT00000032199 | 0.962130801  | 5.76E-07 |
| TUCP_001021 | XLOC_038889 | ENSRNOT00000073636 | 0.953033841  | 1.66E-06 |
| TUCP_001021 | XLOC_038889 | ENSRNOT00000078500 | 0.950180611  | 2.22E-06 |
| TUCP_001021 | XLOC_038889 | ENSRNOT00000009198 | 0.951217628  | 2.00E-06 |
| TUCP_001021 | XLOC_038889 | ENSRNOT00000084850 | 0.953841577  | 1.53E-06 |
| TUCP_001020 | XLOC_038708 | ENSRNOT00000001215 | -0.952717633 | 1.72E-06 |
| TUCP_001020 | XLOC_038708 | ENSRNOT00000082998 | -0.950778092 | 2.09E-06 |
| TUCP_001020 | XLOC_038708 | ENSRNOT00000018293 | -0.951816056 | 1.89E-06 |
| TUCP_001020 | XLOC_038708 | ENSRNOT00000027083 | -0.951081792 | 2.03E-06 |
| TUCP_001020 | XLOC_038708 | ENSRNOT00000014373 | 0.957146611  | 1.06E-06 |
| TUCP_001020 | XLOC_038708 | ENSRNOT00000015566 | -0.951339429 | 1.98E-06 |
| TUCP_001020 | XLOC_038708 | ENSRNOT00000079644 | 0.962815398  | 5.26E-07 |
| TUCP_001020 | XLOC_038708 | ENSRNOT00000059524 | 0.95512835   | 1.33E-06 |
| TUCP_001020 | XLOC_038708 | ENSRNOT00000005220 | -0.957521613 | 1.01E-06 |
| TUCP_001020 | XLOC_038708 | ENSRNOT00000054932 | 0.952025121  | 1.85E-06 |
| TUCP_001020 | XLOC_038708 | ENSRNOT00000086310 | 0.958210296  | 9.36E-07 |
| TUCP_001020 | XLOC_038708 | ENSRNOT00000089829 | 0.96442444   | 4.23E-07 |
| TUCP_001020 | XLOC_038708 | ENSRNOT00000013747 | -0.974555928 | 8.05E-08 |
| TUCP_001020 | XLOC_038708 | ENSRNOT00000074389 | 0.956954177  | 1.08E-06 |
| TUCP_001020 | XLOC_038708 | ENSRNOT00000025308 | 0.957190229  | 1.05E-06 |
| TUCP_001020 | XLOC_038708 | ENSRNOT00000066204 | 0.962031433  | 5.83E-07 |
| TUCP_001020 | XLOC_038708 | ENSRNOT00000009497 | -0.950721581 | 2.11E-06 |
| TUCP_001020 | XLOC_038708 | ENSRNOT00000003247 | 0.957943416  | 9.65E-07 |
| TUCP_001020 | XLOC_038708 | ENSRNOT00000043554 | -0.968577689 | 2.29E-07 |
| TUCP_001020 | XLOC_038708 | ENSRNOT00000019213 | -0.960410342 | 7.17E-07 |
| TUCP_001020 | XLOC_038708 | ENSRNOT00000040637 | -0.963303663 | 4.93E-07 |
| TUCP_001020 | XLOC_038708 | ENSRNOT00000013695 | 0.966344335  | 3.21E-07 |
| TUCP_001020 | XLOC_038708 | ENSRNOT00000081621 | -0.951996994 | 1.85E-06 |
| TUCP_001020 | XLOC_038708 | ENSRNOT00000045699 | -0.974198747 | 8.62E-08 |
| TUCP_001020 | XLOC_038708 | ENSRNOT00000064401 | -0.952459416 | 1.77E-06 |

|             |             |                    |              |          |
|-------------|-------------|--------------------|--------------|----------|
| TUCP_001020 | XLOC_038708 | ENSRNOT00000021750 | -0.950937716 | 2.06E-06 |
| TUCP_001020 | XLOC_038708 | ENSRNOT00000022532 | -0.95594243  | 1.21E-06 |
| TUCP_001020 | XLOC_038708 | ENSRNOT00000024568 | 0.95088359   | 2.07E-06 |
| TUCP_001020 | XLOC_038708 | ENSRNOT00000039523 | -0.97143141  | 1.43E-07 |
| TUCP_001020 | XLOC_038708 | ENSRNOT00000010463 | -0.953852595 | 1.53E-06 |
| TUCP_001020 | XLOC_038708 | ENSRNOT00000026718 | -0.956732973 | 1.11E-06 |
| TUCP_001020 | XLOC_038708 | ENSRNOT00000072208 | -0.953157566 | 1.64E-06 |
| TUCP_001020 | XLOC_038708 | ENSRNOT00000005934 | -0.952050185 | 1.84E-06 |
| TUCP_001020 | XLOC_038708 | ENSRNOT00000041513 | -0.964450574 | 4.21E-07 |
| TUCP_001020 | XLOC_038708 | ENSRNOT00000013058 | -0.95306055  | 1.66E-06 |
| TUCP_001020 | XLOC_038708 | ENSRNOT00000090327 | -0.950082888 | 2.24E-06 |
| TUCP_001020 | XLOC_038708 | ENSRNOT00000064160 | -0.954315578 | 1.45E-06 |
| TUCP_001020 | XLOC_038708 | ENSRNOT00000031891 | 0.955771532  | 1.24E-06 |
| TUCP_001020 | XLOC_038708 | ENSRNOT00000002715 | 0.979258997  | 2.92E-08 |
| TUCP_001020 | XLOC_038708 | ENSRNOT00000010541 | -0.950045961 | 2.25E-06 |
| TUCP_001020 | XLOC_038708 | ENSRNOT00000068033 | -0.967005729 | 2.91E-07 |
| TUCP_001020 | XLOC_038708 | ENSRNOT00000016947 | -0.964575202 | 4.14E-07 |
| TUCP_001020 | XLOC_038708 | ENSRNOT00000018003 | -0.955570042 | 1.27E-06 |
| TUCP_001020 | XLOC_038708 | ENSRNOT00000090918 | -0.959366564 | 8.15E-07 |
| TUCP_001020 | XLOC_038708 | ENSRNOT00000038912 | -0.951351371 | 1.98E-06 |
| TUCP_001020 | XLOC_038708 | ENSRNOT00000021925 | -0.950100613 | 2.24E-06 |
| TUCP_001020 | XLOC_038708 | ENSRNOT00000027200 | 0.952932231  | 1.68E-06 |
| TUCP_001020 | XLOC_038708 | ENSRNOT00000077220 | 0.952991795  | 1.67E-06 |
| TUCP_001020 | XLOC_038708 | ENSRNOT00000032202 | 0.956375386  | 1.16E-06 |
| TUCP_001020 | XLOC_038708 | ENSRNOT00000040348 | 0.95480216   | 1.38E-06 |
| TUCP_001020 | XLOC_038708 | ENSRNOT00000022342 | -0.953746204 | 1.54E-06 |
| TUCP_001020 | XLOC_038708 | ENSRNOT00000028074 | 0.960727767  | 6.89E-07 |
| TUCP_001020 | XLOC_038708 | ENSRNOT00000048063 | -0.960813123 | 6.81E-07 |
| TUCP_001020 | XLOC_038708 | ENSRNOT00000078589 | 0.962797202  | 5.27E-07 |
| TUCP_001020 | XLOC_038708 | ENSRNOT00000081881 | -0.957460225 | 1.02E-06 |
| TUCP_001020 | XLOC_038708 | ENSRNOT00000009839 | -0.966661361 | 3.07E-07 |
| TUCP_001020 | XLOC_038708 | ENSRNOT00000020155 | -0.964301561 | 4.30E-07 |
| TUCP_001020 | XLOC_038708 | ENSRNOT00000025827 | -0.966809425 | 3.00E-07 |
| TUCP_001020 | XLOC_038708 | ENSRNOT00000015325 | 0.95214175   | 1.82E-06 |
| TUCP_001020 | XLOC_038708 | ENSRNOT00000021716 | -0.959545666 | 7.97E-07 |
| TUCP_001020 | XLOC_038708 | ENSRNOT00000016351 | 0.968183178  | 2.43E-07 |
| TUCP_001020 | XLOC_038708 | ENSRNOT00000079767 | 0.955798402  | 1.23E-06 |
| TUCP_001020 | XLOC_038708 | ENSRNOT00000005262 | -0.962610978 | 5.40E-07 |
| TUCP_001020 | XLOC_038708 | ENSRNOT00000025819 | 0.950192504  | 2.22E-06 |
| TUCP_001020 | XLOC_038708 | ENSRNOT0000002771  | -0.967700836 | 2.62E-07 |
| TUCP_001020 | XLOC_038708 | ENSRNOT00000011408 | -0.975651875 | 6.47E-08 |
| TUCP_001020 | XLOC_038708 | ENSRNOT00000016723 | -0.961738033 | 6.06E-07 |
| TUCP_001020 | XLOC_038708 | ENSRNOT00000077935 | 0.956439997  | 1.15E-06 |
| TUCP_001020 | XLOC_038708 | ENSRNOT00000016191 | -0.974482916 | 8.16E-08 |
| TUCP_001020 | XLOC_038708 | ENSRNOT00000078390 | 0.951053428  | 2.04E-06 |
| TUCP_001020 | XLOC_038708 | ENSRNOT00000008427 | 0.950292681  | 2.20E-06 |
| TUCP_001020 | XLOC_038708 | ENSRNOT00000027452 | -0.95407383  | 1.49E-06 |
| TUCP_001020 | XLOC_038708 | ENSRNOT00000019652 | -0.952119085 | 1.83E-06 |
| TUCP_001020 | XLOC_038708 | ENSRNOT00000006499 | -0.954573955 | 1.41E-06 |
| TUCP_001020 | XLOC_038708 | ENSRNOT00000043451 | -0.962297184 | 5.63E-07 |
| TUCP_001020 | XLOC_038708 | ENSRNOT00000027125 | 0.958093474  | 9.49E-07 |

|             |             |                    |              |          |
|-------------|-------------|--------------------|--------------|----------|
| TUCP_001020 | XLOC_038708 | ENSRNOT00000014749 | -0.957223177 | 1.05E-06 |
| TUCP_001020 | XLOC_038708 | ENSRNOT00000026231 | -0.980568918 | 2.11E-08 |
| TUCP_001020 | XLOC_038708 | ENSRNOT00000078161 | 0.958759807  | 8.77E-07 |
| TUCP_001020 | XLOC_038708 | ENSRNOT00000064723 | 0.954590438  | 1.41E-06 |
| TUCP_001020 | XLOC_038708 | ENSRNOT00000002173 | 0.968246149  | 2.41E-07 |
| TUCP_001020 | XLOC_038708 | ENSRNOT00000057807 | 0.95163524   | 1.92E-06 |
| TUCP_001020 | XLOC_038708 | ENSRNOT00000038448 | 0.954166807  | 1.47E-06 |
| TUCP_001020 | XLOC_038708 | ENSRNOT00000050223 | 0.951067855  | 2.03E-06 |
| TUCP_001020 | XLOC_038708 | ENSRNOT00000078929 | -0.950056332 | 2.25E-06 |
| TUCP_001020 | XLOC_038708 | ENSRNOT00000089185 | 0.950547966  | 2.14E-06 |
| TUCP_001020 | XLOC_038708 | ENSRNOT00000059807 | -0.956888665 | 1.09E-06 |
| TUCP_001020 | XLOC_038708 | ENSRNOT00000084734 | -0.95856885  | 8.97E-07 |
| TUCP_001020 | XLOC_038708 | ENSRNOT00000027666 | -0.951299227 | 1.99E-06 |
| TUCP_001020 | XLOC_038708 | ENSRNOT00000010853 | -0.964801358 | 4.01E-07 |
| TUCP_001020 | XLOC_038708 | ENSRNOT00000074081 | 0.965623149  | 3.57E-07 |
| TUCP_001020 | XLOC_038708 | ENSRNOT00000090925 | -0.958936016 | 8.58E-07 |
| TUCP_001020 | XLOC_038708 | ENSRNOT00000021001 | -0.961975755 | 5.87E-07 |
| TUCP_001020 | XLOC_038708 | ENSRNOT00000046126 | 0.95116374   | 2.02E-06 |
| TUCP_001020 | XLOC_038708 | ENSRNOT00000040543 | 0.963674886  | 4.69E-07 |
| TUCP_001020 | XLOC_038708 | ENSRNOT00000014887 | -0.963441229 | 4.84E-07 |
| TUCP_001020 | XLOC_038708 | ENSRNOT00000040548 | 0.968434235  | 2.34E-07 |
| TUCP_001020 | XLOC_038708 | ENSRNOT00000072416 | 0.952132061  | 1.83E-06 |
| TUCP_001020 | XLOC_038708 | ENSRNOT00000023786 | 0.960212258  | 7.34E-07 |
| TUCP_001020 | XLOC_038708 | ENSRNOT00000001234 | 0.952445727  | 1.77E-06 |
| TUCP_001020 | XLOC_038708 | ENSRNOT00000025550 | 0.952857098  | 1.69E-06 |
| TUCP_001020 | XLOC_038708 | ENSRNOT00000092037 | 0.95705676   | 1.07E-06 |
| TUCP_001020 | XLOC_038708 | ENSRNOT00000045735 | -0.954695297 | 1.39E-06 |
| TUCP_001020 | XLOC_038708 | ENSRNOT00000061432 | -0.951655982 | 1.92E-06 |
| TUCP_001020 | XLOC_038708 | ENSRNOT00000068269 | 0.956000082  | 1.21E-06 |
| TUCP_001020 | XLOC_038708 | ENSRNOT00000033975 | -0.953937419 | 1.51E-06 |
| TUCP_001020 | XLOC_038708 | ENSRNOT00000015092 | -0.95091624  | 2.07E-06 |
| TUCP_001020 | XLOC_038708 | ENSRNOT00000017603 | -0.954339707 | 1.45E-06 |
| TUCP_001020 | XLOC_038708 | ENSRNOT00000044866 | 0.971300197  | 1.46E-07 |
| TUCP_001020 | XLOC_038708 | ENSRNOT00000011041 | -0.971343748 | 1.45E-07 |
| TUCP_001020 | XLOC_038708 | ENSRNOT00000088677 | 0.969177395  | 2.08E-07 |
| TUCP_001020 | XLOC_038708 | ENSRNOT00000083957 | -0.967405315 | 2.74E-07 |
| TUCP_001020 | XLOC_038708 | ENSRNOT00000000334 | 0.959594174  | 7.92E-07 |
| TUCP_001148 | XLOC_043177 | ENSRNOT00000026860 | 0.963019598  | 5.12E-07 |
| TUCP_001148 | XLOC_043177 | ENSRNOT00000073559 | 0.963812836  | 4.60E-07 |
| TUCP_001148 | XLOC_043177 | ENSRNOT00000000713 | 0.9507726    | 2.10E-06 |
| TUCP_001148 | XLOC_043177 | ENSRNOT00000026941 | 0.951516952  | 1.94E-06 |
| TUCP_001148 | XLOC_043177 | ENSRNOT00000081246 | 0.976292777  | 5.67E-08 |
| TUCP_001148 | XLOC_043177 | ENSRNOT00000015006 | 0.957392756  | 1.03E-06 |
| TUCP_001148 | XLOC_043177 | ENSRNOT00000009877 | 0.958949775  | 8.57E-07 |
| TUCP_001148 | XLOC_043177 | ENSRNOT00000007351 | -0.982449885 | 1.27E-08 |
| TUCP_001148 | XLOC_043177 | ENSRNOT00000027452 | 0.977635684  | 4.24E-08 |
| TUCP_001148 | XLOC_043177 | ENSRNOT00000074939 | 0.97674938   | 5.15E-08 |
| TUCP_001148 | XLOC_043177 | ENSRNOT00000015203 | 0.967364157  | 2.76E-07 |
| TUCP_001148 | XLOC_043177 | ENSRNOT00000086336 | 0.950462073  | 2.16E-06 |
| TUCP_001148 | XLOC_043177 | ENSRNOT00000043856 | 0.957706424  | 9.93E-07 |
| TUCP_001148 | XLOC_043177 | ENSRNOT00000026065 | 0.952057894  | 1.84E-06 |

|             |             |                     |              |          |
|-------------|-------------|---------------------|--------------|----------|
| TUCP_001148 | XLOC_043177 | ENSRNOT00000048613  | 0.965060226  | 3.87E-07 |
| TUCP_001148 | XLOC_043177 | ENSRNOT00000023638  | 0.960483029  | 7.10E-07 |
| TUCP_001148 | XLOC_043177 | ENSRNOT00000022726  | 0.966472464  | 3.15E-07 |
| TUCP_001148 | XLOC_043177 | ENSRNOT00000005220  | 0.961439771  | 6.29E-07 |
| TUCP_001148 | XLOC_043177 | ENSRNOT00000044635  | 0.973848891  | 9.22E-08 |
| TUCP_001148 | XLOC_043177 | ENSRNOT00000021116  | 0.98512673   | 5.59E-09 |
| TUCP_001148 | XLOC_043177 | ENSRNOT000000082100 | 0.981657672  | 1.59E-08 |
| TUCP_001148 | XLOC_043177 | ENSRNOT00000017776  | 0.9565196    | 1.14E-06 |
| TUCP_001148 | XLOC_043177 | ENSRNOT00000076763  | 0.975046488  | 7.31E-08 |
| TUCP_001148 | XLOC_043177 | ENSRNOT00000043216  | 0.983138341  | 1.04E-08 |
| TUCP_001148 | XLOC_043177 | ENSRNOT00000044742  | 0.959551954  | 7.97E-07 |
| TUCP_001148 | XLOC_043177 | ENSRNOT00000027414  | 0.951610622  | 1.93E-06 |
| TUCP_001148 | XLOC_043177 | ENSRNOT00000028563  | 0.968531239  | 2.31E-07 |
| TUCP_001148 | XLOC_043177 | ENSRNOT00000015076  | 0.960437762  | 7.14E-07 |
| TUCP_001148 | XLOC_043177 | ENSRNOT00000013661  | 0.975936576  | 6.10E-08 |
| TUCP_001148 | XLOC_043177 | ENSRNOT00000043345  | 0.982450986  | 1.27E-08 |
| TUCP_001148 | XLOC_043177 | ENSRNOT00000010418  | 0.973402964  | 1.00E-07 |
| TUCP_001148 | XLOC_043177 | ENSRNOT00000015073  | 0.983120561  | 1.05E-08 |
| TUCP_001148 | XLOC_043177 | ENSRNOT00000019213  | 0.973698879  | 9.48E-08 |
| TUCP_001148 | XLOC_043177 | ENSRNOT00000015479  | 0.966711246  | 3.04E-07 |
| TUCP_001148 | XLOC_043177 | ENSRNOT00000004698  | 0.95032686   | 2.19E-06 |
| TUCP_001148 | XLOC_043177 | ENSRNOT00000001507  | 0.965232221  | 3.77E-07 |
| TUCP_001148 | XLOC_043177 | ENSRNOT00000026783  | 0.964525957  | 4.17E-07 |
| TUCP_001148 | XLOC_043177 | ENSRNOT000000088125 | 0.971344652  | 1.45E-07 |
| TUCP_001148 | XLOC_043177 | ENSRNOT00000029866  | 0.95496786   | 1.35E-06 |
| TUCP_001148 | XLOC_043177 | ENSRNOT00000019923  | 0.972048101  | 1.28E-07 |
| TUCP_001148 | XLOC_043177 | ENSRNOT00000029439  | 0.968275156  | 2.40E-07 |
| TUCP_001148 | XLOC_043177 | ENSRNOT00000093174  | 0.968656364  | 2.26E-07 |
| TUCP_001148 | XLOC_043177 | ENSRNOT00000076820  | 0.95438101   | 1.44E-06 |
| TUCP_001148 | XLOC_043177 | ENSRNOT00000036951  | 0.968734466  | 2.23E-07 |
| TUCP_001148 | XLOC_043177 | ENSRNOT00000071764  | 0.967589205  | 2.67E-07 |
| TUCP_001148 | XLOC_043177 | ENSRNOT00000035989  | 0.950237686  | 2.21E-06 |
| TUCP_001148 | XLOC_043177 | ENSRNOT00000011926  | 0.967834157  | 2.57E-07 |
| TUCP_001148 | XLOC_043177 | ENSRNOT00000004486  | 0.953498407  | 1.58E-06 |
| TUCP_001148 | XLOC_043177 | ENSRNOT00000024402  | 0.954569044  | 1.41E-06 |
| TUCP_001148 | XLOC_043177 | ENSRNOT00000075326  | 0.95281786   | 1.70E-06 |
| TUCP_001148 | XLOC_043177 | ENSRNOT00000021348  | 0.98808934   | 1.85E-09 |
| TUCP_001148 | XLOC_043177 | ENSRNOT00000076453  | 0.954172272  | 1.47E-06 |
| TUCP_001148 | XLOC_043177 | ENSRNOT00000077908  | 0.952899271  | 1.69E-06 |
| TUCP_001148 | XLOC_043177 | ENSRNOT00000037456  | 0.955967619  | 1.21E-06 |
| TUCP_001148 | XLOC_043177 | ENSRNOT00000012671  | 0.957721913  | 9.91E-07 |
| TUCP_001148 | XLOC_043177 | ENSRNOT00000032944  | 0.957425161  | 1.03E-06 |
| TUCP_001148 | XLOC_043177 | ENSRNOT00000017165  | -0.952901959 | 1.69E-06 |
| TUCP_001148 | XLOC_043177 | ENSRNOT000000083215 | 0.970337803  | 1.72E-07 |
| TUCP_001148 | XLOC_043177 | ENSRNOT000000085228 | 0.963158512  | 5.02E-07 |
| TUCP_001148 | XLOC_043177 | ENSRNOT00000017319  | 0.956915926  | 1.09E-06 |
| TUCP_001148 | XLOC_043177 | ENSRNOT00000055187  | 0.981892055  | 1.49E-08 |
| TUCP_001148 | XLOC_043177 | ENSRNOT00000001809  | 0.967251234  | 2.81E-07 |
| TUCP_001148 | XLOC_043177 | ENSRNOT00000079866  | 0.978148461  | 3.78E-08 |
| TUCP_001148 | XLOC_043177 | ENSRNOT000000081632 | 0.953781921  | 1.54E-06 |
| TUCP_001148 | XLOC_043177 | ENSRNOT00000019820  | 0.953517589  | 1.58E-06 |



|             |             |                     |             |          |
|-------------|-------------|---------------------|-------------|----------|
| TUCP_001148 | XLOC_043177 | ENSRNOT00000067822  | 0.977360457 | 4.51E-08 |
| TUCP_001148 | XLOC_043177 | ENSRNOT00000010149  | 0.966256882 | 3.26E-07 |
| TUCP_001148 | XLOC_043177 | ENSRNOT00000087371  | 0.958940923 | 8.58E-07 |
| TUCP_001148 | XLOC_043177 | ENSRNOT00000024771  | 0.956495734 | 1.14E-06 |
| TUCP_001148 | XLOC_043177 | ENSRNOT00000028839  | 0.950635302 | 2.12E-06 |
| TUCP_001148 | XLOC_043177 | ENSRNOT00000021614  | 0.971464129 | 1.42E-07 |
| TUCP_001148 | XLOC_043177 | ENSRNOT00000039842  | 0.960055869 | 7.49E-07 |
| TUCP_001148 | XLOC_043177 | ENSRNOT00000093357  | 0.954811712 | 1.38E-06 |
| TUCP_001148 | XLOC_043177 | ENSRNOT00000037446  | 0.95887262  | 8.65E-07 |
| TUCP_001148 | XLOC_043177 | ENSRNOT00000004032  | 0.981306671 | 1.74E-08 |
| TUCP_001148 | XLOC_043177 | ENSRNOT00000017948  | 0.965959126 | 3.40E-07 |
| TUCP_001148 | XLOC_043177 | ENSRNOT00000009156  | 0.951282152 | 1.99E-06 |
| TUCP_001148 | XLOC_043177 | ENSRNOT00000066526  | 0.966807949 | 3.00E-07 |
| TUCP_001148 | XLOC_043177 | ENSRNOT00000039341  | 0.950726902 | 2.11E-06 |
| TUCP_001148 | XLOC_043177 | ENSRNOT00000091909  | 0.95949624  | 8.02E-07 |
| TUCP_001148 | XLOC_043177 | ENSRNOT00000036666  | 0.954380516 | 1.44E-06 |
| TUCP_001148 | XLOC_043177 | ENSRNOT00000070815  | 0.971581785 | 1.39E-07 |
| TUCP_001148 | XLOC_043177 | ENSRNOT00000078675  | 0.966387819 | 3.19E-07 |
| TUCP_001148 | XLOC_043177 | ENSRNOT00000019222  | 0.971624406 | 1.38E-07 |
| TUCP_001148 | XLOC_043177 | ENSRNOT00000004359  | 0.955979071 | 1.21E-06 |
| TUCP_001148 | XLOC_043177 | ENSRNOT00000060362  | 0.950665687 | 2.12E-06 |
| TUCP_001148 | XLOC_043177 | ENSRNOT00000013274  | 0.985599269 | 4.76E-09 |
| TUCP_001148 | XLOC_043177 | ENSRNOT00000022213  | 0.953396101 | 1.60E-06 |
| TUCP_001148 | XLOC_043177 | ENSRNOT00000022610  | 0.958441774 | 9.10E-07 |
| TUCP_001148 | XLOC_043177 | ENSRNOT00000020437  | 0.966128635 | 3.32E-07 |
| TUCP_001148 | XLOC_043177 | ENSRNOT00000015609  | 0.9516508   | 1.92E-06 |
| TUCP_001148 | XLOC_043177 | ENSRNOT00000079895  | 0.971045531 | 1.53E-07 |
| TUCP_001148 | XLOC_043177 | ENSRNOT00000005659  | 0.950294034 | 2.20E-06 |
| TUCP_001148 | XLOC_043177 | ENSRNOT000000050138 | 0.954852605 | 1.37E-06 |
| TUCP_001148 | XLOC_043177 | ENSRNOT00000047387  | 0.965184399 | 3.80E-07 |
| TUCP_001148 | XLOC_043177 | ENSRNOT00000028458  | 0.951616819 | 1.92E-06 |
| TUCP_001148 | XLOC_043177 | ENSRNOT00000045488  | 0.9624746   | 5.50E-07 |
| TUCP_001148 | XLOC_043177 | ENSRNOT00000058072  | 0.977540156 | 4.33E-08 |
| TUCP_001148 | XLOC_043177 | ENSRNOT00000045083  | 0.960613315 | 6.99E-07 |
| TUCP_001148 | XLOC_043177 | ENSRNOT00000083127  | 0.955711789 | 1.25E-06 |
| TUCP_001148 | XLOC_043177 | ENSRNOT00000017629  | 0.9811278   | 1.83E-08 |
| TUCP_001148 | XLOC_043177 | ENSRNOT00000026174  | 0.980246385 | 2.29E-08 |
| TUCP_001148 | XLOC_043177 | ENSRNOT00000013260  | 0.95228456  | 1.80E-06 |
| TUCP_001148 | XLOC_043177 | ENSRNOT00000008803  | 0.97912567  | 3.01E-08 |
| TUCP_001148 | XLOC_043177 | ENSRNOT00000063956  | 0.97088609  | 1.57E-07 |
| TUCP_001148 | XLOC_043177 | ENSRNOT00000003991  | 0.967637076 | 2.65E-07 |
| TUCP_001148 | XLOC_043177 | ENSRNOT00000004508  | 0.978113673 | 3.81E-08 |
| TUCP_001148 | XLOC_043177 | ENSRNOT00000034744  | 0.975422012 | 6.78E-08 |
| TUCP_001148 | XLOC_043177 | ENSRNOT00000078475  | 0.975048448 | 7.30E-08 |
| TUCP_001148 | XLOC_043177 | ENSRNOT00000077888  | -0.9603649  | 7.21E-07 |
| TUCP_001148 | XLOC_043177 | ENSRNOT00000009683  | 0.963364346 | 4.89E-07 |
| TUCP_001148 | XLOC_043177 | ENSRNOT00000021153  | 0.966812924 | 3.00E-07 |
| TUCP_001148 | XLOC_043177 | ENSRNOT00000007175  | 0.961475975 | 6.26E-07 |
| TUCP_001148 | XLOC_043177 | ENSRNOT00000034704  | 0.977339297 | 4.53E-08 |
| TUCP_001148 | XLOC_043177 | ENSRNOT00000064902  | 0.962531047 | 5.46E-07 |
| TUCP_001148 | XLOC_043177 | ENSRNOT00000025027  | 0.957446554 | 1.02E-06 |

|             |             |                    |              |          |
|-------------|-------------|--------------------|--------------|----------|
| TUCP_001148 | XLOC_043177 | ENSRNOT00000046745 | 0.965242929  | 3.77E-07 |
| TUCP_001148 | XLOC_043177 | ENSRNOT00000021015 | 0.963722568  | 4.66E-07 |
| TUCP_001148 | XLOC_043177 | ENSRNOT00000079442 | 0.976635602  | 5.27E-08 |
| TUCP_001148 | XLOC_043177 | ENSRNOT00000076729 | 0.971830102  | 1.33E-07 |
| TUCP_001148 | XLOC_043177 | ENSRNOT00000090665 | 0.951461388  | 1.96E-06 |
| TUCP_001148 | XLOC_043177 | ENSRNOT00000011408 | 0.950303521  | 2.20E-06 |
| TUCP_001148 | XLOC_043177 | ENSRNOT00000016722 | 0.967797581  | 2.58E-07 |
| TUCP_001148 | XLOC_043177 | ENSRNOT00000091265 | 0.957369414  | 1.03E-06 |
| TUCP_001148 | XLOC_043177 | ENSRNOT00000010463 | 0.963384943  | 4.87E-07 |
| TUCP_001148 | XLOC_043177 | ENSRNOT00000073526 | 0.976427576  | 5.51E-08 |
| TUCP_001148 | XLOC_043177 | ENSRNOT00000010927 | 0.959530237  | 7.99E-07 |
| TUCP_001148 | XLOC_043177 | ENSRNOT00000000658 | 0.951008888  | 2.05E-06 |
| TUCP_001148 | XLOC_043177 | ENSRNOT00000039631 | 0.979527808  | 2.74E-08 |
| TUCP_001148 | XLOC_043177 | ENSRNOT00000091488 | 0.958535794  | 9.00E-07 |
| TUCP_001148 | XLOC_043177 | ENSRNOT00000025832 | 0.975598876  | 6.54E-08 |
| TUCP_001148 | XLOC_043177 | ENSRNOT00000024322 | 0.964457964  | 4.21E-07 |
| TUCP_001148 | XLOC_043177 | ENSRNOT00000049538 | 0.952216409  | 1.81E-06 |
| TUCP_001148 | XLOC_043177 | ENSRNOT00000005909 | 0.966925706  | 2.95E-07 |
| TUCP_001148 | XLOC_043177 | ENSRNOT00000045882 | 0.977025679  | 4.85E-08 |
| TUCP_001148 | XLOC_043177 | ENSRNOT00000036750 | 0.993820883  | 7.02E-11 |
| TUCP_001148 | XLOC_043177 | ENSRNOT00000023989 | 0.950604344  | 2.13E-06 |
| TUCP_001148 | XLOC_043177 | ENSRNOT00000009198 | 0.964992619  | 3.90E-07 |
| TUCP_001148 | XLOC_043177 | ENSRNOT00000025092 | 0.971121129  | 1.51E-07 |
| TUCP_001148 | XLOC_043177 | ENSRNOT00000009129 | 0.959159724  | 8.35E-07 |
| TUCP_001148 | XLOC_043177 | ENSRNOT00000086122 | 0.960853775  | 6.78E-07 |
| TUCP_001148 | XLOC_043177 | ENSRNOT00000037790 | 0.968073538  | 2.48E-07 |
| TUCP_001148 | XLOC_043177 | ENSRNOT00000024659 | 0.971630589  | 1.38E-07 |
| TUCP_001148 | XLOC_043177 | ENSRNOT00000006969 | 0.971036153  | 1.53E-07 |
| TUCP_001148 | XLOC_043177 | ENSRNOT00000007091 | 0.952177938  | 1.82E-06 |
| TUCP_001148 | XLOC_043177 | ENSRNOT00000088054 | 0.969789519  | 1.88E-07 |
| TUCP_001148 | XLOC_043177 | ENSRNOT00000075424 | 0.969130411  | 2.10E-07 |
| TUCP_001148 | XLOC_043177 | ENSRNOT00000038703 | 0.965060783  | 3.87E-07 |
| TUCP_001148 | XLOC_043177 | ENSRNOT00000057313 | 0.96404874   | 4.45E-07 |
| TUCP_001148 | XLOC_043177 | ENSRNOT00000040393 | 0.962474954  | 5.50E-07 |
| TUCP_001148 | XLOC_043177 | ENSRNOT00000088196 | 0.953230212  | 1.63E-06 |
| TUCP_001148 | XLOC_043177 | ENSRNOT00000000157 | 0.963661282  | 4.69E-07 |
| TUCP_001148 | XLOC_043177 | ENSRNOT00000023645 | 0.973694372  | 9.49E-08 |
| TUCP_001148 | XLOC_043177 | ENSRNOT00000084734 | 0.954348867  | 1.45E-06 |
| TUCP_001148 | XLOC_043177 | ENSRNOT00000010992 | 0.969445439  | 1.99E-07 |
| TUCP_001148 | XLOC_043177 | ENSRNOT00000035700 | 0.966720319  | 3.04E-07 |
| TUCP_001148 | XLOC_043177 | ENSRNOT00000081897 | 0.958168683  | 9.40E-07 |
| TUCP_001148 | XLOC_043177 | ENSRNOT00000003359 | -0.951248086 | 2.00E-06 |
| TUCP_001148 | XLOC_043177 | ENSRNOT00000038647 | 0.964295182  | 4.30E-07 |
| TUCP_001148 | XLOC_043177 | ENSRNOT00000076669 | 0.967342216  | 2.77E-07 |
| TUCP_001148 | XLOC_043177 | ENSRNOT00000011984 | 0.967971783  | 2.52E-07 |
| TUCP_001148 | XLOC_043177 | ENSRNOT00000047210 | 0.958376851  | 9.17E-07 |
| TUCP_001148 | XLOC_043177 | ENSRNOT00000043872 | 0.953562879  | 1.57E-06 |
| TUCP_001148 | XLOC_043177 | ENSRNOT00000074653 | 0.95962791   | 7.89E-07 |
| TUCP_001148 | XLOC_043177 | ENSRNOT00000017761 | 0.955342102  | 1.30E-06 |
| TUCP_001148 | XLOC_043177 | ENSRNOT00000088279 | 0.955215646  | 1.32E-06 |
| TUCP_001148 | XLOC_043177 | ENSRNOT00000026457 | 0.951243776  | 2.00E-06 |

|             |             |                    |              |          |
|-------------|-------------|--------------------|--------------|----------|
| TUCP_001148 | XLOC_043177 | ENSRNOT00000004570 | 0.955669878  | 1.25E-06 |
| TUCP_001148 | XLOC_043177 | ENSRNOT00000012736 | 0.951498047  | 1.95E-06 |
| TUCP_001148 | XLOC_043177 | ENSRNOT00000031230 | 0.987835103  | 2.06E-09 |
| TUCP_001148 | XLOC_043177 | ENSRNOT00000013758 | 0.961286133  | 6.42E-07 |
| TUCP_001148 | XLOC_043177 | ENSRNOT00000010748 | 0.958755061  | 8.77E-07 |
| TUCP_001148 | XLOC_043177 | ENSRNOT00000006963 | 0.957613741  | 1.00E-06 |
| TUCP_001148 | XLOC_043177 | ENSRNOT00000080928 | 0.969164355  | 2.08E-07 |
| TUCP_001148 | XLOC_043177 | ENSRNOT00000052288 | 0.953970709  | 1.51E-06 |
| TUCP_001148 | XLOC_043177 | ENSRNOT00000026543 | 0.952857709  | 1.69E-06 |
| TUCP_001148 | XLOC_043177 | ENSRNOT00000035474 | 0.960899664  | 6.74E-07 |
| TUCP_001148 | XLOC_043177 | ENSRNOT00000009342 | 0.974518654  | 8.11E-08 |
| TUCP_001148 | XLOC_043177 | ENSRNOT00000091205 | 0.954359843  | 1.44E-06 |
| TUCP_001148 | XLOC_043177 | ENSRNOT00000027910 | 0.969537962  | 1.96E-07 |
| TUCP_001148 | XLOC_043177 | ENSRNOT00000079464 | 0.95123842   | 2.00E-06 |
| TUCP_001148 | XLOC_043177 | ENSRNOT00000085596 | 0.97566795   | 6.45E-08 |
| TUCP_001148 | XLOC_043177 | ENSRNOT00000041384 | -0.954000248 | 1.50E-06 |
| TUCP_001148 | XLOC_043177 | ENSRNOT00000029125 | 0.957340119  | 1.04E-06 |
| TUCP_001148 | XLOC_043177 | ENSRNOT00000035491 | 0.952295956  | 1.80E-06 |
| TUCP_001148 | XLOC_043177 | ENSRNOT00000004412 | 0.980259182  | 2.28E-08 |
| TUCP_001148 | XLOC_043177 | ENSRNOT00000012048 | 0.971600404  | 1.39E-07 |
| TUCP_001148 | XLOC_043177 | ENSRNOT00000064798 | 0.969728654  | 1.90E-07 |
| TUCP_001148 | XLOC_043177 | ENSRNOT00000061100 | 0.966625176  | 3.08E-07 |
| TUCP_001148 | XLOC_043177 | ENSRNOT00000024941 | 0.960989102  | 6.66E-07 |
| TUCP_001148 | XLOC_043177 | ENSRNOT00000019675 | 0.957939517  | 9.66E-07 |
| TUCP_001148 | XLOC_043177 | ENSRNOT00000082174 | 0.973390321  | 1.00E-07 |
| TUCP_001148 | XLOC_043177 | ENSRNOT00000005144 | 0.958372479  | 9.18E-07 |
| TUCP_001148 | XLOC_043177 | ENSRNOT00000013985 | 0.970017565  | 1.81E-07 |
| TUCP_001148 | XLOC_043177 | ENSRNOT00000018998 | 0.963845724  | 4.58E-07 |
| TUCP_001148 | XLOC_043177 | ENSRNOT00000004463 | 0.961832791  | 5.98E-07 |
| TUCP_001148 | XLOC_043177 | ENSRNOT00000027964 | 0.976300593  | 5.66E-08 |
| TUCP_001148 | XLOC_043177 | ENSRNOT00000047975 | 0.960553795  | 7.04E-07 |
| TUCP_001148 | XLOC_043177 | ENSRNOT00000010224 | 0.953707437  | 1.55E-06 |
| TUCP_001148 | XLOC_043177 | ENSRNOT00000072081 | 0.971218227  | 1.48E-07 |
| TUCP_001148 | XLOC_043177 | ENSRNOT00000011041 | 0.955406083  | 1.29E-06 |
| TUCP_001148 | XLOC_043177 | ENSRNOT00000021674 | 0.978334293  | 3.63E-08 |
| TUCP_001148 | XLOC_043177 | ENSRNOT00000027615 | 0.95043844   | 2.17E-06 |
| TUCP_001148 | XLOC_043177 | ENSRNOT00000002292 | 0.974768154  | 7.72E-08 |
| TUCP_001148 | XLOC_043177 | ENSRNOT00000029001 | 0.96837074   | 2.36E-07 |
| TUCP_001148 | XLOC_043177 | ENSRNOT00000004140 | 0.974920385  | 7.49E-08 |
| TUCP_001148 | XLOC_043177 | ENSRNOT00000083799 | 0.957967771  | 9.63E-07 |
| TUCP_001148 | XLOC_043177 | ENSRNOT00000009066 | 0.973373351  | 1.01E-07 |
| TUCP_001149 | XLOC_043177 | ENSRNOT00000006188 | -0.955982207 | 1.21E-06 |
| TUCP_001149 | XLOC_043177 | ENSRNOT00000006186 | 0.976026743  | 5.99E-08 |
| TUCP_001149 | XLOC_043177 | ENSRNOT00000090621 | 0.973418014  | 1.00E-07 |
| TUCP_001149 | XLOC_043177 | ENSRNOT00000075397 | 0.953705824  | 1.55E-06 |
| TUCP_001149 | XLOC_043177 | ENSRNOT00000032926 | -0.956082219 | 1.20E-06 |
| TUCP_001149 | XLOC_043177 | ENSRNOT00000019104 | -0.960053006 | 7.49E-07 |
| TUCP_001149 | XLOC_043177 | ENSRNOT00000006217 | 0.978779207  | 3.27E-08 |
| TUCP_001149 | XLOC_043177 | ENSRNOT00000068353 | 0.972362928  | 1.21E-07 |
| TUCP_001149 | XLOC_043177 | ENSRNOT00000079138 | 0.975881858  | 6.17E-08 |
| TUCP_001149 | XLOC_043177 | ENSRNOT00000044635 | 0.958344017  | 9.21E-07 |

|             |             |                    |              |          |
|-------------|-------------|--------------------|--------------|----------|
| TUCP_001149 | XLOC_043177 | ENSRNOT00000026941 | 0.961964398  | 5.88E-07 |
| TUCP_001149 | XLOC_043177 | ENSRNOT00000031692 | -0.953408186 | 1.60E-06 |
| TUCP_001149 | XLOC_043177 | ENSRNOT00000052063 | 0.982204726  | 1.36E-08 |
| TUCP_001149 | XLOC_043177 | ENSRNOT00000055540 | 0.968109064  | 2.46E-07 |
| TUCP_001149 | XLOC_043177 | ENSRNOT00000006752 | 0.96859213   | 2.28E-07 |
| TUCP_001149 | XLOC_043177 | ENSRNOT00000031672 | -0.950764112 | 2.10E-06 |
| TUCP_001149 | XLOC_043177 | ENSRNOT00000072771 | 0.950430146  | 2.17E-06 |
| TUCP_001149 | XLOC_043177 | ENSRNOT00000073370 | 0.956315941  | 1.16E-06 |
| TUCP_001149 | XLOC_043177 | ENSRNOT00000065300 | 0.962123181  | 5.76E-07 |
| TUCP_001149 | XLOC_043177 | ENSRNOT00000076820 | 0.958317325  | 9.24E-07 |
| TUCP_001149 | XLOC_043177 | ENSRNOT00000008274 | -0.961023605 | 6.63E-07 |
| TUCP_001149 | XLOC_043177 | ENSRNOT00000065871 | 0.955124776  | 1.33E-06 |
| TUCP_001149 | XLOC_043177 | ENSRNOT00000091448 | -0.952135368 | 1.83E-06 |
| TUCP_001149 | XLOC_043177 | ENSRNOT00000077999 | 0.964662039  | 4.09E-07 |
| TUCP_001149 | XLOC_043177 | ENSRNOT00000068134 | 0.95797434   | 9.62E-07 |
| TUCP_001149 | XLOC_043177 | ENSRNOT00000067626 | -0.958550757 | 8.99E-07 |
| TUCP_001149 | XLOC_043177 | ENSRNOT00000003146 | -0.96345536  | 4.83E-07 |
| TUCP_001149 | XLOC_043177 | ENSRNOT00000026391 | 0.963098906  | 5.06E-07 |
| TUCP_001149 | XLOC_043177 | ENSRNOT00000015188 | 0.957659072  | 9.98E-07 |
| TUCP_001149 | XLOC_043177 | ENSRNOT00000005686 | -0.973516334 | 9.81E-08 |
| TUCP_001149 | XLOC_043177 | ENSRNOT00000087278 | -0.977865076 | 4.03E-08 |
| TUCP_001149 | XLOC_043177 | ENSRNOT00000030074 | 0.972835087  | 1.11E-07 |
| TUCP_001149 | XLOC_043177 | ENSRNOT00000010141 | 0.953763787  | 1.54E-06 |
| TUCP_001149 | XLOC_043177 | ENSRNOT00000009150 | 0.965802639  | 3.48E-07 |
| TUCP_001149 | XLOC_043177 | ENSRNOT00000084709 | 0.972224367  | 1.24E-07 |
| TUCP_001149 | XLOC_043177 | ENSRNOT00000009156 | 0.954928583  | 1.36E-06 |
| TUCP_001149 | XLOC_043177 | ENSRNOT00000026481 | 0.968258321  | 2.41E-07 |
| TUCP_001149 | XLOC_043177 | ENSRNOT00000001403 | 0.963003875  | 5.13E-07 |
| TUCP_001149 | XLOC_043177 | ENSRNOT00000001401 | 0.962283668  | 5.64E-07 |
| TUCP_001149 | XLOC_043177 | ENSRNOT00000016132 | -0.964074834 | 4.44E-07 |
| TUCP_001149 | XLOC_043177 | ENSRNOT00000013067 | -0.970766269 | 1.60E-07 |
| TUCP_001149 | XLOC_043177 | ENSRNOT00000002313 | -0.951685212 | 1.91E-06 |
| TUCP_001149 | XLOC_043177 | ENSRNOT00000016637 | -0.951559334 | 1.94E-06 |
| TUCP_001149 | XLOC_043177 | ENSRNOT00000038994 | -0.952195431 | 1.81E-06 |
| TUCP_001149 | XLOC_043177 | ENSRNOT00000079895 | 0.972291992  | 1.23E-07 |
| TUCP_001149 | XLOC_043177 | ENSRNOT00000005220 | 0.956872548  | 1.09E-06 |
| TUCP_001149 | XLOC_043177 | ENSRNOT00000074586 | -0.962931806 | 5.18E-07 |
| TUCP_001149 | XLOC_043177 | ENSRNOT00000023262 | -0.958912965 | 8.61E-07 |
| TUCP_001149 | XLOC_043177 | ENSRNOT00000002465 | 0.963352789  | 4.89E-07 |
| TUCP_001149 | XLOC_043177 | ENSRNOT00000011880 | 0.960169565  | 7.38E-07 |
| TUCP_001149 | XLOC_043177 | ENSRNOT00000003992 | -0.960804957 | 6.82E-07 |
| TUCP_001149 | XLOC_043177 | ENSRNOT00000020885 | 0.969929015  | 1.84E-07 |
| TUCP_001149 | XLOC_043177 | ENSRNOT00000077706 | 0.958549043  | 8.99E-07 |
| TUCP_001149 | XLOC_043177 | ENSRNOT00000055602 | -0.954590528 | 1.41E-06 |
| TUCP_001149 | XLOC_043177 | ENSRNOT00000021015 | 0.951273672  | 1.99E-06 |
| TUCP_001149 | XLOC_043177 | ENSRNOT00000003840 | 0.985011386  | 5.81E-09 |
| TUCP_001149 | XLOC_043177 | ENSRNOT00000019656 | -0.953425633 | 1.60E-06 |
| TUCP_001149 | XLOC_043177 | ENSRNOT00000049285 | -0.955567625 | 1.27E-06 |
| TUCP_001149 | XLOC_043177 | ENSRNOT00000015239 | -0.978427132 | 3.55E-08 |
| TUCP_001149 | XLOC_043177 | ENSRNOT00000074649 | 0.976453568  | 5.48E-08 |
| TUCP_001149 | XLOC_043177 | ENSRNOT00000082108 | -0.961566713 | 6.19E-07 |

|             |             |                    |              |          |
|-------------|-------------|--------------------|--------------|----------|
| TUCP_001149 | XLOC_043177 | ENSRNOT00000018877 | -0.953089021 | 1.65E-06 |
| TUCP_001149 | XLOC_043177 | ENSRNOT00000077146 | -0.971719387 | 1.36E-07 |
| TUCP_001149 | XLOC_043177 | ENSRNOT00000060002 | -0.962821298 | 5.26E-07 |
| TUCP_001149 | XLOC_043177 | ENSRNOT00000086456 | -0.950570983 | 2.14E-06 |
| TUCP_001149 | XLOC_043177 | ENSRNOT00000075209 | -0.961996263 | 5.86E-07 |
| TUCP_001149 | XLOC_043177 | ENSRNOT00000023977 | -0.953985185 | 1.50E-06 |
| TUCP_001149 | XLOC_043177 | ENSRNOT00000066133 | -0.971135216 | 1.50E-07 |
| TUCP_001149 | XLOC_043177 | ENSRNOT00000048933 | -0.957791943 | 9.83E-07 |
| TUCP_001149 | XLOC_043177 | ENSRNOT00000035385 | 0.959285317  | 8.23E-07 |
| TUCP_001149 | XLOC_043177 | ENSRNOT00000057738 | 0.950063576  | 2.25E-06 |
| TUCP_001149 | XLOC_043177 | ENSRNOT00000017190 | 0.953854373  | 1.52E-06 |
| TUCP_001149 | XLOC_043177 | ENSRNOT00000064535 | -0.973923138 | 9.09E-08 |
| TUCP_001149 | XLOC_043177 | ENSRNOT00000087033 | -0.966171639 | 3.30E-07 |
| TUCP_001149 | XLOC_043177 | ENSRNOT00000077367 | -0.955384767 | 1.29E-06 |
| TUCP_001149 | XLOC_043177 | ENSRNOT00000039102 | 0.959631151  | 7.89E-07 |
| TUCP_001149 | XLOC_043177 | ENSRNOT00000091205 | 0.961616508  | 6.15E-07 |
| TUCP_001149 | XLOC_043177 | ENSRNOT00000009742 | -0.953100726 | 1.65E-06 |
| TUCP_001149 | XLOC_043177 | ENSRNOT00000007369 | 0.965396937  | 3.69E-07 |
| TUCP_001149 | XLOC_043177 | ENSRNOT00000060698 | -0.968428685 | 2.34E-07 |
| TUCP_001149 | XLOC_043177 | ENSRNOT00000017998 | 0.951991389  | 1.85E-06 |
| TUCP_001149 | XLOC_043177 | ENSRNOT00000026174 | 0.959308339  | 8.21E-07 |
| TUCP_001149 | XLOC_043177 | ENSRNOT00000065529 | 0.959076934  | 8.44E-07 |
| TUCP_001149 | XLOC_043177 | ENSRNOT00000017776 | 0.955821079  | 1.23E-06 |
| TUCP_001149 | XLOC_043177 | ENSRNOT00000005144 | 0.975368306  | 6.85E-08 |
| TUCP_001149 | XLOC_043177 | ENSRNOT00000021534 | -0.953324449 | 1.61E-06 |
| TUCP_001149 | XLOC_043177 | ENSRNOT00000088679 | -0.951263151 | 1.99E-06 |
| TUCP_001149 | XLOC_043177 | ENSRNOT00000004463 | 0.95197993   | 1.85E-06 |
| TUCP_001149 | XLOC_043177 | ENSRNOT00000023256 | 0.976539635  | 5.38E-08 |
| TUCP_001149 | XLOC_043177 | ENSRNOT00000016776 | -0.956662584 | 1.12E-06 |
| TUCP_001149 | XLOC_043177 | ENSRNOT00000022097 | 0.9580931    | 9.49E-07 |
| TUCP_001149 | XLOC_043177 | ENSRNOT00000008987 | -0.958730473 | 8.80E-07 |
| TUCP_001149 | XLOC_043177 | ENSRNOT00000092876 | -0.967318253 | 2.78E-07 |
| TUCP_001149 | XLOC_043177 | ENSRNOT00000024253 | 0.974733137  | 7.77E-08 |
| TUCP_001149 | XLOC_043177 | ENSRNOT00000081796 | 0.968567262  | 2.29E-07 |
| TUCP_001149 | XLOC_043177 | ENSRNOT0000009080  | -0.951070279 | 2.03E-06 |
| TUCP_001149 | XLOC_043177 | ENSRNOT00000063930 | -0.97124123  | 1.48E-07 |
| TUCP_001149 | XLOC_043177 | ENSRNOT00000013116 | -0.951060304 | 2.04E-06 |
| TUCP_001149 | XLOC_043177 | ENSRNOT00000048613 | 0.978642904  | 3.38E-08 |
| TUCP_001149 | XLOC_043177 | ENSRNOT00000013025 | -0.967240496 | 2.81E-07 |
| TUCP_001149 | XLOC_043177 | ENSRNOT00000088125 | 0.965080561  | 3.86E-07 |
| TUCP_001149 | XLOC_043177 | ENSRNOT00000041237 | -0.95002421  | 2.26E-06 |
| TUCP_001149 | XLOC_043177 | ENSRNOT00000024005 | 0.955909439  | 1.22E-06 |
| TUCP_001149 | XLOC_043177 | ENSRNOT00000084069 | 0.956083654  | 1.19E-06 |
| TUCP_001149 | XLOC_043177 | ENSRNOT00000001679 | 0.963379455  | 4.88E-07 |
| TUCP_001149 | XLOC_043177 | ENSRNOT00000013613 | -0.95057006  | 2.14E-06 |
| TUCP_001149 | XLOC_043177 | ENSRNOT00000026531 | -0.961681963 | 6.10E-07 |
| TUCP_001149 | XLOC_043177 | ENSRNOT00000010419 | 0.968082981  | 2.47E-07 |
| TUCP_001149 | XLOC_043177 | ENSRNOT00000019057 | -0.961080106 | 6.59E-07 |
| TUCP_001149 | XLOC_043177 | ENSRNOT00000021629 | -0.965852717 | 3.45E-07 |
| TUCP_001149 | XLOC_043177 | ENSRNOT00000016306 | -0.965627531 | 3.57E-07 |
| TUCP_001149 | XLOC_043177 | ENSRNOT00000015476 | -0.958493234 | 9.05E-07 |

|             |             |                    |              |          |
|-------------|-------------|--------------------|--------------|----------|
| TUCP_001149 | XLOC_043177 | ENSRNOT00000025079 | -0.973074931 | 1.07E-07 |
| TUCP_001149 | XLOC_043177 | ENSRNOT00000048754 | -0.955709179 | 1.25E-06 |
| TUCP_001149 | XLOC_043177 | ENSRNOT00000020316 | -0.953520816 | 1.58E-06 |
| TUCP_001149 | XLOC_043177 | ENSRNOT00000021458 | -0.953193853 | 1.64E-06 |
| TUCP_001149 | XLOC_043177 | ENSRNOT00000011926 | 0.953012195  | 1.67E-06 |
| TUCP_001149 | XLOC_043177 | ENSRNOT00000054761 | -0.95765161  | 9.99E-07 |
| TUCP_001149 | XLOC_043177 | ENSRNOT00000007824 | -0.963890692 | 4.55E-07 |
| TUCP_001149 | XLOC_043177 | ENSRNOT00000020681 | -0.956264685 | 1.17E-06 |
| TUCP_001149 | XLOC_043177 | ENSRNOT00000057898 | -0.950745093 | 2.10E-06 |
| TUCP_001149 | XLOC_043177 | ENSRNOT00000024677 | 0.982186629  | 1.37E-08 |
| TUCP_001149 | XLOC_043177 | ENSRNOT00000056100 | -0.950639125 | 2.12E-06 |
| TUCP_001149 | XLOC_043177 | ENSRNOT00000071540 | 0.976769723  | 5.12E-08 |
| TUCP_001149 | XLOC_043177 | ENSRNOT00000073643 | -0.952506475 | 1.76E-06 |
| TUCP_001149 | XLOC_043177 | ENSRNOT00000078349 | -0.951805103 | 1.89E-06 |
| TUCP_001149 | XLOC_043177 | ENSRNOT00000011654 | -0.955836635 | 1.23E-06 |
| TUCP_001149 | XLOC_043177 | ENSRNOT00000022502 | -0.959261125 | 8.25E-07 |
| TUCP_001149 | XLOC_043177 | ENSRNOT00000060811 | 0.953941279  | 1.51E-06 |
| TUCP_001149 | XLOC_043177 | ENSRNOT00000021803 | -0.955433874 | 1.28E-06 |
| TUCP_001149 | XLOC_043177 | ENSRNOT00000024352 | 0.984656121  | 6.53E-09 |
| TUCP_001149 | XLOC_043177 | ENSRNOT00000082627 | -0.955992766 | 1.21E-06 |
| TUCP_001149 | XLOC_043177 | ENSRNOT00000003780 | 0.956942259  | 1.08E-06 |
| TUCP_001149 | XLOC_043177 | ENSRNOT00000060494 | 0.950735295  | 2.10E-06 |
| TUCP_001149 | XLOC_043177 | ENSRNOT00000081800 | 0.957528257  | 1.01E-06 |
| TUCP_001149 | XLOC_043177 | ENSRNOT00000022342 | 0.950796289  | 2.09E-06 |
| TUCP_001149 | XLOC_043177 | ENSRNOT00000025104 | -0.950092596 | 2.24E-06 |
| TUCP_001149 | XLOC_043177 | ENSRNOT00000023667 | 0.95046804   | 2.16E-06 |
| TUCP_001149 | XLOC_043177 | ENSRNOT00000009221 | 0.958291377  | 9.27E-07 |
| TUCP_001149 | XLOC_043177 | ENSRNOT00000074054 | 0.955827124  | 1.23E-06 |
| TUCP_001149 | XLOC_043177 | ENSRNOT00000068026 | -0.958445482 | 9.10E-07 |
| TUCP_001149 | XLOC_043177 | ENSRNOT00000026089 | 0.976780322  | 5.11E-08 |
| TUCP_001149 | XLOC_043177 | ENSRNOT00000090456 | 0.95530446   | 1.30E-06 |
| TUCP_001149 | XLOC_043177 | ENSRNOT00000058382 | 0.972443054  | 1.19E-07 |
| TUCP_001149 | XLOC_043177 | ENSRNOT00000055683 | 0.955374908  | 1.29E-06 |
| TUCP_001149 | XLOC_043177 | ENSRNOT00000005587 | -0.953944314 | 1.51E-06 |
| TUCP_001149 | XLOC_043177 | ENSRNOT00000061100 | 0.969442941  | 1.99E-07 |
| TUCP_001149 | XLOC_043177 | ENSRNOT00000017995 | 0.960479684  | 7.10E-07 |
| TUCP_001149 | XLOC_043177 | ENSRNOT00000000898 | 0.966825013  | 2.99E-07 |
| TUCP_001149 | XLOC_043177 | ENSRNOT00000005459 | 0.9512434    | 2.00E-06 |
| TUCP_001149 | XLOC_043177 | ENSRNOT00000027910 | 0.967306972  | 2.78E-07 |
| TUCP_001149 | XLOC_043177 | ENSRNOT00000090262 | 0.958371785  | 9.18E-07 |
| TUCP_001149 | XLOC_043177 | ENSRNOT00000037015 | 0.958656785  | 8.87E-07 |
| TUCP_001149 | XLOC_043177 | ENSRNOT00000027917 | 0.959654235  | 7.87E-07 |
| TUCP_001149 | XLOC_043177 | ENSRNOT00000066032 | 0.975622659  | 6.51E-08 |
| TUCP_001149 | XLOC_043177 | ENSRNOT00000002510 | -0.953448133 | 1.59E-06 |
| TUCP_001149 | XLOC_043177 | ENSRNOT00000001783 | 0.958478157  | 9.06E-07 |
| TUCP_001149 | XLOC_043177 | ENSRNOT00000021143 | 0.951092944  | 2.03E-06 |
| TUCP_001149 | XLOC_043177 | ENSRNOT00000033677 | -0.951861911 | 1.88E-06 |
| TUCP_001149 | XLOC_043177 | ENSRNOT00000000155 | 0.95407331   | 1.49E-06 |
| TUCP_001149 | XLOC_043177 | ENSRNOT00000075630 | -0.953635203 | 1.56E-06 |
| TUCP_001149 | XLOC_043177 | ENSRNOT00000011984 | 0.952084447  | 1.83E-06 |
| TUCP_001149 | XLOC_043177 | ENSRNOT00000020669 | 0.950816098  | 2.09E-06 |

|             |             |                    |              |          |
|-------------|-------------|--------------------|--------------|----------|
| TUCP_001149 | XLOC_043177 | ENSRNOT00000064039 | 0.954181127  | 1.47E-06 |
| TUCP_001149 | XLOC_043177 | ENSRNOT00000031625 | 0.960733115  | 6.88E-07 |
| TUCP_001149 | XLOC_043177 | ENSRNOT00000076300 | -0.955160403 | 1.32E-06 |
| TUCP_001149 | XLOC_043177 | ENSRNOT00000025086 | -0.961142643 | 6.54E-07 |
| TUCP_001149 | XLOC_043177 | ENSRNOT00000015537 | 0.960600126  | 7.00E-07 |
| TUCP_001149 | XLOC_043177 | ENSRNOT00000015946 | -0.961316115 | 6.39E-07 |
| TUCP_001149 | XLOC_043177 | ENSRNOT00000085279 | 0.954455913  | 1.43E-06 |
| TUCP_001149 | XLOC_043177 | ENSRNOT00000012528 | 0.970482007  | 1.68E-07 |
| TUCP_001149 | XLOC_043177 | ENSRNOT00000005389 | 0.960571838  | 7.02E-07 |
| TUCP_001149 | XLOC_043177 | ENSRNOT00000087011 | -0.956808498 | 1.10E-06 |
| TUCP_001149 | XLOC_043177 | ENSRNOT00000028907 | 0.979050868  | 3.07E-08 |
| TUCP_001149 | XLOC_043177 | ENSRNOT00000010224 | 0.958709063  | 8.82E-07 |
| TUCP_001149 | XLOC_043177 | ENSRNOT00000025147 | 0.963178732  | 5.01E-07 |
| TUCP_001149 | XLOC_043177 | ENSRNOT00000078862 | 0.959150158  | 8.36E-07 |
| TUCP_001149 | XLOC_043177 | ENSRNOT00000039551 | -0.958668777 | 8.86E-07 |
| TUCP_001149 | XLOC_043177 | ENSRNOT00000014946 | 0.953795403  | 1.53E-06 |
| TUCP_001149 | XLOC_043177 | ENSRNOT00000082998 | 0.958038434  | 9.55E-07 |
| TUCP_001149 | XLOC_043177 | ENSRNOT00000007350 | 0.987375569  | 2.47E-09 |
| TUCP_001149 | XLOC_043177 | ENSRNOT00000004400 | 0.977737677  | 4.15E-08 |
| TUCP_001149 | XLOC_043177 | ENSRNOT00000083578 | 0.984031504  | 7.96E-09 |
| TUCP_001149 | XLOC_043177 | ENSRNOT00000020297 | 0.961160057  | 6.52E-07 |
| TUCP_001149 | XLOC_043177 | ENSRNOT00000023638 | 0.959327238  | 8.19E-07 |
| TUCP_001149 | XLOC_043177 | ENSRNOT00000005659 | 0.961584657  | 6.18E-07 |
| TUCP_001149 | XLOC_043177 | ENSRNOT00000045326 | 0.951687348  | 1.91E-06 |
| TUCP_001149 | XLOC_043177 | ENSRNOT00000039607 | -0.951011461 | 2.05E-06 |
| TUCP_001149 | XLOC_043177 | ENSRNOT00000074023 | 0.952882334  | 1.69E-06 |
| TUCP_001149 | XLOC_043177 | ENSRNOT00000009073 | -0.956600429 | 1.13E-06 |
| TUCP_001149 | XLOC_043177 | ENSRNOT00000018341 | -0.958135167 | 9.44E-07 |
| TUCP_001149 | XLOC_043177 | ENSRNOT00000065076 | 0.960060747  | 7.48E-07 |
| TUCP_001149 | XLOC_043177 | ENSRNOT00000013516 | 0.962308177  | 5.62E-07 |
| TUCP_001149 | XLOC_043177 | ENSRNOT00000016012 | -0.965418935 | 3.67E-07 |
| TUCP_001149 | XLOC_043177 | ENSRNOT00000012060 | 0.96355352   | 4.76E-07 |
| TUCP_001149 | XLOC_043177 | ENSRNOT00000027760 | 0.957649887  | 9.99E-07 |
| TUCP_001149 | XLOC_043177 | ENSRNOT00000024402 | 0.95074854   | 2.10E-06 |
| TUCP_001149 | XLOC_043177 | ENSRNOT00000018028 | -0.956152719 | 1.19E-06 |
| TUCP_001149 | XLOC_043177 | ENSRNOT00000089933 | 0.955764475  | 1.24E-06 |
| TUCP_001149 | XLOC_043177 | ENSRNOT00000077908 | 0.96939519   | 2.01E-07 |
| TUCP_001149 | XLOC_043177 | ENSRNOT00000090461 | 0.957349675  | 1.03E-06 |
| TUCP_001149 | XLOC_043177 | ENSRNOT00000073983 | 0.951463754  | 1.95E-06 |
| TUCP_001149 | XLOC_043177 | ENSRNOT00000084012 | 0.965868873  | 3.44E-07 |
| TUCP_001149 | XLOC_043177 | ENSRNOT00000019040 | -0.950646464 | 2.12E-06 |
| TUCP_001149 | XLOC_043177 | ENSRNOT00000019820 | 0.957224235  | 1.05E-06 |
| TUCP_001149 | XLOC_043177 | ENSRNOT00000067822 | 0.959215033  | 8.30E-07 |
| TUCP_001149 | XLOC_043177 | ENSRNOT00000011832 | -0.966836718 | 2.99E-07 |
| TUCP_001149 | XLOC_043177 | ENSRNOT00000024066 | 0.955018996  | 1.34E-06 |
| TUCP_001149 | XLOC_043177 | ENSRNOT00000006835 | 0.95113885   | 2.02E-06 |
| TUCP_001149 | XLOC_043177 | ENSRNOT00000077727 | -0.969794262 | 1.88E-07 |
| TUCP_001149 | XLOC_043177 | ENSRNOT00000011930 | 0.957286489  | 1.04E-06 |
| TUCP_001149 | XLOC_043177 | ENSRNOT00000044346 | -0.961612554 | 6.15E-07 |
| TUCP_001149 | XLOC_043177 | ENSRNOT00000068745 | 0.981383755  | 1.71E-08 |
| TUCP_001149 | XLOC_043177 | ENSRNOT00000020453 | -0.958849184 | 8.67E-07 |

|             |             |                    |              |          |
|-------------|-------------|--------------------|--------------|----------|
| TUCP_001149 | XLOC_043177 | ENSRNOT00000091909 | 0.966845489  | 2.98E-07 |
| TUCP_001149 | XLOC_043177 | ENSRNOT00000003544 | -0.9641045   | 4.42E-07 |
| TUCP_001149 | XLOC_043177 | ENSRNOT00000022190 | -0.957629637 | 1.00E-06 |
| TUCP_001149 | XLOC_043177 | ENSRNOT00000025913 | -0.961307228 | 6.40E-07 |
| TUCP_001149 | XLOC_043177 | ENSRNOT00000004196 | 0.952891558  | 1.69E-06 |
| TUCP_001149 | XLOC_043177 | ENSRNOT00000076230 | 0.967984446  | 2.51E-07 |
| TUCP_001149 | XLOC_043177 | ENSRNOT00000007882 | -0.951170174 | 2.01E-06 |
| TUCP_001149 | XLOC_043177 | ENSRNOT00000073919 | 0.985389795  | 5.12E-09 |
| TUCP_001149 | XLOC_043177 | ENSRNOT00000067780 | -0.95563804  | 1.26E-06 |
| TUCP_001149 | XLOC_043177 | ENSRNOT00000025966 | 0.956031765  | 1.20E-06 |
| TUCP_001149 | XLOC_043177 | ENSRNOT00000089611 | 0.954217664  | 1.47E-06 |
| TUCP_001149 | XLOC_043177 | ENSRNOT00000086590 | 0.96919775   | 2.07E-07 |
| TUCP_001149 | XLOC_043177 | ENSRNOT00000034883 | -0.960991873 | 6.66E-07 |
| TUCP_001149 | XLOC_043177 | ENSRNOT00000072357 | -0.963768017 | 4.63E-07 |
| TUCP_001149 | XLOC_043177 | ENSRNOT00000065947 | 0.969381682  | 2.01E-07 |
| TUCP_001149 | XLOC_043177 | ENSRNOT00000005910 | -0.955983889 | 1.21E-06 |
| TUCP_001149 | XLOC_043177 | ENSRNOT00000017624 | 0.958043266  | 9.54E-07 |
| TUCP_001149 | XLOC_043177 | ENSRNOT00000076485 | -0.956551184 | 1.13E-06 |
| TUCP_001149 | XLOC_043177 | ENSRNOT00000078475 | 0.971106215  | 1.51E-07 |
| TUCP_001149 | XLOC_043177 | ENSRNOT00000040169 | 0.972864244  | 1.11E-07 |
| TUCP_001149 | XLOC_043177 | ENSRNOT00000036051 | 0.964612875  | 4.12E-07 |
| TUCP_001149 | XLOC_043177 | ENSRNOT00000016722 | 0.975866416  | 6.19E-08 |
| TUCP_001149 | XLOC_043177 | ENSRNOT00000000013 | 0.960263197  | 7.30E-07 |
| TUCP_001149 | XLOC_043177 | ENSRNOT00000080222 | -0.952914949 | 1.68E-06 |
| TUCP_001149 | XLOC_043177 | ENSRNOT00000025523 | 0.962765576  | 5.29E-07 |
| TUCP_001149 | XLOC_043177 | ENSRNOT00000005161 | 0.972261703  | 1.23E-07 |
| TUCP_001149 | XLOC_043177 | ENSRNOT00000026118 | -0.956489736 | 1.14E-06 |
| TUCP_001149 | XLOC_043177 | ENSRNOT00000037955 | -0.961291225 | 6.41E-07 |
| TUCP_001149 | XLOC_043177 | ENSRNOT00000055582 | 0.951756694  | 1.90E-06 |
| TUCP_001149 | XLOC_043177 | ENSRNOT00000004999 | 0.969496816  | 1.98E-07 |
| TUCP_001149 | XLOC_043177 | ENSRNOT00000009122 | 0.961794281  | 6.01E-07 |
| TUCP_001149 | XLOC_043177 | ENSRNOT00000056865 | -0.950392794 | 2.18E-06 |
| TUCP_001149 | XLOC_043177 | ENSRNOT00000019554 | 0.954973748  | 1.35E-06 |
| TUCP_001149 | XLOC_043177 | ENSRNOT00000047663 | -0.953604426 | 1.57E-06 |
| TUCP_001149 | XLOC_043177 | ENSRNOT00000088191 | 0.953051415  | 1.66E-06 |
| TUCP_001149 | XLOC_043177 | ENSRNOT00000080602 | 0.951490101  | 1.95E-06 |
| TUCP_001149 | XLOC_043177 | ENSRNOT00000029202 | -0.966842144 | 2.99E-07 |
| TUCP_001149 | XLOC_043177 | ENSRNOT00000025791 | -0.952767358 | 1.71E-06 |
| TUCP_001149 | XLOC_043177 | ENSRNOT00000005489 | 0.979649838  | 2.66E-08 |
| TUCP_001149 | XLOC_043177 | ENSRNOT00000025794 | -0.950565455 | 2.14E-06 |
| TUCP_001149 | XLOC_043177 | ENSRNOT00000058111 | -0.95720296  | 1.05E-06 |
| TUCP_001149 | XLOC_043177 | ENSRNOT00000018844 | 0.954631655  | 1.40E-06 |
| TUCP_001149 | XLOC_043177 | ENSRNOT00000009994 | -0.959648937 | 7.87E-07 |
| TUCP_001149 | XLOC_043177 | ENSRNOT00000002114 | -0.956760506 | 1.11E-06 |
| TUCP_001149 | XLOC_043177 | ENSRNOT00000024841 | -0.961644108 | 6.13E-07 |
| TUCP_001149 | XLOC_043177 | ENSRNOT00000080928 | 0.966520293  | 3.13E-07 |
| TUCP_001149 | XLOC_043177 | ENSRNOT00000018074 | -0.968315017 | 2.38E-07 |
| TUCP_001149 | XLOC_043177 | ENSRNOT00000037679 | 0.968740563  | 2.23E-07 |
| TUCP_001149 | XLOC_043177 | ENSRNOT00000043581 | -0.954195936 | 1.47E-06 |
| TUCP_001149 | XLOC_043177 | ENSRNOT00000000120 | 0.953677631  | 1.55E-06 |
| TUCP_001149 | XLOC_043177 | ENSRNOT00000013632 | 0.951549035  | 1.94E-06 |



|             |             |                    |              |          |
|-------------|-------------|--------------------|--------------|----------|
| TUCP_001149 | XLOC_043177 | ENSRNOT00000078906 | -0.961399995 | 6.32E-07 |
| TUCP_001149 | XLOC_043177 | ENSRNOT00000010418 | 0.964462689  | 4.21E-07 |
| TUCP_001149 | XLOC_043177 | ENSRNOT00000084049 | 0.965068096  | 3.86E-07 |
| TUCP_001149 | XLOC_043177 | ENSRNOT00000019172 | -0.960711341 | 6.90E-07 |
| TUCP_001149 | XLOC_043177 | ENSRNOT00000015495 | -0.966419456 | 3.18E-07 |
| TUCP_001149 | XLOC_043177 | ENSRNOT00000032244 | 0.963035492  | 5.11E-07 |
| TUCP_001149 | XLOC_043177 | ENSRNOT00000019910 | -0.973393732 | 1.00E-07 |
| TUCP_001149 | XLOC_043177 | ENSRNOT00000040393 | 0.968591752  | 2.28E-07 |
| TUCP_001149 | XLOC_043177 | ENSRNOT00000025097 | 0.960452318  | 7.13E-07 |
| TUCP_001149 | XLOC_043177 | ENSRNOT00000067901 | -0.95647706  | 1.14E-06 |
| TUCP_001149 | XLOC_043177 | ENSRNOT00000025314 | 0.972117425  | 1.27E-07 |
| TUCP_001149 | XLOC_043177 | ENSRNOT00000021674 | 0.972915921  | 1.10E-07 |
| TUCP_001149 | XLOC_043177 | ENSRNOT00000036613 | -0.973834216 | 9.24E-08 |
| TUCP_001149 | XLOC_043177 | ENSRNOT00000025705 | 0.964035399  | 4.46E-07 |
| TUCP_001149 | XLOC_043177 | ENSRNOT00000089211 | 0.967598961  | 2.66E-07 |
| TUCP_001149 | XLOC_043177 | ENSRNOT00000004140 | 0.963741904  | 4.64E-07 |
| TUCP_001149 | XLOC_043177 | ENSRNOT00000008113 | -0.960754976 | 6.86E-07 |
| TUCP_001149 | XLOC_043177 | ENSRNOT00000007698 | -0.951361016 | 1.98E-06 |
| TUCP_001149 | XLOC_043177 | ENSRNOT00000048910 | -0.950922117 | 2.06E-06 |
| TUCP_001149 | XLOC_043177 | ENSRNOT00000020357 | 0.957009555  | 1.08E-06 |
| TUCP_001149 | XLOC_043177 | ENSRNOT00000019213 | 0.962096901  | 5.78E-07 |
| TUCP_001149 | XLOC_043177 | ENSRNOT00000020051 | 0.956480539  | 1.14E-06 |
| TUCP_001149 | XLOC_043177 | ENSRNOT00000087062 | 0.955288158  | 1.31E-06 |
| TUCP_001149 | XLOC_043177 | ENSRNOT00000015678 | -0.962616658 | 5.40E-07 |
| TUCP_001149 | XLOC_043177 | ENSRNOT00000020197 | -0.958194301 | 9.37E-07 |
| TUCP_001149 | XLOC_043177 | ENSRNOT00000049459 | -0.966173614 | 3.30E-07 |
| TUCP_001149 | XLOC_043177 | ENSRNOT00000083381 | 0.967660861  | 2.64E-07 |
| TUCP_001149 | XLOC_043177 | ENSRNOT00000084567 | 0.959813497  | 7.72E-07 |
| TUCP_001149 | XLOC_043177 | ENSRNOT00000001118 | 0.981658408  | 1.59E-08 |
| TUCP_001149 | XLOC_043177 | ENSRNOT00000045833 | 0.959235337  | 8.28E-07 |
| TUCP_001149 | XLOC_043177 | ENSRNOT0000001507  | 0.980308828  | 2.26E-08 |
| TUCP_001149 | XLOC_043177 | ENSRNOT00000083568 | 0.969504714  | 1.97E-07 |
| TUCP_001149 | XLOC_043177 | ENSRNOT00000018584 | 0.962941717  | 5.17E-07 |
| TUCP_001149 | XLOC_043177 | ENSRNOT00000039177 | -0.963269056 | 4.95E-07 |
| TUCP_001149 | XLOC_043177 | ENSRNOT00000017271 | 0.980129918  | 2.36E-08 |
| TUCP_001149 | XLOC_043177 | ENSRNOT00000037456 | 0.963604845  | 4.73E-07 |
| TUCP_001149 | XLOC_043177 | ENSRNOT00000030082 | 0.955671441  | 1.25E-06 |
| TUCP_001149 | XLOC_043177 | ENSRNOT00000025517 | 0.964288938  | 4.31E-07 |
| TUCP_001149 | XLOC_043177 | ENSRNOT00000025510 | -0.972025382 | 1.29E-07 |
| TUCP_001149 | XLOC_043177 | ENSRNOT00000075424 | 0.968476381  | 2.33E-07 |
| TUCP_001149 | XLOC_043177 | ENSRNOT00000065045 | 0.974186826  | 8.64E-08 |
| TUCP_001149 | XLOC_043177 | ENSRNOT00000012177 | -0.969474222 | 1.98E-07 |
| TUCP_001149 | XLOC_043177 | ENSRNOT00000083968 | -0.953949679 | 1.51E-06 |
| TUCP_001149 | XLOC_043177 | ENSRNOT00000033806 | 0.952454684  | 1.77E-06 |
| TUCP_001149 | XLOC_043177 | ENSRNOT00000034298 | 0.969355196  | 2.02E-07 |
| TUCP_001149 | XLOC_043177 | ENSRNOT00000075452 | 0.951771188  | 1.89E-06 |
| TUCP_001149 | XLOC_043177 | ENSRNOT00000020892 | -0.968983513 | 2.15E-07 |
| TUCP_001149 | XLOC_043177 | ENSRNOT00000016445 | 0.958140192  | 9.43E-07 |
| TUCP_001149 | XLOC_043177 | ENSRNOT00000011956 | 0.958474948  | 9.07E-07 |
| TUCP_001149 | XLOC_043177 | ENSRNOT00000024119 | 0.952867532  | 1.69E-06 |
| TUCP_001149 | XLOC_043177 | ENSRNOT00000006824 | -0.967612795 | 2.66E-07 |

|             |             |                     |              |          |
|-------------|-------------|---------------------|--------------|----------|
| TUCP_001149 | XLOC_043177 | ENSRNOT00000088509  | 0.965085489  | 3.85E-07 |
| TUCP_001149 | XLOC_043177 | ENSRNOT00000086260  | -0.952145425 | 1.82E-06 |
| TUCP_001149 | XLOC_043177 | ENSRNOT00000086868  | 0.957549151  | 1.01E-06 |
| TUCP_001149 | XLOC_043177 | ENSRNOT00000010683  | -0.956982991 | 1.08E-06 |
| TUCP_001149 | XLOC_043177 | ENSRNOT00000001158  | 0.954169184  | 1.47E-06 |
| TUCP_001149 | XLOC_043177 | ENSRNOT00000045488  | 0.968700742  | 2.24E-07 |
| TUCP_001149 | XLOC_043177 | ENSRNOT00000090853  | -0.950319783 | 2.19E-06 |
| TUCP_001149 | XLOC_043177 | ENSRNOT00000093174  | 0.973937595  | 9.06E-08 |
| TUCP_001149 | XLOC_043177 | ENSRNOT00000020648  | 0.951050324  | 2.04E-06 |
| TUCP_001149 | XLOC_043177 | ENSRNOT00000019816  | -0.967312773 | 2.78E-07 |
| TUCP_001149 | XLOC_043177 | ENSRNOT00000020383  | 0.990494979  | 6.01E-10 |
| TUCP_001149 | XLOC_043177 | ENSRNOT00000015518  | -0.958711708 | 8.82E-07 |
| TUCP_001149 | XLOC_043177 | ENSRNOT00000000302  | 0.966192491  | 3.29E-07 |
| TUCP_001149 | XLOC_043177 | ENSRNOT00000011675  | 0.954021885  | 1.50E-06 |
| TUCP_001149 | XLOC_043177 | ENSRNOT00000020795  | 0.960103971  | 7.44E-07 |
| TUCP_001149 | XLOC_043177 | ENSRNOT00000087502  | 0.951601747  | 1.93E-06 |
| TUCP_001149 | XLOC_043177 | ENSRNOT00000012424  | 0.960146379  | 7.40E-07 |
| TUCP_001149 | XLOC_043177 | ENSRNOT00000000717  | -0.951430902 | 1.96E-06 |
| TUCP_001149 | XLOC_043177 | ENSRNOT00000086122  | 0.955413968  | 1.29E-06 |
| TUCP_001149 | XLOC_043177 | ENSRNOT00000007091  | 0.969892645  | 1.85E-07 |
| TUCP_001149 | XLOC_043177 | ENSRNOT00000023763  | -0.950208863 | 2.22E-06 |
| TUCP_001149 | XLOC_043177 | ENSRNOT00000042799  | 0.963242766  | 4.97E-07 |
| TUCP_001149 | XLOC_043177 | ENSRNOT00000010993  | 0.958956772  | 8.56E-07 |
| TUCP_001149 | XLOC_043177 | ENSRNOT00000059181  | 0.951479791  | 1.95E-06 |
| TUCP_001149 | XLOC_043177 | ENSRNOT00000017291  | -0.95322846  | 1.63E-06 |
| TUCP_001149 | XLOC_043177 | ENSRNOT00000003691  | -0.954253079 | 1.46E-06 |
| TUCP_001149 | XLOC_043177 | ENSRNOT00000080216  | -0.95114398  | 2.02E-06 |
| TUCP_001149 | XLOC_043177 | ENSRNOT00000081678  | 0.967273228  | 2.80E-07 |
| TUCP_001149 | XLOC_043177 | ENSRNOT00000017765  | 0.979503473  | 2.75E-08 |
| TUCP_001149 | XLOC_043177 | ENSRNOT00000017761  | 0.969526927  | 1.97E-07 |
| TUCP_001149 | XLOC_043177 | ENSRNOT00000023543  | -0.970601047 | 1.65E-07 |
| TUCP_001149 | XLOC_043177 | ENSRNOT00000085517  | 0.979771974  | 2.58E-08 |
| TUCP_001149 | XLOC_043177 | ENSRNOT00000085458  | -0.951258141 | 2.00E-06 |
| TUCP_001149 | XLOC_043177 | ENSRNOT00000037405  | 0.967651053  | 2.64E-07 |
| TUCP_001149 | XLOC_043177 | ENSRNOT00000025460  | 0.969337598  | 2.03E-07 |
| TUCP_001149 | XLOC_043177 | ENSRNOT00000026760  | -0.974450523 | 8.21E-08 |
| TUCP_001149 | XLOC_043177 | ENSRNOT00000001322  | -0.952634057 | 1.73E-06 |
| TUCP_001149 | XLOC_043177 | ENSRNOT000000061345 | -0.951713741 | 1.91E-06 |
| TUCP_001149 | XLOC_043177 | ENSRNOT00000026767  | 0.964384946  | 4.25E-07 |
| TUCP_001149 | XLOC_043177 | ENSRNOT00000081077  | -0.951247118 | 2.00E-06 |
| TUCP_001149 | XLOC_043177 | ENSRNOT00000016568  | 0.954953028  | 1.35E-06 |
| TUCP_001149 | XLOC_043177 | ENSRNOT00000037588  | -0.959292021 | 8.22E-07 |
| TUCP_001149 | XLOC_043177 | ENSRNOT00000067503  | 0.962355168  | 5.59E-07 |
| TUCP_001149 | XLOC_043177 | ENSRNOT00000027967  | 0.959639507  | 7.88E-07 |
| TUCP_001149 | XLOC_043177 | ENSRNOT00000047210  | 0.968874361  | 2.18E-07 |
| TUCP_001149 | XLOC_043177 | ENSRNOT00000046639  | 0.969376045  | 2.01E-07 |
| TUCP_001149 | XLOC_043177 | ENSRNOT00000064930  | 0.960248258  | 7.31E-07 |
| TUCP_001149 | XLOC_043177 | ENSRNOT00000079996  | 0.957272775  | 1.04E-06 |
| TUCP_004370 | XLOC_192935 | ENSRNOT00000004694  | 0.956080913  | 1.20E-06 |
| TUCP_004370 | XLOC_192935 | ENSRNOT00000093655  | -0.963973936 | 4.50E-07 |
| TUCP_004370 | XLOC_192935 | ENSRNOT00000089949  | 0.959649412  | 7.87E-07 |

|             |             |                    |              |          |
|-------------|-------------|--------------------|--------------|----------|
| TUCP_001027 | XLOC_038913 | ENSRNOT0000003378  | 0.958621955  | 8.91E-07 |
| TUCP_001027 | XLOC_038913 | ENSRNOT00000029340 | 0.963096189  | 5.07E-07 |
| TUCP_001027 | XLOC_038913 | ENSRNOT00000038646 | 0.962060305  | 5.81E-07 |
| TUCP_001027 | XLOC_038913 | ENSRNOT00000092579 | 0.962060305  | 5.81E-07 |
| TUCP_001027 | XLOC_038913 | ENSRNOT00000089235 | 0.965629846  | 3.57E-07 |
| TUCP_001027 | XLOC_038913 | ENSRNOT00000036383 | 0.950083809  | 2.24E-06 |
| TUCP_001027 | XLOC_038913 | ENSRNOT00000016026 | 0.95742434   | 1.03E-06 |
| TUCP_001027 | XLOC_038913 | ENSRNOT00000076528 | 0.962221375  | 5.69E-07 |
| TUCP_001027 | XLOC_038913 | ENSRNOT00000083034 | 0.950859233  | 2.08E-06 |
| TUCP_001027 | XLOC_038913 | ENSRNOT00000089607 | 0.960340727  | 7.23E-07 |
| TUCP_001027 | XLOC_038913 | ENSRNOT00000086014 | 0.950730549  | 2.10E-06 |
| TUCP_001027 | XLOC_038913 | ENSRNOT00000021748 | 0.962060305  | 5.81E-07 |
| TUCP_001027 | XLOC_038913 | ENSRNOT00000078137 | 0.962060305  | 5.81E-07 |
| TUCP_001027 | XLOC_038913 | ENSRNOT00000092740 | 0.962060305  | 5.81E-07 |
| TUCP_001027 | XLOC_038913 | ENSRNOT00000070958 | 0.962060305  | 5.81E-07 |
| TUCP_001027 | XLOC_038913 | ENSRNOT00000027268 | 0.962060305  | 5.81E-07 |
| TUCP_001027 | XLOC_038913 | ENSRNOT00000004459 | 0.962060305  | 5.81E-07 |
| TUCP_001027 | XLOC_038913 | ENSRNOT00000061516 | 0.962119188  | 5.76E-07 |
| TUCP_001027 | XLOC_038913 | ENSRNOT00000088168 | 0.962060305  | 5.81E-07 |
| TUCP_001027 | XLOC_038913 | ENSRNOT00000088148 | 0.962060305  | 5.81E-07 |
| TUCP_001027 | XLOC_038913 | ENSRNOT00000088527 | 0.962060305  | 5.81E-07 |
| TUCP_001027 | XLOC_038913 | ENSRNOT00000078701 | 0.962060305  | 5.81E-07 |
| TUCP_001027 | XLOC_038913 | ENSRNOT00000090078 | 0.962060305  | 5.81E-07 |
| TUCP_001027 | XLOC_038913 | ENSRNOT00000089085 | 0.962060305  | 5.81E-07 |
| TUCP_001027 | XLOC_038913 | ENSRNOT00000008153 | 0.962207276  | 5.70E-07 |
| TUCP_001027 | XLOC_038913 | ENSRNOT00000079189 | 0.962085429  | 5.79E-07 |
| TUCP_001027 | XLOC_038913 | ENSRNOT00000009776 | 0.962060305  | 5.81E-07 |
| TUCP_001142 | XLOC_043037 | ENSRNOT00000026809 | 0.954548657  | 1.42E-06 |
| TUCP_000201 | XLOC_006665 | ENSRNOT00000005349 | 0.962868897  | 5.22E-07 |
| TUCP_000201 | XLOC_006665 | ENSRNOT00000011342 | 0.962418808  | 5.54E-07 |
| TUCP_000201 | XLOC_006665 | ENSRNOT00000088381 | 0.950988402  | 2.05E-06 |
| TUCP_000201 | XLOC_006665 | ENSRNOT00000076466 | 0.972028668  | 1.29E-07 |
| TUCP_000201 | XLOC_006665 | ENSRNOT00000085943 | 0.958558819  | 8.98E-07 |
| TUCP_000201 | XLOC_006665 | ENSRNOT00000046585 | 0.957981678  | 9.61E-07 |
| TUCP_000201 | XLOC_006665 | ENSRNOT00000093230 | 0.970576589  | 1.65E-07 |
| TUCP_001146 | XLOC_043177 | ENSRNOT00000001099 | -0.953939535 | 1.51E-06 |
| TUCP_001146 | XLOC_043177 | ENSRNOT00000080760 | 0.966233617  | 3.27E-07 |
| TUCP_001146 | XLOC_043177 | ENSRNOT00000012881 | -0.958785111 | 8.74E-07 |
| TUCP_001146 | XLOC_043177 | ENSRNOT00000003691 | -0.951619632 | 1.92E-06 |
| TUCP_001146 | XLOC_043177 | ENSRNOT00000010852 | 0.951092522  | 2.03E-06 |
| TUCP_001146 | XLOC_043177 | ENSRNOT00000090129 | -0.951685895 | 1.91E-06 |
| TUCP_001146 | XLOC_043177 | ENSRNOT00000022190 | -0.965321069 | 3.73E-07 |
| TUCP_001146 | XLOC_043177 | ENSRNOT00000025794 | -0.953856143 | 1.52E-06 |
| TUCP_001146 | XLOC_043177 | ENSRNOT00000075397 | 0.961533298  | 6.22E-07 |
| TUCP_001146 | XLOC_043177 | ENSRNOT00000049745 | 0.958890958  | 8.63E-07 |
| TUCP_001146 | XLOC_043177 | ENSRNOT00000077231 | 0.959760758  | 7.77E-07 |
| TUCP_001146 | XLOC_043177 | ENSRNOT00000025913 | -0.958003925 | 9.59E-07 |
| TUCP_001146 | XLOC_043177 | ENSRNOT00000040629 | 0.959830542  | 7.70E-07 |
| TUCP_001146 | XLOC_043177 | ENSRNOT00000080443 | 0.963108804  | 5.06E-07 |
| TUCP_001146 | XLOC_043177 | ENSRNOT00000032667 | -0.968923669 | 2.17E-07 |
| TUCP_001146 | XLOC_043177 | ENSRNOT00000046323 | 0.950849111  | 2.08E-06 |

|             |             |                    |              |          |
|-------------|-------------|--------------------|--------------|----------|
| TUCP_001146 | XLOC_043177 | ENSRNOT00000002445 | -0.950337832 | 2.19E-06 |
| TUCP_001146 | XLOC_043177 | ENSRNOT00000000060 | 0.957687495  | 9.95E-07 |
| TUCP_001146 | XLOC_043177 | ENSRNOT00000001691 | 0.965080341  | 3.86E-07 |
| TUCP_001146 | XLOC_043177 | ENSRNOT00000015624 | 0.970485252  | 1.68E-07 |
| TUCP_001146 | XLOC_043177 | ENSRNOT00000077526 | 0.959681376  | 7.84E-07 |
| TUCP_001146 | XLOC_043177 | ENSRNOT00000058962 | 0.975871526  | 6.19E-08 |
| TUCP_001146 | XLOC_043177 | ENSRNOT00000003940 | -0.955207048 | 1.32E-06 |
| TUCP_001146 | XLOC_043177 | ENSRNOT00000066370 | 0.961271139  | 6.43E-07 |
| TUCP_001146 | XLOC_043177 | ENSRNOT00000026988 | -0.959302363 | 8.21E-07 |
| TUCP_001146 | XLOC_043177 | ENSRNOT00000044628 | 0.957822686  | 9.79E-07 |
| TUCP_001146 | XLOC_043177 | ENSRNOT00000086706 | 0.96463085   | 4.11E-07 |
| TUCP_001146 | XLOC_043177 | ENSRNOT00000002114 | -0.956763806 | 1.11E-06 |
| TUCP_001146 | XLOC_043177 | ENSRNOT00000004017 | 0.951242668  | 2.00E-06 |
| TUCP_001146 | XLOC_043177 | ENSRNOT00000000083 | -0.95966053  | 7.86E-07 |
| TUCP_001146 | XLOC_043177 | ENSRNOT00000068167 | 0.965292619  | 3.74E-07 |
| TUCP_001146 | XLOC_043177 | ENSRNOT00000037133 | 0.965292245  | 3.74E-07 |
| TUCP_001146 | XLOC_043177 | ENSRNOT00000088133 | -0.960128992 | 7.42E-07 |
| TUCP_001146 | XLOC_043177 | ENSRNOT00000074023 | 0.951802947  | 1.89E-06 |
| TUCP_001146 | XLOC_043177 | ENSRNOT00000082146 | -0.950525213 | 2.15E-06 |
| TUCP_001146 | XLOC_043177 | ENSRNOT00000080173 | -0.96420562  | 4.36E-07 |
| TUCP_001146 | XLOC_043177 | ENSRNOT00000019983 | -0.952686974 | 1.72E-06 |
| TUCP_001146 | XLOC_043177 | ENSRNOT00000013632 | 0.953606512  | 1.57E-06 |
| TUCP_001146 | XLOC_043177 | ENSRNOT00000023876 | 0.966562369  | 3.11E-07 |
| TUCP_001146 | XLOC_043177 | ENSRNOT00000033017 | 0.951613218  | 1.93E-06 |
| TUCP_001146 | XLOC_043177 | ENSRNOT00000080677 | -0.951207555 | 2.01E-06 |
| TUCP_001146 | XLOC_043177 | ENSRNOT00000013864 | -0.951702519 | 1.91E-06 |
| TUCP_001146 | XLOC_043177 | ENSRNOT00000013463 | 0.951704367  | 1.91E-06 |
| TUCP_001146 | XLOC_043177 | ENSRNOT00000090987 | -0.952366737 | 1.78E-06 |
| TUCP_001146 | XLOC_043177 | ENSRNOT00000010381 | 0.955515218  | 1.27E-06 |
| TUCP_001146 | XLOC_043177 | ENSRNOT00000025856 | -0.962328232 | 5.61E-07 |
| TUCP_001146 | XLOC_043177 | ENSRNOT00000026831 | 0.958062229  | 9.52E-07 |
| TUCP_001146 | XLOC_043177 | ENSRNOT0000000653  | 0.955524548  | 1.27E-06 |
| TUCP_001146 | XLOC_043177 | ENSRNOT00000019115 | 0.95005641   | 2.25E-06 |
| TUCP_001146 | XLOC_043177 | ENSRNOT00000049285 | -0.950780553 | 2.09E-06 |
| TUCP_001146 | XLOC_043177 | ENSRNOT00000075656 | -0.952562227 | 1.75E-06 |
| TUCP_001146 | XLOC_043177 | ENSRNOT00000050609 | -0.957322404 | 1.04E-06 |
| TUCP_001146 | XLOC_043177 | ENSRNOT00000030445 | 0.961725731  | 6.07E-07 |
| TUCP_001146 | XLOC_043177 | ENSRNOT00000016132 | -0.952257845 | 1.80E-06 |
| TUCP_001146 | XLOC_043177 | ENSRNOT00000023537 | -0.954297074 | 1.45E-06 |
| TUCP_001146 | XLOC_043177 | ENSRNOT00000058495 | -0.96008008  | 7.47E-07 |
| TUCP_001146 | XLOC_043177 | ENSRNOT00000027057 | 0.982585582  | 1.23E-08 |
| TUCP_001146 | XLOC_043177 | ENSRNOT00000028057 | 0.978717203  | 3.32E-08 |
| TUCP_001146 | XLOC_043177 | ENSRNOT00000026235 | -0.954058366 | 1.49E-06 |
| TUCP_001146 | XLOC_043177 | ENSRNOT00000022074 | 0.952925132  | 1.68E-06 |
| TUCP_001146 | XLOC_043177 | ENSRNOT00000013246 | 0.960757713  | 6.86E-07 |
| TUCP_001146 | XLOC_043177 | ENSRNOT00000013580 | 0.957712392  | 9.92E-07 |
| TUCP_001146 | XLOC_043177 | ENSRNOT00000090338 | -0.9660873   | 3.34E-07 |
| TUCP_001146 | XLOC_043177 | ENSRNOT00000017254 | -0.980679246 | 2.05E-08 |
| TUCP_001146 | XLOC_043177 | ENSRNOT00000041494 | 0.952573401  | 1.74E-06 |
| TUCP_001146 | XLOC_043177 | ENSRNOT00000007738 | -0.951143958 | 2.02E-06 |
| TUCP_001146 | XLOC_043177 | ENSRNOT00000008987 | -0.95661637  | 1.13E-06 |

|             |             |                    |              |          |
|-------------|-------------|--------------------|--------------|----------|
| TUCP_001146 | XLOC_043177 | ENSRNOT00000089524 | 0.952233192  | 1.81E-06 |
| TUCP_001146 | XLOC_043177 | ENSRNOT00000019759 | 0.950584812  | 2.14E-06 |
| TUCP_001146 | XLOC_043177 | ENSRNOT00000028963 | 0.950524631  | 2.15E-06 |
| TUCP_001146 | XLOC_043177 | ENSRNOT00000078741 | 0.954275999  | 1.46E-06 |
| TUCP_001146 | XLOC_043177 | ENSRNOT00000002151 | -0.957374888 | 1.03E-06 |
| TUCP_001146 | XLOC_043177 | ENSRNOT00000005257 | 0.950468193  | 2.16E-06 |
| TUCP_001146 | XLOC_043177 | ENSRNOT00000023977 | -0.954606185 | 1.41E-06 |
| TUCP_001146 | XLOC_043177 | ENSRNOT00000082151 | -0.953560891 | 1.57E-06 |
| TUCP_001146 | XLOC_043177 | ENSRNOT00000009318 | 0.967354098  | 2.76E-07 |
| TUCP_001146 | XLOC_043177 | ENSRNOT00000085621 | 0.957157618  | 1.06E-06 |
| TUCP_001147 | XLOC_043177 | ENSRNOT00000006188 | -0.972492125 | 1.18E-07 |
| TUCP_001147 | XLOC_043177 | ENSRNOT00000006186 | 0.985172017  | 5.51E-09 |
| TUCP_001147 | XLOC_043177 | ENSRNOT00000090621 | 0.961227789  | 6.47E-07 |
| TUCP_001147 | XLOC_043177 | ENSRNOT00000075397 | 0.970935308  | 1.56E-07 |
| TUCP_001147 | XLOC_043177 | ENSRNOT00000032926 | -0.977795658 | 4.10E-08 |
| TUCP_001147 | XLOC_043177 | ENSRNOT00000019104 | -0.980958257 | 1.91E-08 |
| TUCP_001147 | XLOC_043177 | ENSRNOT00000021348 | 0.951417456  | 1.96E-06 |
| TUCP_001147 | XLOC_043177 | ENSRNOT00000002222 | 0.950068564  | 2.25E-06 |
| TUCP_001147 | XLOC_043177 | ENSRNOT00000068353 | 0.979204815  | 2.96E-08 |
| TUCP_001147 | XLOC_043177 | ENSRNOT00000049349 | 0.95090022   | 2.07E-06 |
| TUCP_001147 | XLOC_043177 | ENSRNOT00000079138 | 0.963701187  | 4.67E-07 |
| TUCP_001147 | XLOC_043177 | ENSRNOT00000025067 | -0.957488477 | 1.02E-06 |
| TUCP_001147 | XLOC_043177 | ENSRNOT00000086706 | 0.956188027  | 1.18E-06 |
| TUCP_001147 | XLOC_043177 | ENSRNOT00000035277 | 0.963295875  | 4.93E-07 |
| TUCP_001147 | XLOC_043177 | ENSRNOT00000030914 | -0.951542631 | 1.94E-06 |
| TUCP_001147 | XLOC_043177 | ENSRNOT00000004017 | 0.950018614  | 2.26E-06 |
| TUCP_001147 | XLOC_043177 | ENSRNOT00000086310 | -0.960911641 | 6.73E-07 |
| TUCP_001147 | XLOC_043177 | ENSRNOT00000010030 | -0.967546488 | 2.68E-07 |
| TUCP_001147 | XLOC_043177 | ENSRNOT00000007855 | 0.958769574  | 8.76E-07 |
| TUCP_001147 | XLOC_043177 | ENSRNOT00000011130 | -0.958535963 | 9.00E-07 |
| TUCP_001147 | XLOC_043177 | ENSRNOT00000031692 | -0.963154095 | 5.03E-07 |
| TUCP_001147 | XLOC_043177 | ENSRNOT00000014384 | -0.96187058  | 5.95E-07 |
| TUCP_001147 | XLOC_043177 | ENSRNOT00000037203 | -0.958810225 | 8.71E-07 |
| TUCP_001147 | XLOC_043177 | ENSRNOT00000006752 | 0.971493556  | 1.41E-07 |
| TUCP_001147 | XLOC_043177 | ENSRNOT00000000618 | -0.956299582 | 1.17E-06 |
| TUCP_001147 | XLOC_043177 | ENSRNOT00000072771 | 0.959123527  | 8.39E-07 |
| TUCP_001147 | XLOC_043177 | ENSRNOT00000073370 | 0.969284239  | 2.04E-07 |
| TUCP_001147 | XLOC_043177 | ENSRNOT00000065300 | 0.978331701  | 3.63E-08 |
| TUCP_001147 | XLOC_043177 | ENSRNOT00000035320 | -0.963991377 | 4.49E-07 |
| TUCP_001147 | XLOC_043177 | ENSRNOT00000076820 | 0.95159      | 1.93E-06 |
| TUCP_001147 | XLOC_043177 | ENSRNOT00000008274 | -0.975023184 | 7.34E-08 |
| TUCP_001147 | XLOC_043177 | ENSRNOT00000065871 | 0.95901683   | 8.50E-07 |
| TUCP_001147 | XLOC_043177 | ENSRNOT00000018028 | -0.965596965 | 3.58E-07 |
| TUCP_001147 | XLOC_043177 | ENSRNOT00000091448 | -0.962667468 | 5.36E-07 |
| TUCP_001147 | XLOC_043177 | ENSRNOT00000077999 | 0.985800272  | 4.44E-09 |
| TUCP_001147 | XLOC_043177 | ENSRNOT00000001891 | -0.955842557 | 1.23E-06 |
| TUCP_001147 | XLOC_043177 | ENSRNOT00000068134 | 0.967725908  | 2.61E-07 |
| TUCP_001147 | XLOC_043177 | ENSRNOT00000067626 | -0.952138952 | 1.82E-06 |
| TUCP_001147 | XLOC_043177 | ENSRNOT00000003146 | -0.971945825 | 1.31E-07 |
| TUCP_001147 | XLOC_043177 | ENSRNOT00000085228 | 0.962098322  | 5.78E-07 |
| TUCP_001147 | XLOC_043177 | ENSRNOT00000026391 | 0.976220398  | 5.75E-08 |

|             |             |                     |              |          |
|-------------|-------------|---------------------|--------------|----------|
| TUCP_001147 | XLOC_043177 | ENSRNOT00000060002  | -0.979912582 | 2.49E-08 |
| TUCP_001147 | XLOC_043177 | ENSRNOT00000015188  | 0.961886592  | 5.94E-07 |
| TUCP_001147 | XLOC_043177 | ENSRNOT00000005686  | -0.981716298 | 1.56E-08 |
| TUCP_001147 | XLOC_043177 | ENSRNOT00000006217  | 0.984875661  | 6.08E-09 |
| TUCP_001147 | XLOC_043177 | ENSRNOT00000056015  | -0.955330692 | 1.30E-06 |
| TUCP_001147 | XLOC_043177 | ENSRNOT00000010927  | 0.953945657  | 1.51E-06 |
| TUCP_001147 | XLOC_043177 | ENSRNOT000000087371 | 0.962506404  | 5.48E-07 |
| TUCP_001147 | XLOC_043177 | ENSRNOT00000030074  | 0.960883518  | 6.75E-07 |
| TUCP_001147 | XLOC_043177 | ENSRNOT00000010141  | 0.956940918  | 1.08E-06 |
| TUCP_001147 | XLOC_043177 | ENSRNOT000000067391 | -0.966351835 | 3.21E-07 |
| TUCP_001147 | XLOC_043177 | ENSRNOT00000009150  | 0.961265067  | 6.43E-07 |
| TUCP_001147 | XLOC_043177 | ENSRNOT00000037446  | 0.965193454  | 3.79E-07 |
| TUCP_001147 | XLOC_043177 | ENSRNOT00000023619  | 0.95701284   | 1.08E-06 |
| TUCP_001147 | XLOC_043177 | ENSRNOT000000084709 | 0.988682678  | 1.43E-09 |
| TUCP_001147 | XLOC_043177 | ENSRNOT00000029179  | -0.95499982  | 1.35E-06 |
| TUCP_001147 | XLOC_043177 | ENSRNOT00000009156  | 0.960504637  | 7.08E-07 |
| TUCP_001147 | XLOC_043177 | ENSRNOT00000090912  | 0.973583997  | 9.69E-08 |
| TUCP_001147 | XLOC_043177 | ENSRNOT00000043752  | -0.952001731 | 1.85E-06 |
| TUCP_001147 | XLOC_043177 | ENSRNOT00000025856  | -0.957414042 | 1.03E-06 |
| TUCP_001147 | XLOC_043177 | ENSRNOT00000072299  | 0.967285899  | 2.79E-07 |
| TUCP_001147 | XLOC_043177 | ENSRNOT00000028074  | -0.956729602 | 1.11E-06 |
| TUCP_001147 | XLOC_043177 | ENSRNOT00000026643  | 0.96491331   | 3.95E-07 |
| TUCP_001147 | XLOC_043177 | ENSRNOT00000001403  | 0.96198899   | 5.86E-07 |
| TUCP_001147 | XLOC_043177 | ENSRNOT00000001401  | 0.964111093  | 4.41E-07 |
| TUCP_001147 | XLOC_043177 | ENSRNOT00000016132  | -0.977161599 | 4.71E-08 |
| TUCP_001147 | XLOC_043177 | ENSRNOT000000058495 | -0.964514892 | 4.17E-07 |
| TUCP_001147 | XLOC_043177 | ENSRNOT00000013067  | -0.984758846 | 6.31E-09 |
| TUCP_001147 | XLOC_043177 | ENSRNOT00000004351  | -0.960053594 | 7.49E-07 |
| TUCP_001147 | XLOC_043177 | ENSRNOT00000027145  | -0.954256305 | 1.46E-06 |
| TUCP_001147 | XLOC_043177 | ENSRNOT00000002313  | -0.957337086 | 1.04E-06 |
| TUCP_001147 | XLOC_043177 | ENSRNOT00000034692  | -0.960151434 | 7.40E-07 |
| TUCP_001147 | XLOC_043177 | ENSRNOT00000016637  | -0.95926071  | 8.25E-07 |
| TUCP_001147 | XLOC_043177 | ENSRNOT00000038994  | -0.9555873   | 1.26E-06 |
| TUCP_001147 | XLOC_043177 | ENSRNOT00000020910  | 0.958151926  | 9.42E-07 |
| TUCP_001147 | XLOC_043177 | ENSRNOT00000079895  | 0.979378294  | 2.84E-08 |
| TUCP_001147 | XLOC_043177 | ENSRNOT00000005220  | 0.970795038  | 1.59E-07 |
| TUCP_001147 | XLOC_043177 | ENSRNOT000000074586 | -0.978141136 | 3.79E-08 |
| TUCP_001147 | XLOC_043177 | ENSRNOT00000005658  | -0.952879843 | 1.69E-06 |
| TUCP_001147 | XLOC_043177 | ENSRNOT00000075444  | -0.962780051 | 5.28E-07 |
| TUCP_001147 | XLOC_043177 | ENSRNOT00000071929  | -0.964899484 | 3.96E-07 |
| TUCP_001147 | XLOC_043177 | ENSRNOT000000081047 | 0.957513875  | 1.02E-06 |
| TUCP_001147 | XLOC_043177 | ENSRNOT00000002465  | 0.953352176  | 1.61E-06 |
| TUCP_001147 | XLOC_043177 | ENSRNOT00000011880  | 0.976702076  | 5.20E-08 |
| TUCP_001147 | XLOC_043177 | ENSRNOT00000028290  | -0.957522874 | 1.01E-06 |
| TUCP_001147 | XLOC_043177 | ENSRNOT00000003992  | -0.972495105 | 1.18E-07 |
| TUCP_001147 | XLOC_043177 | ENSRNOT000000050515 | 0.970116084  | 1.79E-07 |
| TUCP_001147 | XLOC_043177 | ENSRNOT00000038032  | -0.955925706 | 1.22E-06 |
| TUCP_001147 | XLOC_043177 | ENSRNOT00000077706  | 0.961019855  | 6.64E-07 |
| TUCP_001147 | XLOC_043177 | ENSRNOT000000089980 | -0.953876022 | 1.52E-06 |
| TUCP_001147 | XLOC_043177 | ENSRNOT00000078070  | 0.97386677   | 9.19E-08 |
| TUCP_001147 | XLOC_043177 | ENSRNOT00000046745  | 0.95685995   | 1.09E-06 |

|             |             |                    |              |          |
|-------------|-------------|--------------------|--------------|----------|
| TUCP_001147 | XLOC_043177 | ENSRNOT00000055607 | -0.950664175 | 2.12E-06 |
| TUCP_001147 | XLOC_043177 | ENSRNOT00000003840 | 0.953924873  | 1.51E-06 |
| TUCP_001147 | XLOC_043177 | ENSRNOT00000089294 | -0.960364084 | 7.21E-07 |
| TUCP_001147 | XLOC_043177 | ENSRNOT00000089293 | 0.956174921  | 1.18E-06 |
| TUCP_001147 | XLOC_043177 | ENSRNOT00000028893 | -0.952883166 | 1.69E-06 |
| TUCP_001147 | XLOC_043177 | ENSRNOT00000023876 | 0.958756151  | 8.77E-07 |
| TUCP_001147 | XLOC_043177 | ENSRNOT00000003106 | -0.95210107  | 1.83E-06 |
| TUCP_001147 | XLOC_043177 | ENSRNOT00000002187 | -0.966939208 | 2.94E-07 |
| TUCP_001147 | XLOC_043177 | ENSRNOT00000091488 | 0.970322345  | 1.73E-07 |
| TUCP_001147 | XLOC_043177 | ENSRNOT00000019656 | -0.96013008  | 7.42E-07 |
| TUCP_001147 | XLOC_043177 | ENSRNOT00000049285 | -0.963581836 | 4.75E-07 |
| TUCP_001147 | XLOC_043177 | ENSRNOT00000032505 | -0.965170018 | 3.81E-07 |
| TUCP_001147 | XLOC_043177 | ENSRNOT00000015239 | -0.971472191 | 1.42E-07 |
| TUCP_001147 | XLOC_043177 | ENSRNOT00000006366 | -0.961777471 | 6.03E-07 |
| TUCP_001147 | XLOC_043177 | ENSRNOT00000074649 | 0.980060839  | 2.40E-08 |
| TUCP_001147 | XLOC_043177 | ENSRNOT00000082108 | -0.966999083 | 2.92E-07 |
| TUCP_001147 | XLOC_043177 | ENSRNOT00000018877 | -0.968625295 | 2.27E-07 |
| TUCP_001147 | XLOC_043177 | ENSRNOT00000077146 | -0.984937495 | 5.95E-09 |
| TUCP_001147 | XLOC_043177 | ENSRNOT00000052063 | 0.996423379  | 4.58E-12 |
| TUCP_001147 | XLOC_043177 | ENSRNOT00000031672 | -0.966922948 | 2.95E-07 |
| TUCP_001147 | XLOC_043177 | ENSRNOT00000064723 | -0.955340665 | 1.30E-06 |
| TUCP_001147 | XLOC_043177 | ENSRNOT00000006969 | 0.960737249  | 6.88E-07 |
| TUCP_001147 | XLOC_043177 | ENSRNOT00000086456 | -0.960695345 | 6.92E-07 |
| TUCP_001147 | XLOC_043177 | ENSRNOT00000036959 | -0.958150471 | 9.42E-07 |
| TUCP_001147 | XLOC_043177 | ENSRNOT00000075209 | -0.955266864 | 1.31E-06 |
| TUCP_001147 | XLOC_043177 | ENSRNOT00000057738 | 0.960697584  | 6.91E-07 |
| TUCP_001147 | XLOC_043177 | ENSRNOT00000006395 | -0.972648956 | 1.15E-07 |
| TUCP_001147 | XLOC_043177 | ENSRNOT00000023977 | -0.964919519 | 3.94E-07 |
| TUCP_001147 | XLOC_043177 | ENSRNOT00000066133 | -0.991185629 | 4.13E-10 |
| TUCP_001147 | XLOC_043177 | ENSRNOT00000048933 | -0.969607259 | 1.94E-07 |
| TUCP_001147 | XLOC_043177 | ENSRNOT00000027970 | 0.958237292  | 9.33E-07 |
| TUCP_001147 | XLOC_043177 | ENSRNOT00000012432 | -0.954748769 | 1.38E-06 |
| TUCP_001147 | XLOC_043177 | ENSRNOT00000085596 | 0.957881543  | 9.72E-07 |
| TUCP_001147 | XLOC_043177 | ENSRNOT00000035385 | 0.970422294  | 1.70E-07 |
| TUCP_001147 | XLOC_043177 | ENSRNOT00000088509 | 0.957399136  | 1.03E-06 |
| TUCP_001147 | XLOC_043177 | ENSRNOT00000026293 | 0.958384549  | 9.17E-07 |
| TUCP_001147 | XLOC_043177 | ENSRNOT00000019487 | 0.96672707   | 3.04E-07 |
| TUCP_001147 | XLOC_043177 | ENSRNOT00000089007 | -0.952009189 | 1.85E-06 |
| TUCP_001147 | XLOC_043177 | ENSRNOT00000018170 | -0.969646518 | 1.93E-07 |
| TUCP_001147 | XLOC_043177 | ENSRNOT00000010915 | -0.959408584 | 8.11E-07 |
| TUCP_001147 | XLOC_043177 | ENSRNOT00000064535 | -0.9852497   | 5.36E-09 |
| TUCP_001147 | XLOC_043177 | ENSRNOT00000015624 | 0.969092688  | 2.11E-07 |
| TUCP_001147 | XLOC_043177 | ENSRNOT00000055540 | 0.972653523  | 1.15E-07 |
| TUCP_001147 | XLOC_043177 | ENSRNOT00000085295 | -0.964254808 | 4.33E-07 |
| TUCP_001147 | XLOC_043177 | ENSRNOT00000035474 | 0.955913418  | 1.22E-06 |
| TUCP_001147 | XLOC_043177 | ENSRNOT00000072632 | -0.961042447 | 6.62E-07 |
| TUCP_001147 | XLOC_043177 | ENSRNOT00000002114 | -0.969641064 | 1.93E-07 |
| TUCP_001147 | XLOC_043177 | ENSRNOT00000039102 | 0.961288     | 6.42E-07 |
| TUCP_001147 | XLOC_043177 | ENSRNOT00000086260 | -0.968249562 | 2.41E-07 |
| TUCP_001147 | XLOC_043177 | ENSRNOT00000091205 | 0.966459132  | 3.16E-07 |
| TUCP_001147 | XLOC_043177 | ENSRNOT00000009742 | -0.954015355 | 1.50E-06 |

|             |             |                     |              |          |
|-------------|-------------|---------------------|--------------|----------|
| TUCP_001147 | XLOC_043177 | ENSRNOT0000004241   | -0.959866539 | 7.66E-07 |
| TUCP_001147 | XLOC_043177 | ENSRNOT0000007369   | 0.967440855  | 2.73E-07 |
| TUCP_001147 | XLOC_043177 | ENSRNOT0000004787   | -0.968370858 | 2.36E-07 |
| TUCP_001147 | XLOC_043177 | ENSRNOT00000060698  | -0.986004513 | 4.13E-09 |
| TUCP_001147 | XLOC_043177 | ENSRNOT00000058351  | 0.970954005  | 1.55E-07 |
| TUCP_001147 | XLOC_043177 | ENSRNOT00000010748  | 0.969772876  | 1.89E-07 |
| TUCP_001147 | XLOC_043177 | ENSRNOT00000080207  | 0.970934967  | 1.56E-07 |
| TUCP_001147 | XLOC_043177 | ENSRNOT00000017998  | 0.958974038  | 8.54E-07 |
| TUCP_001147 | XLOC_043177 | ENSRNOT00000061100  | 0.977615081  | 4.26E-08 |
| TUCP_001147 | XLOC_043177 | ENSRNOT00000065529  | 0.956983398  | 1.08E-06 |
| TUCP_001147 | XLOC_043177 | ENSRNOT00000017776  | 0.969188309  | 2.08E-07 |
| TUCP_001147 | XLOC_043177 | ENSRNOT00000005144  | 0.969671694  | 1.92E-07 |
| TUCP_001147 | XLOC_043177 | ENSRNOT00000026457  | 0.957751795  | 9.87E-07 |
| TUCP_001147 | XLOC_043177 | ENSRNOT00000088679  | -0.953020365 | 1.67E-06 |
| TUCP_001147 | XLOC_043177 | ENSRNOT00000004463  | 0.965008903  | 3.90E-07 |
| TUCP_001147 | XLOC_043177 | ENSRNOT00000023256  | 0.966548821  | 3.12E-07 |
| TUCP_001147 | XLOC_043177 | ENSRNOT00000016776  | -0.96442013  | 4.23E-07 |
| TUCP_001147 | XLOC_043177 | ENSRNOT00000022097  | 0.979807886  | 2.56E-08 |
| TUCP_001147 | XLOC_043177 | ENSRNOT00000008987  | -0.96874438  | 2.23E-07 |
| TUCP_001147 | XLOC_043177 | ENSRNOT00000055992  | -0.964270682 | 4.32E-07 |
| TUCP_001147 | XLOC_043177 | ENSRNOT000000092876 | -0.972522866 | 1.18E-07 |
| TUCP_001147 | XLOC_043177 | ENSRNOT00000024253  | 0.974545594  | 8.06E-08 |
| TUCP_001147 | XLOC_043177 | ENSRNOT00000088073  | -0.952847787 | 1.70E-06 |
| TUCP_001147 | XLOC_043177 | ENSRNOT00000059854  | -0.958859129 | 8.66E-07 |
| TUCP_001147 | XLOC_043177 | ENSRNOT00000039607  | -0.963567088 | 4.76E-07 |
| TUCP_001147 | XLOC_043177 | ENSRNOT00000075400  | -0.958900513 | 8.62E-07 |
| TUCP_001147 | XLOC_043177 | ENSRNOT00000009080  | -0.960857776 | 6.78E-07 |
| TUCP_001147 | XLOC_043177 | ENSRNOT00000063930  | -0.977474464 | 4.40E-08 |
| TUCP_001147 | XLOC_043177 | ENSRNOT00000074544  | -0.952525241 | 1.75E-06 |
| TUCP_001147 | XLOC_043177 | ENSRNOT00000046215  | -0.955491837 | 1.28E-06 |
| TUCP_001147 | XLOC_043177 | ENSRNOT00000013116  | -0.953786438 | 1.54E-06 |
| TUCP_001147 | XLOC_043177 | ENSRNOT00000020453  | -0.9660858   | 3.34E-07 |
| TUCP_001147 | XLOC_043177 | ENSRNOT00000013025  | -0.974636756 | 7.92E-08 |
| TUCP_001147 | XLOC_043177 | ENSRNOT00000016012  | -0.969188256 | 2.08E-07 |
| TUCP_001147 | XLOC_043177 | ENSRNOT00000041237  | -0.965855622 | 3.45E-07 |
| TUCP_001147 | XLOC_043177 | ENSRNOT00000024005  | 0.950250854  | 2.21E-06 |
| TUCP_001147 | XLOC_043177 | ENSRNOT00000021110  | -0.950004799 | 2.26E-06 |
| TUCP_001147 | XLOC_043177 | ENSRNOT00000018057  | 0.954675511  | 1.40E-06 |
| TUCP_001147 | XLOC_043177 | ENSRNOT00000087838  | -0.963084735 | 5.07E-07 |
| TUCP_001147 | XLOC_043177 | ENSRNOT00000001774  | -0.952076639 | 1.84E-06 |
| TUCP_001147 | XLOC_043177 | ENSRNOT00000081981  | 0.950390433  | 2.18E-06 |
| TUCP_001147 | XLOC_043177 | ENSRNOT00000001679  | 0.950730052  | 2.10E-06 |
| TUCP_001147 | XLOC_043177 | ENSRNOT00000013613  | -0.954204333 | 1.47E-06 |
| TUCP_001147 | XLOC_043177 | ENSRNOT00000017805  | 0.953502661  | 1.58E-06 |
| TUCP_001147 | XLOC_043177 | ENSRNOT00000010419  | 0.966649603  | 3.07E-07 |
| TUCP_001147 | XLOC_043177 | ENSRNOT00000019057  | -0.969758418 | 1.89E-07 |
| TUCP_001147 | XLOC_043177 | ENSRNOT00000014479  | -0.952229173 | 1.81E-06 |
| TUCP_001147 | XLOC_043177 | ENSRNOT00000003326  | -0.952296148 | 1.80E-06 |
| TUCP_001147 | XLOC_043177 | ENSRNOT00000021629  | -0.97373111  | 9.43E-08 |
| TUCP_001147 | XLOC_043177 | ENSRNOT00000047836  | -0.964094056 | 4.43E-07 |
| TUCP_001147 | XLOC_043177 | ENSRNOT00000015476  | -0.97433383  | 8.40E-08 |



|             |             |                    |              |          |
|-------------|-------------|--------------------|--------------|----------|
| TUCP_001147 | XLOC_043177 | ENSRNOT00000021621 | -0.950510817 | 2.15E-06 |
| TUCP_001147 | XLOC_043177 | ENSRNOT00000075630 | -0.959454121 | 8.06E-07 |
| TUCP_001147 | XLOC_043177 | ENSRNOT00000091808 | -0.950507313 | 2.15E-06 |
| TUCP_001147 | XLOC_043177 | ENSRNOT00000025079 | -0.992068523 | 2.44E-10 |
| TUCP_001147 | XLOC_043177 | ENSRNOT00000048754 | -0.979685233 | 2.63E-08 |
| TUCP_001147 | XLOC_043177 | ENSRNOT00000002866 | -0.955831711 | 1.23E-06 |
| TUCP_001147 | XLOC_043177 | ENSRNOT00000011432 | -0.956490317 | 1.14E-06 |
| TUCP_001147 | XLOC_043177 | ENSRNOT00000021458 | -0.95755314  | 1.01E-06 |
| TUCP_001147 | XLOC_043177 | ENSRNOT00000054761 | -0.960919408 | 6.72E-07 |
| TUCP_001147 | XLOC_043177 | ENSRNOT00000004007 | -0.952182956 | 1.82E-06 |
| TUCP_001147 | XLOC_043177 | ENSRNOT00000019816 | -0.9769959   | 4.88E-08 |
| TUCP_001147 | XLOC_043177 | ENSRNOT00000020681 | -0.974365652 | 8.35E-08 |
| TUCP_001147 | XLOC_043177 | ENSRNOT00000057898 | -0.968103827 | 2.46E-07 |
| TUCP_001147 | XLOC_043177 | ENSRNOT00000024677 | 0.983299759  | 9.95E-09 |
| TUCP_001147 | XLOC_043177 | ENSRNOT00000078680 | -0.957600945 | 1.00E-06 |
| TUCP_001147 | XLOC_043177 | ENSRNOT00000022432 | -0.952028158 | 1.85E-06 |
| TUCP_001147 | XLOC_043177 | ENSRNOT00000091602 | -0.953269062 | 1.62E-06 |
| TUCP_001147 | XLOC_043177 | ENSRNOT00000056100 | -0.963649226 | 4.70E-07 |
| TUCP_001147 | XLOC_043177 | ENSRNOT00000012671 | 0.950249055  | 2.21E-06 |
| TUCP_001147 | XLOC_043177 | ENSRNOT00000009817 | -0.953065529 | 1.66E-06 |
| TUCP_001147 | XLOC_043177 | ENSRNOT00000084782 | -0.957190206 | 1.05E-06 |
| TUCP_001147 | XLOC_043177 | ENSRNOT00000047126 | -0.950026638 | 2.26E-06 |
| TUCP_001147 | XLOC_043177 | ENSRNOT00000077231 | 0.964463096  | 4.20E-07 |
| TUCP_001147 | XLOC_043177 | ENSRNOT00000072762 | -0.955104883 | 1.33E-06 |
| TUCP_001147 | XLOC_043177 | ENSRNOT00000071540 | 0.976547096  | 5.37E-08 |
| TUCP_001147 | XLOC_043177 | ENSRNOT00000031701 | -0.95335012  | 1.61E-06 |
| TUCP_001147 | XLOC_043177 | ENSRNOT00000032893 | -0.952361595 | 1.78E-06 |
| TUCP_001147 | XLOC_043177 | ENSRNOT00000072849 | -0.964746783 | 4.04E-07 |
| TUCP_001147 | XLOC_043177 | ENSRNOT00000073643 | -0.963747794 | 4.64E-07 |
| TUCP_001147 | XLOC_043177 | ENSRNOT00000078349 | -0.969823191 | 1.87E-07 |
| TUCP_001147 | XLOC_043177 | ENSRNOT00000011654 | -0.955802622 | 1.23E-06 |
| TUCP_001147 | XLOC_043177 | ENSRNOT00000022502 | -0.976665549 | 5.24E-08 |
| TUCP_001147 | XLOC_043177 | ENSRNOT00000088555 | -0.956798094 | 1.10E-06 |
| TUCP_001147 | XLOC_043177 | ENSRNOT00000056079 | -0.952217019 | 1.81E-06 |
| TUCP_001147 | XLOC_043177 | ENSRNOT00000087443 | 0.967202597  | 2.83E-07 |
| TUCP_001147 | XLOC_043177 | ENSRNOT00000015297 | -0.952769112 | 1.71E-06 |
| TUCP_001147 | XLOC_043177 | ENSRNOT00000021803 | -0.970508937 | 1.67E-07 |
| TUCP_001147 | XLOC_043177 | ENSRNOT00000039857 | -0.969170196 | 2.08E-07 |
| TUCP_001147 | XLOC_043177 | ENSRNOT00000024352 | 0.987840068  | 2.05E-09 |
| TUCP_001147 | XLOC_043177 | ENSRNOT00000082627 | -0.97136344  | 1.45E-07 |
| TUCP_001147 | XLOC_043177 | ENSRNOT00000003780 | 0.977104838  | 4.77E-08 |
| TUCP_001147 | XLOC_043177 | ENSRNOT00000003787 | -0.965430387 | 3.67E-07 |
| TUCP_001147 | XLOC_043177 | ENSRNOT00000014506 | -0.960131751 | 7.42E-07 |
| TUCP_001147 | XLOC_043177 | ENSRNOT00000023262 | -0.96428097  | 4.31E-07 |
| TUCP_001147 | XLOC_043177 | ENSRNOT00000077908 | 0.977621773  | 4.26E-08 |
| TUCP_001147 | XLOC_043177 | ENSRNOT00000025104 | -0.965753854 | 3.50E-07 |
| TUCP_001147 | XLOC_043177 | ENSRNOT00000020990 | -0.950055157 | 2.25E-06 |
| TUCP_001147 | XLOC_043177 | ENSRNOT00000008317 | -0.955287523 | 1.31E-06 |
| TUCP_001147 | XLOC_043177 | ENSRNOT00000023667 | 0.957360158  | 1.03E-06 |
| TUCP_001147 | XLOC_043177 | ENSRNOT00000009225 | -0.954070805 | 1.49E-06 |
| TUCP_001147 | XLOC_043177 | ENSRNOT00000068381 | 0.961402621  | 6.32E-07 |

|             |             |                    |              |          |
|-------------|-------------|--------------------|--------------|----------|
| TUCP_001147 | XLOC_043177 | ENSRNOT00000020197 | -0.976484918 | 5.44E-08 |
| TUCP_001147 | XLOC_043177 | ENSRNOT00000068026 | -0.973888434 | 9.15E-08 |
| TUCP_001147 | XLOC_043177 | ENSRNOT00000026089 | 0.963887787  | 4.55E-07 |
| TUCP_001147 | XLOC_043177 | ENSRNOT00000085621 | 0.972940176  | 1.09E-07 |
| TUCP_001147 | XLOC_043177 | ENSRNOT00000090456 | 0.964159567  | 4.39E-07 |
| TUCP_001147 | XLOC_043177 | ENSRNOT00000014821 | -0.956574521 | 1.13E-06 |
| TUCP_001147 | XLOC_043177 | ENSRNOT00000058382 | 0.972986351  | 1.08E-07 |
| TUCP_001147 | XLOC_043177 | ENSRNOT0000008889  | -0.95484308  | 1.37E-06 |
| TUCP_001147 | XLOC_043177 | ENSRNOT00000055683 | 0.969319306  | 2.03E-07 |
| TUCP_001147 | XLOC_043177 | ENSRNOT0000005587  | -0.959632552 | 7.89E-07 |
| TUCP_001147 | XLOC_043177 | ENSRNOT00000035605 | 0.959480875  | 8.04E-07 |
| TUCP_001147 | XLOC_043177 | ENSRNOT00000017746 | -0.96195173  | 5.89E-07 |
| TUCP_001147 | XLOC_043177 | ENSRNOT0000000804  | -0.95403713  | 1.50E-06 |
| TUCP_001147 | XLOC_043177 | ENSRNOT00000023567 | -0.953996061 | 1.50E-06 |
| TUCP_001147 | XLOC_043177 | ENSRNOT00000026174 | 0.95203364   | 1.84E-06 |
| TUCP_001147 | XLOC_043177 | ENSRNOT00000017995 | 0.971398526  | 1.44E-07 |
| TUCP_001147 | XLOC_043177 | ENSRNOT00000027910 | 0.975311604  | 6.93E-08 |
| TUCP_001147 | XLOC_043177 | ENSRNOT0000000898  | 0.964691868  | 4.07E-07 |
| TUCP_001147 | XLOC_043177 | ENSRNOT00000013375 | -0.954809492 | 1.38E-06 |
| TUCP_001147 | XLOC_043177 | ENSRNOT00000024285 | -0.950062716 | 2.25E-06 |
| TUCP_001147 | XLOC_043177 | ENSRNOT00000081725 | 0.961350242  | 6.37E-07 |
| TUCP_001147 | XLOC_043177 | ENSRNOT00000005459 | 0.959544154  | 7.97E-07 |
| TUCP_001147 | XLOC_043177 | ENSRNOT00000024753 | -0.958950383 | 8.57E-07 |
| TUCP_001147 | XLOC_043177 | ENSRNOT00000090262 | 0.960170661  | 7.38E-07 |
| TUCP_001147 | XLOC_043177 | ENSRNOT00000002771 | 0.961426675  | 6.30E-07 |
| TUCP_001147 | XLOC_043177 | ENSRNOT00000037015 | 0.963339436  | 4.90E-07 |
| TUCP_001147 | XLOC_043177 | ENSRNOT00000024452 | -0.961613489 | 6.15E-07 |
| TUCP_001147 | XLOC_043177 | ENSRNOT00000028885 | -0.961750995 | 6.05E-07 |
| TUCP_001147 | XLOC_043177 | ENSRNOT00000013553 | 0.959664059  | 7.86E-07 |
| TUCP_001147 | XLOC_043177 | ENSRNOT00000010783 | -0.965642713 | 3.56E-07 |
| TUCP_001147 | XLOC_043177 | ENSRNOT00000028888 | 0.956198261  | 1.18E-06 |
| TUCP_001147 | XLOC_043177 | ENSRNOT00000016372 | -0.954487814 | 1.42E-06 |
| TUCP_001147 | XLOC_043177 | ENSRNOT00000066032 | 0.963278854  | 4.94E-07 |
| TUCP_001147 | XLOC_043177 | ENSRNOT00000027616 | -0.951192277 | 2.01E-06 |
| TUCP_001147 | XLOC_043177 | ENSRNOT00000028876 | -0.96069471  | 6.92E-07 |
| TUCP_001147 | XLOC_043177 | ENSRNOT00000029833 | 0.95002781   | 2.26E-06 |
| TUCP_001147 | XLOC_043177 | ENSRNOT00000002510 | -0.954988476 | 1.35E-06 |
| TUCP_001147 | XLOC_043177 | ENSRNOT00000001783 | 0.963840209  | 4.58E-07 |
| TUCP_001147 | XLOC_043177 | ENSRNOT00000021143 | 0.963179961  | 5.01E-07 |
| TUCP_001147 | XLOC_043177 | ENSRNOT00000021145 | -0.962496534 | 5.49E-07 |
| TUCP_001147 | XLOC_043177 | ENSRNOT00000020417 | -0.962423215 | 5.54E-07 |
| TUCP_001147 | XLOC_043177 | ENSRNOT00000006804 | 0.960127639  | 7.42E-07 |
| TUCP_001147 | XLOC_043177 | ENSRNOT00000020809 | -0.965172665 | 3.81E-07 |
| TUCP_001147 | XLOC_043177 | ENSRNOT00000082151 | -0.963606536 | 4.73E-07 |
| TUCP_001147 | XLOC_043177 | ENSRNOT00000008982 | 0.966143019  | 3.31E-07 |
| TUCP_001147 | XLOC_043177 | ENSRNOT00000001607 | 0.951533479  | 1.94E-06 |
| TUCP_001147 | XLOC_043177 | ENSRNOT00000003359 | -0.960813152 | 6.81E-07 |
| TUCP_001147 | XLOC_043177 | ENSRNOT00000038511 | -0.956905234 | 1.09E-06 |
| TUCP_001147 | XLOC_043177 | ENSRNOT00000011984 | 0.970723719  | 1.61E-07 |
| TUCP_001147 | XLOC_043177 | ENSRNOT00000019647 | -0.953818447 | 1.53E-06 |
| TUCP_001147 | XLOC_043177 | ENSRNOT00000085971 | -0.97444627  | 8.22E-08 |

|             |             |                    |              |          |
|-------------|-------------|--------------------|--------------|----------|
| TUCP_001147 | XLOC_043177 | ENSRNOT00000074653 | 0.952189457  | 1.82E-06 |
| TUCP_001147 | XLOC_043177 | ENSRNOT00000031625 | 0.952537453  | 1.75E-06 |
| TUCP_001147 | XLOC_043177 | ENSRNOT00000022142 | 0.95368005   | 1.55E-06 |
| TUCP_001147 | XLOC_043177 | ENSRNOT00000076300 | -0.96697028  | 2.93E-07 |
| TUCP_001147 | XLOC_043177 | ENSRNOT00000073041 | 0.951618622  | 1.92E-06 |
| TUCP_001147 | XLOC_043177 | ENSRNOT00000025086 | -0.969246278 | 2.06E-07 |
| TUCP_001147 | XLOC_043177 | ENSRNOT00000083127 | 0.959170439  | 8.34E-07 |
| TUCP_001147 | XLOC_043177 | ENSRNOT0000007702  | -0.959457877 | 8.06E-07 |
| TUCP_001147 | XLOC_043177 | ENSRNOT00000036931 | -0.959040503 | 8.48E-07 |
| TUCP_001147 | XLOC_043177 | ENSRNOT00000015946 | -0.968732511 | 2.23E-07 |
| TUCP_001147 | XLOC_043177 | ENSRNOT0000004172  | 0.953348098  | 1.61E-06 |
| TUCP_001147 | XLOC_043177 | ENSRNOT00000023965 | -0.956277491 | 1.17E-06 |
| TUCP_001147 | XLOC_043177 | ENSRNOT00000011694 | -0.952665891 | 1.73E-06 |
| TUCP_001147 | XLOC_043177 | ENSRNOT00000029125 | 0.957396975  | 1.03E-06 |
| TUCP_001147 | XLOC_043177 | ENSRNOT00000085279 | 0.959608303  | 7.91E-07 |
| TUCP_001147 | XLOC_043177 | ENSRNOT00000012528 | 0.963882909  | 4.56E-07 |
| TUCP_001147 | XLOC_043177 | ENSRNOT00000068184 | -0.964760092 | 4.03E-07 |
| TUCP_001147 | XLOC_043177 | ENSRNOT00000089016 | -0.957753015 | 9.87E-07 |
| TUCP_001147 | XLOC_043177 | ENSRNOT00000005387 | 0.969636882  | 1.93E-07 |
| TUCP_001147 | XLOC_043177 | ENSRNOT00000022864 | -0.955097186 | 1.33E-06 |
| TUCP_001147 | XLOC_043177 | ENSRNOT00000005381 | 0.956212403  | 1.18E-06 |
| TUCP_001147 | XLOC_043177 | ENSRNOT00000028907 | 0.97681078   | 5.08E-08 |
| TUCP_001147 | XLOC_043177 | ENSRNOT00000072890 | -0.951518568 | 1.94E-06 |
| TUCP_001147 | XLOC_043177 | ENSRNOT00000010224 | 0.961921783  | 5.91E-07 |
| TUCP_001147 | XLOC_043177 | ENSRNOT00000025147 | 0.962039296  | 5.82E-07 |
| TUCP_001147 | XLOC_043177 | ENSRNOT00000087278 | -0.981253242 | 1.77E-08 |
| TUCP_001147 | XLOC_043177 | ENSRNOT00000087556 | -0.955302067 | 1.30E-06 |
| TUCP_001147 | XLOC_043177 | ENSRNOT00000025887 | -0.956346673 | 1.16E-06 |
| TUCP_001147 | XLOC_043177 | ENSRNOT00000078862 | 0.972877649  | 1.10E-07 |
| TUCP_001147 | XLOC_043177 | ENSRNOT00000003940 | -0.953776781 | 1.54E-06 |
| TUCP_001147 | XLOC_043177 | ENSRNOT00000017687 | -0.956066783 | 1.20E-06 |
| TUCP_001147 | XLOC_043177 | ENSRNOT00000015799 | 0.954334064  | 1.45E-06 |
| TUCP_001147 | XLOC_043177 | ENSRNOT00000039551 | -0.965632504 | 3.56E-07 |
| TUCP_001147 | XLOC_043177 | ENSRNOT00000082998 | 0.958988125  | 8.53E-07 |
| TUCP_001147 | XLOC_043177 | ENSRNOT00000011237 | -0.958732526 | 8.79E-07 |
| TUCP_001147 | XLOC_043177 | ENSRNOT00000007350 | 0.977366811  | 4.50E-08 |
| TUCP_001147 | XLOC_043177 | ENSRNOT00000004400 | 0.963764562  | 4.63E-07 |
| TUCP_001147 | XLOC_043177 | ENSRNOT00000018936 | -0.956985806 | 1.08E-06 |
| TUCP_001147 | XLOC_043177 | ENSRNOT00000083578 | 0.980838028  | 1.97E-08 |
| TUCP_001147 | XLOC_043177 | ENSRNOT00000020297 | 0.974916696  | 7.50E-08 |
| TUCP_001147 | XLOC_043177 | ENSRNOT00000023638 | 0.973365879  | 1.01E-07 |
| TUCP_001147 | XLOC_043177 | ENSRNOT00000030501 | -0.952577329 | 1.74E-06 |
| TUCP_001147 | XLOC_043177 | ENSRNOT00000005659 | 0.971956538  | 1.30E-07 |
| TUCP_001147 | XLOC_043177 | ENSRNOT00000023144 | 0.956254065  | 1.17E-06 |
| TUCP_001147 | XLOC_043177 | ENSRNOT00000009275 | -0.951168879 | 2.01E-06 |
| TUCP_001147 | XLOC_043177 | ENSRNOT00000045326 | 0.963987657  | 4.49E-07 |
| TUCP_001147 | XLOC_043177 | ENSRNOT00000034487 | -0.955066309 | 1.34E-06 |
| TUCP_001147 | XLOC_043177 | ENSRNOT00000045833 | 0.954866169  | 1.37E-06 |
| TUCP_001147 | XLOC_043177 | ENSRNOT00000074023 | 0.979894624  | 2.50E-08 |
| TUCP_001147 | XLOC_043177 | ENSRNOT00000009073 | -0.952893916 | 1.69E-06 |
| TUCP_001147 | XLOC_043177 | ENSRNOT00000056813 | 0.950007217  | 2.26E-06 |

|             |             |                    |              |          |
|-------------|-------------|--------------------|--------------|----------|
| TUCP_001147 | XLOC_043177 | ENSRNOT00000048910 | -0.970060087 | 1.80E-07 |
| TUCP_001147 | XLOC_043177 | ENSRNOT00000018341 | -0.973939649 | 9.06E-08 |
| TUCP_001147 | XLOC_043177 | ENSRNOT00000065076 | 0.965655631  | 3.55E-07 |
| TUCP_001147 | XLOC_043177 | ENSRNOT00000013516 | 0.964807202  | 4.01E-07 |
| TUCP_001147 | XLOC_043177 | ENSRNOT00000054685 | 0.955792578  | 1.23E-06 |
| TUCP_001147 | XLOC_043177 | ENSRNOT00000021534 | -0.963455131 | 4.83E-07 |
| TUCP_001147 | XLOC_043177 | ENSRNOT00000013695 | -0.959620244 | 7.90E-07 |
| TUCP_001147 | XLOC_043177 | ENSRNOT00000088125 | 0.971390748  | 1.44E-07 |
| TUCP_001147 | XLOC_043177 | ENSRNOT00000012060 | 0.973060048  | 1.07E-07 |
| TUCP_001147 | XLOC_043177 | ENSRNOT00000038247 | 0.951589671  | 1.93E-06 |
| TUCP_001147 | XLOC_043177 | ENSRNOT00000080928 | 0.957119442  | 1.06E-06 |
| TUCP_001147 | XLOC_043177 | ENSRNOT00000027760 | 0.966775834  | 3.02E-07 |
| TUCP_001147 | XLOC_043177 | ENSRNOT00000024402 | 0.970785039  | 1.60E-07 |
| TUCP_001147 | XLOC_043177 | ENSRNOT00000089545 | -0.956036663 | 1.20E-06 |
| TUCP_001147 | XLOC_043177 | ENSRNOT00000089933 | 0.980564045  | 2.11E-08 |
| TUCP_001147 | XLOC_043177 | ENSRNOT00000022924 | -0.954673033 | 1.40E-06 |
| TUCP_001147 | XLOC_043177 | ENSRNOT00000090461 | 0.961460658  | 6.28E-07 |
| TUCP_001147 | XLOC_043177 | ENSRNOT00000026481 | 0.982084379  | 1.41E-08 |
| TUCP_001147 | XLOC_043177 | ENSRNOT00000073983 | 0.957780993  | 9.84E-07 |
| TUCP_001147 | XLOC_043177 | ENSRNOT00000026718 | 0.95292582   | 1.68E-06 |
| TUCP_001147 | XLOC_043177 | ENSRNOT00000032780 | 0.954098254  | 1.49E-06 |
| TUCP_001147 | XLOC_043177 | ENSRNOT00000084012 | 0.972911832  | 1.10E-07 |
| TUCP_001147 | XLOC_043177 | ENSRNOT00000033677 | -0.973201473 | 1.04E-07 |
| TUCP_001147 | XLOC_043177 | ENSRNOT00000027234 | 0.955984518  | 1.21E-06 |
| TUCP_001147 | XLOC_043177 | ENSRNOT00000019820 | 0.965945073  | 3.41E-07 |
| TUCP_001147 | XLOC_043177 | ENSRNOT00000067822 | 0.954556508  | 1.41E-06 |
| TUCP_001147 | XLOC_043177 | ENSRNOT00000016389 | -0.952242981 | 1.81E-06 |
| TUCP_001147 | XLOC_043177 | ENSRNOT00000011832 | -0.973795441 | 9.31E-08 |
| TUCP_001147 | XLOC_043177 | ENSRNOT00000024066 | 0.9709143    | 1.56E-07 |
| TUCP_001147 | XLOC_043177 | ENSRNOT00000021030 | -0.963020076 | 5.12E-07 |
| TUCP_001147 | XLOC_043177 | ENSRNOT00000006835 | 0.978241889  | 3.70E-08 |
| TUCP_001147 | XLOC_043177 | ENSRNOT00000077727 | -0.986329676 | 3.67E-09 |
| TUCP_001147 | XLOC_043177 | ENSRNOT00000011930 | 0.963408418  | 4.86E-07 |
| TUCP_001147 | XLOC_043177 | ENSRNOT00000044346 | -0.981770362 | 1.54E-08 |
| TUCP_001147 | XLOC_043177 | ENSRNOT00000073492 | -0.954731294 | 1.39E-06 |
| TUCP_001147 | XLOC_043177 | ENSRNOT00000070886 | -0.952076153 | 1.84E-06 |
| TUCP_001147 | XLOC_043177 | ENSRNOT00000068745 | 0.965598613  | 3.58E-07 |
| TUCP_001147 | XLOC_043177 | ENSRNOT00000048613 | 0.967221571  | 2.82E-07 |
| TUCP_001147 | XLOC_043177 | ENSRNOT00000017949 | -0.953178591 | 1.64E-06 |
| TUCP_001147 | XLOC_043177 | ENSRNOT00000090156 | -0.950688098 | 2.11E-06 |
| TUCP_001147 | XLOC_043177 | ENSRNOT00000091909 | 0.978405368  | 3.57E-08 |
| TUCP_001147 | XLOC_043177 | ENSRNOT00000001081 | 0.968397265  | 2.35E-07 |
| TUCP_001147 | XLOC_043177 | ENSRNOT00000003544 | -0.975186974 | 7.11E-08 |
| TUCP_001147 | XLOC_043177 | ENSRNOT00000086119 | -0.975090015 | 7.24E-08 |
| TUCP_001147 | XLOC_043177 | ENSRNOT00000022190 | -0.976874529 | 5.01E-08 |
| TUCP_001147 | XLOC_043177 | ENSRNOT00000025913 | -0.970210451 | 1.76E-07 |
| TUCP_001147 | XLOC_043177 | ENSRNOT0000001077  | 0.951459812  | 1.96E-06 |
| TUCP_001147 | XLOC_043177 | ENSRNOT00000077220 | -0.974156098 | 8.69E-08 |
| TUCP_001147 | XLOC_043177 | ENSRNOT00000004196 | 0.954603255  | 1.41E-06 |
| TUCP_001147 | XLOC_043177 | ENSRNOT00000065983 | 0.973101964  | 1.06E-07 |
| TUCP_001147 | XLOC_043177 | ENSRNOT00000030782 | -0.967975204 | 2.51E-07 |

|             |             |                    |              |          |
|-------------|-------------|--------------------|--------------|----------|
| TUCP_001147 | XLOC_043177 | ENSRNOT0000007882  | -0.966274433 | 3.25E-07 |
| TUCP_001147 | XLOC_043177 | ENSRNOT00000073919 | 0.982107823  | 1.40E-08 |
| TUCP_001147 | XLOC_043177 | ENSRNOT00000067780 | -0.973636174 | 9.60E-08 |
| TUCP_001147 | XLOC_043177 | ENSRNOT00000086577 | 0.954588995  | 1.41E-06 |
| TUCP_001147 | XLOC_043177 | ENSRNOT00000059807 | 0.956867058  | 1.09E-06 |
| TUCP_001147 | XLOC_043177 | ENSRNOT00000089611 | 0.952284821  | 1.80E-06 |
| TUCP_001147 | XLOC_043177 | ENSRNOT00000073910 | -0.956652183 | 1.12E-06 |
| TUCP_001147 | XLOC_043177 | ENSRNOT00000052422 | 0.951126302  | 2.02E-06 |
| TUCP_001147 | XLOC_043177 | ENSRNOT00000039012 | -0.953994745 | 1.50E-06 |
| TUCP_001147 | XLOC_043177 | ENSRNOT00000086590 | 0.975044732  | 7.31E-08 |
| TUCP_001147 | XLOC_043177 | ENSRNOT00000034883 | -0.967463451 | 2.72E-07 |
| TUCP_001147 | XLOC_043177 | ENSRNOT00000020155 | 0.95678952   | 1.10E-06 |
| TUCP_001147 | XLOC_043177 | ENSRNOT00000072357 | -0.970838836 | 1.58E-07 |
| TUCP_001147 | XLOC_043177 | ENSRNOT00000039593 | -0.952656758 | 1.73E-06 |
| TUCP_001147 | XLOC_043177 | ENSRNOT00000079801 | -0.952208664 | 1.81E-06 |
| TUCP_001147 | XLOC_043177 | ENSRNOT00000087011 | -0.971510382 | 1.41E-07 |
| TUCP_001147 | XLOC_043177 | ENSRNOT00000067739 | -0.950239932 | 2.21E-06 |
| TUCP_001147 | XLOC_043177 | ENSRNOT00000005910 | -0.967104927 | 2.87E-07 |
| TUCP_001147 | XLOC_043177 | ENSRNOT00000017626 | -0.96107597  | 6.59E-07 |
| TUCP_001147 | XLOC_043177 | ENSRNOT00000076485 | -0.976058148 | 5.95E-08 |
| TUCP_001147 | XLOC_043177 | ENSRNOT00000090987 | -0.951920764 | 1.87E-06 |
| TUCP_001147 | XLOC_043177 | ENSRNOT00000078475 | 0.975248451  | 7.02E-08 |
| TUCP_001147 | XLOC_043177 | ENSRNOT00000087429 | 0.959842823  | 7.69E-07 |
| TUCP_001147 | XLOC_043177 | ENSRNOT00000040169 | 0.96420323   | 4.36E-07 |
| TUCP_001147 | XLOC_043177 | ENSRNOT00000036051 | 0.957955473  | 9.64E-07 |
| TUCP_001147 | XLOC_043177 | ENSRNOT00000029704 | -0.950607779 | 2.13E-06 |
| TUCP_001147 | XLOC_043177 | ENSRNOT00000076230 | 0.954812848  | 1.38E-06 |
| TUCP_001147 | XLOC_043177 | ENSRNOT00000016722 | 0.97632077   | 5.63E-08 |
| TUCP_001147 | XLOC_043177 | ENSRNOT00000028685 | 0.950872801  | 2.07E-06 |
| TUCP_001147 | XLOC_043177 | ENSRNOT00000000013 | 0.967636368  | 2.65E-07 |
| TUCP_001147 | XLOC_043177 | ENSRNOT00000080222 | -0.956760563 | 1.11E-06 |
| TUCP_001147 | XLOC_043177 | ENSRNOT00000025523 | 0.966880101  | 2.97E-07 |
| TUCP_001147 | XLOC_043177 | ENSRNOT00000018473 | -0.957956947 | 9.64E-07 |
| TUCP_001147 | XLOC_043177 | ENSRNOT00000005161 | 0.962710409  | 5.33E-07 |
| TUCP_001147 | XLOC_043177 | ENSRNOT00000026118 | -0.958335598 | 9.22E-07 |
| TUCP_001147 | XLOC_043177 | ENSRNOT00000037955 | -0.962588609 | 5.42E-07 |
| TUCP_001147 | XLOC_043177 | ENSRNOT00000016111 | -0.951274499 | 1.99E-06 |
| TUCP_001147 | XLOC_043177 | ENSRNOT00000055582 | 0.958320132  | 9.24E-07 |
| TUCP_001147 | XLOC_043177 | ENSRNOT00000016220 | -0.963927868 | 4.53E-07 |
| TUCP_001147 | XLOC_043177 | ENSRNOT00000017765 | 0.969385049  | 2.01E-07 |
| TUCP_001147 | XLOC_043177 | ENSRNOT00000004999 | 0.979017689  | 3.09E-08 |
| TUCP_001147 | XLOC_043177 | ENSRNOT00000009122 | 0.963723786  | 4.66E-07 |
| TUCP_001147 | XLOC_043177 | ENSRNOT00000013463 | 0.959142447  | 8.37E-07 |
| TUCP_001147 | XLOC_043177 | ENSRNOT00000088054 | 0.970143291  | 1.78E-07 |
| TUCP_001147 | XLOC_043177 | ENSRNOT00000025966 | 0.974671208  | 7.87E-08 |
| TUCP_001147 | XLOC_043177 | ENSRNOT00000019554 | 0.969519603  | 1.97E-07 |
| TUCP_001147 | XLOC_043177 | ENSRNOT00000047663 | -0.97473907  | 7.76E-08 |
| TUCP_001147 | XLOC_043177 | ENSRNOT00000080602 | 0.966928861  | 2.95E-07 |
| TUCP_001147 | XLOC_043177 | ENSRNOT00000029202 | -0.981240507 | 1.77E-08 |
| TUCP_001147 | XLOC_043177 | ENSRNOT00000025791 | -0.967192906 | 2.83E-07 |
| TUCP_001147 | XLOC_043177 | ENSRNOT00000005489 | 0.986952637  | 2.91E-09 |

|             |             |                    |              |          |
|-------------|-------------|--------------------|--------------|----------|
| TUCP_001147 | XLOC_043177 | ENSRNOT00000025794 | -0.956944365 | 1.08E-06 |
| TUCP_001147 | XLOC_043177 | ENSRNOT00000084069 | 0.974063588  | 8.85E-08 |
| TUCP_001147 | XLOC_043177 | ENSRNOT00000058111 | -0.964695509 | 4.07E-07 |
| TUCP_001147 | XLOC_043177 | ENSRNOT00000050834 | -0.951327162 | 1.98E-06 |
| TUCP_001147 | XLOC_043177 | ENSRNOT00000054828 | 0.953056631  | 1.66E-06 |
| TUCP_001147 | XLOC_043177 | ENSRNOT00000088279 | 0.960879968  | 6.76E-07 |
| TUCP_001147 | XLOC_043177 | ENSRNOT00000009994 | -0.958681332 | 8.85E-07 |
| TUCP_001147 | XLOC_043177 | ENSRNOT00000012736 | 0.95936042   | 8.15E-07 |
| TUCP_001147 | XLOC_043177 | ENSRNOT00000077367 | -0.964469563 | 4.20E-07 |
| TUCP_001147 | XLOC_043177 | ENSRNOT00000024841 | -0.97043509  | 1.69E-07 |
| TUCP_001147 | XLOC_043177 | ENSRNOT00000009462 | 0.95640818   | 1.15E-06 |
| TUCP_001147 | XLOC_043177 | ENSRNOT00000009345 | -0.957184681 | 1.05E-06 |
| TUCP_001147 | XLOC_043177 | ENSRNOT00000024924 | -0.9559962   | 1.21E-06 |
| TUCP_001147 | XLOC_043177 | ENSRNOT00000079011 | -0.967014572 | 2.91E-07 |
| TUCP_001147 | XLOC_043177 | ENSRNOT00000018074 | -0.986022768 | 4.10E-09 |
| TUCP_001147 | XLOC_043177 | ENSRNOT00000037679 | 0.983374454  | 9.73E-09 |
| TUCP_001147 | XLOC_043177 | ENSRNOT00000000124 | -0.952676901 | 1.73E-06 |
| TUCP_001147 | XLOC_043177 | ENSRNOT00000014124 | 0.965622541  | 3.57E-07 |
| TUCP_001147 | XLOC_043177 | ENSRNOT00000043581 | -0.967097056 | 2.87E-07 |
| TUCP_001147 | XLOC_043177 | ENSRNOT00000000120 | 0.9703267    | 1.72E-07 |
| TUCP_001147 | XLOC_043177 | ENSRNOT00000013632 | 0.957713437  | 9.92E-07 |
| TUCP_001147 | XLOC_043177 | ENSRNOT00000078906 | -0.978815015 | 3.24E-08 |
| TUCP_001147 | XLOC_043177 | ENSRNOT00000010418 | 0.962857832  | 5.23E-07 |
| TUCP_001147 | XLOC_043177 | ENSRNOT00000028545 | -0.951939199 | 1.86E-06 |
| TUCP_001147 | XLOC_043177 | ENSRNOT00000013733 | -0.956630825 | 1.12E-06 |
| TUCP_001147 | XLOC_043177 | ENSRNOT00000009900 | -0.956938044 | 1.08E-06 |
| TUCP_001147 | XLOC_043177 | ENSRNOT00000028225 | 0.958847094  | 8.67E-07 |
| TUCP_001147 | XLOC_043177 | ENSRNOT00000066561 | -0.963270341 | 4.95E-07 |
| TUCP_001147 | XLOC_043177 | ENSRNOT00000019172 | -0.965010228 | 3.89E-07 |
| TUCP_001147 | XLOC_043177 | ENSRNOT00000026941 | 0.977303286  | 4.57E-08 |
| TUCP_001147 | XLOC_043177 | ENSRNOT00000015495 | -0.976244481 | 5.73E-08 |
| TUCP_001147 | XLOC_043177 | ENSRNOT00000032244 | 0.957700573  | 9.93E-07 |
| TUCP_001147 | XLOC_043177 | ENSRNOT00000019910 | -0.971345531 | 1.45E-07 |
| TUCP_001147 | XLOC_043177 | ENSRNOT00000040393 | 0.97535146   | 6.88E-08 |
| TUCP_001147 | XLOC_043177 | ENSRNOT00000025097 | 0.982206985  | 1.36E-08 |
| TUCP_001147 | XLOC_043177 | ENSRNOT00000067901 | -0.981137249 | 1.82E-08 |
| TUCP_001147 | XLOC_043177 | ENSRNOT00000016376 | -0.95231539  | 1.79E-06 |
| TUCP_001147 | XLOC_043177 | ENSRNOT00000021674 | 0.978152908  | 3.78E-08 |
| TUCP_001147 | XLOC_043177 | ENSRNOT00000036613 | -0.986644562 | 3.27E-09 |
| TUCP_001147 | XLOC_043177 | ENSRNOT00000015537 | 0.973517739  | 9.81E-08 |
| TUCP_001147 | XLOC_043177 | ENSRNOT00000025705 | 0.979149219  | 3.00E-08 |
| TUCP_001147 | XLOC_043177 | ENSRNOT00000004140 | 0.961542769  | 6.21E-07 |
| TUCP_001147 | XLOC_043177 | ENSRNOT00000008113 | -0.983236102 | 1.01E-08 |
| TUCP_001147 | XLOC_043177 | ENSRNOT00000022552 | -0.964750819 | 4.04E-07 |
| TUCP_001147 | XLOC_043177 | ENSRNOT00000036195 | -0.951468756 | 1.95E-06 |
| TUCP_001147 | XLOC_043177 | ENSRNOT00000047105 | 0.956481914  | 1.14E-06 |
| TUCP_001147 | XLOC_043177 | ENSRNOT0000007698  | -0.963078041 | 5.08E-07 |
| TUCP_001147 | XLOC_043177 | ENSRNOT00000016306 | -0.963685529 | 4.68E-07 |
| TUCP_001147 | XLOC_043177 | ENSRNOT00000020357 | 0.958915129  | 8.60E-07 |
| TUCP_001147 | XLOC_043177 | ENSRNOT00000019213 | 0.9644931    | 4.19E-07 |
| TUCP_001147 | XLOC_043177 | ENSRNOT00000020051 | 0.962857997  | 5.23E-07 |

|             |             |                    |              |          |
|-------------|-------------|--------------------|--------------|----------|
| TUCP_001147 | XLOC_043177 | ENSRNOT00000026279 | -0.9509214   | 2.06E-06 |
| TUCP_001147 | XLOC_043177 | ENSRNOT00000087062 | 0.955287953  | 1.31E-06 |
| TUCP_001147 | XLOC_043177 | ENSRNOT00000071560 | 0.950305006  | 2.20E-06 |
| TUCP_001147 | XLOC_043177 | ENSRNOT0000003087  | 0.955441527  | 1.28E-06 |
| TUCP_001147 | XLOC_043177 | ENSRNOT00000015678 | -0.97463091  | 7.93E-08 |
| TUCP_001147 | XLOC_043177 | ENSRNOT00000082508 | -0.950521878 | 2.15E-06 |
| TUCP_001147 | XLOC_043177 | ENSRNOT00000073193 | -0.960266571 | 7.30E-07 |
| TUCP_001147 | XLOC_043177 | ENSRNOT00000010728 | 0.961837687  | 5.98E-07 |
| TUCP_001147 | XLOC_043177 | ENSRNOT00000082863 | 0.970209569  | 1.76E-07 |
| TUCP_001147 | XLOC_043177 | ENSRNOT00000049459 | -0.974321888 | 8.42E-08 |
| TUCP_001147 | XLOC_043177 | ENSRNOT00000065947 | 0.964685434  | 4.08E-07 |
| TUCP_001147 | XLOC_043177 | ENSRNOT00000071166 | 0.955018206  | 1.34E-06 |
| TUCP_001147 | XLOC_043177 | ENSRNOT00000084567 | 0.962243974  | 5.67E-07 |
| TUCP_001147 | XLOC_043177 | ENSRNOT00000074389 | -0.955503812 | 1.27E-06 |
| TUCP_001147 | XLOC_043177 | ENSRNOT00000078872 | -0.954479366 | 1.43E-06 |
| TUCP_001147 | XLOC_043177 | ENSRNOT00000013851 | -0.950865597 | 2.08E-06 |
| TUCP_001147 | XLOC_043177 | ENSRNOT00000001118 | 0.960089914  | 7.46E-07 |
| TUCP_001147 | XLOC_043177 | ENSRNOT00000055437 | -0.955500775 | 1.28E-06 |
| TUCP_001147 | XLOC_043177 | ENSRNOT00000091596 | -0.960855471 | 6.78E-07 |
| TUCP_001147 | XLOC_043177 | ENSRNOT00000039836 | -0.951333058 | 1.98E-06 |
| TUCP_001147 | XLOC_043177 | ENSRNOT00000010806 | -0.954292425 | 1.45E-06 |
| TUCP_001147 | XLOC_043177 | ENSRNOT00000001507 | 0.986322488  | 3.68E-09 |
| TUCP_001147 | XLOC_043177 | ENSRNOT00000066947 | -0.960386732 | 7.19E-07 |
| TUCP_001147 | XLOC_043177 | ENSRNOT00000083568 | 0.970193457  | 1.76E-07 |
| TUCP_001147 | XLOC_043177 | ENSRNOT00000018584 | 0.958205801  | 9.36E-07 |
| TUCP_001147 | XLOC_043177 | ENSRNOT00000039177 | -0.978876865 | 3.20E-08 |
| TUCP_001147 | XLOC_043177 | ENSRNOT00000021496 | -0.965842716 | 3.46E-07 |
| TUCP_001147 | XLOC_043177 | ENSRNOT00000017271 | 0.972276831  | 1.23E-07 |
| TUCP_001147 | XLOC_043177 | ENSRNOT00000006843 | -0.96106702  | 6.60E-07 |
| TUCP_001147 | XLOC_043177 | ENSRNOT00000022676 | -0.962102317 | 5.78E-07 |
| TUCP_001147 | XLOC_043177 | ENSRNOT00000037456 | 0.963069474  | 5.08E-07 |
| TUCP_001147 | XLOC_043177 | ENSRNOT00000030082 | 0.968617558  | 2.27E-07 |
| TUCP_001147 | XLOC_043177 | ENSRNOT00000025517 | 0.972759774  | 1.13E-07 |
| TUCP_001147 | XLOC_043177 | ENSRNOT00000000477 | -0.953325373 | 1.61E-06 |
| TUCP_001147 | XLOC_043177 | ENSRNOT00000025510 | -0.97839384  | 3.58E-08 |
| TUCP_001147 | XLOC_043177 | ENSRNOT00000000577 | 0.9754501    | 6.74E-08 |
| TUCP_001147 | XLOC_043177 | ENSRNOT00000075424 | 0.973598733  | 9.66E-08 |
| TUCP_001147 | XLOC_043177 | ENSRNOT00000065045 | 0.970999114  | 1.54E-07 |
| TUCP_001147 | XLOC_043177 | ENSRNOT00000012177 | -0.964597608 | 4.13E-07 |
| TUCP_001147 | XLOC_043177 | ENSRNOT00000061392 | 0.954601639  | 1.41E-06 |
| TUCP_001147 | XLOC_043177 | ENSRNOT00000080677 | -0.954261744 | 1.46E-06 |
| TUCP_001147 | XLOC_043177 | ENSRNOT00000046490 | -0.961817469 | 5.99E-07 |
| TUCP_001147 | XLOC_043177 | ENSRNOT00000016649 | 0.954185209  | 1.47E-06 |
| TUCP_001147 | XLOC_043177 | ENSRNOT00000007824 | -0.977191128 | 4.68E-08 |
| TUCP_001147 | XLOC_043177 | ENSRNOT00000001979 | -0.958815484 | 8.71E-07 |
| TUCP_001147 | XLOC_043177 | ENSRNOT00000083968 | -0.970292426 | 1.73E-07 |
| TUCP_001147 | XLOC_043177 | ENSRNOT00000037133 | 0.973533914  | 9.78E-08 |
| TUCP_001147 | XLOC_043177 | ENSRNOT00000068633 | 0.953377568  | 1.60E-06 |
| TUCP_001147 | XLOC_043177 | ENSRNOT00000034298 | 0.974490663  | 8.15E-08 |
| TUCP_001147 | XLOC_043177 | ENSRNOT00000083964 | -0.952063488 | 1.84E-06 |
| TUCP_001147 | XLOC_043177 | ENSRNOT00000075452 | 0.95414692   | 1.48E-06 |

|             |             |                     |              |          |
|-------------|-------------|---------------------|--------------|----------|
| TUCP_001147 | XLOC_043177 | ENSRNOT00000026726  | -0.954542104 | 1.42E-06 |
| TUCP_001147 | XLOC_043177 | ENSRNOT00000026831  | 0.958660005  | 8.87E-07 |
| TUCP_001147 | XLOC_043177 | ENSRNOT00000074985  | -0.955525305 | 1.27E-06 |
| TUCP_001147 | XLOC_043177 | ENSRNOT00000020892  | -0.96001422  | 7.53E-07 |
| TUCP_001147 | XLOC_043177 | ENSRNOT00000016445  | 0.986422504  | 3.55E-09 |
| TUCP_001147 | XLOC_043177 | ENSRNOT00000011898  | -0.955567338 | 1.27E-06 |
| TUCP_001147 | XLOC_043177 | ENSRNOT00000019133  | 0.965403026  | 3.68E-07 |
| TUCP_001147 | XLOC_043177 | ENSRNOT00000011956  | 0.959426259  | 8.09E-07 |
| TUCP_001147 | XLOC_043177 | ENSRNOT00000024119  | 0.958414092  | 9.13E-07 |
| TUCP_001147 | XLOC_043177 | ENSRNOT00000001322  | -0.956317695 | 1.16E-06 |
| TUCP_001147 | XLOC_043177 | ENSRNOT00000006824  | -0.98315633  | 1.04E-08 |
| TUCP_001147 | XLOC_043177 | ENSRNOT00000012775  | -0.962875423 | 5.22E-07 |
| TUCP_001147 | XLOC_043177 | ENSRNOT000000082138 | -0.958762173 | 8.76E-07 |
| TUCP_001147 | XLOC_043177 | ENSRNOT000000066793 | -0.951203091 | 2.01E-06 |
| TUCP_001147 | XLOC_043177 | ENSRNOT00000009811  | 0.975086468  | 7.25E-08 |
| TUCP_001147 | XLOC_043177 | ENSRNOT00000010683  | -0.961086722 | 6.58E-07 |
| TUCP_001147 | XLOC_043177 | ENSRNOT00000001158  | 0.959985129  | 7.55E-07 |
| TUCP_001147 | XLOC_043177 | ENSRNOT000000045488 | 0.975931113  | 6.11E-08 |
| TUCP_001147 | XLOC_043177 | ENSRNOT000000050119 | -0.950137558 | 2.23E-06 |
| TUCP_001147 | XLOC_043177 | ENSRNOT000000090853 | -0.951445479 | 1.96E-06 |
| TUCP_001147 | XLOC_043177 | ENSRNOT000000093174 | 0.961880609  | 5.95E-07 |
| TUCP_001147 | XLOC_043177 | ENSRNOT000000036666 | 0.95277427   | 1.71E-06 |
| TUCP_001147 | XLOC_043177 | ENSRNOT000000089211 | 0.974417933  | 8.27E-08 |
| TUCP_001147 | XLOC_043177 | ENSRNOT000000020383 | 0.991399169  | 3.65E-10 |
| TUCP_001147 | XLOC_043177 | ENSRNOT000000015518 | -0.969261676 | 2.05E-07 |
| TUCP_001147 | XLOC_043177 | ENSRNOT00000000302  | 0.977076505  | 4.80E-08 |
| TUCP_001147 | XLOC_043177 | ENSRNOT000000055602 | -0.97096572  | 1.55E-07 |
| TUCP_001147 | XLOC_043177 | ENSRNOT00000026909  | -0.959686226 | 7.84E-07 |
| TUCP_001147 | XLOC_043177 | ENSRNOT00000004290  | 0.950522676  | 2.15E-06 |
| TUCP_001147 | XLOC_043177 | ENSRNOT000000088133 | -0.950481641 | 2.16E-06 |
| TUCP_001147 | XLOC_043177 | ENSRNOT00000012424  | 0.976131473  | 5.86E-08 |
| TUCP_001147 | XLOC_043177 | ENSRNOT00000000658  | 0.964615413  | 4.12E-07 |
| TUCP_001147 | XLOC_043177 | ENSRNOT000000026531 | -0.972342391 | 1.22E-07 |
| TUCP_001147 | XLOC_043177 | ENSRNOT000000083632 | -0.956987308 | 1.08E-06 |
| TUCP_001147 | XLOC_043177 | ENSRNOT00000000717  | -0.970970608 | 1.55E-07 |
| TUCP_001147 | XLOC_043177 | ENSRNOT000000044395 | 0.95833629   | 9.22E-07 |
| TUCP_001147 | XLOC_043177 | ENSRNOT000000049048 | -0.962012582 | 5.84E-07 |
| TUCP_001147 | XLOC_043177 | ENSRNOT00000000718  | 0.97013016   | 1.78E-07 |
| TUCP_001147 | XLOC_043177 | ENSRNOT000000086122 | 0.9660349    | 3.36E-07 |
| TUCP_001147 | XLOC_043177 | ENSRNOT000000030222 | -0.956343835 | 1.16E-06 |
| TUCP_001147 | XLOC_043177 | ENSRNOT000000017504 | 0.952764273  | 1.71E-06 |
| TUCP_001147 | XLOC_043177 | ENSRNOT000000087346 | 0.951000304  | 2.05E-06 |
| TUCP_001147 | XLOC_043177 | ENSRNOT000000088628 | 0.957065984  | 1.07E-06 |
| TUCP_001147 | XLOC_043177 | ENSRNOT000000023763 | -0.970631394 | 1.64E-07 |
| TUCP_001147 | XLOC_043177 | ENSRNOT000000042799 | 0.95781857   | 9.80E-07 |
| TUCP_001147 | XLOC_043177 | ENSRNOT000000010993 | 0.955773631  | 1.24E-06 |
| TUCP_001147 | XLOC_043177 | ENSRNOT000000059181 | 0.957315756  | 1.04E-06 |
| TUCP_001147 | XLOC_043177 | ENSRNOT000000017291 | -0.954533958 | 1.42E-06 |
| TUCP_001147 | XLOC_043177 | ENSRNOT000000003691 | -0.96303432  | 5.11E-07 |
| TUCP_001147 | XLOC_043177 | ENSRNOT000000003690 | 0.95038919   | 2.18E-06 |
| TUCP_001147 | XLOC_043177 | ENSRNOT000000080216 | -0.963077073 | 5.08E-07 |



|             |             |                    |              |          |
|-------------|-------------|--------------------|--------------|----------|
| TUCP_001147 | XLOC_043177 | ENSRNOT00000081678 | 0.97101146   | 1.54E-07 |
| TUCP_001147 | XLOC_043177 | ENSRNOT00000008901 | -0.954771821 | 1.38E-06 |
| TUCP_001147 | XLOC_043177 | ENSRNOT00000061201 | -0.965451548 | 3.66E-07 |
| TUCP_001147 | XLOC_043177 | ENSRNOT00000081077 | -0.963234457 | 4.97E-07 |
| TUCP_001147 | XLOC_043177 | ENSRNOT00000017761 | 0.973380521  | 1.01E-07 |
| TUCP_001147 | XLOC_043177 | ENSRNOT00000023543 | -0.986446556 | 3.52E-09 |
| TUCP_001147 | XLOC_043177 | ENSRNOT00000001923 | 0.954825369  | 1.37E-06 |
| TUCP_001147 | XLOC_043177 | ENSRNOT00000028737 | -0.951305557 | 1.99E-06 |
| TUCP_001147 | XLOC_043177 | ENSRNOT00000018634 | -0.954746145 | 1.39E-06 |
| TUCP_001147 | XLOC_043177 | ENSRNOT00000039341 | 0.955774976  | 1.24E-06 |
| TUCP_001147 | XLOC_043177 | ENSRNOT00000065501 | 0.956525931  | 1.14E-06 |
| TUCP_001147 | XLOC_043177 | ENSRNOT00000055386 | 0.966347824  | 3.21E-07 |
| TUCP_001147 | XLOC_043177 | ENSRNOT00000085517 | 0.964795303  | 4.01E-07 |
| TUCP_001147 | XLOC_043177 | ENSRNOT00000038212 | -0.95887106  | 8.65E-07 |
| TUCP_001147 | XLOC_043177 | ENSRNOT00000037405 | 0.964316222  | 4.29E-07 |
| TUCP_001147 | XLOC_043177 | ENSRNOT00000085458 | -0.962719568 | 5.33E-07 |
| TUCP_001147 | XLOC_043177 | ENSRNOT00000014605 | -0.954996313 | 1.35E-06 |
| TUCP_001147 | XLOC_043177 | ENSRNOT00000085519 | 0.958057249  | 9.53E-07 |
| TUCP_001147 | XLOC_043177 | ENSRNOT00000082174 | 0.955607802  | 1.26E-06 |
| TUCP_001147 | XLOC_043177 | ENSRNOT00000042125 | 0.964323026  | 4.29E-07 |
| TUCP_001147 | XLOC_043177 | ENSRNOT00000025460 | 0.965958677  | 3.40E-07 |
| TUCP_001147 | XLOC_043177 | ENSRNOT00000087033 | -0.971979884 | 1.30E-07 |
| TUCP_001147 | XLOC_043177 | ENSRNOT00000010541 | 0.952302716  | 1.79E-06 |
| TUCP_001147 | XLOC_043177 | ENSRNOT00000026760 | -0.987222071 | 2.63E-09 |
| TUCP_001147 | XLOC_043177 | ENSRNOT00000075800 | -0.95514958  | 1.33E-06 |
| TUCP_001147 | XLOC_043177 | ENSRNOT00000024491 | -0.959361232 | 8.15E-07 |
| TUCP_001147 | XLOC_043177 | ENSRNOT00000026767 | 0.966991654  | 2.92E-07 |
| TUCP_001147 | XLOC_043177 | ENSRNOT00000084597 | -0.957692053 | 9.94E-07 |
| TUCP_001147 | XLOC_043177 | ENSRNOT00000016568 | 0.963123462  | 5.05E-07 |
| TUCP_001147 | XLOC_043177 | ENSRNOT00000037588 | -0.967480702 | 2.71E-07 |
| TUCP_001147 | XLOC_043177 | ENSRNOT00000027360 | -0.954925527 | 1.36E-06 |
| TUCP_001147 | XLOC_043177 | ENSRNOT00000067503 | 0.960624739  | 6.98E-07 |
| TUCP_001147 | XLOC_043177 | ENSRNOT00000016401 | 0.956493782  | 1.14E-06 |
| TUCP_001147 | XLOC_043177 | ENSRNOT00000023388 | -0.969105674 | 2.10E-07 |
| TUCP_001147 | XLOC_043177 | ENSRNOT00000064930 | 0.959952147  | 7.58E-07 |
| TUCP_001147 | XLOC_043177 | ENSRNOT00000027967 | 0.977860573  | 4.04E-08 |
| TUCP_001147 | XLOC_043177 | ENSRNOT00000024938 | -0.964243669 | 4.33E-07 |
| TUCP_001147 | XLOC_043177 | ENSRNOT00000002053 | -0.95002928  | 2.26E-06 |
| TUCP_001147 | XLOC_043177 | ENSRNOT00000024933 | -0.966809331 | 3.00E-07 |
| TUCP_001147 | XLOC_043177 | ENSRNOT00000047210 | 0.975145984  | 7.16E-08 |
| TUCP_001147 | XLOC_043177 | ENSRNOT00000046639 | 0.979519796  | 2.74E-08 |
| TUCP_001147 | XLOC_043177 | ENSRNOT00000036658 | -0.954728048 | 1.39E-06 |
| TUCP_001147 | XLOC_043177 | ENSRNOT00000079996 | 0.968349101  | 2.37E-07 |
| TUCP_001147 | XLOC_043177 | ENSRNOT00000024548 | 0.954700376  | 1.39E-06 |
| TUCP_001144 | XLOC_043177 | ENSRNOT00000075521 | 0.953441951  | 1.59E-06 |
| TUCP_001144 | XLOC_043177 | ENSRNOT00000086590 | 0.952468167  | 1.76E-06 |
| TUCP_001144 | XLOC_043177 | ENSRNOT00000006186 | 0.95372431   | 1.55E-06 |
| TUCP_001144 | XLOC_043177 | ENSRNOT00000082863 | 0.958567235  | 8.97E-07 |
| TUCP_001144 | XLOC_043177 | ENSRNOT00000028628 | -0.957365466 | 1.03E-06 |
| TUCP_001144 | XLOC_043177 | ENSRNOT00000091751 | 0.958699743  | 8.83E-07 |
| TUCP_001144 | XLOC_043177 | ENSRNOT00000004017 | 0.95918475   | 8.33E-07 |

|             |             |                     |              |          |
|-------------|-------------|---------------------|--------------|----------|
| TUCP_001144 | XLOC_043177 | ENSRNOT0000007855   | 0.960261596  | 7.30E-07 |
| TUCP_001144 | XLOC_043177 | ENSRNOT00000030850  | 0.950856796  | 2.08E-06 |
| TUCP_001144 | XLOC_043177 | ENSRNOT00000044742  | 0.96942084   | 2.00E-07 |
| TUCP_001144 | XLOC_043177 | ENSRNOT0000007028   | -0.956770807 | 1.11E-06 |
| TUCP_001144 | XLOC_043177 | ENSRNOT00000067610  | -0.969956887 | 1.83E-07 |
| TUCP_001144 | XLOC_043177 | ENSRNOT00000025079  | -0.957042972 | 1.07E-06 |
| TUCP_001144 | XLOC_043177 | ENSRNOT00000048754  | -0.950119826 | 2.24E-06 |
| TUCP_001144 | XLOC_043177 | ENSRNOT00000038247  | 0.956066794  | 1.20E-06 |
| TUCP_001144 | XLOC_043177 | ENSRNOT00000090461  | 0.959031495  | 8.48E-07 |
| TUCP_001144 | XLOC_043177 | ENSRNOT00000009811  | 0.968532787  | 2.30E-07 |
| TUCP_001144 | XLOC_043177 | ENSRNOT00000068134  | 0.951779453  | 1.89E-06 |
| TUCP_001144 | XLOC_043177 | ENSRNOT00000026718  | 0.957417895  | 1.03E-06 |
| TUCP_001144 | XLOC_043177 | ENSRNOT00000085228  | 0.957925189  | 9.68E-07 |
| TUCP_001144 | XLOC_043177 | ENSRNOT000000032780 | 0.958345404  | 9.21E-07 |
| TUCP_001144 | XLOC_043177 | ENSRNOT00000017319  | 0.951070839  | 2.03E-06 |
| TUCP_001144 | XLOC_043177 | ENSRNOT00000086065  | 0.970604238  | 1.65E-07 |
| TUCP_001144 | XLOC_043177 | ENSRNOT00000077231  | 0.979252007  | 2.92E-08 |
| TUCP_001144 | XLOC_043177 | ENSRNOT00000072518  | 0.980249456  | 2.29E-08 |
| TUCP_001144 | XLOC_043177 | ENSRNOT00000016333  | -0.955902236 | 1.22E-06 |
| TUCP_001144 | XLOC_043177 | ENSRNOT00000061392  | 0.95988982   | 7.64E-07 |
| TUCP_001144 | XLOC_043177 | ENSRNOT00000012364  | -0.963252376 | 4.96E-07 |
| TUCP_001144 | XLOC_043177 | ENSRNOT00000002410  | 0.957970457  | 9.62E-07 |
| TUCP_001144 | XLOC_043177 | ENSRNOT00000087371  | 0.955407879  | 1.29E-06 |
| TUCP_001144 | XLOC_043177 | ENSRNOT00000006835  | 0.957381852  | 1.03E-06 |
| TUCP_001144 | XLOC_043177 | ENSRNOT000000021037 | 0.971790529  | 1.34E-07 |
| TUCP_001144 | XLOC_043177 | ENSRNOT00000044346  | -0.960190146 | 7.36E-07 |
| TUCP_001144 | XLOC_043177 | ENSRNOT00000084709  | 0.95241217   | 1.77E-06 |
| TUCP_001144 | XLOC_043177 | ENSRNOT00000009156  | 0.962384569  | 5.57E-07 |
| TUCP_001144 | XLOC_043177 | ENSRNOT00000026481  | 0.957873738  | 9.73E-07 |
| TUCP_001144 | XLOC_043177 | ENSRNOT00000012892  | 0.965202985  | 3.79E-07 |
| TUCP_001144 | XLOC_043177 | ENSRNOT00000020028  | 0.951903367  | 1.87E-06 |
| TUCP_001144 | XLOC_043177 | ENSRNOT0000001081   | 0.950090677  | 2.24E-06 |
| TUCP_001144 | XLOC_043177 | ENSRNOT00000018122  | 0.953051568  | 1.66E-06 |
| TUCP_001144 | XLOC_043177 | ENSRNOT00000015609  | 0.953823645  | 1.53E-06 |
| TUCP_001144 | XLOC_043177 | ENSRNOT00000090123  | 0.963259438  | 4.96E-07 |
| TUCP_001144 | XLOC_043177 | ENSRNOT00000019133  | 0.972200996  | 1.25E-07 |
| TUCP_001144 | XLOC_043177 | ENSRNOT00000008817  | 0.963144709  | 5.03E-07 |
| TUCP_001144 | XLOC_043177 | ENSRNOT00000079698  | -0.951741882 | 1.90E-06 |
| TUCP_001144 | XLOC_043177 | ENSRNOT00000010303  | -0.968125432 | 2.46E-07 |
| TUCP_001144 | XLOC_043177 | ENSRNOT00000052422  | 0.972264247  | 1.23E-07 |
| TUCP_001144 | XLOC_043177 | ENSRNOT00000068381  | 0.952102125  | 1.83E-06 |
| TUCP_001144 | XLOC_043177 | ENSRNOT00000086119  | -0.954719613 | 1.39E-06 |
| TUCP_001144 | XLOC_043177 | ENSRNOT00000064588  | 0.970300515  | 1.73E-07 |
| TUCP_001144 | XLOC_043177 | ENSRNOT00000085621  | 0.953537937  | 1.58E-06 |
| TUCP_001144 | XLOC_043177 | ENSRNOT00000026633  | 0.958274007  | 9.29E-07 |
| TUCP_001144 | XLOC_043177 | ENSRNOT00000014537  | 0.973169114  | 1.05E-07 |
| TUCP_001144 | XLOC_043177 | ENSRNOT00000077555  | 0.977044194  | 4.83E-08 |
| TUCP_001144 | XLOC_043177 | ENSRNOT00000011880  | 0.971524838  | 1.41E-07 |
| TUCP_001144 | XLOC_043177 | ENSRNOT00000021408  | 0.973911651  | 9.11E-08 |
| TUCP_001144 | XLOC_043177 | ENSRNOT00000014454  | 0.950088756  | 2.24E-06 |
| TUCP_001144 | XLOC_043177 | ENSRNOT00000089980  | -0.952388613 | 1.78E-06 |

|             |             |                     |              |          |
|-------------|-------------|---------------------|--------------|----------|
| TUCP_001144 | XLOC_043177 | ENSRNOT00000083214  | 0.955734749  | 1.24E-06 |
| TUCP_001144 | XLOC_043177 | ENSRNOT00000024322  | 0.960347911  | 7.22E-07 |
| TUCP_001144 | XLOC_043177 | ENSRNOT00000000577  | 0.967365811  | 2.76E-07 |
| TUCP_001144 | XLOC_043177 | ENSRNOT00000012424  | 0.967060315  | 2.89E-07 |
| TUCP_001144 | XLOC_043177 | ENSRNOT00000008427  | -0.964203267 | 4.36E-07 |
| TUCP_001144 | XLOC_043177 | ENSRNOT000000091488 | 0.956786884  | 1.10E-06 |
| TUCP_001144 | XLOC_043177 | ENSRNOT000000032505 | -0.960727639 | 6.89E-07 |
| TUCP_001144 | XLOC_043177 | ENSRNOT00000029833  | 0.959929128  | 7.61E-07 |
| TUCP_001144 | XLOC_043177 | ENSRNOT000000034487 | -0.962120076 | 5.76E-07 |
| TUCP_001144 | XLOC_043177 | ENSRNOT00000022074  | 0.961075535  | 6.59E-07 |
| TUCP_001144 | XLOC_043177 | ENSRNOT00000008022  | 0.962512593  | 5.47E-07 |
| TUCP_001144 | XLOC_043177 | ENSRNOT00000009691  | 0.983367051  | 9.75E-09 |
| TUCP_001144 | XLOC_043177 | ENSRNOT00000025434  | 0.956431182  | 1.15E-06 |
| TUCP_001144 | XLOC_043177 | ENSRNOT000000043752 | -0.958309733 | 9.25E-07 |
| TUCP_001144 | XLOC_043177 | ENSRNOT00000019554  | 0.95308706   | 1.65E-06 |
| TUCP_001144 | XLOC_043177 | ENSRNOT000000066133 | -0.951687112 | 1.91E-06 |
| TUCP_001144 | XLOC_043177 | ENSRNOT000000064840 | 0.955159023  | 1.32E-06 |
| TUCP_001144 | XLOC_043177 | ENSRNOT000000003690 | 0.9544777    | 1.43E-06 |
| TUCP_001144 | XLOC_043177 | ENSRNOT00000011984  | 0.953194022  | 1.64E-06 |
| TUCP_001144 | XLOC_043177 | ENSRNOT000000063951 | 0.967831268  | 2.57E-07 |
| TUCP_001144 | XLOC_043177 | ENSRNOT00000016184  | -0.951815272 | 1.89E-06 |
| TUCP_001144 | XLOC_043177 | ENSRNOT00000019487  | 0.97866734   | 3.36E-08 |
| TUCP_001144 | XLOC_043177 | ENSRNOT000000054828 | 0.95741058   | 1.03E-06 |
| TUCP_001144 | XLOC_043177 | ENSRNOT00000001923  | 0.956515217  | 1.14E-06 |
| TUCP_001144 | XLOC_043177 | ENSRNOT00000015898  | 0.976773328  | 5.12E-08 |
| TUCP_001144 | XLOC_043177 | ENSRNOT000000005405 | 0.962306893  | 5.62E-07 |
| TUCP_001144 | XLOC_043177 | ENSRNOT00000010218  | 0.955977145  | 1.21E-06 |
| TUCP_001144 | XLOC_043177 | ENSRNOT00000010748  | 0.956306168  | 1.17E-06 |
| TUCP_001144 | XLOC_043177 | ENSRNOT000000009111 | 0.956505324  | 1.14E-06 |
| TUCP_001144 | XLOC_043177 | ENSRNOT00000011466  | 0.950082778  | 2.24E-06 |
| TUCP_001144 | XLOC_043177 | ENSRNOT000000063917 | -0.96992341  | 1.84E-07 |
| TUCP_001144 | XLOC_043177 | ENSRNOT00000028888  | 0.973540696  | 9.77E-08 |
| TUCP_001144 | XLOC_043177 | ENSRNOT000000071698 | 0.956610424  | 1.13E-06 |
| TUCP_001144 | XLOC_043177 | ENSRNOT00000023330  | 0.960328248  | 7.24E-07 |
| TUCP_001144 | XLOC_043177 | ENSRNOT000000081077 | -0.950764265 | 2.10E-06 |
| TUCP_001144 | XLOC_043177 | ENSRNOT000000083414 | 0.971274459  | 1.47E-07 |
| TUCP_001144 | XLOC_043177 | ENSRNOT00000017776  | 0.951675812  | 1.91E-06 |
| TUCP_001144 | XLOC_043177 | ENSRNOT00000016401  | 0.967520585  | 2.70E-07 |
| TUCP_001144 | XLOC_043177 | ENSRNOT00000025097  | 0.970875245  | 1.57E-07 |
| TUCP_001144 | XLOC_043177 | ENSRNOT00000026457  | 0.965692371  | 3.53E-07 |
| TUCP_001144 | XLOC_043177 | ENSRNOT00000004463  | 0.953105535  | 1.65E-06 |
| TUCP_001144 | XLOC_043177 | ENSRNOT000000044009 | 0.984464983  | 6.94E-09 |
| TUCP_001144 | XLOC_043177 | ENSRNOT00000014124  | 0.967513598  | 2.70E-07 |
| TUCP_001144 | XLOC_043177 | ENSRNOT00000024548  | 0.967930854  | 2.53E-07 |
| TUCP_001145 | XLOC_043177 | ENSRNOT00000025983  | 0.953088518  | 1.65E-06 |
| TUCP_001145 | XLOC_043177 | ENSRNOT000000032780 | 0.97595143   | 6.08E-08 |
| TUCP_001145 | XLOC_043177 | ENSRNOT00000011350  | 0.97921528   | 2.95E-08 |
| TUCP_001145 | XLOC_043177 | ENSRNOT000000090835 | 0.96013274   | 7.42E-07 |
| TUCP_001145 | XLOC_043177 | ENSRNOT000000072518 | 0.95058317   | 2.14E-06 |
| TUCP_001145 | XLOC_043177 | ENSRNOT00000016333  | -0.952509508 | 1.76E-06 |
| TUCP_001145 | XLOC_043177 | ENSRNOT00000017312  | 0.95595071   | 1.21E-06 |

|             |             |                    |              |          |
|-------------|-------------|--------------------|--------------|----------|
| TUCP_001145 | XLOC_043177 | ENSRNOT00000087592 | 0.955601955  | 1.26E-06 |
| TUCP_001145 | XLOC_043177 | ENSRNOT00000061392 | 0.953094382  | 1.65E-06 |
| TUCP_001145 | XLOC_043177 | ENSRNOT00000055992 | -0.962831483 | 5.25E-07 |
| TUCP_001145 | XLOC_043177 | ENSRNOT00000021408 | 0.953830247  | 1.53E-06 |
| TUCP_001145 | XLOC_043177 | ENSRNOT00000008655 | 0.963587733  | 4.74E-07 |
| TUCP_001145 | XLOC_043177 | ENSRNOT00000005228 | 0.955277811  | 1.31E-06 |
| TUCP_001145 | XLOC_043177 | ENSRNOT00000004762 | 0.960117661  | 7.43E-07 |
| TUCP_001145 | XLOC_043177 | ENSRNOT00000080207 | 0.95965903   | 7.86E-07 |
| TUCP_001145 | XLOC_043177 | ENSRNOT00000016948 | -0.953748893 | 1.54E-06 |
| TUCP_001145 | XLOC_043177 | ENSRNOT00000052224 | 0.954574449  | 1.41E-06 |
| TUCP_001145 | XLOC_043177 | ENSRNOT00000078070 | 0.95430408   | 1.45E-06 |
| TUCP_001145 | XLOC_043177 | ENSRNOT00000076872 | 0.964472896  | 4.20E-07 |
| TUCP_001145 | XLOC_043177 | ENSRNOT00000087443 | 0.954208709  | 1.47E-06 |
| TUCP_001145 | XLOC_043177 | ENSRNOT00000091128 | -0.956535894 | 1.14E-06 |
| TUCP_001145 | XLOC_043177 | ENSRNOT00000009803 | 0.966989611  | 2.92E-07 |
| TUCP_001145 | XLOC_043177 | ENSRNOT00000048910 | -0.95057712  | 2.14E-06 |
| TUCP_001145 | XLOC_043177 | ENSRNOT00000027537 | 0.956933698  | 1.09E-06 |
| TUCP_001145 | XLOC_043177 | ENSRNOT00000015116 | 0.974914812  | 7.50E-08 |
| TUCP_001145 | XLOC_043177 | ENSRNOT00000083369 | 0.955312525  | 1.30E-06 |
| TUCP_001145 | XLOC_043177 | ENSRNOT00000078102 | 0.957272906  | 1.04E-06 |
| TUCP_001145 | XLOC_043177 | ENSRNOT00000004524 | 0.970286427  | 1.74E-07 |
| TUCP_001145 | XLOC_043177 | ENSRNOT00000058351 | 0.964539329  | 4.16E-07 |
| TUCP_001145 | XLOC_043177 | ENSRNOT00000083220 | 0.955712401  | 1.25E-06 |
| TUCP_001145 | XLOC_043177 | ENSRNOT00000018533 | 0.963164369  | 5.02E-07 |
| TUCP_001145 | XLOC_043177 | ENSRNOT00000003989 | 0.95104279   | 2.04E-06 |
| TUCP_001145 | XLOC_043177 | ENSRNOT00000024969 | 0.959584003  | 7.93E-07 |
| TUCP_001145 | XLOC_043177 | ENSRNOT00000029833 | 0.958425185  | 9.12E-07 |
| TUCP_001145 | XLOC_043177 | ENSRNOT00000014814 | 0.974084191  | 8.82E-08 |
| TUCP_001145 | XLOC_043177 | ENSRNOT00000019133 | 0.961932903  | 5.91E-07 |
| TUCP_001145 | XLOC_043177 | ENSRNOT00000016519 | 0.961396948  | 6.33E-07 |
| TUCP_001145 | XLOC_043177 | ENSRNOT00000015265 | 0.956200432  | 1.18E-06 |
| TUCP_001145 | XLOC_043177 | ENSRNOT00000011466 | 0.954618729  | 1.40E-06 |
| TUCP_001145 | XLOC_043177 | ENSRNOT00000004046 | -0.958637963 | 8.89E-07 |
| TUCP_001145 | XLOC_043177 | ENSRNOT00000052422 | 0.956352311  | 1.16E-06 |
| TUCP_001145 | XLOC_043177 | ENSRNOT00000057146 | 0.957393226  | 1.03E-06 |
| TUCP_001145 | XLOC_043177 | ENSRNOT00000067486 | -0.957193946 | 1.05E-06 |
| TUCP_001145 | XLOC_043177 | ENSRNOT00000082511 | 0.951737523  | 1.90E-06 |
| TUCP_001145 | XLOC_043177 | ENSRNOT00000058842 | 0.957320381  | 1.04E-06 |
| TUCP_001145 | XLOC_043177 | ENSRNOT00000008982 | 0.950322554  | 2.19E-06 |
| TUCP_000004 | XLOC_000130 | ENSRNOT00000092026 | 0.96620614   | 3.28E-07 |
| TUCP_000004 | XLOC_000130 | ENSRNOT00000093075 | 1            | 0        |
| TUCP_000004 | XLOC_000130 | ENSRNOT00000058260 | 1            | 0        |
| TUCP_000004 | XLOC_000130 | ENSRNOT00000088887 | 1            | 1.33E-79 |
| TUCP_000004 | XLOC_000130 | ENSRNOT00000084986 | 1            | 0        |
| TUCP_000004 | XLOC_000130 | ENSRNOT00000074346 | 0.9702256    | 1.75E-07 |
| TUCP_000004 | XLOC_000130 | ENSRNOT00000073209 | 0.983711602  | 8.79E-09 |
| TUCP_000004 | XLOC_000130 | ENSRNOT00000080155 | 0.973069673  | 1.07E-07 |
| TUCP_000004 | XLOC_000130 | ENSRNOT00000072573 | 0.996213272  | 6.09E-12 |
| TUCP_000004 | XLOC_000130 | ENSRNOT00000017828 | 0.996001583  | 7.99E-12 |
| TUCP_000004 | XLOC_000130 | ENSRNOT00000080444 | 0.969625907  | 1.93E-07 |
| TUCP_000004 | XLOC_000130 | ENSRNOT00000071312 | 1            | 0        |

|             |             |                    |             |          |
|-------------|-------------|--------------------|-------------|----------|
| TUCP_000004 | XLOC_000130 | ENSRNOT00000088245 | 1           | 0        |
| TUCP_000004 | XLOC_000130 | ENSRNOT00000036565 | 0.969065335 | 2.12E-07 |
| TUCP_000004 | XLOC_000130 | ENSRNOT00000058833 | 0.998673261 | 3.23E-14 |
| TUCP_000004 | XLOC_000130 | ENSRNOT00000078052 | 1           | 0        |
| TUCP_000004 | XLOC_000130 | ENSRNOT00000078494 | 0.999927093 | 1.62E-20 |
| TUCP_000004 | XLOC_000130 | ENSRNOT00000085653 | 1           | 0        |
| TUCP_000004 | XLOC_000130 | ENSRNOT00000057950 | 0.969329371 | 2.03E-07 |
| TUCP_000004 | XLOC_000130 | ENSRNOT00000081992 | 0.999320526 | 1.14E-15 |
| TUCP_000004 | XLOC_000130 | ENSRNOT00000038553 | 0.955765808 | 1.24E-06 |
| TUCP_000004 | XLOC_000130 | ENSRNOT00000084120 | 0.958115447 | 9.46E-07 |
| TUCP_000004 | XLOC_000130 | ENSRNOT00000055406 | 1           | 0        |
| TUCP_000004 | XLOC_000130 | ENSRNOT00000070817 | 0.998968079 | 9.20E-15 |
| TUCP_000004 | XLOC_000130 | ENSRNOT00000026753 | 1           | 0        |
| TUCP_000004 | XLOC_000130 | ENSRNOT00000080533 | 0.996682529 | 3.15E-12 |
| TUCP_000004 | XLOC_000130 | ENSRNOT00000072774 | 0.979665261 | 2.65E-08 |
| TUCP_000004 | XLOC_000130 | ENSRNOT00000086031 | 1           | 1.33E-79 |
| TUCP_000004 | XLOC_000130 | ENSRNOT00000014312 | 1           | 0        |
| TUCP_000004 | XLOC_000130 | ENSRNOT00000042882 | 0.963218427 | 4.98E-07 |
| TUCP_000004 | XLOC_000130 | ENSRNOT00000088012 | 0.956765806 | 1.11E-06 |
| TUCP_000004 | XLOC_000130 | ENSRNOT00000051231 | 0.999242378 | 1.96E-15 |
| TUCP_000004 | XLOC_000130 | ENSRNOT00000089407 | 0.992986194 | 1.32E-10 |
| TUCP_000004 | XLOC_000130 | ENSRNOT00000055034 | 0.998331441 | 1.02E-13 |
| TUCP_000004 | XLOC_000130 | ENSRNOT00000046837 | 0.97252559  | 1.18E-07 |
| TUCP_003957 | XLOC_173585 | ENSRNOT00000088568 | 0.968552726 | 2.30E-07 |
| TUCP_000002 | XLOC_000034 | ENSRNOT00000028542 | 0.955801568 | 1.23E-06 |
| TUCP_000002 | XLOC_000034 | ENSRNOT00000024072 | 0.958447057 | 9.10E-07 |
| TUCP_000002 | XLOC_000034 | ENSRNOT00000036506 | 0.968684495 | 2.25E-07 |
| TUCP_000002 | XLOC_000034 | ENSRNOT00000073235 | 0.968217285 | 2.42E-07 |
| TUCP_000002 | XLOC_000034 | ENSRNOT00000018787 | 0.95020481  | 2.22E-06 |
| TUCP_000002 | XLOC_000034 | ENSRNOT00000023144 | 0.951252901 | 2.00E-06 |
| TUCP_000002 | XLOC_000034 | ENSRNOT00000080695 | 0.969162614 | 2.09E-07 |
| TUCP_000002 | XLOC_000034 | ENSRNOT00000057160 | 0.955991807 | 1.21E-06 |
| TUCP_000002 | XLOC_000034 | ENSRNOT00000002560 | 0.975196771 | 7.09E-08 |
| TUCP_000002 | XLOC_000034 | ENSRNOT00000045223 | 0.950889058 | 2.07E-06 |
| TUCP_000002 | XLOC_000034 | ENSRNOT00000044395 | 0.959667344 | 7.85E-07 |
| TUCP_000003 | XLOC_000034 | ENSRNOT00000082043 | 0.998965531 | 9.31E-15 |
| TUCP_000003 | XLOC_000034 | ENSRNOT00000090080 | 0.970514074 | 1.67E-07 |
| TUCP_000003 | XLOC_000034 | ENSRNOT00000068444 | 1           | 0        |
| TUCP_000003 | XLOC_000034 | ENSRNOT00000081370 | 0.999740797 | 9.21E-18 |
| TUCP_000003 | XLOC_000034 | ENSRNOT00000078645 | 0.989717078 | 8.90E-10 |
| TUCP_000003 | XLOC_000034 | ENSRNOT00000075987 | 0.987945283 | 1.96E-09 |
| TUCP_000003 | XLOC_000034 | ENSRNOT00000074990 | 1           | 0        |
| TUCP_000003 | XLOC_000034 | ENSRNOT00000087323 | 0.995029331 | 2.37E-11 |
| TUCP_000003 | XLOC_000034 | ENSRNOT00000074930 | 1           | 0        |
| TUCP_000003 | XLOC_000034 | ENSRNOT00000080575 | 0.999929267 | 1.39E-20 |
| TUCP_000003 | XLOC_000034 | ENSRNOT00000057761 | 0.982981445 | 1.09E-08 |
| TUCP_000003 | XLOC_000034 | ENSRNOT00000078369 | 0.993028032 | 1.28E-10 |
| TUCP_000003 | XLOC_000034 | ENSRNOT00000092982 | 1           | 0        |
| TUCP_000003 | XLOC_000034 | ENSRNOT00000088367 | 1           | 0        |
| TUCP_000003 | XLOC_000034 | ENSRNOT00000061874 | 0.968405099 | 2.35E-07 |
| TUCP_000003 | XLOC_000034 | ENSRNOT00000077789 | 0.99346224  | 9.30E-11 |

|             |             |                    |             |          |
|-------------|-------------|--------------------|-------------|----------|
| TUCP_000003 | XLOC_000034 | ENSRNOT00000081996 | 1           | 0        |
| TUCP_000003 | XLOC_000034 | ENSRNOT00000022280 | 0.982176915 | 1.37E-08 |
| TUCP_000003 | XLOC_000034 | ENSRNOT00000082058 | 1           | 0        |
| TUCP_000003 | XLOC_000034 | ENSRNOT00000088905 | 1           | 0        |
| TUCP_000003 | XLOC_000034 | ENSRNOT00000086831 | 1           | 0        |
| TUCP_000003 | XLOC_000034 | ENSRNOT00000045099 | 1           | 0        |
| TUCP_000003 | XLOC_000034 | ENSRNOT00000086745 | 0.978585655 | 3.42E-08 |
| TUCP_000003 | XLOC_000034 | ENSRNOT00000085849 | 0.988270765 | 1.71E-09 |
| TUCP_000003 | XLOC_000034 | ENSRNOT00000086397 | 0.957188178 | 1.05E-06 |
| TUCP_000003 | XLOC_000034 | ENSRNOT00000079606 | 0.960472013 | 7.11E-07 |
| TUCP_000003 | XLOC_000034 | ENSRNOT00000090207 | 0.953487741 | 1.59E-06 |
| TUCP_000003 | XLOC_000034 | ENSRNOT00000087025 | 1           | 0        |
| TUCP_000003 | XLOC_000034 | ENSRNOT00000019853 | 1           | 0        |
| TUCP_000003 | XLOC_000034 | ENSRNOT00000073853 | 0.989715487 | 8.91E-10 |
| TUCP_000003 | XLOC_000034 | ENSRNOT00000065912 | 0.974234118 | 8.57E-08 |
| TUCP_000003 | XLOC_000034 | ENSRNOT00000073828 | 0.971647353 | 1.38E-07 |
| TUCP_000003 | XLOC_000034 | ENSRNOT00000078683 | 0.966682958 | 3.06E-07 |
| TUCP_000003 | XLOC_000034 | ENSRNOT00000093083 | 0.999140292 | 3.69E-15 |
| TUCP_004034 | XLOC_177707 | ENSRNOT00000022863 | 0.950284846 | 2.20E-06 |
| TUCP_004037 | XLOC_177802 | ENSRNOT00000065386 | 0.95682449  | 1.10E-06 |
| TUCP_004037 | XLOC_177802 | ENSRNOT00000009090 | 0.959500771 | 8.02E-07 |
| TUCP_004036 | XLOC_177714 | ENSRNOT00000090352 | 0.950970578 | 2.05E-06 |
| TUCP_004036 | XLOC_177714 | ENSRNOT00000079494 | 0.95162254  | 1.92E-06 |
| TUCP_000008 | XLOC_000282 | ENSRNOT00000042251 | 0.953228696 | 1.63E-06 |
| TUCP_000008 | XLOC_000282 | ENSRNOT00000002984 | 0.962086722 | 5.79E-07 |
| TUCP_000008 | XLOC_000282 | ENSRNOT00000083764 | 0.955399149 | 1.29E-06 |
| TUCP_000008 | XLOC_000282 | ENSRNOT00000092365 | 0.954572661 | 1.41E-06 |
| TUCP_000008 | XLOC_000282 | ENSRNOT00000089306 | 0.958476989 | 9.07E-07 |
| TUCP_000008 | XLOC_000282 | ENSRNOT00000086829 | 0.972271273 | 1.23E-07 |
| TUCP_000008 | XLOC_000282 | ENSRNOT00000045301 | 0.957149988 | 1.06E-06 |
| TUCP_000008 | XLOC_000282 | ENSRNOT00000041186 | 0.956723787 | 1.11E-06 |
| TUCP_000008 | XLOC_000282 | ENSRNOT00000076182 | 0.957149988 | 1.06E-06 |
| TUCP_000008 | XLOC_000282 | ENSRNOT00000081709 | 0.958144787 | 9.43E-07 |
| TUCP_000008 | XLOC_000282 | ENSRNOT00000014103 | 0.957149988 | 1.06E-06 |
| TUCP_000008 | XLOC_000282 | ENSRNOT00000082289 | 0.953653053 | 1.56E-06 |
| TUCP_000008 | XLOC_000282 | ENSRNOT00000088893 | 0.957149988 | 1.06E-06 |
| TUCP_000008 | XLOC_000282 | ENSRNOT00000081014 | 0.957149988 | 1.06E-06 |
| TUCP_000008 | XLOC_000282 | ENSRNOT00000067543 | 0.957149988 | 1.06E-06 |
| TUCP_000008 | XLOC_000282 | ENSRNOT00000050968 | 0.960574206 | 7.02E-07 |
| TUCP_000008 | XLOC_000282 | ENSRNOT00000035125 | 0.98184624  | 1.51E-08 |
| TUCP_000008 | XLOC_000282 | ENSRNOT00000086036 | 0.956518874 | 1.14E-06 |
| TUCP_000008 | XLOC_000282 | ENSRNOT00000063929 | 0.957149988 | 1.06E-06 |
| TUCP_000008 | XLOC_000282 | ENSRNOT00000068416 | 0.957229105 | 1.05E-06 |
| TUCP_000008 | XLOC_000282 | ENSRNOT00000041617 | 0.963677631 | 4.68E-07 |
| TUCP_000008 | XLOC_000282 | ENSRNOT00000091763 | 0.962318102 | 5.62E-07 |
| TUCP_000008 | XLOC_000282 | ENSRNOT00000022200 | 0.968187975 | 2.43E-07 |
| TUCP_000008 | XLOC_000282 | ENSRNOT00000050543 | 0.958415886 | 9.13E-07 |
| TUCP_000008 | XLOC_000282 | ENSRNOT00000079275 | 0.957025388 | 1.07E-06 |
| TUCP_000008 | XLOC_000282 | ENSRNOT00000052367 | 0.95133311  | 1.98E-06 |
| TUCP_000008 | XLOC_000282 | ENSRNOT00000090658 | 0.957149988 | 1.06E-06 |
| TUCP_000008 | XLOC_000282 | ENSRNOT00000022571 | 0.954611869 | 1.41E-06 |

|             |             |                    |              |          |
|-------------|-------------|--------------------|--------------|----------|
| TUCP_000008 | XLOC_000282 | ENSRNOT00000057472 | 0.957149988  | 1.06E-06 |
| TUCP_004032 | XLOC_177707 | ENSRNOT00000065143 | 0.950099198  | 2.24E-06 |
| TUCP_004032 | XLOC_177707 | ENSRNOT00000024149 | 0.952134086  | 1.83E-06 |
| TUCP_004032 | XLOC_177707 | ENSRNOT00000027526 | 0.950000351  | 2.26E-06 |
| TUCP_004032 | XLOC_177707 | ENSRNOT00000074081 | -0.951535881 | 1.94E-06 |
| TUCP_004032 | XLOC_177707 | ENSRNOT00000081906 | 0.952682361  | 1.73E-06 |
| TUCP_004032 | XLOC_177707 | ENSRNOT00000021471 | -0.967261412 | 2.80E-07 |
| TUCP_004032 | XLOC_177707 | ENSRNOT00000051294 | 0.952825281  | 1.70E-06 |
| TUCP_004032 | XLOC_177707 | ENSRNOT00000078503 | 0.957692606  | 9.94E-07 |
| TUCP_004032 | XLOC_177707 | ENSRNOT00000023133 | 0.950559498  | 2.14E-06 |
| TUCP_004032 | XLOC_177707 | ENSRNOT00000005647 | 0.954175603  | 1.47E-06 |
| TUCP_004032 | XLOC_177707 | ENSRNOT00000003991 | 0.964560482  | 4.15E-07 |
| TUCP_004032 | XLOC_177707 | ENSRNOT00000077406 | 0.960952277  | 6.70E-07 |
| TUCP_004032 | XLOC_177707 | ENSRNOT00000057788 | -0.955402842 | 1.29E-06 |
| TUCP_004032 | XLOC_177707 | ENSRNOT00000016036 | 0.957681798  | 9.95E-07 |
| TUCP_004032 | XLOC_177707 | ENSRNOT00000011052 | 0.961979327  | 5.87E-07 |
| TUCP_004032 | XLOC_177707 | ENSRNOT00000005478 | -0.956612699 | 1.13E-06 |
| TUCP_004032 | XLOC_177707 | ENSRNOT00000002291 | 0.952521648  | 1.75E-06 |
| TUCP_004032 | XLOC_177707 | ENSRNOT00000090342 | 0.968866353  | 2.19E-07 |
| TUCP_004032 | XLOC_177707 | ENSRNOT00000025550 | -0.951938899 | 1.86E-06 |
| TUCP_004032 | XLOC_177707 | ENSRNOT00000012895 | 0.967156984  | 2.85E-07 |
| TUCP_004032 | XLOC_177707 | ENSRNOT00000009496 | 0.952717289  | 1.72E-06 |
| TUCP_004032 | XLOC_177707 | ENSRNOT00000019630 | 0.951019235  | 2.04E-06 |
| TUCP_004032 | XLOC_177707 | ENSRNOT00000003158 | -0.950478159 | 2.16E-06 |
| TUCP_004032 | XLOC_177707 | ENSRNOT00000078250 | 0.950631394  | 2.13E-06 |
| TUCP_004032 | XLOC_177707 | ENSRNOT00000020322 | 0.966530008  | 3.13E-07 |
| TUCP_004032 | XLOC_177707 | ENSRNOT00000031267 | 0.958531688  | 9.01E-07 |
| TUCP_004032 | XLOC_177707 | ENSRNOT00000071971 | 0.956901091  | 1.09E-06 |
| TUCP_004032 | XLOC_177707 | ENSRNOT00000017181 | -0.954153416 | 1.48E-06 |
| TUCP_004032 | XLOC_177707 | ENSRNOT00000017753 | 0.963251699  | 4.96E-07 |
| TUCP_004032 | XLOC_177707 | ENSRNOT00000064798 | 0.95280784   | 1.70E-06 |
| TUCP_004032 | XLOC_177707 | ENSRNOT00000027194 | 0.958993774  | 8.52E-07 |
| TUCP_004032 | XLOC_177707 | ENSRNOT00000006499 | 0.962706869  | 5.34E-07 |
| TUCP_004032 | XLOC_177707 | ENSRNOT00000031851 | -0.963889853 | 4.55E-07 |
| TUCP_004032 | XLOC_177707 | ENSRNOT00000033235 | 0.973626922  | 9.61E-08 |
| TUCP_004032 | XLOC_177707 | ENSRNOT00000025936 | -0.953041724 | 1.66E-06 |
| TUCP_004032 | XLOC_177707 | ENSRNOT00000056430 | 0.967408114  | 2.74E-07 |
| TUCP_004032 | XLOC_177707 | ENSRNOT00000022862 | 0.95706392   | 1.07E-06 |
| TUCP_004032 | XLOC_177707 | ENSRNOT00000008677 | 0.956421306  | 1.15E-06 |
| TUCP_004032 | XLOC_177707 | ENSRNOT00000032158 | 0.955511245  | 1.27E-06 |
| TUCP_004032 | XLOC_177707 | ENSRNOT00000090688 | 0.974493329  | 8.15E-08 |
| TUCP_004032 | XLOC_177707 | ENSRNOT00000005942 | 0.956728067  | 1.11E-06 |
| TUCP_004032 | XLOC_177707 | ENSRNOT00000029167 | 0.95608873   | 1.19E-06 |
| TUCP_004032 | XLOC_177707 | ENSRNOT00000010898 | 0.950217161  | 2.21E-06 |
| TUCP_004032 | XLOC_177707 | ENSRNOT00000047192 | -0.952179949 | 1.82E-06 |
| TUCP_004032 | XLOC_177707 | ENSRNOT00000021001 | 0.956120359  | 1.19E-06 |
| TUCP_004032 | XLOC_177707 | ENSRNOT00000082699 | 0.95068768   | 2.11E-06 |
| TUCP_004032 | XLOC_177707 | ENSRNOT00000048063 | 0.950018061  | 2.26E-06 |
| TUCP_004032 | XLOC_177707 | ENSRNOT00000085424 | 0.971013851  | 1.53E-07 |
| TUCP_004032 | XLOC_177707 | ENSRNOT00000080797 | -0.95170245  | 1.91E-06 |
| TUCP_004032 | XLOC_177707 | ENSRNOT00000019886 | 0.974879498  | 7.55E-08 |

|             |             |                     |              |          |
|-------------|-------------|---------------------|--------------|----------|
| TUCP_004032 | XLOC_177707 | ENSRNOT00000011682  | -0.964465827 | 4.20E-07 |
| TUCP_004032 | XLOC_177707 | ENSRNOT00000000157  | 0.966953088  | 2.94E-07 |
| TUCP_004032 | XLOC_177707 | ENSRNOT000000008372 | 0.967054477  | 2.89E-07 |
| TUCP_004032 | XLOC_177707 | ENSRNOT000000031568 | 0.973208973  | 1.04E-07 |
| TUCP_000732 | XLOC_027261 | ENSRNOT000000093014 | 0.974648792  | 7.90E-08 |
| TUCP_000639 | XLOC_023526 | ENSRNOT000000006697 | 0.954700389  | 1.39E-06 |
| TUCP_000639 | XLOC_023526 | ENSRNOT00000010680  | 0.960170252  | 7.38E-07 |
| TUCP_000639 | XLOC_023526 | ENSRNOT00000009975  | 0.959340203  | 8.17E-07 |
| TUCP_000639 | XLOC_023526 | ENSRNOT000000072682 | 0.967875235  | 2.55E-07 |
| TUCP_000639 | XLOC_023526 | ENSRNOT000000061054 | 0.954646181  | 1.40E-06 |
| TUCP_000639 | XLOC_023526 | ENSRNOT000000087799 | 0.978215545  | 3.73E-08 |
| TUCP_000639 | XLOC_023526 | ENSRNOT000000078752 | -0.953798655 | 1.53E-06 |
| TUCP_000639 | XLOC_023526 | ENSRNOT000000091367 | 0.95353381   | 1.58E-06 |
| TUCP_000639 | XLOC_023526 | ENSRNOT000000087521 | 0.960312494  | 7.25E-07 |
| TUCP_004274 | XLOC_187956 | ENSRNOT000000020074 | -0.976179638 | 5.80E-08 |
| TUCP_004274 | XLOC_187956 | ENSRNOT000000075184 | -0.950350121 | 2.19E-06 |
| TUCP_000736 | XLOC_027394 | ENSRNOT000000092021 | 0.970614906  | 1.64E-07 |
| TUCP_000736 | XLOC_027394 | ENSRNOT000000074583 | 0.966469588  | 3.16E-07 |
| TUCP_000736 | XLOC_027394 | ENSRNOT000000032802 | 0.965057813  | 3.87E-07 |
| TUCP_000736 | XLOC_027394 | ENSRNOT00000014533  | 0.954332422  | 1.45E-06 |
| TUCP_000736 | XLOC_027394 | ENSRNOT00000015320  | 0.962760123  | 5.30E-07 |
| TUCP_000736 | XLOC_027394 | ENSRNOT000000028066 | 0.976272421  | 5.69E-08 |
| TUCP_000736 | XLOC_027394 | ENSRNOT000000089265 | 0.963237501  | 4.97E-07 |
| TUCP_000736 | XLOC_027394 | ENSRNOT00000013768  | 0.963936764  | 4.52E-07 |
| TUCP_000736 | XLOC_027394 | ENSRNOT00000004713  | 0.976142345  | 5.85E-08 |
| TUCP_000736 | XLOC_027394 | ENSRNOT000000077479 | 0.961925552  | 5.91E-07 |
| TUCP_000736 | XLOC_027394 | ENSRNOT000000086775 | 0.97378151   | 9.34E-08 |
| TUCP_000736 | XLOC_027394 | ENSRNOT00000011864  | 0.953306514  | 1.62E-06 |
| TUCP_000736 | XLOC_027394 | ENSRNOT000000050099 | 0.954025858  | 1.50E-06 |
| TUCP_000736 | XLOC_027394 | ENSRNOT00000011509  | 0.963097194  | 5.07E-07 |
| TUCP_000736 | XLOC_027394 | ENSRNOT000000050350 | 0.963991863  | 4.49E-07 |
| TUCP_000736 | XLOC_027394 | ENSRNOT00000013146  | -0.977117912 | 4.75E-08 |
| TUCP_000736 | XLOC_027394 | ENSRNOT000000021400 | 0.953992778  | 1.50E-06 |
| TUCP_000736 | XLOC_027394 | ENSRNOT000000081835 | 0.953353881  | 1.61E-06 |
| TUCP_000736 | XLOC_027394 | ENSRNOT000000085885 | 0.955585504  | 1.26E-06 |
| TUCP_000736 | XLOC_027394 | ENSRNOT00000003778  | 0.963294107  | 4.93E-07 |
| TUCP_000736 | XLOC_027394 | ENSRNOT00000018696  | 0.95135955   | 1.98E-06 |
| TUCP_000736 | XLOC_027394 | ENSRNOT000000091050 | 0.950949322  | 2.06E-06 |
| TUCP_000736 | XLOC_027394 | ENSRNOT00000015032  | 0.955302354  | 1.30E-06 |
| TUCP_000736 | XLOC_027394 | ENSRNOT000000039215 | 0.963477834  | 4.81E-07 |
| TUCP_000736 | XLOC_027394 | ENSRNOT000000085355 | 0.958566627  | 8.97E-07 |
| TUCP_000736 | XLOC_027394 | ENSRNOT00000018101  | 0.961666242  | 6.11E-07 |
| TUCP_000736 | XLOC_027394 | ENSRNOT000000080163 | 0.985736137  | 4.54E-09 |
| TUCP_000736 | XLOC_027394 | ENSRNOT000000038178 | 0.961033714  | 6.63E-07 |
| TUCP_000736 | XLOC_027394 | ENSRNOT00000001446  | -0.959544174 | 7.97E-07 |
| TUCP_000736 | XLOC_027394 | ENSRNOT000000039730 | 0.961658483  | 6.12E-07 |
| TUCP_000736 | XLOC_027394 | ENSRNOT000000077119 | 0.961968892  | 5.88E-07 |
| TUCP_000736 | XLOC_027394 | ENSRNOT000000083452 | 0.965330655  | 3.72E-07 |
| TUCP_000736 | XLOC_027394 | ENSRNOT00000016629  | -0.95095024  | 2.06E-06 |
| TUCP_000736 | XLOC_027394 | ENSRNOT000000065103 | 0.961966911  | 5.88E-07 |
| TUCP_000736 | XLOC_027394 | ENSRNOT00000012314  | 0.970187628  | 1.76E-07 |



|             |             |                    |              |          |
|-------------|-------------|--------------------|--------------|----------|
| TUCP_000736 | XLOC_027394 | ENSRNOT00000082393 | 0.964751571  | 4.04E-07 |
| TUCP_000736 | XLOC_027394 | ENSRNOT00000040736 | 0.951139091  | 2.02E-06 |
| TUCP_000736 | XLOC_027394 | ENSRNOT00000032236 | 0.964261538  | 4.32E-07 |
| TUCP_000736 | XLOC_027394 | ENSRNOT00000026235 | 0.955080633  | 1.34E-06 |
| TUCP_000736 | XLOC_027394 | ENSRNOT00000075936 | 0.972406777  | 1.20E-07 |
| TUCP_000736 | XLOC_027394 | ENSRNOT00000000637 | 0.957442392  | 1.02E-06 |
| TUCP_000736 | XLOC_027394 | ENSRNOT00000009260 | 0.971702928  | 1.36E-07 |
| TUCP_000736 | XLOC_027394 | ENSRNOT00000073138 | 0.954294157  | 1.45E-06 |
| TUCP_000736 | XLOC_027394 | ENSRNOT00000013989 | 0.961094775  | 6.58E-07 |
| TUCP_000736 | XLOC_027394 | ENSRNOT00000091765 | 0.950538107  | 2.15E-06 |
| TUCP_000736 | XLOC_027394 | ENSRNOT00000070792 | 0.971103163  | 1.51E-07 |
| TUCP_000736 | XLOC_027394 | ENSRNOT00000013191 | 0.958418143  | 9.13E-07 |
| TUCP_000736 | XLOC_027394 | ENSRNOT00000091272 | 0.950784813  | 2.09E-06 |
| TUCP_000736 | XLOC_027394 | ENSRNOT00000084552 | 0.95650784   | 1.14E-06 |
| TUCP_000736 | XLOC_027394 | ENSRNOT00000050415 | 0.962808781  | 5.26E-07 |
| TUCP_000736 | XLOC_027394 | ENSRNOT00000038610 | 0.956786904  | 1.10E-06 |
| TUCP_000736 | XLOC_027394 | ENSRNOT00000090774 | 0.966304893  | 3.23E-07 |
| TUCP_000737 | XLOC_027398 | ENSRNOT00000047161 | 0.971531042  | 1.40E-07 |
| TUCP_000737 | XLOC_027398 | ENSRNOT00000088492 | 0.956377867  | 1.16E-06 |
| TUCP_000737 | XLOC_027398 | ENSRNOT00000079000 | 0.95863535   | 8.90E-07 |
| TUCP_000737 | XLOC_027398 | ENSRNOT00000059459 | 0.955949946  | 1.21E-06 |
| TUCP_001161 | XLOC_043996 | ENSRNOT00000000008 | 0.978153188  | 3.78E-08 |
| TUCP_001161 | XLOC_043996 | ENSRNOT00000060048 | 0.975103918  | 7.22E-08 |
| TUCP_001161 | XLOC_043996 | ENSRNOT00000082304 | 0.973455492  | 9.93E-08 |
| TUCP_001161 | XLOC_043996 | ENSRNOT00000006219 | 0.978153188  | 3.78E-08 |
| TUCP_001161 | XLOC_043996 | ENSRNOT00000065376 | 0.978153188  | 3.78E-08 |
| TUCP_001161 | XLOC_043996 | ENSRNOT00000081433 | 0.959312131  | 8.20E-07 |
| TUCP_001161 | XLOC_043996 | ENSRNOT00000083575 | 0.978153188  | 3.78E-08 |
| TUCP_001161 | XLOC_043996 | ENSRNOT00000087739 | 0.978153188  | 3.78E-08 |
| TUCP_001161 | XLOC_043996 | ENSRNOT00000079826 | 0.978153188  | 3.78E-08 |
| TUCP_001161 | XLOC_043996 | ENSRNOT00000025770 | 0.967319347  | 2.78E-07 |
| TUCP_001161 | XLOC_043996 | ENSRNOT00000088244 | 0.954317372  | 1.45E-06 |
| TUCP_001161 | XLOC_043996 | ENSRNOT00000048523 | 0.978153188  | 3.78E-08 |
| TUCP_001161 | XLOC_043996 | ENSRNOT00000026428 | 0.987468741  | 2.38E-09 |
| TUCP_001161 | XLOC_043996 | ENSRNOT00000085673 | 0.978153188  | 3.78E-08 |
| TUCP_001161 | XLOC_043996 | ENSRNOT00000072972 | 0.951210313  | 2.01E-06 |
| TUCP_001161 | XLOC_043996 | ENSRNOT00000050573 | 0.978153188  | 3.78E-08 |
| TUCP_001161 | XLOC_043996 | ENSRNOT00000074378 | 0.979728793  | 2.61E-08 |
| TUCP_001161 | XLOC_043996 | ENSRNOT00000076927 | 0.972861486  | 1.11E-07 |
| TUCP_001161 | XLOC_043996 | ENSRNOT00000090581 | 0.978153188  | 3.78E-08 |
| TUCP_001161 | XLOC_043996 | ENSRNOT00000076239 | 0.98707812   | 2.78E-09 |
| TUCP_001161 | XLOC_043996 | ENSRNOT00000065485 | 0.978153188  | 3.78E-08 |
| TUCP_001161 | XLOC_043996 | ENSRNOT0000006356  | 0.974395504  | 8.30E-08 |
| TUCP_001161 | XLOC_043996 | ENSRNOT00000022091 | 0.978153188  | 3.78E-08 |
| TUCP_001161 | XLOC_043996 | ENSRNOT00000064764 | 0.969273019  | 2.05E-07 |
| TUCP_001161 | XLOC_043996 | ENSRNOT00000093571 | 0.978153188  | 3.78E-08 |
| TUCP_001161 | XLOC_043996 | ENSRNOT00000092395 | 0.977044556  | 4.83E-08 |
| TUCP_000633 | XLOC_023312 | ENSRNOT00000073079 | -0.950405686 | 2.17E-06 |
| TUCP_000633 | XLOC_023312 | ENSRNOT00000010638 | -0.957822616 | 9.79E-07 |
| TUCP_000632 | XLOC_023215 | ENSRNOT00000057218 | 0.983708976  | 8.79E-09 |
| TUCP_000632 | XLOC_023215 | ENSRNOT00000056771 | 0.991876288  | 2.75E-10 |

|             |             |                    |              |          |
|-------------|-------------|--------------------|--------------|----------|
| TUCP_000632 | XLOC_023215 | ENSRNOT00000049947 | 0.972962467  | 1.09E-07 |
| TUCP_000632 | XLOC_023215 | ENSRNOT00000074141 | 0.953115424  | 1.65E-06 |
| TUCP_000632 | XLOC_023215 | ENSRNOT00000001672 | 0.999522589  | 1.95E-16 |
| TUCP_000738 | XLOC_027630 | ENSRNOT00000001215 | 0.960105146  | 7.44E-07 |
| TUCP_000738 | XLOC_027630 | ENSRNOT00000036506 | 0.968957637  | 2.15E-07 |
| TUCP_000738 | XLOC_027630 | ENSRNOT00000065143 | 0.950466602  | 2.16E-06 |
| TUCP_000738 | XLOC_027630 | ENSRNOT00000027117 | -0.95342532  | 1.60E-06 |
| TUCP_000738 | XLOC_027630 | ENSRNOT0000001855  | 0.954970095  | 1.35E-06 |
| TUCP_000738 | XLOC_027630 | ENSRNOT00000001691 | 0.964325764  | 4.29E-07 |
| TUCP_000738 | XLOC_027630 | ENSRNOT00000020910 | 0.950501714  | 2.15E-06 |
| TUCP_000738 | XLOC_027630 | ENSRNOT00000005220 | 0.95245169   | 1.77E-06 |
| TUCP_000738 | XLOC_027630 | ENSRNOT00000013852 | 0.958702165  | 8.83E-07 |
| TUCP_000738 | XLOC_027630 | ENSRNOT00000089418 | 0.952991735  | 1.67E-06 |
| TUCP_000738 | XLOC_027630 | ENSRNOT00000045926 | 0.950669008  | 2.12E-06 |
| TUCP_000738 | XLOC_027630 | ENSRNOT00000021534 | -0.951047077 | 2.04E-06 |
| TUCP_000738 | XLOC_027630 | ENSRNOT00000083677 | -0.964489632 | 4.19E-07 |
| TUCP_000738 | XLOC_027630 | ENSRNOT00000091399 | 0.959509104  | 8.01E-07 |
| TUCP_000738 | XLOC_027630 | ENSRNOT00000075480 | -0.952323519 | 1.79E-06 |
| TUCP_000738 | XLOC_027630 | ENSRNOT00000090338 | -0.962848843 | 5.24E-07 |
| TUCP_000738 | XLOC_027630 | ENSRNOT00000057160 | 0.965241291  | 3.77E-07 |
| TUCP_000738 | XLOC_027630 | ENSRNOT00000002837 | -0.954227508 | 1.47E-06 |
| TUCP_000738 | XLOC_027630 | ENSRNOT00000057898 | -0.957062598 | 1.07E-06 |
| TUCP_000738 | XLOC_027630 | ENSRNOT00000072969 | 0.954106199  | 1.48E-06 |
| TUCP_000738 | XLOC_027630 | ENSRNOT00000003641 | 0.952435959  | 1.77E-06 |
| TUCP_000738 | XLOC_027630 | ENSRNOT00000036838 | -0.951756858 | 1.90E-06 |
| TUCP_000738 | XLOC_027630 | ENSRNOT00000061253 | 0.954248988  | 1.46E-06 |
| TUCP_000738 | XLOC_027630 | ENSRNOT00000065045 | 0.951390389  | 1.97E-06 |
| TUCP_000738 | XLOC_027630 | ENSRNOT00000082639 | 0.96734053   | 2.77E-07 |
| TUCP_000738 | XLOC_027630 | ENSRNOT00000000048 | 0.959366804  | 8.15E-07 |
| TUCP_000738 | XLOC_027630 | ENSRNOT00000088133 | -0.954624428 | 1.40E-06 |
| TUCP_000738 | XLOC_027630 | ENSRNOT00000041044 | 0.953697652  | 1.55E-06 |
| TUCP_000738 | XLOC_027630 | ENSRNOT00000089928 | 0.956292669  | 1.17E-06 |
| TUCP_000738 | XLOC_027630 | ENSRNOT00000037133 | 0.963232971  | 4.97E-07 |
| TUCP_000738 | XLOC_027630 | ENSRNOT00000078816 | 0.950425626  | 2.17E-06 |
| TUCP_000738 | XLOC_027630 | ENSRNOT00000083964 | -0.958635927 | 8.90E-07 |
| TUCP_000738 | XLOC_027630 | ENSRNOT00000031384 | 0.970994787  | 1.54E-07 |
| TUCP_000738 | XLOC_027630 | ENSRNOT00000091909 | 0.956306304  | 1.17E-06 |
| TUCP_000738 | XLOC_027630 | ENSRNOT00000024352 | 0.951333982  | 1.98E-06 |
| TUCP_000738 | XLOC_027630 | ENSRNOT00000003780 | 0.952500866  | 1.76E-06 |
| TUCP_000738 | XLOC_027630 | ENSRNOT00000026643 | 0.96795042   | 2.52E-07 |
| TUCP_000738 | XLOC_027630 | ENSRNOT00000001403 | 0.958907106  | 8.61E-07 |
| TUCP_000738 | XLOC_027630 | ENSRNOT00000040348 | -0.9528143   | 1.70E-06 |
| TUCP_000738 | XLOC_027630 | ENSRNOT00000086577 | 0.973779926  | 9.34E-08 |
| TUCP_000738 | XLOC_027630 | ENSRNOT00000059807 | 0.950753223  | 2.10E-06 |
| TUCP_000738 | XLOC_027630 | ENSRNOT00000007738 | -0.9540642   | 1.49E-06 |
| TUCP_000738 | XLOC_027630 | ENSRNOT00000048063 | 0.951818427  | 1.89E-06 |
| TUCP_000738 | XLOC_027630 | ENSRNOT00000065600 | 0.967324722  | 2.78E-07 |
| TUCP_000738 | XLOC_027630 | ENSRNOT00000041815 | -0.950081966 | 2.24E-06 |
| TUCP_000738 | XLOC_027630 | ENSRNOT00000033975 | 0.973154637  | 1.05E-07 |
| TUCP_000738 | XLOC_027630 | ENSRNOT00000056100 | -0.952928501 | 1.68E-06 |
| TUCP_000738 | XLOC_027630 | ENSRNOT00000001099 | -0.957183749 | 1.05E-06 |

|             |             |                    |              |          |
|-------------|-------------|--------------------|--------------|----------|
| TUCP_000738 | XLOC_027630 | ENSRNOT00000014821 | -0.954930075 | 1.36E-06 |
| TUCP_000738 | XLOC_027630 | ENSRNOT00000034883 | -0.951015622 | 2.05E-06 |
| TUCP_000738 | XLOC_027630 | ENSRNOT00000088599 | 0.960037245  | 7.51E-07 |
| TUCP_000738 | XLOC_027630 | ENSRNOT00000055321 | 0.953991027  | 1.50E-06 |
| TUCP_000738 | XLOC_027630 | ENSRNOT00000005587 | -0.953594755 | 1.57E-06 |
| TUCP_000738 | XLOC_027630 | ENSRNOT00000065529 | 0.950978131  | 2.05E-06 |
| TUCP_000738 | XLOC_027630 | ENSRNOT00000021158 | 0.960398775  | 7.18E-07 |
| TUCP_000738 | XLOC_027630 | ENSRNOT00000000302 | 0.963472686  | 4.82E-07 |
| TUCP_000738 | XLOC_027630 | ENSRNOT00000037015 | 0.954969017  | 1.35E-06 |
| TUCP_000738 | XLOC_027630 | ENSRNOT00000031555 | -0.958055124 | 9.53E-07 |
| TUCP_000738 | XLOC_027630 | ENSRNOT00000054976 | -0.960311358 | 7.25E-07 |
| TUCP_000738 | XLOC_027630 | ENSRNOT00000018787 | 0.971517748  | 1.41E-07 |
| TUCP_000738 | XLOC_027630 | ENSRNOT00000080591 | 0.969119602  | 2.10E-07 |
| TUCP_000738 | XLOC_027630 | ENSRNOT00000003568 | 0.963392115  | 4.87E-07 |
| TUCP_000738 | XLOC_027630 | ENSRNOT00000077146 | -0.951089892 | 2.03E-06 |
| TUCP_000738 | XLOC_027630 | ENSRNOT00000013463 | 0.954870638  | 1.37E-06 |
| TUCP_000738 | XLOC_027630 | ENSRNOT00000089673 | -0.952400873 | 1.78E-06 |
| TUCP_000738 | XLOC_027630 | ENSRNOT00000000263 | 0.950388142  | 2.18E-06 |
| TUCP_000738 | XLOC_027630 | ENSRNOT00000082151 | -0.962605264 | 5.41E-07 |
| TUCP_000738 | XLOC_027630 | ENSRNOT00000022578 | 0.961801836  | 6.01E-07 |
| TUCP_000738 | XLOC_027630 | ENSRNOT00000017907 | -0.952706037 | 1.72E-06 |
| TUCP_000738 | XLOC_027630 | ENSRNOT00000038807 | 0.962245131  | 5.67E-07 |
| TUCP_000738 | XLOC_027630 | ENSRNOT00000002443 | 0.956944922  | 1.08E-06 |
| TUCP_000738 | XLOC_027630 | ENSRNOT00000057537 | 0.983782159  | 8.60E-09 |
| TUCP_000738 | XLOC_027630 | ENSRNOT00000002114 | -0.95150504  | 1.95E-06 |
| TUCP_000738 | XLOC_027630 | ENSRNOT00000027970 | 0.956026605  | 1.20E-06 |
| TUCP_000738 | XLOC_027630 | ENSRNOT00000015624 | 0.952863651  | 1.69E-06 |
| TUCP_000738 | XLOC_027630 | ENSRNOT00000036072 | 0.963623189  | 4.72E-07 |
| TUCP_000738 | XLOC_027630 | ENSRNOT00000080695 | 0.961518459  | 6.23E-07 |
| TUCP_000738 | XLOC_027630 | ENSRNOT00000046215 | -0.95081535  | 2.09E-06 |
| TUCP_000738 | XLOC_027630 | ENSRNOT00000038212 | -0.954992019 | 1.35E-06 |
| TUCP_000738 | XLOC_027630 | ENSRNOT00000037409 | 0.963833996  | 4.59E-07 |
| TUCP_000738 | XLOC_027630 | ENSRNOT00000000120 | 0.959448897  | 8.07E-07 |
| TUCP_000738 | XLOC_027630 | ENSRNOT00000007369 | 0.951961725  | 1.86E-06 |
| TUCP_000738 | XLOC_027630 | ENSRNOT00000042125 | 0.969460574  | 1.99E-07 |
| TUCP_000738 | XLOC_027630 | ENSRNOT00000028545 | -0.955543741 | 1.27E-06 |
| TUCP_000738 | XLOC_027630 | ENSRNOT00000032248 | 0.959380761  | 8.13E-07 |
| TUCP_000738 | XLOC_027630 | ENSRNOT00000027967 | 0.960336497  | 7.23E-07 |
| TUCP_000738 | XLOC_027630 | ENSRNOT00000022097 | 0.950773564  | 2.10E-06 |
| TUCP_000738 | XLOC_027630 | ENSRNOT00000008987 | -0.96688361  | 2.97E-07 |
| TUCP_000738 | XLOC_027630 | ENSRNOT00000083957 | 0.954012045  | 1.50E-06 |
| TUCP_000738 | XLOC_027630 | ENSRNOT00000005311 | 0.959627387  | 7.89E-07 |
| TUCP_000738 | XLOC_027630 | ENSRNOT00000005257 | 0.960242534  | 7.32E-07 |
| TUCP_000738 | XLOC_027630 | ENSRNOT00000008113 | -0.950916224 | 2.07E-06 |
| TUCP_000739 | XLOC_027869 | ENSRNOT00000026966 | 0.970322306  | 1.73E-07 |
| TUCP_000739 | XLOC_027869 | ENSRNOT00000068416 | 0.999999782  | 3.88E-33 |
| TUCP_000739 | XLOC_027869 | ENSRNOT00000086036 | 0.999958274  | 9.96E-22 |
| TUCP_000739 | XLOC_027869 | ENSRNOT00000026803 | 0.985046075  | 5.74E-09 |
| TUCP_000739 | XLOC_027869 | ENSRNOT00000047527 | 0.963071698  | 5.08E-07 |
| TUCP_000739 | XLOC_027869 | ENSRNOT00000042251 | 0.999344295  | 9.53E-16 |
| TUCP_000739 | XLOC_027869 | ENSRNOT0000002984  | 0.998397069  | 8.31E-14 |

|             |             |                    |              |          |
|-------------|-------------|--------------------|--------------|----------|
| TUCP_000739 | XLOC_027869 | ENSRNOT00000083764 | 0.999541808  | 1.59E-16 |
| TUCP_000739 | XLOC_027869 | ENSRNOT00000076802 | 0.962695843  | 5.34E-07 |
| TUCP_000739 | XLOC_027869 | ENSRNOT00000092365 | 0.999161651  | 3.26E-15 |
| TUCP_000739 | XLOC_027869 | ENSRNOT00000079275 | 0.999901911  | 7.15E-20 |
| TUCP_000739 | XLOC_027869 | ENSRNOT00000066062 | -0.959706712 | 7.82E-07 |
| TUCP_000739 | XLOC_027869 | ENSRNOT00000045301 | 1            | 0        |
| TUCP_000739 | XLOC_027869 | ENSRNOT00000041186 | 0.999975782  | 6.56E-23 |
| TUCP_000739 | XLOC_027869 | ENSRNOT00000010092 | 0.977711778  | 4.17E-08 |
| TUCP_000739 | XLOC_027869 | ENSRNOT00000076182 | 1            | 0        |
| TUCP_000739 | XLOC_027869 | ENSRNOT00000087404 | 0.951157664  | 2.02E-06 |
| TUCP_000739 | XLOC_027869 | ENSRNOT00000052003 | 0.95837331   | 9.18E-07 |
| TUCP_000739 | XLOC_027869 | ENSRNOT00000081709 | 0.998485154  | 6.27E-14 |
| TUCP_000739 | XLOC_027869 | ENSRNOT00000005726 | 0.959610119  | 7.91E-07 |
| TUCP_000739 | XLOC_027869 | ENSRNOT00000014103 | 1            | 0        |
| TUCP_000739 | XLOC_027869 | ENSRNOT00000057433 | 0.964930601  | 3.94E-07 |
| TUCP_000739 | XLOC_027869 | ENSRNOT00000082289 | 0.998931566  | 1.09E-14 |
| TUCP_000739 | XLOC_027869 | ENSRNOT00000092516 | 0.957459323  | 1.02E-06 |
| TUCP_000739 | XLOC_027869 | ENSRNOT00000008898 | 0.990039768  | 7.59E-10 |
| TUCP_000739 | XLOC_027869 | ENSRNOT00000083493 | 0.995461232  | 1.51E-11 |
| TUCP_000739 | XLOC_027869 | ENSRNOT00000092563 | 0.987201084  | 2.65E-09 |
| TUCP_000739 | XLOC_027869 | ENSRNOT00000088893 | 1            | 0        |
| TUCP_000739 | XLOC_027869 | ENSRNOT00000076693 | 0.955029582  | 1.34E-06 |
| TUCP_000739 | XLOC_027869 | ENSRNOT00000081014 | 1            | 0        |
| TUCP_000739 | XLOC_027869 | ENSRNOT00000067543 | 1            | 0        |
| TUCP_000739 | XLOC_027869 | ENSRNOT00000050968 | 0.996816433  | 2.56E-12 |
| TUCP_000739 | XLOC_027869 | ENSRNOT00000042201 | 0.960235595  | 7.32E-07 |
| TUCP_000739 | XLOC_027869 | ENSRNOT00000004373 | 0.957315473  | 1.04E-06 |
| TUCP_000739 | XLOC_027869 | ENSRNOT00000063929 | 1            | 0        |
| TUCP_000739 | XLOC_027869 | ENSRNOT00000057472 | 1            | 0        |
| TUCP_000739 | XLOC_027869 | ENSRNOT00000041617 | 0.952449765  | 1.77E-06 |
| TUCP_000739 | XLOC_027869 | ENSRNOT00000091763 | 0.986310385  | 3.70E-09 |
| TUCP_000739 | XLOC_027869 | ENSRNOT00000022200 | 0.998491303  | 6.14E-14 |
| TUCP_000739 | XLOC_027869 | ENSRNOT00000067379 | 0.997260967  | 1.21E-12 |
| TUCP_000739 | XLOC_027869 | ENSRNOT00000020786 | 0.976428448  | 5.51E-08 |
| TUCP_000739 | XLOC_027869 | ENSRNOT00000050543 | 0.999722223  | 1.30E-17 |
| TUCP_000739 | XLOC_027869 | ENSRNOT00000089306 | 0.999866649  | 3.32E-19 |
| TUCP_000739 | XLOC_027869 | ENSRNOT00000052367 | 0.997268394  | 1.19E-12 |
| TUCP_000739 | XLOC_027869 | ENSRNOT00000090658 | 1            | 0        |
| TUCP_000739 | XLOC_027869 | ENSRNOT00000022571 | 0.995290013  | 1.81E-11 |
| TUCP_000739 | XLOC_027869 | ENSRNOT00000044520 | 0.981817158  | 1.52E-08 |
| TUCP_000739 | XLOC_027869 | ENSRNOT00000065448 | 0.963648868  | 4.70E-07 |
| TUCP_000637 | XLOC_023526 | ENSRNOT00000055536 | 0.958386803  | 9.16E-07 |
| TUCP_000637 | XLOC_023526 | ENSRNOT00000010680 | 0.974975005  | 7.41E-08 |
| TUCP_000637 | XLOC_023526 | ENSRNOT00000064983 | 0.957302037  | 1.04E-06 |
| TUCP_000637 | XLOC_023526 | ENSRNOT00000016088 | 0.951427742  | 1.96E-06 |
| TUCP_000637 | XLOC_023526 | ENSRNOT00000009975 | 0.982078218  | 1.41E-08 |
| TUCP_000637 | XLOC_023526 | ENSRNOT00000072682 | 0.970158678  | 1.77E-07 |
| TUCP_000637 | XLOC_023526 | ENSRNOT00000015062 | 0.950885206  | 2.07E-06 |
| TUCP_000637 | XLOC_023526 | ENSRNOT00000081226 | 0.950347397  | 2.19E-06 |
| TUCP_000637 | XLOC_023526 | ENSRNOT00000081631 | 0.963407696  | 4.86E-07 |
| TUCP_000637 | XLOC_023526 | ENSRNOT00000021715 | 0.954629744  | 1.40E-06 |

|             |             |                    |              |          |
|-------------|-------------|--------------------|--------------|----------|
| TUCP_000637 | XL0C_023526 | ENSRNOT00000065897 | 0.952154938  | 1.82E-06 |
| TUCP_000637 | XL0C_023526 | ENSRNOT00000023014 | 0.951461285  | 1.96E-06 |
| TUCP_000637 | XL0C_023526 | ENSRNOT00000083594 | 0.964329639  | 4.28E-07 |
| TUCP_000637 | XL0C_023526 | ENSRNOT00000016037 | 0.958491645  | 9.05E-07 |
| TUCP_000637 | XL0C_023526 | ENSRNOT00000056050 | 0.964371039  | 4.26E-07 |
| TUCP_000637 | XL0C_023526 | ENSRNOT00000005343 | -0.951373013 | 1.97E-06 |
| TUCP_000637 | XL0C_023526 | ENSRNOT00000046552 | 0.950074345  | 2.25E-06 |
| TUCP_000637 | XL0C_023526 | ENSRNOT00000060977 | 0.960062977  | 7.48E-07 |
| TUCP_000637 | XL0C_023526 | ENSRNOT00000065801 | 0.950095317  | 2.24E-06 |
| TUCP_000637 | XL0C_023526 | ENSRNOT00000088385 | 0.960335985  | 7.23E-07 |
| TUCP_000637 | XL0C_023526 | ENSRNOT00000023613 | 0.953346388  | 1.61E-06 |
| TUCP_000637 | XL0C_023526 | ENSRNOT00000016485 | 0.9663595    | 3.21E-07 |
| TUCP_000637 | XL0C_023526 | ENSRNOT00000078752 | -0.951683074 | 1.91E-06 |
| TUCP_000637 | XL0C_023526 | ENSRNOT00000010701 | 0.95184671   | 1.88E-06 |
| TUCP_000637 | XL0C_023526 | ENSRNOT00000005770 | 0.95880156   | 8.72E-07 |
| TUCP_000637 | XL0C_023526 | ENSRNOT00000006697 | 0.979901249  | 2.50E-08 |
| TUCP_000637 | XL0C_023526 | ENSRNOT00000085334 | 0.973423056  | 9.99E-08 |
| TUCP_000637 | XL0C_023526 | ENSRNOT00000034482 | 0.975176489  | 7.12E-08 |
| TUCP_000637 | XL0C_023526 | ENSRNOT00000061054 | 0.954447294  | 1.43E-06 |
| TUCP_000637 | XL0C_023526 | ENSRNOT00000064122 | 0.957793354  | 9.83E-07 |
| TUCP_000637 | XL0C_023526 | ENSRNOT00000008764 | 0.975507576  | 6.66E-08 |
| TUCP_000637 | XL0C_023526 | ENSRNOT00000012757 | 0.956950588  | 1.08E-06 |
| TUCP_000637 | XL0C_023526 | ENSRNOT00000037902 | 0.962193063  | 5.71E-07 |
| TUCP_000637 | XL0C_023526 | ENSRNOT00000006109 | 0.958444847  | 9.10E-07 |
| TUCP_000637 | XL0C_023526 | ENSRNOT00000087799 | 0.954545914  | 1.42E-06 |
| TUCP_000637 | XL0C_023526 | ENSRNOT00000092757 | 0.950888938  | 2.07E-06 |
| TUCP_000637 | XL0C_023526 | ENSRNOT00000078800 | 0.951466878  | 1.95E-06 |
| TUCP_000636 | XL0C_023526 | ENSRNOT00000085954 | 0.953109194  | 1.65E-06 |
| TUCP_000636 | XL0C_023526 | ENSRNOT00000065897 | 0.967121093  | 2.86E-07 |
| TUCP_000636 | XL0C_023526 | ENSRNOT00000002408 | 0.951202867  | 2.01E-06 |
| TUCP_000636 | XL0C_023526 | ENSRNOT00000013801 | 0.950482466  | 2.16E-06 |
| TUCP_000636 | XL0C_023526 | ENSRNOT00000033116 | 0.961749406  | 6.05E-07 |
| TUCP_000635 | XL0C_023526 | ENSRNOT00000001215 | 0.950952895  | 2.06E-06 |
| TUCP_000635 | XL0C_023526 | ENSRNOT00000036506 | 0.9514487    | 1.96E-06 |
| TUCP_000635 | XL0C_023526 | ENSRNOT00000005958 | 0.966151412  | 3.31E-07 |
| TUCP_000635 | XL0C_023526 | ENSRNOT00000006186 | 0.959618903  | 7.90E-07 |
| TUCP_000635 | XL0C_023526 | ENSRNOT00000082998 | 0.957206056  | 1.05E-06 |
| TUCP_000635 | XL0C_023526 | ENSRNOT00000048910 | -0.968500173 | 2.32E-07 |
| TUCP_000635 | XL0C_023526 | ENSRNOT00000007350 | 0.954046795  | 1.49E-06 |
| TUCP_000635 | XL0C_023526 | ENSRNOT00000019104 | -0.955624569 | 1.26E-06 |
| TUCP_000635 | XL0C_023526 | ENSRNOT00000037597 | 0.962773425  | 5.29E-07 |
| TUCP_000635 | XL0C_023526 | ENSRNOT00000068353 | 0.985556969  | 4.83E-09 |
| TUCP_000635 | XL0C_023526 | ENSRNOT00000058382 | 0.968991331  | 2.14E-07 |
| TUCP_000635 | XL0C_023526 | ENSRNOT00000023638 | 0.967350839  | 2.77E-07 |
| TUCP_000635 | XL0C_023526 | ENSRNOT00000020910 | 0.971638341  | 1.38E-07 |
| TUCP_000635 | XL0C_023526 | ENSRNOT00000005220 | 0.955501679  | 1.27E-06 |
| TUCP_000635 | XL0C_023526 | ENSRNOT00000023144 | 0.967083174  | 2.88E-07 |
| TUCP_000635 | XL0C_023526 | ENSRNOT00000081796 | 0.952219263  | 1.81E-06 |
| TUCP_000635 | XL0C_023526 | ENSRNOT00000010030 | -0.962764886 | 5.30E-07 |
| TUCP_000635 | XL0C_023526 | ENSRNOT00000074023 | 0.952184955  | 1.82E-06 |
| TUCP_000635 | XL0C_023526 | ENSRNOT00000017776 | 0.953510771  | 1.58E-06 |

|             |             |                    |              |          |
|-------------|-------------|--------------------|--------------|----------|
| TUCP_000635 | XLOC_023526 | ENSRNOT00000083568 | 0.969221556  | 2.07E-07 |
| TUCP_000635 | XLOC_023526 | ENSRNOT00000091596 | -0.95831229  | 9.24E-07 |
| TUCP_000635 | XLOC_023526 | ENSRNOT00000091128 | -0.953552382 | 1.57E-06 |
| TUCP_000635 | XLOC_023526 | ENSRNOT00000081981 | 0.977858318  | 4.04E-08 |
| TUCP_000635 | XLOC_023526 | ENSRNOT00000048754 | -0.964085547 | 4.43E-07 |
| TUCP_000635 | XLOC_023526 | ENSRNOT00000006752 | 0.969985993  | 1.82E-07 |
| TUCP_000635 | XLOC_023526 | ENSRNOT00000051494 | 0.953794329  | 1.53E-06 |
| TUCP_000635 | XLOC_023526 | ENSRNOT00000018533 | 0.952416376  | 1.77E-06 |
| TUCP_000635 | XLOC_023526 | ENSRNOT00000073564 | -0.951873524 | 1.88E-06 |
| TUCP_000635 | XLOC_023526 | ENSRNOT00000024969 | 0.975120817  | 7.20E-08 |
| TUCP_000635 | XLOC_023526 | ENSRNOT00000091399 | 0.961452459  | 6.28E-07 |
| TUCP_000635 | XLOC_023526 | ENSRNOT00000073372 | 0.954413841  | 1.44E-06 |
| TUCP_000635 | XLOC_023526 | ENSRNOT00000025079 | -0.960951474 | 6.70E-07 |
| TUCP_000635 | XLOC_023526 | ENSRNOT00000026141 | 0.954488286  | 1.42E-06 |
| TUCP_000635 | XLOC_023526 | ENSRNOT00000084709 | 0.963755766  | 4.63E-07 |
| TUCP_000635 | XLOC_023526 | ENSRNOT00000084031 | 0.953690063  | 1.55E-06 |
| TUCP_000635 | XLOC_023526 | ENSRNOT00000064643 | 0.953507439  | 1.58E-06 |
| TUCP_000635 | XLOC_023526 | ENSRNOT00000057160 | 0.950955602  | 2.06E-06 |
| TUCP_000635 | XLOC_023526 | ENSRNOT00000054761 | -0.954202778 | 1.47E-06 |
| TUCP_000635 | XLOC_023526 | ENSRNOT00000024402 | 0.96633201   | 3.22E-07 |
| TUCP_000635 | XLOC_023526 | ENSRNOT00000020681 | -0.952212196 | 1.81E-06 |
| TUCP_000635 | XLOC_023526 | ENSRNOT00000002837 | -0.952054592 | 1.84E-06 |
| TUCP_000635 | XLOC_023526 | ENSRNOT00000019519 | 0.959029164  | 8.49E-07 |
| TUCP_000635 | XLOC_023526 | ENSRNOT00000089933 | 0.98110457   | 1.84E-08 |
| TUCP_000635 | XLOC_023526 | ENSRNOT00000009811 | 0.963896634  | 4.55E-07 |
| TUCP_000635 | XLOC_023526 | ENSRNOT00000025517 | 0.962322902  | 5.61E-07 |
| TUCP_000635 | XLOC_023526 | ENSRNOT00000063930 | -0.952831699 | 1.70E-06 |
| TUCP_000635 | XLOC_023526 | ENSRNOT00000025510 | -0.958374668 | 9.18E-07 |
| TUCP_000635 | XLOC_023526 | ENSRNOT00000032780 | 0.96053865   | 7.05E-07 |
| TUCP_000635 | XLOC_023526 | ENSRNOT00000084012 | 0.95456135   | 1.41E-06 |
| TUCP_000635 | XLOC_023526 | ENSRNOT00000009708 | -0.95522833  | 1.31E-06 |
| TUCP_000635 | XLOC_023526 | ENSRNOT00000033677 | -0.95476279  | 1.38E-06 |
| TUCP_000635 | XLOC_023526 | ENSRNOT00000005686 | -0.955075293 | 1.34E-06 |
| TUCP_000635 | XLOC_023526 | ENSRNOT00000005297 | 0.952269158  | 1.80E-06 |
| TUCP_000635 | XLOC_023526 | ENSRNOT00000061392 | 0.951376259  | 1.97E-06 |
| TUCP_000635 | XLOC_023526 | ENSRNOT00000011832 | -0.951083194 | 2.03E-06 |
| TUCP_000635 | XLOC_023526 | ENSRNOT00000087278 | -0.967640552 | 2.65E-07 |
| TUCP_000635 | XLOC_023526 | ENSRNOT00000021030 | -0.953392496 | 1.60E-06 |
| TUCP_000635 | XLOC_023526 | ENSRNOT00000077727 | -0.957045404 | 1.07E-06 |
| TUCP_000635 | XLOC_023526 | ENSRNOT00000011930 | 0.952995317  | 1.67E-06 |
| TUCP_000635 | XLOC_023526 | ENSRNOT00000044346 | -0.951746561 | 1.90E-06 |
| TUCP_000635 | XLOC_023526 | ENSRNOT00000009150 | 0.960253238  | 7.31E-07 |
| TUCP_000635 | XLOC_023526 | ENSRNOT00000087443 | 0.95728768   | 1.04E-06 |
| TUCP_000635 | XLOC_023526 | ENSRNOT00000075452 | 0.958037776  | 9.55E-07 |
| TUCP_000635 | XLOC_023526 | ENSRNOT00000090912 | 0.961646718  | 6.13E-07 |
| TUCP_000635 | XLOC_023526 | ENSRNOT00000091909 | 0.96615696   | 3.30E-07 |
| TUCP_000635 | XLOC_023526 | ENSRNOT00000020147 | 0.96353936   | 4.77E-07 |
| TUCP_000635 | XLOC_023526 | ENSRNOT00000001081 | 0.95401223   | 1.50E-06 |
| TUCP_000635 | XLOC_023526 | ENSRNOT00000026481 | 0.953474826  | 1.59E-06 |
| TUCP_000635 | XLOC_023526 | ENSRNOT00000024352 | 0.970013658  | 1.82E-07 |
| TUCP_000635 | XLOC_023526 | ENSRNOT00000064535 | -0.961646336 | 6.13E-07 |

|             |             |                    |              |          |
|-------------|-------------|--------------------|--------------|----------|
| TUCP_000635 | XL0C_023526 | ENSRNOT00000083220 | 0.98030576   | 2.26E-08 |
| TUCP_000635 | XL0C_023526 | ENSRNOT00000003780 | 0.951737824  | 1.90E-06 |
| TUCP_000635 | XL0C_023526 | ENSRNOT00000026643 | 0.978538176  | 3.46E-08 |
| TUCP_000635 | XL0C_023526 | ENSRNOT00000001403 | 0.954655644  | 1.40E-06 |
| TUCP_000635 | XL0C_023526 | ENSRNOT00000022190 | -0.950677021 | 2.12E-06 |
| TUCP_000635 | XL0C_023526 | ENSRNOT00000013067 | -0.959190802 | 8.32E-07 |
| TUCP_000635 | XL0C_023526 | ENSRNOT00000025966 | 0.986832166  | 3.05E-09 |
| TUCP_000635 | XL0C_023526 | ENSRNOT00000050515 | 0.958062169  | 9.52E-07 |
| TUCP_000635 | XL0C_023526 | ENSRNOT00000088509 | 0.957487956  | 1.02E-06 |
| TUCP_000635 | XL0C_023526 | ENSRNOT00000016739 | 0.954957309  | 1.35E-06 |
| TUCP_000635 | XL0C_023526 | ENSRNOT00000066133 | -0.966015056 | 3.37E-07 |
| TUCP_000635 | XL0C_023526 | ENSRNOT00000078102 | 0.960458538  | 7.12E-07 |
| TUCP_000635 | XL0C_023526 | ENSRNOT00000077999 | 0.961176292  | 6.51E-07 |
| TUCP_000635 | XL0C_023526 | ENSRNOT00000034883 | -0.951003387 | 2.05E-06 |
| TUCP_000635 | XL0C_023526 | ENSRNOT00000072357 | -0.951905627 | 1.87E-06 |
| TUCP_000635 | XL0C_023526 | ENSRNOT00000005587 | -0.95597021  | 1.21E-06 |
| TUCP_000635 | XL0C_023526 | ENSRNOT00000081047 | 0.961285265  | 6.42E-07 |
| TUCP_000635 | XL0C_023526 | ENSRNOT00000005073 | 0.950227279  | 2.21E-06 |
| TUCP_000635 | XL0C_023526 | ENSRNOT00000058351 | 0.974066605  | 8.84E-08 |
| TUCP_000635 | XL0C_023526 | ENSRNOT00000032248 | 0.956719573  | 1.11E-06 |
| TUCP_000635 | XL0C_023526 | ENSRNOT00000027910 | 0.975722683  | 6.38E-08 |
| TUCP_000635 | XL0C_023526 | ENSRNOT00000078475 | 0.966814458  | 3.00E-07 |
| TUCP_000635 | XL0C_023526 | ENSRNOT00000089211 | 0.966285886  | 3.24E-07 |
| TUCP_000635 | XL0C_023526 | ENSRNOT00000040169 | 0.967349978  | 2.77E-07 |
| TUCP_000635 | XL0C_023526 | ENSRNOT00000019133 | 0.954753861  | 1.38E-06 |
| TUCP_000635 | XL0C_023526 | ENSRNOT00000065300 | 0.965269432  | 3.75E-07 |
| TUCP_000635 | XL0C_023526 | ENSRNOT00000020383 | 0.952874099  | 1.69E-06 |
| TUCP_000635 | XL0C_023526 | ENSRNOT00000005459 | 0.955173289  | 1.32E-06 |
| TUCP_000635 | XL0C_023526 | ENSRNOT00000015518 | -0.959523158 | 7.99E-07 |
| TUCP_000635 | XL0C_023526 | ENSRNOT00000019910 | -0.95446905  | 1.43E-06 |
| TUCP_000635 | XL0C_023526 | ENSRNOT00000000302 | 0.976945554  | 4.93E-08 |
| TUCP_000635 | XL0C_023526 | ENSRNOT00000090262 | 0.950787408  | 2.09E-06 |
| TUCP_000635 | XL0C_023526 | ENSRNOT00000078070 | 0.978192508  | 3.74E-08 |
| TUCP_000635 | XL0C_023526 | ENSRNOT00000015092 | 0.950309297  | 2.19E-06 |
| TUCP_000635 | XL0C_023526 | ENSRNOT00000015678 | -0.957607434 | 1.00E-06 |
| TUCP_000635 | XL0C_023526 | ENSRNOT00000089293 | 0.957821908  | 9.79E-07 |
| TUCP_000635 | XL0C_023526 | ENSRNOT00000046745 | 0.958678168  | 8.85E-07 |
| TUCP_000635 | XL0C_023526 | ENSRNOT00000005489 | 0.95609412   | 1.19E-06 |
| TUCP_000635 | XL0C_023526 | ENSRNOT00000000013 | 0.960085866  | 7.46E-07 |
| TUCP_000635 | XL0C_023526 | ENSRNOT00000074649 | 0.974581341  | 8.01E-08 |
| TUCP_000635 | XL0C_023526 | ENSRNOT00000077146 | -0.95836103  | 9.19E-07 |
| TUCP_000635 | XL0C_023526 | ENSRNOT00000052063 | 0.959591902  | 7.93E-07 |
| TUCP_000635 | XL0C_023526 | ENSRNOT00000084422 | 0.951597536  | 1.93E-06 |
| TUCP_000635 | XL0C_023526 | ENSRNOT00000060002 | -0.951323708 | 1.98E-06 |
| TUCP_000635 | XL0C_023526 | ENSRNOT00000004046 | -0.984907615 | 6.01E-09 |
| TUCP_000635 | XL0C_023526 | ENSRNOT00000088054 | 0.954573966  | 1.41E-06 |
| TUCP_000635 | XL0C_023526 | ENSRNOT00000006395 | -0.957197912 | 1.05E-06 |
| TUCP_000635 | XL0C_023526 | ENSRNOT00000006824 | -0.956130317 | 1.19E-06 |
| TUCP_000635 | XL0C_023526 | ENSRNOT00000040393 | 0.958285183  | 9.27E-07 |
| TUCP_000635 | XL0C_023526 | ENSRNOT00000025147 | 0.98182597   | 1.51E-08 |
| TUCP_000635 | XL0C_023526 | ENSRNOT00000042799 | 0.980873791  | 1.95E-08 |

|             |             |                     |              |          |
|-------------|-------------|---------------------|--------------|----------|
| TUCP_000635 | XLOC_023526 | ENSRNOT00000048933  | -0.959785898 | 7.74E-07 |
| TUCP_000635 | XLOC_023526 | ENSRNOT00000029202  | -0.953941291 | 1.51E-06 |
| TUCP_000635 | XLOC_023526 | ENSRNOT00000060362  | 0.952256088  | 1.80E-06 |
| TUCP_000635 | XLOC_023526 | ENSRNOT00000058362  | 0.952386286  | 1.78E-06 |
| TUCP_000635 | XLOC_023526 | ENSRNOT00000084069  | 0.95682152   | 1.10E-06 |
| TUCP_000635 | XLOC_023526 | ENSRNOT00000022097  | 0.960954225  | 6.69E-07 |
| TUCP_000635 | XLOC_023526 | ENSRNOT00000008901  | -0.952920392 | 1.68E-06 |
| TUCP_000635 | XLOC_023526 | ENSRNOT00000061201  | -0.953943418 | 1.51E-06 |
| TUCP_000635 | XLOC_023526 | ENSRNOT00000005659  | 0.958636532  | 8.90E-07 |
| TUCP_000635 | XLOC_023526 | ENSRNOT00000017761  | 0.957274008  | 1.04E-06 |
| TUCP_000635 | XLOC_023526 | ENSRNOT00000002443  | 0.953600679  | 1.57E-06 |
| TUCP_000635 | XLOC_023526 | ENSRNOT00000026691  | 0.975481983  | 6.70E-08 |
| TUCP_000635 | XLOC_023526 | ENSRNOT000000022142 | 0.953434217  | 1.59E-06 |
| TUCP_000635 | XLOC_023526 | ENSRNOT000000055992 | -0.963074829 | 5.08E-07 |
| TUCP_000635 | XLOC_023526 | ENSRNOT000000027970 | 0.961932897  | 5.91E-07 |
| TUCP_000635 | XLOC_023526 | ENSRNOT00000010748  | 0.959424361  | 8.09E-07 |
| TUCP_000635 | XLOC_023526 | ENSRNOT00000015537  | 0.967572051  | 2.67E-07 |
| TUCP_000635 | XLOC_023526 | ENSRNOT000000029764 | -0.954050903 | 1.49E-06 |
| TUCP_000635 | XLOC_023526 | ENSRNOT000000035474 | 0.955246828  | 1.31E-06 |
| TUCP_000635 | XLOC_023526 | ENSRNOT000000080695 | 0.970178543  | 1.77E-07 |
| TUCP_000635 | XLOC_023526 | ENSRNOT000000079011 | -0.954684822 | 1.39E-06 |
| TUCP_000635 | XLOC_023526 | ENSRNOT00000015946  | -0.950907303 | 2.07E-06 |
| TUCP_000635 | XLOC_023526 | ENSRNOT000000025009 | 0.967250257  | 2.81E-07 |
| TUCP_000635 | XLOC_023526 | ENSRNOT00000018074  | -0.958671879 | 8.86E-07 |
| TUCP_000635 | XLOC_023526 | ENSRNOT000000076872 | 0.951095034  | 2.03E-06 |
| TUCP_000635 | XLOC_023526 | ENSRNOT000000091205 | 0.979429314  | 2.80E-08 |
| TUCP_000635 | XLOC_023526 | ENSRNOT000000085519 | 0.955554444  | 1.27E-06 |
| TUCP_000635 | XLOC_023526 | ENSRNOT00000000120  | 0.968030318  | 2.49E-07 |
| TUCP_000635 | XLOC_023526 | ENSRNOT000000025705 | 0.960047674  | 7.50E-07 |
| TUCP_000635 | XLOC_023526 | ENSRNOT000000078906 | -0.954671893 | 1.40E-06 |
| TUCP_000635 | XLOC_023526 | ENSRNOT000000029125 | 0.980436218  | 2.18E-08 |
| TUCP_000635 | XLOC_023526 | ENSRNOT000000042125 | 0.974914792  | 7.50E-08 |
| TUCP_000635 | XLOC_023526 | ENSRNOT000000060698 | -0.960347058 | 7.22E-07 |
| TUCP_000635 | XLOC_023526 | ENSRNOT000000040069 | 0.982317414  | 1.32E-08 |
| TUCP_000635 | XLOC_023526 | ENSRNOT00000014814  | 0.972541808  | 1.17E-07 |
| TUCP_000635 | XLOC_023526 | ENSRNOT000000026760 | -0.95647652  | 1.14E-06 |
| TUCP_000635 | XLOC_023526 | ENSRNOT000000023543 | -0.95751751  | 1.01E-06 |
| TUCP_000635 | XLOC_023526 | ENSRNOT000000080207 | 0.968735039  | 2.23E-07 |
| TUCP_000635 | XLOC_023526 | ENSRNOT00000015495  | -0.954131042 | 1.48E-06 |
| TUCP_000635 | XLOC_023526 | ENSRNOT00000016568  | 0.951811112  | 1.89E-06 |
| TUCP_000635 | XLOC_023526 | ENSRNOT000000065529 | 0.972548799  | 1.17E-07 |
| TUCP_000635 | XLOC_023526 | ENSRNOT000000077503 | 0.960128257  | 7.42E-07 |
| TUCP_000635 | XLOC_023526 | ENSRNOT000000075708 | 0.979035583  | 3.08E-08 |
| TUCP_000635 | XLOC_023526 | ENSRNOT000000067901 | -0.956808057 | 1.10E-06 |
| TUCP_000635 | XLOC_023526 | ENSRNOT000000004463 | 0.950403151  | 2.17E-06 |
| TUCP_000635 | XLOC_023526 | ENSRNOT000000027967 | 0.970274348  | 1.74E-07 |
| TUCP_000635 | XLOC_023526 | ENSRNOT000000008982 | 0.983329333  | 9.86E-09 |
| TUCP_000635 | XLOC_023526 | ENSRNOT000000021674 | 0.967074715  | 2.88E-07 |
| TUCP_000635 | XLOC_023526 | ENSRNOT000000047210 | 0.953035023  | 1.66E-06 |
| TUCP_000635 | XLOC_023526 | ENSRNOT000000036613 | -0.972804589 | 1.12E-07 |
| TUCP_000635 | XLOC_023526 | ENSRNOT000000028876 | -0.956041789 | 1.20E-06 |



|             |             |                    |              |          |
|-------------|-------------|--------------------|--------------|----------|
| TUCP_000635 | XLOC_023526 | ENSRNOT00000014384 | -0.950457147 | 2.16E-06 |
| TUCP_000635 | XLOC_023526 | ENSRNOT00000083957 | 0.956705451  | 1.11E-06 |
| TUCP_000635 | XLOC_023526 | ENSRNOT00000005311 | 0.956615764  | 1.13E-06 |
| TUCP_000635 | XLOC_023526 | ENSRNOT00000046639 | 0.956212864  | 1.18E-06 |
| TUCP_000635 | XLOC_023526 | ENSRNOT00000015799 | 0.963269709  | 4.95E-07 |
| TUCP_000635 | XLOC_023526 | ENSRNOT00000008113 | -0.9681406   | 2.45E-07 |
| TUCP_000635 | XLOC_023526 | ENSRNOT00000079996 | 0.956524888  | 1.14E-06 |
| TUCP_000635 | XLOC_023526 | ENSRNOT00000021629 | -0.96758685  | 2.67E-07 |
| TUCP_000634 | XLOC_023526 | ENSRNOT00000006188 | -0.970570667 | 1.65E-07 |
| TUCP_000634 | XLOC_023526 | ENSRNOT00000006186 | 0.956065667  | 1.20E-06 |
| TUCP_000634 | XLOC_023526 | ENSRNOT00000090621 | 0.968230253  | 2.42E-07 |
| TUCP_000634 | XLOC_023526 | ENSRNOT00000016088 | 0.975620965  | 6.51E-08 |
| TUCP_000634 | XLOC_023526 | ENSRNOT00000013743 | 0.967999024  | 2.50E-07 |
| TUCP_000634 | XLOC_023526 | ENSRNOT00000075397 | 0.977184218  | 4.69E-08 |
| TUCP_000634 | XLOC_023526 | ENSRNOT00000032926 | -0.965537878 | 3.61E-07 |
| TUCP_000634 | XLOC_023526 | ENSRNOT00000019104 | -0.954838755 | 1.37E-06 |
| TUCP_000634 | XLOC_023526 | ENSRNOT00000006217 | 0.950298723  | 2.20E-06 |
| TUCP_000634 | XLOC_023526 | ENSRNOT00000049349 | 0.963611145  | 4.73E-07 |
| TUCP_000634 | XLOC_023526 | ENSRNOT00000089319 | 0.970696585  | 1.62E-07 |
| TUCP_000634 | XLOC_023526 | ENSRNOT00000079138 | 0.959290229  | 8.22E-07 |
| TUCP_000634 | XLOC_023526 | ENSRNOT00000078737 | -0.955943637 | 1.21E-06 |
| TUCP_000634 | XLOC_023526 | ENSRNOT00000086706 | 0.971126327  | 1.51E-07 |
| TUCP_000634 | XLOC_023526 | ENSRNOT00000076916 | 0.957005909  | 1.08E-06 |
| TUCP_000634 | XLOC_023526 | ENSRNOT00000004017 | 0.982668397  | 1.20E-08 |
| TUCP_000634 | XLOC_023526 | ENSRNOT00000010030 | -0.965882296 | 3.44E-07 |
| TUCP_000634 | XLOC_023526 | ENSRNOT00000011130 | -0.956504125 | 1.14E-06 |
| TUCP_000634 | XLOC_023526 | ENSRNOT00000031692 | -0.965825299 | 3.47E-07 |
| TUCP_000634 | XLOC_023526 | ENSRNOT00000014384 | -0.966469513 | 3.16E-07 |
| TUCP_000634 | XLOC_023526 | ENSRNOT00000042638 | 0.960632347  | 6.97E-07 |
| TUCP_000634 | XLOC_023526 | ENSRNOT00000030850 | 0.96151327   | 6.23E-07 |
| TUCP_000634 | XLOC_023526 | ENSRNOT00000006752 | 0.980625518  | 2.08E-08 |
| TUCP_000634 | XLOC_023526 | ENSRNOT00000057562 | 0.964008802  | 4.48E-07 |
| TUCP_000634 | XLOC_023526 | ENSRNOT00000073370 | 0.98184121   | 1.51E-08 |
| TUCP_000634 | XLOC_023526 | ENSRNOT00000019921 | 0.981806233  | 1.52E-08 |
| TUCP_000634 | XLOC_023526 | ENSRNOT00000065978 | 0.98140509   | 1.70E-08 |
| TUCP_000634 | XLOC_023526 | ENSRNOT00000025767 | 0.957921912  | 9.68E-07 |
| TUCP_000634 | XLOC_023526 | ENSRNOT00000065871 | 0.966611334  | 3.09E-07 |
| TUCP_000634 | XLOC_023526 | ENSRNOT00000077999 | 0.963528927  | 4.78E-07 |
| TUCP_000634 | XLOC_023526 | ENSRNOT00000067626 | -0.953784456 | 1.54E-06 |
| TUCP_000634 | XLOC_023526 | ENSRNOT00000026726 | -0.951455486 | 1.96E-06 |
| TUCP_000634 | XLOC_023526 | ENSRNOT00000013286 | 0.983460641  | 9.48E-09 |
| TUCP_000634 | XLOC_023526 | ENSRNOT00000015188 | 0.961744359  | 6.05E-07 |
| TUCP_000634 | XLOC_023526 | ENSRNOT00000017648 | -0.955810161 | 1.23E-06 |
| TUCP_000634 | XLOC_023526 | ENSRNOT00000018488 | -0.960705958 | 6.91E-07 |
| TUCP_000634 | XLOC_023526 | ENSRNOT00000089673 | -0.957285924 | 1.04E-06 |
| TUCP_000634 | XLOC_023526 | ENSRNOT00000005839 | 0.951259106  | 2.00E-06 |
| TUCP_000634 | XLOC_023526 | ENSRNOT00000075934 | -0.954815394 | 1.37E-06 |
| TUCP_000634 | XLOC_023526 | ENSRNOT00000030074 | 0.965623388  | 3.57E-07 |
| TUCP_000634 | XLOC_023526 | ENSRNOT00000067391 | -0.962262776 | 5.66E-07 |
| TUCP_000634 | XLOC_023526 | ENSRNOT00000009150 | 0.975697675  | 6.41E-08 |
| TUCP_000634 | XLOC_023526 | ENSRNOT00000084709 | 0.981582352  | 1.62E-08 |

|             |             |                     |              |          |
|-------------|-------------|---------------------|--------------|----------|
| TUCP_000634 | XLOC_023526 | ENSRNOT00000029179  | -0.960358623 | 7.21E-07 |
| TUCP_000634 | XLOC_023526 | ENSRNOT00000009156  | 0.952691624  | 1.72E-06 |
| TUCP_000634 | XLOC_023526 | ENSRNOT00000026481  | 0.951824411  | 1.88E-06 |
| TUCP_000634 | XLOC_023526 | ENSRNOT00000000469  | 0.967277747  | 2.80E-07 |
| TUCP_000634 | XLOC_023526 | ENSRNOT00000007326  | -0.952187378 | 1.82E-06 |
| TUCP_000634 | XLOC_023526 | ENSRNOT000000082709 | -0.961517923 | 6.23E-07 |
| TUCP_000634 | XLOC_023526 | ENSRNOT00000025856  | -0.960466931 | 7.12E-07 |
| TUCP_000634 | XLOC_023526 | ENSRNOT00000072299  | 0.96384476   | 4.58E-07 |
| TUCP_000634 | XLOC_023526 | ENSRNOT00000072357  | -0.981478661 | 1.66E-08 |
| TUCP_000634 | XLOC_023526 | ENSRNOT00000016132  | -0.965717254 | 3.52E-07 |
| TUCP_000634 | XLOC_023526 | ENSRNOT00000013067  | -0.98263618  | 1.21E-08 |
| TUCP_000634 | XLOC_023526 | ENSRNOT00000074515  | -0.970210957 | 1.76E-07 |
| TUCP_000634 | XLOC_023526 | ENSRNOT00000075843  | -0.951565825 | 1.93E-06 |
| TUCP_000634 | XLOC_023526 | ENSRNOT00000066952  | 0.963529754  | 4.78E-07 |
| TUCP_000634 | XLOC_023526 | ENSRNOT00000027145  | -0.959467647 | 8.05E-07 |
| TUCP_000634 | XLOC_023526 | ENSRNOT00000002313  | -0.962583823 | 5.42E-07 |
| TUCP_000634 | XLOC_023526 | ENSRNOT00000016637  | -0.976470081 | 5.46E-08 |
| TUCP_000634 | XLOC_023526 | ENSRNOT00000038994  | -0.969004439 | 2.14E-07 |
| TUCP_000634 | XLOC_023526 | ENSRNOT00000019531  | -0.954390449 | 1.44E-06 |
| TUCP_000634 | XLOC_023526 | ENSRNOT00000074586  | -0.972500602 | 1.18E-07 |
| TUCP_000634 | XLOC_023526 | ENSRNOT00000045765  | -0.961163759 | 6.52E-07 |
| TUCP_000634 | XLOC_023526 | ENSRNOT000000088214 | 0.983494372  | 9.38E-09 |
| TUCP_000634 | XLOC_023526 | ENSRNOT000000084031 | 0.968387178  | 2.36E-07 |
| TUCP_000634 | XLOC_023526 | ENSRNOT00000011880  | 0.968577465  | 2.29E-07 |
| TUCP_000634 | XLOC_023526 | ENSRNOT00000005486  | -0.963304512 | 4.93E-07 |
| TUCP_000634 | XLOC_023526 | ENSRNOT00000023989  | 0.958031689  | 9.56E-07 |
| TUCP_000634 | XLOC_023526 | ENSRNOT00000003992  | -0.962093741 | 5.78E-07 |
| TUCP_000634 | XLOC_023526 | ENSRNOT00000050515  | 0.972755007  | 1.13E-07 |
| TUCP_000634 | XLOC_023526 | ENSRNOT000000089980 | -0.968309559 | 2.39E-07 |
| TUCP_000634 | XLOC_023526 | ENSRNOT00000055602  | -0.973465864 | 9.91E-08 |
| TUCP_000634 | XLOC_023526 | ENSRNOT00000046745  | 0.964063966  | 4.44E-07 |
| TUCP_000634 | XLOC_023526 | ENSRNOT00000055607  | -0.971386265 | 1.44E-07 |
| TUCP_000634 | XLOC_023526 | ENSRNOT000000089294 | -0.95067244  | 2.12E-06 |
| TUCP_000634 | XLOC_023526 | ENSRNOT00000023876  | 0.975236561  | 7.04E-08 |
| TUCP_000634 | XLOC_023526 | ENSRNOT00000033359  | 0.961755452  | 6.04E-07 |
| TUCP_000634 | XLOC_023526 | ENSRNOT00000061201  | -0.971722109 | 1.36E-07 |
| TUCP_000634 | XLOC_023526 | ENSRNOT00000013801  | 0.975491378  | 6.68E-08 |
| TUCP_000634 | XLOC_023526 | ENSRNOT00000002187  | -0.959758516 | 7.77E-07 |
| TUCP_000634 | XLOC_023526 | ENSRNOT00000049285  | -0.97464095  | 7.92E-08 |
| TUCP_000634 | XLOC_023526 | ENSRNOT00000015239  | -0.972926929 | 1.09E-07 |
| TUCP_000634 | XLOC_023526 | ENSRNOT00000074649  | 0.977843797  | 4.05E-08 |
| TUCP_000634 | XLOC_023526 | ENSRNOT00000035277  | 0.977707733  | 4.18E-08 |
| TUCP_000634 | XLOC_023526 | ENSRNOT00000018877  | -0.956553607 | 1.13E-06 |
| TUCP_000634 | XLOC_023526 | ENSRNOT00000077146  | -0.980675875 | 2.05E-08 |
| TUCP_000634 | XLOC_023526 | ENSRNOT00000044847  | -0.959093537 | 8.42E-07 |
| TUCP_000634 | XLOC_023526 | ENSRNOT00000052063  | 0.953014209  | 1.67E-06 |
| TUCP_000634 | XLOC_023526 | ENSRNOT00000031672  | -0.967364871 | 2.76E-07 |
| TUCP_000634 | XLOC_023526 | ENSRNOT00000060002  | -0.965723856 | 3.52E-07 |
| TUCP_000634 | XLOC_023526 | ENSRNOT000000086456 | -0.966615935 | 3.09E-07 |
| TUCP_000634 | XLOC_023526 | ENSRNOT00000052033  | -0.952963407 | 1.68E-06 |
| TUCP_000634 | XLOC_023526 | ENSRNOT00000075209  | -0.971468627 | 1.42E-07 |

|             |             |                     |              |          |
|-------------|-------------|---------------------|--------------|----------|
| TUCP_000634 | XL0C_023526 | ENSRNOT00000006395  | -0.954180982 | 1.47E-06 |
| TUCP_000634 | XL0C_023526 | ENSRNOT000000023979 | 0.954696385  | 1.39E-06 |
| TUCP_000634 | XL0C_023526 | ENSRNOT000000023977 | -0.969747578 | 1.90E-07 |
| TUCP_000634 | XL0C_023526 | ENSRNOT000000066133 | -0.977779889 | 4.11E-08 |
| TUCP_000634 | XL0C_023526 | ENSRNOT000000048933 | -0.967968653 | 2.52E-07 |
| TUCP_000634 | XL0C_023526 | ENSRNOT000000027970 | 0.9663388    | 3.22E-07 |
| TUCP_000634 | XL0C_023526 | ENSRNOT000000035385 | 0.972314691  | 1.22E-07 |
| TUCP_000634 | XL0C_023526 | ENSRNOT000000057738 | 0.978180993  | 3.75E-08 |
| TUCP_000634 | XL0C_023526 | ENSRNOT000000080443 | 0.95496666   | 1.35E-06 |
| TUCP_000634 | XL0C_023526 | ENSRNOT000000065897 | 0.966438798  | 3.17E-07 |
| TUCP_000634 | XL0C_023526 | ENSRNOT000000064535 | -0.97809343  | 3.83E-08 |
| TUCP_000634 | XL0C_023526 | ENSRNOT000000015624 | 0.95152113   | 1.94E-06 |
| TUCP_000634 | XL0C_023526 | ENSRNOT000000087408 | 0.96153586   | 6.22E-07 |
| TUCP_000634 | XL0C_023526 | ENSRNOT000000085295 | -0.956939771 | 1.08E-06 |
| TUCP_000634 | XL0C_023526 | ENSRNOT000000072632 | -0.96211082  | 5.77E-07 |
| TUCP_000634 | XL0C_023526 | ENSRNOT00000002114  | -0.972127584 | 1.26E-07 |
| TUCP_000634 | XL0C_023526 | ENSRNOT000000039102 | 0.983437536  | 9.55E-09 |
| TUCP_000634 | XL0C_023526 | ENSRNOT000000091205 | 0.959417492  | 8.10E-07 |
| TUCP_000634 | XL0C_023526 | ENSRNOT00000009742  | -0.968841016 | 2.20E-07 |
| TUCP_000634 | XL0C_023526 | ENSRNOT000000010983 | 0.979341356  | 2.86E-08 |
| TUCP_000634 | XL0C_023526 | ENSRNOT000000007369 | 0.950948409  | 2.06E-06 |
| TUCP_000634 | XL0C_023526 | ENSRNOT000000060698 | -0.97515404  | 7.15E-08 |
| TUCP_000634 | XL0C_023526 | ENSRNOT000000058351 | 0.963543827  | 4.77E-07 |
| TUCP_000634 | XL0C_023526 | ENSRNOT000000045946 | 0.965586799  | 3.59E-07 |
| TUCP_000634 | XL0C_023526 | ENSRNOT000000010748 | 0.958075297  | 9.51E-07 |
| TUCP_000634 | XL0C_023526 | ENSRNOT000000017998 | 0.979224972  | 2.94E-08 |
| TUCP_000634 | XL0C_023526 | ENSRNOT000000065529 | 0.959293591  | 8.22E-07 |
| TUCP_000634 | XL0C_023526 | ENSRNOT000000017776 | 0.95827843   | 9.28E-07 |
| TUCP_000634 | XL0C_023526 | ENSRNOT000000021534 | -0.959835145 | 7.69E-07 |
| TUCP_000634 | XL0C_023526 | ENSRNOT000000023628 | -0.966472522 | 3.15E-07 |
| TUCP_000634 | XL0C_023526 | ENSRNOT000000088679 | -0.958348135 | 9.21E-07 |
| TUCP_000634 | XL0C_023526 | ENSRNOT000000087033 | -0.952280866 | 1.80E-06 |
| TUCP_000634 | XL0C_023526 | ENSRNOT000000037809 | -0.964350745 | 4.27E-07 |
| TUCP_000634 | XL0C_023526 | ENSRNOT000000002028 | 0.954899033  | 1.36E-06 |
| TUCP_000634 | XL0C_023526 | ENSRNOT000000013321 | 0.960611153  | 6.99E-07 |
| TUCP_000634 | XL0C_023526 | ENSRNOT000000016776 | -0.959603038 | 7.92E-07 |
| TUCP_000634 | XL0C_023526 | ENSRNOT000000008987 | -0.962874551 | 5.22E-07 |
| TUCP_000634 | XL0C_023526 | ENSRNOT000000092876 | -0.966499378 | 3.14E-07 |
| TUCP_000634 | XL0C_023526 | ENSRNOT000000024253 | 0.982430519  | 1.28E-08 |
| TUCP_000634 | XL0C_023526 | ENSRNOT000000088073 | -0.957117109 | 1.06E-06 |
| TUCP_000634 | XL0C_023526 | ENSRNOT000000045833 | 0.980086184  | 2.39E-08 |
| TUCP_000634 | XL0C_023526 | ENSRNOT00000009080  | -0.974416829 | 8.27E-08 |
| TUCP_000634 | XL0C_023526 | ENSRNOT000000063930 | -0.977691339 | 4.19E-08 |
| TUCP_000634 | XL0C_023526 | ENSRNOT000000048613 | 0.960261779  | 7.30E-07 |
| TUCP_000634 | XL0C_023526 | ENSRNOT000000013025 | -0.976579859 | 5.34E-08 |
| TUCP_000634 | XL0C_023526 | ENSRNOT000000041237 | -0.961884648 | 5.94E-07 |
| TUCP_000634 | XL0C_023526 | ENSRNOT000000023430 | -0.956744214 | 1.11E-06 |
| TUCP_000634 | XL0C_023526 | ENSRNOT000000057953 | 0.980647936  | 2.07E-08 |
| TUCP_000634 | XL0C_023526 | ENSRNOT000000021114 | 0.969087859  | 2.11E-07 |
| TUCP_000634 | XL0C_023526 | ENSRNOT000000016485 | 0.95632558   | 1.16E-06 |
| TUCP_000634 | XL0C_023526 | ENSRNOT000000018074 | -0.965511453 | 3.63E-07 |

|             |             |                     |              |          |
|-------------|-------------|---------------------|--------------|----------|
| TUCP_000634 | XL0C_023526 | ENSRNOT00000001679  | 0.95179858   | 1.89E-06 |
| TUCP_000634 | XL0C_023526 | ENSRNOT000000013613 | -0.957748868 | 9.88E-07 |
| TUCP_000634 | XL0C_023526 | ENSRNOT000000010419 | 0.95964143   | 7.88E-07 |
| TUCP_000634 | XL0C_023526 | ENSRNOT00000078884  | -0.968273277 | 2.40E-07 |
| TUCP_000634 | XL0C_023526 | ENSRNOT00000003326  | -0.957839259 | 9.77E-07 |
| TUCP_000634 | XL0C_023526 | ENSRNOT000000016306 | -0.957160688 | 1.06E-06 |
| TUCP_000634 | XL0C_023526 | ENSRNOT000000015476 | -0.964477857 | 4.20E-07 |
| TUCP_000634 | XL0C_023526 | ENSRNOT000000020207 | 0.960520506  | 7.07E-07 |
| TUCP_000634 | XL0C_023526 | ENSRNOT000000074683 | 0.980051174  | 2.41E-08 |
| TUCP_000634 | XL0C_023526 | ENSRNOT000000025079 | -0.965006792 | 3.90E-07 |
| TUCP_000634 | XL0C_023526 | ENSRNOT000000048754 | -0.952254205 | 1.80E-06 |
| TUCP_000634 | XL0C_023526 | ENSRNOT000000077060 | 0.972429974  | 1.20E-07 |
| TUCP_000634 | XL0C_023526 | ENSRNOT000000021458 | -0.963123239 | 5.05E-07 |
| TUCP_000634 | XL0C_023526 | ENSRNOT000000007824 | -0.960665805 | 6.94E-07 |
| TUCP_000634 | XL0C_023526 | ENSRNOT000000020681 | -0.958216897 | 9.35E-07 |
| TUCP_000634 | XL0C_023526 | ENSRNOT000000057898 | -0.964069391 | 4.44E-07 |
| TUCP_000634 | XL0C_023526 | ENSRNOT000000024677 | 0.976360279  | 5.59E-08 |
| TUCP_000634 | XL0C_023526 | ENSRNOT000000056100 | -0.968445253 | 2.34E-07 |
| TUCP_000634 | XL0C_023526 | ENSRNOT000000009811 | 0.961321548  | 6.39E-07 |
| TUCP_000634 | XL0C_023526 | ENSRNOT000000052002 | 0.960421387  | 7.16E-07 |
| TUCP_000634 | XL0C_023526 | ENSRNOT000000077231 | 0.954330106  | 1.45E-06 |
| TUCP_000634 | XL0C_023526 | ENSRNOT000000030798 | -0.9565272   | 1.14E-06 |
| TUCP_000634 | XL0C_023526 | ENSRNOT000000072762 | -0.965205265 | 3.79E-07 |
| TUCP_000634 | XL0C_023526 | ENSRNOT000000071540 | 0.950939081  | 2.06E-06 |
| TUCP_000634 | XL0C_023526 | ENSRNOT000000031701 | -0.951795503 | 1.89E-06 |
| TUCP_000634 | XL0C_023526 | ENSRNOT000000073860 | -0.963057776 | 5.09E-07 |
| TUCP_000634 | XL0C_023526 | ENSRNOT000000072849 | -0.958769304 | 8.76E-07 |
| TUCP_000634 | XL0C_023526 | ENSRNOT000000073643 | -0.976703949 | 5.20E-08 |
| TUCP_000634 | XL0C_023526 | ENSRNOT000000078349 | -0.961446455 | 6.29E-07 |
| TUCP_000634 | XL0C_023526 | ENSRNOT000000022502 | -0.96031353  | 7.25E-07 |
| TUCP_000634 | XL0C_023526 | ENSRNOT000000017556 | 0.958222216  | 9.34E-07 |
| TUCP_000634 | XL0C_023526 | ENSRNOT000000085545 | -0.96566688  | 3.55E-07 |
| TUCP_000634 | XL0C_023526 | ENSRNOT000000021802 | 0.965662499  | 3.55E-07 |
| TUCP_000634 | XL0C_023526 | ENSRNOT000000024352 | 0.956048891  | 1.20E-06 |
| TUCP_000634 | XL0C_023526 | ENSRNOT000000082627 | -0.970147395 | 1.78E-07 |
| TUCP_000634 | XL0C_023526 | ENSRNOT000000018122 | 0.978505001  | 3.49E-08 |
| TUCP_000634 | XL0C_023526 | ENSRNOT000000072118 | 0.977624397  | 4.25E-08 |
| TUCP_000634 | XL0C_023526 | ENSRNOT000000003780 | 0.956442108  | 1.15E-06 |
| TUCP_000634 | XL0C_023526 | ENSRNOT000000003787 | -0.965897952 | 3.43E-07 |
| TUCP_000634 | XL0C_023526 | ENSRNOT000000014506 | -0.965523324 | 3.62E-07 |
| TUCP_000634 | XL0C_023526 | ENSRNOT000000023262 | -0.975945879 | 6.09E-08 |
| TUCP_000634 | XL0C_023526 | ENSRNOT000000059246 | 0.976780332  | 5.11E-08 |
| TUCP_000634 | XL0C_023526 | ENSRNOT000000025104 | -0.9514231   | 1.96E-06 |
| TUCP_000634 | XL0C_023526 | ENSRNOT000000091427 | -0.966689393 | 3.05E-07 |
| TUCP_000634 | XL0C_023526 | ENSRNOT000000026312 | 0.989681515  | 9.05E-10 |
| TUCP_000634 | XL0C_023526 | ENSRNOT000000005604 | 0.977259553  | 4.61E-08 |
| TUCP_000634 | XL0C_023526 | ENSRNOT000000068381 | 0.980248007  | 2.29E-08 |
| TUCP_000634 | XL0C_023526 | ENSRNOT000000068026 | -0.975707615 | 6.40E-08 |
| TUCP_000634 | XL0C_023526 | ENSRNOT000000085621 | 0.965678845  | 3.54E-07 |
| TUCP_000634 | XL0C_023526 | ENSRNOT000000014821 | -0.95922407  | 8.29E-07 |
| TUCP_000634 | XL0C_023526 | ENSRNOT000000058382 | 0.985036412  | 5.76E-09 |

|             |             |                    |              |          |
|-------------|-------------|--------------------|--------------|----------|
| TUCP_000634 | XL0C_023526 | ENSRNOT00000082711 | 0.961710978  | 6.08E-07 |
| TUCP_000634 | XL0C_023526 | ENSRNOT00000026531 | -0.9888632   | 1.32E-09 |
| TUCP_000634 | XL0C_023526 | ENSRNOT00000035605 | 0.968438366  | 2.34E-07 |
| TUCP_000634 | XL0C_023526 | ENSRNOT00000025221 | -0.950272623 | 2.20E-06 |
| TUCP_000634 | XL0C_023526 | ENSRNOT00000005172 | 0.962882148  | 5.21E-07 |
| TUCP_000634 | XL0C_023526 | ENSRNOT00000017746 | -0.965515701 | 3.62E-07 |
| TUCP_000634 | XL0C_023526 | ENSRNOT00000017995 | 0.968782548  | 2.22E-07 |
| TUCP_000634 | XL0C_023526 | ENSRNOT00000071897 | -0.959655995 | 7.87E-07 |
| TUCP_000634 | XL0C_023526 | ENSRNOT00000081725 | 0.978466363  | 3.52E-08 |
| TUCP_000634 | XL0C_023526 | ENSRNOT00000005459 | 0.981360496  | 1.72E-08 |
| TUCP_000634 | XL0C_023526 | ENSRNOT00000009135 | 0.954177928  | 1.47E-06 |
| TUCP_000634 | XL0C_023526 | ENSRNOT00000024452 | -0.968266649 | 2.40E-07 |
| TUCP_000634 | XL0C_023526 | ENSRNOT00000000258 | -0.951758393 | 1.90E-06 |
| TUCP_000634 | XL0C_023526 | ENSRNOT00000028888 | 0.950655291  | 2.12E-06 |
| TUCP_000634 | XL0C_023526 | ENSRNOT00000066032 | 0.952548982  | 1.75E-06 |
| TUCP_000634 | XL0C_023526 | ENSRNOT00000002109 | 0.957817334  | 9.80E-07 |
| TUCP_000634 | XL0C_023526 | ENSRNOT00000025314 | 0.963373098  | 4.88E-07 |
| TUCP_000634 | XL0C_023526 | ENSRNOT00000082151 | -0.95489161  | 1.36E-06 |
| TUCP_000634 | XL0C_023526 | ENSRNOT00000034411 | 0.972418008  | 1.20E-07 |
| TUCP_000634 | XL0C_023526 | ENSRNOT00000005686 | -0.978202615 | 3.74E-08 |
| TUCP_000634 | XL0C_023526 | ENSRNOT00000038511 | -0.952567793 | 1.75E-06 |
| TUCP_000634 | XL0C_023526 | ENSRNOT00000085971 | -0.954129335 | 1.48E-06 |
| TUCP_000634 | XL0C_023526 | ENSRNOT00000084597 | -0.950092849 | 2.24E-06 |
| TUCP_000634 | XL0C_023526 | ENSRNOT00000005405 | 0.97450112   | 8.13E-08 |
| TUCP_000634 | XL0C_023526 | ENSRNOT00000077152 | 0.960189026  | 7.37E-07 |
| TUCP_000634 | XL0C_023526 | ENSRNOT00000015537 | 0.973451866  | 9.93E-08 |
| TUCP_000634 | XL0C_023526 | ENSRNOT00000025705 | 0.979711258  | 2.62E-08 |
| TUCP_000634 | XL0C_023526 | ENSRNOT00000019820 | 0.964598245  | 4.13E-07 |
| TUCP_000634 | XL0C_023526 | ENSRNOT00000004172 | 0.952170844  | 1.82E-06 |
| TUCP_000634 | XL0C_023526 | ENSRNOT00000023965 | -0.962029081 | 5.83E-07 |
| TUCP_000634 | XL0C_023526 | ENSRNOT00000040476 | 0.956589854  | 1.13E-06 |
| TUCP_000634 | XL0C_023526 | ENSRNOT00000061580 | -0.960256557 | 7.30E-07 |
| TUCP_000634 | XL0C_023526 | ENSRNOT00000085279 | 0.977718801  | 4.17E-08 |
| TUCP_000634 | XL0C_023526 | ENSRNOT00000012528 | 0.950869585  | 2.08E-06 |
| TUCP_000634 | XL0C_023526 | ENSRNOT00000068184 | -0.957883243 | 9.72E-07 |
| TUCP_000634 | XL0C_023526 | ENSRNOT00000015769 | 0.960183093  | 7.37E-07 |
| TUCP_000634 | XL0C_023526 | ENSRNOT00000082904 | 0.99401751   | 5.97E-11 |
| TUCP_000634 | XL0C_023526 | ENSRNOT00000015318 | -0.960105504 | 7.44E-07 |
| TUCP_000634 | XL0C_023526 | ENSRNOT00000015223 | 0.994864279  | 2.79E-11 |
| TUCP_000634 | XL0C_023526 | ENSRNOT00000085669 | 0.957138456  | 1.06E-06 |
| TUCP_000634 | XL0C_023526 | ENSRNOT00000028907 | 0.980475406  | 2.16E-08 |
| TUCP_000634 | XL0C_023526 | ENSRNOT00000010224 | 0.95957855   | 7.94E-07 |
| TUCP_000634 | XL0C_023526 | ENSRNOT00000025887 | -0.966364247 | 3.20E-07 |
| TUCP_000634 | XL0C_023526 | ENSRNOT00000003940 | -0.953723596 | 1.55E-06 |
| TUCP_000634 | XL0C_023526 | ENSRNOT00000017687 | -0.968783752 | 2.22E-07 |
| TUCP_000634 | XL0C_023526 | ENSRNOT00000015006 | 0.956101436  | 1.19E-06 |
| TUCP_000634 | XL0C_023526 | ENSRNOT00000011237 | -0.951047568 | 2.04E-06 |
| TUCP_000634 | XL0C_023526 | ENSRNOT00000007350 | 0.967781192  | 2.59E-07 |
| TUCP_000634 | XL0C_023526 | ENSRNOT00000083578 | 0.964385703  | 4.25E-07 |
| TUCP_000634 | XL0C_023526 | ENSRNOT00000000181 | 0.993243867  | 1.10E-10 |
| TUCP_000634 | XL0C_023526 | ENSRNOT00000090499 | -0.953372056 | 1.60E-06 |

|             |             |                     |              |          |
|-------------|-------------|---------------------|--------------|----------|
| TUCP_000634 | XL0C_023526 | ENSRNOT00000020297  | 0.970468885  | 1.68E-07 |
| TUCP_000634 | XL0C_023526 | ENSRNOT00000023638  | 0.950325193  | 2.19E-06 |
| TUCP_000634 | XL0C_023526 | ENSRNOT00000017361  | 0.9618238    | 5.99E-07 |
| TUCP_000634 | XL0C_023526 | ENSRNOT00000005658  | -0.951886924 | 1.87E-06 |
| TUCP_000634 | XL0C_023526 | ENSRNOT00000045326  | 0.95276687   | 1.71E-06 |
| TUCP_000634 | XL0C_023526 | ENSRNOT00000039607  | -0.959416566 | 8.10E-07 |
| TUCP_000634 | XL0C_023526 | ENSRNOT00000008074  | -0.971215738 | 1.48E-07 |
| TUCP_000634 | XL0C_023526 | ENSRNOT00000005901  | 0.966118505  | 3.32E-07 |
| TUCP_000634 | XL0C_023526 | ENSRNOT00000074023  | 0.978390528  | 3.58E-08 |
| TUCP_000634 | XL0C_023526 | ENSRNOT00000009073  | -0.951463902 | 1.95E-06 |
| TUCP_000634 | XL0C_023526 | ENSRNOT00000018341  | -0.964699224 | 4.07E-07 |
| TUCP_000634 | XL0C_023526 | ENSRNOT00000017385  | -0.950065912 | 2.25E-06 |
| TUCP_000634 | XL0C_023526 | ENSRNOT00000065076  | 0.950104129  | 2.24E-06 |
| TUCP_000634 | XL0C_023526 | ENSRNOT00000013516  | 0.978449002  | 3.53E-08 |
| TUCP_000634 | XL0C_023526 | ENSRNOT000000054685 | 0.960826169  | 6.80E-07 |
| TUCP_000634 | XL0C_023526 | ENSRNOT00000012060  | 0.954304793  | 1.45E-06 |
| TUCP_000634 | XL0C_023526 | ENSRNOT00000023037  | 0.975010023  | 7.36E-08 |
| TUCP_000634 | XL0C_023526 | ENSRNOT000000034282 | 0.97339652   | 1.00E-07 |
| TUCP_000634 | XL0C_023526 | ENSRNOT00000027760  | 0.973262555  | 1.03E-07 |
| TUCP_000634 | XL0C_023526 | ENSRNOT000000089545 | -0.956557024 | 1.13E-06 |
| TUCP_000634 | XL0C_023526 | ENSRNOT00000019519  | 0.959179201  | 8.33E-07 |
| TUCP_000634 | XL0C_023526 | ENSRNOT000000089933 | 0.964411528  | 4.24E-07 |
| TUCP_000634 | XL0C_023526 | ENSRNOT00000022924  | -0.96725362  | 2.81E-07 |
| TUCP_000634 | XL0C_023526 | ENSRNOT000000090461 | 0.953782134  | 1.54E-06 |
| TUCP_000634 | XL0C_023526 | ENSRNOT000000090912 | 0.958173806  | 9.40E-07 |
| TUCP_000634 | XL0C_023526 | ENSRNOT000000073983 | 0.959129091  | 8.39E-07 |
| TUCP_000634 | XL0C_023526 | ENSRNOT000000067554 | 0.968052893  | 2.48E-07 |
| TUCP_000634 | XL0C_023526 | ENSRNOT00000010784  | 0.97086152   | 1.58E-07 |
| TUCP_000634 | XL0C_023526 | ENSRNOT00000010783  | -0.967878936 | 2.55E-07 |
| TUCP_000634 | XL0C_023526 | ENSRNOT00000026075  | 0.957427265  | 1.03E-06 |
| TUCP_000634 | XL0C_023526 | ENSRNOT00000036931  | -0.951540226 | 1.94E-06 |
| TUCP_000634 | XL0C_023526 | ENSRNOT00000011832  | -0.985806305 | 4.43E-09 |
| TUCP_000634 | XL0C_023526 | ENSRNOT00000021030  | -0.960408371 | 7.17E-07 |
| TUCP_000634 | XL0C_023526 | ENSRNOT000000077727 | -0.971191506 | 1.49E-07 |
| TUCP_000634 | XL0C_023526 | ENSRNOT00000044346  | -0.972036882 | 1.28E-07 |
| TUCP_000634 | XL0C_023526 | ENSRNOT00000092066  | -0.963422051 | 4.85E-07 |
| TUCP_000634 | XL0C_023526 | ENSRNOT000000064776 | -0.961684163 | 6.10E-07 |
| TUCP_000634 | XL0C_023526 | ENSRNOT00000092068  | 0.971605024  | 1.39E-07 |
| TUCP_000634 | XL0C_023526 | ENSRNOT00000048781  | 0.959450914  | 8.06E-07 |
| TUCP_000634 | XL0C_023526 | ENSRNOT00000013867  | 0.954084354  | 1.49E-06 |
| TUCP_000634 | XL0C_023526 | ENSRNOT00000003265  | 0.980452461  | 2.18E-08 |
| TUCP_000634 | XL0C_023526 | ENSRNOT000000085334 | 0.956939278  | 1.08E-06 |
| TUCP_000634 | XL0C_023526 | ENSRNOT00000022190  | -0.973715241 | 9.45E-08 |
| TUCP_000634 | XL0C_023526 | ENSRNOT000000067739 | -0.962977783 | 5.15E-07 |
| TUCP_000634 | XL0C_023526 | ENSRNOT000000004196 | 0.959065433  | 8.45E-07 |
| TUCP_000634 | XL0C_023526 | ENSRNOT000000030782 | -0.95140661  | 1.97E-06 |
| TUCP_000634 | XL0C_023526 | ENSRNOT00000007882  | -0.957405133 | 1.03E-06 |
| TUCP_000634 | XL0C_023526 | ENSRNOT000000073919 | 0.955532127  | 1.27E-06 |
| TUCP_000634 | XL0C_023526 | ENSRNOT000000067780 | -0.956666538 | 1.12E-06 |
| TUCP_000634 | XL0C_023526 | ENSRNOT000000036658 | -0.973931506 | 9.08E-08 |
| TUCP_000634 | XL0C_023526 | ENSRNOT000000089611 | 0.970547563  | 1.66E-07 |

|             |             |                    |              |          |
|-------------|-------------|--------------------|--------------|----------|
| TUCP_000634 | XL0C_023526 | ENSRNOT0000007738  | -0.950240573 | 2.21E-06 |
| TUCP_000634 | XL0C_023526 | ENSRNOT00000039012 | -0.95258333  | 1.74E-06 |
| TUCP_000634 | XL0C_023526 | ENSRNOT00000066098 | -0.958123238 | 9.45E-07 |
| TUCP_000634 | XL0C_023526 | ENSRNOT0000008253  | -0.962953912 | 5.16E-07 |
| TUCP_000634 | XL0C_023526 | ENSRNOT00000086590 | 0.961117019  | 6.56E-07 |
| TUCP_000634 | XL0C_023526 | ENSRNOT00000018634 | -0.976567614 | 5.35E-08 |
| TUCP_000634 | XL0C_023526 | ENSRNOT00000034883 | -0.966031915 | 3.36E-07 |
| TUCP_000634 | XL0C_023526 | ENSRNOT00000079801 | -0.960707788 | 6.90E-07 |
| TUCP_000634 | XL0C_023526 | ENSRNOT00000025913 | -0.971322596 | 1.46E-07 |
| TUCP_000634 | XL0C_023526 | ENSRNOT00000005910 | -0.964754084 | 4.04E-07 |
| TUCP_000634 | XL0C_023526 | ENSRNOT00000017624 | 0.953922314  | 1.51E-06 |
| TUCP_000634 | XL0C_023526 | ENSRNOT00000076485 | -0.950396736 | 2.18E-06 |
| TUCP_000634 | XL0C_023526 | ENSRNOT00000073356 | 0.950940252  | 2.06E-06 |
| TUCP_000634 | XL0C_023526 | ENSRNOT00000040169 | 0.954777532  | 1.38E-06 |
| TUCP_000634 | XL0C_023526 | ENSRNOT00000026249 | -0.974856433 | 7.59E-08 |
| TUCP_000634 | XL0C_023526 | ENSRNOT00000026988 | -0.954481387 | 1.43E-06 |
| TUCP_000634 | XL0C_023526 | ENSRNOT00000036051 | 0.962467795  | 5.51E-07 |
| TUCP_000634 | XL0C_023526 | ENSRNOT00000029704 | -0.952556331 | 1.75E-06 |
| TUCP_000634 | XL0C_023526 | ENSRNOT00000014832 | -0.955942798 | 1.21E-06 |
| TUCP_000634 | XL0C_023526 | ENSRNOT00000028685 | 0.950791547  | 2.09E-06 |
| TUCP_000634 | XL0C_023526 | ENSRNOT00000000013 | 0.970108206  | 1.79E-07 |
| TUCP_000634 | XL0C_023526 | ENSRNOT00000018477 | -0.976544264 | 5.38E-08 |
| TUCP_000634 | XL0C_023526 | ENSRNOT00000080222 | -0.957850959 | 9.76E-07 |
| TUCP_000634 | XL0C_023526 | ENSRNOT00000018473 | -0.955210764 | 1.32E-06 |
| TUCP_000634 | XL0C_023526 | ENSRNOT00000005161 | 0.954292006  | 1.45E-06 |
| TUCP_000634 | XL0C_023526 | ENSRNOT00000037955 | -0.97222308  | 1.24E-07 |
| TUCP_000634 | XL0C_023526 | ENSRNOT00000017765 | 0.962776307  | 5.29E-07 |
| TUCP_000634 | XL0C_023526 | ENSRNOT0000004999  | 0.967428849  | 2.73E-07 |
| TUCP_000634 | XL0C_023526 | ENSRNOT00000013463 | 0.965192733  | 3.80E-07 |
| TUCP_000634 | XL0C_023526 | ENSRNOT00000041365 | 0.95535813   | 1.30E-06 |
| TUCP_000634 | XL0C_023526 | ENSRNOT00000047663 | -0.967818307 | 2.58E-07 |
| TUCP_000634 | XL0C_023526 | ENSRNOT00000029202 | -0.961753291 | 6.04E-07 |
| TUCP_000634 | XL0C_023526 | ENSRNOT00000025791 | -0.955954785 | 1.21E-06 |
| TUCP_000634 | XL0C_023526 | ENSRNOT00000005489 | 0.951627169  | 1.92E-06 |
| TUCP_000634 | XL0C_023526 | ENSRNOT00000025794 | -0.96715929  | 2.85E-07 |
| TUCP_000634 | XL0C_023526 | ENSRNOT00000063951 | 0.955391141  | 1.29E-06 |
| TUCP_000634 | XL0C_023526 | ENSRNOT00000058111 | -0.966871458 | 2.97E-07 |
| TUCP_000634 | XL0C_023526 | ENSRNOT00000084422 | 0.959305844  | 8.21E-07 |
| TUCP_000634 | XL0C_023526 | ENSRNOT00000009994 | -0.977956616 | 3.95E-08 |
| TUCP_000634 | XL0C_023526 | ENSRNOT00000078994 | 0.969206374  | 2.07E-07 |
| TUCP_000634 | XL0C_023526 | ENSRNOT00000077367 | -0.954154036 | 1.48E-06 |
| TUCP_000634 | XL0C_023526 | ENSRNOT00000024841 | -0.974537334 | 8.08E-08 |
| TUCP_000634 | XL0C_023526 | ENSRNOT00000009462 | 0.968899757  | 2.17E-07 |
| TUCP_000634 | XL0C_023526 | ENSRNOT00000024924 | -0.961226121 | 6.47E-07 |
| TUCP_000634 | XL0C_023526 | ENSRNOT00000027875 | 0.954820268  | 1.37E-06 |
| TUCP_000634 | XL0C_023526 | ENSRNOT00000046215 | -0.964422638 | 4.23E-07 |
| TUCP_000634 | XL0C_023526 | ENSRNOT00000087838 | -0.963981358 | 4.49E-07 |
| TUCP_000634 | XL0C_023526 | ENSRNOT00000014124 | 0.959213911  | 8.30E-07 |
| TUCP_000634 | XL0C_023526 | ENSRNOT00000043581 | -0.952144405 | 1.82E-06 |
| TUCP_000634 | XL0C_023526 | ENSRNOT00000000120 | 0.96998164   | 1.83E-07 |
| TUCP_000634 | XL0C_023526 | ENSRNOT00000013632 | 0.96085629   | 6.78E-07 |

|             |             |                    |              |          |
|-------------|-------------|--------------------|--------------|----------|
| TUCP_000634 | XL0C_023526 | ENSRNOT00000078906 | -0.952622334 | 1.74E-06 |
| TUCP_000634 | XL0C_023526 | ENSRNOT00000055442 | 0.968307267  | 2.39E-07 |
| TUCP_000634 | XL0C_023526 | ENSRNOT00000028225 | 0.972680872  | 1.14E-07 |
| TUCP_000634 | XL0C_023526 | ENSRNOT00000015495 | -0.980909036 | 1.93E-08 |
| TUCP_000634 | XL0C_023526 | ENSRNOT00000032248 | 0.951003578  | 2.05E-06 |
| TUCP_000634 | XL0C_023526 | ENSRNOT00000012216 | -0.952345787 | 1.79E-06 |
| TUCP_000634 | XL0C_023526 | ENSRNOT00000067901 | -0.952451763 | 1.77E-06 |
| TUCP_000634 | XL0C_023526 | ENSRNOT00000011511 | -0.955502105 | 1.27E-06 |
| TUCP_000634 | XL0C_023526 | ENSRNOT00000036613 | -0.9634546   | 4.83E-07 |
| TUCP_000634 | XL0C_023526 | ENSRNOT00000010024 | 0.955496032  | 1.28E-06 |
| TUCP_000634 | XL0C_023526 | ENSRNOT00000007698 | -0.967235937 | 2.81E-07 |
| TUCP_000634 | XL0C_023526 | ENSRNOT00000006460 | 0.952660981  | 1.73E-06 |
| TUCP_000634 | XL0C_023526 | ENSRNOT00000007702 | -0.950376196 | 2.18E-06 |
| TUCP_000634 | XL0C_023526 | ENSRNOT00000020051 | 0.98624515   | 3.79E-09 |
| TUCP_000634 | XL0C_023526 | ENSRNOT00000026279 | -0.956089148 | 1.19E-06 |
| TUCP_000634 | XL0C_023526 | ENSRNOT00000087062 | 0.979111913  | 3.02E-08 |
| TUCP_000634 | XL0C_023526 | ENSRNOT00000015678 | -0.967278488 | 2.80E-07 |
| TUCP_000634 | XL0C_023526 | ENSRNOT00000082914 | 0.969454563  | 1.99E-07 |
| TUCP_000634 | XL0C_023526 | ENSRNOT00000006340 | 0.971282933  | 1.47E-07 |
| TUCP_000634 | XL0C_023526 | ENSRNOT00000049459 | -0.963841833 | 4.58E-07 |
| TUCP_000634 | XL0C_023526 | ENSRNOT00000087011 | -0.965376418 | 3.70E-07 |
| TUCP_000634 | XL0C_023526 | ENSRNOT00000004391 | 0.961129047  | 6.55E-07 |
| TUCP_000634 | XL0C_023526 | ENSRNOT00000008361 | 0.95629757   | 1.17E-06 |
| TUCP_000634 | XL0C_023526 | ENSRNOT00000013851 | -0.979732836 | 2.60E-08 |
| TUCP_000634 | XL0C_023526 | ENSRNOT00000019180 | -0.952075453 | 1.84E-06 |
| TUCP_000634 | XL0C_023526 | ENSRNOT00000007028 | -0.963756651 | 4.63E-07 |
| TUCP_000634 | XL0C_023526 | ENSRNOT00000022746 | -0.958169193 | 9.40E-07 |
| TUCP_000634 | XL0C_023526 | ENSRNOT00000001507 | 0.955126701  | 1.33E-06 |
| TUCP_000634 | XL0C_023526 | ENSRNOT00000087604 | 0.967957607  | 2.52E-07 |
| TUCP_000634 | XL0C_023526 | ENSRNOT00000083568 | 0.96466828   | 4.09E-07 |
| TUCP_000634 | XL0C_023526 | ENSRNOT00000039177 | -0.971850912 | 1.33E-07 |
| TUCP_000634 | XL0C_023526 | ENSRNOT00000005620 | -0.956747569 | 1.11E-06 |
| TUCP_000634 | XL0C_023526 | ENSRNOT00000022676 | -0.957466432 | 1.02E-06 |
| TUCP_000634 | XL0C_023526 | ENSRNOT00000030082 | 0.969413632  | 2.00E-07 |
| TUCP_000634 | XL0C_023526 | ENSRNOT00000087287 | 0.964197991  | 4.36E-07 |
| TUCP_000634 | XL0C_023526 | ENSRNOT00000000577 | 0.962161614  | 5.73E-07 |
| TUCP_000634 | XL0C_023526 | ENSRNOT00000029328 | 0.972038444  | 1.28E-07 |
| TUCP_000634 | XL0C_023526 | ENSRNOT00000081226 | 0.97350324   | 9.84E-08 |
| TUCP_000634 | XL0C_023526 | ENSRNOT00000065045 | 0.956924116  | 1.09E-06 |
| TUCP_000634 | XL0C_023526 | ENSRNOT00000028290 | -0.950322917 | 2.19E-06 |
| TUCP_000634 | XL0C_023526 | ENSRNOT00000066708 | 0.966656723  | 3.07E-07 |
| TUCP_000634 | XL0C_023526 | ENSRNOT00000080677 | -0.954542929 | 1.42E-06 |
| TUCP_000634 | XL0C_023526 | ENSRNOT00000046490 | -0.958845211 | 8.68E-07 |
| TUCP_000634 | XL0C_023526 | ENSRNOT00000016629 | 0.950705785  | 2.11E-06 |
| TUCP_000634 | XL0C_023526 | ENSRNOT00000046552 | 0.959962816  | 7.57E-07 |
| TUCP_000634 | XL0C_023526 | ENSRNOT00000001979 | -0.954680053 | 1.40E-06 |
| TUCP_000634 | XL0C_023526 | ENSRNOT00000083968 | -0.971790702 | 1.34E-07 |
| TUCP_000634 | XL0C_023526 | ENSRNOT00000033806 | 0.960911598  | 6.73E-07 |
| TUCP_000634 | XL0C_023526 | ENSRNOT00000083964 | -0.953321786 | 1.61E-06 |
| TUCP_000634 | XL0C_023526 | ENSRNOT00000026724 | -0.95184295  | 1.88E-06 |
| TUCP_000634 | XL0C_023526 | ENSRNOT00000001893 | 0.966916268  | 2.95E-07 |



|             |             |                    |              |          |
|-------------|-------------|--------------------|--------------|----------|
| TUCP_000634 | XLOC_023526 | ENSRNOT00000026831 | 0.958830079  | 8.69E-07 |
| TUCP_000634 | XLOC_023526 | ENSRNOT00000068452 | 0.958567925  | 8.97E-07 |
| TUCP_000634 | XLOC_023526 | ENSRNOT00000007821 | 0.981467133  | 1.67E-08 |
| TUCP_000634 | XLOC_023526 | ENSRNOT00000028266 | 0.951389272  | 1.97E-06 |
| TUCP_000634 | XLOC_023526 | ENSRNOT00000032363 | 0.95549077   | 1.28E-06 |
| TUCP_000634 | XLOC_023526 | ENSRNOT00000078185 | -0.954202533 | 1.47E-06 |
| TUCP_000634 | XLOC_023526 | ENSRNOT00000024119 | 0.983775577  | 8.62E-09 |
| TUCP_000634 | XLOC_023526 | ENSRNOT00000075800 | -0.958087355 | 9.49E-07 |
| TUCP_000634 | XLOC_023526 | ENSRNOT00000006824 | -0.957898168 | 9.71E-07 |
| TUCP_000634 | XLOC_023526 | ENSRNOT00000086260 | -0.98503628  | 5.76E-09 |
| TUCP_000634 | XLOC_023526 | ENSRNOT00000018328 | -0.953012535 | 1.67E-06 |
| TUCP_000634 | XLOC_023526 | ENSRNOT00000029701 | 0.973667138  | 9.54E-08 |
| TUCP_000634 | XLOC_023526 | ENSRNOT00000001099 | -0.957650273 | 9.99E-07 |
| TUCP_000634 | XLOC_023526 | ENSRNOT00000085736 | -0.957175749 | 1.06E-06 |
| TUCP_000634 | XLOC_023526 | ENSRNOT00000073193 | -0.950060867 | 2.25E-06 |
| TUCP_000634 | XLOC_023526 | ENSRNOT00000090853 | -0.954238064 | 1.46E-06 |
| TUCP_000634 | XLOC_023526 | ENSRNOT00000020316 | -0.956901207 | 1.09E-06 |
| TUCP_000634 | XLOC_023526 | ENSRNOT00000006709 | -0.95586623  | 1.22E-06 |
| TUCP_000634 | XLOC_023526 | ENSRNOT00000031261 | 0.955558896  | 1.27E-06 |
| TUCP_000634 | XLOC_023526 | ENSRNOT00000020383 | 0.955019694  | 1.34E-06 |
| TUCP_000634 | XLOC_023526 | ENSRNOT00000015518 | -0.966746012 | 3.03E-07 |
| TUCP_000634 | XLOC_023526 | ENSRNOT00000065615 | 0.961993156  | 5.86E-07 |
| TUCP_000634 | XLOC_023526 | ENSRNOT00000011675 | 0.963045837  | 5.10E-07 |
| TUCP_000634 | XLOC_023526 | ENSRNOT00000041106 | 0.968170521  | 2.44E-07 |
| TUCP_000634 | XLOC_023526 | ENSRNOT00000002974 | 0.954195357  | 1.47E-06 |
| TUCP_000634 | XLOC_023526 | ENSRNOT00000033116 | 0.953504233  | 1.58E-06 |
| TUCP_000634 | XLOC_023526 | ENSRNOT00000000717 | -0.956270032 | 1.17E-06 |
| TUCP_000634 | XLOC_023526 | ENSRNOT00000049048 | -0.952644689 | 1.73E-06 |
| TUCP_000634 | XLOC_023526 | ENSRNOT00000049725 | -0.956690882 | 1.12E-06 |
| TUCP_000634 | XLOC_023526 | ENSRNOT00000086122 | 0.960018364  | 7.52E-07 |
| TUCP_000634 | XLOC_023526 | ENSRNOT00000017504 | 0.958534352  | 9.00E-07 |
| TUCP_000634 | XLOC_023526 | ENSRNOT00000023763 | -0.961012779 | 6.64E-07 |
| TUCP_000634 | XLOC_023526 | ENSRNOT00000086995 | 0.951913993  | 1.87E-06 |
| TUCP_000634 | XLOC_023526 | ENSRNOT00000009202 | 0.955647797  | 1.25E-06 |
| TUCP_000634 | XLOC_023526 | ENSRNOT00000010993 | 0.993235619  | 1.10E-10 |
| TUCP_000634 | XLOC_023526 | ENSRNOT00000059181 | 0.979259132  | 2.92E-08 |
| TUCP_000634 | XLOC_023526 | ENSRNOT00000017291 | -0.959703279 | 7.82E-07 |
| TUCP_000634 | XLOC_023526 | ENSRNOT00000083256 | 0.963589097  | 4.74E-07 |
| TUCP_000634 | XLOC_023526 | ENSRNOT0000003691  | -0.967170866 | 2.84E-07 |
| TUCP_000634 | XLOC_023526 | ENSRNOT00000010852 | 0.954763439  | 1.38E-06 |
| TUCP_000634 | XLOC_023526 | ENSRNOT00000007276 | -0.963496622 | 4.80E-07 |
| TUCP_000634 | XLOC_023526 | ENSRNOT00000017761 | 0.972877262  | 1.10E-07 |
| TUCP_000634 | XLOC_023526 | ENSRNOT00000023543 | -0.974322384 | 8.42E-08 |
| TUCP_000634 | XLOC_023526 | ENSRNOT00000035309 | -0.980291552 | 2.27E-08 |
| TUCP_000634 | XLOC_023526 | ENSRNOT00000023014 | 0.952081819  | 1.84E-06 |
| TUCP_000634 | XLOC_023526 | ENSRNOT00000080608 | 0.966822357  | 2.99E-07 |
| TUCP_000634 | XLOC_023526 | ENSRNOT00000017486 | 0.965433959  | 3.67E-07 |
| TUCP_000634 | XLOC_023526 | ENSRNOT00000035145 | -0.955268112 | 1.31E-06 |
| TUCP_000634 | XLOC_023526 | ENSRNOT00000004351 | -0.961537433 | 6.21E-07 |
| TUCP_000634 | XLOC_023526 | ENSRNOT00000079264 | -0.959135239 | 8.38E-07 |
| TUCP_000634 | XLOC_023526 | ENSRNOT00000039341 | 0.952871819  | 1.69E-06 |

|             |             |                    |              |          |
|-------------|-------------|--------------------|--------------|----------|
| TUCP_000634 | XLOC_023526 | ENSRNOT00000038212 | -0.955241944 | 1.31E-06 |
| TUCP_000634 | XLOC_023526 | ENSRNOT00000037405 | 0.964012587  | 4.47E-07 |
| TUCP_000634 | XLOC_023526 | ENSRNOT00000038652 | -0.962491323 | 5.49E-07 |
| TUCP_000634 | XLOC_023526 | ENSRNOT00000025460 | 0.983322072  | 9.88E-09 |
| TUCP_000634 | XLOC_023526 | ENSRNOT00000071917 | 0.950500942  | 2.15E-06 |
| TUCP_000634 | XLOC_023526 | ENSRNOT00000035808 | 0.955940125  | 1.21E-06 |
| TUCP_000634 | XLOC_023526 | ENSRNOT00000026760 | -0.978537748 | 3.46E-08 |
| TUCP_000634 | XLOC_023526 | ENSRNOT0000001289  | 0.975297893  | 6.95E-08 |
| TUCP_000634 | XLOC_023526 | ENSRNOT00000066199 | -0.950038502 | 2.25E-06 |
| TUCP_000634 | XLOC_023526 | ENSRNOT00000081077 | -0.956537205 | 1.14E-06 |
| TUCP_000634 | XLOC_023526 | ENSRNOT00000016568 | 0.982155548  | 1.38E-08 |
| TUCP_000634 | XLOC_023526 | ENSRNOT00000027360 | -0.968573075 | 2.29E-07 |
| TUCP_000634 | XLOC_023526 | ENSRNOT00000075630 | -0.971454558 | 1.42E-07 |
| TUCP_000634 | XLOC_023526 | ENSRNOT00000024938 | -0.96541975  | 3.67E-07 |
| TUCP_000634 | XLOC_023526 | ENSRNOT00000024933 | -0.954663939 | 1.40E-06 |
| TUCP_000634 | XLOC_023526 | ENSRNOT00000079414 | -0.958260409 | 9.30E-07 |
| TUCP_000634 | XLOC_023526 | ENSRNOT00000024011 | 0.980123475  | 2.36E-08 |
| TUCP_000634 | XLOC_023526 | ENSRNOT00000037665 | 0.95559273   | 1.26E-06 |
| TUCP_002307 | XLOC_096580 | ENSRNOT00000081590 | 0.994064024  | 5.75E-11 |
| TUCP_002307 | XLOC_096580 | ENSRNOT00000091175 | 0.952984755  | 1.67E-06 |
| TUCP_001501 | XLOC_057897 | ENSRNOT00000055284 | 0.963199085  | 5.00E-07 |
| TUCP_001501 | XLOC_057897 | ENSRNOT00000091122 | 0.969276336  | 2.05E-07 |
| TUCP_001501 | XLOC_057897 | ENSRNOT00000090446 | 0.959332153  | 8.18E-07 |
| TUCP_001501 | XLOC_057897 | ENSRNOT00000078610 | 0.957925807  | 9.67E-07 |
| TUCP_002301 | XLOC_096143 | ENSRNOT00000024186 | 0.983200502  | 1.02E-08 |
| TUCP_002301 | XLOC_096143 | ENSRNOT00000074753 | 0.998182349  | 1.56E-13 |
| TUCP_002301 | XLOC_096143 | ENSRNOT00000004876 | 0.959071443  | 8.44E-07 |
| TUCP_002301 | XLOC_096143 | ENSRNOT00000041904 | 1            | 0        |
| TUCP_002301 | XLOC_096143 | ENSRNOT00000083487 | 0.989515314  | 9.80E-10 |
| TUCP_002301 | XLOC_096143 | ENSRNOT00000077990 | 1            | 0        |
| TUCP_002301 | XLOC_096143 | ENSRNOT00000038826 | 0.99977672   | 4.37E-18 |
| TUCP_002301 | XLOC_096143 | ENSRNOT00000046842 | 0.973644314  | 9.58E-08 |
| TUCP_002301 | XLOC_096143 | ENSRNOT00000037169 | 0.980329406  | 2.24E-08 |
| TUCP_002301 | XLOC_096143 | ENSRNOT00000021243 | 0.987425406  | 2.42E-09 |
| TUCP_002301 | XLOC_096143 | ENSRNOT00000060250 | 0.999933853  | 9.97E-21 |
| TUCP_002301 | XLOC_096143 | ENSRNOT00000091934 | 1            | 1.33E-79 |
| TUCP_002301 | XLOC_096143 | ENSRNOT00000046585 | 0.982941597  | 1.11E-08 |
| TUCP_002301 | XLOC_096143 | ENSRNOT00000080794 | 0.990839253  | 5.00E-10 |
| TUCP_002301 | XLOC_096143 | ENSRNOT00000014456 | 0.991697153  | 3.06E-10 |
| TUCP_002301 | XLOC_096143 | ENSRNOT00000031205 | 0.991394766  | 3.66E-10 |
| TUCP_002301 | XLOC_096143 | ENSRNOT00000044145 | 1            | 4.25E-78 |
| TUCP_002301 | XLOC_096143 | ENSRNOT00000088381 | 0.989013276  | 1.24E-09 |
| TUCP_002301 | XLOC_096143 | ENSRNOT00000011743 | 0.98678427   | 3.11E-09 |
| TUCP_002301 | XLOC_096143 | ENSRNOT00000089929 | 1            | 0        |
| TUCP_002301 | XLOC_096143 | ENSRNOT00000088624 | 1            | 0        |
| TUCP_002301 | XLOC_096143 | ENSRNOT00000085659 | 0.989908621  | 8.10E-10 |
| TUCP_002301 | XLOC_096143 | ENSRNOT00000015866 | 0.994066664  | 5.73E-11 |
| TUCP_002301 | XLOC_096143 | ENSRNOT00000078633 | 1            | 4.25E-78 |
| TUCP_002301 | XLOC_096143 | ENSRNOT00000034907 | 0.995318542  | 1.76E-11 |
| TUCP_002301 | XLOC_096143 | ENSRNOT00000093230 | 0.958295175  | 9.26E-07 |
| TUCP_002301 | XLOC_096143 | ENSRNOT00000051835 | 1            | 0        |

|             |             |                    |             |          |
|-------------|-------------|--------------------|-------------|----------|
| TUCP_002301 | XLOC_096143 | ENSRNOT00000079087 | 1           | 0        |
| TUCP_002301 | XLOC_096143 | ENSRNOT00000037206 | 1           | 0        |
| TUCP_002301 | XLOC_096143 | ENSRNOT00000083261 | 0.970991658 | 1.54E-07 |
| TUCP_002301 | XLOC_096143 | ENSRNOT00000080590 | 0.999889216 | 1.31E-19 |
| TUCP_002301 | XLOC_096143 | ENSRNOT00000027552 | 0.999801024 | 2.46E-18 |
| TUCP_002301 | XLOC_096143 | ENSRNOT00000077014 | 0.995074376 | 2.26E-11 |
| TUCP_002301 | XLOC_096143 | ENSRNOT00000080453 | 0.99994332  | 4.61E-21 |
| TUCP_002301 | XLOC_096143 | ENSRNOT00000089057 | 0.968243551 | 2.41E-07 |
| TUCP_002301 | XLOC_096143 | ENSRNOT00000066839 | 0.991868612 | 2.76E-10 |
| TUCP_002301 | XLOC_096143 | ENSRNOT00000061284 | 0.955566942 | 1.27E-06 |
| TUCP_002301 | XLOC_096143 | ENSRNOT00000013423 | 0.959677621 | 7.84E-07 |
| TUCP_002301 | XLOC_096143 | ENSRNOT00000071884 | 0.974769955 | 7.72E-08 |
| TUCP_002301 | XLOC_096143 | ENSRNOT00000004128 | 0.961829362 | 5.99E-07 |
| TUCP_002301 | XLOC_096143 | ENSRNOT00000026316 | 0.964408046 | 4.24E-07 |
| TUCP_002301 | XLOC_096143 | ENSRNOT00000057729 | 0.999384184 | 6.97E-16 |
| TUCP_002301 | XLOC_096143 | ENSRNOT00000078663 | 0.975192577 | 7.10E-08 |
| TUCP_002301 | XLOC_096143 | ENSRNOT00000064250 | 0.983131977 | 1.05E-08 |
| TUCP_002301 | XLOC_096143 | ENSRNOT00000021608 | 0.965228881 | 3.78E-07 |
| TUCP_002301 | XLOC_096143 | ENSRNOT00000029634 | 0.995816134 | 1.00E-11 |
| TUCP_002301 | XLOC_096143 | ENSRNOT00000093579 | 0.958564264 | 8.97E-07 |
| TUCP_002301 | XLOC_096143 | ENSRNOT00000086349 | 0.957242511 | 1.05E-06 |
| TUCP_002301 | XLOC_096143 | ENSRNOT00000065460 | 1           | 0        |
| TUCP_002301 | XLOC_096143 | ENSRNOT00000003817 | 0.996778712 | 2.72E-12 |
| TUCP_002301 | XLOC_096143 | ENSRNOT00000016713 | 1           | 0        |
| TUCP_002301 | XLOC_096143 | ENSRNOT00000079260 | 0.996448245 | 4.42E-12 |
| TUCP_002301 | XLOC_096143 | ENSRNOT00000039294 | 1           | 0        |
| TUCP_002301 | XLOC_096143 | ENSRNOT00000092913 | 0.952980228 | 1.67E-06 |
| TUCP_004271 | XLOC_187897 | ENSRNOT00000084500 | 0.984887141 | 6.05E-09 |
| TUCP_004271 | XLOC_187897 | ENSRNOT00000093467 | 0.996134431 | 6.75E-12 |
| TUCP_004271 | XLOC_187897 | ENSRNOT00000029340 | 0.999116572 | 4.23E-15 |
| TUCP_004271 | XLOC_187897 | ENSRNOT00000077972 | 0.962758032 | 5.30E-07 |
| TUCP_004271 | XLOC_187897 | ENSRNOT00000038646 | 1           | 0        |
| TUCP_004271 | XLOC_187897 | ENSRNOT00000012095 | 0.957750287 | 9.88E-07 |
| TUCP_004271 | XLOC_187897 | ENSRNOT00000017909 | 0.975587192 | 6.56E-08 |
| TUCP_004271 | XLOC_187897 | ENSRNOT00000092579 | 1           | 0        |
| TUCP_004271 | XLOC_187897 | ENSRNOT00000089235 | 0.998661162 | 3.38E-14 |
| TUCP_004271 | XLOC_187897 | ENSRNOT00000036383 | 0.988460809 | 1.58E-09 |
| TUCP_004271 | XLOC_187897 | ENSRNOT00000076528 | 0.997115373 | 1.57E-12 |
| TUCP_004271 | XLOC_187897 | ENSRNOT00000075193 | 0.964326971 | 4.29E-07 |
| TUCP_004271 | XLOC_187897 | ENSRNOT00000083034 | 0.990934646 | 4.75E-10 |
| TUCP_004271 | XLOC_187897 | ENSRNOT00000089607 | 0.995091455 | 2.23E-11 |
| TUCP_004271 | XLOC_187897 | ENSRNOT00000086014 | 0.960893638 | 6.74E-07 |
| TUCP_004271 | XLOC_187897 | ENSRNOT00000054939 | 0.958021495 | 9.57E-07 |
| TUCP_004271 | XLOC_187897 | ENSRNOT00000052315 | 0.983687082 | 8.85E-09 |
| TUCP_004271 | XLOC_187897 | ENSRNOT00000088168 | 1           | 0        |
| TUCP_004271 | XLOC_187897 | ENSRNOT00000046231 | 0.96225463  | 5.66E-07 |
| TUCP_004271 | XLOC_187897 | ENSRNOT00000013459 | 0.979098017 | 3.03E-08 |
| TUCP_004271 | XLOC_187897 | ENSRNOT00000078137 | 1           | 0        |
| TUCP_004271 | XLOC_187897 | ENSRNOT00000077764 | 0.977143528 | 4.73E-08 |
| TUCP_004271 | XLOC_187897 | ENSRNOT00000043661 | 0.966975951 | 2.93E-07 |
| TUCP_004271 | XLOC_187897 | ENSRNOT00000092740 | 1           | 0        |

|             |             |                    |              |          |
|-------------|-------------|--------------------|--------------|----------|
| TUCP_004271 | XLOC_187897 | ENSRNOT0000000117  | 0.990989174  | 4.61E-10 |
| TUCP_004271 | XLOC_187897 | ENSRNOT00000071877 | 0.967113583  | 2.87E-07 |
| TUCP_004271 | XLOC_187897 | ENSRNOT00000070958 | 1            | 0        |
| TUCP_004271 | XLOC_187897 | ENSRNOT00000076757 | 0.959205354  | 8.31E-07 |
| TUCP_004271 | XLOC_187897 | ENSRNOT00000085310 | 0.965230243  | 3.78E-07 |
| TUCP_004271 | XLOC_187897 | ENSRNOT00000047241 | 0.966576993  | 3.11E-07 |
| TUCP_004271 | XLOC_187897 | ENSRNOT00000027268 | 1            | 0        |
| TUCP_004271 | XLOC_187897 | ENSRNOT0000004459  | 1            | 0        |
| TUCP_004271 | XLOC_187897 | ENSRNOT00000048373 | 0.959096578  | 8.42E-07 |
| TUCP_004271 | XLOC_187897 | ENSRNOT00000061516 | 0.987595648  | 2.27E-09 |
| TUCP_004271 | XLOC_187897 | ENSRNOT00000088148 | 1            | 0        |
| TUCP_004271 | XLOC_187897 | ENSRNOT00000088527 | 1            | 0        |
| TUCP_004271 | XLOC_187897 | ENSRNOT00000078701 | 1            | 0        |
| TUCP_004271 | XLOC_187897 | ENSRNOT00000052308 | 0.962646127  | 5.38E-07 |
| TUCP_004271 | XLOC_187897 | ENSRNOT00000021748 | 1            | 0        |
| TUCP_004271 | XLOC_187897 | ENSRNOT00000089085 | 1            | 0        |
| TUCP_004271 | XLOC_187897 | ENSRNOT00000008153 | 0.999703506  | 1.80E-17 |
| TUCP_004271 | XLOC_187897 | ENSRNOT00000085896 | 0.971605382  | 1.39E-07 |
| TUCP_004271 | XLOC_187897 | ENSRNOT00000079189 | 0.984972387  | 5.89E-09 |
| TUCP_004271 | XLOC_187897 | ENSRNOT00000090078 | 1            | 0        |
| TUCP_004271 | XLOC_187897 | ENSRNOT00000078020 | 0.958421666  | 9.13E-07 |
| TUCP_004271 | XLOC_187897 | ENSRNOT00000092425 | 0.956092273  | 1.19E-06 |
| TUCP_004271 | XLOC_187897 | ENSRNOT00000009776 | 1            | 0        |
| TUCP_002303 | XLOC_096297 | ENSRNOT00000071884 | 0.978853177  | 3.21E-08 |
| TUCP_002303 | XLOC_096297 | ENSRNOT00000040270 | 0.951399925  | 1.97E-06 |
| TUCP_002303 | XLOC_096297 | ENSRNOT00000008041 | 0.953296402  | 1.62E-06 |
| TUCP_002303 | XLOC_096297 | ENSRNOT00000093579 | 0.973161394  | 1.05E-07 |
| TUCP_002303 | XLOC_096297 | ENSRNOT00000078663 | 0.965408605  | 3.68E-07 |
| TUCP_002303 | XLOC_096297 | ENSRNOT00000085659 | 0.965155748  | 3.82E-07 |
| TUCP_002303 | XLOC_096297 | ENSRNOT00000002220 | 0.961657728  | 6.12E-07 |
| TUCP_002303 | XLOC_096297 | ENSRNOT00000082403 | -0.955972865 | 1.21E-06 |
| TUCP_000209 | XLOC_006687 | ENSRNOT00000085599 | 0.999938016  | 7.20E-21 |
| TUCP_000209 | XLOC_006687 | ENSRNOT00000006689 | 0.994414876  | 4.24E-11 |
| TUCP_000209 | XLOC_006687 | ENSRNOT00000081534 | 0.987990668  | 1.93E-09 |
| TUCP_000209 | XLOC_006687 | ENSRNOT00000085301 | 0.997948819  | 2.85E-13 |
| TUCP_000209 | XLOC_006687 | ENSRNOT00000038729 | 0.99999993   | 1.35E-35 |
| TUCP_000209 | XLOC_006687 | ENSRNOT00000086385 | 0.99999993   | 1.35E-35 |
| TUCP_000209 | XLOC_006687 | ENSRNOT00000077695 | 0.960412386  | 7.16E-07 |
| TUCP_000209 | XLOC_006687 | ENSRNOT00000078561 | 0.986492248  | 3.46E-09 |
| TUCP_000209 | XLOC_006687 | ENSRNOT00000087613 | 0.99999993   | 1.35E-35 |
| TUCP_000209 | XLOC_006687 | ENSRNOT00000026032 | 0.953055776  | 1.66E-06 |
| TUCP_000209 | XLOC_006687 | ENSRNOT00000073350 | 0.965942718  | 3.41E-07 |
| TUCP_000209 | XLOC_006687 | ENSRNOT00000023062 | 0.99999993   | 1.35E-35 |
| TUCP_000209 | XLOC_006687 | ENSRNOT00000058834 | 0.99999993   | 1.35E-35 |
| TUCP_000209 | XLOC_006687 | ENSRNOT00000079420 | 0.99999993   | 1.35E-35 |
| TUCP_000209 | XLOC_006687 | ENSRNOT00000090761 | 0.99999993   | 1.35E-35 |
| TUCP_000209 | XLOC_006687 | ENSRNOT00000055923 | 0.99999993   | 1.35E-35 |
| TUCP_000209 | XLOC_006687 | ENSRNOT00000092416 | 0.963070446  | 5.08E-07 |
| TUCP_000209 | XLOC_006687 | ENSRNOT00000071930 | 0.99999993   | 1.35E-35 |
| TUCP_000209 | XLOC_006687 | ENSRNOT00000001996 | 0.974681065  | 7.85E-08 |
| TUCP_000209 | XLOC_006687 | ENSRNOT00000076756 | 0.99999993   | 1.35E-35 |

|             |             |                    |              |          |
|-------------|-------------|--------------------|--------------|----------|
| TUCP_000209 | XLOC_006687 | ENSRNOT00000081527 | 0.999433169  | 4.60E-16 |
| TUCP_000209 | XLOC_006687 | ENSRNOT00000085067 | 0.960275697  | 7.29E-07 |
| TUCP_000209 | XLOC_006687 | ENSRNOT00000091663 | 0.996421913  | 4.59E-12 |
| TUCP_000209 | XLOC_006687 | ENSRNOT00000081780 | 0.99999993   | 1.35E-35 |
| TUCP_000209 | XLOC_006687 | ENSRNOT00000093689 | 0.953588452  | 1.57E-06 |
| TUCP_000209 | XLOC_006687 | ENSRNOT00000089114 | 0.99999993   | 1.35E-35 |
| TUCP_000209 | XLOC_006687 | ENSRNOT00000021609 | 0.977009836  | 4.87E-08 |
| TUCP_000209 | XLOC_006687 | ENSRNOT00000073316 | 0.99999993   | 1.35E-35 |
| TUCP_000209 | XLOC_006687 | ENSRNOT00000086557 | 0.977398173  | 4.47E-08 |
| TUCP_000209 | XLOC_006687 | ENSRNOT00000071663 | 0.99999993   | 1.35E-35 |
| TUCP_000209 | XLOC_006687 | ENSRNOT00000042860 | 0.99999993   | 1.35E-35 |
| TUCP_000209 | XLOC_006687 | ENSRNOT00000072962 | 0.971376105  | 1.44E-07 |
| TUCP_000209 | XLOC_006687 | ENSRNOT00000088421 | 0.99999993   | 1.35E-35 |
| TUCP_000209 | XLOC_006687 | ENSRNOT00000038898 | 0.99999993   | 1.35E-35 |
| TUCP_000209 | XLOC_006687 | ENSRNOT00000015840 | 0.959446178  | 8.07E-07 |
| TUCP_000209 | XLOC_006687 | ENSRNOT00000064936 | 0.985951228  | 4.21E-09 |
| TUCP_000209 | XLOC_006687 | ENSRNOT00000042777 | 0.990637393  | 5.58E-10 |
| TUCP_000209 | XLOC_006687 | ENSRNOT00000010029 | 0.99999993   | 1.35E-35 |
| TUCP_001507 | XLOC_057996 | ENSRNOT00000021738 | -0.957749269 | 9.88E-07 |
| TUCP_001507 | XLOC_057996 | ENSRNOT00000018613 | -0.959994534 | 7.55E-07 |
| TUCP_003382 | XLOC_146342 | ENSRNOT00000025517 | 0.966074721  | 3.34E-07 |
| TUCP_003382 | XLOC_146342 | ENSRNOT00000003568 | 0.964706112  | 4.06E-07 |
| TUCP_003382 | XLOC_146342 | ENSRNOT00000078306 | 0.96318609   | 5.01E-07 |
| TUCP_003382 | XLOC_146342 | ENSRNOT00000031904 | 0.96018044   | 7.37E-07 |
| TUCP_003382 | XLOC_146342 | ENSRNOT00000026941 | 0.965605122  | 3.58E-07 |
| TUCP_003382 | XLOC_146342 | ENSRNOT00000016445 | 0.950936741  | 2.06E-06 |
| TUCP_003382 | XLOC_146342 | ENSRNOT00000055245 | 0.951376333  | 1.97E-06 |
| TUCP_003382 | XLOC_146342 | ENSRNOT00000038807 | 0.955571487  | 1.27E-06 |
| TUCP_003382 | XLOC_146342 | ENSRNOT00000081678 | 0.959668221  | 7.85E-07 |
| TUCP_003382 | XLOC_146342 | ENSRNOT00000014888 | 0.974741779  | 7.76E-08 |
| TUCP_003382 | XLOC_146342 | ENSRNOT00000037597 | 0.959289674  | 8.22E-07 |
| TUCP_003382 | XLOC_146342 | ENSRNOT00000066024 | 0.967713206  | 2.62E-07 |
| TUCP_003382 | XLOC_146342 | ENSRNOT00000082639 | 0.958473422  | 9.07E-07 |
| TUCP_003382 | XLOC_146342 | ENSRNOT00000057537 | 0.975811512  | 6.26E-08 |
| TUCP_003382 | XLOC_146342 | ENSRNOT0000001855  | 0.958138311  | 9.44E-07 |
| TUCP_003382 | XLOC_146342 | ENSRNOT00000040513 | 0.963631895  | 4.71E-07 |
| TUCP_003382 | XLOC_146342 | ENSRNOT00000016739 | 0.953556217  | 1.57E-06 |
| TUCP_003382 | XLOC_146342 | ENSRNOT00000016428 | 0.970635092  | 1.64E-07 |
| TUCP_003382 | XLOC_146342 | ENSRNOT00000036072 | 0.960612665  | 6.99E-07 |
| TUCP_003382 | XLOC_146342 | ENSRNOT00000080695 | 0.985931866  | 4.24E-09 |
| TUCP_003382 | XLOC_146342 | ENSRNOT00000041044 | 0.965195305  | 3.79E-07 |
| TUCP_003382 | XLOC_146342 | ENSRNOT00000000302 | 0.957201016  | 1.05E-06 |
| TUCP_003382 | XLOC_146342 | ENSRNOT00000078070 | 0.952584462  | 1.74E-06 |
| TUCP_003382 | XLOC_146342 | ENSRNOT00000037133 | 0.959874965  | 7.66E-07 |
| TUCP_003382 | XLOC_146342 | ENSRNOT00000037015 | 0.961023028  | 6.64E-07 |
| TUCP_003382 | XLOC_146342 | ENSRNOT00000065600 | 0.968218496  | 2.42E-07 |
| TUCP_003382 | XLOC_146342 | ENSRNOT00000044395 | 0.96088445   | 6.75E-07 |
| TUCP_003382 | XLOC_146342 | ENSRNOT00000088628 | 0.952695256  | 1.72E-06 |
| TUCP_003382 | XLOC_146342 | ENSRNOT00000018787 | 0.95426972   | 1.46E-06 |
| TUCP_003382 | XLOC_146342 | ENSRNOT00000011429 | 0.959545413  | 7.97E-07 |
| TUCP_003382 | XLOC_146342 | ENSRNOT00000007369 | 0.959416619  | 8.10E-07 |

|             |             |                    |              |          |
|-------------|-------------|--------------------|--------------|----------|
| TUCP_003382 | XLOC_146342 | ENSRNOT00000042125 | 0.955554383  | 1.27E-06 |
| TUCP_003382 | XLOC_146342 | ENSRNOT00000031384 | 0.974250003  | 8.54E-08 |
| TUCP_003382 | XLOC_146342 | ENSRNOT00000084012 | 0.951309067  | 1.99E-06 |
| TUCP_003382 | XLOC_146342 | ENSRNOT00000065076 | 0.953886638  | 1.52E-06 |
| TUCP_003382 | XLOC_146342 | ENSRNOT00000003780 | 0.954948897  | 1.35E-06 |
| TUCP_003382 | XLOC_146342 | ENSRNOT00000026643 | 0.955538217  | 1.27E-06 |
| TUCP_003382 | XLOC_146342 | ENSRNOT00000032244 | 0.951835165  | 1.88E-06 |
| TUCP_003382 | XLOC_146342 | ENSRNOT00000020673 | 0.952568606  | 1.75E-06 |
| TUCP_003382 | XLOC_146342 | ENSRNOT00000068212 | 0.954752907  | 1.38E-06 |
| TUCP_003382 | XLOC_146342 | ENSRNOT00000027967 | 0.963632274  | 4.71E-07 |
| TUCP_003382 | XLOC_146342 | ENSRNOT00000024393 | 0.959505201  | 8.01E-07 |
| TUCP_003382 | XLOC_146342 | ENSRNOT00000009122 | 0.953697508  | 1.55E-06 |
| TUCP_003382 | XLOC_146342 | ENSRNOT00000035989 | 0.951845744  | 1.88E-06 |
| TUCP_003382 | XLOC_146342 | ENSRNOT00000057160 | 0.97814169   | 3.79E-08 |
| TUCP_003382 | XLOC_146342 | ENSRNOT00000024402 | 0.957338548  | 1.04E-06 |
| TUCP_003382 | XLOC_146342 | ENSRNOT00000010367 | 0.966079977  | 3.34E-07 |
| TUCP_003382 | XLOC_146342 | ENSRNOT00000046639 | 0.9578232    | 9.79E-07 |
| TUCP_003382 | XLOC_146342 | ENSRNOT00000002560 | 0.961007664  | 6.65E-07 |
| TUCP_003382 | XLOC_146342 | ENSRNOT00000082151 | -0.952630516 | 1.73E-06 |
| TUCP_001286 | XLOC_048627 | ENSRNOT00000055318 | 0.960314063  | 7.25E-07 |
| TUCP_001286 | XLOC_048627 | ENSRNOT00000071978 | -0.950652894 | 2.12E-06 |
| TUCP_001281 | XLOC_048323 | ENSRNOT00000068405 | 0.953645551  | 1.56E-06 |
| TUCP_001281 | XLOC_048323 | ENSRNOT00000039809 | 0.960240772  | 7.32E-07 |
| TUCP_001281 | XLOC_048323 | ENSRNOT00000074939 | 0.981092437  | 1.84E-08 |
| TUCP_001281 | XLOC_048323 | ENSRNOT00000078445 | -0.961753804 | 6.04E-07 |
| TUCP_001281 | XLOC_048323 | ENSRNOT00000026065 | 0.957938782  | 9.66E-07 |
| TUCP_001281 | XLOC_048323 | ENSRNOT00000005126 | -0.960673703 | 6.93E-07 |
| TUCP_001281 | XLOC_048323 | ENSRNOT00000044635 | 0.958970461  | 8.55E-07 |
| TUCP_001281 | XLOC_048323 | ENSRNOT00000021116 | 0.975464081  | 6.72E-08 |
| TUCP_001281 | XLOC_048323 | ENSRNOT00000082100 | 0.967809145  | 2.58E-07 |
| TUCP_001281 | XLOC_048323 | ENSRNOT00000018057 | 0.957179348  | 1.06E-06 |
| TUCP_001281 | XLOC_048323 | ENSRNOT00000043216 | 0.957677841  | 9.96E-07 |
| TUCP_001281 | XLOC_048323 | ENSRNOT00000028563 | 0.959123345  | 8.39E-07 |
| TUCP_001281 | XLOC_048323 | ENSRNOT00000015076 | 0.977095084  | 4.78E-08 |
| TUCP_001281 | XLOC_048323 | ENSRNOT0000004698  | 0.973716481  | 9.45E-08 |
| TUCP_001281 | XLOC_048323 | ENSRNOT00000066670 | 0.951755099  | 1.90E-06 |
| TUCP_001281 | XLOC_048323 | ENSRNOT00000015073 | 0.974882968  | 7.55E-08 |
| TUCP_001281 | XLOC_048323 | ENSRNOT00000025832 | 0.96885068   | 2.19E-07 |
| TUCP_001281 | XLOC_048323 | ENSRNOT0000006055  | 0.966256842  | 3.26E-07 |
| TUCP_001281 | XLOC_048323 | ENSRNOT00000071573 | 0.967650231  | 2.64E-07 |
| TUCP_001281 | XLOC_048323 | ENSRNOT00000088125 | 0.954193898  | 1.47E-06 |
| TUCP_001281 | XLOC_048323 | ENSRNOT00000011384 | 0.961135076  | 6.54E-07 |
| TUCP_001281 | XLOC_048323 | ENSRNOT00000011622 | 0.953740293  | 1.54E-06 |
| TUCP_001281 | XLOC_048323 | ENSRNOT00000006963 | 0.958130105  | 9.45E-07 |
| TUCP_001281 | XLOC_048323 | ENSRNOT00000071764 | 0.950125564  | 2.23E-06 |
| TUCP_001281 | XLOC_048323 | ENSRNOT00000035989 | 0.951633573  | 1.92E-06 |
| TUCP_001281 | XLOC_048323 | ENSRNOT00000027944 | 0.962557894  | 5.44E-07 |
| TUCP_001281 | XLOC_048323 | ENSRNOT00000021348 | 0.971225862  | 1.48E-07 |
| TUCP_001281 | XLOC_048323 | ENSRNOT00000028842 | 0.960355586  | 7.22E-07 |
| TUCP_001281 | XLOC_048323 | ENSRNOT00000083215 | 0.953964666  | 1.51E-06 |
| TUCP_001281 | XLOC_048323 | ENSRNOT00000055187 | 0.961824971  | 5.99E-07 |

|             |             |                     |             |          |
|-------------|-------------|---------------------|-------------|----------|
| TUCP_001281 | XLOC_048323 | ENSRNOT00000001809  | 0.972732632 | 1.13E-07 |
| TUCP_001281 | XLOC_048323 | ENSRNOT000000078500 | 0.962783621 | 5.28E-07 |
| TUCP_001281 | XLOC_048323 | ENSRNOT000000067822 | 0.958985018 | 8.53E-07 |
| TUCP_001281 | XLOC_048323 | ENSRNOT000000032274 | 0.961901837 | 5.93E-07 |
| TUCP_001281 | XLOC_048323 | ENSRNOT000000024060 | 0.958174409 | 9.40E-07 |
| TUCP_001281 | XLOC_048323 | ENSRNOT000000010149 | 0.960667069 | 6.94E-07 |
| TUCP_001281 | XLOC_048323 | ENSRNOT000000068633 | 0.968138552 | 2.45E-07 |
| TUCP_001281 | XLOC_048323 | ENSRNOT000000037446 | 0.964912798 | 3.95E-07 |
| TUCP_001281 | XLOC_048323 | ENSRNOT000000058645 | 0.964321252 | 4.29E-07 |
| TUCP_001281 | XLOC_048323 | ENSRNOT000000017948 | 0.988435972 | 1.60E-09 |
| TUCP_001281 | XLOC_048323 | ENSRNOT000000025859 | 0.954217799 | 1.47E-06 |
| TUCP_001281 | XLOC_048323 | ENSRNOT000000039852 | 0.970289502 | 1.73E-07 |
| TUCP_001281 | XLOC_048323 | ENSRNOT000000023180 | 0.964466514 | 4.20E-07 |
| TUCP_001281 | XLOC_048323 | ENSRNOT00000000676  | 0.956954364 | 1.08E-06 |
| TUCP_001281 | XLOC_048323 | ENSRNOT000000070815 | 0.954273469 | 1.46E-06 |
| TUCP_001281 | XLOC_048323 | ENSRNOT00000004581  | 0.970377505 | 1.71E-07 |
| TUCP_001281 | XLOC_048323 | ENSRNOT000000019222 | 0.955844455 | 1.23E-06 |
| TUCP_001281 | XLOC_048323 | ENSRNOT000000028070 | 0.957499864 | 1.02E-06 |
| TUCP_001281 | XLOC_048323 | ENSRNOT00000004359  | 0.978308828 | 3.65E-08 |
| TUCP_001281 | XLOC_048323 | ENSRNOT000000013274 | 0.97249684  | 1.18E-07 |
| TUCP_001281 | XLOC_048323 | ENSRNOT000000022610 | 0.971789227 | 1.34E-07 |
| TUCP_001281 | XLOC_048323 | ENSRNOT000000020437 | 0.962146298 | 5.74E-07 |
| TUCP_001281 | XLOC_048323 | ENSRNOT00000006828  | 0.95224832  | 1.80E-06 |
| TUCP_001281 | XLOC_048323 | ENSRNOT000000073346 | 0.956925578 | 1.09E-06 |
| TUCP_001281 | XLOC_048323 | ENSRNOT000000010898 | 0.9555464   | 1.27E-06 |
| TUCP_001281 | XLOC_048323 | ENSRNOT00000005355  | 0.965365473 | 3.70E-07 |
| TUCP_001281 | XLOC_048323 | ENSRNOT000000029419 | 0.958357319 | 9.20E-07 |
| TUCP_001281 | XLOC_048323 | ENSRNOT000000027520 | 0.973531013 | 9.79E-08 |
| TUCP_001281 | XLOC_048323 | ENSRNOT000000047387 | 0.956931478 | 1.09E-06 |
| TUCP_001281 | XLOC_048323 | ENSRNOT000000038433 | 0.956524921 | 1.14E-06 |
| TUCP_001281 | XLOC_048323 | ENSRNOT000000091910 | 0.964661747 | 4.09E-07 |
| TUCP_001281 | XLOC_048323 | ENSRNOT000000039842 | 0.956484818 | 1.14E-06 |
| TUCP_001281 | XLOC_048323 | ENSRNOT000000045083 | 0.97000052  | 1.82E-07 |
| TUCP_001281 | XLOC_048323 | ENSRNOT000000084240 | 0.962897667 | 5.20E-07 |
| TUCP_001281 | XLOC_048323 | ENSRNOT000000017629 | 0.980756469 | 2.01E-08 |
| TUCP_001281 | XLOC_048323 | ENSRNOT000000032199 | 0.952575937 | 1.74E-06 |
| TUCP_001281 | XLOC_048323 | ENSRNOT000000082228 | 0.951712737 | 1.91E-06 |
| TUCP_001281 | XLOC_048323 | ENSRNOT00000004508  | 0.960812678 | 6.81E-07 |
| TUCP_001281 | XLOC_048323 | ENSRNOT000000034744 | 0.968860336 | 2.19E-07 |
| TUCP_001281 | XLOC_048323 | ENSRNOT00000009683  | 0.97401404  | 8.93E-08 |
| TUCP_001281 | XLOC_048323 | ENSRNOT000000021153 | 0.965260693 | 3.76E-07 |
| TUCP_001281 | XLOC_048323 | ENSRNOT000000064902 | 0.966854207 | 2.98E-07 |
| TUCP_001281 | XLOC_048323 | ENSRNOT000000088995 | 0.982064286 | 1.42E-08 |
| TUCP_001281 | XLOC_048323 | ENSRNOT000000024420 | 0.987771954 | 2.11E-09 |
| TUCP_001281 | XLOC_048323 | ENSRNOT000000076729 | 0.961983316 | 5.87E-07 |
| TUCP_001281 | XLOC_048323 | ENSRNOT000000085596 | 0.97889331  | 3.18E-08 |
| TUCP_001281 | XLOC_048323 | ENSRNOT000000074075 | 0.951408993 | 1.97E-06 |
| TUCP_001281 | XLOC_048323 | ENSRNOT000000039631 | 0.979616468 | 2.68E-08 |
| TUCP_001281 | XLOC_048323 | ENSRNOT000000090170 | 0.951148297 | 2.02E-06 |
| TUCP_001281 | XLOC_048323 | ENSRNOT00000006554  | 0.959147457 | 8.37E-07 |
| TUCP_001281 | XLOC_048323 | ENSRNOT000000027452 | 0.952281934 | 1.80E-06 |

|             |             |                    |              |          |
|-------------|-------------|--------------------|--------------|----------|
| TUCP_001281 | XLOC_048323 | ENSRNOT00000049538 | 0.970623533  | 1.64E-07 |
| TUCP_001281 | XLOC_048323 | ENSRNOT00000082253 | 0.974855595  | 7.59E-08 |
| TUCP_001281 | XLOC_048323 | ENSRNOT00000000713 | 0.959826822  | 7.70E-07 |
| TUCP_001281 | XLOC_048323 | ENSRNOT00000027054 | 0.959031401  | 8.48E-07 |
| TUCP_001281 | XLOC_048323 | ENSRNOT00000009129 | 0.964734666  | 4.05E-07 |
| TUCP_001281 | XLOC_048323 | ENSRNOT00000072081 | 0.950061825  | 2.25E-06 |
| TUCP_001281 | XLOC_048323 | ENSRNOT00000036951 | 0.963203373  | 4.99E-07 |
| TUCP_001281 | XLOC_048323 | ENSRNOT00000026457 | 0.959150274  | 8.36E-07 |
| TUCP_001281 | XLOC_048323 | ENSRNOT00000011663 | 0.954818141  | 1.37E-06 |
| TUCP_001281 | XLOC_048323 | ENSRNOT00000057313 | 0.978359793  | 3.60E-08 |
| TUCP_001281 | XLOC_048323 | ENSRNOT00000073930 | 0.950989809  | 2.05E-06 |
| TUCP_001281 | XLOC_048323 | ENSRNOT00000088196 | 0.951120032  | 2.02E-06 |
| TUCP_001281 | XLOC_048323 | ENSRNOT00000023645 | 0.973565472  | 9.72E-08 |
| TUCP_001281 | XLOC_048323 | ENSRNOT00000084734 | 0.950082851  | 2.24E-06 |
| TUCP_001281 | XLOC_048323 | ENSRNOT00000010992 | 0.965278353  | 3.75E-07 |
| TUCP_001281 | XLOC_048323 | ENSRNOT00000064840 | 0.960639973  | 6.96E-07 |
| TUCP_001281 | XLOC_048323 | ENSRNOT00000038802 | 0.952727129  | 1.72E-06 |
| TUCP_001281 | XLOC_048323 | ENSRNOT00000076669 | 0.958433945  | 9.11E-07 |
| TUCP_001281 | XLOC_048323 | ENSRNOT00000011984 | 0.961082332  | 6.59E-07 |
| TUCP_001281 | XLOC_048323 | ENSRNOT00000074653 | 0.975908432  | 6.14E-08 |
| TUCP_001281 | XLOC_048323 | ENSRNOT00000031230 | 0.982491509  | 1.26E-08 |
| TUCP_001281 | XLOC_048323 | ENSRNOT00000059458 | 0.959163459  | 8.35E-07 |
| TUCP_001281 | XLOC_048323 | ENSRNOT00000008184 | 0.969948503  | 1.84E-07 |
| TUCP_001281 | XLOC_048323 | ENSRNOT00000010588 | 0.955443444  | 1.28E-06 |
| TUCP_001281 | XLOC_048323 | ENSRNOT00000002292 | 0.972830078  | 1.11E-07 |
| TUCP_001281 | XLOC_048323 | ENSRNOT00000035491 | 0.95382157   | 1.53E-06 |
| TUCP_001281 | XLOC_048323 | ENSRNOT00000068322 | 0.980308965  | 2.26E-08 |
| TUCP_001281 | XLOC_048323 | ENSRNOT00000022800 | 0.960412505  | 7.16E-07 |
| TUCP_001281 | XLOC_048323 | ENSRNOT00000092906 | 0.950284755  | 2.20E-06 |
| TUCP_001281 | XLOC_048323 | ENSRNOT00000003296 | 0.956221389  | 1.18E-06 |
| TUCP_001281 | XLOC_048323 | ENSRNOT00000071694 | 0.98363818   | 8.99E-09 |
| TUCP_001281 | XLOC_048323 | ENSRNOT00000082174 | 0.963908442  | 4.54E-07 |
| TUCP_001281 | XLOC_048323 | ENSRNOT00000048029 | 0.964708393  | 4.06E-07 |
| TUCP_001281 | XLOC_048323 | ENSRNOT00000004412 | 0.983198185  | 1.03E-08 |
| TUCP_001281 | XLOC_048323 | ENSRNOT00000022485 | 0.950862802  | 2.08E-06 |
| TUCP_001281 | XLOC_048323 | ENSRNOT00000010927 | 0.953872905  | 1.52E-06 |
| TUCP_001281 | XLOC_048323 | ENSRNOT00000024941 | 0.982750151  | 1.17E-08 |
| TUCP_001281 | XLOC_048323 | ENSRNOT00000034704 | 0.975294791  | 6.95E-08 |
| TUCP_001281 | XLOC_048323 | ENSRNOT00000013031 | -0.951749986 | 1.90E-06 |
| TUCP_001281 | XLOC_048323 | ENSRNOT00000036750 | 0.975830116  | 6.24E-08 |
| TUCP_001281 | XLOC_048323 | ENSRNOT00000027964 | 0.964855467  | 3.98E-07 |
| TUCP_001281 | XLOC_048323 | ENSRNOT00000023428 | 0.951873136  | 1.88E-06 |
| TUCP_001281 | XLOC_048323 | ENSRNOT00000051550 | 0.961872041  | 5.95E-07 |
| TUCP_001281 | XLOC_048323 | ENSRNOT00000051319 | 0.953041404  | 1.66E-06 |
| TUCP_001281 | XLOC_048323 | ENSRNOT00000052288 | 0.978506917  | 3.48E-08 |
| TUCP_001281 | XLOC_048323 | ENSRNOT00000013661 | 0.977615457  | 4.26E-08 |
| TUCP_001281 | XLOC_048323 | ENSRNOT00000083799 | 0.964874264  | 3.97E-07 |
| TUCP_001281 | XLOC_048323 | ENSRNOT00000009066 | 0.972972616  | 1.09E-07 |
| TUCP_001162 | XLOC_043999 | ENSRNOT00000083701 | 0.959801698  | 7.73E-07 |
| TUCP_001162 | XLOC_043999 | ENSRNOT00000086126 | 0.96504671   | 3.87E-07 |
| TUCP_001283 | XLOC_048377 | ENSRNOT00000055735 | 0.958573569  | 8.96E-07 |



|             |             |                    |              |          |
|-------------|-------------|--------------------|--------------|----------|
| TUCP_001283 | XLOC_048377 | ENSRNOT00000031904 | 0.967896457  | 2.54E-07 |
| TUCP_001283 | XLOC_048377 | ENSRNOT00000068405 | 0.964728994  | 4.05E-07 |
| TUCP_001283 | XLOC_048377 | ENSRNOT00000039809 | 0.975512673  | 6.66E-08 |
| TUCP_001283 | XLOC_048377 | ENSRNOT00000026941 | 0.971611488  | 1.38E-07 |
| TUCP_001283 | XLOC_048377 | ENSRNOT00000020673 | 0.96297369   | 5.15E-07 |
| TUCP_001283 | XLOC_048377 | ENSRNOT00000019213 | 0.958299818  | 9.26E-07 |
| TUCP_001283 | XLOC_048377 | ENSRNOT00000074939 | 0.954255131  | 1.46E-06 |
| TUCP_001283 | XLOC_048377 | ENSRNOT00000071560 | 0.967452199  | 2.72E-07 |
| TUCP_001283 | XLOC_048377 | ENSRNOT00000023638 | 0.950853871  | 2.08E-06 |
| TUCP_001283 | XLOC_048377 | ENSRNOT00000006175 | 0.959903257  | 7.63E-07 |
| TUCP_001283 | XLOC_048377 | ENSRNOT00000005220 | 0.956315233  | 1.16E-06 |
| TUCP_001283 | XLOC_048377 | ENSRNOT00000044635 | 0.951845522  | 1.88E-06 |
| TUCP_001283 | XLOC_048377 | ENSRNOT00000021116 | 0.953514655  | 1.58E-06 |
| TUCP_001283 | XLOC_048377 | ENSRNOT00000092418 | 0.952003205  | 1.85E-06 |
| TUCP_001283 | XLOC_048377 | ENSRNOT00000082100 | 0.962265008  | 5.66E-07 |
| TUCP_001283 | XLOC_048377 | ENSRNOT00000076285 | 0.955221495  | 1.31E-06 |
| TUCP_001283 | XLOC_048377 | ENSRNOT00000054674 | 0.956710461  | 1.11E-06 |
| TUCP_001283 | XLOC_048377 | ENSRNOT00000091128 | -0.95076888  | 2.10E-06 |
| TUCP_001283 | XLOC_048377 | ENSRNOT00000013758 | 0.969651984  | 1.93E-07 |
| TUCP_001283 | XLOC_048377 | ENSRNOT00000026543 | 0.977181068  | 4.69E-08 |
| TUCP_001283 | XLOC_048377 | ENSRNOT00000015076 | 0.954987366  | 1.35E-06 |
| TUCP_001283 | XLOC_048377 | ENSRNOT00000043345 | 0.957077439  | 1.07E-06 |
| TUCP_001283 | XLOC_048377 | ENSRNOT00000015073 | 0.956340246  | 1.16E-06 |
| TUCP_001283 | XLOC_048377 | ENSRNOT00000025689 | 0.950026526  | 2.26E-06 |
| TUCP_001283 | XLOC_048377 | ENSRNOT00000073564 | -0.953735073 | 1.54E-06 |
| TUCP_001283 | XLOC_048377 | ENSRNOT00000067400 | 0.953188131  | 1.64E-06 |
| TUCP_001283 | XLOC_048377 | ENSRNOT00000006055 | 0.964274151  | 4.32E-07 |
| TUCP_001283 | XLOC_048377 | ENSRNOT00000071573 | 0.974333184  | 8.40E-08 |
| TUCP_001283 | XLOC_048377 | ENSRNOT00000088125 | 0.957703351  | 9.93E-07 |
| TUCP_001283 | XLOC_048377 | ENSRNOT00000023696 | 0.951025209  | 2.04E-06 |
| TUCP_001283 | XLOC_048377 | ENSRNOT00000065300 | 0.962341899  | 5.60E-07 |
| TUCP_001283 | XLOC_048377 | ENSRNOT0000002866  | -0.957451557 | 1.02E-06 |
| TUCP_001283 | XLOC_048377 | ENSRNOT00000025075 | 0.950715199  | 2.11E-06 |
| TUCP_001283 | XLOC_048377 | ENSRNOT00000035989 | 0.989215212  | 1.13E-09 |
| TUCP_001283 | XLOC_048377 | ENSRNOT00000057160 | 0.970451843  | 1.69E-07 |
| TUCP_001283 | XLOC_048377 | ENSRNOT00000082699 | 0.955771111  | 1.24E-06 |
| TUCP_001283 | XLOC_048377 | ENSRNOT00000024402 | 0.96619156   | 3.29E-07 |
| TUCP_001283 | XLOC_048377 | ENSRNOT00000021348 | 0.973225891  | 1.04E-07 |
| TUCP_001283 | XLOC_048377 | ENSRNOT00000010242 | 0.95237879   | 1.78E-06 |
| TUCP_001283 | XLOC_048377 | ENSRNOT00000012671 | 0.970048339  | 1.81E-07 |
| TUCP_001283 | XLOC_048377 | ENSRNOT00000085158 | 0.954169652  | 1.47E-06 |
| TUCP_001283 | XLOC_048377 | ENSRNOT00000083215 | 0.956573256  | 1.13E-06 |
| TUCP_001283 | XLOC_048377 | ENSRNOT00000084012 | 0.959743479  | 7.78E-07 |
| TUCP_001283 | XLOC_048377 | ENSRNOT00000050180 | 0.954326967  | 1.45E-06 |
| TUCP_001283 | XLOC_048377 | ENSRNOT00000055187 | 0.968735046  | 2.23E-07 |
| TUCP_001283 | XLOC_048377 | ENSRNOT00000004834 | 0.960908872  | 6.73E-07 |
| TUCP_001283 | XLOC_048377 | ENSRNOT00000041513 | 0.954590727  | 1.41E-06 |
| TUCP_001283 | XLOC_048377 | ENSRNOT00000000302 | 0.968690284  | 2.25E-07 |
| TUCP_001283 | XLOC_048377 | ENSRNOT00000068633 | 0.955246766  | 1.31E-06 |
| TUCP_001283 | XLOC_048377 | ENSRNOT00000010541 | 0.957555457  | 1.01E-06 |
| TUCP_001283 | XLOC_048377 | ENSRNOT00000037446 | 0.96111426   | 6.56E-07 |

|             |             |                     |             |          |
|-------------|-------------|---------------------|-------------|----------|
| TUCP_001283 | XLOC_048377 | ENSRNOT00000017948  | 0.965269175 | 3.75E-07 |
| TUCP_001283 | XLOC_048377 | ENSRNOT00000025859  | 0.977034416 | 4.84E-08 |
| TUCP_001283 | XLOC_048377 | ENSRNOT00000057313  | 0.978988391 | 3.11E-08 |
| TUCP_001283 | XLOC_048377 | ENSRNOT00000091909  | 0.954352994 | 1.45E-06 |
| TUCP_001283 | XLOC_048377 | ENSRNOT00000000676  | 0.9595743   | 7.94E-07 |
| TUCP_001283 | XLOC_048377 | ENSRNOT00000078675  | 0.957359143 | 1.03E-06 |
| TUCP_001283 | XLOC_048377 | ENSRNOT00000013274  | 0.971595115 | 1.39E-07 |
| TUCP_001283 | XLOC_048377 | ENSRNOT00000085027  | 0.951088318 | 2.03E-06 |
| TUCP_001283 | XLOC_048377 | ENSRNOT00000022342  | 0.955424142 | 1.29E-06 |
| TUCP_001283 | XLOC_048377 | ENSRNOT00000079072  | 0.950492006 | 2.16E-06 |
| TUCP_001283 | XLOC_048377 | ENSRNOT00000045574  | 0.954258328 | 1.46E-06 |
| TUCP_001283 | XLOC_048377 | ENSRNOT00000010898  | 0.956362713 | 1.16E-06 |
| TUCP_001283 | XLOC_048377 | ENSRNOT00000047093  | 0.958203042 | 9.36E-07 |
| TUCP_001283 | XLOC_048377 | ENSRNOT00000000157  | 0.950221866 | 2.21E-06 |
| TUCP_001283 | XLOC_048377 | ENSRNOT00000005355  | 0.975502936 | 6.67E-08 |
| TUCP_001283 | XLOC_048377 | ENSRNOT00000016739  | 0.965758855 | 3.50E-07 |
| TUCP_001283 | XLOC_048377 | ENSRNOT00000009221  | 0.950433909 | 2.17E-06 |
| TUCP_001283 | XLOC_048377 | ENSRNOT00000079895  | 0.967207589 | 2.83E-07 |
| TUCP_001283 | XLOC_048377 | ENSRNOT00000025981  | 0.965204776 | 3.79E-07 |
| TUCP_001283 | XLOC_048377 | ENSRNOT00000023144  | 0.976039381 | 5.97E-08 |
| TUCP_001283 | XLOC_048377 | ENSRNOT00000047387  | 0.977454558 | 4.42E-08 |
| TUCP_001283 | XLOC_048377 | ENSRNOT00000004698  | 0.950903462 | 2.07E-06 |
| TUCP_001283 | XLOC_048377 | ENSRNOT00000091910  | 0.958614805 | 8.92E-07 |
| TUCP_001283 | XLOC_048377 | ENSRNOT00000045488  | 0.966059236 | 3.35E-07 |
| TUCP_001283 | XLOC_048377 | ENSRNOT00000039842  | 0.97722043  | 4.65E-08 |
| TUCP_001283 | XLOC_048377 | ENSRNOT00000017629  | 0.986384161 | 3.60E-09 |
| TUCP_001283 | XLOC_048377 | ENSRNOT00000033998  | 0.958440494 | 9.11E-07 |
| TUCP_001283 | XLOC_048377 | ENSRNOT00000008803  | 0.953128262 | 1.65E-06 |
| TUCP_001283 | XLOC_048377 | ENSRNOT00000005664  | 0.954460789 | 1.43E-06 |
| TUCP_001283 | XLOC_048377 | ENSRNOT00000004508  | 0.965521707 | 3.62E-07 |
| TUCP_001283 | XLOC_048377 | ENSRNOT00000027910  | 0.958601864 | 8.93E-07 |
| TUCP_001283 | XLOC_048377 | ENSRNOT00000078475  | 0.961146819 | 6.53E-07 |
| TUCP_001283 | XLOC_048377 | ENSRNOT00000087429  | 0.955476346 | 1.28E-06 |
| TUCP_001283 | XLOC_048377 | ENSRNOT00000040513  | 0.984536701 | 6.78E-09 |
| TUCP_001283 | XLOC_048377 | ENSRNOT00000004740  | 0.95121987  | 2.00E-06 |
| TUCP_001283 | XLOC_048377 | ENSRNOT00000009683  | 0.970290534 | 1.73E-07 |
| TUCP_001283 | XLOC_048377 | ENSRNOT00000084088  | 0.972701574 | 1.14E-07 |
| TUCP_001283 | XLOC_048377 | ENSRNOT000000064902 | 0.9586926   | 8.84E-07 |
| TUCP_001283 | XLOC_048377 | ENSRNOT00000078070  | 0.960097463 | 7.45E-07 |
| TUCP_001283 | XLOC_048377 | ENSRNOT00000029664  | 0.951470736 | 1.95E-06 |
| TUCP_001283 | XLOC_048377 | ENSRNOT00000076729  | 0.981430195 | 1.69E-08 |
| TUCP_001283 | XLOC_048377 | ENSRNOT00000005262  | 0.953817798 | 1.53E-06 |
| TUCP_001283 | XLOC_048377 | ENSRNOT00000086352  | 0.964041033 | 4.46E-07 |
| TUCP_001283 | XLOC_048377 | ENSRNOT00000091265  | 0.959764728 | 7.76E-07 |
| TUCP_001283 | XLOC_048377 | ENSRNOT00000016191  | 0.954905817 | 1.36E-06 |
| TUCP_001283 | XLOC_048377 | ENSRNOT000000065501 | 0.975455194 | 6.73E-08 |
| TUCP_001283 | XLOC_048377 | ENSRNOT00000027452  | 0.953558692 | 1.57E-06 |
| TUCP_001283 | XLOC_048377 | ENSRNOT00000027615  | 0.965668262 | 3.55E-07 |
| TUCP_001283 | XLOC_048377 | ENSRNOT00000090665  | 0.986837596 | 3.04E-09 |
| TUCP_001283 | XLOC_048377 | ENSRNOT00000025092  | 0.981732313 | 1.55E-08 |
| TUCP_001283 | XLOC_048377 | ENSRNOT00000037790  | 0.951791978 | 1.89E-06 |

|             |             |                    |              |          |
|-------------|-------------|--------------------|--------------|----------|
| TUCP_001283 | XLOC_048377 | ENSRNOT00000090376 | 0.962380515  | 5.57E-07 |
| TUCP_001283 | XLOC_048377 | ENSRNOT00000009122 | 0.951048549  | 2.04E-06 |
| TUCP_001283 | XLOC_048377 | ENSRNOT00000024639 | 0.96686821   | 2.97E-07 |
| TUCP_001283 | XLOC_048377 | ENSRNOT00000088628 | 0.951985592  | 1.85E-06 |
| TUCP_001283 | XLOC_048377 | ENSRNOT00000088054 | 0.965434578  | 3.67E-07 |
| TUCP_001283 | XLOC_048377 | ENSRNOT00000081897 | 0.952891123  | 1.69E-06 |
| TUCP_001283 | XLOC_048377 | ENSRNOT00000090424 | 0.95266379   | 1.73E-06 |
| TUCP_001283 | XLOC_048377 | ENSRNOT00000024420 | 0.961419775  | 6.31E-07 |
| TUCP_001283 | XLOC_048377 | ENSRNOT00000002560 | 0.9610294    | 6.63E-07 |
| TUCP_001283 | XLOC_048377 | ENSRNOT00000043216 | 0.9511335    | 2.02E-06 |
| TUCP_001283 | XLOC_048377 | ENSRNOT00000087534 | -0.952003164 | 1.85E-06 |
| TUCP_001283 | XLOC_048377 | ENSRNOT00000010992 | 0.991612605  | 3.22E-10 |
| TUCP_001283 | XLOC_048377 | ENSRNOT00000038647 | 0.963493337  | 4.80E-07 |
| TUCP_001283 | XLOC_048377 | ENSRNOT00000076669 | 0.981689241  | 1.57E-08 |
| TUCP_001283 | XLOC_048377 | ENSRNOT00000011984 | 0.956541084  | 1.13E-06 |
| TUCP_001283 | XLOC_048377 | ENSRNOT00000088279 | 0.955281499  | 1.31E-06 |
| TUCP_001283 | XLOC_048377 | ENSRNOT00000026293 | 0.969280221  | 2.05E-07 |
| TUCP_001283 | XLOC_048377 | ENSRNOT00000074653 | 0.950540314  | 2.14E-06 |
| TUCP_001283 | XLOC_048377 | ENSRNOT00000089007 | -0.954538631 | 1.42E-06 |
| TUCP_001283 | XLOC_048377 | ENSRNOT00000066024 | 0.959975077  | 7.56E-07 |
| TUCP_001283 | XLOC_048377 | ENSRNOT00000025808 | 0.953506969  | 1.58E-06 |
| TUCP_001283 | XLOC_048377 | ENSRNOT00000001222 | 0.984109886  | 7.77E-09 |
| TUCP_001283 | XLOC_048377 | ENSRNOT00000012736 | 0.959217359  | 8.30E-07 |
| TUCP_001283 | XLOC_048377 | ENSRNOT00000031230 | 0.966792657  | 3.01E-07 |
| TUCP_001283 | XLOC_048377 | ENSRNOT00000083127 | 0.96076341   | 6.86E-07 |
| TUCP_001283 | XLOC_048377 | ENSRNOT00000080695 | 0.975287022  | 6.96E-08 |
| TUCP_001283 | XLOC_048377 | ENSRNOT00000037679 | 0.950122979  | 2.24E-06 |
| TUCP_001283 | XLOC_048377 | ENSRNOT00000003296 | 0.970857376  | 1.58E-07 |
| TUCP_001283 | XLOC_048377 | ENSRNOT00000058852 | -0.953999427 | 1.50E-06 |
| TUCP_001283 | XLOC_048377 | ENSRNOT00000085596 | 0.977386816  | 4.48E-08 |
| TUCP_001283 | XLOC_048377 | ENSRNOT00000071694 | 0.954316514  | 1.45E-06 |
| TUCP_001283 | XLOC_048377 | ENSRNOT00000060696 | 0.96122778   | 6.47E-07 |
| TUCP_001283 | XLOC_048377 | ENSRNOT00000004412 | 0.971364576  | 1.45E-07 |
| TUCP_001283 | XLOC_048377 | ENSRNOT00000080207 | 0.962410195  | 5.55E-07 |
| TUCP_001283 | XLOC_048377 | ENSRNOT00000024942 | 0.950720131  | 2.11E-06 |
| TUCP_001283 | XLOC_048377 | ENSRNOT00000005387 | 0.962691087  | 5.35E-07 |
| TUCP_001283 | XLOC_048377 | ENSRNOT00000025832 | 0.967705817  | 2.62E-07 |
| TUCP_001283 | XLOC_048377 | ENSRNOT00000034704 | 0.969650575  | 1.93E-07 |
| TUCP_001283 | XLOC_048377 | ENSRNOT00000066593 | 0.950002359  | 2.26E-06 |
| TUCP_001283 | XLOC_048377 | ENSRNOT00000026457 | 0.952975818  | 1.67E-06 |
| TUCP_001283 | XLOC_048377 | ENSRNOT00000036750 | 0.967298782  | 2.79E-07 |
| TUCP_001283 | XLOC_048377 | ENSRNOT00000027964 | 0.963557433  | 4.76E-07 |
| TUCP_001283 | XLOC_048377 | ENSRNOT00000003182 | 0.950097157  | 2.24E-06 |
| TUCP_001283 | XLOC_048377 | ENSRNOT00000051550 | 0.958534611  | 9.00E-07 |
| TUCP_001283 | XLOC_048377 | ENSRNOT00000011041 | 0.957048732  | 1.07E-06 |
| TUCP_001283 | XLOC_048377 | ENSRNOT00000021674 | 0.974228611  | 8.57E-08 |
| TUCP_001283 | XLOC_048377 | ENSRNOT00000047192 | -0.952475604 | 1.76E-06 |
| TUCP_001283 | XLOC_048377 | ENSRNOT00000067867 | 0.951930033  | 1.86E-06 |
| TUCP_001283 | XLOC_048377 | ENSRNOT00000052288 | 0.968784055  | 2.22E-07 |
| TUCP_001283 | XLOC_048377 | ENSRNOT00000083799 | 0.969234861  | 2.06E-07 |
| TUCP_001329 | XLOC_051167 | ENSRNOT00000022703 | 0.960958689  | 6.69E-07 |

|             |             |                    |              |          |
|-------------|-------------|--------------------|--------------|----------|
| TUCP_001326 | XLOC_051032 | ENSRNOT00000082869 | 0.958503344  | 9.04E-07 |
| TUCP_001327 | XLOC_051036 | ENSRNOT00000024583 | -0.962623444 | 5.40E-07 |
| TUCP_001327 | XLOC_051036 | ENSRNOT00000065811 | 0.956928878  | 1.09E-06 |
| TUCP_001327 | XLOC_051036 | ENSRNOT00000021590 | 0.950985804  | 2.05E-06 |
| TUCP_001327 | XLOC_051036 | ENSRNOT00000093008 | 0.958854334  | 8.67E-07 |
| TUCP_001325 | XLOC_050977 | ENSRNOT00000001215 | -0.961877206 | 5.95E-07 |
| TUCP_001325 | XLOC_050977 | ENSRNOT00000006188 | 0.957794552  | 9.82E-07 |
| TUCP_001325 | XLOC_050977 | ENSRNOT00000006186 | -0.950231449 | 2.21E-06 |
| TUCP_001325 | XLOC_050977 | ENSRNOT00000013747 | -0.951831791 | 1.88E-06 |
| TUCP_001325 | XLOC_050977 | ENSRNOT00000001196 | 0.955112395  | 1.33E-06 |
| TUCP_001325 | XLOC_050977 | ENSRNOT00000013745 | 0.970842499  | 1.58E-07 |
| TUCP_001325 | XLOC_050977 | ENSRNOT00000075397 | -0.956189966 | 1.18E-06 |
| TUCP_001325 | XLOC_050977 | ENSRNOT00000019104 | 0.95935923   | 8.15E-07 |
| TUCP_001325 | XLOC_050977 | ENSRNOT00000019848 | 0.966018895  | 3.37E-07 |
| TUCP_001325 | XLOC_050977 | ENSRNOT00000015568 | 0.962970456  | 5.15E-07 |
| TUCP_001325 | XLOC_050977 | ENSRNOT0000001691  | -0.952731315 | 1.72E-06 |
| TUCP_001325 | XLOC_050977 | ENSRNOT00000079644 | 0.990566383  | 5.79E-10 |
| TUCP_001325 | XLOC_050977 | ENSRNOT00000020267 | -0.972020747 | 1.29E-07 |
| TUCP_001325 | XLOC_050977 | ENSRNOT00000037955 | 0.961881882  | 5.94E-07 |
| TUCP_001325 | XLOC_050977 | ENSRNOT00000020265 | 0.96420556   | 4.36E-07 |
| TUCP_001325 | XLOC_050977 | ENSRNOT00000064305 | 0.976009578  | 6.01E-08 |
| TUCP_001325 | XLOC_050977 | ENSRNOT00000055062 | 0.964252553  | 4.33E-07 |
| TUCP_001325 | XLOC_050977 | ENSRNOT00000045233 | 0.96979905   | 1.88E-07 |
| TUCP_001325 | XLOC_050977 | ENSRNOT00000042633 | 0.95411456   | 1.48E-06 |
| TUCP_001325 | XLOC_050977 | ENSRNOT00000025308 | 0.968980369  | 2.15E-07 |
| TUCP_001325 | XLOC_050977 | ENSRNOT00000030850 | -0.960700292 | 6.91E-07 |
| TUCP_001325 | XLOC_050977 | ENSRNOT00000033015 | 0.95816092   | 9.41E-07 |
| TUCP_001325 | XLOC_050977 | ENSRNOT00000086893 | 0.962200817  | 5.70E-07 |
| TUCP_001325 | XLOC_050977 | ENSRNOT00000055540 | -0.96128981  | 6.41E-07 |
| TUCP_001325 | XLOC_050977 | ENSRNOT00000003247 | 0.971847576  | 1.33E-07 |
| TUCP_001325 | XLOC_050977 | ENSRNOT00000021534 | 0.957891643  | 9.71E-07 |
| TUCP_001325 | XLOC_050977 | ENSRNOT00000015986 | 0.964886762  | 3.96E-07 |
| TUCP_001325 | XLOC_050977 | ENSRNOT00000025284 | 0.968367252  | 2.37E-07 |
| TUCP_001325 | XLOC_050977 | ENSRNOT00000083677 | 0.954913062  | 1.36E-06 |
| TUCP_001325 | XLOC_050977 | ENSRNOT00000065304 | 0.969084576  | 2.11E-07 |
| TUCP_001325 | XLOC_050977 | ENSRNOT00000045699 | -0.972275675 | 1.23E-07 |
| TUCP_001325 | XLOC_050977 | ENSRNOT00000057045 | 0.979844829  | 2.53E-08 |
| TUCP_001325 | XLOC_050977 | ENSRNOT00000064401 | -0.971353635 | 1.45E-07 |
| TUCP_001325 | XLOC_050977 | ENSRNOT00000035320 | 0.975084502  | 7.25E-08 |
| TUCP_001325 | XLOC_050977 | ENSRNOT00000073971 | -0.961061279 | 6.60E-07 |
| TUCP_001325 | XLOC_050977 | ENSRNOT00000084674 | 0.95156649   | 1.93E-06 |
| TUCP_001325 | XLOC_050977 | ENSRNOT00000019192 | 0.95685279   | 1.10E-06 |
| TUCP_001325 | XLOC_050977 | ENSRNOT00000003412 | 0.976375712  | 5.57E-08 |
| TUCP_001325 | XLOC_050977 | ENSRNOT00000077856 | 0.980759921  | 2.01E-08 |
| TUCP_001325 | XLOC_050977 | ENSRNOT00000024264 | 0.951180728  | 2.01E-06 |
| TUCP_001325 | XLOC_050977 | ENSRNOT00000015188 | -0.96348051  | 4.81E-07 |
| TUCP_001325 | XLOC_050977 | ENSRNOT00000018488 | 0.968052971  | 2.48E-07 |
| TUCP_001325 | XLOC_050977 | ENSRNOT00000040629 | -0.97809792  | 3.83E-08 |
| TUCP_001325 | XLOC_050977 | ENSRNOT00000075934 | 0.958061392  | 9.52E-07 |
| TUCP_001325 | XLOC_050977 | ENSRNOT00000076181 | 0.975949478  | 6.09E-08 |
| TUCP_001325 | XLOC_050977 | ENSRNOT00000030074 | -0.957711072 | 9.92E-07 |

|             |             |                    |              |          |
|-------------|-------------|--------------------|--------------|----------|
| TUCP_001325 | XLOC_050977 | ENSRNOT00000092945 | 0.957732004  | 9.90E-07 |
| TUCP_001325 | XLOC_050977 | ENSRNOT00000068033 | -0.977299319 | 4.57E-08 |
| TUCP_001325 | XLOC_050977 | ENSRNOT00000026481 | -0.961243152 | 6.45E-07 |
| TUCP_001325 | XLOC_050977 | ENSRNOT00000026525 | 0.977048538  | 4.83E-08 |
| TUCP_001325 | XLOC_050977 | ENSRNOT00000082709 | 0.956552236  | 1.13E-06 |
| TUCP_001325 | XLOC_050977 | ENSRNOT00000025856 | 0.963755123  | 4.64E-07 |
| TUCP_001325 | XLOC_050977 | ENSRNOT00000028074 | 0.96743307   | 2.73E-07 |
| TUCP_001325 | XLOC_050977 | ENSRNOT0000001403  | -0.966573081 | 3.11E-07 |
| TUCP_001325 | XLOC_050977 | ENSRNOT00000084313 | 0.959790008  | 7.74E-07 |
| TUCP_001325 | XLOC_050977 | ENSRNOT0000001401  | -0.951866542 | 1.88E-06 |
| TUCP_001325 | XLOC_050977 | ENSRNOT00000016132 | 0.969215523  | 2.07E-07 |
| TUCP_001325 | XLOC_050977 | ENSRNOT00000075181 | 0.956357593  | 1.16E-06 |
| TUCP_001325 | XLOC_050977 | ENSRNOT00000058495 | 0.958593855  | 8.94E-07 |
| TUCP_001325 | XLOC_050977 | ENSRNOT00000013067 | 0.951894516  | 1.87E-06 |
| TUCP_001325 | XLOC_050977 | ENSRNOT0000001360  | 0.961244468  | 6.45E-07 |
| TUCP_001325 | XLOC_050977 | ENSRNOT00000023506 | 0.984334676  | 7.24E-09 |
| TUCP_001325 | XLOC_050977 | ENSRNOT00000024296 | -0.956318122 | 1.16E-06 |
| TUCP_001325 | XLOC_050977 | ENSRNOT00000087190 | 0.963435122  | 4.84E-07 |
| TUCP_001325 | XLOC_050977 | ENSRNOT00000048063 | -0.950168253 | 2.23E-06 |
| TUCP_001325 | XLOC_050977 | ENSRNOT00000083995 | 0.950581324  | 2.14E-06 |
| TUCP_001325 | XLOC_050977 | ENSRNOT00000065288 | 0.960928883  | 6.71E-07 |
| TUCP_001325 | XLOC_050977 | ENSRNOT00000041815 | 0.977947838  | 3.96E-08 |
| TUCP_001325 | XLOC_050977 | ENSRNOT00000033975 | -0.953983083 | 1.50E-06 |
| TUCP_001325 | XLOC_050977 | ENSRNOT0000005220  | -0.956498659 | 1.14E-06 |
| TUCP_001325 | XLOC_050977 | ENSRNOT00000067741 | 0.955172025  | 1.32E-06 |
| TUCP_001325 | XLOC_050977 | ENSRNOT00000045765 | 0.957777675  | 9.84E-07 |
| TUCP_001325 | XLOC_050977 | ENSRNOT00000030893 | 0.951961777  | 1.86E-06 |
| TUCP_001325 | XLOC_050977 | ENSRNOT00000092876 | 0.967858493  | 2.56E-07 |
| TUCP_001325 | XLOC_050977 | ENSRNOT00000024992 | 0.967100832  | 2.87E-07 |
| TUCP_001325 | XLOC_050977 | ENSRNOT00000000532 | 0.965028536  | 3.88E-07 |
| TUCP_001325 | XLOC_050977 | ENSRNOT00000021716 | -0.957633261 | 1.00E-06 |
| TUCP_001325 | XLOC_050977 | ENSRNOT00000021717 | -0.962768181 | 5.29E-07 |
| TUCP_001325 | XLOC_050977 | ENSRNOT00000003992 | 0.960195387  | 7.36E-07 |
| TUCP_001325 | XLOC_050977 | ENSRNOT00000016351 | 0.984283574  | 7.36E-09 |
| TUCP_001325 | XLOC_050977 | ENSRNOT00000050515 | -0.972241328 | 1.24E-07 |
| TUCP_001325 | XLOC_050977 | ENSRNOT00000021400 | 0.970164345  | 1.77E-07 |
| TUCP_001325 | XLOC_050977 | ENSRNOT00000012942 | -0.951429659 | 1.96E-06 |
| TUCP_001325 | XLOC_050977 | ENSRNOT00000011401 | 0.969492397  | 1.98E-07 |
| TUCP_001325 | XLOC_050977 | ENSRNOT00000055602 | 0.959778661  | 7.75E-07 |
| TUCP_001325 | XLOC_050977 | ENSRNOT00000020951 | -0.950344232 | 2.19E-06 |
| TUCP_001325 | XLOC_050977 | ENSRNOT00000082146 | 0.972246814  | 1.24E-07 |
| TUCP_001325 | XLOC_050977 | ENSRNOT00000031555 | 0.98363422   | 9.00E-09 |
| TUCP_001325 | XLOC_050977 | ENSRNOT00000011408 | -0.950899895 | 2.07E-06 |
| TUCP_001325 | XLOC_050977 | ENSRNOT00000000263 | -0.975863306 | 6.20E-08 |
| TUCP_001325 | XLOC_050977 | ENSRNOT00000086350 | 0.953611522  | 1.56E-06 |
| TUCP_001325 | XLOC_050977 | ENSRNOT00000023876 | -0.96082475  | 6.80E-07 |
| TUCP_001325 | XLOC_050977 | ENSRNOT00000034400 | 0.955186235  | 1.32E-06 |
| TUCP_001325 | XLOC_050977 | ENSRNOT00000012625 | 0.978318009  | 3.64E-08 |
| TUCP_001325 | XLOC_050977 | ENSRNOT00000009840 | 0.960981441  | 6.67E-07 |
| TUCP_001325 | XLOC_050977 | ENSRNOT00000049285 | 0.974314183  | 8.43E-08 |
| TUCP_001325 | XLOC_050977 | ENSRNOT00000006246 | 0.952672002  | 1.73E-06 |

|             |             |                     |              |          |
|-------------|-------------|---------------------|--------------|----------|
| TUCP_001325 | XLOC_050977 | ENSRNOT0000006366   | 0.958112519  | 9.46E-07 |
| TUCP_001325 | XLOC_050977 | ENSRNOT00000074649  | -0.951965387 | 1.86E-06 |
| TUCP_001325 | XLOC_050977 | ENSRNOT00000049536  | 0.977694783  | 4.19E-08 |
| TUCP_001325 | XLOC_050977 | ENSRNOT00000033196  | 0.972188065  | 1.25E-07 |
| TUCP_001325 | XLOC_050977 | ENSRNOT00000077146  | 0.960171844  | 7.38E-07 |
| TUCP_001325 | XLOC_050977 | ENSRNOT00000022478  | 0.969409832  | 2.00E-07 |
| TUCP_001325 | XLOC_050977 | ENSRNOT00000064723  | 0.967543298  | 2.69E-07 |
| TUCP_001325 | XLOC_050977 | ENSRNOT00000089673  | 0.966721734  | 3.04E-07 |
| TUCP_001325 | XLOC_050977 | ENSRNOT00000036959  | 0.966312996  | 3.23E-07 |
| TUCP_001325 | XLOC_050977 | ENSRNOT00000089185  | 0.982866055  | 1.13E-08 |
| TUCP_001325 | XLOC_050977 | ENSRNOT00000023977  | 0.981296585  | 1.75E-08 |
| TUCP_001325 | XLOC_050977 | ENSRNOT00000017420  | 0.966261021  | 3.25E-07 |
| TUCP_001325 | XLOC_050977 | ENSRNOT00000009666  | 0.952195608  | 1.81E-06 |
| TUCP_001325 | XLOC_050977 | ENSRNOT000000051953 | 0.956894825  | 1.09E-06 |
| TUCP_001325 | XLOC_050977 | ENSRNOT00000006765  | 0.97379486   | 9.31E-08 |
| TUCP_001325 | XLOC_050977 | ENSRNOT00000017254  | 0.961437661  | 6.29E-07 |
| TUCP_001325 | XLOC_050977 | ENSRNOT00000074081  | 0.97038851   | 1.71E-07 |
| TUCP_001325 | XLOC_050977 | ENSRNOT00000002443  | -0.965943582 | 3.41E-07 |
| TUCP_001325 | XLOC_050977 | ENSRNOT00000086628  | -0.968774203 | 2.22E-07 |
| TUCP_001325 | XLOC_050977 | ENSRNOT00000017190  | -0.955973846 | 1.21E-06 |
| TUCP_001325 | XLOC_050977 | ENSRNOT00000005644  | 0.979876256  | 2.51E-08 |
| TUCP_001325 | XLOC_050977 | ENSRNOT00000014885  | 0.966959721  | 2.93E-07 |
| TUCP_001325 | XLOC_050977 | ENSRNOT00000023786  | 0.978072956  | 3.85E-08 |
| TUCP_001325 | XLOC_050977 | ENSRNOT00000040548  | 0.983801795  | 8.55E-09 |
| TUCP_001325 | XLOC_050977 | ENSRNOT00000015624  | -0.958124053 | 9.45E-07 |
| TUCP_001325 | XLOC_050977 | ENSRNOT00000073239  | 0.966553449  | 3.12E-07 |
| TUCP_001325 | XLOC_050977 | ENSRNOT00000008222  | 0.964208881  | 4.36E-07 |
| TUCP_001325 | XLOC_050977 | ENSRNOT00000010962  | 0.974838907  | 7.61E-08 |
| TUCP_001325 | XLOC_050977 | ENSRNOT00000010620  | 0.966547619  | 3.12E-07 |
| TUCP_001325 | XLOC_050977 | ENSRNOT00000039102  | -0.971435737 | 1.43E-07 |
| TUCP_001325 | XLOC_050977 | ENSRNOT00000078856  | 0.971835551  | 1.33E-07 |
| TUCP_001325 | XLOC_050977 | ENSRNOT00000013933  | 0.954966997  | 1.35E-06 |
| TUCP_001325 | XLOC_050977 | ENSRNOT00000001036  | 0.95756705   | 1.01E-06 |
| TUCP_001325 | XLOC_050977 | ENSRNOT00000007044  | 0.954454967  | 1.43E-06 |
| TUCP_001325 | XLOC_050977 | ENSRNOT00000010983  | -0.976712328 | 5.19E-08 |
| TUCP_001325 | XLOC_050977 | ENSRNOT00000004787  | 0.95064665   | 2.12E-06 |
| TUCP_001325 | XLOC_050977 | ENSRNOT00000007367  | 0.961155645  | 6.52E-07 |
| TUCP_001325 | XLOC_050977 | ENSRNOT00000012996  | -0.957072623 | 1.07E-06 |
| TUCP_001325 | XLOC_050977 | ENSRNOT00000066618  | 0.95883219   | 8.69E-07 |
| TUCP_001325 | XLOC_050977 | ENSRNOT00000004941  | 0.958676816  | 8.85E-07 |
| TUCP_001325 | XLOC_050977 | ENSRNOT00000005148  | 0.977631868  | 4.25E-08 |
| TUCP_001325 | XLOC_050977 | ENSRNOT00000023537  | 0.950354868  | 2.18E-06 |
| TUCP_001325 | XLOC_050977 | ENSRNOT00000070912  | 0.964768151  | 4.03E-07 |
| TUCP_001325 | XLOC_050977 | ENSRNOT00000023628  | 0.954857913  | 1.37E-06 |
| TUCP_001325 | XLOC_050977 | ENSRNOT00000037809  | 0.954089682  | 1.49E-06 |
| TUCP_001325 | XLOC_050977 | ENSRNOT00000002028  | -0.959378729 | 8.14E-07 |
| TUCP_001325 | XLOC_050977 | ENSRNOT00000059807  | -0.967733469 | 2.61E-07 |
| TUCP_001325 | XLOC_050977 | ENSRNOT00000016776  | 0.955626929  | 1.26E-06 |
| TUCP_001325 | XLOC_050977 | ENSRNOT00000028405  | 0.956844037  | 1.10E-06 |
| TUCP_001325 | XLOC_050977 | ENSRNOT00000008987  | 0.981509182  | 1.65E-08 |
| TUCP_001325 | XLOC_050977 | ENSRNOT00000090299  | -0.958728227 | 8.80E-07 |

|             |             |                    |              |          |
|-------------|-------------|--------------------|--------------|----------|
| TUCP_001325 | XLOC_050977 | ENSRNOT00000016677 | 0.957928563  | 9.67E-07 |
| TUCP_001325 | XLOC_050977 | ENSRNOT00000090355 | 0.959690981  | 7.83E-07 |
| TUCP_001325 | XLOC_050977 | ENSRNOT00000019473 | 0.967977479  | 2.51E-07 |
| TUCP_001325 | XLOC_050977 | ENSRNOT0000001099  | 0.970040502  | 1.81E-07 |
| TUCP_001325 | XLOC_050977 | ENSRNOT00000065143 | -0.955778665 | 1.24E-06 |
| TUCP_001325 | XLOC_050977 | ENSRNOT00000040060 | 0.96576388   | 3.50E-07 |
| TUCP_001325 | XLOC_050977 | ENSRNOT00000081796 | -0.950302604 | 2.20E-06 |
| TUCP_001325 | XLOC_050977 | ENSRNOT00000027083 | -0.958629499 | 8.90E-07 |
| TUCP_001325 | XLOC_050977 | ENSRNOT00000002053 | 0.958732134  | 8.79E-07 |
| TUCP_001325 | XLOC_050977 | ENSRNOT00000002429 | 0.954115373  | 1.48E-06 |
| TUCP_001325 | XLOC_050977 | ENSRNOT00000063930 | 0.953910816  | 1.52E-06 |
| TUCP_001325 | XLOC_050977 | ENSRNOT00000013058 | -0.978689998 | 3.34E-08 |
| TUCP_001325 | XLOC_050977 | ENSRNOT00000002037 | 0.953770714  | 1.54E-06 |
| TUCP_001325 | XLOC_050977 | ENSRNOT00000038178 | 0.972604089  | 1.16E-07 |
| TUCP_001325 | XLOC_050977 | ENSRNOT00000081768 | -0.951818054 | 1.89E-06 |
| TUCP_001325 | XLOC_050977 | ENSRNOT00000054932 | 0.95707898   | 1.07E-06 |
| TUCP_001325 | XLOC_050977 | ENSRNOT00000019502 | -0.956563066 | 1.13E-06 |
| TUCP_001325 | XLOC_050977 | ENSRNOT00000089829 | 0.980949011  | 1.91E-08 |
| TUCP_001325 | XLOC_050977 | ENSRNOT00000091050 | 0.959918441  | 7.62E-07 |
| TUCP_001325 | XLOC_050977 | ENSRNOT00000089418 | -0.955167185 | 1.32E-06 |
| TUCP_001325 | XLOC_050977 | ENSRNOT00000001135 | 0.960778828  | 6.84E-07 |
| TUCP_001325 | XLOC_050977 | ENSRNOT00000015247 | 0.964119938  | 4.41E-07 |
| TUCP_001325 | XLOC_050977 | ENSRNOT00000040847 | 0.977348033  | 4.52E-08 |
| TUCP_001325 | XLOC_050977 | ENSRNOT00000014479 | 0.97623761   | 5.73E-08 |
| TUCP_001325 | XLOC_050977 | ENSRNOT00000003326 | 0.970937722  | 1.56E-07 |
| TUCP_001325 | XLOC_050977 | ENSRNOT00000016306 | 0.950911097  | 2.07E-06 |
| TUCP_001325 | XLOC_050977 | ENSRNOT00000086813 | 0.958883397  | 8.64E-07 |
| TUCP_001325 | XLOC_050977 | ENSRNOT00000017692 | 0.973497365  | 9.85E-08 |
| TUCP_001325 | XLOC_050977 | ENSRNOT00000073019 | -0.968317226 | 2.38E-07 |
| TUCP_001325 | XLOC_050977 | ENSRNOT00000012699 | 0.972292476  | 1.23E-07 |
| TUCP_001325 | XLOC_050977 | ENSRNOT00000021750 | -0.957935962 | 9.66E-07 |
| TUCP_001325 | XLOC_050977 | ENSRNOT00000004007 | 0.964000463  | 4.48E-07 |
| TUCP_001325 | XLOC_050977 | ENSRNOT00000057898 | 0.978359677  | 3.60E-08 |
| TUCP_001325 | XLOC_050977 | ENSRNOT00000009000 | 0.967188976  | 2.83E-07 |
| TUCP_001325 | XLOC_050977 | ENSRNOT00000056100 | 0.964017352  | 4.47E-07 |
| TUCP_001325 | XLOC_050977 | ENSRNOT00000036838 | 0.978126827  | 3.80E-08 |
| TUCP_001325 | XLOC_050977 | ENSRNOT00000090129 | 0.958031008  | 9.56E-07 |
| TUCP_001325 | XLOC_050977 | ENSRNOT00000026258 | -0.963507566 | 4.79E-07 |
| TUCP_001325 | XLOC_050977 | ENSRNOT00000020702 | 0.963388504  | 4.87E-07 |
| TUCP_001325 | XLOC_050977 | ENSRNOT00000017486 | -0.958643816 | 8.89E-07 |
| TUCP_001325 | XLOC_050977 | ENSRNOT00000014605 | 0.971770172  | 1.35E-07 |
| TUCP_001325 | XLOC_050977 | ENSRNOT00000012583 | 0.955240061  | 1.31E-06 |
| TUCP_001325 | XLOC_050977 | ENSRNOT00000073643 | 0.96607108   | 3.34E-07 |
| TUCP_001325 | XLOC_050977 | ENSRNOT00000085403 | -0.964732514 | 4.05E-07 |
| TUCP_001325 | XLOC_050977 | ENSRNOT00000015579 | 0.955910116  | 1.22E-06 |
| TUCP_001325 | XLOC_050977 | ENSRNOT00000022502 | 0.972436842  | 1.20E-07 |
| TUCP_001325 | XLOC_050977 | ENSRNOT00000026928 | 0.972793122  | 1.12E-07 |
| TUCP_001325 | XLOC_050977 | ENSRNOT00000005329 | 0.963519554  | 4.79E-07 |
| TUCP_001325 | XLOC_050977 | ENSRNOT00000010252 | 0.950155896  | 2.23E-06 |
| TUCP_001325 | XLOC_050977 | ENSRNOT00000026920 | 0.972065223  | 1.28E-07 |
| TUCP_001325 | XLOC_050977 | ENSRNOT0000001759  | 0.971558018  | 1.40E-07 |

|             |             |                     |              |          |
|-------------|-------------|---------------------|--------------|----------|
| TUCP_001325 | XLOC_050977 | ENSRNOT00000021802  | -0.967952146 | 2.52E-07 |
| TUCP_001325 | XLOC_050977 | ENSRNOT00000021803  | 0.961344109  | 6.37E-07 |
| TUCP_001325 | XLOC_050977 | ENSRNOT00000046973  | -0.952830327 | 1.70E-06 |
| TUCP_001325 | XLOC_050977 | ENSRNOT00000024352  | -0.95220345  | 1.81E-06 |
| TUCP_001325 | XLOC_050977 | ENSRNOT00000018122  | -0.9529687   | 1.67E-06 |
| TUCP_001325 | XLOC_050977 | ENSRNOT00000087748  | 0.955440952  | 1.28E-06 |
| TUCP_001325 | XLOC_050977 | ENSRNOT00000014506  | 0.956308309  | 1.17E-06 |
| TUCP_001325 | XLOC_050977 | ENSRNOT00000017469  | 0.966295032  | 3.24E-07 |
| TUCP_001325 | XLOC_050977 | ENSRNOT00000018101  | 0.959857058  | 7.67E-07 |
| TUCP_001325 | XLOC_050977 | ENSRNOT00000045946  | -0.961289561 | 6.41E-07 |
| TUCP_001325 | XLOC_050977 | ENSRNOT00000005604  | -0.950049188 | 2.25E-06 |
| TUCP_001325 | XLOC_050977 | ENSRNOT00000055957  | 0.974332173  | 8.40E-08 |
| TUCP_001325 | XLOC_050977 | ENSRNOT00000010674  | 0.983234564  | 1.01E-08 |
| TUCP_001325 | XLOC_050977 | ENSRNOT00000023664  | 0.966763679  | 3.02E-07 |
| TUCP_001325 | XLOC_050977 | ENSRNOT00000016730  | 0.972831536  | 1.11E-07 |
| TUCP_001325 | XLOC_050977 | ENSRNOT00000091448  | 0.952599656  | 1.74E-06 |
| TUCP_001325 | XLOC_050977 | ENSRNOT00000014821  | 0.965330329  | 3.72E-07 |
| TUCP_001325 | XLOC_050977 | ENSRNOT00000018549  | 0.952855788  | 1.69E-06 |
| TUCP_001325 | XLOC_050977 | ENSRNOT00000005459  | -0.96115198  | 6.53E-07 |
| TUCP_001325 | XLOC_050977 | ENSRNOT00000005172  | -0.951131357 | 2.02E-06 |
| TUCP_001325 | XLOC_050977 | ENSRNOT00000023567  | 0.963342384  | 4.90E-07 |
| TUCP_001325 | XLOC_050977 | ENSRNOT00000032248  | -0.961790157 | 6.02E-07 |
| TUCP_001325 | XLOC_050977 | ENSRNOT00000026398  | 0.976268133  | 5.70E-08 |
| TUCP_001325 | XLOC_050977 | ENSRNOT00000050350  | 0.953843986  | 1.53E-06 |
| TUCP_001325 | XLOC_050977 | ENSRNOT00000024285  | 0.962783612  | 5.28E-07 |
| TUCP_001325 | XLOC_050977 | ENSRNOT00000071482  | 0.97949052   | 2.76E-08 |
| TUCP_001325 | XLOC_050977 | ENSRNOT00000028744  | 0.953162039  | 1.64E-06 |
| TUCP_001325 | XLOC_050977 | ENSRNOT00000028181  | 0.966757269  | 3.02E-07 |
| TUCP_001325 | XLOC_050977 | ENSRNOT00000002771  | -0.955061576 | 1.34E-06 |
| TUCP_001325 | XLOC_050977 | ENSRNOT000000054976 | 0.971661732  | 1.37E-07 |
| TUCP_001325 | XLOC_050977 | ENSRNOT00000010516  | 0.973857536  | 9.20E-08 |
| TUCP_001325 | XLOC_050977 | ENSRNOT00000000513  | -0.964585741 | 4.13E-07 |
| TUCP_001325 | XLOC_050977 | ENSRNOT00000008427  | 0.96037479   | 7.20E-07 |
| TUCP_001325 | XLOC_050977 | ENSRNOT00000000529  | 0.968893891  | 2.18E-07 |
| TUCP_001325 | XLOC_050977 | ENSRNOT00000081110  | 0.953776926  | 1.54E-06 |
| TUCP_001325 | XLOC_050977 | ENSRNOT00000051022  | -0.954437986 | 1.43E-06 |
| TUCP_001325 | XLOC_050977 | ENSRNOT000000088202 | 0.989305574  | 1.08E-09 |
| TUCP_001325 | XLOC_050977 | ENSRNOT000000088201 | 0.972426031  | 1.20E-07 |
| TUCP_001325 | XLOC_050977 | ENSRNOT00000078161  | 0.971354518  | 1.45E-07 |
| TUCP_001325 | XLOC_050977 | ENSRNOT00000002173  | 0.963689447  | 4.68E-07 |
| TUCP_001325 | XLOC_050977 | ENSRNOT00000011948  | 0.958642438  | 8.89E-07 |
| TUCP_001325 | XLOC_050977 | ENSRNOT00000003600  | 0.950833062  | 2.08E-06 |
| TUCP_001325 | XLOC_050977 | ENSRNOT00000031401  | 0.953101738  | 1.65E-06 |
| TUCP_001325 | XLOC_050977 | ENSRNOT00000003605  | 0.960629479  | 6.97E-07 |
| TUCP_001325 | XLOC_050977 | ENSRNOT00000038212  | 0.974934002  | 7.47E-08 |
| TUCP_001325 | XLOC_050977 | ENSRNOT000000082151 | 0.969060588  | 2.12E-07 |
| TUCP_001325 | XLOC_050977 | ENSRNOT00000020272  | 0.976846349  | 5.04E-08 |
| TUCP_001325 | XLOC_050977 | ENSRNOT00000000155  | -0.969326858 | 2.03E-07 |
| TUCP_001325 | XLOC_050977 | ENSRNOT00000034411  | -0.979523705 | 2.74E-08 |
| TUCP_001325 | XLOC_050977 | ENSRNOT00000001607  | -0.972186161 | 1.25E-07 |
| TUCP_001325 | XLOC_050977 | ENSRNOT00000088677  | 0.98781173   | 2.08E-09 |



|             |             |                    |              |          |
|-------------|-------------|--------------------|--------------|----------|
| TUCP_001325 | XLOC_050977 | ENSRNOT00000036282 | -0.976794383 | 5.10E-08 |
| TUCP_001325 | XLOC_050977 | ENSRNOT00000019644 | 0.953050601  | 1.66E-06 |
| TUCP_001325 | XLOC_050977 | ENSRNOT00000046126 | 0.975465112  | 6.72E-08 |
| TUCP_001325 | XLOC_050977 | ENSRNOT00000085971 | 0.951739349  | 1.90E-06 |
| TUCP_001325 | XLOC_050977 | ENSRNOT00000044975 | 0.958041126  | 9.54E-07 |
| TUCP_001325 | XLOC_050977 | ENSRNOT00000007771 | 0.971299777  | 1.46E-07 |
| TUCP_001325 | XLOC_050977 | ENSRNOT00000022142 | -0.977388942 | 4.48E-08 |
| TUCP_001325 | XLOC_050977 | ENSRNOT00000076300 | 0.966921309  | 2.95E-07 |
| TUCP_001325 | XLOC_050977 | ENSRNOT00000021705 | 0.950508805  | 2.15E-06 |
| TUCP_001325 | XLOC_050977 | ENSRNOT00000052120 | -0.967963438 | 2.52E-07 |
| TUCP_001325 | XLOC_050977 | ENSRNOT00000064735 | -0.971322001 | 1.46E-07 |
| TUCP_001325 | XLOC_050977 | ENSRNOT00000023965 | 0.954688939  | 1.39E-06 |
| TUCP_001325 | XLOC_050977 | ENSRNOT00000001234 | 0.969325065  | 2.03E-07 |
| TUCP_001325 | XLOC_050977 | ENSRNOT00000058763 | 0.98480795   | 6.21E-09 |
| TUCP_001325 | XLOC_050977 | ENSRNOT00000061580 | 0.951178169  | 2.01E-06 |
| TUCP_001325 | XLOC_050977 | ENSRNOT00000016389 | 0.973895592  | 9.14E-08 |
| TUCP_001325 | XLOC_050977 | ENSRNOT00000007688 | 0.955286268  | 1.31E-06 |
| TUCP_001325 | XLOC_050977 | ENSRNOT00000026364 | 0.965849852  | 3.45E-07 |
| TUCP_001325 | XLOC_050977 | ENSRNOT00000015763 | 0.963342793  | 4.90E-07 |
| TUCP_001325 | XLOC_050977 | ENSRNOT00000025819 | 0.987247278  | 2.60E-09 |
| TUCP_001325 | XLOC_050977 | ENSRNOT00000015318 | 0.982379377  | 1.30E-08 |
| TUCP_001325 | XLOC_050977 | ENSRNOT00000028907 | -0.957284811 | 1.04E-06 |
| TUCP_001325 | XLOC_050977 | ENSRNOT00000045532 | 0.991553617  | 3.34E-10 |
| TUCP_001325 | XLOC_050977 | ENSRNOT00000078862 | -0.957516474 | 1.01E-06 |
| TUCP_001325 | XLOC_050977 | ENSRNOT00000039551 | 0.953683352  | 1.55E-06 |
| TUCP_001325 | XLOC_050977 | ENSRNOT00000082998 | -0.971417107 | 1.43E-07 |
| TUCP_001325 | XLOC_050977 | ENSRNOT00000075656 | 0.968624688  | 2.27E-07 |
| TUCP_001325 | XLOC_050977 | ENSRNOT00000007350 | -0.95418812  | 1.47E-06 |
| TUCP_001325 | XLOC_050977 | ENSRNOT00000004956 | -0.967904479 | 2.54E-07 |
| TUCP_001325 | XLOC_050977 | ENSRNOT00000018936 | 0.952203621  | 1.81E-06 |
| TUCP_001325 | XLOC_050977 | ENSRNOT00000083573 | 0.95626035   | 1.17E-06 |
| TUCP_001325 | XLOC_050977 | ENSRNOT00000066204 | 0.987583136  | 2.28E-09 |
| TUCP_001325 | XLOC_050977 | ENSRNOT00000005426 | 0.960442261  | 7.14E-07 |
| TUCP_001325 | XLOC_050977 | ENSRNOT00000045443 | 0.962277757  | 5.65E-07 |
| TUCP_001325 | XLOC_050977 | ENSRNOT00000059524 | 0.981461957  | 1.67E-08 |
| TUCP_001325 | XLOC_050977 | ENSRNOT00000008677 | -0.951976453 | 1.86E-06 |
| TUCP_001325 | XLOC_050977 | ENSRNOT00000050721 | 0.982294243  | 1.33E-08 |
| TUCP_001325 | XLOC_050977 | ENSRNOT00000017361 | -0.97953332  | 2.73E-08 |
| TUCP_001325 | XLOC_050977 | ENSRNOT00000017362 | 0.966410098  | 3.18E-07 |
| TUCP_001325 | XLOC_050977 | ENSRNOT00000045326 | -0.953901271 | 1.52E-06 |
| TUCP_001325 | XLOC_050977 | ENSRNOT00000016649 | -0.950841897 | 2.08E-06 |
| TUCP_001325 | XLOC_050977 | ENSRNOT00000019465 | 0.971729428  | 1.36E-07 |
| TUCP_001325 | XLOC_050977 | ENSRNOT00000018696 | 0.95957081   | 7.95E-07 |
| TUCP_001325 | XLOC_050977 | ENSRNOT00000009073 | 0.968451638  | 2.33E-07 |
| TUCP_001325 | XLOC_050977 | ENSRNOT00000067170 | 0.957801924  | 9.82E-07 |
| TUCP_001325 | XLOC_050977 | ENSRNOT00000077871 | -0.951801228 | 1.89E-06 |
| TUCP_001325 | XLOC_050977 | ENSRNOT0000001586  | 0.97325206   | 1.03E-07 |
| TUCP_001325 | XLOC_050977 | ENSRNOT00000001468 | 0.95371067   | 1.55E-06 |
| TUCP_001325 | XLOC_050977 | ENSRNOT00000017385 | 0.964215763  | 4.35E-07 |
| TUCP_001325 | XLOC_050977 | ENSRNOT00000043554 | -0.958111999 | 9.47E-07 |
| TUCP_001325 | XLOC_050977 | ENSRNOT00000013516 | -0.959021612 | 8.49E-07 |

|             |             |                    |              |          |
|-------------|-------------|--------------------|--------------|----------|
| TUCP_001325 | XLOC_050977 | ENSRNOT00000013043 | 0.959635461  | 7.89E-07 |
| TUCP_001325 | XLOC_050977 | ENSRNOT00000026235 | 0.95816253   | 9.41E-07 |
| TUCP_001325 | XLOC_050977 | ENSRNOT00000013695 | 0.975056613  | 7.29E-08 |
| TUCP_001325 | XLOC_050977 | ENSRNOT00000016541 | 0.953025902  | 1.66E-06 |
| TUCP_001325 | XLOC_050977 | ENSRNOT00000081621 | -0.978380697 | 3.59E-08 |
| TUCP_001325 | XLOC_050977 | ENSRNOT00000027301 | 0.973586002  | 9.69E-08 |
| TUCP_001325 | XLOC_050977 | ENSRNOT00000009551 | -0.951716861 | 1.91E-06 |
| TUCP_001325 | XLOC_050977 | ENSRNOT00000090338 | 0.978863594  | 3.21E-08 |
| TUCP_001325 | XLOC_050977 | ENSRNOT00000026231 | -0.966110477 | 3.33E-07 |
| TUCP_001325 | XLOC_050977 | ENSRNOT00000012114 | 0.955313059  | 1.30E-06 |
| TUCP_001325 | XLOC_050977 | ENSRNOT00000024568 | 0.977272137  | 4.60E-08 |
| TUCP_001325 | XLOC_050977 | ENSRNOT00000039523 | -0.963130679 | 5.04E-07 |
| TUCP_001325 | XLOC_050977 | ENSRNOT00000011731 | 0.959494076  | 8.02E-07 |
| TUCP_001325 | XLOC_050977 | ENSRNOT00000089545 | 0.958789057  | 8.73E-07 |
| TUCP_001325 | XLOC_050977 | ENSRNOT00000083876 | 0.981784672  | 1.53E-08 |
| TUCP_001325 | XLOC_050977 | ENSRNOT00000026718 | -0.953045058 | 1.66E-06 |
| TUCP_001325 | XLOC_050977 | ENSRNOT00000072208 | -0.968546591 | 2.30E-07 |
| TUCP_001325 | XLOC_050977 | ENSRNOT00000012646 | 0.960869554  | 6.77E-07 |
| TUCP_001325 | XLOC_050977 | ENSRNOT00000013762 | -0.955411005 | 1.29E-06 |
| TUCP_001325 | XLOC_050977 | ENSRNOT00000033677 | 0.963213122  | 4.99E-07 |
| TUCP_001325 | XLOC_050977 | ENSRNOT00000019121 | 0.965693171  | 3.53E-07 |
| TUCP_001325 | XLOC_050977 | ENSRNOT00000012361 | 0.959361755  | 8.15E-07 |
| TUCP_001325 | XLOC_050977 | ENSRNOT00000086775 | 0.951439076  | 1.96E-06 |
| TUCP_001325 | XLOC_050977 | ENSRNOT00000019820 | -0.965585051 | 3.59E-07 |
| TUCP_001325 | XLOC_050977 | ENSRNOT00000083351 | 0.95817011   | 9.40E-07 |
| TUCP_001325 | XLOC_050977 | ENSRNOT00000006111 | 0.958672824  | 8.86E-07 |
| TUCP_001325 | XLOC_050977 | ENSRNOT00000003940 | 0.950557293  | 2.14E-06 |
| TUCP_001325 | XLOC_050977 | ENSRNOT00000013864 | 0.960055953  | 7.49E-07 |
| TUCP_001325 | XLOC_050977 | ENSRNOT00000020932 | 0.967243136  | 2.81E-07 |
| TUCP_001325 | XLOC_050977 | ENSRNOT00000073492 | 0.965667261  | 3.55E-07 |
| TUCP_001325 | XLOC_050977 | ENSRNOT00000068745 | -0.956076502 | 1.20E-06 |
| TUCP_001325 | XLOC_050977 | ENSRNOT00000030975 | 0.965926533  | 3.42E-07 |
| TUCP_001325 | XLOC_050977 | ENSRNOT00000092068 | -0.969039494 | 2.13E-07 |
| TUCP_001325 | XLOC_050977 | ENSRNOT00000016947 | -0.950357401 | 2.18E-06 |
| TUCP_001325 | XLOC_050977 | ENSRNOT00000091863 | 0.955534745  | 1.27E-06 |
| TUCP_001325 | XLOC_050977 | ENSRNOT00000074212 | -0.952033609 | 1.84E-06 |
| TUCP_001325 | XLOC_050977 | ENSRNOT00000091866 | 0.974806086  | 7.66E-08 |
| TUCP_001325 | XLOC_050977 | ENSRNOT00000081327 | 0.966079982  | 3.34E-07 |
| TUCP_001325 | XLOC_050977 | ENSRNOT00000021925 | -0.952739971 | 1.71E-06 |
| TUCP_001325 | XLOC_050977 | ENSRNOT00000022194 | 0.956880382  | 1.09E-06 |
| TUCP_001325 | XLOC_050977 | ENSRNOT00000086119 | 0.960217338  | 7.34E-07 |
| TUCP_001325 | XLOC_050977 | ENSRNOT00000064452 | 0.963410285  | 4.86E-07 |
| TUCP_001325 | XLOC_050977 | ENSRNOT00000067739 | 0.975286233  | 6.97E-08 |
| TUCP_001325 | XLOC_050977 | ENSRNOT00000019386 | 0.974813431  | 7.65E-08 |
| TUCP_001325 | XLOC_050977 | ENSRNOT00000077220 | 0.958839461  | 8.68E-07 |
| TUCP_001325 | XLOC_050977 | ENSRNOT00000025916 | 0.950655083  | 2.12E-06 |
| TUCP_001325 | XLOC_050977 | ENSRNOT00000076230 | -0.951044943 | 2.04E-06 |
| TUCP_001325 | XLOC_050977 | ENSRNOT00000040348 | 0.964062879  | 4.44E-07 |
| TUCP_001325 | XLOC_050977 | ENSRNOT00000007169 | 0.966468678  | 3.16E-07 |
| TUCP_001325 | XLOC_050977 | ENSRNOT00000007889 | 0.979450416  | 2.79E-08 |
| TUCP_001325 | XLOC_050977 | ENSRNOT00000073910 | 0.965825168  | 3.47E-07 |

|             |             |                      |              |          |
|-------------|-------------|----------------------|--------------|----------|
| TUCP_001325 | XLOC_050977 | ENSRNOT00000007738   | 0.992492938  | 1.85E-10 |
| TUCP_001325 | XLOC_050977 | ENSRNOT000000030803  | 0.950382568  | 2.18E-06 |
| TUCP_001325 | XLOC_050977 | ENSRNOT000000064450  | 0.976295306  | 5.66E-08 |
| TUCP_001325 | XLOC_050977 | ENSRNOT00000008256   | 0.957576053  | 1.01E-06 |
| TUCP_001325 | XLOC_050977 | ENSRNOT000000034883  | 0.973468503  | 9.90E-08 |
| TUCP_001325 | XLOC_050977 | ENSRNOT000000020155  | -0.97305251  | 1.07E-07 |
| TUCP_001325 | XLOC_050977 | ENSRNOT000000025827  | -0.972665555 | 1.15E-07 |
| TUCP_001325 | XLOC_050977 | ENSRNOT000000025824  | 0.955225046  | 1.31E-06 |
| TUCP_001325 | XLOC_050977 | ENSRNOT000000072357  | 0.957759322  | 9.86E-07 |
| TUCP_001325 | XLOC_050977 | ENSRNOT00000000707   | 0.953808556  | 1.53E-06 |
| TUCP_001325 | XLOC_050977 | ENSRNOT000000022676  | 0.950172101  | 2.22E-06 |
| TUCP_001325 | XLOC_050977 | ENSRNOT000000015213  | 0.965563691  | 3.60E-07 |
| TUCP_001325 | XLOC_050977 | ENSRNOT000000017232  | 0.957722775  | 9.91E-07 |
| TUCP_001325 | XLOC_050977 | ENSRNOT000000082945  | -0.951163303 | 2.02E-06 |
| TUCP_001325 | XLOC_050977 | ENSRNOT00000007949   | 0.962358064  | 5.59E-07 |
| TUCP_001325 | XLOC_050977 | ENSRNOT000000055888  | 0.96873105   | 2.23E-07 |
| TUCP_001325 | XLOC_050977 | ENSRNOT000000003691  | 0.973339355  | 1.01E-07 |
| TUCP_001325 | XLOC_050977 | ENSRNOT000000074261  | 0.951722022  | 1.90E-06 |
| TUCP_001325 | XLOC_050977 | ENSRNOT000000003690  | -0.956007104 | 1.21E-06 |
| TUCP_001325 | XLOC_050977 | ENSRNOT0000000051522 | -0.984439524 | 7.00E-09 |
| TUCP_001325 | XLOC_050977 | ENSRNOT000000004842  | 0.970427747  | 1.69E-07 |
| TUCP_001325 | XLOC_050977 | ENSRNOT0000000033048 | 0.965747037  | 3.51E-07 |
| TUCP_001325 | XLOC_050977 | ENSRNOT000000000013  | -0.953471651 | 1.59E-06 |
| TUCP_001325 | XLOC_050977 | ENSRNOT0000000015131 | 0.963540032  | 4.77E-07 |
| TUCP_001325 | XLOC_050977 | ENSRNOT0000000072031 | 0.972075508  | 1.28E-07 |
| TUCP_001325 | XLOC_050977 | ENSRNOT0000000074389 | 0.980725086  | 2.03E-08 |
| TUCP_001325 | XLOC_050977 | ENSRNOT0000000030329 | 0.983781341  | 8.60E-09 |
| TUCP_001325 | XLOC_050977 | ENSRNOT0000000027195 | -0.963422951 | 4.85E-07 |
| TUCP_001325 | XLOC_050977 | ENSRNOT0000000033450 | 0.955721951  | 1.24E-06 |
| TUCP_001325 | XLOC_050977 | ENSRNOT000000001935  | 0.963276118  | 4.95E-07 |
| TUCP_001325 | XLOC_050977 | ENSRNOT0000000027125 | 0.968165999  | 2.44E-07 |
| TUCP_001325 | XLOC_050977 | ENSRNOT0000000027121 | -0.955257332 | 1.31E-06 |
| TUCP_001325 | XLOC_050977 | ENSRNOT0000000023078 | -0.97444153  | 8.23E-08 |
| TUCP_001325 | XLOC_050977 | ENSRNOT000000004999  | -0.964888128 | 3.96E-07 |
| TUCP_001325 | XLOC_050977 | ENSRNOT0000000013463 | -0.972086848 | 1.27E-07 |
| TUCP_001325 | XLOC_050977 | ENSRNOT0000000050223 | 0.973596428  | 9.67E-08 |
| TUCP_001325 | XLOC_050977 | ENSRNOT0000000013093 | 0.951681203  | 1.91E-06 |
| TUCP_001325 | XLOC_050977 | ENSRNOT0000000036658 | 0.959804979  | 7.72E-07 |
| TUCP_001325 | XLOC_050977 | ENSRNOT0000000047663 | 0.960255642  | 7.31E-07 |
| TUCP_001325 | XLOC_050977 | ENSRNOT0000000061191 | 0.980122255  | 2.36E-08 |
| TUCP_001325 | XLOC_050977 | ENSRNOT0000000017907 | 0.983799243  | 8.55E-09 |
| TUCP_001325 | XLOC_050977 | ENSRNOT0000000028434 | 0.965184955  | 3.80E-07 |
| TUCP_001325 | XLOC_050977 | ENSRNOT000000005489  | -0.955057179 | 1.34E-06 |
| TUCP_001325 | XLOC_050977 | ENSRNOT0000000025794 | 0.970678626  | 1.62E-07 |
| TUCP_001325 | XLOC_050977 | ENSRNOT0000000058111 | 0.973419781  | 9.99E-08 |
| TUCP_001325 | XLOC_050977 | ENSRNOT0000000084422 | -0.968842337 | 2.19E-07 |
| TUCP_001325 | XLOC_050977 | ENSRNOT000000001720  | 0.951796599  | 1.89E-06 |
| TUCP_001325 | XLOC_050977 | ENSRNOT000000009994  | 0.957223126  | 1.05E-06 |
| TUCP_001325 | XLOC_050977 | ENSRNOT000000002114  | 0.969434966  | 2.00E-07 |
| TUCP_001325 | XLOC_050977 | ENSRNOT000000009993  | 0.968626549  | 2.27E-07 |
| TUCP_001325 | XLOC_050977 | ENSRNOT0000000027970 | -0.969458593 | 1.99E-07 |

|             |             |                    |              |          |
|-------------|-------------|--------------------|--------------|----------|
| TUCP_001325 | XLOC_050977 | ENSRNOT00000006376 | 0.968675293  | 2.25E-07 |
| TUCP_001325 | XLOC_050977 | ENSRNOT00000046215 | 0.979338738  | 2.86E-08 |
| TUCP_001325 | XLOC_050977 | ENSRNOT00000077479 | 0.968588372  | 2.28E-07 |
| TUCP_001325 | XLOC_050977 | ENSRNOT00000000083 | 0.973229031  | 1.04E-07 |
| TUCP_001325 | XLOC_050977 | ENSRNOT00000061973 | 0.959885389  | 7.65E-07 |
| TUCP_001325 | XLOC_050977 | ENSRNOT00000014124 | -0.963691102 | 4.68E-07 |
| TUCP_001325 | XLOC_050977 | ENSRNOT00000000120 | -0.960235179 | 7.32E-07 |
| TUCP_001325 | XLOC_050977 | ENSRNOT00000013632 | -0.954851055 | 1.37E-06 |
| TUCP_001325 | XLOC_050977 | ENSRNOT00000028545 | 0.98699595   | 2.87E-09 |
| TUCP_001325 | XLOC_050977 | ENSRNOT00000009900 | 0.963347614  | 4.90E-07 |
| TUCP_001325 | XLOC_050977 | ENSRNOT00000055442 | -0.968182291 | 2.43E-07 |
| TUCP_001325 | XLOC_050977 | ENSRNOT00000028225 | -0.954027912 | 1.50E-06 |
| TUCP_001325 | XLOC_050977 | ENSRNOT00000019172 | 0.963953808  | 4.51E-07 |
| TUCP_001325 | XLOC_050977 | ENSRNOT00000068267 | 0.966077162  | 3.34E-07 |
| TUCP_001325 | XLOC_050977 | ENSRNOT00000020994 | 0.966133338  | 3.31E-07 |
| TUCP_001325 | XLOC_050977 | ENSRNOT00000084552 | 0.962500544  | 5.48E-07 |
| TUCP_001325 | XLOC_050977 | ENSRNOT00000068269 | 0.977326388  | 4.54E-08 |
| TUCP_001325 | XLOC_050977 | ENSRNOT00000019916 | 0.965924186  | 3.42E-07 |
| TUCP_001325 | XLOC_050977 | ENSRNOT00000019911 | 0.950171703  | 2.22E-06 |
| TUCP_001325 | XLOC_050977 | ENSRNOT00000040393 | -0.960844334 | 6.79E-07 |
| TUCP_001325 | XLOC_050977 | ENSRNOT00000011907 | 0.960042     | 7.50E-07 |
| TUCP_001325 | XLOC_050977 | ENSRNOT00000077401 | 0.966003036  | 3.38E-07 |
| TUCP_001325 | XLOC_050977 | ENSRNOT00000044866 | 0.952921132  | 1.68E-06 |
| TUCP_001325 | XLOC_050977 | ENSRNOT00000073135 | -0.965983637 | 3.39E-07 |
| TUCP_001325 | XLOC_050977 | ENSRNOT00000064700 | -0.96925207  | 2.06E-07 |
| TUCP_001325 | XLOC_050977 | ENSRNOT00000036613 | 0.960065727  | 7.48E-07 |
| TUCP_001325 | XLOC_050977 | ENSRNOT00000019983 | 0.976883439  | 5.00E-08 |
| TUCP_001325 | XLOC_050977 | ENSRNOT00000010020 | 0.957468807  | 1.02E-06 |
| TUCP_001325 | XLOC_050977 | ENSRNOT00000025252 | 0.957189295  | 1.05E-06 |
| TUCP_001325 | XLOC_050977 | ENSRNOT00000074494 | 0.971894243  | 1.32E-07 |
| TUCP_001325 | XLOC_050977 | ENSRNOT00000049193 | 0.962645757  | 5.38E-07 |
| TUCP_001325 | XLOC_050977 | ENSRNOT00000036194 | 0.971893957  | 1.32E-07 |
| TUCP_001325 | XLOC_050977 | ENSRNOT00000000334 | 0.989405645  | 1.03E-09 |
| TUCP_001325 | XLOC_050977 | ENSRNOT00000077186 | 0.954519485  | 1.42E-06 |
| TUCP_001325 | XLOC_050977 | ENSRNOT00000084766 | -0.963562993 | 4.76E-07 |
| TUCP_001325 | XLOC_050977 | ENSRNOT00000039729 | 0.958120765  | 9.46E-07 |
| TUCP_001325 | XLOC_050977 | ENSRNOT00000014780 | 0.983707365  | 8.80E-09 |
| TUCP_001325 | XLOC_050977 | ENSRNOT00000014785 | 0.970609752  | 1.64E-07 |
| TUCP_001325 | XLOC_050977 | ENSRNOT00000014373 | 0.984103387  | 7.78E-09 |
| TUCP_001325 | XLOC_050977 | ENSRNOT00000026279 | 0.962179895  | 5.72E-07 |
| TUCP_001325 | XLOC_050977 | ENSRNOT00000003085 | 0.956044683  | 1.20E-06 |
| TUCP_001325 | XLOC_050977 | ENSRNOT00000041091 | 0.976676677  | 5.23E-08 |
| TUCP_001325 | XLOC_050977 | ENSRNOT00000082508 | 0.95339064   | 1.60E-06 |
| TUCP_001325 | XLOC_050977 | ENSRNOT00000082863 | -0.968662831 | 2.26E-07 |
| TUCP_001325 | XLOC_050977 | ENSRNOT00000065942 | 0.961918396  | 5.92E-07 |
| TUCP_001325 | XLOC_050977 | ENSRNOT00000065947 | -0.952661105 | 1.73E-06 |
| TUCP_001325 | XLOC_050977 | ENSRNOT00000013852 | -0.961788375 | 6.02E-07 |
| TUCP_001325 | XLOC_050977 | ENSRNOT00000091596 | 0.952881867  | 1.69E-06 |
| TUCP_001325 | XLOC_050977 | ENSRNOT00000039836 | 0.96040161   | 7.17E-07 |
| TUCP_001325 | XLOC_050977 | ENSRNOT00000055321 | -0.95140832  | 1.97E-06 |
| TUCP_001325 | XLOC_050977 | ENSRNOT00000076105 | 0.974308837  | 8.44E-08 |

|             |             |                    |              |          |
|-------------|-------------|--------------------|--------------|----------|
| TUCP_001325 | XLOC_050977 | ENSRNOT00000092211 | 0.95206885   | 1.84E-06 |
| TUCP_001325 | XLOC_050977 | ENSRNOT00000015170 | 0.952166713  | 1.82E-06 |
| TUCP_001325 | XLOC_050977 | ENSRNOT00000058897 | -0.950628362 | 2.13E-06 |
| TUCP_001325 | XLOC_050977 | ENSRNOT00000019768 | -0.960724731 | 6.89E-07 |
| TUCP_001325 | XLOC_050977 | ENSRNOT00000061883 | -0.951900392 | 1.87E-06 |
| TUCP_001325 | XLOC_050977 | ENSRNOT00000039177 | 0.95524194   | 1.31E-06 |
| TUCP_001325 | XLOC_050977 | ENSRNOT00000017375 | 0.959414642  | 8.10E-07 |
| TUCP_001325 | XLOC_050977 | ENSRNOT00000009247 | 0.953534813  | 1.58E-06 |
| TUCP_001325 | XLOC_050977 | ENSRNOT00000029635 | 0.957722103  | 9.91E-07 |
| TUCP_001325 | XLOC_050977 | ENSRNOT00000039377 | 0.958621762  | 8.91E-07 |
| TUCP_001325 | XLOC_050977 | ENSRNOT00000016801 | -0.952929355 | 1.68E-06 |
| TUCP_001325 | XLOC_050977 | ENSRNOT0000002837  | 0.95244417   | 1.77E-06 |
| TUCP_001325 | XLOC_050977 | ENSRNOT00000072969 | -0.955814247 | 1.23E-06 |
| TUCP_001325 | XLOC_050977 | ENSRNOT00000012881 | 0.972486701  | 1.19E-07 |
| TUCP_001325 | XLOC_050977 | ENSRNOT00000045855 | 0.952843002  | 1.70E-06 |
| TUCP_001325 | XLOC_050977 | ENSRNOT00000000577 | -0.951354549 | 1.98E-06 |
| TUCP_001325 | XLOC_050977 | ENSRNOT00000056405 | -0.958534097 | 9.00E-07 |
| TUCP_001325 | XLOC_050977 | ENSRNOT00000041456 | 0.963226865  | 4.98E-07 |
| TUCP_001325 | XLOC_050977 | ENSRNOT00000088133 | 0.987214541  | 2.63E-09 |
| TUCP_001325 | XLOC_050977 | ENSRNOT00000080677 | 0.979829606  | 2.54E-08 |
| TUCP_001325 | XLOC_050977 | ENSRNOT00000080797 | 0.95895911   | 8.56E-07 |
| TUCP_001325 | XLOC_050977 | ENSRNOT00000016629 | -0.954575567 | 1.41E-06 |
| TUCP_001325 | XLOC_050977 | ENSRNOT00000016254 | 0.954258835  | 1.46E-06 |
| TUCP_001325 | XLOC_050977 | ENSRNOT00000007824 | 0.962673271  | 5.36E-07 |
| TUCP_001325 | XLOC_050977 | ENSRNOT00000001979 | 0.961408897  | 6.32E-07 |
| TUCP_001325 | XLOC_050977 | ENSRNOT00000003715 | 0.962161566  | 5.73E-07 |
| TUCP_001325 | XLOC_050977 | ENSRNOT00000083968 | 0.961548476  | 6.21E-07 |
| TUCP_001325 | XLOC_050977 | ENSRNOT00000024119 | -0.960145329 | 7.41E-07 |
| TUCP_001325 | XLOC_050977 | ENSRNOT00000047634 | 0.96478317   | 4.02E-07 |
| TUCP_001325 | XLOC_050977 | ENSRNOT00000083964 | 0.991502809  | 3.44E-10 |
| TUCP_001325 | XLOC_050977 | ENSRNOT00000075452 | -0.959023648 | 8.49E-07 |
| TUCP_001325 | XLOC_050977 | ENSRNOT00000026726 | 0.953469403  | 1.59E-06 |
| TUCP_001325 | XLOC_050977 | ENSRNOT00000037039 | 0.959648413  | 7.87E-07 |
| TUCP_001325 | XLOC_050977 | ENSRNOT00000061304 | 0.984168142  | 7.63E-09 |
| TUCP_001325 | XLOC_050977 | ENSRNOT00000032363 | -0.965539885 | 3.61E-07 |
| TUCP_001325 | XLOC_050977 | ENSRNOT00000027200 | 0.968184405  | 2.43E-07 |
| TUCP_001325 | XLOC_050977 | ENSRNOT00000016447 | 0.957772778  | 9.85E-07 |
| TUCP_001325 | XLOC_050977 | ENSRNOT00000032202 | 0.963902752  | 4.54E-07 |
| TUCP_001325 | XLOC_050977 | ENSRNOT00000019130 | 0.952151769  | 1.82E-06 |
| TUCP_001325 | XLOC_050977 | ENSRNOT00000066888 | 0.968370869  | 2.36E-07 |
| TUCP_001325 | XLOC_050977 | ENSRNOT00000002151 | 0.962567204  | 5.44E-07 |
| TUCP_001325 | XLOC_050977 | ENSRNOT00000002152 | 0.979352785  | 2.85E-08 |
| TUCP_001325 | XLOC_050977 | ENSRNOT00000006824 | 0.950364768  | 2.18E-06 |
| TUCP_001325 | XLOC_050977 | ENSRNOT00000060607 | 0.950616055  | 2.13E-06 |
| TUCP_001325 | XLOC_050977 | ENSRNOT00000032667 | 0.9585436    | 8.99E-07 |
| TUCP_001325 | XLOC_050977 | ENSRNOT00000082138 | 0.954777364  | 1.38E-06 |
| TUCP_001325 | XLOC_050977 | ENSRNOT00000037456 | -0.959350207 | 8.16E-07 |
| TUCP_001325 | XLOC_050977 | ENSRNOT00000086340 | 0.955609074  | 1.26E-06 |
| TUCP_001325 | XLOC_050977 | ENSRNOT00000018328 | 0.955724386  | 1.24E-06 |
| TUCP_001325 | XLOC_050977 | ENSRNOT00000066247 | 0.963218944  | 4.98E-07 |
| TUCP_001325 | XLOC_050977 | ENSRNOT00000027526 | -0.954143425 | 1.48E-06 |

|             |             |                    |              |          |
|-------------|-------------|--------------------|--------------|----------|
| TUCP_001325 | XLOC_050977 | ENSRNOT0000009726  | 0.952000716  | 1.85E-06 |
| TUCP_001325 | XLOC_050977 | ENSRNOT00000050119 | 0.969527618  | 1.97E-07 |
| TUCP_001325 | XLOC_050977 | ENSRNOT00000010079 | 0.967611216  | 2.66E-07 |
| TUCP_001325 | XLOC_050977 | ENSRNOT00000031261 | -0.958430461 | 9.12E-07 |
| TUCP_001325 | XLOC_050977 | ENSRNOT00000067836 | 0.958351026  | 9.20E-07 |
| TUCP_001325 | XLOC_050977 | ENSRNOT00000022117 | 0.973495279  | 9.85E-08 |
| TUCP_001325 | XLOC_050977 | ENSRNOT00000064068 | 0.956067146  | 1.20E-06 |
| TUCP_001325 | XLOC_050977 | ENSRNOT00000008126 | 0.977589039  | 4.29E-08 |
| TUCP_001325 | XLOC_050977 | ENSRNOT00000044073 | 0.976528581  | 5.39E-08 |
| TUCP_001325 | XLOC_050977 | ENSRNOT00000059487 | 0.970548936  | 1.66E-07 |
| TUCP_001325 | XLOC_050977 | ENSRNOT00000041106 | -0.97191229  | 1.31E-07 |
| TUCP_001325 | XLOC_050977 | ENSRNOT00000019713 | 0.9595651    | 7.95E-07 |
| TUCP_001325 | XLOC_050977 | ENSRNOT00000018782 | 0.958964467  | 8.55E-07 |
| TUCP_001325 | XLOC_050977 | ENSRNOT00000085355 | 0.952093345  | 1.83E-06 |
| TUCP_001325 | XLOC_050977 | ENSRNOT00000020005 | -0.954863117 | 1.37E-06 |
| TUCP_001325 | XLOC_050977 | ENSRNOT00000085214 | 0.990116735  | 7.30E-10 |
| TUCP_001325 | XLOC_050977 | ENSRNOT00000086122 | -0.950730407 | 2.10E-06 |
| TUCP_001325 | XLOC_050977 | ENSRNOT00000011563 | 0.951018213  | 2.04E-06 |
| TUCP_001325 | XLOC_050977 | ENSRNOT00000010753 | 0.97641932   | 5.52E-08 |
| TUCP_001325 | XLOC_050977 | ENSRNOT00000023763 | 0.962240787  | 5.67E-07 |
| TUCP_001325 | XLOC_050977 | ENSRNOT00000038448 | 0.979999283  | 2.44E-08 |
| TUCP_001325 | XLOC_050977 | ENSRNOT00000058842 | -0.95357713  | 1.57E-06 |
| TUCP_001325 | XLOC_050977 | ENSRNOT00000028893 | 0.965238865  | 3.77E-07 |
| TUCP_001325 | XLOC_050977 | ENSRNOT00000088615 | 0.964822361  | 4.00E-07 |
| TUCP_001325 | XLOC_050977 | ENSRNOT00000086310 | 0.976543878  | 5.38E-08 |
| TUCP_001325 | XLOC_050977 | ENSRNOT00000059181 | -0.977857136 | 4.04E-08 |
| TUCP_001325 | XLOC_050977 | ENSRNOT00000040543 | 0.955107928  | 1.33E-06 |
| TUCP_001325 | XLOC_050977 | ENSRNOT00000015618 | 0.969032558  | 2.13E-07 |
| TUCP_001325 | XLOC_050977 | ENSRNOT00000007077 | 0.977912419  | 3.99E-08 |
| TUCP_001325 | XLOC_050977 | ENSRNOT00000007079 | 0.953588902  | 1.57E-06 |
| TUCP_001325 | XLOC_050977 | ENSRNOT00000008210 | -0.96909397  | 2.11E-07 |
| TUCP_001325 | XLOC_050977 | ENSRNOT00000014809 | 0.964879156  | 3.97E-07 |
| TUCP_001325 | XLOC_050977 | ENSRNOT00000064849 | 0.968440033  | 2.34E-07 |
| TUCP_001325 | XLOC_050977 | ENSRNOT00000008901 | 0.957879372  | 9.73E-07 |
| TUCP_001325 | XLOC_050977 | ENSRNOT00000017761 | -0.951745963 | 1.90E-06 |
| TUCP_001325 | XLOC_050977 | ENSRNOT00000072416 | 0.951332586  | 1.98E-06 |
| TUCP_001325 | XLOC_050977 | ENSRNOT00000023017 | 0.971855821  | 1.33E-07 |
| TUCP_001325 | XLOC_050977 | ENSRNOT00000080608 | -0.967439682 | 2.73E-07 |
| TUCP_001325 | XLOC_050977 | ENSRNOT00000022065 | 0.951595274  | 1.93E-06 |
| TUCP_001325 | XLOC_050977 | ENSRNOT00000017340 | 0.960416096  | 7.16E-07 |
| TUCP_001325 | XLOC_050977 | ENSRNOT00000016740 | -0.962240673 | 5.67E-07 |
| TUCP_001325 | XLOC_050977 | ENSRNOT00000027117 | 0.963934497  | 4.52E-07 |
| TUCP_001325 | XLOC_050977 | ENSRNOT00000061392 | -0.950995335 | 2.05E-06 |
| TUCP_001325 | XLOC_050977 | ENSRNOT00000068078 | 0.969821317  | 1.87E-07 |
| TUCP_001325 | XLOC_050977 | ENSRNOT00000080591 | -0.95240691  | 1.78E-06 |
| TUCP_001325 | XLOC_050977 | ENSRNOT00000092037 | 0.968783059  | 2.22E-07 |
| TUCP_001325 | XLOC_050977 | ENSRNOT00000042125 | -0.959749509 | 7.78E-07 |
| TUCP_001325 | XLOC_050977 | ENSRNOT00000025460 | -0.965949962 | 3.40E-07 |
| TUCP_001325 | XLOC_050977 | ENSRNOT00000081272 | 0.958585768  | 8.95E-07 |
| TUCP_001325 | XLOC_050977 | ENSRNOT00000071917 | -0.957896903 | 9.71E-07 |
| TUCP_001325 | XLOC_050977 | ENSRNOT00000045735 | -0.962649534 | 5.38E-07 |

|             |             |                    |              |          |
|-------------|-------------|--------------------|--------------|----------|
| TUCP_001325 | XLOC_050977 | ENSRNOT00000026760 | 0.961390146  | 6.33E-07 |
| TUCP_001325 | XLOC_050977 | ENSRNOT00000028130 | 0.976761162  | 5.13E-08 |
| TUCP_001325 | XLOC_050977 | ENSRNOT00000081077 | 0.965046091  | 3.87E-07 |
| TUCP_001325 | XLOC_050977 | ENSRNOT00000063821 | 0.985411695  | 5.08E-09 |
| TUCP_001325 | XLOC_050977 | ENSRNOT00000025913 | 0.956723966  | 1.11E-06 |
| TUCP_001325 | XLOC_050977 | ENSRNOT00000002353 | -0.951377441 | 1.97E-06 |
| TUCP_001325 | XLOC_050977 | ENSRNOT00000002355 | 0.980902315  | 1.94E-08 |
| TUCP_001325 | XLOC_050977 | ENSRNOT00000044254 | 0.97061671   | 1.64E-07 |
| TUCP_001325 | XLOC_050977 | ENSRNOT00000044486 | 0.959933903  | 7.60E-07 |
| TUCP_001325 | XLOC_050977 | ENSRNOT00000047210 | -0.962229974 | 5.68E-07 |
| TUCP_001325 | XLOC_050977 | ENSRNOT00000079414 | 0.95039296   | 2.18E-06 |
| TUCP_001325 | XLOC_050977 | ENSRNOT00000079002 | 0.960782501  | 6.84E-07 |
| TUCP_001325 | XLOC_050977 | ENSRNOT00000083957 | -0.955308288 | 1.30E-06 |
| TUCP_001325 | XLOC_050977 | ENSRNOT00000001366 | 0.954606374  | 1.41E-06 |
| TUCP_001325 | XLOC_050977 | ENSRNOT00000005885 | 0.971063009  | 1.52E-07 |
| TUCP_001325 | XLOC_050977 | ENSRNOT00000011326 | 0.985043517  | 5.75E-09 |
| TUCP_001325 | XLOC_050977 | ENSRNOT00000011654 | 0.971013136  | 1.54E-07 |
| TUCP_001325 | XLOC_050977 | ENSRNOT00000080285 | 0.962126124  | 5.76E-07 |
| TUCP_001325 | XLOC_050977 | ENSRNOT00000026057 | 0.951914651  | 1.87E-06 |
| TUCP_001322 | XLOC_050647 | ENSRNOT00000031904 | 0.955602555  | 1.26E-06 |
| TUCP_001322 | XLOC_050647 | ENSRNOT00000039809 | 0.954964478  | 1.35E-06 |
| TUCP_001322 | XLOC_050647 | ENSRNOT00000000743 | 0.965922031  | 3.42E-07 |
| TUCP_001322 | XLOC_050647 | ENSRNOT00000027083 | 0.955400639  | 1.29E-06 |
| TUCP_001322 | XLOC_050647 | ENSRNOT00000021348 | 0.952479118  | 1.76E-06 |
| TUCP_001322 | XLOC_050647 | ENSRNOT00000078445 | -0.962152556 | 5.74E-07 |
| TUCP_001322 | XLOC_050647 | ENSRNOT00000005228 | 0.969675317  | 1.92E-07 |
| TUCP_001322 | XLOC_050647 | ENSRNOT00000006175 | 0.961629271  | 6.14E-07 |
| TUCP_001322 | XLOC_050647 | ENSRNOT00000028628 | -0.956617694 | 1.12E-06 |
| TUCP_001322 | XLOC_050647 | ENSRNOT00000023144 | 0.97730256   | 4.57E-08 |
| TUCP_001322 | XLOC_050647 | ENSRNOT00000016649 | 0.962054575  | 5.81E-07 |
| TUCP_001322 | XLOC_050647 | ENSRNOT00000091128 | -0.966316252 | 3.23E-07 |
| TUCP_001322 | XLOC_050647 | ENSRNOT00000009803 | 0.952857418  | 1.69E-06 |
| TUCP_001322 | XLOC_050647 | ENSRNOT00000019618 | 0.956658874  | 1.12E-06 |
| TUCP_001322 | XLOC_050647 | ENSRNOT00000026543 | 0.981042648  | 1.87E-08 |
| TUCP_001322 | XLOC_050647 | ENSRNOT00000066670 | 0.956105197  | 1.19E-06 |
| TUCP_001322 | XLOC_050647 | ENSRNOT00000012187 | 0.972204789  | 1.25E-07 |
| TUCP_001322 | XLOC_050647 | ENSRNOT00000066810 | 0.963683576  | 4.68E-07 |
| TUCP_001322 | XLOC_050647 | ENSRNOT00000012463 | -0.950919876 | 2.06E-06 |
| TUCP_001322 | XLOC_050647 | ENSRNOT00000024969 | 0.959681109  | 7.84E-07 |
| TUCP_001322 | XLOC_050647 | ENSRNOT00000006055 | 0.958285432  | 9.27E-07 |
| TUCP_001322 | XLOC_050647 | ENSRNOT00000028646 | 0.966076529  | 3.34E-07 |
| TUCP_001322 | XLOC_050647 | ENSRNOT00000044742 | 0.953762258  | 1.54E-06 |
| TUCP_001322 | XLOC_050647 | ENSRNOT00000038247 | 0.959832069  | 7.70E-07 |
| TUCP_001322 | XLOC_050647 | ENSRNOT00000071764 | 0.968544468  | 2.30E-07 |
| TUCP_001322 | XLOC_050647 | ENSRNOT00000074939 | 0.95159354   | 1.93E-06 |
| TUCP_001322 | XLOC_050647 | ENSRNOT00000009811 | 0.952038019  | 1.84E-06 |
| TUCP_001322 | XLOC_050647 | ENSRNOT00000065168 | 0.956486751  | 1.14E-06 |
| TUCP_001322 | XLOC_050647 | ENSRNOT00000025075 | 0.95741853   | 1.03E-06 |
| TUCP_001322 | XLOC_050647 | ENSRNOT00000085228 | 0.956275859  | 1.17E-06 |
| TUCP_001322 | XLOC_050647 | ENSRNOT00000032780 | 0.955503367  | 1.27E-06 |
| TUCP_001322 | XLOC_050647 | ENSRNOT00000020134 | 0.954658841  | 1.40E-06 |

|             |             |                    |              |          |
|-------------|-------------|--------------------|--------------|----------|
| TUCP_001322 | XLOC_050647 | ENSRNOT00000087592 | 0.979212765  | 2.95E-08 |
| TUCP_001322 | XLOC_050647 | ENSRNOT00000017021 | 0.958875457  | 8.64E-07 |
| TUCP_001322 | XLOC_050647 | ENSRNOT00000061392 | 0.960569011  | 7.03E-07 |
| TUCP_001322 | XLOC_050647 | ENSRNOT00000032274 | 0.951151113  | 2.02E-06 |
| TUCP_001322 | XLOC_050647 | ENSRNOT00000002410 | 0.958902982  | 8.62E-07 |
| TUCP_001322 | XLOC_050647 | ENSRNOT00000008655 | 0.953429954  | 1.60E-06 |
| TUCP_001322 | XLOC_050647 | ENSRNOT00000012895 | 0.95464579   | 1.40E-06 |
| TUCP_001322 | XLOC_050647 | ENSRNOT00000015116 | 0.953057357  | 1.66E-06 |
| TUCP_001322 | XLOC_050647 | ENSRNOT00000031267 | 0.974127575  | 8.74E-08 |
| TUCP_001322 | XLOC_050647 | ENSRNOT00000083220 | 0.958757223  | 8.77E-07 |
| TUCP_001322 | XLOC_050647 | ENSRNOT00000067846 | -0.95986204  | 7.67E-07 |
| TUCP_001322 | XLOC_050647 | ENSRNOT00000086119 | -0.951034955 | 2.04E-06 |
| TUCP_001322 | XLOC_050647 | ENSRNOT00000019133 | 0.953187731  | 1.64E-06 |
| TUCP_001322 | XLOC_050647 | ENSRNOT00000052018 | 0.975004738  | 7.37E-08 |
| TUCP_001322 | XLOC_050647 | ENSRNOT00000010898 | 0.972026943  | 1.29E-07 |
| TUCP_001322 | XLOC_050647 | ENSRNOT00000047093 | 0.968419157  | 2.35E-07 |
| TUCP_001322 | XLOC_050647 | ENSRNOT00000078274 | 0.96268464   | 5.35E-07 |
| TUCP_001322 | XLOC_050647 | ENSRNOT00000015265 | 0.960034231  | 7.51E-07 |
| TUCP_001322 | XLOC_050647 | ENSRNOT00000073675 | -0.950426977 | 2.17E-06 |
| TUCP_001322 | XLOC_050647 | ENSRNOT00000005355 | 0.958423204  | 9.12E-07 |
| TUCP_001322 | XLOC_050647 | ENSRNOT00000052422 | 0.950351466  | 2.19E-06 |
| TUCP_001322 | XLOC_050647 | ENSRNOT00000078102 | 0.95082689   | 2.08E-06 |
| TUCP_001322 | XLOC_050647 | ENSRNOT00000090123 | 0.95448016   | 1.43E-06 |
| TUCP_001322 | XLOC_050647 | ENSRNOT00000081047 | 0.950661662  | 2.12E-06 |
| TUCP_001322 | XLOC_050647 | ENSRNOT00000012156 | 0.962248701  | 5.67E-07 |
| TUCP_001322 | XLOC_050647 | ENSRNOT00000049819 | 0.968613391  | 2.28E-07 |
| TUCP_001322 | XLOC_050647 | ENSRNOT00000003991 | 0.952227934  | 1.81E-06 |
| TUCP_001322 | XLOC_050647 | ENSRNOT00000021408 | 0.963954083  | 4.51E-07 |
| TUCP_001322 | XLOC_050647 | ENSRNOT00000006034 | -0.956939059 | 1.08E-06 |
| TUCP_001322 | XLOC_050647 | ENSRNOT00000087429 | 0.958942226  | 8.58E-07 |
| TUCP_001322 | XLOC_050647 | ENSRNOT00000060362 | 0.978722828  | 3.31E-08 |
| TUCP_001322 | XLOC_050647 | ENSRNOT00000084088 | 0.9614722    | 6.27E-07 |
| TUCP_001322 | XLOC_050647 | ENSRNOT00000052224 | 0.96855649   | 2.30E-07 |
| TUCP_001322 | XLOC_050647 | ENSRNOT00000078070 | 0.970407404  | 1.70E-07 |
| TUCP_001322 | XLOC_050647 | ENSRNOT00000024322 | 0.950140495  | 2.23E-06 |
| TUCP_001322 | XLOC_050647 | ENSRNOT00000088182 | 0.96774567   | 2.60E-07 |
| TUCP_001322 | XLOC_050647 | ENSRNOT00000091265 | 0.968063335  | 2.48E-07 |
| TUCP_001322 | XLOC_050647 | ENSRNOT00000026915 | 0.963801414  | 4.61E-07 |
| TUCP_001322 | XLOC_050647 | ENSRNOT00000027454 | 0.968340646  | 2.38E-07 |
| TUCP_001322 | XLOC_050647 | ENSRNOT00000025832 | 0.961725533  | 6.07E-07 |
| TUCP_001322 | XLOC_050647 | ENSRNOT00000017753 | 0.95301773   | 1.67E-06 |
| TUCP_001322 | XLOC_050647 | ENSRNOT00000006499 | 0.959512421  | 8.00E-07 |
| TUCP_001322 | XLOC_050647 | ENSRNOT00000025936 | -0.95166881  | 1.91E-06 |
| TUCP_001322 | XLOC_050647 | ENSRNOT00000012702 | -0.951922286 | 1.87E-06 |
| TUCP_001322 | XLOC_050647 | ENSRNOT00000009280 | 0.960634211  | 6.97E-07 |
| TUCP_001322 | XLOC_050647 | ENSRNOT00000090420 | -0.964467131 | 4.20E-07 |
| TUCP_001322 | XLOC_050647 | ENSRNOT00000076669 | 0.958124959  | 9.45E-07 |
| TUCP_001322 | XLOC_050647 | ENSRNOT00000080110 | 0.952264645  | 1.80E-06 |
| TUCP_001322 | XLOC_050647 | ENSRNOT00000078390 | -0.953305114 | 1.62E-06 |
| TUCP_001322 | XLOC_050647 | ENSRNOT00000083127 | 0.955609551  | 1.26E-06 |
| TUCP_001322 | XLOC_050647 | ENSRNOT00000076872 | 0.9651324    | 3.83E-07 |



|             |             |                    |              |          |
|-------------|-------------|--------------------|--------------|----------|
| TUCP_001322 | XLOC_050647 | ENSRNOT00000055992 | -0.952651801 | 1.73E-06 |
| TUCP_001322 | XLOC_050647 | ENSRNOT00000060696 | 0.964090185  | 4.43E-07 |
| TUCP_001322 | XLOC_050647 | ENSRNOT00000042125 | 0.960833319  | 6.80E-07 |
| TUCP_001322 | XLOC_050647 | ENSRNOT00000081400 | 0.962774228  | 5.29E-07 |
| TUCP_001322 | XLOC_050647 | ENSRNOT00000014814 | 0.968873479  | 2.18E-07 |
| TUCP_001322 | XLOC_050647 | ENSRNOT00000067181 | 0.956292273  | 1.17E-06 |
| TUCP_001322 | XLOC_050647 | ENSRNOT00000064798 | 0.955531142  | 1.27E-06 |
| TUCP_001322 | XLOC_050647 | ENSRNOT00000080207 | 0.972008407  | 1.29E-07 |
| TUCP_001322 | XLOC_050647 | ENSRNOT00000033235 | 0.951124308  | 2.02E-06 |
| TUCP_001322 | XLOC_050647 | ENSRNOT00000026457 | 0.957849896  | 9.76E-07 |
| TUCP_001322 | XLOC_050647 | ENSRNOT00000023428 | 0.966944288  | 2.94E-07 |
| TUCP_001322 | XLOC_050647 | ENSRNOT00000047192 | -0.966088238 | 3.34E-07 |
| TUCP_001322 | XLOC_050647 | ENSRNOT00000015799 | 0.968334028  | 2.38E-07 |
| TUCP_001322 | XLOC_050647 | ENSRNOT00000083799 | 0.966947903  | 2.94E-07 |
| TUCP_001322 | XLOC_050647 | ENSRNOT00000024548 | 0.956270662  | 1.17E-06 |
| TUCP_000275 | XLOC_008439 | ENSRNOT00000085195 | 0.963124284  | 5.05E-07 |
| TUCP_000275 | XLOC_008439 | ENSRNOT00000013705 | 0.965521094  | 3.62E-07 |
| TUCP_000275 | XLOC_008439 | ENSRNOT00000040851 | 0.965521094  | 3.62E-07 |
| TUCP_000275 | XLOC_008439 | ENSRNOT00000058389 | 0.965521094  | 3.62E-07 |
| TUCP_000275 | XLOC_008439 | ENSRNOT00000031586 | 0.963891691  | 4.55E-07 |
| TUCP_000275 | XLOC_008439 | ENSRNOT00000028653 | 0.965521094  | 3.62E-07 |
| TUCP_000275 | XLOC_008439 | ENSRNOT00000023542 | 0.965521094  | 3.62E-07 |
| TUCP_000275 | XLOC_008439 | ENSRNOT00000017230 | 0.965333528  | 3.72E-07 |
| TUCP_000275 | XLOC_008439 | ENSRNOT00000092890 | 0.969783734  | 1.89E-07 |
| TUCP_000275 | XLOC_008439 | ENSRNOT00000012174 | 0.965521094  | 3.62E-07 |
| TUCP_000275 | XLOC_008439 | ENSRNOT00000051680 | 0.967011418  | 2.91E-07 |
| TUCP_000275 | XLOC_008439 | ENSRNOT00000089118 | 0.965521094  | 3.62E-07 |
| TUCP_000275 | XLOC_008439 | ENSRNOT00000025245 | 0.965060478  | 3.87E-07 |
| TUCP_000275 | XLOC_008439 | ENSRNOT00000015138 | 0.965178188  | 3.80E-07 |
| TUCP_000275 | XLOC_008439 | ENSRNOT00000080185 | 0.973871903  | 9.18E-08 |
| TUCP_000275 | XLOC_008439 | ENSRNOT00000086502 | 0.989502448  | 9.86E-10 |
| TUCP_000275 | XLOC_008439 | ENSRNOT00000079661 | 0.965521094  | 3.62E-07 |
| TUCP_000275 | XLOC_008439 | ENSRNOT00000042220 | 0.965521094  | 3.62E-07 |
| TUCP_000275 | XLOC_008439 | ENSRNOT00000005031 | 0.975526357  | 6.64E-08 |
| TUCP_000275 | XLOC_008439 | ENSRNOT00000086710 | 0.963958975  | 4.51E-07 |
| TUCP_000275 | XLOC_008439 | ENSRNOT00000075226 | 0.965521094  | 3.62E-07 |
| TUCP_000275 | XLOC_008439 | ENSRNOT00000000351 | 0.965521094  | 3.62E-07 |
| TUCP_000275 | XLOC_008439 | ENSRNOT00000092294 | 0.954295855  | 1.45E-06 |
| TUCP_001320 | XLOC_050501 | ENSRNOT00000084075 | 0.996106112  | 7.00E-12 |
| TUCP_001320 | XLOC_050501 | ENSRNOT00000012880 | 0.968043129  | 2.49E-07 |
| TUCP_001320 | XLOC_050501 | ENSRNOT00000074465 | 1            | 0        |
| TUCP_001320 | XLOC_050501 | ENSRNOT00000090898 | 0.961670541  | 6.11E-07 |
| TUCP_001320 | XLOC_050501 | ENSRNOT00000079805 | 0.997980451  | 2.64E-13 |
| TUCP_001320 | XLOC_050501 | ENSRNOT00000040912 | 1            | 0        |
| TUCP_001320 | XLOC_050501 | ENSRNOT00000072648 | 1            | 0        |
| TUCP_001320 | XLOC_050501 | ENSRNOT00000007398 | 0.989054103  | 1.21E-09 |
| TUCP_001320 | XLOC_050501 | ENSRNOT00000070803 | 1            | 0        |
| TUCP_001320 | XLOC_050501 | ENSRNOT00000012196 | 1            | 0        |
| TUCP_001320 | XLOC_050501 | ENSRNOT00000085772 | 1            | 0        |
| TUCP_001320 | XLOC_050501 | ENSRNOT00000093284 | 0.999975856  | 6.46E-23 |
| TUCP_001320 | XLOC_050501 | ENSRNOT00000086374 | 0.993568904  | 8.57E-11 |

|             |             |                    |             |          |
|-------------|-------------|--------------------|-------------|----------|
| TUCP_001320 | XLOC_050501 | ENSRNOT00000015270 | 1           | 0        |
| TUCP_001320 | XLOC_050501 | ENSRNOT00000046192 | 1           | 0        |
| TUCP_001320 | XLOC_050501 | ENSRNOT00000044226 | 1           | 0        |
| TUCP_001320 | XLOC_050501 | ENSRNOT00000081898 | 0.989837012 | 8.39E-10 |
| TUCP_001320 | XLOC_050501 | ENSRNOT00000081954 | 0.964005219 | 4.48E-07 |
| TUCP_001320 | XLOC_050501 | ENSRNOT00000080291 | 0.998427671 | 7.55E-14 |
| TUCP_001320 | XLOC_050501 | ENSRNOT00000004293 | 0.984239049 | 7.46E-09 |
| TUCP_001320 | XLOC_050501 | ENSRNOT00000078231 | 0.960455489 | 7.13E-07 |
| TUCP_001320 | XLOC_050501 | ENSRNOT00000002834 | 1           | 0        |
| TUCP_001320 | XLOC_050501 | ENSRNOT00000001464 | 1           | 0        |
| TUCP_001320 | XLOC_050501 | ENSRNOT00000090716 | 0.994769629 | 3.06E-11 |
| TUCP_001320 | XLOC_050501 | ENSRNOT00000083542 | 0.972568514 | 1.17E-07 |
| TUCP_001320 | XLOC_050501 | ENSRNOT00000076044 | 1           | 0        |
| TUCP_001320 | XLOC_050501 | ENSRNOT00000074353 | 1           | 0        |
| TUCP_001320 | XLOC_050501 | ENSRNOT00000043510 | 0.958144129 | 9.43E-07 |
| TUCP_001320 | XLOC_050501 | ENSRNOT00000087122 | 0.980089513 | 2.38E-08 |
| TUCP_001320 | XLOC_050501 | ENSRNOT00000074295 | 0.987777006 | 2.11E-09 |
| TUCP_001320 | XLOC_050501 | ENSRNOT00000057873 | 1           | 0        |
| TUCP_001320 | XLOC_050501 | ENSRNOT00000083002 | 0.988874897 | 1.32E-09 |
| TUCP_001320 | XLOC_050501 | ENSRNOT00000088399 | 0.999999855 | 4.99E-34 |
| TUCP_001320 | XLOC_050501 | ENSRNOT00000086248 | 1           | 0        |
| TUCP_001320 | XLOC_050501 | ENSRNOT00000089750 | 0.999992758 | 1.57E-25 |
| TUCP_001320 | XLOC_050501 | ENSRNOT00000030517 | 0.971225224 | 1.48E-07 |
| TUCP_001320 | XLOC_050501 | ENSRNOT00000034772 | 0.994265187 | 4.84E-11 |
| TUCP_001320 | XLOC_050501 | ENSRNOT00000089305 | 0.969641693 | 1.93E-07 |
| TUCP_001320 | XLOC_050501 | ENSRNOT00000024580 | 0.954183021 | 1.47E-06 |
| TUCP_001320 | XLOC_050501 | ENSRNOT00000064601 | 0.966578038 | 3.11E-07 |
| TUCP_001320 | XLOC_050501 | ENSRNOT00000015870 | 0.965901306 | 3.43E-07 |
| TUCP_001320 | XLOC_050501 | ENSRNOT00000080812 | 0.992998865 | 1.31E-10 |
| TUCP_001320 | XLOC_050501 | ENSRNOT00000092755 | 1           | 0        |
| TUCP_001320 | XLOC_050501 | ENSRNOT00000031683 | 1           | 0        |
| TUCP_001320 | XLOC_050501 | ENSRNOT00000087764 | 0.988156196 | 1.80E-09 |
| TUCP_003381 | XLOC_146339 | ENSRNOT00000072166 | 0.970135089 | 1.78E-07 |
| TUCP_003381 | XLOC_146339 | ENSRNOT00000081198 | 0.963318292 | 4.92E-07 |
| TUCP_001730 | XLOC_070993 | ENSRNOT00000072166 | 0.957746398 | 9.88E-07 |
| TUCP_001730 | XLOC_070993 | ENSRNOT00000081198 | 0.968081345 | 2.47E-07 |
| TUCP_000648 | XLOC_024251 | ENSRNOT00000084075 | 0.977262396 | 4.61E-08 |
| TUCP_000648 | XLOC_024251 | ENSRNOT00000074465 | 0.978971392 | 3.13E-08 |
| TUCP_000648 | XLOC_024251 | ENSRNOT00000079805 | 0.986586782 | 3.34E-09 |
| TUCP_000648 | XLOC_024251 | ENSRNOT00000040912 | 0.978971392 | 3.13E-08 |
| TUCP_000648 | XLOC_024251 | ENSRNOT00000072648 | 0.978971392 | 3.13E-08 |
| TUCP_000648 | XLOC_024251 | ENSRNOT00000007398 | 0.972737519 | 1.13E-07 |
| TUCP_000648 | XLOC_024251 | ENSRNOT00000070803 | 0.978971392 | 3.13E-08 |
| TUCP_000648 | XLOC_024251 | ENSRNOT00000012196 | 0.978971392 | 3.13E-08 |
| TUCP_000648 | XLOC_024251 | ENSRNOT00000085772 | 0.978971392 | 3.13E-08 |
| TUCP_000648 | XLOC_024251 | ENSRNOT00000093284 | 0.979113514 | 3.02E-08 |
| TUCP_000648 | XLOC_024251 | ENSRNOT00000086374 | 0.976013677 | 6.01E-08 |
| TUCP_000648 | XLOC_024251 | ENSRNOT00000015270 | 0.978971392 | 3.13E-08 |
| TUCP_000648 | XLOC_024251 | ENSRNOT00000046192 | 0.978971392 | 3.13E-08 |
| TUCP_000648 | XLOC_024251 | ENSRNOT00000044226 | 0.978971392 | 3.13E-08 |
| TUCP_000648 | XLOC_024251 | ENSRNOT00000081898 | 0.979544095 | 2.73E-08 |

|             |             |                    |              |          |
|-------------|-------------|--------------------|--------------|----------|
| TUCP_000648 | XLOC_024251 | ENSRNOT00000080291 | 0.980604618  | 2.09E-08 |
| TUCP_000648 | XLOC_024251 | ENSRNOT00000004293 | 0.963087821  | 5.07E-07 |
| TUCP_000648 | XLOC_024251 | ENSRNOT00000078231 | 0.951794337  | 1.89E-06 |
| TUCP_000648 | XLOC_024251 | ENSRNOT00000087723 | 0.968696987  | 2.25E-07 |
| TUCP_000648 | XLOC_024251 | ENSRNOT00000001464 | 0.978971392  | 3.13E-08 |
| TUCP_000648 | XLOC_024251 | ENSRNOT00000090716 | 0.976709925  | 5.19E-08 |
| TUCP_000648 | XLOC_024251 | ENSRNOT00000057873 | 0.978971392  | 3.13E-08 |
| TUCP_000648 | XLOC_024251 | ENSRNOT00000021278 | 0.955525939  | 1.27E-06 |
| TUCP_000648 | XLOC_024251 | ENSRNOT00000076044 | 0.978971392  | 3.13E-08 |
| TUCP_000648 | XLOC_024251 | ENSRNOT00000074353 | 0.978971392  | 3.13E-08 |
| TUCP_000648 | XLOC_024251 | ENSRNOT00000087122 | 0.975696603  | 6.41E-08 |
| TUCP_000648 | XLOC_024251 | ENSRNOT00000083542 | 0.959301575  | 8.21E-07 |
| TUCP_000648 | XLOC_024251 | ENSRNOT00000083002 | 0.964751955  | 4.04E-07 |
| TUCP_000648 | XLOC_024251 | ENSRNOT00000088399 | 0.978925101  | 3.16E-08 |
| TUCP_000648 | XLOC_024251 | ENSRNOT00000086248 | 0.978971392  | 3.13E-08 |
| TUCP_000648 | XLOC_024251 | ENSRNOT00000089750 | 0.978915855  | 3.17E-08 |
| TUCP_000648 | XLOC_024251 | ENSRNOT00000034772 | 0.973497891  | 9.85E-08 |
| TUCP_000648 | XLOC_024251 | ENSRNOT00000002834 | 0.978971392  | 3.13E-08 |
| TUCP_000648 | XLOC_024251 | ENSRNOT00000080812 | 0.961042457  | 6.62E-07 |
| TUCP_000648 | XLOC_024251 | ENSRNOT00000092755 | 0.978971392  | 3.13E-08 |
| TUCP_000648 | XLOC_024251 | ENSRNOT00000031683 | 0.978971392  | 3.13E-08 |
| TUCP_000648 | XLOC_024251 | ENSRNOT00000087764 | 0.978704289  | 3.33E-08 |
| TUCP_000649 | XLOC_024319 | ENSRNOT00000055073 | 0.98148022   | 1.66E-08 |
| TUCP_000649 | XLOC_024319 | ENSRNOT00000019171 | 0.994552573  | 3.74E-11 |
| TUCP_000649 | XLOC_024319 | ENSRNOT00000010948 | 0.98980171   | 8.54E-10 |
| TUCP_000130 | XLOC_003451 | ENSRNOT00000065143 | 0.95705748   | 1.07E-06 |
| TUCP_000130 | XLOC_003451 | ENSRNOT00000044885 | 0.953819905  | 1.53E-06 |
| TUCP_000130 | XLOC_003451 | ENSRNOT00000082998 | 0.960061558  | 7.48E-07 |
| TUCP_000130 | XLOC_003451 | ENSRNOT00000081246 | 0.971454413  | 1.42E-07 |
| TUCP_000130 | XLOC_003451 | ENSRNOT00000009877 | 0.955410974  | 1.29E-06 |
| TUCP_000130 | XLOC_003451 | ENSRNOT00000007351 | -0.966019893 | 3.37E-07 |
| TUCP_000130 | XLOC_003451 | ENSRNOT00000017668 | 0.95250299   | 1.76E-06 |
| TUCP_000130 | XLOC_003451 | ENSRNOT00000051022 | 0.962662927  | 5.37E-07 |
| TUCP_000130 | XLOC_003451 | ENSRNOT00000082508 | -0.959569505 | 7.95E-07 |
| TUCP_000130 | XLOC_003451 | ENSRNOT00000023638 | 0.969656127  | 1.93E-07 |
| TUCP_000130 | XLOC_003451 | ENSRNOT00000005228 | 0.960903182  | 6.74E-07 |
| TUCP_000130 | XLOC_003451 | ENSRNOT00000017361 | 0.951095985  | 2.03E-06 |
| TUCP_000130 | XLOC_003451 | ENSRNOT00000005659 | 0.95150049   | 1.95E-06 |
| TUCP_000130 | XLOC_003451 | ENSRNOT00000027526 | 0.966961822  | 2.93E-07 |
| TUCP_000130 | XLOC_003451 | ENSRNOT00000045326 | 0.957492947  | 1.02E-06 |
| TUCP_000130 | XLOC_003451 | ENSRNOT00000071166 | 0.95050111   | 2.15E-06 |
| TUCP_000130 | XLOC_003451 | ENSRNOT00000016649 | 0.952057984  | 1.84E-06 |
| TUCP_000130 | XLOC_003451 | ENSRNOT00000090342 | 0.979992715  | 2.44E-08 |
| TUCP_000130 | XLOC_003451 | ENSRNOT00000028856 | 0.965295244  | 3.74E-07 |
| TUCP_000130 | XLOC_003451 | ENSRNOT00000000743 | 0.953116719  | 1.65E-06 |
| TUCP_000130 | XLOC_003451 | ENSRNOT00000030850 | 0.956000408  | 1.21E-06 |
| TUCP_000130 | XLOC_003451 | ENSRNOT00000067170 | -0.968738731 | 2.23E-07 |
| TUCP_000130 | XLOC_003451 | ENSRNOT00000043216 | 0.958857298  | 8.66E-07 |
| TUCP_000130 | XLOC_003451 | ENSRNOT00000091128 | -0.971959078 | 1.30E-07 |
| TUCP_000130 | XLOC_003451 | ENSRNOT00000001586 | -0.955604776 | 1.26E-06 |
| TUCP_000130 | XLOC_003451 | ENSRNOT00000081981 | 0.988064894  | 1.87E-09 |

|             |             |                     |              |          |
|-------------|-------------|---------------------|--------------|----------|
| TUCP_000130 | XLOC_003451 | ENSRNOT00000009496  | 0.973822377  | 9.27E-08 |
| TUCP_000130 | XLOC_003451 | ENSRNOT00000083369  | 0.960715418  | 6.90E-07 |
| TUCP_000130 | XLOC_003451 | ENSRNOT00000006752  | 0.95941834   | 8.10E-07 |
| TUCP_000130 | XLOC_003451 | ENSRNOT00000004172  | 0.969500305  | 1.97E-07 |
| TUCP_000130 | XLOC_003451 | ENSRNOT00000014979  | 0.962459135  | 5.51E-07 |
| TUCP_000130 | XLOC_003451 | ENSRNOT00000077201  | -0.951367901 | 1.97E-06 |
| TUCP_000130 | XLOC_003451 | ENSRNOT00000018533  | 0.961830038  | 5.98E-07 |
| TUCP_000130 | XLOC_003451 | ENSRNOT00000024969  | 0.969375563  | 2.02E-07 |
| TUCP_000130 | XLOC_003451 | ENSRNOT00000026783  | 0.959596294  | 7.92E-07 |
| TUCP_000130 | XLOC_003451 | ENSRNOT00000048754  | -0.957149401 | 1.06E-06 |
| TUCP_000130 | XLOC_003451 | ENSRNOT00000038247  | 0.951697875  | 1.91E-06 |
| TUCP_000130 | XLOC_003451 | ENSRNOT00000029439  | 0.951018631  | 2.04E-06 |
| TUCP_000130 | XLOC_003451 | ENSRNOT00000045285  | 0.950191733  | 2.22E-06 |
| TUCP_000130 | XLOC_003451 | ENSRNOT00000071764  | 0.955198133  | 1.32E-06 |
| TUCP_000130 | XLOC_003451 | ENSRNOT00000079109  | 0.955764349  | 1.24E-06 |
| TUCP_000130 | XLOC_003451 | ENSRNOT0000004007   | -0.955870774 | 1.22E-06 |
| TUCP_000130 | XLOC_003451 | ENSRNOT00000025372  | 0.957919038  | 9.68E-07 |
| TUCP_000130 | XLOC_003451 | ENSRNOT00000000120  | 0.954931414  | 1.36E-06 |
| TUCP_000130 | XLOC_003451 | ENSRNOT00000019519  | 0.960379197  | 7.19E-07 |
| TUCP_000130 | XLOC_003451 | ENSRNOT00000089933  | 0.966718441  | 3.04E-07 |
| TUCP_000130 | XLOC_003451 | ENSRNOT000000091602 | -0.952833749 | 1.70E-06 |
| TUCP_000130 | XLOC_003451 | ENSRNOT000000037456 | 0.950218603  | 2.21E-06 |
| TUCP_000130 | XLOC_003451 | ENSRNOT00000009811  | 0.967453842  | 2.72E-07 |
| TUCP_000130 | XLOC_003451 | ENSRNOT00000023196  | 0.953956031  | 1.51E-06 |
| TUCP_000130 | XLOC_003451 | ENSRNOT00000005490  | 0.965979387  | 3.39E-07 |
| TUCP_000130 | XLOC_003451 | ENSRNOT00000072208  | 0.952935524  | 1.68E-06 |
| TUCP_000130 | XLOC_003451 | ENSRNOT00000032780  | 0.975350835  | 6.88E-08 |
| TUCP_000130 | XLOC_003451 | ENSRNOT00000009708  | -0.978476657 | 3.51E-08 |
| TUCP_000130 | XLOC_003451 | ENSRNOT00000017319  | 0.959457747  | 8.06E-07 |
| TUCP_000130 | XLOC_003451 | ENSRNOT00000015188  | 0.9664142    | 3.18E-07 |
| TUCP_000130 | XLOC_003451 | ENSRNOT00000033677  | -0.952714772 | 1.72E-06 |
| TUCP_000130 | XLOC_003451 | ENSRNOT00000079866  | 0.955751302  | 1.24E-06 |
| TUCP_000130 | XLOC_003451 | ENSRNOT00000072518  | 0.967622628  | 2.65E-07 |
| TUCP_000130 | XLOC_003451 | ENSRNOT00000023133  | 0.957695671  | 9.94E-07 |
| TUCP_000130 | XLOC_003451 | ENSRNOT00000011499  | -0.950532672 | 2.15E-06 |
| TUCP_000130 | XLOC_003451 | ENSRNOT00000005958  | 0.982595065  | 1.22E-08 |
| TUCP_000130 | XLOC_003451 | ENSRNOT00000004787  | -0.950335711 | 2.19E-06 |
| TUCP_000130 | XLOC_003451 | ENSRNOT00000002410  | 0.959082171  | 8.43E-07 |
| TUCP_000130 | XLOC_003451 | ENSRNOT00000027012  | 0.95186854   | 1.88E-06 |
| TUCP_000130 | XLOC_003451 | ENSRNOT00000021030  | -0.954400783 | 1.44E-06 |
| TUCP_000130 | XLOC_003451 | ENSRNOT00000057361  | 0.952547438  | 1.75E-06 |
| TUCP_000130 | XLOC_003451 | ENSRNOT00000017556  | 0.962707416  | 5.34E-07 |
| TUCP_000130 | XLOC_003451 | ENSRNOT0000004032   | 0.957649781  | 9.99E-07 |
| TUCP_000130 | XLOC_003451 | ENSRNOT00000087443  | 0.953028754  | 1.66E-06 |
| TUCP_000130 | XLOC_003451 | ENSRNOT00000047192  | -0.965979357 | 3.39E-07 |
| TUCP_000130 | XLOC_003451 | ENSRNOT00000026481  | 0.950139902  | 2.23E-06 |
| TUCP_000130 | XLOC_003451 | ENSRNOT00000000468  | 0.955589074  | 1.26E-06 |
| TUCP_000130 | XLOC_003451 | ENSRNOT00000044562  | 0.964194773  | 4.36E-07 |
| TUCP_000130 | XLOC_003451 | ENSRNOT00000021803  | -0.9543037   | 1.45E-06 |
| TUCP_000130 | XLOC_003451 | ENSRNOT00000001081  | 0.971393607  | 1.44E-07 |
| TUCP_000130 | XLOC_003451 | ENSRNOT00000058351  | 0.966692156  | 3.05E-07 |

|             |             |                    |              |          |
|-------------|-------------|--------------------|--------------|----------|
| TUCP_000130 | XLOC_003451 | ENSRNOT00000083220 | 0.962842203  | 5.24E-07 |
| TUCP_000130 | XLOC_003451 | ENSRNOT00000086119 | -0.954145468 | 1.48E-06 |
| TUCP_000130 | XLOC_003451 | ENSRNOT00000084385 | 0.964867667  | 3.97E-07 |
| TUCP_000130 | XLOC_003451 | ENSRNOT00000058312 | 0.956455022  | 1.15E-06 |
| TUCP_000130 | XLOC_003451 | ENSRNOT00000019133 | 0.969263353  | 2.05E-07 |
| TUCP_000130 | XLOC_003451 | ENSRNOT00000020437 | 0.954411543  | 1.44E-06 |
| TUCP_000130 | XLOC_003451 | ENSRNOT00000015265 | 0.959364335  | 8.15E-07 |
| TUCP_000130 | XLOC_003451 | ENSRNOT00000052422 | 0.97535345   | 6.87E-08 |
| TUCP_000130 | XLOC_003451 | ENSRNOT00000068381 | 0.957472612  | 1.02E-06 |
| TUCP_000130 | XLOC_003451 | ENSRNOT00000057146 | 0.960443895  | 7.14E-07 |
| TUCP_000130 | XLOC_003451 | ENSRNOT00000031979 | -0.953922894 | 1.51E-06 |
| TUCP_000130 | XLOC_003451 | ENSRNOT00000015609 | 0.959485936  | 8.03E-07 |
| TUCP_000130 | XLOC_003451 | ENSRNOT00000004319 | -0.95541154  | 1.29E-06 |
| TUCP_000130 | XLOC_003451 | ENSRNOT00000078102 | 0.979650021  | 2.66E-08 |
| TUCP_000130 | XLOC_003451 | ENSRNOT00000070893 | 0.951608916  | 1.93E-06 |
| TUCP_000130 | XLOC_003451 | ENSRNOT00000086590 | 0.95020103   | 2.22E-06 |
| TUCP_000130 | XLOC_003451 | ENSRNOT00000008929 | 0.954603358  | 1.41E-06 |
| TUCP_000130 | XLOC_003451 | ENSRNOT00000019177 | 0.965958175  | 3.40E-07 |
| TUCP_000130 | XLOC_003451 | ENSRNOT00000016129 | 0.954753824  | 1.38E-06 |
| TUCP_000130 | XLOC_003451 | ENSRNOT00000081047 | 0.96417643   | 4.38E-07 |
| TUCP_000130 | XLOC_003451 | ENSRNOT00000073559 | 0.973197146  | 1.04E-07 |
| TUCP_000130 | XLOC_003451 | ENSRNOT00000005486 | -0.956831211 | 1.10E-06 |
| TUCP_000130 | XLOC_003451 | ENSRNOT00000023989 | 0.965555464  | 3.60E-07 |
| TUCP_000130 | XLOC_003451 | ENSRNOT00000003991 | 0.95554848   | 1.27E-06 |
| TUCP_000130 | XLOC_003451 | ENSRNOT00000021408 | 0.965989854  | 3.38E-07 |
| TUCP_000130 | XLOC_003451 | ENSRNOT00000019502 | 0.963888354  | 4.55E-07 |
| TUCP_000130 | XLOC_003451 | ENSRNOT00000050515 | 0.959477067  | 8.04E-07 |
| TUCP_000130 | XLOC_003451 | ENSRNOT00000023477 | 0.950803643  | 2.09E-06 |
| TUCP_000130 | XLOC_003451 | ENSRNOT00000084055 | -0.950800478 | 2.09E-06 |
| TUCP_000130 | XLOC_003451 | ENSRNOT00000035591 | -0.960218435 | 7.34E-07 |
| TUCP_000130 | XLOC_003451 | ENSRNOT00000027910 | 0.965863646  | 3.45E-07 |
| TUCP_000130 | XLOC_003451 | ENSRNOT00000018074 | -0.950380142 | 2.18E-06 |
| TUCP_000130 | XLOC_003451 | ENSRNOT00000052224 | 0.955917716  | 1.22E-06 |
| TUCP_000130 | XLOC_003451 | ENSRNOT00000078070 | 0.966031602  | 3.36E-07 |
| TUCP_000130 | XLOC_003451 | ENSRNOT00000046745 | 0.977966544  | 3.94E-08 |
| TUCP_000130 | XLOC_003451 | ENSRNOT00000087502 | 0.957251473  | 1.05E-06 |
| TUCP_000130 | XLOC_003451 | ENSRNOT00000024322 | 0.956696917  | 1.11E-06 |
| TUCP_000130 | XLOC_003451 | ENSRNOT00000088182 | 0.959993728  | 7.55E-07 |
| TUCP_000130 | XLOC_003451 | ENSRNOT00000085228 | 0.97413049   | 8.74E-08 |
| TUCP_000130 | XLOC_003451 | ENSRNOT00000073526 | 0.950135035  | 2.23E-06 |
| TUCP_000130 | XLOC_003451 | ENSRNOT00000010784 | 0.967285079  | 2.79E-07 |
| TUCP_000130 | XLOC_003451 | ENSRNOT00000013801 | 0.95072011   | 2.11E-06 |
| TUCP_000130 | XLOC_003451 | ENSRNOT00000028885 | -0.953687044 | 1.55E-06 |
| TUCP_000130 | XLOC_003451 | ENSRNOT00000000013 | 0.969618651  | 1.94E-07 |
| TUCP_000130 | XLOC_003451 | ENSRNOT00000077999 | 0.950301799  | 2.20E-06 |
| TUCP_000130 | XLOC_003451 | ENSRNOT00000040069 | 0.95702168   | 1.07E-06 |
| TUCP_000130 | XLOC_003451 | ENSRNOT00000003690 | 0.955868999  | 1.22E-06 |
| TUCP_000130 | XLOC_003451 | ENSRNOT00000017753 | 0.984190908  | 7.57E-09 |
| TUCP_000130 | XLOC_003451 | ENSRNOT00000002109 | 0.978217246  | 3.72E-08 |
| TUCP_000130 | XLOC_003451 | ENSRNOT00000006499 | 0.958806793  | 8.72E-07 |
| TUCP_000130 | XLOC_003451 | ENSRNOT00000005909 | 0.964606784  | 4.12E-07 |

|             |             |                    |              |          |
|-------------|-------------|--------------------|--------------|----------|
| TUCP_000130 | XLOC_003451 | ENSRNOT00000029125 | 0.983457687  | 9.49E-09 |
| TUCP_000130 | XLOC_003451 | ENSRNOT00000074649 | 0.955002231  | 1.35E-06 |
| TUCP_000130 | XLOC_003451 | ENSRNOT00000029833 | 0.975339509  | 6.89E-08 |
| TUCP_000130 | XLOC_003451 | ENSRNOT00000022074 | 0.961830426  | 5.98E-07 |
| TUCP_000130 | XLOC_003451 | ENSRNOT00000036951 | 0.959615044  | 7.90E-07 |
| TUCP_000130 | XLOC_003451 | ENSRNOT00000016519 | 0.961017439  | 6.64E-07 |
| TUCP_000130 | XLOC_003451 | ENSRNOT00000004046 | -0.968447487 | 2.34E-07 |
| TUCP_000130 | XLOC_003451 | ENSRNOT00000078250 | 0.96057449   | 7.02E-07 |
| TUCP_000130 | XLOC_003451 | ENSRNOT00000058842 | 0.963739426  | 4.65E-07 |
| TUCP_000130 | XLOC_003451 | ENSRNOT00000066133 | -0.951028201 | 2.04E-06 |
| TUCP_000130 | XLOC_003451 | ENSRNOT00000077231 | 0.954916123  | 1.36E-06 |
| TUCP_000130 | XLOC_003451 | ENSRNOT00000090123 | 0.959404075  | 8.11E-07 |
| TUCP_000130 | XLOC_003451 | ENSRNOT00000035700 | 0.970019374  | 1.81E-07 |
| TUCP_000130 | XLOC_003451 | ENSRNOT00000029202 | -0.951540997 | 1.94E-06 |
| TUCP_000130 | XLOC_003451 | ENSRNOT00000060362 | 0.973742341  | 9.41E-08 |
| TUCP_000130 | XLOC_003451 | ENSRNOT0000009803  | 0.974503148  | 8.13E-08 |
| TUCP_000130 | XLOC_003451 | ENSRNOT00000092029 | 0.966102103  | 3.33E-07 |
| TUCP_000130 | XLOC_003451 | ENSRNOT00000016991 | 0.954605683  | 1.41E-06 |
| TUCP_000130 | XLOC_003451 | ENSRNOT00000011350 | 0.968345742  | 2.37E-07 |
| TUCP_000130 | XLOC_003451 | ENSRNOT00000085756 | 0.956792203  | 1.10E-06 |
| TUCP_000130 | XLOC_003451 | ENSRNOT00000008901 | -0.969489603 | 1.98E-07 |
| TUCP_000130 | XLOC_003451 | ENSRNOT00000017761 | 0.957259911  | 1.05E-06 |
| TUCP_000130 | XLOC_003451 | ENSRNOT00000054828 | 0.967935381  | 2.53E-07 |
| TUCP_000130 | XLOC_003451 | ENSRNOT00000020663 | -0.950384525 | 2.18E-06 |
| TUCP_000130 | XLOC_003451 | ENSRNOT00000078994 | 0.960813049  | 6.81E-07 |
| TUCP_000130 | XLOC_003451 | ENSRNOT00000022142 | 0.956683617  | 1.12E-06 |
| TUCP_000130 | XLOC_003451 | ENSRNOT00000080608 | 0.975501567  | 6.67E-08 |
| TUCP_000130 | XLOC_003451 | ENSRNOT00000017063 | -0.951195657 | 2.01E-06 |
| TUCP_000130 | XLOC_003451 | ENSRNOT00000027970 | 0.96527804   | 3.75E-07 |
| TUCP_000130 | XLOC_003451 | ENSRNOT00000010748 | 0.981357116  | 1.72E-08 |
| TUCP_000130 | XLOC_003451 | ENSRNOT00000008757 | 0.961961086  | 5.88E-07 |
| TUCP_000130 | XLOC_003451 | ENSRNOT00000050834 | -0.956674191 | 1.12E-06 |
| TUCP_000130 | XLOC_003451 | ENSRNOT00000052120 | 0.96116333   | 6.52E-07 |
| TUCP_000130 | XLOC_003451 | ENSRNOT00000004762 | 0.951178099  | 2.01E-06 |
| TUCP_000130 | XLOC_003451 | ENSRNOT00000035474 | 0.979361971  | 2.85E-08 |
| TUCP_000130 | XLOC_003451 | ENSRNOT00000019820 | 0.96506348   | 3.87E-07 |
| TUCP_000130 | XLOC_003451 | ENSRNOT00000084422 | 0.97094998   | 1.55E-07 |
| TUCP_000130 | XLOC_003451 | ENSRNOT00000061392 | 0.971369381  | 1.44E-07 |
| TUCP_000130 | XLOC_003451 | ENSRNOT00000076872 | 0.980274976  | 2.28E-08 |
| TUCP_000130 | XLOC_003451 | ENSRNOT00000091205 | 0.972633449  | 1.15E-07 |
| TUCP_000130 | XLOC_003451 | ENSRNOT00000014124 | 0.96469137   | 4.07E-07 |
| TUCP_000130 | XLOC_003451 | ENSRNOT00000059744 | 0.952238739  | 1.81E-06 |
| TUCP_000130 | XLOC_003451 | ENSRNOT00000085519 | 0.955270838  | 1.31E-06 |
| TUCP_000130 | XLOC_003451 | ENSRNOT00000040476 | 0.984201453  | 7.55E-09 |
| TUCP_000130 | XLOC_003451 | ENSRNOT00000038182 | -0.957753414 | 9.87E-07 |
| TUCP_000130 | XLOC_003451 | ENSRNOT00000010983 | 0.950977217  | 2.05E-06 |
| TUCP_000130 | XLOC_003451 | ENSRNOT00000085279 | 0.958410552  | 9.14E-07 |
| TUCP_000130 | XLOC_003451 | ENSRNOT00000042125 | 0.968854403  | 2.19E-07 |
| TUCP_000130 | XLOC_003451 | ENSRNOT00000077406 | 0.956448846  | 1.15E-06 |
| TUCP_000130 | XLOC_003451 | ENSRNOT00000009900 | -0.952679054 | 1.73E-06 |
| TUCP_000130 | XLOC_003451 | ENSRNOT00000055442 | 0.95340372   | 1.60E-06 |

|             |             |                    |              |          |
|-------------|-------------|--------------------|--------------|----------|
| TUCP_000130 | XLOC_003451 | ENSRNOT00000014814 | 0.972978142  | 1.08E-07 |
| TUCP_000130 | XLOC_003451 | ENSRNOT00000087095 | 0.97624946   | 5.72E-08 |
| TUCP_000130 | XLOC_003451 | ENSRNOT00000064798 | 0.975453377  | 6.74E-08 |
| TUCP_000130 | XLOC_003451 | ENSRNOT00000080207 | 0.95491863   | 1.36E-06 |
| TUCP_000130 | XLOC_003451 | ENSRNOT00000033235 | 0.984908567  | 6.01E-09 |
| TUCP_000130 | XLOC_003451 | ENSRNOT00000017776 | 0.968058836  | 2.48E-07 |
| TUCP_000130 | XLOC_003451 | ENSRNOT00000040393 | 0.954189908  | 1.47E-06 |
| TUCP_000130 | XLOC_003451 | ENSRNOT00000017165 | -0.950292689 | 2.20E-06 |
| TUCP_000130 | XLOC_003451 | ENSRNOT00000012187 | 0.961169084  | 6.51E-07 |
| TUCP_000130 | XLOC_003451 | ENSRNOT00000067901 | -0.95920717  | 8.31E-07 |
| TUCP_000130 | XLOC_003451 | ENSRNOT00000004463 | 0.959089517  | 8.43E-07 |
| TUCP_000130 | XLOC_003451 | ENSRNOT00000008982 | 0.982756769  | 1.17E-08 |
| TUCP_000130 | XLOC_003451 | ENSRNOT00000064700 | 0.954908998  | 1.36E-06 |
| TUCP_000130 | XLOC_003451 | ENSRNOT00000047210 | 0.950731474  | 2.10E-06 |
| TUCP_000130 | XLOC_003451 | ENSRNOT00000025887 | -0.952134219 | 1.83E-06 |
| TUCP_000130 | XLOC_003451 | ENSRNOT00000006321 | -0.950499351 | 2.15E-06 |
| TUCP_000130 | XLOC_003451 | ENSRNOT00000017687 | -0.953854144 | 1.52E-06 |
| TUCP_000130 | XLOC_003451 | ENSRNOT00000015799 | 0.973051044  | 1.07E-07 |
| TUCP_000130 | XLOC_003451 | ENSRNOT00000011682 | -0.952837115 | 1.70E-06 |
| TUCP_000130 | XLOC_003451 | ENSRNOT00000079996 | 0.965964023  | 3.40E-07 |
| TUCP_000644 | XLOC_023936 | ENSRNOT00000084702 | 0.954065612  | 1.49E-06 |
| TUCP_000644 | XLOC_023936 | ENSRNOT00000084944 | 0.996668039  | 3.22E-12 |
| TUCP_000644 | XLOC_023936 | ENSRNOT00000076072 | 0.981081583  | 1.85E-08 |
| TUCP_003951 | XLOC_173487 | ENSRNOT00000084133 | 1            | 0        |
| TUCP_003951 | XLOC_173487 | ENSRNOT00000093745 | 0.981891039  | 1.49E-08 |
| TUCP_003951 | XLOC_173487 | ENSRNOT00000065542 | 0.99828699   | 1.16E-13 |
| TUCP_003951 | XLOC_173487 | ENSRNOT00000082464 | 1            | 0        |
| TUCP_003951 | XLOC_173487 | ENSRNOT00000087659 | 1            | 0        |
| TUCP_003951 | XLOC_173487 | ENSRNOT00000084582 | 0.976633579  | 5.28E-08 |
| TUCP_003951 | XLOC_173487 | ENSRNOT00000085078 | 1            | 0        |
| TUCP_003951 | XLOC_173487 | ENSRNOT00000014028 | 1            | 0        |
| TUCP_003951 | XLOC_173487 | ENSRNOT00000049363 | 1            | 0        |
| TUCP_003951 | XLOC_173487 | ENSRNOT00000065473 | 0.999949098  | 2.69E-21 |
| TUCP_003951 | XLOC_173487 | ENSRNOT00000000142 | 0.998996155  | 8.01E-15 |
| TUCP_003951 | XLOC_173487 | ENSRNOT00000082288 | 0.999998398  | 8.30E-29 |
| TUCP_003951 | XLOC_173487 | ENSRNOT00000039664 | 1            | 0        |
| TUCP_003951 | XLOC_173487 | ENSRNOT00000065402 | 1            | 0        |
| TUCP_003951 | XLOC_173487 | ENSRNOT00000064551 | 0.965365872  | 3.70E-07 |
| TUCP_003951 | XLOC_173487 | ENSRNOT00000084141 | 1            | 0        |
| TUCP_003951 | XLOC_173487 | ENSRNOT00000082435 | 1            | 0        |
| TUCP_003951 | XLOC_173487 | ENSRNOT00000082928 | 0.996801059  | 2.62E-12 |
| TUCP_003951 | XLOC_173487 | ENSRNOT00000066546 | 0.956953619  | 1.08E-06 |
| TUCP_003951 | XLOC_173487 | ENSRNOT00000046013 | 0.988138626  | 1.81E-09 |
| TUCP_003951 | XLOC_173487 | ENSRNOT00000067931 | 0.978893628  | 3.18E-08 |
| TUCP_003951 | XLOC_173487 | ENSRNOT00000086425 | 0.992023315  | 2.51E-10 |
| TUCP_003951 | XLOC_173487 | ENSRNOT00000093696 | 0.956927219  | 1.09E-06 |
| TUCP_003951 | XLOC_173487 | ENSRNOT00000036228 | 0.982337157  | 1.31E-08 |
| TUCP_003951 | XLOC_173487 | ENSRNOT00000014030 | 1            | 0        |
| TUCP_003951 | XLOC_173487 | ENSRNOT00000081966 | 1            | 0        |
| TUCP_003951 | XLOC_173487 | ENSRNOT00000075906 | 1            | 0        |
| TUCP_003951 | XLOC_173487 | ENSRNOT00000088396 | 0.981336994  | 1.73E-08 |

|             |             |                    |             |          |
|-------------|-------------|--------------------|-------------|----------|
| TUCP_003951 | XLOC_173487 | ENSRNOT00000049259 | 0.965500259 | 3.63E-07 |
| TUCP_003951 | XLOC_173487 | ENSRNOT00000092838 | 0.982579749 | 1.23E-08 |
| TUCP_003951 | XLOC_173487 | ENSRNOT00000093442 | 0.959217317 | 8.30E-07 |
| TUCP_000642 | XLOC_023864 | ENSRNOT00000080794 | 0.965921341 | 3.42E-07 |
| TUCP_000642 | XLOC_023864 | ENSRNOT00000083261 | 0.964340607 | 4.28E-07 |
| TUCP_000642 | XLOC_023864 | ENSRNOT00000090914 | 0.956843552 | 1.10E-06 |
| TUCP_000642 | XLOC_023864 | ENSRNOT00000000697 | 0.968840463 | 2.20E-07 |
| TUCP_000642 | XLOC_023864 | ENSRNOT00000079260 | 0.950917832 | 2.07E-06 |
| TUCP_000642 | XLOC_023864 | ENSRNOT00000029634 | 0.952014697 | 1.85E-06 |
| TUCP_000642 | XLOC_023864 | ENSRNOT00000077014 | 0.957775466 | 9.85E-07 |
| TUCP_000642 | XLOC_023864 | ENSRNOT00000021243 | 0.957071596 | 1.07E-06 |
| TUCP_000642 | XLOC_023864 | ENSRNOT00000021608 | 0.954809758 | 1.38E-06 |
| TUCP_000642 | XLOC_023864 | ENSRNOT00000003817 | 0.954708602 | 1.39E-06 |
| TUCP_000642 | XLOC_023864 | ENSRNOT00000022559 | 0.973577057 | 9.70E-08 |
| TUCP_000642 | XLOC_023864 | ENSRNOT00000074753 | 0.952235886 | 1.81E-06 |
| TUCP_000642 | XLOC_023864 | ENSRNOT00000074810 | 0.952361274 | 1.78E-06 |
| TUCP_000642 | XLOC_023864 | ENSRNOT00000024575 | 0.965675826 | 3.54E-07 |
| TUCP_000642 | XLOC_023864 | ENSRNOT00000011743 | 0.953769607 | 1.54E-06 |
| TUCP_000642 | XLOC_023864 | ENSRNOT00000066839 | 0.954641496 | 1.40E-06 |
| TUCP_000642 | XLOC_023864 | ENSRNOT00000078663 | 0.953677522 | 1.55E-06 |
| TUCP_001738 | XLOC_071405 | ENSRNOT00000085599 | 0.997663051 | 5.47E-13 |
| TUCP_001738 | XLOC_071405 | ENSRNOT00000006689 | 0.991246463 | 3.99E-10 |
| TUCP_001738 | XLOC_071405 | ENSRNOT00000081534 | 0.986242675 | 3.79E-09 |
| TUCP_001738 | XLOC_071405 | ENSRNOT00000085301 | 0.994422866 | 4.21E-11 |
| TUCP_001738 | XLOC_071405 | ENSRNOT00000038729 | 0.997831186 | 3.77E-13 |
| TUCP_001738 | XLOC_071405 | ENSRNOT00000086385 | 0.997831186 | 3.77E-13 |
| TUCP_001738 | XLOC_071405 | ENSRNOT00000077695 | 0.966124281 | 3.32E-07 |
| TUCP_001738 | XLOC_071405 | ENSRNOT00000078561 | 0.988978848 | 1.26E-09 |
| TUCP_001738 | XLOC_071405 | ENSRNOT00000087613 | 0.997831186 | 3.77E-13 |
| TUCP_001738 | XLOC_071405 | ENSRNOT00000073350 | 0.957382115 | 1.03E-06 |
| TUCP_001738 | XLOC_071405 | ENSRNOT00000023062 | 0.997831186 | 3.77E-13 |
| TUCP_001738 | XLOC_071405 | ENSRNOT00000058834 | 0.997831186 | 3.77E-13 |
| TUCP_001738 | XLOC_071405 | ENSRNOT00000079420 | 0.997831186 | 3.77E-13 |
| TUCP_001738 | XLOC_071405 | ENSRNOT00000090761 | 0.997831186 | 3.77E-13 |
| TUCP_001738 | XLOC_071405 | ENSRNOT00000055923 | 0.997831186 | 3.77E-13 |
| TUCP_001738 | XLOC_071405 | ENSRNOT00000092416 | 0.965847035 | 3.46E-07 |
| TUCP_001738 | XLOC_071405 | ENSRNOT00000071930 | 0.997831186 | 3.77E-13 |
| TUCP_001738 | XLOC_071405 | ENSRNOT00000001996 | 0.973969619 | 9.01E-08 |
| TUCP_001738 | XLOC_071405 | ENSRNOT00000076756 | 0.997831186 | 3.77E-13 |
| TUCP_001738 | XLOC_071405 | ENSRNOT00000081527 | 0.996925208 | 2.15E-12 |
| TUCP_001738 | XLOC_071405 | ENSRNOT00000085067 | 0.953307682 | 1.62E-06 |
| TUCP_001738 | XLOC_071405 | ENSRNOT00000091663 | 0.993061721 | 1.25E-10 |
| TUCP_001738 | XLOC_071405 | ENSRNOT00000081780 | 0.997831186 | 3.77E-13 |
| TUCP_001738 | XLOC_071405 | ENSRNOT00000089114 | 0.997831186 | 3.77E-13 |
| TUCP_001738 | XLOC_071405 | ENSRNOT00000021609 | 0.972846773 | 1.11E-07 |
| TUCP_001738 | XLOC_071405 | ENSRNOT00000093444 | 0.953704223 | 1.55E-06 |
| TUCP_001738 | XLOC_071405 | ENSRNOT00000073316 | 0.997831186 | 3.77E-13 |
| TUCP_001738 | XLOC_071405 | ENSRNOT00000086557 | 0.978996953 | 3.11E-08 |
| TUCP_001738 | XLOC_071405 | ENSRNOT00000071663 | 0.997831186 | 3.77E-13 |
| TUCP_001738 | XLOC_071405 | ENSRNOT00000042860 | 0.997831186 | 3.77E-13 |
| TUCP_001738 | XLOC_071405 | ENSRNOT00000072962 | 0.966683205 | 3.06E-07 |



|             |             |                    |              |          |
|-------------|-------------|--------------------|--------------|----------|
| TUCP_001738 | XLOC_071405 | ENSRNOT00000088421 | 0.997831186  | 3.77E-13 |
| TUCP_001738 | XLOC_071405 | ENSRNOT00000038898 | 0.997831186  | 3.77E-13 |
| TUCP_001738 | XLOC_071405 | ENSRNOT00000064936 | 0.98221146   | 1.36E-08 |
| TUCP_001738 | XLOC_071405 | ENSRNOT00000042777 | 0.993118574  | 1.20E-10 |
| TUCP_001738 | XLOC_071405 | ENSRNOT00000010029 | 0.997831186  | 3.77E-13 |
| TUCP_000136 | XLOC_003769 | ENSRNOT00000079651 | 0.975584735  | 6.56E-08 |
| TUCP_000641 | XLOC_023651 | ENSRNOT00000012671 | 0.952079293  | 1.84E-06 |
| TUCP_000641 | XLOC_023651 | ENSRNOT00000031904 | 0.95148423   | 1.95E-06 |
| TUCP_000641 | XLOC_023651 | ENSRNOT00000073983 | 0.970957928  | 1.55E-07 |
| TUCP_000641 | XLOC_023651 | ENSRNOT00000082998 | 0.952393997  | 1.78E-06 |
| TUCP_000641 | XLOC_023651 | ENSRNOT00000063956 | 0.952335042  | 1.79E-06 |
| TUCP_000641 | XLOC_023651 | ENSRNOT00000055321 | 0.963303647  | 4.93E-07 |
| TUCP_000641 | XLOC_023651 | ENSRNOT00000080768 | 0.956662287  | 1.12E-06 |
| TUCP_000641 | XLOC_023651 | ENSRNOT00000038807 | 0.961645052  | 6.13E-07 |
| TUCP_000641 | XLOC_023651 | ENSRNOT00000004810 | 0.96704522   | 2.90E-07 |
| TUCP_000641 | XLOC_023651 | ENSRNOT00000009852 | 0.950785851  | 2.09E-06 |
| TUCP_000641 | XLOC_023651 | ENSRNOT00000084422 | 0.956432338  | 1.15E-06 |
| TUCP_000641 | XLOC_023651 | ENSRNOT00000067866 | 0.95203342   | 1.84E-06 |
| TUCP_000641 | XLOC_023651 | ENSRNOT00000088279 | 0.960788061  | 6.84E-07 |
| TUCP_000641 | XLOC_023651 | ENSRNOT00000027275 | 0.95250846   | 1.76E-06 |
| TUCP_000641 | XLOC_023651 | ENSRNOT00000023133 | 0.96058041   | 7.02E-07 |
| TUCP_000641 | XLOC_023651 | ENSRNOT00000023989 | 0.981357743  | 1.72E-08 |
| TUCP_000641 | XLOC_023651 | ENSRNOT00000039341 | 0.973653394  | 9.57E-08 |
| TUCP_000641 | XLOC_023651 | ENSRNOT00000035346 | -0.952859329 | 1.69E-06 |
| TUCP_000641 | XLOC_023651 | ENSRNOT00000017995 | 0.951049162  | 2.04E-06 |
| TUCP_000641 | XLOC_023651 | ENSRNOT00000005958 | 0.951846167  | 1.88E-06 |
| TUCP_000641 | XLOC_023651 | ENSRNOT00000001855 | 0.952935934  | 1.68E-06 |
| TUCP_000641 | XLOC_023651 | ENSRNOT00000073356 | 0.958705287  | 8.82E-07 |
| TUCP_000641 | XLOC_023651 | ENSRNOT00000089319 | 0.958510709  | 9.03E-07 |
| TUCP_000641 | XLOC_023651 | ENSRNOT00000082805 | 0.954918176  | 1.36E-06 |
| TUCP_000641 | XLOC_023651 | ENSRNOT00000050515 | 0.955880244  | 1.22E-06 |
| TUCP_000641 | XLOC_023651 | ENSRNOT00000052120 | 0.958740917  | 8.79E-07 |
| TUCP_000641 | XLOC_023651 | ENSRNOT00000005220 | 0.954122107  | 1.48E-06 |
| TUCP_000641 | XLOC_023651 | ENSRNOT00000035474 | 0.951511265  | 1.95E-06 |
| TUCP_000641 | XLOC_023651 | ENSRNOT00000066230 | 0.964096459  | 4.42E-07 |
| TUCP_000641 | XLOC_023651 | ENSRNOT00000009135 | 0.971109099  | 1.51E-07 |
| TUCP_000641 | XLOC_023651 | ENSRNOT00000027910 | 0.957994935  | 9.60E-07 |
| TUCP_000641 | XLOC_023651 | ENSRNOT00000023807 | -0.956558218 | 1.13E-06 |
| TUCP_000641 | XLOC_023651 | ENSRNOT00000036054 | 0.969494008  | 1.98E-07 |
| TUCP_000641 | XLOC_023651 | ENSRNOT00000091205 | 0.954517789  | 1.42E-06 |
| TUCP_000641 | XLOC_023651 | ENSRNOT00000004032 | 0.954581545  | 1.41E-06 |
| TUCP_000641 | XLOC_023651 | ENSRNOT00000023652 | 0.952497088  | 1.76E-06 |
| TUCP_000641 | XLOC_023651 | ENSRNOT00000038703 | 0.953625493  | 1.56E-06 |
| TUCP_000641 | XLOC_023651 | ENSRNOT00000090342 | 0.957097193  | 1.07E-06 |
| TUCP_000641 | XLOC_023651 | ENSRNOT00000090912 | 0.961114498  | 6.56E-07 |
| TUCP_000641 | XLOC_023651 | ENSRNOT00000024119 | 0.956819713  | 1.10E-06 |
| TUCP_000641 | XLOC_023651 | ENSRNOT00000029125 | 0.953122273  | 1.65E-06 |
| TUCP_000641 | XLOC_023651 | ENSRNOT00000046745 | 0.953018163  | 1.67E-06 |
| TUCP_000641 | XLOC_023651 | ENSRNOT00000091909 | 0.954813316  | 1.38E-06 |
| TUCP_000641 | XLOC_023651 | ENSRNOT00000005587 | -0.954556211 | 1.41E-06 |
| TUCP_000641 | XLOC_023651 | ENSRNOT00000024402 | 0.95591279   | 1.22E-06 |

|             |             |                     |              |          |
|-------------|-------------|---------------------|--------------|----------|
| TUCP_000641 | XLOC_023651 | ENSRNOT00000028266  | 0.961327884  | 6.38E-07 |
| TUCP_000641 | XLOC_023651 | ENSRNOT00000028405  | -0.951985377 | 1.85E-06 |
| TUCP_000641 | XLOC_023651 | ENSRNOT000000081981 | 0.953593596  | 1.57E-06 |
| TUCP_000641 | XLOC_023651 | ENSRNOT00000067400  | 0.950221745  | 2.21E-06 |
| TUCP_000641 | XLOC_023651 | ENSRNOT00000023638  | 0.957405866  | 1.03E-06 |
| TUCP_000641 | XLOC_023651 | ENSRNOT00000074649  | 0.951820125  | 1.89E-06 |
| TUCP_000641 | XLOC_023651 | ENSRNOT00000065529  | 0.958896318  | 8.62E-07 |
| TUCP_000641 | XLOC_023651 | ENSRNOT00000015799  | 0.951086056  | 2.03E-06 |
| TUCP_000641 | XLOC_023651 | ENSRNOT00000017165  | -0.953539034 | 1.58E-06 |
| TUCP_000641 | XLOC_023651 | ENSRNOT00000086122  | 0.961019394  | 6.64E-07 |
| TUCP_000641 | XLOC_023651 | ENSRNOT00000019923  | 0.956449705  | 1.15E-06 |
| TUCP_000641 | XLOC_023651 | ENSRNOT00000029439  | 0.963706492  | 4.67E-07 |
| TUCP_000641 | XLOC_023651 | ENSRNOT00000045285  | 0.976947184  | 4.93E-08 |
| TUCP_000641 | XLOC_023651 | ENSRNOT00000067840  | 0.964587396  | 4.13E-07 |
| TUCP_000641 | XLOC_023651 | ENSRNOT00000021650  | 0.953418943  | 1.60E-06 |
| TUCP_000641 | XLOC_023651 | ENSRNOT00000048063  | 0.950839514  | 2.08E-06 |
| TUCP_000641 | XLOC_023651 | ENSRNOT00000041365  | 0.96500805   | 3.90E-07 |
| TUCP_000641 | XLOC_023651 | ENSRNOT00000090299  | 0.953889579  | 1.52E-06 |
| TUCP_000641 | XLOC_023651 | ENSRNOT00000045047  | 0.965316809  | 3.73E-07 |
| TUCP_000641 | XLOC_023651 | ENSRNOT00000025705  | 0.955672224  | 1.25E-06 |
| TUCP_000641 | XLOC_023651 | ENSRNOT00000085228  | 0.954071561  | 1.49E-06 |
| TUCP_000641 | XLOC_023651 | ENSRNOT00000074177  | 0.962205395  | 5.70E-07 |
| TUCP_000641 | XLOC_023651 | ENSRNOT00000033975  | 0.964359305  | 4.27E-07 |
| TUCP_000641 | XLOC_023651 | ENSRNOT00000000157  | 0.956927301  | 1.09E-06 |
| TUCP_000641 | XLOC_023651 | ENSRNOT00000003641  | 0.957576528  | 1.01E-06 |
| TUCP_001454 | XLOC_056235 | ENSRNOT00000026966  | 0.970348858  | 1.72E-07 |
| TUCP_001454 | XLOC_056235 | ENSRNOT00000068416  | 0.999992544  | 1.81E-25 |
| TUCP_001454 | XLOC_056235 | ENSRNOT00000086036  | 0.999944839  | 4.02E-21 |
| TUCP_001454 | XLOC_056235 | ENSRNOT00000026803  | 0.98521366   | 5.43E-09 |
| TUCP_001454 | XLOC_056235 | ENSRNOT00000047527  | 0.963633841  | 4.71E-07 |
| TUCP_001454 | XLOC_056235 | ENSRNOT00000042251  | 0.999408084  | 5.72E-16 |
| TUCP_001454 | XLOC_056235 | ENSRNOT0000002984   | 0.998406743  | 8.06E-14 |
| TUCP_001454 | XLOC_056235 | ENSRNOT00000083764  | 0.999515147  | 2.11E-16 |
| TUCP_001454 | XLOC_056235 | ENSRNOT00000076802  | 0.963481956  | 4.81E-07 |
| TUCP_001454 | XLOC_056235 | ENSRNOT00000092365  | 0.999128056  | 3.96E-15 |
| TUCP_001454 | XLOC_056235 | ENSRNOT00000079275  | 0.999918397  | 2.85E-20 |
| TUCP_001454 | XLOC_056235 | ENSRNOT00000066062  | -0.960275163 | 7.29E-07 |
| TUCP_001454 | XLOC_056235 | ENSRNOT00000045301  | 0.999993014  | 1.31E-25 |
| TUCP_001454 | XLOC_056235 | ENSRNOT00000041186  | 0.99996094   | 7.16E-22 |
| TUCP_001454 | XLOC_056235 | ENSRNOT00000010092  | 0.978388124  | 3.58E-08 |
| TUCP_001454 | XLOC_056235 | ENSRNOT00000076182  | 0.999993014  | 1.31E-25 |
| TUCP_001454 | XLOC_056235 | ENSRNOT00000087404  | 0.951058305  | 2.04E-06 |
| TUCP_001454 | XLOC_056235 | ENSRNOT00000052003  | 0.959334045  | 8.18E-07 |
| TUCP_001454 | XLOC_056235 | ENSRNOT00000081709  | 0.998400955  | 8.21E-14 |
| TUCP_001454 | XLOC_056235 | ENSRNOT00000005726  | 0.960445803  | 7.13E-07 |
| TUCP_001454 | XLOC_056235 | ENSRNOT00000014103  | 0.999993014  | 1.31E-25 |
| TUCP_001454 | XLOC_056235 | ENSRNOT00000057433  | 0.965848018  | 3.46E-07 |
| TUCP_001454 | XLOC_056235 | ENSRNOT00000082289  | 0.999039244  | 6.44E-15 |
| TUCP_001454 | XLOC_056235 | ENSRNOT00000092516  | 0.957955426  | 9.64E-07 |
| TUCP_001454 | XLOC_056235 | ENSRNOT00000008898  | 0.989825061  | 8.44E-10 |
| TUCP_001454 | XLOC_056235 | ENSRNOT00000083493  | 0.99534284   | 1.71E-11 |

|             |             |                    |             |          |
|-------------|-------------|--------------------|-------------|----------|
| TUCP_001454 | XLOC_056235 | ENSRNOT00000092563 | 0.987090505 | 2.76E-09 |
| TUCP_001454 | XLOC_056235 | ENSRNOT00000088893 | 0.999993014 | 1.31E-25 |
| TUCP_001454 | XLOC_056235 | ENSRNOT00000076693 | 0.955633898 | 1.26E-06 |
| TUCP_001454 | XLOC_056235 | ENSRNOT00000081014 | 0.999993014 | 1.31E-25 |
| TUCP_001454 | XLOC_056235 | ENSRNOT00000067543 | 0.999993014 | 1.31E-25 |
| TUCP_001454 | XLOC_056235 | ENSRNOT00000050968 | 0.996953292 | 2.06E-12 |
| TUCP_001454 | XLOC_056235 | ENSRNOT00000042201 | 0.960363509 | 7.21E-07 |
| TUCP_001454 | XLOC_056235 | ENSRNOT0000004373  | 0.957518074 | 1.01E-06 |
| TUCP_001454 | XLOC_056235 | ENSRNOT00000063929 | 0.999993014 | 1.31E-25 |
| TUCP_001454 | XLOC_056235 | ENSRNOT00000057472 | 0.999993014 | 1.31E-25 |
| TUCP_001454 | XLOC_056235 | ENSRNOT00000041617 | 0.952575444 | 1.74E-06 |
| TUCP_001454 | XLOC_056235 | ENSRNOT00000091763 | 0.986275585 | 3.75E-09 |
| TUCP_001454 | XLOC_056235 | ENSRNOT00000022200 | 0.998448629 | 7.06E-14 |
| TUCP_001454 | XLOC_056235 | ENSRNOT00000067379 | 0.99719751  | 1.36E-12 |
| TUCP_001454 | XLOC_056235 | ENSRNOT00000020786 | 0.977041246 | 4.83E-08 |
| TUCP_001454 | XLOC_056235 | ENSRNOT00000050543 | 0.999710163 | 1.61E-17 |
| TUCP_001454 | XLOC_056235 | ENSRNOT00000089306 | 0.999866202 | 3.38E-19 |
| TUCP_001454 | XLOC_056235 | ENSRNOT00000052367 | 0.99748824  | 7.84E-13 |
| TUCP_001454 | XLOC_056235 | ENSRNOT00000090658 | 0.999993014 | 1.31E-25 |
| TUCP_001454 | XLOC_056235 | ENSRNOT00000022571 | 0.995134268 | 2.13E-11 |
| TUCP_001454 | XLOC_056235 | ENSRNOT00000044520 | 0.981534265 | 1.64E-08 |
| TUCP_001454 | XLOC_056235 | ENSRNOT00000065448 | 0.964154168 | 4.39E-07 |
| TUCP_001457 | XLOC_056238 | ENSRNOT00000088064 | 0.958881027 | 8.64E-07 |
| TUCP_003782 | XLOC_165873 | ENSRNOT00000092680 | 0.950313157 | 2.19E-06 |
| TUCP_003783 | XLOC_165873 | ENSRNOT00000021669 | 0.957707166 | 9.92E-07 |
| TUCP_003783 | XLOC_165873 | ENSRNOT00000026361 | 0.95539151  | 1.29E-06 |
| TUCP_003469 | XLOC_149649 | ENSRNOT00000024186 | 0.983200502 | 1.02E-08 |
| TUCP_003469 | XLOC_149649 | ENSRNOT00000074753 | 0.998182349 | 1.56E-13 |
| TUCP_003469 | XLOC_149649 | ENSRNOT00000004876 | 0.959071443 | 8.44E-07 |
| TUCP_003469 | XLOC_149649 | ENSRNOT00000041904 | 1           | 0        |
| TUCP_003469 | XLOC_149649 | ENSRNOT00000083487 | 0.989515314 | 9.80E-10 |
| TUCP_003469 | XLOC_149649 | ENSRNOT00000077990 | 1           | 0        |
| TUCP_003469 | XLOC_149649 | ENSRNOT00000038826 | 0.99977672  | 4.37E-18 |
| TUCP_003469 | XLOC_149649 | ENSRNOT00000046842 | 0.973644314 | 9.58E-08 |
| TUCP_003469 | XLOC_149649 | ENSRNOT00000037169 | 0.980329406 | 2.24E-08 |
| TUCP_003469 | XLOC_149649 | ENSRNOT00000021243 | 0.987425406 | 2.42E-09 |
| TUCP_003469 | XLOC_149649 | ENSRNOT00000060250 | 0.999933853 | 9.97E-21 |
| TUCP_003469 | XLOC_149649 | ENSRNOT00000091934 | 1           | 0        |
| TUCP_003469 | XLOC_149649 | ENSRNOT00000046585 | 0.982941597 | 1.11E-08 |
| TUCP_003469 | XLOC_149649 | ENSRNOT00000080794 | 0.990839253 | 5.00E-10 |
| TUCP_003469 | XLOC_149649 | ENSRNOT00000014456 | 0.991697153 | 3.06E-10 |
| TUCP_003469 | XLOC_149649 | ENSRNOT00000031205 | 0.991394766 | 3.66E-10 |
| TUCP_003469 | XLOC_149649 | ENSRNOT00000044145 | 1           | 0        |
| TUCP_003469 | XLOC_149649 | ENSRNOT00000088381 | 0.989013276 | 1.24E-09 |
| TUCP_003469 | XLOC_149649 | ENSRNOT00000011743 | 0.98678427  | 3.11E-09 |
| TUCP_003469 | XLOC_149649 | ENSRNOT00000089929 | 1           | 0        |
| TUCP_003469 | XLOC_149649 | ENSRNOT00000088624 | 1           | 0        |
| TUCP_003469 | XLOC_149649 | ENSRNOT00000085659 | 0.989908621 | 8.10E-10 |
| TUCP_003469 | XLOC_149649 | ENSRNOT00000015866 | 0.994066664 | 5.73E-11 |
| TUCP_003469 | XLOC_149649 | ENSRNOT00000078633 | 1           | 0        |
| TUCP_003469 | XLOC_149649 | ENSRNOT00000034907 | 0.995318542 | 1.76E-11 |

|             |             |                    |             |          |
|-------------|-------------|--------------------|-------------|----------|
| TUCP_003469 | XLOC_149649 | ENSRNOT00000093230 | 0.958295175 | 9.26E-07 |
| TUCP_003469 | XLOC_149649 | ENSRNOT00000051835 | 1           | 0        |
| TUCP_003469 | XLOC_149649 | ENSRNOT00000079087 | 1           | 0        |
| TUCP_003469 | XLOC_149649 | ENSRNOT00000037206 | 1           | 0        |
| TUCP_003469 | XLOC_149649 | ENSRNOT00000083261 | 0.970991658 | 1.54E-07 |
| TUCP_003469 | XLOC_149649 | ENSRNOT00000080590 | 0.999889216 | 1.31E-19 |
| TUCP_003469 | XLOC_149649 | ENSRNOT00000027552 | 0.999801024 | 2.46E-18 |
| TUCP_003469 | XLOC_149649 | ENSRNOT00000077014 | 0.995074376 | 2.26E-11 |
| TUCP_003469 | XLOC_149649 | ENSRNOT00000080453 | 0.99994332  | 4.61E-21 |
| TUCP_003469 | XLOC_149649 | ENSRNOT00000089057 | 0.968243551 | 2.41E-07 |
| TUCP_003469 | XLOC_149649 | ENSRNOT00000066839 | 0.991868612 | 2.76E-10 |
| TUCP_003469 | XLOC_149649 | ENSRNOT00000061284 | 0.955566942 | 1.27E-06 |
| TUCP_003469 | XLOC_149649 | ENSRNOT00000013423 | 0.959677621 | 7.84E-07 |
| TUCP_003469 | XLOC_149649 | ENSRNOT00000071884 | 0.974769955 | 7.72E-08 |
| TUCP_003469 | XLOC_149649 | ENSRNOT00000004128 | 0.961829362 | 5.99E-07 |
| TUCP_003469 | XLOC_149649 | ENSRNOT00000026316 | 0.964408046 | 4.24E-07 |
| TUCP_003469 | XLOC_149649 | ENSRNOT00000057729 | 0.999384184 | 6.97E-16 |
| TUCP_003469 | XLOC_149649 | ENSRNOT00000078663 | 0.975192577 | 7.10E-08 |
| TUCP_003469 | XLOC_149649 | ENSRNOT00000064250 | 0.983131977 | 1.05E-08 |
| TUCP_003469 | XLOC_149649 | ENSRNOT00000021608 | 0.965228881 | 3.78E-07 |
| TUCP_003469 | XLOC_149649 | ENSRNOT00000029634 | 0.995816134 | 1.00E-11 |
| TUCP_003469 | XLOC_149649 | ENSRNOT00000093579 | 0.958564264 | 8.97E-07 |
| TUCP_003469 | XLOC_149649 | ENSRNOT00000086349 | 0.957242511 | 1.05E-06 |
| TUCP_003469 | XLOC_149649 | ENSRNOT00000065460 | 1           | 0        |
| TUCP_003469 | XLOC_149649 | ENSRNOT00000003817 | 0.996778712 | 2.72E-12 |
| TUCP_003469 | XLOC_149649 | ENSRNOT00000016713 | 1           | 0        |
| TUCP_003469 | XLOC_149649 | ENSRNOT00000079260 | 0.996448245 | 4.42E-12 |
| TUCP_003469 | XLOC_149649 | ENSRNOT00000039294 | 1           | 1.33E-79 |
| TUCP_003469 | XLOC_149649 | ENSRNOT00000092913 | 0.952980228 | 1.67E-06 |
| TUCP_003468 | XLOC_149649 | ENSRNOT00000024186 | 0.983200502 | 1.02E-08 |
| TUCP_003468 | XLOC_149649 | ENSRNOT00000074753 | 0.998182349 | 1.56E-13 |
| TUCP_003468 | XLOC_149649 | ENSRNOT00000004876 | 0.959071443 | 8.44E-07 |
| TUCP_003468 | XLOC_149649 | ENSRNOT00000041904 | 1           | 0        |
| TUCP_003468 | XLOC_149649 | ENSRNOT00000083487 | 0.989515314 | 9.80E-10 |
| TUCP_003468 | XLOC_149649 | ENSRNOT00000077990 | 1           | 0        |
| TUCP_003468 | XLOC_149649 | ENSRNOT00000038826 | 0.99977672  | 4.37E-18 |
| TUCP_003468 | XLOC_149649 | ENSRNOT00000046842 | 0.973644314 | 9.58E-08 |
| TUCP_003468 | XLOC_149649 | ENSRNOT00000037169 | 0.980329406 | 2.24E-08 |
| TUCP_003468 | XLOC_149649 | ENSRNOT00000021243 | 0.987425406 | 2.42E-09 |
| TUCP_003468 | XLOC_149649 | ENSRNOT00000060250 | 0.999933853 | 9.97E-21 |
| TUCP_003468 | XLOC_149649 | ENSRNOT00000091934 | 1           | 0        |
| TUCP_003468 | XLOC_149649 | ENSRNOT00000046585 | 0.982941597 | 1.11E-08 |
| TUCP_003468 | XLOC_149649 | ENSRNOT00000080794 | 0.990839253 | 5.00E-10 |
| TUCP_003468 | XLOC_149649 | ENSRNOT00000014456 | 0.991697153 | 3.06E-10 |
| TUCP_003468 | XLOC_149649 | ENSRNOT00000031205 | 0.991394766 | 3.66E-10 |
| TUCP_003468 | XLOC_149649 | ENSRNOT00000044145 | 1           | 0        |
| TUCP_003468 | XLOC_149649 | ENSRNOT00000088381 | 0.989013276 | 1.24E-09 |
| TUCP_003468 | XLOC_149649 | ENSRNOT00000011743 | 0.98678427  | 3.11E-09 |
| TUCP_003468 | XLOC_149649 | ENSRNOT00000089929 | 1           | 0        |
| TUCP_003468 | XLOC_149649 | ENSRNOT00000088624 | 1           | 0        |
| TUCP_003468 | XLOC_149649 | ENSRNOT00000085659 | 0.989908621 | 8.10E-10 |

|             |             |                    |             |          |
|-------------|-------------|--------------------|-------------|----------|
| TUCP_003468 | XLOC_149649 | ENSRNOT00000015866 | 0.994066664 | 5.73E-11 |
| TUCP_003468 | XLOC_149649 | ENSRNOT00000078633 | 1           | 1.33E-79 |
| TUCP_003468 | XLOC_149649 | ENSRNOT00000034907 | 0.995318542 | 1.76E-11 |
| TUCP_003468 | XLOC_149649 | ENSRNOT00000093230 | 0.958295175 | 9.26E-07 |
| TUCP_003468 | XLOC_149649 | ENSRNOT00000051835 | 1           | 0        |
| TUCP_003468 | XLOC_149649 | ENSRNOT00000079087 | 1           | 0        |
| TUCP_003468 | XLOC_149649 | ENSRNOT00000037206 | 1           | 0        |
| TUCP_003468 | XLOC_149649 | ENSRNOT00000083261 | 0.970991658 | 1.54E-07 |
| TUCP_003468 | XLOC_149649 | ENSRNOT00000080590 | 0.999889216 | 1.31E-19 |
| TUCP_003468 | XLOC_149649 | ENSRNOT00000027552 | 0.999801024 | 2.46E-18 |
| TUCP_003468 | XLOC_149649 | ENSRNOT00000077014 | 0.995074376 | 2.26E-11 |
| TUCP_003468 | XLOC_149649 | ENSRNOT00000080453 | 0.99994332  | 4.61E-21 |
| TUCP_003468 | XLOC_149649 | ENSRNOT00000089057 | 0.968243551 | 2.41E-07 |
| TUCP_003468 | XLOC_149649 | ENSRNOT00000066839 | 0.991868612 | 2.76E-10 |
| TUCP_003468 | XLOC_149649 | ENSRNOT00000061284 | 0.955566942 | 1.27E-06 |
| TUCP_003468 | XLOC_149649 | ENSRNOT00000013423 | 0.959677621 | 7.84E-07 |
| TUCP_003468 | XLOC_149649 | ENSRNOT00000071884 | 0.974769955 | 7.72E-08 |
| TUCP_003468 | XLOC_149649 | ENSRNOT00000004128 | 0.961829362 | 5.99E-07 |
| TUCP_003468 | XLOC_149649 | ENSRNOT00000026316 | 0.964408046 | 4.24E-07 |
| TUCP_003468 | XLOC_149649 | ENSRNOT00000057729 | 0.999384184 | 6.97E-16 |
| TUCP_003468 | XLOC_149649 | ENSRNOT00000078663 | 0.975192577 | 7.10E-08 |
| TUCP_003468 | XLOC_149649 | ENSRNOT00000064250 | 0.983131977 | 1.05E-08 |
| TUCP_003468 | XLOC_149649 | ENSRNOT00000021608 | 0.965228881 | 3.78E-07 |
| TUCP_003468 | XLOC_149649 | ENSRNOT00000029634 | 0.995816134 | 1.00E-11 |
| TUCP_003468 | XLOC_149649 | ENSRNOT00000093579 | 0.958564264 | 8.97E-07 |
| TUCP_003468 | XLOC_149649 | ENSRNOT00000086349 | 0.957242511 | 1.05E-06 |
| TUCP_003468 | XLOC_149649 | ENSRNOT00000065460 | 1           | 0        |
| TUCP_003468 | XLOC_149649 | ENSRNOT00000003817 | 0.996778712 | 2.72E-12 |
| TUCP_003468 | XLOC_149649 | ENSRNOT00000016713 | 1           | 0        |
| TUCP_003468 | XLOC_149649 | ENSRNOT00000079260 | 0.996448245 | 4.42E-12 |
| TUCP_003468 | XLOC_149649 | ENSRNOT00000039294 | 1           | 0        |
| TUCP_003468 | XLOC_149649 | ENSRNOT00000092913 | 0.952980228 | 1.67E-06 |
| TUCP_003467 | XLOC_149649 | ENSRNOT00000092026 | 0.96620614  | 3.28E-07 |
| TUCP_003467 | XLOC_149649 | ENSRNOT00000093075 | 1           | 0        |
| TUCP_003467 | XLOC_149649 | ENSRNOT00000058260 | 1           | 0        |
| TUCP_003467 | XLOC_149649 | ENSRNOT00000088887 | 1           | 4.25E-78 |
| TUCP_003467 | XLOC_149649 | ENSRNOT00000084986 | 1           | 0        |
| TUCP_003467 | XLOC_149649 | ENSRNOT00000074346 | 0.9702256   | 1.75E-07 |
| TUCP_003467 | XLOC_149649 | ENSRNOT00000073209 | 0.983711602 | 8.79E-09 |
| TUCP_003467 | XLOC_149649 | ENSRNOT00000080155 | 0.973069673 | 1.07E-07 |
| TUCP_003467 | XLOC_149649 | ENSRNOT00000072573 | 0.996213272 | 6.09E-12 |
| TUCP_003467 | XLOC_149649 | ENSRNOT00000017828 | 0.996001583 | 7.99E-12 |
| TUCP_003467 | XLOC_149649 | ENSRNOT00000080444 | 0.969625907 | 1.93E-07 |
| TUCP_003467 | XLOC_149649 | ENSRNOT00000071312 | 1           | 0        |
| TUCP_003467 | XLOC_149649 | ENSRNOT00000088245 | 1           | 0        |
| TUCP_003467 | XLOC_149649 | ENSRNOT00000036565 | 0.969065335 | 2.12E-07 |
| TUCP_003467 | XLOC_149649 | ENSRNOT00000058833 | 0.998673261 | 3.23E-14 |
| TUCP_003467 | XLOC_149649 | ENSRNOT00000078052 | 1           | 1.33E-79 |
| TUCP_003467 | XLOC_149649 | ENSRNOT00000078494 | 0.999927093 | 1.62E-20 |
| TUCP_003467 | XLOC_149649 | ENSRNOT00000085653 | 1           | 0        |
| TUCP_003467 | XLOC_149649 | ENSRNOT00000057950 | 0.969329371 | 2.03E-07 |

|             |             |                    |             |          |
|-------------|-------------|--------------------|-------------|----------|
| TUCP_003467 | XLOC_149649 | ENSRNOT00000081992 | 0.999320526 | 1.14E-15 |
| TUCP_003467 | XLOC_149649 | ENSRNOT00000038553 | 0.955765808 | 1.24E-06 |
| TUCP_003467 | XLOC_149649 | ENSRNOT00000084120 | 0.958115447 | 9.46E-07 |
| TUCP_003467 | XLOC_149649 | ENSRNOT00000055406 | 1           | 1.33E-79 |
| TUCP_003467 | XLOC_149649 | ENSRNOT00000070817 | 0.998968079 | 9.20E-15 |
| TUCP_003467 | XLOC_149649 | ENSRNOT00000026753 | 1           | 1.33E-79 |
| TUCP_003467 | XLOC_149649 | ENSRNOT00000080533 | 0.996682529 | 3.15E-12 |
| TUCP_003467 | XLOC_149649 | ENSRNOT00000072774 | 0.979665261 | 2.65E-08 |
| TUCP_003467 | XLOC_149649 | ENSRNOT00000086031 | 1           | 1.33E-79 |
| TUCP_003467 | XLOC_149649 | ENSRNOT00000014312 | 1           | 0        |
| TUCP_003467 | XLOC_149649 | ENSRNOT00000042882 | 0.963218427 | 4.98E-07 |
| TUCP_003467 | XLOC_149649 | ENSRNOT00000088012 | 0.956765806 | 1.11E-06 |
| TUCP_003467 | XLOC_149649 | ENSRNOT00000051231 | 0.999242378 | 1.96E-15 |
| TUCP_003467 | XLOC_149649 | ENSRNOT00000089407 | 0.992986194 | 1.32E-10 |
| TUCP_003467 | XLOC_149649 | ENSRNOT00000055034 | 0.998331441 | 1.02E-13 |
| TUCP_003467 | XLOC_149649 | ENSRNOT00000046837 | 0.97252559  | 1.18E-07 |
| TUCP_000274 | XLOC_008439 | ENSRNOT00000079307 | 0.96798912  | 2.51E-07 |
| TUCP_001511 | XLOC_058092 | ENSRNOT00000084133 | 1           | 0        |
| TUCP_001511 | XLOC_058092 | ENSRNOT00000093745 | 0.981891039 | 1.49E-08 |
| TUCP_001511 | XLOC_058092 | ENSRNOT00000065542 | 0.99828699  | 1.16E-13 |
| TUCP_001511 | XLOC_058092 | ENSRNOT00000082464 | 1           | 0        |
| TUCP_001511 | XLOC_058092 | ENSRNOT00000087659 | 1           | 0        |
| TUCP_001511 | XLOC_058092 | ENSRNOT00000084582 | 0.976633579 | 5.28E-08 |
| TUCP_001511 | XLOC_058092 | ENSRNOT00000085078 | 1           | 0        |
| TUCP_001511 | XLOC_058092 | ENSRNOT00000014028 | 1           | 0        |
| TUCP_001511 | XLOC_058092 | ENSRNOT00000049363 | 1           | 0        |
| TUCP_001511 | XLOC_058092 | ENSRNOT00000065473 | 0.999949098 | 2.69E-21 |
| TUCP_001511 | XLOC_058092 | ENSRNOT00000000142 | 0.998996155 | 8.01E-15 |
| TUCP_001511 | XLOC_058092 | ENSRNOT00000082288 | 0.999998398 | 8.30E-29 |
| TUCP_001511 | XLOC_058092 | ENSRNOT00000039664 | 1           | 0        |
| TUCP_001511 | XLOC_058092 | ENSRNOT00000065402 | 1           | 0        |
| TUCP_001511 | XLOC_058092 | ENSRNOT00000064551 | 0.965365872 | 3.70E-07 |
| TUCP_001511 | XLOC_058092 | ENSRNOT00000084141 | 1           | 0        |
| TUCP_001511 | XLOC_058092 | ENSRNOT00000082435 | 1           | 0        |
| TUCP_001511 | XLOC_058092 | ENSRNOT00000082928 | 0.996801059 | 2.62E-12 |
| TUCP_001511 | XLOC_058092 | ENSRNOT00000066546 | 0.956953619 | 1.08E-06 |
| TUCP_001511 | XLOC_058092 | ENSRNOT00000046013 | 0.988138626 | 1.81E-09 |
| TUCP_001511 | XLOC_058092 | ENSRNOT00000067931 | 0.978893628 | 3.18E-08 |
| TUCP_001511 | XLOC_058092 | ENSRNOT00000086425 | 0.992023315 | 2.51E-10 |
| TUCP_001511 | XLOC_058092 | ENSRNOT00000093696 | 0.956927219 | 1.09E-06 |
| TUCP_001511 | XLOC_058092 | ENSRNOT00000036228 | 0.982337157 | 1.31E-08 |
| TUCP_001511 | XLOC_058092 | ENSRNOT00000014030 | 1           | 0        |
| TUCP_001511 | XLOC_058092 | ENSRNOT00000081966 | 1           | 0        |
| TUCP_001511 | XLOC_058092 | ENSRNOT00000075906 | 1           | 0        |
| TUCP_001511 | XLOC_058092 | ENSRNOT00000088396 | 0.981336994 | 1.73E-08 |
| TUCP_001511 | XLOC_058092 | ENSRNOT00000049259 | 0.965500259 | 3.63E-07 |
| TUCP_001511 | XLOC_058092 | ENSRNOT00000092838 | 0.982579749 | 1.23E-08 |
| TUCP_001511 | XLOC_058092 | ENSRNOT00000093442 | 0.959217317 | 8.30E-07 |
| TUCP_001510 | XLOC_058020 | ENSRNOT00000021320 | 0.972845712 | 1.11E-07 |
| TUCP_003788 | XLOC_165890 | ENSRNOT00000027411 | 0.950774957 | 2.10E-06 |
| TUCP_003788 | XLOC_165890 | ENSRNOT00000060943 | 0.954985181 | 1.35E-06 |

|             |             |                    |              |          |
|-------------|-------------|--------------------|--------------|----------|
| TUCP_003788 | XLOC_165890 | ENSRNOT00000080455 | 0.954152308  | 1.48E-06 |
| TUCP_003788 | XLOC_165890 | ENSRNOT00000033017 | 0.969868624  | 1.86E-07 |
| TUCP_003788 | XLOC_165890 | ENSRNOT00000026426 | 0.956658262  | 1.12E-06 |
| TUCP_003788 | XLOC_165890 | ENSRNOT00000013580 | 0.959129008  | 8.39E-07 |
| TUCP_003788 | XLOC_165890 | ENSRNOT00000065600 | 0.96279408   | 5.27E-07 |
| TUCP_003788 | XLOC_165890 | ENSRNOT00000041494 | 0.97304927   | 1.07E-07 |
| TUCP_003788 | XLOC_165890 | ENSRNOT00000041044 | 0.95062751   | 2.13E-06 |
| TUCP_003788 | XLOC_165890 | ENSRNOT00000081512 | 0.961814455  | 6.00E-07 |
| TUCP_003788 | XLOC_165890 | ENSRNOT00000023302 | 0.955365059  | 1.29E-06 |
| TUCP_003788 | XLOC_165890 | ENSRNOT00000016975 | 0.954510483  | 1.42E-06 |
| TUCP_003788 | XLOC_165890 | ENSRNOT00000032843 | 0.960177674  | 7.38E-07 |
| TUCP_003788 | XLOC_165890 | ENSRNOT00000022419 | 0.958558078  | 8.98E-07 |
| TUCP_003788 | XLOC_165890 | ENSRNOT00000022578 | 0.956322064  | 1.16E-06 |
| TUCP_003788 | XLOC_165890 | ENSRNOT00000075558 | 0.950291478  | 2.20E-06 |
| TUCP_003789 | XLOC_165897 | ENSRNOT00000004676 | 0.955202068  | 1.32E-06 |
| TUCP_003789 | XLOC_165897 | ENSRNOT00000075558 | 0.954993285  | 1.35E-06 |
| TUCP_003789 | XLOC_165897 | ENSRNOT00000038074 | 0.959463921  | 8.05E-07 |
| TUCP_003789 | XLOC_165897 | ENSRNOT00000020428 | 0.953836814  | 1.53E-06 |
| TUCP_003789 | XLOC_165897 | ENSRNOT00000080152 | 0.950976248  | 2.05E-06 |
| TUCP_003789 | XLOC_165897 | ENSRNOT00000032843 | 0.959287774  | 8.23E-07 |
| TUCP_003789 | XLOC_165897 | ENSRNOT00000080455 | 0.964407419  | 4.24E-07 |
| TUCP_003789 | XLOC_165897 | ENSRNOT00000022419 | 0.954524417  | 1.42E-06 |
| TUCP_002019 | XLOC_082203 | ENSRNOT00000050099 | 0.950675487  | 2.12E-06 |
| TUCP_002019 | XLOC_082203 | ENSRNOT00000073352 | 0.957171434  | 1.06E-06 |
| TUCP_002019 | XLOC_082203 | ENSRNOT00000010580 | 0.962291011  | 5.64E-07 |
| TUCP_002019 | XLOC_082203 | ENSRNOT00000030706 | 0.952296309  | 1.80E-06 |
| TUCP_002019 | XLOC_082203 | ENSRNOT00000029755 | 0.968817574  | 2.20E-07 |
| TUCP_002019 | XLOC_082203 | ENSRNOT00000024404 | 0.953657575  | 1.56E-06 |
| TUCP_002019 | XLOC_082203 | ENSRNOT00000012494 | 0.957273399  | 1.04E-06 |
| TUCP_003541 | XLOC_154088 | ENSRNOT00000085476 | 0.960897505  | 6.74E-07 |
| TUCP_003541 | XLOC_154088 | ENSRNOT00000088719 | 0.958265595  | 9.30E-07 |
| TUCP_002011 | XLOC_081841 | ENSRNOT00000090621 | 0.962518151  | 5.47E-07 |
| TUCP_002011 | XLOC_081841 | ENSRNOT00000072069 | -0.955093197 | 1.33E-06 |
| TUCP_002011 | XLOC_081841 | ENSRNOT00000006460 | 0.957631708  | 1.00E-06 |
| TUCP_002011 | XLOC_081841 | ENSRNOT00000075397 | 0.951394118  | 1.97E-06 |
| TUCP_002011 | XLOC_081841 | ENSRNOT00000068212 | 0.950869033  | 2.08E-06 |
| TUCP_002011 | XLOC_081841 | ENSRNOT00000063930 | -0.951342673 | 1.98E-06 |
| TUCP_002011 | XLOC_081841 | ENSRNOT00000079138 | 0.955002599  | 1.35E-06 |
| TUCP_002011 | XLOC_081841 | ENSRNOT00000072716 | 0.955964348  | 1.21E-06 |
| TUCP_002011 | XLOC_081841 | ENSRNOT00000024005 | 0.953382011  | 1.60E-06 |
| TUCP_002011 | XLOC_081841 | ENSRNOT00000084567 | 0.953492393  | 1.58E-06 |
| TUCP_002011 | XLOC_081841 | ENSRNOT00000025309 | 0.971532097  | 1.40E-07 |
| TUCP_002011 | XLOC_081841 | ENSRNOT00000019180 | -0.957509403 | 1.02E-06 |
| TUCP_002011 | XLOC_081841 | ENSRNOT00000021826 | 0.953981542  | 1.50E-06 |
| TUCP_002011 | XLOC_081841 | ENSRNOT00000065076 | 0.955196337  | 1.32E-06 |
| TUCP_002011 | XLOC_081841 | ENSRNOT00000022746 | -0.962181856 | 5.72E-07 |
| TUCP_002011 | XLOC_081841 | ENSRNOT00000082513 | 0.953113691  | 1.65E-06 |
| TUCP_002011 | XLOC_081841 | ENSRNOT00000016306 | -0.956503891 | 1.14E-06 |
| TUCP_002011 | XLOC_081841 | ENSRNOT00000091399 | 0.951737642  | 1.90E-06 |
| TUCP_002011 | XLOC_081841 | ENSRNOT00000075480 | -0.95592167  | 1.22E-06 |
| TUCP_002011 | XLOC_081841 | ENSRNOT00000036137 | 0.95898535   | 8.53E-07 |

|             |             |                     |              |          |
|-------------|-------------|---------------------|--------------|----------|
| TUCP_002011 | XLOC_081841 | ENSRNOT00000020929  | 0.964820513  | 4.00E-07 |
| TUCP_002011 | XLOC_081841 | ENSRNOT00000005620  | -0.958052041 | 9.53E-07 |
| TUCP_002011 | XLOC_081841 | ENSRNOT000000064643 | 0.955746543  | 1.24E-06 |
| TUCP_002011 | XLOC_081841 | ENSRNOT00000027760  | 0.953877561  | 1.52E-06 |
| TUCP_002011 | XLOC_081841 | ENSRNOT00000001077  | 0.953709867  | 1.55E-06 |
| TUCP_002011 | XLOC_081841 | ENSRNOT00000068026  | -0.956544344 | 1.13E-06 |
| TUCP_002011 | XLOC_081841 | ENSRNOT00000065045  | 0.952438089  | 1.77E-06 |
| TUCP_002011 | XLOC_081841 | ENSRNOT00000018634  | -0.965195139 | 3.79E-07 |
| TUCP_002011 | XLOC_081841 | ENSRNOT00000046552  | 0.951036298  | 2.04E-06 |
| TUCP_002011 | XLOC_081841 | ENSRNOT00000011930  | 0.970475176  | 1.68E-07 |
| TUCP_002011 | XLOC_081841 | ENSRNOT00000037333  | -0.950125104 | 2.23E-06 |
| TUCP_002011 | XLOC_081841 | ENSRNOT00000090156  | -0.951592214 | 1.93E-06 |
| TUCP_002011 | XLOC_081841 | ENSRNOT00000025856  | -0.950589861 | 2.13E-06 |
| TUCP_002011 | XLOC_081841 | ENSRNOT00000083344  | 0.96003376   | 7.51E-07 |
| TUCP_002011 | XLOC_081841 | ENSRNOT00000004351  | -0.952533417 | 1.75E-06 |
| TUCP_002011 | XLOC_081841 | ENSRNOT00000003544  | -0.957069489 | 1.07E-06 |
| TUCP_002011 | XLOC_081841 | ENSRNOT00000079609  | 0.951267007  | 1.99E-06 |
| TUCP_002011 | XLOC_081841 | ENSRNOT00000085334  | 0.960263195  | 7.30E-07 |
| TUCP_002011 | XLOC_081841 | ENSRNOT00000023262  | -0.955404989 | 1.29E-06 |
| TUCP_002011 | XLOC_081841 | ENSRNOT00000076230  | 0.950023677  | 2.26E-06 |
| TUCP_002011 | XLOC_081841 | ENSRNOT00000066952  | 0.958672301  | 8.86E-07 |
| TUCP_002011 | XLOC_081841 | ENSRNOT00000036658  | -0.954944523 | 1.36E-06 |
| TUCP_002011 | XLOC_081841 | ENSRNOT00000089611  | 0.963849816  | 4.58E-07 |
| TUCP_002011 | XLOC_081841 | ENSRNOT00000020910  | 0.954705132  | 1.39E-06 |
| TUCP_002011 | XLOC_081841 | ENSRNOT00000018328  | -0.950121361 | 2.24E-06 |
| TUCP_002011 | XLOC_081841 | ENSRNOT00000008253  | -0.962925563 | 5.18E-07 |
| TUCP_002011 | XLOC_081841 | ENSRNOT00000000707  | -0.954516717 | 1.42E-06 |
| TUCP_002011 | XLOC_081841 | ENSRNOT00000017624  | 0.953433965  | 1.59E-06 |
| TUCP_002011 | XLOC_081841 | ENSRNOT00000018864  | -0.954199137 | 1.47E-06 |
| TUCP_002011 | XLOC_081841 | ENSRNOT00000066923  | -0.953457073 | 1.59E-06 |
| TUCP_002011 | XLOC_081841 | ENSRNOT00000040169  | 0.954616719  | 1.40E-06 |
| TUCP_002011 | XLOC_081841 | ENSRNOT00000029701  | 0.97440225   | 8.29E-08 |
| TUCP_002011 | XLOC_081841 | ENSRNOT00000036051  | 0.950502613  | 2.15E-06 |
| TUCP_002011 | XLOC_081841 | ENSRNOT00000030706  | -0.952144387 | 1.82E-06 |
| TUCP_002011 | XLOC_081841 | ENSRNOT00000037015  | 0.974874619  | 7.56E-08 |
| TUCP_002011 | XLOC_081841 | ENSRNOT00000011675  | 0.957078167  | 1.07E-06 |
| TUCP_002011 | XLOC_081841 | ENSRNOT00000087329  | -0.95348501  | 1.59E-06 |
| TUCP_002011 | XLOC_081841 | ENSRNOT00000011773  | 0.951889011  | 1.87E-06 |
| TUCP_002011 | XLOC_081841 | ENSRNOT00000089673  | -0.957396765 | 1.03E-06 |
| TUCP_002011 | XLOC_081841 | ENSRNOT00000075209  | -0.951626367 | 1.92E-06 |
| TUCP_002011 | XLOC_081841 | ENSRNOT00000055630  | 0.95393187   | 1.51E-06 |
| TUCP_002011 | XLOC_081841 | ENSRNOT00000009202  | 0.970579662  | 1.65E-07 |
| TUCP_002011 | XLOC_081841 | ENSRNOT00000017291  | -0.956104463 | 1.19E-06 |
| TUCP_002011 | XLOC_081841 | ENSRNOT00000080216  | -0.95522417  | 1.31E-06 |
| TUCP_002011 | XLOC_081841 | ENSRNOT00000005873  | -0.973376367 | 1.01E-07 |
| TUCP_002011 | XLOC_081841 | ENSRNOT00000057738  | 0.972331762  | 1.22E-07 |
| TUCP_002011 | XLOC_081841 | ENSRNOT00000014888  | 0.955810027  | 1.23E-06 |
| TUCP_002011 | XLOC_081841 | ENSRNOT00000057537  | 0.953968578  | 1.51E-06 |
| TUCP_002011 | XLOC_081841 | ENSRNOT00000006160  | 0.950738905  | 2.10E-06 |
| TUCP_002011 | XLOC_081841 | ENSRNOT00000023014  | 0.957473277  | 1.02E-06 |
| TUCP_002011 | XLOC_081841 | ENSRNOT00000026518  | 0.953638407  | 1.56E-06 |



|             |             |                    |              |          |
|-------------|-------------|--------------------|--------------|----------|
| TUCP_002011 | XLOC_081841 | ENSRNOT00000035145 | -0.956538124 | 1.14E-06 |
| TUCP_002011 | XLOC_081841 | ENSRNOT00000059173 | -0.953530056 | 1.58E-06 |
| TUCP_002011 | XLOC_081841 | ENSRNOT00000032106 | 0.950684432  | 2.11E-06 |
| TUCP_002011 | XLOC_081841 | ENSRNOT00000037409 | 0.963642754  | 4.71E-07 |
| TUCP_002011 | XLOC_081841 | ENSRNOT00000074150 | 0.962823833  | 5.25E-07 |
| TUCP_002011 | XLOC_081841 | ENSRNOT00000007369 | 0.955720352  | 1.24E-06 |
| TUCP_002011 | XLOC_081841 | ENSRNOT00000085466 | 0.951963528  | 1.86E-06 |
| TUCP_002011 | XLOC_081841 | ENSRNOT00000075800 | -0.951089002 | 2.03E-06 |
| TUCP_002011 | XLOC_081841 | ENSRNOT00000083891 | -0.957472224 | 1.02E-06 |
| TUCP_002011 | XLOC_081841 | ENSRNOT00000016568 | 0.959736564  | 7.79E-07 |
| TUCP_002011 | XLOC_081841 | ENSRNOT00000024947 | -0.970262679 | 1.74E-07 |
| TUCP_002011 | XLOC_081841 | ENSRNOT00000008919 | -0.957405339 | 1.03E-06 |
| TUCP_002011 | XLOC_081841 | ENSRNOT00000088679 | -0.961645367 | 6.13E-07 |
| TUCP_002011 | XLOC_081841 | ENSRNOT00000051494 | 0.957251202  | 1.05E-06 |
| TUCP_002011 | XLOC_081841 | ENSRNOT00000027967 | 0.965662591  | 3.55E-07 |
| TUCP_002011 | XLOC_081841 | ENSRNOT00000081678 | 0.953798316  | 1.53E-06 |
| TUCP_004768 | XLOC_210497 | ENSRNOT00000082043 | 0.991358509  | 3.74E-10 |
| TUCP_004768 | XLOC_210497 | ENSRNOT00000090080 | 0.962753553  | 5.30E-07 |
| TUCP_004768 | XLOC_210497 | ENSRNOT00000068444 | 0.993338608  | 1.02E-10 |
| TUCP_004768 | XLOC_210497 | ENSRNOT00000081370 | 0.993788464  | 7.21E-11 |
| TUCP_004768 | XLOC_210497 | ENSRNOT00000078645 | 0.985618586  | 4.73E-09 |
| TUCP_004768 | XLOC_210497 | ENSRNOT00000075987 | 0.978303684  | 3.65E-08 |
| TUCP_004768 | XLOC_210497 | ENSRNOT00000074990 | 0.993338608  | 1.02E-10 |
| TUCP_004768 | XLOC_210497 | ENSRNOT00000087323 | 0.986860375  | 3.02E-09 |
| TUCP_004768 | XLOC_210497 | ENSRNOT00000074930 | 0.993338608  | 1.02E-10 |
| TUCP_004768 | XLOC_210497 | ENSRNOT00000080575 | 0.993485942  | 9.14E-11 |
| TUCP_004768 | XLOC_210497 | ENSRNOT00000057761 | 0.974316553  | 8.43E-08 |
| TUCP_004768 | XLOC_210497 | ENSRNOT00000078369 | 0.983260488  | 1.01E-08 |
| TUCP_004768 | XLOC_210497 | ENSRNOT00000092982 | 0.993338608  | 1.02E-10 |
| TUCP_004768 | XLOC_210497 | ENSRNOT00000088367 | 0.993338608  | 1.02E-10 |
| TUCP_004768 | XLOC_210497 | ENSRNOT00000089257 | 0.957279381  | 1.04E-06 |
| TUCP_004768 | XLOC_210497 | ENSRNOT00000061874 | 0.980212477  | 2.31E-08 |
| TUCP_004768 | XLOC_210497 | ENSRNOT00000077789 | 0.98102533   | 1.88E-08 |
| TUCP_004768 | XLOC_210497 | ENSRNOT00000081996 | 0.993338608  | 1.02E-10 |
| TUCP_004768 | XLOC_210497 | ENSRNOT00000022280 | 0.972680783  | 1.14E-07 |
| TUCP_004768 | XLOC_210497 | ENSRNOT00000082058 | 0.993338608  | 1.02E-10 |
| TUCP_004768 | XLOC_210497 | ENSRNOT00000088905 | 0.993338608  | 1.02E-10 |
| TUCP_004768 | XLOC_210497 | ENSRNOT00000086831 | 0.993338608  | 1.02E-10 |
| TUCP_004768 | XLOC_210497 | ENSRNOT00000045099 | 0.993338608  | 1.02E-10 |
| TUCP_004768 | XLOC_210497 | ENSRNOT00000086745 | 0.969289563  | 2.04E-07 |
| TUCP_004768 | XLOC_210497 | ENSRNOT00000085849 | 0.978566241  | 3.44E-08 |
| TUCP_004768 | XLOC_210497 | ENSRNOT00000086397 | 0.964862821  | 3.98E-07 |
| TUCP_004768 | XLOC_210497 | ENSRNOT00000079606 | 0.950866145  | 2.08E-06 |
| TUCP_004768 | XLOC_210497 | ENSRNOT00000073828 | 0.962450344  | 5.52E-07 |
| TUCP_004768 | XLOC_210497 | ENSRNOT00000087025 | 0.993338608  | 1.02E-10 |
| TUCP_004768 | XLOC_210497 | ENSRNOT00000019853 | 0.993338608  | 1.02E-10 |
| TUCP_004768 | XLOC_210497 | ENSRNOT00000073853 | 0.981474213  | 1.67E-08 |
| TUCP_004768 | XLOC_210497 | ENSRNOT00000065912 | 0.982820961  | 1.14E-08 |
| TUCP_004768 | XLOC_210497 | ENSRNOT00000078683 | 0.956422009  | 1.15E-06 |
| TUCP_004768 | XLOC_210497 | ENSRNOT00000093083 | 0.993498534  | 9.05E-11 |
| TUCP_002013 | XLOC_082168 | ENSRNOT00000059266 | 0.959814491  | 7.71E-07 |

|             |             |                    |              |          |
|-------------|-------------|--------------------|--------------|----------|
| TUCP_002013 | XLOC_082168 | ENSRNOT00000075569 | 0.950975844  | 2.05E-06 |
| TUCP_002013 | XLOC_082168 | ENSRNOT00000019266 | 0.956179392  | 1.18E-06 |
| TUCP_002013 | XLOC_082168 | ENSRNOT00000093581 | 0.951696668  | 1.91E-06 |
| TUCP_002013 | XLOC_082168 | ENSRNOT00000077462 | 0.987001915  | 2.86E-09 |
| TUCP_002013 | XLOC_082168 | ENSRNOT00000077390 | 0.96995744   | 1.83E-07 |
| TUCP_002013 | XLOC_082168 | ENSRNOT00000043737 | 0.952242671  | 1.81E-06 |
| TUCP_002012 | XLOC_082054 | ENSRNOT00000075521 | 0.972864636  | 1.11E-07 |
| TUCP_002012 | XLOC_082054 | ENSRNOT0000007698  | -0.962606899 | 5.41E-07 |
| TUCP_002012 | XLOC_082054 | ENSRNOT00000084766 | 0.953280558  | 1.62E-06 |
| TUCP_002012 | XLOC_082054 | ENSRNOT00000090456 | 0.955944289  | 1.21E-06 |
| TUCP_002012 | XLOC_082054 | ENSRNOT00000045833 | 0.960316347  | 7.25E-07 |
| TUCP_002012 | XLOC_082054 | ENSRNOT00000010524 | 0.951010132  | 2.05E-06 |
| TUCP_002012 | XLOC_082054 | ENSRNOT00000020357 | 0.98477991   | 6.27E-09 |
| TUCP_002012 | XLOC_082054 | ENSRNOT00000075397 | 0.958265983  | 9.30E-07 |
| TUCP_002012 | XLOC_082054 | ENSRNOT0000007350  | 0.950962048  | 2.06E-06 |
| TUCP_002012 | XLOC_082054 | ENSRNOT0000004400  | 0.95785648   | 9.75E-07 |
| TUCP_002012 | XLOC_082054 | ENSRNOT00000019104 | -0.953819152 | 1.53E-06 |
| TUCP_002012 | XLOC_082054 | ENSRNOT00000063930 | -0.952974634 | 1.67E-06 |
| TUCP_002012 | XLOC_082054 | ENSRNOT00000087062 | 0.964821632  | 4.00E-07 |
| TUCP_002012 | XLOC_082054 | ENSRNOT00000006217 | 0.970856545  | 1.58E-07 |
| TUCP_002012 | XLOC_082054 | ENSRNOT00000015678 | -0.963243169 | 4.97E-07 |
| TUCP_002012 | XLOC_082054 | ENSRNOT00000049459 | -0.956259959 | 1.17E-06 |
| TUCP_002012 | XLOC_082054 | ENSRNOT00000013025 | -0.950349719 | 2.19E-06 |
| TUCP_002012 | XLOC_082054 | ENSRNOT00000078739 | -0.955669515 | 1.25E-06 |
| TUCP_002012 | XLOC_082054 | ENSRNOT00000041237 | -0.950149192 | 2.23E-06 |
| TUCP_002012 | XLOC_082054 | ENSRNOT00000009275 | -0.961671551 | 6.11E-07 |
| TUCP_002012 | XLOC_082054 | ENSRNOT00000000083 | -0.950184481 | 2.22E-06 |
| TUCP_002012 | XLOC_082054 | ENSRNOT00000006186 | 0.955254915  | 1.31E-06 |
| TUCP_002012 | XLOC_082054 | ENSRNOT00000036051 | 0.958432376  | 9.11E-07 |
| TUCP_002012 | XLOC_082054 | ENSRNOT00000083968 | -0.974907737 | 7.51E-08 |
| TUCP_002012 | XLOC_082054 | ENSRNOT00000017571 | -0.96616868  | 3.30E-07 |
| TUCP_002012 | XLOC_082054 | ENSRNOT0000007855  | 0.974016602  | 8.93E-08 |
| TUCP_002012 | XLOC_082054 | ENSRNOT00000074023 | 0.950569226  | 2.14E-06 |
| TUCP_002012 | XLOC_082054 | ENSRNOT00000013851 | -0.955273002 | 1.31E-06 |
| TUCP_002012 | XLOC_082054 | ENSRNOT00000001401 | 0.954506916  | 1.42E-06 |
| TUCP_002012 | XLOC_082054 | ENSRNOT00000071929 | -0.952208078 | 1.81E-06 |
| TUCP_002012 | XLOC_082054 | ENSRNOT00000055540 | 0.952987191  | 1.67E-06 |
| TUCP_002012 | XLOC_082054 | ENSRNOT00000031672 | -0.973868001 | 9.19E-08 |
| TUCP_002012 | XLOC_082054 | ENSRNOT0000002028  | 0.972228789  | 1.24E-07 |
| TUCP_002012 | XLOC_082054 | ENSRNOT00000078884 | -0.955245747 | 1.31E-06 |
| TUCP_002012 | XLOC_082054 | ENSRNOT00000012060 | 0.961970688  | 5.88E-07 |
| TUCP_002012 | XLOC_082054 | ENSRNOT00000021621 | -0.979912266 | 2.49E-08 |
| TUCP_002012 | XLOC_082054 | ENSRNOT00000020207 | 0.971683912  | 1.37E-07 |
| TUCP_002012 | XLOC_082054 | ENSRNOT00000074683 | 0.955537756  | 1.27E-06 |
| TUCP_002012 | XLOC_082054 | ENSRNOT00000025079 | -0.958717899 | 8.81E-07 |
| TUCP_002012 | XLOC_082054 | ENSRNOT00000039177 | -0.966413919 | 3.18E-07 |
| TUCP_002012 | XLOC_082054 | ENSRNOT00000017271 | 0.966646797  | 3.07E-07 |
| TUCP_002012 | XLOC_082054 | ENSRNOT0000007824  | -0.956412312 | 1.15E-06 |
| TUCP_002012 | XLOC_082054 | ENSRNOT00000020681 | -0.955162867 | 1.32E-06 |
| TUCP_002012 | XLOC_082054 | ENSRNOT00000057898 | -0.95515951  | 1.32E-06 |
| TUCP_002012 | XLOC_082054 | ENSRNOT00000024677 | 0.971299396  | 1.46E-07 |

|             |             |                    |              |          |
|-------------|-------------|--------------------|--------------|----------|
| TUCP_002012 | XLOC_082054 | ENSRNOT00000090461 | 0.960366673  | 7.21E-07 |
| TUCP_002012 | XLOC_082054 | ENSRNOT00000030082 | 0.951189325  | 2.01E-06 |
| TUCP_002012 | XLOC_082054 | ENSRNOT00000026481 | 0.951658257  | 1.92E-06 |
| TUCP_002012 | XLOC_082054 | ENSRNOT00000000577 | 0.96337945   | 4.88E-07 |
| TUCP_002012 | XLOC_082054 | ENSRNOT00000026392 | 0.950052637  | 2.25E-06 |
| TUCP_002012 | XLOC_082054 | ENSRNOT00000011948 | -0.96384787  | 4.58E-07 |
| TUCP_002012 | XLOC_082054 | ENSRNOT00000018488 | -0.967129079 | 2.86E-07 |
| TUCP_002012 | XLOC_082054 | ENSRNOT00000005686 | -0.950964997 | 2.06E-06 |
| TUCP_002012 | XLOC_082054 | ENSRNOT00000017486 | 0.95511783   | 1.33E-06 |
| TUCP_002012 | XLOC_082054 | ENSRNOT00000014605 | -0.968635132 | 2.27E-07 |
| TUCP_002012 | XLOC_082054 | ENSRNOT00000046490 | -0.951569557 | 1.93E-06 |
| TUCP_002012 | XLOC_082054 | ENSRNOT00000011832 | -0.956010413 | 1.20E-06 |
| TUCP_002012 | XLOC_082054 | ENSRNOT00000030074 | 0.968058715  | 2.48E-07 |
| TUCP_002012 | XLOC_082054 | ENSRNOT00000010141 | 0.972395135  | 1.21E-07 |
| TUCP_002012 | XLOC_082054 | ENSRNOT00000077727 | -0.951439953 | 1.96E-06 |
| TUCP_002012 | XLOC_082054 | ENSRNOT00000022502 | -0.962018655 | 5.84E-07 |
| TUCP_002012 | XLOC_082054 | ENSRNOT00000001979 | -0.953471459 | 1.59E-06 |
| TUCP_002012 | XLOC_082054 | ENSRNOT00000044346 | -0.968860804 | 2.19E-07 |
| TUCP_002012 | XLOC_082054 | ENSRNOT00000016568 | 0.951098256  | 2.03E-06 |
| TUCP_002012 | XLOC_082054 | ENSRNOT00000067391 | -0.950034959 | 2.25E-06 |
| TUCP_002012 | XLOC_082054 | ENSRNOT00000084709 | 0.961592736  | 6.17E-07 |
| TUCP_002012 | XLOC_082054 | ENSRNOT00000009156 | 0.951388392  | 1.97E-06 |
| TUCP_002012 | XLOC_082054 | ENSRNOT00000043170 | 0.950098172  | 2.24E-06 |
| TUCP_002012 | XLOC_082054 | ENSRNOT00000029996 | -0.95065746  | 2.12E-06 |
| TUCP_002012 | XLOC_082054 | ENSRNOT00000025856 | -0.951715105 | 1.91E-06 |
| TUCP_002012 | XLOC_082054 | ENSRNOT00000072299 | 0.956747139  | 1.11E-06 |
| TUCP_002012 | XLOC_082054 | ENSRNOT00000003544 | -0.958997187 | 8.52E-07 |
| TUCP_002012 | XLOC_082054 | ENSRNOT00000067735 | -0.956936811 | 1.08E-06 |
| TUCP_002012 | XLOC_082054 | ENSRNOT00000022190 | -0.957740289 | 9.89E-07 |
| TUCP_002012 | XLOC_082054 | ENSRNOT00000023262 | -0.952622109 | 1.74E-06 |
| TUCP_002012 | XLOC_082054 | ENSRNOT00000067739 | -0.96575784  | 3.50E-07 |
| TUCP_002012 | XLOC_082054 | ENSRNOT00000058495 | -0.962488737 | 5.49E-07 |
| TUCP_002012 | XLOC_082054 | ENSRNOT00000013067 | -0.965181903 | 3.80E-07 |
| TUCP_002012 | XLOC_082054 | ENSRNOT00000075843 | -0.956730972 | 1.11E-06 |
| TUCP_002012 | XLOC_082054 | ENSRNOT00000030782 | -0.958272679 | 9.29E-07 |
| TUCP_002012 | XLOC_082054 | ENSRNOT00000046486 | -0.96341152  | 4.86E-07 |
| TUCP_002012 | XLOC_082054 | ENSRNOT00000073919 | 0.9769129    | 4.97E-08 |
| TUCP_002012 | XLOC_082054 | ENSRNOT00000082863 | 0.959938784  | 7.60E-07 |
| TUCP_002012 | XLOC_082054 | ENSRNOT00000016220 | -0.95149504  | 1.95E-06 |
| TUCP_002012 | XLOC_082054 | ENSRNOT00000018122 | 0.960235064  | 7.32E-07 |
| TUCP_002012 | XLOC_082054 | ENSRNOT00000020537 | -0.969735175 | 1.90E-07 |
| TUCP_002012 | XLOC_082054 | ENSRNOT00000006824 | -0.956945528 | 1.08E-06 |
| TUCP_002012 | XLOC_082054 | ENSRNOT00000089611 | 0.953612431  | 1.56E-06 |
| TUCP_002012 | XLOC_082054 | ENSRNOT00000005604 | 0.958708896  | 8.82E-07 |
| TUCP_002012 | XLOC_082054 | ENSRNOT00000073910 | -0.955615827 | 1.26E-06 |
| TUCP_002012 | XLOC_082054 | ENSRNOT00000016637 | -0.951981972 | 1.85E-06 |
| TUCP_002012 | XLOC_082054 | ENSRNOT00000032667 | -0.960542517 | 7.05E-07 |
| TUCP_002012 | XLOC_082054 | ENSRNOT00000023667 | 0.957921461  | 9.68E-07 |
| TUCP_002012 | XLOC_082054 | ENSRNOT00000086260 | -0.96021812  | 7.34E-07 |
| TUCP_002012 | XLOC_082054 | ENSRNOT00000000155 | 0.954670085  | 1.40E-06 |
| TUCP_002012 | XLOC_082054 | ENSRNOT00000078743 | -0.950763636 | 2.10E-06 |

|             |             |                    |              |          |
|-------------|-------------|--------------------|--------------|----------|
| TUCP_002012 | XLOC_082054 | ENSRNOT00000039012 | -0.958403296 | 9.15E-07 |
| TUCP_002012 | XLOC_082054 | ENSRNOT00000066098 | -0.964083471 | 4.43E-07 |
| TUCP_002012 | XLOC_082054 | ENSRNOT00000068026 | -0.957169446 | 1.06E-06 |
| TUCP_002012 | XLOC_082054 | ENSRNOT00000066793 | -0.976107142 | 5.89E-08 |
| TUCP_002012 | XLOC_082054 | ENSRNOT00000085621 | 0.961317344  | 6.39E-07 |
| TUCP_002012 | XLOC_082054 | ENSRNOT00000001099 | -0.950225481 | 2.21E-06 |
| TUCP_002012 | XLOC_082054 | ENSRNOT00000074586 | -0.957652779 | 9.99E-07 |
| TUCP_002012 | XLOC_082054 | ENSRNOT00000008883 | 0.953215753  | 1.63E-06 |
| TUCP_002012 | XLOC_082054 | ENSRNOT00000034883 | -0.960353748 | 7.22E-07 |
| TUCP_002012 | XLOC_082054 | ENSRNOT00000001158 | 0.973951225  | 9.04E-08 |
| TUCP_002012 | XLOC_082054 | ENSRNOT00000010127 | 0.975010843  | 7.36E-08 |
| TUCP_002012 | XLOC_082054 | ENSRNOT00000014506 | -0.964176338 | 4.38E-07 |
| TUCP_002012 | XLOC_082054 | ENSRNOT00000026531 | -0.960094843 | 7.45E-07 |
| TUCP_002012 | XLOC_082054 | ENSRNOT00000035605 | 0.954836714  | 1.37E-06 |
| TUCP_002012 | XLOC_082054 | ENSRNOT00000081351 | 0.959211581  | 8.30E-07 |
| TUCP_002012 | XLOC_082054 | ENSRNOT00000016132 | -0.956563396 | 1.13E-06 |
| TUCP_002012 | XLOC_082054 | ENSRNOT00000092083 | 0.954113794  | 1.48E-06 |
| TUCP_002012 | XLOC_082054 | ENSRNOT00000011880 | 0.962926511  | 5.18E-07 |
| TUCP_002012 | XLOC_082054 | ENSRNOT00000003992 | -0.956596678 | 1.13E-06 |
| TUCP_002012 | XLOC_082054 | ENSRNOT00000037588 | -0.950887965 | 2.07E-06 |
| TUCP_002012 | XLOC_082054 | ENSRNOT00000014859 | -0.95121791  | 2.00E-06 |
| TUCP_002012 | XLOC_082054 | ENSRNOT00000000898 | 0.970331708  | 1.72E-07 |
| TUCP_002012 | XLOC_082054 | ENSRNOT00000031261 | 0.95741699   | 1.03E-06 |
| TUCP_002012 | XLOC_082054 | ENSRNOT00000019816 | -0.950045819 | 2.25E-06 |
| TUCP_002012 | XLOC_082054 | ENSRNOT00000004017 | 0.952583789  | 1.74E-06 |
| TUCP_002012 | XLOC_082054 | ENSRNOT00000077706 | 0.985047324  | 5.74E-09 |
| TUCP_002012 | XLOC_082054 | ENSRNOT00000089980 | -0.963261439 | 4.96E-07 |
| TUCP_002012 | XLOC_082054 | ENSRNOT00000027032 | -0.973915836 | 9.10E-08 |
| TUCP_002012 | XLOC_082054 | ENSRNOT00000055602 | -0.951544939 | 1.94E-06 |
| TUCP_002012 | XLOC_082054 | ENSRNOT00000006835 | 0.973729041  | 9.43E-08 |
| TUCP_002012 | XLOC_082054 | ENSRNOT00000055607 | -0.954565935 | 1.41E-06 |
| TUCP_002012 | XLOC_082054 | ENSRNOT00000008074 | -0.954035183 | 1.50E-06 |
| TUCP_002012 | XLOC_082054 | ENSRNOT00000011277 | 0.951577709  | 1.93E-06 |
| TUCP_002012 | XLOC_082054 | ENSRNOT00000025434 | 0.957261824  | 1.05E-06 |
| TUCP_002012 | XLOC_082054 | ENSRNOT00000012424 | 0.957695925  | 9.94E-07 |
| TUCP_002012 | XLOC_082054 | ENSRNOT00000023876 | 0.957190728  | 1.05E-06 |
| TUCP_002012 | XLOC_082054 | ENSRNOT00000035385 | 0.96666268   | 3.07E-07 |
| TUCP_002012 | XLOC_082054 | ENSRNOT00000008427 | -0.951832863 | 1.88E-06 |
| TUCP_002012 | XLOC_082054 | ENSRNOT00000018477 | -0.964110412 | 4.42E-07 |
| TUCP_002012 | XLOC_082054 | ENSRNOT00000080222 | -0.972467929 | 1.19E-07 |
| TUCP_002012 | XLOC_082054 | ENSRNOT00000081110 | -0.953413827 | 1.60E-06 |
| TUCP_002012 | XLOC_082054 | ENSRNOT00000018473 | -0.951258657 | 2.00E-06 |
| TUCP_002012 | XLOC_082054 | ENSRNOT00000049285 | -0.970560264 | 1.66E-07 |
| TUCP_002012 | XLOC_082054 | ENSRNOT00000000717 | -0.950527978 | 2.15E-06 |
| TUCP_002012 | XLOC_082054 | ENSRNOT00000025934 | -0.960250727 | 7.31E-07 |
| TUCP_002012 | XLOC_082054 | ENSRNOT00000037955 | -0.964723009 | 4.06E-07 |
| TUCP_002012 | XLOC_082054 | ENSRNOT00000035277 | 0.953273512  | 1.62E-06 |
| TUCP_002012 | XLOC_082054 | ENSRNOT00000077146 | -0.965956585 | 3.40E-07 |
| TUCP_002012 | XLOC_082054 | ENSRNOT00000089294 | -0.959407992 | 8.11E-07 |
| TUCP_002012 | XLOC_082054 | ENSRNOT00000088502 | -0.974656062 | 7.89E-08 |
| TUCP_002012 | XLOC_082054 | ENSRNOT00000017504 | 0.95340257   | 1.60E-06 |

|             |             |                    |              |          |
|-------------|-------------|--------------------|--------------|----------|
| TUCP_002012 | XL0C_082054 | ENSRNOT0000004999  | 0.956491268  | 1.14E-06 |
| TUCP_002012 | XL0C_082054 | ENSRNOT00000016389 | -0.95929228  | 8.22E-07 |
| TUCP_002012 | XL0C_082054 | ENSRNOT00000035448 | -0.951440465 | 1.96E-06 |
| TUCP_002012 | XL0C_082054 | ENSRNOT00000020417 | -0.968996547 | 2.14E-07 |
| TUCP_002012 | XL0C_082054 | ENSRNOT00000023763 | -0.950023689 | 2.26E-06 |
| TUCP_002012 | XL0C_082054 | ENSRNOT00000023977 | -0.964466546 | 4.20E-07 |
| TUCP_002012 | XL0C_082054 | ENSRNOT00000066133 | -0.959072481 | 8.44E-07 |
| TUCP_002012 | XL0C_082054 | ENSRNOT00000075630 | -0.960883403 | 6.75E-07 |
| TUCP_002012 | XL0C_082054 | ENSRNOT00000083256 | 0.955799381  | 1.23E-06 |
| TUCP_002012 | XL0C_082054 | ENSRNOT00000038511 | -0.951123808 | 2.02E-06 |
| TUCP_002012 | XL0C_082054 | ENSRNOT00000005489 | 0.963282247  | 4.94E-07 |
| TUCP_002012 | XL0C_082054 | ENSRNOT00000010508 | 0.950324103  | 2.19E-06 |
| TUCP_002012 | XL0C_082054 | ENSRNOT00000058111 | -0.952516871 | 1.75E-06 |
| TUCP_002012 | XL0C_082054 | ENSRNOT00000017765 | 0.960116417  | 7.43E-07 |
| TUCP_002012 | XL0C_082054 | ENSRNOT00000019487 | 0.959937641  | 7.60E-07 |
| TUCP_002012 | XL0C_082054 | ENSRNOT00000009994 | -0.959836241 | 7.69E-07 |
| TUCP_002012 | XL0C_082054 | ENSRNOT00000001923 | 0.96032671   | 7.24E-07 |
| TUCP_002012 | XL0C_082054 | ENSRNOT00000002114 | -0.953046905 | 1.66E-06 |
| TUCP_002012 | XL0C_082054 | ENSRNOT00000010915 | -0.952824602 | 1.70E-06 |
| TUCP_002012 | XL0C_082054 | ENSRNOT00000064535 | -0.962274672 | 5.65E-07 |
| TUCP_002012 | XL0C_082054 | ENSRNOT00000015624 | 0.951959173  | 1.86E-06 |
| TUCP_002012 | XL0C_082054 | ENSRNOT00000018341 | -0.950613589 | 2.13E-06 |
| TUCP_002012 | XL0C_082054 | ENSRNOT00000087033 | -0.957574174 | 1.01E-06 |
| TUCP_002012 | XL0C_082054 | ENSRNOT00000015537 | 0.954038644  | 1.50E-06 |
| TUCP_002012 | XL0C_082054 | ENSRNOT00000072632 | -0.966572557 | 3.11E-07 |
| TUCP_002012 | XL0C_082054 | ENSRNOT00000011290 | 0.95309999   | 1.65E-06 |
| TUCP_002012 | XL0C_082054 | ENSRNOT00000077367 | -0.955216843 | 1.32E-06 |
| TUCP_002012 | XL0C_082054 | ENSRNOT00000052063 | 0.961599767  | 6.16E-07 |
| TUCP_002012 | XL0C_082054 | ENSRNOT00000085516 | -0.952616724 | 1.74E-06 |
| TUCP_002012 | XL0C_082054 | ENSRNOT00000006188 | -0.960878886 | 6.76E-07 |
| TUCP_002012 | XL0C_082054 | ENSRNOT00000076230 | 0.956901426  | 1.09E-06 |
| TUCP_002012 | XL0C_082054 | ENSRNOT00000092876 | -0.96146979  | 6.27E-07 |
| TUCP_002012 | XL0C_082054 | ENSRNOT00000027145 | -0.958921963 | 8.60E-07 |
| TUCP_002012 | XL0C_082054 | ENSRNOT00000028888 | 0.970372977  | 1.71E-07 |
| TUCP_002012 | XL0C_082054 | ENSRNOT00000025460 | 0.961248746  | 6.45E-07 |
| TUCP_002012 | XL0C_082054 | ENSRNOT00000060698 | -0.966277085 | 3.25E-07 |
| TUCP_002012 | XL0C_082054 | ENSRNOT00000086590 | 0.950505412  | 2.15E-06 |
| TUCP_002012 | XL0C_082054 | ENSRNOT00000024841 | -0.963121029 | 5.05E-07 |
| TUCP_002012 | XL0C_082054 | ENSRNOT00000066561 | -0.954183752 | 1.47E-06 |
| TUCP_002012 | XL0C_082054 | ENSRNOT00000026760 | -0.966126007 | 3.32E-07 |
| TUCP_002012 | XL0C_082054 | ENSRNOT00000023543 | -0.954721713 | 1.39E-06 |
| TUCP_002012 | XL0C_082054 | ENSRNOT00000017998 | 0.959239506  | 8.27E-07 |
| TUCP_002012 | XL0C_082054 | ENSRNOT00000081077 | -0.962607706 | 5.41E-07 |
| TUCP_002012 | XL0C_082054 | ENSRNOT00000091739 | -0.955766539 | 1.24E-06 |
| TUCP_002012 | XL0C_082054 | ENSRNOT00000025913 | -0.953878858 | 1.52E-06 |
| TUCP_002012 | XL0C_082054 | ENSRNOT00000055386 | 0.956934256  | 1.09E-06 |
| TUCP_002012 | XL0C_082054 | ENSRNOT00000025097 | 0.96490077   | 3.96E-07 |
| TUCP_002012 | XL0C_082054 | ENSRNOT00000021534 | -0.950331845 | 2.19E-06 |
| TUCP_002012 | XL0C_082054 | ENSRNOT00000008253 | -0.95421307  | 1.47E-06 |
| TUCP_002012 | XL0C_082054 | ENSRNOT00000028907 | 0.97204704   | 1.28E-07 |
| TUCP_002012 | XL0C_082054 | ENSRNOT00000037809 | -0.966323202 | 3.22E-07 |

|             |             |                     |              |          |
|-------------|-------------|---------------------|--------------|----------|
| TUCP_002012 | XLOC_082054 | ENSRNOT00000024938  | -0.957747572 | 9.88E-07 |
| TUCP_002012 | XLOC_082054 | ENSRNOT00000013516  | 0.971537343  | 1.40E-07 |
| TUCP_002012 | XLOC_082054 | ENSRNOT00000044486  | -0.950233863 | 2.21E-06 |
| TUCP_002012 | XLOC_082054 | ENSRNOT00000087556  | -0.958656105 | 8.87E-07 |
| TUCP_002012 | XLOC_082054 | ENSRNOT00000022097  | 0.951409493  | 1.97E-06 |
| TUCP_002012 | XLOC_082054 | ENSRNOT00000036613  | -0.953974113 | 1.51E-06 |
| TUCP_002012 | XLOC_082054 | ENSRNOT00000064588  | 0.955315263  | 1.30E-06 |
| TUCP_002012 | XLOC_082054 | ENSRNOT00000008256  | -0.970229904 | 1.75E-07 |
| TUCP_002012 | XLOC_082054 | ENSRNOT00000078862  | 0.954377873  | 1.44E-06 |
| TUCP_002012 | XLOC_082054 | ENSRNOT00000024253  | 0.962510261  | 5.48E-07 |
| TUCP_002012 | XLOC_082054 | ENSRNOT00000072357  | -0.954927086 | 1.36E-06 |
| TUCP_002017 | XLOC_082201 | ENSRNOT00000001215  | -0.969601302 | 1.94E-07 |
| TUCP_002017 | XLOC_082201 | ENSRNOT00000003001  | 0.958282814  | 9.28E-07 |
| TUCP_002017 | XLOC_082201 | ENSRNOT00000084766  | -0.968318947 | 2.38E-07 |
| TUCP_002017 | XLOC_082201 | ENSRNOT00000014946  | -0.953865092 | 1.52E-06 |
| TUCP_002017 | XLOC_082201 | ENSRNOT00000000513  | -0.962017803 | 5.84E-07 |
| TUCP_002017 | XLOC_082201 | ENSRNOT00000075397  | -0.960148742 | 7.40E-07 |
| TUCP_002017 | XLOC_082201 | ENSRNOT00000007350  | -0.959651869 | 7.87E-07 |
| TUCP_002017 | XLOC_082201 | ENSRNOT00000004956  | -0.964310786 | 4.29E-07 |
| TUCP_002017 | XLOC_082201 | ENSRNOT00000013058  | -0.972252912 | 1.24E-07 |
| TUCP_002017 | XLOC_082201 | ENSRNOT000000082914 | -0.951387823 | 1.97E-06 |
| TUCP_002017 | XLOC_082201 | ENSRNOT000000021858 | -0.958499627 | 9.04E-07 |
| TUCP_002017 | XLOC_082201 | ENSRNOT00000079644  | 0.958579033  | 8.96E-07 |
| TUCP_002017 | XLOC_082201 | ENSRNOT00000032802  | 0.952064741  | 1.84E-06 |
| TUCP_002017 | XLOC_082201 | ENSRNOT000000082863 | -0.953776577 | 1.54E-06 |
| TUCP_002017 | XLOC_082201 | ENSRNOT00000010835  | -0.97740169  | 4.47E-08 |
| TUCP_002017 | XLOC_082201 | ENSRNOT000000089418 | -0.963572658 | 4.75E-07 |
| TUCP_002017 | XLOC_082201 | ENSRNOT00000039836  | 0.959261324  | 8.25E-07 |
| TUCP_002017 | XLOC_082201 | ENSRNOT00000040847  | 0.970152058  | 1.77E-07 |
| TUCP_002017 | XLOC_082201 | ENSRNOT00000002028  | -0.957671741 | 9.97E-07 |
| TUCP_002017 | XLOC_082201 | ENSRNOT00000066776  | 0.956107093  | 1.19E-06 |
| TUCP_002017 | XLOC_082201 | ENSRNOT00000083677  | 0.964349199  | 4.27E-07 |
| TUCP_002017 | XLOC_082201 | ENSRNOT00000073019  | -0.954748359 | 1.38E-06 |
| TUCP_002017 | XLOC_082201 | ENSRNOT00000065978  | -0.951622888 | 1.92E-06 |
| TUCP_002017 | XLOC_082201 | ENSRNOT00000064401  | -0.956250451 | 1.17E-06 |
| TUCP_002017 | XLOC_082201 | ENSRNOT00000090338  | 0.966247919  | 3.26E-07 |
| TUCP_002017 | XLOC_082201 | ENSRNOT00000019983  | 0.961598513  | 6.17E-07 |
| TUCP_002017 | XLOC_082201 | ENSRNOT00000080387  | -0.955651922 | 1.25E-06 |
| TUCP_002017 | XLOC_082201 | ENSRNOT00000072969  | -0.968898067 | 2.18E-07 |
| TUCP_002017 | XLOC_082201 | ENSRNOT00000091448  | 0.955362303  | 1.29E-06 |
| TUCP_002017 | XLOC_082201 | ENSRNOT00000077856  | 0.968188451  | 2.43E-07 |
| TUCP_002017 | XLOC_082201 | ENSRNOT00000090129  | 0.959077472  | 8.44E-07 |
| TUCP_002017 | XLOC_082201 | ENSRNOT00000056405  | -0.979442609 | 2.79E-08 |
| TUCP_002017 | XLOC_082201 | ENSRNOT00000088133  | 0.957077978  | 1.07E-06 |
| TUCP_002017 | XLOC_082201 | ENSRNOT00000006111  | 0.958677515  | 8.85E-07 |
| TUCP_002017 | XLOC_082201 | ENSRNOT00000073643  | 0.955194431  | 1.32E-06 |
| TUCP_002017 | XLOC_082201 | ENSRNOT00000087278  | 0.950643698  | 2.12E-06 |
| TUCP_002017 | XLOC_082201 | ENSRNOT00000030074  | -0.957844859 | 9.77E-07 |
| TUCP_002017 | XLOC_082201 | ENSRNOT00000028089  | -0.973487849 | 9.87E-08 |
| TUCP_002017 | XLOC_082201 | ENSRNOT00000068745  | -0.950600652 | 2.13E-06 |
| TUCP_002017 | XLOC_082201 | ENSRNOT00000086798  | 0.964625135  | 4.11E-07 |

|             |             |                     |              |          |
|-------------|-------------|---------------------|--------------|----------|
| TUCP_002017 | XLOC_082201 | ENSRNOT00000092068  | -0.951092091 | 2.03E-06 |
| TUCP_002017 | XLOC_082201 | ENSRNOT00000083964  | 0.957166959  | 1.06E-06 |
| TUCP_002017 | XLOC_082201 | ENSRNOT00000048781  | -0.955240709 | 1.31E-06 |
| TUCP_002017 | XLOC_082201 | ENSRNOT00000074212  | -0.962938121 | 5.17E-07 |
| TUCP_002017 | XLOC_082201 | ENSRNOT00000013864  | 0.959879751  | 7.65E-07 |
| TUCP_002017 | XLOC_082201 | ENSRNOT00000021729  | -0.957932162 | 9.67E-07 |
| TUCP_002017 | XLOC_082201 | ENSRNOT00000028074  | 0.957314064  | 1.04E-06 |
| TUCP_002017 | XLOC_082201 | ENSRNOT00000026643  | -0.961767843 | 6.03E-07 |
| TUCP_002017 | XLOC_082201 | ENSRNOT00000001403  | -0.966718102 | 3.04E-07 |
| TUCP_002017 | XLOC_082201 | ENSRNOT00000025913  | 0.953253049  | 1.63E-06 |
| TUCP_002017 | XLOC_082201 | ENSRNOT00000012314  | 0.956312207  | 1.16E-06 |
| TUCP_002017 | XLOC_082201 | ENSRNOT00000076230  | -0.959099537 | 8.42E-07 |
| TUCP_002017 | XLOC_082201 | ENSRNOT00000038178  | 0.960990409  | 6.66E-07 |
| TUCP_002017 | XLOC_082201 | ENSRNOT00000007889  | 0.954873173  | 1.37E-06 |
| TUCP_002017 | XLOC_082201 | ENSRNOT00000007738  | 0.968285851  | 2.40E-07 |
| TUCP_002017 | XLOC_082201 | ENSRNOT00000064667  | 0.963802966  | 4.61E-07 |
| TUCP_002017 | XLOC_082201 | ENSRNOT00000031464  | 0.951232459  | 2.00E-06 |
| TUCP_002017 | XLOC_082201 | ENSRNOT00000008256  | 0.96781856   | 2.58E-07 |
| TUCP_002017 | XLOC_082201 | ENSRNOT00000001099  | 0.956003299  | 1.21E-06 |
| TUCP_002017 | XLOC_082201 | ENSRNOT00000034883  | 0.979135554  | 3.01E-08 |
| TUCP_002017 | XLOC_082201 | ENSRNOT000000081123 | -0.967338163 | 2.77E-07 |
| TUCP_002017 | XLOC_082201 | ENSRNOT000000081351 | -0.958636737 | 8.90E-07 |
| TUCP_002017 | XLOC_082201 | ENSRNOT000000084031 | -0.953689465 | 1.55E-06 |
| TUCP_002017 | XLOC_082201 | ENSRNOT00000092083  | -0.962985946 | 5.14E-07 |
| TUCP_002017 | XLOC_082201 | ENSRNOT00000001412  | -0.951788217 | 1.89E-06 |
| TUCP_002017 | XLOC_082201 | ENSRNOT00000055437  | 0.963987885  | 4.49E-07 |
| TUCP_002017 | XLOC_082201 | ENSRNOT00000050350  | 0.957058979  | 1.07E-06 |
| TUCP_002017 | XLOC_082201 | ENSRNOT00000036092  | -0.961559021 | 6.20E-07 |
| TUCP_002017 | XLOC_082201 | ENSRNOT00000005459  | -0.962008737 | 5.85E-07 |
| TUCP_002017 | XLOC_082201 | ENSRNOT00000025222  | 0.963855917  | 4.57E-07 |
| TUCP_002017 | XLOC_082201 | ENSRNOT00000004290  | -0.969049493 | 2.12E-07 |
| TUCP_002017 | XLOC_082201 | ENSRNOT00000031555  | 0.979361729  | 2.85E-08 |
| TUCP_002017 | XLOC_082201 | ENSRNOT00000080591  | -0.958862733 | 8.66E-07 |
| TUCP_002017 | XLOC_082201 | ENSRNOT00000072031  | 0.960264949  | 7.30E-07 |
| TUCP_002017 | XLOC_082201 | ENSRNOT00000049285  | 0.962927409  | 5.18E-07 |
| TUCP_002017 | XLOC_082201 | ENSRNOT00000017603  | -0.958647387 | 8.88E-07 |
| TUCP_002017 | XLOC_082201 | ENSRNOT00000037955  | 0.959412368  | 8.10E-07 |
| TUCP_002017 | XLOC_082201 | ENSRNOT000000082146 | 0.951201764  | 2.01E-06 |
| TUCP_002017 | XLOC_082201 | ENSRNOT00000077146  | 0.958765908  | 8.76E-07 |
| TUCP_002017 | XLOC_082201 | ENSRNOT00000026235  | 0.956408929  | 1.15E-06 |
| TUCP_002017 | XLOC_082201 | ENSRNOT00000089673  | 0.950374028  | 2.18E-06 |
| TUCP_002017 | XLOC_082201 | ENSRNOT00000000886  | -0.955547396 | 1.27E-06 |
| TUCP_002017 | XLOC_082201 | ENSRNOT00000023977  | 0.95766157   | 9.98E-07 |
| TUCP_002017 | XLOC_082201 | ENSRNOT00000056022  | -0.95808898  | 9.49E-07 |
| TUCP_002017 | XLOC_082201 | ENSRNOT00000059807  | -0.959566626 | 7.95E-07 |
| TUCP_002017 | XLOC_082201 | ENSRNOT00000000155  | -0.952245007 | 1.80E-06 |
| TUCP_002017 | XLOC_082201 | ENSRNOT00000005489  | -0.957527882 | 1.01E-06 |
| TUCP_002017 | XLOC_082201 | ENSRNOT00000025794  | 0.96022356   | 7.33E-07 |
| TUCP_002017 | XLOC_082201 | ENSRNOT00000085118  | -0.951095614 | 2.03E-06 |
| TUCP_002017 | XLOC_082201 | ENSRNOT00000081077  | 0.972750851  | 1.13E-07 |
| TUCP_002017 | XLOC_082201 | ENSRNOT00000091282  | 0.984130701  | 7.72E-09 |

|             |             |                     |              |          |
|-------------|-------------|---------------------|--------------|----------|
| TUCP_002017 | XLOC_082201 | ENSRNOT0000002443   | -0.962718783 | 5.33E-07 |
| TUCP_002017 | XLOC_082201 | ENSRNOT00000077479  | 0.964486088  | 4.19E-07 |
| TUCP_002017 | XLOC_082201 | ENSRNOT00000002114  | 0.951847034  | 1.88E-06 |
| TUCP_002017 | XLOC_082201 | ENSRNOT00000027970  | -0.955096805 | 1.33E-06 |
| TUCP_002017 | XLOC_082201 | ENSRNOT00000040060  | 0.955234256  | 1.31E-06 |
| TUCP_002017 | XLOC_082201 | ENSRNOT00000064735  | -0.962744597 | 5.31E-07 |
| TUCP_002017 | XLOC_082201 | ENSRNOT00000039102  | -0.957789588 | 9.83E-07 |
| TUCP_002017 | XLOC_082201 | ENSRNOT00000078856  | 0.974432982  | 8.24E-08 |
| TUCP_002017 | XLOC_082201 | ENSRNOT00000037409  | -0.953852169 | 1.53E-06 |
| TUCP_002017 | XLOC_082201 | ENSRNOT00000092876  | 0.977744082  | 4.14E-08 |
| TUCP_002017 | XLOC_082201 | ENSRNOT00000013632  | -0.95130159  | 1.99E-06 |
| TUCP_002017 | XLOC_082201 | ENSRNOT00000080677  | 0.963414047  | 4.85E-07 |
| TUCP_002017 | XLOC_082201 | ENSRNOT00000025460  | -0.953825791 | 1.53E-06 |
| TUCP_002017 | XLOC_082201 | ENSRNOT00000020941  | -0.951072477 | 2.03E-06 |
| TUCP_002017 | XLOC_082201 | ENSRNOT00000045946  | -0.951321484 | 1.98E-06 |
| TUCP_002017 | XLOC_082201 | ENSRNOT00000005143  | -0.956199101 | 1.18E-06 |
| TUCP_002017 | XLOC_082201 | ENSRNOT00000011832  | 0.955900174  | 1.22E-06 |
| TUCP_002017 | XLOC_082201 | ENSRNOT00000032248  | -0.959959831 | 7.58E-07 |
| TUCP_002017 | XLOC_082201 | ENSRNOT00000015318  | 0.962362821  | 5.58E-07 |
| TUCP_002017 | XLOC_082201 | ENSRNOT00000077274  | 0.96475252   | 4.04E-07 |
| TUCP_002017 | XLOC_082201 | ENSRNOT00000028907  | -0.955537434 | 1.27E-06 |
| TUCP_002017 | XLOC_082201 | ENSRNOT00000037809  | 0.952653333  | 1.73E-06 |
| TUCP_002017 | XLOC_082201 | ENSRNOT00000013516  | -0.960692469 | 6.92E-07 |
| TUCP_002017 | XLOC_082201 | ENSRNOT00000073135  | -0.950881294 | 2.07E-06 |
| TUCP_002017 | XLOC_082201 | ENSRNOT00000036613  | 0.965893505  | 3.43E-07 |
| TUCP_002017 | XLOC_082201 | ENSRNOT00000008987  | 0.968405436  | 2.35E-07 |
| TUCP_002017 | XLOC_082201 | ENSRNOT00000016677  | 0.970726975  | 1.61E-07 |
| TUCP_002017 | XLOC_082201 | ENSRNOT00000083957  | -0.951938134 | 1.86E-06 |
| TUCP_002017 | XLOC_082201 | ENSRNOT00000038066  | -0.952260531 | 1.80E-06 |
| TUCP_002017 | XLOC_082201 | ENSRNOT00000005311  | -0.961754769 | 6.04E-07 |
| TUCP_002017 | XLOC_082201 | ENSRNOT00000077803  | -0.973688975 | 9.50E-08 |
| TUCP_002017 | XLOC_082201 | ENSRNOT00000019473  | 0.955011272  | 1.35E-06 |
| TUCP_002017 | XLOC_082201 | ENSRNOT00000091866  | 0.959258639  | 8.25E-07 |
| TUCP_002016 | XLOC_082200 | ENSRNOT00000074583  | 0.963617117  | 4.72E-07 |
| TUCP_002016 | XLOC_082200 | ENSRNOT00000003759  | 0.960180195  | 7.37E-07 |
| TUCP_002016 | XLOC_082200 | ENSRNOT00000004713  | 0.951125666  | 2.02E-06 |
| TUCP_002016 | XLOC_082200 | ENSRNOT000000051067 | 0.951571358  | 1.93E-06 |
| TUCP_002016 | XLOC_082200 | ENSRNOT00000075936  | 0.950957246  | 2.06E-06 |
| TUCP_002016 | XLOC_082200 | ENSRNOT00000014560  | 0.957097719  | 1.06E-06 |
| TUCP_002016 | XLOC_082200 | ENSRNOT00000013182  | 0.951517424  | 1.94E-06 |
| TUCP_002016 | XLOC_082200 | ENSRNOT00000040736  | 0.964096779  | 4.42E-07 |
| TUCP_002016 | XLOC_082200 | ENSRNOT00000003778  | 0.952785461  | 1.71E-06 |
| TUCP_002016 | XLOC_082200 | ENSRNOT00000076879  | 0.953301128  | 1.62E-06 |
| TUCP_002016 | XLOC_082200 | ENSRNOT00000078299  | 0.954816295  | 1.37E-06 |
| TUCP_002016 | XLOC_082200 | ENSRNOT00000013809  | 0.952966706  | 1.67E-06 |
| TUCP_002016 | XLOC_082200 | ENSRNOT00000029184  | 0.952522811  | 1.75E-06 |
| TUCP_002016 | XLOC_082200 | ENSRNOT00000051028  | -0.951607771 | 1.93E-06 |
| TUCP_002016 | XLOC_082200 | ENSRNOT00000012314  | 0.950395412  | 2.18E-06 |
| TUCP_002016 | XLOC_082200 | ENSRNOT00000082393  | 0.961310672  | 6.40E-07 |
| TUCP_002016 | XLOC_082200 | ENSRNOT00000021359  | 0.951869141  | 1.88E-06 |
| TUCP_002016 | XLOC_082200 | ENSRNOT00000022167  | 0.967824673  | 2.57E-07 |



|             |             |                    |              |          |
|-------------|-------------|--------------------|--------------|----------|
| TUCP_002016 | XLOC_082200 | ENSRNOT00000022128 | 0.963865727  | 4.57E-07 |
| TUCP_002016 | XLOC_082200 | ENSRNOT00000093365 | 0.954235543  | 1.46E-06 |
| TUCP_002016 | XLOC_082200 | ENSRNOT00000013191 | 0.954746488  | 1.39E-06 |
| TUCP_002016 | XLOC_082200 | ENSRNOT00000090774 | 0.965135337  | 3.83E-07 |
| TUCP_002397 | XLOC_101142 | ENSRNOT00000079942 | 0.965749492  | 3.50E-07 |
| TUCP_002397 | XLOC_101142 | ENSRNOT00000010289 | 0.959531697  | 7.99E-07 |
| TUCP_002398 | XLOC_101177 | ENSRNOT00000085599 | 0.95183863   | 1.88E-06 |
| TUCP_002398 | XLOC_101177 | ENSRNOT00000081534 | 0.955649855  | 1.25E-06 |
| TUCP_002398 | XLOC_101177 | ENSRNOT00000038729 | 0.952450333  | 1.77E-06 |
| TUCP_002398 | XLOC_101177 | ENSRNOT00000086385 | 0.952450333  | 1.77E-06 |
| TUCP_002398 | XLOC_101177 | ENSRNOT00000032339 | 0.952554222  | 1.75E-06 |
| TUCP_002398 | XLOC_101177 | ENSRNOT00000087613 | 0.952450333  | 1.77E-06 |
| TUCP_002398 | XLOC_101177 | ENSRNOT00000023062 | 0.952450333  | 1.77E-06 |
| TUCP_002398 | XLOC_101177 | ENSRNOT00000058834 | 0.952450333  | 1.77E-06 |
| TUCP_002398 | XLOC_101177 | ENSRNOT00000079420 | 0.952450333  | 1.77E-06 |
| TUCP_002398 | XLOC_101177 | ENSRNOT00000090761 | 0.952450333  | 1.77E-06 |
| TUCP_002398 | XLOC_101177 | ENSRNOT00000055923 | 0.952450333  | 1.77E-06 |
| TUCP_002398 | XLOC_101177 | ENSRNOT00000071930 | 0.952450333  | 1.77E-06 |
| TUCP_002398 | XLOC_101177 | ENSRNOT00000076756 | 0.952450333  | 1.77E-06 |
| TUCP_002398 | XLOC_101177 | ENSRNOT00000081527 | 0.951870043  | 1.88E-06 |
| TUCP_002398 | XLOC_101177 | ENSRNOT00000091663 | 0.954877765  | 1.37E-06 |
| TUCP_002398 | XLOC_101177 | ENSRNOT00000081780 | 0.952450333  | 1.77E-06 |
| TUCP_002398 | XLOC_101177 | ENSRNOT00000089114 | 0.952450333  | 1.77E-06 |
| TUCP_002398 | XLOC_101177 | ENSRNOT00000073316 | 0.952450333  | 1.77E-06 |
| TUCP_002398 | XLOC_101177 | ENSRNOT00000071663 | 0.952450333  | 1.77E-06 |
| TUCP_002398 | XLOC_101177 | ENSRNOT00000042860 | 0.952450333  | 1.77E-06 |
| TUCP_002398 | XLOC_101177 | ENSRNOT00000088421 | 0.952450333  | 1.77E-06 |
| TUCP_002398 | XLOC_101177 | ENSRNOT00000038898 | 0.952450333  | 1.77E-06 |
| TUCP_002398 | XLOC_101177 | ENSRNOT00000042777 | 0.975438092  | 6.76E-08 |
| TUCP_002398 | XLOC_101177 | ENSRNOT00000010029 | 0.952450333  | 1.77E-06 |
| TUCP_003125 | XLOC_133460 | ENSRNOT00000016083 | 0.963751793  | 4.64E-07 |
| TUCP_003125 | XLOC_133460 | ENSRNOT00000074448 | 0.957695851  | 9.94E-07 |
| TUCP_003125 | XLOC_133460 | ENSRNOT00000083254 | 0.959092875  | 8.42E-07 |
| TUCP_003125 | XLOC_133460 | ENSRNOT00000080190 | 0.973540641  | 9.77E-08 |
| TUCP_003125 | XLOC_133460 | ENSRNOT00000012432 | 0.957931612  | 9.67E-07 |
| TUCP_003125 | XLOC_133460 | ENSRNOT00000090946 | -0.961187745 | 6.50E-07 |
| TUCP_003125 | XLOC_133460 | ENSRNOT00000020297 | -0.951769044 | 1.90E-06 |
| TUCP_003125 | XLOC_133460 | ENSRNOT00000015139 | 0.970754457  | 1.60E-07 |
| TUCP_003125 | XLOC_133460 | ENSRNOT0000003792  | 0.957531481  | 1.01E-06 |
| TUCP_003125 | XLOC_133460 | ENSRNOT0000005953  | 0.950603707  | 2.13E-06 |
| TUCP_003125 | XLOC_133460 | ENSRNOT00000018527 | 0.963869654  | 4.56E-07 |
| TUCP_003125 | XLOC_133460 | ENSRNOT00000032926 | 0.962447663  | 5.52E-07 |
| TUCP_003125 | XLOC_133460 | ENSRNOT00000022017 | 0.95642547   | 1.15E-06 |
| TUCP_003125 | XLOC_133460 | ENSRNOT00000026297 | 0.959130787  | 8.38E-07 |
| TUCP_003125 | XLOC_133460 | ENSRNOT00000023543 | 0.955982708  | 1.21E-06 |
| TUCP_003125 | XLOC_133460 | ENSRNOT00000061504 | 0.974357876  | 8.36E-08 |
| TUCP_003125 | XLOC_133460 | ENSRNOT00000090499 | 0.973660058  | 9.55E-08 |
| TUCP_003125 | XLOC_133460 | ENSRNOT00000012494 | 0.952324532  | 1.79E-06 |
| TUCP_003125 | XLOC_133460 | ENSRNOT00000031701 | 0.966054834  | 3.35E-07 |
| TUCP_003125 | XLOC_133460 | ENSRNOT00000013025 | 0.951640453  | 1.92E-06 |
| TUCP_003125 | XLOC_133460 | ENSRNOT00000026748 | 0.988307121  | 1.69E-09 |

|             |             |                    |             |          |
|-------------|-------------|--------------------|-------------|----------|
| TUCP_003125 | XLOC_133460 | ENSRNOT00000072849 | 0.963734517 | 4.65E-07 |
| TUCP_003125 | XLOC_133460 | ENSRNOT00000009327 | 0.960517747 | 7.07E-07 |
| TUCP_003125 | XLOC_133460 | ENSRNOT00000064041 | 0.966978299 | 2.93E-07 |
| TUCP_003125 | XLOC_133460 | ENSRNOT00000076485 | 0.960224102 | 7.33E-07 |
| TUCP_003125 | XLOC_133460 | ENSRNOT00000041330 | 0.976707058 | 5.19E-08 |
| TUCP_003125 | XLOC_133460 | ENSRNOT00000057422 | 0.972034341 | 1.29E-07 |
| TUCP_003125 | XLOC_133460 | ENSRNOT00000022461 | 0.950476064 | 2.16E-06 |
| TUCP_003125 | XLOC_133460 | ENSRNOT00000049082 | 0.957868795 | 9.74E-07 |
| TUCP_003125 | XLOC_133460 | ENSRNOT00000018074 | 0.961235224 | 6.46E-07 |
| TUCP_003125 | XLOC_133460 | ENSRNOT00000018233 | 0.95153107  | 1.94E-06 |
| TUCP_003125 | XLOC_133460 | ENSRNOT00000031692 | 0.950236143 | 2.21E-06 |
| TUCP_003125 | XLOC_133460 | ENSRNOT00000023791 | 0.969316664 | 2.03E-07 |
| TUCP_003125 | XLOC_133460 | ENSRNOT00000024710 | 0.958932873 | 8.59E-07 |
| TUCP_003125 | XLOC_133460 | ENSRNOT00000075474 | 0.950563846 | 2.14E-06 |
| TUCP_003125 | XLOC_133460 | ENSRNOT00000009923 | 0.967274027 | 2.80E-07 |
| TUCP_003125 | XLOC_133460 | ENSRNOT00000061201 | 0.953593254 | 1.57E-06 |
| TUCP_003125 | XLOC_133460 | ENSRNOT00000093672 | 0.960617885 | 6.98E-07 |
| TUCP_003125 | XLOC_133460 | ENSRNOT00000019302 | 0.977525564 | 4.35E-08 |
| TUCP_003125 | XLOC_133460 | ENSRNOT00000039857 | 0.950139114 | 2.23E-06 |
| TUCP_003125 | XLOC_133460 | ENSRNOT00000081547 | 0.955151186 | 1.33E-06 |
| TUCP_003125 | XLOC_133460 | ENSRNOT00000082451 | 0.957634693 | 1.00E-06 |
| TUCP_003125 | XLOC_133460 | ENSRNOT00000028034 | 0.951042222 | 2.04E-06 |
| TUCP_003125 | XLOC_133460 | ENSRNOT00000004351 | 0.952214878 | 1.81E-06 |
| TUCP_003125 | XLOC_133460 | ENSRNOT00000007577 | 0.953286785 | 1.62E-06 |
| TUCP_003125 | XLOC_133460 | ENSRNOT00000015495 | 0.955712636 | 1.25E-06 |
| TUCP_003125 | XLOC_133460 | ENSRNOT00000015476 | 0.954028872 | 1.50E-06 |
| TUCP_003125 | XLOC_133460 | ENSRNOT00000024452 | 0.962652471 | 5.37E-07 |
| TUCP_003125 | XLOC_133460 | ENSRNOT00000072297 | 0.958166901 | 9.40E-07 |
| TUCP_003125 | XLOC_133460 | ENSRNOT00000000617 | 0.954914327 | 1.36E-06 |
| TUCP_003125 | XLOC_133460 | ENSRNOT00000007882 | 0.95155039  | 1.94E-06 |
| TUCP_003125 | XLOC_133460 | ENSRNOT00000016376 | 0.953444871 | 1.59E-06 |
| TUCP_003125 | XLOC_133460 | ENSRNOT00000072733 | 0.959298836 | 8.21E-07 |
| TUCP_003125 | XLOC_133460 | ENSRNOT00000090156 | 0.952761691 | 1.71E-06 |
| TUCP_003125 | XLOC_133460 | ENSRNOT00000087342 | 0.952283145 | 1.80E-06 |
| TUCP_003125 | XLOC_133460 | ENSRNOT00000072458 | 0.951936056 | 1.86E-06 |
| TUCP_003125 | XLOC_133460 | ENSRNOT00000020681 | 0.951722974 | 1.90E-06 |
| TUCP_003125 | XLOC_133460 | ENSRNOT00000075128 | 0.953573867 | 1.57E-06 |
| TUCP_003125 | XLOC_133460 | ENSRNOT00000007802 | 0.981201649 | 1.79E-08 |
| TUCP_003125 | XLOC_133460 | ENSRNOT00000088073 | 0.967720614 | 2.61E-07 |
| TUCP_003125 | XLOC_133460 | ENSRNOT00000000804 | 0.950147134 | 2.23E-06 |
| TUCP_001213 | XLOC_045218 | ENSRNOT00000093075 | 0.971594659 | 1.39E-07 |
| TUCP_001213 | XLOC_045218 | ENSRNOT00000058260 | 0.971594659 | 1.39E-07 |
| TUCP_001213 | XLOC_045218 | ENSRNOT00000088887 | 0.971594659 | 1.39E-07 |
| TUCP_001213 | XLOC_045218 | ENSRNOT00000084986 | 0.971594659 | 1.39E-07 |
| TUCP_001213 | XLOC_045218 | ENSRNOT00000074346 | 0.978428129 | 3.55E-08 |
| TUCP_001213 | XLOC_045218 | ENSRNOT00000073209 | 0.954221808 | 1.47E-06 |
| TUCP_001213 | XLOC_045218 | ENSRNOT00000072573 | 0.965277335 | 3.75E-07 |
| TUCP_001213 | XLOC_045218 | ENSRNOT00000017828 | 0.963656807 | 4.70E-07 |
| TUCP_001213 | XLOC_045218 | ENSRNOT00000071312 | 0.971594659 | 1.39E-07 |
| TUCP_001213 | XLOC_045218 | ENSRNOT00000088245 | 0.971594659 | 1.39E-07 |
| TUCP_001213 | XLOC_045218 | ENSRNOT00000058833 | 0.967132308 | 2.86E-07 |

|             |             |                    |              |          |
|-------------|-------------|--------------------|--------------|----------|
| TUCP_001213 | XLOC_045218 | ENSRNOT00000078052 | 0.971594659  | 1.39E-07 |
| TUCP_001213 | XLOC_045218 | ENSRNOT00000078494 | 0.970975992  | 1.54E-07 |
| TUCP_001213 | XLOC_045218 | ENSRNOT00000085653 | 0.971594659  | 1.39E-07 |
| TUCP_001213 | XLOC_045218 | ENSRNOT00000081992 | 0.971658951  | 1.37E-07 |
| TUCP_001213 | XLOC_045218 | ENSRNOT00000055406 | 0.971594659  | 1.39E-07 |
| TUCP_001213 | XLOC_045218 | ENSRNOT00000070817 | 0.970087595  | 1.79E-07 |
| TUCP_001213 | XLOC_045218 | ENSRNOT00000026753 | 0.971594659  | 1.39E-07 |
| TUCP_001213 | XLOC_045218 | ENSRNOT00000080533 | 0.966493736  | 3.14E-07 |
| TUCP_001213 | XLOC_045218 | ENSRNOT00000086031 | 0.971594659  | 1.39E-07 |
| TUCP_001213 | XLOC_045218 | ENSRNOT00000014312 | 0.971594659  | 1.39E-07 |
| TUCP_001213 | XLOC_045218 | ENSRNOT00000051231 | 0.968387031  | 2.36E-07 |
| TUCP_001213 | XLOC_045218 | ENSRNOT00000089407 | 0.957517032  | 1.01E-06 |
| TUCP_001213 | XLOC_045218 | ENSRNOT00000055034 | 0.97180077   | 1.34E-07 |
| TUCP_001213 | XLOC_045218 | ENSRNOT00000046837 | 0.979167548  | 2.98E-08 |
| TUCP_001359 | XLOC_052435 | ENSRNOT00000026558 | 0.951497183  | 1.95E-06 |
| TUCP_001359 | XLOC_052435 | ENSRNOT0000001600  | 0.951174843  | 2.01E-06 |
| TUCP_001359 | XLOC_052435 | ENSRNOT00000071927 | 0.959091109  | 8.42E-07 |
| TUCP_001359 | XLOC_052435 | ENSRNOT00000014684 | 0.964965596  | 3.92E-07 |
| TUCP_001359 | XLOC_052435 | ENSRNOT00000012657 | 0.957961664  | 9.63E-07 |
| TUCP_001359 | XLOC_052435 | ENSRNOT00000035523 | 0.955634876  | 1.26E-06 |
| TUCP_001359 | XLOC_052435 | ENSRNOT00000033984 | 0.956984706  | 1.08E-06 |
| TUCP_001359 | XLOC_052435 | ENSRNOT00000015718 | -0.960833581 | 6.80E-07 |
| TUCP_001359 | XLOC_052435 | ENSRNOT00000005694 | 0.952188785  | 1.82E-06 |
| TUCP_001359 | XLOC_052435 | ENSRNOT00000004363 | 0.968665561  | 2.26E-07 |
| TUCP_001359 | XLOC_052435 | ENSRNOT00000016263 | 0.95026295   | 2.20E-06 |
| TUCP_001359 | XLOC_052435 | ENSRNOT00000022633 | 0.975593993  | 6.55E-08 |
| TUCP_001359 | XLOC_052435 | ENSRNOT00000023100 | 0.97338439   | 1.01E-07 |
| TUCP_001359 | XLOC_052435 | ENSRNOT00000029620 | 0.960469094  | 7.11E-07 |
| TUCP_001359 | XLOC_052435 | ENSRNOT00000086541 | 0.967036915  | 2.90E-07 |
| TUCP_001359 | XLOC_052435 | ENSRNOT00000003823 | 0.955011516  | 1.35E-06 |
| TUCP_001359 | XLOC_052435 | ENSRNOT00000024286 | 0.954076806  | 1.49E-06 |
| TUCP_001359 | XLOC_052435 | ENSRNOT00000044983 | 0.956479751  | 1.14E-06 |
| TUCP_001359 | XLOC_052435 | ENSRNOT00000010252 | 0.953961581  | 1.51E-06 |
| TUCP_001359 | XLOC_052435 | ENSRNOT00000016768 | 0.952974005  | 1.67E-06 |
| TUCP_001359 | XLOC_052435 | ENSRNOT00000008365 | 0.963251586  | 4.96E-07 |
| TUCP_001359 | XLOC_052435 | ENSRNOT00000044975 | 0.955675843  | 1.25E-06 |
| TUCP_001359 | XLOC_052435 | ENSRNOT00000068683 | 0.953195014  | 1.64E-06 |
| TUCP_001359 | XLOC_052435 | ENSRNOT00000034603 | 0.958229377  | 9.34E-07 |
| TUCP_001359 | XLOC_052435 | ENSRNOT00000011371 | 0.964492407  | 4.19E-07 |
| TUCP_001359 | XLOC_052435 | ENSRNOT00000032249 | 0.973818976  | 9.27E-08 |
| TUCP_001359 | XLOC_052435 | ENSRNOT00000067912 | 0.953196997  | 1.63E-06 |
| TUCP_001359 | XLOC_052435 | ENSRNOT00000089309 | 0.955247755  | 1.31E-06 |
| TUCP_001359 | XLOC_052435 | ENSRNOT00000045311 | 0.955778954  | 1.24E-06 |
| TUCP_001359 | XLOC_052435 | ENSRNOT00000036972 | 0.952509757  | 1.76E-06 |
| TUCP_001359 | XLOC_052435 | ENSRNOT00000029443 | 0.966859139  | 2.98E-07 |
| TUCP_001359 | XLOC_052435 | ENSRNOT00000092857 | 0.958216854  | 9.35E-07 |
| TUCP_001359 | XLOC_052435 | ENSRNOT00000025197 | 0.966117564  | 3.32E-07 |
| TUCP_001359 | XLOC_052435 | ENSRNOT00000055179 | 0.96858567   | 2.29E-07 |
| TUCP_001359 | XLOC_052435 | ENSRNOT00000083995 | 0.95443421   | 1.43E-06 |
| TUCP_001359 | XLOC_052435 | ENSRNOT00000000211 | 0.967845414  | 2.56E-07 |
| TUCP_001359 | XLOC_052435 | ENSRNOT00000082116 | 0.966363963  | 3.20E-07 |

|             |             |                    |              |          |
|-------------|-------------|--------------------|--------------|----------|
| TUCP_001359 | XLOC_052435 | ENSRNOT00000086223 | 0.959597765  | 7.92E-07 |
| TUCP_001359 | XLOC_052435 | ENSRNOT00000092075 | 0.953283291  | 1.62E-06 |
| TUCP_001359 | XLOC_052435 | ENSRNOT00000000792 | 0.964972263  | 3.92E-07 |
| TUCP_001358 | XLOC_052337 | ENSRNOT00000073147 | 0.966338462  | 3.22E-07 |
| TUCP_001358 | XLOC_052337 | ENSRNOT00000016993 | 0.950198611  | 2.22E-06 |
| TUCP_001216 | XLOC_045326 | ENSRNOT00000077186 | 0.980706564  | 2.04E-08 |
| TUCP_001216 | XLOC_045326 | ENSRNOT00000039551 | 0.966711347  | 3.04E-07 |
| TUCP_001216 | XLOC_045326 | ENSRNOT00000014946 | -0.969788198 | 1.88E-07 |
| TUCP_001216 | XLOC_045326 | ENSRNOT00000081796 | -0.956689849 | 1.12E-06 |
| TUCP_001216 | XLOC_045326 | ENSRNOT00000013747 | -0.950584331 | 2.14E-06 |
| TUCP_001216 | XLOC_045326 | ENSRNOT00000014780 | 0.961469931  | 6.27E-07 |
| TUCP_001216 | XLOC_045326 | ENSRNOT00000020357 | -0.955224171 | 1.31E-06 |
| TUCP_001216 | XLOC_045326 | ENSRNOT00000006460 | -0.959693783 | 7.83E-07 |
| TUCP_001216 | XLOC_045326 | ENSRNOT00000075397 | -0.953223277 | 1.63E-06 |
| TUCP_001216 | XLOC_045326 | ENSRNOT00000087346 | -0.979572326 | 2.71E-08 |
| TUCP_001216 | XLOC_045326 | ENSRNOT0000007350  | -0.955582149 | 1.26E-06 |
| TUCP_001216 | XLOC_045326 | ENSRNOT00000019104 | 0.956818776  | 1.10E-06 |
| TUCP_001216 | XLOC_045326 | ENSRNOT00000026279 | 0.953352541  | 1.61E-06 |
| TUCP_001216 | XLOC_045326 | ENSRNOT00000077451 | 0.964803369  | 4.01E-07 |
| TUCP_001216 | XLOC_045326 | ENSRNOT00000021506 | 0.965622511  | 3.57E-07 |
| TUCP_001216 | XLOC_045326 | ENSRNOT00000077646 | 0.965316878  | 3.73E-07 |
| TUCP_001216 | XLOC_045326 | ENSRNOT00000013116 | 0.962696811  | 5.34E-07 |
| TUCP_001216 | XLOC_045326 | ENSRNOT00000021858 | -0.966993339 | 2.92E-07 |
| TUCP_001216 | XLOC_045326 | ENSRNOT00000079644 | 0.958134504  | 9.44E-07 |
| TUCP_001216 | XLOC_045326 | ENSRNOT00000009565 | 0.971403827  | 1.44E-07 |
| TUCP_001216 | XLOC_045326 | ENSRNOT00000041237 | 0.951301752  | 1.99E-06 |
| TUCP_001216 | XLOC_045326 | ENSRNOT00000079138 | -0.957123745 | 1.06E-06 |
| TUCP_001216 | XLOC_045326 | ENSRNOT00000065942 | 0.989682793  | 9.05E-10 |
| TUCP_001216 | XLOC_045326 | ENSRNOT00000010127 | -0.956566554 | 1.13E-06 |
| TUCP_001216 | XLOC_045326 | ENSRNOT00000064305 | 0.967650627  | 2.64E-07 |
| TUCP_001216 | XLOC_045326 | ENSRNOT00000054932 | 0.96193042   | 5.91E-07 |
| TUCP_001216 | XLOC_045326 | ENSRNOT00000030914 | 0.950315579  | 2.19E-06 |
| TUCP_001216 | XLOC_045326 | ENSRNOT00000086310 | 0.972259671  | 1.23E-07 |
| TUCP_001216 | XLOC_045326 | ENSRNOT00000025827 | -0.957551547 | 1.01E-06 |
| TUCP_001216 | XLOC_045326 | ENSRNOT00000074389 | 0.964325098  | 4.29E-07 |
| TUCP_001216 | XLOC_045326 | ENSRNOT00000025309 | -0.953920365 | 1.51E-06 |
| TUCP_001216 | XLOC_045326 | ENSRNOT00000025308 | 0.951789257  | 1.89E-06 |
| TUCP_001216 | XLOC_045326 | ENSRNOT00000009073 | 0.950065857  | 2.25E-06 |
| TUCP_001216 | XLOC_045326 | ENSRNOT00000030893 | 0.961654393  | 6.12E-07 |
| TUCP_001216 | XLOC_045326 | ENSRNOT00000066204 | 0.95994785   | 7.59E-07 |
| TUCP_001216 | XLOC_045326 | ENSRNOT00000039836 | 0.96176695   | 6.03E-07 |
| TUCP_001216 | XLOC_045326 | ENSRNOT00000072077 | 0.957580435  | 1.01E-06 |
| TUCP_001216 | XLOC_045326 | ENSRNOT00000018101 | 0.966617209  | 3.09E-07 |
| TUCP_001216 | XLOC_045326 | ENSRNOT00000003247 | 0.969351201  | 2.02E-07 |
| TUCP_001216 | XLOC_045326 | ENSRNOT00000009963 | -0.953276206 | 1.62E-06 |
| TUCP_001216 | XLOC_045326 | ENSRNOT00000031672 | 0.953507088  | 1.58E-06 |
| TUCP_001216 | XLOC_045326 | ENSRNOT00000013516 | -0.956182128 | 1.18E-06 |
| TUCP_001216 | XLOC_045326 | ENSRNOT00000003326 | 0.951578595  | 1.93E-06 |
| TUCP_001216 | XLOC_045326 | ENSRNOT00000000052 | 0.956768765  | 1.11E-06 |
| TUCP_001216 | XLOC_045326 | ENSRNOT00000025284 | 0.969657191  | 1.93E-07 |
| TUCP_001216 | XLOC_045326 | ENSRNOT00000013695 | 0.954021709  | 1.50E-06 |

|             |             |                    |              |          |
|-------------|-------------|--------------------|--------------|----------|
| TUCP_001216 | XLOC_045326 | ENSRNOT00000086813 | 0.971653753  | 1.37E-07 |
| TUCP_001216 | XLOC_045326 | ENSRNOT00000012060 | -0.960036645 | 7.51E-07 |
| TUCP_001216 | XLOC_045326 | ENSRNOT00000006203 | -0.953618086 | 1.56E-06 |
| TUCP_001216 | XLOC_045326 | ENSRNOT00000083568 | -0.958577979 | 8.96E-07 |
| TUCP_001216 | XLOC_045326 | ENSRNOT00000073019 | -0.966337843 | 3.22E-07 |
| TUCP_001216 | XLOC_045326 | ENSRNOT00000084709 | -0.953674035 | 1.55E-06 |
| TUCP_001216 | XLOC_045326 | ENSRNOT00000039177 | 0.962234218  | 5.68E-07 |
| TUCP_001216 | XLOC_045326 | ENSRNOT00000088615 | 0.964255243  | 4.33E-07 |
| TUCP_001216 | XLOC_045326 | ENSRNOT00000035320 | 0.969284219  | 2.05E-07 |
| TUCP_001216 | XLOC_045326 | ENSRNOT00000092068 | -0.955295145 | 1.30E-06 |
| TUCP_001216 | XLOC_045326 | ENSRNOT00000090338 | 0.952394457  | 1.78E-06 |
| TUCP_001216 | XLOC_045326 | ENSRNOT00000034282 | -0.951657899 | 1.92E-06 |
| TUCP_001216 | XLOC_045326 | ENSRNOT00000007824 | 0.954775569  | 1.38E-06 |
| TUCP_001216 | XLOC_045326 | ENSRNOT00000083573 | 0.966907954  | 2.96E-07 |
| TUCP_001216 | XLOC_045326 | ENSRNOT00000089545 | 0.96262377   | 5.39E-07 |
| TUCP_001216 | XLOC_045326 | ENSRNOT00000024677 | -0.955038563 | 1.34E-06 |
| TUCP_001216 | XLOC_045326 | ENSRNOT00000037681 | 0.961206656  | 6.48E-07 |
| TUCP_001216 | XLOC_045326 | ENSRNOT00000017469 | 0.968687029  | 2.25E-07 |
| TUCP_001216 | XLOC_045326 | ENSRNOT00000091448 | 0.964728285  | 4.05E-07 |
| TUCP_001216 | XLOC_045326 | ENSRNOT00000046807 | 0.977173506  | 4.70E-08 |
| TUCP_001216 | XLOC_045326 | ENSRNOT00000077856 | 0.953203226  | 1.63E-06 |
| TUCP_001216 | XLOC_045326 | ENSRNOT00000024264 | 0.952644602  | 1.73E-06 |
| TUCP_001216 | XLOC_045326 | ENSRNOT00000000577 | -0.959029287 | 8.49E-07 |
| TUCP_001216 | XLOC_045326 | ENSRNOT00000010783 | 0.963115068  | 5.05E-07 |
| TUCP_001216 | XLOC_045326 | ENSRNOT00000079609 | -0.953442288 | 1.59E-06 |
| TUCP_001216 | XLOC_045326 | ENSRNOT00000006443 | 0.981598865  | 1.61E-08 |
| TUCP_001216 | XLOC_045326 | ENSRNOT00000080522 | 0.968307322  | 2.39E-07 |
| TUCP_001216 | XLOC_045326 | ENSRNOT00000019121 | 0.971580237  | 1.39E-07 |
| TUCP_001216 | XLOC_045326 | ENSRNOT00000072762 | 0.976439713  | 5.50E-08 |
| TUCP_001216 | XLOC_045326 | ENSRNOT00000086775 | 0.952685121  | 1.72E-06 |
| TUCP_001216 | XLOC_045326 | ENSRNOT00000030007 | 0.961541253  | 6.21E-07 |
| TUCP_001216 | XLOC_045326 | ENSRNOT00000012175 | 0.956991228  | 1.08E-06 |
| TUCP_001216 | XLOC_045326 | ENSRNOT00000083287 | 0.959069277  | 8.45E-07 |
| TUCP_001216 | XLOC_045326 | ENSRNOT00000012963 | 0.950008464  | 2.26E-06 |
| TUCP_001216 | XLOC_045326 | ENSRNOT00000011832 | 0.963941675  | 4.52E-07 |
| TUCP_001216 | XLOC_045326 | ENSRNOT00000081682 | 0.959464385  | 8.05E-07 |
| TUCP_001216 | XLOC_045326 | ENSRNOT00000073643 | 0.972431569  | 1.20E-07 |
| TUCP_001216 | XLOC_045326 | ENSRNOT00000030074 | -0.955352993 | 1.30E-06 |
| TUCP_001216 | XLOC_045326 | ENSRNOT00000017269 | 0.965048528  | 3.87E-07 |
| TUCP_001216 | XLOC_045326 | ENSRNOT00000004007 | 0.953125455  | 1.65E-06 |
| TUCP_001216 | XLOC_045326 | ENSRNOT00000022502 | 0.96312209   | 5.05E-07 |
| TUCP_001216 | XLOC_045326 | ENSRNOT00000001979 | 0.979005388  | 3.10E-08 |
| TUCP_001216 | XLOC_045326 | ENSRNOT00000028089 | -0.956684732 | 1.12E-06 |
| TUCP_001216 | XLOC_045326 | ENSRNOT00000083968 | 0.972364402  | 1.21E-07 |
| TUCP_001216 | XLOC_045326 | ENSRNOT00000092945 | 0.951761891  | 1.90E-06 |
| TUCP_001216 | XLOC_045326 | ENSRNOT00000017340 | 0.982744982  | 1.17E-08 |
| TUCP_001216 | XLOC_045326 | ENSRNOT00000009150 | -0.951181444 | 2.01E-06 |
| TUCP_001216 | XLOC_045326 | ENSRNOT00000068745 | -0.956146975 | 1.19E-06 |
| TUCP_001216 | XLOC_045326 | ENSRNOT00000026920 | 0.964188124  | 4.37E-07 |
| TUCP_001216 | XLOC_045326 | ENSRNOT00000086798 | 0.967287102  | 2.79E-07 |
| TUCP_001216 | XLOC_045326 | ENSRNOT00000083967 | -0.988770796 | 1.38E-09 |

|             |             |                    |              |          |
|-------------|-------------|--------------------|--------------|----------|
| TUCP_001216 | XLOC_045326 | ENSRNOT00000083964 | 0.960836037  | 6.79E-07 |
| TUCP_001216 | XLOC_045326 | ENSRNOT00000075452 | -0.950873026 | 2.07E-06 |
| TUCP_001216 | XLOC_045326 | ENSRNOT00000026726 | 0.966789753  | 3.01E-07 |
| TUCP_001216 | XLOC_045326 | ENSRNOT00000021802 | -0.953546098 | 1.58E-06 |
| TUCP_001216 | XLOC_045326 | ENSRNOT00000013864 | 0.952369182  | 1.78E-06 |
| TUCP_001216 | XLOC_045326 | ENSRNOT00000017813 | 0.950095553  | 2.24E-06 |
| TUCP_001216 | XLOC_045326 | ENSRNOT00000026525 | 0.965965885  | 3.40E-07 |
| TUCP_001216 | XLOC_045326 | ENSRNOT00000027435 | -0.955854014 | 1.23E-06 |
| TUCP_001216 | XLOC_045326 | ENSRNOT00000061304 | 0.960860783  | 6.77E-07 |
| TUCP_001216 | XLOC_045326 | ENSRNOT00000072299 | -0.964126491 | 4.41E-07 |
| TUCP_001216 | XLOC_045326 | ENSRNOT00000028074 | 0.972137575  | 1.26E-07 |
| TUCP_001216 | XLOC_045326 | ENSRNOT00000020892 | 0.960198919  | 7.36E-07 |
| TUCP_001216 | XLOC_045326 | ENSRNOT00000001401 | -0.965281911 | 3.75E-07 |
| TUCP_001216 | XLOC_045326 | ENSRNOT00000060098 | 0.962766663  | 5.29E-07 |
| TUCP_001216 | XLOC_045326 | ENSRNOT00000067739 | 0.981196898  | 1.79E-08 |
| TUCP_001216 | XLOC_045326 | ENSRNOT00000019386 | 0.954926169  | 1.36E-06 |
| TUCP_001216 | XLOC_045326 | ENSRNOT00000014859 | 0.957903467  | 9.70E-07 |
| TUCP_001216 | XLOC_045326 | ENSRNOT00000001360 | 0.962667783  | 5.36E-07 |
| TUCP_001216 | XLOC_045326 | ENSRNOT00000066888 | 0.950828994  | 2.08E-06 |
| TUCP_001216 | XLOC_045326 | ENSRNOT00000024253 | -0.95496157  | 1.35E-06 |
| TUCP_001216 | XLOC_045326 | ENSRNOT00000083110 | 0.957453619  | 1.02E-06 |
| TUCP_001216 | XLOC_045326 | ENSRNOT00000020537 | 0.957687054  | 9.95E-07 |
| TUCP_001216 | XLOC_045326 | ENSRNOT00000036658 | 0.960635747  | 6.97E-07 |
| TUCP_001216 | XLOC_045326 | ENSRNOT00000002313 | 0.9658431    | 3.46E-07 |
| TUCP_001216 | XLOC_045326 | ENSRNOT00000012775 | 0.955351941  | 1.30E-06 |
| TUCP_001216 | XLOC_045326 | ENSRNOT00000016637 | 0.957193598  | 1.05E-06 |
| TUCP_001216 | XLOC_045326 | ENSRNOT00000010674 | 0.968364889  | 2.37E-07 |
| TUCP_001216 | XLOC_045326 | ENSRNOT00000030803 | 0.954444646  | 1.43E-06 |
| TUCP_001216 | XLOC_045326 | ENSRNOT00000086260 | 0.952678115  | 1.73E-06 |
| TUCP_001216 | XLOC_045326 | ENSRNOT00000064667 | 0.957291287  | 1.04E-06 |
| TUCP_001216 | XLOC_045326 | ENSRNOT00000072856 | 0.971537591  | 1.40E-07 |
| TUCP_001216 | XLOC_045326 | ENSRNOT00000018328 | 0.971667686  | 1.37E-07 |
| TUCP_001216 | XLOC_045326 | ENSRNOT00000008256 | 0.953257035  | 1.62E-06 |
| TUCP_001216 | XLOC_045326 | ENSRNOT00000036613 | 0.955235308  | 1.31E-06 |
| TUCP_001216 | XLOC_045326 | ENSRNOT00000034883 | 0.957912196  | 9.69E-07 |
| TUCP_001216 | XLOC_045326 | ENSRNOT00000009726 | 0.965002744  | 3.90E-07 |
| TUCP_001216 | XLOC_045326 | ENSRNOT00000025824 | 0.956008493  | 1.20E-06 |
| TUCP_001216 | XLOC_045326 | ENSRNOT00000071929 | 0.962138309  | 5.75E-07 |
| TUCP_001216 | XLOC_045326 | ENSRNOT00000090853 | 0.95246221   | 1.76E-06 |
| TUCP_001216 | XLOC_045326 | ENSRNOT0000000707  | 0.951395429  | 1.97E-06 |
| TUCP_001216 | XLOC_045326 | ENSRNOT00000005170 | 0.953133379  | 1.65E-06 |
| TUCP_001216 | XLOC_045326 | ENSRNOT00000000532 | 0.954802404  | 1.38E-06 |
| TUCP_001216 | XLOC_045326 | ENSRNOT0000006913  | 0.960556343  | 7.04E-07 |
| TUCP_001216 | XLOC_045326 | ENSRNOT00000025913 | 0.953699756  | 1.55E-06 |
| TUCP_001216 | XLOC_045326 | ENSRNOT00000079677 | 0.955108284  | 1.33E-06 |
| TUCP_001216 | XLOC_045326 | ENSRNOT00000003992 | 0.97855803   | 3.44E-08 |
| TUCP_001216 | XLOC_045326 | ENSRNOT00000071897 | 0.954693977  | 1.39E-06 |
| TUCP_001216 | XLOC_045326 | ENSRNOT00000020472 | 0.961774028  | 6.03E-07 |
| TUCP_001216 | XLOC_045326 | ENSRNOT00000031261 | -0.981038553 | 1.87E-08 |
| TUCP_001216 | XLOC_045326 | ENSRNOT00000067836 | 0.969107194  | 2.10E-07 |
| TUCP_001216 | XLOC_045326 | ENSRNOT00000019816 | 0.955863875  | 1.22E-06 |

|             |             |                    |              |          |
|-------------|-------------|--------------------|--------------|----------|
| TUCP_001216 | XLOC_045326 | ENSRNOT00000018494 | 0.965043278  | 3.88E-07 |
| TUCP_001216 | XLOC_045326 | ENSRNOT00000024285 | 0.970488376  | 1.68E-07 |
| TUCP_001216 | XLOC_045326 | ENSRNOT00000071482 | 0.966352114  | 3.21E-07 |
| TUCP_001216 | XLOC_045326 | ENSRNOT00000009136 | 0.951963897  | 1.86E-06 |
| TUCP_001216 | XLOC_045326 | ENSRNOT00000064068 | 0.964819323  | 4.00E-07 |
| TUCP_001216 | XLOC_045326 | ENSRNOT00000025222 | 0.965278304  | 3.75E-07 |
| TUCP_001216 | XLOC_045326 | ENSRNOT00000023067 | 0.971676499  | 1.37E-07 |
| TUCP_001216 | XLOC_045326 | ENSRNOT00000056015 | 0.9598112    | 7.72E-07 |
| TUCP_001216 | XLOC_045326 | ENSRNOT00000074261 | 0.961982191  | 5.87E-07 |
| TUCP_001216 | XLOC_045326 | ENSRNOT00000068528 | 0.979663193  | 2.65E-08 |
| TUCP_001216 | XLOC_045326 | ENSRNOT00000011675 | -0.95000939  | 2.26E-06 |
| TUCP_001216 | XLOC_045326 | ENSRNOT00000027917 | -0.953840775 | 1.53E-06 |
| TUCP_001216 | XLOC_045326 | ENSRNOT00000004290 | -0.967929889 | 2.53E-07 |
| TUCP_001216 | XLOC_045326 | ENSRNOT00000039000 | 0.965930638  | 3.41E-07 |
| TUCP_001216 | XLOC_045326 | ENSRNOT00000076230 | -0.97306738  | 1.07E-07 |
| TUCP_001216 | XLOC_045326 | ENSRNOT00000009238 | 0.958800817  | 8.72E-07 |
| TUCP_001216 | XLOC_045326 | ENSRNOT00000028893 | 0.9597861    | 7.74E-07 |
| TUCP_001216 | XLOC_045326 | ENSRNOT00000072357 | 0.952282933  | 1.80E-06 |
| TUCP_001216 | XLOC_045326 | ENSRNOT00000034401 | 0.952690985  | 1.72E-06 |
| TUCP_001216 | XLOC_045326 | ENSRNOT00000000527 | 0.967381162  | 2.75E-07 |
| TUCP_001216 | XLOC_045326 | ENSRNOT00000050102 | 0.951444905  | 1.96E-06 |
| TUCP_001216 | XLOC_045326 | ENSRNOT00000080591 | -0.951266736 | 1.99E-06 |
| TUCP_001216 | XLOC_045326 | ENSRNOT00000080222 | 0.959700005  | 7.82E-07 |
| TUCP_001216 | XLOC_045326 | ENSRNOT00000081110 | 0.960592829  | 7.00E-07 |
| TUCP_001216 | XLOC_045326 | ENSRNOT00000049285 | 0.95532547   | 1.30E-06 |
| TUCP_001216 | XLOC_045326 | ENSRNOT00000093385 | -0.961719974 | 6.07E-07 |
| TUCP_001216 | XLOC_045326 | ENSRNOT00000006366 | 0.952857219  | 1.69E-06 |
| TUCP_001216 | XLOC_045326 | ENSRNOT00000088202 | 0.976043122  | 5.97E-08 |
| TUCP_001216 | XLOC_045326 | ENSRNOT00000037955 | 0.973474805  | 9.89E-08 |
| TUCP_001216 | XLOC_045326 | ENSRNOT00000017224 | 0.962591297  | 5.42E-07 |
| TUCP_001216 | XLOC_045326 | ENSRNOT00000085911 | 0.993644881  | 8.08E-11 |
| TUCP_001216 | XLOC_045326 | ENSRNOT00000005459 | -0.950728652 | 2.10E-06 |
| TUCP_001216 | XLOC_045326 | ENSRNOT00000078161 | 0.98145499   | 1.67E-08 |
| TUCP_001216 | XLOC_045326 | ENSRNOT00000064723 | 0.966813115  | 3.00E-07 |
| TUCP_001216 | XLOC_045326 | ENSRNOT00000044662 | 0.970944093  | 1.55E-07 |
| TUCP_001216 | XLOC_045326 | ENSRNOT00000077080 | 0.971319571  | 1.46E-07 |
| TUCP_001216 | XLOC_045326 | ENSRNOT00000086456 | 0.973141093  | 1.05E-07 |
| TUCP_001216 | XLOC_045326 | ENSRNOT00000036959 | 0.965130352  | 3.83E-07 |
| TUCP_001216 | XLOC_045326 | ENSRNOT00000019465 | 0.959356622  | 8.16E-07 |
| TUCP_001216 | XLOC_045326 | ENSRNOT00000075209 | 0.96736565   | 2.76E-07 |
| TUCP_001216 | XLOC_045326 | ENSRNOT00000056145 | 0.950515663  | 2.15E-06 |
| TUCP_001216 | XLOC_045326 | ENSRNOT00000006824 | 0.959222227  | 8.29E-07 |
| TUCP_001216 | XLOC_045326 | ENSRNOT00000023977 | 0.954499796  | 1.42E-06 |
| TUCP_001216 | XLOC_045326 | ENSRNOT00000011572 | 0.95185044   | 1.88E-06 |
| TUCP_001216 | XLOC_045326 | ENSRNOT00000000155 | -0.970597941 | 1.65E-07 |
| TUCP_001216 | XLOC_045326 | ENSRNOT00000018849 | 0.956933646  | 1.09E-06 |
| TUCP_001216 | XLOC_045326 | ENSRNOT00000067741 | 0.974882093  | 7.55E-08 |
| TUCP_001216 | XLOC_045326 | ENSRNOT00000048933 | 0.956424402  | 1.15E-06 |
| TUCP_001216 | XLOC_045326 | ENSRNOT00000059181 | -0.957958562 | 9.64E-07 |
| TUCP_001216 | XLOC_045326 | ENSRNOT00000054717 | 0.955082965  | 1.34E-06 |
| TUCP_001216 | XLOC_045326 | ENSRNOT00000003691 | 0.957276119  | 1.04E-06 |

|             |             |                    |              |          |
|-------------|-------------|--------------------|--------------|----------|
| TUCP_001216 | XLOC_045326 | ENSRNOT00000045532 | 0.95454974   | 1.41E-06 |
| TUCP_001216 | XLOC_045326 | ENSRNOT00000028434 | 0.95806448   | 9.52E-07 |
| TUCP_001216 | XLOC_045326 | ENSRNOT00000022389 | 0.962547297  | 5.45E-07 |
| TUCP_001216 | XLOC_045326 | ENSRNOT00000025794 | 0.960157319  | 7.39E-07 |
| TUCP_001216 | XLOC_045326 | ENSRNOT00000024712 | 0.956429261  | 1.15E-06 |
| TUCP_001216 | XLOC_045326 | ENSRNOT00000064849 | 0.974547307  | 8.06E-08 |
| TUCP_001216 | XLOC_045326 | ENSRNOT00000058111 | 0.986160112  | 3.91E-09 |
| TUCP_001216 | XLOC_045326 | ENSRNOT00000011869 | 0.959673184  | 7.85E-07 |
| TUCP_001216 | XLOC_045326 | ENSRNOT00000008901 | 0.954333245  | 1.45E-06 |
| TUCP_001216 | XLOC_045326 | ENSRNOT00000046126 | 0.951885133  | 1.87E-06 |
| TUCP_001216 | XLOC_045326 | ENSRNOT00000028744 | 0.964714563  | 4.06E-07 |
| TUCP_001216 | XLOC_045326 | ENSRNOT00000007738 | 0.95897123   | 8.55E-07 |
| TUCP_001216 | XLOC_045326 | ENSRNOT00000026928 | 0.95840916   | 9.14E-07 |
| TUCP_001216 | XLOC_045326 | ENSRNOT00000017190 | -0.961608967 | 6.16E-07 |
| TUCP_001216 | XLOC_045326 | ENSRNOT00000009994 | 0.970062522  | 1.80E-07 |
| TUCP_001216 | XLOC_045326 | ENSRNOT00000000649 | 0.962435655  | 5.53E-07 |
| TUCP_001216 | XLOC_045326 | ENSRNOT00000018173 | 0.960833666  | 6.80E-07 |
| TUCP_001216 | XLOC_045326 | ENSRNOT00000040548 | 0.953053001  | 1.66E-06 |
| TUCP_001216 | XLOC_045326 | ENSRNOT00000022142 | -0.950283243 | 2.20E-06 |
| TUCP_001216 | XLOC_045326 | ENSRNOT00000076300 | 0.957419143  | 1.03E-06 |
| TUCP_001216 | XLOC_045326 | ENSRNOT00000014585 | 0.960034492  | 7.51E-07 |
| TUCP_001216 | XLOC_045326 | ENSRNOT00000024841 | 0.952627766  | 1.73E-06 |
| TUCP_001216 | XLOC_045326 | ENSRNOT00000027753 | 0.967093309  | 2.88E-07 |
| TUCP_001216 | XLOC_045326 | ENSRNOT00000021705 | 0.950351356  | 2.19E-06 |
| TUCP_001216 | XLOC_045326 | ENSRNOT00000073239 | 0.959829155  | 7.70E-07 |
| TUCP_001216 | XLOC_045326 | ENSRNOT00000040060 | 0.958122957  | 9.45E-07 |
| TUCP_001216 | XLOC_045326 | ENSRNOT00000046215 | 0.968146844  | 2.45E-07 |
| TUCP_001216 | XLOC_045326 | ENSRNOT00000015946 | 0.966822075  | 2.99E-07 |
| TUCP_001216 | XLOC_045326 | ENSRNOT00000039102 | -0.955418935 | 1.29E-06 |
| TUCP_001216 | XLOC_045326 | ENSRNOT00000082138 | 0.950027465  | 2.26E-06 |
| TUCP_001216 | XLOC_045326 | ENSRNOT00000076467 | 0.962196749  | 5.71E-07 |
| TUCP_001216 | XLOC_045326 | ENSRNOT00000016265 | 0.96948135   | 1.98E-07 |
| TUCP_001216 | XLOC_045326 | ENSRNOT00000047572 | 0.953252972  | 1.63E-06 |
| TUCP_001216 | XLOC_045326 | ENSRNOT00000058763 | 0.956073035  | 1.20E-06 |
| TUCP_001216 | XLOC_045326 | ENSRNOT00000023962 | 0.965589597  | 3.59E-07 |
| TUCP_001216 | XLOC_045326 | ENSRNOT0000007044  | 0.958202557  | 9.36E-07 |
| TUCP_001216 | XLOC_045326 | ENSRNOT00000036282 | -0.965750068 | 3.50E-07 |
| TUCP_001216 | XLOC_045326 | ENSRNOT00000012625 | 0.958120754  | 9.46E-07 |
| TUCP_001216 | XLOC_045326 | ENSRNOT00000080677 | 0.96669734   | 3.05E-07 |
| TUCP_001216 | XLOC_045326 | ENSRNOT00000025460 | -0.962932602 | 5.18E-07 |
| TUCP_001216 | XLOC_045326 | ENSRNOT00000028545 | 0.952963966  | 1.68E-06 |
| TUCP_001216 | XLOC_045326 | ENSRNOT00000025784 | 0.964136798  | 4.40E-07 |
| TUCP_001216 | XLOC_045326 | ENSRNOT00000028225 | -0.960615941 | 6.98E-07 |
| TUCP_001216 | XLOC_045326 | ENSRNOT00000019172 | 0.969611172  | 1.94E-07 |
| TUCP_001216 | XLOC_045326 | ENSRNOT00000061345 | 0.96043813   | 7.14E-07 |
| TUCP_001216 | XLOC_045326 | ENSRNOT00000020994 | 0.959076417  | 8.44E-07 |
| TUCP_001216 | XLOC_045326 | ENSRNOT0000000134  | 0.966889024  | 2.96E-07 |
| TUCP_001216 | XLOC_045326 | ENSRNOT00000027360 | 0.967229     | 2.82E-07 |
| TUCP_001216 | XLOC_045326 | ENSRNOT00000004770 | 0.970827701  | 1.58E-07 |
| TUCP_001216 | XLOC_045326 | ENSRNOT00000025819 | 0.967069453  | 2.89E-07 |
| TUCP_001216 | XLOC_045326 | ENSRNOT00000015318 | 0.968954489  | 2.16E-07 |



|             |             |                    |              |          |
|-------------|-------------|--------------------|--------------|----------|
| TUCP_001216 | XLOC_045326 | ENSRNOT00000014479 | 0.972684615  | 1.14E-07 |
| TUCP_001216 | XLOC_045326 | ENSRNOT00000028907 | -0.961249072 | 6.45E-07 |
| TUCP_001216 | XLOC_045326 | ENSRNOT00000014317 | 0.960547483  | 7.04E-07 |
| TUCP_001216 | XLOC_045326 | ENSRNOT00000090970 | -0.961210924 | 6.48E-07 |
| TUCP_001216 | XLOC_045326 | ENSRNOT00000016776 | 0.967770016  | 2.59E-07 |
| TUCP_001216 | XLOC_045326 | ENSRNOT00000089086 | 0.957013888  | 1.08E-06 |
| TUCP_001216 | XLOC_045326 | ENSRNOT00000041151 | 0.953859582  | 1.52E-06 |
| TUCP_001216 | XLOC_045326 | ENSRNOT00000079414 | 0.97575455   | 6.34E-08 |
| TUCP_001216 | XLOC_045326 | ENSRNOT00000008987 | 0.952052454  | 1.84E-06 |
| TUCP_001216 | XLOC_045326 | ENSRNOT00000024011 | -0.964070129 | 4.44E-07 |
| TUCP_001216 | XLOC_045326 | ENSRNOT00000092876 | 0.968785725  | 2.21E-07 |
| TUCP_001216 | XLOC_045326 | ENSRNOT00000078862 | -0.953204481 | 1.63E-06 |
| TUCP_001216 | XLOC_045326 | ENSRNOT00000015986 | 0.953080987  | 1.65E-06 |
| TUCP_001216 | XLOC_045326 | ENSRNOT00000001366 | 0.963792756  | 4.61E-07 |
| TUCP_001216 | XLOC_045326 | ENSRNOT00000011326 | 0.964963023  | 3.92E-07 |
| TUCP_001216 | XLOC_045326 | ENSRNOT00000019473 | 0.961263257  | 6.44E-07 |
| TUCP_001216 | XLOC_045326 | ENSRNOT00000036194 | 0.957606882  | 1.00E-06 |
| TUCP_001217 | XLOC_045599 | ENSRNOT00000009428 | 0.964038936  | 4.46E-07 |
| TUCP_001217 | XLOC_045599 | ENSRNOT00000081021 | 0.951889469  | 1.87E-06 |
| TUCP_001215 | XLOC_045320 | ENSRNOT00000001215 | -0.95509722  | 1.33E-06 |
| TUCP_001215 | XLOC_045320 | ENSRNOT00000013747 | -0.960395007 | 7.18E-07 |
| TUCP_001215 | XLOC_045320 | ENSRNOT00000075397 | -0.962529949 | 5.46E-07 |
| TUCP_001215 | XLOC_045320 | ENSRNOT00000019104 | 0.956809378  | 1.10E-06 |
| TUCP_001215 | XLOC_045320 | ENSRNOT00000019848 | 0.963455698  | 4.83E-07 |
| TUCP_001215 | XLOC_045320 | ENSRNOT00000077451 | 0.96986336   | 1.86E-07 |
| TUCP_001215 | XLOC_045320 | ENSRNOT00000086798 | 0.969154415  | 2.09E-07 |
| TUCP_001215 | XLOC_045320 | ENSRNOT00000079644 | 0.968290141  | 2.39E-07 |
| TUCP_001215 | XLOC_045320 | ENSRNOT00000079138 | -0.956924443 | 1.09E-06 |
| TUCP_001215 | XLOC_045320 | ENSRNOT00000064305 | 0.979386507  | 2.83E-08 |
| TUCP_001215 | XLOC_045320 | ENSRNOT00000006913 | 0.95377881   | 1.54E-06 |
| TUCP_001215 | XLOC_045320 | ENSRNOT00000029508 | -0.957207594 | 1.05E-06 |
| TUCP_001215 | XLOC_045320 | ENSRNOT00000086310 | 0.977535829  | 4.34E-08 |
| TUCP_001215 | XLOC_045320 | ENSRNOT00000037955 | 0.974631181  | 7.93E-08 |
| TUCP_001215 | XLOC_045320 | ENSRNOT00000025309 | -0.95231539  | 1.79E-06 |
| TUCP_001215 | XLOC_045320 | ENSRNOT00000025308 | 0.956823982  | 1.10E-06 |
| TUCP_001215 | XLOC_045320 | ENSRNOT00000030850 | -0.960683367 | 6.93E-07 |
| TUCP_001215 | XLOC_045320 | ENSRNOT00000055540 | -0.955451569 | 1.28E-06 |
| TUCP_001215 | XLOC_045320 | ENSRNOT00000003247 | 0.976761476  | 5.13E-08 |
| TUCP_001215 | XLOC_045320 | ENSRNOT00000015986 | 0.963573856  | 4.75E-07 |
| TUCP_001215 | XLOC_045320 | ENSRNOT00000025284 | 0.974889246  | 7.54E-08 |
| TUCP_001215 | XLOC_045320 | ENSRNOT00000072771 | -0.954306241 | 1.45E-06 |
| TUCP_001215 | XLOC_045320 | ENSRNOT00000065978 | -0.953081168 | 1.65E-06 |
| TUCP_001215 | XLOC_045320 | ENSRNOT00000035320 | 0.972229668  | 1.24E-07 |
| TUCP_001215 | XLOC_045320 | ENSRNOT00000017469 | 0.978086647  | 3.84E-08 |
| TUCP_001215 | XLOC_045320 | ENSRNOT00000091448 | 0.969113482  | 2.10E-07 |
| TUCP_001215 | XLOC_045320 | ENSRNOT00000046807 | 0.981210508  | 1.79E-08 |
| TUCP_001215 | XLOC_045320 | ENSRNOT00000026398 | 0.951852779  | 1.88E-06 |
| TUCP_001215 | XLOC_045320 | ENSRNOT00000077856 | 0.971642618  | 1.38E-07 |
| TUCP_001215 | XLOC_045320 | ENSRNOT00000024264 | 0.957895571  | 9.71E-07 |
| TUCP_001215 | XLOC_045320 | ENSRNOT00000061580 | 0.951661805  | 1.92E-06 |
| TUCP_001215 | XLOC_045320 | ENSRNOT00000015188 | -0.955870633 | 1.22E-06 |

|             |             |                    |              |          |
|-------------|-------------|--------------------|--------------|----------|
| TUCP_001215 | XLOC_045320 | ENSRNOT00000018488 | 0.955557152  | 1.27E-06 |
| TUCP_001215 | XLOC_045320 | ENSRNOT00000086456 | 0.971188554  | 1.49E-07 |
| TUCP_001215 | XLOC_045320 | ENSRNOT00000080522 | 0.98474482   | 6.34E-09 |
| TUCP_001215 | XLOC_045320 | ENSRNOT00000030007 | 0.978707802  | 3.33E-08 |
| TUCP_001215 | XLOC_045320 | ENSRNOT00000082686 | 0.961539599  | 6.21E-07 |
| TUCP_001215 | XLOC_045320 | ENSRNOT00000030074 | -0.95693596  | 1.08E-06 |
| TUCP_001215 | XLOC_045320 | ENSRNOT00000017269 | 0.963411495  | 4.86E-07 |
| TUCP_001215 | XLOC_045320 | ENSRNOT00000026462 | 0.951768508  | 1.90E-06 |
| TUCP_001215 | XLOC_045320 | ENSRNOT00000092945 | 0.968910884  | 2.17E-07 |
| TUCP_001215 | XLOC_045320 | ENSRNOT00000009150 | -0.954358905 | 1.44E-06 |
| TUCP_001215 | XLOC_045320 | ENSRNOT00000084709 | -0.956858814 | 1.09E-06 |
| TUCP_001215 | XLOC_045320 | ENSRNOT00000026481 | -0.956285261 | 1.17E-06 |
| TUCP_001215 | XLOC_045320 | ENSRNOT00000009994 | 0.972878941  | 1.10E-07 |
| TUCP_001215 | XLOC_045320 | ENSRNOT00000026525 | 0.973364044  | 1.01E-07 |
| TUCP_001215 | XLOC_045320 | ENSRNOT00000072299 | -0.957393545 | 1.03E-06 |
| TUCP_001215 | XLOC_045320 | ENSRNOT00000028074 | 0.965220583  | 3.78E-07 |
| TUCP_001215 | XLOC_045320 | ENSRNOT00000072357 | 0.956049851  | 1.20E-06 |
| TUCP_001215 | XLOC_045320 | ENSRNOT00000016132 | 0.953386721  | 1.60E-06 |
| TUCP_001215 | XLOC_045320 | ENSRNOT00000001366 | 0.978360169  | 3.60E-08 |
| TUCP_001215 | XLOC_045320 | ENSRNOT00000013067 | 0.952739269  | 1.71E-06 |
| TUCP_001215 | XLOC_045320 | ENSRNOT00000001360 | 0.962308943  | 5.62E-07 |
| TUCP_001215 | XLOC_045320 | ENSRNOT00000023506 | 0.953689717  | 1.55E-06 |
| TUCP_001215 | XLOC_045320 | ENSRNOT00000002313 | 0.972577036  | 1.17E-07 |
| TUCP_001215 | XLOC_045320 | ENSRNOT00000032363 | -0.956283501 | 1.17E-06 |
| TUCP_001215 | XLOC_045320 | ENSRNOT00000016637 | 0.963900458  | 4.54E-07 |
| TUCP_001215 | XLOC_045320 | ENSRNOT00000011714 | 0.956714603  | 1.11E-06 |
| TUCP_001215 | XLOC_045320 | ENSRNOT00000030893 | 0.954275417  | 1.46E-06 |
| TUCP_001215 | XLOC_045320 | ENSRNOT00000071929 | 0.954542439  | 1.42E-06 |
| TUCP_001215 | XLOC_045320 | ENSRNOT00000061191 | 0.95632425   | 1.16E-06 |
| TUCP_001215 | XLOC_045320 | ENSRNOT00000079677 | 0.965952007  | 3.40E-07 |
| TUCP_001215 | XLOC_045320 | ENSRNOT00000003992 | 0.975092345  | 7.24E-08 |
| TUCP_001215 | XLOC_045320 | ENSRNOT00000021400 | 0.967963206  | 2.52E-07 |
| TUCP_001215 | XLOC_045320 | ENSRNOT00000012942 | -0.952095997 | 1.83E-06 |
| TUCP_001215 | XLOC_045320 | ENSRNOT00000089980 | 0.950080409  | 2.24E-06 |
| TUCP_001215 | XLOC_045320 | ENSRNOT00000085885 | 0.954100176  | 1.49E-06 |
| TUCP_001215 | XLOC_045320 | ENSRNOT00000020951 | -0.957220212 | 1.05E-06 |
| TUCP_001215 | XLOC_045320 | ENSRNOT00000028893 | 0.953120532  | 1.65E-06 |
| TUCP_001215 | XLOC_045320 | ENSRNOT00000023876 | -0.960179258 | 7.37E-07 |
| TUCP_001215 | XLOC_045320 | ENSRNOT00000034401 | 0.959364737  | 8.15E-07 |
| TUCP_001215 | XLOC_045320 | ENSRNOT00000012625 | 0.968648631  | 2.26E-07 |
| TUCP_001215 | XLOC_045320 | ENSRNOT00000049285 | 0.961416426  | 6.31E-07 |
| TUCP_001215 | XLOC_045320 | ENSRNOT00000006366 | 0.957245985  | 1.05E-06 |
| TUCP_001215 | XLOC_045320 | ENSRNOT00000085911 | 0.987227988  | 2.62E-09 |
| TUCP_001215 | XLOC_045320 | ENSRNOT00000044662 | 0.968339658  | 2.38E-07 |
| TUCP_001215 | XLOC_045320 | ENSRNOT00000064723 | 0.965909051  | 3.42E-07 |
| TUCP_001215 | XLOC_045320 | ENSRNOT00000089673 | 0.953603894  | 1.57E-06 |
| TUCP_001215 | XLOC_045320 | ENSRNOT00000036959 | 0.965679423  | 3.54E-07 |
| TUCP_001215 | XLOC_045320 | ENSRNOT00000075209 | 0.972148414  | 1.26E-07 |
| TUCP_001215 | XLOC_045320 | ENSRNOT00000023977 | 0.964059839  | 4.45E-07 |
| TUCP_001215 | XLOC_045320 | ENSRNOT00000067741 | 0.981341713  | 1.73E-08 |
| TUCP_001215 | XLOC_045320 | ENSRNOT00000048933 | 0.957897843  | 9.71E-07 |

|             |             |                    |              |          |
|-------------|-------------|--------------------|--------------|----------|
| TUCP_001215 | XLOC_045320 | ENSRNOT00000002443 | -0.955524064 | 1.27E-06 |
| TUCP_001215 | XLOC_045320 | ENSRNOT00000017190 | -0.965068079 | 3.86E-07 |
| TUCP_001215 | XLOC_045320 | ENSRNOT00000000649 | 0.957643227  | 1.00E-06 |
| TUCP_001215 | XLOC_045320 | ENSRNOT00000018173 | 0.965287023  | 3.74E-07 |
| TUCP_001215 | XLOC_045320 | ENSRNOT00000040548 | 0.97059735   | 1.65E-07 |
| TUCP_001215 | XLOC_045320 | ENSRNOT00000073239 | 0.975801256  | 6.28E-08 |
| TUCP_001215 | XLOC_045320 | ENSRNOT00000040060 | 0.975214148  | 7.07E-08 |
| TUCP_001215 | XLOC_045320 | ENSRNOT00000081835 | 0.962503511  | 5.48E-07 |
| TUCP_001215 | XLOC_045320 | ENSRNOT00000039102 | -0.965113463 | 3.84E-07 |
| TUCP_001215 | XLOC_045320 | ENSRNOT00000009742 | 0.962871327  | 5.22E-07 |
| TUCP_001215 | XLOC_045320 | ENSRNOT00000007044 | 0.973612736  | 9.64E-08 |
| TUCP_001215 | XLOC_045320 | ENSRNOT00000010983 | -0.953835758 | 1.53E-06 |
| TUCP_001215 | XLOC_045320 | ENSRNOT00000012996 | -0.955016557 | 1.34E-06 |
| TUCP_001215 | XLOC_045320 | ENSRNOT00000045946 | -0.950801977 | 2.09E-06 |
| TUCP_001215 | XLOC_045320 | ENSRNOT00000088679 | 0.954987076  | 1.35E-06 |
| TUCP_001215 | XLOC_045320 | ENSRNOT00000016776 | 0.972884705  | 1.10E-07 |
| TUCP_001215 | XLOC_045320 | ENSRNOT00000008987 | 0.963483577  | 4.81E-07 |
| TUCP_001215 | XLOC_045320 | ENSRNOT00000092876 | 0.973622577  | 9.62E-08 |
| TUCP_001215 | XLOC_045320 | ENSRNOT00000031935 | 0.962299039  | 5.63E-07 |
| TUCP_001215 | XLOC_045320 | ENSRNOT00000024253 | -0.956797135 | 1.10E-06 |
| TUCP_001215 | XLOC_045320 | ENSRNOT00000019473 | 0.971758154  | 1.35E-07 |
| TUCP_001215 | XLOC_045320 | ENSRNOT00000081796 | -0.962280014 | 5.64E-07 |
| TUCP_001215 | XLOC_045320 | ENSRNOT00000066041 | 0.95344691   | 1.59E-06 |
| TUCP_001215 | XLOC_045320 | ENSRNOT00000013058 | -0.962360468 | 5.59E-07 |
| TUCP_001215 | XLOC_045320 | ENSRNOT00000046215 | 0.978094935  | 3.83E-08 |
| TUCP_001215 | XLOC_045320 | ENSRNOT00000013116 | 0.977129946  | 4.74E-08 |
| TUCP_001215 | XLOC_045320 | ENSRNOT00000009565 | 0.971106253  | 1.51E-07 |
| TUCP_001215 | XLOC_045320 | ENSRNOT00000038178 | 0.969203691  | 2.07E-07 |
| TUCP_001215 | XLOC_045320 | ENSRNOT00000054932 | 0.953217544  | 1.63E-06 |
| TUCP_001215 | XLOC_045320 | ENSRNOT00000089829 | 0.953716468  | 1.55E-06 |
| TUCP_001215 | XLOC_045320 | ENSRNOT00000040847 | 0.958609141  | 8.92E-07 |
| TUCP_001215 | XLOC_045320 | ENSRNOT00000014479 | 0.979781448  | 2.57E-08 |
| TUCP_001215 | XLOC_045320 | ENSRNOT00000003326 | 0.966384857  | 3.19E-07 |
| TUCP_001215 | XLOC_045320 | ENSRNOT00000016306 | 0.958441515  | 9.10E-07 |
| TUCP_001215 | XLOC_045320 | ENSRNOT00000086813 | 0.967963169  | 2.52E-07 |
| TUCP_001215 | XLOC_045320 | ENSRNOT00000073019 | -0.977000841 | 4.88E-08 |
| TUCP_001215 | XLOC_045320 | ENSRNOT00000004007 | 0.963406     | 4.86E-07 |
| TUCP_001215 | XLOC_045320 | ENSRNOT00000024677 | -0.95404978  | 1.49E-06 |
| TUCP_001215 | XLOC_045320 | ENSRNOT00000090338 | 0.966269633  | 3.25E-07 |
| TUCP_001215 | XLOC_045320 | ENSRNOT00000056100 | 0.95086419   | 2.08E-06 |
| TUCP_001215 | XLOC_045320 | ENSRNOT00000006443 | 0.980899636  | 1.94E-08 |
| TUCP_001215 | XLOC_045320 | ENSRNOT00000072762 | 0.975759244  | 6.33E-08 |
| TUCP_001215 | XLOC_045320 | ENSRNOT00000073643 | 0.976458724  | 5.47E-08 |
| TUCP_001215 | XLOC_045320 | ENSRNOT00000052002 | -0.951285235 | 1.99E-06 |
| TUCP_001215 | XLOC_045320 | ENSRNOT00000022502 | 0.96521321   | 3.78E-07 |
| TUCP_001215 | XLOC_045320 | ENSRNOT00000026928 | 0.967507519  | 2.70E-07 |
| TUCP_001215 | XLOC_045320 | ENSRNOT00000026920 | 0.960775123  | 6.85E-07 |
| TUCP_001215 | XLOC_045320 | ENSRNOT00000021802 | -0.960834088 | 6.80E-07 |
| TUCP_001215 | XLOC_045320 | ENSRNOT00000021803 | 0.950773236  | 2.10E-06 |
| TUCP_001215 | XLOC_045320 | ENSRNOT00000050415 | 0.959897237  | 7.64E-07 |
| TUCP_001215 | XLOC_045320 | ENSRNOT00000010674 | 0.973466535  | 9.91E-08 |

|             |             |                    |              |          |
|-------------|-------------|--------------------|--------------|----------|
| TUCP_001215 | XLOC_045320 | ENSRNOT00000068381 | -0.959001497 | 8.51E-07 |
| TUCP_001215 | XLOC_045320 | ENSRNOT00000020994 | 0.974100835  | 8.79E-08 |
| TUCP_001215 | XLOC_045320 | ENSRNOT00000005459 | -0.961157424 | 6.52E-07 |
| TUCP_001215 | XLOC_045320 | ENSRNOT00000065103 | 0.961972673  | 5.87E-07 |
| TUCP_001215 | XLOC_045320 | ENSRNOT00000064068 | 0.975112283  | 7.21E-08 |
| TUCP_001215 | XLOC_045320 | ENSRNOT00000023567 | 0.957211893  | 1.05E-06 |
| TUCP_001215 | XLOC_045320 | ENSRNOT00000068269 | 0.965924549  | 3.42E-07 |
| TUCP_001215 | XLOC_045320 | ENSRNOT00000071897 | 0.961685416  | 6.10E-07 |
| TUCP_001215 | XLOC_045320 | ENSRNOT00000050350 | 0.966112694  | 3.32E-07 |
| TUCP_001215 | XLOC_045320 | ENSRNOT00000018494 | 0.977378292  | 4.49E-08 |
| TUCP_001215 | XLOC_045320 | ENSRNOT00000024285 | 0.968909449  | 2.17E-07 |
| TUCP_001215 | XLOC_045320 | ENSRNOT00000071482 | 0.975248499  | 7.02E-08 |
| TUCP_001215 | XLOC_045320 | ENSRNOT00000009136 | 0.96621498   | 3.28E-07 |
| TUCP_001215 | XLOC_045320 | ENSRNOT00000023067 | 0.983050459  | 1.07E-08 |
| TUCP_001215 | XLOC_045320 | ENSRNOT00000027917 | -0.959003927 | 8.51E-07 |
| TUCP_001215 | XLOC_045320 | ENSRNOT00000000527 | 0.978853668  | 3.21E-08 |
| TUCP_001215 | XLOC_045320 | ENSRNOT00000000529 | 0.965592144  | 3.58E-07 |
| TUCP_001215 | XLOC_045320 | ENSRNOT00000081110 | 0.968222518  | 2.42E-07 |
| TUCP_001215 | XLOC_045320 | ENSRNOT00000039000 | 0.9758127    | 6.26E-08 |
| TUCP_001215 | XLOC_045320 | ENSRNOT00000088202 | 0.978619557  | 3.39E-08 |
| TUCP_001215 | XLOC_045320 | ENSRNOT00000078161 | 0.981824649  | 1.52E-08 |
| TUCP_001215 | XLOC_045320 | ENSRNOT00000077303 | 0.952379684  | 1.78E-06 |
| TUCP_001215 | XLOC_045320 | ENSRNOT00000024033 | -0.953528394 | 1.58E-06 |
| TUCP_001215 | XLOC_045320 | ENSRNOT00000082151 | 0.955869172  | 1.22E-06 |
| TUCP_001215 | XLOC_045320 | ENSRNOT00000011572 | 0.958049265  | 9.54E-07 |
| TUCP_001215 | XLOC_045320 | ENSRNOT00000000155 | -0.971669795 | 1.37E-07 |
| TUCP_001215 | XLOC_045320 | ENSRNOT00000034411 | -0.952809126 | 1.70E-06 |
| TUCP_001215 | XLOC_045320 | ENSRNOT0000001607  | -0.951498538 | 1.95E-06 |
| TUCP_001215 | XLOC_045320 | ENSRNOT00000077080 | 0.958075288  | 9.51E-07 |
| TUCP_001215 | XLOC_045320 | ENSRNOT00000036282 | -0.970855001 | 1.58E-07 |
| TUCP_001215 | XLOC_045320 | ENSRNOT00000040629 | -0.959071977 | 8.44E-07 |
| TUCP_001215 | XLOC_045320 | ENSRNOT00000046126 | 0.965516284  | 3.62E-07 |
| TUCP_001215 | XLOC_045320 | ENSRNOT00000077479 | 0.969058622  | 2.12E-07 |
| TUCP_001215 | XLOC_045320 | ENSRNOT00000022142 | -0.96225011  | 5.67E-07 |
| TUCP_001215 | XLOC_045320 | ENSRNOT00000076300 | 0.956593112  | 1.13E-06 |
| TUCP_001215 | XLOC_045320 | ENSRNOT00000015946 | 0.968965448  | 2.15E-07 |
| TUCP_001215 | XLOC_045320 | ENSRNOT00000058763 | 0.960618649  | 6.98E-07 |
| TUCP_001215 | XLOC_045320 | ENSRNOT00000023962 | 0.976784533  | 5.11E-08 |
| TUCP_001215 | XLOC_045320 | ENSRNOT00000025819 | 0.973538436  | 9.77E-08 |
| TUCP_001215 | XLOC_045320 | ENSRNOT00000015318 | 0.976147772  | 5.84E-08 |
| TUCP_001215 | XLOC_045320 | ENSRNOT00000073388 | 0.953675346  | 1.55E-06 |
| TUCP_001215 | XLOC_045320 | ENSRNOT00000028907 | -0.963863095 | 4.57E-07 |
| TUCP_001215 | XLOC_045320 | ENSRNOT00000014317 | 0.979181052  | 2.97E-08 |
| TUCP_001215 | XLOC_045320 | ENSRNOT00000045532 | 0.963210897  | 4.99E-07 |
| TUCP_001215 | XLOC_045320 | ENSRNOT00000041151 | 0.959725086  | 7.80E-07 |
| TUCP_001215 | XLOC_045320 | ENSRNOT00000025887 | 0.954451565  | 1.43E-06 |
| TUCP_001215 | XLOC_045320 | ENSRNOT00000078862 | -0.953015858 | 1.67E-06 |
| TUCP_001215 | XLOC_045320 | ENSRNOT00000005311 | -0.95292205  | 1.68E-06 |
| TUCP_001215 | XLOC_045320 | ENSRNOT00000039551 | 0.97623782   | 5.73E-08 |
| TUCP_001215 | XLOC_045320 | ENSRNOT00000014946 | -0.960324096 | 7.24E-07 |
| TUCP_001215 | XLOC_045320 | ENSRNOT00000082998 | -0.955634414 | 1.26E-06 |

|             |             |                    |              |          |
|-------------|-------------|--------------------|--------------|----------|
| TUCP_001215 | XLOC_045320 | ENSRNOT00000028527 | 0.961826644  | 5.99E-07 |
| TUCP_001215 | XLOC_045320 | ENSRNOT00000007350 | -0.959099333 | 8.42E-07 |
| TUCP_001215 | XLOC_045320 | ENSRNOT00000004956 | -0.956143946 | 1.19E-06 |
| TUCP_001215 | XLOC_045320 | ENSRNOT00000083573 | 0.968302777  | 2.39E-07 |
| TUCP_001215 | XLOC_045320 | ENSRNOT00000083578 | -0.953357993 | 1.61E-06 |
| TUCP_001215 | XLOC_045320 | ENSRNOT00000059524 | 0.954502707  | 1.42E-06 |
| TUCP_001215 | XLOC_045320 | ENSRNOT00000017361 | -0.956498202 | 1.14E-06 |
| TUCP_001215 | XLOC_045320 | ENSRNOT00000042973 | 0.957072296  | 1.07E-06 |
| TUCP_001215 | XLOC_045320 | ENSRNOT00000019465 | 0.97002248   | 1.81E-07 |
| TUCP_001215 | XLOC_045320 | ENSRNOT00000018696 | 0.962228869  | 5.68E-07 |
| TUCP_001215 | XLOC_045320 | ENSRNOT00000009073 | 0.959380695  | 8.13E-07 |
| TUCP_001215 | XLOC_045320 | ENSRNOT0000001586  | 0.964175499  | 4.38E-07 |
| TUCP_001215 | XLOC_045320 | ENSRNOT00000081786 | 0.95860357   | 8.93E-07 |
| TUCP_001215 | XLOC_045320 | ENSRNOT00000013516 | -0.961310765 | 6.40E-07 |
| TUCP_001215 | XLOC_045320 | ENSRNOT00000066776 | 0.961152971  | 6.53E-07 |
| TUCP_001215 | XLOC_045320 | ENSRNOT00000013695 | 0.955934247  | 1.22E-06 |
| TUCP_001215 | XLOC_045320 | ENSRNOT00000012060 | -0.954397443 | 1.44E-06 |
| TUCP_001215 | XLOC_045320 | ENSRNOT00000030975 | 0.955488752  | 1.28E-06 |
| TUCP_001215 | XLOC_045320 | ENSRNOT00000009000 | 0.957813374  | 9.80E-07 |
| TUCP_001215 | XLOC_045320 | ENSRNOT00000034282 | -0.961287046 | 6.42E-07 |
| TUCP_001215 | XLOC_045320 | ENSRNOT00000039523 | -0.952908484 | 1.68E-06 |
| TUCP_001215 | XLOC_045320 | ENSRNOT00000089545 | 0.967588162  | 2.67E-07 |
| TUCP_001215 | XLOC_045320 | ENSRNOT00000037681 | 0.968815255  | 2.20E-07 |
| TUCP_001215 | XLOC_045320 | ENSRNOT00000067009 | 0.957067955  | 1.07E-06 |
| TUCP_001215 | XLOC_045320 | ENSRNOT00000010783 | 0.956843034  | 1.10E-06 |
| TUCP_001215 | XLOC_045320 | ENSRNOT00000085151 | 0.955036265  | 1.34E-06 |
| TUCP_001215 | XLOC_045320 | ENSRNOT00000016330 | 0.950883948  | 2.07E-06 |
| TUCP_001215 | XLOC_045320 | ENSRNOT00000019121 | 0.982517684  | 1.25E-08 |
| TUCP_001215 | XLOC_045320 | ENSRNOT00000086775 | 0.971852541  | 1.33E-07 |
| TUCP_001215 | XLOC_045320 | ENSRNOT00000019820 | -0.960418134 | 7.16E-07 |
| TUCP_001215 | XLOC_045320 | ENSRNOT00000016389 | 0.95135199   | 1.98E-06 |
| TUCP_001215 | XLOC_045320 | ENSRNOT00000012963 | 0.969975596  | 1.83E-07 |
| TUCP_001215 | XLOC_045320 | ENSRNOT00000011832 | 0.966416577  | 3.18E-07 |
| TUCP_001215 | XLOC_045320 | ENSRNOT00000024069 | 0.95582129   | 1.23E-06 |
| TUCP_001215 | XLOC_045320 | ENSRNOT00000028089 | -0.957510094 | 1.02E-06 |
| TUCP_001215 | XLOC_045320 | ENSRNOT00000068745 | -0.960341506 | 7.23E-07 |
| TUCP_001215 | XLOC_045320 | ENSRNOT00000091637 | -0.954699301 | 1.39E-06 |
| TUCP_001215 | XLOC_045320 | ENSRNOT00000092068 | -0.968134246 | 2.45E-07 |
| TUCP_001215 | XLOC_045320 | ENSRNOT00000012646 | 0.953034535  | 1.66E-06 |
| TUCP_001215 | XLOC_045320 | ENSRNOT00000074212 | -0.954463159 | 1.43E-06 |
| TUCP_001215 | XLOC_045320 | ENSRNOT00000013864 | 0.971516475  | 1.41E-07 |
| TUCP_001215 | XLOC_045320 | ENSRNOT00000051843 | 0.952340363  | 1.79E-06 |
| TUCP_001215 | XLOC_045320 | ENSRNOT00000027435 | -0.969426133 | 2.00E-07 |
| TUCP_001215 | XLOC_045320 | ENSRNOT00000022194 | 0.961016244  | 6.64E-07 |
| TUCP_001215 | XLOC_045320 | ENSRNOT00000019389 | 0.952337714  | 1.79E-06 |
| TUCP_001215 | XLOC_045320 | ENSRNOT00000060098 | 0.962645362  | 5.38E-07 |
| TUCP_001215 | XLOC_045320 | ENSRNOT00000067739 | 0.979014797  | 3.09E-08 |
| TUCP_001215 | XLOC_045320 | ENSRNOT00000019386 | 0.96706984   | 2.89E-07 |
| TUCP_001215 | XLOC_045320 | ENSRNOT00000076230 | -0.974975923 | 7.41E-08 |
| TUCP_001215 | XLOC_045320 | ENSRNOT00000083110 | 0.972890051  | 1.10E-07 |
| TUCP_001215 | XLOC_045320 | ENSRNOT00000036658 | 0.962782887  | 5.28E-07 |

|             |             |                     |              |          |
|-------------|-------------|---------------------|--------------|----------|
| TUCP_001215 | XLOC_045320 | ENSRNOT00000007738  | 0.970493027  | 1.68E-07 |
| TUCP_001215 | XLOC_045320 | ENSRNOT000000030803 | 0.965553186  | 3.60E-07 |
| TUCP_001215 | XLOC_045320 | ENSRNOT000000072856 | 0.963362415  | 4.89E-07 |
| TUCP_001215 | XLOC_045320 | ENSRNOT000000084552 | 0.953021858  | 1.67E-06 |
| TUCP_001215 | XLOC_045320 | ENSRNOT000000034883 | 0.966451001  | 3.16E-07 |
| TUCP_001215 | XLOC_045320 | ENSRNOT000000020155 | -0.963950617 | 4.51E-07 |
| TUCP_001215 | XLOC_045320 | ENSRNOT000000025827 | -0.960307704 | 7.26E-07 |
| TUCP_001215 | XLOC_045320 | ENSRNOT00000001401  | -0.966506464 | 3.14E-07 |
| TUCP_001215 | XLOC_045320 | ENSRNOT00000000707  | 0.965619774  | 3.57E-07 |
| TUCP_001215 | XLOC_045320 | ENSRNOT000000014533 | 0.957164866  | 1.06E-06 |
| TUCP_001215 | XLOC_045320 | ENSRNOT000000075917 | 0.953965497  | 1.51E-06 |
| TUCP_001215 | XLOC_045320 | ENSRNOT000000014585 | 0.964409842  | 4.24E-07 |
| TUCP_001215 | XLOC_045320 | ENSRNOT000000074261 | 0.97859299   | 3.42E-08 |
| TUCP_001215 | XLOC_045320 | ENSRNOT000000055062 | 0.955909022  | 1.22E-06 |
| TUCP_001215 | XLOC_045320 | ENSRNOT000000009238 | 0.964807618  | 4.01E-07 |
| TUCP_001215 | XLOC_045320 | ENSRNOT000000080591 | -0.959546906 | 7.97E-07 |
| TUCP_001215 | XLOC_045320 | ENSRNOT000000080222 | 0.954031558  | 1.50E-06 |
| TUCP_001215 | XLOC_045320 | ENSRNOT000000033450 | 0.961262972  | 6.44E-07 |
| TUCP_001215 | XLOC_045320 | ENSRNOT000000004999 | -0.952934495 | 1.68E-06 |
| TUCP_001215 | XLOC_045320 | ENSRNOT000000013463 | -0.955790038 | 1.23E-06 |
| TUCP_001215 | XLOC_045320 | ENSRNOT000000007889 | 0.955677     | 1.25E-06 |
| TUCP_001215 | XLOC_045320 | ENSRNOT000000000532 | 0.963731115  | 4.65E-07 |
| TUCP_001215 | XLOC_045320 | ENSRNOT000000005486 | 0.950239478  | 2.21E-06 |
| TUCP_001215 | XLOC_045320 | ENSRNOT000000017907 | 0.964047764  | 4.45E-07 |
| TUCP_001215 | XLOC_045320 | ENSRNOT000000028434 | 0.964408954  | 4.24E-07 |
| TUCP_001215 | XLOC_045320 | ENSRNOT000000025794 | 0.974277457  | 8.49E-08 |
| TUCP_001215 | XLOC_045320 | ENSRNOT000000058111 | 0.985777867  | 4.47E-09 |
| TUCP_001215 | XLOC_045320 | ENSRNOT000000011869 | 0.973518075  | 9.81E-08 |
| TUCP_001215 | XLOC_045320 | ENSRNOT000000001720 | 0.957103381  | 1.06E-06 |
| TUCP_001215 | XLOC_045320 | ENSRNOT000000020472 | 0.956286287  | 1.17E-06 |
| TUCP_001215 | XLOC_045320 | ENSRNOT000000002114 | 0.95306573   | 1.66E-06 |
| TUCP_001215 | XLOC_045320 | ENSRNOT000000027753 | 0.969932193  | 1.84E-07 |
| TUCP_001215 | XLOC_045320 | ENSRNOT000000080928 | -0.954717954 | 1.39E-06 |
| TUCP_001215 | XLOC_045320 | ENSRNOT000000077646 | 0.950315033  | 2.19E-06 |
| TUCP_001215 | XLOC_045320 | ENSRNOT000000000083 | 0.959575503  | 7.94E-07 |
| TUCP_001215 | XLOC_045320 | ENSRNOT000000076467 | 0.973140079  | 1.05E-07 |
| TUCP_001215 | XLOC_045320 | ENSRNOT000000013632 | -0.955136355 | 1.33E-06 |
| TUCP_001215 | XLOC_045320 | ENSRNOT000000028545 | 0.957235195  | 1.05E-06 |
| TUCP_001215 | XLOC_045320 | ENSRNOT000000027575 | 0.96520102   | 3.79E-07 |
| TUCP_001215 | XLOC_045320 | ENSRNOT000000028225 | -0.964030677 | 4.46E-07 |
| TUCP_001215 | XLOC_045320 | ENSRNOT000000019172 | 0.978285495  | 3.67E-08 |
| TUCP_001215 | XLOC_045320 | ENSRNOT000000009963 | -0.966491275 | 3.15E-07 |
| TUCP_001215 | XLOC_045320 | ENSRNOT000000032248 | -0.957115724 | 1.06E-06 |
| TUCP_001215 | XLOC_045320 | ENSRNOT000000064700 | -0.953601225 | 1.57E-06 |
| TUCP_001215 | XLOC_045320 | ENSRNOT000000036613 | 0.959780378  | 7.75E-07 |
| TUCP_001215 | XLOC_045320 | ENSRNOT000000025252 | 0.965494715  | 3.64E-07 |
| TUCP_001215 | XLOC_045320 | ENSRNOT000000036194 | 0.958482248  | 9.06E-07 |
| TUCP_001215 | XLOC_045320 | ENSRNOT000000077186 | 0.974094878  | 8.80E-08 |
| TUCP_001215 | XLOC_045320 | ENSRNOT000000014780 | 0.976316025  | 5.64E-08 |
| TUCP_001215 | XLOC_045320 | ENSRNOT000000006460 | -0.965915434 | 3.42E-07 |
| TUCP_001215 | XLOC_045320 | ENSRNOT000000026279 | 0.964851083  | 3.98E-07 |

|             |             |                     |              |          |
|-------------|-------------|---------------------|--------------|----------|
| TUCP_001215 | XLOC_045320 | ENSRNOT00000021506  | 0.961940649  | 5.90E-07 |
| TUCP_001215 | XLOC_045320 | ENSRNOT00000021858  | -0.97215079  | 1.26E-07 |
| TUCP_001215 | XLOC_045320 | ENSRNOT00000082863  | -0.952916426 | 1.68E-06 |
| TUCP_001215 | XLOC_045320 | ENSRNOT00000065942  | 0.993403984  | 9.72E-11 |
| TUCP_001215 | XLOC_045320 | ENSRNOT00000014309  | 0.958222889  | 9.34E-07 |
| TUCP_001215 | XLOC_045320 | ENSRNOT00000074389  | 0.963744692  | 4.64E-07 |
| TUCP_001215 | XLOC_045320 | ENSRNOT00000066204  | 0.971736888  | 1.35E-07 |
| TUCP_001215 | XLOC_045320 | ENSRNOT00000039836  | 0.963581683  | 4.75E-07 |
| TUCP_001215 | XLOC_045320 | ENSRNOT00000018101  | 0.978261025  | 3.69E-08 |
| TUCP_001215 | XLOC_045320 | ENSRNOT00000090970  | -0.96668268  | 3.06E-07 |
| TUCP_001215 | XLOC_045320 | ENSRNOT00000000052  | 0.963162657  | 5.02E-07 |
| TUCP_001215 | XLOC_045320 | ENSRNOT00000083568  | -0.966419317 | 3.18E-07 |
| TUCP_001215 | XLOC_045320 | ENSRNOT00000039177  | 0.959332245  | 8.18E-07 |
| TUCP_001215 | XLOC_045320 | ENSRNOT00000017375  | 0.95515473   | 1.32E-06 |
| TUCP_001215 | XLOC_045320 | ENSRNOT00000000577  | -0.959785597 | 7.74E-07 |
| TUCP_001215 | XLOC_045320 | ENSRNOT00000088133  | 0.963079372  | 5.08E-07 |
| TUCP_001215 | XLOC_045320 | ENSRNOT00000016629  | -0.957190562 | 1.05E-06 |
| TUCP_001215 | XLOC_045320 | ENSRNOT00000007824  | 0.950912668  | 2.07E-06 |
| TUCP_001215 | XLOC_045320 | ENSRNOT00000001979  | 0.975703664  | 6.40E-08 |
| TUCP_001215 | XLOC_045320 | ENSRNOT00000083968  | 0.973430161  | 9.97E-08 |
| TUCP_001215 | XLOC_045320 | ENSRNOT00000083967  | -0.989600981 | 9.41E-10 |
| TUCP_001215 | XLOC_045320 | ENSRNOT00000083964  | 0.968884434  | 2.18E-07 |
| TUCP_001215 | XLOC_045320 | ENSRNOT00000026726  | 0.963781958  | 4.62E-07 |
| TUCP_001215 | XLOC_045320 | ENSRNOT00000081682  | 0.958157724  | 9.41E-07 |
| TUCP_001215 | XLOC_045320 | ENSRNOT00000007821  | -0.955315604 | 1.30E-06 |
| TUCP_001215 | XLOC_045320 | ENSRNOT000000061304 | 0.974340306  | 8.39E-08 |
| TUCP_001215 | XLOC_045320 | ENSRNOT00000079609  | -0.957843147 | 9.77E-07 |
| TUCP_001215 | XLOC_045320 | ENSRNOT00000020892  | 0.956166112  | 1.18E-06 |
| TUCP_001215 | XLOC_045320 | ENSRNOT00000012314  | 0.950193139  | 2.22E-06 |
| TUCP_001215 | XLOC_045320 | ENSRNOT00000066888  | 0.965820314  | 3.47E-07 |
| TUCP_001215 | XLOC_045320 | ENSRNOT00000024119  | -0.950436481 | 2.17E-06 |
| TUCP_001215 | XLOC_045320 | ENSRNOT00000006824  | 0.95598813   | 1.21E-06 |
| TUCP_001215 | XLOC_045320 | ENSRNOT00000012775  | 0.951304734  | 1.99E-06 |
| TUCP_001215 | XLOC_045320 | ENSRNOT00000086260  | 0.957287661  | 1.04E-06 |
| TUCP_001215 | XLOC_045320 | ENSRNOT00000064667  | 0.972432595  | 1.20E-07 |
| TUCP_001215 | XLOC_045320 | ENSRNOT00000018328  | 0.983043294  | 1.07E-08 |
| TUCP_001215 | XLOC_045320 | ENSRNOT00000038610  | 0.965140768  | 3.82E-07 |
| TUCP_001215 | XLOC_045320 | ENSRNOT00000009726  | 0.965580065  | 3.59E-07 |
| TUCP_001215 | XLOC_045320 | ENSRNOT00000090853  | 0.96786216   | 2.56E-07 |
| TUCP_001215 | XLOC_045320 | ENSRNOT00000089265  | 0.951699569  | 1.91E-06 |
| TUCP_001215 | XLOC_045320 | ENSRNOT00000031261  | -0.985032037 | 5.77E-09 |
| TUCP_001215 | XLOC_045320 | ENSRNOT00000067836  | 0.973304473  | 1.02E-07 |
| TUCP_001215 | XLOC_045320 | ENSRNOT00000019816  | 0.955978174  | 1.21E-06 |
| TUCP_001215 | XLOC_045320 | ENSRNOT00000078366  | -0.956859697 | 1.09E-06 |
| TUCP_001215 | XLOC_045320 | ENSRNOT00000025222  | 0.981293149  | 1.75E-08 |
| TUCP_001215 | XLOC_045320 | ENSRNOT00000056015  | 0.9594678    | 8.05E-07 |
| TUCP_001215 | XLOC_045320 | ENSRNOT00000068528  | 0.986690795  | 3.22E-09 |
| TUCP_001215 | XLOC_045320 | ENSRNOT00000011675  | -0.955725596 | 1.24E-06 |
| TUCP_001215 | XLOC_045320 | ENSRNOT00000004290  | -0.974568964 | 8.03E-08 |
| TUCP_001215 | XLOC_045320 | ENSRNOT00000041106  | -0.961473552 | 6.27E-07 |
| TUCP_001215 | XLOC_045320 | ENSRNOT00000020005  | -0.95339666  | 1.60E-06 |

|             |             |                     |              |          |
|-------------|-------------|---------------------|--------------|----------|
| TUCP_001215 | XLOC_045320 | ENSRNOT00000085214  | 0.958157106  | 9.42E-07 |
| TUCP_001215 | XLOC_045320 | ENSRNOT00000093385  | -0.962086572 | 5.79E-07 |
| TUCP_001215 | XLOC_045320 | ENSRNOT00000017224  | 0.971884529  | 1.32E-07 |
| TUCP_001215 | XLOC_045320 | ENSRNOT00000026235  | 0.951233117  | 2.00E-06 |
| TUCP_001215 | XLOC_045320 | ENSRNOT00000087346  | -0.972620073 | 1.16E-07 |
| TUCP_001215 | XLOC_045320 | ENSRNOT00000088615  | 0.975370335  | 6.85E-08 |
| TUCP_001215 | XLOC_045320 | ENSRNOT00000059181  | -0.969441389 | 1.99E-07 |
| TUCP_001215 | XLOC_045320 | ENSRNOT0000007077   | 0.958084948  | 9.50E-07 |
| TUCP_001215 | XLOC_045320 | ENSRNOT00000028744  | 0.955623117  | 1.26E-06 |
| TUCP_001215 | XLOC_045320 | ENSRNOT00000003691  | 0.970100065  | 1.79E-07 |
| TUCP_001215 | XLOC_045320 | ENSRNOT00000022389  | 0.974985453  | 7.40E-08 |
| TUCP_001215 | XLOC_045320 | ENSRNOT00000064849  | 0.987589457  | 2.27E-09 |
| TUCP_001215 | XLOC_045320 | ENSRNOT00000008901  | 0.964129649  | 4.40E-07 |
| TUCP_001215 | XLOC_045320 | ENSRNOT00000017761  | -0.952613988 | 1.74E-06 |
| TUCP_001215 | XLOC_045320 | ENSRNOT00000004770  | 0.981328122  | 1.73E-08 |
| TUCP_001215 | XLOC_045320 | ENSRNOT00000023017  | 0.967740923  | 2.61E-07 |
| TUCP_001215 | XLOC_045320 | ENSRNOT00000016265  | 0.974000039  | 8.96E-08 |
| TUCP_001215 | XLOC_045320 | ENSRNOT00000017486  | -0.951877643 | 1.87E-06 |
| TUCP_001215 | XLOC_045320 | ENSRNOT00000017340  | 0.986902251  | 2.97E-09 |
| TUCP_001215 | XLOC_045320 | ENSRNOT00000080677  | 0.980873391  | 1.95E-08 |
| TUCP_001215 | XLOC_045320 | ENSRNOT00000025460  | -0.968326416 | 2.38E-07 |
| TUCP_001215 | XLOC_045320 | ENSRNOT00000025784  | 0.969679343  | 1.92E-07 |
| TUCP_001215 | XLOC_045320 | ENSRNOT00000061345  | 0.952692323  | 1.72E-06 |
| TUCP_001215 | XLOC_045320 | ENSRNOT00000028130  | 0.950185483  | 2.22E-06 |
| TUCP_001215 | XLOC_045320 | ENSRNOT00000025913  | 0.966888435  | 2.97E-07 |
| TUCP_001215 | XLOC_045320 | ENSRNOT00000027360  | 0.968105618  | 2.46E-07 |
| TUCP_001215 | XLOC_045320 | ENSRNOT00000044486  | 0.950716692  | 2.11E-06 |
| TUCP_001215 | XLOC_045320 | ENSRNOT00000079414  | 0.98382798   | 8.48E-09 |
| TUCP_001215 | XLOC_045320 | ENSRNOT00000024011  | -0.9740515   | 8.87E-08 |
| TUCP_001215 | XLOC_045320 | ENSRNOT00000000134  | 0.978077837  | 3.84E-08 |
| TUCP_001215 | XLOC_045320 | ENSRNOT00000011326  | 0.976692933  | 5.21E-08 |
| TUCP_001353 | XLOC_051977 | ENSRNOT00000073149  | 0.955079459  | 1.34E-06 |
| TUCP_001352 | XLOC_051975 | ENSRNOT00000072452  | 0.968619854  | 2.27E-07 |
| TUCP_001351 | XLOC_051728 | ENSRNOT00000010992  | 0.972446656  | 1.19E-07 |
| TUCP_001351 | XLOC_051728 | ENSRNOT00000002560  | 0.961690244  | 6.09E-07 |
| TUCP_001351 | XLOC_051728 | ENSRNOT00000068405  | 0.953777953  | 1.54E-06 |
| TUCP_001351 | XLOC_051728 | ENSRNOT00000047387  | 0.953883961  | 1.52E-06 |
| TUCP_001351 | XLOC_051728 | ENSRNOT00000076669  | 0.96915875   | 2.09E-07 |
| TUCP_001351 | XLOC_051728 | ENSRNOT00000085596  | 0.954310881  | 1.45E-06 |
| TUCP_001351 | XLOC_051728 | ENSRNOT00000091910  | 0.951115305  | 2.02E-06 |
| TUCP_001351 | XLOC_051728 | ENSRNOT00000012093  | 0.955297887  | 1.30E-06 |
| TUCP_001351 | XLOC_051728 | ENSRNOT00000035989  | 0.975400289  | 6.81E-08 |
| TUCP_001351 | XLOC_051728 | ENSRNOT00000017629  | 0.961938831  | 5.90E-07 |
| TUCP_001351 | XLOC_051728 | ENSRNOT00000022022  | 0.950459221  | 2.16E-06 |
| TUCP_001351 | XLOC_051728 | ENSRNOT00000078445  | -0.95675109  | 1.11E-06 |
| TUCP_001351 | XLOC_051728 | ENSRNOT00000013026  | 0.958130683  | 9.44E-07 |
| TUCP_001351 | XLOC_051728 | ENSRNOT00000091417  | 0.952750865  | 1.71E-06 |
| TUCP_001351 | XLOC_051728 | ENSRNOT00000009683  | 0.950150042  | 2.23E-06 |
| TUCP_001351 | XLOC_051728 | ENSRNOT000000052288 | 0.957142497  | 1.06E-06 |
| TUCP_001351 | XLOC_051728 | ENSRNOT00000041163  | 0.954714389  | 1.39E-06 |
| TUCP_001351 | XLOC_051728 | ENSRNOT00000023144  | 0.95014783   | 2.23E-06 |



|             |             |                    |              |          |
|-------------|-------------|--------------------|--------------|----------|
| TUCP_001351 | XLOC_051728 | ENSRNOT00000080695 | 0.950634213  | 2.12E-06 |
| TUCP_001351 | XLOC_051728 | ENSRNOT00000039809 | 0.980977641  | 1.90E-08 |
| TUCP_001351 | XLOC_051728 | ENSRNOT00000029664 | 0.952964203  | 1.68E-06 |
| TUCP_001351 | XLOC_051728 | ENSRNOT00000067867 | 0.953178482  | 1.64E-06 |
| TUCP_001351 | XLOC_051728 | ENSRNOT00000076729 | 0.963092193  | 5.07E-07 |
| TUCP_001351 | XLOC_051728 | ENSRNOT00000090665 | 0.962843014  | 5.24E-07 |
| TUCP_001351 | XLOC_051728 | ENSRNOT00000003296 | 0.986453923  | 3.51E-09 |
| TUCP_001351 | XLOC_051728 | ENSRNOT00000033964 | 0.9539764    | 1.51E-06 |
| TUCP_001351 | XLOC_051728 | ENSRNOT00000058852 | -0.957571947 | 1.01E-06 |
| TUCP_001351 | XLOC_051728 | ENSRNOT00000071694 | 0.95462729   | 1.40E-06 |
| TUCP_001351 | XLOC_051728 | ENSRNOT00000080181 | 0.951859704  | 1.88E-06 |
| TUCP_001351 | XLOC_051728 | ENSRNOT00000025859 | 0.971880607  | 1.32E-07 |
| TUCP_001351 | XLOC_051728 | ENSRNOT00000026543 | 0.96016764   | 7.39E-07 |
| TUCP_001351 | XLOC_051728 | ENSRNOT00000034503 | 0.961367156  | 6.35E-07 |
| TUCP_001351 | XLOC_051728 | ENSRNOT00000000676 | 0.953616295  | 1.56E-06 |
| TUCP_001351 | XLOC_051728 | ENSRNOT00000004412 | 0.953085271  | 1.65E-06 |
| TUCP_001351 | XLOC_051728 | ENSRNOT00000084088 | 0.962014183  | 5.84E-07 |
| TUCP_001351 | XLOC_051728 | ENSRNOT00000024639 | 0.954574128  | 1.41E-06 |
| TUCP_001351 | XLOC_051728 | ENSRNOT00000024942 | 0.95089214   | 2.07E-06 |
| TUCP_001351 | XLOC_051728 | ENSRNOT00000006055 | 0.95800043   | 9.59E-07 |
| TUCP_001351 | XLOC_051728 | ENSRNOT00000071573 | 0.974543625  | 8.07E-08 |
| TUCP_001351 | XLOC_051728 | ENSRNOT00000034704 | 0.952171346  | 1.82E-06 |
| TUCP_001351 | XLOC_051728 | ENSRNOT00000085027 | 0.95250526   | 1.76E-06 |
| TUCP_001351 | XLOC_051728 | ENSRNOT00000009280 | 0.953076336  | 1.66E-06 |
| TUCP_001351 | XLOC_051728 | ENSRNOT00000051550 | 0.964595976  | 4.13E-07 |
| TUCP_001351 | XLOC_051728 | ENSRNOT00000025092 | 0.952191592  | 1.81E-06 |
| TUCP_001351 | XLOC_051728 | ENSRNOT00000051496 | 0.957221577  | 1.05E-06 |
| TUCP_001351 | XLOC_051728 | ENSRNOT00000024156 | 0.96364693   | 4.70E-07 |
| TUCP_001351 | XLOC_051728 | ENSRNOT00000090376 | 0.964804063  | 4.01E-07 |
| TUCP_001351 | XLOC_051728 | ENSRNOT00000017948 | 0.956207268  | 1.18E-06 |
| TUCP_001351 | XLOC_051728 | ENSRNOT00000010898 | 0.955318606  | 1.30E-06 |
| TUCP_001351 | XLOC_051728 | ENSRNOT00000050180 | 0.960640771  | 6.96E-07 |
| TUCP_001351 | XLOC_051728 | ENSRNOT00000005355 | 0.973958075  | 9.03E-08 |
| TUCP_001351 | XLOC_051728 | ENSRNOT00000010242 | 0.957858905  | 9.75E-07 |
| TUCP_001351 | XLOC_051728 | ENSRNOT00000028842 | 0.957481531  | 1.02E-06 |
| TUCP_001351 | XLOC_051728 | ENSRNOT00000057313 | 0.964038173  | 4.46E-07 |
| TUCP_001351 | XLOC_051728 | ENSRNOT00000024420 | 0.970184692  | 1.76E-07 |
| TUCP_001351 | XLOC_051728 | ENSRNOT00000004834 | 0.950965975  | 2.06E-06 |
| TUCP_001351 | XLOC_051728 | ENSRNOT00000001222 | 0.974881435  | 7.55E-08 |
| TUCP_001351 | XLOC_051728 | ENSRNOT00000083799 | 0.957071279  | 1.07E-06 |
| TUCP_002109 | XLOC_087392 | ENSRNOT00000006319 | 0.96776927   | 2.59E-07 |
| TUCP_001605 | XLOC_063406 | ENSRNOT00000034503 | 0.959087985  | 8.43E-07 |
| TUCP_001605 | XLOC_063406 | ENSRNOT00000090671 | 0.95833068   | 9.22E-07 |
| TUCP_001356 | XLOC_052040 | ENSRNOT00000026633 | 0.952355493  | 1.78E-06 |
| TUCP_001356 | XLOC_052040 | ENSRNOT00000010835 | 0.956182512  | 1.18E-06 |
| TUCP_001356 | XLOC_052040 | ENSRNOT00000081123 | 0.957069666  | 1.07E-06 |
| TUCP_001356 | XLOC_052040 | ENSRNOT00000084031 | 0.950196334  | 2.22E-06 |
| TUCP_001356 | XLOC_052040 | ENSRNOT00000092083 | 0.951643765  | 1.92E-06 |
| TUCP_001356 | XLOC_052040 | ENSRNOT00000074212 | 0.956875616  | 1.09E-06 |
| TUCP_001356 | XLOC_052040 | ENSRNOT00000036585 | 0.958291249  | 9.27E-07 |
| TUCP_001356 | XLOC_052040 | ENSRNOT00000012760 | -0.961002816 | 6.65E-07 |

|             |             |                    |              |          |
|-------------|-------------|--------------------|--------------|----------|
| TUCP_001356 | XLOC_052040 | ENSRNOT00000017571 | -0.954568665 | 1.41E-06 |
| TUCP_001356 | XLOC_052040 | ENSRNOT00000076467 | -0.952599983 | 1.74E-06 |
| TUCP_001356 | XLOC_052040 | ENSRNOT00000091325 | -0.950646997 | 2.12E-06 |
| TUCP_001356 | XLOC_052040 | ENSRNOT00000020951 | 0.956767475  | 1.11E-06 |
| TUCP_001356 | XLOC_052040 | ENSRNOT00000013851 | -0.960386824 | 7.19E-07 |
| TUCP_001356 | XLOC_052040 | ENSRNOT00000023876 | 0.956048189  | 1.20E-06 |
| TUCP_001356 | XLOC_052040 | ENSRNOT00000002974 | 0.952131676  | 1.83E-06 |
| TUCP_001356 | XLOC_052040 | ENSRNOT00000085465 | -0.959017903 | 8.50E-07 |
| TUCP_001356 | XLOC_052040 | ENSRNOT00000068452 | 0.960174515  | 7.38E-07 |
| TUCP_001356 | XLOC_052040 | ENSRNOT00000028225 | 0.951413265  | 1.96E-06 |
| TUCP_001356 | XLOC_052040 | ENSRNOT00000021729 | 0.957563534  | 1.01E-06 |
| TUCP_001356 | XLOC_052040 | ENSRNOT00000013516 | 0.955089033  | 1.33E-06 |
| TUCP_001356 | XLOC_052040 | ENSRNOT00000032363 | 0.950310953  | 2.19E-06 |
| TUCP_001356 | XLOC_052040 | ENSRNOT00000080342 | 0.951784747  | 1.89E-06 |
| TUCP_001356 | XLOC_052040 | ENSRNOT00000049745 | 0.959011594  | 8.50E-07 |
| TUCP_001356 | XLOC_052040 | ENSRNOT00000025767 | 0.951062754  | 2.04E-06 |
| TUCP_001356 | XLOC_052040 | ENSRNOT00000018122 | 0.955814988  | 1.23E-06 |
| TUCP_001356 | XLOC_052040 | ENSRNOT00000030109 | 0.951845959  | 1.88E-06 |
| TUCP_001356 | XLOC_052040 | ENSRNOT00000009319 | -0.953145049 | 1.64E-06 |
| TUCP_001356 | XLOC_052040 | ENSRNOT00000000886 | 0.969792968  | 1.88E-07 |
| TUCP_001356 | XLOC_052040 | ENSRNOT00000052002 | 0.958950465  | 8.57E-07 |
| TUCP_001356 | XLOC_052040 | ENSRNOT00000015935 | 0.950637903  | 2.12E-06 |
| TUCP_001356 | XLOC_052040 | ENSRNOT00000077803 | 0.952431851  | 1.77E-06 |
| TUCP_001607 | XLOC_063412 | ENSRNOT00000007314 | -0.95974218  | 7.78E-07 |
| TUCP_001607 | XLOC_063412 | ENSRNOT00000025846 | -0.952729574 | 1.72E-06 |
| TUCP_001607 | XLOC_063412 | ENSRNOT00000013914 | -0.954132582 | 1.48E-06 |
| TUCP_001607 | XLOC_063412 | ENSRNOT00000012635 | -0.961276682 | 6.43E-07 |
| TUCP_001607 | XLOC_063412 | ENSRNOT00000004878 | -0.95464507  | 1.40E-06 |
| TUCP_001607 | XLOC_063412 | ENSRNOT00000027083 | 0.960517202  | 7.07E-07 |
| TUCP_001607 | XLOC_063412 | ENSRNOT00000048914 | 0.953207718  | 1.63E-06 |
| TUCP_001607 | XLOC_063412 | ENSRNOT00000028625 | -0.982758829 | 1.17E-08 |
| TUCP_001607 | XLOC_063412 | ENSRNOT00000050834 | -0.962107407 | 5.77E-07 |
| TUCP_001607 | XLOC_063412 | ENSRNOT00000024016 | -0.960735666 | 6.88E-07 |
| TUCP_001607 | XLOC_063412 | ENSRNOT00000028589 | -0.958425205 | 9.12E-07 |
| TUCP_001607 | XLOC_063412 | ENSRNOT0000002568  | -0.955641672 | 1.26E-06 |
| TUCP_001607 | XLOC_063412 | ENSRNOT00000083173 | -0.951456006 | 1.96E-06 |
| TUCP_001607 | XLOC_063412 | ENSRNOT00000012583 | -0.960381432 | 7.19E-07 |
| TUCP_001607 | XLOC_063412 | ENSRNOT00000015471 | -0.955990605 | 1.21E-06 |
| TUCP_001607 | XLOC_063412 | ENSRNOT00000059524 | -0.950711448 | 2.11E-06 |
| TUCP_001607 | XLOC_063412 | ENSRNOT00000003715 | -0.962390621 | 5.56E-07 |
| TUCP_001607 | XLOC_063412 | ENSRNOT00000017476 | -0.950677023 | 2.12E-06 |
| TUCP_001607 | XLOC_063412 | ENSRNOT00000016386 | -0.972003035 | 1.29E-07 |
| TUCP_001607 | XLOC_063412 | ENSRNOT00000021075 | -0.957573449 | 1.01E-06 |
| TUCP_001607 | XLOC_063412 | ENSRNOT00000079985 | -0.954277883 | 1.46E-06 |
| TUCP_001607 | XLOC_063412 | ENSRNOT00000073675 | -0.950550803 | 2.14E-06 |
| TUCP_001607 | XLOC_063412 | ENSRNOT00000021073 | -0.963322176 | 4.92E-07 |
| TUCP_001607 | XLOC_063412 | ENSRNOT0000007002  | -0.976253295 | 5.71E-08 |
| TUCP_001607 | XLOC_063412 | ENSRNOT00000025550 | -0.961324086 | 6.39E-07 |
| TUCP_001607 | XLOC_063412 | ENSRNOT00000003834 | -0.953102709 | 1.65E-06 |
| TUCP_001607 | XLOC_063412 | ENSRNOT00000078282 | -0.956174679 | 1.18E-06 |
| TUCP_001607 | XLOC_063412 | ENSRNOT00000067846 | -0.952270667 | 1.80E-06 |

|             |             |                     |              |          |
|-------------|-------------|---------------------|--------------|----------|
| TUCP_001607 | XLOC_063412 | ENSRNOT00000091941  | -0.967868426 | 2.56E-07 |
| TUCP_001607 | XLOC_063412 | ENSRNOT00000091864  | -0.966164519 | 3.30E-07 |
| TUCP_001607 | XLOC_063412 | ENSRNOT00000007367  | -0.954794434 | 1.38E-06 |
| TUCP_001607 | XLOC_063412 | ENSRNOT00000081400  | 0.958016791  | 9.57E-07 |
| TUCP_001607 | XLOC_063412 | ENSRNOT00000009645  | -0.959491651 | 8.02E-07 |
| TUCP_001607 | XLOC_063412 | ENSRNOT00000004350  | -0.952950888 | 1.68E-06 |
| TUCP_001607 | XLOC_063412 | ENSRNOT00000004942  | -0.978662812 | 3.36E-08 |
| TUCP_001607 | XLOC_063412 | ENSRNOT00000024491  | -0.960237196 | 7.32E-07 |
| TUCP_001607 | XLOC_063412 | ENSRNOT00000015170  | -0.95166614  | 1.92E-06 |
| TUCP_001607 | XLOC_063412 | ENSRNOT00000087146  | 0.968769178  | 2.22E-07 |
| TUCP_001607 | XLOC_063412 | ENSRNOT00000025916  | -0.961112845 | 6.56E-07 |
| TUCP_001607 | XLOC_063412 | ENSRNOT00000033196  | -0.953667104 | 1.56E-06 |
| TUCP_001607 | XLOC_063412 | ENSRNOT00000015757  | -0.959824356 | 7.70E-07 |
| TUCP_001607 | XLOC_063412 | ENSRNOT000000051554 | -0.96407776  | 4.43E-07 |
| TUCP_001607 | XLOC_063412 | ENSRNOT00000027141  | -0.953803093 | 1.53E-06 |
| TUCP_001607 | XLOC_063412 | ENSRNOT00000018742  | -0.958642741 | 8.89E-07 |
| TUCP_001607 | XLOC_063412 | ENSRNOT000000082855 | 0.953303986  | 1.62E-06 |
| TUCP_001607 | XLOC_063412 | ENSRNOT00000006900  | -0.963607728 | 4.73E-07 |
| TUCP_001607 | XLOC_063412 | ENSRNOT00000090420  | -0.955670726 | 1.25E-06 |
| TUCP_001607 | XLOC_063412 | ENSRNOT00000011551  | -0.950288313 | 2.20E-06 |
| TUCP_001607 | XLOC_063412 | ENSRNOT00000000177  | -0.950103556 | 2.24E-06 |
| TUCP_001607 | XLOC_063412 | ENSRNOT000000057036 | 0.966053464  | 3.35E-07 |
| TUCP_001607 | XLOC_063412 | ENSRNOT000000089329 | -0.958683275 | 8.85E-07 |
| TUCP_001607 | XLOC_063412 | ENSRNOT00000078685  | 0.951139702  | 2.02E-06 |
| TUCP_001607 | XLOC_063412 | ENSRNOT000000003540 | -0.953730179 | 1.55E-06 |
| TUCP_001606 | XLOC_063410 | ENSRNOT000000057036 | 0.95704257   | 1.07E-06 |
| TUCP_000941 | XLOC_034843 | ENSRNOT000000051653 | 0.954990499  | 1.35E-06 |
| TUCP_000941 | XLOC_034843 | ENSRNOT000000003216 | 0.960998728  | 6.66E-07 |
| TUCP_000868 | XLOC_032611 | ENSRNOT000000043344 | -0.953079933 | 1.65E-06 |
| TUCP_000868 | XLOC_032611 | ENSRNOT000000079019 | 0.964130305  | 4.40E-07 |
| TUCP_000868 | XLOC_032611 | ENSRNOT000000079128 | 0.956467269  | 1.14E-06 |
| TUCP_000868 | XLOC_032611 | ENSRNOT000000066598 | 0.968098278  | 2.47E-07 |
| TUCP_000868 | XLOC_032611 | ENSRNOT000000048528 | 0.951320494  | 1.98E-06 |
| TUCP_000868 | XLOC_032611 | ENSRNOT00000012340  | 0.965653986  | 3.55E-07 |
| TUCP_000868 | XLOC_032611 | ENSRNOT000000064039 | 0.962991859  | 5.14E-07 |
| TUCP_000868 | XLOC_032611 | ENSRNOT000000068156 | 0.953809775  | 1.53E-06 |
| TUCP_000868 | XLOC_032611 | ENSRNOT00000018872  | 0.956760787  | 1.11E-06 |
| TUCP_000868 | XLOC_032611 | ENSRNOT00000028677  | 0.954118557  | 1.48E-06 |
| TUCP_000868 | XLOC_032611 | ENSRNOT00000014320  | 0.952900749  | 1.69E-06 |
| TUCP_000868 | XLOC_032611 | ENSRNOT000000057740 | 0.955863344  | 1.22E-06 |
| TUCP_000868 | XLOC_032611 | ENSRNOT00000029111  | -0.953578959 | 1.57E-06 |
| TUCP_000869 | XLOC_032613 | ENSRNOT000000060476 | 0.951579094  | 1.93E-06 |
| TUCP_000869 | XLOC_032613 | ENSRNOT00000012101  | 0.953316161  | 1.61E-06 |
| TUCP_000944 | XLOC_034904 | ENSRNOT000000068595 | 0.984236536  | 7.47E-09 |
| TUCP_000949 | XLOC_035030 | ENSRNOT000000005067 | 0.950666302  | 2.12E-06 |
| TUCP_000949 | XLOC_035030 | ENSRNOT000000082172 | 0.950430884  | 2.17E-06 |
| TUCP_000949 | XLOC_035030 | ENSRNOT000000057740 | 0.970037956  | 1.81E-07 |
| TUCP_000949 | XLOC_035030 | ENSRNOT00000023911  | 0.953713832  | 1.55E-06 |
| TUCP_003572 | XLOC_156739 | ENSRNOT000000045937 | 0.953051358  | 1.66E-06 |
| TUCP_003572 | XLOC_156739 | ENSRNOT00000001196  | 0.961249432  | 6.45E-07 |
| TUCP_003572 | XLOC_156739 | ENSRNOT00000018506  | 0.959135631  | 8.38E-07 |

|             |             |                    |              |          |
|-------------|-------------|--------------------|--------------|----------|
| TUCP_003572 | XLOC_156739 | ENSRNOT00000024959 | 0.972081046  | 1.27E-07 |
| TUCP_003572 | XLOC_156739 | ENSRNOT00000003567 | 0.970981059  | 1.54E-07 |
| TUCP_003572 | XLOC_156739 | ENSRNOT00000004713 | 0.973242744  | 1.03E-07 |
| TUCP_003572 | XLOC_156739 | ENSRNOT00000041430 | 0.951595545  | 1.93E-06 |
| TUCP_003572 | XLOC_156739 | ENSRNOT00000045443 | 0.963832995  | 4.59E-07 |
| TUCP_003572 | XLOC_156739 | ENSRNOT00000024418 | 0.959226033  | 8.29E-07 |
| TUCP_003572 | XLOC_156739 | ENSRNOT00000038178 | 0.959626649  | 7.89E-07 |
| TUCP_003572 | XLOC_156739 | ENSRNOT00000029819 | 0.975689349  | 6.42E-08 |
| TUCP_003572 | XLOC_156739 | ENSRNOT00000040736 | 0.958212804  | 9.35E-07 |
| TUCP_003572 | XLOC_156739 | ENSRNOT00000019501 | 0.955036156  | 1.34E-06 |
| TUCP_003572 | XLOC_156739 | ENSRNOT00000045233 | 0.964932853  | 3.94E-07 |
| TUCP_003572 | XLOC_156739 | ENSRNOT00000018696 | 0.959208011  | 8.31E-07 |
| TUCP_003572 | XLOC_156739 | ENSRNOT00000091050 | 0.952707266  | 1.72E-06 |
| TUCP_003572 | XLOC_156739 | ENSRNOT00000010056 | -0.958451332 | 9.09E-07 |
| TUCP_003572 | XLOC_156739 | ENSRNOT00000068683 | 0.953293399  | 1.62E-06 |
| TUCP_003572 | XLOC_156739 | ENSRNOT00000010252 | 0.950849915  | 2.08E-06 |
| TUCP_003572 | XLOC_156739 | ENSRNOT00000075006 | 0.960480145  | 7.10E-07 |
| TUCP_003572 | XLOC_156739 | ENSRNOT00000013043 | 0.965648126  | 3.56E-07 |
| TUCP_003572 | XLOC_156739 | ENSRNOT00000060300 | 0.975408979  | 6.80E-08 |
| TUCP_003572 | XLOC_156739 | ENSRNOT00000009883 | 0.971008682  | 1.54E-07 |
| TUCP_003572 | XLOC_156739 | ENSRNOT00000051349 | 0.972013293  | 1.29E-07 |
| TUCP_003572 | XLOC_156739 | ENSRNOT00000023033 | 0.974507761  | 8.12E-08 |
| TUCP_003572 | XLOC_156739 | ENSRNOT00000009313 | 0.974522697  | 8.10E-08 |
| TUCP_003572 | XLOC_156739 | ENSRNOT00000057045 | 0.963629534  | 4.72E-07 |
| TUCP_003572 | XLOC_156739 | ENSRNOT00000009318 | -0.964936186 | 3.94E-07 |
| TUCP_003572 | XLOC_156739 | ENSRNOT00000009247 | 0.968467797  | 2.33E-07 |
| TUCP_003572 | XLOC_156739 | ENSRNOT00000086244 | -0.964418148 | 4.23E-07 |
| TUCP_003572 | XLOC_156739 | ENSRNOT00000029635 | 0.964368913  | 4.26E-07 |
| TUCP_003572 | XLOC_156739 | ENSRNOT00000013191 | 0.953859963  | 1.52E-06 |
| TUCP_003572 | XLOC_156739 | ENSRNOT00000011731 | 0.982506619  | 1.25E-08 |
| TUCP_003572 | XLOC_156739 | ENSRNOT00000009319 | 0.960274718  | 7.29E-07 |
| TUCP_003572 | XLOC_156739 | ENSRNOT00000003412 | 0.95340876   | 1.60E-06 |
| TUCP_003572 | XLOC_156739 | ENSRNOT00000000681 | 0.965483631  | 3.64E-07 |
| TUCP_003572 | XLOC_156739 | ENSRNOT00000090129 | 0.956117307  | 1.19E-06 |
| TUCP_003572 | XLOC_156739 | ENSRNOT00000085151 | 0.956842324  | 1.10E-06 |
| TUCP_003572 | XLOC_156739 | ENSRNOT00000012361 | 0.961091282  | 6.58E-07 |
| TUCP_003572 | XLOC_156739 | ENSRNOT00000013058 | -0.954423782 | 1.43E-06 |
| TUCP_003572 | XLOC_156739 | ENSRNOT00000046888 | 0.951467217  | 1.95E-06 |
| TUCP_003572 | XLOC_156739 | ENSRNOT00000006111 | 0.970825099  | 1.59E-07 |
| TUCP_003572 | XLOC_156739 | ENSRNOT00000070792 | 0.976495797  | 5.43E-08 |
| TUCP_003572 | XLOC_156739 | ENSRNOT00000010316 | 0.978181637  | 3.75E-08 |
| TUCP_003572 | XLOC_156739 | ENSRNOT00000037339 | 0.967764015  | 2.60E-07 |
| TUCP_003572 | XLOC_156739 | ENSRNOT00000055062 | 0.968315953  | 2.38E-07 |
| TUCP_003572 | XLOC_156739 | ENSRNOT00000050179 | -0.955849342 | 1.23E-06 |
| TUCP_003572 | XLOC_156739 | ENSRNOT00000047634 | 0.952606805  | 1.74E-06 |
| TUCP_003572 | XLOC_156739 | ENSRNOT00000025197 | 0.970570594  | 1.65E-07 |
| TUCP_003572 | XLOC_156739 | ENSRNOT00000066520 | -0.954437343 | 1.43E-06 |
| TUCP_003572 | XLOC_156739 | ENSRNOT00000081272 | 0.95130673   | 1.99E-06 |
| TUCP_003572 | XLOC_156739 | ENSRNOT00000081327 | 0.970398511  | 1.70E-07 |
| TUCP_003572 | XLOC_156739 | ENSRNOT00000007949 | 0.978063323  | 3.86E-08 |
| TUCP_003572 | XLOC_156739 | ENSRNOT00000012314 | 0.967828906  | 2.57E-07 |

|             |             |                     |              |          |
|-------------|-------------|---------------------|--------------|----------|
| TUCP_003572 | XLOC_156739 | ENSRNOT00000010050  | 0.957519553  | 1.01E-06 |
| TUCP_003572 | XLOC_156739 | ENSRNOT00000074517  | 0.982737224  | 1.17E-08 |
| TUCP_003572 | XLOC_156739 | ENSRNOT00000023506  | 0.966358755  | 3.21E-07 |
| TUCP_003572 | XLOC_156739 | ENSRNOT00000035123  | 0.954989769  | 1.35E-06 |
| TUCP_003572 | XLOC_156739 | ENSRNOT00000007889  | 0.961041628  | 6.62E-07 |
| TUCP_003572 | XLOC_156739 | ENSRNOT000000084927 | 0.965993796  | 3.38E-07 |
| TUCP_003572 | XLOC_156739 | ENSRNOT00000024464  | 0.957324862  | 1.04E-06 |
| TUCP_003572 | XLOC_156739 | ENSRNOT00000078746  | 0.965483279  | 3.64E-07 |
| TUCP_003572 | XLOC_156739 | ENSRNOT00000091272  | 0.981589677  | 1.62E-08 |
| TUCP_003572 | XLOC_156739 | ENSRNOT00000016730  | 0.97428044   | 8.49E-08 |
| TUCP_003572 | XLOC_156739 | ENSRNOT00000084552  | 0.976118551  | 5.88E-08 |
| TUCP_003572 | XLOC_156739 | ENSRNOT00000023856  | 0.985177496  | 5.50E-09 |
| TUCP_003572 | XLOC_156739 | ENSRNOT00000074583  | 0.964450657  | 4.21E-07 |
| TUCP_003572 | XLOC_156739 | ENSRNOT00000014824  | 0.966303153  | 3.23E-07 |
| TUCP_003572 | XLOC_156739 | ENSRNOT00000032236  | 0.964767709  | 4.03E-07 |
| TUCP_003572 | XLOC_156739 | ENSRNOT00000015320  | 0.962877033  | 5.22E-07 |
| TUCP_003572 | XLOC_156739 | ENSRNOT00000056998  | -0.957949266 | 9.65E-07 |
| TUCP_003572 | XLOC_156739 | ENSRNOT00000082427  | 0.959903199  | 7.63E-07 |
| TUCP_003572 | XLOC_156739 | ENSRNOT00000028066  | 0.97323954   | 1.03E-07 |
| TUCP_003572 | XLOC_156739 | ENSRNOT00000067688  | 0.963155824  | 5.03E-07 |
| TUCP_003572 | XLOC_156739 | ENSRNOT00000004363  | 0.958713047  | 8.81E-07 |
| TUCP_003572 | XLOC_156739 | ENSRNOT00000027212  | 0.972379403  | 1.21E-07 |
| TUCP_003572 | XLOC_156739 | ENSRNOT00000083351  | 0.961938201  | 5.90E-07 |
| TUCP_003572 | XLOC_156739 | ENSRNOT00000050350  | 0.959970102  | 7.57E-07 |
| TUCP_003572 | XLOC_156739 | ENSRNOT00000077856  | 0.95301024   | 1.67E-06 |
| TUCP_003572 | XLOC_156739 | ENSRNOT00000021400  | 0.960790879  | 6.83E-07 |
| TUCP_003572 | XLOC_156739 | ENSRNOT00000024286  | 0.963688322  | 4.68E-07 |
| TUCP_003572 | XLOC_156739 | ENSRNOT00000037397  | 0.954070245  | 1.49E-06 |
| TUCP_003572 | XLOC_156739 | ENSRNOT00000089457  | 0.951689696  | 1.91E-06 |
| TUCP_003572 | XLOC_156739 | ENSRNOT00000003778  | 0.965841112  | 3.46E-07 |
| TUCP_003572 | XLOC_156739 | ENSRNOT00000082146  | 0.957966407  | 9.63E-07 |
| TUCP_003572 | XLOC_156739 | ENSRNOT00000089513  | -0.95236138  | 1.78E-06 |
| TUCP_003572 | XLOC_156739 | ENSRNOT00000086350  | 0.956638058  | 1.12E-06 |
| TUCP_003572 | XLOC_156739 | ENSRNOT00000010516  | 0.96170532   | 6.08E-07 |
| TUCP_003572 | XLOC_156739 | ENSRNOT00000013496  | 0.981525338  | 1.64E-08 |
| TUCP_003572 | XLOC_156739 | ENSRNOT00000018782  | 0.96503939   | 3.88E-07 |
| TUCP_003572 | XLOC_156739 | ENSRNOT00000039215  | 0.965013384  | 3.89E-07 |
| TUCP_003572 | XLOC_156739 | ENSRNOT00000015131  | 0.98556579   | 4.82E-09 |
| TUCP_003572 | XLOC_156739 | ENSRNOT00000000529  | 0.9515364    | 1.94E-06 |
| TUCP_003572 | XLOC_156739 | ENSRNOT00000072031  | 0.958857777  | 8.66E-07 |
| TUCP_003572 | XLOC_156739 | ENSRNOT00000044788  | 0.977213335  | 4.66E-08 |
| TUCP_003572 | XLOC_156739 | ENSRNOT00000039730  | 0.954094171  | 1.49E-06 |
| TUCP_003572 | XLOC_156739 | ENSRNOT00000019652  | -0.964253847 | 4.33E-07 |
| TUCP_003572 | XLOC_156739 | ENSRNOT00000087481  | 0.9650593    | 3.87E-07 |
| TUCP_003572 | XLOC_156739 | ENSRNOT00000083004  | 0.950428219  | 2.17E-06 |
| TUCP_003572 | XLOC_156739 | ENSRNOT00000088201  | 0.957598623  | 1.01E-06 |
| TUCP_003572 | XLOC_156739 | ENSRNOT00000082393  | 0.950937853  | 2.06E-06 |
| TUCP_003572 | XLOC_156739 | ENSRNOT00000019392  | 0.977022739  | 4.85E-08 |
| TUCP_003572 | XLOC_156739 | ENSRNOT00000016768  | 0.953807384  | 1.53E-06 |
| TUCP_003572 | XLOC_156739 | ENSRNOT00000091765  | 0.965138184  | 3.82E-07 |
| TUCP_003572 | XLOC_156739 | ENSRNOT00000071133  | 0.967099155  | 2.87E-07 |

|             |             |                    |              |          |
|-------------|-------------|--------------------|--------------|----------|
| TUCP_003572 | XLOC_156739 | ENSRNOT00000015525 | 0.960472419  | 7.11E-07 |
| TUCP_003572 | XLOC_156739 | ENSRNOT00000050223 | 0.97183643   | 1.33E-07 |
| TUCP_003572 | XLOC_156739 | ENSRNOT00000005085 | 0.952250701  | 1.80E-06 |
| TUCP_003572 | XLOC_156739 | ENSRNOT00000031951 | 0.956046244  | 1.20E-06 |
| TUCP_003572 | XLOC_156739 | ENSRNOT00000014134 | 0.973749151  | 9.39E-08 |
| TUCP_003572 | XLOC_156739 | ENSRNOT00000020272 | 0.966988822  | 2.92E-07 |
| TUCP_003572 | XLOC_156739 | ENSRNOT00000017420 | 0.963158556  | 5.02E-07 |
| TUCP_003572 | XLOC_156739 | ENSRNOT00000077894 | 0.964735474  | 4.05E-07 |
| TUCP_003572 | XLOC_156739 | ENSRNOT00000012632 | 0.959277474  | 8.24E-07 |
| TUCP_003572 | XLOC_156739 | ENSRNOT00000019644 | 0.985211317  | 5.43E-09 |
| TUCP_003572 | XLOC_156739 | ENSRNOT00000005644 | 0.970539545  | 1.66E-07 |
| TUCP_003572 | XLOC_156739 | ENSRNOT00000044467 | 0.9574004    | 1.03E-06 |
| TUCP_003572 | XLOC_156739 | ENSRNOT00000077479 | 0.957639996  | 1.00E-06 |
| TUCP_003572 | XLOC_156739 | ENSRNOT00000041091 | 0.95998602   | 7.55E-07 |
| TUCP_003572 | XLOC_156739 | ENSRNOT00000011509 | 0.983289566  | 9.98E-09 |
| TUCP_003572 | XLOC_156739 | ENSRNOT00000077401 | 0.973050522  | 1.07E-07 |
| TUCP_003572 | XLOC_156739 | ENSRNOT00000029443 | 0.959506242  | 8.01E-07 |
| TUCP_003572 | XLOC_156739 | ENSRNOT00000010620 | 0.980192437  | 2.32E-08 |
| TUCP_003572 | XLOC_156739 | ENSRNOT00000061973 | 0.964844442  | 3.99E-07 |
| TUCP_003572 | XLOC_156739 | ENSRNOT00000041003 | 0.953076615  | 1.66E-06 |
| TUCP_003572 | XLOC_156739 | ENSRNOT00000068078 | 0.958911274  | 8.61E-07 |
| TUCP_003572 | XLOC_156739 | ENSRNOT00000003745 | 0.954749788  | 1.38E-06 |
| TUCP_003572 | XLOC_156739 | ENSRNOT00000000039 | 0.965398149  | 3.69E-07 |
| TUCP_003572 | XLOC_156739 | ENSRNOT00000037181 | 0.966344317  | 3.21E-07 |
| TUCP_003572 | XLOC_156739 | ENSRNOT00000080163 | 0.953515677  | 1.58E-06 |
| TUCP_003572 | XLOC_156739 | ENSRNOT00000001759 | 0.965281917  | 3.75E-07 |
| TUCP_003572 | XLOC_156739 | ENSRNOT00000001446 | -0.95246294  | 1.76E-06 |
| TUCP_003572 | XLOC_156739 | ENSRNOT00000045735 | -0.951809832 | 1.89E-06 |
| TUCP_003572 | XLOC_156739 | ENSRNOT00000078532 | 0.953193679  | 1.64E-06 |
| TUCP_003572 | XLOC_156739 | ENSRNOT00000000637 | 0.970261802  | 1.74E-07 |
| TUCP_003572 | XLOC_156739 | ENSRNOT00000028130 | 0.95872963   | 8.80E-07 |
| TUCP_003572 | XLOC_156739 | ENSRNOT00000018061 | 0.95376857   | 1.54E-06 |
| TUCP_003572 | XLOC_156739 | ENSRNOT00000015763 | 0.981811986  | 1.52E-08 |
| TUCP_003572 | XLOC_156739 | ENSRNOT00000011907 | 0.978653486  | 3.37E-08 |
| TUCP_003572 | XLOC_156739 | ENSRNOT00000003414 | 0.958929392  | 8.59E-07 |
| TUCP_003572 | XLOC_156739 | ENSRNOT00000073138 | 0.950766895  | 2.10E-06 |
| TUCP_003572 | XLOC_156739 | ENSRNOT00000075148 | 0.961992407  | 5.86E-07 |
| TUCP_003572 | XLOC_156739 | ENSRNOT00000009260 | 0.951554847  | 1.94E-06 |
| TUCP_003572 | XLOC_156739 | ENSRNOT00000013989 | 0.981361265  | 1.72E-08 |
| TUCP_003572 | XLOC_156739 | ENSRNOT00000015387 | 0.956273735  | 1.17E-06 |
| TUCP_003572 | XLOC_156739 | ENSRNOT00000058611 | 0.989782311  | 8.62E-10 |
| TUCP_003572 | XLOC_156739 | ENSRNOT00000025252 | 0.952651299  | 1.73E-06 |
| TUCP_003572 | XLOC_156739 | ENSRNOT0000005885  | 0.955066687  | 1.34E-06 |
| TUCP_003572 | XLOC_156739 | ENSRNOT00000086223 | 0.952024009  | 1.85E-06 |
| TUCP_003572 | XLOC_156739 | ENSRNOT00000015579 | 0.97115957   | 1.50E-07 |
| TUCP_003298 | XLOC_141882 | ENSRNOT00000055735 | 0.953869361  | 1.52E-06 |
| TUCP_003298 | XLOC_141882 | ENSRNOT00000019213 | 0.958748616  | 8.78E-07 |
| TUCP_003298 | XLOC_141882 | ENSRNOT00000074939 | 0.95937453   | 8.14E-07 |
| TUCP_003298 | XLOC_141882 | ENSRNOT00000071560 | 0.954965695  | 1.35E-06 |
| TUCP_003298 | XLOC_141882 | ENSRNOT00000026065 | 0.961207883  | 6.48E-07 |
| TUCP_003298 | XLOC_141882 | ENSRNOT00000088125 | 0.975968795  | 6.06E-08 |

|             |             |                     |              |          |
|-------------|-------------|---------------------|--------------|----------|
| TUCP_003298 | XLOC_141882 | ENSRNOT00000005659  | 0.958424339  | 9.12E-07 |
| TUCP_003298 | XLOC_141882 | ENSRNOT000000044635 | 0.968375434  | 2.36E-07 |
| TUCP_003298 | XLOC_141882 | ENSRNOT000000065947 | 0.951348156  | 1.98E-06 |
| TUCP_003298 | XLOC_141882 | ENSRNOT000000021116 | 0.950635619  | 2.12E-06 |
| TUCP_003298 | XLOC_141882 | ENSRNOT000000082100 | 0.964094461  | 4.42E-07 |
| TUCP_003298 | XLOC_141882 | ENSRNOT000000018057 | 0.972273373  | 1.23E-07 |
| TUCP_003298 | XLOC_141882 | ENSRNOT000000056813 | 0.96604322   | 3.36E-07 |
| TUCP_003298 | XLOC_141882 | ENSRNOT000000015076 | 0.989236199  | 1.12E-09 |
| TUCP_003298 | XLOC_141882 | ENSRNOT00000004698  | 0.963387367  | 4.87E-07 |
| TUCP_003298 | XLOC_141882 | ENSRNOT000000010418 | 0.968093231  | 2.47E-07 |
| TUCP_003298 | XLOC_141882 | ENSRNOT000000015073 | 0.962449368  | 5.52E-07 |
| TUCP_003298 | XLOC_141882 | ENSRNOT000000037679 | 0.962814157  | 5.26E-07 |
| TUCP_003298 | XLOC_141882 | ENSRNOT000000001507 | 0.9528995    | 1.69E-06 |
| TUCP_003298 | XLOC_141882 | ENSRNOT000000006055 | 0.968157751  | 2.44E-07 |
| TUCP_003298 | XLOC_141882 | ENSRNOT000000071573 | 0.957963953  | 9.63E-07 |
| TUCP_003298 | XLOC_141882 | ENSRNOT000000005126 | -0.95949871  | 8.02E-07 |
| TUCP_003298 | XLOC_141882 | ENSRNOT000000065300 | 0.963581467  | 4.75E-07 |
| TUCP_003298 | XLOC_141882 | ENSRNOT000000011384 | 0.950639282  | 2.12E-06 |
| TUCP_003298 | XLOC_141882 | ENSRNOT000000012977 | 0.950426004  | 2.17E-06 |
| TUCP_003298 | XLOC_141882 | ENSRNOT000000082691 | 0.966357643  | 3.21E-07 |
| TUCP_003298 | XLOC_141882 | ENSRNOT000000035989 | 0.960833513  | 6.80E-07 |
| TUCP_003298 | XLOC_141882 | ENSRNOT000000027944 | 0.955955587  | 1.21E-06 |
| TUCP_003298 | XLOC_141882 | ENSRNOT000000021348 | 0.95436279   | 1.44E-06 |
| TUCP_003298 | XLOC_141882 | ENSRNOT000000010242 | 0.953597366  | 1.57E-06 |
| TUCP_003298 | XLOC_141882 | ENSRNOT000000027828 | 0.957534267  | 1.01E-06 |
| TUCP_003298 | XLOC_141882 | ENSRNOT000000077908 | 0.953194464  | 1.64E-06 |
| TUCP_003298 | XLOC_141882 | ENSRNOT000000025510 | -0.952069921 | 1.84E-06 |
| TUCP_003298 | XLOC_141882 | ENSRNOT000000003146 | -0.960828355 | 6.80E-07 |
| TUCP_003298 | XLOC_141882 | ENSRNOT000000084012 | 0.962265709  | 5.65E-07 |
| TUCP_003298 | XLOC_141882 | ENSRNOT000000022534 | 0.959706344  | 7.82E-07 |
| TUCP_003298 | XLOC_141882 | ENSRNOT000000055187 | 0.958108423  | 9.47E-07 |
| TUCP_003298 | XLOC_141882 | ENSRNOT000000075424 | 0.958695326  | 8.83E-07 |
| TUCP_003298 | XLOC_141882 | ENSRNOT00000004834  | 0.96815402   | 2.45E-07 |
| TUCP_003298 | XLOC_141882 | ENSRNOT000000067822 | 0.969091214  | 2.11E-07 |
| TUCP_003298 | XLOC_141882 | ENSRNOT000000024060 | 0.97202271   | 1.29E-07 |
| TUCP_003298 | XLOC_141882 | ENSRNOT000000010927 | 0.958093886  | 9.49E-07 |
| TUCP_003298 | XLOC_141882 | ENSRNOT000000087371 | 0.950321733  | 2.19E-06 |
| TUCP_003298 | XLOC_141882 | ENSRNOT000000068633 | 0.991398673  | 3.65E-10 |
| TUCP_003298 | XLOC_141882 | ENSRNOT000000037446 | 0.981708521  | 1.56E-08 |
| TUCP_003298 | XLOC_141882 | ENSRNOT000000023619 | 0.950599951  | 2.13E-06 |
| TUCP_003298 | XLOC_141882 | ENSRNOT000000058645 | 0.971486427  | 1.42E-07 |
| TUCP_003298 | XLOC_141882 | ENSRNOT000000017948 | 0.971115737  | 1.51E-07 |
| TUCP_003298 | XLOC_141882 | ENSRNOT000000057313 | 0.97758362   | 4.29E-08 |
| TUCP_003298 | XLOC_141882 | ENSRNOT000000019554 | 0.962351063  | 5.59E-07 |
| TUCP_003298 | XLOC_141882 | ENSRNOT000000004359 | 0.955906521  | 1.22E-06 |
| TUCP_003298 | XLOC_141882 | ENSRNOT000000013274 | 0.955561015  | 1.27E-06 |
| TUCP_003298 | XLOC_141882 | ENSRNOT000000005355 | 0.954639767  | 1.40E-06 |
| TUCP_003298 | XLOC_141882 | ENSRNOT000000079895 | 0.964842415  | 3.99E-07 |
| TUCP_003298 | XLOC_141882 | ENSRNOT000000026089 | 0.965005754  | 3.90E-07 |
| TUCP_003298 | XLOC_141882 | ENSRNOT000000090456 | 0.950174432  | 2.22E-06 |
| TUCP_003298 | XLOC_141882 | ENSRNOT000000047387 | 0.953976429  | 1.51E-06 |

|             |             |                    |              |          |
|-------------|-------------|--------------------|--------------|----------|
| TUCP_003298 | XLOC_141882 | ENSRNOT00000015325 | -0.956458663 | 1.15E-06 |
| TUCP_003298 | XLOC_141882 | ENSRNOT00000013661 | 0.954455071  | 1.43E-06 |
| TUCP_003298 | XLOC_141882 | ENSRNOT00000045488 | 0.955076571  | 1.34E-06 |
| TUCP_003298 | XLOC_141882 | ENSRNOT00000039842 | 0.966656767  | 3.07E-07 |
| TUCP_003298 | XLOC_141882 | ENSRNOT00000093174 | 0.954559725  | 1.41E-06 |
| TUCP_003298 | XLOC_141882 | ENSRNOT00000017629 | 0.976607672  | 5.30E-08 |
| TUCP_003298 | XLOC_141882 | ENSRNOT00000013260 | 0.950568753  | 2.14E-06 |
| TUCP_003298 | XLOC_141882 | ENSRNOT00000082228 | 0.970356515  | 1.72E-07 |
| TUCP_003298 | XLOC_141882 | ENSRNOT00000034744 | 0.955674818  | 1.25E-06 |
| TUCP_003298 | XLOC_141882 | ENSRNOT00000078475 | 0.951010677  | 2.05E-06 |
| TUCP_003298 | XLOC_141882 | ENSRNOT00000082273 | 0.952992731  | 1.67E-06 |
| TUCP_003298 | XLOC_141882 | ENSRNOT00000009683 | 0.964646547  | 4.10E-07 |
| TUCP_003298 | XLOC_141882 | ENSRNOT00000084088 | 0.955037519  | 1.34E-06 |
| TUCP_003298 | XLOC_141882 | ENSRNOT00000064902 | 0.965742366  | 3.51E-07 |
| TUCP_003298 | XLOC_141882 | ENSRNOT00000088995 | 0.976458009  | 5.47E-08 |
| TUCP_003298 | XLOC_141882 | ENSRNOT0000002771  | 0.950117694  | 2.24E-06 |
| TUCP_003298 | XLOC_141882 | ENSRNOT00000016722 | 0.960122942  | 7.43E-07 |
| TUCP_003298 | XLOC_141882 | ENSRNOT00000012424 | 0.956026673  | 1.20E-06 |
| TUCP_003298 | XLOC_141882 | ENSRNOT00000025097 | 0.956568103  | 1.13E-06 |
| TUCP_003298 | XLOC_141882 | ENSRNOT00000039631 | 0.95772636   | 9.90E-07 |
| TUCP_003298 | XLOC_141882 | ENSRNOT00000090170 | 0.968409348  | 2.35E-07 |
| TUCP_003298 | XLOC_141882 | ENSRNOT00000006554 | 0.96686699   | 2.97E-07 |
| TUCP_003298 | XLOC_141882 | ENSRNOT00000025523 | 0.960859224  | 6.77E-07 |
| TUCP_003298 | XLOC_141882 | ENSRNOT00000082253 | 0.971792075  | 1.34E-07 |
| TUCP_003298 | XLOC_141882 | ENSRNOT00000000718 | 0.950517088  | 2.15E-06 |
| TUCP_003298 | XLOC_141882 | ENSRNOT00000007091 | 0.964296313  | 4.30E-07 |
| TUCP_003298 | XLOC_141882 | ENSRNOT00000026457 | 0.957968275  | 9.63E-07 |
| TUCP_003298 | XLOC_141882 | ENSRNOT00000078929 | 0.950306525  | 2.19E-06 |
| TUCP_003298 | XLOC_141882 | ENSRNOT00000090424 | 0.962014755  | 5.84E-07 |
| TUCP_003298 | XLOC_141882 | ENSRNOT00000088196 | 0.955351105  | 1.30E-06 |
| TUCP_003298 | XLOC_141882 | ENSRNOT0000001222  | 0.956939511  | 1.08E-06 |
| TUCP_003298 | XLOC_141882 | ENSRNOT00000023645 | 0.965888524  | 3.43E-07 |
| TUCP_003298 | XLOC_141882 | ENSRNOT00000088191 | 0.951433348  | 1.96E-06 |
| TUCP_003298 | XLOC_141882 | ENSRNOT00000024336 | 0.952920664  | 1.68E-06 |
| TUCP_003298 | XLOC_141882 | ENSRNOT00000011984 | 0.971265002  | 1.47E-07 |
| TUCP_003298 | XLOC_141882 | ENSRNOT00000026293 | 0.957456842  | 1.02E-06 |
| TUCP_003298 | XLOC_141882 | ENSRNOT00000074653 | 0.988990995  | 1.25E-09 |
| TUCP_003298 | XLOC_141882 | ENSRNOT00000001923 | 0.951001344  | 2.05E-06 |
| TUCP_003298 | XLOC_141882 | ENSRNOT00000031230 | 0.96757205   | 2.67E-07 |
| TUCP_003298 | XLOC_141882 | ENSRNOT0000002292  | 0.973146129  | 1.05E-07 |
| TUCP_003298 | XLOC_141882 | ENSRNOT00000045083 | 0.970026212  | 1.81E-07 |
| TUCP_003298 | XLOC_141882 | ENSRNOT00000035491 | 0.955770313  | 1.24E-06 |
| TUCP_003298 | XLOC_141882 | ENSRNOT00000068322 | 0.971737165  | 1.35E-07 |
| TUCP_003298 | XLOC_141882 | ENSRNOT00000080800 | 0.952054774  | 1.84E-06 |
| TUCP_003298 | XLOC_141882 | ENSRNOT00000085596 | 0.984301866  | 7.31E-09 |
| TUCP_003298 | XLOC_141882 | ENSRNOT00000071694 | 0.973143464  | 1.05E-07 |
| TUCP_003298 | XLOC_141882 | ENSRNOT00000082174 | 0.967847914  | 2.56E-07 |
| TUCP_003298 | XLOC_141882 | ENSRNOT00000010986 | 0.955579354  | 1.26E-06 |
| TUCP_003298 | XLOC_141882 | ENSRNOT00000004412 | 0.968189495  | 2.43E-07 |
| TUCP_003298 | XLOC_141882 | ENSRNOT00000066968 | 0.959156888  | 8.36E-07 |
| TUCP_003298 | XLOC_141882 | ENSRNOT00000023330 | 0.955412847  | 1.29E-06 |



|             |             |                    |              |          |
|-------------|-------------|--------------------|--------------|----------|
| TUCP_003298 | XLOC_141882 | ENSRNOT00000061100 | 0.968867726  | 2.19E-07 |
| TUCP_003298 | XLOC_141882 | ENSRNOT00000024941 | 0.978619339  | 3.39E-08 |
| TUCP_003298 | XLOC_141882 | ENSRNOT00000034704 | 0.952394259  | 1.78E-06 |
| TUCP_003298 | XLOC_141882 | ENSRNOT00000005144 | 0.962447329  | 5.52E-07 |
| TUCP_003298 | XLOC_141882 | ENSRNOT00000066593 | 0.969745923  | 1.90E-07 |
| TUCP_003298 | XLOC_141882 | ENSRNOT00000013031 | -0.962229817 | 5.68E-07 |
| TUCP_003298 | XLOC_141882 | ENSRNOT00000036750 | 0.967985909  | 2.51E-07 |
| TUCP_003298 | XLOC_141882 | ENSRNOT00000027964 | 0.954774215  | 1.38E-06 |
| TUCP_003298 | XLOC_141882 | ENSRNOT00000003182 | 0.960104786  | 7.44E-07 |
| TUCP_003298 | XLOC_141882 | ENSRNOT00000024420 | 0.956566035  | 1.13E-06 |
| TUCP_003298 | XLOC_141882 | ENSRNOT00000021674 | 0.957336183  | 1.04E-06 |
| TUCP_003298 | XLOC_141882 | ENSRNOT00000047210 | 0.950877163  | 2.07E-06 |
| TUCP_003298 | XLOC_141882 | ENSRNOT00000052288 | 0.978391911  | 3.58E-08 |
| TUCP_003298 | XLOC_141882 | ENSRNOT00000048029 | 0.977214543  | 4.66E-08 |
| TUCP_003298 | XLOC_141882 | ENSRNOT00000004140 | 0.95084263   | 2.08E-06 |
| TUCP_003298 | XLOC_141882 | ENSRNOT00000083799 | 0.951890891  | 1.87E-06 |
| TUCP_003298 | XLOC_141882 | ENSRNOT00000024548 | 0.951270059  | 1.99E-06 |
| TUCP_003298 | XLOC_141882 | ENSRNOT00000070933 | 0.967876408  | 2.55E-07 |
| TUCP_001715 | XLOC_069833 | ENSRNOT00000022635 | 0.951407126  | 1.97E-06 |
| TUCP_003244 | XLOC_139076 | ENSRNOT00000083943 | 0.954779855  | 1.38E-06 |
| TUCP_003244 | XLOC_139076 | ENSRNOT00000040162 | 0.97214645   | 1.26E-07 |
| TUCP_003244 | XLOC_139076 | ENSRNOT00000056174 | 0.950602973  | 2.13E-06 |
| TUCP_002169 | XLOC_090402 | ENSRNOT00000085195 | 0.999404969  | 5.87E-16 |
| TUCP_002169 | XLOC_090402 | ENSRNOT00000013705 | 1            | 0        |
| TUCP_002169 | XLOC_090402 | ENSRNOT00000040851 | 1            | 1.33E-79 |
| TUCP_002169 | XLOC_090402 | ENSRNOT00000075676 | 0.958697783  | 8.83E-07 |
| TUCP_002169 | XLOC_090402 | ENSRNOT00000058389 | 1            | 1.33E-79 |
| TUCP_002169 | XLOC_090402 | ENSRNOT00000086827 | 0.95592964   | 1.22E-06 |
| TUCP_002169 | XLOC_090402 | ENSRNOT00000023542 | 1            | 1.33E-79 |
| TUCP_002169 | XLOC_090402 | ENSRNOT00000028653 | 1            | 1.33E-79 |
| TUCP_002169 | XLOC_090402 | ENSRNOT00000017230 | 0.955378945  | 1.29E-06 |
| TUCP_002169 | XLOC_090402 | ENSRNOT00000092890 | 0.955137645  | 1.33E-06 |
| TUCP_002169 | XLOC_090402 | ENSRNOT00000012174 | 1            | 0        |
| TUCP_002169 | XLOC_090402 | ENSRNOT00000051680 | 0.994991197  | 2.46E-11 |
| TUCP_002169 | XLOC_090402 | ENSRNOT00000089118 | 1            | 4.25E-78 |
| TUCP_002169 | XLOC_090402 | ENSRNOT00000025245 | 0.999967061  | 3.05E-22 |
| TUCP_002169 | XLOC_090402 | ENSRNOT00000015138 | 0.999902179  | 7.05E-20 |
| TUCP_002169 | XLOC_090402 | ENSRNOT00000080185 | 0.99902259   | 7.01E-15 |
| TUCP_002169 | XLOC_090402 | ENSRNOT00000090729 | 0.965956282  | 3.40E-07 |
| TUCP_002169 | XLOC_090402 | ENSRNOT00000049165 | 0.973440588  | 9.95E-08 |
| TUCP_002169 | XLOC_090402 | ENSRNOT00000086502 | 0.96495109   | 3.93E-07 |
| TUCP_002169 | XLOC_090402 | ENSRNOT00000079661 | 1            | 1.33E-79 |
| TUCP_002169 | XLOC_090402 | ENSRNOT00000076338 | 0.985532463  | 4.87E-09 |
| TUCP_002169 | XLOC_090402 | ENSRNOT00000042220 | 1            | 1.33E-79 |
| TUCP_002169 | XLOC_090402 | ENSRNOT00000005031 | 0.952974465  | 1.67E-06 |
| TUCP_002169 | XLOC_090402 | ENSRNOT00000079167 | 0.979848988  | 2.53E-08 |
| TUCP_002169 | XLOC_090402 | ENSRNOT00000061950 | 0.962035217  | 5.83E-07 |
| TUCP_002169 | XLOC_090402 | ENSRNOT00000086710 | 0.999839781  | 8.31E-19 |
| TUCP_002169 | XLOC_090402 | ENSRNOT00000075226 | 1            | 0        |
| TUCP_002169 | XLOC_090402 | ENSRNOT00000000351 | 1            | 0        |
| TUCP_002169 | XLOC_090402 | ENSRNOT00000092294 | 0.986520908  | 3.43E-09 |

|             |             |                    |              |          |
|-------------|-------------|--------------------|--------------|----------|
| TUCP_002165 | XLOC_090402 | ENSRNOT00000090780 | 0.954810918  | 1.38E-06 |
| TUCP_002164 | XLOC_090402 | ENSRNOT00000080988 | 0.951257212  | 2.00E-06 |
| TUCP_002164 | XLOC_090402 | ENSRNOT00000038802 | 0.954516604  | 1.42E-06 |
| TUCP_002164 | XLOC_090402 | ENSRNOT00000038433 | 0.961803039  | 6.01E-07 |
| TUCP_002164 | XLOC_090402 | ENSRNOT00000091910 | 0.95966044   | 7.86E-07 |
| TUCP_002164 | XLOC_090402 | ENSRNOT00000020070 | 0.970690166  | 1.62E-07 |
| TUCP_002164 | XLOC_090402 | ENSRNOT00000075653 | 0.951819012  | 1.89E-06 |
| TUCP_002164 | XLOC_090402 | ENSRNOT00000074939 | 0.961438373  | 6.29E-07 |
| TUCP_002164 | XLOC_090402 | ENSRNOT00000036287 | 0.961320439  | 6.39E-07 |
| TUCP_002164 | XLOC_090402 | ENSRNOT00000030024 | 0.95090913   | 2.07E-06 |
| TUCP_002164 | XLOC_090402 | ENSRNOT00000031230 | 0.953788089  | 1.54E-06 |
| TUCP_002164 | XLOC_090402 | ENSRNOT00000032274 | 0.958600983  | 8.93E-07 |
| TUCP_002164 | XLOC_090402 | ENSRNOT00000009683 | 0.957043764  | 1.07E-06 |
| TUCP_002164 | XLOC_090402 | ENSRNOT00000039344 | 0.955097313  | 1.33E-06 |
| TUCP_002164 | XLOC_090402 | ENSRNOT00000089971 | 0.96962338   | 1.94E-07 |
| TUCP_002164 | XLOC_090402 | ENSRNOT00000008106 | 0.965039129  | 3.88E-07 |
| TUCP_002164 | XLOC_090402 | ENSRNOT00000071694 | 0.959124184  | 8.39E-07 |
| TUCP_002164 | XLOC_090402 | ENSRNOT00000055401 | 0.970019757  | 1.81E-07 |
| TUCP_002164 | XLOC_090402 | ENSRNOT00000035491 | 0.957475382  | 1.02E-06 |
| TUCP_002164 | XLOC_090402 | ENSRNOT00000039631 | 0.954512387  | 1.42E-06 |
| TUCP_002164 | XLOC_090402 | ENSRNOT00000023180 | 0.954694652  | 1.39E-06 |
| TUCP_002164 | XLOC_090402 | ENSRNOT00000039852 | 0.956715243  | 1.11E-06 |
| TUCP_002164 | XLOC_090402 | ENSRNOT00000019222 | 0.953355579  | 1.61E-06 |
| TUCP_002164 | XLOC_090402 | ENSRNOT00000004359 | 0.971821151  | 1.33E-07 |
| TUCP_002164 | XLOC_090402 | ENSRNOT00000024941 | 0.963172191  | 5.02E-07 |
| TUCP_002164 | XLOC_090402 | ENSRNOT00000023428 | 0.958497664  | 9.04E-07 |
| TUCP_002164 | XLOC_090402 | ENSRNOT00000075326 | 0.960432545  | 7.15E-07 |
| TUCP_002164 | XLOC_090402 | ENSRNOT00000001809 | 0.962288589  | 5.64E-07 |
| TUCP_002164 | XLOC_090402 | ENSRNOT00000029001 | 0.95231875   | 1.79E-06 |
| TUCP_002164 | XLOC_090402 | ENSRNOT00000009066 | 0.957295872  | 1.04E-06 |
| TUCP_002649 | XLOC_112157 | ENSRNOT00000010539 | 0.97208221   | 1.27E-07 |
| TUCP_002649 | XLOC_112157 | ENSRNOT00000007601 | 0.951872856  | 1.88E-06 |
| TUCP_002649 | XLOC_112157 | ENSRNOT00000009132 | 0.954133431  | 1.48E-06 |
| TUCP_002649 | XLOC_112157 | ENSRNOT00000023623 | 0.957736077  | 9.89E-07 |
| TUCP_002649 | XLOC_112157 | ENSRNOT00000003511 | 0.956335815  | 1.16E-06 |
| TUCP_002649 | XLOC_112157 | ENSRNOT00000072682 | 0.95582189   | 1.23E-06 |
| TUCP_002649 | XLOC_112157 | ENSRNOT00000051139 | 0.952368531  | 1.78E-06 |
| TUCP_002649 | XLOC_112157 | ENSRNOT00000065801 | 0.965554527  | 3.60E-07 |
| TUCP_002649 | XLOC_112157 | ENSRNOT0000002814  | 0.971170406  | 1.49E-07 |
| TUCP_002649 | XLOC_112157 | ENSRNOT00000015864 | 0.973879747  | 9.17E-08 |
| TUCP_002649 | XLOC_112157 | ENSRNOT00000009398 | 0.961851838  | 5.97E-07 |
| TUCP_002649 | XLOC_112157 | ENSRNOT00000079152 | 0.977158987  | 4.71E-08 |
| TUCP_002649 | XLOC_112157 | ENSRNOT00000023661 | 0.962540859  | 5.45E-07 |
| TUCP_002649 | XLOC_112157 | ENSRNOT00000041762 | 0.959649962  | 7.87E-07 |
| TUCP_002649 | XLOC_112157 | ENSRNOT00000045875 | 0.953261389  | 1.62E-06 |
| TUCP_002649 | XLOC_112157 | ENSRNOT00000004764 | 0.962905153  | 5.20E-07 |
| TUCP_002649 | XLOC_112157 | ENSRNOT00000003932 | 0.952452525  | 1.77E-06 |
| TUCP_003578 | XLOC_156996 | ENSRNOT00000066880 | -0.959643246 | 7.88E-07 |
| TUCP_001512 | XLOC_058120 | ENSRNOT00000000008 | 1            | 0        |
| TUCP_001512 | XLOC_058120 | ENSRNOT00000060048 | 0.998711457  | 2.79E-14 |
| TUCP_001512 | XLOC_058120 | ENSRNOT00000082304 | 0.996875989  | 2.33E-12 |

|             |             |                    |              |          |
|-------------|-------------|--------------------|--------------|----------|
| TUCP_001512 | XLOC_058120 | ENSRNOT0000006219  | 1            | 0        |
| TUCP_001512 | XLOC_058120 | ENSRNOT00000065376 | 1            | 0        |
| TUCP_001512 | XLOC_058120 | ENSRNOT00000081433 | 0.984469223  | 6.93E-09 |
| TUCP_001512 | XLOC_058120 | ENSRNOT00000083575 | 1            | 0        |
| TUCP_001512 | XLOC_058120 | ENSRNOT00000087739 | 1            | 1.33E-79 |
| TUCP_001512 | XLOC_058120 | ENSRNOT00000079826 | 1            | 1.33E-79 |
| TUCP_001512 | XLOC_058120 | ENSRNOT00000025770 | 0.993828251  | 6.98E-11 |
| TUCP_001512 | XLOC_058120 | ENSRNOT00000088244 | 0.973479481  | 9.88E-08 |
| TUCP_001512 | XLOC_058120 | ENSRNOT00000048523 | 1            | 0        |
| TUCP_001512 | XLOC_058120 | ENSRNOT00000079365 | 0.958936699  | 8.58E-07 |
| TUCP_001512 | XLOC_058120 | ENSRNOT00000020229 | 0.960002785  | 7.54E-07 |
| TUCP_001512 | XLOC_058120 | ENSRNOT00000026428 | 0.996986683  | 1.95E-12 |
| TUCP_001512 | XLOC_058120 | ENSRNOT00000085673 | 1            | 1.33E-79 |
| TUCP_001512 | XLOC_058120 | ENSRNOT00000072972 | 0.981476166  | 1.67E-08 |
| TUCP_001512 | XLOC_058120 | ENSRNOT00000050573 | 1            | 4.25E-78 |
| TUCP_001512 | XLOC_058120 | ENSRNOT00000089876 | -0.953630353 | 1.56E-06 |
| TUCP_001512 | XLOC_058120 | ENSRNOT00000074378 | 0.998901807  | 1.26E-14 |
| TUCP_001512 | XLOC_058120 | ENSRNOT00000093571 | 1            | 0        |
| TUCP_001512 | XLOC_058120 | ENSRNOT00000090581 | 1            | 1.33E-79 |
| TUCP_001512 | XLOC_058120 | ENSRNOT00000076239 | 0.98020752   | 2.31E-08 |
| TUCP_001512 | XLOC_058120 | ENSRNOT00000065485 | 1            | 0        |
| TUCP_001512 | XLOC_058120 | ENSRNOT00000006356 | 0.999544279  | 1.55E-16 |
| TUCP_001512 | XLOC_058120 | ENSRNOT00000087199 | 0.974421555  | 8.26E-08 |
| TUCP_001512 | XLOC_058120 | ENSRNOT00000022091 | 1            | 0        |
| TUCP_001512 | XLOC_058120 | ENSRNOT00000064764 | 0.98460888   | 6.63E-09 |
| TUCP_001512 | XLOC_058120 | ENSRNOT00000076927 | 0.971163156  | 1.50E-07 |
| TUCP_001512 | XLOC_058120 | ENSRNOT00000092395 | 0.999522978  | 1.94E-16 |
| TUCP_003800 | XLOC_166074 | ENSRNOT00000006186 | 0.959726322  | 7.80E-07 |
| TUCP_003800 | XLOC_166074 | ENSRNOT00000026941 | 0.978229252  | 3.71E-08 |
| TUCP_003800 | XLOC_166074 | ENSRNOT00000021348 | 0.983046746  | 1.07E-08 |
| TUCP_003800 | XLOC_166074 | ENSRNOT00000074649 | 0.954656091  | 1.40E-06 |
| TUCP_003800 | XLOC_166074 | ENSRNOT00000073559 | 0.981710674  | 1.56E-08 |
| TUCP_003800 | XLOC_166074 | ENSRNOT00000003891 | 0.963259943  | 4.96E-07 |
| TUCP_003800 | XLOC_166074 | ENSRNOT00000006175 | 0.969565082  | 1.95E-07 |
| TUCP_003800 | XLOC_166074 | ENSRNOT00000086706 | 0.968773391  | 2.22E-07 |
| TUCP_003800 | XLOC_166074 | ENSRNOT00000004017 | 0.956094327  | 1.19E-06 |
| TUCP_003800 | XLOC_166074 | ENSRNOT00000086310 | -0.952871993 | 1.69E-06 |
| TUCP_003800 | XLOC_166074 | ENSRNOT00000010030 | -0.950206569 | 2.22E-06 |
| TUCP_003800 | XLOC_166074 | ENSRNOT00000052063 | 0.961676501  | 6.10E-07 |
| TUCP_003800 | XLOC_166074 | ENSRNOT00000030850 | 0.970071599  | 1.80E-07 |
| TUCP_003800 | XLOC_166074 | ENSRNOT00000027411 | 0.950540178  | 2.14E-06 |
| TUCP_003800 | XLOC_166074 | ENSRNOT00000033017 | 0.981886794  | 1.49E-08 |
| TUCP_003800 | XLOC_166074 | ENSRNOT00000009712 | 0.963542103  | 4.77E-07 |
| TUCP_003800 | XLOC_166074 | ENSRNOT00000066370 | 0.95707234   | 1.07E-06 |
| TUCP_003800 | XLOC_166074 | ENSRNOT00000057562 | 0.954959396  | 1.35E-06 |
| TUCP_003800 | XLOC_166074 | ENSRNOT00000072771 | 0.968600296  | 2.28E-07 |
| TUCP_003800 | XLOC_166074 | ENSRNOT00000073370 | 0.963179341  | 5.01E-07 |
| TUCP_003800 | XLOC_166074 | ENSRNOT00000065300 | 0.958424112  | 9.12E-07 |
| TUCP_003800 | XLOC_166074 | ENSRNOT00000044742 | 0.977961549  | 3.95E-08 |
| TUCP_003800 | XLOC_166074 | ENSRNOT00000045699 | 0.953636769  | 1.56E-06 |
| TUCP_003800 | XLOC_166074 | ENSRNOT00000029439 | 0.973721363  | 9.44E-08 |

|             |             |                    |              |          |
|-------------|-------------|--------------------|--------------|----------|
| TUCP_003800 | XLOC_166074 | ENSRNOT00000045285 | 0.956698927  | 1.11E-06 |
| TUCP_003800 | XLOC_166074 | ENSRNOT00000014664 | 0.963544991  | 4.77E-07 |
| TUCP_003800 | XLOC_166074 | ENSRNOT00000035989 | 0.950903318  | 2.07E-06 |
| TUCP_003800 | XLOC_166074 | ENSRNOT00000057160 | 0.964064647  | 4.44E-07 |
| TUCP_003800 | XLOC_166074 | ENSRNOT00000045047 | 0.968802855  | 2.21E-07 |
| TUCP_003800 | XLOC_166074 | ENSRNOT00000075326 | 0.968282538  | 2.40E-07 |
| TUCP_003800 | XLOC_166074 | ENSRNOT00000077999 | 0.965699928  | 3.53E-07 |
| TUCP_003800 | XLOC_166074 | ENSRNOT00000024266 | 0.960290391  | 7.27E-07 |
| TUCP_003800 | XLOC_166074 | ENSRNOT00000083214 | 0.951891914  | 1.87E-06 |
| TUCP_003800 | XLOC_166074 | ENSRNOT00000085228 | 0.980886446  | 1.95E-08 |
| TUCP_003800 | XLOC_166074 | ENSRNOT00000020134 | 0.981268893  | 1.76E-08 |
| TUCP_003800 | XLOC_166074 | ENSRNOT00000017319 | 0.955207638  | 1.32E-06 |
| TUCP_003800 | XLOC_166074 | ENSRNOT00000015188 | 0.955782575  | 1.24E-06 |
| TUCP_003800 | XLOC_166074 | ENSRNOT00000079866 | 0.975278055  | 6.98E-08 |
| TUCP_003800 | XLOC_166074 | ENSRNOT00000005839 | 0.959742127  | 7.78E-07 |
| TUCP_003800 | XLOC_166074 | ENSRNOT00000087371 | 0.975760813  | 6.33E-08 |
| TUCP_003800 | XLOC_166074 | ENSRNOT00000041044 | 0.950631255  | 2.13E-06 |
| TUCP_003800 | XLOC_166074 | ENSRNOT00000037446 | 0.965783793  | 3.49E-07 |
| TUCP_003800 | XLOC_166074 | ENSRNOT00000084709 | 0.966487976  | 3.15E-07 |
| TUCP_003800 | XLOC_166074 | ENSRNOT00000009156 | 0.955735844  | 1.24E-06 |
| TUCP_003800 | XLOC_166074 | ENSRNOT00000026481 | 0.973665225  | 9.54E-08 |
| TUCP_003800 | XLOC_166074 | ENSRNOT00000000468 | 0.954785086  | 1.38E-06 |
| TUCP_003800 | XLOC_166074 | ENSRNOT00000012892 | 0.969812791  | 1.88E-07 |
| TUCP_003800 | XLOC_166074 | ENSRNOT00000090918 | 0.950353174  | 2.18E-06 |
| TUCP_003800 | XLOC_166074 | ENSRNOT00000016132 | -0.964949952 | 3.93E-07 |
| TUCP_003800 | XLOC_166074 | ENSRNOT00000013067 | -0.958029419 | 9.56E-07 |
| TUCP_003800 | XLOC_166074 | ENSRNOT00000047093 | 0.969487004  | 1.98E-07 |
| TUCP_003800 | XLOC_166074 | ENSRNOT00000089524 | 0.964838558  | 3.99E-07 |
| TUCP_003800 | XLOC_166074 | ENSRNOT00000033975 | 0.966052328  | 3.35E-07 |
| TUCP_003800 | XLOC_166074 | ENSRNOT00000079895 | 0.973191872  | 1.04E-07 |
| TUCP_003800 | XLOC_166074 | ENSRNOT00000021496 | -0.954608763 | 1.41E-06 |
| TUCP_003800 | XLOC_166074 | ENSRNOT00000081512 | 0.971406202  | 1.43E-07 |
| TUCP_003800 | XLOC_166074 | ENSRNOT00000011880 | 0.970786986  | 1.60E-07 |
| TUCP_003800 | XLOC_166074 | ENSRNOT00000023989 | 0.973749535  | 9.39E-08 |
| TUCP_003800 | XLOC_166074 | ENSRNOT00000003991 | 0.952317554  | 1.79E-06 |
| TUCP_003800 | XLOC_166074 | ENSRNOT00000021408 | 0.956281077  | 1.17E-06 |
| TUCP_003800 | XLOC_166074 | ENSRNOT00000050515 | 0.957889157  | 9.72E-07 |
| TUCP_003800 | XLOC_166074 | ENSRNOT00000084088 | 0.963984221  | 4.49E-07 |
| TUCP_003800 | XLOC_166074 | ENSRNOT00000064902 | 0.955624417  | 1.26E-06 |
| TUCP_003800 | XLOC_166074 | ENSRNOT00000078070 | 0.968838146  | 2.20E-07 |
| TUCP_003800 | XLOC_166074 | ENSRNOT00000046745 | 0.96965061   | 1.93E-07 |
| TUCP_003800 | XLOC_166074 | ENSRNOT00000021015 | 0.952038764  | 1.84E-06 |
| TUCP_003800 | XLOC_166074 | ENSRNOT00000076729 | 0.965405783  | 3.68E-07 |
| TUCP_003800 | XLOC_166074 | ENSRNOT00000011408 | 0.956572267  | 1.13E-06 |
| TUCP_003800 | XLOC_166074 | ENSRNOT00000023876 | 0.957918123  | 9.68E-07 |
| TUCP_003800 | XLOC_166074 | ENSRNOT00000091488 | 0.974758587  | 7.73E-08 |
| TUCP_003800 | XLOC_166074 | ENSRNOT00000027452 | 0.977267232  | 4.60E-08 |
| TUCP_003800 | XLOC_166074 | ENSRNOT00000003568 | 0.95030279   | 2.20E-06 |
| TUCP_003800 | XLOC_166074 | ENSRNOT00000024119 | 0.958793364  | 8.73E-07 |
| TUCP_003800 | XLOC_166074 | ENSRNOT00000035277 | 0.951888236  | 1.87E-06 |
| TUCP_003800 | XLOC_166074 | ENSRNOT00000077146 | -0.957262596 | 1.04E-06 |

|             |             |                     |              |          |
|-------------|-------------|---------------------|--------------|----------|
| TUCP_003800 | XLOC_166074 | ENSRNOT00000006969  | 0.96324869   | 4.96E-07 |
| TUCP_003800 | XLOC_166074 | ENSRNOT00000001222  | 0.950682761  | 2.11E-06 |
| TUCP_003800 | XLOC_166074 | ENSRNOT000000066133 | -0.963202136 | 5.00E-07 |
| TUCP_003800 | XLOC_166074 | ENSRNOT000000083093 | 0.972852503  | 1.11E-07 |
| TUCP_003800 | XLOC_166074 | ENSRNOT000000085596 | 0.965599524  | 3.58E-07 |
| TUCP_003800 | XLOC_166074 | ENSRNOT000000088279 | 0.973489729  | 9.86E-08 |
| TUCP_003800 | XLOC_166074 | ENSRNOT000000026293 | 0.97101127   | 1.54E-07 |
| TUCP_003800 | XLOC_166074 | ENSRNOT00000019487  | 0.956556541  | 1.13E-06 |
| TUCP_003800 | XLOC_166074 | ENSRNOT000000089007 | -0.952575049 | 1.74E-06 |
| TUCP_003800 | XLOC_166074 | ENSRNOT000000080443 | 0.962339398  | 5.60E-07 |
| TUCP_003800 | XLOC_166074 | ENSRNOT00000015624  | 0.96593636   | 3.41E-07 |
| TUCP_003800 | XLOC_166074 | ENSRNOT000000035474 | 0.970271571  | 1.74E-07 |
| TUCP_003800 | XLOC_166074 | ENSRNOT000000091205 | 0.961082118  | 6.59E-07 |
| TUCP_003800 | XLOC_166074 | ENSRNOT000000060696 | 0.987033686  | 2.82E-09 |
| TUCP_003800 | XLOC_166074 | ENSRNOT00000004787  | -0.950702144 | 2.11E-06 |
| TUCP_003800 | XLOC_166074 | ENSRNOT00000004412  | 0.961444689  | 6.29E-07 |
| TUCP_003800 | XLOC_166074 | ENSRNOT00000010748  | 0.979799952  | 2.56E-08 |
| TUCP_003800 | XLOC_166074 | ENSRNOT000000080207 | 0.976052167  | 5.96E-08 |
| TUCP_003800 | XLOC_166074 | ENSRNOT000000026174 | 0.962156388  | 5.74E-07 |
| TUCP_003800 | XLOC_166074 | ENSRNOT000000065529 | 0.950530037  | 2.15E-06 |
| TUCP_003800 | XLOC_166074 | ENSRNOT00000017776  | 0.969991479  | 1.82E-07 |
| TUCP_003800 | XLOC_166074 | ENSRNOT000000005686 | -0.958777402 | 8.75E-07 |
| TUCP_003800 | XLOC_166074 | ENSRNOT000000005144 | 0.955001255  | 1.35E-06 |
| TUCP_003800 | XLOC_166074 | ENSRNOT000000026457 | 0.971152226  | 1.50E-07 |
| TUCP_003800 | XLOC_166074 | ENSRNOT000000004463 | 0.973576052  | 9.71E-08 |
| TUCP_003800 | XLOC_166074 | ENSRNOT000000080928 | 0.958664526  | 8.87E-07 |
| TUCP_003800 | XLOC_166074 | ENSRNOT000000008982 | 0.96025513   | 7.31E-07 |
| TUCP_003800 | XLOC_166074 | ENSRNOT000000047192 | -0.974238299 | 8.56E-08 |
| TUCP_003800 | XLOC_166074 | ENSRNOT000000008987 | -0.953739784 | 1.54E-06 |
| TUCP_003800 | XLOC_166074 | ENSRNOT000000090299 | 0.953582989  | 1.57E-06 |
| TUCP_003800 | XLOC_166074 | ENSRNOT000000029001 | 0.955520501  | 1.27E-06 |
| TUCP_003800 | XLOC_166074 | ENSRNOT000000083799 | 0.966357812  | 3.21E-07 |
| TUCP_003800 | XLOC_166074 | ENSRNOT000000048020 | 0.95336651   | 1.61E-06 |
| TUCP_003800 | XLOC_166074 | ENSRNOT000000081246 | 0.9556112    | 1.26E-06 |
| TUCP_003800 | XLOC_166074 | ENSRNOT000000074939 | 0.966931507  | 2.95E-07 |
| TUCP_003800 | XLOC_166074 | ENSRNOT000000066041 | -0.960148798 | 7.40E-07 |
| TUCP_003800 | XLOC_166074 | ENSRNOT000000006055 | 0.958308026  | 9.25E-07 |
| TUCP_003800 | XLOC_166074 | ENSRNOT00000001855  | 0.960721662  | 6.89E-07 |
| TUCP_003800 | XLOC_166074 | ENSRNOT000000037699 | 0.96686165   | 2.98E-07 |
| TUCP_003800 | XLOC_166074 | ENSRNOT000000055683 | 0.955873131  | 1.22E-06 |
| TUCP_003800 | XLOC_166074 | ENSRNOT000000076763 | 0.965722936  | 3.52E-07 |
| TUCP_003800 | XLOC_166074 | ENSRNOT000000043216 | 0.960985808  | 6.67E-07 |
| TUCP_003800 | XLOC_166074 | ENSRNOT000000081981 | 0.960617299  | 6.98E-07 |
| TUCP_003800 | XLOC_166074 | ENSRNOT00000013758  | 0.952820623  | 1.70E-06 |
| TUCP_003800 | XLOC_166074 | ENSRNOT00000010418  | 0.963955073  | 4.51E-07 |
| TUCP_003800 | XLOC_166074 | ENSRNOT000000025079 | -0.974912228 | 7.50E-08 |
| TUCP_003800 | XLOC_166074 | ENSRNOT000000048754 | -0.969539221 | 1.96E-07 |
| TUCP_003800 | XLOC_166074 | ENSRNOT000000044628 | 0.953539543  | 1.58E-06 |
| TUCP_003800 | XLOC_166074 | ENSRNOT000000025075 | 0.97959359   | 2.69E-08 |
| TUCP_003800 | XLOC_166074 | ENSRNOT00000011926  | 0.951621541  | 1.92E-06 |
| TUCP_003800 | XLOC_166074 | ENSRNOT00000012671  | 0.965990034  | 3.38E-07 |

|             |             |                     |              |          |
|-------------|-------------|---------------------|--------------|----------|
| TUCP_003800 | XLOC_166074 | ENSRNOT00000077231  | 0.974019954  | 8.92E-08 |
| TUCP_003800 | XLOC_166074 | ENSRNOT00000007369  | 0.952534278  | 1.75E-06 |
| TUCP_003800 | XLOC_166074 | ENSRNOT00000071540  | 0.950459654  | 2.16E-06 |
| TUCP_003800 | XLOC_166074 | ENSRNOT00000017556  | 0.962832407  | 5.25E-07 |
| TUCP_003800 | XLOC_166074 | ENSRNOT00000087443  | 0.952339403  | 1.79E-06 |
| TUCP_003800 | XLOC_166074 | ENSRNOT00000021803  | -0.959821543 | 7.71E-07 |
| TUCP_003800 | XLOC_166074 | ENSRNOT00000020028  | 0.961693554  | 6.09E-07 |
| TUCP_003800 | XLOC_166074 | ENSRNOT00000000676  | 0.951422334  | 1.96E-06 |
| TUCP_003800 | XLOC_166074 | ENSRNOT00000024352  | 0.966597331  | 3.10E-07 |
| TUCP_003800 | XLOC_166074 | ENSRNOT00000083220  | 0.962383946  | 5.57E-07 |
| TUCP_003800 | XLOC_166074 | ENSRNOT00000018122  | 0.950130939  | 2.23E-06 |
| TUCP_003800 | XLOC_166074 | ENSRNOT00000003780  | 0.978918645  | 3.17E-08 |
| TUCP_003800 | XLOC_166074 | ENSRNOT00000060362  | 0.962826562  | 5.25E-07 |
| TUCP_003800 | XLOC_166074 | ENSRNOT00000013274  | 0.978970517  | 3.13E-08 |
| TUCP_003800 | XLOC_166074 | ENSRNOT00000068381  | 0.958869355  | 8.65E-07 |
| TUCP_003800 | XLOC_166074 | ENSRNOT00000085621  | 0.963402907  | 4.86E-07 |
| TUCP_003800 | XLOC_166074 | ENSRNOT00000076404  | 0.956830844  | 1.10E-06 |
| TUCP_003800 | XLOC_166074 | ENSRNOT00000088599  | 0.959785054  | 7.74E-07 |
| TUCP_003800 | XLOC_166074 | ENSRNOT00000083127  | 0.981468459  | 1.67E-08 |
| TUCP_003800 | XLOC_166074 | ENSRNOT00000061100  | 0.974392134  | 8.31E-08 |
| TUCP_003800 | XLOC_166074 | ENSRNOT00000017021  | 0.966414803  | 3.18E-07 |
| TUCP_003800 | XLOC_166074 | ENSRNOT00000017995  | 0.96344691   | 4.83E-07 |
| TUCP_003800 | XLOC_166074 | ENSRNOT00000009683  | 0.971951616  | 1.30E-07 |
| TUCP_003800 | XLOC_166074 | ENSRNOT00000081725  | 0.959821484  | 7.71E-07 |
| TUCP_003800 | XLOC_166074 | ENSRNOT00000005459  | 0.957106349  | 1.06E-06 |
| TUCP_003800 | XLOC_166074 | ENSRNOT00000043535  | 0.955782649  | 1.24E-06 |
| TUCP_003800 | XLOC_166074 | ENSRNOT00000027910  | 0.974682962  | 7.85E-08 |
| TUCP_003800 | XLOC_166074 | ENSRNOT00000002771  | 0.967096245  | 2.87E-07 |
| TUCP_003800 | XLOC_166074 | ENSRNOT00000079442  | 0.975352374  | 6.87E-08 |
| TUCP_003800 | XLOC_166074 | ENSRNOT00000024322  | 0.977749525  | 4.14E-08 |
| TUCP_003800 | XLOC_166074 | ENSRNOT00000011270  | 0.952631233  | 1.73E-06 |
| TUCP_003800 | XLOC_166074 | ENSRNOT00000016191  | 0.972870648  | 1.11E-07 |
| TUCP_003800 | XLOC_166074 | ENSRNOT00000078390  | -0.963556553 | 4.76E-07 |
| TUCP_003800 | XLOC_166074 | ENSRNOT00000013985  | 0.950855456  | 2.08E-06 |
| TUCP_003800 | XLOC_166074 | ENSRNOT00000028888  | 0.952631575  | 1.73E-06 |
| TUCP_003800 | XLOC_166074 | ENSRNOT00000074972  | 0.954533002  | 1.42E-06 |
| TUCP_003800 | XLOC_166074 | ENSRNOT000000033677 | -0.962796412 | 5.27E-07 |
| TUCP_003800 | XLOC_166074 | ENSRNOT00000082151  | -0.954207518 | 1.47E-06 |
| TUCP_003800 | XLOC_166074 | ENSRNOT00000003359  | -0.953420808 | 1.60E-06 |
| TUCP_003800 | XLOC_166074 | ENSRNOT00000090057  | 0.951352156  | 1.98E-06 |
| TUCP_003800 | XLOC_166074 | ENSRNOT00000011984  | 0.973572515  | 9.71E-08 |
| TUCP_003800 | XLOC_166074 | ENSRNOT00000043872  | 0.952933235  | 1.68E-06 |
| TUCP_003800 | XLOC_166074 | ENSRNOT00000000658  | 0.980194642  | 2.32E-08 |
| TUCP_003800 | XLOC_166074 | ENSRNOT000000031230 | 0.966193137  | 3.29E-07 |
| TUCP_003800 | XLOC_166074 | ENSRNOT00000015898  | 0.959517855  | 8.00E-07 |
| TUCP_003800 | XLOC_166074 | ENSRNOT00000002292  | 0.958233473  | 9.33E-07 |
| TUCP_003800 | XLOC_166074 | ENSRNOT00000078306  | 0.956468649  | 1.14E-06 |
| TUCP_003800 | XLOC_166074 | ENSRNOT00000004172  | 0.953462191  | 1.59E-06 |
| TUCP_003800 | XLOC_166074 | ENSRNOT00000092876  | -0.950695039 | 2.11E-06 |
| TUCP_003800 | XLOC_166074 | ENSRNOT00000029125  | 0.963598768  | 4.73E-07 |
| TUCP_003800 | XLOC_166074 | ENSRNOT00000026280  | 0.971874415  | 1.32E-07 |

|             |             |                      |              |          |
|-------------|-------------|----------------------|--------------|----------|
| TUCP_003800 | XLOC_166074 | ENSRNOT00000005387   | 0.979603666  | 2.69E-08 |
| TUCP_003800 | XLOC_166074 | ENSRNOT000000022863  | 0.958711067  | 8.82E-07 |
| TUCP_003800 | XLOC_166074 | ENSRNOT000000017165  | -0.955645532 | 1.25E-06 |
| TUCP_003800 | XLOC_166074 | ENSRNOT00000010224   | 0.960554408  | 7.04E-07 |
| TUCP_003800 | XLOC_166074 | ENSRNOT000000022796  | 0.983994828  | 8.05E-09 |
| TUCP_003800 | XLOC_166074 | ENSRNOT000000005311  | 0.956127279  | 1.19E-06 |
| TUCP_003800 | XLOC_166074 | ENSRNOT000000015799  | 0.991865008  | 2.77E-10 |
| TUCP_003800 | XLOC_166074 | ENSRNOT000000005958  | 0.951457154  | 1.96E-06 |
| TUCP_003800 | XLOC_166074 | ENSRNOT000000039551  | -0.953616187 | 1.56E-06 |
| TUCP_003800 | XLOC_166074 | ENSRNOT000000082998  | 0.952319874  | 1.79E-06 |
| TUCP_003800 | XLOC_166074 | ENSRNOT000000015006  | 0.971073911  | 1.52E-07 |
| TUCP_003800 | XLOC_166074 | ENSRNOT000000007351  | -0.965335299 | 3.72E-07 |
| TUCP_003800 | XLOC_166074 | ENSRNOT000000083578  | 0.950917541  | 2.07E-06 |
| TUCP_003800 | XLOC_166074 | ENSRNOT000000023133  | 0.953783798  | 1.54E-06 |
| TUCP_003800 | XLOC_166074 | ENSRNOT000000023638  | 0.976749422  | 5.15E-08 |
| TUCP_003800 | XLOC_166074 | ENSRNOT000000005228  | 0.95003729   | 2.25E-06 |
| TUCP_003800 | XLOC_166074 | ENSRNOT000000005220  | 0.973518147  | 9.81E-08 |
| TUCP_003800 | XLOC_166074 | ENSRNOT000000023144  | 0.980739077  | 2.02E-08 |
| TUCP_003800 | XLOC_166074 | ENSRNOT000000045326  | 0.950478086  | 2.16E-06 |
| TUCP_003800 | XLOC_166074 | ENSRNOT000000016649  | 0.967128409  | 2.86E-07 |
| TUCP_003800 | XLOC_166074 | ENSRNOT000000074023  | 0.959496978  | 8.02E-07 |
| TUCP_003800 | XLOC_166074 | ENSRNOT0000000056813 | 0.951718233  | 1.90E-06 |
| TUCP_003800 | XLOC_166074 | ENSRNOT000000091128  | -0.961575658 | 6.18E-07 |
| TUCP_003800 | XLOC_166074 | ENSRNOT000000001586  | -0.953061886 | 1.66E-06 |
| TUCP_003800 | XLOC_166074 | ENSRNOT000000026543  | 0.971711091  | 1.36E-07 |
| TUCP_003800 | XLOC_166074 | ENSRNOT000000029237  | 0.95334143   | 1.61E-06 |
| TUCP_003800 | XLOC_166074 | ENSRNOT000000071971  | 0.961742102  | 6.05E-07 |
| TUCP_003800 | XLOC_166074 | ENSRNOT000000012187  | 0.966752653  | 3.03E-07 |
| TUCP_003800 | XLOC_166074 | ENSRNOT000000024969  | 0.95160431   | 1.93E-06 |
| TUCP_003800 | XLOC_166074 | ENSRNOT000000013049  | 0.954249082  | 1.46E-06 |
| TUCP_003800 | XLOC_166074 | ENSRNOT000000034609  | 0.960324911  | 7.24E-07 |
| TUCP_003800 | XLOC_166074 | ENSRNOT000000088125  | 0.969645819  | 1.93E-07 |
| TUCP_003800 | XLOC_166074 | ENSRNOT000000038247  | 0.965614623  | 3.57E-07 |
| TUCP_003800 | XLOC_166074 | ENSRNOT000000024402  | 0.983046938  | 1.07E-08 |
| TUCP_003800 | XLOC_166074 | ENSRNOT000000089933  | 0.976092267  | 5.91E-08 |
| TUCP_003800 | XLOC_166074 | ENSRNOT000000077908  | 0.960144013  | 7.41E-07 |
| TUCP_003800 | XLOC_166074 | ENSRNOT000000003641  | 0.950839576  | 2.08E-06 |
| TUCP_003800 | XLOC_166074 | ENSRNOT000000090912  | 0.950908977  | 2.07E-06 |
| TUCP_003800 | XLOC_166074 | ENSRNOT000000085158  | 0.95683829   | 1.10E-06 |
| TUCP_003800 | XLOC_166074 | ENSRNOT000000010463  | 0.959886061  | 7.65E-07 |
| TUCP_003800 | XLOC_166074 | ENSRNOT000000026718  | 0.962599515  | 5.41E-07 |
| TUCP_003800 | XLOC_166074 | ENSRNOT000000032780  | 0.953535073  | 1.58E-06 |
| TUCP_003800 | XLOC_166074 | ENSRNOT000000027232  | 0.950929433  | 2.06E-06 |
| TUCP_003800 | XLOC_166074 | ENSRNOT000000027234  | 0.958522798  | 9.02E-07 |
| TUCP_003800 | XLOC_166074 | ENSRNOT000000019820  | 0.972590128  | 1.16E-07 |
| TUCP_003800 | XLOC_166074 | ENSRNOT000000067822  | 0.95676107   | 1.11E-06 |
| TUCP_003800 | XLOC_166074 | ENSRNOT00000002410   | 0.973621544  | 9.62E-08 |
| TUCP_003800 | XLOC_166074 | ENSRNOT000000077727  | -0.959258052 | 8.26E-07 |
| TUCP_003800 | XLOC_166074 | ENSRNOT000000006804  | 0.960977891  | 6.67E-07 |
| TUCP_003800 | XLOC_166074 | ENSRNOT000000010541  | 0.980623196  | 2.08E-08 |
| TUCP_003800 | XLOC_166074 | ENSRNOT00000004032   | 0.950512892  | 2.15E-06 |

|             |             |                    |              |          |
|-------------|-------------|--------------------|--------------|----------|
| TUCP_003800 | XLOC_166074 | ENSRNOT00000016947 | 0.958840016  | 8.68E-07 |
| TUCP_003800 | XLOC_166074 | ENSRNOT00000091909 | 0.973768568  | 9.36E-08 |
| TUCP_003800 | XLOC_166074 | ENSRNOT00000001081 | 0.964804365  | 4.01E-07 |
| TUCP_003800 | XLOC_166074 | ENSRNOT00000078675 | 0.965273971  | 3.75E-07 |
| TUCP_003800 | XLOC_166074 | ENSRNOT00000019222 | 0.965954694  | 3.40E-07 |
| TUCP_003800 | XLOC_166074 | ENSRNOT00000022190 | -0.964354885 | 4.27E-07 |
| TUCP_003800 | XLOC_166074 | ENSRNOT00000025913 | -0.951870816 | 1.88E-06 |
| TUCP_003800 | XLOC_166074 | ENSRNOT00000090123 | 0.967775781  | 2.59E-07 |
| TUCP_003800 | XLOC_166074 | ENSRNOT00000077220 | -0.957051962 | 1.07E-06 |
| TUCP_003800 | XLOC_166074 | ENSRNOT00000065983 | 0.959319854  | 8.19E-07 |
| TUCP_003800 | XLOC_166074 | ENSRNOT00000052018 | 0.961116862  | 6.56E-07 |
| TUCP_003800 | XLOC_166074 | ENSRNOT00000067780 | -0.956331208 | 1.16E-06 |
| TUCP_003800 | XLOC_166074 | ENSRNOT00000086577 | 0.962898589  | 5.20E-07 |
| TUCP_003800 | XLOC_166074 | ENSRNOT00000000157 | 0.951752112  | 1.90E-06 |
| TUCP_003800 | XLOC_166074 | ENSRNOT00000010303 | -0.951785851 | 1.89E-06 |
| TUCP_003800 | XLOC_166074 | ENSRNOT00000052422 | 0.958237586  | 9.33E-07 |
| TUCP_003800 | XLOC_166074 | ENSRNOT00000086119 | -0.968041703 | 2.49E-07 |
| TUCP_003800 | XLOC_166074 | ENSRNOT00000020155 | 0.964632374  | 4.11E-07 |
| TUCP_003800 | XLOC_166074 | ENSRNOT00000014537 | 0.960705796  | 6.91E-07 |
| TUCP_003800 | XLOC_166074 | ENSRNOT00000017629 | 0.962894145  | 5.20E-07 |
| TUCP_003800 | XLOC_166074 | ENSRNOT00000005910 | -0.95008578  | 2.24E-06 |
| TUCP_003800 | XLOC_166074 | ENSRNOT00000078475 | 0.97361594   | 9.63E-08 |
| TUCP_003800 | XLOC_166074 | ENSRNOT00000087429 | 0.968057744  | 2.48E-07 |
| TUCP_003800 | XLOC_166074 | ENSRNOT00000016722 | 0.962289777  | 5.64E-07 |
| TUCP_003800 | XLOC_166074 | ENSRNOT00000091265 | 0.969107406  | 2.10E-07 |
| TUCP_003800 | XLOC_166074 | ENSRNOT00000073526 | 0.958941806  | 8.58E-07 |
| TUCP_003800 | XLOC_166074 | ENSRNOT00000065501 | 0.980516668  | 2.14E-08 |
| TUCP_003800 | XLOC_166074 | ENSRNOT00000000013 | 0.953817012  | 1.53E-06 |
| TUCP_003800 | XLOC_166074 | ENSRNOT00000017753 | 0.955053062  | 1.34E-06 |
| TUCP_003800 | XLOC_166074 | ENSRNOT00000066739 | 0.958970985  | 8.55E-07 |
| TUCP_003800 | XLOC_166074 | ENSRNOT00000045882 | 0.971697895  | 1.36E-07 |
| TUCP_003800 | XLOC_166074 | ENSRNOT00000031904 | 0.97683435   | 5.05E-08 |
| TUCP_003800 | XLOC_166074 | ENSRNOT00000028057 | 0.956042131  | 1.20E-06 |
| TUCP_003800 | XLOC_166074 | ENSRNOT00000055582 | 0.971113278  | 1.51E-07 |
| TUCP_003800 | XLOC_166074 | ENSRNOT00000022074 | 0.977140604  | 4.73E-08 |
| TUCP_003800 | XLOC_166074 | ENSRNOT00000037790 | 0.972512351  | 1.18E-07 |
| TUCP_003800 | XLOC_166074 | ENSRNOT00000004999 | 0.958242032  | 9.32E-07 |
| TUCP_003800 | XLOC_166074 | ENSRNOT00000041365 | 0.96904854   | 2.12E-07 |
| TUCP_003800 | XLOC_166074 | ENSRNOT00000088054 | 0.987418478  | 2.43E-09 |
| TUCP_003800 | XLOC_166074 | ENSRNOT00000029202 | -0.95950001  | 8.02E-07 |
| TUCP_003800 | XLOC_166074 | ENSRNOT00000038647 | 0.973300753  | 1.02E-07 |
| TUCP_003800 | XLOC_166074 | ENSRNOT00000076669 | 0.960259825  | 7.30E-07 |
| TUCP_003800 | XLOC_166074 | ENSRNOT00000084422 | 0.952483279  | 1.76E-06 |
| TUCP_003800 | XLOC_166074 | ENSRNOT00000054828 | 0.95751366   | 1.02E-06 |
| TUCP_003800 | XLOC_166074 | ENSRNOT00000066024 | 0.950592458  | 2.13E-06 |
| TUCP_003800 | XLOC_166074 | ENSRNOT00000012736 | 0.984996135  | 5.84E-09 |
| TUCP_003800 | XLOC_166074 | ENSRNOT00000027970 | 0.960576455  | 7.02E-07 |
| TUCP_003800 | XLOC_166074 | ENSRNOT00000009462 | 0.968419985  | 2.35E-07 |
| TUCP_003800 | XLOC_166074 | ENSRNOT00000018074 | -0.969575745 | 1.95E-07 |
| TUCP_003800 | XLOC_166074 | ENSRNOT00000037679 | 0.962075471  | 5.80E-07 |
| TUCP_003800 | XLOC_166074 | ENSRNOT00000014124 | 0.970588873  | 1.65E-07 |



|             |             |                    |              |          |
|-------------|-------------|--------------------|--------------|----------|
| TUCP_003800 | XLOC_166074 | ENSRNOT0000000120  | 0.951720764  | 1.90E-06 |
| TUCP_003800 | XLOC_166074 | ENSRNOT00000013632 | 0.964490315  | 4.19E-07 |
| TUCP_003800 | XLOC_166074 | ENSRNOT00000078906 | -0.958170096 | 9.40E-07 |
| TUCP_003800 | XLOC_166074 | ENSRNOT00000009900 | -0.959206385 | 8.31E-07 |
| TUCP_003800 | XLOC_166074 | ENSRNOT00000019172 | -0.950256142 | 2.21E-06 |
| TUCP_003800 | XLOC_166074 | ENSRNOT00000064798 | 0.96986995   | 1.86E-07 |
| TUCP_003800 | XLOC_166074 | ENSRNOT00000021216 | 0.95267428   | 1.73E-06 |
| TUCP_003800 | XLOC_166074 | ENSRNOT00000040393 | 0.972806553  | 1.12E-07 |
| TUCP_003800 | XLOC_166074 | ENSRNOT00000025097 | 0.961443413  | 6.29E-07 |
| TUCP_003800 | XLOC_166074 | ENSRNOT00000067901 | -0.962768039 | 5.29E-07 |
| TUCP_003800 | XLOC_166074 | ENSRNOT00000036750 | 0.965755579  | 3.50E-07 |
| TUCP_003800 | XLOC_166074 | ENSRNOT00000011041 | 0.967827299  | 2.57E-07 |
| TUCP_003800 | XLOC_166074 | ENSRNOT00000021674 | 0.975919599  | 6.12E-08 |
| TUCP_003800 | XLOC_166074 | ENSRNOT00000064700 | 0.965150561  | 3.82E-07 |
| TUCP_003800 | XLOC_166074 | ENSRNOT00000036613 | -0.956143351 | 1.19E-06 |
| TUCP_003800 | XLOC_166074 | ENSRNOT00000028876 | -0.951347753 | 1.98E-06 |
| TUCP_003800 | XLOC_166074 | ENSRNOT00000025705 | 0.961995854  | 5.86E-07 |
| TUCP_003800 | XLOC_166074 | ENSRNOT00000004140 | 0.963755473  | 4.63E-07 |
| TUCP_003800 | XLOC_166074 | ENSRNOT00000022552 | -0.951261236 | 2.00E-06 |
| TUCP_003800 | XLOC_166074 | ENSRNOT00000047105 | 0.975122309  | 7.20E-08 |
| TUCP_003800 | XLOC_166074 | ENSRNOT00000048910 | -0.961737285 | 6.06E-07 |
| TUCP_003800 | XLOC_166074 | ENSRNOT00000019213 | 0.966729269  | 3.04E-07 |
| TUCP_003800 | XLOC_166074 | ENSRNOT00000060002 | -0.951856523 | 1.88E-06 |
| TUCP_003800 | XLOC_166074 | ENSRNOT00000071560 | 0.951857938  | 1.88E-06 |
| TUCP_003800 | XLOC_166074 | ENSRNOT00000082863 | 0.951298961  | 1.99E-06 |
| TUCP_003800 | XLOC_166074 | ENSRNOT00000071166 | 0.963131726  | 5.04E-07 |
| TUCP_003800 | XLOC_166074 | ENSRNOT00000047387 | 0.966171978  | 3.30E-07 |
| TUCP_003800 | XLOC_166074 | ENSRNOT00000016975 | 0.963131255  | 5.04E-07 |
| TUCP_003800 | XLOC_166074 | ENSRNOT00000055437 | -0.951106291 | 2.03E-06 |
| TUCP_003800 | XLOC_166074 | ENSRNOT00000007028 | -0.951536549 | 1.94E-06 |
| TUCP_003800 | XLOC_166074 | ENSRNOT00000060943 | 0.959935742  | 7.60E-07 |
| TUCP_003800 | XLOC_166074 | ENSRNOT00000043345 | 0.981909774  | 1.48E-08 |
| TUCP_003800 | XLOC_166074 | ENSRNOT00000076872 | 0.955451641  | 1.28E-06 |
| TUCP_003800 | XLOC_166074 | ENSRNOT00000001507 | 0.97306703   | 1.07E-07 |
| TUCP_003800 | XLOC_166074 | ENSRNOT00000083568 | 0.954559682  | 1.41E-06 |
| TUCP_003800 | XLOC_166074 | ENSRNOT00000018584 | 0.953808996  | 1.53E-06 |
| TUCP_003800 | XLOC_166074 | ENSRNOT00000081047 | 0.975795281  | 6.28E-08 |
| TUCP_003800 | XLOC_166074 | ENSRNOT00000071764 | 0.965594777  | 3.58E-07 |
| TUCP_003800 | XLOC_166074 | ENSRNOT0000004486  | 0.967017639  | 2.91E-07 |
| TUCP_003800 | XLOC_166074 | ENSRNOT00000037456 | 0.952654142  | 1.73E-06 |
| TUCP_003800 | XLOC_166074 | ENSRNOT00000065168 | 0.988200539  | 1.77E-09 |
| TUCP_003800 | XLOC_166074 | ENSRNOT00000000577 | 0.957085547  | 1.07E-06 |
| TUCP_003800 | XLOC_166074 | ENSRNOT00000075424 | 0.964259415  | 4.33E-07 |
| TUCP_003800 | XLOC_166074 | ENSRNOT00000061392 | 0.967492118  | 2.71E-07 |
| TUCP_003800 | XLOC_166074 | ENSRNOT00000037133 | 0.958337966  | 9.22E-07 |
| TUCP_003800 | XLOC_166074 | ENSRNOT00000064802 | 0.95008328   | 2.24E-06 |
| TUCP_003800 | XLOC_166074 | ENSRNOT0000001893  | 0.952440848  | 1.77E-06 |
| TUCP_003800 | XLOC_166074 | ENSRNOT00000073991 | 0.956775039  | 1.11E-06 |
| TUCP_003800 | XLOC_166074 | ENSRNOT00000026831 | 0.967513348  | 2.70E-07 |
| TUCP_003800 | XLOC_166074 | ENSRNOT00000068452 | 0.950137713  | 2.23E-06 |
| TUCP_003800 | XLOC_166074 | ENSRNOT00000021729 | 0.950587664  | 2.13E-06 |

|             |             |                    |              |          |
|-------------|-------------|--------------------|--------------|----------|
| TUCP_003800 | XLOC_166074 | ENSRNOT00000028266 | 0.960378984  | 7.19E-07 |
| TUCP_003800 | XLOC_166074 | ENSRNOT00000016445 | 0.957046224  | 1.07E-06 |
| TUCP_003800 | XLOC_166074 | ENSRNOT00000019133 | 0.971278403  | 1.47E-07 |
| TUCP_003800 | XLOC_166074 | ENSRNOT0000002403  | 0.955860241  | 1.23E-06 |
| TUCP_003800 | XLOC_166074 | ENSRNOT00000027337 | 0.974636179  | 7.92E-08 |
| TUCP_003800 | XLOC_166074 | ENSRNOT00000006824 | -0.954341122 | 1.45E-06 |
| TUCP_003800 | XLOC_166074 | ENSRNOT00000021001 | 0.953775104  | 1.54E-06 |
| TUCP_003800 | XLOC_166074 | ENSRNOT00000009811 | 0.989229021  | 1.12E-09 |
| TUCP_003800 | XLOC_166074 | ENSRNOT00000045488 | 0.974373547  | 8.34E-08 |
| TUCP_003800 | XLOC_166074 | ENSRNOT00000093174 | 0.951914401  | 1.87E-06 |
| TUCP_003800 | XLOC_166074 | ENSRNOT00000077555 | 0.971347708  | 1.45E-07 |
| TUCP_003800 | XLOC_166074 | ENSRNOT00000078073 | -0.953469121 | 1.59E-06 |
| TUCP_003800 | XLOC_166074 | ENSRNOT00000005381 | 0.970383355  | 1.71E-07 |
| TUCP_003800 | XLOC_166074 | ENSRNOT00000020383 | 0.966312481  | 3.23E-07 |
| TUCP_003800 | XLOC_166074 | ENSRNOT00000000302 | 0.960983927  | 6.67E-07 |
| TUCP_003800 | XLOC_166074 | ENSRNOT00000090665 | 0.959080248  | 8.43E-07 |
| TUCP_003800 | XLOC_166074 | ENSRNOT00000015609 | 0.957073193  | 1.07E-06 |
| TUCP_003800 | XLOC_166074 | ENSRNOT00000025832 | 0.963757431  | 4.63E-07 |
| TUCP_003800 | XLOC_166074 | ENSRNOT00000065229 | 0.961458383  | 6.28E-07 |
| TUCP_003800 | XLOC_166074 | ENSRNOT00000005909 | 0.954315817  | 1.45E-06 |
| TUCP_003800 | XLOC_166074 | ENSRNOT00000072518 | 0.954322287  | 1.45E-06 |
| TUCP_003800 | XLOC_166074 | ENSRNOT00000086122 | 0.979917578  | 2.49E-08 |
| TUCP_003800 | XLOC_166074 | ENSRNOT00000010992 | 0.950646145  | 2.12E-06 |
| TUCP_003800 | XLOC_166074 | ENSRNOT00000010853 | 0.956389493  | 1.15E-06 |
| TUCP_003800 | XLOC_166074 | ENSRNOT00000038807 | 0.957513586  | 1.02E-06 |
| TUCP_003800 | XLOC_166074 | ENSRNOT00000047210 | 0.96837323   | 2.36E-07 |
| TUCP_003800 | XLOC_166074 | ENSRNOT00000017761 | 0.973580468  | 9.70E-08 |
| TUCP_003800 | XLOC_166074 | ENSRNOT00000023543 | -0.950551686 | 2.14E-06 |
| TUCP_003800 | XLOC_166074 | ENSRNOT00000058563 | 0.953598172  | 1.57E-06 |
| TUCP_003800 | XLOC_166074 | ENSRNOT00000005405 | 0.950106573  | 2.24E-06 |
| TUCP_003800 | XLOC_166074 | ENSRNOT00000026426 | 0.963092012  | 5.07E-07 |
| TUCP_003800 | XLOC_166074 | ENSRNOT00000080695 | 0.95019942   | 2.22E-06 |
| TUCP_003800 | XLOC_166074 | ENSRNOT00000039341 | 0.971273176  | 1.47E-07 |
| TUCP_003800 | XLOC_166074 | ENSRNOT00000034704 | 0.957579424  | 1.01E-06 |
| TUCP_003800 | XLOC_166074 | ENSRNOT00000082174 | 0.969793336  | 1.88E-07 |
| TUCP_003800 | XLOC_166074 | ENSRNOT00000042125 | 0.966004095  | 3.38E-07 |
| TUCP_003800 | XLOC_166074 | ENSRNOT00000026760 | -0.95634888  | 1.16E-06 |
| TUCP_003800 | XLOC_166074 | ENSRNOT00000012048 | 0.970093332  | 1.79E-07 |
| TUCP_003800 | XLOC_166074 | ENSRNOT00000081077 | -0.953681827 | 1.55E-06 |
| TUCP_003800 | XLOC_166074 | ENSRNOT00000023428 | 0.95619367   | 1.18E-06 |
| TUCP_003800 | XLOC_166074 | ENSRNOT00000041494 | 0.962223361  | 5.69E-07 |
| TUCP_003800 | XLOC_166074 | ENSRNOT00000083957 | 0.96247513   | 5.50E-07 |
| TUCP_003800 | XLOC_166074 | ENSRNOT00000046639 | 0.951866362  | 1.88E-06 |
| TUCP_003800 | XLOC_166074 | ENSRNOT00000024548 | 0.96715893   | 2.85E-07 |
| TUCP_003240 | XLOC_138858 | ENSRNOT00000058497 | 0.958279911  | 9.28E-07 |
| TUCP_003240 | XLOC_138858 | ENSRNOT00000081534 | 0.952514947  | 1.76E-06 |
| TUCP_003240 | XLOC_138858 | ENSRNOT00000032339 | 0.980227722  | 2.30E-08 |
| TUCP_004440 | XLOC_195492 | ENSRNOT00000081312 | 0.962698109  | 5.34E-07 |
| TUCP_004440 | XLOC_195492 | ENSRNOT00000008140 | 0.951131515  | 2.02E-06 |
| TUCP_004440 | XLOC_195492 | ENSRNOT00000030996 | 0.951966599  | 1.86E-06 |
| TUCP_004440 | XLOC_195492 | ENSRNOT00000080174 | 0.952918917  | 1.68E-06 |

|             |             |                    |             |          |
|-------------|-------------|--------------------|-------------|----------|
| TUCP_004440 | XLOC_195492 | ENSRNOT00000032922 | 0.964490306 | 4.19E-07 |
| TUCP_004440 | XLOC_195492 | ENSRNOT00000019350 | 0.961060556 | 6.60E-07 |
| TUCP_004440 | XLOC_195492 | ENSRNOT00000023132 | 0.972848894 | 1.11E-07 |
| TUCP_004440 | XLOC_195492 | ENSRNOT00000035400 | 0.954484632 | 1.42E-06 |
| TUCP_004440 | XLOC_195492 | ENSRNOT00000092322 | 0.965742123 | 3.51E-07 |
| TUCP_004440 | XLOC_195492 | ENSRNOT00000004159 | 0.951362763 | 1.97E-06 |
| TUCP_004440 | XLOC_195492 | ENSRNOT00000020853 | 0.969686908 | 1.92E-07 |
| TUCP_004440 | XLOC_195492 | ENSRNOT00000019056 | 0.951386039 | 1.97E-06 |
| TUCP_004440 | XLOC_195492 | ENSRNOT00000086179 | 0.954514286 | 1.42E-06 |
| TUCP_004440 | XLOC_195492 | ENSRNOT00000009882 | 0.965598148 | 3.58E-07 |
| TUCP_004440 | XLOC_195492 | ENSRNOT00000077063 | 0.964425468 | 4.23E-07 |
| TUCP_004440 | XLOC_195492 | ENSRNOT00000056780 | 0.952381198 | 1.78E-06 |
| TUCP_004440 | XLOC_195492 | ENSRNOT00000042864 | 0.960014217 | 7.53E-07 |
| TUCP_004440 | XLOC_195492 | ENSRNOT00000013587 | 0.951258016 | 2.00E-06 |
| TUCP_004440 | XLOC_195492 | ENSRNOT00000057758 | 0.956738581 | 1.11E-06 |
| TUCP_004440 | XLOC_195492 | ENSRNOT00000080846 | 0.960396217 | 7.18E-07 |
| TUCP_004440 | XLOC_195492 | ENSRNOT00000070961 | 0.952661128 | 1.73E-06 |
| TUCP_004440 | XLOC_195492 | ENSRNOT00000026552 | 0.984441776 | 6.99E-09 |
| TUCP_004440 | XLOC_195492 | ENSRNOT00000039709 | 0.966627376 | 3.08E-07 |
| TUCP_004440 | XLOC_195492 | ENSRNOT00000019044 | 0.974856455 | 7.59E-08 |
| TUCP_004440 | XLOC_195492 | ENSRNOT00000011940 | 0.953010749 | 1.67E-06 |
| TUCP_004440 | XLOC_195492 | ENSRNOT00000001373 | 0.950095981 | 2.24E-06 |
| TUCP_004440 | XLOC_195492 | ENSRNOT00000024775 | 0.958607174 | 8.93E-07 |
| TUCP_004440 | XLOC_195492 | ENSRNOT00000021036 | 0.979459526 | 2.78E-08 |
| TUCP_004440 | XLOC_195492 | ENSRNOT00000090003 | 0.971225267 | 1.48E-07 |
| TUCP_004440 | XLOC_195492 | ENSRNOT00000054958 | 0.950438248 | 2.17E-06 |
| TUCP_004440 | XLOC_195492 | ENSRNOT00000025506 | 0.97119614  | 1.49E-07 |
| TUCP_004440 | XLOC_195492 | ENSRNOT00000024980 | 0.957777784 | 9.84E-07 |
| TUCP_004440 | XLOC_195492 | ENSRNOT00000001566 | 0.9546668   | 1.40E-06 |
| TUCP_004440 | XLOC_195492 | ENSRNOT00000000812 | 0.952833817 | 1.70E-06 |
| TUCP_004440 | XLOC_195492 | ENSRNOT00000035513 | 0.951671028 | 1.91E-06 |
| TUCP_004440 | XLOC_195492 | ENSRNOT00000031653 | 0.976081543 | 5.92E-08 |
| TUCP_004440 | XLOC_195492 | ENSRNOT00000020543 | 0.971153562 | 1.50E-07 |
| TUCP_004440 | XLOC_195492 | ENSRNOT00000015192 | 0.976330724 | 5.62E-08 |
| TUCP_004440 | XLOC_195492 | ENSRNOT00000056656 | 0.988853701 | 1.33E-09 |
| TUCP_004440 | XLOC_195492 | ENSRNOT00000077730 | 0.97014858  | 1.78E-07 |
| TUCP_004440 | XLOC_195492 | ENSRNOT00000071494 | 0.965808335 | 3.47E-07 |
| TUCP_004440 | XLOC_195492 | ENSRNOT00000050774 | 0.958445588 | 9.10E-07 |
| TUCP_004440 | XLOC_195492 | ENSRNOT00000023854 | 0.958417692 | 9.13E-07 |
| TUCP_004440 | XLOC_195492 | ENSRNOT00000024690 | 0.958653304 | 8.88E-07 |
| TUCP_004440 | XLOC_195492 | ENSRNOT00000076430 | 0.976554134 | 5.36E-08 |
| TUCP_004440 | XLOC_195492 | ENSRNOT00000056923 | 0.957785886 | 9.83E-07 |
| TUCP_004440 | XLOC_195492 | ENSRNOT00000065023 | 0.963480784 | 4.81E-07 |
| TUCP_004440 | XLOC_195492 | ENSRNOT00000047717 | 0.961024681 | 6.63E-07 |
| TUCP_004440 | XLOC_195492 | ENSRNOT00000028217 | 0.985612978 | 4.74E-09 |
| TUCP_004440 | XLOC_195492 | ENSRNOT00000038439 | 0.954827985 | 1.37E-06 |
| TUCP_004440 | XLOC_195492 | ENSRNOT00000057902 | 0.967536817 | 2.69E-07 |
| TUCP_004440 | XLOC_195492 | ENSRNOT00000020558 | 0.965897662 | 3.43E-07 |
| TUCP_004440 | XLOC_195492 | ENSRNOT00000067725 | 0.980572729 | 2.11E-08 |
| TUCP_004440 | XLOC_195492 | ENSRNOT00000083983 | 0.952491857 | 1.76E-06 |
| TUCP_004440 | XLOC_195492 | ENSRNOT00000027609 | 0.962374504 | 5.57E-07 |

|             |             |                     |              |          |
|-------------|-------------|---------------------|--------------|----------|
| TUCP_004440 | XLOC_195492 | ENSRNOT00000005661  | 0.959231716  | 8.28E-07 |
| TUCP_004440 | XLOC_195492 | ENSRNOT000000041371 | 0.954409757  | 1.44E-06 |
| TUCP_004440 | XLOC_195492 | ENSRNOT000000061385 | 0.956357202  | 1.16E-06 |
| TUCP_004440 | XLOC_195492 | ENSRNOT000000075598 | 0.955598275  | 1.26E-06 |
| TUCP_004440 | XLOC_195492 | ENSRNOT00000007940  | 0.956691494  | 1.12E-06 |
| TUCP_004440 | XLOC_195492 | ENSRNOT000000032162 | 0.957976771  | 9.62E-07 |
| TUCP_004440 | XLOC_195492 | ENSRNOT000000024126 | 0.974044881  | 8.88E-08 |
| TUCP_004440 | XLOC_195492 | ENSRNOT00000017955  | 0.95574903   | 1.24E-06 |
| TUCP_004440 | XLOC_195492 | ENSRNOT000000073926 | 0.987335569  | 2.51E-09 |
| TUCP_004440 | XLOC_195492 | ENSRNOT000000027512 | 0.970349864  | 1.72E-07 |
| TUCP_004440 | XLOC_195492 | ENSRNOT00000007300  | 0.960198841  | 7.36E-07 |
| TUCP_004440 | XLOC_195492 | ENSRNOT000000027450 | 0.955980767  | 1.21E-06 |
| TUCP_004440 | XLOC_195492 | ENSRNOT000000022170 | 0.964925623  | 3.94E-07 |
| TUCP_004440 | XLOC_195492 | ENSRNOT00000010613  | 0.96886375   | 2.19E-07 |
| TUCP_004440 | XLOC_195492 | ENSRNOT00000012376  | 0.967797538  | 2.58E-07 |
| TUCP_004440 | XLOC_195492 | ENSRNOT00000002198  | 0.964296473  | 4.30E-07 |
| TUCP_004440 | XLOC_195492 | ENSRNOT000000076388 | 0.953418205  | 1.60E-06 |
| TUCP_004440 | XLOC_195492 | ENSRNOT00000016262  | 0.966678684  | 3.06E-07 |
| TUCP_004440 | XLOC_195492 | ENSRNOT000000078220 | 0.954832444  | 1.37E-06 |
| TUCP_004440 | XLOC_195492 | ENSRNOT000000064323 | 0.956469901  | 1.14E-06 |
| TUCP_004440 | XLOC_195492 | ENSRNOT00000017618  | 0.954012866  | 1.50E-06 |
| TUCP_004440 | XLOC_195492 | ENSRNOT000000009468 | 0.968436499  | 2.34E-07 |
| TUCP_004440 | XLOC_195492 | ENSRNOT00000014002  | 0.97016408   | 1.77E-07 |
| TUCP_004440 | XLOC_195492 | ENSRNOT000000036374 | 0.955906942  | 1.22E-06 |
| TUCP_004440 | XLOC_195492 | ENSRNOT000000068666 | 0.964269886  | 4.32E-07 |
| TUCP_004440 | XLOC_195492 | ENSRNOT00000013535  | 0.965449639  | 3.66E-07 |
| TUCP_004440 | XLOC_195492 | ENSRNOT000000055250 | 0.957875342  | 9.73E-07 |
| TUCP_004440 | XLOC_195492 | ENSRNOT00000007681  | 0.959401612  | 8.11E-07 |
| TUCP_004440 | XLOC_195492 | ENSRNOT000000066199 | 0.956773239  | 1.11E-06 |
| TUCP_004440 | XLOC_195492 | ENSRNOT000000047698 | 0.973180683  | 1.04E-07 |
| TUCP_004440 | XLOC_195492 | ENSRNOT000000070916 | 0.959214745  | 8.30E-07 |
| TUCP_004440 | XLOC_195492 | ENSRNOT00000006860  | 0.960643847  | 6.96E-07 |
| TUCP_004440 | XLOC_195492 | ENSRNOT000000025921 | 0.955533563  | 1.27E-06 |
| TUCP_004440 | XLOC_195492 | ENSRNOT00000001402  | 0.956593624  | 1.13E-06 |
| TUCP_004440 | XLOC_195492 | ENSRNOT00000007917  | 0.95313571   | 1.65E-06 |
| TUCP_004440 | XLOC_195492 | ENSRNOT00000008359  | 0.959221499  | 8.29E-07 |
| TUCP_004440 | XLOC_195492 | ENSRNOT00000005286  | 0.98043289   | 2.19E-08 |
| TUCP_004440 | XLOC_195492 | ENSRNOT000000029166 | 0.971586606  | 1.39E-07 |
| TUCP_004440 | XLOC_195492 | ENSRNOT00000040981  | 0.97611433   | 5.88E-08 |
| TUCP_004440 | XLOC_195492 | ENSRNOT000000056725 | 0.961480828  | 6.26E-07 |
| TUCP_004440 | XLOC_195492 | ENSRNOT00000018043  | 0.973203593  | 1.04E-07 |
| TUCP_004440 | XLOC_195492 | ENSRNOT00000011320  | 0.952277824  | 1.80E-06 |
| TUCP_004440 | XLOC_195492 | ENSRNOT000000065642 | 0.960388118  | 7.19E-07 |
| TUCP_004440 | XLOC_195492 | ENSRNOT000000048022 | 0.953758198  | 1.54E-06 |
| TUCP_003380 | XLOC_146339 | ENSRNOT00000010561  | 0.952649972  | 1.73E-06 |
| TUCP_003380 | XLOC_146339 | ENSRNOT000000061693 | -0.965064545 | 3.86E-07 |
| TUCP_003380 | XLOC_146339 | ENSRNOT00000003072  | 0.970702379  | 1.62E-07 |
| TUCP_000415 | XLOC_013946 | ENSRNOT000000086004 | 0.9925586    | 1.77E-10 |
| TUCP_000415 | XLOC_013946 | ENSRNOT000000085598 | 0.951758502  | 1.90E-06 |
| TUCP_000415 | XLOC_013946 | ENSRNOT000000059172 | 0.957133067  | 1.06E-06 |
| TUCP_000415 | XLOC_013946 | ENSRNOT000000033629 | 0.956461442  | 1.15E-06 |

|             |             |                    |             |          |
|-------------|-------------|--------------------|-------------|----------|
| TUCP_000415 | XLOC_013946 | ENSRNOT00000013836 | 0.958664264 | 8.87E-07 |
| TUCP_000415 | XLOC_013946 | ENSRNOT00000008154 | 0.958621626 | 8.91E-07 |
| TUCP_000415 | XLOC_013946 | ENSRNOT00000027487 | 0.95276261  | 1.71E-06 |
| TUCP_003088 | XLOC_132420 | ENSRNOT0000001743  | 0.955502286 | 1.27E-06 |
| TUCP_003088 | XLOC_132420 | ENSRNOT00000024160 | 0.956406924 | 1.15E-06 |
| TUCP_003866 | XLOC_169504 | ENSRNOT00000092026 | 0.96620614  | 3.28E-07 |
| TUCP_003866 | XLOC_169504 | ENSRNOT00000093075 | 1           | 0        |
| TUCP_003866 | XLOC_169504 | ENSRNOT00000058260 | 1           | 0        |
| TUCP_003866 | XLOC_169504 | ENSRNOT00000088887 | 1           | 0        |
| TUCP_003866 | XLOC_169504 | ENSRNOT00000084986 | 1           | 0        |
| TUCP_003866 | XLOC_169504 | ENSRNOT00000074346 | 0.9702256   | 1.75E-07 |
| TUCP_003866 | XLOC_169504 | ENSRNOT00000073209 | 0.983711602 | 8.79E-09 |
| TUCP_003866 | XLOC_169504 | ENSRNOT00000080155 | 0.973069673 | 1.07E-07 |
| TUCP_003866 | XLOC_169504 | ENSRNOT00000072573 | 0.996213272 | 6.09E-12 |
| TUCP_003866 | XLOC_169504 | ENSRNOT00000017828 | 0.996001583 | 7.99E-12 |
| TUCP_003866 | XLOC_169504 | ENSRNOT00000080444 | 0.969625907 | 1.93E-07 |
| TUCP_003866 | XLOC_169504 | ENSRNOT00000071312 | 1           | 0        |
| TUCP_003866 | XLOC_169504 | ENSRNOT00000088245 | 1           | 0        |
| TUCP_003866 | XLOC_169504 | ENSRNOT00000036565 | 0.969065335 | 2.12E-07 |
| TUCP_003866 | XLOC_169504 | ENSRNOT00000058833 | 0.998673261 | 3.23E-14 |
| TUCP_003866 | XLOC_169504 | ENSRNOT00000078052 | 1           | 0        |
| TUCP_003866 | XLOC_169504 | ENSRNOT00000078494 | 0.999927093 | 1.62E-20 |
| TUCP_003866 | XLOC_169504 | ENSRNOT00000085653 | 1           | 0        |
| TUCP_003866 | XLOC_169504 | ENSRNOT00000057950 | 0.969329371 | 2.03E-07 |
| TUCP_003866 | XLOC_169504 | ENSRNOT00000081992 | 0.999320526 | 1.14E-15 |
| TUCP_003866 | XLOC_169504 | ENSRNOT00000038553 | 0.955765808 | 1.24E-06 |
| TUCP_003866 | XLOC_169504 | ENSRNOT00000084120 | 0.958115447 | 9.46E-07 |
| TUCP_003866 | XLOC_169504 | ENSRNOT00000055406 | 1           | 1.33E-79 |
| TUCP_003866 | XLOC_169504 | ENSRNOT00000070817 | 0.998968079 | 9.20E-15 |
| TUCP_003866 | XLOC_169504 | ENSRNOT00000026753 | 1           | 1.33E-79 |
| TUCP_003866 | XLOC_169504 | ENSRNOT00000080533 | 0.996682529 | 3.15E-12 |
| TUCP_003866 | XLOC_169504 | ENSRNOT00000072774 | 0.979665261 | 2.65E-08 |
| TUCP_003866 | XLOC_169504 | ENSRNOT00000086031 | 1           | 0        |
| TUCP_003866 | XLOC_169504 | ENSRNOT00000014312 | 1           | 0        |
| TUCP_003866 | XLOC_169504 | ENSRNOT00000042882 | 0.963218427 | 4.98E-07 |
| TUCP_003866 | XLOC_169504 | ENSRNOT00000088012 | 0.956765806 | 1.11E-06 |
| TUCP_003866 | XLOC_169504 | ENSRNOT00000051231 | 0.999242378 | 1.96E-15 |
| TUCP_003866 | XLOC_169504 | ENSRNOT00000089407 | 0.992986194 | 1.32E-10 |
| TUCP_003866 | XLOC_169504 | ENSRNOT00000055034 | 0.998331441 | 1.02E-13 |
| TUCP_003866 | XLOC_169504 | ENSRNOT00000046837 | 0.97252559  | 1.18E-07 |
| TUCP_004442 | XLOC_195553 | ENSRNOT00000015918 | 0.973609353 | 9.64E-08 |
| TUCP_004442 | XLOC_195553 | ENSRNOT00000010763 | 0.953882435 | 1.52E-06 |
| TUCP_004442 | XLOC_195553 | ENSRNOT00000070984 | 0.954624857 | 1.40E-06 |
| TUCP_004442 | XLOC_195553 | ENSRNOT00000017334 | 0.951419244 | 1.96E-06 |
| TUCP_004442 | XLOC_195553 | ENSRNOT00000020925 | 0.950830085 | 2.08E-06 |
| TUCP_004442 | XLOC_195553 | ENSRNOT00000028390 | 0.959367513 | 8.15E-07 |
| TUCP_004442 | XLOC_195553 | ENSRNOT00000036770 | 0.95124819  | 2.00E-06 |
| TUCP_004442 | XLOC_195553 | ENSRNOT00000035238 | 0.953575989 | 1.57E-06 |
| TUCP_004442 | XLOC_195553 | ENSRNOT00000084431 | 0.956681864 | 1.12E-06 |
| TUCP_004442 | XLOC_195553 | ENSRNOT00000004955 | 0.960504884 | 7.08E-07 |
| TUCP_004442 | XLOC_195553 | ENSRNOT00000047223 | 0.953604279 | 1.57E-06 |

|             |             |                    |              |          |
|-------------|-------------|--------------------|--------------|----------|
| TUCP_004442 | XLOC_195553 | ENSRNOT00000005693 | 0.962755817  | 5.30E-07 |
| TUCP_004442 | XLOC_195553 | ENSRNOT00000017889 | 0.953608819  | 1.57E-06 |
| TUCP_004442 | XLOC_195553 | ENSRNOT00000021403 | 0.952345264  | 1.79E-06 |
| TUCP_004442 | XLOC_195553 | ENSRNOT00000074435 | 0.966365841  | 3.20E-07 |
| TUCP_004442 | XLOC_195553 | ENSRNOT00000028284 | 0.966150938  | 3.31E-07 |
| TUCP_003323 | XLOC_143300 | ENSRNOT00000049798 | -0.955657297 | 1.25E-06 |
| TUCP_003323 | XLOC_143300 | ENSRNOT00000078221 | 0.950062404  | 2.25E-06 |
| TUCP_003323 | XLOC_143300 | ENSRNOT00000091237 | 0.950461643  | 2.16E-06 |
| TUCP_003323 | XLOC_143300 | ENSRNOT00000076407 | 0.957797928  | 9.82E-07 |
| TUCP_003323 | XLOC_143300 | ENSRNOT00000001579 | 0.957781276  | 9.84E-07 |
| TUCP_003323 | XLOC_143300 | ENSRNOT00000037587 | -0.965113293 | 3.84E-07 |
| TUCP_003323 | XLOC_143300 | ENSRNOT00000080340 | 0.969323971  | 2.03E-07 |
| TUCP_003323 | XLOC_143300 | ENSRNOT00000081995 | -0.953109653 | 1.65E-06 |
| TUCP_003323 | XLOC_143300 | ENSRNOT00000010289 | 0.967175587  | 2.84E-07 |
| TUCP_003323 | XLOC_143300 | ENSRNOT00000000628 | 0.950717157  | 2.11E-06 |
| TUCP_002705 | XLOC_114880 | ENSRNOT00000085195 | 0.999404969  | 5.87E-16 |
| TUCP_002705 | XLOC_114880 | ENSRNOT00000013705 | 1            | 0        |
| TUCP_002705 | XLOC_114880 | ENSRNOT00000040851 | 1            | 0        |
| TUCP_002705 | XLOC_114880 | ENSRNOT00000075676 | 0.958697783  | 8.83E-07 |
| TUCP_002705 | XLOC_114880 | ENSRNOT00000058389 | 1            | 0        |
| TUCP_002705 | XLOC_114880 | ENSRNOT00000086827 | 0.95592964   | 1.22E-06 |
| TUCP_002705 | XLOC_114880 | ENSRNOT00000023542 | 1            | 0        |
| TUCP_002705 | XLOC_114880 | ENSRNOT00000028653 | 1            | 0        |
| TUCP_002705 | XLOC_114880 | ENSRNOT00000017230 | 0.955378945  | 1.29E-06 |
| TUCP_002705 | XLOC_114880 | ENSRNOT00000092890 | 0.955137645  | 1.33E-06 |
| TUCP_002705 | XLOC_114880 | ENSRNOT00000012174 | 1            | 0        |
| TUCP_002705 | XLOC_114880 | ENSRNOT00000051680 | 0.994991197  | 2.46E-11 |
| TUCP_002705 | XLOC_114880 | ENSRNOT00000089118 | 1            | 0        |
| TUCP_002705 | XLOC_114880 | ENSRNOT00000025245 | 0.999967061  | 3.05E-22 |
| TUCP_002705 | XLOC_114880 | ENSRNOT00000015138 | 0.999902179  | 7.05E-20 |
| TUCP_002705 | XLOC_114880 | ENSRNOT00000080185 | 0.99902259   | 7.01E-15 |
| TUCP_002705 | XLOC_114880 | ENSRNOT00000090729 | 0.965956282  | 3.40E-07 |
| TUCP_002705 | XLOC_114880 | ENSRNOT00000049165 | 0.973440588  | 9.95E-08 |
| TUCP_002705 | XLOC_114880 | ENSRNOT00000086502 | 0.96495109   | 3.93E-07 |
| TUCP_002705 | XLOC_114880 | ENSRNOT00000079661 | 1            | 0        |
| TUCP_002705 | XLOC_114880 | ENSRNOT00000076338 | 0.985532463  | 4.87E-09 |
| TUCP_002705 | XLOC_114880 | ENSRNOT00000042220 | 1            | 4.25E-78 |
| TUCP_002705 | XLOC_114880 | ENSRNOT00000005031 | 0.952974465  | 1.67E-06 |
| TUCP_002705 | XLOC_114880 | ENSRNOT00000079167 | 0.979848988  | 2.53E-08 |
| TUCP_002705 | XLOC_114880 | ENSRNOT00000061950 | 0.962035217  | 5.83E-07 |
| TUCP_002705 | XLOC_114880 | ENSRNOT00000086710 | 0.999839781  | 8.31E-19 |
| TUCP_002705 | XLOC_114880 | ENSRNOT00000075226 | 1            | 0        |
| TUCP_002705 | XLOC_114880 | ENSRNOT00000000351 | 1            | 0        |
| TUCP_002705 | XLOC_114880 | ENSRNOT00000092294 | 0.986520908  | 3.43E-09 |
| TUCP_000389 | XLOC_013241 | ENSRNOT00000035700 | 0.95270668   | 1.72E-06 |
| TUCP_000389 | XLOC_013241 | ENSRNOT00000073559 | 0.950423155  | 2.17E-06 |
| TUCP_000389 | XLOC_013241 | ENSRNOT00000081246 | 0.961065263  | 6.60E-07 |
| TUCP_000389 | XLOC_013241 | ENSRNOT00000085152 | 0.977623149  | 4.26E-08 |
| TUCP_000389 | XLOC_013241 | ENSRNOT00000041908 | 0.95902507   | 8.49E-07 |
| TUCP_000389 | XLOC_013241 | ENSRNOT00000001809 | 0.961175178  | 6.51E-07 |
| TUCP_000389 | XLOC_013241 | ENSRNOT00000040540 | 0.95608415   | 1.19E-06 |

|             |             |                    |              |          |
|-------------|-------------|--------------------|--------------|----------|
| TUCP_000389 | XLOC_013241 | ENSRNOT00000021037 | 0.953113973  | 1.65E-06 |
| TUCP_000389 | XLOC_013241 | ENSRNOT00000072518 | 0.954027029  | 1.50E-06 |
| TUCP_000389 | XLOC_013241 | ENSRNOT00000026783 | 0.950586206  | 2.13E-06 |
| TUCP_000389 | XLOC_013241 | ENSRNOT00000017668 | 0.960335603  | 7.23E-07 |
| TUCP_000389 | XLOC_013241 | ENSRNOT00000026251 | 0.962989018  | 5.14E-07 |
| TUCP_000389 | XLOC_013241 | ENSRNOT00000071733 | 0.97523928   | 7.03E-08 |
| TUCP_000389 | XLOC_013241 | ENSRNOT00000027012 | 0.9706188    | 1.64E-07 |
| TUCP_000389 | XLOC_013241 | ENSRNOT00000077409 | 0.955652432  | 1.25E-06 |
| TUCP_000389 | XLOC_013241 | ENSRNOT00000008817 | 0.950200948  | 2.22E-06 |
| TUCP_000389 | XLOC_013241 | ENSRNOT00000025027 | 0.963858637  | 4.57E-07 |
| TUCP_000389 | XLOC_013241 | ENSRNOT00000016859 | 0.965298788  | 3.74E-07 |
| TUCP_000389 | XLOC_013241 | ENSRNOT00000081297 | 0.957663428  | 9.98E-07 |
| TUCP_000389 | XLOC_013241 | ENSRNOT00000005490 | 0.955979998  | 1.21E-06 |
| TUCP_000389 | XLOC_013241 | ENSRNOT00000003177 | 0.963479199  | 4.81E-07 |
| TUCP_000389 | XLOC_013241 | ENSRNOT00000072196 | 0.970253194  | 1.75E-07 |
| TUCP_000389 | XLOC_013241 | ENSRNOT00000020028 | 0.953892514  | 1.52E-06 |
| TUCP_000389 | XLOC_013241 | ENSRNOT00000014979 | 0.954274387  | 1.46E-06 |
| TUCP_000389 | XLOC_013241 | ENSRNOT00000070815 | 0.966937394  | 2.94E-07 |
| TUCP_000389 | XLOC_013241 | ENSRNOT00000017753 | 0.956895347  | 1.09E-06 |
| TUCP_000389 | XLOC_013241 | ENSRNOT00000015479 | 0.950515082  | 2.15E-06 |
| TUCP_000389 | XLOC_013241 | ENSRNOT00000027611 | 0.953480318  | 1.59E-06 |
| TUCP_000389 | XLOC_013241 | ENSRNOT00000033235 | 0.956409795  | 1.15E-06 |
| TUCP_000389 | XLOC_013241 | ENSRNOT00000040731 | 0.982708732  | 1.18E-08 |
| TUCP_000389 | XLOC_013241 | ENSRNOT00000058072 | 0.95115168   | 2.02E-06 |
| TUCP_000389 | XLOC_013241 | ENSRNOT00000023477 | 0.974038321  | 8.89E-08 |
| TUCP_000389 | XLOC_013241 | ENSRNOT00000012379 | 0.96820243   | 2.43E-07 |
| TUCP_000389 | XLOC_013241 | ENSRNOT00000030343 | 0.951465267  | 1.95E-06 |
| TUCP_000389 | XLOC_013241 | ENSRNOT00000013985 | 0.95939326   | 8.12E-07 |
| TUCP_000389 | XLOC_013241 | ENSRNOT00000014701 | 0.952727755  | 1.72E-06 |
| TUCP_000389 | XLOC_013241 | ENSRNOT00000000468 | 0.96180303   | 6.01E-07 |
| TUCP_000389 | XLOC_013241 | ENSRNOT00000006321 | -0.957572953 | 1.01E-06 |
| TUCP_003168 | XLOC_136176 | ENSRNOT00000079266 | 0.973797424  | 9.31E-08 |
| TUCP_002706 | XLOC_114888 | ENSRNOT00000008184 | 0.956818615  | 1.10E-06 |
| TUCP_003166 | XLOC_135957 | ENSRNOT00000006284 | 0.950422677  | 2.17E-06 |
| TUCP_003166 | XLOC_135957 | ENSRNOT00000092913 | 0.961321627  | 6.39E-07 |
| TUCP_003166 | XLOC_135957 | ENSRNOT00000037094 | 0.969343386  | 2.03E-07 |
| TUCP_003164 | XLOC_135886 | ENSRNOT00000085195 | 0.977188178  | 4.68E-08 |
| TUCP_003164 | XLOC_135886 | ENSRNOT00000013705 | 0.978633778  | 3.38E-08 |
| TUCP_003164 | XLOC_135886 | ENSRNOT00000040851 | 0.978633778  | 3.38E-08 |
| TUCP_003164 | XLOC_135886 | ENSRNOT00000058389 | 0.978633778  | 3.38E-08 |
| TUCP_003164 | XLOC_135886 | ENSRNOT00000023542 | 0.978633778  | 3.38E-08 |
| TUCP_003164 | XLOC_135886 | ENSRNOT00000028653 | 0.978633778  | 3.38E-08 |
| TUCP_003164 | XLOC_135886 | ENSRNOT00000017230 | 0.968201058  | 2.43E-07 |
| TUCP_003164 | XLOC_135886 | ENSRNOT00000012174 | 0.978633778  | 3.38E-08 |
| TUCP_003164 | XLOC_135886 | ENSRNOT00000080185 | 0.975886424  | 6.17E-08 |
| TUCP_003164 | XLOC_135886 | ENSRNOT00000089118 | 0.978633778  | 3.38E-08 |
| TUCP_003164 | XLOC_135886 | ENSRNOT00000025245 | 0.978398399  | 3.57E-08 |
| TUCP_003164 | XLOC_135886 | ENSRNOT00000082316 | 0.951693221  | 1.91E-06 |
| TUCP_003164 | XLOC_135886 | ENSRNOT00000015138 | 0.978441939  | 3.54E-08 |
| TUCP_003164 | XLOC_135886 | ENSRNOT00000051680 | 0.968282604  | 2.40E-07 |
| TUCP_003164 | XLOC_135886 | ENSRNOT00000079661 | 0.978633778  | 3.38E-08 |

|             |             |                    |             |          |
|-------------|-------------|--------------------|-------------|----------|
| TUCP_003164 | XLOC_135886 | ENSRNOT00000076338 | 0.968645685 | 2.26E-07 |
| TUCP_003164 | XLOC_135886 | ENSRNOT00000042220 | 0.978633778 | 3.38E-08 |
| TUCP_003164 | XLOC_135886 | ENSRNOT00000079167 | 0.958822096 | 8.70E-07 |
| TUCP_003164 | XLOC_135886 | ENSRNOT00000086710 | 0.977396258 | 4.47E-08 |
| TUCP_003164 | XLOC_135886 | ENSRNOT00000075226 | 0.978633778 | 3.38E-08 |
| TUCP_003164 | XLOC_135886 | ENSRNOT00000000351 | 0.978633778 | 3.38E-08 |
| TUCP_003164 | XLOC_135886 | ENSRNOT00000092294 | 0.961294727 | 6.41E-07 |
| TUCP_000388 | XLOC_013221 | ENSRNOT00000000649 | 0.950701027 | 2.11E-06 |
| TUCP_000388 | XLOC_013221 | ENSRNOT00000087963 | 0.972949853 | 1.09E-07 |
| TUCP_000388 | XLOC_013221 | ENSRNOT00000082497 | 0.97683054  | 5.06E-08 |
| TUCP_003163 | XLOC_135885 | ENSRNOT00000083747 | 0.973550962 | 9.75E-08 |
| TUCP_003163 | XLOC_135885 | ENSRNOT00000082776 | 0.953409263 | 1.60E-06 |
| TUCP_001958 | XLOC_079146 | ENSRNOT00000034744 | 0.950387514 | 2.18E-06 |
| TUCP_001958 | XLOC_079146 | ENSRNOT00000006177 | 0.950960301 | 2.06E-06 |
| TUCP_001958 | XLOC_079146 | ENSRNOT00000000713 | 0.957038785 | 1.07E-06 |
| TUCP_001958 | XLOC_079146 | ENSRNOT00000039631 | 0.962097889 | 5.78E-07 |
| TUCP_001958 | XLOC_079146 | ENSRNOT00000003189 | 0.953498697 | 1.58E-06 |
| TUCP_001958 | XLOC_079146 | ENSRNOT00000020070 | 0.969540302 | 1.96E-07 |
| TUCP_001958 | XLOC_079146 | ENSRNOT00000026216 | 0.958608308 | 8.93E-07 |
| TUCP_001958 | XLOC_079146 | ENSRNOT00000027611 | 0.953859735 | 1.52E-06 |
| TUCP_001958 | XLOC_079146 | ENSRNOT00000027054 | 0.959233964 | 8.28E-07 |
| TUCP_003606 | XLOC_158685 | ENSRNOT00000093745 | 0.973842564 | 9.23E-08 |
| TUCP_003606 | XLOC_158685 | ENSRNOT00000088016 | 0.959864121 | 7.67E-07 |
| TUCP_000895 | XLOC_033438 | ENSRNOT00000085599 | 0.999938502 | 6.93E-21 |
| TUCP_000895 | XLOC_033438 | ENSRNOT00000006689 | 0.9944189   | 4.22E-11 |
| TUCP_000895 | XLOC_033438 | ENSRNOT00000081534 | 0.987999291 | 1.92E-09 |
| TUCP_000895 | XLOC_033438 | ENSRNOT00000085301 | 0.99793679  | 2.93E-13 |
| TUCP_000895 | XLOC_033438 | ENSRNOT00000038729 | 1           | 4.25E-78 |
| TUCP_000895 | XLOC_033438 | ENSRNOT00000086385 | 1           | 4.25E-78 |
| TUCP_000895 | XLOC_033438 | ENSRNOT00000077695 | 0.96038616  | 7.19E-07 |
| TUCP_000895 | XLOC_033438 | ENSRNOT00000078561 | 0.986503348 | 3.45E-09 |
| TUCP_000895 | XLOC_033438 | ENSRNOT00000087613 | 1           | 4.25E-78 |
| TUCP_000895 | XLOC_033438 | ENSRNOT00000026032 | 0.953050675 | 1.66E-06 |
| TUCP_000895 | XLOC_033438 | ENSRNOT00000073350 | 0.9658754   | 3.44E-07 |
| TUCP_000895 | XLOC_033438 | ENSRNOT00000023062 | 1           | 4.25E-78 |
| TUCP_000895 | XLOC_033438 | ENSRNOT00000058834 | 1           | 1.33E-79 |
| TUCP_000895 | XLOC_033438 | ENSRNOT00000079420 | 1           | 4.25E-78 |
| TUCP_000895 | XLOC_033438 | ENSRNOT00000090761 | 1           | 4.25E-78 |
| TUCP_000895 | XLOC_033438 | ENSRNOT00000055923 | 1           | 0        |
| TUCP_000895 | XLOC_033438 | ENSRNOT00000092416 | 0.963085379 | 5.07E-07 |
| TUCP_000895 | XLOC_033438 | ENSRNOT00000071930 | 1           | 1.33E-79 |
| TUCP_000895 | XLOC_033438 | ENSRNOT00000001996 | 0.974721715 | 7.79E-08 |
| TUCP_000895 | XLOC_033438 | ENSRNOT00000076756 | 1           | 0        |
| TUCP_000895 | XLOC_033438 | ENSRNOT00000081527 | 0.999420479 | 5.14E-16 |
| TUCP_000895 | XLOC_033438 | ENSRNOT00000085067 | 0.960262084 | 7.30E-07 |
| TUCP_000895 | XLOC_033438 | ENSRNOT00000091663 | 0.99642667  | 4.56E-12 |
| TUCP_000895 | XLOC_033438 | ENSRNOT00000081780 | 1           | 0        |
| TUCP_000895 | XLOC_033438 | ENSRNOT00000093689 | 0.953599805 | 1.57E-06 |
| TUCP_000895 | XLOC_033438 | ENSRNOT00000089114 | 1           | 1.33E-79 |
| TUCP_000895 | XLOC_033438 | ENSRNOT00000021609 | 0.977017895 | 4.86E-08 |
| TUCP_000895 | XLOC_033438 | ENSRNOT00000073316 | 1           | 0        |



|             |             |                    |              |          |
|-------------|-------------|--------------------|--------------|----------|
| TUCP_000895 | XLOC_033438 | ENSRNOT00000086557 | 0.977413455  | 4.46E-08 |
| TUCP_000895 | XLOC_033438 | ENSRNOT00000071663 | 1            | 0        |
| TUCP_000895 | XLOC_033438 | ENSRNOT00000042860 | 1            | 4.25E-78 |
| TUCP_000895 | XLOC_033438 | ENSRNOT00000072962 | 0.971287317  | 1.46E-07 |
| TUCP_000895 | XLOC_033438 | ENSRNOT00000088421 | 1            | 1.33E-79 |
| TUCP_000895 | XLOC_033438 | ENSRNOT00000038898 | 1            | 0        |
| TUCP_000895 | XLOC_033438 | ENSRNOT00000015840 | 0.959452012  | 8.06E-07 |
| TUCP_000895 | XLOC_033438 | ENSRNOT00000064936 | 0.985957557  | 4.20E-09 |
| TUCP_000895 | XLOC_033438 | ENSRNOT00000042777 | 0.990642579  | 5.56E-10 |
| TUCP_000895 | XLOC_033438 | ENSRNOT00000010029 | 1            | 1.33E-79 |
| TUCP_004446 | XLOC_195766 | ENSRNOT00000085195 | 0.992242404  | 2.18E-10 |
| TUCP_004446 | XLOC_195766 | ENSRNOT00000013705 | 0.99400109   | 6.06E-11 |
| TUCP_004446 | XLOC_195766 | ENSRNOT00000040851 | 0.99400109   | 6.06E-11 |
| TUCP_004446 | XLOC_195766 | ENSRNOT00000075676 | 0.968943374  | 2.16E-07 |
| TUCP_004446 | XLOC_195766 | ENSRNOT00000058389 | 0.99400109   | 6.06E-11 |
| TUCP_004446 | XLOC_195766 | ENSRNOT00000086827 | 0.974221697  | 8.59E-08 |
| TUCP_004446 | XLOC_195766 | ENSRNOT00000028653 | 0.99400109   | 6.06E-11 |
| TUCP_004446 | XLOC_195766 | ENSRNOT00000023542 | 0.99400109   | 6.06E-11 |
| TUCP_004446 | XLOC_195766 | ENSRNOT00000092890 | 0.960289266  | 7.27E-07 |
| TUCP_004446 | XLOC_195766 | ENSRNOT00000012174 | 0.99400109   | 6.06E-11 |
| TUCP_004446 | XLOC_195766 | ENSRNOT00000080185 | 0.9924966    | 1.85E-10 |
| TUCP_004446 | XLOC_195766 | ENSRNOT00000089118 | 0.99400109   | 6.06E-11 |
| TUCP_004446 | XLOC_195766 | ENSRNOT00000025245 | 0.993846479  | 6.88E-11 |
| TUCP_004446 | XLOC_195766 | ENSRNOT00000015138 | 0.992934032  | 1.37E-10 |
| TUCP_004446 | XLOC_195766 | ENSRNOT00000051680 | 0.991902575  | 2.70E-10 |
| TUCP_004446 | XLOC_195766 | ENSRNOT00000049165 | 0.970967529  | 1.55E-07 |
| TUCP_004446 | XLOC_195766 | ENSRNOT00000086502 | 0.952329108  | 1.79E-06 |
| TUCP_004446 | XLOC_195766 | ENSRNOT00000079661 | 0.99400109   | 6.06E-11 |
| TUCP_004446 | XLOC_195766 | ENSRNOT00000076338 | 0.970588652  | 1.65E-07 |
| TUCP_004446 | XLOC_195766 | ENSRNOT00000042220 | 0.99400109   | 6.06E-11 |
| TUCP_004446 | XLOC_195766 | ENSRNOT00000079167 | 0.96352337   | 4.78E-07 |
| TUCP_004446 | XLOC_195766 | ENSRNOT00000088394 | 0.95520015   | 1.32E-06 |
| TUCP_004446 | XLOC_195766 | ENSRNOT00000061950 | 0.972396705  | 1.20E-07 |
| TUCP_004446 | XLOC_195766 | ENSRNOT00000086710 | 0.994075369  | 5.69E-11 |
| TUCP_004446 | XLOC_195766 | ENSRNOT00000082031 | 0.95684585   | 1.10E-06 |
| TUCP_004446 | XLOC_195766 | ENSRNOT00000075226 | 0.99400109   | 6.06E-11 |
| TUCP_004446 | XLOC_195766 | ENSRNOT00000000351 | 0.99400109   | 6.06E-11 |
| TUCP_004446 | XLOC_195766 | ENSRNOT00000092294 | 0.983094043  | 1.06E-08 |
| TUCP_000891 | XLOC_033333 | ENSRNOT00000086899 | 0.963443911  | 4.84E-07 |
| TUCP_000891 | XLOC_033333 | ENSRNOT00000023152 | 0.96127902   | 6.42E-07 |
| TUCP_000891 | XLOC_033333 | ENSRNOT00000049732 | 0.959629656  | 7.89E-07 |
| TUCP_003600 | XLOC_158395 | ENSRNOT00000002394 | 0.951898977  | 1.87E-06 |
| TUCP_003600 | XLOC_158395 | ENSRNOT00000077544 | 0.970125992  | 1.78E-07 |
| TUCP_003600 | XLOC_158395 | ENSRNOT00000006517 | -0.950019009 | 2.26E-06 |
| TUCP_003761 | XLOC_165231 | ENSRNOT00000086703 | 0.971038345  | 1.53E-07 |
| TUCP_003761 | XLOC_165231 | ENSRNOT00000084758 | 0.968364276  | 2.37E-07 |
| TUCP_003865 | XLOC_169504 | ENSRNOT00000010993 | 0.967429494  | 2.73E-07 |
| TUCP_003865 | XLOC_169504 | ENSRNOT00000058382 | 0.966252157  | 3.26E-07 |
| TUCP_003865 | XLOC_169504 | ENSRNOT00000045833 | 0.959864547  | 7.67E-07 |
| TUCP_003865 | XLOC_169504 | ENSRNOT00000090621 | 0.972966649  | 1.09E-07 |
| TUCP_003865 | XLOC_169504 | ENSRNOT00000087329 | -0.950374295 | 2.18E-06 |

|             |             |                    |              |          |
|-------------|-------------|--------------------|--------------|----------|
| TUCP_003865 | XLOC_169504 | ENSRNOT0000005297  | 0.954209157  | 1.47E-06 |
| TUCP_003865 | XLOC_169504 | ENSRNOT00000074649 | 0.959438639  | 8.08E-07 |
| TUCP_003865 | XLOC_169504 | ENSRNOT00000017624 | 0.962117413  | 5.77E-07 |
| TUCP_003865 | XLOC_169504 | ENSRNOT00000068353 | 0.951645226  | 1.92E-06 |
| TUCP_003865 | XLOC_169504 | ENSRNOT00000066708 | 0.962773694  | 5.29E-07 |
| TUCP_003865 | XLOC_169504 | ENSRNOT00000016629 | 0.950544892  | 2.14E-06 |
| TUCP_003865 | XLOC_169504 | ENSRNOT00000077152 | 0.954339516  | 1.45E-06 |
| TUCP_003865 | XLOC_169504 | ENSRNOT00000015537 | 0.958407727  | 9.14E-07 |
| TUCP_003865 | XLOC_169504 | ENSRNOT00000079138 | 0.952263003  | 1.80E-06 |
| TUCP_003865 | XLOC_169504 | ENSRNOT00000015518 | -0.958357974 | 9.19E-07 |
| TUCP_003865 | XLOC_169504 | ENSRNOT00000019921 | 0.95151893   | 1.94E-06 |
| TUCP_003865 | XLOC_169504 | ENSRNOT00000081796 | 0.952429545  | 1.77E-06 |
| TUCP_003865 | XLOC_169504 | ENSRNOT00000016568 | 0.953461836  | 1.59E-06 |
| TUCP_003865 | XLOC_169504 | ENSRNOT00000003472 | -0.960890967 | 6.75E-07 |
| TUCP_003865 | XLOC_169504 | ENSRNOT00000033806 | 0.964563438  | 4.15E-07 |
| TUCP_003865 | XLOC_169504 | ENSRNOT00000007591 | 0.951696151  | 1.91E-06 |
| TUCP_003865 | XLOC_169504 | ENSRNOT00000009150 | 0.979556226  | 2.72E-08 |
| TUCP_003865 | XLOC_169504 | ENSRNOT00000068745 | 0.951592576  | 1.93E-06 |
| TUCP_003865 | XLOC_169504 | ENSRNOT00000074028 | 0.952664778  | 1.73E-06 |
| TUCP_003865 | XLOC_169504 | ENSRNOT00000034400 | -0.966549349 | 3.12E-07 |
| TUCP_003865 | XLOC_169504 | ENSRNOT00000025460 | 0.958836634  | 8.69E-07 |
| TUCP_003865 | XLOC_169504 | ENSRNOT00000017385 | -0.957281836 | 1.04E-06 |
| TUCP_003865 | XLOC_169504 | ENSRNOT00000006752 | 0.965092622  | 3.85E-07 |
| TUCP_003865 | XLOC_169504 | ENSRNOT00000007350 | 0.965423812  | 3.67E-07 |
| TUCP_003865 | XLOC_169504 | ENSRNOT00000025857 | 0.968604036  | 2.28E-07 |
| TUCP_003865 | XLOC_169504 | ENSRNOT00000075843 | -0.957439465 | 1.02E-06 |
| TUCP_003865 | XLOC_169504 | ENSRNOT00000003765 | 0.974740269  | 7.76E-08 |
| TUCP_003865 | XLOC_169504 | ENSRNOT00000061345 | -0.951527783 | 1.94E-06 |
| TUCP_003865 | XLOC_169504 | ENSRNOT00000007004 | 0.971680506  | 1.37E-07 |
| TUCP_003865 | XLOC_169504 | ENSRNOT00000027739 | 0.956584222  | 1.13E-06 |
| TUCP_003865 | XLOC_169504 | ENSRNOT00000032324 | 0.957065497  | 1.07E-06 |
| TUCP_003865 | XLOC_169504 | ENSRNOT00000059246 | 0.960701517  | 6.91E-07 |
| TUCP_003865 | XLOC_169504 | ENSRNOT00000077503 | 0.955909675  | 1.22E-06 |
| TUCP_003865 | XLOC_169504 | ENSRNOT00000082904 | 0.962964584  | 5.16E-07 |
| TUCP_003865 | XLOC_169504 | ENSRNOT00000015223 | 0.960888354  | 6.75E-07 |
| TUCP_003865 | XLOC_169504 | ENSRNOT00000036282 | 0.952516795  | 1.75E-06 |
| TUCP_003865 | XLOC_169504 | ENSRNOT00000065978 | 0.962416876  | 5.54E-07 |
| TUCP_003865 | XLOC_169504 | ENSRNOT00000025314 | 0.97765917   | 4.22E-08 |
| TUCP_003865 | XLOC_169504 | ENSRNOT00000036658 | -0.951607551 | 1.93E-06 |
| TUCP_003865 | XLOC_169504 | ENSRNOT00000025147 | 0.956091426  | 1.19E-06 |
| TUCP_003865 | XLOC_169504 | ENSRNOT00000040169 | 0.974083212  | 8.82E-08 |
| TUCP_003865 | XLOC_169504 | ENSRNOT00000005604 | 0.952287399  | 1.80E-06 |
| TUCP_003865 | XLOC_169504 | ENSRNOT00000027760 | 0.951732669  | 1.90E-06 |
| TUCP_003865 | XLOC_169504 | ENSRNOT00000075209 | -0.961672667 | 6.11E-07 |
| TUCP_003865 | XLOC_169504 | ENSRNOT00000076472 | 0.961530528  | 6.22E-07 |
| TUCP_003865 | XLOC_169504 | ENSRNOT00000019519 | 0.951615711  | 1.92E-06 |
| TUCP_003865 | XLOC_169504 | ENSRNOT00000024253 | 0.959806138  | 7.72E-07 |
| TUCP_003865 | XLOC_169504 | ENSRNOT00000015239 | -0.96334406  | 4.90E-07 |
| TUCP_001813 | XLOC_075166 | ENSRNOT00000005048 | 0.951686041  | 1.91E-06 |
| TUCP_003764 | XLOC_165231 | ENSRNOT00000084075 | 0.996106112  | 7.00E-12 |
| TUCP_003764 | XLOC_165231 | ENSRNOT00000012880 | 0.968043129  | 2.49E-07 |

|             |             |                    |             |          |
|-------------|-------------|--------------------|-------------|----------|
| TUCP_003764 | XLOC_165231 | ENSRNOT00000074465 | 1           | 0        |
| TUCP_003764 | XLOC_165231 | ENSRNOT00000090898 | 0.961670541 | 6.11E-07 |
| TUCP_003764 | XLOC_165231 | ENSRNOT00000079805 | 0.997980451 | 2.64E-13 |
| TUCP_003764 | XLOC_165231 | ENSRNOT00000040912 | 1           | 0        |
| TUCP_003764 | XLOC_165231 | ENSRNOT00000072648 | 1           | 0        |
| TUCP_003764 | XLOC_165231 | ENSRNOT00000007398 | 0.989054103 | 1.21E-09 |
| TUCP_003764 | XLOC_165231 | ENSRNOT00000070803 | 1           | 0        |
| TUCP_003764 | XLOC_165231 | ENSRNOT00000012196 | 1           | 0        |
| TUCP_003764 | XLOC_165231 | ENSRNOT00000085772 | 1           | 0        |
| TUCP_003764 | XLOC_165231 | ENSRNOT00000093284 | 0.999975856 | 6.46E-23 |
| TUCP_003764 | XLOC_165231 | ENSRNOT00000086374 | 0.993568904 | 8.57E-11 |
| TUCP_003764 | XLOC_165231 | ENSRNOT00000015270 | 1           | 0        |
| TUCP_003764 | XLOC_165231 | ENSRNOT00000046192 | 1           | 0        |
| TUCP_003764 | XLOC_165231 | ENSRNOT00000044226 | 1           | 0        |
| TUCP_003764 | XLOC_165231 | ENSRNOT00000081898 | 0.989837012 | 8.39E-10 |
| TUCP_003764 | XLOC_165231 | ENSRNOT00000081954 | 0.964005219 | 4.48E-07 |
| TUCP_003764 | XLOC_165231 | ENSRNOT00000080291 | 0.998427671 | 7.55E-14 |
| TUCP_003764 | XLOC_165231 | ENSRNOT00000004293 | 0.984239049 | 7.46E-09 |
| TUCP_003764 | XLOC_165231 | ENSRNOT00000078231 | 0.960455489 | 7.13E-07 |
| TUCP_003764 | XLOC_165231 | ENSRNOT00000002834 | 1           | 0        |
| TUCP_003764 | XLOC_165231 | ENSRNOT00000001464 | 1           | 0        |
| TUCP_003764 | XLOC_165231 | ENSRNOT00000090716 | 0.994769629 | 3.06E-11 |
| TUCP_003764 | XLOC_165231 | ENSRNOT00000083542 | 0.972568514 | 1.17E-07 |
| TUCP_003764 | XLOC_165231 | ENSRNOT00000076044 | 1           | 0        |
| TUCP_003764 | XLOC_165231 | ENSRNOT00000074353 | 1           | 0        |
| TUCP_003764 | XLOC_165231 | ENSRNOT00000043510 | 0.958144129 | 9.43E-07 |
| TUCP_003764 | XLOC_165231 | ENSRNOT00000087122 | 0.980089513 | 2.38E-08 |
| TUCP_003764 | XLOC_165231 | ENSRNOT00000074295 | 0.987777006 | 2.11E-09 |
| TUCP_003764 | XLOC_165231 | ENSRNOT00000057873 | 1           | 0        |
| TUCP_003764 | XLOC_165231 | ENSRNOT00000083002 | 0.988874897 | 1.32E-09 |
| TUCP_003764 | XLOC_165231 | ENSRNOT00000088399 | 0.999999855 | 4.99E-34 |
| TUCP_003764 | XLOC_165231 | ENSRNOT00000086248 | 1           | 0        |
| TUCP_003764 | XLOC_165231 | ENSRNOT00000089750 | 0.999992758 | 1.57E-25 |
| TUCP_003764 | XLOC_165231 | ENSRNOT00000030517 | 0.971225224 | 1.48E-07 |
| TUCP_003764 | XLOC_165231 | ENSRNOT00000034772 | 0.994265187 | 4.84E-11 |
| TUCP_003764 | XLOC_165231 | ENSRNOT00000089305 | 0.969641693 | 1.93E-07 |
| TUCP_003764 | XLOC_165231 | ENSRNOT00000024580 | 0.954183021 | 1.47E-06 |
| TUCP_003764 | XLOC_165231 | ENSRNOT00000064601 | 0.966578038 | 3.11E-07 |
| TUCP_003764 | XLOC_165231 | ENSRNOT00000015870 | 0.965901306 | 3.43E-07 |
| TUCP_003764 | XLOC_165231 | ENSRNOT00000080812 | 0.992998865 | 1.31E-10 |
| TUCP_003764 | XLOC_165231 | ENSRNOT00000092755 | 1           | 0        |
| TUCP_003764 | XLOC_165231 | ENSRNOT00000031683 | 1           | 0        |
| TUCP_003764 | XLOC_165231 | ENSRNOT00000087764 | 0.988156196 | 1.80E-09 |
| TUCP_003609 | XLOC_158842 | ENSRNOT00000006519 | 0.950247664 | 2.21E-06 |
| TUCP_003767 | XLOC_165291 | ENSRNOT00000022945 | 0.950303778 | 2.20E-06 |
| TUCP_003767 | XLOC_165291 | ENSRNOT00000002576 | 0.950958355 | 2.06E-06 |
| TUCP_003767 | XLOC_165291 | ENSRNOT00000047179 | 0.954691758 | 1.39E-06 |
| TUCP_003767 | XLOC_165291 | ENSRNOT00000072087 | 0.952139814 | 1.82E-06 |
| TUCP_003081 | XLOC_132184 | ENSRNOT00000026428 | 0.959010129 | 8.51E-07 |
| TUCP_003081 | XLOC_132184 | ENSRNOT00000076239 | 0.959875572 | 7.66E-07 |
| TUCP_003709 | XLOC_162167 | ENSRNOT00000043196 | 0.968843592 | 2.19E-07 |

|             |             |                    |              |          |
|-------------|-------------|--------------------|--------------|----------|
| TUCP_003709 | XLOC_162167 | ENSRNOT00000021851 | 0.962068395  | 5.80E-07 |
| TUCP_000935 | XLOC_034597 | ENSRNOT00000013570 | -0.951313194 | 1.98E-06 |
| TUCP_000935 | XLOC_034597 | ENSRNOT00000082687 | -0.966160645 | 3.30E-07 |
| TUCP_000935 | XLOC_034597 | ENSRNOT00000008184 | 0.972042293  | 1.28E-07 |
| TUCP_000935 | XLOC_034597 | ENSRNOT00000073346 | 0.950021734  | 2.26E-06 |
| TUCP_000935 | XLOC_034597 | ENSRNOT00000068322 | 0.962869358  | 5.22E-07 |
| TUCP_000935 | XLOC_034597 | ENSRNOT00000051550 | 0.960683986  | 6.93E-07 |
| TUCP_000935 | XLOC_034597 | ENSRNOT00000012093 | 0.959594466  | 7.92E-07 |
| TUCP_000935 | XLOC_034597 | ENSRNOT00000003013 | 0.967004499  | 2.91E-07 |
| TUCP_000935 | XLOC_034597 | ENSRNOT00000088995 | 0.954201812  | 1.47E-06 |
| TUCP_000935 | XLOC_034597 | ENSRNOT00000061267 | 0.954262765  | 1.46E-06 |
| TUCP_002994 | XLOC_128384 | ENSRNOT00000014129 | 0.962229224  | 5.68E-07 |
| TUCP_003864 | XLOC_169474 | ENSRNOT00000006188 | -0.954959774 | 1.35E-06 |
| TUCP_003864 | XLOC_169474 | ENSRNOT00000006186 | 0.981398548  | 1.70E-08 |
| TUCP_003864 | XLOC_169474 | ENSRNOT00000013743 | 0.962230973  | 5.68E-07 |
| TUCP_003864 | XLOC_169474 | ENSRNOT00000021348 | 0.955639616  | 1.26E-06 |
| TUCP_003864 | XLOC_169474 | ENSRNOT00000005958 | 0.951241468  | 2.00E-06 |
| TUCP_003864 | XLOC_169474 | ENSRNOT00000003891 | 0.955266264  | 1.31E-06 |
| TUCP_003864 | XLOC_169474 | ENSRNOT00000068353 | 0.951509231  | 1.95E-06 |
| TUCP_003864 | XLOC_169474 | ENSRNOT00000025067 | -0.952046421 | 1.84E-06 |
| TUCP_003864 | XLOC_169474 | ENSRNOT00000004017 | 0.965082968  | 3.85E-07 |
| TUCP_003864 | XLOC_169474 | ENSRNOT00000086310 | -0.950241455 | 2.21E-06 |
| TUCP_003864 | XLOC_169474 | ENSRNOT00000010030 | -0.976491325 | 5.44E-08 |
| TUCP_003864 | XLOC_169474 | ENSRNOT00000028856 | 0.968931408  | 2.16E-07 |
| TUCP_003864 | XLOC_169474 | ENSRNOT00000052063 | 0.952296138  | 1.80E-06 |
| TUCP_003864 | XLOC_169474 | ENSRNOT00000030850 | 0.964274916  | 4.32E-07 |
| TUCP_003864 | XLOC_169474 | ENSRNOT00000006752 | 0.989074576  | 1.20E-09 |
| TUCP_003864 | XLOC_169474 | ENSRNOT00000057562 | 0.952333583  | 1.79E-06 |
| TUCP_003864 | XLOC_169474 | ENSRNOT00000006321 | -0.952748628 | 1.71E-06 |
| TUCP_003864 | XLOC_169474 | ENSRNOT00000072771 | 0.951541559  | 1.94E-06 |
| TUCP_003864 | XLOC_169474 | ENSRNOT00000073370 | 0.955777351  | 1.24E-06 |
| TUCP_003864 | XLOC_169474 | ENSRNOT00000065300 | 0.951517065  | 1.94E-06 |
| TUCP_003864 | XLOC_169474 | ENSRNOT00000019921 | 0.966875849  | 2.97E-07 |
| TUCP_003864 | XLOC_169474 | ENSRNOT00000014701 | 0.964130036  | 4.40E-07 |
| TUCP_003864 | XLOC_169474 | ENSRNOT00000019923 | 0.959490236  | 8.03E-07 |
| TUCP_003864 | XLOC_169474 | ENSRNOT00000029439 | 0.967210901  | 2.82E-07 |
| TUCP_003864 | XLOC_169474 | ENSRNOT00000004400 | 0.962875355  | 5.22E-07 |
| TUCP_003864 | XLOC_169474 | ENSRNOT00000035320 | -0.952796824 | 1.70E-06 |
| TUCP_003864 | XLOC_169474 | ENSRNOT00000076820 | 0.987135852  | 2.72E-09 |
| TUCP_003864 | XLOC_169474 | ENSRNOT00000077999 | 0.969658073  | 1.92E-07 |
| TUCP_003864 | XLOC_169474 | ENSRNOT00000068134 | 0.967328333  | 2.78E-07 |
| TUCP_003864 | XLOC_169474 | ENSRNOT00000085228 | 0.978069046  | 3.85E-08 |
| TUCP_003864 | XLOC_169474 | ENSRNOT0000006969  | 0.973610638  | 9.64E-08 |
| TUCP_003864 | XLOC_169474 | ENSRNOT00000017319 | 0.96516845   | 3.81E-07 |
| TUCP_003864 | XLOC_169474 | ENSRNOT00000013286 | 0.951506786  | 1.95E-06 |
| TUCP_003864 | XLOC_169474 | ENSRNOT00000015188 | 0.987668658  | 2.20E-09 |
| TUCP_003864 | XLOC_169474 | ENSRNOT00000079866 | 0.972138579  | 1.26E-07 |
| TUCP_003864 | XLOC_169474 | ENSRNOT00000005839 | 0.955719589  | 1.24E-06 |
| TUCP_003864 | XLOC_169474 | ENSRNOT00000015537 | 0.962644599  | 5.38E-07 |
| TUCP_003864 | XLOC_169474 | ENSRNOT00000010927 | 0.966186098  | 3.29E-07 |
| TUCP_003864 | XLOC_169474 | ENSRNOT00000087278 | -0.95551686  | 1.27E-06 |

|             |             |                    |              |          |
|-------------|-------------|--------------------|--------------|----------|
| TUCP_003864 | XLOC_169474 | ENSRNOT00000030074 | 0.959558848  | 7.96E-07 |
| TUCP_003864 | XLOC_169474 | ENSRNOT00000024841 | -0.955619781 | 1.26E-06 |
| TUCP_003864 | XLOC_169474 | ENSRNOT00000009150 | 0.965834922  | 3.46E-07 |
| TUCP_003864 | XLOC_169474 | ENSRNOT00000019688 | 0.951724483  | 1.90E-06 |
| TUCP_003864 | XLOC_169474 | ENSRNOT00000084709 | 0.974766228  | 7.72E-08 |
| TUCP_003864 | XLOC_169474 | ENSRNOT00000068033 | 0.953188005  | 1.64E-06 |
| TUCP_003864 | XLOC_169474 | ENSRNOT00000009156 | 0.979253488  | 2.92E-08 |
| TUCP_003864 | XLOC_169474 | ENSRNOT00000026481 | 0.972730893  | 1.13E-07 |
| TUCP_003864 | XLOC_169474 | ENSRNOT00000000468 | 0.952116491  | 1.83E-06 |
| TUCP_003864 | XLOC_169474 | ENSRNOT00000044562 | 0.958951898  | 8.57E-07 |
| TUCP_003864 | XLOC_169474 | ENSRNOT00000006395 | -0.962852864 | 5.23E-07 |
| TUCP_003864 | XLOC_169474 | ENSRNOT00000012892 | 0.954720277  | 1.39E-06 |
| TUCP_003864 | XLOC_169474 | ENSRNOT00000001403 | 0.951854227  | 1.88E-06 |
| TUCP_003864 | XLOC_169474 | ENSRNOT00000072357 | -0.972583492 | 1.17E-07 |
| TUCP_003864 | XLOC_169474 | ENSRNOT00000016132 | -0.969178032 | 2.08E-07 |
| TUCP_003864 | XLOC_169474 | ENSRNOT00000023477 | 0.960361243  | 7.21E-07 |
| TUCP_003864 | XLOC_169474 | ENSRNOT00000034692 | -0.972697744 | 1.14E-07 |
| TUCP_003864 | XLOC_169474 | ENSRNOT00000016637 | -0.95362325  | 1.56E-06 |
| TUCP_003864 | XLOC_169474 | ENSRNOT00000031977 | 0.95291213   | 1.68E-06 |
| TUCP_003864 | XLOC_169474 | ENSRNOT00000031979 | -0.958182341 | 9.39E-07 |
| TUCP_003864 | XLOC_169474 | ENSRNOT00000007004 | 0.956844864  | 1.10E-06 |
| TUCP_003864 | XLOC_169474 | ENSRNOT00000019531 | -0.956567819 | 1.13E-06 |
| TUCP_003864 | XLOC_169474 | ENSRNOT00000079895 | 0.964437133  | 4.22E-07 |
| TUCP_003864 | XLOC_169474 | ENSRNOT00000078102 | 0.960290034  | 7.27E-07 |
| TUCP_003864 | XLOC_169474 | ENSRNOT00000074586 | -0.962865588 | 5.22E-07 |
| TUCP_003864 | XLOC_169474 | ENSRNOT00000075444 | -0.969080837 | 2.11E-07 |
| TUCP_003864 | XLOC_169474 | ENSRNOT00000021496 | -0.950708607 | 2.11E-06 |
| TUCP_003864 | XLOC_169474 | ENSRNOT00000011880 | 0.975714557  | 6.39E-08 |
| TUCP_003864 | XLOC_169474 | ENSRNOT00000023989 | 0.975230599  | 7.04E-08 |
| TUCP_003864 | XLOC_169474 | ENSRNOT00000003992 | -0.951704004 | 1.91E-06 |
| TUCP_003864 | XLOC_169474 | ENSRNOT00000020885 | 0.951314035  | 1.98E-06 |
| TUCP_003864 | XLOC_169474 | ENSRNOT00000050515 | 0.974630912  | 7.93E-08 |
| TUCP_003864 | XLOC_169474 | ENSRNOT00000089980 | -0.95667158  | 1.12E-06 |
| TUCP_003864 | XLOC_169474 | ENSRNOT00000078073 | -0.956875595 | 1.09E-06 |
| TUCP_003864 | XLOC_169474 | ENSRNOT00000025027 | 0.96265793   | 5.37E-07 |
| TUCP_003864 | XLOC_169474 | ENSRNOT00000055602 | -0.954286636 | 1.46E-06 |
| TUCP_003864 | XLOC_169474 | ENSRNOT00000087997 | 0.952685364  | 1.72E-06 |
| TUCP_003864 | XLOC_169474 | ENSRNOT00000021015 | 0.975808098  | 6.27E-08 |
| TUCP_003864 | XLOC_169474 | ENSRNOT00000025791 | -0.959653285 | 7.87E-07 |
| TUCP_003864 | XLOC_169474 | ENSRNOT00000033359 | 0.952810633  | 1.70E-06 |
| TUCP_003864 | XLOC_169474 | ENSRNOT00000061201 | -0.966816135 | 3.00E-07 |
| TUCP_003864 | XLOC_169474 | ENSRNOT00000013801 | 0.958098794  | 9.48E-07 |
| TUCP_003864 | XLOC_169474 | ENSRNOT00000091488 | 0.96594815   | 3.41E-07 |
| TUCP_003864 | XLOC_169474 | ENSRNOT00000027452 | 0.951141786  | 2.02E-06 |
| TUCP_003864 | XLOC_169474 | ENSRNOT00000019656 | -0.959561785 | 7.96E-07 |
| TUCP_003864 | XLOC_169474 | ENSRNOT00000015239 | -0.951578493 | 1.93E-06 |
| TUCP_003864 | XLOC_169474 | ENSRNOT00000074649 | 0.987973897  | 1.94E-09 |
| TUCP_003864 | XLOC_169474 | ENSRNOT00000035277 | 0.960402347  | 7.17E-07 |
| TUCP_003864 | XLOC_169474 | ENSRNOT00000077146 | -0.964702245 | 4.07E-07 |
| TUCP_003864 | XLOC_169474 | ENSRNOT00000044847 | -0.952413721 | 1.77E-06 |
| TUCP_003864 | XLOC_169474 | ENSRNOT00000036951 | 0.961415475  | 6.31E-07 |

|             |             |                    |              |          |
|-------------|-------------|--------------------|--------------|----------|
| TUCP_003864 | XLOC_169474 | ENSRNOT00000060002 | -0.962904044 | 5.20E-07 |
| TUCP_003864 | XLOC_169474 | ENSRNOT00000043752 | -0.958711749 | 8.82E-07 |
| TUCP_003864 | XLOC_169474 | ENSRNOT00000078250 | 0.954555746  | 1.41E-06 |
| TUCP_003864 | XLOC_169474 | ENSRNOT00000023977 | -0.95226965  | 1.80E-06 |
| TUCP_003864 | XLOC_169474 | ENSRNOT00000066133 | -0.977309517 | 4.56E-08 |
| TUCP_003864 | XLOC_169474 | ENSRNOT00000076387 | 0.951322558  | 1.98E-06 |
| TUCP_003864 | XLOC_169474 | ENSRNOT00000048933 | -0.965327267 | 3.72E-07 |
| TUCP_003864 | XLOC_169474 | ENSRNOT00000082562 | 0.95234267   | 1.79E-06 |
| TUCP_003864 | XLOC_169474 | ENSRNOT00000040540 | 0.953231089  | 1.63E-06 |
| TUCP_003864 | XLOC_169474 | ENSRNOT00000018170 | -0.950966475 | 2.06E-06 |
| TUCP_003864 | XLOC_169474 | ENSRNOT00000064535 | -0.977401035 | 4.47E-08 |
| TUCP_003864 | XLOC_169474 | ENSRNOT00000010748 | 0.986153635  | 3.92E-09 |
| TUCP_003864 | XLOC_169474 | ENSRNOT00000087408 | 0.950324431  | 2.19E-06 |
| TUCP_003864 | XLOC_169474 | ENSRNOT00000035474 | 0.97994096   | 2.47E-08 |
| TUCP_003864 | XLOC_169474 | ENSRNOT00000072632 | -0.950475186 | 2.16E-06 |
| TUCP_003864 | XLOC_169474 | ENSRNOT00000039102 | 0.962920538  | 5.19E-07 |
| TUCP_003864 | XLOC_169474 | ENSRNOT00000023807 | -0.960160334 | 7.39E-07 |
| TUCP_003864 | XLOC_169474 | ENSRNOT00000091205 | 0.986513438  | 3.44E-09 |
| TUCP_003864 | XLOC_169474 | ENSRNOT00000010983 | 0.96716832   | 2.84E-07 |
| TUCP_003864 | XLOC_169474 | ENSRNOT00000060698 | -0.966710077 | 3.04E-07 |
| TUCP_003864 | XLOC_169474 | ENSRNOT00000058351 | 0.965138171  | 3.82E-07 |
| TUCP_003864 | XLOC_169474 | ENSRNOT00000061100 | 0.966914632  | 2.95E-07 |
| TUCP_003864 | XLOC_169474 | ENSRNOT00000065529 | 0.966705626  | 3.05E-07 |
| TUCP_003864 | XLOC_169474 | ENSRNOT00000017776 | 0.987976118  | 1.94E-09 |
| TUCP_003864 | XLOC_169474 | ENSRNOT00000005686 | -0.968449922 | 2.33E-07 |
| TUCP_003864 | XLOC_169474 | ENSRNOT00000013985 | 0.95191316   | 1.87E-06 |
| TUCP_003864 | XLOC_169474 | ENSRNOT00000018998 | 0.96364016   | 4.71E-07 |
| TUCP_003864 | XLOC_169474 | ENSRNOT00000004463 | 0.974491435  | 8.15E-08 |
| TUCP_003864 | XLOC_169474 | ENSRNOT00000080928 | 0.958271036  | 9.29E-07 |
| TUCP_003864 | XLOC_169474 | ENSRNOT00000013321 | 0.961746763  | 6.05E-07 |
| TUCP_003864 | XLOC_169474 | ENSRNOT00000008982 | 0.980925297  | 1.93E-08 |
| TUCP_003864 | XLOC_169474 | ENSRNOT00000008987 | -0.950893359 | 2.07E-06 |
| TUCP_003864 | XLOC_169474 | ENSRNOT00000090299 | 0.950519132  | 2.15E-06 |
| TUCP_003864 | XLOC_169474 | ENSRNOT00000092876 | -0.954665894 | 1.40E-06 |
| TUCP_003864 | XLOC_169474 | ENSRNOT00000024253 | 0.976162661  | 5.82E-08 |
| TUCP_003864 | XLOC_169474 | ENSRNOT00000081796 | 0.959282952  | 8.23E-07 |
| TUCP_003864 | XLOC_169474 | ENSRNOT00000081246 | 0.963073885  | 5.08E-07 |
| TUCP_003864 | XLOC_169474 | ENSRNOT00000011984 | 0.952869748  | 1.69E-06 |
| TUCP_003864 | XLOC_169474 | ENSRNOT00000063930 | -0.964156964 | 4.39E-07 |
| TUCP_003864 | XLOC_169474 | ENSRNOT00000048613 | 0.992216598  | 2.22E-10 |
| TUCP_003864 | XLOC_169474 | ENSRNOT00000023437 | 0.953162749  | 1.64E-06 |
| TUCP_003864 | XLOC_169474 | ENSRNOT00000013025 | -0.95942914  | 8.09E-07 |
| TUCP_003864 | XLOC_169474 | ENSRNOT00000088125 | 0.950686451  | 2.11E-06 |
| TUCP_003864 | XLOC_169474 | ENSRNOT00000023430 | -0.954393951 | 1.44E-06 |
| TUCP_003864 | XLOC_169474 | ENSRNOT00000019502 | 0.964529416  | 4.17E-07 |
| TUCP_003864 | XLOC_169474 | ENSRNOT00000018057 | 0.950008279  | 2.26E-06 |
| TUCP_003864 | XLOC_169474 | ENSRNOT00000038703 | 0.976372829  | 5.57E-08 |
| TUCP_003864 | XLOC_169474 | ENSRNOT00000043216 | 0.966607025  | 3.09E-07 |
| TUCP_003864 | XLOC_169474 | ENSRNOT00000081981 | 0.972565068  | 1.17E-07 |
| TUCP_003864 | XLOC_169474 | ENSRNOT00000026531 | -0.968205256 | 2.43E-07 |
| TUCP_003864 | XLOC_169474 | ENSRNOT00000010418 | 0.962406906  | 5.55E-07 |

|             |             |                    |              |          |
|-------------|-------------|--------------------|--------------|----------|
| TUCP_003864 | XLOC_169474 | ENSRNOT00000015479 | 0.984236003  | 7.47E-09 |
| TUCP_003864 | XLOC_169474 | ENSRNOT00000047836 | -0.961824425 | 5.99E-07 |
| TUCP_003864 | XLOC_169474 | ENSRNOT00000074683 | 0.967284806  | 2.79E-07 |
| TUCP_003864 | XLOC_169474 | ENSRNOT00000025079 | -0.970988061 | 1.54E-07 |
| TUCP_003864 | XLOC_169474 | ENSRNOT00000073019 | 0.957059693  | 1.07E-06 |
| TUCP_003864 | XLOC_169474 | ENSRNOT00000021458 | -0.96182514  | 5.99E-07 |
| TUCP_003864 | XLOC_169474 | ENSRNOT00000079109 | 0.961005093  | 6.65E-07 |
| TUCP_003864 | XLOC_169474 | ENSRNOT00000011926 | 0.971460182  | 1.42E-07 |
| TUCP_003864 | XLOC_169474 | ENSRNOT00000054761 | -0.962596118 | 5.41E-07 |
| TUCP_003864 | XLOC_169474 | ENSRNOT00000007824 | -0.956244663 | 1.17E-06 |
| TUCP_003864 | XLOC_169474 | ENSRNOT00000020681 | -0.954829665 | 1.37E-06 |
| TUCP_003864 | XLOC_169474 | ENSRNOT00000024677 | 0.957344403  | 1.04E-06 |
| TUCP_003864 | XLOC_169474 | ENSRNOT00000009811 | 0.971527343  | 1.40E-07 |
| TUCP_003864 | XLOC_169474 | ENSRNOT00000009708 | -0.958998423 | 8.52E-07 |
| TUCP_003864 | XLOC_169474 | ENSRNOT00000077231 | 0.952710395  | 1.72E-06 |
| TUCP_003864 | XLOC_169474 | ENSRNOT00000017486 | 0.970803085  | 1.59E-07 |
| TUCP_003864 | XLOC_169474 | ENSRNOT00000071540 | 0.963694586  | 4.67E-07 |
| TUCP_003864 | XLOC_169474 | ENSRNOT00000072849 | -0.951336763 | 1.98E-06 |
| TUCP_003864 | XLOC_169474 | ENSRNOT00000078349 | -0.951170051 | 2.01E-06 |
| TUCP_003864 | XLOC_169474 | ENSRNOT00000022502 | -0.951850386 | 1.88E-06 |
| TUCP_003864 | XLOC_169474 | ENSRNOT00000017556 | 0.955634019  | 1.26E-06 |
| TUCP_003864 | XLOC_169474 | ENSRNOT00000087443 | 0.957870787  | 9.74E-07 |
| TUCP_003864 | XLOC_169474 | ENSRNOT00000021803 | -0.965012306 | 3.89E-07 |
| TUCP_003864 | XLOC_169474 | ENSRNOT00000039857 | -0.95502536  | 1.34E-06 |
| TUCP_003864 | XLOC_169474 | ENSRNOT00000046973 | 0.957039877  | 1.07E-06 |
| TUCP_003864 | XLOC_169474 | ENSRNOT00000024352 | 0.968796707  | 2.21E-07 |
| TUCP_003864 | XLOC_169474 | ENSRNOT00000018122 | 0.953940284  | 1.51E-06 |
| TUCP_003864 | XLOC_169474 | ENSRNOT00000072118 | 0.950034456  | 2.25E-06 |
| TUCP_003864 | XLOC_169474 | ENSRNOT00000003787 | -0.956463634 | 1.14E-06 |
| TUCP_003864 | XLOC_169474 | ENSRNOT00000058312 | 0.950887342  | 2.07E-06 |
| TUCP_003864 | XLOC_169474 | ENSRNOT00000077908 | 0.974131816  | 8.74E-08 |
| TUCP_003864 | XLOC_169474 | ENSRNOT00000091427 | -0.96048749  | 7.10E-07 |
| TUCP_003864 | XLOC_169474 | ENSRNOT00000026312 | 0.970689659  | 1.62E-07 |
| TUCP_003864 | XLOC_169474 | ENSRNOT00000005604 | 0.954158729  | 1.48E-06 |
| TUCP_003864 | XLOC_169474 | ENSRNOT00000068381 | 0.984762588  | 6.31E-09 |
| TUCP_003864 | XLOC_169474 | ENSRNOT00000058382 | 0.97161646   | 1.38E-07 |
| TUCP_003864 | XLOC_169474 | ENSRNOT00000005587 | -0.95183554  | 1.88E-06 |
| TUCP_003864 | XLOC_169474 | ENSRNOT00000026174 | 0.972948224  | 1.09E-07 |
| TUCP_003864 | XLOC_169474 | ENSRNOT00000005073 | 0.968877469  | 2.18E-07 |
| TUCP_003864 | XLOC_169474 | ENSRNOT00000017995 | 0.968486336  | 2.32E-07 |
| TUCP_003864 | XLOC_169474 | ENSRNOT00000010463 | 0.965774214  | 3.49E-07 |
| TUCP_003864 | XLOC_169474 | ENSRNOT00000013375 | -0.950133347 | 2.23E-06 |
| TUCP_003864 | XLOC_169474 | ENSRNOT00000081725 | 0.967017042  | 2.91E-07 |
| TUCP_003864 | XLOC_169474 | ENSRNOT00000005459 | 0.974367255  | 8.35E-08 |
| TUCP_003864 | XLOC_169474 | ENSRNOT00000009135 | 0.968828207  | 2.20E-07 |
| TUCP_003864 | XLOC_169474 | ENSRNOT00000027910 | 0.97962295   | 2.67E-08 |
| TUCP_003864 | XLOC_169474 | ENSRNOT00000024322 | 0.958539652  | 9.00E-07 |
| TUCP_003864 | XLOC_169474 | ENSRNOT00000032780 | 0.961623691  | 6.15E-07 |
| TUCP_003864 | XLOC_169474 | ENSRNOT00000028885 | -0.958597674 | 8.94E-07 |
| TUCP_003864 | XLOC_169474 | ENSRNOT00000023628 | -0.950196254 | 2.22E-06 |
| TUCP_003864 | XLOC_169474 | ENSRNOT00000066032 | 0.958568431  | 8.97E-07 |

|             |             |                    |              |          |
|-------------|-------------|--------------------|--------------|----------|
| TUCP_003864 | XLOC_169474 | ENSRNOT00000051022 | 0.954767506  | 1.38E-06 |
| TUCP_003864 | XLOC_169474 | ENSRNOT00000029833 | 0.964716112  | 4.06E-07 |
| TUCP_003864 | XLOC_169474 | ENSRNOT00000034487 | -0.959524949 | 7.99E-07 |
| TUCP_003864 | XLOC_169474 | ENSRNOT00000031401 | -0.958590543 | 8.94E-07 |
| TUCP_003864 | XLOC_169474 | ENSRNOT00000050138 | 0.950444132  | 2.17E-06 |
| TUCP_003864 | XLOC_169474 | ENSRNOT00000003359 | -0.965211988 | 3.78E-07 |
| TUCP_003864 | XLOC_169474 | ENSRNOT00000038511 | -0.951638649 | 1.92E-06 |
| TUCP_003864 | XLOC_169474 | ENSRNOT00000091834 | 0.951589525  | 1.93E-06 |
| TUCP_003864 | XLOC_169474 | ENSRNOT00000016991 | 0.952444928  | 1.77E-06 |
| TUCP_003864 | XLOC_169474 | ENSRNOT00000020669 | 0.974923839  | 7.49E-08 |
| TUCP_003864 | XLOC_169474 | ENSRNOT00000084597 | -0.950378336 | 2.18E-06 |
| TUCP_003864 | XLOC_169474 | ENSRNOT00000022142 | 0.96030494   | 7.26E-07 |
| TUCP_003864 | XLOC_169474 | ENSRNOT00000076300 | -0.957696085 | 9.94E-07 |
| TUCP_003864 | XLOC_169474 | ENSRNOT00000012334 | 0.958112987  | 9.46E-07 |
| TUCP_003864 | XLOC_169474 | ENSRNOT00000025086 | -0.954285536 | 1.46E-06 |
| TUCP_003864 | XLOC_169474 | ENSRNOT00000077152 | 0.976484227  | 5.44E-08 |
| TUCP_003864 | XLOC_169474 | ENSRNOT00000028876 | -0.950245059 | 2.21E-06 |
| TUCP_003864 | XLOC_169474 | ENSRNOT00000052120 | 0.971158282  | 1.50E-07 |
| TUCP_003864 | XLOC_169474 | ENSRNOT00000019820 | 0.981577555  | 1.62E-08 |
| TUCP_003864 | XLOC_169474 | ENSRNOT00000004172 | 0.986349744  | 3.65E-09 |
| TUCP_003864 | XLOC_169474 | ENSRNOT00000040476 | 0.97735802   | 4.51E-08 |
| TUCP_003864 | XLOC_169474 | ENSRNOT00000029125 | 0.976455371  | 5.48E-08 |
| TUCP_003864 | XLOC_169474 | ENSRNOT00000085279 | 0.992114432  | 2.37E-10 |
| TUCP_003864 | XLOC_169474 | ENSRNOT00000077888 | -0.962590807 | 5.42E-07 |
| TUCP_003864 | XLOC_169474 | ENSRNOT00000082904 | 0.956632346  | 1.12E-06 |
| TUCP_003864 | XLOC_169474 | ENSRNOT00000017165 | -0.96205424  | 5.81E-07 |
| TUCP_003864 | XLOC_169474 | ENSRNOT00000015223 | 0.963912027  | 4.54E-07 |
| TUCP_003864 | XLOC_169474 | ENSRNOT00000028907 | 0.963126771  | 5.05E-07 |
| TUCP_003864 | XLOC_169474 | ENSRNOT00000010224 | 0.98029479   | 2.26E-08 |
| TUCP_003864 | XLOC_169474 | ENSRNOT00000025147 | 0.950236342  | 2.21E-06 |
| TUCP_003864 | XLOC_169474 | ENSRNOT00000007175 | 0.976440622  | 5.49E-08 |
| TUCP_003864 | XLOC_169474 | ENSRNOT00000025887 | -0.958684225 | 8.84E-07 |
| TUCP_003864 | XLOC_169474 | ENSRNOT00000002109 | 0.972004783  | 1.29E-07 |
| TUCP_003864 | XLOC_169474 | ENSRNOT00000017687 | -0.962528911 | 5.46E-07 |
| TUCP_003864 | XLOC_169474 | ENSRNOT00000015799 | 0.959112     | 8.40E-07 |
| TUCP_003864 | XLOC_169474 | ENSRNOT00000073559 | 0.967248374  | 2.81E-07 |
| TUCP_003864 | XLOC_169474 | ENSRNOT00000082998 | 0.972176713  | 1.25E-07 |
| TUCP_003864 | XLOC_169474 | ENSRNOT00000015006 | 0.975200899  | 7.09E-08 |
| TUCP_003864 | XLOC_169474 | ENSRNOT00000077727 | -0.968596865 | 2.28E-07 |
| TUCP_003864 | XLOC_169474 | ENSRNOT00000007350 | 0.957738324  | 9.89E-07 |
| TUCP_003864 | XLOC_169474 | ENSRNOT00000007351 | -0.975267206 | 6.99E-08 |
| TUCP_003864 | XLOC_169474 | ENSRNOT00000083578 | 0.970777017  | 1.60E-07 |
| TUCP_003864 | XLOC_169474 | ENSRNOT00000000181 | 0.967216113  | 2.82E-07 |
| TUCP_003864 | XLOC_169474 | ENSRNOT00000023638 | 0.976082292  | 5.92E-08 |
| TUCP_003864 | XLOC_169474 | ENSRNOT00000022726 | 0.963986366  | 4.49E-07 |
| TUCP_003864 | XLOC_169474 | ENSRNOT00000017361 | 0.953168204  | 1.64E-06 |
| TUCP_003864 | XLOC_169474 | ENSRNOT00000005220 | 0.963120869  | 5.05E-07 |
| TUCP_003864 | XLOC_169474 | ENSRNOT00000045326 | 0.97615902   | 5.83E-08 |
| TUCP_003864 | XLOC_169474 | ENSRNOT00000002510 | -0.953379159 | 1.60E-06 |
| TUCP_003864 | XLOC_169474 | ENSRNOT00000045833 | 0.973925317  | 9.09E-08 |
| TUCP_003864 | XLOC_169474 | ENSRNOT00000090342 | 0.960965453  | 6.68E-07 |



|             |             |                    |              |          |
|-------------|-------------|--------------------|--------------|----------|
| TUCP_003864 | XLOC_169474 | ENSRNOT00000067170 | -0.959905153 | 7.63E-07 |
| TUCP_003864 | XLOC_169474 | ENSRNOT00000013516 | 0.952362858  | 1.78E-06 |
| TUCP_003864 | XLOC_169474 | ENSRNOT00000026783 | 0.975622302  | 6.51E-08 |
| TUCP_003864 | XLOC_169474 | ENSRNOT00000016012 | -0.951370797 | 1.97E-06 |
| TUCP_003864 | XLOC_169474 | ENSRNOT00000091637 | 0.956134599  | 1.19E-06 |
| TUCP_003864 | XLOC_169474 | ENSRNOT00000024402 | 0.954581084  | 1.41E-06 |
| TUCP_003864 | XLOC_169474 | ENSRNOT00000019519 | 0.980704005  | 2.04E-08 |
| TUCP_003864 | XLOC_169474 | ENSRNOT00000089933 | 0.969340755  | 2.03E-07 |
| TUCP_003864 | XLOC_169474 | ENSRNOT00000022924 | -0.962131773 | 5.75E-07 |
| TUCP_003864 | XLOC_169474 | ENSRNOT00000090461 | 0.966100936  | 3.33E-07 |
| TUCP_003864 | XLOC_169474 | ENSRNOT00000090912 | 0.957875149  | 9.73E-07 |
| TUCP_003864 | XLOC_169474 | ENSRNOT00000073983 | 0.96029538   | 7.27E-07 |
| TUCP_003864 | XLOC_169474 | ENSRNOT00000010784 | 0.970902746  | 1.56E-07 |
| TUCP_003864 | XLOC_169474 | ENSRNOT00000010783 | -0.963625623 | 4.72E-07 |
| TUCP_003864 | XLOC_169474 | ENSRNOT00000074323 | 0.969280075  | 2.05E-07 |
| TUCP_003864 | XLOC_169474 | ENSRNOT00000033677 | -0.965205913 | 3.79E-07 |
| TUCP_003864 | XLOC_169474 | ENSRNOT00000036931 | -0.967335107 | 2.77E-07 |
| TUCP_003864 | XLOC_169474 | ENSRNOT00000067822 | 0.957592331  | 1.01E-06 |
| TUCP_003864 | XLOC_169474 | ENSRNOT00000016389 | -0.950607092 | 2.13E-06 |
| TUCP_003864 | XLOC_169474 | ENSRNOT00000011832 | -0.958309422 | 9.25E-07 |
| TUCP_003864 | XLOC_169474 | ENSRNOT00000021030 | -0.953790745 | 1.54E-06 |
| TUCP_003864 | XLOC_169474 | ENSRNOT00000051181 | 0.950271537  | 2.20E-06 |
| TUCP_003864 | XLOC_169474 | ENSRNOT00000057361 | 0.954188365  | 1.47E-06 |
| TUCP_003864 | XLOC_169474 | ENSRNOT00000021037 | 0.964315311  | 4.29E-07 |
| TUCP_003864 | XLOC_169474 | ENSRNOT00000044346 | -0.968425376 | 2.34E-07 |
| TUCP_003864 | XLOC_169474 | ENSRNOT00000068745 | 0.950590164  | 2.13E-06 |
| TUCP_003864 | XLOC_169474 | ENSRNOT00000004032 | 0.971046294  | 1.53E-07 |
| TUCP_003864 | XLOC_169474 | ENSRNOT00000020453 | -0.961698106 | 6.09E-07 |
| TUCP_003864 | XLOC_169474 | ENSRNOT00000092068 | 0.959444128  | 8.07E-07 |
| TUCP_003864 | XLOC_169474 | ENSRNOT00000030749 | -0.950296053 | 2.20E-06 |
| TUCP_003864 | XLOC_169474 | ENSRNOT00000091909 | 0.969426259  | 2.00E-07 |
| TUCP_003864 | XLOC_169474 | ENSRNOT00000001081 | 0.972096235  | 1.27E-07 |
| TUCP_003864 | XLOC_169474 | ENSRNOT00000086119 | -0.957877463 | 9.73E-07 |
| TUCP_003864 | XLOC_169474 | ENSRNOT00000084385 | 0.959646357  | 7.87E-07 |
| TUCP_003864 | XLOC_169474 | ENSRNOT00000022190 | -0.959440143 | 8.08E-07 |
| TUCP_003864 | XLOC_169474 | ENSRNOT00000025913 | -0.953785328 | 1.54E-06 |
| TUCP_003864 | XLOC_169474 | ENSRNOT00000065983 | 0.95783379   | 9.78E-07 |
| TUCP_003864 | XLOC_169474 | ENSRNOT00000030782 | -0.961382977 | 6.34E-07 |
| TUCP_003864 | XLOC_169474 | ENSRNOT00000073919 | 0.951248112  | 2.00E-06 |
| TUCP_003864 | XLOC_169474 | ENSRNOT00000067780 | -0.968556825 | 2.30E-07 |
| TUCP_003864 | XLOC_169474 | ENSRNOT00000052422 | 0.963824236  | 4.59E-07 |
| TUCP_003864 | XLOC_169474 | ENSRNOT00000015609 | 0.962963344  | 5.16E-07 |
| TUCP_003864 | XLOC_169474 | ENSRNOT00000086590 | 0.987090268  | 2.76E-09 |
| TUCP_003864 | XLOC_169474 | ENSRNOT00000034883 | -0.953382813 | 1.60E-06 |
| TUCP_003864 | XLOC_169474 | ENSRNOT00000022286 | 0.959321889  | 8.19E-07 |
| TUCP_003864 | XLOC_169474 | ENSRNOT00000005910 | -0.950225347 | 2.21E-06 |
| TUCP_003864 | XLOC_169474 | ENSRNOT00000076485 | -0.952630352 | 1.73E-06 |
| TUCP_003864 | XLOC_169474 | ENSRNOT00000073356 | 0.968086423  | 2.47E-07 |
| TUCP_003864 | XLOC_169474 | ENSRNOT00000078475 | 0.969777154  | 1.89E-07 |
| TUCP_003864 | XLOC_169474 | ENSRNOT00000013067 | -0.969437486 | 2.00E-07 |
| TUCP_003864 | XLOC_169474 | ENSRNOT00000026249 | -0.961494287 | 6.25E-07 |

|             |             |                    |              |          |
|-------------|-------------|--------------------|--------------|----------|
| TUCP_003864 | XLOC_169474 | ENSRNOT00000016722 | 0.981079197  | 1.85E-08 |
| TUCP_003864 | XLOC_169474 | ENSRNOT00000073526 | 0.971860599  | 1.33E-07 |
| TUCP_003864 | XLOC_169474 | ENSRNOT00000000013 | 0.993134602  | 1.19E-10 |
| TUCP_003864 | XLOC_169474 | ENSRNOT00000005161 | 0.963585697  | 4.74E-07 |
| TUCP_003864 | XLOC_169474 | ENSRNOT00000017753 | 0.958793314  | 8.73E-07 |
| TUCP_003864 | XLOC_169474 | ENSRNOT00000037955 | -0.956397777 | 1.15E-06 |
| TUCP_003864 | XLOC_169474 | ENSRNOT00000022074 | 0.959238352  | 8.28E-07 |
| TUCP_003864 | XLOC_169474 | ENSRNOT0000004999  | 0.960353887  | 7.22E-07 |
| TUCP_003864 | XLOC_169474 | ENSRNOT00000041365 | 0.962847503  | 5.24E-07 |
| TUCP_003864 | XLOC_169474 | ENSRNOT00000088054 | 0.958725205  | 8.80E-07 |
| TUCP_003864 | XLOC_169474 | ENSRNOT00000019554 | 0.955357863  | 1.30E-06 |
| TUCP_003864 | XLOC_169474 | ENSRNOT00000035700 | 0.978556622  | 3.44E-08 |
| TUCP_003864 | XLOC_169474 | ENSRNOT00000029202 | -0.965104873 | 3.84E-07 |
| TUCP_003864 | XLOC_169474 | ENSRNOT00000092029 | 0.962676999  | 5.36E-07 |
| TUCP_003864 | XLOC_169474 | ENSRNOT00000005489 | 0.961011455  | 6.65E-07 |
| TUCP_003864 | XLOC_169474 | ENSRNOT00000063951 | 0.953548448  | 1.58E-06 |
| TUCP_003864 | XLOC_169474 | ENSRNOT00000058111 | -0.950071218 | 2.25E-06 |
| TUCP_003864 | XLOC_169474 | ENSRNOT00000084422 | 0.976436376  | 5.50E-08 |
| TUCP_003864 | XLOC_169474 | ENSRNOT00000054828 | 0.964837329  | 3.99E-07 |
| TUCP_003864 | XLOC_169474 | ENSRNOT00000009994 | -0.952166001 | 1.82E-06 |
| TUCP_003864 | XLOC_169474 | ENSRNOT00000078994 | 0.981045079  | 1.87E-08 |
| TUCP_003864 | XLOC_169474 | ENSRNOT00000002114 | -0.954414062 | 1.44E-06 |
| TUCP_003864 | XLOC_169474 | ENSRNOT00000027970 | 0.963556863  | 4.76E-07 |
| TUCP_003864 | XLOC_169474 | ENSRNOT00000009462 | 0.965396499  | 3.69E-07 |
| TUCP_003864 | XLOC_169474 | ENSRNOT00000018074 | -0.974908623 | 7.51E-08 |
| TUCP_003864 | XLOC_169474 | ENSRNOT00000014124 | 0.977089581  | 4.78E-08 |
| TUCP_003864 | XLOC_169474 | ENSRNOT00000043581 | -0.95121191  | 2.01E-06 |
| TUCP_003864 | XLOC_169474 | ENSRNOT00000000120 | 0.959383833  | 8.13E-07 |
| TUCP_003864 | XLOC_169474 | ENSRNOT00000013632 | 0.966449421  | 3.16E-07 |
| TUCP_003864 | XLOC_169474 | ENSRNOT00000078906 | -0.961561226 | 6.20E-07 |
| TUCP_003864 | XLOC_169474 | ENSRNOT00000077981 | 0.972443836  | 1.19E-07 |
| TUCP_003864 | XLOC_169474 | ENSRNOT00000085060 | 0.959321125  | 8.19E-07 |
| TUCP_003864 | XLOC_169474 | ENSRNOT00000055442 | 0.960776723  | 6.84E-07 |
| TUCP_003864 | XLOC_169474 | ENSRNOT00000014979 | 0.981091621  | 1.84E-08 |
| TUCP_003864 | XLOC_169474 | ENSRNOT00000019172 | -0.958941937 | 8.58E-07 |
| TUCP_003864 | XLOC_169474 | ENSRNOT00000064798 | 0.972872152  | 1.11E-07 |
| TUCP_003864 | XLOC_169474 | ENSRNOT00000019177 | 0.957661367  | 9.98E-07 |
| TUCP_003864 | XLOC_169474 | ENSRNOT00000015495 | -0.973920565 | 9.09E-08 |
| TUCP_003864 | XLOC_169474 | ENSRNOT00000040393 | 0.974942815  | 7.46E-08 |
| TUCP_003864 | XLOC_169474 | ENSRNOT00000067901 | -0.969570682 | 1.95E-07 |
| TUCP_003864 | XLOC_169474 | ENSRNOT00000036750 | 0.957372419  | 1.03E-06 |
| TUCP_003864 | XLOC_169474 | ENSRNOT00000024659 | 0.967612238  | 2.66E-07 |
| TUCP_003864 | XLOC_169474 | ENSRNOT00000021674 | 0.966773157  | 3.02E-07 |
| TUCP_003864 | XLOC_169474 | ENSRNOT00000064700 | 0.965363056  | 3.70E-07 |
| TUCP_003864 | XLOC_169474 | ENSRNOT00000036613 | -0.962130436 | 5.76E-07 |
| TUCP_003864 | XLOC_169474 | ENSRNOT00000054948 | 0.950970028  | 2.05E-06 |
| TUCP_003864 | XLOC_169474 | ENSRNOT0000002292  | 0.957052945  | 1.07E-06 |
| TUCP_003864 | XLOC_169474 | ENSRNOT00000025705 | 0.9733856    | 1.01E-07 |
| TUCP_003864 | XLOC_169474 | ENSRNOT00000004140 | 0.973054245  | 1.07E-07 |
| TUCP_003864 | XLOC_169474 | ENSRNOT00000007698 | -0.951160558 | 2.02E-06 |
| TUCP_003864 | XLOC_169474 | ENSRNOT00000048910 | -0.961838519 | 5.98E-07 |

|             |             |                    |              |          |
|-------------|-------------|--------------------|--------------|----------|
| TUCP_003864 | XLOC_169474 | ENSRNOT00000019213 | 0.965082182  | 3.86E-07 |
| TUCP_003864 | XLOC_169474 | ENSRNOT00000020051 | 0.958081656  | 9.50E-07 |
| TUCP_003864 | XLOC_169474 | ENSRNOT00000087062 | 0.975924815  | 6.12E-08 |
| TUCP_003864 | XLOC_169474 | ENSRNOT00000015678 | -0.95799345  | 9.60E-07 |
| TUCP_003864 | XLOC_169474 | ENSRNOT00000082508 | -0.951664331 | 1.92E-06 |
| TUCP_003864 | XLOC_169474 | ENSRNOT00000006340 | 0.962060116  | 5.81E-07 |
| TUCP_003864 | XLOC_169474 | ENSRNOT00000007164 | 0.950778595  | 2.09E-06 |
| TUCP_003864 | XLOC_169474 | ENSRNOT00000049459 | -0.971215434 | 1.48E-07 |
| TUCP_003864 | XLOC_169474 | ENSRNOT00000071166 | 0.950686298  | 2.11E-06 |
| TUCP_003864 | XLOC_169474 | ENSRNOT00000001118 | 0.961162749  | 6.52E-07 |
| TUCP_003864 | XLOC_169474 | ENSRNOT00000009496 | 0.969412136  | 2.00E-07 |
| TUCP_003864 | XLOC_169474 | ENSRNOT00000048754 | -0.977486422 | 4.39E-08 |
| TUCP_003864 | XLOC_169474 | ENSRNOT00000083369 | 0.956191865  | 1.18E-06 |
| TUCP_003864 | XLOC_169474 | ENSRNOT00000076872 | 0.960999522  | 6.66E-07 |
| TUCP_003864 | XLOC_169474 | ENSRNOT00000015073 | 0.951666678  | 1.92E-06 |
| TUCP_003864 | XLOC_169474 | ENSRNOT00000001507 | 0.97884345   | 3.22E-08 |
| TUCP_003864 | XLOC_169474 | ENSRNOT00000083568 | 0.956374996  | 1.16E-06 |
| TUCP_003864 | XLOC_169474 | ENSRNOT00000039177 | -0.95076376  | 2.10E-06 |
| TUCP_003864 | XLOC_169474 | ENSRNOT00000081047 | 0.95453865   | 1.42E-06 |
| TUCP_003864 | XLOC_169474 | ENSRNOT00000037456 | 0.976204711  | 5.77E-08 |
| TUCP_003864 | XLOC_169474 | ENSRNOT00000000577 | 0.955012143  | 1.35E-06 |
| TUCP_003864 | XLOC_169474 | ENSRNOT00000075424 | 0.973714465  | 9.46E-08 |
| TUCP_003864 | XLOC_169474 | ENSRNOT00000012177 | -0.963413891 | 4.85E-07 |
| TUCP_003864 | XLOC_169474 | ENSRNOT00000061392 | 0.955830967  | 1.23E-06 |
| TUCP_003864 | XLOC_169474 | ENSRNOT00000027012 | 0.974010886  | 8.94E-08 |
| TUCP_003864 | XLOC_169474 | ENSRNOT00000024771 | 0.95102356   | 2.04E-06 |
| TUCP_003864 | XLOC_169474 | ENSRNOT00000005405 | 0.972143449  | 1.26E-07 |
| TUCP_003864 | XLOC_169474 | ENSRNOT00000007821 | 0.95748893   | 1.02E-06 |
| TUCP_003864 | XLOC_169474 | ENSRNOT00000028266 | 0.957240688  | 1.05E-06 |
| TUCP_003864 | XLOC_169474 | ENSRNOT00000011898 | -0.957173141 | 1.06E-06 |
| TUCP_003864 | XLOC_169474 | ENSRNOT00000019133 | 0.958701957  | 8.83E-07 |
| TUCP_003864 | XLOC_169474 | ENSRNOT00000024119 | 0.979648995  | 2.66E-08 |
| TUCP_003864 | XLOC_169474 | ENSRNOT00000001322 | -0.951618598 | 1.92E-06 |
| TUCP_003864 | XLOC_169474 | ENSRNOT00000006824 | -0.955781056 | 1.24E-06 |
| TUCP_003864 | XLOC_169474 | ENSRNOT00000086868 | 0.973913051  | 9.11E-08 |
| TUCP_003864 | XLOC_169474 | ENSRNOT00000093174 | 0.970832306  | 1.58E-07 |
| TUCP_003864 | XLOC_169474 | ENSRNOT00000020648 | 0.966910819  | 2.96E-07 |
| TUCP_003864 | XLOC_169474 | ENSRNOT00000036666 | 0.984876372  | 6.08E-09 |
| TUCP_003864 | XLOC_169474 | ENSRNOT00000089211 | 0.960000105  | 7.54E-07 |
| TUCP_003864 | XLOC_169474 | ENSRNOT00000020383 | 0.962023599  | 5.84E-07 |
| TUCP_003864 | XLOC_169474 | ENSRNOT00000015518 | -0.959109231 | 8.41E-07 |
| TUCP_003864 | XLOC_169474 | ENSRNOT00000090784 | -0.95530024  | 1.30E-06 |
| TUCP_003864 | XLOC_169474 | ENSRNOT00000087502 | 0.988973677  | 1.26E-09 |
| TUCP_003864 | XLOC_169474 | ENSRNOT00000041106 | 0.972236448  | 1.24E-07 |
| TUCP_003864 | XLOC_169474 | ENSRNOT00000046745 | 0.994526245  | 3.83E-11 |
| TUCP_003864 | XLOC_169474 | ENSRNOT00000012424 | 0.958957093  | 8.56E-07 |
| TUCP_003864 | XLOC_169474 | ENSRNOT00000005909 | 0.971543867  | 1.40E-07 |
| TUCP_003864 | XLOC_169474 | ENSRNOT00000072518 | 0.967365757  | 2.76E-07 |
| TUCP_003864 | XLOC_169474 | ENSRNOT00000086122 | 0.975905503  | 6.14E-08 |
| TUCP_003864 | XLOC_169474 | ENSRNOT00000044009 | 0.967654642  | 2.64E-07 |
| TUCP_003864 | XLOC_169474 | ENSRNOT00000086995 | 0.976331342  | 5.62E-08 |

|             |             |                    |              |          |
|-------------|-------------|--------------------|--------------|----------|
| TUCP_003864 | XLOC_169474 | ENSRNOT00000010993 | 0.965495067  | 3.64E-07 |
| TUCP_003864 | XLOC_169474 | ENSRNOT00000059181 | 0.970269579  | 1.74E-07 |
| TUCP_003864 | XLOC_169474 | ENSRNOT00000003690 | 0.965641405  | 3.56E-07 |
| TUCP_003864 | XLOC_169474 | ENSRNOT00000058362 | 0.963402022  | 4.86E-07 |
| TUCP_003864 | XLOC_169474 | ENSRNOT00000011350 | 0.95448077   | 1.43E-06 |
| TUCP_003864 | XLOC_169474 | ENSRNOT00000008901 | -0.959910298 | 7.62E-07 |
| TUCP_003864 | XLOC_169474 | ENSRNOT00000005659 | 0.969133969  | 2.09E-07 |
| TUCP_003864 | XLOC_169474 | ENSRNOT00000017761 | 0.984985937  | 5.86E-09 |
| TUCP_003864 | XLOC_169474 | ENSRNOT00000023543 | -0.967669896 | 2.63E-07 |
| TUCP_003864 | XLOC_169474 | ENSRNOT00000080608 | 0.958459237  | 9.08E-07 |
| TUCP_003864 | XLOC_169474 | ENSRNOT00000039341 | 0.967759515  | 2.60E-07 |
| TUCP_003864 | XLOC_169474 | ENSRNOT00000037405 | 0.980020334  | 2.42E-08 |
| TUCP_003864 | XLOC_169474 | ENSRNOT00000083939 | 0.956718227  | 1.11E-06 |
| TUCP_003864 | XLOC_169474 | ENSRNOT00000085519 | 0.957479633  | 1.02E-06 |
| TUCP_003864 | XLOC_169474 | ENSRNOT00000005490 | 0.959062848  | 8.45E-07 |
| TUCP_003864 | XLOC_169474 | ENSRNOT00000082174 | 0.958384569  | 9.17E-07 |
| TUCP_003864 | XLOC_169474 | ENSRNOT00000025460 | 0.972904261  | 1.10E-07 |
| TUCP_003864 | XLOC_169474 | ENSRNOT00000026760 | -0.970674892 | 1.63E-07 |
| TUCP_003864 | XLOC_169474 | ENSRNOT00000001289 | 0.957344421  | 1.04E-06 |
| TUCP_003864 | XLOC_169474 | ENSRNOT00000023330 | 0.951006971  | 2.05E-06 |
| TUCP_003864 | XLOC_169474 | ENSRNOT00000081077 | -0.958295537 | 9.26E-07 |
| TUCP_003864 | XLOC_169474 | ENSRNOT00000033235 | 0.956698237  | 1.11E-06 |
| TUCP_003864 | XLOC_169474 | ENSRNOT00000037588 | -0.950153196 | 2.23E-06 |
| TUCP_003864 | XLOC_169474 | ENSRNOT00000024933 | -0.95960404  | 7.92E-07 |
| TUCP_003864 | XLOC_169474 | ENSRNOT00000047210 | 0.972272542  | 1.23E-07 |
| TUCP_003864 | XLOC_169474 | ENSRNOT00000052002 | 0.953063187  | 1.66E-06 |
| TUCP_003864 | XLOC_169474 | ENSRNOT00000037665 | 0.953184013  | 1.64E-06 |
| TUCP_003864 | XLOC_169474 | ENSRNOT00000064930 | 0.97236734   | 1.21E-07 |
| TUCP_003864 | XLOC_169474 | ENSRNOT00000079996 | 0.978721619  | 3.31E-08 |
| TUCP_001819 | XLOC_075229 | ENSRNOT00000005630 | -0.961376483 | 6.34E-07 |
| TUCP_001819 | XLOC_075229 | ENSRNOT00000006957 | -0.959386137 | 8.13E-07 |
| TUCP_003188 | XLOC_137463 | ENSRNOT00000076528 | 0.952001874  | 1.85E-06 |
| TUCP_003188 | XLOC_137463 | ENSRNOT00000077458 | 0.952656794  | 1.73E-06 |
| TUCP_003188 | XLOC_137463 | ENSRNOT00000089607 | 0.957537401  | 1.01E-06 |
| TUCP_000638 | XLOC_023526 | ENSRNOT00000076400 | 0.950090486  | 2.24E-06 |
| TUCP_000638 | XLOC_023526 | ENSRNOT00000055536 | 0.965982813  | 3.39E-07 |
| TUCP_000638 | XLOC_023526 | ENSRNOT00000020376 | 0.951619051  | 1.92E-06 |
| TUCP_000638 | XLOC_023526 | ENSRNOT00000004764 | 0.951096392  | 2.03E-06 |
| TUCP_000638 | XLOC_023526 | ENSRNOT00000016088 | 0.951010518  | 2.05E-06 |
| TUCP_000638 | XLOC_023526 | ENSRNOT00000009975 | 0.989207137  | 1.13E-09 |
| TUCP_000638 | XLOC_023526 | ENSRNOT00000072682 | 0.977273562  | 4.60E-08 |
| TUCP_000638 | XLOC_023526 | ENSRNOT00000061054 | 0.967210493  | 2.83E-07 |
| TUCP_000638 | XLOC_023526 | ENSRNOT0000001642  | 0.959116469  | 8.40E-07 |
| TUCP_000638 | XLOC_023526 | ENSRNOT00000081631 | 0.953835897  | 1.53E-06 |
| TUCP_000638 | XLOC_023526 | ENSRNOT00000017829 | 0.959267196  | 8.25E-07 |
| TUCP_000638 | XLOC_023526 | ENSRNOT00000083594 | 0.95030289   | 2.20E-06 |
| TUCP_000638 | XLOC_023526 | ENSRNOT00000042890 | 0.950894231  | 2.07E-06 |
| TUCP_000638 | XLOC_023526 | ENSRNOT00000007601 | 0.954591879  | 1.41E-06 |
| TUCP_000638 | XLOC_023526 | ENSRNOT00000056050 | 0.953072448  | 1.66E-06 |
| TUCP_000638 | XLOC_023526 | ENSRNOT00000060977 | 0.952073448  | 1.84E-06 |
| TUCP_000638 | XLOC_023526 | ENSRNOT00000065801 | 0.972260023  | 1.23E-07 |

|             |             |                     |              |          |
|-------------|-------------|---------------------|--------------|----------|
| TUCP_000638 | XL0C_023526 | ENSRNOT00000088385  | 0.953821528  | 1.53E-06 |
| TUCP_000638 | XL0C_023526 | ENSRNOT00000015864  | 0.962378665  | 5.57E-07 |
| TUCP_000638 | XL0C_023526 | ENSRNOT00000005306  | 0.952433675  | 1.77E-06 |
| TUCP_000638 | XL0C_023526 | ENSRNOT00000078752  | -0.952902312 | 1.69E-06 |
| TUCP_000638 | XL0C_023526 | ENSRNOT00000079152  | 0.960656178  | 6.95E-07 |
| TUCP_000638 | XL0C_023526 | ENSRNOT00000010701  | 0.953789006  | 1.54E-06 |
| TUCP_000638 | XL0C_023526 | ENSRNOT000000064983 | 0.954705311  | 1.39E-06 |
| TUCP_000638 | XL0C_023526 | ENSRNOT00000005770  | 0.962188715  | 5.71E-07 |
| TUCP_000638 | XL0C_023526 | ENSRNOT00000006697  | 0.963070382  | 5.08E-07 |
| TUCP_000638 | XL0C_023526 | ENSRNOT000000085334 | 0.976294712  | 5.67E-08 |
| TUCP_000638 | XL0C_023526 | ENSRNOT000000034482 | 0.971715624  | 1.36E-07 |
| TUCP_000638 | XL0C_023526 | ENSRNOT000000043827 | 0.958090865  | 9.49E-07 |
| TUCP_000638 | XL0C_023526 | ENSRNOT000000008764 | 0.96909601   | 2.11E-07 |
| TUCP_000638 | XL0C_023526 | ENSRNOT000000012757 | 0.969773314  | 1.89E-07 |
| TUCP_000638 | XL0C_023526 | ENSRNOT000000037902 | 0.967756698  | 2.60E-07 |
| TUCP_000638 | XL0C_023526 | ENSRNOT000000023623 | 0.953123294  | 1.65E-06 |
| TUCP_000638 | XL0C_023526 | ENSRNOT000000023607 | 0.956744265  | 1.11E-06 |
| TUCP_000638 | XL0C_023526 | ENSRNOT000000055877 | 0.953434114  | 1.59E-06 |
| TUCP_000638 | XL0C_023526 | ENSRNOT000000006109 | 0.974520085  | 8.10E-08 |
| TUCP_000638 | XL0C_023526 | ENSRNOT000000075144 | 0.960026712  | 7.52E-07 |
| TUCP_000638 | XL0C_023526 | ENSRNOT000000065811 | 0.951006595  | 2.05E-06 |
| TUCP_000638 | XL0C_023526 | ENSRNOT000000074131 | 0.955421727  | 1.29E-06 |
| TUCP_000638 | XL0C_023526 | ENSRNOT000000025355 | 0.960340418  | 7.23E-07 |
| TUCP_002559 | XL0C_108634 | ENSRNOT000000047105 | -0.953228467 | 1.63E-06 |
| TUCP_002559 | XL0C_108634 | ENSRNOT000000004017 | -0.950452478 | 2.16E-06 |
| TUCP_002559 | XL0C_108634 | ENSRNOT000000039607 | 0.975303369  | 6.94E-08 |
| TUCP_002559 | XL0C_108634 | ENSRNOT000000090621 | -0.952565762 | 1.75E-06 |
| TUCP_002559 | XL0C_108634 | ENSRNOT000000013743 | -0.957137455 | 1.06E-06 |
| TUCP_002559 | XL0C_108634 | ENSRNOT000000011237 | 0.955920659  | 1.22E-06 |
| TUCP_002559 | XL0C_108634 | ENSRNOT000000032926 | 0.95085387   | 2.08E-06 |
| TUCP_002559 | XL0C_108634 | ENSRNOT000000026279 | 0.953848681  | 1.53E-06 |
| TUCP_002559 | XL0C_108634 | ENSRNOT000000063930 | 0.958650192  | 8.88E-07 |
| TUCP_002559 | XL0C_108634 | ENSRNOT000000045063 | -0.95655522  | 1.13E-06 |
| TUCP_002559 | XL0C_108634 | ENSRNOT000000083578 | -0.95112542  | 2.02E-06 |
| TUCP_002559 | XL0C_108634 | ENSRNOT00000002222  | -0.951628918 | 1.92E-06 |
| TUCP_002559 | XL0C_108634 | ENSRNOT000000067479 | -0.975313038 | 6.93E-08 |
| TUCP_002559 | XL0C_108634 | ENSRNOT000000003087 | -0.956856099 | 1.09E-06 |
| TUCP_002559 | XL0C_108634 | ENSRNOT000000082914 | -0.960683354 | 6.93E-07 |
| TUCP_002559 | XL0C_108634 | ENSRNOT00000001855  | -0.964912025 | 3.95E-07 |
| TUCP_002559 | XL0C_108634 | ENSRNOT00000001691  | -0.958474746 | 9.07E-07 |
| TUCP_002559 | XL0C_108634 | ENSRNOT000000089319 | -0.983370017 | 9.74E-09 |
| TUCP_002559 | XL0C_108634 | ENSRNOT000000041237 | 0.966028418  | 3.37E-07 |
| TUCP_002559 | XL0C_108634 | ENSRNOT000000079138 | -0.964116214 | 4.41E-07 |
| TUCP_002559 | XL0C_108634 | ENSRNOT000000006917 | -0.950263275 | 2.20E-06 |
| TUCP_002559 | XL0C_108634 | ENSRNOT000000078737 | 0.965474441  | 3.65E-07 |
| TUCP_002559 | XL0C_108634 | ENSRNOT000000087011 | 0.962649277  | 5.38E-07 |
| TUCP_002559 | XL0C_108634 | ENSRNOT00000002329  | -0.95913368  | 8.38E-07 |
| TUCP_002559 | XL0C_108634 | ENSRNOT000000003733 | 0.959453381  | 8.06E-07 |
| TUCP_002559 | XL0C_108634 | ENSRNOT000000021114 | -0.970691954 | 1.62E-07 |
| TUCP_002559 | XL0C_108634 | ENSRNOT000000016485 | -0.966500149 | 3.14E-07 |
| TUCP_002559 | XL0C_108634 | ENSRNOT000000046215 | 0.957981246  | 9.61E-07 |

|             |             |                    |              |          |
|-------------|-------------|--------------------|--------------|----------|
| TUCP_002559 | XLOC_108634 | ENSRNOT00000074023 | -0.960864105 | 6.77E-07 |
| TUCP_002559 | XLOC_108634 | ENSRNOT00000008361 | -0.980801759 | 1.99E-08 |
| TUCP_002559 | XLOC_108634 | ENSRNOT00000042638 | -0.968969483 | 2.15E-07 |
| TUCP_002559 | XLOC_108634 | ENSRNOT00000019180 | 0.95036337   | 2.18E-06 |
| TUCP_002559 | XLOC_108634 | ENSRNOT00000001289 | -0.961205409 | 6.48E-07 |
| TUCP_002559 | XLOC_108634 | ENSRNOT00000091046 | -0.957354465 | 1.03E-06 |
| TUCP_002559 | XLOC_108634 | ENSRNOT00000018341 | 0.956149285  | 1.19E-06 |
| TUCP_002559 | XLOC_108634 | ENSRNOT00000060943 | -0.950492725 | 2.15E-06 |
| TUCP_002559 | XLOC_108634 | ENSRNOT00000010419 | -0.958634262 | 8.90E-07 |
| TUCP_002559 | XLOC_108634 | ENSRNOT00000065076 | -0.953804913 | 1.53E-06 |
| TUCP_002559 | XLOC_108634 | ENSRNOT00000006460 | -0.96796483  | 2.52E-07 |
| TUCP_002559 | XLOC_108634 | ENSRNOT00000021534 | 0.952299954  | 1.79E-06 |
| TUCP_002559 | XLOC_108634 | ENSRNOT00000054685 | -0.96613772  | 3.31E-07 |
| TUCP_002559 | XLOC_108634 | ENSRNOT00000072771 | -0.966305872 | 3.23E-07 |
| TUCP_002559 | XLOC_108634 | ENSRNOT00000057953 | -0.982356807 | 1.31E-08 |
| TUCP_002559 | XLOC_108634 | ENSRNOT00000073370 | -0.969113033 | 2.10E-07 |
| TUCP_002559 | XLOC_108634 | ENSRNOT00000083568 | -0.952835488 | 1.70E-06 |
| TUCP_002559 | XLOC_108634 | ENSRNOT00000019921 | -0.96718991  | 2.83E-07 |
| TUCP_002559 | XLOC_108634 | ENSRNOT0000009009  | -0.959995235 | 7.54E-07 |
| TUCP_002559 | XLOC_108634 | ENSRNOT00000055602 | 0.967717787  | 2.62E-07 |
| TUCP_002559 | XLOC_108634 | ENSRNOT00000005620 | 0.956569835  | 1.13E-06 |
| TUCP_002559 | XLOC_108634 | ENSRNOT00000039177 | 0.96119483   | 6.49E-07 |
| TUCP_002559 | XLOC_108634 | ENSRNOT00000020051 | -0.981698478 | 1.57E-08 |
| TUCP_002559 | XLOC_108634 | ENSRNOT00000011832 | 0.953139247  | 1.64E-06 |
| TUCP_002559 | XLOC_108634 | ENSRNOT00000064643 | -0.960554541 | 7.04E-07 |
| TUCP_002559 | XLOC_108634 | ENSRNOT00000013228 | -0.955664605 | 1.25E-06 |
| TUCP_002559 | XLOC_108634 | ENSRNOT00000034282 | -0.966873098 | 2.97E-07 |
| TUCP_002559 | XLOC_108634 | ENSRNOT00000027760 | -0.968314168 | 2.39E-07 |
| TUCP_002559 | XLOC_108634 | ENSRNOT00000024402 | -0.95605016  | 1.20E-06 |
| TUCP_002559 | XLOC_108634 | ENSRNOT00000007824 | 0.956277132  | 1.17E-06 |
| TUCP_002559 | XLOC_108634 | ENSRNOT00000065871 | -0.968909603 | 2.17E-07 |
| TUCP_002559 | XLOC_108634 | ENSRNOT00000057898 | 0.951541235  | 1.94E-06 |
| TUCP_002559 | XLOC_108634 | ENSRNOT00000024677 | -0.952200691 | 1.81E-06 |
| TUCP_002559 | XLOC_108634 | ENSRNOT00000022676 | 0.959072961  | 8.44E-07 |
| TUCP_002559 | XLOC_108634 | ENSRNOT00000056100 | 0.963317615  | 4.92E-07 |
| TUCP_002559 | XLOC_108634 | ENSRNOT00000001077 | -0.955660825 | 1.25E-06 |
| TUCP_002559 | XLOC_108634 | ENSRNOT00000000477 | 0.955306083  | 1.30E-06 |
| TUCP_002559 | XLOC_108634 | ENSRNOT00000073983 | -0.963880533 | 4.56E-07 |
| TUCP_002559 | XLOC_108634 | ENSRNOT00000067554 | -0.950645002 | 2.12E-06 |
| TUCP_002559 | XLOC_108634 | ENSRNOT00000010783 | 0.956402756  | 1.15E-06 |
| TUCP_002559 | XLOC_108634 | ENSRNOT00000026726 | 0.95629881   | 1.17E-06 |
| TUCP_002559 | XLOC_108634 | ENSRNOT00000081226 | -0.956047664 | 1.20E-06 |
| TUCP_002559 | XLOC_108634 | ENSRNOT00000080152 | -0.951310869 | 1.99E-06 |
| TUCP_002559 | XLOC_108634 | ENSRNOT00000017648 | 0.960221576  | 7.34E-07 |
| TUCP_002559 | XLOC_108634 | ENSRNOT00000041365 | -0.961129128 | 6.55E-07 |
| TUCP_002559 | XLOC_108634 | ENSRNOT00000030798 | 0.960905375  | 6.73E-07 |
| TUCP_002559 | XLOC_108634 | ENSRNOT0000005834  | -0.953159393 | 1.64E-06 |
| TUCP_002559 | XLOC_108634 | ENSRNOT00000031487 | -0.960405497 | 7.17E-07 |
| TUCP_002559 | XLOC_108634 | ENSRNOT00000046490 | 0.950260895  | 2.20E-06 |
| TUCP_002559 | XLOC_108634 | ENSRNOT00000071672 | -0.957056778 | 1.07E-06 |
| TUCP_002559 | XLOC_108634 | ENSRNOT00000073643 | 0.968575423  | 2.29E-07 |

|             |             |                     |              |          |
|-------------|-------------|---------------------|--------------|----------|
| TUCP_002559 | XLOC_108634 | ENSRNOT00000024066  | -0.952288111 | 1.80E-06 |
| TUCP_002559 | XLOC_108634 | ENSRNOT00000078349  | 0.954863613  | 1.37E-06 |
| TUCP_002559 | XLOC_108634 | ENSRNOT00000046552  | -0.977913435 | 3.99E-08 |
| TUCP_002559 | XLOC_108634 | ENSRNOT00000077727  | 0.955914482  | 1.22E-06 |
| TUCP_002559 | XLOC_108634 | ENSRNOT00000080418  | 0.953191999  | 1.64E-06 |
| TUCP_002559 | XLOC_108634 | ENSRNOT00000092066  | 0.955499983  | 1.28E-06 |
| TUCP_002559 | XLOC_108634 | ENSRNOT00000067391  | 0.960367058  | 7.20E-07 |
| TUCP_002559 | XLOC_108634 | ENSRNOT0000001893   | -0.952820789 | 1.70E-06 |
| TUCP_002559 | XLOC_108634 | ENSRNOT00000049349  | -0.976318164 | 5.64E-08 |
| TUCP_002559 | XLOC_108634 | ENSRNOT00000085545  | 0.96286257   | 5.23E-07 |
| TUCP_002559 | XLOC_108634 | ENSRNOT00000013867  | -0.964573758 | 4.14E-07 |
| TUCP_002559 | XLOC_108634 | ENSRNOT00000021802  | -0.975736204 | 6.36E-08 |
| TUCP_002559 | XLOC_108634 | ENSRNOT00000026831  | -0.961418085 | 6.31E-07 |
| TUCP_002559 | XLOC_108634 | ENSRNOT00000018640  | -0.976378476 | 5.57E-08 |
| TUCP_002559 | XLOC_108634 | ENSRNOT00000007821  | -0.96969     | 1.91E-07 |
| TUCP_002559 | XLOC_108634 | ENSRNOT00000082709  | 0.952181531  | 1.82E-06 |
| TUCP_002559 | XLOC_108634 | ENSRNOT00000004351  | 0.95114945   | 2.02E-06 |
| TUCP_002559 | XLOC_108634 | ENSRNOT00000072118  | -0.953503112 | 1.58E-06 |
| TUCP_002559 | XLOC_108634 | ENSRNOT00000003780  | -0.969270133 | 2.05E-07 |
| TUCP_002559 | XLOC_108634 | ENSRNOT00000003787  | 0.957098902  | 1.06E-06 |
| TUCP_002559 | XLOC_108634 | ENSRNOT000000072357 | 0.961205494  | 6.48E-07 |
| TUCP_002559 | XLOC_108634 | ENSRNOT00000060494  | -0.965117585 | 3.84E-07 |
| TUCP_002559 | XLOC_108634 | ENSRNOT00000059246  | -0.971627907 | 1.38E-07 |
| TUCP_002559 | XLOC_108634 | ENSRNOT00000013067  | 0.952282183  | 1.80E-06 |
| TUCP_002559 | XLOC_108634 | ENSRNOT000000074515 | 0.95458445   | 1.41E-06 |
| TUCP_002559 | XLOC_108634 | ENSRNOT00000016324  | 0.964651574  | 4.10E-07 |
| TUCP_002559 | XLOC_108634 | ENSRNOT00000066952  | -0.961201153 | 6.49E-07 |
| TUCP_002559 | XLOC_108634 | ENSRNOT00000024119  | -0.965323841 | 3.73E-07 |
| TUCP_002559 | XLOC_108634 | ENSRNOT000000091427 | 0.965929991  | 3.41E-07 |
| TUCP_002559 | XLOC_108634 | ENSRNOT00000001322  | 0.95658003   | 1.13E-06 |
| TUCP_002559 | XLOC_108634 | ENSRNOT00000036658  | 0.951490619  | 1.95E-06 |
| TUCP_002559 | XLOC_108634 | ENSRNOT00000089611  | -0.957105922 | 1.06E-06 |
| TUCP_002559 | XLOC_108634 | ENSRNOT00000055957  | 0.95158417   | 1.93E-06 |
| TUCP_002559 | XLOC_108634 | ENSRNOT00000086260  | 0.959311059  | 8.20E-07 |
| TUCP_002559 | XLOC_108634 | ENSRNOT00000003641  | -0.968740443 | 2.23E-07 |
| TUCP_002559 | XLOC_108634 | ENSRNOT00000054948  | -0.957830617 | 9.78E-07 |
| TUCP_002559 | XLOC_108634 | ENSRNOT000000074586 | 0.950575107  | 2.14E-06 |
| TUCP_002559 | XLOC_108634 | ENSRNOT00000005658  | 0.963860127  | 4.57E-07 |
| TUCP_002559 | XLOC_108634 | ENSRNOT00000058382  | -0.952021766 | 1.85E-06 |
| TUCP_002559 | XLOC_108634 | ENSRNOT00000082711  | -0.952805415 | 1.70E-06 |
| TUCP_002559 | XLOC_108634 | ENSRNOT00000015769  | -0.965832016 | 3.46E-07 |
| TUCP_002559 | XLOC_108634 | ENSRNOT00000026531  | 0.954168328  | 1.47E-06 |
| TUCP_002559 | XLOC_108634 | ENSRNOT00000005172  | -0.970002361 | 1.82E-07 |
| TUCP_002559 | XLOC_108634 | ENSRNOT00000032843  | -0.956564936 | 1.13E-06 |
| TUCP_002559 | XLOC_108634 | ENSRNOT00000017746  | 0.956707435  | 1.11E-06 |
| TUCP_002559 | XLOC_108634 | ENSRNOT00000086706  | -0.968718248 | 2.24E-07 |
| TUCP_002559 | XLOC_108634 | ENSRNOT00000023989  | -0.95810654  | 9.47E-07 |
| TUCP_002559 | XLOC_108634 | ENSRNOT00000029704  | 0.954782206  | 1.38E-06 |
| TUCP_002559 | XLOC_108634 | ENSRNOT00000003992  | 0.951862258  | 1.88E-06 |
| TUCP_002559 | XLOC_108634 | ENSRNOT00000017995  | -0.97552134  | 6.64E-08 |
| TUCP_002559 | XLOC_108634 | ENSRNOT00000087287  | -0.951686778 | 1.91E-06 |

|             |             |                     |              |          |
|-------------|-------------|---------------------|--------------|----------|
| TUCP_002559 | XLOC_108634 | ENSRNOT00000027553  | 0.950273659  | 2.20E-06 |
| TUCP_002559 | XLOC_108634 | ENSRNOT00000027360  | 0.976592222  | 5.32E-08 |
| TUCP_002559 | XLOC_108634 | ENSRNOT00000050515  | -0.950518218 | 2.15E-06 |
| TUCP_002559 | XLOC_108634 | ENSRNOT00000024285  | 0.951829712  | 1.88E-06 |
| TUCP_002559 | XLOC_108634 | ENSRNOT00000029701  | -0.977508435 | 4.37E-08 |
| TUCP_002559 | XLOC_108634 | ENSRNOT00000005459  | -0.952610392 | 1.74E-06 |
| TUCP_002559 | XLOC_108634 | ENSRNOT00000009135  | -0.955119997 | 1.33E-06 |
| TUCP_002559 | XLOC_108634 | ENSRNOT00000056015  | 0.952286916  | 1.80E-06 |
| TUCP_002559 | XLOC_108634 | ENSRNOT00000025634  | 0.963253594  | 4.96E-07 |
| TUCP_002559 | XLOC_108634 | ENSRNOT00000065615  | -0.96089212  | 6.75E-07 |
| TUCP_002559 | XLOC_108634 | ENSRNOT00000037015  | -0.969964012 | 1.83E-07 |
| TUCP_002559 | XLOC_108634 | ENSRNOT00000055607  | 0.950446221  | 2.16E-06 |
| TUCP_002559 | XLOC_108634 | ENSRNOT00000008244  | -0.958406773 | 9.14E-07 |
| TUCP_002559 | XLOC_108634 | ENSRNOT00000008267  | 0.961750482  | 6.05E-07 |
| TUCP_002559 | XLOC_108634 | ENSRNOT00000011675  | -0.959438077 | 8.08E-07 |
| TUCP_002559 | XLOC_108634 | ENSRNOT00000080750  | -0.950122791 | 2.24E-06 |
| TUCP_002559 | XLOC_108634 | ENSRNOT00000089879  | 0.962262979  | 5.66E-07 |
| TUCP_002559 | XLOC_108634 | ENSRNOT00000000258  | 0.966365724  | 3.20E-07 |
| TUCP_002559 | XLOC_108634 | ENSRNOT00000018477  | 0.950431181  | 2.17E-06 |
| TUCP_002559 | XLOC_108634 | ENSRNOT00000011130  | 0.95075555   | 2.10E-06 |
| TUCP_002559 | XLOC_108634 | ENSRNOT00000018473  | 0.951923347  | 1.87E-06 |
| TUCP_002559 | XLOC_108634 | ENSRNOT00000000717  | 0.955352938  | 1.30E-06 |
| TUCP_002559 | XLOC_108634 | ENSRNOT000000074649 | -0.95117825  | 2.01E-06 |
| TUCP_002559 | XLOC_108634 | ENSRNOT00000049048  | 0.950901628  | 2.07E-06 |
| TUCP_002559 | XLOC_108634 | ENSRNOT00000017224  | 0.955508187  | 1.27E-06 |
| TUCP_002559 | XLOC_108634 | ENSRNOT00000011874  | -0.968796606 | 2.21E-07 |
| TUCP_002559 | XLOC_108634 | ENSRNOT00000074972  | -0.963187189 | 5.01E-07 |
| TUCP_002559 | XLOC_108634 | ENSRNOT00000067840  | -0.96527872  | 3.75E-07 |
| TUCP_002559 | XLOC_108634 | ENSRNOT00000004999  | -0.957515706 | 1.01E-06 |
| TUCP_002559 | XLOC_108634 | ENSRNOT00000013463  | -0.952678174 | 1.73E-06 |
| TUCP_002559 | XLOC_108634 | ENSRNOT00000086456  | 0.962715325  | 5.33E-07 |
| TUCP_002559 | XLOC_108634 | ENSRNOT00000023763  | 0.958229336  | 9.34E-07 |
| TUCP_002559 | XLOC_108634 | ENSRNOT00000066230  | -0.954137834 | 1.48E-06 |
| TUCP_002559 | XLOC_108634 | ENSRNOT00000006802  | -0.985002424 | 5.83E-09 |
| TUCP_002559 | XLOC_108634 | ENSRNOT00000074177  | -0.952519584 | 1.75E-06 |
| TUCP_002559 | XLOC_108634 | ENSRNOT00000009202  | -0.968400576 | 2.35E-07 |
| TUCP_002559 | XLOC_108634 | ENSRNOT00000047663  | 0.954481451  | 1.43E-06 |
| TUCP_002559 | XLOC_108634 | ENSRNOT000000082151 | 0.963299746  | 4.93E-07 |
| TUCP_002559 | XLOC_108634 | ENSRNOT00000065045  | -0.968687769 | 2.25E-07 |
| TUCP_002559 | XLOC_108634 | ENSRNOT00000034411  | -0.950819723 | 2.09E-06 |
| TUCP_002559 | XLOC_108634 | ENSRNOT00000010993  | -0.962881735 | 5.21E-07 |
| TUCP_002559 | XLOC_108634 | ENSRNOT00000048933  | 0.952432282  | 1.77E-06 |
| TUCP_002559 | XLOC_108634 | ENSRNOT00000000532  | 0.950370535  | 2.18E-06 |
| TUCP_002559 | XLOC_108634 | ENSRNOT00000005486  | 0.960174483  | 7.38E-07 |
| TUCP_002559 | XLOC_108634 | ENSRNOT000000075630 | 0.95228678   | 1.80E-06 |
| TUCP_002559 | XLOC_108634 | ENSRNOT00000023876  | -0.951252803 | 2.00E-06 |
| TUCP_002559 | XLOC_108634 | ENSRNOT00000025791  | 0.95374772   | 1.54E-06 |
| TUCP_002559 | XLOC_108634 | ENSRNOT00000035385  | -0.952297538 | 1.80E-06 |
| TUCP_002559 | XLOC_108634 | ENSRNOT00000085619  | -0.96920635  | 2.07E-07 |
| TUCP_002559 | XLOC_108634 | ENSRNOT00000058111  | 0.960058338  | 7.49E-07 |
| TUCP_002559 | XLOC_108634 | ENSRNOT00000005873  | 0.955289072  | 1.31E-06 |



|             |             |                     |              |          |
|-------------|-------------|---------------------|--------------|----------|
| TUCP_002559 | XLOC_108634 | ENSRNOT0000007276   | 0.960373442  | 7.20E-07 |
| TUCP_002559 | XLOC_108634 | ENSRNOT00000057738  | -0.957741323 | 9.89E-07 |
| TUCP_002559 | XLOC_108634 | ENSRNOT0000009994   | 0.959632163  | 7.89E-07 |
| TUCP_002559 | XLOC_108634 | ENSRNOT00000022716  | -0.954986732 | 1.35E-06 |
| TUCP_002559 | XLOC_108634 | ENSRNOT00000065897  | -0.961443269 | 6.29E-07 |
| TUCP_002559 | XLOC_108634 | ENSRNOT00000023014  | -0.952222067 | 1.81E-06 |
| TUCP_002559 | XLOC_108634 | ENSRNOT00000028737  | 0.952572628  | 1.74E-06 |
| TUCP_002559 | XLOC_108634 | ENSRNOT00000028561  | -0.965204411 | 3.79E-07 |
| TUCP_002559 | XLOC_108634 | ENSRNOT00000027973  | 0.952488714  | 1.76E-06 |
| TUCP_002559 | XLOC_108634 | ENSRNOT00000018634  | 0.963255521  | 4.96E-07 |
| TUCP_002559 | XLOC_108634 | ENSRNOT00000089970  | -0.966184174 | 3.29E-07 |
| TUCP_002559 | XLOC_108634 | ENSRNOT00000085295  | 0.95579337   | 1.23E-06 |
| TUCP_002559 | XLOC_108634 | ENSRNOT00000013613  | 0.95691952   | 1.09E-06 |
| TUCP_002559 | XLOC_108634 | ENSRNOT00000027875  | -0.983722054 | 8.76E-09 |
| TUCP_002559 | XLOC_108634 | ENSRNOT00000039341  | -0.951271691 | 1.99E-06 |
| TUCP_002559 | XLOC_108634 | ENSRNOT00000028685  | -0.96235435  | 5.59E-07 |
| TUCP_002559 | XLOC_108634 | ENSRNOT00000039102  | -0.959332829 | 8.18E-07 |
| TUCP_002559 | XLOC_108634 | ENSRNOT00000035277  | -0.965624924 | 3.57E-07 |
| TUCP_002559 | XLOC_108634 | ENSRNOT00000023965  | 0.952694904  | 1.72E-06 |
| TUCP_002559 | XLOC_108634 | ENSRNOT00000002188  | -0.967266106 | 2.80E-07 |
| TUCP_002559 | XLOC_108634 | ENSRNOT000000064636 | 0.959529829  | 7.99E-07 |
| TUCP_002559 | XLOC_108634 | ENSRNOT00000007369  | -0.969336042 | 2.03E-07 |
| TUCP_002559 | XLOC_108634 | ENSRNOT00000028781  | -0.953521132 | 1.58E-06 |
| TUCP_002559 | XLOC_108634 | ENSRNOT00000085466  | -0.968170872 | 2.44E-07 |
| TUCP_002559 | XLOC_108634 | ENSRNOT00000000469  | -0.972203152 | 1.25E-07 |
| TUCP_002559 | XLOC_108634 | ENSRNOT00000035808  | -0.968492247 | 2.32E-07 |
| TUCP_002559 | XLOC_108634 | ENSRNOT00000026760  | 0.951472982  | 1.95E-06 |
| TUCP_002559 | XLOC_108634 | ENSRNOT00000075800  | 0.95660327   | 1.13E-06 |
| TUCP_002559 | XLOC_108634 | ENSRNOT00000017998  | -0.964135858 | 4.40E-07 |
| TUCP_002559 | XLOC_108634 | ENSRNOT00000093378  | -0.954927579 | 1.36E-06 |
| TUCP_002559 | XLOC_108634 | ENSRNOT00000065529  | -0.964112802 | 4.41E-07 |
| TUCP_002559 | XLOC_108634 | ENSRNOT00000021216  | -0.953372872 | 1.60E-06 |
| TUCP_002559 | XLOC_108634 | ENSRNOT00000013431  | 0.962993739  | 5.14E-07 |
| TUCP_002559 | XLOC_108634 | ENSRNOT00000082904  | -0.95357346  | 1.57E-06 |
| TUCP_002559 | XLOC_108634 | ENSRNOT00000008764  | -0.952442617 | 1.77E-06 |
| TUCP_002559 | XLOC_108634 | ENSRNOT00000068026  | 0.956406373  | 1.15E-06 |
| TUCP_002559 | XLOC_108634 | ENSRNOT000000082805 | -0.97045945  | 1.69E-07 |
| TUCP_002559 | XLOC_108634 | ENSRNOT00000024938  | 0.952280537  | 1.80E-06 |
| TUCP_002559 | XLOC_108634 | ENSRNOT00000016776  | 0.960404242  | 7.17E-07 |
| TUCP_002559 | XLOC_108634 | ENSRNOT00000090057  | -0.952728432 | 1.72E-06 |
| TUCP_002559 | XLOC_108634 | ENSRNOT00000025887  | 0.951719384  | 1.90E-06 |
| TUCP_002559 | XLOC_108634 | ENSRNOT00000021286  | -0.953193985 | 1.64E-06 |
| TUCP_002559 | XLOC_108634 | ENSRNOT00000024011  | -0.953220068 | 1.63E-06 |
| TUCP_002559 | XLOC_108634 | ENSRNOT00000025705  | -0.969691636 | 1.91E-07 |
| TUCP_002559 | XLOC_108634 | ENSRNOT00000080266  | -0.957239698 | 1.05E-06 |
| TUCP_002559 | XLOC_108634 | ENSRNOT00000061580  | 0.972727471  | 1.14E-07 |
| TUCP_002559 | XLOC_108634 | ENSRNOT00000005257  | -0.95248645  | 1.76E-06 |
| TUCP_002559 | XLOC_108634 | ENSRNOT00000036194  | 0.952842522  | 1.70E-06 |
| TUCP_001645 | XLOC_064934 | ENSRNOT00000022194  | -0.952302428 | 1.79E-06 |
| TUCP_001645 | XLOC_064934 | ENSRNOT00000003794  | -0.955393882 | 1.29E-06 |
| TUCP_001645 | XLOC_064934 | ENSRNOT00000002188  | 0.950975748  | 2.05E-06 |

|             |             |                    |              |          |
|-------------|-------------|--------------------|--------------|----------|
| TUCP_001645 | XLOC_064934 | ENSRNOT00000067566 | -0.950681273 | 2.11E-06 |
| TUCP_001645 | XLOC_064934 | ENSRNOT00000010396 | 0.976701838  | 5.20E-08 |
| TUCP_001645 | XLOC_064934 | ENSRNOT00000087748 | -0.951448573 | 1.96E-06 |
| TUCP_001645 | XLOC_064934 | ENSRNOT00000026641 | 0.958105783  | 9.47E-07 |
| TUCP_001645 | XLOC_064934 | ENSRNOT00000022714 | 0.969614636  | 1.94E-07 |
| TUCP_001645 | XLOC_064934 | ENSRNOT00000008865 | -0.961318782 | 6.39E-07 |
| TUCP_003189 | XLOC_137464 | ENSRNOT00000003745 | 0.952188983  | 1.82E-06 |
| TUCP_003189 | XLOC_137464 | ENSRNOT00000031693 | 0.956388848  | 1.15E-06 |
| TUCP_003189 | XLOC_137464 | ENSRNOT00000024418 | 0.954406167  | 1.44E-06 |
| TUCP_003189 | XLOC_137464 | ENSRNOT00000034421 | 0.966531956  | 3.13E-07 |
| TUCP_003189 | XLOC_137464 | ENSRNOT00000011845 | 0.953534089  | 1.58E-06 |
| TUCP_003189 | XLOC_137464 | ENSRNOT00000033018 | 0.954131652  | 1.48E-06 |
| TUCP_003189 | XLOC_137464 | ENSRNOT00000025797 | -0.951556158 | 1.94E-06 |
| TUCP_003189 | XLOC_137464 | ENSRNOT00000084722 | 0.957139974  | 1.06E-06 |
| TUCP_003189 | XLOC_137464 | ENSRNOT00000068354 | 0.961284019  | 6.42E-07 |
| TUCP_002554 | XLOC_108074 | ENSRNOT00000071840 | 0.997067213  | 1.70E-12 |
| TUCP_002554 | XLOC_108074 | ENSRNOT00000083608 | 0.987719892  | 2.15E-09 |
| TUCP_002554 | XLOC_108074 | ENSRNOT00000076035 | 0.950340286  | 2.19E-06 |
| TUCP_002554 | XLOC_108074 | ENSRNOT00000086969 | 0.954493463  | 1.42E-06 |
| TUCP_002554 | XLOC_108074 | ENSRNOT00000085476 | 0.958012559  | 9.58E-07 |
| TUCP_002554 | XLOC_108074 | ENSRNOT00000066382 | 0.972110647  | 1.27E-07 |
| TUCP_002554 | XLOC_108074 | ENSRNOT00000045584 | 0.997067213  | 1.70E-12 |
| TUCP_002554 | XLOC_108074 | ENSRNOT00000077995 | 0.995196156  | 2.00E-11 |
| TUCP_002554 | XLOC_108074 | ENSRNOT00000066004 | 0.996586764  | 3.63E-12 |
| TUCP_002554 | XLOC_108074 | ENSRNOT00000064284 | 0.962542753  | 5.45E-07 |
| TUCP_002554 | XLOC_108074 | ENSRNOT00000066685 | 0.972473934  | 1.19E-07 |
| TUCP_002554 | XLOC_108074 | ENSRNOT00000082086 | 0.961851095  | 5.97E-07 |
| TUCP_002554 | XLOC_108074 | ENSRNOT00000089494 | 0.97423026   | 8.57E-08 |
| TUCP_002554 | XLOC_108074 | ENSRNOT00000083747 | 0.966133192  | 3.31E-07 |
| TUCP_002554 | XLOC_108074 | ENSRNOT00000092182 | 0.997067213  | 1.70E-12 |
| TUCP_002554 | XLOC_108074 | ENSRNOT00000084461 | 0.997067213  | 1.70E-12 |
| TUCP_002554 | XLOC_108074 | ENSRNOT00000060448 | 0.997067213  | 1.70E-12 |
| TUCP_002554 | XLOC_108074 | ENSRNOT00000032631 | 0.997067213  | 1.70E-12 |
| TUCP_002554 | XLOC_108074 | ENSRNOT00000079503 | 0.964384565  | 4.25E-07 |
| TUCP_002554 | XLOC_108074 | ENSRNOT00000027950 | 0.951927341  | 1.86E-06 |
| TUCP_002554 | XLOC_108074 | ENSRNOT00000060113 | 0.982500194  | 1.26E-08 |
| TUCP_002554 | XLOC_108074 | ENSRNOT00000054910 | 0.988409542  | 1.62E-09 |
| TUCP_002554 | XLOC_108074 | ENSRNOT00000057176 | 0.997046351  | 1.76E-12 |
| TUCP_002554 | XLOC_108074 | ENSRNOT00000078176 | 0.9899797    | 7.82E-10 |
| TUCP_002554 | XLOC_108074 | ENSRNOT00000056364 | 0.988736891  | 1.40E-09 |
| TUCP_002554 | XLOC_108074 | ENSRNOT00000093431 | 0.997067213  | 1.70E-12 |
| TUCP_002554 | XLOC_108074 | ENSRNOT00000024758 | 0.974573376  | 8.02E-08 |
| TUCP_002554 | XLOC_108074 | ENSRNOT00000092901 | 0.997067213  | 1.70E-12 |
| TUCP_002554 | XLOC_108074 | ENSRNOT00000089290 | 0.996962416  | 2.03E-12 |
| TUCP_002554 | XLOC_108074 | ENSRNOT00000090211 | 0.997070102  | 1.69E-12 |
| TUCP_002554 | XLOC_108074 | ENSRNOT00000075244 | 0.964702634  | 4.07E-07 |
| TUCP_002554 | XLOC_108074 | ENSRNOT00000091828 | 0.993691491  | 7.79E-11 |
| TUCP_002554 | XLOC_108074 | ENSRNOT00000091944 | 0.996754072  | 2.82E-12 |
| TUCP_002554 | XLOC_108074 | ENSRNOT00000070855 | 0.997067213  | 1.70E-12 |
| TUCP_002554 | XLOC_108074 | ENSRNOT00000046980 | 0.977244324  | 4.63E-08 |
| TUCP_002554 | XLOC_108074 | ENSRNOT00000084109 | 0.996389309  | 4.80E-12 |

|             |             |                    |             |          |
|-------------|-------------|--------------------|-------------|----------|
| TUCP_002554 | XLOC_108074 | ENSRNOT00000060645 | 0.970422384 | 1.70E-07 |
| TUCP_002554 | XLOC_108074 | ENSRNOT00000041569 | 0.997067213 | 1.70E-12 |
| TUCP_002554 | XLOC_108074 | ENSRNOT00000087091 | 0.997067213 | 1.70E-12 |
| TUCP_002554 | XLOC_108074 | ENSRNOT00000003308 | 0.98887585  | 1.32E-09 |
| TUCP_002554 | XLOC_108074 | ENSRNOT00000026113 | 0.99668286  | 3.15E-12 |
| TUCP_002554 | XLOC_108074 | ENSRNOT00000014939 | 0.996209617 | 6.12E-12 |
| TUCP_002554 | XLOC_108074 | ENSRNOT00000058314 | 0.992514317 | 1.83E-10 |
| TUCP_002554 | XLOC_108074 | ENSRNOT00000047870 | 0.974798365 | 7.67E-08 |
| TUCP_002554 | XLOC_108074 | ENSRNOT00000071603 | 0.997023733 | 1.83E-12 |
| TUCP_002554 | XLOC_108074 | ENSRNOT00000088376 | 0.964457903 | 4.21E-07 |
| TUCP_002554 | XLOC_108074 | ENSRNOT00000029298 | 0.956527219 | 1.14E-06 |
| TUCP_002554 | XLOC_108074 | ENSRNOT00000044232 | 0.980173663 | 2.33E-08 |
| TUCP_002554 | XLOC_108074 | ENSRNOT00000023287 | 0.969678814 | 1.92E-07 |
| TUCP_002554 | XLOC_108074 | ENSRNOT00000071714 | 0.973136554 | 1.05E-07 |
| TUCP_002554 | XLOC_108074 | ENSRNOT00000075836 | 0.997067213 | 1.70E-12 |
| TUCP_002554 | XLOC_108074 | ENSRNOT00000073229 | 0.997067213 | 1.70E-12 |
| TUCP_002554 | XLOC_108074 | ENSRNOT00000077731 | 0.963997086 | 4.48E-07 |
| TUCP_002554 | XLOC_108074 | ENSRNOT00000039652 | 0.97096933  | 1.55E-07 |
| TUCP_002554 | XLOC_108074 | ENSRNOT00000060454 | 0.997067213 | 1.70E-12 |
| TUCP_002554 | XLOC_108074 | ENSRNOT00000082776 | 0.978826665 | 3.23E-08 |
| TUCP_002554 | XLOC_108074 | ENSRNOT00000088719 | 0.958755001 | 8.77E-07 |
| TUCP_002554 | XLOC_108074 | ENSRNOT00000007683 | 0.997348313 | 1.03E-12 |
| TUCP_002554 | XLOC_108074 | ENSRNOT00000092916 | 0.971734265 | 1.36E-07 |
| TUCP_002554 | XLOC_108074 | ENSRNOT00000009295 | 0.991724487 | 3.01E-10 |
| TUCP_002550 | XLOC_107928 | ENSRNOT00000035770 | 0.953237246 | 1.63E-06 |
| TUCP_002551 | XLOC_107991 | ENSRNOT00000092026 | 0.96595297  | 3.40E-07 |
| TUCP_002551 | XLOC_107991 | ENSRNOT00000093075 | 0.999977936 | 4.12E-23 |
| TUCP_002551 | XLOC_107991 | ENSRNOT00000058260 | 0.999977936 | 4.12E-23 |
| TUCP_002551 | XLOC_107991 | ENSRNOT00000088887 | 0.999977936 | 4.12E-23 |
| TUCP_002551 | XLOC_107991 | ENSRNOT00000084986 | 0.999977936 | 4.12E-23 |
| TUCP_002551 | XLOC_107991 | ENSRNOT00000074346 | 0.970928565 | 1.56E-07 |
| TUCP_002551 | XLOC_107991 | ENSRNOT00000073209 | 0.98353592  | 9.27E-09 |
| TUCP_002551 | XLOC_107991 | ENSRNOT00000080155 | 0.973333727 | 1.02E-07 |
| TUCP_002551 | XLOC_107991 | ENSRNOT00000072573 | 0.996230773 | 5.95E-12 |
| TUCP_002551 | XLOC_107991 | ENSRNOT00000017828 | 0.995920263 | 8.84E-12 |
| TUCP_002551 | XLOC_107991 | ENSRNOT00000080444 | 0.9691991   | 2.07E-07 |
| TUCP_002551 | XLOC_107991 | ENSRNOT00000071312 | 0.999977936 | 4.12E-23 |
| TUCP_002551 | XLOC_107991 | ENSRNOT00000088245 | 0.999977936 | 4.12E-23 |
| TUCP_002551 | XLOC_107991 | ENSRNOT00000036565 | 0.968807994 | 2.21E-07 |
| TUCP_002551 | XLOC_107991 | ENSRNOT00000058833 | 0.998617019 | 3.97E-14 |
| TUCP_002551 | XLOC_107991 | ENSRNOT00000078052 | 0.999977936 | 4.12E-23 |
| TUCP_002551 | XLOC_107991 | ENSRNOT00000078494 | 0.999897009 | 9.12E-20 |
| TUCP_002551 | XLOC_107991 | ENSRNOT00000085653 | 0.999977936 | 4.12E-23 |
| TUCP_002551 | XLOC_107991 | ENSRNOT00000057950 | 0.969460306 | 1.99E-07 |
| TUCP_002551 | XLOC_107991 | ENSRNOT00000081992 | 0.999292635 | 1.39E-15 |
| TUCP_002551 | XLOC_107991 | ENSRNOT00000038553 | 0.955466609 | 1.28E-06 |
| TUCP_002551 | XLOC_107991 | ENSRNOT00000084120 | 0.957719613 | 9.91E-07 |
| TUCP_002551 | XLOC_107991 | ENSRNOT00000055406 | 0.999977936 | 4.12E-23 |
| TUCP_002551 | XLOC_107991 | ENSRNOT00000070817 | 0.998915867 | 1.18E-14 |
| TUCP_002551 | XLOC_107991 | ENSRNOT00000026753 | 0.999977936 | 4.12E-23 |
| TUCP_002551 | XLOC_107991 | ENSRNOT00000080533 | 0.996606474 | 3.52E-12 |

|             |             |                    |             |          |
|-------------|-------------|--------------------|-------------|----------|
| TUCP_002551 | XLOC_107991 | ENSRNOT00000072774 | 0.979510364 | 2.75E-08 |
| TUCP_002551 | XLOC_107991 | ENSRNOT00000086031 | 0.999977936 | 4.12E-23 |
| TUCP_002551 | XLOC_107991 | ENSRNOT00000014312 | 0.999977936 | 4.12E-23 |
| TUCP_002551 | XLOC_107991 | ENSRNOT00000042882 | 0.962865931 | 5.22E-07 |
| TUCP_002551 | XLOC_107991 | ENSRNOT00000088012 | 0.956551482 | 1.13E-06 |
| TUCP_002551 | XLOC_107991 | ENSRNOT00000051231 | 0.999194477 | 2.67E-15 |
| TUCP_002551 | XLOC_107991 | ENSRNOT00000089407 | 0.99288635  | 1.42E-10 |
| TUCP_002551 | XLOC_107991 | ENSRNOT00000055034 | 0.998429552 | 7.50E-14 |
| TUCP_002551 | XLOC_107991 | ENSRNOT00000046837 | 0.973311834 | 1.02E-07 |
| TUCP_002552 | XLOC_107991 | ENSRNOT00000092026 | 0.960962388 | 6.69E-07 |
| TUCP_002552 | XLOC_107991 | ENSRNOT00000093075 | 0.997580679 | 6.50E-13 |
| TUCP_002552 | XLOC_107991 | ENSRNOT00000058260 | 0.997580679 | 6.50E-13 |
| TUCP_002552 | XLOC_107991 | ENSRNOT00000088887 | 0.997580679 | 6.50E-13 |
| TUCP_002552 | XLOC_107991 | ENSRNOT00000084986 | 0.997580679 | 6.50E-13 |
| TUCP_002552 | XLOC_107991 | ENSRNOT00000074346 | 0.96318624  | 5.01E-07 |
| TUCP_002552 | XLOC_107991 | ENSRNOT00000073209 | 0.979075585 | 3.05E-08 |
| TUCP_002552 | XLOC_107991 | ENSRNOT00000080155 | 0.979622601 | 2.67E-08 |
| TUCP_002552 | XLOC_107991 | ENSRNOT00000072573 | 0.997147793 | 1.48E-12 |
| TUCP_002552 | XLOC_107991 | ENSRNOT00000017828 | 0.992659228 | 1.66E-10 |
| TUCP_002552 | XLOC_107991 | ENSRNOT00000080444 | 0.958946165 | 8.57E-07 |
| TUCP_002552 | XLOC_107991 | ENSRNOT00000071312 | 0.997580679 | 6.50E-13 |
| TUCP_002552 | XLOC_107991 | ENSRNOT00000088245 | 0.997580679 | 6.50E-13 |
| TUCP_002552 | XLOC_107991 | ENSRNOT00000036565 | 0.964299288 | 4.30E-07 |
| TUCP_002552 | XLOC_107991 | ENSRNOT00000058833 | 0.99951121  | 2.20E-16 |
| TUCP_002552 | XLOC_107991 | ENSRNOT00000078052 | 0.997580679 | 6.50E-13 |
| TUCP_002552 | XLOC_107991 | ENSRNOT00000078494 | 0.997381877 | 9.65E-13 |
| TUCP_002552 | XLOC_107991 | ENSRNOT00000085653 | 0.997580679 | 6.50E-13 |
| TUCP_002552 | XLOC_107991 | ENSRNOT00000057950 | 0.966188955 | 3.29E-07 |
| TUCP_002552 | XLOC_107991 | ENSRNOT00000081992 | 0.996438324 | 4.49E-12 |
| TUCP_002552 | XLOC_107991 | ENSRNOT00000084120 | 0.958304821 | 9.25E-07 |
| TUCP_002552 | XLOC_107991 | ENSRNOT00000055406 | 0.997580679 | 6.50E-13 |
| TUCP_002552 | XLOC_107991 | ENSRNOT00000070817 | 0.997549188 | 6.93E-13 |
| TUCP_002552 | XLOC_107991 | ENSRNOT00000026753 | 0.997580679 | 6.50E-13 |
| TUCP_002552 | XLOC_107991 | ENSRNOT00000080533 | 0.993421508 | 9.60E-11 |
| TUCP_002552 | XLOC_107991 | ENSRNOT00000014268 | 0.950973932 | 2.05E-06 |
| TUCP_002552 | XLOC_107991 | ENSRNOT00000072774 | 0.975200369 | 7.09E-08 |
| TUCP_002552 | XLOC_107991 | ENSRNOT00000086031 | 0.997580679 | 6.50E-13 |
| TUCP_002552 | XLOC_107991 | ENSRNOT00000014312 | 0.997580679 | 6.50E-13 |
| TUCP_002552 | XLOC_107991 | ENSRNOT00000042882 | 0.966431792 | 3.17E-07 |
| TUCP_002552 | XLOC_107991 | ENSRNOT00000088012 | 0.951414369 | 1.96E-06 |
| TUCP_002552 | XLOC_107991 | ENSRNOT00000051231 | 0.996534363 | 3.91E-12 |
| TUCP_002552 | XLOC_107991 | ENSRNOT00000089407 | 0.998051297 | 2.21E-13 |
| TUCP_002552 | XLOC_107991 | ENSRNOT00000055034 | 0.998933096 | 1.09E-14 |
| TUCP_002552 | XLOC_107991 | ENSRNOT00000046837 | 0.965045977 | 3.87E-07 |
| TUCP_002415 | XLOC_101974 | ENSRNOT00000020425 | 0.963988565 | 4.49E-07 |
| TUCP_002415 | XLOC_101974 | ENSRNOT00000071986 | 0.954384529 | 1.44E-06 |
| TUCP_002415 | XLOC_101974 | ENSRNOT00000092974 | 0.977856    | 4.04E-08 |
| TUCP_002415 | XLOC_101974 | ENSRNOT00000029757 | 0.95393799  | 1.51E-06 |
| TUCP_002414 | XLOC_101928 | ENSRNOT00000024186 | 0.961880204 | 5.95E-07 |
| TUCP_002414 | XLOC_101928 | ENSRNOT00000074753 | 0.978503615 | 3.49E-08 |
| TUCP_002414 | XLOC_101928 | ENSRNOT00000041904 | 0.976213637 | 5.76E-08 |

|             |             |                    |             |          |
|-------------|-------------|--------------------|-------------|----------|
| TUCP_002414 | XLOC_101928 | ENSRNOT00000083487 | 0.954040275 | 1.49E-06 |
| TUCP_002414 | XLOC_101928 | ENSRNOT00000077990 | 0.976213637 | 5.76E-08 |
| TUCP_002414 | XLOC_101928 | ENSRNOT00000038826 | 0.975772853 | 6.31E-08 |
| TUCP_002414 | XLOC_101928 | ENSRNOT00000046842 | 0.953092648 | 1.65E-06 |
| TUCP_002414 | XLOC_101928 | ENSRNOT00000037169 | 0.964061148 | 4.45E-07 |
| TUCP_002414 | XLOC_101928 | ENSRNOT00000021243 | 0.960457221 | 7.12E-07 |
| TUCP_002414 | XLOC_101928 | ENSRNOT00000060250 | 0.976491412 | 5.44E-08 |
| TUCP_002414 | XLOC_101928 | ENSRNOT00000091934 | 0.976213637 | 5.76E-08 |
| TUCP_002414 | XLOC_101928 | ENSRNOT00000086027 | 0.96478195  | 4.02E-07 |
| TUCP_002414 | XLOC_101928 | ENSRNOT00000046585 | 0.986824778 | 3.06E-09 |
| TUCP_002414 | XLOC_101928 | ENSRNOT00000080794 | 0.961392464 | 6.33E-07 |
| TUCP_002414 | XLOC_101928 | ENSRNOT00000014456 | 0.957688043 | 9.95E-07 |
| TUCP_002414 | XLOC_101928 | ENSRNOT00000031205 | 0.980347595 | 2.23E-08 |
| TUCP_002414 | XLOC_101928 | ENSRNOT00000044145 | 0.976213637 | 5.76E-08 |
| TUCP_002414 | XLOC_101928 | ENSRNOT00000088381 | 0.987325851 | 2.52E-09 |
| TUCP_002414 | XLOC_101928 | ENSRNOT00000011743 | 0.965165034 | 3.81E-07 |
| TUCP_002414 | XLOC_101928 | ENSRNOT00000089929 | 0.976213637 | 5.76E-08 |
| TUCP_002414 | XLOC_101928 | ENSRNOT00000088624 | 0.976213637 | 5.76E-08 |
| TUCP_002414 | XLOC_101928 | ENSRNOT00000085659 | 0.979082732 | 3.04E-08 |
| TUCP_002414 | XLOC_101928 | ENSRNOT00000015866 | 0.981054693 | 1.86E-08 |
| TUCP_002414 | XLOC_101928 | ENSRNOT00000078633 | 0.976213637 | 5.76E-08 |
| TUCP_002414 | XLOC_101928 | ENSRNOT00000024575 | 0.964330501 | 4.28E-07 |
| TUCP_002414 | XLOC_101928 | ENSRNOT00000034907 | 0.975817054 | 6.25E-08 |
| TUCP_002414 | XLOC_101928 | ENSRNOT00000011342 | 0.952458688 | 1.77E-06 |
| TUCP_002414 | XLOC_101928 | ENSRNOT00000051835 | 0.976213637 | 5.76E-08 |
| TUCP_002414 | XLOC_101928 | ENSRNOT00000009825 | 0.953557022 | 1.57E-06 |
| TUCP_002414 | XLOC_101928 | ENSRNOT00000079087 | 0.976213637 | 5.76E-08 |
| TUCP_002414 | XLOC_101928 | ENSRNOT00000037206 | 0.976213637 | 5.76E-08 |
| TUCP_002414 | XLOC_101928 | ENSRNOT00000083261 | 0.961993106 | 5.86E-07 |
| TUCP_002414 | XLOC_101928 | ENSRNOT00000091904 | 0.952303855 | 1.79E-06 |
| TUCP_002414 | XLOC_101928 | ENSRNOT00000080590 | 0.974899361 | 7.52E-08 |
| TUCP_002414 | XLOC_101928 | ENSRNOT00000027552 | 0.974953459 | 7.44E-08 |
| TUCP_002414 | XLOC_101928 | ENSRNOT00000077014 | 0.982319106 | 1.32E-08 |
| TUCP_002414 | XLOC_101928 | ENSRNOT00000080453 | 0.976353811 | 5.60E-08 |
| TUCP_002414 | XLOC_101928 | ENSRNOT00000057729 | 0.975534643 | 6.63E-08 |
| TUCP_002414 | XLOC_101928 | ENSRNOT00000061284 | 0.975564151 | 6.59E-08 |
| TUCP_002414 | XLOC_101928 | ENSRNOT00000013423 | 0.972959427 | 1.09E-07 |
| TUCP_002414 | XLOC_101928 | ENSRNOT00000071884 | 0.969083182 | 2.11E-07 |
| TUCP_002414 | XLOC_101928 | ENSRNOT00000066839 | 0.962107937 | 5.77E-07 |
| TUCP_002414 | XLOC_101928 | ENSRNOT00000078663 | 0.970026495 | 1.81E-07 |
| TUCP_002414 | XLOC_101928 | ENSRNOT00000064250 | 0.952395506 | 1.78E-06 |
| TUCP_002414 | XLOC_101928 | ENSRNOT00000040509 | 0.959987518 | 7.55E-07 |
| TUCP_002414 | XLOC_101928 | ENSRNOT00000021608 | 0.969215553 | 2.07E-07 |
| TUCP_002414 | XLOC_101928 | ENSRNOT00000029634 | 0.968627887 | 2.27E-07 |
| TUCP_002414 | XLOC_101928 | ENSRNOT00000093579 | 0.981290186 | 1.75E-08 |
| TUCP_002414 | XLOC_101928 | ENSRNOT00000065460 | 0.976213637 | 5.76E-08 |
| TUCP_002414 | XLOC_101928 | ENSRNOT00000003817 | 0.970327378 | 1.72E-07 |
| TUCP_002414 | XLOC_101928 | ENSRNOT00000016713 | 0.976213637 | 5.76E-08 |
| TUCP_002414 | XLOC_101928 | ENSRNOT00000079260 | 0.976380103 | 5.57E-08 |
| TUCP_002414 | XLOC_101928 | ENSRNOT00000039294 | 0.976213637 | 5.76E-08 |
| TUCP_002414 | XLOC_101928 | ENSRNOT00000024337 | 0.978297532 | 3.66E-08 |

|             |             |                     |             |          |
|-------------|-------------|---------------------|-------------|----------|
| TUCP_002417 | XLOC_102313 | ENSRNOT00000007339  | 0.959767405 | 7.76E-07 |
| TUCP_002417 | XLOC_102313 | ENSRNOT000000050825 | 0.972357687 | 1.21E-07 |
| TUCP_002416 | XLOC_102236 | ENSRNOT00000009183  | 0.952420555 | 1.77E-06 |
| TUCP_002416 | XLOC_102236 | ENSRNOT000000070822 | 0.968682849 | 2.25E-07 |
| TUCP_002416 | XLOC_102236 | ENSRNOT000000079536 | 0.953367249 | 1.61E-06 |
| TUCP_002416 | XLOC_102236 | ENSRNOT000000016067 | 0.965752695 | 3.50E-07 |
| TUCP_002411 | XLOC_101758 | ENSRNOT000000024186 | 0.982981473 | 1.09E-08 |
| TUCP_002411 | XLOC_101758 | ENSRNOT000000074753 | 0.998329645 | 1.02E-13 |
| TUCP_002411 | XLOC_101758 | ENSRNOT00000004876  | 0.958501883 | 9.04E-07 |
| TUCP_002411 | XLOC_101758 | ENSRNOT000000041904 | 0.999883917 | 1.66E-19 |
| TUCP_002411 | XLOC_101758 | ENSRNOT000000083487 | 0.988449146 | 1.59E-09 |
| TUCP_002411 | XLOC_101758 | ENSRNOT000000077990 | 0.999883917 | 1.66E-19 |
| TUCP_002411 | XLOC_101758 | ENSRNOT000000038826 | 0.999609935 | 7.11E-17 |
| TUCP_002411 | XLOC_101758 | ENSRNOT000000037094 | 0.950116184 | 2.24E-06 |
| TUCP_002411 | XLOC_101758 | ENSRNOT000000046842 | 0.97317597  | 1.05E-07 |
| TUCP_002411 | XLOC_101758 | ENSRNOT000000037169 | 0.979996427 | 2.44E-08 |
| TUCP_002411 | XLOC_101758 | ENSRNOT000000021243 | 0.987064496 | 2.79E-09 |
| TUCP_002411 | XLOC_101758 | ENSRNOT000000060250 | 0.999992987 | 1.34E-25 |
| TUCP_002411 | XLOC_101758 | ENSRNOT000000091934 | 0.999883917 | 1.66E-19 |
| TUCP_002411 | XLOC_101758 | ENSRNOT000000086027 | 0.951714735 | 1.91E-06 |
| TUCP_002411 | XLOC_101758 | ENSRNOT000000046585 | 0.982509922 | 1.25E-08 |
| TUCP_002411 | XLOC_101758 | ENSRNOT000000080794 | 0.99037756  | 6.39E-10 |
| TUCP_002411 | XLOC_101758 | ENSRNOT000000014456 | 0.991381691 | 3.69E-10 |
| TUCP_002411 | XLOC_101758 | ENSRNOT000000031205 | 0.990991132 | 4.60E-10 |
| TUCP_002411 | XLOC_101758 | ENSRNOT000000044145 | 0.999883917 | 1.66E-19 |
| TUCP_002411 | XLOC_101758 | ENSRNOT000000088381 | 0.988668164 | 1.44E-09 |
| TUCP_002411 | XLOC_101758 | ENSRNOT000000011743 | 0.986417275 | 3.56E-09 |
| TUCP_002411 | XLOC_101758 | ENSRNOT000000089929 | 0.999883917 | 1.66E-19 |
| TUCP_002411 | XLOC_101758 | ENSRNOT000000088624 | 0.999883917 | 1.66E-19 |
| TUCP_002411 | XLOC_101758 | ENSRNOT000000085659 | 0.989621974 | 9.32E-10 |
| TUCP_002411 | XLOC_101758 | ENSRNOT000000015866 | 0.993526986 | 8.85E-11 |
| TUCP_002411 | XLOC_101758 | ENSRNOT000000078633 | 0.999883917 | 1.66E-19 |
| TUCP_002411 | XLOC_101758 | ENSRNOT000000034907 | 0.994470065 | 4.04E-11 |
| TUCP_002411 | XLOC_101758 | ENSRNOT000000093230 | 0.95725073  | 1.05E-06 |
| TUCP_002411 | XLOC_101758 | ENSRNOT000000051835 | 0.999883917 | 1.66E-19 |
| TUCP_002411 | XLOC_101758 | ENSRNOT000000079087 | 0.999883917 | 1.66E-19 |
| TUCP_002411 | XLOC_101758 | ENSRNOT000000037206 | 0.999883917 | 1.66E-19 |
| TUCP_002411 | XLOC_101758 | ENSRNOT000000083261 | 0.971916936 | 1.31E-07 |
| TUCP_002411 | XLOC_101758 | ENSRNOT000000080590 | 0.999749957 | 7.69E-18 |
| TUCP_002411 | XLOC_101758 | ENSRNOT000000027552 | 0.999831924 | 1.06E-18 |
| TUCP_002411 | XLOC_101758 | ENSRNOT000000077014 | 0.996203184 | 6.17E-12 |
| TUCP_002411 | XLOC_101758 | ENSRNOT000000080453 | 0.999867207 | 3.25E-19 |
| TUCP_002411 | XLOC_101758 | ENSRNOT000000089057 | 0.966417662 | 3.18E-07 |
| TUCP_002411 | XLOC_101758 | ENSRNOT000000066839 | 0.991516424 | 3.41E-10 |
| TUCP_002411 | XLOC_101758 | ENSRNOT000000061284 | 0.956943336 | 1.08E-06 |
| TUCP_002411 | XLOC_101758 | ENSRNOT000000013423 | 0.959710672 | 7.81E-07 |
| TUCP_002411 | XLOC_101758 | ENSRNOT000000071884 | 0.974211708 | 8.60E-08 |
| TUCP_002411 | XLOC_101758 | ENSRNOT000000004128 | 0.960232033 | 7.33E-07 |
| TUCP_002411 | XLOC_101758 | ENSRNOT000000026316 | 0.963949913 | 4.51E-07 |
| TUCP_002411 | XLOC_101758 | ENSRNOT000000057729 | 0.999213506 | 2.37E-15 |
| TUCP_002411 | XLOC_101758 | ENSRNOT000000078663 | 0.976732508 | 5.17E-08 |

|             |             |                    |              |          |
|-------------|-------------|--------------------|--------------|----------|
| TUCP_002411 | XLOC_101758 | ENSRNOT00000064250 | 0.984508925  | 6.85E-09 |
| TUCP_002411 | XLOC_101758 | ENSRNOT00000021608 | 0.966634413  | 3.08E-07 |
| TUCP_002411 | XLOC_101758 | ENSRNOT00000029634 | 0.995520182  | 1.41E-11 |
| TUCP_002411 | XLOC_101758 | ENSRNOT00000093579 | 0.957685181  | 9.95E-07 |
| TUCP_002411 | XLOC_101758 | ENSRNOT00000086349 | 0.956132705  | 1.19E-06 |
| TUCP_002411 | XLOC_101758 | ENSRNOT00000065460 | 0.999883917  | 1.66E-19 |
| TUCP_002411 | XLOC_101758 | ENSRNOT00000003817 | 0.99755781   | 6.81E-13 |
| TUCP_002411 | XLOC_101758 | ENSRNOT00000016713 | 0.999883917  | 1.66E-19 |
| TUCP_002411 | XLOC_101758 | ENSRNOT00000079260 | 0.996081819  | 7.22E-12 |
| TUCP_002411 | XLOC_101758 | ENSRNOT00000039294 | 0.999883917  | 1.66E-19 |
| TUCP_002411 | XLOC_101758 | ENSRNOT00000092913 | 0.953750761  | 1.54E-06 |
| TUCP_002410 | XLOC_101658 | ENSRNOT00000031291 | 0.953515142  | 1.58E-06 |
| TUCP_002410 | XLOC_101658 | ENSRNOT00000035486 | 0.953224989  | 1.63E-06 |
| TUCP_002410 | XLOC_101658 | ENSRNOT00000009468 | 0.963868234  | 4.56E-07 |
| TUCP_002410 | XLOC_101658 | ENSRNOT00000021937 | 0.961571622  | 6.19E-07 |
| TUCP_002410 | XLOC_101658 | ENSRNOT00000080174 | 0.965430636  | 3.67E-07 |
| TUCP_002410 | XLOC_101658 | ENSRNOT00000011237 | 0.952066841  | 1.84E-06 |
| TUCP_002410 | XLOC_101658 | ENSRNOT00000004400 | -0.957013873 | 1.08E-06 |
| TUCP_002410 | XLOC_101658 | ENSRNOT00000009080 | 0.953755325  | 1.54E-06 |
| TUCP_002410 | XLOC_101658 | ENSRNOT00000002428 | -0.958336328 | 9.22E-07 |
| TUCP_002410 | XLOC_101658 | ENSRNOT00000074544 | 0.957375681  | 1.03E-06 |
| TUCP_002410 | XLOC_101658 | ENSRNOT00000035400 | 0.954514055  | 1.42E-06 |
| TUCP_002410 | XLOC_101658 | ENSRNOT00000004241 | 0.957059404  | 1.07E-06 |
| TUCP_002410 | XLOC_101658 | ENSRNOT00000013341 | 0.956573345  | 1.13E-06 |
| TUCP_002410 | XLOC_101658 | ENSRNOT00000020197 | 0.95877519   | 8.75E-07 |
| TUCP_002410 | XLOC_101658 | ENSRNOT00000007698 | 0.953777661  | 1.54E-06 |
| TUCP_002410 | XLOC_101658 | ENSRNOT00000049349 | -0.955963728 | 1.21E-06 |
| TUCP_002410 | XLOC_101658 | ENSRNOT00000016012 | 0.970924015  | 1.56E-07 |
| TUCP_002410 | XLOC_101658 | ENSRNOT00000078739 | 0.963026904  | 5.11E-07 |
| TUCP_002410 | XLOC_101658 | ENSRNOT00000030501 | 0.982181964  | 1.37E-08 |
| TUCP_002410 | XLOC_101658 | ENSRNOT00000017204 | 0.959906858  | 7.63E-07 |
| TUCP_002410 | XLOC_101658 | ENSRNOT00000010333 | 0.956160097  | 1.18E-06 |
| TUCP_002410 | XLOC_101658 | ENSRNOT00000005658 | 0.950206026  | 2.22E-06 |
| TUCP_002410 | XLOC_101658 | ENSRNOT00000001859 | 0.964458946  | 4.21E-07 |
| TUCP_002410 | XLOC_101658 | ENSRNOT00000087011 | 0.970184073  | 1.77E-07 |
| TUCP_002410 | XLOC_101658 | ENSRNOT00000035277 | -0.955590608 | 1.26E-06 |
| TUCP_002410 | XLOC_101658 | ENSRNOT00000052063 | -0.965806194 | 3.48E-07 |
| TUCP_002410 | XLOC_101658 | ENSRNOT00000028888 | -0.953343408 | 1.61E-06 |
| TUCP_002410 | XLOC_101658 | ENSRNOT00000014063 | 0.951793108  | 1.89E-06 |
| TUCP_002410 | XLOC_101658 | ENSRNOT00000021110 | 0.97346939   | 9.90E-08 |
| TUCP_002410 | XLOC_101658 | ENSRNOT00000083864 | 0.96617179   | 3.30E-07 |
| TUCP_002410 | XLOC_101658 | ENSRNOT00000020853 | 0.955608976  | 1.26E-06 |
| TUCP_002410 | XLOC_101658 | ENSRNOT00000024712 | 0.956247518  | 1.17E-06 |
| TUCP_002410 | XLOC_101658 | ENSRNOT00000001774 | 0.983028514  | 1.08E-08 |
| TUCP_002410 | XLOC_101658 | ENSRNOT00000093552 | 0.990527231  | 5.91E-10 |
| TUCP_002410 | XLOC_101658 | ENSRNOT00000084069 | -0.956851566 | 1.10E-06 |
| TUCP_002410 | XLOC_101658 | ENSRNOT00000037203 | 0.955465451  | 1.28E-06 |
| TUCP_002410 | XLOC_101658 | ENSRNOT00000013613 | 0.961921866  | 5.91E-07 |
| TUCP_002410 | XLOC_101658 | ENSRNOT00000081787 | 0.951241357  | 2.00E-06 |
| TUCP_002410 | XLOC_101658 | ENSRNOT00000022676 | 0.955814608  | 1.23E-06 |
| TUCP_002410 | XLOC_101658 | ENSRNOT00000075400 | 0.960671798  | 6.94E-07 |

|             |             |                    |              |          |
|-------------|-------------|--------------------|--------------|----------|
| TUCP_002410 | XLOC_101658 | ENSRNOT0000000618  | 0.962457849  | 5.51E-07 |
| TUCP_002410 | XLOC_101658 | ENSRNOT00000078884 | 0.954696629  | 1.39E-06 |
| TUCP_002410 | XLOC_101658 | ENSRNOT00000027553 | 0.965220908  | 3.78E-07 |
| TUCP_002410 | XLOC_101658 | ENSRNOT00000056675 | 0.957761698  | 9.86E-07 |
| TUCP_002410 | XLOC_101658 | ENSRNOT00000013295 | 0.974721543  | 7.79E-08 |
| TUCP_002410 | XLOC_101658 | ENSRNOT00000023456 | 0.952133433  | 1.83E-06 |
| TUCP_002410 | XLOC_101658 | ENSRNOT00000066947 | 0.960706716  | 6.91E-07 |
| TUCP_002410 | XLOC_101658 | ENSRNOT00000021621 | 0.975066273  | 7.28E-08 |
| TUCP_002410 | XLOC_101658 | ENSRNOT00000091808 | 0.968502857  | 2.32E-07 |
| TUCP_002410 | XLOC_101658 | ENSRNOT00000025079 | 0.963451629  | 4.83E-07 |
| TUCP_002410 | XLOC_101658 | ENSRNOT00000084709 | -0.952599698 | 1.74E-06 |
| TUCP_002410 | XLOC_101658 | ENSRNOT00000023037 | -0.951108201 | 2.03E-06 |
| TUCP_002410 | XLOC_101658 | ENSRNOT00000077063 | 0.960231495  | 7.33E-07 |
| TUCP_002410 | XLOC_101658 | ENSRNOT00000056181 | 0.955308956  | 1.30E-06 |
| TUCP_002410 | XLOC_101658 | ENSRNOT00000017271 | -0.963048396 | 5.10E-07 |
| TUCP_002410 | XLOC_101658 | ENSRNOT00000011432 | 0.974046231  | 8.88E-08 |
| TUCP_002410 | XLOC_101658 | ENSRNOT00000021458 | 0.955358418  | 1.30E-06 |
| TUCP_002410 | XLOC_101658 | ENSRNOT00000014384 | 0.963220515  | 4.98E-07 |
| TUCP_002410 | XLOC_101658 | ENSRNOT00000007824 | 0.957225138  | 1.05E-06 |
| TUCP_002410 | XLOC_101658 | ENSRNOT00000046639 | -0.950082073 | 2.24E-06 |
| TUCP_002410 | XLOC_101658 | ENSRNOT00000018028 | 0.956638919  | 1.12E-06 |
| TUCP_002410 | XLOC_101658 | ENSRNOT00000024677 | -0.959513829 | 8.00E-07 |
| TUCP_002410 | XLOC_101658 | ENSRNOT00000079801 | 0.955423098  | 1.29E-06 |
| TUCP_002410 | XLOC_101658 | ENSRNOT00000001891 | 0.966144867  | 3.31E-07 |
| TUCP_002410 | XLOC_101658 | ENSRNOT00000077999 | -0.955636915 | 1.26E-06 |
| TUCP_002410 | XLOC_101658 | ENSRNOT00000018405 | 0.974443229  | 8.23E-08 |
| TUCP_002410 | XLOC_101658 | ENSRNOT00000068134 | -0.958336541 | 9.22E-07 |
| TUCP_002410 | XLOC_101658 | ENSRNOT00000046807 | 0.952737168  | 1.72E-06 |
| TUCP_002410 | XLOC_101658 | ENSRNOT00000002851 | 0.962605605  | 5.41E-07 |
| TUCP_002410 | XLOC_101658 | ENSRNOT00000026552 | 0.951592809  | 1.93E-06 |
| TUCP_002410 | XLOC_101658 | ENSRNOT00000010783 | 0.956890396  | 1.09E-06 |
| TUCP_002410 | XLOC_101658 | ENSRNOT00000066793 | 0.973285344  | 1.02E-07 |
| TUCP_002410 | XLOC_101658 | ENSRNOT00000055711 | -0.956211271 | 1.18E-06 |
| TUCP_002410 | XLOC_101658 | ENSRNOT00000056644 | 0.952889107  | 1.69E-06 |
| TUCP_002410 | XLOC_101658 | ENSRNOT00000066521 | 0.973219682  | 1.04E-07 |
| TUCP_002410 | XLOC_101658 | ENSRNOT00000075630 | 0.961306194  | 6.40E-07 |
| TUCP_002410 | XLOC_101658 | ENSRNOT00000023463 | 0.975805069  | 6.27E-08 |
| TUCP_002410 | XLOC_101658 | ENSRNOT00000072762 | 0.959538088  | 7.98E-07 |
| TUCP_002410 | XLOC_101658 | ENSRNOT00000014211 | 0.958097925  | 9.48E-07 |
| TUCP_002410 | XLOC_101658 | ENSRNOT00000012177 | 0.964502827  | 4.18E-07 |
| TUCP_002410 | XLOC_101658 | ENSRNOT00000038652 | 0.962732912  | 5.32E-07 |
| TUCP_002410 | XLOC_101658 | ENSRNOT00000046490 | 0.970707758  | 1.62E-07 |
| TUCP_002410 | XLOC_101658 | ENSRNOT00000074586 | 0.954361975  | 1.44E-06 |
| TUCP_002410 | XLOC_101658 | ENSRNOT00000022637 | 0.959045451  | 8.47E-07 |
| TUCP_002410 | XLOC_101658 | ENSRNOT00000008274 | 0.97240722   | 1.20E-07 |
| TUCP_002410 | XLOC_101658 | ENSRNOT00000027604 | 0.951407216  | 1.97E-06 |
| TUCP_002410 | XLOC_101658 | ENSRNOT00000003992 | 0.95991853   | 7.62E-07 |
| TUCP_002410 | XLOC_101658 | ENSRNOT00000007326 | 0.951573906  | 1.93E-06 |
| TUCP_002410 | XLOC_101658 | ENSRNOT00000024775 | 0.961641995  | 6.13E-07 |
| TUCP_002410 | XLOC_101658 | ENSRNOT00000017784 | 0.971515958  | 1.41E-07 |
| TUCP_002410 | XLOC_101658 | ENSRNOT00000024801 | 0.964994286  | 3.90E-07 |



|             |             |                     |              |          |
|-------------|-------------|---------------------|--------------|----------|
| TUCP_002410 | XLOC_101658 | ENSRNOT00000001979  | 0.956655788  | 1.12E-06 |
| TUCP_002410 | XLOC_101658 | ENSRNOT000000090575 | 0.963081669  | 5.08E-07 |
| TUCP_002410 | XLOC_101658 | ENSRNOT000000025036 | 0.953336276  | 1.61E-06 |
| TUCP_002410 | XLOC_101658 | ENSRNOT000000068184 | 0.969993185  | 1.82E-07 |
| TUCP_002410 | XLOC_101658 | ENSRNOT000000074667 | 0.951167296  | 2.01E-06 |
| TUCP_002410 | XLOC_101658 | ENSRNOT000000070886 | 0.961214493  | 6.48E-07 |
| TUCP_002410 | XLOC_101658 | ENSRNOT000000020453 | 0.954781567  | 1.38E-06 |
| TUCP_002410 | XLOC_101658 | ENSRNOT000000021134 | 0.960321803  | 7.25E-07 |
| TUCP_002410 | XLOC_101658 | ENSRNOT000000026724 | 0.962056927  | 5.81E-07 |
| TUCP_002410 | XLOC_101658 | ENSRNOT000000080035 | 0.966676619  | 3.06E-07 |
| TUCP_002410 | XLOC_101658 | ENSRNOT000000026726 | 0.955823454  | 1.23E-06 |
| TUCP_002410 | XLOC_101658 | ENSRNOT000000025506 | 0.955847135  | 1.23E-06 |
| TUCP_002410 | XLOC_101658 | ENSRNOT000000006395 | 0.958212505  | 9.35E-07 |
| TUCP_002410 | XLOC_101658 | ENSRNOT000000003667 | 0.971064341  | 1.52E-07 |
| TUCP_002410 | XLOC_101658 | ENSRNOT000000039857 | 0.956147621  | 1.19E-06 |
| TUCP_002410 | XLOC_101658 | ENSRNOT000000000812 | 0.962498115  | 5.48E-07 |
| TUCP_002410 | XLOC_101658 | ENSRNOT000000035513 | 0.975222853  | 7.05E-08 |
| TUCP_002410 | XLOC_101658 | ENSRNOT000000072357 | 0.953663545  | 1.56E-06 |
| TUCP_002410 | XLOC_101658 | ENSRNOT000000011898 | 0.97103718   | 1.53E-07 |
| TUCP_002410 | XLOC_101658 | ENSRNOT000000013067 | 0.952635801  | 1.73E-06 |
| TUCP_002410 | XLOC_101658 | ENSRNOT000000004196 | -0.96463211  | 4.11E-07 |
| TUCP_002410 | XLOC_101658 | ENSRNOT000000014859 | 0.954102321  | 1.48E-06 |
| TUCP_002410 | XLOC_101658 | ENSRNOT000000007917 | 0.952060367  | 1.84E-06 |
| TUCP_002410 | XLOC_101658 | ENSRNOT000000082627 | 0.957947977  | 9.65E-07 |
| TUCP_002410 | XLOC_101658 | ENSRNOT000000007882 | 0.956149913  | 1.19E-06 |
| TUCP_002410 | XLOC_101658 | ENSRNOT000000073919 | -0.957418364 | 1.03E-06 |
| TUCP_002410 | XLOC_101658 | ENSRNOT000000041237 | 0.96083546   | 6.79E-07 |
| TUCP_002410 | XLOC_101658 | ENSRNOT000000027145 | 0.971153475  | 1.50E-07 |
| TUCP_002410 | XLOC_101658 | ENSRNOT000000020409 | 0.951734713  | 1.90E-06 |
| TUCP_002410 | XLOC_101658 | ENSRNOT000000006824 | 0.967520029  | 2.70E-07 |
| TUCP_002410 | XLOC_101658 | ENSRNOT000000006709 | 0.960399502  | 7.18E-07 |
| TUCP_002410 | XLOC_101658 | ENSRNOT000000023430 | 0.952159743  | 1.82E-06 |
| TUCP_002410 | XLOC_101658 | ENSRNOT000000002313 | 0.953400378  | 1.60E-06 |
| TUCP_002410 | XLOC_101658 | ENSRNOT000000012775 | 0.956734059  | 1.11E-06 |
| TUCP_002410 | XLOC_101658 | ENSRNOT000000008317 | 0.96734534   | 2.77E-07 |
| TUCP_002410 | XLOC_101658 | ENSRNOT000000091541 | 0.957270301  | 1.04E-06 |
| TUCP_002410 | XLOC_101658 | ENSRNOT000000044449 | 0.952038047  | 1.84E-06 |
| TUCP_002410 | XLOC_101658 | ENSRNOT000000086260 | 0.950984403  | 2.05E-06 |
| TUCP_002410 | XLOC_101658 | ENSRNOT000000039012 | 0.965018823  | 3.89E-07 |
| TUCP_002410 | XLOC_101658 | ENSRNOT000000003787 | 0.950444891  | 2.17E-06 |
| TUCP_002410 | XLOC_101658 | ENSRNOT000000019531 | 0.971549664  | 1.40E-07 |
| TUCP_002410 | XLOC_101658 | ENSRNOT000000068026 | 0.951803498  | 1.89E-06 |
| TUCP_002410 | XLOC_101658 | ENSRNOT000000017955 | 0.969197577  | 2.07E-07 |
| TUCP_002410 | XLOC_101658 | ENSRNOT000000065023 | 0.961675618  | 6.10E-07 |
| TUCP_002410 | XLOC_101658 | ENSRNOT000000028217 | 0.951073898  | 2.03E-06 |
| TUCP_002410 | XLOC_101658 | ENSRNOT000000047126 | 0.962020164  | 5.84E-07 |
| TUCP_002410 | XLOC_101658 | ENSRNOT000000008889 | 0.959264484  | 8.25E-07 |
| TUCP_002410 | XLOC_101658 | ENSRNOT000000009275 | 0.95901361   | 8.50E-07 |
| TUCP_002410 | XLOC_101658 | ENSRNOT000000071929 | 0.963333701  | 4.91E-07 |
| TUCP_002410 | XLOC_101658 | ENSRNOT000000073193 | 0.960170975  | 7.38E-07 |
| TUCP_002410 | XLOC_101658 | ENSRNOT000000075057 | 0.953185387  | 1.64E-06 |

|             |             |                     |              |          |
|-------------|-------------|---------------------|--------------|----------|
| TUCP_002410 | XLOC_101658 | ENSRNOT00000017746  | 0.955638825  | 1.26E-06 |
| TUCP_002410 | XLOC_101658 | ENSRNOT00000023569  | 0.957581962  | 1.01E-06 |
| TUCP_002410 | XLOC_101658 | ENSRNOT00000067626  | 0.958738298  | 8.79E-07 |
| TUCP_002410 | XLOC_101658 | ENSRNOT00000017626  | 0.951558286  | 1.94E-06 |
| TUCP_002410 | XLOC_101658 | ENSRNOT00000037946  | 0.950163836  | 2.23E-06 |
| TUCP_002410 | XLOC_101658 | ENSRNOT00000070825  | 0.955970099  | 1.21E-06 |
| TUCP_002410 | XLOC_101658 | ENSRNOT00000003359  | 0.95515343   | 1.32E-06 |
| TUCP_002410 | XLOC_101658 | ENSRNOT00000025134  | 0.96027147   | 7.29E-07 |
| TUCP_002410 | XLOC_101658 | ENSRNOT00000009345  | 0.960485128  | 7.10E-07 |
| TUCP_002410 | XLOC_101658 | ENSRNOT00000013733  | 0.95718523   | 1.05E-06 |
| TUCP_002410 | XLOC_101658 | ENSRNOT00000019816  | 0.952879157  | 1.69E-06 |
| TUCP_002410 | XLOC_101658 | ENSRNOT00000038032  | 0.956325952  | 1.16E-06 |
| TUCP_002410 | XLOC_101658 | ENSRNOT00000077706  | -0.974276522 | 8.50E-08 |
| TUCP_002410 | XLOC_101658 | ENSRNOT00000089980  | 0.962178884  | 5.72E-07 |
| TUCP_002410 | XLOC_101658 | ENSRNOT00000025221  | 0.976105581  | 5.89E-08 |
| TUCP_002410 | XLOC_101658 | ENSRNOT00000074515  | 0.96811101   | 2.46E-07 |
| TUCP_002410 | XLOC_101658 | ENSRNOT00000024753  | 0.978666148  | 3.36E-08 |
| TUCP_002410 | XLOC_101658 | ENSRNOT00000077730  | 0.957361261  | 1.03E-06 |
| TUCP_002410 | XLOC_101658 | ENSRNOT00000065722  | 0.981239174  | 1.77E-08 |
| TUCP_002410 | XLOC_101658 | ENSRNOT00000024452  | 0.95149541   | 1.95E-06 |
| TUCP_002410 | XLOC_101658 | ENSRNOT00000089294  | 0.978923759  | 3.16E-08 |
| TUCP_002410 | XLOC_101658 | ENSRNOT00000024326  | 0.950761774  | 2.10E-06 |
| TUCP_002410 | XLOC_101658 | ENSRNOT00000024456  | 0.954235895  | 1.46E-06 |
| TUCP_002410 | XLOC_101658 | ENSRNOT0000001631   | 0.96006288   | 7.48E-07 |
| TUCP_002410 | XLOC_101658 | ENSRNOT00000014832  | 0.952550367  | 1.75E-06 |
| TUCP_002410 | XLOC_101658 | ENSRNOT00000007855  | -0.974285633 | 8.48E-08 |
| TUCP_002410 | XLOC_101658 | ENSRNOT00000000258  | 0.960428713  | 7.15E-07 |
| TUCP_002410 | XLOC_101658 | ENSRNOT00000080222  | 0.95300724   | 1.67E-06 |
| TUCP_002410 | XLOC_101658 | ENSRNOT00000018473  | 0.96288039   | 5.21E-07 |
| TUCP_002410 | XLOC_101658 | ENSRNOT00000078793  | -0.976264477 | 5.70E-08 |
| TUCP_002410 | XLOC_101658 | ENSRNOT00000000717  | 0.961978889  | 5.87E-07 |
| TUCP_002410 | XLOC_101658 | ENSRNOT00000026118  | 0.970965406  | 1.55E-07 |
| TUCP_002410 | XLOC_101658 | ENSRNOT00000017707  | 0.955472302  | 1.28E-06 |
| TUCP_002410 | XLOC_101658 | ENSRNOT00000006946  | 0.953583276  | 1.57E-06 |
| TUCP_002410 | XLOC_101658 | ENSRNOT00000049048  | 0.967850765  | 2.56E-07 |
| TUCP_002410 | XLOC_101658 | ENSRNOT00000037955  | 0.959632477  | 7.89E-07 |
| TUCP_002410 | XLOC_101658 | ENSRNOT000000031692 | 0.958771868  | 8.75E-07 |
| TUCP_002410 | XLOC_101658 | ENSRNOT00000018877  | 0.969796754  | 1.88E-07 |
| TUCP_002410 | XLOC_101658 | ENSRNOT00000025104  | 0.95982894   | 7.70E-07 |
| TUCP_002410 | XLOC_101658 | ENSRNOT00000008585  | 0.956124729  | 1.19E-06 |
| TUCP_002410 | XLOC_101658 | ENSRNOT00000012017  | 0.956555162  | 1.13E-06 |
| TUCP_002410 | XLOC_101658 | ENSRNOT00000018050  | 0.961500564  | 6.24E-07 |
| TUCP_002410 | XLOC_101658 | ENSRNOT00000030222  | 0.974965613  | 7.43E-08 |
| TUCP_002410 | XLOC_101658 | ENSRNOT00000089066  | -0.952405852 | 1.78E-06 |
| TUCP_002410 | XLOC_101658 | ENSRNOT00000017339  | 0.956611197  | 1.13E-06 |
| TUCP_002410 | XLOC_101658 | ENSRNOT00000072890  | 0.958085212  | 9.50E-07 |
| TUCP_002410 | XLOC_101658 | ENSRNOT00000039177  | 0.961888756  | 5.94E-07 |
| TUCP_002410 | XLOC_101658 | ENSRNOT00000086456  | 0.955901888  | 1.22E-06 |
| TUCP_002410 | XLOC_101658 | ENSRNOT00000020417  | 0.953288318  | 1.62E-06 |
| TUCP_002410 | XLOC_101658 | ENSRNOT00000006804  | -0.966434068 | 3.17E-07 |
| TUCP_002410 | XLOC_101658 | ENSRNOT00000043752  | 0.964336073  | 4.28E-07 |

|             |             |                    |              |          |
|-------------|-------------|--------------------|--------------|----------|
| TUCP_002410 | XLOC_101658 | ENSRNOT00000030823 | 0.957357184  | 1.03E-06 |
| TUCP_002410 | XLOC_101658 | ENSRNOT00000020809 | 0.962798437  | 5.27E-07 |
| TUCP_002410 | XLOC_101658 | ENSRNOT00000013481 | 0.958971196  | 8.55E-07 |
| TUCP_002410 | XLOC_101658 | ENSRNOT0000001605  | 0.96179829   | 6.01E-07 |
| TUCP_002410 | XLOC_101658 | ENSRNOT00000092024 | -0.953993258 | 1.50E-06 |
| TUCP_002410 | XLOC_101658 | ENSRNOT00000005686 | 0.956008471  | 1.20E-06 |
| TUCP_002410 | XLOC_101658 | ENSRNOT00000080013 | 0.970510786  | 1.67E-07 |
| TUCP_002410 | XLOC_101658 | ENSRNOT00000025791 | 0.957086567  | 1.07E-06 |
| TUCP_002410 | XLOC_101658 | ENSRNOT00000080216 | 0.960678419  | 6.93E-07 |
| TUCP_002410 | XLOC_101658 | ENSRNOT00000003551 | 0.972432039  | 1.20E-07 |
| TUCP_002410 | XLOC_101658 | ENSRNOT00000088884 | 0.953194906  | 1.64E-06 |
| TUCP_002410 | XLOC_101658 | ENSRNOT00000076388 | 0.971481859  | 1.42E-07 |
| TUCP_002410 | XLOC_101658 | ENSRNOT00000020982 | 0.960442229  | 7.14E-07 |
| TUCP_002410 | XLOC_101658 | ENSRNOT00000005155 | -0.965569553 | 3.60E-07 |
| TUCP_002410 | XLOC_101658 | ENSRNOT00000019647 | 0.957745123  | 9.88E-07 |
| TUCP_002410 | XLOC_101658 | ENSRNOT00000086147 | 0.951353335  | 1.98E-06 |
| TUCP_002410 | XLOC_101658 | ENSRNOT00000009994 | 0.950850684  | 2.08E-06 |
| TUCP_002410 | XLOC_101658 | ENSRNOT00000018846 | 0.954688748  | 1.39E-06 |
| TUCP_002410 | XLOC_101658 | ENSRNOT00000077040 | 0.970673455  | 1.63E-07 |
| TUCP_002410 | XLOC_101658 | ENSRNOT00000077367 | 0.958731405  | 8.80E-07 |
| TUCP_002410 | XLOC_101658 | ENSRNOT00000010915 | 0.954837861  | 1.37E-06 |
| TUCP_002410 | XLOC_101658 | ENSRNOT00000038994 | 0.953285109  | 1.62E-06 |
| TUCP_002410 | XLOC_101658 | ENSRNOT00000064535 | 0.956874732  | 1.09E-06 |
| TUCP_002410 | XLOC_101658 | ENSRNOT00000018341 | 0.969930953  | 1.84E-07 |
| TUCP_002410 | XLOC_101658 | ENSRNOT00000025086 | 0.965310724  | 3.73E-07 |
| TUCP_002410 | XLOC_101658 | ENSRNOT00000038511 | 0.956999607  | 1.08E-06 |
| TUCP_002410 | XLOC_101658 | ENSRNOT00000002511 | 0.962653391  | 5.37E-07 |
| TUCP_002410 | XLOC_101658 | ENSRNOT00000082963 | 0.950772309  | 2.10E-06 |
| TUCP_002410 | XLOC_101658 | ENSRNOT00000024924 | 0.979702494  | 2.62E-08 |
| TUCP_002410 | XLOC_101658 | ENSRNOT00000072632 | 0.967502777  | 2.70E-07 |
| TUCP_002410 | XLOC_101658 | ENSRNOT00000079784 | 0.974880904  | 7.55E-08 |
| TUCP_002410 | XLOC_101658 | ENSRNOT00000079011 | 0.959246158  | 8.27E-07 |
| TUCP_002410 | XLOC_101658 | ENSRNOT00000010621 | 0.958856413  | 8.66E-07 |
| TUCP_002410 | XLOC_101658 | ENSRNOT00000010127 | -0.953195908 | 1.63E-06 |
| TUCP_002410 | XLOC_101658 | ENSRNOT00000013553 | -0.954080372 | 1.49E-06 |
| TUCP_002410 | XLOC_101658 | ENSRNOT00000085458 | 0.959965849  | 7.57E-07 |
| TUCP_002410 | XLOC_101658 | ENSRNOT00000026767 | -0.962810175 | 5.26E-07 |
| TUCP_002410 | XLOC_101658 | ENSRNOT00000000124 | 0.96512088   | 3.83E-07 |
| TUCP_002410 | XLOC_101658 | ENSRNOT00000043581 | 0.971109339  | 1.51E-07 |
| TUCP_002410 | XLOC_101658 | ENSRNOT00000010419 | -0.951424871 | 1.96E-06 |
| TUCP_002410 | XLOC_101658 | ENSRNOT00000011694 | 0.952639333  | 1.73E-06 |
| TUCP_002410 | XLOC_101658 | ENSRNOT00000039572 | 0.95829127   | 9.27E-07 |
| TUCP_002410 | XLOC_101658 | ENSRNOT00000078906 | 0.971810412  | 1.34E-07 |
| TUCP_002410 | XLOC_101658 | ENSRNOT00000082108 | 0.958753466  | 8.77E-07 |
| TUCP_002410 | XLOC_101658 | ENSRNOT00000028781 | -0.955916675 | 1.22E-06 |
| TUCP_002410 | XLOC_101658 | ENSRNOT00000002510 | 0.954411885  | 1.44E-06 |
| TUCP_002410 | XLOC_101658 | ENSRNOT00000087033 | 0.962522394  | 5.47E-07 |
| TUCP_002410 | XLOC_101658 | ENSRNOT00000013535 | 0.967274929  | 2.80E-07 |
| TUCP_002410 | XLOC_101658 | ENSRNOT00000024841 | 0.96689943   | 2.96E-07 |
| TUCP_002410 | XLOC_101658 | ENSRNOT00000066561 | 0.978765993  | 3.28E-08 |
| TUCP_002410 | XLOC_101658 | ENSRNOT00000023543 | 0.962788358  | 5.28E-07 |

|             |             |                    |              |          |
|-------------|-------------|--------------------|--------------|----------|
| TUCP_002410 | XLOC_101658 | ENSRNOT00000076485 | 0.951533589  | 1.94E-06 |
| TUCP_002410 | XLOC_101658 | ENSRNOT00000066199 | 0.952636891  | 1.73E-06 |
| TUCP_002410 | XLOC_101658 | ENSRNOT00000089016 | 0.974947887  | 7.45E-08 |
| TUCP_002410 | XLOC_101658 | ENSRNOT00000019358 | 0.975187052  | 7.11E-08 |
| TUCP_002410 | XLOC_101658 | ENSRNOT00000022864 | 0.950529523  | 2.15E-06 |
| TUCP_002410 | XLOC_101658 | ENSRNOT00000025097 | -0.952612765 | 1.74E-06 |
| TUCP_002410 | XLOC_101658 | ENSRNOT00000031672 | 0.970334709  | 1.72E-07 |
| TUCP_002410 | XLOC_101658 | ENSRNOT00000020909 | 0.951893355  | 1.87E-06 |
| TUCP_002410 | XLOC_101658 | ENSRNOT00000087556 | 0.973670567  | 9.53E-08 |
| TUCP_002410 | XLOC_101658 | ENSRNOT00000077727 | 0.957748252  | 9.88E-07 |
| TUCP_002410 | XLOC_101658 | ENSRNOT00000016376 | 0.953189211  | 1.64E-06 |
| TUCP_002410 | XLOC_101658 | ENSRNOT00000024938 | 0.967232047  | 2.82E-07 |
| TUCP_002410 | XLOC_101658 | ENSRNOT00000011511 | 0.965985453  | 3.39E-07 |
| TUCP_002410 | XLOC_101658 | ENSRNOT00000065642 | 0.957451679  | 1.02E-06 |
| TUCP_002410 | XLOC_101658 | ENSRNOT00000089086 | 0.957819171  | 9.80E-07 |
| TUCP_002410 | XLOC_101658 | ENSRNOT0000005286  | 0.96661013   | 3.09E-07 |
| TUCP_002410 | XLOC_101658 | ENSRNOT00000080418 | 0.956397359  | 1.15E-06 |
| TUCP_002410 | XLOC_101658 | ENSRNOT00000028876 | 0.953115944  | 1.65E-06 |
| TUCP_002410 | XLOC_101658 | ENSRNOT00000029753 | 0.958357098  | 9.20E-07 |
| TUCP_002410 | XLOC_101658 | ENSRNOT00000024933 | 0.950879676  | 2.07E-06 |
| TUCP_002410 | XLOC_101658 | ENSRNOT00000038464 | 0.956939925  | 1.08E-06 |
| TUCP_002410 | XLOC_101658 | ENSRNOT00000019778 | 0.96289733   | 5.20E-07 |
| TUCP_002410 | XLOC_101658 | ENSRNOT00000011320 | 0.968119691  | 2.46E-07 |
| TUCP_002410 | XLOC_101658 | ENSRNOT00000008359 | 0.970596122  | 1.65E-07 |
| TUCP_002410 | XLOC_101658 | ENSRNOT00000048022 | 0.968083999  | 2.47E-07 |
| TUCP_002410 | XLOC_101658 | ENSRNOT00000036195 | 0.956634082  | 1.12E-06 |
| TUCP_002799 | XLOC_118166 | ENSRNOT00000026631 | 0.958326083  | 9.23E-07 |
| TUCP_002799 | XLOC_118166 | ENSRNOT00000051494 | 0.952010074  | 1.85E-06 |
| TUCP_002799 | XLOC_118166 | ENSRNOT00000024000 | 0.959057367  | 8.46E-07 |
| TUCP_002799 | XLOC_118166 | ENSRNOT00000032248 | 0.963214679  | 4.99E-07 |
| TUCP_002799 | XLOC_118166 | ENSRNOT00000079742 | 0.962256692  | 5.66E-07 |
| TUCP_002799 | XLOC_118166 | ENSRNOT00000077503 | 0.965035143  | 3.88E-07 |
| TUCP_003113 | XLOC_132871 | ENSRNOT00000059459 | 0.99654236   | 3.87E-12 |
| TUCP_002797 | XLOC_117939 | ENSRNOT00000001196 | 0.960722752  | 6.89E-07 |
| TUCP_002797 | XLOC_117939 | ENSRNOT00000013745 | 0.961463591  | 6.27E-07 |
| TUCP_002797 | XLOC_117939 | ENSRNOT00000075397 | -0.951220679 | 2.00E-06 |
| TUCP_002797 | XLOC_117939 | ENSRNOT00000019848 | 0.97726521   | 4.60E-08 |
| TUCP_002797 | XLOC_117939 | ENSRNOT00000015568 | 0.95462867   | 1.40E-06 |
| TUCP_002797 | XLOC_117939 | ENSRNOT00000079130 | -0.95265872  | 1.73E-06 |
| TUCP_002797 | XLOC_117939 | ENSRNOT00000079644 | 0.983557229  | 9.21E-09 |
| TUCP_002797 | XLOC_117939 | ENSRNOT00000020267 | -0.968558143 | 2.30E-07 |
| TUCP_002797 | XLOC_117939 | ENSRNOT00000064305 | 0.978256944  | 3.69E-08 |
| TUCP_002797 | XLOC_117939 | ENSRNOT00000029508 | -0.957379901 | 1.03E-06 |
| TUCP_002797 | XLOC_117939 | ENSRNOT00000086310 | 0.960674379  | 6.93E-07 |
| TUCP_002797 | XLOC_117939 | ENSRNOT00000045233 | 0.972103193  | 1.27E-07 |
| TUCP_002797 | XLOC_117939 | ENSRNOT00000042633 | 0.963268744  | 4.95E-07 |
| TUCP_002797 | XLOC_117939 | ENSRNOT00000025309 | -0.967232053 | 2.82E-07 |
| TUCP_002797 | XLOC_117939 | ENSRNOT00000025308 | 0.966079314  | 3.34E-07 |
| TUCP_002797 | XLOC_117939 | ENSRNOT00000033015 | 0.97355075   | 9.75E-08 |
| TUCP_002797 | XLOC_117939 | ENSRNOT00000055540 | -0.950771689 | 2.10E-06 |
| TUCP_002797 | XLOC_117939 | ENSRNOT0000003247  | 0.965777801  | 3.49E-07 |

|             |             |                    |              |          |
|-------------|-------------|--------------------|--------------|----------|
| TUCP_002797 | XLOC_117939 | ENSRNOT00000085311 | 0.971492897  | 1.41E-07 |
| TUCP_002797 | XLOC_117939 | ENSRNOT00000015986 | 0.964654064  | 4.09E-07 |
| TUCP_002797 | XLOC_117939 | ENSRNOT00000025284 | 0.966982117  | 2.92E-07 |
| TUCP_002797 | XLOC_117939 | ENSRNOT00000022620 | -0.950191806 | 2.22E-06 |
| TUCP_002797 | XLOC_117939 | ENSRNOT00000015247 | 0.968838722  | 2.20E-07 |
| TUCP_002797 | XLOC_117939 | ENSRNOT00000057045 | 0.97263947   | 1.15E-07 |
| TUCP_002797 | XLOC_117939 | ENSRNOT00000035320 | 0.957146114  | 1.06E-06 |
| TUCP_002797 | XLOC_117939 | ENSRNOT00000022241 | 0.959714397  | 7.81E-07 |
| TUCP_002797 | XLOC_117939 | ENSRNOT00000084674 | 0.967780893  | 2.59E-07 |
| TUCP_002797 | XLOC_117939 | ENSRNOT00000019192 | 0.962348614  | 5.59E-07 |
| TUCP_002797 | XLOC_117939 | ENSRNOT00000003414 | 0.956592499  | 1.13E-06 |
| TUCP_002797 | XLOC_117939 | ENSRNOT00000003412 | 0.978798205  | 3.26E-08 |
| TUCP_002797 | XLOC_117939 | ENSRNOT00000077856 | 0.986771757  | 3.12E-09 |
| TUCP_002797 | XLOC_117939 | ENSRNOT00000018488 | 0.960652852  | 6.95E-07 |
| TUCP_002797 | XLOC_117939 | ENSRNOT00000080522 | 0.95198439   | 1.85E-06 |
| TUCP_002797 | XLOC_117939 | ENSRNOT00000000049 | 0.95637098   | 1.16E-06 |
| TUCP_002797 | XLOC_117939 | ENSRNOT00000030007 | 0.951926509  | 1.86E-06 |
| TUCP_002797 | XLOC_117939 | ENSRNOT00000045993 | 0.956418093  | 1.15E-06 |
| TUCP_002797 | XLOC_117939 | ENSRNOT00000075934 | 0.953533199  | 1.58E-06 |
| TUCP_002797 | XLOC_117939 | ENSRNOT00000082686 | 0.963581241  | 4.75E-07 |
| TUCP_002797 | XLOC_117939 | ENSRNOT00000076181 | 0.968898904  | 2.18E-07 |
| TUCP_002797 | XLOC_117939 | ENSRNOT00000092945 | 0.961354774  | 6.36E-07 |
| TUCP_002797 | XLOC_117939 | ENSRNOT00000024196 | -0.960590492 | 7.01E-07 |
| TUCP_002797 | XLOC_117939 | ENSRNOT00000026525 | 0.971731399  | 1.36E-07 |
| TUCP_002797 | XLOC_117939 | ENSRNOT00000028074 | 0.953822285  | 1.53E-06 |
| TUCP_002797 | XLOC_117939 | ENSRNOT00000084313 | 0.950952611  | 2.06E-06 |
| TUCP_002797 | XLOC_117939 | ENSRNOT00000059524 | 0.966235495  | 3.27E-07 |
| TUCP_002797 | XLOC_117939 | ENSRNOT00000058495 | 0.963749738  | 4.64E-07 |
| TUCP_002797 | XLOC_117939 | ENSRNOT00000001360 | 0.956048588  | 1.20E-06 |
| TUCP_002797 | XLOC_117939 | ENSRNOT00000023506 | 0.985550841  | 4.84E-09 |
| TUCP_002797 | XLOC_117939 | ENSRNOT00000017081 | 0.956441147  | 1.15E-06 |
| TUCP_002797 | XLOC_117939 | ENSRNOT00000087190 | 0.968868314  | 2.19E-07 |
| TUCP_002797 | XLOC_117939 | ENSRNOT00000083995 | 0.953362146  | 1.61E-06 |
| TUCP_002797 | XLOC_117939 | ENSRNOT00000011714 | 0.955483417  | 1.28E-06 |
| TUCP_002797 | XLOC_117939 | ENSRNOT00000045765 | 0.954312701  | 1.45E-06 |
| TUCP_002797 | XLOC_117939 | ENSRNOT00000030893 | 0.957420098  | 1.03E-06 |
| TUCP_002797 | XLOC_117939 | ENSRNOT00000024992 | 0.957270073  | 1.04E-06 |
| TUCP_002797 | XLOC_117939 | ENSRNOT00000000532 | 0.96083426   | 6.80E-07 |
| TUCP_002797 | XLOC_117939 | ENSRNOT0000002465  | -0.950263352 | 2.20E-06 |
| TUCP_002797 | XLOC_117939 | ENSRNOT00000033618 | -0.953192282 | 1.64E-06 |
| TUCP_002797 | XLOC_117939 | ENSRNOT00000019028 | -0.957633842 | 1.00E-06 |
| TUCP_002797 | XLOC_117939 | ENSRNOT00000016351 | 0.96951333   | 1.97E-07 |
| TUCP_002797 | XLOC_117939 | ENSRNOT00000013146 | -0.95133306  | 1.98E-06 |
| TUCP_002797 | XLOC_117939 | ENSRNOT00000021400 | 0.973316013  | 1.02E-07 |
| TUCP_002797 | XLOC_117939 | ENSRNOT00000011401 | 0.952213712  | 1.81E-06 |
| TUCP_002797 | XLOC_117939 | ENSRNOT00000085885 | 0.950624763  | 2.13E-06 |
| TUCP_002797 | XLOC_117939 | ENSRNOT00000082146 | 0.963863782  | 4.57E-07 |
| TUCP_002797 | XLOC_117939 | ENSRNOT00000031555 | 0.962845291  | 5.24E-07 |
| TUCP_002797 | XLOC_117939 | ENSRNOT00000000263 | -0.957498345 | 1.02E-06 |
| TUCP_002797 | XLOC_117939 | ENSRNOT00000086350 | 0.960067145  | 7.48E-07 |
| TUCP_002797 | XLOC_117939 | ENSRNOT00000050102 | 0.954813119  | 1.38E-06 |

|             |             |                     |              |          |
|-------------|-------------|---------------------|--------------|----------|
| TUCP_002797 | XLOC_117939 | ENSRNOT00000012625  | 0.978499322  | 3.49E-08 |
| TUCP_002797 | XLOC_117939 | ENSRNOT00000049285  | 0.966347308  | 3.21E-07 |
| TUCP_002797 | XLOC_117939 | ENSRNOT00000049536  | 0.965311554  | 3.73E-07 |
| TUCP_002797 | XLOC_117939 | ENSRNOT00000033196  | 0.973429421  | 9.98E-08 |
| TUCP_002797 | XLOC_117939 | ENSRNOT00000085911  | 0.955970011  | 1.21E-06 |
| TUCP_002797 | XLOC_117939 | ENSRNOT00000022478  | 0.951333284  | 1.98E-06 |
| TUCP_002797 | XLOC_117939 | ENSRNOT00000064723  | 0.957085995  | 1.07E-06 |
| TUCP_002797 | XLOC_117939 | ENSRNOT00000089673  | 0.97013476   | 1.78E-07 |
| TUCP_002797 | XLOC_117939 | ENSRNOT00000089185  | 0.966857993  | 2.98E-07 |
| TUCP_002797 | XLOC_117939 | ENSRNOT00000023977  | 0.969730719  | 1.90E-07 |
| TUCP_002797 | XLOC_117939 | ENSRNOT00000017420  | 0.960964731  | 6.68E-07 |
| TUCP_002797 | XLOC_117939 | ENSRNOT00000067741  | 0.979620669  | 2.68E-08 |
| TUCP_002797 | XLOC_117939 | ENSRNOT00000006765  | 0.979121616  | 3.02E-08 |
| TUCP_002797 | XLOC_117939 | ENSRNOT00000005644  | 0.983555565  | 9.21E-09 |
| TUCP_002797 | XLOC_117939 | ENSRNOT00000014885  | 0.973962127  | 9.02E-08 |
| TUCP_002797 | XLOC_117939 | ENSRNOT00000023786  | 0.96096263   | 6.69E-07 |
| TUCP_002797 | XLOC_117939 | ENSRNOT00000041091  | 0.976801211  | 5.09E-08 |
| TUCP_002797 | XLOC_117939 | ENSRNOT00000040548  | 0.967717314  | 2.62E-07 |
| TUCP_002797 | XLOC_117939 | ENSRNOT00000040060  | 0.973003537  | 1.08E-07 |
| TUCP_002797 | XLOC_117939 | ENSRNOT00000010962  | 0.979480074  | 2.77E-08 |
| TUCP_002797 | XLOC_117939 | ENSRNOT00000081835  | 0.959565046  | 7.95E-07 |
| TUCP_002797 | XLOC_117939 | ENSRNOT00000010620  | 0.973185066  | 1.04E-07 |
| TUCP_002797 | XLOC_117939 | ENSRNOT00000078856  | 0.95506659   | 1.34E-06 |
| TUCP_002797 | XLOC_117939 | ENSRNOT00000017692  | 0.95596335   | 1.21E-06 |
| TUCP_002797 | XLOC_117939 | ENSRNOT00000001036  | 0.954860178  | 1.37E-06 |
| TUCP_002797 | XLOC_117939 | ENSRNOT00000007044  | 0.972785737  | 1.12E-07 |
| TUCP_002797 | XLOC_117939 | ENSRNOT00000007367  | 0.965393621  | 3.69E-07 |
| TUCP_002797 | XLOC_117939 | ENSRNOT00000004941  | 0.951800898  | 1.89E-06 |
| TUCP_002797 | XLOC_117939 | ENSRNOT00000005148  | 0.973777995  | 9.34E-08 |
| TUCP_002797 | XLOC_117939 | ENSRNOT000000070912 | 0.970065442  | 1.80E-07 |
| TUCP_002797 | XLOC_117939 | ENSRNOT00000023252  | 0.95070529   | 2.11E-06 |
| TUCP_002797 | XLOC_117939 | ENSRNOT00000017603  | -0.954986657 | 1.35E-06 |
| TUCP_002797 | XLOC_117939 | ENSRNOT00000037809  | 0.950500554  | 2.15E-06 |
| TUCP_002797 | XLOC_117939 | ENSRNOT00000059807  | -0.956197445 | 1.18E-06 |
| TUCP_002797 | XLOC_117939 | ENSRNOT00000016776  | 0.955590377  | 1.26E-06 |
| TUCP_002797 | XLOC_117939 | ENSRNOT00000088677  | 0.964717968  | 4.06E-07 |
| TUCP_002797 | XLOC_117939 | ENSRNOT00000008987  | 0.968713616  | 2.24E-07 |
| TUCP_002797 | XLOC_117939 | ENSRNOT00000092876  | 0.954281447  | 1.46E-06 |
| TUCP_002797 | XLOC_117939 | ENSRNOT00000073239  | 0.969553102  | 1.96E-07 |
| TUCP_002797 | XLOC_117939 | ENSRNOT00000019473  | 0.987214283  | 2.63E-09 |
| TUCP_002797 | XLOC_117939 | ENSRNOT00000001099  | 0.960291166  | 7.27E-07 |
| TUCP_002797 | XLOC_117939 | ENSRNOT00000008222  | 0.951292741  | 1.99E-06 |
| TUCP_002797 | XLOC_117939 | ENSRNOT00000000513  | -0.969474862 | 1.98E-07 |
| TUCP_002797 | XLOC_117939 | ENSRNOT00000013058  | -0.962903516 | 5.20E-07 |
| TUCP_002797 | XLOC_117939 | ENSRNOT00000002037  | 0.957107312  | 1.06E-06 |
| TUCP_002797 | XLOC_117939 | ENSRNOT00000038178  | 0.973671163  | 9.53E-08 |
| TUCP_002797 | XLOC_117939 | ENSRNOT00000089829  | 0.958490521  | 9.05E-07 |
| TUCP_002797 | XLOC_117939 | ENSRNOT00000091050  | 0.97265693   | 1.15E-07 |
| TUCP_002797 | XLOC_117939 | ENSRNOT00000001135  | 0.962312109  | 5.62E-07 |
| TUCP_002797 | XLOC_117939 | ENSRNOT00000009963  | -0.954585358 | 1.41E-06 |
| TUCP_002797 | XLOC_117939 | ENSRNOT00000067566  | 0.955497333  | 1.28E-06 |

|             |             |                     |             |          |
|-------------|-------------|---------------------|-------------|----------|
| TUCP_002797 | XLOC_117939 | ENSRNOT00000014479  | 0.967882479 | 2.55E-07 |
| TUCP_002797 | XLOC_117939 | ENSRNOT00000003326  | 0.967953773 | 2.52E-07 |
| TUCP_002797 | XLOC_117939 | ENSRNOT000000086813 | 0.973692985 | 9.49E-08 |
| TUCP_002797 | XLOC_117939 | ENSRNOT00000012699  | 0.961170662 | 6.51E-07 |
| TUCP_002797 | XLOC_117939 | ENSRNOT00000004007  | 0.951558323 | 1.94E-06 |
| TUCP_002797 | XLOC_117939 | ENSRNOT000000057898 | 0.958471168 | 9.07E-07 |
| TUCP_002797 | XLOC_117939 | ENSRNOT000000090338 | 0.983047787 | 1.07E-08 |
| TUCP_002797 | XLOC_117939 | ENSRNOT000000036838 | 0.973919939 | 9.10E-08 |
| TUCP_002797 | XLOC_117939 | ENSRNOT00000006443  | 0.96412586  | 4.41E-07 |
| TUCP_002797 | XLOC_117939 | ENSRNOT00000015618  | 0.959282089 | 8.23E-07 |
| TUCP_002797 | XLOC_117939 | ENSRNOT00000014605  | 0.950601607 | 2.13E-06 |
| TUCP_002797 | XLOC_117939 | ENSRNOT00000012583  | 0.955632005 | 1.26E-06 |
| TUCP_002797 | XLOC_117939 | ENSRNOT000000073643 | 0.954640466 | 1.40E-06 |
| TUCP_002797 | XLOC_117939 | ENSRNOT00000015579  | 0.962256158 | 5.66E-07 |
| TUCP_002797 | XLOC_117939 | ENSRNOT000000022502 | 0.958968896 | 8.55E-07 |
| TUCP_002797 | XLOC_117939 | ENSRNOT000000026928 | 0.967911195 | 2.54E-07 |
| TUCP_002797 | XLOC_117939 | ENSRNOT00000010252  | 0.954145415 | 1.48E-06 |
| TUCP_002797 | XLOC_117939 | ENSRNOT000000026920 | 0.959010984 | 8.51E-07 |
| TUCP_002797 | XLOC_117939 | ENSRNOT000000021802 | -0.95254472 | 1.75E-06 |
| TUCP_002797 | XLOC_117939 | ENSRNOT000000077479 | 0.975398288 | 6.81E-08 |
| TUCP_002797 | XLOC_117939 | ENSRNOT000000025856 | 0.963800279 | 4.61E-07 |
| TUCP_002797 | XLOC_117939 | ENSRNOT000000087748 | 0.952502573 | 1.76E-06 |
| TUCP_002797 | XLOC_117939 | ENSRNOT00000017469  | 0.974624596 | 7.94E-08 |
| TUCP_002797 | XLOC_117939 | ENSRNOT00000017254  | 0.960916358 | 6.73E-07 |
| TUCP_002797 | XLOC_117939 | ENSRNOT000000055957 | 0.954756246 | 1.38E-06 |
| TUCP_002797 | XLOC_117939 | ENSRNOT00000010674  | 0.97649071  | 5.44E-08 |
| TUCP_002797 | XLOC_117939 | ENSRNOT000000023664 | 0.969635626 | 1.93E-07 |
| TUCP_002797 | XLOC_117939 | ENSRNOT000000091272 | 0.956647435 | 1.12E-06 |
| TUCP_002797 | XLOC_117939 | ENSRNOT00000016730  | 0.969325622 | 2.03E-07 |
| TUCP_002797 | XLOC_117939 | ENSRNOT000000024286 | 0.953244581 | 1.63E-06 |
| TUCP_002797 | XLOC_117939 | ENSRNOT000000028066 | 0.950057012 | 2.25E-06 |
| TUCP_002797 | XLOC_117939 | ENSRNOT000000023567 | 0.964964184 | 3.92E-07 |
| TUCP_002797 | XLOC_117939 | ENSRNOT000000026398 | 0.962683354 | 5.35E-07 |
| TUCP_002797 | XLOC_117939 | ENSRNOT000000050350 | 0.962087275 | 5.79E-07 |
| TUCP_002797 | XLOC_117939 | ENSRNOT000000071482 | 0.971953413 | 1.30E-07 |
| TUCP_002797 | XLOC_117939 | ENSRNOT000000009136 | 0.955841834 | 1.23E-06 |
| TUCP_002797 | XLOC_117939 | ENSRNOT000000027032 | 0.952040411 | 1.84E-06 |
| TUCP_002797 | XLOC_117939 | ENSRNOT00000010516  | 0.980541759 | 2.13E-08 |
| TUCP_002797 | XLOC_117939 | ENSRNOT00000000527  | 0.968084827 | 2.47E-07 |
| TUCP_002797 | XLOC_117939 | ENSRNOT00000011907  | 0.960810505 | 6.82E-07 |
| TUCP_002797 | XLOC_117939 | ENSRNOT00000000529  | 0.97353605  | 9.78E-08 |
| TUCP_002797 | XLOC_117939 | ENSRNOT000000081110 | 0.968538171 | 2.30E-07 |
| TUCP_002797 | XLOC_117939 | ENSRNOT000000039730 | 0.951183089 | 2.01E-06 |
| TUCP_002797 | XLOC_117939 | ENSRNOT000000028527 | 0.955777616 | 1.24E-06 |
| TUCP_002797 | XLOC_117939 | ENSRNOT000000088202 | 0.981889656 | 1.49E-08 |
| TUCP_002797 | XLOC_117939 | ENSRNOT000000088201 | 0.959231085 | 8.28E-07 |
| TUCP_002797 | XLOC_117939 | ENSRNOT000000066581 | 0.958971416 | 8.55E-07 |
| TUCP_002797 | XLOC_117939 | ENSRNOT000000078161 | 0.955790247 | 1.23E-06 |
| TUCP_002797 | XLOC_117939 | ENSRNOT00000019644  | 0.953774747 | 1.54E-06 |
| TUCP_002797 | XLOC_117939 | ENSRNOT00000003600  | 0.95171003  | 1.91E-06 |
| TUCP_002797 | XLOC_117939 | ENSRNOT000000082151 | 0.960451619 | 7.13E-07 |

|             |             |                    |              |          |
|-------------|-------------|--------------------|--------------|----------|
| TUCP_002797 | XLOC_117939 | ENSRNOT00000020272 | 0.969953641  | 1.83E-07 |
| TUCP_002797 | XLOC_117939 | ENSRNOT00000000155 | -0.974895836 | 7.53E-08 |
| TUCP_002797 | XLOC_117939 | ENSRNOT00000001607 | -0.952449788 | 1.77E-06 |
| TUCP_002797 | XLOC_117939 | ENSRNOT00000036282 | -0.954432533 | 1.43E-06 |
| TUCP_002797 | XLOC_117939 | ENSRNOT00000040629 | -0.972107161 | 1.27E-07 |
| TUCP_002797 | XLOC_117939 | ENSRNOT00000046126 | 0.971929006  | 1.31E-07 |
| TUCP_002797 | XLOC_117939 | ENSRNOT00000044975 | 0.950110926  | 2.24E-06 |
| TUCP_002797 | XLOC_117939 | ENSRNOT00000006376 | 0.967175551  | 2.84E-07 |
| TUCP_002797 | XLOC_117939 | ENSRNOT00000033048 | 0.962545483  | 5.45E-07 |
| TUCP_002797 | XLOC_117939 | ENSRNOT00000077401 | 0.972463006  | 1.19E-07 |
| TUCP_002797 | XLOC_117939 | ENSRNOT00000010056 | -0.960197148 | 7.36E-07 |
| TUCP_002797 | XLOC_117939 | ENSRNOT00000058763 | 0.981561884  | 1.63E-08 |
| TUCP_002797 | XLOC_117939 | ENSRNOT00000023962 | 0.95568061   | 1.25E-06 |
| TUCP_002797 | XLOC_117939 | ENSRNOT00000060300 | 0.957388186  | 1.03E-06 |
| TUCP_002797 | XLOC_117939 | ENSRNOT00000015763 | 0.958855705  | 8.67E-07 |
| TUCP_002797 | XLOC_117939 | ENSRNOT00000025819 | 0.96888835   | 2.18E-07 |
| TUCP_002797 | XLOC_117939 | ENSRNOT00000015318 | 0.974535473  | 8.08E-08 |
| TUCP_002797 | XLOC_117939 | ENSRNOT00000073388 | 0.958485175  | 9.06E-07 |
| TUCP_002797 | XLOC_117939 | ENSRNOT00000014317 | 0.955720157  | 1.24E-06 |
| TUCP_002797 | XLOC_117939 | ENSRNOT00000045532 | 0.979867521  | 2.52E-08 |
| TUCP_002797 | XLOC_117939 | ENSRNOT00000078862 | -0.951110664 | 2.03E-06 |
| TUCP_002797 | XLOC_117939 | ENSRNOT00000017688 | 0.978039375  | 3.88E-08 |
| TUCP_002797 | XLOC_117939 | ENSRNOT00000039296 | -0.958503496 | 9.04E-07 |
| TUCP_002797 | XLOC_117939 | ENSRNOT00000075656 | 0.96607967   | 3.34E-07 |
| TUCP_002797 | XLOC_117939 | ENSRNOT00000018506 | 0.962505075  | 5.48E-07 |
| TUCP_002797 | XLOC_117939 | ENSRNOT00000083573 | 0.95164858   | 1.92E-06 |
| TUCP_002797 | XLOC_117939 | ENSRNOT00000088799 | 0.952213063  | 1.81E-06 |
| TUCP_002797 | XLOC_117939 | ENSRNOT00000045443 | 0.96325425   | 4.96E-07 |
| TUCP_002797 | XLOC_117939 | ENSRNOT00000029620 | 0.950426859  | 2.17E-06 |
| TUCP_002797 | XLOC_117939 | ENSRNOT00000050721 | 0.969667505  | 1.92E-07 |
| TUCP_002797 | XLOC_117939 | ENSRNOT00000017362 | 0.962091244  | 5.79E-07 |
| TUCP_002797 | XLOC_117939 | ENSRNOT00000019465 | 0.958515738  | 9.02E-07 |
| TUCP_002797 | XLOC_117939 | ENSRNOT00000018696 | 0.98259573   | 1.22E-08 |
| TUCP_002797 | XLOC_117939 | ENSRNOT00000009073 | 0.971182517  | 1.49E-07 |
| TUCP_002797 | XLOC_117939 | ENSRNOT00000001586 | 0.960135909  | 7.41E-07 |
| TUCP_002797 | XLOC_117939 | ENSRNOT00000013043 | 0.971259972  | 1.47E-07 |
| TUCP_002797 | XLOC_117939 | ENSRNOT00000034603 | 0.950036448  | 2.25E-06 |
| TUCP_002797 | XLOC_117939 | ENSRNOT00000013695 | 0.950396759  | 2.18E-06 |
| TUCP_002797 | XLOC_117939 | ENSRNOT00000016541 | 0.972923073  | 1.10E-07 |
| TUCP_002797 | XLOC_117939 | ENSRNOT00000081621 | -0.952851567 | 1.69E-06 |
| TUCP_002797 | XLOC_117939 | ENSRNOT00000027301 | 0.969025344  | 2.13E-07 |
| TUCP_002797 | XLOC_117939 | ENSRNOT00000023033 | 0.950105647  | 2.24E-06 |
| TUCP_002797 | XLOC_117939 | ENSRNOT00000009000 | 0.975762267  | 6.33E-08 |
| TUCP_002797 | XLOC_117939 | ENSRNOT00000024568 | 0.955008958  | 1.35E-06 |
| TUCP_002797 | XLOC_117939 | ENSRNOT00000039523 | -0.952333322 | 1.79E-06 |
| TUCP_002797 | XLOC_117939 | ENSRNOT00000011731 | 0.972011507  | 1.29E-07 |
| TUCP_002797 | XLOC_117939 | ENSRNOT00000089545 | 0.958359653  | 9.19E-07 |
| TUCP_002797 | XLOC_117939 | ENSRNOT00000083876 | 0.959501192  | 8.02E-07 |
| TUCP_002797 | XLOC_117939 | ENSRNOT00000085151 | 0.965271638  | 3.75E-07 |
| TUCP_002797 | XLOC_117939 | ENSRNOT00000011948 | 0.954851213  | 1.37E-06 |
| TUCP_002797 | XLOC_117939 | ENSRNOT00000073079 | 0.962134154  | 5.75E-07 |



|             |             |                    |              |          |
|-------------|-------------|--------------------|--------------|----------|
| TUCP_002797 | XLOC_117939 | ENSRNOT00000019121 | 0.975788628  | 6.29E-08 |
| TUCP_002797 | XLOC_117939 | ENSRNOT00000012361 | 0.970235875  | 1.75E-07 |
| TUCP_002797 | XLOC_117939 | ENSRNOT00000086775 | 0.965976123  | 3.39E-07 |
| TUCP_002797 | XLOC_117939 | ENSRNOT00000083351 | 0.963538865  | 4.77E-07 |
| TUCP_002797 | XLOC_117939 | ENSRNOT00000036338 | 0.953449513  | 1.59E-06 |
| TUCP_002797 | XLOC_117939 | ENSRNOT00000006111 | 0.956427606  | 1.15E-06 |
| TUCP_002797 | XLOC_117939 | ENSRNOT00000013864 | 0.969407835  | 2.00E-07 |
| TUCP_002797 | XLOC_117939 | ENSRNOT00000013116 | 0.954172484  | 1.47E-06 |
| TUCP_002797 | XLOC_117939 | ENSRNOT00000020932 | 0.965702438  | 3.53E-07 |
| TUCP_002797 | XLOC_117939 | ENSRNOT00000030975 | 0.96381198   | 4.60E-07 |
| TUCP_002797 | XLOC_117939 | ENSRNOT00000091863 | 0.951405305  | 1.97E-06 |
| TUCP_002797 | XLOC_117939 | ENSRNOT00000091866 | 0.978187014  | 3.75E-08 |
| TUCP_002797 | XLOC_117939 | ENSRNOT00000081327 | 0.962217541  | 5.69E-07 |
| TUCP_002797 | XLOC_117939 | ENSRNOT00000003544 | 0.95395916   | 1.51E-06 |
| TUCP_002797 | XLOC_117939 | ENSRNOT00000022194 | 0.975954972  | 6.08E-08 |
| TUCP_002797 | XLOC_117939 | ENSRNOT00000064450 | 0.963057999  | 5.09E-07 |
| TUCP_002797 | XLOC_117939 | ENSRNOT00000064452 | 0.955511487  | 1.27E-06 |
| TUCP_002797 | XLOC_117939 | ENSRNOT00000067739 | 0.961040899  | 6.62E-07 |
| TUCP_002797 | XLOC_117939 | ENSRNOT00000019386 | 0.969227888  | 2.06E-07 |
| TUCP_002797 | XLOC_117939 | ENSRNOT00000076230 | -0.962889839 | 5.21E-07 |
| TUCP_002797 | XLOC_117939 | ENSRNOT00000040348 | 0.956438733  | 1.15E-06 |
| TUCP_002797 | XLOC_117939 | ENSRNOT00000014134 | 0.960773386  | 6.85E-07 |
| TUCP_002797 | XLOC_117939 | ENSRNOT00000007738 | 0.984567352  | 6.72E-09 |
| TUCP_002797 | XLOC_117939 | ENSRNOT00000084552 | 0.96951356   | 1.97E-07 |
| TUCP_002797 | XLOC_117939 | ENSRNOT00000025980 | 0.956349264  | 1.16E-06 |
| TUCP_002797 | XLOC_117939 | ENSRNOT00000034883 | 0.960410061  | 7.17E-07 |
| TUCP_002797 | XLOC_117939 | ENSRNOT00000020155 | -0.951304739 | 1.99E-06 |
| TUCP_002797 | XLOC_117939 | ENSRNOT00000000707 | 0.973788453  | 9.32E-08 |
| TUCP_002797 | XLOC_117939 | ENSRNOT00000025913 | 0.953402369  | 1.60E-06 |
| TUCP_002797 | XLOC_117939 | ENSRNOT00000017232 | 0.950572165  | 2.14E-06 |
| TUCP_002797 | XLOC_117939 | ENSRNOT00000007949 | 0.961294664  | 6.41E-07 |
| TUCP_002797 | XLOC_117939 | ENSRNOT00000014585 | 0.967451483  | 2.72E-07 |
| TUCP_002797 | XLOC_117939 | ENSRNOT00000055888 | 0.951520666  | 1.94E-06 |
| TUCP_002797 | XLOC_117939 | ENSRNOT00000003691 | 0.968804077  | 2.21E-07 |
| TUCP_002797 | XLOC_117939 | ENSRNOT00000074261 | 0.973622275  | 9.62E-08 |
| TUCP_002797 | XLOC_117939 | ENSRNOT00000055062 | 0.96641952   | 3.18E-07 |
| TUCP_002797 | XLOC_117939 | ENSRNOT00000051522 | -0.973263344 | 1.03E-07 |
| TUCP_002797 | XLOC_117939 | ENSRNOT00000016939 | 0.954346323  | 1.45E-06 |
| TUCP_002797 | XLOC_117939 | ENSRNOT00000009238 | 0.971135988  | 1.50E-07 |
| TUCP_002797 | XLOC_117939 | ENSRNOT00000004842 | 0.963812945  | 4.60E-07 |
| TUCP_002797 | XLOC_117939 | ENSRNOT00000015131 | 0.952428588  | 1.77E-06 |
| TUCP_002797 | XLOC_117939 | ENSRNOT00000072031 | 0.97817461   | 3.76E-08 |
| TUCP_002797 | XLOC_117939 | ENSRNOT00000030329 | 0.969685255  | 1.92E-07 |
| TUCP_002797 | XLOC_117939 | ENSRNOT00000026057 | 0.956189381  | 1.18E-06 |
| TUCP_002797 | XLOC_117939 | ENSRNOT00000033450 | 0.971409236  | 1.43E-07 |
| TUCP_002797 | XLOC_117939 | ENSRNOT00000001935 | 0.957775931  | 9.85E-07 |
| TUCP_002797 | XLOC_117939 | ENSRNOT00000027125 | 0.959402165  | 8.11E-07 |
| TUCP_002797 | XLOC_117939 | ENSRNOT00000023078 | -0.977458733 | 4.41E-08 |
| TUCP_002797 | XLOC_117939 | ENSRNOT00000013463 | -0.964016991 | 4.47E-07 |
| TUCP_002797 | XLOC_117939 | ENSRNOT00000050223 | 0.966743229  | 3.03E-07 |
| TUCP_002797 | XLOC_117939 | ENSRNOT00000023483 | 0.950621976  | 2.13E-06 |

|             |             |                     |              |          |
|-------------|-------------|---------------------|--------------|----------|
| TUCP_002797 | XLOC_117939 | ENSRNOT0000007889   | 0.975055952  | 7.29E-08 |
| TUCP_002797 | XLOC_117939 | ENSRNOT00000061191  | 0.972070484  | 1.28E-07 |
| TUCP_002797 | XLOC_117939 | ENSRNOT00000017907  | 0.975091192  | 7.24E-08 |
| TUCP_002797 | XLOC_117939 | ENSRNOT00000028434  | 0.979666494  | 2.65E-08 |
| TUCP_002797 | XLOC_117939 | ENSRNOT00000025794  | 0.969249161  | 2.06E-07 |
| TUCP_002797 | XLOC_117939 | ENSRNOT00000058111  | 0.958518513  | 9.02E-07 |
| TUCP_002797 | XLOC_117939 | ENSRNOT00000001720  | 0.968874715  | 2.18E-07 |
| TUCP_002797 | XLOC_117939 | ENSRNOT00000002114  | 0.956909199  | 1.09E-06 |
| TUCP_002797 | XLOC_117939 | ENSRNOT00000009993  | 0.968305439  | 2.39E-07 |
| TUCP_002797 | XLOC_117939 | ENSRNOT00000007771  | 0.958962221  | 8.56E-07 |
| TUCP_002797 | XLOC_117939 | ENSRNOT00000046215  | 0.974811973  | 7.65E-08 |
| TUCP_002797 | XLOC_117939 | ENSRNOT00000018101  | 0.969324967  | 2.03E-07 |
| TUCP_002797 | XLOC_117939 | ENSRNOT00000000083  | 0.975920432  | 6.12E-08 |
| TUCP_002797 | XLOC_117939 | ENSRNOT000000061973 | 0.961757072  | 6.04E-07 |
| TUCP_002797 | XLOC_117939 | ENSRNOT000000028545 | 0.972698834  | 1.14E-07 |
| TUCP_002797 | XLOC_117939 | ENSRNOT00000001759  | 0.9633639    | 4.89E-07 |
| TUCP_002797 | XLOC_117939 | ENSRNOT00000019172  | 0.95220753   | 1.81E-06 |
| TUCP_002797 | XLOC_117939 | ENSRNOT00000068267  | 0.967121924  | 2.86E-07 |
| TUCP_002797 | XLOC_117939 | ENSRNOT00000020994  | 0.97150964   | 1.41E-07 |
| TUCP_002797 | XLOC_117939 | ENSRNOT00000068269  | 0.983436486  | 9.55E-09 |
| TUCP_002797 | XLOC_117939 | ENSRNOT00000019916  | 0.951818114  | 1.89E-06 |
| TUCP_002797 | XLOC_117939 | ENSRNOT000000074796 | 0.957197833  | 1.05E-06 |
| TUCP_002797 | XLOC_117939 | ENSRNOT000000032236 | 0.958668478  | 8.86E-07 |
| TUCP_002797 | XLOC_117939 | ENSRNOT000000036972 | 0.950796045  | 2.09E-06 |
| TUCP_002797 | XLOC_117939 | ENSRNOT00000019983  | 0.952575343  | 1.74E-06 |
| TUCP_002797 | XLOC_117939 | ENSRNOT000000025252 | 0.95475432   | 1.38E-06 |
| TUCP_002797 | XLOC_117939 | ENSRNOT000000074494 | 0.9672566    | 2.81E-07 |
| TUCP_002797 | XLOC_117939 | ENSRNOT00000049193  | 0.959074996  | 8.44E-07 |
| TUCP_002797 | XLOC_117939 | ENSRNOT000000036194 | 0.959259985  | 8.25E-07 |
| TUCP_002797 | XLOC_117939 | ENSRNOT000000000334 | 0.962684661  | 5.35E-07 |
| TUCP_002797 | XLOC_117939 | ENSRNOT000000077186 | 0.956630056  | 1.12E-06 |
| TUCP_002797 | XLOC_117939 | ENSRNOT000000084766 | -0.968108705 | 2.46E-07 |
| TUCP_002797 | XLOC_117939 | ENSRNOT00000014780  | 0.981513374  | 1.65E-08 |
| TUCP_002797 | XLOC_117939 | ENSRNOT00000014373  | 0.973538395  | 9.77E-08 |
| TUCP_002797 | XLOC_117939 | ENSRNOT00000026279  | 0.959622088  | 7.90E-07 |
| TUCP_002797 | XLOC_117939 | ENSRNOT00000003085  | 0.952802472  | 1.70E-06 |
| TUCP_002797 | XLOC_117939 | ENSRNOT000000004713 | 0.951204308  | 2.01E-06 |
| TUCP_002797 | XLOC_117939 | ENSRNOT000000073492 | 0.953350078  | 1.61E-06 |
| TUCP_002797 | XLOC_117939 | ENSRNOT00000021858  | -0.952931564 | 1.68E-06 |
| TUCP_002797 | XLOC_117939 | ENSRNOT000000089624 | 0.976923597  | 4.96E-08 |
| TUCP_002797 | XLOC_117939 | ENSRNOT000000065942 | 0.968368528  | 2.36E-07 |
| TUCP_002797 | XLOC_117939 | ENSRNOT000000074389 | 0.959802725  | 7.73E-07 |
| TUCP_002797 | XLOC_117939 | ENSRNOT000000066204 | 0.979864405  | 2.52E-08 |
| TUCP_002797 | XLOC_117939 | ENSRNOT000000039836 | 0.963341408  | 4.90E-07 |
| TUCP_002797 | XLOC_117939 | ENSRNOT000000076105 | 0.967727948  | 2.61E-07 |
| TUCP_002797 | XLOC_117939 | ENSRNOT000000068683 | 0.954954636  | 1.35E-06 |
| TUCP_002797 | XLOC_117939 | ENSRNOT000000092211 | 0.960760338  | 6.86E-07 |
| TUCP_002797 | XLOC_117939 | ENSRNOT000000000052 | 0.96225773   | 5.66E-07 |
| TUCP_002797 | XLOC_117939 | ENSRNOT00000015170  | 0.958076258  | 9.51E-07 |
| TUCP_002797 | XLOC_117939 | ENSRNOT000000073569 | 0.957274231  | 1.04E-06 |
| TUCP_002797 | XLOC_117939 | ENSRNOT00000017375  | 0.963236998  | 4.97E-07 |

|             |             |                    |              |          |
|-------------|-------------|--------------------|--------------|----------|
| TUCP_002797 | XLOC_117939 | ENSRNOT00000029635 | 0.966500921  | 3.14E-07 |
| TUCP_002797 | XLOC_117939 | ENSRNOT00000039377 | 0.955054317  | 1.34E-06 |
| TUCP_002797 | XLOC_117939 | ENSRNOT00000012881 | 0.964965937  | 3.92E-07 |
| TUCP_002797 | XLOC_117939 | ENSRNOT00000045855 | 0.958770938  | 8.75E-07 |
| TUCP_002797 | XLOC_117939 | ENSRNOT00000028363 | 0.966712181  | 3.04E-07 |
| TUCP_002797 | XLOC_117939 | ENSRNOT00000088133 | 0.980269987  | 2.28E-08 |
| TUCP_002797 | XLOC_117939 | ENSRNOT00000003715 | 0.963818662  | 4.60E-07 |
| TUCP_002797 | XLOC_117939 | ENSRNOT00000083968 | 0.951629732  | 1.92E-06 |
| TUCP_002797 | XLOC_117939 | ENSRNOT00000047634 | 0.963273493  | 4.95E-07 |
| TUCP_002797 | XLOC_117939 | ENSRNOT00000083964 | 0.979176034  | 2.98E-08 |
| TUCP_002797 | XLOC_117939 | ENSRNOT00000061304 | 0.97267956   | 1.15E-07 |
| TUCP_002797 | XLOC_117939 | ENSRNOT00000016447 | 0.960852157  | 6.78E-07 |
| TUCP_002797 | XLOC_117939 | ENSRNOT00000012314 | 0.953153473  | 1.64E-06 |
| TUCP_002797 | XLOC_117939 | ENSRNOT00000032202 | 0.954812537  | 1.38E-06 |
| TUCP_002797 | XLOC_117939 | ENSRNOT00000019130 | 0.966125454  | 3.32E-07 |
| TUCP_002797 | XLOC_117939 | ENSRNOT00000066888 | 0.973507297  | 9.83E-08 |
| TUCP_002797 | XLOC_117939 | ENSRNOT00000002151 | 0.96296465   | 5.16E-07 |
| TUCP_002797 | XLOC_117939 | ENSRNOT00000002152 | 0.956424056  | 1.15E-06 |
| TUCP_002797 | XLOC_117939 | ENSRNOT00000032667 | 0.958792923  | 8.73E-07 |
| TUCP_002797 | XLOC_117939 | ENSRNOT00000086340 | 0.97241921   | 1.20E-07 |
| TUCP_002797 | XLOC_117939 | ENSRNOT00000018328 | 0.967152511  | 2.85E-07 |
| TUCP_002797 | XLOC_117939 | ENSRNOT00000066247 | 0.950662253  | 2.12E-06 |
| TUCP_002797 | XLOC_117939 | ENSRNOT00000009726 | 0.96067326   | 6.93E-07 |
| TUCP_002797 | XLOC_117939 | ENSRNOT00000050119 | 0.95517129   | 1.32E-06 |
| TUCP_002797 | XLOC_117939 | ENSRNOT00000090853 | 0.952377861  | 1.78E-06 |
| TUCP_002797 | XLOC_117939 | ENSRNOT00000089265 | 0.955434872  | 1.28E-06 |
| TUCP_002797 | XLOC_117939 | ENSRNOT00000018864 | 0.956282641  | 1.17E-06 |
| TUCP_002797 | XLOC_117939 | ENSRNOT00000010079 | 0.97073437   | 1.61E-07 |
| TUCP_002797 | XLOC_117939 | ENSRNOT00000067836 | 0.959750606  | 7.77E-07 |
| TUCP_002797 | XLOC_117939 | ENSRNOT00000022117 | 0.978378337  | 3.59E-08 |
| TUCP_002797 | XLOC_117939 | ENSRNOT00000064068 | 0.958322245  | 9.23E-07 |
| TUCP_002797 | XLOC_117939 | ENSRNOT00000025222 | 0.957932041  | 9.67E-07 |
| TUCP_002797 | XLOC_117939 | ENSRNOT00000044073 | 0.960189902  | 7.37E-07 |
| TUCP_002797 | XLOC_117939 | ENSRNOT00000068528 | 0.964213177  | 4.35E-07 |
| TUCP_002797 | XLOC_117939 | ENSRNOT00000020794 | -0.954631741 | 1.40E-06 |
| TUCP_002797 | XLOC_117939 | ENSRNOT00000059487 | 0.954075589  | 1.49E-06 |
| TUCP_002797 | XLOC_117939 | ENSRNOT00000019713 | 0.967756367  | 2.60E-07 |
| TUCP_002797 | XLOC_117939 | ENSRNOT00000018782 | 0.952087252  | 1.83E-06 |
| TUCP_002797 | XLOC_117939 | ENSRNOT00000085214 | 0.979493245  | 2.76E-08 |
| TUCP_002797 | XLOC_117939 | ENSRNOT00000093385 | -0.952230367 | 1.81E-06 |
| TUCP_002797 | XLOC_117939 | ENSRNOT00000049725 | 0.951864931  | 1.88E-06 |
| TUCP_002797 | XLOC_117939 | ENSRNOT00000026235 | 0.957961234  | 9.63E-07 |
| TUCP_002797 | XLOC_117939 | ENSRNOT00000010753 | 0.967794218  | 2.59E-07 |
| TUCP_002797 | XLOC_117939 | ENSRNOT00000038448 | 0.962206853  | 5.70E-07 |
| TUCP_002797 | XLOC_117939 | ENSRNOT00000088615 | 0.98411893   | 7.75E-09 |
| TUCP_002797 | XLOC_117939 | ENSRNOT00000059181 | -0.950710112 | 2.11E-06 |
| TUCP_002797 | XLOC_117939 | ENSRNOT0000007077  | 0.994110822  | 5.52E-11 |
| TUCP_002797 | XLOC_117939 | ENSRNOT0000007079  | 0.968824472  | 2.20E-07 |
| TUCP_002797 | XLOC_117939 | ENSRNOT00000014809 | 0.970783184  | 1.60E-07 |
| TUCP_002797 | XLOC_117939 | ENSRNOT00000064849 | 0.985246509  | 5.37E-09 |
| TUCP_002797 | XLOC_117939 | ENSRNOT00000045950 | 0.952621479  | 1.74E-06 |

|             |             |                     |              |          |
|-------------|-------------|---------------------|--------------|----------|
| TUCP_002797 | XLOC_117939 | ENSRNOT00000023017  | 0.970756225  | 1.60E-07 |
| TUCP_002797 | XLOC_117939 | ENSRNOT00000017340  | 0.96905245   | 2.12E-07 |
| TUCP_002797 | XLOC_117939 | ENSRNOT00000016740  | -0.953249922 | 1.63E-06 |
| TUCP_002797 | XLOC_117939 | ENSRNOT00000038212  | 0.955036134  | 1.34E-06 |
| TUCP_002797 | XLOC_117939 | ENSRNOT00000068078  | 0.957025336  | 1.07E-06 |
| TUCP_002797 | XLOC_117939 | ENSRNOT00000092037  | 0.966083576  | 3.34E-07 |
| TUCP_002797 | XLOC_117939 | ENSRNOT00000080677  | 0.976854958  | 5.03E-08 |
| TUCP_002797 | XLOC_117939 | ENSRNOT00000028130  | 0.984250631  | 7.43E-09 |
| TUCP_002797 | XLOC_117939 | ENSRNOT00000063821  | 0.965380389  | 3.70E-07 |
| TUCP_002797 | XLOC_117939 | ENSRNOT00000005885  | 0.964764225  | 4.03E-07 |
| TUCP_002797 | XLOC_117939 | ENSRNOT0000002355   | 0.974465155  | 8.19E-08 |
| TUCP_002797 | XLOC_117939 | ENSRNOT00000044486  | 0.960421625  | 7.16E-07 |
| TUCP_002797 | XLOC_117939 | ENSRNOT00000079414  | 0.957515949  | 1.01E-06 |
| TUCP_002797 | XLOC_117939 | ENSRNOT00000001366  | 0.974305527  | 8.45E-08 |
| TUCP_002797 | XLOC_117939 | ENSRNOT00000036658  | 0.952593881  | 1.74E-06 |
| TUCP_002797 | XLOC_117939 | ENSRNOT00000011326  | 0.988753451  | 1.39E-09 |
| TUCP_002797 | XLOC_117939 | ENSRNOT00000083814  | 0.952897563  | 1.69E-06 |
| TUCP_000735 | XLOC_027319 | ENSRNOT000000057218 | 0.952067562  | 1.84E-06 |
| TUCP_002419 | XLOC_102344 | ENSRNOT00000005349  | 0.953864436  | 1.52E-06 |
| TUCP_002419 | XLOC_102344 | ENSRNOT00000011342  | 0.962166562  | 5.73E-07 |
| TUCP_002419 | XLOC_102344 | ENSRNOT00000017139  | 0.954804889  | 1.38E-06 |
| TUCP_002419 | XLOC_102344 | ENSRNOT00000076466  | 0.965735628  | 3.51E-07 |
| TUCP_002419 | XLOC_102344 | ENSRNOT00000085943  | 0.967192052  | 2.83E-07 |
| TUCP_002419 | XLOC_102344 | ENSRNOT00000072396  | 0.973136276  | 1.05E-07 |
| TUCP_002793 | XLOC_117879 | ENSRNOT00000084075  | 0.996106112  | 7.00E-12 |
| TUCP_002793 | XLOC_117879 | ENSRNOT00000012880  | 0.968043129  | 2.49E-07 |
| TUCP_002793 | XLOC_117879 | ENSRNOT00000074465  | 1            | 0        |
| TUCP_002793 | XLOC_117879 | ENSRNOT00000090898  | 0.961670541  | 6.11E-07 |
| TUCP_002793 | XLOC_117879 | ENSRNOT00000079805  | 0.997980451  | 2.64E-13 |
| TUCP_002793 | XLOC_117879 | ENSRNOT00000040912  | 1            | 1.33E-79 |
| TUCP_002793 | XLOC_117879 | ENSRNOT00000072648  | 1            | 0        |
| TUCP_002793 | XLOC_117879 | ENSRNOT0000007398   | 0.989054103  | 1.21E-09 |
| TUCP_002793 | XLOC_117879 | ENSRNOT00000070803  | 1            | 0        |
| TUCP_002793 | XLOC_117879 | ENSRNOT00000012196  | 1            | 0        |
| TUCP_002793 | XLOC_117879 | ENSRNOT00000085772  | 1            | 0        |
| TUCP_002793 | XLOC_117879 | ENSRNOT00000093284  | 0.999975856  | 6.46E-23 |
| TUCP_002793 | XLOC_117879 | ENSRNOT00000086374  | 0.993568904  | 8.57E-11 |
| TUCP_002793 | XLOC_117879 | ENSRNOT00000015270  | 1            | 0        |
| TUCP_002793 | XLOC_117879 | ENSRNOT00000046192  | 1            | 0        |
| TUCP_002793 | XLOC_117879 | ENSRNOT00000044226  | 1            | 0        |
| TUCP_002793 | XLOC_117879 | ENSRNOT00000081898  | 0.989837012  | 8.39E-10 |
| TUCP_002793 | XLOC_117879 | ENSRNOT00000081954  | 0.964005219  | 4.48E-07 |
| TUCP_002793 | XLOC_117879 | ENSRNOT00000080291  | 0.998427671  | 7.55E-14 |
| TUCP_002793 | XLOC_117879 | ENSRNOT00000004293  | 0.984239049  | 7.46E-09 |
| TUCP_002793 | XLOC_117879 | ENSRNOT00000078231  | 0.960455489  | 7.13E-07 |
| TUCP_002793 | XLOC_117879 | ENSRNOT00000002834  | 1            | 1.33E-79 |
| TUCP_002793 | XLOC_117879 | ENSRNOT0000001464   | 1            | 0        |
| TUCP_002793 | XLOC_117879 | ENSRNOT00000090716  | 0.994769629  | 3.06E-11 |
| TUCP_002793 | XLOC_117879 | ENSRNOT00000083542  | 0.972568514  | 1.17E-07 |
| TUCP_002793 | XLOC_117879 | ENSRNOT00000076044  | 1            | 4.25E-78 |
| TUCP_002793 | XLOC_117879 | ENSRNOT00000074353  | 1            | 0        |

|             |             |                    |             |          |
|-------------|-------------|--------------------|-------------|----------|
| TUCP_002793 | XLOC_117879 | ENSRNOT00000043510 | 0.958144129 | 9.43E-07 |
| TUCP_002793 | XLOC_117879 | ENSRNOT00000087122 | 0.980089513 | 2.38E-08 |
| TUCP_002793 | XLOC_117879 | ENSRNOT00000074295 | 0.987777006 | 2.11E-09 |
| TUCP_002793 | XLOC_117879 | ENSRNOT00000057873 | 1           | 4.25E-78 |
| TUCP_002793 | XLOC_117879 | ENSRNOT00000083002 | 0.988874897 | 1.32E-09 |
| TUCP_002793 | XLOC_117879 | ENSRNOT00000088399 | 0.999999855 | 4.99E-34 |
| TUCP_002793 | XLOC_117879 | ENSRNOT00000086248 | 1           | 0        |
| TUCP_002793 | XLOC_117879 | ENSRNOT00000089750 | 0.999992758 | 1.57E-25 |
| TUCP_002793 | XLOC_117879 | ENSRNOT00000030517 | 0.971225224 | 1.48E-07 |
| TUCP_002793 | XLOC_117879 | ENSRNOT00000034772 | 0.994265187 | 4.84E-11 |
| TUCP_002793 | XLOC_117879 | ENSRNOT00000089305 | 0.969641693 | 1.93E-07 |
| TUCP_002793 | XLOC_117879 | ENSRNOT00000024580 | 0.954183021 | 1.47E-06 |
| TUCP_002793 | XLOC_117879 | ENSRNOT00000064601 | 0.966578038 | 3.11E-07 |
| TUCP_002793 | XLOC_117879 | ENSRNOT00000015870 | 0.965901306 | 3.43E-07 |
| TUCP_002793 | XLOC_117879 | ENSRNOT00000080812 | 0.992998865 | 1.31E-10 |
| TUCP_002793 | XLOC_117879 | ENSRNOT00000092755 | 1           | 0        |
| TUCP_002793 | XLOC_117879 | ENSRNOT00000031683 | 1           | 4.25E-78 |
| TUCP_002793 | XLOC_117879 | ENSRNOT00000087764 | 0.988156196 | 1.80E-09 |
| TUCP_004265 | XLOC_187512 | ENSRNOT00000059951 | 0.962898117 | 5.20E-07 |
| TUCP_004265 | XLOC_187512 | ENSRNOT00000072241 | 0.966344115 | 3.21E-07 |
| TUCP_000630 | XLOC_023041 | ENSRNOT00000056430 | 0.950972267 | 2.05E-06 |
| TUCP_000630 | XLOC_023041 | ENSRNOT00000034089 | 0.969146947 | 2.09E-07 |
| TUCP_000630 | XLOC_023041 | ENSRNOT00000057199 | 0.95608676  | 1.19E-06 |
| TUCP_000630 | XLOC_023041 | ENSRNOT00000023744 | 0.961260012 | 6.44E-07 |
| TUCP_000630 | XLOC_023041 | ENSRNOT00000082699 | 0.958427255 | 9.12E-07 |
| TUCP_000630 | XLOC_023041 | ENSRNOT00000031549 | 0.954293941 | 1.45E-06 |
| TUCP_000630 | XLOC_023041 | ENSRNOT00000081432 | 0.96571921  | 3.52E-07 |
| TUCP_000630 | XLOC_023041 | ENSRNOT00000066024 | 0.963458839 | 4.83E-07 |
| TUCP_000630 | XLOC_023041 | ENSRNOT00000093701 | 0.952112434 | 1.83E-06 |
| TUCP_000630 | XLOC_023041 | ENSRNOT00000052072 | 0.951470225 | 1.95E-06 |
| TUCP_001618 | XLOC_064256 | ENSRNOT00000065168 | 0.960072407 | 7.47E-07 |
| TUCP_001618 | XLOC_064256 | ENSRNOT00000073559 | 0.978594423 | 3.41E-08 |
| TUCP_001618 | XLOC_064256 | ENSRNOT00000005490 | 0.964962781 | 3.92E-07 |
| TUCP_001618 | XLOC_064256 | ENSRNOT00000081246 | 0.95924649  | 8.27E-07 |
| TUCP_001618 | XLOC_064256 | ENSRNOT00000010784 | 0.953474787 | 1.59E-06 |
| TUCP_001618 | XLOC_064256 | ENSRNOT00000085152 | 0.957524122 | 1.01E-06 |
| TUCP_001618 | XLOC_064256 | ENSRNOT00000020134 | 0.95288932  | 1.69E-06 |
| TUCP_001618 | XLOC_064256 | ENSRNOT00000082245 | 0.956002991 | 1.21E-06 |
| TUCP_001618 | XLOC_064256 | ENSRNOT00000014537 | 0.953283703 | 1.62E-06 |
| TUCP_001618 | XLOC_064256 | ENSRNOT00000005839 | 0.969163463 | 2.09E-07 |
| TUCP_001618 | XLOC_064256 | ENSRNOT00000072196 | 0.986093713 | 4.00E-09 |
| TUCP_001618 | XLOC_064256 | ENSRNOT00000023989 | 0.95790354  | 9.70E-07 |
| TUCP_001618 | XLOC_064256 | ENSRNOT00000058563 | 0.963428483 | 4.85E-07 |
| TUCP_001618 | XLOC_064256 | ENSRNOT00000043856 | 0.956076046 | 1.20E-06 |
| TUCP_001618 | XLOC_064256 | ENSRNOT00000071733 | 0.971006302 | 1.54E-07 |
| TUCP_001618 | XLOC_064256 | ENSRNOT00000027012 | 0.958141713 | 9.43E-07 |
| TUCP_001618 | XLOC_064256 | ENSRNOT00000057361 | 0.968112556 | 2.46E-07 |
| TUCP_001618 | XLOC_064256 | ENSRNOT00000026251 | 0.95601151  | 1.20E-06 |
| TUCP_001618 | XLOC_064256 | ENSRNOT00000029866 | 0.958833699 | 8.69E-07 |
| TUCP_001618 | XLOC_064256 | ENSRNOT00000024128 | 0.964982849 | 3.91E-07 |
| TUCP_001618 | XLOC_064256 | ENSRNOT0000002410  | 0.950712363 | 2.11E-06 |

|             |             |                    |             |          |
|-------------|-------------|--------------------|-------------|----------|
| TUCP_001618 | XL0C_064256 | ENSRNOT0000000468  | 0.990945993 | 4.72E-10 |
| TUCP_001618 | XL0C_064256 | ENSRNOT00000073991 | 0.961004782 | 6.65E-07 |
| TUCP_001618 | XL0C_064256 | ENSRNOT00000012892 | 0.955192612 | 1.32E-06 |
| TUCP_001618 | XL0C_064256 | ENSRNOT00000020028 | 0.981313898 | 1.74E-08 |
| TUCP_001618 | XL0C_064256 | ENSRNOT00000071971 | 0.95039049  | 2.18E-06 |
| TUCP_001618 | XL0C_064256 | ENSRNOT00000024322 | 0.95560578  | 1.26E-06 |
| TUCP_001618 | XL0C_064256 | ENSRNOT00000017753 | 0.954457804 | 1.43E-06 |
| TUCP_001618 | XL0C_064256 | ENSRNOT00000061432 | 0.951757566 | 1.90E-06 |
| TUCP_001618 | XL0C_064256 | ENSRNOT00000033235 | 0.956869423 | 1.09E-06 |
| TUCP_001618 | XL0C_064256 | ENSRNOT00000087583 | 0.950666062 | 2.12E-06 |
| TUCP_001618 | XL0C_064256 | ENSRNOT00000017165 | -0.9507505  | 2.10E-06 |
| TUCP_001618 | XL0C_064256 | ENSRNOT00000044742 | 0.951039293 | 2.04E-06 |
| TUCP_001618 | XL0C_064256 | ENSRNOT00000013985 | 0.950651102 | 2.12E-06 |
| TUCP_001618 | XL0C_064256 | ENSRNOT00000029439 | 0.96010938  | 7.44E-07 |
| TUCP_001618 | XL0C_064256 | ENSRNOT00000045285 | 0.955799582 | 1.23E-06 |
| TUCP_001618 | XL0C_064256 | ENSRNOT00000028759 | 0.952234397 | 1.81E-06 |
| TUCP_001618 | XL0C_064256 | ENSRNOT00000071764 | 0.951856531 | 1.88E-06 |
| TUCP_001618 | XL0C_064256 | ENSRNOT00000012048 | 0.965346931 | 3.71E-07 |
| TUCP_001618 | XL0C_064256 | ENSRNOT00000041365 | 0.952637935 | 1.73E-06 |
| TUCP_001618 | XL0C_064256 | ENSRNOT00000075326 | 0.955649037 | 1.25E-06 |
| TUCP_001618 | XL0C_064256 | ENSRNOT00000029167 | 0.957198219 | 1.05E-06 |
| TUCP_004092 | XL0C_179241 | ENSRNOT00000084075 | 0.958938646 | 8.58E-07 |
| TUCP_004092 | XL0C_179241 | ENSRNOT00000012196 | 0.966864153 | 2.98E-07 |
| TUCP_004092 | XL0C_179241 | ENSRNOT00000074465 | 0.966864153 | 2.98E-07 |
| TUCP_004092 | XL0C_179241 | ENSRNOT00000079805 | 0.968516331 | 2.31E-07 |
| TUCP_004092 | XL0C_179241 | ENSRNOT00000040912 | 0.966864153 | 2.98E-07 |
| TUCP_004092 | XL0C_179241 | ENSRNOT00000072648 | 0.966864153 | 2.98E-07 |
| TUCP_004092 | XL0C_179241 | ENSRNOT00000007398 | 0.969629763 | 1.93E-07 |
| TUCP_004092 | XL0C_179241 | ENSRNOT00000070803 | 0.966864153 | 2.98E-07 |
| TUCP_004092 | XL0C_179241 | ENSRNOT00000083542 | 0.961180121 | 6.50E-07 |
| TUCP_004092 | XL0C_179241 | ENSRNOT00000085772 | 0.966864153 | 2.98E-07 |
| TUCP_004092 | XL0C_179241 | ENSRNOT00000015270 | 0.966864153 | 2.98E-07 |
| TUCP_004092 | XL0C_179241 | ENSRNOT00000046192 | 0.966864153 | 2.98E-07 |
| TUCP_004092 | XL0C_179241 | ENSRNOT00000044226 | 0.966864153 | 2.98E-07 |
| TUCP_004092 | XL0C_179241 | ENSRNOT00000086374 | 0.976121323 | 5.87E-08 |
| TUCP_004092 | XL0C_179241 | ENSRNOT00000080291 | 0.963820196 | 4.59E-07 |
| TUCP_004092 | XL0C_179241 | ENSRNOT00000001464 | 0.966864153 | 2.98E-07 |
| TUCP_004092 | XL0C_179241 | ENSRNOT00000090716 | 0.97576258  | 6.32E-08 |
| TUCP_004092 | XL0C_179241 | ENSRNOT00000057873 | 0.966864153 | 2.98E-07 |
| TUCP_004092 | XL0C_179241 | ENSRNOT00000076044 | 0.966864153 | 2.98E-07 |
| TUCP_004092 | XL0C_179241 | ENSRNOT00000074353 | 0.966864153 | 2.98E-07 |
| TUCP_004092 | XL0C_179241 | ENSRNOT00000087122 | 0.978430262 | 3.55E-08 |
| TUCP_004092 | XL0C_179241 | ENSRNOT00000093284 | 0.966512866 | 3.14E-07 |
| TUCP_004092 | XL0C_179241 | ENSRNOT00000088399 | 0.966844393 | 2.98E-07 |
| TUCP_004092 | XL0C_179241 | ENSRNOT00000086248 | 0.966864153 | 2.98E-07 |
| TUCP_004092 | XL0C_179241 | ENSRNOT00000089750 | 0.967033082 | 2.90E-07 |
| TUCP_004092 | XL0C_179241 | ENSRNOT00000030517 | 0.954250416 | 1.46E-06 |
| TUCP_004092 | XL0C_179241 | ENSRNOT00000034772 | 0.966689008 | 3.05E-07 |
| TUCP_004092 | XL0C_179241 | ENSRNOT00000002834 | 0.966864153 | 2.98E-07 |
| TUCP_004092 | XL0C_179241 | ENSRNOT00000080812 | 0.962955475 | 5.16E-07 |
| TUCP_004092 | XL0C_179241 | ENSRNOT00000092755 | 0.966864153 | 2.98E-07 |

|             |             |                    |              |          |
|-------------|-------------|--------------------|--------------|----------|
| TUCP_004092 | XLOC_179241 | ENSRNOT00000031683 | 0.966864153  | 2.98E-07 |
| TUCP_004092 | XLOC_179241 | ENSRNOT00000087764 | 0.979104677  | 3.03E-08 |
| TUCP_004091 | XLOC_179206 | ENSRNOT00000081570 | 0.953325408  | 1.61E-06 |
| TUCP_004091 | XLOC_179206 | ENSRNOT00000091652 | 0.986015633  | 4.11E-09 |
| TUCP_004091 | XLOC_179206 | ENSRNOT00000036564 | 0.954212582  | 1.47E-06 |
| TUCP_004091 | XLOC_179206 | ENSRNOT00000085266 | 0.953535547  | 1.58E-06 |
| TUCP_004091 | XLOC_179206 | ENSRNOT00000080865 | 0.986814332  | 3.07E-09 |
| TUCP_004091 | XLOC_179206 | ENSRNOT00000073534 | 0.982468475  | 1.27E-08 |
| TUCP_004091 | XLOC_179206 | ENSRNOT00000078707 | 0.990479511  | 6.06E-10 |
| TUCP_004091 | XLOC_179206 | ENSRNOT00000087758 | 0.954049727  | 1.49E-06 |
| TUCP_004091 | XLOC_179206 | ENSRNOT00000049832 | 0.95473945   | 1.39E-06 |
| TUCP_004091 | XLOC_179206 | ENSRNOT00000093019 | 0.986814332  | 3.07E-09 |
| TUCP_004091 | XLOC_179206 | ENSRNOT00000024825 | 0.963083216  | 5.08E-07 |
| TUCP_004091 | XLOC_179206 | ENSRNOT00000059266 | 0.973838132  | 9.24E-08 |
| TUCP_004091 | XLOC_179206 | ENSRNOT00000085908 | 0.988317255  | 1.68E-09 |
| TUCP_004091 | XLOC_179206 | ENSRNOT00000046744 | 0.986814332  | 3.07E-09 |
| TUCP_004091 | XLOC_179206 | ENSRNOT00000076429 | 0.986814332  | 3.07E-09 |
| TUCP_004091 | XLOC_179206 | ENSRNOT00000084667 | 0.988423468  | 1.61E-09 |
| TUCP_004091 | XLOC_179206 | ENSRNOT00000055412 | 0.986814332  | 3.07E-09 |
| TUCP_004091 | XLOC_179206 | ENSRNOT00000093201 | 0.985822438  | 4.41E-09 |
| TUCP_004091 | XLOC_179206 | ENSRNOT00000072724 | 0.986814332  | 3.07E-09 |
| TUCP_004091 | XLOC_179206 | ENSRNOT00000066017 | 0.978066341  | 3.85E-08 |
| TUCP_004091 | XLOC_179206 | ENSRNOT00000082760 | 0.970617949  | 1.64E-07 |
| TUCP_004091 | XLOC_179206 | ENSRNOT00000073148 | 0.966600079  | 3.09E-07 |
| TUCP_004091 | XLOC_179206 | ENSRNOT00000054858 | 0.969466247  | 1.99E-07 |
| TUCP_004091 | XLOC_179206 | ENSRNOT00000084375 | 0.986814332  | 3.07E-09 |
| TUCP_004091 | XLOC_179206 | ENSRNOT00000012161 | 0.989250937  | 1.11E-09 |
| TUCP_004091 | XLOC_179206 | ENSRNOT00000042369 | 0.986095373  | 4.00E-09 |
| TUCP_004091 | XLOC_179206 | ENSRNOT00000086554 | 0.986814332  | 3.07E-09 |
| TUCP_004091 | XLOC_179206 | ENSRNOT00000047921 | 0.986814332  | 3.07E-09 |
| TUCP_004091 | XLOC_179206 | ENSRNOT00000064261 | 0.986899491  | 2.97E-09 |
| TUCP_004091 | XLOC_179206 | ENSRNOT00000086660 | 0.986083808  | 4.02E-09 |
| TUCP_004091 | XLOC_179206 | ENSRNOT00000080933 | 0.964077173  | 4.44E-07 |
| TUCP_004091 | XLOC_179206 | ENSRNOT00000083977 | 0.986814332  | 3.07E-09 |
| TUCP_004091 | XLOC_179206 | ENSRNOT00000092933 | 0.986814332  | 3.07E-09 |
| TUCP_004091 | XLOC_179206 | ENSRNOT00000085447 | 0.984977681  | 5.88E-09 |
| TUCP_004091 | XLOC_179206 | ENSRNOT00000041281 | 0.970805593  | 1.59E-07 |
| TUCP_004139 | XLOC_180719 | ENSRNOT00000073559 | 0.976192712  | 5.79E-08 |
| TUCP_004139 | XLOC_180719 | ENSRNOT00000011230 | 0.968084347  | 2.47E-07 |
| TUCP_004139 | XLOC_180719 | ENSRNOT00000000743 | 0.956487715  | 1.14E-06 |
| TUCP_004139 | XLOC_180719 | ENSRNOT00000081246 | 0.977001003  | 4.88E-08 |
| TUCP_004139 | XLOC_180719 | ENSRNOT00000016555 | 0.959444375  | 8.07E-07 |
| TUCP_004139 | XLOC_180719 | ENSRNOT00000021348 | 0.965700075  | 3.53E-07 |
| TUCP_004139 | XLOC_180719 | ENSRNOT00000078445 | -0.960607898 | 6.99E-07 |
| TUCP_004139 | XLOC_180719 | ENSRNOT00000023326 | 0.950222134  | 2.21E-06 |
| TUCP_004139 | XLOC_180719 | ENSRNOT00000005228 | 0.957897888  | 9.71E-07 |
| TUCP_004139 | XLOC_180719 | ENSRNOT00000006175 | 0.964503501  | 4.18E-07 |
| TUCP_004139 | XLOC_180719 | ENSRNOT00000043216 | 0.962709919  | 5.33E-07 |
| TUCP_004139 | XLOC_180719 | ENSRNOT00000091128 | -0.957721127 | 9.91E-07 |
| TUCP_004139 | XLOC_180719 | ENSRNOT00000044742 | 0.97513069   | 7.19E-08 |
| TUCP_004139 | XLOC_180719 | ENSRNOT00000026543 | 0.971284011  | 1.47E-07 |

|             |             |                    |              |          |
|-------------|-------------|--------------------|--------------|----------|
| TUCP_004139 | XLOC_180719 | ENSRNOT00000066670 | 0.985367072  | 5.16E-09 |
| TUCP_004139 | XLOC_180719 | ENSRNOT00000071971 | 0.968930783  | 2.16E-07 |
| TUCP_004139 | XLOC_180719 | ENSRNOT00000012187 | 0.958418005  | 9.13E-07 |
| TUCP_004139 | XLOC_180719 | ENSRNOT00000005942 | 0.95719155   | 1.05E-06 |
| TUCP_004139 | XLOC_180719 | ENSRNOT00000066810 | 0.955730927  | 1.24E-06 |
| TUCP_004139 | XLOC_180719 | ENSRNOT00000012463 | -0.959468768 | 8.05E-07 |
| TUCP_004139 | XLOC_180719 | ENSRNOT00000022074 | 0.950207644  | 2.22E-06 |
| TUCP_004139 | XLOC_180719 | ENSRNOT00000012379 | 0.957381064  | 1.03E-06 |
| TUCP_004139 | XLOC_180719 | ENSRNOT00000029866 | 0.954768485  | 1.38E-06 |
| TUCP_004139 | XLOC_180719 | ENSRNOT00000007351 | -0.956502033 | 1.14E-06 |
| TUCP_004139 | XLOC_180719 | ENSRNOT00000071764 | 0.985379651  | 5.13E-09 |
| TUCP_004139 | XLOC_180719 | ENSRNOT00000075326 | 0.959200516  | 8.31E-07 |
| TUCP_004139 | XLOC_180719 | ENSRNOT00000074939 | 0.974382586  | 8.32E-08 |
| TUCP_004139 | XLOC_180719 | ENSRNOT00000065168 | 0.956392721  | 1.15E-06 |
| TUCP_004139 | XLOC_180719 | ENSRNOT00000085228 | 0.961321373  | 6.39E-07 |
| TUCP_004139 | XLOC_180719 | ENSRNOT00000020134 | 0.96031044   | 7.26E-07 |
| TUCP_004139 | XLOC_180719 | ENSRNOT00000017319 | 0.955360285  | 1.29E-06 |
| TUCP_004139 | XLOC_180719 | ENSRNOT00000001809 | 0.955329036  | 1.30E-06 |
| TUCP_004139 | XLOC_180719 | ENSRNOT00000079866 | 0.953865333  | 1.52E-06 |
| TUCP_004139 | XLOC_180719 | ENSRNOT00000072518 | 0.95009548   | 2.24E-06 |
| TUCP_004139 | XLOC_180719 | ENSRNOT00000073991 | 0.968570133  | 2.29E-07 |
| TUCP_004139 | XLOC_180719 | ENSRNOT00000087592 | 0.965376496  | 3.70E-07 |
| TUCP_004139 | XLOC_180719 | ENSRNOT00000032274 | 0.974580521  | 8.01E-08 |
| TUCP_004139 | XLOC_180719 | ENSRNOT00000002410 | 0.964513271  | 4.18E-07 |
| TUCP_004139 | XLOC_180719 | ENSRNOT00000020028 | 0.964323649  | 4.29E-07 |
| TUCP_004139 | XLOC_180719 | ENSRNOT00000017948 | 0.953472287  | 1.59E-06 |
| TUCP_004139 | XLOC_180719 | ENSRNOT00000012895 | 0.976814569  | 5.08E-08 |
| TUCP_004139 | XLOC_180719 | ENSRNOT00000055401 | 0.954069952  | 1.49E-06 |
| TUCP_004139 | XLOC_180719 | ENSRNOT00000000468 | 0.962543223  | 5.45E-07 |
| TUCP_004139 | XLOC_180719 | ENSRNOT00000072196 | 0.973641789  | 9.59E-08 |
| TUCP_004139 | XLOC_180719 | ENSRNOT00000000676 | 0.963858937  | 4.57E-07 |
| TUCP_004139 | XLOC_180719 | ENSRNOT00000023180 | 0.966217204  | 3.27E-07 |
| TUCP_004139 | XLOC_180719 | ENSRNOT00000039852 | 0.957431786  | 1.02E-06 |
| TUCP_004139 | XLOC_180719 | ENSRNOT00000031267 | 0.959628222  | 7.89E-07 |
| TUCP_004139 | XLOC_180719 | ENSRNOT00000028070 | 0.954397032  | 1.44E-06 |
| TUCP_004139 | XLOC_180719 | ENSRNOT00000060362 | 0.96670998   | 3.04E-07 |
| TUCP_004139 | XLOC_180719 | ENSRNOT00000013274 | 0.958442755  | 9.10E-07 |
| TUCP_004139 | XLOC_180719 | ENSRNOT00000022610 | 0.961377384  | 6.34E-07 |
| TUCP_004139 | XLOC_180719 | ENSRNOT00000020437 | 0.969404931  | 2.01E-07 |
| TUCP_004139 | XLOC_180719 | ENSRNOT00000010898 | 0.971377126  | 1.44E-07 |
| TUCP_004139 | XLOC_180719 | ENSRNOT00000092158 | 0.95562177   | 1.26E-06 |
| TUCP_004139 | XLOC_180719 | ENSRNOT00000029167 | 0.988969582  | 1.26E-09 |
| TUCP_004139 | XLOC_180719 | ENSRNOT00000027520 | 0.953661689  | 1.56E-06 |
| TUCP_004139 | XLOC_180719 | ENSRNOT00000047387 | 0.952645341  | 1.73E-06 |
| TUCP_004139 | XLOC_180719 | ENSRNOT00000058072 | 0.973366107  | 1.01E-07 |
| TUCP_004139 | XLOC_180719 | ENSRNOT00000014537 | 0.956991869  | 1.08E-06 |
| TUCP_004139 | XLOC_180719 | ENSRNOT00000077555 | 0.950486026  | 2.16E-06 |
| TUCP_004139 | XLOC_180719 | ENSRNOT00000017021 | 0.956263567  | 1.17E-06 |
| TUCP_004139 | XLOC_180719 | ENSRNOT00000003991 | 0.967817338  | 2.58E-07 |
| TUCP_004139 | XLOC_180719 | ENSRNOT00000021408 | 0.957042263  | 1.07E-06 |
| TUCP_004139 | XLOC_180719 | ENSRNOT00000009440 | -0.952971345 | 1.67E-06 |



|             |             |                    |              |          |
|-------------|-------------|--------------------|--------------|----------|
| TUCP_004139 | XLOC_180719 | ENSRNOT0000009683  | 0.956865042  | 1.09E-06 |
| TUCP_004139 | XLOC_180719 | ENSRNOT00000084088 | 0.958121849  | 9.45E-07 |
| TUCP_004139 | XLOC_180719 | ENSRNOT00000043535 | 0.965886355  | 3.44E-07 |
| TUCP_004139 | XLOC_180719 | ENSRNOT00000024322 | 0.977428288  | 4.44E-08 |
| TUCP_004139 | XLOC_180719 | ENSRNOT00000091265 | 0.970291805  | 1.73E-07 |
| TUCP_004139 | XLOC_180719 | ENSRNOT00000052018 | 0.954115548  | 1.48E-06 |
| TUCP_004139 | XLOC_180719 | ENSRNOT00000027454 | 0.959715625  | 7.81E-07 |
| TUCP_004139 | XLOC_180719 | ENSRNOT00000025832 | 0.968947792  | 2.16E-07 |
| TUCP_004139 | XLOC_180719 | ENSRNOT00000076729 | 0.961347972  | 6.37E-07 |
| TUCP_004139 | XLOC_180719 | ENSRNOT00000017753 | 0.978445483  | 3.53E-08 |
| TUCP_004139 | XLOC_180719 | ENSRNOT00000006499 | 0.963537607  | 4.77E-07 |
| TUCP_004139 | XLOC_180719 | ENSRNOT00000045882 | 0.951836144  | 1.88E-06 |
| TUCP_004139 | XLOC_180719 | ENSRNOT00000066736 | 0.960272229  | 7.29E-07 |
| TUCP_004139 | XLOC_180719 | ENSRNOT00000025936 | -0.959910484 | 7.62E-07 |
| TUCP_004139 | XLOC_180719 | ENSRNOT00000009129 | 0.967047029  | 2.90E-07 |
| TUCP_004139 | XLOC_180719 | ENSRNOT00000072534 | 0.95432776   | 1.45E-06 |
| TUCP_004139 | XLOC_180719 | ENSRNOT00000028759 | 0.959930917  | 7.60E-07 |
| TUCP_004139 | XLOC_180719 | ENSRNOT00000036951 | 0.962261401  | 5.66E-07 |
| TUCP_004139 | XLOC_180719 | ENSRNOT00000090420 | -0.958455165 | 9.09E-07 |
| TUCP_004139 | XLOC_180719 | ENSRNOT00000000157 | 0.973030566  | 1.07E-07 |
| TUCP_004139 | XLOC_180719 | ENSRNOT00000076669 | 0.962805271  | 5.27E-07 |
| TUCP_004139 | XLOC_180719 | ENSRNOT00000031230 | 0.961567593  | 6.19E-07 |
| TUCP_004139 | XLOC_180719 | ENSRNOT00000071733 | 0.974537424  | 8.08E-08 |
| TUCP_004139 | XLOC_180719 | ENSRNOT00000077406 | 0.952458108  | 1.77E-06 |
| TUCP_004139 | XLOC_180719 | ENSRNOT00000011052 | 0.965494161  | 3.64E-07 |
| TUCP_004139 | XLOC_180719 | ENSRNOT00000035474 | 0.953173353  | 1.64E-06 |
| TUCP_004139 | XLOC_180719 | ENSRNOT00000086336 | 0.956851807  | 1.10E-06 |
| TUCP_004139 | XLOC_180719 | ENSRNOT00000076872 | 0.95490505   | 1.36E-06 |
| TUCP_004139 | XLOC_180719 | ENSRNOT00000041384 | -0.952348587 | 1.79E-06 |
| TUCP_004139 | XLOC_180719 | ENSRNOT00000060696 | 0.962531505  | 5.46E-07 |
| TUCP_004139 | XLOC_180719 | ENSRNOT00000004412 | 0.96169751   | 6.09E-07 |
| TUCP_004139 | XLOC_180719 | ENSRNOT00000067181 | 0.955601299  | 1.26E-06 |
| TUCP_004139 | XLOC_180719 | ENSRNOT00000064798 | 0.969501775  | 1.97E-07 |
| TUCP_004139 | XLOC_180719 | ENSRNOT00000026280 | 0.958752221  | 8.77E-07 |
| TUCP_004139 | XLOC_180719 | ENSRNOT00000022485 | 0.956579829  | 1.13E-06 |
| TUCP_004139 | XLOC_180719 | ENSRNOT00000033235 | 0.974096923  | 8.79E-08 |
| TUCP_004139 | XLOC_180719 | ENSRNOT00000027452 | 0.966980878  | 2.92E-07 |
| TUCP_004139 | XLOC_180719 | ENSRNOT00000034704 | 0.967280343  | 2.80E-07 |
| TUCP_004139 | XLOC_180719 | ENSRNOT00000017165 | -0.950763589 | 2.10E-06 |
| TUCP_004139 | XLOC_180719 | ENSRNOT00000013985 | 0.966244882  | 3.26E-07 |
| TUCP_004139 | XLOC_180719 | ENSRNOT00000023428 | 0.979446832  | 2.79E-08 |
| TUCP_004139 | XLOC_180719 | ENSRNOT00000047192 | -0.96380387  | 4.60E-07 |
| TUCP_004139 | XLOC_180719 | ENSRNOT00000029001 | 0.950945955  | 2.06E-06 |
| TUCP_004139 | XLOC_180719 | ENSRNOT00000015799 | 0.953963264  | 1.51E-06 |
| TUCP_004139 | XLOC_180719 | ENSRNOT00000083799 | 0.971987601  | 1.30E-07 |
| TUCP_004556 | XLOC_200149 | ENSRNOT00000076400 | 0.984039723  | 7.94E-09 |
| TUCP_004556 | XLOC_200149 | ENSRNOT0000001077  | 0.951283906  | 1.99E-06 |
| TUCP_004556 | XLOC_200149 | ENSRNOT00000055536 | 0.968328002  | 2.38E-07 |
| TUCP_004556 | XLOC_200149 | ENSRNOT00000020376 | 0.950817312  | 2.09E-06 |
| TUCP_004556 | XLOC_200149 | ENSRNOT00000050321 | 0.953889234  | 1.52E-06 |
| TUCP_004556 | XLOC_200149 | ENSRNOT00000026757 | 0.957184754  | 1.05E-06 |

|             |             |                    |              |          |
|-------------|-------------|--------------------|--------------|----------|
| TUCP_004556 | XLOC_200149 | ENSRNOT00000009975 | 0.976625478  | 5.28E-08 |
| TUCP_004556 | XLOC_200149 | ENSRNOT00000072682 | 0.966267064  | 3.25E-07 |
| TUCP_004556 | XLOC_200149 | ENSRNOT00000006460 | 0.963560425  | 4.76E-07 |
| TUCP_004556 | XLOC_200149 | ENSRNOT00000015062 | 0.972678063  | 1.15E-07 |
| TUCP_004556 | XLOC_200149 | ENSRNOT00000005172 | 0.95435028   | 1.45E-06 |
| TUCP_004556 | XLOC_200149 | ENSRNOT00000020472 | -0.954881959 | 1.36E-06 |
| TUCP_004556 | XLOC_200149 | ENSRNOT00000022309 | 0.957313466  | 1.04E-06 |
| TUCP_004556 | XLOC_200149 | ENSRNOT00000092083 | 0.950115435  | 2.24E-06 |
| TUCP_004556 | XLOC_200149 | ENSRNOT00000081631 | 0.960961114  | 6.69E-07 |
| TUCP_004556 | XLOC_200149 | ENSRNOT00000021715 | 0.972608623  | 1.16E-07 |
| TUCP_004556 | XLOC_200149 | ENSRNOT00000017829 | 0.971588943  | 1.39E-07 |
| TUCP_004556 | XLOC_200149 | ENSRNOT00000087138 | 0.957284429  | 1.04E-06 |
| TUCP_004556 | XLOC_200149 | ENSRNOT00000023014 | 0.95041645   | 2.17E-06 |
| TUCP_004556 | XLOC_200149 | ENSRNOT00000026518 | 0.966092458  | 3.33E-07 |
| TUCP_004556 | XLOC_200149 | ENSRNOT00000007601 | 0.95646365   | 1.14E-06 |
| TUCP_004556 | XLOC_200149 | ENSRNOT00000066893 | 0.973398552  | 1.00E-07 |
| TUCP_004556 | XLOC_200149 | ENSRNOT00000046552 | 0.953470186  | 1.59E-06 |
| TUCP_004556 | XLOC_200149 | ENSRNOT00000065801 | 0.963422796  | 4.85E-07 |
| TUCP_004556 | XLOC_200149 | ENSRNOT00000072716 | 0.950582998  | 2.14E-06 |
| TUCP_004556 | XLOC_200149 | ENSRNOT00000088385 | 0.963841815  | 4.58E-07 |
| TUCP_004556 | XLOC_200149 | ENSRNOT00000023613 | 0.954100338  | 1.49E-06 |
| TUCP_004556 | XLOC_200149 | ENSRNOT00000029508 | 0.970433487  | 1.69E-07 |
| TUCP_004556 | XLOC_200149 | ENSRNOT00000084567 | 0.957601315  | 1.00E-06 |
| TUCP_004556 | XLOC_200149 | ENSRNOT00000014320 | 0.952971067  | 1.67E-06 |
| TUCP_004556 | XLOC_200149 | ENSRNOT00000025309 | 0.957443846  | 1.02E-06 |
| TUCP_004556 | XLOC_200149 | ENSRNOT00000021858 | 0.951635387  | 1.92E-06 |
| TUCP_004556 | XLOC_200149 | ENSRNOT00000001490 | 0.96560992   | 3.58E-07 |
| TUCP_004556 | XLOC_200149 | ENSRNOT00000062057 | 0.965098943  | 3.85E-07 |
| TUCP_004556 | XLOC_200149 | ENSRNOT00000011675 | 0.967898966  | 2.54E-07 |
| TUCP_004556 | XLOC_200149 | ENSRNOT00000005770 | 0.966904614  | 2.96E-07 |
| TUCP_004556 | XLOC_200149 | ENSRNOT00000048781 | 0.959031746  | 8.48E-07 |
| TUCP_004556 | XLOC_200149 | ENSRNOT00000021826 | 0.955464607  | 1.28E-06 |
| TUCP_004556 | XLOC_200149 | ENSRNOT00000018640 | 0.950473306  | 2.16E-06 |
| TUCP_004556 | XLOC_200149 | ENSRNOT00000048687 | 0.9612842    | 6.42E-07 |
| TUCP_004556 | XLOC_200149 | ENSRNOT00000082664 | 0.966249974  | 3.26E-07 |
| TUCP_004556 | XLOC_200149 | ENSRNOT00000027476 | 0.961720523  | 6.07E-07 |
| TUCP_004556 | XLOC_200149 | ENSRNOT00000021537 | 0.955075509  | 1.34E-06 |
| TUCP_004556 | XLOC_200149 | ENSRNOT00000085334 | 0.969867245  | 1.86E-07 |
| TUCP_004556 | XLOC_200149 | ENSRNOT00000018892 | 0.957151949  | 1.06E-06 |
| TUCP_004556 | XLOC_200149 | ENSRNOT00000048528 | 0.963242283  | 4.97E-07 |
| TUCP_004556 | XLOC_200149 | ENSRNOT00000073493 | 0.965841535  | 3.46E-07 |
| TUCP_004556 | XLOC_200149 | ENSRNOT00000064023 | 0.958077276  | 9.50E-07 |
| TUCP_004556 | XLOC_200149 | ENSRNOT00000006071 | 0.956679333  | 1.12E-06 |
| TUCP_004556 | XLOC_200149 | ENSRNOT00000081604 | 0.955560359  | 1.27E-06 |
| TUCP_004556 | XLOC_200149 | ENSRNOT00000037409 | 0.954170866  | 1.47E-06 |
| TUCP_004556 | XLOC_200149 | ENSRNOT00000064122 | 0.955558314  | 1.27E-06 |
| TUCP_004556 | XLOC_200149 | ENSRNOT00000008764 | 0.968325861  | 2.38E-07 |
| TUCP_004556 | XLOC_200149 | ENSRNOT00000081226 | 0.965494438  | 3.64E-07 |
| TUCP_004556 | XLOC_200149 | ENSRNOT00000036137 | 0.967421295  | 2.74E-07 |
| TUCP_004556 | XLOC_200149 | ENSRNOT00000020929 | 0.987235902  | 2.61E-09 |
| TUCP_004556 | XLOC_200149 | ENSRNOT00000023623 | 0.954665928  | 1.40E-06 |

|             |             |                    |              |          |
|-------------|-------------|--------------------|--------------|----------|
| TUCP_004556 | XLOC_200149 | ENSRNOT00000079128 | 0.966051186  | 3.35E-07 |
| TUCP_004556 | XLOC_200149 | ENSRNOT00000066598 | 0.964826539  | 4.00E-07 |
| TUCP_004556 | XLOC_200149 | ENSRNOT00000083134 | 0.953712728  | 1.55E-06 |
| TUCP_004556 | XLOC_200149 | ENSRNOT00000065629 | 0.960114954  | 7.43E-07 |
| TUCP_004556 | XLOC_200149 | ENSRNOT00000065871 | 0.950393089  | 2.18E-06 |
| TUCP_004556 | XLOC_200149 | ENSRNOT00000056050 | 0.956449126  | 1.15E-06 |
| TUCP_004556 | XLOC_200149 | ENSRNOT00000092757 | 0.9697753    | 1.89E-07 |
| TUCP_004556 | XLOC_200149 | ENSRNOT0000009202  | 0.951445618  | 1.96E-06 |
| TUCP_004556 | XLOC_200149 | ENSRNOT00000011773 | 0.957363388  | 1.03E-06 |
| TUCP_004556 | XLOC_200149 | ENSRNOT00000078800 | 0.972921499  | 1.10E-07 |
| TUCP_004556 | XLOC_200149 | ENSRNOT00000010939 | 0.951115781  | 2.02E-06 |
| TUCP_004557 | XLOC_200188 | ENSRNOT00000021452 | -0.963587071 | 4.74E-07 |
| TUCP_004557 | XLOC_200188 | ENSRNOT00000010539 | 0.959918533  | 7.62E-07 |
| TUCP_004557 | XLOC_200188 | ENSRNOT00000000697 | 0.972983375  | 1.08E-07 |
| TUCP_004557 | XLOC_200188 | ENSRNOT00000023623 | 0.950920967  | 2.06E-06 |
| TUCP_004557 | XLOC_200188 | ENSRNOT00000003511 | 0.95085371   | 2.08E-06 |
| TUCP_004557 | XLOC_200188 | ENSRNOT00000028588 | 0.977099113  | 4.77E-08 |
| TUCP_004557 | XLOC_200188 | ENSRNOT00000041762 | 0.966652891  | 3.07E-07 |
| TUCP_004557 | XLOC_200188 | ENSRNOT00000047453 | 0.967422812  | 2.74E-07 |
| TUCP_004557 | XLOC_200188 | ENSRNOT00000024583 | -0.953880085 | 1.52E-06 |
| TUCP_004557 | XLOC_200188 | ENSRNOT00000015888 | 0.957560756  | 1.01E-06 |
| TUCP_004557 | XLOC_200188 | ENSRNOT00000022559 | 0.953497807  | 1.58E-06 |
| TUCP_004557 | XLOC_200188 | ENSRNOT00000023661 | 0.965843537  | 3.46E-07 |
| TUCP_004557 | XLOC_200188 | ENSRNOT00000074810 | 0.950745209  | 2.10E-06 |
| TUCP_004557 | XLOC_200188 | ENSRNOT00000086027 | 0.953551597  | 1.57E-06 |
| TUCP_004557 | XLOC_200188 | ENSRNOT00000024575 | 0.966903025  | 2.96E-07 |
| TUCP_004557 | XLOC_200188 | ENSRNOT00000091315 | 0.955480093  | 1.28E-06 |
| TUCP_003274 | XLOC_140316 | ENSRNOT00000078572 | 0.959460448  | 8.06E-07 |
| TUCP_003274 | XLOC_140316 | ENSRNOT00000040904 | 0.953103609  | 1.65E-06 |
| TUCP_003274 | XLOC_140316 | ENSRNOT00000067090 | 0.965688342  | 3.54E-07 |
| TUCP_003274 | XLOC_140316 | ENSRNOT00000016485 | 0.9720063    | 1.29E-07 |
| TUCP_003274 | XLOC_140316 | ENSRNOT00000085334 | 0.950751818  | 2.10E-06 |
| TUCP_003274 | XLOC_140316 | ENSRNOT00000038780 | 0.955521137  | 1.27E-06 |
| TUCP_003274 | XLOC_140316 | ENSRNOT00000043827 | 0.959269129  | 8.24E-07 |
| TUCP_003274 | XLOC_140316 | ENSRNOT00000045997 | 0.956517804  | 1.14E-06 |
| TUCP_003274 | XLOC_140316 | ENSRNOT00000057953 | 0.952351857  | 1.79E-06 |
| TUCP_003274 | XLOC_140316 | ENSRNOT00000082592 | 0.956806672  | 1.10E-06 |
| TUCP_003275 | XLOC_140487 | ENSRNOT00000017409 | 0.952888636  | 1.69E-06 |
| TUCP_003275 | XLOC_140487 | ENSRNOT00000017364 | 0.966974764  | 2.93E-07 |
| TUCP_003270 | XLOC_140006 | ENSRNOT00000085954 | 0.955642477  | 1.26E-06 |
| TUCP_004418 | XLOC_194702 | ENSRNOT00000035695 | -0.953495778 | 1.58E-06 |
| TUCP_003377 | XLOC_146336 | ENSRNOT00000068212 | 0.956562885  | 1.13E-06 |
| TUCP_003377 | XLOC_146336 | ENSRNOT0000001602  | 0.963280442  | 4.94E-07 |
| TUCP_003377 | XLOC_146336 | ENSRNOT00000007914 | 0.953174284  | 1.64E-06 |
| TUCP_004415 | XLOC_194697 | ENSRNOT00000080170 | 0.966623114  | 3.08E-07 |
| TUCP_003373 | XLOC_146142 | ENSRNOT00000042465 | 0.971523344  | 1.41E-07 |
| TUCP_003373 | XLOC_146142 | ENSRNOT00000091370 | 0.970708722  | 1.62E-07 |
| TUCP_001614 | XLOC_063754 | ENSRNOT00000006186 | 0.958467686  | 9.08E-07 |
| TUCP_001614 | XLOC_063754 | ENSRNOT00000090621 | 0.953514811  | 1.58E-06 |
| TUCP_001614 | XLOC_063754 | ENSRNOT00000078349 | -0.967355443 | 2.76E-07 |
| TUCP_001614 | XLOC_063754 | ENSRNOT00000013743 | 0.966310818  | 3.23E-07 |

|             |             |                    |              |          |
|-------------|-------------|--------------------|--------------|----------|
| TUCP_001614 | XLOC_063754 | ENSRNOT00000075397 | 0.982005936  | 1.44E-08 |
| TUCP_001614 | XLOC_063754 | ENSRNOT00000032926 | -0.961676405 | 6.10E-07 |
| TUCP_001614 | XLOC_063754 | ENSRNOT00000019104 | -0.964919488 | 3.94E-07 |
| TUCP_001614 | XLOC_063754 | ENSRNOT00000003891 | 0.950874166  | 2.07E-06 |
| TUCP_001614 | XLOC_063754 | ENSRNOT00000089319 | 0.950310265  | 2.19E-06 |
| TUCP_001614 | XLOC_063754 | ENSRNOT00000086706 | 0.968984746  | 2.15E-07 |
| TUCP_001614 | XLOC_063754 | ENSRNOT00000030914 | -0.967195364 | 2.83E-07 |
| TUCP_001614 | XLOC_063754 | ENSRNOT00000004017 | 0.973190159  | 1.04E-07 |
| TUCP_001614 | XLOC_063754 | ENSRNOT00000085885 | -0.97076528  | 1.60E-07 |
| TUCP_001614 | XLOC_063754 | ENSRNOT00000028856 | 0.951876882  | 1.87E-06 |
| TUCP_001614 | XLOC_063754 | ENSRNOT00000011130 | -0.956680111 | 1.12E-06 |
| TUCP_001614 | XLOC_063754 | ENSRNOT00000031692 | -0.953003683 | 1.67E-06 |
| TUCP_001614 | XLOC_063754 | ENSRNOT00000014384 | -0.958396371 | 9.15E-07 |
| TUCP_001614 | XLOC_063754 | ENSRNOT00000030850 | 0.976255973  | 5.71E-08 |
| TUCP_001614 | XLOC_063754 | ENSRNOT00000055540 | 0.964480375  | 4.19E-07 |
| TUCP_001614 | XLOC_063754 | ENSRNOT00000006752 | 0.973275197  | 1.03E-07 |
| TUCP_001614 | XLOC_063754 | ENSRNOT00000057562 | 0.950790806  | 2.09E-06 |
| TUCP_001614 | XLOC_063754 | ENSRNOT00000025284 | -0.95557214  | 1.27E-06 |
| TUCP_001614 | XLOC_063754 | ENSRNOT00000072771 | 0.959151192  | 8.36E-07 |
| TUCP_001614 | XLOC_063754 | ENSRNOT00000073370 | 0.977139041  | 4.73E-08 |
| TUCP_001614 | XLOC_063754 | ENSRNOT00000019921 | 0.954397397  | 1.44E-06 |
| TUCP_001614 | XLOC_063754 | ENSRNOT00000065978 | 0.97313399   | 1.05E-07 |
| TUCP_001614 | XLOC_063754 | ENSRNOT00000025767 | 0.965792045  | 3.48E-07 |
| TUCP_001614 | XLOC_063754 | ENSRNOT00000035320 | -0.954000504 | 1.50E-06 |
| TUCP_001614 | XLOC_063754 | ENSRNOT00000076820 | 0.950411924  | 2.17E-06 |
| TUCP_001614 | XLOC_063754 | ENSRNOT00000065871 | 0.952161683  | 1.82E-06 |
| TUCP_001614 | XLOC_063754 | ENSRNOT00000077999 | 0.959427861  | 8.09E-07 |
| TUCP_001614 | XLOC_063754 | ENSRNOT00000068134 | 0.950965985  | 2.06E-06 |
| TUCP_001614 | XLOC_063754 | ENSRNOT00000046807 | -0.961749927 | 6.05E-07 |
| TUCP_001614 | XLOC_063754 | ENSRNOT00000013286 | 0.972783284  | 1.12E-07 |
| TUCP_001614 | XLOC_063754 | ENSRNOT00000015188 | 0.971905018  | 1.32E-07 |
| TUCP_001614 | XLOC_063754 | ENSRNOT00000018488 | -0.967135011 | 2.86E-07 |
| TUCP_001614 | XLOC_063754 | ENSRNOT00000089673 | -0.961760296 | 6.04E-07 |
| TUCP_001614 | XLOC_063754 | ENSRNOT00000005839 | 0.95084188   | 2.08E-06 |
| TUCP_001614 | XLOC_063754 | ENSRNOT00000080522 | -0.969250812 | 2.06E-07 |
| TUCP_001614 | XLOC_063754 | ENSRNOT00000000048 | 0.955358393  | 1.30E-06 |
| TUCP_001614 | XLOC_063754 | ENSRNOT00000087278 | -0.954206101 | 1.47E-06 |
| TUCP_001614 | XLOC_063754 | ENSRNOT00000030074 | 0.958870107  | 8.65E-07 |
| TUCP_001614 | XLOC_063754 | ENSRNOT00000026462 | -0.952992254 | 1.67E-06 |
| TUCP_001614 | XLOC_063754 | ENSRNOT00000009150 | 0.973867653  | 9.19E-08 |
| TUCP_001614 | XLOC_063754 | ENSRNOT00000084709 | 0.984355715  | 7.19E-09 |
| TUCP_001614 | XLOC_063754 | ENSRNOT00000029179 | -0.960781079 | 6.84E-07 |
| TUCP_001614 | XLOC_063754 | ENSRNOT00000009156 | 0.952581561  | 1.74E-06 |
| TUCP_001614 | XLOC_063754 | ENSRNOT00000026481 | 0.962442173  | 5.53E-07 |
| TUCP_001614 | XLOC_063754 | ENSRNOT00000016776 | -0.967074055 | 2.88E-07 |
| TUCP_001614 | XLOC_063754 | ENSRNOT00000000469 | 0.961832507  | 5.98E-07 |
| TUCP_001614 | XLOC_063754 | ENSRNOT00000024352 | 0.955835349  | 1.23E-06 |
| TUCP_001614 | XLOC_063754 | ENSRNOT00000072299 | 0.964812044  | 4.00E-07 |
| TUCP_001614 | XLOC_063754 | ENSRNOT00000001401 | 0.959395829  | 8.12E-07 |
| TUCP_001614 | XLOC_063754 | ENSRNOT00000016132 | -0.972864018 | 1.11E-07 |
| TUCP_001614 | XLOC_063754 | ENSRNOT00000013067 | -0.978023168 | 3.89E-08 |

|             |             |                    |              |          |
|-------------|-------------|--------------------|--------------|----------|
| TUCP_001614 | XLOC_063754 | ENSRNOT00000018122 | 0.968166911  | 2.44E-07 |
| TUCP_001614 | XLOC_063754 | ENSRNOT00000002313 | -0.972237627 | 1.24E-07 |
| TUCP_001614 | XLOC_063754 | ENSRNOT00000016637 | -0.987681982 | 2.19E-09 |
| TUCP_001614 | XLOC_063754 | ENSRNOT00000038994 | -0.97199051  | 1.30E-07 |
| TUCP_001614 | XLOC_063754 | ENSRNOT00000074586 | -0.958501277 | 9.04E-07 |
| TUCP_001614 | XLOC_063754 | ENSRNOT00000045765 | -0.957797831 | 9.82E-07 |
| TUCP_001614 | XLOC_063754 | ENSRNOT00000088214 | 0.960356898  | 7.21E-07 |
| TUCP_001614 | XLOC_063754 | ENSRNOT00000081047 | 0.957840543  | 9.77E-07 |
| TUCP_001614 | XLOC_063754 | ENSRNOT00000011880 | 0.974956989  | 7.44E-08 |
| TUCP_001614 | XLOC_063754 | ENSRNOT00000005486 | -0.963472808 | 4.82E-07 |
| TUCP_001614 | XLOC_063754 | ENSRNOT00000003992 | -0.960894385 | 6.74E-07 |
| TUCP_001614 | XLOC_063754 | ENSRNOT00000050515 | 0.959102073  | 8.41E-07 |
| TUCP_001614 | XLOC_063754 | ENSRNOT00000089980 | -0.96344132  | 4.84E-07 |
| TUCP_001614 | XLOC_063754 | ENSRNOT00000078073 | -0.952650665 | 1.73E-06 |
| TUCP_001614 | XLOC_063754 | ENSRNOT00000086310 | -0.951708633 | 1.91E-06 |
| TUCP_001614 | XLOC_063754 | ENSRNOT00000020951 | 0.956569051  | 1.13E-06 |
| TUCP_001614 | XLOC_063754 | ENSRNOT00000046745 | 0.963750393  | 4.64E-07 |
| TUCP_001614 | XLOC_063754 | ENSRNOT00000055607 | -0.964774553 | 4.03E-07 |
| TUCP_001614 | XLOC_063754 | ENSRNOT00000023876 | 0.978638161  | 3.38E-08 |
| TUCP_001614 | XLOC_063754 | ENSRNOT00000033359 | 0.965365637  | 3.70E-07 |
| TUCP_001614 | XLOC_063754 | ENSRNOT00000061201 | -0.95045091  | 2.16E-06 |
| TUCP_001614 | XLOC_063754 | ENSRNOT00000013801 | 0.959518907  | 8.00E-07 |
| TUCP_001614 | XLOC_063754 | ENSRNOT00000012625 | -0.954043509 | 1.49E-06 |
| TUCP_001614 | XLOC_063754 | ENSRNOT00000049285 | -0.964975858 | 3.91E-07 |
| TUCP_001614 | XLOC_063754 | ENSRNOT00000015239 | -0.974454403 | 8.21E-08 |
| TUCP_001614 | XLOC_063754 | ENSRNOT00000006366 | -0.960417931 | 7.16E-07 |
| TUCP_001614 | XLOC_063754 | ENSRNOT00000074649 | 0.973160291  | 1.05E-07 |
| TUCP_001614 | XLOC_063754 | ENSRNOT00000035277 | 0.961872168  | 5.95E-07 |
| TUCP_001614 | XLOC_063754 | ENSRNOT00000077146 | -0.970974064 | 1.55E-07 |
| TUCP_001614 | XLOC_063754 | ENSRNOT00000044847 | -0.961220074 | 6.47E-07 |
| TUCP_001614 | XLOC_063754 | ENSRNOT00000052063 | 0.958999949  | 8.52E-07 |
| TUCP_001614 | XLOC_063754 | ENSRNOT00000060002 | -0.955967815 | 1.21E-06 |
| TUCP_001614 | XLOC_063754 | ENSRNOT00000086456 | -0.967395965 | 2.75E-07 |
| TUCP_001614 | XLOC_063754 | ENSRNOT00000036959 | -0.951482068 | 1.95E-06 |
| TUCP_001614 | XLOC_063754 | ENSRNOT00000010367 | 0.956378266  | 1.16E-06 |
| TUCP_001614 | XLOC_063754 | ENSRNOT00000023977 | -0.96622714  | 3.27E-07 |
| TUCP_001614 | XLOC_063754 | ENSRNOT00000066133 | -0.976191616 | 5.79E-08 |
| TUCP_001614 | XLOC_063754 | ENSRNOT00000048933 | -0.97829509  | 3.66E-08 |
| TUCP_001614 | XLOC_063754 | ENSRNOT00000027970 | 0.970024613  | 1.81E-07 |
| TUCP_001614 | XLOC_063754 | ENSRNOT00000035385 | 0.967447043  | 2.73E-07 |
| TUCP_001614 | XLOC_063754 | ENSRNOT00000009994 | -0.969996947 | 1.82E-07 |
| TUCP_001614 | XLOC_063754 | ENSRNOT00000057738 | 0.966242801  | 3.26E-07 |
| TUCP_001614 | XLOC_063754 | ENSRNOT00000019487 | 0.959091769  | 8.42E-07 |
| TUCP_001614 | XLOC_063754 | ENSRNOT00000030692 | -0.969472745 | 1.98E-07 |
| TUCP_001614 | XLOC_063754 | ENSRNOT00000071192 | -0.960515807 | 7.07E-07 |
| TUCP_001614 | XLOC_063754 | ENSRNOT00000080443 | 0.96171982   | 6.07E-07 |
| TUCP_001614 | XLOC_063754 | ENSRNOT00000064535 | -0.966930203 | 2.95E-07 |
| TUCP_001614 | XLOC_063754 | ENSRNOT00000010748 | 0.969894363  | 1.85E-07 |
| TUCP_001614 | XLOC_063754 | ENSRNOT00000085295 | -0.958746997 | 8.78E-07 |
| TUCP_001614 | XLOC_063754 | ENSRNOT00000040060 | -0.966306374 | 3.23E-07 |
| TUCP_001614 | XLOC_063754 | ENSRNOT00000035474 | 0.956400099  | 1.15E-06 |

|             |             |                     |              |          |
|-------------|-------------|---------------------|--------------|----------|
| TUCP_001614 | XLOC_063754 | ENSRNOT00000039102  | 0.978520867  | 3.47E-08 |
| TUCP_001614 | XLOC_063754 | ENSRNOT00000023807  | -0.951200772 | 2.01E-06 |
| TUCP_001614 | XLOC_063754 | ENSRNOT00000078856  | -0.960273167 | 7.29E-07 |
| TUCP_001614 | XLOC_063754 | ENSRNOT00000091205  | 0.970538923  | 1.66E-07 |
| TUCP_001614 | XLOC_063754 | ENSRNOT00000009742  | -0.989236994 | 1.12E-09 |
| TUCP_001614 | XLOC_063754 | ENSRNOT00000010983  | 0.965257823  | 3.76E-07 |
| TUCP_001614 | XLOC_063754 | ENSRNOT000000081786 | -0.964388354 | 4.25E-07 |
| TUCP_001614 | XLOC_063754 | ENSRNOT00000007369  | 0.960840255  | 6.79E-07 |
| TUCP_001614 | XLOC_063754 | ENSRNOT00000060698  | -0.963914662 | 4.54E-07 |
| TUCP_001614 | XLOC_063754 | ENSRNOT00000058351  | 0.966461703  | 3.16E-07 |
| TUCP_001614 | XLOC_063754 | ENSRNOT00000045946  | 0.976832495  | 5.06E-08 |
| TUCP_001614 | XLOC_063754 | ENSRNOT00000017998  | 0.962655548  | 5.37E-07 |
| TUCP_001614 | XLOC_063754 | ENSRNOT00000065529  | 0.952323735  | 1.79E-06 |
| TUCP_001614 | XLOC_063754 | ENSRNOT00000017776  | 0.969746054  | 1.90E-07 |
| TUCP_001614 | XLOC_063754 | ENSRNOT00000088679  | -0.97768536  | 4.20E-08 |
| TUCP_001614 | XLOC_063754 | ENSRNOT00000013321  | 0.961519391  | 6.23E-07 |
| TUCP_001614 | XLOC_063754 | ENSRNOT00000008982  | 0.959387615  | 8.13E-07 |
| TUCP_001614 | XLOC_063754 | ENSRNOT00000090057  | 0.961604923  | 6.16E-07 |
| TUCP_001614 | XLOC_063754 | ENSRNOT00000008987  | -0.963124849 | 5.05E-07 |
| TUCP_001614 | XLOC_063754 | ENSRNOT00000092876  | -0.964986949 | 3.91E-07 |
| TUCP_001614 | XLOC_063754 | ENSRNOT00000031935  | -0.977900344 | 4.00E-08 |
| TUCP_001614 | XLOC_063754 | ENSRNOT00000024253  | 0.982259263  | 1.34E-08 |
| TUCP_001614 | XLOC_063754 | ENSRNOT00000088073  | -0.963193806 | 5.00E-07 |
| TUCP_001614 | XLOC_063754 | ENSRNOT00000039607  | -0.953132444 | 1.65E-06 |
| TUCP_001614 | XLOC_063754 | ENSRNOT00000009080  | -0.975649984 | 6.47E-08 |
| TUCP_001614 | XLOC_063754 | ENSRNOT00000063930  | -0.973978812 | 8.99E-08 |
| TUCP_001614 | XLOC_063754 | ENSRNOT00000013116  | -0.977024859 | 4.85E-08 |
| TUCP_001614 | XLOC_063754 | ENSRNOT00000048613  | 0.95876736   | 8.76E-07 |
| TUCP_001614 | XLOC_063754 | ENSRNOT00000001855  | 0.957649432  | 9.99E-07 |
| TUCP_001614 | XLOC_063754 | ENSRNOT00000013025  | -0.989956842 | 7.91E-10 |
| TUCP_001614 | XLOC_063754 | ENSRNOT00000038178  | -0.951151426 | 2.02E-06 |
| TUCP_001614 | XLOC_063754 | ENSRNOT00000057953  | 0.962541052  | 5.45E-07 |
| TUCP_001614 | XLOC_063754 | ENSRNOT00000019502  | 0.950457084  | 2.16E-06 |
| TUCP_001614 | XLOC_063754 | ENSRNOT00000036051  | 0.955393695  | 1.29E-06 |
| TUCP_001614 | XLOC_063754 | ENSRNOT00000021110  | -0.951776972 | 1.89E-06 |
| TUCP_001614 | XLOC_063754 | ENSRNOT00000018074  | -0.971876562 | 1.32E-07 |
| TUCP_001614 | XLOC_063754 | ENSRNOT000000081981 | 0.958620343  | 8.91E-07 |
| TUCP_001614 | XLOC_063754 | ENSRNOT00000001679  | 0.970975479  | 1.55E-07 |
| TUCP_001614 | XLOC_063754 | ENSRNOT00000014479  | -0.954126046 | 1.48E-06 |
| TUCP_001614 | XLOC_063754 | ENSRNOT00000003326  | -0.97521493  | 7.07E-08 |
| TUCP_001614 | XLOC_063754 | ENSRNOT00000016306  | -0.971564288 | 1.40E-07 |
| TUCP_001614 | XLOC_063754 | ENSRNOT00000015476  | -0.970433238 | 1.69E-07 |
| TUCP_001614 | XLOC_063754 | ENSRNOT00000074683  | 0.954854162  | 1.37E-06 |
| TUCP_001614 | XLOC_063754 | ENSRNOT00000025079  | -0.959965454 | 7.57E-07 |
| TUCP_001614 | XLOC_063754 | ENSRNOT00000073019  | 0.962764996  | 5.29E-07 |
| TUCP_001614 | XLOC_063754 | ENSRNOT00000077060  | 0.951959633  | 1.86E-06 |
| TUCP_001614 | XLOC_063754 | ENSRNOT00000093174  | 0.955358505  | 1.30E-06 |
| TUCP_001614 | XLOC_063754 | ENSRNOT00000021458  | -0.966994152 | 2.92E-07 |
| TUCP_001614 | XLOC_063754 | ENSRNOT00000011926  | 0.956149402  | 1.19E-06 |
| TUCP_001614 | XLOC_063754 | ENSRNOT00000004007  | -0.961867492 | 5.96E-07 |
| TUCP_001614 | XLOC_063754 | ENSRNOT00000020681  | -0.951535252 | 1.94E-06 |

|             |             |                    |              |          |
|-------------|-------------|--------------------|--------------|----------|
| TUCP_001614 | XLOC_063754 | ENSRNOT00000057898 | -0.95077861  | 2.09E-06 |
| TUCP_001614 | XLOC_063754 | ENSRNOT00000007821 | 0.9820461    | 1.43E-08 |
| TUCP_001614 | XLOC_063754 | ENSRNOT00000056100 | -0.961698976 | 6.09E-07 |
| TUCP_001614 | XLOC_063754 | ENSRNOT00000009811 | 0.966984011  | 2.92E-07 |
| TUCP_001614 | XLOC_063754 | ENSRNOT00000077231 | 0.969714273  | 1.91E-07 |
| TUCP_001614 | XLOC_063754 | ENSRNOT00000072762 | -0.970123261 | 1.78E-07 |
| TUCP_001614 | XLOC_063754 | ENSRNOT00000071540 | 0.959481822  | 8.03E-07 |
| TUCP_001614 | XLOC_063754 | ENSRNOT00000072849 | -0.955261439 | 1.31E-06 |
| TUCP_001614 | XLOC_063754 | ENSRNOT00000073643 | -0.976343637 | 5.61E-08 |
| TUCP_001614 | XLOC_063754 | ENSRNOT00000052002 | 0.969569754  | 1.95E-07 |
| TUCP_001614 | XLOC_063754 | ENSRNOT00000022502 | -0.964661275 | 4.09E-07 |
| TUCP_001614 | XLOC_063754 | ENSRNOT00000026928 | -0.952494197 | 1.76E-06 |
| TUCP_001614 | XLOC_063754 | ENSRNOT00000087443 | 0.960640741  | 6.96E-07 |
| TUCP_001614 | XLOC_063754 | ENSRNOT00000089545 | -0.957549894 | 1.01E-06 |
| TUCP_001614 | XLOC_063754 | ENSRNOT00000021802 | 0.952354143  | 1.78E-06 |
| TUCP_001614 | XLOC_063754 | ENSRNOT00000021803 | -0.950928497 | 2.06E-06 |
| TUCP_001614 | XLOC_063754 | ENSRNOT00000025856 | -0.962391289 | 5.56E-07 |
| TUCP_001614 | XLOC_063754 | ENSRNOT00000082627 | -0.959737601 | 7.79E-07 |
| TUCP_001614 | XLOC_063754 | ENSRNOT00000037681 | -0.965967881 | 3.40E-07 |
| TUCP_001614 | XLOC_063754 | ENSRNOT00000072118 | 0.964821022  | 4.00E-07 |
| TUCP_001614 | XLOC_063754 | ENSRNOT00000003780 | 0.952110257  | 1.83E-06 |
| TUCP_001614 | XLOC_063754 | ENSRNOT00000023262 | -0.974683266 | 7.85E-08 |
| TUCP_001614 | XLOC_063754 | ENSRNOT00000059246 | 0.959149184  | 8.36E-07 |
| TUCP_001614 | XLOC_063754 | ENSRNOT00000077908 | 0.954965091  | 1.35E-06 |
| TUCP_001614 | XLOC_063754 | ENSRNOT00000091427 | -0.967769157 | 2.59E-07 |
| TUCP_001614 | XLOC_063754 | ENSRNOT00000026312 | 0.965788458  | 3.48E-07 |
| TUCP_001614 | XLOC_063754 | ENSRNOT00000005604 | 0.953667958  | 1.56E-06 |
| TUCP_001614 | XLOC_063754 | ENSRNOT00000068381 | 0.98759577   | 2.27E-09 |
| TUCP_001614 | XLOC_063754 | ENSRNOT00000068026 | -0.966683902 | 3.06E-07 |
| TUCP_001614 | XLOC_063754 | ENSRNOT00000085621 | 0.952956719  | 1.68E-06 |
| TUCP_001614 | XLOC_063754 | ENSRNOT00000058382 | 0.978947523  | 3.14E-08 |
| TUCP_001614 | XLOC_063754 | ENSRNOT00000026531 | -0.979874223 | 2.51E-08 |
| TUCP_001614 | XLOC_063754 | ENSRNOT00000035605 | 0.959790288  | 7.74E-07 |
| TUCP_001614 | XLOC_063754 | ENSRNOT00000078366 | 0.961402735  | 6.32E-07 |
| TUCP_001614 | XLOC_063754 | ENSRNOT00000023567 | -0.95066149  | 2.12E-06 |
| TUCP_001614 | XLOC_063754 | ENSRNOT00000017995 | 0.950658556  | 2.12E-06 |
| TUCP_001614 | XLOC_063754 | ENSRNOT00000071897 | -0.982690151 | 1.19E-08 |
| TUCP_001614 | XLOC_063754 | ENSRNOT00000081725 | 0.96461756   | 4.12E-07 |
| TUCP_001614 | XLOC_063754 | ENSRNOT00000005459 | 0.976082597  | 5.92E-08 |
| TUCP_001614 | XLOC_063754 | ENSRNOT00000027910 | 0.958939498  | 8.58E-07 |
| TUCP_001614 | XLOC_063754 | ENSRNOT00000073144 | -0.951814518 | 1.89E-06 |
| TUCP_001614 | XLOC_063754 | ENSRNOT00000027917 | 0.952226829  | 1.81E-06 |
| TUCP_001614 | XLOC_063754 | ENSRNOT00000024452 | -0.955062778 | 1.34E-06 |
| TUCP_001614 | XLOC_063754 | ENSRNOT00000028888 | 0.95404384   | 1.49E-06 |
| TUCP_001614 | XLOC_063754 | ENSRNOT00000016372 | -0.974278805 | 8.49E-08 |
| TUCP_001614 | XLOC_063754 | ENSRNOT00000002109 | 0.960342585  | 7.23E-07 |
| TUCP_001614 | XLOC_063754 | ENSRNOT00000041106 | 0.970931461  | 1.56E-07 |
| TUCP_001614 | XLOC_063754 | ENSRNOT00000024033 | 0.953872045  | 1.52E-06 |
| TUCP_001614 | XLOC_063754 | ENSRNOT00000011572 | -0.958380113 | 9.17E-07 |
| TUCP_001614 | XLOC_063754 | ENSRNOT00000034411 | 0.954403047  | 1.44E-06 |
| TUCP_001614 | XLOC_063754 | ENSRNOT0000001607  | 0.956452709  | 1.15E-06 |

|             |             |                     |              |          |
|-------------|-------------|---------------------|--------------|----------|
| TUCP_001614 | XLOC_063754 | ENSRNOT00000005686  | -0.985094247 | 5.65E-09 |
| TUCP_001614 | XLOC_063754 | ENSRNOT000000020982 | -0.951279467 | 1.99E-06 |
| TUCP_001614 | XLOC_063754 | ENSRNOT000000085971 | -0.961283225 | 6.42E-07 |
| TUCP_001614 | XLOC_063754 | ENSRNOT000000077479 | -0.956263268 | 1.17E-06 |
| TUCP_001614 | XLOC_063754 | ENSRNOT000000022142 | 0.963154258  | 5.03E-07 |
| TUCP_001614 | XLOC_063754 | ENSRNOT000000005405 | 0.972416541  | 1.20E-07 |
| TUCP_001614 | XLOC_063754 | ENSRNOT000000077152 | 0.951550324  | 1.94E-06 |
| TUCP_001614 | XLOC_063754 | ENSRNOT000000015537 | 0.97235358   | 1.21E-07 |
| TUCP_001614 | XLOC_063754 | ENSRNOT000000052120 | 0.952184809  | 1.82E-06 |
| TUCP_001614 | XLOC_063754 | ENSRNOT000000007702 | -0.958629168 | 8.90E-07 |
| TUCP_001614 | XLOC_063754 | ENSRNOT000000030007 | -0.976328721 | 5.63E-08 |
| TUCP_001614 | XLOC_063754 | ENSRNOT000000015946 | -0.970686416 | 1.62E-07 |
| TUCP_001614 | XLOC_063754 | ENSRNOT000000004172 | 0.964340097  | 4.28E-07 |
| TUCP_001614 | XLOC_063754 | ENSRNOT000000023965 | -0.95037139  | 2.18E-06 |
| TUCP_001614 | XLOC_063754 | ENSRNOT000000040476 | 0.952931051  | 1.68E-06 |
| TUCP_001614 | XLOC_063754 | ENSRNOT000000023962 | -0.9508076   | 2.09E-06 |
| TUCP_001614 | XLOC_063754 | ENSRNOT000000085279 | 0.976365746  | 5.58E-08 |
| TUCP_001614 | XLOC_063754 | ENSRNOT000000015769 | 0.956658913  | 1.12E-06 |
| TUCP_001614 | XLOC_063754 | ENSRNOT000000082904 | 0.969299349  | 2.04E-07 |
| TUCP_001614 | XLOC_063754 | ENSRNOT000000015318 | -0.964035364 | 4.46E-07 |
| TUCP_001614 | XLOC_063754 | ENSRNOT000000015223 | 0.976188923  | 5.79E-08 |
| TUCP_001614 | XLOC_063754 | ENSRNOT000000028907 | 0.975989127  | 6.04E-08 |
| TUCP_001614 | XLOC_063754 | ENSRNOT000000010224 | 0.965609383  | 3.58E-07 |
| TUCP_001614 | XLOC_063754 | ENSRNOT000000025887 | -0.973273477 | 1.03E-07 |
| TUCP_001614 | XLOC_063754 | ENSRNOT000000003940 | -0.96038227  | 7.19E-07 |
| TUCP_001614 | XLOC_063754 | ENSRNOT000000017687 | -0.95955645  | 7.96E-07 |
| TUCP_001614 | XLOC_063754 | ENSRNOT000000005958 | 0.952781421  | 1.71E-06 |
| TUCP_001614 | XLOC_063754 | ENSRNOT000000039551 | -0.963677296 | 4.68E-07 |
| TUCP_001614 | XLOC_063754 | ENSRNOT000000082998 | 0.955919408  | 1.22E-06 |
| TUCP_001614 | XLOC_063754 | ENSRNOT000000015006 | 0.967644675  | 2.64E-07 |
| TUCP_001614 | XLOC_063754 | ENSRNOT000000007350 | 0.967914238  | 2.54E-07 |
| TUCP_001614 | XLOC_063754 | ENSRNOT000000083578 | 0.973111858  | 1.06E-07 |
| TUCP_001614 | XLOC_063754 | ENSRNOT000000000181 | 0.973152474  | 1.05E-07 |
| TUCP_001614 | XLOC_063754 | ENSRNOT000000023638 | 0.964934025  | 3.94E-07 |
| TUCP_001614 | XLOC_063754 | ENSRNOT000000017361 | 0.957634458  | 1.00E-06 |
| TUCP_001614 | XLOC_063754 | ENSRNOT000000045326 | 0.966808211  | 3.00E-07 |
| TUCP_001614 | XLOC_063754 | ENSRNOT000000045833 | 0.972359093  | 1.21E-07 |
| TUCP_001614 | XLOC_063754 | ENSRNOT000000008074 | -0.957186145 | 1.05E-06 |
| TUCP_001614 | XLOC_063754 | ENSRNOT000000005901 | 0.96663419   | 3.08E-07 |
| TUCP_001614 | XLOC_063754 | ENSRNOT000000074023 | 0.97553072   | 6.63E-08 |
| TUCP_001614 | XLOC_063754 | ENSRNOT000000019465 | -0.966676875 | 3.06E-07 |
| TUCP_001614 | XLOC_063754 | ENSRNOT000000009073 | -0.950877297 | 2.07E-06 |
| TUCP_001614 | XLOC_063754 | ENSRNOT000000067170 | -0.954352496 | 1.45E-06 |
| TUCP_001614 | XLOC_063754 | ENSRNOT000000024710 | -0.956267641 | 1.17E-06 |
| TUCP_001614 | XLOC_063754 | ENSRNOT000000001586 | -0.962488813 | 5.49E-07 |
| TUCP_001614 | XLOC_063754 | ENSRNOT000000065076 | 0.95022504   | 2.21E-06 |
| TUCP_001614 | XLOC_063754 | ENSRNOT000000013516 | 0.974868629  | 7.57E-08 |
| TUCP_001614 | XLOC_063754 | ENSRNOT000000080677 | -0.972042203 | 1.28E-07 |
| TUCP_001614 | XLOC_063754 | ENSRNOT000000016012 | -0.952732598 | 1.72E-06 |
| TUCP_001614 | XLOC_063754 | ENSRNOT000000012060 | 0.954514595  | 1.42E-06 |
| TUCP_001614 | XLOC_063754 | ENSRNOT000000034282 | 0.972090292  | 1.27E-07 |



|             |             |                    |              |          |
|-------------|-------------|--------------------|--------------|----------|
| TUCP_001614 | XLOC_063754 | ENSRNOT00000027760 | 0.950015471  | 2.26E-06 |
| TUCP_001614 | XLOC_063754 | ENSRNOT00000018028 | -0.954830755 | 1.37E-06 |
| TUCP_001614 | XLOC_063754 | ENSRNOT00000019519 | 0.967418546  | 2.74E-07 |
| TUCP_001614 | XLOC_063754 | ENSRNOT00000089933 | 0.981688024  | 1.57E-08 |
| TUCP_001614 | XLOC_063754 | ENSRNOT00000022924 | -0.974464042 | 8.19E-08 |
| TUCP_001614 | XLOC_063754 | ENSRNOT00000067009 | -0.954490837 | 1.42E-06 |
| TUCP_001614 | XLOC_063754 | ENSRNOT00000090461 | 0.97070786   | 1.62E-07 |
| TUCP_001614 | XLOC_063754 | ENSRNOT00000073983 | 0.954098527  | 1.49E-06 |
| TUCP_001614 | XLOC_063754 | ENSRNOT00000067554 | 0.969870976  | 1.86E-07 |
| TUCP_001614 | XLOC_063754 | ENSRNOT00000010784 | 0.972576406  | 1.17E-07 |
| TUCP_001614 | XLOC_063754 | ENSRNOT00000010783 | -0.960260479 | 7.30E-07 |
| TUCP_001614 | XLOC_063754 | ENSRNOT00000026075 | 0.950608733  | 2.13E-06 |
| TUCP_001614 | XLOC_063754 | ENSRNOT00000016330 | -0.961604279 | 6.16E-07 |
| TUCP_001614 | XLOC_063754 | ENSRNOT00000019820 | 0.975689024  | 6.42E-08 |
| TUCP_001614 | XLOC_063754 | ENSRNOT00000011832 | -0.984195422 | 7.56E-09 |
| TUCP_001614 | XLOC_063754 | ENSRNOT00000032301 | -0.966144098 | 3.31E-07 |
| TUCP_001614 | XLOC_063754 | ENSRNOT00000021030 | -0.954341652 | 1.45E-06 |
| TUCP_001614 | XLOC_063754 | ENSRNOT00000006835 | 0.953808932  | 1.53E-06 |
| TUCP_001614 | XLOC_063754 | ENSRNOT00000077727 | -0.966104505 | 3.33E-07 |
| TUCP_001614 | XLOC_063754 | ENSRNOT00000044346 | -0.976543831 | 5.38E-08 |
| TUCP_001614 | XLOC_063754 | ENSRNOT00000068745 | 0.95514397   | 1.33E-06 |
| TUCP_001614 | XLOC_063754 | ENSRNOT00000091637 | 0.964064524  | 4.44E-07 |
| TUCP_001614 | XLOC_063754 | ENSRNOT00000092068 | 0.9729964    | 1.08E-07 |
| TUCP_001614 | XLOC_063754 | ENSRNOT00000017949 | -0.966110342 | 3.33E-07 |
| TUCP_001614 | XLOC_063754 | ENSRNOT00000023437 | 0.951958739  | 1.86E-06 |
| TUCP_001614 | XLOC_063754 | ENSRNOT00000074212 | 0.960926249  | 6.72E-07 |
| TUCP_001614 | XLOC_063754 | ENSRNOT00000013864 | -0.967282727 | 2.79E-07 |
| TUCP_001614 | XLOC_063754 | ENSRNOT00000003265 | 0.971111662  | 1.51E-07 |
| TUCP_001614 | XLOC_063754 | ENSRNOT00000001081 | 0.96433274   | 4.28E-07 |
| TUCP_001614 | XLOC_063754 | ENSRNOT00000003544 | -0.954297586 | 1.45E-06 |
| TUCP_001614 | XLOC_063754 | ENSRNOT00000022190 | -0.976497688 | 5.43E-08 |
| TUCP_001614 | XLOC_063754 | ENSRNOT00000060098 | -0.966368293 | 3.20E-07 |
| TUCP_001614 | XLOC_063754 | ENSRNOT00000025913 | -0.984433827 | 7.01E-09 |
| TUCP_001614 | XLOC_063754 | ENSRNOT00000006308 | -0.963136365 | 5.04E-07 |
| TUCP_001614 | XLOC_063754 | ENSRNOT00000076230 | 0.955258449  | 1.31E-06 |
| TUCP_001614 | XLOC_063754 | ENSRNOT00000021015 | 0.955978683  | 1.21E-06 |
| TUCP_001614 | XLOC_063754 | ENSRNOT00000073919 | 0.960537757  | 7.05E-07 |
| TUCP_001614 | XLOC_063754 | ENSRNOT00000036658 | -0.970859282 | 1.58E-07 |
| TUCP_001614 | XLOC_063754 | ENSRNOT00000089611 | 0.95597156   | 1.21E-06 |
| TUCP_001614 | XLOC_063754 | ENSRNOT00000052422 | 0.951229297  | 2.00E-06 |
| TUCP_001614 | XLOC_063754 | ENSRNOT00000086590 | 0.965337556  | 3.72E-07 |
| TUCP_001614 | XLOC_063754 | ENSRNOT00000065942 | -0.964849516 | 3.98E-07 |
| TUCP_001614 | XLOC_063754 | ENSRNOT00000018634 | -0.972361675 | 1.21E-07 |
| TUCP_001614 | XLOC_063754 | ENSRNOT00000034883 | -0.965104443 | 3.84E-07 |
| TUCP_001614 | XLOC_063754 | ENSRNOT00000020155 | 0.958472374  | 9.07E-07 |
| TUCP_001614 | XLOC_063754 | ENSRNOT00000072357 | -0.966168509 | 3.30E-07 |
| TUCP_001614 | XLOC_063754 | ENSRNOT0000000707  | -0.952044145 | 1.84E-06 |
| TUCP_001614 | XLOC_063754 | ENSRNOT00000087011 | -0.956130461 | 1.19E-06 |
| TUCP_001614 | XLOC_063754 | ENSRNOT00000067739 | -0.954329944 | 1.45E-06 |
| TUCP_001614 | XLOC_063754 | ENSRNOT00000005910 | -0.990389731 | 6.35E-10 |
| TUCP_001614 | XLOC_063754 | ENSRNOT00000029701 | 0.959569975  | 7.95E-07 |

|             |             |                    |              |          |
|-------------|-------------|--------------------|--------------|----------|
| TUCP_001614 | XLOC_063754 | ENSRNOT00000026988 | -0.968666408 | 2.26E-07 |
| TUCP_001614 | XLOC_063754 | ENSRNOT00000010852 | 0.952674957  | 1.73E-06 |
| TUCP_001614 | XLOC_063754 | ENSRNOT00000016722 | 0.955717624  | 1.24E-06 |
| TUCP_001614 | XLOC_063754 | ENSRNOT00000000013 | 0.971855944  | 1.33E-07 |
| TUCP_001614 | XLOC_063754 | ENSRNOT00000080222 | -0.953744157 | 1.54E-06 |
| TUCP_001614 | XLOC_063754 | ENSRNOT00000037955 | -0.961791438 | 6.01E-07 |
| TUCP_001614 | XLOC_063754 | ENSRNOT00000055582 | 0.958655392  | 8.88E-07 |
| TUCP_001614 | XLOC_063754 | ENSRNOT00000022074 | 0.953158103  | 1.64E-06 |
| TUCP_001614 | XLOC_063754 | ENSRNOT00000008901 | -0.959942771 | 7.59E-07 |
| TUCP_001614 | XLOC_063754 | ENSRNOT00000004999 | 0.968226677  | 2.42E-07 |
| TUCP_001614 | XLOC_063754 | ENSRNOT00000013463 | 0.969175337  | 2.08E-07 |
| TUCP_001614 | XLOC_063754 | ENSRNOT00000025966 | 0.951774026  | 1.89E-06 |
| TUCP_001614 | XLOC_063754 | ENSRNOT00000047663 | -0.961033627 | 6.63E-07 |
| TUCP_001614 | XLOC_063754 | ENSRNOT00000000532 | -0.955883707 | 1.22E-06 |
| TUCP_001614 | XLOC_063754 | ENSRNOT00000029202 | -0.974868688 | 7.57E-08 |
| TUCP_001614 | XLOC_063754 | ENSRNOT00000017907 | -0.956676863 | 1.12E-06 |
| TUCP_001614 | XLOC_063754 | ENSRNOT00000025794 | -0.976829822 | 5.06E-08 |
| TUCP_001614 | XLOC_063754 | ENSRNOT00000058111 | -0.965440007 | 3.66E-07 |
| TUCP_001614 | XLOC_063754 | ENSRNOT00000084422 | 0.963112036  | 5.06E-07 |
| TUCP_001614 | XLOC_063754 | ENSRNOT00000054828 | 0.95395668   | 1.51E-06 |
| TUCP_001614 | XLOC_063754 | ENSRNOT00000002443 | 0.960740967  | 6.88E-07 |
| TUCP_001614 | XLOC_063754 | ENSRNOT00000078994 | 0.965690456  | 3.53E-07 |
| TUCP_001614 | XLOC_063754 | ENSRNOT00000002114 | -0.976329974 | 5.62E-08 |
| TUCP_001614 | XLOC_063754 | ENSRNOT00000024841 | -0.950535206 | 2.15E-06 |
| TUCP_001614 | XLOC_063754 | ENSRNOT00000009462 | 0.978602713  | 3.41E-08 |
| TUCP_001614 | XLOC_063754 | ENSRNOT00000046215 | -0.970530339 | 1.67E-07 |
| TUCP_001614 | XLOC_063754 | ENSRNOT00000000083 | -0.951638714 | 1.92E-06 |
| TUCP_001614 | XLOC_063754 | ENSRNOT00000015495 | -0.960664565 | 6.94E-07 |
| TUCP_001614 | XLOC_063754 | ENSRNOT00000087838 | -0.985903055 | 4.28E-09 |
| TUCP_001614 | XLOC_063754 | ENSRNOT00000014124 | 0.956171752  | 1.18E-06 |
| TUCP_001614 | XLOC_063754 | ENSRNOT00000000120 | 0.979494613  | 2.76E-08 |
| TUCP_001614 | XLOC_063754 | ENSRNOT00000013632 | 0.976026705  | 5.99E-08 |
| TUCP_001614 | XLOC_063754 | ENSRNOT00000055442 | 0.95289755   | 1.69E-06 |
| TUCP_001614 | XLOC_063754 | ENSRNOT00000028225 | 0.979060345  | 3.06E-08 |
| TUCP_001614 | XLOC_063754 | ENSRNOT00000019172 | -0.969138002 | 2.09E-07 |
| TUCP_001614 | XLOC_063754 | ENSRNOT00000020994 | -0.961980068 | 5.87E-07 |
| TUCP_001614 | XLOC_063754 | ENSRNOT00000032248 | 0.957654763  | 9.99E-07 |
| TUCP_001614 | XLOC_063754 | ENSRNOT00000040393 | 0.960975246  | 6.68E-07 |
| TUCP_001614 | XLOC_063754 | ENSRNOT00000032236 | -0.950884437 | 2.07E-06 |
| TUCP_001614 | XLOC_063754 | ENSRNOT00000067901 | -0.969440001 | 1.99E-07 |
| TUCP_001614 | XLOC_063754 | ENSRNOT00000025314 | 0.95469243   | 1.39E-06 |
| TUCP_001614 | XLOC_063754 | ENSRNOT00000064700 | 0.963494579  | 4.80E-07 |
| TUCP_001614 | XLOC_063754 | ENSRNOT00000036613 | -0.972234319 | 1.24E-07 |
| TUCP_001614 | XLOC_063754 | ENSRNOT00000025705 | 0.957690607  | 9.94E-07 |
| TUCP_001614 | XLOC_063754 | ENSRNOT00000019983 | -0.95059837  | 2.13E-06 |
| TUCP_001614 | XLOC_063754 | ENSRNOT00000044922 | -0.950189704 | 2.22E-06 |
| TUCP_001614 | XLOC_063754 | ENSRNOT00000006460 | 0.961181785  | 6.50E-07 |
| TUCP_001614 | XLOC_063754 | ENSRNOT00000020051 | 0.973600931  | 9.66E-08 |
| TUCP_001614 | XLOC_063754 | ENSRNOT00000026279 | -0.970629386 | 1.64E-07 |
| TUCP_001614 | XLOC_063754 | ENSRNOT00000087062 | 0.966938695  | 2.94E-07 |
| TUCP_001614 | XLOC_063754 | ENSRNOT00000030749 | -0.962123139 | 5.76E-07 |

|             |             |                     |              |          |
|-------------|-------------|---------------------|--------------|----------|
| TUCP_001614 | XLOC_063754 | ENSRNOT00000082863  | 0.951000654  | 2.05E-06 |
| TUCP_001614 | XLOC_063754 | ENSRNOT00000007164  | 0.951258857  | 2.00E-06 |
| TUCP_001614 | XLOC_063754 | ENSRNOT00000049459  | -0.963318279 | 4.92E-07 |
| TUCP_001614 | XLOC_063754 | ENSRNOT00000014309  | -0.981579236 | 1.62E-08 |
| TUCP_001614 | XLOC_063754 | ENSRNOT00000017571  | -0.95166503  | 1.92E-06 |
| TUCP_001614 | XLOC_063754 | ENSRNOT00000013851  | -0.966501309 | 3.14E-07 |
| TUCP_001614 | XLOC_063754 | ENSRNOT00000007028  | -0.950915223 | 2.07E-06 |
| TUCP_001614 | XLOC_063754 | ENSRNOT00000018101  | -0.959397985 | 8.12E-07 |
| TUCP_001614 | XLOC_063754 | ENSRNOT00000001507  | 0.957217877  | 1.05E-06 |
| TUCP_001614 | XLOC_063754 | ENSRNOT000000087604 | 0.960635076  | 6.97E-07 |
| TUCP_001614 | XLOC_063754 | ENSRNOT000000083568 | 0.976409717  | 5.53E-08 |
| TUCP_001614 | XLOC_063754 | ENSRNOT00000039177  | -0.962881046 | 5.21E-07 |
| TUCP_001614 | XLOC_063754 | ENSRNOT00000005620  | -0.951531746 | 1.94E-06 |
| TUCP_001614 | XLOC_063754 | ENSRNOT000000084031 | 0.974042242  | 8.89E-08 |
| TUCP_001614 | XLOC_063754 | ENSRNOT00000030109  | 0.95496952   | 1.35E-06 |
| TUCP_001614 | XLOC_063754 | ENSRNOT00000017271  | 0.957174583  | 1.06E-06 |
| TUCP_001614 | XLOC_063754 | ENSRNOT00000037456  | 0.95319182   | 1.64E-06 |
| TUCP_001614 | XLOC_063754 | ENSRNOT00000030082  | 0.963220892  | 4.98E-07 |
| TUCP_001614 | XLOC_063754 | ENSRNOT00000000577  | 0.972158129  | 1.26E-07 |
| TUCP_001614 | XLOC_063754 | ENSRNOT000000081226 | 0.952435099  | 1.77E-06 |
| TUCP_001614 | XLOC_063754 | ENSRNOT000000088133 | -0.950427764 | 2.17E-06 |
| TUCP_001614 | XLOC_063754 | ENSRNOT00000038652  | -0.961500587 | 6.24E-07 |
| TUCP_001614 | XLOC_063754 | ENSRNOT00000016629  | 0.967195048  | 2.83E-07 |
| TUCP_001614 | XLOC_063754 | ENSRNOT00000075209  | -0.978836982 | 3.23E-08 |
| TUCP_001614 | XLOC_063754 | ENSRNOT00000001979  | -0.951297887 | 1.99E-06 |
| TUCP_001614 | XLOC_063754 | ENSRNOT000000083968 | -0.975238032 | 7.03E-08 |
| TUCP_001614 | XLOC_063754 | ENSRNOT000000083967 | 0.956682809  | 1.12E-06 |
| TUCP_001614 | XLOC_063754 | ENSRNOT000000083964 | -0.954650899 | 1.40E-06 |
| TUCP_001614 | XLOC_063754 | ENSRNOT00000026831  | 0.955104788  | 1.33E-06 |
| TUCP_001614 | XLOC_063754 | ENSRNOT000000068452 | 0.965740568  | 3.51E-07 |
| TUCP_001614 | XLOC_063754 | ENSRNOT00000024677  | 0.970293289  | 1.73E-07 |
| TUCP_001614 | XLOC_063754 | ENSRNOT000000061304 | -0.954220738 | 1.47E-06 |
| TUCP_001614 | XLOC_063754 | ENSRNOT00000028266  | 0.956105764  | 1.19E-06 |
| TUCP_001614 | XLOC_063754 | ENSRNOT00000032363  | 0.968575569  | 2.29E-07 |
| TUCP_001614 | XLOC_063754 | ENSRNOT00000019133  | 0.963547826  | 4.77E-07 |
| TUCP_001614 | XLOC_063754 | ENSRNOT00000011956  | 0.951668355  | 1.91E-06 |
| TUCP_001614 | XLOC_063754 | ENSRNOT00000024119  | 0.977671199  | 4.21E-08 |
| TUCP_001614 | XLOC_063754 | ENSRNOT00000006824  | -0.953838269 | 1.53E-06 |
| TUCP_001614 | XLOC_063754 | ENSRNOT000000086260 | -0.98151763  | 1.65E-08 |
| TUCP_001614 | XLOC_063754 | ENSRNOT000000064667 | -0.957776261 | 9.85E-07 |
| TUCP_001614 | XLOC_063754 | ENSRNOT00000018328  | -0.9718923   | 1.32E-07 |
| TUCP_001614 | XLOC_063754 | ENSRNOT00000038610  | -0.96899586  | 2.14E-07 |
| TUCP_001614 | XLOC_063754 | ENSRNOT00000010683  | -0.972913797 | 1.10E-07 |
| TUCP_001614 | XLOC_063754 | ENSRNOT000000085736 | -0.962407802 | 5.55E-07 |
| TUCP_001614 | XLOC_063754 | ENSRNOT000000090853 | -0.97421676  | 8.59E-08 |
| TUCP_001614 | XLOC_063754 | ENSRNOT00000020316  | -0.955544398 | 1.27E-06 |
| TUCP_001614 | XLOC_063754 | ENSRNOT00000036666  | 0.95125371   | 2.00E-06 |
| TUCP_001614 | XLOC_063754 | ENSRNOT00000031261  | 0.965944459  | 3.41E-07 |
| TUCP_001614 | XLOC_063754 | ENSRNOT00000019816  | -0.960083849 | 7.46E-07 |
| TUCP_001614 | XLOC_063754 | ENSRNOT00000020383  | 0.964329563  | 4.28E-07 |
| TUCP_001614 | XLOC_063754 | ENSRNOT00000073847  | -0.961309766 | 6.40E-07 |

|             |             |                    |              |          |
|-------------|-------------|--------------------|--------------|----------|
| TUCP_001614 | XLOC_063754 | ENSRNOT00000064068 | -0.95478598  | 1.38E-06 |
| TUCP_001614 | XLOC_063754 | ENSRNOT00000025222 | -0.960499082 | 7.09E-07 |
| TUCP_001614 | XLOC_063754 | ENSRNOT00000056015 | -0.952852965 | 1.69E-06 |
| TUCP_001614 | XLOC_063754 | ENSRNOT00000030706 | -0.95738911  | 1.03E-06 |
| TUCP_001614 | XLOC_063754 | ENSRNOT00000068528 | -0.958905855 | 8.61E-07 |
| TUCP_001614 | XLOC_063754 | ENSRNOT00000011675 | 0.962428643  | 5.54E-07 |
| TUCP_001614 | XLOC_063754 | ENSRNOT00000087502 | 0.954863417  | 1.37E-06 |
| TUCP_001614 | XLOC_063754 | ENSRNOT00000004290 | 0.961383475  | 6.34E-07 |
| TUCP_001614 | XLOC_063754 | ENSRNOT00000039000 | -0.952690113 | 1.72E-06 |
| TUCP_001614 | XLOC_063754 | ENSRNOT00000021944 | 0.953867133  | 1.52E-06 |
| TUCP_001614 | XLOC_063754 | ENSRNOT00000020005 | 0.963581344  | 4.75E-07 |
| TUCP_001614 | XLOC_063754 | ENSRNOT00000083632 | -0.969637591 | 1.93E-07 |
| TUCP_001614 | XLOC_063754 | ENSRNOT00000049725 | -0.959992067 | 7.55E-07 |
| TUCP_001614 | XLOC_063754 | ENSRNOT00000086122 | 0.963123912  | 5.05E-07 |
| TUCP_001614 | XLOC_063754 | ENSRNOT00000026235 | -0.967979047 | 2.51E-07 |
| TUCP_001614 | XLOC_063754 | ENSRNOT00000087346 | 0.955851     | 1.23E-06 |
| TUCP_001614 | XLOC_063754 | ENSRNOT00000010993 | 0.96963792   | 1.93E-07 |
| TUCP_001614 | XLOC_063754 | ENSRNOT00000059181 | 0.980934765  | 1.92E-08 |
| TUCP_001614 | XLOC_063754 | ENSRNOT00000017291 | -0.961422943 | 6.31E-07 |
| TUCP_001614 | XLOC_063754 | ENSRNOT00000003691 | -0.976619207 | 5.29E-08 |
| TUCP_001614 | XLOC_063754 | ENSRNOT00000003690 | 0.95767045   | 9.97E-07 |
| TUCP_001614 | XLOC_063754 | ENSRNOT00000017765 | 0.958438209  | 9.11E-07 |
| TUCP_001614 | XLOC_063754 | ENSRNOT00000017761 | 0.979236535  | 2.94E-08 |
| TUCP_001614 | XLOC_063754 | ENSRNOT00000023543 | -0.966569548 | 3.11E-07 |
| TUCP_001614 | XLOC_063754 | ENSRNOT00000035309 | -0.975541021 | 6.62E-08 |
| TUCP_001614 | XLOC_063754 | ENSRNOT00000080608 | 0.964395704  | 4.24E-07 |
| TUCP_001614 | XLOC_063754 | ENSRNOT00000017486 | 0.962407363  | 5.55E-07 |
| TUCP_001614 | XLOC_063754 | ENSRNOT00000039341 | 0.964421989  | 4.23E-07 |
| TUCP_001614 | XLOC_063754 | ENSRNOT00000079304 | -0.966566855 | 3.11E-07 |
| TUCP_001614 | XLOC_063754 | ENSRNOT00000037405 | 0.95187037   | 1.88E-06 |
| TUCP_001614 | XLOC_063754 | ENSRNOT00000042125 | 0.950105622  | 2.24E-06 |
| TUCP_001614 | XLOC_063754 | ENSRNOT00000025460 | 0.978966048  | 3.13E-08 |
| TUCP_001614 | XLOC_063754 | ENSRNOT00000025784 | -0.950250107 | 2.21E-06 |
| TUCP_001614 | XLOC_063754 | ENSRNOT00000026760 | -0.971723035 | 1.36E-07 |
| TUCP_001614 | XLOC_063754 | ENSRNOT00000081077 | -0.95044551  | 2.16E-06 |
| TUCP_001614 | XLOC_063754 | ENSRNOT00000016568 | 0.972294274  | 1.23E-07 |
| TUCP_001614 | XLOC_063754 | ENSRNOT00000027360 | -0.973236265 | 1.03E-07 |
| TUCP_001614 | XLOC_063754 | ENSRNOT00000004770 | -0.964011961 | 4.48E-07 |
| TUCP_001614 | XLOC_063754 | ENSRNOT00000047210 | 0.958685994  | 8.84E-07 |
| TUCP_001614 | XLOC_063754 | ENSRNOT00000079414 | -0.972506939 | 1.18E-07 |
| TUCP_001614 | XLOC_063754 | ENSRNOT00000024011 | 0.983666394  | 8.91E-09 |
| TUCP_001614 | XLOC_063754 | ENSRNOT00000000134 | -0.951123406 | 2.02E-06 |
| TUCP_001614 | XLOC_063754 | ENSRNOT00000005885 | -0.957815756 | 9.80E-07 |
| TUCP_001614 | XLOC_063754 | ENSRNOT00000079996 | 0.954748852  | 1.38E-06 |
| TUCP_003278 | XLOC_140546 | ENSRNOT00000072396 | 0.95644402   | 1.15E-06 |
| TUCP_003278 | XLOC_140546 | ENSRNOT00000079549 | 0.956618564  | 1.12E-06 |
| TUCP_003278 | XLOC_140546 | ENSRNOT00000093577 | 0.964284896  | 4.31E-07 |
| TUCP_004559 | XLOC_200313 | ENSRNOT00000013747 | 0.967565522  | 2.68E-07 |
| TUCP_004559 | XLOC_200313 | ENSRNOT00000013745 | -0.966161048 | 3.30E-07 |
| TUCP_004559 | XLOC_200313 | ENSRNOT00000019104 | -0.971940941 | 1.31E-07 |
| TUCP_004559 | XLOC_200313 | ENSRNOT00000019848 | -0.972880774 | 1.10E-07 |

|             |             |                     |              |          |
|-------------|-------------|---------------------|--------------|----------|
| TUCP_004559 | XLOC_200313 | ENSRNOT00000015566  | 0.95496279   | 1.35E-06 |
| TUCP_004559 | XLOC_200313 | ENSRNOT00000001691  | 0.9509011    | 2.07E-06 |
| TUCP_004559 | XLOC_200313 | ENSRNOT000000089319 | 0.952792405  | 1.71E-06 |
| TUCP_004559 | XLOC_200313 | ENSRNOT00000020267  | 0.954766196  | 1.38E-06 |
| TUCP_004559 | XLOC_200313 | ENSRNOT000000079138 | 0.963055811  | 5.09E-07 |
| TUCP_004559 | XLOC_200313 | ENSRNOT000000078737 | -0.967259858 | 2.80E-07 |
| TUCP_004559 | XLOC_200313 | ENSRNOT000000025067 | -0.971135468 | 1.50E-07 |
| TUCP_004559 | XLOC_200313 | ENSRNOT000000086706 | 0.95493029   | 1.36E-06 |
| TUCP_004559 | XLOC_200313 | ENSRNOT000000030914 | -0.964416248 | 4.23E-07 |
| TUCP_004559 | XLOC_200313 | ENSRNOT000000078326 | -0.951937821 | 1.86E-06 |
| TUCP_004559 | XLOC_200313 | ENSRNOT000000086310 | -0.975512651 | 6.66E-08 |
| TUCP_004559 | XLOC_200313 | ENSRNOT000000011130 | -0.959561173 | 7.96E-07 |
| TUCP_004559 | XLOC_200313 | ENSRNOT000000037955 | -0.951339236 | 1.98E-06 |
| TUCP_004559 | XLOC_200313 | ENSRNOT000000025309 | 0.962848819  | 5.24E-07 |
| TUCP_004559 | XLOC_200313 | ENSRNOT000000025308 | -0.962833298 | 5.25E-07 |
| TUCP_004559 | XLOC_200313 | ENSRNOT000000042459 | -0.95372111  | 1.55E-06 |
| TUCP_004559 | XLOC_200313 | ENSRNOT000000003247 | -0.976231608 | 5.74E-08 |
| TUCP_004559 | XLOC_200313 | ENSRNOT000000085311 | -0.959746302 | 7.78E-07 |
| TUCP_004559 | XLOC_200313 | ENSRNOT000000021534 | -0.952887255 | 1.69E-06 |
| TUCP_004559 | XLOC_200313 | ENSRNOT000000015986 | -0.953281846 | 1.62E-06 |
| TUCP_004559 | XLOC_200313 | ENSRNOT000000025284 | -0.982202264 | 1.37E-08 |
| TUCP_004559 | XLOC_200313 | ENSRNOT000000006591 | -0.961677807 | 6.10E-07 |
| TUCP_004559 | XLOC_200313 | ENSRNOT000000018622 | -0.965028883 | 3.88E-07 |
| TUCP_004559 | XLOC_200313 | ENSRNOT000000072771 | 0.981681834  | 1.58E-08 |
| TUCP_004559 | XLOC_200313 | ENSRNOT000000022620 | 0.979782962  | 2.57E-08 |
| TUCP_004559 | XLOC_200313 | ENSRNOT000000035320 | -0.985562424 | 4.82E-09 |
| TUCP_004559 | XLOC_200313 | ENSRNOT000000017469 | -0.984294517 | 7.33E-09 |
| TUCP_004559 | XLOC_200313 | ENSRNOT000000077999 | 0.960337895  | 7.23E-07 |
| TUCP_004559 | XLOC_200313 | ENSRNOT000000003412 | -0.95711161  | 1.06E-06 |
| TUCP_004559 | XLOC_200313 | ENSRNOT000000003146 | -0.950046738 | 2.25E-06 |
| TUCP_004559 | XLOC_200313 | ENSRNOT000000003794 | -0.953593842 | 1.57E-06 |
| TUCP_004559 | XLOC_200313 | ENSRNOT000000015188 | 0.950855325  | 2.08E-06 |
| TUCP_004559 | XLOC_200313 | ENSRNOT000000017648 | -0.957396413 | 1.03E-06 |
| TUCP_004559 | XLOC_200313 | ENSRNOT000000039335 | -0.965106133 | 3.84E-07 |
| TUCP_004559 | XLOC_200313 | ENSRNOT000000040629 | 0.965913439  | 3.42E-07 |
| TUCP_004559 | XLOC_200313 | ENSRNOT000000083287 | -0.970834728 | 1.58E-07 |
| TUCP_004559 | XLOC_200313 | ENSRNOT000000082686 | -0.974026721 | 8.91E-08 |
| TUCP_004559 | XLOC_200313 | ENSRNOT000000076181 | -0.967067393 | 2.89E-07 |
| TUCP_004559 | XLOC_200313 | ENSRNOT000000017269 | -0.968287831 | 2.39E-07 |
| TUCP_004559 | XLOC_200313 | ENSRNOT000000026462 | -0.981761177 | 1.54E-08 |
| TUCP_004559 | XLOC_200313 | ENSRNOT000000080418 | -0.965218808 | 3.78E-07 |
| TUCP_004559 | XLOC_200313 | ENSRNOT000000067391 | -0.96573418  | 3.51E-07 |
| TUCP_004559 | XLOC_200313 | ENSRNOT000000029179 | -0.963194203 | 5.00E-07 |
| TUCP_004559 | XLOC_200313 | ENSRNOT000000026481 | 0.953984687  | 1.50E-06 |
| TUCP_004559 | XLOC_200313 | ENSRNOT000000000469 | 0.952267154  | 1.80E-06 |
| TUCP_004559 | XLOC_200313 | ENSRNOT000000056145 | -0.976421536 | 5.52E-08 |
| TUCP_004559 | XLOC_200313 | ENSRNOT000000017813 | -0.96079396  | 6.83E-07 |
| TUCP_004559 | XLOC_200313 | ENSRNOT000000026525 | -0.958421288 | 9.13E-07 |
| TUCP_004559 | XLOC_200313 | ENSRNOT000000082709 | -0.95518133  | 1.32E-06 |
| TUCP_004559 | XLOC_200313 | ENSRNOT000000001404 | -0.955476378 | 1.28E-06 |
| TUCP_004559 | XLOC_200313 | ENSRNOT000000000817 | -0.963609561 | 4.73E-07 |

|             |             |                    |              |          |
|-------------|-------------|--------------------|--------------|----------|
| TUCP_004559 | XLOC_200313 | ENSRNOT00000084313 | -0.969681496 | 1.92E-07 |
| TUCP_004559 | XLOC_200313 | ENSRNOT00000001401 | 0.979332353  | 2.87E-08 |
| TUCP_004559 | XLOC_200313 | ENSRNOT00000016132 | -0.958634043 | 8.90E-07 |
| TUCP_004559 | XLOC_200313 | ENSRNOT0000001366  | -0.970447313 | 1.69E-07 |
| TUCP_004559 | XLOC_200313 | ENSRNOT00000031487 | 0.959498302  | 8.02E-07 |
| TUCP_004559 | XLOC_200313 | ENSRNOT00000013067 | -0.955569844 | 1.27E-06 |
| TUCP_004559 | XLOC_200313 | ENSRNOT00000001360 | -0.989591306 | 9.46E-10 |
| TUCP_004559 | XLOC_200313 | ENSRNOT00000015199 | -0.952361413 | 1.78E-06 |
| TUCP_004559 | XLOC_200313 | ENSRNOT00000009028 | 0.95261106   | 1.74E-06 |
| TUCP_004559 | XLOC_200313 | ENSRNOT00000016220 | -0.954190981 | 1.47E-06 |
| TUCP_004559 | XLOC_200313 | ENSRNOT00000017081 | -0.952242075 | 1.81E-06 |
| TUCP_004559 | XLOC_200313 | ENSRNOT00000002313 | -0.966421373 | 3.18E-07 |
| TUCP_004559 | XLOC_200313 | ENSRNOT00000016637 | -0.958718158 | 8.81E-07 |
| TUCP_004559 | XLOC_200313 | ENSRNOT00000003780 | 0.954203559  | 1.47E-06 |
| TUCP_004559 | XLOC_200313 | ENSRNOT00000060607 | -0.961389751 | 6.33E-07 |
| TUCP_004559 | XLOC_200313 | ENSRNOT00000079895 | 0.954295873  | 1.45E-06 |
| TUCP_004559 | XLOC_200313 | ENSRNOT00000054948 | 0.953202455  | 1.63E-06 |
| TUCP_004559 | XLOC_200313 | ENSRNOT00000045765 | -0.951166319 | 2.01E-06 |
| TUCP_004559 | XLOC_200313 | ENSRNOT00000071929 | -0.975960042 | 6.07E-08 |
| TUCP_004559 | XLOC_200313 | ENSRNOT00000064305 | -0.982298303 | 1.33E-08 |
| TUCP_004559 | XLOC_200313 | ENSRNOT00000002465 | 0.967979913  | 2.51E-07 |
| TUCP_004559 | XLOC_200313 | ENSRNOT00000029202 | -0.965836953 | 3.46E-07 |
| TUCP_004559 | XLOC_200313 | ENSRNOT00000021716 | 0.97009388   | 1.79E-07 |
| TUCP_004559 | XLOC_200313 | ENSRNOT00000003992 | -0.978926153 | 3.16E-08 |
| TUCP_004559 | XLOC_200313 | ENSRNOT00000019028 | 0.952432849  | 1.77E-06 |
| TUCP_004559 | XLOC_200313 | ENSRNOT00000016351 | -0.957084077 | 1.07E-06 |
| TUCP_004559 | XLOC_200313 | ENSRNOT00000050515 | 0.957721413  | 9.91E-07 |
| TUCP_004559 | XLOC_200313 | ENSRNOT00000017907 | -0.976098809 | 5.90E-08 |
| TUCP_004559 | XLOC_200313 | ENSRNOT00000078073 | -0.965524634 | 3.62E-07 |
| TUCP_004559 | XLOC_200313 | ENSRNOT00000064901 | 0.961466147  | 6.27E-07 |
| TUCP_004559 | XLOC_200313 | ENSRNOT00000055607 | -0.95825972  | 9.30E-07 |
| TUCP_004559 | XLOC_200313 | ENSRNOT00000028893 | -0.981157004 | 1.81E-08 |
| TUCP_004559 | XLOC_200313 | ENSRNOT00000023876 | 0.952114588  | 1.83E-06 |
| TUCP_004559 | XLOC_200313 | ENSRNOT00000003106 | -0.952651698 | 1.73E-06 |
| TUCP_004559 | XLOC_200313 | ENSRNOT00000042633 | -0.955233435 | 1.31E-06 |
| TUCP_004559 | XLOC_200313 | ENSRNOT00000049285 | -0.951358673 | 1.98E-06 |
| TUCP_004559 | XLOC_200313 | ENSRNOT00000006366 | -0.982497889 | 1.26E-08 |
| TUCP_004559 | XLOC_200313 | ENSRNOT00000074649 | 0.952042422  | 1.84E-06 |
| TUCP_004559 | XLOC_200313 | ENSRNOT00000025104 | -0.950215687 | 2.21E-06 |
| TUCP_004559 | XLOC_200313 | ENSRNOT00000085911 | -0.962501621 | 5.48E-07 |
| TUCP_004559 | XLOC_200313 | ENSRNOT00000044662 | -0.956274049 | 1.17E-06 |
| TUCP_004559 | XLOC_200313 | ENSRNOT00000064723 | -0.979913537 | 2.49E-08 |
| TUCP_004559 | XLOC_200313 | ENSRNOT00000073834 | -0.984282717 | 7.36E-09 |
| TUCP_004559 | XLOC_200313 | ENSRNOT00000052131 | -0.955982919 | 1.21E-06 |
| TUCP_004559 | XLOC_200313 | ENSRNOT00000028807 | -0.961685408 | 6.10E-07 |
| TUCP_004559 | XLOC_200313 | ENSRNOT00000086456 | -0.976961939 | 4.92E-08 |
| TUCP_004559 | XLOC_200313 | ENSRNOT00000036959 | -0.980343965 | 2.24E-08 |
| TUCP_004559 | XLOC_200313 | ENSRNOT00000027301 | -0.960053414 | 7.49E-07 |
| TUCP_004559 | XLOC_200313 | ENSRNOT00000010367 | 0.952172326  | 1.82E-06 |
| TUCP_004559 | XLOC_200313 | ENSRNOT00000089185 | -0.950072561 | 2.25E-06 |
| TUCP_004559 | XLOC_200313 | ENSRNOT0000001227  | -0.966713556 | 3.04E-07 |

|             |             |                     |              |          |
|-------------|-------------|---------------------|--------------|----------|
| TUCP_004559 | XLOC_200313 | ENSRNOT00000067741  | -0.96147534  | 6.26E-07 |
| TUCP_004559 | XLOC_200313 | ENSRNOT00000048933  | -0.965171328 | 3.81E-07 |
| TUCP_004559 | XLOC_200313 | ENSRNOT00000006765  | -0.958569937 | 8.97E-07 |
| TUCP_004559 | XLOC_200313 | ENSRNOT00000035385  | 0.959506867  | 8.01E-07 |
| TUCP_004559 | XLOC_200313 | ENSRNOT00000027275  | 0.952120099  | 1.83E-06 |
| TUCP_004559 | XLOC_200313 | ENSRNOT00000057739  | -0.956241336 | 1.17E-06 |
| TUCP_004559 | XLOC_200313 | ENSRNOT00000089007  | -0.962220644 | 5.69E-07 |
| TUCP_004559 | XLOC_200313 | ENSRNOT00000071192  | -0.953731132 | 1.54E-06 |
| TUCP_004559 | XLOC_200313 | ENSRNOT00000014885  | -0.964970488 | 3.92E-07 |
| TUCP_004559 | XLOC_200313 | ENSRNOT00000023786  | -0.95014702  | 2.23E-06 |
| TUCP_004559 | XLOC_200313 | ENSRNOT00000040548  | -0.95551619  | 1.27E-06 |
| TUCP_004559 | XLOC_200313 | ENSRNOT00000015624  | 0.950275969  | 2.20E-06 |
| TUCP_004559 | XLOC_200313 | ENSRNOT00000085295  | -0.962406408 | 5.55E-07 |
| TUCP_004559 | XLOC_200313 | ENSRNOT00000022377  | -0.959233853 | 8.28E-07 |
| TUCP_004559 | XLOC_200313 | ENSRNOT00000040060  | -0.952471148 | 1.76E-06 |
| TUCP_004559 | XLOC_200313 | ENSRNOT00000010962  | -0.951174757 | 2.01E-06 |
| TUCP_004559 | XLOC_200313 | ENSRNOT00000045545  | -0.95297427  | 1.67E-06 |
| TUCP_004559 | XLOC_200313 | ENSRNOT00000009749  | -0.965561998 | 3.60E-07 |
| TUCP_004559 | XLOC_200313 | ENSRNOT00000039102  | 0.954566341  | 1.41E-06 |
| TUCP_004559 | XLOC_200313 | ENSRNOT00000001135  | -0.96356552  | 4.76E-07 |
| TUCP_004559 | XLOC_200313 | ENSRNOT00000017692  | -0.966188683 | 3.29E-07 |
| TUCP_004559 | XLOC_200313 | ENSRNOT00000007044  | -0.973533653 | 9.78E-08 |
| TUCP_004559 | XLOC_200313 | ENSRNOT00000007369  | 0.966969095  | 2.93E-07 |
| TUCP_004559 | XLOC_200313 | ENSRNOT00000004787  | -0.96042505  | 7.15E-07 |
| TUCP_004559 | XLOC_200313 | ENSRNOT00000085466  | 0.969072682  | 2.12E-07 |
| TUCP_004559 | XLOC_200313 | ENSRNOT00000038811  | -0.950791917 | 2.09E-06 |
| TUCP_004559 | XLOC_200313 | ENSRNOT00000007367  | -0.973448136 | 9.94E-08 |
| TUCP_004559 | XLOC_200313 | ENSRNOT00000060757  | -0.964654835 | 4.09E-07 |
| TUCP_004559 | XLOC_200313 | ENSRNOT00000004941  | -0.987003865 | 2.86E-09 |
| TUCP_004559 | XLOC_200313 | ENSRNOT00000066968  | 0.96267524   | 5.36E-07 |
| TUCP_004559 | XLOC_200313 | ENSRNOT00000017995  | 0.963310446  | 4.92E-07 |
| TUCP_004559 | XLOC_200313 | ENSRNOT00000013431  | -0.975907061 | 6.14E-08 |
| TUCP_004559 | XLOC_200313 | ENSRNOT00000028703  | -0.958824762 | 8.70E-07 |
| TUCP_004559 | XLOC_200313 | ENSRNOT00000088679  | -0.960684696 | 6.92E-07 |
| TUCP_004559 | XLOC_200313 | ENSRNOT00000023256  | 0.964122075  | 4.41E-07 |
| TUCP_004559 | XLOC_200313 | ENSRNOT00000016776  | -0.986656541 | 3.26E-09 |
| TUCP_004559 | XLOC_200313 | ENSRNOT000000061619 | -0.951833243 | 1.88E-06 |
| TUCP_004559 | XLOC_200313 | ENSRNOT00000088677  | -0.964258562 | 4.33E-07 |
| TUCP_004559 | XLOC_200313 | ENSRNOT00000008987  | -0.960125629 | 7.42E-07 |
| TUCP_004559 | XLOC_200313 | ENSRNOT00000061580  | -0.964956331 | 3.92E-07 |
| TUCP_004559 | XLOC_200313 | ENSRNOT00000091116  | -0.967430327 | 2.73E-07 |
| TUCP_004559 | XLOC_200313 | ENSRNOT00000039607  | -0.976635312 | 5.27E-08 |
| TUCP_004559 | XLOC_200313 | ENSRNOT00000027083  | 0.953267684  | 1.62E-06 |
| TUCP_004559 | XLOC_200313 | ENSRNOT00000028737  | -0.960428322 | 7.15E-07 |
| TUCP_004559 | XLOC_200313 | ENSRNOT00000002053  | -0.95816835  | 9.40E-07 |
| TUCP_004559 | XLOC_200313 | ENSRNOT00000066041  | -0.958910656 | 8.61E-07 |
| TUCP_004559 | XLOC_200313 | ENSRNOT00000063930  | -0.964306742 | 4.30E-07 |
| TUCP_004559 | XLOC_200313 | ENSRNOT00000074420  | -0.961662517 | 6.12E-07 |
| TUCP_004559 | XLOC_200313 | ENSRNOT00000077646  | -0.951531351 | 1.94E-06 |
| TUCP_004559 | XLOC_200313 | ENSRNOT00000002037  | -0.953105531 | 1.65E-06 |
| TUCP_004559 | XLOC_200313 | ENSRNOT00000020155  | 0.95950661   | 8.01E-07 |

|             |             |                     |              |          |
|-------------|-------------|---------------------|--------------|----------|
| TUCP_004559 | XLOC_200313 | ENSRNOT00000001855  | 0.965901434  | 3.43E-07 |
| TUCP_004559 | XLOC_200313 | ENSRNOT000000041237 | -0.974354546 | 8.37E-08 |
| TUCP_004559 | XLOC_200313 | ENSRNOT00000006050  | -0.974084252 | 8.81E-08 |
| TUCP_004559 | XLOC_200313 | ENSRNOT00000002040  | -0.95822936  | 9.34E-07 |
| TUCP_004559 | XLOC_200313 | ENSRNOT00000003733  | -0.966368838 | 3.20E-07 |
| TUCP_004559 | XLOC_200313 | ENSRNOT000000036054 | 0.956520816  | 1.14E-06 |
| TUCP_004559 | XLOC_200313 | ENSRNOT000000028561 | 0.964028333  | 4.47E-07 |
| TUCP_004559 | XLOC_200313 | ENSRNOT000000013613 | -0.954086961 | 1.49E-06 |
| TUCP_004559 | XLOC_200313 | ENSRNOT000000027653 | -0.956419884 | 1.15E-06 |
| TUCP_004559 | XLOC_200313 | ENSRNOT000000014479 | -0.979777036 | 2.58E-08 |
| TUCP_004559 | XLOC_200313 | ENSRNOT000000027220 | -0.954167427 | 1.47E-06 |
| TUCP_004559 | XLOC_200313 | ENSRNOT00000003326  | -0.966904365 | 2.96E-07 |
| TUCP_004559 | XLOC_200313 | ENSRNOT000000021629 | -0.958815046 | 8.71E-07 |
| TUCP_004559 | XLOC_200313 | ENSRNOT000000016306 | -0.971481171 | 1.42E-07 |
| TUCP_004559 | XLOC_200313 | ENSRNOT000000006205 | -0.952733977 | 1.72E-06 |
| TUCP_004559 | XLOC_200313 | ENSRNOT000000086813 | -0.953616312 | 1.56E-06 |
| TUCP_004559 | XLOC_200313 | ENSRNOT000000015476 | -0.953577241 | 1.57E-06 |
| TUCP_004559 | XLOC_200313 | ENSRNOT000000047530 | 0.960647367  | 6.96E-07 |
| TUCP_004559 | XLOC_200313 | ENSRNOT000000021455 | -0.958023742 | 9.56E-07 |
| TUCP_004559 | XLOC_200313 | ENSRNOT000000064643 | 0.964572999  | 4.14E-07 |
| TUCP_004559 | XLOC_200313 | ENSRNOT000000007824 | -0.969646254 | 1.93E-07 |
| TUCP_004559 | XLOC_200313 | ENSRNOT000000057898 | -0.96228411  | 5.64E-07 |
| TUCP_004559 | XLOC_200313 | ENSRNOT000000007821 | 0.952771919  | 1.71E-06 |
| TUCP_004559 | XLOC_200313 | ENSRNOT000000090338 | -0.955696271 | 1.25E-06 |
| TUCP_004559 | XLOC_200313 | ENSRNOT000000056100 | -0.959219105 | 8.29E-07 |
| TUCP_004559 | XLOC_200313 | ENSRNOT000000001077 | 0.967108506  | 2.87E-07 |
| TUCP_004559 | XLOC_200313 | ENSRNOT000000075800 | -0.950272453 | 2.20E-06 |
| TUCP_004559 | XLOC_200313 | ENSRNOT000000036838 | -0.952867749 | 1.69E-06 |
| TUCP_004559 | XLOC_200313 | ENSRNOT000000009817 | -0.96916676  | 2.08E-07 |
| TUCP_004559 | XLOC_200313 | ENSRNOT000000006443 | -0.957123619 | 1.06E-06 |
| TUCP_004559 | XLOC_200313 | ENSRNOT000000025294 | -0.976247828 | 5.72E-08 |
| TUCP_004559 | XLOC_200313 | ENSRNOT000000030798 | -0.95340868  | 1.60E-06 |
| TUCP_004559 | XLOC_200313 | ENSRNOT000000018634 | -0.960442145 | 7.14E-07 |
| TUCP_004559 | XLOC_200313 | ENSRNOT000000071540 | 0.967243376  | 2.81E-07 |
| TUCP_004559 | XLOC_200313 | ENSRNOT000000012583 | -0.972465616 | 1.19E-07 |
| TUCP_004559 | XLOC_200313 | ENSRNOT000000073643 | -0.970644171 | 1.63E-07 |
| TUCP_004559 | XLOC_200313 | ENSRNOT000000085403 | 0.965371002  | 3.70E-07 |
| TUCP_004559 | XLOC_200313 | ENSRNOT000000078349 | -0.977114858 | 4.76E-08 |
| TUCP_004559 | XLOC_200313 | ENSRNOT000000011654 | -0.952271302 | 1.80E-06 |
| TUCP_004559 | XLOC_200313 | ENSRNOT000000022502 | -0.975831424 | 6.24E-08 |
| TUCP_004559 | XLOC_200313 | ENSRNOT000000026928 | -0.978132344 | 3.80E-08 |
| TUCP_004559 | XLOC_200313 | ENSRNOT000000044486 | -0.951375456 | 1.97E-06 |
| TUCP_004559 | XLOC_200313 | ENSRNOT000000026920 | -0.96311645  | 5.05E-07 |
| TUCP_004559 | XLOC_200313 | ENSRNOT000000089545 | -0.97903925  | 3.08E-08 |
| TUCP_004559 | XLOC_200313 | ENSRNOT000000021802 | 0.965295247  | 3.74E-07 |
| TUCP_004559 | XLOC_200313 | ENSRNOT000000021803 | -0.96848024  | 2.32E-07 |
| TUCP_004559 | XLOC_200313 | ENSRNOT000000018646 | -0.962004561 | 5.85E-07 |
| TUCP_004559 | XLOC_200313 | ENSRNOT000000024352 | 0.958238102  | 9.33E-07 |
| TUCP_004559 | XLOC_200313 | ENSRNOT000000038912 | 0.954253674  | 1.46E-06 |
| TUCP_004559 | XLOC_200313 | ENSRNOT000000082627 | -0.951559798 | 1.94E-06 |
| TUCP_004559 | XLOC_200313 | ENSRNOT000000013279 | 0.959450304  | 8.07E-07 |



|             |             |                     |              |          |
|-------------|-------------|---------------------|--------------|----------|
| TUCP_004559 | XLOC_200313 | ENSRNOT00000003787  | -0.963880912 | 4.56E-07 |
| TUCP_004559 | XLOC_200313 | ENSRNOT000000023262 | -0.954953154 | 1.35E-06 |
| TUCP_004559 | XLOC_200313 | ENSRNOT000000014859 | -0.958509068 | 9.03E-07 |
| TUCP_004559 | XLOC_200313 | ENSRNOT000000022342 | 0.967848754  | 2.56E-07 |
| TUCP_004559 | XLOC_200313 | ENSRNOT000000022343 | -0.954912156 | 1.36E-06 |
| TUCP_004559 | XLOC_200313 | ENSRNOT000000010893 | -0.952633031 | 1.73E-06 |
| TUCP_004559 | XLOC_200313 | ENSRNOT000000055957 | -0.975376852 | 6.84E-08 |
| TUCP_004559 | XLOC_200313 | ENSRNOT000000010674 | -0.980154723 | 2.34E-08 |
| TUCP_004559 | XLOC_200313 | ENSRNOT000000023664 | -0.981028025 | 1.88E-08 |
| TUCP_004559 | XLOC_200313 | ENSRNOT000000068026 | -0.951362586 | 1.98E-06 |
| TUCP_004559 | XLOC_200313 | ENSRNOT000000007314 | -0.954085763 | 1.49E-06 |
| TUCP_004559 | XLOC_200313 | ENSRNOT000000090456 | 0.954020731  | 1.50E-06 |
| TUCP_004559 | XLOC_200313 | ENSRNOT000000071482 | -0.954767092 | 1.38E-06 |
| TUCP_004559 | XLOC_200313 | ENSRNOT000000064068 | -0.987662851 | 2.20E-09 |
| TUCP_004559 | XLOC_200313 | ENSRNOT000000005172 | 0.95070891   | 2.11E-06 |
| TUCP_004559 | XLOC_200313 | ENSRNOT000000005170 | -0.973161488 | 1.05E-07 |
| TUCP_004559 | XLOC_200313 | ENSRNOT000000017746 | -0.951376481 | 1.97E-06 |
| TUCP_004559 | XLOC_200313 | ENSRNOT000000023567 | -0.973314136 | 1.02E-07 |
| TUCP_004559 | XLOC_200313 | ENSRNOT000000070912 | -0.950995607 | 2.05E-06 |
| TUCP_004559 | XLOC_200313 | ENSRNOT000000026398 | -0.976489337 | 5.44E-08 |
| TUCP_004559 | XLOC_200313 | ENSRNOT000000071897 | -0.964103944 | 4.42E-07 |
| TUCP_004559 | XLOC_200313 | ENSRNOT000000066923 | -0.953524063 | 1.58E-06 |
| TUCP_004559 | XLOC_200313 | ENSRNOT000000024285 | -0.988861508 | 1.33E-09 |
| TUCP_004559 | XLOC_200313 | ENSRNOT000000041277 | -0.955409978 | 1.29E-06 |
| TUCP_004559 | XLOC_200313 | ENSRNOT000000024264 | -0.956365443 | 1.16E-06 |
| TUCP_004559 | XLOC_200313 | ENSRNOT000000028744 | -0.972365344 | 1.21E-07 |
| TUCP_004559 | XLOC_200313 | ENSRNOT000000027910 | 0.953584092  | 1.57E-06 |
| TUCP_004559 | XLOC_200313 | ENSRNOT000000044073 | -0.964185409 | 4.37E-07 |
| TUCP_004559 | XLOC_200313 | ENSRNOT000000002771 | 0.954021772  | 1.50E-06 |
| TUCP_004559 | XLOC_200313 | ENSRNOT000000037015 | 0.95498319   | 1.35E-06 |
| TUCP_004559 | XLOC_200313 | ENSRNOT000000067135 | -0.956427926 | 1.15E-06 |
| TUCP_004559 | XLOC_200313 | ENSRNOT000000000527 | -0.966845346 | 2.98E-07 |
| TUCP_004559 | XLOC_200313 | ENSRNOT000000000258 | -0.962886756 | 5.21E-07 |
| TUCP_004559 | XLOC_200313 | ENSRNOT000000000529 | -0.958945971 | 8.57E-07 |
| TUCP_004559 | XLOC_200313 | ENSRNOT000000016372 | -0.972481938 | 1.19E-07 |
| TUCP_004559 | XLOC_200313 | ENSRNOT000000027615 | 0.954217379  | 1.47E-06 |
| TUCP_004559 | XLOC_200313 | ENSRNOT000000001734 | -0.95948127  | 8.03E-07 |
| TUCP_004559 | XLOC_200313 | ENSRNOT000000088202 | -0.980148493 | 2.35E-08 |
| TUCP_004559 | XLOC_200313 | ENSRNOT000000061916 | -0.960011107 | 7.53E-07 |
| TUCP_004559 | XLOC_200313 | ENSRNOT000000078161 | -0.984886648 | 6.05E-09 |
| TUCP_004559 | XLOC_200313 | ENSRNOT000000021145 | -0.963212009 | 4.99E-07 |
| TUCP_004559 | XLOC_200313 | ENSRNOT000000047572 | -0.97862863  | 3.39E-08 |
| TUCP_004559 | XLOC_200313 | ENSRNOT00000006802  | 0.961744373  | 6.05E-07 |
| TUCP_004559 | XLOC_200313 | ENSRNOT000000082151 | -0.978656459 | 3.37E-08 |
| TUCP_004559 | XLOC_200313 | ENSRNOT000000011572 | -0.985337148 | 5.21E-09 |
| TUCP_004559 | XLOC_200313 | ENSRNOT000000001607 | 0.967609647  | 2.66E-07 |
| TUCP_004559 | XLOC_200313 | ENSRNOT000000033324 | 0.956931539  | 1.09E-06 |
| TUCP_004559 | XLOC_200313 | ENSRNOT000000036282 | 0.956315255  | 1.16E-06 |
| TUCP_004559 | XLOC_200313 | ENSRNOT000000080522 | -0.962383592 | 5.57E-07 |
| TUCP_004559 | XLOC_200313 | ENSRNOT000000046126 | -0.962367896 | 5.58E-07 |
| TUCP_004559 | XLOC_200313 | ENSRNOT000000085971 | -0.954335542 | 1.45E-06 |

|             |             |                    |              |          |
|-------------|-------------|--------------------|--------------|----------|
| TUCP_004559 | XLOC_200313 | ENSRNOT00000086847 | -0.959590589 | 7.93E-07 |
| TUCP_004559 | XLOC_200313 | ENSRNOT00000020663 | -0.968978981 | 2.15E-07 |
| TUCP_004559 | XLOC_200313 | ENSRNOT00000007771 | -0.950664253 | 2.12E-06 |
| TUCP_004559 | XLOC_200313 | ENSRNOT00000022142 | 0.952431991  | 1.77E-06 |
| TUCP_004559 | XLOC_200313 | ENSRNOT00000076300 | -0.982043864 | 1.43E-08 |
| TUCP_004559 | XLOC_200313 | ENSRNOT00000021705 | -0.961799864 | 6.01E-07 |
| TUCP_004559 | XLOC_200313 | ENSRNOT00000052120 | 0.959443584  | 8.07E-07 |
| TUCP_004559 | XLOC_200313 | ENSRNOT00000078306 | 0.965568228  | 3.60E-07 |
| TUCP_004559 | XLOC_200313 | ENSRNOT00000036931 | -0.963197332 | 5.00E-07 |
| TUCP_004559 | XLOC_200313 | ENSRNOT00000015946 | -0.972445867 | 1.19E-07 |
| TUCP_004559 | XLOC_200313 | ENSRNOT00000023965 | -0.957449281 | 1.02E-06 |
| TUCP_004559 | XLOC_200313 | ENSRNOT00000001234 | -0.955267019 | 1.31E-06 |
| TUCP_004559 | XLOC_200313 | ENSRNOT00000058763 | -0.968422304 | 2.35E-07 |
| TUCP_004559 | XLOC_200313 | ENSRNOT00000023962 | -0.97010441  | 1.79E-07 |
| TUCP_004559 | XLOC_200313 | ENSRNOT00000022864 | -0.956645383 | 1.12E-06 |
| TUCP_004559 | XLOC_200313 | ENSRNOT0000005381  | 0.963851233  | 4.57E-07 |
| TUCP_004559 | XLOC_200313 | ENSRNOT00000025819 | -0.96705738  | 2.89E-07 |
| TUCP_004559 | XLOC_200313 | ENSRNOT00000015318 | -0.959800058 | 7.73E-07 |
| TUCP_004559 | XLOC_200313 | ENSRNOT00000028900 | -0.950172931 | 2.22E-06 |
| TUCP_004559 | XLOC_200313 | ENSRNOT00000045532 | -0.975515186 | 6.65E-08 |
| TUCP_004559 | XLOC_200313 | ENSRNOT00000025887 | -0.977474677 | 4.40E-08 |
| TUCP_004559 | XLOC_200313 | ENSRNOT00000066211 | -0.966011305 | 3.37E-07 |
| TUCP_004559 | XLOC_200313 | ENSRNOT00000078862 | 0.954658634  | 1.40E-06 |
| TUCP_004559 | XLOC_200313 | ENSRNOT0000005257  | 0.9572687    | 1.04E-06 |
| TUCP_004559 | XLOC_200313 | ENSRNOT00000059599 | -0.953436226 | 1.59E-06 |
| TUCP_004559 | XLOC_200313 | ENSRNOT00000039291 | -0.961050228 | 6.61E-07 |
| TUCP_004559 | XLOC_200313 | ENSRNOT00000031904 | 0.955051534  | 1.34E-06 |
| TUCP_004559 | XLOC_200313 | ENSRNOT00000039551 | -0.960484943 | 7.10E-07 |
| TUCP_004559 | XLOC_200313 | ENSRNOT00000082999 | -0.960462456 | 7.12E-07 |
| TUCP_004559 | XLOC_200313 | ENSRNOT00000082998 | 0.960218564  | 7.34E-07 |
| TUCP_004559 | XLOC_200313 | ENSRNOT00000077727 | -0.961395639 | 6.33E-07 |
| TUCP_004559 | XLOC_200313 | ENSRNOT00000050795 | 0.950618586  | 2.13E-06 |
| TUCP_004559 | XLOC_200313 | ENSRNOT00000083573 | -0.95897224  | 8.54E-07 |
| TUCP_004559 | XLOC_200313 | ENSRNOT00000083578 | 0.970500694  | 1.67E-07 |
| TUCP_004559 | XLOC_200313 | ENSRNOT00000066204 | -0.977907155 | 3.99E-08 |
| TUCP_004559 | XLOC_200313 | ENSRNOT00000023638 | 0.954197842  | 1.47E-06 |
| TUCP_004559 | XLOC_200313 | ENSRNOT00000059524 | -0.9734728   | 9.89E-08 |
| TUCP_004559 | XLOC_200313 | ENSRNOT00000017362 | -0.967722849 | 2.61E-07 |
| TUCP_004559 | XLOC_200313 | ENSRNOT0000005658  | -0.977935713 | 3.97E-08 |
| TUCP_004559 | XLOC_200313 | ENSRNOT00000074023 | 0.953654465  | 1.56E-06 |
| TUCP_004559 | XLOC_200313 | ENSRNOT00000019465 | -0.976163512 | 5.82E-08 |
| TUCP_004559 | XLOC_200313 | ENSRNOT00000009073 | -0.970030484 | 1.81E-07 |
| TUCP_004559 | XLOC_200313 | ENSRNOT00000024712 | -0.969092301 | 2.11E-07 |
| TUCP_004559 | XLOC_200313 | ENSRNOT00000067170 | -0.963204456 | 4.99E-07 |
| TUCP_004559 | XLOC_200313 | ENSRNOT00000060432 | -0.964000988 | 4.48E-07 |
| TUCP_004559 | XLOC_200313 | ENSRNOT00000001586 | -0.968714114 | 2.24E-07 |
| TUCP_004559 | XLOC_200313 | ENSRNOT00000001468 | -0.955009151 | 1.35E-06 |
| TUCP_004559 | XLOC_200313 | ENSRNOT00000072077 | -0.974617355 | 7.95E-08 |
| TUCP_004559 | XLOC_200313 | ENSRNOT00000006460 | 0.962890694  | 5.21E-07 |
| TUCP_004559 | XLOC_200313 | ENSRNOT00000028405 | -0.960078534 | 7.47E-07 |
| TUCP_004559 | XLOC_200313 | ENSRNOT00000013695 | -0.975657653 | 6.46E-08 |

|             |             |                     |              |          |
|-------------|-------------|---------------------|--------------|----------|
| TUCP_004559 | XLOC_200313 | ENSRNOT00000016541  | -0.963680927 | 4.68E-07 |
| TUCP_004559 | XLOC_200313 | ENSRNOT000000081621 | 0.966596313  | 3.10E-07 |
| TUCP_004559 | XLOC_200313 | ENSRNOT00000012060  | 0.958932197  | 8.59E-07 |
| TUCP_004559 | XLOC_200313 | ENSRNOT00000005033  | -0.975092928 | 7.24E-08 |
| TUCP_004559 | XLOC_200313 | ENSRNOT00000009000  | -0.967678096 | 2.63E-07 |
| TUCP_004559 | XLOC_200313 | ENSRNOT000000039523 | 0.957187857  | 1.05E-06 |
| TUCP_004559 | XLOC_200313 | ENSRNOT00000018028  | -0.954729758 | 1.39E-06 |
| TUCP_004559 | XLOC_200313 | ENSRNOT00000079185  | -0.95505192  | 1.34E-06 |
| TUCP_004559 | XLOC_200313 | ENSRNOT00000077908  | 0.958295911  | 9.26E-07 |
| TUCP_004559 | XLOC_200313 | ENSRNOT00000003641  | 0.950267418  | 2.20E-06 |
| TUCP_004559 | XLOC_200313 | ENSRNOT00000065673  | -0.961301384 | 6.40E-07 |
| TUCP_004559 | XLOC_200313 | ENSRNOT00000073983  | 0.954394728  | 1.44E-06 |
| TUCP_004559 | XLOC_200313 | ENSRNOT00000010783  | -0.963752248 | 4.64E-07 |
| TUCP_004559 | XLOC_200313 | ENSRNOT000000033677 | -0.959624483 | 7.90E-07 |
| TUCP_004559 | XLOC_200313 | ENSRNOT00000016330  | -0.978463616 | 3.52E-08 |
| TUCP_004559 | XLOC_200313 | ENSRNOT00000019121  | -0.97304396  | 1.07E-07 |
| TUCP_004559 | XLOC_200313 | ENSRNOT00000019820  | 0.963894105  | 4.55E-07 |
| TUCP_004559 | XLOC_200313 | ENSRNOT00000016389  | -0.95558923  | 1.26E-06 |
| TUCP_004559 | XLOC_200313 | ENSRNOT00000021030  | -0.957291955 | 1.04E-06 |
| TUCP_004559 | XLOC_200313 | ENSRNOT00000064671  | -0.963499403 | 4.80E-07 |
| TUCP_004559 | XLOC_200313 | ENSRNOT00000013116  | -0.955756882 | 1.24E-06 |
| TUCP_004559 | XLOC_200313 | ENSRNOT00000020932  | -0.95999105  | 7.55E-07 |
| TUCP_004559 | XLOC_200313 | ENSRNOT00000073492  | -0.958165095 | 9.41E-07 |
| TUCP_004559 | XLOC_200313 | ENSRNOT00000014044  | -0.950542935 | 2.14E-06 |
| TUCP_004559 | XLOC_200313 | ENSRNOT00000016947  | 0.956989805  | 1.08E-06 |
| TUCP_004559 | XLOC_200313 | ENSRNOT00000091863  | -0.951574883 | 1.93E-06 |
| TUCP_004559 | XLOC_200313 | ENSRNOT00000091864  | -0.958754269 | 8.77E-07 |
| TUCP_004559 | XLOC_200313 | ENSRNOT00000027753  | -0.957666755 | 9.97E-07 |
| TUCP_004559 | XLOC_200313 | ENSRNOT00000027435  | 0.952104004  | 1.83E-06 |
| TUCP_004559 | XLOC_200313 | ENSRNOT00000003544  | -0.961947171 | 5.89E-07 |
| TUCP_004559 | XLOC_200313 | ENSRNOT000000086119 | -0.954962524 | 1.35E-06 |
| TUCP_004559 | XLOC_200313 | ENSRNOT00000003540  | -0.964116524 | 4.41E-07 |
| TUCP_004559 | XLOC_200313 | ENSRNOT00000060098  | -0.961368022 | 6.35E-07 |
| TUCP_004559 | XLOC_200313 | ENSRNOT00000067739  | -0.966644974 | 3.07E-07 |
| TUCP_004559 | XLOC_200313 | ENSRNOT00000019386  | -0.984804577 | 6.22E-09 |
| TUCP_004559 | XLOC_200313 | ENSRNOT00000076230  | 0.952021928  | 1.85E-06 |
| TUCP_004559 | XLOC_200313 | ENSRNOT00000007736  | -0.950006987 | 2.26E-06 |
| TUCP_004559 | XLOC_200313 | ENSRNOT00000021636  | -0.953380404 | 1.60E-06 |
| TUCP_004559 | XLOC_200313 | ENSRNOT00000036658  | -0.960610843 | 6.99E-07 |
| TUCP_004559 | XLOC_200313 | ENSRNOT00000007738  | -0.95847371  | 9.07E-07 |
| TUCP_004559 | XLOC_200313 | ENSRNOT00000022107  | -0.964159607 | 4.39E-07 |
| TUCP_004559 | XLOC_200313 | ENSRNOT00000030803  | -0.954477705 | 1.43E-06 |
| TUCP_004559 | XLOC_200313 | ENSRNOT00000041116  | -0.964520117 | 4.17E-07 |
| TUCP_004559 | XLOC_200313 | ENSRNOT00000056918  | -0.965401839 | 3.68E-07 |
| TUCP_004559 | XLOC_200313 | ENSRNOT00000025824  | -0.969067437 | 2.12E-07 |
| TUCP_004559 | XLOC_200313 | ENSRNOT00000072357  | -0.96084757  | 6.78E-07 |
| TUCP_004559 | XLOC_200313 | ENSRNOT00000000707  | -0.963285019 | 4.94E-07 |
| TUCP_004559 | XLOC_200313 | ENSRNOT00000086605  | -0.957767656 | 9.86E-07 |
| TUCP_004559 | XLOC_200313 | ENSRNOT00000025913  | -0.954479631 | 1.43E-06 |
| TUCP_004559 | XLOC_200313 | ENSRNOT00000017232  | -0.964302405 | 4.30E-07 |
| TUCP_004559 | XLOC_200313 | ENSRNOT00000090987  | -0.962668119 | 5.36E-07 |

|             |             |                     |              |          |
|-------------|-------------|---------------------|--------------|----------|
| TUCP_004559 | XLOC_200313 | ENSRNOT00000075917  | -0.950512904 | 2.15E-06 |
| TUCP_004559 | XLOC_200313 | ENSRNOT00000029701  | 0.961091249  | 6.58E-07 |
| TUCP_004559 | XLOC_200313 | ENSRNOT00000014585  | -0.971216307 | 1.48E-07 |
| TUCP_004559 | XLOC_200313 | ENSRNOT00000003691  | -0.97241809  | 1.20E-07 |
| TUCP_004559 | XLOC_200313 | ENSRNOT00000074261  | -0.964495889 | 4.19E-07 |
| TUCP_004559 | XLOC_200313 | ENSRNOT00000004842  | -0.960684284 | 6.92E-07 |
| TUCP_004559 | XLOC_200313 | ENSRNOT00000089879  | -0.97273719  | 1.13E-07 |
| TUCP_004559 | XLOC_200313 | ENSRNOT00000080591  | 0.953796647  | 1.53E-06 |
| TUCP_004559 | XLOC_200313 | ENSRNOT00000080222  | -0.956271762 | 1.17E-06 |
| TUCP_004559 | XLOC_200313 | ENSRNOT00000014809  | -0.955327448 | 1.30E-06 |
| TUCP_004559 | XLOC_200313 | ENSRNOT00000030329  | -0.964398784 | 4.24E-07 |
| TUCP_004559 | XLOC_200313 | ENSRNOT00000023414  | 0.969272124  | 2.05E-07 |
| TUCP_004559 | XLOC_200313 | ENSRNOT00000033450  | -0.955868595 | 1.22E-06 |
| TUCP_004559 | XLOC_200313 | ENSRNOT00000001935  | -0.956490506 | 1.14E-06 |
| TUCP_004559 | XLOC_200313 | ENSRNOT00000004999  | 0.970154143  | 1.77E-07 |
| TUCP_004559 | XLOC_200313 | ENSRNOT00000009122  | 0.982717188  | 1.18E-08 |
| TUCP_004559 | XLOC_200313 | ENSRNOT00000013463  | 0.963231057  | 4.98E-07 |
| TUCP_004559 | XLOC_200313 | ENSRNOT000000050617 | -0.958331063 | 9.22E-07 |
| TUCP_004559 | XLOC_200313 | ENSRNOT00000004007  | -0.970406606 | 1.70E-07 |
| TUCP_004559 | XLOC_200313 | ENSRNOT00000047663  | -0.956588307 | 1.13E-06 |
| TUCP_004559 | XLOC_200313 | ENSRNOT00000000532  | -0.987699586 | 2.17E-09 |
| TUCP_004559 | XLOC_200313 | ENSRNOT00000005486  | -0.975597951 | 6.54E-08 |
| TUCP_004559 | XLOC_200313 | ENSRNOT000000054717 | -0.951988153 | 1.85E-06 |
| TUCP_004559 | XLOC_200313 | ENSRNOT000000025791 | -0.966192271 | 3.29E-07 |
| TUCP_004559 | XLOC_200313 | ENSRNOT000000028434 | -0.97719889  | 4.67E-08 |
| TUCP_004559 | XLOC_200313 | ENSRNOT000000025794 | -0.960558146 | 7.04E-07 |
| TUCP_004559 | XLOC_200313 | ENSRNOT000000058111 | -0.98076954  | 2.01E-08 |
| TUCP_004559 | XLOC_200313 | ENSRNOT00000011869  | -0.950403782 | 2.17E-06 |
| TUCP_004559 | XLOC_200313 | ENSRNOT000000020478 | -0.956462866 | 1.14E-06 |
| TUCP_004559 | XLOC_200313 | ENSRNOT000000050834 | -0.956613765 | 1.13E-06 |
| TUCP_004559 | XLOC_200313 | ENSRNOT00000009994  | -0.966778816 | 3.01E-07 |
| TUCP_004559 | XLOC_200313 | ENSRNOT00000002114  | -0.952679315 | 1.73E-06 |
| TUCP_004559 | XLOC_200313 | ENSRNOT00000009993  | -0.96994008  | 1.84E-07 |
| TUCP_004559 | XLOC_200313 | ENSRNOT000000027973 | -0.955240846 | 1.31E-06 |
| TUCP_004559 | XLOC_200313 | ENSRNOT00000005762  | -0.97341459  | 1.00E-07 |
| TUCP_004559 | XLOC_200313 | ENSRNOT00000080928  | 0.957795372  | 9.82E-07 |
| TUCP_004559 | XLOC_200313 | ENSRNOT000000044147 | -0.951410976 | 1.97E-06 |
| TUCP_004559 | XLOC_200313 | ENSRNOT000000027875 | 0.954187008  | 1.47E-06 |
| TUCP_004559 | XLOC_200313 | ENSRNOT00000046215  | -0.981276752 | 1.76E-08 |
| TUCP_004559 | XLOC_200313 | ENSRNOT00000000083  | -0.97334545  | 1.01E-07 |
| TUCP_004559 | XLOC_200313 | ENSRNOT000000087838 | -0.956220438 | 1.18E-06 |
| TUCP_004559 | XLOC_200313 | ENSRNOT00000016265  | -0.960653174 | 6.95E-07 |
| TUCP_004559 | XLOC_200313 | ENSRNOT00000064636  | -0.963880483 | 4.56E-07 |
| TUCP_004559 | XLOC_200313 | ENSRNOT000000028545 | -0.974374397 | 8.34E-08 |
| TUCP_004559 | XLOC_200313 | ENSRNOT000000009900 | -0.961376785 | 6.34E-07 |
| TUCP_004559 | XLOC_200313 | ENSRNOT000000028225 | 0.954624836  | 1.40E-06 |
| TUCP_004559 | XLOC_200313 | ENSRNOT00000066561  | -0.952022958 | 1.85E-06 |
| TUCP_004559 | XLOC_200313 | ENSRNOT00000019172  | -0.983809393 | 8.53E-09 |
| TUCP_004559 | XLOC_200313 | ENSRNOT00000049927  | -0.957995472 | 9.60E-07 |
| TUCP_004559 | XLOC_200313 | ENSRNOT00000068267  | -0.960070861 | 7.47E-07 |
| TUCP_004559 | XLOC_200313 | ENSRNOT00000020994  | -0.964734216 | 4.05E-07 |

|             |             |                    |              |          |
|-------------|-------------|--------------------|--------------|----------|
| TUCP_004559 | XLOC_200313 | ENSRNOT00000068269 | -0.95966889  | 7.85E-07 |
| TUCP_004559 | XLOC_200313 | ENSRNOT00000021216 | 0.952437486  | 1.77E-06 |
| TUCP_004559 | XLOC_200313 | ENSRNOT00000067901 | -0.950966619 | 2.06E-06 |
| TUCP_004559 | XLOC_200313 | ENSRNOT00000011714 | -0.958674734 | 8.85E-07 |
| TUCP_004559 | XLOC_200313 | ENSRNOT00000067907 | -0.96685185  | 2.98E-07 |
| TUCP_004559 | XLOC_200313 | ENSRNOT00000033015 | -0.955372989 | 1.29E-06 |
| TUCP_004559 | XLOC_200313 | ENSRNOT00000064700 | 0.96091169   | 6.73E-07 |
| TUCP_004559 | XLOC_200313 | ENSRNOT00000027759 | -0.962744961 | 5.31E-07 |
| TUCP_004559 | XLOC_200313 | ENSRNOT00000010020 | -0.971038695 | 1.53E-07 |
| TUCP_004559 | XLOC_200313 | ENSRNOT00000061166 | -0.950857172 | 2.08E-06 |
| TUCP_004559 | XLOC_200313 | ENSRNOT00000022552 | -0.958148493 | 9.42E-07 |
| TUCP_004559 | XLOC_200313 | ENSRNOT00000036194 | -0.98470359  | 6.43E-09 |
| TUCP_004559 | XLOC_200313 | ENSRNOT00000036195 | -0.959511705 | 8.01E-07 |
| TUCP_004559 | XLOC_200313 | ENSRNOT00000077186 | -0.981609224 | 1.61E-08 |
| TUCP_004559 | XLOC_200313 | ENSRNOT00000081314 | -0.971135321 | 1.50E-07 |
| TUCP_004559 | XLOC_200313 | ENSRNOT00000013914 | -0.952170446 | 1.82E-06 |
| TUCP_004559 | XLOC_200313 | ENSRNOT00000014780 | -0.953981132 | 1.50E-06 |
| TUCP_004559 | XLOC_200313 | ENSRNOT00000086946 | -0.956545331 | 1.13E-06 |
| TUCP_004559 | XLOC_200313 | ENSRNOT00000009645 | -0.95023565  | 2.21E-06 |
| TUCP_004559 | XLOC_200313 | ENSRNOT00000014785 | -0.951203291 | 2.01E-06 |
| TUCP_004559 | XLOC_200313 | ENSRNOT00000014373 | -0.96079802  | 6.83E-07 |
| TUCP_004559 | XLOC_200313 | ENSRNOT00000026279 | -0.985578505 | 4.80E-09 |
| TUCP_004559 | XLOC_200313 | ENSRNOT00000082508 | -0.973885285 | 9.16E-08 |
| TUCP_004559 | XLOC_200313 | ENSRNOT00000021858 | 0.957721545  | 9.91E-07 |
| TUCP_004559 | XLOC_200313 | ENSRNOT00000022259 | -0.955924307 | 1.22E-06 |
| TUCP_004559 | XLOC_200313 | ENSRNOT00000056199 | -0.953735595 | 1.54E-06 |
| TUCP_004559 | XLOC_200313 | ENSRNOT00000065942 | -0.982182544 | 1.37E-08 |
| TUCP_004559 | XLOC_200313 | ENSRNOT00000087011 | -0.962736397 | 5.32E-07 |
| TUCP_004559 | XLOC_200313 | ENSRNOT00000071166 | 0.95529704   | 1.30E-06 |
| TUCP_004559 | XLOC_200313 | ENSRNOT00000084563 | -0.952256507 | 1.80E-06 |
| TUCP_004559 | XLOC_200313 | ENSRNOT00000039850 | -0.977342599 | 4.53E-08 |
| TUCP_004559 | XLOC_200313 | ENSRNOT00000074389 | -0.976032496 | 5.98E-08 |
| TUCP_004559 | XLOC_200313 | ENSRNOT00000018173 | -0.959312588 | 8.20E-07 |
| TUCP_004559 | XLOC_200313 | ENSRNOT00000091596 | -0.951742711 | 1.90E-06 |
| TUCP_004559 | XLOC_200313 | ENSRNOT00000018674 | -0.964312251 | 4.29E-07 |
| TUCP_004559 | XLOC_200313 | ENSRNOT00000018101 | -0.957391846 | 1.03E-06 |
| TUCP_004559 | XLOC_200313 | ENSRNOT00000003012 | -0.965716428 | 3.52E-07 |
| TUCP_004559 | XLOC_200313 | ENSRNOT00000073564 | -0.961903667 | 5.93E-07 |
| TUCP_004559 | XLOC_200313 | ENSRNOT0000001507  | 0.954358116  | 1.44E-06 |
| TUCP_004559 | XLOC_200313 | ENSRNOT00000073569 | -0.962704518 | 5.34E-07 |
| TUCP_004559 | XLOC_200313 | ENSRNOT00000083568 | 0.955280987  | 1.31E-06 |
| TUCP_004559 | XLOC_200313 | ENSRNOT00000039177 | -0.97203803  | 1.28E-07 |
| TUCP_004559 | XLOC_200313 | ENSRNOT0000005620  | -0.973070232 | 1.07E-07 |
| TUCP_004559 | XLOC_200313 | ENSRNOT00000017375 | -0.950107953 | 2.24E-06 |
| TUCP_004559 | XLOC_200313 | ENSRNOT00000030065 | -0.953481231 | 1.59E-06 |
| TUCP_004559 | XLOC_200313 | ENSRNOT00000002837 | -0.966289042 | 3.24E-07 |
| TUCP_004559 | XLOC_200313 | ENSRNOT00000022676 | -0.970984007 | 1.54E-07 |
| TUCP_004559 | XLOC_200313 | ENSRNOT00000000477 | -0.96823197  | 2.42E-07 |
| TUCP_004559 | XLOC_200313 | ENSRNOT00000012881 | -0.96029196  | 7.27E-07 |
| TUCP_004559 | XLOC_200313 | ENSRNOT00000035628 | -0.968773452 | 2.22E-07 |
| TUCP_004559 | XLOC_200313 | ENSRNOT00000071239 | -0.95241408  | 1.77E-06 |

|             |             |                    |              |          |
|-------------|-------------|--------------------|--------------|----------|
| TUCP_004559 | XLOC_200313 | ENSRNOT00000011499 | -0.974323558 | 8.42E-08 |
| TUCP_004559 | XLOC_200313 | ENSRNOT00000075424 | 0.95611221   | 1.19E-06 |
| TUCP_004559 | XLOC_200313 | ENSRNOT00000065045 | 0.963695587  | 4.67E-07 |
| TUCP_004559 | XLOC_200313 | ENSRNOT00000016027 | -0.964673836 | 4.08E-07 |
| TUCP_004559 | XLOC_200313 | ENSRNOT00000028290 | -0.952996863 | 1.67E-06 |
| TUCP_004559 | XLOC_200313 | ENSRNOT00000088133 | -0.961806917 | 6.00E-07 |
| TUCP_004559 | XLOC_200313 | ENSRNOT00000024402 | 0.961898607  | 5.93E-07 |
| TUCP_004559 | XLOC_200313 | ENSRNOT00000075209 | -0.952863396 | 1.69E-06 |
| TUCP_004559 | XLOC_200313 | ENSRNOT00000001979 | -0.97284166  | 1.11E-07 |
| TUCP_004559 | XLOC_200313 | ENSRNOT00000003715 | -0.953075671 | 1.66E-06 |
| TUCP_004559 | XLOC_200313 | ENSRNOT00000083968 | -0.963022411 | 5.12E-07 |
| TUCP_004559 | XLOC_200313 | ENSRNOT00000041808 | -0.952064519 | 1.84E-06 |
| TUCP_004559 | XLOC_200313 | ENSRNOT00000083967 | 0.955603438  | 1.26E-06 |
| TUCP_004559 | XLOC_200313 | ENSRNOT00000083964 | -0.969623804 | 1.94E-07 |
| TUCP_004559 | XLOC_200313 | ENSRNOT00000026726 | -0.977818988 | 4.07E-08 |
| TUCP_004559 | XLOC_200313 | ENSRNOT00000033795 | -0.971645387 | 1.38E-07 |
| TUCP_004559 | XLOC_200313 | ENSRNOT00000081682 | -0.974659676 | 7.89E-08 |
| TUCP_004559 | XLOC_200313 | ENSRNOT00000026831 | 0.953344646  | 1.61E-06 |
| TUCP_004559 | XLOC_200313 | ENSRNOT00000061304 | -0.971682329 | 1.37E-07 |
| TUCP_004559 | XLOC_200313 | ENSRNOT00000016447 | -0.96173569  | 6.06E-07 |
| TUCP_004559 | XLOC_200313 | ENSRNOT00000016324 | -0.954887296 | 1.36E-06 |
| TUCP_004559 | XLOC_200313 | ENSRNOT00000066888 | -0.953388216 | 1.60E-06 |
| TUCP_004559 | XLOC_200313 | ENSRNOT00000002151 | -0.967421704 | 2.74E-07 |
| TUCP_004559 | XLOC_200313 | ENSRNOT00000001322 | -0.96221062  | 5.70E-07 |
| TUCP_004559 | XLOC_200313 | ENSRNOT00000006824 | -0.970657141 | 1.63E-07 |
| TUCP_004559 | XLOC_200313 | ENSRNOT00000012775 | -0.966336902 | 3.22E-07 |
| TUCP_004559 | XLOC_200313 | ENSRNOT00000077040 | -0.959582405 | 7.94E-07 |
| TUCP_004559 | XLOC_200313 | ENSRNOT00000038464 | -0.956355642 | 1.16E-06 |
| TUCP_004559 | XLOC_200313 | ENSRNOT00000000177 | -0.958770143 | 8.75E-07 |
| TUCP_004559 | XLOC_200313 | ENSRNOT00000018328 | -0.975275175 | 6.98E-08 |
| TUCP_004559 | XLOC_200313 | ENSRNOT00000084645 | -0.969591091 | 1.95E-07 |
| TUCP_004559 | XLOC_200313 | ENSRNOT00000045488 | 0.95518073   | 1.32E-06 |
| TUCP_004559 | XLOC_200313 | ENSRNOT00000050119 | -0.953985448 | 1.50E-06 |
| TUCP_004559 | XLOC_200313 | ENSRNOT00000083843 | -0.965671121 | 3.54E-07 |
| TUCP_004559 | XLOC_200313 | ENSRNOT00000082429 | -0.960337768 | 7.23E-07 |
| TUCP_004559 | XLOC_200313 | ENSRNOT00000067836 | -0.968586754 | 2.29E-07 |
| TUCP_004559 | XLOC_200313 | ENSRNOT00000019816 | -0.976405039 | 5.54E-08 |
| TUCP_004559 | XLOC_200313 | ENSRNOT00000073847 | -0.958863907 | 8.66E-07 |
| TUCP_004559 | XLOC_200313 | ENSRNOT00000015518 | -0.953674899 | 1.55E-06 |
| TUCP_004559 | XLOC_200313 | ENSRNOT00000056015 | -0.985931318 | 4.24E-09 |
| TUCP_004559 | XLOC_200313 | ENSRNOT00000055602 | -0.961230787 | 6.46E-07 |
| TUCP_004559 | XLOC_200313 | ENSRNOT00000068528 | -0.96313051  | 5.04E-07 |
| TUCP_004559 | XLOC_200313 | ENSRNOT00000026909 | -0.951134446 | 2.02E-06 |
| TUCP_004559 | XLOC_200313 | ENSRNOT00000059487 | -0.952957289 | 1.68E-06 |
| TUCP_004559 | XLOC_200313 | ENSRNOT00000039000 | -0.95057196  | 2.14E-06 |
| TUCP_004559 | XLOC_200313 | ENSRNOT00000017165 | -0.950588547 | 2.13E-06 |
| TUCP_004559 | XLOC_200313 | ENSRNOT00000000576 | -0.970142985 | 1.78E-07 |
| TUCP_004559 | XLOC_200313 | ENSRNOT00000019713 | -0.965809966 | 3.47E-07 |
| TUCP_004559 | XLOC_200313 | ENSRNOT00000021944 | 0.955395511  | 1.29E-06 |
| TUCP_004559 | XLOC_200313 | ENSRNOT00000023977 | -0.959247013 | 8.27E-07 |
| TUCP_004559 | XLOC_200313 | ENSRNOT00000012428 | -0.957315452 | 1.04E-06 |

|             |             |                    |              |          |
|-------------|-------------|--------------------|--------------|----------|
| TUCP_004559 | XLOC_200313 | ENSRNOT00000083632 | -0.957382525 | 1.03E-06 |
| TUCP_004559 | XLOC_200313 | ENSRNOT00000000717 | -0.955559831 | 1.27E-06 |
| TUCP_004559 | XLOC_200313 | ENSRNOT00000022846 | -0.95740756  | 1.03E-06 |
| TUCP_004559 | XLOC_200313 | ENSRNOT00000049048 | -0.955772935 | 1.24E-06 |
| TUCP_004559 | XLOC_200313 | ENSRNOT00000017224 | -0.994056759 | 5.78E-11 |
| TUCP_004559 | XLOC_200313 | ENSRNOT00000049725 | -0.954956304 | 1.35E-06 |
| TUCP_004559 | XLOC_200313 | ENSRNOT00000089062 | 0.970791163  | 1.59E-07 |
| TUCP_004559 | XLOC_200313 | ENSRNOT00000010753 | -0.973500703 | 9.84E-08 |
| TUCP_004559 | XLOC_200313 | ENSRNOT00000087346 | 0.95897565   | 8.54E-07 |
| TUCP_004559 | XLOC_200313 | ENSRNOT00000023763 | -0.969727246 | 1.90E-07 |
| TUCP_004559 | XLOC_200313 | ENSRNOT00000066230 | 0.951393475  | 1.97E-06 |
| TUCP_004559 | XLOC_200313 | ENSRNOT00000023641 | -0.956806596 | 1.10E-06 |
| TUCP_004559 | XLOC_200313 | ENSRNOT00000009202 | 0.958948613  | 8.57E-07 |
| TUCP_004559 | XLOC_200313 | ENSRNOT00000059181 | 0.957866534  | 9.74E-07 |
| TUCP_004559 | XLOC_200313 | ENSRNOT00000020702 | -0.973043241 | 1.07E-07 |
| TUCP_004559 | XLOC_200313 | ENSRNOT00000010853 | 0.957654155  | 9.99E-07 |
| TUCP_004559 | XLOC_200313 | ENSRNOT00000022389 | -0.966161388 | 3.30E-07 |
| TUCP_004559 | XLOC_200313 | ENSRNOT00000038807 | 0.955793744  | 1.23E-06 |
| TUCP_004559 | XLOC_200313 | ENSRNOT00000064849 | -0.961852254 | 5.97E-07 |
| TUCP_004559 | XLOC_200313 | ENSRNOT00000045950 | -0.96307481  | 5.08E-07 |
| TUCP_004559 | XLOC_200313 | ENSRNOT00000008901 | -0.956281071 | 1.17E-06 |
| TUCP_004559 | XLOC_200313 | ENSRNOT00000017761 | 0.951150887  | 2.02E-06 |
| TUCP_004559 | XLOC_200313 | ENSRNOT00000004770 | -0.965461551 | 3.65E-07 |
| TUCP_004559 | XLOC_200313 | ENSRNOT00000023017 | -0.975873162 | 6.18E-08 |
| TUCP_004559 | XLOC_200313 | ENSRNOT00000080608 | 0.954271015  | 1.46E-06 |
| TUCP_004559 | XLOC_200313 | ENSRNOT00000022065 | -0.963082902 | 5.08E-07 |
| TUCP_004559 | XLOC_200313 | ENSRNOT00000017340 | -0.981737536 | 1.55E-08 |
| TUCP_004559 | XLOC_200313 | ENSRNOT00000016740 | 0.965869743  | 3.44E-07 |
| TUCP_004559 | XLOC_200313 | ENSRNOT00000038212 | -0.951065973 | 2.03E-06 |
| TUCP_004559 | XLOC_200313 | ENSRNOT00000085458 | -0.951717213 | 1.91E-06 |
| TUCP_004559 | XLOC_200313 | ENSRNOT00000039572 | -0.96402016  | 4.47E-07 |
| TUCP_004559 | XLOC_200313 | ENSRNOT00000012625 | -0.958994414 | 8.52E-07 |
| TUCP_004559 | XLOC_200313 | ENSRNOT00000080677 | -0.965422664 | 3.67E-07 |
| TUCP_004559 | XLOC_200313 | ENSRNOT00000087033 | -0.959792788 | 7.73E-07 |
| TUCP_004559 | XLOC_200313 | ENSRNOT00000025784 | -0.97745897  | 4.41E-08 |
| TUCP_004559 | XLOC_200313 | ENSRNOT00000025782 | -0.956270603 | 1.17E-06 |
| TUCP_004559 | XLOC_200313 | ENSRNOT00000026760 | -0.957983573 | 9.61E-07 |
| TUCP_004559 | XLOC_200313 | ENSRNOT00000017687 | -0.957938111 | 9.66E-07 |
| TUCP_004559 | XLOC_200313 | ENSRNOT00000024491 | -0.960154822 | 7.40E-07 |
| TUCP_004559 | XLOC_200313 | ENSRNOT00000063821 | -0.970653397 | 1.63E-07 |
| TUCP_004559 | XLOC_200313 | ENSRNOT00000037588 | -0.953044102 | 1.66E-06 |
| TUCP_004559 | XLOC_200313 | ENSRNOT00000027360 | -0.983665485 | 8.91E-09 |
| TUCP_004559 | XLOC_200313 | ENSRNOT00000024947 | -0.957224777 | 1.05E-06 |
| TUCP_004559 | XLOC_200313 | ENSRNOT00000041227 | -0.960884988 | 6.75E-07 |
| TUCP_004559 | XLOC_200313 | ENSRNOT00000027967 | 0.953997437  | 1.50E-06 |
| TUCP_004559 | XLOC_200313 | ENSRNOT00000037039 | -0.958326872 | 9.23E-07 |
| TUCP_004559 | XLOC_200313 | ENSRNOT00000081678 | 0.950991814  | 2.05E-06 |
| TUCP_004559 | XLOC_200313 | ENSRNOT00000079414 | -0.960736374 | 6.88E-07 |
| TUCP_004559 | XLOC_200313 | ENSRNOT00000089673 | -0.951201426 | 2.01E-06 |
| TUCP_004559 | XLOC_200313 | ENSRNOT00000000134 | -0.980103498 | 2.38E-08 |
| TUCP_004559 | XLOC_200313 | ENSRNOT00000011326 | -0.966855834 | 2.98E-07 |

|             |             |                    |              |          |
|-------------|-------------|--------------------|--------------|----------|
| TUCP_003070 | XLOC_131595 | ENSRNOT00000005050 | 0.955395308  | 1.29E-06 |
| TUCP_003368 | XLOC_145996 | ENSRNOT00000078906 | 0.953254125  | 1.62E-06 |
| TUCP_003368 | XLOC_145996 | ENSRNOT00000068134 | -0.954429132 | 1.43E-06 |
| TUCP_003368 | XLOC_145996 | ENSRNOT00000039857 | 0.953417312  | 1.60E-06 |
| TUCP_003368 | XLOC_145996 | ENSRNOT00000054936 | 0.973436643  | 9.96E-08 |
| TUCP_003368 | XLOC_145996 | ENSRNOT00000008301 | 0.962295498  | 5.63E-07 |
| TUCP_003368 | XLOC_145996 | ENSRNOT00000024933 | 0.95677004   | 1.11E-06 |
| TUCP_003368 | XLOC_145996 | ENSRNOT0000007702  | 0.954379228  | 1.44E-06 |
| TUCP_003368 | XLOC_145996 | ENSRNOT00000010303 | 0.952621542  | 1.74E-06 |
| TUCP_003368 | XLOC_145996 | ENSRNOT00000083939 | -0.952856963 | 1.69E-06 |
| TUCP_003368 | XLOC_145996 | ENSRNOT00000017707 | 0.959023071  | 8.49E-07 |
| TUCP_003368 | XLOC_145996 | ENSRNOT00000048221 | 0.956405544  | 1.15E-06 |
| TUCP_003368 | XLOC_145996 | ENSRNOT00000002510 | 0.954842488  | 1.37E-06 |
| TUCP_001920 | XLOC_078973 | ENSRNOT00000030035 | 0.951196153  | 2.01E-06 |
| TUCP_000477 | XLOC_016520 | ENSRNOT00000008196 | 0.975306507  | 6.94E-08 |
| TUCP_000477 | XLOC_016520 | ENSRNOT00000076978 | 0.965763969  | 3.50E-07 |
| TUCP_000477 | XLOC_016520 | ENSRNOT00000066416 | 0.987904576  | 2.00E-09 |
| TUCP_000477 | XLOC_016520 | ENSRNOT00000055335 | 0.958973612  | 8.54E-07 |
| TUCP_000477 | XLOC_016520 | ENSRNOT00000050345 | 0.957594311  | 1.01E-06 |
| TUCP_000477 | XLOC_016520 | ENSRNOT00000078446 | 0.957843854  | 9.77E-07 |
| TUCP_000477 | XLOC_016520 | ENSRNOT00000091052 | 0.955889322  | 1.22E-06 |
| TUCP_003076 | XLOC_131887 | ENSRNOT00000060683 | 0.952822358  | 1.70E-06 |
| TUCP_003076 | XLOC_131887 | ENSRNOT00000036195 | 0.958597673  | 8.94E-07 |
| TUCP_003076 | XLOC_131887 | ENSRNOT00000059854 | 0.971105909  | 1.51E-07 |
| TUCP_003076 | XLOC_131887 | ENSRNOT00000020297 | -0.967987546 | 2.51E-07 |
| TUCP_003076 | XLOC_131887 | ENSRNOT00000006188 | 0.953014546  | 1.67E-06 |
| TUCP_003076 | XLOC_131887 | ENSRNOT00000001597 | 0.955399738  | 1.29E-06 |
| TUCP_003076 | XLOC_131887 | ENSRNOT00000039607 | 0.969197823  | 2.07E-07 |
| TUCP_003076 | XLOC_131887 | ENSRNOT00000009468 | 0.964057847  | 4.45E-07 |
| TUCP_003076 | XLOC_131887 | ENSRNOT00000021937 | 0.960889858  | 6.75E-07 |
| TUCP_003076 | XLOC_131887 | ENSRNOT00000080174 | 0.954362344  | 1.44E-06 |
| TUCP_003076 | XLOC_131887 | ENSRNOT00000011237 | 0.98266156   | 1.20E-08 |
| TUCP_003076 | XLOC_131887 | ENSRNOT00000020051 | -0.960201842 | 7.35E-07 |
| TUCP_003076 | XLOC_131887 | ENSRNOT00000074544 | 0.952697356  | 1.72E-06 |
| TUCP_003076 | XLOC_131887 | ENSRNOT00000004408 | 0.950050167  | 2.25E-06 |
| TUCP_003076 | XLOC_131887 | ENSRNOT00000004241 | 0.976416255  | 5.52E-08 |
| TUCP_003076 | XLOC_131887 | ENSRNOT00000003087 | -0.952417136 | 1.77E-06 |
| TUCP_003076 | XLOC_131887 | ENSRNOT00000015678 | 0.967227733  | 2.82E-07 |
| TUCP_003076 | XLOC_131887 | ENSRNOT00000084202 | 0.958732043  | 8.79E-07 |
| TUCP_003076 | XLOC_131887 | ENSRNOT00000020197 | 0.973847023  | 9.22E-08 |
| TUCP_003076 | XLOC_131887 | ENSRNOT00000007698 | 0.969400556  | 2.01E-07 |
| TUCP_003076 | XLOC_131887 | ENSRNOT00000049349 | -0.96681459  | 3.00E-07 |
| TUCP_003076 | XLOC_131887 | ENSRNOT00000083864 | 0.964300555  | 4.30E-07 |
| TUCP_003076 | XLOC_131887 | ENSRNOT00000009564 | 0.950147267  | 2.23E-06 |
| TUCP_003076 | XLOC_131887 | ENSRNOT00000030501 | 0.959977624  | 7.56E-07 |
| TUCP_003076 | XLOC_131887 | ENSRNOT00000023430 | 0.957602068  | 1.00E-06 |
| TUCP_003076 | XLOC_131887 | ENSRNOT00000018149 | 0.964153361  | 4.39E-07 |
| TUCP_003076 | XLOC_131887 | ENSRNOT00000005658 | 0.964546354  | 4.16E-07 |
| TUCP_003076 | XLOC_131887 | ENSRNOT00000001859 | 0.954294913  | 1.45E-06 |
| TUCP_003076 | XLOC_131887 | ENSRNOT00000054931 | 0.964424325  | 4.23E-07 |
| TUCP_003076 | XLOC_131887 | ENSRNOT00000087011 | 0.970149879  | 1.78E-07 |



|             |             |                    |              |          |
|-------------|-------------|--------------------|--------------|----------|
| TUCP_003076 | XLOC_131887 | ENSRNOT00000073370 | -0.95214325  | 1.82E-06 |
| TUCP_003076 | XLOC_131887 | ENSRNOT00000003733 | 0.955075586  | 1.34E-06 |
| TUCP_003076 | XLOC_131887 | ENSRNOT00000083968 | 0.953369054  | 1.61E-06 |
| TUCP_003076 | XLOC_131887 | ENSRNOT00000010031 | 0.980367618  | 2.22E-08 |
| TUCP_003076 | XLOC_131887 | ENSRNOT00000007855 | -0.951573105 | 1.93E-06 |
| TUCP_003076 | XLOC_131887 | ENSRNOT00000074023 | -0.951075718 | 2.03E-06 |
| TUCP_003076 | XLOC_131887 | ENSRNOT00000022952 | 0.985042899  | 5.75E-09 |
| TUCP_003076 | XLOC_131887 | ENSRNOT00000031692 | 0.95137666   | 1.97E-06 |
| TUCP_003076 | XLOC_131887 | ENSRNOT00000014384 | 0.9587615    | 8.76E-07 |
| TUCP_003076 | XLOC_131887 | ENSRNOT00000024712 | 0.967705956  | 2.62E-07 |
| TUCP_003076 | XLOC_131887 | ENSRNOT00000091596 | 0.952591493  | 1.74E-06 |
| TUCP_003076 | XLOC_131887 | ENSRNOT0000001774  | 0.959496026  | 8.02E-07 |
| TUCP_003076 | XLOC_131887 | ENSRNOT00000093552 | 0.952240384  | 1.81E-06 |
| TUCP_003076 | XLOC_131887 | ENSRNOT00000037405 | -0.956469909 | 1.14E-06 |
| TUCP_003076 | XLOC_131887 | ENSRNOT00000037203 | 0.986603509  | 3.32E-09 |
| TUCP_003076 | XLOC_131887 | ENSRNOT00000013613 | 0.969803171  | 1.88E-07 |
| TUCP_003076 | XLOC_131887 | ENSRNOT00000031672 | 0.986035227  | 4.09E-09 |
| TUCP_003076 | XLOC_131887 | ENSRNOT00000081787 | 0.951820144  | 1.89E-06 |
| TUCP_003076 | XLOC_131887 | ENSRNOT00000076101 | 0.957668462  | 9.97E-07 |
| TUCP_003076 | XLOC_131887 | ENSRNOT00000075400 | 0.952020588  | 1.85E-06 |
| TUCP_003076 | XLOC_131887 | ENSRNOT00000000618 | 0.982875843  | 1.13E-08 |
| TUCP_003076 | XLOC_131887 | ENSRNOT00000078884 | 0.966225238  | 3.27E-07 |
| TUCP_003076 | XLOC_131887 | ENSRNOT00000054685 | -0.954076016 | 1.49E-06 |
| TUCP_003076 | XLOC_131887 | ENSRNOT00000056675 | 0.972624646  | 1.16E-07 |
| TUCP_003076 | XLOC_131887 | ENSRNOT00000024882 | 0.952296329  | 1.80E-06 |
| TUCP_003076 | XLOC_131887 | ENSRNOT00000047836 | 0.959375239  | 8.14E-07 |
| TUCP_003076 | XLOC_131887 | ENSRNOT00000001507 | -0.954872428 | 1.37E-06 |
| TUCP_003076 | XLOC_131887 | ENSRNOT00000066947 | 0.962521065  | 5.47E-07 |
| TUCP_003076 | XLOC_131887 | ENSRNOT00000012060 | -0.957448654 | 1.02E-06 |
| TUCP_003076 | XLOC_131887 | ENSRNOT00000021621 | 0.954694202  | 1.39E-06 |
| TUCP_003076 | XLOC_131887 | ENSRNOT00000022827 | 0.959037489  | 8.48E-07 |
| TUCP_003076 | XLOC_131887 | ENSRNOT00000074683 | -0.950238328 | 2.21E-06 |
| TUCP_003076 | XLOC_131887 | ENSRNOT00000025079 | 0.97152587   | 1.41E-07 |
| TUCP_003076 | XLOC_131887 | ENSRNOT00000048754 | 0.953489222  | 1.59E-06 |
| TUCP_003076 | XLOC_131887 | ENSRNOT00000084709 | -0.958083963 | 9.50E-07 |
| TUCP_003076 | XLOC_131887 | ENSRNOT00000039177 | 0.972850103  | 1.11E-07 |
| TUCP_003076 | XLOC_131887 | ENSRNOT00000004891 | 0.951976272  | 1.86E-06 |
| TUCP_003076 | XLOC_131887 | ENSRNOT00000011432 | 0.96645766   | 3.16E-07 |
| TUCP_003076 | XLOC_131887 | ENSRNOT00000021134 | 0.966196101  | 3.28E-07 |
| TUCP_003076 | XLOC_131887 | ENSRNOT00000027760 | -0.964130436 | 4.40E-07 |
| TUCP_003076 | XLOC_131887 | ENSRNOT00000054761 | 0.951923188  | 1.87E-06 |
| TUCP_003076 | XLOC_131887 | ENSRNOT00000017784 | 0.955944368  | 1.21E-06 |
| TUCP_003076 | XLOC_131887 | ENSRNOT00000065871 | -0.952813253 | 1.70E-06 |
| TUCP_003076 | XLOC_131887 | ENSRNOT00000024677 | -0.966097802 | 3.33E-07 |
| TUCP_003076 | XLOC_131887 | ENSRNOT00000017746 | 0.953386199  | 1.60E-06 |
| TUCP_003076 | XLOC_131887 | ENSRNOT00000001891 | 0.965239578  | 3.77E-07 |
| TUCP_003076 | XLOC_131887 | ENSRNOT00000000552 | 0.969136209  | 2.09E-07 |
| TUCP_003076 | XLOC_131887 | ENSRNOT00000030082 | -0.952584844 | 1.74E-06 |
| TUCP_003076 | XLOC_131887 | ENSRNOT00000082730 | 0.957094978  | 1.07E-06 |
| TUCP_003076 | XLOC_131887 | ENSRNOT00000083843 | 0.953883671  | 1.52E-06 |
| TUCP_003076 | XLOC_131887 | ENSRNOT00000067626 | 0.969533579  | 1.96E-07 |

|             |             |                    |              |          |
|-------------|-------------|--------------------|--------------|----------|
| TUCP_003076 | XLOC_131887 | ENSRNOT00000073983 | -0.952718875 | 1.72E-06 |
| TUCP_003076 | XLOC_131887 | ENSRNOT00000034487 | 0.950035291  | 2.25E-06 |
| TUCP_003076 | XLOC_131887 | ENSRNOT00000002851 | 0.96007229   | 7.47E-07 |
| TUCP_003076 | XLOC_131887 | ENSRNOT00000084782 | 0.969644439  | 1.93E-07 |
| TUCP_003076 | XLOC_131887 | ENSRNOT00000047126 | 0.972532119  | 1.18E-07 |
| TUCP_003076 | XLOC_131887 | ENSRNOT00000006725 | 0.955501829  | 1.27E-06 |
| TUCP_003076 | XLOC_131887 | ENSRNOT00000010783 | 0.975063674  | 7.28E-08 |
| TUCP_003076 | XLOC_131887 | ENSRNOT00000020909 | 0.978532825  | 3.46E-08 |
| TUCP_003076 | XLOC_131887 | ENSRNOT00000010621 | 0.958145103  | 9.43E-07 |
| TUCP_003076 | XLOC_131887 | ENSRNOT00000026767 | -0.959493332 | 8.02E-07 |
| TUCP_003076 | XLOC_131887 | ENSRNOT00000017648 | 0.956400889  | 1.15E-06 |
| TUCP_003076 | XLOC_131887 | ENSRNOT00000041365 | -0.957517642 | 1.01E-06 |
| TUCP_003076 | XLOC_131887 | ENSRNOT00000075630 | 0.967522323  | 2.69E-07 |
| TUCP_003076 | XLOC_131887 | ENSRNOT00000002222 | -0.951435624 | 1.96E-06 |
| TUCP_003076 | XLOC_131887 | ENSRNOT00000034266 | 0.953873979  | 1.52E-06 |
| TUCP_003076 | XLOC_131887 | ENSRNOT00000054869 | -0.95022101  | 2.21E-06 |
| TUCP_003076 | XLOC_131887 | ENSRNOT00000014211 | 0.960885265  | 6.75E-07 |
| TUCP_003076 | XLOC_131887 | ENSRNOT00000067479 | -0.95803931  | 9.55E-07 |
| TUCP_003076 | XLOC_131887 | ENSRNOT00000046490 | 0.973505107  | 9.84E-08 |
| TUCP_003076 | XLOC_131887 | ENSRNOT00000024841 | 0.980325743  | 2.25E-08 |
| TUCP_003076 | XLOC_131887 | ENSRNOT00000013341 | 0.971708979  | 1.36E-07 |
| TUCP_003076 | XLOC_131887 | ENSRNOT00000011832 | 0.951546418  | 1.94E-06 |
| TUCP_003076 | XLOC_131887 | ENSRNOT00000008274 | 0.968654229  | 2.26E-07 |
| TUCP_003076 | XLOC_131887 | ENSRNOT00000024066 | -0.959531426 | 7.99E-07 |
| TUCP_003076 | XLOC_131887 | ENSRNOT00000003992 | 0.964465766  | 4.20E-07 |
| TUCP_003076 | XLOC_131887 | ENSRNOT00000073005 | 0.954745574  | 1.39E-06 |
| TUCP_003076 | XLOC_131887 | ENSRNOT00000064290 | 0.95332925   | 1.61E-06 |
| TUCP_003076 | XLOC_131887 | ENSRNOT00000007824 | 0.978066405  | 3.85E-08 |
| TUCP_003076 | XLOC_131887 | ENSRNOT00000080418 | 0.978645005  | 3.37E-08 |
| TUCP_003076 | XLOC_131887 | ENSRNOT00000001979 | 0.954783982  | 1.38E-06 |
| TUCP_003076 | XLOC_131887 | ENSRNOT00000067011 | -0.976460351 | 5.47E-08 |
| TUCP_003076 | XLOC_131887 | ENSRNOT00000013535 | 0.955983642  | 1.21E-06 |
| TUCP_003076 | XLOC_131887 | ENSRNOT00000067391 | 0.961721153  | 6.07E-07 |
| TUCP_003076 | XLOC_131887 | ENSRNOT00000020453 | 0.962411874  | 5.55E-07 |
| TUCP_003076 | XLOC_131887 | ENSRNOT00000018237 | 0.953666409  | 1.56E-06 |
| TUCP_003076 | XLOC_131887 | ENSRNOT00000026724 | 0.959506601  | 8.01E-07 |
| TUCP_003076 | XLOC_131887 | ENSRNOT00000026726 | 0.960554023  | 7.04E-07 |
| TUCP_003076 | XLOC_131887 | ENSRNOT00000066521 | 0.957474096  | 1.02E-06 |
| TUCP_003076 | XLOC_131887 | ENSRNOT00000015297 | 0.983758606  | 8.66E-09 |
| TUCP_003076 | XLOC_131887 | ENSRNOT00000079801 | 0.975101433  | 7.23E-08 |
| TUCP_003076 | XLOC_131887 | ENSRNOT00000003667 | 0.965575135  | 3.59E-07 |
| TUCP_003076 | XLOC_131887 | ENSRNOT00000039857 | 0.951385225  | 1.97E-06 |
| TUCP_003076 | XLOC_131887 | ENSRNOT00000024352 | -0.956239689 | 1.17E-06 |
| TUCP_003076 | XLOC_131887 | ENSRNOT00000024981 | 0.969670337  | 1.92E-07 |
| TUCP_003076 | XLOC_131887 | ENSRNOT00000072299 | -0.950575403 | 2.14E-06 |
| TUCP_003076 | XLOC_131887 | ENSRNOT00000084597 | 0.956264829  | 1.17E-06 |
| TUCP_003076 | XLOC_131887 | ENSRNOT00000003780 | -0.959575017 | 7.94E-07 |
| TUCP_003076 | XLOC_131887 | ENSRNOT00000035513 | 0.964255702  | 4.33E-07 |
| TUCP_003076 | XLOC_131887 | ENSRNOT00000014506 | 0.957148907  | 1.06E-06 |
| TUCP_003076 | XLOC_131887 | ENSRNOT00000076085 | 0.956502536  | 1.14E-06 |
| TUCP_003076 | XLOC_131887 | ENSRNOT00000077220 | 0.960505904  | 7.08E-07 |

|             |             |                     |              |          |
|-------------|-------------|---------------------|--------------|----------|
| TUCP_003076 | XLOC_131887 | ENSRNOT00000013067  | 0.956637663  | 1.12E-06 |
| TUCP_003076 | XLOC_131887 | ENSRNOT00000074515  | 0.971973726  | 1.30E-07 |
| TUCP_003076 | XLOC_131887 | ENSRNOT00000014859  | 0.969171711  | 2.08E-07 |
| TUCP_003076 | XLOC_131887 | ENSRNOT00000022987  | 0.972445554  | 1.19E-07 |
| TUCP_003076 | XLOC_131887 | ENSRNOT00000000812  | 0.980419968  | 2.19E-08 |
| TUCP_003076 | XLOC_131887 | ENSRNOT00000007882  | 0.961939867  | 5.90E-07 |
| TUCP_003076 | XLOC_131887 | ENSRNOT00000047663  | 0.956750407  | 1.11E-06 |
| TUCP_003076 | XLOC_131887 | ENSRNOT00000006946  | 0.952041484  | 1.84E-06 |
| TUCP_003076 | XLOC_131887 | ENSRNOT00000041237  | 0.973725123  | 9.44E-08 |
| TUCP_003076 | XLOC_131887 | ENSRNOT00000027145  | 0.964315669  | 4.29E-07 |
| TUCP_003076 | XLOC_131887 | ENSRNOT00000026312  | -0.951579715 | 1.93E-06 |
| TUCP_003076 | XLOC_131887 | ENSRNOT00000006824  | 0.970104797  | 1.79E-07 |
| TUCP_003076 | XLOC_131887 | ENSRNOT000000061201 | 0.950520701  | 2.15E-06 |
| TUCP_003076 | XLOC_131887 | ENSRNOT00000013587  | 0.950715348  | 2.11E-06 |
| TUCP_003076 | XLOC_131887 | ENSRNOT00000023463  | 0.970102606  | 1.79E-07 |
| TUCP_003076 | XLOC_131887 | ENSRNOT00000073910  | 0.952350297  | 1.79E-06 |
| TUCP_003076 | XLOC_131887 | ENSRNOT00000008317  | 0.982009095  | 1.44E-08 |
| TUCP_003076 | XLOC_131887 | ENSRNOT00000077040  | 0.962699528  | 5.34E-07 |
| TUCP_003076 | XLOC_131887 | ENSRNOT00000044449  | 0.963751655  | 4.64E-07 |
| TUCP_003076 | XLOC_131887 | ENSRNOT00000009225  | 0.952000697  | 1.85E-06 |
| TUCP_003076 | XLOC_131887 | ENSRNOT00000006217  | -0.952674688 | 1.73E-06 |
| TUCP_003076 | XLOC_131887 | ENSRNOT00000078743  | 0.950011899  | 2.26E-06 |
| TUCP_003076 | XLOC_131887 | ENSRNOT00000039012  | 0.977180306  | 4.69E-08 |
| TUCP_003076 | XLOC_131887 | ENSRNOT00000003787  | 0.963024957  | 5.11E-07 |
| TUCP_003076 | XLOC_131887 | ENSRNOT00000019531  | 0.969014111  | 2.14E-07 |
| TUCP_003076 | XLOC_131887 | ENSRNOT000000068026 | 0.952944998  | 1.68E-06 |
| TUCP_003076 | XLOC_131887 | ENSRNOT00000032893  | 0.969316869  | 2.03E-07 |
| TUCP_003076 | XLOC_131887 | ENSRNOT00000054948  | -0.952881986 | 1.69E-06 |
| TUCP_003076 | XLOC_131887 | ENSRNOT00000017955  | 0.969963978  | 1.83E-07 |
| TUCP_003076 | XLOC_131887 | ENSRNOT000000085621 | -0.958898353 | 8.62E-07 |
| TUCP_003076 | XLOC_131887 | ENSRNOT00000074586  | 0.960164787  | 7.39E-07 |
| TUCP_003076 | XLOC_131887 | ENSRNOT00000008161  | 0.956431657  | 1.15E-06 |
| TUCP_003076 | XLOC_131887 | ENSRNOT00000075444  | 0.959026384  | 8.49E-07 |
| TUCP_003076 | XLOC_131887 | ENSRNOT00000005996  | 0.96574814   | 3.51E-07 |
| TUCP_003076 | XLOC_131887 | ENSRNOT0000001605   | 0.970723493  | 1.61E-07 |
| TUCP_003076 | XLOC_131887 | ENSRNOT00000008889  | 0.959012642  | 8.50E-07 |
| TUCP_003076 | XLOC_131887 | ENSRNOT00000009275  | 0.955838063  | 1.23E-06 |
| TUCP_003076 | XLOC_131887 | ENSRNOT00000025824  | 0.95719537   | 1.05E-06 |
| TUCP_003076 | XLOC_131887 | ENSRNOT00000071929  | 0.958737199  | 8.79E-07 |
| TUCP_003076 | XLOC_131887 | ENSRNOT00000073193  | 0.985465099  | 4.99E-09 |
| TUCP_003076 | XLOC_131887 | ENSRNOT00000025221  | 0.977882699  | 4.02E-08 |
| TUCP_003076 | XLOC_131887 | ENSRNOT00000021496  | 0.954636719  | 1.40E-06 |
| TUCP_003076 | XLOC_131887 | ENSRNOT00000022676  | 0.974992784  | 7.39E-08 |
| TUCP_003076 | XLOC_131887 | ENSRNOT00000029193  | 0.955541992  | 1.27E-06 |
| TUCP_003076 | XLOC_131887 | ENSRNOT000000063875 | 0.950458437  | 2.16E-06 |
| TUCP_003076 | XLOC_131887 | ENSRNOT00000050696  | -0.972561332 | 1.17E-07 |
| TUCP_003076 | XLOC_131887 | ENSRNOT00000006709  | 0.973421893  | 9.99E-08 |
| TUCP_003076 | XLOC_131887 | ENSRNOT00000034386  | 0.953562948  | 1.57E-06 |
| TUCP_003076 | XLOC_131887 | ENSRNOT00000017626  | 0.968356549  | 2.37E-07 |
| TUCP_003076 | XLOC_131887 | ENSRNOT00000037946  | 0.955510727  | 1.27E-06 |
| TUCP_003076 | XLOC_131887 | ENSRNOT00000070825  | 0.982940003  | 1.11E-08 |

|             |             |                    |              |          |
|-------------|-------------|--------------------|--------------|----------|
| TUCP_003076 | XLOC_131887 | ENSRNOT00000025134 | 0.969911088  | 1.85E-07 |
| TUCP_003076 | XLOC_131887 | ENSRNOT00000002169 | 0.955841638  | 1.23E-06 |
| TUCP_003076 | XLOC_131887 | ENSRNOT00000027553 | 0.968370635  | 2.36E-07 |
| TUCP_003076 | XLOC_131887 | ENSRNOT00000022864 | 0.961164585  | 6.52E-07 |
| TUCP_003076 | XLOC_131887 | ENSRNOT00000013733 | 0.978359392  | 3.60E-08 |
| TUCP_003076 | XLOC_131887 | ENSRNOT00000013375 | 0.964454841  | 4.21E-07 |
| TUCP_003076 | XLOC_131887 | ENSRNOT00000050515 | -0.961820507 | 5.99E-07 |
| TUCP_003076 | XLOC_131887 | ENSRNOT00000081725 | -0.961735729 | 6.06E-07 |
| TUCP_003076 | XLOC_131887 | ENSRNOT00000028744 | 0.957749836  | 9.88E-07 |
| TUCP_003076 | XLOC_131887 | ENSRNOT00000015518 | 0.95743103   | 1.02E-06 |
| TUCP_003076 | XLOC_131887 | ENSRNOT00000009135 | -0.964271642 | 4.32E-07 |
| TUCP_003076 | XLOC_131887 | ENSRNOT00000024753 | 0.988054419  | 1.88E-09 |
| TUCP_003076 | XLOC_131887 | ENSRNOT00000082739 | 0.954082028  | 1.49E-06 |
| TUCP_003076 | XLOC_131887 | ENSRNOT00000016286 | 0.952139222  | 1.82E-06 |
| TUCP_003076 | XLOC_131887 | ENSRNOT00000055602 | 0.968229767  | 2.42E-07 |
| TUCP_003076 | XLOC_131887 | ENSRNOT00000038511 | 0.967872017  | 2.55E-07 |
| TUCP_003076 | XLOC_131887 | ENSRNOT00000090268 | 0.977635998  | 4.24E-08 |
| TUCP_003076 | XLOC_131887 | ENSRNOT00000024452 | 0.952102557  | 1.83E-06 |
| TUCP_003076 | XLOC_131887 | ENSRNOT00000089294 | 0.983041869  | 1.07E-08 |
| TUCP_003076 | XLOC_131887 | ENSRNOT00000082627 | 0.962013529  | 5.84E-07 |
| TUCP_003076 | XLOC_131887 | ENSRNOT00000065642 | 0.959825738  | 7.70E-07 |
| TUCP_003076 | XLOC_131887 | ENSRNOT00000024456 | 0.970209178  | 1.76E-07 |
| TUCP_003076 | XLOC_131887 | ENSRNOT00000028893 | 0.954143339  | 1.48E-06 |
| TUCP_003076 | XLOC_131887 | ENSRNOT00000075474 | 0.955895685  | 1.22E-06 |
| TUCP_003076 | XLOC_131887 | ENSRNOT00000072357 | 0.962653353  | 5.37E-07 |
| TUCP_003076 | XLOC_131887 | ENSRNOT00000014832 | 0.956627303  | 1.12E-06 |
| TUCP_003076 | XLOC_131887 | ENSRNOT00000002187 | 0.959341779  | 8.17E-07 |
| TUCP_003076 | XLOC_131887 | ENSRNOT00000016324 | 0.968671986  | 2.25E-07 |
| TUCP_003076 | XLOC_131887 | ENSRNOT00000023388 | 0.98591077   | 4.27E-09 |
| TUCP_003076 | XLOC_131887 | ENSRNOT00000000258 | 0.981341542  | 1.73E-08 |
| TUCP_003076 | XLOC_131887 | ENSRNOT00000018477 | 0.975240851  | 7.03E-08 |
| TUCP_003076 | XLOC_131887 | ENSRNOT00000091488 | -0.959554037 | 7.96E-07 |
| TUCP_003076 | XLOC_131887 | ENSRNOT00000023628 | 0.961911326  | 5.92E-07 |
| TUCP_003076 | XLOC_131887 | ENSRNOT00000018473 | 0.99037349   | 6.41E-10 |
| TUCP_003076 | XLOC_131887 | ENSRNOT00000075283 | 0.969450382  | 1.99E-07 |
| TUCP_003076 | XLOC_131887 | ENSRNOT00000020161 | -0.959850616 | 7.68E-07 |
| TUCP_003076 | XLOC_131887 | ENSRNOT00000000717 | 0.977581426  | 4.30E-08 |
| TUCP_003076 | XLOC_131887 | ENSRNOT00000026118 | 0.960769993  | 6.85E-07 |
| TUCP_003076 | XLOC_131887 | ENSRNOT00000077999 | -0.963115543 | 5.05E-07 |
| TUCP_003076 | XLOC_131887 | ENSRNOT00000008361 | -0.956435449 | 1.15E-06 |
| TUCP_003076 | XLOC_131887 | ENSRNOT00000074649 | -0.950270408 | 2.20E-06 |
| TUCP_003076 | XLOC_131887 | ENSRNOT00000049048 | 0.972587157  | 1.16E-07 |
| TUCP_003076 | XLOC_131887 | ENSRNOT0000007476  | 0.955741562  | 1.24E-06 |
| TUCP_003076 | XLOC_131887 | ENSRNOT00000037955 | 0.954982264  | 1.35E-06 |
| TUCP_003076 | XLOC_131887 | ENSRNOT00000082108 | 0.959967307  | 7.57E-07 |
| TUCP_003076 | XLOC_131887 | ENSRNOT00000018877 | 0.958206039  | 9.36E-07 |
| TUCP_003076 | XLOC_131887 | ENSRNOT00000025104 | 0.956673154  | 1.12E-06 |
| TUCP_003076 | XLOC_131887 | ENSRNOT00000077146 | 0.955518791  | 1.27E-06 |
| TUCP_003076 | XLOC_131887 | ENSRNOT00000006804 | -0.967738954 | 2.61E-07 |
| TUCP_003076 | XLOC_131887 | ENSRNOT00000052063 | -0.956759721 | 1.11E-06 |
| TUCP_003076 | XLOC_131887 | ENSRNOT00000030222 | 0.955150676  | 1.33E-06 |

|             |             |                    |              |          |
|-------------|-------------|--------------------|--------------|----------|
| TUCP_003076 | XLOC_131887 | ENSRNOT00000089066 | -0.967414807 | 2.74E-07 |
| TUCP_003076 | XLOC_131887 | ENSRNOT00000017504 | -0.957002032 | 1.08E-06 |
| TUCP_003076 | XLOC_131887 | ENSRNOT00000024326 | 0.963753971  | 4.64E-07 |
| TUCP_003076 | XLOC_131887 | ENSRNOT00000004999 | -0.950855917 | 2.08E-06 |
| TUCP_003076 | XLOC_131887 | ENSRNOT00000072890 | 0.952445599  | 1.77E-06 |
| TUCP_003076 | XLOC_131887 | ENSRNOT00000017683 | 0.952351835  | 1.79E-06 |
| TUCP_003076 | XLOC_131887 | ENSRNOT00000086456 | 0.953149537  | 1.64E-06 |
| TUCP_003076 | XLOC_131887 | ENSRNOT00000023763 | 0.961997022  | 5.86E-07 |
| TUCP_003076 | XLOC_131887 | ENSRNOT00000029704 | 0.956122573  | 1.19E-06 |
| TUCP_003076 | XLOC_131887 | ENSRNOT00000033677 | 0.957859328  | 9.75E-07 |
| TUCP_003076 | XLOC_131887 | ENSRNOT00000006395 | 0.974100668  | 8.79E-08 |
| TUCP_003076 | XLOC_131887 | ENSRNOT00000077706 | -0.963846149 | 4.58E-07 |
| TUCP_003076 | XLOC_131887 | ENSRNOT00000023641 | 0.970708522  | 1.62E-07 |
| TUCP_003076 | XLOC_131887 | ENSRNOT00000020809 | 0.983306512  | 9.93E-09 |
| TUCP_003076 | XLOC_131887 | ENSRNOT00000028907 | -0.953407396 | 1.60E-06 |
| TUCP_003076 | XLOC_131887 | ENSRNOT00000066133 | 0.957068348  | 1.07E-06 |
| TUCP_003076 | XLOC_131887 | ENSRNOT00000065045 | -0.962885963 | 5.21E-07 |
| TUCP_003076 | XLOC_131887 | ENSRNOT00000010993 | -0.955285818 | 1.31E-06 |
| TUCP_003076 | XLOC_131887 | ENSRNOT00000003359 | 0.953912116  | 1.52E-06 |
| TUCP_003076 | XLOC_131887 | ENSRNOT00000017998 | -0.962483799 | 5.50E-07 |
| TUCP_003076 | XLOC_131887 | ENSRNOT00000025791 | 0.974956185  | 7.44E-08 |
| TUCP_003076 | XLOC_131887 | ENSRNOT00000003106 | 0.950776518  | 2.09E-06 |
| TUCP_003076 | XLOC_131887 | ENSRNOT00000058111 | 0.958505496  | 9.04E-07 |
| TUCP_003076 | XLOC_131887 | ENSRNOT00000007276 | 0.970564628  | 1.66E-07 |
| TUCP_003076 | XLOC_131887 | ENSRNOT00000000253 | 0.972584484  | 1.16E-07 |
| TUCP_003076 | XLOC_131887 | ENSRNOT00000075544 | 0.954682967  | 1.39E-06 |
| TUCP_003076 | XLOC_131887 | ENSRNOT00000021705 | 0.960686525  | 6.92E-07 |
| TUCP_003076 | XLOC_131887 | ENSRNOT00000023543 | 0.964155791  | 4.39E-07 |
| TUCP_003076 | XLOC_131887 | ENSRNOT00000018846 | 0.952520765  | 1.75E-06 |
| TUCP_003076 | XLOC_131887 | ENSRNOT00000004196 | -0.962737721 | 5.31E-07 |
| TUCP_003076 | XLOC_131887 | ENSRNOT00000028737 | 0.961374838  | 6.35E-07 |
| TUCP_003076 | XLOC_131887 | ENSRNOT00000076300 | 0.955985765  | 1.21E-06 |
| TUCP_003076 | XLOC_131887 | ENSRNOT00000005489 | -0.953683761 | 1.55E-06 |
| TUCP_003076 | XLOC_131887 | ENSRNOT00000027973 | 0.971393535  | 1.44E-07 |
| TUCP_003076 | XLOC_131887 | ENSRNOT00000064535 | 0.969483026  | 1.98E-07 |
| TUCP_003076 | XLOC_131887 | ENSRNOT00000015624 | -0.954204208 | 1.47E-06 |
| TUCP_003076 | XLOC_131887 | ENSRNOT00000018341 | 0.971916998  | 1.31E-07 |
| TUCP_003076 | XLOC_131887 | ENSRNOT00000025086 | 0.967029871  | 2.90E-07 |
| TUCP_003076 | XLOC_131887 | ENSRNOT0000001227  | 0.955050986  | 1.34E-06 |
| TUCP_003076 | XLOC_131887 | ENSRNOT0000002511  | 0.955502669  | 1.27E-06 |
| TUCP_003076 | XLOC_131887 | ENSRNOT00000082963 | 0.95940155   | 8.11E-07 |
| TUCP_003076 | XLOC_131887 | ENSRNOT00000024924 | 0.97756732   | 4.31E-08 |
| TUCP_003076 | XLOC_131887 | ENSRNOT00000072632 | 0.976571079  | 5.35E-08 |
| TUCP_003076 | XLOC_131887 | ENSRNOT00000014002 | 0.963588029  | 4.74E-07 |
| TUCP_003076 | XLOC_131887 | ENSRNOT00000079011 | 0.965098585  | 3.85E-07 |
| TUCP_003076 | XLOC_131887 | ENSRNOT00000086238 | -0.955595813 | 1.26E-06 |
| TUCP_003076 | XLOC_131887 | ENSRNOT00000013553 | -0.973196831 | 1.04E-07 |
| TUCP_003076 | XLOC_131887 | ENSRNOT00000065722 | 0.963912822  | 4.54E-07 |
| TUCP_003076 | XLOC_131887 | ENSRNOT00000085458 | 0.955350239  | 1.30E-06 |
| TUCP_003076 | XLOC_131887 | ENSRNOT00000035277 | -0.970953984 | 1.55E-07 |
| TUCP_003076 | XLOC_131887 | ENSRNOT00000035486 | 0.959770086  | 7.76E-07 |

|             |             |                    |              |          |
|-------------|-------------|--------------------|--------------|----------|
| TUCP_003076 | XLOC_131887 | ENSRNOT00000008244 | -0.957960286 | 9.64E-07 |
| TUCP_003076 | XLOC_131887 | ENSRNOT00000000124 | 0.97074278   | 1.61E-07 |
| TUCP_003076 | XLOC_131887 | ENSRNOT00000010915 | 0.964426885  | 4.23E-07 |
| TUCP_003076 | XLOC_131887 | ENSRNOT00000043581 | 0.984019477  | 7.99E-09 |
| TUCP_003076 | XLOC_131887 | ENSRNOT00000010419 | -0.961844279 | 5.97E-07 |
| TUCP_003076 | XLOC_131887 | ENSRNOT00000011694 | 0.973955424  | 9.03E-08 |
| TUCP_003076 | XLOC_131887 | ENSRNOT00000026846 | 0.953527106  | 1.58E-06 |
| TUCP_003076 | XLOC_131887 | ENSRNOT00000078906 | 0.972740969  | 1.13E-07 |
| TUCP_003076 | XLOC_131887 | ENSRNOT00000087033 | 0.960219719  | 7.34E-07 |
| TUCP_003076 | XLOC_131887 | ENSRNOT00000005961 | 0.958375618  | 9.18E-07 |
| TUCP_003076 | XLOC_131887 | ENSRNOT00000060698 | 0.95039714   | 2.18E-06 |
| TUCP_003076 | XLOC_131887 | ENSRNOT00000022065 | 0.96326639   | 4.95E-07 |
| TUCP_003076 | XLOC_131887 | ENSRNOT00000066561 | 0.971728568  | 1.36E-07 |
| TUCP_003076 | XLOC_131887 | ENSRNOT00000026760 | 0.959984941  | 7.55E-07 |
| TUCP_003076 | XLOC_131887 | ENSRNOT00000001289 | -0.956620568 | 1.12E-06 |
| TUCP_003076 | XLOC_131887 | ENSRNOT00000068184 | 0.981556645  | 1.63E-08 |
| TUCP_003076 | XLOC_131887 | ENSRNOT00000076485 | 0.956203741  | 1.18E-06 |
| TUCP_003076 | XLOC_131887 | ENSRNOT00000015495 | 0.951008976  | 2.05E-06 |
| TUCP_003076 | XLOC_131887 | ENSRNOT00000066199 | 0.966877092  | 2.97E-07 |
| TUCP_003076 | XLOC_131887 | ENSRNOT00000089016 | 0.972109291  | 1.27E-07 |
| TUCP_003076 | XLOC_131887 | ENSRNOT00000019358 | 0.967571604  | 2.67E-07 |
| TUCP_003076 | XLOC_131887 | ENSRNOT00000017995 | -0.969467672 | 1.99E-07 |
| TUCP_003076 | XLOC_131887 | ENSRNOT00000021216 | -0.950892337 | 2.07E-06 |
| TUCP_003076 | XLOC_131887 | ENSRNOT00000067503 | -0.954712541 | 1.39E-06 |
| TUCP_003076 | XLOC_131887 | ENSRNOT00000021534 | 0.950850792  | 2.08E-06 |
| TUCP_003076 | XLOC_131887 | ENSRNOT00000018170 | 0.971811352  | 1.34E-07 |
| TUCP_003076 | XLOC_131887 | ENSRNOT00000071745 | 0.966510622  | 3.14E-07 |
| TUCP_003076 | XLOC_131887 | ENSRNOT00000077727 | 0.965482806  | 3.64E-07 |
| TUCP_003076 | XLOC_131887 | ENSRNOT00000024938 | 0.975626584  | 6.50E-08 |
| TUCP_003076 | XLOC_131887 | ENSRNOT00000011511 | 0.965609043  | 3.58E-07 |
| TUCP_003076 | XLOC_131887 | ENSRNOT00000008113 | 0.954354163  | 1.45E-06 |
| TUCP_003076 | XLOC_131887 | ENSRNOT00000072129 | 0.958521546  | 9.02E-07 |
| TUCP_003076 | XLOC_131887 | ENSRNOT00000089086 | 0.954804729  | 1.38E-06 |
| TUCP_003076 | XLOC_131887 | ENSRNOT00000022097 | -0.962679054 | 5.36E-07 |
| TUCP_003076 | XLOC_131887 | ENSRNOT00000036042 | 0.96208325   | 5.79E-07 |
| TUCP_003076 | XLOC_131887 | ENSRNOT00000009345 | 0.961215181  | 6.48E-07 |
| TUCP_003076 | XLOC_131887 | ENSRNOT00000025705 | -0.971297859 | 1.46E-07 |
| TUCP_003076 | XLOC_131887 | ENSRNOT00000029753 | 0.958978358  | 8.54E-07 |
| TUCP_003076 | XLOC_131887 | ENSRNOT00000024933 | 0.97972733   | 2.61E-08 |
| TUCP_003076 | XLOC_131887 | ENSRNOT00000019778 | 0.981197458  | 1.79E-08 |
| TUCP_003076 | XLOC_131887 | ENSRNOT00000011320 | 0.975852904  | 6.21E-08 |
| TUCP_003076 | XLOC_131887 | ENSRNOT00000085669 | -0.953805411 | 1.53E-06 |
| TUCP_003076 | XLOC_131887 | ENSRNOT00000008359 | 0.952727073  | 1.72E-06 |
| TUCP_003076 | XLOC_131887 | ENSRNOT00000048022 | 0.967993496  | 2.51E-07 |
| TUCP_003076 | XLOC_131887 | ENSRNOT00000019175 | 0.987824418  | 2.06E-09 |
| TUCP_003076 | XLOC_131887 | ENSRNOT00000013295 | 0.972053927  | 1.28E-07 |
| TUCP_003077 | XLOC_131908 | ENSRNOT00000068416 | 0.96747954   | 2.71E-07 |
| TUCP_003077 | XLOC_131908 | ENSRNOT00000026803 | 0.966483135  | 3.15E-07 |
| TUCP_003077 | XLOC_131908 | ENSRNOT00000042251 | 0.965248009  | 3.77E-07 |
| TUCP_003077 | XLOC_131908 | ENSRNOT0000002984  | 0.959976161  | 7.56E-07 |
| TUCP_003077 | XLOC_131908 | ENSRNOT00000067379 | 0.966286074  | 3.24E-07 |

|             |             |                    |             |          |
|-------------|-------------|--------------------|-------------|----------|
| TUCP_003077 | XLOC_131908 | ENSRNOT00000092365 | 0.96559478  | 3.58E-07 |
| TUCP_003077 | XLOC_131908 | ENSRNOT00000089306 | 0.966530712 | 3.13E-07 |
| TUCP_003077 | XLOC_131908 | ENSRNOT00000045301 | 0.967441969 | 2.73E-07 |
| TUCP_003077 | XLOC_131908 | ENSRNOT00000041186 | 0.96852468  | 2.31E-07 |
| TUCP_003077 | XLOC_131908 | ENSRNOT00000076182 | 0.967441969 | 2.73E-07 |
| TUCP_003077 | XLOC_131908 | ENSRNOT00000081709 | 0.966124274 | 3.32E-07 |
| TUCP_003077 | XLOC_131908 | ENSRNOT00000014103 | 0.967441969 | 2.73E-07 |
| TUCP_003077 | XLOC_131908 | ENSRNOT00000082289 | 0.964861334 | 3.98E-07 |
| TUCP_003077 | XLOC_131908 | ENSRNOT00000083493 | 0.969992056 | 1.82E-07 |
| TUCP_003077 | XLOC_131908 | ENSRNOT00000092563 | 0.951023422 | 2.04E-06 |
| TUCP_003077 | XLOC_131908 | ENSRNOT00000088893 | 0.967441969 | 2.73E-07 |
| TUCP_003077 | XLOC_131908 | ENSRNOT00000081014 | 0.967441969 | 2.73E-07 |
| TUCP_003077 | XLOC_131908 | ENSRNOT00000067543 | 0.967441969 | 2.73E-07 |
| TUCP_003077 | XLOC_131908 | ENSRNOT00000050968 | 0.969463935 | 1.99E-07 |
| TUCP_003077 | XLOC_131908 | ENSRNOT00000042201 | 0.988873828 | 1.32E-09 |
| TUCP_003077 | XLOC_131908 | ENSRNOT00000086036 | 0.967054731 | 2.89E-07 |
| TUCP_003077 | XLOC_131908 | ENSRNOT00000063929 | 0.967441969 | 2.73E-07 |
| TUCP_003077 | XLOC_131908 | ENSRNOT00000044520 | 0.96042754  | 7.15E-07 |
| TUCP_003077 | XLOC_131908 | ENSRNOT00000022200 | 0.964592657 | 4.13E-07 |
| TUCP_003077 | XLOC_131908 | ENSRNOT00000078372 | 0.967436539 | 2.73E-07 |
| TUCP_003077 | XLOC_131908 | ENSRNOT00000083764 | 0.966232624 | 3.27E-07 |
| TUCP_003077 | XLOC_131908 | ENSRNOT00000020786 | 0.956801531 | 1.10E-06 |
| TUCP_003077 | XLOC_131908 | ENSRNOT00000050543 | 0.966679576 | 3.06E-07 |
| TUCP_003077 | XLOC_131908 | ENSRNOT00000079275 | 0.965512977 | 3.63E-07 |
| TUCP_003077 | XLOC_131908 | ENSRNOT00000052367 | 0.962929878 | 5.18E-07 |
| TUCP_003077 | XLOC_131908 | ENSRNOT00000090658 | 0.967441969 | 2.73E-07 |
| TUCP_003077 | XLOC_131908 | ENSRNOT00000022571 | 0.955976954 | 1.21E-06 |
| TUCP_003077 | XLOC_131908 | ENSRNOT00000057472 | 0.967441969 | 2.73E-07 |
| TUCP_003079 | XLOC_132184 | ENSRNOT00000084075 | 0.970426646 | 1.70E-07 |
| TUCP_003079 | XLOC_132184 | ENSRNOT00000012880 | 0.973862942 | 9.19E-08 |
| TUCP_003079 | XLOC_132184 | ENSRNOT00000074465 | 0.978005608 | 3.91E-08 |
| TUCP_003079 | XLOC_132184 | ENSRNOT00000079805 | 0.977366214 | 4.50E-08 |
| TUCP_003079 | XLOC_132184 | ENSRNOT00000040912 | 0.978005608 | 3.91E-08 |
| TUCP_003079 | XLOC_132184 | ENSRNOT00000072648 | 0.978005608 | 3.91E-08 |
| TUCP_003079 | XLOC_132184 | ENSRNOT0000007398  | 0.964062586 | 4.44E-07 |
| TUCP_003079 | XLOC_132184 | ENSRNOT00000070803 | 0.978005608 | 3.91E-08 |
| TUCP_003079 | XLOC_132184 | ENSRNOT00000012196 | 0.978005608 | 3.91E-08 |
| TUCP_003079 | XLOC_132184 | ENSRNOT00000085772 | 0.978005608 | 3.91E-08 |
| TUCP_003079 | XLOC_132184 | ENSRNOT00000086374 | 0.991434878 | 3.58E-10 |
| TUCP_003079 | XLOC_132184 | ENSRNOT00000015270 | 0.978005608 | 3.91E-08 |
| TUCP_003079 | XLOC_132184 | ENSRNOT00000046192 | 0.978005608 | 3.91E-08 |
| TUCP_003079 | XLOC_132184 | ENSRNOT00000044226 | 0.978005608 | 3.91E-08 |
| TUCP_003079 | XLOC_132184 | ENSRNOT00000081898 | 0.952329792 | 1.79E-06 |
| TUCP_003079 | XLOC_132184 | ENSRNOT00000080291 | 0.974380942 | 8.33E-08 |
| TUCP_003079 | XLOC_132184 | ENSRNOT00000004293 | 0.961956191 | 5.89E-07 |
| TUCP_003079 | XLOC_132184 | ENSRNOT00000078231 | 0.951802893 | 1.89E-06 |
| TUCP_003079 | XLOC_132184 | ENSRNOT0000001464  | 0.978005608 | 3.91E-08 |
| TUCP_003079 | XLOC_132184 | ENSRNOT00000090716 | 0.982474776 | 1.26E-08 |
| TUCP_003079 | XLOC_132184 | ENSRNOT00000057873 | 0.978005608 | 3.91E-08 |
| TUCP_003079 | XLOC_132184 | ENSRNOT00000076044 | 0.978005608 | 3.91E-08 |
| TUCP_003079 | XLOC_132184 | ENSRNOT00000074353 | 0.978005608 | 3.91E-08 |

|             |             |                    |              |          |
|-------------|-------------|--------------------|--------------|----------|
| TUCP_003079 | XLOC_132184 | ENSRNOT00000087122 | 0.974366195  | 8.35E-08 |
| TUCP_003079 | XLOC_132184 | ENSRNOT00000074295 | 0.96806433   | 2.48E-07 |
| TUCP_003079 | XLOC_132184 | ENSRNOT00000093284 | 0.977684787  | 4.20E-08 |
| TUCP_003079 | XLOC_132184 | ENSRNOT00000083002 | 0.97449507   | 8.14E-08 |
| TUCP_003079 | XLOC_132184 | ENSRNOT00000088399 | 0.977981899  | 3.93E-08 |
| TUCP_003079 | XLOC_132184 | ENSRNOT00000086248 | 0.978005608  | 3.91E-08 |
| TUCP_003079 | XLOC_132184 | ENSRNOT00000089750 | 0.977960423  | 3.95E-08 |
| TUCP_003079 | XLOC_132184 | ENSRNOT00000030517 | 0.965352197  | 3.71E-07 |
| TUCP_003079 | XLOC_132184 | ENSRNOT00000034772 | 0.969651074  | 1.93E-07 |
| TUCP_003079 | XLOC_132184 | ENSRNOT00000089305 | 0.976415245  | 5.52E-08 |
| TUCP_003079 | XLOC_132184 | ENSRNOT00000064601 | 0.95461551   | 1.40E-06 |
| TUCP_003079 | XLOC_132184 | ENSRNOT0000002834  | 0.978005608  | 3.91E-08 |
| TUCP_003079 | XLOC_132184 | ENSRNOT00000080812 | 0.976305173  | 5.65E-08 |
| TUCP_003079 | XLOC_132184 | ENSRNOT00000092755 | 0.978005608  | 3.91E-08 |
| TUCP_003079 | XLOC_132184 | ENSRNOT00000031683 | 0.978005608  | 3.91E-08 |
| TUCP_003079 | XLOC_132184 | ENSRNOT00000087764 | 0.987250891  | 2.60E-09 |
| TUCP_001598 | XLOC_062686 | ENSRNOT00000035700 | 0.956911106  | 1.09E-06 |
| TUCP_001598 | XLOC_062686 | ENSRNOT00000081246 | 0.958175278  | 9.40E-07 |
| TUCP_001598 | XLOC_062686 | ENSRNOT00000023196 | 0.977263497  | 4.61E-08 |
| TUCP_001598 | XLOC_062686 | ENSRNOT00000016129 | 0.963309251  | 4.92E-07 |
| TUCP_001598 | XLOC_062686 | ENSRNOT00000000468 | 0.961189237  | 6.50E-07 |
| TUCP_001598 | XLOC_062686 | ENSRNOT00000072518 | 0.952573468  | 1.74E-06 |
| TUCP_001598 | XLOC_062686 | ENSRNOT00000080271 | 0.95133387   | 1.98E-06 |
| TUCP_001598 | XLOC_062686 | ENSRNOT00000017668 | 0.976564487  | 5.35E-08 |
| TUCP_001598 | XLOC_062686 | ENSRNOT00000035346 | -0.950157957 | 2.23E-06 |
| TUCP_001598 | XLOC_062686 | ENSRNOT00000040731 | 0.981507772  | 1.65E-08 |
| TUCP_001598 | XLOC_062686 | ENSRNOT00000071733 | 0.956369827  | 1.16E-06 |
| TUCP_001598 | XLOC_062686 | ENSRNOT00000027012 | 0.956519934  | 1.14E-06 |
| TUCP_001598 | XLOC_062686 | ENSRNOT00000024021 | 0.951798853  | 1.89E-06 |
| TUCP_001598 | XLOC_062686 | ENSRNOT00000025223 | 0.955689021  | 1.25E-06 |
| TUCP_001598 | XLOC_062686 | ENSRNOT00000007491 | 0.957669562  | 9.97E-07 |
| TUCP_001598 | XLOC_062686 | ENSRNOT00000090342 | 0.956618361  | 1.12E-06 |
| TUCP_001598 | XLOC_062686 | ENSRNOT00000076872 | 0.953696938  | 1.55E-06 |
| TUCP_001598 | XLOC_062686 | ENSRNOT00000059744 | 0.960814655  | 6.81E-07 |
| TUCP_001598 | XLOC_062686 | ENSRNOT00000040476 | 0.95714609   | 1.06E-06 |
| TUCP_001598 | XLOC_062686 | ENSRNOT00000081297 | 0.957936764  | 9.66E-07 |
| TUCP_001598 | XLOC_062686 | ENSRNOT00000005490 | 0.961732761  | 6.06E-07 |
| TUCP_001598 | XLOC_062686 | ENSRNOT00000008817 | 0.95033144   | 2.19E-06 |
| TUCP_001598 | XLOC_062686 | ENSRNOT00000009496 | 0.957167606  | 1.06E-06 |
| TUCP_001598 | XLOC_062686 | ENSRNOT00000083369 | 0.95687178   | 1.09E-06 |
| TUCP_001598 | XLOC_062686 | ENSRNOT00000014979 | 0.952622005  | 1.74E-06 |
| TUCP_001598 | XLOC_062686 | ENSRNOT00000087095 | 0.967716252  | 2.62E-07 |
| TUCP_001598 | XLOC_062686 | ENSRNOT00000002109 | 0.957455623  | 1.02E-06 |
| TUCP_001598 | XLOC_062686 | ENSRNOT00000015725 | 0.959580002  | 7.94E-07 |
| TUCP_001598 | XLOC_062686 | ENSRNOT00000033235 | 0.967240119  | 2.81E-07 |
| TUCP_001598 | XLOC_062686 | ENSRNOT00000029833 | 0.950050339  | 2.25E-06 |
| TUCP_001598 | XLOC_062686 | ENSRNOT00000012379 | 0.963463557  | 4.82E-07 |
| TUCP_001598 | XLOC_062686 | ENSRNOT00000014701 | 0.955744582  | 1.24E-06 |
| TUCP_001598 | XLOC_062686 | ENSRNOT00000017753 | 0.974148032  | 8.71E-08 |
| TUCP_001598 | XLOC_062686 | ENSRNOT00000025372 | 0.962999075  | 5.13E-07 |
| TUCP_001598 | XLOC_062686 | ENSRNOT00000003177 | 0.967113044  | 2.87E-07 |



|             |             |                    |             |          |
|-------------|-------------|--------------------|-------------|----------|
| TUCP_001598 | XLOC_062686 | ENSRNOT00000078250 | 0.953462638 | 1.59E-06 |
| TUCP_002899 | XLOC_124622 | ENSRNOT00000085461 | 0.964370777 | 4.26E-07 |
| TUCP_002899 | XLOC_124622 | ENSRNOT00000033502 | 0.95843175  | 9.11E-07 |
| TUCP_002483 | XLOC_105060 | ENSRNOT00000071840 | 0.968028409 | 2.49E-07 |
| TUCP_002483 | XLOC_105060 | ENSRNOT00000083608 | 0.952446158 | 1.77E-06 |
| TUCP_002483 | XLOC_105060 | ENSRNOT00000066382 | 0.956452197 | 1.15E-06 |
| TUCP_002483 | XLOC_105060 | ENSRNOT00000045584 | 0.968028409 | 2.49E-07 |
| TUCP_002483 | XLOC_105060 | ENSRNOT00000077995 | 0.963732981 | 4.65E-07 |
| TUCP_002483 | XLOC_105060 | ENSRNOT00000066004 | 0.970367698 | 1.71E-07 |
| TUCP_002483 | XLOC_105060 | ENSRNOT00000064284 | 0.986493122 | 3.46E-09 |
| TUCP_002483 | XLOC_105060 | ENSRNOT00000066685 | 0.959141237 | 8.37E-07 |
| TUCP_002483 | XLOC_105060 | ENSRNOT00000092182 | 0.968028409 | 2.49E-07 |
| TUCP_002483 | XLOC_105060 | ENSRNOT00000084461 | 0.968028409 | 2.49E-07 |
| TUCP_002483 | XLOC_105060 | ENSRNOT00000060448 | 0.968028409 | 2.49E-07 |
| TUCP_002483 | XLOC_105060 | ENSRNOT00000032631 | 0.968028409 | 2.49E-07 |
| TUCP_002483 | XLOC_105060 | ENSRNOT00000054910 | 0.960142001 | 7.41E-07 |
| TUCP_002483 | XLOC_105060 | ENSRNOT00000057176 | 0.967969903 | 2.52E-07 |
| TUCP_002483 | XLOC_105060 | ENSRNOT00000078176 | 0.958339362 | 9.21E-07 |
| TUCP_002483 | XLOC_105060 | ENSRNOT00000056364 | 0.961656781 | 6.12E-07 |
| TUCP_002483 | XLOC_105060 | ENSRNOT00000093431 | 0.968028409 | 2.49E-07 |
| TUCP_002483 | XLOC_105060 | ENSRNOT00000092901 | 0.968028409 | 2.49E-07 |
| TUCP_002483 | XLOC_105060 | ENSRNOT00000089290 | 0.968127324 | 2.46E-07 |
| TUCP_002483 | XLOC_105060 | ENSRNOT00000090211 | 0.963832861 | 4.59E-07 |
| TUCP_002483 | XLOC_105060 | ENSRNOT00000091828 | 0.964410447 | 4.24E-07 |
| TUCP_002483 | XLOC_105060 | ENSRNOT00000091944 | 0.970746744 | 1.61E-07 |
| TUCP_002483 | XLOC_105060 | ENSRNOT00000070855 | 0.968028409 | 2.49E-07 |
| TUCP_002483 | XLOC_105060 | ENSRNOT00000046980 | 0.987653817 | 2.21E-09 |
| TUCP_002483 | XLOC_105060 | ENSRNOT00000084109 | 0.966624982 | 3.08E-07 |
| TUCP_002483 | XLOC_105060 | ENSRNOT00000060645 | 0.980147759 | 2.35E-08 |
| TUCP_002483 | XLOC_105060 | ENSRNOT00000041569 | 0.968028409 | 2.49E-07 |
| TUCP_002483 | XLOC_105060 | ENSRNOT00000087091 | 0.968028409 | 2.49E-07 |
| TUCP_002483 | XLOC_105060 | ENSRNOT0000003308  | 0.953376228 | 1.60E-06 |
| TUCP_002483 | XLOC_105060 | ENSRNOT00000026113 | 0.967199292 | 2.83E-07 |
| TUCP_002483 | XLOC_105060 | ENSRNOT00000014939 | 0.967667065 | 2.64E-07 |
| TUCP_002483 | XLOC_105060 | ENSRNOT00000058314 | 0.953847802 | 1.53E-06 |
| TUCP_002483 | XLOC_105060 | ENSRNOT00000047870 | 0.96238138  | 5.57E-07 |
| TUCP_002483 | XLOC_105060 | ENSRNOT00000071603 | 0.967910216 | 2.54E-07 |
| TUCP_002483 | XLOC_105060 | ENSRNOT00000088376 | 0.96017734  | 7.38E-07 |
| TUCP_002483 | XLOC_105060 | ENSRNOT00000044232 | 0.973866864 | 9.19E-08 |
| TUCP_002483 | XLOC_105060 | ENSRNOT0000007683  | 0.966624152 | 3.08E-07 |
| TUCP_002483 | XLOC_105060 | ENSRNOT00000075836 | 0.968028409 | 2.49E-07 |
| TUCP_002483 | XLOC_105060 | ENSRNOT00000073229 | 0.968028409 | 2.49E-07 |
| TUCP_002483 | XLOC_105060 | ENSRNOT00000060454 | 0.968028409 | 2.49E-07 |
| TUCP_002483 | XLOC_105060 | ENSRNOT0000009295  | 0.960444449 | 7.14E-07 |
| TUCP_002953 | XLOC_127185 | ENSRNOT00000021243 | 0.950259236 | 2.21E-06 |
| TUCP_002953 | XLOC_127185 | ENSRNOT00000061047 | 0.981670588 | 1.58E-08 |
| TUCP_002953 | XLOC_127185 | ENSRNOT00000042721 | 0.981085579 | 1.85E-08 |
| TUCP_002953 | XLOC_127185 | ENSRNOT00000064613 | 0.963082501 | 5.08E-07 |
| TUCP_002953 | XLOC_127185 | ENSRNOT00000026932 | 0.954154011 | 1.48E-06 |
| TUCP_002486 | XLOC_105179 | ENSRNOT00000000593 | 0.965701431 | 3.53E-07 |
| TUCP_002486 | XLOC_105179 | ENSRNOT00000047126 | 0.956378343 | 1.16E-06 |

|             |             |                    |              |          |
|-------------|-------------|--------------------|--------------|----------|
| TUCP_002486 | XLOC_105179 | ENSRNOT00000028988 | -0.96345032  | 4.83E-07 |
| TUCP_002486 | XLOC_105179 | ENSRNOT00000089086 | 0.954173104  | 1.47E-06 |
| TUCP_002486 | XLOC_105179 | ENSRNOT00000085465 | 0.950676012  | 2.12E-06 |
| TUCP_002487 | XLOC_105179 | ENSRNOT00000044017 | -0.95634686  | 1.16E-06 |
| TUCP_002487 | XLOC_105179 | ENSRNOT00000005601 | -0.953004037 | 1.67E-06 |
| TUCP_002487 | XLOC_105179 | ENSRNOT00000028695 | -0.95240191  | 1.78E-06 |
| TUCP_002487 | XLOC_105179 | ENSRNOT00000025037 | 0.956571334  | 1.13E-06 |
| TUCP_002487 | XLOC_105179 | ENSRNOT00000065722 | -0.952822492 | 1.70E-06 |
| TUCP_002487 | XLOC_105179 | ENSRNOT00000065615 | 0.950511698  | 2.15E-06 |
| TUCP_002487 | XLOC_105179 | ENSRNOT00000023419 | -0.958253841 | 9.31E-07 |
| TUCP_002487 | XLOC_105179 | ENSRNOT00000017217 | 0.965734721  | 3.51E-07 |
| TUCP_002487 | XLOC_105179 | ENSRNOT00000089501 | 0.954643756  | 1.40E-06 |
| TUCP_002956 | XLOC_127733 | ENSRNOT00000060929 | -0.951077052 | 2.03E-06 |
| TUCP_002957 | XLOC_127791 | ENSRNOT00000073559 | 0.956038816  | 1.20E-06 |
| TUCP_002957 | XLOC_127791 | ENSRNOT00000087443 | 0.967701034  | 2.62E-07 |
| TUCP_002957 | XLOC_127791 | ENSRNOT00000008573 | 0.958320777  | 9.24E-07 |
| TUCP_002957 | XLOC_127791 | ENSRNOT00000009979 | 0.950318639  | 2.19E-06 |
| TUCP_002957 | XLOC_127791 | ENSRNOT00000006186 | 0.960531278  | 7.06E-07 |
| TUCP_002957 | XLOC_127791 | ENSRNOT00000082998 | 0.951802907  | 1.89E-06 |
| TUCP_002957 | XLOC_127791 | ENSRNOT00000081246 | 0.959056981  | 8.46E-07 |
| TUCP_002957 | XLOC_127791 | ENSRNOT00000048910 | -0.953220584 | 1.63E-06 |
| TUCP_002957 | XLOC_127791 | ENSRNOT00000015006 | 0.964048461  | 4.45E-07 |
| TUCP_002957 | XLOC_127791 | ENSRNOT00000009877 | 0.959277664  | 8.24E-07 |
| TUCP_002957 | XLOC_127791 | ENSRNOT00000045882 | 0.961481644  | 6.26E-07 |
| TUCP_002957 | XLOC_127791 | ENSRNOT00000074939 | 0.975522227  | 6.64E-08 |
| TUCP_002957 | XLOC_127791 | ENSRNOT00000006055 | 0.954632645  | 1.40E-06 |
| TUCP_002957 | XLOC_127791 | ENSRNOT00000003891 | 0.976138334  | 5.85E-08 |
| TUCP_002957 | XLOC_127791 | ENSRNOT00000086336 | 0.971832958  | 1.33E-07 |
| TUCP_002957 | XLOC_127791 | ENSRNOT00000026065 | 0.962359568  | 5.59E-07 |
| TUCP_002957 | XLOC_127791 | ENSRNOT00000001290 | 0.953597093  | 1.57E-06 |
| TUCP_002957 | XLOC_127791 | ENSRNOT00000023638 | 0.958125045  | 9.45E-07 |
| TUCP_002957 | XLOC_127791 | ENSRNOT00000005228 | 0.962299447  | 5.63E-07 |
| TUCP_002957 | XLOC_127791 | ENSRNOT00000022726 | 0.962916345  | 5.19E-07 |
| TUCP_002957 | XLOC_127791 | ENSRNOT00000005220 | 0.959773936  | 7.75E-07 |
| TUCP_002957 | XLOC_127791 | ENSRNOT00000044635 | 0.957510378  | 1.02E-06 |
| TUCP_002957 | XLOC_127791 | ENSRNOT00000045326 | 0.969057085  | 2.12E-07 |
| TUCP_002957 | XLOC_127791 | ENSRNOT00000086548 | 0.951377043  | 1.97E-06 |
| TUCP_002957 | XLOC_127791 | ENSRNOT00000019502 | 0.966257643  | 3.25E-07 |
| TUCP_002957 | XLOC_127791 | ENSRNOT00000028856 | 0.970481618  | 1.68E-07 |
| TUCP_002957 | XLOC_127791 | ENSRNOT00000017776 | 0.97835518   | 3.61E-08 |
| TUCP_002957 | XLOC_127791 | ENSRNOT00000030850 | 0.954251521  | 1.46E-06 |
| TUCP_002957 | XLOC_127791 | ENSRNOT00000043216 | 0.979220958  | 2.95E-08 |
| TUCP_002957 | XLOC_127791 | ENSRNOT00000080654 | 0.970071768  | 1.80E-07 |
| TUCP_002957 | XLOC_127791 | ENSRNOT00000044742 | 0.974466536  | 8.19E-08 |
| TUCP_002957 | XLOC_127791 | ENSRNOT00000009496 | 0.957902302  | 9.70E-07 |
| TUCP_002957 | XLOC_127791 | ENSRNOT00000027414 | 0.970666734  | 1.63E-07 |
| TUCP_002957 | XLOC_127791 | ENSRNOT00000028563 | 0.966224863  | 3.27E-07 |
| TUCP_002957 | XLOC_127791 | ENSRNOT00000015076 | 0.956657207  | 1.12E-06 |
| TUCP_002957 | XLOC_127791 | ENSRNOT00000043345 | 0.963128216  | 5.04E-07 |
| TUCP_002957 | XLOC_127791 | ENSRNOT00000010418 | 0.970457831  | 1.69E-07 |
| TUCP_002957 | XLOC_127791 | ENSRNOT00000015073 | 0.95902395   | 8.49E-07 |

|             |             |                    |             |          |
|-------------|-------------|--------------------|-------------|----------|
| TUCP_002957 | XL0C_127791 | ENSRNOT00000043554 | 0.966623816 | 3.08E-07 |
| TUCP_002957 | XL0C_127791 | ENSRNOT00000019213 | 0.968794309 | 2.21E-07 |
| TUCP_002957 | XL0C_127791 | ENSRNOT00000012187 | 0.966669405 | 3.06E-07 |
| TUCP_002957 | XL0C_127791 | ENSRNOT00000005942 | 0.966866075 | 2.97E-07 |
| TUCP_002957 | XL0C_127791 | ENSRNOT00000074725 | 0.953977014 | 1.50E-06 |
| TUCP_002957 | XL0C_127791 | ENSRNOT00000015479 | 0.960764282 | 6.86E-07 |
| TUCP_002957 | XL0C_127791 | ENSRNOT00000074653 | 0.97258843  | 1.16E-07 |
| TUCP_002957 | XL0C_127791 | ENSRNOT00000085251 | -0.95941229 | 8.10E-07 |
| TUCP_002957 | XL0C_127791 | ENSRNOT00000001507 | 0.955078501 | 1.34E-06 |
| TUCP_002957 | XL0C_127791 | ENSRNOT00000026783 | 0.977130904 | 4.74E-08 |
| TUCP_002957 | XL0C_127791 | ENSRNOT00000088125 | 0.960853688 | 6.78E-07 |
| TUCP_002957 | XL0C_127791 | ENSRNOT00000023619 | 0.970484985 | 1.68E-07 |
| TUCP_002957 | XL0C_127791 | ENSRNOT00000065300 | 0.95780588  | 9.81E-07 |
| TUCP_002957 | XL0C_127791 | ENSRNOT00000011384 | 0.967241998 | 2.81E-07 |
| TUCP_002957 | XL0C_127791 | ENSRNOT00000018584 | 0.969089563 | 2.11E-07 |
| TUCP_002957 | XL0C_127791 | ENSRNOT00000045699 | 0.965462573 | 3.65E-07 |
| TUCP_002957 | XL0C_127791 | ENSRNOT00000038247 | 0.965423768 | 3.67E-07 |
| TUCP_002957 | XL0C_127791 | ENSRNOT00000029439 | 0.958371749 | 9.18E-07 |
| TUCP_002957 | XL0C_127791 | ENSRNOT00000044628 | 0.952628751 | 1.73E-06 |
| TUCP_002957 | XL0C_127791 | ENSRNOT00000064401 | 0.959924522 | 7.61E-07 |
| TUCP_002957 | XL0C_127791 | ENSRNOT00000045083 | 0.960348741 | 7.22E-07 |
| TUCP_002957 | XL0C_127791 | ENSRNOT00000011663 | 0.969338133 | 2.03E-07 |
| TUCP_002957 | XL0C_127791 | ENSRNOT00000076820 | 0.954697546 | 1.39E-06 |
| TUCP_002957 | XL0C_127791 | ENSRNOT00000036951 | 0.976694258 | 5.21E-08 |
| TUCP_002957 | XL0C_127791 | ENSRNOT00000071764 | 0.954853052 | 1.37E-06 |
| TUCP_002957 | XL0C_127791 | ENSRNOT00000022534 | 0.964608548 | 4.12E-07 |
| TUCP_002957 | XL0C_127791 | ENSRNOT00000011926 | 0.961215668 | 6.48E-07 |
| TUCP_002957 | XL0C_127791 | ENSRNOT00000027944 | 0.953567262 | 1.57E-06 |
| TUCP_002957 | XL0C_127791 | ENSRNOT00000075326 | 0.962372048 | 5.58E-07 |
| TUCP_002957 | XL0C_127791 | ENSRNOT00000021348 | 0.97519791  | 7.09E-08 |
| TUCP_002957 | XL0C_127791 | ENSRNOT00000027611 | 0.95735213  | 1.03E-06 |
| TUCP_002957 | XL0C_127791 | ENSRNOT00000004003 | 0.956178373 | 1.18E-06 |
| TUCP_002957 | XL0C_127791 | ENSRNOT00000036750 | 0.970473854 | 1.68E-07 |
| TUCP_002957 | XL0C_127791 | ENSRNOT00000017629 | 0.961682861 | 6.10E-07 |
| TUCP_002957 | XL0C_127791 | ENSRNOT00000077908 | 0.950681688 | 2.11E-06 |
| TUCP_002957 | XL0C_127791 | ENSRNOT00000030109 | 0.952476996 | 1.76E-06 |
| TUCP_002957 | XL0C_127791 | ENSRNOT00000037456 | 0.97476233  | 7.73E-08 |
| TUCP_002957 | XL0C_127791 | ENSRNOT00000009811 | 0.951101537 | 2.03E-06 |
| TUCP_002957 | XL0C_127791 | ENSRNOT00000026481 | 0.959518892 | 8.00E-07 |
| TUCP_002957 | XL0C_127791 | ENSRNOT00000024266 | 0.969331266 | 2.03E-07 |
| TUCP_002957 | XL0C_127791 | ENSRNOT00000026718 | 0.955767208 | 1.24E-06 |
| TUCP_002957 | XL0C_127791 | ENSRNOT00000072208 | 0.951143859 | 2.02E-06 |
| TUCP_002957 | XL0C_127791 | ENSRNOT00000017319 | 0.973162143 | 1.05E-07 |
| TUCP_002957 | XL0C_127791 | ENSRNOT00000055187 | 0.958102908 | 9.48E-07 |
| TUCP_002957 | XL0C_127791 | ENSRNOT00000005934 | 0.967404763 | 2.74E-07 |
| TUCP_002957 | XL0C_127791 | ENSRNOT00000001809 | 0.955142172 | 1.33E-06 |
| TUCP_002957 | XL0C_127791 | ENSRNOT00000086065 | 0.953339925 | 1.61E-06 |
| TUCP_002957 | XL0C_127791 | ENSRNOT00000079866 | 0.980510159 | 2.14E-08 |
| TUCP_002957 | XL0C_127791 | ENSRNOT00000072518 | 0.959587771 | 7.93E-07 |
| TUCP_002957 | XL0C_127791 | ENSRNOT00000041513 | 0.954526591 | 1.42E-06 |
| TUCP_002957 | XL0C_127791 | ENSRNOT00000071560 | 0.953019024 | 1.67E-06 |

|             |             |                    |              |          |
|-------------|-------------|--------------------|--------------|----------|
| TUCP_002957 | XLOC_127791 | ENSRNOT00000067822 | 0.962347445  | 5.59E-07 |
| TUCP_002957 | XLOC_127791 | ENSRNOT00000024060 | 0.962493043  | 5.49E-07 |
| TUCP_002957 | XLOC_127791 | ENSRNOT00000010149 | 0.964445023  | 4.22E-07 |
| TUCP_002957 | XLOC_127791 | ENSRNOT00000087371 | 0.955255273  | 1.31E-06 |
| TUCP_002957 | XLOC_127791 | ENSRNOT00000024771 | 0.968240422  | 2.41E-07 |
| TUCP_002957 | XLOC_127791 | ENSRNOT00000051181 | 0.950592782  | 2.13E-06 |
| TUCP_002957 | XLOC_127791 | ENSRNOT00000021037 | 0.968839701  | 2.20E-07 |
| TUCP_002957 | XLOC_127791 | ENSRNOT00000047192 | -0.952135007 | 1.83E-06 |
| TUCP_002957 | XLOC_127791 | ENSRNOT00000019687 | 0.953803234  | 1.53E-06 |
| TUCP_002957 | XLOC_127791 | ENSRNOT00000068633 | 0.957635458  | 1.00E-06 |
| TUCP_002957 | XLOC_127791 | ENSRNOT00000010541 | 0.956894622  | 1.09E-06 |
| TUCP_002957 | XLOC_127791 | ENSRNOT00000037446 | 0.952757664  | 1.71E-06 |
| TUCP_002957 | XLOC_127791 | ENSRNOT00000004032 | 0.960211755  | 7.35E-07 |
| TUCP_002957 | XLOC_127791 | ENSRNOT00000084385 | 0.968349174  | 2.37E-07 |
| TUCP_002957 | XLOC_127791 | ENSRNOT00000017948 | 0.966513211  | 3.13E-07 |
| TUCP_002957 | XLOC_127791 | ENSRNOT00000068033 | 0.95798798   | 9.60E-07 |
| TUCP_002957 | XLOC_127791 | ENSRNOT00000009156 | 0.965662918  | 3.55E-07 |
| TUCP_002957 | XLOC_127791 | ENSRNOT00000043953 | 0.95012492   | 2.23E-06 |
| TUCP_002957 | XLOC_127791 | ENSRNOT00000012895 | 0.961847988  | 5.97E-07 |
| TUCP_002957 | XLOC_127791 | ENSRNOT00000004508 | 0.953847665  | 1.53E-06 |
| TUCP_002957 | XLOC_127791 | ENSRNOT00000025832 | 0.960211782  | 7.35E-07 |
| TUCP_002957 | XLOC_127791 | ENSRNOT00000023180 | 0.955341555  | 1.30E-06 |
| TUCP_002957 | XLOC_127791 | ENSRNOT00000066526 | 0.95773106   | 9.90E-07 |
| TUCP_002957 | XLOC_127791 | ENSRNOT00000074212 | 0.953148311  | 1.64E-06 |
| TUCP_002957 | XLOC_127791 | ENSRNOT00000012892 | 0.963388436  | 4.87E-07 |
| TUCP_002957 | XLOC_127791 | ENSRNOT00000090918 | 0.972832467  | 1.11E-07 |
| TUCP_002957 | XLOC_127791 | ENSRNOT00000001081 | 0.95558609   | 1.26E-06 |
| TUCP_002957 | XLOC_127791 | ENSRNOT00000036666 | 0.967028267  | 2.90E-07 |
| TUCP_002957 | XLOC_127791 | ENSRNOT00000021729 | 0.951072752  | 2.03E-06 |
| TUCP_002957 | XLOC_127791 | ENSRNOT00000021925 | 0.950554476  | 2.14E-06 |
| TUCP_002957 | XLOC_127791 | ENSRNOT00000087429 | 0.968673852  | 2.25E-07 |
| TUCP_002957 | XLOC_127791 | ENSRNOT00000015609 | 0.980992525  | 1.89E-08 |
| TUCP_002957 | XLOC_127791 | ENSRNOT00000019222 | 0.972382026  | 1.21E-07 |
| TUCP_002957 | XLOC_127791 | ENSRNOT00000028070 | 0.96670581   | 3.05E-07 |
| TUCP_002957 | XLOC_127791 | ENSRNOT00000088196 | 0.963889288  | 4.55E-07 |
| TUCP_002957 | XLOC_127791 | ENSRNOT00000014508 | 0.95074427   | 2.10E-06 |
| TUCP_002957 | XLOC_127791 | ENSRNOT00000015092 | 0.955389875  | 1.29E-06 |
| TUCP_002957 | XLOC_127791 | ENSRNOT00000052075 | 0.959279585  | 8.23E-07 |
| TUCP_002957 | XLOC_127791 | ENSRNOT00000065983 | 0.966696066  | 3.05E-07 |
| TUCP_002957 | XLOC_127791 | ENSRNOT00000022213 | 0.970282705  | 1.74E-07 |
| TUCP_002957 | XLOC_127791 | ENSRNOT00000022839 | 0.955225017  | 1.31E-06 |
| TUCP_002957 | XLOC_127791 | ENSRNOT00000020437 | 0.966911286  | 2.95E-07 |
| TUCP_002957 | XLOC_127791 | ENSRNOT00000010898 | 0.953658371  | 1.56E-06 |
| TUCP_002957 | XLOC_127791 | ENSRNOT00000005355 | 0.953925068  | 1.51E-06 |
| TUCP_002957 | XLOC_127791 | ENSRNOT00000003991 | 0.957606786  | 1.00E-06 |
| TUCP_002957 | XLOC_127791 | ENSRNOT00000052422 | 0.955408287  | 1.29E-06 |
| TUCP_002957 | XLOC_127791 | ENSRNOT00000001242 | 0.973230243  | 1.04E-07 |
| TUCP_002957 | XLOC_127791 | ENSRNOT00000005909 | 0.972714111  | 1.14E-07 |
| TUCP_002957 | XLOC_127791 | ENSRNOT00000023330 | 0.964581973  | 4.14E-07 |
| TUCP_002957 | XLOC_127791 | ENSRNOT00000079895 | 0.96402719   | 4.47E-07 |
| TUCP_002957 | XLOC_127791 | ENSRNOT00000078102 | 0.958295914  | 9.26E-07 |

|             |             |                     |             |          |
|-------------|-------------|---------------------|-------------|----------|
| TUCP_002957 | XL0C_127791 | ENSRNOT00000019820  | 0.95503857  | 1.34E-06 |
| TUCP_002957 | XL0C_127791 | ENSRNOT00000026633  | 0.953226299 | 1.63E-06 |
| TUCP_002957 | XL0C_127791 | ENSRNOT00000026174  | 0.962436003 | 5.53E-07 |
| TUCP_002957 | XL0C_127791 | ENSRNOT00000007164  | 0.970063151 | 1.80E-07 |
| TUCP_002957 | XL0C_127791 | ENSRNOT00000020155  | 0.958276426 | 9.28E-07 |
| TUCP_002957 | XL0C_127791 | ENSRNOT000000088599 | 0.953875107 | 1.52E-06 |
| TUCP_002957 | XL0C_127791 | ENSRNOT00000004698  | 0.972794316 | 1.12E-07 |
| TUCP_002957 | XL0C_127791 | ENSRNOT000000081047 | 0.974660755 | 7.88E-08 |
| TUCP_002957 | XL0C_127791 | ENSRNOT00000014537  | 0.968662832 | 2.26E-07 |
| TUCP_002957 | XL0C_127791 | ENSRNOT000000077555 | 0.966485015 | 3.15E-07 |
| TUCP_002957 | XL0C_127791 | ENSRNOT00000011880  | 0.959289978 | 8.22E-07 |
| TUCP_002957 | XL0C_127791 | ENSRNOT00000017021  | 0.961595057 | 6.17E-07 |
| TUCP_002957 | XL0C_127791 | ENSRNOT00000010463  | 0.980644048 | 2.07E-08 |
| TUCP_002957 | XL0C_127791 | ENSRNOT000000021408 | 0.9537215   | 1.55E-06 |
| TUCP_002957 | XL0C_127791 | ENSRNOT000000034744 | 0.96948931  | 1.98E-07 |
| TUCP_002957 | XL0C_127791 | ENSRNOT000000078475 | 0.976079373 | 5.93E-08 |
| TUCP_002957 | XL0C_127791 | ENSRNOT00000009328  | 0.953216473 | 1.63E-06 |
| TUCP_002957 | XL0C_127791 | ENSRNOT000000089211 | 0.956356668 | 1.16E-06 |
| TUCP_002957 | XL0C_127791 | ENSRNOT00000009683  | 0.973065974 | 1.07E-07 |
| TUCP_002957 | XL0C_127791 | ENSRNOT000000021153 | 0.96070683  | 6.91E-07 |
| TUCP_002957 | XL0C_127791 | ENSRNOT000000007175 | 0.96595924  | 3.40E-07 |
| TUCP_002957 | XL0C_127791 | ENSRNOT000000022862 | 0.953030643 | 1.66E-06 |
| TUCP_002957 | XL0C_127791 | ENSRNOT000000064902 | 0.968602459 | 2.28E-07 |
| TUCP_002957 | XL0C_127791 | ENSRNOT000000064900 | 0.95103857  | 2.04E-06 |
| TUCP_002957 | XL0C_127791 | ENSRNOT000000005262 | 0.956975163 | 1.08E-06 |
| TUCP_002957 | XL0C_127791 | ENSRNOT00000013274  | 0.976293223 | 5.67E-08 |
| TUCP_002957 | XL0C_127791 | ENSRNOT000000021015 | 0.977422668 | 4.45E-08 |
| TUCP_002957 | XL0C_127791 | ENSRNOT000000079442 | 0.953306273 | 1.62E-06 |
| TUCP_002957 | XL0C_127791 | ENSRNOT000000024322 | 0.971765516 | 1.35E-07 |
| TUCP_002957 | XL0C_127791 | ENSRNOT000000002771 | 0.957275786 | 1.04E-06 |
| TUCP_002957 | XL0C_127791 | ENSRNOT00000011408  | 0.970623895 | 1.64E-07 |
| TUCP_002957 | XL0C_127791 | ENSRNOT00000011270  | 0.97573286  | 6.36E-08 |
| TUCP_002957 | XL0C_127791 | ENSRNOT000000085228 | 0.970879385 | 1.57E-07 |
| TUCP_002957 | XL0C_127791 | ENSRNOT000000091265 | 0.963284202 | 4.94E-07 |
| TUCP_002957 | XL0C_127791 | ENSRNOT000000046745 | 0.956559132 | 1.13E-06 |
| TUCP_002957 | XL0C_127791 | ENSRNOT00000010927  | 0.970665904 | 1.63E-07 |
| TUCP_002957 | XL0C_127791 | ENSRNOT000000000658 | 0.95102061  | 2.04E-06 |
| TUCP_002957 | XL0C_127791 | ENSRNOT00000016191  | 0.950259275 | 2.21E-06 |
| TUCP_002957 | XL0C_127791 | ENSRNOT000000039631 | 0.962706711 | 5.34E-07 |
| TUCP_002957 | XL0C_127791 | ENSRNOT00000000013  | 0.954836052 | 1.37E-06 |
| TUCP_002957 | XL0C_127791 | ENSRNOT000000087502 | 0.951403954 | 1.97E-06 |
| TUCP_002957 | XL0C_127791 | ENSRNOT00000018998  | 0.971039401 | 1.53E-07 |
| TUCP_002957 | XL0C_127791 | ENSRNOT000000027452 | 0.976713768 | 5.19E-08 |
| TUCP_002957 | XL0C_127791 | ENSRNOT000000003690 | 0.964477953 | 4.20E-07 |
| TUCP_002957 | XL0C_127791 | ENSRNOT000000065229 | 0.954112862 | 1.48E-06 |
| TUCP_002957 | XL0C_127791 | ENSRNOT000000049538 | 0.960443665 | 7.14E-07 |
| TUCP_002957 | XL0C_127791 | ENSRNOT000000051022 | 0.962341783 | 5.60E-07 |
| TUCP_002957 | XL0C_127791 | ENSRNOT000000000713 | 0.956051623 | 1.20E-06 |
| TUCP_002957 | XL0C_127791 | ENSRNOT000000087725 | 0.960099437 | 7.45E-07 |
| TUCP_002957 | XL0C_127791 | ENSRNOT000000034704 | 0.960241686 | 7.32E-07 |
| TUCP_002957 | XL0C_127791 | ENSRNOT000000029833 | 0.954403116 | 1.44E-06 |

|             |             |                    |              |          |
|-------------|-------------|--------------------|--------------|----------|
| TUCP_002957 | XLOC_127791 | ENSRNOT00000055582 | 0.962512915  | 5.47E-07 |
| TUCP_002957 | XLOC_127791 | ENSRNOT00000086122 | 0.96777564   | 2.59E-07 |
| TUCP_002957 | XLOC_127791 | ENSRNOT00000022074 | 0.961453834  | 6.28E-07 |
| TUCP_002957 | XLOC_127791 | ENSRNOT0000006963  | 0.962700173  | 5.34E-07 |
| TUCP_002957 | XLOC_127791 | ENSRNOT0000009691  | 0.96507961   | 3.86E-07 |
| TUCP_002957 | XLOC_127791 | ENSRNOT00000002173 | -0.96005976  | 7.48E-07 |
| TUCP_002957 | XLOC_127791 | ENSRNOT0000006969  | 0.962141108  | 5.75E-07 |
| TUCP_002957 | XLOC_127791 | ENSRNOT00000030229 | 0.952783704  | 1.71E-06 |
| TUCP_002957 | XLOC_127791 | ENSRNOT00000010224 | 0.951527088  | 1.94E-06 |
| TUCP_002957 | XLOC_127791 | ENSRNOT00000078929 | 0.952711087  | 1.72E-06 |
| TUCP_002957 | XLOC_127791 | ENSRNOT00000003770 | -0.959517594 | 8.00E-07 |
| TUCP_002957 | XLOC_127791 | ENSRNOT00000057313 | 0.954271587  | 1.46E-06 |
| TUCP_002957 | XLOC_127791 | ENSRNOT00000016722 | 0.966795547  | 3.01E-07 |
| TUCP_002957 | XLOC_127791 | ENSRNOT00000019554 | 0.965814552  | 3.47E-07 |
| TUCP_002957 | XLOC_127791 | ENSRNOT00000023645 | 0.984241829  | 7.45E-09 |
| TUCP_002957 | XLOC_127791 | ENSRNOT00000084734 | 0.965480532  | 3.64E-07 |
| TUCP_002957 | XLOC_127791 | ENSRNOT00000035700 | 0.964440358  | 4.22E-07 |
| TUCP_002957 | XLOC_127791 | ENSRNOT00000064840 | 0.961928852  | 5.91E-07 |
| TUCP_002957 | XLOC_127791 | ENSRNOT00000020379 | 0.951706086  | 1.91E-06 |
| TUCP_002957 | XLOC_127791 | ENSRNOT00000092029 | 0.965901587  | 3.43E-07 |
| TUCP_002957 | XLOC_127791 | ENSRNOT00000011984 | 0.955883401  | 1.22E-06 |
| TUCP_002957 | XLOC_127791 | ENSRNOT00000016991 | 0.956232812  | 1.18E-06 |
| TUCP_002957 | XLOC_127791 | ENSRNOT00000090925 | 0.978673003  | 3.35E-08 |
| TUCP_002957 | XLOC_127791 | ENSRNOT00000047210 | 0.972708407  | 1.14E-07 |
| TUCP_002957 | XLOC_127791 | ENSRNOT00000087080 | 0.955582251  | 1.26E-06 |
| TUCP_002957 | XLOC_127791 | ENSRNOT00000084422 | 0.953071054  | 1.66E-06 |
| TUCP_002957 | XLOC_127791 | ENSRNOT00000043872 | 0.978896487  | 3.18E-08 |
| TUCP_002957 | XLOC_127791 | ENSRNOT0000005659  | 0.962562893  | 5.44E-07 |
| TUCP_002957 | XLOC_127791 | ENSRNOT00000017761 | 0.950334215  | 2.19E-06 |
| TUCP_002957 | XLOC_127791 | ENSRNOT00000054828 | 0.955049615  | 1.34E-06 |
| TUCP_002957 | XLOC_127791 | ENSRNOT0000001923  | 0.954184012  | 1.47E-06 |
| TUCP_002957 | XLOC_127791 | ENSRNOT00000066028 | 0.950190428  | 2.22E-06 |
| TUCP_002957 | XLOC_127791 | ENSRNOT00000031230 | 0.978864368  | 3.21E-08 |
| TUCP_002957 | XLOC_127791 | ENSRNOT00000074659 | 0.952971162  | 1.67E-06 |
| TUCP_002957 | XLOC_127791 | ENSRNOT00000013758 | 0.960569852  | 7.02E-07 |
| TUCP_002957 | XLOC_127791 | ENSRNOT00000077406 | 0.968791194  | 2.21E-07 |
| TUCP_002957 | XLOC_127791 | ENSRNOT00000015434 | 0.961860947  | 5.96E-07 |
| TUCP_002957 | XLOC_127791 | ENSRNOT00000010748 | 0.965836382  | 3.46E-07 |
| TUCP_002957 | XLOC_127791 | ENSRNOT0000002292  | 0.985332663  | 5.22E-09 |
| TUCP_002957 | XLOC_127791 | ENSRNOT00000035474 | 0.976464911  | 5.47E-08 |
| TUCP_002957 | XLOC_127791 | ENSRNOT00000008982 | 0.952842482  | 1.70E-06 |
| TUCP_002957 | XLOC_127791 | ENSRNOT00000039341 | 0.958088413  | 9.49E-07 |
| TUCP_002957 | XLOC_127791 | ENSRNOT00000054980 | 0.960247938  | 7.31E-07 |
| TUCP_002957 | XLOC_127791 | ENSRNOT00000006195 | 0.953049464  | 1.66E-06 |
| TUCP_002957 | XLOC_127791 | ENSRNOT00000004172 | 0.969267872  | 2.05E-07 |
| TUCP_002957 | XLOC_127791 | ENSRNOT00000027910 | 0.960380822  | 7.19E-07 |
| TUCP_002957 | XLOC_127791 | ENSRNOT00000014124 | 0.958817374  | 8.71E-07 |
| TUCP_002957 | XLOC_127791 | ENSRNOT00000085596 | 0.967898981  | 2.54E-07 |
| TUCP_002957 | XLOC_127791 | ENSRNOT00000013632 | 0.951923232  | 1.87E-06 |
| TUCP_002957 | XLOC_127791 | ENSRNOT00000035491 | 0.957438049  | 1.02E-06 |
| TUCP_002957 | XLOC_127791 | ENSRNOT00000034722 | 0.952774066  | 1.71E-06 |

|             |             |                    |             |          |
|-------------|-------------|--------------------|-------------|----------|
| TUCP_002957 | XLOC_127791 | ENSRNOT00000082174 | 0.986036391 | 4.08E-09 |
| TUCP_002957 | XLOC_127791 | ENSRNOT00000004412 | 0.972380648 | 1.21E-07 |
| TUCP_002957 | XLOC_127791 | ENSRNOT00000007768 | 0.95313276  | 1.65E-06 |
| TUCP_002957 | XLOC_127791 | ENSRNOT00000064798 | 0.975307276 | 6.94E-08 |
| TUCP_002957 | XLOC_127791 | ENSRNOT00000019177 | 0.961864289 | 5.96E-07 |
| TUCP_002957 | XLOC_127791 | ENSRNOT00000026280 | 0.961471379 | 6.27E-07 |
| TUCP_002957 | XLOC_127791 | ENSRNOT00000022485 | 0.9788858   | 3.19E-08 |
| TUCP_002957 | XLOC_127791 | ENSRNOT00000061100 | 0.970288827 | 1.73E-07 |
| TUCP_002957 | XLOC_127791 | ENSRNOT00000005387 | 0.950234356 | 2.21E-06 |
| TUCP_002957 | XLOC_127791 | ENSRNOT00000024941 | 0.956442136 | 1.15E-06 |
| TUCP_002957 | XLOC_127791 | ENSRNOT00000043535 | 0.967176026 | 2.84E-07 |
| TUCP_002957 | XLOC_127791 | ENSRNOT00000040393 | 0.973012861 | 1.08E-07 |
| TUCP_002957 | XLOC_127791 | ENSRNOT00000026457 | 0.967666026 | 2.64E-07 |
| TUCP_002957 | XLOC_127791 | ENSRNOT00000047356 | 0.96503325  | 3.88E-07 |
| TUCP_002957 | XLOC_127791 | ENSRNOT00000004463 | 0.966579375 | 3.10E-07 |
| TUCP_002957 | XLOC_127791 | ENSRNOT00000027964 | 0.955887146 | 1.22E-06 |
| TUCP_002957 | XLOC_127791 | ENSRNOT00000015188 | 0.959432828 | 8.08E-07 |
| TUCP_002957 | XLOC_127791 | ENSRNOT00000024659 | 0.951652611 | 1.92E-06 |
| TUCP_002957 | XLOC_127791 | ENSRNOT00000023428 | 0.960240308 | 7.32E-07 |
| TUCP_002957 | XLOC_127791 | ENSRNOT00000011041 | 0.959709463 | 7.81E-07 |
| TUCP_002957 | XLOC_127791 | ENSRNOT00000021674 | 0.963040638 | 5.10E-07 |
| TUCP_002957 | XLOC_127791 | ENSRNOT00000064700 | 0.951067966 | 2.03E-06 |
| TUCP_002957 | XLOC_127791 | ENSRNOT00000017753 | 0.964132887 | 4.40E-07 |
| TUCP_002957 | XLOC_127791 | ENSRNOT00000083799 | 0.959305658 | 8.21E-07 |
| TUCP_002957 | XLOC_127791 | ENSRNOT00000080110 | 0.953642184 | 1.56E-06 |
| TUCP_002957 | XLOC_127791 | ENSRNOT00000048029 | 0.962078284 | 5.79E-07 |
| TUCP_002957 | XLOC_127791 | ENSRNOT00000004140 | 0.979188914 | 2.97E-08 |
| TUCP_002957 | XLOC_127791 | ENSRNOT00000010433 | 0.957671202 | 9.97E-07 |
| TUCP_002957 | XLOC_127791 | ENSRNOT00000064930 | 0.970850765 | 1.58E-07 |
| TUCP_002957 | XLOC_127791 | ENSRNOT00000093174 | 0.968219576 | 2.42E-07 |
| TUCP_002957 | XLOC_127791 | ENSRNOT00000079996 | 0.962807517 | 5.27E-07 |
| TUCP_002957 | XLOC_127791 | ENSRNOT00000024548 | 0.955358644 | 1.30E-06 |
| TUCP_002958 | XLOC_127791 | ENSRNOT00000082043 | 0.998965531 | 9.31E-15 |
| TUCP_002958 | XLOC_127791 | ENSRNOT00000090080 | 0.970514074 | 1.67E-07 |
| TUCP_002958 | XLOC_127791 | ENSRNOT00000068444 | 1           | 0        |
| TUCP_002958 | XLOC_127791 | ENSRNOT00000081370 | 0.999740797 | 9.21E-18 |
| TUCP_002958 | XLOC_127791 | ENSRNOT00000078645 | 0.989717078 | 8.90E-10 |
| TUCP_002958 | XLOC_127791 | ENSRNOT00000075987 | 0.987945283 | 1.96E-09 |
| TUCP_002958 | XLOC_127791 | ENSRNOT00000074990 | 1           | 0        |
| TUCP_002958 | XLOC_127791 | ENSRNOT00000087323 | 0.995029331 | 2.37E-11 |
| TUCP_002958 | XLOC_127791 | ENSRNOT00000074930 | 1           | 0        |
| TUCP_002958 | XLOC_127791 | ENSRNOT00000080575 | 0.999929267 | 1.39E-20 |
| TUCP_002958 | XLOC_127791 | ENSRNOT00000057761 | 0.982981445 | 1.09E-08 |
| TUCP_002958 | XLOC_127791 | ENSRNOT00000078369 | 0.993028032 | 1.28E-10 |
| TUCP_002958 | XLOC_127791 | ENSRNOT00000092982 | 1           | 0        |
| TUCP_002958 | XLOC_127791 | ENSRNOT00000088367 | 1           | 0        |
| TUCP_002958 | XLOC_127791 | ENSRNOT00000061874 | 0.968405099 | 2.35E-07 |
| TUCP_002958 | XLOC_127791 | ENSRNOT00000077789 | 0.99346224  | 9.30E-11 |
| TUCP_002958 | XLOC_127791 | ENSRNOT00000081996 | 1           | 0        |
| TUCP_002958 | XLOC_127791 | ENSRNOT00000022280 | 0.982176915 | 1.37E-08 |
| TUCP_002958 | XLOC_127791 | ENSRNOT00000082058 | 1           | 0        |

|             |             |                    |              |          |
|-------------|-------------|--------------------|--------------|----------|
| TUCP_002958 | XL0C_127791 | ENSRNOT00000088905 | 1            | 1.33E-79 |
| TUCP_002958 | XL0C_127791 | ENSRNOT00000086831 | 1            | 0        |
| TUCP_002958 | XL0C_127791 | ENSRNOT00000045099 | 1            | 0        |
| TUCP_002958 | XL0C_127791 | ENSRNOT00000086745 | 0.978585655  | 3.42E-08 |
| TUCP_002958 | XL0C_127791 | ENSRNOT00000085849 | 0.988270765  | 1.71E-09 |
| TUCP_002958 | XL0C_127791 | ENSRNOT00000086397 | 0.957188178  | 1.05E-06 |
| TUCP_002958 | XL0C_127791 | ENSRNOT00000079606 | 0.960472013  | 7.11E-07 |
| TUCP_002958 | XL0C_127791 | ENSRNOT00000090207 | 0.953487741  | 1.59E-06 |
| TUCP_002958 | XL0C_127791 | ENSRNOT00000087025 | 1            | 0        |
| TUCP_002958 | XL0C_127791 | ENSRNOT00000019853 | 1            | 0        |
| TUCP_002958 | XL0C_127791 | ENSRNOT00000073853 | 0.989715487  | 8.91E-10 |
| TUCP_002958 | XL0C_127791 | ENSRNOT00000065912 | 0.974234118  | 8.57E-08 |
| TUCP_002958 | XL0C_127791 | ENSRNOT00000073828 | 0.971647353  | 1.38E-07 |
| TUCP_002958 | XL0C_127791 | ENSRNOT00000078683 | 0.966682958  | 3.06E-07 |
| TUCP_002958 | XL0C_127791 | ENSRNOT00000093083 | 0.999140292  | 3.69E-15 |
| TUCP_002893 | XL0C_124353 | ENSRNOT00000080962 | -0.950175002 | 2.22E-06 |
| TUCP_002893 | XL0C_124353 | ENSRNOT0000009009  | -0.950974695 | 2.05E-06 |
| TUCP_002893 | XL0C_124353 | ENSRNOT00000082805 | -0.95398586  | 1.50E-06 |
| TUCP_002893 | XL0C_124353 | ENSRNOT00000018640 | -0.956291847 | 1.17E-06 |
| TUCP_002893 | XL0C_124353 | ENSRNOT00000035808 | -0.969283408 | 2.05E-07 |
| TUCP_002893 | XL0C_124353 | ENSRNOT00000004810 | -0.96528802  | 3.74E-07 |
| TUCP_002893 | XL0C_124353 | ENSRNOT00000036904 | -0.961097507 | 6.57E-07 |
| TUCP_002893 | XL0C_124353 | ENSRNOT00000092066 | 0.962803417  | 5.27E-07 |
| TUCP_002893 | XL0C_124353 | ENSRNOT00000005834 | -0.962429183 | 5.53E-07 |
| TUCP_002893 | XL0C_124353 | ENSRNOT00000006802 | -0.950919778 | 2.07E-06 |
| TUCP_002893 | XL0C_124353 | ENSRNOT00000023979 | -0.954191209 | 1.47E-06 |
| TUCP_002893 | XL0C_124353 | ENSRNOT00000045063 | -0.956650987 | 1.12E-06 |
| TUCP_002893 | XL0C_124353 | ENSRNOT00000078816 | -0.950430593 | 2.17E-06 |
| TUCP_002893 | XL0C_124353 | ENSRNOT00000006917 | -0.962580053 | 5.43E-07 |
| TUCP_002893 | XL0C_124353 | ENSRNOT00000018870 | -0.95516141  | 1.32E-06 |
| TUCP_002895 | XL0C_124487 | ENSRNOT00000022968 | 0.950647908  | 2.12E-06 |
| TUCP_002895 | XL0C_124487 | ENSRNOT00000081954 | 0.984162693  | 7.64E-09 |
| TUCP_002895 | XL0C_124487 | ENSRNOT00000004577 | 0.957323284  | 1.04E-06 |
| TUCP_002895 | XL0C_124487 | ENSRNOT00000090898 | 0.951480489  | 1.95E-06 |
| TUCP_003369 | XL0C_146003 | ENSRNOT00000054936 | 0.962113323  | 5.77E-07 |
| TUCP_003369 | XL0C_146003 | ENSRNOT00000008301 | 0.965109046  | 3.84E-07 |
| TUCP_003369 | XL0C_146003 | ENSRNOT00000007702 | 0.953125406  | 1.65E-06 |
| TUCP_001540 | XL0C_060073 | ENSRNOT00000038016 | 0.952229591  | 1.81E-06 |
| TUCP_002171 | XL0C_090517 | ENSRNOT00000085599 | 0.999938502  | 6.93E-21 |
| TUCP_002171 | XL0C_090517 | ENSRNOT00000006689 | 0.9944189    | 4.22E-11 |
| TUCP_002171 | XL0C_090517 | ENSRNOT00000081534 | 0.987999291  | 1.92E-09 |
| TUCP_002171 | XL0C_090517 | ENSRNOT00000085301 | 0.99793679   | 2.93E-13 |
| TUCP_002171 | XL0C_090517 | ENSRNOT00000038729 | 1            | 0        |
| TUCP_002171 | XL0C_090517 | ENSRNOT00000086385 | 1            | 0        |
| TUCP_002171 | XL0C_090517 | ENSRNOT00000077695 | 0.96038616   | 7.19E-07 |
| TUCP_002171 | XL0C_090517 | ENSRNOT00000078561 | 0.986503348  | 3.45E-09 |
| TUCP_002171 | XL0C_090517 | ENSRNOT00000087613 | 1            | 0        |
| TUCP_002171 | XL0C_090517 | ENSRNOT00000026032 | 0.953050675  | 1.66E-06 |
| TUCP_002171 | XL0C_090517 | ENSRNOT00000073350 | 0.9658754    | 3.44E-07 |
| TUCP_002171 | XL0C_090517 | ENSRNOT00000023062 | 1            | 0        |
| TUCP_002171 | XL0C_090517 | ENSRNOT00000058834 | 1            | 0        |



|             |             |                    |              |          |
|-------------|-------------|--------------------|--------------|----------|
| TUCP_002171 | XLOC_090517 | ENSRNOT00000079420 | 1            | 0        |
| TUCP_002171 | XLOC_090517 | ENSRNOT00000090761 | 1            | 0        |
| TUCP_002171 | XLOC_090517 | ENSRNOT00000055923 | 1            | 0        |
| TUCP_002171 | XLOC_090517 | ENSRNOT00000092416 | 0.963085379  | 5.07E-07 |
| TUCP_002171 | XLOC_090517 | ENSRNOT00000071930 | 1            | 0        |
| TUCP_002171 | XLOC_090517 | ENSRNOT00000001996 | 0.974721715  | 7.79E-08 |
| TUCP_002171 | XLOC_090517 | ENSRNOT00000076756 | 1            | 0        |
| TUCP_002171 | XLOC_090517 | ENSRNOT00000081527 | 0.999420479  | 5.14E-16 |
| TUCP_002171 | XLOC_090517 | ENSRNOT00000085067 | 0.960262084  | 7.30E-07 |
| TUCP_002171 | XLOC_090517 | ENSRNOT00000091663 | 0.99642667   | 4.56E-12 |
| TUCP_002171 | XLOC_090517 | ENSRNOT00000081780 | 1            | 0        |
| TUCP_002171 | XLOC_090517 | ENSRNOT00000093689 | 0.953599805  | 1.57E-06 |
| TUCP_002171 | XLOC_090517 | ENSRNOT00000089114 | 1            | 0        |
| TUCP_002171 | XLOC_090517 | ENSRNOT00000021609 | 0.977017895  | 4.86E-08 |
| TUCP_002171 | XLOC_090517 | ENSRNOT00000073316 | 1            | 0        |
| TUCP_002171 | XLOC_090517 | ENSRNOT00000086557 | 0.977413455  | 4.46E-08 |
| TUCP_002171 | XLOC_090517 | ENSRNOT00000071663 | 1            | 0        |
| TUCP_002171 | XLOC_090517 | ENSRNOT00000042860 | 1            | 0        |
| TUCP_002171 | XLOC_090517 | ENSRNOT00000072962 | 0.971287317  | 1.46E-07 |
| TUCP_002171 | XLOC_090517 | ENSRNOT00000088421 | 1            | 0        |
| TUCP_002171 | XLOC_090517 | ENSRNOT00000038898 | 1            | 0        |
| TUCP_002171 | XLOC_090517 | ENSRNOT00000015840 | 0.959452012  | 8.06E-07 |
| TUCP_002171 | XLOC_090517 | ENSRNOT00000064936 | 0.985957557  | 4.20E-09 |
| TUCP_002171 | XLOC_090517 | ENSRNOT00000042777 | 0.990642579  | 5.56E-10 |
| TUCP_002171 | XLOC_090517 | ENSRNOT00000010029 | 1            | 0        |
| TUCP_004251 | XLOC_186717 | ENSRNOT00000033017 | 0.955440856  | 1.28E-06 |
| TUCP_004251 | XLOC_186717 | ENSRNOT00000067554 | 0.951093986  | 2.03E-06 |
| TUCP_004251 | XLOC_186717 | ENSRNOT00000083214 | 0.953705188  | 1.55E-06 |
| TUCP_004251 | XLOC_186717 | ENSRNOT00000090057 | 0.966613975  | 3.09E-07 |
| TUCP_004251 | XLOC_186717 | ENSRNOT00000064984 | -0.976461024 | 5.47E-08 |
| TUCP_004251 | XLOC_186717 | ENSRNOT00000080024 | 0.954112929  | 1.48E-06 |
| TUCP_004251 | XLOC_186717 | ENSRNOT00000082245 | 0.951100312  | 2.03E-06 |
| TUCP_004251 | XLOC_186717 | ENSRNOT00000033468 | 0.950820423  | 2.09E-06 |
| TUCP_004251 | XLOC_186717 | ENSRNOT00000028963 | 0.952142828  | 1.82E-06 |
| TUCP_004251 | XLOC_186717 | ENSRNOT00000057146 | 0.954152806  | 1.48E-06 |
| TUCP_004251 | XLOC_186717 | ENSRNOT00000013049 | 0.954299669  | 1.45E-06 |
| TUCP_004251 | XLOC_186717 | ENSRNOT00000023133 | 0.952272911  | 1.80E-06 |
| TUCP_004251 | XLOC_186717 | ENSRNOT00000015799 | 0.954410396  | 1.44E-06 |
| TUCP_004250 | XLOC_186707 | ENSRNOT00000065143 | 0.967611917  | 2.66E-07 |
| TUCP_004250 | XLOC_186707 | ENSRNOT00000005958 | 0.986317316  | 3.69E-09 |
| TUCP_004250 | XLOC_186707 | ENSRNOT00000082998 | 0.957850745  | 9.76E-07 |
| TUCP_004250 | XLOC_186707 | ENSRNOT00000027083 | 0.957624141  | 1.00E-06 |
| TUCP_004250 | XLOC_186707 | ENSRNOT00000082508 | -0.957622679 | 1.00E-06 |
| TUCP_004250 | XLOC_186707 | ENSRNOT00000023638 | 0.968381118  | 2.36E-07 |
| TUCP_004250 | XLOC_186707 | ENSRNOT00000009563 | -0.952699515 | 1.72E-06 |
| TUCP_004250 | XLOC_186707 | ENSRNOT00000059524 | -0.956571451 | 1.13E-06 |
| TUCP_004250 | XLOC_186707 | ENSRNOT00000020910 | 0.965204113  | 3.79E-07 |
| TUCP_004250 | XLOC_186707 | ENSRNOT00000005659 | 0.950182273  | 2.22E-06 |
| TUCP_004250 | XLOC_186707 | ENSRNOT00000023144 | 0.959013664  | 8.50E-07 |
| TUCP_004250 | XLOC_186707 | ENSRNOT00000082869 | 0.953645111  | 1.56E-06 |
| TUCP_004250 | XLOC_186707 | ENSRNOT00000016649 | 0.95516777   | 1.32E-06 |

|             |             |                     |              |          |
|-------------|-------------|---------------------|--------------|----------|
| TUCP_004250 | XLOC_186707 | ENSRNOT00000090342  | 0.960698872  | 6.91E-07 |
| TUCP_004250 | XLOC_186707 | ENSRNOT00000000743  | 0.954375623  | 1.44E-06 |
| TUCP_004250 | XLOC_186707 | ENSRNOT00000028646  | 0.956815422  | 1.10E-06 |
| TUCP_004250 | XLOC_186707 | ENSRNOT00000067170  | -0.964399072 | 4.24E-07 |
| TUCP_004250 | XLOC_186707 | ENSRNOT00000091128  | -0.968217219 | 2.42E-07 |
| TUCP_004250 | XLOC_186707 | ENSRNOT00000001586  | -0.952146129 | 1.82E-06 |
| TUCP_004250 | XLOC_186707 | ENSRNOT000000081981 | 0.987588767  | 2.27E-09 |
| TUCP_004250 | XLOC_186707 | ENSRNOT00000009496  | 0.95044756   | 2.16E-06 |
| TUCP_004250 | XLOC_186707 | ENSRNOT00000006752  | 0.951543241  | 1.94E-06 |
| TUCP_004250 | XLOC_186707 | ENSRNOT000000012187 | 0.959374909  | 8.14E-07 |
| TUCP_004250 | XLOC_186707 | ENSRNOT00000018533  | 0.961923222  | 5.91E-07 |
| TUCP_004250 | XLOC_186707 | ENSRNOT00000073564  | -0.958084596 | 9.50E-07 |
| TUCP_004250 | XLOC_186707 | ENSRNOT00000024969  | 0.984193563  | 7.57E-09 |
| TUCP_004250 | XLOC_186707 | ENSRNOT000000085251 | -0.952642209 | 1.73E-06 |
| TUCP_004250 | XLOC_186707 | ENSRNOT000000065300 | 0.96026785   | 7.29E-07 |
| TUCP_004250 | XLOC_186707 | ENSRNOT00000017063  | -0.952759062 | 1.71E-06 |
| TUCP_004250 | XLOC_186707 | ENSRNOT00000004007  | -0.957230977 | 1.05E-06 |
| TUCP_004250 | XLOC_186707 | ENSRNOT00000002837  | -0.96158044  | 6.18E-07 |
| TUCP_004250 | XLOC_186707 | ENSRNOT000000089933 | 0.973048552  | 1.07E-07 |
| TUCP_004250 | XLOC_186707 | ENSRNOT000000091602 | -0.960841119 | 6.79E-07 |
| TUCP_004250 | XLOC_186707 | ENSRNOT000000009811 | 0.956744021  | 1.11E-06 |
| TUCP_004250 | XLOC_186707 | ENSRNOT000000072208 | 0.953085634  | 1.65E-06 |
| TUCP_004250 | XLOC_186707 | ENSRNOT000000032780 | 0.971352     | 1.45E-07 |
| TUCP_004250 | XLOC_186707 | ENSRNOT00000009708  | -0.974513089 | 8.12E-08 |
| TUCP_004250 | XLOC_186707 | ENSRNOT000000017312 | 0.952643204  | 1.73E-06 |
| TUCP_004250 | XLOC_186707 | ENSRNOT000000019820 | 0.950312562  | 2.19E-06 |
| TUCP_004250 | XLOC_186707 | ENSRNOT000000061392 | 0.965561688  | 3.60E-07 |
| TUCP_004250 | XLOC_186707 | ENSRNOT00000004787  | -0.958154151 | 9.42E-07 |
| TUCP_004250 | XLOC_186707 | ENSRNOT000000008655 | 0.952816413  | 1.70E-06 |
| TUCP_004250 | XLOC_186707 | ENSRNOT000000012966 | 0.957785599  | 9.83E-07 |
| TUCP_004250 | XLOC_186707 | ENSRNOT000000021030 | -0.956933505 | 1.09E-06 |
| TUCP_004250 | XLOC_186707 | ENSRNOT00000003714  | 0.963226465  | 4.98E-07 |
| TUCP_004250 | XLOC_186707 | ENSRNOT000000005329 | -0.959463892 | 8.05E-07 |
| TUCP_004250 | XLOC_186707 | ENSRNOT000000087443 | 0.959141252  | 8.37E-07 |
| TUCP_004250 | XLOC_186707 | ENSRNOT000000091909 | 0.952167884  | 1.82E-06 |
| TUCP_004250 | XLOC_186707 | ENSRNOT00000001081  | 0.962529802  | 5.46E-07 |
| TUCP_004250 | XLOC_186707 | ENSRNOT000000005228 | 0.964732521  | 4.05E-07 |
| TUCP_004250 | XLOC_186707 | ENSRNOT000000083220 | 0.975275669  | 6.98E-08 |
| TUCP_004250 | XLOC_186707 | ENSRNOT000000086119 | -0.953555487 | 1.57E-06 |
| TUCP_004250 | XLOC_186707 | ENSRNOT000000058312 | 0.952926877  | 1.68E-06 |
| TUCP_004250 | XLOC_186707 | ENSRNOT000000060362 | 0.96455639   | 4.15E-07 |
| TUCP_004250 | XLOC_186707 | ENSRNOT000000015265 | 0.955376247  | 1.29E-06 |
| TUCP_004250 | XLOC_186707 | ENSRNOT000000052422 | 0.960296696  | 7.27E-07 |
| TUCP_004250 | XLOC_186707 | ENSRNOT000000057146 | 0.953844859  | 1.53E-06 |
| TUCP_004250 | XLOC_186707 | ENSRNOT000000000120 | 0.967629053  | 2.65E-07 |
| TUCP_004250 | XLOC_186707 | ENSRNOT000000080207 | 0.964282979  | 4.31E-07 |
| TUCP_004250 | XLOC_186707 | ENSRNOT00000004319  | -0.966316626 | 3.23E-07 |
| TUCP_004250 | XLOC_186707 | ENSRNOT000000078102 | 0.978451514  | 3.53E-08 |
| TUCP_004250 | XLOC_186707 | ENSRNOT000000007314 | -0.953738824 | 1.54E-06 |
| TUCP_004250 | XLOC_186707 | ENSRNOT000000088599 | 0.95146477   | 1.95E-06 |
| TUCP_004250 | XLOC_186707 | ENSRNOT000000055321 | 0.951657743  | 1.92E-06 |

|             |             |                     |              |          |
|-------------|-------------|---------------------|--------------|----------|
| TUCP_004250 | XLOC_186707 | ENSRNOT00000063873  | 0.95848876   | 9.05E-07 |
| TUCP_004250 | XLOC_186707 | ENSRNOT00000081047  | 0.968542809  | 2.30E-07 |
| TUCP_004250 | XLOC_186707 | ENSRNOT00000088353  | -0.957625309 | 1.00E-06 |
| TUCP_004250 | XLOC_186707 | ENSRNOT00000089211  | 0.950803587  | 2.09E-06 |
| TUCP_004250 | XLOC_186707 | ENSRNOT00000050515  | 0.951120337  | 2.02E-06 |
| TUCP_004250 | XLOC_186707 | ENSRNOT00000019133  | 0.962776825  | 5.29E-07 |
| TUCP_004250 | XLOC_186707 | ENSRNOT00000035591  | -0.962510289 | 5.48E-07 |
| TUCP_004250 | XLOC_186707 | ENSRNOT00000027910  | 0.964198508  | 4.36E-07 |
| TUCP_004250 | XLOC_186707 | ENSRNOT00000052224  | 0.974258324  | 8.53E-08 |
| TUCP_004250 | XLOC_186707 | ENSRNOT00000078070  | 0.981098039  | 1.84E-08 |
| TUCP_004250 | XLOC_186707 | ENSRNOT00000046745  | 0.955530323  | 1.27E-06 |
| TUCP_004250 | XLOC_186707 | ENSRNOT00000088182  | 0.962453712  | 5.52E-07 |
| TUCP_004250 | XLOC_186707 | ENSRNOT00000085228  | 0.955918756  | 1.22E-06 |
| TUCP_004250 | XLOC_186707 | ENSRNOT00000026643  | 0.9613269    | 6.38E-07 |
| TUCP_004250 | XLOC_186707 | ENSRNOT00000028885  | -0.950817315 | 2.09E-06 |
| TUCP_004250 | XLOC_186707 | ENSRNOT00000000013  | 0.954068313  | 1.49E-06 |
| TUCP_004250 | XLOC_186707 | ENSRNOT00000040069  | 0.972516883  | 1.18E-07 |
| TUCP_004250 | XLOC_186707 | ENSRNOT00000019656  | -0.950765196 | 2.10E-06 |
| TUCP_004250 | XLOC_186707 | ENSRNOT00000017753  | 0.960900821  | 6.74E-07 |
| TUCP_004250 | XLOC_186707 | ENSRNOT00000005909  | 0.952877709  | 1.69E-06 |
| TUCP_004250 | XLOC_186707 | ENSRNOT000000074649 | 0.950372101  | 2.18E-06 |
| TUCP_004250 | XLOC_186707 | ENSRNOT00000029833  | 0.962976837  | 5.15E-07 |
| TUCP_004250 | XLOC_186707 | ENSRNOT000000067846 | -0.953619244 | 1.56E-06 |
| TUCP_004250 | XLOC_186707 | ENSRNOT000000084422 | 0.959297879  | 8.22E-07 |
| TUCP_004250 | XLOC_186707 | ENSRNOT00000016519  | 0.956104523  | 1.19E-06 |
| TUCP_004250 | XLOC_186707 | ENSRNOT000000036959 | -0.950748231 | 2.10E-06 |
| TUCP_004250 | XLOC_186707 | ENSRNOT00000004046  | -0.988354381 | 1.65E-09 |
| TUCP_004250 | XLOC_186707 | ENSRNOT00000058842  | 0.960996789  | 6.66E-07 |
| TUCP_004250 | XLOC_186707 | ENSRNOT000000029202 | -0.952792377 | 1.71E-06 |
| TUCP_004250 | XLOC_186707 | ENSRNOT000000009803 | 0.971336689  | 1.45E-07 |
| TUCP_004250 | XLOC_186707 | ENSRNOT000000092029 | 0.952103906  | 1.83E-06 |
| TUCP_004250 | XLOC_186707 | ENSRNOT00000011350  | 0.960775796  | 6.85E-07 |
| TUCP_004250 | XLOC_186707 | ENSRNOT000000085756 | 0.961309157  | 6.40E-07 |
| TUCP_004250 | XLOC_186707 | ENSRNOT000000008901 | -0.965805487 | 3.48E-07 |
| TUCP_004250 | XLOC_186707 | ENSRNOT00000050834  | -0.967631564 | 2.65E-07 |
| TUCP_004250 | XLOC_186707 | ENSRNOT00000054828  | 0.95325819   | 1.62E-06 |
| TUCP_004250 | XLOC_186707 | ENSRNOT00000002443  | 0.959747693  | 7.78E-07 |
| TUCP_004250 | XLOC_186707 | ENSRNOT000000022142 | 0.962672104  | 5.36E-07 |
| TUCP_004250 | XLOC_186707 | ENSRNOT00000055992  | -0.95934513  | 8.17E-07 |
| TUCP_004250 | XLOC_186707 | ENSRNOT00000027970  | 0.966212777  | 3.28E-07 |
| TUCP_004250 | XLOC_186707 | ENSRNOT00000010748  | 0.966176784  | 3.29E-07 |
| TUCP_004250 | XLOC_186707 | ENSRNOT000000008757 | 0.959038425  | 8.48E-07 |
| TUCP_004250 | XLOC_186707 | ENSRNOT00000005478  | -0.951591872 | 1.93E-06 |
| TUCP_004250 | XLOC_186707 | ENSRNOT00000015537  | 0.951801642  | 1.89E-06 |
| TUCP_004250 | XLOC_186707 | ENSRNOT000000035474 | 0.965960239  | 3.40E-07 |
| TUCP_004250 | XLOC_186707 | ENSRNOT000000080695 | 0.95561492   | 1.26E-06 |
| TUCP_004250 | XLOC_186707 | ENSRNOT00000076872  | 0.963201648  | 5.00E-07 |
| TUCP_004250 | XLOC_186707 | ENSRNOT000000091205 | 0.966618657  | 3.09E-07 |
| TUCP_004250 | XLOC_186707 | ENSRNOT000000080608 | 0.96937572   | 2.02E-07 |
| TUCP_004250 | XLOC_186707 | ENSRNOT000000085519 | 0.959029986  | 8.49E-07 |
| TUCP_004250 | XLOC_186707 | ENSRNOT00000040476  | 0.961936952  | 5.90E-07 |

|             |             |                    |              |          |
|-------------|-------------|--------------------|--------------|----------|
| TUCP_004250 | XLOC_186707 | ENSRNOT00000038182 | -0.956779937 | 1.10E-06 |
| TUCP_004250 | XLOC_186707 | ENSRNOT00000029125 | 0.980799927  | 1.99E-08 |
| TUCP_004250 | XLOC_186707 | ENSRNOT00000042125 | 0.983397392  | 9.66E-09 |
| TUCP_004250 | XLOC_186707 | ENSRNOT00000010824 | 0.95499623   | 1.35E-06 |
| TUCP_004250 | XLOC_186707 | ENSRNOT00000009900 | -0.953640405 | 1.56E-06 |
| TUCP_004250 | XLOC_186707 | ENSRNOT00000058351 | 0.973024802  | 1.08E-07 |
| TUCP_004250 | XLOC_186707 | ENSRNOT00000014814 | 0.980343217  | 2.24E-08 |
| TUCP_004250 | XLOC_186707 | ENSRNOT00000087095 | 0.960601454  | 7.00E-07 |
| TUCP_004250 | XLOC_186707 | ENSRNOT00000064798 | 0.954871087  | 1.37E-06 |
| TUCP_004250 | XLOC_186707 | ENSRNOT00000019177 | 0.954755051  | 1.38E-06 |
| TUCP_004250 | XLOC_186707 | ENSRNOT00000024491 | -0.953887749 | 1.52E-06 |
| TUCP_004250 | XLOC_186707 | ENSRNOT00000033235 | 0.95501079   | 1.35E-06 |
| TUCP_004250 | XLOC_186707 | ENSRNOT00000032248 | 0.950954045  | 2.06E-06 |
| TUCP_004250 | XLOC_186707 | ENSRNOT00000017776 | 0.952936269  | 1.68E-06 |
| TUCP_004250 | XLOC_186707 | ENSRNOT00000040393 | 0.951347149  | 1.98E-06 |
| TUCP_004250 | XLOC_186707 | ENSRNOT00000077201 | -0.970468707 | 1.68E-07 |
| TUCP_004250 | XLOC_186707 | ENSRNOT00000067901 | -0.956582554 | 1.13E-06 |
| TUCP_004250 | XLOC_186707 | ENSRNOT00000008982 | 0.982125592  | 1.39E-08 |
| TUCP_004250 | XLOC_186707 | ENSRNOT00000047192 | -0.966140998 | 3.31E-07 |
| TUCP_004250 | XLOC_186707 | ENSRNOT00000036613 | -0.951415148 | 1.96E-06 |
| TUCP_004250 | XLOC_186707 | ENSRNOT00000015799 | 0.96438445   | 4.25E-07 |
| TUCP_004250 | XLOC_186707 | ENSRNOT00000011682 | -0.950773053 | 2.10E-06 |
| TUCP_004250 | XLOC_186707 | ENSRNOT00000079996 | 0.959124352  | 8.39E-07 |
| TUCP_004253 | XLOC_186971 | ENSRNOT00000076294 | 0.966445573  | 3.17E-07 |
| TUCP_004253 | XLOC_186971 | ENSRNOT00000078157 | 0.961114534  | 6.56E-07 |
| TUCP_004253 | XLOC_186971 | ENSRNOT00000040840 | 0.966781551  | 3.01E-07 |
| TUCP_004253 | XLOC_186971 | ENSRNOT00000083263 | 0.962833525  | 5.25E-07 |
| TUCP_004159 | XLOC_181052 | ENSRNOT00000050279 | 0.953427666  | 1.60E-06 |
| TUCP_004159 | XLOC_181052 | ENSRNOT00000025656 | 0.952416424  | 1.77E-06 |
| TUCP_004159 | XLOC_181052 | ENSRNOT00000039398 | 0.958869253  | 8.65E-07 |
| TUCP_004159 | XLOC_181052 | ENSRNOT00000050179 | 0.957155955  | 1.06E-06 |
| TUCP_004159 | XLOC_181052 | ENSRNOT00000001912 | 0.963426424  | 4.85E-07 |
| TUCP_004159 | XLOC_181052 | ENSRNOT00000077797 | 0.951622348  | 1.92E-06 |
| TUCP_004159 | XLOC_181052 | ENSRNOT00000067528 | 0.959196492  | 8.32E-07 |
| TUCP_004159 | XLOC_181052 | ENSRNOT00000072132 | 0.950152445  | 2.23E-06 |
| TUCP_004159 | XLOC_181052 | ENSRNOT00000092535 | 0.950226621  | 2.21E-06 |
| TUCP_004255 | XLOC_187167 | ENSRNOT00000092186 | 0.961013254  | 6.64E-07 |
| TUCP_004526 | XLOC_199496 | ENSRNOT00000086342 | 0.973682438  | 9.51E-08 |
| TUCP_004526 | XLOC_199496 | ENSRNOT00000093641 | 0.953417945  | 1.60E-06 |
| TUCP_004525 | XLOC_199496 | ENSRNOT0000002220  | 0.950278152  | 2.20E-06 |
| TUCP_004525 | XLOC_199496 | ENSRNOT00000071188 | 0.958853658  | 8.67E-07 |
| TUCP_003976 | XLOC_174270 | ENSRNOT00000016167 | -0.951975354 | 1.86E-06 |
| TUCP_003976 | XLOC_174270 | ENSRNOT00000027640 | -0.962376703 | 5.57E-07 |
| TUCP_003976 | XLOC_174270 | ENSRNOT00000091320 | 0.955797327  | 1.23E-06 |
| TUCP_003976 | XLOC_174270 | ENSRNOT00000012837 | -0.954468592 | 1.43E-06 |
| TUCP_003976 | XLOC_174270 | ENSRNOT00000084912 | -0.961699323 | 6.09E-07 |
| TUCP_003976 | XLOC_174270 | ENSRNOT00000006148 | 0.971895772  | 1.32E-07 |
| TUCP_003976 | XLOC_174270 | ENSRNOT00000023548 | -0.96022701  | 7.33E-07 |
| TUCP_003976 | XLOC_174270 | ENSRNOT00000007583 | 0.958876297  | 8.64E-07 |
| TUCP_003976 | XLOC_174270 | ENSRNOT00000005522 | -0.954553749 | 1.41E-06 |
| TUCP_004259 | XLOC_187269 | ENSRNOT00000031083 | 0.960368863  | 7.20E-07 |

|             |             |                    |              |          |
|-------------|-------------|--------------------|--------------|----------|
| TUCP_004259 | XLOC_187269 | ENSRNOT00000038188 | 0.95664166   | 1.12E-06 |
| TUCP_004259 | XLOC_187269 | ENSRNOT00000068132 | -0.956859083 | 1.09E-06 |
| TUCP_004259 | XLOC_187269 | ENSRNOT00000012131 | 0.957416175  | 1.03E-06 |
| TUCP_004153 | XLOC_180782 | ENSRNOT00000085158 | 0.954303013  | 1.45E-06 |
| TUCP_004153 | XLOC_180782 | ENSRNOT00000039809 | 0.955369262  | 1.29E-06 |
| TUCP_004153 | XLOC_180782 | ENSRNOT00000091910 | 0.95768125   | 9.95E-07 |
| TUCP_004153 | XLOC_180782 | ENSRNOT00000025808 | 0.956523562  | 1.14E-06 |
| TUCP_004153 | XLOC_180782 | ENSRNOT00000032274 | 0.975127423  | 7.19E-08 |
| TUCP_004153 | XLOC_180782 | ENSRNOT00000006175 | 0.975259578  | 7.00E-08 |
| TUCP_004153 | XLOC_180782 | ENSRNOT00000008221 | 0.955741239  | 1.24E-06 |
| TUCP_004153 | XLOC_180782 | ENSRNOT00000064946 | 0.957048176  | 1.07E-06 |
| TUCP_004153 | XLOC_180782 | ENSRNOT00000090665 | 0.959270716  | 8.24E-07 |
| TUCP_004153 | XLOC_180782 | ENSRNOT00000016975 | 0.966337553  | 3.22E-07 |
| TUCP_004153 | XLOC_180782 | ENSRNOT00000091265 | 0.951195931  | 2.01E-06 |
| TUCP_004153 | XLOC_180782 | ENSRNOT00000025859 | 0.960236481  | 7.32E-07 |
| TUCP_004153 | XLOC_180782 | ENSRNOT00000071697 | 0.954031599  | 1.50E-06 |
| TUCP_004153 | XLOC_180782 | ENSRNOT00000026543 | 0.960469515  | 7.11E-07 |
| TUCP_004153 | XLOC_180782 | ENSRNOT00000027454 | 0.968453007  | 2.33E-07 |
| TUCP_004153 | XLOC_180782 | ENSRNOT0000000676  | 0.960824505  | 6.80E-07 |
| TUCP_004153 | XLOC_180782 | ENSRNOT00000006454 | 0.96463995   | 4.10E-07 |
| TUCP_004153 | XLOC_180782 | ENSRNOT00000027263 | 0.953031422  | 1.66E-06 |
| TUCP_004153 | XLOC_180782 | ENSRNOT00000009280 | 0.951193777  | 2.01E-06 |
| TUCP_004153 | XLOC_180782 | ENSRNOT00000029859 | 0.957001746  | 1.08E-06 |
| TUCP_004153 | XLOC_180782 | ENSRNOT00000024156 | 0.960211536  | 7.35E-07 |
| TUCP_004153 | XLOC_180782 | ENSRNOT00000023428 | 0.958332701  | 9.22E-07 |
| TUCP_004153 | XLOC_180782 | ENSRNOT00000037800 | 0.952818183  | 1.70E-06 |
| TUCP_004153 | XLOC_180782 | ENSRNOT00000047093 | 0.953847408  | 1.53E-06 |
| TUCP_004150 | XLOC_180748 | ENSRNOT00000010992 | 0.951457117  | 1.96E-06 |
| TUCP_004150 | XLOC_180748 | ENSRNOT00000065168 | 0.951481382  | 1.95E-06 |
| TUCP_004150 | XLOC_180748 | ENSRNOT00000039809 | 0.958868316  | 8.65E-07 |
| TUCP_004150 | XLOC_180748 | ENSRNOT00000076669 | 0.957305633  | 1.04E-06 |
| TUCP_004150 | XLOC_180748 | ENSRNOT00000091910 | 0.950063428  | 2.25E-06 |
| TUCP_004150 | XLOC_180748 | ENSRNOT00000020134 | 0.958666652  | 8.86E-07 |
| TUCP_004150 | XLOC_180748 | ENSRNOT00000016555 | 0.957811249  | 9.81E-07 |
| TUCP_004150 | XLOC_180748 | ENSRNOT00000081512 | 0.955218071  | 1.32E-06 |
| TUCP_004150 | XLOC_180748 | ENSRNOT00000021348 | 0.954883511  | 1.36E-06 |
| TUCP_004150 | XLOC_180748 | ENSRNOT00000025808 | 0.965642317  | 3.56E-07 |
| TUCP_004150 | XLOC_180748 | ENSRNOT00000017021 | 0.950474795  | 2.16E-06 |
| TUCP_004150 | XLOC_180748 | ENSRNOT00000049819 | 0.952584472  | 1.74E-06 |
| TUCP_004150 | XLOC_180748 | ENSRNOT00000012156 | 0.952726154  | 1.72E-06 |
| TUCP_004150 | XLOC_180748 | ENSRNOT00000032274 | 0.981585214  | 1.62E-08 |
| TUCP_004150 | XLOC_180748 | ENSRNOT00000006175 | 0.979979835  | 2.45E-08 |
| TUCP_004150 | XLOC_180748 | ENSRNOT00000008221 | 0.958677861  | 8.85E-07 |
| TUCP_004150 | XLOC_180748 | ENSRNOT00000047522 | 0.955599689  | 1.26E-06 |
| TUCP_004150 | XLOC_180748 | ENSRNOT00000023144 | 0.965369569  | 3.70E-07 |
| TUCP_004150 | XLOC_180748 | ENSRNOT00000090665 | 0.964095615  | 4.42E-07 |
| TUCP_004150 | XLOC_180748 | ENSRNOT00000016975 | 0.966554078  | 3.12E-07 |
| TUCP_004150 | XLOC_180748 | ENSRNOT00000091265 | 0.965978253  | 3.39E-07 |
| TUCP_004150 | XLOC_180748 | ENSRNOT00000027411 | 0.952500376  | 1.76E-06 |
| TUCP_004150 | XLOC_180748 | ENSRNOT00000025859 | 0.961489357  | 6.25E-07 |
| TUCP_004150 | XLOC_180748 | ENSRNOT00000071697 | 0.952126534  | 1.83E-06 |

|             |             |                    |              |          |
|-------------|-------------|--------------------|--------------|----------|
| TUCP_004150 | XLOC_180748 | ENSRNOT00000026543 | 0.975817194  | 6.25E-08 |
| TUCP_004150 | XLOC_180748 | ENSRNOT00000027454 | 0.971743145  | 1.35E-07 |
| TUCP_004150 | XLOC_180748 | ENSRNOT00000066670 | 0.950272322  | 2.20E-06 |
| TUCP_004150 | XLOC_180748 | ENSRNOT0000000676  | 0.96164828   | 6.13E-07 |
| TUCP_004150 | XLOC_180748 | ENSRNOT00000025832 | 0.964156802  | 4.39E-07 |
| TUCP_004150 | XLOC_180748 | ENSRNOT00000066810 | 0.967924761  | 2.53E-07 |
| TUCP_004150 | XLOC_180748 | ENSRNOT00000018535 | 0.954130041  | 1.48E-06 |
| TUCP_004150 | XLOC_180748 | ENSRNOT00000045882 | 0.955051728  | 1.34E-06 |
| TUCP_004150 | XLOC_180748 | ENSRNOT00000060362 | 0.961473174  | 6.27E-07 |
| TUCP_004150 | XLOC_180748 | ENSRNOT00000013274 | 0.95426269   | 1.46E-06 |
| TUCP_004150 | XLOC_180748 | ENSRNOT00000009280 | 0.955583922  | 1.26E-06 |
| TUCP_004150 | XLOC_180748 | ENSRNOT00000087592 | 0.958999059  | 8.52E-07 |
| TUCP_004150 | XLOC_180748 | ENSRNOT00000029859 | 0.95075076   | 2.10E-06 |
| TUCP_004150 | XLOC_180748 | ENSRNOT00000024156 | 0.960531155  | 7.06E-07 |
| TUCP_004150 | XLOC_180748 | ENSRNOT00000047093 | 0.954978237  | 1.35E-06 |
| TUCP_004150 | XLOC_180748 | ENSRNOT00000078274 | 0.955621949  | 1.26E-06 |
| TUCP_004150 | XLOC_180748 | ENSRNOT00000010898 | 0.952259268  | 1.80E-06 |
| TUCP_004150 | XLOC_180748 | ENSRNOT00000071764 | 0.96682621   | 2.99E-07 |
| TUCP_004150 | XLOC_180748 | ENSRNOT00000037800 | 0.953999272  | 1.50E-06 |
| TUCP_004150 | XLOC_180748 | ENSRNOT00000023428 | 0.965219507  | 3.78E-07 |
| TUCP_004150 | XLOC_180748 | ENSRNOT00000029167 | 0.951072031  | 2.03E-06 |
| TUCP_004151 | XLOC_180749 | ENSRNOT00000010992 | 0.959606186  | 7.91E-07 |
| TUCP_004151 | XLOC_180749 | ENSRNOT00000039809 | 0.968468735  | 2.33E-07 |
| TUCP_004151 | XLOC_180749 | ENSRNOT00000076669 | 0.963085113  | 5.07E-07 |
| TUCP_004151 | XLOC_180749 | ENSRNOT00000016555 | 0.954071383  | 1.49E-06 |
| TUCP_004151 | XLOC_180749 | ENSRNOT00000021348 | 0.95271466   | 1.72E-06 |
| TUCP_004151 | XLOC_180749 | ENSRNOT00000025808 | 0.969303766  | 2.04E-07 |
| TUCP_004151 | XLOC_180749 | ENSRNOT00000012156 | 0.96883535   | 2.20E-07 |
| TUCP_004151 | XLOC_180749 | ENSRNOT00000078445 | -0.956629664 | 1.12E-06 |
| TUCP_004151 | XLOC_180749 | ENSRNOT00000087592 | 0.963231152  | 4.98E-07 |
| TUCP_004151 | XLOC_180749 | ENSRNOT00000032274 | 0.976683061  | 5.22E-08 |
| TUCP_004151 | XLOC_180749 | ENSRNOT00000006175 | 0.959764429  | 7.76E-07 |
| TUCP_004151 | XLOC_180749 | ENSRNOT00000049819 | 0.952966907  | 1.67E-06 |
| TUCP_004151 | XLOC_180749 | ENSRNOT00000023144 | 0.971523337  | 1.41E-07 |
| TUCP_004151 | XLOC_180749 | ENSRNOT00000078274 | 0.954492811  | 1.42E-06 |
| TUCP_004151 | XLOC_180749 | ENSRNOT00000090665 | 0.959761922  | 7.76E-07 |
| TUCP_004151 | XLOC_180749 | ENSRNOT00000003296 | 0.966178681  | 3.29E-07 |
| TUCP_004151 | XLOC_180749 | ENSRNOT00000091265 | 0.962444246  | 5.52E-07 |
| TUCP_004151 | XLOC_180749 | ENSRNOT00000025859 | 0.967570892  | 2.67E-07 |
| TUCP_004151 | XLOC_180749 | ENSRNOT00000026543 | 0.975964327  | 6.07E-08 |
| TUCP_004151 | XLOC_180749 | ENSRNOT00000027454 | 0.973072094  | 1.07E-07 |
| TUCP_004151 | XLOC_180749 | ENSRNOT00000066670 | 0.956268256  | 1.17E-06 |
| TUCP_004151 | XLOC_180749 | ENSRNOT0000000676  | 0.95296342   | 1.68E-06 |
| TUCP_004151 | XLOC_180749 | ENSRNOT00000025832 | 0.970881223  | 1.57E-07 |
| TUCP_004151 | XLOC_180749 | ENSRNOT00000066810 | 0.967375029  | 2.76E-07 |
| TUCP_004151 | XLOC_180749 | ENSRNOT00000018535 | 0.970362173  | 1.71E-07 |
| TUCP_004151 | XLOC_180749 | ENSRNOT00000071573 | 0.959586725  | 7.93E-07 |
| TUCP_004151 | XLOC_180749 | ENSRNOT00000060362 | 0.965572689  | 3.59E-07 |
| TUCP_004151 | XLOC_180749 | ENSRNOT00000009280 | 0.971098733  | 1.51E-07 |
| TUCP_004151 | XLOC_180749 | ENSRNOT00000025092 | 0.950833048  | 2.08E-06 |
| TUCP_004151 | XLOC_180749 | ENSRNOT00000024156 | 0.97600674   | 6.02E-08 |

|             |             |                    |             |          |
|-------------|-------------|--------------------|-------------|----------|
| TUCP_004151 | XLOC_180749 | ENSRNOT00000023428 | 0.955036226 | 1.34E-06 |
| TUCP_004151 | XLOC_180749 | ENSRNOT00000051550 | 0.960090117 | 7.46E-07 |
| TUCP_004151 | XLOC_180749 | ENSRNOT00000010898 | 0.961304457 | 6.40E-07 |
| TUCP_004151 | XLOC_180749 | ENSRNOT00000071764 | 0.956471354 | 1.14E-06 |
| TUCP_004151 | XLOC_180749 | ENSRNOT00000005355 | 0.966476943 | 3.15E-07 |
| TUCP_004151 | XLOC_180749 | ENSRNOT00000024420 | 0.950361188 | 2.18E-06 |
| TUCP_004151 | XLOC_180749 | ENSRNOT00000043156 | 0.954847812 | 1.37E-06 |
| TUCP_004151 | XLOC_180749 | ENSRNOT00000083799 | 0.951999273 | 1.85E-06 |
| TUCP_004156 | XLOC_180877 | ENSRNOT00000001600 | 0.954567017 | 1.41E-06 |
| TUCP_004156 | XLOC_180877 | ENSRNOT00000005127 | 0.952791897 | 1.71E-06 |
| TUCP_004156 | XLOC_180877 | ENSRNOT00000065448 | 0.960980778 | 6.67E-07 |
| TUCP_004156 | XLOC_180877 | ENSRNOT00000047527 | 0.952185778 | 1.82E-06 |
| TUCP_004156 | XLOC_180877 | ENSRNOT00000076802 | 0.951177744 | 2.01E-06 |
| TUCP_004156 | XLOC_180877 | ENSRNOT00000020071 | 0.96120841  | 6.48E-07 |
| TUCP_004156 | XLOC_180877 | ENSRNOT00000040985 | 0.958536987 | 9.00E-07 |
| TUCP_004156 | XLOC_180877 | ENSRNOT00000047700 | 0.967060331 | 2.89E-07 |
| TUCP_004156 | XLOC_180877 | ENSRNOT00000057384 | 0.96815084  | 2.45E-07 |
| TUCP_004156 | XLOC_180877 | ENSRNOT00000027214 | 0.969138115 | 2.09E-07 |
| TUCP_004156 | XLOC_180877 | ENSRNOT00000030532 | 0.961752819 | 6.04E-07 |
| TUCP_004156 | XLOC_180877 | ENSRNOT00000072810 | 0.95249263  | 1.76E-06 |
| TUCP_004157 | XLOC_180877 | ENSRNOT00000036642 | 0.959233712 | 8.28E-07 |
| TUCP_004157 | XLOC_180877 | ENSRNOT00000015316 | 0.958548878 | 8.99E-07 |
| TUCP_004157 | XLOC_180877 | ENSRNOT00000018860 | 0.977833832 | 4.06E-08 |
| TUCP_004157 | XLOC_180877 | ENSRNOT00000007312 | 0.954703818 | 1.39E-06 |
| TUCP_004154 | XLOC_180784 | ENSRNOT00000065168 | 0.963747304 | 4.64E-07 |
| TUCP_004154 | XLOC_180784 | ENSRNOT00000083093 | 0.953264846 | 1.62E-06 |
| TUCP_004154 | XLOC_180784 | ENSRNOT00000020134 | 0.96909099  | 2.11E-07 |
| TUCP_004154 | XLOC_180784 | ENSRNOT00000016555 | 0.961885475 | 5.94E-07 |
| TUCP_004154 | XLOC_180784 | ENSRNOT00000017021 | 0.957453403 | 1.02E-06 |
| TUCP_004154 | XLOC_180784 | ENSRNOT00000087592 | 0.962432603 | 5.53E-07 |
| TUCP_004154 | XLOC_180784 | ENSRNOT00000032274 | 0.975922291 | 6.12E-08 |
| TUCP_004154 | XLOC_180784 | ENSRNOT00000006175 | 0.978558228 | 3.44E-08 |
| TUCP_004154 | XLOC_180784 | ENSRNOT00000008221 | 0.964765759 | 4.03E-07 |
| TUCP_004154 | XLOC_180784 | ENSRNOT00000023144 | 0.951006755 | 2.05E-06 |
| TUCP_004154 | XLOC_180784 | ENSRNOT00000016975 | 0.977979414 | 3.93E-08 |
| TUCP_004154 | XLOC_180784 | ENSRNOT00000091265 | 0.958632771 | 8.90E-07 |
| TUCP_004154 | XLOC_180784 | ENSRNOT00000027411 | 0.954076395 | 1.49E-06 |
| TUCP_004154 | XLOC_180784 | ENSRNOT00000012015 | 0.951943601 | 1.86E-06 |
| TUCP_004154 | XLOC_180784 | ENSRNOT00000019618 | 0.960316991 | 7.25E-07 |
| TUCP_004154 | XLOC_180784 | ENSRNOT00000026915 | 0.954608956 | 1.41E-06 |
| TUCP_004154 | XLOC_180784 | ENSRNOT00000089971 | 0.954826257 | 1.37E-06 |
| TUCP_004154 | XLOC_180784 | ENSRNOT00000027454 | 0.971789575 | 1.34E-07 |
| TUCP_004154 | XLOC_180784 | ENSRNOT00000000676 | 0.957233267 | 1.05E-06 |
| TUCP_004154 | XLOC_180784 | ENSRNOT00000025832 | 0.950699321 | 2.11E-06 |
| TUCP_004154 | XLOC_180784 | ENSRNOT00000066810 | 0.95106959  | 2.03E-06 |
| TUCP_004154 | XLOC_180784 | ENSRNOT00000044742 | 0.952137337 | 1.83E-06 |
| TUCP_004154 | XLOC_180784 | ENSRNOT00000052018 | 0.954752999 | 1.38E-06 |
| TUCP_004154 | XLOC_180784 | ENSRNOT00000047093 | 0.957161684 | 1.06E-06 |
| TUCP_004154 | XLOC_180784 | ENSRNOT00000071764 | 0.966172839 | 3.30E-07 |
| TUCP_004154 | XLOC_180784 | ENSRNOT00000023428 | 0.972191153 | 1.25E-07 |
| TUCP_004154 | XLOC_180784 | ENSRNOT00000075326 | 0.959257456 | 8.26E-07 |

|             |             |                    |              |          |
|-------------|-------------|--------------------|--------------|----------|
| TUCP_004154 | XLOC_180784 | ENSRNOT00000026543 | 0.962859984  | 5.23E-07 |
| TUCP_004154 | XLOC_180784 | ENSRNOT00000029167 | 0.961168464  | 6.51E-07 |
| TUCP_004155 | XLOC_180796 | ENSRNOT00000035700 | 0.954047869  | 1.49E-06 |
| TUCP_004155 | XLOC_180796 | ENSRNOT00000032944 | 0.954546253  | 1.42E-06 |
| TUCP_004155 | XLOC_180796 | ENSRNOT00000081246 | 0.950188398  | 2.22E-06 |
| TUCP_004155 | XLOC_180796 | ENSRNOT00000055187 | 0.951523109  | 1.94E-06 |
| TUCP_004155 | XLOC_180796 | ENSRNOT00000043872 | 0.954665199  | 1.40E-06 |
| TUCP_004155 | XLOC_180796 | ENSRNOT00000079866 | 0.952350358  | 1.79E-06 |
| TUCP_004155 | XLOC_180796 | ENSRNOT00000009135 | 0.955558971  | 1.27E-06 |
| TUCP_004155 | XLOC_180796 | ENSRNOT00000021614 | 0.967956687  | 2.52E-07 |
| TUCP_004155 | XLOC_180796 | ENSRNOT00000022726 | 0.950750223  | 2.10E-06 |
| TUCP_004155 | XLOC_180796 | ENSRNOT00000015271 | 0.95189834   | 1.87E-06 |
| TUCP_004155 | XLOC_180796 | ENSRNOT00000044635 | 0.963067489  | 5.09E-07 |
| TUCP_004155 | XLOC_180796 | ENSRNOT00000009342 | 0.96967217   | 1.92E-07 |
| TUCP_004155 | XLOC_180796 | ENSRNOT00000021116 | 0.956252819  | 1.17E-06 |
| TUCP_004155 | XLOC_180796 | ENSRNOT00000082100 | 0.965206358  | 3.79E-07 |
| TUCP_004155 | XLOC_180796 | ENSRNOT00000004032 | 0.969876663  | 1.86E-07 |
| TUCP_004155 | XLOC_180796 | ENSRNOT00000059951 | 0.977611492  | 4.27E-08 |
| TUCP_004155 | XLOC_180796 | ENSRNOT00000063956 | 0.967558844  | 2.68E-07 |
| TUCP_004155 | XLOC_180796 | ENSRNOT00000076763 | 0.956144044  | 1.19E-06 |
| TUCP_004155 | XLOC_180796 | ENSRNOT00000043216 | 0.966881715  | 2.97E-07 |
| TUCP_004155 | XLOC_180796 | ENSRNOT00000073526 | 0.956262599  | 1.17E-06 |
| TUCP_004155 | XLOC_180796 | ENSRNOT00000066526 | 0.963281526  | 4.94E-07 |
| TUCP_004155 | XLOC_180796 | ENSRNOT00000006533 | 0.953470843  | 1.59E-06 |
| TUCP_004155 | XLOC_180796 | ENSRNOT00000085060 | 0.961752737  | 6.04E-07 |
| TUCP_004155 | XLOC_180796 | ENSRNOT00000015073 | 0.959827285  | 7.70E-07 |
| TUCP_004155 | XLOC_180796 | ENSRNOT00000070815 | 0.953595281  | 1.57E-06 |
| TUCP_004155 | XLOC_180796 | ENSRNOT00000047975 | 0.960651153  | 6.95E-07 |
| TUCP_004155 | XLOC_180796 | ENSRNOT00000015479 | 0.96113893   | 6.54E-07 |
| TUCP_004155 | XLOC_180796 | ENSRNOT00000087662 | 0.965502152  | 3.63E-07 |
| TUCP_004155 | XLOC_180796 | ENSRNOT00000009198 | 0.960619051  | 6.98E-07 |
| TUCP_004155 | XLOC_180796 | ENSRNOT00000019675 | 0.960167152  | 7.39E-07 |
| TUCP_004155 | XLOC_180796 | ENSRNOT00000029866 | 0.958481391  | 9.06E-07 |
| TUCP_004155 | XLOC_180796 | ENSRNOT00000019923 | 0.952597633  | 1.74E-06 |
| TUCP_004155 | XLOC_180796 | ENSRNOT00000029439 | 0.962052163  | 5.81E-07 |
| TUCP_004155 | XLOC_180796 | ENSRNOT00000027964 | 0.9531098    | 1.65E-06 |
| TUCP_004155 | XLOC_180796 | ENSRNOT00000072081 | 0.961640092  | 6.13E-07 |
| TUCP_004155 | XLOC_180796 | ENSRNOT00000006969 | 0.953918068  | 1.51E-06 |
| TUCP_004155 | XLOC_180796 | ENSRNOT00000038703 | 0.963002648  | 5.13E-07 |
| TUCP_004155 | XLOC_180796 | ENSRNOT00000021153 | 0.956546044  | 1.13E-06 |
| TUCP_004155 | XLOC_180796 | ENSRNOT00000076453 | 0.954739968  | 1.39E-06 |
| TUCP_004155 | XLOC_180796 | ENSRNOT00000000157 | 0.950602927  | 2.13E-06 |
| TUCP_004155 | XLOC_180796 | ENSRNOT00000084734 | 0.952875178  | 1.69E-06 |
| TUCP_004484 | XLOC_197366 | ENSRNOT00000071884 | 0.958484643  | 9.06E-07 |
| TUCP_004484 | XLOC_197366 | ENSRNOT00000061194 | 0.950251903  | 2.21E-06 |
| TUCP_004484 | XLOC_197366 | ENSRNOT00000020329 | 0.980538128  | 2.13E-08 |
| TUCP_004484 | XLOC_197366 | ENSRNOT00000040270 | 0.959219245  | 8.29E-07 |
| TUCP_004484 | XLOC_197366 | ENSRNOT00000008041 | 0.9647679    | 4.03E-07 |
| TUCP_004484 | XLOC_197366 | ENSRNOT00000002220 | 0.978142702  | 3.79E-08 |
| TUCP_004484 | XLOC_197366 | ENSRNOT00000029531 | -0.953155376 | 1.64E-06 |
| TUCP_004485 | XLOC_197476 | ENSRNOT00000078446 | 0.957138389  | 1.06E-06 |



|             |             |                    |              |          |
|-------------|-------------|--------------------|--------------|----------|
| TUCP_004485 | XLOC_197476 | ENSRNOT00000066416 | 0.951750341  | 1.90E-06 |
| TUCP_004485 | XLOC_197476 | ENSRNOT00000007339 | 0.950646375  | 2.12E-06 |
| TUCP_004485 | XLOC_197476 | ENSRNOT00000050825 | 0.967857138  | 2.56E-07 |
| TUCP_004486 | XLOC_197547 | ENSRNOT00000085954 | 0.964879265  | 3.97E-07 |
| TUCP_004486 | XLOC_197547 | ENSRNOT00000013088 | 0.954904458  | 1.36E-06 |
| TUCP_000270 | XLOC_008415 | ENSRNOT00000084133 | 1            | 0        |
| TUCP_000270 | XLOC_008415 | ENSRNOT00000093745 | 0.981891039  | 1.49E-08 |
| TUCP_000270 | XLOC_008415 | ENSRNOT00000065542 | 0.99828699   | 1.16E-13 |
| TUCP_000270 | XLOC_008415 | ENSRNOT00000082464 | 1            | 0        |
| TUCP_000270 | XLOC_008415 | ENSRNOT00000087659 | 1            | 0        |
| TUCP_000270 | XLOC_008415 | ENSRNOT00000084582 | 0.976633579  | 5.28E-08 |
| TUCP_000270 | XLOC_008415 | ENSRNOT00000085078 | 1            | 0        |
| TUCP_000270 | XLOC_008415 | ENSRNOT00000014028 | 1            | 1.33E-79 |
| TUCP_000270 | XLOC_008415 | ENSRNOT00000049363 | 1            | 0        |
| TUCP_000270 | XLOC_008415 | ENSRNOT00000065473 | 0.999949098  | 2.69E-21 |
| TUCP_000270 | XLOC_008415 | ENSRNOT00000000142 | 0.998996155  | 8.01E-15 |
| TUCP_000270 | XLOC_008415 | ENSRNOT00000082288 | 0.999998398  | 8.30E-29 |
| TUCP_000270 | XLOC_008415 | ENSRNOT00000039664 | 1            | 0        |
| TUCP_000270 | XLOC_008415 | ENSRNOT00000065402 | 1            | 0        |
| TUCP_000270 | XLOC_008415 | ENSRNOT00000064551 | 0.965365872  | 3.70E-07 |
| TUCP_000270 | XLOC_008415 | ENSRNOT00000084141 | 1            | 0        |
| TUCP_000270 | XLOC_008415 | ENSRNOT00000082435 | 1            | 0        |
| TUCP_000270 | XLOC_008415 | ENSRNOT00000082928 | 0.996801059  | 2.62E-12 |
| TUCP_000270 | XLOC_008415 | ENSRNOT00000066546 | 0.956953619  | 1.08E-06 |
| TUCP_000270 | XLOC_008415 | ENSRNOT00000046013 | 0.988138626  | 1.81E-09 |
| TUCP_000270 | XLOC_008415 | ENSRNOT00000067931 | 0.978893628  | 3.18E-08 |
| TUCP_000270 | XLOC_008415 | ENSRNOT00000086425 | 0.992023315  | 2.51E-10 |
| TUCP_000270 | XLOC_008415 | ENSRNOT00000093696 | 0.956927219  | 1.09E-06 |
| TUCP_000270 | XLOC_008415 | ENSRNOT00000036228 | 0.982337157  | 1.31E-08 |
| TUCP_000270 | XLOC_008415 | ENSRNOT00000014030 | 1            | 0        |
| TUCP_000270 | XLOC_008415 | ENSRNOT00000081966 | 1            | 1.33E-79 |
| TUCP_000270 | XLOC_008415 | ENSRNOT00000075906 | 1            | 1.33E-79 |
| TUCP_000270 | XLOC_008415 | ENSRNOT00000088396 | 0.981336994  | 1.73E-08 |
| TUCP_000270 | XLOC_008415 | ENSRNOT00000049259 | 0.965500259  | 3.63E-07 |
| TUCP_000270 | XLOC_008415 | ENSRNOT00000092838 | 0.982579749  | 1.23E-08 |
| TUCP_000270 | XLOC_008415 | ENSRNOT00000093442 | 0.959217317  | 8.30E-07 |
| TUCP_004483 | XLOC_197330 | ENSRNOT00000026966 | 0.970322306  | 1.73E-07 |
| TUCP_004483 | XLOC_197330 | ENSRNOT00000068416 | 0.999999782  | 3.88E-33 |
| TUCP_004483 | XLOC_197330 | ENSRNOT00000086036 | 0.999958274  | 9.96E-22 |
| TUCP_004483 | XLOC_197330 | ENSRNOT00000026803 | 0.985046075  | 5.74E-09 |
| TUCP_004483 | XLOC_197330 | ENSRNOT00000047527 | 0.963071698  | 5.08E-07 |
| TUCP_004483 | XLOC_197330 | ENSRNOT00000042251 | 0.999344295  | 9.53E-16 |
| TUCP_004483 | XLOC_197330 | ENSRNOT0000002984  | 0.998397069  | 8.31E-14 |
| TUCP_004483 | XLOC_197330 | ENSRNOT00000083764 | 0.999541808  | 1.59E-16 |
| TUCP_004483 | XLOC_197330 | ENSRNOT00000076802 | 0.962695843  | 5.34E-07 |
| TUCP_004483 | XLOC_197330 | ENSRNOT00000092365 | 0.999161651  | 3.26E-15 |
| TUCP_004483 | XLOC_197330 | ENSRNOT00000079275 | 0.999901911  | 7.15E-20 |
| TUCP_004483 | XLOC_197330 | ENSRNOT00000066062 | -0.959706712 | 7.82E-07 |
| TUCP_004483 | XLOC_197330 | ENSRNOT00000045301 | 1            | 0        |
| TUCP_004483 | XLOC_197330 | ENSRNOT00000041186 | 0.999975782  | 6.56E-23 |
| TUCP_004483 | XLOC_197330 | ENSRNOT00000010092 | 0.977711778  | 4.17E-08 |

|             |             |                    |              |          |
|-------------|-------------|--------------------|--------------|----------|
| TUCP_004483 | XLOC_197330 | ENSRNOT00000076182 | 1            | 0        |
| TUCP_004483 | XLOC_197330 | ENSRNOT00000087404 | 0.951157664  | 2.02E-06 |
| TUCP_004483 | XLOC_197330 | ENSRNOT00000052003 | 0.95837331   | 9.18E-07 |
| TUCP_004483 | XLOC_197330 | ENSRNOT00000081709 | 0.998485154  | 6.27E-14 |
| TUCP_004483 | XLOC_197330 | ENSRNOT00000005726 | 0.959610119  | 7.91E-07 |
| TUCP_004483 | XLOC_197330 | ENSRNOT00000014103 | 1            | 0        |
| TUCP_004483 | XLOC_197330 | ENSRNOT00000057433 | 0.964930601  | 3.94E-07 |
| TUCP_004483 | XLOC_197330 | ENSRNOT00000082289 | 0.998931566  | 1.09E-14 |
| TUCP_004483 | XLOC_197330 | ENSRNOT00000092516 | 0.957459323  | 1.02E-06 |
| TUCP_004483 | XLOC_197330 | ENSRNOT00000008898 | 0.990039768  | 7.59E-10 |
| TUCP_004483 | XLOC_197330 | ENSRNOT00000083493 | 0.995461232  | 1.51E-11 |
| TUCP_004483 | XLOC_197330 | ENSRNOT00000092563 | 0.987201084  | 2.65E-09 |
| TUCP_004483 | XLOC_197330 | ENSRNOT00000088893 | 1            | 0        |
| TUCP_004483 | XLOC_197330 | ENSRNOT00000076693 | 0.955029582  | 1.34E-06 |
| TUCP_004483 | XLOC_197330 | ENSRNOT00000081014 | 1            | 0        |
| TUCP_004483 | XLOC_197330 | ENSRNOT00000067543 | 1            | 0        |
| TUCP_004483 | XLOC_197330 | ENSRNOT00000050968 | 0.996816433  | 2.56E-12 |
| TUCP_004483 | XLOC_197330 | ENSRNOT00000042201 | 0.960235595  | 7.32E-07 |
| TUCP_004483 | XLOC_197330 | ENSRNOT00000004373 | 0.957315473  | 1.04E-06 |
| TUCP_004483 | XLOC_197330 | ENSRNOT00000063929 | 1            | 0        |
| TUCP_004483 | XLOC_197330 | ENSRNOT00000057472 | 1            | 0        |
| TUCP_004483 | XLOC_197330 | ENSRNOT00000041617 | 0.952449765  | 1.77E-06 |
| TUCP_004483 | XLOC_197330 | ENSRNOT00000091763 | 0.986310385  | 3.70E-09 |
| TUCP_004483 | XLOC_197330 | ENSRNOT00000022200 | 0.998491303  | 6.14E-14 |
| TUCP_004483 | XLOC_197330 | ENSRNOT00000067379 | 0.997260967  | 1.21E-12 |
| TUCP_004483 | XLOC_197330 | ENSRNOT00000020786 | 0.976428448  | 5.51E-08 |
| TUCP_004483 | XLOC_197330 | ENSRNOT00000050543 | 0.999722223  | 1.30E-17 |
| TUCP_004483 | XLOC_197330 | ENSRNOT00000089306 | 0.999866649  | 3.32E-19 |
| TUCP_004483 | XLOC_197330 | ENSRNOT00000052367 | 0.997268394  | 1.19E-12 |
| TUCP_004483 | XLOC_197330 | ENSRNOT00000090658 | 1            | 0        |
| TUCP_004483 | XLOC_197330 | ENSRNOT00000022571 | 0.995290013  | 1.81E-11 |
| TUCP_004483 | XLOC_197330 | ENSRNOT00000044520 | 0.981817158  | 1.52E-08 |
| TUCP_004483 | XLOC_197330 | ENSRNOT00000065448 | 0.963648868  | 4.70E-07 |
| TUCP_004523 | XLOC_199467 | ENSRNOT00000065143 | 0.966839568  | 2.99E-07 |
| TUCP_004523 | XLOC_199467 | ENSRNOT00000024149 | 0.966333305  | 3.22E-07 |
| TUCP_004523 | XLOC_199467 | ENSRNOT00000005958 | 0.969579013  | 1.95E-07 |
| TUCP_004523 | XLOC_199467 | ENSRNOT00000008573 | 0.959723317  | 7.80E-07 |
| TUCP_004523 | XLOC_199467 | ENSRNOT00000009979 | 0.950990991  | 2.05E-06 |
| TUCP_004523 | XLOC_199467 | ENSRNOT00000082998 | 0.957392554  | 1.03E-06 |
| TUCP_004523 | XLOC_199467 | ENSRNOT00000081246 | 0.976983079  | 4.90E-08 |
| TUCP_004523 | XLOC_199467 | ENSRNOT00000019213 | 0.957590465  | 1.01E-06 |
| TUCP_004523 | XLOC_199467 | ENSRNOT00000009877 | 0.986454465  | 3.51E-09 |
| TUCP_004523 | XLOC_199467 | ENSRNOT00000007351 | -0.960622609 | 6.98E-07 |
| TUCP_004523 | XLOC_199467 | ENSRNOT00000074939 | 0.964075003  | 4.44E-07 |
| TUCP_004523 | XLOC_199467 | ENSRNOT00000017665 | 0.950634855  | 2.12E-06 |
| TUCP_004523 | XLOC_199467 | ENSRNOT00000073559 | 0.957926288  | 9.67E-07 |
| TUCP_004523 | XLOC_199467 | ENSRNOT00000071560 | 0.953890466  | 1.52E-06 |
| TUCP_004523 | XLOC_199467 | ENSRNOT00000025936 | -0.965120579 | 3.83E-07 |
| TUCP_004523 | XLOC_199467 | ENSRNOT00000023638 | 0.961520155  | 6.23E-07 |
| TUCP_004523 | XLOC_199467 | ENSRNOT00000005228 | 0.985566191  | 4.82E-09 |
| TUCP_004523 | XLOC_199467 | ENSRNOT00000021592 | 0.960444392  | 7.14E-07 |

|             |             |                     |              |          |
|-------------|-------------|---------------------|--------------|----------|
| TUCP_004523 | XLOC_199467 | ENSRNOT00000005659  | 0.954738132  | 1.39E-06 |
| TUCP_004523 | XLOC_199467 | ENSRNOT000000023144 | 0.960674991  | 6.93E-07 |
| TUCP_004523 | XLOC_199467 | ENSRNOT000000082869 | 0.953362674  | 1.61E-06 |
| TUCP_004523 | XLOC_199467 | ENSRNOT000000045326 | 0.951243526  | 2.00E-06 |
| TUCP_004523 | XLOC_199467 | ENSRNOT000000086548 | 0.960788796  | 6.83E-07 |
| TUCP_004523 | XLOC_199467 | ENSRNOT000000019502 | 0.971322549  | 1.46E-07 |
| TUCP_004523 | XLOC_199467 | ENSRNOT000000016649 | 0.955143722  | 1.33E-06 |
| TUCP_004523 | XLOC_199467 | ENSRNOT000000090342 | 0.953583666  | 1.57E-06 |
| TUCP_004523 | XLOC_199467 | ENSRNOT000000028856 | 0.964043957  | 4.46E-07 |
| TUCP_004523 | XLOC_199467 | ENSRNOT00000000743  | 0.953270102  | 1.62E-06 |
| TUCP_004523 | XLOC_199467 | ENSRNOT000000065300 | 0.957078183  | 1.07E-06 |
| TUCP_004523 | XLOC_199467 | ENSRNOT000000043216 | 0.9800568    | 2.40E-08 |
| TUCP_004523 | XLOC_199467 | ENSRNOT000000091128 | -0.966229968 | 3.27E-07 |
| TUCP_004523 | XLOC_199467 | ENSRNOT000000044742 | 0.955875812  | 1.22E-06 |
| TUCP_004523 | XLOC_199467 | ENSRNOT000000081981 | 0.975098541  | 7.23E-08 |
| TUCP_004523 | XLOC_199467 | ENSRNOT00000009496  | 0.96921574   | 2.07E-07 |
| TUCP_004523 | XLOC_199467 | ENSRNOT000000027414 | 0.973661606  | 9.55E-08 |
| TUCP_004523 | XLOC_199467 | ENSRNOT000000026543 | 0.959549053  | 7.97E-07 |
| TUCP_004523 | XLOC_199467 | ENSRNOT000000006195 | 0.977380127  | 4.49E-08 |
| TUCP_004523 | XLOC_199467 | ENSRNOT000000003158 | -0.957475377 | 1.02E-06 |
| TUCP_004523 | XLOC_199467 | ENSRNOT000000004172 | 0.957389517  | 1.03E-06 |
| TUCP_004523 | XLOC_199467 | ENSRNOT000000020322 | 0.966098252  | 3.33E-07 |
| TUCP_004523 | XLOC_199467 | ENSRNOT000000015073 | 0.954066962  | 1.49E-06 |
| TUCP_004523 | XLOC_199467 | ENSRNOT000000043554 | 0.958493768  | 9.05E-07 |
| TUCP_004523 | XLOC_199467 | ENSRNOT000000012187 | 0.980167175  | 2.34E-08 |
| TUCP_004523 | XLOC_199467 | ENSRNOT000000005942 | 0.985203456  | 5.45E-09 |
| TUCP_004523 | XLOC_199467 | ENSRNOT000000057814 | 0.950411561  | 2.17E-06 |
| TUCP_004523 | XLOC_199467 | ENSRNOT000000018533 | 0.964926936  | 3.94E-07 |
| TUCP_004523 | XLOC_199467 | ENSRNOT000000024969 | 0.973057109  | 1.07E-07 |
| TUCP_004523 | XLOC_199467 | ENSRNOT000000085251 | -0.959069993 | 8.45E-07 |
| TUCP_004523 | XLOC_199467 | ENSRNOT000000026783 | 0.96545825   | 3.65E-07 |
| TUCP_004523 | XLOC_199467 | ENSRNOT000000012379 | 0.963155147  | 5.03E-07 |
| TUCP_004523 | XLOC_199467 | ENSRNOT000000028646 | 0.979243952  | 2.93E-08 |
| TUCP_004523 | XLOC_199467 | ENSRNOT000000011384 | 0.974341971  | 8.39E-08 |
| TUCP_004523 | XLOC_199467 | ENSRNOT000000045699 | 0.957979275  | 9.61E-07 |
| TUCP_004523 | XLOC_199467 | ENSRNOT000000087443 | 0.95628067   | 1.17E-06 |
| TUCP_004523 | XLOC_199467 | ENSRNOT000000073971 | 0.956953998  | 1.08E-06 |
| TUCP_004523 | XLOC_199467 | ENSRNOT000000006963 | 0.966520984  | 3.13E-07 |
| TUCP_004523 | XLOC_199467 | ENSRNOT000000071764 | 0.96757472   | 2.67E-07 |
| TUCP_004523 | XLOC_199467 | ENSRNOT000000035989 | 0.954256589  | 1.46E-06 |
| TUCP_004523 | XLOC_199467 | ENSRNOT000000082699 | 0.959471979  | 8.04E-07 |
| TUCP_004523 | XLOC_199467 | ENSRNOT000000076611 | -0.963489675 | 4.81E-07 |
| TUCP_004523 | XLOC_199467 | ENSRNOT000000021348 | 0.965411875  | 3.68E-07 |
| TUCP_004523 | XLOC_199467 | ENSRNOT000000025372 | 0.963468516  | 4.82E-07 |
| TUCP_004523 | XLOC_199467 | ENSRNOT000000004003 | 0.961146722  | 6.53E-07 |
| TUCP_004523 | XLOC_199467 | ENSRNOT000000036750 | 0.950233169  | 2.21E-06 |
| TUCP_004523 | XLOC_199467 | ENSRNOT000000052075 | 0.956702447  | 1.11E-06 |
| TUCP_004523 | XLOC_199467 | ENSRNOT000000008372 | 0.950765947  | 2.10E-06 |
| TUCP_004523 | XLOC_199467 | ENSRNOT000000037456 | 0.960102772  | 7.44E-07 |
| TUCP_004523 | XLOC_199467 | ENSRNOT000000090123 | 0.951399708  | 1.97E-06 |
| TUCP_004523 | XLOC_199467 | ENSRNOT00000006680  | 0.959212508  | 8.30E-07 |

|             |             |                    |              |          |
|-------------|-------------|--------------------|--------------|----------|
| TUCP_004523 | XLOC_199467 | ENSRNOT00000022839 | 0.968720718  | 2.24E-07 |
| TUCP_004523 | XLOC_199467 | ENSRNOT00000083215 | 0.97132376   | 1.46E-07 |
| TUCP_004523 | XLOC_199467 | ENSRNOT00000085228 | 0.963563093  | 4.76E-07 |
| TUCP_004523 | XLOC_199467 | ENSRNOT00000032780 | 0.960927777  | 6.72E-07 |
| TUCP_004523 | XLOC_199467 | ENSRNOT00000079109 | 0.963081735  | 5.08E-07 |
| TUCP_004523 | XLOC_199467 | ENSRNOT00000017319 | 0.963311042  | 4.92E-07 |
| TUCP_004523 | XLOC_199467 | ENSRNOT00000055187 | 0.954682252  | 1.39E-06 |
| TUCP_004523 | XLOC_199467 | ENSRNOT0000005934  | 0.973209187  | 1.04E-07 |
| TUCP_004523 | XLOC_199467 | ENSRNOT00000079866 | 0.969441424  | 1.99E-07 |
| TUCP_004523 | XLOC_199467 | ENSRNOT00000041513 | 0.971213796  | 1.48E-07 |
| TUCP_004523 | XLOC_199467 | ENSRNOT00000034267 | 0.956175834  | 1.18E-06 |
| TUCP_004523 | XLOC_199467 | ENSRNOT00000027944 | 0.954077468  | 1.49E-06 |
| TUCP_004523 | XLOC_199467 | ENSRNOT00000087592 | 0.955351236  | 1.30E-06 |
| TUCP_004523 | XLOC_199467 | ENSRNOT00000010927 | 0.962977407  | 5.15E-07 |
| TUCP_004523 | XLOC_199467 | ENSRNOT00000019687 | 0.971630015  | 1.38E-07 |
| TUCP_004523 | XLOC_199467 | ENSRNOT00000010541 | 0.958372675  | 9.18E-07 |
| TUCP_004523 | XLOC_199467 | ENSRNOT0000004032  | 0.971424585  | 1.43E-07 |
| TUCP_004523 | XLOC_199467 | ENSRNOT00000084385 | 0.981254564  | 1.77E-08 |
| TUCP_004523 | XLOC_199467 | ENSRNOT00000017948 | 0.958587812  | 8.95E-07 |
| TUCP_004523 | XLOC_199467 | ENSRNOT00000012895 | 0.98601949   | 4.11E-09 |
| TUCP_004523 | XLOC_199467 | ENSRNOT00000004508 | 0.954744844  | 1.39E-06 |
| TUCP_004523 | XLOC_199467 | ENSRNOT00000044562 | 0.955912297  | 1.22E-06 |
| TUCP_004523 | XLOC_199467 | ENSRNOT00000090918 | 0.973766443  | 9.36E-08 |
| TUCP_004523 | XLOC_199467 | ENSRNOT00000001081 | 0.954635806  | 1.40E-06 |
| TUCP_004523 | XLOC_199467 | ENSRNOT00000009440 | -0.956180631 | 1.18E-06 |
| TUCP_004523 | XLOC_199467 | ENSRNOT00000083220 | 0.958002062  | 9.59E-07 |
| TUCP_004523 | XLOC_199467 | ENSRNOT00000025983 | 0.971010771  | 1.54E-07 |
| TUCP_004523 | XLOC_199467 | ENSRNOT00000015609 | 0.973982812  | 8.99E-08 |
| TUCP_004523 | XLOC_199467 | ENSRNOT00000054874 | 0.969003243  | 2.14E-07 |
| TUCP_004523 | XLOC_199467 | ENSRNOT00000028070 | 0.952106455  | 1.83E-06 |
| TUCP_004523 | XLOC_199467 | ENSRNOT00000014508 | 0.950357265  | 2.18E-06 |
| TUCP_004523 | XLOC_199467 | ENSRNOT00000058312 | 0.952567116  | 1.75E-06 |
| TUCP_004523 | XLOC_199467 | ENSRNOT00000060362 | 0.980816386  | 1.98E-08 |
| TUCP_004523 | XLOC_199467 | ENSRNOT00000013274 | 0.96155062   | 6.20E-07 |
| TUCP_004523 | XLOC_199467 | ENSRNOT00000022213 | 0.97481815   | 7.64E-08 |
| TUCP_004523 | XLOC_199467 | ENSRNOT00000022610 | 0.952350985  | 1.79E-06 |
| TUCP_004523 | XLOC_199467 | ENSRNOT00000020437 | 0.988314125  | 1.68E-09 |
| TUCP_004523 | XLOC_199467 | ENSRNOT00000006828 | 0.966820132  | 3.00E-07 |
| TUCP_004523 | XLOC_199467 | ENSRNOT00000010898 | 0.984041972  | 7.94E-09 |
| TUCP_004523 | XLOC_199467 | ENSRNOT00000071493 | -0.961369588 | 6.35E-07 |
| TUCP_004523 | XLOC_199467 | ENSRNOT00000015265 | 0.976278412  | 5.68E-08 |
| TUCP_004523 | XLOC_199467 | ENSRNOT00000003971 | 0.956474455  | 1.14E-06 |
| TUCP_004523 | XLOC_199467 | ENSRNOT0000005355  | 0.960732207  | 6.88E-07 |
| TUCP_004523 | XLOC_199467 | ENSRNOT00000048063 | 0.967745595  | 2.60E-07 |
| TUCP_004523 | XLOC_199467 | ENSRNOT00000079454 | 0.954070647  | 1.49E-06 |
| TUCP_004523 | XLOC_199467 | ENSRNOT00000066810 | 0.962005866  | 5.85E-07 |
| TUCP_004523 | XLOC_199467 | ENSRNOT00000001242 | 0.981165152  | 1.81E-08 |
| TUCP_004523 | XLOC_199467 | ENSRNOT00000004026 | 0.956873515  | 1.09E-06 |
| TUCP_004523 | XLOC_199467 | ENSRNOT00000078589 | -0.953848126 | 1.53E-06 |
| TUCP_004523 | XLOC_199467 | ENSRNOT00000078102 | 0.984355324  | 7.19E-09 |
| TUCP_004523 | XLOC_199467 | ENSRNOT00000070893 | 0.976645399  | 5.26E-08 |

|             |             |                     |              |          |
|-------------|-------------|---------------------|--------------|----------|
| TUCP_004523 | XLOC_199467 | ENSRNOT00000025981  | 0.95313738   | 1.64E-06 |
| TUCP_004523 | XLOC_199467 | ENSRNOT00000008982  | 0.970193554  | 1.76E-07 |
| TUCP_004523 | XLOC_199467 | ENSRNOT00000010873  | -0.950463295 | 2.16E-06 |
| TUCP_004523 | XLOC_199467 | ENSRNOT00000007164  | 0.956234721  | 1.17E-06 |
| TUCP_004523 | XLOC_199467 | ENSRNOT000000087095 | 0.97018679   | 1.76E-07 |
| TUCP_004523 | XLOC_199467 | ENSRNOT000000027526 | 0.959231985  | 8.28E-07 |
| TUCP_004523 | XLOC_199467 | ENSRNOT000000088599 | 0.96487077   | 3.97E-07 |
| TUCP_004523 | XLOC_199467 | ENSRNOT00000004698  | 0.96590932   | 3.42E-07 |
| TUCP_004523 | XLOC_199467 | ENSRNOT000000058072 | 0.954008406  | 1.50E-06 |
| TUCP_004523 | XLOC_199467 | ENSRNOT000000063873 | 0.955794782  | 1.23E-06 |
| TUCP_004523 | XLOC_199467 | ENSRNOT000000081047 | 0.980294869  | 2.26E-08 |
| TUCP_004523 | XLOC_199467 | ENSRNOT000000084240 | 0.954466935  | 1.43E-06 |
| TUCP_004523 | XLOC_199467 | ENSRNOT000000067688 | -0.958231767 | 9.33E-07 |
| TUCP_004523 | XLOC_199467 | ENSRNOT000000026174 | 0.950338702  | 2.19E-06 |
| TUCP_004523 | XLOC_199467 | ENSRNOT000000005911 | 0.963068912  | 5.08E-07 |
| TUCP_004523 | XLOC_199467 | ENSRNOT000000003991 | 0.981093337  | 1.84E-08 |
| TUCP_004523 | XLOC_199467 | ENSRNOT000000021408 | 0.960389308  | 7.18E-07 |
| TUCP_004523 | XLOC_199467 | ENSRNOT000000078475 | 0.958835376  | 8.69E-07 |
| TUCP_004523 | XLOC_199467 | ENSRNOT000000087429 | 0.961084638  | 6.58E-07 |
| TUCP_004523 | XLOC_199467 | ENSRNOT000000032158 | 0.951118101  | 2.02E-06 |
| TUCP_004523 | XLOC_199467 | ENSRNOT000000080207 | 0.958549756  | 8.99E-07 |
| TUCP_004523 | XLOC_199467 | ENSRNOT000000064900 | 0.956659983  | 1.12E-06 |
| TUCP_004523 | XLOC_199467 | ENSRNOT000000017776 | 0.960933284  | 6.71E-07 |
| TUCP_004523 | XLOC_199467 | ENSRNOT000000027910 | 0.963586956  | 4.74E-07 |
| TUCP_004523 | XLOC_199467 | ENSRNOT000000052224 | 0.95028699   | 2.20E-06 |
| TUCP_004523 | XLOC_199467 | ENSRNOT000000078070 | 0.956980587  | 1.08E-06 |
| TUCP_004523 | XLOC_199467 | ENSRNOT000000005262 | 0.968070054  | 2.48E-07 |
| TUCP_004523 | XLOC_199467 | ENSRNOT000000046745 | 0.9561559    | 1.19E-06 |
| TUCP_004523 | XLOC_199467 | ENSRNOT000000021015 | 0.957650266  | 9.99E-07 |
| TUCP_004523 | XLOC_199467 | ENSRNOT000000092029 | 0.982143562  | 1.39E-08 |
| TUCP_004523 | XLOC_199467 | ENSRNOT000000024322 | 0.955091881  | 1.33E-06 |
| TUCP_004523 | XLOC_199467 | ENSRNOT000000011408 | 0.952840834  | 1.70E-06 |
| TUCP_004523 | XLOC_199467 | ENSRNOT000000072208 | 0.962223129  | 5.69E-07 |
| TUCP_004523 | XLOC_199467 | ENSRNOT000000091265 | 0.968352596  | 2.37E-07 |
| TUCP_004523 | XLOC_199467 | ENSRNOT000000082107 | 0.957052162  | 1.07E-06 |
| TUCP_004523 | XLOC_199467 | ENSRNOT000000078390 | -0.956500731 | 1.14E-06 |
| TUCP_004523 | XLOC_199467 | ENSRNOT000000025832 | 0.970636698  | 1.64E-07 |
| TUCP_004523 | XLOC_199467 | ENSRNOT000000017181 | -0.952880506 | 1.69E-06 |
| TUCP_004523 | XLOC_199467 | ENSRNOT000000049538 | 0.966043215  | 3.36E-07 |
| TUCP_004523 | XLOC_199467 | ENSRNOT000000051022 | 0.968977582  | 2.15E-07 |
| TUCP_004523 | XLOC_199467 | ENSRNOT000000006499 | 0.954287926  | 1.46E-06 |
| TUCP_004523 | XLOC_199467 | ENSRNOT000000005909 | 0.976003501  | 6.02E-08 |
| TUCP_004523 | XLOC_199467 | ENSRNOT000000087725 | 0.963532751  | 4.78E-07 |
| TUCP_004523 | XLOC_199467 | ENSRNOT000000066736 | 0.955771245  | 1.24E-06 |
| TUCP_004523 | XLOC_199467 | ENSRNOT000000029833 | 0.955465638  | 1.28E-06 |
| TUCP_004523 | XLOC_199467 | ENSRNOT000000009198 | 0.969980875  | 1.83E-07 |
| TUCP_004523 | XLOC_199467 | ENSRNOT000000076729 | 0.958425343  | 9.12E-07 |
| TUCP_004523 | XLOC_199467 | ENSRNOT000000009129 | 0.974614361  | 7.96E-08 |
| TUCP_004523 | XLOC_199467 | ENSRNOT000000025394 | 0.958821784  | 8.70E-07 |
| TUCP_004523 | XLOC_199467 | ENSRNOT000000000495 | 0.95102704   | 2.04E-06 |
| TUCP_004523 | XLOC_199467 | ENSRNOT000000022074 | 0.953391437  | 1.60E-06 |

|             |             |                    |              |          |
|-------------|-------------|--------------------|--------------|----------|
| TUCP_004523 | XLOC_199467 | ENSRNOT00000036951 | 0.978557313  | 3.44E-08 |
| TUCP_004523 | XLOC_199467 | ENSRNOT00000016519 | 0.95341955   | 1.60E-06 |
| TUCP_004523 | XLOC_199467 | ENSRNOT00000008929 | 0.967999336  | 2.50E-07 |
| TUCP_004523 | XLOC_199467 | ENSRNOT00000002173 | -0.958147707 | 9.43E-07 |
| TUCP_004523 | XLOC_199467 | ENSRNOT00000026597 | 0.956830079  | 1.10E-06 |
| TUCP_004523 | XLOC_199467 | ENSRNOT00000011663 | 0.95344259   | 1.59E-06 |
| TUCP_004523 | XLOC_199467 | ENSRNOT00000043953 | 0.959917972  | 7.62E-07 |
| TUCP_004523 | XLOC_199467 | ENSRNOT00000057313 | 0.954666388  | 1.40E-06 |
| TUCP_004523 | XLOC_199467 | ENSRNOT00000058842 | 0.955912679  | 1.22E-06 |
| TUCP_004523 | XLOC_199467 | ENSRNOT00000023645 | 0.95393288   | 1.51E-06 |
| TUCP_004523 | XLOC_199467 | ENSRNOT00000084734 | 0.96584064   | 3.46E-07 |
| TUCP_004523 | XLOC_199467 | ENSRNOT00000035700 | 0.970996558  | 1.54E-07 |
| TUCP_004523 | XLOC_199467 | ENSRNOT00000038247 | 0.966911861  | 2.95E-07 |
| TUCP_004523 | XLOC_199467 | ENSRNOT00000029136 | -0.960886179 | 6.75E-07 |
| TUCP_004523 | XLOC_199467 | ENSRNOT00000026755 | 0.954617346  | 1.40E-06 |
| TUCP_004523 | XLOC_199467 | ENSRNOT00000076669 | 0.96771022   | 2.62E-07 |
| TUCP_004523 | XLOC_199467 | ENSRNOT00000085596 | 0.952428218  | 1.77E-06 |
| TUCP_004523 | XLOC_199467 | ENSRNOT00000016991 | 0.957761502  | 9.86E-07 |
| TUCP_004523 | XLOC_199467 | ENSRNOT00000090925 | 0.969238875  | 2.06E-07 |
| TUCP_004523 | XLOC_199467 | ENSRNOT00000047210 | 0.95804651   | 9.54E-07 |
| TUCP_004523 | XLOC_199467 | ENSRNOT00000085756 | 0.951641332  | 1.92E-06 |
| TUCP_004523 | XLOC_199467 | ENSRNOT00000008901 | -0.950610924 | 2.13E-06 |
| TUCP_004523 | XLOC_199467 | ENSRNOT00000043872 | 0.950065118  | 2.25E-06 |
| TUCP_004523 | XLOC_199467 | ENSRNOT00000054828 | 0.952935204  | 1.68E-06 |
| TUCP_004523 | XLOC_199467 | ENSRNOT00000031230 | 0.964851157  | 3.98E-07 |
| TUCP_004523 | XLOC_199467 | ENSRNOT00000013758 | 0.961220589  | 6.47E-07 |
| TUCP_004523 | XLOC_199467 | ENSRNOT00000077406 | 0.975316188  | 6.92E-08 |
| TUCP_004523 | XLOC_199467 | ENSRNOT00000040069 | 0.968973021  | 2.15E-07 |
| TUCP_004523 | XLOC_199467 | ENSRNOT00000010748 | 0.964116338  | 4.41E-07 |
| TUCP_004523 | XLOC_199467 | ENSRNOT00000002292 | 0.950436394  | 2.17E-06 |
| TUCP_004523 | XLOC_199467 | ENSRNOT00000028563 | 0.969274957  | 2.05E-07 |
| TUCP_004523 | XLOC_199467 | ENSRNOT00000035474 | 0.978374809  | 3.59E-08 |
| TUCP_004523 | XLOC_199467 | ENSRNOT00000052422 | 0.953448341  | 1.59E-06 |
| TUCP_004523 | XLOC_199467 | ENSRNOT00000086336 | 0.973733526  | 9.42E-08 |
| TUCP_004523 | XLOC_199467 | ENSRNOT00000084422 | 0.954196039  | 1.47E-06 |
| TUCP_004523 | XLOC_199467 | ENSRNOT00000056130 | 0.955526961  | 1.27E-06 |
| TUCP_004523 | XLOC_199467 | ENSRNOT00000076872 | 0.960230237  | 7.33E-07 |
| TUCP_004523 | XLOC_199467 | ENSRNOT00000091205 | 0.954154063  | 1.48E-06 |
| TUCP_004523 | XLOC_199467 | ENSRNOT00000034704 | 0.958849165  | 8.67E-07 |
| TUCP_004523 | XLOC_199467 | ENSRNOT00000080110 | 0.96042695   | 7.15E-07 |
| TUCP_004523 | XLOC_199467 | ENSRNOT00000066670 | 0.970256559  | 1.74E-07 |
| TUCP_004523 | XLOC_199467 | ENSRNOT00000065921 | 0.952390947  | 1.78E-06 |
| TUCP_004523 | XLOC_199467 | ENSRNOT00000005490 | 0.956612451  | 1.13E-06 |
| TUCP_004523 | XLOC_199467 | ENSRNOT00000029125 | 0.975393821  | 6.82E-08 |
| TUCP_004523 | XLOC_199467 | ENSRNOT00000082174 | 0.951985652  | 1.85E-06 |
| TUCP_004523 | XLOC_199467 | ENSRNOT00000042125 | 0.957913255  | 9.69E-07 |
| TUCP_004523 | XLOC_199467 | ENSRNOT00000010824 | 0.96535229   | 3.71E-07 |
| TUCP_004523 | XLOC_199467 | ENSRNOT00000014814 | 0.96744203   | 2.73E-07 |
| TUCP_004523 | XLOC_199467 | ENSRNOT00000004412 | 0.972725207  | 1.14E-07 |
| TUCP_004523 | XLOC_199467 | ENSRNOT00000007768 | 0.951958051  | 1.86E-06 |
| TUCP_004523 | XLOC_199467 | ENSRNOT00000067181 | 0.973320955  | 1.02E-07 |

|             |             |                    |              |          |
|-------------|-------------|--------------------|--------------|----------|
| TUCP_004523 | XLOC_199467 | ENSRNOT00000064798 | 0.979164863  | 2.99E-08 |
| TUCP_004523 | XLOC_199467 | ENSRNOT00000019177 | 0.975598782  | 6.54E-08 |
| TUCP_004523 | XLOC_199467 | ENSRNOT00000014261 | 0.957669094  | 9.97E-07 |
| TUCP_004523 | XLOC_199467 | ENSRNOT00000022485 | 0.971141874  | 1.50E-07 |
| TUCP_004523 | XLOC_199467 | ENSRNOT00000033235 | 0.978024112  | 3.89E-08 |
| TUCP_004523 | XLOC_199467 | ENSRNOT00000084595 | 0.959537295  | 7.98E-07 |
| TUCP_004523 | XLOC_199467 | ENSRNOT00000027452 | 0.96871698   | 2.24E-07 |
| TUCP_004523 | XLOC_199467 | ENSRNOT00000043535 | 0.959222629  | 8.29E-07 |
| TUCP_004523 | XLOC_199467 | ENSRNOT00000040393 | 0.960779876  | 6.84E-07 |
| TUCP_004523 | XLOC_199467 | ENSRNOT00000026457 | 0.950867338  | 2.08E-06 |
| TUCP_004523 | XLOC_199467 | ENSRNOT00000004463 | 0.959555509  | 7.96E-07 |
| TUCP_004523 | XLOC_199467 | ENSRNOT00000027964 | 0.964121428  | 4.41E-07 |
| TUCP_004523 | XLOC_199467 | ENSRNOT00000051496 | 0.951398019  | 1.97E-06 |
| TUCP_004523 | XLOC_199467 | ENSRNOT00000023428 | 0.960533162  | 7.06E-07 |
| TUCP_004523 | XLOC_199467 | ENSRNOT00000011041 | 0.955332861  | 1.30E-06 |
| TUCP_004523 | XLOC_199467 | ENSRNOT00000047192 | -0.963454576 | 4.83E-07 |
| TUCP_004523 | XLOC_199467 | ENSRNOT00000017753 | 0.98417567   | 7.61E-09 |
| TUCP_004523 | XLOC_199467 | ENSRNOT00000083799 | 0.956295098  | 1.17E-06 |
| TUCP_004523 | XLOC_199467 | ENSRNOT00000012463 | -0.956996027 | 1.08E-06 |
| TUCP_004523 | XLOC_199467 | ENSRNOT00000004140 | 0.961078763  | 6.59E-07 |
| TUCP_004523 | XLOC_199467 | ENSRNOT00000015799 | 0.957884668  | 9.72E-07 |
| TUCP_004523 | XLOC_199467 | ENSRNOT00000011682 | -0.967006314 | 2.91E-07 |
| TUCP_004523 | XLOC_199467 | ENSRNOT00000015092 | 0.961310565  | 6.40E-07 |
| TUCP_004523 | XLOC_199467 | ENSRNOT00000079996 | 0.956979867  | 1.08E-06 |
| TUCP_004488 | XLOC_197548 | ENSRNOT00000056554 | 0.956656273  | 1.12E-06 |
| TUCP_004800 | XLOC_212543 | ENSRNOT00000077458 | 0.966084027  | 3.34E-07 |
| TUCP_004800 | XLOC_212543 | ENSRNOT00000084722 | 0.96846893   | 2.33E-07 |
| TUCP_004801 | XLOC_212572 | ENSRNOT00000004249 | -0.965715671 | 3.52E-07 |
| TUCP_003850 | XLOC_168598 | ENSRNOT00000015127 | 0.952747353  | 1.71E-06 |
| TUCP_003850 | XLOC_168598 | ENSRNOT00000085599 | 0.958880734  | 8.64E-07 |
| TUCP_003850 | XLOC_168598 | ENSRNOT00000006689 | 0.959601194  | 7.92E-07 |
| TUCP_003850 | XLOC_168598 | ENSRNOT00000081534 | 0.958734226  | 8.79E-07 |
| TUCP_003850 | XLOC_168598 | ENSRNOT00000085301 | 0.958960071  | 8.56E-07 |
| TUCP_003850 | XLOC_168598 | ENSRNOT00000038729 | 0.959657886  | 7.86E-07 |
| TUCP_003850 | XLOC_168598 | ENSRNOT00000086385 | 0.959657886  | 7.86E-07 |
| TUCP_003850 | XLOC_168598 | ENSRNOT00000087613 | 0.959657886  | 7.86E-07 |
| TUCP_003850 | XLOC_168598 | ENSRNOT00000041605 | 0.961175111  | 6.51E-07 |
| TUCP_003850 | XLOC_168598 | ENSRNOT00000023062 | 0.959657886  | 7.86E-07 |
| TUCP_003850 | XLOC_168598 | ENSRNOT00000058834 | 0.959657886  | 7.86E-07 |
| TUCP_003850 | XLOC_168598 | ENSRNOT00000079420 | 0.959657886  | 7.86E-07 |
| TUCP_003850 | XLOC_168598 | ENSRNOT00000090761 | 0.959657886  | 7.86E-07 |
| TUCP_003850 | XLOC_168598 | ENSRNOT00000055923 | 0.959657886  | 7.86E-07 |
| TUCP_003850 | XLOC_168598 | ENSRNOT00000071930 | 0.959657886  | 7.86E-07 |
| TUCP_003850 | XLOC_168598 | ENSRNOT00000076756 | 0.959657886  | 7.86E-07 |
| TUCP_003850 | XLOC_168598 | ENSRNOT00000081527 | 0.956897537  | 1.09E-06 |
| TUCP_003850 | XLOC_168598 | ENSRNOT00000091663 | 0.95608507   | 1.19E-06 |
| TUCP_003850 | XLOC_168598 | ENSRNOT00000081780 | 0.959657886  | 7.86E-07 |
| TUCP_003850 | XLOC_168598 | ENSRNOT00000089114 | 0.959657886  | 7.86E-07 |
| TUCP_003850 | XLOC_168598 | ENSRNOT00000072402 | 0.961287571  | 6.42E-07 |
| TUCP_003850 | XLOC_168598 | ENSRNOT00000073316 | 0.959657886  | 7.86E-07 |
| TUCP_003850 | XLOC_168598 | ENSRNOT00000086557 | 0.953691771  | 1.55E-06 |

|             |             |                    |              |          |
|-------------|-------------|--------------------|--------------|----------|
| TUCP_003850 | XLOC_168598 | ENSRNOT00000071663 | 0.959657886  | 7.86E-07 |
| TUCP_003850 | XLOC_168598 | ENSRNOT00000042860 | 0.959657886  | 7.86E-07 |
| TUCP_003850 | XLOC_168598 | ENSRNOT00000088421 | 0.959657886  | 7.86E-07 |
| TUCP_003850 | XLOC_168598 | ENSRNOT00000038898 | 0.959657886  | 7.86E-07 |
| TUCP_003850 | XLOC_168598 | ENSRNOT00000010029 | 0.959657886  | 7.86E-07 |
| TUCP_003684 | XLOC_161161 | ENSRNOT00000008971 | 0.955683904  | 1.25E-06 |
| TUCP_003684 | XLOC_161161 | ENSRNOT00000089970 | 0.950690774  | 2.11E-06 |
| TUCP_003684 | XLOC_161161 | ENSRNOT00000028490 | 0.952565915  | 1.75E-06 |
| TUCP_003684 | XLOC_161161 | ENSRNOT00000090944 | 0.963162238  | 5.02E-07 |
| TUCP_003684 | XLOC_161161 | ENSRNOT00000024083 | 0.968008498  | 2.50E-07 |
| TUCP_003684 | XLOC_161161 | ENSRNOT00000060494 | 0.963066756  | 5.09E-07 |
| TUCP_003684 | XLOC_161161 | ENSRNOT00000090923 | 0.951388711  | 1.97E-06 |
| TUCP_003684 | XLOC_161161 | ENSRNOT00000012528 | 0.950576191  | 2.14E-06 |
| TUCP_003684 | XLOC_161161 | ENSRNOT00000018844 | 0.961347055  | 6.37E-07 |
| TUCP_003684 | XLOC_161161 | ENSRNOT00000074054 | 0.95593671   | 1.21E-06 |
| TUCP_003684 | XLOC_161161 | ENSRNOT00000079595 | 0.961440839  | 6.29E-07 |
| TUCP_003684 | XLOC_161161 | ENSRNOT00000014627 | 0.977621336  | 4.26E-08 |
| TUCP_003684 | XLOC_161161 | ENSRNOT00000021884 | 0.961468534  | 6.27E-07 |
| TUCP_003684 | XLOC_161161 | ENSRNOT00000084299 | 0.963081534  | 5.08E-07 |
| TUCP_003684 | XLOC_161161 | ENSRNOT00000005664 | 0.957648089  | 9.99E-07 |
| TUCP_003684 | XLOC_161161 | ENSRNOT00000003840 | 0.951964316  | 1.86E-06 |
| TUCP_004805 | XLOC_212784 | ENSRNOT00000029674 | 0.958485107  | 9.06E-07 |
| TUCP_004806 | XLOC_212892 | ENSRNOT00000006502 | 0.999115307  | 4.26E-15 |
| TUCP_004806 | XLOC_212892 | ENSRNOT00000041777 | 0.955380492  | 1.29E-06 |
| TUCP_004806 | XLOC_212892 | ENSRNOT00000079606 | 0.983056749  | 1.07E-08 |
| TUCP_004806 | XLOC_212892 | ENSRNOT00000064751 | 0.970876102  | 1.57E-07 |
| TUCP_004806 | XLOC_212892 | ENSRNOT00000079093 | 0.974777622  | 7.71E-08 |
| TUCP_004807 | XLOC_212927 | ENSRNOT00000033379 | 0.968165088  | 2.44E-07 |
| TUCP_004807 | XLOC_212927 | ENSRNOT00000004279 | 0.952544653  | 1.75E-06 |
| TUCP_004807 | XLOC_212927 | ENSRNOT00000057051 | 0.960942614  | 6.70E-07 |
| TUCP_004807 | XLOC_212927 | ENSRNOT00000026893 | 0.955454869  | 1.28E-06 |
| TUCP_004808 | XLOC_212938 | ENSRNOT00000000201 | 0.952285992  | 1.80E-06 |
| TUCP_003991 | XLOC_175314 | ENSRNOT00000075989 | -0.965801369 | 3.48E-07 |
| TUCP_003990 | XLOC_175160 | ENSRNOT00000029177 | -0.954056446 | 1.49E-06 |
| TUCP_003997 | XLOC_175362 | ENSRNOT00000028484 | 0.950973427  | 2.05E-06 |
| TUCP_003997 | XLOC_175362 | ENSRNOT00000028732 | 0.983539735  | 9.26E-09 |
| TUCP_003997 | XLOC_175362 | ENSRNOT00000078337 | 0.952176177  | 1.82E-06 |
| TUCP_000088 | XLOC_002151 | ENSRNOT00000024186 | 0.985476671  | 4.97E-09 |
| TUCP_000088 | XLOC_002151 | ENSRNOT00000074753 | 0.989265007  | 1.10E-09 |
| TUCP_000088 | XLOC_002151 | ENSRNOT00000004876 | 0.960419334  | 7.16E-07 |
| TUCP_000088 | XLOC_002151 | ENSRNOT00000041904 | 0.991477324  | 3.49E-10 |
| TUCP_000088 | XLOC_002151 | ENSRNOT00000083487 | 0.988102051  | 1.84E-09 |
| TUCP_000088 | XLOC_002151 | ENSRNOT00000077990 | 0.991477324  | 3.49E-10 |
| TUCP_000088 | XLOC_002151 | ENSRNOT00000038826 | 0.990947608  | 4.72E-10 |
| TUCP_000088 | XLOC_002151 | ENSRNOT00000046842 | 0.965202063  | 3.79E-07 |
| TUCP_000088 | XLOC_002151 | ENSRNOT00000037169 | 0.980945993  | 1.92E-08 |
| TUCP_000088 | XLOC_002151 | ENSRNOT00000021243 | 0.985397207  | 5.10E-09 |
| TUCP_000088 | XLOC_002151 | ENSRNOT00000060250 | 0.990822667  | 5.05E-10 |
| TUCP_000088 | XLOC_002151 | ENSRNOT00000091934 | 0.991477324  | 3.49E-10 |
| TUCP_000088 | XLOC_002151 | ENSRNOT00000086027 | 0.956885544  | 1.09E-06 |
| TUCP_000088 | XLOC_002151 | ENSRNOT00000046585 | 0.992703456  | 1.61E-10 |



|             |             |                    |             |          |
|-------------|-------------|--------------------|-------------|----------|
| TUCP_000088 | XLOC_002151 | ENSRNOT00000080794 | 0.983082015 | 1.06E-08 |
| TUCP_000088 | XLOC_002151 | ENSRNOT00000014456 | 0.981090318 | 1.84E-08 |
| TUCP_000088 | XLOC_002151 | ENSRNOT00000031205 | 0.995258942 | 1.87E-11 |
| TUCP_000088 | XLOC_002151 | ENSRNOT00000044145 | 0.991477324 | 3.49E-10 |
| TUCP_000088 | XLOC_002151 | ENSRNOT00000088381 | 0.995299224 | 1.79E-11 |
| TUCP_000088 | XLOC_002151 | ENSRNOT00000011743 | 0.97827178  | 3.68E-08 |
| TUCP_000088 | XLOC_002151 | ENSRNOT00000089929 | 0.991477324 | 3.49E-10 |
| TUCP_000088 | XLOC_002151 | ENSRNOT00000088624 | 0.991477324 | 3.49E-10 |
| TUCP_000088 | XLOC_002151 | ENSRNOT00000085659 | 0.974214266 | 8.60E-08 |
| TUCP_000088 | XLOC_002151 | ENSRNOT00000015866 | 0.994525471 | 3.84E-11 |
| TUCP_000088 | XLOC_002151 | ENSRNOT00000064250 | 0.973533286 | 9.78E-08 |
| TUCP_000088 | XLOC_002151 | ENSRNOT00000034907 | 0.99362841  | 8.18E-11 |
| TUCP_000088 | XLOC_002151 | ENSRNOT00000093230 | 0.970857461 | 1.58E-07 |
| TUCP_000088 | XLOC_002151 | ENSRNOT00000051835 | 0.991477324 | 3.49E-10 |
| TUCP_000088 | XLOC_002151 | ENSRNOT00000009825 | 0.954177285 | 1.47E-06 |
| TUCP_000088 | XLOC_002151 | ENSRNOT00000079087 | 0.991477324 | 3.49E-10 |
| TUCP_000088 | XLOC_002151 | ENSRNOT00000037206 | 0.991477324 | 3.49E-10 |
| TUCP_000088 | XLOC_002151 | ENSRNOT00000083261 | 0.954805945 | 1.38E-06 |
| TUCP_000088 | XLOC_002151 | ENSRNOT00000080590 | 0.991442921 | 3.56E-10 |
| TUCP_000088 | XLOC_002151 | ENSRNOT00000027552 | 0.990325069 | 6.57E-10 |
| TUCP_000088 | XLOC_002151 | ENSRNOT00000077014 | 0.987715931 | 2.16E-09 |
| TUCP_000088 | XLOC_002151 | ENSRNOT00000080453 | 0.991115583 | 4.29E-10 |
| TUCP_000088 | XLOC_002151 | ENSRNOT00000089057 | 0.965513219 | 3.63E-07 |
| TUCP_000088 | XLOC_002151 | ENSRNOT00000057729 | 0.990385449 | 6.37E-10 |
| TUCP_000088 | XLOC_002151 | ENSRNOT00000078633 | 0.991477324 | 3.49E-10 |
| TUCP_000088 | XLOC_002151 | ENSRNOT00000013423 | 0.971280661 | 1.47E-07 |
| TUCP_000088 | XLOC_002151 | ENSRNOT00000071884 | 0.958126767 | 9.45E-07 |
| TUCP_000088 | XLOC_002151 | ENSRNOT00000066839 | 0.981794942 | 1.53E-08 |
| TUCP_000088 | XLOC_002151 | ENSRNOT00000078663 | 0.970740326 | 1.61E-07 |
| TUCP_000088 | XLOC_002151 | ENSRNOT00000021608 | 0.955462943 | 1.28E-06 |
| TUCP_000088 | XLOC_002151 | ENSRNOT00000029634 | 0.988235615 | 1.74E-09 |
| TUCP_000088 | XLOC_002151 | ENSRNOT00000093579 | 0.962281908 | 5.64E-07 |
| TUCP_000088 | XLOC_002151 | ENSRNOT00000065460 | 0.991477324 | 3.49E-10 |
| TUCP_000088 | XLOC_002151 | ENSRNOT00000003817 | 0.986216743 | 3.83E-09 |
| TUCP_000088 | XLOC_002151 | ENSRNOT00000016713 | 0.991477324 | 3.49E-10 |
| TUCP_000088 | XLOC_002151 | ENSRNOT00000079260 | 0.991681618 | 3.09E-10 |
| TUCP_000088 | XLOC_002151 | ENSRNOT00000039294 | 0.991477324 | 3.49E-10 |
| TUCP_000088 | XLOC_002151 | ENSRNOT00000024337 | 0.951679725 | 1.91E-06 |
| TUCP_000089 | XLOC_002151 | ENSRNOT00000024186 | 0.986284533 | 3.74E-09 |
| TUCP_000089 | XLOC_002151 | ENSRNOT00000074753 | 0.989020716 | 1.23E-09 |
| TUCP_000089 | XLOC_002151 | ENSRNOT00000004876 | 0.964190567 | 4.37E-07 |
| TUCP_000089 | XLOC_002151 | ENSRNOT00000041904 | 0.990969653 | 4.66E-10 |
| TUCP_000089 | XLOC_002151 | ENSRNOT00000083487 | 0.983698078 | 8.82E-09 |
| TUCP_000089 | XLOC_002151 | ENSRNOT00000077990 | 0.990969653 | 4.66E-10 |
| TUCP_000089 | XLOC_002151 | ENSRNOT00000038826 | 0.990264487 | 6.78E-10 |
| TUCP_000089 | XLOC_002151 | ENSRNOT00000037094 | 0.958702758 | 8.83E-07 |
| TUCP_000089 | XLOC_002151 | ENSRNOT00000046842 | 0.960952762 | 6.69E-07 |
| TUCP_000089 | XLOC_002151 | ENSRNOT00000037169 | 0.976919973 | 4.96E-08 |
| TUCP_000089 | XLOC_002151 | ENSRNOT00000021243 | 0.978796941 | 3.26E-08 |
| TUCP_000089 | XLOC_002151 | ENSRNOT00000060250 | 0.991179748 | 4.14E-10 |
| TUCP_000089 | XLOC_002151 | ENSRNOT00000091934 | 0.990969653 | 4.66E-10 |

|             |             |                    |              |          |
|-------------|-------------|--------------------|--------------|----------|
| TUCP_000089 | XLOC_002151 | ENSRNOT00000086027 | 0.974719805  | 7.79E-08 |
| TUCP_000089 | XLOC_002151 | ENSRNOT00000046585 | 0.995221741  | 1.95E-11 |
| TUCP_000089 | XLOC_002151 | ENSRNOT00000080794 | 0.978776938  | 3.27E-08 |
| TUCP_000089 | XLOC_002151 | ENSRNOT00000014456 | 0.977232136  | 4.64E-08 |
| TUCP_000089 | XLOC_002151 | ENSRNOT00000031205 | 0.995879971  | 9.28E-12 |
| TUCP_000089 | XLOC_002151 | ENSRNOT00000044145 | 0.990969653  | 4.66E-10 |
| TUCP_000089 | XLOC_002151 | ENSRNOT00000088381 | 0.997516425  | 7.41E-13 |
| TUCP_000089 | XLOC_002151 | ENSRNOT00000011743 | 0.975102974  | 7.23E-08 |
| TUCP_000089 | XLOC_002151 | ENSRNOT00000089929 | 0.990969653  | 4.66E-10 |
| TUCP_000089 | XLOC_002151 | ENSRNOT00000088624 | 0.990969653  | 4.66E-10 |
| TUCP_000089 | XLOC_002151 | ENSRNOT00000085659 | 0.979349183  | 2.86E-08 |
| TUCP_000089 | XLOC_002151 | ENSRNOT00000015866 | 0.991703263  | 3.05E-10 |
| TUCP_000089 | XLOC_002151 | ENSRNOT00000078633 | 0.990969653  | 4.66E-10 |
| TUCP_000089 | XLOC_002151 | ENSRNOT00000024575 | 0.964066305  | 4.44E-07 |
| TUCP_000089 | XLOC_002151 | ENSRNOT00000034907 | 0.990812296  | 5.08E-10 |
| TUCP_000089 | XLOC_002151 | ENSRNOT00000093230 | 0.966217545  | 3.27E-07 |
| TUCP_000089 | XLOC_002151 | ENSRNOT00000051835 | 0.990969653  | 4.66E-10 |
| TUCP_000089 | XLOC_002151 | ENSRNOT00000009825 | 0.951630614  | 1.92E-06 |
| TUCP_000089 | XLOC_002151 | ENSRNOT00000079087 | 0.990969653  | 4.66E-10 |
| TUCP_000089 | XLOC_002151 | ENSRNOT00000037206 | 0.990969653  | 4.66E-10 |
| TUCP_000089 | XLOC_002151 | ENSRNOT00000083261 | 0.966268814  | 3.25E-07 |
| TUCP_000089 | XLOC_002151 | ENSRNOT00000011342 | 0.95389451   | 1.52E-06 |
| TUCP_000089 | XLOC_002151 | ENSRNOT00000080590 | 0.990684866  | 5.44E-10 |
| TUCP_000089 | XLOC_002151 | ENSRNOT00000027552 | 0.990750475  | 5.25E-10 |
| TUCP_000089 | XLOC_002151 | ENSRNOT00000077014 | 0.994819455  | 2.91E-11 |
| TUCP_000089 | XLOC_002151 | ENSRNOT00000080453 | 0.990995417  | 4.59E-10 |
| TUCP_000089 | XLOC_002151 | ENSRNOT00000089057 | 0.964288003  | 4.31E-07 |
| TUCP_000089 | XLOC_002151 | ENSRNOT00000057729 | 0.989170825  | 1.15E-09 |
| TUCP_000089 | XLOC_002151 | ENSRNOT00000061284 | 0.961608986  | 6.16E-07 |
| TUCP_000089 | XLOC_002151 | ENSRNOT00000013423 | 0.973982728  | 8.99E-08 |
| TUCP_000089 | XLOC_002151 | ENSRNOT00000071884 | 0.962876769  | 5.22E-07 |
| TUCP_000089 | XLOC_002151 | ENSRNOT00000066839 | 0.976235416  | 5.74E-08 |
| TUCP_000089 | XLOC_002151 | ENSRNOT00000078663 | 0.978500236  | 3.49E-08 |
| TUCP_000089 | XLOC_002151 | ENSRNOT00000064250 | 0.981764495  | 1.54E-08 |
| TUCP_000089 | XLOC_002151 | ENSRNOT00000021608 | 0.965413041  | 3.68E-07 |
| TUCP_000089 | XLOC_002151 | ENSRNOT00000029634 | 0.986207557  | 3.84E-09 |
| TUCP_000089 | XLOC_002151 | ENSRNOT00000093579 | 0.966019224  | 3.37E-07 |
| TUCP_000089 | XLOC_002151 | ENSRNOT00000065460 | 0.990969653  | 4.66E-10 |
| TUCP_000089 | XLOC_002151 | ENSRNOT0000003817  | 0.990220565  | 6.93E-10 |
| TUCP_000089 | XLOC_002151 | ENSRNOT00000016713 | 0.990969653  | 4.66E-10 |
| TUCP_000089 | XLOC_002151 | ENSRNOT00000079260 | 0.989724118  | 8.87E-10 |
| TUCP_000089 | XLOC_002151 | ENSRNOT00000039294 | 0.990969653  | 4.66E-10 |
| TUCP_000089 | XLOC_002151 | ENSRNOT00000024337 | 0.96173028   | 6.06E-07 |
| TUCP_004138 | XLOC_180715 | ENSRNOT00000073559 | 0.977760256  | 4.13E-08 |
| TUCP_004138 | XLOC_180715 | ENSRNOT00000011230 | 0.960051115  | 7.49E-07 |
| TUCP_004138 | XLOC_180715 | ENSRNOT00000081246 | 0.960991784  | 6.66E-07 |
| TUCP_004138 | XLOC_180715 | ENSRNOT00000074939 | 0.96051132   | 7.08E-07 |
| TUCP_004138 | XLOC_180715 | ENSRNOT00000023133 | 0.951742571  | 1.90E-06 |
| TUCP_004138 | XLOC_180715 | ENSRNOT00000005228 | 0.951095204  | 2.03E-06 |
| TUCP_004138 | XLOC_180715 | ENSRNOT00000039166 | 0.958693231  | 8.84E-07 |
| TUCP_004138 | XLOC_180715 | ENSRNOT00000028628 | -0.957011422 | 1.08E-06 |

|             |             |                    |              |          |
|-------------|-------------|--------------------|--------------|----------|
| TUCP_004138 | XLOC_180715 | ENSRNOT00000090342 | 0.963801282  | 4.61E-07 |
| TUCP_004138 | XLOC_180715 | ENSRNOT00000028856 | 0.950209474  | 2.22E-06 |
| TUCP_004138 | XLOC_180715 | ENSRNOT00000043216 | 0.952032604  | 1.84E-06 |
| TUCP_004138 | XLOC_180715 | ENSRNOT00000091128 | -0.960429064 | 7.15E-07 |
| TUCP_004138 | XLOC_180715 | ENSRNOT00000066670 | 0.955617522  | 1.26E-06 |
| TUCP_004138 | XLOC_180715 | ENSRNOT00000004172 | 0.951827287  | 1.88E-06 |
| TUCP_004138 | XLOC_180715 | ENSRNOT00000071971 | 0.968892241  | 2.18E-07 |
| TUCP_004138 | XLOC_180715 | ENSRNOT00000012187 | 0.959524586  | 7.99E-07 |
| TUCP_004138 | XLOC_180715 | ENSRNOT00000026783 | 0.960273636  | 7.29E-07 |
| TUCP_004138 | XLOC_180715 | ENSRNOT00000040731 | 0.952312916  | 1.79E-06 |
| TUCP_004138 | XLOC_180715 | ENSRNOT00000012379 | 0.952639213  | 1.73E-06 |
| TUCP_004138 | XLOC_180715 | ENSRNOT00000044742 | 0.97840047   | 3.57E-08 |
| TUCP_004138 | XLOC_180715 | ENSRNOT00000038247 | 0.954968877  | 1.35E-06 |
| TUCP_004138 | XLOC_180715 | ENSRNOT00000071764 | 0.979530867  | 2.73E-08 |
| TUCP_004138 | XLOC_180715 | ENSRNOT00000075326 | 0.958183799  | 9.39E-07 |
| TUCP_004138 | XLOC_180715 | ENSRNOT00000021348 | 0.95121949   | 2.00E-06 |
| TUCP_004138 | XLOC_180715 | ENSRNOT00000009811 | 0.958513988  | 9.03E-07 |
| TUCP_004138 | XLOC_180715 | ENSRNOT00000023196 | 0.95289389   | 1.69E-06 |
| TUCP_004138 | XLOC_180715 | ENSRNOT00000065168 | 0.963419129  | 4.85E-07 |
| TUCP_004138 | XLOC_180715 | ENSRNOT00000085228 | 0.974844498  | 7.61E-08 |
| TUCP_004138 | XLOC_180715 | ENSRNOT00000032780 | 0.959758482  | 7.77E-07 |
| TUCP_004138 | XLOC_180715 | ENSRNOT00000055669 | 0.961585765  | 6.18E-07 |
| TUCP_004138 | XLOC_180715 | ENSRNOT00000020134 | 0.957212408  | 1.05E-06 |
| TUCP_004138 | XLOC_180715 | ENSRNOT00000017319 | 0.966805987  | 3.00E-07 |
| TUCP_004138 | XLOC_180715 | ENSRNOT00000086065 | 0.95535279   | 1.30E-06 |
| TUCP_004138 | XLOC_180715 | ENSRNOT00000079866 | 0.951886407  | 1.87E-06 |
| TUCP_004138 | XLOC_180715 | ENSRNOT00000072518 | 0.98251029   | 1.25E-08 |
| TUCP_004138 | XLOC_180715 | ENSRNOT00000017668 | 0.964268673  | 4.32E-07 |
| TUCP_004138 | XLOC_180715 | ENSRNOT00000072196 | 0.981457743  | 1.67E-08 |
| TUCP_004138 | XLOC_180715 | ENSRNOT00000087592 | 0.964745278  | 4.04E-07 |
| TUCP_004138 | XLOC_180715 | ENSRNOT00000061392 | 0.968607736  | 2.28E-07 |
| TUCP_004138 | XLOC_180715 | ENSRNOT00000063917 | -0.957232583 | 1.05E-06 |
| TUCP_004138 | XLOC_180715 | ENSRNOT00000002410 | 0.974350841  | 8.37E-08 |
| TUCP_004138 | XLOC_180715 | ENSRNOT00000027012 | 0.957140226  | 1.06E-06 |
| TUCP_004138 | XLOC_180715 | ENSRNOT00000021037 | 0.97496663   | 7.42E-08 |
| TUCP_004138 | XLOC_180715 | ENSRNOT00000017556 | 0.951596993  | 1.93E-06 |
| TUCP_004138 | XLOC_180715 | ENSRNOT00000000468 | 0.97328144   | 1.03E-07 |
| TUCP_004138 | XLOC_180715 | ENSRNOT00000073991 | 0.950549383  | 2.14E-06 |
| TUCP_004138 | XLOC_180715 | ENSRNOT00000012892 | 0.962919821  | 5.19E-07 |
| TUCP_004138 | XLOC_180715 | ENSRNOT00000020028 | 0.981215753  | 1.78E-08 |
| TUCP_004138 | XLOC_180715 | ENSRNOT00000023180 | 0.967534737  | 2.69E-07 |
| TUCP_004138 | XLOC_180715 | ENSRNOT00000015609 | 0.960572371  | 7.02E-07 |
| TUCP_004138 | XLOC_180715 | ENSRNOT00000016321 | -0.950999526 | 2.05E-06 |
| TUCP_004138 | XLOC_180715 | ENSRNOT00000023477 | 0.961453869  | 6.28E-07 |
| TUCP_004138 | XLOC_180715 | ENSRNOT00000008817 | 0.970907642  | 1.56E-07 |
| TUCP_004138 | XLOC_180715 | ENSRNOT00000087583 | 0.961209216  | 6.48E-07 |
| TUCP_004138 | XLOC_180715 | ENSRNOT00000052018 | 0.960037821  | 7.50E-07 |
| TUCP_004138 | XLOC_180715 | ENSRNOT00000010303 | -0.955018844 | 1.34E-06 |
| TUCP_004138 | XLOC_180715 | ENSRNOT00000052422 | 0.974180616  | 8.65E-08 |
| TUCP_004138 | XLOC_180715 | ENSRNOT00000064798 | 0.976411072  | 5.53E-08 |
| TUCP_004138 | XLOC_180715 | ENSRNOT00000029167 | 0.964090494  | 4.43E-07 |

|             |             |                    |              |          |
|-------------|-------------|--------------------|--------------|----------|
| TUCP_004138 | XLOC_180715 | ENSRNOT00000090123 | 0.957464313  | 1.02E-06 |
| TUCP_004138 | XLOC_180715 | ENSRNOT00000027526 | 0.950167568  | 2.23E-06 |
| TUCP_004138 | XLOC_180715 | ENSRNOT00000014537 | 0.973706915  | 9.47E-08 |
| TUCP_004138 | XLOC_180715 | ENSRNOT00000077555 | 0.953347869  | 1.61E-06 |
| TUCP_004138 | XLOC_180715 | ENSRNOT00000023989 | 0.95646657   | 1.14E-06 |
| TUCP_004138 | XLOC_180715 | ENSRNOT00000021408 | 0.978734375  | 3.31E-08 |
| TUCP_004138 | XLOC_180715 | ENSRNOT00000031267 | 0.96107162   | 6.59E-07 |
| TUCP_004138 | XLOC_180715 | ENSRNOT00000014454 | 0.954820136  | 1.37E-06 |
| TUCP_004138 | XLOC_180715 | ENSRNOT00000019133 | 0.953880653  | 1.52E-06 |
| TUCP_004138 | XLOC_180715 | ENSRNOT00000078073 | -0.95194118  | 1.86E-06 |
| TUCP_004138 | XLOC_180715 | ENSRNOT00000024322 | 0.972757954  | 1.13E-07 |
| TUCP_004138 | XLOC_180715 | ENSRNOT00000088182 | 0.953407837  | 1.60E-06 |
| TUCP_004138 | XLOC_180715 | ENSRNOT00000091265 | 0.959907613  | 7.63E-07 |
| TUCP_004138 | XLOC_180715 | ENSRNOT00000026457 | 0.952603768  | 1.74E-06 |
| TUCP_004138 | XLOC_180715 | ENSRNOT00000025832 | 0.955344583  | 1.30E-06 |
| TUCP_004138 | XLOC_180715 | ENSRNOT00000017753 | 0.975002122  | 7.37E-08 |
| TUCP_004138 | XLOC_180715 | ENSRNOT00000002109 | 0.956977617  | 1.08E-06 |
| TUCP_004138 | XLOC_180715 | ENSRNOT00000006499 | 0.981832688  | 1.51E-08 |
| TUCP_004138 | XLOC_180715 | ENSRNOT00000019011 | 0.958419899  | 9.13E-07 |
| TUCP_004138 | XLOC_180715 | ENSRNOT00000029833 | 0.966808998  | 3.00E-07 |
| TUCP_004138 | XLOC_180715 | ENSRNOT00000034487 | -0.951344893 | 1.98E-06 |
| TUCP_004138 | XLOC_180715 | ENSRNOT00000022074 | 0.954755657  | 1.38E-06 |
| TUCP_004138 | XLOC_180715 | ENSRNOT00000036951 | 0.959328401  | 8.19E-07 |
| TUCP_004138 | XLOC_180715 | ENSRNOT00000016519 | 0.950813611  | 2.09E-06 |
| TUCP_004138 | XLOC_180715 | ENSRNOT00000041365 | 0.951006291  | 2.05E-06 |
| TUCP_004138 | XLOC_180715 | ENSRNOT00000023428 | 0.964733521  | 4.05E-07 |
| TUCP_004138 | XLOC_180715 | ENSRNOT00000031401 | -0.954277185 | 1.46E-06 |
| TUCP_004138 | XLOC_180715 | ENSRNOT00000058842 | 0.956615355  | 1.13E-06 |
| TUCP_004138 | XLOC_180715 | ENSRNOT00000000157 | 0.952285097  | 1.80E-06 |
| TUCP_004138 | XLOC_180715 | ENSRNOT00000035700 | 0.952047618  | 1.84E-06 |
| TUCP_004138 | XLOC_180715 | ENSRNOT00000060362 | 0.964526256  | 4.17E-07 |
| TUCP_004138 | XLOC_180715 | ENSRNOT00000064840 | 0.956976349  | 1.08E-06 |
| TUCP_004138 | XLOC_180715 | ENSRNOT00000083093 | 0.952875036  | 1.69E-06 |
| TUCP_004138 | XLOC_180715 | ENSRNOT00000016991 | 0.958204135  | 9.36E-07 |
| TUCP_004138 | XLOC_180715 | ENSRNOT00000011350 | 0.950314535  | 2.19E-06 |
| TUCP_004138 | XLOC_180715 | ENSRNOT00000082245 | 0.953678957  | 1.55E-06 |
| TUCP_004138 | XLOC_180715 | ENSRNOT00000054828 | 0.965934682  | 3.41E-07 |
| TUCP_004138 | XLOC_180715 | ENSRNOT00000058563 | 0.966771651  | 3.02E-07 |
| TUCP_004138 | XLOC_180715 | ENSRNOT00000071733 | 0.967543845  | 2.69E-07 |
| TUCP_004138 | XLOC_180715 | ENSRNOT00000077406 | 0.963781748  | 4.62E-07 |
| TUCP_004138 | XLOC_180715 | ENSRNOT00000010748 | 0.963640616  | 4.71E-07 |
| TUCP_004138 | XLOC_180715 | ENSRNOT00000011052 | 0.952993216  | 1.67E-06 |
| TUCP_004138 | XLOC_180715 | ENSRNOT00000078994 | 0.951350026  | 1.98E-06 |
| TUCP_004138 | XLOC_180715 | ENSRNOT00000035474 | 0.963035123  | 5.11E-07 |
| TUCP_004138 | XLOC_180715 | ENSRNOT00000076872 | 0.981622888  | 1.60E-08 |
| TUCP_004138 | XLOC_180715 | ENSRNOT00000014124 | 0.959790891  | 7.74E-07 |
| TUCP_004138 | XLOC_180715 | ENSRNOT00000040476 | 0.953270677  | 1.62E-06 |
| TUCP_004138 | XLOC_180715 | ENSRNOT00000005490 | 0.959529068  | 7.99E-07 |
| TUCP_004138 | XLOC_180715 | ENSRNOT00000060696 | 0.95007137   | 2.25E-06 |
| TUCP_004138 | XLOC_180715 | ENSRNOT00000007768 | 0.951676913  | 1.91E-06 |
| TUCP_004138 | XLOC_180715 | ENSRNOT00000061432 | 0.957697704  | 9.94E-07 |

|             |             |                     |              |          |
|-------------|-------------|---------------------|--------------|----------|
| TUCP_004138 | XLOC_180715 | ENSRNOT00000019177  | 0.958253961  | 9.31E-07 |
| TUCP_004138 | XLOC_180715 | ENSRNOT00000026280  | 0.951446574  | 1.96E-06 |
| TUCP_004138 | XLOC_180715 | ENSRNOT00000022485  | 0.95861833   | 8.91E-07 |
| TUCP_004138 | XLOC_180715 | ENSRNOT00000033235  | 0.980113739  | 2.37E-08 |
| TUCP_004138 | XLOC_180715 | ENSRNOT00000027452  | 0.959107919  | 8.41E-07 |
| TUCP_004138 | XLOC_180715 | ENSRNOT00000030343  | 0.95754303   | 1.01E-06 |
| TUCP_004138 | XLOC_180715 | ENSRNOT00000017165  | -0.968017052 | 2.50E-07 |
| TUCP_004138 | XLOC_180715 | ENSRNOT00000013985  | 0.952049535  | 1.84E-06 |
| TUCP_004138 | XLOC_180715 | ENSRNOT00000004463  | 0.950379241  | 2.18E-06 |
| TUCP_004138 | XLOC_180715 | ENSRNOT00000044009  | 0.961994731  | 5.86E-07 |
| TUCP_004138 | XLOC_180715 | ENSRNOT00000015898  | 0.953770458  | 1.54E-06 |
| TUCP_004138 | XLOC_180715 | ENSRNOT00000047192  | -0.954912592 | 1.36E-06 |
| TUCP_004138 | XLOC_180715 | ENSRNOT00000015799  | 0.960529374  | 7.06E-07 |
| TUCP_004138 | XLOC_180715 | ENSRNOT00000083799  | 0.955800244  | 1.23E-06 |
| TUCP_004138 | XLOC_180715 | ENSRNOT00000024548  | 0.953983909  | 1.50E-06 |
| TUCP_000084 | XLOC_002148 | ENSRNOT00000061185  | 0.960411908  | 7.16E-07 |
| TUCP_000086 | XLOC_002148 | ENSRNOT00000034842  | 0.996863055  | 2.38E-12 |
| TUCP_000087 | XLOC_002151 | ENSRNOT00000024186  | 0.984882764  | 6.06E-09 |
| TUCP_000087 | XLOC_002151 | ENSRNOT00000074753  | 0.997304081  | 1.12E-12 |
| TUCP_000087 | XLOC_002151 | ENSRNOT00000004876  | 0.961270389  | 6.43E-07 |
| TUCP_000087 | XLOC_002151 | ENSRNOT000000041904 | 0.999176714  | 2.97E-15 |
| TUCP_000087 | XLOC_002151 | ENSRNOT000000083487 | 0.988195509  | 1.77E-09 |
| TUCP_000087 | XLOC_002151 | ENSRNOT00000077990  | 0.999176714  | 2.97E-15 |
| TUCP_000087 | XLOC_002151 | ENSRNOT00000038826  | 0.998858028  | 1.53E-14 |
| TUCP_000087 | XLOC_002151 | ENSRNOT00000037094  | 0.951843124  | 1.88E-06 |
| TUCP_000087 | XLOC_002151 | ENSRNOT00000046842  | 0.971474673  | 1.42E-07 |
| TUCP_000087 | XLOC_002151 | ENSRNOT00000037169  | 0.98056939   | 2.11E-08 |
| TUCP_000087 | XLOC_002151 | ENSRNOT00000021243  | 0.98566422   | 4.66E-09 |
| TUCP_000087 | XLOC_002151 | ENSRNOT00000060250  | 0.999140702  | 3.68E-15 |
| TUCP_000087 | XLOC_002151 | ENSRNOT00000091934  | 0.999176714  | 2.97E-15 |
| TUCP_000087 | XLOC_002151 | ENSRNOT00000086027  | 0.957334169  | 1.04E-06 |
| TUCP_000087 | XLOC_002151 | ENSRNOT00000046585  | 0.989094672  | 1.19E-09 |
| TUCP_000087 | XLOC_002151 | ENSRNOT00000080794  | 0.987831819  | 2.06E-09 |
| TUCP_000087 | XLOC_002151 | ENSRNOT00000014456  | 0.990109343  | 7.33E-10 |
| TUCP_000087 | XLOC_002151 | ENSRNOT00000031205  | 0.994799076  | 2.97E-11 |
| TUCP_000087 | XLOC_002151 | ENSRNOT00000044145  | 0.999176714  | 2.97E-15 |
| TUCP_000087 | XLOC_002151 | ENSRNOT00000088381  | 0.993858206  | 6.81E-11 |
| TUCP_000087 | XLOC_002151 | ENSRNOT00000011743  | 0.984999895  | 5.83E-09 |
| TUCP_000087 | XLOC_002151 | ENSRNOT00000089929  | 0.999176714  | 2.97E-15 |
| TUCP_000087 | XLOC_002151 | ENSRNOT00000088624  | 0.999176714  | 2.97E-15 |
| TUCP_000087 | XLOC_002151 | ENSRNOT00000085659  | 0.990098219  | 7.37E-10 |
| TUCP_000087 | XLOC_002151 | ENSRNOT00000015866  | 0.995939855  | 8.63E-12 |
| TUCP_000087 | XLOC_002151 | ENSRNOT00000078633  | 0.999176714  | 2.97E-15 |
| TUCP_000087 | XLOC_002151 | ENSRNOT00000081085  | 0.950146296  | 2.23E-06 |
| TUCP_000087 | XLOC_002151 | ENSRNOT00000034907  | 0.996068506  | 7.35E-12 |
| TUCP_000087 | XLOC_002151 | ENSRNOT00000093230  | 0.962368666  | 5.58E-07 |
| TUCP_000087 | XLOC_002151 | ENSRNOT00000051835  | 0.999176714  | 2.97E-15 |
| TUCP_000087 | XLOC_002151 | ENSRNOT00000009825  | 0.953317493  | 1.61E-06 |
| TUCP_000087 | XLOC_002151 | ENSRNOT00000079087  | 0.999176714  | 2.97E-15 |
| TUCP_000087 | XLOC_002151 | ENSRNOT00000037206  | 0.999176714  | 2.97E-15 |
| TUCP_000087 | XLOC_002151 | ENSRNOT00000083261  | 0.970315663  | 1.73E-07 |

|             |             |                    |             |          |
|-------------|-------------|--------------------|-------------|----------|
| TUCP_000087 | XLOC_002151 | ENSRNOT00000080590 | 0.998976738 | 8.82E-15 |
| TUCP_000087 | XLOC_002151 | ENSRNOT00000027552 | 0.998918698 | 1.16E-14 |
| TUCP_000087 | XLOC_002151 | ENSRNOT00000077014 | 0.996637683 | 3.37E-12 |
| TUCP_000087 | XLOC_002151 | ENSRNOT00000080453 | 0.999197693 | 2.61E-15 |
| TUCP_000087 | XLOC_002151 | ENSRNOT00000089057 | 0.969479802 | 1.98E-07 |
| TUCP_000087 | XLOC_002151 | ENSRNOT00000066839 | 0.989101367 | 1.19E-09 |
| TUCP_000087 | XLOC_002151 | ENSRNOT00000061284 | 0.959885548 | 7.65E-07 |
| TUCP_000087 | XLOC_002151 | ENSRNOT00000013423 | 0.966403448 | 3.19E-07 |
| TUCP_000087 | XLOC_002151 | ENSRNOT00000071884 | 0.975095276 | 7.24E-08 |
| TUCP_000087 | XLOC_002151 | ENSRNOT00000004128 | 0.960630967 | 6.97E-07 |
| TUCP_000087 | XLOC_002151 | ENSRNOT00000026316 | 0.958568166 | 8.97E-07 |
| TUCP_000087 | XLOC_002151 | ENSRNOT00000057729 | 0.998350928 | 9.58E-14 |
| TUCP_000087 | XLOC_002151 | ENSRNOT00000078663 | 0.977307333 | 4.56E-08 |
| TUCP_000087 | XLOC_002151 | ENSRNOT00000064250 | 0.982402709 | 1.29E-08 |
| TUCP_000087 | XLOC_002151 | ENSRNOT00000021608 | 0.965936956 | 3.41E-07 |
| TUCP_000087 | XLOC_002151 | ENSRNOT00000029634 | 0.994055416 | 5.79E-11 |
| TUCP_000087 | XLOC_002151 | ENSRNOT00000093579 | 0.965048023 | 3.87E-07 |
| TUCP_000087 | XLOC_002151 | ENSRNOT00000086349 | 0.95429393  | 1.45E-06 |
| TUCP_000087 | XLOC_002151 | ENSRNOT00000065460 | 0.999176714 | 2.97E-15 |
| TUCP_000087 | XLOC_002151 | ENSRNOT00000003817 | 0.996199988 | 6.20E-12 |
| TUCP_000087 | XLOC_002151 | ENSRNOT00000016713 | 0.999176714 | 2.97E-15 |
| TUCP_000087 | XLOC_002151 | ENSRNOT00000079260 | 0.996470915 | 4.29E-12 |
| TUCP_000087 | XLOC_002151 | ENSRNOT00000039294 | 0.999176714 | 2.97E-15 |
| TUCP_000087 | XLOC_002151 | ENSRNOT00000024337 | 0.957175155 | 1.06E-06 |
| TUCP_000480 | XLOC_016654 | ENSRNOT00000081570 | 0.962961027 | 5.16E-07 |
| TUCP_000480 | XLOC_016654 | ENSRNOT00000091652 | 0.99819185  | 1.52E-13 |
| TUCP_000480 | XLOC_016654 | ENSRNOT00000036564 | 0.972337506 | 1.22E-07 |
| TUCP_000480 | XLOC_016654 | ENSRNOT00000000109 | 0.962179854 | 5.72E-07 |
| TUCP_000480 | XLOC_016654 | ENSRNOT00000080865 | 1           | 4.25E-78 |
| TUCP_000480 | XLOC_016654 | ENSRNOT00000073534 | 0.995808019 | 1.01E-11 |
| TUCP_000480 | XLOC_016654 | ENSRNOT00000012161 | 0.987544327 | 2.31E-09 |
| TUCP_000480 | XLOC_016654 | ENSRNOT00000078707 | 0.960060506 | 7.48E-07 |
| TUCP_000480 | XLOC_016654 | ENSRNOT00000087758 | 0.968778527 | 2.22E-07 |
| TUCP_000480 | XLOC_016654 | ENSRNOT00000049832 | 0.969039151 | 2.13E-07 |
| TUCP_000480 | XLOC_016654 | ENSRNOT00000093019 | 1           | 0        |
| TUCP_000480 | XLOC_016654 | ENSRNOT00000024825 | 0.980452701 | 2.18E-08 |
| TUCP_000480 | XLOC_016654 | ENSRNOT00000059266 | 0.96033506  | 7.23E-07 |
| TUCP_000480 | XLOC_016654 | ENSRNOT00000072734 | 0.965018115 | 3.89E-07 |
| TUCP_000480 | XLOC_016654 | ENSRNOT00000085908 | 0.996653227 | 3.29E-12 |
| TUCP_000480 | XLOC_016654 | ENSRNOT00000046744 | 1           | 4.25E-78 |
| TUCP_000480 | XLOC_016654 | ENSRNOT00000076429 | 1           | 0        |
| TUCP_000480 | XLOC_016654 | ENSRNOT00000084667 | 0.999660971 | 3.53E-17 |
| TUCP_000480 | XLOC_016654 | ENSRNOT00000055412 | 1           | 0        |
| TUCP_000480 | XLOC_016654 | ENSRNOT00000093201 | 0.9997022   | 1.84E-17 |
| TUCP_000480 | XLOC_016654 | ENSRNOT00000072724 | 1           | 1.33E-79 |
| TUCP_000480 | XLOC_016654 | ENSRNOT00000090323 | 0.95603782  | 1.20E-06 |
| TUCP_000480 | XLOC_016654 | ENSRNOT00000082760 | 0.986293522 | 3.72E-09 |
| TUCP_000480 | XLOC_016654 | ENSRNOT00000066017 | 0.989785653 | 8.61E-10 |
| TUCP_000480 | XLOC_016654 | ENSRNOT00000073148 | 0.985721397 | 4.56E-09 |
| TUCP_000480 | XLOC_016654 | ENSRNOT00000077462 | 0.960098183 | 7.45E-07 |
| TUCP_000480 | XLOC_016654 | ENSRNOT00000084375 | 1           | 0        |

|             |             |                    |              |          |
|-------------|-------------|--------------------|--------------|----------|
| TUCP_000480 | XLOC_016654 | ENSRNOT00000085447 | 0.998400682  | 8.22E-14 |
| TUCP_000480 | XLOC_016654 | ENSRNOT00000006249 | 0.966489607  | 3.15E-07 |
| TUCP_000480 | XLOC_016654 | ENSRNOT00000087073 | 0.952450698  | 1.77E-06 |
| TUCP_000480 | XLOC_016654 | ENSRNOT00000042369 | 0.995659369  | 1.20E-11 |
| TUCP_000480 | XLOC_016654 | ENSRNOT00000086554 | 1            | 1.33E-79 |
| TUCP_000480 | XLOC_016654 | ENSRNOT00000054858 | 0.985228824  | 5.40E-09 |
| TUCP_000480 | XLOC_016654 | ENSRNOT00000047921 | 1            | 0        |
| TUCP_000480 | XLOC_016654 | ENSRNOT00000064261 | 0.999977196  | 4.86E-23 |
| TUCP_000480 | XLOC_016654 | ENSRNOT00000086660 | 0.999208903  | 2.44E-15 |
| TUCP_000480 | XLOC_016654 | ENSRNOT00000080933 | 0.967360681  | 2.76E-07 |
| TUCP_000480 | XLOC_016654 | ENSRNOT00000083977 | 1            | 4.25E-78 |
| TUCP_000480 | XLOC_016654 | ENSRNOT00000092933 | 1            | 0        |
| TUCP_000480 | XLOC_016654 | ENSRNOT00000009061 | 0.953300672  | 1.62E-06 |
| TUCP_000480 | XLOC_016654 | ENSRNOT00000041281 | 0.987828355  | 2.06E-09 |
| TUCP_000082 | XLOC_002121 | ENSRNOT00000008873 | -0.959270724 | 8.24E-07 |
| TUCP_000082 | XLOC_002121 | ENSRNOT00000007698 | 0.953119621  | 1.65E-06 |
| TUCP_000082 | XLOC_002121 | ENSRNOT00000006186 | -0.957846778 | 9.76E-07 |
| TUCP_000082 | XLOC_002121 | ENSRNOT00000048910 | 0.964764862  | 4.03E-07 |
| TUCP_000082 | XLOC_002121 | ENSRNOT00000020357 | -0.950605976 | 2.13E-06 |
| TUCP_000082 | XLOC_002121 | ENSRNOT00000080174 | 0.954070901  | 1.49E-06 |
| TUCP_000082 | XLOC_002121 | ENSRNOT00000074544 | 0.955300906  | 1.30E-06 |
| TUCP_000082 | XLOC_002121 | ENSRNOT00000004241 | 0.973279056  | 1.03E-07 |
| TUCP_000082 | XLOC_002121 | ENSRNOT00000015678 | 0.964062571  | 4.44E-07 |
| TUCP_000082 | XLOC_002121 | ENSRNOT00000022259 | 0.958036109  | 9.55E-07 |
| TUCP_000082 | XLOC_002121 | ENSRNOT00000078650 | 0.952485454  | 1.76E-06 |
| TUCP_000082 | XLOC_002121 | ENSRNOT00000030501 | 0.980013022  | 2.43E-08 |
| TUCP_000082 | XLOC_002121 | ENSRNOT00000023430 | 0.955051866  | 1.34E-06 |
| TUCP_000082 | XLOC_002121 | ENSRNOT00000010333 | 0.959507904  | 8.01E-07 |
| TUCP_000082 | XLOC_002121 | ENSRNOT00000005658 | 0.952305324  | 1.79E-06 |
| TUCP_000082 | XLOC_002121 | ENSRNOT00000087011 | 0.958085411  | 9.49E-07 |
| TUCP_000082 | XLOC_002121 | ENSRNOT00000002510 | 0.958259828  | 9.30E-07 |
| TUCP_000082 | XLOC_002121 | ENSRNOT00000086310 | 0.963421211  | 4.85E-07 |
| TUCP_000082 | XLOC_002121 | ENSRNOT00000021110 | 0.953817372  | 1.53E-06 |
| TUCP_000082 | XLOC_002121 | ENSRNOT00000074389 | 0.958670337  | 8.86E-07 |
| TUCP_000082 | XLOC_002121 | ENSRNOT00000078872 | 0.951232855  | 2.00E-06 |
| TUCP_000082 | XLOC_002121 | ENSRNOT00000083864 | 0.970157819  | 1.77E-07 |
| TUCP_000082 | XLOC_002121 | ENSRNOT00000014384 | 0.96918827   | 2.08E-07 |
| TUCP_000082 | XLOC_002121 | ENSRNOT00000024712 | 0.973588565  | 9.68E-08 |
| TUCP_000082 | XLOC_002121 | ENSRNOT00000091596 | 0.975417527  | 6.78E-08 |
| TUCP_000082 | XLOC_002121 | ENSRNOT00000001774 | 0.967381795  | 2.75E-07 |
| TUCP_000082 | XLOC_002121 | ENSRNOT00000093552 | 0.973388829  | 1.01E-07 |
| TUCP_000082 | XLOC_002121 | ENSRNOT00000084069 | -0.959377409 | 8.14E-07 |
| TUCP_000082 | XLOC_002121 | ENSRNOT00000029332 | 0.951421523  | 1.96E-06 |
| TUCP_000082 | XLOC_002121 | ENSRNOT00000037203 | 0.959831717  | 7.70E-07 |
| TUCP_000082 | XLOC_002121 | ENSRNOT00000013613 | 0.951705477  | 1.91E-06 |
| TUCP_000082 | XLOC_002121 | ENSRNOT00000072890 | 0.966241931  | 3.26E-07 |
| TUCP_000082 | XLOC_002121 | ENSRNOT00000031672 | 0.969398926  | 2.01E-07 |
| TUCP_000082 | XLOC_002121 | ENSRNOT00000056675 | 0.959612228  | 7.91E-07 |
| TUCP_000082 | XLOC_002121 | ENSRNOT00000017784 | 0.963645439  | 4.70E-07 |
| TUCP_000082 | XLOC_002121 | ENSRNOT00000066947 | 0.987513007  | 2.34E-09 |
| TUCP_000082 | XLOC_002121 | ENSRNOT00000091808 | 0.959523589  | 7.99E-07 |

|             |             |                    |              |          |
|-------------|-------------|--------------------|--------------|----------|
| TUCP_000082 | XLOC_002121 | ENSRNOT00000025079 | 0.967518638  | 2.70E-07 |
| TUCP_000082 | XLOC_002121 | ENSRNOT00000039177 | 0.960001528  | 7.54E-07 |
| TUCP_000082 | XLOC_002121 | ENSRNOT00000035320 | 0.960409286  | 7.17E-07 |
| TUCP_000082 | XLOC_002121 | ENSRNOT00000021134 | 0.957802665  | 9.81E-07 |
| TUCP_000082 | XLOC_002121 | ENSRNOT00000054761 | 0.952176317  | 1.82E-06 |
| TUCP_000082 | XLOC_002121 | ENSRNOT00000007824 | 0.968090712  | 2.47E-07 |
| TUCP_000082 | XLOC_002121 | ENSRNOT00000021744 | 0.968779889  | 2.22E-07 |
| TUCP_000082 | XLOC_002121 | ENSRNOT00000079801 | 0.961683147  | 6.10E-07 |
| TUCP_000082 | XLOC_002121 | ENSRNOT00000022432 | 0.955501929  | 1.27E-06 |
| TUCP_000082 | XLOC_002121 | ENSRNOT00000064484 | 0.966977656  | 2.93E-07 |
| TUCP_000082 | XLOC_002121 | ENSRNOT00000091448 | 0.956135118  | 1.19E-06 |
| TUCP_000082 | XLOC_002121 | ENSRNOT00000077999 | -0.958762912 | 8.76E-07 |
| TUCP_000082 | XLOC_002121 | ENSRNOT00000020030 | 0.968114436  | 2.46E-07 |
| TUCP_000082 | XLOC_002121 | ENSRNOT00000068134 | -0.971324392 | 1.46E-07 |
| TUCP_000082 | XLOC_002121 | ENSRNOT00000046807 | 0.95200578   | 1.85E-06 |
| TUCP_000082 | XLOC_002121 | ENSRNOT00000024264 | 0.955622795  | 1.26E-06 |
| TUCP_000082 | XLOC_002121 | ENSRNOT00000084782 | 0.950797353  | 2.09E-06 |
| TUCP_000082 | XLOC_002121 | ENSRNOT00000047126 | 0.981152338  | 1.81E-08 |
| TUCP_000082 | XLOC_002121 | ENSRNOT00000000577 | -0.95938314  | 8.13E-07 |
| TUCP_000082 | XLOC_002121 | ENSRNOT00000010783 | 0.984977433  | 5.88E-09 |
| TUCP_000082 | XLOC_002121 | ENSRNOT00000033677 | 0.963990846  | 4.49E-07 |
| TUCP_000082 | XLOC_002121 | ENSRNOT00000041365 | -0.961552141 | 6.20E-07 |
| TUCP_000082 | XLOC_002121 | ENSRNOT00000021937 | 0.971828293  | 1.33E-07 |
| TUCP_000082 | XLOC_002121 | ENSRNOT00000072762 | 0.970361031  | 1.71E-07 |
| TUCP_000082 | XLOC_002121 | ENSRNOT00000012177 | 0.965169488  | 3.81E-07 |
| TUCP_000082 | XLOC_002121 | ENSRNOT00000012175 | 0.953429416  | 1.60E-06 |
| TUCP_000082 | XLOC_002121 | ENSRNOT00000008301 | 0.965182217  | 3.80E-07 |
| TUCP_000082 | XLOC_002121 | ENSRNOT00000024775 | 0.956560975  | 1.13E-06 |
| TUCP_000082 | XLOC_002121 | ENSRNOT00000077727 | 0.95153361   | 1.94E-06 |
| TUCP_000082 | XLOC_002121 | ENSRNOT00000080418 | 0.966092556  | 3.33E-07 |
| TUCP_000082 | XLOC_002121 | ENSRNOT00000001979 | 0.976059723  | 5.95E-08 |
| TUCP_000082 | XLOC_002121 | ENSRNOT00000090575 | 0.963366018  | 4.89E-07 |
| TUCP_000082 | XLOC_002121 | ENSRNOT00000083968 | 0.950115216  | 2.24E-06 |
| TUCP_000082 | XLOC_002121 | ENSRNOT00000084709 | -0.959463572 | 8.05E-07 |
| TUCP_000082 | XLOC_002121 | ENSRNOT00000083967 | -0.95415785  | 1.48E-06 |
| TUCP_000082 | XLOC_002121 | ENSRNOT00000026481 | -0.95698193  | 1.08E-06 |
| TUCP_000082 | XLOC_002121 | ENSRNOT00000026726 | 0.972303723  | 1.23E-07 |
| TUCP_000082 | XLOC_002121 | ENSRNOT00000006395 | 0.964501026  | 4.18E-07 |
| TUCP_000082 | XLOC_002121 | ENSRNOT00000081682 | 0.964000389  | 4.48E-07 |
| TUCP_000082 | XLOC_002121 | ENSRNOT0000003667  | 0.959855255  | 7.68E-07 |
| TUCP_000082 | XLOC_002121 | ENSRNOT00000046973 | -0.958755108 | 8.77E-07 |
| TUCP_000082 | XLOC_002121 | ENSRNOT00000024352 | -0.951509024 | 1.95E-06 |
| TUCP_000082 | XLOC_002121 | ENSRNOT00000000812 | 0.95520402   | 1.32E-06 |
| TUCP_000082 | XLOC_002121 | ENSRNOT00000028074 | 0.963908827  | 4.54E-07 |
| TUCP_000082 | XLOC_002121 | ENSRNOT00000003787 | 0.950726904  | 2.11E-06 |
| TUCP_000082 | XLOC_002121 | ENSRNOT00000020892 | 0.959319359  | 8.19E-07 |
| TUCP_000082 | XLOC_002121 | ENSRNOT0000001227  | 0.958773669  | 8.75E-07 |
| TUCP_000082 | XLOC_002121 | ENSRNOT00000011898 | 0.956277699  | 1.17E-06 |
| TUCP_000082 | XLOC_002121 | ENSRNOT00000067739 | 0.959152544  | 8.36E-07 |
| TUCP_000082 | XLOC_002121 | ENSRNOT00000016327 | 0.954988108  | 1.35E-06 |
| TUCP_000082 | XLOC_002121 | ENSRNOT00000014859 | 0.969688672  | 1.92E-07 |



|             |             |                     |              |          |
|-------------|-------------|---------------------|--------------|----------|
| TUCP_000082 | XLOC_002121 | ENSRNOT00000016324  | 0.954962538  | 1.35E-06 |
| TUCP_000082 | XLOC_002121 | ENSRNOT00000079698  | 0.950246308  | 2.21E-06 |
| TUCP_000082 | XLOC_002121 | ENSRNOT00000041237  | 0.960602991  | 7.00E-07 |
| TUCP_000082 | XLOC_002121 | ENSRNOT00000027145  | 0.96619496   | 3.28E-07 |
| TUCP_000082 | XLOC_002121 | ENSRNOT00000006824  | 0.971885285  | 1.32E-07 |
| TUCP_000082 | XLOC_002121 | ENSRNOT00000024933  | 0.958290464  | 9.27E-07 |
| TUCP_000082 | XLOC_002121 | ENSRNOT00000008317  | 0.959793291  | 7.73E-07 |
| TUCP_000082 | XLOC_002121 | ENSRNOT00000077040  | 0.964574804  | 4.14E-07 |
| TUCP_000082 | XLOC_002121 | ENSRNOT00000010303  | 0.959389461  | 8.12E-07 |
| TUCP_000082 | XLOC_002121 | ENSRNOT00000019531  | 0.97910066   | 3.03E-08 |
| TUCP_000082 | XLOC_002121 | ENSRNOT00000066793  | 0.953458474  | 1.59E-06 |
| TUCP_000082 | XLOC_002121 | ENSRNOT00000086590  | -0.951035608 | 2.04E-06 |
| TUCP_000082 | XLOC_002121 | ENSRNOT00000005996  | 0.953834926  | 1.53E-06 |
| TUCP_000082 | XLOC_002121 | ENSRNOT00000025827  | -0.964195146 | 4.36E-07 |
| TUCP_000082 | XLOC_002121 | ENSRNOT00000025824  | 0.958619184  | 8.91E-07 |
| TUCP_000082 | XLOC_002121 | ENSRNOT00000071929  | 0.958190901  | 9.38E-07 |
| TUCP_000082 | XLOC_002121 | ENSRNOT00000073193  | 0.965264218  | 3.76E-07 |
| TUCP_000082 | XLOC_002121 | ENSRNOT00000021496  | 0.958776619  | 8.75E-07 |
| TUCP_000082 | XLOC_002121 | ENSRNOT00000022676  | 0.965439299  | 3.66E-07 |
| TUCP_000082 | XLOC_002121 | ENSRNOT00000005073  | -0.953236723 | 1.63E-06 |
| TUCP_000082 | XLOC_002121 | ENSRNOT00000003992  | 0.974312288  | 8.44E-08 |
| TUCP_000082 | XLOC_002121 | ENSRNOT00000070825  | 0.958620056  | 8.91E-07 |
| TUCP_000082 | XLOC_002121 | ENSRNOT00000034961  | 0.955121364  | 1.33E-06 |
| TUCP_000082 | XLOC_002121 | ENSRNOT00000002169  | 0.958063037  | 9.52E-07 |
| TUCP_000082 | XLOC_002121 | ENSRNOT00000013375  | 0.956297762  | 1.17E-06 |
| TUCP_000082 | XLOC_002121 | ENSRNOT00000005015  | -0.959839759 | 7.69E-07 |
| TUCP_000082 | XLOC_002121 | ENSRNOT00000024285  | 0.968193382  | 2.43E-07 |
| TUCP_000082 | XLOC_002121 | ENSRNOT00000081725  | -0.960484913 | 7.10E-07 |
| TUCP_000082 | XLOC_002121 | ENSRNOT00000028744  | 0.963653248  | 4.70E-07 |
| TUCP_000082 | XLOC_002121 | ENSRNOT00000025221  | 0.963432662  | 4.84E-07 |
| TUCP_000082 | XLOC_002121 | ENSRNOT00000024753  | 0.97521813   | 7.06E-08 |
| TUCP_000082 | XLOC_002121 | ENSRNOT00000008256  | 0.950390105  | 2.18E-06 |
| TUCP_000082 | XLOC_002121 | ENSRNOT00000025791  | 0.970003014  | 1.82E-07 |
| TUCP_000082 | XLOC_002121 | ENSRNOT00000090268  | 0.958336655  | 9.22E-07 |
| TUCP_000082 | XLOC_002121 | ENSRNOT00000089294  | 0.972419569  | 1.20E-07 |
| TUCP_000082 | XLOC_002121 | ENSRNOT00000024326  | 0.971501444  | 1.41E-07 |
| TUCP_000082 | XLOC_002121 | ENSRNOT00000024456  | 0.951139871  | 2.02E-06 |
| TUCP_000082 | XLOC_002121 | ENSRNOT00000028893  | 0.957511801  | 1.02E-06 |
| TUCP_000082 | XLOC_002121 | ENSRNOT00000000258  | 0.961887004  | 5.94E-07 |
| TUCP_000082 | XLOC_002121 | ENSRNOT00000018473  | 0.955405502  | 1.29E-06 |
| TUCP_000082 | XLOC_002121 | ENSRNOT00000020161  | -0.965180435 | 3.80E-07 |
| TUCP_000082 | XLOC_002121 | ENSRNOT00000000717  | 0.955294651  | 1.30E-06 |
| TUCP_000082 | XLOC_002121 | ENSRNOT00000026118  | 0.965758984  | 3.50E-07 |
| TUCP_000082 | XLOC_002121 | ENSRNOT00000032505  | 0.965227366  | 3.78E-07 |
| TUCP_000082 | XLOC_002121 | ENSRNOT00000049048  | 0.95713139   | 1.06E-06 |
| TUCP_000082 | XLOC_002121 | ENSRNOT00000012702  | 0.95193385   | 1.86E-06 |
| TUCP_000082 | XLOC_002121 | ENSRNOT00000037955  | 0.966114128  | 3.32E-07 |
| TUCP_000082 | XLOC_002121 | ENSRNOT00000034487  | 0.976793049  | 5.10E-08 |
| TUCP_000082 | XLOC_002121 | ENSRNOT000000052063 | -0.950164709 | 2.23E-06 |
| TUCP_000082 | XLOC_002121 | ENSRNOT00000030222  | 0.961377391  | 6.34E-07 |
| TUCP_000082 | XLOC_002121 | ENSRNOT00000078161  | 0.961034811  | 6.63E-07 |

|             |             |                    |              |          |
|-------------|-------------|--------------------|--------------|----------|
| TUCP_000082 | XLOC_002121 | ENSRNOT00000087346 | -0.967279479 | 2.80E-07 |
| TUCP_000082 | XLOC_002121 | ENSRNOT00000024938 | 0.956180011  | 1.18E-06 |
| TUCP_000082 | XLOC_002121 | ENSRNOT00000009696 | -0.964710256 | 4.06E-07 |
| TUCP_000082 | XLOC_002121 | ENSRNOT00000086456 | 0.952227133  | 1.81E-06 |
| TUCP_000082 | XLOC_002121 | ENSRNOT00000036959 | 0.959184447  | 8.33E-07 |
| TUCP_000082 | XLOC_002121 | ENSRNOT00000021803 | 0.954654831  | 1.40E-06 |
| TUCP_000082 | XLOC_002121 | ENSRNOT00000006804 | -0.953907311 | 1.52E-06 |
| TUCP_000082 | XLOC_002121 | ENSRNOT00000031401 | 0.960446787  | 7.13E-07 |
| TUCP_000082 | XLOC_002121 | ENSRNOT00000043752 | 0.963379395  | 4.88E-07 |
| TUCP_000082 | XLOC_002121 | ENSRNOT00000023641 | 0.954465893  | 1.43E-06 |
| TUCP_000082 | XLOC_002121 | ENSRNOT00000048933 | 0.963649185  | 4.70E-07 |
| TUCP_000082 | XLOC_002121 | ENSRNOT0000003359  | 0.950362828  | 2.18E-06 |
| TUCP_000082 | XLOC_002121 | ENSRNOT00000038511 | 0.955990535  | 1.21E-06 |
| TUCP_000082 | XLOC_002121 | ENSRNOT00000023463 | 0.957213219  | 1.05E-06 |
| TUCP_000082 | XLOC_002121 | ENSRNOT00000058111 | 0.965644346  | 3.56E-07 |
| TUCP_000082 | XLOC_002121 | ENSRNOT00000019647 | 0.953363289  | 1.61E-06 |
| TUCP_000082 | XLOC_002121 | ENSRNOT00000021705 | 0.957917451  | 9.68E-07 |
| TUCP_000082 | XLOC_002121 | ENSRNOT00000021475 | 0.957696255  | 9.94E-07 |
| TUCP_000082 | XLOC_002121 | ENSRNOT00000010915 | 0.973217357  | 1.04E-07 |
| TUCP_000082 | XLOC_002121 | ENSRNOT00000064535 | 0.96317913   | 5.01E-07 |
| TUCP_000082 | XLOC_002121 | ENSRNOT00000016027 | 0.96294948   | 5.17E-07 |
| TUCP_000082 | XLOC_002121 | ENSRNOT00000018341 | 0.950161724  | 2.23E-06 |
| TUCP_000082 | XLOC_002121 | ENSRNOT00000025086 | 0.968668637  | 2.26E-07 |
| TUCP_000082 | XLOC_002121 | ENSRNOT00000028876 | 0.95307216   | 1.66E-06 |
| TUCP_000082 | XLOC_002121 | ENSRNOT00000024924 | 0.963118997  | 5.05E-07 |
| TUCP_000082 | XLOC_002121 | ENSRNOT00000072632 | 0.953857028  | 1.52E-06 |
| TUCP_000082 | XLOC_002121 | ENSRNOT00000079011 | 0.96354631   | 4.77E-07 |
| TUCP_000082 | XLOC_002121 | ENSRNOT00000010621 | 0.960693174  | 6.92E-07 |
| TUCP_000082 | XLOC_002121 | ENSRNOT00000000124 | 0.963870214  | 4.56E-07 |
| TUCP_000082 | XLOC_002121 | ENSRNOT00000076300 | 0.957361684  | 1.03E-06 |
| TUCP_000082 | XLOC_002121 | ENSRNOT00000043581 | 0.974993408  | 7.38E-08 |
| TUCP_000082 | XLOC_002121 | ENSRNOT00000092876 | 0.953689279  | 1.55E-06 |
| TUCP_000082 | XLOC_002121 | ENSRNOT00000078906 | 0.983781437  | 8.60E-09 |
| TUCP_000082 | XLOC_002121 | ENSRNOT00000022410 | 0.958068942  | 9.51E-07 |
| TUCP_000082 | XLOC_002121 | ENSRNOT00000022065 | 0.957141259  | 1.06E-06 |
| TUCP_000082 | XLOC_002121 | ENSRNOT00000066561 | 0.973686502  | 9.51E-08 |
| TUCP_000082 | XLOC_002121 | ENSRNOT00000068184 | 0.962527605  | 5.46E-07 |
| TUCP_000082 | XLOC_002121 | ENSRNOT00000026767 | -0.951323981 | 1.98E-06 |
| TUCP_000082 | XLOC_002121 | ENSRNOT00000063917 | 0.950811904  | 2.09E-06 |
| TUCP_000082 | XLOC_002121 | ENSRNOT00000078073 | 0.961014362  | 6.64E-07 |
| TUCP_000082 | XLOC_002121 | ENSRNOT00000023628 | 0.950105725  | 2.24E-06 |
| TUCP_000082 | XLOC_002121 | ENSRNOT00000020909 | 0.963682814  | 4.68E-07 |
| TUCP_000082 | XLOC_002121 | ENSRNOT00000087033 | 0.950116053  | 2.24E-06 |
| TUCP_000082 | XLOC_002121 | ENSRNOT00000078793 | -0.951237712 | 2.00E-06 |
| TUCP_000082 | XLOC_002121 | ENSRNOT00000044009 | -0.950206109 | 2.22E-06 |
| TUCP_000082 | XLOC_002121 | ENSRNOT00000024841 | 0.970542732  | 1.66E-07 |
| TUCP_000082 | XLOC_002121 | ENSRNOT00000072129 | 0.961168326  | 6.51E-07 |
| TUCP_000082 | XLOC_002121 | ENSRNOT00000089086 | 0.989009071  | 1.24E-09 |
| TUCP_000082 | XLOC_002121 | ENSRNOT00000022552 | 0.953633067  | 1.56E-06 |
| TUCP_000082 | XLOC_002121 | ENSRNOT00000029753 | 0.960686065  | 6.92E-07 |
| TUCP_000082 | XLOC_002121 | ENSRNOT00000017955 | 0.965963651  | 3.40E-07 |

|             |             |                    |              |          |
|-------------|-------------|--------------------|--------------|----------|
| TUCP_000082 | XLOC_002121 | ENSRNOT00000078862 | -0.951078736 | 2.03E-06 |
| TUCP_000082 | XLOC_002121 | ENSRNOT00000038464 | 0.95604565   | 1.20E-06 |
| TUCP_000082 | XLOC_002121 | ENSRNOT00000019778 | 0.95983447   | 7.70E-07 |
| TUCP_000082 | XLOC_002121 | ENSRNOT00000011320 | 0.959289444  | 8.22E-07 |
| TUCP_000082 | XLOC_002121 | ENSRNOT00000048022 | 0.972356777  | 1.21E-07 |
| TUCP_000082 | XLOC_002121 | ENSRNOT00000072357 | 0.959960378  | 7.58E-07 |
| TUCP_000082 | XLOC_002121 | ENSRNOT00000013295 | 0.959803264  | 7.72E-07 |
| TUCP_000083 | XLOC_002148 | ENSRNOT00000011801 | 0.950949708  | 2.06E-06 |
| TUCP_004738 | XLOC_209420 | ENSRNOT00000000299 | 0.987312247  | 2.53E-09 |
| TUCP_004738 | XLOC_209420 | ENSRNOT00000036656 | 0.990756149  | 5.23E-10 |
| TUCP_004738 | XLOC_209420 | ENSRNOT00000036672 | 0.972815236  | 1.12E-07 |
| TUCP_004738 | XLOC_209420 | ENSRNOT00000021671 | 0.965348301  | 3.71E-07 |
| TUCP_004738 | XLOC_209420 | ENSRNOT00000083418 | 0.981333439  | 1.73E-08 |
| TUCP_004738 | XLOC_209420 | ENSRNOT00000092186 | 0.980804919  | 1.99E-08 |
| TUCP_003075 | XLOC_131886 | ENSRNOT00000078220 | 0.957997502  | 9.59E-07 |
| TUCP_003075 | XLOC_131886 | ENSRNOT00000004891 | 0.954782228  | 1.38E-06 |
| TUCP_003075 | XLOC_131886 | ENSRNOT00000021036 | 0.951946622  | 1.86E-06 |
| TUCP_001642 | XLOC_064932 | ENSRNOT00000008865 | -0.95520584  | 1.32E-06 |
| TUCP_001642 | XLOC_064932 | ENSRNOT00000061253 | 0.965388275  | 3.69E-07 |
| TUCP_001642 | XLOC_064932 | ENSRNOT00000010396 | 0.960505211  | 7.08E-07 |
| TUCP_001642 | XLOC_064932 | ENSRNOT00000002837 | -0.956969451 | 1.08E-06 |
| TUCP_001642 | XLOC_064932 | ENSRNOT00000026641 | 0.959200748  | 8.31E-07 |
| TUCP_001642 | XLOC_064932 | ENSRNOT00000005257 | 0.951313826  | 1.98E-06 |
| TUCP_001642 | XLOC_064932 | ENSRNOT00000022714 | 0.959520269  | 8.00E-07 |
| TUCP_001642 | XLOC_064932 | ENSRNOT00000088353 | -0.962688169 | 5.35E-07 |
| TUCP_004737 | XLOC_209420 | ENSRNOT00000075106 | 0.950912224  | 2.07E-06 |
| TUCP_004734 | XLOC_209414 | ENSRNOT00000001248 | -0.959464235 | 8.05E-07 |
| TUCP_004734 | XLOC_209414 | ENSRNOT00000072864 | 0.966129043  | 3.32E-07 |
| TUCP_004734 | XLOC_209414 | ENSRNOT00000018986 | -0.954702879 | 1.39E-06 |
| TUCP_004734 | XLOC_209414 | ENSRNOT00000084588 | 0.956535326  | 1.14E-06 |
| TUCP_004734 | XLOC_209414 | ENSRNOT00000077926 | 0.951964658  | 1.86E-06 |
| TUCP_004734 | XLOC_209414 | ENSRNOT00000027271 | 0.967232389  | 2.82E-07 |
| TUCP_001842 | XLOC_075905 | ENSRNOT00000060048 | 0.954020103  | 1.50E-06 |
| TUCP_001842 | XLOC_075905 | ENSRNOT00000087199 | 0.993810983  | 7.08E-11 |
| TUCP_001842 | XLOC_075905 | ENSRNOT00000076072 | 0.969574064  | 1.95E-07 |
| TUCP_001842 | XLOC_075905 | ENSRNOT00000084374 | 0.999677927  | 2.73E-17 |
| TUCP_000313 | XLOC_010282 | ENSRNOT00000037809 | 0.952388183  | 1.78E-06 |
| TUCP_000313 | XLOC_010282 | ENSRNOT00000051402 | 0.966532109  | 3.13E-07 |
| TUCP_000313 | XLOC_010282 | ENSRNOT00000076673 | 0.953016786  | 1.67E-06 |
| TUCP_000313 | XLOC_010282 | ENSRNOT00000003001 | 0.950559601  | 2.14E-06 |
| TUCP_000313 | XLOC_010282 | ENSRNOT00000084766 | -0.962610841 | 5.40E-07 |
| TUCP_000313 | XLOC_010282 | ENSRNOT00000012924 | 0.957067629  | 1.07E-06 |
| TUCP_000313 | XLOC_010282 | ENSRNOT00000091282 | 0.962576758  | 5.43E-07 |
| TUCP_000313 | XLOC_010282 | ENSRNOT00000010580 | 0.956326638  | 1.16E-06 |
| TUCP_000313 | XLOC_010282 | ENSRNOT00000025222 | 0.960760387  | 6.86E-07 |
| TUCP_000313 | XLOC_010282 | ENSRNOT00000010689 | 0.973873044  | 9.18E-08 |
| TUCP_000313 | XLOC_010282 | ENSRNOT00000038546 | 0.960947067  | 6.70E-07 |
| TUCP_000313 | XLOC_010282 | ENSRNOT00000005143 | -0.976583278 | 5.33E-08 |
| TUCP_000313 | XLOC_010282 | ENSRNOT00000016677 | 0.974250148  | 8.54E-08 |
| TUCP_000313 | XLOC_010282 | ENSRNOT00000064667 | 0.958686529  | 8.84E-07 |
| TUCP_000313 | XLOC_010282 | ENSRNOT00000092876 | 0.952148017  | 1.82E-06 |

|             |             |                     |             |          |
|-------------|-------------|---------------------|-------------|----------|
| TUCP_000313 | XLOC_010282 | ENSRNOT00000003759  | 0.95955077  | 7.97E-07 |
| TUCP_000313 | XLOC_010282 | ENSRNOT000000081077 | 0.953277748 | 1.62E-06 |
| TUCP_000313 | XLOC_010282 | ENSRNOT00000001110  | 0.982463568 | 1.27E-08 |
| TUCP_000313 | XLOC_010282 | ENSRNOT00000021211  | 0.964734378 | 4.05E-07 |
| TUCP_000313 | XLOC_010282 | ENSRNOT00000021359  | 0.956860544 | 1.09E-06 |
| TUCP_000313 | XLOC_010282 | ENSRNOT00000034883  | 0.952837057 | 1.70E-06 |
| TUCP_000255 | XLOC_007621 | ENSRNOT000000084977 | 0.952068972 | 1.84E-06 |
| TUCP_004327 | XLOC_190552 | ENSRNOT00000081570  | 0.963144529 | 5.03E-07 |
| TUCP_004327 | XLOC_190552 | ENSRNOT00000091652  | 0.998087231 | 2.01E-13 |
| TUCP_004327 | XLOC_190552 | ENSRNOT00000036564  | 0.971391536 | 1.44E-07 |
| TUCP_004327 | XLOC_190552 | ENSRNOT00000000109  | 0.96135687  | 6.36E-07 |
| TUCP_004327 | XLOC_190552 | ENSRNOT00000080865  | 0.999762144 | 5.99E-18 |
| TUCP_004327 | XLOC_190552 | ENSRNOT00000073534  | 0.995542978 | 1.37E-11 |
| TUCP_004327 | XLOC_190552 | ENSRNOT00000012161  | 0.98929398  | 1.09E-09 |
| TUCP_004327 | XLOC_190552 | ENSRNOT00000078707  | 0.96563675  | 3.56E-07 |
| TUCP_004327 | XLOC_190552 | ENSRNOT00000087758  | 0.968284694 | 2.40E-07 |
| TUCP_004327 | XLOC_190552 | ENSRNOT00000049832  | 0.968603539 | 2.28E-07 |
| TUCP_004327 | XLOC_190552 | ENSRNOT00000093019  | 0.999762144 | 5.99E-18 |
| TUCP_004327 | XLOC_190552 | ENSRNOT00000024825  | 0.979621012 | 2.68E-08 |
| TUCP_004327 | XLOC_190552 | ENSRNOT00000059266  | 0.96363237  | 4.71E-07 |
| TUCP_004327 | XLOC_190552 | ENSRNOT00000072734  | 0.963783663 | 4.62E-07 |
| TUCP_004327 | XLOC_190552 | ENSRNOT00000085908  | 0.997063698 | 1.71E-12 |
| TUCP_004327 | XLOC_190552 | ENSRNOT00000046744  | 0.999762144 | 5.99E-18 |
| TUCP_004327 | XLOC_190552 | ENSRNOT00000076429  | 0.999762144 | 5.99E-18 |
| TUCP_004327 | XLOC_190552 | ENSRNOT00000084667  | 0.999685101 | 2.44E-17 |
| TUCP_004327 | XLOC_190552 | ENSRNOT00000055412  | 0.999762144 | 5.99E-18 |
| TUCP_004327 | XLOC_190552 | ENSRNOT00000093201  | 0.999370359 | 7.78E-16 |
| TUCP_004327 | XLOC_190552 | ENSRNOT00000072724  | 0.999762144 | 5.99E-18 |
| TUCP_004327 | XLOC_190552 | ENSRNOT00000090323  | 0.954863612 | 1.37E-06 |
| TUCP_004327 | XLOC_190552 | ENSRNOT00000082760  | 0.985699068 | 4.60E-09 |
| TUCP_004327 | XLOC_190552 | ENSRNOT00000066017  | 0.989729664 | 8.85E-10 |
| TUCP_004327 | XLOC_190552 | ENSRNOT00000073148  | 0.984661763 | 6.52E-09 |
| TUCP_004327 | XLOC_190552 | ENSRNOT00000077462  | 0.959259886 | 8.25E-07 |
| TUCP_004327 | XLOC_190552 | ENSRNOT00000084375  | 0.999762144 | 5.99E-18 |
| TUCP_004327 | XLOC_190552 | ENSRNOT00000085447  | 0.998128385 | 1.80E-13 |
| TUCP_004327 | XLOC_190552 | ENSRNOT00000006249  | 0.965600367 | 3.58E-07 |
| TUCP_004327 | XLOC_190552 | ENSRNOT00000087073  | 0.951237272 | 2.00E-06 |
| TUCP_004327 | XLOC_190552 | ENSRNOT00000042369  | 0.99590284  | 9.03E-12 |
| TUCP_004327 | XLOC_190552 | ENSRNOT00000086554  | 0.999762144 | 5.99E-18 |
| TUCP_004327 | XLOC_190552 | ENSRNOT00000054858  | 0.984621009 | 6.60E-09 |
| TUCP_004327 | XLOC_190552 | ENSRNOT00000047921  | 0.999762144 | 5.99E-18 |
| TUCP_004327 | XLOC_190552 | ENSRNOT00000064261  | 0.999753853 | 7.11E-18 |
| TUCP_004327 | XLOC_190552 | ENSRNOT00000086660  | 0.998977992 | 8.77E-15 |
| TUCP_004327 | XLOC_190552 | ENSRNOT00000080933  | 0.968406876 | 2.35E-07 |
| TUCP_004327 | XLOC_190552 | ENSRNOT00000083977  | 0.999762144 | 5.99E-18 |
| TUCP_004327 | XLOC_190552 | ENSRNOT00000092933  | 0.999762144 | 5.99E-18 |
| TUCP_004327 | XLOC_190552 | ENSRNOT0000009061   | 0.95268967  | 1.72E-06 |
| TUCP_004327 | XLOC_190552 | ENSRNOT00000041281  | 0.987054735 | 2.80E-09 |
| TUCP_004326 | XLOC_190552 | ENSRNOT00000081570  | 0.962961027 | 5.16E-07 |
| TUCP_004326 | XLOC_190552 | ENSRNOT00000091652  | 0.99819185  | 1.52E-13 |
| TUCP_004326 | XLOC_190552 | ENSRNOT00000036564  | 0.972337506 | 1.22E-07 |

|             |             |                    |             |          |
|-------------|-------------|--------------------|-------------|----------|
| TUCP_004326 | XLOC_190552 | ENSRNOT0000000109  | 0.962179854 | 5.72E-07 |
| TUCP_004326 | XLOC_190552 | ENSRNOT00000080865 | 1           | 0        |
| TUCP_004326 | XLOC_190552 | ENSRNOT00000073534 | 0.995808019 | 1.01E-11 |
| TUCP_004326 | XLOC_190552 | ENSRNOT00000012161 | 0.987544327 | 2.31E-09 |
| TUCP_004326 | XLOC_190552 | ENSRNOT00000078707 | 0.960060506 | 7.48E-07 |
| TUCP_004326 | XLOC_190552 | ENSRNOT00000087758 | 0.968778527 | 2.22E-07 |
| TUCP_004326 | XLOC_190552 | ENSRNOT00000049832 | 0.969039151 | 2.13E-07 |
| TUCP_004326 | XLOC_190552 | ENSRNOT00000093019 | 1           | 0        |
| TUCP_004326 | XLOC_190552 | ENSRNOT00000024825 | 0.980452701 | 2.18E-08 |
| TUCP_004326 | XLOC_190552 | ENSRNOT00000059266 | 0.96033506  | 7.23E-07 |
| TUCP_004326 | XLOC_190552 | ENSRNOT00000072734 | 0.965018115 | 3.89E-07 |
| TUCP_004326 | XLOC_190552 | ENSRNOT00000085908 | 0.996653227 | 3.29E-12 |
| TUCP_004326 | XLOC_190552 | ENSRNOT00000046744 | 1           | 1.33E-79 |
| TUCP_004326 | XLOC_190552 | ENSRNOT00000076429 | 1           | 4.25E-78 |
| TUCP_004326 | XLOC_190552 | ENSRNOT00000084667 | 0.999660971 | 3.53E-17 |
| TUCP_004326 | XLOC_190552 | ENSRNOT00000055412 | 1           | 0        |
| TUCP_004326 | XLOC_190552 | ENSRNOT00000093201 | 0.9997022   | 1.84E-17 |
| TUCP_004326 | XLOC_190552 | ENSRNOT00000072724 | 1           | 4.25E-78 |
| TUCP_004326 | XLOC_190552 | ENSRNOT00000090323 | 0.95603782  | 1.20E-06 |
| TUCP_004326 | XLOC_190552 | ENSRNOT00000082760 | 0.986293522 | 3.72E-09 |
| TUCP_004326 | XLOC_190552 | ENSRNOT00000066017 | 0.989785653 | 8.61E-10 |
| TUCP_004326 | XLOC_190552 | ENSRNOT00000073148 | 0.985721397 | 4.56E-09 |
| TUCP_004326 | XLOC_190552 | ENSRNOT00000077462 | 0.960098183 | 7.45E-07 |
| TUCP_004326 | XLOC_190552 | ENSRNOT00000084375 | 1           | 0        |
| TUCP_004326 | XLOC_190552 | ENSRNOT00000085447 | 0.998400682 | 8.22E-14 |
| TUCP_004326 | XLOC_190552 | ENSRNOT00000006249 | 0.966489607 | 3.15E-07 |
| TUCP_004326 | XLOC_190552 | ENSRNOT00000087073 | 0.952450698 | 1.77E-06 |
| TUCP_004326 | XLOC_190552 | ENSRNOT00000042369 | 0.995659369 | 1.20E-11 |
| TUCP_004326 | XLOC_190552 | ENSRNOT00000086554 | 1           | 0        |
| TUCP_004326 | XLOC_190552 | ENSRNOT00000054858 | 0.985228824 | 5.40E-09 |
| TUCP_004326 | XLOC_190552 | ENSRNOT00000047921 | 1           | 0        |
| TUCP_004326 | XLOC_190552 | ENSRNOT00000064261 | 0.999977196 | 4.86E-23 |
| TUCP_004326 | XLOC_190552 | ENSRNOT00000086660 | 0.999208903 | 2.44E-15 |
| TUCP_004326 | XLOC_190552 | ENSRNOT00000080933 | 0.967360681 | 2.76E-07 |
| TUCP_004326 | XLOC_190552 | ENSRNOT00000083977 | 1           | 0        |
| TUCP_004326 | XLOC_190552 | ENSRNOT00000092933 | 1           | 0        |
| TUCP_004326 | XLOC_190552 | ENSRNOT00000009061 | 0.953300672 | 1.62E-06 |
| TUCP_004326 | XLOC_190552 | ENSRNOT00000041281 | 0.987828355 | 2.06E-09 |
| TUCP_000250 | XLOC_007621 | ENSRNOT00000033112 | 0.951301326 | 1.99E-06 |
| TUCP_000250 | XLOC_007621 | ENSRNOT00000030737 | 0.965843835 | 3.46E-07 |
| TUCP_000253 | XLOC_007621 | ENSRNOT00000081570 | 0.963419335 | 4.85E-07 |
| TUCP_000253 | XLOC_007621 | ENSRNOT00000091652 | 0.99804503  | 2.24E-13 |
| TUCP_000253 | XLOC_007621 | ENSRNOT00000036564 | 0.97248853  | 1.19E-07 |
| TUCP_000253 | XLOC_007621 | ENSRNOT00000000109 | 0.961799043 | 6.01E-07 |
| TUCP_000253 | XLOC_007621 | ENSRNOT00000080865 | 0.999989925 | 8.17E-25 |
| TUCP_000253 | XLOC_007621 | ENSRNOT00000073534 | 0.995766187 | 1.06E-11 |
| TUCP_000253 | XLOC_007621 | ENSRNOT00000012161 | 0.987320059 | 2.53E-09 |
| TUCP_000253 | XLOC_007621 | ENSRNOT00000078707 | 0.959702206 | 7.82E-07 |
| TUCP_000253 | XLOC_007621 | ENSRNOT00000087758 | 0.968240403 | 2.41E-07 |
| TUCP_000253 | XLOC_007621 | ENSRNOT00000049832 | 0.968997122 | 2.14E-07 |
| TUCP_000253 | XLOC_007621 | ENSRNOT00000093019 | 0.999989925 | 8.17E-25 |

|             |             |                    |              |          |
|-------------|-------------|--------------------|--------------|----------|
| TUCP_000253 | XLOC_007621 | ENSRNOT00000024825 | 0.980243989  | 2.29E-08 |
| TUCP_000253 | XLOC_007621 | ENSRNOT00000059266 | 0.960758868  | 6.86E-07 |
| TUCP_000253 | XLOC_007621 | ENSRNOT00000072734 | 0.964861425  | 3.98E-07 |
| TUCP_000253 | XLOC_007621 | ENSRNOT00000085908 | 0.996426723  | 4.56E-12 |
| TUCP_000253 | XLOC_007621 | ENSRNOT00000046744 | 0.999989925  | 8.17E-25 |
| TUCP_000253 | XLOC_007621 | ENSRNOT00000076429 | 0.999989925  | 8.17E-25 |
| TUCP_000253 | XLOC_007621 | ENSRNOT00000084667 | 0.999613501  | 6.79E-17 |
| TUCP_000253 | XLOC_007621 | ENSRNOT00000055412 | 0.999989925  | 8.17E-25 |
| TUCP_000253 | XLOC_007621 | ENSRNOT00000093201 | 0.999713205  | 1.53E-17 |
| TUCP_000253 | XLOC_007621 | ENSRNOT00000072724 | 0.999989925  | 8.17E-25 |
| TUCP_000253 | XLOC_007621 | ENSRNOT00000090323 | 0.955436768  | 1.28E-06 |
| TUCP_000253 | XLOC_007621 | ENSRNOT00000082760 | 0.986058801  | 4.05E-09 |
| TUCP_000253 | XLOC_007621 | ENSRNOT00000066017 | 0.989785032  | 8.61E-10 |
| TUCP_000253 | XLOC_007621 | ENSRNOT00000073148 | 0.986043816  | 4.07E-09 |
| TUCP_000253 | XLOC_007621 | ENSRNOT00000077462 | 0.960829967  | 6.80E-07 |
| TUCP_000253 | XLOC_007621 | ENSRNOT00000084375 | 0.999989925  | 8.17E-25 |
| TUCP_000253 | XLOC_007621 | ENSRNOT00000085447 | 0.998561466  | 4.84E-14 |
| TUCP_000253 | XLOC_007621 | ENSRNOT00000006249 | 0.966639579  | 3.08E-07 |
| TUCP_000253 | XLOC_007621 | ENSRNOT00000087073 | 0.952266625  | 1.80E-06 |
| TUCP_000253 | XLOC_007621 | ENSRNOT00000042369 | 0.995811033  | 1.01E-11 |
| TUCP_000253 | XLOC_007621 | ENSRNOT00000086554 | 0.999989925  | 8.17E-25 |
| TUCP_000253 | XLOC_007621 | ENSRNOT00000054858 | 0.984985609  | 5.86E-09 |
| TUCP_000253 | XLOC_007621 | ENSRNOT00000047921 | 0.999989925  | 8.17E-25 |
| TUCP_000253 | XLOC_007621 | ENSRNOT00000064261 | 0.999959156  | 8.95E-22 |
| TUCP_000253 | XLOC_007621 | ENSRNOT00000086660 | 0.999243909  | 1.94E-15 |
| TUCP_000253 | XLOC_007621 | ENSRNOT00000080933 | 0.967021036  | 2.91E-07 |
| TUCP_000253 | XLOC_007621 | ENSRNOT00000083977 | 0.999989925  | 8.17E-25 |
| TUCP_000253 | XLOC_007621 | ENSRNOT00000092933 | 0.999989925  | 8.17E-25 |
| TUCP_000253 | XLOC_007621 | ENSRNOT00000009061 | 0.95339949   | 1.60E-06 |
| TUCP_000253 | XLOC_007621 | ENSRNOT00000041281 | 0.987534197  | 2.32E-09 |
| TUCP_004521 | XLOC_199441 | ENSRNOT00000068601 | 0.972567311  | 1.17E-07 |
| TUCP_004521 | XLOC_199441 | ENSRNOT00000023425 | 0.959772334  | 7.75E-07 |
| TUCP_004521 | XLOC_199441 | ENSRNOT00000021705 | 0.952012823  | 1.85E-06 |
| TUCP_004521 | XLOC_199441 | ENSRNOT00000064290 | 0.956191946  | 1.18E-06 |
| TUCP_004521 | XLOC_199441 | ENSRNOT00000044147 | 0.971150548  | 1.50E-07 |
| TUCP_004521 | XLOC_199441 | ENSRNOT00000054931 | 0.955727581  | 1.24E-06 |
| TUCP_004521 | XLOC_199441 | ENSRNOT00000083633 | 0.972007129  | 1.29E-07 |
| TUCP_004521 | XLOC_199441 | ENSRNOT00000079545 | 0.96218848   | 5.71E-07 |
| TUCP_004521 | XLOC_199441 | ENSRNOT00000081196 | 0.959914775  | 7.62E-07 |
| TUCP_004521 | XLOC_199441 | ENSRNOT00000010020 | 0.952446119  | 1.77E-06 |
| TUCP_004521 | XLOC_199441 | ENSRNOT00000048298 | 0.974758081  | 7.74E-08 |
| TUCP_004521 | XLOC_199441 | ENSRNOT00000002222 | -0.957375179 | 1.03E-06 |
| TUCP_004521 | XLOC_199441 | ENSRNOT00000029076 | 0.979782883  | 2.57E-08 |
| TUCP_004521 | XLOC_199441 | ENSRNOT00000015091 | -0.961772242 | 6.03E-07 |
| TUCP_003290 | XLOC_140964 | ENSRNOT00000008573 | 0.959570508  | 7.95E-07 |
| TUCP_003290 | XLOC_140964 | ENSRNOT00000009979 | 0.952504632  | 1.76E-06 |
| TUCP_003290 | XLOC_140964 | ENSRNOT00000006186 | 0.969388509  | 2.01E-07 |
| TUCP_003290 | XLOC_140964 | ENSRNOT00000012617 | -0.9526683   | 1.73E-06 |
| TUCP_003290 | XLOC_140964 | ENSRNOT00000021348 | 0.964985734  | 3.91E-07 |
| TUCP_003290 | XLOC_140964 | ENSRNOT00000005958 | 0.958977654  | 8.54E-07 |
| TUCP_003290 | XLOC_140964 | ENSRNOT00000003891 | 0.955869755  | 1.22E-06 |

|             |             |                    |              |          |
|-------------|-------------|--------------------|--------------|----------|
| TUCP_003290 | XLOC_140964 | ENSRNOT00000044635 | 0.971706442  | 1.36E-07 |
| TUCP_003290 | XLOC_140964 | ENSRNOT00000082100 | 0.957569896  | 1.01E-06 |
| TUCP_003290 | XLOC_140964 | ENSRNOT00000028856 | 0.977612887  | 4.27E-08 |
| TUCP_003290 | XLOC_140964 | ENSRNOT00000030850 | 0.95336626   | 1.61E-06 |
| TUCP_003290 | XLOC_140964 | ENSRNOT00000055582 | 0.957713323  | 9.92E-07 |
| TUCP_003290 | XLOC_140964 | ENSRNOT00000027414 | 0.971172497  | 1.49E-07 |
| TUCP_003290 | XLOC_140964 | ENSRNOT00000055540 | 0.960174721  | 7.38E-07 |
| TUCP_003290 | XLOC_140964 | ENSRNOT00000006752 | 0.958839641  | 8.68E-07 |
| TUCP_003290 | XLOC_140964 | ENSRNOT00000020322 | 0.952251822  | 1.80E-06 |
| TUCP_003290 | XLOC_140964 | ENSRNOT00000085251 | -0.982189661 | 1.37E-08 |
| TUCP_003290 | XLOC_140964 | ENSRNOT00000065300 | 0.972341539  | 1.22E-07 |
| TUCP_003290 | XLOC_140964 | ENSRNOT00000044742 | 0.951871908  | 1.88E-06 |
| TUCP_003290 | XLOC_140964 | ENSRNOT00000009877 | 0.970939913  | 1.55E-07 |
| TUCP_003290 | XLOC_140964 | ENSRNOT00000045699 | 0.971593756  | 1.39E-07 |
| TUCP_003290 | XLOC_140964 | ENSRNOT00000029439 | 0.965478829  | 3.64E-07 |
| TUCP_003290 | XLOC_140964 | ENSRNOT00000064401 | 0.970686393  | 1.62E-07 |
| TUCP_003290 | XLOC_140964 | ENSRNOT00000076820 | 0.968715302  | 2.24E-07 |
| TUCP_003290 | XLOC_140964 | ENSRNOT00000006963 | 0.968474465  | 2.33E-07 |
| TUCP_003290 | XLOC_140964 | ENSRNOT00000022534 | 0.968852853  | 2.19E-07 |
| TUCP_003290 | XLOC_140964 | ENSRNOT00000067489 | 0.95318989   | 1.64E-06 |
| TUCP_003290 | XLOC_140964 | ENSRNOT00000024266 | 0.961334821  | 6.38E-07 |
| TUCP_003290 | XLOC_140964 | ENSRNOT00000083215 | 0.970066602  | 1.80E-07 |
| TUCP_003290 | XLOC_140964 | ENSRNOT00000085228 | 0.976604208  | 5.31E-08 |
| TUCP_003290 | XLOC_140964 | ENSRNOT00000017319 | 0.971768706  | 1.35E-07 |
| TUCP_003290 | XLOC_140964 | ENSRNOT00000055187 | 0.971552146  | 1.40E-07 |
| TUCP_003290 | XLOC_140964 | ENSRNOT00000005934 | 0.973682415  | 9.51E-08 |
| TUCP_003290 | XLOC_140964 | ENSRNOT00000079866 | 0.980270462  | 2.28E-08 |
| TUCP_003290 | XLOC_140964 | ENSRNOT00000072518 | 0.950216962  | 2.21E-06 |
| TUCP_003290 | XLOC_140964 | ENSRNOT00000010149 | 0.957608421  | 1.00E-06 |
| TUCP_003290 | XLOC_140964 | ENSRNOT00000087278 | -0.954706579 | 1.39E-06 |
| TUCP_003290 | XLOC_140964 | ENSRNOT00000019687 | 0.95739083   | 1.03E-06 |
| TUCP_003290 | XLOC_140964 | ENSRNOT00000023619 | 0.963479569  | 4.81E-07 |
| TUCP_003290 | XLOC_140964 | ENSRNOT00000068033 | 0.977216635  | 4.65E-08 |
| TUCP_003290 | XLOC_140964 | ENSRNOT00000009156 | 0.961350483  | 6.36E-07 |
| TUCP_003290 | XLOC_140964 | ENSRNOT00000090912 | 0.95612439   | 1.19E-06 |
| TUCP_003290 | XLOC_140964 | ENSRNOT00000044562 | 0.957028181  | 1.07E-06 |
| TUCP_003290 | XLOC_140964 | ENSRNOT00000090918 | 0.959932336  | 7.60E-07 |
| TUCP_003290 | XLOC_140964 | ENSRNOT00000001403 | 0.966286512  | 3.24E-07 |
| TUCP_003290 | XLOC_140964 | ENSRNOT00000088196 | 0.96950768   | 1.97E-07 |
| TUCP_003290 | XLOC_140964 | ENSRNOT00000016132 | -0.964964468 | 3.92E-07 |
| TUCP_003290 | XLOC_140964 | ENSRNOT00000034692 | -0.962247889 | 5.67E-07 |
| TUCP_003290 | XLOC_140964 | ENSRNOT00000048063 | 0.968906386  | 2.17E-07 |
| TUCP_003290 | XLOC_140964 | ENSRNOT00000079454 | 0.951392598  | 1.97E-06 |
| TUCP_003290 | XLOC_140964 | ENSRNOT00000079895 | 0.973217405  | 1.04E-07 |
| TUCP_003290 | XLOC_140964 | ENSRNOT00000078102 | 0.973542554  | 9.77E-08 |
| TUCP_003290 | XLOC_140964 | ENSRNOT00000058072 | 0.952819841  | 1.70E-06 |
| TUCP_003290 | XLOC_140964 | ENSRNOT00000081047 | 0.977578332  | 4.30E-08 |
| TUCP_003290 | XLOC_140964 | ENSRNOT00000011880 | 0.956493716  | 1.14E-06 |
| TUCP_003290 | XLOC_140964 | ENSRNOT00000023989 | 0.958513683  | 9.03E-07 |
| TUCP_003290 | XLOC_140964 | ENSRNOT00000020885 | 0.955936308  | 1.21E-06 |
| TUCP_003290 | XLOC_140964 | ENSRNOT0000003991  | 0.975711323  | 6.39E-08 |

|             |             |                    |              |          |
|-------------|-------------|--------------------|--------------|----------|
| TUCP_003290 | XLOC_140964 | ENSRNOT00000050515 | 0.951718173  | 1.91E-06 |
| TUCP_003290 | XLOC_140964 | ENSRNOT00000021153 | 0.967673817  | 2.63E-07 |
| TUCP_003290 | XLOC_140964 | ENSRNOT00000064902 | 0.95940989   | 8.10E-07 |
| TUCP_003290 | XLOC_140964 | ENSRNOT00000064900 | 0.95484302   | 1.37E-06 |
| TUCP_003290 | XLOC_140964 | ENSRNOT00000078070 | 0.957070446  | 1.07E-06 |
| TUCP_003290 | XLOC_140964 | ENSRNOT00000087997 | 0.958563329  | 8.97E-07 |
| TUCP_003290 | XLOC_140964 | ENSRNOT00000021015 | 0.984233056  | 7.47E-09 |
| TUCP_003290 | XLOC_140964 | ENSRNOT00000082146 | -0.952079987 | 1.84E-06 |
| TUCP_003290 | XLOC_140964 | ENSRNOT00000011408 | 0.963150513  | 5.03E-07 |
| TUCP_003290 | XLOC_140964 | ENSRNOT00000027452 | 0.965176692  | 3.80E-07 |
| TUCP_003290 | XLOC_140964 | ENSRNOT00000019656 | -0.972167892 | 1.26E-07 |
| TUCP_003290 | XLOC_140964 | ENSRNOT00000049538 | 0.961665029  | 6.11E-07 |
| TUCP_003290 | XLOC_140964 | ENSRNOT00000074649 | 0.964588999  | 4.13E-07 |
| TUCP_003290 | XLOC_140964 | ENSRNOT00000036951 | 0.978118552  | 3.81E-08 |
| TUCP_003290 | XLOC_140964 | ENSRNOT00000006969 | 0.958669634  | 8.86E-07 |
| TUCP_003290 | XLOC_140964 | ENSRNOT00000011663 | 0.968866549  | 2.19E-07 |
| TUCP_003290 | XLOC_140964 | ENSRNOT00000078250 | 0.959930228  | 7.61E-07 |
| TUCP_003290 | XLOC_140964 | ENSRNOT00000066133 | -0.954444556 | 1.43E-06 |
| TUCP_003290 | XLOC_140964 | ENSRNOT00000029136 | -0.962212622 | 5.69E-07 |
| TUCP_003290 | XLOC_140964 | ENSRNOT00000085596 | 0.966046306  | 3.36E-07 |
| TUCP_003290 | XLOC_140964 | ENSRNOT00000003102 | 0.95780537   | 9.81E-07 |
| TUCP_003290 | XLOC_140964 | ENSRNOT00000080110 | 0.960816425  | 6.81E-07 |
| TUCP_003290 | XLOC_140964 | ENSRNOT00000040069 | 0.964426943  | 4.23E-07 |
| TUCP_003290 | XLOC_140964 | ENSRNOT00000010748 | 0.976466893  | 5.46E-08 |
| TUCP_003290 | XLOC_140964 | ENSRNOT00000027616 | -0.95576738  | 1.24E-06 |
| TUCP_003290 | XLOC_140964 | ENSRNOT00000035474 | 0.986548497  | 3.39E-09 |
| TUCP_003290 | XLOC_140964 | ENSRNOT00000023807 | -0.977809313 | 4.08E-08 |
| TUCP_003290 | XLOC_140964 | ENSRNOT00000078856 | -0.959027134 | 8.49E-07 |
| TUCP_003290 | XLOC_140964 | ENSRNOT00000091205 | 0.97083422   | 1.58E-07 |
| TUCP_003290 | XLOC_140964 | ENSRNOT00000004787 | -0.959059536 | 8.46E-07 |
| TUCP_003290 | XLOC_140964 | ENSRNOT00000010824 | 0.957049613  | 1.07E-06 |
| TUCP_003290 | XLOC_140964 | ENSRNOT00000014814 | 0.953944323  | 1.51E-06 |
| TUCP_003290 | XLOC_140964 | ENSRNOT00000004412 | 0.96810253   | 2.46E-07 |
| TUCP_003290 | XLOC_140964 | ENSRNOT00000080207 | 0.950146841  | 2.23E-06 |
| TUCP_003290 | XLOC_140964 | ENSRNOT00000026174 | 0.977514285  | 4.36E-08 |
| TUCP_003290 | XLOC_140964 | ENSRNOT00000034704 | 0.954236237  | 1.46E-06 |
| TUCP_003290 | XLOC_140964 | ENSRNOT00000005144 | 0.950219541  | 2.21E-06 |
| TUCP_003290 | XLOC_140964 | ENSRNOT00000018998 | 0.975938518  | 6.10E-08 |
| TUCP_003290 | XLOC_140964 | ENSRNOT00000004463 | 0.967664963  | 2.64E-07 |
| TUCP_003290 | XLOC_140964 | ENSRNOT00000008982 | 0.97655939   | 5.36E-08 |
| TUCP_003290 | XLOC_140964 | ENSRNOT00000047192 | -0.960583347 | 7.01E-07 |
| TUCP_003290 | XLOC_140964 | ENSRNOT00000090299 | 0.960321343  | 7.25E-07 |
| TUCP_003290 | XLOC_140964 | ENSRNOT00000048029 | 0.960711424  | 6.90E-07 |
| TUCP_003290 | XLOC_140964 | ENSRNOT00000083799 | 0.955354326  | 1.30E-06 |
| TUCP_003290 | XLOC_140964 | ENSRNOT00000065143 | 0.960064726  | 7.48E-07 |
| TUCP_003290 | XLOC_140964 | ENSRNOT00000081246 | 0.969280862  | 2.05E-07 |
| TUCP_003290 | XLOC_140964 | ENSRNOT00000027083 | 0.952224406  | 1.81E-06 |
| TUCP_003290 | XLOC_140964 | ENSRNOT00000074939 | 0.960241235  | 7.32E-07 |
| TUCP_003290 | XLOC_140964 | ENSRNOT00000001290 | 0.956872011  | 1.09E-06 |
| TUCP_003290 | XLOC_140964 | ENSRNOT00000009563 | -0.968142035 | 2.45E-07 |
| TUCP_003290 | XLOC_140964 | ENSRNOT00000088125 | 0.959673012  | 7.85E-07 |



|             |             |                    |              |          |
|-------------|-------------|--------------------|--------------|----------|
| TUCP_003290 | XLOC_140964 | ENSRNOT00000019502 | 0.979526201  | 2.74E-08 |
| TUCP_003290 | XLOC_140964 | ENSRNOT00000043216 | 0.986324935  | 3.68E-09 |
| TUCP_003290 | XLOC_140964 | ENSRNOT00000081981 | 0.973994128  | 8.97E-08 |
| TUCP_003290 | XLOC_140964 | ENSRNOT00000013758 | 0.968869258  | 2.19E-07 |
| TUCP_003290 | XLOC_140964 | ENSRNOT00000028563 | 0.973874366  | 9.17E-08 |
| TUCP_003290 | XLOC_140964 | ENSRNOT00000006195 | 0.956550283  | 1.13E-06 |
| TUCP_003290 | XLOC_140964 | ENSRNOT00000010418 | 0.964963966  | 3.92E-07 |
| TUCP_003290 | XLOC_140964 | ENSRNOT00000015479 | 0.976405636  | 5.54E-08 |
| TUCP_003290 | XLOC_140964 | ENSRNOT00000047836 | -0.953317993 | 1.61E-06 |
| TUCP_003290 | XLOC_140964 | ENSRNOT00000012379 | 0.953333861  | 1.61E-06 |
| TUCP_003290 | XLOC_140964 | ENSRNOT00000011384 | 0.971695197  | 1.36E-07 |
| TUCP_003290 | XLOC_140964 | ENSRNOT00000048754 | -0.962221746 | 5.69E-07 |
| TUCP_003290 | XLOC_140964 | ENSRNOT00000044628 | 0.951889232  | 1.87E-06 |
| TUCP_003290 | XLOC_140964 | ENSRNOT00000079109 | 0.976197467  | 5.78E-08 |
| TUCP_003290 | XLOC_140964 | ENSRNOT00000011926 | 0.966725295  | 3.04E-07 |
| TUCP_003290 | XLOC_140964 | ENSRNOT00000028847 | 0.958447213  | 9.10E-07 |
| TUCP_003290 | XLOC_140964 | ENSRNOT00000004003 | 0.953253128  | 1.63E-06 |
| TUCP_003290 | XLOC_140964 | ENSRNOT00000052075 | 0.965608998  | 3.58E-07 |
| TUCP_003290 | XLOC_140964 | ENSRNOT00000091602 | -0.96888025  | 2.18E-07 |
| TUCP_003290 | XLOC_140964 | ENSRNOT00000073971 | 0.959628372  | 7.89E-07 |
| TUCP_003290 | XLOC_140964 | ENSRNOT00000006680 | 0.957111054  | 1.06E-06 |
| TUCP_003290 | XLOC_140964 | ENSRNOT00000090129 | -0.951060766 | 2.04E-06 |
| TUCP_003290 | XLOC_140964 | ENSRNOT00000035989 | 0.956186284  | 1.18E-06 |
| TUCP_003290 | XLOC_140964 | ENSRNOT00000011654 | -0.95352779  | 1.58E-06 |
| TUCP_003290 | XLOC_140964 | ENSRNOT00000087443 | 0.973215449  | 1.04E-07 |
| TUCP_003290 | XLOC_140964 | ENSRNOT00000020147 | 0.958912887  | 8.61E-07 |
| TUCP_003290 | XLOC_140964 | ENSRNOT00000024352 | 0.960322248  | 7.25E-07 |
| TUCP_003290 | XLOC_140964 | ENSRNOT00000014508 | 0.972917452  | 1.10E-07 |
| TUCP_003290 | XLOC_140964 | ENSRNOT00000058312 | 0.96994055   | 1.84E-07 |
| TUCP_003290 | XLOC_140964 | ENSRNOT00000013274 | 0.959174727  | 8.34E-07 |
| TUCP_003290 | XLOC_140964 | ENSRNOT00000010898 | 0.956412661  | 1.15E-06 |
| TUCP_003290 | XLOC_140964 | ENSRNOT0000005355  | 0.954315238  | 1.45E-06 |
| TUCP_003290 | XLOC_140964 | ENSRNOT00000068381 | 0.952026061  | 1.85E-06 |
| TUCP_003290 | XLOC_140964 | ENSRNOT00000009221 | 0.951777876  | 1.89E-06 |
| TUCP_003290 | XLOC_140964 | ENSRNOT00000079917 | 0.956057439  | 1.20E-06 |
| TUCP_003290 | XLOC_140964 | ENSRNOT00000010873 | -0.969026398 | 2.13E-07 |
| TUCP_003290 | XLOC_140964 | ENSRNOT00000014821 | -0.953268435 | 1.62E-06 |
| TUCP_003290 | XLOC_140964 | ENSRNOT00000088599 | 0.975097952  | 7.23E-08 |
| TUCP_003290 | XLOC_140964 | ENSRNOT00000016129 | 0.960058324  | 7.49E-07 |
| TUCP_003290 | XLOC_140964 | ENSRNOT00000061100 | 0.970700238  | 1.62E-07 |
| TUCP_003290 | XLOC_140964 | ENSRNOT00000022839 | 0.964389492  | 4.25E-07 |
| TUCP_003290 | XLOC_140964 | ENSRNOT00000034744 | 0.971779633  | 1.34E-07 |
| TUCP_003290 | XLOC_140964 | ENSRNOT00000017776 | 0.985146886  | 5.55E-09 |
| TUCP_003290 | XLOC_140964 | ENSRNOT00000027910 | 0.98122829   | 1.78E-08 |
| TUCP_003290 | XLOC_140964 | ENSRNOT00000002771 | 0.953588325  | 1.57E-06 |
| TUCP_003290 | XLOC_140964 | ENSRNOT00000024322 | 0.963235575  | 4.97E-07 |
| TUCP_003290 | XLOC_140964 | ENSRNOT00000011270 | 0.969663673  | 1.92E-07 |
| TUCP_003290 | XLOC_140964 | ENSRNOT00000003770 | -0.975520703 | 6.64E-08 |
| TUCP_003290 | XLOC_140964 | ENSRNOT00000047975 | 0.967810672  | 2.58E-07 |
| TUCP_003290 | XLOC_140964 | ENSRNOT00000027615 | 0.959137557  | 8.38E-07 |
| TUCP_003290 | XLOC_140964 | ENSRNOT00000051022 | 0.97606179   | 5.95E-08 |

|             |             |                    |              |          |
|-------------|-------------|--------------------|--------------|----------|
| TUCP_003290 | XLOC_140964 | ENSRNOT00000029833 | 0.964789053  | 4.02E-07 |
| TUCP_003290 | XLOC_140964 | ENSRNOT00000002173 | -0.969420818 | 2.00E-07 |
| TUCP_003290 | XLOC_140964 | ENSRNOT00000015188 | 0.976914015  | 4.97E-08 |
| TUCP_003290 | XLOC_140964 | ENSRNOT00000057313 | 0.956337367  | 1.16E-06 |
| TUCP_003290 | XLOC_140964 | ENSRNOT00000059807 | 0.952311414  | 1.79E-06 |
| TUCP_003290 | XLOC_140964 | ENSRNOT00000050138 | 0.955425929  | 1.29E-06 |
| TUCP_003290 | XLOC_140964 | ENSRNOT00000091834 | 0.964174905  | 4.38E-07 |
| TUCP_003290 | XLOC_140964 | ENSRNOT00000012895 | 0.966319731  | 3.23E-07 |
| TUCP_003290 | XLOC_140964 | ENSRNOT00000016991 | 0.95926826   | 8.25E-07 |
| TUCP_003290 | XLOC_140964 | ENSRNOT00000009852 | 0.952329491  | 1.79E-06 |
| TUCP_003290 | XLOC_140964 | ENSRNOT00000025394 | 0.957403053  | 1.03E-06 |
| TUCP_003290 | XLOC_140964 | ENSRNOT00000020669 | 0.960754351  | 6.86E-07 |
| TUCP_003290 | XLOC_140964 | ENSRNOT00000043872 | 0.973625728  | 9.62E-08 |
| TUCP_003290 | XLOC_140964 | ENSRNOT00000074653 | 0.964800884  | 4.01E-07 |
| TUCP_003290 | XLOC_140964 | ENSRNOT00000004570 | 0.954472148  | 1.43E-06 |
| TUCP_003290 | XLOC_140964 | ENSRNOT00000031230 | 0.97398091   | 8.99E-08 |
| TUCP_003290 | XLOC_140964 | ENSRNOT00000074659 | 0.952246029  | 1.80E-06 |
| TUCP_003290 | XLOC_140964 | ENSRNOT00000077406 | 0.971565618  | 1.40E-07 |
| TUCP_003290 | XLOC_140964 | ENSRNOT00000015434 | 0.953206692  | 1.63E-06 |
| TUCP_003290 | XLOC_140964 | ENSRNOT00000002292 | 0.977039343  | 4.84E-08 |
| TUCP_003290 | XLOC_140964 | ENSRNOT00000052120 | 0.965287538  | 3.74E-07 |
| TUCP_003290 | XLOC_140964 | ENSRNOT00000086336 | 0.96577234   | 3.49E-07 |
| TUCP_003290 | XLOC_140964 | ENSRNOT00000054980 | 0.952714544  | 1.72E-06 |
| TUCP_003290 | XLOC_140964 | ENSRNOT00000056130 | 0.958092973  | 9.49E-07 |
| TUCP_003290 | XLOC_140964 | ENSRNOT00000004172 | 0.977435447  | 4.44E-08 |
| TUCP_003290 | XLOC_140964 | ENSRNOT00000029125 | 0.975083442  | 7.25E-08 |
| TUCP_003290 | XLOC_140964 | ENSRNOT00000085279 | 0.959801511  | 7.73E-07 |
| TUCP_003290 | XLOC_140964 | ENSRNOT00000087095 | 0.959143822  | 8.37E-07 |
| TUCP_003290 | XLOC_140964 | ENSRNOT00000005389 | 0.960024999  | 7.52E-07 |
| TUCP_003290 | XLOC_140964 | ENSRNOT00000026280 | 0.952913857  | 1.68E-06 |
| TUCP_003290 | XLOC_140964 | ENSRNOT00000010927 | 0.982604697  | 1.22E-08 |
| TUCP_003290 | XLOC_140964 | ENSRNOT00000022862 | 0.953004437  | 1.67E-06 |
| TUCP_003290 | XLOC_140964 | ENSRNOT00000015092 | 0.969254991  | 2.05E-07 |
| TUCP_003290 | XLOC_140964 | ENSRNOT00000083632 | -0.951842484 | 1.88E-06 |
| TUCP_003290 | XLOC_140964 | ENSRNOT00000010224 | 0.957907559  | 9.70E-07 |
| TUCP_003290 | XLOC_140964 | ENSRNOT00000008210 | 0.961607028  | 6.16E-07 |
| TUCP_003290 | XLOC_140964 | ENSRNOT00000007175 | 0.963631766  | 4.71E-07 |
| TUCP_003290 | XLOC_140964 | ENSRNOT00000073559 | 0.952154565  | 1.82E-06 |
| TUCP_003290 | XLOC_140964 | ENSRNOT00000082998 | 0.979834408  | 2.54E-08 |
| TUCP_003290 | XLOC_140964 | ENSRNOT00000015006 | 0.968782379  | 2.22E-07 |
| TUCP_003290 | XLOC_140964 | ENSRNOT00000007351 | -0.96108228  | 6.59E-07 |
| TUCP_003290 | XLOC_140964 | ENSRNOT00000017665 | 0.961379722  | 6.34E-07 |
| TUCP_003290 | XLOC_140964 | ENSRNOT00000083578 | 0.953693109  | 1.55E-06 |
| TUCP_003290 | XLOC_140964 | ENSRNOT00000026065 | 0.962922803  | 5.19E-07 |
| TUCP_003290 | XLOC_140964 | ENSRNOT00000023638 | 0.982662576  | 1.20E-08 |
| TUCP_003290 | XLOC_140964 | ENSRNOT00000005228 | 0.965562454  | 3.60E-07 |
| TUCP_003290 | XLOC_140964 | ENSRNOT00000022726 | 0.979586029  | 2.70E-08 |
| TUCP_003290 | XLOC_140964 | ENSRNOT00000005220 | 0.974429726  | 8.25E-08 |
| TUCP_003290 | XLOC_140964 | ENSRNOT00000045326 | 0.976977236  | 4.90E-08 |
| TUCP_003290 | XLOC_140964 | ENSRNOT00000016649 | 0.966710477  | 3.04E-07 |
| TUCP_003290 | XLOC_140964 | ENSRNOT00000090342 | 0.956213633  | 1.18E-06 |

|             |             |                    |              |          |
|-------------|-------------|--------------------|--------------|----------|
| TUCP_003290 | XLOC_140964 | ENSRNOT00000067170 | -0.95137182  | 1.97E-06 |
| TUCP_003290 | XLOC_140964 | ENSRNOT00000077871 | 0.965159733  | 3.81E-07 |
| TUCP_003290 | XLOC_140964 | ENSRNOT00000080654 | 0.95703798   | 1.07E-06 |
| TUCP_003290 | XLOC_140964 | ENSRNOT0000001586  | -0.95230564  | 1.79E-06 |
| TUCP_003290 | XLOC_140964 | ENSRNOT00000088509 | 0.953046397  | 1.66E-06 |
| TUCP_003290 | XLOC_140964 | ENSRNOT00000043554 | 0.968841637  | 2.20E-07 |
| TUCP_003290 | XLOC_140964 | ENSRNOT00000012187 | 0.962416339  | 5.54E-07 |
| TUCP_003290 | XLOC_140964 | ENSRNOT00000057814 | 0.952422375  | 1.77E-06 |
| TUCP_003290 | XLOC_140964 | ENSRNOT00000026783 | 0.976848169  | 5.04E-08 |
| TUCP_003290 | XLOC_140964 | ENSRNOT00000081621 | 0.95992076   | 7.61E-07 |
| TUCP_003290 | XLOC_140964 | ENSRNOT00000032158 | 0.95931801   | 8.20E-07 |
| TUCP_003290 | XLOC_140964 | ENSRNOT00000038247 | 0.956740416  | 1.11E-06 |
| TUCP_003290 | XLOC_140964 | ENSRNOT00000027944 | 0.954929165  | 1.36E-06 |
| TUCP_003290 | XLOC_140964 | ENSRNOT00000089933 | 0.961634619  | 6.14E-07 |
| TUCP_003290 | XLOC_140964 | ENSRNOT00000077908 | 0.96542276   | 3.67E-07 |
| TUCP_003290 | XLOC_140964 | ENSRNOT00000083876 | -0.950682325 | 2.11E-06 |
| TUCP_003290 | XLOC_140964 | ENSRNOT00000026481 | 0.965354086  | 3.71E-07 |
| TUCP_003290 | XLOC_140964 | ENSRNOT00000010463 | 0.967880306  | 2.55E-07 |
| TUCP_003290 | XLOC_140964 | ENSRNOT00000026718 | 0.953830374  | 1.53E-06 |
| TUCP_003290 | XLOC_140964 | ENSRNOT00000072208 | 0.973306021  | 1.02E-07 |
| TUCP_003290 | XLOC_140964 | ENSRNOT00000032780 | 0.957212765  | 1.05E-06 |
| TUCP_003290 | XLOC_140964 | ENSRNOT00000084012 | 0.963304589  | 4.93E-07 |
| TUCP_003290 | XLOC_140964 | ENSRNOT00000013762 | 0.952667996  | 1.73E-06 |
| TUCP_003290 | XLOC_140964 | ENSRNOT00000019820 | 0.970769099  | 1.60E-07 |
| TUCP_003290 | XLOC_140964 | ENSRNOT00000067822 | 0.966652366  | 3.07E-07 |
| TUCP_003290 | XLOC_140964 | ENSRNOT00000024060 | 0.970507166  | 1.67E-07 |
| TUCP_003290 | XLOC_140964 | ENSRNOT00000051181 | 0.955366121  | 1.29E-06 |
| TUCP_003290 | XLOC_140964 | ENSRNOT00000021037 | 0.950107943  | 2.24E-06 |
| TUCP_003290 | XLOC_140964 | ENSRNOT00000064774 | 0.962587881  | 5.42E-07 |
| TUCP_003290 | XLOC_140964 | ENSRNOT00000027684 | 0.957025817  | 1.07E-06 |
| TUCP_003290 | XLOC_140964 | ENSRNOT00000025362 | -0.958930605 | 8.59E-07 |
| TUCP_003290 | XLOC_140964 | ENSRNOT00000010541 | 0.955682464  | 1.25E-06 |
| TUCP_003290 | XLOC_140964 | ENSRNOT00000068745 | 0.954339357  | 1.45E-06 |
| TUCP_003290 | XLOC_140964 | ENSRNOT00000004032 | 0.979454685  | 2.79E-08 |
| TUCP_003290 | XLOC_140964 | ENSRNOT00000048613 | 0.967084062  | 2.88E-07 |
| TUCP_003290 | XLOC_140964 | ENSRNOT00000017948 | 0.950268143  | 2.20E-06 |
| TUCP_003290 | XLOC_140964 | ENSRNOT00000065229 | 0.954337621  | 1.45E-06 |
| TUCP_003290 | XLOC_140964 | ENSRNOT00000066526 | 0.953726403  | 1.55E-06 |
| TUCP_003290 | XLOC_140964 | ENSRNOT00000074212 | 0.953985589  | 1.50E-06 |
| TUCP_003290 | XLOC_140964 | ENSRNOT00000091909 | 0.975456392  | 6.73E-08 |
| TUCP_003290 | XLOC_140964 | ENSRNOT00000001081 | 0.964357602  | 4.27E-07 |
| TUCP_003290 | XLOC_140964 | ENSRNOT00000021925 | 0.966774262  | 3.02E-07 |
| TUCP_003290 | XLOC_140964 | ENSRNOT00000086119 | -0.958453638 | 9.09E-07 |
| TUCP_003290 | XLOC_140964 | ENSRNOT00000084385 | 0.981760994  | 1.54E-08 |
| TUCP_003290 | XLOC_140964 | ENSRNOT00000065983 | 0.976310964  | 5.65E-08 |
| TUCP_003290 | XLOC_140964 | ENSRNOT00000022213 | 0.975382432  | 6.83E-08 |
| TUCP_003290 | XLOC_140964 | ENSRNOT00000067780 | -0.964916688 | 3.95E-07 |
| TUCP_003290 | XLOC_140964 | ENSRNOT00000073675 | -0.953597488 | 1.57E-06 |
| TUCP_003290 | XLOC_140964 | ENSRNOT00000052422 | 0.960407036  | 7.17E-07 |
| TUCP_003290 | XLOC_140964 | ENSRNOT00000001242 | 0.974066846  | 8.84E-08 |
| TUCP_003290 | XLOC_140964 | ENSRNOT00000015609 | 0.97515661   | 7.15E-08 |

|             |             |                    |              |          |
|-------------|-------------|--------------------|--------------|----------|
| TUCP_003290 | XLOC_140964 | ENSRNOT00000086590 | 0.958990347  | 8.53E-07 |
| TUCP_003290 | XLOC_140964 | ENSRNOT00000025983 | 0.955555305  | 1.27E-06 |
| TUCP_003290 | XLOC_140964 | ENSRNOT00000020155 | 0.963597024  | 4.74E-07 |
| TUCP_003290 | XLOC_140964 | ENSRNOT00000055321 | 0.967113075  | 2.87E-07 |
| TUCP_003290 | XLOC_140964 | ENSRNOT00000004698 | 0.956486362  | 1.14E-06 |
| TUCP_003290 | XLOC_140964 | ENSRNOT00000045083 | 0.95725217   | 1.05E-06 |
| TUCP_003290 | XLOC_140964 | ENSRNOT00000014537 | 0.950978913  | 2.05E-06 |
| TUCP_003290 | XLOC_140964 | ENSRNOT00000017629 | 0.956733075  | 1.11E-06 |
| TUCP_003290 | XLOC_140964 | ENSRNOT00000065947 | 0.950305358  | 2.20E-06 |
| TUCP_003290 | XLOC_140964 | ENSRNOT00000021116 | 0.952898217  | 1.69E-06 |
| TUCP_003290 | XLOC_140964 | ENSRNOT00000078475 | 0.98116186   | 1.81E-08 |
| TUCP_003290 | XLOC_140964 | ENSRNOT00000087429 | 0.961084736  | 6.58E-07 |
| TUCP_003290 | XLOC_140964 | ENSRNOT00000005262 | 0.953225509  | 1.63E-06 |
| TUCP_003290 | XLOC_140964 | ENSRNOT00000016722 | 0.975887066  | 6.17E-08 |
| TUCP_003290 | XLOC_140964 | ENSRNOT00000073526 | 0.952525151  | 1.75E-06 |
| TUCP_003290 | XLOC_140964 | ENSRNOT00000000013 | 0.973030513  | 1.07E-07 |
| TUCP_003290 | XLOC_140964 | ENSRNOT00000017753 | 0.972798436  | 1.12E-07 |
| TUCP_003290 | XLOC_140964 | ENSRNOT00000009198 | 0.968432278  | 2.34E-07 |
| TUCP_003290 | XLOC_140964 | ENSRNOT00000009129 | 0.958482796  | 9.06E-07 |
| TUCP_003290 | XLOC_140964 | ENSRNOT00000022074 | 0.958692682  | 8.84E-07 |
| TUCP_003290 | XLOC_140964 | ENSRNOT00000004999 | 0.95080854   | 2.09E-06 |
| TUCP_003290 | XLOC_140964 | ENSRNOT00000013093 | -0.955052221 | 1.34E-06 |
| TUCP_003290 | XLOC_140964 | ENSRNOT00000019554 | 0.966803226  | 3.00E-07 |
| TUCP_003290 | XLOC_140964 | ENSRNOT00000035700 | 0.980524942  | 2.14E-08 |
| TUCP_003290 | XLOC_140964 | ENSRNOT00000029202 | -0.95175438  | 1.90E-06 |
| TUCP_003290 | XLOC_140964 | ENSRNOT00000092029 | 0.981087146  | 1.85E-08 |
| TUCP_003290 | XLOC_140964 | ENSRNOT00000063956 | 0.954668607  | 1.40E-06 |
| TUCP_003290 | XLOC_140964 | ENSRNOT00000005489 | 0.958413562  | 9.13E-07 |
| TUCP_003290 | XLOC_140964 | ENSRNOT00000084422 | 0.973221673  | 1.04E-07 |
| TUCP_003290 | XLOC_140964 | ENSRNOT00000050834 | -0.955583368 | 1.26E-06 |
| TUCP_003290 | XLOC_140964 | ENSRNOT00000054828 | 0.958188859  | 9.38E-07 |
| TUCP_003290 | XLOC_140964 | ENSRNOT0000002114  | -0.951442956 | 1.96E-06 |
| TUCP_003290 | XLOC_140964 | ENSRNOT00000027970 | 0.961365547  | 6.35E-07 |
| TUCP_003290 | XLOC_140964 | ENSRNOT00000080928 | 0.953240339  | 1.63E-06 |
| TUCP_003290 | XLOC_140964 | ENSRNOT00000009342 | 0.971223358  | 1.48E-07 |
| TUCP_003290 | XLOC_140964 | ENSRNOT00000022142 | 0.968309241  | 2.39E-07 |
| TUCP_003290 | XLOC_140964 | ENSRNOT00000014124 | 0.965845074  | 3.46E-07 |
| TUCP_003290 | XLOC_140964 | ENSRNOT00000000120 | 0.959788349  | 7.74E-07 |
| TUCP_003290 | XLOC_140964 | ENSRNOT00000013632 | 0.958329627  | 9.23E-07 |
| TUCP_003290 | XLOC_140964 | ENSRNOT00000084049 | 0.950755602  | 2.10E-06 |
| TUCP_003290 | XLOC_140964 | ENSRNOT00000009900 | -0.956279636 | 1.17E-06 |
| TUCP_003290 | XLOC_140964 | ENSRNOT00000015073 | 0.968900808  | 2.17E-07 |
| TUCP_003290 | XLOC_140964 | ENSRNOT00000064798 | 0.978404939  | 3.57E-08 |
| TUCP_003290 | XLOC_140964 | ENSRNOT00000019177 | 0.974586354  | 8.00E-08 |
| TUCP_003290 | XLOC_140964 | ENSRNOT00000022485 | 0.958602135  | 8.93E-07 |
| TUCP_003290 | XLOC_140964 | ENSRNOT00000019911 | -0.957650657 | 9.99E-07 |
| TUCP_003290 | XLOC_140964 | ENSRNOT00000040393 | 0.986088809  | 4.01E-09 |
| TUCP_003290 | XLOC_140964 | ENSRNOT00000066593 | 0.960760194  | 6.86E-07 |
| TUCP_003290 | XLOC_140964 | ENSRNOT00000067901 | -0.959360599 | 8.15E-07 |
| TUCP_003290 | XLOC_140964 | ENSRNOT00000036750 | 0.966037974  | 3.36E-07 |
| TUCP_003290 | XLOC_140964 | ENSRNOT00000024659 | 0.970964532  | 1.55E-07 |

|             |             |                     |              |          |
|-------------|-------------|---------------------|--------------|----------|
| TUCP_003290 | XLOC_140964 | ENSRNOT00000011041  | 0.955581288  | 1.26E-06 |
| TUCP_003290 | XLOC_140964 | ENSRNOT00000021674  | 0.967338069  | 2.77E-07 |
| TUCP_003290 | XLOC_140964 | ENSRNOT00000064700  | 0.965952677  | 3.40E-07 |
| TUCP_003290 | XLOC_140964 | ENSRNOT00000036613  | -0.957085959 | 1.07E-06 |
| TUCP_003290 | XLOC_140964 | ENSRNOT00000019983  | -0.957788437 | 9.83E-07 |
| TUCP_003290 | XLOC_140964 | ENSRNOT00000004140  | 0.99036731   | 6.43E-10 |
| TUCP_003290 | XLOC_140964 | ENSRNOT00000010433  | 0.954321084  | 1.45E-06 |
| TUCP_003290 | XLOC_140964 | ENSRNOT00000000334  | -0.956055491 | 1.20E-06 |
| TUCP_003290 | XLOC_140964 | ENSRNOT00000019213  | 0.976676781  | 5.23E-08 |
| TUCP_003290 | XLOC_140964 | ENSRNOT000000071560 | 0.951535698  | 1.94E-06 |
| TUCP_003290 | XLOC_140964 | ENSRNOT000000082508 | -0.953967544 | 1.51E-06 |
| TUCP_003290 | XLOC_140964 | ENSRNOT00000030749  | -0.950319015 | 2.19E-06 |
| TUCP_003290 | XLOC_140964 | ENSRNOT000000082863 | 0.950940443  | 2.06E-06 |
| TUCP_003290 | XLOC_140964 | ENSRNOT00000007164  | 0.971888999  | 1.32E-07 |
| TUCP_003290 | XLOC_140964 | ENSRNOT00000049459  | -0.956087206 | 1.19E-06 |
| TUCP_003290 | XLOC_140964 | ENSRNOT000000086548 | 0.974787499  | 7.69E-08 |
| TUCP_003290 | XLOC_140964 | ENSRNOT00000001118  | 0.962907842  | 5.20E-07 |
| TUCP_003290 | XLOC_140964 | ENSRNOT000000067181 | 0.963705399  | 4.67E-07 |
| TUCP_003290 | XLOC_140964 | ENSRNOT00000009496  | 0.97763041   | 4.25E-08 |
| TUCP_003290 | XLOC_140964 | ENSRNOT00000015076  | 0.95924847   | 8.26E-07 |
| TUCP_003290 | XLOC_140964 | ENSRNOT00000043345  | 0.955050959  | 1.34E-06 |
| TUCP_003290 | XLOC_140964 | ENSRNOT00000014979  | 0.964375025  | 4.26E-07 |
| TUCP_003290 | XLOC_140964 | ENSRNOT00000005942  | 0.96343363   | 4.84E-07 |
| TUCP_003290 | XLOC_140964 | ENSRNOT00000018533  | 0.957896676  | 9.71E-07 |
| TUCP_003290 | XLOC_140964 | ENSRNOT00000001507  | 0.965543699  | 3.61E-07 |
| TUCP_003290 | XLOC_140964 | ENSRNOT00000028646  | 0.951492732  | 1.95E-06 |
| TUCP_003290 | XLOC_140964 | ENSRNOT00000018584  | 0.954112201  | 1.48E-06 |
| TUCP_003290 | XLOC_140964 | ENSRNOT00000016801  | 0.954206175  | 1.47E-06 |
| TUCP_003290 | XLOC_140964 | ENSRNOT00000037456  | 0.990461368  | 6.12E-10 |
| TUCP_003290 | XLOC_140964 | ENSRNOT00000025510  | -0.953612954 | 1.56E-06 |
| TUCP_003290 | XLOC_140964 | ENSRNOT00000075424  | 0.962483873  | 5.50E-07 |
| TUCP_003290 | XLOC_140964 | ENSRNOT00000041513  | 0.963530205  | 4.78E-07 |
| TUCP_003290 | XLOC_140964 | ENSRNOT000000061392 | 0.951973193  | 1.86E-06 |
| TUCP_003290 | XLOC_140964 | ENSRNOT00000024771  | 0.962911358  | 5.19E-07 |
| TUCP_003290 | XLOC_140964 | ENSRNOT00000068633  | 0.960448144  | 7.13E-07 |
| TUCP_003290 | XLOC_140964 | ENSRNOT00000028266  | 0.952245522  | 1.80E-06 |
| TUCP_003290 | XLOC_140964 | ENSRNOT00000020437  | 0.972949527  | 1.09E-07 |
| TUCP_003290 | XLOC_140964 | ENSRNOT00000024119  | 0.957395481  | 1.03E-06 |
| TUCP_003290 | XLOC_140964 | ENSRNOT00000003971  | 0.964193617  | 4.36E-07 |
| TUCP_003290 | XLOC_140964 | ENSRNOT00000012942  | 0.954945305  | 1.36E-06 |
| TUCP_003290 | XLOC_140964 | ENSRNOT00000004319  | -0.961992226 | 5.86E-07 |
| TUCP_003290 | XLOC_140964 | ENSRNOT00000044608  | -0.969670608 | 1.92E-07 |
| TUCP_003290 | XLOC_140964 | ENSRNOT00000086868  | 0.967618804  | 2.66E-07 |
| TUCP_003290 | XLOC_140964 | ENSRNOT00000027526  | 0.952252436  | 1.80E-06 |
| TUCP_003290 | XLOC_140964 | ENSRNOT00000045488  | 0.950298036  | 2.20E-06 |
| TUCP_003290 | XLOC_140964 | ENSRNOT000000093174 | 0.980676858  | 2.05E-08 |
| TUCP_003290 | XLOC_140964 | ENSRNOT00000067688  | -0.954738802 | 1.39E-06 |
| TUCP_003290 | XLOC_140964 | ENSRNOT00000004508  | 0.955634873  | 1.26E-06 |
| TUCP_003290 | XLOC_140964 | ENSRNOT00000036666  | 0.971192577  | 1.49E-07 |
| TUCP_003290 | XLOC_140964 | ENSRNOT00000089211  | 0.983104857  | 1.05E-08 |
| TUCP_003290 | XLOC_140964 | ENSRNOT00000020383  | 0.950501118  | 2.15E-06 |

|             |             |                    |              |          |
|-------------|-------------|--------------------|--------------|----------|
| TUCP_003290 | XLOC_140964 | ENSRNOT0000000302  | 0.958451768  | 9.09E-07 |
| TUCP_003290 | XLOC_140964 | ENSRNOT00000087502 | 0.968563973  | 2.29E-07 |
| TUCP_003290 | XLOC_140964 | ENSRNOT00000041106 | 0.957042408  | 1.07E-06 |
| TUCP_003290 | XLOC_140964 | ENSRNOT00000046745 | 0.975194503  | 7.09E-08 |
| TUCP_003290 | XLOC_140964 | ENSRNOT00000025832 | 0.95234548   | 1.79E-06 |
| TUCP_003290 | XLOC_140964 | ENSRNOT00000076729 | 0.950951487  | 2.06E-06 |
| TUCP_003290 | XLOC_140964 | ENSRNOT00000005909 | 0.986137769  | 3.94E-09 |
| TUCP_003290 | XLOC_140964 | ENSRNOT00000087725 | 0.956903872  | 1.09E-06 |
| TUCP_003290 | XLOC_140964 | ENSRNOT00000086122 | 0.97241732   | 1.20E-07 |
| TUCP_003290 | XLOC_140964 | ENSRNOT00000030229 | 0.959037932  | 8.48E-07 |
| TUCP_003290 | XLOC_140964 | ENSRNOT00000058842 | 0.956541931  | 1.13E-06 |
| TUCP_003290 | XLOC_140964 | ENSRNOT00000023645 | 0.978448132  | 3.53E-08 |
| TUCP_003290 | XLOC_140964 | ENSRNOT00000084734 | 0.964223679  | 4.35E-07 |
| TUCP_003290 | XLOC_140964 | ENSRNOT00000023537 | -0.958522997 | 9.02E-07 |
| TUCP_003290 | XLOC_140964 | ENSRNOT00000059181 | 0.951886284  | 1.87E-06 |
| TUCP_003290 | XLOC_140964 | ENSRNOT0000003690  | 0.971370506  | 1.44E-07 |
| TUCP_003290 | XLOC_140964 | ENSRNOT00000058362 | 0.955861385  | 1.22E-06 |
| TUCP_003290 | XLOC_140964 | ENSRNOT00000090925 | 0.972299332  | 1.23E-07 |
| TUCP_003290 | XLOC_140964 | ENSRNOT00000008901 | -0.950860154 | 2.08E-06 |
| TUCP_003290 | XLOC_140964 | ENSRNOT0000005659  | 0.973512123  | 9.82E-08 |
| TUCP_003290 | XLOC_140964 | ENSRNOT00000017761 | 0.966631017  | 3.08E-07 |
| TUCP_003290 | XLOC_140964 | ENSRNOT00000005478 | -0.963734277 | 4.65E-07 |
| TUCP_003290 | XLOC_140964 | ENSRNOT00000039341 | 0.967900206  | 2.54E-07 |
| TUCP_003290 | XLOC_140964 | ENSRNOT00000017181 | -0.96290227  | 5.20E-07 |
| TUCP_003290 | XLOC_140964 | ENSRNOT00000071853 | -0.966428343 | 3.17E-07 |
| TUCP_003290 | XLOC_140964 | ENSRNOT00000082174 | 0.970700735  | 1.62E-07 |
| TUCP_003290 | XLOC_140964 | ENSRNOT00000042125 | 0.959810029  | 7.72E-07 |
| TUCP_003290 | XLOC_140964 | ENSRNOT00000081272 | -0.95920943  | 8.30E-07 |
| TUCP_003290 | XLOC_140964 | ENSRNOT00000045735 | 0.953151212  | 1.64E-06 |
| TUCP_003290 | XLOC_140964 | ENSRNOT00000026760 | -0.951553384 | 1.94E-06 |
| TUCP_003290 | XLOC_140964 | ENSRNOT00000023330 | 0.960870344  | 6.76E-07 |
| TUCP_003290 | XLOC_140964 | ENSRNOT00000033235 | 0.957715838  | 9.91E-07 |
| TUCP_003290 | XLOC_140964 | ENSRNOT00000084595 | 0.968180186  | 2.44E-07 |
| TUCP_003290 | XLOC_140964 | ENSRNOT00000047356 | 0.955394154  | 1.29E-06 |
| TUCP_003290 | XLOC_140964 | ENSRNOT00000027964 | 0.969789981  | 1.88E-07 |
| TUCP_003290 | XLOC_140964 | ENSRNOT00000047210 | 0.9869668    | 2.90E-09 |
| TUCP_003290 | XLOC_140964 | ENSRNOT00000064930 | 0.971625604  | 1.38E-07 |
| TUCP_003290 | XLOC_140964 | ENSRNOT00000079996 | 0.978019492  | 3.89E-08 |
| TUCP_003291 | XLOC_140964 | ENSRNOT00000092026 | 0.96620614   | 3.28E-07 |
| TUCP_003291 | XLOC_140964 | ENSRNOT00000093075 | 1            | 0        |
| TUCP_003291 | XLOC_140964 | ENSRNOT00000058260 | 1            | 0        |
| TUCP_003291 | XLOC_140964 | ENSRNOT00000088887 | 1            | 0        |
| TUCP_003291 | XLOC_140964 | ENSRNOT00000084986 | 1            | 0        |
| TUCP_003291 | XLOC_140964 | ENSRNOT00000074346 | 0.9702256    | 1.75E-07 |
| TUCP_003291 | XLOC_140964 | ENSRNOT00000073209 | 0.983711602  | 8.79E-09 |
| TUCP_003291 | XLOC_140964 | ENSRNOT00000080155 | 0.973069673  | 1.07E-07 |
| TUCP_003291 | XLOC_140964 | ENSRNOT00000072573 | 0.996213272  | 6.09E-12 |
| TUCP_003291 | XLOC_140964 | ENSRNOT00000017828 | 0.996001583  | 7.99E-12 |
| TUCP_003291 | XLOC_140964 | ENSRNOT00000080444 | 0.969625907  | 1.93E-07 |
| TUCP_003291 | XLOC_140964 | ENSRNOT00000071312 | 1            | 0        |
| TUCP_003291 | XLOC_140964 | ENSRNOT00000088245 | 1            | 0        |

|             |             |                    |              |          |
|-------------|-------------|--------------------|--------------|----------|
| TUCP_003291 | XLOC_140964 | ENSRNOT00000036565 | 0.969065335  | 2.12E-07 |
| TUCP_003291 | XLOC_140964 | ENSRNOT00000058833 | 0.998673261  | 3.23E-14 |
| TUCP_003291 | XLOC_140964 | ENSRNOT00000078052 | 1            | 0        |
| TUCP_003291 | XLOC_140964 | ENSRNOT00000078494 | 0.999927093  | 1.62E-20 |
| TUCP_003291 | XLOC_140964 | ENSRNOT00000085653 | 1            | 0        |
| TUCP_003291 | XLOC_140964 | ENSRNOT00000057950 | 0.969329371  | 2.03E-07 |
| TUCP_003291 | XLOC_140964 | ENSRNOT00000081992 | 0.999320526  | 1.14E-15 |
| TUCP_003291 | XLOC_140964 | ENSRNOT00000038553 | 0.955765808  | 1.24E-06 |
| TUCP_003291 | XLOC_140964 | ENSRNOT00000084120 | 0.958115447  | 9.46E-07 |
| TUCP_003291 | XLOC_140964 | ENSRNOT00000055406 | 1            | 0        |
| TUCP_003291 | XLOC_140964 | ENSRNOT00000070817 | 0.998968079  | 9.20E-15 |
| TUCP_003291 | XLOC_140964 | ENSRNOT00000026753 | 1            | 0        |
| TUCP_003291 | XLOC_140964 | ENSRNOT00000080533 | 0.996682529  | 3.15E-12 |
| TUCP_003291 | XLOC_140964 | ENSRNOT00000072774 | 0.979665261  | 2.65E-08 |
| TUCP_003291 | XLOC_140964 | ENSRNOT00000086031 | 1            | 0        |
| TUCP_003291 | XLOC_140964 | ENSRNOT00000014312 | 1            | 0        |
| TUCP_003291 | XLOC_140964 | ENSRNOT00000042882 | 0.963218427  | 4.98E-07 |
| TUCP_003291 | XLOC_140964 | ENSRNOT00000088012 | 0.956765806  | 1.11E-06 |
| TUCP_003291 | XLOC_140964 | ENSRNOT00000051231 | 0.999242378  | 1.96E-15 |
| TUCP_003291 | XLOC_140964 | ENSRNOT00000089407 | 0.992986194  | 1.32E-10 |
| TUCP_003291 | XLOC_140964 | ENSRNOT00000055034 | 0.998331441  | 1.02E-13 |
| TUCP_003291 | XLOC_140964 | ENSRNOT00000046837 | 0.97252559   | 1.18E-07 |
| TUCP_003293 | XLOC_141678 | ENSRNOT00000006188 | -0.954045667 | 1.49E-06 |
| TUCP_003293 | XLOC_141678 | ENSRNOT00000006186 | 0.982753824  | 1.17E-08 |
| TUCP_003293 | XLOC_141678 | ENSRNOT00000032926 | -0.952222148 | 1.81E-06 |
| TUCP_003293 | XLOC_141678 | ENSRNOT00000019104 | -0.97261341  | 1.16E-07 |
| TUCP_003293 | XLOC_141678 | ENSRNOT00000068353 | 0.952715386  | 1.72E-06 |
| TUCP_003293 | XLOC_141678 | ENSRNOT00000020910 | 0.962197874  | 5.71E-07 |
| TUCP_003293 | XLOC_141678 | ENSRNOT00000025067 | -0.965504704 | 3.63E-07 |
| TUCP_003293 | XLOC_141678 | ENSRNOT00000086310 | -0.956313201 | 1.16E-06 |
| TUCP_003293 | XLOC_141678 | ENSRNOT00000010030 | -0.961038347 | 6.62E-07 |
| TUCP_003293 | XLOC_141678 | ENSRNOT00000028856 | 0.967091669  | 2.88E-07 |
| TUCP_003293 | XLOC_141678 | ENSRNOT00000052063 | 0.956317566  | 1.16E-06 |
| TUCP_003293 | XLOC_141678 | ENSRNOT00000009803 | 0.958270983  | 9.29E-07 |
| TUCP_003293 | XLOC_141678 | ENSRNOT00000086893 | -0.96780453  | 2.58E-07 |
| TUCP_003293 | XLOC_141678 | ENSRNOT00000037203 | -0.95319163  | 1.64E-06 |
| TUCP_003293 | XLOC_141678 | ENSRNOT00000006752 | 0.979011902  | 3.10E-08 |
| TUCP_003293 | XLOC_141678 | ENSRNOT00000031672 | -0.950950296 | 2.06E-06 |
| TUCP_003293 | XLOC_141678 | ENSRNOT00000073372 | 0.959659626  | 7.86E-07 |
| TUCP_003293 | XLOC_141678 | ENSRNOT00000035320 | -0.962929095 | 5.18E-07 |
| TUCP_003293 | XLOC_141678 | ENSRNOT00000076820 | 0.972843778  | 1.11E-07 |
| TUCP_003293 | XLOC_141678 | ENSRNOT00000067486 | -0.964197442 | 4.36E-07 |
| TUCP_003293 | XLOC_141678 | ENSRNOT00000077999 | 0.975623602  | 6.51E-08 |
| TUCP_003293 | XLOC_141678 | ENSRNOT00000068134 | 0.964130654  | 4.40E-07 |
| TUCP_003293 | XLOC_141678 | ENSRNOT00000026398 | -0.952515106 | 1.76E-06 |
| TUCP_003293 | XLOC_141678 | ENSRNOT00000024264 | -0.954778099 | 1.38E-06 |
| TUCP_003293 | XLOC_141678 | ENSRNOT00000085228 | 0.97168344   | 1.37E-07 |
| TUCP_003293 | XLOC_141678 | ENSRNOT00000017319 | 0.967578842  | 2.67E-07 |
| TUCP_003293 | XLOC_141678 | ENSRNOT00000015188 | 0.975010234  | 7.36E-08 |
| TUCP_003293 | XLOC_141678 | ENSRNOT00000005686 | -0.953487489 | 1.59E-06 |
| TUCP_003293 | XLOC_141678 | ENSRNOT00000017312 | 0.965732514  | 3.51E-07 |

|             |             |                    |              |          |
|-------------|-------------|--------------------|--------------|----------|
| TUCP_003293 | XLOC_141678 | ENSRNOT00000010927 | 0.973126522  | 1.06E-07 |
| TUCP_003293 | XLOC_141678 | ENSRNOT00000087278 | -0.95178433  | 1.89E-06 |
| TUCP_003293 | XLOC_141678 | ENSRNOT00000010141 | 0.958074524  | 9.51E-07 |
| TUCP_003293 | XLOC_141678 | ENSRNOT00000009150 | 0.960895999  | 6.74E-07 |
| TUCP_003293 | XLOC_141678 | ENSRNOT00000084709 | 0.970465812  | 1.68E-07 |
| TUCP_003293 | XLOC_141678 | ENSRNOT00000009156 | 0.956025209  | 1.20E-06 |
| TUCP_003293 | XLOC_141678 | ENSRNOT00000026481 | 0.971356786  | 1.45E-07 |
| TUCP_003293 | XLOC_141678 | ENSRNOT00000044562 | 0.955836823  | 1.23E-06 |
| TUCP_003293 | XLOC_141678 | ENSRNOT00000006395 | -0.967332031 | 2.77E-07 |
| TUCP_003293 | XLOC_141678 | ENSRNOT00000015116 | 0.950531757  | 2.15E-06 |
| TUCP_003293 | XLOC_141678 | ENSRNOT00000026525 | -0.951565938 | 1.93E-06 |
| TUCP_003293 | XLOC_141678 | ENSRNOT00000072357 | -0.962885544 | 5.21E-07 |
| TUCP_003293 | XLOC_141678 | ENSRNOT00000016132 | -0.965112735 | 3.84E-07 |
| TUCP_003293 | XLOC_141678 | ENSRNOT00000013067 | -0.966985165 | 2.92E-07 |
| TUCP_003293 | XLOC_141678 | ENSRNOT00000016220 | -0.956340418 | 1.16E-06 |
| TUCP_003293 | XLOC_141678 | ENSRNOT00000034692 | -0.975063221 | 7.28E-08 |
| TUCP_003293 | XLOC_141678 | ENSRNOT00000031977 | 0.955879597  | 1.22E-06 |
| TUCP_003293 | XLOC_141678 | ENSRNOT00000031979 | -0.96482995  | 3.99E-07 |
| TUCP_003293 | XLOC_141678 | ENSRNOT00000079895 | 0.950515869  | 2.15E-06 |
| TUCP_003293 | XLOC_141678 | ENSRNOT00000078102 | 0.973202189  | 1.04E-07 |
| TUCP_003293 | XLOC_141678 | ENSRNOT00000074586 | -0.958461897 | 9.08E-07 |
| TUCP_003293 | XLOC_141678 | ENSRNOT00000075444 | -0.954934724 | 1.36E-06 |
| TUCP_003293 | XLOC_141678 | ENSRNOT00000021496 | -0.957489069 | 1.02E-06 |
| TUCP_003293 | XLOC_141678 | ENSRNOT00000011880 | 0.964684037  | 4.08E-07 |
| TUCP_003293 | XLOC_141678 | ENSRNOT00000005486 | -0.956882832 | 1.09E-06 |
| TUCP_003293 | XLOC_141678 | ENSRNOT00000003992 | -0.959367965 | 8.15E-07 |
| TUCP_003293 | XLOC_141678 | ENSRNOT00000021408 | 0.958840794  | 8.68E-07 |
| TUCP_003293 | XLOC_141678 | ENSRNOT00000046983 | -0.968082868 | 2.47E-07 |
| TUCP_003293 | XLOC_141678 | ENSRNOT00000050515 | 0.977408019  | 4.46E-08 |
| TUCP_003293 | XLOC_141678 | ENSRNOT00000028589 | -0.952583016 | 1.74E-06 |
| TUCP_003293 | XLOC_141678 | ENSRNOT00000052224 | 0.953575714  | 1.57E-06 |
| TUCP_003293 | XLOC_141678 | ENSRNOT00000055602 | -0.952926319 | 1.68E-06 |
| TUCP_003293 | XLOC_141678 | ENSRNOT00000087997 | 0.966023741  | 3.37E-07 |
| TUCP_003293 | XLOC_141678 | ENSRNOT00000034400 | -0.955550039 | 1.27E-06 |
| TUCP_003293 | XLOC_141678 | ENSRNOT00000061201 | -0.968096209 | 2.47E-07 |
| TUCP_003293 | XLOC_141678 | ENSRNOT0000002187  | -0.954777911 | 1.38E-06 |
| TUCP_003293 | XLOC_141678 | ENSRNOT00000091488 | 0.951581476  | 1.93E-06 |
| TUCP_003293 | XLOC_141678 | ENSRNOT00000019656 | -0.974465798 | 8.19E-08 |
| TUCP_003293 | XLOC_141678 | ENSRNOT00000032505 | -0.960077744 | 7.47E-07 |
| TUCP_003293 | XLOC_141678 | ENSRNOT00000006499 | 0.952710873  | 1.72E-06 |
| TUCP_003293 | XLOC_141678 | ENSRNOT00000074649 | 0.97549251   | 6.68E-08 |
| TUCP_003293 | XLOC_141678 | ENSRNOT00000077146 | -0.958206625 | 9.36E-07 |
| TUCP_003293 | XLOC_141678 | ENSRNOT00000014384 | -0.957805213 | 9.81E-07 |
| TUCP_003293 | XLOC_141678 | ENSRNOT00000036951 | 0.957905854  | 9.70E-07 |
| TUCP_003293 | XLOC_141678 | ENSRNOT00000060002 | -0.96483764  | 3.99E-07 |
| TUCP_003293 | XLOC_141678 | ENSRNOT00000004046 | -0.957025998 | 1.07E-06 |
| TUCP_003293 | XLOC_141678 | ENSRNOT00000043752 | -0.959676848 | 7.85E-07 |
| TUCP_003293 | XLOC_141678 | ENSRNOT00000078250 | 0.952080743  | 1.84E-06 |
| TUCP_003293 | XLOC_141678 | ENSRNOT00000023977 | -0.953953342 | 1.51E-06 |
| TUCP_003293 | XLOC_141678 | ENSRNOT00000066133 | -0.98169392  | 1.57E-08 |
| TUCP_003293 | XLOC_141678 | ENSRNOT00000076387 | 0.97503224   | 7.33E-08 |



|             |             |                    |              |          |
|-------------|-------------|--------------------|--------------|----------|
| TUCP_003293 | XLOC_141678 | ENSRNOT00000048933 | -0.960852929 | 6.78E-07 |
| TUCP_003293 | XLOC_141678 | ENSRNOT00000051953 | -0.952920573 | 1.68E-06 |
| TUCP_003293 | XLOC_141678 | ENSRNOT00000027970 | 0.962679009  | 5.36E-07 |
| TUCP_003293 | XLOC_141678 | ENSRNOT00000088509 | 0.960679598  | 6.93E-07 |
| TUCP_003293 | XLOC_141678 | ENSRNOT00000019487 | 0.959683019  | 7.84E-07 |
| TUCP_003293 | XLOC_141678 | ENSRNOT00000018170 | -0.956130278 | 1.19E-06 |
| TUCP_003293 | XLOC_141678 | ENSRNOT00000010915 | -0.971239718 | 1.48E-07 |
| TUCP_003293 | XLOC_141678 | ENSRNOT00000040069 | 0.963055118  | 5.09E-07 |
| TUCP_003293 | XLOC_141678 | ENSRNOT00000010748 | 0.978690141  | 3.34E-08 |
| TUCP_003293 | XLOC_141678 | ENSRNOT00000055540 | 0.959016792  | 8.50E-07 |
| TUCP_003293 | XLOC_141678 | ENSRNOT00000087033 | -0.952903071 | 1.69E-06 |
| TUCP_003293 | XLOC_141678 | ENSRNOT00000004762 | 0.981065395  | 1.86E-08 |
| TUCP_003293 | XLOC_141678 | ENSRNOT00000035474 | 0.972617905  | 1.16E-07 |
| TUCP_003293 | XLOC_141678 | ENSRNOT00000072632 | -0.959771768 | 7.75E-07 |
| TUCP_003293 | XLOC_141678 | ENSRNOT00000091205 | 0.970387426  | 1.71E-07 |
| TUCP_003293 | XLOC_141678 | ENSRNOT00000055992 | -0.9695974   | 1.94E-07 |
| TUCP_003293 | XLOC_141678 | ENSRNOT00000010983 | 0.95335214   | 1.61E-06 |
| TUCP_003293 | XLOC_141678 | ENSRNOT00000004787 | -0.96513486  | 3.83E-07 |
| TUCP_003293 | XLOC_141678 | ENSRNOT00000060698 | -0.971398705 | 1.44E-07 |
| TUCP_003293 | XLOC_141678 | ENSRNOT00000058351 | 0.990377468  | 6.39E-10 |
| TUCP_003293 | XLOC_141678 | ENSRNOT00000014814 | 0.97694102   | 4.94E-08 |
| TUCP_003293 | XLOC_141678 | ENSRNOT00000080207 | 0.961874047  | 5.95E-07 |
| TUCP_003293 | XLOC_141678 | ENSRNOT00000061100 | 0.953253912  | 1.62E-06 |
| TUCP_003293 | XLOC_141678 | ENSRNOT00000017776 | 0.976059318  | 5.95E-08 |
| TUCP_003293 | XLOC_141678 | ENSRNOT00000026457 | 0.951154922  | 2.02E-06 |
| TUCP_003293 | XLOC_141678 | ENSRNOT00000023628 | -0.956084124 | 1.19E-06 |
| TUCP_003293 | XLOC_141678 | ENSRNOT00000004463 | 0.964876315  | 3.97E-07 |
| TUCP_003293 | XLOC_141678 | ENSRNOT00000013321 | 0.950525373  | 2.15E-06 |
| TUCP_003293 | XLOC_141678 | ENSRNOT00000008982 | 0.983074622  | 1.06E-08 |
| TUCP_003293 | XLOC_141678 | ENSRNOT00000022097 | 0.952886783  | 1.69E-06 |
| TUCP_003293 | XLOC_141678 | ENSRNOT00000048029 | 0.954392351  | 1.44E-06 |
| TUCP_003293 | XLOC_141678 | ENSRNOT00000024253 | 0.969308668  | 2.04E-07 |
| TUCP_003293 | XLOC_141678 | ENSRNOT00000045833 | 0.964873019  | 3.97E-07 |
| TUCP_003293 | XLOC_141678 | ENSRNOT00000010524 | 0.953657245  | 1.56E-06 |
| TUCP_003293 | XLOC_141678 | ENSRNOT0000002053  | -0.959726245 | 7.80E-07 |
| TUCP_003293 | XLOC_141678 | ENSRNOT00000063930 | -0.958304607 | 9.25E-07 |
| TUCP_003293 | XLOC_141678 | ENSRNOT00000074544 | -0.953885628 | 1.52E-06 |
| TUCP_003293 | XLOC_141678 | ENSRNOT00000048613 | 0.958715524  | 8.81E-07 |
| TUCP_003293 | XLOC_141678 | ENSRNOT00000023430 | -0.957532872 | 1.01E-06 |
| TUCP_003293 | XLOC_141678 | ENSRNOT00000019502 | 0.95326228   | 1.62E-06 |
| TUCP_003293 | XLOC_141678 | ENSRNOT00000065300 | 0.97125055   | 1.47E-07 |
| TUCP_003293 | XLOC_141678 | ENSRNOT00000018057 | 0.958772722  | 8.75E-07 |
| TUCP_003293 | XLOC_141678 | ENSRNOT00000081981 | 0.968241426  | 2.41E-07 |
| TUCP_003293 | XLOC_141678 | ENSRNOT00000014479 | -0.955676058 | 1.25E-06 |
| TUCP_003293 | XLOC_141678 | ENSRNOT00000015479 | 0.959320941  | 8.19E-07 |
| TUCP_003293 | XLOC_141678 | ENSRNOT00000021629 | -0.95924226  | 8.27E-07 |
| TUCP_003293 | XLOC_141678 | ENSRNOT00000047836 | -0.965841655 | 3.46E-07 |
| TUCP_003293 | XLOC_141678 | ENSRNOT00000015476 | -0.957292081 | 1.04E-06 |
| TUCP_003293 | XLOC_141678 | ENSRNOT00000074683 | 0.966235015  | 3.27E-07 |
| TUCP_003293 | XLOC_141678 | ENSRNOT00000025079 | -0.967576222 | 2.67E-07 |
| TUCP_003293 | XLOC_141678 | ENSRNOT00000073019 | 0.95000135   | 2.26E-06 |

|             |             |                    |              |          |
|-------------|-------------|--------------------|--------------|----------|
| TUCP_003293 | XLOC_141678 | ENSRNOT00000079109 | 0.95508345   | 1.34E-06 |
| TUCP_003293 | XLOC_141678 | ENSRNOT00000054761 | -0.959185026 | 8.33E-07 |
| TUCP_003293 | XLOC_141678 | ENSRNOT00000004007 | -0.968137398 | 2.45E-07 |
| TUCP_003293 | XLOC_141678 | ENSRNOT00000020681 | -0.978370009 | 3.60E-08 |
| TUCP_003293 | XLOC_141678 | ENSRNOT00000057898 | -0.95281242  | 1.70E-06 |
| TUCP_003293 | XLOC_141678 | ENSRNOT00000022432 | -0.971761048 | 1.35E-07 |
| TUCP_003293 | XLOC_141678 | ENSRNOT00000091602 | -0.961679755 | 6.10E-07 |
| TUCP_003293 | XLOC_141678 | ENSRNOT00000009811 | 0.967365289  | 2.76E-07 |
| TUCP_003293 | XLOC_141678 | ENSRNOT00000009817 | -0.956580412 | 1.13E-06 |
| TUCP_003293 | XLOC_141678 | ENSRNOT00000084782 | -0.952081908 | 1.84E-06 |
| TUCP_003293 | XLOC_141678 | ENSRNOT00000009708 | -0.985823129 | 4.40E-09 |
| TUCP_003293 | XLOC_141678 | ENSRNOT00000077231 | 0.960536281  | 7.05E-07 |
| TUCP_003293 | XLOC_141678 | ENSRNOT00000017486 | 0.974354057  | 8.37E-08 |
| TUCP_003293 | XLOC_141678 | ENSRNOT00000014605 | -0.959296625 | 8.22E-07 |
| TUCP_003293 | XLOC_141678 | ENSRNOT00000052002 | 0.954057897  | 1.49E-06 |
| TUCP_003293 | XLOC_141678 | ENSRNOT00000022502 | -0.969416612 | 2.00E-07 |
| TUCP_003293 | XLOC_141678 | ENSRNOT00000017556 | 0.952178839  | 1.82E-06 |
| TUCP_003293 | XLOC_141678 | ENSRNOT00000087443 | 0.973927578  | 9.08E-08 |
| TUCP_003293 | XLOC_141678 | ENSRNOT00000021803 | -0.971503562 | 1.41E-07 |
| TUCP_003293 | XLOC_141678 | ENSRNOT00000039857 | -0.950975915 | 2.05E-06 |
| TUCP_003293 | XLOC_141678 | ENSRNOT00000046973 | 0.954933831  | 1.36E-06 |
| TUCP_003293 | XLOC_141678 | ENSRNOT00000024352 | 0.953477584  | 1.59E-06 |
| TUCP_003293 | XLOC_141678 | ENSRNOT00000003787 | -0.961299849 | 6.41E-07 |
| TUCP_003293 | XLOC_141678 | ENSRNOT00000058312 | 0.955227359  | 1.31E-06 |
| TUCP_003293 | XLOC_141678 | ENSRNOT00000025104 | -0.958842272 | 8.68E-07 |
| TUCP_003293 | XLOC_141678 | ENSRNOT00000026312 | 0.965006456  | 3.90E-07 |
| TUCP_003293 | XLOC_141678 | ENSRNOT00000005604 | 0.950102449  | 2.24E-06 |
| TUCP_003293 | XLOC_141678 | ENSRNOT00000009225 | -0.955323158 | 1.30E-06 |
| TUCP_003293 | XLOC_141678 | ENSRNOT00000068381 | 0.967104749  | 2.87E-07 |
| TUCP_003293 | XLOC_141678 | ENSRNOT00000090456 | 0.952604111  | 1.74E-06 |
| TUCP_003293 | XLOC_141678 | ENSRNOT00000026531 | -0.958387246 | 9.16E-07 |
| TUCP_003293 | XLOC_141678 | ENSRNOT00000016129 | 0.965771431  | 3.49E-07 |
| TUCP_003293 | XLOC_141678 | ENSRNOT00000023567 | -0.950815382 | 2.09E-06 |
| TUCP_003293 | XLOC_141678 | ENSRNOT00000005073 | 0.956761359  | 1.11E-06 |
| TUCP_003293 | XLOC_141678 | ENSRNOT00000034961 | -0.950251834 | 2.21E-06 |
| TUCP_003293 | XLOC_141678 | ENSRNOT00000013375 | -0.967224201 | 2.82E-07 |
| TUCP_003293 | XLOC_141678 | ENSRNOT00000041277 | -0.966091415 | 3.33E-07 |
| TUCP_003293 | XLOC_141678 | ENSRNOT00000028743 | -0.953539444 | 1.58E-06 |
| TUCP_003293 | XLOC_141678 | ENSRNOT00000028744 | -0.958797023 | 8.73E-07 |
| TUCP_003293 | XLOC_141678 | ENSRNOT00000027910 | 0.966103711  | 3.33E-07 |
| TUCP_003293 | XLOC_141678 | ENSRNOT00000088182 | 0.950396413  | 2.18E-06 |
| TUCP_003293 | XLOC_141678 | ENSRNOT00000024326 | -0.952556076 | 1.75E-06 |
| TUCP_003293 | XLOC_141678 | ENSRNOT00000028885 | -0.977601599 | 4.28E-08 |
| TUCP_003293 | XLOC_141678 | ENSRNOT00000008427 | -0.950996217 | 2.05E-06 |
| TUCP_003293 | XLOC_141678 | ENSRNOT00000027616 | -0.959071373 | 8.44E-07 |
| TUCP_003293 | XLOC_141678 | ENSRNOT00000051022 | 0.956353259  | 1.16E-06 |
| TUCP_003293 | XLOC_141678 | ENSRNOT00000029833 | 0.986493721  | 3.46E-09 |
| TUCP_003293 | XLOC_141678 | ENSRNOT00000012702 | -0.954285605 | 1.46E-06 |
| TUCP_003293 | XLOC_141678 | ENSRNOT00000034487 | -0.975842408 | 6.22E-08 |
| TUCP_003293 | XLOC_141678 | ENSRNOT00000061916 | -0.950262874 | 2.20E-06 |
| TUCP_003293 | XLOC_141678 | ENSRNOT00000016519 | 0.963439311  | 4.84E-07 |

|             |             |                    |              |          |
|-------------|-------------|--------------------|--------------|----------|
| TUCP_003293 | XLOC_141678 | ENSRNOT00000021145 | -0.958469254 | 9.07E-07 |
| TUCP_003293 | XLOC_141678 | ENSRNOT00000031401 | -0.964142825 | 4.40E-07 |
| TUCP_003293 | XLOC_141678 | ENSRNOT0000003605  | -0.962981867 | 5.14E-07 |
| TUCP_003293 | XLOC_141678 | ENSRNOT00000072129 | -0.951415497 | 1.96E-06 |
| TUCP_003293 | XLOC_141678 | ENSRNOT0000001607  | 0.952871092  | 1.69E-06 |
| TUCP_003293 | XLOC_141678 | ENSRNOT00000072518 | 0.973726104  | 9.44E-08 |
| TUCP_003293 | XLOC_141678 | ENSRNOT00000038511 | -0.952579936 | 1.74E-06 |
| TUCP_003293 | XLOC_141678 | ENSRNOT00000085756 | 0.950306941  | 2.19E-06 |
| TUCP_003293 | XLOC_141678 | ENSRNOT00000020669 | 0.970141259  | 1.78E-07 |
| TUCP_003293 | XLOC_141678 | ENSRNOT00000085971 | -0.958453804 | 9.09E-07 |
| TUCP_003293 | XLOC_141678 | ENSRNOT00000020663 | -0.951041237 | 2.04E-06 |
| TUCP_003293 | XLOC_141678 | ENSRNOT00000022142 | 0.97001974   | 1.81E-07 |
| TUCP_003293 | XLOC_141678 | ENSRNOT00000076300 | -0.965340317 | 3.72E-07 |
| TUCP_003293 | XLOC_141678 | ENSRNOT00000025086 | -0.961439295 | 6.29E-07 |
| TUCP_003293 | XLOC_141678 | ENSRNOT00000077152 | 0.957949562  | 9.65E-07 |
| TUCP_003293 | XLOC_141678 | ENSRNOT00000028876 | -0.956768708 | 1.11E-06 |
| TUCP_003293 | XLOC_141678 | ENSRNOT00000052120 | 0.955647675  | 1.25E-06 |
| TUCP_003293 | XLOC_141678 | ENSRNOT00000011499 | -0.950845265 | 2.08E-06 |
| TUCP_003293 | XLOC_141678 | ENSRNOT00000015946 | -0.958434682 | 9.11E-07 |
| TUCP_003293 | XLOC_141678 | ENSRNOT00000004172 | 0.977128295  | 4.74E-08 |
| TUCP_003293 | XLOC_141678 | ENSRNOT00000001234 | -0.951637612 | 1.92E-06 |
| TUCP_003293 | XLOC_141678 | ENSRNOT00000040476 | 0.971480603  | 1.42E-07 |
| TUCP_003293 | XLOC_141678 | ENSRNOT00000029125 | 0.973130681  | 1.05E-07 |
| TUCP_003293 | XLOC_141678 | ENSRNOT00000085279 | 0.978321404  | 3.64E-08 |
| TUCP_003293 | XLOC_141678 | ENSRNOT00000024060 | 0.953507232  | 1.58E-06 |
| TUCP_003293 | XLOC_141678 | ENSRNOT00000087095 | 0.956308267  | 1.17E-06 |
| TUCP_003293 | XLOC_141678 | ENSRNOT00000004319 | -0.960242849 | 7.32E-07 |
| TUCP_003293 | XLOC_141678 | ENSRNOT00000006570 | -0.965933252 | 3.41E-07 |
| TUCP_003293 | XLOC_141678 | ENSRNOT00000025819 | -0.95427656  | 1.46E-06 |
| TUCP_003293 | XLOC_141678 | ENSRNOT00000010906 | -0.962562751 | 5.44E-07 |
| TUCP_003293 | XLOC_141678 | ENSRNOT00000015223 | 0.951277779  | 1.99E-06 |
| TUCP_003293 | XLOC_141678 | ENSRNOT00000072890 | -0.963416619 | 4.85E-07 |
| TUCP_003293 | XLOC_141678 | ENSRNOT00000010224 | 0.954799416  | 1.38E-06 |
| TUCP_003293 | XLOC_141678 | ENSRNOT00000025147 | 0.958566041  | 8.97E-07 |
| TUCP_003293 | XLOC_141678 | ENSRNOT00000007175 | 0.96691128   | 2.95E-07 |
| TUCP_003293 | XLOC_141678 | ENSRNOT00000025887 | -0.967903247 | 2.54E-07 |
| TUCP_003293 | XLOC_141678 | ENSRNOT00000002109 | 0.959564863  | 7.95E-07 |
| TUCP_003293 | XLOC_141678 | ENSRNOT00000017687 | -0.969900873 | 1.85E-07 |
| TUCP_003293 | XLOC_141678 | ENSRNOT00000005958 | 0.951058211  | 2.04E-06 |
| TUCP_003293 | XLOC_141678 | ENSRNOT00000039551 | -0.951759779 | 1.90E-06 |
| TUCP_003293 | XLOC_141678 | ENSRNOT00000082998 | 0.962994878  | 5.14E-07 |
| TUCP_003293 | XLOC_141678 | ENSRNOT00000075714 | 0.953782796  | 1.54E-06 |
| TUCP_003293 | XLOC_141678 | ENSRNOT00000083578 | 0.95694819   | 1.08E-06 |
| TUCP_003293 | XLOC_141678 | ENSRNOT00000000181 | 0.9616441    | 6.13E-07 |
| TUCP_003293 | XLOC_141678 | ENSRNOT00000023638 | 0.963796595  | 4.61E-07 |
| TUCP_003293 | XLOC_141678 | ENSRNOT00000005228 | 0.955583307  | 1.26E-06 |
| TUCP_003293 | XLOC_141678 | ENSRNOT00000022726 | 0.950637625  | 2.12E-06 |
| TUCP_003293 | XLOC_141678 | ENSRNOT00000028628 | -0.958749288 | 8.78E-07 |
| TUCP_003293 | XLOC_141678 | ENSRNOT00000005220 | 0.950921165  | 2.06E-06 |
| TUCP_003293 | XLOC_141678 | ENSRNOT00000045326 | 0.977354939  | 4.51E-08 |
| TUCP_003293 | XLOC_141678 | ENSRNOT00000090342 | 0.965556282  | 3.60E-07 |

|             |             |                    |              |          |
|-------------|-------------|--------------------|--------------|----------|
| TUCP_003293 | XLOC_141678 | ENSRNOT00000067170 | -0.970188435 | 1.76E-07 |
| TUCP_003293 | XLOC_141678 | ENSRNOT00000091128 | -0.966536738 | 3.12E-07 |
| TUCP_003293 | XLOC_141678 | ENSRNOT00000048910 | -0.965066234 | 3.86E-07 |
| TUCP_003293 | XLOC_141678 | ENSRNOT00000017385 | -0.953009503 | 1.67E-06 |
| TUCP_003293 | XLOC_141678 | ENSRNOT00000019820 | 0.962198457  | 5.70E-07 |
| TUCP_003293 | XLOC_141678 | ENSRNOT00000028405 | -0.955014646 | 1.35E-06 |
| TUCP_003293 | XLOC_141678 | ENSRNOT00000036959 | -0.970562783 | 1.66E-07 |
| TUCP_003293 | XLOC_141678 | ENSRNOT00000026783 | 0.969663983  | 1.92E-07 |
| TUCP_003293 | XLOC_141678 | ENSRNOT00000038247 | 0.957765199  | 9.86E-07 |
| TUCP_003293 | XLOC_141678 | ENSRNOT00000027944 | 0.950184677  | 2.22E-06 |
| TUCP_003293 | XLOC_141678 | ENSRNOT00000018028 | -0.962864466 | 5.23E-07 |
| TUCP_003293 | XLOC_141678 | ENSRNOT00000019519 | 0.979818128  | 2.55E-08 |
| TUCP_003293 | XLOC_141678 | ENSRNOT00000089933 | 0.965980744  | 3.39E-07 |
| TUCP_003293 | XLOC_141678 | ENSRNOT00000077908 | 0.97038083   | 1.71E-07 |
| TUCP_003293 | XLOC_141678 | ENSRNOT00000090461 | 0.957082998  | 1.07E-06 |
| TUCP_003293 | XLOC_141678 | ENSRNOT00000090912 | 0.957342893  | 1.04E-06 |
| TUCP_003293 | XLOC_141678 | ENSRNOT00000032780 | 0.984935508  | 5.96E-09 |
| TUCP_003293 | XLOC_141678 | ENSRNOT00000010783 | -0.962013345 | 5.84E-07 |
| TUCP_003293 | XLOC_141678 | ENSRNOT00000074323 | 0.986295143  | 3.72E-09 |
| TUCP_003293 | XLOC_141678 | ENSRNOT00000013762 | 0.955178128  | 1.32E-06 |
| TUCP_003293 | XLOC_141678 | ENSRNOT00000033677 | -0.973401068 | 1.00E-07 |
| TUCP_003293 | XLOC_141678 | ENSRNOT00000016330 | -0.952000404 | 1.85E-06 |
| TUCP_003293 | XLOC_141678 | ENSRNOT00000016333 | -0.965642173 | 3.56E-07 |
| TUCP_003293 | XLOC_141678 | ENSRNOT00000036931 | -0.970693654 | 1.62E-07 |
| TUCP_003293 | XLOC_141678 | ENSRNOT00000016389 | -0.973998207 | 8.96E-08 |
| TUCP_003293 | XLOC_141678 | ENSRNOT00000074847 | -0.967801832 | 2.58E-07 |
| TUCP_003293 | XLOC_141678 | ENSRNOT00000021030 | -0.982584024 | 1.23E-08 |
| TUCP_003293 | XLOC_141678 | ENSRNOT00000006835 | 0.950190564  | 2.22E-06 |
| TUCP_003293 | XLOC_141678 | ENSRNOT00000077727 | -0.968450994 | 2.33E-07 |
| TUCP_003293 | XLOC_141678 | ENSRNOT00000021037 | 0.956121694  | 1.19E-06 |
| TUCP_003293 | XLOC_141678 | ENSRNOT00000044346 | -0.981721046 | 1.56E-08 |
| TUCP_003293 | XLOC_141678 | ENSRNOT00000020453 | -0.95433618  | 1.45E-06 |
| TUCP_003293 | XLOC_141678 | ENSRNOT00000027537 | 0.961524959  | 6.22E-07 |
| TUCP_003293 | XLOC_141678 | ENSRNOT00000091909 | 0.955558844  | 1.27E-06 |
| TUCP_003293 | XLOC_141678 | ENSRNOT0000001081  | 0.978852084  | 3.22E-08 |
| TUCP_003293 | XLOC_141678 | ENSRNOT00000016948 | -0.954249219 | 1.46E-06 |
| TUCP_003293 | XLOC_141678 | ENSRNOT00000086119 | -0.972637129 | 1.15E-07 |
| TUCP_003293 | XLOC_141678 | ENSRNOT00000013695 | -0.958081048 | 9.50E-07 |
| TUCP_003293 | XLOC_141678 | ENSRNOT00000022190 | -0.954252694 | 1.46E-06 |
| TUCP_003293 | XLOC_141678 | ENSRNOT00000067739 | -0.953792538 | 1.53E-06 |
| TUCP_003293 | XLOC_141678 | ENSRNOT00000077220 | -0.955521351 | 1.27E-06 |
| TUCP_003293 | XLOC_141678 | ENSRNOT00000065983 | 0.974770719  | 7.72E-08 |
| TUCP_003293 | XLOC_141678 | ENSRNOT00000030782 | -0.981968201 | 1.46E-08 |
| TUCP_003293 | XLOC_141678 | ENSRNOT00000067780 | -0.961551689 | 6.20E-07 |
| TUCP_003293 | XLOC_141678 | ENSRNOT00000025966 | 0.951976309  | 1.86E-06 |
| TUCP_003293 | XLOC_141678 | ENSRNOT00000073910 | -0.953112161 | 1.65E-06 |
| TUCP_003293 | XLOC_141678 | ENSRNOT00000052422 | 0.982173185  | 1.38E-08 |
| TUCP_003293 | XLOC_141678 | ENSRNOT00000015609 | 0.95715119   | 1.06E-06 |
| TUCP_003293 | XLOC_141678 | ENSRNOT00000086590 | 0.985983301  | 4.16E-09 |
| TUCP_003293 | XLOC_141678 | ENSRNOT00000025983 | 0.958514799  | 9.03E-07 |
| TUCP_003293 | XLOC_141678 | ENSRNOT00000034883 | -0.951918069 | 1.87E-06 |

|             |             |                    |              |          |
|-------------|-------------|--------------------|--------------|----------|
| TUCP_003293 | XLOC_141678 | ENSRNOT00000022286 | 0.957923323  | 9.68E-07 |
| TUCP_003293 | XLOC_141678 | ENSRNOT00000039593 | -0.951108373 | 2.03E-06 |
| TUCP_003293 | XLOC_141678 | ENSRNOT00000022676 | -0.955280997 | 1.31E-06 |
| TUCP_003293 | XLOC_141678 | ENSRNOT00000076485 | -0.950949337 | 2.06E-06 |
| TUCP_003293 | XLOC_141678 | ENSRNOT00000082945 | 0.966383011  | 3.20E-07 |
| TUCP_003293 | XLOC_141678 | ENSRNOT00000035591 | -0.951219833 | 2.00E-06 |
| TUCP_003293 | XLOC_141678 | ENSRNOT00000016722 | 0.969898067  | 1.85E-07 |
| TUCP_003293 | XLOC_141678 | ENSRNOT00000000013 | 0.984759147  | 6.31E-09 |
| TUCP_003293 | XLOC_141678 | ENSRNOT00000080222 | -0.951341219 | 1.98E-06 |
| TUCP_003293 | XLOC_141678 | ENSRNOT00000017753 | 0.950353498  | 2.18E-06 |
| TUCP_003293 | XLOC_141678 | ENSRNOT00000026118 | -0.951315049 | 1.98E-06 |
| TUCP_003293 | XLOC_141678 | ENSRNOT00000027145 | -0.950006213 | 2.26E-06 |
| TUCP_003293 | XLOC_141678 | ENSRNOT00000008022 | 0.954316743  | 1.45E-06 |
| TUCP_003293 | XLOC_141678 | ENSRNOT00000026186 | 0.96132903   | 6.38E-07 |
| TUCP_003293 | XLOC_141678 | ENSRNOT00000019554 | 0.96833131   | 2.38E-07 |
| TUCP_003293 | XLOC_141678 | ENSRNOT00000047663 | -0.950978135 | 2.05E-06 |
| TUCP_003293 | XLOC_141678 | ENSRNOT00000005876 | 0.965721329  | 3.52E-07 |
| TUCP_003293 | XLOC_141678 | ENSRNOT00000035700 | 0.966091893  | 3.33E-07 |
| TUCP_003293 | XLOC_141678 | ENSRNOT00000029202 | -0.970352482 | 1.72E-07 |
| TUCP_003293 | XLOC_141678 | ENSRNOT00000025791 | -0.963364685 | 4.89E-07 |
| TUCP_003293 | XLOC_141678 | ENSRNOT00000005489 | 0.962770666  | 5.29E-07 |
| TUCP_003293 | XLOC_141678 | ENSRNOT00000084422 | 0.96620522   | 3.28E-07 |
| TUCP_003293 | XLOC_141678 | ENSRNOT00000050834 | -0.953418182 | 1.60E-06 |
| TUCP_003293 | XLOC_141678 | ENSRNOT00000054828 | 0.977005298  | 4.87E-08 |
| TUCP_003293 | XLOC_141678 | ENSRNOT00000078994 | 0.961080817  | 6.59E-07 |
| TUCP_003293 | XLOC_141678 | ENSRNOT00000002114 | -0.950616944 | 2.13E-06 |
| TUCP_003293 | XLOC_141678 | ENSRNOT00000024841 | -0.961218659 | 6.47E-07 |
| TUCP_003293 | XLOC_141678 | ENSRNOT00000077311 | 0.954834294  | 1.37E-06 |
| TUCP_003293 | XLOC_141678 | ENSRNOT00000079011 | -0.962055047 | 5.81E-07 |
| TUCP_003293 | XLOC_141678 | ENSRNOT00000011466 | 0.958705516  | 8.82E-07 |
| TUCP_003293 | XLOC_141678 | ENSRNOT00000018074 | -0.969382417 | 2.01E-07 |
| TUCP_003293 | XLOC_141678 | ENSRNOT00000000124 | -0.95420807  | 1.47E-06 |
| TUCP_003293 | XLOC_141678 | ENSRNOT00000014124 | 0.974434966  | 8.24E-08 |
| TUCP_003293 | XLOC_141678 | ENSRNOT00000043581 | -0.951622294 | 1.92E-06 |
| TUCP_003293 | XLOC_141678 | ENSRNOT00000000120 | 0.961285554  | 6.42E-07 |
| TUCP_003293 | XLOC_141678 | ENSRNOT00000078906 | -0.955811148 | 1.23E-06 |
| TUCP_003293 | XLOC_141678 | ENSRNOT00000009900 | -0.955369674 | 1.29E-06 |
| TUCP_003293 | XLOC_141678 | ENSRNOT00000066561 | -0.950231244 | 2.21E-06 |
| TUCP_003293 | XLOC_141678 | ENSRNOT00000019172 | -0.958016797 | 9.57E-07 |
| TUCP_003293 | XLOC_141678 | ENSRNOT00000064798 | 0.965916916  | 3.42E-07 |
| TUCP_003293 | XLOC_141678 | ENSRNOT00000019177 | 0.971763831  | 1.35E-07 |
| TUCP_003293 | XLOC_141678 | ENSRNOT00000015495 | -0.958382879 | 9.17E-07 |
| TUCP_003293 | XLOC_141678 | ENSRNOT00000083414 | 0.956753691  | 1.11E-06 |
| TUCP_003293 | XLOC_141678 | ENSRNOT00000002238 | -0.963597577 | 4.74E-07 |
| TUCP_003293 | XLOC_141678 | ENSRNOT00000019910 | -0.957049129 | 1.07E-06 |
| TUCP_003293 | XLOC_141678 | ENSRNOT00000040393 | 0.962726835  | 5.32E-07 |
| TUCP_003293 | XLOC_141678 | ENSRNOT00000067901 | -0.981598328 | 1.61E-08 |
| TUCP_003293 | XLOC_141678 | ENSRNOT00000036613 | -0.968964722 | 2.15E-07 |
| TUCP_003293 | XLOC_141678 | ENSRNOT00000015537 | 0.981246121  | 1.77E-08 |
| TUCP_003293 | XLOC_141678 | ENSRNOT00000025705 | 0.956913308  | 1.09E-06 |
| TUCP_003293 | XLOC_141678 | ENSRNOT00000008113 | -0.950272158 | 2.20E-06 |

|             |             |                    |              |          |
|-------------|-------------|--------------------|--------------|----------|
| TUCP_003293 | XLOC_141678 | ENSRNOT00000044885 | 0.969692011  | 1.91E-07 |
| TUCP_003293 | XLOC_141678 | ENSRNOT00000016306 | -0.951416966 | 1.96E-06 |
| TUCP_003293 | XLOC_141678 | ENSRNOT00000020357 | 0.961697475  | 6.09E-07 |
| TUCP_003293 | XLOC_141678 | ENSRNOT00000019213 | 0.950712171  | 2.11E-06 |
| TUCP_003293 | XLOC_141678 | ENSRNOT00000087062 | 0.964972145  | 3.92E-07 |
| TUCP_003293 | XLOC_141678 | ENSRNOT00000015678 | -0.96755711  | 2.68E-07 |
| TUCP_003293 | XLOC_141678 | ENSRNOT00000082508 | -0.963326835 | 4.91E-07 |
| TUCP_003293 | XLOC_141678 | ENSRNOT00000022259 | -0.957276262 | 1.04E-06 |
| TUCP_003293 | XLOC_141678 | ENSRNOT00000010728 | 0.965566533  | 3.60E-07 |
| TUCP_003293 | XLOC_141678 | ENSRNOT00000082863 | 0.972647784  | 1.15E-07 |
| TUCP_003293 | XLOC_141678 | ENSRNOT00000091698 | -0.952024131 | 1.85E-06 |
| TUCP_003293 | XLOC_141678 | ENSRNOT00000049459 | -0.966498947 | 3.14E-07 |
| TUCP_003293 | XLOC_141678 | ENSRNOT00000071166 | 0.953916911  | 1.51E-06 |
| TUCP_003293 | XLOC_141678 | ENSRNOT00000060282 | 0.956429801  | 1.15E-06 |
| TUCP_003293 | XLOC_141678 | ENSRNOT00000074389 | -0.959586438 | 7.93E-07 |
| TUCP_003293 | XLOC_141678 | ENSRNOT00000078872 | -0.96240687  | 5.55E-07 |
| TUCP_003293 | XLOC_141678 | ENSRNOT00000091596 | -0.964113787 | 4.41E-07 |
| TUCP_003293 | XLOC_141678 | ENSRNOT00000009496 | 0.950562818  | 2.14E-06 |
| TUCP_003293 | XLOC_141678 | ENSRNOT00000048754 | -0.978220773 | 3.72E-08 |
| TUCP_003293 | XLOC_141678 | ENSRNOT00000083369 | 0.97760256   | 4.28E-08 |
| TUCP_003293 | XLOC_141678 | ENSRNOT00000076872 | 0.975046599  | 7.31E-08 |
| TUCP_003293 | XLOC_141678 | ENSRNOT00000014979 | 0.969074489  | 2.12E-07 |
| TUCP_003293 | XLOC_141678 | ENSRNOT00000018533 | 0.976893952  | 4.99E-08 |
| TUCP_003293 | XLOC_141678 | ENSRNOT00000073564 | -0.952614911 | 1.74E-06 |
| TUCP_003293 | XLOC_141678 | ENSRNOT00000010806 | -0.963731958 | 4.65E-07 |
| TUCP_003293 | XLOC_141678 | ENSRNOT00000001507 | 0.961406835  | 6.32E-07 |
| TUCP_003293 | XLOC_141678 | ENSRNOT00000066947 | -0.96575537  | 3.50E-07 |
| TUCP_003293 | XLOC_141678 | ENSRNOT00000017379 | -0.95847494  | 9.07E-07 |
| TUCP_003293 | XLOC_141678 | ENSRNOT00000039177 | -0.955731513 | 1.24E-06 |
| TUCP_003293 | XLOC_141678 | ENSRNOT00000081047 | 0.951179778  | 2.01E-06 |
| TUCP_003293 | XLOC_141678 | ENSRNOT00000016801 | 0.950904435  | 2.07E-06 |
| TUCP_003293 | XLOC_141678 | ENSRNOT00000037456 | 0.964714022  | 4.06E-07 |
| TUCP_003293 | XLOC_141678 | ENSRNOT00000025510 | -0.96134312  | 6.37E-07 |
| TUCP_003293 | XLOC_141678 | ENSRNOT00000000577 | 0.968900564  | 2.17E-07 |
| TUCP_003293 | XLOC_141678 | ENSRNOT00000055669 | 0.954416929  | 1.44E-06 |
| TUCP_003293 | XLOC_141678 | ENSRNOT00000075424 | 0.963298069  | 4.93E-07 |
| TUCP_003293 | XLOC_141678 | ENSRNOT00000012177 | -0.96102783  | 6.63E-07 |
| TUCP_003293 | XLOC_141678 | ENSRNOT00000061392 | 0.972072604  | 1.28E-07 |
| TUCP_003293 | XLOC_141678 | ENSRNOT00000027012 | 0.950161305  | 2.23E-06 |
| TUCP_003293 | XLOC_141678 | ENSRNOT00000007824 | -0.959751678 | 7.77E-07 |
| TUCP_003293 | XLOC_141678 | ENSRNOT00000001979 | -0.958470088 | 9.07E-07 |
| TUCP_003293 | XLOC_141678 | ENSRNOT00000075452 | 0.952490094  | 1.76E-06 |
| TUCP_003293 | XLOC_141678 | ENSRNOT00000020892 | -0.956166182 | 1.18E-06 |
| TUCP_003293 | XLOC_141678 | ENSRNOT00000011898 | -0.954676664 | 1.40E-06 |
| TUCP_003293 | XLOC_141678 | ENSRNOT00000019133 | 0.973108681  | 1.06E-07 |
| TUCP_003293 | XLOC_141678 | ENSRNOT00000052075 | 0.960572731  | 7.02E-07 |
| TUCP_003293 | XLOC_141678 | ENSRNOT00000079698 | -0.976627143 | 5.28E-08 |
| TUCP_003293 | XLOC_141678 | ENSRNOT00000006824 | -0.963882525 | 4.56E-07 |
| TUCP_003293 | XLOC_141678 | ENSRNOT00000068184 | -0.951136724 | 2.02E-06 |
| TUCP_003293 | XLOC_141678 | ENSRNOT00000027526 | 0.954045631  | 1.49E-06 |
| TUCP_003293 | XLOC_141678 | ENSRNOT00000035286 | 0.959637526  | 7.88E-07 |

|             |             |                    |              |          |
|-------------|-------------|--------------------|--------------|----------|
| TUCP_003293 | XLOC_141678 | ENSRNOT00000020648 | 0.981084317  | 1.85E-08 |
| TUCP_003293 | XLOC_141678 | ENSRNOT00000036666 | 0.951842783  | 1.88E-06 |
| TUCP_003293 | XLOC_141678 | ENSRNOT00000089211 | 0.965954364  | 3.40E-07 |
| TUCP_003293 | XLOC_141678 | ENSRNOT00000015518 | -0.974118304 | 8.76E-08 |
| TUCP_003293 | XLOC_141678 | ENSRNOT00000078070 | 0.971524167  | 1.41E-07 |
| TUCP_003293 | XLOC_141678 | ENSRNOT00000087502 | 0.975654832  | 6.47E-08 |
| TUCP_003293 | XLOC_141678 | ENSRNOT00000046745 | 0.966253806  | 3.26E-07 |
| TUCP_003293 | XLOC_141678 | ENSRNOT00000012424 | 0.976890009  | 4.99E-08 |
| TUCP_003293 | XLOC_141678 | ENSRNOT00000021944 | 0.958837932  | 8.68E-07 |
| TUCP_003293 | XLOC_141678 | ENSRNOT00000067610 | -0.958974016 | 8.54E-07 |
| TUCP_003293 | XLOC_141678 | ENSRNOT00000005909 | 0.967631024  | 2.65E-07 |
| TUCP_003293 | XLOC_141678 | ENSRNOT00000023763 | -0.957210082 | 1.05E-06 |
| TUCP_003293 | XLOC_141678 | ENSRNOT00000044009 | 0.971370488  | 1.44E-07 |
| TUCP_003293 | XLOC_141678 | ENSRNOT00000058842 | 0.974323189  | 8.42E-08 |
| TUCP_003293 | XLOC_141678 | ENSRNOT00000059181 | 0.96302898   | 5.11E-07 |
| TUCP_003293 | XLOC_141678 | ENSRNOT0000003690  | 0.975626309  | 6.50E-08 |
| TUCP_003293 | XLOC_141678 | ENSRNOT00000058362 | 0.977702292  | 4.18E-08 |
| TUCP_003293 | XLOC_141678 | ENSRNOT00000011350 | 0.990119039  | 7.30E-10 |
| TUCP_003293 | XLOC_141678 | ENSRNOT00000008901 | -0.976733084 | 5.16E-08 |
| TUCP_003293 | XLOC_141678 | ENSRNOT0000005659  | 0.98395214   | 8.16E-09 |
| TUCP_003293 | XLOC_141678 | ENSRNOT00000017761 | 0.957736202  | 9.89E-07 |
| TUCP_003293 | XLOC_141678 | ENSRNOT00000023543 | -0.968051376 | 2.48E-07 |
| TUCP_003293 | XLOC_141678 | ENSRNOT00000080608 | 0.965144067  | 3.82E-07 |
| TUCP_003293 | XLOC_141678 | ENSRNOT00000008757 | 0.963840675  | 4.58E-07 |
| TUCP_003293 | XLOC_141678 | ENSRNOT00000005478 | -0.950741147 | 2.10E-06 |
| TUCP_003293 | XLOC_141678 | ENSRNOT00000037405 | 0.971063036  | 1.52E-07 |
| TUCP_003293 | XLOC_141678 | ENSRNOT00000085519 | 0.99182998   | 2.83E-10 |
| TUCP_003293 | XLOC_141678 | ENSRNOT00000089874 | -0.951374825 | 1.97E-06 |
| TUCP_003293 | XLOC_141678 | ENSRNOT00000042125 | 0.963679857  | 4.68E-07 |
| TUCP_003293 | XLOC_141678 | ENSRNOT00000025460 | 0.959571891  | 7.95E-07 |
| TUCP_003293 | XLOC_141678 | ENSRNOT00000026760 | -0.969835192 | 1.87E-07 |
| TUCP_003293 | XLOC_141678 | ENSRNOT00000023330 | 0.97231573   | 1.22E-07 |
| TUCP_003293 | XLOC_141678 | ENSRNOT00000024491 | -0.962037447 | 5.83E-07 |
| TUCP_003293 | XLOC_141678 | ENSRNOT00000084597 | -0.962564384 | 5.44E-07 |
| TUCP_003293 | XLOC_141678 | ENSRNOT00000037588 | -0.971760212 | 1.35E-07 |
| TUCP_003293 | XLOC_141678 | ENSRNOT00000016401 | 0.956490763  | 1.14E-06 |
| TUCP_003293 | XLOC_141678 | ENSRNOT00000064535 | -0.981199402 | 1.79E-08 |
| TUCP_003293 | XLOC_141678 | ENSRNOT00000037039 | -0.952121333 | 1.83E-06 |
| TUCP_003293 | XLOC_141678 | ENSRNOT00000047210 | 0.963476465  | 4.81E-07 |
| TUCP_003293 | XLOC_141678 | ENSRNOT00000079002 | -0.963516347 | 4.79E-07 |
| TUCP_003293 | XLOC_141678 | ENSRNOT00000078349 | -0.961342937 | 6.37E-07 |
| TUCP_003293 | XLOC_141678 | ENSRNOT00000064930 | 0.967837583  | 2.57E-07 |
| TUCP_003293 | XLOC_141678 | ENSRNOT00000079996 | 0.989727268  | 8.86E-10 |
| TUCP_004329 | XLOC_190664 | ENSRNOT00000082043 | 0.998965531  | 9.31E-15 |
| TUCP_004329 | XLOC_190664 | ENSRNOT00000090080 | 0.970514074  | 1.67E-07 |
| TUCP_004329 | XLOC_190664 | ENSRNOT00000068444 | 1            | 0        |
| TUCP_004329 | XLOC_190664 | ENSRNOT00000081370 | 0.999740797  | 9.21E-18 |
| TUCP_004329 | XLOC_190664 | ENSRNOT00000078645 | 0.989717078  | 8.90E-10 |
| TUCP_004329 | XLOC_190664 | ENSRNOT00000075987 | 0.987945283  | 1.96E-09 |
| TUCP_004329 | XLOC_190664 | ENSRNOT00000074990 | 1            | 0        |
| TUCP_004329 | XLOC_190664 | ENSRNOT00000087323 | 0.995029331  | 2.37E-11 |

|             |             |                    |             |          |
|-------------|-------------|--------------------|-------------|----------|
| TUCP_004329 | XLOC_190664 | ENSRNOT00000074930 | 1           | 0        |
| TUCP_004329 | XLOC_190664 | ENSRNOT00000080575 | 0.999929267 | 1.39E-20 |
| TUCP_004329 | XLOC_190664 | ENSRNOT00000057761 | 0.982981445 | 1.09E-08 |
| TUCP_004329 | XLOC_190664 | ENSRNOT00000078369 | 0.993028032 | 1.28E-10 |
| TUCP_004329 | XLOC_190664 | ENSRNOT00000092982 | 1           | 4.25E-78 |
| TUCP_004329 | XLOC_190664 | ENSRNOT00000088367 | 1           | 0        |
| TUCP_004329 | XLOC_190664 | ENSRNOT00000061874 | 0.968405099 | 2.35E-07 |
| TUCP_004329 | XLOC_190664 | ENSRNOT00000077789 | 0.99346224  | 9.30E-11 |
| TUCP_004329 | XLOC_190664 | ENSRNOT00000081996 | 1           | 1.33E-79 |
| TUCP_004329 | XLOC_190664 | ENSRNOT00000022280 | 0.982176915 | 1.37E-08 |
| TUCP_004329 | XLOC_190664 | ENSRNOT00000082058 | 1           | 1.33E-79 |
| TUCP_004329 | XLOC_190664 | ENSRNOT00000088905 | 1           | 1.33E-79 |
| TUCP_004329 | XLOC_190664 | ENSRNOT00000086831 | 1           | 0        |
| TUCP_004329 | XLOC_190664 | ENSRNOT00000045099 | 1           | 4.25E-78 |
| TUCP_004329 | XLOC_190664 | ENSRNOT00000086745 | 0.978585655 | 3.42E-08 |
| TUCP_004329 | XLOC_190664 | ENSRNOT00000085849 | 0.988270765 | 1.71E-09 |
| TUCP_004329 | XLOC_190664 | ENSRNOT00000086397 | 0.957188178 | 1.05E-06 |
| TUCP_004329 | XLOC_190664 | ENSRNOT00000079606 | 0.960472013 | 7.11E-07 |
| TUCP_004329 | XLOC_190664 | ENSRNOT00000090207 | 0.953487741 | 1.59E-06 |
| TUCP_004329 | XLOC_190664 | ENSRNOT00000087025 | 1           | 4.25E-78 |
| TUCP_004329 | XLOC_190664 | ENSRNOT00000019853 | 1           | 0        |
| TUCP_004329 | XLOC_190664 | ENSRNOT00000073853 | 0.989715487 | 8.91E-10 |
| TUCP_004329 | XLOC_190664 | ENSRNOT00000065912 | 0.974234118 | 8.57E-08 |
| TUCP_004329 | XLOC_190664 | ENSRNOT00000073828 | 0.971647353 | 1.38E-07 |
| TUCP_004329 | XLOC_190664 | ENSRNOT00000078683 | 0.966682958 | 3.06E-07 |
| TUCP_004329 | XLOC_190664 | ENSRNOT00000093083 | 0.999140292 | 3.69E-15 |
| TUCP_004328 | XLOC_190600 | ENSRNOT00000055127 | 0.963287664 | 4.94E-07 |
| TUCP_004328 | XLOC_190600 | ENSRNOT0000001570  | 0.955516359 | 1.27E-06 |
| TUCP_004328 | XLOC_190600 | ENSRNOT00000020071 | 0.976685324 | 5.22E-08 |
| TUCP_004328 | XLOC_190600 | ENSRNOT00000028007 | 0.962664871 | 5.37E-07 |
| TUCP_004328 | XLOC_190600 | ENSRNOT00000076802 | 0.972708574 | 1.14E-07 |
| TUCP_004328 | XLOC_190600 | ENSRNOT0000009620  | 0.950981107 | 2.05E-06 |
| TUCP_004328 | XLOC_190600 | ENSRNOT00000074738 | 0.974313291 | 8.44E-08 |
| TUCP_004328 | XLOC_190600 | ENSRNOT00000084429 | 0.982074335 | 1.41E-08 |
| TUCP_004328 | XLOC_190600 | ENSRNOT00000081108 | 0.977632925 | 4.25E-08 |
| TUCP_004328 | XLOC_190600 | ENSRNOT00000056995 | 0.955213597 | 1.32E-06 |
| TUCP_004328 | XLOC_190600 | ENSRNOT00000031025 | 0.962557641 | 5.44E-07 |
| TUCP_004328 | XLOC_190600 | ENSRNOT00000056551 | 0.973728023 | 9.43E-08 |
| TUCP_004328 | XLOC_190600 | ENSRNOT0000001853  | 0.956599549 | 1.13E-06 |
| TUCP_004328 | XLOC_190600 | ENSRNOT00000077134 | 0.969350537 | 2.02E-07 |
| TUCP_004328 | XLOC_190600 | ENSRNOT00000038494 | 0.956780265 | 1.10E-06 |
| TUCP_004328 | XLOC_190600 | ENSRNOT00000011295 | 0.951027563 | 2.04E-06 |
| TUCP_004328 | XLOC_190600 | ENSRNOT00000039263 | 0.97142764  | 1.43E-07 |
| TUCP_004328 | XLOC_190600 | ENSRNOT00000005726 | 0.956023085 | 1.20E-06 |
| TUCP_004328 | XLOC_190600 | ENSRNOT00000043486 | 0.962076604 | 5.80E-07 |
| TUCP_004328 | XLOC_190600 | ENSRNOT00000054757 | 0.967732541 | 2.61E-07 |
| TUCP_004328 | XLOC_190600 | ENSRNOT00000041741 | 0.964230716 | 4.34E-07 |
| TUCP_004328 | XLOC_190600 | ENSRNOT00000082002 | 0.954279352 | 1.46E-06 |
| TUCP_004328 | XLOC_190600 | ENSRNOT00000081893 | 0.957766919 | 9.86E-07 |
| TUCP_004328 | XLOC_190600 | ENSRNOT00000082143 | 0.961667264 | 6.11E-07 |
| TUCP_004328 | XLOC_190600 | ENSRNOT00000085570 | 0.98387198  | 8.36E-09 |



|             |             |                    |             |          |
|-------------|-------------|--------------------|-------------|----------|
| TUCP_004328 | XLOC_190600 | ENSRNOT00000047564 | 0.962820977 | 5.26E-07 |
| TUCP_004328 | XLOC_190600 | ENSRNOT00000083067 | 0.981738124 | 1.55E-08 |
| TUCP_004328 | XLOC_190600 | ENSRNOT00000076693 | 0.971412268 | 1.43E-07 |
| TUCP_004328 | XLOC_190600 | ENSRNOT00000090867 | 0.962590211 | 5.42E-07 |
| TUCP_004328 | XLOC_190600 | ENSRNOT00000038426 | 0.973168619 | 1.05E-07 |
| TUCP_004328 | XLOC_190600 | ENSRNOT00000029990 | 0.966220914 | 3.27E-07 |
| TUCP_004328 | XLOC_190600 | ENSRNOT00000076618 | 0.95072999  | 2.10E-06 |
| TUCP_004328 | XLOC_190600 | ENSRNOT0000002695  | 0.963333459 | 4.91E-07 |
| TUCP_004328 | XLOC_190600 | ENSRNOT00000087140 | 0.967248213 | 2.81E-07 |
| TUCP_004328 | XLOC_190600 | ENSRNOT00000087603 | 0.975616635 | 6.52E-08 |
| TUCP_004328 | XLOC_190600 | ENSRNOT00000078434 | 0.980481903 | 2.16E-08 |
| TUCP_004328 | XLOC_190600 | ENSRNOT00000023504 | 0.967947918 | 2.52E-07 |
| TUCP_004328 | XLOC_190600 | ENSRNOT00000010673 | 0.956671164 | 1.12E-06 |
| TUCP_004328 | XLOC_190600 | ENSRNOT00000080956 | 0.967428995 | 2.73E-07 |
| TUCP_004328 | XLOC_190600 | ENSRNOT00000084847 | 0.972916627 | 1.10E-07 |
| TUCP_004328 | XLOC_190600 | ENSRNOT00000060765 | 0.956290136 | 1.17E-06 |
| TUCP_004328 | XLOC_190600 | ENSRNOT00000050656 | 0.977473278 | 4.40E-08 |
| TUCP_004328 | XLOC_190600 | ENSRNOT00000088078 | 0.955292386 | 1.30E-06 |
| TUCP_004328 | XLOC_190600 | ENSRNOT00000013904 | 0.954939709 | 1.36E-06 |
| TUCP_004328 | XLOC_190600 | ENSRNOT00000057992 | 0.978071015 | 3.85E-08 |
| TUCP_004328 | XLOC_190600 | ENSRNOT00000072810 | 0.968690454 | 2.25E-07 |
| TUCP_004639 | XLOC_204189 | ENSRNOT00000071840 | 1           | 0        |
| TUCP_004639 | XLOC_204189 | ENSRNOT00000083608 | 0.992618428 | 1.70E-10 |
| TUCP_004639 | XLOC_204189 | ENSRNOT00000076035 | 0.956476518 | 1.14E-06 |
| TUCP_004639 | XLOC_204189 | ENSRNOT00000085476 | 0.96207118  | 5.80E-07 |
| TUCP_004639 | XLOC_204189 | ENSRNOT00000066382 | 0.96329105  | 4.94E-07 |
| TUCP_004639 | XLOC_204189 | ENSRNOT00000045584 | 1           | 0        |
| TUCP_004639 | XLOC_204189 | ENSRNOT00000077995 | 0.994428404 | 4.19E-11 |
| TUCP_004639 | XLOC_204189 | ENSRNOT00000066004 | 0.999857217 | 4.67E-19 |
| TUCP_004639 | XLOC_204189 | ENSRNOT00000064284 | 0.968782027 | 2.22E-07 |
| TUCP_004639 | XLOC_204189 | ENSRNOT00000068197 | 0.955470548 | 1.28E-06 |
| TUCP_004639 | XLOC_204189 | ENSRNOT00000082086 | 0.97275676  | 1.13E-07 |
| TUCP_004639 | XLOC_204189 | ENSRNOT00000089494 | 0.983505294 | 9.35E-09 |
| TUCP_004639 | XLOC_204189 | ENSRNOT00000083747 | 0.957764469 | 9.86E-07 |
| TUCP_004639 | XLOC_204189 | ENSRNOT00000092182 | 1           | 0        |
| TUCP_004639 | XLOC_204189 | ENSRNOT00000084461 | 1           | 0        |
| TUCP_004639 | XLOC_204189 | ENSRNOT00000060448 | 1           | 0        |
| TUCP_004639 | XLOC_204189 | ENSRNOT00000032631 | 1           | 0        |
| TUCP_004639 | XLOC_204189 | ENSRNOT00000079503 | 0.957317866 | 1.04E-06 |
| TUCP_004639 | XLOC_204189 | ENSRNOT00000027950 | 0.960989928 | 6.66E-07 |
| TUCP_004639 | XLOC_204189 | ENSRNOT00000060113 | 0.975275164 | 6.98E-08 |
| TUCP_004639 | XLOC_204189 | ENSRNOT00000054910 | 0.990580154 | 5.75E-10 |
| TUCP_004639 | XLOC_204189 | ENSRNOT00000057176 | 0.999998955 | 9.83E-30 |
| TUCP_004639 | XLOC_204189 | ENSRNOT00000078176 | 0.994350784 | 4.49E-11 |
| TUCP_004639 | XLOC_204189 | ENSRNOT00000056364 | 0.990647125 | 5.55E-10 |
| TUCP_004639 | XLOC_204189 | ENSRNOT00000093431 | 1           | 0        |
| TUCP_004639 | XLOC_204189 | ENSRNOT00000024758 | 0.981367686 | 1.71E-08 |
| TUCP_004639 | XLOC_204189 | ENSRNOT00000092901 | 1           | 4.25E-78 |
| TUCP_004639 | XLOC_204189 | ENSRNOT00000089290 | 0.999988082 | 1.89E-24 |
| TUCP_004639 | XLOC_204189 | ENSRNOT00000090211 | 0.998865151 | 1.48E-14 |
| TUCP_004639 | XLOC_204189 | ENSRNOT00000075244 | 0.962646865 | 5.38E-07 |

|             |             |                    |              |          |
|-------------|-------------|--------------------|--------------|----------|
| TUCP_004639 | XLOC_204189 | ENSRNOT00000091828 | 0.996371069  | 4.93E-12 |
| TUCP_004639 | XLOC_204189 | ENSRNOT00000091944 | 0.999786107  | 3.52E-18 |
| TUCP_004639 | XLOC_204189 | ENSRNOT00000070855 | 1            | 1.33E-79 |
| TUCP_004639 | XLOC_204189 | ENSRNOT00000009295 | 0.995887068  | 9.21E-12 |
| TUCP_004639 | XLOC_204189 | ENSRNOT00000084109 | 0.999673655  | 2.91E-17 |
| TUCP_004639 | XLOC_204189 | ENSRNOT00000060645 | 0.973934385  | 9.07E-08 |
| TUCP_004639 | XLOC_204189 | ENSRNOT00000041569 | 1            | 0        |
| TUCP_004639 | XLOC_204189 | ENSRNOT00000087091 | 1            | 0        |
| TUCP_004639 | XLOC_204189 | ENSRNOT00000003308 | 0.990930758  | 4.76E-10 |
| TUCP_004639 | XLOC_204189 | ENSRNOT00000026113 | 0.999851454  | 5.69E-19 |
| TUCP_004639 | XLOC_204189 | ENSRNOT00000014939 | 0.999846854  | 6.63E-19 |
| TUCP_004639 | XLOC_204189 | ENSRNOT00000058314 | 0.99088442   | 4.88E-10 |
| TUCP_004639 | XLOC_204189 | ENSRNOT00000047870 | 0.981575908  | 1.62E-08 |
| TUCP_004639 | XLOC_204189 | ENSRNOT00000071603 | 0.999995875  | 9.40E-27 |
| TUCP_004639 | XLOC_204189 | ENSRNOT00000088376 | 0.970305372  | 1.73E-07 |
| TUCP_004639 | XLOC_204189 | ENSRNOT00000060454 | 1            | 0        |
| TUCP_004639 | XLOC_204189 | ENSRNOT00000029298 | 0.957304374  | 1.04E-06 |
| TUCP_004639 | XLOC_204189 | ENSRNOT00000044232 | 0.98372207   | 8.76E-09 |
| TUCP_004639 | XLOC_204189 | ENSRNOT00000023287 | 0.974929583  | 7.48E-08 |
| TUCP_004639 | XLOC_204189 | ENSRNOT00000071714 | 0.978813661  | 3.24E-08 |
| TUCP_004639 | XLOC_204189 | ENSRNOT00000075836 | 1            | 0        |
| TUCP_004639 | XLOC_204189 | ENSRNOT00000073229 | 1            | 0        |
| TUCP_004639 | XLOC_204189 | ENSRNOT00000077731 | 0.965942857  | 3.41E-07 |
| TUCP_004639 | XLOC_204189 | ENSRNOT00000046980 | 0.982667176  | 1.20E-08 |
| TUCP_004639 | XLOC_204189 | ENSRNOT00000039652 | 0.972574547  | 1.17E-07 |
| TUCP_004639 | XLOC_204189 | ENSRNOT00000066685 | 0.981130123  | 1.83E-08 |
| TUCP_004639 | XLOC_204189 | ENSRNOT00000082776 | 0.966379954  | 3.20E-07 |
| TUCP_004639 | XLOC_204189 | ENSRNOT00000088719 | 0.965171519  | 3.81E-07 |
| TUCP_004639 | XLOC_204189 | ENSRNOT00000007683 | 0.999755897  | 6.82E-18 |
| TUCP_004639 | XLOC_204189 | ENSRNOT00000092916 | 0.96606874   | 3.35E-07 |
| TUCP_004639 | XLOC_204189 | ENSRNOT00000081106 | 0.95354262   | 1.58E-06 |
| TUCP_000534 | XLOC_018511 | ENSRNOT00000000008 | 1            | 0        |
| TUCP_000534 | XLOC_018511 | ENSRNOT00000060048 | 0.998711457  | 2.79E-14 |
| TUCP_000534 | XLOC_018511 | ENSRNOT00000082304 | 0.996875989  | 2.33E-12 |
| TUCP_000534 | XLOC_018511 | ENSRNOT00000006219 | 1            | 0        |
| TUCP_000534 | XLOC_018511 | ENSRNOT00000065376 | 1            | 0        |
| TUCP_000534 | XLOC_018511 | ENSRNOT00000081433 | 0.984469223  | 6.93E-09 |
| TUCP_000534 | XLOC_018511 | ENSRNOT00000083575 | 1            | 0        |
| TUCP_000534 | XLOC_018511 | ENSRNOT00000087739 | 1            | 0        |
| TUCP_000534 | XLOC_018511 | ENSRNOT00000079826 | 1            | 0        |
| TUCP_000534 | XLOC_018511 | ENSRNOT00000025770 | 0.993828251  | 6.98E-11 |
| TUCP_000534 | XLOC_018511 | ENSRNOT00000088244 | 0.973479481  | 9.88E-08 |
| TUCP_000534 | XLOC_018511 | ENSRNOT00000048523 | 1            | 0        |
| TUCP_000534 | XLOC_018511 | ENSRNOT00000079365 | 0.958936699  | 8.58E-07 |
| TUCP_000534 | XLOC_018511 | ENSRNOT00000020229 | 0.960002785  | 7.54E-07 |
| TUCP_000534 | XLOC_018511 | ENSRNOT00000026428 | 0.996986683  | 1.95E-12 |
| TUCP_000534 | XLOC_018511 | ENSRNOT00000085673 | 1            | 0        |
| TUCP_000534 | XLOC_018511 | ENSRNOT00000072972 | 0.981476166  | 1.67E-08 |
| TUCP_000534 | XLOC_018511 | ENSRNOT00000050573 | 1            | 0        |
| TUCP_000534 | XLOC_018511 | ENSRNOT00000089876 | -0.953630353 | 1.56E-06 |
| TUCP_000534 | XLOC_018511 | ENSRNOT00000074378 | 0.998901807  | 1.26E-14 |

|             |             |                     |              |          |
|-------------|-------------|---------------------|--------------|----------|
| TUCP_000534 | XLOC_018511 | ENSRNOT00000093571  | 1            | 0        |
| TUCP_000534 | XLOC_018511 | ENSRNOT00000090581  | 1            | 0        |
| TUCP_000534 | XLOC_018511 | ENSRNOT00000076239  | 0.98020752   | 2.31E-08 |
| TUCP_000534 | XLOC_018511 | ENSRNOT00000065485  | 1            | 0        |
| TUCP_000534 | XLOC_018511 | ENSRNOT0000006356   | 0.999544279  | 1.55E-16 |
| TUCP_000534 | XLOC_018511 | ENSRNOT00000087199  | 0.974421555  | 8.26E-08 |
| TUCP_000534 | XLOC_018511 | ENSRNOT00000022091  | 1            | 0        |
| TUCP_000534 | XLOC_018511 | ENSRNOT00000064764  | 0.98460888   | 6.63E-09 |
| TUCP_000534 | XLOC_018511 | ENSRNOT00000076927  | 0.971163156  | 1.50E-07 |
| TUCP_000534 | XLOC_018511 | ENSRNOT00000092395  | 0.999522978  | 1.94E-16 |
| TUCP_002227 | XLOC_092641 | ENSRNOT00000000246  | 0.952353041  | 1.78E-06 |
| TUCP_002227 | XLOC_092641 | ENSRNOT00000007185  | -0.960285067 | 7.28E-07 |
| TUCP_002227 | XLOC_092641 | ENSRNOT000000082869 | 0.950163599  | 2.23E-06 |
| TUCP_002227 | XLOC_092641 | ENSRNOT000000085988 | 0.955543671  | 1.27E-06 |
| TUCP_002227 | XLOC_092641 | ENSRNOT000000035672 | 0.969323773  | 2.03E-07 |
| TUCP_002227 | XLOC_092641 | ENSRNOT000000082699 | 0.950076255  | 2.25E-06 |
| TUCP_002227 | XLOC_092641 | ENSRNOT000000056998 | 0.953050057  | 1.66E-06 |
| TUCP_002227 | XLOC_092641 | ENSRNOT000000031549 | 0.970384413  | 1.71E-07 |
| TUCP_002227 | XLOC_092641 | ENSRNOT000000051294 | 0.962124528  | 5.76E-07 |
| TUCP_002227 | XLOC_092641 | ENSRNOT000000029049 | 0.962087234  | 5.79E-07 |
| TUCP_002227 | XLOC_092641 | ENSRNOT000000056430 | 0.952061336  | 1.84E-06 |
| TUCP_002227 | XLOC_092641 | ENSRNOT000000008372 | 0.950175187  | 2.22E-06 |
| TUCP_000536 | XLOC_018732 | ENSRNOT000000058497 | 0.964744264  | 4.04E-07 |
| TUCP_000530 | XLOC_018336 | ENSRNOT000000024186 | 0.957341406  | 1.04E-06 |
| TUCP_000530 | XLOC_018336 | ENSRNOT000000074753 | 0.977613649  | 4.26E-08 |
| TUCP_000530 | XLOC_018336 | ENSRNOT000000041904 | 0.98508982   | 5.66E-09 |
| TUCP_000530 | XLOC_018336 | ENSRNOT000000080193 | -0.960985684 | 6.67E-07 |
| TUCP_000530 | XLOC_018336 | ENSRNOT000000081798 | 0.977449521  | 4.42E-08 |
| TUCP_000530 | XLOC_018336 | ENSRNOT000000083487 | 0.967448844  | 2.73E-07 |
| TUCP_000530 | XLOC_018336 | ENSRNOT000000077990 | 0.98508982   | 5.66E-09 |
| TUCP_000530 | XLOC_018336 | ENSRNOT000000038826 | 0.985166619  | 5.52E-09 |
| TUCP_000530 | XLOC_018336 | ENSRNOT000000078663 | 0.953259047  | 1.62E-06 |
| TUCP_000530 | XLOC_018336 | ENSRNOT000000060250 | 0.984547678  | 6.76E-09 |
| TUCP_000530 | XLOC_018336 | ENSRNOT000000091934 | 0.98508982   | 5.66E-09 |
| TUCP_000530 | XLOC_018336 | ENSRNOT000000093579 | 0.957911816  | 9.69E-07 |
| TUCP_000530 | XLOC_018336 | ENSRNOT000000046585 | 0.969069425  | 2.12E-07 |
| TUCP_000530 | XLOC_018336 | ENSRNOT000000080794 | 0.969378892  | 2.01E-07 |
| TUCP_000530 | XLOC_018336 | ENSRNOT000000002220 | 0.958535821  | 9.00E-07 |
| TUCP_000530 | XLOC_018336 | ENSRNOT00000014456  | 0.989011253  | 1.24E-09 |
| TUCP_000530 | XLOC_018336 | ENSRNOT000000031205 | 0.978121539  | 3.81E-08 |
| TUCP_000530 | XLOC_018336 | ENSRNOT000000079260 | 0.980905093  | 1.94E-08 |
| TUCP_000530 | XLOC_018336 | ENSRNOT000000044145 | 0.98508982   | 5.66E-09 |
| TUCP_000530 | XLOC_018336 | ENSRNOT000000088381 | 0.975135447  | 7.18E-08 |
| TUCP_000530 | XLOC_018336 | ENSRNOT000000011743 | 0.965351288  | 3.71E-07 |
| TUCP_000530 | XLOC_018336 | ENSRNOT000000089929 | 0.98508982   | 5.66E-09 |
| TUCP_000530 | XLOC_018336 | ENSRNOT000000088624 | 0.98508982   | 5.66E-09 |
| TUCP_000530 | XLOC_018336 | ENSRNOT000000085659 | 0.992252956  | 2.17E-10 |
| TUCP_000530 | XLOC_018336 | ENSRNOT000000015866 | 0.980288015  | 2.27E-08 |
| TUCP_000530 | XLOC_018336 | ENSRNOT000000064250 | 0.957031987  | 1.07E-06 |
| TUCP_000530 | XLOC_018336 | ENSRNOT000000034907 | 0.982545281  | 1.24E-08 |
| TUCP_000530 | XLOC_018336 | ENSRNOT000000051835 | 0.98508982   | 5.66E-09 |

|             |             |                    |             |          |
|-------------|-------------|--------------------|-------------|----------|
| TUCP_000530 | XLOC_018336 | ENSRNOT00000009825 | 0.957644534 | 1.00E-06 |
| TUCP_000530 | XLOC_018336 | ENSRNOT00000079087 | 0.98508982  | 5.66E-09 |
| TUCP_000530 | XLOC_018336 | ENSRNOT00000037206 | 0.98508982  | 5.66E-09 |
| TUCP_000530 | XLOC_018336 | ENSRNOT00000080590 | 0.985164703 | 5.52E-09 |
| TUCP_000530 | XLOC_018336 | ENSRNOT00000027552 | 0.985609876 | 4.74E-09 |
| TUCP_000530 | XLOC_018336 | ENSRNOT00000047694 | 0.964519402 | 4.17E-07 |
| TUCP_000530 | XLOC_018336 | ENSRNOT00000018923 | 0.955418495 | 1.29E-06 |
| TUCP_000530 | XLOC_018336 | ENSRNOT00000080453 | 0.985269271 | 5.33E-09 |
| TUCP_000530 | XLOC_018336 | ENSRNOT00000089057 | 0.964727267 | 4.05E-07 |
| TUCP_000530 | XLOC_018336 | ENSRNOT00000066839 | 0.979337726 | 2.87E-08 |
| TUCP_000530 | XLOC_018336 | ENSRNOT00000078633 | 0.98508982  | 5.66E-09 |
| TUCP_000530 | XLOC_018336 | ENSRNOT00000071884 | 0.980306479 | 2.26E-08 |
| TUCP_000530 | XLOC_018336 | ENSRNOT00000004128 | 0.964433722 | 4.22E-07 |
| TUCP_000530 | XLOC_018336 | ENSRNOT00000026316 | 0.961229602 | 6.46E-07 |
| TUCP_000530 | XLOC_018336 | ENSRNOT00000057729 | 0.983924734 | 8.23E-09 |
| TUCP_000530 | XLOC_018336 | ENSRNOT00000021243 | 0.966146834 | 3.31E-07 |
| TUCP_000530 | XLOC_018336 | ENSRNOT00000037169 | 0.950497715 | 2.15E-06 |
| TUCP_000530 | XLOC_018336 | ENSRNOT00000029634 | 0.976602683 | 5.31E-08 |
| TUCP_000530 | XLOC_018336 | ENSRNOT00000077014 | 0.976942105 | 4.94E-08 |
| TUCP_000530 | XLOC_018336 | ENSRNOT00000065460 | 0.98508982  | 5.66E-09 |
| TUCP_000530 | XLOC_018336 | ENSRNOT00000003817 | 0.981394891 | 1.70E-08 |
| TUCP_000530 | XLOC_018336 | ENSRNOT00000016713 | 0.98508982  | 5.66E-09 |
| TUCP_000530 | XLOC_018336 | ENSRNOT00000041074 | 0.958792871 | 8.73E-07 |
| TUCP_000530 | XLOC_018336 | ENSRNOT00000039294 | 0.98508982  | 5.66E-09 |
| TUCP_000533 | XLOC_018458 | ENSRNOT00000083843 | 0.960087366 | 7.46E-07 |
| TUCP_000533 | XLOC_018458 | ENSRNOT00000047572 | 0.965493239 | 3.64E-07 |
| TUCP_000533 | XLOC_018458 | ENSRNOT00000025824 | 0.957860447 | 9.75E-07 |
| TUCP_000533 | XLOC_018458 | ENSRNOT00000021937 | 0.952343976 | 1.79E-06 |
| TUCP_000533 | XLOC_018458 | ENSRNOT00000007790 | 0.964424832 | 4.23E-07 |
| TUCP_000533 | XLOC_018458 | ENSRNOT00000022676 | 0.950414393 | 2.17E-06 |
| TUCP_000533 | XLOC_018458 | ENSRNOT00000054932 | 0.954504518 | 1.42E-06 |
| TUCP_000533 | XLOC_018458 | ENSRNOT00000063875 | 0.977517621 | 4.36E-08 |
| TUCP_000533 | XLOC_018458 | ENSRNOT00000018674 | 0.958127442 | 9.45E-07 |
| TUCP_000533 | XLOC_018458 | ENSRNOT00000070825 | 0.96565379  | 3.55E-07 |
| TUCP_000533 | XLOC_018458 | ENSRNOT00000005432 | 0.951877599 | 1.87E-06 |
| TUCP_000533 | XLOC_018458 | ENSRNOT00000022065 | 0.962483438 | 5.50E-07 |
| TUCP_000533 | XLOC_018458 | ENSRNOT00000021705 | 0.956189998 | 1.18E-06 |
| TUCP_000533 | XLOC_018458 | ENSRNOT00000032162 | 0.954727823 | 1.39E-06 |
| TUCP_000533 | XLOC_018458 | ENSRNOT00000024285 | 0.951191643 | 2.01E-06 |
| TUCP_000533 | XLOC_018458 | ENSRNOT00000064290 | 0.959354158 | 8.16E-07 |
| TUCP_000533 | XLOC_018458 | ENSRNOT00000054931 | 0.970385177 | 1.71E-07 |
| TUCP_000533 | XLOC_018458 | ENSRNOT00000080418 | 0.964428282 | 4.23E-07 |
| TUCP_000533 | XLOC_018458 | ENSRNOT00000048298 | 0.95254707  | 1.75E-06 |
| TUCP_000533 | XLOC_018458 | ENSRNOT00000003733 | 0.960967457 | 6.68E-07 |
| TUCP_000533 | XLOC_018458 | ENSRNOT00000024712 | 0.966285478 | 3.24E-07 |
| TUCP_000533 | XLOC_018458 | ENSRNOT00000024456 | 0.960250212 | 7.31E-07 |
| TUCP_000533 | XLOC_018458 | ENSRNOT00000028893 | 0.955833816 | 1.23E-06 |
| TUCP_000533 | XLOC_018458 | ENSRNOT00000026726 | 0.952128151 | 1.83E-06 |
| TUCP_000533 | XLOC_018458 | ENSRNOT00000072077 | 0.950901244 | 2.07E-06 |
| TUCP_000533 | XLOC_018458 | ENSRNOT00000027973 | 0.95536611  | 1.29E-06 |
| TUCP_000533 | XLOC_018458 | ENSRNOT00000000258 | 0.965092015 | 3.85E-07 |

|             |             |                     |              |          |
|-------------|-------------|---------------------|--------------|----------|
| TUCP_000533 | XLOC_018458 | ENSRNOT00000076101  | 0.95971812   | 7.81E-07 |
| TUCP_000533 | XLOC_018458 | ENSRNOT00000011344  | 0.957257903  | 1.05E-06 |
| TUCP_000533 | XLOC_018458 | ENSRNOT00000025782  | 0.952193358  | 1.81E-06 |
| TUCP_000533 | XLOC_018458 | ENSRNOT00000000812  | 0.95600462   | 1.21E-06 |
| TUCP_000533 | XLOC_018458 | ENSRNOT00000020161  | -0.955951881 | 1.21E-06 |
| TUCP_000533 | XLOC_018458 | ENSRNOT00000056675  | 0.956987794  | 1.08E-06 |
| TUCP_000533 | XLOC_018458 | ENSRNOT00000023641  | 0.959109897  | 8.40E-07 |
| TUCP_000533 | XLOC_018458 | ENSRNOT00000006591  | 0.950765653  | 2.10E-06 |
| TUCP_000533 | XLOC_018458 | ENSRNOT00000087022  | 0.951252236  | 2.00E-06 |
| TUCP_000533 | XLOC_018458 | ENSRNOT00000014859  | 0.955137336  | 1.33E-06 |
| TUCP_000533 | XLOC_018458 | ENSRNOT00000016324  | 0.956853852  | 1.10E-06 |
| TUCP_000533 | XLOC_018458 | ENSRNOT00000005033  | 0.965017795  | 3.89E-07 |
| TUCP_000533 | XLOC_018458 | ENSRNOT00000021144  | 0.951579804  | 1.93E-06 |
| TUCP_000533 | XLOC_018458 | ENSRNOT00000077040  | 0.953851022  | 1.53E-06 |
| TUCP_000533 | XLOC_018458 | ENSRNOT00000017784  | 0.957624429  | 1.00E-06 |
| TUCP_000533 | XLOC_018458 | ENSRNOT00000029021  | 0.952635701  | 1.73E-06 |
| TUCP_000533 | XLOC_018458 | ENSRNOT00000033795  | 0.958296746  | 9.26E-07 |
| TUCP_000533 | XLOC_018458 | ENSRNOT00000019778  | 0.966107106  | 3.33E-07 |
| TUCP_000533 | XLOC_018458 | ENSRNOT00000011320  | 0.950189728  | 2.22E-06 |
| TUCP_000533 | XLOC_018458 | ENSRNOT00000000552  | 0.963487741  | 4.81E-07 |
| TUCP_000538 | XLOC_018754 | ENSRNOT00000084944  | 0.992928774  | 1.38E-10 |
| TUCP_000539 | XLOC_018946 | ENSRNOT00000012757  | 0.95794285   | 9.66E-07 |
| TUCP_000539 | XLOC_018946 | ENSRNOT00000006947  | 0.967147068  | 2.85E-07 |
| TUCP_000539 | XLOC_018946 | ENSRNOT00000005505  | 0.980558682  | 2.12E-08 |
| TUCP_000539 | XLOC_018946 | ENSRNOT00000023623  | 0.952303617  | 1.79E-06 |
| TUCP_000539 | XLOC_018946 | ENSRNOT00000021590  | 0.95395695   | 1.51E-06 |
| TUCP_000539 | XLOC_018946 | ENSRNOT00000072682  | 0.954638017  | 1.40E-06 |
| TUCP_000539 | XLOC_018946 | ENSRNOT00000010142  | 0.971514008  | 1.41E-07 |
| TUCP_000539 | XLOC_018946 | ENSRNOT000000091359 | -0.967875898 | 2.55E-07 |
| TUCP_000539 | XLOC_018946 | ENSRNOT000000006109 | 0.958948112  | 8.57E-07 |
| TUCP_000539 | XLOC_018946 | ENSRNOT00000047453  | 0.95360564   | 1.57E-06 |
| TUCP_000539 | XLOC_018946 | ENSRNOT00000024583  | -0.954833466 | 1.37E-06 |
| TUCP_000539 | XLOC_018946 | ENSRNOT000000086144 | 0.961621217  | 6.15E-07 |
| TUCP_000539 | XLOC_018946 | ENSRNOT00000023661  | 0.955476457  | 1.28E-06 |
| TUCP_000539 | XLOC_018946 | ENSRNOT000000065111 | 0.956634981  | 1.12E-06 |
| TUCP_002229 | XLOC_092856 | ENSRNOT00000029866  | 0.951813803  | 1.89E-06 |
| TUCP_002229 | XLOC_092856 | ENSRNOT00000012895  | 0.955368197  | 1.29E-06 |
| TUCP_002229 | XLOC_092856 | ENSRNOT000000006175 | 0.956182331  | 1.18E-06 |
| TUCP_002229 | XLOC_092856 | ENSRNOT00000026543  | 0.950194744  | 2.22E-06 |
| TUCP_002229 | XLOC_092856 | ENSRNOT00000078274  | 0.967300619  | 2.79E-07 |
| TUCP_002229 | XLOC_092856 | ENSRNOT000000081246 | 0.957899058  | 9.70E-07 |
| TUCP_002229 | XLOC_092856 | ENSRNOT00000071764  | 0.951052463  | 2.04E-06 |
| TUCP_002229 | XLOC_092856 | ENSRNOT00000027616  | -0.950064597 | 2.25E-06 |
| TUCP_002229 | XLOC_092856 | ENSRNOT000000058312 | 0.971335246  | 1.45E-07 |
| TUCP_002229 | XLOC_092856 | ENSRNOT000000031230 | 0.955080251  | 1.34E-06 |
| TUCP_002229 | XLOC_092856 | ENSRNOT00000043216  | 0.950575474  | 2.14E-06 |
| TUCP_000505 | XLOC_017313 | ENSRNOT00000080386  | 0.967158261  | 2.85E-07 |
| TUCP_001035 | XLOC_039160 | ENSRNOT00000013582  | -0.959752592 | 7.77E-07 |
| TUCP_001035 | XLOC_039160 | ENSRNOT00000010561  | 0.957612541  | 1.00E-06 |
| TUCP_001035 | XLOC_039160 | ENSRNOT000000006160 | 0.957496664  | 1.02E-06 |
| TUCP_001035 | XLOC_039160 | ENSRNOT00000009398  | 0.960681691  | 6.93E-07 |

|             |             |                     |              |          |
|-------------|-------------|---------------------|--------------|----------|
| TUCP_001035 | XLOC_039160 | ENSRNOT00000061132  | 0.959349675  | 8.16E-07 |
| TUCP_001032 | XLOC_038945 | ENSRNOT00000008221  | 0.953166119  | 1.64E-06 |
| TUCP_001032 | XLOC_038945 | ENSRNOT00000027454  | 0.955860188  | 1.23E-06 |
| TUCP_001032 | XLOC_038945 | ENSRNOT00000012156  | 0.952939024  | 1.68E-06 |
| TUCP_001032 | XLOC_038945 | ENSRNOT00000032737  | 0.952733162  | 1.72E-06 |
| TUCP_001032 | XLOC_038945 | ENSRNOT00000018535  | 0.95971338   | 7.81E-07 |
| TUCP_001033 | XLOC_039101 | ENSRNOT00000078274  | 0.956506494  | 1.14E-06 |
| TUCP_001030 | XLOC_038915 | ENSRNOT00000033661  | 0.950345948  | 2.19E-06 |
| TUCP_001031 | XLOC_038944 | ENSRNOT00000018179  | 0.957219499  | 1.05E-06 |
| TUCP_001031 | XLOC_038944 | ENSRNOT00000008221  | 0.959121943  | 8.39E-07 |
| TUCP_001031 | XLOC_038944 | ENSRNOT00000050180  | 0.956676197  | 1.12E-06 |
| TUCP_001031 | XLOC_038944 | ENSRNOT00000025808  | 0.957191725  | 1.05E-06 |
| TUCP_001031 | XLOC_038944 | ENSRNOT00000006454  | 0.963600759  | 4.73E-07 |
| TUCP_001031 | XLOC_038944 | ENSRNOT000000064946 | 0.972616681  | 1.16E-07 |
| TUCP_001031 | XLOC_038944 | ENSRNOT00000047093  | 0.952514862  | 1.76E-06 |
| TUCP_001137 | XLOC_042943 | ENSRNOT00000000438  | 0.952040032  | 1.84E-06 |
| TUCP_001137 | XLOC_042943 | ENSRNOT00000047234  | 0.961146972  | 6.53E-07 |
| TUCP_001137 | XLOC_042943 | ENSRNOT00000007795  | 0.959570097  | 7.95E-07 |
| TUCP_001137 | XLOC_042943 | ENSRNOT00000088385  | 0.960308768  | 7.26E-07 |
| TUCP_000030 | XLOC_000533 | ENSRNOT00000020656  | 0.951566921  | 1.93E-06 |
| TUCP_001135 | XLOC_042759 | ENSRNOT00000067875  | 0.964334211  | 4.28E-07 |
| TUCP_001135 | XLOC_042759 | ENSRNOT00000014089  | 0.956545183  | 1.13E-06 |
| TUCP_001133 | XLOC_042732 | ENSRNOT00000026966  | 0.970322306  | 1.73E-07 |
| TUCP_001133 | XLOC_042732 | ENSRNOT00000068416  | 0.999999782  | 3.88E-33 |
| TUCP_001133 | XLOC_042732 | ENSRNOT00000086036  | 0.999958274  | 9.96E-22 |
| TUCP_001133 | XLOC_042732 | ENSRNOT00000026803  | 0.985046075  | 5.74E-09 |
| TUCP_001133 | XLOC_042732 | ENSRNOT00000047527  | 0.963071698  | 5.08E-07 |
| TUCP_001133 | XLOC_042732 | ENSRNOT00000042251  | 0.999344295  | 9.53E-16 |
| TUCP_001133 | XLOC_042732 | ENSRNOT00000002984  | 0.998397069  | 8.31E-14 |
| TUCP_001133 | XLOC_042732 | ENSRNOT00000083764  | 0.999541808  | 1.59E-16 |
| TUCP_001133 | XLOC_042732 | ENSRNOT00000076802  | 0.962695843  | 5.34E-07 |
| TUCP_001133 | XLOC_042732 | ENSRNOT00000092365  | 0.999161651  | 3.26E-15 |
| TUCP_001133 | XLOC_042732 | ENSRNOT00000079275  | 0.999901911  | 7.15E-20 |
| TUCP_001133 | XLOC_042732 | ENSRNOT00000066062  | -0.959706712 | 7.82E-07 |
| TUCP_001133 | XLOC_042732 | ENSRNOT00000045301  | 1            | 0        |
| TUCP_001133 | XLOC_042732 | ENSRNOT00000041186  | 0.999975782  | 6.56E-23 |
| TUCP_001133 | XLOC_042732 | ENSRNOT00000010092  | 0.977711778  | 4.17E-08 |
| TUCP_001133 | XLOC_042732 | ENSRNOT00000076182  | 1            | 0        |
| TUCP_001133 | XLOC_042732 | ENSRNOT00000087404  | 0.951157664  | 2.02E-06 |
| TUCP_001133 | XLOC_042732 | ENSRNOT00000052003  | 0.95837331   | 9.18E-07 |
| TUCP_001133 | XLOC_042732 | ENSRNOT00000081709  | 0.998485154  | 6.27E-14 |
| TUCP_001133 | XLOC_042732 | ENSRNOT00000005726  | 0.959610119  | 7.91E-07 |
| TUCP_001133 | XLOC_042732 | ENSRNOT00000014103  | 1            | 0        |
| TUCP_001133 | XLOC_042732 | ENSRNOT00000057433  | 0.964930601  | 3.94E-07 |
| TUCP_001133 | XLOC_042732 | ENSRNOT00000082289  | 0.998931566  | 1.09E-14 |
| TUCP_001133 | XLOC_042732 | ENSRNOT00000092516  | 0.957459323  | 1.02E-06 |
| TUCP_001133 | XLOC_042732 | ENSRNOT00000008898  | 0.990039768  | 7.59E-10 |
| TUCP_001133 | XLOC_042732 | ENSRNOT00000083493  | 0.995461232  | 1.51E-11 |
| TUCP_001133 | XLOC_042732 | ENSRNOT00000092563  | 0.987201084  | 2.65E-09 |
| TUCP_001133 | XLOC_042732 | ENSRNOT00000088893  | 1            | 0        |
| TUCP_001133 | XLOC_042732 | ENSRNOT00000076693  | 0.955029582  | 1.34E-06 |

|             |             |                    |              |          |
|-------------|-------------|--------------------|--------------|----------|
| TUCP_001133 | XLOC_042732 | ENSRNOT00000081014 | 1            | 0        |
| TUCP_001133 | XLOC_042732 | ENSRNOT00000067543 | 1            | 0        |
| TUCP_001133 | XLOC_042732 | ENSRNOT00000050968 | 0.996816433  | 2.56E-12 |
| TUCP_001133 | XLOC_042732 | ENSRNOT00000042201 | 0.960235595  | 7.32E-07 |
| TUCP_001133 | XLOC_042732 | ENSRNOT00000004373 | 0.957315473  | 1.04E-06 |
| TUCP_001133 | XLOC_042732 | ENSRNOT00000063929 | 1            | 0        |
| TUCP_001133 | XLOC_042732 | ENSRNOT00000057472 | 1            | 0        |
| TUCP_001133 | XLOC_042732 | ENSRNOT00000041617 | 0.952449765  | 1.77E-06 |
| TUCP_001133 | XLOC_042732 | ENSRNOT00000091763 | 0.986310385  | 3.70E-09 |
| TUCP_001133 | XLOC_042732 | ENSRNOT00000022200 | 0.998491303  | 6.14E-14 |
| TUCP_001133 | XLOC_042732 | ENSRNOT00000067379 | 0.997260967  | 1.21E-12 |
| TUCP_001133 | XLOC_042732 | ENSRNOT00000020786 | 0.976428448  | 5.51E-08 |
| TUCP_001133 | XLOC_042732 | ENSRNOT00000050543 | 0.999722223  | 1.30E-17 |
| TUCP_001133 | XLOC_042732 | ENSRNOT00000089306 | 0.999866649  | 3.32E-19 |
| TUCP_001133 | XLOC_042732 | ENSRNOT00000052367 | 0.997268394  | 1.19E-12 |
| TUCP_001133 | XLOC_042732 | ENSRNOT00000090658 | 1            | 0        |
| TUCP_001133 | XLOC_042732 | ENSRNOT00000022571 | 0.995290013  | 1.81E-11 |
| TUCP_001133 | XLOC_042732 | ENSRNOT00000044520 | 0.981817158  | 1.52E-08 |
| TUCP_001133 | XLOC_042732 | ENSRNOT00000065448 | 0.963648868  | 4.70E-07 |
| TUCP_001132 | XLOC_042660 | ENSRNOT00000078067 | -0.971504347 | 1.41E-07 |
| TUCP_001132 | XLOC_042660 | ENSRNOT00000003834 | -0.954041879 | 1.49E-06 |
| TUCP_001038 | XLOC_039641 | ENSRNOT00000071694 | 0.953831629  | 1.53E-06 |
| TUCP_001038 | XLOC_039641 | ENSRNOT00000004834 | 0.968477218  | 2.32E-07 |
| TUCP_001038 | XLOC_039641 | ENSRNOT00000085158 | 0.9562845    | 1.17E-06 |
| TUCP_001038 | XLOC_039641 | ENSRNOT00000089971 | 0.951685911  | 1.91E-06 |
| TUCP_001038 | XLOC_039641 | ENSRNOT00000006554 | 0.971345365  | 1.45E-07 |
| TUCP_001038 | XLOC_039641 | ENSRNOT00000010609 | 0.957895179  | 9.71E-07 |
| TUCP_001038 | XLOC_039641 | ENSRNOT00000091910 | 0.974764714  | 7.73E-08 |
| TUCP_001038 | XLOC_039641 | ENSRNOT00000075653 | 0.959524267  | 7.99E-07 |
| TUCP_001038 | XLOC_039641 | ENSRNOT00000010035 | 0.953876396  | 1.52E-06 |
| TUCP_001038 | XLOC_039641 | ENSRNOT00000068645 | 0.956738515  | 1.11E-06 |
| TUCP_001038 | XLOC_039641 | ENSRNOT00000026293 | 0.953580549  | 1.57E-06 |
| TUCP_001038 | XLOC_039641 | ENSRNOT00000078675 | 0.966000545  | 3.38E-07 |
| TUCP_001038 | XLOC_039641 | ENSRNOT00000019222 | 0.958685091  | 8.84E-07 |
| TUCP_001038 | XLOC_039641 | ENSRNOT00000047685 | 0.964092818  | 4.43E-07 |
| TUCP_001038 | XLOC_039641 | ENSRNOT00000004359 | 0.951331533  | 1.98E-06 |
| TUCP_001038 | XLOC_039641 | ENSRNOT00000037446 | 0.957980177  | 9.61E-07 |
| TUCP_001038 | XLOC_039641 | ENSRNOT00000024941 | 0.962566189  | 5.44E-07 |
| TUCP_001038 | XLOC_039641 | ENSRNOT00000038647 | 0.95159434   | 1.93E-06 |
| TUCP_001038 | XLOC_039641 | ENSRNOT00000009683 | 0.956415572  | 1.15E-06 |
| TUCP_004023 | XLOC_177325 | ENSRNOT00000032386 | 0.991763785  | 2.94E-10 |
| TUCP_004023 | XLOC_177325 | ENSRNOT00000030677 | 0.971153438  | 1.50E-07 |
| TUCP_004023 | XLOC_177325 | ENSRNOT00000023945 | 0.985212168  | 5.43E-09 |
| TUCP_004023 | XLOC_177325 | ENSRNOT00000024755 | 0.962683759  | 5.35E-07 |
| TUCP_004023 | XLOC_177325 | ENSRNOT00000037068 | 0.976173279  | 5.81E-08 |
| TUCP_004748 | XLOC_209431 | ENSRNOT00000010001 | 0.991793299  | 2.89E-10 |
| TUCP_004748 | XLOC_209431 | ENSRNOT00000085797 | 0.963671465  | 4.69E-07 |
| TUCP_004748 | XLOC_209431 | ENSRNOT00000093083 | 0.951207229  | 2.01E-06 |
| TUCP_000404 | XLOC_013709 | ENSRNOT00000037800 | 0.958663266  | 8.87E-07 |
| TUCP_004027 | XLOC_177527 | ENSRNOT00000013745 | 0.97048052   | 1.68E-07 |
| TUCP_004027 | XLOC_177527 | ENSRNOT00000075397 | -0.961423974 | 6.31E-07 |

|             |             |                    |              |          |
|-------------|-------------|--------------------|--------------|----------|
| TUCP_004027 | XLOC_177527 | ENSRNOT00000032926 | 0.961125835  | 6.55E-07 |
| TUCP_004027 | XLOC_177527 | ENSRNOT00000019104 | 0.987937207  | 1.97E-09 |
| TUCP_004027 | XLOC_177527 | ENSRNOT00000019848 | 0.962902074  | 5.20E-07 |
| TUCP_004027 | XLOC_177527 | ENSRNOT00000015566 | -0.966405828 | 3.18E-07 |
| TUCP_004027 | XLOC_177527 | ENSRNOT00000083173 | 0.971048016  | 1.53E-07 |
| TUCP_004027 | XLOC_177527 | ENSRNOT00000020910 | -0.96819218  | 2.43E-07 |
| TUCP_004027 | XLOC_177527 | ENSRNOT00000078737 | 0.955810683  | 1.23E-06 |
| TUCP_004027 | XLOC_177527 | ENSRNOT00000025067 | 0.980683358  | 2.05E-08 |
| TUCP_004027 | XLOC_177527 | ENSRNOT00000086706 | -0.955601202 | 1.26E-06 |
| TUCP_004027 | XLOC_177527 | ENSRNOT00000030914 | 0.965149803  | 3.82E-07 |
| TUCP_004027 | XLOC_177527 | ENSRNOT00000019997 | -0.95625072  | 1.17E-06 |
| TUCP_004027 | XLOC_177527 | ENSRNOT00000086310 | 0.972363363  | 1.21E-07 |
| TUCP_004027 | XLOC_177527 | ENSRNOT00000079698 | 0.973939864  | 9.06E-08 |
| TUCP_004027 | XLOC_177527 | ENSRNOT00000045233 | 0.957679769  | 9.96E-07 |
| TUCP_004027 | XLOC_177527 | ENSRNOT00000011130 | 0.972072158  | 1.28E-07 |
| TUCP_004027 | XLOC_177527 | ENSRNOT0000001935  | 0.95461063   | 1.41E-06 |
| TUCP_004027 | XLOC_177527 | ENSRNOT00000030850 | -0.951192214 | 2.01E-06 |
| TUCP_004027 | XLOC_177527 | ENSRNOT00000078282 | 0.952189381  | 1.82E-06 |
| TUCP_004027 | XLOC_177527 | ENSRNOT00000042459 | 0.958951662  | 8.57E-07 |
| TUCP_004027 | XLOC_177527 | ENSRNOT00000074606 | 0.955525323  | 1.27E-06 |
| TUCP_004027 | XLOC_177527 | ENSRNOT00000086893 | 0.968439304  | 2.34E-07 |
| TUCP_004027 | XLOC_177527 | ENSRNOT00000055540 | -0.967316998 | 2.78E-07 |
| TUCP_004027 | XLOC_177527 | ENSRNOT00000006752 | -0.95132335  | 1.98E-06 |
| TUCP_004027 | XLOC_177527 | ENSRNOT00000003247 | 0.95839777   | 9.15E-07 |
| TUCP_004027 | XLOC_177527 | ENSRNOT00000085311 | 0.950416587  | 2.17E-06 |
| TUCP_004027 | XLOC_177527 | ENSRNOT00000077146 | 0.951296557  | 1.99E-06 |
| TUCP_004027 | XLOC_177527 | ENSRNOT00000025284 | 0.983123886  | 1.05E-08 |
| TUCP_004027 | XLOC_177527 | ENSRNOT00000018622 | 0.956845564  | 1.10E-06 |
| TUCP_004027 | XLOC_177527 | ENSRNOT00000072771 | -0.955828331 | 1.23E-06 |
| TUCP_004027 | XLOC_177527 | ENSRNOT00000022620 | -0.964821709 | 4.00E-07 |
| TUCP_004027 | XLOC_177527 | ENSRNOT00000065300 | -0.963785762 | 4.62E-07 |
| TUCP_004027 | XLOC_177527 | ENSRNOT00000022126 | 0.959378217  | 8.14E-07 |
| TUCP_004027 | XLOC_177527 | ENSRNOT00000057045 | 0.956204166  | 1.18E-06 |
| TUCP_004027 | XLOC_177527 | ENSRNOT00000035320 | 0.982165996  | 1.38E-08 |
| TUCP_004027 | XLOC_177527 | ENSRNOT00000017469 | 0.973525667  | 9.80E-08 |
| TUCP_004027 | XLOC_177527 | ENSRNOT00000091448 | 0.950897327  | 2.07E-06 |
| TUCP_004027 | XLOC_177527 | ENSRNOT00000077999 | -0.971657165 | 1.37E-07 |
| TUCP_004027 | XLOC_177527 | ENSRNOT00000003412 | 0.966333839  | 3.22E-07 |
| TUCP_004027 | XLOC_177527 | ENSRNOT00000003146 | 0.952743878  | 1.71E-06 |
| TUCP_004027 | XLOC_177527 | ENSRNOT00000003794 | 0.968563735  | 2.29E-07 |
| TUCP_004027 | XLOC_177527 | ENSRNOT00000085228 | -0.951687565 | 1.91E-06 |
| TUCP_004027 | XLOC_177527 | ENSRNOT00000015188 | -0.957040263 | 1.07E-06 |
| TUCP_004027 | XLOC_177527 | ENSRNOT00000018488 | 0.958558328  | 8.98E-07 |
| TUCP_004027 | XLOC_177527 | ENSRNOT00000089673 | 0.950724322  | 2.11E-06 |
| TUCP_004027 | XLOC_177527 | ENSRNOT00000080522 | 0.964311041  | 4.29E-07 |
| TUCP_004027 | XLOC_177527 | ENSRNOT00000083287 | 0.958726893  | 8.80E-07 |
| TUCP_004027 | XLOC_177527 | ENSRNOT00000082686 | 0.972050044  | 1.28E-07 |
| TUCP_004027 | XLOC_177527 | ENSRNOT00000076181 | 0.967393207  | 2.75E-07 |
| TUCP_004027 | XLOC_177527 | ENSRNOT00000017269 | 0.955329695  | 1.30E-06 |
| TUCP_004027 | XLOC_177527 | ENSRNOT00000026462 | 0.977996346  | 3.91E-08 |
| TUCP_004027 | XLOC_177527 | ENSRNOT00000080418 | 0.95137852   | 1.97E-06 |



|             |             |                     |              |          |
|-------------|-------------|---------------------|--------------|----------|
| TUCP_004027 | XLOC_177527 | ENSRNOT00000067391  | 0.964636421  | 4.10E-07 |
| TUCP_004027 | XLOC_177527 | ENSRNOT00000084709  | -0.960870987 | 6.76E-07 |
| TUCP_004027 | XLOC_177527 | ENSRNOT00000029179  | 0.973439233  | 9.96E-08 |
| TUCP_004027 | XLOC_177527 | ENSRNOT00000026481  | -0.963319402 | 4.92E-07 |
| TUCP_004027 | XLOC_177527 | ENSRNOT00000017813  | 0.961786458  | 6.02E-07 |
| TUCP_004027 | XLOC_177527 | ENSRNOT00000026525  | 0.973003195  | 1.08E-07 |
| TUCP_004027 | XLOC_177527 | ENSRNOT00000082709  | 0.966169103  | 3.30E-07 |
| TUCP_004027 | XLOC_177527 | ENSRNOT00000072299  | -0.951100796 | 2.03E-06 |
| TUCP_004027 | XLOC_177527 | ENSRNOT00000001404  | 0.967692467  | 2.63E-07 |
| TUCP_004027 | XLOC_177527 | ENSRNOT00000000817  | 0.957031738  | 1.07E-06 |
| TUCP_004027 | XLOC_177527 | ENSRNOT00000084313  | 0.963150798  | 5.03E-07 |
| TUCP_004027 | XLOC_177527 | ENSRNOT00000001401  | -0.962772364 | 5.29E-07 |
| TUCP_004027 | XLOC_177527 | ENSRNOT000000016132 | 0.970963848  | 1.55E-07 |
| TUCP_004027 | XLOC_177527 | ENSRNOT00000001366  | 0.964208813  | 4.36E-07 |
| TUCP_004027 | XLOC_177527 | ENSRNOT00000058495  | 0.96268898   | 5.35E-07 |
| TUCP_004027 | XLOC_177527 | ENSRNOT00000013067  | 0.966402017  | 3.19E-07 |
| TUCP_004027 | XLOC_177527 | ENSRNOT00000001360  | 0.96933119   | 2.03E-07 |
| TUCP_004027 | XLOC_177527 | ENSRNOT00000046486  | 0.951550021  | 1.94E-06 |
| TUCP_004027 | XLOC_177527 | ENSRNOT00000027141  | 0.96660399   | 3.09E-07 |
| TUCP_004027 | XLOC_177527 | ENSRNOT00000016220  | 0.982750334  | 1.17E-08 |
| TUCP_004027 | XLOC_177527 | ENSRNOT00000017081  | 0.967942737  | 2.53E-07 |
| TUCP_004027 | XLOC_177527 | ENSRNOT00000002313  | 0.964058186  | 4.45E-07 |
| TUCP_004027 | XLOC_177527 | ENSRNOT00000037389  | 0.958441426  | 9.10E-07 |
| TUCP_004027 | XLOC_177527 | ENSRNOT00000016637  | 0.963178893  | 5.01E-07 |
| TUCP_004027 | XLOC_177527 | ENSRNOT00000031979  | 0.959060768  | 8.45E-07 |
| TUCP_004027 | XLOC_177527 | ENSRNOT00000074586  | 0.954558435  | 1.41E-06 |
| TUCP_004027 | XLOC_177527 | ENSRNOT00000045765  | 0.959295183  | 8.22E-07 |
| TUCP_004027 | XLOC_177527 | ENSRNOT00000071929  | 0.971106699  | 1.51E-07 |
| TUCP_004027 | XLOC_177527 | ENSRNOT00000064305  | 0.971453552  | 1.42E-07 |
| TUCP_004027 | XLOC_177527 | ENSRNOT00000000532  | 0.977324733  | 4.54E-08 |
| TUCP_004027 | XLOC_177527 | ENSRNOT00000029202  | 0.981948956  | 1.46E-08 |
| TUCP_004027 | XLOC_177527 | ENSRNOT00000028290  | 0.96820144   | 2.43E-07 |
| TUCP_004027 | XLOC_177527 | ENSRNOT00000003992  | 0.972425435  | 1.20E-07 |
| TUCP_004027 | XLOC_177527 | ENSRNOT00000016351  | 0.954849129  | 1.37E-06 |
| TUCP_004027 | XLOC_177527 | ENSRNOT00000046983  | 0.96343231   | 4.84E-07 |
| TUCP_004027 | XLOC_177527 | ENSRNOT00000050515  | -0.966716849 | 3.04E-07 |
| TUCP_004027 | XLOC_177527 | ENSRNOT00000028589  | 0.975083378  | 7.25E-08 |
| TUCP_004027 | XLOC_177527 | ENSRNOT00000078073  | 0.961232243  | 6.46E-07 |
| TUCP_004027 | XLOC_177527 | ENSRNOT00000052224  | -0.967068977 | 2.89E-07 |
| TUCP_004027 | XLOC_177527 | ENSRNOT00000064901  | -0.964035629 | 4.46E-07 |
| TUCP_004027 | XLOC_177527 | ENSRNOT00000055607  | 0.967174978  | 2.84E-07 |
| TUCP_004027 | XLOC_177527 | ENSRNOT00000032289  | 0.973151977  | 1.05E-07 |
| TUCP_004027 | XLOC_177527 | ENSRNOT00000023876  | -0.956152227 | 1.19E-06 |
| TUCP_004027 | XLOC_177527 | ENSRNOT00000003106  | 0.962264425  | 5.66E-07 |
| TUCP_004027 | XLOC_177527 | ENSRNOT00000012625  | 0.970121377  | 1.78E-07 |
| TUCP_004027 | XLOC_177527 | ENSRNOT00000019157  | 0.950029626  | 2.26E-06 |
| TUCP_004027 | XLOC_177527 | ENSRNOT00000019656  | 0.954068101  | 1.49E-06 |
| TUCP_004027 | XLOC_177527 | ENSRNOT00000049285  | 0.953764097  | 1.54E-06 |
| TUCP_004027 | XLOC_177527 | ENSRNOT00000078390  | 0.959988117  | 7.55E-07 |
| TUCP_004027 | XLOC_177527 | ENSRNOT00000033056  | 0.955375951  | 1.29E-06 |
| TUCP_004027 | XLOC_177527 | ENSRNOT00000006366  | 0.978976388  | 3.12E-08 |

|             |             |                    |              |          |
|-------------|-------------|--------------------|--------------|----------|
| TUCP_004027 | XLOC_177527 | ENSRNOT00000074649 | -0.951506668 | 1.95E-06 |
| TUCP_004027 | XLOC_177527 | ENSRNOT00000025936 | 0.950309984  | 2.19E-06 |
| TUCP_004027 | XLOC_177527 | ENSRNOT00000080677 | 0.968088216  | 2.47E-07 |
| TUCP_004027 | XLOC_177527 | ENSRNOT00000022343 | 0.957384021  | 1.03E-06 |
| TUCP_004027 | XLOC_177527 | ENSRNOT00000067846 | 0.959623748  | 7.90E-07 |
| TUCP_004027 | XLOC_177527 | ENSRNOT00000044662 | 0.950320788  | 2.19E-06 |
| TUCP_004027 | XLOC_177527 | ENSRNOT00000022478 | 0.950409783  | 2.17E-06 |
| TUCP_004027 | XLOC_177527 | ENSRNOT00000064723 | 0.974877416  | 7.56E-08 |
| TUCP_004027 | XLOC_177527 | ENSRNOT00000073834 | 0.980306929  | 2.26E-08 |
| TUCP_004027 | XLOC_177527 | ENSRNOT00000028807 | 0.963668653  | 4.69E-07 |
| TUCP_004027 | XLOC_177527 | ENSRNOT00000060002 | 0.962653825  | 5.37E-07 |
| TUCP_004027 | XLOC_177527 | ENSRNOT00000086456 | 0.965683058  | 3.54E-07 |
| TUCP_004027 | XLOC_177527 | ENSRNOT00000036959 | 0.988817057  | 1.35E-09 |
| TUCP_004027 | XLOC_177527 | ENSRNOT00000010367 | -0.950042735 | 2.25E-06 |
| TUCP_004027 | XLOC_177527 | ENSRNOT00000056145 | 0.960825329  | 6.80E-07 |
| TUCP_004027 | XLOC_177527 | ENSRNOT00000001227 | 0.953676706  | 1.55E-06 |
| TUCP_004027 | XLOC_177527 | ENSRNOT00000066133 | 0.967456094  | 2.72E-07 |
| TUCP_004027 | XLOC_177527 | ENSRNOT00000067741 | 0.95253349   | 1.75E-06 |
| TUCP_004027 | XLOC_177527 | ENSRNOT00000060432 | 0.982045394  | 1.43E-08 |
| TUCP_004027 | XLOC_177527 | ENSRNOT00000048933 | 0.964329065  | 4.28E-07 |
| TUCP_004027 | XLOC_177527 | ENSRNOT00000051953 | 0.972355976  | 1.21E-07 |
| TUCP_004027 | XLOC_177527 | ENSRNOT00000006765 | 0.957664413  | 9.97E-07 |
| TUCP_004027 | XLOC_177527 | ENSRNOT00000035385 | -0.964962423 | 3.92E-07 |
| TUCP_004027 | XLOC_177527 | ENSRNOT00000088509 | -0.950750946 | 2.10E-06 |
| TUCP_004027 | XLOC_177527 | ENSRNOT00000002443 | -0.953331165 | 1.61E-06 |
| TUCP_004027 | XLOC_177527 | ENSRNOT00000019487 | -0.96685929  | 2.98E-07 |
| TUCP_004027 | XLOC_177527 | ENSRNOT00000071192 | 0.962871763  | 5.22E-07 |
| TUCP_004027 | XLOC_177527 | ENSRNOT00000014885 | 0.966175437  | 3.29E-07 |
| TUCP_004027 | XLOC_177527 | ENSRNOT00000023786 | 0.958555966  | 8.98E-07 |
| TUCP_004027 | XLOC_177527 | ENSRNOT00000055992 | 0.96471626   | 4.06E-07 |
| TUCP_004027 | XLOC_177527 | ENSRNOT00000064535 | 0.960629229  | 6.97E-07 |
| TUCP_004027 | XLOC_177527 | ENSRNOT00000010748 | -0.962473272 | 5.50E-07 |
| TUCP_004027 | XLOC_177527 | ENSRNOT00000085295 | 0.968755737  | 2.23E-07 |
| TUCP_004027 | XLOC_177527 | ENSRNOT00000008222 | 0.9547977    | 1.38E-06 |
| TUCP_004027 | XLOC_177527 | ENSRNOT00000035474 | -0.950632403 | 2.13E-06 |
| TUCP_004027 | XLOC_177527 | ENSRNOT00000009749 | 0.973322519  | 1.02E-07 |
| TUCP_004027 | XLOC_177527 | ENSRNOT00000086260 | 0.953250431  | 1.63E-06 |
| TUCP_004027 | XLOC_177527 | ENSRNOT00000001135 | 0.961935052  | 5.90E-07 |
| TUCP_004027 | XLOC_177527 | ENSRNOT00000017692 | 0.968214988  | 2.42E-07 |
| TUCP_004027 | XLOC_177527 | ENSRNOT00000007044 | 0.970377971  | 1.71E-07 |
| TUCP_004027 | XLOC_177527 | ENSRNOT00000038182 | 0.967015519  | 2.91E-07 |
| TUCP_004027 | XLOC_177527 | ENSRNOT00000010983 | -0.950265666 | 2.20E-06 |
| TUCP_004027 | XLOC_177527 | ENSRNOT00000004787 | 0.982580338  | 1.23E-08 |
| TUCP_004027 | XLOC_177527 | ENSRNOT00000007367 | 0.963298387  | 4.93E-07 |
| TUCP_004027 | XLOC_177527 | ENSRNOT00000058351 | -0.967298286 | 2.79E-07 |
| TUCP_004027 | XLOC_177527 | ENSRNOT00000022000 | 0.959134414  | 8.38E-07 |
| TUCP_004027 | XLOC_177527 | ENSRNOT00000066968 | -0.956304391 | 1.17E-06 |
| TUCP_004027 | XLOC_177527 | ENSRNOT00000005148 | 0.950545256  | 2.14E-06 |
| TUCP_004027 | XLOC_177527 | ENSRNOT00000070912 | 0.966499859  | 3.14E-07 |
| TUCP_004027 | XLOC_177527 | ENSRNOT00000087146 | -0.959397841 | 8.12E-07 |
| TUCP_004027 | XLOC_177527 | ENSRNOT00000013431 | 0.96426341   | 4.32E-07 |

|             |             |                    |              |          |
|-------------|-------------|--------------------|--------------|----------|
| TUCP_004027 | XLOC_177527 | ENSRNOT00000028703 | 0.971886331  | 1.32E-07 |
| TUCP_004027 | XLOC_177527 | ENSRNOT00000088679 | 0.964717547  | 4.06E-07 |
| TUCP_004027 | XLOC_177527 | ENSRNOT00000087033 | 0.955752276  | 1.24E-06 |
| TUCP_004027 | XLOC_177527 | ENSRNOT00000016776 | 0.974945738  | 7.45E-08 |
| TUCP_004027 | XLOC_177527 | ENSRNOT00000047192 | 0.970536718  | 1.66E-07 |
| TUCP_004027 | XLOC_177527 | ENSRNOT00000088677 | 0.952526374  | 1.75E-06 |
| TUCP_004027 | XLOC_177527 | ENSRNOT00000008987 | 0.959596206  | 7.92E-07 |
| TUCP_004027 | XLOC_177527 | ENSRNOT00000090355 | 0.958570045  | 8.97E-07 |
| TUCP_004027 | XLOC_177527 | ENSRNOT00000024253 | -0.952382411 | 1.78E-06 |
| TUCP_004027 | XLOC_177527 | ENSRNOT00000018684 | 0.961385915  | 6.34E-07 |
| TUCP_004027 | XLOC_177527 | ENSRNOT00000040060 | 0.96031679   | 7.25E-07 |
| TUCP_004027 | XLOC_177527 | ENSRNOT00000039607 | 0.95238403   | 1.78E-06 |
| TUCP_004027 | XLOC_177527 | ENSRNOT00000027083 | -0.970312449 | 1.73E-07 |
| TUCP_004027 | XLOC_177527 | ENSRNOT00000028737 | 0.960155049  | 7.40E-07 |
| TUCP_004027 | XLOC_177527 | ENSRNOT00000002053 | 0.96017568   | 7.38E-07 |
| TUCP_004027 | XLOC_177527 | ENSRNOT00000066041 | 0.962351738  | 5.59E-07 |
| TUCP_004027 | XLOC_177527 | ENSRNOT00000063930 | 0.966823967  | 2.99E-07 |
| TUCP_004027 | XLOC_177527 | ENSRNOT00000046215 | 0.976367953  | 5.58E-08 |
| TUCP_004027 | XLOC_177527 | ENSRNOT00000013116 | 0.959409388  | 8.11E-07 |
| TUCP_004027 | XLOC_177527 | ENSRNOT00000013025 | 0.953764691  | 1.54E-06 |
| TUCP_004027 | XLOC_177527 | ENSRNOT00000065304 | 0.959167273  | 8.35E-07 |
| TUCP_004027 | XLOC_177527 | ENSRNOT00000041237 | 0.963499322  | 4.80E-07 |
| TUCP_004027 | XLOC_177527 | ENSRNOT00000027301 | 0.965256002  | 3.76E-07 |
| TUCP_004027 | XLOC_177527 | ENSRNOT00000087838 | 0.9692956    | 2.04E-07 |
| TUCP_004027 | XLOC_177527 | ENSRNOT00000081981 | -0.951389801 | 1.97E-06 |
| TUCP_004027 | XLOC_177527 | ENSRNOT00000027653 | 0.961648994  | 6.13E-07 |
| TUCP_004027 | XLOC_177527 | ENSRNOT00000014479 | 0.982370233  | 1.30E-08 |
| TUCP_004027 | XLOC_177527 | ENSRNOT00000003326 | 0.977733449  | 4.15E-08 |
| TUCP_004027 | XLOC_177527 | ENSRNOT00000021629 | 0.96371017   | 4.66E-07 |
| TUCP_004027 | XLOC_177527 | ENSRNOT00000016306 | 0.973186716  | 1.04E-07 |
| TUCP_004027 | XLOC_177527 | ENSRNOT00000015471 | 0.967834585  | 2.57E-07 |
| TUCP_004027 | XLOC_177527 | ENSRNOT00000015476 | 0.972157859  | 1.26E-07 |
| TUCP_004027 | XLOC_177527 | ENSRNOT00000025079 | 0.953685709  | 1.55E-06 |
| TUCP_004027 | XLOC_177527 | ENSRNOT00000021455 | 0.951614769  | 1.93E-06 |
| TUCP_004027 | XLOC_177527 | ENSRNOT00000004007 | 0.993898625  | 6.59E-11 |
| TUCP_004027 | XLOC_177527 | ENSRNOT00000020681 | 0.956831294  | 1.10E-06 |
| TUCP_004027 | XLOC_177527 | ENSRNOT00000057898 | 0.966651645  | 3.07E-07 |
| TUCP_004027 | XLOC_177527 | ENSRNOT00000022432 | 0.958990659  | 8.53E-07 |
| TUCP_004027 | XLOC_177527 | ENSRNOT00000091602 | 0.971563636  | 1.40E-07 |
| TUCP_004027 | XLOC_177527 | ENSRNOT00000090338 | 0.951218117  | 2.00E-06 |
| TUCP_004027 | XLOC_177527 | ENSRNOT00000009811 | -0.95319889  | 1.63E-06 |
| TUCP_004027 | XLOC_177527 | ENSRNOT00000023567 | 0.983587431  | 9.12E-09 |
| TUCP_004027 | XLOC_177527 | ENSRNOT00000009817 | 0.983215151  | 1.02E-08 |
| TUCP_004027 | XLOC_177527 | ENSRNOT00000009708 | 0.979212739  | 2.95E-08 |
| TUCP_004027 | XLOC_177527 | ENSRNOT00000025294 | 0.976050886  | 5.96E-08 |
| TUCP_004027 | XLOC_177527 | ENSRNOT00000030798 | 0.957893142  | 9.71E-07 |
| TUCP_004027 | XLOC_177527 | ENSRNOT00000021523 | -0.971383561 | 1.44E-07 |
| TUCP_004027 | XLOC_177527 | ENSRNOT00000018634 | 0.959233551  | 8.28E-07 |
| TUCP_004027 | XLOC_177527 | ENSRNOT00000071540 | -0.955374686 | 1.29E-06 |
| TUCP_004027 | XLOC_177527 | ENSRNOT00000012583 | 0.979976889  | 2.45E-08 |
| TUCP_004027 | XLOC_177527 | ENSRNOT00000010318 | 0.956601449  | 1.13E-06 |

|             |             |                    |              |          |
|-------------|-------------|--------------------|--------------|----------|
| TUCP_004027 | XLOC_177527 | ENSRNOT00000072849 | 0.954446989  | 1.43E-06 |
| TUCP_004027 | XLOC_177527 | ENSRNOT00000073643 | 0.958619987  | 8.91E-07 |
| TUCP_004027 | XLOC_177527 | ENSRNOT00000078349 | 0.983240294  | 1.01E-08 |
| TUCP_004027 | XLOC_177527 | ENSRNOT00000022502 | 0.986958099  | 2.91E-09 |
| TUCP_004027 | XLOC_177527 | ENSRNOT00000026928 | 0.9757656    | 6.32E-08 |
| TUCP_004027 | XLOC_177527 | ENSRNOT00000005329 | 0.958737067  | 8.79E-07 |
| TUCP_004027 | XLOC_177527 | ENSRNOT00000087443 | -0.957673813 | 9.96E-07 |
| TUCP_004027 | XLOC_177527 | ENSRNOT00000009900 | 0.973933444  | 9.07E-08 |
| TUCP_004027 | XLOC_177527 | ENSRNOT00000018028 | 0.966338169  | 3.22E-07 |
| TUCP_004027 | XLOC_177527 | ENSRNOT00000021803 | 0.97545062   | 6.74E-08 |
| TUCP_004027 | XLOC_177527 | ENSRNOT00000025856 | 0.962944715  | 5.17E-07 |
| TUCP_004027 | XLOC_177527 | ENSRNOT00000039850 | 0.959629802  | 7.89E-07 |
| TUCP_004027 | XLOC_177527 | ENSRNOT00000082627 | 0.952024779  | 1.85E-06 |
| TUCP_004027 | XLOC_177527 | ENSRNOT00000087748 | 0.956289894  | 1.17E-06 |
| TUCP_004027 | XLOC_177527 | ENSRNOT00000003787 | 0.968690769  | 2.25E-07 |
| TUCP_004027 | XLOC_177527 | ENSRNOT00000014506 | 0.951110678  | 2.03E-06 |
| TUCP_004027 | XLOC_177527 | ENSRNOT00000023262 | 0.964537482  | 4.16E-07 |
| TUCP_004027 | XLOC_177527 | ENSRNOT00000014859 | 0.955975905  | 1.21E-06 |
| TUCP_004027 | XLOC_177527 | ENSRNOT00000015757 | 0.959677846  | 7.84E-07 |
| TUCP_004027 | XLOC_177527 | ENSRNOT00000025104 | 0.958939119  | 8.58E-07 |
| TUCP_004027 | XLOC_177527 | ENSRNOT00000004941 | 0.976805315  | 5.09E-08 |
| TUCP_004027 | XLOC_177527 | ENSRNOT00000010893 | 0.950664733  | 2.12E-06 |
| TUCP_004027 | XLOC_177527 | ENSRNOT00000004942 | 0.951065614  | 2.04E-06 |
| TUCP_004027 | XLOC_177527 | ENSRNOT00000055957 | 0.957793739  | 9.83E-07 |
| TUCP_004027 | XLOC_177527 | ENSRNOT00000010674 | 0.978806902  | 3.25E-08 |
| TUCP_004027 | XLOC_177527 | ENSRNOT00000023664 | 0.968553062  | 2.30E-07 |
| TUCP_004027 | XLOC_177527 | ENSRNOT00000009225 | 0.959864675  | 7.67E-07 |
| TUCP_004027 | XLOC_177527 | ENSRNOT00000068026 | 0.959905551  | 7.63E-07 |
| TUCP_004027 | XLOC_177527 | ENSRNOT00000007314 | 0.98197892   | 1.45E-08 |
| TUCP_004027 | XLOC_177527 | ENSRNOT00000090456 | -0.968733363 | 2.23E-07 |
| TUCP_004027 | XLOC_177527 | ENSRNOT00000026531 | 0.957365848  | 1.03E-06 |
| TUCP_004027 | XLOC_177527 | ENSRNOT00000064068 | 0.978959629  | 3.13E-08 |
| TUCP_004027 | XLOC_177527 | ENSRNOT00000005170 | 0.957789142  | 9.83E-07 |
| TUCP_004027 | XLOC_177527 | ENSRNOT00000017746 | 0.95189138   | 1.87E-06 |
| TUCP_004027 | XLOC_177527 | ENSRNOT00000016286 | 0.950458595  | 2.16E-06 |
| TUCP_004027 | XLOC_177527 | ENSRNOT00000026398 | 0.984635249  | 6.57E-09 |
| TUCP_004027 | XLOC_177527 | ENSRNOT00000034961 | 0.959387045  | 8.13E-07 |
| TUCP_004027 | XLOC_177527 | ENSRNOT00000071897 | 0.958248082  | 9.31E-07 |
| TUCP_004027 | XLOC_177527 | ENSRNOT00000050609 | 0.963882812  | 4.56E-07 |
| TUCP_004027 | XLOC_177527 | ENSRNOT00000066923 | 0.960456982  | 7.12E-07 |
| TUCP_004027 | XLOC_177527 | ENSRNOT00000013375 | 0.950232926  | 2.21E-06 |
| TUCP_004027 | XLOC_177527 | ENSRNOT00000024285 | 0.967013925  | 2.91E-07 |
| TUCP_004027 | XLOC_177527 | ENSRNOT00000041277 | 0.976083368  | 5.92E-08 |
| TUCP_004027 | XLOC_177527 | ENSRNOT00000024264 | 0.965052988  | 3.87E-07 |
| TUCP_004027 | XLOC_177527 | ENSRNOT00000028744 | 0.966636002  | 3.08E-07 |
| TUCP_004027 | XLOC_177527 | ENSRNOT00000027910 | -0.952101186 | 1.83E-06 |
| TUCP_004027 | XLOC_177527 | ENSRNOT00000067135 | 0.964627323  | 4.11E-07 |
| TUCP_004027 | XLOC_177527 | ENSRNOT00000054976 | 0.952497577  | 1.76E-06 |
| TUCP_004027 | XLOC_177527 | ENSRNOT00000010516 | 0.950275407  | 2.20E-06 |
| TUCP_004027 | XLOC_177527 | ENSRNOT00000010510 | 0.951528608  | 1.94E-06 |
| TUCP_004027 | XLOC_177527 | ENSRNOT00000010783 | 0.956175276  | 1.18E-06 |

|             |             |                     |              |          |
|-------------|-------------|---------------------|--------------|----------|
| TUCP_004027 | XLOC_177527 | ENSRNOT0000000529   | 0.954891709  | 1.36E-06 |
| TUCP_004027 | XLOC_177527 | ENSRNOT00000016372  | 0.980659649  | 2.06E-08 |
| TUCP_004027 | XLOC_177527 | ENSRNOT00000088202  | 0.971358971  | 1.45E-07 |
| TUCP_004027 | XLOC_177527 | ENSRNOT00000029833  | -0.970056627 | 1.80E-07 |
| TUCP_004027 | XLOC_177527 | ENSRNOT00000012702  | 0.961792022  | 6.01E-07 |
| TUCP_004027 | XLOC_177527 | ENSRNOT00000061916  | 0.973660125  | 9.55E-08 |
| TUCP_004027 | XLOC_177527 | ENSRNOT00000078161  | 0.962802777  | 5.27E-07 |
| TUCP_004027 | XLOC_177527 | ENSRNOT00000021145  | 0.972308735  | 1.22E-07 |
| TUCP_004027 | XLOC_177527 | ENSRNOT00000020417  | 0.962669785  | 5.36E-07 |
| TUCP_004027 | XLOC_177527 | ENSRNOT00000003600  | 0.952463467  | 1.76E-06 |
| TUCP_004027 | XLOC_177527 | ENSRNOT00000003605  | 0.959865976  | 7.67E-07 |
| TUCP_004027 | XLOC_177527 | ENSRNOT00000019886  | -0.960348792 | 7.22E-07 |
| TUCP_004027 | XLOC_177527 | ENSRNOT000000082151 | 0.970132675  | 1.78E-07 |
| TUCP_004027 | XLOC_177527 | ENSRNOT00000011572  | 0.97551263   | 6.66E-08 |
| TUCP_004027 | XLOC_177527 | ENSRNOT00000001607  | -0.982542226 | 1.24E-08 |
| TUCP_004027 | XLOC_177527 | ENSRNOT00000012635  | 0.951766     | 1.90E-06 |
| TUCP_004027 | XLOC_177527 | ENSRNOT00000033324  | -0.954041918 | 1.49E-06 |
| TUCP_004027 | XLOC_177527 | ENSRNOT00000090162  | 0.951308502  | 1.99E-06 |
| TUCP_004027 | XLOC_177527 | ENSRNOT00000039186  | 0.954149387  | 1.48E-06 |
| TUCP_004027 | XLOC_177527 | ENSRNOT00000051554  | 0.951038975  | 2.04E-06 |
| TUCP_004027 | XLOC_177527 | ENSRNOT00000040629  | -0.958040747 | 9.54E-07 |
| TUCP_004027 | XLOC_177527 | ENSRNOT00000077579  | 0.962259921  | 5.66E-07 |
| TUCP_004027 | XLOC_177527 | ENSRNOT00000085971  | 0.978181307  | 3.75E-08 |
| TUCP_004027 | XLOC_177527 | ENSRNOT00000086847  | 0.950029981  | 2.26E-06 |
| TUCP_004027 | XLOC_177527 | ENSRNOT00000020663  | 0.978354926  | 3.61E-08 |
| TUCP_004027 | XLOC_177527 | ENSRNOT00000007771  | 0.964883746  | 3.96E-07 |
| TUCP_004027 | XLOC_177527 | ENSRNOT00000022142  | -0.968660645 | 2.26E-07 |
| TUCP_004027 | XLOC_177527 | ENSRNOT00000076300  | 0.973986122  | 8.98E-08 |
| TUCP_004027 | XLOC_177527 | ENSRNOT00000028885  | 0.971850252  | 1.33E-07 |
| TUCP_004027 | XLOC_177527 | ENSRNOT00000015537  | -0.965055743 | 3.87E-07 |
| TUCP_004027 | XLOC_177527 | ENSRNOT00000052120  | -0.951757397 | 1.90E-06 |
| TUCP_004027 | XLOC_177527 | ENSRNOT00000078306  | -0.952966185 | 1.67E-06 |
| TUCP_004027 | XLOC_177527 | ENSRNOT00000019820  | -0.962492235 | 5.49E-07 |
| TUCP_004027 | XLOC_177527 | ENSRNOT00000015946  | 0.981987948  | 1.45E-08 |
| TUCP_004027 | XLOC_177527 | ENSRNOT00000023965  | 0.964199075  | 4.36E-07 |
| TUCP_004027 | XLOC_177527 | ENSRNOT00000001234  | 0.967398457  | 2.75E-07 |
| TUCP_004027 | XLOC_177527 | ENSRNOT00000023962  | 0.962770664  | 5.29E-07 |
| TUCP_004027 | XLOC_177527 | ENSRNOT00000002410  | -0.952749028 | 1.71E-06 |
| TUCP_004027 | XLOC_177527 | ENSRNOT00000004319  | 0.971268372  | 1.47E-07 |
| TUCP_004027 | XLOC_177527 | ENSRNOT00000022864  | 0.950410534  | 2.17E-06 |
| TUCP_004027 | XLOC_177527 | ENSRNOT00000025819  | 0.968340467  | 2.38E-07 |
| TUCP_004027 | XLOC_177527 | ENSRNOT00000015318  | 0.961106136  | 6.57E-07 |
| TUCP_004027 | XLOC_177527 | ENSRNOT00000045532  | 0.971535131  | 1.40E-07 |
| TUCP_004027 | XLOC_177527 | ENSRNOT00000025887  | 0.986901009  | 2.97E-09 |
| TUCP_004027 | XLOC_177527 | ENSRNOT00000066211  | 0.9541779    | 1.47E-06 |
| TUCP_004027 | XLOC_177527 | ENSRNOT00000078862  | -0.960425187 | 7.15E-07 |
| TUCP_004027 | XLOC_177527 | ENSRNOT00000003940  | 0.963081562  | 5.08E-07 |
| TUCP_004027 | XLOC_177527 | ENSRNOT00000005257  | -0.959500574 | 8.02E-07 |
| TUCP_004027 | XLOC_177527 | ENSRNOT00000039296  | -0.963771925 | 4.62E-07 |
| TUCP_004027 | XLOC_177527 | ENSRNOT00000059599  | 0.960032352  | 7.51E-07 |
| TUCP_004027 | XLOC_177527 | ENSRNOT00000039291  | 0.954250132  | 1.46E-06 |

|             |             |                     |              |          |
|-------------|-------------|---------------------|--------------|----------|
| TUCP_004027 | XLOC_177527 | ENSRNOT0000005958   | -0.950300749 | 2.20E-06 |
| TUCP_004027 | XLOC_177527 | ENSRNOT00000039551  | 0.966345682  | 3.21E-07 |
| TUCP_004027 | XLOC_177527 | ENSRNOT00000082999  | 0.975750208  | 6.34E-08 |
| TUCP_004027 | XLOC_177527 | ENSRNOT00000082998  | -0.956812991 | 1.10E-06 |
| TUCP_004027 | XLOC_177527 | ENSRNOT00000087386  | 0.950587275  | 2.13E-06 |
| TUCP_004027 | XLOC_177527 | ENSRNOT00000050795  | -0.953488621 | 1.59E-06 |
| TUCP_004027 | XLOC_177527 | ENSRNOT00000083573  | 0.9764434    | 5.49E-08 |
| TUCP_004027 | XLOC_177527 | ENSRNOT00000083578  | -0.961258959 | 6.44E-07 |
| TUCP_004027 | XLOC_177527 | ENSRNOT00000066204  | 0.973171839  | 1.05E-07 |
| TUCP_004027 | XLOC_177527 | ENSRNOT00000016386  | 0.951024322  | 2.04E-06 |
| TUCP_004027 | XLOC_177527 | ENSRNOT00000023638  | -0.961269535 | 6.43E-07 |
| TUCP_004027 | XLOC_177527 | ENSRNOT00000059524  | 0.982309388  | 1.32E-08 |
| TUCP_004027 | XLOC_177527 | ENSRNOT00000050721  | 0.959378289  | 8.14E-07 |
| TUCP_004027 | XLOC_177527 | ENSRNOT00000017362  | 0.980754415  | 2.01E-08 |
| TUCP_004027 | XLOC_177527 | ENSRNOT00000005658  | 0.961221244  | 6.47E-07 |
| TUCP_004027 | XLOC_177527 | ENSRNOT00000090342  | -0.962075569 | 5.80E-07 |
| TUCP_004027 | XLOC_177527 | ENSRNOT00000074023  | -0.9667208   | 3.04E-07 |
| TUCP_004027 | XLOC_177527 | ENSRNOT00000019465  | 0.976531749  | 5.39E-08 |
| TUCP_004027 | XLOC_177527 | ENSRNOT00000009073  | 0.958878006  | 8.64E-07 |
| TUCP_004027 | XLOC_177527 | ENSRNOT00000024712  | 0.958560719  | 8.98E-07 |
| TUCP_004027 | XLOC_177527 | ENSRNOT00000067170  | 0.981766839  | 1.54E-08 |
| TUCP_004027 | XLOC_177527 | ENSRNOT000000091128 | 0.963978183  | 4.50E-07 |
| TUCP_004027 | XLOC_177527 | ENSRNOT00000001586  | 0.97501444   | 7.35E-08 |
| TUCP_004027 | XLOC_177527 | ENSRNOT00000001468  | 0.956338536  | 1.16E-06 |
| TUCP_004027 | XLOC_177527 | ENSRNOT00000007223  | 0.951197969  | 2.01E-06 |
| TUCP_004027 | XLOC_177527 | ENSRNOT00000028405  | 0.958263723  | 9.30E-07 |
| TUCP_004027 | XLOC_177527 | ENSRNOT00000013695  | 0.973593905  | 9.67E-08 |
| TUCP_004027 | XLOC_177527 | ENSRNOT00000016541  | 0.952437686  | 1.77E-06 |
| TUCP_004027 | XLOC_177527 | ENSRNOT000000081621 | -0.961208708 | 6.48E-07 |
| TUCP_004027 | XLOC_177527 | ENSRNOT00000006050  | 0.966213774  | 3.28E-07 |
| TUCP_004027 | XLOC_177527 | ENSRNOT00000009000  | 0.969221058  | 2.07E-07 |
| TUCP_004027 | XLOC_177527 | ENSRNOT00000012114  | 0.962586737  | 5.42E-07 |
| TUCP_004027 | XLOC_177527 | ENSRNOT00000017949  | 0.959690885  | 7.83E-07 |
| TUCP_004027 | XLOC_177527 | ENSRNOT00000085403  | -0.954767072 | 1.38E-06 |
| TUCP_004027 | XLOC_177527 | ENSRNOT00000089545  | 0.975301519  | 6.94E-08 |
| TUCP_004027 | XLOC_177527 | ENSRNOT00000087346  | -0.958118873 | 9.46E-07 |
| TUCP_004027 | XLOC_177527 | ENSRNOT00000079185  | 0.954002744  | 1.50E-06 |
| TUCP_004027 | XLOC_177527 | ENSRNOT00000077908  | -0.962699288 | 5.34E-07 |
| TUCP_004027 | XLOC_177527 | ENSRNOT00000083876  | 0.962565907  | 5.44E-07 |
| TUCP_004027 | XLOC_177527 | ENSRNOT00000065673  | 0.959403242  | 8.11E-07 |
| TUCP_004027 | XLOC_177527 | ENSRNOT00000026718  | -0.956990951 | 1.08E-06 |
| TUCP_004027 | XLOC_177527 | ENSRNOT00000084012  | -0.953174279 | 1.64E-06 |
| TUCP_004027 | XLOC_177527 | ENSRNOT00000033677  | 0.966215253  | 3.28E-07 |
| TUCP_004027 | XLOC_177527 | ENSRNOT00000016330  | 0.983323861  | 9.88E-09 |
| TUCP_004027 | XLOC_177527 | ENSRNOT00000019121  | 0.953966389  | 1.51E-06 |
| TUCP_004027 | XLOC_177527 | ENSRNOT00000011499  | 0.97671238   | 5.19E-08 |
| TUCP_004027 | XLOC_177527 | ENSRNOT00000016389  | 0.973153421  | 1.05E-07 |
| TUCP_004027 | XLOC_177527 | ENSRNOT00000074847  | 0.951262526  | 2.00E-06 |
| TUCP_004027 | XLOC_177527 | ENSRNOT00000064679  | 0.954303943  | 1.45E-06 |
| TUCP_004027 | XLOC_177527 | ENSRNOT00000032301  | 0.950767538  | 2.10E-06 |
| TUCP_004027 | XLOC_177527 | ENSRNOT00000016428  | -0.958992494 | 8.52E-07 |

|             |             |                    |              |          |
|-------------|-------------|--------------------|--------------|----------|
| TUCP_004027 | XLOC_177527 | ENSRNOT00000021030 | 0.985467211  | 4.98E-09 |
| TUCP_004027 | XLOC_177527 | ENSRNOT00000077727 | 0.967418777  | 2.74E-07 |
| TUCP_004027 | XLOC_177527 | ENSRNOT00000070794 | 0.953729607  | 1.55E-06 |
| TUCP_004027 | XLOC_177527 | ENSRNOT00000011930 | -0.96172036  | 6.07E-07 |
| TUCP_004027 | XLOC_177527 | ENSRNOT00000044346 | 0.963064939  | 5.09E-07 |
| TUCP_004027 | XLOC_177527 | ENSRNOT00000020932 | 0.958459859  | 9.08E-07 |
| TUCP_004027 | XLOC_177527 | ENSRNOT00000073492 | 0.96587848   | 3.44E-07 |
| TUCP_004027 | XLOC_177527 | ENSRNOT0000000203  | 0.952703874  | 1.72E-06 |
| TUCP_004027 | XLOC_177527 | ENSRNOT00000042633 | 0.961849156  | 5.97E-07 |
| TUCP_004027 | XLOC_177527 | ENSRNOT0000000206  | 0.970139055  | 1.78E-07 |
| TUCP_004027 | XLOC_177527 | ENSRNOT00000091864 | 0.977046486  | 4.83E-08 |
| TUCP_004027 | XLOC_177527 | ENSRNOT0000001081  | -0.961575714 | 6.18E-07 |
| TUCP_004027 | XLOC_177527 | ENSRNOT00000051843 | 0.958588     | 8.95E-07 |
| TUCP_004027 | XLOC_177527 | ENSRNOT00000003544 | 0.969959871  | 1.83E-07 |
| TUCP_004027 | XLOC_177527 | ENSRNOT00000086119 | 0.974163282  | 8.68E-08 |
| TUCP_004027 | XLOC_177527 | ENSRNOT00000003540 | 0.972560474  | 1.17E-07 |
| TUCP_004027 | XLOC_177527 | ENSRNOT00000022190 | 0.960020739  | 7.52E-07 |
| TUCP_004027 | XLOC_177527 | ENSRNOT00000067739 | 0.96343095   | 4.84E-07 |
| TUCP_004027 | XLOC_177527 | ENSRNOT00000019386 | 0.9839174    | 8.25E-09 |
| TUCP_004027 | XLOC_177527 | ENSRNOT00000077220 | 0.951260835  | 2.00E-06 |
| TUCP_004027 | XLOC_177527 | ENSRNOT00000025916 | 0.95771765   | 9.91E-07 |
| TUCP_004027 | XLOC_177527 | ENSRNOT00000065983 | -0.951742881 | 1.90E-06 |
| TUCP_004027 | XLOC_177527 | ENSRNOT00000030782 | 0.967425478  | 2.73E-07 |
| TUCP_004027 | XLOC_177527 | ENSRNOT00000007736 | 0.963439515  | 4.84E-07 |
| TUCP_004027 | XLOC_177527 | ENSRNOT00000021636 | 0.950454224  | 2.16E-06 |
| TUCP_004027 | XLOC_177527 | ENSRNOT00000036658 | 0.963488766  | 4.81E-07 |
| TUCP_004027 | XLOC_177527 | ENSRNOT00000073910 | 0.955170512  | 1.32E-06 |
| TUCP_004027 | XLOC_177527 | ENSRNOT00000007738 | 0.957775732  | 9.85E-07 |
| TUCP_004027 | XLOC_177527 | ENSRNOT00000022107 | 0.951882848  | 1.87E-06 |
| TUCP_004027 | XLOC_177527 | ENSRNOT00000052422 | -0.969152646 | 2.09E-07 |
| TUCP_004027 | XLOC_177527 | ENSRNOT0000002645  | 0.957503337  | 1.02E-06 |
| TUCP_004027 | XLOC_177527 | ENSRNOT00000034883 | 0.95017241   | 2.22E-06 |
| TUCP_004027 | XLOC_177527 | ENSRNOT00000020155 | -0.953932898 | 1.51E-06 |
| TUCP_004027 | XLOC_177527 | ENSRNOT00000072357 | 0.957252082  | 1.05E-06 |
| TUCP_004027 | XLOC_177527 | ENSRNOT00000039593 | 0.960331634  | 7.24E-07 |
| TUCP_004027 | XLOC_177527 | ENSRNOT00000000707 | 0.959131987  | 8.38E-07 |
| TUCP_004027 | XLOC_177527 | ENSRNOT00000022676 | 0.964136475  | 4.40E-07 |
| TUCP_004027 | XLOC_177527 | ENSRNOT00000025913 | 0.964234385  | 4.34E-07 |
| TUCP_004027 | XLOC_177527 | ENSRNOT00000005910 | 0.953614935  | 1.56E-06 |
| TUCP_004027 | XLOC_177527 | ENSRNOT00000086608 | 0.970897104  | 1.57E-07 |
| TUCP_004027 | XLOC_177527 | ENSRNOT00000090987 | 0.971217632  | 1.48E-07 |
| TUCP_004027 | XLOC_177527 | ENSRNOT00000029701 | -0.950214577 | 2.22E-06 |
| TUCP_004027 | XLOC_177527 | ENSRNOT00000014585 | 0.962376055  | 5.57E-07 |
| TUCP_004027 | XLOC_177527 | ENSRNOT00000003691 | 0.974927566  | 7.48E-08 |
| TUCP_004027 | XLOC_177527 | ENSRNOT00000033048 | 0.957374059  | 1.03E-06 |
| TUCP_004027 | XLOC_177527 | ENSRNOT00000089879 | 0.962306062  | 5.63E-07 |
| TUCP_004027 | XLOC_177527 | ENSRNOT00000083351 | 0.952646154  | 1.73E-06 |
| TUCP_004027 | XLOC_177527 | ENSRNOT00000080222 | 0.963088145  | 5.07E-07 |
| TUCP_004027 | XLOC_177527 | ENSRNOT00000030329 | 0.968354128  | 2.37E-07 |
| TUCP_004027 | XLOC_177527 | ENSRNOT00000033450 | 0.958984328  | 8.53E-07 |
| TUCP_004027 | XLOC_177527 | ENSRNOT00000028057 | -0.953950065 | 1.51E-06 |

|             |             |                    |              |          |
|-------------|-------------|--------------------|--------------|----------|
| TUCP_004027 | XLOC_177527 | ENSRNOT00000027125 | 0.954178454  | 1.47E-06 |
| TUCP_004027 | XLOC_177527 | ENSRNOT00000016758 | 0.953021679  | 1.67E-06 |
| TUCP_004027 | XLOC_177527 | ENSRNOT00000023078 | -0.950351946 | 2.19E-06 |
| TUCP_004027 | XLOC_177527 | ENSRNOT00000004999 | -0.964250881 | 4.33E-07 |
| TUCP_004027 | XLOC_177527 | ENSRNOT00000009122 | -0.957917348 | 9.68E-07 |
| TUCP_004027 | XLOC_177527 | ENSRNOT00000013463 | -0.96482611  | 4.00E-07 |
| TUCP_004027 | XLOC_177527 | ENSRNOT00000039335 | 0.952270877  | 1.80E-06 |
| TUCP_004027 | XLOC_177527 | ENSRNOT00000054966 | 0.960237631  | 7.32E-07 |
| TUCP_004027 | XLOC_177527 | ENSRNOT00000047663 | 0.960079296  | 7.47E-07 |
| TUCP_004027 | XLOC_177527 | ENSRNOT00000061191 | 0.972981573  | 1.08E-07 |
| TUCP_004027 | XLOC_177527 | ENSRNOT00000005486 | 0.985381394  | 5.13E-09 |
| TUCP_004027 | XLOC_177527 | ENSRNOT00000017907 | 0.977087729  | 4.79E-08 |
| TUCP_004027 | XLOC_177527 | ENSRNOT00000025791 | 0.959036188  | 8.48E-07 |
| TUCP_004027 | XLOC_177527 | ENSRNOT00000028434 | 0.979008041  | 3.10E-08 |
| TUCP_004027 | XLOC_177527 | ENSRNOT00000025794 | 0.964321757  | 4.29E-07 |
| TUCP_004027 | XLOC_177527 | ENSRNOT00000058111 | 0.964670507  | 4.08E-07 |
| TUCP_004027 | XLOC_177527 | ENSRNOT00000050834 | 0.973995881  | 8.96E-08 |
| TUCP_004027 | XLOC_177527 | ENSRNOT00000054828 | -0.970043447 | 1.81E-07 |
| TUCP_004027 | XLOC_177527 | ENSRNOT00000089933 | -0.965775943 | 3.49E-07 |
| TUCP_004027 | XLOC_177527 | ENSRNOT00000009994 | 0.955075537  | 1.34E-06 |
| TUCP_004027 | XLOC_177527 | ENSRNOT00000002114 | 0.965961089  | 3.40E-07 |
| TUCP_004027 | XLOC_177527 | ENSRNOT00000002445 | 0.956806667  | 1.10E-06 |
| TUCP_004027 | XLOC_177527 | ENSRNOT00000009993 | 0.955488838  | 1.28E-06 |
| TUCP_004027 | XLOC_177527 | ENSRNOT00000027970 | -0.959374255 | 8.14E-07 |
| TUCP_004027 | XLOC_177527 | ENSRNOT00000005762 | 0.978294711  | 3.66E-08 |
| TUCP_004027 | XLOC_177527 | ENSRNOT00000027759 | 0.962843014  | 5.24E-07 |
| TUCP_004027 | XLOC_177527 | ENSRNOT00000021075 | 0.971620866  | 1.38E-07 |
| TUCP_004027 | XLOC_177527 | ENSRNOT00000000083 | 0.978757417  | 3.29E-08 |
| TUCP_004027 | XLOC_177527 | ENSRNOT00000018074 | 0.956003946  | 1.21E-06 |
| TUCP_004027 | XLOC_177527 | ENSRNOT00000014124 | -0.954154087 | 1.48E-06 |
| TUCP_004027 | XLOC_177527 | ENSRNOT00000000120 | -0.967665988 | 2.64E-07 |
| TUCP_004027 | XLOC_177527 | ENSRNOT00000028545 | 0.968028825  | 2.49E-07 |
| TUCP_004027 | XLOC_177527 | ENSRNOT00000027575 | 0.958398502  | 9.15E-07 |
| TUCP_004027 | XLOC_177527 | ENSRNOT00000028225 | -0.952516724 | 1.75E-06 |
| TUCP_004027 | XLOC_177527 | ENSRNOT00000066561 | 0.95022965   | 2.21E-06 |
| TUCP_004027 | XLOC_177527 | ENSRNOT00000019172 | 0.978560994  | 3.44E-08 |
| TUCP_004027 | XLOC_177527 | ENSRNOT00000049927 | 0.975782438  | 6.30E-08 |
| TUCP_004027 | XLOC_177527 | ENSRNOT00000068267 | 0.961849158  | 5.97E-07 |
| TUCP_004027 | XLOC_177527 | ENSRNOT00000020994 | 0.967708169  | 2.62E-07 |
| TUCP_004027 | XLOC_177527 | ENSRNOT00000019916 | 0.95273637   | 1.72E-06 |
| TUCP_004027 | XLOC_177527 | ENSRNOT00000019911 | 0.964449408  | 4.21E-07 |
| TUCP_004027 | XLOC_177527 | ENSRNOT00000040393 | -0.952571056 | 1.75E-06 |
| TUCP_004027 | XLOC_177527 | ENSRNOT00000067901 | 0.977978043  | 3.93E-08 |
| TUCP_004027 | XLOC_177527 | ENSRNOT00000064700 | -0.958965519 | 8.55E-07 |
| TUCP_004027 | XLOC_177527 | ENSRNOT00000036613 | 0.960431891  | 7.15E-07 |
| TUCP_004027 | XLOC_177527 | ENSRNOT00000045226 | 0.952027711  | 1.85E-06 |
| TUCP_004027 | XLOC_177527 | ENSRNOT00000074494 | 0.957632069  | 1.00E-06 |
| TUCP_004027 | XLOC_177527 | ENSRNOT00000011682 | 0.95110574   | 2.03E-06 |
| TUCP_004027 | XLOC_177527 | ENSRNOT00000022552 | 0.965566323  | 3.60E-07 |
| TUCP_004027 | XLOC_177527 | ENSRNOT00000036194 | 0.974548096  | 8.06E-08 |
| TUCP_004027 | XLOC_177527 | ENSRNOT00000000334 | 0.953043395  | 1.66E-06 |



|             |             |                     |              |          |
|-------------|-------------|---------------------|--------------|----------|
| TUCP_004027 | XLOC_177527 | ENSRNOT00000077186  | 0.951584386  | 1.93E-06 |
| TUCP_004027 | XLOC_177527 | ENSRNOT00000013914  | 0.961781379  | 6.02E-07 |
| TUCP_004027 | XLOC_177527 | ENSRNOT00000078070  | -0.968555825 | 2.30E-07 |
| TUCP_004027 | XLOC_177527 | ENSRNOT00000014780  | 0.957378069  | 1.03E-06 |
| TUCP_004027 | XLOC_177527 | ENSRNOT00000009645  | 0.96575654   | 3.50E-07 |
| TUCP_004027 | XLOC_177527 | ENSRNOT00000014373  | 0.964788782  | 4.02E-07 |
| TUCP_004027 | XLOC_177527 | ENSRNOT00000026279  | 0.985930808  | 4.24E-09 |
| TUCP_004027 | XLOC_177527 | ENSRNOT00000003085  | 0.951139381  | 2.02E-06 |
| TUCP_004027 | XLOC_177527 | ENSRNOT000000082508 | 0.980359007  | 2.23E-08 |
| TUCP_004027 | XLOC_177527 | ENSRNOT00000022259  | 0.9587994    | 8.72E-07 |
| TUCP_004027 | XLOC_177527 | ENSRNOT00000010728  | -0.953947053 | 1.51E-06 |
| TUCP_004027 | XLOC_177527 | ENSRNOT000000082863 | -0.968697843 | 2.25E-07 |
| TUCP_004027 | XLOC_177527 | ENSRNOT000000091698 | 0.953285147  | 1.62E-06 |
| TUCP_004027 | XLOC_177527 | ENSRNOT000000065942 | 0.963727652  | 4.65E-07 |
| TUCP_004027 | XLOC_177527 | ENSRNOT000000087011 | 0.956078274  | 1.20E-06 |
| TUCP_004027 | XLOC_177527 | ENSRNOT000000071166 | -0.965234598 | 3.77E-07 |
| TUCP_004027 | XLOC_177527 | ENSRNOT000000052063 | -0.951664401 | 1.92E-06 |
| TUCP_004027 | XLOC_177527 | ENSRNOT000000074389 | 0.975395011  | 6.82E-08 |
| TUCP_004027 | XLOC_177527 | ENSRNOT000000078872 | 0.961029138  | 6.63E-07 |
| TUCP_004027 | XLOC_177527 | ENSRNOT00000018173  | 0.968515328  | 2.31E-07 |
| TUCP_004027 | XLOC_177527 | ENSRNOT000000091596 | 0.950675221  | 2.12E-06 |
| TUCP_004027 | XLOC_177527 | ENSRNOT000000039836 | 0.95280133   | 1.70E-06 |
| TUCP_004027 | XLOC_177527 | ENSRNOT000000076105 | 0.951331553  | 1.98E-06 |
| TUCP_004027 | XLOC_177527 | ENSRNOT000000003012 | 0.972325823  | 1.22E-07 |
| TUCP_004027 | XLOC_177527 | ENSRNOT000000073564 | 0.966629009  | 3.08E-07 |
| TUCP_004027 | XLOC_177527 | ENSRNOT000000015170 | 0.954055024  | 1.49E-06 |
| TUCP_004027 | XLOC_177527 | ENSRNOT000000087604 | -0.95443543  | 1.43E-06 |
| TUCP_004027 | XLOC_177527 | ENSRNOT000000039177 | 0.969571179  | 1.95E-07 |
| TUCP_004027 | XLOC_177527 | ENSRNOT000000005620 | 0.968445059  | 2.34E-07 |
| TUCP_004027 | XLOC_177527 | ENSRNOT00000014384  | 0.960639361  | 6.96E-07 |
| TUCP_004027 | XLOC_177527 | ENSRNOT00000002837  | 0.969343314  | 2.03E-07 |
| TUCP_004027 | XLOC_177527 | ENSRNOT000000090420 | 0.954916111  | 1.36E-06 |
| TUCP_004027 | XLOC_177527 | ENSRNOT00000000477  | 0.969831888  | 1.87E-07 |
| TUCP_004027 | XLOC_177527 | ENSRNOT00000012881  | 0.967123664  | 2.86E-07 |
| TUCP_004027 | XLOC_177527 | ENSRNOT000000035628 | 0.983260854  | 1.01E-08 |
| TUCP_004027 | XLOC_177527 | ENSRNOT00000000577  | -0.97040561  | 1.70E-07 |
| TUCP_004027 | XLOC_177527 | ENSRNOT000000071239 | 0.954764572  | 1.38E-06 |
| TUCP_004027 | XLOC_177527 | ENSRNOT000000075424 | -0.953724967 | 1.55E-06 |
| TUCP_004027 | XLOC_177527 | ENSRNOT000000088133 | 0.967123484  | 2.86E-07 |
| TUCP_004027 | XLOC_177527 | ENSRNOT000000063917 | 0.968225614  | 2.42E-07 |
| TUCP_004027 | XLOC_177527 | ENSRNOT000000080797 | 0.950236903  | 2.21E-06 |
| TUCP_004027 | XLOC_177527 | ENSRNOT000000037039 | 0.980047284  | 2.41E-08 |
| TUCP_004027 | XLOC_177527 | ENSRNOT000000075209 | 0.951423164  | 1.96E-06 |
| TUCP_004027 | XLOC_177527 | ENSRNOT00000001979  | 0.969217295  | 2.07E-07 |
| TUCP_004027 | XLOC_177527 | ENSRNOT000000003714 | -0.955142697 | 1.33E-06 |
| TUCP_004027 | XLOC_177527 | ENSRNOT000000003715 | 0.968945493  | 2.16E-07 |
| TUCP_004027 | XLOC_177527 | ENSRNOT000000083968 | 0.968289943  | 2.39E-07 |
| TUCP_004027 | XLOC_177527 | ENSRNOT000000037133 | -0.951005395 | 2.05E-06 |
| TUCP_004027 | XLOC_177527 | ENSRNOT000000083964 | 0.969696458  | 1.91E-07 |
| TUCP_004027 | XLOC_177527 | ENSRNOT000000075452 | -0.951879485 | 1.87E-06 |
| TUCP_004027 | XLOC_177527 | ENSRNOT00000026726  | 0.961616904  | 6.15E-07 |

|             |             |                     |              |          |
|-------------|-------------|---------------------|--------------|----------|
| TUCP_004027 | XLOC_177527 | ENSRNOT00000029996  | 0.960394783  | 7.18E-07 |
| TUCP_004027 | XLOC_177527 | ENSRNOT00000081688  | 0.96093238   | 6.71E-07 |
| TUCP_004027 | XLOC_177527 | ENSRNOT00000061304  | 0.979950985  | 2.47E-08 |
| TUCP_004027 | XLOC_177527 | ENSRNOT00000032363  | -0.957031857 | 1.07E-06 |
| TUCP_004027 | XLOC_177527 | ENSRNOT00000016447  | 0.96037644   | 7.20E-07 |
| TUCP_004027 | XLOC_177527 | ENSRNOT00000019133  | -0.962935357 | 5.18E-07 |
| TUCP_004027 | XLOC_177527 | ENSRNOT00000078185  | 0.961389988  | 6.33E-07 |
| TUCP_004027 | XLOC_177527 | ENSRNOT0000002151   | 0.982359314  | 1.31E-08 |
| TUCP_004027 | XLOC_177527 | ENSRNOT0000001322   | 0.950795136  | 2.09E-06 |
| TUCP_004027 | XLOC_177527 | ENSRNOT00000006824  | 0.969103214  | 2.11E-07 |
| TUCP_004027 | XLOC_177527 | ENSRNOT00000012775  | 0.976006831  | 6.02E-08 |
| TUCP_004027 | XLOC_177527 | ENSRNOT00000082138  | 0.953994574  | 1.50E-06 |
| TUCP_004027 | XLOC_177527 | ENSRNOT00000000177  | 0.974488938  | 8.15E-08 |
| TUCP_004027 | XLOC_177527 | ENSRNOT00000018328  | 0.968919922  | 2.17E-07 |
| TUCP_004027 | XLOC_177527 | ENSRNOT00000061392  | -0.965580557 | 3.59E-07 |
| TUCP_004027 | XLOC_177527 | ENSRNOT00000008982  | -0.951666199 | 1.92E-06 |
| TUCP_004027 | XLOC_177527 | ENSRNOT00000010683  | 0.959631673  | 7.89E-07 |
| TUCP_004027 | XLOC_177527 | ENSRNOT00000050119  | 0.957725385  | 9.90E-07 |
| TUCP_004027 | XLOC_177527 | ENSRNOT00000090853  | 0.951041125  | 2.04E-06 |
| TUCP_004027 | XLOC_177527 | ENSRNOT00000036838  | 0.959517915  | 8.00E-07 |
| TUCP_004027 | XLOC_177527 | ENSRNOT000000031261 | -0.951290134 | 1.99E-06 |
| TUCP_004027 | XLOC_177527 | ENSRNOT00000067836  | 0.98114359   | 1.82E-08 |
| TUCP_004027 | XLOC_177527 | ENSRNOT00000019816  | 0.976003105  | 6.02E-08 |
| TUCP_004027 | XLOC_177527 | ENSRNOT00000073847  | 0.961596505  | 6.17E-07 |
| TUCP_004027 | XLOC_177527 | ENSRNOT00000015518  | 0.962816215  | 5.26E-07 |
| TUCP_004027 | XLOC_177527 | ENSRNOT00000011174  | 0.954732487  | 1.39E-06 |
| TUCP_004027 | XLOC_177527 | ENSRNOT00000056015  | 0.977431637  | 4.44E-08 |
| TUCP_004027 | XLOC_177527 | ENSRNOT00000015808  | 0.961801587  | 6.01E-07 |
| TUCP_004027 | XLOC_177527 | ENSRNOT00000033196  | 0.96281709   | 5.26E-07 |
| TUCP_004027 | XLOC_177527 | ENSRNOT00000055602  | 0.958773661  | 8.75E-07 |
| TUCP_004027 | XLOC_177527 | ENSRNOT00000068528  | 0.950108835  | 2.24E-06 |
| TUCP_004027 | XLOC_177527 | ENSRNOT00000026909  | 0.964127895  | 4.40E-07 |
| TUCP_004027 | XLOC_177527 | ENSRNOT00000068524  | 0.956254311  | 1.17E-06 |
| TUCP_004027 | XLOC_177527 | ENSRNOT00000039000  | 0.955684636  | 1.25E-06 |
| TUCP_004027 | XLOC_177527 | ENSRNOT00000010906  | 0.953817909  | 1.53E-06 |
| TUCP_004027 | XLOC_177527 | ENSRNOT00000018248  | 0.956304319  | 1.17E-06 |
| TUCP_004027 | XLOC_177527 | ENSRNOT00000030692  | 0.956568721  | 1.13E-06 |
| TUCP_004027 | XLOC_177527 | ENSRNOT00000000576  | 0.953884738  | 1.52E-06 |
| TUCP_004027 | XLOC_177527 | ENSRNOT00000019713  | 0.95824642   | 9.32E-07 |
| TUCP_004027 | XLOC_177527 | ENSRNOT00000021944  | -0.97580357  | 6.27E-08 |
| TUCP_004027 | XLOC_177527 | ENSRNOT00000023977  | 0.968112622  | 2.46E-07 |
| TUCP_004027 | XLOC_177527 | ENSRNOT00000083632  | 0.964383441  | 4.25E-07 |
| TUCP_004027 | XLOC_177527 | ENSRNOT00000000717  | 0.951352685  | 1.98E-06 |
| TUCP_004027 | XLOC_177527 | ENSRNOT00000049048  | 0.951787159  | 1.89E-06 |
| TUCP_004027 | XLOC_177527 | ENSRNOT00000017224  | 0.965503456  | 3.63E-07 |
| TUCP_004027 | XLOC_177527 | ENSRNOT00000049725  | 0.963044454  | 5.10E-07 |
| TUCP_004027 | XLOC_177527 | ENSRNOT00000089062  | -0.97544841  | 6.74E-08 |
| TUCP_004027 | XLOC_177527 | ENSRNOT00000002355  | 0.96148488   | 6.26E-07 |
| TUCP_004027 | XLOC_177527 | ENSRNOT00000010753  | 0.969433275  | 2.00E-07 |
| TUCP_004027 | XLOC_177527 | ENSRNOT00000026992  | 0.950892131  | 2.07E-06 |
| TUCP_004027 | XLOC_177527 | ENSRNOT00000023763  | 0.971689442  | 1.37E-07 |

|             |             |                    |              |          |
|-------------|-------------|--------------------|--------------|----------|
| TUCP_004027 | XLOC_177527 | ENSRNOT00000058842 | -0.955259346 | 1.31E-06 |
| TUCP_004027 | XLOC_177527 | ENSRNOT00000028893 | 0.962822693  | 5.25E-07 |
| TUCP_004027 | XLOC_177527 | ENSRNOT00000023383 | 0.952326295  | 1.79E-06 |
| TUCP_004027 | XLOC_177527 | ENSRNOT00000077231 | -0.966719053 | 3.04E-07 |
| TUCP_004027 | XLOC_177527 | ENSRNOT00000059181 | -0.964965235 | 3.92E-07 |
| TUCP_004027 | XLOC_177527 | ENSRNOT00000020702 | 0.957928388  | 9.67E-07 |
| TUCP_004027 | XLOC_177527 | ENSRNOT00000007079 | 0.967692983  | 2.63E-07 |
| TUCP_004027 | XLOC_177527 | ENSRNOT00000003690 | -0.953320149 | 1.61E-06 |
| TUCP_004027 | XLOC_177527 | ENSRNOT00000004878 | 0.952239686  | 1.81E-06 |
| TUCP_004027 | XLOC_177527 | ENSRNOT00000014809 | 0.954493737  | 1.42E-06 |
| TUCP_004027 | XLOC_177527 | ENSRNOT00000064849 | 0.951630373  | 1.92E-06 |
| TUCP_004027 | XLOC_177527 | ENSRNOT00000004972 | -0.950199048 | 2.22E-06 |
| TUCP_004027 | XLOC_177527 | ENSRNOT00000036931 | 0.966670941  | 3.06E-07 |
| TUCP_004027 | XLOC_177527 | ENSRNOT00000008901 | 0.978589988  | 3.42E-08 |
| TUCP_004027 | XLOC_177527 | ENSRNOT00000072007 | 0.955685089  | 1.25E-06 |
| TUCP_004027 | XLOC_177527 | ENSRNOT00000023543 | 0.9544586    | 1.43E-06 |
| TUCP_004027 | XLOC_177527 | ENSRNOT00000023017 | 0.967357387  | 2.76E-07 |
| TUCP_004027 | XLOC_177527 | ENSRNOT00000080608 | -0.976297313 | 5.66E-08 |
| TUCP_004027 | XLOC_177527 | ENSRNOT00000008757 | -0.952094157 | 1.83E-06 |
| TUCP_004027 | XLOC_177527 | ENSRNOT00000005478 | 0.956303852  | 1.17E-06 |
| TUCP_004027 | XLOC_177527 | ENSRNOT00000061166 | 0.951431442  | 1.96E-06 |
| TUCP_004027 | XLOC_177527 | ENSRNOT00000055386 | -0.972021339 | 1.29E-07 |
| TUCP_004027 | XLOC_177527 | ENSRNOT00000038212 | 0.959380602  | 8.13E-07 |
| TUCP_004027 | XLOC_177527 | ENSRNOT00000000013 | -0.950867854 | 2.08E-06 |
| TUCP_004027 | XLOC_177527 | ENSRNOT00000085519 | -0.965625211 | 3.57E-07 |
| TUCP_004027 | XLOC_177527 | ENSRNOT00000042125 | -0.971957875 | 1.30E-07 |
| TUCP_004027 | XLOC_177527 | ENSRNOT00000025784 | 0.967200515  | 2.83E-07 |
| TUCP_004027 | XLOC_177527 | ENSRNOT00000007824 | 0.960752379  | 6.87E-07 |
| TUCP_004027 | XLOC_177527 | ENSRNOT00000026760 | 0.966796667  | 3.01E-07 |
| TUCP_004027 | XLOC_177527 | ENSRNOT00000017687 | 0.976079783  | 5.92E-08 |
| TUCP_004027 | XLOC_177527 | ENSRNOT00000024491 | 0.982071683  | 1.42E-08 |
| TUCP_004027 | XLOC_177527 | ENSRNOT00000084597 | 0.955207639  | 1.32E-06 |
| TUCP_004027 | XLOC_177527 | ENSRNOT00000063821 | 0.958562224  | 8.97E-07 |
| TUCP_004027 | XLOC_177527 | ENSRNOT00000037588 | 0.970994289  | 1.54E-07 |
| TUCP_004027 | XLOC_177527 | ENSRNOT00000027360 | 0.966302945  | 3.23E-07 |
| TUCP_004027 | XLOC_177527 | ENSRNOT00000024947 | 0.973781479  | 9.34E-08 |
| TUCP_004027 | XLOC_177527 | ENSRNOT00000027967 | -0.955718369 | 1.24E-06 |
| TUCP_004027 | XLOC_177527 | ENSRNOT00000003207 | 0.956199852  | 1.18E-06 |
| TUCP_004027 | XLOC_177527 | ENSRNOT0000002052  | 0.965637306  | 3.56E-07 |
| TUCP_004027 | XLOC_177527 | ENSRNOT00000044486 | 0.975417408  | 6.78E-08 |
| TUCP_004027 | XLOC_177527 | ENSRNOT00000047210 | -0.954093401 | 1.49E-06 |
| TUCP_004027 | XLOC_177527 | ENSRNOT00000079414 | 0.961141549  | 6.54E-07 |
| TUCP_004027 | XLOC_177527 | ENSRNOT00000079002 | 0.983483665  | 9.42E-09 |
| TUCP_004027 | XLOC_177527 | ENSRNOT00000024016 | 0.96522411   | 3.78E-07 |
| TUCP_004027 | XLOC_177527 | ENSRNOT00000000134 | 0.967175268  | 2.84E-07 |
| TUCP_004027 | XLOC_177527 | ENSRNOT00000005885 | 0.956499933  | 1.14E-06 |
| TUCP_004027 | XLOC_177527 | ENSRNOT00000011326 | 0.954912705  | 1.36E-06 |
| TUCP_004027 | XLOC_177527 | ENSRNOT00000079996 | -0.955922172 | 1.22E-06 |
| TUCP_000406 | XLOC_013713 | ENSRNOT00000010381 | 0.959281971  | 8.23E-07 |
| TUCP_000406 | XLOC_013713 | ENSRNOT00000023302 | 0.958849713  | 8.67E-07 |
| TUCP_000406 | XLOC_013713 | ENSRNOT00000075992 | -0.950440345 | 2.17E-06 |

|             |             |                     |              |          |
|-------------|-------------|---------------------|--------------|----------|
| TUCP_000406 | XLOC_013713 | ENSRNOT00000037363  | -0.950768765 | 2.10E-06 |
| TUCP_004025 | XLOC_177329 | ENSRNOT00000081085  | 0.961942986  | 5.90E-07 |
| TUCP_004025 | XLOC_177329 | ENSRNOT00000029634  | 0.950685899  | 2.11E-06 |
| TUCP_000408 | XLOC_013744 | ENSRNOT00000025981  | 0.960137328  | 7.41E-07 |
| TUCP_000408 | XLOC_013744 | ENSRNOT00000010992  | 0.956800245  | 1.10E-06 |
| TUCP_000408 | XLOC_013744 | ENSRNOT00000068405  | 0.965002141  | 3.90E-07 |
| TUCP_000408 | XLOC_013744 | ENSRNOT00000005684  | 0.955579624  | 1.26E-06 |
| TUCP_000408 | XLOC_013744 | ENSRNOT00000049810  | 0.952572871  | 1.74E-06 |
| TUCP_000408 | XLOC_013744 | ENSRNOT00000015203  | 0.955174969  | 1.32E-06 |
| TUCP_000408 | XLOC_013744 | ENSRNOT00000004508  | 0.959326071  | 8.19E-07 |
| TUCP_000408 | XLOC_013744 | ENSRNOT00000015929  | 0.96567312   | 3.54E-07 |
| TUCP_000408 | XLOC_013744 | ENSRNOT00000022271  | 0.951222     | 2.00E-06 |
| TUCP_000408 | XLOC_013744 | ENSRNOT00000021592  | 0.952879691  | 1.69E-06 |
| TUCP_000408 | XLOC_013744 | ENSRNOT00000017349  | 0.956062928  | 1.20E-06 |
| TUCP_000408 | XLOC_013744 | ENSRNOT00000003779  | 0.97679417   | 5.10E-08 |
| TUCP_000408 | XLOC_013744 | ENSRNOT00000021132  | 0.980891301  | 1.94E-08 |
| TUCP_000408 | XLOC_013744 | ENSRNOT00000058852  | -0.950706188 | 2.11E-06 |
| TUCP_000408 | XLOC_013744 | ENSRNOT000000054674 | 0.964405749  | 4.24E-07 |
| TUCP_000408 | XLOC_013744 | ENSRNOT00000028540  | 0.952497411  | 1.76E-06 |
| TUCP_000408 | XLOC_013744 | ENSRNOT00000044896  | 0.951350798  | 1.98E-06 |
| TUCP_000408 | XLOC_013744 | ENSRNOT00000090886  | 0.972372595  | 1.21E-07 |
| TUCP_000408 | XLOC_013744 | ENSRNOT00000024232  | 0.957718127  | 9.91E-07 |
| TUCP_000408 | XLOC_013744 | ENSRNOT00000028155  | 0.95860244   | 8.93E-07 |
| TUCP_000408 | XLOC_013744 | ENSRNOT00000024942  | 0.95481693   | 1.37E-06 |
| TUCP_000408 | XLOC_013744 | ENSRNOT00000026367  | 0.953912017  | 1.52E-06 |
| TUCP_000408 | XLOC_013744 | ENSRNOT00000023696  | 0.959505144  | 8.01E-07 |
| TUCP_000408 | XLOC_013744 | ENSRNOT00000034146  | 0.955064441  | 1.34E-06 |
| TUCP_000408 | XLOC_013744 | ENSRNOT00000035580  | 0.968133368  | 2.45E-07 |
| TUCP_000408 | XLOC_013744 | ENSRNOT00000024639  | 0.968297807  | 2.39E-07 |
| TUCP_000409 | XLOC_013774 | ENSRNOT000000086349 | 0.950434828  | 2.17E-06 |
| TUCP_000409 | XLOC_013774 | ENSRNOT00000068389  | 0.957784564  | 9.84E-07 |
| TUCP_000409 | XLOC_013774 | ENSRNOT00000038580  | 0.962746044  | 5.31E-07 |
| TUCP_004028 | XLOC_177541 | ENSRNOT00000047105  | 0.953540413  | 1.58E-06 |
| TUCP_004028 | XLOC_177541 | ENSRNOT00000059854  | -0.95971251  | 7.81E-07 |
| TUCP_004028 | XLOC_177541 | ENSRNOT00000020297  | 0.957203385  | 1.05E-06 |
| TUCP_004028 | XLOC_177541 | ENSRNOT00000006188  | -0.962076874 | 5.80E-07 |
| TUCP_004028 | XLOC_177541 | ENSRNOT00000001597  | -0.957149101 | 1.06E-06 |
| TUCP_004028 | XLOC_177541 | ENSRNOT00000026941  | 0.957900696  | 9.70E-07 |
| TUCP_004028 | XLOC_177541 | ENSRNOT00000011237  | -0.954218857 | 1.47E-06 |
| TUCP_004028 | XLOC_177541 | ENSRNOT00000032926  | -0.954839208 | 1.37E-06 |
| TUCP_004028 | XLOC_177541 | ENSRNOT00000031904  | 0.9514567    | 1.96E-06 |
| TUCP_004028 | XLOC_177541 | ENSRNOT00000004241  | -0.976034034 | 5.98E-08 |
| TUCP_004028 | XLOC_177541 | ENSRNOT00000013341  | -0.953397899 | 1.60E-06 |
| TUCP_004028 | XLOC_177541 | ENSRNOT00000068353  | 0.961588396  | 6.17E-07 |
| TUCP_004028 | XLOC_177541 | ENSRNOT00000020197  | -0.958974277 | 8.54E-07 |
| TUCP_004028 | XLOC_177541 | ENSRNOT00000007698  | -0.955975175 | 1.21E-06 |
| TUCP_004028 | XLOC_177541 | ENSRNOT00000049349  | 0.95015703   | 2.23E-06 |
| TUCP_004028 | XLOC_177541 | ENSRNOT00000041237  | -0.954344789 | 1.45E-06 |
| TUCP_004028 | XLOC_177541 | ENSRNOT00000005220  | 0.952117408  | 1.83E-06 |
| TUCP_004028 | XLOC_177541 | ENSRNOT00000023144  | 0.964524784  | 4.17E-07 |
| TUCP_004028 | XLOC_177541 | ENSRNOT00000007028  | -0.963743481 | 4.64E-07 |

|             |             |                    |              |          |
|-------------|-------------|--------------------|--------------|----------|
| TUCP_004028 | XLOC_177541 | ENSRNOT00000086706 | 0.957385503  | 1.03E-06 |
| TUCP_004028 | XLOC_177541 | ENSRNOT00000071166 | 0.963914413  | 4.54E-07 |
| TUCP_004028 | XLOC_177541 | ENSRNOT00000016649 | 0.951548955  | 1.94E-06 |
| TUCP_004028 | XLOC_177541 | ENSRNOT00000088555 | -0.954982014 | 1.35E-06 |
| TUCP_004028 | XLOC_177541 | ENSRNOT00000010030 | -0.969247497 | 2.06E-07 |
| TUCP_004028 | XLOC_177541 | ENSRNOT00000074023 | 0.964202264  | 4.36E-07 |
| TUCP_004028 | XLOC_177541 | ENSRNOT00000014384 | -0.963324595 | 4.91E-07 |
| TUCP_004028 | XLOC_177541 | ENSRNOT00000018074 | -0.964476055 | 4.20E-07 |
| TUCP_004028 | XLOC_177541 | ENSRNOT00000001774 | -0.950172126 | 2.22E-06 |
| TUCP_004028 | XLOC_177541 | ENSRNOT00000084069 | 0.951305763  | 1.99E-06 |
| TUCP_004028 | XLOC_177541 | ENSRNOT00000033017 | 0.959270159  | 8.24E-07 |
| TUCP_004028 | XLOC_177541 | ENSRNOT00000013759 | -0.952082496 | 1.84E-06 |
| TUCP_004028 | XLOC_177541 | ENSRNOT00000037203 | -0.960225275 | 7.33E-07 |
| TUCP_004028 | XLOC_177541 | ENSRNOT00000017805 | 0.96100841   | 6.65E-07 |
| TUCP_004028 | XLOC_177541 | ENSRNOT00000000618 | -0.963950322 | 4.51E-07 |
| TUCP_004028 | XLOC_177541 | ENSRNOT00000054685 | 0.95488872   | 1.36E-06 |
| TUCP_004028 | XLOC_177541 | ENSRNOT00000018341 | -0.970076935 | 1.80E-07 |
| TUCP_004028 | XLOC_177541 | ENSRNOT00000025079 | -0.970776112 | 1.60E-07 |
| TUCP_004028 | XLOC_177541 | ENSRNOT00000048754 | -0.974379473 | 8.33E-08 |
| TUCP_004028 | XLOC_177541 | ENSRNOT00000084709 | 0.95795668   | 9.64E-07 |
| TUCP_004028 | XLOC_177541 | ENSRNOT00000039177 | -0.954074132 | 1.49E-06 |
| TUCP_004028 | XLOC_177541 | ENSRNOT00000025075 | 0.951308982  | 1.99E-06 |
| TUCP_004028 | XLOC_177541 | ENSRNOT00000057160 | 0.963770698  | 4.63E-07 |
| TUCP_004028 | XLOC_177541 | ENSRNOT00000024402 | 0.969527499  | 1.97E-07 |
| TUCP_004028 | XLOC_177541 | ENSRNOT00000007824 | -0.957545122 | 1.01E-06 |
| TUCP_004028 | XLOC_177541 | ENSRNOT00000057898 | -0.95041337  | 2.17E-06 |
| TUCP_004028 | XLOC_177541 | ENSRNOT00000089933 | 0.962650664  | 5.38E-07 |
| TUCP_004028 | XLOC_177541 | ENSRNOT00000078070 | 0.967795512  | 2.58E-07 |
| TUCP_004028 | XLOC_177541 | ENSRNOT00000009811 | 0.975998679  | 6.03E-08 |
| TUCP_004028 | XLOC_177541 | ENSRNOT00000025517 | 0.952507069  | 1.76E-06 |
| TUCP_004028 | XLOC_177541 | ENSRNOT00000065168 | 0.963880959  | 4.56E-07 |
| TUCP_004028 | XLOC_177541 | ENSRNOT00000083214 | 0.951757415  | 1.90E-06 |
| TUCP_004028 | XLOC_177541 | ENSRNOT00000083127 | 0.967262994  | 2.80E-07 |
| TUCP_004028 | XLOC_177541 | ENSRNOT00000033677 | -0.961940015 | 5.90E-07 |
| TUCP_004028 | XLOC_177541 | ENSRNOT00000077231 | 0.954957666  | 1.35E-06 |
| TUCP_004028 | XLOC_177541 | ENSRNOT00000005686 | -0.951357897 | 1.98E-06 |
| TUCP_004028 | XLOC_177541 | ENSRNOT00000054869 | 0.953321095  | 1.61E-06 |
| TUCP_004028 | XLOC_177541 | ENSRNOT00000061392 | 0.954786799  | 1.38E-06 |
| TUCP_004028 | XLOC_177541 | ENSRNOT00000046490 | -0.953082799 | 1.65E-06 |
| TUCP_004028 | XLOC_177541 | ENSRNOT00000008274 | -0.964574082 | 4.14E-07 |
| TUCP_004028 | XLOC_177541 | ENSRNOT00000077727 | -0.965869568 | 3.44E-07 |
| TUCP_004028 | XLOC_177541 | ENSRNOT00000067391 | -0.958471242 | 9.07E-07 |
| TUCP_004028 | XLOC_177541 | ENSRNOT00000037133 | 0.974359506  | 8.36E-08 |
| TUCP_004028 | XLOC_177541 | ENSRNOT00000013344 | -0.956285627 | 1.17E-06 |
| TUCP_004028 | XLOC_177541 | ENSRNOT00000017556 | 0.978102586  | 3.82E-08 |
| TUCP_004028 | XLOC_177541 | ENSRNOT00000020453 | -0.960786484 | 6.84E-07 |
| TUCP_004028 | XLOC_177541 | ENSRNOT00000090912 | 0.953551964  | 1.57E-06 |
| TUCP_004028 | XLOC_177541 | ENSRNOT00000001893 | 0.971643601  | 1.38E-07 |
| TUCP_004028 | XLOC_177541 | ENSRNOT00000091909 | 0.961733394  | 6.06E-07 |
| TUCP_004028 | XLOC_177541 | ENSRNOT00000039857 | -0.955536357 | 1.27E-06 |
| TUCP_004028 | XLOC_177541 | ENSRNOT00000024352 | 0.95215077   | 1.82E-06 |

|             |             |                     |              |          |
|-------------|-------------|---------------------|--------------|----------|
| TUCP_004028 | XLOC_177541 | ENSRNOT00000082627  | -0.954683741 | 1.39E-06 |
| TUCP_004028 | XLOC_177541 | ENSRNOT00000072118  | 0.957397964  | 1.03E-06 |
| TUCP_004028 | XLOC_177541 | ENSRNOT00000003780  | 0.970373109  | 1.71E-07 |
| TUCP_004028 | XLOC_177541 | ENSRNOT00000086119  | -0.956059451 | 1.20E-06 |
| TUCP_004028 | XLOC_177541 | ENSRNOT00000022190  | -0.963054095 | 5.10E-07 |
| TUCP_004028 | XLOC_177541 | ENSRNOT00000077220  | -0.953141876 | 1.64E-06 |
| TUCP_004028 | XLOC_177541 | ENSRNOT00000013067  | -0.962522696 | 5.47E-07 |
| TUCP_004028 | XLOC_177541 | ENSRNOT00000004351  | -0.954649084 | 1.40E-06 |
| TUCP_004028 | XLOC_177541 | ENSRNOT00000007882  | -0.953031365 | 1.66E-06 |
| TUCP_004028 | XLOC_177541 | ENSRNOT000000075444 | -0.957434188 | 1.02E-06 |
| TUCP_004028 | XLOC_177541 | ENSRNOT00000067780  | -0.957902752 | 9.70E-07 |
| TUCP_004028 | XLOC_177541 | ENSRNOT00000047093  | 0.952556925  | 1.75E-06 |
| TUCP_004028 | XLOC_177541 | ENSRNOT00000006824  | -0.960403195 | 7.17E-07 |
| TUCP_004028 | XLOC_177541 | ENSRNOT000000073910 | -0.950641071 | 2.12E-06 |
| TUCP_004028 | XLOC_177541 | ENSRNOT00000000170  | -0.953575098 | 1.57E-06 |
| TUCP_004028 | XLOC_177541 | ENSRNOT00000003787  | -0.961603283 | 6.16E-07 |
| TUCP_004028 | XLOC_177541 | ENSRNOT00000068026  | -0.957096535 | 1.07E-06 |
| TUCP_004028 | XLOC_177541 | ENSRNOT00000083220  | 0.953877358  | 1.52E-06 |
| TUCP_004028 | XLOC_177541 | ENSRNOT00000085621  | 0.956159948  | 1.18E-06 |
| TUCP_004028 | XLOC_177541 | ENSRNOT00000074586  | -0.962932264 | 5.18E-07 |
| TUCP_004028 | XLOC_177541 | ENSRNOT00000001559  | 0.953357969  | 1.61E-06 |
| TUCP_004028 | XLOC_177541 | ENSRNOT00000005996  | -0.956204819 | 1.18E-06 |
| TUCP_004028 | XLOC_177541 | ENSRNOT00000008889  | -0.95754231  | 1.01E-06 |
| TUCP_004028 | XLOC_177541 | ENSRNOT00000016445  | 0.953497459  | 1.58E-06 |
| TUCP_004028 | XLOC_177541 | ENSRNOT00000026531  | -0.951367091 | 1.97E-06 |
| TUCP_004028 | XLOC_177541 | ENSRNOT000000073193 | -0.956709684 | 1.11E-06 |
| TUCP_004028 | XLOC_177541 | ENSRNOT00000021496  | -0.958258894 | 9.30E-07 |
| TUCP_004028 | XLOC_177541 | ENSRNOT00000081512  | 0.976261568  | 5.70E-08 |
| TUCP_004028 | XLOC_177541 | ENSRNOT000000032843 | 0.957321754  | 1.04E-06 |
| TUCP_004028 | XLOC_177541 | ENSRNOT00000022676  | -0.952692438 | 1.72E-06 |
| TUCP_004028 | XLOC_177541 | ENSRNOT00000087011  | -0.955500275 | 1.28E-06 |
| TUCP_004028 | XLOC_177541 | ENSRNOT00000050696  | 0.957103241  | 1.06E-06 |
| TUCP_004028 | XLOC_177541 | ENSRNOT00000006709  | -0.96588852  | 3.43E-07 |
| TUCP_004028 | XLOC_177541 | ENSRNOT00000023989  | 0.950394801  | 2.18E-06 |
| TUCP_004028 | XLOC_177541 | ENSRNOT00000076485  | -0.96726512  | 2.80E-07 |
| TUCP_004028 | XLOC_177541 | ENSRNOT00000013375  | -0.9530974   | 1.65E-06 |
| TUCP_004028 | XLOC_177541 | ENSRNOT00000050515  | 0.956778039  | 1.10E-06 |
| TUCP_004028 | XLOC_177541 | ENSRNOT00000019133  | 0.959359735  | 8.15E-07 |
| TUCP_004028 | XLOC_177541 | ENSRNOT00000025221  | -0.951811512 | 1.89E-06 |
| TUCP_004028 | XLOC_177541 | ENSRNOT00000017746  | -0.95748718  | 1.02E-06 |
| TUCP_004028 | XLOC_177541 | ENSRNOT00000000302  | 0.958344473  | 9.21E-07 |
| TUCP_004028 | XLOC_177541 | ENSRNOT00000055602  | -0.961863048 | 5.96E-07 |
| TUCP_004028 | XLOC_177541 | ENSRNOT00000038511  | -0.963477826 | 4.81E-07 |
| TUCP_004028 | XLOC_177541 | ENSRNOT00000008244  | 0.954246659  | 1.46E-06 |
| TUCP_004028 | XLOC_177541 | ENSRNOT00000089293  | 0.961828232  | 5.99E-07 |
| TUCP_004028 | XLOC_177541 | ENSRNOT00000088628  | 0.953825489  | 1.53E-06 |
| TUCP_004028 | XLOC_177541 | ENSRNOT00000066120  | -0.954351466 | 1.45E-06 |
| TUCP_004028 | XLOC_177541 | ENSRNOT00000061201  | -0.966598794 | 3.10E-07 |
| TUCP_004028 | XLOC_177541 | ENSRNOT00000002187  | -0.964441721 | 4.22E-07 |
| TUCP_004028 | XLOC_177541 | ENSRNOT00000023388  | -0.964571906 | 4.14E-07 |
| TUCP_004028 | XLOC_177541 | ENSRNOT00000013553  | 0.953562883  | 1.57E-06 |

|             |             |                    |              |          |
|-------------|-------------|--------------------|--------------|----------|
| TUCP_004028 | XLOC_177541 | ENSRNOT00000077999 | 0.971040713  | 1.53E-07 |
| TUCP_004028 | XLOC_177541 | ENSRNOT00000091488 | 0.950048309  | 2.25E-06 |
| TUCP_004028 | XLOC_177541 | ENSRNOT00000000717 | -0.969130975 | 2.10E-07 |
| TUCP_004028 | XLOC_177541 | ENSRNOT00000020909 | -0.96001804  | 7.52E-07 |
| TUCP_004028 | XLOC_177541 | ENSRNOT00000003568 | 0.95378504   | 1.54E-06 |
| TUCP_004028 | XLOC_177541 | ENSRNOT00000049048 | -0.958425929 | 9.12E-07 |
| TUCP_004028 | XLOC_177541 | ENSRNOT00000007476 | -0.960638248 | 6.96E-07 |
| TUCP_004028 | XLOC_177541 | ENSRNOT00000018877 | -0.965266224 | 3.76E-07 |
| TUCP_004028 | XLOC_177541 | ENSRNOT00000077146 | -0.960045395 | 7.50E-07 |
| TUCP_004028 | XLOC_177541 | ENSRNOT00000014235 | 0.950737349  | 2.10E-06 |
| TUCP_004028 | XLOC_177541 | ENSRNOT00000052063 | 0.960636429  | 6.97E-07 |
| TUCP_004028 | XLOC_177541 | ENSRNOT00000024326 | -0.951754355 | 1.90E-06 |
| TUCP_004028 | XLOC_177541 | ENSRNOT00000060002 | -0.964358876 | 4.27E-07 |
| TUCP_004028 | XLOC_177541 | ENSRNOT00000004046 | -0.952004109 | 1.85E-06 |
| TUCP_004028 | XLOC_177541 | ENSRNOT00000023763 | -0.950821971 | 2.09E-06 |
| TUCP_004028 | XLOC_177541 | ENSRNOT00000088054 | 0.970632755  | 1.64E-07 |
| TUCP_004028 | XLOC_177541 | ENSRNOT00000006804 | 0.955617384  | 1.26E-06 |
| TUCP_004028 | XLOC_177541 | ENSRNOT00000006395 | -0.977277752 | 4.59E-08 |
| TUCP_004028 | XLOC_177541 | ENSRNOT00000020809 | -0.960151683 | 7.40E-07 |
| TUCP_004028 | XLOC_177541 | ENSRNOT00000082151 | -0.957765635 | 9.86E-07 |
| TUCP_004028 | XLOC_177541 | ENSRNOT00000066133 | -0.963176486 | 5.01E-07 |
| TUCP_004028 | XLOC_177541 | ENSRNOT00000066132 | 0.95247428   | 1.76E-06 |
| TUCP_004028 | XLOC_177541 | ENSRNOT00000001605 | -0.952262852 | 1.80E-06 |
| TUCP_004028 | XLOC_177541 | ENSRNOT00000005486 | -0.950580488 | 2.14E-06 |
| TUCP_004028 | XLOC_177541 | ENSRNOT00000003359 | -0.96156424  | 6.19E-07 |
| TUCP_004028 | XLOC_177541 | ENSRNOT00000025791 | -0.955244166 | 1.31E-06 |
| TUCP_004028 | XLOC_177541 | ENSRNOT00000022097 | 0.970709472  | 1.62E-07 |
| TUCP_004028 | XLOC_177541 | ENSRNOT00000018170 | -0.956470757 | 1.14E-06 |
| TUCP_004028 | XLOC_177541 | ENSRNOT00000026293 | 0.950247123  | 2.21E-06 |
| TUCP_004028 | XLOC_177541 | ENSRNOT00000044395 | 0.95336361   | 1.61E-06 |
| TUCP_004028 | XLOC_177541 | ENSRNOT00000023543 | -0.96513467  | 3.83E-07 |
| TUCP_004028 | XLOC_177541 | ENSRNOT00000012736 | 0.955975262  | 1.21E-06 |
| TUCP_004028 | XLOC_177541 | ENSRNOT00000064535 | -0.956101773 | 1.19E-06 |
| TUCP_004028 | XLOC_177541 | ENSRNOT00000015624 | 0.963350065  | 4.90E-07 |
| TUCP_004028 | XLOC_177541 | ENSRNOT00000017384 | 0.955580619  | 1.26E-06 |
| TUCP_004028 | XLOC_177541 | ENSRNOT00000087033 | -0.950999299 | 2.05E-06 |
| TUCP_004028 | XLOC_177541 | ENSRNOT00000089524 | 0.957015244  | 1.08E-06 |
| TUCP_004028 | XLOC_177541 | ENSRNOT00000009345 | -0.963523509 | 4.78E-07 |
| TUCP_004028 | XLOC_177541 | ENSRNOT00000024924 | -0.952804676 | 1.70E-06 |
| TUCP_004028 | XLOC_177541 | ENSRNOT00000072632 | -0.951485578 | 1.95E-06 |
| TUCP_004028 | XLOC_177541 | ENSRNOT00000079011 | -0.963472066 | 4.82E-07 |
| TUCP_004028 | XLOC_177541 | ENSRNOT00000085458 | -0.956354779 | 1.16E-06 |
| TUCP_004028 | XLOC_177541 | ENSRNOT00000000124 | -0.964138406 | 4.40E-07 |
| TUCP_004028 | XLOC_177541 | ENSRNOT00000002866 | -0.952985539 | 1.67E-06 |
| TUCP_004028 | XLOC_177541 | ENSRNOT00000043581 | -0.962803492 | 5.27E-07 |
| TUCP_004028 | XLOC_177541 | ENSRNOT00000011694 | -0.952675811 | 1.73E-06 |
| TUCP_004028 | XLOC_177541 | ENSRNOT00000026846 | -0.963466422 | 4.82E-07 |
| TUCP_004028 | XLOC_177541 | ENSRNOT00000078906 | -0.958585704 | 8.95E-07 |
| TUCP_004028 | XLOC_177541 | ENSRNOT00000042125 | 0.960514918  | 7.07E-07 |
| TUCP_004028 | XLOC_177541 | ENSRNOT00000060698 | -0.965152229 | 3.82E-07 |
| TUCP_004028 | XLOC_177541 | ENSRNOT00000058351 | 0.952652882  | 1.73E-06 |

|             |             |                    |              |          |
|-------------|-------------|--------------------|--------------|----------|
| TUCP_004028 | XLOC_177541 | ENSRNOT00000066561 | -0.954672969 | 1.40E-06 |
| TUCP_004028 | XLOC_177541 | ENSRNOT00000026760 | -0.956490118 | 1.14E-06 |
| TUCP_004028 | XLOC_177541 | ENSRNOT00000068184 | -0.963563603 | 4.76E-07 |
| TUCP_004028 | XLOC_177541 | ENSRNOT00000010748 | 0.950200851  | 2.22E-06 |
| TUCP_004028 | XLOC_177541 | ENSRNOT00000080207 | 0.96213367   | 5.75E-07 |
| TUCP_004028 | XLOC_177541 | ENSRNOT00000015495 | -0.960465699 | 7.12E-07 |
| TUCP_004028 | XLOC_177541 | ENSRNOT00000089016 | -0.953067575 | 1.66E-06 |
| TUCP_004028 | XLOC_177541 | ENSRNOT00000084597 | -0.966396493 | 3.19E-07 |
| TUCP_004028 | XLOC_177541 | ENSRNOT00000017995 | 0.965223681  | 3.78E-07 |
| TUCP_004028 | XLOC_177541 | ENSRNOT00000022864 | -0.960073039 | 7.47E-07 |
| TUCP_004028 | XLOC_177541 | ENSRNOT00000026426 | 0.950488919  | 2.16E-06 |
| TUCP_004028 | XLOC_177541 | ENSRNOT00000021534 | -0.958889054 | 8.63E-07 |
| TUCP_004028 | XLOC_177541 | ENSRNOT00000071745 | -0.953214277 | 1.63E-06 |
| TUCP_004028 | XLOC_177541 | ENSRNOT00000027967 | 0.951076386  | 2.03E-06 |
| TUCP_004028 | XLOC_177541 | ENSRNOT00000024938 | -0.958754141 | 8.77E-07 |
| TUCP_004028 | XLOC_177541 | ENSRNOT00000011511 | -0.958438114 | 9.11E-07 |
| TUCP_004028 | XLOC_177541 | ENSRNOT00000024933 | -0.958200101 | 9.37E-07 |
| TUCP_004028 | XLOC_177541 | ENSRNOT00000041494 | 0.956972112  | 1.08E-06 |
| TUCP_004028 | XLOC_177541 | ENSRNOT00000028876 | -0.978980198 | 3.12E-08 |
| TUCP_004028 | XLOC_177541 | ENSRNOT00000025705 | 0.970238297  | 1.75E-07 |
| TUCP_004028 | XLOC_177541 | ENSRNOT00000046639 | 0.954671706  | 1.40E-06 |
| TUCP_004028 | XLOC_177541 | ENSRNOT00000015799 | 0.971373556  | 1.44E-07 |
| TUCP_004028 | XLOC_177541 | ENSRNOT00000085669 | 0.952414605  | 1.77E-06 |
| TUCP_004028 | XLOC_177541 | ENSRNOT00000008113 | -0.968077898 | 2.47E-07 |
| TUCP_004028 | XLOC_177541 | ENSRNOT00000022552 | -0.955672327 | 1.25E-06 |
| TUCP_004028 | XLOC_177541 | ENSRNOT00000072357 | -0.955147334 | 1.33E-06 |
| TUCP_002676 | XLOC_113217 | ENSRNOT00000071840 | 0.969886603  | 1.85E-07 |
| TUCP_002676 | XLOC_113217 | ENSRNOT00000083608 | 0.950770578  | 2.10E-06 |
| TUCP_002676 | XLOC_113217 | ENSRNOT00000086969 | 0.976211337  | 5.77E-08 |
| TUCP_002676 | XLOC_113217 | ENSRNOT00000066382 | 0.971146939  | 1.50E-07 |
| TUCP_002676 | XLOC_113217 | ENSRNOT00000039313 | 0.957291965  | 1.04E-06 |
| TUCP_002676 | XLOC_113217 | ENSRNOT00000045584 | 0.969886603  | 1.85E-07 |
| TUCP_002676 | XLOC_113217 | ENSRNOT00000077995 | 0.969049843  | 2.12E-07 |
| TUCP_002676 | XLOC_113217 | ENSRNOT00000066004 | 0.967876701  | 2.55E-07 |
| TUCP_002676 | XLOC_113217 | ENSRNOT00000075836 | 0.969886603  | 1.85E-07 |
| TUCP_002676 | XLOC_113217 | ENSRNOT00000082776 | 0.95611576   | 1.19E-06 |
| TUCP_002676 | XLOC_113217 | ENSRNOT00000089494 | 0.953714214  | 1.55E-06 |
| TUCP_002676 | XLOC_113217 | ENSRNOT00000092182 | 0.969886603  | 1.85E-07 |
| TUCP_002676 | XLOC_113217 | ENSRNOT00000084461 | 0.969886603  | 1.85E-07 |
| TUCP_002676 | XLOC_113217 | ENSRNOT00000060448 | 0.969886603  | 1.85E-07 |
| TUCP_002676 | XLOC_113217 | ENSRNOT00000032631 | 0.969886603  | 1.85E-07 |
| TUCP_002676 | XLOC_113217 | ENSRNOT00000079503 | 0.961669029  | 6.11E-07 |
| TUCP_002676 | XLOC_113217 | ENSRNOT00000060113 | 0.967100367  | 2.87E-07 |
| TUCP_002676 | XLOC_113217 | ENSRNOT00000039652 | 0.957458847  | 1.02E-06 |
| TUCP_002676 | XLOC_113217 | ENSRNOT00000054910 | 0.953768972  | 1.54E-06 |
| TUCP_002676 | XLOC_113217 | ENSRNOT00000057176 | 0.969775884  | 1.89E-07 |
| TUCP_002676 | XLOC_113217 | ENSRNOT00000078176 | 0.956354309  | 1.16E-06 |
| TUCP_002676 | XLOC_113217 | ENSRNOT00000056364 | 0.977664935  | 4.22E-08 |
| TUCP_002676 | XLOC_113217 | ENSRNOT00000093431 | 0.969886603  | 1.85E-07 |
| TUCP_002676 | XLOC_113217 | ENSRNOT00000092901 | 0.969886603  | 1.85E-07 |
| TUCP_002676 | XLOC_113217 | ENSRNOT00000089290 | 0.969869351  | 1.86E-07 |



|             |             |                    |              |          |
|-------------|-------------|--------------------|--------------|----------|
| TUCP_002676 | XLOC_113217 | ENSRNOT00000071603 | 0.969993146  | 1.82E-07 |
| TUCP_002676 | XLOC_113217 | ENSRNOT00000075244 | 0.950489425  | 2.16E-06 |
| TUCP_002676 | XLOC_113217 | ENSRNOT00000091828 | 0.972898406  | 1.10E-07 |
| TUCP_002676 | XLOC_113217 | ENSRNOT00000091944 | 0.968754136  | 2.23E-07 |
| TUCP_002676 | XLOC_113217 | ENSRNOT00000070855 | 0.969886603  | 1.85E-07 |
| TUCP_002676 | XLOC_113217 | ENSRNOT00000084109 | 0.968645424  | 2.26E-07 |
| TUCP_002676 | XLOC_113217 | ENSRNOT00000007683 | 0.969997648  | 1.82E-07 |
| TUCP_002676 | XLOC_113217 | ENSRNOT00000041569 | 0.969886603  | 1.85E-07 |
| TUCP_002676 | XLOC_113217 | ENSRNOT00000087091 | 0.969886603  | 1.85E-07 |
| TUCP_002676 | XLOC_113217 | ENSRNOT00000018890 | 0.972166381  | 1.26E-07 |
| TUCP_002676 | XLOC_113217 | ENSRNOT00000026113 | 0.968434845  | 2.34E-07 |
| TUCP_002676 | XLOC_113217 | ENSRNOT00000014939 | 0.967623149  | 2.65E-07 |
| TUCP_002676 | XLOC_113217 | ENSRNOT00000058314 | 0.95082464   | 2.08E-06 |
| TUCP_002676 | XLOC_113217 | ENSRNOT00000047870 | 0.976605205  | 5.31E-08 |
| TUCP_002676 | XLOC_113217 | ENSRNOT00000090211 | 0.976216092  | 5.76E-08 |
| TUCP_002676 | XLOC_113217 | ENSRNOT00000088376 | 0.982774022  | 1.16E-08 |
| TUCP_002676 | XLOC_113217 | ENSRNOT00000003308 | 0.975528488  | 6.63E-08 |
| TUCP_002676 | XLOC_113217 | ENSRNOT00000044232 | 0.977804243  | 4.09E-08 |
| TUCP_002676 | XLOC_113217 | ENSRNOT00000023287 | 0.972239405  | 1.24E-07 |
| TUCP_002676 | XLOC_113217 | ENSRNOT00000071714 | 0.954035863  | 1.50E-06 |
| TUCP_002676 | XLOC_113217 | ENSRNOT00000068197 | 0.962850885  | 5.23E-07 |
| TUCP_002676 | XLOC_113217 | ENSRNOT00000073229 | 0.969886603  | 1.85E-07 |
| TUCP_002676 | XLOC_113217 | ENSRNOT00000077731 | 0.952495419  | 1.76E-06 |
| TUCP_002676 | XLOC_113217 | ENSRNOT00000031973 | 0.956926667  | 1.09E-06 |
| TUCP_002676 | XLOC_113217 | ENSRNOT00000032121 | 0.959355591  | 8.16E-07 |
| TUCP_002676 | XLOC_113217 | ENSRNOT00000060454 | 0.969886603  | 1.85E-07 |
| TUCP_002676 | XLOC_113217 | ENSRNOT00000092916 | 0.961714849  | 6.07E-07 |
| TUCP_002676 | XLOC_113217 | ENSRNOT00000009295 | 0.967976217  | 2.51E-07 |
| TUCP_004747 | XLOC_209423 | ENSRNOT00000030054 | -0.955557221 | 1.27E-06 |
| TUCP_002091 | XLOC_086010 | ENSRNOT00000064145 | 0.952996646  | 1.67E-06 |
| TUCP_002091 | XLOC_086010 | ENSRNOT00000067185 | 0.952483089  | 1.76E-06 |
| TUCP_002091 | XLOC_086010 | ENSRNOT00000082184 | 0.967477131  | 2.71E-07 |
| TUCP_002091 | XLOC_086010 | ENSRNOT00000077185 | 0.956300722  | 1.17E-06 |
| TUCP_002093 | XLOC_086406 | ENSRNOT00000009802 | 0.965749016  | 3.50E-07 |
| TUCP_002093 | XLOC_086406 | ENSRNOT00000010218 | 0.959831119  | 7.70E-07 |
| TUCP_002093 | XLOC_086406 | ENSRNOT00000027335 | 0.963899842  | 4.54E-07 |
| TUCP_002093 | XLOC_086406 | ENSRNOT00000014837 | 0.968432584  | 2.34E-07 |
| TUCP_002093 | XLOC_086406 | ENSRNOT00000010986 | 0.967191557  | 2.83E-07 |
| TUCP_002093 | XLOC_086406 | ENSRNOT00000009691 | 0.960521848  | 7.07E-07 |
| TUCP_002093 | XLOC_086406 | ENSRNOT00000071698 | 0.950069734  | 2.25E-06 |
| TUCP_002093 | XLOC_086406 | ENSRNOT00000038408 | -0.960172636 | 7.38E-07 |
| TUCP_002093 | XLOC_086406 | ENSRNOT00000089059 | 0.971849323  | 1.33E-07 |
| TUCP_002093 | XLOC_086406 | ENSRNOT00000067735 | -0.963293965 | 4.93E-07 |
| TUCP_002093 | XLOC_086406 | ENSRNOT00000081518 | 0.951280022  | 1.99E-06 |
| TUCP_002093 | XLOC_086406 | ENSRNOT00000016401 | 0.955810056  | 1.23E-06 |
| TUCP_002093 | XLOC_086406 | ENSRNOT00000024548 | 0.950394293  | 2.18E-06 |
| TUCP_002093 | XLOC_086406 | ENSRNOT00000012977 | 0.954488594  | 1.42E-06 |
| TUCP_002319 | XLOC_096888 | ENSRNOT00000084500 | 0.970870463  | 1.57E-07 |
| TUCP_002319 | XLOC_096888 | ENSRNOT00000093467 | 0.987505029  | 2.35E-09 |
| TUCP_002319 | XLOC_096888 | ENSRNOT00000029340 | 0.995988741  | 8.12E-12 |
| TUCP_002319 | XLOC_096888 | ENSRNOT00000038646 | 0.992503855  | 1.84E-10 |

|             |             |                    |             |          |
|-------------|-------------|--------------------|-------------|----------|
| TUCP_002319 | XLOC_096888 | ENSRNOT00000012095 | 0.963306365 | 4.93E-07 |
| TUCP_002319 | XLOC_096888 | ENSRNOT00000017909 | 0.961132734 | 6.54E-07 |
| TUCP_002319 | XLOC_096888 | ENSRNOT00000092579 | 0.992503855 | 1.84E-10 |
| TUCP_002319 | XLOC_096888 | ENSRNOT00000061516 | 0.98419351  | 7.57E-09 |
| TUCP_002319 | XLOC_096888 | ENSRNOT00000036383 | 0.980143441 | 2.35E-08 |
| TUCP_002319 | XLOC_096888 | ENSRNOT00000076528 | 0.987285317 | 2.56E-09 |
| TUCP_002319 | XLOC_096888 | ENSRNOT00000075193 | 0.952074801 | 1.84E-06 |
| TUCP_002319 | XLOC_096888 | ENSRNOT00000083034 | 0.972593496 | 1.16E-07 |
| TUCP_002319 | XLOC_096888 | ENSRNOT00000089607 | 0.983645611 | 8.96E-09 |
| TUCP_002319 | XLOC_096888 | ENSRNOT00000086014 | 0.969358564 | 2.02E-07 |
| TUCP_002319 | XLOC_096888 | ENSRNOT00000054939 | 0.955419312 | 1.29E-06 |
| TUCP_002319 | XLOC_096888 | ENSRNOT00000052315 | 0.983173617 | 1.03E-08 |
| TUCP_002319 | XLOC_096888 | ENSRNOT00000011761 | 0.958881671 | 8.64E-07 |
| TUCP_002319 | XLOC_096888 | ENSRNOT00000013459 | 0.965467104 | 3.65E-07 |
| TUCP_002319 | XLOC_096888 | ENSRNOT00000078137 | 0.992503855 | 1.84E-10 |
| TUCP_002319 | XLOC_096888 | ENSRNOT00000077764 | 0.952519222 | 1.75E-06 |
| TUCP_002319 | XLOC_096888 | ENSRNOT00000092740 | 0.992503855 | 1.84E-10 |
| TUCP_002319 | XLOC_096888 | ENSRNOT00000000117 | 0.985483009 | 4.96E-09 |
| TUCP_002319 | XLOC_096888 | ENSRNOT00000071877 | 0.959407924 | 8.11E-07 |
| TUCP_002319 | XLOC_096888 | ENSRNOT00000070958 | 0.992503855 | 1.84E-10 |
| TUCP_002319 | XLOC_096888 | ENSRNOT00000035538 | 0.950352589 | 2.19E-06 |
| TUCP_002319 | XLOC_096888 | ENSRNOT00000027268 | 0.992503855 | 1.84E-10 |
| TUCP_002319 | XLOC_096888 | ENSRNOT00000004459 | 0.992503855 | 1.84E-10 |
| TUCP_002319 | XLOC_096888 | ENSRNOT00000089235 | 0.992904173 | 1.40E-10 |
| TUCP_002319 | XLOC_096888 | ENSRNOT00000088168 | 0.992503855 | 1.84E-10 |
| TUCP_002319 | XLOC_096888 | ENSRNOT00000088148 | 0.992503855 | 1.84E-10 |
| TUCP_002319 | XLOC_096888 | ENSRNOT00000088527 | 0.992503855 | 1.84E-10 |
| TUCP_002319 | XLOC_096888 | ENSRNOT00000078701 | 0.992503855 | 1.84E-10 |
| TUCP_002319 | XLOC_096888 | ENSRNOT00000090078 | 0.992503855 | 1.84E-10 |
| TUCP_002319 | XLOC_096888 | ENSRNOT00000021748 | 0.992503855 | 1.84E-10 |
| TUCP_002319 | XLOC_096888 | ENSRNOT00000089085 | 0.992503855 | 1.84E-10 |
| TUCP_002319 | XLOC_096888 | ENSRNOT00000008153 | 0.990493968 | 6.02E-10 |
| TUCP_002319 | XLOC_096888 | ENSRNOT00000085896 | 0.985682926 | 4.63E-09 |
| TUCP_002319 | XLOC_096888 | ENSRNOT00000079189 | 0.977400666 | 4.47E-08 |
| TUCP_002319 | XLOC_096888 | ENSRNOT00000092425 | 0.960447499 | 7.13E-07 |
| TUCP_002319 | XLOC_096888 | ENSRNOT00000009776 | 0.992503855 | 1.84E-10 |
| TUCP_000743 | XLOC_027883 | ENSRNOT00000056243 | 0.950243483 | 2.21E-06 |
| TUCP_000743 | XLOC_027883 | ENSRNOT00000089059 | 0.950568971 | 2.14E-06 |
| TUCP_000743 | XLOC_027883 | ENSRNOT00000009111 | 0.958400731 | 9.15E-07 |
| TUCP_000743 | XLOC_027883 | ENSRNOT00000026915 | 0.951022955 | 2.04E-06 |
| TUCP_000743 | XLOC_027883 | ENSRNOT00000012977 | 0.964975071 | 3.91E-07 |
| TUCP_002097 | XLOC_086792 | ENSRNOT00000073254 | 0.963749569 | 4.64E-07 |
| TUCP_000458 | XLOC_015592 | ENSRNOT00000015124 | 0.957512353 | 1.02E-06 |
| TUCP_000458 | XLOC_015592 | ENSRNOT00000008764 | 0.954308364 | 1.45E-06 |
| TUCP_000458 | XLOC_015592 | ENSRNOT00000037902 | 0.968198615 | 2.43E-07 |
| TUCP_000458 | XLOC_015592 | ENSRNOT00000066534 | 0.951572762 | 1.93E-06 |
| TUCP_000458 | XLOC_015592 | ENSRNOT00000083256 | 0.951210412 | 2.01E-06 |
| TUCP_000458 | XLOC_015592 | ENSRNOT00000090700 | 0.962080802 | 5.79E-07 |
| TUCP_000458 | XLOC_015592 | ENSRNOT00000026074 | 0.95811265  | 9.46E-07 |
| TUCP_000458 | XLOC_015592 | ENSRNOT00000001642 | 0.950297075 | 2.20E-06 |
| TUCP_000458 | XLOC_015592 | ENSRNOT00000085334 | 0.95545513  | 1.28E-06 |

|             |             |                     |              |          |
|-------------|-------------|---------------------|--------------|----------|
| TUCP_000458 | XLOC_015592 | ENSRNOT00000012757  | 0.955137787  | 1.33E-06 |
| TUCP_000458 | XLOC_015592 | ENSRNOT00000024375  | 0.952281632  | 1.80E-06 |
| TUCP_000458 | XLOC_015592 | ENSRNOT00000061054  | 0.984624999  | 6.59E-09 |
| TUCP_000458 | XLOC_015592 | ENSRNOT00000055536  | 0.958509438  | 9.03E-07 |
| TUCP_000620 | XLOC_022409 | ENSRNOT00000005958  | 0.953055944  | 1.66E-06 |
| TUCP_000620 | XLOC_022409 | ENSRNOT00000001559  | 0.966135167  | 3.31E-07 |
| TUCP_000620 | XLOC_022409 | ENSRNOT000000081246 | 0.973366283  | 1.01E-07 |
| TUCP_000620 | XLOC_022409 | ENSRNOT00000080768  | 0.96186189   | 5.96E-07 |
| TUCP_000620 | XLOC_022409 | ENSRNOT00000073526  | 0.973363446  | 1.01E-07 |
| TUCP_000620 | XLOC_022409 | ENSRNOT00000007351  | -0.957721058 | 9.91E-07 |
| TUCP_000620 | XLOC_022409 | ENSRNOT00000073559  | 0.956579348  | 1.13E-06 |
| TUCP_000620 | XLOC_022409 | ENSRNOT00000023989  | 0.962681939  | 5.35E-07 |
| TUCP_000620 | XLOC_022409 | ENSRNOT00000035346  | -0.956373111 | 1.16E-06 |
| TUCP_000620 | XLOC_022409 | ENSRNOT000000058312 | 0.957457397  | 1.02E-06 |
| TUCP_000620 | XLOC_022409 | ENSRNOT00000029125  | 0.967169639  | 2.84E-07 |
| TUCP_000620 | XLOC_022409 | ENSRNOT00000023638  | 0.95010249   | 2.24E-06 |
| TUCP_000620 | XLOC_022409 | ENSRNOT000000057361 | 0.955885245  | 1.22E-06 |
| TUCP_000620 | XLOC_022409 | ENSRNOT00000027910  | 0.952398355  | 1.78E-06 |
| TUCP_000620 | XLOC_022409 | ENSRNOT00000046745  | 0.967478058  | 2.71E-07 |
| TUCP_000620 | XLOC_022409 | ENSRNOT00000091205  | 0.95449727   | 1.42E-06 |
| TUCP_000620 | XLOC_022409 | ENSRNOT00000004032  | 0.964040617  | 4.46E-07 |
| TUCP_000620 | XLOC_022409 | ENSRNOT00000076763  | 0.970237453  | 1.75E-07 |
| TUCP_000620 | XLOC_022409 | ENSRNOT00000043216  | 0.956028604  | 1.20E-06 |
| TUCP_000620 | XLOC_022409 | ENSRNOT00000081981  | 0.965023361  | 3.89E-07 |
| TUCP_000620 | XLOC_022409 | ENSRNOT00000000468  | 0.952793872  | 1.71E-06 |
| TUCP_000620 | XLOC_022409 | ENSRNOT00000026543  | 0.950733921  | 2.10E-06 |
| TUCP_000620 | XLOC_022409 | ENSRNOT00000017753  | 0.954513726  | 1.42E-06 |
| TUCP_000620 | XLOC_022409 | ENSRNOT00000033235  | 0.955399801  | 1.29E-06 |
| TUCP_000620 | XLOC_022409 | ENSRNOT00000065529  | 0.953471006  | 1.59E-06 |
| TUCP_000620 | XLOC_022409 | ENSRNOT00000060362  | 0.964693861  | 4.07E-07 |
| TUCP_000620 | XLOC_022409 | ENSRNOT00000033197  | 0.957782072  | 9.84E-07 |
| TUCP_000620 | XLOC_022409 | ENSRNOT00000075558  | 0.959193066  | 8.32E-07 |
| TUCP_000620 | XLOC_022409 | ENSRNOT00000029866  | 0.965072311  | 3.86E-07 |
| TUCP_000620 | XLOC_022409 | ENSRNOT00000019923  | 0.954473521  | 1.43E-06 |
| TUCP_000620 | XLOC_022409 | ENSRNOT00000029439  | 0.972514958  | 1.18E-07 |
| TUCP_000620 | XLOC_022409 | ENSRNOT00000045285  | 0.978650126  | 3.37E-08 |
| TUCP_000620 | XLOC_022409 | ENSRNOT00000008982  | 0.952242812  | 1.81E-06 |
| TUCP_000620 | XLOC_022409 | ENSRNOT00000071764  | 0.950001486  | 2.26E-06 |
| TUCP_000620 | XLOC_022409 | ENSRNOT00000012048  | 0.966863983  | 2.98E-07 |
| TUCP_000620 | XLOC_022409 | ENSRNOT00000015799  | 0.960892927  | 6.75E-07 |
| TUCP_002313 | XLOC_096644 | ENSRNOT00000072367  | -0.9651935   | 3.79E-07 |
| TUCP_000622 | XLOC_022638 | ENSRNOT00000000008  | 0.969918172  | 1.84E-07 |
| TUCP_000622 | XLOC_022638 | ENSRNOT00000060048  | 0.978741631  | 3.30E-08 |
| TUCP_000622 | XLOC_022638 | ENSRNOT00000082304  | 0.963260835  | 4.96E-07 |
| TUCP_000622 | XLOC_022638 | ENSRNOT00000006219  | 0.969918172  | 1.84E-07 |
| TUCP_000622 | XLOC_022638 | ENSRNOT00000065376  | 0.969918172  | 1.84E-07 |
| TUCP_000622 | XLOC_022638 | ENSRNOT00000083575  | 0.969918172  | 1.84E-07 |
| TUCP_000622 | XLOC_022638 | ENSRNOT00000087739  | 0.969918172  | 1.84E-07 |
| TUCP_000622 | XLOC_022638 | ENSRNOT00000079826  | 0.969918172  | 1.84E-07 |
| TUCP_000622 | XLOC_022638 | ENSRNOT00000025770  | 0.951843281  | 1.88E-06 |
| TUCP_000622 | XLOC_022638 | ENSRNOT00000088244  | 0.950450029  | 2.16E-06 |

|             |             |                    |             |          |
|-------------|-------------|--------------------|-------------|----------|
| TUCP_000622 | XLOC_022638 | ENSRNOT00000048523 | 0.969918172 | 1.84E-07 |
| TUCP_000622 | XLOC_022638 | ENSRNOT00000026428 | 0.969866222 | 1.86E-07 |
| TUCP_000622 | XLOC_022638 | ENSRNOT00000085673 | 0.969918172 | 1.84E-07 |
| TUCP_000622 | XLOC_022638 | ENSRNOT00000050573 | 0.969918172 | 1.84E-07 |
| TUCP_000622 | XLOC_022638 | ENSRNOT00000074378 | 0.971723326 | 1.36E-07 |
| TUCP_000622 | XLOC_022638 | ENSRNOT00000076927 | 0.965032372 | 3.88E-07 |
| TUCP_000622 | XLOC_022638 | ENSRNOT00000090581 | 0.969918172 | 1.84E-07 |
| TUCP_000622 | XLOC_022638 | ENSRNOT00000076239 | 0.973866562 | 9.19E-08 |
| TUCP_000622 | XLOC_022638 | ENSRNOT00000084374 | 0.966754655 | 3.02E-07 |
| TUCP_000622 | XLOC_022638 | ENSRNOT00000065485 | 0.969918172 | 1.84E-07 |
| TUCP_000622 | XLOC_022638 | ENSRNOT0000006356  | 0.966712652 | 3.04E-07 |
| TUCP_000622 | XLOC_022638 | ENSRNOT00000087199 | 0.983150636 | 1.04E-08 |
| TUCP_000622 | XLOC_022638 | ENSRNOT00000022091 | 0.969918172 | 1.84E-07 |
| TUCP_000622 | XLOC_022638 | ENSRNOT00000064764 | 0.961042326 | 6.62E-07 |
| TUCP_000622 | XLOC_022638 | ENSRNOT00000093571 | 0.969918172 | 1.84E-07 |
| TUCP_000622 | XLOC_022638 | ENSRNOT00000092395 | 0.968037147 | 2.49E-07 |
| TUCP_002316 | XLOC_096644 | ENSRNOT00000085599 | 0.975294784 | 6.95E-08 |
| TUCP_002316 | XLOC_096644 | ENSRNOT00000006689 | 0.967827071 | 2.57E-07 |
| TUCP_002316 | XLOC_096644 | ENSRNOT00000081534 | 0.97391677  | 9.10E-08 |
| TUCP_002316 | XLOC_096644 | ENSRNOT00000085301 | 0.970538192 | 1.66E-07 |
| TUCP_002316 | XLOC_096644 | ENSRNOT00000038729 | 0.975599436 | 6.54E-08 |
| TUCP_002316 | XLOC_096644 | ENSRNOT00000086385 | 0.975599436 | 6.54E-08 |
| TUCP_002316 | XLOC_096644 | ENSRNOT00000078561 | 0.955940468 | 1.21E-06 |
| TUCP_002316 | XLOC_096644 | ENSRNOT00000071704 | 0.973933547 | 9.07E-08 |
| TUCP_002316 | XLOC_096644 | ENSRNOT00000023062 | 0.975599436 | 6.54E-08 |
| TUCP_002316 | XLOC_096644 | ENSRNOT00000058834 | 0.975599436 | 6.54E-08 |
| TUCP_002316 | XLOC_096644 | ENSRNOT00000079420 | 0.975599436 | 6.54E-08 |
| TUCP_002316 | XLOC_096644 | ENSRNOT00000087613 | 0.975599436 | 6.54E-08 |
| TUCP_002316 | XLOC_096644 | ENSRNOT00000090761 | 0.975599436 | 6.54E-08 |
| TUCP_002316 | XLOC_096644 | ENSRNOT00000055923 | 0.975599436 | 6.54E-08 |
| TUCP_002316 | XLOC_096644 | ENSRNOT00000015840 | 0.952374265 | 1.78E-06 |
| TUCP_002316 | XLOC_096644 | ENSRNOT00000071930 | 0.975599436 | 6.54E-08 |
| TUCP_002316 | XLOC_096644 | ENSRNOT00000001996 | 0.951118284 | 2.02E-06 |
| TUCP_002316 | XLOC_096644 | ENSRNOT00000076756 | 0.975599436 | 6.54E-08 |
| TUCP_002316 | XLOC_096644 | ENSRNOT00000084004 | 0.976600795 | 5.31E-08 |
| TUCP_002316 | XLOC_096644 | ENSRNOT00000081527 | 0.974318773 | 8.43E-08 |
| TUCP_002316 | XLOC_096644 | ENSRNOT00000085067 | 0.983203929 | 1.02E-08 |
| TUCP_002316 | XLOC_096644 | ENSRNOT00000091663 | 0.969354705 | 2.02E-07 |
| TUCP_002316 | XLOC_096644 | ENSRNOT00000081780 | 0.975599436 | 6.54E-08 |
| TUCP_002316 | XLOC_096644 | ENSRNOT00000089114 | 0.975599436 | 6.54E-08 |
| TUCP_002316 | XLOC_096644 | ENSRNOT00000073316 | 0.975599436 | 6.54E-08 |
| TUCP_002316 | XLOC_096644 | ENSRNOT00000014498 | 0.966209237 | 3.28E-07 |
| TUCP_002316 | XLOC_096644 | ENSRNOT00000083296 | 0.964552847 | 4.15E-07 |
| TUCP_002316 | XLOC_096644 | ENSRNOT00000071663 | 0.975599436 | 6.54E-08 |
| TUCP_002316 | XLOC_096644 | ENSRNOT00000042860 | 0.975599436 | 6.54E-08 |
| TUCP_002316 | XLOC_096644 | ENSRNOT00000088421 | 0.975599436 | 6.54E-08 |
| TUCP_002316 | XLOC_096644 | ENSRNOT00000038898 | 0.975599436 | 6.54E-08 |
| TUCP_002316 | XLOC_096644 | ENSRNOT00000064936 | 0.95821565  | 9.35E-07 |
| TUCP_002316 | XLOC_096644 | ENSRNOT00000042777 | 0.963459509 | 4.82E-07 |
| TUCP_002316 | XLOC_096644 | ENSRNOT00000010029 | 0.975599436 | 6.54E-08 |
| TUCP_002170 | XLOC_090402 | ENSRNOT00000039809 | 0.976131507 | 5.86E-08 |

|             |             |                     |              |          |
|-------------|-------------|---------------------|--------------|----------|
| TUCP_002170 | XLOC_090402 | ENSRNOT00000019213  | 0.953734262  | 1.54E-06 |
| TUCP_002170 | XLOC_090402 | ENSRNOT00000016555  | 0.952532435  | 1.75E-06 |
| TUCP_002170 | XLOC_090402 | ENSRNOT00000074939  | 0.988860241  | 1.33E-09 |
| TUCP_002170 | XLOC_090402 | ENSRNOT00000078445  | -0.9658182   | 3.47E-07 |
| TUCP_002170 | XLOC_090402 | ENSRNOT00000000184  | -0.953225162 | 1.63E-06 |
| TUCP_002170 | XLOC_090402 | ENSRNOT000000088125 | 0.968854783  | 2.19E-07 |
| TUCP_002170 | XLOC_090402 | ENSRNOT00000006175  | 0.967429673  | 2.73E-07 |
| TUCP_002170 | XLOC_090402 | ENSRNOT00000021116  | 0.957445827  | 1.02E-06 |
| TUCP_002170 | XLOC_090402 | ENSRNOT000000082100 | 0.963943519  | 4.52E-07 |
| TUCP_002170 | XLOC_090402 | ENSRNOT00000043535  | 0.956002603  | 1.21E-06 |
| TUCP_002170 | XLOC_090402 | ENSRNOT00000018057  | 0.953636978  | 1.56E-06 |
| TUCP_002170 | XLOC_090402 | ENSRNOT00000056813  | 0.964100434  | 4.42E-07 |
| TUCP_002170 | XLOC_090402 | ENSRNOT00000043216  | 0.954335392  | 1.45E-06 |
| TUCP_002170 | XLOC_090402 | ENSRNOT00000044742  | 0.96816868   | 2.44E-07 |
| TUCP_002170 | XLOC_090402 | ENSRNOT00000026543  | 0.958251254  | 9.31E-07 |
| TUCP_002170 | XLOC_090402 | ENSRNOT00000015076  | 0.966422738  | 3.18E-07 |
| TUCP_002170 | XLOC_090402 | ENSRNOT00000004698  | 0.976020995  | 6.00E-08 |
| TUCP_002170 | XLOC_090402 | ENSRNOT00000066670  | 0.95267094   | 1.73E-06 |
| TUCP_002170 | XLOC_090402 | ENSRNOT00000010418  | 0.955508083  | 1.27E-06 |
| TUCP_002170 | XLOC_090402 | ENSRNOT00000015073  | 0.959653759  | 7.87E-07 |
| TUCP_002170 | XLOC_090402 | ENSRNOT00000025689  | 0.963462251  | 4.82E-07 |
| TUCP_002170 | XLOC_090402 | ENSRNOT00000025832  | 0.975062579  | 7.28E-08 |
| TUCP_002170 | XLOC_090402 | ENSRNOT00000006055  | 0.979529283  | 2.74E-08 |
| TUCP_002170 | XLOC_090402 | ENSRNOT00000071573  | 0.960376177  | 7.20E-07 |
| TUCP_002170 | XLOC_090402 | ENSRNOT00000005126  | -0.967437569 | 2.73E-07 |
| TUCP_002170 | XLOC_090402 | ENSRNOT00000011384  | 0.953447135  | 1.59E-06 |
| TUCP_002170 | XLOC_090402 | ENSRNOT00000038247  | 0.955436156  | 1.28E-06 |
| TUCP_002170 | XLOC_090402 | ENSRNOT00000012977  | 0.957313572  | 1.04E-06 |
| TUCP_002170 | XLOC_090402 | ENSRNOT00000071764  | 0.966329197  | 3.22E-07 |
| TUCP_002170 | XLOC_090402 | ENSRNOT00000035989  | 0.959009787  | 8.51E-07 |
| TUCP_002170 | XLOC_090402 | ENSRNOT00000075326  | 0.960072941  | 7.47E-07 |
| TUCP_002170 | XLOC_090402 | ENSRNOT00000021348  | 0.982548106  | 1.24E-08 |
| TUCP_002170 | XLOC_090402 | ENSRNOT00000077555  | 0.958850902  | 8.67E-07 |
| TUCP_002170 | XLOC_090402 | ENSRNOT00000012671  | 0.959975208  | 7.56E-07 |
| TUCP_002170 | XLOC_090402 | ENSRNOT00000026718  | 0.953554522  | 1.57E-06 |
| TUCP_002170 | XLOC_090402 | ENSRNOT00000083127  | 0.967159578  | 2.85E-07 |
| TUCP_002170 | XLOC_090402 | ENSRNOT00000055187  | 0.953113538  | 1.65E-06 |
| TUCP_002170 | XLOC_090402 | ENSRNOT00000001809  | 0.962860922  | 5.23E-07 |
| TUCP_002170 | XLOC_090402 | ENSRNOT00000004834  | 0.959878761  | 7.65E-07 |
| TUCP_002170 | XLOC_090402 | ENSRNOT00000044293  | 0.954554405  | 1.41E-06 |
| TUCP_002170 | XLOC_090402 | ENSRNOT00000024548  | 0.965723317  | 3.52E-07 |
| TUCP_002170 | XLOC_090402 | ENSRNOT000000087592 | 0.956909766  | 1.09E-06 |
| TUCP_002170 | XLOC_090402 | ENSRNOT00000067822  | 0.961910619  | 5.92E-07 |
| TUCP_002170 | XLOC_090402 | ENSRNOT00000032274  | 0.973293965  | 1.02E-07 |
| TUCP_002170 | XLOC_090402 | ENSRNOT000000087371 | 0.968138796  | 2.45E-07 |
| TUCP_002170 | XLOC_090402 | ENSRNOT000000008018 | 0.952220151  | 1.81E-06 |
| TUCP_002170 | XLOC_090402 | ENSRNOT00000016384  | -0.951708263 | 1.91E-06 |
| TUCP_002170 | XLOC_090402 | ENSRNOT00000068633  | 0.961574197  | 6.19E-07 |
| TUCP_002170 | XLOC_090402 | ENSRNOT00000037446  | 0.982910667  | 1.12E-08 |
| TUCP_002170 | XLOC_090402 | ENSRNOT00000017948  | 0.985037057  | 5.76E-09 |
| TUCP_002170 | XLOC_090402 | ENSRNOT00000004905  | 0.953246614  | 1.63E-06 |

|             |             |                     |             |          |
|-------------|-------------|---------------------|-------------|----------|
| TUCP_002170 | XLOC_090402 | ENSRNOT00000025859  | 0.963826255 | 4.59E-07 |
| TUCP_002170 | XLOC_090402 | ENSRNOT00000039852  | 0.957218158 | 1.05E-06 |
| TUCP_002170 | XLOC_090402 | ENSRNOT00000023180  | 0.966769524 | 3.02E-07 |
| TUCP_002170 | XLOC_090402 | ENSRNOT00000000676  | 0.978026694 | 3.89E-08 |
| TUCP_002170 | XLOC_090402 | ENSRNOT00000078675  | 0.955627094 | 1.26E-06 |
| TUCP_002170 | XLOC_090402 | ENSRNOT00000019222  | 0.969449621 | 1.99E-07 |
| TUCP_002170 | XLOC_090402 | ENSRNOT00000028070  | 0.968085868 | 2.47E-07 |
| TUCP_002170 | XLOC_090402 | ENSRNOT00000004359  | 0.982361269 | 1.31E-08 |
| TUCP_002170 | XLOC_090402 | ENSRNOT00000013274  | 0.984067775 | 7.87E-09 |
| TUCP_002170 | XLOC_090402 | ENSRNOT000000085027 | 0.959634322 | 7.89E-07 |
| TUCP_002170 | XLOC_090402 | ENSRNOT00000022610  | 0.961217605 | 6.47E-07 |
| TUCP_002170 | XLOC_090402 | ENSRNOT00000020437  | 0.953682825 | 1.55E-06 |
| TUCP_002170 | XLOC_090402 | ENSRNOT00000010898  | 0.963191921 | 5.00E-07 |
| TUCP_002170 | XLOC_090402 | ENSRNOT000000047093 | 0.955884581 | 1.22E-06 |
| TUCP_002170 | XLOC_090402 | ENSRNOT00000005355  | 0.968897611 | 2.18E-07 |
| TUCP_002170 | XLOC_090402 | ENSRNOT00000079895  | 0.953013029 | 1.67E-06 |
| TUCP_002170 | XLOC_090402 | ENSRNOT00000029419  | 0.950976904 | 2.05E-06 |
| TUCP_002170 | XLOC_090402 | ENSRNOT00000027520  | 0.972489869 | 1.18E-07 |
| TUCP_002170 | XLOC_090402 | ENSRNOT000000047387 | 0.972892455 | 1.10E-07 |
| TUCP_002170 | XLOC_090402 | ENSRNOT00000038433  | 0.951537185 | 1.94E-06 |
| TUCP_002170 | XLOC_090402 | ENSRNOT000000091910 | 0.984472793 | 6.93E-09 |
| TUCP_002170 | XLOC_090402 | ENSRNOT00000039842  | 0.950923537 | 2.06E-06 |
| TUCP_002170 | XLOC_090402 | ENSRNOT000000045083 | 0.956871206 | 1.09E-06 |
| TUCP_002170 | XLOC_090402 | ENSRNOT000000084240 | 0.958098853 | 9.48E-07 |
| TUCP_002170 | XLOC_090402 | ENSRNOT00000017629  | 0.985041154 | 5.75E-09 |
| TUCP_002170 | XLOC_090402 | ENSRNOT00000017021  | 0.967661493 | 2.64E-07 |
| TUCP_002170 | XLOC_090402 | ENSRNOT000000082228 | 0.950102482 | 2.24E-06 |
| TUCP_002170 | XLOC_090402 | ENSRNOT00000004508  | 0.951442369 | 1.96E-06 |
| TUCP_002170 | XLOC_090402 | ENSRNOT000000087429 | 0.951600264 | 1.93E-06 |
| TUCP_002170 | XLOC_090402 | ENSRNOT00000009683  | 0.990205504 | 6.98E-10 |
| TUCP_002170 | XLOC_090402 | ENSRNOT000000064840 | 0.958008125 | 9.58E-07 |
| TUCP_002170 | XLOC_090402 | ENSRNOT000000084088 | 0.967216904 | 2.82E-07 |
| TUCP_002170 | XLOC_090402 | ENSRNOT000000078175 | 0.956199735 | 1.18E-06 |
| TUCP_002170 | XLOC_090402 | ENSRNOT000000064902 | 0.973223547 | 1.04E-07 |
| TUCP_002170 | XLOC_090402 | ENSRNOT00000009280  | 0.958151385 | 9.42E-07 |
| TUCP_002170 | XLOC_090402 | ENSRNOT000000088995 | 0.967284546 | 2.79E-07 |
| TUCP_002170 | XLOC_090402 | ENSRNOT00000024420  | 0.976048857 | 5.96E-08 |
| TUCP_002170 | XLOC_090402 | ENSRNOT00000002771  | 0.950556719 | 2.14E-06 |
| TUCP_002170 | XLOC_090402 | ENSRNOT00000024322  | 0.963428837 | 4.84E-07 |
| TUCP_002170 | XLOC_090402 | ENSRNOT000000090665 | 0.964010089 | 4.48E-07 |
| TUCP_002170 | XLOC_090402 | ENSRNOT000000085596 | 0.984374531 | 7.15E-09 |
| TUCP_002170 | XLOC_090402 | ENSRNOT000000081897 | 0.954846854 | 1.37E-06 |
| TUCP_002170 | XLOC_090402 | ENSRNOT000000089971 | 0.969070444 | 2.12E-07 |
| TUCP_002170 | XLOC_090402 | ENSRNOT000000065501 | 0.968538823 | 2.30E-07 |
| TUCP_002170 | XLOC_090402 | ENSRNOT00000027454  | 0.95968359  | 7.84E-07 |
| TUCP_002170 | XLOC_090402 | ENSRNOT000000091488 | 0.951012225 | 2.05E-06 |
| TUCP_002170 | XLOC_090402 | ENSRNOT00000027452  | 0.965513847 | 3.63E-07 |
| TUCP_002170 | XLOC_090402 | ENSRNOT000000076729 | 0.973984869 | 8.98E-08 |
| TUCP_002170 | XLOC_090402 | ENSRNOT000000049538 | 0.951486737 | 1.95E-06 |
| TUCP_002170 | XLOC_090402 | ENSRNOT000000082253 | 0.956710424 | 1.11E-06 |
| TUCP_002170 | XLOC_090402 | ENSRNOT000000045882 | 0.960897485 | 6.74E-07 |

|             |             |                    |              |          |
|-------------|-------------|--------------------|--------------|----------|
| TUCP_002170 | XL0C_090402 | ENSRNOT00000025092 | 0.954590303  | 1.41E-06 |
| TUCP_002170 | XL0C_090402 | ENSRNOT00000009129 | 0.955272142  | 1.31E-06 |
| TUCP_002170 | XL0C_090402 | ENSRNOT00000036951 | 0.955989971  | 1.21E-06 |
| TUCP_002170 | XL0C_090402 | ENSRNOT00000006969 | 0.95015321   | 2.23E-06 |
| TUCP_002170 | XL0C_090402 | ENSRNOT00000090420 | -0.952653109 | 1.73E-06 |
| TUCP_002170 | XL0C_090402 | ENSRNOT00000026457 | 0.975285673  | 6.97E-08 |
| TUCP_002170 | XL0C_090402 | ENSRNOT00000091265 | 0.966670601  | 3.06E-07 |
| TUCP_002170 | XL0C_090402 | ENSRNOT00000057313 | 0.972701247  | 1.14E-07 |
| TUCP_002170 | XL0C_090402 | ENSRNOT00000073930 | 0.957781115  | 9.84E-07 |
| TUCP_002170 | XL0C_090402 | ENSRNOT00000001222 | 0.960505769  | 7.08E-07 |
| TUCP_002170 | XL0C_090402 | ENSRNOT00000023645 | 0.959868032  | 7.66E-07 |
| TUCP_002170 | XL0C_090402 | ENSRNOT00000010992 | 0.972310518  | 1.22E-07 |
| TUCP_002170 | XL0C_090402 | ENSRNOT00000038647 | 0.957505968  | 1.02E-06 |
| TUCP_002170 | XL0C_090402 | ENSRNOT00000076669 | 0.968832425  | 2.20E-07 |
| TUCP_002170 | XL0C_090402 | ENSRNOT00000011984 | 0.976633507  | 5.28E-08 |
| TUCP_002170 | XL0C_090402 | ENSRNOT00000026293 | 0.974940653  | 7.46E-08 |
| TUCP_002170 | XL0C_090402 | ENSRNOT00000074653 | 0.975665144  | 6.45E-08 |
| TUCP_002170 | XL0C_090402 | ENSRNOT00000031230 | 0.985106673  | 5.63E-09 |
| TUCP_002170 | XL0C_090402 | ENSRNOT00000041096 | 0.951964419  | 1.86E-06 |
| TUCP_002170 | XL0C_090402 | ENSRNOT00000008184 | 0.960192874  | 7.36E-07 |
| TUCP_002170 | XL0C_090402 | ENSRNOT00000052288 | 0.963181677  | 5.01E-07 |
| TUCP_002170 | XL0C_090402 | ENSRNOT00000039344 | 0.952231983  | 1.81E-06 |
| TUCP_002170 | XL0C_090402 | ENSRNOT00000039631 | 0.96473087   | 4.05E-07 |
| TUCP_002170 | XL0C_090402 | ENSRNOT00000035491 | 0.960365524  | 7.21E-07 |
| TUCP_002170 | XL0C_090402 | ENSRNOT00000068322 | 0.97417267   | 8.67E-08 |
| TUCP_002170 | XL0C_090402 | ENSRNOT00000006554 | 0.956263297  | 1.17E-06 |
| TUCP_002170 | XL0C_090402 | ENSRNOT00000003296 | 0.960866337  | 6.77E-07 |
| TUCP_002170 | XL0C_090402 | ENSRNOT00000043345 | 0.9561514    | 1.19E-06 |
| TUCP_002170 | XL0C_090402 | ENSRNOT00000071694 | 0.991386143  | 3.68E-10 |
| TUCP_002170 | XL0C_090402 | ENSRNOT00000082174 | 0.969279833  | 2.05E-07 |
| TUCP_002170 | XL0C_090402 | ENSRNOT00000060696 | 0.951938521  | 1.86E-06 |
| TUCP_002170 | XL0C_090402 | ENSRNOT00000048029 | 0.950771122  | 2.10E-06 |
| TUCP_002170 | XL0C_090402 | ENSRNOT00000004412 | 0.983389146  | 9.69E-09 |
| TUCP_002170 | XL0C_090402 | ENSRNOT00000064798 | 0.951093023  | 2.03E-06 |
| TUCP_002170 | XL0C_090402 | ENSRNOT00000022485 | 0.950849848  | 2.08E-06 |
| TUCP_002170 | XL0C_090402 | ENSRNOT00000061100 | 0.958335438  | 9.22E-07 |
| TUCP_002170 | XL0C_090402 | ENSRNOT00000005387 | 0.952856158  | 1.69E-06 |
| TUCP_002170 | XL0C_090402 | ENSRNOT00000024941 | 0.991121953  | 4.28E-10 |
| TUCP_002170 | XL0C_090402 | ENSRNOT00000034704 | 0.981148681  | 1.82E-08 |
| TUCP_002170 | XL0C_090402 | ENSRNOT00000013985 | 0.953911783  | 1.52E-06 |
| TUCP_002170 | XL0C_090402 | ENSRNOT00000036750 | 0.97496481   | 7.43E-08 |
| TUCP_002170 | XL0C_090402 | ENSRNOT00000027964 | 0.950183862  | 2.22E-06 |
| TUCP_002170 | XL0C_090402 | ENSRNOT00000023428 | 0.972156075  | 1.26E-07 |
| TUCP_002170 | XL0C_090402 | ENSRNOT00000051550 | 0.956905731  | 1.09E-06 |
| TUCP_002170 | XL0C_090402 | ENSRNOT00000011041 | 0.953785249  | 1.54E-06 |
| TUCP_002170 | XL0C_090402 | ENSRNOT00000021674 | 0.950603709  | 2.13E-06 |
| TUCP_002170 | XL0C_090402 | ENSRNOT0000002292  | 0.973485354  | 9.87E-08 |
| TUCP_002170 | XL0C_090402 | ENSRNOT00000029001 | 0.960024341  | 7.52E-07 |
| TUCP_002170 | XL0C_090402 | ENSRNOT00000013661 | 0.952667232  | 1.73E-06 |
| TUCP_002170 | XL0C_090402 | ENSRNOT00000085501 | -0.957499266 | 1.02E-06 |
| TUCP_002170 | XL0C_090402 | ENSRNOT00000083799 | 0.98074602   | 2.02E-08 |

|             |             |                     |              |          |
|-------------|-------------|---------------------|--------------|----------|
| TUCP_002170 | XLOC_090402 | ENSRNOT00000009066  | 0.969743389  | 1.90E-07 |
| TUCP_000496 | XLOC_017168 | ENSRNOT000000071840 | 0.958215024  | 9.35E-07 |
| TUCP_000496 | XLOC_017168 | ENSRNOT000000060448 | 0.958215024  | 9.35E-07 |
| TUCP_000496 | XLOC_017168 | ENSRNOT000000045584 | 0.958215024  | 9.35E-07 |
| TUCP_000496 | XLOC_017168 | ENSRNOT000000077995 | 0.95670179   | 1.11E-06 |
| TUCP_000496 | XLOC_017168 | ENSRNOT000000066004 | 0.957026426  | 1.07E-06 |
| TUCP_000496 | XLOC_017168 | ENSRNOT000000075836 | 0.958215024  | 9.35E-07 |
| TUCP_000496 | XLOC_017168 | ENSRNOT000000081106 | 0.966380871  | 3.20E-07 |
| TUCP_000496 | XLOC_017168 | ENSRNOT000000082084 | 0.969675746  | 1.92E-07 |
| TUCP_000496 | XLOC_017168 | ENSRNOT000000083747 | 0.957237154  | 1.05E-06 |
| TUCP_000496 | XLOC_017168 | ENSRNOT000000092182 | 0.958215024  | 9.35E-07 |
| TUCP_000496 | XLOC_017168 | ENSRNOT000000084461 | 0.958215024  | 9.35E-07 |
| TUCP_000496 | XLOC_017168 | ENSRNOT000000047784 | 0.963064342  | 5.09E-07 |
| TUCP_000496 | XLOC_017168 | ENSRNOT000000032631 | 0.958215024  | 9.35E-07 |
| TUCP_000496 | XLOC_017168 | ENSRNOT000000079503 | 0.969537996  | 1.96E-07 |
| TUCP_000496 | XLOC_017168 | ENSRNOT000000056490 | 0.961940353  | 5.90E-07 |
| TUCP_000496 | XLOC_017168 | ENSRNOT000000054910 | 0.955491861  | 1.28E-06 |
| TUCP_000496 | XLOC_017168 | ENSRNOT000000057176 | 0.958152365  | 9.42E-07 |
| TUCP_000496 | XLOC_017168 | ENSRNOT000000093431 | 0.958215024  | 9.35E-07 |
| TUCP_000496 | XLOC_017168 | ENSRNOT000000024758 | 0.959693723  | 7.83E-07 |
| TUCP_000496 | XLOC_017168 | ENSRNOT000000092901 | 0.958215024  | 9.35E-07 |
| TUCP_000496 | XLOC_017168 | ENSRNOT000000089290 | 0.957914549  | 9.69E-07 |
| TUCP_000496 | XLOC_017168 | ENSRNOT000000071603 | 0.958088601  | 9.49E-07 |
| TUCP_000496 | XLOC_017168 | ENSRNOT000000075244 | 0.96713168   | 2.86E-07 |
| TUCP_000496 | XLOC_017168 | ENSRNOT000000091944 | 0.95643322   | 1.15E-06 |
| TUCP_000496 | XLOC_017168 | ENSRNOT000000070855 | 0.958215024  | 9.35E-07 |
| TUCP_000496 | XLOC_017168 | ENSRNOT000000084109 | 0.956096734  | 1.19E-06 |
| TUCP_000496 | XLOC_017168 | ENSRNOT00000007683  | 0.95779914   | 9.82E-07 |
| TUCP_000496 | XLOC_017168 | ENSRNOT000000016442 | 0.9581576    | 9.41E-07 |
| TUCP_000496 | XLOC_017168 | ENSRNOT000000041569 | 0.958215024  | 9.35E-07 |
| TUCP_000496 | XLOC_017168 | ENSRNOT000000087091 | 0.958215024  | 9.35E-07 |
| TUCP_000496 | XLOC_017168 | ENSRNOT000000023287 | 0.960241093  | 7.32E-07 |
| TUCP_000496 | XLOC_017168 | ENSRNOT000000026113 | 0.957337734  | 1.04E-06 |
| TUCP_000496 | XLOC_017168 | ENSRNOT000000014939 | 0.957324398  | 1.04E-06 |
| TUCP_000496 | XLOC_017168 | ENSRNOT000000090211 | 0.957579551  | 1.01E-06 |
| TUCP_000496 | XLOC_017168 | ENSRNOT000000073229 | 0.958215024  | 9.35E-07 |
| TUCP_000496 | XLOC_017168 | ENSRNOT000000060454 | 0.958215024  | 9.35E-07 |
| TUCP_000496 | XLOC_017168 | ENSRNOT000000082776 | 0.975052762  | 7.30E-08 |
| TUCP_000496 | XLOC_017168 | ENSRNOT00000009295  | 0.950410532  | 2.17E-06 |
| TUCP_001298 | XLOC_049179 | ENSRNOT000000065379 | 0.971556672  | 1.40E-07 |
| TUCP_002250 | XLOC_093849 | ENSRNOT000000013703 | -0.951339563 | 1.98E-06 |
| TUCP_002250 | XLOC_093849 | ENSRNOT00000001607  | -0.960180935 | 7.37E-07 |
| TUCP_002250 | XLOC_093849 | ENSRNOT000000026398 | 0.952834191  | 1.70E-06 |
| TUCP_002250 | XLOC_093849 | ENSRNOT000000051953 | 0.96215542   | 5.74E-07 |
| TUCP_002250 | XLOC_093849 | ENSRNOT000000026718 | -0.955438738 | 1.28E-06 |
| TUCP_002250 | XLOC_093849 | ENSRNOT00000000577  | -0.95665072  | 1.12E-06 |
| TUCP_002250 | XLOC_093849 | ENSRNOT000000077080 | 0.952303973  | 1.79E-06 |
| TUCP_002250 | XLOC_093849 | ENSRNOT000000021523 | -0.957110489 | 1.06E-06 |
| TUCP_002250 | XLOC_093849 | ENSRNOT000000083573 | 0.962468412  | 5.51E-07 |
| TUCP_002250 | XLOC_093849 | ENSRNOT000000019487 | -0.953719243 | 1.55E-06 |
| TUCP_002250 | XLOC_093849 | ENSRNOT000000088202 | 0.95255204   | 1.75E-06 |



|             |             |                    |              |          |
|-------------|-------------|--------------------|--------------|----------|
| TUCP_002250 | XLOC_093849 | ENSRNOT00000040629 | -0.954769649 | 1.38E-06 |
| TUCP_002250 | XLOC_093849 | ENSRNOT00000015566 | -0.952388805 | 1.78E-06 |
| TUCP_002250 | XLOC_093849 | ENSRNOT00000021717 | -0.961125017 | 6.55E-07 |
| TUCP_002250 | XLOC_093849 | ENSRNOT00000083414 | -0.956889454 | 1.09E-06 |
| TUCP_002250 | XLOC_093849 | ENSRNOT00000063917 | 0.968891573  | 2.18E-07 |
| TUCP_002250 | XLOC_093849 | ENSRNOT00000010641 | -0.958464299 | 9.08E-07 |
| TUCP_002250 | XLOC_093849 | ENSRNOT00000082863 | -0.95598058  | 1.21E-06 |
| TUCP_002250 | XLOC_093849 | ENSRNOT00000086310 | 0.951537333  | 1.94E-06 |
| TUCP_002250 | XLOC_093849 | ENSRNOT00000002771 | -0.950753182 | 2.10E-06 |
| TUCP_002250 | XLOC_093849 | ENSRNOT00000089829 | 0.975277397  | 6.98E-08 |
| TUCP_002250 | XLOC_093849 | ENSRNOT00000025827 | -0.953162961 | 1.64E-06 |
| TUCP_002250 | XLOC_093849 | ENSRNOT00000074389 | 0.959556706  | 7.96E-07 |
| TUCP_002250 | XLOC_093849 | ENSRNOT00000009151 | 0.966279567  | 3.24E-07 |
| TUCP_002250 | XLOC_093849 | ENSRNOT00000025308 | 0.954695098  | 1.39E-06 |
| TUCP_002250 | XLOC_093849 | ENSRNOT00000023786 | 0.957760573  | 9.86E-07 |
| TUCP_002250 | XLOC_093849 | ENSRNOT00000018431 | 0.952338174  | 1.79E-06 |
| TUCP_002250 | XLOC_093849 | ENSRNOT00000012625 | 0.951950245  | 1.86E-06 |
| TUCP_002250 | XLOC_093849 | ENSRNOT00000050102 | 0.967072934  | 2.88E-07 |
| TUCP_002250 | XLOC_093849 | ENSRNOT00000008427 | 0.959503422  | 8.01E-07 |
| TUCP_002250 | XLOC_093849 | ENSRNOT00000028888 | -0.958741242 | 8.78E-07 |
| TUCP_002250 | XLOC_093849 | ENSRNOT00000019115 | -0.966507965 | 3.14E-07 |
| TUCP_002250 | XLOC_093849 | ENSRNOT00000028074 | 0.967390807  | 2.75E-07 |
| TUCP_002250 | XLOC_093849 | ENSRNOT00000079644 | 0.954914913  | 1.36E-06 |
| TUCP_002250 | XLOC_093849 | ENSRNOT00000064450 | 0.954343072  | 1.45E-06 |
| TUCP_002250 | XLOC_093849 | ENSRNOT00000040637 | -0.952077368 | 1.84E-06 |
| TUCP_002250 | XLOC_093849 | ENSRNOT00000013695 | 0.953799202  | 1.53E-06 |
| TUCP_002250 | XLOC_093849 | ENSRNOT00000086813 | 0.950659027  | 2.12E-06 |
| TUCP_002250 | XLOC_093849 | ENSRNOT00000022861 | -0.954379517 | 1.44E-06 |
| TUCP_002250 | XLOC_093849 | ENSRNOT00000027125 | 0.950632815  | 2.13E-06 |
| TUCP_002250 | XLOC_093849 | ENSRNOT00000010083 | -0.951078813 | 2.03E-06 |
| TUCP_002250 | XLOC_093849 | ENSRNOT00000079698 | 0.951691986  | 1.91E-06 |
| TUCP_002250 | XLOC_093849 | ENSRNOT00000026231 | -0.960167522 | 7.39E-07 |
| TUCP_002250 | XLOC_093849 | ENSRNOT00000078161 | 0.952945536  | 1.68E-06 |
| TUCP_002250 | XLOC_093849 | ENSRNOT00000088677 | 0.950905885  | 2.07E-06 |
| TUCP_002250 | XLOC_093849 | ENSRNOT00000079002 | 0.952255487  | 1.80E-06 |
| TUCP_002250 | XLOC_093849 | ENSRNOT00000017779 | -0.953637824 | 1.56E-06 |
| TUCP_002250 | XLOC_093849 | ENSRNOT00000058962 | -0.957521837 | 1.01E-06 |
| TUCP_002250 | XLOC_093849 | ENSRNOT00000003600 | 0.958797737  | 8.73E-07 |
| TUCP_002250 | XLOC_093849 | ENSRNOT00000024548 | -0.95183763  | 1.88E-06 |
| TUCP_002250 | XLOC_093849 | ENSRNOT00000027200 | 0.957804458  | 9.81E-07 |
| TUCP_002250 | XLOC_093849 | ENSRNOT00000083876 | 0.951437883  | 1.96E-06 |
| TUCP_002250 | XLOC_093849 | ENSRNOT00000064588 | -0.950281624 | 2.20E-06 |
| TUCP_001841 | XLOC_075896 | ENSRNOT00000087157 | 0.967396272  | 2.75E-07 |
| TUCP_001841 | XLOC_075896 | ENSRNOT00000028625 | -0.950329506 | 2.19E-06 |
| TUCP_001841 | XLOC_075896 | ENSRNOT00000009096 | -0.955387353 | 1.29E-06 |
| TUCP_003885 | XLOC_170766 | ENSRNOT00000002797 | 0.951808708  | 1.89E-06 |
| TUCP_003885 | XLOC_170766 | ENSRNOT00000022559 | 0.960343075  | 7.23E-07 |
| TUCP_002203 | XLOC_091836 | ENSRNOT00000025981 | 0.950239161  | 2.21E-06 |
| TUCP_002203 | XLOC_091836 | ENSRNOT00000006680 | 0.951997417  | 1.85E-06 |
| TUCP_002203 | XLOC_091836 | ENSRNOT00000040859 | 0.962474171  | 5.50E-07 |
| TUCP_002203 | XLOC_091836 | ENSRNOT00000027561 | 0.977489926  | 4.38E-08 |

|             |             |                    |              |          |
|-------------|-------------|--------------------|--------------|----------|
| TUCP_002203 | XLOC_091836 | ENSRNOT00000067663 | 0.953616246  | 1.56E-06 |
| TUCP_002203 | XLOC_091836 | ENSRNOT00000003102 | 0.950592871  | 2.13E-06 |
| TUCP_002203 | XLOC_091836 | ENSRNOT00000000554 | 0.960025011  | 7.52E-07 |
| TUCP_002203 | XLOC_091836 | ENSRNOT00000017665 | 0.952445925  | 1.77E-06 |
| TUCP_002203 | XLOC_091836 | ENSRNOT00000013507 | 0.957645498  | 1.00E-06 |
| TUCP_002203 | XLOC_091836 | ENSRNOT00000034267 | 0.95135682   | 1.98E-06 |
| TUCP_002203 | XLOC_091836 | ENSRNOT00000021321 | 0.962749166  | 5.31E-07 |
| TUCP_002203 | XLOC_091836 | ENSRNOT00000077289 | 0.960132446  | 7.42E-07 |
| TUCP_002203 | XLOC_091836 | ENSRNOT00000027974 | 0.962015845  | 5.84E-07 |
| TUCP_002203 | XLOC_091836 | ENSRNOT00000077797 | 0.956846903  | 1.10E-06 |
| TUCP_002203 | XLOC_091836 | ENSRNOT00000027436 | 0.955586902  | 1.26E-06 |
| TUCP_002203 | XLOC_091836 | ENSRNOT00000075006 | -0.953324025 | 1.61E-06 |
| TUCP_002203 | XLOC_091836 | ENSRNOT00000027223 | 0.97515096   | 7.16E-08 |
| TUCP_002203 | XLOC_091836 | ENSRNOT00000016987 | 0.964157973  | 4.39E-07 |
| TUCP_002203 | XLOC_091836 | ENSRNOT00000023032 | 0.961972778  | 5.87E-07 |
| TUCP_002203 | XLOC_091836 | ENSRNOT00000027580 | 0.951437551  | 1.96E-06 |
| TUCP_002203 | XLOC_091836 | ENSRNOT00000071215 | 0.96664877   | 3.07E-07 |
| TUCP_002203 | XLOC_091836 | ENSRNOT00000039235 | 0.955185269  | 1.32E-06 |
| TUCP_002203 | XLOC_091836 | ENSRNOT00000026597 | 0.958203419  | 9.36E-07 |
| TUCP_002203 | XLOC_091836 | ENSRNOT00000048063 | 0.956037483  | 1.20E-06 |
| TUCP_001296 | XLOC_048951 | ENSRNOT00000029340 | 0.955641062  | 1.26E-06 |
| TUCP_001296 | XLOC_048951 | ENSRNOT00000038646 | 0.953192889  | 1.64E-06 |
| TUCP_001296 | XLOC_048951 | ENSRNOT00000092579 | 0.953192889  | 1.64E-06 |
| TUCP_001296 | XLOC_048951 | ENSRNOT00000076528 | 0.96161831   | 6.15E-07 |
| TUCP_001296 | XLOC_048951 | ENSRNOT00000077458 | 0.951543851  | 1.94E-06 |
| TUCP_001296 | XLOC_048951 | ENSRNOT00000083034 | 0.96122511   | 6.47E-07 |
| TUCP_001296 | XLOC_048951 | ENSRNOT00000089607 | 0.963331712  | 4.91E-07 |
| TUCP_001296 | XLOC_048951 | ENSRNOT00000021748 | 0.953192889  | 1.64E-06 |
| TUCP_001296 | XLOC_048951 | ENSRNOT00000071484 | 0.957892985  | 9.71E-07 |
| TUCP_001296 | XLOC_048951 | ENSRNOT00000078137 | 0.953192889  | 1.64E-06 |
| TUCP_001296 | XLOC_048951 | ENSRNOT00000092740 | 0.953192889  | 1.64E-06 |
| TUCP_001296 | XLOC_048951 | ENSRNOT00000070958 | 0.953192889  | 1.64E-06 |
| TUCP_001296 | XLOC_048951 | ENSRNOT00000027268 | 0.953192889  | 1.64E-06 |
| TUCP_001296 | XLOC_048951 | ENSRNOT00000004459 | 0.953192889  | 1.64E-06 |
| TUCP_001296 | XLOC_048951 | ENSRNOT00000088168 | 0.953192889  | 1.64E-06 |
| TUCP_001296 | XLOC_048951 | ENSRNOT00000088148 | 0.953192889  | 1.64E-06 |
| TUCP_001296 | XLOC_048951 | ENSRNOT00000088527 | 0.953192889  | 1.64E-06 |
| TUCP_001296 | XLOC_048951 | ENSRNOT00000078701 | 0.953192889  | 1.64E-06 |
| TUCP_001296 | XLOC_048951 | ENSRNOT00000090078 | 0.953192889  | 1.64E-06 |
| TUCP_001296 | XLOC_048951 | ENSRNOT00000089085 | 0.953192889  | 1.64E-06 |
| TUCP_001296 | XLOC_048951 | ENSRNOT00000008153 | 0.95309183   | 1.65E-06 |
| TUCP_001296 | XLOC_048951 | ENSRNOT00000009776 | 0.953192889  | 1.64E-06 |
| TUCP_003202 | XLOC_137961 | ENSRNOT00000017369 | 0.959235469  | 8.28E-07 |
| TUCP_003202 | XLOC_137961 | ENSRNOT00000070861 | 0.951165232  | 2.01E-06 |
| TUCP_003202 | XLOC_137961 | ENSRNOT00000029757 | 0.959791912  | 7.74E-07 |
| TUCP_001295 | XLOC_048949 | ENSRNOT00000024186 | 0.983200502  | 1.02E-08 |
| TUCP_001295 | XLOC_048949 | ENSRNOT00000074753 | 0.998182349  | 1.56E-13 |
| TUCP_001295 | XLOC_048949 | ENSRNOT00000004876 | 0.959071443  | 8.44E-07 |
| TUCP_001295 | XLOC_048949 | ENSRNOT00000041904 | 1            | 0        |
| TUCP_001295 | XLOC_048949 | ENSRNOT00000083487 | 0.989515314  | 9.80E-10 |
| TUCP_001295 | XLOC_048949 | ENSRNOT00000077990 | 1            | 0        |

|             |             |                    |             |          |
|-------------|-------------|--------------------|-------------|----------|
| TUCP_001295 | XLOC_048949 | ENSRNOT00000038826 | 0.99977672  | 4.37E-18 |
| TUCP_001295 | XLOC_048949 | ENSRNOT00000046842 | 0.973644314 | 9.58E-08 |
| TUCP_001295 | XLOC_048949 | ENSRNOT00000037169 | 0.980329406 | 2.24E-08 |
| TUCP_001295 | XLOC_048949 | ENSRNOT00000021243 | 0.987425406 | 2.42E-09 |
| TUCP_001295 | XLOC_048949 | ENSRNOT00000060250 | 0.999933853 | 9.97E-21 |
| TUCP_001295 | XLOC_048949 | ENSRNOT00000091934 | 1           | 0        |
| TUCP_001295 | XLOC_048949 | ENSRNOT00000046585 | 0.982941597 | 1.11E-08 |
| TUCP_001295 | XLOC_048949 | ENSRNOT00000080794 | 0.990839253 | 5.00E-10 |
| TUCP_001295 | XLOC_048949 | ENSRNOT00000014456 | 0.991697153 | 3.06E-10 |
| TUCP_001295 | XLOC_048949 | ENSRNOT00000031205 | 0.991394766 | 3.66E-10 |
| TUCP_001295 | XLOC_048949 | ENSRNOT00000044145 | 1           | 0        |
| TUCP_001295 | XLOC_048949 | ENSRNOT00000088381 | 0.989013276 | 1.24E-09 |
| TUCP_001295 | XLOC_048949 | ENSRNOT00000011743 | 0.98678427  | 3.11E-09 |
| TUCP_001295 | XLOC_048949 | ENSRNOT00000089929 | 1           | 0        |
| TUCP_001295 | XLOC_048949 | ENSRNOT00000088624 | 1           | 0        |
| TUCP_001295 | XLOC_048949 | ENSRNOT00000085659 | 0.989908621 | 8.10E-10 |
| TUCP_001295 | XLOC_048949 | ENSRNOT00000015866 | 0.994066664 | 5.73E-11 |
| TUCP_001295 | XLOC_048949 | ENSRNOT00000078633 | 1           | 0        |
| TUCP_001295 | XLOC_048949 | ENSRNOT00000034907 | 0.995318542 | 1.76E-11 |
| TUCP_001295 | XLOC_048949 | ENSRNOT00000093230 | 0.958295175 | 9.26E-07 |
| TUCP_001295 | XLOC_048949 | ENSRNOT00000051835 | 1           | 0        |
| TUCP_001295 | XLOC_048949 | ENSRNOT00000079087 | 1           | 0        |
| TUCP_001295 | XLOC_048949 | ENSRNOT00000037206 | 1           | 0        |
| TUCP_001295 | XLOC_048949 | ENSRNOT00000083261 | 0.970991658 | 1.54E-07 |
| TUCP_001295 | XLOC_048949 | ENSRNOT00000080590 | 0.999889216 | 1.31E-19 |
| TUCP_001295 | XLOC_048949 | ENSRNOT00000027552 | 0.999801024 | 2.46E-18 |
| TUCP_001295 | XLOC_048949 | ENSRNOT00000077014 | 0.995074376 | 2.26E-11 |
| TUCP_001295 | XLOC_048949 | ENSRNOT00000080453 | 0.99994332  | 4.61E-21 |
| TUCP_001295 | XLOC_048949 | ENSRNOT00000089057 | 0.968243551 | 2.41E-07 |
| TUCP_001295 | XLOC_048949 | ENSRNOT00000066839 | 0.991868612 | 2.76E-10 |
| TUCP_001295 | XLOC_048949 | ENSRNOT00000061284 | 0.955566942 | 1.27E-06 |
| TUCP_001295 | XLOC_048949 | ENSRNOT00000013423 | 0.959677621 | 7.84E-07 |
| TUCP_001295 | XLOC_048949 | ENSRNOT00000071884 | 0.974769955 | 7.72E-08 |
| TUCP_001295 | XLOC_048949 | ENSRNOT00000004128 | 0.961829362 | 5.99E-07 |
| TUCP_001295 | XLOC_048949 | ENSRNOT00000026316 | 0.964408046 | 4.24E-07 |
| TUCP_001295 | XLOC_048949 | ENSRNOT00000057729 | 0.999384184 | 6.97E-16 |
| TUCP_001295 | XLOC_048949 | ENSRNOT00000078663 | 0.975192577 | 7.10E-08 |
| TUCP_001295 | XLOC_048949 | ENSRNOT00000064250 | 0.983131977 | 1.05E-08 |
| TUCP_001295 | XLOC_048949 | ENSRNOT00000021608 | 0.965228881 | 3.78E-07 |
| TUCP_001295 | XLOC_048949 | ENSRNOT00000029634 | 0.995816134 | 1.00E-11 |
| TUCP_001295 | XLOC_048949 | ENSRNOT00000093579 | 0.958564264 | 8.97E-07 |
| TUCP_001295 | XLOC_048949 | ENSRNOT00000086349 | 0.957242511 | 1.05E-06 |
| TUCP_001295 | XLOC_048949 | ENSRNOT00000065460 | 1           | 0        |
| TUCP_001295 | XLOC_048949 | ENSRNOT00000003817 | 0.996778712 | 2.72E-12 |
| TUCP_001295 | XLOC_048949 | ENSRNOT00000016713 | 1           | 0        |
| TUCP_001295 | XLOC_048949 | ENSRNOT00000079260 | 0.996448245 | 4.42E-12 |
| TUCP_001295 | XLOC_048949 | ENSRNOT00000039294 | 1           | 0        |
| TUCP_001295 | XLOC_048949 | ENSRNOT00000092913 | 0.952980228 | 1.67E-06 |
| TUCP_001681 | XLOC_068082 | ENSRNOT00000032737 | 0.956135637 | 1.19E-06 |
| TUCP_001680 | XLOC_067766 | ENSRNOT00000073486 | 0.957525868 | 1.01E-06 |
| TUCP_001680 | XLOC_067766 | ENSRNOT00000000681 | 0.955548914 | 1.27E-06 |

|             |             |                     |              |          |
|-------------|-------------|---------------------|--------------|----------|
| TUCP_001680 | XLOC_067766 | ENSRNOT00000082191  | 0.96894051   | 2.16E-07 |
| TUCP_001680 | XLOC_067766 | ENSRNOT00000025157  | 0.951829786  | 1.88E-06 |
| TUCP_001680 | XLOC_067766 | ENSRNOT00000093254  | -0.955359807 | 1.30E-06 |
| TUCP_001680 | XLOC_067766 | ENSRNOT00000045209  | 0.959587113  | 7.93E-07 |
| TUCP_001683 | XLOC_068382 | ENSRNOT00000078014  | 0.954360528  | 1.44E-06 |
| TUCP_000224 | XLOC_006969 | ENSRNOT00000027083  | 0.952265957  | 1.80E-06 |
| TUCP_000224 | XLOC_006969 | ENSRNOT00000079633  | -0.955160693 | 1.32E-06 |
| TUCP_000224 | XLOC_006969 | ENSRNOT0000003085   | -0.965945969 | 3.41E-07 |
| TUCP_000224 | XLOC_006969 | ENSRNOT00000012052  | 0.950594008  | 2.13E-06 |
| TUCP_000224 | XLOC_006969 | ENSRNOT00000001290  | 0.950974115  | 2.05E-06 |
| TUCP_000224 | XLOC_006969 | ENSRNOT00000045443  | -0.965144713 | 3.82E-07 |
| TUCP_000224 | XLOC_006969 | ENSRNOT00000008677  | 0.956242818  | 1.17E-06 |
| TUCP_000224 | XLOC_006969 | ENSRNOT00000028625  | -0.951149766 | 2.02E-06 |
| TUCP_000224 | XLOC_006969 | ENSRNOT000000082869 | 0.963139409  | 5.04E-07 |
| TUCP_000224 | XLOC_006969 | ENSRNOT00000045233  | -0.967165396 | 2.84E-07 |
| TUCP_000224 | XLOC_006969 | ENSRNOT00000001586  | -0.963692334 | 4.67E-07 |
| TUCP_000224 | XLOC_006969 | ENSRNOT00000007185  | -0.951417295 | 1.96E-06 |
| TUCP_000224 | XLOC_006969 | ENSRNOT00000026789  | 0.967818096  | 2.58E-07 |
| TUCP_000224 | XLOC_006969 | ENSRNOT00000023033  | -0.953450425 | 1.59E-06 |
| TUCP_000224 | XLOC_006969 | ENSRNOT00000075927  | 0.951405056  | 1.97E-06 |
| TUCP_000224 | XLOC_006969 | ENSRNOT000000057045 | -0.961338261 | 6.37E-07 |
| TUCP_000224 | XLOC_006969 | ENSRNOT00000044628  | 0.964720116  | 4.06E-07 |
| TUCP_000224 | XLOC_006969 | ENSRNOT00000009318  | 0.950218328  | 2.21E-06 |
| TUCP_000224 | XLOC_006969 | ENSRNOT00000009247  | -0.966624953 | 3.08E-07 |
| TUCP_000224 | XLOC_006969 | ENSRNOT000000081906 | 0.956864262  | 1.09E-06 |
| TUCP_000224 | XLOC_006969 | ENSRNOT000000082699 | 0.950722033  | 2.11E-06 |
| TUCP_000224 | XLOC_006969 | ENSRNOT00000011731  | -0.963427343 | 4.85E-07 |
| TUCP_000224 | XLOC_006969 | ENSRNOT000000083876 | -0.952792471 | 1.71E-06 |
| TUCP_000224 | XLOC_006969 | ENSRNOT00000026710  | -0.957554227 | 1.01E-06 |
| TUCP_000224 | XLOC_006969 | ENSRNOT00000003412  | -0.963148409 | 5.03E-07 |
| TUCP_000224 | XLOC_006969 | ENSRNOT00000012881  | -0.966021421 | 3.37E-07 |
| TUCP_000224 | XLOC_006969 | ENSRNOT00000003794  | -0.970176993 | 1.77E-07 |
| TUCP_000224 | XLOC_006969 | ENSRNOT000000051294 | 0.977768961  | 4.12E-08 |
| TUCP_000224 | XLOC_006969 | ENSRNOT00000040629  | 0.951604172  | 1.93E-06 |
| TUCP_000224 | XLOC_006969 | ENSRNOT00000009894  | -0.95468285  | 1.39E-06 |
| TUCP_000224 | XLOC_006969 | ENSRNOT00000002410  | 0.955854137  | 1.23E-06 |
| TUCP_000224 | XLOC_006969 | ENSRNOT00000010316  | -0.956575107 | 1.13E-06 |
| TUCP_000224 | XLOC_006969 | ENSRNOT00000019680  | -0.970349333 | 1.72E-07 |
| TUCP_000224 | XLOC_006969 | ENSRNOT00000025362  | -0.964876873 | 3.97E-07 |
| TUCP_000224 | XLOC_006969 | ENSRNOT000000083173 | -0.952072201 | 1.84E-06 |
| TUCP_000224 | XLOC_006969 | ENSRNOT00000001759  | -0.966424882 | 3.18E-07 |
| TUCP_000224 | XLOC_006969 | ENSRNOT00000019386  | -0.950988142 | 2.05E-06 |
| TUCP_000224 | XLOC_006969 | ENSRNOT00000002151  | -0.953869894 | 1.52E-06 |
| TUCP_000224 | XLOC_006969 | ENSRNOT00000037844  | -0.96807018  | 2.48E-07 |
| TUCP_000224 | XLOC_006969 | ENSRNOT00000007634  | 0.963970129  | 4.50E-07 |
| TUCP_000224 | XLOC_006969 | ENSRNOT00000017254  | -0.962059491 | 5.81E-07 |
| TUCP_000224 | XLOC_006969 | ENSRNOT00000021001  | 0.951328046  | 1.98E-06 |
| TUCP_000224 | XLOC_006969 | ENSRNOT000000031549 | 0.954639621  | 1.40E-06 |
| TUCP_000224 | XLOC_006969 | ENSRNOT00000016730  | -0.961466686 | 6.27E-07 |
| TUCP_000224 | XLOC_006969 | ENSRNOT000000084552 | -0.955577198 | 1.26E-06 |
| TUCP_000224 | XLOC_006969 | ENSRNOT000000067688 | -0.969489066 | 1.98E-07 |

|             |             |                     |              |          |
|-------------|-------------|---------------------|--------------|----------|
| TUCP_000224 | XL0C_006969 | ENSRNOT00000001826  | 0.954159095  | 1.48E-06 |
| TUCP_000224 | XL0C_006969 | ENSRNOT000000088353 | -0.966195256 | 3.28E-07 |
| TUCP_000224 | XL0C_006969 | ENSRNOT000000083351 | -0.964128764 | 4.40E-07 |
| TUCP_000224 | XL0C_006969 | ENSRNOT000000050609 | -0.965089338 | 3.85E-07 |
| TUCP_000224 | XL0C_006969 | ENSRNOT000000017907 | -0.953362599 | 1.61E-06 |
| TUCP_000224 | XL0C_006969 | ENSRNOT000000022862 | 0.953397291  | 1.60E-06 |
| TUCP_000224 | XL0C_006969 | ENSRNOT000000082146 | -0.955001633 | 1.35E-06 |
| TUCP_000224 | XL0C_006969 | ENSRNOT000000023678 | 0.958170512  | 9.40E-07 |
| TUCP_000224 | XL0C_006969 | ENSRNOT000000086350 | -0.968741034 | 2.23E-07 |
| TUCP_000224 | XL0C_006969 | ENSRNOT000000010516 | -0.951149676 | 2.02E-06 |
| TUCP_000224 | XL0C_006969 | ENSRNOT000000015131 | -0.953716936 | 1.55E-06 |
| TUCP_000224 | XL0C_006969 | ENSRNOT000000017181 | -0.975257247 | 7.01E-08 |
| TUCP_000224 | XL0C_006969 | ENSRNOT000000026057 | -0.971510649 | 1.41E-07 |
| TUCP_000224 | XL0C_006969 | ENSRNOT000000056430 | 0.954005758  | 1.50E-06 |
| TUCP_000224 | XL0C_006969 | ENSRNOT000000067912 | -0.95681364  | 1.10E-06 |
| TUCP_000224 | XL0C_006969 | ENSRNOT000000027125 | -0.96020168  | 7.35E-07 |
| TUCP_000224 | XL0C_006969 | ENSRNOT000000086329 | 0.950161122  | 2.23E-06 |
| TUCP_000224 | XL0C_006969 | ENSRNOT000000015520 | 0.951628193  | 1.92E-06 |
| TUCP_000224 | XL0C_006969 | ENSRNOT000000015525 | -0.950188598 | 2.22E-06 |
| TUCP_000224 | XL0C_006969 | ENSRNOT000000038448 | -0.954694587 | 1.39E-06 |
| TUCP_000224 | XL0C_006969 | ENSRNOT000000050223 | -0.951479231 | 1.95E-06 |
| TUCP_000224 | XL0C_006969 | ENSRNOT000000019886 | 0.968476445  | 2.33E-07 |
| TUCP_000224 | XL0C_006969 | ENSRNOT000000027666 | 0.950603036  | 2.13E-06 |
| TUCP_000224 | XL0C_006969 | ENSRNOT00000006765  | -0.950876973 | 2.07E-06 |
| TUCP_000224 | XL0C_006969 | ENSRNOT000000077894 | -0.977543219 | 4.33E-08 |
| TUCP_000224 | XL0C_006969 | ENSRNOT000000064700 | 0.953143032  | 1.64E-06 |
| TUCP_000224 | XL0C_006969 | ENSRNOT000000014809 | -0.950097657 | 2.24E-06 |
| TUCP_000224 | XL0C_006969 | ENSRNOT000000021471 | -0.974301558 | 8.45E-08 |
| TUCP_000224 | XL0C_006969 | ENSRNOT000000023786 | -0.950452468 | 2.16E-06 |
| TUCP_000224 | XL0C_006969 | ENSRNOT000000046323 | 0.969756373  | 1.89E-07 |
| TUCP_000224 | XL0C_006969 | ENSRNOT000000090688 | 0.953442133  | 1.59E-06 |
| TUCP_000224 | XL0C_006969 | ENSRNOT000000078306 | 0.950277057  | 2.20E-06 |
| TUCP_000224 | XL0C_006969 | ENSRNOT000000072480 | -0.961378514 | 6.34E-07 |
| TUCP_000224 | XL0C_006969 | ENSRNOT000000009900 | -0.950596771 | 2.13E-06 |
| TUCP_000224 | XL0C_006969 | ENSRNOT000000078532 | -0.958616808 | 8.92E-07 |
| TUCP_000224 | XL0C_006969 | ENSRNOT000000022000 | -0.957979858 | 9.61E-07 |
| TUCP_000224 | XL0C_006969 | ENSRNOT000000070912 | -0.965256086 | 3.76E-07 |
| TUCP_000224 | XL0C_006969 | ENSRNOT000000019911 | -0.966718419 | 3.04E-07 |
| TUCP_000224 | XL0C_006969 | ENSRNOT000000043535 | 0.953670388  | 1.55E-06 |
| TUCP_000224 | XL0C_006969 | ENSRNOT000000032236 | -0.951379505 | 1.97E-06 |
| TUCP_000224 | XL0C_006969 | ENSRNOT000000005885 | -0.952914835 | 1.68E-06 |
| TUCP_000224 | XL0C_006969 | ENSRNOT000000002355 | -0.961502312 | 6.24E-07 |
| TUCP_000224 | XL0C_006969 | ENSRNOT000000003207 | -0.951139628 | 2.02E-06 |
| TUCP_000224 | XL0C_006969 | ENSRNOT000000020272 | -0.954826468 | 1.37E-06 |
| TUCP_000224 | XL0C_006969 | ENSRNOT000000047192 | -0.952724771 | 1.72E-06 |
| TUCP_000224 | XL0C_006969 | ENSRNOT000000058611 | -0.953039802 | 1.66E-06 |
| TUCP_000224 | XL0C_006969 | ENSRNOT000000011682 | -0.964837408 | 3.99E-07 |
| TUCP_000224 | XL0C_006969 | ENSRNOT000000015579 | -0.969361406 | 2.02E-07 |
| TUCP_001685 | XL0C_068850 | ENSRNOT000000019256 | 0.952423288  | 1.77E-06 |
| TUCP_001739 | XL0C_071405 | ENSRNOT000000079575 | 0.967982595  | 2.51E-07 |
| TUCP_001720 | XL0C_070271 | ENSRNOT000000015181 | 0.969486376  | 1.98E-07 |

|             |             |                    |              |          |
|-------------|-------------|--------------------|--------------|----------|
| TUCP_001720 | XLOC_070271 | ENSRNOT00000025624 | 0.969409232  | 2.00E-07 |
| TUCP_001720 | XLOC_070271 | ENSRNOT00000008387 | 0.964621961  | 4.11E-07 |
| TUCP_001721 | XLOC_070275 | ENSRNOT00000026966 | 0.970322306  | 1.73E-07 |
| TUCP_001721 | XLOC_070275 | ENSRNOT00000068416 | 0.999999782  | 3.88E-33 |
| TUCP_001721 | XLOC_070275 | ENSRNOT00000086036 | 0.999958274  | 9.96E-22 |
| TUCP_001721 | XLOC_070275 | ENSRNOT00000026803 | 0.985046075  | 5.74E-09 |
| TUCP_001721 | XLOC_070275 | ENSRNOT00000047527 | 0.963071698  | 5.08E-07 |
| TUCP_001721 | XLOC_070275 | ENSRNOT00000042251 | 0.999344295  | 9.53E-16 |
| TUCP_001721 | XLOC_070275 | ENSRNOT0000002984  | 0.998397069  | 8.31E-14 |
| TUCP_001721 | XLOC_070275 | ENSRNOT00000083764 | 0.999541808  | 1.59E-16 |
| TUCP_001721 | XLOC_070275 | ENSRNOT00000076802 | 0.962695843  | 5.34E-07 |
| TUCP_001721 | XLOC_070275 | ENSRNOT00000092365 | 0.999161651  | 3.26E-15 |
| TUCP_001721 | XLOC_070275 | ENSRNOT00000079275 | 0.999901911  | 7.15E-20 |
| TUCP_001721 | XLOC_070275 | ENSRNOT00000066062 | -0.959706712 | 7.82E-07 |
| TUCP_001721 | XLOC_070275 | ENSRNOT00000045301 | 1            | 0        |
| TUCP_001721 | XLOC_070275 | ENSRNOT00000041186 | 0.999975782  | 6.56E-23 |
| TUCP_001721 | XLOC_070275 | ENSRNOT00000010092 | 0.977711778  | 4.17E-08 |
| TUCP_001721 | XLOC_070275 | ENSRNOT00000076182 | 1            | 0        |
| TUCP_001721 | XLOC_070275 | ENSRNOT00000087404 | 0.951157664  | 2.02E-06 |
| TUCP_001721 | XLOC_070275 | ENSRNOT00000052003 | 0.95837331   | 9.18E-07 |
| TUCP_001721 | XLOC_070275 | ENSRNOT00000081709 | 0.998485154  | 6.27E-14 |
| TUCP_001721 | XLOC_070275 | ENSRNOT00000005726 | 0.959610119  | 7.91E-07 |
| TUCP_001721 | XLOC_070275 | ENSRNOT00000014103 | 1            | 0        |
| TUCP_001721 | XLOC_070275 | ENSRNOT00000057433 | 0.964930601  | 3.94E-07 |
| TUCP_001721 | XLOC_070275 | ENSRNOT00000082289 | 0.998931566  | 1.09E-14 |
| TUCP_001721 | XLOC_070275 | ENSRNOT00000092516 | 0.957459323  | 1.02E-06 |
| TUCP_001721 | XLOC_070275 | ENSRNOT0000008898  | 0.990039768  | 7.59E-10 |
| TUCP_001721 | XLOC_070275 | ENSRNOT00000083493 | 0.995461232  | 1.51E-11 |
| TUCP_001721 | XLOC_070275 | ENSRNOT00000092563 | 0.987201084  | 2.65E-09 |
| TUCP_001721 | XLOC_070275 | ENSRNOT00000088893 | 1            | 0        |
| TUCP_001721 | XLOC_070275 | ENSRNOT00000076693 | 0.955029582  | 1.34E-06 |
| TUCP_001721 | XLOC_070275 | ENSRNOT00000081014 | 1            | 0        |
| TUCP_001721 | XLOC_070275 | ENSRNOT00000067543 | 1            | 0        |
| TUCP_001721 | XLOC_070275 | ENSRNOT00000050968 | 0.996816433  | 2.56E-12 |
| TUCP_001721 | XLOC_070275 | ENSRNOT00000042201 | 0.960235595  | 7.32E-07 |
| TUCP_001721 | XLOC_070275 | ENSRNOT00000004373 | 0.957315473  | 1.04E-06 |
| TUCP_001721 | XLOC_070275 | ENSRNOT00000063929 | 1            | 0        |
| TUCP_001721 | XLOC_070275 | ENSRNOT00000057472 | 1            | 0        |
| TUCP_001721 | XLOC_070275 | ENSRNOT00000041617 | 0.952449765  | 1.77E-06 |
| TUCP_001721 | XLOC_070275 | ENSRNOT00000091763 | 0.986310385  | 3.70E-09 |
| TUCP_001721 | XLOC_070275 | ENSRNOT00000022200 | 0.998491303  | 6.14E-14 |
| TUCP_001721 | XLOC_070275 | ENSRNOT00000067379 | 0.997260967  | 1.21E-12 |
| TUCP_001721 | XLOC_070275 | ENSRNOT00000020786 | 0.976428448  | 5.51E-08 |
| TUCP_001721 | XLOC_070275 | ENSRNOT00000050543 | 0.999722223  | 1.30E-17 |
| TUCP_001721 | XLOC_070275 | ENSRNOT00000089306 | 0.999866649  | 3.32E-19 |
| TUCP_001721 | XLOC_070275 | ENSRNOT00000052367 | 0.997268394  | 1.19E-12 |
| TUCP_001721 | XLOC_070275 | ENSRNOT00000090658 | 1            | 0        |
| TUCP_001721 | XLOC_070275 | ENSRNOT00000022571 | 0.995290013  | 1.81E-11 |
| TUCP_001721 | XLOC_070275 | ENSRNOT00000044520 | 0.981817158  | 1.52E-08 |
| TUCP_001721 | XLOC_070275 | ENSRNOT00000065448 | 0.963648868  | 4.70E-07 |
| TUCP_001727 | XLOC_070991 | ENSRNOT00000027263 | 0.95117761   | 2.01E-06 |

|             |             |                    |              |          |
|-------------|-------------|--------------------|--------------|----------|
| TUCP_002178 | XLOC_090978 | ENSRNOT00000009497 | -0.953526556 | 1.58E-06 |
| TUCP_002178 | XLOC_090978 | ENSRNOT00000001198 | -0.977998225 | 3.91E-08 |
| TUCP_002178 | XLOC_090978 | ENSRNOT00000020749 | -0.96236533  | 5.58E-07 |
| TUCP_002178 | XLOC_090978 | ENSRNOT00000023259 | -0.953386428 | 1.60E-06 |
| TUCP_002178 | XLOC_090978 | ENSRNOT00000000689 | -0.950098865 | 2.24E-06 |
| TUCP_002178 | XLOC_090978 | ENSRNOT00000036098 | -0.954862999 | 1.37E-06 |
| TUCP_002178 | XLOC_090978 | ENSRNOT00000056842 | -0.963486688 | 4.81E-07 |
| TUCP_002178 | XLOC_090978 | ENSRNOT00000009998 | -0.959468663 | 8.05E-07 |
| TUCP_002178 | XLOC_090978 | ENSRNOT00000076964 | -0.950731602 | 2.10E-06 |
| TUCP_002178 | XLOC_090978 | ENSRNOT00000009404 | -0.951461703 | 1.96E-06 |
| TUCP_001040 | XLOC_039795 | ENSRNOT00000041617 | 0.9524105    | 1.77E-06 |
| TUCP_001040 | XLOC_039795 | ENSRNOT00000083067 | 0.950669047  | 2.12E-06 |
| TUCP_001040 | XLOC_039795 | ENSRNOT00000076802 | 0.965750484  | 3.50E-07 |
| TUCP_001040 | XLOC_039795 | ENSRNOT00000020071 | 0.962798675  | 5.27E-07 |
| TUCP_001040 | XLOC_039795 | ENSRNOT00000088078 | 0.972030604  | 1.29E-07 |
| TUCP_001040 | XLOC_039795 | ENSRNOT00000043486 | 0.954074173  | 1.49E-06 |
| TUCP_001040 | XLOC_039795 | ENSRNOT00000047564 | 0.983295427  | 9.96E-09 |
| TUCP_001040 | XLOC_039795 | ENSRNOT00000017412 | 0.951287299  | 1.99E-06 |
| TUCP_001040 | XLOC_039795 | ENSRNOT00000084847 | 0.963795361  | 4.61E-07 |
| TUCP_001040 | XLOC_039795 | ENSRNOT00000082002 | 0.967017372  | 2.91E-07 |
| TUCP_001040 | XLOC_039795 | ENSRNOT00000065448 | 0.971883746  | 1.32E-07 |
| TUCP_001040 | XLOC_039795 | ENSRNOT00000005726 | 0.95000183   | 2.26E-06 |
| TUCP_001040 | XLOC_039795 | ENSRNOT00000085570 | 0.958243984  | 9.32E-07 |
| TUCP_000640 | XLOC_023538 | ENSRNOT00000008988 | 0.950093338  | 2.24E-06 |
| TUCP_000640 | XLOC_023538 | ENSRNOT00000042890 | 0.951381154  | 1.97E-06 |
| TUCP_000640 | XLOC_023538 | ENSRNOT00000003511 | 0.964395536  | 4.24E-07 |
| TUCP_000640 | XLOC_023538 | ENSRNOT00000086144 | 0.975081594  | 7.26E-08 |
| TUCP_000640 | XLOC_023538 | ENSRNOT00000005505 | 0.967510488  | 2.70E-07 |
| TUCP_000640 | XLOC_023538 | ENSRNOT00000023623 | 0.953856093  | 1.52E-06 |
| TUCP_000640 | XLOC_023538 | ENSRNOT00000023607 | 0.953726177  | 1.55E-06 |
| TUCP_000640 | XLOC_023538 | ENSRNOT00000072682 | 0.969351742  | 2.02E-07 |
| TUCP_000640 | XLOC_023538 | ENSRNOT00000016804 | 0.953791142  | 1.54E-06 |
| TUCP_000640 | XLOC_023538 | ENSRNOT00000091359 | -0.967804989 | 2.58E-07 |
| TUCP_000640 | XLOC_023538 | ENSRNOT00000065111 | 0.964751539  | 4.04E-07 |
| TUCP_000640 | XLOC_023538 | ENSRNOT00000009975 | 0.959958459  | 7.58E-07 |
| TUCP_000640 | XLOC_023538 | ENSRNOT00000024583 | -0.95003074  | 2.26E-06 |
| TUCP_000640 | XLOC_023538 | ENSRNOT00000010701 | 0.978174388  | 3.76E-08 |
| TUCP_000640 | XLOC_023538 | ENSRNOT00000023661 | 0.96019782   | 7.36E-07 |
| TUCP_000640 | XLOC_023538 | ENSRNOT00000034482 | 0.961892576  | 5.94E-07 |
| TUCP_000640 | XLOC_023538 | ENSRNOT00000006109 | 0.954964423  | 1.35E-06 |
| TUCP_000640 | XLOC_023538 | ENSRNOT00000041762 | 0.966381066  | 3.20E-07 |
| TUCP_000640 | XLOC_023538 | ENSRNOT00000089358 | 0.96650758   | 3.14E-07 |
| TUCP_000640 | XLOC_023538 | ENSRNOT00000006697 | 0.968412392  | 2.35E-07 |
| TUCP_001045 | XLOC_039894 | ENSRNOT00000031904 | 0.960893819  | 6.74E-07 |
| TUCP_001045 | XLOC_039894 | ENSRNOT00000013914 | -0.956340443 | 1.16E-06 |
| TUCP_001045 | XLOC_039894 | ENSRNOT00000082999 | -0.958282647 | 9.28E-07 |
| TUCP_001045 | XLOC_039894 | ENSRNOT00000000743 | 0.959701249  | 7.82E-07 |
| TUCP_001045 | XLOC_039894 | ENSRNOT00000013745 | -0.959247438 | 8.27E-07 |
| TUCP_001045 | XLOC_039894 | ENSRNOT00000027083 | 0.975135006  | 7.18E-08 |
| TUCP_001045 | XLOC_039894 | ENSRNOT00000014373 | -0.961681515 | 6.10E-07 |
| TUCP_001045 | XLOC_039894 | ENSRNOT00000026279 | -0.963346403 | 4.90E-07 |

|             |             |                    |              |          |
|-------------|-------------|--------------------|--------------|----------|
| TUCP_001045 | XLOC_039894 | ENSRNOT00000015568 | -0.957856952 | 9.75E-07 |
| TUCP_001045 | XLOC_039894 | ENSRNOT00000013695 | -0.950095062 | 2.24E-06 |
| TUCP_001045 | XLOC_039894 | ENSRNOT00000003085 | -0.978650864 | 3.37E-08 |
| TUCP_001045 | XLOC_039894 | ENSRNOT00000002037 | -0.977175581 | 4.70E-08 |
| TUCP_001045 | XLOC_039894 | ENSRNOT00000060607 | -0.96118195  | 6.50E-07 |
| TUCP_001045 | XLOC_039894 | ENSRNOT00000083173 | -0.965564777 | 3.60E-07 |
| TUCP_001045 | XLOC_039894 | ENSRNOT00000045443 | -0.954349281 | 1.45E-06 |
| TUCP_001045 | XLOC_039894 | ENSRNOT00000031458 | 0.951093781  | 2.03E-06 |
| TUCP_001045 | XLOC_039894 | ENSRNOT00000072771 | 0.95239762   | 1.78E-06 |
| TUCP_001045 | XLOC_039894 | ENSRNOT00000059524 | -0.976563192 | 5.35E-08 |
| TUCP_001045 | XLOC_039894 | ENSRNOT00000019680 | -0.972447725 | 1.19E-07 |
| TUCP_001045 | XLOC_039894 | ENSRNOT00000050721 | -0.962032176 | 5.83E-07 |
| TUCP_001045 | XLOC_039894 | ENSRNOT00000017476 | -0.956800057 | 1.10E-06 |
| TUCP_001045 | XLOC_039894 | ENSRNOT00000042125 | 0.952088207  | 1.83E-06 |
| TUCP_001045 | XLOC_039894 | ENSRNOT00000064305 | -0.968336523 | 2.38E-07 |
| TUCP_001045 | XLOC_039894 | ENSRNOT00000022620 | 0.977744669  | 4.14E-08 |
| TUCP_001045 | XLOC_039894 | ENSRNOT00000016649 | 0.953059923  | 1.66E-06 |
| TUCP_001045 | XLOC_039894 | ENSRNOT00000002152 | -0.950662401 | 2.12E-06 |
| TUCP_001045 | XLOC_039894 | ENSRNOT00000045233 | -0.966061347 | 3.35E-07 |
| TUCP_001045 | XLOC_039894 | ENSRNOT00000003715 | -0.957577654 | 1.01E-06 |
| TUCP_001045 | XLOC_039894 | ENSRNOT00000018696 | -0.956627388 | 1.12E-06 |
| TUCP_001045 | XLOC_039894 | ENSRNOT00000067170 | -0.958867437 | 8.65E-07 |
| TUCP_001045 | XLOC_039894 | ENSRNOT00000066204 | -0.971060326 | 1.52E-07 |
| TUCP_001045 | XLOC_039894 | ENSRNOT00000060432 | -0.951116857 | 2.02E-06 |
| TUCP_001045 | XLOC_039894 | ENSRNOT00000001586 | -0.972284472 | 1.23E-07 |
| TUCP_001045 | XLOC_039894 | ENSRNOT00000001468 | -0.96898823  | 2.14E-07 |
| TUCP_001045 | XLOC_039894 | ENSRNOT00000027653 | -0.956738404 | 1.11E-06 |
| TUCP_001045 | XLOC_039894 | ENSRNOT00000003247 | -0.952884088 | 1.69E-06 |
| TUCP_001045 | XLOC_039894 | ENSRNOT00000085311 | -0.967484962 | 2.71E-07 |
| TUCP_001045 | XLOC_039894 | ENSRNOT00000014479 | -0.95552146  | 1.27E-06 |
| TUCP_001045 | XLOC_039894 | ENSRNOT00000013043 | -0.956239912 | 1.17E-06 |
| TUCP_001045 | XLOC_039894 | ENSRNOT00000003326 | -0.951263527 | 1.99E-06 |
| TUCP_001045 | XLOC_039894 | ENSRNOT00000073564 | -0.951962033 | 1.86E-06 |
| TUCP_001045 | XLOC_039894 | ENSRNOT00000025284 | -0.950751505 | 2.10E-06 |
| TUCP_001045 | XLOC_039894 | ENSRNOT00000073569 | -0.967539704 | 2.69E-07 |
| TUCP_001045 | XLOC_039894 | ENSRNOT00000016541 | -0.976516004 | 5.41E-08 |
| TUCP_001045 | XLOC_039894 | ENSRNOT00000065304 | -0.962681893 | 5.35E-07 |
| TUCP_001045 | XLOC_039894 | ENSRNOT00000027301 | -0.957153675 | 1.06E-06 |
| TUCP_001045 | XLOC_039894 | ENSRNOT00000025550 | -0.96736048  | 2.76E-07 |
| TUCP_001045 | XLOC_039894 | ENSRNOT00000023033 | -0.950166336 | 2.23E-06 |
| TUCP_001045 | XLOC_039894 | ENSRNOT00000005644 | -0.953071121 | 1.66E-06 |
| TUCP_001045 | XLOC_039894 | ENSRNOT00000057045 | -0.961384376 | 6.34E-07 |
| TUCP_001045 | XLOC_039894 | ENSRNOT00000035320 | -0.951160129 | 2.02E-06 |
| TUCP_001045 | XLOC_039894 | ENSRNOT00000090338 | -0.954293499 | 1.45E-06 |
| TUCP_001045 | XLOC_039894 | ENSRNOT00000009247 | -0.96600558  | 3.38E-07 |
| TUCP_001045 | XLOC_039894 | ENSRNOT00000025075 | 0.951931305  | 1.86E-06 |
| TUCP_001045 | XLOC_039894 | ENSRNOT00000022241 | -0.955075491 | 1.34E-06 |
| TUCP_001045 | XLOC_039894 | ENSRNOT00000082699 | 0.958049776  | 9.53E-07 |
| TUCP_001045 | XLOC_039894 | ENSRNOT00000039377 | -0.954989108 | 1.35E-06 |
| TUCP_001045 | XLOC_039894 | ENSRNOT00000085403 | 0.974925174  | 7.49E-08 |
| TUCP_001045 | XLOC_039894 | ENSRNOT0000004007  | -0.958999044 | 8.52E-07 |



|             |             |                    |              |          |
|-------------|-------------|--------------------|--------------|----------|
| TUCP_001045 | XLOC_039894 | ENSRNOT00000019848 | -0.967022904 | 2.91E-07 |
| TUCP_001045 | XLOC_039894 | ENSRNOT00000011731 | -0.956304735 | 1.17E-06 |
| TUCP_001045 | XLOC_039894 | ENSRNOT00000002837 | -0.956996715 | 1.08E-06 |
| TUCP_001045 | XLOC_039894 | ENSRNOT00000066041 | -0.960718524 | 6.90E-07 |
| TUCP_001045 | XLOC_039894 | ENSRNOT00000084674 | -0.953549195 | 1.58E-06 |
| TUCP_001045 | XLOC_039894 | ENSRNOT00000091602 | -0.959403307 | 8.11E-07 |
| TUCP_001045 | XLOC_039894 | ENSRNOT0000009000  | -0.960902677 | 6.74E-07 |
| TUCP_001045 | XLOC_039894 | ENSRNOT00000068269 | -0.967154517 | 2.85E-07 |
| TUCP_001045 | XLOC_039894 | ENSRNOT0000007044  | -0.964491311 | 4.19E-07 |
| TUCP_001045 | XLOC_039894 | ENSRNOT00000065673 | -0.963536436 | 4.77E-07 |
| TUCP_001045 | XLOC_039894 | ENSRNOT0000003412  | -0.972591671 | 1.16E-07 |
| TUCP_001045 | XLOC_039894 | ENSRNOT00000012881 | -0.973607811 | 9.65E-08 |
| TUCP_001045 | XLOC_039894 | ENSRNOT00000003794 | -0.977532738 | 4.34E-08 |
| TUCP_001045 | XLOC_039894 | ENSRNOT00000035628 | -0.978029017 | 3.89E-08 |
| TUCP_001045 | XLOC_039894 | ENSRNOT00000011326 | -0.95316467  | 1.64E-06 |
| TUCP_001045 | XLOC_039894 | ENSRNOT00000049927 | -0.968995682 | 2.14E-07 |
| TUCP_001045 | XLOC_039894 | ENSRNOT00000022000 | -0.964331487 | 4.28E-07 |
| TUCP_001045 | XLOC_039894 | ENSRNOT00000020702 | -0.963126815 | 5.05E-07 |
| TUCP_001045 | XLOC_039894 | ENSRNOT00000040629 | 0.960423631  | 7.15E-07 |
| TUCP_001045 | XLOC_039894 | ENSRNOT00000010381 | 0.961724021  | 6.07E-07 |
| TUCP_001045 | XLOC_039894 | ENSRNOT00000011499 | -0.962883487 | 5.21E-07 |
| TUCP_001045 | XLOC_039894 | ENSRNOT00000088133 | -0.961618378 | 6.15E-07 |
| TUCP_001045 | XLOC_039894 | ENSRNOT00000070809 | -0.956934964 | 1.09E-06 |
| TUCP_001045 | XLOC_039894 | ENSRNOT00000026398 | -0.970608697 | 1.64E-07 |
| TUCP_001045 | XLOC_039894 | ENSRNOT00000036338 | -0.968732014 | 2.23E-07 |
| TUCP_001045 | XLOC_039894 | ENSRNOT00000082686 | -0.970825104 | 1.59E-07 |
| TUCP_001045 | XLOC_039894 | ENSRNOT00000076181 | -0.955598669 | 1.26E-06 |
| TUCP_001045 | XLOC_039894 | ENSRNOT00000037039 | -0.96437408  | 4.26E-07 |
| TUCP_001045 | XLOC_039894 | ENSRNOT00000027121 | 0.95084639   | 2.08E-06 |
| TUCP_001045 | XLOC_039894 | ENSRNOT00000015579 | -0.972548044 | 1.17E-07 |
| TUCP_001045 | XLOC_039894 | ENSRNOT00000026462 | -0.956037634 | 1.20E-06 |
| TUCP_001045 | XLOC_039894 | ENSRNOT00000070794 | -0.960924853 | 6.72E-07 |
| TUCP_001045 | XLOC_039894 | ENSRNOT00000020932 | -0.96083057  | 6.80E-07 |
| TUCP_001045 | XLOC_039894 | ENSRNOT00000026928 | -0.957244997 | 1.05E-06 |
| TUCP_001045 | XLOC_039894 | ENSRNOT00000082508 | -0.96761054  | 2.66E-07 |
| TUCP_001045 | XLOC_039894 | ENSRNOT00000016351 | -0.957418588 | 1.03E-06 |
| TUCP_001045 | XLOC_039894 | ENSRNOT00000047192 | -0.957038614 | 1.07E-06 |
| TUCP_001045 | XLOC_039894 | ENSRNOT00000083632 | -0.950549696 | 2.14E-06 |
| TUCP_001045 | XLOC_039894 | ENSRNOT00000077163 | -0.953885898 | 1.52E-06 |
| TUCP_001045 | XLOC_039894 | ENSRNOT0000009900  | -0.970788831 | 1.59E-07 |
| TUCP_001045 | XLOC_039894 | ENSRNOT00000091864 | -0.95420864  | 1.47E-06 |
| TUCP_001045 | XLOC_039894 | ENSRNOT00000022714 | 0.958919547  | 8.60E-07 |
| TUCP_001045 | XLOC_039894 | ENSRNOT00000018646 | -0.955196959 | 1.32E-06 |
| TUCP_001045 | XLOC_039894 | ENSRNOT00000059599 | -0.974210356 | 8.60E-08 |
| TUCP_001045 | XLOC_039894 | ENSRNOT00000061304 | -0.962026988 | 5.83E-07 |
| TUCP_001045 | XLOC_039894 | ENSRNOT00000007002 | -0.951017602 | 2.04E-06 |
| TUCP_001045 | XLOC_039894 | ENSRNOT00000083995 | -0.953458887 | 1.59E-06 |
| TUCP_001045 | XLOC_039894 | ENSRNOT00000025308 | -0.95141149  | 1.97E-06 |
| TUCP_001045 | XLOC_039894 | ENSRNOT00000003540 | -0.961737945 | 6.06E-07 |
| TUCP_001045 | XLOC_039894 | ENSRNOT00000026641 | 0.95388581   | 1.52E-06 |
| TUCP_001045 | XLOC_039894 | ENSRNOT00000017688 | -0.950636244 | 2.12E-06 |

|             |             |                     |              |          |
|-------------|-------------|---------------------|--------------|----------|
| TUCP_001045 | XLOC_039894 | ENSRNOT0000001366   | -0.955503592 | 1.27E-06 |
| TUCP_001045 | XLOC_039894 | ENSRNOT00000019386  | -0.97913628  | 3.01E-08 |
| TUCP_001045 | XLOC_039894 | ENSRNOT00000017469  | -0.963111238 | 5.06E-07 |
| TUCP_001045 | XLOC_039894 | ENSRNOT00000019130  | -0.960709509 | 6.90E-07 |
| TUCP_001045 | XLOC_039894 | ENSRNOT00000015757  | -0.960031039 | 7.51E-07 |
| TUCP_001045 | XLOC_039894 | ENSRNOT00000040348  | -0.955414782 | 1.29E-06 |
| TUCP_001045 | XLOC_039894 | ENSRNOT00000002151  | -0.971804411 | 1.34E-07 |
| TUCP_001045 | XLOC_039894 | ENSRNOT00000021636  | -0.975676445 | 6.44E-08 |
| TUCP_001045 | XLOC_039894 | ENSRNOT00000009333  | -0.958411814 | 9.14E-07 |
| TUCP_001045 | XLOC_039894 | ENSRNOT00000008865  | -0.950193697 | 2.22E-06 |
| TUCP_001045 | XLOC_039894 | ENSRNOT00000007634  | 0.951376334  | 1.97E-06 |
| TUCP_001045 | XLOC_039894 | ENSRNOT00000017254  | -0.954585513 | 1.41E-06 |
| TUCP_001045 | XLOC_039894 | ENSRNOT000000073675 | -0.951238253 | 2.00E-06 |
| TUCP_001045 | XLOC_039894 | ENSRNOT00000010674  | -0.955307543 | 1.30E-06 |
| TUCP_001045 | XLOC_039894 | ENSRNOT00000020267  | 0.959998711  | 7.54E-07 |
| TUCP_001045 | XLOC_039894 | ENSRNOT00000023664  | -0.969590824 | 1.95E-07 |
| TUCP_001045 | XLOC_039894 | ENSRNOT00000000177  | -0.960623445 | 6.98E-07 |
| TUCP_001045 | XLOC_039894 | ENSRNOT00000016730  | -0.95822992  | 9.33E-07 |
| TUCP_001045 | XLOC_039894 | ENSRNOT000000084552 | -0.950160226 | 2.23E-06 |
| TUCP_001045 | XLOC_039894 | ENSRNOT000000081881 | 0.962859638  | 5.23E-07 |
| TUCP_001045 | XLOC_039894 | ENSRNOT000000004319 | -0.958126566 | 9.45E-07 |
| TUCP_001045 | XLOC_039894 | ENSRNOT000000028625 | -0.971512502 | 1.41E-07 |
| TUCP_001045 | XLOC_039894 | ENSRNOT000000087146 | 0.971600753  | 1.39E-07 |
| TUCP_001045 | XLOC_039894 | ENSRNOT000000075992 | -0.957892319 | 9.71E-07 |
| TUCP_001045 | XLOC_039894 | ENSRNOT000000007314 | -0.967558068 | 2.68E-07 |
| TUCP_001045 | XLOC_039894 | ENSRNOT00000017692  | -0.970304461 | 1.73E-07 |
| TUCP_001045 | XLOC_039894 | ENSRNOT00000018549  | -0.956831374 | 1.10E-06 |
| TUCP_001045 | XLOC_039894 | ENSRNOT000000078644 | 0.952942225  | 1.68E-06 |
| TUCP_001045 | XLOC_039894 | ENSRNOT000000088353 | -0.960883231 | 6.75E-07 |
| TUCP_001045 | XLOC_039894 | ENSRNOT000000000532 | -0.960175839 | 7.38E-07 |
| TUCP_001045 | XLOC_039894 | ENSRNOT00000023567  | -0.96160287  | 6.16E-07 |
| TUCP_001045 | XLOC_039894 | ENSRNOT000000071239 | -0.9537811   | 1.54E-06 |
| TUCP_001045 | XLOC_039894 | ENSRNOT000000021716 | 0.964073989  | 4.44E-07 |
| TUCP_001045 | XLOC_039894 | ENSRNOT000000038448 | -0.960931366 | 6.71E-07 |
| TUCP_001045 | XLOC_039894 | ENSRNOT000000090987 | -0.954455299 | 1.43E-06 |
| TUCP_001045 | XLOC_039894 | ENSRNOT000000083351 | -0.959881415 | 7.65E-07 |
| TUCP_001045 | XLOC_039894 | ENSRNOT000000050609 | -0.960392084 | 7.18E-07 |
| TUCP_001045 | XLOC_039894 | ENSRNOT000000006765 | -0.969256572 | 2.05E-07 |
| TUCP_001045 | XLOC_039894 | ENSRNOT000000084563 | -0.96295379  | 5.16E-07 |
| TUCP_001045 | XLOC_039894 | ENSRNOT000000090420 | -0.963494489 | 4.80E-07 |
| TUCP_001045 | XLOC_039894 | ENSRNOT00000017907  | -0.97242356  | 1.20E-07 |
| TUCP_001045 | XLOC_039894 | ENSRNOT000000064068 | -0.960007484 | 7.53E-07 |
| TUCP_001045 | XLOC_039894 | ENSRNOT00000016447  | -0.968540121 | 2.30E-07 |
| TUCP_001045 | XLOC_039894 | ENSRNOT000000003691 | -0.950616282 | 2.13E-06 |
| TUCP_001045 | XLOC_039894 | ENSRNOT000000001720 | -0.95425819  | 1.46E-06 |
| TUCP_001045 | XLOC_039894 | ENSRNOT000000074261 | -0.950439376 | 2.17E-06 |
| TUCP_001045 | XLOC_039894 | ENSRNOT000000067135 | -0.955182536 | 1.32E-06 |
| TUCP_001045 | XLOC_039894 | ENSRNOT000000023678 | 0.952365134  | 1.78E-06 |
| TUCP_001045 | XLOC_039894 | ENSRNOT000000028434 | -0.971675801 | 1.37E-07 |
| TUCP_001045 | XLOC_039894 | ENSRNOT000000086350 | -0.970350336 | 1.72E-07 |
| TUCP_001045 | XLOC_039894 | ENSRNOT00000010516  | -0.955813232 | 1.23E-06 |

|             |             |                    |              |          |
|-------------|-------------|--------------------|--------------|----------|
| TUCP_001045 | XLOC_039894 | ENSRNOT0000007736  | -0.961679526 | 6.10E-07 |
| TUCP_001045 | XLOC_039894 | ENSRNOT00000037363 | -0.961093401 | 6.58E-07 |
| TUCP_001045 | XLOC_039894 | ENSRNOT00000022478 | -0.966425941 | 3.18E-07 |
| TUCP_001045 | XLOC_039894 | ENSRNOT00000000529 | -0.953557255 | 1.57E-06 |
| TUCP_001045 | XLOC_039894 | ENSRNOT00000003207 | -0.951846807 | 1.88E-06 |
| TUCP_001045 | XLOC_039894 | ENSRNOT00000030329 | -0.961147708 | 6.53E-07 |
| TUCP_001045 | XLOC_039894 | ENSRNOT00000026057 | -0.97545027  | 6.74E-08 |
| TUCP_001045 | XLOC_039894 | ENSRNOT00000023414 | 0.960583018  | 7.01E-07 |
| TUCP_001045 | XLOC_039894 | ENSRNOT00000025936 | -0.957904961 | 9.70E-07 |
| TUCP_001045 | XLOC_039894 | ENSRNOT00000033450 | -0.965107148 | 3.84E-07 |
| TUCP_001045 | XLOC_039894 | ENSRNOT00000017224 | -0.957111008 | 1.06E-06 |
| TUCP_001045 | XLOC_039894 | ENSRNOT00000067912 | -0.953692762 | 1.55E-06 |
| TUCP_001045 | XLOC_039894 | ENSRNOT00000033196 | -0.966010721 | 3.37E-07 |
| TUCP_001045 | XLOC_039894 | ENSRNOT00000027125 | -0.971105749 | 1.51E-07 |
| TUCP_001045 | XLOC_039894 | ENSRNOT00000065288 | -0.961884233 | 5.94E-07 |
| TUCP_001045 | XLOC_039894 | ENSRNOT00000089062 | 0.980321362  | 2.25E-08 |
| TUCP_001045 | XLOC_039894 | ENSRNOT00000045311 | -0.957385434 | 1.03E-06 |
| TUCP_001045 | XLOC_039894 | ENSRNOT00000061916 | -0.95586112  | 1.23E-06 |
| TUCP_001045 | XLOC_039894 | ENSRNOT00000014749 | 0.95162332   | 1.92E-06 |
| TUCP_001045 | XLOC_039894 | ENSRNOT00000010753 | -0.975586339 | 6.56E-08 |
| TUCP_001045 | XLOC_039894 | ENSRNOT00000073834 | -0.960665601 | 6.94E-07 |
| TUCP_001045 | XLOC_039894 | ENSRNOT00000009122 | 0.954304836  | 1.45E-06 |
| TUCP_001045 | XLOC_039894 | ENSRNOT00000028807 | -0.967405486 | 2.74E-07 |
| TUCP_001045 | XLOC_039894 | ENSRNOT00000039335 | -0.952306289 | 1.79E-06 |
| TUCP_001045 | XLOC_039894 | ENSRNOT00000010367 | 0.955027864  | 1.34E-06 |
| TUCP_001045 | XLOC_039894 | ENSRNOT00000050223 | -0.956684073 | 1.12E-06 |
| TUCP_001045 | XLOC_039894 | ENSRNOT00000019886 | 0.984305639  | 7.30E-09 |
| TUCP_001045 | XLOC_039894 | ENSRNOT00000032289 | -0.963125029 | 5.05E-07 |
| TUCP_001045 | XLOC_039894 | ENSRNOT00000082151 | -0.958127541 | 9.45E-07 |
| TUCP_001045 | XLOC_039894 | ENSRNOT00000002052 | -0.952732393 | 1.72E-06 |
| TUCP_001045 | XLOC_039894 | ENSRNOT00000089007 | -0.955083996 | 1.33E-06 |
| TUCP_001045 | XLOC_039894 | ENSRNOT00000009666 | -0.978763795 | 3.28E-08 |
| TUCP_001045 | XLOC_039894 | ENSRNOT00000001607 | 0.954035448  | 1.50E-06 |
| TUCP_001045 | XLOC_039894 | ENSRNOT00000033015 | -0.964432762 | 4.22E-07 |
| TUCP_001045 | XLOC_039894 | ENSRNOT00000012635 | -0.962563379 | 5.44E-07 |
| TUCP_001045 | XLOC_039894 | ENSRNOT00000045532 | -0.960044519 | 7.50E-07 |
| TUCP_001045 | XLOC_039894 | ENSRNOT00000033324 | 0.963595123  | 4.74E-07 |
| TUCP_001045 | XLOC_039894 | ENSRNOT00000074081 | -0.956720314 | 1.11E-06 |
| TUCP_001045 | XLOC_039894 | ENSRNOT00000014809 | -0.962681566 | 5.35E-07 |
| TUCP_001045 | XLOC_039894 | ENSRNOT00000021471 | -0.977647568 | 4.23E-08 |
| TUCP_001045 | XLOC_039894 | ENSRNOT00000046126 | -0.952857973 | 1.69E-06 |
| TUCP_001045 | XLOC_039894 | ENSRNOT00000050834 | -0.973487084 | 9.87E-08 |
| TUCP_001045 | XLOC_039894 | ENSRNOT00000066024 | 0.961851057  | 5.97E-07 |
| TUCP_001045 | XLOC_039894 | ENSRNOT00000020663 | -0.961742064 | 6.05E-07 |
| TUCP_001045 | XLOC_039894 | ENSRNOT00000014885 | -0.950020466 | 2.26E-06 |
| TUCP_001045 | XLOC_039894 | ENSRNOT00000067566 | -0.952367305 | 1.78E-06 |
| TUCP_001045 | XLOC_039894 | ENSRNOT00000022107 | -0.956298475 | 1.17E-06 |
| TUCP_001045 | XLOC_039894 | ENSRNOT00000041091 | -0.964415323 | 4.23E-07 |
| TUCP_001045 | XLOC_039894 | ENSRNOT00000002445 | -0.951017496 | 2.04E-06 |
| TUCP_001045 | XLOC_039894 | ENSRNOT00000009993 | -0.961857922 | 5.96E-07 |
| TUCP_001045 | XLOC_039894 | ENSRNOT00000007771 | -0.968882742 | 2.18E-07 |

|             |             |                     |              |          |
|-------------|-------------|---------------------|--------------|----------|
| TUCP_001045 | XLOC_039894 | ENSRNOT00000005762  | -0.965016878 | 3.89E-07 |
| TUCP_001045 | XLOC_039894 | ENSRNOT000000031549 | 0.958949506  | 8.57E-07 |
| TUCP_001045 | XLOC_039894 | ENSRNOT000000022377 | -0.973344673 | 1.01E-07 |
| TUCP_001045 | XLOC_039894 | ENSRNOT000000040548 | -0.950337737 | 2.19E-06 |
| TUCP_001045 | XLOC_039894 | ENSRNOT000000078306 | 0.976966566  | 4.91E-08 |
| TUCP_001045 | XLOC_039894 | ENSRNOT000000046215 | -0.954409702 | 1.44E-06 |
| TUCP_001045 | XLOC_039894 | ENSRNOT000000036838 | -0.952086604 | 1.83E-06 |
| TUCP_001045 | XLOC_039894 | ENSRNOT000000076105 | -0.959610874 | 7.91E-07 |
| TUCP_001045 | XLOC_039894 | ENSRNOT000000000083 | -0.965458238 | 3.65E-07 |
| TUCP_001045 | XLOC_039894 | ENSRNOT000000023017 | -0.973960293 | 9.03E-08 |
| TUCP_001045 | XLOC_039894 | ENSRNOT000000021073 | -0.950762529 | 2.10E-06 |
| TUCP_001045 | XLOC_039894 | ENSRNOT000000075279 | 0.960038382  | 7.50E-07 |
| TUCP_001045 | XLOC_039894 | ENSRNOT000000001234 | -0.960754499 | 6.86E-07 |
| TUCP_001045 | XLOC_039894 | ENSRNOT000000068078 | -0.954826421 | 1.37E-06 |
| TUCP_001045 | XLOC_039894 | ENSRNOT000000033048 | -0.958704952 | 8.82E-07 |
| TUCP_001045 | XLOC_039894 | ENSRNOT000000023786 | -0.969101825 | 2.11E-07 |
| TUCP_001045 | XLOC_039894 | ENSRNOT000000092037 | -0.959922427 | 7.61E-07 |
| TUCP_001045 | XLOC_039894 | ENSRNOT000000012583 | -0.968992905 | 2.14E-07 |
| TUCP_001045 | XLOC_039894 | ENSRNOT000000081621 | 0.964395196  | 4.24E-07 |
| TUCP_001045 | XLOC_039894 | ENSRNOT000000060696 | 0.955317039  | 1.30E-06 |
| TUCP_001045 | XLOC_039894 | ENSRNOT000000004787 | -0.962477581 | 5.50E-07 |
| TUCP_001045 | XLOC_039894 | ENSRNOT000000028545 | -0.951552008 | 1.94E-06 |
| TUCP_001045 | XLOC_039894 | ENSRNOT000000007367 | -0.959834555 | 7.70E-07 |
| TUCP_001045 | XLOC_039894 | ENSRNOT000000001759 | -0.958931743 | 8.59E-07 |
| TUCP_001045 | XLOC_039894 | ENSRNOT000000080797 | -0.955885429 | 1.22E-06 |
| TUCP_001045 | XLOC_039894 | ENSRNOT000000020994 | -0.950147658 | 2.23E-06 |
| TUCP_001045 | XLOC_039894 | ENSRNOT000000004941 | -0.958282703 | 9.28E-07 |
| TUCP_001045 | XLOC_039894 | ENSRNOT000000066968 | 0.959257235  | 8.26E-07 |
| TUCP_001045 | XLOC_039894 | ENSRNOT000000068267 | -0.963145993 | 5.03E-07 |
| TUCP_001045 | XLOC_039894 | ENSRNOT000000024491 | -0.957903938 | 9.70E-07 |
| TUCP_001045 | XLOC_039894 | ENSRNOT000000030344 | -0.96043688  | 7.14E-07 |
| TUCP_001045 | XLOC_039894 | ENSRNOT000000070912 | -0.970621423 | 1.64E-07 |
| TUCP_001045 | XLOC_039894 | ENSRNOT000000019916 | -0.967787344 | 2.59E-07 |
| TUCP_001045 | XLOC_039894 | ENSRNOT000000019911 | -0.960560839 | 7.03E-07 |
| TUCP_001045 | XLOC_039894 | ENSRNOT000000028703 | -0.961677211 | 6.10E-07 |
| TUCP_001045 | XLOC_039894 | ENSRNOT000000016372 | -0.956268182 | 1.17E-06 |
| TUCP_001045 | XLOC_039894 | ENSRNOT000000011714 | -0.954610528 | 1.41E-06 |
| TUCP_001045 | XLOC_039894 | ENSRNOT000000002355 | -0.977314866 | 4.55E-08 |
| TUCP_001045 | XLOC_039894 | ENSRNOT000000017181 | -0.960524536 | 7.06E-07 |
| TUCP_001045 | XLOC_039894 | ENSRNOT000000037844 | -0.968220678 | 2.42E-07 |
| TUCP_001045 | XLOC_039894 | ENSRNOT000000020272 | -0.951934052 | 1.86E-06 |
| TUCP_001045 | XLOC_039894 | ENSRNOT000000005478 | -0.956465705 | 1.14E-06 |
| TUCP_001045 | XLOC_039894 | ENSRNOT000000064700 | 0.954397254  | 1.44E-06 |
| TUCP_001045 | XLOC_039894 | ENSRNOT000000026871 | -0.95081087  | 2.09E-06 |
| TUCP_001045 | XLOC_039894 | ENSRNOT000000063821 | -0.960914251 | 6.73E-07 |
| TUCP_001045 | XLOC_039894 | ENSRNOT000000016740 | 0.953877193  | 1.52E-06 |
| TUCP_001045 | XLOC_039894 | ENSRNOT000000074494 | -0.95028806  | 2.20E-06 |
| TUCP_001045 | XLOC_039894 | ENSRNOT000000011682 | -0.959016708 | 8.50E-07 |
| TUCP_001045 | XLOC_039894 | ENSRNOT000000074993 | -0.951047864 | 2.04E-06 |
| TUCP_001045 | XLOC_039894 | ENSRNOT000000003600 | -0.954319627 | 1.45E-06 |
| TUCP_001045 | XLOC_039894 | ENSRNOT000000036194 | -0.953403186 | 1.60E-06 |

|             |             |                    |             |          |
|-------------|-------------|--------------------|-------------|----------|
| TUCP_004368 | XLOC_192891 | ENSRNOT00000002576 | 0.952331615 | 1.79E-06 |
| TUCP_000101 | XLOC_002696 | ENSRNOT00000000008 | 0.997562269 | 6.75E-13 |
| TUCP_000101 | XLOC_002696 | ENSRNOT00000060048 | 0.996424687 | 4.57E-12 |
| TUCP_000101 | XLOC_002696 | ENSRNOT00000082304 | 0.993894716 | 6.61E-11 |
| TUCP_000101 | XLOC_002696 | ENSRNOT00000006219 | 0.997562269 | 6.75E-13 |
| TUCP_000101 | XLOC_002696 | ENSRNOT00000065376 | 0.997562269 | 6.75E-13 |
| TUCP_000101 | XLOC_002696 | ENSRNOT00000081433 | 0.980844279 | 1.97E-08 |
| TUCP_000101 | XLOC_002696 | ENSRNOT00000083575 | 0.997562269 | 6.75E-13 |
| TUCP_000101 | XLOC_002696 | ENSRNOT00000087739 | 0.997562269 | 6.75E-13 |
| TUCP_000101 | XLOC_002696 | ENSRNOT00000079826 | 0.997562269 | 6.75E-13 |
| TUCP_000101 | XLOC_002696 | ENSRNOT00000025770 | 0.990983957 | 4.62E-10 |
| TUCP_000101 | XLOC_002696 | ENSRNOT00000088244 | 0.97342984  | 9.97E-08 |
| TUCP_000101 | XLOC_002696 | ENSRNOT00000048523 | 0.997562269 | 6.75E-13 |
| TUCP_000101 | XLOC_002696 | ENSRNOT00000079365 | 0.975675718 | 6.44E-08 |
| TUCP_000101 | XLOC_002696 | ENSRNOT00000020229 | 0.951605533 | 1.93E-06 |
| TUCP_000101 | XLOC_002696 | ENSRNOT00000026428 | 0.993565954 | 8.59E-11 |
| TUCP_000101 | XLOC_002696 | ENSRNOT00000085673 | 0.997562269 | 6.75E-13 |
| TUCP_000101 | XLOC_002696 | ENSRNOT00000072972 | 0.976121686 | 5.87E-08 |
| TUCP_000101 | XLOC_002696 | ENSRNOT00000050573 | 0.997562269 | 6.75E-13 |
| TUCP_000101 | XLOC_002696 | ENSRNOT00000074378 | 0.996222207 | 6.02E-12 |
| TUCP_000101 | XLOC_002696 | ENSRNOT00000093571 | 0.997562269 | 6.75E-13 |
| TUCP_000101 | XLOC_002696 | ENSRNOT00000090581 | 0.997562269 | 6.75E-13 |
| TUCP_000101 | XLOC_002696 | ENSRNOT00000076239 | 0.973314884 | 1.02E-07 |
| TUCP_000101 | XLOC_002696 | ENSRNOT00000065485 | 0.997562269 | 6.75E-13 |
| TUCP_000101 | XLOC_002696 | ENSRNOT00000006356 | 0.996433118 | 4.52E-12 |
| TUCP_000101 | XLOC_002696 | ENSRNOT00000087199 | 0.970477982 | 1.68E-07 |
| TUCP_000101 | XLOC_002696 | ENSRNOT00000022091 | 0.997562269 | 6.75E-13 |
| TUCP_000101 | XLOC_002696 | ENSRNOT00000064764 | 0.980333352 | 2.24E-08 |
| TUCP_000101 | XLOC_002696 | ENSRNOT00000076927 | 0.967353229 | 2.76E-07 |
| TUCP_000101 | XLOC_002696 | ENSRNOT00000092395 | 0.996870896 | 2.35E-12 |
| TUCP_000100 | XLOC_002691 | ENSRNOT00000012880 | 0.95292991  | 1.68E-06 |
| TUCP_000100 | XLOC_002691 | ENSRNOT00000074465 | 0.954205392 | 1.47E-06 |
| TUCP_000100 | XLOC_002691 | ENSRNOT00000079805 | 0.952955505 | 1.68E-06 |
| TUCP_000100 | XLOC_002691 | ENSRNOT00000040912 | 0.954205392 | 1.47E-06 |
| TUCP_000100 | XLOC_002691 | ENSRNOT00000072648 | 0.954205392 | 1.47E-06 |
| TUCP_000100 | XLOC_002691 | ENSRNOT00000007398 | 0.954529556 | 1.42E-06 |
| TUCP_000100 | XLOC_002691 | ENSRNOT00000070803 | 0.954205392 | 1.47E-06 |
| TUCP_000100 | XLOC_002691 | ENSRNOT00000012196 | 0.954205392 | 1.47E-06 |
| TUCP_000100 | XLOC_002691 | ENSRNOT00000085772 | 0.954205392 | 1.47E-06 |
| TUCP_000100 | XLOC_002691 | ENSRNOT00000015270 | 0.954205392 | 1.47E-06 |
| TUCP_000100 | XLOC_002691 | ENSRNOT00000046192 | 0.954205392 | 1.47E-06 |
| TUCP_000100 | XLOC_002691 | ENSRNOT00000044226 | 0.954205392 | 1.47E-06 |
| TUCP_000100 | XLOC_002691 | ENSRNOT00000086374 | 0.969976586 | 1.83E-07 |
| TUCP_000100 | XLOC_002691 | ENSRNOT00000001464 | 0.954205392 | 1.47E-06 |
| TUCP_000100 | XLOC_002691 | ENSRNOT00000090716 | 0.967964538 | 2.52E-07 |
| TUCP_000100 | XLOC_002691 | ENSRNOT00000057873 | 0.954205392 | 1.47E-06 |
| TUCP_000100 | XLOC_002691 | ENSRNOT00000076044 | 0.954205392 | 1.47E-06 |
| TUCP_000100 | XLOC_002691 | ENSRNOT00000074353 | 0.954205392 | 1.47E-06 |
| TUCP_000100 | XLOC_002691 | ENSRNOT00000043510 | 0.952669063 | 1.73E-06 |
| TUCP_000100 | XLOC_002691 | ENSRNOT00000087122 | 0.977583785 | 4.29E-08 |
| TUCP_000100 | XLOC_002691 | ENSRNOT00000093284 | 0.953592123 | 1.57E-06 |

|             |             |                    |             |          |
|-------------|-------------|--------------------|-------------|----------|
| TUCP_000100 | XLOC_002691 | ENSRNOT00000088399 | 0.954183826 | 1.47E-06 |
| TUCP_000100 | XLOC_002691 | ENSRNOT00000086248 | 0.954205392 | 1.47E-06 |
| TUCP_000100 | XLOC_002691 | ENSRNOT00000089750 | 0.954563922 | 1.41E-06 |
| TUCP_000100 | XLOC_002691 | ENSRNOT00000030517 | 0.956751655 | 1.11E-06 |
| TUCP_000100 | XLOC_002691 | ENSRNOT00000089305 | 0.968905234 | 2.17E-07 |
| TUCP_000100 | XLOC_002691 | ENSRNOT00000002834 | 0.954205392 | 1.47E-06 |
| TUCP_000100 | XLOC_002691 | ENSRNOT00000080812 | 0.951586333 | 1.93E-06 |
| TUCP_000100 | XLOC_002691 | ENSRNOT00000092755 | 0.954205392 | 1.47E-06 |
| TUCP_000100 | XLOC_002691 | ENSRNOT00000031683 | 0.954205392 | 1.47E-06 |
| TUCP_000100 | XLOC_002691 | ENSRNOT00000087764 | 0.965626981 | 3.57E-07 |
| TUCP_000568 | XLOC_020107 | ENSRNOT00000084782 | 0.956241903 | 1.17E-06 |
| TUCP_000568 | XLOC_020107 | ENSRNOT00000079545 | 0.957383158 | 1.03E-06 |
| TUCP_000568 | XLOC_020107 | ENSRNOT00000016758 | 0.951085922 | 2.03E-06 |
| TUCP_000568 | XLOC_020107 | ENSRNOT00000020030 | 0.952914949 | 1.68E-06 |
| TUCP_000102 | XLOC_002732 | ENSRNOT00000071840 | 0.966153435 | 3.30E-07 |
| TUCP_000102 | XLOC_002732 | ENSRNOT00000083608 | 0.960192756 | 7.36E-07 |
| TUCP_000102 | XLOC_002732 | ENSRNOT00000085476 | 0.955901113 | 1.22E-06 |
| TUCP_000102 | XLOC_002732 | ENSRNOT00000045584 | 0.966153435 | 3.30E-07 |
| TUCP_000102 | XLOC_002732 | ENSRNOT00000077995 | 0.957434205 | 1.02E-06 |
| TUCP_000102 | XLOC_002732 | ENSRNOT00000066004 | 0.96562836  | 3.57E-07 |
| TUCP_000102 | XLOC_002732 | ENSRNOT00000075836 | 0.966153435 | 3.30E-07 |
| TUCP_000102 | XLOC_002732 | ENSRNOT00000082086 | 0.964033105 | 4.46E-07 |
| TUCP_000102 | XLOC_002732 | ENSRNOT00000092182 | 0.966153435 | 3.30E-07 |
| TUCP_000102 | XLOC_002732 | ENSRNOT00000084461 | 0.966153435 | 3.30E-07 |
| TUCP_000102 | XLOC_002732 | ENSRNOT00000060448 | 0.966153435 | 3.30E-07 |
| TUCP_000102 | XLOC_002732 | ENSRNOT00000032631 | 0.966153435 | 3.30E-07 |
| TUCP_000102 | XLOC_002732 | ENSRNOT00000054910 | 0.971102782 | 1.51E-07 |
| TUCP_000102 | XLOC_002732 | ENSRNOT00000057176 | 0.966054404 | 3.35E-07 |
| TUCP_000102 | XLOC_002732 | ENSRNOT00000078176 | 0.967110679 | 2.87E-07 |
| TUCP_000102 | XLOC_002732 | ENSRNOT00000056364 | 0.952310122 | 1.79E-06 |
| TUCP_000102 | XLOC_002732 | ENSRNOT00000093431 | 0.966153435 | 3.30E-07 |
| TUCP_000102 | XLOC_002732 | ENSRNOT00000024758 | 0.963062609 | 5.09E-07 |
| TUCP_000102 | XLOC_002732 | ENSRNOT00000092901 | 0.966153435 | 3.30E-07 |
| TUCP_000102 | XLOC_002732 | ENSRNOT00000089290 | 0.96568239  | 3.54E-07 |
| TUCP_000102 | XLOC_002732 | ENSRNOT00000071603 | 0.966297636 | 3.24E-07 |
| TUCP_000102 | XLOC_002732 | ENSRNOT00000091828 | 0.959865944 | 7.67E-07 |
| TUCP_000102 | XLOC_002732 | ENSRNOT00000091944 | 0.963439962 | 4.84E-07 |
| TUCP_000102 | XLOC_002732 | ENSRNOT00000070855 | 0.966153435 | 3.30E-07 |
| TUCP_000102 | XLOC_002732 | ENSRNOT0000007604  | 0.974826791 | 7.63E-08 |
| TUCP_000102 | XLOC_002732 | ENSRNOT00000084109 | 0.965843028 | 3.46E-07 |
| TUCP_000102 | XLOC_002732 | ENSRNOT00000041569 | 0.966153435 | 3.30E-07 |
| TUCP_000102 | XLOC_002732 | ENSRNOT00000087091 | 0.966153435 | 3.30E-07 |
| TUCP_000102 | XLOC_002732 | ENSRNOT00000026113 | 0.964841517 | 3.99E-07 |
| TUCP_000102 | XLOC_002732 | ENSRNOT00000014939 | 0.966435172 | 3.17E-07 |
| TUCP_000102 | XLOC_002732 | ENSRNOT00000058314 | 0.981541312 | 1.64E-08 |
| TUCP_000102 | XLOC_002732 | ENSRNOT00000071714 | 0.960485388 | 7.10E-07 |
| TUCP_000102 | XLOC_002732 | ENSRNOT00000090211 | 0.961297102 | 6.41E-07 |
| TUCP_000102 | XLOC_002732 | ENSRNOT00000029298 | 0.980946281 | 1.92E-08 |
| TUCP_000102 | XLOC_002732 | ENSRNOT00000007683 | 0.969759814 | 1.89E-07 |
| TUCP_000102 | XLOC_002732 | ENSRNOT00000073229 | 0.966153435 | 3.30E-07 |
| TUCP_000102 | XLOC_002732 | ENSRNOT00000060454 | 0.966153435 | 3.30E-07 |

|             |             |                     |              |          |
|-------------|-------------|---------------------|--------------|----------|
| TUCP_000102 | XLOC_002732 | ENSRNOT00000009295  | 0.968729246  | 2.23E-07 |
| TUCP_001502 | XLOC_057941 | ENSRNOT00000010938  | 0.951123802  | 2.02E-06 |
| TUCP_001503 | XLOC_057945 | ENSRNOT00000085185  | 0.952077392  | 1.84E-06 |
| TUCP_001503 | XLOC_057945 | ENSRNOT00000037509  | 0.956774217  | 1.11E-06 |
| TUCP_001500 | XLOC_057861 | ENSRNOT00000006175  | 0.970363568  | 1.71E-07 |
| TUCP_001500 | XLOC_057861 | ENSRNOT00000026543  | 0.964503454  | 4.18E-07 |
| TUCP_001500 | XLOC_057861 | ENSRNOT00000008221  | 0.961414083  | 6.31E-07 |
| TUCP_001500 | XLOC_057861 | ENSRNOT00000027454  | 0.958235752  | 9.33E-07 |
| TUCP_001500 | XLOC_057861 | ENSRNOT00000018535  | 0.951564583  | 1.93E-06 |
| TUCP_001500 | XLOC_057861 | ENSRNOT00000078274  | 0.965009653  | 3.89E-07 |
| TUCP_001500 | XLOC_057861 | ENSRNOT00000032274  | 0.954080662  | 1.49E-06 |
| TUCP_002179 | XLOC_090980 | ENSRNOT00000088737  | 0.970807699  | 1.59E-07 |
| TUCP_001506 | XLOC_057996 | ENSRNOT00000035922  | 0.955349118  | 1.30E-06 |
| TUCP_001506 | XLOC_057996 | ENSRNOT00000045954  | 0.972200019  | 1.25E-07 |
| TUCP_002570 | XLOC_108862 | ENSRNOT00000006680  | 0.964805054  | 4.01E-07 |
| TUCP_002570 | XLOC_108862 | ENSRNOT00000031904  | 0.959681482  | 7.84E-07 |
| TUCP_002570 | XLOC_108862 | ENSRNOT00000067554  | 0.953636728  | 1.56E-06 |
| TUCP_002570 | XLOC_108862 | ENSRNOT00000000743  | 0.950358565  | 2.18E-06 |
| TUCP_002570 | XLOC_108862 | ENSRNOT00000010784  | 0.955587128  | 1.26E-06 |
| TUCP_002570 | XLOC_108862 | ENSRNOT00000038807  | 0.964355302  | 4.27E-07 |
| TUCP_002570 | XLOC_108862 | ENSRNOT00000005958  | 0.967265691  | 2.80E-07 |
| TUCP_002570 | XLOC_108862 | ENSRNOT00000023133  | 0.972310954  | 1.22E-07 |
| TUCP_002570 | XLOC_108862 | ENSRNOT00000001826  | 0.952164209  | 1.82E-06 |
| TUCP_002570 | XLOC_108862 | ENSRNOT00000023989  | 0.955206417  | 1.32E-06 |
| TUCP_002570 | XLOC_108862 | ENSRNOT00000073559  | 0.9682589    | 2.41E-07 |
| TUCP_002570 | XLOC_108862 | ENSRNOT00000080608  | 0.951710629  | 1.91E-06 |
| TUCP_002570 | XLOC_108862 | ENSRNOT00000002410  | 0.962056458  | 5.81E-07 |
| TUCP_002570 | XLOC_108862 | ENSRNOT00000090688  | 0.972927501  | 1.09E-07 |
| TUCP_002570 | XLOC_108862 | ENSRNOT00000078306  | 0.953908288  | 1.52E-06 |
| TUCP_002570 | XLOC_108862 | ENSRNOT00000041044  | 0.9510601    | 2.04E-06 |
| TUCP_002570 | XLOC_108862 | ENSRNOT00000090342  | 0.95306576   | 1.66E-06 |
| TUCP_002570 | XLOC_108862 | ENSRNOT00000036054  | 0.953506716  | 1.58E-06 |
| TUCP_002570 | XLOC_108862 | ENSRNOT00000010541  | 0.950826185  | 2.08E-06 |
| TUCP_002570 | XLOC_108862 | ENSRNOT00000047192  | -0.959764017 | 7.76E-07 |
| TUCP_002570 | XLOC_108862 | ENSRNOT00000027411  | 0.955878498  | 1.22E-06 |
| TUCP_002570 | XLOC_108862 | ENSRNOT00000001586  | -0.955800656 | 1.23E-06 |
| TUCP_002570 | XLOC_108862 | ENSRNOT000000081981 | 0.955847078  | 1.23E-06 |
| TUCP_002570 | XLOC_108862 | ENSRNOT00000009496  | 0.951143162  | 2.02E-06 |
| TUCP_002570 | XLOC_108862 | ENSRNOT00000060696  | 0.95793402   | 9.67E-07 |
| TUCP_002570 | XLOC_108862 | ENSRNOT00000071971  | 0.960398969  | 7.18E-07 |
| TUCP_002570 | XLOC_108862 | ENSRNOT00000064700  | 0.952544039  | 1.75E-06 |
| TUCP_002570 | XLOC_108862 | ENSRNOT00000017753  | 0.956231078  | 1.18E-06 |
| TUCP_002570 | XLOC_108862 | ENSRNOT00000013049  | 0.958622014  | 8.91E-07 |
| TUCP_002570 | XLOC_108862 | ENSRNOT00000033235  | 0.964707191  | 4.06E-07 |
| TUCP_002570 | XLOC_108862 | ENSRNOT00000015799  | 0.963966271  | 4.50E-07 |
| TUCP_002570 | XLOC_108862 | ENSRNOT00000021650  | 0.961618337  | 6.15E-07 |
| TUCP_002570 | XLOC_108862 | ENSRNOT00000060943  | 0.956730247  | 1.11E-06 |
| TUCP_002570 | XLOC_108862 | ENSRNOT00000074972  | 0.952483073  | 1.76E-06 |
| TUCP_002570 | XLOC_108862 | ENSRNOT00000045285  | 0.967265428  | 2.80E-07 |
| TUCP_002570 | XLOC_108862 | ENSRNOT00000015520  | 0.959676242  | 7.85E-07 |
| TUCP_002570 | XLOC_108862 | ENSRNOT00000090057  | 0.959820157  | 7.71E-07 |

|             |             |                    |              |          |
|-------------|-------------|--------------------|--------------|----------|
| TUCP_002570 | XLOC_108862 | ENSRNOT00000021001 | 0.970059314  | 1.80E-07 |
| TUCP_002570 | XLOC_108862 | ENSRNOT00000067866 | 0.950138206  | 2.23E-06 |
| TUCP_002570 | XLOC_108862 | ENSRNOT00000082699 | 0.954116051  | 1.48E-06 |
| TUCP_002570 | XLOC_108862 | ENSRNOT00000010367 | 0.951635262  | 1.92E-06 |
| TUCP_002570 | XLOC_108862 | ENSRNOT00000073991 | 0.954417822  | 1.44E-06 |
| TUCP_002570 | XLOC_108862 | ENSRNOT00000019886 | 0.961140613  | 6.54E-07 |
| TUCP_002570 | XLOC_108862 | ENSRNOT00000033975 | 0.955825969  | 1.23E-06 |
| TUCP_002570 | XLOC_108862 | ENSRNOT00000000157 | 0.951565209  | 1.93E-06 |
| TUCP_001504 | XLOC_057946 | ENSRNOT00000013255 | 0.956142182  | 1.19E-06 |
| TUCP_001504 | XLOC_057946 | ENSRNOT00000085185 | 0.960228734  | 7.33E-07 |
| TUCP_001505 | XLOC_057950 | ENSRNOT00000073233 | -0.956976005 | 1.08E-06 |
| TUCP_001505 | XLOC_057950 | ENSRNOT00000002524 | 0.95928346   | 8.23E-07 |
| TUCP_001505 | XLOC_057950 | ENSRNOT00000010333 | 0.954355657  | 1.44E-06 |
| TUCP_001505 | XLOC_057950 | ENSRNOT00000013950 | 0.959955709  | 7.58E-07 |
| TUCP_001505 | XLOC_057950 | ENSRNOT00000086179 | 0.955532807  | 1.27E-06 |
| TUCP_001505 | XLOC_057950 | ENSRNOT00000015192 | 0.978357457  | 3.61E-08 |
| TUCP_001505 | XLOC_057950 | ENSRNOT00000029166 | 0.95132862   | 1.98E-06 |
| TUCP_003926 | XLOC_172729 | ENSRNOT00000021475 | 0.950482624  | 2.16E-06 |
| TUCP_003476 | XLOC_150237 | ENSRNOT00000079805 | 0.958386088  | 9.16E-07 |
| TUCP_003476 | XLOC_150237 | ENSRNOT00000086374 | 0.955680883  | 1.25E-06 |
| TUCP_003476 | XLOC_150237 | ENSRNOT00000087723 | 0.951650372  | 1.92E-06 |
| TUCP_003476 | XLOC_150237 | ENSRNOT00000087764 | 0.966393099  | 3.19E-07 |
| TUCP_003476 | XLOC_150237 | ENSRNOT00000090716 | 0.957444497  | 1.02E-06 |
| TUCP_003477 | XLOC_150237 | ENSRNOT00000048457 | 0.952862266  | 1.69E-06 |
| TUCP_003477 | XLOC_150237 | ENSRNOT00000082497 | 0.9631906    | 5.00E-07 |
| TUCP_001665 | XLOC_065778 | ENSRNOT00000090659 | 0.97612083   | 5.87E-08 |
| TUCP_001665 | XLOC_065778 | ENSRNOT00000091911 | 0.972530326  | 1.18E-07 |
| TUCP_001665 | XLOC_065778 | ENSRNOT00000076530 | 0.951471354  | 1.95E-06 |
| TUCP_003575 | XLOC_156950 | ENSRNOT00000000008 | 0.979502097  | 2.75E-08 |
| TUCP_003575 | XLOC_156950 | ENSRNOT00000060048 | 0.976506604  | 5.42E-08 |
| TUCP_003575 | XLOC_156950 | ENSRNOT00000082304 | 0.974851142  | 7.60E-08 |
| TUCP_003575 | XLOC_156950 | ENSRNOT00000006219 | 0.979502097  | 2.75E-08 |
| TUCP_003575 | XLOC_156950 | ENSRNOT00000065376 | 0.979502097  | 2.75E-08 |
| TUCP_003575 | XLOC_156950 | ENSRNOT00000081433 | 0.96075335   | 6.87E-07 |
| TUCP_003575 | XLOC_156950 | ENSRNOT00000083575 | 0.979502097  | 2.75E-08 |
| TUCP_003575 | XLOC_156950 | ENSRNOT00000087739 | 0.979502097  | 2.75E-08 |
| TUCP_003575 | XLOC_156950 | ENSRNOT00000079826 | 0.979502097  | 2.75E-08 |
| TUCP_003575 | XLOC_156950 | ENSRNOT00000025770 | 0.979624158  | 2.67E-08 |
| TUCP_003575 | XLOC_156950 | ENSRNOT00000088244 | 0.951434043  | 1.96E-06 |
| TUCP_003575 | XLOC_156950 | ENSRNOT00000048523 | 0.979502097  | 2.75E-08 |
| TUCP_003575 | XLOC_156950 | ENSRNOT00000026428 | 0.9736918    | 9.50E-08 |
| TUCP_003575 | XLOC_156950 | ENSRNOT00000085673 | 0.979502097  | 2.75E-08 |
| TUCP_003575 | XLOC_156950 | ENSRNOT00000072972 | 0.975033075  | 7.33E-08 |
| TUCP_003575 | XLOC_156950 | ENSRNOT00000050573 | 0.979502097  | 2.75E-08 |
| TUCP_003575 | XLOC_156950 | ENSRNOT00000074378 | 0.976547012  | 5.37E-08 |
| TUCP_003575 | XLOC_156950 | ENSRNOT00000076927 | 0.975110231  | 7.22E-08 |
| TUCP_003575 | XLOC_156950 | ENSRNOT00000090581 | 0.979502097  | 2.75E-08 |
| TUCP_003575 | XLOC_156950 | ENSRNOT00000076239 | 0.9506912    | 2.11E-06 |
| TUCP_003575 | XLOC_156950 | ENSRNOT00000065485 | 0.979502097  | 2.75E-08 |
| TUCP_003575 | XLOC_156950 | ENSRNOT00000006356 | 0.979658096  | 2.65E-08 |
| TUCP_003575 | XLOC_156950 | ENSRNOT00000022091 | 0.979502097  | 2.75E-08 |



|             |             |                     |              |          |
|-------------|-------------|---------------------|--------------|----------|
| TUCP_003575 | XLOC_156950 | ENSRNOT00000064764  | 0.993683919  | 7.83E-11 |
| TUCP_003575 | XLOC_156950 | ENSRNOT00000093571  | 0.979502097  | 2.75E-08 |
| TUCP_003575 | XLOC_156950 | ENSRNOT00000092395  | 0.978412746  | 3.56E-08 |
| TUCP_003576 | XLOC_156959 | ENSRNOT00000003248  | 0.951382508  | 1.97E-06 |
| TUCP_003571 | XLOC_156715 | ENSRNOT00000020376  | 0.963410435  | 4.86E-07 |
| TUCP_003571 | XLOC_156715 | ENSRNOT00000064983  | 0.965906964  | 3.43E-07 |
| TUCP_003571 | XLOC_156715 | ENSRNOT00000035605  | 0.95068151   | 2.11E-06 |
| TUCP_003571 | XLOC_156715 | ENSRNOT00000061054  | 0.954958412  | 1.35E-06 |
| TUCP_003571 | XLOC_156715 | ENSRNOT00000085954  | 0.97178545   | 1.34E-07 |
| TUCP_003571 | XLOC_156715 | ENSRNOT00000057738  | 0.96892649   | 2.17E-07 |
| TUCP_003571 | XLOC_156715 | ENSRNOT00000038780  | 0.977786247  | 4.10E-08 |
| TUCP_003571 | XLOC_156715 | ENSRNOT00000023014  | 0.965705709  | 3.53E-07 |
| TUCP_003571 | XLOC_156715 | ENSRNOT00000026518  | 0.959348886  | 8.17E-07 |
| TUCP_003571 | XLOC_156715 | ENSRNOT00000002309  | 0.957194668  | 1.05E-06 |
| TUCP_003571 | XLOC_156715 | ENSRNOT00000007601  | 0.955300983  | 1.30E-06 |
| TUCP_003571 | XLOC_156715 | ENSRNOT00000029701  | 0.954707994  | 1.39E-06 |
| TUCP_003571 | XLOC_156715 | ENSRNOT00000083256  | 0.95071995   | 2.11E-06 |
| TUCP_003571 | XLOC_156715 | ENSRNOT00000065801  | 0.969568597  | 1.95E-07 |
| TUCP_003571 | XLOC_156715 | ENSRNOT00000003593  | 0.958416697  | 9.13E-07 |
| TUCP_003571 | XLOC_156715 | ENSRNOT00000078752  | -0.953987645 | 1.50E-06 |
| TUCP_003571 | XLOC_156715 | ENSRNOT00000079152  | 0.959956298  | 7.58E-07 |
| TUCP_003571 | XLOC_156715 | ENSRNOT00000004391  | 0.964543065  | 4.16E-07 |
| TUCP_003571 | XLOC_156715 | ENSRNOT00000008244  | 0.954855347  | 1.37E-06 |
| TUCP_003571 | XLOC_156715 | ENSRNOT00000013088  | 0.963899433  | 4.54E-07 |
| TUCP_003571 | XLOC_156715 | ENSRNOT00000074150  | 0.958489375  | 9.05E-07 |
| TUCP_003571 | XLOC_156715 | ENSRNOT00000083344  | 0.954868664  | 1.37E-06 |
| TUCP_003571 | XLOC_156715 | ENSRNOT00000067524  | 0.95003108   | 2.26E-06 |
| TUCP_003571 | XLOC_156715 | ENSRNOT00000085334  | 0.978733874  | 3.31E-08 |
| TUCP_003571 | XLOC_156715 | ENSRNOT00000035427  | 0.960014359  | 7.53E-07 |
| TUCP_003571 | XLOC_156715 | ENSRNOT00000008440  | 0.951717638  | 1.91E-06 |
| TUCP_003571 | XLOC_156715 | ENSRNOT00000034482  | 0.954381096  | 1.44E-06 |
| TUCP_003571 | XLOC_156715 | ENSRNOT00000043827  | 0.958170614  | 9.40E-07 |
| TUCP_003571 | XLOC_156715 | ENSRNOT00000079742  | 0.958083274  | 9.50E-07 |
| TUCP_003571 | XLOC_156715 | ENSRNOT00000066952  | 0.956499059  | 1.14E-06 |
| TUCP_003571 | XLOC_156715 | ENSRNOT00000005873  | -0.956452972 | 1.15E-06 |
| TUCP_003571 | XLOC_156715 | ENSRNOT000000051494 | 0.956184993  | 1.18E-06 |
| TUCP_003571 | XLOC_156715 | ENSRNOT00000075480  | -0.952254764 | 1.80E-06 |
| TUCP_003571 | XLOC_156715 | ENSRNOT00000011773  | 0.952475663  | 1.76E-06 |
| TUCP_003571 | XLOC_156715 | ENSRNOT00000027760  | 0.964915418  | 3.95E-07 |
| TUCP_003571 | XLOC_156715 | ENSRNOT00000065811  | 0.965823381  | 3.47E-07 |
| TUCP_003571 | XLOC_156715 | ENSRNOT00000077578  | -0.960223529 | 7.33E-07 |
| TUCP_003571 | XLOC_156715 | ENSRNOT00000092757  | 0.954249943  | 1.46E-06 |
| TUCP_003924 | XLOC_172688 | ENSRNOT00000074148  | -0.955969155 | 1.21E-06 |
| TUCP_003924 | XLOC_172688 | ENSRNOT00000016162  | -0.95024478  | 2.21E-06 |
| TUCP_002008 | XLOC_081836 | ENSRNOT00000055536  | 0.955323148  | 1.30E-06 |
| TUCP_002008 | XLOC_081836 | ENSRNOT00000090621  | 0.967695587  | 2.62E-07 |
| TUCP_002008 | XLOC_081836 | ENSRNOT00000072069  | -0.950505443 | 2.15E-06 |
| TUCP_002008 | XLOC_081836 | ENSRNOT00000006460  | 0.960405945  | 7.17E-07 |
| TUCP_002008 | XLOC_081836 | ENSRNOT00000075397  | 0.95107461   | 2.03E-06 |
| TUCP_002008 | XLOC_081836 | ENSRNOT00000009080  | -0.954999988 | 1.35E-06 |
| TUCP_002008 | XLOC_081836 | ENSRNOT00000068212  | 0.959041951  | 8.47E-07 |

|             |             |                    |              |          |
|-------------|-------------|--------------------|--------------|----------|
| TUCP_002008 | XLOC_081836 | ENSRNOT00000010939 | 0.955948409  | 1.21E-06 |
| TUCP_002008 | XLOC_081836 | ENSRNOT00000003087 | 0.959537263  | 7.98E-07 |
| TUCP_002008 | XLOC_081836 | ENSRNOT00000049349 | 0.954119948  | 1.48E-06 |
| TUCP_002008 | XLOC_081836 | ENSRNOT00000079138 | 0.955685734  | 1.25E-06 |
| TUCP_002008 | XLOC_081836 | ENSRNOT00000028624 | 0.955866814  | 1.22E-06 |
| TUCP_002008 | XLOC_081836 | ENSRNOT00000087329 | -0.953749846 | 1.54E-06 |
| TUCP_002008 | XLOC_081836 | ENSRNOT00000072716 | 0.954280509  | 1.46E-06 |
| TUCP_002008 | XLOC_081836 | ENSRNOT00000088385 | 0.952593217  | 1.74E-06 |
| TUCP_002008 | XLOC_081836 | ENSRNOT00000036051 | 0.957815417  | 9.80E-07 |
| TUCP_002008 | XLOC_081836 | ENSRNOT00000004391 | 0.957558335  | 1.01E-06 |
| TUCP_002008 | XLOC_081836 | ENSRNOT00000084567 | 0.964487093  | 4.19E-07 |
| TUCP_002008 | XLOC_081836 | ENSRNOT00000082183 | 0.95030666   | 2.19E-06 |
| TUCP_002008 | XLOC_081836 | ENSRNOT00000025309 | 0.969230287  | 2.06E-07 |
| TUCP_002008 | XLOC_081836 | ENSRNOT00000019180 | -0.950550607 | 2.14E-06 |
| TUCP_002008 | XLOC_081836 | ENSRNOT00000021826 | 0.95444105   | 1.28E-06 |
| TUCP_002008 | XLOC_081836 | ENSRNOT00000010419 | 0.958180876  | 9.39E-07 |
| TUCP_002008 | XLOC_081836 | ENSRNOT00000065076 | 0.960946683  | 6.70E-07 |
| TUCP_002008 | XLOC_081836 | ENSRNOT00000048687 | 0.952287036  | 1.80E-06 |
| TUCP_002008 | XLOC_081836 | ENSRNOT00000054685 | 0.959293519  | 8.22E-07 |
| TUCP_002008 | XLOC_081836 | ENSRNOT00000022746 | -0.959450388 | 8.07E-07 |
| TUCP_002008 | XLOC_081836 | ENSRNOT00000082513 | 0.965900206  | 3.43E-07 |
| TUCP_002008 | XLOC_081836 | ENSRNOT00000020929 | 0.977186883  | 4.68E-08 |
| TUCP_002008 | XLOC_081836 | ENSRNOT00000036137 | 0.975145089  | 7.17E-08 |
| TUCP_002008 | XLOC_081836 | ENSRNOT00000075480 | -0.956137461 | 1.19E-06 |
| TUCP_002008 | XLOC_081836 | ENSRNOT00000005620 | -0.953200433 | 1.63E-06 |
| TUCP_002008 | XLOC_081836 | ENSRNOT00000027760 | 0.96194445   | 5.90E-07 |
| TUCP_002008 | XLOC_081836 | ENSRNOT00000047234 | 0.95344972   | 1.59E-06 |
| TUCP_002008 | XLOC_081836 | ENSRNOT00000065871 | 0.950694912  | 2.11E-06 |
| TUCP_002008 | XLOC_081836 | ENSRNOT00000092757 | 0.952334023  | 1.79E-06 |
| TUCP_002008 | XLOC_081836 | ENSRNOT00000038780 | 0.952072494  | 1.84E-06 |
| TUCP_002008 | XLOC_081836 | ENSRNOT00000001077 | 0.957555866  | 1.01E-06 |
| TUCP_002008 | XLOC_081836 | ENSRNOT00000068026 | -0.960030085 | 7.51E-07 |
| TUCP_002008 | XLOC_081836 | ENSRNOT00000015062 | 0.953790732  | 1.54E-06 |
| TUCP_002008 | XLOC_081836 | ENSRNOT00000081226 | 0.960741618  | 6.88E-07 |
| TUCP_002008 | XLOC_081836 | ENSRNOT00000065045 | 0.951961338  | 1.86E-06 |
| TUCP_002008 | XLOC_081836 | ENSRNOT00000017624 | 0.960026741  | 7.52E-07 |
| TUCP_002008 | XLOC_081836 | ENSRNOT00000081631 | 0.959700085  | 7.82E-07 |
| TUCP_002008 | XLOC_081836 | ENSRNOT00000018634 | -0.961922428 | 5.91E-07 |
| TUCP_002008 | XLOC_081836 | ENSRNOT00000040525 | 0.954874904  | 1.37E-06 |
| TUCP_002008 | XLOC_081836 | ENSRNOT00000046552 | 0.962758266  | 5.30E-07 |
| TUCP_002008 | XLOC_081836 | ENSRNOT00000011930 | 0.961735643  | 6.06E-07 |
| TUCP_002008 | XLOC_081836 | ENSRNOT00000023613 | 0.951133116  | 2.02E-06 |
| TUCP_002008 | XLOC_081836 | ENSRNOT00000033806 | 0.951344863  | 1.98E-06 |
| TUCP_002008 | XLOC_081836 | ENSRNOT00000037333 | -0.959298342 | 8.22E-07 |
| TUCP_002008 | XLOC_081836 | ENSRNOT00000090156 | -0.951025508 | 2.04E-06 |
| TUCP_002008 | XLOC_081836 | ENSRNOT00000048781 | 0.950122679  | 2.24E-06 |
| TUCP_002008 | XLOC_081836 | ENSRNOT00000083344 | 0.972470509  | 1.19E-07 |
| TUCP_002008 | XLOC_081836 | ENSRNOT00000004351 | -0.952892744 | 1.69E-06 |
| TUCP_002008 | XLOC_081836 | ENSRNOT00000003544 | -0.951423174 | 1.96E-06 |
| TUCP_002008 | XLOC_081836 | ENSRNOT00000079609 | 0.954597111  | 1.41E-06 |
| TUCP_002008 | XLOC_081836 | ENSRNOT00000085334 | 0.976915849  | 4.97E-08 |

|             |             |                    |              |          |
|-------------|-------------|--------------------|--------------|----------|
| TUCP_002008 | XLOC_081836 | ENSRNOT00000023262 | -0.953379735 | 1.60E-06 |
| TUCP_002008 | XLOC_081836 | ENSRNOT00000004196 | 0.954030408  | 1.50E-06 |
| TUCP_002008 | XLOC_081836 | ENSRNOT00000076230 | 0.950731002  | 2.10E-06 |
| TUCP_002008 | XLOC_081836 | ENSRNOT00000066952 | 0.96668349   | 3.06E-07 |
| TUCP_002008 | XLOC_081836 | ENSRNOT00000035427 | 0.950036052  | 2.25E-06 |
| TUCP_002008 | XLOC_081836 | ENSRNOT00000036658 | -0.954468383 | 1.43E-06 |
| TUCP_002008 | XLOC_081836 | ENSRNOT00000089611 | 0.971605597  | 1.39E-07 |
| TUCP_002008 | XLOC_081836 | ENSRNOT00000086260 | -0.955621326 | 1.26E-06 |
| TUCP_002008 | XLOC_081836 | ENSRNOT00000011675 | 0.964372608  | 4.26E-07 |
| TUCP_002008 | XLOC_081836 | ENSRNOT00000008253 | -0.963795216 | 4.61E-07 |
| TUCP_002008 | XLOC_081836 | ENSRNOT00000029701 | 0.973907241  | 9.12E-08 |
| TUCP_002008 | XLOC_081836 | ENSRNOT00000076400 | 0.951804974  | 1.89E-06 |
| TUCP_002008 | XLOC_081836 | ENSRNOT00000010680 | 0.953219199  | 1.63E-06 |
| TUCP_002008 | XLOC_081836 | ENSRNOT00000064983 | 0.955442776  | 1.28E-06 |
| TUCP_002008 | XLOC_081836 | ENSRNOT00000021715 | 0.954579983  | 1.41E-06 |
| TUCP_002008 | XLOC_081836 | ENSRNOT00000071897 | -0.951399489 | 1.97E-06 |
| TUCP_002008 | XLOC_081836 | ENSRNOT00000066923 | -0.951365209 | 1.97E-06 |
| TUCP_002008 | XLOC_081836 | ENSRNOT00000040169 | 0.955190379  | 1.32E-06 |
| TUCP_002008 | XLOC_081836 | ENSRNOT00000012767 | 0.956329474  | 1.16E-06 |
| TUCP_002008 | XLOC_081836 | ENSRNOT00000005343 | -0.951813886 | 1.89E-06 |
| TUCP_002008 | XLOC_081836 | ENSRNOT00000072580 | -0.958761227 | 8.76E-07 |
| TUCP_002008 | XLOC_081836 | ENSRNOT00000008244 | 0.951920409  | 1.87E-06 |
| TUCP_002008 | XLOC_081836 | ENSRNOT00000001490 | 0.953380507  | 1.60E-06 |
| TUCP_002008 | XLOC_081836 | ENSRNOT00000037015 | 0.975274353  | 6.98E-08 |
| TUCP_002008 | XLOC_081836 | ENSRNOT00000067524 | 0.951209886  | 2.01E-06 |
| TUCP_002008 | XLOC_081836 | ENSRNOT00000015239 | -0.951693131 | 1.91E-06 |
| TUCP_002008 | XLOC_081836 | ENSRNOT00000014320 | 0.954419838  | 1.43E-06 |
| TUCP_002008 | XLOC_081836 | ENSRNOT00000064122 | 0.956776759  | 1.10E-06 |
| TUCP_002008 | XLOC_081836 | ENSRNOT00000064542 | -0.954647663 | 1.40E-06 |
| TUCP_002008 | XLOC_081836 | ENSRNOT00000011773 | 0.969867482  | 1.86E-07 |
| TUCP_002008 | XLOC_081836 | ENSRNOT00000086456 | -0.951134422 | 2.02E-06 |
| TUCP_002008 | XLOC_081836 | ENSRNOT00000052033 | -0.958103062 | 9.48E-07 |
| TUCP_002008 | XLOC_081836 | ENSRNOT00000075209 | -0.951561425 | 1.94E-06 |
| TUCP_002008 | XLOC_081836 | ENSRNOT00000022309 | 0.957356124  | 1.03E-06 |
| TUCP_002008 | XLOC_081836 | ENSRNOT00000055630 | 0.950113091  | 2.24E-06 |
| TUCP_002008 | XLOC_081836 | ENSRNOT00000009202 | 0.97061409   | 1.64E-07 |
| TUCP_002008 | XLOC_081836 | ENSRNOT00000020376 | 0.952748736  | 1.71E-06 |
| TUCP_002008 | XLOC_081836 | ENSRNOT00000010852 | 0.951476853  | 1.95E-06 |
| TUCP_002008 | XLOC_081836 | ENSRNOT00000080216 | -0.960764433 | 6.86E-07 |
| TUCP_002008 | XLOC_081836 | ENSRNOT00000005873 | -0.975621766 | 6.51E-08 |
| TUCP_002008 | XLOC_081836 | ENSRNOT00000057738 | 0.979976065  | 2.45E-08 |
| TUCP_002008 | XLOC_081836 | ENSRNOT00000017829 | 0.950787376  | 2.09E-06 |
| TUCP_002008 | XLOC_081836 | ENSRNOT00000006160 | 0.961755002  | 6.04E-07 |
| TUCP_002008 | XLOC_081836 | ENSRNOT00000023014 | 0.97431358   | 8.43E-08 |
| TUCP_002008 | XLOC_081836 | ENSRNOT00000026518 | 0.967878633  | 2.55E-07 |
| TUCP_002008 | XLOC_081836 | ENSRNOT00000035145 | -0.956997721 | 1.08E-06 |
| TUCP_002008 | XLOC_081836 | ENSRNOT00000065801 | 0.963023006  | 5.12E-07 |
| TUCP_002008 | XLOC_081836 | ENSRNOT00000032106 | 0.964014781  | 4.47E-07 |
| TUCP_002008 | XLOC_081836 | ENSRNOT00000079152 | 0.953713597  | 1.55E-06 |
| TUCP_002008 | XLOC_081836 | ENSRNOT00000037409 | 0.957610989  | 1.00E-06 |
| TUCP_002008 | XLOC_081836 | ENSRNOT00000074150 | 0.970355383  | 1.72E-07 |

|             |             |                     |              |          |
|-------------|-------------|---------------------|--------------|----------|
| TUCP_002008 | XLOC_081836 | ENSRNOT0000007369   | 0.952276754  | 1.80E-06 |
| TUCP_002008 | XLOC_081836 | ENSRNOT00000016568  | 0.964060708  | 4.45E-07 |
| TUCP_002008 | XLOC_081836 | ENSRNOT00000024947  | -0.95878645  | 8.74E-07 |
| TUCP_002008 | XLOC_081836 | ENSRNOT00000008919  | -0.961085614 | 6.58E-07 |
| TUCP_002008 | XLOC_081836 | ENSRNOT00000008764  | 0.953257771  | 1.62E-06 |
| TUCP_002008 | XLOC_081836 | ENSRNOT000000088679 | -0.955008904 | 1.35E-06 |
| TUCP_002008 | XLOC_081836 | ENSRNOT000000051494 | 0.951616748  | 1.92E-06 |
| TUCP_002008 | XLOC_081836 | ENSRNOT00000027967  | 0.964523052  | 4.17E-07 |
| TUCP_002008 | XLOC_081836 | ENSRNOT000000081678 | 0.953928769  | 1.51E-06 |
| TUCP_002009 | XLOC_081837 | ENSRNOT00000001077  | 0.953246016  | 1.63E-06 |
| TUCP_002009 | XLOC_081837 | ENSRNOT000000025517 | 0.950935743  | 2.06E-06 |
| TUCP_002009 | XLOC_081837 | ENSRNOT00000017291  | -0.953705228 | 1.55E-06 |
| TUCP_002009 | XLOC_081837 | ENSRNOT000000068026 | -0.959445083 | 8.07E-07 |
| TUCP_002009 | XLOC_081837 | ENSRNOT00000010852  | 0.95749771   | 1.02E-06 |
| TUCP_002009 | XLOC_081837 | ENSRNOT000000080216 | -0.956277642 | 1.17E-06 |
| TUCP_002009 | XLOC_081837 | ENSRNOT00000026391  | 0.95455071   | 1.41E-06 |
| TUCP_002009 | XLOC_081837 | ENSRNOT000000075397 | 0.95928861   | 8.22E-07 |
| TUCP_002009 | XLOC_081837 | ENSRNOT000000081678 | 0.961968523  | 5.88E-07 |
| TUCP_002009 | XLOC_081837 | ENSRNOT000000005873 | -0.956740573 | 1.11E-06 |
| TUCP_002009 | XLOC_081837 | ENSRNOT00000000707  | -0.95448095  | 1.43E-06 |
| TUCP_002009 | XLOC_081837 | ENSRNOT000000057738 | 0.969152181  | 2.09E-07 |
| TUCP_002009 | XLOC_081837 | ENSRNOT00000014888  | 0.955347563  | 1.30E-06 |
| TUCP_002009 | XLOC_081837 | ENSRNOT000000025913 | -0.950782348 | 2.09E-06 |
| TUCP_002009 | XLOC_081837 | ENSRNOT000000021826 | 0.958291192  | 9.27E-07 |
| TUCP_002009 | XLOC_081837 | ENSRNOT000000057537 | 0.954838058  | 1.37E-06 |
| TUCP_002009 | XLOC_081837 | ENSRNOT000000018634 | -0.959918546 | 7.62E-07 |
| TUCP_002009 | XLOC_081837 | ENSRNOT000000018864 | -0.953996134 | 1.50E-06 |
| TUCP_002009 | XLOC_081837 | ENSRNOT000000026518 | 0.957726479  | 9.90E-07 |
| TUCP_002009 | XLOC_081837 | ENSRNOT000000001691 | 0.957465597  | 1.02E-06 |
| TUCP_002009 | XLOC_081837 | ENSRNOT000000040525 | 0.957874302  | 9.73E-07 |
| TUCP_002009 | XLOC_081837 | ENSRNOT000000031384 | 0.957003793  | 1.08E-06 |
| TUCP_002009 | XLOC_081837 | ENSRNOT00000012767  | 0.965167365  | 3.81E-07 |
| TUCP_002009 | XLOC_081837 | ENSRNOT000000046639 | 0.952258251  | 1.80E-06 |
| TUCP_002009 | XLOC_081837 | ENSRNOT000000029701 | 0.969995738  | 1.82E-07 |
| TUCP_002009 | XLOC_081837 | ENSRNOT000000065600 | 0.961855597  | 5.96E-07 |
| TUCP_002009 | XLOC_081837 | ENSRNOT00000011930  | 0.95815802   | 9.41E-07 |
| TUCP_002009 | XLOC_081837 | ENSRNOT000000030706 | -0.950248797 | 2.21E-06 |
| TUCP_002009 | XLOC_081837 | ENSRNOT000000037133 | 0.961250571  | 6.45E-07 |
| TUCP_002009 | XLOC_081837 | ENSRNOT000000037015 | 0.976565828  | 5.35E-08 |
| TUCP_002009 | XLOC_081837 | ENSRNOT000000074023 | 0.957369612  | 1.03E-06 |
| TUCP_002009 | XLOC_081837 | ENSRNOT000000037409 | 0.95367795   | 1.55E-06 |
| TUCP_002009 | XLOC_081837 | ENSRNOT000000008244 | 0.953918188  | 1.51E-06 |
| TUCP_002009 | XLOC_081837 | ENSRNOT00000013524  | 0.956443445  | 1.15E-06 |
| TUCP_002009 | XLOC_081837 | ENSRNOT000000072580 | -0.950074539 | 2.25E-06 |
| TUCP_002009 | XLOC_081837 | ENSRNOT000000074150 | 0.95429145   | 1.45E-06 |
| TUCP_002009 | XLOC_081837 | ENSRNOT000000007369 | 0.958284134  | 9.28E-07 |
| TUCP_002009 | XLOC_081837 | ENSRNOT000000085466 | 0.952204054  | 1.81E-06 |
| TUCP_002009 | XLOC_081837 | ENSRNOT00000017805  | 0.951807591  | 1.89E-06 |
| TUCP_002009 | XLOC_081837 | ENSRNOT000000065076 | 0.967150861  | 2.85E-07 |
| TUCP_002009 | XLOC_081837 | ENSRNOT000000025856 | -0.954018648 | 1.50E-06 |
| TUCP_002009 | XLOC_081837 | ENSRNOT000000083344 | 0.950906439  | 2.07E-06 |

|             |             |                     |              |          |
|-------------|-------------|---------------------|--------------|----------|
| TUCP_002009 | XLOC_081837 | ENSRNOT00000004351  | -0.952300187 | 1.79E-06 |
| TUCP_002009 | XLOC_081837 | ENSRNOT00000003544  | -0.959935318 | 7.60E-07 |
| TUCP_002009 | XLOC_081837 | ENSRNOT000000079609 | 0.954444811  | 1.43E-06 |
| TUCP_002009 | XLOC_081837 | ENSRNOT000000054685 | 0.960543247  | 7.05E-07 |
| TUCP_002009 | XLOC_081837 | ENSRNOT000000022746 | -0.952409548 | 1.77E-06 |
| TUCP_002009 | XLOC_081837 | ENSRNOT000000022190 | -0.950695045 | 2.11E-06 |
| TUCP_002009 | XLOC_081837 | ENSRNOT000000085334 | 0.954726693  | 1.39E-06 |
| TUCP_002009 | XLOC_081837 | ENSRNOT00000016568  | 0.955488695  | 1.28E-06 |
| TUCP_002009 | XLOC_081837 | ENSRNOT000000024947 | -0.965392864 | 3.69E-07 |
| TUCP_002009 | XLOC_081837 | ENSRNOT000000025309 | 0.970480502  | 1.68E-07 |
| TUCP_002009 | XLOC_081837 | ENSRNOT000000066952 | 0.952205434  | 1.81E-06 |
| TUCP_002009 | XLOC_081837 | ENSRNOT000000036137 | 0.957470304  | 1.02E-06 |
| TUCP_002009 | XLOC_081837 | ENSRNOT000000051494 | 0.95964871   | 7.87E-07 |
| TUCP_002009 | XLOC_081837 | ENSRNOT000000020929 | 0.962847375  | 5.24E-07 |
| TUCP_002009 | XLOC_081837 | ENSRNOT000000027967 | 0.967792567  | 2.59E-07 |
| TUCP_002009 | XLOC_081837 | ENSRNOT00000016060  | 0.957820781  | 9.79E-07 |
| TUCP_002009 | XLOC_081837 | ENSRNOT000000089611 | 0.953582806  | 1.57E-06 |
| TUCP_002009 | XLOC_081837 | ENSRNOT000000090156 | -0.955429141 | 1.29E-06 |
| TUCP_002009 | XLOC_081837 | ENSRNOT000000084567 | 0.95953396   | 7.98E-07 |
| TUCP_002009 | XLOC_081837 | ENSRNOT000000089673 | -0.953017429 | 1.67E-06 |
| TUCP_002009 | XLOC_081837 | ENSRNOT000000088679 | -0.9557993   | 1.23E-06 |
| TUCP_002009 | XLOC_081837 | ENSRNOT000000083891 | -0.957326177 | 1.04E-06 |
| TUCP_002009 | XLOC_081837 | ENSRNOT00000016428  | 0.959852421  | 7.68E-07 |
| TUCP_002009 | XLOC_081837 | ENSRNOT00000010367  | 0.96245734   | 5.51E-07 |
| TUCP_002009 | XLOC_081837 | ENSRNOT000000086260 | -0.956274888 | 1.17E-06 |
| TUCP_002009 | XLOC_081837 | ENSRNOT000000055630 | 0.974895196  | 7.53E-08 |
| TUCP_002009 | XLOC_081837 | ENSRNOT00000011675  | 0.953402058  | 1.60E-06 |
| TUCP_002009 | XLOC_081837 | ENSRNOT00000005257  | 0.956196573  | 1.18E-06 |
| TUCP_002009 | XLOC_081837 | ENSRNOT000000068212 | 0.965772746  | 3.49E-07 |
| TUCP_002009 | XLOC_081837 | ENSRNOT000000009202 | 0.961205364  | 6.48E-07 |
| TUCP_002009 | XLOC_081837 | ENSRNOT000000008253 | -0.953177836 | 1.64E-06 |
| TUCP_002009 | XLOC_081837 | ENSRNOT000000082151 | -0.953889251 | 1.52E-06 |
| TUCP_002006 | XLOC_081822 | ENSRNOT000000076400 | 0.951357103  | 1.98E-06 |
| TUCP_002006 | XLOC_081822 | ENSRNOT00000010680  | 0.955970705  | 1.21E-06 |
| TUCP_002006 | XLOC_081822 | ENSRNOT000000020376 | 0.955208243  | 1.32E-06 |
| TUCP_002006 | XLOC_081822 | ENSRNOT000000090923 | 0.954249106  | 1.46E-06 |
| TUCP_002006 | XLOC_081822 | ENSRNOT000000064983 | 0.958632551  | 8.90E-07 |
| TUCP_002006 | XLOC_081822 | ENSRNOT00000013524  | 0.951241677  | 2.00E-06 |
| TUCP_002006 | XLOC_081822 | ENSRNOT00000006460  | 0.952017054  | 1.85E-06 |
| TUCP_002006 | XLOC_081822 | ENSRNOT00000015062  | 0.960121263  | 7.43E-07 |
| TUCP_002006 | XLOC_081822 | ENSRNOT000000081226 | 0.950611196  | 2.13E-06 |
| TUCP_002006 | XLOC_081822 | ENSRNOT000000057738 | 0.968932228  | 2.16E-07 |
| TUCP_002006 | XLOC_081822 | ENSRNOT000000068212 | 0.967261438  | 2.80E-07 |
| TUCP_002006 | XLOC_081822 | ENSRNOT00000010939  | 0.957379358  | 1.03E-06 |
| TUCP_002006 | XLOC_081822 | ENSRNOT000000081631 | 0.952343948  | 1.79E-06 |
| TUCP_002006 | XLOC_081822 | ENSRNOT000000023014 | 0.963841419  | 4.58E-07 |
| TUCP_002006 | XLOC_081822 | ENSRNOT000000026518 | 0.960278915  | 7.28E-07 |
| TUCP_002006 | XLOC_081822 | ENSRNOT000000029701 | 0.965582288  | 3.59E-07 |
| TUCP_002006 | XLOC_081822 | ENSRNOT000000046552 | 0.95512336   | 1.33E-06 |
| TUCP_002006 | XLOC_081822 | ENSRNOT000000065801 | 0.952710638  | 1.72E-06 |
| TUCP_002006 | XLOC_081822 | ENSRNOT000000088385 | 0.96083254   | 6.80E-07 |

|             |             |                     |              |          |
|-------------|-------------|---------------------|--------------|----------|
| TUCP_002006 | XLOC_081822 | ENSRNOT00000032106  | 0.952538386  | 1.75E-06 |
| TUCP_002006 | XLOC_081822 | ENSRNOT000000084567 | 0.956566727  | 1.13E-06 |
| TUCP_002006 | XLOC_081822 | ENSRNOT00000014320  | 0.958137545  | 9.44E-07 |
| TUCP_002006 | XLOC_081822 | ENSRNOT00000090621  | 0.952825083  | 1.70E-06 |
| TUCP_002006 | XLOC_081822 | ENSRNOT00000037409  | 0.959298419  | 8.22E-07 |
| TUCP_002006 | XLOC_081822 | ENSRNOT00000037015  | 0.973707141  | 9.47E-08 |
| TUCP_002006 | XLOC_081822 | ENSRNOT00000074150  | 0.95681982   | 1.10E-06 |
| TUCP_002006 | XLOC_081822 | ENSRNOT00000021826  | 0.950161038  | 2.23E-06 |
| TUCP_002006 | XLOC_081822 | ENSRNOT00000065076  | 0.959575633  | 7.94E-07 |
| TUCP_002006 | XLOC_081822 | ENSRNOT00000048687  | 0.950561694  | 2.14E-06 |
| TUCP_002006 | XLOC_081822 | ENSRNOT00000083344  | 0.960638333  | 6.96E-07 |
| TUCP_002006 | XLOC_081822 | ENSRNOT00000054685  | 0.954980774  | 1.35E-06 |
| TUCP_002006 | XLOC_081822 | ENSRNOT00000085334  | 0.96954024   | 1.96E-07 |
| TUCP_002006 | XLOC_081822 | ENSRNOT00000082513  | 0.95734677   | 1.03E-06 |
| TUCP_002006 | XLOC_081822 | ENSRNOT00000025309  | 0.959102391  | 8.41E-07 |
| TUCP_002006 | XLOC_081822 | ENSRNOT00000008919  | -0.952405659 | 1.78E-06 |
| TUCP_002006 | XLOC_081822 | ENSRNOT00000066952  | 0.958436573  | 9.11E-07 |
| TUCP_002006 | XLOC_081822 | ENSRNOT00000005873  | -0.965340774 | 3.72E-07 |
| TUCP_002006 | XLOC_081822 | ENSRNOT00000036137  | 0.968407184  | 2.35E-07 |
| TUCP_002006 | XLOC_081822 | ENSRNOT00000051494  | 0.952524546  | 1.75E-06 |
| TUCP_002006 | XLOC_081822 | ENSRNOT00000020929  | 0.971551825  | 1.40E-07 |
| TUCP_002006 | XLOC_081822 | ENSRNOT00000027967  | 0.952724827  | 1.72E-06 |
| TUCP_002006 | XLOC_081822 | ENSRNOT00000089611  | 0.955720276  | 1.24E-06 |
| TUCP_002006 | XLOC_081822 | ENSRNOT00000027760  | 0.950645352  | 2.12E-06 |
| TUCP_002006 | XLOC_081822 | ENSRNOT00000047234  | 0.954694515  | 1.39E-06 |
| TUCP_002006 | XLOC_081822 | ENSRNOT00000055630  | 0.952942483  | 1.68E-06 |
| TUCP_002006 | XLOC_081822 | ENSRNOT00000011675  | 0.955033391  | 1.34E-06 |
| TUCP_002006 | XLOC_081822 | ENSRNOT00000009202  | 0.963146006  | 5.03E-07 |
| TUCP_002006 | XLOC_081822 | ENSRNOT00000011773  | 0.964362949  | 4.26E-07 |
| TUCP_002006 | XLOC_081822 | ENSRNOT00000038780  | 0.954937582  | 1.36E-06 |
| TUCP_002007 | XLOC_081831 | ENSRNOT00000076400  | 0.954347993  | 1.45E-06 |
| TUCP_002007 | XLOC_081831 | ENSRNOT00000046552  | 0.958946545  | 8.57E-07 |
| TUCP_002007 | XLOC_081831 | ENSRNOT00000018634  | -0.950192285 | 2.22E-06 |
| TUCP_002007 | XLOC_081831 | ENSRNOT00000055536  | 0.957769326  | 9.85E-07 |
| TUCP_002007 | XLOC_081831 | ENSRNOT00000010680  | 0.956434192  | 1.15E-06 |
| TUCP_002007 | XLOC_081831 | ENSRNOT00000020376  | 0.958649764  | 8.88E-07 |
| TUCP_002007 | XLOC_081831 | ENSRNOT00000064983  | 0.963918419  | 4.53E-07 |
| TUCP_002007 | XLOC_081831 | ENSRNOT00000013524  | 0.954477774  | 1.43E-06 |
| TUCP_002007 | XLOC_081831 | ENSRNOT00000009975  | 0.953988146  | 1.50E-06 |
| TUCP_002007 | XLOC_081831 | ENSRNOT00000006460  | 0.953721713  | 1.55E-06 |
| TUCP_002007 | XLOC_081831 | ENSRNOT00000015062  | 0.963108558  | 5.06E-07 |
| TUCP_002007 | XLOC_081831 | ENSRNOT00000081226  | 0.960336814  | 7.23E-07 |
| TUCP_002007 | XLOC_081831 | ENSRNOT00000057738  | 0.97538719   | 6.83E-08 |
| TUCP_002007 | XLOC_081831 | ENSRNOT00000068212  | 0.963683726  | 4.68E-07 |
| TUCP_002007 | XLOC_081831 | ENSRNOT00000038780  | 0.959107689  | 8.41E-07 |
| TUCP_002007 | XLOC_081831 | ENSRNOT00000021715  | 0.956370145  | 1.16E-06 |
| TUCP_002007 | XLOC_081831 | ENSRNOT00000081631  | 0.957670571  | 9.97E-07 |
| TUCP_002007 | XLOC_081831 | ENSRNOT00000017624  | 0.954424899  | 1.43E-06 |
| TUCP_002007 | XLOC_081831 | ENSRNOT00000003087  | 0.951337481  | 1.98E-06 |
| TUCP_002007 | XLOC_081831 | ENSRNOT00000023014  | 0.970813739  | 1.59E-07 |
| TUCP_002007 | XLOC_081831 | ENSRNOT00000026518  | 0.966329228  | 3.22E-07 |

|             |             |                    |              |          |
|-------------|-------------|--------------------|--------------|----------|
| TUCP_002007 | XLOC_081831 | ENSRNOT00000040525 | 0.951052981  | 2.04E-06 |
| TUCP_002007 | XLOC_081831 | ENSRNOT00000072580 | -0.95065093  | 2.12E-06 |
| TUCP_002007 | XLOC_081831 | ENSRNOT00000012767 | 0.954744649  | 1.39E-06 |
| TUCP_002007 | XLOC_081831 | ENSRNOT00000029701 | 0.966831673  | 2.99E-07 |
| TUCP_002007 | XLOC_081831 | ENSRNOT00000071998 | 0.950475935  | 2.16E-06 |
| TUCP_002007 | XLOC_081831 | ENSRNOT00000065801 | 0.964208626  | 4.36E-07 |
| TUCP_002007 | XLOC_081831 | ENSRNOT00000088385 | 0.965520504  | 3.62E-07 |
| TUCP_002007 | XLOC_081831 | ENSRNOT00000008919 | -0.956950928 | 1.08E-06 |
| TUCP_002007 | XLOC_081831 | ENSRNOT00000032106 | 0.959813588  | 7.71E-07 |
| TUCP_002007 | XLOC_081831 | ENSRNOT00000037015 | 0.972459194  | 1.19E-07 |
| TUCP_002007 | XLOC_081831 | ENSRNOT00000014320 | 0.958486158  | 9.06E-07 |
| TUCP_002007 | XLOC_081831 | ENSRNOT00000090621 | 0.95836741   | 9.18E-07 |
| TUCP_002007 | XLOC_081831 | ENSRNOT00000037409 | 0.962309039  | 5.62E-07 |
| TUCP_002007 | XLOC_081831 | ENSRNOT00000008244 | 0.952703377  | 1.72E-06 |
| TUCP_002007 | XLOC_081831 | ENSRNOT00000001490 | 0.950338934  | 2.19E-06 |
| TUCP_002007 | XLOC_081831 | ENSRNOT00000079152 | 0.955534413  | 1.27E-06 |
| TUCP_002007 | XLOC_081831 | ENSRNOT00000074150 | 0.965182081  | 3.80E-07 |
| TUCP_002007 | XLOC_081831 | ENSRNOT00000021826 | 0.952755271  | 1.71E-06 |
| TUCP_002007 | XLOC_081831 | ENSRNOT00000010419 | 0.952261445  | 1.80E-06 |
| TUCP_002007 | XLOC_081831 | ENSRNOT00000065076 | 0.96161623   | 6.15E-07 |
| TUCP_002007 | XLOC_081831 | ENSRNOT00000048687 | 0.954959708  | 1.35E-06 |
| TUCP_002007 | XLOC_081831 | ENSRNOT00000011773 | 0.968674063  | 2.25E-07 |
| TUCP_002007 | XLOC_081831 | ENSRNOT00000083344 | 0.962588434  | 5.42E-07 |
| TUCP_002007 | XLOC_081831 | ENSRNOT00000054685 | 0.960366127  | 7.21E-07 |
| TUCP_002007 | XLOC_081831 | ENSRNOT00000085334 | 0.97936496   | 2.85E-08 |
| TUCP_002007 | XLOC_081831 | ENSRNOT00000082513 | 0.959786776  | 7.74E-07 |
| TUCP_002007 | XLOC_081831 | ENSRNOT00000016568 | 0.956342915  | 1.16E-06 |
| TUCP_002007 | XLOC_081831 | ENSRNOT00000025309 | 0.959827533  | 7.70E-07 |
| TUCP_002007 | XLOC_081831 | ENSRNOT00000064122 | 0.956218197  | 1.18E-06 |
| TUCP_002007 | XLOC_081831 | ENSRNOT00000075480 | -0.951596042 | 1.93E-06 |
| TUCP_002007 | XLOC_081831 | ENSRNOT00000008764 | 0.958396722  | 9.15E-07 |
| TUCP_002007 | XLOC_081831 | ENSRNOT00000066952 | 0.962850416  | 5.24E-07 |
| TUCP_002007 | XLOC_081831 | ENSRNOT00000005873 | -0.965736805 | 3.51E-07 |
| TUCP_002007 | XLOC_081831 | ENSRNOT00000036137 | 0.976337223  | 5.62E-08 |
| TUCP_002007 | XLOC_081831 | ENSRNOT00000051494 | 0.953899774  | 1.52E-06 |
| TUCP_002007 | XLOC_081831 | ENSRNOT00000020929 | 0.978126798  | 3.80E-08 |
| TUCP_002007 | XLOC_081831 | ENSRNOT00000027967 | 0.954212611  | 1.47E-06 |
| TUCP_002007 | XLOC_081831 | ENSRNOT00000089611 | 0.961348231  | 6.37E-07 |
| TUCP_002007 | XLOC_081831 | ENSRNOT00000084567 | 0.963564678  | 4.76E-07 |
| TUCP_002007 | XLOC_081831 | ENSRNOT00000027760 | 0.956435627  | 1.15E-06 |
| TUCP_002007 | XLOC_081831 | ENSRNOT00000047234 | 0.954776942  | 1.38E-06 |
| TUCP_002007 | XLOC_081831 | ENSRNOT00000011675 | 0.960547496  | 7.04E-07 |
| TUCP_002007 | XLOC_081831 | ENSRNOT00000037333 | -0.952066647 | 1.84E-06 |
| TUCP_002007 | XLOC_081831 | ENSRNOT00000009202 | 0.963541522  | 4.77E-07 |
| TUCP_002007 | XLOC_081831 | ENSRNOT00000008253 | -0.951764291 | 1.90E-06 |
| TUCP_002007 | XLOC_081831 | ENSRNOT00000010369 | 0.951161412  | 2.02E-06 |
| TUCP_002007 | XLOC_081831 | ENSRNOT00000005343 | -0.954913096 | 1.36E-06 |
| TUCP_002007 | XLOC_081831 | ENSRNOT00000078800 | 0.955438642  | 1.28E-06 |
| TUCP_002007 | XLOC_081831 | ENSRNOT00000010939 | 0.960617846  | 6.98E-07 |
| TUCP_002004 | XLOC_081392 | ENSRNOT00000093745 | 0.961463797  | 6.27E-07 |
| TUCP_003925 | XLOC_172728 | ENSRNOT00000086186 | 0.959296457  | 8.22E-07 |

|             |             |                    |              |          |
|-------------|-------------|--------------------|--------------|----------|
| TUCP_003579 | XLOC_157600 | ENSRNOT00000083993 | 0.952796994  | 1.70E-06 |
| TUCP_002003 | XLOC_081386 | ENSRNOT00000044511 | 0.955894782  | 1.22E-06 |
| TUCP_002003 | XLOC_081386 | ENSRNOT00000087138 | 0.967600483  | 2.66E-07 |
| TUCP_002003 | XLOC_081386 | ENSRNOT00000079722 | 0.951764849  | 1.90E-06 |
| TUCP_002003 | XLOC_081386 | ENSRNOT00000007914 | 0.959524046  | 7.99E-07 |
| TUCP_001518 | XLOC_058688 | ENSRNOT00000047105 | 0.953214288  | 1.63E-06 |
| TUCP_001518 | XLOC_058688 | ENSRNOT00000080660 | 0.965005189  | 3.90E-07 |
| TUCP_001518 | XLOC_058688 | ENSRNOT00000036506 | 0.955258821  | 1.31E-06 |
| TUCP_001518 | XLOC_058688 | ENSRNOT00000026941 | 0.957628629  | 1.00E-06 |
| TUCP_001518 | XLOC_058688 | ENSRNOT00000075656 | -0.958419792 | 9.13E-07 |
| TUCP_001518 | XLOC_058688 | ENSRNOT00000013745 | -0.952573768 | 1.74E-06 |
| TUCP_001518 | XLOC_058688 | ENSRNOT00000075397 | 0.962102251  | 5.78E-07 |
| TUCP_001518 | XLOC_058688 | ENSRNOT00000032926 | -0.958297223 | 9.26E-07 |
| TUCP_001518 | XLOC_058688 | ENSRNOT00000006217 | 0.950413684  | 2.17E-06 |
| TUCP_001518 | XLOC_058688 | ENSRNOT00000040525 | 0.955343598  | 1.30E-06 |
| TUCP_001518 | XLOC_058688 | ENSRNOT0000006067  | 0.951394552  | 1.97E-06 |
| TUCP_001518 | XLOC_058688 | ENSRNOT00000001855 | 0.97202814   | 1.29E-07 |
| TUCP_001518 | XLOC_058688 | ENSRNOT00000001691 | 0.979079314  | 3.05E-08 |
| TUCP_001518 | XLOC_058688 | ENSRNOT00000086706 | 0.963543555  | 4.77E-07 |
| TUCP_001518 | XLOC_058688 | ENSRNOT00000074023 | 0.977961616  | 3.95E-08 |
| TUCP_001518 | XLOC_058688 | ENSRNOT00000013851 | -0.955096623 | 1.33E-06 |
| TUCP_001518 | XLOC_058688 | ENSRNOT00000042638 | 0.959598098  | 7.92E-07 |
| TUCP_001518 | XLOC_058688 | ENSRNOT00000024710 | -0.951723639 | 1.90E-06 |
| TUCP_001518 | XLOC_058688 | ENSRNOT00000055582 | 0.950124082  | 2.23E-06 |
| TUCP_001518 | XLOC_058688 | ENSRNOT00000033017 | 0.978583815  | 3.42E-08 |
| TUCP_001518 | XLOC_058688 | ENSRNOT00000066370 | 0.969838292  | 1.87E-07 |
| TUCP_001518 | XLOC_058688 | ENSRNOT00000065076 | 0.961669356  | 6.11E-07 |
| TUCP_001518 | XLOC_058688 | ENSRNOT00000054685 | 0.962372607  | 5.58E-07 |
| TUCP_001518 | XLOC_058688 | ENSRNOT00000012060 | 0.951968436  | 1.86E-06 |
| TUCP_001518 | XLOC_058688 | ENSRNOT00000073370 | 0.959092608  | 8.42E-07 |
| TUCP_001518 | XLOC_058688 | ENSRNOT00000004551 | 0.951434859  | 1.96E-06 |
| TUCP_001518 | XLOC_058688 | ENSRNOT00000013580 | 0.973821948  | 9.27E-08 |
| TUCP_001518 | XLOC_058688 | ENSRNOT00000019759 | 0.958999854  | 8.52E-07 |
| TUCP_001518 | XLOC_058688 | ENSRNOT00000065871 | 0.951498901  | 1.95E-06 |
| TUCP_001518 | XLOC_058688 | ENSRNOT00000042903 | 0.966155693  | 3.30E-07 |
| TUCP_001518 | XLOC_058688 | ENSRNOT00000057898 | -0.951724274 | 1.90E-06 |
| TUCP_001518 | XLOC_058688 | ENSRNOT00000089933 | 0.961247495  | 6.45E-07 |
| TUCP_001518 | XLOC_058688 | ENSRNOT00000056100 | -0.961061674 | 6.60E-07 |
| TUCP_001518 | XLOC_058688 | ENSRNOT00000009811 | 0.951263894  | 1.99E-06 |
| TUCP_001518 | XLOC_058688 | ENSRNOT00000026391 | 0.956875532  | 1.09E-06 |
| TUCP_001518 | XLOC_058688 | ENSRNOT00000068663 | 0.952177693  | 1.82E-06 |
| TUCP_001518 | XLOC_058688 | ENSRNOT00000005834 | 0.958536189  | 9.00E-07 |
| TUCP_001518 | XLOC_058688 | ENSRNOT00000077526 | 0.969066357  | 2.12E-07 |
| TUCP_001518 | XLOC_058688 | ENSRNOT00000024066 | 0.954247168  | 1.46E-06 |
| TUCP_001518 | XLOC_058688 | ENSRNOT00000003940 | -0.952136338 | 1.83E-06 |
| TUCP_001518 | XLOC_058688 | ENSRNOT00000037133 | 0.97730927   | 4.56E-08 |
| TUCP_001518 | XLOC_058688 | ENSRNOT00000064772 | 0.960516155  | 7.07E-07 |
| TUCP_001518 | XLOC_058688 | ENSRNOT00000049245 | 0.951041355  | 2.04E-06 |
| TUCP_001518 | XLOC_058688 | ENSRNOT00000090912 | 0.953505984  | 1.58E-06 |
| TUCP_001518 | XLOC_058688 | ENSRNOT00000013867 | 0.960642093  | 6.96E-07 |
| TUCP_001518 | XLOC_058688 | ENSRNOT00000026831 | 0.967566547  | 2.68E-07 |



|             |             |                    |              |          |
|-------------|-------------|--------------------|--------------|----------|
| TUCP_001518 | XLOC_058688 | ENSRNOT00000032363 | 0.95142419   | 1.96E-06 |
| TUCP_001518 | XLOC_058688 | ENSRNOT00000003780 | 0.967291197  | 2.79E-07 |
| TUCP_001518 | XLOC_058688 | ENSRNOT00000022190 | -0.952261121 | 1.80E-06 |
| TUCP_001518 | XLOC_058688 | ENSRNOT00000025913 | -0.950205934 | 2.22E-06 |
| TUCP_001518 | XLOC_058688 | ENSRNOT00000011956 | 0.95510761   | 1.33E-06 |
| TUCP_001518 | XLOC_058688 | ENSRNOT00000079517 | -0.956277459 | 1.17E-06 |
| TUCP_001518 | XLOC_058688 | ENSRNOT00000086577 | 0.968996335  | 2.14E-07 |
| TUCP_001518 | XLOC_058688 | ENSRNOT00000089524 | 0.967952043  | 2.52E-07 |
| TUCP_001518 | XLOC_058688 | ENSRNOT00000065600 | 0.969967656  | 1.83E-07 |
| TUCP_001518 | XLOC_058688 | ENSRNOT00000086260 | -0.950547449 | 2.14E-06 |
| TUCP_001518 | XLOC_058688 | ENSRNOT00000033975 | 0.954818119  | 1.37E-06 |
| TUCP_001518 | XLOC_058688 | ENSRNOT00000085621 | 0.972426291  | 1.20E-07 |
| TUCP_001518 | XLOC_058688 | ENSRNOT00000030082 | 0.950169651  | 2.22E-06 |
| TUCP_001518 | XLOC_058688 | ENSRNOT00000014821 | -0.952130789 | 1.83E-06 |
| TUCP_001518 | XLOC_058688 | ENSRNOT00000055683 | 0.971116602  | 1.51E-07 |
| TUCP_001518 | XLOC_058688 | ENSRNOT00000016445 | 0.975409298  | 6.80E-08 |
| TUCP_001518 | XLOC_058688 | ENSRNOT00000032843 | 0.955450316  | 1.28E-06 |
| TUCP_001518 | XLOC_058688 | ENSRNOT00000073327 | 0.959397507  | 8.12E-07 |
| TUCP_001518 | XLOC_058688 | ENSRNOT00000005910 | -0.951276505 | 1.99E-06 |
| TUCP_001518 | XLOC_058688 | ENSRNOT00000073667 | -0.952920611 | 1.68E-06 |
| TUCP_001518 | XLOC_058688 | ENSRNOT00000065615 | 0.960729847  | 6.89E-07 |
| TUCP_001518 | XLOC_058688 | ENSRNOT00000037015 | 0.955291963  | 1.30E-06 |
| TUCP_001518 | XLOC_058688 | ENSRNOT00000020794 | 0.951031289  | 2.04E-06 |
| TUCP_001518 | XLOC_058688 | ENSRNOT00000008244 | 0.952557966  | 1.75E-06 |
| TUCP_001518 | XLOC_058688 | ENSRNOT00000023876 | 0.96217979   | 5.72E-07 |
| TUCP_001518 | XLOC_058688 | ENSRNOT00000002974 | 0.952552721  | 1.75E-06 |
| TUCP_001518 | XLOC_058688 | ENSRNOT0000000658  | 0.950221168  | 2.21E-06 |
| TUCP_001518 | XLOC_058688 | ENSRNOT00000028685 | 0.960164015  | 7.39E-07 |
| TUCP_001518 | XLOC_058688 | ENSRNOT00000067135 | -0.955192087 | 1.32E-06 |
| TUCP_001518 | XLOC_058688 | ENSRNOT00000083632 | -0.959480097 | 8.04E-07 |
| TUCP_001518 | XLOC_058688 | ENSRNOT00000003568 | 0.956512612  | 1.14E-06 |
| TUCP_001518 | XLOC_058688 | ENSRNOT00000027057 | 0.960804036  | 6.82E-07 |
| TUCP_001518 | XLOC_058688 | ENSRNOT00000028057 | 0.974227854  | 8.58E-08 |
| TUCP_001518 | XLOC_058688 | ENSRNOT00000077146 | -0.957372967 | 1.03E-06 |
| TUCP_001518 | XLOC_058688 | ENSRNOT00000004999 | 0.955897497  | 1.22E-06 |
| TUCP_001518 | XLOC_058688 | ENSRNOT00000013463 | 0.967243902  | 2.81E-07 |
| TUCP_001518 | XLOC_058688 | ENSRNOT00000024393 | 0.959375537  | 8.14E-07 |
| TUCP_001518 | XLOC_058688 | ENSRNOT00000047663 | -0.964096864 | 4.42E-07 |
| TUCP_001518 | XLOC_058688 | ENSRNOT00000082151 | -0.951788924 | 1.89E-06 |
| TUCP_001518 | XLOC_058688 | ENSRNOT00000022578 | 0.959078964  | 8.44E-07 |
| TUCP_001518 | XLOC_058688 | ENSRNOT00000010852 | 0.957202543  | 1.05E-06 |
| TUCP_001518 | XLOC_058688 | ENSRNOT00000013524 | 0.951772968  | 1.89E-06 |
| TUCP_001518 | XLOC_058688 | ENSRNOT00000085971 | -0.969618882 | 1.94E-07 |
| TUCP_001518 | XLOC_058688 | ENSRNOT00000027370 | 0.953895873  | 1.52E-06 |
| TUCP_001518 | XLOC_058688 | ENSRNOT00000080443 | 0.955076454  | 1.34E-06 |
| TUCP_001518 | XLOC_058688 | ENSRNOT00000022716 | 0.963516578  | 4.79E-07 |
| TUCP_001518 | XLOC_058688 | ENSRNOT00000012736 | 0.951650911  | 1.92E-06 |
| TUCP_001518 | XLOC_058688 | ENSRNOT00000015624 | 0.96626008   | 3.25E-07 |
| TUCP_001518 | XLOC_058688 | ENSRNOT00000026426 | 0.952703848  | 1.72E-06 |
| TUCP_001518 | XLOC_058688 | ENSRNOT00000085295 | -0.952662536 | 1.73E-06 |
| TUCP_001518 | XLOC_058688 | ENSRNOT0000002114  | -0.961006133 | 6.65E-07 |

|             |             |                    |              |          |
|-------------|-------------|--------------------|--------------|----------|
| TUCP_001518 | XLOC_058688 | ENSRNOT00000014127 | 0.95532046   | 1.30E-06 |
| TUCP_001518 | XLOC_058688 | ENSRNOT00000037679 | 0.952710941  | 1.72E-06 |
| TUCP_001518 | XLOC_058688 | ENSRNOT00000000120 | 0.958126281  | 9.45E-07 |
| TUCP_001518 | XLOC_058688 | ENSRNOT00000007369 | 0.960667189  | 6.94E-07 |
| TUCP_001518 | XLOC_058688 | ENSRNOT00000060696 | 0.950711191  | 2.11E-06 |
| TUCP_001518 | XLOC_058688 | ENSRNOT00000026760 | -0.950517802 | 2.15E-06 |
| TUCP_001518 | XLOC_058688 | ENSRNOT00000005387 | 0.958863267  | 8.66E-07 |
| TUCP_001518 | XLOC_058688 | ENSRNOT00000022677 | -0.955982533 | 1.21E-06 |
| TUCP_001518 | XLOC_058688 | ENSRNOT00000073643 | -0.953806203 | 1.53E-06 |
| TUCP_001518 | XLOC_058688 | ENSRNOT00000027967 | 0.95577374   | 1.24E-06 |
| TUCP_001518 | XLOC_058688 | ENSRNOT00000016060 | 0.955946374  | 1.21E-06 |
| TUCP_001518 | XLOC_058688 | ENSRNOT00000012286 | -0.963298583 | 4.93E-07 |
| TUCP_001518 | XLOC_058688 | ENSRNOT00000090057 | 0.953901549  | 1.52E-06 |
| TUCP_001518 | XLOC_058688 | ENSRNOT00000081678 | 0.953106871  | 1.65E-06 |
| TUCP_001518 | XLOC_058688 | ENSRNOT00000008987 | -0.954017102 | 1.50E-06 |
| TUCP_001518 | XLOC_058688 | ENSRNOT00000022796 | 0.952622468  | 1.74E-06 |
| TUCP_001518 | XLOC_058688 | ENSRNOT00000005257 | 0.956673133  | 1.12E-06 |
| TUCP_001613 | XLOC_063750 | ENSRNOT00000026558 | 0.953007429  | 1.67E-06 |
| TUCP_001613 | XLOC_063750 | ENSRNOT00000026677 | 0.95355456   | 1.57E-06 |
| TUCP_001613 | XLOC_063750 | ENSRNOT00000018500 | 0.956155799  | 1.19E-06 |
| TUCP_001613 | XLOC_063750 | ENSRNOT00000028067 | 0.971526333  | 1.41E-07 |
| TUCP_001613 | XLOC_063750 | ENSRNOT00000015568 | 0.954521874  | 1.42E-06 |
| TUCP_001613 | XLOC_063750 | ENSRNOT00000078503 | -0.959208093 | 8.31E-07 |
| TUCP_001613 | XLOC_063750 | ENSRNOT00000016263 | 0.955961556  | 1.21E-06 |
| TUCP_001613 | XLOC_063750 | ENSRNOT00000020475 | 0.958988989  | 8.53E-07 |
| TUCP_001613 | XLOC_063750 | ENSRNOT00000020265 | 0.971746262  | 1.35E-07 |
| TUCP_001613 | XLOC_063750 | ENSRNOT00000064809 | 0.956314176  | 1.16E-06 |
| TUCP_001613 | XLOC_063750 | ENSRNOT00000013933 | 0.955059519  | 1.34E-06 |
| TUCP_001613 | XLOC_063750 | ENSRNOT00000039005 | 0.964224816  | 4.35E-07 |
| TUCP_001613 | XLOC_063750 | ENSRNOT00000060692 | 0.951246782  | 2.00E-06 |
| TUCP_001613 | XLOC_063750 | ENSRNOT00000065288 | 0.956061581  | 1.20E-06 |
| TUCP_001613 | XLOC_063750 | ENSRNOT00000014912 | 0.959911693  | 7.62E-07 |
| TUCP_001613 | XLOC_063750 | ENSRNOT00000028423 | 0.964294976  | 4.30E-07 |
| TUCP_001613 | XLOC_063750 | ENSRNOT00000031851 | 0.950034319  | 2.25E-06 |
| TUCP_001613 | XLOC_063750 | ENSRNOT00000026364 | 0.957469168  | 1.02E-06 |
| TUCP_001613 | XLOC_063750 | ENSRNOT00000030344 | 0.955829763  | 1.23E-06 |
| TUCP_001613 | XLOC_063750 | ENSRNOT00000086390 | 0.951015061  | 2.05E-06 |
| TUCP_001613 | XLOC_063750 | ENSRNOT00000016112 | 0.963018278  | 5.12E-07 |
| TUCP_001613 | XLOC_063750 | ENSRNOT00000022478 | 0.953361536  | 1.61E-06 |
| TUCP_001613 | XLOC_063750 | ENSRNOT00000037844 | 0.954062808  | 1.49E-06 |
| TUCP_001613 | XLOC_063750 | ENSRNOT00000010673 | 0.955186516  | 1.32E-06 |
| TUCP_001613 | XLOC_063750 | ENSRNOT00000044254 | 0.963733433  | 4.65E-07 |
| TUCP_001613 | XLOC_063750 | ENSRNOT00000028801 | -0.957448797 | 1.02E-06 |
| TUCP_001613 | XLOC_063750 | ENSRNOT00000077163 | 0.956750086  | 1.11E-06 |
| TUCP_001613 | XLOC_063750 | ENSRNOT00000036040 | 0.954018523  | 1.50E-06 |
| TUCP_001613 | XLOC_063750 | ENSRNOT00000015876 | -0.950583607 | 2.14E-06 |
| TUCP_001613 | XLOC_063750 | ENSRNOT00000079437 | 0.952637395  | 1.73E-06 |
| TUCP_001613 | XLOC_063750 | ENSRNOT00000032015 | 0.978167697  | 3.77E-08 |
| TUCP_001613 | XLOC_063750 | ENSRNOT00000016842 | 0.950973266  | 2.05E-06 |
| TUCP_001613 | XLOC_063750 | ENSRNOT00000022798 | 0.955109022  | 1.33E-06 |
| TUCP_001613 | XLOC_063750 | ENSRNOT00000044608 | 0.954570952  | 1.41E-06 |

|             |             |                    |              |          |
|-------------|-------------|--------------------|--------------|----------|
| TUCP_003363 | XLOC_145784 | ENSRNOT0000002191  | 0.959438547  | 8.08E-07 |
| TUCP_001267 | XLOC_047897 | ENSRNOT00000008196 | 0.965285395  | 3.75E-07 |
| TUCP_001267 | XLOC_047897 | ENSRNOT00000076187 | 0.965713951  | 3.52E-07 |
| TUCP_001267 | XLOC_047897 | ENSRNOT00000066416 | 0.981114552  | 1.83E-08 |
| TUCP_001267 | XLOC_047897 | ENSRNOT00000009542 | 0.964546372  | 4.16E-07 |
| TUCP_001267 | XLOC_047897 | ENSRNOT00000060292 | 0.981986307  | 1.45E-08 |
| TUCP_001267 | XLOC_047897 | ENSRNOT00000078446 | 0.956358492  | 1.16E-06 |
| TUCP_001267 | XLOC_047897 | ENSRNOT00000087153 | 0.964051198  | 4.45E-07 |
| TUCP_001267 | XLOC_047897 | ENSRNOT00000091052 | 0.990715061  | 5.35E-10 |
| TUCP_001515 | XLOC_058502 | ENSRNOT00000025981 | 0.962959735  | 5.16E-07 |
| TUCP_001515 | XLOC_058502 | ENSRNOT00000029439 | 0.963880208  | 4.56E-07 |
| TUCP_001515 | XLOC_058502 | ENSRNOT00000065143 | 0.950128624  | 2.23E-06 |
| TUCP_001515 | XLOC_058502 | ENSRNOT00000031904 | 0.961463642  | 6.27E-07 |
| TUCP_001515 | XLOC_058502 | ENSRNOT00000082869 | 0.981696077  | 1.57E-08 |
| TUCP_001515 | XLOC_058502 | ENSRNOT00000081246 | 0.967658351  | 2.64E-07 |
| TUCP_001515 | XLOC_058502 | ENSRNOT00000055321 | 0.950216311  | 2.21E-06 |
| TUCP_001515 | XLOC_058502 | ENSRNOT00000038807 | 0.953746944  | 1.54E-06 |
| TUCP_001515 | XLOC_058502 | ENSRNOT00000058072 | 0.956848909  | 1.10E-06 |
| TUCP_001515 | XLOC_058502 | ENSRNOT00000007351 | -0.954239255 | 1.46E-06 |
| TUCP_001515 | XLOC_058502 | ENSRNOT00000017665 | 0.950168635  | 2.23E-06 |
| TUCP_001515 | XLOC_058502 | ENSRNOT00000079866 | 0.952324051  | 1.79E-06 |
| TUCP_001515 | XLOC_058502 | ENSRNOT00000051294 | 0.951178368  | 2.01E-06 |
| TUCP_001515 | XLOC_058502 | ENSRNOT00000066024 | 0.9587894    | 8.73E-07 |
| TUCP_001515 | XLOC_058502 | ENSRNOT00000021471 | -0.960884537 | 6.75E-07 |
| TUCP_001515 | XLOC_058502 | ENSRNOT00000004570 | 0.951915579  | 1.87E-06 |
| TUCP_001515 | XLOC_058502 | ENSRNOT00000023989 | 0.9534601    | 1.59E-06 |
| TUCP_001515 | XLOC_058502 | ENSRNOT00000031230 | 0.950032231  | 2.26E-06 |
| TUCP_001515 | XLOC_058502 | ENSRNOT00000005958 | 0.956301648  | 1.17E-06 |
| TUCP_001515 | XLOC_058502 | ENSRNOT00000003991 | 0.971513283  | 1.41E-07 |
| TUCP_001515 | XLOC_058502 | ENSRNOT00000048063 | 0.952974529  | 1.67E-06 |
| TUCP_001515 | XLOC_058502 | ENSRNOT00000023638 | 0.97239943   | 1.20E-07 |
| TUCP_001515 | XLOC_058502 | ENSRNOT00000009563 | -0.956987512 | 1.08E-06 |
| TUCP_001515 | XLOC_058502 | ENSRNOT00000010748 | 0.951666264  | 1.92E-06 |
| TUCP_001515 | XLOC_058502 | ENSRNOT00000090688 | 0.953462199  | 1.59E-06 |
| TUCP_001515 | XLOC_058502 | ENSRNOT00000050834 | -0.961217898 | 6.47E-07 |
| TUCP_001515 | XLOC_058502 | ENSRNOT00000078306 | 0.961831653  | 5.98E-07 |
| TUCP_001515 | XLOC_058502 | ENSRNOT00000035474 | 0.95175658   | 1.90E-06 |
| TUCP_001515 | XLOC_058502 | ENSRNOT00000041044 | 0.970343598  | 1.72E-07 |
| TUCP_001515 | XLOC_058502 | ENSRNOT00000027910 | 0.956852447  | 1.10E-06 |
| TUCP_001515 | XLOC_058502 | ENSRNOT00000016649 | 0.966310088  | 3.23E-07 |
| TUCP_001515 | XLOC_058502 | ENSRNOT00000073675 | -0.953833334 | 1.53E-06 |
| TUCP_001515 | XLOC_058502 | ENSRNOT00000046745 | 0.955099816  | 1.33E-06 |
| TUCP_001515 | XLOC_058502 | ENSRNOT00000025362 | -0.952117977 | 1.83E-06 |
| TUCP_001515 | XLOC_058502 | ENSRNOT00000073559 | 0.956490049  | 1.14E-06 |
| TUCP_001515 | XLOC_058502 | ENSRNOT00000004032 | 0.951568109  | 1.93E-06 |
| TUCP_001515 | XLOC_058502 | ENSRNOT00000088599 | 0.976870169  | 5.02E-08 |
| TUCP_001515 | XLOC_058502 | ENSRNOT00000017181 | -0.964825215 | 4.00E-07 |
| TUCP_001515 | XLOC_058502 | ENSRNOT00000023807 | -0.950974747 | 2.05E-06 |
| TUCP_001515 | XLOC_058502 | ENSRNOT00000012895 | 0.960153066  | 7.40E-07 |
| TUCP_001515 | XLOC_058502 | ENSRNOT00000029125 | 0.956466339  | 1.14E-06 |
| TUCP_001515 | XLOC_058502 | ENSRNOT00000060696 | 0.956177916  | 1.18E-06 |

|             |             |                    |              |          |
|-------------|-------------|--------------------|--------------|----------|
| TUCP_001515 | XLOC_058502 | ENSRNOT00000013758 | 0.953410743  | 1.60E-06 |
| TUCP_001515 | XLOC_058502 | ENSRNOT00000026543 | 0.960918031  | 6.72E-07 |
| TUCP_001515 | XLOC_058502 | ENSRNOT00000043345 | 0.951320528  | 1.98E-06 |
| TUCP_001515 | XLOC_058502 | ENSRNOT00000015006 | 0.952345313  | 1.79E-06 |
| TUCP_001515 | XLOC_058502 | ENSRNOT00000024322 | 0.952042729  | 1.84E-06 |
| TUCP_001515 | XLOC_058502 | ENSRNOT00000067181 | 0.970996422  | 1.54E-07 |
| TUCP_001515 | XLOC_058502 | ENSRNOT00000081981 | 0.963199863  | 5.00E-07 |
| TUCP_001515 | XLOC_058502 | ENSRNOT00000085251 | -0.960265188 | 7.30E-07 |
| TUCP_001515 | XLOC_058502 | ENSRNOT00000089933 | 0.950011845  | 2.26E-06 |
| TUCP_001515 | XLOC_058502 | ENSRNOT00000026174 | 0.950257509  | 2.21E-06 |
| TUCP_001515 | XLOC_058502 | ENSRNOT00000042125 | 0.953775996  | 1.54E-06 |
| TUCP_001515 | XLOC_058502 | ENSRNOT00000027223 | 0.95055031   | 2.14E-06 |
| TUCP_001515 | XLOC_058502 | ENSRNOT00000076669 | 0.954994784  | 1.35E-06 |
| TUCP_001515 | XLOC_058502 | ENSRNOT00000076729 | 0.955978137  | 1.21E-06 |
| TUCP_001515 | XLOC_058502 | ENSRNOT00000029866 | 0.951979708  | 1.85E-06 |
| TUCP_001515 | XLOC_058502 | ENSRNOT00000091602 | -0.956297904 | 1.17E-06 |
| TUCP_001515 | XLOC_058502 | ENSRNOT00000022074 | 0.955032373  | 1.34E-06 |
| TUCP_001515 | XLOC_058502 | ENSRNOT00000045285 | 0.954410997  | 1.44E-06 |
| TUCP_001515 | XLOC_058502 | ENSRNOT00000081047 | 0.954863084  | 1.37E-06 |
| TUCP_001515 | XLOC_058502 | ENSRNOT00000058312 | 0.962988598  | 5.14E-07 |
| TUCP_001515 | XLOC_058502 | ENSRNOT00000035989 | 0.95111687   | 2.02E-06 |
| TUCP_001515 | XLOC_058502 | ENSRNOT00000010898 | 0.954343344  | 1.45E-06 |
| TUCP_001515 | XLOC_058502 | ENSRNOT00000047192 | -0.958575816 | 8.96E-07 |
| TUCP_001515 | XLOC_058502 | ENSRNOT00000017753 | 0.962344162  | 5.60E-07 |
| TUCP_001515 | XLOC_058502 | ENSRNOT00000057160 | 0.961759722  | 6.04E-07 |
| TUCP_001515 | XLOC_058502 | ENSRNOT00000082699 | 0.963832062  | 4.59E-07 |
| TUCP_001515 | XLOC_058502 | ENSRNOT00000090299 | 0.951649197  | 1.92E-06 |
| TUCP_001515 | XLOC_058502 | ENSRNOT00000000743 | 0.970580103  | 1.65E-07 |
| TUCP_001515 | XLOC_058502 | ENSRNOT00000085228 | 0.951484746  | 1.95E-06 |
| TUCP_001515 | XLOC_058502 | ENSRNOT00000004319 | -0.953182526 | 1.64E-06 |
| TUCP_001515 | XLOC_058502 | ENSRNOT00000015799 | 0.959395051  | 8.12E-07 |
| TUCP_001515 | XLOC_058502 | ENSRNOT00000043216 | 0.954457456  | 1.43E-06 |
| TUCP_001515 | XLOC_058502 | ENSRNOT00000091909 | 0.963586043  | 4.74E-07 |
| TUCP_001515 | XLOC_058502 | ENSRNOT00000044608 | -0.950016187 | 2.26E-06 |
| TUCP_001264 | XLOC_047752 | ENSRNOT00000024186 | 0.969359019  | 2.02E-07 |
| TUCP_001264 | XLOC_047752 | ENSRNOT00000074753 | 0.989774658  | 8.65E-10 |
| TUCP_001264 | XLOC_047752 | ENSRNOT00000041904 | 0.994005628  | 6.03E-11 |
| TUCP_001264 | XLOC_047752 | ENSRNOT00000080193 | -0.958608438 | 8.93E-07 |
| TUCP_001264 | XLOC_047752 | ENSRNOT00000081798 | 0.968254842  | 2.41E-07 |
| TUCP_001264 | XLOC_047752 | ENSRNOT00000083487 | 0.980289512  | 2.27E-08 |
| TUCP_001264 | XLOC_047752 | ENSRNOT00000077990 | 0.994005628  | 6.03E-11 |
| TUCP_001264 | XLOC_047752 | ENSRNOT00000038826 | 0.994680213  | 3.33E-11 |
| TUCP_001264 | XLOC_047752 | ENSRNOT00000046842 | 0.965314444  | 3.73E-07 |
| TUCP_001264 | XLOC_047752 | ENSRNOT00000021243 | 0.979778079  | 2.57E-08 |
| TUCP_001264 | XLOC_047752 | ENSRNOT00000060250 | 0.993814131  | 7.06E-11 |
| TUCP_001264 | XLOC_047752 | ENSRNOT00000091934 | 0.994005628  | 6.03E-11 |
| TUCP_001264 | XLOC_047752 | ENSRNOT00000046585 | 0.974820897  | 7.64E-08 |
| TUCP_001264 | XLOC_047752 | ENSRNOT00000080794 | 0.983103044  | 1.05E-08 |
| TUCP_001264 | XLOC_047752 | ENSRNOT00000014456 | 0.999811738  | 1.86E-18 |
| TUCP_001264 | XLOC_047752 | ENSRNOT00000031205 | 0.983427062  | 9.58E-09 |
| TUCP_001264 | XLOC_047752 | ENSRNOT00000079260 | 0.991450245  | 3.55E-10 |

|             |             |                    |             |          |
|-------------|-------------|--------------------|-------------|----------|
| TUCP_001264 | XLOC_047752 | ENSRNOT00000044145 | 0.994005628 | 6.03E-11 |
| TUCP_001264 | XLOC_047752 | ENSRNOT00000088381 | 0.981468589 | 1.67E-08 |
| TUCP_001264 | XLOC_047752 | ENSRNOT00000011743 | 0.979097558 | 3.03E-08 |
| TUCP_001264 | XLOC_047752 | ENSRNOT00000089929 | 0.994005628 | 6.03E-11 |
| TUCP_001264 | XLOC_047752 | ENSRNOT00000088624 | 0.994005628 | 6.03E-11 |
| TUCP_001264 | XLOC_047752 | ENSRNOT00000085659 | 0.982425472 | 1.28E-08 |
| TUCP_001264 | XLOC_047752 | ENSRNOT00000015866 | 0.98968787  | 9.03E-10 |
| TUCP_001264 | XLOC_047752 | ENSRNOT00000064250 | 0.96957256  | 1.95E-07 |
| TUCP_001264 | XLOC_047752 | ENSRNOT00000034907 | 0.992948263 | 1.36E-10 |
| TUCP_001264 | XLOC_047752 | ENSRNOT00000051835 | 0.994005628 | 6.03E-11 |
| TUCP_001264 | XLOC_047752 | ENSRNOT00000079087 | 0.994005628 | 6.03E-11 |
| TUCP_001264 | XLOC_047752 | ENSRNOT00000037206 | 0.994005628 | 6.03E-11 |
| TUCP_001264 | XLOC_047752 | ENSRNOT00000083261 | 0.955613531 | 1.26E-06 |
| TUCP_001264 | XLOC_047752 | ENSRNOT00000015353 | 0.956003512 | 1.21E-06 |
| TUCP_001264 | XLOC_047752 | ENSRNOT00000080590 | 0.993732776 | 7.54E-11 |
| TUCP_001264 | XLOC_047752 | ENSRNOT00000027552 | 0.994007624 | 6.02E-11 |
| TUCP_001264 | XLOC_047752 | ENSRNOT00000047694 | 0.965081138 | 3.86E-07 |
| TUCP_001264 | XLOC_047752 | ENSRNOT00000077014 | 0.987538468 | 2.32E-09 |
| TUCP_001264 | XLOC_047752 | ENSRNOT00000080453 | 0.993697962 | 7.75E-11 |
| TUCP_001264 | XLOC_047752 | ENSRNOT00000089057 | 0.961514674 | 6.23E-07 |
| TUCP_001264 | XLOC_047752 | ENSRNOT00000066839 | 0.992072048 | 2.43E-10 |
| TUCP_001264 | XLOC_047752 | ENSRNOT00000078633 | 0.994005628 | 6.03E-11 |
| TUCP_001264 | XLOC_047752 | ENSRNOT00000071884 | 0.965775296 | 3.49E-07 |
| TUCP_001264 | XLOC_047752 | ENSRNOT00000004128 | 0.965665824 | 3.55E-07 |
| TUCP_001264 | XLOC_047752 | ENSRNOT00000026316 | 0.97428101  | 8.49E-08 |
| TUCP_001264 | XLOC_047752 | ENSRNOT00000057729 | 0.993009878 | 1.30E-10 |
| TUCP_001264 | XLOC_047752 | ENSRNOT00000078663 | 0.962973457 | 5.15E-07 |
| TUCP_001264 | XLOC_047752 | ENSRNOT00000037169 | 0.965075744 | 3.86E-07 |
| TUCP_001264 | XLOC_047752 | ENSRNOT00000029634 | 0.988505103 | 1.55E-09 |
| TUCP_001264 | XLOC_047752 | ENSRNOT00000065460 | 0.994005628 | 6.03E-11 |
| TUCP_001264 | XLOC_047752 | ENSRNOT00000003817 | 0.993743352 | 7.47E-11 |
| TUCP_001264 | XLOC_047752 | ENSRNOT00000016713 | 0.994005628 | 6.03E-11 |
| TUCP_001264 | XLOC_047752 | ENSRNOT00000041074 | 0.972338013 | 1.22E-07 |
| TUCP_001264 | XLOC_047752 | ENSRNOT00000039294 | 0.994005628 | 6.03E-11 |
| TUCP_001264 | XLOC_047752 | ENSRNOT00000092913 | 0.967605924 | 2.66E-07 |
| TUCP_001593 | XLOC_062103 | ENSRNOT00000047105 | 0.959831916 | 7.70E-07 |
| TUCP_001593 | XLOC_062103 | ENSRNOT00000006995 | 0.961734456 | 6.06E-07 |
| TUCP_001593 | XLOC_062103 | ENSRNOT00000026860 | 0.953428305 | 1.60E-06 |
| TUCP_001593 | XLOC_062103 | ENSRNOT00000027407 | 0.95080737  | 2.09E-06 |
| TUCP_001593 | XLOC_062103 | ENSRNOT00000026941 | 0.972975932 | 1.08E-07 |
| TUCP_001593 | XLOC_062103 | ENSRNOT00000013743 | 0.955638734 | 1.26E-06 |
| TUCP_001593 | XLOC_062103 | ENSRNOT00000074939 | 0.952848302 | 1.70E-06 |
| TUCP_001593 | XLOC_062103 | ENSRNOT00000073710 | 0.952333653 | 1.79E-06 |
| TUCP_001593 | XLOC_062103 | ENSRNOT00000089226 | 0.952457004 | 1.77E-06 |
| TUCP_001593 | XLOC_062103 | ENSRNOT00000043856 | 0.962049953 | 5.82E-07 |
| TUCP_001593 | XLOC_062103 | ENSRNOT00000072771 | 0.963563141 | 4.76E-07 |
| TUCP_001593 | XLOC_062103 | ENSRNOT00000005220 | 0.951607263 | 1.93E-06 |
| TUCP_001593 | XLOC_062103 | ENSRNOT00000086706 | 0.955831891 | 1.23E-06 |
| TUCP_001593 | XLOC_062103 | ENSRNOT00000071166 | 0.950211437 | 2.22E-06 |
| TUCP_001593 | XLOC_062103 | ENSRNOT00000047387 | 0.961445757 | 6.29E-07 |
| TUCP_001593 | XLOC_062103 | ENSRNOT00000037699 | 0.976453538 | 5.48E-08 |

|             |             |                    |              |          |
|-------------|-------------|--------------------|--------------|----------|
| TUCP_001593 | XL0C_062103 | ENSRNOT0000007855  | 0.962347925  | 5.59E-07 |
| TUCP_001593 | XL0C_062103 | ENSRNOT00000052063 | 0.955278434  | 1.31E-06 |
| TUCP_001593 | XL0C_062103 | ENSRNOT00000056813 | 0.966929304  | 2.95E-07 |
| TUCP_001593 | XL0C_062103 | ENSRNOT00000044742 | 0.958090133  | 9.49E-07 |
| TUCP_001593 | XL0C_062103 | ENSRNOT00000009712 | 0.951405006  | 1.97E-06 |
| TUCP_001593 | XL0C_062103 | ENSRNOT00000066370 | 0.967370186  | 2.76E-07 |
| TUCP_001593 | XL0C_062103 | ENSRNOT00000026457 | 0.950203872  | 2.22E-06 |
| TUCP_001593 | XL0C_062103 | ENSRNOT00000009627 | 0.966054862  | 3.35E-07 |
| TUCP_001593 | XL0C_062103 | ENSRNOT00000043345 | 0.971737997  | 1.35E-07 |
| TUCP_001593 | XL0C_062103 | ENSRNOT00000010418 | 0.978910292  | 3.17E-08 |
| TUCP_001593 | XL0C_062103 | ENSRNOT00000074054 | 0.953474278  | 1.59E-06 |
| TUCP_001593 | XL0C_062103 | ENSRNOT00000026789 | 0.951281855  | 1.99E-06 |
| TUCP_001593 | XL0C_062103 | ENSRNOT00000012279 | 0.962873971  | 5.22E-07 |
| TUCP_001593 | XL0C_062103 | ENSRNOT00000022628 | 0.966488319  | 3.15E-07 |
| TUCP_001593 | XL0C_062103 | ENSRNOT00000064802 | 0.961628567  | 6.14E-07 |
| TUCP_001593 | XL0C_062103 | ENSRNOT00000001507 | 0.970633472  | 1.64E-07 |
| TUCP_001593 | XL0C_062103 | ENSRNOT00000088125 | 0.984596289  | 6.66E-09 |
| TUCP_001593 | XL0C_062103 | ENSRNOT00000012736 | 0.984882597  | 6.06E-09 |
| TUCP_001593 | XL0C_062103 | ENSRNOT00000073370 | 0.955356468  | 1.30E-06 |
| TUCP_001593 | XL0C_062103 | ENSRNOT00000023350 | 0.967714868  | 2.62E-07 |
| TUCP_001593 | XL0C_062103 | ENSRNOT00000025079 | -0.962268364 | 5.65E-07 |
| TUCP_001593 | XL0C_062103 | ENSRNOT00000018584 | 0.961632506  | 6.14E-07 |
| TUCP_001593 | XL0C_062103 | ENSRNOT00000004551 | 0.951826936  | 1.88E-06 |
| TUCP_001593 | XL0C_062103 | ENSRNOT00000047530 | 0.955991546  | 1.21E-06 |
| TUCP_001593 | XL0C_062103 | ENSRNOT00000012977 | 0.950298617  | 2.20E-06 |
| TUCP_001593 | XL0C_062103 | ENSRNOT00000017271 | 0.953392979  | 1.60E-06 |
| TUCP_001593 | XL0C_062103 | ENSRNOT00000025075 | 0.965825814  | 3.47E-07 |
| TUCP_001593 | XL0C_062103 | ENSRNOT00000004486 | 0.969758811  | 1.89E-07 |
| TUCP_001593 | XL0C_062103 | ENSRNOT00000024402 | 0.950038848  | 2.25E-06 |
| TUCP_001593 | XL0C_062103 | ENSRNOT00000075326 | 0.955368573  | 1.29E-06 |
| TUCP_001593 | XL0C_062103 | ENSRNOT00000021348 | 0.955761184  | 1.24E-06 |
| TUCP_001593 | XL0C_062103 | ENSRNOT00000017629 | 0.956350277  | 1.16E-06 |
| TUCP_001593 | XL0C_062103 | ENSRNOT00000077908 | 0.962742722  | 5.31E-07 |
| TUCP_001593 | XL0C_062103 | ENSRNOT00000004999 | 0.958213716  | 9.35E-07 |
| TUCP_001593 | XL0C_062103 | ENSRNOT00000012671 | 0.958932892  | 8.59E-07 |
| TUCP_001593 | XL0C_062103 | ENSRNOT00000026481 | 0.959416207  | 8.10E-07 |
| TUCP_001593 | XL0C_062103 | ENSRNOT00000065168 | 0.951481094  | 1.95E-06 |
| TUCP_001593 | XL0C_062103 | ENSRNOT00000010463 | 0.952507855  | 1.76E-06 |
| TUCP_001593 | XL0C_062103 | ENSRNOT00000003146 | -0.962724849 | 5.32E-07 |
| TUCP_001593 | XL0C_062103 | ENSRNOT00000026718 | 0.962479145  | 5.50E-07 |
| TUCP_001593 | XL0C_062103 | ENSRNOT00000028271 | 0.980258732  | 2.28E-08 |
| TUCP_001593 | XL0C_062103 | ENSRNOT00000035491 | 0.96791429   | 2.54E-07 |
| TUCP_001593 | XL0C_062103 | ENSRNOT00000026259 | 0.954250614  | 1.46E-06 |
| TUCP_001593 | XL0C_062103 | ENSRNOT00000071540 | 0.960242043  | 7.32E-07 |
| TUCP_001593 | XL0C_062103 | ENSRNOT00000067822 | 0.963599764  | 4.73E-07 |
| TUCP_001593 | XL0C_062103 | ENSRNOT00000045047 | 0.950741427  | 2.10E-06 |
| TUCP_001593 | XL0C_062103 | ENSRNOT00000019759 | 0.954951511  | 1.35E-06 |
| TUCP_001593 | XL0C_062103 | ENSRNOT00000071381 | 0.962274271  | 5.65E-07 |
| TUCP_001593 | XL0C_062103 | ENSRNOT00000010541 | 0.950138451  | 2.23E-06 |
| TUCP_001593 | XL0C_062103 | ENSRNOT00000037446 | 0.983681276  | 8.87E-09 |
| TUCP_001593 | XL0C_062103 | ENSRNOT00000049245 | 0.975689125  | 6.42E-08 |

|             |             |                    |              |          |
|-------------|-------------|--------------------|--------------|----------|
| TUCP_001593 | XLOC_062103 | ENSRNOT0000009156  | 0.960515453  | 7.07E-07 |
| TUCP_001593 | XLOC_062103 | ENSRNOT00000016947 | 0.962757885  | 5.30E-07 |
| TUCP_001593 | XLOC_062103 | ENSRNOT00000066521 | -0.951953847 | 1.86E-06 |
| TUCP_001593 | XLOC_062103 | ENSRNOT00000012892 | 0.955721532  | 1.24E-06 |
| TUCP_001593 | XLOC_062103 | ENSRNOT00000018413 | -0.952475642 | 1.76E-06 |
| TUCP_001593 | XLOC_062103 | ENSRNOT00000026831 | 0.972172385  | 1.25E-07 |
| TUCP_001593 | XLOC_062103 | ENSRNOT00000029994 | 0.977310347  | 4.56E-08 |
| TUCP_001593 | XLOC_062103 | ENSRNOT0000003780  | 0.960816722  | 6.81E-07 |
| TUCP_001593 | XLOC_062103 | ENSRNOT00000086119 | -0.955049924 | 1.34E-06 |
| TUCP_001593 | XLOC_062103 | ENSRNOT00000019222 | 0.967184446  | 2.84E-07 |
| TUCP_001593 | XLOC_062103 | ENSRNOT00000016132 | -0.952825592 | 1.70E-06 |
| TUCP_001593 | XLOC_062103 | ENSRNOT00000077220 | -0.950755275 | 2.10E-06 |
| TUCP_001593 | XLOC_062103 | ENSRNOT00000013274 | 0.957110728  | 1.06E-06 |
| TUCP_001593 | XLOC_062103 | ENSRNOT00000011956 | 0.960229527  | 7.33E-07 |
| TUCP_001593 | XLOC_062103 | ENSRNOT00000078187 | 0.953840736  | 1.53E-06 |
| TUCP_001593 | XLOC_062103 | ENSRNOT0000002403  | 0.966197318  | 3.28E-07 |
| TUCP_001593 | XLOC_062103 | ENSRNOT00000027337 | 0.973775511  | 9.35E-08 |
| TUCP_001593 | XLOC_062103 | ENSRNOT00000047093 | 0.955627174  | 1.26E-06 |
| TUCP_001593 | XLOC_062103 | ENSRNOT00000028888 | 0.966752165  | 3.03E-07 |
| TUCP_001593 | XLOC_062103 | ENSRNOT00000009683 | 0.966508971  | 3.14E-07 |
| TUCP_001593 | XLOC_062103 | ENSRNOT00000089524 | 0.95928753   | 8.23E-07 |
| TUCP_001593 | XLOC_062103 | ENSRNOT00000078675 | 0.966448795  | 3.16E-07 |
| TUCP_001593 | XLOC_062103 | ENSRNOT00000079895 | 0.966295698  | 3.24E-07 |
| TUCP_001593 | XLOC_062103 | ENSRNOT00000026089 | 0.9613452    | 6.37E-07 |
| TUCP_001593 | XLOC_062103 | ENSRNOT00000091751 | 0.967859049  | 2.56E-07 |
| TUCP_001593 | XLOC_062103 | ENSRNOT00000085621 | 0.96124531   | 6.45E-07 |
| TUCP_001593 | XLOC_062103 | ENSRNOT00000077999 | 0.951177569  | 2.01E-06 |
| TUCP_001593 | XLOC_062103 | ENSRNOT0000008883  | 0.954991557  | 1.35E-06 |
| TUCP_001593 | XLOC_062103 | ENSRNOT00000001153 | 0.95369818   | 1.55E-06 |
| TUCP_001593 | XLOC_062103 | ENSRNOT00000076404 | 0.963466711  | 4.82E-07 |
| TUCP_001593 | XLOC_062103 | ENSRNOT00000020155 | 0.950177707  | 2.22E-06 |
| TUCP_001593 | XLOC_062103 | ENSRNOT00000028697 | 0.964732564  | 4.05E-07 |
| TUCP_001593 | XLOC_062103 | ENSRNOT00000055683 | 0.9625724    | 5.43E-07 |
| TUCP_001593 | XLOC_062103 | ENSRNOT00000026280 | 0.963816091  | 4.60E-07 |
| TUCP_001593 | XLOC_062103 | ENSRNOT00000045488 | 0.979025155  | 3.09E-08 |
| TUCP_001593 | XLOC_062103 | ENSRNOT00000077555 | 0.966673427  | 3.06E-07 |
| TUCP_001593 | XLOC_062103 | ENSRNOT00000065947 | 0.959091655  | 8.42E-07 |
| TUCP_001593 | XLOC_062103 | ENSRNOT00000011880 | 0.955975627  | 1.21E-06 |
| TUCP_001593 | XLOC_062103 | ENSRNOT00000013260 | 0.953671486  | 1.55E-06 |
| TUCP_001593 | XLOC_062103 | ENSRNOT00000031487 | 0.955664921  | 1.25E-06 |
| TUCP_001593 | XLOC_062103 | ENSRNOT00000082228 | 0.963123791  | 5.05E-07 |
| TUCP_001593 | XLOC_062103 | ENSRNOT00000017995 | 0.952497262  | 1.76E-06 |
| TUCP_001593 | XLOC_062103 | ENSRNOT00000000898 | 0.952127588  | 1.83E-06 |
| TUCP_001593 | XLOC_062103 | ENSRNOT00000024941 | 0.967442238  | 2.73E-07 |
| TUCP_001593 | XLOC_062103 | ENSRNOT00000064060 | 0.960672391  | 6.94E-07 |
| TUCP_001593 | XLOC_062103 | ENSRNOT00000010609 | 0.958957607  | 8.56E-07 |
| TUCP_001593 | XLOC_062103 | ENSRNOT00000067503 | 0.962555697  | 5.44E-07 |
| TUCP_001593 | XLOC_062103 | ENSRNOT00000020383 | 0.960307683  | 7.26E-07 |
| TUCP_001593 | XLOC_062103 | ENSRNOT00000084088 | 0.951471575  | 1.95E-06 |
| TUCP_001593 | XLOC_062103 | ENSRNOT00000064902 | 0.957109793  | 1.06E-06 |
| TUCP_001593 | XLOC_062103 | ENSRNOT00000083093 | 0.951242286  | 2.00E-06 |

|             |             |                    |              |          |
|-------------|-------------|--------------------|--------------|----------|
| TUCP_001593 | XLOC_062103 | ENSRNOT0000002771  | 0.973368431  | 1.01E-07 |
| TUCP_001593 | XLOC_062103 | ENSRNOT00000079442 | 0.966181927  | 3.29E-07 |
| TUCP_001593 | XLOC_062103 | ENSRNOT00000024322 | 0.962174205  | 5.72E-07 |
| TUCP_001593 | XLOC_062103 | ENSRNOT00000016722 | 0.953445944  | 1.59E-06 |
| TUCP_001593 | XLOC_062103 | ENSRNOT00000000658 | 0.989861296  | 8.29E-10 |
| TUCP_001593 | XLOC_062103 | ENSRNOT00000013800 | 0.954571507  | 1.41E-06 |
| TUCP_001593 | XLOC_062103 | ENSRNOT00000089971 | 0.962835251  | 5.25E-07 |
| TUCP_001593 | XLOC_062103 | ENSRNOT00000065501 | 0.975645053  | 6.48E-08 |
| TUCP_001593 | XLOC_062103 | ENSRNOT00000091488 | 0.979966663  | 2.46E-08 |
| TUCP_001593 | XLOC_062103 | ENSRNOT00000025523 | 0.982179062  | 1.37E-08 |
| TUCP_001593 | XLOC_062103 | ENSRNOT00000066032 | 0.958463386  | 9.08E-07 |
| TUCP_001593 | XLOC_062103 | ENSRNOT00000070933 | 0.951857209  | 1.88E-06 |
| TUCP_001593 | XLOC_062103 | ENSRNOT00000066739 | 0.955563726  | 1.27E-06 |
| TUCP_001593 | XLOC_062103 | ENSRNOT00000035277 | 0.960049283  | 7.49E-07 |
| TUCP_001593 | XLOC_062103 | ENSRNOT00000027057 | 0.950760887  | 2.10E-06 |
| TUCP_001593 | XLOC_062103 | ENSRNOT00000028057 | 0.957602837  | 1.00E-06 |
| TUCP_001593 | XLOC_062103 | ENSRNOT00000055582 | 0.966286804  | 3.24E-07 |
| TUCP_001593 | XLOC_062103 | ENSRNOT00000086122 | 0.954876543  | 1.37E-06 |
| TUCP_001593 | XLOC_062103 | ENSRNOT00000037790 | 0.969098813  | 2.11E-07 |
| TUCP_001593 | XLOC_062103 | ENSRNOT00000021143 | 0.963233973  | 4.97E-07 |
| TUCP_001593 | XLOC_062103 | ENSRNOT00000006969 | 0.970370362  | 1.71E-07 |
| TUCP_001593 | XLOC_062103 | ENSRNOT00000088054 | 0.963258008  | 4.96E-07 |
| TUCP_001593 | XLOC_062103 | ENSRNOT00000006804 | 0.969239274  | 2.06E-07 |
| TUCP_001593 | XLOC_062103 | ENSRNOT00000001222 | 0.950070763  | 2.25E-06 |
| TUCP_001593 | XLOC_062103 | ENSRNOT00000027234 | 0.976824095  | 5.07E-08 |
| TUCP_001593 | XLOC_062103 | ENSRNOT00000038647 | 0.963524029  | 4.78E-07 |
| TUCP_001593 | XLOC_062103 | ENSRNOT00000010853 | 0.956732277  | 1.11E-06 |
| TUCP_001593 | XLOC_062103 | ENSRNOT00000011984 | 0.973832928  | 9.25E-08 |
| TUCP_001593 | XLOC_062103 | ENSRNOT00000026293 | 0.971359095  | 1.45E-07 |
| TUCP_001593 | XLOC_062103 | ENSRNOT00000074653 | 0.961454507  | 6.28E-07 |
| TUCP_001593 | XLOC_062103 | ENSRNOT00000089007 | -0.96573543  | 3.51E-07 |
| TUCP_001593 | XLOC_062103 | ENSRNOT00000088279 | 0.950630427  | 2.13E-06 |
| TUCP_001593 | XLOC_062103 | ENSRNOT00000031230 | 0.95311376   | 1.65E-06 |
| TUCP_001593 | XLOC_062103 | ENSRNOT00000041096 | 0.953260296  | 1.62E-06 |
| TUCP_001593 | XLOC_062103 | ENSRNOT00000015898 | 0.960592607  | 7.00E-07 |
| TUCP_001593 | XLOC_062103 | ENSRNOT00000001923 | 0.953767421  | 1.54E-06 |
| TUCP_001593 | XLOC_062103 | ENSRNOT00000073041 | 0.952863789  | 1.69E-06 |
| TUCP_001593 | XLOC_062103 | ENSRNOT00000015624 | 0.963585281  | 4.74E-07 |
| TUCP_001593 | XLOC_062103 | ENSRNOT00000080928 | 0.950403969  | 2.17E-06 |
| TUCP_001593 | XLOC_062103 | ENSRNOT00000083127 | 0.97558554   | 6.56E-08 |
| TUCP_001593 | XLOC_062103 | ENSRNOT00000013553 | 0.95682393   | 1.10E-06 |
| TUCP_001593 | XLOC_062103 | ENSRNOT00000065722 | -0.957032175 | 1.07E-06 |
| TUCP_001593 | XLOC_062103 | ENSRNOT00000018074 | -0.951110009 | 2.03E-06 |
| TUCP_001593 | XLOC_062103 | ENSRNOT00000037679 | 0.971407315  | 1.43E-07 |
| TUCP_001593 | XLOC_062103 | ENSRNOT00000085596 | 0.963453146  | 4.83E-07 |
| TUCP_001593 | XLOC_062103 | ENSRNOT00000082174 | 0.964706641  | 4.06E-07 |
| TUCP_001593 | XLOC_062103 | ENSRNOT00000060696 | 0.965934044  | 3.41E-07 |
| TUCP_001593 | XLOC_062103 | ENSRNOT00000066968 | 0.956324381  | 1.16E-06 |
| TUCP_001593 | XLOC_062103 | ENSRNOT00000013107 | 0.964671887  | 4.08E-07 |
| TUCP_001593 | XLOC_062103 | ENSRNOT00000033976 | 0.952384126  | 1.78E-06 |
| TUCP_001593 | XLOC_062103 | ENSRNOT00000061100 | 0.978008774  | 3.90E-08 |



|             |             |                    |             |          |
|-------------|-------------|--------------------|-------------|----------|
| TUCP_001593 | XLOC_062103 | ENSRNOT0000005387  | 0.980979687 | 1.90E-08 |
| TUCP_001593 | XLOC_062103 | ENSRNOT00000021216 | 0.974587773 | 8.00E-08 |
| TUCP_001593 | XLOC_062103 | ENSRNOT00000005381 | 0.981483131 | 1.66E-08 |
| TUCP_001593 | XLOC_062103 | ENSRNOT00000005144 | 0.975364473 | 6.86E-08 |
| TUCP_001593 | XLOC_062103 | ENSRNOT00000025097 | 0.972532645 | 1.18E-07 |
| TUCP_001593 | XLOC_062103 | ENSRNOT00000013985 | 0.952530146 | 1.75E-06 |
| TUCP_001593 | XLOC_062103 | ENSRNOT00000036750 | 0.954935397 | 1.36E-06 |
| TUCP_001593 | XLOC_062103 | ENSRNOT00000010224 | 0.963539266 | 4.77E-07 |
| TUCP_001593 | XLOC_062103 | ENSRNOT00000087371 | 0.974384714 | 8.32E-08 |
| TUCP_001593 | XLOC_062103 | ENSRNOT00000028636 | 0.95261835  | 1.74E-06 |
| TUCP_001593 | XLOC_062103 | ENSRNOT00000054948 | 0.967202825 | 2.83E-07 |
| TUCP_001593 | XLOC_062103 | ENSRNOT00000002292 | 0.961130365 | 6.55E-07 |
| TUCP_001593 | XLOC_062103 | ENSRNOT00000022796 | 0.967620496 | 2.65E-07 |
| TUCP_001593 | XLOC_062103 | ENSRNOT00000075424 | 0.961097083 | 6.57E-07 |
| TUCP_001593 | XLOC_062103 | ENSRNOT00000029001 | 0.96576045  | 3.50E-07 |
| TUCP_001593 | XLOC_062103 | ENSRNOT00000074395 | 0.955457605 | 1.28E-06 |
| TUCP_001593 | XLOC_062103 | ENSRNOT00000083799 | 0.951948217 | 1.86E-06 |
| TUCP_001593 | XLOC_062103 | ENSRNOT00000024548 | 0.960719055 | 6.89E-07 |
| TUCP_001260 | XLOC_047604 | ENSRNOT00000084720 | 0.958719824 | 8.81E-07 |
| TUCP_001340 | XLOC_051310 | ENSRNOT00000079466 | 0.955274967 | 1.31E-06 |
| TUCP_001340 | XLOC_051310 | ENSRNOT00000015127 | 0.954958383 | 1.35E-06 |
| TUCP_001341 | XLOC_051310 | ENSRNOT00000014312 | 0.955022648 | 1.34E-06 |
| TUCP_001341 | XLOC_051310 | ENSRNOT00000055406 | 0.955022648 | 1.34E-06 |
| TUCP_001341 | XLOC_051310 | ENSRNOT00000093075 | 0.955022648 | 1.34E-06 |
| TUCP_001341 | XLOC_051310 | ENSRNOT00000058833 | 0.952228591 | 1.81E-06 |
| TUCP_001341 | XLOC_051310 | ENSRNOT00000078052 | 0.955022648 | 1.34E-06 |
| TUCP_001341 | XLOC_051310 | ENSRNOT00000058260 | 0.955022648 | 1.34E-06 |
| TUCP_001341 | XLOC_051310 | ENSRNOT00000088245 | 0.955022648 | 1.34E-06 |
| TUCP_001341 | XLOC_051310 | ENSRNOT00000088887 | 0.955022648 | 1.34E-06 |
| TUCP_001341 | XLOC_051310 | ENSRNOT00000078494 | 0.954594952 | 1.41E-06 |
| TUCP_001341 | XLOC_051310 | ENSRNOT00000070817 | 0.952690353 | 1.72E-06 |
| TUCP_001341 | XLOC_051310 | ENSRNOT00000026753 | 0.955022648 | 1.34E-06 |
| TUCP_001341 | XLOC_051310 | ENSRNOT00000051231 | 0.953145032 | 1.64E-06 |
| TUCP_001341 | XLOC_051310 | ENSRNOT00000085653 | 0.955022648 | 1.34E-06 |
| TUCP_001341 | XLOC_051310 | ENSRNOT00000084986 | 0.955022648 | 1.34E-06 |
| TUCP_001341 | XLOC_051310 | ENSRNOT00000086031 | 0.955022648 | 1.34E-06 |
| TUCP_001341 | XLOC_051310 | ENSRNOT00000081992 | 0.960152567 | 7.40E-07 |
| TUCP_001341 | XLOC_051310 | ENSRNOT00000071312 | 0.955022648 | 1.34E-06 |
| TUCP_001342 | XLOC_051310 | ENSRNOT00000024186 | 0.98305423  | 1.07E-08 |
| TUCP_001342 | XLOC_051310 | ENSRNOT00000074753 | 0.998227134 | 1.38E-13 |
| TUCP_001342 | XLOC_051310 | ENSRNOT00000004876 | 0.958943391 | 8.57E-07 |
| TUCP_001342 | XLOC_051310 | ENSRNOT00000041904 | 0.999987126 | 2.79E-24 |
| TUCP_001342 | XLOC_051310 | ENSRNOT00000083487 | 0.989427255 | 1.02E-09 |
| TUCP_001342 | XLOC_051310 | ENSRNOT00000077990 | 0.999987126 | 2.79E-24 |
| TUCP_001342 | XLOC_051310 | ENSRNOT00000038826 | 0.999821575 | 1.42E-18 |
| TUCP_001342 | XLOC_051310 | ENSRNOT00000046842 | 0.974789085 | 7.69E-08 |
| TUCP_001342 | XLOC_051310 | ENSRNOT00000037169 | 0.980149193 | 2.35E-08 |
| TUCP_001342 | XLOC_051310 | ENSRNOT00000021243 | 0.987332476 | 2.51E-09 |
| TUCP_001342 | XLOC_051310 | ENSRNOT00000060250 | 0.999915143 | 3.46E-20 |
| TUCP_001342 | XLOC_051310 | ENSRNOT00000091934 | 0.999987126 | 2.79E-24 |
| TUCP_001342 | XLOC_051310 | ENSRNOT00000046585 | 0.982825507 | 1.14E-08 |

|             |             |                    |             |          |
|-------------|-------------|--------------------|-------------|----------|
| TUCP_001342 | XLOC_051310 | ENSRNOT00000080794 | 0.991142111 | 4.23E-10 |
| TUCP_001342 | XLOC_051310 | ENSRNOT00000014456 | 0.991619132 | 3.21E-10 |
| TUCP_001342 | XLOC_051310 | ENSRNOT00000031205 | 0.99128802  | 3.90E-10 |
| TUCP_001342 | XLOC_051310 | ENSRNOT00000044145 | 0.999987126 | 2.79E-24 |
| TUCP_001342 | XLOC_051310 | ENSRNOT00000088381 | 0.988925531 | 1.29E-09 |
| TUCP_001342 | XLOC_051310 | ENSRNOT00000011743 | 0.987593804 | 2.27E-09 |
| TUCP_001342 | XLOC_051310 | ENSRNOT00000089929 | 0.999987126 | 2.79E-24 |
| TUCP_001342 | XLOC_051310 | ENSRNOT00000088624 | 0.999987126 | 2.79E-24 |
| TUCP_001342 | XLOC_051310 | ENSRNOT00000085659 | 0.98982397  | 8.45E-10 |
| TUCP_001342 | XLOC_051310 | ENSRNOT00000015866 | 0.993915674 | 6.50E-11 |
| TUCP_001342 | XLOC_051310 | ENSRNOT00000078633 | 0.999987126 | 2.79E-24 |
| TUCP_001342 | XLOC_051310 | ENSRNOT00000034907 | 0.995446435 | 1.53E-11 |
| TUCP_001342 | XLOC_051310 | ENSRNOT00000093230 | 0.957713342 | 9.92E-07 |
| TUCP_001342 | XLOC_051310 | ENSRNOT00000051835 | 0.999987126 | 2.79E-24 |
| TUCP_001342 | XLOC_051310 | ENSRNOT00000079087 | 0.999987126 | 2.79E-24 |
| TUCP_001342 | XLOC_051310 | ENSRNOT00000037206 | 0.999987126 | 2.79E-24 |
| TUCP_001342 | XLOC_051310 | ENSRNOT00000083261 | 0.971486227 | 1.42E-07 |
| TUCP_001342 | XLOC_051310 | ENSRNOT00000080590 | 0.999868791 | 3.06E-19 |
| TUCP_001342 | XLOC_051310 | ENSRNOT00000027552 | 0.999787431 | 3.42E-18 |
| TUCP_001342 | XLOC_051310 | ENSRNOT00000077014 | 0.994988647 | 2.47E-11 |
| TUCP_001342 | XLOC_051310 | ENSRNOT00000080453 | 0.99990509  | 6.06E-20 |
| TUCP_001342 | XLOC_051310 | ENSRNOT00000089057 | 0.967657    | 2.64E-07 |
| TUCP_001342 | XLOC_051310 | ENSRNOT00000066839 | 0.992249161 | 2.17E-10 |
| TUCP_001342 | XLOC_051310 | ENSRNOT00000061284 | 0.955601825 | 1.26E-06 |
| TUCP_001342 | XLOC_051310 | ENSRNOT00000013423 | 0.959365028 | 8.15E-07 |
| TUCP_001342 | XLOC_051310 | ENSRNOT00000071884 | 0.974587704 | 8.00E-08 |
| TUCP_001342 | XLOC_051310 | ENSRNOT00000004128 | 0.962327782 | 5.61E-07 |
| TUCP_001342 | XLOC_051310 | ENSRNOT00000026316 | 0.964557198 | 4.15E-07 |
| TUCP_001342 | XLOC_051310 | ENSRNOT00000057729 | 0.999353512 | 8.88E-16 |
| TUCP_001342 | XLOC_051310 | ENSRNOT00000078663 | 0.974919311 | 7.49E-08 |
| TUCP_001342 | XLOC_051310 | ENSRNOT00000064250 | 0.983106326 | 1.05E-08 |
| TUCP_001342 | XLOC_051310 | ENSRNOT00000021608 | 0.965406223 | 3.68E-07 |
| TUCP_001342 | XLOC_051310 | ENSRNOT00000029634 | 0.995811802 | 1.01E-11 |
| TUCP_001342 | XLOC_051310 | ENSRNOT00000093579 | 0.958614482 | 8.92E-07 |
| TUCP_001342 | XLOC_051310 | ENSRNOT00000086349 | 0.957740758 | 9.89E-07 |
| TUCP_001342 | XLOC_051310 | ENSRNOT00000065460 | 0.999987126 | 2.79E-24 |
| TUCP_001342 | XLOC_051310 | ENSRNOT00000003817 | 0.996689357 | 3.11E-12 |
| TUCP_001342 | XLOC_051310 | ENSRNOT00000016713 | 0.999987126 | 2.79E-24 |
| TUCP_001342 | XLOC_051310 | ENSRNOT00000079260 | 0.996796427 | 2.64E-12 |
| TUCP_001342 | XLOC_051310 | ENSRNOT00000039294 | 0.999987126 | 2.79E-24 |
| TUCP_001342 | XLOC_051310 | ENSRNOT00000092913 | 0.95379902  | 1.53E-06 |
| TUCP_001615 | XLOC_063843 | ENSRNOT00000084133 | 1           | 0        |
| TUCP_001615 | XLOC_063843 | ENSRNOT00000093745 | 0.981891039 | 1.49E-08 |
| TUCP_001615 | XLOC_063843 | ENSRNOT00000065542 | 0.99828699  | 1.16E-13 |
| TUCP_001615 | XLOC_063843 | ENSRNOT00000082464 | 1           | 0        |
| TUCP_001615 | XLOC_063843 | ENSRNOT00000087659 | 1           | 0        |
| TUCP_001615 | XLOC_063843 | ENSRNOT00000084582 | 0.976633579 | 5.28E-08 |
| TUCP_001615 | XLOC_063843 | ENSRNOT00000085078 | 1           | 0        |
| TUCP_001615 | XLOC_063843 | ENSRNOT00000014028 | 1           | 0        |
| TUCP_001615 | XLOC_063843 | ENSRNOT00000049363 | 1           | 0        |
| TUCP_001615 | XLOC_063843 | ENSRNOT00000065473 | 0.999949098 | 2.69E-21 |

|             |             |                    |             |          |
|-------------|-------------|--------------------|-------------|----------|
| TUCP_001615 | XLOC_063843 | ENSRNOT0000000142  | 0.998996155 | 8.01E-15 |
| TUCP_001615 | XLOC_063843 | ENSRNOT00000082288 | 0.999998398 | 8.30E-29 |
| TUCP_001615 | XLOC_063843 | ENSRNOT00000039664 | 1           | 0        |
| TUCP_001615 | XLOC_063843 | ENSRNOT00000065402 | 1           | 0        |
| TUCP_001615 | XLOC_063843 | ENSRNOT00000064551 | 0.965365872 | 3.70E-07 |
| TUCP_001615 | XLOC_063843 | ENSRNOT00000084141 | 1           | 0        |
| TUCP_001615 | XLOC_063843 | ENSRNOT00000082435 | 1           | 0        |
| TUCP_001615 | XLOC_063843 | ENSRNOT00000082928 | 0.996801059 | 2.62E-12 |
| TUCP_001615 | XLOC_063843 | ENSRNOT00000066546 | 0.956953619 | 1.08E-06 |
| TUCP_001615 | XLOC_063843 | ENSRNOT00000046013 | 0.988138626 | 1.81E-09 |
| TUCP_001615 | XLOC_063843 | ENSRNOT00000067931 | 0.978893628 | 3.18E-08 |
| TUCP_001615 | XLOC_063843 | ENSRNOT00000086425 | 0.992023315 | 2.51E-10 |
| TUCP_001615 | XLOC_063843 | ENSRNOT00000093696 | 0.956927219 | 1.09E-06 |
| TUCP_001615 | XLOC_063843 | ENSRNOT00000036228 | 0.982337157 | 1.31E-08 |
| TUCP_001615 | XLOC_063843 | ENSRNOT00000014030 | 1           | 0        |
| TUCP_001615 | XLOC_063843 | ENSRNOT00000081966 | 1           | 0        |
| TUCP_001615 | XLOC_063843 | ENSRNOT00000075906 | 1           | 0        |
| TUCP_001615 | XLOC_063843 | ENSRNOT00000088396 | 0.981336994 | 1.73E-08 |
| TUCP_001615 | XLOC_063843 | ENSRNOT00000049259 | 0.965500259 | 3.63E-07 |
| TUCP_001615 | XLOC_063843 | ENSRNOT00000092838 | 0.982579749 | 1.23E-08 |
| TUCP_001615 | XLOC_063843 | ENSRNOT00000093442 | 0.959217317 | 8.30E-07 |
| TUCP_001612 | XLOC_063733 | ENSRNOT00000084133 | 0.970310674 | 1.73E-07 |
| TUCP_001612 | XLOC_063733 | ENSRNOT00000093745 | 0.99855926  | 4.88E-14 |
| TUCP_001612 | XLOC_063733 | ENSRNOT00000046013 | 0.954060661 | 1.49E-06 |
| TUCP_001612 | XLOC_063733 | ENSRNOT00000082464 | 0.970310674 | 1.73E-07 |
| TUCP_001612 | XLOC_063733 | ENSRNOT00000087659 | 0.970310674 | 1.73E-07 |
| TUCP_001612 | XLOC_063733 | ENSRNOT00000084582 | 0.97342473  | 9.98E-08 |
| TUCP_001612 | XLOC_063733 | ENSRNOT00000085078 | 0.970310674 | 1.73E-07 |
| TUCP_001612 | XLOC_063733 | ENSRNOT00000014028 | 0.970310674 | 1.73E-07 |
| TUCP_001612 | XLOC_063733 | ENSRNOT00000049363 | 0.970310674 | 1.73E-07 |
| TUCP_001612 | XLOC_063733 | ENSRNOT00000065473 | 0.969975294 | 1.83E-07 |
| TUCP_001612 | XLOC_063733 | ENSRNOT00000000142 | 0.966320677 | 3.23E-07 |
| TUCP_001612 | XLOC_063733 | ENSRNOT00000082288 | 0.970663716 | 1.63E-07 |
| TUCP_001612 | XLOC_063733 | ENSRNOT00000039664 | 0.970310674 | 1.73E-07 |
| TUCP_001612 | XLOC_063733 | ENSRNOT00000065402 | 0.970310674 | 1.73E-07 |
| TUCP_001612 | XLOC_063733 | ENSRNOT00000084141 | 0.970310674 | 1.73E-07 |
| TUCP_001612 | XLOC_063733 | ENSRNOT00000082435 | 0.970310674 | 1.73E-07 |
| TUCP_001612 | XLOC_063733 | ENSRNOT00000082928 | 0.965074781 | 3.86E-07 |
| TUCP_001612 | XLOC_063733 | ENSRNOT00000065542 | 0.965625929 | 3.57E-07 |
| TUCP_001612 | XLOC_063733 | ENSRNOT00000086425 | 0.964852599 | 3.98E-07 |
| TUCP_001612 | XLOC_063733 | ENSRNOT00000014030 | 0.970310674 | 1.73E-07 |
| TUCP_001612 | XLOC_063733 | ENSRNOT00000081966 | 0.970310674 | 1.73E-07 |
| TUCP_001612 | XLOC_063733 | ENSRNOT00000075906 | 0.970310674 | 1.73E-07 |
| TUCP_001612 | XLOC_063733 | ENSRNOT00000088396 | 0.951057364 | 2.04E-06 |
| TUCP_001612 | XLOC_063733 | ENSRNOT00000049259 | 0.953748697 | 1.54E-06 |
| TUCP_001345 | XLOC_051452 | ENSRNOT00000006356 | 0.952272327 | 1.80E-06 |
| TUCP_001345 | XLOC_051452 | ENSRNOT00000091647 | 0.959616283 | 7.90E-07 |
| TUCP_001345 | XLOC_051452 | ENSRNOT00000092395 | 0.955846085 | 1.23E-06 |
| TUCP_001345 | XLOC_051452 | ENSRNOT00000025770 | 0.963132286 | 5.04E-07 |
| TUCP_001345 | XLOC_051452 | ENSRNOT00000072972 | 0.953638659 | 1.56E-06 |
| TUCP_001269 | XLOC_048200 | ENSRNOT00000081246 | 0.95612827  | 1.19E-06 |

|             |             |                    |             |          |
|-------------|-------------|--------------------|-------------|----------|
| TUCP_001269 | XLOC_048200 | ENSRNOT00000026860 | 0.953045041 | 1.66E-06 |
| TUCP_001269 | XLOC_048200 | ENSRNOT00000066736 | 0.955752447 | 1.24E-06 |
| TUCP_001269 | XLOC_048200 | ENSRNOT00000032944 | 0.96420636  | 4.36E-07 |
| TUCP_001269 | XLOC_048200 | ENSRNOT0000000157  | 0.95090003  | 2.07E-06 |
| TUCP_001269 | XLOC_048200 | ENSRNOT00000083215 | 0.95466259  | 1.40E-06 |
| TUCP_001269 | XLOC_048200 | ENSRNOT00000085596 | 0.950590649 | 2.13E-06 |
| TUCP_001269 | XLOC_048200 | ENSRNOT00000013661 | 0.975793333 | 6.29E-08 |
| TUCP_001269 | XLOC_048200 | ENSRNOT00000020070 | 0.955264523 | 1.31E-06 |
| TUCP_001269 | XLOC_048200 | ENSRNOT00000058072 | 0.975458534 | 6.73E-08 |
| TUCP_001269 | XLOC_048200 | ENSRNOT00000055187 | 0.963141609 | 5.04E-07 |
| TUCP_001269 | XLOC_048200 | ENSRNOT00000074939 | 0.957767823 | 9.85E-07 |
| TUCP_001269 | XLOC_048200 | ENSRNOT00000017629 | 0.957864021 | 9.74E-07 |
| TUCP_001269 | XLOC_048200 | ENSRNOT00000032199 | 0.959600379 | 7.92E-07 |
| TUCP_001269 | XLOC_048200 | ENSRNOT00000015203 | 0.952260969 | 1.80E-06 |
| TUCP_001269 | XLOC_048200 | ENSRNOT00000081632 | 0.95582831  | 1.23E-06 |
| TUCP_001269 | XLOC_048200 | ENSRNOT00000021614 | 0.96348282  | 4.81E-07 |
| TUCP_001269 | XLOC_048200 | ENSRNOT00000067822 | 0.955640419 | 1.26E-06 |
| TUCP_001269 | XLOC_048200 | ENSRNOT00000003991 | 0.95160781  | 1.93E-06 |
| TUCP_001269 | XLOC_048200 | ENSRNOT00000004508 | 0.965225162 | 3.78E-07 |
| TUCP_001269 | XLOC_048200 | ENSRNOT00000034744 | 0.963836894 | 4.58E-07 |
| TUCP_001269 | XLOC_048200 | ENSRNOT00000010149 | 0.954514209 | 1.42E-06 |
| TUCP_001269 | XLOC_048200 | ENSRNOT00000022726 | 0.953725468 | 1.55E-06 |
| TUCP_001269 | XLOC_048200 | ENSRNOT00000002292 | 0.956084937 | 1.19E-06 |
| TUCP_001269 | XLOC_048200 | ENSRNOT00000021153 | 0.952998868 | 1.67E-06 |
| TUCP_001269 | XLOC_048200 | ENSRNOT00000028563 | 0.956690997 | 1.12E-06 |
| TUCP_001269 | XLOC_048200 | ENSRNOT00000009342 | 0.961681069 | 6.10E-07 |
| TUCP_001269 | XLOC_048200 | ENSRNOT00000021116 | 0.976866327 | 5.02E-08 |
| TUCP_001269 | XLOC_048200 | ENSRNOT00000082100 | 0.968176606 | 2.44E-07 |
| TUCP_001269 | XLOC_048200 | ENSRNOT00000001809 | 0.976427438 | 5.51E-08 |
| TUCP_001269 | XLOC_048200 | ENSRNOT00000076729 | 0.95474222  | 1.39E-06 |
| TUCP_001269 | XLOC_048200 | ENSRNOT00000051720 | 0.965529771 | 3.62E-07 |
| TUCP_001269 | XLOC_048200 | ENSRNOT00000034704 | 0.96918943  | 2.08E-07 |
| TUCP_001269 | XLOC_048200 | ENSRNOT00000017948 | 0.950352994 | 2.18E-06 |
| TUCP_001269 | XLOC_048200 | ENSRNOT00000063956 | 0.9673532   | 2.76E-07 |
| TUCP_001269 | XLOC_048200 | ENSRNOT00000081897 | 0.95390366  | 1.52E-06 |
| TUCP_001269 | XLOC_048200 | ENSRNOT00000043216 | 0.955462737 | 1.28E-06 |
| TUCP_001269 | XLOC_048200 | ENSRNOT00000055401 | 0.974135438 | 8.73E-08 |
| TUCP_001269 | XLOC_048200 | ENSRNOT00000035491 | 0.951105693 | 2.03E-06 |
| TUCP_001269 | XLOC_048200 | ENSRNOT00000066526 | 0.958239183 | 9.32E-07 |
| TUCP_001269 | XLOC_048200 | ENSRNOT00000039631 | 0.982613584 | 1.22E-08 |
| TUCP_001269 | XLOC_048200 | ENSRNOT00000043345 | 0.952808881 | 1.70E-06 |
| TUCP_001269 | XLOC_048200 | ENSRNOT00000039852 | 0.961915847 | 5.92E-07 |
| TUCP_001269 | XLOC_048200 | ENSRNOT00000015073 | 0.960455353 | 7.13E-07 |
| TUCP_001269 | XLOC_048200 | ENSRNOT00000004412 | 0.958328424 | 9.23E-07 |
| TUCP_001269 | XLOC_048200 | ENSRNOT00000049538 | 0.958350788 | 9.20E-07 |
| TUCP_001269 | XLOC_048200 | ENSRNOT00000000713 | 0.962455105 | 5.52E-07 |
| TUCP_001269 | XLOC_048200 | ENSRNOT00000004359 | 0.965327007 | 3.72E-07 |
| TUCP_001269 | XLOC_048200 | ENSRNOT00000026174 | 0.952945691 | 1.68E-06 |
| TUCP_001269 | XLOC_048200 | ENSRNOT00000009198 | 0.951073655 | 2.03E-06 |
| TUCP_001269 | XLOC_048200 | ENSRNOT00000027054 | 0.951164368 | 2.01E-06 |
| TUCP_001269 | XLOC_048200 | ENSRNOT00000013274 | 0.955301373 | 1.30E-06 |

|             |             |                    |              |          |
|-------------|-------------|--------------------|--------------|----------|
| TUCP_001269 | XLOC_048200 | ENSRNOT00000007351 | -0.954814126 | 1.37E-06 |
| TUCP_001269 | XLOC_048200 | ENSRNOT00000013985 | 0.969575858  | 1.95E-07 |
| TUCP_001269 | XLOC_048200 | ENSRNOT00000067761 | 0.951715562  | 1.91E-06 |
| TUCP_001269 | XLOC_048200 | ENSRNOT00000036750 | 0.970253334  | 1.74E-07 |
| TUCP_001269 | XLOC_048200 | ENSRNOT00000060669 | 0.966059662  | 3.35E-07 |
| TUCP_001269 | XLOC_048200 | ENSRNOT00000080465 | 0.967844055  | 2.57E-07 |
| TUCP_001269 | XLOC_048200 | ENSRNOT00000045083 | 0.954786979  | 1.38E-06 |
| TUCP_001269 | XLOC_048200 | ENSRNOT00000072081 | 0.9603757    | 7.20E-07 |
| TUCP_001269 | XLOC_048200 | ENSRNOT00000024659 | 0.958424077  | 9.12E-07 |
| TUCP_001269 | XLOC_048200 | ENSRNOT00000070815 | 0.977255316  | 4.61E-08 |
| TUCP_001269 | XLOC_048200 | ENSRNOT00000031230 | 0.969906107  | 1.85E-07 |
| TUCP_001269 | XLOC_048200 | ENSRNOT00000021348 | 0.953927226  | 1.51E-06 |
| TUCP_001269 | XLOC_048200 | ENSRNOT00000029001 | 0.96657918   | 3.10E-07 |
| TUCP_001269 | XLOC_048200 | ENSRNOT00000009430 | 0.977460831  | 4.41E-08 |
| TUCP_001269 | XLOC_048200 | ENSRNOT00000076453 | 0.960717051  | 6.90E-07 |
| TUCP_001269 | XLOC_048200 | ENSRNOT00000020437 | 0.95078853   | 2.09E-06 |
| TUCP_001269 | XLOC_048200 | ENSRNOT00000043856 | 0.956624485  | 1.12E-06 |
| TUCP_001269 | XLOC_048200 | ENSRNOT00000023645 | 0.961715909  | 6.07E-07 |
| TUCP_001269 | XLOC_048200 | ENSRNOT00000009066 | 0.974483738  | 8.16E-08 |
| TUCP_001268 | XLOC_047925 | ENSRNOT00000016494 | 0.961102507  | 6.57E-07 |
| TUCP_001268 | XLOC_047925 | ENSRNOT00000010784 | 0.951321029  | 1.98E-06 |
| TUCP_001268 | XLOC_047925 | ENSRNOT00000027846 | 0.963738601  | 4.65E-07 |
| TUCP_001268 | XLOC_047925 | ENSRNOT00000089674 | 0.961951753  | 5.89E-07 |
| TUCP_000955 | XLOC_035120 | ENSRNOT00000082346 | -0.965367819 | 3.70E-07 |
| TUCP_000819 | XLOC_031775 | ENSRNOT00000088078 | 0.960184862  | 7.37E-07 |
| TUCP_000819 | XLOC_031775 | ENSRNOT00000082002 | 0.959858396  | 7.67E-07 |
| TUCP_000819 | XLOC_031775 | ENSRNOT00000017412 | 0.951259037  | 2.00E-06 |
| TUCP_000819 | XLOC_031775 | ENSRNOT00000070937 | 0.971003183  | 1.54E-07 |
| TUCP_000951 | XLOC_035083 | ENSRNOT00000084766 | -0.958381583 | 9.17E-07 |
| TUCP_000951 | XLOC_035083 | ENSRNOT00000020537 | 0.952774373  | 1.71E-06 |
| TUCP_000951 | XLOC_035083 | ENSRNOT00000020357 | -0.963423215 | 4.85E-07 |
| TUCP_000951 | XLOC_035083 | ENSRNOT00000027032 | 0.950997472  | 2.05E-06 |
| TUCP_000951 | XLOC_035083 | ENSRNOT00000008256 | 0.968151642  | 2.45E-07 |
| TUCP_000951 | XLOC_035083 | ENSRNOT00000021621 | 0.950519122  | 2.15E-06 |
| TUCP_000951 | XLOC_035083 | ENSRNOT00000066793 | 0.955596121  | 1.26E-06 |
| TUCP_000815 | XLOC_031235 | ENSRNOT00000042251 | 0.95914654   | 8.37E-07 |
| TUCP_000815 | XLOC_031235 | ENSRNOT00000002984 | 0.961749197  | 6.05E-07 |
| TUCP_000815 | XLOC_031235 | ENSRNOT00000067379 | 0.951575998  | 1.93E-06 |
| TUCP_000815 | XLOC_031235 | ENSRNOT00000092365 | 0.963214391  | 4.99E-07 |
| TUCP_000815 | XLOC_031235 | ENSRNOT00000089306 | 0.963969015  | 4.50E-07 |
| TUCP_000815 | XLOC_031235 | ENSRNOT00000086829 | 0.968375116  | 2.36E-07 |
| TUCP_000815 | XLOC_031235 | ENSRNOT00000045301 | 0.962905923  | 5.20E-07 |
| TUCP_000815 | XLOC_031235 | ENSRNOT00000041186 | 0.962473154  | 5.50E-07 |
| TUCP_000815 | XLOC_031235 | ENSRNOT00000076182 | 0.962905923  | 5.20E-07 |
| TUCP_000815 | XLOC_031235 | ENSRNOT00000081709 | 0.958138224  | 9.44E-07 |
| TUCP_000815 | XLOC_031235 | ENSRNOT00000014103 | 0.962905923  | 5.20E-07 |
| TUCP_000815 | XLOC_031235 | ENSRNOT00000082289 | 0.958741323  | 8.78E-07 |
| TUCP_000815 | XLOC_031235 | ENSRNOT00000083493 | 0.957519528  | 1.01E-06 |
| TUCP_000815 | XLOC_031235 | ENSRNOT00000092563 | 0.954928133  | 1.36E-06 |
| TUCP_000815 | XLOC_031235 | ENSRNOT00000088893 | 0.962905923  | 5.20E-07 |
| TUCP_000815 | XLOC_031235 | ENSRNOT00000081014 | 0.962905923  | 5.20E-07 |

|             |             |                    |              |          |
|-------------|-------------|--------------------|--------------|----------|
| TUCP_000815 | XLOC_031235 | ENSRNOT00000067543 | 0.962905923  | 5.20E-07 |
| TUCP_000815 | XLOC_031235 | ENSRNOT00000050968 | 0.969185692  | 2.08E-07 |
| TUCP_000815 | XLOC_031235 | ENSRNOT00000035125 | 0.99062833   | 5.60E-10 |
| TUCP_000815 | XLOC_031235 | ENSRNOT00000086036 | 0.962054507  | 5.81E-07 |
| TUCP_000815 | XLOC_031235 | ENSRNOT00000063929 | 0.962905923  | 5.20E-07 |
| TUCP_000815 | XLOC_031235 | ENSRNOT00000068416 | 0.962944179  | 5.17E-07 |
| TUCP_000815 | XLOC_031235 | ENSRNOT00000041617 | 0.962634861  | 5.39E-07 |
| TUCP_000815 | XLOC_031235 | ENSRNOT00000091763 | 0.95205574   | 1.84E-06 |
| TUCP_000815 | XLOC_031235 | ENSRNOT00000022200 | 0.974992221  | 7.39E-08 |
| TUCP_000815 | XLOC_031235 | ENSRNOT00000083764 | 0.960556801  | 7.04E-07 |
| TUCP_000815 | XLOC_031235 | ENSRNOT00000050543 | 0.964185698  | 4.37E-07 |
| TUCP_000815 | XLOC_031235 | ENSRNOT00000079275 | 0.962921013  | 5.19E-07 |
| TUCP_000815 | XLOC_031235 | ENSRNOT00000052367 | 0.958891376  | 8.63E-07 |
| TUCP_000815 | XLOC_031235 | ENSRNOT00000090658 | 0.962905923  | 5.20E-07 |
| TUCP_000815 | XLOC_031235 | ENSRNOT00000022571 | 0.963094245  | 5.07E-07 |
| TUCP_000815 | XLOC_031235 | ENSRNOT00000057472 | 0.962905923  | 5.20E-07 |
| TUCP_000814 | XLOC_031223 | ENSRNOT00000006992 | 0.960006932  | 7.53E-07 |
| TUCP_000814 | XLOC_031223 | ENSRNOT00000076516 | 0.952629745  | 1.73E-06 |
| TUCP_000814 | XLOC_031223 | ENSRNOT00000030991 | 0.98064324   | 2.07E-08 |
| TUCP_000814 | XLOC_031223 | ENSRNOT00000076793 | 0.951004658  | 2.05E-06 |
| TUCP_000814 | XLOC_031223 | ENSRNOT00000087660 | 0.955066815  | 1.34E-06 |
| TUCP_000814 | XLOC_031223 | ENSRNOT00000091927 | 0.958091786  | 9.49E-07 |
| TUCP_000814 | XLOC_031223 | ENSRNOT00000067281 | 0.954859639  | 1.37E-06 |
| TUCP_000814 | XLOC_031223 | ENSRNOT00000086747 | 0.964083907  | 4.43E-07 |
| TUCP_003682 | XLOC_161004 | ENSRNOT00000047820 | 0.953492011  | 1.58E-06 |
| TUCP_003682 | XLOC_161004 | ENSRNOT00000031161 | 0.975517658  | 6.65E-08 |
| TUCP_003682 | XLOC_161004 | ENSRNOT00000002361 | -0.956498554 | 1.14E-06 |
| TUCP_003682 | XLOC_161004 | ENSRNOT00000012715 | 0.951084844  | 2.03E-06 |
| TUCP_003681 | XLOC_160822 | ENSRNOT00000006995 | 0.963703257  | 4.67E-07 |
| TUCP_003681 | XLOC_160822 | ENSRNOT00000027407 | 0.963459302  | 4.83E-07 |
| TUCP_003681 | XLOC_160822 | ENSRNOT00000006188 | -0.951425584 | 1.96E-06 |
| TUCP_003681 | XLOC_160822 | ENSRNOT00000080173 | -0.955439628 | 1.28E-06 |
| TUCP_003681 | XLOC_160822 | ENSRNOT00000013743 | 0.977961734  | 3.95E-08 |
| TUCP_003681 | XLOC_160822 | ENSRNOT00000087062 | 0.950049583  | 2.25E-06 |
| TUCP_003681 | XLOC_160822 | ENSRNOT00000041237 | -0.952743544 | 1.71E-06 |
| TUCP_003681 | XLOC_160822 | ENSRNOT00000017361 | 0.950994585  | 2.05E-06 |
| TUCP_003681 | XLOC_160822 | ENSRNOT00000091751 | 0.962391661  | 5.56E-07 |
| TUCP_003681 | XLOC_160822 | ENSRNOT00000086706 | 0.968931573  | 2.16E-07 |
| TUCP_003681 | XLOC_160822 | ENSRNOT00000071166 | 0.959579135  | 7.94E-07 |
| TUCP_003681 | XLOC_160822 | ENSRNOT00000004017 | 0.981635276  | 1.60E-08 |
| TUCP_003681 | XLOC_160822 | ENSRNOT00000037699 | 0.952604797  | 1.74E-06 |
| TUCP_003681 | XLOC_160822 | ENSRNOT00000029332 | -0.965424796 | 3.67E-07 |
| TUCP_003681 | XLOC_160822 | ENSRNOT00000066370 | 0.953874893  | 1.52E-06 |
| TUCP_003681 | XLOC_160822 | ENSRNOT00000031672 | -0.955491743 | 1.28E-06 |
| TUCP_003681 | XLOC_160822 | ENSRNOT00000013516 | 0.952296585  | 1.80E-06 |
| TUCP_003681 | XLOC_160822 | ENSRNOT00000061005 | 0.950862288  | 2.08E-06 |
| TUCP_003681 | XLOC_160822 | ENSRNOT00000072771 | 0.956195141  | 1.18E-06 |
| TUCP_003681 | XLOC_160822 | ENSRNOT00000073370 | 0.957537598  | 1.01E-06 |
| TUCP_003681 | XLOC_160822 | ENSRNOT00000023350 | 0.963992192  | 4.49E-07 |
| TUCP_003681 | XLOC_160822 | ENSRNOT00000047530 | 0.967602142  | 2.66E-07 |
| TUCP_003681 | XLOC_160822 | ENSRNOT00000039177 | -0.95383312  | 1.53E-06 |

|             |             |                    |              |          |
|-------------|-------------|--------------------|--------------|----------|
| TUCP_003681 | XLOC_160822 | ENSRNOT00000017373 | 0.956789568  | 1.10E-06 |
| TUCP_003681 | XLOC_160822 | ENSRNOT00000019759 | 0.951678993  | 1.91E-06 |
| TUCP_003681 | XLOC_160822 | ENSRNOT00000057898 | -0.956978316 | 1.08E-06 |
| TUCP_003681 | XLOC_160822 | ENSRNOT00000079185 | -0.956966408 | 1.08E-06 |
| TUCP_003681 | XLOC_160822 | ENSRNOT00000067391 | -0.952280164 | 1.80E-06 |
| TUCP_003681 | XLOC_160822 | ENSRNOT00000026481 | 0.950367778  | 2.18E-06 |
| TUCP_003681 | XLOC_160822 | ENSRNOT00000026398 | -0.955822378 | 1.23E-06 |
| TUCP_003681 | XLOC_160822 | ENSRNOT00000012881 | -0.955250171 | 1.31E-06 |
| TUCP_003681 | XLOC_160822 | ENSRNOT00000016947 | 0.951105707  | 2.03E-06 |
| TUCP_003681 | XLOC_160822 | ENSRNOT00000026392 | 0.961015359  | 6.64E-07 |
| TUCP_003681 | XLOC_160822 | ENSRNOT00000028271 | 0.955907504  | 1.22E-06 |
| TUCP_003681 | XLOC_160822 | ENSRNOT00000086065 | 0.950679461  | 2.12E-06 |
| TUCP_003681 | XLOC_160822 | ENSRNOT00000040629 | 0.967477613  | 2.71E-07 |
| TUCP_003681 | XLOC_160822 | ENSRNOT00000019820 | 0.950960158  | 2.06E-06 |
| TUCP_003681 | XLOC_160822 | ENSRNOT00000088133 | -0.952694391 | 1.72E-06 |
| TUCP_003681 | XLOC_160822 | ENSRNOT00000012364 | -0.953642673 | 1.56E-06 |
| TUCP_003681 | XLOC_160822 | ENSRNOT00000002410 | 0.951963204  | 1.86E-06 |
| TUCP_003681 | XLOC_160822 | ENSRNOT00000091739 | -0.955583696 | 1.26E-06 |
| TUCP_003681 | XLOC_160822 | ENSRNOT00000012892 | 0.964887976  | 3.96E-07 |
| TUCP_003681 | XLOC_160822 | ENSRNOT00000007824 | -0.951543069 | 1.94E-06 |
| TUCP_003681 | XLOC_160822 | ENSRNOT00000083968 | -0.961262786 | 6.44E-07 |
| TUCP_003681 | XLOC_160822 | ENSRNOT00000049745 | 0.952150681  | 1.82E-06 |
| TUCP_003681 | XLOC_160822 | ENSRNOT00000009156 | 0.962756955  | 5.30E-07 |
| TUCP_003681 | XLOC_160822 | ENSRNOT00000026724 | -0.951094959 | 2.03E-06 |
| TUCP_003681 | XLOC_160822 | ENSRNOT00000013867 | 0.960947345  | 6.70E-07 |
| TUCP_003681 | XLOC_160822 | ENSRNOT00000021802 | 0.964968423  | 3.92E-07 |
| TUCP_003681 | XLOC_160822 | ENSRNOT00000021803 | -0.953951821 | 1.51E-06 |
| TUCP_003681 | XLOC_160822 | ENSRNOT00000026831 | 0.975832833  | 6.23E-08 |
| TUCP_003681 | XLOC_160822 | ENSRNOT00000018122 | 0.976969149  | 4.91E-08 |
| TUCP_003681 | XLOC_160822 | ENSRNOT00000064450 | -0.955129809 | 1.33E-06 |
| TUCP_003681 | XLOC_160822 | ENSRNOT00000015769 | 0.965942468  | 3.41E-07 |
| TUCP_003681 | XLOC_160822 | ENSRNOT00000022190 | -0.950601831 | 2.13E-06 |
| TUCP_003681 | XLOC_160822 | ENSRNOT00000016132 | -0.959847745 | 7.68E-07 |
| TUCP_003681 | XLOC_160822 | ENSRNOT00000013067 | -0.95073573  | 2.10E-06 |
| TUCP_003681 | XLOC_160822 | ENSRNOT00000078187 | 0.971389263  | 1.44E-07 |
| TUCP_003681 | XLOC_160822 | ENSRNOT00000046486 | -0.970427909 | 1.69E-07 |
| TUCP_003681 | XLOC_160822 | ENSRNOT00000002151 | -0.957336115 | 1.04E-06 |
| TUCP_003681 | XLOC_160822 | ENSRNOT00000005601 | -0.958024407 | 9.56E-07 |
| TUCP_003681 | XLOC_160822 | ENSRNOT00000017254 | -0.957051758 | 1.07E-06 |
| TUCP_003681 | XLOC_160822 | ENSRNOT00000073910 | -0.964475555 | 4.20E-07 |
| TUCP_003681 | XLOC_160822 | ENSRNOT00000007738 | -0.951914862 | 1.87E-06 |
| TUCP_003681 | XLOC_160822 | ENSRNOT00000010674 | -0.950358862 | 2.18E-06 |
| TUCP_003681 | XLOC_160822 | ENSRNOT00000003787 | -0.957935453 | 9.66E-07 |
| TUCP_003681 | XLOC_160822 | ENSRNOT00000019531 | -0.952226864 | 1.81E-06 |
| TUCP_003681 | XLOC_160822 | ENSRNOT00000054948 | 0.964523631  | 4.17E-07 |
| TUCP_003681 | XLOC_160822 | ENSRNOT00000085621 | 0.962803473  | 5.27E-07 |
| TUCP_003681 | XLOC_160822 | ENSRNOT00000074586 | -0.952164721 | 1.82E-06 |
| TUCP_003681 | XLOC_160822 | ENSRNOT00000008883 | 0.972601507  | 1.16E-07 |
| TUCP_003681 | XLOC_160822 | ENSRNOT00000072357 | -0.953961707 | 1.51E-06 |
| TUCP_003681 | XLOC_160822 | ENSRNOT00000026531 | -0.950268503 | 2.20E-06 |
| TUCP_003681 | XLOC_160822 | ENSRNOT00000084597 | -0.953895867 | 1.52E-06 |

|             |             |                    |              |          |
|-------------|-------------|--------------------|--------------|----------|
| TUCP_003681 | XLOC_160822 | ENSRNOT00000022676 | -0.956206832 | 1.18E-06 |
| TUCP_003681 | XLOC_160822 | ENSRNOT00000011880 | 0.958611193  | 8.92E-07 |
| TUCP_003681 | XLOC_160822 | ENSRNOT00000046323 | 0.959332308  | 8.18E-07 |
| TUCP_003681 | XLOC_160822 | ENSRNOT00000021717 | 0.950596891  | 2.13E-06 |
| TUCP_003681 | XLOC_160822 | ENSRNOT00000049423 | -0.986761337 | 3.13E-09 |
| TUCP_003681 | XLOC_160822 | ENSRNOT00000055886 | 0.961438035  | 6.29E-07 |
| TUCP_003681 | XLOC_160822 | ENSRNOT00000077706 | 0.95127281   | 1.99E-06 |
| TUCP_003681 | XLOC_160822 | ENSRNOT00000089980 | -0.973530902 | 9.79E-08 |
| TUCP_003681 | XLOC_160822 | ENSRNOT00000078073 | -0.956743789 | 1.11E-06 |
| TUCP_003681 | XLOC_160822 | ENSRNOT00000055602 | -0.952063397 | 1.84E-06 |
| TUCP_003681 | XLOC_160822 | ENSRNOT0000002771  | 0.956251364  | 1.17E-06 |
| TUCP_003681 | XLOC_160822 | ENSRNOT00000055607 | -0.967389529 | 2.75E-07 |
| TUCP_003681 | XLOC_160822 | ENSRNOT00000041106 | 0.955650704  | 1.25E-06 |
| TUCP_003681 | XLOC_160822 | ENSRNOT00000023876 | 0.972903945  | 1.10E-07 |
| TUCP_003681 | XLOC_160822 | ENSRNOT0000002974  | 0.962645393  | 5.38E-07 |
| TUCP_003681 | XLOC_160822 | ENSRNOT0000000658  | 0.955981027  | 1.21E-06 |
| TUCP_003681 | XLOC_160822 | ENSRNOT00000013800 | 0.966650959  | 3.07E-07 |
| TUCP_003681 | XLOC_160822 | ENSRNOT00000008427 | -0.958505305 | 9.04E-07 |
| TUCP_003681 | XLOC_160822 | ENSRNOT00000028888 | 0.983273311  | 1.00E-08 |
| TUCP_003681 | XLOC_160822 | ENSRNOT00000049285 | -0.954070934 | 1.49E-06 |
| TUCP_003681 | XLOC_160822 | ENSRNOT00000000717 | -0.951377201 | 1.97E-06 |
| TUCP_003681 | XLOC_160822 | ENSRNOT00000035277 | 0.97219526   | 1.25E-07 |
| TUCP_003681 | XLOC_160822 | ENSRNOT00000027057 | 0.968739987  | 2.23E-07 |
| TUCP_003681 | XLOC_160822 | ENSRNOT0000004999  | 0.960977392  | 6.67E-07 |
| TUCP_003681 | XLOC_160822 | ENSRNOT00000023763 | -0.951788268 | 1.89E-06 |
| TUCP_003681 | XLOC_160822 | ENSRNOT00000068167 | 0.956920319  | 1.09E-06 |
| TUCP_003681 | XLOC_160822 | ENSRNOT00000023977 | -0.958075256 | 9.51E-07 |
| TUCP_003681 | XLOC_160822 | ENSRNOT00000082151 | -0.95205474  | 1.84E-06 |
| TUCP_003681 | XLOC_160822 | ENSRNOT00000034411 | 0.965820565  | 3.47E-07 |
| TUCP_003681 | XLOC_160822 | ENSRNOT00000001607 | 0.961512214  | 6.23E-07 |
| TUCP_003681 | XLOC_160822 | ENSRNOT00000027666 | 0.955250196  | 1.31E-06 |
| TUCP_003681 | XLOC_160822 | ENSRNOT00000035385 | 0.95690001   | 1.09E-06 |
| TUCP_003681 | XLOC_160822 | ENSRNOT00000085619 | 0.951643318  | 1.92E-06 |
| TUCP_003681 | XLOC_160822 | ENSRNOT00000087287 | 0.955515096  | 1.27E-06 |
| TUCP_003681 | XLOC_160822 | ENSRNOT0000007276  | -0.960042251 | 7.50E-07 |
| TUCP_003681 | XLOC_160822 | ENSRNOT00000020174 | -0.96399365  | 4.49E-07 |
| TUCP_003681 | XLOC_160822 | ENSRNOT00000040540 | 0.958923445  | 8.60E-07 |
| TUCP_003681 | XLOC_160822 | ENSRNOT00000009994 | -0.950523523 | 2.15E-06 |
| TUCP_003681 | XLOC_160822 | ENSRNOT00000080443 | 0.973218524  | 1.04E-07 |
| TUCP_003681 | XLOC_160822 | ENSRNOT00000015898 | 0.977453236  | 4.42E-08 |
| TUCP_003681 | XLOC_160822 | ENSRNOT00000005641 | 0.954986305  | 1.35E-06 |
| TUCP_003681 | XLOC_160822 | ENSRNOT00000005405 | 0.955757008  | 1.24E-06 |
| TUCP_003681 | XLOC_160822 | ENSRNOT00000015624 | 0.966252299  | 3.26E-07 |
| TUCP_003681 | XLOC_160822 | ENSRNOT00000058563 | 0.954223779  | 1.47E-06 |
| TUCP_003681 | XLOC_160822 | ENSRNOT00000013613 | -0.954009982 | 1.50E-06 |
| TUCP_003681 | XLOC_160822 | ENSRNOT00000036931 | -0.952084779 | 1.83E-06 |
| TUCP_003681 | XLOC_160822 | ENSRNOT00000000083 | -0.96114843  | 6.53E-07 |
| TUCP_003681 | XLOC_160822 | ENSRNOT00000038212 | -0.954245091 | 1.46E-06 |
| TUCP_003681 | XLOC_160822 | ENSRNOT00000023965 | -0.950062285 | 2.25E-06 |
| TUCP_003681 | XLOC_160822 | ENSRNOT00000014124 | 0.956883313  | 1.09E-06 |
| TUCP_003681 | XLOC_160822 | ENSRNOT00000013632 | 0.952236761  | 1.81E-06 |



|             |             |                    |              |          |
|-------------|-------------|--------------------|--------------|----------|
| TUCP_003681 | XLOC_160822 | ENSRNOT00000091488 | 0.958574526  | 8.96E-07 |
| TUCP_003681 | XLOC_160822 | ENSRNOT00000028781 | 0.961006576  | 6.65E-07 |
| TUCP_003681 | XLOC_160822 | ENSRNOT00000026760 | -0.952060449 | 1.84E-06 |
| TUCP_003681 | XLOC_160822 | ENSRNOT00000013107 | 0.965044212  | 3.88E-07 |
| TUCP_003681 | XLOC_160822 | ENSRNOT00000033976 | 0.950263866  | 2.20E-06 |
| TUCP_003681 | XLOC_160822 | ENSRNOT00000081077 | -0.953532125 | 1.58E-06 |
| TUCP_003681 | XLOC_160822 | ENSRNOT00000017995 | 0.954107727  | 1.48E-06 |
| TUCP_003681 | XLOC_160822 | ENSRNOT00000021216 | 0.986498135  | 3.45E-09 |
| TUCP_003681 | XLOC_160822 | ENSRNOT00000063917 | -0.959533368 | 7.98E-07 |
| TUCP_003681 | XLOC_160822 | ENSRNOT00000021534 | -0.950215502 | 2.21E-06 |
| TUCP_003681 | XLOC_160822 | ENSRNOT00000023628 | -0.95223627  | 1.81E-06 |
| TUCP_003681 | XLOC_160822 | ENSRNOT00000013246 | 0.976433877  | 5.50E-08 |
| TUCP_003681 | XLOC_160822 | ENSRNOT00000010224 | 0.968150395  | 2.45E-07 |
| TUCP_003681 | XLOC_160822 | ENSRNOT00000073135 | 0.963218793  | 4.98E-07 |
| TUCP_003681 | XLOC_160822 | ENSRNOT00000064700 | 0.959148958  | 8.36E-07 |
| TUCP_003681 | XLOC_160822 | ENSRNOT00000065722 | -0.951040689 | 2.04E-06 |
| TUCP_003681 | XLOC_160822 | ENSRNOT00000061580 | -0.956233572 | 1.17E-06 |
| TUCP_003681 | XLOC_160822 | ENSRNOT00000074395 | 0.957794838  | 9.82E-07 |
| TUCP_003681 | XLOC_160822 | ENSRNOT00000017687 | -0.961782061 | 6.02E-07 |
| TUCP_000810 | XLOC_030878 | ENSRNOT00000024186 | 0.983200502  | 1.02E-08 |
| TUCP_000810 | XLOC_030878 | ENSRNOT00000074753 | 0.998182349  | 1.56E-13 |
| TUCP_000810 | XLOC_030878 | ENSRNOT00000004876 | 0.959071443  | 8.44E-07 |
| TUCP_000810 | XLOC_030878 | ENSRNOT00000041904 | 1            | 0        |
| TUCP_000810 | XLOC_030878 | ENSRNOT00000083487 | 0.989515314  | 9.80E-10 |
| TUCP_000810 | XLOC_030878 | ENSRNOT00000077990 | 1            | 0        |
| TUCP_000810 | XLOC_030878 | ENSRNOT00000038826 | 0.99977672   | 4.37E-18 |
| TUCP_000810 | XLOC_030878 | ENSRNOT00000046842 | 0.973644314  | 9.58E-08 |
| TUCP_000810 | XLOC_030878 | ENSRNOT00000037169 | 0.980329406  | 2.24E-08 |
| TUCP_000810 | XLOC_030878 | ENSRNOT00000021243 | 0.987425406  | 2.42E-09 |
| TUCP_000810 | XLOC_030878 | ENSRNOT00000060250 | 0.999933853  | 9.97E-21 |
| TUCP_000810 | XLOC_030878 | ENSRNOT00000091934 | 1            | 0        |
| TUCP_000810 | XLOC_030878 | ENSRNOT00000046585 | 0.982941597  | 1.11E-08 |
| TUCP_000810 | XLOC_030878 | ENSRNOT00000080794 | 0.990839253  | 5.00E-10 |
| TUCP_000810 | XLOC_030878 | ENSRNOT00000014456 | 0.991697153  | 3.06E-10 |
| TUCP_000810 | XLOC_030878 | ENSRNOT00000031205 | 0.991394766  | 3.66E-10 |
| TUCP_000810 | XLOC_030878 | ENSRNOT00000044145 | 1            | 0        |
| TUCP_000810 | XLOC_030878 | ENSRNOT00000088381 | 0.989013276  | 1.24E-09 |
| TUCP_000810 | XLOC_030878 | ENSRNOT00000011743 | 0.98678427   | 3.11E-09 |
| TUCP_000810 | XLOC_030878 | ENSRNOT00000089929 | 1            | 0        |
| TUCP_000810 | XLOC_030878 | ENSRNOT00000088624 | 1            | 0        |
| TUCP_000810 | XLOC_030878 | ENSRNOT00000085659 | 0.989908621  | 8.10E-10 |
| TUCP_000810 | XLOC_030878 | ENSRNOT00000015866 | 0.994066664  | 5.73E-11 |
| TUCP_000810 | XLOC_030878 | ENSRNOT00000078633 | 1            | 4.25E-78 |
| TUCP_000810 | XLOC_030878 | ENSRNOT00000034907 | 0.995318542  | 1.76E-11 |
| TUCP_000810 | XLOC_030878 | ENSRNOT00000093230 | 0.958295175  | 9.26E-07 |
| TUCP_000810 | XLOC_030878 | ENSRNOT00000051835 | 1            | 0        |
| TUCP_000810 | XLOC_030878 | ENSRNOT00000079087 | 1            | 0        |
| TUCP_000810 | XLOC_030878 | ENSRNOT00000037206 | 1            | 0        |
| TUCP_000810 | XLOC_030878 | ENSRNOT00000083261 | 0.970991658  | 1.54E-07 |
| TUCP_000810 | XLOC_030878 | ENSRNOT00000080590 | 0.999889216  | 1.31E-19 |
| TUCP_000810 | XLOC_030878 | ENSRNOT00000027552 | 0.999801024  | 2.46E-18 |

|             |             |                    |              |          |
|-------------|-------------|--------------------|--------------|----------|
| TUCP_000810 | XLOC_030878 | ENSRNOT00000077014 | 0.995074376  | 2.26E-11 |
| TUCP_000810 | XLOC_030878 | ENSRNOT00000080453 | 0.99994332   | 4.61E-21 |
| TUCP_000810 | XLOC_030878 | ENSRNOT00000089057 | 0.968243551  | 2.41E-07 |
| TUCP_000810 | XLOC_030878 | ENSRNOT00000066839 | 0.991868612  | 2.76E-10 |
| TUCP_000810 | XLOC_030878 | ENSRNOT00000061284 | 0.955566942  | 1.27E-06 |
| TUCP_000810 | XLOC_030878 | ENSRNOT00000013423 | 0.959677621  | 7.84E-07 |
| TUCP_000810 | XLOC_030878 | ENSRNOT00000071884 | 0.974769955  | 7.72E-08 |
| TUCP_000810 | XLOC_030878 | ENSRNOT00000004128 | 0.961829362  | 5.99E-07 |
| TUCP_000810 | XLOC_030878 | ENSRNOT00000026316 | 0.964408046  | 4.24E-07 |
| TUCP_000810 | XLOC_030878 | ENSRNOT00000057729 | 0.999384184  | 6.97E-16 |
| TUCP_000810 | XLOC_030878 | ENSRNOT00000078663 | 0.975192577  | 7.10E-08 |
| TUCP_000810 | XLOC_030878 | ENSRNOT00000064250 | 0.983131977  | 1.05E-08 |
| TUCP_000810 | XLOC_030878 | ENSRNOT00000021608 | 0.965228881  | 3.78E-07 |
| TUCP_000810 | XLOC_030878 | ENSRNOT00000029634 | 0.995816134  | 1.00E-11 |
| TUCP_000810 | XLOC_030878 | ENSRNOT00000093579 | 0.958564264  | 8.97E-07 |
| TUCP_000810 | XLOC_030878 | ENSRNOT00000086349 | 0.957242511  | 1.05E-06 |
| TUCP_000810 | XLOC_030878 | ENSRNOT00000065460 | 1            | 0        |
| TUCP_000810 | XLOC_030878 | ENSRNOT00000003817 | 0.996778712  | 2.72E-12 |
| TUCP_000810 | XLOC_030878 | ENSRNOT00000016713 | 1            | 0        |
| TUCP_000810 | XLOC_030878 | ENSRNOT00000079260 | 0.996448245  | 4.42E-12 |
| TUCP_000810 | XLOC_030878 | ENSRNOT00000039294 | 1            | 0        |
| TUCP_000810 | XLOC_030878 | ENSRNOT00000092913 | 0.952980228  | 1.67E-06 |
| TUCP_002679 | XLOC_113217 | ENSRNOT00000068354 | 0.977947272  | 3.96E-08 |
| TUCP_002679 | XLOC_113217 | ENSRNOT00000057504 | 0.965004476  | 3.90E-07 |
| TUCP_002679 | XLOC_113217 | ENSRNOT00000034421 | 0.956594033  | 1.13E-06 |
| TUCP_002679 | XLOC_113217 | ENSRNOT00000076757 | 0.954329125  | 1.45E-06 |
| TUCP_002679 | XLOC_113217 | ENSRNOT00000003075 | 0.962795242  | 5.27E-07 |
| TUCP_002679 | XLOC_113217 | ENSRNOT00000028877 | 0.97182105   | 1.33E-07 |
| TUCP_002679 | XLOC_113217 | ENSRNOT00000078299 | 0.964100631  | 4.42E-07 |
| TUCP_002679 | XLOC_113217 | ENSRNOT00000010968 | 0.971166338  | 1.50E-07 |
| TUCP_002679 | XLOC_113217 | ENSRNOT00000077764 | 0.957879947  | 9.73E-07 |
| TUCP_002679 | XLOC_113217 | ENSRNOT00000085479 | 0.970731094  | 1.61E-07 |
| TUCP_002679 | XLOC_113217 | ENSRNOT00000025731 | 0.984187957  | 7.58E-09 |
| TUCP_002679 | XLOC_113217 | ENSRNOT00000000995 | 0.973871009  | 9.18E-08 |
| TUCP_002679 | XLOC_113217 | ENSRNOT00000003458 | 0.978882609  | 3.19E-08 |
| TUCP_002679 | XLOC_113217 | ENSRNOT00000093748 | 0.958655507  | 8.88E-07 |
| TUCP_002679 | XLOC_113217 | ENSRNOT00000078020 | 0.953416477  | 1.60E-06 |
| TUCP_002679 | XLOC_113217 | ENSRNOT00000051028 | -0.965760143 | 3.50E-07 |
| TUCP_002679 | XLOC_113217 | ENSRNOT00000031693 | 0.982816448  | 1.15E-08 |
| TUCP_002679 | XLOC_113217 | ENSRNOT00000052130 | 0.977287292  | 4.58E-08 |
| TUCP_002679 | XLOC_113217 | ENSRNOT00000003082 | 0.957458708  | 1.02E-06 |
| TUCP_002679 | XLOC_113217 | ENSRNOT00000077972 | 0.957030356  | 1.07E-06 |
| TUCP_002678 | XLOC_113217 | ENSRNOT00000089607 | 0.950797766  | 2.09E-06 |
| TUCP_002678 | XLOC_113217 | ENSRNOT00000083034 | 0.956051363  | 1.20E-06 |
| TUCP_002678 | XLOC_113217 | ENSRNOT00000034421 | 0.958649069  | 8.88E-07 |
| TUCP_002678 | XLOC_113217 | ENSRNOT00000010968 | 0.952296092  | 1.80E-06 |
| TUCP_002678 | XLOC_113217 | ENSRNOT00000028877 | 0.971698287  | 1.36E-07 |
| TUCP_002678 | XLOC_113217 | ENSRNOT00000078299 | 0.954869138  | 1.37E-06 |
| TUCP_002678 | XLOC_113217 | ENSRNOT00000073846 | -0.958436364 | 9.11E-07 |
| TUCP_002678 | XLOC_113217 | ENSRNOT00000085479 | 0.997062759  | 1.71E-12 |
| TUCP_002678 | XLOC_113217 | ENSRNOT00000025731 | 0.978070398  | 3.85E-08 |

|             |             |                    |              |          |
|-------------|-------------|--------------------|--------------|----------|
| TUCP_002678 | XLOC_113217 | ENSRNOT00000068354 | 0.975988679  | 6.04E-08 |
| TUCP_002678 | XLOC_113217 | ENSRNOT00000000995 | 0.976724798  | 5.17E-08 |
| TUCP_002678 | XLOC_113217 | ENSRNOT00000003458 | 0.961756621  | 6.04E-07 |
| TUCP_002678 | XLOC_113217 | ENSRNOT00000093748 | 0.976666321  | 5.24E-08 |
| TUCP_002678 | XLOC_113217 | ENSRNOT00000084722 | 0.957254449  | 1.05E-06 |
| TUCP_002678 | XLOC_113217 | ENSRNOT00000078020 | 0.96210837   | 5.77E-07 |
| TUCP_002678 | XLOC_113217 | ENSRNOT00000051028 | -0.971463102 | 1.42E-07 |
| TUCP_002678 | XLOC_113217 | ENSRNOT00000031693 | 0.982216372  | 1.36E-08 |
| TUCP_002678 | XLOC_113217 | ENSRNOT00000077458 | 0.954676642  | 1.40E-06 |
| TUCP_002678 | XLOC_113217 | ENSRNOT00000077764 | 0.969670121  | 1.92E-07 |
| TUCP_002678 | XLOC_113217 | ENSRNOT00000052130 | 0.954931975  | 1.36E-06 |
| TUCP_002678 | XLOC_113217 | ENSRNOT00000077972 | 0.954092     | 1.49E-06 |
| TUCP_002671 | XLOC_113217 | ENSRNOT00000077317 | 0.985101781  | 5.64E-09 |
| TUCP_002671 | XLOC_113217 | ENSRNOT00000007763 | -0.951844894 | 1.88E-06 |
| TUCP_002671 | XLOC_113217 | ENSRNOT00000016768 | 0.95617508   | 1.18E-06 |
| TUCP_002671 | XLOC_113217 | ENSRNOT00000084881 | 0.959939273  | 7.60E-07 |
| TUCP_002670 | XLOC_113217 | ENSRNOT00000088376 | 0.958082137  | 9.50E-07 |
| TUCP_002670 | XLOC_113217 | ENSRNOT00000078220 | 0.951157837  | 2.02E-06 |
| TUCP_002670 | XLOC_113217 | ENSRNOT00000086969 | 0.957624196  | 1.00E-06 |
| TUCP_002670 | XLOC_113217 | ENSRNOT00000044232 | 0.95459458   | 1.41E-06 |
| TUCP_002670 | XLOC_113217 | ENSRNOT00000023287 | 0.95191457   | 1.87E-06 |
| TUCP_002670 | XLOC_113217 | ENSRNOT00000039313 | 0.976357405  | 5.59E-08 |
| TUCP_002670 | XLOC_113217 | ENSRNOT00000015316 | 0.959965364  | 7.57E-07 |
| TUCP_002670 | XLOC_113217 | ENSRNOT00000078074 | 0.961020873  | 6.64E-07 |
| TUCP_002670 | XLOC_113217 | ENSRNOT00000092186 | 0.959068462  | 8.45E-07 |
| TUCP_002670 | XLOC_113217 | ENSRNOT00000018860 | 0.968214937  | 2.42E-07 |
| TUCP_002670 | XLOC_113217 | ENSRNOT00000047870 | 0.950633338  | 2.12E-06 |
| TUCP_002670 | XLOC_113217 | ENSRNOT00000018890 | 0.996195203  | 6.24E-12 |
| TUCP_002673 | XLOC_113217 | ENSRNOT00000010092 | 0.962392838  | 5.56E-07 |
| TUCP_002673 | XLOC_113217 | ENSRNOT00000052003 | 0.964082536  | 4.43E-07 |
| TUCP_002673 | XLOC_113217 | ENSRNOT00000020786 | 0.956030956  | 1.20E-06 |
| TUCP_002673 | XLOC_113217 | ENSRNOT00000047700 | 0.95734879   | 1.03E-06 |
| TUCP_002673 | XLOC_113217 | ENSRNOT00000047527 | 0.967864949  | 2.56E-07 |
| TUCP_002673 | XLOC_113217 | ENSRNOT00000076802 | 0.956463373  | 1.14E-06 |
| TUCP_002673 | XLOC_113217 | ENSRNOT0000005726  | 0.950598619  | 2.13E-06 |
| TUCP_002673 | XLOC_113217 | ENSRNOT00000052367 | 0.953256563  | 1.62E-06 |
| TUCP_002673 | XLOC_113217 | ENSRNOT00000050968 | 0.950089831  | 2.24E-06 |
| TUCP_002673 | XLOC_113217 | ENSRNOT00000076693 | 0.951608606  | 1.93E-06 |
| TUCP_002673 | XLOC_113217 | ENSRNOT00000039263 | 0.952525265  | 1.75E-06 |
| TUCP_002673 | XLOC_113217 | ENSRNOT00000039876 | 0.951568485  | 1.93E-06 |
| TUCP_002673 | XLOC_113217 | ENSRNOT00000082289 | 0.952856593  | 1.69E-06 |
| TUCP_002673 | XLOC_113217 | ENSRNOT00000082143 | 0.962533024  | 5.46E-07 |
| TUCP_002673 | XLOC_113217 | ENSRNOT00000092516 | 0.965010059  | 3.89E-07 |
| TUCP_002673 | XLOC_113217 | ENSRNOT00000057433 | 0.975981425  | 6.05E-08 |
| TUCP_002673 | XLOC_113217 | ENSRNOT00000066062 | -0.95931386  | 8.20E-07 |
| TUCP_002673 | XLOC_113217 | ENSRNOT00000072810 | 0.956365343  | 1.16E-06 |
| TUCP_002672 | XLOC_113217 | ENSRNOT00000031693 | 0.976234649  | 5.74E-08 |
| TUCP_002672 | XLOC_113217 | ENSRNOT00000034421 | 0.98524217   | 5.38E-09 |
| TUCP_002672 | XLOC_113217 | ENSRNOT00000003075 | 0.980134972  | 2.36E-08 |
| TUCP_002672 | XLOC_113217 | ENSRNOT00000004965 | 0.963010138  | 5.13E-07 |
| TUCP_002672 | XLOC_113217 | ENSRNOT00000040856 | 0.954940635  | 1.36E-06 |

|             |             |                     |              |          |
|-------------|-------------|---------------------|--------------|----------|
| TUCP_002672 | XLOC_113217 | ENSRNOT00000025731  | 0.964863779  | 3.98E-07 |
| TUCP_002672 | XLOC_113217 | ENSRNOT00000005085  | 0.950111271  | 2.24E-06 |
| TUCP_002672 | XLOC_113217 | ENSRNOT00000025797  | -0.952938152 | 1.68E-06 |
| TUCP_002672 | XLOC_113217 | ENSRNOT00000084722  | 0.959425197  | 8.09E-07 |
| TUCP_002672 | XLOC_113217 | ENSRNOT00000068354  | 0.952863072  | 1.69E-06 |
| TUCP_002675 | XLOC_113217 | ENSRNOT00000092186  | 0.955953764  | 1.21E-06 |
| TUCP_002675 | XLOC_113217 | ENSRNOT00000018890  | 0.950889991  | 2.07E-06 |
| TUCP_002674 | XLOC_113217 | ENSRNOT00000003745  | 0.959792682  | 7.73E-07 |
| TUCP_002674 | XLOC_113217 | ENSRNOT00000049732  | 0.980456582  | 2.17E-08 |
| TUCP_002674 | XLOC_113217 | ENSRNOT000000034421 | 0.952128258  | 1.83E-06 |
| TUCP_002674 | XLOC_113217 | ENSRNOT00000080851  | 0.994246369  | 4.92E-11 |
| TUCP_002674 | XLOC_113217 | ENSRNOT00000086899  | 0.959084023  | 8.43E-07 |
| TUCP_002674 | XLOC_113217 | ENSRNOT000000023152 | 0.971549705  | 1.40E-07 |
| TUCP_002674 | XLOC_113217 | ENSRNOT000000025797 | -0.969633887 | 1.93E-07 |
| TUCP_002674 | XLOC_113217 | ENSRNOT00000092125  | 0.983683011  | 8.86E-09 |
| TUCP_002674 | XLOC_113217 | ENSRNOT00000084722  | 0.967643247  | 2.65E-07 |
| TUCP_002674 | XLOC_113217 | ENSRNOT00000013732  | 0.988640262  | 1.46E-09 |
| TUCP_002674 | XLOC_113217 | ENSRNOT00000009077  | 0.964462968  | 4.20E-07 |
| TUCP_002674 | XLOC_113217 | ENSRNOT00000055148  | 0.967161151  | 2.85E-07 |
| TUCP_002674 | XLOC_113217 | ENSRNOT00000026303  | 0.966800456  | 3.00E-07 |
| TUCP_002677 | XLOC_113217 | ENSRNOT00000015756  | 0.950256291  | 2.21E-06 |
| TUCP_002677 | XLOC_113217 | ENSRNOT00000087022  | 0.961291891  | 6.41E-07 |
| TUCP_002677 | XLOC_113217 | ENSRNOT00000026376  | 0.96815072   | 2.45E-07 |
| TUCP_002677 | XLOC_113217 | ENSRNOT00000024656  | 0.957567874  | 1.01E-06 |
| TUCP_002677 | XLOC_113217 | ENSRNOT00000036343  | 0.967240234  | 2.81E-07 |
| TUCP_002677 | XLOC_113217 | ENSRNOT00000004962  | 0.951594417  | 1.93E-06 |
| TUCP_002677 | XLOC_113217 | ENSRNOT00000021144  | 0.96171657   | 6.07E-07 |
| TUCP_002677 | XLOC_113217 | ENSRNOT00000066014  | 0.957433215  | 1.02E-06 |
| TUCP_002677 | XLOC_113217 | ENSRNOT00000064671  | 0.958103396  | 9.47E-07 |
| TUCP_002677 | XLOC_113217 | ENSRNOT00000016356  | 0.972223354  | 1.24E-07 |
| TUCP_002677 | XLOC_113217 | ENSRNOT00000002040  | 0.960629572  | 6.97E-07 |
| TUCP_002677 | XLOC_113217 | ENSRNOT00000001806  | 0.950677911  | 2.12E-06 |
| TUCP_000988 | XLOC_036321 | ENSRNOT00000091652  | 0.966939638  | 2.94E-07 |
| TUCP_000988 | XLOC_036321 | ENSRNOT00000036564  | 0.963878427  | 4.56E-07 |
| TUCP_000988 | XLOC_036321 | ENSRNOT00000080865  | 0.968551561  | 2.30E-07 |
| TUCP_000988 | XLOC_036321 | ENSRNOT00000073534  | 0.98468199   | 6.47E-09 |
| TUCP_000988 | XLOC_036321 | ENSRNOT00000012161  | 0.97256395   | 1.17E-07 |
| TUCP_000988 | XLOC_036321 | ENSRNOT00000071825  | 0.972528946  | 1.18E-07 |
| TUCP_000988 | XLOC_036321 | ENSRNOT00000049832  | 0.970477072  | 1.68E-07 |
| TUCP_000988 | XLOC_036321 | ENSRNOT00000093019  | 0.968551561  | 2.30E-07 |
| TUCP_000988 | XLOC_036321 | ENSRNOT00000085908  | 0.969651124  | 1.93E-07 |
| TUCP_000988 | XLOC_036321 | ENSRNOT00000046744  | 0.968551561  | 2.30E-07 |
| TUCP_000988 | XLOC_036321 | ENSRNOT00000076429  | 0.968551561  | 2.30E-07 |
| TUCP_000988 | XLOC_036321 | ENSRNOT00000084667  | 0.96697594   | 2.93E-07 |
| TUCP_000988 | XLOC_036321 | ENSRNOT00000055412  | 0.968551561  | 2.30E-07 |
| TUCP_000988 | XLOC_036321 | ENSRNOT00000093201  | 0.967190096  | 2.83E-07 |
| TUCP_000988 | XLOC_036321 | ENSRNOT00000072724  | 0.968551561  | 2.30E-07 |
| TUCP_000988 | XLOC_036321 | ENSRNOT00000066017  | 0.982620779  | 1.21E-08 |
| TUCP_000988 | XLOC_036321 | ENSRNOT00000082760  | 0.951170709  | 2.01E-06 |
| TUCP_000988 | XLOC_036321 | ENSRNOT00000074472  | 0.969740243  | 1.90E-07 |
| TUCP_000988 | XLOC_036321 | ENSRNOT00000073148  | 0.967973181  | 2.51E-07 |

|             |             |                     |              |          |
|-------------|-------------|---------------------|--------------|----------|
| TUCP_000988 | XLOC_036321 | ENSRNOT00000084375  | 0.968551561  | 2.30E-07 |
| TUCP_000988 | XLOC_036321 | ENSRNOT00000006249  | 0.983149691  | 1.04E-08 |
| TUCP_000988 | XLOC_036321 | ENSRNOT00000042369  | 0.977437962  | 4.43E-08 |
| TUCP_000988 | XLOC_036321 | ENSRNOT00000059326  | 0.96921569   | 2.07E-07 |
| TUCP_000988 | XLOC_036321 | ENSRNOT00000086554  | 0.968551561  | 2.30E-07 |
| TUCP_000988 | XLOC_036321 | ENSRNOT00000047921  | 0.968551561  | 2.30E-07 |
| TUCP_000988 | XLOC_036321 | ENSRNOT00000064261  | 0.968190956  | 2.43E-07 |
| TUCP_000988 | XLOC_036321 | ENSRNOT00000086660  | 0.968321092  | 2.38E-07 |
| TUCP_000988 | XLOC_036321 | ENSRNOT00000083977  | 0.968551561  | 2.30E-07 |
| TUCP_000988 | XLOC_036321 | ENSRNOT00000092933  | 0.968551561  | 2.30E-07 |
| TUCP_000988 | XLOC_036321 | ENSRNOT00000085447  | 0.962979711  | 5.15E-07 |
| TUCP_000988 | XLOC_036321 | ENSRNOT00000041281  | 0.970293813  | 1.73E-07 |
| TUCP_003540 | XLOC_154088 | ENSRNOT00000034744  | 0.951867761  | 1.88E-06 |
| TUCP_003540 | XLOC_154088 | ENSRNOT00000018998  | 0.952757735  | 1.71E-06 |
| TUCP_003540 | XLOC_154088 | ENSRNOT00000026860  | 0.960644599  | 6.96E-07 |
| TUCP_003540 | XLOC_154088 | ENSRNOT00000049044  | 0.971815446  | 1.34E-07 |
| TUCP_003540 | XLOC_154088 | ENSRNOT00000022726  | 0.953379608  | 1.60E-06 |
| TUCP_003540 | XLOC_154088 | ENSRNOT00000024659  | 0.975201359  | 7.09E-08 |
| TUCP_003540 | XLOC_154088 | ENSRNOT00000079109  | 0.950888004  | 2.07E-06 |
| TUCP_003540 | XLOC_154088 | ENSRNOT00000038431  | 0.963165239  | 5.02E-07 |
| TUCP_003540 | XLOC_154088 | ENSRNOT00000019656  | -0.950199014 | 2.22E-06 |
| TUCP_003540 | XLOC_154088 | ENSRNOT00000093174  | 0.961237946  | 6.46E-07 |
| TUCP_003540 | XLOC_154088 | ENSRNOT00000005518  | -0.950777543 | 2.09E-06 |
| TUCP_003540 | XLOC_154088 | ENSRNOT00000021015  | 0.955329866  | 1.30E-06 |
| TUCP_003540 | XLOC_154088 | ENSRNOT00000067489  | 0.952544322  | 1.75E-06 |
| TUCP_003540 | XLOC_154088 | ENSRNOT00000004570  | 0.951336515  | 1.98E-06 |
| TUCP_003540 | XLOC_154088 | ENSRNOT00000010873  | -0.95344008  | 1.59E-06 |
| TUCP_003540 | XLOC_154088 | ENSRNOT00000086868  | 0.957406912  | 1.03E-06 |
| TUCP_003540 | XLOC_154088 | ENSRNOT00000026174  | 0.958055477  | 9.53E-07 |
| TUCP_002079 | XLOC_085258 | ENSRNOT00000082047  | 0.964894786  | 3.96E-07 |
| TUCP_002079 | XLOC_085258 | ENSRNOT00000021506  | 0.954787931  | 1.38E-06 |
| TUCP_002079 | XLOC_085258 | ENSRNOT00000040116  | 0.987417976  | 2.43E-09 |
| TUCP_002079 | XLOC_085258 | ENSRNOT00000011869  | 0.961242422  | 6.45E-07 |
| TUCP_002079 | XLOC_085258 | ENSRNOT00000000990  | 0.958049906  | 9.53E-07 |
| TUCP_002079 | XLOC_085258 | ENSRNOT00000003082  | 0.95197017   | 1.86E-06 |
| TUCP_002079 | XLOC_085258 | ENSRNOT00000073521  | 0.959573245  | 7.95E-07 |
| TUCP_002079 | XLOC_085258 | ENSRNOT00000044751  | 0.95274873   | 1.71E-06 |
| TUCP_002079 | XLOC_085258 | ENSRNOT00000006172  | 0.967213716  | 2.82E-07 |
| TUCP_002079 | XLOC_085258 | ENSRNOT00000012963  | 0.951496039  | 1.95E-06 |
| TUCP_002079 | XLOC_085258 | ENSRNOT00000018494  | 0.950958315  | 2.06E-06 |
| TUCP_002079 | XLOC_085258 | ENSRNOT000000031360 | 0.95206563   | 1.84E-06 |
| TUCP_002079 | XLOC_085258 | ENSRNOT00000023067  | 0.970110594  | 1.79E-07 |
| TUCP_002079 | XLOC_085258 | ENSRNOT00000000527  | 0.960336109  | 7.23E-07 |
| TUCP_002079 | XLOC_085258 | ENSRNOT00000042117  | 0.954186224  | 1.47E-06 |
| TUCP_002079 | XLOC_085258 | ENSRNOT00000001050  | 0.973487234  | 9.87E-08 |
| TUCP_002079 | XLOC_085258 | ENSRNOT00000050063  | 0.97179117   | 1.34E-07 |
| TUCP_002079 | XLOC_085258 | ENSRNOT00000000256  | 0.969718303  | 1.91E-07 |
| TUCP_002079 | XLOC_085258 | ENSRNOT00000003075  | 0.951473219  | 1.95E-06 |
| TUCP_002079 | XLOC_085258 | ENSRNOT00000000528  | 0.962128402  | 5.76E-07 |
| TUCP_002079 | XLOC_085258 | ENSRNOT00000074629  | 0.978024668  | 3.89E-08 |
| TUCP_002079 | XLOC_085258 | ENSRNOT00000003343  | 0.960036352  | 7.51E-07 |

|             |             |                    |             |          |
|-------------|-------------|--------------------|-------------|----------|
| TUCP_002079 | XLOC_085258 | ENSRNOT00000023452 | 0.965135594 | 3.83E-07 |
| TUCP_002079 | XLOC_085258 | ENSRNOT00000028527 | 0.958478877 | 9.06E-07 |
| TUCP_002079 | XLOC_085258 | ENSRNOT00000008813 | 0.955795718 | 1.23E-06 |
| TUCP_002079 | XLOC_085258 | ENSRNOT00000071612 | 0.975434648 | 6.76E-08 |
| TUCP_002079 | XLOC_085258 | ENSRNOT00000073388 | 0.963843634 | 4.58E-07 |
| TUCP_002079 | XLOC_085258 | ENSRNOT00000014317 | 0.950523173 | 2.15E-06 |
| TUCP_002079 | XLOC_085258 | ENSRNOT00000045357 | 0.951693906 | 1.91E-06 |
| TUCP_002079 | XLOC_085258 | ENSRNOT00000041151 | 0.956832794 | 1.10E-06 |
| TUCP_002079 | XLOC_085258 | ENSRNOT00000023483 | 0.954246127 | 1.46E-06 |
| TUCP_002078 | XLOC_085249 | ENSRNOT00000082047 | 0.965291603 | 3.74E-07 |
| TUCP_002078 | XLOC_085249 | ENSRNOT00000000995 | 0.972733748 | 1.13E-07 |
| TUCP_002078 | XLOC_085249 | ENSRNOT00000014533 | 0.962935387 | 5.18E-07 |
| TUCP_002078 | XLOC_085249 | ENSRNOT00000068354 | 0.977306429 | 4.56E-08 |
| TUCP_002078 | XLOC_085249 | ENSRNOT00000003082 | 0.990433889 | 6.21E-10 |
| TUCP_002078 | XLOC_085249 | ENSRNOT00000044751 | 0.974648639 | 7.90E-08 |
| TUCP_002078 | XLOC_085249 | ENSRNOT00000031109 | 0.95540177  | 1.29E-06 |
| TUCP_002078 | XLOC_085249 | ENSRNOT00000012963 | 0.961628543 | 6.14E-07 |
| TUCP_002078 | XLOC_085249 | ENSRNOT00000057504 | 0.959656701 | 7.86E-07 |
| TUCP_002078 | XLOC_085249 | ENSRNOT00000010968 | 0.987260545 | 2.59E-09 |
| TUCP_002078 | XLOC_085249 | ENSRNOT00000028877 | 0.958774622 | 8.75E-07 |
| TUCP_002078 | XLOC_085249 | ENSRNOT00000009448 | 0.97180572  | 1.34E-07 |
| TUCP_002078 | XLOC_085249 | ENSRNOT00000000110 | 0.956473613 | 1.14E-06 |
| TUCP_002078 | XLOC_085249 | ENSRNOT00000089457 | 0.955694343 | 1.25E-06 |
| TUCP_002078 | XLOC_085249 | ENSRNOT00000025731 | 0.979918273 | 2.49E-08 |
| TUCP_002078 | XLOC_085249 | ENSRNOT00000042973 | 0.958630653 | 8.90E-07 |
| TUCP_002078 | XLOC_085249 | ENSRNOT00000003458 | 0.984073161 | 7.86E-09 |
| TUCP_002078 | XLOC_085249 | ENSRNOT00000042117 | 0.976692495 | 5.21E-08 |
| TUCP_002078 | XLOC_085249 | ENSRNOT00000031693 | 0.952753788 | 1.71E-06 |
| TUCP_002078 | XLOC_085249 | ENSRNOT00000063849 | 0.950291715 | 2.20E-06 |
| TUCP_002078 | XLOC_085249 | ENSRNOT00000000256 | 0.962063641 | 5.81E-07 |
| TUCP_002078 | XLOC_085249 | ENSRNOT00000082497 | 0.969414353 | 2.00E-07 |
| TUCP_002078 | XLOC_085249 | ENSRNOT00000003075 | 0.981604301 | 1.61E-08 |
| TUCP_002078 | XLOC_085249 | ENSRNOT00000004965 | 0.974179125 | 8.66E-08 |
| TUCP_002078 | XLOC_085249 | ENSRNOT00000011369 | 0.968656691 | 2.26E-07 |
| TUCP_002078 | XLOC_085249 | ENSRNOT00000019389 | 0.952560601 | 1.75E-06 |
| TUCP_002078 | XLOC_085249 | ENSRNOT00000008813 | 0.971696115 | 1.36E-07 |
| TUCP_002078 | XLOC_085249 | ENSRNOT00000051067 | 0.967215099 | 2.82E-07 |
| TUCP_002078 | XLOC_085249 | ENSRNOT00000071612 | 0.958724343 | 8.80E-07 |
| TUCP_002078 | XLOC_085249 | ENSRNOT00000023067 | 0.955304217 | 1.30E-06 |
| TUCP_002078 | XLOC_085249 | ENSRNOT00000006196 | 0.974848507 | 7.60E-08 |
| TUCP_002078 | XLOC_085249 | ENSRNOT00000073138 | 0.962260765 | 5.66E-07 |
| TUCP_002078 | XLOC_085249 | ENSRNOT00000045357 | 0.971962136 | 1.30E-07 |
| TUCP_002078 | XLOC_085249 | ENSRNOT00000014317 | 0.951219971 | 2.00E-06 |
| TUCP_002078 | XLOC_085249 | ENSRNOT00000040116 | 0.976377176 | 5.57E-08 |
| TUCP_002078 | XLOC_085249 | ENSRNOT00000022128 | 0.960719035 | 6.89E-07 |
| TUCP_002078 | XLOC_085249 | ENSRNOT00000023483 | 0.951059499 | 2.04E-06 |
| TUCP_002078 | XLOC_085249 | ENSRNOT00000016133 | 0.959395161 | 8.12E-07 |
| TUCP_002073 | XLOC_085085 | ENSRNOT00000033648 | 0.972429915 | 1.20E-07 |
| TUCP_002073 | XLOC_085085 | ENSRNOT00000009482 | 0.956958722 | 1.08E-06 |
| TUCP_002073 | XLOC_085085 | ENSRNOT00000004528 | 0.960800083 | 6.82E-07 |
| TUCP_002073 | XLOC_085085 | ENSRNOT00000039437 | 0.98048166  | 2.16E-08 |

|             |             |                    |              |          |
|-------------|-------------|--------------------|--------------|----------|
| TUCP_002071 | XLOC_084804 | ENSRNOT00000077186 | 0.959654218  | 7.87E-07 |
| TUCP_002071 | XLOC_084804 | ENSRNOT00000039607 | 0.9509137    | 2.07E-06 |
| TUCP_002071 | XLOC_084804 | ENSRNOT00000020357 | -0.956381095 | 1.16E-06 |
| TUCP_002071 | XLOC_084804 | ENSRNOT00000080174 | 0.951033618  | 2.04E-06 |
| TUCP_002071 | XLOC_084804 | ENSRNOT00000009080 | 0.954400152  | 1.44E-06 |
| TUCP_002071 | XLOC_084804 | ENSRNOT00000015678 | 0.955863454  | 1.22E-06 |
| TUCP_002071 | XLOC_084804 | ENSRNOT00000021858 | -0.951297125 | 1.99E-06 |
| TUCP_002071 | XLOC_084804 | ENSRNOT00000086813 | 0.959377394  | 8.14E-07 |
| TUCP_002071 | XLOC_084804 | ENSRNOT00000009565 | 0.960577768  | 7.02E-07 |
| TUCP_002071 | XLOC_084804 | ENSRNOT00000030501 | 0.967033184  | 2.90E-07 |
| TUCP_002071 | XLOC_084804 | ENSRNOT00000010333 | 0.962072167  | 5.80E-07 |
| TUCP_002071 | XLOC_084804 | ENSRNOT00000065942 | 0.96005116   | 7.49E-07 |
| TUCP_002071 | XLOC_084804 | ENSRNOT00000010127 | -0.955613145 | 1.26E-06 |
| TUCP_002071 | XLOC_084804 | ENSRNOT00000087011 | 0.958501606  | 9.04E-07 |
| TUCP_002071 | XLOC_084804 | ENSRNOT00000003733 | 0.950862225  | 2.08E-06 |
| TUCP_002071 | XLOC_084804 | ENSRNOT00000086310 | 0.961082298  | 6.59E-07 |
| TUCP_002071 | XLOC_084804 | ENSRNOT00000021110 | 0.964475929  | 4.20E-07 |
| TUCP_002071 | XLOC_084804 | ENSRNOT00000074389 | 0.95258259   | 1.74E-06 |
| TUCP_002071 | XLOC_084804 | ENSRNOT00000091808 | 0.956352398  | 1.16E-06 |
| TUCP_002071 | XLOC_084804 | ENSRNOT00000024712 | 0.967534941  | 2.69E-07 |
| TUCP_002071 | XLOC_084804 | ENSRNOT00000091596 | 0.954747394  | 1.38E-06 |
| TUCP_002071 | XLOC_084804 | ENSRNOT00000001774 | 0.95441615   | 1.44E-06 |
| TUCP_002071 | XLOC_084804 | ENSRNOT00000093552 | 0.976763678  | 5.13E-08 |
| TUCP_002071 | XLOC_084804 | ENSRNOT00000029332 | 0.95146505   | 1.95E-06 |
| TUCP_002071 | XLOC_084804 | ENSRNOT00000072077 | 0.95369269   | 1.55E-06 |
| TUCP_002071 | XLOC_084804 | ENSRNOT00000013613 | 0.952293562  | 1.80E-06 |
| TUCP_002071 | XLOC_084804 | ENSRNOT00000089943 | 0.956631667  | 1.12E-06 |
| TUCP_002071 | XLOC_084804 | ENSRNOT00000031672 | 0.969669681  | 1.92E-07 |
| TUCP_002071 | XLOC_084804 | ENSRNOT00000013295 | 0.95225269   | 1.80E-06 |
| TUCP_002071 | XLOC_084804 | ENSRNOT00000066947 | 0.96264442   | 5.38E-07 |
| TUCP_002071 | XLOC_084804 | ENSRNOT00000021621 | 0.954223617  | 1.47E-06 |
| TUCP_002071 | XLOC_084804 | ENSRNOT00000006203 | -0.963117512 | 5.05E-07 |
| TUCP_002071 | XLOC_084804 | ENSRNOT00000083568 | -0.951976056 | 1.86E-06 |
| TUCP_002071 | XLOC_084804 | ENSRNOT00000025079 | 0.953827551  | 1.53E-06 |
| TUCP_002071 | XLOC_084804 | ENSRNOT00000084709 | -0.956501659 | 1.14E-06 |
| TUCP_002071 | XLOC_084804 | ENSRNOT00000023037 | -0.954479638 | 1.43E-06 |
| TUCP_002071 | XLOC_084804 | ENSRNOT00000039177 | 0.964394488  | 4.25E-07 |
| TUCP_002071 | XLOC_084804 | ENSRNOT00000035320 | 0.957382779  | 1.03E-06 |
| TUCP_002071 | XLOC_084804 | ENSRNOT00000017784 | 0.963196022  | 5.00E-07 |
| TUCP_002071 | XLOC_084804 | ENSRNOT00000033795 | 0.954968201  | 1.35E-06 |
| TUCP_002071 | XLOC_084804 | ENSRNOT00000024677 | -0.95814091  | 9.43E-07 |
| TUCP_002071 | XLOC_084804 | ENSRNOT00000091448 | 0.958288127  | 9.27E-07 |
| TUCP_002071 | XLOC_084804 | ENSRNOT00000068134 | -0.956461345 | 1.15E-06 |
| TUCP_002071 | XLOC_084804 | ENSRNOT00000046807 | 0.975841151  | 6.22E-08 |
| TUCP_002071 | XLOC_084804 | ENSRNOT00000047126 | 0.972892764  | 1.10E-07 |
| TUCP_002071 | XLOC_084804 | ENSRNOT00000000577 | -0.953448002 | 1.59E-06 |
| TUCP_002071 | XLOC_084804 | ENSRNOT00000010783 | 0.976910032  | 4.97E-08 |
| TUCP_002071 | XLOC_084804 | ENSRNOT00000026726 | 0.973233575  | 1.03E-07 |
| TUCP_002071 | XLOC_084804 | ENSRNOT00000006443 | 0.95972823   | 7.80E-07 |
| TUCP_002071 | XLOC_084804 | ENSRNOT00000021937 | 0.962937509  | 5.17E-07 |
| TUCP_002071 | XLOC_084804 | ENSRNOT00000072762 | 0.983835014  | 8.46E-09 |

|             |             |                    |              |          |
|-------------|-------------|--------------------|--------------|----------|
| TUCP_002071 | XLOC_084804 | ENSRNOT00000012175 | 0.956298313  | 1.17E-06 |
| TUCP_002071 | XLOC_084804 | ENSRNOT00000011832 | 0.96146457   | 6.27E-07 |
| TUCP_002071 | XLOC_084804 | ENSRNOT00000073643 | 0.953537332  | 1.58E-06 |
| TUCP_002071 | XLOC_084804 | ENSRNOT00000008301 | 0.963581233  | 4.75E-07 |
| TUCP_002071 | XLOC_084804 | ENSRNOT00000007824 | 0.961520181  | 6.23E-07 |
| TUCP_002071 | XLOC_084804 | ENSRNOT00000080418 | 0.962260965  | 5.66E-07 |
| TUCP_002071 | XLOC_084804 | ENSRNOT00000001979 | 0.980041024  | 2.41E-08 |
| TUCP_002071 | XLOC_084804 | ENSRNOT00000090575 | 0.962509747  | 5.48E-07 |
| TUCP_002071 | XLOC_084804 | ENSRNOT00000083968 | 0.963169767  | 5.02E-07 |
| TUCP_002071 | XLOC_084804 | ENSRNOT00000017340 | 0.950480788  | 2.16E-06 |
| TUCP_002071 | XLOC_084804 | ENSRNOT00000026920 | 0.950337607  | 2.19E-06 |
| TUCP_002071 | XLOC_084804 | ENSRNOT00000086798 | 0.950969123  | 2.05E-06 |
| TUCP_002071 | XLOC_084804 | ENSRNOT00000083967 | -0.976275143 | 5.69E-08 |
| TUCP_002071 | XLOC_084804 | ENSRNOT00000000469 | -0.951555796 | 1.94E-06 |
| TUCP_002071 | XLOC_084804 | ENSRNOT00000066521 | 0.956014135  | 1.20E-06 |
| TUCP_002071 | XLOC_084804 | ENSRNOT00000018028 | 0.950049468  | 2.25E-06 |
| TUCP_002071 | XLOC_084804 | ENSRNOT00000081682 | 0.964548901  | 4.15E-07 |
| TUCP_002071 | XLOC_084804 | ENSRNOT00000003667 | 0.955179065  | 1.32E-06 |
| TUCP_002071 | XLOC_084804 | ENSRNOT00000017813 | 0.950191587  | 2.22E-06 |
| TUCP_002071 | XLOC_084804 | ENSRNOT00000072299 | -0.956309578 | 1.16E-06 |
| TUCP_002071 | XLOC_084804 | ENSRNOT00000028074 | 0.963127188  | 5.05E-07 |
| TUCP_002071 | XLOC_084804 | ENSRNOT00000092876 | 0.963510654  | 4.79E-07 |
| TUCP_002071 | XLOC_084804 | ENSRNOT00000020892 | 0.961828043  | 5.99E-07 |
| TUCP_002071 | XLOC_084804 | ENSRNOT00000072357 | 0.95957995   | 7.94E-07 |
| TUCP_002071 | XLOC_084804 | ENSRNOT00000060098 | 0.9581375    | 9.44E-07 |
| TUCP_002071 | XLOC_084804 | ENSRNOT00000067739 | 0.972659698  | 1.15E-07 |
| TUCP_002071 | XLOC_084804 | ENSRNOT00000016327 | 0.970127093  | 1.78E-07 |
| TUCP_002071 | XLOC_084804 | ENSRNOT00000074515 | 0.958751063  | 8.77E-07 |
| TUCP_002071 | XLOC_084804 | ENSRNOT00000014859 | 0.969535525  | 1.96E-07 |
| TUCP_002071 | XLOC_084804 | ENSRNOT00000076230 | -0.954819026 | 1.37E-06 |
| TUCP_002071 | XLOC_084804 | ENSRNOT00000061345 | 0.964254467  | 4.33E-07 |
| TUCP_002071 | XLOC_084804 | ENSRNOT00000041237 | 0.960370923  | 7.20E-07 |
| TUCP_002071 | XLOC_084804 | ENSRNOT00000027145 | 0.965349905  | 3.71E-07 |
| TUCP_002071 | XLOC_084804 | ENSRNOT00000020537 | 0.958487531  | 9.05E-07 |
| TUCP_002071 | XLOC_084804 | ENSRNOT0000006824  | 0.966791182  | 3.01E-07 |
| TUCP_002071 | XLOC_084804 | ENSRNOT0000002313  | 0.964169201  | 4.38E-07 |
| TUCP_002071 | XLOC_084804 | ENSRNOT00000012775 | 0.955520823  | 1.27E-06 |
| TUCP_002071 | XLOC_084804 | ENSRNOT00000016637 | 0.952105272  | 1.83E-06 |
| TUCP_002071 | XLOC_084804 | ENSRNOT00000077040 | 0.965114908  | 3.84E-07 |
| TUCP_002071 | XLOC_084804 | ENSRNOT00000038994 | 0.951991872  | 1.85E-06 |
| TUCP_002071 | XLOC_084804 | ENSRNOT00000086260 | 0.952809605  | 1.70E-06 |
| TUCP_002071 | XLOC_084804 | ENSRNOT00000072856 | 0.971911071  | 1.31E-07 |
| TUCP_002071 | XLOC_084804 | ENSRNOT00000089294 | 0.959373123  | 8.14E-07 |
| TUCP_002071 | XLOC_084804 | ENSRNOT00000019531 | 0.968637417  | 2.27E-07 |
| TUCP_002071 | XLOC_084804 | ENSRNOT00000066793 | 0.962736983  | 5.31E-07 |
| TUCP_002071 | XLOC_084804 | ENSRNOT00000005658 | 0.956571842  | 1.13E-06 |
| TUCP_002071 | XLOC_084804 | ENSRNOT00000025827 | -0.950256099 | 2.21E-06 |
| TUCP_002071 | XLOC_084804 | ENSRNOT00000025824 | 0.960893999  | 6.74E-07 |
| TUCP_002071 | XLOC_084804 | ENSRNOT00000071929 | 0.964795706  | 4.01E-07 |
| TUCP_002071 | XLOC_084804 | ENSRNOT00000073193 | 0.950771254  | 2.10E-06 |
| TUCP_002071 | XLOC_084804 | ENSRNOT00000022676 | 0.95674951   | 1.11E-06 |



|             |             |                    |              |          |
|-------------|-------------|--------------------|--------------|----------|
| TUCP_002071 | XLOC_084804 | ENSRNOT00000054932 | 0.95850318   | 9.04E-07 |
| TUCP_002071 | XLOC_084804 | ENSRNOT00000017624 | -0.95147691  | 1.95E-06 |
| TUCP_002071 | XLOC_084804 | ENSRNOT00000003992 | 0.978286498  | 3.67E-08 |
| TUCP_002071 | XLOC_084804 | ENSRNOT00000031261 | -0.966633762 | 3.08E-07 |
| TUCP_002071 | XLOC_084804 | ENSRNOT00000024285 | 0.96407666   | 4.44E-07 |
| TUCP_002071 | XLOC_084804 | ENSRNOT00000081725 | -0.9536959   | 1.55E-06 |
| TUCP_002071 | XLOC_084804 | ENSRNOT00000089980 | 0.95490993   | 1.36E-06 |
| TUCP_002071 | XLOC_084804 | ENSRNOT00000028744 | 0.964155961  | 4.39E-07 |
| TUCP_002071 | XLOC_084804 | ENSRNOT00000025221 | 0.952922859  | 1.68E-06 |
| TUCP_002071 | XLOC_084804 | ENSRNOT00000024753 | 0.960995874  | 6.66E-07 |
| TUCP_002071 | XLOC_084804 | ENSRNOT00000075843 | 0.955786284  | 1.24E-06 |
| TUCP_002071 | XLOC_084804 | ENSRNOT00000090268 | 0.959572593  | 7.95E-07 |
| TUCP_002071 | XLOC_084804 | ENSRNOT00000016324 | 0.952277532  | 1.80E-06 |
| TUCP_002071 | XLOC_084804 | ENSRNOT00000028893 | 0.951703602  | 1.91E-06 |
| TUCP_002071 | XLOC_084804 | ENSRNOT00000075476 | -0.954319536 | 1.45E-06 |
| TUCP_002071 | XLOC_084804 | ENSRNOT00000077080 | 0.960578371  | 7.02E-07 |
| TUCP_002071 | XLOC_084804 | ENSRNOT00000000258 | 0.965988628  | 3.39E-07 |
| TUCP_002071 | XLOC_084804 | ENSRNOT00000018477 | 0.950094025  | 2.24E-06 |
| TUCP_002071 | XLOC_084804 | ENSRNOT00000080222 | 0.958132011  | 9.44E-07 |
| TUCP_002071 | XLOC_084804 | ENSRNOT00000003551 | 0.951695712  | 1.91E-06 |
| TUCP_002071 | XLOC_084804 | ENSRNOT00000090939 | 0.954019182  | 1.50E-06 |
| TUCP_002071 | XLOC_084804 | ENSRNOT00000018473 | 0.9527062    | 1.72E-06 |
| TUCP_002071 | XLOC_084804 | ENSRNOT00000078793 | -0.964215805 | 4.35E-07 |
| TUCP_002071 | XLOC_084804 | ENSRNOT00000026118 | 0.965432809  | 3.67E-07 |
| TUCP_002071 | XLOC_084804 | ENSRNOT00000088202 | 0.951454501  | 1.96E-06 |
| TUCP_002071 | XLOC_084804 | ENSRNOT00000049048 | 0.950702273  | 2.11E-06 |
| TUCP_002071 | XLOC_084804 | ENSRNOT00000037955 | 0.978139874  | 3.79E-08 |
| TUCP_002071 | XLOC_084804 | ENSRNOT00000085911 | 0.972092201  | 1.27E-07 |
| TUCP_002071 | XLOC_084804 | ENSRNOT00000014384 | 0.961847036  | 5.97E-07 |
| TUCP_002071 | XLOC_084804 | ENSRNOT00000030222 | 0.959946769  | 7.59E-07 |
| TUCP_002071 | XLOC_084804 | ENSRNOT00000078161 | 0.966444161  | 3.17E-07 |
| TUCP_002071 | XLOC_084804 | ENSRNOT00000087346 | -0.96978282  | 1.89E-07 |
| TUCP_002071 | XLOC_084804 | ENSRNOT00000024938 | 0.953814754  | 1.53E-06 |
| TUCP_002071 | XLOC_084804 | ENSRNOT00000009696 | -0.964787407 | 4.02E-07 |
| TUCP_002071 | XLOC_084804 | ENSRNOT00000086456 | 0.97045385   | 1.69E-07 |
| TUCP_002071 | XLOC_084804 | ENSRNOT00000036959 | 0.953110068  | 1.65E-06 |
| TUCP_002071 | XLOC_084804 | ENSRNOT00000047572 | 0.953789832  | 1.54E-06 |
| TUCP_002071 | XLOC_084804 | ENSRNOT00000043752 | 0.951127138  | 2.02E-06 |
| TUCP_002071 | XLOC_084804 | ENSRNOT0000001227  | 0.956351275  | 1.16E-06 |
| TUCP_002071 | XLOC_084804 | ENSRNOT00000018849 | 0.959374652  | 8.14E-07 |
| TUCP_002071 | XLOC_084804 | ENSRNOT00000048933 | 0.962360775  | 5.58E-07 |
| TUCP_002071 | XLOC_084804 | ENSRNOT00000080013 | 0.96039597   | 7.18E-07 |
| TUCP_002071 | XLOC_084804 | ENSRNOT00000025791 | 0.95615952   | 1.18E-06 |
| TUCP_002071 | XLOC_084804 | ENSRNOT00000023463 | 0.958695598  | 8.83E-07 |
| TUCP_002071 | XLOC_084804 | ENSRNOT00000058111 | 0.976606079  | 5.31E-08 |
| TUCP_002071 | XLOC_084804 | ENSRNOT00000008317 | 0.955448886  | 1.28E-06 |
| TUCP_002071 | XLOC_084804 | ENSRNOT00000017190 | -0.958022165 | 9.57E-07 |
| TUCP_002071 | XLOC_084804 | ENSRNOT00000009994 | 0.967325385  | 2.78E-07 |
| TUCP_002071 | XLOC_084804 | ENSRNOT00000064535 | 0.954366125  | 1.44E-06 |
| TUCP_002071 | XLOC_084804 | ENSRNOT00000078166 | 0.952749884  | 1.71E-06 |
| TUCP_002071 | XLOC_084804 | ENSRNOT00000016027 | 0.950813409  | 2.09E-06 |

|             |             |                     |              |          |
|-------------|-------------|---------------------|--------------|----------|
| TUCP_002071 | XLOC_084804 | ENSRNOT00000025086  | 0.953159244  | 1.64E-06 |
| TUCP_002071 | XLOC_084804 | ENSRNOT00000024924  | 0.956988267  | 1.08E-06 |
| TUCP_002071 | XLOC_084804 | ENSRNOT00000077646  | 0.967248025  | 2.81E-07 |
| TUCP_002071 | XLOC_084804 | ENSRNOT00000010621  | 0.952687548  | 1.72E-06 |
| TUCP_002071 | XLOC_084804 | ENSRNOT00000043581  | 0.960125634  | 7.42E-07 |
| TUCP_002071 | XLOC_084804 | ENSRNOT00000089545  | 0.953944821  | 1.51E-06 |
| TUCP_002071 | XLOC_084804 | ENSRNOT00000039572  | 0.950949688  | 2.06E-06 |
| TUCP_002071 | XLOC_084804 | ENSRNOT00000078906  | 0.966687965  | 3.05E-07 |
| TUCP_002071 | XLOC_084804 | ENSRNOT00000028888  | -0.951180383 | 2.01E-06 |
| TUCP_002071 | XLOC_084804 | ENSRNOT00000038652  | 0.956488799  | 1.14E-06 |
| TUCP_002071 | XLOC_084804 | ENSRNOT00000025460  | -0.952789851 | 1.71E-06 |
| TUCP_002071 | XLOC_084804 | ENSRNOT00000087033  | 0.950557171  | 2.14E-06 |
| TUCP_002071 | XLOC_084804 | ENSRNOT00000025784  | 0.95682665   | 1.10E-06 |
| TUCP_002071 | XLOC_084804 | ENSRNOT00000024841  | 0.970468708  | 1.68E-07 |
| TUCP_002071 | XLOC_084804 | ENSRNOT00000066561  | 0.966369633  | 3.20E-07 |
| TUCP_002071 | XLOC_084804 | ENSRNOT00000019172  | 0.952112953  | 1.83E-06 |
| TUCP_002071 | XLOC_084804 | ENSRNOT00000068184  | 0.950433887  | 2.17E-06 |
| TUCP_002071 | XLOC_084804 | ENSRNOT00000019358  | 0.960915959  | 6.73E-07 |
| TUCP_002071 | XLOC_084804 | ENSRNOT00000027360  | 0.957092513  | 1.07E-06 |
| TUCP_002071 | XLOC_084804 | ENSRNOT00000090970  | -0.95059094  | 2.13E-06 |
| TUCP_002071 | XLOC_084804 | ENSRNOT00000002524  | 0.950350699  | 2.19E-06 |
| TUCP_002071 | XLOC_084804 | ENSRNOT00000028907  | -0.956029738 | 1.20E-06 |
| TUCP_002071 | XLOC_084804 | ENSRNOT00000072722  | 0.953087802  | 1.65E-06 |
| TUCP_002071 | XLOC_084804 | ENSRNOT00000016776  | 0.956869009  | 1.09E-06 |
| TUCP_002071 | XLOC_084804 | ENSRNOT00000006913  | 0.95239218   | 1.78E-06 |
| TUCP_002071 | XLOC_084804 | ENSRNOT00000089086  | 0.984564427  | 6.72E-09 |
| TUCP_002071 | XLOC_084804 | ENSRNOT00000079414  | 0.957324254  | 1.04E-06 |
| TUCP_002071 | XLOC_084804 | ENSRNOT00000065722  | 0.95642463   | 1.15E-06 |
| TUCP_002071 | XLOC_084804 | ENSRNOT00000008256  | 0.958467717  | 9.08E-07 |
| TUCP_002071 | XLOC_084804 | ENSRNOT00000038464  | 0.963287225  | 4.94E-07 |
| TUCP_002071 | XLOC_084804 | ENSRNOT00000024253  | -0.953457402 | 1.59E-06 |
| TUCP_002071 | XLOC_084804 | ENSRNOT00000048022  | 0.95673899   | 1.11E-06 |
| TUCP_002070 | XLOC_084803 | ENSRNOT00000030074  | -0.960285382 | 7.28E-07 |
| TUCP_002070 | XLOC_084803 | ENSRNOT00000007698  | 0.971555076  | 1.40E-07 |
| TUCP_002070 | XLOC_084803 | ENSRNOT00000006186  | -0.953743584 | 1.54E-06 |
| TUCP_002070 | XLOC_084803 | ENSRNOT00000048910  | 0.953684487  | 1.55E-06 |
| TUCP_002070 | XLOC_084803 | ENSRNOT00000020357  | -0.953680015 | 1.55E-06 |
| TUCP_002070 | XLOC_084803 | ENSRNOT00000004400  | -0.955620497 | 1.26E-06 |
| TUCP_002070 | XLOC_084803 | ENSRNOT00000074544  | 0.953152083  | 1.64E-06 |
| TUCP_002070 | XLOC_084803 | ENSRNOT00000004241  | 0.953748876  | 1.54E-06 |
| TUCP_002070 | XLOC_084803 | ENSRNOT00000015678  | 0.977982039  | 3.93E-08 |
| TUCP_002070 | XLOC_084803 | ENSRNOT00000019358  | 0.960028012  | 7.51E-07 |
| TUCP_002070 | XLOC_084803 | ENSRNOT00000030501  | 0.955283199  | 1.31E-06 |
| TUCP_002070 | XLOC_084803 | ENSRNOT00000022952  | 0.953639019  | 1.56E-06 |
| TUCP_002070 | XLOC_084803 | ENSRNOT000000052063 | -0.952586755 | 1.74E-06 |
| TUCP_002070 | XLOC_084803 | ENSRNOT00000001774  | 0.955018108  | 1.34E-06 |
| TUCP_002070 | XLOC_084803 | ENSRNOT00000093552  | 0.965638147  | 3.56E-07 |
| TUCP_002070 | XLOC_084803 | ENSRNOT00000084069  | -0.962585201 | 5.42E-07 |
| TUCP_002070 | XLOC_084803 | ENSRNOT000000031672 | 0.958437686  | 9.11E-07 |
| TUCP_002070 | XLOC_084803 | ENSRNOT00000013516  | -0.952066208 | 1.84E-06 |
| TUCP_002070 | XLOC_084803 | ENSRNOT00000078884  | 0.951636973  | 1.92E-06 |

|             |             |                    |              |          |
|-------------|-------------|--------------------|--------------|----------|
| TUCP_002070 | XLOC_084803 | ENSRNOT00000020207 | -0.963977981 | 4.50E-07 |
| TUCP_002070 | XLOC_084803 | ENSRNOT00000025079 | 0.960251567  | 7.31E-07 |
| TUCP_002070 | XLOC_084803 | ENSRNOT00000011432 | 0.959527981  | 7.99E-07 |
| TUCP_002070 | XLOC_084803 | ENSRNOT00000024677 | -0.963014502 | 5.12E-07 |
| TUCP_002070 | XLOC_084803 | ENSRNOT00000068134 | -0.962850883 | 5.23E-07 |
| TUCP_002070 | XLOC_084803 | ENSRNOT00000047126 | 0.991329846  | 3.80E-10 |
| TUCP_002070 | XLOC_084803 | ENSRNOT00000010783 | 0.958311428  | 9.25E-07 |
| TUCP_002070 | XLOC_084803 | ENSRNOT00000072762 | 0.959458979  | 8.06E-07 |
| TUCP_002070 | XLOC_084803 | ENSRNOT00000012177 | 0.951672643  | 1.91E-06 |
| TUCP_002070 | XLOC_084803 | ENSRNOT00000011832 | 0.96457933   | 4.14E-07 |
| TUCP_002070 | XLOC_084803 | ENSRNOT00000087278 | 0.950479289  | 2.16E-06 |
| TUCP_002070 | XLOC_084803 | ENSRNOT00000008301 | 0.961284553  | 6.42E-07 |
| TUCP_002070 | XLOC_084803 | ENSRNOT00000067011 | -0.972655533 | 1.15E-07 |
| TUCP_002070 | XLOC_084803 | ENSRNOT00000090575 | 0.963154685  | 5.03E-07 |
| TUCP_002070 | XLOC_084803 | ENSRNOT00000084709 | -0.961423302 | 6.31E-07 |
| TUCP_002070 | XLOC_084803 | ENSRNOT00000068452 | -0.954328946 | 1.45E-06 |
| TUCP_002070 | XLOC_084803 | ENSRNOT00000046973 | -0.955008286 | 1.35E-06 |
| TUCP_002070 | XLOC_084803 | ENSRNOT00000072299 | -0.950548365 | 2.14E-06 |
| TUCP_002070 | XLOC_084803 | ENSRNOT00000004196 | -0.956865687 | 1.09E-06 |
| TUCP_002070 | XLOC_084803 | ENSRNOT00000075843 | 0.954315286  | 1.45E-06 |
| TUCP_002070 | XLOC_084803 | ENSRNOT00000073919 | -0.956662925 | 1.12E-06 |
| TUCP_002070 | XLOC_084803 | ENSRNOT00000023667 | -0.951169342 | 2.01E-06 |
| TUCP_002070 | XLOC_084803 | ENSRNOT00000078743 | 0.953442182  | 1.59E-06 |
| TUCP_002070 | XLOC_084803 | ENSRNOT00000008256 | 0.963060002  | 5.09E-07 |
| TUCP_002070 | XLOC_084803 | ENSRNOT00000058382 | -0.958080782 | 9.50E-07 |
| TUCP_002070 | XLOC_084803 | ENSRNOT00000073193 | 0.953187112  | 1.64E-06 |
| TUCP_002070 | XLOC_084803 | ENSRNOT00000079801 | 0.953951978  | 1.51E-06 |
| TUCP_002070 | XLOC_084803 | ENSRNOT0000000804  | 0.950813774  | 2.09E-06 |
| TUCP_002070 | XLOC_084803 | ENSRNOT00000017624 | -0.950089149 | 2.24E-06 |
| TUCP_002070 | XLOC_084803 | ENSRNOT00000081725 | -0.976092827 | 5.91E-08 |
| TUCP_002070 | XLOC_084803 | ENSRNOT00000020383 | -0.955057304 | 1.34E-06 |
| TUCP_002070 | XLOC_084803 | ENSRNOT00000005459 | -0.95013214  | 2.23E-06 |
| TUCP_002070 | XLOC_084803 | ENSRNOT00000074515 | 0.953435709  | 1.59E-06 |
| TUCP_002070 | XLOC_084803 | ENSRNOT00000024753 | 0.95392363   | 1.51E-06 |
| TUCP_002070 | XLOC_084803 | ENSRNOT0000006835  | -0.956175197 | 1.18E-06 |
| TUCP_002070 | XLOC_084803 | ENSRNOT00000090268 | 0.966650544  | 3.07E-07 |
| TUCP_002070 | XLOC_084803 | ENSRNOT00000089294 | 0.975261309  | 7.00E-08 |
| TUCP_002070 | XLOC_084803 | ENSRNOT00000075476 | -0.957717453 | 9.91E-07 |
| TUCP_002070 | XLOC_084803 | ENSRNOT00000005161 | -0.953977099 | 1.50E-06 |
| TUCP_002070 | XLOC_084803 | ENSRNOT00000078793 | -0.970200701 | 1.76E-07 |
| TUCP_002070 | XLOC_084803 | ENSRNOT00000032505 | 0.950415953  | 2.17E-06 |
| TUCP_002070 | XLOC_084803 | ENSRNOT00000037955 | 0.962079246  | 5.79E-07 |
| TUCP_002070 | XLOC_084803 | ENSRNOT0000002510  | 0.972686403  | 1.14E-07 |
| TUCP_002070 | XLOC_084803 | ENSRNOT00000006395 | 0.950086441  | 2.24E-06 |
| TUCP_002070 | XLOC_084803 | ENSRNOT00000086995 | -0.953064911 | 1.66E-06 |
| TUCP_002070 | XLOC_084803 | ENSRNOT00000010993 | -0.953606226 | 1.57E-06 |
| TUCP_002070 | XLOC_084803 | ENSRNOT00000024933 | 0.966541425  | 3.12E-07 |
| TUCP_002070 | XLOC_084803 | ENSRNOT00000005489 | -0.956063706 | 1.20E-06 |
| TUCP_002070 | XLOC_084803 | ENSRNOT00000017765 | -0.953515161 | 1.58E-06 |
| TUCP_002070 | XLOC_084803 | ENSRNOT00000077367 | 0.964414785  | 4.23E-07 |
| TUCP_002070 | XLOC_084803 | ENSRNOT00000064535 | 0.95500267   | 1.35E-06 |

|             |             |                    |              |          |
|-------------|-------------|--------------------|--------------|----------|
| TUCP_002070 | XLOC_084803 | ENSRNOT00000020409 | 0.955169723  | 1.32E-06 |
| TUCP_002070 | XLOC_084803 | ENSRNOT00000012924 | 0.951777584  | 1.89E-06 |
| TUCP_002070 | XLOC_084803 | ENSRNOT00000024924 | 0.951042662  | 2.04E-06 |
| TUCP_002070 | XLOC_084803 | ENSRNOT00000010621 | 0.968529111  | 2.31E-07 |
| TUCP_002070 | XLOC_084803 | ENSRNOT00000043581 | 0.950990531  | 2.05E-06 |
| TUCP_002070 | XLOC_084803 | ENSRNOT00000082982 | 0.955494138  | 1.28E-06 |
| TUCP_002070 | XLOC_084803 | ENSRNOT00000078906 | 0.982424066  | 1.28E-08 |
| TUCP_002070 | XLOC_084803 | ENSRNOT00000085465 | 0.958269665  | 9.29E-07 |
| TUCP_002070 | XLOC_084803 | ENSRNOT00000025460 | -0.951286736 | 1.99E-06 |
| TUCP_002070 | XLOC_084803 | ENSRNOT00000024841 | 0.964287321  | 4.31E-07 |
| TUCP_002070 | XLOC_084803 | ENSRNOT00000015495 | 0.950127272  | 2.23E-06 |
| TUCP_002070 | XLOC_084803 | ENSRNOT00000023388 | 0.955049961  | 1.34E-06 |
| TUCP_002070 | XLOC_084803 | ENSRNOT00000028907 | -0.959227351 | 8.29E-07 |
| TUCP_002070 | XLOC_084803 | ENSRNOT00000011511 | 0.952589452  | 1.74E-06 |
| TUCP_002070 | XLOC_084803 | ENSRNOT00000089086 | 0.981743909  | 1.55E-08 |
| TUCP_002070 | XLOC_084803 | ENSRNOT00000022097 | -0.952462213 | 1.76E-06 |
| TUCP_002070 | XLOC_084803 | ENSRNOT00000092876 | 0.95783894   | 9.77E-07 |
| TUCP_002070 | XLOC_084803 | ENSRNOT00000024253 | -0.953726632 | 1.55E-06 |
| TUCP_003238 | XLOC_138775 | ENSRNOT00000090073 | 0.966197278  | 3.28E-07 |
| TUCP_003238 | XLOC_138775 | ENSRNOT00000000471 | 0.959343337  | 8.17E-07 |
| TUCP_003238 | XLOC_138775 | ENSRNOT00000015813 | 0.950876453  | 2.07E-06 |
| TUCP_003390 | XLOC_146751 | ENSRNOT00000065312 | 0.961642839  | 6.13E-07 |
| TUCP_003390 | XLOC_146751 | ENSRNOT00000040740 | 0.95446686   | 1.43E-06 |
| TUCP_003390 | XLOC_146751 | ENSRNOT00000076705 | -0.952948276 | 1.68E-06 |
| TUCP_001468 | XLOC_056512 | ENSRNOT00000070878 | 0.95933945   | 8.17E-07 |
| TUCP_004692 | XLOC_206136 | ENSRNOT00000084500 | 0.954708491  | 1.39E-06 |
| TUCP_004692 | XLOC_206136 | ENSRNOT00000000117 | 0.953655496  | 1.56E-06 |
| TUCP_004692 | XLOC_206136 | ENSRNOT00000071877 | 0.954364067  | 1.44E-06 |
| TUCP_004692 | XLOC_206136 | ENSRNOT00000052308 | 0.950336771  | 2.19E-06 |
| TUCP_004692 | XLOC_206136 | ENSRNOT00000013459 | 0.951060205  | 2.04E-06 |
| TUCP_004692 | XLOC_206136 | ENSRNOT00000047241 | 0.951593417  | 1.93E-06 |
| TUCP_004692 | XLOC_206136 | ENSRNOT00000043661 | 0.952144616  | 1.82E-06 |
| TUCP_004692 | XLOC_206136 | ENSRNOT00000078020 | 0.955055138  | 1.34E-06 |
| TUCP_004692 | XLOC_206136 | ENSRNOT00000083034 | 0.95221014   | 1.81E-06 |
| TUCP_004692 | XLOC_206136 | ENSRNOT00000067034 | 0.951834082  | 1.88E-06 |
| TUCP_001015 | XLOC_038488 | ENSRNOT00000025493 | 0.96661781   | 3.09E-07 |
| TUCP_001015 | XLOC_038488 | ENSRNOT00000049703 | 0.960588978  | 7.01E-07 |
| TUCP_001015 | XLOC_038488 | ENSRNOT00000059194 | 0.950611614  | 2.13E-06 |
| TUCP_001463 | XLOC_056244 | ENSRNOT00000021487 | 0.953183508  | 1.64E-06 |
| TUCP_003137 | XLOC_134645 | ENSRNOT00000071840 | 1            | 0        |
| TUCP_003137 | XLOC_134645 | ENSRNOT00000083608 | 0.992618428  | 1.70E-10 |
| TUCP_003137 | XLOC_134645 | ENSRNOT00000076035 | 0.956476518  | 1.14E-06 |
| TUCP_003137 | XLOC_134645 | ENSRNOT00000085476 | 0.96207118   | 5.80E-07 |
| TUCP_003137 | XLOC_134645 | ENSRNOT00000066382 | 0.96329105   | 4.94E-07 |
| TUCP_003137 | XLOC_134645 | ENSRNOT00000045584 | 1            | 1.33E-79 |
| TUCP_003137 | XLOC_134645 | ENSRNOT00000077995 | 0.994428404  | 4.19E-11 |
| TUCP_003137 | XLOC_134645 | ENSRNOT00000066004 | 0.999857217  | 4.67E-19 |
| TUCP_003137 | XLOC_134645 | ENSRNOT00000064284 | 0.968782027  | 2.22E-07 |
| TUCP_003137 | XLOC_134645 | ENSRNOT00000068197 | 0.955470548  | 1.28E-06 |
| TUCP_003137 | XLOC_134645 | ENSRNOT00000082086 | 0.97275676   | 1.13E-07 |
| TUCP_003137 | XLOC_134645 | ENSRNOT00000089494 | 0.983505294  | 9.35E-09 |

|             |             |                    |             |          |
|-------------|-------------|--------------------|-------------|----------|
| TUCP_003137 | XLOC_134645 | ENSRNOT00000083747 | 0.957764469 | 9.86E-07 |
| TUCP_003137 | XLOC_134645 | ENSRNOT00000092182 | 1           | 0        |
| TUCP_003137 | XLOC_134645 | ENSRNOT00000084461 | 1           | 0        |
| TUCP_003137 | XLOC_134645 | ENSRNOT00000060448 | 1           | 0        |
| TUCP_003137 | XLOC_134645 | ENSRNOT00000032631 | 1           | 1.33E-79 |
| TUCP_003137 | XLOC_134645 | ENSRNOT00000079503 | 0.957317866 | 1.04E-06 |
| TUCP_003137 | XLOC_134645 | ENSRNOT00000027950 | 0.960989928 | 6.66E-07 |
| TUCP_003137 | XLOC_134645 | ENSRNOT00000060113 | 0.975275164 | 6.98E-08 |
| TUCP_003137 | XLOC_134645 | ENSRNOT00000054910 | 0.990580154 | 5.75E-10 |
| TUCP_003137 | XLOC_134645 | ENSRNOT00000057176 | 0.999998955 | 9.83E-30 |
| TUCP_003137 | XLOC_134645 | ENSRNOT00000078176 | 0.994350784 | 4.49E-11 |
| TUCP_003137 | XLOC_134645 | ENSRNOT00000056364 | 0.990647125 | 5.55E-10 |
| TUCP_003137 | XLOC_134645 | ENSRNOT00000093431 | 1           | 0        |
| TUCP_003137 | XLOC_134645 | ENSRNOT00000024758 | 0.981367686 | 1.71E-08 |
| TUCP_003137 | XLOC_134645 | ENSRNOT00000092901 | 1           | 4.25E-78 |
| TUCP_003137 | XLOC_134645 | ENSRNOT00000089290 | 0.999988082 | 1.89E-24 |
| TUCP_003137 | XLOC_134645 | ENSRNOT00000090211 | 0.998865151 | 1.48E-14 |
| TUCP_003137 | XLOC_134645 | ENSRNOT00000075244 | 0.962646865 | 5.38E-07 |
| TUCP_003137 | XLOC_134645 | ENSRNOT00000091828 | 0.996371069 | 4.93E-12 |
| TUCP_003137 | XLOC_134645 | ENSRNOT00000091944 | 0.999786107 | 3.52E-18 |
| TUCP_003137 | XLOC_134645 | ENSRNOT00000070855 | 1           | 0        |
| TUCP_003137 | XLOC_134645 | ENSRNOT00000009295 | 0.995887068 | 9.21E-12 |
| TUCP_003137 | XLOC_134645 | ENSRNOT00000084109 | 0.999673655 | 2.91E-17 |
| TUCP_003137 | XLOC_134645 | ENSRNOT00000060645 | 0.973934385 | 9.07E-08 |
| TUCP_003137 | XLOC_134645 | ENSRNOT00000041569 | 1           | 1.33E-79 |
| TUCP_003137 | XLOC_134645 | ENSRNOT00000087091 | 1           | 0        |
| TUCP_003137 | XLOC_134645 | ENSRNOT00000003308 | 0.990930758 | 4.76E-10 |
| TUCP_003137 | XLOC_134645 | ENSRNOT00000026113 | 0.999851454 | 5.69E-19 |
| TUCP_003137 | XLOC_134645 | ENSRNOT00000014939 | 0.999846854 | 6.63E-19 |
| TUCP_003137 | XLOC_134645 | ENSRNOT00000058314 | 0.99088442  | 4.88E-10 |
| TUCP_003137 | XLOC_134645 | ENSRNOT00000047870 | 0.981575908 | 1.62E-08 |
| TUCP_003137 | XLOC_134645 | ENSRNOT00000071603 | 0.999995875 | 9.40E-27 |
| TUCP_003137 | XLOC_134645 | ENSRNOT00000088376 | 0.970305372 | 1.73E-07 |
| TUCP_003137 | XLOC_134645 | ENSRNOT00000060454 | 1           | 0        |
| TUCP_003137 | XLOC_134645 | ENSRNOT00000029298 | 0.957304374 | 1.04E-06 |
| TUCP_003137 | XLOC_134645 | ENSRNOT00000044232 | 0.98372207  | 8.76E-09 |
| TUCP_003137 | XLOC_134645 | ENSRNOT00000023287 | 0.974929583 | 7.48E-08 |
| TUCP_003137 | XLOC_134645 | ENSRNOT00000071714 | 0.978813661 | 3.24E-08 |
| TUCP_003137 | XLOC_134645 | ENSRNOT00000075836 | 1           | 0        |
| TUCP_003137 | XLOC_134645 | ENSRNOT00000073229 | 1           | 0        |
| TUCP_003137 | XLOC_134645 | ENSRNOT00000077731 | 0.965942857 | 3.41E-07 |
| TUCP_003137 | XLOC_134645 | ENSRNOT00000046980 | 0.982667176 | 1.20E-08 |
| TUCP_003137 | XLOC_134645 | ENSRNOT00000039652 | 0.972574547 | 1.17E-07 |
| TUCP_003137 | XLOC_134645 | ENSRNOT00000066685 | 0.981130123 | 1.83E-08 |
| TUCP_003137 | XLOC_134645 | ENSRNOT00000082776 | 0.966379954 | 3.20E-07 |
| TUCP_003137 | XLOC_134645 | ENSRNOT00000088719 | 0.965171519 | 3.81E-07 |
| TUCP_003137 | XLOC_134645 | ENSRNOT0000007683  | 0.999755897 | 6.82E-18 |
| TUCP_003137 | XLOC_134645 | ENSRNOT00000092916 | 0.96606874  | 3.35E-07 |
| TUCP_003137 | XLOC_134645 | ENSRNOT00000081106 | 0.95354262  | 1.58E-06 |
| TUCP_001467 | XLOC_056454 | ENSRNOT00000001196 | 0.950839815 | 2.08E-06 |
| TUCP_001467 | XLOC_056454 | ENSRNOT00000013745 | 0.965594465 | 3.58E-07 |

|             |             |                    |              |          |
|-------------|-------------|--------------------|--------------|----------|
| TUCP_001467 | XLOC_056454 | ENSRNOT00000019848 | 0.98392656   | 8.22E-09 |
| TUCP_001467 | XLOC_056454 | ENSRNOT00000015568 | 0.961290406  | 6.41E-07 |
| TUCP_001467 | XLOC_056454 | ENSRNOT00000077451 | 0.952549901  | 1.75E-06 |
| TUCP_001467 | XLOC_056454 | ENSRNOT00000079130 | -0.951103067 | 2.03E-06 |
| TUCP_001467 | XLOC_056454 | ENSRNOT00000079644 | 0.97343067   | 9.97E-08 |
| TUCP_001467 | XLOC_056454 | ENSRNOT00000020267 | -0.982880437 | 1.13E-08 |
| TUCP_001467 | XLOC_056454 | ENSRNOT00000064305 | 0.984659364  | 6.52E-09 |
| TUCP_001467 | XLOC_056454 | ENSRNOT00000086310 | 0.962219414  | 5.69E-07 |
| TUCP_001467 | XLOC_056454 | ENSRNOT00000045233 | 0.964572699  | 4.14E-07 |
| TUCP_001467 | XLOC_056454 | ENSRNOT00000042633 | 0.977842568  | 4.05E-08 |
| TUCP_001467 | XLOC_056454 | ENSRNOT00000025308 | 0.96952612   | 1.97E-07 |
| TUCP_001467 | XLOC_056454 | ENSRNOT00000033015 | 0.991112474  | 4.30E-10 |
| TUCP_001467 | XLOC_056454 | ENSRNOT00000003247 | 0.979460444  | 2.78E-08 |
| TUCP_001467 | XLOC_056454 | ENSRNOT00000085311 | 0.973931959  | 9.07E-08 |
| TUCP_001467 | XLOC_056454 | ENSRNOT00000025284 | 0.97367803   | 9.52E-08 |
| TUCP_001467 | XLOC_056454 | ENSRNOT00000065304 | 0.959785303  | 7.74E-07 |
| TUCP_001467 | XLOC_056454 | ENSRNOT00000022620 | -0.959474296 | 8.04E-07 |
| TUCP_001467 | XLOC_056454 | ENSRNOT00000015247 | 0.974731871  | 7.78E-08 |
| TUCP_001467 | XLOC_056454 | ENSRNOT00000057045 | 0.97391117   | 9.11E-08 |
| TUCP_001467 | XLOC_056454 | ENSRNOT00000035320 | 0.966924143  | 2.95E-07 |
| TUCP_001467 | XLOC_056454 | ENSRNOT00000022241 | 0.969938901  | 1.84E-07 |
| TUCP_001467 | XLOC_056454 | ENSRNOT00000084674 | 0.964265326  | 4.32E-07 |
| TUCP_001467 | XLOC_056454 | ENSRNOT00000019192 | 0.956649579  | 1.12E-06 |
| TUCP_001467 | XLOC_056454 | ENSRNOT00000003412 | 0.976601465  | 5.31E-08 |
| TUCP_001467 | XLOC_056454 | ENSRNOT00000077856 | 0.972066906  | 1.28E-07 |
| TUCP_001467 | XLOC_056454 | ENSRNOT00000024264 | 0.950048599  | 2.25E-06 |
| TUCP_001467 | XLOC_056454 | ENSRNOT00000018488 | 0.951985886  | 1.85E-06 |
| TUCP_001467 | XLOC_056454 | ENSRNOT00000040629 | -0.966159483 | 3.30E-07 |
| TUCP_001467 | XLOC_056454 | ENSRNOT00000075934 | 0.954179132  | 1.47E-06 |
| TUCP_001467 | XLOC_056454 | ENSRNOT00000082686 | 0.966665381  | 3.07E-07 |
| TUCP_001467 | XLOC_056454 | ENSRNOT00000076181 | 0.976973355  | 4.91E-08 |
| TUCP_001467 | XLOC_056454 | ENSRNOT00000017269 | 0.954975487  | 1.35E-06 |
| TUCP_001467 | XLOC_056454 | ENSRNOT00000026462 | 0.951937626  | 1.86E-06 |
| TUCP_001467 | XLOC_056454 | ENSRNOT00000026525 | 0.973031319  | 1.07E-07 |
| TUCP_001467 | XLOC_056454 | ENSRNOT00000084313 | 0.956770919  | 1.11E-06 |
| TUCP_001467 | XLOC_056454 | ENSRNOT00000001366 | 0.968890319  | 2.18E-07 |
| TUCP_001467 | XLOC_056454 | ENSRNOT00000058495 | 0.953103639  | 1.65E-06 |
| TUCP_001467 | XLOC_056454 | ENSRNOT00000001360 | 0.969078281  | 2.11E-07 |
| TUCP_001467 | XLOC_056454 | ENSRNOT00000023506 | 0.978355831  | 3.61E-08 |
| TUCP_001467 | XLOC_056454 | ENSRNOT00000024296 | -0.958618223 | 8.91E-07 |
| TUCP_001467 | XLOC_056454 | ENSRNOT00000087190 | 0.95670308   | 1.11E-06 |
| TUCP_001467 | XLOC_056454 | ENSRNOT00000037389 | 0.959606041  | 7.91E-07 |
| TUCP_001467 | XLOC_056454 | ENSRNOT00000083995 | 0.95081352   | 2.09E-06 |
| TUCP_001467 | XLOC_056454 | ENSRNOT00000065288 | 0.958571878  | 8.96E-07 |
| TUCP_001467 | XLOC_056454 | ENSRNOT00000060607 | 0.967959538  | 2.52E-07 |
| TUCP_001467 | XLOC_056454 | ENSRNOT00000011714 | 0.951309664  | 1.99E-06 |
| TUCP_001467 | XLOC_056454 | ENSRNOT00000039729 | 0.951976009  | 1.86E-06 |
| TUCP_001467 | XLOC_056454 | ENSRNOT00000045765 | 0.965531477  | 3.62E-07 |
| TUCP_001467 | XLOC_056454 | ENSRNOT00000024992 | 0.953522364  | 1.58E-06 |
| TUCP_001467 | XLOC_056454 | ENSRNOT00000000532 | 0.967736692  | 2.61E-07 |
| TUCP_001467 | XLOC_056454 | ENSRNOT00000021716 | -0.957546028 | 1.01E-06 |

|             |             |                    |              |          |
|-------------|-------------|--------------------|--------------|----------|
| TUCP_001467 | XLOC_056454 | ENSRNOT00000016351 | 0.978868483  | 3.20E-08 |
| TUCP_001467 | XLOC_056454 | ENSRNOT00000021400 | 0.957623851  | 1.00E-06 |
| TUCP_001467 | XLOC_056454 | ENSRNOT00000011401 | 0.955879397  | 1.22E-06 |
| TUCP_001467 | XLOC_056454 | ENSRNOT00000082146 | 0.956079718  | 1.20E-06 |
| TUCP_001467 | XLOC_056454 | ENSRNOT00000000263 | -0.96068059  | 6.93E-07 |
| TUCP_001467 | XLOC_056454 | ENSRNOT00000086350 | 0.964742158  | 4.04E-07 |
| TUCP_001467 | XLOC_056454 | ENSRNOT00000012625 | 0.9711272    | 1.51E-07 |
| TUCP_001467 | XLOC_056454 | ENSRNOT00000009840 | 0.956843688  | 1.10E-06 |
| TUCP_001467 | XLOC_056454 | ENSRNOT00000049285 | 0.954701384  | 1.39E-06 |
| TUCP_001467 | XLOC_056454 | ENSRNOT00000006366 | 0.952966686  | 1.67E-06 |
| TUCP_001467 | XLOC_056454 | ENSRNOT00000049536 | 0.968426629  | 2.34E-07 |
| TUCP_001467 | XLOC_056454 | ENSRNOT00000033196 | 0.977050786  | 4.82E-08 |
| TUCP_001467 | XLOC_056454 | ENSRNOT00000022478 | 0.964458703  | 4.21E-07 |
| TUCP_001467 | XLOC_056454 | ENSRNOT00000064723 | 0.962421043  | 5.54E-07 |
| TUCP_001467 | XLOC_056454 | ENSRNOT00000073834 | 0.957625115  | 1.00E-06 |
| TUCP_001467 | XLOC_056454 | ENSRNOT00000089673 | 0.959405435  | 8.11E-07 |
| TUCP_001467 | XLOC_056454 | ENSRNOT00000036959 | 0.961008961  | 6.65E-07 |
| TUCP_001467 | XLOC_056454 | ENSRNOT00000089185 | 0.974750481  | 7.75E-08 |
| TUCP_001467 | XLOC_056454 | ENSRNOT00000023977 | 0.965659656  | 3.55E-07 |
| TUCP_001467 | XLOC_056454 | ENSRNOT00000017420 | 0.957748821  | 9.88E-07 |
| TUCP_001467 | XLOC_056454 | ENSRNOT00000009666 | 0.963155193  | 5.03E-07 |
| TUCP_001467 | XLOC_056454 | ENSRNOT00000006765 | 0.979439642  | 2.80E-08 |
| TUCP_001467 | XLOC_056454 | ENSRNOT00000074081 | 0.961420767  | 6.31E-07 |
| TUCP_001467 | XLOC_056454 | ENSRNOT00000086628 | -0.968119553 | 2.46E-07 |
| TUCP_001467 | XLOC_056454 | ENSRNOT00000017190 | -0.958193266 | 9.38E-07 |
| TUCP_001467 | XLOC_056454 | ENSRNOT00000005644 | 0.970917683  | 1.56E-07 |
| TUCP_001467 | XLOC_056454 | ENSRNOT00000014885 | 0.982101164  | 1.40E-08 |
| TUCP_001467 | XLOC_056454 | ENSRNOT00000018173 | 0.953800225  | 1.53E-06 |
| TUCP_001467 | XLOC_056454 | ENSRNOT00000041091 | 0.9765254    | 5.40E-08 |
| TUCP_001467 | XLOC_056454 | ENSRNOT00000023786 | 0.975392984  | 6.82E-08 |
| TUCP_001467 | XLOC_056454 | ENSRNOT00000022377 | 0.955020261  | 1.34E-06 |
| TUCP_001467 | XLOC_056454 | ENSRNOT00000040548 | 0.97192969   | 1.31E-07 |
| TUCP_001467 | XLOC_056454 | ENSRNOT00000040060 | 0.962136921  | 5.75E-07 |
| TUCP_001467 | XLOC_056454 | ENSRNOT00000010962 | 0.989562702  | 9.59E-10 |
| TUCP_001467 | XLOC_056454 | ENSRNOT00000010620 | 0.955895383  | 1.22E-06 |
| TUCP_001467 | XLOC_056454 | ENSRNOT00000001135 | 0.980367688  | 2.22E-08 |
| TUCP_001467 | XLOC_056454 | ENSRNOT00000017692 | 0.977988174  | 3.92E-08 |
| TUCP_001467 | XLOC_056454 | ENSRNOT00000001036 | 0.958448212  | 9.10E-07 |
| TUCP_001467 | XLOC_056454 | ENSRNOT0000007044  | 0.970070791  | 1.80E-07 |
| TUCP_001467 | XLOC_056454 | ENSRNOT00000010983 | -0.954882374 | 1.36E-06 |
| TUCP_001467 | XLOC_056454 | ENSRNOT00000000039 | 0.956157027  | 1.19E-06 |
| TUCP_001467 | XLOC_056454 | ENSRNOT00000007367 | 0.972413078  | 1.20E-07 |
| TUCP_001467 | XLOC_056454 | ENSRNOT00000060757 | 0.951114339  | 2.03E-06 |
| TUCP_001467 | XLOC_056454 | ENSRNOT00000004941 | 0.974679254  | 7.86E-08 |
| TUCP_001467 | XLOC_056454 | ENSRNOT00000005148 | 0.979202581  | 2.96E-08 |
| TUCP_001467 | XLOC_056454 | ENSRNOT00000070912 | 0.970184332  | 1.77E-07 |
| TUCP_001467 | XLOC_056454 | ENSRNOT00000087146 | -0.951290107 | 1.99E-06 |
| TUCP_001467 | XLOC_056454 | ENSRNOT00000013431 | 0.95585299   | 1.23E-06 |
| TUCP_001467 | XLOC_056454 | ENSRNOT00000028703 | 0.960202377  | 7.35E-07 |
| TUCP_001467 | XLOC_056454 | ENSRNOT00000016776 | 0.958530155  | 9.01E-07 |
| TUCP_001467 | XLOC_056454 | ENSRNOT00000088677 | 0.972471556  | 1.19E-07 |

|             |             |                    |             |          |
|-------------|-------------|--------------------|-------------|----------|
| TUCP_001467 | XLOC_056454 | ENSRNOT0000008987  | 0.958900466 | 8.62E-07 |
| TUCP_001467 | XLOC_056454 | ENSRNOT00000090355 | 0.952981699 | 1.67E-06 |
| TUCP_001467 | XLOC_056454 | ENSRNOT00000073239 | 0.955202206 | 1.32E-06 |
| TUCP_001467 | XLOC_056454 | ENSRNOT00000019473 | 0.973555789 | 9.74E-08 |
| TUCP_001467 | XLOC_056454 | ENSRNOT00000001099 | 0.951386688 | 1.97E-06 |
| TUCP_001467 | XLOC_056454 | ENSRNOT00000008222 | 0.959673705 | 7.85E-07 |
| TUCP_001467 | XLOC_056454 | ENSRNOT00000002053 | 0.955689485 | 1.25E-06 |
| TUCP_001467 | XLOC_056454 | ENSRNOT00000002037 | 0.973050676 | 1.07E-07 |
| TUCP_001467 | XLOC_056454 | ENSRNOT00000038178 | 0.955218136 | 1.32E-06 |
| TUCP_001467 | XLOC_056454 | ENSRNOT00000002040 | 0.974326491 | 8.41E-08 |
| TUCP_001467 | XLOC_056454 | ENSRNOT00000088553 | 0.962202414 | 5.70E-07 |
| TUCP_001467 | XLOC_056454 | ENSRNOT00000089829 | 0.955628184 | 1.26E-06 |
| TUCP_001467 | XLOC_056454 | ENSRNOT00000091050 | 0.952917096 | 1.68E-06 |
| TUCP_001467 | XLOC_056454 | ENSRNOT00000027653 | 0.956381514 | 1.16E-06 |
| TUCP_001467 | XLOC_056454 | ENSRNOT00000067566 | 0.960540063 | 7.05E-07 |
| TUCP_001467 | XLOC_056454 | ENSRNOT00000014479 | 0.973447541 | 9.94E-08 |
| TUCP_001467 | XLOC_056454 | ENSRNOT00000003326 | 0.965317386 | 3.73E-07 |
| TUCP_001467 | XLOC_056454 | ENSRNOT00000016306 | 0.95310519  | 1.65E-06 |
| TUCP_001467 | XLOC_056454 | ENSRNOT00000086813 | 0.962986156 | 5.14E-07 |
| TUCP_001467 | XLOC_056454 | ENSRNOT00000012699 | 0.95344973  | 1.59E-06 |
| TUCP_001467 | XLOC_056454 | ENSRNOT00000004007 | 0.958940522 | 8.58E-07 |
| TUCP_001467 | XLOC_056454 | ENSRNOT00000057898 | 0.960294155 | 7.27E-07 |
| TUCP_001467 | XLOC_056454 | ENSRNOT00000090338 | 0.963558811 | 4.76E-07 |
| TUCP_001467 | XLOC_056454 | ENSRNOT00000036838 | 0.969872438 | 1.86E-07 |
| TUCP_001467 | XLOC_056454 | ENSRNOT00000082442 | 0.956014246 | 1.20E-06 |
| TUCP_001467 | XLOC_056454 | ENSRNOT00000006443 | 0.961048435 | 6.61E-07 |
| TUCP_001467 | XLOC_056454 | ENSRNOT00000025294 | 0.950353556 | 2.18E-06 |
| TUCP_001467 | XLOC_056454 | ENSRNOT00000020702 | 0.977339291 | 4.53E-08 |
| TUCP_001467 | XLOC_056454 | ENSRNOT00000012583 | 0.969975244 | 1.83E-07 |
| TUCP_001467 | XLOC_056454 | ENSRNOT00000015579 | 0.963169711 | 5.02E-07 |
| TUCP_001467 | XLOC_056454 | ENSRNOT00000022502 | 0.959602997 | 7.92E-07 |
| TUCP_001467 | XLOC_056454 | ENSRNOT00000026928 | 0.966773408 | 3.02E-07 |
| TUCP_001467 | XLOC_056454 | ENSRNOT00000026920 | 0.977818363 | 4.07E-08 |
| TUCP_001467 | XLOC_056454 | ENSRNOT00000001759 | 0.954545691 | 1.42E-06 |
| TUCP_001467 | XLOC_056454 | ENSRNOT00000021803 | 0.950568796 | 2.14E-06 |
| TUCP_001467 | XLOC_056454 | ENSRNOT00000018646 | 0.960963339 | 6.69E-07 |
| TUCP_001467 | XLOC_056454 | ENSRNOT00000025856 | 0.956936212 | 1.08E-06 |
| TUCP_001467 | XLOC_056454 | ENSRNOT00000087748 | 0.962944509 | 5.17E-07 |
| TUCP_001467 | XLOC_056454 | ENSRNOT00000017469 | 0.982982448 | 1.09E-08 |
| TUCP_001467 | XLOC_056454 | ENSRNOT00000008865 | 0.957011184 | 1.08E-06 |
| TUCP_001467 | XLOC_056454 | ENSRNOT00000010893 | 0.960866516 | 6.77E-07 |
| TUCP_001467 | XLOC_056454 | ENSRNOT00000055957 | 0.97671612  | 5.18E-08 |
| TUCP_001467 | XLOC_056454 | ENSRNOT00000010674 | 0.985906376 | 4.28E-09 |
| TUCP_001467 | XLOC_056454 | ENSRNOT00000023664 | 0.977673036 | 4.21E-08 |
| TUCP_001467 | XLOC_056454 | ENSRNOT00000016730 | 0.9599162   | 7.62E-07 |
| TUCP_001467 | XLOC_056454 | ENSRNOT00000067741 | 0.970675493 | 1.63E-07 |
| TUCP_001467 | XLOC_056454 | ENSRNOT00000023567 | 0.972332118 | 1.22E-07 |
| TUCP_001467 | XLOC_056454 | ENSRNOT00000026398 | 0.975271962 | 6.99E-08 |
| TUCP_001467 | XLOC_056454 | ENSRNOT00000024285 | 0.956355353 | 1.16E-06 |
| TUCP_001467 | XLOC_056454 | ENSRNOT00000041277 | 0.951836276 | 1.88E-06 |
| TUCP_001467 | XLOC_056454 | ENSRNOT00000071482 | 0.978951177 | 3.14E-08 |



|             |             |                    |              |          |
|-------------|-------------|--------------------|--------------|----------|
| TUCP_001467 | XL0C_056454 | ENSRNOT00000028744 | 0.951480031  | 1.95E-06 |
| TUCP_001467 | XL0C_056454 | ENSRNOT00000077479 | 0.95492813   | 1.36E-06 |
| TUCP_001467 | XL0C_056454 | ENSRNOT00000054976 | 0.952340971  | 1.79E-06 |
| TUCP_001467 | XL0C_056454 | ENSRNOT00000010516 | 0.973185339  | 1.04E-07 |
| TUCP_001467 | XL0C_056454 | ENSRNOT00000000527 | 0.966086393  | 3.34E-07 |
| TUCP_001467 | XL0C_056454 | ENSRNOT00000000529 | 0.965184794  | 3.80E-07 |
| TUCP_001467 | XL0C_056454 | ENSRNOT00000081110 | 0.95986809   | 7.66E-07 |
| TUCP_001467 | XL0C_056454 | ENSRNOT00000028527 | 0.954616373  | 1.40E-06 |
| TUCP_001467 | XL0C_056454 | ENSRNOT00000088202 | 0.982065923  | 1.42E-08 |
| TUCP_001467 | XL0C_056454 | ENSRNOT00000088201 | 0.958902902  | 8.62E-07 |
| TUCP_001467 | XL0C_056454 | ENSRNOT00000078161 | 0.965290422  | 3.74E-07 |
| TUCP_001467 | XL0C_056454 | ENSRNOT00000082151 | 0.960609537  | 6.99E-07 |
| TUCP_001467 | XL0C_056454 | ENSRNOT00000003600 | 0.954406442  | 1.44E-06 |
| TUCP_001467 | XL0C_056454 | ENSRNOT00000014134 | 0.955293556  | 1.30E-06 |
| TUCP_001467 | XL0C_056454 | ENSRNOT00000011572 | 0.953312753  | 1.61E-06 |
| TUCP_001467 | XL0C_056454 | ENSRNOT00000000155 | -0.969333189 | 2.03E-07 |
| TUCP_001467 | XL0C_056454 | ENSRNOT00000001607 | -0.957701807 | 9.93E-07 |
| TUCP_001467 | XL0C_056454 | ENSRNOT00000036282 | -0.962637185 | 5.39E-07 |
| TUCP_001467 | XL0C_056454 | ENSRNOT00000046126 | 0.969339833  | 2.03E-07 |
| TUCP_001467 | XL0C_056454 | ENSRNOT00000006376 | 0.961096161  | 6.57E-07 |
| TUCP_001467 | XL0C_056454 | ENSRNOT00000022142 | -0.952574022 | 1.74E-06 |
| TUCP_001467 | XL0C_056454 | ENSRNOT00000033048 | 0.966946446  | 2.94E-07 |
| TUCP_001467 | XL0C_056454 | ENSRNOT00000077401 | 0.960982074  | 6.67E-07 |
| TUCP_001467 | XL0C_056454 | ENSRNOT00000052120 | -0.953871163 | 1.52E-06 |
| TUCP_001467 | XL0C_056454 | ENSRNOT00000001234 | 0.967406282  | 2.74E-07 |
| TUCP_001467 | XL0C_056454 | ENSRNOT00000058763 | 0.991846631  | 2.80E-10 |
| TUCP_001467 | XL0C_056454 | ENSRNOT00000023962 | 0.952357521  | 1.78E-06 |
| TUCP_001467 | XL0C_056454 | ENSRNOT00000016389 | 0.96531303   | 3.73E-07 |
| TUCP_001467 | XL0C_056454 | ENSRNOT00000007688 | 0.96072905   | 6.89E-07 |
| TUCP_001467 | XL0C_056454 | ENSRNOT00000026364 | 0.956959643  | 1.08E-06 |
| TUCP_001467 | XL0C_056454 | ENSRNOT00000025819 | 0.979475504  | 2.77E-08 |
| TUCP_001467 | XL0C_056454 | ENSRNOT00000015318 | 0.959879436  | 7.65E-07 |
| TUCP_001467 | XL0C_056454 | ENSRNOT00000073388 | 0.95429076   | 1.46E-06 |
| TUCP_001467 | XL0C_056454 | ENSRNOT00000056041 | 0.952126727  | 1.83E-06 |
| TUCP_001467 | XL0C_056454 | ENSRNOT00000045532 | 0.98456074   | 6.73E-09 |
| TUCP_001467 | XL0C_056454 | ENSRNOT00000017688 | 0.969784248  | 1.89E-07 |
| TUCP_001467 | XL0C_056454 | ENSRNOT00000039296 | -0.965543793 | 3.61E-07 |
| TUCP_001467 | XL0C_056454 | ENSRNOT00000059599 | 0.977307451  | 4.56E-08 |
| TUCP_001467 | XL0C_056454 | ENSRNOT00000075656 | 0.951469284  | 1.95E-06 |
| TUCP_001467 | XL0C_056454 | ENSRNOT00000083573 | 0.951967633  | 1.86E-06 |
| TUCP_001467 | XL0C_056454 | ENSRNOT00000079962 | -0.955164448 | 1.32E-06 |
| TUCP_001467 | XL0C_056454 | ENSRNOT00000045443 | 0.952354078  | 1.78E-06 |
| TUCP_001467 | XL0C_056454 | ENSRNOT00000059524 | 0.97397951   | 8.99E-08 |
| TUCP_001467 | XL0C_056454 | ENSRNOT00000084766 | -0.950746159 | 2.10E-06 |
| TUCP_001467 | XL0C_056454 | ENSRNOT00000050721 | 0.980560404  | 2.12E-08 |
| TUCP_001467 | XL0C_056454 | ENSRNOT00000017361 | -0.956476762 | 1.14E-06 |
| TUCP_001467 | XL0C_056454 | ENSRNOT00000017362 | 0.975932587  | 6.11E-08 |
| TUCP_001467 | XL0C_056454 | ENSRNOT00000019465 | 0.960565893  | 7.03E-07 |
| TUCP_001467 | XL0C_056454 | ENSRNOT00000018696 | 0.967376265  | 2.76E-07 |
| TUCP_001467 | XL0C_056454 | ENSRNOT00000009073 | 0.974491222  | 8.15E-08 |
| TUCP_001467 | XL0C_056454 | ENSRNOT00000067170 | 0.957636836  | 1.00E-06 |

|             |             |                    |              |          |
|-------------|-------------|--------------------|--------------|----------|
| TUCP_001467 | XLOC_056454 | ENSRNOT00000060432 | 0.957023013  | 1.07E-06 |
| TUCP_001467 | XLOC_056454 | ENSRNOT00000001586 | 0.964745769  | 4.04E-07 |
| TUCP_001467 | XLOC_056454 | ENSRNOT00000001468 | 0.959461951  | 8.05E-07 |
| TUCP_001467 | XLOC_056454 | ENSRNOT00000017385 | 0.953299327  | 1.62E-06 |
| TUCP_001467 | XLOC_056454 | ENSRNOT00000013043 | 0.962833168  | 5.25E-07 |
| TUCP_001467 | XLOC_056454 | ENSRNOT00000013695 | 0.959821498  | 7.71E-07 |
| TUCP_001467 | XLOC_056454 | ENSRNOT00000016541 | 0.984549065  | 6.76E-09 |
| TUCP_001467 | XLOC_056454 | ENSRNOT00000081621 | -0.968310033 | 2.39E-07 |
| TUCP_001467 | XLOC_056454 | ENSRNOT00000027301 | 0.966436488  | 3.17E-07 |
| TUCP_001467 | XLOC_056454 | ENSRNOT00000009000 | 0.981516195  | 1.65E-08 |
| TUCP_001467 | XLOC_056454 | ENSRNOT00000012114 | 0.954346608  | 1.45E-06 |
| TUCP_001467 | XLOC_056454 | ENSRNOT00000024568 | 0.959054896  | 8.46E-07 |
| TUCP_001467 | XLOC_056454 | ENSRNOT00000085403 | -0.976482968 | 5.45E-08 |
| TUCP_001467 | XLOC_056454 | ENSRNOT00000011731 | 0.961216579  | 6.47E-07 |
| TUCP_001467 | XLOC_056454 | ENSRNOT00000089545 | 0.965525392  | 3.62E-07 |
| TUCP_001467 | XLOC_056454 | ENSRNOT00000083876 | 0.953194686  | 1.64E-06 |
| TUCP_001467 | XLOC_056454 | ENSRNOT00000065673 | 0.950021572  | 2.26E-06 |
| TUCP_001467 | XLOC_056454 | ENSRNOT00000019121 | 0.972709722  | 1.14E-07 |
| TUCP_001467 | XLOC_056454 | ENSRNOT00000012361 | 0.958280586  | 9.28E-07 |
| TUCP_001467 | XLOC_056454 | ENSRNOT00000086775 | 0.952157853  | 1.82E-06 |
| TUCP_001467 | XLOC_056454 | ENSRNOT00000083351 | 0.957744853  | 9.88E-07 |
| TUCP_001467 | XLOC_056454 | ENSRNOT00000036338 | 0.969055195  | 2.12E-07 |
| TUCP_001467 | XLOC_056454 | ENSRNOT00000091866 | 0.95322875   | 1.63E-06 |
| TUCP_001467 | XLOC_056454 | ENSRNOT00000070794 | 0.951439926  | 1.96E-06 |
| TUCP_001467 | XLOC_056454 | ENSRNOT00000020932 | 0.986668968  | 3.24E-09 |
| TUCP_001467 | XLOC_056454 | ENSRNOT00000073492 | 0.958292072  | 9.27E-07 |
| TUCP_001467 | XLOC_056454 | ENSRNOT00000030975 | 0.961532591  | 6.22E-07 |
| TUCP_001467 | XLOC_056454 | ENSRNOT00000013864 | 0.952835225  | 1.70E-06 |
| TUCP_001467 | XLOC_056454 | ENSRNOT00000051843 | 0.951945873  | 1.86E-06 |
| TUCP_001467 | XLOC_056454 | ENSRNOT00000022194 | 0.964167493  | 4.38E-07 |
| TUCP_001467 | XLOC_056454 | ENSRNOT00000064450 | 0.962876694  | 5.22E-07 |
| TUCP_001467 | XLOC_056454 | ENSRNOT00000064452 | 0.956879861  | 1.09E-06 |
| TUCP_001467 | XLOC_056454 | ENSRNOT00000015213 | 0.977657143  | 4.22E-08 |
| TUCP_001467 | XLOC_056454 | ENSRNOT00000019386 | 0.971796646  | 1.34E-07 |
| TUCP_001467 | XLOC_056454 | ENSRNOT00000025916 | 0.963008705  | 5.13E-07 |
| TUCP_001467 | XLOC_056454 | ENSRNOT00000040348 | 0.950740255  | 2.10E-06 |
| TUCP_001467 | XLOC_056454 | ENSRNOT00000021636 | 0.957900102  | 9.70E-07 |
| TUCP_001467 | XLOC_056454 | ENSRNOT00000007889 | 0.960213572  | 7.34E-07 |
| TUCP_001467 | XLOC_056454 | ENSRNOT00000073910 | 0.950389203  | 2.18E-06 |
| TUCP_001467 | XLOC_056454 | ENSRNOT00000007738 | 0.977946703  | 3.96E-08 |
| TUCP_001467 | XLOC_056454 | ENSRNOT00000030803 | 0.956489331  | 1.14E-06 |
| TUCP_001467 | XLOC_056454 | ENSRNOT00000084552 | 0.957226487  | 1.05E-06 |
| TUCP_001467 | XLOC_056454 | ENSRNOT00000025980 | 0.951472128  | 1.95E-06 |
| TUCP_001467 | XLOC_056454 | ENSRNOT00000025824 | 0.957211398  | 1.05E-06 |
| TUCP_001467 | XLOC_056454 | ENSRNOT00000000707 | 0.967782061  | 2.59E-07 |
| TUCP_001467 | XLOC_056454 | ENSRNOT00000067739 | 0.966509247  | 3.14E-07 |
| TUCP_001467 | XLOC_056454 | ENSRNOT00000017232 | 0.971837235  | 1.33E-07 |
| TUCP_001467 | XLOC_056454 | ENSRNOT00000086608 | 0.953775889  | 1.54E-06 |
| TUCP_001467 | XLOC_056454 | ENSRNOT00000007949 | 0.952518731  | 1.75E-06 |
| TUCP_001467 | XLOC_056454 | ENSRNOT00000014585 | 0.967336911  | 2.77E-07 |
| TUCP_001467 | XLOC_056454 | ENSRNOT0000003691  | 0.965538836  | 3.61E-07 |

|             |             |                     |              |          |
|-------------|-------------|---------------------|--------------|----------|
| TUCP_001467 | XLOC_056454 | ENSRNOT00000074261  | 0.969933732  | 1.84E-07 |
| TUCP_001467 | XLOC_056454 | ENSRNOT00000051522  | -0.981296553 | 1.75E-08 |
| TUCP_001467 | XLOC_056454 | ENSRNOT00000016939  | 0.955435694  | 1.28E-06 |
| TUCP_001467 | XLOC_056454 | ENSRNOT00000009238  | 0.951012257  | 2.05E-06 |
| TUCP_001467 | XLOC_056454 | ENSRNOT00000004842  | 0.977957793  | 3.95E-08 |
| TUCP_001467 | XLOC_056454 | ENSRNOT00000072031  | 0.964478284  | 4.20E-07 |
| TUCP_001467 | XLOC_056454 | ENSRNOT00000030329  | 0.978112086  | 3.81E-08 |
| TUCP_001467 | XLOC_056454 | ENSRNOT00000026057  | 0.95396372   | 1.51E-06 |
| TUCP_001467 | XLOC_056454 | ENSRNOT00000033450  | 0.974479319  | 8.17E-08 |
| TUCP_001467 | XLOC_056454 | ENSRNOT00000001935  | 0.973805616  | 9.29E-08 |
| TUCP_001467 | XLOC_056454 | ENSRNOT00000027125  | 0.963063354  | 5.09E-07 |
| TUCP_001467 | XLOC_056454 | ENSRNOT00000027121  | -0.95238198  | 1.78E-06 |
| TUCP_001467 | XLOC_056454 | ENSRNOT00000023078  | -0.967950366 | 2.52E-07 |
| TUCP_001467 | XLOC_056454 | ENSRNOT00000013463  | -0.954726846 | 1.39E-06 |
| TUCP_001467 | XLOC_056454 | ENSRNOT00000017081  | 0.969172281  | 2.08E-07 |
| TUCP_001467 | XLOC_056454 | ENSRNOT00000050223  | 0.961233444  | 6.46E-07 |
| TUCP_001467 | XLOC_056454 | ENSRNOT00000061191  | 0.972161979  | 1.26E-07 |
| TUCP_001467 | XLOC_056454 | ENSRNOT00000017907  | 0.975627699  | 6.50E-08 |
| TUCP_001467 | XLOC_056454 | ENSRNOT00000026754  | 0.951735217  | 1.90E-06 |
| TUCP_001467 | XLOC_056454 | ENSRNOT00000028434  | 0.973490561  | 9.86E-08 |
| TUCP_001467 | XLOC_056454 | ENSRNOT00000025794  | 0.959380497  | 8.13E-07 |
| TUCP_001467 | XLOC_056454 | ENSRNOT00000058111  | 0.95656514   | 1.13E-06 |
| TUCP_001467 | XLOC_056454 | ENSRNOT00000001720  | 0.951101578  | 2.03E-06 |
| TUCP_001467 | XLOC_056454 | ENSRNOT00000009994  | 0.951889238  | 1.87E-06 |
| TUCP_001467 | XLOC_056454 | ENSRNOT00000009993  | 0.973069398  | 1.07E-07 |
| TUCP_001467 | XLOC_056454 | ENSRNOT00000007771  | 0.970275651  | 1.74E-07 |
| TUCP_001467 | XLOC_056454 | ENSRNOT00000046215  | 0.971811184  | 1.34E-07 |
| TUCP_001467 | XLOC_056454 | ENSRNOT00000018101  | 0.961974653  | 5.87E-07 |
| TUCP_001467 | XLOC_056454 | ENSRNOT00000000083  | 0.974479121  | 8.17E-08 |
| TUCP_001467 | XLOC_056454 | ENSRNOT000000061973 | 0.952414135  | 1.77E-06 |
| TUCP_001467 | XLOC_056454 | ENSRNOT00000076300  | 0.953267365  | 1.62E-06 |
| TUCP_001467 | XLOC_056454 | ENSRNOT00000028545  | 0.972572578  | 1.17E-07 |
| TUCP_001467 | XLOC_056454 | ENSRNOT00000009900  | 0.954646988  | 1.40E-06 |
| TUCP_001467 | XLOC_056454 | ENSRNOT00000019172  | 0.95976101   | 7.76E-07 |
| TUCP_001467 | XLOC_056454 | ENSRNOT00000068267  | 0.973916078  | 9.10E-08 |
| TUCP_001467 | XLOC_056454 | ENSRNOT00000020994  | 0.970383793  | 1.71E-07 |
| TUCP_001467 | XLOC_056454 | ENSRNOT00000068269  | 0.976383608  | 5.56E-08 |
| TUCP_001467 | XLOC_056454 | ENSRNOT00000019916  | 0.967177222  | 2.84E-07 |
| TUCP_001467 | XLOC_056454 | ENSRNOT00000024658  | 0.959427707  | 8.09E-07 |
| TUCP_001467 | XLOC_056454 | ENSRNOT00000044866  | 0.955365656  | 1.29E-06 |
| TUCP_001467 | XLOC_056454 | ENSRNOT00000020272  | 0.962864656  | 5.23E-07 |
| TUCP_001467 | XLOC_056454 | ENSRNOT00000064700  | -0.950386719 | 2.18E-06 |
| TUCP_001467 | XLOC_056454 | ENSRNOT00000010020  | 0.954159403  | 1.48E-06 |
| TUCP_001467 | XLOC_056454 | ENSRNOT00000074494  | 0.969336362  | 2.03E-07 |
| TUCP_001467 | XLOC_056454 | ENSRNOT00000049193  | 0.969581699  | 1.95E-07 |
| TUCP_001467 | XLOC_056454 | ENSRNOT00000036194  | 0.972955655  | 1.09E-07 |
| TUCP_001467 | XLOC_056454 | ENSRNOT00000000334  | 0.961724764  | 6.07E-07 |
| TUCP_001467 | XLOC_056454 | ENSRNOT00000077186  | 0.96312065   | 5.05E-07 |
| TUCP_001467 | XLOC_056454 | ENSRNOT00000081314  | 0.953653749  | 1.56E-06 |
| TUCP_001467 | XLOC_056454 | ENSRNOT00000014780  | 0.983910942  | 8.26E-09 |
| TUCP_001467 | XLOC_056454 | ENSRNOT00000009645  | 0.953025578  | 1.66E-06 |

|             |             |                    |              |          |
|-------------|-------------|--------------------|--------------|----------|
| TUCP_001467 | XLOC_056454 | ENSRNOT00000014785 | 0.956216817  | 1.18E-06 |
| TUCP_001467 | XLOC_056454 | ENSRNOT00000014373 | 0.985385601  | 5.12E-09 |
| TUCP_001467 | XLOC_056454 | ENSRNOT00000026279 | 0.96656528   | 3.11E-07 |
| TUCP_001467 | XLOC_056454 | ENSRNOT0000003085  | 0.960872422  | 6.76E-07 |
| TUCP_001467 | XLOC_056454 | ENSRNOT00000082508 | 0.951973426  | 1.86E-06 |
| TUCP_001467 | XLOC_056454 | ENSRNOT00000089624 | 0.959989824  | 7.55E-07 |
| TUCP_001467 | XLOC_056454 | ENSRNOT00000056199 | 0.959010028  | 8.51E-07 |
| TUCP_001467 | XLOC_056454 | ENSRNOT00000065942 | 0.959573632  | 7.94E-07 |
| TUCP_001467 | XLOC_056454 | ENSRNOT00000074389 | 0.969585555  | 1.95E-07 |
| TUCP_001467 | XLOC_056454 | ENSRNOT00000066204 | 0.979683889  | 2.63E-08 |
| TUCP_001467 | XLOC_056454 | ENSRNOT00000076105 | 0.975361424  | 6.86E-08 |
| TUCP_001467 | XLOC_056454 | ENSRNOT0000003012  | 0.957822444  | 9.79E-07 |
| TUCP_001467 | XLOC_056454 | ENSRNOT00000090970 | -0.951109234 | 2.03E-06 |
| TUCP_001467 | XLOC_056454 | ENSRNOT00000000052 | 0.964124974  | 4.41E-07 |
| TUCP_001467 | XLOC_056454 | ENSRNOT00000073569 | 0.967628119  | 2.65E-07 |
| TUCP_001467 | XLOC_056454 | ENSRNOT00000021455 | 0.95744417   | 1.02E-06 |
| TUCP_001467 | XLOC_056454 | ENSRNOT00000005620 | 0.952575511  | 1.74E-06 |
| TUCP_001467 | XLOC_056454 | ENSRNOT00000017375 | 0.959298792  | 8.21E-07 |
| TUCP_001467 | XLOC_056454 | ENSRNOT00000039377 | 0.954199232  | 1.47E-06 |
| TUCP_001467 | XLOC_056454 | ENSRNOT0000002837  | 0.959041815  | 8.47E-07 |
| TUCP_001467 | XLOC_056454 | ENSRNOT00000012881 | 0.968097331  | 2.47E-07 |
| TUCP_001467 | XLOC_056454 | ENSRNOT00000045855 | 0.962602427  | 5.41E-07 |
| TUCP_001467 | XLOC_056454 | ENSRNOT00000028363 | 0.965393154  | 3.69E-07 |
| TUCP_001467 | XLOC_056454 | ENSRNOT00000041456 | 0.960651954  | 6.95E-07 |
| TUCP_001467 | XLOC_056454 | ENSRNOT00000088133 | 0.974233835  | 8.57E-08 |
| TUCP_001467 | XLOC_056454 | ENSRNOT00000037039 | 0.952661187  | 1.73E-06 |
| TUCP_001467 | XLOC_056454 | ENSRNOT0000001979  | 0.953956587  | 1.51E-06 |
| TUCP_001467 | XLOC_056454 | ENSRNOT0000003715  | 0.965176505  | 3.80E-07 |
| TUCP_001467 | XLOC_056454 | ENSRNOT00000047634 | 0.956923031  | 1.09E-06 |
| TUCP_001467 | XLOC_056454 | ENSRNOT00000083964 | 0.974770105  | 7.72E-08 |
| TUCP_001467 | XLOC_056454 | ENSRNOT00000026726 | 0.950525184  | 2.15E-06 |
| TUCP_001467 | XLOC_056454 | ENSRNOT00000061304 | 0.980885644  | 1.95E-08 |
| TUCP_001467 | XLOC_056454 | ENSRNOT00000016447 | 0.963688347  | 4.68E-07 |
| TUCP_001467 | XLOC_056454 | ENSRNOT00000032202 | 0.950288262  | 2.20E-06 |
| TUCP_001467 | XLOC_056454 | ENSRNOT00000019130 | 0.972003357  | 1.29E-07 |
| TUCP_001467 | XLOC_056454 | ENSRNOT00000066888 | 0.964175533  | 4.38E-07 |
| TUCP_001467 | XLOC_056454 | ENSRNOT00000002151 | 0.967166982  | 2.84E-07 |
| TUCP_001467 | XLOC_056454 | ENSRNOT00000002152 | 0.960381403  | 7.19E-07 |
| TUCP_001467 | XLOC_056454 | ENSRNOT00000021152 | -0.95860562  | 8.93E-07 |
| TUCP_001467 | XLOC_056454 | ENSRNOT00000011551 | 0.95412861   | 1.48E-06 |
| TUCP_001467 | XLOC_056454 | ENSRNOT00000086340 | 0.96202821   | 5.83E-07 |
| TUCP_001467 | XLOC_056454 | ENSRNOT00000018328 | 0.961447986  | 6.29E-07 |
| TUCP_001467 | XLOC_056454 | ENSRNOT00000066247 | 0.964990885  | 3.91E-07 |
| TUCP_001467 | XLOC_056454 | ENSRNOT00000009726 | 0.962629154  | 5.39E-07 |
| TUCP_001467 | XLOC_056454 | ENSRNOT00000050119 | 0.951525387  | 1.94E-06 |
| TUCP_001467 | XLOC_056454 | ENSRNOT00000018864 | 0.951293467  | 1.99E-06 |
| TUCP_001467 | XLOC_056454 | ENSRNOT00000010079 | 0.980559221  | 2.12E-08 |
| TUCP_001467 | XLOC_056454 | ENSRNOT00000067836 | 0.95833636   | 9.22E-07 |
| TUCP_001467 | XLOC_056454 | ENSRNOT00000022117 | 0.985685387  | 4.62E-09 |
| TUCP_001467 | XLOC_056454 | ENSRNOT00000064068 | 0.970112867  | 1.79E-07 |
| TUCP_001467 | XLOC_056454 | ENSRNOT00000056015 | 0.958223453  | 9.34E-07 |

|             |             |                     |              |          |
|-------------|-------------|---------------------|--------------|----------|
| TUCP_001467 | XLOC_056454 | ENSRNOT00000044073  | 0.976151109  | 5.84E-08 |
| TUCP_001467 | XLOC_056454 | ENSRNOT00000068528  | 0.950165331  | 2.23E-06 |
| TUCP_001467 | XLOC_056454 | ENSRNOT00000035628  | 0.952242565  | 1.81E-06 |
| TUCP_001467 | XLOC_056454 | ENSRNOT00000059487  | 0.959416908  | 8.10E-07 |
| TUCP_001467 | XLOC_056454 | ENSRNOT00000019713  | 0.975833798  | 6.23E-08 |
| TUCP_001467 | XLOC_056454 | ENSRNOT00000085214  | 0.988866003  | 1.32E-09 |
| TUCP_001467 | XLOC_056454 | ENSRNOT00000017224  | 0.95655136   | 1.13E-06 |
| TUCP_001467 | XLOC_056454 | ENSRNOT00000049725  | 0.956956887  | 1.08E-06 |
| TUCP_001467 | XLOC_056454 | ENSRNOT00000010753  | 0.975792293  | 6.29E-08 |
| TUCP_001467 | XLOC_056454 | ENSRNOT00000028893  | 0.958846897  | 8.67E-07 |
| TUCP_001467 | XLOC_056454 | ENSRNOT00000038448  | 0.96409647   | 4.42E-07 |
| TUCP_001467 | XLOC_056454 | ENSRNOT00000026258  | -0.950539627 | 2.14E-06 |
| TUCP_001467 | XLOC_056454 | ENSRNOT00000032289  | 0.951854801  | 1.88E-06 |
| TUCP_001467 | XLOC_056454 | ENSRNOT00000088615  | 0.973639366  | 9.59E-08 |
| TUCP_001467 | XLOC_056454 | ENSRNOT00000059181  | -0.954848295 | 1.37E-06 |
| TUCP_001467 | XLOC_056454 | ENSRNOT00000015618  | 0.958615017  | 8.92E-07 |
| TUCP_001467 | XLOC_056454 | ENSRNOT00000007077  | 0.986705156  | 3.20E-09 |
| TUCP_001467 | XLOC_056454 | ENSRNOT00000007079  | 0.966198616  | 3.28E-07 |
| TUCP_001467 | XLOC_056454 | ENSRNOT00000014809  | 0.968743987  | 2.23E-07 |
| TUCP_001467 | XLOC_056454 | ENSRNOT00000064849  | 0.975013054  | 7.36E-08 |
| TUCP_001467 | XLOC_056454 | ENSRNOT00000045950  | 0.968955959  | 2.16E-07 |
| TUCP_001467 | XLOC_056454 | ENSRNOT000000072416 | 0.953821062  | 1.53E-06 |
| TUCP_001467 | XLOC_056454 | ENSRNOT00000023017  | 0.983722593  | 8.76E-09 |
| TUCP_001467 | XLOC_056454 | ENSRNOT00000017340  | 0.972644029  | 1.15E-07 |
| TUCP_001467 | XLOC_056454 | ENSRNOT00000016740  | -0.964967709 | 3.92E-07 |
| TUCP_001467 | XLOC_056454 | ENSRNOT00000038212  | 0.959612025  | 7.91E-07 |
| TUCP_001467 | XLOC_056454 | ENSRNOT00000068078  | 0.955141489  | 1.33E-06 |
| TUCP_001467 | XLOC_056454 | ENSRNOT00000092037  | 0.970952334  | 1.55E-07 |
| TUCP_001467 | XLOC_056454 | ENSRNOT00000080677  | 0.965941726  | 3.41E-07 |
| TUCP_001467 | XLOC_056454 | ENSRNOT00000028130  | 0.974057658  | 8.86E-08 |
| TUCP_001467 | XLOC_056454 | ENSRNOT00000063821  | 0.979377619  | 2.84E-08 |
| TUCP_001467 | XLOC_056454 | ENSRNOT00000041227  | 0.953782718  | 1.54E-06 |
| TUCP_001467 | XLOC_056454 | ENSRNOT00000002355  | 0.978532008  | 3.46E-08 |
| TUCP_001467 | XLOC_056454 | ENSRNOT00000011326  | 0.982886571  | 1.12E-08 |
| TUCP_001467 | XLOC_056454 | ENSRNOT00000044486  | 0.960257204  | 7.30E-07 |
| TUCP_001467 | XLOC_056454 | ENSRNOT00000079414  | 0.952254505  | 1.80E-06 |
| TUCP_001467 | XLOC_056454 | ENSRNOT00000079002  | 0.951721932  | 1.90E-06 |
| TUCP_001467 | XLOC_056454 | ENSRNOT00000091068  | 0.961483334  | 6.26E-07 |
| TUCP_001467 | XLOC_056454 | ENSRNOT00000000134  | 0.960347614  | 7.22E-07 |
| TUCP_001467 | XLOC_056454 | ENSRNOT00000005885  | 0.953393598  | 1.60E-06 |
| TUCP_001467 | XLOC_056454 | ENSRNOT00000044254  | 0.955531855  | 1.27E-06 |
| TUCP_001467 | XLOC_056454 | ENSRNOT00000080285  | 0.960145804  | 7.41E-07 |
