# Supplementary material for: Comparative transcriptome analysis of transcripts of uncertain coding potential in septic myocardial depression
Source: BMC Cardiovasc Disord. 2021 Apr 8;21:166. doi: 10.1186/s12872-021-01973-z (PMC8028820; doi:10.1186/s12872-021-01973-z)
Supplement: Supplementary file 5 — Additional file 5. Table S4: Detailed information on all the co-located genes for each DE TUCP. [file 12872_2021_1973_MOESM5_ESM.xls]

Chromosome	TUCP_ID	TUCP_Gene_ID	TUCP_Gene_Symbol	TUCP_Status	TUCP_Start	TUCP_End	TUCP_Strand	mRNA_ID	mRNA_Gene_Id	mRNA_Gene_Symbol	mRNA_Gene_Description	mRNA_Start	mRNA_End	mRNA_Strand	Distance	Location
2	TUCP_002354	XLOC_098636	--	TUCP	118785836	118801147	+	ENSRNOT00000083720	ENSRNOG00000056371	Pik3ca	Phosphatidylinositol 3-kinase, C2 domain||Phosphatidylinositol 3-kinase Ras-binding (PI3K RBD) domain||Protein kinase-like domain||Phosphoinositide 3-kinase, accessory (PIK) domain||C2 domain||Phosphatidylinositol 3/4-kinase, conserved site||Phosphatidylinositol Kinase||Ubiquitin-related domain||Phosphatidylinositol 3-/4-kinase, catalytic domain||Phosphatidylinositol 3-kinase adaptor-binding (PI3…	118831350	118861454	+	30202	upstream
2	TUCP_002354	XLOC_098636	--	TUCP	118785836	118801147	+	ENSRNOT00000013858	ENSRNOG00000010119	Zmat3	Zinc finger, C2H2-like||Zinc finger, double-stranded RNA binding||Zinc finger, U1-type	118721334	118745766	-	40069	upstream
2	TUCP_002354	XLOC_098636	--	TUCP	118785836	118801147	+	ENSRNOT00000079431	ENSRNOG00000053688	AABR07009965.1	-	118746333	118746753	+	39082	downstream
2	TUCP_002354	XLOC_098636	--	TUCP	118785836	118801147	+	ENSRNOT00000058860	ENSRNOG00000027836	Kcnmb3	Potassium channel, calcium-activated, BK, beta subunit	118868225	118882562	-	67077	downstream
9	TUCP_004528	XLOC_199496	--	TUCP	111180979	111187844	+	ENSRNOT00000076669	ENSRNOG00000011613	Ppip5k2	Histidine phosphatase superfamily, clade-2||Histidine phosphatase superfamily||Histidine acid phosphatase active site||-	111220858	111246986	+	33013	upstream
9	TUCP_004528	XLOC_199496	--	TUCP	111180979	111187844	+	ENSRNOT00000087355	ENSRNOG00000011962	Gin1	Ribonuclease H-like domain||Integrase, catalytic core	111199141	111213098	-	11296	downstream
9	TUCP_004528	XLOC_199496	--	TUCP	111180979	111187844	+	ENSRNOT00000072791	ENSRNOG00000011613	Ppip5k2	Histidine phosphatase superfamily, clade-2||Histidine phosphatase superfamily||Histidine acid phosphatase active site||-	111279495	111284630	+	91650	upstream
9	TUCP_004528	XLOC_199496	--	TUCP	111180979	111187844	+	ENSRNOT00000056439	ENSRNOG00000011613	Ppip5k2	Histidine phosphatase superfamily, clade-2||Histidine phosphatase superfamily||Histidine acid phosphatase active site||-	111233147	111249477	+	45302	upstream
9	TUCP_004528	XLOC_199496	--	TUCP	111180979	111187844	+	ENSRNOT00000016028	ENSRNOG00000011962	Gin1	Ribonuclease H-like domain||Integrase, catalytic core	111200383	111220651	-	12538	downstream
9	TUCP_004528	XLOC_199496	--	TUCP	111180979	111187844	+	ENSRNOT00000076729	ENSRNOG00000011613	Ppip5k2	Histidine phosphatase superfamily, clade-2||Histidine phosphatase superfamily||Histidine acid phosphatase active site||-	111249351	111286185	+	61506	upstream
9	TUCP_004528	XLOC_199496	--	TUCP	111180979	111187844	+	ENSRNOT00000041418	ENSRNOG00000033280	Pam	Peptidylglycine alpha-hydroxylating monooxygenase/peptidyl-hydroxyglycine alpha-amidating lyase||NHL repeat, subgroup||NHL repeat||PHM/PNGase F domain||Copper type II ascorbate-dependent monooxygenase, C-terminal||Copper type II, ascorbate-dependent monooxygenase, histidine-cluster-2 conserved site||Six-bladed beta-propeller, TolB-like||Copper type II, ascorbate-dependent monooxygenase-like, C-te…	111028824	111109582	+	71396	downstream
9	TUCP_004528	XLOC_199496	--	TUCP	111180979	111187844	+	ENSRNOT00000056457	ENSRNOG00000033280	Pam	Peptidylglycine alpha-hydroxylating monooxygenase/peptidyl-hydroxyglycine alpha-amidating lyase||NHL repeat, subgroup||NHL repeat||PHM/PNGase F domain||Copper type II ascorbate-dependent monooxygenase, C-terminal||Copper type II, ascorbate-dependent monooxygenase, histidine-cluster-2 conserved site||Six-bladed beta-propeller, TolB-like||Copper type II, ascorbate-dependent monooxygenase-like, C-te…	111028874	111177583	+	3395	downstream
9	TUCP_004528	XLOC_199496	--	TUCP	111180979	111187844	+	ENSRNOT00000043451	ENSRNOG00000033280	Pam	Peptidylglycine alpha-hydroxylating monooxygenase/peptidyl-hydroxyglycine alpha-amidating lyase||NHL repeat, subgroup||NHL repeat||PHM/PNGase F domain||Copper type II ascorbate-dependent monooxygenase, C-terminal||Copper type II, ascorbate-dependent monooxygenase, histidine-cluster-2 conserved site||Six-bladed beta-propeller, TolB-like||Copper type II, ascorbate-dependent monooxygenase-like, C-te…	111028575	111177602	+	3376	downstream
9	TUCP_004452	XLOC_196072	--	TUCP	11124864	11152923	+	ENSRNOT00000074075	ENSRNOG00000048282	Mpnd	JAB1/MPN/MOV34 metalloenzyme domain	11055371	11061611	-	63252	upstream
9	TUCP_004452	XLOC_196072	--	TUCP	11124864	11152923	+	ENSRNOT00000074695	ENSRNOG00000049683	Sh3gl1	BAR domain||SH3 domain||Arfaptin homology (AH) domain/BAR domain	11031841	11055285	+	69578	downstream
9	TUCP_004452	XLOC_196072	--	TUCP	11124864	11152923	+	ENSRNOT00000072031	ENSRNOG00000050509	Ebi3	Interferon/interleukin receptor domain||Fibronectin type III||Long hematopoietin receptor, soluble alpha chain, conserved site||Immunoglobulin-like fold	11110874	11114843	-	10020	upstream
9	TUCP_004452	XLOC_196072	--	TUCP	11124864	11152923	+	ENSRNOT00000071107	ENSRNOG00000046479	Chaf1a	Chromatin assembly factor 1 subunit A, N-terminal||Chromatin assembly factor 1 subunit A||Chromatin assembly factor 1 subunit A, C-terminal	11001129	11027506	-	97357	upstream
9	TUCP_004452	XLOC_196072	--	TUCP	11124864	11152923	+	ENSRNOT00000074767	ENSRNOG00000049983	Shd	SH2 domain	11089106	11096704	-	28159	upstream
9	TUCP_004452	XLOC_196072	--	TUCP	11124864	11152923	+	ENSRNOT00000072830	ENSRNOG00000050318	Fsd1	SPRY domain||Immunoglobulin-like fold||B30.2/SPRY domain||Concanavalin A-like lectin/glucanase domain||COS domain||Fibronectin type III||B-box, C-terminal	11067369	11080155	-	44708	upstream
9	TUCP_004452	XLOC_196072	--	TUCP	11124864	11152923	+	ENSRNOT00000072357	ENSRNOG00000047456	Ccdc94	CWC16 protein	11098924	11108741	-	16122	upstream
9	TUCP_004452	XLOC_196072	--	TUCP	11124864	11152923	+	ENSRNOT00000070920	ENSRNOG00000045605	Uxs1	NAD(P)-binding domain||UDP-glucuronate decarboxylase N-terminal	11165011	11240282	-	12087	downstream
9	TUCP_004452	XLOC_196072	--	TUCP	11124864	11152923	+	ENSRNOT00000082837	ENSRNOG00000045605	Uxs1	NAD(P)-binding domain||UDP-glucuronate decarboxylase N-terminal	11164715	11339790	-	11791	downstream
9	TUCP_004452	XLOC_196072	--	TUCP	11124864	11152923	+	ENSRNOT00000075121	ENSRNOG00000047306	Stap2	PH domain-like||SH2 domain	11064605	11070122	+	54741	downstream
4	TUCP_003193	XLOC_137663	--	TUCP	100254620	100264313	+	ENSRNOT00000084281	ENSRNOG00000012975	Ggcx	RmlC-like cupin domain||RmlC-like jelly roll fold||Vitamin K-dependent gamma-carboxylase||HTTM	100277406	100283044	+	13092	upstream
4	TUCP_003193	XLOC_137663	--	TUCP	100254620	100264313	+	ENSRNOT00000084782	ENSRNOG00000013520	Mat2a	S-adenosylmethionine synthetase, central domain||S-adenosylmethionine synthetase superfamily||S-adenosylmethionine synthetase, conserved site||S-adenosylmethionine synthetase||S-adenosylmethionine synthetase, N-terminal||S-adenosylmethionine synthetase, C-terminal	100296075	100303080	-	31761	downstream
4	TUCP_003193	XLOC_137663	--	TUCP	100254620	100264313	+	ENSRNOT00000079415	ENSRNOG00000061100	Tmem150a	Transmembrane protein 150A||Frag1/DRAM/Sfk1	100218661	100222130	+	32489	downstream
4	TUCP_003193	XLOC_137663	--	TUCP	100254620	100264313	+	ENSRNOT00000016699	ENSRNOG00000012035	Rnf181	Zinc finger, RING-type||Zinc finger, RING/FYVE/PHD-type	100222106	100228809	-	25810	upstream
4	TUCP_003193	XLOC_137663	--	TUCP	100254620	100264313	+	ENSRNOT00000015807	ENSRNOG00000011713	LOC691113	Uncharacterised protein family UPF0561	100209951	100212122	+	42497	downstream
4	TUCP_003193	XLOC_137663	--	TUCP	100254620	100264313	+	ENSRNOT00000086820	ENSRNOG00000012975	Ggcx	RmlC-like cupin domain||RmlC-like jelly roll fold||Vitamin K-dependent gamma-carboxylase||HTTM	100277391	100293250	+	13077	upstream
4	TUCP_003193	XLOC_137663	--	TUCP	100254620	100264313	+	ENSRNOT00000016984	ENSRNOG00000012659	Vamp5	Synaptobrevin/Vesicle-associated membrane protein||Synaptobrevin	100231561	100232559	-	22060	upstream
4	TUCP_003193	XLOC_137663	--	TUCP	100254620	100264313	+	ENSRNOT00000018170	ENSRNOG00000013520	Mat2a	S-adenosylmethionine synthetase, central domain||S-adenosylmethionine synthetase superfamily||S-adenosylmethionine synthetase, conserved site||S-adenosylmethionine synthetase||S-adenosylmethionine synthetase, N-terminal||S-adenosylmethionine synthetase, C-terminal	100297478	100303047	-	33164	downstream
4	TUCP_003193	XLOC_137663	--	TUCP	100254620	100264313	+	ENSRNOT00000014505	ENSRNOG00000010761	Sftpb	Saposin B type domain||Saposin-like type B, region 1||Saposin B type, region 2||Saposin-like||Saposin||Saposin A-type domain	100166863	100175938	+	78681	downstream
4	TUCP_003193	XLOC_137663	--	TUCP	100254620	100264313	+	ENSRNOT00000017301	ENSRNOG00000012748	Vamp8	Synaptobrevin/Vesicle-associated membrane protein||Synaptobrevin	100250301	100252755	-	1864	upstream
4	TUCP_003193	XLOC_137663	--	TUCP	100254620	100264313	+	ENSRNOT00000017927	ENSRNOG00000012975	Ggcx	RmlC-like cupin domain||RmlC-like jelly roll fold||Vitamin K-dependent gamma-carboxylase||HTTM	100277412	100293250	+	13098	upstream
4	TUCP_003193	XLOC_137663	--	TUCP	100254620	100264313	+	ENSRNOT00000015562	ENSRNOG00000010930	Usp39	Zinc finger, RING/FYVE/PHD-type||Ubiquitin specific protease domain||Zinc finger, UBP-type||Peptidase C19, ubiquitin carboxyl-terminal hydrolase	100181455	100213858	-	40761	upstream
4	TUCP_003192	XLOC_137559	--	TUCP	98627229	98632962	+	ENSRNOT00000048493	ENSRNOG00000047464	AABR07060886.1	Immunoglobulin V-set domain||Immunoglobulin subtype||Immunoglobulin-like domain||Immunoglobulin-like fold	98481520	98542683	+	84545	downstream
4	TUCP_003192	XLOC_137559	--	TUCP	98627229	98632962	+	ENSRNOT00000007927	ENSRNOG00000005576	Rpia	Ribose-5-phosphate isomerase, type A, subgroup||Ribose 5-phosphate isomerase, type A	98568028	98593664	-	33564	upstream
4	TUCP_003192	XLOC_137559	--	TUCP	98627229	98632962	+	ENSRNOT00000078381	ENSRNOG00000047464	AABR07060886.1	Immunoglobulin V-set domain||Immunoglobulin subtype||Immunoglobulin-like domain||Immunoglobulin-like fold	98481520	98541360	+	85868	downstream
4	TUCP_003192	XLOC_137559	--	TUCP	98627229	98632962	+	ENSRNOT00000008451	ENSRNOG00000006069	Eif2ak3	Quinoprotein alcohol dehydrogenase-like superfamily||Serine/threonine-protein kinase, active site||Quinoprotein alcohol dehydrogenase-like domain||Protein kinase domain||Protein kinase-like domain	98648545	98709694	+	15582	upstream
4	TUCP_003192	XLOC_137559	--	TUCP	98627229	98632962	+	ENSRNOT00000008473	ENSRNOG00000006476	Tex37	Testis-expressed sequence 37 protein	98728109	98735346	-	95146	downstream
4	TUCP_003191	XLOC_137559	--	TUCP	98627220	98632962	+	ENSRNOT00000048493	ENSRNOG00000047464	AABR07060886.1	Immunoglobulin V-set domain||Immunoglobulin subtype||Immunoglobulin-like domain||Immunoglobulin-like fold	98481520	98542683	+	84536	downstream
4	TUCP_003191	XLOC_137559	--	TUCP	98627220	98632962	+	ENSRNOT00000007927	ENSRNOG00000005576	Rpia	Ribose-5-phosphate isomerase, type A, subgroup||Ribose 5-phosphate isomerase, type A	98568028	98593664	-	33555	upstream
4	TUCP_003191	XLOC_137559	--	TUCP	98627220	98632962	+	ENSRNOT00000078381	ENSRNOG00000047464	AABR07060886.1	Immunoglobulin V-set domain||Immunoglobulin subtype||Immunoglobulin-like domain||Immunoglobulin-like fold	98481520	98541360	+	85859	downstream
4	TUCP_003191	XLOC_137559	--	TUCP	98627220	98632962	+	ENSRNOT00000008451	ENSRNOG00000006069	Eif2ak3	Quinoprotein alcohol dehydrogenase-like superfamily||Serine/threonine-protein kinase, active site||Quinoprotein alcohol dehydrogenase-like domain||Protein kinase domain||Protein kinase-like domain	98648545	98709694	+	15582	upstream
4	TUCP_003191	XLOC_137559	--	TUCP	98627220	98632962	+	ENSRNOT00000008473	ENSRNOG00000006476	Tex37	Testis-expressed sequence 37 protein	98728109	98735346	-	95146	downstream
4	TUCP_003190	XLOC_137467	--	TUCP	97796258	97801640	+	ENSRNOT00000075400	ENSRNOG00000050231	Gng12	G-protein gamma-like domain||G-protein, gamma subunit	97657671	97760102	+	36155	downstream
4	TUCP_003190	XLOC_137467	--	TUCP	97796258	97801640	+	ENSRNOT00000007698	ENSRNOG00000005615	Gadd45a	50S ribosomal protein L30e-like||Growth arrest and DNA damage-inducible protein GADD45||Ribosomal protein L7Ae/L30e/S12e/Gadd45	97782512	97784842	-	11415	upstream
4	TUCP_003197	XLOC_137908	--	TUCP	115207688	115210629	+	ENSRNOT00000066678	ENSRNOG00000011617	Dguok	Deoxynucleoside kinase domain||Deoxynucleoside kinase||P-loop containing nucleoside triphosphate hydrolase	115180433	115208061	-	(374)	antisense
4	TUCP_003197	XLOC_137908	--	TUCP	115207688	115210629	+	ENSRNOT00000042699	ENSRNOG00000029401	Actg2	Actin, conserved site||Actin/actin-like conserved site||Actin family	115215060	115239723	-	4430	downstream
4	TUCP_003197	XLOC_137908	--	TUCP	115207688	115210629	+	ENSRNOT00000015296	ENSRNOG00000011387	Tet3	Zinc finger, CXXC-type||2OGFeDO, oxygenase domain	115066309	115157263	-	50424	upstream
4	TUCP_003197	XLOC_137908	--	TUCP	115207688	115210629	+	ENSRNOT00000014708	ENSRNOG00000012227	Stambp	JAB1/MPN/MOV34 metalloenzyme domain||USP8 dimerisation domain	115249351	115273836	-	38721	downstream
4	TUCP_003197	XLOC_137908	--	TUCP	115207688	115210629	+	ENSRNOT00000084388	ENSRNOG00000011617	Dguok	Deoxynucleoside kinase domain||Deoxynucleoside kinase||P-loop containing nucleoside triphosphate hydrolase	115180971	115208026	-	(339)	antisense
4	TUCP_003197	XLOC_137908	--	TUCP	115207688	115210629	+	ENSRNOT00000086968	ENSRNOG00000012227	Stambp	JAB1/MPN/MOV34 metalloenzyme domain||USP8 dimerisation domain	115249352	115275068	-	38722	downstream
4	TUCP_003195	XLOC_137831	--	TUCP	113497613	113504401	+	ENSRNOT00000067314	ENSRNOG00000006102	Pole4	Transcription factor CBF/NF-Y/archaeal histone domain||Histone-fold	113491644	113497455	-	157	upstream
4	TUCP_003195	XLOC_137831	--	TUCP	113497613	113504401	+	ENSRNOT00000007984	ENSRNOG00000005853	Tacr1	Neurokinin receptor||GPCR, rhodopsin-like, 7TM||G protein-coupled receptor, rhodopsin-like||Neurokinin NK1 receptor	113247795	113414504	+	83108	downstream
4	TUCP_003195	XLOC_137831	--	TUCP	113497613	113504401	+	ENSRNOT00000079173	ENSRNOG00000006102	Pole4	Transcription factor CBF/NF-Y/archaeal histone domain||Histone-fold	113492229	113497396	-	216	upstream
4	TUCP_003195	XLOC_137831	--	TUCP	113497613	113504401	+	ENSRNOT00000008813	ENSRNOG00000006116	Hk2	Hexokinase, N-terminal||Hexokinase, C-terminal||Hexokinase||Hexokinase, binding site	113559427	113610243	-	55025	downstream
4	TUCP_003233	XLOC_138535	--	TUCP	127603028	127668938	+	ENSRNOT00000068274	ENSRNOG00000005686	Suclg2	Succinyl-CoA synthetase-like||Succinyl-CoA synthetase, beta subunit||Succinyl-CoA synthetase, beta subunit, conserved site||ATP-grasp fold, succinyl-CoA synthetase-type||ATP-grasp fold||ATP-citrate lyase/succinyl-CoA ligase||ATP-grasp fold, subdomain 1||ATP-grasp fold, subdomain 2	127552101	127824970	-	(65911)	antisense
4	TUCP_003199	XLOC_137908	--	TUCP	115207707	115210629	+	ENSRNOT00000066678	ENSRNOG00000011617	Dguok	Deoxynucleoside kinase domain||Deoxynucleoside kinase||P-loop containing nucleoside triphosphate hydrolase	115180433	115208061	-	(355)	antisense
4	TUCP_003199	XLOC_137908	--	TUCP	115207707	115210629	+	ENSRNOT00000042699	ENSRNOG00000029401	Actg2	Actin, conserved site||Actin/actin-like conserved site||Actin family	115215060	115239723	-	4430	downstream
4	TUCP_003199	XLOC_137908	--	TUCP	115207707	115210629	+	ENSRNOT00000015296	ENSRNOG00000011387	Tet3	Zinc finger, CXXC-type||2OGFeDO, oxygenase domain	115066309	115157263	-	50443	upstream
4	TUCP_003199	XLOC_137908	--	TUCP	115207707	115210629	+	ENSRNOT00000014708	ENSRNOG00000012227	Stambp	JAB1/MPN/MOV34 metalloenzyme domain||USP8 dimerisation domain	115249351	115273836	-	38721	downstream
4	TUCP_003199	XLOC_137908	--	TUCP	115207707	115210629	+	ENSRNOT00000084388	ENSRNOG00000011617	Dguok	Deoxynucleoside kinase domain||Deoxynucleoside kinase||P-loop containing nucleoside triphosphate hydrolase	115180971	115208026	-	(320)	antisense
4	TUCP_003199	XLOC_137908	--	TUCP	115207707	115210629	+	ENSRNOT00000086968	ENSRNOG00000012227	Stambp	JAB1/MPN/MOV34 metalloenzyme domain||USP8 dimerisation domain	115249352	115275068	-	38722	downstream
4	TUCP_003198	XLOC_137908	--	TUCP	115207707	115210629	+	ENSRNOT00000066678	ENSRNOG00000011617	Dguok	Deoxynucleoside kinase domain||Deoxynucleoside kinase||P-loop containing nucleoside triphosphate hydrolase	115180433	115208061	-	(355)	antisense
4	TUCP_003198	XLOC_137908	--	TUCP	115207707	115210629	+	ENSRNOT00000042699	ENSRNOG00000029401	Actg2	Actin, conserved site||Actin/actin-like conserved site||Actin family	115215060	115239723	-	4430	downstream
4	TUCP_003198	XLOC_137908	--	TUCP	115207707	115210629	+	ENSRNOT00000015296	ENSRNOG00000011387	Tet3	Zinc finger, CXXC-type||2OGFeDO, oxygenase domain	115066309	115157263	-	50443	upstream
4	TUCP_003198	XLOC_137908	--	TUCP	115207707	115210629	+	ENSRNOT00000014708	ENSRNOG00000012227	Stambp	JAB1/MPN/MOV34 metalloenzyme domain||USP8 dimerisation domain	115249351	115273836	-	38721	downstream
4	TUCP_003198	XLOC_137908	--	TUCP	115207707	115210629	+	ENSRNOT00000084388	ENSRNOG00000011617	Dguok	Deoxynucleoside kinase domain||Deoxynucleoside kinase||P-loop containing nucleoside triphosphate hydrolase	115180971	115208026	-	(320)	antisense
4	TUCP_003198	XLOC_137908	--	TUCP	115207707	115210629	+	ENSRNOT00000086968	ENSRNOG00000012227	Stambp	JAB1/MPN/MOV34 metalloenzyme domain||USP8 dimerisation domain	115249352	115275068	-	38722	downstream
4	TUCP_003230	XLOC_138412	--	TUCP	124892062	124902711	+	ENSRNOT00000057045	ENSRNOG00000023257	Adamts9	Peptidase M12B, GON-ADAMTSs||Peptidase M12B, ADAM/reprolysin||Metallopeptidase, catalytic domain||Peptidase M12B, propeptide||ADAM-TS Spacer 1||Peptidase M12B, ADAM-TS||Thrombospondin type-1 (TSP1) repeat	124660262	124858250	-	33811	upstream
10	TUCP_000884	XLOC_032870	--	TUCP	103198427	103202059	-	ENSRNOT00000004081	ENSRNOG00000024578	Ttyh2	Tweety	103206014	103248862	+	3954	upstream
10	TUCP_000884	XLOC_032870	--	TUCP	103198427	103202059	-	ENSRNOT00000038852	ENSRNOG00000024523	Dnai2	WD40 repeat||WD40/YVTN repeat-like-containing domain||WD40-repeat-containing domain	103266296	103301544	+	64236	upstream
10	TUCP_000885	XLOC_032964	--	TUCP	105459131	105492287	-	ENSRNOT00000032163	ENSRNOG00000010626	Sphk1	Diacylglycerol kinase, catalytic domain||NAD kinase/diacylglycerol kinase-like domain	105498728	105504393	+	6440	upstream
10	TUCP_000885	XLOC_032964	--	TUCP	105459131	105492287	-	ENSRNOT00000013573	ENSRNOG00000010083	Prpsap1	Phosphoribosyltransferase-like||Ribose-phosphate pyrophosphokinase, N-terminal domain||Ribose-phosphate diphosphokinase	105430520	105452228	-	6902	upstream
10	TUCP_000885	XLOC_032964	--	TUCP	105459131	105492287	-	ENSRNOT00000088457	ENSRNOG00000010626	Sphk1	Diacylglycerol kinase, catalytic domain||NAD kinase/diacylglycerol kinase-like domain	105499569	105504393	+	7281	upstream
10	TUCP_000885	XLOC_032964	--	TUCP	105459131	105492287	-	ENSRNOT00000014699	ENSRNOG00000011007	Ube2o	Ubiquitin-conjugating enzyme/RWD-like||Ubiquitin-conjugating enzyme E2	105506955	105552986	-	14667	downstream
10	TUCP_000885	XLOC_032964	--	TUCP	105459131	105492287	-	ENSRNOT00000034817	ENSRNOG00000025254	Qrich2	Protein of unknown function DUF4795	105399814	105412627	-	46503	upstream
10	TUCP_000885	XLOC_032964	--	TUCP	105459131	105492287	-	ENSRNOT00000072230	ENSRNOG00000049862	Rnf157	Zinc finger, RING-type||Zinc finger, RING/FYVE/PHD-type	105298934	105368242	-	90888	upstream
10	TUCP_000885	XLOC_032964	--	TUCP	105459131	105492287	-	ENSRNOT00000015221	ENSRNOG00000011182	Aanat	Acyl-CoA N-acyltransferase||GNAT domain	105568091	105572403	+	75803	upstream
10	TUCP_000885	XLOC_032964	--	TUCP	105459131	105492287	-	ENSRNOT00000075293	ENSRNOG00000049862	Rnf157	Zinc finger, RING-type||Zinc finger, RING/FYVE/PHD-type	105293490	105368242	-	90888	upstream
10	TUCP_000885	XLOC_032964	--	TUCP	105459131	105492287	-	ENSRNOT00000013359	ENSRNOG00000010029	Ubald2	UBA-like	105393072	105396863	+	62267	downstream
10	TUCP_000885	XLOC_032964	--	TUCP	105459131	105492287	-	ENSRNOT00000083593	ENSRNOG00000010626	Sphk1	Diacylglycerol kinase, catalytic domain||NAD kinase/diacylglycerol kinase-like domain	105500290	105504393	+	8002	upstream
10	TUCP_000885	XLOC_032964	--	TUCP	105459131	105492287	-	ENSRNOT00000068026	ENSRNOG00000011459	Rhbdf2	Rhomboid serine protease||Peptidase S54, rhomboid domain||Peptidase S54, rhomboid	105573752	105600913	-	81464	downstream
10	TUCP_000885	XLOC_032964	--	TUCP	105459131	105492287	-	ENSRNOT00000079080	ENSRNOG00000010626	Sphk1	Diacylglycerol kinase, catalytic domain||NAD kinase/diacylglycerol kinase-like domain	105500290	105504393	+	8002	upstream
10	TUCP_000886	XLOC_033255	--	TUCP	108030805	108031233	-	ENSRNOT00000073470	ENSRNOG00000047026	Enpp7	Ectonucleotide pyrophosphatase/phosphodiesterase family||Ectonucleotide pyrophosphatase/phosphodiesterase family member 7||Alkaline-phosphatase-like, core domain||Alkaline phosphatase-like, alpha/beta/alpha||Type I phosphodiesterase/nucleotide pyrophosphatase/phosphate transferase	108095131	108099483	+	63897	upstream
10	TUCP_000887	XLOC_033296	--	TUCP	108963440	108978157	-	ENSRNOT00000005379	ENSRNOG00000004014	Chmp6	Snf7 family	109073678	109079348	+	95520	upstream
10	TUCP_000887	XLOC_033296	--	TUCP	108963440	108978157	-	ENSRNOT00000005337	ENSRNOG00000003821	Rptor	WD40 repeat||Raptor, N-terminal CASPase-like domain||Armadillo-like helical||WD40/YVTN repeat-like-containing domain||Regulatory associated protein of TOR||Armadillo-type fold||WD40-repeat-containing domain||HEAT repeat	108750620	109058691	+	(14718)	antisense
10	TUCP_000880	XLOC_032621	--	TUCP	95631249	95675200	-	ENSRNOT00000029782	ENSRNOG00000027271	RGD1359290	Ribosomal protein L22/L17, eukaryotic/archaeal||Ribosomal protein L22/L17||Ribosomal protein L22/L17, conserved site	95642640	95657977	+	(15338)	antisense
10	TUCP_000880	XLOC_032621	--	TUCP	95631249	95675200	-	ENSRNOT00000004283	ENSRNOG00000003117	Psmd12	Proteasome component (PCI) domain||Winged helix-turn-helix DNA-binding domain	95706685	95725812	+	31484	upstream
10	TUCP_000880	XLOC_032621	--	TUCP	95631249	95675200	-	ENSRNOT00000030300	ENSRNOG00000003213	Helz	P-loop containing nucleoside triphosphate hydrolase||Zinc finger, CCCH-type	95770154	95906927	+	94953	upstream
10	TUCP_000881	XLOC_032621	--	TUCP	95631249	95675202	-	ENSRNOT00000029782	ENSRNOG00000027271	RGD1359290	Ribosomal protein L22/L17, eukaryotic/archaeal||Ribosomal protein L22/L17||Ribosomal protein L22/L17, conserved site	95642640	95657977	+	(15338)	antisense
10	TUCP_000881	XLOC_032621	--	TUCP	95631249	95675202	-	ENSRNOT00000004283	ENSRNOG00000003117	Psmd12	Proteasome component (PCI) domain||Winged helix-turn-helix DNA-binding domain	95706685	95725812	+	31482	upstream
10	TUCP_000881	XLOC_032621	--	TUCP	95631249	95675202	-	ENSRNOT00000030300	ENSRNOG00000003213	Helz	P-loop containing nucleoside triphosphate hydrolase||Zinc finger, CCCH-type	95770154	95906927	+	94951	upstream
10	TUCP_000882	XLOC_032621	--	TUCP	95631249	95675202	-	ENSRNOT00000029782	ENSRNOG00000027271	RGD1359290	Ribosomal protein L22/L17, eukaryotic/archaeal||Ribosomal protein L22/L17||Ribosomal protein L22/L17, conserved site	95642640	95657977	+	(15338)	antisense
10	TUCP_000882	XLOC_032621	--	TUCP	95631249	95675202	-	ENSRNOT00000004283	ENSRNOG00000003117	Psmd12	Proteasome component (PCI) domain||Winged helix-turn-helix DNA-binding domain	95706685	95725812	+	31482	upstream
10	TUCP_000882	XLOC_032621	--	TUCP	95631249	95675202	-	ENSRNOT00000030300	ENSRNOG00000003213	Helz	P-loop containing nucleoside triphosphate hydrolase||Zinc finger, CCCH-type	95770154	95906927	+	94951	upstream
10	TUCP_000883	XLOC_032621	--	TUCP	95631249	95680370	-	ENSRNOT00000029782	ENSRNOG00000027271	RGD1359290	Ribosomal protein L22/L17, eukaryotic/archaeal||Ribosomal protein L22/L17||Ribosomal protein L22/L17, conserved site	95642640	95657977	+	(15338)	antisense
10	TUCP_000883	XLOC_032621	--	TUCP	95631249	95680370	-	ENSRNOT00000004283	ENSRNOG00000003117	Psmd12	Proteasome component (PCI) domain||Winged helix-turn-helix DNA-binding domain	95706685	95725812	+	26314	upstream
10	TUCP_000883	XLOC_032621	--	TUCP	95631249	95680370	-	ENSRNOT00000030300	ENSRNOG00000003213	Helz	P-loop containing nucleoside triphosphate hydrolase||Zinc finger, CCCH-type	95770154	95906927	+	89783	upstream
6	TUCP_003755	XLOC_164804	--	TUCP	91489568	91497889	+	ENSRNOT00000005608	ENSRNOG00000004234	Mgat2	N-acetylglucosaminyltransferase II||Nucleotide-diphospho-sugar transferases	91476698	91479183	+	10384	downstream
6	TUCP_003755	XLOC_164804	--	TUCP	91489568	91497889	+	ENSRNOT00000005577	ENSRNOG00000004196	Rps29	Ribosomal protein S14, conserved site||Ribosomal protein S14	91455333	91456696	-	32871	upstream
6	TUCP_003755	XLOC_164804	--	TUCP	91489568	91497889	+	ENSRNOT00000006223	ENSRNOG00000004474	Klhdc2	Kelch-type beta propeller	91595823	91610799	+	97933	upstream
6	TUCP_003755	XLOC_164804	--	TUCP	91489568	91497889	+	ENSRNOT00000059187	ENSRNOG00000028155	Dnaaf2	PIH1 family	91481954	91490366	-	(799)	antisense
6	TUCP_003755	XLOC_164804	--	TUCP	91489568	91497889	+	ENSRNOT00000005595	ENSRNOG00000004216	Lrr1	Leucine-rich repeat||Leucine-rich repeat, typical subtype||Leucine-rich repeat domain, L domain-like	91463308	91472308	+	17259	downstream
6	TUCP_003755	XLOC_164804	--	TUCP	91489568	91497889	+	ENSRNOT00000034507	ENSRNOG00000028058	AABR07064716.1	Nascent polypeptide-associated complex NAC domain	91580777	91581262	-	82887	downstream
6	TUCP_003755	XLOC_164804	--	TUCP	91489568	91497889	+	ENSRNOT00000082500	ENSRNOG00000004425	Klhdc1	Kelch-type beta propeller||Kelch repeat type 2	91532467	91584200	+	34577	upstream
6	TUCP_003755	XLOC_164804	--	TUCP	91489568	91497889	+	ENSRNOT00000005835	ENSRNOG00000004242	Pole2	DNA polymerase alpha/epsilon, subunit B||DNA polymerase epsilon subunit B, N-terminal||DNA polymerase epsilon, subunit B	91494393	91518996	-	(3497)	antisense
6	TUCP_003755	XLOC_164804	--	TUCP	91489568	91497889	+	ENSRNOT00000064668	ENSRNOG00000004425	Klhdc1	Kelch-type beta propeller||Kelch repeat type 2	91532469	91583013	+	34579	upstream
6	TUCP_003754	XLOC_164804	--	TUCP	91489568	91497889	+	ENSRNOT00000005608	ENSRNOG00000004234	Mgat2	N-acetylglucosaminyltransferase II||Nucleotide-diphospho-sugar transferases	91476698	91479183	+	10384	downstream
6	TUCP_003754	XLOC_164804	--	TUCP	91489568	91497889	+	ENSRNOT00000005577	ENSRNOG00000004196	Rps29	Ribosomal protein S14, conserved site||Ribosomal protein S14	91455333	91456696	-	32871	upstream
6	TUCP_003754	XLOC_164804	--	TUCP	91489568	91497889	+	ENSRNOT00000006223	ENSRNOG00000004474	Klhdc2	Kelch-type beta propeller	91595823	91610799	+	97933	upstream
6	TUCP_003754	XLOC_164804	--	TUCP	91489568	91497889	+	ENSRNOT00000059187	ENSRNOG00000028155	Dnaaf2	PIH1 family	91481954	91490366	-	(799)	antisense
6	TUCP_003754	XLOC_164804	--	TUCP	91489568	91497889	+	ENSRNOT00000005595	ENSRNOG00000004216	Lrr1	Leucine-rich repeat||Leucine-rich repeat, typical subtype||Leucine-rich repeat domain, L domain-like	91463308	91472308	+	17259	downstream
6	TUCP_003754	XLOC_164804	--	TUCP	91489568	91497889	+	ENSRNOT00000034507	ENSRNOG00000028058	AABR07064716.1	Nascent polypeptide-associated complex NAC domain	91580777	91581262	-	82887	downstream
6	TUCP_003754	XLOC_164804	--	TUCP	91489568	91497889	+	ENSRNOT00000082500	ENSRNOG00000004425	Klhdc1	Kelch-type beta propeller||Kelch repeat type 2	91532467	91584200	+	34577	upstream
6	TUCP_003754	XLOC_164804	--	TUCP	91489568	91497889	+	ENSRNOT00000005835	ENSRNOG00000004242	Pole2	DNA polymerase alpha/epsilon, subunit B||DNA polymerase epsilon subunit B, N-terminal||DNA polymerase epsilon, subunit B	91494393	91518996	-	(3497)	antisense
6	TUCP_003754	XLOC_164804	--	TUCP	91489568	91497889	+	ENSRNOT00000064668	ENSRNOG00000004425	Klhdc1	Kelch-type beta propeller||Kelch repeat type 2	91532469	91583013	+	34579	upstream
6	TUCP_003756	XLOC_164891	--	TUCP	93365505	93369986	+	ENSRNOT00000089473	ENSRNOG00000026239	Arid4a	Chromo domain-like||Chromo/chromo shadow domain||Tudor domain||RNA binding activity-knot of a chromodomain||RBB1NT||ARID DNA-binding domain	93462852	93531806	+	92865	upstream
6	TUCP_003756	XLOC_164891	--	TUCP	93365505	93369986	+	ENSRNOT00000010753	ENSRNOG00000007851	Psma3	Proteasome, subunit alpha/beta||Nucleophile aminohydrolases, N-terminal||Proteasome alpha-subunit, N-terminal domain||Proteasome A-type subunit	93423002	93444240	+	53015	upstream
6	TUCP_003756	XLOC_164891	--	TUCP	93365505	93369986	+	ENSRNOT00000009610	ENSRNOG00000007329	Frmd6	Ubiquitin-related domain||FERM/acyl-CoA-binding protein, 3-helical bundle||FERM, C-terminal PH-like domain||FERM, N-terminal||FERM central domain||Band 4.1 domain||PH domain-like||FERM domain	93281408	93358840	+	6664	downstream
6	TUCP_003756	XLOC_164891	--	TUCP	93365505	93369986	+	ENSRNOT00000031595	ENSRNOG00000026239	Arid4a	Chromo domain-like||Chromo/chromo shadow domain||Tudor domain||RNA binding activity-knot of a chromodomain||RBB1NT||ARID DNA-binding domain	93461713	93532901	+	91726	upstream
6	TUCP_003756	XLOC_164891	--	TUCP	93365505	93369986	+	ENSRNOT00000010300	ENSRNOG00000007504	Actr10	Actin family||Actin-related protein 10	93385457	93411576	+	15470	upstream
6	TUCP_003751	XLOC_164579	--	TUCP	79305330	79333618	+	ENSRNOT00000030706	ENSRNOG00000022697	Clec14a	C-type lectin-like||C-type lectin||C-type lectin fold	79303304	79306443	-	(1114)	antisense
6	TUCP_003751	XLOC_164579	--	TUCP	79305330	79333618	+	ENSRNOT00000073970	ENSRNOG00000048145	Sstr1	Somatostatin receptor 1||Somatostatin receptor family||GPCR, rhodopsin-like, 7TM||G protein-coupled receptor, rhodopsin-like	79254339	79258611	+	46718	downstream
10	TUCP_000889	XLOC_033326	--	TUCP	109371217	109373654	-	ENSRNOT00000066736	ENSRNOG00000043102	Bahcc1	Bromo adjacent homology (BAH) domain	109446444	109479891	+	72789	upstream
10	TUCP_000889	XLOC_033326	--	TUCP	109371217	109373654	-	ENSRNOT00000065565	ENSRNOG00000042653	LOC690871	-	109278712	109280863	+	90353	downstream
10	TUCP_000889	XLOC_033326	--	TUCP	109371217	109373654	-	ENSRNOT00000006225	ENSRNOG00000004604	Slc38a10	Amino acid transporter, transmembrane domain	109284957	109333899	-	37317	upstream
10	TUCP_000889	XLOC_033326	--	TUCP	109371217	109373654	-	ENSRNOT00000038993	ENSRNOG00000028161	Tepsin	ENTH domain||ENTH/VHS	109271172	109278510	-	92706	upstream
6	TUCP_003753	XLOC_164725	--	TUCP	86517719	86570608	+	ENSRNOT00000034756	ENSRNOG00000023230	RGD1307621	-	86651196	86659371	+	80587	upstream
9	TUCP_004517	XLOC_199252	--	TUCP	102980404	102982241	+	ENSRNOT00000050494	ENSRNOG00000019087	Fam174a	Protein of unknown function DUF1180	102862890	102881038	+	99365	downstream
4	TUCP_003234	XLOC_138628	--	TUCP	131957697	131972187	+	ENSRNOT00000013719	ENSRNOG00000010301	Eif4e3	Translation Initiation factor eIF- 4e-like||Translation Initiation factor eIF- 4e	132068598	132111079	-	96410	downstream
2	TUCP_002352	XLOC_098119	--	TUCP	104679119	104686246	+	ENSRNOT00000082627	ENSRNOG00000011913	Cp	Multicopper oxidase, type 3||Ceruloplasmin||Cupredoxin||Multicopper oxidase, type 2||Multicopper oxidase, type 1||Multicopper oxidases, conserved site||Multicopper oxidase, copper-binding site	104744476	104799853	+	58229	upstream
2	TUCP_002352	XLOC_098119	--	TUCP	104679119	104686246	+	ENSRNOT00000016083	ENSRNOG00000011913	Cp	Multicopper oxidase, type 3||Ceruloplasmin||Cupredoxin||Multicopper oxidase, type 2||Multicopper oxidase, type 1||Multicopper oxidases, conserved site||Multicopper oxidase, copper-binding site	104744461	104789146	+	58214	upstream
17	TUCP_001968	XLOC_079628	--	TUCP	14064010	14076800	-	ENSRNOT00000019489	ENSRNOG00000014538	Nxnl2	Thioredoxin-like fold||Nucleoredoxin-like protein 2	14053896	14058642	-	5367	upstream
17	TUCP_001968	XLOC_079628	--	TUCP	14064010	14076800	-	ENSRNOT00000075373	ENSRNOG00000046068	AABR07027088.1	Spindlin/spermiogenesis-specific protein	14087182	14091766	-	10381	downstream
17	TUCP_001969	XLOC_079634	--	TUCP	14138836	14142216	-	ENSRNOT00000019489	ENSRNOG00000014538	Nxnl2	Thioredoxin-like fold||Nucleoredoxin-like protein 2	14053896	14058642	-	80193	upstream
17	TUCP_001969	XLOC_079634	--	TUCP	14138836	14142216	-	ENSRNOT00000075373	ENSRNOG00000046068	AABR07027088.1	Spindlin/spermiogenesis-specific protein	14087182	14091766	-	47069	upstream
4	TUCP_003331	XLOC_143339	--	TUCP	67561180	67606986	-	ENSRNOT00000039067	ENSRNOG00000026528	Mrps33	Ribosomal protein S27/S33, mitochondrial	67607273	67610710	-	286	downstream
4	TUCP_003331	XLOC_143339	--	TUCP	67561180	67606986	-	ENSRNOT00000014604	ENSRNOG00000010957	Braf	Raf-like Ras-binding||Protein kinase domain||Protein kinase-like domain||Diacylglycerol/phorbol-ester binding||Serine-threonine/tyrosine-protein kinase catalytic domain||Protein kinase C-like, phorbol ester/diacylglycerol-binding domain||Serine/threonine-protein kinase, active site||Protein kinase, ATP binding site||Ubiquitin-related domain	67396192	67520356	-	40823	upstream
2	TUCP_002561	XLOC_108796	--	TUCP	117531881	117580309	-	ENSRNOT00000015479	ENSRNOG00000011640	AABR07009931.1	MDS1-EVI1 complex locus protein MDS1	117666294	117666683	-	85984	downstream
2	TUCP_002561	XLOC_108796	--	TUCP	117531881	117580309	-	ENSRNOT00000068381	ENSRNOG00000012645	Mecom	Evi1/Prdm16||Zinc finger, C2H2||Zinc finger C2H2-type/integrase DNA-binding domain||Zinc finger, C2H2-like	117396007	117454769	-	77111	upstream
2	TUCP_002560	XLOC_108796	--	TUCP	117513031	117574211	-	ENSRNOT00000015479	ENSRNOG00000011640	AABR07009931.1	MDS1-EVI1 complex locus protein MDS1	117666294	117666683	-	92082	downstream
2	TUCP_002560	XLOC_108796	--	TUCP	117513031	117574211	-	ENSRNOT00000068381	ENSRNOG00000012645	Mecom	Evi1/Prdm16||Zinc finger, C2H2||Zinc finger C2H2-type/integrase DNA-binding domain||Zinc finger, C2H2-like	117396007	117454769	-	58261	upstream
2	TUCP_002563	XLOC_108829	--	TUCP	117602507	117614557	-	ENSRNOT00000015479	ENSRNOG00000011640	AABR07009931.1	MDS1-EVI1 complex locus protein MDS1	117666294	117666683	-	51736	downstream
9	TUCP_004450	XLOC_195970	--	TUCP	9463422	9522430	+	ENSRNOT00000073294	ENSRNOG00000050430	Vav1	Guanine-nucleotide dissociation stimulator, CDC24, conserved site||PH domain-like||SH2 domain||Protein vav||Protein kinase C-like, phorbol ester/diacylglycerol-binding domain||Calmodulin-regulated spectrin-associated protein, CH domain||Variant SH3 domain||Smooth muscle protein/calponin||SH3 domain||Calponin homology domain||Dbl homology (DH) domain	9617786	9675110	-	95355	downstream
9	TUCP_004450	XLOC_195970	--	TUCP	9463422	9522430	+	ENSRNOT00000073926	ENSRNOG00000046254	Adgre1	EGF-like domain||EGF-like calcium-binding domain||GPCR, family 2-like||Complement Clr-like EGF domain||Growth factor receptor cysteine-rich domain||EGF-type aspartate/asparagine hydroxylation site||GPCR, family 2, secretin-like, conserved site||EGF-like calcium-binding, conserved site||GPCR family 2, EMR1-like receptor||EGF-like, conserved site||GPCR, family 2, secretin-like||GPS motif	9431860	9585865	-	(59009)	antisense
2	TUCP_002565	XLOC_108833	--	TUCP	117708727	117775049	-	ENSRNOT00000015479	ENSRNOG00000011640	AABR07009931.1	MDS1-EVI1 complex locus protein MDS1	117666294	117666683	-	42043	upstream
2	TUCP_002564	XLOC_108829	--	TUCP	117602507	117614557	-	ENSRNOT00000015479	ENSRNOG00000011640	AABR07009931.1	MDS1-EVI1 complex locus protein MDS1	117666294	117666683	-	51736	downstream
2	TUCP_002566	XLOC_108848	--	TUCP	117748704	117750621	-	ENSRNOT00000015479	ENSRNOG00000011640	AABR07009931.1	MDS1-EVI1 complex locus protein MDS1	117666294	117666683	-	82020	upstream
7	TUCP_004193	XLOC_184374	--	TUCP	134750853	134788727	-	ENSRNOT00000090908	ENSRNOG00000022778	Pphln1	Periphilin-1	134603121	134695864	+	54988	downstream
7	TUCP_004193	XLOC_184374	--	TUCP	134750853	134788727	-	ENSRNOT00000036750	ENSRNOG00000022772	Prickle1	PET domain||Zinc finger, LIM-type	134702964	134722215	-	28637	upstream
7	TUCP_004193	XLOC_184374	--	TUCP	134750853	134788727	-	ENSRNOT00000055688	ENSRNOG00000022778	Pphln1	Periphilin-1	134603122	134693804	+	57048	downstream
2	TUCP_002353	XLOC_098185	--	TUCP	105253150	105267368	+	ENSRNOT00000014178	ENSRNOG00000010640	Agtr1b	Angiotensin II receptor type 1||Angiotensin II receptor family||GPCR, rhodopsin-like, 7TM||G protein-coupled receptor, rhodopsin-like	105149020	105224295	-	28854	upstream
16	TUCP_001802	XLOC_074612	--	TUCP	72367335	72401692	-	ENSRNOT00000032116	ENSRNOG00000025365	Ido2	Indoleamine 2,3-dioxygenase	72268943	72289156	+	78178	downstream
16	TUCP_001802	XLOC_074612	--	TUCP	72367335	72401692	-	ENSRNOT00000074449	ENSRNOG00000047977	LOC100910163	Arginine vasopressin-induced protein 1/C8orf4	72401887	72403179	+	194	upstream
16	TUCP_001802	XLOC_074612	--	TUCP	72367335	72401692	-	ENSRNOT00000072459	ENSRNOG00000049811	LOC684871	Arginine vasopressin-induced protein 1/C8orf4	72388880	72389200	+	(321)	antisense
20	TUCP_002763	XLOC_117239	--	TUCP	25979406	26024484	-	ENSRNOT00000033980	ENSRNOG00000026466	Lrrtm3	Leucine-rich repeat domain, L domain-like||Leucine-rich repeat||Leucine-rich repeat, typical subtype||Leucine-rich repeat N-terminal domain	25990304	26163656	+	(34181)	antisense
20	TUCP_002763	XLOC_117239	--	TUCP	25979406	26024484	-	ENSRNOT00000081254	ENSRNOG00000026466	Lrrtm3	Leucine-rich repeat domain, L domain-like||Leucine-rich repeat||Leucine-rich repeat, typical subtype||Leucine-rich repeat N-terminal domain	25990656	25996550	+	(5895)	antisense
20	TUCP_002716	XLOC_114941	--	TUCP	21565691	21595449	+	ENSRNOT00000038095	ENSRNOG00000027859	Tmem26	Transmembrane protein 26	21642484	21689553	-	47034	downstream
20	TUCP_002761	XLOC_117228	--	TUCP	25922618	25978393	-	ENSRNOT00000033980	ENSRNOG00000026466	Lrrtm3	Leucine-rich repeat domain, L domain-like||Leucine-rich repeat||Leucine-rich repeat, typical subtype||Leucine-rich repeat N-terminal domain	25990304	26163656	+	11910	upstream
20	TUCP_002761	XLOC_117228	--	TUCP	25922618	25978393	-	ENSRNOT00000081254	ENSRNOG00000026466	Lrrtm3	Leucine-rich repeat domain, L domain-like||Leucine-rich repeat||Leucine-rich repeat, typical subtype||Leucine-rich repeat N-terminal domain	25990656	25996550	+	12262	upstream
20	TUCP_002761	XLOC_117228	--	TUCP	25922618	25978393	-	ENSRNOT00000084660	ENSRNOG00000000373	Ctnna3	Vinculin/alpha-catenin||Alpha T-catenin||Alpha-catenin	25064702	25826658	-	95959	upstream
20	TUCP_002761	XLOC_117228	--	TUCP	25922618	25978393	-	ENSRNOT00000057950	ENSRNOG00000000373	Ctnna3	Vinculin/alpha-catenin||Alpha T-catenin||Alpha-catenin	25064702	25826658	-	95959	upstream
20	TUCP_002760	XLOC_117143	--	TUCP	20631758	20634484	-	ENSRNOT00000087085	ENSRNOG00000000633	Rhobtb1	Small GTPase superfamily||BTB/POZ domain||Small GTP-binding protein domain||SKP1/BTB/POZ domain||P-loop containing nucleoside triphosphate hydrolase	20640685	20680675	-	6200	downstream
20	TUCP_002760	XLOC_117143	--	TUCP	20631758	20634484	-	ENSRNOT00000086806	ENSRNOG00000000632	Cdk1	Protein kinase, ATP binding site||Serine/threonine-protein kinase, active site||Protein kinase-like domain||Protein kinase domain	20576385	20591487	+	40270	downstream
20	TUCP_002760	XLOC_117143	--	TUCP	20631758	20634484	-	ENSRNOT00000000784	ENSRNOG00000000633	Rhobtb1	Small GTPase superfamily||BTB/POZ domain||Small GTP-binding protein domain||SKP1/BTB/POZ domain||P-loop containing nucleoside triphosphate hydrolase	20638579	20713128	-	4094	downstream
20	TUCP_002760	XLOC_117143	--	TUCP	20631758	20634484	-	ENSRNOT00000000783	ENSRNOG00000000632	Cdk1	Protein kinase, ATP binding site||Serine/threonine-protein kinase, active site||Protein kinase-like domain||Protein kinase domain	20576377	20591509	+	40248	downstream
20	TUCP_002760	XLOC_117143	--	TUCP	20631758	20634484	-	ENSRNOT00000081113	ENSRNOG00000000632	Cdk1	Protein kinase, ATP binding site||Serine/threonine-protein kinase, active site||Protein kinase-like domain||Protein kinase domain	20577561	20591549	+	40208	downstream
20	TUCP_002767	XLOC_117240	--	TUCP	26101474	26170447	-	ENSRNOT00000033980	ENSRNOG00000026466	Lrrtm3	Leucine-rich repeat domain, L domain-like||Leucine-rich repeat||Leucine-rich repeat, typical subtype||Leucine-rich repeat N-terminal domain	25990304	26163656	+	(62183)	antisense
20	TUCP_002766	XLOC_117240	--	TUCP	26101474	26170447	-	ENSRNOT00000033980	ENSRNOG00000026466	Lrrtm3	Leucine-rich repeat domain, L domain-like||Leucine-rich repeat||Leucine-rich repeat, typical subtype||Leucine-rich repeat N-terminal domain	25990304	26163656	+	(62183)	antisense
20	TUCP_002765	XLOC_117240	--	TUCP	26101474	26170447	-	ENSRNOT00000033980	ENSRNOG00000026466	Lrrtm3	Leucine-rich repeat domain, L domain-like||Leucine-rich repeat||Leucine-rich repeat, typical subtype||Leucine-rich repeat N-terminal domain	25990304	26163656	+	(62183)	antisense
20	TUCP_002764	XLOC_117240	--	TUCP	26101474	26170447	-	ENSRNOT00000033980	ENSRNOG00000026466	Lrrtm3	Leucine-rich repeat domain, L domain-like||Leucine-rich repeat||Leucine-rich repeat, typical subtype||Leucine-rich repeat N-terminal domain	25990304	26163656	+	(62183)	antisense
3	TUCP_002819	XLOC_119447	--	TUCP	33084326	33116705	+	ENSRNOT00000007404	ENSRNOG00000005334	Acvr2a	Activin types I and II receptor domain||Serine/threonine-protein kinase, active site||Protein kinase-like domain||Protein kinase domain||Ser/Thr protein kinase, TGFB receptor	32947378	33034282	+	50043	downstream
3	TUCP_002819	XLOC_119447	--	TUCP	33084326	33116705	+	ENSRNOT00000006937	ENSRNOG00000005021	Orc4	P-loop containing nucleoside triphosphate hydrolase||Origin recognition complex subunit 4||Origin recognition complex subunit 4, C-terminal||AAA+ ATPase domain	33037034	33075685	-	8640	upstream
3	TUCP_002818	XLOC_119447	--	TUCP	33084326	33111643	+	ENSRNOT00000007404	ENSRNOG00000005334	Acvr2a	Activin types I and II receptor domain||Serine/threonine-protein kinase, active site||Protein kinase-like domain||Protein kinase domain||Ser/Thr protein kinase, TGFB receptor	32947378	33034282	+	50043	downstream
3	TUCP_002818	XLOC_119447	--	TUCP	33084326	33111643	+	ENSRNOT00000006937	ENSRNOG00000005021	Orc4	P-loop containing nucleoside triphosphate hydrolase||Origin recognition complex subunit 4||Origin recognition complex subunit 4, C-terminal||AAA+ ATPase domain	33037034	33075685	-	8640	upstream
20	TUCP_002769	XLOC_117242	--	TUCP	26179580	26203416	-	ENSRNOT00000033980	ENSRNOG00000026466	Lrrtm3	Leucine-rich repeat domain, L domain-like||Leucine-rich repeat||Leucine-rich repeat, typical subtype||Leucine-rich repeat N-terminal domain	25990304	26163656	+	15923	downstream
20	TUCP_002768	XLOC_117242	--	TUCP	26179580	26202806	-	ENSRNOT00000033980	ENSRNOG00000026466	Lrrtm3	Leucine-rich repeat domain, L domain-like||Leucine-rich repeat||Leucine-rich repeat, typical subtype||Leucine-rich repeat N-terminal domain	25990304	26163656	+	15923	downstream
11	TUCP_000921	XLOC_033919	--	TUCP	15809611	15823275	+	ENSRNOT00000090586	ENSRNOG00000055793	AABR07033287.1	-	15858069	15858281	-	34793	downstream
7	TUCP_004109	XLOC_179513	--	TUCP	17998024	18031820	-	ENSRNOT00000068151	ENSRNOG00000048787	Vom1r108	GPCR, rhodopsin-like, 7TM||Vomeronasal receptor, type 1	18120715	18121635	+	88894	upstream
7	TUCP_004109	XLOC_179513	--	TUCP	17998024	18031820	-	ENSRNOT00000064298	ENSRNOG00000043367	Vom1r106	Vomeronasal receptor, type 1||GPCR, rhodopsin-like, 7TM	17956631	17957554	+	40469	downstream
7	TUCP_004109	XLOC_179513	--	TUCP	17998024	18031820	-	ENSRNOT00000065474	ENSRNOG00000042090	Vom1r107	Vomeronasal receptor, type 1||GPCR, rhodopsin-like, 7TM	18068060	18069043	+	36239	upstream
7	TUCP_004108	XLOC_179512	--	TUCP	17863674	17888113	-	ENSRNOT00000030164	ENSRNOG00000028214	Zscan4f	Retrovirus capsid, C-terminal||SCAN domain||Zinc finger, C2H2||Zinc finger C2H2-type/integrase DNA-binding domain||Zinc finger, C2H2-like	17852184	17859653	-	4020	upstream
7	TUCP_004108	XLOC_179512	--	TUCP	17863674	17888113	-	ENSRNOT00000064298	ENSRNOG00000043367	Vom1r106	Vomeronasal receptor, type 1||GPCR, rhodopsin-like, 7TM	17956631	17957554	+	68517	upstream
2	TUCP_002350	XLOC_098118	--	TUCP	104648093	104702577	+	ENSRNOT00000082627	ENSRNOG00000011913	Cp	Multicopper oxidase, type 3||Ceruloplasmin||Cupredoxin||Multicopper oxidase, type 2||Multicopper oxidase, type 1||Multicopper oxidases, conserved site||Multicopper oxidase, copper-binding site	104744476	104799853	+	41898	upstream
2	TUCP_002350	XLOC_098118	--	TUCP	104648093	104702577	+	ENSRNOT00000016083	ENSRNOG00000011913	Cp	Multicopper oxidase, type 3||Ceruloplasmin||Cupredoxin||Multicopper oxidase, type 2||Multicopper oxidase, type 1||Multicopper oxidases, conserved site||Multicopper oxidase, copper-binding site	104744461	104789146	+	41883	upstream
2	TUCP_002350	XLOC_098118	--	TUCP	104648093	104702577	+	ENSRNOT00000050440	ENSRNOG00000031406	Hps3	Hermansky-Pudlak syndrome 3 protein||Hermansky-Pudlak syndrome 3 protein, N-terminal domain||Hermansky-Pudlak syndrome 3 protein, C-terminal domain||Hermansky-Pudlak syndrome 3, central region	104789423	104830898	-	86845	downstream
4	TUCP_003339	XLOC_144383	--	TUCP	99033845	99039350	-	ENSRNOT00000008698	ENSRNOG00000006508	Thnsl2	Threonine synthase-like||Tryptophan synthase beta subunit-like PLP-dependent enzyme||Threonine synthase, N-terminal	98976550	98995590	-	38254	upstream
4	TUCP_003339	XLOC_144383	--	TUCP	99033845	99039350	-	ENSRNOT00000009327	ENSRNOG00000007124	Krcc1	-	99133842	99146827	+	94491	upstream
4	TUCP_003339	XLOC_144383	--	TUCP	99033845	99039350	-	ENSRNOT00000008840	ENSRNOG00000006675	Fabp1	Cytosolic fatty-acid binding||Calycin-like||Calycin||Intracellular lipid binding protein	99063181	99066954	+	23830	upstream
4	TUCP_003339	XLOC_144383	--	TUCP	99033845	99039350	-	ENSRNOT00000009184	ENSRNOG00000006776	Smyd1	Zinc finger, MYND-type||SET domain	99074535	99125111	-	35184	downstream
15	TUCP_001634	XLOC_064883	--	TUCP	11216584	11224743	-	ENSRNOT00000007672	ENSRNOG00000005857	Lrrc3b	Leucine-rich repeat N-terminal domain||Leucine-rich repeat||Leucine-rich repeat, typical subtype||Leucine-rich repeat domain, L domain-like	11298478	11299257	+	73734	upstream
15	TUCP_001635	XLOC_064916	--	TUCP	12554102	12569489	-	ENSRNOT00000029140	ENSRNOG00000027633	LOC102550375	-	12584423	12602692	-	14933	downstream
15	TUCP_001635	XLOC_064916	--	TUCP	12554102	12569489	-	ENSRNOT00000010103	ENSRNOG00000007246	Atxn7	SCA7 domain||Ataxin-7	12425175	12513931	-	40170	upstream
15	TUCP_001635	XLOC_064916	--	TUCP	12554102	12569489	-	ENSRNOT00000083787	ENSRNOG00000007701	Thoc7	THO complex subunit 7/Mft1	12569235	12584094	+	(255)	antisense
15	TUCP_001635	XLOC_064916	--	TUCP	12554102	12569489	-	ENSRNOT00000079000	ENSRNOG00000007701	Thoc7	THO complex subunit 7/Mft1	12577440	12583912	+	7950	upstream
15	TUCP_001635	XLOC_064916	--	TUCP	12554102	12569489	-	ENSRNOT00000010675	ENSRNOG00000007701	Thoc7	THO complex subunit 7/Mft1	12570062	12584094	+	572	upstream
8	TUCP_004247	XLOC_186698	--	TUCP	45607927	45717222	+	ENSRNOT00000047820	ENSRNOG00000050630	AABR07070043.1	NAD(P)-binding domain||Glyceraldehyde 3-phosphate dehydrogenase, active site||Glyceraldehyde 3-phosphate dehydrogenase, NAD(P) binding domain||Glyceraldehyde-3-phosphate dehydrogenase, type I||Glyceraldehyde 3-phosphate dehydrogenase, catalytic domain||Glyceraldehyde/Erythrose phosphate dehydrogenase family	45561390	45562574	+	45352	downstream
8	TUCP_004247	XLOC_186698	--	TUCP	45607927	45717222	+	ENSRNOT00000059997	ENSRNOG00000039200	AABR07070046.1	-	45797315	45806638	+	80092	upstream
20	TUCP_002711	XLOC_114905	--	TUCP	20022681	20046649	+	ENSRNOT00000082181	ENSRNOG00000053288	Ank3	Ankyrin repeat||Death-like domain||Ankyrin repeat-containing domain||Death domain||ZU5 domain	20105047	20471259	+	58397	upstream
15	TUCP_001636	XLOC_064916	--	TUCP	12554102	12569489	-	ENSRNOT00000029140	ENSRNOG00000027633	LOC102550375	-	12584423	12602692	-	14933	downstream
15	TUCP_001636	XLOC_064916	--	TUCP	12554102	12569489	-	ENSRNOT00000010103	ENSRNOG00000007246	Atxn7	SCA7 domain||Ataxin-7	12425175	12513931	-	40170	upstream
15	TUCP_001636	XLOC_064916	--	TUCP	12554102	12569489	-	ENSRNOT00000083787	ENSRNOG00000007701	Thoc7	THO complex subunit 7/Mft1	12569235	12584094	+	(255)	antisense
15	TUCP_001636	XLOC_064916	--	TUCP	12554102	12569489	-	ENSRNOT00000079000	ENSRNOG00000007701	Thoc7	THO complex subunit 7/Mft1	12577440	12583912	+	7950	upstream
15	TUCP_001636	XLOC_064916	--	TUCP	12554102	12569489	-	ENSRNOT00000010675	ENSRNOG00000007701	Thoc7	THO complex subunit 7/Mft1	12570062	12584094	+	572	upstream
17	TUCP_001919	XLOC_078882	--	TUCP	289408	336595	-	ENSRNOT00000023685	ENSRNOG00000017597	Fbp1	Fructose-1,6-bisphosphatase||Fructose-1-6-bisphosphatase class I, N-terminal||Fructose-1,6-bisphosphatase, active site||Fructose-1,6-bisphosphatase class 1	396180	417480	-	59584	downstream
17	TUCP_001919	XLOC_078882	--	TUCP	289408	336595	-	ENSRNOT00000023865	ENSRNOG00000017637	Fbp2	Fructose-1,6-bisphosphatase, active site||Fructose-1-6-bisphosphatase class I, N-terminal||Fructose-1,6-bisphosphatase||Fructose-1,6-bisphosphatase class 1	372551	389967	-	35955	downstream
17	TUCP_001918	XLOC_078881	--	TUCP	284997	322328	-	ENSRNOT00000023685	ENSRNOG00000017597	Fbp1	Fructose-1,6-bisphosphatase||Fructose-1-6-bisphosphatase class I, N-terminal||Fructose-1,6-bisphosphatase, active site||Fructose-1,6-bisphosphatase class 1	396180	417480	-	73851	downstream
17	TUCP_001918	XLOC_078881	--	TUCP	284997	322328	-	ENSRNOT00000023865	ENSRNOG00000017637	Fbp2	Fructose-1,6-bisphosphatase, active site||Fructose-1-6-bisphosphatase class I, N-terminal||Fructose-1,6-bisphosphatase||Fructose-1,6-bisphosphatase class 1	372551	389967	-	50222	downstream
8	TUCP_004408	XLOC_194445	--	TUCP	99628204	99650278	-	ENSRNOT00000089624	ENSRNOG00000008048	Plscr1	Scramblase	99713783	99725021	+	63504	upstream
8	TUCP_004408	XLOC_194445	--	TUCP	99628204	99650278	-	ENSRNOT00000087190	ENSRNOG00000008048	Plscr1	Scramblase	99632803	99725217	+	(17476)	antisense
8	TUCP_004408	XLOC_194445	--	TUCP	99628204	99650278	-	ENSRNOT00000073400	ENSRNOG00000047917	Plscr5	Scramblase||Tubby C-terminal-like domain	99568958	99579255	+	48948	downstream
8	TUCP_004408	XLOC_194445	--	TUCP	99628204	99650278	-	ENSRNOT00000010689	ENSRNOG00000008048	Plscr1	Scramblase	99625545	99645881	+	(17678)	antisense
8	TUCP_004408	XLOC_194445	--	TUCP	99628204	99650278	-	ENSRNOT00000042834	ENSRNOG00000030551	LOC102551265	Scramblase	99680406	99783327	+	30127	upstream
8	TUCP_004408	XLOC_194445	--	TUCP	99628204	99650278	-	ENSRNOT00000056727	ENSRNOG00000008048	Plscr1	Scramblase	99625602	99645881	+	(17678)	antisense
8	TUCP_004408	XLOC_194445	--	TUCP	99628204	99650278	-	ENSRNOT00000086524	ENSRNOG00000008048	Plscr1	Scramblase	99636749	99645495	+	(8747)	antisense
4	TUCP_003369	XLOC_146003	--	TUCP	140587831	140614598	-	ENSRNOT00000082723	ENSRNOG00000007104	Itpr1	Ryanodine receptor-related||Armadillo-type fold||Inositol 1,4,5-trisphosphate-binding protein receptor||RyR/IP3R Homology associated domain||MIR motif||Ion transport domain||Inositol 1,4,5-trisphosphate/ryanodine receptor||RIH (RyR and IP3R Homology) domain	140377565	140579477	+	8353	downstream
4	TUCP_003369	XLOC_146003	--	TUCP	140587831	140614598	-	ENSRNOT00000009563	ENSRNOG00000007152	Bhlhe40	Myc-type, basic helix-loop-helix (bHLH) domain||Orange domain	140703619	140709319	+	89020	upstream
4	TUCP_003369	XLOC_146003	--	TUCP	140587831	140614598	-	ENSRNOT00000040255	ENSRNOG00000007104	Itpr1	Ryanodine receptor-related||Armadillo-type fold||Inositol 1,4,5-trisphosphate-binding protein receptor||RyR/IP3R Homology associated domain||MIR motif||Ion transport domain||Inositol 1,4,5-trisphosphate/ryanodine receptor||RIH (RyR and IP3R Homology) domain	140247313	140579675	+	8155	downstream
4	TUCP_003369	XLOC_146003	--	TUCP	140587831	140614598	-	ENSRNOT00000079266	ENSRNOG00000052718	AABR07061707.1	-	140503200	140503412	-	84418	upstream
4	TUCP_003369	XLOC_146003	--	TUCP	140587831	140614598	-	ENSRNOT00000043646	ENSRNOG00000007104	Itpr1	Ryanodine receptor-related||Armadillo-type fold||Inositol 1,4,5-trisphosphate-binding protein receptor||RyR/IP3R Homology associated domain||MIR motif||Ion transport domain||Inositol 1,4,5-trisphosphate/ryanodine receptor||RIH (RyR and IP3R Homology) domain	140247335	140580748	+	7082	downstream
4	TUCP_003369	XLOC_146003	--	TUCP	140587831	140614598	-	ENSRNOT00000041130	ENSRNOG00000007104	Itpr1	Ryanodine receptor-related||Armadillo-type fold||Inositol 1,4,5-trisphosphate-binding protein receptor||RyR/IP3R Homology associated domain||MIR motif||Ion transport domain||Inositol 1,4,5-trisphosphate/ryanodine receptor||RIH (RyR and IP3R Homology) domain	140247335	140580748	+	7082	downstream
4	TUCP_003369	XLOC_146003	--	TUCP	140587831	140614598	-	ENSRNOT00000064025	ENSRNOG00000007104	Itpr1	Ryanodine receptor-related||Armadillo-type fold||Inositol 1,4,5-trisphosphate-binding protein receptor||RyR/IP3R Homology associated domain||MIR motif||Ion transport domain||Inositol 1,4,5-trisphosphate/ryanodine receptor||RIH (RyR and IP3R Homology) domain	140247335	140580748	+	7082	downstream
17	TUCP_001911	XLOC_078874	--	TUCP	65535	357191	-	ENSRNOT00000023685	ENSRNOG00000017597	Fbp1	Fructose-1,6-bisphosphatase||Fructose-1-6-bisphosphatase class I, N-terminal||Fructose-1,6-bisphosphatase, active site||Fructose-1,6-bisphosphatase class 1	396180	417480	-	38988	downstream
17	TUCP_001911	XLOC_078874	--	TUCP	65535	357191	-	ENSRNOT00000023865	ENSRNOG00000017637	Fbp2	Fructose-1,6-bisphosphatase, active site||Fructose-1-6-bisphosphatase class I, N-terminal||Fructose-1,6-bisphosphatase||Fructose-1,6-bisphosphatase class 1	372551	389967	-	15359	downstream
8	TUCP_004405	XLOC_194393	--	TUCP	97527705	97538871	-	ENSRNOT00000019285	ENSRNOG00000014064	Ctsh	Cysteine peptidase, histidine active site||Cysteine peptidase, asparagine active site||Cathepsin propeptide inhibitor domain (I29)||Cysteine peptidase, cysteine active site||Peptidase C1A||Peptidase C1A, papain C-terminal	97439216	97458287	+	69417	downstream
8	TUCP_004405	XLOC_194393	--	TUCP	97527705	97538871	-	ENSRNOT00000080421	ENSRNOG00000058412	Morf4l1	RNA binding activity-knot of a chromodomain||Chromo/chromo shadow domain||MRG||MRG domain||Chromo domain-like	97474092	97494834	-	32870	upstream
8	TUCP_004405	XLOC_194393	--	TUCP	97527705	97538871	-	ENSRNOT00000080142	ENSRNOG00000014064	Ctsh	Cysteine peptidase, histidine active site||Cysteine peptidase, asparagine active site||Cathepsin propeptide inhibitor domain (I29)||Cysteine peptidase, cysteine active site||Peptidase C1A||Peptidase C1A, papain C-terminal	97439161	97458267	+	69437	downstream
8	TUCP_004405	XLOC_194393	--	TUCP	97527705	97538871	-	ENSRNOT00000037276	ENSRNOG00000028036	Adamts7	ADAM-TS Spacer 1||Peptidase M12B, ADAM-TS||Thrombospondin type-1 (TSP1) repeat||PLAC||Peptidase M12B, propeptide||Metallopeptidase, catalytic domain||Peptidase M12B, ADAM/reprolysin	97537968	97575636	+	(904)	antisense
8	TUCP_004405	XLOC_194393	--	TUCP	97527705	97538871	-	ENSRNOT00000030645	ENSRNOG00000014543	Tbc1d2b	Rab-GTPase-TBC domain	97577565	97647072	-	38693	downstream
8	TUCP_004405	XLOC_194393	--	TUCP	97527705	97538871	-	ENSRNOT00000068394	ENSRNOG00000028036	Adamts7	ADAM-TS Spacer 1||Peptidase M12B, ADAM-TS||Thrombospondin type-1 (TSP1) repeat||PLAC||Peptidase M12B, propeptide||Metallopeptidase, catalytic domain||Peptidase M12B, ADAM/reprolysin	97535777	97575655	+	(3095)	antisense
8	TUCP_004406	XLOC_194393	--	TUCP	97527705	97538871	-	ENSRNOT00000019285	ENSRNOG00000014064	Ctsh	Cysteine peptidase, histidine active site||Cysteine peptidase, asparagine active site||Cathepsin propeptide inhibitor domain (I29)||Cysteine peptidase, cysteine active site||Peptidase C1A||Peptidase C1A, papain C-terminal	97439216	97458287	+	69417	downstream
8	TUCP_004406	XLOC_194393	--	TUCP	97527705	97538871	-	ENSRNOT00000080421	ENSRNOG00000058412	Morf4l1	RNA binding activity-knot of a chromodomain||Chromo/chromo shadow domain||MRG||MRG domain||Chromo domain-like	97474092	97494834	-	32870	upstream
8	TUCP_004406	XLOC_194393	--	TUCP	97527705	97538871	-	ENSRNOT00000080142	ENSRNOG00000014064	Ctsh	Cysteine peptidase, histidine active site||Cysteine peptidase, asparagine active site||Cathepsin propeptide inhibitor domain (I29)||Cysteine peptidase, cysteine active site||Peptidase C1A||Peptidase C1A, papain C-terminal	97439161	97458267	+	69437	downstream
8	TUCP_004406	XLOC_194393	--	TUCP	97527705	97538871	-	ENSRNOT00000037276	ENSRNOG00000028036	Adamts7	ADAM-TS Spacer 1||Peptidase M12B, ADAM-TS||Thrombospondin type-1 (TSP1) repeat||PLAC||Peptidase M12B, propeptide||Metallopeptidase, catalytic domain||Peptidase M12B, ADAM/reprolysin	97537968	97575636	+	(904)	antisense
8	TUCP_004406	XLOC_194393	--	TUCP	97527705	97538871	-	ENSRNOT00000030645	ENSRNOG00000014543	Tbc1d2b	Rab-GTPase-TBC domain	97577565	97647072	-	38693	downstream
8	TUCP_004406	XLOC_194393	--	TUCP	97527705	97538871	-	ENSRNOT00000068394	ENSRNOG00000028036	Adamts7	ADAM-TS Spacer 1||Peptidase M12B, ADAM-TS||Thrombospondin type-1 (TSP1) repeat||PLAC||Peptidase M12B, propeptide||Metallopeptidase, catalytic domain||Peptidase M12B, ADAM/reprolysin	97535777	97575655	+	(3095)	antisense
8	TUCP_004407	XLOC_194399	--	TUCP	97560759	97568123	-	ENSRNOT00000037276	ENSRNOG00000028036	Adamts7	ADAM-TS Spacer 1||Peptidase M12B, ADAM-TS||Thrombospondin type-1 (TSP1) repeat||PLAC||Peptidase M12B, propeptide||Metallopeptidase, catalytic domain||Peptidase M12B, ADAM/reprolysin	97537968	97575636	+	(7365)	antisense
8	TUCP_004407	XLOC_194399	--	TUCP	97560759	97568123	-	ENSRNOT00000030645	ENSRNOG00000014543	Tbc1d2b	Rab-GTPase-TBC domain	97577565	97647072	-	9441	downstream
8	TUCP_004407	XLOC_194399	--	TUCP	97560759	97568123	-	ENSRNOT00000080421	ENSRNOG00000058412	Morf4l1	RNA binding activity-knot of a chromodomain||Chromo/chromo shadow domain||MRG||MRG domain||Chromo domain-like	97474092	97494834	-	65924	upstream
8	TUCP_004407	XLOC_194399	--	TUCP	97560759	97568123	-	ENSRNOT00000068394	ENSRNOG00000028036	Adamts7	ADAM-TS Spacer 1||Peptidase M12B, ADAM-TS||Thrombospondin type-1 (TSP1) repeat||PLAC||Peptidase M12B, propeptide||Metallopeptidase, catalytic domain||Peptidase M12B, ADAM/reprolysin	97535777	97575655	+	(7365)	antisense
17	TUCP_001915	XLOC_078877	--	TUCP	28677	359862	-	ENSRNOT00000023685	ENSRNOG00000017597	Fbp1	Fructose-1,6-bisphosphatase||Fructose-1-6-bisphosphatase class I, N-terminal||Fructose-1,6-bisphosphatase, active site||Fructose-1,6-bisphosphatase class 1	396180	417480	-	36317	downstream
17	TUCP_001915	XLOC_078877	--	TUCP	28677	359862	-	ENSRNOT00000023865	ENSRNOG00000017637	Fbp2	Fructose-1,6-bisphosphatase, active site||Fructose-1-6-bisphosphatase class I, N-terminal||Fructose-1,6-bisphosphatase||Fructose-1,6-bisphosphatase class 1	372551	389967	-	12688	downstream
17	TUCP_001914	XLOC_078877	--	TUCP	27485	359862	-	ENSRNOT00000023685	ENSRNOG00000017597	Fbp1	Fructose-1,6-bisphosphatase||Fructose-1-6-bisphosphatase class I, N-terminal||Fructose-1,6-bisphosphatase, active site||Fructose-1,6-bisphosphatase class 1	396180	417480	-	36317	downstream
17	TUCP_001914	XLOC_078877	--	TUCP	27485	359862	-	ENSRNOT00000023865	ENSRNOG00000017637	Fbp2	Fructose-1,6-bisphosphatase, active site||Fructose-1-6-bisphosphatase class I, N-terminal||Fructose-1,6-bisphosphatase||Fructose-1,6-bisphosphatase class 1	372551	389967	-	12688	downstream
8	TUCP_004402	XLOC_194335	--	TUCP	95977816	95997943	-	ENSRNOT00000086161	ENSRNOG00000011348	Snx14	Phox homologous domain||RGS domain||Sorting nexin, C-terminal||Phox-associated domain	96023445	96088364	-	25501	downstream
8	TUCP_004402	XLOC_194335	--	TUCP	95977816	95997943	-	ENSRNOT00000056818	ENSRNOG00000011348	Snx14	Phox homologous domain||RGS domain||Sorting nexin, C-terminal||Phox-associated domain	96023502	96088405	-	25558	downstream
8	TUCP_004402	XLOC_194335	--	TUCP	95977816	95997943	-	ENSRNOT00000015057	ENSRNOG00000011071	Nt5e	Calcineurin-like phosphoesterase domain, apaH type||5'-Nucleotidase/apyrase||5'-Nucleotidase, C-terminal||5'-Nucleotidase, conserved site||Metallo-dependent phosphatase-like	95968652	96012696	+	(20128)	antisense
8	TUCP_004403	XLOC_194388	--	TUCP	97454541	97473415	-	ENSRNOT00000019285	ENSRNOG00000014064	Ctsh	Cysteine peptidase, histidine active site||Cysteine peptidase, asparagine active site||Cathepsin propeptide inhibitor domain (I29)||Cysteine peptidase, cysteine active site||Peptidase C1A||Peptidase C1A, papain C-terminal	97439216	97458287	+	(3747)	antisense
8	TUCP_004403	XLOC_194388	--	TUCP	97454541	97473415	-	ENSRNOT00000018794	ENSRNOG00000014025	Rasgrf1	Ras-specific guanine nucleotide-releasing factor 1||Ras-like guanine nucleotide exchange factor, N-terminal||Ras guanine nucleotide exchange factor domain||Dbl homology (DH) domain||Ras guanine-nucleotide exchange factor, conserved site||IQ motif, EF-hand binding site||PH domain-like||Guanine-nucleotide dissociation stimulator, CDC24, conserved site||Pleckstrin homology domain||Ras guanine-nucleo…	97291580	97405102	+	49438	downstream
8	TUCP_004403	XLOC_194388	--	TUCP	97454541	97473415	-	ENSRNOT00000080421	ENSRNOG00000058412	Morf4l1	RNA binding activity-knot of a chromodomain||Chromo/chromo shadow domain||MRG||MRG domain||Chromo domain-like	97474092	97494834	-	676	downstream
8	TUCP_004403	XLOC_194388	--	TUCP	97454541	97473415	-	ENSRNOT00000082757	ENSRNOG00000014025	Rasgrf1	Ras-specific guanine nucleotide-releasing factor 1||Ras-like guanine nucleotide exchange factor, N-terminal||Ras guanine nucleotide exchange factor domain||Dbl homology (DH) domain||Ras guanine-nucleotide exchange factor, conserved site||IQ motif, EF-hand binding site||PH domain-like||Guanine-nucleotide dissociation stimulator, CDC24, conserved site||Pleckstrin homology domain||Ras guanine-nucleo…	97277456	97404768	+	49772	downstream
8	TUCP_004403	XLOC_194388	--	TUCP	97454541	97473415	-	ENSRNOT00000080142	ENSRNOG00000014064	Ctsh	Cysteine peptidase, histidine active site||Cysteine peptidase, asparagine active site||Cathepsin propeptide inhibitor domain (I29)||Cysteine peptidase, cysteine active site||Peptidase C1A||Peptidase C1A, papain C-terminal	97439161	97458267	+	(3727)	antisense
8	TUCP_004403	XLOC_194388	--	TUCP	97454541	97473415	-	ENSRNOT00000037276	ENSRNOG00000028036	Adamts7	ADAM-TS Spacer 1||Peptidase M12B, ADAM-TS||Thrombospondin type-1 (TSP1) repeat||PLAC||Peptidase M12B, propeptide||Metallopeptidase, catalytic domain||Peptidase M12B, ADAM/reprolysin	97537968	97575636	+	64552	upstream
8	TUCP_004403	XLOC_194388	--	TUCP	97454541	97473415	-	ENSRNOT00000068394	ENSRNOG00000028036	Adamts7	ADAM-TS Spacer 1||Peptidase M12B, ADAM-TS||Thrombospondin type-1 (TSP1) repeat||PLAC||Peptidase M12B, propeptide||Metallopeptidase, catalytic domain||Peptidase M12B, ADAM/reprolysin	97535777	97575655	+	62361	upstream
8	TUCP_004388	XLOC_193572	--	TUCP	78986511	78988037	-	ENSRNOT00000089335	ENSRNOG00000055631	Zfp280d	Domain of unknown function DUF4195||Zinc finger, C2H2||Zinc finger, C2H2-like	78858570	78948377	+	38133	downstream
8	TUCP_004388	XLOC_193572	--	TUCP	78986511	78988037	-	ENSRNOT00000086562	ENSRNOG00000059702	Tex9	-	79083522	79119720	-	95484	downstream
8	TUCP_004388	XLOC_193572	--	TUCP	78986511	78988037	-	ENSRNOT00000090047	ENSRNOG00000055631	Zfp280d	Domain of unknown function DUF4195||Zinc finger, C2H2||Zinc finger, C2H2-like	78872102	78949447	+	37063	downstream
8	TUCP_004388	XLOC_193572	--	TUCP	78986511	78988037	-	ENSRNOT00000077613	ENSRNOG00000057867	Mns1	Meiosis-specific nuclear structural protein 1	79054237	79075122	+	66199	upstream
15	TUCP_001671	XLOC_066654	--	TUCP	57878152	57883236	-	ENSRNOT00000001389	ENSRNOG00000001052	Slc25a30	Mitochondrial substrate/solute carrier||Mitochondrial carrier domain||Mitochondrial brown fat uncoupling protein	57813356	57834173	-	43978	upstream
15	TUCP_001671	XLOC_066654	--	TUCP	57878152	57883236	-	ENSRNOT00000000168	ENSRNOG00000000155	Cog3	Conserved oligomeric Golgi complex, subunit 3	57755189	57805184	-	72967	upstream
15	TUCP_001671	XLOC_066654	--	TUCP	57878152	57883236	-	ENSRNOT00000044254	ENSRNOG00000029316	Gtf2f2	Winged helix-turn-helix DNA-binding domain||Transcription Factor IIF, Rap30/Rap74, interaction||Transcription initiation factor IIF, beta subunit	57942059	58068892	-	58822	downstream
15	TUCP_001671	XLOC_066654	--	TUCP	57878152	57883236	-	ENSRNOT00000001383	ENSRNOG00000001049	Tpt1	Translationally controlled tumour protein||Mss4/translationally controlled tumour-associated TCTP||Translationally controlled tumour protein, conserved site||Mss4-like	57891680	57894504	+	8443	upstream
15	TUCP_001633	XLOC_064831	--	TUCP	10460218	10462339	-	ENSRNOT00000078249	ENSRNOG00000005993	Oxsm	Beta-ketoacyl synthase, N-terminal||Thiolase-like||Beta-ketoacyl synthase, C-terminal||3-oxoacyl-[acyl-carrier-protein] synthase 2||Polyketide synthase, beta-ketoacyl synthase domain||Beta-ketoacyl synthase, active site	10462106	10466021	+	(234)	antisense
15	TUCP_001633	XLOC_064831	--	TUCP	10460218	10462339	-	ENSRNOT00000008289	ENSRNOG00000006143	Ngly1	Transglutaminase-like||Galactose-binding domain-like||PUB domain||Peptide N glycanase, PAW domain	10405164	10455956	-	4261	upstream
15	TUCP_001633	XLOC_064831	--	TUCP	10460218	10462339	-	ENSRNOT00000008035	ENSRNOG00000005993	Oxsm	Beta-ketoacyl synthase, N-terminal||Thiolase-like||Beta-ketoacyl synthase, C-terminal||3-oxoacyl-[acyl-carrier-protein] synthase 2||Polyketide synthase, beta-ketoacyl synthase domain||Beta-ketoacyl synthase, active site	10462749	10466496	+	409	upstream
3	TUCP_002965	XLOC_128222	--	TUCP	60170197	60212133	-	ENSRNOT00000024922	ENSRNOG00000018406	Wipf1	WAS/WASL-interacting protein family member 1||WH2 domain	60150021	60166013	-	4183	upstream
3	TUCP_002965	XLOC_128222	--	TUCP	60170197	60212133	-	ENSRNOT00000086329	ENSRNOG00000018485	Gpr155	Winged helix-turn-helix DNA-binding domain||Auxin efflux carrier||DEP domain	60051535	60105212	-	64984	upstream
3	TUCP_002965	XLOC_128222	--	TUCP	60170197	60212133	-	ENSRNOT00000025158	ENSRNOG00000018485	Gpr155	Winged helix-turn-helix DNA-binding domain||Auxin efflux carrier||DEP domain	60051546	60105242	-	64954	upstream
3	TUCP_002964	XLOC_128106	--	TUCP	58009686	58010724	-	ENSRNOT00000084797	ENSRNOG00000061587	Metap1d	Peptidase M24, methionine aminopeptidase||Peptidase M24A, methionine aminopeptidase, subfamily 1||Peptidase M24, structural domain	58084606	58162675	+	73881	upstream
3	TUCP_002964	XLOC_128106	--	TUCP	58009686	58010724	-	ENSRNOT00000090426	ENSRNOG00000022922	Slc25a12	Mitochondrial substrate/solute carrier||EF-hand domain pair||Mitochondrial carrier domain||Mitochondrial carrier protein||EF-hand domain||EF-Hand 1, calcium-binding site	57882421	57913999	-	95686	upstream
3	TUCP_002964	XLOC_128106	--	TUCP	58009686	58010724	-	ENSRNOT00000036728	ENSRNOG00000022922	Slc25a12	Mitochondrial substrate/solute carrier||EF-hand domain pair||Mitochondrial carrier domain||Mitochondrial carrier protein||EF-hand domain||EF-Hand 1, calcium-binding site	57882370	57957346	-	52339	upstream
3	TUCP_002964	XLOC_128106	--	TUCP	58009686	58010724	-	ENSRNOT00000002085	ENSRNOG00000001524	Hat1	Acyl-CoA N-acyltransferase||Histone acetyltransferase type B, catalytic subunit||Histone acetyl transferase HAT1 N-terminal	58022238	58070068	+	11513	upstream
3	TUCP_002964	XLOC_128106	--	TUCP	58009686	58010724	-	ENSRNOT00000048356	ENSRNOG00000048003	AABR07052498.1	Ribosomal protein L21e||Translation protein SH3-like domain	58009032	58009514	-	171	upstream
3	TUCP_002967	XLOC_128223	--	TUCP	60221727	60224937	-	ENSRNOT00000024922	ENSRNOG00000018406	Wipf1	WAS/WASL-interacting protein family member 1||WH2 domain	60150021	60166013	-	55713	upstream
3	TUCP_002966	XLOC_128222	--	TUCP	60170197	60212133	-	ENSRNOT00000024922	ENSRNOG00000018406	Wipf1	WAS/WASL-interacting protein family member 1||WH2 domain	60150021	60166013	-	4183	upstream
3	TUCP_002966	XLOC_128222	--	TUCP	60170197	60212133	-	ENSRNOT00000086329	ENSRNOG00000018485	Gpr155	Winged helix-turn-helix DNA-binding domain||Auxin efflux carrier||DEP domain	60051535	60105212	-	64984	upstream
3	TUCP_002966	XLOC_128222	--	TUCP	60170197	60212133	-	ENSRNOT00000025158	ENSRNOG00000018485	Gpr155	Winged helix-turn-helix DNA-binding domain||Auxin efflux carrier||DEP domain	60051546	60105242	-	64954	upstream
3	TUCP_002961	XLOC_127821	--	TUCP	46156396	46174030	-	ENSRNOT00000051344	ENSRNOG00000031951	LOC100361645	Domain of unknown function DUF1725	46185360	46234331	+	11329	upstream
3	TUCP_002961	XLOC_127821	--	TUCP	46156396	46174030	-	ENSRNOT00000085885	ENSRNOG00000056984	Baz2b	Methyl-CpG DNA binding||Zinc finger, PHD-finger||Zinc finger, RING/FYVE/PHD-type||Zinc finger, PHD-type||Bromodomain, conserved site||WHIM2 domain||Bromodomain||DNA-binding domain||DDT domain||Zinc finger, FYVE/PHD-type	45968825	46153371	-	3024	upstream
3	TUCP_002960	XLOC_127821	--	TUCP	46156396	46174025	-	ENSRNOT00000051344	ENSRNOG00000031951	LOC100361645	Domain of unknown function DUF1725	46185360	46234331	+	11334	upstream
3	TUCP_002960	XLOC_127821	--	TUCP	46156396	46174025	-	ENSRNOT00000085885	ENSRNOG00000056984	Baz2b	Methyl-CpG DNA binding||Zinc finger, PHD-finger||Zinc finger, RING/FYVE/PHD-type||Zinc finger, PHD-type||Bromodomain, conserved site||WHIM2 domain||Bromodomain||DNA-binding domain||DDT domain||Zinc finger, FYVE/PHD-type	45968825	46153371	-	3024	upstream
3	TUCP_002963	XLOC_128011	--	TUCP	54339512	54342770	-	ENSRNOT00000087122	ENSRNOG00000024808	Stk39	Protein kinase-like domain||Protein kinase domain||Protein kinase, ATP binding site||Serine/threonine-protein kinase OSR1/WNK, CCT domain	54360420	54593306	-	17649	downstream
3	TUCP_002963	XLOC_128011	--	TUCP	54339512	54342770	-	ENSRNOT00000037133	ENSRNOG00000024808	Stk39	Protein kinase-like domain||Protein kinase domain||Protein kinase, ATP binding site||Serine/threonine-protein kinase OSR1/WNK, CCT domain	54359451	54625414	-	16680	downstream
3	TUCP_002963	XLOC_128011	--	TUCP	54339512	54342770	-	ENSRNOT00000010018	ENSRNOG00000007625	B3galt1	Glycosyl transferase, family 31||Nucleotide-diphospho-sugar transferases	54253949	54267292	+	72219	downstream
3	TUCP_002962	XLOC_127866	--	TUCP	47635273	47639327	-	ENSRNOT00000065340	ENSRNOG00000005049	Tbr1	Transcription factor, T-box, conserved site||p53-like transcription factor, DNA-binding||Transcription factor, T-box||T-box transcription factor-associated	47677720	47685902	+	38392	upstream
3	TUCP_002962	XLOC_127866	--	TUCP	47635273	47639327	-	ENSRNOT00000082769	ENSRNOG00000061129	Psmd14	JAB1/MPN/MOV34 metalloenzyme domain||Rpn11/EIF3F, C-terminal	47578384	47673338	+	(4055)	antisense
3	TUCP_002969	XLOC_128258	--	TUCP	60621795	60624064	-	ENSRNOT00000068745	ENSRNOG00000017939	Chn1	Diacylglycerol/phorbol-ester binding||Protein kinase C-like, phorbol ester/diacylglycerol-binding domain||Chimaerin||Rho GTPase activation protein||Rho GTPase-activating protein domain||SH2 domain	60513077	60611924	-	9870	upstream
3	TUCP_002969	XLOC_128258	--	TUCP	60621795	60624064	-	ENSRNOT00000002174	ENSRNOG00000001597	Atf2	Zinc finger, C2H2||Basic-leucine zipper domain||Transcription factor cyclic AMP-dependent, CRE-BP1-type||Zinc finger C2H2-type/integrase DNA-binding domain||cAMP-dependent transcription factor ATF-2	60721135	60795951	-	97070	downstream
3	TUCP_002969	XLOC_128258	--	TUCP	60621795	60624064	-	ENSRNOT00000050513	ENSRNOG00000001597	Atf2	Zinc finger, C2H2||Basic-leucine zipper domain||Transcription factor cyclic AMP-dependent, CRE-BP1-type||Zinc finger C2H2-type/integrase DNA-binding domain||cAMP-dependent transcription factor ATF-2	60721171	60765645	-	97106	downstream
3	TUCP_002968	XLOC_128225	--	TUCP	60393056	60408041	-	ENSRNOT00000024706	ENSRNOG00000018286	Chrna1	Neurotransmitter-gated ion-channel, conserved site||Nicotinic acetylcholine receptor||Neurotransmitter-gated ion-channel transmembrane domain||Neurotransmitter-gated ion-channel ligand-binding domain||Nicotinic acetylcholine-gated receptor, transmembrane domain||Neurotransmitter-gated ion-channel	60445666	60460724	-	37624	downstream
10	TUCP_000723	XLOC_026938	--	TUCP	85365381	85367284	+	ENSRNOT00000080935	ENSRNOG00000059008	Socs7	SOCS box domain||SH2 domain||Suppressor of cytokine signalling 7	85301875	85330397	+	34983	downstream
10	TUCP_000723	XLOC_026938	--	TUCP	85365381	85367284	+	ENSRNOT00000014752	ENSRNOG00000010540	Mrpl45	Tim44-like domain||NTF2-like domain	85257876	85269806	+	95574	downstream
10	TUCP_000723	XLOC_026938	--	TUCP	85365381	85367284	+	ENSRNOT00000079921	ENSRNOG00000055533	4933428G20Rik	-	85433236	85435016	-	65951	downstream
10	TUCP_000723	XLOC_026938	--	TUCP	85365381	85367284	+	ENSRNOT00000014863	ENSRNOG00000029245	Gpr179	Probable G-protein coupled receptor 179||GPCR family 3, C-terminal	85287100	85289777	-	75603	upstream
10	TUCP_000723	XLOC_026938	--	TUCP	85365381	85367284	+	ENSRNOT00000016070	ENSRNOG00000011475	Srcin1	SRC kinase signalling inhibitor 1||Actin interacting protein 3, C-terminal	85460059	85517683	-	92774	downstream
10	TUCP_000723	XLOC_026938	--	TUCP	85365381	85367284	+	ENSRNOT00000034305	ENSRNOG00000022771	Arhgap23	Rho GTPase activation protein||PDZ domain||Pleckstrin homology domain||PH domain-like||Rho GTPase-activating protein domain	85384881	85444556	+	17596	upstream
10	TUCP_000723	XLOC_026938	--	TUCP	85365381	85367284	+	ENSRNOT00000055427	ENSRNOG00000029245	Gpr179	Probable G-protein coupled receptor 179||GPCR family 3, C-terminal	85274057	85289777	-	75603	upstream
6	TUCP_003759	XLOC_165231	--	TUCP	100020074	100027380	+	ENSRNOT00000083286	ENSRNOG00000008049	Max	-||Myc-type, basic helix-loop-helix (bHLH) domain	99985519	100011226	-	8847	upstream
6	TUCP_003759	XLOC_165231	--	TUCP	100020074	100027380	+	ENSRNOT00000010954	ENSRNOG00000008049	Max	-||Myc-type, basic helix-loop-helix (bHLH) domain	99984260	100011388	-	8685	upstream
6	TUCP_003759	XLOC_165231	--	TUCP	100020074	100027380	+	ENSRNOT00000041442	ENSRNOG00000008049	Max	-||Myc-type, basic helix-loop-helix (bHLH) domain	99985519	100011226	-	8847	upstream
6	TUCP_003759	XLOC_165231	--	TUCP	100020074	100027380	+	ENSRNOT00000010588	ENSRNOG00000007660	Fntb	Terpenoid cyclases/protein prenyltransferase alpha-alpha toroid||PFTB repeat||Protein farnesyltransferase subunit beta	99883959	99966988	+	53085	downstream
10	TUCP_000722	XLOC_026889	--	TUCP	84881359	84896617	+	ENSRNOT00000073746	ENSRNOG00000046493	Pnpo	Pyridoxamine 5'-phosphate oxidase||Pyridoxamine 5'-phosphate oxidase-like, FMN-binding domain||Pyridoxamine 5'-phosphate oxidase, conserved site||FMN-binding split barrel||Pyridoxine 5'-phosphate oxidase, dimerisation, C-terminal	84874927	84881190	-	168	upstream
10	TUCP_000722	XLOC_026889	--	TUCP	84881359	84896617	+	ENSRNOT00000013542	ENSRNOG00000009902	Lrrc46	Leucine-rich repeat||Leucine-rich repeat domain, L domain-like	84971676	84976170	-	75058	downstream
10	TUCP_000722	XLOC_026889	--	TUCP	84881359	84896617	+	ENSRNOT00000085830	ENSRNOG00000009473	Osbpl7	Oxysterol-binding protein, conserved site||Oxysterol-binding protein||Pleckstrin homology domain||PH domain-like	84986328	85004562	+	89710	upstream
10	TUCP_000722	XLOC_026889	--	TUCP	84881359	84896617	+	ENSRNOT00000013580	ENSRNOG00000010214	Scrn2	Peptidase C69, dipeptidase A	84966989	84971009	+	70371	upstream
10	TUCP_000722	XLOC_026889	--	TUCP	84881359	84896617	+	ENSRNOT00000067665	ENSRNOG00000009473	Osbpl7	Oxysterol-binding protein, conserved site||Oxysterol-binding protein||Pleckstrin homology domain||PH domain-like	84986384	85003938	+	89766	upstream
10	TUCP_000722	XLOC_026889	--	TUCP	84881359	84896617	+	ENSRNOT00000071765	ENSRNOG00000049238	LOC102552659	Growth factor receptor domain 4||Furin-like repeat||Protein kinase, ATP binding site||Tyrosine-protein kinase, active site||Serine-threonine/tyrosine-protein kinase catalytic domain||Protein kinase domain||Protein kinase-like domain||Growth factor receptor cysteine-rich domain||Tyrosine-protein kinase, catalytic domain	84838264	84845288	+	36070	downstream
10	TUCP_000722	XLOC_026889	--	TUCP	84881359	84896617	+	ENSRNOT00000071495	ENSRNOG00000050874	LOC102552549	Thioredoxin-like fold||Selenoprotein, Rdx type	84846522	84847857	-	33501	upstream
10	TUCP_000722	XLOC_026889	--	TUCP	84881359	84896617	+	ENSRNOT00000071719	ENSRNOG00000048747	Cdk5rap3	Protein of unknown function DUF773	84780608	84789832	-	91526	upstream
10	TUCP_000722	XLOC_026889	--	TUCP	84881359	84896617	+	ENSRNOT00000065555	ENSRNOG00000009567	Mrpl10	-	84979717	84983928	+	83099	upstream
10	TUCP_000722	XLOC_026889	--	TUCP	84881359	84896617	+	ENSRNOT00000073292	ENSRNOG00000049162	Prr15l	Proline-rich protein 15	84871680	84871982	+	9376	downstream
10	TUCP_000722	XLOC_026889	--	TUCP	84881359	84896617	+	ENSRNOT00000038572	ENSRNOG00000023551	Sp6	Zinc finger, C2H2||Zinc finger, C2H2-like||Transcription factor Sp1 family||Zinc finger C2H2-type/integrase DNA-binding domain	84955864	84960045	+	59246	upstream
10	TUCP_000722	XLOC_026889	--	TUCP	84881359	84896617	+	ENSRNOT00000087322	ENSRNOG00000010492	Sp2	Zinc finger, C2H2||Transcription factor Sp2||Transcription factor Sp1 family||Zinc finger, C2H2-like||Zinc finger C2H2-type/integrase DNA-binding domain	84890932	84915471	-	(5686)	antisense
10	TUCP_000722	XLOC_026889	--	TUCP	84881359	84896617	+	ENSRNOT00000068083	ENSRNOG00000010492	Sp2	Zinc finger, C2H2||Transcription factor Sp2||Transcription factor Sp1 family||Zinc finger, C2H2-like||Zinc finger C2H2-type/integrase DNA-binding domain	84891821	84920886	-	(4797)	antisense
10	TUCP_000722	XLOC_026889	--	TUCP	84881359	84896617	+	ENSRNOT00000013114	ENSRNOG00000009567	Mrpl10	-	84976377	84984780	+	79759	upstream
6	TUCP_003758	XLOC_165125	--	TUCP	96246068	96260455	+	ENSRNOT00000078190	ENSRNOG00000007785	Trmt5	S-adenosyl-L-methionine-dependent methyltransferase||tRNA (guanine(37)-N(1))-methyltransferase, eukaryotic||SAM-dependent methyltransferase TRM5/TYW2-type	96153014	96171779	-	74288	upstream
6	TUCP_003758	XLOC_165125	--	TUCP	96246068	96260455	+	ENSRNOT00000046585	ENSRNOG00000032000	LOC688981	Ribosomal protein L26/L24P, eukaryotic/archaeal||Translation protein SH3-like domain||Ribosomal protein L2 domain 2||Ribosomal protein L24/L26, conserved site	96202040	96202477	-	43590	upstream
6	TUCP_003758	XLOC_165125	--	TUCP	96246068	96260455	+	ENSRNOT00000010163	ENSRNOG00000007267	Mnat1	Zinc finger, RING/FYVE/PHD-type||Cdk-activating kinase assembly factor MAT1/Tfb3||Zinc finger, RING-type, conserved site||Ubiquitin interacting motif||Cdk-activating kinase assembly factor MAT1, centre||Zinc finger, RING-type	96007805	96153330	+	92737	downstream
6	TUCP_003758	XLOC_165125	--	TUCP	96246068	96260455	+	ENSRNOT00000029328	ENSRNOG00000022622	Slc38a6	Amino acid transporter, transmembrane domain	96171756	96241096	+	4971	downstream
6	TUCP_003758	XLOC_165125	--	TUCP	96246068	96260455	+	ENSRNOT00000010546	ENSRNOG00000007785	Trmt5	S-adenosyl-L-methionine-dependent methyltransferase||tRNA (guanine(37)-N(1))-methyltransferase, eukaryotic||SAM-dependent methyltransferase TRM5/TYW2-type	96164579	96171629	-	74438	upstream
4	TUCP_003210	XLOC_138405	--	TUCP	124680310	124762483	+	ENSRNOT00000057045	ENSRNOG00000023257	Adamts9	Peptidase M12B, GON-ADAMTSs||Peptidase M12B, ADAM/reprolysin||Metallopeptidase, catalytic domain||Peptidase M12B, propeptide||ADAM-TS Spacer 1||Peptidase M12B, ADAM-TS||Thrombospondin type-1 (TSP1) repeat	124660262	124858250	-	(82174)	antisense
4	TUCP_003211	XLOC_138405	--	TUCP	124703413	124762483	+	ENSRNOT00000057045	ENSRNOG00000023257	Adamts9	Peptidase M12B, GON-ADAMTSs||Peptidase M12B, ADAM/reprolysin||Metallopeptidase, catalytic domain||Peptidase M12B, propeptide||ADAM-TS Spacer 1||Peptidase M12B, ADAM-TS||Thrombospondin type-1 (TSP1) repeat	124660262	124858250	-	(59071)	antisense
4	TUCP_003212	XLOC_138405	--	TUCP	124703594	124762483	+	ENSRNOT00000057045	ENSRNOG00000023257	Adamts9	Peptidase M12B, GON-ADAMTSs||Peptidase M12B, ADAM/reprolysin||Metallopeptidase, catalytic domain||Peptidase M12B, propeptide||ADAM-TS Spacer 1||Peptidase M12B, ADAM-TS||Thrombospondin type-1 (TSP1) repeat	124660262	124858250	-	(58890)	antisense
4	TUCP_003213	XLOC_138405	--	TUCP	124710300	124762483	+	ENSRNOT00000057045	ENSRNOG00000023257	Adamts9	Peptidase M12B, GON-ADAMTSs||Peptidase M12B, ADAM/reprolysin||Metallopeptidase, catalytic domain||Peptidase M12B, propeptide||ADAM-TS Spacer 1||Peptidase M12B, ADAM-TS||Thrombospondin type-1 (TSP1) repeat	124660262	124858250	-	(52184)	antisense
8	TUCP_004242	XLOC_186481	--	TUCP	37029246	37104751	+	ENSRNOT00000040783	ENSRNOG00000030188	LOC103693040	-	37125726	37126809	-	20974	downstream
8	TUCP_004242	XLOC_186481	--	TUCP	37029246	37104751	+	ENSRNOT00000070856	ENSRNOG00000049011	Gm17689	-	37156619	37158502	+	51867	upstream
8	TUCP_004242	XLOC_186481	--	TUCP	37029246	37104751	+	ENSRNOT00000060446	ENSRNOG00000039445	LOC100361828	-	37024363	37026142	-	3103	upstream
8	TUCP_004242	XLOC_186481	--	TUCP	37029246	37104751	+	ENSRNOT00000032208	ENSRNOG00000024026	LOC100362078	-	37064313	37069464	-	(5152)	antisense
8	TUCP_004242	XLOC_186481	--	TUCP	37029246	37104751	+	ENSRNOT00000067297	ENSRNOG00000042925	RGD1304554	-	37014747	37016116	-	13129	upstream
8	TUCP_004242	XLOC_186481	--	TUCP	37029246	37104751	+	ENSRNOT00000072767	ENSRNOG00000049588	Pate-f	-	37080432	37093082	-	(12651)	antisense
4	TUCP_003215	XLOC_138405	--	TUCP	124745831	124762483	+	ENSRNOT00000057045	ENSRNOG00000023257	Adamts9	Peptidase M12B, GON-ADAMTSs||Peptidase M12B, ADAM/reprolysin||Metallopeptidase, catalytic domain||Peptidase M12B, propeptide||ADAM-TS Spacer 1||Peptidase M12B, ADAM-TS||Thrombospondin type-1 (TSP1) repeat	124660262	124858250	-	(16653)	antisense
4	TUCP_003216	XLOC_138407	--	TUCP	124782291	124801560	+	ENSRNOT00000057045	ENSRNOG00000023257	Adamts9	Peptidase M12B, GON-ADAMTSs||Peptidase M12B, ADAM/reprolysin||Metallopeptidase, catalytic domain||Peptidase M12B, propeptide||ADAM-TS Spacer 1||Peptidase M12B, ADAM-TS||Thrombospondin type-1 (TSP1) repeat	124660262	124858250	-	(19270)	antisense
4	TUCP_003217	XLOC_138409	--	TUCP	124801638	124813590	+	ENSRNOT00000057045	ENSRNOG00000023257	Adamts9	Peptidase M12B, GON-ADAMTSs||Peptidase M12B, ADAM/reprolysin||Metallopeptidase, catalytic domain||Peptidase M12B, propeptide||ADAM-TS Spacer 1||Peptidase M12B, ADAM-TS||Thrombospondin type-1 (TSP1) repeat	124660262	124858250	-	(11953)	antisense
4	TUCP_003218	XLOC_138410	--	TUCP	124854871	125165162	+	ENSRNOT00000057045	ENSRNOG00000023257	Adamts9	Peptidase M12B, GON-ADAMTSs||Peptidase M12B, ADAM/reprolysin||Metallopeptidase, catalytic domain||Peptidase M12B, propeptide||ADAM-TS Spacer 1||Peptidase M12B, ADAM-TS||Thrombospondin type-1 (TSP1) repeat	124660262	124858250	-	(3380)	antisense
4	TUCP_003219	XLOC_138410	--	TUCP	124855098	125122475	+	ENSRNOT00000057045	ENSRNOG00000023257	Adamts9	Peptidase M12B, GON-ADAMTSs||Peptidase M12B, ADAM/reprolysin||Metallopeptidase, catalytic domain||Peptidase M12B, propeptide||ADAM-TS Spacer 1||Peptidase M12B, ADAM-TS||Thrombospondin type-1 (TSP1) repeat	124660262	124858250	-	(3153)	antisense
17	TUCP_001861	XLOC_077321	--	TUCP	49649119	49699696	+	ENSRNOT00000018190	ENSRNOG00000013454	Rala	P-loop containing nucleoside triphosphate hydrolase||Small GTP-binding protein domain||Small GTPase superfamily, Ras type||Ras-related protein Ral||Small GTPase superfamily	49714294	49727664	+	14597	upstream
17	TUCP_001861	XLOC_077321	--	TUCP	49649119	49699696	+	ENSRNOT00000017955	ENSRNOG00000013438	Yae1d1	Essential protein Yae1, N-terminal	49610548	49617065	+	32053	downstream
17	TUCP_001860	XLOC_077315	--	TUCP	49561998	49606010	+	ENSRNOT00000048929	ENSRNOG00000030925	Tgif2-ps1	Homeobox KN domain||Homeodomain-like||Homeobox domain	49516429	49517142	+	44855	downstream
17	TUCP_001860	XLOC_077315	--	TUCP	49561998	49606010	+	ENSRNOT00000017955	ENSRNOG00000013438	Yae1d1	Essential protein Yae1, N-terminal	49610548	49617065	+	4537	upstream
17	TUCP_001860	XLOC_077315	--	TUCP	49561998	49606010	+	ENSRNOT00000017713	ENSRNOG00000013237	Pou6f2	POU domain||POU-specific domain||POU domain, class 6, transcription factor 2||Homeobox domain||Lambda repressor-like, DNA-binding domain||Homeodomain-like	49322205	49469557	+	92440	downstream
17	TUCP_001863	XLOC_077367	--	TUCP	49934845	49936603	+	ENSRNOT00000018431	ENSRNOG00000013620	Cdk13	Protein kinase-like domain||Protein kinase domain||Serine/threonine-protein kinase, active site||Protein kinase, ATP binding site	49833400	49921550	+	13294	downstream
17	TUCP_001863	XLOC_077367	--	TUCP	49934845	49936603	+	ENSRNOT00000080628	ENSRNOG00000013806	Mplkip	M-phase-specific PLK1-interacting protein-like||M-phase-specific PLK1-interacting protein-like, vertebrate	49955375	49991059	-	18771	downstream
17	TUCP_001863	XLOC_077367	--	TUCP	49934845	49936603	+	ENSRNOT00000018458	ENSRNOG00000013806	Mplkip	M-phase-specific PLK1-interacting protein-like||M-phase-specific PLK1-interacting protein-like, vertebrate	49955060	49990982	-	18456	downstream
17	TUCP_001862	XLOC_077326	--	TUCP	49703540	49710769	+	ENSRNOT00000018190	ENSRNOG00000013454	Rala	P-loop containing nucleoside triphosphate hydrolase||Small GTP-binding protein domain||Small GTPase superfamily, Ras type||Ras-related protein Ral||Small GTPase superfamily	49714294	49727664	+	3524	upstream
17	TUCP_001862	XLOC_077326	--	TUCP	49703540	49710769	+	ENSRNOT00000017955	ENSRNOG00000013438	Yae1d1	Essential protein Yae1, N-terminal	49610548	49617065	+	86474	downstream
2	TUCP_002589	XLOC_109609	--	TUCP	144997757	145403002	-	ENSRNOT00000093284	ENSRNOG00000032922	Dclk1	-||Doublecortin domain||Protein kinase, ATP binding site||Serine/threonine-protein kinase, active site||Calcium/calmodulin-dependent/calcium-dependent protein kinase||Protein kinase-like domain||Protein kinase domain	144861455	144936807	+	60949	downstream
2	TUCP_002589	XLOC_109609	--	TUCP	144997757	145403002	-	ENSRNOT00000040631	ENSRNOG00000032941	Mab21l1	Protein male abnormal 21-like 1/2||Mab-21 domain	145174876	145177265	+	(2390)	antisense
2	TUCP_002589	XLOC_109609	--	TUCP	144997757	145403002	-	ENSRNOT00000019748	ENSRNOG00000032922	Dclk1	-||Doublecortin domain||Protein kinase, ATP binding site||Serine/threonine-protein kinase, active site||Calcium/calmodulin-dependent/calcium-dependent protein kinase||Protein kinase-like domain||Protein kinase domain	144861455	144936927	+	60829	downstream
2	TUCP_002589	XLOC_109609	--	TUCP	144997757	145403002	-	ENSRNOT00000093407	ENSRNOG00000032922	Dclk1	-||Doublecortin domain||Protein kinase, ATP binding site||Serine/threonine-protein kinase, active site||Calcium/calmodulin-dependent/calcium-dependent protein kinase||Protein kinase-like domain||Protein kinase domain	144646429	144936803	+	60953	downstream
2	TUCP_002589	XLOC_109609	--	TUCP	144997757	145403002	-	ENSRNOT00000078337	ENSRNOG00000032922	Dclk1	-||Doublecortin domain||Protein kinase, ATP binding site||Serine/threonine-protein kinase, active site||Calcium/calmodulin-dependent/calcium-dependent protein kinase||Protein kinase-like domain||Protein kinase domain	144646308	144934025	+	63731	downstream
2	TUCP_002588	XLOC_109609	--	TUCP	144997757	145403002	-	ENSRNOT00000093284	ENSRNOG00000032922	Dclk1	-||Doublecortin domain||Protein kinase, ATP binding site||Serine/threonine-protein kinase, active site||Calcium/calmodulin-dependent/calcium-dependent protein kinase||Protein kinase-like domain||Protein kinase domain	144861455	144936807	+	60949	downstream
2	TUCP_002588	XLOC_109609	--	TUCP	144997757	145403002	-	ENSRNOT00000040631	ENSRNOG00000032941	Mab21l1	Protein male abnormal 21-like 1/2||Mab-21 domain	145174876	145177265	+	(2390)	antisense
2	TUCP_002588	XLOC_109609	--	TUCP	144997757	145403002	-	ENSRNOT00000019748	ENSRNOG00000032922	Dclk1	-||Doublecortin domain||Protein kinase, ATP binding site||Serine/threonine-protein kinase, active site||Calcium/calmodulin-dependent/calcium-dependent protein kinase||Protein kinase-like domain||Protein kinase domain	144861455	144936927	+	60829	downstream
2	TUCP_002588	XLOC_109609	--	TUCP	144997757	145403002	-	ENSRNOT00000093407	ENSRNOG00000032922	Dclk1	-||Doublecortin domain||Protein kinase, ATP binding site||Serine/threonine-protein kinase, active site||Calcium/calmodulin-dependent/calcium-dependent protein kinase||Protein kinase-like domain||Protein kinase domain	144646429	144936803	+	60953	downstream
2	TUCP_002588	XLOC_109609	--	TUCP	144997757	145403002	-	ENSRNOT00000078337	ENSRNOG00000032922	Dclk1	-||Doublecortin domain||Protein kinase, ATP binding site||Serine/threonine-protein kinase, active site||Calcium/calmodulin-dependent/calcium-dependent protein kinase||Protein kinase-like domain||Protein kinase domain	144646308	144934025	+	63731	downstream
2	TUCP_002587	XLOC_109609	--	TUCP	144997757	145403001	-	ENSRNOT00000093284	ENSRNOG00000032922	Dclk1	-||Doublecortin domain||Protein kinase, ATP binding site||Serine/threonine-protein kinase, active site||Calcium/calmodulin-dependent/calcium-dependent protein kinase||Protein kinase-like domain||Protein kinase domain	144861455	144936807	+	60949	downstream
2	TUCP_002587	XLOC_109609	--	TUCP	144997757	145403001	-	ENSRNOT00000040631	ENSRNOG00000032941	Mab21l1	Protein male abnormal 21-like 1/2||Mab-21 domain	145174876	145177265	+	(2390)	antisense
2	TUCP_002587	XLOC_109609	--	TUCP	144997757	145403001	-	ENSRNOT00000019748	ENSRNOG00000032922	Dclk1	-||Doublecortin domain||Protein kinase, ATP binding site||Serine/threonine-protein kinase, active site||Calcium/calmodulin-dependent/calcium-dependent protein kinase||Protein kinase-like domain||Protein kinase domain	144861455	144936927	+	60829	downstream
2	TUCP_002587	XLOC_109609	--	TUCP	144997757	145403001	-	ENSRNOT00000093407	ENSRNOG00000032922	Dclk1	-||Doublecortin domain||Protein kinase, ATP binding site||Serine/threonine-protein kinase, active site||Calcium/calmodulin-dependent/calcium-dependent protein kinase||Protein kinase-like domain||Protein kinase domain	144646429	144936803	+	60953	downstream
2	TUCP_002587	XLOC_109609	--	TUCP	144997757	145403001	-	ENSRNOT00000078337	ENSRNOG00000032922	Dclk1	-||Doublecortin domain||Protein kinase, ATP binding site||Serine/threonine-protein kinase, active site||Calcium/calmodulin-dependent/calcium-dependent protein kinase||Protein kinase-like domain||Protein kinase domain	144646308	144934025	+	63731	downstream
2	TUCP_002586	XLOC_109608	--	TUCP	144989417	144997513	-	ENSRNOT00000093284	ENSRNOG00000032922	Dclk1	-||Doublecortin domain||Protein kinase, ATP binding site||Serine/threonine-protein kinase, active site||Calcium/calmodulin-dependent/calcium-dependent protein kinase||Protein kinase-like domain||Protein kinase domain	144861455	144936807	+	52609	downstream
2	TUCP_002586	XLOC_109608	--	TUCP	144989417	144997513	-	ENSRNOT00000019748	ENSRNOG00000032922	Dclk1	-||Doublecortin domain||Protein kinase, ATP binding site||Serine/threonine-protein kinase, active site||Calcium/calmodulin-dependent/calcium-dependent protein kinase||Protein kinase-like domain||Protein kinase domain	144861455	144936927	+	52489	downstream
2	TUCP_002586	XLOC_109608	--	TUCP	144989417	144997513	-	ENSRNOT00000093407	ENSRNOG00000032922	Dclk1	-||Doublecortin domain||Protein kinase, ATP binding site||Serine/threonine-protein kinase, active site||Calcium/calmodulin-dependent/calcium-dependent protein kinase||Protein kinase-like domain||Protein kinase domain	144646429	144936803	+	52613	downstream
2	TUCP_002586	XLOC_109608	--	TUCP	144989417	144997513	-	ENSRNOT00000078337	ENSRNOG00000032922	Dclk1	-||Doublecortin domain||Protein kinase, ATP binding site||Serine/threonine-protein kinase, active site||Calcium/calmodulin-dependent/calcium-dependent protein kinase||Protein kinase-like domain||Protein kinase domain	144646308	144934025	+	55391	downstream
2	TUCP_002585	XLOC_109601	--	TUCP	144947700	144965421	-	ENSRNOT00000072110	ENSRNOG00000032922	Dclk1	-||Doublecortin domain||Protein kinase, ATP binding site||Serine/threonine-protein kinase, active site||Calcium/calmodulin-dependent/calcium-dependent protein kinase||Protein kinase-like domain||Protein kinase domain	144861459	144870582	+	77117	downstream
2	TUCP_002585	XLOC_109601	--	TUCP	144947700	144965421	-	ENSRNOT00000093284	ENSRNOG00000032922	Dclk1	-||Doublecortin domain||Protein kinase, ATP binding site||Serine/threonine-protein kinase, active site||Calcium/calmodulin-dependent/calcium-dependent protein kinase||Protein kinase-like domain||Protein kinase domain	144861455	144936807	+	10892	downstream
2	TUCP_002585	XLOC_109601	--	TUCP	144947700	144965421	-	ENSRNOT00000019748	ENSRNOG00000032922	Dclk1	-||Doublecortin domain||Protein kinase, ATP binding site||Serine/threonine-protein kinase, active site||Calcium/calmodulin-dependent/calcium-dependent protein kinase||Protein kinase-like domain||Protein kinase domain	144861455	144936927	+	10772	downstream
2	TUCP_002585	XLOC_109601	--	TUCP	144947700	144965421	-	ENSRNOT00000093407	ENSRNOG00000032922	Dclk1	-||Doublecortin domain||Protein kinase, ATP binding site||Serine/threonine-protein kinase, active site||Calcium/calmodulin-dependent/calcium-dependent protein kinase||Protein kinase-like domain||Protein kinase domain	144646429	144936803	+	10896	downstream
2	TUCP_002585	XLOC_109601	--	TUCP	144947700	144965421	-	ENSRNOT00000078337	ENSRNOG00000032922	Dclk1	-||Doublecortin domain||Protein kinase, ATP binding site||Serine/threonine-protein kinase, active site||Calcium/calmodulin-dependent/calcium-dependent protein kinase||Protein kinase-like domain||Protein kinase domain	144646308	144934025	+	13674	downstream
15	TUCP_001557	XLOC_060268	--	TUCP	4751948	4777847	+	ENSRNOT00000008391	ENSRNOG00000006341	Saysd1	Uncharacterised domain SAYSvFN	4658246	4663694	+	88253	downstream
15	TUCP_001557	XLOC_060268	--	TUCP	4751948	4777847	+	ENSRNOT00000071133	ENSRNOG00000048980	Gng2	G-protein, gamma subunit||G-protein gamma-like domain	4850122	4853555	+	72274	upstream
7	TUCP_003988	XLOC_175146	--	TUCP	70467524	70479448	+	ENSRNOT00000067774	ENSRNOG00000005138	Pip4k2c	Phosphatidylinositol-4-phosphate 5-kinase, C-terminal||Phosphatidylinositol-4-phosphate 5-kinase, N-terminal domain||Phosphatidylinositol-4-phosphate 5-kinase||Phosphatidylinositol-4-phosphate 5-kinase, core	70483942	70498992	-	4493	downstream
7	TUCP_003988	XLOC_175146	--	TUCP	70467524	70479448	+	ENSRNOT00000008854	ENSRNOG00000006209	Mbd6	DNA-binding domain||Methyl-CpG DNA binding	70571435	70577147	-	91986	downstream
7	TUCP_003988	XLOC_175146	--	TUCP	70467524	70479448	+	ENSRNOT00000045687	ENSRNOG00000033161	RGD1565117	Ribosomal protein S26e	70445366	70445692	+	21831	downstream
7	TUCP_003988	XLOC_175146	--	TUCP	70467524	70479448	+	ENSRNOT00000007721	ENSRNOG00000005299	Kif5a	Kinesin motor domain, conserved site||Kinesin motor domain||P-loop containing nucleoside triphosphate hydrolase||Kinesin-like protein	70513343	70556827	-	33894	downstream
7	TUCP_003988	XLOC_175146	--	TUCP	70467524	70479448	+	ENSRNOT00000046099	ENSRNOG00000004839	B4galnt1	Nucleotide-diphospho-sugar transferases||Glycosyltransferase 2-like||Ganglioside GM2 synthase	70452579	70459880	+	7643	downstream
7	TUCP_003988	XLOC_175146	--	TUCP	70467524	70479448	+	ENSRNOT00000052288	ENSRNOG00000029465	Slc26a10	SLC26A/SulP transporter||STAS domain||Solute carrier family 26 member 10||SLC26A/SulP transporter domain	70459532	70467453	-	70	upstream
7	TUCP_003988	XLOC_175146	--	TUCP	70467524	70479448	+	ENSRNOT00000090057	ENSRNOG00000005129	Dtx3	Zinc finger, RING-type||Zinc finger, RING/FYVE/PHD-type||Zinc finger, RING-type, conserved site	70476729	70480724	-	(2720)	antisense
7	TUCP_003988	XLOC_175146	--	TUCP	70467524	70479448	+	ENSRNOT00000084012	ENSRNOG00000025584	Agap2	P-loop containing nucleoside triphosphate hydrolase||Arf GTPase activating protein||PH domain-like||Pleckstrin homology domain||Ankyrin repeat||Ankyrin repeat-containing domain||Small GTPase superfamily	70364813	70372286	+	95237	downstream
7	TUCP_003988	XLOC_175146	--	TUCP	70467524	70479448	+	ENSRNOT00000080594	ENSRNOG00000005299	Kif5a	Kinesin motor domain, conserved site||Kinesin motor domain||P-loop containing nucleoside triphosphate hydrolase||Kinesin-like protein	70515832	70552897	-	36383	downstream
7	TUCP_003988	XLOC_175146	--	TUCP	70467524	70479448	+	ENSRNOT00000088995	ENSRNOG00000029465	Slc26a10	SLC26A/SulP transporter||STAS domain||Solute carrier family 26 member 10||SLC26A/SulP transporter domain	70460539	70467915	-	(392)	antisense
7	TUCP_003988	XLOC_175146	--	TUCP	70467524	70479448	+	ENSRNOT00000006815	ENSRNOG00000005129	Dtx3	Zinc finger, RING-type||Zinc finger, RING/FYVE/PHD-type||Zinc finger, RING-type, conserved site	70477135	70481796	-	(2314)	antisense
7	TUCP_003988	XLOC_175146	--	TUCP	70467524	70479448	+	ENSRNOT00000008120	ENSRNOG00000025481	Dctn2	Dynamitin	70556024	70571287	+	76575	upstream
7	TUCP_003988	XLOC_175146	--	TUCP	70467524	70479448	+	ENSRNOT00000006800	ENSRNOG00000005034	Arhgef25	Rho guanine nucleotide exchange factor 25||PH domain-like||Dbl homology (DH) domain	70469312	70476340	-	(7029)	antisense
7	TUCP_003988	XLOC_175146	--	TUCP	70467524	70479448	+	ENSRNOT00000049895	ENSRNOG00000025570	Os9	Mannose-6-phosphate receptor binding domain||Glucosidase II beta subunit-like	70380311	70407177	-	60346	upstream
7	TUCP_003988	XLOC_175146	--	TUCP	70467524	70479448	+	ENSRNOT00000031230	ENSRNOG00000025584	Agap2	P-loop containing nucleoside triphosphate hydrolase||Arf GTPase activating protein||PH domain-like||Pleckstrin homology domain||Ankyrin repeat||Ankyrin repeat-containing domain||Small GTPase superfamily	70364813	70377422	+	90101	downstream
7	TUCP_003988	XLOC_175146	--	TUCP	70467524	70479448	+	ENSRNOT00000090498	ENSRNOG00000052955	AC114111.1	-	70452367	70452675	-	14848	upstream
7	TUCP_003988	XLOC_175146	--	TUCP	70467524	70479448	+	ENSRNOT00000087495	ENSRNOG00000025481	Dctn2	Dynamitin	70556019	70572614	+	76570	upstream
7	TUCP_003988	XLOC_175146	--	TUCP	70467524	70479448	+	ENSRNOT00000079327	ENSRNOG00000005138	Pip4k2c	Phosphatidylinositol-4-phosphate 5-kinase, C-terminal||Phosphatidylinositol-4-phosphate 5-kinase, N-terminal domain||Phosphatidylinositol-4-phosphate 5-kinase||Phosphatidylinositol-4-phosphate 5-kinase, core	70484439	70498995	-	4990	downstream
7	TUCP_003989	XLOC_175146	--	TUCP	70468577	70479448	+	ENSRNOT00000067774	ENSRNOG00000005138	Pip4k2c	Phosphatidylinositol-4-phosphate 5-kinase, C-terminal||Phosphatidylinositol-4-phosphate 5-kinase, N-terminal domain||Phosphatidylinositol-4-phosphate 5-kinase||Phosphatidylinositol-4-phosphate 5-kinase, core	70483942	70498992	-	4493	downstream
7	TUCP_003989	XLOC_175146	--	TUCP	70468577	70479448	+	ENSRNOT00000008854	ENSRNOG00000006209	Mbd6	DNA-binding domain||Methyl-CpG DNA binding	70571435	70577147	-	91986	downstream
7	TUCP_003989	XLOC_175146	--	TUCP	70468577	70479448	+	ENSRNOT00000045687	ENSRNOG00000033161	RGD1565117	Ribosomal protein S26e	70445366	70445692	+	22884	downstream
7	TUCP_003989	XLOC_175146	--	TUCP	70468577	70479448	+	ENSRNOT00000007721	ENSRNOG00000005299	Kif5a	Kinesin motor domain, conserved site||Kinesin motor domain||P-loop containing nucleoside triphosphate hydrolase||Kinesin-like protein	70513343	70556827	-	33894	downstream
7	TUCP_003989	XLOC_175146	--	TUCP	70468577	70479448	+	ENSRNOT00000046099	ENSRNOG00000004839	B4galnt1	Nucleotide-diphospho-sugar transferases||Glycosyltransferase 2-like||Ganglioside GM2 synthase	70452579	70459880	+	8696	downstream
7	TUCP_003989	XLOC_175146	--	TUCP	70468577	70479448	+	ENSRNOT00000052288	ENSRNOG00000029465	Slc26a10	SLC26A/SulP transporter||STAS domain||Solute carrier family 26 member 10||SLC26A/SulP transporter domain	70459532	70467453	-	1123	upstream
7	TUCP_003989	XLOC_175146	--	TUCP	70468577	70479448	+	ENSRNOT00000090057	ENSRNOG00000005129	Dtx3	Zinc finger, RING-type||Zinc finger, RING/FYVE/PHD-type||Zinc finger, RING-type, conserved site	70476729	70480724	-	(2720)	antisense
7	TUCP_003989	XLOC_175146	--	TUCP	70468577	70479448	+	ENSRNOT00000084012	ENSRNOG00000025584	Agap2	P-loop containing nucleoside triphosphate hydrolase||Arf GTPase activating protein||PH domain-like||Pleckstrin homology domain||Ankyrin repeat||Ankyrin repeat-containing domain||Small GTPase superfamily	70364813	70372286	+	96290	downstream
7	TUCP_003989	XLOC_175146	--	TUCP	70468577	70479448	+	ENSRNOT00000080594	ENSRNOG00000005299	Kif5a	Kinesin motor domain, conserved site||Kinesin motor domain||P-loop containing nucleoside triphosphate hydrolase||Kinesin-like protein	70515832	70552897	-	36383	downstream
7	TUCP_003989	XLOC_175146	--	TUCP	70468577	70479448	+	ENSRNOT00000088995	ENSRNOG00000029465	Slc26a10	SLC26A/SulP transporter||STAS domain||Solute carrier family 26 member 10||SLC26A/SulP transporter domain	70460539	70467915	-	661	upstream
7	TUCP_003989	XLOC_175146	--	TUCP	70468577	70479448	+	ENSRNOT00000006815	ENSRNOG00000005129	Dtx3	Zinc finger, RING-type||Zinc finger, RING/FYVE/PHD-type||Zinc finger, RING-type, conserved site	70477135	70481796	-	(2314)	antisense
7	TUCP_003989	XLOC_175146	--	TUCP	70468577	70479448	+	ENSRNOT00000008120	ENSRNOG00000025481	Dctn2	Dynamitin	70556024	70571287	+	76575	upstream
7	TUCP_003989	XLOC_175146	--	TUCP	70468577	70479448	+	ENSRNOT00000006800	ENSRNOG00000005034	Arhgef25	Rho guanine nucleotide exchange factor 25||PH domain-like||Dbl homology (DH) domain	70469312	70476340	-	(7029)	antisense
7	TUCP_003989	XLOC_175146	--	TUCP	70468577	70479448	+	ENSRNOT00000049895	ENSRNOG00000025570	Os9	Mannose-6-phosphate receptor binding domain||Glucosidase II beta subunit-like	70380311	70407177	-	61399	upstream
7	TUCP_003989	XLOC_175146	--	TUCP	70468577	70479448	+	ENSRNOT00000031230	ENSRNOG00000025584	Agap2	P-loop containing nucleoside triphosphate hydrolase||Arf GTPase activating protein||PH domain-like||Pleckstrin homology domain||Ankyrin repeat||Ankyrin repeat-containing domain||Small GTPase superfamily	70364813	70377422	+	91154	downstream
7	TUCP_003989	XLOC_175146	--	TUCP	70468577	70479448	+	ENSRNOT00000090498	ENSRNOG00000052955	AC114111.1	-	70452367	70452675	-	15901	upstream
7	TUCP_003989	XLOC_175146	--	TUCP	70468577	70479448	+	ENSRNOT00000087495	ENSRNOG00000025481	Dctn2	Dynamitin	70556019	70572614	+	76570	upstream
7	TUCP_003989	XLOC_175146	--	TUCP	70468577	70479448	+	ENSRNOT00000079327	ENSRNOG00000005138	Pip4k2c	Phosphatidylinositol-4-phosphate 5-kinase, C-terminal||Phosphatidylinositol-4-phosphate 5-kinase, N-terminal domain||Phosphatidylinositol-4-phosphate 5-kinase||Phosphatidylinositol-4-phosphate 5-kinase, core	70484439	70498995	-	4990	downstream
10	TUCP_000888	XLOC_033315	--	TUCP	109337827	109418852	-	ENSRNOT00000066736	ENSRNOG00000043102	Bahcc1	Bromo adjacent homology (BAH) domain	109446444	109479891	+	27591	upstream
10	TUCP_000888	XLOC_033315	--	TUCP	109337827	109418852	-	ENSRNOT00000065565	ENSRNOG00000042653	LOC690871	-	109278712	109280863	+	56963	downstream
10	TUCP_000888	XLOC_033315	--	TUCP	109337827	109418852	-	ENSRNOT00000006225	ENSRNOG00000004604	Slc38a10	Amino acid transporter, transmembrane domain	109284957	109333899	-	3927	upstream
10	TUCP_000888	XLOC_033315	--	TUCP	109337827	109418852	-	ENSRNOT00000005977	ENSRNOG00000004430	Cep131	Centrosomal protein of 131 kDa	109243039	109267500	-	70326	upstream
10	TUCP_000888	XLOC_033315	--	TUCP	109337827	109418852	-	ENSRNOT00000038993	ENSRNOG00000028161	Tepsin	ENTH domain||ENTH/VHS	109271172	109278510	-	59316	upstream
7	TUCP_003984	XLOC_174788	--	TUCP	59616443	59644843	+	ENSRNOT00000085836	ENSRNOG00000004909	Cnot2	NOT2/NOT3/NOT5	59532641	59547174	-	69268	upstream
7	TUCP_003984	XLOC_174788	--	TUCP	59616443	59644843	+	ENSRNOT00000091427	ENSRNOG00000004909	Cnot2	NOT2/NOT3/NOT5	59527124	59587382	-	29060	upstream
7	TUCP_003984	XLOC_174788	--	TUCP	59616443	59644843	+	ENSRNOT00000066396	ENSRNOG00000004909	Cnot2	NOT2/NOT3/NOT5	59530568	59587385	-	29057	upstream
7	TUCP_003985	XLOC_174927	--	TUCP	62161271	62164289	+	ENSRNOT00000010720	ENSRNOG00000007834	Cand1	Armadillo-type fold||TATA-binding protein interacting (TIP20)||Armadillo-like helical	62124362	62162453	-	(1183)	antisense
7	TUCP_003986	XLOC_174927	--	TUCP	62161271	62164289	+	ENSRNOT00000010720	ENSRNOG00000007834	Cand1	Armadillo-type fold||TATA-binding protein interacting (TIP20)||Armadillo-like helical	62124362	62162453	-	(1183)	antisense
7	TUCP_003987	XLOC_175146	--	TUCP	70467524	70479448	+	ENSRNOT00000067774	ENSRNOG00000005138	Pip4k2c	Phosphatidylinositol-4-phosphate 5-kinase, C-terminal||Phosphatidylinositol-4-phosphate 5-kinase, N-terminal domain||Phosphatidylinositol-4-phosphate 5-kinase||Phosphatidylinositol-4-phosphate 5-kinase, core	70483942	70498992	-	4493	downstream
7	TUCP_003987	XLOC_175146	--	TUCP	70467524	70479448	+	ENSRNOT00000008854	ENSRNOG00000006209	Mbd6	DNA-binding domain||Methyl-CpG DNA binding	70571435	70577147	-	91986	downstream
7	TUCP_003987	XLOC_175146	--	TUCP	70467524	70479448	+	ENSRNOT00000045687	ENSRNOG00000033161	RGD1565117	Ribosomal protein S26e	70445366	70445692	+	21831	downstream
7	TUCP_003987	XLOC_175146	--	TUCP	70467524	70479448	+	ENSRNOT00000007721	ENSRNOG00000005299	Kif5a	Kinesin motor domain, conserved site||Kinesin motor domain||P-loop containing nucleoside triphosphate hydrolase||Kinesin-like protein	70513343	70556827	-	33894	downstream
7	TUCP_003987	XLOC_175146	--	TUCP	70467524	70479448	+	ENSRNOT00000046099	ENSRNOG00000004839	B4galnt1	Nucleotide-diphospho-sugar transferases||Glycosyltransferase 2-like||Ganglioside GM2 synthase	70452579	70459880	+	7643	downstream
7	TUCP_003987	XLOC_175146	--	TUCP	70467524	70479448	+	ENSRNOT00000052288	ENSRNOG00000029465	Slc26a10	SLC26A/SulP transporter||STAS domain||Solute carrier family 26 member 10||SLC26A/SulP transporter domain	70459532	70467453	-	70	upstream
7	TUCP_003987	XLOC_175146	--	TUCP	70467524	70479448	+	ENSRNOT00000090057	ENSRNOG00000005129	Dtx3	Zinc finger, RING-type||Zinc finger, RING/FYVE/PHD-type||Zinc finger, RING-type, conserved site	70476729	70480724	-	(2720)	antisense
7	TUCP_003987	XLOC_175146	--	TUCP	70467524	70479448	+	ENSRNOT00000084012	ENSRNOG00000025584	Agap2	P-loop containing nucleoside triphosphate hydrolase||Arf GTPase activating protein||PH domain-like||Pleckstrin homology domain||Ankyrin repeat||Ankyrin repeat-containing domain||Small GTPase superfamily	70364813	70372286	+	95237	downstream
7	TUCP_003987	XLOC_175146	--	TUCP	70467524	70479448	+	ENSRNOT00000080594	ENSRNOG00000005299	Kif5a	Kinesin motor domain, conserved site||Kinesin motor domain||P-loop containing nucleoside triphosphate hydrolase||Kinesin-like protein	70515832	70552897	-	36383	downstream
7	TUCP_003987	XLOC_175146	--	TUCP	70467524	70479448	+	ENSRNOT00000088995	ENSRNOG00000029465	Slc26a10	SLC26A/SulP transporter||STAS domain||Solute carrier family 26 member 10||SLC26A/SulP transporter domain	70460539	70467915	-	(392)	antisense
7	TUCP_003987	XLOC_175146	--	TUCP	70467524	70479448	+	ENSRNOT00000006815	ENSRNOG00000005129	Dtx3	Zinc finger, RING-type||Zinc finger, RING/FYVE/PHD-type||Zinc finger, RING-type, conserved site	70477135	70481796	-	(2314)	antisense
7	TUCP_003987	XLOC_175146	--	TUCP	70467524	70479448	+	ENSRNOT00000008120	ENSRNOG00000025481	Dctn2	Dynamitin	70556024	70571287	+	76575	upstream
7	TUCP_003987	XLOC_175146	--	TUCP	70467524	70479448	+	ENSRNOT00000006800	ENSRNOG00000005034	Arhgef25	Rho guanine nucleotide exchange factor 25||PH domain-like||Dbl homology (DH) domain	70469312	70476340	-	(7029)	antisense
7	TUCP_003987	XLOC_175146	--	TUCP	70467524	70479448	+	ENSRNOT00000049895	ENSRNOG00000025570	Os9	Mannose-6-phosphate receptor binding domain||Glucosidase II beta subunit-like	70380311	70407177	-	60346	upstream
7	TUCP_003987	XLOC_175146	--	TUCP	70467524	70479448	+	ENSRNOT00000031230	ENSRNOG00000025584	Agap2	P-loop containing nucleoside triphosphate hydrolase||Arf GTPase activating protein||PH domain-like||Pleckstrin homology domain||Ankyrin repeat||Ankyrin repeat-containing domain||Small GTPase superfamily	70364813	70377422	+	90101	downstream
7	TUCP_003987	XLOC_175146	--	TUCP	70467524	70479448	+	ENSRNOT00000090498	ENSRNOG00000052955	AC114111.1	-	70452367	70452675	-	14848	upstream
7	TUCP_003987	XLOC_175146	--	TUCP	70467524	70479448	+	ENSRNOT00000087495	ENSRNOG00000025481	Dctn2	Dynamitin	70556019	70572614	+	76570	upstream
7	TUCP_003987	XLOC_175146	--	TUCP	70467524	70479448	+	ENSRNOT00000079327	ENSRNOG00000005138	Pip4k2c	Phosphatidylinositol-4-phosphate 5-kinase, C-terminal||Phosphatidylinositol-4-phosphate 5-kinase, N-terminal domain||Phosphatidylinositol-4-phosphate 5-kinase||Phosphatidylinositol-4-phosphate 5-kinase, core	70484439	70498995	-	4990	downstream
15	TUCP_001556	XLOC_060268	--	TUCP	4748300	4770761	+	ENSRNOT00000008391	ENSRNOG00000006341	Saysd1	Uncharacterised domain SAYSvFN	4658246	4663694	+	84605	downstream
15	TUCP_001556	XLOC_060268	--	TUCP	4748300	4770761	+	ENSRNOT00000071133	ENSRNOG00000048980	Gng2	G-protein, gamma subunit||G-protein gamma-like domain	4850122	4853555	+	79360	upstream
18	TUCP_002090	XLOC_086005	--	TUCP	78548712	78578213	+	ENSRNOT00000015645	ENSRNOG00000045593	Dcp2	NUDIX hydrolase domain||NUDIX hydrolase domain-like||NUDIX hydrolase, conserved site	78584534	78607983	-	6320	downstream
18	TUCP_002090	XLOC_086005	--	TUCP	78548712	78578213	+	ENSRNOT00000076421	ENSRNOG00000045593	Dcp2	NUDIX hydrolase domain||NUDIX hydrolase domain-like||NUDIX hydrolase, conserved site	78584312	78607982	-	6098	downstream
1	TUCP_000321	XLOC_010468	--	TUCP	274589949	274597623	+	ENSRNOT00000020155	ENSRNOG00000014779	Pdcd4	MIF4G-like domain||Initiation factor eIF-4 gamma, MA3||Armadillo-type fold	274625224	274648204	+	27600	upstream
1	TUCP_000321	XLOC_010468	--	TUCP	274589949	274597623	+	ENSRNOT00000054685	ENSRNOG00000014705	Rbm20	RNA recognition motif domain||Zinc finger, U1-type||Nucleotide-binding alpha-beta plait domain||Zinc finger, C2H2-type matrin	274391932	274589816	+	132	downstream
1	TUCP_000321	XLOC_010468	--	TUCP	274589949	274597623	+	ENSRNOT00000074341	ENSRNOG00000047019	Bbip1	Cilia BBSome complex subunit 10	274649490	274650363	-	51866	downstream
1	TUCP_000321	XLOC_010468	--	TUCP	274589949	274597623	+	ENSRNOT00000020580	ENSRNOG00000015339	Shoc2	Leucine-rich repeat, typical subtype||Leucine-rich repeat||Leucine-rich repeat domain, L domain-like	274688580	274751816	+	90956	upstream
1	TUCP_000320	XLOC_010466	--	TUCP	274379279	274380417	+	ENSRNOT00000019560	ENSRNOG00000014173	Smc3	Structural maintenance of chromosomes protein||SMCs flexible hinge||RecF/RecN/SMC, N-terminal||P-loop containing nucleoside triphosphate hydrolase||Structural maintenance of chromosomes protein 3	274309758	274352838	+	26440	downstream
1	TUCP_000320	XLOC_010466	--	TUCP	274379279	274380417	+	ENSRNOT00000054686	ENSRNOG00000014173	Smc3	Structural maintenance of chromosomes protein||SMCs flexible hinge||RecF/RecN/SMC, N-terminal||P-loop containing nucleoside triphosphate hydrolase||Structural maintenance of chromosomes protein 3	274310153	274352854	+	26424	downstream
1	TUCP_000320	XLOC_010466	--	TUCP	274379279	274380417	+	ENSRNOT00000054685	ENSRNOG00000014705	Rbm20	RNA recognition motif domain||Zinc finger, U1-type||Nucleotide-binding alpha-beta plait domain||Zinc finger, C2H2-type matrin	274391932	274589816	+	11514	upstream
1	TUCP_000323	XLOC_010515	--	TUCP	276017365	276018189	+	ENSRNOT00000021041	ENSRNOG00000015671	Tectb	Zona pellucida domain||Zona pellucida domain, conserved site	275957698	275976572	+	40792	downstream
1	TUCP_000323	XLOC_010515	--	TUCP	276017365	276018189	+	ENSRNOT00000045642	ENSRNOG00000013993	AABR07007000.1	CTNNB1 binding, N-teminal||Transcription factor TCF/LEF||Transcription factor 7-like 2||Catenin binding domain	276011416	276012351	-	5013	upstream
8	TUCP_004339	XLOC_191314	--	TUCP	21387818	21394802	-	ENSRNOT00000078192	ENSRNOG00000025937	Zfp26	Zinc finger C2H2-type/integrase DNA-binding domain||Zinc finger, C2H2-like||Krueppel-associated box||Zinc finger, C2H2	21448618	21453190	-	53815	downstream
8	TUCP_004339	XLOC_191314	--	TUCP	21387818	21394802	-	ENSRNOT00000044249	ENSRNOG00000033025	Olr1192	Olfactory receptor||G protein-coupled receptor, rhodopsin-like||GPCR, rhodopsin-like, 7TM	21340469	21341431	-	46386	upstream
8	TUCP_004339	XLOC_191314	--	TUCP	21387818	21394802	-	ENSRNOT00000050206	ENSRNOG00000028864	Olr1193	GPCR, rhodopsin-like, 7TM||G protein-coupled receptor, rhodopsin-like||Olfactory receptor	21305250	21306212	+	81605	downstream
8	TUCP_004339	XLOC_191314	--	TUCP	21387818	21394802	-	ENSRNOT00000077465	ENSRNOG00000033624	Zfp426	Zinc finger, C2H2||Krueppel-associated box||Zinc finger, C2H2-like||Zinc finger C2H2-type/integrase DNA-binding domain	21478383	21492801	-	83580	downstream
8	TUCP_004339	XLOC_191314	--	TUCP	21387818	21394802	-	ENSRNOT00000071010	ENSRNOG00000048394	Zfp560	Zinc finger, C2H2||Zinc finger, C2H2-like||Zinc finger C2H2-type/integrase DNA-binding domain	21380504	21384131	-	3686	upstream
8	TUCP_004339	XLOC_191314	--	TUCP	21387818	21394802	-	ENSRNOT00000038069	ENSRNOG00000033624	Zfp426	Zinc finger, C2H2||Krueppel-associated box||Zinc finger, C2H2-like||Zinc finger C2H2-type/integrase DNA-binding domain	21477329	21481735	-	82526	downstream
8	TUCP_004339	XLOC_191314	--	TUCP	21387818	21394802	-	ENSRNOT00000038084	ENSRNOG00000025937	Zfp26	Zinc finger C2H2-type/integrase DNA-binding domain||Zinc finger, C2H2-like||Krueppel-associated box||Zinc finger, C2H2	21449176	21458379	-	54373	downstream
1	TUCP_000325	XLOC_010522	--	TUCP	276575315	276599355	+	ENSRNOT00000019681	ENSRNOG00000049232	Tcf7l2	High mobility group box domain||Transcription factor 7-like 2||Transcription factor TCF/LEF||CTNNB1 binding, N-teminal	276659542	276730514	+	60186	upstream
1	TUCP_000325	XLOC_010522	--	TUCP	276575315	276599355	+	ENSRNOT00000066236	ENSRNOG00000042786	Vti1a	Target SNARE coiled-coil homology domain||t-SNARE||Vesicle transport v-SNARE, N-terminal	276310072	276487667	+	87647	downstream
1	TUCP_000325	XLOC_010522	--	TUCP	276575315	276599355	+	ENSRNOT00000067460	ENSRNOG00000042786	Vti1a	Target SNARE coiled-coil homology domain||t-SNARE||Vesicle transport v-SNARE, N-terminal	276309927	276490602	+	84712	downstream
1	TUCP_000324	XLOC_010521	--	TUCP	276536001	276575064	+	ENSRNOT00000019681	ENSRNOG00000049232	Tcf7l2	High mobility group box domain||Transcription factor 7-like 2||Transcription factor TCF/LEF||CTNNB1 binding, N-teminal	276659542	276730514	+	84477	upstream
1	TUCP_000324	XLOC_010521	--	TUCP	276536001	276575064	+	ENSRNOT00000066236	ENSRNOG00000042786	Vti1a	Target SNARE coiled-coil homology domain||t-SNARE||Vesicle transport v-SNARE, N-terminal	276310072	276487667	+	48333	downstream
1	TUCP_000324	XLOC_010521	--	TUCP	276536001	276575064	+	ENSRNOT00000067460	ENSRNOG00000042786	Vti1a	Target SNARE coiled-coil homology domain||t-SNARE||Vesicle transport v-SNARE, N-terminal	276309927	276490602	+	45398	downstream
1	TUCP_000327	XLOC_010523	--	TUCP	276617124	276638723	+	ENSRNOT00000019681	ENSRNOG00000049232	Tcf7l2	High mobility group box domain||Transcription factor 7-like 2||Transcription factor TCF/LEF||CTNNB1 binding, N-teminal	276659542	276730514	+	20818	upstream
1	TUCP_000326	XLOC_010522	--	TUCP	276575315	276599355	+	ENSRNOT00000019681	ENSRNOG00000049232	Tcf7l2	High mobility group box domain||Transcription factor 7-like 2||Transcription factor TCF/LEF||CTNNB1 binding, N-teminal	276659542	276730514	+	60186	upstream
1	TUCP_000326	XLOC_010522	--	TUCP	276575315	276599355	+	ENSRNOT00000066236	ENSRNOG00000042786	Vti1a	Target SNARE coiled-coil homology domain||t-SNARE||Vesicle transport v-SNARE, N-terminal	276310072	276487667	+	87647	downstream
1	TUCP_000326	XLOC_010522	--	TUCP	276575315	276599355	+	ENSRNOT00000067460	ENSRNOG00000042786	Vti1a	Target SNARE coiled-coil homology domain||t-SNARE||Vesicle transport v-SNARE, N-terminal	276309927	276490602	+	84712	downstream
1	TUCP_000329	XLOC_010523	--	TUCP	276617137	276638723	+	ENSRNOT00000019681	ENSRNOG00000049232	Tcf7l2	High mobility group box domain||Transcription factor 7-like 2||Transcription factor TCF/LEF||CTNNB1 binding, N-teminal	276659542	276730514	+	20818	upstream
1	TUCP_000328	XLOC_010523	--	TUCP	276617137	276638723	+	ENSRNOT00000019681	ENSRNOG00000049232	Tcf7l2	High mobility group box domain||Transcription factor 7-like 2||Transcription factor TCF/LEF||CTNNB1 binding, N-teminal	276659542	276730514	+	20818	upstream
8	TUCP_004330	XLOC_191137	--	TUCP	13139659	13157496	-	ENSRNOT00000083006	ENSRNOG00000059178	AABR07073360.1	-	13223502	13223779	+	66005	upstream
8	TUCP_004330	XLOC_191137	--	TUCP	13139659	13157496	-	ENSRNOT00000061616	ENSRNOG00000008990	Amotl1	Angiomotin||Angiomotin, C-terminal	13042641	13109487	-	30171	upstream
8	TUCP_004330	XLOC_191137	--	TUCP	13139659	13157496	-	ENSRNOT00000078117	ENSRNOG00000009043	Piwil4	PAZ domain||Ribonuclease H-like domain||Piwi domain	13209384	13251812	-	51887	downstream
8	TUCP_004330	XLOC_191137	--	TUCP	13139659	13157496	-	ENSRNOT00000049724	ENSRNOG00000009043	Piwil4	PAZ domain||Ribonuclease H-like domain||Piwi domain	13208774	13251812	-	51277	downstream
8	TUCP_004331	XLOC_191140	--	TUCP	13172515	13197445	-	ENSRNOT00000061616	ENSRNOG00000008990	Amotl1	Angiomotin||Angiomotin, C-terminal	13042641	13109487	-	63027	upstream
8	TUCP_004331	XLOC_191140	--	TUCP	13172515	13197445	-	ENSRNOT00000012176	ENSRNOG00000009157	Fut4	Glycosyl transferase family 10||Fucosyltransferase, N-terminal	13258768	13262729	-	61322	downstream
8	TUCP_004331	XLOC_191140	--	TUCP	13172515	13197445	-	ENSRNOT00000083006	ENSRNOG00000059178	AABR07073360.1	-	13223502	13223779	+	26056	upstream
8	TUCP_004331	XLOC_191140	--	TUCP	13172515	13197445	-	ENSRNOT00000049724	ENSRNOG00000009043	Piwil4	PAZ domain||Ribonuclease H-like domain||Piwi domain	13208774	13251812	-	11328	downstream
8	TUCP_004331	XLOC_191140	--	TUCP	13172515	13197445	-	ENSRNOT00000012217	ENSRNOG00000009203	RGD1561795	-	13275270	13290773	-	77824	downstream
8	TUCP_004331	XLOC_191140	--	TUCP	13172515	13197445	-	ENSRNOT00000078117	ENSRNOG00000009043	Piwil4	PAZ domain||Ribonuclease H-like domain||Piwi domain	13209384	13251812	-	11938	downstream
8	TUCP_004336	XLOC_191297	--	TUCP	20377064	20383785	-	ENSRNOT00000086296	ENSRNOG00000052784	Olr1172	GPCR, rhodopsin-like, 7TM||G protein-coupled receptor, rhodopsin-like||Olfactory receptor	20442073	20443068	-	58287	downstream
8	TUCP_004336	XLOC_191297	--	TUCP	20377064	20383785	-	ENSRNOT00000072834	ENSRNOG00000046041	Olr1171	G protein-coupled receptor, rhodopsin-like||GPCR, rhodopsin-like, 7TM||Olfactory receptor	20397606	20398544	-	13820	downstream
8	TUCP_004336	XLOC_191297	--	TUCP	20377064	20383785	-	ENSRNOT00000071855	ENSRNOG00000047916	Olr1169	G protein-coupled receptor, rhodopsin-like||GPCR, rhodopsin-like, 7TM||Olfactory receptor	20358272	20359228	+	17835	downstream
8	TUCP_004337	XLOC_191304	--	TUCP	21206907	21209284	-	ENSRNOT00000050206	ENSRNOG00000028864	Olr1193	GPCR, rhodopsin-like, 7TM||G protein-coupled receptor, rhodopsin-like||Olfactory receptor	21305250	21306212	+	95965	upstream
8	TUCP_004337	XLOC_191304	--	TUCP	21206907	21209284	-	ENSRNOT00000067321	ENSRNOG00000056873	Or7e24	G protein-coupled receptor, rhodopsin-like||GPCR, rhodopsin-like, 7TM||Olfactory receptor	21214143	21224737	-	4858	downstream
8	TUCP_004337	XLOC_191304	--	TUCP	21206907	21209284	-	ENSRNOT00000061271	ENSRNOG00000039892	Olr1185	G protein-coupled receptor, rhodopsin-like||GPCR, rhodopsin-like, 7TM||Olfactory receptor	21163998	21164966	+	41940	downstream
8	TUCP_004337	XLOC_191304	--	TUCP	21206907	21209284	-	ENSRNOT00000048082	ENSRNOG00000033839	LOC100361194	G protein-coupled receptor, rhodopsin-like||GPCR, rhodopsin-like, 7TM||Olfactory receptor	21271190	21272116	+	61905	upstream
8	TUCP_004334	XLOC_191252	--	TUCP	18538153	18639750	-	ENSRNOT00000061339	ENSRNOG00000039931	Muc16	Mucin-16||SEA domain	18437787	18508971	-	29181	upstream
8	TUCP_004334	XLOC_191252	--	TUCP	18538153	18639750	-	ENSRNOT00000008415	ENSRNOG00000006428	Olr1121	Olfactory receptor||G protein-coupled receptor, rhodopsin-like||GPCR, rhodopsin-like, 7TM	18719444	18720385	-	79693	downstream
8	TUCP_004335	XLOC_191252	--	TUCP	18609062	18639761	-	ENSRNOT00000008415	ENSRNOG00000006428	Olr1121	Olfactory receptor||G protein-coupled receptor, rhodopsin-like||GPCR, rhodopsin-like, 7TM	18719444	18720385	-	79682	downstream
AABR07024203.1	TUCP_004626	XLOC_203973	--	TUCP	59366	96087	+	ENSRNOT00000087606	ENSRNOG00000051594	AABR07024203.1	Schlafen, AAA domain||Schlafen family	15431	19511	+	39854	downstream
AABR07024203.1	TUCP_004626	XLOC_203973	--	TUCP	59366	96087	+	ENSRNOT00000091763	ENSRNOG00000061777	AABR07024203.2	Schlafen, AAA domain||Schlafen family member 14||Retroviral nucleocapsid protein Gag||Retrovirus capsid, C-terminal||P-loop containing nucleoside triphosphate hydrolase||Schlafen family||Zinc-binding ribosomal protein||Ribosomal protein S27e||Ribosomal protein S27e, zinc-binding domain	27105	49934	-	9431	upstream
AABR07024203.1	TUCP_004626	XLOC_203973	--	TUCP	59366	96087	+	ENSRNOT00000083350	ENSRNOG00000052864	LOC108348326	Pex, N-terminal||Peroxisome assembly protein 12||Zinc finger, RING/FYVE/PHD-type	56708	58907	-	458	upstream
AABR07024203.1	TUCP_004627	XLOC_203973	--	TUCP	59383	96087	+	ENSRNOT00000087606	ENSRNOG00000051594	AABR07024203.1	Schlafen, AAA domain||Schlafen family	15431	19511	+	39871	downstream
AABR07024203.1	TUCP_004627	XLOC_203973	--	TUCP	59383	96087	+	ENSRNOT00000091763	ENSRNOG00000061777	AABR07024203.2	Schlafen, AAA domain||Schlafen family member 14||Retroviral nucleocapsid protein Gag||Retrovirus capsid, C-terminal||P-loop containing nucleoside triphosphate hydrolase||Schlafen family||Zinc-binding ribosomal protein||Ribosomal protein S27e||Ribosomal protein S27e, zinc-binding domain	27105	49934	-	9448	upstream
AABR07024203.1	TUCP_004627	XLOC_203973	--	TUCP	59383	96087	+	ENSRNOT00000083350	ENSRNOG00000052864	LOC108348326	Pex, N-terminal||Peroxisome assembly protein 12||Zinc finger, RING/FYVE/PHD-type	56708	58907	-	475	upstream
9	TUCP_004620	XLOC_203750	--	TUCP	117724833	117736706	-	ENSRNOT00000022396	ENSRNOG00000016719	Zfp161	BTB/POZ domain||SKP1/BTB/POZ domain||Zinc finger, C2H2-like||Zinc finger C2H2-type/integrase DNA-binding domain||Zinc finger, C2H2	117737611	117744300	+	904	upstream
9	TUCP_004620	XLOC_203750	--	TUCP	117724833	117736706	-	ENSRNOT00000086943	ENSRNOG00000053805	Akain1	-	117795132	117842270	+	58425	upstream
9	TUCP_004620	XLOC_203750	--	TUCP	117724833	117736706	-	ENSRNOT00000022878	ENSRNOG00000016724	Epb41l3	Ubiquitin-related domain||FERM conserved site||Band 4.1-like protein 3||FERM adjacent (FA)||FERM/acyl-CoA-binding protein, 3-helical bundle||FERM, C-terminal PH-like domain||Band 4.1 domain||FERM, N-terminal||FERM central domain||Band 4.1, C-terminal||SAB domain||Ezrin/radixin/moesin-like||PH domain-like||FERM domain	117538009	117665508	+	59324	downstream
9	TUCP_004620	XLOC_203750	--	TUCP	117724833	117736706	-	ENSRNOT00000088647	ENSRNOG00000016724	Epb41l3	Ubiquitin-related domain||FERM conserved site||Band 4.1-like protein 3||FERM adjacent (FA)||FERM/acyl-CoA-binding protein, 3-helical bundle||FERM, C-terminal PH-like domain||Band 4.1 domain||FERM, N-terminal||FERM central domain||Band 4.1, C-terminal||SAB domain||Ezrin/radixin/moesin-like||PH domain-like||FERM domain	117583610	117666410	+	58422	downstream
9	TUCP_004620	XLOC_203750	--	TUCP	117724833	117736706	-	ENSRNOT00000049426	ENSRNOG00000016724	Epb41l3	Ubiquitin-related domain||FERM conserved site||Band 4.1-like protein 3||FERM adjacent (FA)||FERM/acyl-CoA-binding protein, 3-helical bundle||FERM, C-terminal PH-like domain||Band 4.1 domain||FERM, N-terminal||FERM central domain||Band 4.1, C-terminal||SAB domain||Ezrin/radixin/moesin-like||PH domain-like||FERM domain	117583620	117664121	+	60711	downstream
9	TUCP_004620	XLOC_203750	--	TUCP	117724833	117736706	-	ENSRNOT00000022849	ENSRNOG00000016724	Epb41l3	Ubiquitin-related domain||FERM conserved site||Band 4.1-like protein 3||FERM adjacent (FA)||FERM/acyl-CoA-binding protein, 3-helical bundle||FERM, C-terminal PH-like domain||Band 4.1 domain||FERM, N-terminal||FERM central domain||Band 4.1, C-terminal||SAB domain||Ezrin/radixin/moesin-like||PH domain-like||FERM domain	117538346	117666405	+	58427	downstream
9	TUCP_004621	XLOC_203750	--	TUCP	117725844	117736706	-	ENSRNOT00000022396	ENSRNOG00000016719	Zfp161	BTB/POZ domain||SKP1/BTB/POZ domain||Zinc finger, C2H2-like||Zinc finger C2H2-type/integrase DNA-binding domain||Zinc finger, C2H2	117737611	117744300	+	904	upstream
9	TUCP_004621	XLOC_203750	--	TUCP	117725844	117736706	-	ENSRNOT00000086943	ENSRNOG00000053805	Akain1	-	117795132	117842270	+	58425	upstream
9	TUCP_004621	XLOC_203750	--	TUCP	117725844	117736706	-	ENSRNOT00000022878	ENSRNOG00000016724	Epb41l3	Ubiquitin-related domain||FERM conserved site||Band 4.1-like protein 3||FERM adjacent (FA)||FERM/acyl-CoA-binding protein, 3-helical bundle||FERM, C-terminal PH-like domain||Band 4.1 domain||FERM, N-terminal||FERM central domain||Band 4.1, C-terminal||SAB domain||Ezrin/radixin/moesin-like||PH domain-like||FERM domain	117538009	117665508	+	60335	downstream
9	TUCP_004621	XLOC_203750	--	TUCP	117725844	117736706	-	ENSRNOT00000088647	ENSRNOG00000016724	Epb41l3	Ubiquitin-related domain||FERM conserved site||Band 4.1-like protein 3||FERM adjacent (FA)||FERM/acyl-CoA-binding protein, 3-helical bundle||FERM, C-terminal PH-like domain||Band 4.1 domain||FERM, N-terminal||FERM central domain||Band 4.1, C-terminal||SAB domain||Ezrin/radixin/moesin-like||PH domain-like||FERM domain	117583610	117666410	+	59433	downstream
9	TUCP_004621	XLOC_203750	--	TUCP	117725844	117736706	-	ENSRNOT00000049426	ENSRNOG00000016724	Epb41l3	Ubiquitin-related domain||FERM conserved site||Band 4.1-like protein 3||FERM adjacent (FA)||FERM/acyl-CoA-binding protein, 3-helical bundle||FERM, C-terminal PH-like domain||Band 4.1 domain||FERM, N-terminal||FERM central domain||Band 4.1, C-terminal||SAB domain||Ezrin/radixin/moesin-like||PH domain-like||FERM domain	117583620	117664121	+	61722	downstream
9	TUCP_004621	XLOC_203750	--	TUCP	117725844	117736706	-	ENSRNOT00000022849	ENSRNOG00000016724	Epb41l3	Ubiquitin-related domain||FERM conserved site||Band 4.1-like protein 3||FERM adjacent (FA)||FERM/acyl-CoA-binding protein, 3-helical bundle||FERM, C-terminal PH-like domain||Band 4.1 domain||FERM, N-terminal||FERM central domain||Band 4.1, C-terminal||SAB domain||Ezrin/radixin/moesin-like||PH domain-like||FERM domain	117538346	117666405	+	59438	downstream
9	TUCP_004622	XLOC_203765	--	TUCP	119161224	119171233	-	ENSRNOT00000021534	ENSRNOG00000015906	Tgif1	Homeobox KN domain||Homeobox domain||Homeodomain-like	119181083	119190698	-	9849	downstream
9	TUCP_004622	XLOC_203765	--	TUCP	119161224	119171233	-	ENSRNOT00000090512	ENSRNOG00000016196	Dlgap1	SAPAP family||Disks large-associated protein 1	118842787	119158196	+	3027	downstream
9	TUCP_004622	XLOC_203765	--	TUCP	119161224	119171233	-	ENSRNOT00000087592	ENSRNOG00000016196	Dlgap1	SAPAP family||Disks large-associated protein 1	118849302	119156706	+	4517	downstream
9	TUCP_004622	XLOC_203765	--	TUCP	119161224	119171233	-	ENSRNOT00000022351	ENSRNOG00000016196	Dlgap1	SAPAP family||Disks large-associated protein 1	118586179	119157564	+	3659	downstream
AABR07024203.1	TUCP_004628	XLOC_203973	--	TUCP	59498	84009	+	ENSRNOT00000087606	ENSRNOG00000051594	AABR07024203.1	Schlafen, AAA domain||Schlafen family	15431	19511	+	39986	downstream
AABR07024203.1	TUCP_004628	XLOC_203973	--	TUCP	59498	84009	+	ENSRNOT00000091763	ENSRNOG00000061777	AABR07024203.2	Schlafen, AAA domain||Schlafen family member 14||Retroviral nucleocapsid protein Gag||Retrovirus capsid, C-terminal||P-loop containing nucleoside triphosphate hydrolase||Schlafen family||Zinc-binding ribosomal protein||Ribosomal protein S27e||Ribosomal protein S27e, zinc-binding domain	27105	49934	-	9563	upstream
AABR07024203.1	TUCP_004628	XLOC_203973	--	TUCP	59498	84009	+	ENSRNOT00000083350	ENSRNOG00000052864	LOC108348326	Pex, N-terminal||Peroxisome assembly protein 12||Zinc finger, RING/FYVE/PHD-type	56708	58907	-	590	upstream
AABR07024203.1	TUCP_004629	XLOC_203973	--	TUCP	63161	95076	+	ENSRNOT00000087606	ENSRNOG00000051594	AABR07024203.1	Schlafen, AAA domain||Schlafen family	15431	19511	+	43649	downstream
AABR07024203.1	TUCP_004629	XLOC_203973	--	TUCP	63161	95076	+	ENSRNOT00000091763	ENSRNOG00000061777	AABR07024203.2	Schlafen, AAA domain||Schlafen family member 14||Retroviral nucleocapsid protein Gag||Retrovirus capsid, C-terminal||P-loop containing nucleoside triphosphate hydrolase||Schlafen family||Zinc-binding ribosomal protein||Ribosomal protein S27e||Ribosomal protein S27e, zinc-binding domain	27105	49934	-	13226	upstream
AABR07024203.1	TUCP_004629	XLOC_203973	--	TUCP	63161	95076	+	ENSRNOT00000083350	ENSRNOG00000052864	LOC108348326	Pex, N-terminal||Peroxisome assembly protein 12||Zinc finger, RING/FYVE/PHD-type	56708	58907	-	4253	upstream
2	TUCP_002351	XLOC_098119	--	TUCP	104679102	104686246	+	ENSRNOT00000082627	ENSRNOG00000011913	Cp	Multicopper oxidase, type 3||Ceruloplasmin||Cupredoxin||Multicopper oxidase, type 2||Multicopper oxidase, type 1||Multicopper oxidases, conserved site||Multicopper oxidase, copper-binding site	104744476	104799853	+	58229	upstream
2	TUCP_002351	XLOC_098119	--	TUCP	104679102	104686246	+	ENSRNOT00000016083	ENSRNOG00000011913	Cp	Multicopper oxidase, type 3||Ceruloplasmin||Cupredoxin||Multicopper oxidase, type 2||Multicopper oxidase, type 1||Multicopper oxidases, conserved site||Multicopper oxidase, copper-binding site	104744461	104789146	+	58214	upstream
1	TUCP_000185	XLOC_006148	--	TUCP	164109856	164130048	+	ENSRNOT00000022557	ENSRNOG00000016573	Dgat2	Diacylglycerol acyltransferase	164113459	164143818	-	(16590)	antisense
1	TUCP_000185	XLOC_006148	--	TUCP	164109856	164130048	+	ENSRNOT00000035774	ENSRNOG00000027228	Mogat2	Diacylglycerol acyltransferase	164181764	164205222	-	51715	downstream
1	TUCP_000185	XLOC_006148	--	TUCP	164109856	164130048	+	ENSRNOT00000022176	ENSRNOG00000016206	Uvrag	UV radiation resistance protein/autophagy-related protein 14||C2 domain	163844818	164101578	-	8277	upstream
1	TUCP_000185	XLOC_006148	--	TUCP	164109856	164130048	+	ENSRNOT00000034389	ENSRNOG00000027204	Map6	Microtubule-associated protein 6	164225934	164292093	+	95885	upstream
1	TUCP_000185	XLOC_006148	--	TUCP	164109856	164130048	+	ENSRNOT00000081669	ENSRNOG00000016573	Dgat2	Diacylglycerol acyltransferase	164114210	164142206	-	(15839)	antisense
1	TUCP_000184	XLOC_006006	--	TUCP	162307909	162314180	+	ENSRNOT00000031161	ENSRNOG00000024961	Usp35	Ubiquitin specific protease, conserved site||Ubiquitin specific protease domain||Armadillo-type fold||Peptidase C19, ubiquitin carboxyl-terminal hydrolase	162284777	162300515	-	7393	upstream
1	TUCP_000184	XLOC_006006	--	TUCP	162307909	162314180	+	ENSRNOT00000016361	ENSRNOG00000011882	Gab2	Pleckstrin homology domain||PH domain-like	162083030	162279727	+	28181	downstream
1	TUCP_000184	XLOC_006006	--	TUCP	162307909	162314180	+	ENSRNOT00000035743	ENSRNOG00000024793	Kctd21	SKP1/BTB/POZ domain||BTB/POZ domain||Potassium channel tetramerisation-type BTB domain	162320730	162325013	+	6549	upstream
1	TUCP_000184	XLOC_006006	--	TUCP	162307909	162314180	+	ENSRNOT00000016509	ENSRNOG00000012383	Ndufc2	NADH:ubiquinone oxidoreductase, subunit b14.5b	162369801	162376023	+	55620	upstream
1	TUCP_000184	XLOC_006006	--	TUCP	162307909	162314180	+	ENSRNOT00000016478	ENSRNOG00000012292	Alg8	Glycosyl transferase, ALG6/ALG8	162342051	162362141	+	27870	upstream
1	TUCP_000184	XLOC_006006	--	TUCP	162307909	162314180	+	ENSRNOT00000016540	ENSRNOG00000012404	Thrsp	Spot 14 family	162381253	162385575	-	67072	downstream
1	TUCP_000187	XLOC_006154	--	TUCP	164174487	164189195	+	ENSRNOT00000022557	ENSRNOG00000016573	Dgat2	Diacylglycerol acyltransferase	164113459	164143818	-	30668	upstream
1	TUCP_000187	XLOC_006154	--	TUCP	164174487	164189195	+	ENSRNOT00000035774	ENSRNOG00000027228	Mogat2	Diacylglycerol acyltransferase	164181764	164205222	-	(7432)	antisense
1	TUCP_000187	XLOC_006154	--	TUCP	164174487	164189195	+	ENSRNOT00000034389	ENSRNOG00000027204	Map6	Microtubule-associated protein 6	164225934	164292093	+	36738	upstream
1	TUCP_000187	XLOC_006154	--	TUCP	164174487	164189195	+	ENSRNOT00000081669	ENSRNOG00000016573	Dgat2	Diacylglycerol acyltransferase	164114210	164142206	-	32280	upstream
1	TUCP_000187	XLOC_006154	--	TUCP	164174487	164189195	+	ENSRNOT00000022176	ENSRNOG00000016206	Uvrag	UV radiation resistance protein/autophagy-related protein 14||C2 domain	163844818	164101578	-	72908	upstream
1	TUCP_000186	XLOC_006154	--	TUCP	164165049	164174433	+	ENSRNOT00000022557	ENSRNOG00000016573	Dgat2	Diacylglycerol acyltransferase	164113459	164143818	-	21230	upstream
1	TUCP_000186	XLOC_006154	--	TUCP	164165049	164174433	+	ENSRNOT00000035774	ENSRNOG00000027228	Mogat2	Diacylglycerol acyltransferase	164181764	164205222	-	7330	downstream
1	TUCP_000186	XLOC_006154	--	TUCP	164165049	164174433	+	ENSRNOT00000081669	ENSRNOG00000016573	Dgat2	Diacylglycerol acyltransferase	164114210	164142206	-	22842	upstream
1	TUCP_000186	XLOC_006154	--	TUCP	164165049	164174433	+	ENSRNOT00000034389	ENSRNOG00000027204	Map6	Microtubule-associated protein 6	164225934	164292093	+	51500	upstream
1	TUCP_000186	XLOC_006154	--	TUCP	164165049	164174433	+	ENSRNOT00000022176	ENSRNOG00000016206	Uvrag	UV radiation resistance protein/autophagy-related protein 14||C2 domain	163844818	164101578	-	63470	upstream
1	TUCP_000181	XLOC_005879	--	TUCP	157461674	157481459	+	ENSRNOT00000012781	ENSRNOG00000009462	Ccdc90b	Coiled-coil domain-containing protein 90-like	157403595	157417147	+	44526	downstream
1	TUCP_000181	XLOC_005879	--	TUCP	157461674	157481459	+	ENSRNOT00000013552	ENSRNOG00000009891	Pcf11	RNA polymerase II-binding domain||ENTH/VHS||CID domain	157468626	157494008	-	(12834)	antisense
1	TUCP_000181	XLOC_005879	--	TUCP	157461674	157481459	+	ENSRNOT00000092066	ENSRNOG00000010224	Rab30	Small GTP-binding protein domain||P-loop containing nucleoside triphosphate hydrolase||Small GTPase superfamily	157573324	157659508	+	91864	upstream
1	TUCP_000181	XLOC_005879	--	TUCP	157461674	157481459	+	ENSRNOT00000068402	ENSRNOG00000009664	Ankrd42	Ankyrin repeat-containing domain||Ankyrin repeat	157419123	157461588	-	85	upstream
1	TUCP_000180	XLOC_005776	--	TUCP	153791230	153857879	+	ENSRNOT00000080927	ENSRNOG00000017307	Prss23	Serine proteases, trypsin family, histidine active site||Serine proteases, trypsin domain||Peptidase S1, PA clan	153732532	153752541	-	38688	upstream
1	TUCP_000180	XLOC_005776	--	TUCP	153791230	153857879	+	ENSRNOT00000023329	ENSRNOG00000017311	Me3	NAD(P)-binding domain||Malic enzyme, conserved site||Malic oxidoreductase||Malic enzyme, N-terminal domain||Malic enzyme, NAD-binding	153861569	154056587	+	3689	upstream
1	TUCP_000180	XLOC_005776	--	TUCP	153791230	153857879	+	ENSRNOT00000023239	ENSRNOG00000017307	Prss23	Serine proteases, trypsin family, histidine active site||Serine proteases, trypsin domain||Peptidase S1, PA clan	153732534	153740905	-	50324	upstream
1	TUCP_000180	XLOC_005776	--	TUCP	153791230	153857879	+	ENSRNOT00000087067	ENSRNOG00000017311	Me3	NAD(P)-binding domain||Malic enzyme, conserved site||Malic oxidoreductase||Malic enzyme, N-terminal domain||Malic enzyme, NAD-binding	153861948	154056654	+	4068	upstream
1	TUCP_000182	XLOC_005883	--	TUCP	157846268	157852433	+	ENSRNOT00000014271	ENSRNOG00000010630	Prcp	Peptidase S28||Alpha/Beta hydrolase fold	157701089	157750169	+	96098	downstream
1	TUCP_000182	XLOC_005883	--	TUCP	157846268	157852433	+	ENSRNOT00000014284	ENSRNOG00000010763	Fam181b	FAM181	157920786	157922274	+	68352	upstream
12	TUCP_001124	XLOC_042595	--	TUCP	5492380	5509542	-	ENSRNOT00000050885	ENSRNOG00000030410	Zfp958	Zinc finger, C2H2-like||Zinc finger C2H2-type/integrase DNA-binding domain||Zinc finger, C2H2	5485903	5490935	-	1444	upstream
12	TUCP_001124	XLOC_042595	--	TUCP	5492380	5509542	-	ENSRNOT00000076483	ENSRNOG00000000894	Fry	Cell morphogenesis protein N-terminal||Cell morphogenesis protein C-terminal||Cell morphogenesis central region||Armadillo-type fold	5573729	5682608	-	64186	downstream
12	TUCP_001124	XLOC_042595	--	TUCP	5492380	5509542	-	ENSRNOT00000041365	ENSRNOG00000000894	Fry	Cell morphogenesis protein N-terminal||Cell morphogenesis protein C-terminal||Cell morphogenesis central region||Armadillo-type fold	5575432	5773036	-	65889	downstream
12	TUCP_001124	XLOC_042595	--	TUCP	5492380	5509542	-	ENSRNOT00000077167	ENSRNOG00000000894	Fry	Cell morphogenesis protein N-terminal||Cell morphogenesis protein C-terminal||Cell morphogenesis central region||Armadillo-type fold	5573730	5685448	-	64187	downstream
12	TUCP_001125	XLOC_042598	--	TUCP	5842936	5978138	-	ENSRNOT00000001197	ENSRNOG00000000897	Rxfp2	Leucine-rich repeat, typical subtype||Leucine-rich repeat||Leucine-rich repeat domain, L domain-like||Low-density lipoprotein (LDL) receptor class A repeat||Low-density lipoprotein (LDL) receptor class A, conserved site||GPCR, rhodopsin-like, 7TM||Relaxin receptor||G protein-coupled receptor, rhodopsin-like	6016884	6078411	-	38745	downstream
12	TUCP_001125	XLOC_042598	--	TUCP	5842936	5978138	-	ENSRNOT00000075920	ENSRNOG00000000894	Fry	Cell morphogenesis protein N-terminal||Cell morphogenesis protein C-terminal||Cell morphogenesis central region||Armadillo-type fold	5693414	5822874	-	20061	upstream
12	TUCP_001125	XLOC_042598	--	TUCP	5842936	5978138	-	ENSRNOT00000041365	ENSRNOG00000000894	Fry	Cell morphogenesis protein N-terminal||Cell morphogenesis protein C-terminal||Cell morphogenesis central region||Armadillo-type fold	5575432	5773036	-	69899	upstream
12	TUCP_001126	XLOC_042600	--	TUCP	5826922	5835031	-	ENSRNOT00000075920	ENSRNOG00000000894	Fry	Cell morphogenesis protein N-terminal||Cell morphogenesis protein C-terminal||Cell morphogenesis central region||Armadillo-type fold	5693414	5822874	-	4047	upstream
12	TUCP_001126	XLOC_042600	--	TUCP	5826922	5835031	-	ENSRNOT00000041365	ENSRNOG00000000894	Fry	Cell morphogenesis protein N-terminal||Cell morphogenesis protein C-terminal||Cell morphogenesis central region||Armadillo-type fold	5575432	5773036	-	53885	upstream
12	TUCP_001127	XLOC_042600	--	TUCP	5830870	5839638	-	ENSRNOT00000075920	ENSRNOG00000000894	Fry	Cell morphogenesis protein N-terminal||Cell morphogenesis protein C-terminal||Cell morphogenesis central region||Armadillo-type fold	5693414	5822874	-	7995	upstream
12	TUCP_001127	XLOC_042600	--	TUCP	5830870	5839638	-	ENSRNOT00000041365	ENSRNOG00000000894	Fry	Cell morphogenesis protein N-terminal||Cell morphogenesis protein C-terminal||Cell morphogenesis central region||Armadillo-type fold	5575432	5773036	-	57833	upstream
1	TUCP_000189	XLOC_006167	--	TUCP	164349001	164349954	+	ENSRNOT00000055321	ENSRNOG00000036859	Gdpd5	PLC-like phosphodiesterase, TIM beta/alpha-barrel domain||Glycerophosphodiester phosphodiesterase domain||Glycerophosphoryl diester phosphodiesterase	164380577	164418593	+	30622	upstream
1	TUCP_000189	XLOC_006167	--	TUCP	164349001	164349954	+	ENSRNOT00000023386	ENSRNOG00000017365	Klhl35	BTB/Kelch-associated||Kelch-like protein 35||Galactose oxidase, beta-propeller||BTB-kelch protein||BTB/POZ domain||SKP1/BTB/POZ domain||Kelch repeat type 1	164425475	164430934	+	75520	upstream
1	TUCP_000189	XLOC_006167	--	TUCP	164349001	164349954	+	ENSRNOT00000023935	ENSRNOG00000017418	Rps3	Ribosomal protein S3, C-terminal||K homology domain-like, alpha/beta||Ribosomal protein S3, eukaryotic/archaeal||Ribosomal protein S3, conserved site||K homology domain, prokaryotic type||K Homology domain, type 2	164435878	164441167	-	85923	downstream
1	TUCP_000189	XLOC_006167	--	TUCP	164349001	164349954	+	ENSRNOT00000086091	ENSRNOG00000016831	Serpinh1	Serpin, conserved site||Serpin domain||Serpin family	164301614	164307084	-	41916	upstream
1	TUCP_000189	XLOC_006167	--	TUCP	164349001	164349954	+	ENSRNOT00000022983	ENSRNOG00000016831	Serpinh1	Serpin, conserved site||Serpin domain||Serpin family	164301010	164308317	-	40683	upstream
1	TUCP_000189	XLOC_006167	--	TUCP	164349001	164349954	+	ENSRNOT00000034389	ENSRNOG00000027204	Map6	Microtubule-associated protein 6	164225934	164292093	+	56907	downstream
1	TUCP_000188	XLOC_006166	--	TUCP	164337122	164369154	+	ENSRNOT00000055321	ENSRNOG00000036859	Gdpd5	PLC-like phosphodiesterase, TIM beta/alpha-barrel domain||Glycerophosphodiester phosphodiesterase domain||Glycerophosphoryl diester phosphodiesterase	164380577	164418593	+	11422	upstream
1	TUCP_000188	XLOC_006166	--	TUCP	164337122	164369154	+	ENSRNOT00000023386	ENSRNOG00000017365	Klhl35	BTB/Kelch-associated||Kelch-like protein 35||Galactose oxidase, beta-propeller||BTB-kelch protein||BTB/POZ domain||SKP1/BTB/POZ domain||Kelch repeat type 1	164425475	164430934	+	56320	upstream
1	TUCP_000188	XLOC_006166	--	TUCP	164337122	164369154	+	ENSRNOT00000023935	ENSRNOG00000017418	Rps3	Ribosomal protein S3, C-terminal||K homology domain-like, alpha/beta||Ribosomal protein S3, eukaryotic/archaeal||Ribosomal protein S3, conserved site||K homology domain, prokaryotic type||K Homology domain, type 2	164435878	164441167	-	66723	downstream
1	TUCP_000188	XLOC_006166	--	TUCP	164337122	164369154	+	ENSRNOT00000086091	ENSRNOG00000016831	Serpinh1	Serpin, conserved site||Serpin domain||Serpin family	164301614	164307084	-	30037	upstream
1	TUCP_000188	XLOC_006166	--	TUCP	164337122	164369154	+	ENSRNOT00000022983	ENSRNOG00000016831	Serpinh1	Serpin, conserved site||Serpin domain||Serpin family	164301010	164308317	-	28804	upstream
1	TUCP_000188	XLOC_006166	--	TUCP	164337122	164369154	+	ENSRNOT00000034389	ENSRNOG00000027204	Map6	Microtubule-associated protein 6	164225934	164292093	+	45028	downstream
12	TUCP_001122	XLOC_042333	--	TUCP	44883	49770	-	ENSRNOT00000090447	ENSRNOG00000055204	AABR07034833.1	-	53872	54885	-	4101	downstream
12	TUCP_001123	XLOC_042340	--	TUCP	105782	117419	-	ENSRNOT00000090447	ENSRNOG00000055204	AABR07034833.1	-	53872	54885	-	50896	upstream
1	TUCP_000435	XLOC_014439	--	TUCP	69966561	69978931	-	ENSRNOT00000083609	ENSRNOG00000059513	LOC102547412	Krueppel-associated box||Zinc finger, C2H2||Zinc finger C2H2-type/integrase DNA-binding domain||Zinc finger, C2H2-like	69866069	69879804	+	86756	downstream
1	TUCP_000435	XLOC_014439	--	TUCP	69966561	69978931	-	ENSRNOT00000055721	ENSRNOG00000015956	Usp29	Ubiquitin carboxyl-terminal hydrolase 26/37, N-terminal||Peptidase C19, ubiquitin carboxyl-terminal hydrolase||Ubiquitin specific protease domain||Ubiquitin-specific peptidase 29||Ubiquitin specific protease, conserved site	69988673	70003582	-	9741	downstream
1	TUCP_000435	XLOC_014439	--	TUCP	69966561	69978931	-	ENSRNOT00000021245	ENSRNOG00000015825	Aurkc	Protein kinase-like domain||Protein kinase domain||Protein kinase, ATP binding site||Serine/threonine-protein kinase, active site||Aurora kinase C||Aurora kinase	69958452	69963592	-	2968	upstream
1	TUCP_000434	XLOC_014439	--	TUCP	69966561	69978931	-	ENSRNOT00000083609	ENSRNOG00000059513	LOC102547412	Krueppel-associated box||Zinc finger, C2H2||Zinc finger C2H2-type/integrase DNA-binding domain||Zinc finger, C2H2-like	69866069	69879804	+	86756	downstream
1	TUCP_000434	XLOC_014439	--	TUCP	69966561	69978931	-	ENSRNOT00000055721	ENSRNOG00000015956	Usp29	Ubiquitin carboxyl-terminal hydrolase 26/37, N-terminal||Peptidase C19, ubiquitin carboxyl-terminal hydrolase||Ubiquitin specific protease domain||Ubiquitin-specific peptidase 29||Ubiquitin specific protease, conserved site	69988673	70003582	-	9741	downstream
1	TUCP_000434	XLOC_014439	--	TUCP	69966561	69978931	-	ENSRNOT00000021245	ENSRNOG00000015825	Aurkc	Protein kinase-like domain||Protein kinase domain||Protein kinase, ATP binding site||Serine/threonine-protein kinase, active site||Aurora kinase C||Aurora kinase	69958452	69963592	-	2968	upstream
1	TUCP_000437	XLOC_014439	--	TUCP	69966561	69978931	-	ENSRNOT00000083609	ENSRNOG00000059513	LOC102547412	Krueppel-associated box||Zinc finger, C2H2||Zinc finger C2H2-type/integrase DNA-binding domain||Zinc finger, C2H2-like	69866069	69879804	+	86756	downstream
1	TUCP_000437	XLOC_014439	--	TUCP	69966561	69978931	-	ENSRNOT00000055721	ENSRNOG00000015956	Usp29	Ubiquitin carboxyl-terminal hydrolase 26/37, N-terminal||Peptidase C19, ubiquitin carboxyl-terminal hydrolase||Ubiquitin specific protease domain||Ubiquitin-specific peptidase 29||Ubiquitin specific protease, conserved site	69988673	70003582	-	9741	downstream
1	TUCP_000437	XLOC_014439	--	TUCP	69966561	69978931	-	ENSRNOT00000021245	ENSRNOG00000015825	Aurkc	Protein kinase-like domain||Protein kinase domain||Protein kinase, ATP binding site||Serine/threonine-protein kinase, active site||Aurora kinase C||Aurora kinase	69958452	69963592	-	2968	upstream
1	TUCP_000436	XLOC_014439	--	TUCP	69966561	69978931	-	ENSRNOT00000083609	ENSRNOG00000059513	LOC102547412	Krueppel-associated box||Zinc finger, C2H2||Zinc finger C2H2-type/integrase DNA-binding domain||Zinc finger, C2H2-like	69866069	69879804	+	86756	downstream
1	TUCP_000436	XLOC_014439	--	TUCP	69966561	69978931	-	ENSRNOT00000055721	ENSRNOG00000015956	Usp29	Ubiquitin carboxyl-terminal hydrolase 26/37, N-terminal||Peptidase C19, ubiquitin carboxyl-terminal hydrolase||Ubiquitin specific protease domain||Ubiquitin-specific peptidase 29||Ubiquitin specific protease, conserved site	69988673	70003582	-	9741	downstream
1	TUCP_000436	XLOC_014439	--	TUCP	69966561	69978931	-	ENSRNOT00000021245	ENSRNOG00000015825	Aurkc	Protein kinase-like domain||Protein kinase domain||Protein kinase, ATP binding site||Serine/threonine-protein kinase, active site||Aurora kinase C||Aurora kinase	69958452	69963592	-	2968	upstream
1	TUCP_000431	XLOC_014439	--	TUCP	69966561	69978451	-	ENSRNOT00000083609	ENSRNOG00000059513	LOC102547412	Krueppel-associated box||Zinc finger, C2H2||Zinc finger C2H2-type/integrase DNA-binding domain||Zinc finger, C2H2-like	69866069	69879804	+	86756	downstream
1	TUCP_000431	XLOC_014439	--	TUCP	69966561	69978451	-	ENSRNOT00000055721	ENSRNOG00000015956	Usp29	Ubiquitin carboxyl-terminal hydrolase 26/37, N-terminal||Peptidase C19, ubiquitin carboxyl-terminal hydrolase||Ubiquitin specific protease domain||Ubiquitin-specific peptidase 29||Ubiquitin specific protease, conserved site	69988673	70003582	-	10221	downstream
1	TUCP_000431	XLOC_014439	--	TUCP	69966561	69978451	-	ENSRNOT00000021245	ENSRNOG00000015825	Aurkc	Protein kinase-like domain||Protein kinase domain||Protein kinase, ATP binding site||Serine/threonine-protein kinase, active site||Aurora kinase C||Aurora kinase	69958452	69963592	-	2968	upstream
1	TUCP_000430	XLOC_014439	--	TUCP	69966561	69970497	-	ENSRNOT00000083609	ENSRNOG00000059513	LOC102547412	Krueppel-associated box||Zinc finger, C2H2||Zinc finger C2H2-type/integrase DNA-binding domain||Zinc finger, C2H2-like	69866069	69879804	+	86756	downstream
1	TUCP_000430	XLOC_014439	--	TUCP	69966561	69970497	-	ENSRNOT00000055721	ENSRNOG00000015956	Usp29	Ubiquitin carboxyl-terminal hydrolase 26/37, N-terminal||Peptidase C19, ubiquitin carboxyl-terminal hydrolase||Ubiquitin specific protease domain||Ubiquitin-specific peptidase 29||Ubiquitin specific protease, conserved site	69988673	70003582	-	18175	downstream
1	TUCP_000430	XLOC_014439	--	TUCP	69966561	69970497	-	ENSRNOT00000021245	ENSRNOG00000015825	Aurkc	Protein kinase-like domain||Protein kinase domain||Protein kinase, ATP binding site||Serine/threonine-protein kinase, active site||Aurora kinase C||Aurora kinase	69958452	69963592	-	2968	upstream
1	TUCP_000433	XLOC_014439	--	TUCP	69966561	69978931	-	ENSRNOT00000083609	ENSRNOG00000059513	LOC102547412	Krueppel-associated box||Zinc finger, C2H2||Zinc finger C2H2-type/integrase DNA-binding domain||Zinc finger, C2H2-like	69866069	69879804	+	86756	downstream
1	TUCP_000433	XLOC_014439	--	TUCP	69966561	69978931	-	ENSRNOT00000055721	ENSRNOG00000015956	Usp29	Ubiquitin carboxyl-terminal hydrolase 26/37, N-terminal||Peptidase C19, ubiquitin carboxyl-terminal hydrolase||Ubiquitin specific protease domain||Ubiquitin-specific peptidase 29||Ubiquitin specific protease, conserved site	69988673	70003582	-	9741	downstream
1	TUCP_000433	XLOC_014439	--	TUCP	69966561	69978931	-	ENSRNOT00000021245	ENSRNOG00000015825	Aurkc	Protein kinase-like domain||Protein kinase domain||Protein kinase, ATP binding site||Serine/threonine-protein kinase, active site||Aurora kinase C||Aurora kinase	69958452	69963592	-	2968	upstream
1	TUCP_000432	XLOC_014439	--	TUCP	69966561	69978895	-	ENSRNOT00000083609	ENSRNOG00000059513	LOC102547412	Krueppel-associated box||Zinc finger, C2H2||Zinc finger C2H2-type/integrase DNA-binding domain||Zinc finger, C2H2-like	69866069	69879804	+	86756	downstream
1	TUCP_000432	XLOC_014439	--	TUCP	69966561	69978895	-	ENSRNOT00000055721	ENSRNOG00000015956	Usp29	Ubiquitin carboxyl-terminal hydrolase 26/37, N-terminal||Peptidase C19, ubiquitin carboxyl-terminal hydrolase||Ubiquitin specific protease domain||Ubiquitin-specific peptidase 29||Ubiquitin specific protease, conserved site	69988673	70003582	-	9777	downstream
1	TUCP_000432	XLOC_014439	--	TUCP	69966561	69978895	-	ENSRNOT00000021245	ENSRNOG00000015825	Aurkc	Protein kinase-like domain||Protein kinase domain||Protein kinase, ATP binding site||Serine/threonine-protein kinase, active site||Aurora kinase C||Aurora kinase	69958452	69963592	-	2968	upstream
X	TUCP_004750	XLOC_209435	--	TUCP	100222276	100244877	+	ENSRNOT00000091859	ENSRNOG00000056486	AABR07040430.1	High mobility group box domain	100206243	100207974	-	14301	upstream
X	TUCP_004751	XLOC_209444	--	TUCP	100283831	100289968	+	ENSRNOT00000091859	ENSRNOG00000056486	AABR07040430.1	High mobility group box domain	100206243	100207974	-	75856	upstream
1	TUCP_000439	XLOC_014465	--	TUCP	71175745	71179004	-	ENSRNOT00000035184	ENSRNOG00000015322	Zfp78	Zinc finger, C2H2-like||Zinc finger C2H2-type/integrase DNA-binding domain||Zinc finger, C2H2||Krueppel-associated box	71183171	71190423	-	4166	downstream
1	TUCP_000439	XLOC_014465	--	TUCP	71175745	71179004	-	ENSRNOT00000063956	ENSRNOG00000033906	Zfp667	Zinc finger C2H2-type/integrase DNA-binding domain||Zinc finger, C2H2-like||Zinc finger, C2H2||Krueppel-associated box	71270107	71290337	-	91102	downstream
1	TUCP_000439	XLOC_014465	--	TUCP	71175745	71179004	-	ENSRNOT00000020523	ENSRNOG00000042777	Zfp28	Zinc finger, C2H2||Krueppel-associated box||Zinc finger, C2H2-like||Zinc finger C2H2-type/integrase DNA-binding domain	71167156	71173216	-	2528	upstream
1	TUCP_000439	XLOC_014465	--	TUCP	71175745	71179004	-	ENSRNOT00000035217	ENSRNOG00000015322	Zfp78	Zinc finger, C2H2-like||Zinc finger C2H2-type/integrase DNA-binding domain||Zinc finger, C2H2||Krueppel-associated box	71183171	71190423	-	4166	downstream
1	TUCP_000439	XLOC_014465	--	TUCP	71175745	71179004	-	ENSRNOT00000039438	ENSRNOG00000034184	Zfp583	Zinc finger, C2H2-like||Zinc finger C2H2-type/integrase DNA-binding domain||Krueppel-associated box||Zinc finger, C2H2	71251258	71262129	+	72253	upstream
1	TUCP_000439	XLOC_014465	--	TUCP	71175745	71179004	-	ENSRNOT00000067530	ENSRNOG00000034184	Zfp583	Zinc finger, C2H2-like||Zinc finger C2H2-type/integrase DNA-binding domain||Krueppel-associated box||Zinc finger, C2H2	71252950	71262421	+	73945	upstream
1	TUCP_000439	XLOC_014465	--	TUCP	71175745	71179004	-	ENSRNOT00000064949	ENSRNOG00000042502	Smim17	-	71115043	71135764	-	39980	upstream
1	TUCP_000438	XLOC_014457	--	TUCP	70595331	70603645	-	ENSRNOT00000050607	ENSRNOG00000030070	Olr8	G protein-coupled receptor, rhodopsin-like||GPCR, rhodopsin-like, 7TM||Olfactory receptor	70495403	70496347	-	98983	upstream
X	TUCP_004756	XLOC_209565	--	TUCP	105586976	105599215	+	ENSRNOT00000029511	ENSRNOG00000025705	Armcx2	Armadillo||Armadillo-type fold||Armadillo-like helical||Armadillo repeat-containing domain	105617385	105622156	-	18169	downstream
X	TUCP_004756	XLOC_209565	--	TUCP	105586976	105599215	+	ENSRNOT00000088760	ENSRNOG00000025730	Armcx3	Armadillo||Armadillo-type fold||Armadillo repeat-containing domain||Armadillo-like helical	105575759	105580562	+	6413	downstream
X	TUCP_004756	XLOC_209565	--	TUCP	105586976	105599215	+	ENSRNOT00000029664	ENSRNOG00000025730	Armcx3	Armadillo||Armadillo-type fold||Armadillo repeat-containing domain||Armadillo-like helical	105573909	105577451	+	9524	downstream
X	TUCP_004756	XLOC_209565	--	TUCP	105586976	105599215	+	ENSRNOT00000029833	ENSRNOG00000037709	Armcx1	Armadillo-type fold||Armadillo||Armadillo-like helical||Armadillo repeat-containing domain	105537602	105539375	+	47600	downstream
X	TUCP_004756	XLOC_209565	--	TUCP	105586976	105599215	+	ENSRNOT00000029807	ENSRNOG00000037707	Armcx6	Armadillo repeat-containing domain	105565747	105568343	-	18632	upstream
X	TUCP_004756	XLOC_209565	--	TUCP	105586976	105599215	+	ENSRNOT00000040476	ENSRNOG00000043128	Armcx4	Armadillo-type fold||Armadillo||Armadillo-like helical||Armadillo repeat-containing domain	105500173	105507288	+	79687	downstream
X	TUCP_004757	XLOC_209565	--	TUCP	105586976	105606014	+	ENSRNOT00000029511	ENSRNOG00000025705	Armcx2	Armadillo||Armadillo-type fold||Armadillo-like helical||Armadillo repeat-containing domain	105617385	105622156	-	11370	downstream
X	TUCP_004757	XLOC_209565	--	TUCP	105586976	105606014	+	ENSRNOT00000088760	ENSRNOG00000025730	Armcx3	Armadillo||Armadillo-type fold||Armadillo repeat-containing domain||Armadillo-like helical	105575759	105580562	+	6413	downstream
X	TUCP_004757	XLOC_209565	--	TUCP	105586976	105606014	+	ENSRNOT00000029664	ENSRNOG00000025730	Armcx3	Armadillo||Armadillo-type fold||Armadillo repeat-containing domain||Armadillo-like helical	105573909	105577451	+	9524	downstream
X	TUCP_004757	XLOC_209565	--	TUCP	105586976	105606014	+	ENSRNOT00000029833	ENSRNOG00000037709	Armcx1	Armadillo-type fold||Armadillo||Armadillo-like helical||Armadillo repeat-containing domain	105537602	105539375	+	47600	downstream
X	TUCP_004757	XLOC_209565	--	TUCP	105586976	105606014	+	ENSRNOT00000029807	ENSRNOG00000037707	Armcx6	Armadillo repeat-containing domain	105565747	105568343	-	18632	upstream
X	TUCP_004757	XLOC_209565	--	TUCP	105586976	105606014	+	ENSRNOT00000040476	ENSRNOG00000043128	Armcx4	Armadillo-type fold||Armadillo||Armadillo-like helical||Armadillo repeat-containing domain	105500173	105507288	+	79687	downstream
1	TUCP_000619	XLOC_022408	--	TUCP	260653700	260657099	-	ENSRNOT00000065632	ENSRNOG00000013309	Pik3ap1	DBB domain||Ankyrin repeat-containing domain	260529170	260638816	-	14883	upstream
1	TUCP_000619	XLOC_022408	--	TUCP	260653700	260657099	-	ENSRNOT00000077962	ENSRNOG00000013309	Pik3ap1	DBB domain||Ankyrin repeat-containing domain	260530537	260638915	-	14784	upstream
1	TUCP_000619	XLOC_022408	--	TUCP	260653700	260657099	-	ENSRNOT00000076842	ENSRNOG00000042679	Lcor	Homeodomain-like||DNA binding HTH domain, Psq-type||-	260732485	260807926	+	75385	upstream
1	TUCP_000619	XLOC_022408	--	TUCP	260653700	260657099	-	ENSRNOT00000017938	ENSRNOG00000013309	Pik3ap1	DBB domain||Ankyrin repeat-containing domain	260527781	260638843	-	14856	upstream
1	TUCP_000619	XLOC_022408	--	TUCP	260653700	260657099	-	ENSRNOT00000076073	ENSRNOG00000042679	Lcor	Homeodomain-like||DNA binding HTH domain, Psq-type||-	260732502	260830854	+	75402	upstream
1	TUCP_000618	XLOC_022357	--	TUCP	258959345	258986453	-	ENSRNOT00000093005	ENSRNOG00000049464	Cyp2c13	Cytochrome P450, E-class, group I||Cytochrome P450, conserved site||Cytochrome P450	258796625	258875572	-	83772	upstream
1	TUCP_000618	XLOC_022357	--	TUCP	258959345	258986453	-	ENSRNOT00000071633	ENSRNOG00000049464	Cyp2c13	Cytochrome P450, E-class, group I||Cytochrome P450, conserved site||Cytochrome P450	258796622	258877045	-	82299	upstream
1	TUCP_000618	XLOC_022357	--	TUCP	258959345	258986453	-	ENSRNOT00000020940	ENSRNOG00000015267	Aldh18a1	Glutamate/acetylglutamate kinase||GPR domain||Glutamate 5-kinase, conserved site||Aldehyde dehydrogenase N-terminal domain||Aldehyde dehydrogenase domain||Glutamate 5-kinase/delta-1-pyrroline-5-carboxylate synthase||Delta l-pyrroline-5-carboxylate synthetase||Aldehyde dehydrogenase, C-terminal||Gamma-glutamyl phosphate reductase GPR, conserved site||Aspartate/glutamate/uridylate kinase||Aldehyde/…	259057413	259089632	-	70959	downstream
1	TUCP_000618	XLOC_022357	--	TUCP	258959345	258986453	-	ENSRNOT00000091297	ENSRNOG00000015267	Aldh18a1	Glutamate/acetylglutamate kinase||GPR domain||Glutamate 5-kinase, conserved site||Aldehyde dehydrogenase N-terminal domain||Aldehyde dehydrogenase domain||Glutamate 5-kinase/delta-1-pyrroline-5-carboxylate synthase||Delta l-pyrroline-5-carboxylate synthetase||Aldehyde dehydrogenase, C-terminal||Gamma-glutamyl phosphate reductase GPR, conserved site||Aspartate/glutamate/uridylate kinase||Aldehyde/…	259057402	259089642	-	70948	downstream
1	TUCP_000615	XLOC_022263	--	TUCP	255797044	255801753	-	ENSRNOT00000047387	ENSRNOG00000020689	Cpeb3	Armadillo-like helical||Nucleotide-binding alpha-beta plait domain||RNA recognition motif domain||Cytoplasmic polyadenylation element-binding protein, ZZ domain	255665238	255815733	-	(4710)	sense_overlapping
1	TUCP_000615	XLOC_022263	--	TUCP	255797044	255801753	-	ENSRNOT00000018878	ENSRNOG00000014105	AC103056.1	Ribosomal protein L29	255801694	255802172	+	(60)	antisense
1	TUCP_000615	XLOC_022263	--	TUCP	255797044	255801753	-	ENSRNOT00000023562	ENSRNOG00000017396	March5	Zinc finger, RING/FYVE/PHD-type||Zinc finger, RING-CH-type||E3 ubiquitin-protein ligase MARCH-like	255842783	255863142	+	41029	upstream
1	TUCP_000615	XLOC_022263	--	TUCP	255797044	255801753	-	ENSRNOT00000031545	ENSRNOG00000022718	AC094246.1	50S ribosomal protein L30e-like||Ribosomal protein L7Ae/L30e/S12e/Gadd45||Ribosomal protein L7A/L8||Ribosomal protein L7Ae conserved site	255710658	255711417	+	85626	downstream
1	TUCP_000614	XLOC_022195	--	TUCP	254739103	254745739	-	ENSRNOT00000025493	ENSRNOG00000018827	Htr7	G protein-coupled receptor, rhodopsin-like||GPCR, rhodopsin-like, 7TM||5-Hydroxytryptamine 7 receptor||5-hydroxytryptamine receptor family	254547937	254671778	-	67324	upstream
1	TUCP_000614	XLOC_022195	--	TUCP	254739103	254745739	-	ENSRNOT00000025412	ENSRNOG00000018718	Rpp30	RNase P subunit p30||Polymerase/histidinol phosphatase-like	254697247	254720087	+	19015	downstream
1	TUCP_000614	XLOC_022195	--	TUCP	254739103	254745739	-	ENSRNOT00000025258	ENSRNOG00000018598	Ankrd1	Ankyrin repeat-containing domain||Ankyrin repeat	254726969	254735548	-	3554	upstream
1	TUCP_000614	XLOC_022195	--	TUCP	254739103	254745739	-	ENSRNOT00000025450	ENSRNOG00000018827	Htr7	G protein-coupled receptor, rhodopsin-like||GPCR, rhodopsin-like, 7TM||5-Hydroxytryptamine 7 receptor||5-hydroxytryptamine receptor family	254547627	254671596	-	67506	upstream
2	TUCP_002365	XLOC_099421	--	TUCP	140617523	140623596	+	ENSRNOT00000017736	ENSRNOG00000013045	Setd7	Histone-lysine N-methyltransferase, SET||MORN motif||SET domain	140576188	140618405	-	(883)	antisense
2	TUCP_002365	XLOC_099421	--	TUCP	140617523	140623596	+	ENSRNOT00000088846	ENSRNOG00000061857	Mgst2	5-lipoxygenase-activating protein||Membrane associated eicosanoid/glutathione metabolism-like domain||Membrane-associated, eicosanoid/glutathione metabolism (MAPEG) protein	140708397	140727281	+	84800	upstream
2	TUCP_002365	XLOC_099421	--	TUCP	140617523	140623596	+	ENSRNOT00000017379	ENSRNOG00000012385	Naa15	Tetratricopeptide repeat||Tetratricopeptide repeat-containing domain||N-terminal acetyltransferase A, auxiliary subunit||Tetratricopeptide-like helical domain	140471690	140534259	+	83263	downstream
2	TUCP_002365	XLOC_099421	--	TUCP	140617523	140623596	+	ENSRNOT00000017396	ENSRNOG00000013035	Rab33b	Small GTP-binding protein domain||P-loop containing nucleoside triphosphate hydrolase||Small GTPase superfamily	140541619	140552220	+	65302	downstream
1	TUCP_000616	XLOC_022357	--	TUCP	258914182	259013779	-	ENSRNOT00000093005	ENSRNOG00000049464	Cyp2c13	Cytochrome P450, E-class, group I||Cytochrome P450, conserved site||Cytochrome P450	258796625	258875572	-	38609	upstream
1	TUCP_000616	XLOC_022357	--	TUCP	258914182	259013779	-	ENSRNOT00000071633	ENSRNOG00000049464	Cyp2c13	Cytochrome P450, E-class, group I||Cytochrome P450, conserved site||Cytochrome P450	258796622	258877045	-	37136	upstream
1	TUCP_000616	XLOC_022357	--	TUCP	258914182	259013779	-	ENSRNOT00000074429	ENSRNOG00000047112	LOC100912537	Domain of unknown function DUF1619	259097455	259106948	-	83675	downstream
1	TUCP_000616	XLOC_022357	--	TUCP	258914182	259013779	-	ENSRNOT00000020940	ENSRNOG00000015267	Aldh18a1	Glutamate/acetylglutamate kinase||GPR domain||Glutamate 5-kinase, conserved site||Aldehyde dehydrogenase N-terminal domain||Aldehyde dehydrogenase domain||Glutamate 5-kinase/delta-1-pyrroline-5-carboxylate synthase||Delta l-pyrroline-5-carboxylate synthetase||Aldehyde dehydrogenase, C-terminal||Gamma-glutamyl phosphate reductase GPR, conserved site||Aspartate/glutamate/uridylate kinase||Aldehyde/…	259057413	259089632	-	43633	downstream
1	TUCP_000616	XLOC_022357	--	TUCP	258914182	259013779	-	ENSRNOT00000091297	ENSRNOG00000015267	Aldh18a1	Glutamate/acetylglutamate kinase||GPR domain||Glutamate 5-kinase, conserved site||Aldehyde dehydrogenase N-terminal domain||Aldehyde dehydrogenase domain||Glutamate 5-kinase/delta-1-pyrroline-5-carboxylate synthase||Delta l-pyrroline-5-carboxylate synthetase||Aldehyde dehydrogenase, C-terminal||Gamma-glutamyl phosphate reductase GPR, conserved site||Aspartate/glutamate/uridylate kinase||Aldehyde/…	259057402	259089642	-	43622	downstream
2	TUCP_002363	XLOC_099421	--	TUCP	140617508	140623596	+	ENSRNOT00000017736	ENSRNOG00000013045	Setd7	Histone-lysine N-methyltransferase, SET||MORN motif||SET domain	140576188	140618405	-	(898)	antisense
2	TUCP_002363	XLOC_099421	--	TUCP	140617508	140623596	+	ENSRNOT00000088846	ENSRNOG00000061857	Mgst2	5-lipoxygenase-activating protein||Membrane associated eicosanoid/glutathione metabolism-like domain||Membrane-associated, eicosanoid/glutathione metabolism (MAPEG) protein	140708397	140727281	+	84800	upstream
2	TUCP_002363	XLOC_099421	--	TUCP	140617508	140623596	+	ENSRNOT00000017379	ENSRNOG00000012385	Naa15	Tetratricopeptide repeat||Tetratricopeptide repeat-containing domain||N-terminal acetyltransferase A, auxiliary subunit||Tetratricopeptide-like helical domain	140471690	140534259	+	83248	downstream
2	TUCP_002363	XLOC_099421	--	TUCP	140617508	140623596	+	ENSRNOT00000017396	ENSRNOG00000013035	Rab33b	Small GTP-binding protein domain||P-loop containing nucleoside triphosphate hydrolase||Small GTPase superfamily	140541619	140552220	+	65287	downstream
2	TUCP_002362	XLOC_099421	--	TUCP	140617480	140623596	+	ENSRNOT00000017736	ENSRNOG00000013045	Setd7	Histone-lysine N-methyltransferase, SET||MORN motif||SET domain	140576188	140618405	-	(926)	antisense
2	TUCP_002362	XLOC_099421	--	TUCP	140617480	140623596	+	ENSRNOT00000088846	ENSRNOG00000061857	Mgst2	5-lipoxygenase-activating protein||Membrane associated eicosanoid/glutathione metabolism-like domain||Membrane-associated, eicosanoid/glutathione metabolism (MAPEG) protein	140708397	140727281	+	84800	upstream
2	TUCP_002362	XLOC_099421	--	TUCP	140617480	140623596	+	ENSRNOT00000017379	ENSRNOG00000012385	Naa15	Tetratricopeptide repeat||Tetratricopeptide repeat-containing domain||N-terminal acetyltransferase A, auxiliary subunit||Tetratricopeptide-like helical domain	140471690	140534259	+	83220	downstream
2	TUCP_002362	XLOC_099421	--	TUCP	140617480	140623596	+	ENSRNOT00000017396	ENSRNOG00000013035	Rab33b	Small GTP-binding protein domain||P-loop containing nucleoside triphosphate hydrolase||Small GTPase superfamily	140541619	140552220	+	65259	downstream
1	TUCP_000613	XLOC_022053	--	TUCP	252784805	252801986	-	ENSRNOT00000025845	ENSRNOG00000019077	Lipa	Alpha/Beta hydrolase fold||Lipase, eukaryotic||Alpha/beta hydrolase fold-1	252816538	252849756	-	14551	downstream
1	TUCP_000613	XLOC_022053	--	TUCP	252784805	252801986	-	ENSRNOT00000054757	ENSRNOG00000036604	Ifit2	Tetratricopeptide repeat-containing domain||Tetratricopeptide repeat||Tetratricopeptide-like helical domain||Interferon-induced protein with tetratricopeptide repeats 2	252894663	252900726	+	92676	upstream
1	TUCP_000613	XLOC_022053	--	TUCP	252784805	252801986	-	ENSRNOT00000078279	ENSRNOG00000019077	Lipa	Alpha/Beta hydrolase fold||Lipase, eukaryotic||Alpha/beta hydrolase fold-1	252816527	252849904	-	14540	downstream
1	TUCP_000613	XLOC_022053	--	TUCP	252784805	252801986	-	ENSRNOT00000025856	ENSRNOG00000019141	Ch25h	Fatty acid hydroxylase	252807065	252808380	-	5078	downstream
X	TUCP_004813	XLOC_213757	--	TUCP	76010067	76031892	-	ENSRNOT00000003573	ENSRNOG00000002660	Magee1	MAGE homology domain	76083549	76087117	+	51656	upstream
X	TUCP_004813	XLOC_213757	--	TUCP	76010067	76031892	-	ENSRNOT00000003667	ENSRNOG00000002662	Pbdc1	Polysaccharide biosynthesis domain||Protein PBDC1, metazoa/fungi||Yst0336-like domain	76042239	76046938	+	10346	upstream
7	TUCP_004077	XLOC_179112	--	TUCP	10326011	10364211	-	ENSRNOT00000047433	ENSRNOG00000048910	Zfp709l1	Zinc finger C2H2-type/integrase DNA-binding domain||Zinc finger, C2H2-like||Zinc finger, C2H2||Krueppel-associated box	10418602	10430992	-	54390	downstream
16	TUCP_001696	XLOC_069431	--	TUCP	21565515	21597218	+	ENSRNOT00000066776	ENSRNOG00000042504	Zfp964	Zinc finger C2H2-type/integrase DNA-binding domain||Zinc finger, C2H2-like||Zinc finger, C2H2	21472267	21473808	-	91706	upstream
16	TUCP_001696	XLOC_069431	--	TUCP	21565515	21597218	+	ENSRNOT00000015635	ENSRNOG00000028919	Zfp868	Krueppel-associated box||Zinc finger, C2H2||Zinc finger, C2H2-like||Zinc finger C2H2-type/integrase DNA-binding domain	21518873	21524286	+	41228	downstream
16	TUCP_001697	XLOC_069431	--	TUCP	21584834	21612998	+	ENSRNOT00000015635	ENSRNOG00000028919	Zfp868	Krueppel-associated box||Zinc finger, C2H2||Zinc finger, C2H2-like||Zinc finger C2H2-type/integrase DNA-binding domain	21518873	21524286	+	60547	downstream
16	TUCP_001694	XLOC_069431	--	TUCP	21561958	21597218	+	ENSRNOT00000066776	ENSRNOG00000042504	Zfp964	Zinc finger C2H2-type/integrase DNA-binding domain||Zinc finger, C2H2-like||Zinc finger, C2H2	21472267	21473808	-	88149	upstream
16	TUCP_001694	XLOC_069431	--	TUCP	21561958	21597218	+	ENSRNOT00000015635	ENSRNOG00000028919	Zfp868	Krueppel-associated box||Zinc finger, C2H2||Zinc finger, C2H2-like||Zinc finger C2H2-type/integrase DNA-binding domain	21518873	21524286	+	37671	downstream
16	TUCP_001695	XLOC_069431	--	TUCP	21561958	21640360	+	ENSRNOT00000066776	ENSRNOG00000042504	Zfp964	Zinc finger C2H2-type/integrase DNA-binding domain||Zinc finger, C2H2-like||Zinc finger, C2H2	21472267	21473808	-	88149	upstream
16	TUCP_001695	XLOC_069431	--	TUCP	21561958	21640360	+	ENSRNOT00000015635	ENSRNOG00000028919	Zfp868	Krueppel-associated box||Zinc finger, C2H2||Zinc finger, C2H2-like||Zinc finger C2H2-type/integrase DNA-binding domain	21518873	21524286	+	37671	downstream
16	TUCP_001692	XLOC_069370	--	TUCP	20485414	20491619	+	ENSRNOT00000026225	ENSRNOG00000019387	Ifi30	Gamma interferon inducible lysosomal thiol reductase GILT	20426566	20430752	+	54661	downstream
16	TUCP_001692	XLOC_069370	--	TUCP	20485414	20491619	+	ENSRNOT00000026457	ENSRNOG00000019518	Pde4c	HD/PDEase domain||3'5'-cyclic nucleotide phosphodiesterase||3'5'-cyclic nucleotide phosphodiesterase, catalytic domain||3'5'-cyclic nucleotide phosphodiesterase, conserved site	20442609	20460959	-	24454	upstream
16	TUCP_001692	XLOC_069370	--	TUCP	20485414	20491619	+	ENSRNOT00000026713	ENSRNOG00000019698	Ssbp4	Sequence-specific single-strand DNA-binding protein||LIS1 homology motif	20578131	20589290	+	86511	upstream
16	TUCP_001692	XLOC_069370	--	TUCP	20485414	20491619	+	ENSRNOT00000026567	ENSRNOG00000019572	Lsm4	LSM domain||LSM domain, eukaryotic/archaea-type||Like-Sm (LSM) domain containing protein, LSm4/SmD1/SmD3	20506399	20511818	-	14779	downstream
16	TUCP_001692	XLOC_069370	--	TUCP	20485414	20491619	+	ENSRNOT00000026470	ENSRNOG00000019568	Jund	Transcription factor JunD||Jun-like transcription factor||Basic-leucine zipper domain||Transcription factor Jun||Transcription factor, Skn-1-like, DNA-binding domain	20485029	20486707	-	(1294)	antisense
16	TUCP_001692	XLOC_069370	--	TUCP	20485414	20491619	+	ENSRNOT00000026601	ENSRNOG00000019657	Mk1	Profilin||Profilin1/2/3, vertebrate	20531720	20534209	-	40100	downstream
16	TUCP_001692	XLOC_069370	--	TUCP	20485414	20491619	+	ENSRNOT00000026391	ENSRNOG00000019433	Rab3a	P-loop containing nucleoside triphosphate hydrolase||Small GTP-binding protein domain||Small GTPase superfamily	20435101	20439206	-	46207	upstream
16	TUCP_001692	XLOC_069370	--	TUCP	20485414	20491619	+	ENSRNOT00000026821	ENSRNOG00000019741	Isyna1	Myo-inositol-1-phosphate synthase, GAPDH-like||NAD(P)-binding domain||Myo-inositol-1-phosphate synthase	20589481	20592449	-	97861	downstream
16	TUCP_001692	XLOC_069370	--	TUCP	20485414	20491619	+	ENSRNOT00000026210	ENSRNOG00000019228	Pik3r2	PI3K p85 subunit, inter-SH2 domain||SH3 domain||Rho GTPase-activating protein domain||SH2 domain||Rho GTPase activation protein||PI3K p85 subunit	20416432	20424980	+	60433	downstream
16	TUCP_001692	XLOC_069370	--	TUCP	20485414	20491619	+	ENSRNOT00000026652	ENSRNOG00000019661	Gdf15	Cystine-knot cytokine||Transforming growth factor-beta, C-terminal||Transforming growth factor-beta-related	20555395	20557978	+	63775	upstream
16	TUCP_001692	XLOC_069370	--	TUCP	20485414	20491619	+	ENSRNOT00000037756	ENSRNOG00000022753	Mast3	Serine/threonine-protein kinase, active site||Protein kinase-like domain||Protein kinase domain||Microtubule-associated serine/threonine-protein kinase, domain||Microtubule-associated serine/threonine-protein kinase, pre-PK domain||AGC-kinase, C-terminal||PDZ domain	20400577	20414767	+	70646	downstream
16	TUCP_001692	XLOC_069370	--	TUCP	20485414	20491619	+	ENSRNOT00000078108	ENSRNOG00000022753	Mast3	Serine/threonine-protein kinase, active site||Protein kinase-like domain||Protein kinase domain||Microtubule-associated serine/threonine-protein kinase, domain||Microtubule-associated serine/threonine-protein kinase, pre-PK domain||AGC-kinase, C-terminal||PDZ domain	20395845	20413633	+	71780	downstream
16	TUCP_001692	XLOC_069370	--	TUCP	20485414	20491619	+	ENSRNOT00000066168	ENSRNOG00000043249	LOC100360908	-	20462609	20466351	-	19062	upstream
16	TUCP_001692	XLOC_069370	--	TUCP	20485414	20491619	+	ENSRNOT00000026271	ENSRNOG00000019394	Mpv17l2	Mpv17/PMP22	20432899	20435974	+	49439	downstream
16	TUCP_001692	XLOC_069370	--	TUCP	20485414	20491619	+	ENSRNOT00000031692	ENSRNOG00000022565	Lrrc25	Leucine-rich repeat domain, L domain-like||Leucine-rich repeat	20558222	20562399	-	66602	downstream
16	TUCP_001692	XLOC_069370	--	TUCP	20485414	20491619	+	ENSRNOT00000026597	ENSRNOG00000019639	Pgpep1	Pyroglutamyl peptidase I, metazoa||Peptidase C15, pyroglutamyl peptidase I-like||Peptidase C15, pyroglutamyl peptidase I	20521956	20531396	+	30336	upstream
16	TUCP_001693	XLOC_069431	--	TUCP	21561620	21597218	+	ENSRNOT00000066776	ENSRNOG00000042504	Zfp964	Zinc finger C2H2-type/integrase DNA-binding domain||Zinc finger, C2H2-like||Zinc finger, C2H2	21472267	21473808	-	87811	upstream
16	TUCP_001693	XLOC_069431	--	TUCP	21561620	21597218	+	ENSRNOT00000015635	ENSRNOG00000028919	Zfp868	Krueppel-associated box||Zinc finger, C2H2||Zinc finger, C2H2-like||Zinc finger C2H2-type/integrase DNA-binding domain	21518873	21524286	+	37333	downstream
16	TUCP_001690	XLOC_069283	--	TUCP	19560798	19577162	+	ENSRNOT00000086105	ENSRNOG00000016256	Myo9b	Protein kinase C-like, phorbol ester/diacylglycerol-binding domain||Unconventional myosin-IXb||Rho GTPase activation protein||P-loop containing nucleoside triphosphate hydrolase||Myosin head, motor domain||IQ motif, EF-hand binding site||Ras-associating (RA) domain||Rho GTPase-activating protein domain||Ubiquitin-related domain	19669411	19754065	+	92248	upstream
16	TUCP_001690	XLOC_069283	--	TUCP	19560798	19577162	+	ENSRNOT00000087576	ENSRNOG00000016256	Myo9b	Protein kinase C-like, phorbol ester/diacylglycerol-binding domain||Unconventional myosin-IXb||Rho GTPase activation protein||P-loop containing nucleoside triphosphate hydrolase||Myosin head, motor domain||IQ motif, EF-hand binding site||Ras-associating (RA) domain||Rho GTPase-activating protein domain||Ubiquitin-related domain	19669411	19754069	+	92248	upstream
16	TUCP_001690	XLOC_069283	--	TUCP	19560798	19577162	+	ENSRNOT00000021742	ENSRNOG00000016186	Zfp709	Zinc finger, C2H2-like||Zinc finger C2H2-type/integrase DNA-binding domain||Zinc finger, C2H2||Krueppel-associated box	19634134	19637609	-	56971	downstream
16	TUCP_001690	XLOC_069283	--	TUCP	19560798	19577162	+	ENSRNOT00000078714	ENSRNOG00000052038	Haus8	-	19654822	19669153	-	77659	downstream
16	TUCP_001690	XLOC_069283	--	TUCP	19560798	19577162	+	ENSRNOT00000021609	ENSRNOG00000015751	Cyp4f18	Cytochrome P450, conserved site||Cytochrome P450, E-class, group I||Cytochrome P450	19410810	19528934	+	31863	downstream
16	TUCP_001690	XLOC_069283	--	TUCP	19560798	19577162	+	ENSRNOT00000083651	ENSRNOG00000016256	Myo9b	Protein kinase C-like, phorbol ester/diacylglycerol-binding domain||Unconventional myosin-IXb||Rho GTPase activation protein||P-loop containing nucleoside triphosphate hydrolase||Myosin head, motor domain||IQ motif, EF-hand binding site||Ras-associating (RA) domain||Rho GTPase-activating protein domain||Ubiquitin-related domain	19669411	19754069	+	92248	upstream
16	TUCP_001690	XLOC_069283	--	TUCP	19560798	19577162	+	ENSRNOT00000045099	ENSRNOG00000016256	Myo9b	Protein kinase C-like, phorbol ester/diacylglycerol-binding domain||Unconventional myosin-IXb||Rho GTPase activation protein||P-loop containing nucleoside triphosphate hydrolase||Myosin head, motor domain||IQ motif, EF-hand binding site||Ras-associating (RA) domain||Rho GTPase-activating protein domain||Ubiquitin-related domain	19669411	19754069	+	92248	upstream
16	TUCP_001690	XLOC_069283	--	TUCP	19560798	19577162	+	ENSRNOT00000087597	ENSRNOG00000016186	Zfp709	Zinc finger, C2H2-like||Zinc finger C2H2-type/integrase DNA-binding domain||Zinc finger, C2H2||Krueppel-associated box	19634656	19643236	-	57493	downstream
16	TUCP_001690	XLOC_069283	--	TUCP	19560798	19577162	+	ENSRNOT00000090775	ENSRNOG00000052038	Haus8	-	19654798	19669196	-	77635	downstream
16	TUCP_001690	XLOC_069283	--	TUCP	19560798	19577162	+	ENSRNOT00000074514	ENSRNOG00000049856	Zfp617	Zinc finger C2H2-type/integrase DNA-binding domain||Zinc finger, C2H2-like||Zinc finger, C2H2||Krueppel-associated box	19541593	19544727	-	16070	upstream
16	TUCP_001690	XLOC_069283	--	TUCP	19560798	19577162	+	ENSRNOT00000090131	ENSRNOG00000060701	Zfp617	Zinc finger, C2H2-like||Zinc finger C2H2-type/integrase DNA-binding domain||Zinc finger, C2H2	19581812	19583386	-	4649	downstream
16	TUCP_001690	XLOC_069283	--	TUCP	19560798	19577162	+	ENSRNOT00000085328	ENSRNOG00000015751	Cyp4f18	Cytochrome P450, conserved site||Cytochrome P450, E-class, group I||Cytochrome P450	19501193	19528999	+	31798	downstream
16	TUCP_001691	XLOC_069287	--	TUCP	19592264	19597359	+	ENSRNOT00000086105	ENSRNOG00000016256	Myo9b	Protein kinase C-like, phorbol ester/diacylglycerol-binding domain||Unconventional myosin-IXb||Rho GTPase activation protein||P-loop containing nucleoside triphosphate hydrolase||Myosin head, motor domain||IQ motif, EF-hand binding site||Ras-associating (RA) domain||Rho GTPase-activating protein domain||Ubiquitin-related domain	19669411	19754065	+	72051	upstream
16	TUCP_001691	XLOC_069287	--	TUCP	19592264	19597359	+	ENSRNOT00000087576	ENSRNOG00000016256	Myo9b	Protein kinase C-like, phorbol ester/diacylglycerol-binding domain||Unconventional myosin-IXb||Rho GTPase activation protein||P-loop containing nucleoside triphosphate hydrolase||Myosin head, motor domain||IQ motif, EF-hand binding site||Ras-associating (RA) domain||Rho GTPase-activating protein domain||Ubiquitin-related domain	19669411	19754069	+	72051	upstream
16	TUCP_001691	XLOC_069287	--	TUCP	19592264	19597359	+	ENSRNOT00000081321	ENSRNOG00000016256	Myo9b	Protein kinase C-like, phorbol ester/diacylglycerol-binding domain||Unconventional myosin-IXb||Rho GTPase activation protein||P-loop containing nucleoside triphosphate hydrolase||Myosin head, motor domain||IQ motif, EF-hand binding site||Ras-associating (RA) domain||Rho GTPase-activating protein domain||Ubiquitin-related domain	19686630	19753133	+	89270	upstream
16	TUCP_001691	XLOC_069287	--	TUCP	19592264	19597359	+	ENSRNOT00000021742	ENSRNOG00000016186	Zfp709	Zinc finger, C2H2-like||Zinc finger C2H2-type/integrase DNA-binding domain||Zinc finger, C2H2||Krueppel-associated box	19634134	19637609	-	36774	downstream
16	TUCP_001691	XLOC_069287	--	TUCP	19592264	19597359	+	ENSRNOT00000078714	ENSRNOG00000052038	Haus8	-	19654822	19669153	-	57462	downstream
16	TUCP_001691	XLOC_069287	--	TUCP	19592264	19597359	+	ENSRNOT00000021609	ENSRNOG00000015751	Cyp4f18	Cytochrome P450, conserved site||Cytochrome P450, E-class, group I||Cytochrome P450	19410810	19528934	+	63329	downstream
16	TUCP_001691	XLOC_069287	--	TUCP	19592264	19597359	+	ENSRNOT00000083651	ENSRNOG00000016256	Myo9b	Protein kinase C-like, phorbol ester/diacylglycerol-binding domain||Unconventional myosin-IXb||Rho GTPase activation protein||P-loop containing nucleoside triphosphate hydrolase||Myosin head, motor domain||IQ motif, EF-hand binding site||Ras-associating (RA) domain||Rho GTPase-activating protein domain||Ubiquitin-related domain	19669411	19754069	+	72051	upstream
16	TUCP_001691	XLOC_069287	--	TUCP	19592264	19597359	+	ENSRNOT00000045099	ENSRNOG00000016256	Myo9b	Protein kinase C-like, phorbol ester/diacylglycerol-binding domain||Unconventional myosin-IXb||Rho GTPase activation protein||P-loop containing nucleoside triphosphate hydrolase||Myosin head, motor domain||IQ motif, EF-hand binding site||Ras-associating (RA) domain||Rho GTPase-activating protein domain||Ubiquitin-related domain	19669411	19754069	+	72051	upstream
16	TUCP_001691	XLOC_069287	--	TUCP	19592264	19597359	+	ENSRNOT00000087597	ENSRNOG00000016186	Zfp709	Zinc finger, C2H2-like||Zinc finger C2H2-type/integrase DNA-binding domain||Zinc finger, C2H2||Krueppel-associated box	19634656	19643236	-	37296	downstream
16	TUCP_001691	XLOC_069287	--	TUCP	19592264	19597359	+	ENSRNOT00000090775	ENSRNOG00000052038	Haus8	-	19654798	19669196	-	57438	downstream
16	TUCP_001691	XLOC_069287	--	TUCP	19592264	19597359	+	ENSRNOT00000074514	ENSRNOG00000049856	Zfp617	Zinc finger C2H2-type/integrase DNA-binding domain||Zinc finger, C2H2-like||Zinc finger, C2H2||Krueppel-associated box	19541593	19544727	-	47536	upstream
16	TUCP_001691	XLOC_069287	--	TUCP	19592264	19597359	+	ENSRNOT00000090131	ENSRNOG00000060701	Zfp617	Zinc finger, C2H2-like||Zinc finger C2H2-type/integrase DNA-binding domain||Zinc finger, C2H2	19581812	19583386	-	8877	upstream
16	TUCP_001691	XLOC_069287	--	TUCP	19592264	19597359	+	ENSRNOT00000085328	ENSRNOG00000015751	Cyp4f18	Cytochrome P450, conserved site||Cytochrome P450, E-class, group I||Cytochrome P450	19501193	19528999	+	63264	downstream
16	TUCP_001702	XLOC_069655	--	TUCP	23357834	23359425	+	ENSRNOT00000068629	ENSRNOG00000013884	Psd3	PH domain-like||Pleckstrin homology domain, spectrin-type||Pleckstrin homology domain||Sec7 domain, alpha orthogonal bundle||Sec7 domain	23447366	23781604	+	87940	upstream
16	TUCP_001702	XLOC_069655	--	TUCP	23357834	23359425	+	ENSRNOT00000075287	ENSRNOG00000049177	AABR07024972.1	-	23317953	23319005	+	38828	downstream
16	TUCP_001698	XLOC_069431	--	TUCP	21584834	21612998	+	ENSRNOT00000015635	ENSRNOG00000028919	Zfp868	Krueppel-associated box||Zinc finger, C2H2||Zinc finger, C2H2-like||Zinc finger C2H2-type/integrase DNA-binding domain	21518873	21524286	+	60547	downstream
16	TUCP_001699	XLOC_069557	--	TUCP	22761079	22765237	+	ENSRNOT00000050775	ENSRNOG00000029606	Ccdc94	CWC16 protein	22851465	22853022	-	86227	downstream
11	TUCP_001050	XLOC_040145	--	TUCP	88083047	88086274	-	ENSRNOT00000051991	ENSRNOG00000030452	Rimbp3	Variant SH3 domain||Immunoglobulin-like fold||SH3 domain||Fibronectin type III	88033180	88038518	-	44528	upstream
11	TUCP_001050	XLOC_040145	--	TUCP	88083047	88086274	-	ENSRNOT00000078394	ENSRNOG00000001861	Ydjc	NodB homology domain||Glycoside hydrolase/deacetylase, beta/alpha-barrel||Chitooligosaccharide deacetylase ChbG-like	88090934	88093516	-	4659	downstream
11	TUCP_001050	XLOC_040145	--	TUCP	88083047	88086274	-	ENSRNOT00000041557	ENSRNOG00000001860	Ccdc116	Protein of unknown function DUF4702	88095170	88098252	+	8895	upstream
11	TUCP_001050	XLOC_040145	--	TUCP	88083047	88086274	-	ENSRNOT00000085475	ENSRNOG00000001858	Ypel1	Yippee/Mis18/Cereblon	88173890	88177448	-	87615	downstream
11	TUCP_001050	XLOC_040145	--	TUCP	88083047	88086274	-	ENSRNOT00000034506	ENSRNOG00000026900	Ppil2	U box domain||Cyclophilin-type peptidyl-prolyl cis-trans isomerase domain||Cyclophilin-type peptidyl-prolyl cis-trans isomerase, conserved site||Cyclophilin-like domain||Zinc finger, RING/FYVE/PHD-type||Cyclophilin-type peptidyl-prolyl cis-trans isomerase	88147377	88169968	+	61102	upstream
11	TUCP_001050	XLOC_040145	--	TUCP	88083047	88086274	-	ENSRNOT00000002539	ENSRNOG00000001858	Ypel1	Yippee/Mis18/Cereblon	88173890	88180542	-	87615	downstream
11	TUCP_001050	XLOC_040145	--	TUCP	88083047	88086274	-	ENSRNOT00000046664	ENSRNOG00000026918	RGD1308065	-	88131960	88145481	+	45685	upstream
11	TUCP_001050	XLOC_040145	--	TUCP	88083047	88086274	-	ENSRNOT00000002542	ENSRNOG00000001861	Ydjc	NodB homology domain||Glycoside hydrolase/deacetylase, beta/alpha-barrel||Chitooligosaccharide deacetylase ChbG-like	88090921	88092756	-	4646	downstream
11	TUCP_001050	XLOC_040145	--	TUCP	88083047	88086274	-	ENSRNOT00000002540	ENSRNOG00000001859	Sdf2l1	MIR motif||Glycosyltransferase 39-like	88122271	88124513	+	35996	upstream
11	TUCP_001050	XLOC_040145	--	TUCP	88083047	88086274	-	ENSRNOT00000046159	ENSRNOG00000001862	Ube2l3	-	88047832	88088476	+	(3228)	antisense
11	TUCP_001050	XLOC_040145	--	TUCP	88083047	88086274	-	ENSRNOT00000079595	ENSRNOG00000051458	Hic2	Zinc finger, C2H2||BTB/POZ domain||SKP1/BTB/POZ domain||Zinc finger, C2H2-like||Zinc finger C2H2-type/integrase DNA-binding domain	87988213	88016825	-	66221	upstream
11	TUCP_001051	XLOC_040152	--	TUCP	88169027	88169895	-	ENSRNOT00000078394	ENSRNOG00000001861	Ydjc	NodB homology domain||Glycoside hydrolase/deacetylase, beta/alpha-barrel||Chitooligosaccharide deacetylase ChbG-like	88090934	88093516	-	75510	upstream
11	TUCP_001051	XLOC_040152	--	TUCP	88169027	88169895	-	ENSRNOT00000002533	ENSRNOG00000001849	Mapk1	Mitogen-activated protein (MAP) kinase, conserved site||Mitogen-activated protein (MAP) kinase, ERK1/2||Serine/threonine-protein kinase, active site||Protein kinase, ATP binding site||Protein kinase domain||Protein kinase-like domain	88211599	88273254	-	41703	downstream
11	TUCP_001051	XLOC_040152	--	TUCP	88169027	88169895	-	ENSRNOT00000041557	ENSRNOG00000001860	Ccdc116	Protein of unknown function DUF4702	88095170	88098252	+	70774	downstream
11	TUCP_001051	XLOC_040152	--	TUCP	88169027	88169895	-	ENSRNOT00000085475	ENSRNOG00000001858	Ypel1	Yippee/Mis18/Cereblon	88173890	88177448	-	3994	downstream
11	TUCP_001051	XLOC_040152	--	TUCP	88169027	88169895	-	ENSRNOT00000034506	ENSRNOG00000026900	Ppil2	U box domain||Cyclophilin-type peptidyl-prolyl cis-trans isomerase domain||Cyclophilin-type peptidyl-prolyl cis-trans isomerase, conserved site||Cyclophilin-like domain||Zinc finger, RING/FYVE/PHD-type||Cyclophilin-type peptidyl-prolyl cis-trans isomerase	88147377	88169968	+	(869)	antisense
11	TUCP_001051	XLOC_040152	--	TUCP	88169027	88169895	-	ENSRNOT00000002539	ENSRNOG00000001858	Ypel1	Yippee/Mis18/Cereblon	88173890	88180542	-	3994	downstream
11	TUCP_001051	XLOC_040152	--	TUCP	88169027	88169895	-	ENSRNOT00000046664	ENSRNOG00000026918	RGD1308065	-	88131960	88145481	+	23545	downstream
11	TUCP_001051	XLOC_040152	--	TUCP	88169027	88169895	-	ENSRNOT00000002542	ENSRNOG00000001861	Ydjc	NodB homology domain||Glycoside hydrolase/deacetylase, beta/alpha-barrel||Chitooligosaccharide deacetylase ChbG-like	88090921	88092756	-	76270	upstream
11	TUCP_001051	XLOC_040152	--	TUCP	88169027	88169895	-	ENSRNOT00000002540	ENSRNOG00000001859	Sdf2l1	MIR motif||Glycosyltransferase 39-like	88122271	88124513	+	44513	downstream
11	TUCP_001051	XLOC_040152	--	TUCP	88169027	88169895	-	ENSRNOT00000046159	ENSRNOG00000001862	Ube2l3	-	88047832	88088476	+	80550	downstream
1	TUCP_000059	XLOC_001127	--	TUCP	25632961	25691367	+	ENSRNOT00000042072	ENSRNOG00000012609	Trdn	Aspartyl beta-hydroxylase/Triadin domain||Triadin	25405369	25839345	-	(58407)	antisense
1	TUCP_000059	XLOC_001127	--	TUCP	25632961	25691367	+	ENSRNOT00000092757	ENSRNOG00000012609	Trdn	Aspartyl beta-hydroxylase/Triadin domain||Triadin	25716396	25839279	-	25028	downstream
1	TUCP_000059	XLOC_001127	--	TUCP	25632961	25691367	+	ENSRNOT00000090388	ENSRNOG00000012609	Trdn	Aspartyl beta-hydroxylase/Triadin domain||Triadin	25403390	25839198	-	(58407)	antisense
1	TUCP_000058	XLOC_001127	--	TUCP	25632938	25667090	+	ENSRNOT00000042072	ENSRNOG00000012609	Trdn	Aspartyl beta-hydroxylase/Triadin domain||Triadin	25405369	25839345	-	(34153)	antisense
1	TUCP_000058	XLOC_001127	--	TUCP	25632938	25667090	+	ENSRNOT00000092757	ENSRNOG00000012609	Trdn	Aspartyl beta-hydroxylase/Triadin domain||Triadin	25716396	25839279	-	49305	downstream
1	TUCP_000058	XLOC_001127	--	TUCP	25632938	25667090	+	ENSRNOT00000090388	ENSRNOG00000012609	Trdn	Aspartyl beta-hydroxylase/Triadin domain||Triadin	25403390	25839198	-	(34153)	antisense
11	TUCP_001054	XLOC_040185	--	TUCP	89002293	89007855	-	ENSRNOT00000002498	ENSRNOG00000001825	Pkp2	Armadillo||Armadillo-type fold||Plakophilin/Delta catenin||Armadillo-like helical	88912599	88972176	-	30116	upstream
11	TUCP_001054	XLOC_040185	--	TUCP	89002293	89007855	-	ENSRNOT00000074586	ENSRNOG00000050869	Cebpd	CCAAT/enhancer-binding protein C/EBP||CCAAT/enhancer-binding protein, chordates||Basic-leucine zipper domain	89008008	89009146	+	152	upstream
11	TUCP_001054	XLOC_040185	--	TUCP	89002293	89007855	-	ENSRNOT00000057502	ENSRNOG00000037851	Spidr	Domain of unknown function DUF4503||Domain of unknown function DUF4502	89010377	89260297	-	2521	downstream
11	TUCP_001054	XLOC_040185	--	TUCP	89002293	89007855	-	ENSRNOT00000089517	ENSRNOG00000037851	Spidr	Domain of unknown function DUF4503||Domain of unknown function DUF4502	89009931	89239798	-	2075	downstream
11	TUCP_001055	XLOC_040185	--	TUCP	89002293	89008896	-	ENSRNOT00000002498	ENSRNOG00000001825	Pkp2	Armadillo||Armadillo-type fold||Plakophilin/Delta catenin||Armadillo-like helical	88912599	88972176	-	30116	upstream
11	TUCP_001055	XLOC_040185	--	TUCP	89002293	89008896	-	ENSRNOT00000074586	ENSRNOG00000050869	Cebpd	CCAAT/enhancer-binding protein C/EBP||CCAAT/enhancer-binding protein, chordates||Basic-leucine zipper domain	89008008	89009146	+	(889)	antisense
11	TUCP_001055	XLOC_040185	--	TUCP	89002293	89008896	-	ENSRNOT00000057502	ENSRNOG00000037851	Spidr	Domain of unknown function DUF4503||Domain of unknown function DUF4502	89010377	89260297	-	1480	downstream
11	TUCP_001055	XLOC_040185	--	TUCP	89002293	89008896	-	ENSRNOT00000089517	ENSRNOG00000037851	Spidr	Domain of unknown function DUF4503||Domain of unknown function DUF4502	89009931	89239798	-	1034	downstream
11	TUCP_001056	XLOC_040197	--	TUCP	89570257	89588764	-	ENSRNOT00000035247	ENSRNOG00000025028	Prkdc	FATC domain||Armadillo-type fold||Phosphatidylinositol 3-/4-kinase, catalytic domain||PIK-related kinase, FAT||PIK-related kinase||Protein kinase-like domain||Phosphatidylinositol 3/4-kinase, conserved site||NUC194||Armadillo-like helical	89293696	89510871	-	59385	upstream
11	TUCP_001056	XLOC_040197	--	TUCP	89570257	89588764	-	ENSRNOT00000031401	ENSRNOG00000001829	Ube2v2	Ubiquitin-conjugating enzyme E2||Ubiquitin-conjugating enzyme/RWD-like	89557273	89591175	+	(18508)	antisense
11	TUCP_001056	XLOC_040197	--	TUCP	89570257	89588764	-	ENSRNOT00000002510	ENSRNOG00000001833	Mcm4	Nucleic acid-binding, OB-fold||MCM domain||Rubredoxin-type fold||MCM N-terminal domain||Mini-chromosome maintenance protein||Mini-chromosome maintenance complex protein 4||Mini-chromosome maintenance, conserved site||P-loop containing nucleoside triphosphate hydrolase	89511191	89524892	+	45364	downstream
11	TUCP_001056	XLOC_040197	--	TUCP	89570257	89588764	-	ENSRNOT00000088212	ENSRNOG00000001829	Ube2v2	Ubiquitin-conjugating enzyme E2||Ubiquitin-conjugating enzyme/RWD-like	89569489	89588385	+	(18129)	antisense
1	TUCP_000501	XLOC_017168	--	TUCP	137413558	137427306	-	ENSRNOT00000014553	ENSRNOG00000010959	Klhl25	BTB-kelch protein||Kelch-like protein 25||BTB/POZ domain||Kelch-type beta propeller||SKP1/BTB/POZ domain||Kelch repeat type 1||BTB/Kelch-associated	137333881	137359072	-	54485	upstream
1	TUCP_000501	XLOC_017168	--	TUCP	137413558	137427306	-	ENSRNOT00000014802	ENSRNOG00000010964	Akap13	Dbl homology (DH) domain||Protein kinase C-like, phorbol ester/diacylglycerol-binding domain||A-kinase anchor protein 13||Ankyrin repeat-containing domain||PH domain-like||Pleckstrin homology domain	137014272	137315272	+	98285	downstream
1	TUCP_000052	XLOC_001127	--	TUCP	25632914	25667090	+	ENSRNOT00000042072	ENSRNOG00000012609	Trdn	Aspartyl beta-hydroxylase/Triadin domain||Triadin	25405369	25839345	-	(34177)	antisense
1	TUCP_000052	XLOC_001127	--	TUCP	25632914	25667090	+	ENSRNOT00000092757	ENSRNOG00000012609	Trdn	Aspartyl beta-hydroxylase/Triadin domain||Triadin	25716396	25839279	-	49305	downstream
1	TUCP_000052	XLOC_001127	--	TUCP	25632914	25667090	+	ENSRNOT00000090388	ENSRNOG00000012609	Trdn	Aspartyl beta-hydroxylase/Triadin domain||Triadin	25403390	25839198	-	(34177)	antisense
1	TUCP_000503	XLOC_017313	--	TUCP	142029491	142039219	-	ENSRNOT00000029471	ENSRNOG00000042059	Rccd1	Regulator of chromosome condensation 1/beta-lactamase-inhibitor protein II||Regulator of chromosome condensation, RCC1	142109252	142114634	-	70032	downstream
1	TUCP_000503	XLOC_017313	--	TUCP	142029491	142039219	-	ENSRNOT00000017532	ENSRNOG00000013057	Prc1	Protein regulator of cytokinesis 1||Microtubule-associated protein, MAP65/Ase1/PRC1	142087208	142108746	+	47988	upstream
1	TUCP_000503	XLOC_017313	--	TUCP	142029491	142039219	-	ENSRNOT00000042558	ENSRNOG00000033498	Cib1	EF-hand domain pair||EF-Hand 1, calcium-binding site||EF-hand domain	142014958	142020525	-	8965	upstream
1	TUCP_000503	XLOC_017313	--	TUCP	142029491	142039219	-	ENSRNOT00000018107	ENSRNOG00000013553	Ngrn	Neugrin/Rrg9	142050458	142056336	+	11238	upstream
1	TUCP_000503	XLOC_017313	--	TUCP	142029491	142039219	-	ENSRNOT00000030914	ENSRNOG00000025167	Sema4b	Semaphorin||Plexin repeat||WD40/YVTN repeat-like-containing domain||Plexin-like fold||Sema domain	141986145	142014398	+	15092	downstream
1	TUCP_000503	XLOC_017313	--	TUCP	142029491	142039219	-	ENSRNOT00000017407	ENSRNOG00000012357	Unc45a	Tetratricopeptide repeat||Armadillo-like helical||Tetratricopeptide repeat-containing domain||Armadillo-type fold||UNC-45/Cro1/She4, central domain||Tetratricopeptide-like helical domain	142118917	142133627	-	79697	downstream
1	TUCP_000503	XLOC_017313	--	TUCP	142029491	142039219	-	ENSRNOT00000090006	ENSRNOG00000056362	Ttll13	Tubulin-tyrosine ligase/Tubulin polyglutamylase	142034423	142050071	+	(4797)	antisense
1	TUCP_000503	XLOC_017313	--	TUCP	142029491	142039219	-	ENSRNOT00000016445	ENSRNOG00000012236	Hddc3	HD/PDEase domain||HD domain	142136452	142138737	+	97232	upstream
1	TUCP_000503	XLOC_017313	--	TUCP	142029491	142039219	-	ENSRNOT00000017862	ENSRNOG00000013149	Vps33b	Sec1-like, domain 2||Vacuolar protein sorting-associated protein 33||Sec1-like protein	142060955	142083953	+	21735	upstream
1	TUCP_000502	XLOC_017294	--	TUCP	141756223	141766973	-	ENSRNOT00000078857	ENSRNOG00000014589	Arpin	Uncharacterised protein family UPF0552	141662850	141672810	-	83412	upstream
1	TUCP_000502	XLOC_017294	--	TUCP	141756223	141766973	-	ENSRNOT00000019568	ENSRNOG00000014589	Arpin	Uncharacterised protein family UPF0552	141666119	141672711	-	83511	upstream
1	TUCP_000502	XLOC_017294	--	TUCP	141756223	141766973	-	ENSRNOT00000073302	ENSRNOG00000047000	Fuom	RbsD-like domain||D-ribose pyranase RbsD/L-fucose mutarotase FucU	141832774	141836250	+	65800	upstream
1	TUCP_000502	XLOC_017294	--	TUCP	141756223	141766973	-	ENSRNOT00000085988	ENSRNOG00000013949	Idh2	Isocitrate dehydrogenase NADP-dependent||Isocitrate/isopropylmalate dehydrogenase, conserved site||Isopropylmalate dehydrogenase-like domain	141866283	141893705	-	99309	downstream
1	TUCP_000502	XLOC_017294	--	TUCP	141756223	141766973	-	ENSRNOT00000071574	ENSRNOG00000047565	Echs1	Enoyl-CoA hydratase/isomerase, conserved site||ClpP/crotonase-like domain||Crotonase superfamily	141821916	141830764	+	54942	upstream
1	TUCP_000502	XLOC_017294	--	TUCP	141756223	141766973	-	ENSRNOT00000064034	ENSRNOG00000014278	Zfp710	Zinc finger, C2H2||Zinc finger C2H2-type/integrase DNA-binding domain||Zinc finger, C2H2-like	141767940	141870325	+	966	upstream
1	TUCP_000505	XLOC_017313	--	TUCP	142044079	142050800	-	ENSRNOT00000029471	ENSRNOG00000042059	Rccd1	Regulator of chromosome condensation 1/beta-lactamase-inhibitor protein II||Regulator of chromosome condensation, RCC1	142109252	142114634	-	58451	downstream
1	TUCP_000505	XLOC_017313	--	TUCP	142044079	142050800	-	ENSRNOT00000017532	ENSRNOG00000013057	Prc1	Protein regulator of cytokinesis 1||Microtubule-associated protein, MAP65/Ase1/PRC1	142087208	142108746	+	36407	upstream
1	TUCP_000505	XLOC_017313	--	TUCP	142044079	142050800	-	ENSRNOT00000042558	ENSRNOG00000033498	Cib1	EF-hand domain pair||EF-Hand 1, calcium-binding site||EF-hand domain	142014958	142020525	-	23553	upstream
1	TUCP_000505	XLOC_017313	--	TUCP	142044079	142050800	-	ENSRNOT00000018107	ENSRNOG00000013553	Ngrn	Neugrin/Rrg9	142050458	142056336	+	(343)	antisense
1	TUCP_000505	XLOC_017313	--	TUCP	142044079	142050800	-	ENSRNOT00000078982	ENSRNOG00000012055	Man2a2	Glycoside hydrolase/deacetylase, beta/alpha-barrel||Glycosyl hydrolase family 38, C-terminal||Glycoside hydrolase family 38, central domain||Glycoside hydrolase 38/57, N-terminal domain||Glycoside hydrolase families 57/38, central domain||Glycoside hydrolase family 38, N-terminal domain||Glycosyl hydrolase, all-beta||Galactose mutarotase-like domain	142144000	142164007	-	93199	downstream
1	TUCP_000505	XLOC_017313	--	TUCP	142044079	142050800	-	ENSRNOT00000030914	ENSRNOG00000025167	Sema4b	Semaphorin||Plexin repeat||WD40/YVTN repeat-like-containing domain||Plexin-like fold||Sema domain	141986145	142014398	+	29680	downstream
1	TUCP_000505	XLOC_017313	--	TUCP	142044079	142050800	-	ENSRNOT00000016281	ENSRNOG00000012055	Man2a2	Glycoside hydrolase/deacetylase, beta/alpha-barrel||Glycosyl hydrolase family 38, C-terminal||Glycoside hydrolase family 38, central domain||Glycoside hydrolase 38/57, N-terminal domain||Glycoside hydrolase families 57/38, central domain||Glycoside hydrolase family 38, N-terminal domain||Glycosyl hydrolase, all-beta||Galactose mutarotase-like domain	142143799	142164263	-	92998	downstream
1	TUCP_000505	XLOC_017313	--	TUCP	142044079	142050800	-	ENSRNOT00000017407	ENSRNOG00000012357	Unc45a	Tetratricopeptide repeat||Armadillo-like helical||Tetratricopeptide repeat-containing domain||Armadillo-type fold||UNC-45/Cro1/She4, central domain||Tetratricopeptide-like helical domain	142118917	142133627	-	68116	downstream
1	TUCP_000505	XLOC_017313	--	TUCP	142044079	142050800	-	ENSRNOT00000090006	ENSRNOG00000056362	Ttll13	Tubulin-tyrosine ligase/Tubulin polyglutamylase	142034423	142050071	+	(5993)	antisense
1	TUCP_000505	XLOC_017313	--	TUCP	142044079	142050800	-	ENSRNOT00000016445	ENSRNOG00000012236	Hddc3	HD/PDEase domain||HD domain	142136452	142138737	+	85651	upstream
1	TUCP_000505	XLOC_017313	--	TUCP	142044079	142050800	-	ENSRNOT00000017862	ENSRNOG00000013149	Vps33b	Sec1-like, domain 2||Vacuolar protein sorting-associated protein 33||Sec1-like protein	142060955	142083953	+	10154	upstream
1	TUCP_000504	XLOC_017313	--	TUCP	142030261	142050800	-	ENSRNOT00000029471	ENSRNOG00000042059	Rccd1	Regulator of chromosome condensation 1/beta-lactamase-inhibitor protein II||Regulator of chromosome condensation, RCC1	142109252	142114634	-	58451	downstream
1	TUCP_000504	XLOC_017313	--	TUCP	142030261	142050800	-	ENSRNOT00000017532	ENSRNOG00000013057	Prc1	Protein regulator of cytokinesis 1||Microtubule-associated protein, MAP65/Ase1/PRC1	142087208	142108746	+	36407	upstream
1	TUCP_000504	XLOC_017313	--	TUCP	142030261	142050800	-	ENSRNOT00000042558	ENSRNOG00000033498	Cib1	EF-hand domain pair||EF-Hand 1, calcium-binding site||EF-hand domain	142014958	142020525	-	9735	upstream
1	TUCP_000504	XLOC_017313	--	TUCP	142030261	142050800	-	ENSRNOT00000018107	ENSRNOG00000013553	Ngrn	Neugrin/Rrg9	142050458	142056336	+	(343)	antisense
1	TUCP_000504	XLOC_017313	--	TUCP	142030261	142050800	-	ENSRNOT00000078982	ENSRNOG00000012055	Man2a2	Glycoside hydrolase/deacetylase, beta/alpha-barrel||Glycosyl hydrolase family 38, C-terminal||Glycoside hydrolase family 38, central domain||Glycoside hydrolase 38/57, N-terminal domain||Glycoside hydrolase families 57/38, central domain||Glycoside hydrolase family 38, N-terminal domain||Glycosyl hydrolase, all-beta||Galactose mutarotase-like domain	142144000	142164007	-	93199	downstream
1	TUCP_000504	XLOC_017313	--	TUCP	142030261	142050800	-	ENSRNOT00000030914	ENSRNOG00000025167	Sema4b	Semaphorin||Plexin repeat||WD40/YVTN repeat-like-containing domain||Plexin-like fold||Sema domain	141986145	142014398	+	15862	downstream
1	TUCP_000504	XLOC_017313	--	TUCP	142030261	142050800	-	ENSRNOT00000016281	ENSRNOG00000012055	Man2a2	Glycoside hydrolase/deacetylase, beta/alpha-barrel||Glycosyl hydrolase family 38, C-terminal||Glycoside hydrolase family 38, central domain||Glycoside hydrolase 38/57, N-terminal domain||Glycoside hydrolase families 57/38, central domain||Glycoside hydrolase family 38, N-terminal domain||Glycosyl hydrolase, all-beta||Galactose mutarotase-like domain	142143799	142164263	-	92998	downstream
1	TUCP_000504	XLOC_017313	--	TUCP	142030261	142050800	-	ENSRNOT00000017407	ENSRNOG00000012357	Unc45a	Tetratricopeptide repeat||Armadillo-like helical||Tetratricopeptide repeat-containing domain||Armadillo-type fold||UNC-45/Cro1/She4, central domain||Tetratricopeptide-like helical domain	142118917	142133627	-	68116	downstream
1	TUCP_000504	XLOC_017313	--	TUCP	142030261	142050800	-	ENSRNOT00000090006	ENSRNOG00000056362	Ttll13	Tubulin-tyrosine ligase/Tubulin polyglutamylase	142034423	142050071	+	(15649)	antisense
1	TUCP_000504	XLOC_017313	--	TUCP	142030261	142050800	-	ENSRNOT00000016445	ENSRNOG00000012236	Hddc3	HD/PDEase domain||HD domain	142136452	142138737	+	85651	upstream
1	TUCP_000504	XLOC_017313	--	TUCP	142030261	142050800	-	ENSRNOT00000017862	ENSRNOG00000013149	Vps33b	Sec1-like, domain 2||Vacuolar protein sorting-associated protein 33||Sec1-like protein	142060955	142083953	+	10154	upstream
1	TUCP_000055	XLOC_001127	--	TUCP	25632938	25667090	+	ENSRNOT00000042072	ENSRNOG00000012609	Trdn	Aspartyl beta-hydroxylase/Triadin domain||Triadin	25405369	25839345	-	(34153)	antisense
1	TUCP_000055	XLOC_001127	--	TUCP	25632938	25667090	+	ENSRNOT00000092757	ENSRNOG00000012609	Trdn	Aspartyl beta-hydroxylase/Triadin domain||Triadin	25716396	25839279	-	49305	downstream
1	TUCP_000055	XLOC_001127	--	TUCP	25632938	25667090	+	ENSRNOT00000090388	ENSRNOG00000012609	Trdn	Aspartyl beta-hydroxylase/Triadin domain||Triadin	25403390	25839198	-	(34153)	antisense
1	TUCP_000054	XLOC_001127	--	TUCP	25632936	25769126	+	ENSRNOT00000042072	ENSRNOG00000012609	Trdn	Aspartyl beta-hydroxylase/Triadin domain||Triadin	25405369	25839345	-	(136191)	antisense
1	TUCP_000054	XLOC_001127	--	TUCP	25632936	25769126	+	ENSRNOT00000092757	ENSRNOG00000012609	Trdn	Aspartyl beta-hydroxylase/Triadin domain||Triadin	25716396	25839279	-	(52731)	antisense
1	TUCP_000054	XLOC_001127	--	TUCP	25632936	25769126	+	ENSRNOT00000090388	ENSRNOG00000012609	Trdn	Aspartyl beta-hydroxylase/Triadin domain||Triadin	25403390	25839198	-	(136191)	antisense
15	TUCP_001678	XLOC_067031	--	TUCP	75045281	75127429	-	ENSRNOT00000057931	ENSRNOG00000038074	LOC498555	Ribosomal protein L12 family	75067297	75067723	+	(427)	antisense
5	TUCP_003568	XLOC_156604	--	TUCP	75545112	75556457	-	ENSRNOT00000048457	ENSRNOG00000033567	Musk	Immunoglobulin-like fold||Frizzled domain||Immunoglobulin subtype||Immunoglobulin-like domain||Protein kinase, ATP binding site||Tyrosine-protein kinase, active site||Serine-threonine/tyrosine-protein kinase catalytic domain||Protein kinase-like domain||Protein kinase domain||Tyrosine-protein kinase, catalytic domain||Immunoglobulin I-set||Immunoglobulin subtype 2	75392790	75498694	+	46417	downstream
5	TUCP_003568	XLOC_156604	--	TUCP	75545112	75556457	-	ENSRNOT00000044348	ENSRNOG00000013656	Lpar1	Lysophosphatidic acid receptor EDG-2||G protein-coupled receptor, rhodopsin-like||GPCR, rhodopsin-like, 7TM||Lysophosphatidic acid receptor	75557042	75676584	-	584	downstream
5	TUCP_003569	XLOC_156680	--	TUCP	76836116	76838277	-	ENSRNOT00000022866	ENSRNOG00000016780	RGD1310951	Protein of unknown function DUF3504	76860515	76997951	+	22237	upstream
5	TUCP_003569	XLOC_156680	--	TUCP	76836116	76838277	-	ENSRNOT00000022054	ENSRNOG00000038905	AABR07048397.1	RNA recognition motif domain||Nucleotide-binding alpha-beta plait domain	76748749	76750116	+	85999	downstream
5	TUCP_003569	XLOC_156680	--	TUCP	76836116	76838277	-	ENSRNOT00000059458	ENSRNOG00000016692	Hsdl2	Short-chain dehydrogenase/reductase SDR||NAD(P)-binding domain||SCP2 sterol-binding domain	76812931	76848101	+	(2162)	antisense
5	TUCP_003569	XLOC_156680	--	TUCP	76836116	76838277	-	ENSRNOT00000089251	ENSRNOG00000016334	Ptbp3	Nucleotide-binding alpha-beta plait domain||HnRNP-L/PTB||RNA recognition motif domain||Polypyrimidine tract-binding protein 3	76674886	76756147	-	79968	upstream
5	TUCP_003569	XLOC_156680	--	TUCP	76836116	76838277	-	ENSRNOT00000022107	ENSRNOG00000016334	Ptbp3	Nucleotide-binding alpha-beta plait domain||HnRNP-L/PTB||RNA recognition motif domain||Polypyrimidine tract-binding protein 3	76673990	76756140	-	79975	upstream
15	TUCP_001670	XLOC_066543	--	TUCP	57388950	57391085	-	ENSRNOT00000014909	ENSRNOG00000010935	Cpb2	Proteinase inhibitor, propeptide||Peptidase M14, carboxypeptidase A||Proteinase inhibitor, carboxypeptidase propeptide	57290849	57339760	+	49189	downstream
15	TUCP_001670	XLOC_066543	--	TUCP	57388950	57391085	-	ENSRNOT00000015467	ENSRNOG00000011237	Zc3h13	Zinc finger, CCCH-type	57340579	57405287	+	(2136)	antisense
5	TUCP_003563	XLOC_156201	--	TUCP	62090129	62094451	-	ENSRNOT00000011787	ENSRNOG00000008901	Coro2a	WD40 repeat, conserved site||WD40/YVTN repeat-like-containing domain||WD40 repeat||Coronin 2A||Coronin||WD40-repeat-containing domain||Domain of unknown function DUF1899	62157149	62187930	-	62697	downstream
5	TUCP_003563	XLOC_156201	--	TUCP	62090129	62094451	-	ENSRNOT00000066001	ENSRNOG00000008922	Trim14	Concanavalin A-like lectin/glucanase domain||SPRY-associated||Butyrophylin-like||SPRY domain||B-box-type zinc finger||B30.2/SPRY domain	62128941	62153762	-	34489	downstream
5	TUCP_003563	XLOC_156201	--	TUCP	62090129	62094451	-	ENSRNOT00000089789	ENSRNOG00000008901	Coro2a	WD40 repeat, conserved site||WD40/YVTN repeat-like-containing domain||WD40 repeat||Coronin 2A||Coronin||WD40-repeat-containing domain||Domain of unknown function DUF1899	62156839	62186372	-	62387	downstream
5	TUCP_003563	XLOC_156201	--	TUCP	62090129	62094451	-	ENSRNOT00000086962	ENSRNOG00000008922	Trim14	Concanavalin A-like lectin/glucanase domain||SPRY-associated||Butyrophylin-like||SPRY domain||B-box-type zinc finger||B30.2/SPRY domain	62129147	62153786	-	34695	downstream
5	TUCP_003563	XLOC_156201	--	TUCP	62090129	62094451	-	ENSRNOT00000012602	ENSRNOG00000009492	Trmo	TsaA-like domain||Uncharacterised protein family UPF0066, conserved site	61990328	62001196	-	88932	upstream
5	TUCP_003563	XLOC_156201	--	TUCP	62090129	62094451	-	ENSRNOT00000042649	ENSRNOG00000009436	Hemgn	Hemogen	62005071	62025152	-	64976	upstream
5	TUCP_003563	XLOC_156201	--	TUCP	62090129	62094451	-	ENSRNOT00000012260	ENSRNOG00000008945	Nans	N-acetylneuraminic acid synthase, N-terminal||Aldolase-type TIM barrel||Antifreeze-like/N-acetylneuraminic acid synthase C-terminal||SAF domain	62109328	62126494	+	14876	upstream
5	TUCP_003563	XLOC_156201	--	TUCP	62090129	62094451	-	ENSRNOT00000012478	ENSRNOG00000009266	Anp32b	U2A'/phosphoprotein 32 family A, C-terminal||Leucine-rich repeat domain, L domain-like||Leucine-rich repeat	62071346	62094633	+	(4323)	antisense
15	TUCP_001672	XLOC_066657	--	TUCP	57888742	57894493	-	ENSRNOT00000001389	ENSRNOG00000001052	Slc25a30	Mitochondrial substrate/solute carrier||Mitochondrial carrier domain||Mitochondrial brown fat uncoupling protein	57813356	57834173	-	54568	upstream
15	TUCP_001672	XLOC_066657	--	TUCP	57888742	57894493	-	ENSRNOT00000001383	ENSRNOG00000001049	Tpt1	Translationally controlled tumour protein||Mss4/translationally controlled tumour-associated TCTP||Translationally controlled tumour protein, conserved site||Mss4-like	57891680	57894504	+	(2814)	antisense
15	TUCP_001672	XLOC_066657	--	TUCP	57888742	57894493	-	ENSRNOT00000044254	ENSRNOG00000029316	Gtf2f2	Winged helix-turn-helix DNA-binding domain||Transcription Factor IIF, Rap30/Rap74, interaction||Transcription initiation factor IIF, beta subunit	57942059	58068892	-	47565	downstream
15	TUCP_001672	XLOC_066657	--	TUCP	57888742	57894493	-	ENSRNOT00000000168	ENSRNOG00000000155	Cog3	Conserved oligomeric Golgi complex, subunit 3	57755189	57805184	-	83557	upstream
5	TUCP_003561	XLOC_156111	--	TUCP	59670890	59713045	-	ENSRNOT00000091944	ENSRNOG00000013956	Rnf38	Zinc finger, RING-type||Zinc finger, RING/FYVE/PHD-type	59608035	59647633	-	23256	upstream
5	TUCP_003561	XLOC_156111	--	TUCP	59670890	59713045	-	ENSRNOT00000066277	ENSRNOG00000013598	Melk	Protein kinase, ATP binding site||Serine/threonine-protein kinase, active site||Protein kinase domain||Protein kinase-like domain	59783890	59844356	+	70844	upstream
5	TUCP_003561	XLOC_156111	--	TUCP	59670890	59713045	-	ENSRNOT00000077367	ENSRNOG00000013956	Rnf38	Zinc finger, RING-type||Zinc finger, RING/FYVE/PHD-type	59607476	59638492	-	32397	upstream
5	TUCP_003561	XLOC_156111	--	TUCP	59670890	59713045	-	ENSRNOT00000060203	ENSRNOG00000013956	Rnf38	Zinc finger, RING-type||Zinc finger, RING/FYVE/PHD-type	59607992	59638385	-	32504	upstream
5	TUCP_003566	XLOC_156567	--	TUCP	74436443	74443429	-	ENSRNOT00000059627	ENSRNOG00000011425	Ptpn3	FERM domain||PH domain-like||Band 4.1 domain||Protein-tyrosine phosphatase, catalytic||FERM, N-terminal||FERM central domain||FERM, C-terminal PH-like domain||Protein-tyrosine phosphatase-like||PTP type protein phosphatase||FERM/acyl-CoA-binding protein, 3-helical bundle||Ubiquitin-related domain||FERM conserved site||Tyrosine specific protein phosphatases domain||Protein-tyrosine phosphatase, ac…	74250453	74368186	-	68256	upstream
5	TUCP_003566	XLOC_156567	--	TUCP	74436443	74443429	-	ENSRNOT00000076705	ENSRNOG00000011425	Ptpn3	FERM domain||PH domain-like||Band 4.1 domain||Protein-tyrosine phosphatase, catalytic||FERM, N-terminal||FERM central domain||FERM, C-terminal PH-like domain||Protein-tyrosine phosphatase-like||PTP type protein phosphatase||FERM/acyl-CoA-binding protein, 3-helical bundle||Ubiquitin-related domain||FERM conserved site||Tyrosine specific protein phosphatases domain||Protein-tyrosine phosphatase, ac…	74252602	74366817	-	69625	upstream
15	TUCP_001675	XLOC_066751	--	TUCP	60669670	60673645	-	ENSRNOT00000058148	ENSRNOG00000009987	Akap11	SPHK1-interactor/A-kinase anchor 110kDa	60722160	60752106	-	48514	downstream
15	TUCP_001675	XLOC_066751	--	TUCP	60669670	60673645	-	ENSRNOT00000013333	ENSRNOG00000009987	Akap11	SPHK1-interactor/A-kinase anchor 110kDa	60725707	60743064	-	52061	downstream
15	TUCP_001675	XLOC_066751	--	TUCP	60669670	60673645	-	ENSRNOT00000079978	ENSRNOG00000009987	Akap11	SPHK1-interactor/A-kinase anchor 110kDa	60725422	60766579	-	51776	downstream
15	TUCP_001676	XLOC_066794	--	TUCP	61449255	61453503	-	ENSRNOT00000068216	ENSRNOG00000042960	Rgcc	Regulator of cell cycle RGCC	61551861	61564695	-	98357	downstream
15	TUCP_001677	XLOC_066959	--	TUCP	70456275	70481152	-	ENSRNOT00000087940	ENSRNOG00000008986	Diaph3	Formin, FH3 domain||DRF autoregulatory||Rho GTPase-binding/formin homology 3 (GBD/FH3) domain||Formin, protein diaphanous homologue 3||Armadillo-type fold||-||Diaphanous autoregulatory (DAD) domain||Formin, FH2 domain||Formin, GTPase-binding domain	70349804	70399924	-	56350	upstream
19	TUCP_002221	XLOC_092536	--	TUCP	16392996	16415784	-	ENSRNOT00000015272	ENSRNOG00000011180	Irx5	Homeodomain-like||Iroquois-class homeodomain protein||Homeobox domain||Homeobox, conserved site||Homeobox KN domain	16417817	16420511	+	2032	upstream
19	TUCP_002221	XLOC_092536	--	TUCP	16392996	16415784	-	ENSRNOT00000089975	ENSRNOG00000011180	Irx5	Homeodomain-like||Iroquois-class homeodomain protein||Homeobox domain||Homeobox, conserved site||Homeobox KN domain	16415636	16421191	+	(149)	antisense
16	TUCP_001708	XLOC_069783	--	TUCP	29805911	29817717	+	ENSRNOT00000088707	ENSRNOG00000059097	Ddx60	Helicase, C-terminal||DEAD/DEAH box helicase domain||P-loop containing nucleoside triphosphate hydrolase||Helicase superfamily 1/2, ATP-binding domain	29834086	29936307	-	16368	downstream
16	TUCP_001708	XLOC_069783	--	TUCP	29805911	29817717	+	ENSRNOT00000059724	ENSRNOG00000014339	Anxa10	Annexin||Annexin, type X||Annexin repeat||Annexin repeat, conserved site	29674793	29741465	+	64445	downstream
10	TUCP_000650	XLOC_024326	--	TUCP	18452856	18461087	+	ENSRNOT00000043036	ENSRNOG00000032417	Gabrp	Neurotransmitter-gated ion-channel, conserved site||Gamma-aminobutyric-acid A receptor pi subunit||Neurotransmitter-gated ion-channel transmembrane domain||Neurotransmitter-gated ion-channel ligand-binding domain||Neurotransmitter-gated ion-channel||Gamma-aminobutyric acid A receptor/Glycine receptor alpha	18485514	18506337	-	24426	downstream
10	TUCP_000650	XLOC_024326	--	TUCP	18452856	18461087	+	ENSRNOT00000007187	ENSRNOG00000005365	Kcnip1	EF-Hand 1, calcium-binding site||EF-hand domain||Recoverin family||EF-hand domain pair	18558936	18942540	-	97848	downstream
10	TUCP_000650	XLOC_024326	--	TUCP	18452856	18461087	+	ENSRNOT00000059895	ENSRNOG00000005042	Ranbp17	Importin-beta, N-terminal domain||Armadillo-type fold	18140356	18443934	-	8921	upstream
10	TUCP_000650	XLOC_024326	--	TUCP	18452856	18461087	+	ENSRNOT00000080021	ENSRNOG00000005042	Ranbp17	Importin-beta, N-terminal domain||Armadillo-type fold	18139766	18443964	-	8891	upstream
10	TUCP_000650	XLOC_024326	--	TUCP	18452856	18461087	+	ENSRNOT00000083090	ENSRNOG00000005365	Kcnip1	EF-Hand 1, calcium-binding site||EF-hand domain||Recoverin family||EF-hand domain pair	18558129	18574909	-	97041	downstream
10	TUCP_000650	XLOC_024326	--	TUCP	18452856	18461087	+	ENSRNOT00000079031	ENSRNOG00000005365	Kcnip1	EF-Hand 1, calcium-binding site||EF-hand domain||Recoverin family||EF-hand domain pair	18558128	18574710	-	97040	downstream
10	TUCP_000650	XLOC_024326	--	TUCP	18452856	18461087	+	ENSRNOT00000040737	ENSRNOG00000005365	Kcnip1	EF-Hand 1, calcium-binding site||EF-hand domain||Recoverin family||EF-hand domain pair	18558128	18579632	-	97040	downstream
15	TUCP_001588	XLOC_061713	--	TUCP	33640771	33673206	+	ENSRNOT00000024186	ENSRNOG00000016983	Myh7	Myosin tail||Myosin-like IQ motif-containing domain||Myosin, N-terminal, SH3-like||P-loop containing nucleoside triphosphate hydrolase||Myosin head, motor domain||IQ motif, EF-hand binding site	33634422	33656089	-	(15319)	antisense
15	TUCP_001588	XLOC_061713	--	TUCP	33640771	33673206	+	ENSRNOT00000034073	ENSRNOG00000018105	Thtpa	Thiamine triphosphatase||CYTH-like domain||CYTH domain	33755478	33759115	+	82271	upstream
15	TUCP_001588	XLOC_061713	--	TUCP	33640771	33673206	+	ENSRNOT00000065210	ENSRNOG00000048644	AC115371.1	-	33606124	33611579	+	29191	downstream
15	TUCP_001588	XLOC_061713	--	TUCP	33640771	33673206	+	ENSRNOT00000033722	ENSRNOG00000025589	Jph4	MORN motif||Junctophilin	33768595	33775109	-	95388	downstream
15	TUCP_001588	XLOC_061713	--	TUCP	33640771	33673206	+	ENSRNOT00000020409	ENSRNOG00000015732	Bcl2l2	Apoptosis regulator, Bcl-2 protein, BH4||Apoptosis regulator, Bcl-2, BH2 motif, conserved site||Apoptosis regulator, Bcl-W||Apoptosis regulator, Bcl-2, BH4 motif, conserved site||Apoptosis regulator, Bcl-2, BH1 motif, conserved site||Blc2 family||Bcl2-like	33544312	33549164	+	91606	downstream
15	TUCP_001588	XLOC_061713	--	TUCP	33640771	33673206	+	ENSRNOT00000087430	ENSRNOG00000018105	Thtpa	Thiamine triphosphatase||CYTH-like domain||CYTH domain	33755641	33758794	+	82434	upstream
15	TUCP_001588	XLOC_061713	--	TUCP	33640771	33673206	+	ENSRNOT00000034102	ENSRNOG00000025634	Zfhx2	Zinc finger, C2H2-like||Zinc finger, U1-type||Zinc finger, C2H2||Homeodomain-like||Zinc finger homeobox protein 2||Zinc finger C2H2-type/integrase DNA-binding domain||Homeobox domain||Homeobox, conserved site	33720701	33752665	-	47494	downstream
15	TUCP_001588	XLOC_061713	--	TUCP	33640771	33673206	+	ENSRNOT00000083941	ENSRNOG00000025634	Zfhx2	Zinc finger, C2H2-like||Zinc finger, U1-type||Zinc finger, C2H2||Homeodomain-like||Zinc finger homeobox protein 2||Zinc finger C2H2-type/integrase DNA-binding domain||Homeobox domain||Homeobox, conserved site	33721320	33725188	-	48113	downstream
15	TUCP_001588	XLOC_061713	--	TUCP	33640771	33673206	+	ENSRNOT00000023302	ENSRNOG00000025757	Myh6	Myosin tail||Myosin, N-terminal, SH3-like||Myosin-like IQ motif-containing domain||Myosin head, motor domain||P-loop containing nucleoside triphosphate hydrolase||IQ motif, EF-hand binding site	33605654	33629699	-	11071	upstream
15	TUCP_001588	XLOC_061713	--	TUCP	33640771	33673206	+	ENSRNOT00000068212	ENSRNOG00000046229	AC130940.1	-	33632416	33637928	+	2842	downstream
15	TUCP_001588	XLOC_061713	--	TUCP	33640771	33673206	+	ENSRNOT00000022563	ENSRNOG00000016804	Il25	Interleukin-17 family||Cystine-knot cytokine	33596301	33599685	+	41085	downstream
15	TUCP_001588	XLOC_061713	--	TUCP	33640771	33673206	+	ENSRNOT00000021851	ENSRNOG00000016414	Slc22a17	Major facilitator, sugar transporter-like||Sugar transporter, conserved site||Major facilitator superfamily domain	33569843	33576331	-	64439	upstream
15	TUCP_001588	XLOC_061713	--	TUCP	33640771	33673206	+	ENSRNOT00000022514	ENSRNOG00000042029	Efs	SH3 domain||CAS family, DUF3513	33578381	33589522	-	51248	upstream
15	TUCP_001588	XLOC_061713	--	TUCP	33640771	33673206	+	ENSRNOT00000033977	ENSRNOG00000025619	Ap1g2	Armadillo-type fold||Clathrin adaptor, alpha/beta/gamma-adaptin, appendage, Ig-like subdomain||Clathrin/coatomer adaptor, adaptin-like, N-terminal||Coatomer/clathrin adaptor appendage, Ig-like subdomain||Adaptor protein complex AP-1, gamma subunit||Clathrin adaptor, gamma-adaptin, appendage||Armadillo-like helical	33759001	33766438	-	85794	downstream
15	TUCP_001588	XLOC_061713	--	TUCP	33640771	33673206	+	ENSRNOT00000075965	ENSRNOG00000016828	Cmtm5	-||Marvel domain	33600337	33602745	+	38025	downstream
15	TUCP_001588	XLOC_061713	--	TUCP	33640771	33673206	+	ENSRNOT00000021096	ENSRNOG00000042195	Pabpn1	Nucleotide-binding alpha-beta plait domain||RNA recognition motif domain	33555640	33560242	+	80528	downstream
15	TUCP_001588	XLOC_061713	--	TUCP	33640771	33673206	+	ENSRNOT00000024337	ENSRNOG00000018069	Ngdn	Sas10/Utp3/C1D	33677597	33684840	+	4390	upstream
15	TUCP_001588	XLOC_061713	--	TUCP	33640771	33673206	+	ENSRNOT00000022664	ENSRNOG00000016828	Cmtm5	-||Marvel domain	33600102	33602834	+	37936	downstream
15	TUCP_001589	XLOC_061713	--	TUCP	33640771	33673206	+	ENSRNOT00000024186	ENSRNOG00000016983	Myh7	Myosin tail||Myosin-like IQ motif-containing domain||Myosin, N-terminal, SH3-like||P-loop containing nucleoside triphosphate hydrolase||Myosin head, motor domain||IQ motif, EF-hand binding site	33634422	33656089	-	(15319)	antisense
15	TUCP_001589	XLOC_061713	--	TUCP	33640771	33673206	+	ENSRNOT00000034073	ENSRNOG00000018105	Thtpa	Thiamine triphosphatase||CYTH-like domain||CYTH domain	33755478	33759115	+	82271	upstream
15	TUCP_001589	XLOC_061713	--	TUCP	33640771	33673206	+	ENSRNOT00000065210	ENSRNOG00000048644	AC115371.1	-	33606124	33611579	+	29191	downstream
15	TUCP_001589	XLOC_061713	--	TUCP	33640771	33673206	+	ENSRNOT00000033722	ENSRNOG00000025589	Jph4	MORN motif||Junctophilin	33768595	33775109	-	95388	downstream
15	TUCP_001589	XLOC_061713	--	TUCP	33640771	33673206	+	ENSRNOT00000020409	ENSRNOG00000015732	Bcl2l2	Apoptosis regulator, Bcl-2 protein, BH4||Apoptosis regulator, Bcl-2, BH2 motif, conserved site||Apoptosis regulator, Bcl-W||Apoptosis regulator, Bcl-2, BH4 motif, conserved site||Apoptosis regulator, Bcl-2, BH1 motif, conserved site||Blc2 family||Bcl2-like	33544312	33549164	+	91606	downstream
15	TUCP_001589	XLOC_061713	--	TUCP	33640771	33673206	+	ENSRNOT00000087430	ENSRNOG00000018105	Thtpa	Thiamine triphosphatase||CYTH-like domain||CYTH domain	33755641	33758794	+	82434	upstream
15	TUCP_001589	XLOC_061713	--	TUCP	33640771	33673206	+	ENSRNOT00000034102	ENSRNOG00000025634	Zfhx2	Zinc finger, C2H2-like||Zinc finger, U1-type||Zinc finger, C2H2||Homeodomain-like||Zinc finger homeobox protein 2||Zinc finger C2H2-type/integrase DNA-binding domain||Homeobox domain||Homeobox, conserved site	33720701	33752665	-	47494	downstream
15	TUCP_001589	XLOC_061713	--	TUCP	33640771	33673206	+	ENSRNOT00000083941	ENSRNOG00000025634	Zfhx2	Zinc finger, C2H2-like||Zinc finger, U1-type||Zinc finger, C2H2||Homeodomain-like||Zinc finger homeobox protein 2||Zinc finger C2H2-type/integrase DNA-binding domain||Homeobox domain||Homeobox, conserved site	33721320	33725188	-	48113	downstream
15	TUCP_001589	XLOC_061713	--	TUCP	33640771	33673206	+	ENSRNOT00000023302	ENSRNOG00000025757	Myh6	Myosin tail||Myosin, N-terminal, SH3-like||Myosin-like IQ motif-containing domain||Myosin head, motor domain||P-loop containing nucleoside triphosphate hydrolase||IQ motif, EF-hand binding site	33605654	33629699	-	11071	upstream
15	TUCP_001589	XLOC_061713	--	TUCP	33640771	33673206	+	ENSRNOT00000068212	ENSRNOG00000046229	AC130940.1	-	33632416	33637928	+	2842	downstream
15	TUCP_001589	XLOC_061713	--	TUCP	33640771	33673206	+	ENSRNOT00000022563	ENSRNOG00000016804	Il25	Interleukin-17 family||Cystine-knot cytokine	33596301	33599685	+	41085	downstream
15	TUCP_001589	XLOC_061713	--	TUCP	33640771	33673206	+	ENSRNOT00000021851	ENSRNOG00000016414	Slc22a17	Major facilitator, sugar transporter-like||Sugar transporter, conserved site||Major facilitator superfamily domain	33569843	33576331	-	64439	upstream
15	TUCP_001589	XLOC_061713	--	TUCP	33640771	33673206	+	ENSRNOT00000022514	ENSRNOG00000042029	Efs	SH3 domain||CAS family, DUF3513	33578381	33589522	-	51248	upstream
15	TUCP_001589	XLOC_061713	--	TUCP	33640771	33673206	+	ENSRNOT00000033977	ENSRNOG00000025619	Ap1g2	Armadillo-type fold||Clathrin adaptor, alpha/beta/gamma-adaptin, appendage, Ig-like subdomain||Clathrin/coatomer adaptor, adaptin-like, N-terminal||Coatomer/clathrin adaptor appendage, Ig-like subdomain||Adaptor protein complex AP-1, gamma subunit||Clathrin adaptor, gamma-adaptin, appendage||Armadillo-like helical	33759001	33766438	-	85794	downstream
15	TUCP_001589	XLOC_061713	--	TUCP	33640771	33673206	+	ENSRNOT00000075965	ENSRNOG00000016828	Cmtm5	-||Marvel domain	33600337	33602745	+	38025	downstream
15	TUCP_001589	XLOC_061713	--	TUCP	33640771	33673206	+	ENSRNOT00000021096	ENSRNOG00000042195	Pabpn1	Nucleotide-binding alpha-beta plait domain||RNA recognition motif domain	33555640	33560242	+	80528	downstream
15	TUCP_001589	XLOC_061713	--	TUCP	33640771	33673206	+	ENSRNOT00000024337	ENSRNOG00000018069	Ngdn	Sas10/Utp3/C1D	33677597	33684840	+	4390	upstream
15	TUCP_001589	XLOC_061713	--	TUCP	33640771	33673206	+	ENSRNOT00000022664	ENSRNOG00000016828	Cmtm5	-||Marvel domain	33600102	33602834	+	37936	downstream
15	TUCP_001582	XLOC_061571	--	TUCP	30534804	30535393	+	ENSRNOT00000060357	ENSRNOG00000042119	RGD1564212	Immunoglobulin V-set domain||Immunoglobulin subtype||Immunoglobulin-like domain||Immunoglobulin-like fold	30462669	30463240	+	71563	downstream
15	TUCP_001582	XLOC_061571	--	TUCP	30534804	30535393	+	ENSRNOT00000087199	ENSRNOG00000054569	AABR07017745.3	Immunoglobulin-like fold||Immunoglobulin V-set domain||Immunoglobulin-like domain	30550202	30550643	+	14808	upstream
15	TUCP_001582	XLOC_061571	--	TUCP	30534804	30535393	+	ENSRNOT00000071740	ENSRNOG00000048707	AABR07017745.1	Immunoglobulin-like fold||Immunoglobulin subtype||Immunoglobulin V-set domain||Immunoglobulin-like domain	30570483	30571058	+	35089	upstream
15	TUCP_001582	XLOC_061571	--	TUCP	30534804	30535393	+	ENSRNOT00000090632	ENSRNOG00000053763	AABR07017748.2	Immunoglobulin V-set domain||Immunoglobulin subtype||Immunoglobulin-like domain||Immunoglobulin-like fold	30621374	30622138	+	85980	upstream
15	TUCP_001582	XLOC_061571	--	TUCP	30534804	30535393	+	ENSRNOT00000085402	ENSRNOG00000059001	AABR07017737.1	Immunoglobulin-like domain||Immunoglobulin subtype||Immunoglobulin V-set domain||Immunoglobulin-like fold	30440677	30441674	+	93129	downstream
15	TUCP_001582	XLOC_061571	--	TUCP	30534804	30535393	+	ENSRNOT00000086842	ENSRNOG00000051843	AABR07017745.2	Immunoglobulin-like domain||Immunoglobulin V-set domain||Immunoglobulin-like fold	30525754	30526221	+	8582	downstream
15	TUCP_001582	XLOC_061571	--	TUCP	30534804	30535393	+	ENSRNOT00000072977	ENSRNOG00000046957	AABR07017748.1	Immunoglobulin-like fold||Immunoglobulin V-set domain||Immunoglobulin-like domain	30612409	30612842	+	77015	upstream
15	TUCP_001582	XLOC_061571	--	TUCP	30534804	30535393	+	ENSRNOT00000072978	ENSRNOG00000061290	AABR07017745.4	Immunoglobulin-like fold||Immunoglobulin-like domain||Immunoglobulin V-set domain	30557388	30606385	+	21994	upstream
1	TUCP_000127	XLOC_003417	--	TUCP	82098408	82107660	+	ENSRNOT00000091357	ENSRNOG00000056118	Cic	High mobility group box domain	82151669	82163005	+	44008	upstream
1	TUCP_000127	XLOC_003417	--	TUCP	82098408	82107660	+	ENSRNOT00000027783	ENSRNOG00000020489	Tmem145	Intimal thickness related receptor, IRP	82174451	82184068	+	66790	upstream
1	TUCP_000127	XLOC_003417	--	TUCP	82098408	82107660	+	ENSRNOT00000072616	ENSRNOG00000046112	Dedd2	Death effector domain||Death-like domain	82072544	82088275	-	10132	upstream
1	TUCP_000127	XLOC_003417	--	TUCP	82098408	82107660	+	ENSRNOT00000088955	ENSRNOG00000043154	Prr19	Proline-rich protein 19	82169620	82172635	+	61959	upstream
1	TUCP_000127	XLOC_003417	--	TUCP	82098408	82107660	+	ENSRNOT00000027677	ENSRNOG00000020417	Gsk3a	Protein kinase-like domain||Protein kinase domain||Serine/threonine-protein kinase, active site||Protein kinase, ATP binding site	82097848	82108083	-	(9253)	antisense
1	TUCP_000127	XLOC_003417	--	TUCP	82098408	82107660	+	ENSRNOT00000027774	ENSRNOG00000020481	Pafah1b3	SGNH hydrolase-type esterase domain	82163595	82166363	-	55934	downstream
1	TUCP_000127	XLOC_003417	--	TUCP	82098408	82107660	+	ENSRNOT00000068251	ENSRNOG00000043154	Prr19	Proline-rich protein 19	82169620	82172636	+	61959	upstream
1	TUCP_000127	XLOC_003417	--	TUCP	82098408	82107660	+	ENSRNOT00000027684	ENSRNOG00000020426	Erf	ETS domain-containing transcription factor ERF||Winged helix-turn-helix DNA-binding domain||Ets domain	82112449	82120902	-	4788	downstream
1	TUCP_000127	XLOC_003417	--	TUCP	82098408	82107660	+	ENSRNOT00000087572	ENSRNOG00000055650	Pou2f2	POU domain||POU-specific domain||Octamer-binding transcription factor||Homeodomain-like||Lambda repressor-like, DNA-binding domain||Homeobox domain||Homeobox, conserved site	81964104	82004538	-	93869	upstream
1	TUCP_000127	XLOC_003417	--	TUCP	82098408	82107660	+	ENSRNOT00000077313	ENSRNOG00000052687	Megf8	EGF-type aspartate/asparagine hydroxylation site||Kelch-type beta propeller||EGF-like calcium-binding domain||EGF-like domain||EGF domain||EGF-like, conserved site||EGF-like calcium-binding, conserved site||Plexin repeat||CUB domain||Plexin-like fold||Laminin EGF domain	82185034	82234045	+	77373	upstream
1	TUCP_000127	XLOC_003417	--	TUCP	82098408	82107660	+	ENSRNOT00000071251	ENSRNOG00000047526	Zfp526	Zinc finger, C2H2||Zinc finger, C2H2-like||Zinc finger C2H2-type/integrase DNA-binding domain	82089922	82097526	+	881	downstream
1	TUCP_000127	XLOC_003417	--	TUCP	82098408	82107660	+	ENSRNOT00000084569	ENSRNOG00000055650	Pou2f2	POU domain||POU-specific domain||Octamer-binding transcription factor||Homeodomain-like||Lambda repressor-like, DNA-binding domain||Homeobox domain||Homeobox, conserved site	81967274	82003691	-	94716	upstream
1	TUCP_000127	XLOC_003417	--	TUCP	82098408	82107660	+	ENSRNOT00000084530	ENSRNOG00000020417	Gsk3a	Protein kinase-like domain||Protein kinase domain||Serine/threonine-protein kinase, active site||Protein kinase, ATP binding site	82097247	82108203	-	(9253)	antisense
15	TUCP_001580	XLOC_061424	--	TUCP	27834529	27844634	+	ENSRNOT00000013225	ENSRNOG00000009948	Tmem55b	Phosphatidylinositol 4,5-bisphosphate 4-phosphatase	27852154	27855999	-	7519	downstream
15	TUCP_001580	XLOC_061424	--	TUCP	27834529	27844634	+	ENSRNOT00000012790	ENSRNOG00000009333	Osgep	Kae1/TsaD family||Peptidase M22, conserved site||Gcp-like domain	27842422	27849974	-	(2213)	antisense
15	TUCP_001580	XLOC_061424	--	TUCP	27834529	27844634	+	ENSRNOT00000011840	ENSRNOG00000008892	Parp2	Poly(ADP-ribose) polymerase, catalytic domain||Poly(ADP-ribose) polymerase, regulatory domain||WGR domain	27739251	27749648	+	84880	downstream
15	TUCP_001580	XLOC_061424	--	TUCP	27834529	27844634	+	ENSRNOT00000032992	ENSRNOG00000025868	Klhl33	SKP1/BTB/POZ domain||Kelch-like protein 33||Kelch repeat type 1||BTB-kelch protein||Kelch-type beta propeller||BTB/Kelch-associated	27813393	27815261	-	19267	upstream
15	TUCP_001580	XLOC_061424	--	TUCP	27834529	27844634	+	ENSRNOT00000079506	ENSRNOG00000051706	Tep1	Quinoprotein alcohol dehydrogenase-like superfamily||WD40-repeat-containing domain||NACHT nucleoside triphosphatase||WD40 repeat, conserved site||TROVE domain||WD40/YVTN repeat-like-containing domain||P-loop containing nucleoside triphosphate hydrolase||TEP1, N-terminal||Domain of unknown function DUF4062||WD40 repeat	27751188	27798839	-	35689	upstream
15	TUCP_001580	XLOC_061424	--	TUCP	27834529	27844634	+	ENSRNOT00000013582	ENSRNOG00000009982	Pnp	Purine nucleoside phosphorylase I, inosine/guanosine-specific||Purine phosphorylase, family 2, conserved site||Nucleoside phosphorylase domain||Purine nucleoside phosphorylase||PNP/MTAP phosphorylase	27875911	27883350	+	31276	upstream
15	TUCP_001580	XLOC_061424	--	TUCP	27834529	27844634	+	ENSRNOT00000013619	ENSRNOG00000010261	Rnase10	Ribonuclease A-domain||Pancreatic ribonuclease||Inactive ribonuclease-like protein 10	27933211	27933849	+	88576	upstream
15	TUCP_001580	XLOC_061424	--	TUCP	27834529	27844634	+	ENSRNOT00000088981	ENSRNOG00000051706	Tep1	Quinoprotein alcohol dehydrogenase-like superfamily||WD40-repeat-containing domain||NACHT nucleoside triphosphatase||WD40 repeat, conserved site||TROVE domain||WD40/YVTN repeat-like-containing domain||P-loop containing nucleoside triphosphate hydrolase||TEP1, N-terminal||Domain of unknown function DUF4062||WD40 repeat	27751180	27798408	-	36120	upstream
15	TUCP_001580	XLOC_061424	--	TUCP	27834529	27844634	+	ENSRNOT00000067400	ENSRNOG00000042516	A930018M24Rik	Kelch-like protein 33	27818627	27819376	-	15152	upstream
15	TUCP_001580	XLOC_061424	--	TUCP	27834529	27844634	+	ENSRNOT00000013176	ENSRNOG00000009663	Apex1	Endonuclease/exonuclease/phosphatase||AP endonuclease 1, binding site||AP endonuclease 1||AP endonuclease 1, conserved site	27849979	27852079	+	5344	upstream
15	TUCP_001580	XLOC_061424	--	TUCP	27834529	27844634	+	ENSRNOT00000087958	ENSRNOG00000009663	Apex1	Endonuclease/exonuclease/phosphatase||AP endonuclease 1, binding site||AP endonuclease 1||AP endonuclease 1, conserved site	27850151	27852082	+	5516	upstream
15	TUCP_001581	XLOC_061567	--	TUCP	30454236	30454547	+	ENSRNOT00000060357	ENSRNOG00000042119	RGD1564212	Immunoglobulin V-set domain||Immunoglobulin subtype||Immunoglobulin-like domain||Immunoglobulin-like fold	30462669	30463240	+	8121	upstream
15	TUCP_001581	XLOC_061567	--	TUCP	30454236	30454547	+	ENSRNOT00000087199	ENSRNOG00000054569	AABR07017745.3	Immunoglobulin-like fold||Immunoglobulin V-set domain||Immunoglobulin-like domain	30550202	30550643	+	95654	upstream
15	TUCP_001581	XLOC_061567	--	TUCP	30454236	30454547	+	ENSRNOT00000071797	ENSRNOG00000049065	AABR07017735.1	Immunoglobulin-like fold||Immunoglobulin-like domain||Immunoglobulin V-set domain	30429974	30430480	+	23755	downstream
15	TUCP_001581	XLOC_061567	--	TUCP	30454236	30454547	+	ENSRNOT00000085402	ENSRNOG00000059001	AABR07017737.1	Immunoglobulin-like domain||Immunoglobulin subtype||Immunoglobulin V-set domain||Immunoglobulin-like fold	30440677	30441674	+	12561	downstream
15	TUCP_001581	XLOC_061567	--	TUCP	30454236	30454547	+	ENSRNOT00000086842	ENSRNOG00000051843	AABR07017745.2	Immunoglobulin-like domain||Immunoglobulin V-set domain||Immunoglobulin-like fold	30525754	30526221	+	71206	upstream
15	TUCP_001581	XLOC_061567	--	TUCP	30454236	30454547	+	ENSRNOT00000071781	ENSRNOG00000049583	AABR07017733.1	Immunoglobulin-like domain||Immunoglobulin V-set domain||Immunoglobulin-like fold	30413488	30415108	+	39127	downstream
15	TUCP_001586	XLOC_061713	--	TUCP	33640744	33667169	+	ENSRNOT00000024186	ENSRNOG00000016983	Myh7	Myosin tail||Myosin-like IQ motif-containing domain||Myosin, N-terminal, SH3-like||P-loop containing nucleoside triphosphate hydrolase||Myosin head, motor domain||IQ motif, EF-hand binding site	33634422	33656089	-	(15346)	antisense
15	TUCP_001586	XLOC_061713	--	TUCP	33640744	33667169	+	ENSRNOT00000034073	ENSRNOG00000018105	Thtpa	Thiamine triphosphatase||CYTH-like domain||CYTH domain	33755478	33759115	+	88308	upstream
15	TUCP_001586	XLOC_061713	--	TUCP	33640744	33667169	+	ENSRNOT00000065210	ENSRNOG00000048644	AC115371.1	-	33606124	33611579	+	29164	downstream
15	TUCP_001586	XLOC_061713	--	TUCP	33640744	33667169	+	ENSRNOT00000020409	ENSRNOG00000015732	Bcl2l2	Apoptosis regulator, Bcl-2 protein, BH4||Apoptosis regulator, Bcl-2, BH2 motif, conserved site||Apoptosis regulator, Bcl-W||Apoptosis regulator, Bcl-2, BH4 motif, conserved site||Apoptosis regulator, Bcl-2, BH1 motif, conserved site||Blc2 family||Bcl2-like	33544312	33549164	+	91579	downstream
15	TUCP_001586	XLOC_061713	--	TUCP	33640744	33667169	+	ENSRNOT00000087430	ENSRNOG00000018105	Thtpa	Thiamine triphosphatase||CYTH-like domain||CYTH domain	33755641	33758794	+	88471	upstream
15	TUCP_001586	XLOC_061713	--	TUCP	33640744	33667169	+	ENSRNOT00000034102	ENSRNOG00000025634	Zfhx2	Zinc finger, C2H2-like||Zinc finger, U1-type||Zinc finger, C2H2||Homeodomain-like||Zinc finger homeobox protein 2||Zinc finger C2H2-type/integrase DNA-binding domain||Homeobox domain||Homeobox, conserved site	33720701	33752665	-	53531	downstream
15	TUCP_001586	XLOC_061713	--	TUCP	33640744	33667169	+	ENSRNOT00000083941	ENSRNOG00000025634	Zfhx2	Zinc finger, C2H2-like||Zinc finger, U1-type||Zinc finger, C2H2||Homeodomain-like||Zinc finger homeobox protein 2||Zinc finger C2H2-type/integrase DNA-binding domain||Homeobox domain||Homeobox, conserved site	33721320	33725188	-	54150	downstream
15	TUCP_001586	XLOC_061713	--	TUCP	33640744	33667169	+	ENSRNOT00000023302	ENSRNOG00000025757	Myh6	Myosin tail||Myosin, N-terminal, SH3-like||Myosin-like IQ motif-containing domain||Myosin head, motor domain||P-loop containing nucleoside triphosphate hydrolase||IQ motif, EF-hand binding site	33605654	33629699	-	11044	upstream
15	TUCP_001586	XLOC_061713	--	TUCP	33640744	33667169	+	ENSRNOT00000068212	ENSRNOG00000046229	AC130940.1	-	33632416	33637928	+	2815	downstream
15	TUCP_001586	XLOC_061713	--	TUCP	33640744	33667169	+	ENSRNOT00000022563	ENSRNOG00000016804	Il25	Interleukin-17 family||Cystine-knot cytokine	33596301	33599685	+	41058	downstream
15	TUCP_001586	XLOC_061713	--	TUCP	33640744	33667169	+	ENSRNOT00000021851	ENSRNOG00000016414	Slc22a17	Major facilitator, sugar transporter-like||Sugar transporter, conserved site||Major facilitator superfamily domain	33569843	33576331	-	64412	upstream
15	TUCP_001586	XLOC_061713	--	TUCP	33640744	33667169	+	ENSRNOT00000022514	ENSRNOG00000042029	Efs	SH3 domain||CAS family, DUF3513	33578381	33589522	-	51221	upstream
15	TUCP_001586	XLOC_061713	--	TUCP	33640744	33667169	+	ENSRNOT00000033977	ENSRNOG00000025619	Ap1g2	Armadillo-type fold||Clathrin adaptor, alpha/beta/gamma-adaptin, appendage, Ig-like subdomain||Clathrin/coatomer adaptor, adaptin-like, N-terminal||Coatomer/clathrin adaptor appendage, Ig-like subdomain||Adaptor protein complex AP-1, gamma subunit||Clathrin adaptor, gamma-adaptin, appendage||Armadillo-like helical	33759001	33766438	-	91831	downstream
15	TUCP_001586	XLOC_061713	--	TUCP	33640744	33667169	+	ENSRNOT00000075965	ENSRNOG00000016828	Cmtm5	-||Marvel domain	33600337	33602745	+	37998	downstream
15	TUCP_001586	XLOC_061713	--	TUCP	33640744	33667169	+	ENSRNOT00000021096	ENSRNOG00000042195	Pabpn1	Nucleotide-binding alpha-beta plait domain||RNA recognition motif domain	33555640	33560242	+	80501	downstream
15	TUCP_001586	XLOC_061713	--	TUCP	33640744	33667169	+	ENSRNOT00000024337	ENSRNOG00000018069	Ngdn	Sas10/Utp3/C1D	33677597	33684840	+	10427	upstream
15	TUCP_001586	XLOC_061713	--	TUCP	33640744	33667169	+	ENSRNOT00000022664	ENSRNOG00000016828	Cmtm5	-||Marvel domain	33600102	33602834	+	37909	downstream
15	TUCP_001587	XLOC_061713	--	TUCP	33640764	33667169	+	ENSRNOT00000024186	ENSRNOG00000016983	Myh7	Myosin tail||Myosin-like IQ motif-containing domain||Myosin, N-terminal, SH3-like||P-loop containing nucleoside triphosphate hydrolase||Myosin head, motor domain||IQ motif, EF-hand binding site	33634422	33656089	-	(15326)	antisense
15	TUCP_001587	XLOC_061713	--	TUCP	33640764	33667169	+	ENSRNOT00000034073	ENSRNOG00000018105	Thtpa	Thiamine triphosphatase||CYTH-like domain||CYTH domain	33755478	33759115	+	88308	upstream
15	TUCP_001587	XLOC_061713	--	TUCP	33640764	33667169	+	ENSRNOT00000065210	ENSRNOG00000048644	AC115371.1	-	33606124	33611579	+	29184	downstream
15	TUCP_001587	XLOC_061713	--	TUCP	33640764	33667169	+	ENSRNOT00000020409	ENSRNOG00000015732	Bcl2l2	Apoptosis regulator, Bcl-2 protein, BH4||Apoptosis regulator, Bcl-2, BH2 motif, conserved site||Apoptosis regulator, Bcl-W||Apoptosis regulator, Bcl-2, BH4 motif, conserved site||Apoptosis regulator, Bcl-2, BH1 motif, conserved site||Blc2 family||Bcl2-like	33544312	33549164	+	91599	downstream
15	TUCP_001587	XLOC_061713	--	TUCP	33640764	33667169	+	ENSRNOT00000087430	ENSRNOG00000018105	Thtpa	Thiamine triphosphatase||CYTH-like domain||CYTH domain	33755641	33758794	+	88471	upstream
15	TUCP_001587	XLOC_061713	--	TUCP	33640764	33667169	+	ENSRNOT00000034102	ENSRNOG00000025634	Zfhx2	Zinc finger, C2H2-like||Zinc finger, U1-type||Zinc finger, C2H2||Homeodomain-like||Zinc finger homeobox protein 2||Zinc finger C2H2-type/integrase DNA-binding domain||Homeobox domain||Homeobox, conserved site	33720701	33752665	-	53531	downstream
15	TUCP_001587	XLOC_061713	--	TUCP	33640764	33667169	+	ENSRNOT00000083941	ENSRNOG00000025634	Zfhx2	Zinc finger, C2H2-like||Zinc finger, U1-type||Zinc finger, C2H2||Homeodomain-like||Zinc finger homeobox protein 2||Zinc finger C2H2-type/integrase DNA-binding domain||Homeobox domain||Homeobox, conserved site	33721320	33725188	-	54150	downstream
15	TUCP_001587	XLOC_061713	--	TUCP	33640764	33667169	+	ENSRNOT00000023302	ENSRNOG00000025757	Myh6	Myosin tail||Myosin, N-terminal, SH3-like||Myosin-like IQ motif-containing domain||Myosin head, motor domain||P-loop containing nucleoside triphosphate hydrolase||IQ motif, EF-hand binding site	33605654	33629699	-	11064	upstream
15	TUCP_001587	XLOC_061713	--	TUCP	33640764	33667169	+	ENSRNOT00000068212	ENSRNOG00000046229	AC130940.1	-	33632416	33637928	+	2835	downstream
15	TUCP_001587	XLOC_061713	--	TUCP	33640764	33667169	+	ENSRNOT00000022563	ENSRNOG00000016804	Il25	Interleukin-17 family||Cystine-knot cytokine	33596301	33599685	+	41078	downstream
15	TUCP_001587	XLOC_061713	--	TUCP	33640764	33667169	+	ENSRNOT00000021851	ENSRNOG00000016414	Slc22a17	Major facilitator, sugar transporter-like||Sugar transporter, conserved site||Major facilitator superfamily domain	33569843	33576331	-	64432	upstream
15	TUCP_001587	XLOC_061713	--	TUCP	33640764	33667169	+	ENSRNOT00000022514	ENSRNOG00000042029	Efs	SH3 domain||CAS family, DUF3513	33578381	33589522	-	51241	upstream
15	TUCP_001587	XLOC_061713	--	TUCP	33640764	33667169	+	ENSRNOT00000033977	ENSRNOG00000025619	Ap1g2	Armadillo-type fold||Clathrin adaptor, alpha/beta/gamma-adaptin, appendage, Ig-like subdomain||Clathrin/coatomer adaptor, adaptin-like, N-terminal||Coatomer/clathrin adaptor appendage, Ig-like subdomain||Adaptor protein complex AP-1, gamma subunit||Clathrin adaptor, gamma-adaptin, appendage||Armadillo-like helical	33759001	33766438	-	91831	downstream
15	TUCP_001587	XLOC_061713	--	TUCP	33640764	33667169	+	ENSRNOT00000075965	ENSRNOG00000016828	Cmtm5	-||Marvel domain	33600337	33602745	+	38018	downstream
15	TUCP_001587	XLOC_061713	--	TUCP	33640764	33667169	+	ENSRNOT00000021096	ENSRNOG00000042195	Pabpn1	Nucleotide-binding alpha-beta plait domain||RNA recognition motif domain	33555640	33560242	+	80521	downstream
15	TUCP_001587	XLOC_061713	--	TUCP	33640764	33667169	+	ENSRNOT00000024337	ENSRNOG00000018069	Ngdn	Sas10/Utp3/C1D	33677597	33684840	+	10427	upstream
15	TUCP_001587	XLOC_061713	--	TUCP	33640764	33667169	+	ENSRNOT00000022664	ENSRNOG00000016828	Cmtm5	-||Marvel domain	33600102	33602834	+	37929	downstream
15	TUCP_001584	XLOC_061675	--	TUCP	33100201	33101236	+	ENSRNOT00000013246	ENSRNOG00000009713	Oxa1l	Membrane insertase YidC/Oxa1, C-terminal||Membrane insertase OXA1/ALB3/YidC	33004133	33012575	+	87625	downstream
15	TUCP_001584	XLOC_061675	--	TUCP	33100201	33101236	+	ENSRNOT00000060193	ENSRNOG00000039297	Mrpl52	-	33069382	33072777	+	27423	downstream
15	TUCP_001584	XLOC_061675	--	TUCP	33100201	33101236	+	ENSRNOT00000015468	ENSRNOG00000011592	Lrp10	Low-density lipoprotein (LDL) receptor class A, conserved site||Low-density lipoprotein (LDL) receptor class A repeat||CUB domain	33108671	33114829	+	7434	upstream
15	TUCP_001584	XLOC_061675	--	TUCP	33100201	33101236	+	ENSRNOT00000016302	ENSRNOG00000012046	Prmt5	Protein arginine N-methyltransferase||Protein arginine N-methyltransferase PRMT5||S-adenosyl-L-methionine-dependent methyltransferase	33156492	33165895	-	55255	downstream
15	TUCP_001584	XLOC_061675	--	TUCP	33100201	33101236	+	ENSRNOT00000075610	ENSRNOG00000010947	Mmp14	Peptidase M10, metallopeptidase||Peptidase M10A, matrix metallopeptidase, C-terminal||Peptidoglycan binding-like||Hemopexin, conserved site||Peptidase M10A, cysteine switch, zinc binding site||Matrix metalloproteinase-14||Hemopexin-like repeats||Peptidase M10A||Hemopexin-like domain||Peptidase, metallopeptidase||Metallopeptidase, catalytic domain||Peptidase M10A, stromelysin-type	33074441	33083655	+	16545	downstream
15	TUCP_001584	XLOC_061675	--	TUCP	33100201	33101236	+	ENSRNOT00000014391	ENSRNOG00000010296	Slc7a7	Amino acid/polyamine transporter I	33013504	33051129	-	49071	upstream
15	TUCP_001584	XLOC_061675	--	TUCP	33100201	33101236	+	ENSRNOT00000016020	ENSRNOG00000011646	Rem2	Small GTPase superfamily||Sigma-54 interaction domain, ATP-binding site 1||Small GTPase superfamily, Ras type||P-loop containing nucleoside triphosphate hydrolase	33121273	33125752	+	20036	upstream
15	TUCP_001584	XLOC_061675	--	TUCP	33100201	33101236	+	ENSRNOT00000016401	ENSRNOG00000039284	Haus4	HAUS augmin-like complex subunit 4||HAUS augmin-like complex subunit 4, metazoa	33182128	33193537	-	80891	downstream
15	TUCP_001585	XLOC_061713	--	TUCP	33640744	33667169	+	ENSRNOT00000024186	ENSRNOG00000016983	Myh7	Myosin tail||Myosin-like IQ motif-containing domain||Myosin, N-terminal, SH3-like||P-loop containing nucleoside triphosphate hydrolase||Myosin head, motor domain||IQ motif, EF-hand binding site	33634422	33656089	-	(15346)	antisense
15	TUCP_001585	XLOC_061713	--	TUCP	33640744	33667169	+	ENSRNOT00000034073	ENSRNOG00000018105	Thtpa	Thiamine triphosphatase||CYTH-like domain||CYTH domain	33755478	33759115	+	88308	upstream
15	TUCP_001585	XLOC_061713	--	TUCP	33640744	33667169	+	ENSRNOT00000065210	ENSRNOG00000048644	AC115371.1	-	33606124	33611579	+	29164	downstream
15	TUCP_001585	XLOC_061713	--	TUCP	33640744	33667169	+	ENSRNOT00000020409	ENSRNOG00000015732	Bcl2l2	Apoptosis regulator, Bcl-2 protein, BH4||Apoptosis regulator, Bcl-2, BH2 motif, conserved site||Apoptosis regulator, Bcl-W||Apoptosis regulator, Bcl-2, BH4 motif, conserved site||Apoptosis regulator, Bcl-2, BH1 motif, conserved site||Blc2 family||Bcl2-like	33544312	33549164	+	91579	downstream
15	TUCP_001585	XLOC_061713	--	TUCP	33640744	33667169	+	ENSRNOT00000087430	ENSRNOG00000018105	Thtpa	Thiamine triphosphatase||CYTH-like domain||CYTH domain	33755641	33758794	+	88471	upstream
15	TUCP_001585	XLOC_061713	--	TUCP	33640744	33667169	+	ENSRNOT00000034102	ENSRNOG00000025634	Zfhx2	Zinc finger, C2H2-like||Zinc finger, U1-type||Zinc finger, C2H2||Homeodomain-like||Zinc finger homeobox protein 2||Zinc finger C2H2-type/integrase DNA-binding domain||Homeobox domain||Homeobox, conserved site	33720701	33752665	-	53531	downstream
15	TUCP_001585	XLOC_061713	--	TUCP	33640744	33667169	+	ENSRNOT00000083941	ENSRNOG00000025634	Zfhx2	Zinc finger, C2H2-like||Zinc finger, U1-type||Zinc finger, C2H2||Homeodomain-like||Zinc finger homeobox protein 2||Zinc finger C2H2-type/integrase DNA-binding domain||Homeobox domain||Homeobox, conserved site	33721320	33725188	-	54150	downstream
15	TUCP_001585	XLOC_061713	--	TUCP	33640744	33667169	+	ENSRNOT00000023302	ENSRNOG00000025757	Myh6	Myosin tail||Myosin, N-terminal, SH3-like||Myosin-like IQ motif-containing domain||Myosin head, motor domain||P-loop containing nucleoside triphosphate hydrolase||IQ motif, EF-hand binding site	33605654	33629699	-	11044	upstream
15	TUCP_001585	XLOC_061713	--	TUCP	33640744	33667169	+	ENSRNOT00000068212	ENSRNOG00000046229	AC130940.1	-	33632416	33637928	+	2815	downstream
15	TUCP_001585	XLOC_061713	--	TUCP	33640744	33667169	+	ENSRNOT00000022563	ENSRNOG00000016804	Il25	Interleukin-17 family||Cystine-knot cytokine	33596301	33599685	+	41058	downstream
15	TUCP_001585	XLOC_061713	--	TUCP	33640744	33667169	+	ENSRNOT00000021851	ENSRNOG00000016414	Slc22a17	Major facilitator, sugar transporter-like||Sugar transporter, conserved site||Major facilitator superfamily domain	33569843	33576331	-	64412	upstream
15	TUCP_001585	XLOC_061713	--	TUCP	33640744	33667169	+	ENSRNOT00000022514	ENSRNOG00000042029	Efs	SH3 domain||CAS family, DUF3513	33578381	33589522	-	51221	upstream
15	TUCP_001585	XLOC_061713	--	TUCP	33640744	33667169	+	ENSRNOT00000033977	ENSRNOG00000025619	Ap1g2	Armadillo-type fold||Clathrin adaptor, alpha/beta/gamma-adaptin, appendage, Ig-like subdomain||Clathrin/coatomer adaptor, adaptin-like, N-terminal||Coatomer/clathrin adaptor appendage, Ig-like subdomain||Adaptor protein complex AP-1, gamma subunit||Clathrin adaptor, gamma-adaptin, appendage||Armadillo-like helical	33759001	33766438	-	91831	downstream
15	TUCP_001585	XLOC_061713	--	TUCP	33640744	33667169	+	ENSRNOT00000075965	ENSRNOG00000016828	Cmtm5	-||Marvel domain	33600337	33602745	+	37998	downstream
15	TUCP_001585	XLOC_061713	--	TUCP	33640744	33667169	+	ENSRNOT00000021096	ENSRNOG00000042195	Pabpn1	Nucleotide-binding alpha-beta plait domain||RNA recognition motif domain	33555640	33560242	+	80501	downstream
15	TUCP_001585	XLOC_061713	--	TUCP	33640744	33667169	+	ENSRNOT00000024337	ENSRNOG00000018069	Ngdn	Sas10/Utp3/C1D	33677597	33684840	+	10427	upstream
15	TUCP_001585	XLOC_061713	--	TUCP	33640744	33667169	+	ENSRNOT00000022664	ENSRNOG00000016828	Cmtm5	-||Marvel domain	33600102	33602834	+	37909	downstream
8	TUCP_004354	XLOC_192341	--	TUCP	52939968	52953721	-	ENSRNOT00000045356	ENSRNOG00000029980	Zbtb16	Zinc finger, C2H2||BTB/POZ domain||Zinc finger, C2H2-like||SKP1/BTB/POZ domain||Zinc finger C2H2-type/integrase DNA-binding domain	52985313	53146953	-	31591	downstream
8	TUCP_004354	XLOC_192341	--	TUCP	52939968	52953721	-	ENSRNOT00000007789	ENSRNOG00000005930	Nnmt	S-adenosyl-L-methionine-dependent methyltransferase||Methyltransferase NNMT/PNMT/TEMT, conserved site||Methyltransferase, NNMT/PNMT/TEMT	52925175	52937972	-	1995	upstream
2	TUCP_002562	XLOC_108825	--	TUCP	117580384	117589523	-	ENSRNOT00000015479	ENSRNOG00000011640	AABR07009931.1	MDS1-EVI1 complex locus protein MDS1	117666294	117666683	-	76770	downstream
13	TUCP_001270	XLOC_048239	--	TUCP	105013234	105025012	+	ENSRNOT00000003313	ENSRNOG00000002418	Tgfb2	Transforming growth factor-beta, C-terminal||Cystine-knot cytokine||Transforming growth factor beta, conserved site||Transforming growth factor, beta 2||Transforming growth factor-beta||Transforming growth factor-beta-related||Transforming growth factor-beta, N-terminal	105039853	105141030	-	14840	downstream
13	TUCP_001270	XLOC_048239	--	TUCP	105013234	105025012	+	ENSRNOT00000087023	ENSRNOG00000002418	Tgfb2	Transforming growth factor-beta, C-terminal||Cystine-knot cytokine||Transforming growth factor beta, conserved site||Transforming growth factor, beta 2||Transforming growth factor-beta||Transforming growth factor-beta-related||Transforming growth factor-beta, N-terminal	105042274	105140473	-	17261	downstream
10	TUCP_000657	XLOC_025027	--	TUCP	40742478	40764375	+	ENSRNOT00000058665	ENSRNOG00000012575	Fat2	EGF-like calcium-binding domain||EGF-like domain||Cadherin||EGF-like, conserved site||Concanavalin A-like lectin/glucanase domain||Laminin G domain||Cadherin conserved site||Cadherin-like	40584403	40657861	-	84616	upstream
10	TUCP_000657	XLOC_025027	--	TUCP	40742478	40764375	+	ENSRNOT00000017588	ENSRNOG00000013118	Atox1	Heavy-metal-associated, conserved site||Heavy metal-associated domain, HMA	40790845	40805941	-	26469	downstream
10	TUCP_000657	XLOC_025027	--	TUCP	40742478	40764375	+	ENSRNOT00000092189	ENSRNOG00000013588	Glra1	Glycine receptor alpha||Neurotransmitter-gated ion-channel||Gamma-aminobutyric acid A receptor/Glycine receptor alpha||Glycine receptor alpha1||Neurotransmitter-gated ion-channel ligand-binding domain||-||Neurotransmitter-gated ion-channel, conserved site||Neurotransmitter-gated ion-channel transmembrane domain	40856150	40953467	-	91774	downstream
10	TUCP_000657	XLOC_025027	--	TUCP	40742478	40764375	+	ENSRNOT00000063889	ENSRNOG00000013588	Glra1	Glycine receptor alpha||Neurotransmitter-gated ion-channel||Gamma-aminobutyric acid A receptor/Glycine receptor alpha||Glycine receptor alpha1||Neurotransmitter-gated ion-channel ligand-binding domain||-||Neurotransmitter-gated ion-channel, conserved site||Neurotransmitter-gated ion-channel transmembrane domain	40855559	40953651	-	91183	downstream
10	TUCP_000657	XLOC_025027	--	TUCP	40742478	40764375	+	ENSRNOT00000017486	ENSRNOG00000012840	Sparc	Kazal domain||Osteonectin-like, conserved site||EF-Hand 1, calcium-binding site||Follistatin-like, N-terminal||Follistatin/Osteonectin EGF domain||SPARC/Testican, calcium-binding domain||EF-hand domain pair	40742400	40764185	-	(21708)	antisense
10	TUCP_000657	XLOC_025027	--	TUCP	40742478	40764375	+	ENSRNOT00000018149	ENSRNOG00000013186	G3bp1	Nuclear transport factor 2||Nucleotide-binding alpha-beta plait domain||NTF2-like domain||RNA recognition motif domain||Nuclear transport factor 2, eukaryote	40812858	40846252	+	48482	upstream
13	TUCP_001272	XLOC_048239	--	TUCP	105013381	105016775	+	ENSRNOT00000003313	ENSRNOG00000002418	Tgfb2	Transforming growth factor-beta, C-terminal||Cystine-knot cytokine||Transforming growth factor beta, conserved site||Transforming growth factor, beta 2||Transforming growth factor-beta||Transforming growth factor-beta-related||Transforming growth factor-beta, N-terminal	105039853	105141030	-	23077	downstream
13	TUCP_001272	XLOC_048239	--	TUCP	105013381	105016775	+	ENSRNOT00000087023	ENSRNOG00000002418	Tgfb2	Transforming growth factor-beta, C-terminal||Cystine-knot cytokine||Transforming growth factor beta, conserved site||Transforming growth factor, beta 2||Transforming growth factor-beta||Transforming growth factor-beta-related||Transforming growth factor-beta, N-terminal	105042274	105140473	-	25498	downstream
13	TUCP_001273	XLOC_048239	--	TUCP	105013381	105028629	+	ENSRNOT00000003313	ENSRNOG00000002418	Tgfb2	Transforming growth factor-beta, C-terminal||Cystine-knot cytokine||Transforming growth factor beta, conserved site||Transforming growth factor, beta 2||Transforming growth factor-beta||Transforming growth factor-beta-related||Transforming growth factor-beta, N-terminal	105039853	105141030	-	11223	downstream
13	TUCP_001273	XLOC_048239	--	TUCP	105013381	105028629	+	ENSRNOT00000087023	ENSRNOG00000002418	Tgfb2	Transforming growth factor-beta, C-terminal||Cystine-knot cytokine||Transforming growth factor beta, conserved site||Transforming growth factor, beta 2||Transforming growth factor-beta||Transforming growth factor-beta-related||Transforming growth factor-beta, N-terminal	105042274	105140473	-	13644	downstream
10	TUCP_000656	XLOC_024811	--	TUCP	35799131	35806738	+	ENSRNOT00000059190	ENSRNOG00000003399	Hnrnph1	RNA recognition motif domain||Zinc finger, CHHC-type||Nucleotide-binding alpha-beta plait domain	35872619	35879910	+	65880	upstream
10	TUCP_000656	XLOC_024811	--	TUCP	35799131	35806738	+	ENSRNOT00000004323	ENSRNOG00000003235	Mgat4b	Glycosyl transferase family 54	35726544	35736338	+	62792	downstream
10	TUCP_000656	XLOC_024811	--	TUCP	35799131	35806738	+	ENSRNOT00000004740	ENSRNOG00000003536	Rufy1	RUN domain||Zinc finger, FYVE/PHD-type||FYVE zinc finger||Zinc finger, RING/FYVE/PHD-type||Zinc finger, FYVE-related	35882805	35927268	-	76066	downstream
10	TUCP_000656	XLOC_024811	--	TUCP	35799131	35806738	+	ENSRNOT00000004517	ENSRNOG00000003395	Cby3	Chibby family	35857797	35860987	+	51058	upstream
10	TUCP_000656	XLOC_024811	--	TUCP	35799131	35806738	+	ENSRNOT00000067188	ENSRNOG00000003399	Hnrnph1	RNA recognition motif domain||Zinc finger, CHHC-type||Nucleotide-binding alpha-beta plait domain	35870682	35879910	+	63943	upstream
10	TUCP_000656	XLOC_024811	--	TUCP	35799131	35806738	+	ENSRNOT00000049942	ENSRNOG00000003343	Canx	Calreticulin/calnexin, conserved site||Calreticulin/calnexin||Concanavalin A-like lectin/glucanase domain||Calreticulin/calnexin, P domain	35800942	35833861	-	(5797)	antisense
10	TUCP_000656	XLOC_024811	--	TUCP	35799131	35806738	+	ENSRNOT00000004111	ENSRNOG00000003068	Mrnip	Uncharacterised protein family UPF0544	35680658	35704776	+	94354	downstream
10	TUCP_000656	XLOC_024811	--	TUCP	35799131	35806738	+	ENSRNOT00000004361	ENSRNOG00000003268	Maml1	-	35765719	35800120	-	(990)	antisense
10	TUCP_000656	XLOC_024811	--	TUCP	35799131	35806738	+	ENSRNOT00000004308	ENSRNOG00000003147	Sqstm1	UBA-like||Ubiquitin-associated domain||PB1 domain||Zinc finger, ZZ-type	35712615	35716260	-	82870	upstream
10	TUCP_000656	XLOC_024811	--	TUCP	35799131	35806738	+	ENSRNOT00000004359	ENSRNOG00000003244	Ltc4s	5-lipoxygenase-activating protein||Membrane associated eicosanoid/glutathione metabolism-like domain||FLAP/GST2/LTC4S, conserved site||Membrane-associated, eicosanoid/glutathione metabolism (MAPEG) protein	35737664	35739625	-	59505	upstream
10	TUCP_000656	XLOC_024811	--	TUCP	35799131	35806738	+	ENSRNOT00000059255	ENSRNOG00000003147	Sqstm1	UBA-like||Ubiquitin-associated domain||PB1 domain||Zinc finger, ZZ-type	35704730	35716294	-	82836	upstream
10	TUCP_000656	XLOC_024811	--	TUCP	35799131	35806738	+	ENSRNOT00000078505	ENSRNOG00000003399	Hnrnph1	RNA recognition motif domain||Zinc finger, CHHC-type||Nucleotide-binding alpha-beta plait domain	35870232	35878775	+	63493	upstream
13	TUCP_001279	XLOC_048274	--	TUCP	106362090	106380034	+	ENSRNOT00000003489	ENSRNOG00000002593	Esrrg	Zinc finger, nuclear hormone receptor-type||Nuclear hormone receptor, ligand-binding domain||Nuclear hormone receptor||Oestrogen receptor/oestrogen-related receptor||Retinoic acid receptor||Zinc finger, NHR/GATA-type||Oestrogen-related receptor	106463368	106683436	+	83333	upstream
6	TUCP_003698	XLOC_161458	--	TUCP	12131354	12178510	+	ENSRNOT00000061675	ENSRNOG00000016528	Ppp1r21	Uncharacterised domain KLRAQ/TTKRSYEDQ, N-terminal||Uncharacterised domain KLRAQ/TTKRSYEDQ, C-terminal	12253788	12323421	+	75277	upstream
6	TUCP_003698	XLOC_161458	--	TUCP	12131354	12178510	+	ENSRNOT00000061693	ENSRNOG00000040110	Foxn2	Winged helix-turn-helix DNA-binding domain||Fork head domain conserved site 2||Fork head domain conserved site1||Fork head domain	12179227	12205446	+	716	upstream
6	TUCP_003699	XLOC_161467	--	TUCP	12352210	12361097	+	ENSRNOT00000022380	ENSRNOG00000016703	Gtf2a1l	Transcription factor IIA, alpha subunit, N-terminal||Transcription factor IIA, beta-barrel||Transcription factor IIA, alpha/beta subunit||Transcription factor IIA, helical	12415805	12468596	+	54707	upstream
6	TUCP_003699	XLOC_161467	--	TUCP	12352210	12361097	+	ENSRNOT00000061675	ENSRNOG00000016528	Ppp1r21	Uncharacterised domain KLRAQ/TTKRSYEDQ, N-terminal||Uncharacterised domain KLRAQ/TTKRSYEDQ, C-terminal	12253788	12323421	+	28788	downstream
6	TUCP_003699	XLOC_161467	--	TUCP	12352210	12361097	+	ENSRNOT00000022370	ENSRNOG00000016688	Ston1	Stonin homology||Mu homology domain||Stonin-1	12362813	12379783	+	1715	upstream
6	TUCP_003790	XLOC_165897	--	TUCP	107728549	107778269	+	ENSRNOT00000014158	ENSRNOG00000010653	Elmsan1	Zinc finger, C2H2||SANT/Myb domain||Homeodomain-like||SANT domain||ELM2 domain	107636856	107678156	-	50392	upstream
6	TUCP_003790	XLOC_165897	--	TUCP	107728549	107778269	+	ENSRNOT00000014018	ENSRNOG00000010553	Pnma1	Paraneoplastic antigen Ma||Paraneoplastic antigen Ma1	107631227	107633012	-	95536	upstream
6	TUCP_003790	XLOC_165897	--	TUCP	107728549	107778269	+	ENSRNOT00000088712	ENSRNOG00000010653	Elmsan1	Zinc finger, C2H2||SANT/Myb domain||Homeodomain-like||SANT domain||ELM2 domain	107633716	107658741	-	69807	upstream
6	TUCP_003694	XLOC_161318	--	TUCP	9640646	9694497	+	ENSRNOT00000020959	ENSRNOG00000015603	Prkce	AGC-kinase, C-terminal||Serine/threonine-protein kinase, active site||Protein kinase, ATP binding site||Protein kinase C, delta/epsilon/eta/theta types||Protein kinase, C-terminal||Protein kinase C-like, phorbol ester/diacylglycerol-binding domain||Diacylglycerol/phorbol-ester binding||Protein kinase domain||Protein kinase-like domain	9790422	9973396	+	95924	upstream
6	TUCP_003695	XLOC_161318	--	TUCP	9684836	9694497	+	ENSRNOT00000020959	ENSRNOG00000015603	Prkce	AGC-kinase, C-terminal||Serine/threonine-protein kinase, active site||Protein kinase, ATP binding site||Protein kinase C, delta/epsilon/eta/theta types||Protein kinase, C-terminal||Protein kinase C-like, phorbol ester/diacylglycerol-binding domain||Diacylglycerol/phorbol-ester binding||Protein kinase domain||Protein kinase-like domain	9790422	9973396	+	95924	upstream
6	TUCP_003696	XLOC_161323	--	TUCP	9736326	9758373	+	ENSRNOT00000020959	ENSRNOG00000015603	Prkce	AGC-kinase, C-terminal||Serine/threonine-protein kinase, active site||Protein kinase, ATP binding site||Protein kinase C, delta/epsilon/eta/theta types||Protein kinase, C-terminal||Protein kinase C-like, phorbol ester/diacylglycerol-binding domain||Diacylglycerol/phorbol-ester binding||Protein kinase domain||Protein kinase-like domain	9790422	9973396	+	32048	upstream
6	TUCP_003697	XLOC_161324	--	TUCP	9778316	9780664	+	ENSRNOT00000020959	ENSRNOG00000015603	Prkce	AGC-kinase, C-terminal||Serine/threonine-protein kinase, active site||Protein kinase, ATP binding site||Protein kinase C, delta/epsilon/eta/theta types||Protein kinase, C-terminal||Protein kinase C-like, phorbol ester/diacylglycerol-binding domain||Diacylglycerol/phorbol-ester binding||Protein kinase domain||Protein kinase-like domain	9790422	9973396	+	9757	upstream
6	TUCP_003690	XLOC_161314	--	TUCP	9539338	9573174	+	ENSRNOT00000089272	ENSRNOG00000060463	AABR07062799.2	C2 domain	9483594	9491667	+	47670	downstream
6	TUCP_003690	XLOC_161314	--	TUCP	9539338	9573174	+	ENSRNOT00000019894	ENSRNOG00000014720	Srbd1	Tex-like domain||Tex RuvX-like domain||RNA-binding domain, S1||S1 domain||Tex protein, YqgF-like domain||Ribonuclease H-like domain||Nucleic acid-binding, OB-fold||RuvA domain 2-like||Tex-like protein, HTH domain||Tex-like protein, N-terminal||YqgF/RNase H-like domain	9266891	9459188	-	80149	upstream
6	TUCP_003691	XLOC_161314	--	TUCP	9539338	9573174	+	ENSRNOT00000089272	ENSRNOG00000060463	AABR07062799.2	C2 domain	9483594	9491667	+	47670	downstream
6	TUCP_003691	XLOC_161314	--	TUCP	9539338	9573174	+	ENSRNOT00000019894	ENSRNOG00000014720	Srbd1	Tex-like domain||Tex RuvX-like domain||RNA-binding domain, S1||S1 domain||Tex protein, YqgF-like domain||Ribonuclease H-like domain||Nucleic acid-binding, OB-fold||RuvA domain 2-like||Tex-like protein, HTH domain||Tex-like protein, N-terminal||YqgF/RNase H-like domain	9266891	9459188	-	80149	upstream
6	TUCP_003693	XLOC_161318	--	TUCP	9640646	9694497	+	ENSRNOT00000020959	ENSRNOG00000015603	Prkce	AGC-kinase, C-terminal||Serine/threonine-protein kinase, active site||Protein kinase, ATP binding site||Protein kinase C, delta/epsilon/eta/theta types||Protein kinase, C-terminal||Protein kinase C-like, phorbol ester/diacylglycerol-binding domain||Diacylglycerol/phorbol-ester binding||Protein kinase domain||Protein kinase-like domain	9790422	9973396	+	95924	upstream
6	TUCP_003792	XLOC_165940	--	TUCP	107962050	107964173	+	ENSRNOT00000014738	ENSRNOG00000010985	Zfp410	Zinc finger, C2H2||Zinc finger C2H2-type/integrase DNA-binding domain||Zinc finger, C2H2-like	108032856	108058809	+	68682	upstream
6	TUCP_003792	XLOC_165940	--	TUCP	107962050	107964173	+	ENSRNOT00000059073	ENSRNOG00000038166	Ptgr2	GroES-like||Alcohol dehydrogenase, C-terminal||Alcohol dehydrogenase superfamily, zinc-type||NAD(P)-binding domain	108009251	108029859	+	45077	upstream
6	TUCP_003792	XLOC_165940	--	TUCP	107962050	107964173	+	ENSRNOT00000058095	ENSRNOG00000038166	Ptgr2	GroES-like||Alcohol dehydrogenase, C-terminal||Alcohol dehydrogenase superfamily, zinc-type||NAD(P)-binding domain	107999846	108031643	+	35672	upstream
6	TUCP_003792	XLOC_165940	--	TUCP	107962050	107964173	+	ENSRNOT00000014814	ENSRNOG00000011112	Fam161b	Uncharacterised protein family UPF0564	108061063	108076186	-	96889	downstream
8	TUCP_004271	XLOC_187897	--	TUCP	71689972	71695192	+	ENSRNOT00000031207	ENSRNOG00000022852	Snx22	Phox homologous domain	71725774	71728654	-	30581	downstream
8	TUCP_004271	XLOC_187897	--	TUCP	71689972	71695192	+	ENSRNOT00000090096	ENSRNOG00000016620	Csnk1g1	Casein kinase 1 gamma C-terminal||Serine/threonine-protein kinase, active site||Protein kinase, ATP binding site||Protein kinase domain||Protein kinase-like domain	71591360	71679666	+	10305	downstream
8	TUCP_004271	XLOC_187897	--	TUCP	71689972	71695192	+	ENSRNOT00000091751	ENSRNOG00000022852	Snx22	Phox homologous domain	71725771	71728685	-	30578	downstream
8	TUCP_004271	XLOC_187897	--	TUCP	71689972	71695192	+	ENSRNOT00000022960	ENSRNOG00000017029	Snx1	Sorting nexin, N-terminal||Phox homologous domain||Sorting nexin Vps5-like, C-terminal||Sorting nexin-1	71745896	71784551	-	50703	downstream
8	TUCP_004271	XLOC_187897	--	TUCP	71689972	71695192	+	ENSRNOT00000022999	ENSRNOG00000017119	Fam96a	Domain of unknown function DUF59	71786310	71798266	+	91117	upstream
8	TUCP_004271	XLOC_187897	--	TUCP	71689972	71695192	+	ENSRNOT00000022828	ENSRNOG00000016781	Ppib	Cyclophilin-type peptidyl-prolyl cis-trans isomerase, conserved site||Cyclophilin-type peptidyl-prolyl cis-trans isomerase domain||Cyclophilin-type peptidyl-prolyl cis-trans isomerase||Cyclophilin-like domain	71719563	71725562	+	24370	upstream
8	TUCP_004271	XLOC_187897	--	TUCP	71689972	71695192	+	ENSRNOT00000042369	ENSRNOG00000016620	Csnk1g1	Casein kinase 1 gamma C-terminal||Serine/threonine-protein kinase, active site||Protein kinase, ATP binding site||Protein kinase domain||Protein kinase-like domain	71547468	71678214	+	11757	downstream
6	TUCP_003795	XLOC_165950	--	TUCP	108229132	108239517	+	ENSRNOT00000016040	ENSRNOG00000011964	Abcd4	ABC transporter-like||AAA+ ATPase domain||ABC transporter type 1, transmembrane domain||P-loop containing nucleoside triphosphate hydrolase||ABC transporter, conserved site	108315035	108329464	-	75517	downstream
6	TUCP_003795	XLOC_165950	--	TUCP	108229132	108239517	+	ENSRNOT00000063900	ENSRNOG00000011376	Bbof1	Basal body-orientation factor 1||Domain of unknown function DUF4515	108123855	108149607	+	79524	downstream
6	TUCP_003795	XLOC_165950	--	TUCP	108229132	108239517	+	ENSRNOT00000015889	ENSRNOG00000011918	Vsx2	CVC domain||OAR domain||Homeobox, conserved site||Homeobox domain||Homeodomain-like	108285822	108308587	+	46304	upstream
6	TUCP_003795	XLOC_165950	--	TUCP	108229132	108239517	+	ENSRNOT00000089242	ENSRNOG00000011376	Bbof1	Basal body-orientation factor 1||Domain of unknown function DUF4515	108123816	108149344	+	79787	downstream
6	TUCP_003795	XLOC_165950	--	TUCP	108229132	108239517	+	ENSRNOT00000064426	ENSRNOG00000043441	Lin52	Protein LIN52	108167716	108178508	+	50623	downstream
6	TUCP_003795	XLOC_165950	--	TUCP	108229132	108239517	+	ENSRNOT00000015545	ENSRNOG00000011419	Aldh6a1	Methylmalonate-semialdehyde dehydrogenase||Aldehyde dehydrogenase domain||Aldehyde dehydrogenase N-terminal domain||Aldehyde dehydrogenase, cysteine active site||Aldehyde/histidinol dehydrogenase||Aldehyde dehydrogenase, C-terminal	108146582	108167185	-	61946	upstream
6	TUCP_003794	XLOC_165949	--	TUCP	108200915	108220425	+	ENSRNOT00000016040	ENSRNOG00000011964	Abcd4	ABC transporter-like||AAA+ ATPase domain||ABC transporter type 1, transmembrane domain||P-loop containing nucleoside triphosphate hydrolase||ABC transporter, conserved site	108315035	108329464	-	94609	downstream
6	TUCP_003794	XLOC_165949	--	TUCP	108200915	108220425	+	ENSRNOT00000041163	ENSRNOG00000033206	Entpd5	Nucleoside phosphatase GDA1/CD39	108087418	108120579	-	80335	upstream
6	TUCP_003794	XLOC_165949	--	TUCP	108200915	108220425	+	ENSRNOT00000063900	ENSRNOG00000011376	Bbof1	Basal body-orientation factor 1||Domain of unknown function DUF4515	108123855	108149607	+	51307	downstream
6	TUCP_003794	XLOC_165949	--	TUCP	108200915	108220425	+	ENSRNOT00000015889	ENSRNOG00000011918	Vsx2	CVC domain||OAR domain||Homeobox, conserved site||Homeobox domain||Homeodomain-like	108285822	108308587	+	65396	upstream
6	TUCP_003794	XLOC_165949	--	TUCP	108200915	108220425	+	ENSRNOT00000089242	ENSRNOG00000011376	Bbof1	Basal body-orientation factor 1||Domain of unknown function DUF4515	108123816	108149344	+	51570	downstream
6	TUCP_003794	XLOC_165949	--	TUCP	108200915	108220425	+	ENSRNOT00000064426	ENSRNOG00000043441	Lin52	Protein LIN52	108167716	108178508	+	22406	downstream
6	TUCP_003794	XLOC_165949	--	TUCP	108200915	108220425	+	ENSRNOT00000015545	ENSRNOG00000011419	Aldh6a1	Methylmalonate-semialdehyde dehydrogenase||Aldehyde dehydrogenase domain||Aldehyde dehydrogenase N-terminal domain||Aldehyde dehydrogenase, cysteine active site||Aldehyde/histidinol dehydrogenase||Aldehyde dehydrogenase, C-terminal	108146582	108167185	-	33729	upstream
18	TUCP_002107	XLOC_087266	--	TUCP	28667776	28669661	-	ENSRNOT00000045795	ENSRNOG00000032878	Cxxc5	Zinc finger, CXXC-type	28653653	28656910	+	10865	downstream
18	TUCP_002107	XLOC_087266	--	TUCP	28667776	28669661	-	ENSRNOT00000085120	ENSRNOG00000032878	Cxxc5	Zinc finger, CXXC-type	28653592	28656937	+	10838	downstream
18	TUCP_002107	XLOC_087266	--	TUCP	28667776	28669661	-	ENSRNOT00000067702	ENSRNOG00000042523	Ube2d2	Ubiquitin-conjugating enzyme/RWD-like||Ubiquitin-conjugating enzyme E2||Ubiquitin-conjugating enzyme, active site	28594892	28603335	+	64440	downstream
18	TUCP_002106	XLOC_087136	--	TUCP	26673625	26676169	-	ENSRNOT00000038247	ENSRNOG00000026050	Epb41l4a	FERM adjacent (FA)||PH domain-like||FERM, C-terminal PH-like domain||FERM domain	26570647	26658892	-	14732	upstream
18	TUCP_002106	XLOC_087136	--	TUCP	26673625	26676169	-	ENSRNOT00000086729	ENSRNOG00000026050	Epb41l4a	FERM adjacent (FA)||PH domain-like||FERM, C-terminal PH-like domain||FERM domain	26571039	26656879	-	16745	upstream
14	TUCP_001441	XLOC_056007	--	TUCP	1466921	1469927	-	ENSRNOT00000071648	ENSRNOG00000049270	Ppp2r3b	EF-hand domain||EF-Hand 1, calcium-binding site||EF-hand domain pair	1469748	1476355	+	(180)	antisense
14	TUCP_001441	XLOC_056007	--	TUCP	1466921	1469927	-	ENSRNOT00000075656	ENSRNOG00000049828	Crlf2	Immunoglobulin-like fold||Fibronectin type III	1456844	1461543	-	5377	upstream
14	TUCP_001441	XLOC_056007	--	TUCP	1466921	1469927	-	ENSRNOT00000075415	ENSRNOG00000050374	Pigg	Alkaline-phosphatase-like, core domain||Alkaline phosphatase-like, alpha/beta/alpha||Type I phosphodiesterase/nucleotide pyrophosphatase/phosphate transferase	1567723	1595972	-	97795	downstream
14	TUCP_001441	XLOC_056007	--	TUCP	1466921	1469927	-	ENSRNOT00000090361	ENSRNOG00000054053	LOC102554799	Claudin	1499711	1505085	-	29783	downstream
14	TUCP_001441	XLOC_056007	--	TUCP	1466921	1469927	-	ENSRNOT00000070834	ENSRNOG00000049782	Csf2ra	Short hematopoietin receptor, family 2, conserved site||Immunoglobulin-like fold||Type I cytokine receptor, cytokine-binding domain||Fibronectin type III	1463359	1467054	+	(134)	antisense
14	TUCP_001441	XLOC_056007	--	TUCP	1466921	1469927	-	ENSRNOT00000077243	ENSRNOG00000049782	Csf2ra	Short hematopoietin receptor, family 2, conserved site||Immunoglobulin-like fold||Type I cytokine receptor, cytokine-binding domain||Fibronectin type III	1462358	1467264	+	(344)	antisense
18	TUCP_002101	XLOC_086877	--	TUCP	16188412	16193827	-	ENSRNOT00000022117	ENSRNOG00000016207	Galnt1	Nucleotide-diphospho-sugar transferases||Ricin B, lectin domain||Glycosyltransferase 2-like	16146447	16185496	+	2915	downstream
18	TUCP_002100	XLOC_086877	--	TUCP	16188412	16193825	-	ENSRNOT00000022117	ENSRNOG00000016207	Galnt1	Nucleotide-diphospho-sugar transferases||Ricin B, lectin domain||Glycosyltransferase 2-like	16146447	16185496	+	2915	downstream
14	TUCP_001440	XLOC_055990	--	TUCP	570482	577936	-	ENSRNOT00000042551	ENSRNOG00000046925	LOC100912233	Leucine-rich repeat domain, L domain-like||PRAME family	512711	515365	+	55116	downstream
14	TUCP_001440	XLOC_055990	--	TUCP	570482	577936	-	ENSRNOT00000042604	ENSRNOG00000047758	RGD1562932	Leucine-rich repeat domain, L domain-like||PRAME family	523690	526319	+	44162	downstream
14	TUCP_001440	XLOC_055990	--	TUCP	570482	577936	-	ENSRNOT00000043926	ENSRNOG00000048600	RGD1562423	Leucine-rich repeat domain, L domain-like||PRAME family	658179	660837	-	80242	downstream
18	TUCP_002109	XLOC_087392	--	TUCP	31272435	31284340	-	ENSRNOT00000081850	ENSRNOG00000060410	Pcdh1	Cadherin-like||Cadherin||Cadherin conserved site||Protocadherin||Cadherin, N-terminal	31328919	31343797	-	44578	downstream
18	TUCP_002108	XLOC_087337	--	TUCP	30640583	30664494	-	ENSRNOT00000027133	ENSRNOG00000020028	Pcdhb22	Cadherin, N-terminal||Cadherin-like||Cadherin||Cadherin conserved site||Cadherin, cytoplasmic C-terminal domain||Protocadherin beta-15	30592794	30595181	+	45401	downstream
18	TUCP_002108	XLOC_087337	--	TUCP	30640583	30664494	-	ENSRNOT00000060484	ENSRNOG00000039469	Pcdhb19	Cadherin, N-terminal||Protocadherin beta-11||Cadherin-like||Cadherin||Cadherin conserved site||Cadherin, cytoplasmic C-terminal domain	30574627	30577035	+	63547	downstream
18	TUCP_002108	XLOC_087337	--	TUCP	30640583	30664494	-	ENSRNOT00000040016	ENSRNOG00000033479	Pcdhb21	Cadherin-like||Cadherin||Cadherin conserved site||Cadherin, cytoplasmic C-terminal domain||Cadherin, N-terminal	30587872	30590789	+	49793	downstream
18	TUCP_002108	XLOC_087337	--	TUCP	30640583	30664494	-	ENSRNOT00000048166	ENSRNOG00000033123	Pcdhb20	Cadherin||Cadherin-like||Cadherin, cytoplasmic C-terminal domain||Cadherin conserved site||Cadherin, N-terminal	30581530	30584905	+	55677	downstream
18	TUCP_002108	XLOC_087337	--	TUCP	30640583	30664494	-	ENSRNOT00000040998	ENSRNOG00000039471	LOC108348771	Cadherin, N-terminal||Cadherin-like||Cadherin||Cadherin, cytoplasmic C-terminal domain||Cadherin conserved site	30562178	30564577	+	76005	downstream
18	TUCP_002108	XLOC_087337	--	TUCP	30640583	30664494	-	ENSRNOT00000027164	ENSRNOG00000020054	LOC108348201	Cadherin, N-terminal||Cadherin conserved site||Cadherin, cytoplasmic C-terminal domain||Protocadherin beta-7||Cadherin||Cadherin-like	30550877	30553237	+	87345	downstream
5	TUCP_003412	XLOC_147730	--	TUCP	151705	153706	+	ENSRNOT00000056239	ENSRNOG00000037221	Tipinl1	Chromosome segregation in meiosis protein 3	173744	174921	-	20037	downstream
5	TUCP_003412	XLOC_147730	--	TUCP	151705	153706	+	ENSRNOT00000030857	ENSRNOG00000047922	LOC102557117	Krueppel-associated box	187312	187688	+	33605	upstream
5	TUCP_003412	XLOC_147730	--	TUCP	151705	153706	+	ENSRNOT00000033772	ENSRNOG00000047780	AABR07046635.1	Krueppel-associated box	230896	231742	+	77189	upstream
14	TUCP_001478	XLOC_057080	--	TUCP	29153985	29219210	-	ENSRNOT00000087499	ENSRNOG00000057494	AABR07014739.1	GroEL-like equatorial domain	29232295	29232537	-	13084	downstream
5	TUCP_003413	XLOC_147730	--	TUCP	188038	195663	+	ENSRNOT00000056239	ENSRNOG00000037221	Tipinl1	Chromosome segregation in meiosis protein 3	173744	174921	-	13116	upstream
5	TUCP_003413	XLOC_147730	--	TUCP	188038	195663	+	ENSRNOT00000030857	ENSRNOG00000047922	LOC102557117	Krueppel-associated box	187312	187688	+	349	downstream
5	TUCP_003413	XLOC_147730	--	TUCP	188038	195663	+	ENSRNOT00000033772	ENSRNOG00000047780	AABR07046635.1	Krueppel-associated box	230896	231742	+	35232	upstream
14	TUCP_001476	XLOC_056833	--	TUCP	18738876	18743339	-	ENSRNOT00000003745	ENSRNOG00000002792	Cxcl2	Chemokine interleukin-8-like domain||CXC chemokine, conserved site||CXC chemokine	18731378	18733391	-	5484	upstream
14	TUCP_001476	XLOC_056833	--	TUCP	18738876	18743339	-	ENSRNOT00000081455	ENSRNOG00000021347	Mthfd2l	Tetrahydrofolate dehydrogenase/cyclohydrolase, NAD(P)-binding domain||Tetrahydrofolate dehydrogenase/cyclohydrolase, catalytic domain||NAD(P)-binding domain||Tetrahydrofolate dehydrogenase/cyclohydrolase, conserved site||Tetrahydrofolate dehydrogenase/cyclohydrolase	18640277	18704059	-	34816	upstream
14	TUCP_001476	XLOC_056833	--	TUCP	18738876	18743339	-	ENSRNOT00000034090	ENSRNOG00000028043	Cxcl3	Chemokine interleukin-8-like domain||CXC chemokine, conserved site||CXC chemokine	18820168	18839420	-	76828	downstream
14	TUCP_001476	XLOC_056833	--	TUCP	18738876	18743339	-	ENSRNOT00000078746	ENSRNOG00000028043	Cxcl3	Chemokine interleukin-8-like domain||CXC chemokine, conserved site||CXC chemokine	18837821	18839595	-	94481	downstream
14	TUCP_001476	XLOC_056833	--	TUCP	18738876	18743339	-	ENSRNOT00000003778	ENSRNOG00000002802	Cxcl1	Chemokine interleukin-8-like domain||CXC chemokine, conserved site||CXC chemokine	18743685	18745457	-	345	downstream
14	TUCP_001476	XLOC_056833	--	TUCP	18738876	18743339	-	ENSRNOT00000047708	ENSRNOG00000021347	Mthfd2l	Tetrahydrofolate dehydrogenase/cyclohydrolase, NAD(P)-binding domain||Tetrahydrofolate dehydrogenase/cyclohydrolase, catalytic domain||NAD(P)-binding domain||Tetrahydrofolate dehydrogenase/cyclohydrolase, conserved site||Tetrahydrofolate dehydrogenase/cyclohydrolase	18640279	18720357	-	18518	upstream
14	TUCP_001477	XLOC_057009	--	TUCP	23723365	23727066	-	ENSRNOT00000031074	ENSRNOG00000021776	Cenpc	RmlC-like cupin domain||Kinetochore assembly subunit CENP-C, N-terminal domain||Mif2/CENP-C cupin domain||Centromere protein C/Mif2/cnp3||RmlC-like jelly roll fold||CENP-C, middle DNMT3B-binding domain	23611735	23670475	+	52889	downstream
14	TUCP_001474	XLOC_056807	--	TUCP	17594095	17601383	-	ENSRNOT00000003470	ENSRNOG00000002546	Rchy1	Zinc finger, CHY-type||Rubredoxin-type fold||Zinc finger, RING/FYVE/PHD-type||Zinc finger, CTCHY-type||Zinc finger, RING-type	17615968	17631714	+	14584	upstream
14	TUCP_001474	XLOC_056807	--	TUCP	17594095	17601383	-	ENSRNOT00000090938	ENSRNOG00000058724	Thap6	Zinc finger, C2CH-type	17606001	17616170	-	4617	downstream
14	TUCP_001474	XLOC_056807	--	TUCP	17594095	17601383	-	ENSRNOT00000046771	ENSRNOG00000002506	Cdkl2	Serine/threonine-protein kinase, active site||Protein kinase, ATP binding site||Protein kinase-like domain||Protein kinase domain	17534442	17563176	+	30918	downstream
14	TUCP_001474	XLOC_056807	--	TUCP	17594095	17601383	-	ENSRNOT00000087686	ENSRNOG00000059582	LOC100911949	Protein of unknown function DUF4721	17575758	17582823	-	11271	upstream
14	TUCP_001474	XLOC_056807	--	TUCP	17594095	17601383	-	ENSRNOT00000050038	ENSRNOG00000002506	Cdkl2	Serine/threonine-protein kinase, active site||Protein kinase, ATP binding site||Protein kinase-like domain||Protein kinase domain	17531398	17554067	+	40027	downstream
14	TUCP_001474	XLOC_056807	--	TUCP	17594095	17601383	-	ENSRNOT00000079304	ENSRNOG00000002506	Cdkl2	Serine/threonine-protein kinase, active site||Protein kinase, ATP binding site||Protein kinase-like domain||Protein kinase domain	17534412	17565950	+	28144	downstream
14	TUCP_001474	XLOC_056807	--	TUCP	17594095	17601383	-	ENSRNOT00000003346	ENSRNOG00000002433	G3bp2	Nucleotide-binding alpha-beta plait domain||Nuclear transport factor 2||Nuclear transport factor 2, eukaryote||RNA recognition motif domain||NTF2-like domain	17492081	17520792	+	73302	downstream
14	TUCP_001475	XLOC_056807	--	TUCP	17594095	17601383	-	ENSRNOT00000003470	ENSRNOG00000002546	Rchy1	Zinc finger, CHY-type||Rubredoxin-type fold||Zinc finger, RING/FYVE/PHD-type||Zinc finger, CTCHY-type||Zinc finger, RING-type	17615968	17631714	+	14584	upstream
14	TUCP_001475	XLOC_056807	--	TUCP	17594095	17601383	-	ENSRNOT00000090938	ENSRNOG00000058724	Thap6	Zinc finger, C2CH-type	17606001	17616170	-	4617	downstream
14	TUCP_001475	XLOC_056807	--	TUCP	17594095	17601383	-	ENSRNOT00000046771	ENSRNOG00000002506	Cdkl2	Serine/threonine-protein kinase, active site||Protein kinase, ATP binding site||Protein kinase-like domain||Protein kinase domain	17534442	17563176	+	30918	downstream
14	TUCP_001475	XLOC_056807	--	TUCP	17594095	17601383	-	ENSRNOT00000087686	ENSRNOG00000059582	LOC100911949	Protein of unknown function DUF4721	17575758	17582823	-	11271	upstream
14	TUCP_001475	XLOC_056807	--	TUCP	17594095	17601383	-	ENSRNOT00000050038	ENSRNOG00000002506	Cdkl2	Serine/threonine-protein kinase, active site||Protein kinase, ATP binding site||Protein kinase-like domain||Protein kinase domain	17531398	17554067	+	40027	downstream
14	TUCP_001475	XLOC_056807	--	TUCP	17594095	17601383	-	ENSRNOT00000079304	ENSRNOG00000002506	Cdkl2	Serine/threonine-protein kinase, active site||Protein kinase, ATP binding site||Protein kinase-like domain||Protein kinase domain	17534412	17565950	+	28144	downstream
14	TUCP_001475	XLOC_056807	--	TUCP	17594095	17601383	-	ENSRNOT00000003346	ENSRNOG00000002433	G3bp2	Nucleotide-binding alpha-beta plait domain||Nuclear transport factor 2||Nuclear transport factor 2, eukaryote||RNA recognition motif domain||NTF2-like domain	17492081	17520792	+	73302	downstream
14	TUCP_001472	XLOC_056807	--	TUCP	17594095	17601291	-	ENSRNOT00000003470	ENSRNOG00000002546	Rchy1	Zinc finger, CHY-type||Rubredoxin-type fold||Zinc finger, RING/FYVE/PHD-type||Zinc finger, CTCHY-type||Zinc finger, RING-type	17615968	17631714	+	14676	upstream
14	TUCP_001472	XLOC_056807	--	TUCP	17594095	17601291	-	ENSRNOT00000090938	ENSRNOG00000058724	Thap6	Zinc finger, C2CH-type	17606001	17616170	-	4709	downstream
14	TUCP_001472	XLOC_056807	--	TUCP	17594095	17601291	-	ENSRNOT00000046771	ENSRNOG00000002506	Cdkl2	Serine/threonine-protein kinase, active site||Protein kinase, ATP binding site||Protein kinase-like domain||Protein kinase domain	17534442	17563176	+	30918	downstream
14	TUCP_001472	XLOC_056807	--	TUCP	17594095	17601291	-	ENSRNOT00000087686	ENSRNOG00000059582	LOC100911949	Protein of unknown function DUF4721	17575758	17582823	-	11271	upstream
14	TUCP_001472	XLOC_056807	--	TUCP	17594095	17601291	-	ENSRNOT00000050038	ENSRNOG00000002506	Cdkl2	Serine/threonine-protein kinase, active site||Protein kinase, ATP binding site||Protein kinase-like domain||Protein kinase domain	17531398	17554067	+	40027	downstream
14	TUCP_001472	XLOC_056807	--	TUCP	17594095	17601291	-	ENSRNOT00000079304	ENSRNOG00000002506	Cdkl2	Serine/threonine-protein kinase, active site||Protein kinase, ATP binding site||Protein kinase-like domain||Protein kinase domain	17534412	17565950	+	28144	downstream
14	TUCP_001472	XLOC_056807	--	TUCP	17594095	17601291	-	ENSRNOT00000003346	ENSRNOG00000002433	G3bp2	Nucleotide-binding alpha-beta plait domain||Nuclear transport factor 2||Nuclear transport factor 2, eukaryote||RNA recognition motif domain||NTF2-like domain	17492081	17520792	+	73302	downstream
14	TUCP_001473	XLOC_056807	--	TUCP	17594095	17601313	-	ENSRNOT00000003470	ENSRNOG00000002546	Rchy1	Zinc finger, CHY-type||Rubredoxin-type fold||Zinc finger, RING/FYVE/PHD-type||Zinc finger, CTCHY-type||Zinc finger, RING-type	17615968	17631714	+	14654	upstream
14	TUCP_001473	XLOC_056807	--	TUCP	17594095	17601313	-	ENSRNOT00000090938	ENSRNOG00000058724	Thap6	Zinc finger, C2CH-type	17606001	17616170	-	4687	downstream
14	TUCP_001473	XLOC_056807	--	TUCP	17594095	17601313	-	ENSRNOT00000046771	ENSRNOG00000002506	Cdkl2	Serine/threonine-protein kinase, active site||Protein kinase, ATP binding site||Protein kinase-like domain||Protein kinase domain	17534442	17563176	+	30918	downstream
14	TUCP_001473	XLOC_056807	--	TUCP	17594095	17601313	-	ENSRNOT00000087686	ENSRNOG00000059582	LOC100911949	Protein of unknown function DUF4721	17575758	17582823	-	11271	upstream
14	TUCP_001473	XLOC_056807	--	TUCP	17594095	17601313	-	ENSRNOT00000050038	ENSRNOG00000002506	Cdkl2	Serine/threonine-protein kinase, active site||Protein kinase, ATP binding site||Protein kinase-like domain||Protein kinase domain	17531398	17554067	+	40027	downstream
14	TUCP_001473	XLOC_056807	--	TUCP	17594095	17601313	-	ENSRNOT00000079304	ENSRNOG00000002506	Cdkl2	Serine/threonine-protein kinase, active site||Protein kinase, ATP binding site||Protein kinase-like domain||Protein kinase domain	17534412	17565950	+	28144	downstream
14	TUCP_001473	XLOC_056807	--	TUCP	17594095	17601313	-	ENSRNOT00000003346	ENSRNOG00000002433	G3bp2	Nucleotide-binding alpha-beta plait domain||Nuclear transport factor 2||Nuclear transport factor 2, eukaryote||RNA recognition motif domain||NTF2-like domain	17492081	17520792	+	73302	downstream
14	TUCP_001470	XLOC_056727	--	TUCP	15734781	15735198	-	ENSRNOT00000050518	ENSRNOG00000046931	LOC501901	Leucine-rich repeat domain, L domain-like||PRAME family	15680554	15682966	+	51814	downstream
14	TUCP_001470	XLOC_056727	--	TUCP	15734781	15735198	-	ENSRNOT00000051054	ENSRNOG00000048778	RGD1559999	Leucine-rich repeat domain, L domain-like||PRAME family	15706961	15709518	-	25262	upstream
14	TUCP_001470	XLOC_056727	--	TUCP	15734781	15735198	-	ENSRNOT00000040280	ENSRNOG00000048835	RGD1561226	Leucine-rich repeat domain, L domain-like||PRAME family	15722967	15725594	+	9186	downstream
14	TUCP_001471	XLOC_056770	--	TUCP	16332012	16335034	-	ENSRNOT00000002876	ENSRNOG00000002089	Ccng2	Cyclin, N-terminal||Cyclin-like||Cyclin-G2	16267573	16276068	-	55943	upstream
14	TUCP_001471	XLOC_056770	--	TUCP	16332012	16335034	-	ENSRNOT00000002924	ENSRNOG00000002125	Ccni	Cyclin, N-terminal||Cyclin I||Cyclin-like	16341536	16364326	+	6501	upstream
14	TUCP_001471	XLOC_056770	--	TUCP	16332012	16335034	-	ENSRNOT00000091577	ENSRNOG00000002182	Sept11	P-loop containing nucleoside triphosphate hydrolase||Septin-type guanine nucleotide-binding (G) domain||Septin	16371979	16452998	-	36944	downstream
14	TUCP_001471	XLOC_056770	--	TUCP	16332012	16335034	-	ENSRNOT00000067222	ENSRNOG00000002182	Sept11	P-loop containing nucleoside triphosphate hydrolase||Septin-type guanine nucleotide-binding (G) domain||Septin	16369544	16452890	-	34509	downstream
3	TUCP_002811	XLOC_118861	--	TUCP	11649024	11652078	+	ENSRNOT00000032893	ENSRNOG00000022586	Cdk9	Protein kinase-like domain||Protein kinase domain||Serine/threonine-protein kinase, active site||Protein kinase, ATP binding site	11742266	11747113	-	90187	downstream
3	TUCP_002811	XLOC_118861	--	TUCP	11649024	11652078	+	ENSRNOT00000072685	ENSRNOG00000048870	St6galnac4	Glycosyl transferase family 29	11607225	11619593	+	29430	downstream
3	TUCP_002811	XLOC_118861	--	TUCP	11649024	11652078	+	ENSRNOT00000073840	ENSRNOG00000049056	Ak1	Adenylate kinase/UMP-CMP kinase||P-loop containing nucleoside triphosphate hydrolase	11657370	11659127	+	5291	upstream
3	TUCP_002811	XLOC_118861	--	TUCP	11649024	11652078	+	ENSRNOT00000091048	ENSRNOG00000049056	Ak1	Adenylate kinase/UMP-CMP kinase||P-loop containing nucleoside triphosphate hydrolase	11653529	11657768	+	1450	upstream
3	TUCP_002811	XLOC_118861	--	TUCP	11649024	11652078	+	ENSRNOT00000071801	ENSRNOG00000050190	Eng	Zona pellucida domain	11679530	11717485	+	27451	upstream
3	TUCP_002811	XLOC_118861	--	TUCP	11649024	11652078	+	ENSRNOT00000071505	ENSRNOG00000049110	Dpm2	Dolichol phosphate-mannose biosynthesis regulatory	11587941	11590528	+	58495	downstream
3	TUCP_002811	XLOC_118861	--	TUCP	11649024	11652078	+	ENSRNOT00000073087	ENSRNOG00000050834	Fam102a	EEIG1/EHBP1 N-terminal domain	11554457	11586303	+	62720	downstream
3	TUCP_002811	XLOC_118861	--	TUCP	11649024	11652078	+	ENSRNOT00000074122	ENSRNOG00000048676	Pip5kl1	Phosphatidylinositol-4-phosphate 5-kinase, core||Phosphatidylinositol-4-phosphate 5-kinase, C-terminal||Phosphatidylinositol-4-phosphate 5-kinase, N-terminal domain||Phosphatidylinositol-4-phosphate 5-kinase	11593655	11597410	+	51613	downstream
3	TUCP_002811	XLOC_118861	--	TUCP	11649024	11652078	+	ENSRNOT00000074401	ENSRNOG00000046984	St6galnac6	Glycosyl transferase family 29	11629556	11641466	+	7557	downstream
3	TUCP_002811	XLOC_118861	--	TUCP	11649024	11652078	+	ENSRNOT00000074562	ENSRNOG00000050190	Eng	Zona pellucida domain	11679530	11717485	+	27451	upstream
3	TUCP_002811	XLOC_118861	--	TUCP	11649024	11652078	+	ENSRNOT00000070916	ENSRNOG00000050780	Fpgs	Mur ligase, C-terminal||Folylpolyglutamate synthase, eukaryota||Folylpolyglutamate synthetase, conserved site||Folylpolyglutamate synthetase||Mur ligase, central	11717667	11723327	-	65588	downstream
5	TUCP_003411	XLOC_147730	--	TUCP	151676	153706	+	ENSRNOT00000056239	ENSRNOG00000037221	Tipinl1	Chromosome segregation in meiosis protein 3	173744	174921	-	20037	downstream
5	TUCP_003411	XLOC_147730	--	TUCP	151676	153706	+	ENSRNOT00000030857	ENSRNOG00000047922	LOC102557117	Krueppel-associated box	187312	187688	+	33605	upstream
5	TUCP_003411	XLOC_147730	--	TUCP	151676	153706	+	ENSRNOT00000033772	ENSRNOG00000047780	AABR07046635.1	Krueppel-associated box	230896	231742	+	77189	upstream
7	TUCP_004213	XLOC_184900	--	TUCP	144809404	144817394	-	ENSRNOT00000089024	ENSRNOG00000036841	Cbx5	Chromo domain, conserved site||Chromo/chromo shadow domain||Chromo domain subgroup||Chromo shadow domain||Chromo domain||Chromo domain-like	144819420	144837395	-	2025	downstream
7	TUCP_004213	XLOC_184900	--	TUCP	144809404	144817394	-	ENSRNOT00000065270	ENSRNOG00000036835	Copz1	AP complex, mu/sigma subunit||Longin-like domain||Clathrin adaptor complex, small chain	144899534	144926350	+	82139	upstream
7	TUCP_004213	XLOC_184900	--	TUCP	144809404	144817394	-	ENSRNOT00000055289	ENSRNOG00000036841	Cbx5	Chromo domain, conserved site||Chromo/chromo shadow domain||Chromo domain subgroup||Chromo shadow domain||Chromo domain||Chromo domain-like	144819730	144837583	-	2335	downstream
7	TUCP_004213	XLOC_184900	--	TUCP	144809404	144817394	-	ENSRNOT00000051929	ENSRNOG00000036836	AABR07058937.1	Ribosomal protein L29e	144886327	144886926	-	68932	downstream
7	TUCP_004213	XLOC_184900	--	TUCP	144809404	144817394	-	ENSRNOT00000082149	ENSRNOG00000036842	Smug1	Uracil-DNA glycosylase-like	144774160	144778339	-	31064	upstream
7	TUCP_004213	XLOC_184900	--	TUCP	144809404	144817394	-	ENSRNOT00000055285	ENSRNOG00000036839	Hnrnpa1	Nucleotide-binding alpha-beta plait domain||Nuclear factor hnRNPA1||RNA recognition motif domain	144865623	144871585	+	48228	upstream
7	TUCP_004213	XLOC_184900	--	TUCP	144809404	144817394	-	ENSRNOT00000055281	ENSRNOG00000036837	Nfe2	Transcription factor, Skn-1-like, DNA-binding domain||Basic-leucine zipper domain||Basic leucine zipper domain, Maf-type	144872747	144880092	-	55352	downstream
7	TUCP_004213	XLOC_184900	--	TUCP	144809404	144817394	-	ENSRNOT00000055290	ENSRNOG00000036842	Smug1	Uracil-DNA glycosylase-like	144776531	144778656	-	30747	upstream
7	TUCP_004213	XLOC_184900	--	TUCP	144809404	144817394	-	ENSRNOT00000091596	ENSRNOG00000036839	Hnrnpa1	Nucleotide-binding alpha-beta plait domain||Nuclear factor hnRNPA1||RNA recognition motif domain	144865608	144869926	+	48213	upstream
20	TUCP_002762	XLOC_117230	--	TUCP	25930378	25932342	-	ENSRNOT00000033980	ENSRNOG00000026466	Lrrtm3	Leucine-rich repeat domain, L domain-like||Leucine-rich repeat||Leucine-rich repeat, typical subtype||Leucine-rich repeat N-terminal domain	25990304	26163656	+	57961	upstream
20	TUCP_002762	XLOC_117230	--	TUCP	25930378	25932342	-	ENSRNOT00000081254	ENSRNOG00000026466	Lrrtm3	Leucine-rich repeat domain, L domain-like||Leucine-rich repeat||Leucine-rich repeat, typical subtype||Leucine-rich repeat N-terminal domain	25990656	25996550	+	58313	upstream
5	TUCP_003416	XLOC_147869	--	TUCP	2076041	2080920	+	ENSRNOT00000082813	ENSRNOG00000031730	Eloc	S-phase kinase-associated protein 1-like||SKP1/BTB/POZ domain||SKP1 component, POZ domain	2043583	2059351	+	16689	downstream
5	TUCP_003416	XLOC_147869	--	TUCP	2076041	2080920	+	ENSRNOT00000050236	ENSRNOG00000031730	Eloc	S-phase kinase-associated protein 1-like||SKP1/BTB/POZ domain||SKP1 component, POZ domain	2042991	2059351	+	16689	downstream
5	TUCP_003416	XLOC_147869	--	TUCP	2076041	2080920	+	ENSRNOT00000090313	ENSRNOG00000031730	Eloc	S-phase kinase-associated protein 1-like||SKP1/BTB/POZ domain||SKP1 component, POZ domain	2043155	2059351	+	16689	downstream
5	TUCP_003416	XLOC_147869	--	TUCP	2076041	2080920	+	ENSRNOT00000008680	ENSRNOG00000006608	Tmem70	TMEM70 family	2019852	2037038	-	39002	upstream
8	TUCP_004244	XLOC_186617	--	TUCP	42567951	42569755	+	ENSRNOT00000040297	ENSRNOG00000030000	Olr1264	Olfactory receptor||G protein-coupled receptor, rhodopsin-like||GPCR, rhodopsin-like, 7TM	42613601	42614536	+	43845	upstream
8	TUCP_004244	XLOC_186617	--	TUCP	42567951	42569755	+	ENSRNOT00000047107	ENSRNOG00000031423	LOC108350227	G protein-coupled receptor, rhodopsin-like||GPCR, rhodopsin-like, 7TM||Olfactory receptor	42650438	42651391	+	80682	upstream
8	TUCP_004244	XLOC_186617	--	TUCP	42567951	42569755	+	ENSRNOT00000050959	ENSRNOG00000047324	Olr1260	Olfactory receptor||GPCR, rhodopsin-like, 7TM||G protein-coupled receptor, rhodopsin-like	42549930	42550862	+	17088	downstream
8	TUCP_004244	XLOC_186617	--	TUCP	42567951	42569755	+	ENSRNOT00000048537	ENSRNOG00000031054	Olr1266	Olfactory receptor||GPCR, rhodopsin-like, 7TM||G protein-coupled receptor, rhodopsin-like	42663633	42664568	+	93877	upstream
8	TUCP_004244	XLOC_186617	--	TUCP	42567951	42569755	+	ENSRNOT00000042974	ENSRNOG00000032383	Olr1259	Olfactory receptor||GPCR, rhodopsin-like, 7TM||G protein-coupled receptor, rhodopsin-like	42511520	42512467	+	55483	downstream
7	TUCP_004199	XLOC_184475	--	TUCP	137648340	137679983	-	ENSRNOT00000006970	ENSRNOG00000004831	Arid2	Zinc finger, C2H2||ARID DNA-binding domain||DNA-binding RFX-type winged-helix domain||Armadillo-type fold||Winged helix-turn-helix DNA-binding domain	137680530	137795655	+	546	upstream
3	TUCP_002813	XLOC_119091	--	TUCP	17866845	17867318	+	ENSRNOT00000073021	ENSRNOG00000049024	Igkv1-35	Immunoglobulin-like fold||Immunoglobulin-like domain||Immunoglobulin V-set domain||Immunoglobulin subtype	17889972	17890702	+	22653	upstream
5	TUCP_003417	XLOC_147972	--	TUCP	5572717	5602163	+	ENSRNOT00000089152	ENSRNOG00000059973	AABR07046763.1	-	5689526	5691794	-	87362	downstream
5	TUCP_003417	XLOC_147972	--	TUCP	5572717	5602163	+	ENSRNOT00000011026	ENSRNOG00000007975	Ncoa2	PAS domain||PAS fold||Nuclear receptor coactivator Src-1||Domain of unknown function DUF4927||Nuclear receptor coactivator 2||Nuclear receptor coactivator||Myc-type, basic helix-loop-helix (bHLH) domain||Steroid receptor coactivator||Domain of unknown function DUF1518||Nuclear receptor coactivator, Ncoa-type, interlocking||Nuclear receptor coactivator, interlocking	5616483	5694598	+	14319	upstream
4	TUCP_003180	XLOC_136527	--	TUCP	82567717	82574036	+	ENSRNOT00000048225	ENSRNOG00000033407	LOC685406	-	82637411	82643922	+	63374	upstream
4	TUCP_003180	XLOC_136527	--	TUCP	82567717	82574036	+	ENSRNOT00000011069	ENSRNOG00000008063	Hibadh	3-hydroxyisobutyrate dehydrogenase||6-phosphogluconate dehydrogenase C-terminal domain-like||6-phosphogluconate dehydrogenase, domain 2||NAD(P)-binding domain||3-hydroxyisobutyrate dehydrogenase-related||6-phosphogluconate dehydrogenase, NADP-binding||3-hydroxyisobutyrate dehydrogenase, NAD-binding domain||3-hydroxyisobutyrate dehydrogenase-related, conserved site	82604373	82702429	-	30336	downstream
4	TUCP_003180	XLOC_136527	--	TUCP	82567717	82574036	+	ENSRNOT00000078254	ENSRNOG00000059195	AABR07060591.1	-	82665094	82668905	+	91057	upstream
4	TUCP_003180	XLOC_136527	--	TUCP	82567717	82574036	+	ENSRNOT00000051812	ENSRNOG00000043170	LOC685391	-	82648103	82654785	-	74066	downstream
4	TUCP_003181	XLOC_136596	--	TUCP	83922466	83926508	+	ENSRNOT00000085812	ENSRNOG00000009172	Cpvl	Serine carboxypeptidase, serine active site||Alpha/Beta hydrolase fold||Peptidase S10, serine carboxypeptidase	84025926	84127331	-	99417	downstream
4	TUCP_003181	XLOC_136596	--	TUCP	83922466	83926508	+	ENSRNOT00000036951	ENSRNOG00000026941	Tril	Cysteine-rich flanking region, C-terminal||Leucine-rich repeat domain, L domain-like||Leucine-rich repeat, typical subtype||Leucine-rich repeat||Fibronectin type III	83967696	83972540	-	41187	downstream
4	TUCP_003181	XLOC_136596	--	TUCP	83922466	83926508	+	ENSRNOT00000031365	ENSRNOG00000008622	Creb5	Zinc finger C2H2-type/integrase DNA-binding domain||Transcription factor cyclic AMP-dependent, CRE-BP1-type||Basic-leucine zipper domain||Zinc finger, C2H2	83391283	83836351	+	86114	downstream
4	TUCP_003181	XLOC_136596	--	TUCP	83922466	83926508	+	ENSRNOT00000086473	ENSRNOG00000008622	Creb5	Zinc finger C2H2-type/integrase DNA-binding domain||Transcription factor cyclic AMP-dependent, CRE-BP1-type||Basic-leucine zipper domain||Zinc finger, C2H2	83713666	83834178	+	88287	downstream
4	TUCP_003182	XLOC_136752	--	TUCP	85661073	85662500	+	ENSRNOT00000016175	ENSRNOG00000012098	Adcyap1r1	GPCR, family 2, secretin-like||GPCR, family 2-like||GPCR, family 2, extracellular hormone receptor domain||GPCR, family 2, pituitary adenylate cyclase activating polypeptide type 1 receptor||GPCR, family 2, secretin-like, conserved site	85662892	85711696	+	391	upstream
4	TUCP_003182	XLOC_136752	--	TUCP	85661073	85662500	+	ENSRNOT00000016087	ENSRNOG00000011808	Ghrhr	GPCR, family 2, secretin-like||-||GPCR, family 2, growth hormone-releasing hormone receptor||GPCR, family 2-like||GPCR, family 2, extracellular hormone receptor domain||GPCR, family 2, secretin-like, conserved site	85588711	85601335	+	59737	downstream
4	TUCP_003182	XLOC_136752	--	TUCP	85661073	85662500	+	ENSRNOT00000035722	ENSRNOG00000012098	Adcyap1r1	GPCR, family 2, secretin-like||GPCR, family 2-like||GPCR, family 2, extracellular hormone receptor domain||GPCR, family 2, pituitary adenylate cyclase activating polypeptide type 1 receptor||GPCR, family 2, secretin-like, conserved site	85662892	85711696	+	391	upstream
4	TUCP_003182	XLOC_136752	--	TUCP	85661073	85662500	+	ENSRNOT00000087191	ENSRNOG00000011648	Aqp1	Aquaporin 1||Major intrinsic protein||Major intrinsic protein, conserved site||Aquaporin-like	85551502	85569360	+	91712	downstream
4	TUCP_003182	XLOC_136752	--	TUCP	85661073	85662500	+	ENSRNOT00000044578	ENSRNOG00000011808	Ghrhr	GPCR, family 2, secretin-like||-||GPCR, family 2, growth hormone-releasing hormone receptor||GPCR, family 2-like||GPCR, family 2, extracellular hormone receptor domain||GPCR, family 2, secretin-like, conserved site	85588689	85601666	+	59406	downstream
4	TUCP_003182	XLOC_136752	--	TUCP	85661073	85662500	+	ENSRNOT00000046192	ENSRNOG00000012098	Adcyap1r1	GPCR, family 2, secretin-like||GPCR, family 2-like||GPCR, family 2, extracellular hormone receptor domain||GPCR, family 2, pituitary adenylate cyclase activating polypeptide type 1 receptor||GPCR, family 2, secretin-like, conserved site	85662892	85711696	+	391	upstream
4	TUCP_003182	XLOC_136752	--	TUCP	85661073	85662500	+	ENSRNOT00000084855	ENSRNOG00000011808	Ghrhr	GPCR, family 2, secretin-like||-||GPCR, family 2, growth hormone-releasing hormone receptor||GPCR, family 2-like||GPCR, family 2, extracellular hormone receptor domain||GPCR, family 2, secretin-like, conserved site	85588711	85601514	+	59558	downstream
4	TUCP_003182	XLOC_136752	--	TUCP	85661073	85662500	+	ENSRNOT00000081953	ENSRNOG00000011808	Ghrhr	GPCR, family 2, secretin-like||-||GPCR, family 2, growth hormone-releasing hormone receptor||GPCR, family 2-like||GPCR, family 2, extracellular hormone receptor domain||GPCR, family 2, secretin-like, conserved site	85588595	85601306	+	59766	downstream
4	TUCP_003182	XLOC_136752	--	TUCP	85661073	85662500	+	ENSRNOT00000015692	ENSRNOG00000011648	Aqp1	Aquaporin 1||Major intrinsic protein||Major intrinsic protein, conserved site||Aquaporin-like	85551503	85563683	+	97389	downstream
4	TUCP_003182	XLOC_136752	--	TUCP	85661073	85662500	+	ENSRNOT00000043851	ENSRNOG00000012098	Adcyap1r1	GPCR, family 2, secretin-like||GPCR, family 2-like||GPCR, family 2, extracellular hormone receptor domain||GPCR, family 2, pituitary adenylate cyclase activating polypeptide type 1 receptor||GPCR, family 2, secretin-like, conserved site	85662892	85711696	+	391	upstream
3	TUCP_002812	XLOC_118861	--	TUCP	11649024	11652078	+	ENSRNOT00000032893	ENSRNOG00000022586	Cdk9	Protein kinase-like domain||Protein kinase domain||Serine/threonine-protein kinase, active site||Protein kinase, ATP binding site	11742266	11747113	-	90187	downstream
3	TUCP_002812	XLOC_118861	--	TUCP	11649024	11652078	+	ENSRNOT00000072685	ENSRNOG00000048870	St6galnac4	Glycosyl transferase family 29	11607225	11619593	+	29430	downstream
3	TUCP_002812	XLOC_118861	--	TUCP	11649024	11652078	+	ENSRNOT00000073840	ENSRNOG00000049056	Ak1	Adenylate kinase/UMP-CMP kinase||P-loop containing nucleoside triphosphate hydrolase	11657370	11659127	+	5291	upstream
3	TUCP_002812	XLOC_118861	--	TUCP	11649024	11652078	+	ENSRNOT00000091048	ENSRNOG00000049056	Ak1	Adenylate kinase/UMP-CMP kinase||P-loop containing nucleoside triphosphate hydrolase	11653529	11657768	+	1450	upstream
3	TUCP_002812	XLOC_118861	--	TUCP	11649024	11652078	+	ENSRNOT00000071801	ENSRNOG00000050190	Eng	Zona pellucida domain	11679530	11717485	+	27451	upstream
3	TUCP_002812	XLOC_118861	--	TUCP	11649024	11652078	+	ENSRNOT00000071505	ENSRNOG00000049110	Dpm2	Dolichol phosphate-mannose biosynthesis regulatory	11587941	11590528	+	58495	downstream
3	TUCP_002812	XLOC_118861	--	TUCP	11649024	11652078	+	ENSRNOT00000073087	ENSRNOG00000050834	Fam102a	EEIG1/EHBP1 N-terminal domain	11554457	11586303	+	62720	downstream
3	TUCP_002812	XLOC_118861	--	TUCP	11649024	11652078	+	ENSRNOT00000074122	ENSRNOG00000048676	Pip5kl1	Phosphatidylinositol-4-phosphate 5-kinase, core||Phosphatidylinositol-4-phosphate 5-kinase, C-terminal||Phosphatidylinositol-4-phosphate 5-kinase, N-terminal domain||Phosphatidylinositol-4-phosphate 5-kinase	11593655	11597410	+	51613	downstream
3	TUCP_002812	XLOC_118861	--	TUCP	11649024	11652078	+	ENSRNOT00000074401	ENSRNOG00000046984	St6galnac6	Glycosyl transferase family 29	11629556	11641466	+	7557	downstream
3	TUCP_002812	XLOC_118861	--	TUCP	11649024	11652078	+	ENSRNOT00000074562	ENSRNOG00000050190	Eng	Zona pellucida domain	11679530	11717485	+	27451	upstream
3	TUCP_002812	XLOC_118861	--	TUCP	11649024	11652078	+	ENSRNOT00000070916	ENSRNOG00000050780	Fpgs	Mur ligase, C-terminal||Folylpolyglutamate synthase, eukaryota||Folylpolyglutamate synthetase, conserved site||Folylpolyglutamate synthetase||Mur ligase, central	11717667	11723327	-	65588	downstream
4	TUCP_003184	XLOC_137047	--	TUCP	91298933	91316714	+	ENSRNOT00000043827	ENSRNOG00000029321	Ccser1	Serine-rich coiled-coil domain-containing protein||Serine-rich coiled-coil domain-containing protein 1	91373942	91972325	+	57227	upstream
X	TUCP_004779	XLOC_211073	--	TUCP	1270928	1275362	-	ENSRNOT00000042736	ENSRNOG00000028993	LOC102555453	Ribosomal protein L11, conserved site||Ribosomal protein L11, N-terminal||Ribosomal protein L11, C-terminal||Ribosomal protein L11/L12	1345684	1346181	-	70321	downstream
X	TUCP_004779	XLOC_211073	--	TUCP	1270928	1275362	-	ENSRNOT00000013745	ENSRNOG00000010208	Timp1	Metalloproteinase inhibitor 1||Protease inhibitor I35 (TIMP)||Netrin domain||Tissue inhibitor of metalloproteinases-like, OB-fold||Tissue inhibitor of metalloproteinase, conserved site||Proteinase inhibitor I35b (TIMP), C-terminal	1364786	1369384	-	89423	downstream
X	TUCP_004779	XLOC_211073	--	TUCP	1270928	1275362	-	ENSRNOT00000013522	ENSRNOG00000010171	Elk1	Winged helix-turn-helix DNA-binding domain||Ets domain	1297099	1304822	+	21736	upstream
X	TUCP_004779	XLOC_211073	--	TUCP	1270928	1275362	-	ENSRNOT00000013476	ENSRNOG00000009893	Uxt	Prefoldin alpha-like||Prefoldin||Ubiquitously expressed transcript protein UXT	1275612	1287512	+	249	upstream
X	TUCP_004779	XLOC_211073	--	TUCP	1270928	1275362	-	ENSRNOT00000014250	ENSRNOG00000010365	Syn1	Synapsin||ATP-grasp fold, subdomain 2||ATP-grasp fold, subdomain 1||Synapsin, conserved site||Synapsin, ATP-binding domain||Pre-ATP-grasp domain||Synapsin, pre-ATP-grasp domain||Synapsin, phosphorylation site||Synapsin-1	1321315	1379198	+	45952	upstream
X	TUCP_004779	XLOC_211073	--	TUCP	1270928	1275362	-	ENSRNOT00000038909	ENSRNOG00000025811	Cfp	Thrombospondin type-1 (TSP1) repeat	1311121	1316682	+	35758	upstream
4	TUCP_003186	XLOC_137407	--	TUCP	96528647	96561724	+	ENSRNOT00000009569	ENSRNOG00000023679	Prdm5	Zinc finger, C2H2-like||Zinc finger C2H2-type/integrase DNA-binding domain||Zinc finger, C2H2||SET domain	96659084	96812263	+	97359	upstream
4	TUCP_003186	XLOC_137407	--	TUCP	96528647	96561724	+	ENSRNOT00000009094	ENSRNOG00000006857	Ndnf	Fibronectin type III||Protein of unknown function DUF2369||Immunoglobulin-like fold	96562725	96564611	+	1000	upstream
4	TUCP_003186	XLOC_137407	--	TUCP	96528647	96561724	+	ENSRNOT00000091272	ENSRNOG00000054524	Tnip3	-	96449351	96492871	+	35775	downstream
4	TUCP_003187	XLOC_137463	--	TUCP	97780445	97826476	+	ENSRNOT00000007698	ENSRNOG00000005615	Gadd45a	50S ribosomal protein L30e-like||Growth arrest and DNA damage-inducible protein GADD45||Ribosomal protein L7Ae/L30e/S12e/Gadd45	97782512	97784842	-	(2331)	antisense
4	TUCP_003187	XLOC_137463	--	TUCP	97780445	97826476	+	ENSRNOT00000075400	ENSRNOG00000050231	Gng12	G-protein gamma-like domain||G-protein, gamma subunit	97657671	97760102	+	20342	downstream
4	TUCP_003188	XLOC_137463	--	TUCP	97810427	97826476	+	ENSRNOT00000075400	ENSRNOG00000050231	Gng12	G-protein gamma-like domain||G-protein, gamma subunit	97657671	97760102	+	50324	downstream
4	TUCP_003188	XLOC_137463	--	TUCP	97810427	97826476	+	ENSRNOT00000007698	ENSRNOG00000005615	Gadd45a	50S ribosomal protein L30e-like||Growth arrest and DNA damage-inducible protein GADD45||Ribosomal protein L7Ae/L30e/S12e/Gadd45	97782512	97784842	-	25584	upstream
4	TUCP_003189	XLOC_137464	--	TUCP	97784481	97788871	+	ENSRNOT00000007698	ENSRNOG00000005615	Gadd45a	50S ribosomal protein L30e-like||Growth arrest and DNA damage-inducible protein GADD45||Ribosomal protein L7Ae/L30e/S12e/Gadd45	97782512	97784842	-	(362)	antisense
4	TUCP_003189	XLOC_137464	--	TUCP	97784481	97788871	+	ENSRNOT00000075400	ENSRNOG00000050231	Gng12	G-protein gamma-like domain||G-protein, gamma subunit	97657671	97760102	+	24378	downstream
3	TUCP_002814	XLOC_119094	--	TUCP	17951344	17951765	+	ENSRNOT00000073021	ENSRNOG00000049024	Igkv1-35	Immunoglobulin-like fold||Immunoglobulin-like domain||Immunoglobulin V-set domain||Immunoglobulin subtype	17889972	17890702	+	60641	downstream
6	TUCP_003743	XLOC_164109	--	TUCP	69807724	69851943	+	ENSRNOT00000049500	ENSRNOG00000031317	RGD1559629	V-ATPase proteolipid subunit C-like domain||ATPase, F0 complex, subunit C	69950500	69950898	+	98556	upstream
6	TUCP_003746	XLOC_164519	--	TUCP	76225426	76235153	+	ENSRNOT00000009666	ENSRNOG00000007114	Psma6	Proteasome alpha-subunit, N-terminal domain||Proteasome A-type subunit||Nucleophile aminohydrolases, N-terminal||Proteasome, subunit alpha/beta	76188083	76205426	+	19999	downstream
6	TUCP_003746	XLOC_164519	--	TUCP	76225426	76235153	+	ENSRNOT00000084062	ENSRNOG00000007114	Psma6	Proteasome alpha-subunit, N-terminal domain||Proteasome A-type subunit||Nucleophile aminohydrolases, N-terminal||Proteasome, subunit alpha/beta	76174452	76205426	+	19999	downstream
6	TUCP_003746	XLOC_164519	--	TUCP	76225426	76235153	+	ENSRNOT00000009304	ENSRNOG00000007043	RGD1305089	Protein-only RNase P, C-terminal	76079880	76171296	+	54129	downstream
6	TUCP_003746	XLOC_164519	--	TUCP	76225426	76235153	+	ENSRNOT00000009894	ENSRNOG00000007390	Nfkbia	Ankyrin repeat-containing domain||Ankyrin repeat	76267228	76270457	-	32074	downstream
3	TUCP_002817	XLOC_119444	--	TUCP	33168808	33431464	+	ENSRNOT00000006937	ENSRNOG00000005021	Orc4	P-loop containing nucleoside triphosphate hydrolase||Origin recognition complex subunit 4||Origin recognition complex subunit 4, C-terminal||AAA+ ATPase domain	33037034	33075685	-	93122	upstream
3	TUCP_002817	XLOC_119444	--	TUCP	33168808	33431464	+	ENSRNOT00000092907	ENSRNOG00000027596	Mbd5	PWWP domain||Methyl-CpG DNA binding	33440256	33504238	+	8791	upstream
3	TUCP_002817	XLOC_119444	--	TUCP	33168808	33431464	+	ENSRNOT00000034632	ENSRNOG00000027596	Mbd5	PWWP domain||Methyl-CpG DNA binding	33440191	33503685	+	8726	upstream
2	TUCP_002613	XLOC_109993	--	TUCP	156713871	156714530	-	ENSRNOT00000080578	ENSRNOG00000059120	AABR07011031.1	-	156792500	156807305	-	77969	downstream
2	TUCP_002612	XLOC_109992	--	TUCP	156769340	156771515	-	ENSRNOT00000080578	ENSRNOG00000059120	AABR07011031.1	-	156792500	156807305	-	20984	downstream
2	TUCP_002611	XLOC_109992	--	TUCP	156710159	156771515	-	ENSRNOT00000080578	ENSRNOG00000059120	AABR07011031.1	-	156792500	156807305	-	20984	downstream
6	TUCP_003749	XLOC_164537	--	TUCP	76269587	76271443	+	ENSRNOT00000009666	ENSRNOG00000007114	Psma6	Proteasome alpha-subunit, N-terminal domain||Proteasome A-type subunit||Nucleophile aminohydrolases, N-terminal||Proteasome, subunit alpha/beta	76188083	76205426	+	64160	downstream
6	TUCP_003749	XLOC_164537	--	TUCP	76269587	76271443	+	ENSRNOT00000084062	ENSRNOG00000007114	Psma6	Proteasome alpha-subunit, N-terminal domain||Proteasome A-type subunit||Nucleophile aminohydrolases, N-terminal||Proteasome, subunit alpha/beta	76174452	76205426	+	64160	downstream
6	TUCP_003749	XLOC_164537	--	TUCP	76269587	76271443	+	ENSRNOT00000043224	ENSRNOG00000030869	Aldoart2	Fructose-bisphosphate aldolase class-I active site||Aldolase-type TIM barrel||Fructose-bisphosphate aldolase, class-I	76349362	76351051	+	77918	upstream
6	TUCP_003749	XLOC_164537	--	TUCP	76269587	76271443	+	ENSRNOT00000009894	ENSRNOG00000007390	Nfkbia	Ankyrin repeat-containing domain||Ankyrin repeat	76267228	76270457	-	(871)	antisense
6	TUCP_003749	XLOC_164537	--	TUCP	76269587	76271443	+	ENSRNOT00000009304	ENSRNOG00000007043	RGD1305089	Protein-only RNase P, C-terminal	76079880	76171296	+	98290	downstream
2	TUCP_002617	XLOC_110016	--	TUCP	157080549	157083405	-	ENSRNOT00000076409	ENSRNOG00000051147	Rn50_2_1765.1	Rho GTPase-activating protein domain||Rho GTPase activation protein	157056105	157058194	-	22354	upstream
2	TUCP_002617	XLOC_110016	--	TUCP	157080549	157083405	-	ENSRNOT00000001187	ENSRNOG00000000889	LOC304239	Rho GTPase-activating protein domain||Rho GTPase activation protein	157031192	157066781	-	13767	upstream
2	TUCP_002617	XLOC_110016	--	TUCP	157080549	157083405	-	ENSRNOT00000076491	ENSRNOG00000000889	LOC304239	Rho GTPase-activating protein domain||Rho GTPase activation protein	157031018	157035483	-	45065	upstream
2	TUCP_002616	XLOC_110015	--	TUCP	157106065	157116950	-	ENSRNOT00000076409	ENSRNOG00000051147	Rn50_2_1765.1	Rho GTPase-activating protein domain||Rho GTPase activation protein	157056105	157058194	-	47870	upstream
2	TUCP_002616	XLOC_110015	--	TUCP	157106065	157116950	-	ENSRNOT00000001187	ENSRNOG00000000889	LOC304239	Rho GTPase-activating protein domain||Rho GTPase activation protein	157031192	157066781	-	39283	upstream
2	TUCP_002616	XLOC_110015	--	TUCP	157106065	157116950	-	ENSRNOT00000076491	ENSRNOG00000000889	LOC304239	Rho GTPase-activating protein domain||Rho GTPase activation protein	157031018	157035483	-	70581	upstream
2	TUCP_002615	XLOC_109997	--	TUCP	156723736	156781485	-	ENSRNOT00000080578	ENSRNOG00000059120	AABR07011031.1	-	156792500	156807305	-	11014	downstream
2	TUCP_002614	XLOC_109994	--	TUCP	156714617	156772639	-	ENSRNOT00000080578	ENSRNOG00000059120	AABR07011031.1	-	156792500	156807305	-	19860	downstream
2	TUCP_002343	XLOC_097704	--	TUCP	94214064	94244364	+	ENSRNOT00000071039	ENSRNOG00000050719	AABR07009357.1	Glycosyltransferase 39-like	94315538	94315976	-	71173	downstream
2	TUCP_002343	XLOC_097704	--	TUCP	94214064	94244364	+	ENSRNOT00000090023	ENSRNOG00000061328	Pag1	Phosphoprotein associated with glycosphingolipid-enriched microdomains 1	94266213	94277676	+	21848	upstream
7	TUCP_004208	XLOC_184643	--	TUCP	141099571	141111188	-	ENSRNOT00000091538	ENSRNOG00000058430	Bcdin3d	RNA methyltransferase bin3, C-terminal||Bin3-type S-adenosyl-L-methionine binding domain||S-adenosyl-L-methionine-dependent methyltransferase	141132133	141136700	-	20944	downstream
7	TUCP_004208	XLOC_184643	--	TUCP	141099571	141111188	-	ENSRNOT00000092068	ENSRNOG00000056297	Fmnl3	Formin, FH2 domain||Formin, FH3 domain||Formin-like protein 3||Formin, GTPase-binding domain||Rho GTPase-binding/formin homology 3 (GBD/FH3) domain||Armadillo-type fold||Diaphanous autoregulatory (DAD) domain	140983342	141001993	-	97577	upstream
7	TUCP_004208	XLOC_184643	--	TUCP	141099571	141111188	-	ENSRNOT00000086276	ENSRNOG00000056678	Nckap5l	Nck-associated protein 5, C-terminal||Nck-associated protein 5-like	141081943	141093924	-	5646	upstream
7	TUCP_004208	XLOC_184643	--	TUCP	141099571	141111188	-	ENSRNOT00000081434	ENSRNOG00000056678	Nckap5l	Nck-associated protein 5, C-terminal||Nck-associated protein 5-like	141082149	141095691	-	3879	upstream
7	TUCP_004208	XLOC_184643	--	TUCP	141099571	141111188	-	ENSRNOT00000085033	ENSRNOG00000053258	Faim2	Bax inhibitor 1-related	141157963	141185710	-	46774	downstream
7	TUCP_004208	XLOC_184643	--	TUCP	141099571	141111188	-	ENSRNOT00000088176	ENSRNOG00000055579	Tmbim6	Bax inhibitor 1, conserved site||Bax inhibitor 1-related	141054494	141068789	+	30781	downstream
7	TUCP_004208	XLOC_184643	--	TUCP	141099571	141111188	-	ENSRNOT00000084674	ENSRNOG00000055579	Tmbim6	Bax inhibitor 1, conserved site||Bax inhibitor 1-related	141053876	141068789	+	30781	downstream
7	TUCP_004208	XLOC_184643	--	TUCP	141099571	141111188	-	ENSRNOT00000091050	ENSRNOG00000055579	Tmbim6	Bax inhibitor 1, conserved site||Bax inhibitor 1-related	141034982	141069989	+	29581	downstream
5	TUCP_003554	XLOC_155896	--	TUCP	56542385	56554591	-	ENSRNOT00000066081	ENSRNOG00000006485	Topors	Zinc finger, RING-type||Zinc finger, RING-type, conserved site||Zinc finger, RING/FYVE/PHD-type	56554969	56567320	-	377	downstream
5	TUCP_003554	XLOC_155896	--	TUCP	56542385	56554591	-	ENSRNOT00000008337	ENSRNOG00000005849	Aco1	Aconitase/3-isopropylmalate dehydratase, swivel||Aconitase/Iron-responsive element-binding protein 2||Aconitase/3-isopropylmalate dehydratase large subunit, alpha/beta/alpha, subdomain 2||Aconitase A/isopropylmalate dehydratase small subunit, swivel domain||Aconitase/3-isopropylmalate dehydratase large subunit, alpha/beta/alpha domain||Iron regulatory protein 1||Aconitase/isopropylmalate dehydrat…	56425024	56481218	+	61166	downstream
5	TUCP_003554	XLOC_155896	--	TUCP	56542385	56554591	-	ENSRNOT00000029712	ENSRNOG00000024539	Ndufb6	NADH dehydrogenase 1, beta subcomplex, subunit 6	56567109	56576676	-	12517	downstream
5	TUCP_003554	XLOC_155896	--	TUCP	56542385	56554591	-	ENSRNOT00000060765	ENSRNOG00000006384	Ddx58	Caspase recruitment domain||Zinc finger, C2H2||Death-like domain||Helicase superfamily 1/2, ATP-binding domain||Helicase/UvrB, N-terminal||P-loop containing nucleoside triphosphate hydrolase	56500734	56536772	-	5612	upstream
2	TUCP_002573	XLOC_109039	--	TUCP	122770629	122782028	-	ENSRNOT00000080181	ENSRNOG00000056177	Ccdc144b	Protein of unknown function DUF3496	122710996	122756842	-	13786	upstream
2	TUCP_002573	XLOC_109039	--	TUCP	122770629	122782028	-	ENSRNOT00000033080	ENSRNOG00000028350	Arse	Sulfatase, N-terminal||Sulfatase, conserved site||Alkaline phosphatase-like, alpha/beta/alpha||Alkaline-phosphatase-like, core domain	122877286	122884360	+	95257	upstream
2	TUCP_002573	XLOC_109039	--	TUCP	122770629	122782028	-	ENSRNOT00000067090	ENSRNOG00000042283	Rslcan18	Zinc finger C2H2-type/integrase DNA-binding domain||Zinc finger, C2H2-like||Zinc finger, C2H2||Krueppel-associated box	122865100	122869616	+	83071	upstream
2	TUCP_002573	XLOC_109039	--	TUCP	122770629	122782028	-	ENSRNOT00000089353	ENSRNOG00000014178	Acad9	Acyl-CoA dehydrogenase/oxidase C-terminal||Acyl-CoA dehydrogenase, conserved site||Acyl-CoA oxidase/dehydrogenase, central domain||Acyl-CoA dehydrogenase/oxidase, N-terminal||Acyl-CoA dehydrogenase/oxidase, N-terminal and middle domain	122782131	122805764	+	102	upstream
2	TUCP_002573	XLOC_109039	--	TUCP	122770629	122782028	-	ENSRNOT00000086831	ENSRNOG00000054039	AABR07010085.1	-	122690278	122694271	+	76357	downstream
2	TUCP_002573	XLOC_109039	--	TUCP	122770629	122782028	-	ENSRNOT00000019108	ENSRNOG00000014178	Acad9	Acyl-CoA dehydrogenase/oxidase C-terminal||Acyl-CoA dehydrogenase, conserved site||Acyl-CoA oxidase/dehydrogenase, central domain||Acyl-CoA dehydrogenase/oxidase, N-terminal||Acyl-CoA dehydrogenase/oxidase, N-terminal and middle domain	122782060	122805768	+	31	upstream
2	TUCP_002573	XLOC_109039	--	TUCP	122770629	122782028	-	ENSRNOT00000018942	ENSRNOG00000013293	Mccc1	ATP-grasp fold, subdomain 1||ATP-grasp fold, subdomain 2||Biotin carboxylation domain||Biotin-binding site||Rudiment single hybrid motif||Biotin carboxylase, C-terminal||ATP-grasp fold||Carbamoyl-phosphate synthetase large subunit-like, ATP-binding domain||Pre-ATP-grasp domain||Biotin carboxylase-like, N-terminal domain||Biotin/lipoyl attachment||Single hybrid motif	122550775	122690617	-	80011	upstream
3	TUCP_002806	XLOC_118690	--	TUCP	8748089	8751921	+	ENSRNOT00000050528	ENSRNOG00000025892	Set	AGC-kinase, C-terminal||Nucleosome assembly protein (NAP)||Serine/threonine-protein kinase, active site||Protein kinase, ATP binding site||Protein kinase, C-terminal||C2 domain||HR1 rho-binding repeat||Protein kinase-like domain||Protein kinase domain	8628033	8656191	+	91897	downstream
3	TUCP_002806	XLOC_118690	--	TUCP	8748089	8751921	+	ENSRNOT00000021431	ENSRNOG00000015970	Tbc1d13	Rab-GTPase-TBC domain	8701855	8717515	+	30573	downstream
3	TUCP_002806	XLOC_118690	--	TUCP	8748089	8751921	+	ENSRNOT00000078932	ENSRNOG00000025296	Lrrc8a	Leucine-rich repeat domain, L domain-like||LRRC8, pannexin-like TM region||Leucine-rich repeat, typical subtype||Leucine-rich repeat	8817076	8828136	+	65154	upstream
3	TUCP_002806	XLOC_118690	--	TUCP	8748089	8751921	+	ENSRNOT00000030623	ENSRNOG00000025711	LOC499770	Putative RNA methyltransferase||tRNA (guanine-N1-)-methyltransferase, N-terminal||Nucleic acid-binding, OB-fold||Alpha/beta knot methyltransferases	8743882	8751324	-	(3236)	antisense
3	TUCP_002806	XLOC_118690	--	TUCP	8748089	8751921	+	ENSRNOT00000021865	ENSRNOG00000016097	Kyat1	Aminotransferase, class I/classII||Pyridoxal phosphate-dependent transferase||Pyridoxal phosphate-dependent transferase, major region, subdomain 1||Pyridoxal phosphate-dependent transferase, major region, subdomain 2	8752625	8766433	-	703	downstream
3	TUCP_002806	XLOC_118690	--	TUCP	8748089	8751921	+	ENSRNOT00000022786	ENSRNOG00000016989	Dolk	Polyprenol kinase family	8850154	8852192	-	98232	downstream
3	TUCP_002806	XLOC_118690	--	TUCP	8748089	8751921	+	ENSRNOT00000050908	ENSRNOG00000015791	Zdhhc12	Zinc finger, DHHC-type, palmitoyltransferase	8656412	8659102	-	88986	upstream
3	TUCP_002806	XLOC_118690	--	TUCP	8748089	8751921	+	ENSRNOT00000033934	ENSRNOG00000025296	Lrrc8a	Leucine-rich repeat domain, L domain-like||LRRC8, pannexin-like TM region||Leucine-rich repeat, typical subtype||Leucine-rich repeat	8802852	8828533	+	50930	upstream
3	TUCP_002806	XLOC_118690	--	TUCP	8748089	8751921	+	ENSRNOT00000077797	ENSRNOG00000025892	Set	AGC-kinase, C-terminal||Nucleosome assembly protein (NAP)||Serine/threonine-protein kinase, active site||Protein kinase, ATP binding site||Protein kinase, C-terminal||C2 domain||HR1 rho-binding repeat||Protein kinase-like domain||Protein kinase domain	8643936	8659117	+	88971	downstream
3	TUCP_002806	XLOC_118690	--	TUCP	8748089	8751921	+	ENSRNOT00000022552	ENSRNOG00000016794	Phyhd1	Phytanoyl-CoA dioxygenase	8832740	8846125	+	80818	upstream
3	TUCP_002806	XLOC_118690	--	TUCP	8748089	8751921	+	ENSRNOT00000021531	ENSRNOG00000016033	Endog	Extracellular Endonuclease, subunit A||DNA/RNA non-specific endonuclease||DNA/RNA non-specific endonuclease, active site	8741766	8744592	+	3496	downstream
3	TUCP_002806	XLOC_118690	--	TUCP	8748089	8751921	+	ENSRNOT00000035002	ENSRNOG00000025832	Zer1	Armadillo-type fold||Armadillo||Leucine-rich repeat domain, L domain-like||Armadillo-like helical	8662579	8690305	-	57783	upstream
20	TUCP_002771	XLOC_117242	--	TUCP	26179580	26269564	-	ENSRNOT00000033980	ENSRNOG00000026466	Lrrtm3	Leucine-rich repeat domain, L domain-like||Leucine-rich repeat||Leucine-rich repeat, typical subtype||Leucine-rich repeat N-terminal domain	25990304	26163656	+	15923	downstream
20	TUCP_002772	XLOC_117242	--	TUCP	26179580	26269628	-	ENSRNOT00000033980	ENSRNOG00000026466	Lrrtm3	Leucine-rich repeat domain, L domain-like||Leucine-rich repeat||Leucine-rich repeat, typical subtype||Leucine-rich repeat N-terminal domain	25990304	26163656	+	15923	downstream
20	TUCP_002773	XLOC_117242	--	TUCP	26220379	26261175	-	ENSRNOT00000033980	ENSRNOG00000026466	Lrrtm3	Leucine-rich repeat domain, L domain-like||Leucine-rich repeat||Leucine-rich repeat, typical subtype||Leucine-rich repeat N-terminal domain	25990304	26163656	+	56722	downstream
11	TUCP_000989	XLOC_036340	--	TUCP	84399622	84413892	+	ENSRNOT00000066953	ENSRNOG00000042367	Cyp2ab1	Cytochrome P450, E-class, group I||Cytochrome P450, conserved site||Cytochrome P450	84506703	84514328	+	92810	upstream
11	TUCP_000989	XLOC_036340	--	TUCP	84399622	84413892	+	ENSRNOT00000002316	ENSRNOG00000029178	Abcc5	ABC transporter type 1, transmembrane domain||ABC transporter-like||AAA+ ATPase domain||ABC transporter, conserved site||Multidrug resistance-associated protein 5||P-loop containing nucleoside triphosphate hydrolase	84396033	84490211	+	(14271)	sense_overlapping
11	TUCP_000989	XLOC_036340	--	TUCP	84399622	84413892	+	ENSRNOT00000064212	ENSRNOG00000023107	Yeats2	YEATS	84330064	84583542	-	(14271)	antisense
11	TUCP_000989	XLOC_036340	--	TUCP	84399622	84413892	+	ENSRNOT00000058043	ENSRNOG00000001911	Map6d1	Microtubule-associated protein 6	84321078	84327307	+	72314	downstream
11	TUCP_000989	XLOC_036340	--	TUCP	84399622	84413892	+	ENSRNOT00000048306	ENSRNOG00000029178	Abcc5	ABC transporter type 1, transmembrane domain||ABC transporter-like||AAA+ ATPase domain||ABC transporter, conserved site||Multidrug resistance-associated protein 5||P-loop containing nucleoside triphosphate hydrolase	84399417	84428650	+	(14271)	sense_overlapping
11	TUCP_000989	XLOC_036340	--	TUCP	84399622	84413892	+	ENSRNOT00000091595	ENSRNOG00000029178	Abcc5	ABC transporter type 1, transmembrane domain||ABC transporter-like||AAA+ ATPase domain||ABC transporter, conserved site||Multidrug resistance-associated protein 5||P-loop containing nucleoside triphosphate hydrolase	84399417	84488920	+	(14271)	sense_overlapping
11	TUCP_000988	XLOC_036321	--	TUCP	84008246	84009048	+	ENSRNOT00000037612	ENSRNOG00000001707	Vwa5b2	VIT domain||von Willebrand factor, type A	83992076	84008946	-	(701)	antisense
11	TUCP_000988	XLOC_036321	--	TUCP	84008246	84009048	+	ENSRNOT00000002334	ENSRNOG00000029529	LOC102551435	Methyltransferase type 11||S-adenosyl-L-methionine-dependent methyltransferase	83977664	83985385	-	22860	upstream
11	TUCP_000988	XLOC_036321	--	TUCP	84008246	84009048	+	ENSRNOT00000046642	ENSRNOG00000032877	Rps15al2	Ribosomal protein S8	84094520	84094912	+	85471	upstream
11	TUCP_000988	XLOC_036321	--	TUCP	84008246	84009048	+	ENSRNOT00000002331	ENSRNOG00000001712	Alg3	Glycosyltransferase, ALG3	83986230	83991706	+	16539	downstream
11	TUCP_000988	XLOC_036321	--	TUCP	84008246	84009048	+	ENSRNOT00000002323	ENSRNOG00000001708	Dvl3	DEP domain||DIX domain||Dishevelled-3||Winged helix-turn-helix DNA-binding domain||Dishevelled protein domain||Dishevelled-related protein||PDZ domain||Dishevelled C-terminal||Dishevelled family||Ubiquitin-related domain	84051078	84068302	-	42029	downstream
11	TUCP_000988	XLOC_036321	--	TUCP	84008246	84009048	+	ENSRNOT00000002327	ENSRNOG00000001710	Abcf3	ABC transporter, conserved site||P-loop containing nucleoside triphosphate hydrolase||ABC-transporter extension domain||ABC transporter-like||AAA+ ATPase domain	84026207	84037938	-	17158	downstream
11	TUCP_000988	XLOC_036321	--	TUCP	84008246	84009048	+	ENSRNOT00000002321	ENSRNOG00000038160	Eif2b5	Armadillo-type fold||W2 domain||Hexapeptide repeat||MIF4G-like domain||Nucleotide-diphospho-sugar transferases||Trimeric LpxA-like	84080273	84090259	-	71224	downstream
11	TUCP_000988	XLOC_036321	--	TUCP	84008246	84009048	+	ENSRNOT00000002358	ENSRNOG00000001719	Psmd2	Armadillo-type fold||Proteasome/cyclosome repeat||26S proteasome regulatory complex, non-ATPase subcomplex, Rpn1 subunit	83934087	83944763	-	63482	upstream
11	TUCP_000988	XLOC_036321	--	TUCP	84008246	84009048	+	ENSRNOT00000044482	ENSRNOG00000001715	Ece2	Peptidase M13, C-terminal domain||Peptidase M13, N-terminal domain||Peptidase M13||Endothelin-converting enzyme 2||Metallopeptidase, catalytic domain	83948230	83964055	-	44190	upstream
11	TUCP_000988	XLOC_036321	--	TUCP	84008246	84009048	+	ENSRNOT00000058131	ENSRNOG00000038184	Camk2n2	Calcium/calmodulin-dependent protein kinase II inhibitor	83975367	83976588	+	31657	downstream
11	TUCP_000988	XLOC_036321	--	TUCP	84008246	84009048	+	ENSRNOT00000073703	ENSRNOG00000001712	Alg3	Glycosyltransferase, ALG3	83986247	83991706	+	16539	downstream
11	TUCP_000988	XLOC_036321	--	TUCP	84008246	84009048	+	ENSRNOT00000088821	ENSRNOG00000001709	Ap2m1	Clathrin adaptor, mu subunit, conserved site||Mu homology domain||Clathrin adaptor, mu subunit||AP complex, mu/sigma subunit||Longin-like domain	84041630	84047497	-	32581	downstream
11	TUCP_000988	XLOC_036321	--	TUCP	84008246	84009048	+	ENSRNOT00000058092	ENSRNOG00000001709	Ap2m1	Clathrin adaptor, mu subunit, conserved site||Mu homology domain||Clathrin adaptor, mu subunit||AP complex, mu/sigma subunit||Longin-like domain	84041184	84047546	-	32135	downstream
11	TUCP_000988	XLOC_036321	--	TUCP	84008246	84009048	+	ENSRNOT00000040029	ENSRNOG00000001738	Eif4g1	W2 domain||Armadillo-type fold||MIF4G-like, type 3||Initiation factor eIF-4 gamma, MA3||MIF4G-like domain	83908109	83926524	-	81721	upstream
11	TUCP_000988	XLOC_036321	--	TUCP	84008246	84009048	+	ENSRNOT00000041777	ENSRNOG00000001738	Eif4g1	W2 domain||Armadillo-type fold||MIF4G-like, type 3||Initiation factor eIF-4 gamma, MA3||MIF4G-like domain	83908109	83926524	-	81721	upstream
20	TUCP_002776	XLOC_117261	--	TUCP	26469646	26478295	-	ENSRNOT00000049437	ENSRNOG00000000378	Ctnna3	Alpha-catenin||Alpha T-catenin||Vinculin/alpha-catenin	26516836	26589209	-	38540	downstream
20	TUCP_002776	XLOC_117261	--	TUCP	26469646	26478295	-	ENSRNOT00000000423	ENSRNOG00000000376	Tmem167b	Protein of unknown function DUF1242	26534535	26534759	+	56239	upstream
20	TUCP_002777	XLOC_117262	--	TUCP	26484679	26493118	-	ENSRNOT00000049437	ENSRNOG00000000378	Ctnna3	Alpha-catenin||Alpha T-catenin||Vinculin/alpha-catenin	26516836	26589209	-	23717	downstream
20	TUCP_002777	XLOC_117262	--	TUCP	26484679	26493118	-	ENSRNOT00000000423	ENSRNOG00000000376	Tmem167b	Protein of unknown function DUF1242	26534535	26534759	+	41416	upstream
11	TUCP_000985	XLOC_036063	--	TUCP	75607541	75628730	+	ENSRNOT00000032569	ENSRNOG00000024040	Mb21d2	Mab-21 domain	75434197	75533520	+	74020	downstream
11	TUCP_000984	XLOC_035947	--	TUCP	74316316	74332330	+	ENSRNOT00000002346	ENSRNOG00000001720	Hes1	Myc-type, basic helix-loop-helix (bHLH) domain||Orange domain	74312806	74315248	-	1067	upstream
11	TUCP_000981	XLOC_035789	--	TUCP	72612901	72619771	+	ENSRNOT00000073330	ENSRNOG00000048273	Apod	Calycin||Lipocalin family conserved site||Apolipoprotein D, vertebrates||Calycin-like||Lipocalin, ApoD type||Lipocalin||Lipocalin/cytosolic fatty-acid binding domain||Apolipoprotein D	72705129	72726301	+	85357	upstream
11	TUCP_000981	XLOC_035789	--	TUCP	72612901	72619771	+	ENSRNOT00000002366	ENSRNOG00000001736	Bdh1	Short-chain dehydrogenase/reductase SDR||Short-chain dehydrogenase/reductase, conserved site||NAD(P)-binding domain	72578533	72614176	-	(1276)	antisense
11	TUCP_000980	XLOC_035788	--	TUCP	72555357	72559235	+	ENSRNOT00000002366	ENSRNOG00000001736	Bdh1	Short-chain dehydrogenase/reductase SDR||Short-chain dehydrogenase/reductase, conserved site||NAD(P)-binding domain	72578533	72614176	-	19297	downstream
11	TUCP_000983	XLOC_035791	--	TUCP	72620413	72624756	+	ENSRNOT00000073330	ENSRNOG00000048273	Apod	Calycin||Lipocalin family conserved site||Apolipoprotein D, vertebrates||Calycin-like||Lipocalin, ApoD type||Lipocalin||Lipocalin/cytosolic fatty-acid binding domain||Apolipoprotein D	72705129	72726301	+	80372	upstream
11	TUCP_000983	XLOC_035791	--	TUCP	72620413	72624756	+	ENSRNOT00000002366	ENSRNOG00000001736	Bdh1	Short-chain dehydrogenase/reductase SDR||Short-chain dehydrogenase/reductase, conserved site||NAD(P)-binding domain	72578533	72614176	-	6236	upstream
11	TUCP_000982	XLOC_035789	--	TUCP	72612901	72619771	+	ENSRNOT00000073330	ENSRNOG00000048273	Apod	Calycin||Lipocalin family conserved site||Apolipoprotein D, vertebrates||Calycin-like||Lipocalin, ApoD type||Lipocalin||Lipocalin/cytosolic fatty-acid binding domain||Apolipoprotein D	72705129	72726301	+	85357	upstream
11	TUCP_000982	XLOC_035789	--	TUCP	72612901	72619771	+	ENSRNOT00000002366	ENSRNOG00000001736	Bdh1	Short-chain dehydrogenase/reductase SDR||Short-chain dehydrogenase/reductase, conserved site||NAD(P)-binding domain	72578533	72614176	-	(1276)	antisense
4	TUCP_003351	XLOC_145151	--	TUCP	123840338	123846162	-	ENSRNOT00000013498	ENSRNOG00000010090	Ccdc174	Protein of unknown function DUF4078	123760743	123787528	+	52809	downstream
4	TUCP_003351	XLOC_145151	--	TUCP	123840338	123846162	-	ENSRNOT00000051022	ENSRNOG00000010213	Fgd5	Pleckstrin homology domain||PH domain-like||FYVE zinc finger||Zinc finger, FYVE-related||Dbl homology (DH) domain||Zinc finger, RING/FYVE/PHD-type	123865725	123962881	+	19562	upstream
4	TUCP_003351	XLOC_145151	--	TUCP	123840338	123846162	-	ENSRNOT00000029055	ENSRNOG00000022155	RGD1560289	FAM194 family	123801174	123837662	+	2675	downstream
4	TUCP_003350	XLOC_145072	--	TUCP	121868134	121886855	-	ENSRNOT00000086882	ENSRNOG00000052138	Vom1r98	Vomeronasal receptor, type 1||GPCR, rhodopsin-like, 7TM	121912352	121913296	+	25496	upstream
4	TUCP_003350	XLOC_145072	--	TUCP	121868134	121886855	-	ENSRNOT00000080669	ENSRNOG00000058628	Vom1r96	GPCR, rhodopsin-like, 7TM||Vomeronasal receptor, type 1	121870699	121871658	+	(960)	antisense
4	TUCP_003350	XLOC_145072	--	TUCP	121868134	121886855	-	ENSRNOT00000072082	ENSRNOG00000048956	Vom1r95	Vomeronasal receptor, type 1	121821837	121822781	-	45352	upstream
4	TUCP_003350	XLOC_145072	--	TUCP	121868134	121886855	-	ENSRNOT00000085001	ENSRNOG00000053093	Vom1r99	Vomeronasal receptor, type 1	121968622	121969446	-	81766	downstream
4	TUCP_003350	XLOC_145072	--	TUCP	121868134	121886855	-	ENSRNOT00000077949	ENSRNOG00000060112	Vom1r97	Vomeronasal receptor, type 1||GPCR, rhodopsin-like, 7TM	121899292	121900224	+	12436	upstream
4	TUCP_003350	XLOC_145072	--	TUCP	121868134	121886855	-	ENSRNOT00000084689	ENSRNOG00000055542	Vom1r93	Vomeronasal receptor, type 1	121778227	121779159	+	88974	downstream
4	TUCP_003350	XLOC_145072	--	TUCP	121868134	121886855	-	ENSRNOT00000049591	ENSRNOG00000031140	Vom1r94	GPCR, rhodopsin-like, 7TM||Vomeronasal receptor, type 1	121810559	121811539	-	56594	upstream
4	TUCP_003353	XLOC_145172	--	TUCP	123988679	124028107	-	ENSRNOT00000014933	ENSRNOG00000010912	Mrps25	Thioredoxin-like fold||Ribosomal protein/NADH dehydrogenase domain	124036655	124048417	-	8547	downstream
4	TUCP_003353	XLOC_145172	--	TUCP	123988679	124028107	-	ENSRNOT00000051022	ENSRNOG00000010213	Fgd5	Pleckstrin homology domain||PH domain-like||FYVE zinc finger||Zinc finger, FYVE-related||Dbl homology (DH) domain||Zinc finger, RING/FYVE/PHD-type	123865725	123962881	+	25797	downstream
4	TUCP_003353	XLOC_145172	--	TUCP	123988679	124028107	-	ENSRNOT00000015944	ENSRNOG00000011824	Trh	Thyrotropin-releasing hormone	124110716	124113242	-	82608	downstream
4	TUCP_003353	XLOC_145172	--	TUCP	123988679	124028107	-	ENSRNOT00000015602	ENSRNOG00000011391	Rbsn	Zinc finger, FYVE/PHD-type||FYVE zinc finger||Zinc finger, C2H2||Zinc finger, RING/FYVE/PHD-type||Zinc finger, FYVE-related||Rabenosyn, Rab binding domain	124052300	124080906	-	24192	downstream
4	TUCP_003353	XLOC_145172	--	TUCP	123988679	124028107	-	ENSRNOT00000014353	ENSRNOG00000010536	Nr2c2	Zinc finger, NHR/GATA-type||Nuclear hormone receptor||Nuclear hormone receptor, ligand-binding domain||Zinc finger, nuclear hormone receptor-type	124005280	124030349	+	(22828)	antisense
8	TUCP_004432	XLOC_195269	--	TUCP	119030079	119037150	-	ENSRNOT00000051947	ENSRNOG00000030073	Prss44	Serine proteases, trypsin family, serine active site||Serine proteases, trypsin family, histidine active site||Serine proteases, trypsin domain||Peptidase S1, PA clan||Peptidase S1A, chymotrypsin family	119083900	119097707	+	46749	upstream
8	TUCP_004432	XLOC_195269	--	TUCP	119030079	119037150	-	ENSRNOT00000028426	ENSRNOG00000020946	Ccdc12	mRNA splicing factor, Cwf18	118926478	118977051	+	53027	downstream
8	TUCP_004432	XLOC_195269	--	TUCP	119030079	119037150	-	ENSRNOT00000028435	ENSRNOG00000020948	Pth1r	GPCR, family 2, secretin-like, conserved site||GPCR, family 2, parathyroid hormone receptor||GPCR, family 2-like||GPCR, family 2, extracellular hormone receptor domain||GPCR, family 2, secretin-like	118988053	119012671	-	17407	upstream
8	TUCP_004432	XLOC_195269	--	TUCP	119030079	119037150	-	ENSRNOT00000028458	ENSRNOG00000020955	Myl3	EF-hand domain pair||EF-hand domain	119030875	119036996	+	(6122)	antisense
8	TUCP_004432	XLOC_195269	--	TUCP	119030079	119037150	-	ENSRNOT00000048655	ENSRNOG00000030073	Prss44	Serine proteases, trypsin family, serine active site||Serine proteases, trypsin family, histidine active site||Serine proteases, trypsin domain||Peptidase S1, PA clan||Peptidase S1A, chymotrypsin family	119083921	119088205	+	46770	upstream
8	TUCP_004432	XLOC_195269	--	TUCP	119030079	119037150	-	ENSRNOT00000043249	ENSRNOG00000029649	Prss45	Serine proteases, trypsin family, histidine active site||Peptidase S1A, chymotrypsin family||Peptidase S1, PA clan||Serine proteases, trypsin domain	119112678	119118533	+	75527	upstream
8	TUCP_004432	XLOC_195269	--	TUCP	119030079	119037150	-	ENSRNOT00000028479	ENSRNOG00000020981	Prss46	Peptidase S1, PA clan||Serine proteases, trypsin domain||Peptidase S1A, chymotrypsin family||Serine proteases, trypsin family, histidine active site	119121669	119133546	+	84518	upstream
8	TUCP_004432	XLOC_195269	--	TUCP	119030079	119037150	-	ENSRNOT00000051211	ENSRNOG00000031971	Prss42	Peptidase S1A, chymotrypsin family||Peptidase S1, PA clan||Serine proteases, trypsin domain||Serine proteases, trypsin family, histidine active site||Serine proteases, trypsin family, serine active site	119064351	119070630	+	27200	upstream
8	TUCP_004432	XLOC_195269	--	TUCP	119030079	119037150	-	ENSRNOT00000056114	ENSRNOG00000037175	Prss50	Serine proteases, trypsin domain||Peptidase S1, PA clan||Peptidase S1A, chymotrypsin family	119135013	119141150	+	97862	upstream
8	TUCP_004435	XLOC_195378	--	TUCP	122910687	122913603	-	ENSRNOT00000033976	ENSRNOG00000026455	Gpd1l	Glycerol-3-phosphate dehydrogenase, NAD-dependent||6-phosphogluconate dehydrogenase, domain 2||6-phosphogluconate dehydrogenase C-terminal domain-like||Glycerol-3-phosphate dehydrogenase, NAD-dependent, C-terminal||NAD(P)-binding domain||Glycerol-3-phosphate dehydrogenase, NAD-dependent, N-terminal||Glycerol-3-phosphate dehydrogenase, NAD-dependent, eukaryotic	122954948	122987191	-	41344	downstream
8	TUCP_004435	XLOC_195378	--	TUCP	122910687	122913603	-	ENSRNOT00000015188	ENSRNOG00000011201	Cmtm8	Myelin and lymphocyte (MAL) protein||Marvel domain	122848501	122904913	-	5773	upstream
8	TUCP_004435	XLOC_195378	--	TUCP	122910687	122913603	-	ENSRNOT00000014861	ENSRNOG00000010986	Cmtm7	Marvel domain	122812459	122841477	-	69209	upstream
8	TUCP_004434	XLOC_195286	--	TUCP	119374304	119382852	-	ENSRNOT00000044467	ENSRNOG00000033234	Ccrl2	GPCR, rhodopsin-like, 7TM||Chemokine receptor family||G protein-coupled receptor, rhodopsin-like	119324613	119326938	-	47365	upstream
8	TUCP_004434	XLOC_195286	--	TUCP	119374304	119382852	-	ENSRNOT00000047752	ENSRNOG00000031779	Ltf	Transferrin||Transferrin family, iron binding site||Transferrin-like domain	119290416	119313261	+	61042	downstream
8	TUCP_004434	XLOC_195286	--	TUCP	119374304	119382852	-	ENSRNOT00000056060	ENSRNOG00000021047	Lrrfip2	Leucine-rich repeat flightless-interacting protein 1/2	119382011	119483043	+	(842)	antisense
8	TUCP_004434	XLOC_195286	--	TUCP	119374304	119382852	-	ENSRNOT00000010249	ENSRNOG00000007803	RGD1565653	Ubiquitin-related domain||Ubiquitin domain	119285668	119286024	+	88279	downstream
4	TUCP_003357	XLOC_145348	--	TUCP	126039479	126052581	-	ENSRNOT00000071315	ENSRNOG00000022060	Magi1	PDZ domain||Guanylate kinase/L-type calcium channel beta subunit||Membrane-associated guanylate kinase, WW and PDZ domain-containing protein 1||Guanylate kinase, conserved site||WW domain||Guanylate kinase-like domain||P-loop containing nucleoside triphosphate hydrolase	125690237	125958112	-	81366	upstream
4	TUCP_003357	XLOC_145348	--	TUCP	126039479	126052581	-	ENSRNOT00000080234	ENSRNOG00000052174	LOC100361920	Dynein light chain, type 1/2	126070992	126071261	-	18410	downstream
4	TUCP_003356	XLOC_145347	--	TUCP	125979994	126033999	-	ENSRNOT00000071315	ENSRNOG00000022060	Magi1	PDZ domain||Guanylate kinase/L-type calcium channel beta subunit||Membrane-associated guanylate kinase, WW and PDZ domain-containing protein 1||Guanylate kinase, conserved site||WW domain||Guanylate kinase-like domain||P-loop containing nucleoside triphosphate hydrolase	125690237	125958112	-	21881	upstream
4	TUCP_003356	XLOC_145347	--	TUCP	125979994	126033999	-	ENSRNOT00000083271	ENSRNOG00000022060	Magi1	PDZ domain||Guanylate kinase/L-type calcium channel beta subunit||Membrane-associated guanylate kinase, WW and PDZ domain-containing protein 1||Guanylate kinase, conserved site||WW domain||Guanylate kinase-like domain||P-loop containing nucleoside triphosphate hydrolase	125687307	125929002	-	50991	upstream
4	TUCP_003356	XLOC_145347	--	TUCP	125979994	126033999	-	ENSRNOT00000080234	ENSRNOG00000052174	LOC100361920	Dynein light chain, type 1/2	126070992	126071261	-	36992	downstream
8	TUCP_004439	XLOC_195492	--	TUCP	127287087	127301100	-	ENSRNOT00000015113	ENSRNOG00000043167	Itga9	Integrin domain||Integrin alpha beta-propellor||Integrin alpha-2||Integrin alpha chain||Integrin alpha chain, C-terminal cytoplasmic region, conserved site||FG-GAP repeat	127271289	127572988	+	(14014)	antisense
8	TUCP_004439	XLOC_195492	--	TUCP	127287087	127301100	-	ENSRNOT00000078625	ENSRNOG00000029910	Golga4	GRIP	127171537	127248511	+	38575	downstream
8	TUCP_004439	XLOC_195492	--	TUCP	127287087	127301100	-	ENSRNOT00000051290	ENSRNOG00000029910	Golga4	GRIP	127171636	127248310	+	38776	downstream
8	TUCP_004439	XLOC_195492	--	TUCP	127287087	127301100	-	ENSRNOT00000087753	ENSRNOG00000029910	Golga4	GRIP	127171636	127248538	+	38548	downstream
8	TUCP_004438	XLOC_195492	--	TUCP	127287087	127295098	-	ENSRNOT00000015113	ENSRNOG00000043167	Itga9	Integrin domain||Integrin alpha beta-propellor||Integrin alpha-2||Integrin alpha chain||Integrin alpha chain, C-terminal cytoplasmic region, conserved site||FG-GAP repeat	127271289	127572988	+	(8012)	antisense
8	TUCP_004438	XLOC_195492	--	TUCP	127287087	127295098	-	ENSRNOT00000078625	ENSRNOG00000029910	Golga4	GRIP	127171537	127248511	+	38575	downstream
8	TUCP_004438	XLOC_195492	--	TUCP	127287087	127295098	-	ENSRNOT00000051290	ENSRNOG00000029910	Golga4	GRIP	127171636	127248310	+	38776	downstream
8	TUCP_004438	XLOC_195492	--	TUCP	127287087	127295098	-	ENSRNOT00000087753	ENSRNOG00000029910	Golga4	GRIP	127171636	127248538	+	38548	downstream
17	TUCP_001905	XLOC_078874	--	TUCP	64019	348520	-	ENSRNOT00000023685	ENSRNOG00000017597	Fbp1	Fructose-1,6-bisphosphatase||Fructose-1-6-bisphosphatase class I, N-terminal||Fructose-1,6-bisphosphatase, active site||Fructose-1,6-bisphosphatase class 1	396180	417480	-	47659	downstream
17	TUCP_001905	XLOC_078874	--	TUCP	64019	348520	-	ENSRNOT00000023865	ENSRNOG00000017637	Fbp2	Fructose-1,6-bisphosphatase, active site||Fructose-1-6-bisphosphatase class I, N-terminal||Fructose-1,6-bisphosphatase||Fructose-1,6-bisphosphatase class 1	372551	389967	-	24030	downstream
3	TUCP_002978	XLOC_128384	--	TUCP	63606852	63723850	-	ENSRNOT00000058093	ENSRNOG00000038165	Dfnb59	Gasdermin	63510293	63518147	+	88704	downstream
3	TUCP_002978	XLOC_128384	--	TUCP	63606852	63723850	-	ENSRNOT00000068494	ENSRNOG00000023227	AABR07052585.2	Immunoglobulin subtype||Immunoglobulin subtype 2||Immunoglobulin I-set||Immunoglobulin-like domain||Immunoglobulin-like fold	63566184	63568464	-	38387	upstream
3	TUCP_002978	XLOC_128384	--	TUCP	63606852	63723850	-	ENSRNOT00000015624	ENSRNOG00000011195	Prkra	Double-stranded RNA-binding domain||Staufen, C-terminal||Interferon-inducible double-stranded RNA-dependent protein kinase activator A	63489074	63507926	-	98925	upstream
3	TUCP_002978	XLOC_128384	--	TUCP	63606852	63723850	-	ENSRNOT00000015722	ENSRNOG00000011758	Fkbp7	EF-Hand 1, calcium-binding site||Peptidyl-prolyl cis-trans isomerase, FKBP-type||EF-hand domain||FKBP-type peptidyl-prolyl cis-trans isomerase domain||EF-hand domain pair	63522403	63535991	-	70860	upstream
3	TUCP_002978	XLOC_128384	--	TUCP	63606852	63723850	-	ENSRNOT00000030978	ENSRNOG00000022637	AABR07052585.1	Immunoglobulin-like fold||Immunoglobulin subtype 2||Titin, Z repeat||Immunoglobulin I-set||Immunoglobulin-like domain||Immunoglobulin subtype	63820757	63836017	-	96906	downstream
3	TUCP_002978	XLOC_128384	--	TUCP	63606852	63723850	-	ENSRNOT00000016132	ENSRNOG00000011830	Plekha3	Pleckstrin homology domain||PH domain-like	63536166	63557361	+	49490	downstream
3	TUCP_002979	XLOC_128384	--	TUCP	63606852	63723850	-	ENSRNOT00000058093	ENSRNOG00000038165	Dfnb59	Gasdermin	63510293	63518147	+	88704	downstream
3	TUCP_002979	XLOC_128384	--	TUCP	63606852	63723850	-	ENSRNOT00000068494	ENSRNOG00000023227	AABR07052585.2	Immunoglobulin subtype||Immunoglobulin subtype 2||Immunoglobulin I-set||Immunoglobulin-like domain||Immunoglobulin-like fold	63566184	63568464	-	38387	upstream
3	TUCP_002979	XLOC_128384	--	TUCP	63606852	63723850	-	ENSRNOT00000015624	ENSRNOG00000011195	Prkra	Double-stranded RNA-binding domain||Staufen, C-terminal||Interferon-inducible double-stranded RNA-dependent protein kinase activator A	63489074	63507926	-	98925	upstream
3	TUCP_002979	XLOC_128384	--	TUCP	63606852	63723850	-	ENSRNOT00000015722	ENSRNOG00000011758	Fkbp7	EF-Hand 1, calcium-binding site||Peptidyl-prolyl cis-trans isomerase, FKBP-type||EF-hand domain||FKBP-type peptidyl-prolyl cis-trans isomerase domain||EF-hand domain pair	63522403	63535991	-	70860	upstream
3	TUCP_002979	XLOC_128384	--	TUCP	63606852	63723850	-	ENSRNOT00000030978	ENSRNOG00000022637	AABR07052585.1	Immunoglobulin-like fold||Immunoglobulin subtype 2||Titin, Z repeat||Immunoglobulin I-set||Immunoglobulin-like domain||Immunoglobulin subtype	63820757	63836017	-	96906	downstream
3	TUCP_002979	XLOC_128384	--	TUCP	63606852	63723850	-	ENSRNOT00000016132	ENSRNOG00000011830	Plekha3	Pleckstrin homology domain||PH domain-like	63536166	63557361	+	49490	downstream
3	TUCP_002972	XLOC_128303	--	TUCP	61632126	61634259	-	ENSRNOT00000002155	ENSRNOG00000001588	Hoxd13	Homeodomain-like||Homeobox protein Hox1A3 N-terminal||Homeobox, conserved site||Homeobox domain	61590376	61593692	+	38433	downstream
3	TUCP_002972	XLOC_128303	--	TUCP	61632126	61634259	-	ENSRNOT00000086887	ENSRNOG00000053144	AABR07052559.1	-	61635679	61636038	-	1419	downstream
3	TUCP_002972	XLOC_128303	--	TUCP	61632126	61634259	-	ENSRNOT00000002145	ENSRNOG00000001578	Hoxd4	Homeodomain, metazoa||Homeobox domain||Homeobox, conserved site||Homeodomain-like||Homeobox protein, antennapedia type||Homeobox protein, antennapedia type, conserved site	61634005	61651056	+	(255)	antisense
3	TUCP_002972	XLOC_128303	--	TUCP	61632126	61634259	-	ENSRNOT00000033511	ENSRNOG00000001577	Hoxd3	Homeodomain-like||Homeobox domain||Homeobox, conserved site||Homeodomain, metazoa||Domain of unknown function DUF4074||Homeobox protein, antennapedia type, conserved site	61658245	61670282	+	23985	upstream
3	TUCP_002972	XLOC_128303	--	TUCP	61632126	61634259	-	ENSRNOT00000002140	ENSRNOG00000001572	Hoxd1	Homeodomain, metazoa||Homeobox domain||Homeobox, conserved site||Homeodomain-like	61685619	61687758	+	51359	upstream
3	TUCP_002972	XLOC_128303	--	TUCP	61632126	61634259	-	ENSRNOT00000067861	ENSRNOG00000042480	Hoxd8	Homeodomain-like||Homeobox, conserved site||Homeobox domain||Homeodomain, metazoa	61627383	61628628	+	3497	downstream
3	TUCP_002972	XLOC_128303	--	TUCP	61632126	61634259	-	ENSRNOT00000002148	ENSRNOG00000001581	Hoxd10	Homeodomain, metazoa||Homeobox, conserved site||Homeobox domain||Homeodomain-like	61613774	61617367	+	14758	downstream
3	TUCP_002972	XLOC_128303	--	TUCP	61632126	61634259	-	ENSRNOT00000068636	ENSRNOG00000001587	Hoxd12	Homeobox, conserved site||Homeobox domain||Homeodomain, metazoa||Homeodomain-like	61597382	61598503	+	33622	downstream
3	TUCP_002972	XLOC_128303	--	TUCP	61632126	61634259	-	ENSRNOT00000002156	ENSRNOG00000001589	Evx2	Homeodomain-like||Homeodomain, metazoa||Homeobox, conserved site||Homeobox domain	61578229	61581598	-	50527	upstream
3	TUCP_002972	XLOC_128303	--	TUCP	61632126	61634259	-	ENSRNOT00000065426	ENSRNOG00000001580	Hoxd9	Homeobox, conserved site||Homeobox domain||Homeodomain, metazoa||Hox9, N-terminal activation domain||Homeodomain-like||Homeobox protein HXA9/HXB9/HXC9	61620192	61622359	+	9766	downstream
3	TUCP_002972	XLOC_128303	--	TUCP	61632126	61634259	-	ENSRNOT00000080456	ENSRNOG00000051472	Hoxd11	Homeodomain-like||Domain of unknown function DUF3528, homeobox protein, eukaryotic||Homeobox domain||Homeobox, conserved site||Homeodomain, metazoa	61604672	61606400	+	25725	downstream
3	TUCP_002973	XLOC_128381	--	TUCP	63520786	63522279	-	ENSRNOT00000058093	ENSRNOG00000038165	Dfnb59	Gasdermin	63510293	63518147	+	2638	downstream
3	TUCP_002973	XLOC_128381	--	TUCP	63520786	63522279	-	ENSRNOT00000068494	ENSRNOG00000023227	AABR07052585.2	Immunoglobulin subtype||Immunoglobulin subtype 2||Immunoglobulin I-set||Immunoglobulin-like domain||Immunoglobulin-like fold	63566184	63568464	-	43904	downstream
3	TUCP_002973	XLOC_128381	--	TUCP	63520786	63522279	-	ENSRNOT00000015624	ENSRNOG00000011195	Prkra	Double-stranded RNA-binding domain||Staufen, C-terminal||Interferon-inducible double-stranded RNA-dependent protein kinase activator A	63489074	63507926	-	12859	upstream
3	TUCP_002973	XLOC_128381	--	TUCP	63520786	63522279	-	ENSRNOT00000015722	ENSRNOG00000011758	Fkbp7	EF-Hand 1, calcium-binding site||Peptidyl-prolyl cis-trans isomerase, FKBP-type||EF-hand domain||FKBP-type peptidyl-prolyl cis-trans isomerase domain||EF-hand domain pair	63522403	63535991	-	123	downstream
3	TUCP_002973	XLOC_128381	--	TUCP	63520786	63522279	-	ENSRNOT00000016132	ENSRNOG00000011830	Plekha3	Pleckstrin homology domain||PH domain-like	63536166	63557361	+	13886	upstream
3	TUCP_002973	XLOC_128381	--	TUCP	63520786	63522279	-	ENSRNOT00000068199	ENSRNOG00000010812	Osbpl6	PH domain-like||Pleckstrin homology domain||Oxysterol-binding protein||Oxysterol-binding protein, conserved site	63379031	63451037	+	69748	downstream
3	TUCP_002973	XLOC_128381	--	TUCP	63520786	63522279	-	ENSRNOT00000091211	ENSRNOG00000010812	Osbpl6	PH domain-like||Pleckstrin homology domain||Oxysterol-binding protein||Oxysterol-binding protein, conserved site	63353178	63454967	+	65818	downstream
3	TUCP_002970	XLOC_128262	--	TUCP	60632113	60652876	-	ENSRNOT00000068745	ENSRNOG00000017939	Chn1	Diacylglycerol/phorbol-ester binding||Protein kinase C-like, phorbol ester/diacylglycerol-binding domain||Chimaerin||Rho GTPase activation protein||Rho GTPase-activating protein domain||SH2 domain	60513077	60611924	-	20188	upstream
3	TUCP_002970	XLOC_128262	--	TUCP	60632113	60652876	-	ENSRNOT00000002174	ENSRNOG00000001597	Atf2	Zinc finger, C2H2||Basic-leucine zipper domain||Transcription factor cyclic AMP-dependent, CRE-BP1-type||Zinc finger C2H2-type/integrase DNA-binding domain||cAMP-dependent transcription factor ATF-2	60721135	60795951	-	68258	downstream
3	TUCP_002970	XLOC_128262	--	TUCP	60632113	60652876	-	ENSRNOT00000050513	ENSRNOG00000001597	Atf2	Zinc finger, C2H2||Basic-leucine zipper domain||Transcription factor cyclic AMP-dependent, CRE-BP1-type||Zinc finger C2H2-type/integrase DNA-binding domain||cAMP-dependent transcription factor ATF-2	60721171	60765645	-	68294	downstream
3	TUCP_002971	XLOC_128264	--	TUCP	60655783	60675795	-	ENSRNOT00000068745	ENSRNOG00000017939	Chn1	Diacylglycerol/phorbol-ester binding||Protein kinase C-like, phorbol ester/diacylglycerol-binding domain||Chimaerin||Rho GTPase activation protein||Rho GTPase-activating protein domain||SH2 domain	60513077	60611924	-	43858	upstream
3	TUCP_002971	XLOC_128264	--	TUCP	60655783	60675795	-	ENSRNOT00000002174	ENSRNOG00000001597	Atf2	Zinc finger, C2H2||Basic-leucine zipper domain||Transcription factor cyclic AMP-dependent, CRE-BP1-type||Zinc finger C2H2-type/integrase DNA-binding domain||cAMP-dependent transcription factor ATF-2	60721135	60795951	-	45339	downstream
3	TUCP_002971	XLOC_128264	--	TUCP	60655783	60675795	-	ENSRNOT00000050513	ENSRNOG00000001597	Atf2	Zinc finger, C2H2||Basic-leucine zipper domain||Transcription factor cyclic AMP-dependent, CRE-BP1-type||Zinc finger C2H2-type/integrase DNA-binding domain||cAMP-dependent transcription factor ATF-2	60721171	60765645	-	45375	downstream
3	TUCP_002976	XLOC_128384	--	TUCP	63606852	63723850	-	ENSRNOT00000058093	ENSRNOG00000038165	Dfnb59	Gasdermin	63510293	63518147	+	88704	downstream
3	TUCP_002976	XLOC_128384	--	TUCP	63606852	63723850	-	ENSRNOT00000068494	ENSRNOG00000023227	AABR07052585.2	Immunoglobulin subtype||Immunoglobulin subtype 2||Immunoglobulin I-set||Immunoglobulin-like domain||Immunoglobulin-like fold	63566184	63568464	-	38387	upstream
3	TUCP_002976	XLOC_128384	--	TUCP	63606852	63723850	-	ENSRNOT00000015624	ENSRNOG00000011195	Prkra	Double-stranded RNA-binding domain||Staufen, C-terminal||Interferon-inducible double-stranded RNA-dependent protein kinase activator A	63489074	63507926	-	98925	upstream
3	TUCP_002976	XLOC_128384	--	TUCP	63606852	63723850	-	ENSRNOT00000015722	ENSRNOG00000011758	Fkbp7	EF-Hand 1, calcium-binding site||Peptidyl-prolyl cis-trans isomerase, FKBP-type||EF-hand domain||FKBP-type peptidyl-prolyl cis-trans isomerase domain||EF-hand domain pair	63522403	63535991	-	70860	upstream
3	TUCP_002976	XLOC_128384	--	TUCP	63606852	63723850	-	ENSRNOT00000030978	ENSRNOG00000022637	AABR07052585.1	Immunoglobulin-like fold||Immunoglobulin subtype 2||Titin, Z repeat||Immunoglobulin I-set||Immunoglobulin-like domain||Immunoglobulin subtype	63820757	63836017	-	96906	downstream
3	TUCP_002976	XLOC_128384	--	TUCP	63606852	63723850	-	ENSRNOT00000016132	ENSRNOG00000011830	Plekha3	Pleckstrin homology domain||PH domain-like	63536166	63557361	+	49490	downstream
3	TUCP_002977	XLOC_128384	--	TUCP	63606852	63723850	-	ENSRNOT00000058093	ENSRNOG00000038165	Dfnb59	Gasdermin	63510293	63518147	+	88704	downstream
3	TUCP_002977	XLOC_128384	--	TUCP	63606852	63723850	-	ENSRNOT00000068494	ENSRNOG00000023227	AABR07052585.2	Immunoglobulin subtype||Immunoglobulin subtype 2||Immunoglobulin I-set||Immunoglobulin-like domain||Immunoglobulin-like fold	63566184	63568464	-	38387	upstream
3	TUCP_002977	XLOC_128384	--	TUCP	63606852	63723850	-	ENSRNOT00000015624	ENSRNOG00000011195	Prkra	Double-stranded RNA-binding domain||Staufen, C-terminal||Interferon-inducible double-stranded RNA-dependent protein kinase activator A	63489074	63507926	-	98925	upstream
3	TUCP_002977	XLOC_128384	--	TUCP	63606852	63723850	-	ENSRNOT00000015722	ENSRNOG00000011758	Fkbp7	EF-Hand 1, calcium-binding site||Peptidyl-prolyl cis-trans isomerase, FKBP-type||EF-hand domain||FKBP-type peptidyl-prolyl cis-trans isomerase domain||EF-hand domain pair	63522403	63535991	-	70860	upstream
3	TUCP_002977	XLOC_128384	--	TUCP	63606852	63723850	-	ENSRNOT00000030978	ENSRNOG00000022637	AABR07052585.1	Immunoglobulin-like fold||Immunoglobulin subtype 2||Titin, Z repeat||Immunoglobulin I-set||Immunoglobulin-like domain||Immunoglobulin subtype	63820757	63836017	-	96906	downstream
3	TUCP_002977	XLOC_128384	--	TUCP	63606852	63723850	-	ENSRNOT00000016132	ENSRNOG00000011830	Plekha3	Pleckstrin homology domain||PH domain-like	63536166	63557361	+	49490	downstream
3	TUCP_002974	XLOC_128384	--	TUCP	63606852	63723850	-	ENSRNOT00000058093	ENSRNOG00000038165	Dfnb59	Gasdermin	63510293	63518147	+	88704	downstream
3	TUCP_002974	XLOC_128384	--	TUCP	63606852	63723850	-	ENSRNOT00000068494	ENSRNOG00000023227	AABR07052585.2	Immunoglobulin subtype||Immunoglobulin subtype 2||Immunoglobulin I-set||Immunoglobulin-like domain||Immunoglobulin-like fold	63566184	63568464	-	38387	upstream
3	TUCP_002974	XLOC_128384	--	TUCP	63606852	63723850	-	ENSRNOT00000015624	ENSRNOG00000011195	Prkra	Double-stranded RNA-binding domain||Staufen, C-terminal||Interferon-inducible double-stranded RNA-dependent protein kinase activator A	63489074	63507926	-	98925	upstream
3	TUCP_002974	XLOC_128384	--	TUCP	63606852	63723850	-	ENSRNOT00000015722	ENSRNOG00000011758	Fkbp7	EF-Hand 1, calcium-binding site||Peptidyl-prolyl cis-trans isomerase, FKBP-type||EF-hand domain||FKBP-type peptidyl-prolyl cis-trans isomerase domain||EF-hand domain pair	63522403	63535991	-	70860	upstream
3	TUCP_002974	XLOC_128384	--	TUCP	63606852	63723850	-	ENSRNOT00000030978	ENSRNOG00000022637	AABR07052585.1	Immunoglobulin-like fold||Immunoglobulin subtype 2||Titin, Z repeat||Immunoglobulin I-set||Immunoglobulin-like domain||Immunoglobulin subtype	63820757	63836017	-	96906	downstream
3	TUCP_002974	XLOC_128384	--	TUCP	63606852	63723850	-	ENSRNOT00000016132	ENSRNOG00000011830	Plekha3	Pleckstrin homology domain||PH domain-like	63536166	63557361	+	49490	downstream
3	TUCP_002975	XLOC_128384	--	TUCP	63606852	63723850	-	ENSRNOT00000058093	ENSRNOG00000038165	Dfnb59	Gasdermin	63510293	63518147	+	88704	downstream
3	TUCP_002975	XLOC_128384	--	TUCP	63606852	63723850	-	ENSRNOT00000068494	ENSRNOG00000023227	AABR07052585.2	Immunoglobulin subtype||Immunoglobulin subtype 2||Immunoglobulin I-set||Immunoglobulin-like domain||Immunoglobulin-like fold	63566184	63568464	-	38387	upstream
3	TUCP_002975	XLOC_128384	--	TUCP	63606852	63723850	-	ENSRNOT00000015624	ENSRNOG00000011195	Prkra	Double-stranded RNA-binding domain||Staufen, C-terminal||Interferon-inducible double-stranded RNA-dependent protein kinase activator A	63489074	63507926	-	98925	upstream
3	TUCP_002975	XLOC_128384	--	TUCP	63606852	63723850	-	ENSRNOT00000015722	ENSRNOG00000011758	Fkbp7	EF-Hand 1, calcium-binding site||Peptidyl-prolyl cis-trans isomerase, FKBP-type||EF-hand domain||FKBP-type peptidyl-prolyl cis-trans isomerase domain||EF-hand domain pair	63522403	63535991	-	70860	upstream
3	TUCP_002975	XLOC_128384	--	TUCP	63606852	63723850	-	ENSRNOT00000030978	ENSRNOG00000022637	AABR07052585.1	Immunoglobulin-like fold||Immunoglobulin subtype 2||Titin, Z repeat||Immunoglobulin I-set||Immunoglobulin-like domain||Immunoglobulin subtype	63820757	63836017	-	96906	downstream
3	TUCP_002975	XLOC_128384	--	TUCP	63606852	63723850	-	ENSRNOT00000016132	ENSRNOG00000011830	Plekha3	Pleckstrin homology domain||PH domain-like	63536166	63557361	+	49490	downstream
6	TUCP_003896	XLOC_171270	--	TUCP	105268562	105270215	-	ENSRNOT00000009513	ENSRNOG00000007254	Ttc9	Tetratricopeptide-like helical domain||Tetratricopeptide repeat 2||Tetratricopeptide repeat-containing domain||Peptidyl-prolyl cis-trans isomerase, FKBP-type||Tetratricopeptide repeat	105364668	105399500	+	94452	upstream
6	TUCP_003896	XLOC_171270	--	TUCP	105268562	105270215	-	ENSRNOT00000009122	ENSRNOG00000006399	Synj2bp	PDZ domain	105224166	105261549	-	7012	upstream
6	TUCP_003896	XLOC_171270	--	TUCP	105268562	105270215	-	ENSRNOT00000009483	ENSRNOG00000006976	Med6	Mediator complex, subunit Med6, metazoa/plant||Mediator complex, subunit Med6	105302558	105316024	-	32342	downstream
6	TUCP_003896	XLOC_171270	--	TUCP	105268562	105270215	-	ENSRNOT00000087090	ENSRNOG00000007254	Ttc9	Tetratricopeptide-like helical domain||Tetratricopeptide repeat 2||Tetratricopeptide repeat-containing domain||Peptidyl-prolyl cis-trans isomerase, FKBP-type||Tetratricopeptide repeat	105364742	105399490	+	94526	upstream
6	TUCP_003896	XLOC_171270	--	TUCP	105268562	105270215	-	ENSRNOT00000008954	ENSRNOG00000047115	Cox16	Cytochrome c oxidase assembly protein COX16	105201395	105214329	-	54232	upstream
9	TUCP_004531	XLOC_199661	--	TUCP	113945088	114001222	+	ENSRNOT00000016965	ENSRNOG00000042503	Ndufv2	NADH-quinone oxidoreductase subunit E-like||Thioredoxin-like fold	113875703	113900190	-	44897	upstream
9	TUCP_004531	XLOC_199661	--	TUCP	113945088	114001222	+	ENSRNOT00000044153	ENSRNOG00000031795	AABR07068650.1	Ubiquitin-associated domain||Protein kinase, ATP binding site||Protein kinase domain||Protein kinase-like domain	114004095	114152716	-	2872	downstream
9	TUCP_004531	XLOC_199661	--	TUCP	113945088	114001222	+	ENSRNOT00000091398	ENSRNOG00000053306	Washc1	WH2 domain||WASH1, WAHD domain||WASH1	113918858	113936860	+	8227	downstream
9	TUCP_004531	XLOC_199661	--	TUCP	113945088	114001222	+	ENSRNOT00000017253	ENSRNOG00000048545	LOC100910483	Ankyrin repeat-containing domain||Ankyrin repeat	113814537	113846053	-	99034	upstream
9	TUCP_004531	XLOC_199661	--	TUCP	113945088	114001222	+	ENSRNOT00000007657	ENSRNOG00000047516	Map3k7	Mitogen-activated protein (MAP) kinase kinase kinase 7||Protein kinase domain||Protein kinase-like domain||Serine/threonine-protein kinase, active site||Protein kinase, ATP binding site||Serine-threonine/tyrosine-protein kinase catalytic domain	114022137	114079089	+	20914	upstream
17	TUCP_001872	XLOC_077889	--	TUCP	60945813	60949428	+	ENSRNOT00000058852	ENSRNOG00000018698	Wac	WW domain	60888017	60946426	-	(614)	antisense
4	TUCP_003224	XLOC_138410	--	TUCP	124855129	125188704	+	ENSRNOT00000057045	ENSRNOG00000023257	Adamts9	Peptidase M12B, GON-ADAMTSs||Peptidase M12B, ADAM/reprolysin||Metallopeptidase, catalytic domain||Peptidase M12B, propeptide||ADAM-TS Spacer 1||Peptidase M12B, ADAM-TS||Thrombospondin type-1 (TSP1) repeat	124660262	124858250	-	(3122)	antisense
17	TUCP_001870	XLOC_077795	--	TUCP	57804352	57813651	+	ENSRNOT00000089527	ENSRNOG00000060132	LOC102551575	NUDIX hydrolase domain-like||NUDIX hydrolase domain||Isopentenyl-diphosphate delta-isomerase, type 1	57864244	57865804	+	50592	upstream
17	TUCP_001870	XLOC_077795	--	TUCP	57804352	57813651	+	ENSRNOT00000051570	ENSRNOG00000045919	LOC103694120	NUDIX hydrolase domain-like||Isopentenyl-diphosphate delta-isomerase, type 1||NUDIX hydrolase domain	57814539	57816256	-	887	downstream
17	TUCP_001870	XLOC_077795	--	TUCP	57804352	57813651	+	ENSRNOT00000077338	ENSRNOG00000054189	AABR07028157.1	Isopentenyl-diphosphate delta-isomerase, type 1||NUDIX hydrolase domain||NUDIX hydrolase domain-like	57906050	57908621	+	92398	upstream
17	TUCP_001870	XLOC_077795	--	TUCP	57804352	57813651	+	ENSRNOT00000044132	ENSRNOG00000046403	RGD1564999	NUDIX hydrolase domain-like||NUDIX hydrolase domain||Isopentenyl-diphosphate delta-isomerase, type 1	57755210	57765652	-	38699	upstream
4	TUCP_003226	XLOC_138410	--	TUCP	124914208	125165162	+	ENSRNOT00000057045	ENSRNOG00000023257	Adamts9	Peptidase M12B, GON-ADAMTSs||Peptidase M12B, ADAM/reprolysin||Metallopeptidase, catalytic domain||Peptidase M12B, propeptide||ADAM-TS Spacer 1||Peptidase M12B, ADAM-TS||Thrombospondin type-1 (TSP1) repeat	124660262	124858250	-	55957	upstream
4	TUCP_003221	XLOC_138410	--	TUCP	124855129	125024811	+	ENSRNOT00000057045	ENSRNOG00000023257	Adamts9	Peptidase M12B, GON-ADAMTSs||Peptidase M12B, ADAM/reprolysin||Metallopeptidase, catalytic domain||Peptidase M12B, propeptide||ADAM-TS Spacer 1||Peptidase M12B, ADAM-TS||Thrombospondin type-1 (TSP1) repeat	124660262	124858250	-	(3122)	antisense
17	TUCP_001877	XLOC_077926	--	TUCP	62388765	62462694	+	ENSRNOT00000024855	ENSRNOG00000018407	Gjd4	Connexin||Gap junction protein, cysteine-rich domain||Connexin, conserved site||Connexin, N-terminal	62297086	62299655	-	89109	upstream
17	TUCP_001877	XLOC_077926	--	TUCP	62388765	62462694	+	ENSRNOT00000024545	ENSRNOG00000018123	Ccny	Cyclin Y||Cyclin-like||Cyclin, N-terminal	62332537	62462644	-	(73880)	antisense
9	TUCP_004503	XLOC_198409	--	TUCP	82387224	82387927	+	ENSRNOT00000025219	ENSRNOG00000018639	Zfand2b	Zinc finger, AN1-type||Ubiquitin interacting motif	82370924	82373839	+	13384	downstream
9	TUCP_004503	XLOC_198409	--	TUCP	82387224	82387927	+	ENSRNOT00000089555	ENSRNOG00000019704	Resp18	Regulated endocrine-specific protein 18||RESP18 domain	82470759	82477181	-	82831	downstream
9	TUCP_004503	XLOC_198409	--	TUCP	82387224	82387927	+	ENSRNOT00000032419	ENSRNOG00000019052	Ankzf1	Ankyrin repeat||Ankyrin repeat-containing domain||Zinc finger, C2H2	82393672	82400530	+	5744	upstream
9	TUCP_004503	XLOC_198409	--	TUCP	82387224	82387927	+	ENSRNOT00000024975	ENSRNOG00000018325	Cnppd1	Cyclin PHO80-like	82338866	82345262	-	41961	upstream
9	TUCP_004503	XLOC_198409	--	TUCP	82387224	82387927	+	ENSRNOT00000026467	ENSRNOG00000019506	Dnajb2	Ubiquitin interacting motif||DnaJ domain||DnaJ domain, conserved site	82436458	82444668	+	48530	upstream
9	TUCP_004503	XLOC_198409	--	TUCP	82387224	82387927	+	ENSRNOT00000084769	ENSRNOG00000018697	Abcb6	Mitochondrial ABC-transporter, N-terminal five TM domain||ABC transporter, conserved site||P-loop containing nucleoside triphosphate hydrolase||ABC transporter type 1, transmembrane domain||ABC transporter-like||AAA+ ATPase domain	82373963	82377010	-	10213	upstream
9	TUCP_004503	XLOC_198409	--	TUCP	82387224	82387927	+	ENSRNOT00000025740	ENSRNOG00000018975	Atg9a	Autophagy-related protein 9	82382800	82393382	-	(704)	antisense
9	TUCP_004503	XLOC_198409	--	TUCP	82387224	82387927	+	ENSRNOT00000078260	ENSRNOG00000018586	Fam134a	-	82345862	82351802	+	35421	downstream
9	TUCP_004503	XLOC_198409	--	TUCP	82387224	82387927	+	ENSRNOT00000024667	ENSRNOG00000018266	Slc23a3	Xanthine/uracil/vitamin C permease	82328173	82336806	-	50417	upstream
9	TUCP_004503	XLOC_198409	--	TUCP	82387224	82387927	+	ENSRNOT00000026081	ENSRNOG00000019243	Glb1l	Glycoside hydrolase, family 35||Glycoside hydrolase, catalytic domain||Beta-galactosidase 1-like||Glycoside hydrolase 35, catalytic domain||Galactose-binding domain-like||Glycoside hydrolase superfamily	82400569	82410904	-	12641	downstream
9	TUCP_004503	XLOC_198409	--	TUCP	82387224	82387927	+	ENSRNOT00000026194	ENSRNOG00000019294	Stk16	Protein kinase domain||Protein kinase-like domain||Serine/threonine-protein kinase, active site	82411013	82414240	+	23085	upstream
9	TUCP_004503	XLOC_198409	--	TUCP	82387224	82387927	+	ENSRNOT00000026753	ENSRNOG00000019704	Resp18	Regulated endocrine-specific protein 18||RESP18 domain	82470794	82477136	-	82866	downstream
9	TUCP_004503	XLOC_198409	--	TUCP	82387224	82387927	+	ENSRNOT00000025627	ENSRNOG00000018697	Abcb6	Mitochondrial ABC-transporter, N-terminal five TM domain||ABC transporter, conserved site||P-loop containing nucleoside triphosphate hydrolase||ABC transporter type 1, transmembrane domain||ABC transporter-like||AAA+ ATPase domain	82373946	82382272	-	4951	upstream
9	TUCP_004503	XLOC_198409	--	TUCP	82387224	82387927	+	ENSRNOT00000081958	ENSRNOG00000019506	Dnajb2	Ubiquitin interacting motif||DnaJ domain||DnaJ domain, conserved site	82436516	82444668	+	48588	upstream
9	TUCP_004503	XLOC_198409	--	TUCP	82387224	82387927	+	ENSRNOT00000026654	ENSRNOG00000019587	Ptprn	Protein-tyrosine phosphatase, active site||Tyrosine specific protein phosphatases domain||Protein-tyrosine phosphatase, catalytic||Protein-tyrosine phosphatase receptor IA-2 ectodomain||RESP18 domain||Protein-tyrosine phosphatase-like||PTP type protein phosphatase	82446633	82461903	-	58705	downstream
9	TUCP_004503	XLOC_198409	--	TUCP	82387224	82387927	+	ENSRNOT00000004797	ENSRNOG00000003597	Tuba4a	Alpha tubulin||Tubulin/FtsZ, GTPase domain||Tubulin, conserved site||Tubulin/FtsZ, 2-layer sandwich domain||Tubulin, C-terminal||Tubulin||Tubulin/FtsZ, C-terminal	82415605	82419288	-	27677	downstream
9	TUCP_004503	XLOC_198409	--	TUCP	82387224	82387927	+	ENSRNOT00000024444	ENSRNOG00000018162	Nhej1	DNA double-strand break repair and VJ recombination XRCC4, N-terminal||XLF family	82230232	82327534	-	59689	upstream
9	TUCP_004503	XLOC_198409	--	TUCP	82387224	82387927	+	ENSRNOT00000057330	ENSRNOG00000018586	Fam134a	-	82345719	82351567	+	35656	downstream
4	TUCP_003222	XLOC_138410	--	TUCP	124855129	125165162	+	ENSRNOT00000057045	ENSRNOG00000023257	Adamts9	Peptidase M12B, GON-ADAMTSs||Peptidase M12B, ADAM/reprolysin||Metallopeptidase, catalytic domain||Peptidase M12B, propeptide||ADAM-TS Spacer 1||Peptidase M12B, ADAM-TS||Thrombospondin type-1 (TSP1) repeat	124660262	124858250	-	(3122)	antisense
17	TUCP_001878	XLOC_077927	--	TUCP	62463134	62470318	+	ENSRNOT00000024545	ENSRNOG00000018123	Ccny	Cyclin Y||Cyclin-like||Cyclin, N-terminal	62332537	62462644	-	489	upstream
9	TUCP_004509	XLOC_198926	--	TUCP	97163050	97197803	+	ENSRNOT00000040169	ENSRNOG00000019557	Asb18	Ankyrin repeat-containing domain||Ankyrin repeat||SOCS box domain	97085234	97151832	-	11217	upstream
9	TUCP_004509	XLOC_198926	--	TUCP	97163050	97197803	+	ENSRNOT00000026491	ENSRNOG00000019592	Iqca1	AAA+ ATPase domain||ATPase, AAA-type, core||P-loop containing nucleoside triphosphate hydrolase	97183214	97290639	-	(14590)	antisense
9	TUCP_004509	XLOC_198926	--	TUCP	97163050	97197803	+	ENSRNOT00000026419	ENSRNOG00000019495	Gbx2	Homeobox protein GBX-2||Homeodomain-like||Homeodomain, metazoa||Homeobox, conserved site||Homeobox domain	97063728	97065817	-	97232	upstream
9	TUCP_004509	XLOC_198926	--	TUCP	97163050	97197803	+	ENSRNOT00000056724	ENSRNOG00000019592	Iqca1	AAA+ ATPase domain||ATPase, AAA-type, core||P-loop containing nucleoside triphosphate hydrolase	97183214	97290639	-	(14590)	antisense
4	TUCP_003228	XLOC_138410	--	TUCP	124916143	125165162	+	ENSRNOT00000057045	ENSRNOG00000023257	Adamts9	Peptidase M12B, GON-ADAMTSs||Peptidase M12B, ADAM/reprolysin||Metallopeptidase, catalytic domain||Peptidase M12B, propeptide||ADAM-TS Spacer 1||Peptidase M12B, ADAM-TS||Thrombospondin type-1 (TSP1) repeat	124660262	124858250	-	57892	upstream
6	TUCP_003897	XLOC_171339	--	TUCP	106651983	106685273	-	ENSRNOT00000086136	ENSRNOG00000008082	Rgs6	DEP domain||RGS domain||RGS, subdomain 1||G-protein gamma-like domain||Winged helix-turn-helix DNA-binding domain	106496992	106602139	+	49843	downstream
6	TUCP_003897	XLOC_171339	--	TUCP	106651983	106685273	-	ENSRNOT00000058181	ENSRNOG00000008082	Rgs6	DEP domain||RGS domain||RGS, subdomain 1||G-protein gamma-like domain||Winged helix-turn-helix DNA-binding domain	106497125	106598668	+	53314	downstream
6	TUCP_003897	XLOC_171339	--	TUCP	106651983	106685273	-	ENSRNOT00000010926	ENSRNOG00000008086	Dpf3	Zinc finger, C2H2||Zinc finger, C2H2-like||Zinc finger C2H2-type/integrase DNA-binding domain||Requiem/DPF N-terminal domain	106721349	106971250	-	36075	downstream
2	TUCP_002590	XLOC_109609	--	TUCP	145177292	145403001	-	ENSRNOT00000040631	ENSRNOG00000032941	Mab21l1	Protein male abnormal 21-like 1/2||Mab-21 domain	145174876	145177265	+	26	downstream
7	TUCP_004079	XLOC_179112	--	TUCP	10338672	10361577	-	ENSRNOT00000047433	ENSRNOG00000048910	Zfp709l1	Zinc finger C2H2-type/integrase DNA-binding domain||Zinc finger, C2H2-like||Zinc finger, C2H2||Krueppel-associated box	10418602	10430992	-	57024	downstream
8	TUCP_004299	XLOC_189297	--	TUCP	102160349	102168845	+	ENSRNOT00000011263	ENSRNOG00000008519	RGD1309079	Uncharacterised protein family UPF0672||FAM69, protein-kinase domain	102088505	102149912	-	10436	upstream
8	TUCP_004299	XLOC_189297	--	TUCP	102160349	102168845	+	ENSRNOT00000086491	ENSRNOG00000008519	RGD1309079	Uncharacterised protein family UPF0672||FAM69, protein-kinase domain	102140713	102159828	-	520	upstream
8	TUCP_004298	XLOC_188937	--	TUCP	93269032	93283649	+	ENSRNOT00000056930	ENSRNOG00000027728	Ibtk	Regulator of chromosome condensation, RCC1||Ankyrin repeat-containing domain||SKP1/BTB/POZ domain||BTB/POZ domain||Regulator of chromosome condensation 1/beta-lactamase-inhibitor protein II||Ankyrin repeat	93324476	93390305	-	40826	downstream
19	TUCP_002195	XLOC_091741	--	TUCP	55571208	55576116	+	ENSRNOT00000033352	ENSRNOG00000027954	Cdh15	Cadherin, cytoplasmic domain||Cadherin||Cadherin-like||Catenin binding domain||Cadherin conserved site	55669626	55689992	+	93509	upstream
19	TUCP_002195	XLOC_091741	--	TUCP	55571208	55576116	+	ENSRNOT00000081800	ENSRNOG00000014723	Cbfa2t3	Protein CBFA2T3||TAFH/NHR1||CBFA2T family||NHR2-like||Zinc finger, MYND-type	55442107	55490426	-	80781	upstream
19	TUCP_002195	XLOC_091741	--	TUCP	55571208	55576116	+	ENSRNOT00000020313	ENSRNOG00000015077	Acsf3	AMP-binding, conserved site||AMP-dependent synthetase/ligase||AMP-binding enzyme C-terminal domain	55594831	55635122	+	18714	upstream
19	TUCP_002195	XLOC_091741	--	TUCP	55571208	55576116	+	ENSRNOT00000019820	ENSRNOG00000014723	Cbfa2t3	Protein CBFA2T3||TAFH/NHR1||CBFA2T family||NHR2-like||Zinc finger, MYND-type	55441572	55510460	-	60747	upstream
7	TUCP_004078	XLOC_179112	--	TUCP	10338672	10359906	-	ENSRNOT00000047433	ENSRNOG00000048910	Zfp709l1	Zinc finger C2H2-type/integrase DNA-binding domain||Zinc finger, C2H2-like||Zinc finger, C2H2||Krueppel-associated box	10418602	10430992	-	58695	downstream
8	TUCP_004295	XLOC_188553	--	TUCP	82995241	82995504	+	ENSRNOT00000014926	ENSRNOG00000011193	Hmgcll1	HMG-CoA lyase-like1||Aldolase-type TIM barrel||Pyruvate carboxyltransferase	83070545	83205441	+	75040	upstream
8	TUCP_004295	XLOC_188553	--	TUCP	82995241	82995504	+	ENSRNOT00000014846	ENSRNOG00000010917	Bmp5	Transforming growth factor-beta, C-terminal||Transforming growth factor beta, conserved site||Cystine-knot cytokine||Transforming growth factor-beta, N-terminal||Transforming growth factor-beta-related	82878941	82950273	+	44967	downstream
8	TUCP_004294	XLOC_188514	--	TUCP	82360243	82363086	+	ENSRNOT00000080797	ENSRNOG00000009381	Mapk6	Protein kinase-like domain||Protein kinase domain||Serine/threonine-protein kinase, active site||Protein kinase, ATP binding site||Mitogen-activated protein (MAP) kinase, ERK3/4	82328160	82339937	-	20305	upstream
8	TUCP_004294	XLOC_188514	--	TUCP	82360243	82363086	+	ENSRNOT00000012409	ENSRNOG00000009308	Bcl2l10	Bcl2-like||Blc2 family||Apoptosis regulator, Bcl-2, BH2 motif, conserved site	82288705	82294744	+	65498	downstream
8	TUCP_004294	XLOC_188514	--	TUCP	82360243	82363086	+	ENSRNOT00000013053	ENSRNOG00000009381	Mapk6	Protein kinase-like domain||Protein kinase domain||Serine/threonine-protein kinase, active site||Protein kinase, ATP binding site||Mitogen-activated protein (MAP) kinase, ERK3/4	82328020	82351108	-	9134	upstream
8	TUCP_004294	XLOC_188514	--	TUCP	82360243	82363086	+	ENSRNOT00000013512	ENSRNOG00000010116	Leo1	Leo1-like protein	82380757	82405644	+	17670	upstream
8	TUCP_004294	XLOC_188514	--	TUCP	82360243	82363086	+	ENSRNOT00000013852	ENSRNOG00000032436	Tmod3	Leucine-rich repeat domain, L domain-like||Tropomodulin-3||Tropomodulin	82432169	82492243	-	69082	downstream
8	TUCP_004294	XLOC_188514	--	TUCP	82360243	82363086	+	ENSRNOT00000075708	ENSRNOG00000047799	Gnb5	WD40 repeat, conserved site||WD40 repeat||Guanine nucleotide-binding protein, beta subunit||G-protein beta WD-40 repeat||WD40/YVTN repeat-like-containing domain||G-protein, beta subunit||WD40-repeat-containing domain	82257849	82285184	+	75058	downstream
8	TUCP_004294	XLOC_188514	--	TUCP	82360243	82363086	+	ENSRNOT00000011963	ENSRNOG00000047799	Gnb5	WD40 repeat, conserved site||WD40 repeat||Guanine nucleotide-binding protein, beta subunit||G-protein beta WD-40 repeat||WD40/YVTN repeat-like-containing domain||G-protein, beta subunit||WD40-repeat-containing domain	82257849	82285184	+	75058	downstream
8	TUCP_004297	XLOC_188686	--	TUCP	86355932	86357255	+	ENSRNOT00000046322	ENSRNOG00000031132	LOC367117	Ribosomal protein S32, mitochondrial	86281899	86286991	-	68940	upstream
8	TUCP_004296	XLOC_188678	--	TUCP	85939120	85939459	+	ENSRNOT00000037665	ENSRNOG00000025332	Cd109	Alpha-2-macroglobulin, thiol-ester bond-forming||Alpha-2-macroglobulin, N-terminal||Alpha-macroglobulin, receptor-binding||Alpha-macroglobulin complement component||Alpha-2-macroglobulin, N-terminal 2||Alpha-2-macroglobulin||Immunoglobulin E-set||Terpenoid cyclases/protein prenyltransferase alpha-alpha toroid||Alpha-2-macroglobulin, conserved site	85951191	86065409	+	11731	upstream
8	TUCP_004296	XLOC_188678	--	TUCP	85939120	85939459	+	ENSRNOT00000013608	ENSRNOG00000009439	Eef1a1	Translation protein, beta-barrel domain||Translation elongation factor EFTu/EF1A, domain 2||P-loop containing nucleoside triphosphate hydrolase||Translation elongation factor EF1A, eukaryotic/archaeal||Tr-type G domain, conserved site||Translation elongation factor EFTu/EF1A, C-terminal||Transcription factor, GTP-binding domain||Translation elongation factor EF1A/initiation factor IF2gamma, C-ter…	85838869	85840818	-	98301	upstream
8	TUCP_004296	XLOC_188678	--	TUCP	85939120	85939459	+	ENSRNOT00000012474	ENSRNOG00000009330	Slc17a5	Major facilitator superfamily domain||Major facilitator superfamily	85891257	85926450	-	12669	upstream
8	TUCP_004291	XLOC_188379	--	TUCP	78094757	78097489	+	ENSRNOT00000077999	ENSRNOG00000057676	Myzap	Myocardial zonula adherens protein||DNA-directed RNA polymerase II subunit GRINL1	78009015	78096390	-	(1634)	antisense
8	TUCP_004291	XLOC_188379	--	TUCP	78094757	78097489	+	ENSRNOT00000083220	ENSRNOG00000054080	Cgnl1	Myosin tail	78126675	78233430	-	29185	downstream
8	TUCP_004291	XLOC_188379	--	TUCP	78094757	78097489	+	ENSRNOT00000086185	ENSRNOG00000057676	Myzap	Myocardial zonula adherens protein||DNA-directed RNA polymerase II subunit GRINL1	77986094	78096302	-	(1546)	antisense
8	TUCP_004290	XLOC_188379	--	TUCP	78094757	78097489	+	ENSRNOT00000077999	ENSRNOG00000057676	Myzap	Myocardial zonula adherens protein||DNA-directed RNA polymerase II subunit GRINL1	78009015	78096390	-	(1634)	antisense
8	TUCP_004290	XLOC_188379	--	TUCP	78094757	78097489	+	ENSRNOT00000083220	ENSRNOG00000054080	Cgnl1	Myosin tail	78126675	78233430	-	29185	downstream
8	TUCP_004290	XLOC_188379	--	TUCP	78094757	78097489	+	ENSRNOT00000086185	ENSRNOG00000057676	Myzap	Myocardial zonula adherens protein||DNA-directed RNA polymerase II subunit GRINL1	77986094	78096302	-	(1546)	antisense
8	TUCP_004293	XLOC_188486	--	TUCP	81983040	81997727	+	ENSRNOT00000079535	ENSRNOG00000058866	Myo5a	Dilute domain||Myosin head, motor domain||P-loop containing nucleoside triphosphate hydrolase||IQ motif, EF-hand binding site	82038967	82156504	+	41239	upstream
8	TUCP_004293	XLOC_188486	--	TUCP	81983040	81997727	+	ENSRNOT00000082288	ENSRNOG00000058866	Myo5a	Dilute domain||Myosin head, motor domain||P-loop containing nucleoside triphosphate hydrolase||IQ motif, EF-hand binding site	82037977	82156419	+	40249	upstream
8	TUCP_004293	XLOC_188486	--	TUCP	81983040	81997727	+	ENSRNOT00000091789	ENSRNOG00000058866	Myo5a	Dilute domain||Myosin head, motor domain||P-loop containing nucleoside triphosphate hydrolase||IQ motif, EF-hand binding site	82043403	82156617	+	45675	upstream
8	TUCP_004293	XLOC_188486	--	TUCP	81983040	81997727	+	ENSRNOT00000030221	ENSRNOG00000023086	LOC100360828	Endosulphine	81949877	81968589	+	14450	downstream
8	TUCP_004293	XLOC_188486	--	TUCP	81983040	81997727	+	ENSRNOT00000080608	ENSRNOG00000058522	Fam214a	Protein FAM214/SPAC3H8.04, C-terminal||Domain of unknown function DUF4210	81863619	81941536	+	41503	downstream
8	TUCP_004292	XLOC_188392	--	TUCP	78517870	78542339	+	ENSRNOT00000081185	ENSRNOG00000057754	Tcf12	Myc-type, basic helix-loop-helix (bHLH) domain	78345754	78655856	-	(24470)	antisense
1	TUCP_000336	XLOC_010567	--	TUCP	277588351	277592412	+	ENSRNOT00000023024	ENSRNOG00000017064	Tdrd1	Tudor domain||Zinc finger, MYND-type	277641579	277685162	+	49166	upstream
1	TUCP_000336	XLOC_010567	--	TUCP	277588351	277592412	+	ENSRNOT00000022813	ENSRNOG00000017002	Adrb1	Adrenoceptor family||Beta 1 adrenoceptor||G protein-coupled receptor, rhodopsin-like||GPCR, rhodopsin-like, 7TM	277537585	277538985	+	49365	downstream
1	TUCP_000336	XLOC_010567	--	TUCP	277588351	277592412	+	ENSRNOT00000084861	ENSRNOG00000017064	Tdrd1	Tudor domain||Zinc finger, MYND-type	277641512	277685257	+	49099	upstream
1	TUCP_000336	XLOC_010567	--	TUCP	277588351	277592412	+	ENSRNOT00000080039	ENSRNOG00000051680	Ccdc186	-	277606995	277629196	-	14582	downstream
1	TUCP_000336	XLOC_010567	--	TUCP	277588351	277592412	+	ENSRNOT00000051834	ENSRNOG00000025581	Vwa2	von Willebrand factor A domain-containing protein 2||EGF-like calcium-binding domain||EGF-like domain||von Willebrand factor, type A||EGF-like, conserved site	277689729	277730389	+	97316	upstream
9	TUCP_004618	XLOC_203661	--	TUCP	113862022	113872741	-	ENSRNOT00000016965	ENSRNOG00000042503	Ndufv2	NADH-quinone oxidoreductase subunit E-like||Thioredoxin-like fold	113875703	113900190	-	2961	downstream
9	TUCP_004618	XLOC_203661	--	TUCP	113862022	113872741	-	ENSRNOT00000091398	ENSRNOG00000053306	Washc1	WH2 domain||WASH1, WAHD domain||WASH1	113918858	113936860	+	46116	upstream
9	TUCP_004618	XLOC_203661	--	TUCP	113862022	113872741	-	ENSRNOT00000017253	ENSRNOG00000048545	LOC100910483	Ankyrin repeat-containing domain||Ankyrin repeat	113814537	113846053	-	15968	upstream
1	TUCP_000334	XLOC_010523	--	TUCP	276617137	276638723	+	ENSRNOT00000019681	ENSRNOG00000049232	Tcf7l2	High mobility group box domain||Transcription factor 7-like 2||Transcription factor TCF/LEF||CTNNB1 binding, N-teminal	276659542	276730514	+	20818	upstream
1	TUCP_000335	XLOC_010546	--	TUCP	277322722	277326113	+	ENSRNOT00000036321	ENSRNOG00000026204	Dclre1a	DNA repair metallo-beta-lactamase||Metallo-beta-lactamase	277335790	277355075	-	9676	downstream
1	TUCP_000335	XLOC_010546	--	TUCP	277322722	277326113	+	ENSRNOT00000080511	ENSRNOG00000056216	Casp7	Peptidase family C14A, cysteine active site||Caspase-like domain||Peptidase C14A, interleukin-1 beta convertase type||Peptidase C14, caspase non-catalytic subunit p10||Peptidase family C14A, His active site||Peptidase C14A, caspase catalytic domain||Peptidase C14, p20 domain	277190964	277242774	+	79947	downstream
1	TUCP_000335	XLOC_010546	--	TUCP	277322722	277326113	+	ENSRNOT00000022724	ENSRNOG00000016926	Plekhs1	Pleckstrin homology domain||PH domain-like	277261681	277291370	+	31351	downstream
1	TUCP_000335	XLOC_010546	--	TUCP	277322722	277326113	+	ENSRNOT00000022788	ENSRNOG00000016948	Nhlrc2	NHL repeat, subgroup||NHL repeat||Thioredoxin-like fold||Six-bladed beta-propeller, TolB-like	277355619	277415907	+	29505	upstream
1	TUCP_000332	XLOC_010523	--	TUCP	276617137	276638723	+	ENSRNOT00000019681	ENSRNOG00000049232	Tcf7l2	High mobility group box domain||Transcription factor 7-like 2||Transcription factor TCF/LEF||CTNNB1 binding, N-teminal	276659542	276730514	+	20818	upstream
1	TUCP_000333	XLOC_010523	--	TUCP	276617137	276638723	+	ENSRNOT00000019681	ENSRNOG00000049232	Tcf7l2	High mobility group box domain||Transcription factor 7-like 2||Transcription factor TCF/LEF||CTNNB1 binding, N-teminal	276659542	276730514	+	20818	upstream
1	TUCP_000330	XLOC_010523	--	TUCP	276617137	276638723	+	ENSRNOT00000019681	ENSRNOG00000049232	Tcf7l2	High mobility group box domain||Transcription factor 7-like 2||Transcription factor TCF/LEF||CTNNB1 binding, N-teminal	276659542	276730514	+	20818	upstream
1	TUCP_000331	XLOC_010523	--	TUCP	276617137	276638723	+	ENSRNOT00000019681	ENSRNOG00000049232	Tcf7l2	High mobility group box domain||Transcription factor 7-like 2||Transcription factor TCF/LEF||CTNNB1 binding, N-teminal	276659542	276730514	+	20818	upstream
9	TUCP_004611	XLOC_203063	--	TUCP	94976014	94981323	-	ENSRNOT00000087366	ENSRNOG00000018185	Sag	Arrestin C-terminal-like domain||Arrestin, N-terminal||Arrestin, conserved site||Arrestin||Arrestin-like, N-terminal||Arrestin, C-terminal||Immunoglobulin E-set	94928489	94969040	+	6973	downstream
9	TUCP_004611	XLOC_203063	--	TUCP	94976014	94981323	-	ENSRNOT00000035338	ENSRNOG00000023238	Dgkd	Diacylglycerol kinase, catalytic domain||Sterile alpha motif domain||NAD kinase/diacylglycerol kinase-like domain||Sterile alpha motif/pointed domain||Protein kinase C-like, phorbol ester/diacylglycerol-binding domain||Diacylglycerol kinase, accessory domain||PH domain-like||Pleckstrin homology domain	94980409	95069714	+	(915)	antisense
9	TUCP_004611	XLOC_203063	--	TUCP	94976014	94981323	-	ENSRNOT00000064171	ENSRNOG00000018395	Usp40	Ubiquitin specific protease, conserved site||Alcohol dehydrogenase, C-terminal||Peptidase C19, ubiquitin carboxyl-terminal hydrolase||GroES-like||Alcohol dehydrogenase, N-terminal||NAD(P)-binding domain||Alcohol dehydrogenase superfamily, zinc-type||Ubiquitin specific protease domain||Ubiquitin-specific peptidase 40	95072112	95143092	-	90788	downstream
9	TUCP_004611	XLOC_203063	--	TUCP	94976014	94981323	-	ENSRNOT00000080482	ENSRNOG00000017913	Atg16l1	WD40 repeat, conserved site||Autophagy-related protein 16||WD40 repeat||G-protein beta WD-40 repeat||WD40/YVTN repeat-like-containing domain||WD40-repeat-containing domain	94879745	94915204	+	60809	downstream
9	TUCP_004611	XLOC_203063	--	TUCP	94976014	94981323	-	ENSRNOT00000085325	ENSRNOG00000018395	Usp40	Ubiquitin specific protease, conserved site||Alcohol dehydrogenase, C-terminal||Peptidase C19, ubiquitin carboxyl-terminal hydrolase||GroES-like||Alcohol dehydrogenase, N-terminal||NAD(P)-binding domain||Alcohol dehydrogenase superfamily, zinc-type||Ubiquitin specific protease domain||Ubiquitin-specific peptidase 40	95073337	95143142	-	92013	downstream
9	TUCP_004611	XLOC_203063	--	TUCP	94976014	94981323	-	ENSRNOT00000024733	ENSRNOG00000018185	Sag	Arrestin C-terminal-like domain||Arrestin, N-terminal||Arrestin, conserved site||Arrestin||Arrestin-like, N-terminal||Arrestin, C-terminal||Immunoglobulin E-set	94928516	94972027	+	3986	downstream
9	TUCP_004611	XLOC_203063	--	TUCP	94976014	94981323	-	ENSRNOT00000085770	ENSRNOG00000018185	Sag	Arrestin C-terminal-like domain||Arrestin, N-terminal||Arrestin, conserved site||Arrestin||Arrestin-like, N-terminal||Arrestin, C-terminal||Immunoglobulin E-set	94928516	94972027	+	3986	downstream
9	TUCP_004611	XLOC_203063	--	TUCP	94976014	94981323	-	ENSRNOT00000024445	ENSRNOG00000017913	Atg16l1	WD40 repeat, conserved site||Autophagy-related protein 16||WD40 repeat||G-protein beta WD-40 repeat||WD40/YVTN repeat-like-containing domain||WD40-repeat-containing domain	94880053	94915228	+	60785	downstream
9	TUCP_004611	XLOC_203063	--	TUCP	94976014	94981323	-	ENSRNOT00000070819	ENSRNOG00000018395	Usp40	Ubiquitin specific protease, conserved site||Alcohol dehydrogenase, C-terminal||Peptidase C19, ubiquitin carboxyl-terminal hydrolase||GroES-like||Alcohol dehydrogenase, N-terminal||NAD(P)-binding domain||Alcohol dehydrogenase superfamily, zinc-type||Ubiquitin specific protease domain||Ubiquitin-specific peptidase 40	95073536	95108739	-	92212	downstream
9	TUCP_004610	XLOC_203061	--	TUCP	94833097	94837538	-	ENSRNOT00000087366	ENSRNOG00000018185	Sag	Arrestin C-terminal-like domain||Arrestin, N-terminal||Arrestin, conserved site||Arrestin||Arrestin-like, N-terminal||Arrestin, C-terminal||Immunoglobulin E-set	94928489	94969040	+	90950	upstream
9	TUCP_004610	XLOC_203061	--	TUCP	94833097	94837538	-	ENSRNOT00000080482	ENSRNOG00000017913	Atg16l1	WD40 repeat, conserved site||Autophagy-related protein 16||WD40 repeat||G-protein beta WD-40 repeat||WD40/YVTN repeat-like-containing domain||WD40-repeat-containing domain	94879745	94915204	+	42206	upstream
9	TUCP_004610	XLOC_203061	--	TUCP	94833097	94837538	-	ENSRNOT00000051338	ENSRNOG00000017020	Inpp5d	Endonuclease/exonuclease/phosphatase||Inositol polyphosphate-related phosphatase||SH2 domain	94745217	94850771	+	(4442)	antisense
9	TUCP_004610	XLOC_203061	--	TUCP	94833097	94837538	-	ENSRNOT00000024733	ENSRNOG00000018185	Sag	Arrestin C-terminal-like domain||Arrestin, N-terminal||Arrestin, conserved site||Arrestin||Arrestin-like, N-terminal||Arrestin, C-terminal||Immunoglobulin E-set	94928516	94972027	+	90977	upstream
9	TUCP_004610	XLOC_203061	--	TUCP	94833097	94837538	-	ENSRNOT00000085770	ENSRNOG00000018185	Sag	Arrestin C-terminal-like domain||Arrestin, N-terminal||Arrestin, conserved site||Arrestin||Arrestin-like, N-terminal||Arrestin, C-terminal||Immunoglobulin E-set	94928516	94972027	+	90977	upstream
9	TUCP_004610	XLOC_203061	--	TUCP	94833097	94837538	-	ENSRNOT00000024445	ENSRNOG00000017913	Atg16l1	WD40 repeat, conserved site||Autophagy-related protein 16||WD40 repeat||G-protein beta WD-40 repeat||WD40/YVTN repeat-like-containing domain||WD40-repeat-containing domain	94880053	94915228	+	42514	upstream
8	TUCP_004345	XLOC_192035	--	TUCP	44989412	44990958	-	ENSRNOT00000028909	ENSRNOG00000024438	Bsx	Homeodomain-like||Homeodomain, metazoa||Homeobox, conserved site||Homeobox domain	45061670	45065430	+	70711	upstream
8	TUCP_004345	XLOC_192035	--	TUCP	44989412	44990958	-	ENSRNOT00000010743	ENSRNOG00000008138	RGD1309108	Protein of unknown function DUF4591	45084320	45137893	-	93361	downstream
8	TUCP_004345	XLOC_192035	--	TUCP	44989412	44990958	-	ENSRNOT00000080288	ENSRNOG00000053239	Clmp	Immunoglobulin-like domain||Immunoglobulin subtype 2||Immunoglobulin subtype||Immunoglobulin V-set domain||Immunoglobulin-like fold	44847157	44975457	+	13954	downstream
8	TUCP_004345	XLOC_192035	--	TUCP	44989412	44990958	-	ENSRNOT00000044608	ENSRNOG00000034066	Hspa8	Heat shock protein 70 family||Heat shock protein 70kD, peptide-binding domain||Heat shock protein 70, conserved site||Heat shock protein 70kD, C-terminal domain	44990014	44993179	+	(945)	antisense
12	TUCP_001101	XLOC_041786	--	TUCP	40873416	40874924	+	ENSRNOT00000001826	ENSRNOG00000001352	Hectd4	HECT domain	40713841	40822159	-	51256	upstream
12	TUCP_001101	XLOC_041786	--	TUCP	40873416	40874924	+	ENSRNOT00000034951	ENSRNOG00000025936	Rpl6	Ribosomal protein L6, N-terminal||Ribosomal protein L2 domain 2||Translation protein SH3-like domain||60S ribosomal protein L6E	40877613	40881124	-	2688	downstream
12	TUCP_001101	XLOC_041786	--	TUCP	40873416	40874924	+	ENSRNOT00000046323	ENSRNOG00000030124	Ptpn11	Protein-tyrosine phosphatase-like||Protein-tyrosine phosphatase, non-receptor type-6, -11||Tyrosine specific protein phosphatases domain||Protein-tyrosine phosphatase, active site||Protein-tyrosine phosphatase, catalytic||SH2 domain||PTP type protein phosphatase	40895515	40955999	+	20590	upstream
19	TUCP_002231	XLOC_092953	--	TUCP	25302001	25303133	-	ENSRNOT00000008786	ENSRNOG00000006551	Dcaf15	DDB1- and CUL4-associated factor 15, WD40 repeat-containing domain	25212661	25220010	-	81990	upstream
19	TUCP_002231	XLOC_092953	--	TUCP	25302001	25303133	-	ENSRNOT00000011150	ENSRNOG00000008319	Ccdc130	CWC16 protein	25367543	25378974	-	64409	downstream
19	TUCP_002231	XLOC_092953	--	TUCP	25302001	25303133	-	ENSRNOT00000037453	ENSRNOG00000006741	Podnl1	Leucine-rich repeat, typical subtype||Leucine-rich repeat||Leucine-rich repeat domain, L domain-like	25239674	25246525	+	55475	downstream
19	TUCP_002231	XLOC_092953	--	TUCP	25302001	25303133	-	ENSRNOT00000009806	ENSRNOG00000006747	Cc2d1a	C2 domain||Domain of unknown function DM14	25247094	25261946	-	40054	upstream
19	TUCP_002231	XLOC_092953	--	TUCP	25302001	25303133	-	ENSRNOT00000011163	ENSRNOG00000008450	LOC100359539	Ferritin-like superfamily||Ribonucleotide reductase-related||Ribonucleotide reductase small subunit||Ribonucleotide reductase small subunit, acitve site	25391700	25394229	+	88566	upstream
19	TUCP_002231	XLOC_092953	--	TUCP	25302001	25303133	-	ENSRNOT00000050214	ENSRNOG00000031593	Nanos3	Nanos/Xcat2||Zinc finger, nanos-type	25284909	25288335	-	13665	upstream
19	TUCP_002231	XLOC_092953	--	TUCP	25302001	25303133	-	ENSRNOT00000072494	ENSRNOG00000049931	LOC288913	Uncharacterised protein family UPF0390	25355815	25358594	-	52681	downstream
19	TUCP_002231	XLOC_092953	--	TUCP	25302001	25303133	-	ENSRNOT00000010050	ENSRNOG00000007582	Zswim4	-	25320683	25345790	-	17549	downstream
19	TUCP_002231	XLOC_092953	--	TUCP	25302001	25303133	-	ENSRNOT00000030658	ENSRNOG00000025796	RGD1306072	Protein of unknown function DUF4671	25262076	25283972	+	18028	downstream
19	TUCP_002231	XLOC_092953	--	TUCP	25302001	25303133	-	ENSRNOT00000045180	ENSRNOG00000006747	Cc2d1a	C2 domain||Domain of unknown function DM14	25246913	25261911	-	40089	upstream
19	TUCP_002231	XLOC_092953	--	TUCP	25302001	25303133	-	ENSRNOT00000008104	ENSRNOG00000006049	Rfx1	DNA-binding RFX-type winged-helix domain||RFX1 transcription activation region||Winged helix-turn-helix DNA-binding domain	25181564	25212410	+	89590	downstream
19	TUCP_002231	XLOC_092953	--	TUCP	25302001	25303133	-	ENSRNOT00000003762	ENSRNOG00000026211	Mri1	Initiation factor 2B-related||Initiation factor 2B alpha/beta/delta||Methylthioribose-1-phosphate isomerase||Methylthioribose-1-phosphate isomerase-like, N-terminal domain	25360164	25366806	-	57030	downstream
8	TUCP_004342	XLOC_191548	--	TUCP	26387192	26413532	-	ENSRNOT00000046432	ENSRNOG00000029995	Herpud2	Ubiquitin domain||Ubiquitin-related domain	26266760	26311350	-	75841	upstream
8	TUCP_004342	XLOC_191548	--	TUCP	26387192	26413532	-	ENSRNOT00000091773	ENSRNOG00000055222	AC094212.1	Triosephosphate isomerase, bacterial/eukaryotic||Aldolase-type TIM barrel||Triosephosphate isomerase||Triosephosphate isomerase, active site	26341732	26345754	-	41437	upstream
8	TUCP_004342	XLOC_191548	--	TUCP	26387192	26413532	-	ENSRNOT00000008838	ENSRNOG00000006545	Sept7	Septin||P-loop containing nucleoside triphosphate hydrolase||Septin-type guanine nucleotide-binding (G) domain||Septin 7	26413358	26475588	+	(175)	antisense
8	TUCP_004342	XLOC_191548	--	TUCP	26387192	26413532	-	ENSRNOT00000081574	ENSRNOG00000006545	Sept7	Septin||P-loop containing nucleoside triphosphate hydrolase||Septin-type guanine nucleotide-binding (G) domain||Septin 7	26432514	26475588	+	18981	upstream
8	TUCP_004342	XLOC_191548	--	TUCP	26387192	26413532	-	ENSRNOT00000063967	ENSRNOG00000006545	Sept7	Septin||P-loop containing nucleoside triphosphate hydrolase||Septin-type guanine nucleotide-binding (G) domain||Septin 7	26413233	26476611	+	(300)	antisense
9	TUCP_004617	XLOC_203661	--	TUCP	113848297	113860635	-	ENSRNOT00000016965	ENSRNOG00000042503	Ndufv2	NADH-quinone oxidoreductase subunit E-like||Thioredoxin-like fold	113875703	113900190	-	15067	downstream
9	TUCP_004617	XLOC_203661	--	TUCP	113848297	113860635	-	ENSRNOT00000091398	ENSRNOG00000053306	Washc1	WH2 domain||WASH1, WAHD domain||WASH1	113918858	113936860	+	58222	upstream
9	TUCP_004617	XLOC_203661	--	TUCP	113848297	113860635	-	ENSRNOT00000017253	ENSRNOG00000048545	LOC100910483	Ankyrin repeat-containing domain||Ankyrin repeat	113814537	113846053	-	2243	upstream
1	TUCP_000339	XLOC_010729	--	TUCP	282169433	282178606	+	ENSRNOT00000036203	ENSRNOG00000025060	Nanos1	Nanos/Xcat2||Zinc finger, nanos-type	282134981	282135772	+	33660	downstream
1	TUCP_000339	XLOC_010729	--	TUCP	282169433	282178606	+	ENSRNOT00000013845	ENSRNOG00000010230	Fam45a	-	282188110	282210580	+	9503	upstream
1	TUCP_000339	XLOC_010729	--	TUCP	282169433	282178606	+	ENSRNOT00000015687	ENSRNOG00000011439	Grk5	Protein kinase-like domain||Protein kinase domain||GPCR kinase||Protein kinase, ATP binding site||AGC-kinase, C-terminal||RGS domain	282265370	282462605	+	86763	upstream
1	TUCP_000339	XLOC_010729	--	TUCP	282169433	282178606	+	ENSRNOT00000066947	ENSRNOG00000010117	Eif3a	Proteasome component (PCI) domain||Eukaryotic translation initiation factor 3 subunit A	282139823	282170017	-	(585)	antisense
1	TUCP_000339	XLOC_010729	--	TUCP	282169433	282178606	+	ENSRNOT00000015186	ENSRNOG00000010958	Prdx3	Alkyl hydroperoxide reductase subunit C/ Thiol specific antioxidant||Thioredoxin-like fold||Peroxiredoxin, C-terminal	282238773	282251257	-	60166	downstream
1	TUCP_000339	XLOC_010729	--	TUCP	282169433	282178606	+	ENSRNOT00000054674	ENSRNOG00000036572	Sfxn4	Sideroflexin-4||Tricarboxylate/iron carrier	282213675	282235974	-	35068	downstream
7	TUCP_004189	XLOC_183726	--	TUCP	120108615	120125565	-	ENSRNOT00000087548	ENSRNOG00000059015	Triobp	Pleckstrin homology domain||PH domain-like||TRIO and F-actin-binding protein	120176530	120230420	+	50964	upstream
7	TUCP_004189	XLOC_183726	--	TUCP	120108615	120125565	-	ENSRNOT00000011215	ENSRNOG00000008401	Card10	Death-like domain||P-loop containing nucleoside triphosphate hydrolase||CARD domain	119999472	120027026	-	81588	upstream
7	TUCP_004189	XLOC_183726	--	TUCP	120108615	120125565	-	ENSRNOT00000040513	ENSRNOG00000009570	Pdxp	2-phosphoglycolate phosphatase, eukaryotic||Nitrophenylphosphatase-like domain||HAD-superfamily hydrolase, subfamily IIA||HAD-like domain	120140460	120145908	+	14894	upstream
7	TUCP_004189	XLOC_183726	--	TUCP	120108615	120125565	-	ENSRNOT00000073905	ENSRNOG00000009570	Pdxp	2-phosphoglycolate phosphatase, eukaryotic||Nitrophenylphosphatase-like domain||HAD-superfamily hydrolase, subfamily IIA||HAD-like domain	120140492	120144881	+	14926	upstream
7	TUCP_004189	XLOC_183726	--	TUCP	120108615	120125565	-	ENSRNOT00000082862	ENSRNOG00000055700	AC096473.3	-	120202601	120430320	+	77035	upstream
7	TUCP_004189	XLOC_183726	--	TUCP	120108615	120125565	-	ENSRNOT00000077677	ENSRNOG00000008401	Card10	Death-like domain||P-loop containing nucleoside triphosphate hydrolase||CARD domain	120000021	120026755	-	81859	upstream
7	TUCP_004189	XLOC_183726	--	TUCP	120108615	120125565	-	ENSRNOT00000086853	ENSRNOG00000059015	Triobp	Pleckstrin homology domain||PH domain-like||TRIO and F-actin-binding protein	120206188	120229223	+	80622	upstream
7	TUCP_004189	XLOC_183726	--	TUCP	120108615	120125565	-	ENSRNOT00000011750	ENSRNOG00000008539	Lgals2	Galectin, carbohydrate recognition domain||Concanavalin A-like lectin/glucanase domain	120071124	120077612	-	31002	upstream
7	TUCP_004189	XLOC_183726	--	TUCP	120108615	120125565	-	ENSRNOT00000013764	ENSRNOG00000010209	Nol12	Nucleolar protein 12	120161091	120167020	+	35525	upstream
7	TUCP_004189	XLOC_183726	--	TUCP	120108615	120125565	-	ENSRNOT00000063876	ENSRNOG00000008897	Gga1	ENTH/VHS||Clathrin adaptor, alpha/beta/gamma-adaptin, appendage, Ig-like subdomain||Coatomer/clathrin adaptor appendage, Ig-like subdomain||GAT domain||Clathrin adaptor, gamma-adaptin, appendage||VHS domain	120106901	120119737	+	(11123)	antisense
7	TUCP_004189	XLOC_183726	--	TUCP	120108615	120125565	-	ENSRNOT00000012480	ENSRNOG00000009360	Sh3bp1	BAR domain||Rho GTPase-activating protein domain||Rho GTPase activation protein||Arfaptin homology (AH) domain/BAR domain	120125633	120138196	+	67	upstream
7	TUCP_004189	XLOC_183726	--	TUCP	120108615	120125565	-	ENSRNOT00000011270	ENSRNOG00000008517	Cdc42ep1	Cdc42 effector||CRIB domain	120067379	120071440	+	37174	downstream
7	TUCP_004189	XLOC_183726	--	TUCP	120108615	120125565	-	ENSRNOT00000013538	ENSRNOG00000009884	Lgals1	Galectin, carbohydrate recognition domain||Concanavalin A-like lectin/glucanase domain	120153184	120156289	+	27618	upstream
7	TUCP_004188	XLOC_183726	--	TUCP	120108615	120125494	-	ENSRNOT00000087548	ENSRNOG00000059015	Triobp	Pleckstrin homology domain||PH domain-like||TRIO and F-actin-binding protein	120176530	120230420	+	51035	upstream
7	TUCP_004188	XLOC_183726	--	TUCP	120108615	120125494	-	ENSRNOT00000011215	ENSRNOG00000008401	Card10	Death-like domain||P-loop containing nucleoside triphosphate hydrolase||CARD domain	119999472	120027026	-	81588	upstream
7	TUCP_004188	XLOC_183726	--	TUCP	120108615	120125494	-	ENSRNOT00000040513	ENSRNOG00000009570	Pdxp	2-phosphoglycolate phosphatase, eukaryotic||Nitrophenylphosphatase-like domain||HAD-superfamily hydrolase, subfamily IIA||HAD-like domain	120140460	120145908	+	14965	upstream
7	TUCP_004188	XLOC_183726	--	TUCP	120108615	120125494	-	ENSRNOT00000073905	ENSRNOG00000009570	Pdxp	2-phosphoglycolate phosphatase, eukaryotic||Nitrophenylphosphatase-like domain||HAD-superfamily hydrolase, subfamily IIA||HAD-like domain	120140492	120144881	+	14997	upstream
7	TUCP_004188	XLOC_183726	--	TUCP	120108615	120125494	-	ENSRNOT00000082862	ENSRNOG00000055700	AC096473.3	-	120202601	120430320	+	77106	upstream
7	TUCP_004188	XLOC_183726	--	TUCP	120108615	120125494	-	ENSRNOT00000077677	ENSRNOG00000008401	Card10	Death-like domain||P-loop containing nucleoside triphosphate hydrolase||CARD domain	120000021	120026755	-	81859	upstream
7	TUCP_004188	XLOC_183726	--	TUCP	120108615	120125494	-	ENSRNOT00000086853	ENSRNOG00000059015	Triobp	Pleckstrin homology domain||PH domain-like||TRIO and F-actin-binding protein	120206188	120229223	+	80693	upstream
7	TUCP_004188	XLOC_183726	--	TUCP	120108615	120125494	-	ENSRNOT00000011750	ENSRNOG00000008539	Lgals2	Galectin, carbohydrate recognition domain||Concanavalin A-like lectin/glucanase domain	120071124	120077612	-	31002	upstream
7	TUCP_004188	XLOC_183726	--	TUCP	120108615	120125494	-	ENSRNOT00000013764	ENSRNOG00000010209	Nol12	Nucleolar protein 12	120161091	120167020	+	35596	upstream
7	TUCP_004188	XLOC_183726	--	TUCP	120108615	120125494	-	ENSRNOT00000063876	ENSRNOG00000008897	Gga1	ENTH/VHS||Clathrin adaptor, alpha/beta/gamma-adaptin, appendage, Ig-like subdomain||Coatomer/clathrin adaptor appendage, Ig-like subdomain||GAT domain||Clathrin adaptor, gamma-adaptin, appendage||VHS domain	120106901	120119737	+	(11123)	antisense
7	TUCP_004188	XLOC_183726	--	TUCP	120108615	120125494	-	ENSRNOT00000012480	ENSRNOG00000009360	Sh3bp1	BAR domain||Rho GTPase-activating protein domain||Rho GTPase activation protein||Arfaptin homology (AH) domain/BAR domain	120125633	120138196	+	138	upstream
7	TUCP_004188	XLOC_183726	--	TUCP	120108615	120125494	-	ENSRNOT00000011270	ENSRNOG00000008517	Cdc42ep1	Cdc42 effector||CRIB domain	120067379	120071440	+	37174	downstream
7	TUCP_004188	XLOC_183726	--	TUCP	120108615	120125494	-	ENSRNOT00000013538	ENSRNOG00000009884	Lgals1	Galectin, carbohydrate recognition domain||Concanavalin A-like lectin/glucanase domain	120153184	120156289	+	27689	upstream
8	TUCP_004240	XLOC_186273	--	TUCP	33793393	33796043	+	ENSRNOT00000011925	ENSRNOG00000008941	Ets1	Pointed domain||Transforming protein C-ets||Sterile alpha motif/pointed domain||Winged helix-turn-helix DNA-binding domain||Ets domain	33816386	33879625	+	20342	upstream
7	TUCP_004181	XLOC_183134	--	TUCP	104849662	104912872	-	ENSRNOT00000079524	ENSRNOG00000058733	Asap1	Arfaptin homology (AH) domain/BAR domain||Ankyrin repeat-containing domain||PH domain-like||SH3 domain||Ankyrin repeat||Pleckstrin homology domain||Arf GTPase activating protein	104670076	104801045	-	48616	upstream
7	TUCP_004181	XLOC_183134	--	TUCP	104849662	104912872	-	ENSRNOT00000085650	ENSRNOG00000058733	Asap1	Arfaptin homology (AH) domain/BAR domain||Ankyrin repeat-containing domain||PH domain-like||SH3 domain||Ankyrin repeat||Pleckstrin homology domain||Arf GTPase activating protein	104670076	104800536	-	49125	upstream
4	TUCP_003368	XLOC_145996	--	TUCP	140651887	140704730	-	ENSRNOT00000082723	ENSRNOG00000007104	Itpr1	Ryanodine receptor-related||Armadillo-type fold||Inositol 1,4,5-trisphosphate-binding protein receptor||RyR/IP3R Homology associated domain||MIR motif||Ion transport domain||Inositol 1,4,5-trisphosphate/ryanodine receptor||RIH (RyR and IP3R Homology) domain	140377565	140579477	+	72409	downstream
4	TUCP_003368	XLOC_145996	--	TUCP	140651887	140704730	-	ENSRNOT00000009563	ENSRNOG00000007152	Bhlhe40	Myc-type, basic helix-loop-helix (bHLH) domain||Orange domain	140703619	140709319	+	(1112)	antisense
4	TUCP_003368	XLOC_145996	--	TUCP	140651887	140704730	-	ENSRNOT00000040255	ENSRNOG00000007104	Itpr1	Ryanodine receptor-related||Armadillo-type fold||Inositol 1,4,5-trisphosphate-binding protein receptor||RyR/IP3R Homology associated domain||MIR motif||Ion transport domain||Inositol 1,4,5-trisphosphate/ryanodine receptor||RIH (RyR and IP3R Homology) domain	140247313	140579675	+	72211	downstream
4	TUCP_003368	XLOC_145996	--	TUCP	140651887	140704730	-	ENSRNOT00000043646	ENSRNOG00000007104	Itpr1	Ryanodine receptor-related||Armadillo-type fold||Inositol 1,4,5-trisphosphate-binding protein receptor||RyR/IP3R Homology associated domain||MIR motif||Ion transport domain||Inositol 1,4,5-trisphosphate/ryanodine receptor||RIH (RyR and IP3R Homology) domain	140247335	140580748	+	71138	downstream
4	TUCP_003368	XLOC_145996	--	TUCP	140651887	140704730	-	ENSRNOT00000041130	ENSRNOG00000007104	Itpr1	Ryanodine receptor-related||Armadillo-type fold||Inositol 1,4,5-trisphosphate-binding protein receptor||RyR/IP3R Homology associated domain||MIR motif||Ion transport domain||Inositol 1,4,5-trisphosphate/ryanodine receptor||RIH (RyR and IP3R Homology) domain	140247335	140580748	+	71138	downstream
4	TUCP_003368	XLOC_145996	--	TUCP	140651887	140704730	-	ENSRNOT00000064025	ENSRNOG00000007104	Itpr1	Ryanodine receptor-related||Armadillo-type fold||Inositol 1,4,5-trisphosphate-binding protein receptor||RyR/IP3R Homology associated domain||MIR motif||Ion transport domain||Inositol 1,4,5-trisphosphate/ryanodine receptor||RIH (RyR and IP3R Homology) domain	140247335	140580748	+	71138	downstream
7	TUCP_004182	XLOC_183134	--	TUCP	104862699	104895752	-	ENSRNOT00000079524	ENSRNOG00000058733	Asap1	Arfaptin homology (AH) domain/BAR domain||Ankyrin repeat-containing domain||PH domain-like||SH3 domain||Ankyrin repeat||Pleckstrin homology domain||Arf GTPase activating protein	104670076	104801045	-	61653	upstream
7	TUCP_004182	XLOC_183134	--	TUCP	104862699	104895752	-	ENSRNOT00000085650	ENSRNOG00000058733	Asap1	Arfaptin homology (AH) domain/BAR domain||Ankyrin repeat-containing domain||PH domain-like||SH3 domain||Ankyrin repeat||Pleckstrin homology domain||Arf GTPase activating protein	104670076	104800536	-	62162	upstream
7	TUCP_004185	XLOC_183188	--	TUCP	107889627	107894517	-	ENSRNOT00000010980	ENSRNOG00000008209	St3gal1	Sialyltransferase||Glycosyl transferase family 29	107895109	107963142	-	591	downstream
7	TUCP_004185	XLOC_183188	--	TUCP	107889627	107894517	-	ENSRNOT00000093353	ENSRNOG00000008209	St3gal1	Sialyltransferase||Glycosyl transferase family 29	107895045	107963073	-	527	downstream
20	TUCP_002775	XLOC_117255	--	TUCP	26410535	26422326	-	ENSRNOT00000049437	ENSRNOG00000000378	Ctnna3	Alpha-catenin||Alpha T-catenin||Vinculin/alpha-catenin	26516836	26589209	-	94509	downstream
7	TUCP_004186	XLOC_183530	--	TUCP	117163378	117180313	-	ENSRNOT00000045280	ENSRNOG00000032574	Scrib	Leucine-rich repeat, typical subtype||Leucine-rich repeat||PDZ domain||Leucine-rich repeat domain, L domain-like	117105810	117128798	-	34579	upstream
7	TUCP_004186	XLOC_183530	--	TUCP	117163378	117180313	-	ENSRNOT00000040762	ENSRNOG00000023781	Plec	Plectin||Actinin-type actin-binding domain, conserved site||Calponin homology domain||Spectrin/alpha-actinin||Plectin repeat||Plectin/S10, N-terminal	117230319	117259141	-	50005	downstream
7	TUCP_004186	XLOC_183530	--	TUCP	117163378	117180313	-	ENSRNOT00000091840	ENSRNOG00000023781	Plec	Plectin||Actinin-type actin-binding domain, conserved site||Calponin homology domain||Spectrin/alpha-actinin||Plectin repeat||Plectin/S10, N-terminal	117230321	117268300	-	50007	downstream
7	TUCP_004186	XLOC_183530	--	TUCP	117163378	117180313	-	ENSRNOT00000086550	ENSRNOG00000023781	Plec	Plectin||Actinin-type actin-binding domain, conserved site||Calponin homology domain||Spectrin/alpha-actinin||Plectin repeat||Plectin/S10, N-terminal	117230321	117259791	-	50007	downstream
7	TUCP_004186	XLOC_183530	--	TUCP	117163378	117180313	-	ENSRNOT00000083429	ENSRNOG00000023781	Plec	Plectin||Actinin-type actin-binding domain, conserved site||Calponin homology domain||Spectrin/alpha-actinin||Plectin repeat||Plectin/S10, N-terminal	117230321	117265493	-	50007	downstream
7	TUCP_004186	XLOC_183530	--	TUCP	117163378	117180313	-	ENSRNOT00000056481	ENSRNOG00000009960	Puf60	Poly-U binding splicing factor, half-pint||Nucleotide-binding alpha-beta plait domain||RNA recognition motif domain||RNA recognition motif domain, eukaryote	117129237	117140168	-	23209	upstream
7	TUCP_004186	XLOC_183530	--	TUCP	117163378	117180313	-	ENSRNOT00000081021	ENSRNOG00000023781	Plec	Plectin||Actinin-type actin-binding domain, conserved site||Calponin homology domain||Spectrin/alpha-actinin||Plectin repeat||Plectin/S10, N-terminal	117230321	117257402	-	50007	downstream
7	TUCP_004186	XLOC_183530	--	TUCP	117163378	117180313	-	ENSRNOT00000091285	ENSRNOG00000023781	Plec	Plectin||Actinin-type actin-binding domain, conserved site||Calponin homology domain||Spectrin/alpha-actinin||Plectin repeat||Plectin/S10, N-terminal	117230321	117288018	-	50007	downstream
7	TUCP_004186	XLOC_183530	--	TUCP	117163378	117180313	-	ENSRNOT00000042642	ENSRNOG00000023781	Plec	Plectin||Actinin-type actin-binding domain, conserved site||Calponin homology domain||Spectrin/alpha-actinin||Plectin repeat||Plectin/S10, N-terminal	117230321	117289961	-	50007	downstream
[truncated: 16,342 more rows]
